# Supplementary material
Source: PubMed Central journal article supplement (PMC2683249)
Supplement: NIHMS4491-supplement-1.pdf [file NIHMS4491-supplement-1.pdf]

**Significant *cis*- 1Mb associations**  
**linear regression, individual population analysis, 0.001 permutation threshold.**

| Gene | illumina GeneID | SNP Label  | Gene chromosome | SNP chromosome | SNP coordinate (NCBI B35) | Distance in bp SNP - probe midpoi | $-\log_{10}(\text{p-value})$ | Adjusted $R^2$ | Association gradient | permutation threshold (0.001) | Population |
|------|-----------------|------------|-----------------|----------------|---------------------------|-----------------------------------|------------------------------|----------------|----------------------|-------------------------------|------------|
| PHC2 | GI_37595529-A   | rs12041371 | 1               | 1              | 33430755                  | 27817                             | 7.7253                       | 0.4128         | 0.2674               | 5.6131                        | CEU        |
| PHC2 | GI_37595529-A   | rs4652994  | 1               | 1              | 33432639                  | 25933                             | 7.2304                       | 0.3951         | -0.2644              | 5.6131                        | CEU        |
| PHC2 | GI_37595529-A   | rs1132790  | 1               | 1              | 33434365                  | 24207                             | 7.4136                       | 0.4459         | -0.2669              | 5.6131                        | CEU        |
| PHC2 | GI_37595529-A   | rs10914678 | 1               | 1              | 33436321                  | 22251                             | 6.7934                       | 0.3688         | 0.2522               | 5.6131                        | CEU        |
| PHC2 | GI_37595529-A   | rs4653002  | 1               | 1              | 33439619                  | 18953                             | 7.7253                       | 0.4128         | -0.2674              | 5.6131                        | CEU        |
| PHC2 | GI_37595529-A   | rs4653017  | 1               | 1              | 33445821                  | 12751                             | 9.7392                       | 0.4981         | 0.2927               | 5.6131                        | CEU        |
| PHC2 | GI_37595529-A   | rs4233197  | 1               | 1              | 33452841                  | 5731                              | 7.7253                       | 0.4128         | -0.2674              | 5.6131                        | CEU        |
| PHC2 | GI_37595529-A   | rs6682438  | 1               | 1              | 33453239                  | 5333                              | 11.1483                      | 0.5699         | -0.2953              | 5.6131                        | CEU        |
| PHC2 | GI_37595529-A   | rs4652839  | 1               | 1              | 33454022                  | 4550                              | 11.6263                      | 0.5671         | 0.3054               | 5.6131                        | CEU        |
| PHC2 | GI_37595529-A   | rs5861     | 1               | 1              | 33458613                  | 41                                | 11.6263                      | 0.5671         | -0.3054              | 5.6131                        | CEU        |
| PHC2 | GI_37595529-A   | rs10914684 | 1               | 1              | 33464665                  | 6093                              | 10.5081                      | 0.5532         | 0.3186               | 5.6131                        | CEU        |
| PHC2 | GI_37595529-A   | rs10914685 | 1               | 1              | 33464683                  | 6111                              | 11.6263                      | 0.5671         | -0.3054              | 5.6131                        | CEU        |
| PHC2 | GI_37595529-A   | rs4361958  | 1               | 1              | 33465647                  | 7075                              | 7.2231                       | 0.3948         | -0.2575              | 5.6131                        | CEU        |
| PHC2 | GI_37595529-A   | rs7513015  | 1               | 1              | 33468357                  | 9785                              | 11.6263                      | 0.5671         | 0.3054               | 5.6131                        | CEU        |
| PHC2 | GI_37595529-A   | rs4338326  | 1               | 1              | 33470231                  | 11659                             | 5.9812                       | 0.3425         | 0.2431               | 5.6131                        | CEU        |
| PHC2 | GI_37595529-A   | rs12138864 | 1               | 1              | 33472241                  | 13669                             | 7.7092                       | 0.4176         | 0.2654               | 5.6131                        | CEU        |
| PHC2 | GI_37595529-A   | rs10798939 | 1               | 1              | 33478530                  | 19958                             | 6.6494                       | 0.3618         | -0.2819              | 5.6131                        | CEU        |
| PHC2 | GI_37595529-A   | rs4652856  | 1               | 1              | 33487507                  | 28935                             | 10.7688                      | 0.5370         | 0.3049               | 5.6131                        | CEU        |
| PHC2 | GI_37595529-A   | rs4233199  | 1               | 1              | 33488655                  | 30083                             | 7.3099                       | 0.3936         | 0.2490               | 5.6131                        | CEU        |
| PHC2 | GI_37595529-A   | rs4653081  | 1               | 1              | 33488923                  | 30351                             | 11.6263                      | 0.5671         | 0.3054               | 5.6131                        | CEU        |
| PHC2 | GI_37595529-A   | rs6678247  | 1               | 1              | 33492362                  | 33790                             | 11.6263                      | 0.5671         | -0.3054              | 5.6131                        | CEU        |
| PHC2 | GI_37595529-A   | rs4653095  | 1               | 1              | 33497927                  | 39355                             | 11.6263                      | 0.5671         | 0.3054               | 5.6131                        | CEU        |
| PHC2 | GI_37595529-A   | rs6675264  | 1               | 1              | 33500927                  | 42355                             | 11.6263                      | 0.5671         | 0.3054               | 5.6131                        | CEU        |
| PHC2 | GI_37595529-A   | rs6425816  | 1               | 1              | 33501958                  | 43386                             | 11.6455                      | 0.5741         | 0.3132               | 5.6131                        | CEU        |
| PHC2 | GI_37595529-A   | rs7545416  | 1               | 1              | 33505889                  | 47317                             | 11.6263                      | 0.5671         | 0.3054               | 5.6131                        | CEU        |
| PHC2 | GI_37595529-A   | rs4233201  | 1               | 1              | 33511146                  | 52574                             | 11.0138                      | 0.5521         | -0.3041              | 5.6131                        | CEU        |
| PHC2 | GI_37595529-A   | rs4652870  | 1               | 1              | 33516833                  | 58261                             | 11.6263                      | 0.5671         | -0.3054              | 5.6131                        | CEU        |
| PHC2 | GI_37595529-A   | rs12127097 | 1               | 1              | 33519983                  | 61411                             | 6.0161                       | 0.3298         | -0.2489              | 5.6131                        | CEU        |
| PHC2 | GI_37595529-A   | rs10798944 | 1               | 1              | 33521549                  | 62977                             | 10.4476                      | 0.5509         | -0.2964              | 5.6131                        | CEU        |
| PHC2 | GI_37595529-A   | rs942485   | 1               | 1              | 33524916                  | 66344                             | 11.6263                      | 0.5671         | 0.3054               | 5.6131                        | CEU        |
| PHC2 | GI_37595529-A   | rs2763038  | 1               | 1              | 33527053                  | 68481                             | 12.2750                      | 0.6015         | -0.3159              | 5.6131                        | CEU        |
| PHC2 | GI_37595529-A   | rs10798945 | 1               | 1              | 33527966                  | 69394                             | 5.6426                       | 0.3102         | 0.2445               | 5.6131                        | CEU        |
| PHC2 | GI_37595529-A   | rs2247959  | 1               | 1              | 33528832                  | 70260                             | 11.6263                      | 0.5671         | 0.3054               | 5.6131                        | CEU        |
| PHC2 | GI_37595529-A   | rs4652871  | 1               | 1              | 33531610                  | 73038                             | 11.6263                      | 0.5671         | 0.3054               | 5.6131                        | CEU        |
| PHC2 | GI_37595529-A   | rs4298699  | 1               | 1              | 33535327                  | 76755                             | 11.4391                      | 0.5801         | 0.3008               | 5.6131                        | CEU        |
| PHC2 | GI_37595529-A   | rs7514553  | 1               | 1              | 33536195                  | 77623                             | 11.1165                      | 0.5557         | -0.2852              | 5.6131                        | CEU        |
| PHC2 | GI_37595529-A   | rs10914697 | 1               | 1              | 33536388                  | 77816                             | 6.0161                       | 0.3298         | 0.2489               | 5.6131                        | CEU        |
| PHC2 | GI_37595529-A   | rs4652874  | 1               | 1              | 33537367                  | 78795                             | 11.0718                      | 0.5672         | 0.3101               | 5.6131                        | CEU        |
| PHC2 | GI_37595529-A   | rs4653125  | 1               | 1              | 33539665                  | 81093                             | 10.1027                      | 0.5122         | -0.2936              | 5.6131                        | CEU        |
| PHC2 | GI_37595529-A   | rs6661037  | 1               | 1              | 33541686                  | 83114                             | 6.9367                       | 0.3758         | -0.2313              | 5.6131                        | CEU        |
| PHC2 | GI_37595529-A   | rs7514303  | 1               | 1              | 33542068                  | 83496                             | 10.2906                      | 0.5193         | 0.2734               | 5.6131                        | CEU        |
| PHC2 | GI_37595529-A   | rs6701932  | 1               | 1              | 33544223                  | 85651                             | 10.1807                      | 0.5213         | -0.2770              | 5.6131                        | CEU        |
| PHC2 | GI_37595529-A   | rs12130861 | 1               | 1              | 33545482                  | 86910                             | 6.0161                       | 0.3298         | 0.2489               | 5.6131                        | CEU        |

|           |               |            |   |   |          |        |         |        |         |        |     |
|-----------|---------------|------------|---|---|----------|--------|---------|--------|---------|--------|-----|
| PHC2      | GI_37595529-A | rs6675663  | 1 | 1 | 33546784 | 88212  | 11.4860 | 0.5686 | 0.3086  | 5.6131 | CEU |
| PHC2      | GI_37595529-A | rs12094959 | 1 | 1 | 33546839 | 88267  | 5.6341  | 0.3237 | 0.2491  | 5.6131 | CEU |
| PHC2      | GI_37595529-A | rs6663355  | 1 | 1 | 33546901 | 88329  | 10.7292 | 0.5752 | 0.3069  | 5.6131 | CEU |
| PHC2      | GI_37595529-A | rs6672188  | 1 | 1 | 33547986 | 89414  | 9.9157  | 0.5174 | -0.2785 | 5.6131 | CEU |
| PHC2      | GI_37595529-A | rs1535916  | 1 | 1 | 33549449 | 90877  | 6.5070  | 0.3648 | -0.2283 | 5.6131 | CEU |
| PHC2      | GI_37595529-A | rs6677391  | 1 | 1 | 33551761 | 93189  | 11.6263 | 0.5671 | -0.3054 | 5.6131 | CEU |
| PHC2      | GI_37595529-A | rs12354364 | 1 | 1 | 33551987 | 93415  | 5.8293  | 0.3247 | 0.2470  | 5.6131 | CEU |
| PHC2      | GI_37595529-A | rs10753283 | 1 | 1 | 33552336 | 93764  | 11.6263 | 0.5671 | 0.3054  | 5.6131 | CEU |
| PHC2      | GI_37595529-A | rs4652879  | 1 | 1 | 33553657 | 95085  | 6.9367  | 0.3758 | -0.2313 | 5.6131 | CEU |
| PHC2      | GI_37595529-A | rs4652880  | 1 | 1 | 33553918 | 95346  | 11.6263 | 0.5671 | 0.3054  | 5.6131 | CEU |
| PHC2      | GI_37595529-A | rs10914707 | 1 | 1 | 33559091 | 100519 | 6.0161  | 0.3298 | -0.2489 | 5.6131 | CEU |
| PHC2      | GI_37595529-A | rs12121234 | 1 | 1 | 33559496 | 100924 | 6.0161  | 0.3298 | 0.2489  | 5.6131 | CEU |
| PHC2      | GI_37595529-A | rs1998624  | 1 | 1 | 33560242 | 101670 | 12.0120 | 0.5929 | 0.3135  | 5.6131 | CEU |
| PHC2      | GI_37595529-A | rs4653135  | 1 | 1 | 33562923 | 104351 | 6.0161  | 0.3298 | 0.2489  | 5.6131 | CEU |
| PHC2      | GI_37595529-A | rs1324476  | 1 | 1 | 33566337 | 107765 | 9.7580  | 0.4989 | -0.2748 | 5.6131 | CEU |
| PHC2      | GI_37595529-A | rs7544329  | 1 | 1 | 33570844 | 112272 | 5.7849  | 0.3177 | 0.2464  | 5.6131 | CEU |
| PHC2      | GI_37595529-A | rs10914718 | 1 | 1 | 33575881 | 117309 | 5.7919  | 0.3323 | 0.2273  | 5.6131 | CEU |
| PHC2      | GI_37595529-A | rs10798949 | 1 | 1 | 33576272 | 117700 | 9.7793  | 0.5120 | -0.2847 | 5.6131 | CEU |
| PHC2      | GI_37595529-A | rs16835476 | 1 | 1 | 33578083 | 119511 | 5.7849  | 0.3177 | -0.2464 | 5.6131 | CEU |
| PHC2      | GI_37595529-A | rs6425819  | 1 | 1 | 33578601 | 120029 | 7.9507  | 0.4721 | 0.2889  | 5.6131 | CEU |
| PHC2      | GI_37595529-A | rs2336240  | 1 | 1 | 33584844 | 126272 | 8.7353  | 0.4631 | -0.2739 | 5.6131 | CEU |
| NDUFS5    | GI_4758789-S  | rs4660652  | 1 | 1 | 39126952 | 34184  | 6.6105  | 0.3649 | 0.2177  | 5.8045 | CEU |
| NDUFS5    | GI_4758789-S  | rs11205515 | 1 | 1 | 39127974 | 33162  | 6.6637  | 0.3625 | 0.2158  | 5.8045 | CEU |
| NDUFS5    | GI_4758789-S  | rs4147753  | 1 | 1 | 39139457 | 21679  | 6.2145  | 0.3711 | 0.2403  | 5.8045 | CEU |
| NDUFS5    | GI_4758789-S  | rs3768324  | 1 | 1 | 39161555 | 419    | 8.9331  | 0.4775 | 0.2450  | 5.8045 | CEU |
| NDUFS5    | GI_4758789-S  | rs11205599 | 1 | 1 | 39175234 | 14098  | 9.5608  | 0.4911 | -0.2483 | 5.8045 | CEU |
| NDUFS5    | GI_4758789-S  | rs10888650 | 1 | 1 | 39176254 | 15118  | 9.5608  | 0.4911 | -0.2483 | 5.8045 | CEU |
| NDUFS5    | GI_4758789-S  | rs12032116 | 1 | 1 | 39189402 | 28266  | 9.2905  | 0.4862 | 0.2453  | 5.8045 | CEU |
| ERMAP     | GI_19923535-S | rs17386162 | 1 | 1 | 42972458 | 6976   | 6.7921  | 0.3739 | 0.3614  | 5.7441 | CEU |
| ERMAP     | GI_19923535-S | rs12406279 | 1 | 1 | 42979732 | 298    | 7.1056  | 0.3946 | -0.3788 | 5.7441 | CEU |
| ERMAP     | GI_19923535-S | rs9960     | 1 | 1 | 42986886 | 7452   | 6.9788  | 0.3778 | 0.3650  | 5.7441 | CEU |
| Hs.396207 | Hs.396207-S   | rs3014219  | 1 | 1 | 45693547 | 79447  | 5.9626  | 0.3270 | -0.1262 | 5.4065 | CEU |
| Hs.396207 | Hs.396207-S   | rs2991975  | 1 | 1 | 45693619 | 79375  | 5.5618  | 0.3104 | -0.1208 | 5.4065 | CEU |
| Hs.396207 | Hs.396207-S   | rs3014218  | 1 | 1 | 45695421 | 77573  | 5.7719  | 0.3217 | 0.1260  | 5.4065 | CEU |
| Hs.396207 | Hs.396207-S   | rs3014216  | 1 | 1 | 45704853 | 68141  | 6.4512  | 0.3569 | 0.1351  | 5.4065 | CEU |
| Hs.396207 | Hs.396207-S   | rs1084086  | 1 | 1 | 45710193 | 62801  | 23.1497 | 0.8256 | -0.2174 | 5.4065 | CEU |
| Hs.396207 | Hs.396207-S   | rs2152078  | 1 | 1 | 45724693 | 48301  | 22.5597 | 0.8226 | -0.2174 | 5.4065 | CEU |
| Hs.396207 | Hs.396207-S   | rs2991979  | 1 | 1 | 45724951 | 48043  | 23.1497 | 0.8256 | -0.2174 | 5.4065 | CEU |
| Hs.396207 | Hs.396207-S   | rs7548549  | 1 | 1 | 45735701 | 37293  | 22.3414 | 0.8140 | -0.2103 | 5.4065 | CEU |
| Hs.396207 | Hs.396207-S   | rs2230657  | 1 | 1 | 45742582 | 30412  | 7.0589  | 0.3923 | 0.1373  | 5.4065 | CEU |
| Hs.396207 | Hs.396207-S   | rs17410308 | 1 | 1 | 45747284 | 25710  | 7.6890  | 0.4112 | -0.1961 | 5.4065 | CEU |
| Hs.396207 | Hs.396207-S   | rs2050376  | 1 | 1 | 45747723 | 25271  | 25.0467 | 0.8499 | -0.2205 | 5.4065 | CEU |
| Hs.396207 | Hs.396207-S   | rs2230658  | 1 | 1 | 45747947 | 25047  | 24.7262 | 0.8510 | -0.2210 | 5.4065 | CEU |
| Hs.396207 | Hs.396207-S   | rs2230659  | 1 | 1 | 45747977 | 25017  | 25.0467 | 0.8499 | -0.2205 | 5.4065 | CEU |
| Hs.396207 | Hs.396207-S   | rs1972410  | 1 | 1 | 45750040 | 22954  | 26.4305 | 0.8655 | -0.2290 | 5.4065 | CEU |
| Hs.396207 | Hs.396207-S   | rs2991986  | 1 | 1 | 45750375 | 22619  | 25.0467 | 0.8499 | 0.2205  | 5.4065 | CEU |
| Hs.396207 | Hs.396207-S   | rs2991987  | 1 | 1 | 45750515 | 22479  | 25.0467 | 0.8499 | -0.2205 | 5.4065 | CEU |
| Hs.396207 | Hs.396207-S   | rs2253862  | 1 | 1 | 45751053 | 21941  | 26.0115 | 0.8657 | -0.2285 | 5.4065 | CEU |
| Hs.396207 | Hs.396207-S   | rs2991988  | 1 | 1 | 45751524 | 21470  | 26.4305 | 0.8655 | 0.2290  | 5.4065 | CEU |
| Hs.396207 | Hs.396207-S   | rs2991989  | 1 | 1 | 45752058 | 20936  | 25.2916 | 0.8626 | -0.2275 | 5.4065 | CEU |
| Hs.396207 | Hs.396207-S   | rs1547924  | 1 | 1 | 45754205 | 18789  | 25.0467 | 0.8499 | -0.2205 | 5.4065 | CEU |
| Hs.396207 | Hs.396207-S   | rs1547925  | 1 | 1 | 45754449 | 18545  | 26.4305 | 0.8655 | -0.2290 | 5.4065 | CEU |
| Hs.396207 | Hs.396207-S   | rs2275086  | 1 | 1 | 45754972 | 18022  | 26.4305 | 0.8655 | -0.2290 | 5.4065 | CEU |
| Hs.396207 | Hs.396207-S   | rs3014245  | 1 | 1 | 45756006 | 16988  | 26.4305 | 0.8655 | 0.2290  | 5.4065 | CEU |
| Hs.396207 | Hs.396207-S   | rs3014242  | 1 | 1 | 45756670 | 16324  | 24.2416 | 0.8502 | -0.2207 | 5.4065 | CEU |
| Hs.396207 | Hs.396207-S   | rs3014237  | 1 | 1 | 45759345 | 13649  | 22.2703 | 0.8239 | 0.2220  | 5.4065 | CEU |
| Hs.396207 | Hs.396207-S   | rs3014235  | 1 | 1 | 45760605 | 12389  | 26.4305 | 0.8655 | 0.2290  | 5.4065 | CEU |
| Hs.396207 | Hs.396207-S   | rs9429172  | 1 | 1 | 45761569 | 11425  | 25.1891 | 0.8663 | -0.2201 | 5.4065 | CEU |
| Hs.396207 | Hs.396207-S   | rs1250     | 1 | 1 | 45763120 | 9874   | 23.8435 | 0.8452 | 0.2195  | 5.4065 | CEU |

|           |              |            |   |   |          |        |         |        |         |        |     |
|-----------|--------------|------------|---|---|----------|--------|---------|--------|---------|--------|-----|
| Hs.396207 | Hs.396207-S  | rs4391704  | 1 | 1 | 45763329 | 9665   | 6.5901  | 0.3743 | 0.1374  | 5.4065 | CEU |
| Hs.396207 | Hs.396207-S  | rs12037561 | 1 | 1 | 45764365 | 8629   | 27.6176 | 0.8775 | -0.2326 | 5.4065 | CEU |
| Hs.396207 | Hs.396207-S  | rs6703748  | 1 | 1 | 45765069 | 7925   | 22.7211 | 0.8521 | -0.2289 | 5.4065 | CEU |
| Hs.396207 | Hs.396207-S  | rs10890333 | 1 | 1 | 45769415 | 3579   | 26.1118 | 0.8620 | -0.2240 | 5.4065 | CEU |
| Hs.396207 | Hs.396207-S  | rs10890334 | 1 | 1 | 45769471 | 3523   | 23.7326 | 0.8543 | 0.2278  | 5.4065 | CEU |
| Hs.396207 | Hs.396207-S  | rs4431884  | 1 | 1 | 45770416 | 2578   | 25.4759 | 0.8598 | 0.2243  | 5.4065 | CEU |
| Hs.396207 | Hs.396207-S  | rs6694889  | 1 | 1 | 45770899 | 2095   | 26.2477 | 0.8729 | 0.2328  | 5.4065 | CEU |
| Hs.396207 | Hs.396207-S  | rs12023439 | 1 | 1 | 45773729 | 735    | 27.2103 | 0.8780 | 0.2329  | 5.4065 | CEU |
| Hs.396207 | Hs.396207-S  | rs12043945 | 1 | 1 | 45776015 | 3021   | 24.0501 | 0.8581 | -0.2249 | 5.4065 | CEU |
| Hs.396207 | Hs.396207-S  | rs12091503 | 1 | 1 | 45776961 | 3967   | 25.7180 | 0.8625 | -0.2243 | 5.4065 | CEU |
| Hs.396207 | Hs.396207-S  | rs11211145 | 1 | 1 | 45777584 | 4590   | 27.6176 | 0.8775 | 0.2326  | 5.4065 | CEU |
| Hs.396207 | Hs.396207-S  | rs5021934  | 1 | 1 | 45778397 | 5403   | 6.9824  | 0.3780 | -0.1395 | 5.4065 | CEU |
| Hs.396207 | Hs.396207-S  | rs11211146 | 1 | 1 | 45778887 | 5893   | 23.4058 | 0.8767 | -0.2319 | 5.4065 | CEU |
| Hs.396207 | Hs.396207-S  | rs11211147 | 1 | 1 | 45779187 | 6193   | 23.2109 | 0.8744 | 0.2297  | 5.4065 | CEU |
| Hs.396207 | Hs.396207-S  | rs4660312  | 1 | 1 | 45779665 | 6671   | 6.6650  | 0.3676 | 0.1398  | 5.4065 | CEU |
| Hs.396207 | Hs.396207-S  | rs4660313  | 1 | 1 | 45779934 | 6940   | 27.2299 | 0.8782 | -0.2329 | 5.4065 | CEU |
| Hs.396207 | Hs.396207-S  | rs4660880  | 1 | 1 | 45780133 | 7139   | 27.6176 | 0.8775 | 0.2326  | 5.4065 | CEU |
| Hs.396207 | Hs.396207-S  | rs10890336 | 1 | 1 | 45780149 | 7155   | 24.3498 | 0.8719 | 0.2260  | 5.4065 | CEU |
| Hs.396207 | Hs.396207-S  | rs11211149 | 1 | 1 | 45781311 | 8317   | 21.4316 | 0.8343 | -0.2223 | 5.4065 | CEU |
| Hs.396207 | Hs.396207-S  | rs11211152 | 1 | 1 | 45783250 | 10256  | 27.6176 | 0.8775 | 0.2326  | 5.4065 | CEU |
| Hs.396207 | Hs.396207-S  | rs4660882  | 1 | 1 | 45785385 | 12391  | 6.6650  | 0.3676 | 0.1398  | 5.4065 | CEU |
| Hs.396207 | Hs.396207-S  | rs4607935  | 1 | 1 | 45786254 | 13260  | 22.9718 | 0.8553 | 0.2289  | 5.4065 | CEU |
| IPP       | GI_5174472-S | rs4609469  | 1 | 1 | 45786278 | 47557  | 5.9468  | 0.3357 | -0.2535 | 5.6098 | CEU |
| Hs.396207 | Hs.396207-S  | rs4609469  | 1 | 1 | 45786278 | 13284  | 23.7415 | 0.8439 | 0.2180  | 5.4065 | CEU |
| Hs.396207 | Hs.396207-S  | rs12049027 | 1 | 1 | 45787277 | 14283  | 21.3809 | 0.8568 | 0.2150  | 5.4065 | CEU |
| Hs.396207 | Hs.396207-S  | rs10789467 | 1 | 1 | 45787838 | 14844  | 24.6096 | 0.8446 | 0.2239  | 5.4065 | CEU |
| Hs.396207 | Hs.396207-S  | rs6656279  | 1 | 1 | 45793181 | 20187  | 6.7995  | 0.3691 | 0.1411  | 5.4065 | CEU |
| Hs.396207 | Hs.396207-S  | rs3811436  | 1 | 1 | 45794973 | 21979  | 26.4043 | 0.8745 | -0.2323 | 5.4065 | CEU |
| Hs.396207 | Hs.396207-S  | rs12024590 | 1 | 1 | 45796589 | 23595  | 27.0125 | 0.8761 | 0.2332  | 5.4065 | CEU |
| Hs.396207 | Hs.396207-S  | rs3013597  | 1 | 1 | 45797449 | 24455  | 7.3828  | 0.4136 | -0.1465 | 5.4065 | CEU |
| Hs.396207 | Hs.396207-S  | rs11211157 | 1 | 1 | 45801937 | 28943  | 26.1118 | 0.8620 | -0.2240 | 5.4065 | CEU |
| Hs.396207 | Hs.396207-S  | rs10430105 | 1 | 1 | 45807969 | 34975  | 26.9278 | 0.8752 | -0.2311 | 5.4065 | CEU |
| Hs.396207 | Hs.396207-S  | rs11211160 | 1 | 1 | 45815322 | 42328  | 22.4059 | 0.8150 | -0.2288 | 5.4065 | CEU |
| Hs.396207 | Hs.396207-S  | rs10890341 | 1 | 1 | 45816333 | 43339  | 24.6637 | 0.8704 | -0.2287 | 5.4065 | CEU |
| Hs.396207 | Hs.396207-S  | rs3013595  | 1 | 1 | 45822296 | 49302  | 6.6650  | 0.3676 | -0.1398 | 5.4065 | CEU |
| Hs.396207 | Hs.396207-S  | rs11211163 | 1 | 1 | 45822641 | 49647  | 18.9223 | 0.8319 | 0.1884  | 5.4065 | CEU |
| Hs.396207 | Hs.396207-S  | rs11211166 | 1 | 1 | 45827035 | 54041  | 25.7443 | 0.8676 | -0.2222 | 5.4065 | CEU |
| Hs.396207 | Hs.396207-S  | rs10789470 | 1 | 1 | 45827424 | 54430  | 26.1118 | 0.8620 | -0.2240 | 5.4065 | CEU |
| Hs.396207 | Hs.396207-S  | rs10749856 | 1 | 1 | 45833939 | 60945  | 26.1118 | 0.8620 | 0.2240  | 5.4065 | CEU |
| Hs.396207 | Hs.396207-S  | rs4564187  | 1 | 1 | 45835954 | 62960  | 25.4759 | 0.8598 | -0.2243 | 5.4065 | CEU |
| Hs.396207 | Hs.396207-S  | rs4274104  | 1 | 1 | 45929961 | 156967 | 6.5642  | 0.3625 | -0.1377 | 5.4065 | CEU |
| Hs.396207 | Hs.396207-S  | rs11211173 | 1 | 1 | 45931396 | 158402 | 27.6176 | 0.8775 | 0.2326  | 5.4065 | CEU |
| Hs.396207 | Hs.396207-S  | rs12560266 | 1 | 1 | 45933637 | 160643 | 19.7432 | 0.8076 | -0.2232 | 5.4065 | CEU |
| Hs.396207 | Hs.396207-S  | rs11211176 | 1 | 1 | 45935106 | 162112 | 9.9479  | 0.5063 | 0.1529  | 5.4065 | CEU |
| Hs.396207 | Hs.396207-S  | rs11211178 | 1 | 1 | 45939586 | 166592 | 26.1118 | 0.8620 | 0.2240  | 5.4065 | CEU |
| Hs.396207 | Hs.396207-S  | rs4660314  | 1 | 1 | 45941905 | 168911 | 25.4759 | 0.8598 | -0.2243 | 5.4065 | CEU |
| Hs.396207 | Hs.396207-S  | rs4660883  | 1 | 1 | 45948118 | 175124 | 26.1118 | 0.8620 | -0.2240 | 5.4065 | CEU |
| Hs.396207 | Hs.396207-S  | rs6683274  | 1 | 1 | 45953658 | 180664 | 13.2808 | 0.6198 | -0.1946 | 5.4065 | CEU |
| Hs.396207 | Hs.396207-S  | rs4626927  | 1 | 1 | 45960665 | 187671 | 5.7813  | 0.3222 | -0.1291 | 5.4065 | CEU |
| Hs.396207 | Hs.396207-S  | rs10789474 | 1 | 1 | 45962060 | 189066 | 13.6720 | 0.6862 | 0.1966  | 5.4065 | CEU |
| Hs.396207 | Hs.396207-S  | rs7540578  | 1 | 1 | 45964164 | 191170 | 15.6210 | 0.6838 | 0.1983  | 5.4065 | CEU |
| Hs.396207 | Hs.396207-S  | rs6690386  | 1 | 1 | 45965031 | 192037 | 14.2515 | 0.6478 | 0.2051  | 5.4065 | CEU |
| Hs.396207 | Hs.396207-S  | rs6661163  | 1 | 1 | 45967024 | 194030 | 5.9168  | 0.3246 | -0.1305 | 5.4065 | CEU |
| Hs.396207 | Hs.396207-S  | rs6429578  | 1 | 1 | 45969130 | 196136 | 14.2515 | 0.6478 | -0.2051 | 5.4065 | CEU |
| Hs.396207 | Hs.396207-S  | rs12076580 | 1 | 1 | 45970179 | 197185 | 14.2515 | 0.6478 | -0.2051 | 5.4065 | CEU |
| Hs.396207 | Hs.396207-S  | rs7539800  | 1 | 1 | 45974149 | 201155 | 13.5084 | 0.6266 | 0.2035  | 5.4065 | CEU |
| Hs.396207 | Hs.396207-S  | rs10890350 | 1 | 1 | 45974398 | 201404 | 12.1437 | 0.6247 | -0.2032 | 5.4065 | CEU |
| Hs.396207 | Hs.396207-S  | rs4390216  | 1 | 1 | 45978476 | 205482 | 13.5084 | 0.6266 | 0.2035  | 5.4065 | CEU |
| Hs.396207 | Hs.396207-S  | rs6672115  | 1 | 1 | 45984899 | 211905 | 13.5084 | 0.6266 | -0.2035 | 5.4065 | CEU |

|           |              |            |   |   |          |        |         |        |         |        |     |
|-----------|--------------|------------|---|---|----------|--------|---------|--------|---------|--------|-----|
| Hs.396207 | Hs.396207-S  | rs6429580  | 1 | 1 | 45987668 | 214674 | 13.5084 | 0.6266 | 0.2035  | 5.4065 | CEU |
| Hs.396207 | Hs.396207-S  | rs6700597  | 1 | 1 | 45996266 | 223272 | 5.6557  | 0.3249 | 0.1378  | 5.4065 | CEU |
| IPP       | GI_5174472-S | rs7546237  | 1 | 1 | 45997630 | 163795 | 5.6624  | 0.3253 | -0.2484 | 5.6098 | CEU |
| Hs.396207 | Hs.396207-S  | rs7546237  | 1 | 1 | 45997630 | 224636 | 12.7805 | 0.6243 | 0.2032  | 5.4065 | CEU |
| Hs.396207 | Hs.396207-S  | rs11211199 | 1 | 1 | 45999889 | 226895 | 5.7570  | 0.3304 | 0.1345  | 5.4065 | CEU |
| Hs.396207 | Hs.396207-S  | rs11211200 | 1 | 1 | 46000372 | 227378 | 13.2494 | 0.6254 | -0.2029 | 5.4065 | CEU |
| Hs.396207 | Hs.396207-S  | rs4376778  | 1 | 1 | 46000866 | 227872 | 5.8407  | 0.3207 | -0.1330 | 5.4065 | CEU |
| Hs.396207 | Hs.396207-S  | rs6694340  | 1 | 1 | 46001436 | 228442 | 5.5568  | 0.3057 | -0.1310 | 5.4065 | CEU |
| Hs.396207 | Hs.396207-S  | rs6680380  | 1 | 1 | 46012209 | 239215 | 5.8407  | 0.3207 | 0.1330  | 5.4065 | CEU |
| Hs.396207 | Hs.396207-S  | rs10890354 | 1 | 1 | 46017367 | 244373 | 5.8407  | 0.3207 | 0.1330  | 5.4065 | CEU |
| Hs.396207 | Hs.396207-S  | rs4298677  | 1 | 1 | 46018639 | 245645 | 13.5084 | 0.6266 | -0.2035 | 5.4065 | CEU |
| Hs.396207 | Hs.396207-S  | rs6701614  | 1 | 1 | 46021440 | 248446 | 5.4832  | 0.3062 | 0.1324  | 5.4065 | CEU |
| Hs.396207 | Hs.396207-S  | rs10890355 | 1 | 1 | 46029368 | 256374 | 12.0629 | 0.5946 | -0.1981 | 5.4065 | CEU |
| Hs.396207 | Hs.396207-S  | rs11211204 | 1 | 1 | 46029884 | 256890 | 13.5084 | 0.6266 | 0.2035  | 5.4065 | CEU |
| Hs.396207 | Hs.396207-S  | rs7547189  | 1 | 1 | 46031534 | 258540 | 13.5084 | 0.6266 | -0.2035 | 5.4065 | CEU |
| Hs.396207 | Hs.396207-S  | rs7547284  | 1 | 1 | 46031585 | 258591 | 13.5084 | 0.6266 | 0.2035  | 5.4065 | CEU |
| Hs.396207 | Hs.396207-S  | rs6675222  | 1 | 1 | 46038596 | 265602 | 13.0863 | 0.6204 | 0.2031  | 5.4065 | CEU |
| IPP       | GI_5174472-S | rs4660895  | 1 | 1 | 46041759 | 207924 | 5.8469  | 0.3404 | -0.2471 | 5.6098 | CEU |
| Hs.396207 | Hs.396207-S  | rs4660895  | 1 | 1 | 46041759 | 268765 | 13.7095 | 0.6589 | 0.2050  | 5.4065 | CEU |
| Hs.396207 | Hs.396207-S  | rs6688365  | 1 | 1 | 46041904 | 268910 | 5.5413  | 0.3093 | 0.1334  | 5.4065 | CEU |
| Hs.396207 | Hs.396207-S  | rs7531911  | 1 | 1 | 46042443 | 269449 | 13.5084 | 0.6266 | 0.2035  | 5.4065 | CEU |
| Hs.396207 | Hs.396207-S  | rs6656992  | 1 | 1 | 46045088 | 272094 | 5.8407  | 0.3207 | -0.1330 | 5.4065 | CEU |
| Hs.396207 | Hs.396207-S  | rs11211208 | 1 | 1 | 46046276 | 273282 | 5.8407  | 0.3207 | -0.1330 | 5.4065 | CEU |
| Hs.396207 | Hs.396207-S  | rs4660318  | 1 | 1 | 46046896 | 273902 | 13.0863 | 0.6204 | 0.2031  | 5.4065 | CEU |
| Hs.396207 | Hs.396207-S  | rs10890359 | 1 | 1 | 46048655 | 275661 | 9.7716  | 0.5749 | 0.1863  | 5.4065 | CEU |
| Hs.396207 | Hs.396207-S  | rs6682683  | 1 | 1 | 46054357 | 281363 | 12.4657 | 0.6351 | 0.1997  | 5.4065 | CEU |
| Hs.396207 | Hs.396207-S  | rs11211213 | 1 | 1 | 46054537 | 281543 | 5.9180  | 0.3342 | 0.1350  | 5.4065 | CEU |
| Hs.396207 | Hs.396207-S  | rs11211217 | 1 | 1 | 46060249 | 287255 | 13.5084 | 0.6266 | 0.2035  | 5.4065 | CEU |
| Hs.396207 | Hs.396207-S  | rs10789478 | 1 | 1 | 46062526 | 289532 | 9.2383  | 0.5162 | 0.1766  | 5.4065 | CEU |
| Hs.396207 | Hs.396207-S  | rs12139630 | 1 | 1 | 46062955 | 289961 | 5.6632  | 0.3303 | -0.1333 | 5.4065 | CEU |
| Hs.396207 | Hs.396207-S  | rs12144263 | 1 | 1 | 46064466 | 291472 | 5.8407  | 0.3207 | 0.1330  | 5.4065 | CEU |
| Hs.396207 | Hs.396207-S  | rs10890363 | 1 | 1 | 46068168 | 295174 | 5.8694  | 0.3268 | -0.1341 | 5.4065 | CEU |
| Hs.396207 | Hs.396207-S  | rs4539075  | 1 | 1 | 46070030 | 297036 | 13.5084 | 0.6266 | 0.2035  | 5.4065 | CEU |
| Hs.396207 | Hs.396207-S  | rs12409773 | 1 | 1 | 46070851 | 297857 | 5.8407  | 0.3207 | -0.1330 | 5.4065 | CEU |
| Hs.396207 | Hs.396207-S  | rs10890365 | 1 | 1 | 46071368 | 298374 | 13.5084 | 0.6266 | 0.2035  | 5.4065 | CEU |
| Hs.396207 | Hs.396207-S  | rs11211219 | 1 | 1 | 46071498 | 298504 | 13.5084 | 0.6266 | -0.2035 | 5.4065 | CEU |
| Hs.396207 | Hs.396207-S  | rs4545281  | 1 | 1 | 46072074 | 299080 | 5.5413  | 0.3093 | -0.1334 | 5.4065 | CEU |
| Hs.396207 | Hs.396207-S  | rs7512395  | 1 | 1 | 46073197 | 300203 | 13.5084 | 0.6266 | -0.2035 | 5.4065 | CEU |
| Hs.396207 | Hs.396207-S  | rs7556436  | 1 | 1 | 46075900 | 302906 | 5.8407  | 0.3207 | -0.1330 | 5.4065 | CEU |
| Hs.396207 | Hs.396207-S  | rs7527244  | 1 | 1 | 46080792 | 307798 | 13.5084 | 0.6266 | 0.2035  | 5.4065 | CEU |
| Hs.396207 | Hs.396207-S  | rs6698247  | 1 | 1 | 46083506 | 310512 | 5.8407  | 0.3207 | -0.1330 | 5.4065 | CEU |
| Hs.396207 | Hs.396207-S  | rs9787412  | 1 | 1 | 46083616 | 310622 | 13.0373 | 0.6189 | 0.2021  | 5.4065 | CEU |
| Hs.396207 | Hs.396207-S  | rs6675946  | 1 | 1 | 46083794 | 310800 | 5.4551  | 0.3046 | -0.1320 | 5.4065 | CEU |
| Hs.396207 | Hs.396207-S  | rs4660896  | 1 | 1 | 46084436 | 311442 | 13.0373 | 0.6189 | 0.2021  | 5.4065 | CEU |
| Hs.396207 | Hs.396207-S  | rs10732844 | 1 | 1 | 46084708 | 311714 | 12.5399 | 0.6100 | -0.1998 | 5.4065 | CEU |
| Hs.396207 | Hs.396207-S  | rs12133129 | 1 | 1 | 46085368 | 312374 | 13.5084 | 0.6266 | 0.2035  | 5.4065 | CEU |
| Hs.396207 | Hs.396207-S  | rs7526678  | 1 | 1 | 46086179 | 313185 | 5.4551  | 0.3046 | -0.1320 | 5.4065 | CEU |
| Hs.396207 | Hs.396207-S  | rs6686134  | 1 | 1 | 46090288 | 317294 | 5.8407  | 0.3207 | -0.1330 | 5.4065 | CEU |
| Hs.396207 | Hs.396207-S  | rs12564541 | 1 | 1 | 46092257 | 319263 | 5.8407  | 0.3207 | 0.1330  | 5.4065 | CEU |
| Hs.396207 | Hs.396207-S  | rs11211223 | 1 | 1 | 46092625 | 319631 | 13.5084 | 0.6266 | 0.2035  | 5.4065 | CEU |
| Hs.396207 | Hs.396207-S  | rs6687301  | 1 | 1 | 46094872 | 321878 | 13.5084 | 0.6266 | -0.2035 | 5.4065 | CEU |
| Hs.396207 | Hs.396207-S  | rs10789481 | 1 | 1 | 46095603 | 322609 | 5.5677  | 0.3063 | -0.1269 | 5.4065 | CEU |
| Hs.396207 | Hs.396207-S  | rs6657720  | 1 | 1 | 46098289 | 325295 | 13.5084 | 0.6266 | -0.2035 | 5.4065 | CEU |
| Hs.396207 | Hs.396207-S  | rs10890370 | 1 | 1 | 46101237 | 328243 | 13.5084 | 0.6266 | 0.2035  | 5.4065 | CEU |
| Hs.396207 | Hs.396207-S  | rs7526369  | 1 | 1 | 46102580 | 329586 | 13.5084 | 0.6266 | -0.2035 | 5.4065 | CEU |
| Hs.396207 | Hs.396207-S  | rs10890371 | 1 | 1 | 46102917 | 329923 | 13.1099 | 0.6211 | -0.2034 | 5.4065 | CEU |
| Hs.396207 | Hs.396207-S  | rs10890372 | 1 | 1 | 46103040 | 330046 | 11.9124 | 0.6170 | -0.1990 | 5.4065 | CEU |
| Hs.396207 | Hs.396207-S  | rs4074225  | 1 | 1 | 46104384 | 331390 | 13.3018 | 0.6269 | -0.2039 | 5.4065 | CEU |
| Hs.396207 | Hs.396207-S  | rs10890373 | 1 | 1 | 46105775 | 332781 | 13.5084 | 0.6266 | 0.2035  | 5.4065 | CEU |

|           |             |            |   |   |          |        |         |        |         |        |     |
|-----------|-------------|------------|---|---|----------|--------|---------|--------|---------|--------|-----|
| Hs.396207 | Hs.396207-S | rs4134387  | 1 | 1 | 46107178 | 334184 | 13.3018 | 0.6269 | -0.2039 | 5.4065 | CEU |
| Hs.396207 | Hs.396207-S | rs6669522  | 1 | 1 | 46109961 | 336967 | 5.8407  | 0.3207 | -0.1330 | 5.4065 | CEU |
| Hs.396207 | Hs.396207-S | rs6681068  | 1 | 1 | 46110402 | 337408 | 12.8933 | 0.6278 | -0.2020 | 5.4065 | CEU |
| Hs.396207 | Hs.396207-S | rs11211228 | 1 | 1 | 46111860 | 338866 | 13.5084 | 0.6266 | -0.2035 | 5.4065 | CEU |
| Hs.396207 | Hs.396207-S | rs6677007  | 1 | 1 | 46112610 | 339616 | 5.8407  | 0.3207 | -0.1330 | 5.4065 | CEU |
| Hs.396207 | Hs.396207-S | rs12022335 | 1 | 1 | 46114752 | 341758 | 12.2910 | 0.5891 | -0.1994 | 5.4065 | CEU |
| Hs.396207 | Hs.396207-S | rs11211230 | 1 | 1 | 46118787 | 345793 | 5.4551  | 0.3046 | -0.1320 | 5.4065 | CEU |
| Hs.396207 | Hs.396207-S | rs10789485 | 1 | 1 | 46119328 | 346334 | 13.5084 | 0.6266 | 0.2035  | 5.4065 | CEU |
| Hs.396207 | Hs.396207-S | rs10789486 | 1 | 1 | 46120687 | 347693 | 13.0373 | 0.6189 | 0.2021  | 5.4065 | CEU |
| Hs.396207 | Hs.396207-S | rs10890378 | 1 | 1 | 46122677 | 349683 | 13.5084 | 0.6266 | -0.2035 | 5.4065 | CEU |
| Hs.396207 | Hs.396207-S | rs11211232 | 1 | 1 | 46123166 | 350172 | 13.5084 | 0.6266 | -0.2035 | 5.4065 | CEU |
| Hs.396207 | Hs.396207-S | rs7522601  | 1 | 1 | 46131041 | 358047 | 5.8407  | 0.3207 | 0.1330  | 5.4065 | CEU |
| Hs.396207 | Hs.396207-S | rs4660900  | 1 | 1 | 46131625 | 358631 | 13.0863 | 0.6204 | -0.2031 | 5.4065 | CEU |
| Hs.396207 | Hs.396207-S | rs10789487 | 1 | 1 | 46132241 | 359247 | 5.8407  | 0.3207 | 0.1330  | 5.4065 | CEU |
| Hs.396207 | Hs.396207-S | rs11211235 | 1 | 1 | 46152395 | 379401 | 13.2494 | 0.6254 | -0.2029 | 5.4065 | CEU |
| Hs.396207 | Hs.396207-S | rs11211236 | 1 | 1 | 46155787 | 382793 | 13.5084 | 0.6266 | -0.2035 | 5.4065 | CEU |
| Hs.396207 | Hs.396207-S | rs4660328  | 1 | 1 | 46156851 | 383857 | 13.5084 | 0.6266 | 0.2035  | 5.4065 | CEU |
| Hs.396207 | Hs.396207-S | rs11211237 | 1 | 1 | 46159349 | 386355 | 10.5227 | 0.5675 | -0.1988 | 5.4065 | CEU |
| Hs.396207 | Hs.396207-S | rs10890380 | 1 | 1 | 46161489 | 388495 | 13.5084 | 0.6266 | 0.2035  | 5.4065 | CEU |
| Hs.396207 | Hs.396207-S | rs6429588  | 1 | 1 | 46166078 | 393084 | 13.5084 | 0.6266 | -0.2035 | 5.4065 | CEU |
| Hs.396207 | Hs.396207-S | rs11211243 | 1 | 1 | 46167453 | 394459 | 13.5084 | 0.6266 | -0.2035 | 5.4065 | CEU |
| Hs.396207 | Hs.396207-S | rs4660905  | 1 | 1 | 46173607 | 400613 | 13.0863 | 0.6204 | 0.2031  | 5.4065 | CEU |
| Hs.396207 | Hs.396207-S | rs4660334  | 1 | 1 | 46174146 | 401152 | 13.5084 | 0.6266 | -0.2035 | 5.4065 | CEU |
| Hs.396207 | Hs.396207-S | rs4073846  | 1 | 1 | 46174901 | 401907 | 5.8407  | 0.3207 | -0.1330 | 5.4065 | CEU |
| Hs.396207 | Hs.396207-S | rs4073847  | 1 | 1 | 46175032 | 402038 | 13.5084 | 0.6266 | 0.2035  | 5.4065 | CEU |
| Hs.396207 | Hs.396207-S | rs6661500  | 1 | 1 | 46177682 | 404688 | 12.4066 | 0.6124 | -0.2022 | 5.4065 | CEU |
| Hs.396207 | Hs.396207-S | rs11579634 | 1 | 1 | 46178411 | 405417 | 5.8407  | 0.3207 | -0.1330 | 5.4065 | CEU |
| Hs.396207 | Hs.396207-S | rs11589562 | 1 | 1 | 46178741 | 405747 | 5.4551  | 0.3046 | 0.1320  | 5.4065 | CEU |
| Hs.396207 | Hs.396207-S | rs10890382 | 1 | 1 | 46181694 | 408700 | 13.5084 | 0.6266 | 0.2035  | 5.4065 | CEU |
| Hs.396207 | Hs.396207-S | rs12049588 | 1 | 1 | 46184442 | 411448 | 5.5709  | 0.3109 | 0.1310  | 5.4065 | CEU |
| Hs.396207 | Hs.396207-S | rs12021587 | 1 | 1 | 46184779 | 411785 | 5.8694  | 0.3268 | -0.1341 | 5.4065 | CEU |
| Hs.396207 | Hs.396207-S | rs3922887  | 1 | 1 | 46185822 | 412828 | 13.5084 | 0.6266 | -0.2035 | 5.4065 | CEU |
| Hs.396207 | Hs.396207-S | rs4660335  | 1 | 1 | 46186738 | 413744 | 13.5084 | 0.6266 | 0.2035  | 5.4065 | CEU |
| Hs.396207 | Hs.396207-S | rs6677777  | 1 | 1 | 46187856 | 414862 | 13.5084 | 0.6266 | 0.2035  | 5.4065 | CEU |
| Hs.396207 | Hs.396207-S | rs11211248 | 1 | 1 | 46188864 | 415870 | 13.5084 | 0.6266 | 0.2035  | 5.4065 | CEU |
| Hs.396207 | Hs.396207-S | rs11810993 | 1 | 1 | 46190813 | 417819 | 5.8407  | 0.3207 | -0.1330 | 5.4065 | CEU |
| Hs.396207 | Hs.396207-S | rs946529   | 1 | 1 | 46197568 | 424574 | 5.8407  | 0.3207 | 0.1330  | 5.4065 | CEU |
| Hs.396207 | Hs.396207-S | rs946527   | 1 | 1 | 46197990 | 424996 | 12.4475 | 0.5941 | -0.1966 | 5.4065 | CEU |
| Hs.396207 | Hs.396207-S | rs785478   | 1 | 1 | 46203655 | 430661 | 13.5084 | 0.6266 | 0.2035  | 5.4065 | CEU |
| Hs.396207 | Hs.396207-S | rs785480   | 1 | 1 | 46204184 | 431190 | 13.5084 | 0.6266 | -0.2035 | 5.4065 | CEU |
| Hs.396207 | Hs.396207-S | rs1707336  | 1 | 1 | 46205480 | 432486 | 5.8407  | 0.3207 | 0.1330  | 5.4065 | CEU |
| Hs.396207 | Hs.396207-S | rs925524   | 1 | 1 | 46208729 | 435735 | 10.2218 | 0.5357 | -0.1916 | 5.4065 | CEU |
| Hs.396207 | Hs.396207-S | rs1622208  | 1 | 1 | 46210395 | 437401 | 13.5084 | 0.6266 | 0.2035  | 5.4065 | CEU |
| Hs.396207 | Hs.396207-S | rs6675259  | 1 | 1 | 46214315 | 441321 | 12.2595 | 0.6145 | 0.2056  | 5.4065 | CEU |
| Hs.396207 | Hs.396207-S | rs1768809  | 1 | 1 | 46214856 | 441862 | 6.1516  | 0.3367 | 0.1404  | 5.4065 | CEU |
| Hs.396207 | Hs.396207-S | rs1768808  | 1 | 1 | 46215237 | 442243 | 11.3592 | 0.5579 | 0.1739  | 5.4065 | CEU |
| Hs.396207 | Hs.396207-S | rs7538978  | 1 | 1 | 46217074 | 444080 | 13.1394 | 0.6220 | 0.2038  | 5.4065 | CEU |
| Hs.396207 | Hs.396207-S | rs1707322  | 1 | 1 | 46217167 | 444173 | 13.5084 | 0.6266 | 0.2035  | 5.4065 | CEU |
| Hs.396207 | Hs.396207-S | rs1707321  | 1 | 1 | 46217329 | 444335 | 5.8407  | 0.3207 | 0.1330  | 5.4065 | CEU |
| Hs.396207 | Hs.396207-S | rs1707337  | 1 | 1 | 46220789 | 447795 | 13.5084 | 0.6266 | 0.2035  | 5.4065 | CEU |
| Hs.396207 | Hs.396207-S | rs1768807  | 1 | 1 | 46222590 | 449596 | 13.5084 | 0.6266 | 0.2035  | 5.4065 | CEU |
| Hs.396207 | Hs.396207-S | rs12132540 | 1 | 1 | 46223336 | 450342 | 5.4799  | 0.3355 | 0.1396  | 5.4065 | CEU |
| Hs.396207 | Hs.396207-S | rs1768817  | 1 | 1 | 46226554 | 453560 | 13.2494 | 0.6254 | 0.2029  | 5.4065 | CEU |
| Hs.396207 | Hs.396207-S | rs785473   | 1 | 1 | 46228883 | 455889 | 5.8407  | 0.3207 | -0.1330 | 5.4065 | CEU |
| Hs.396207 | Hs.396207-S | rs785472   | 1 | 1 | 46230308 | 457314 | 5.8407  | 0.3207 | -0.1330 | 5.4065 | CEU |
| Hs.396207 | Hs.396207-S | rs785468   | 1 | 1 | 46233537 | 460543 | 13.5084 | 0.6266 | -0.2035 | 5.4065 | CEU |
| Hs.396207 | Hs.396207-S | rs785467   | 1 | 1 | 46233579 | 460585 | 13.5084 | 0.6266 | 0.2035  | 5.4065 | CEU |
| Hs.396207 | Hs.396207-S | rs785465   | 1 | 1 | 46234597 | 461603 | 13.1099 | 0.6211 | 0.2034  | 5.4065 | CEU |
| Hs.396207 | Hs.396207-S | rs785464   | 1 | 1 | 46235109 | 462115 | 5.8407  | 0.3207 | -0.1330 | 5.4065 | CEU |

|           |             |            |   |   |          |        |         |        |         |        |     |
|-----------|-------------|------------|---|---|----------|--------|---------|--------|---------|--------|-----|
| Hs.396207 | Hs.396207-S | rs785508   | 1 | 1 | 46239179 | 466185 | 13.2102 | 0.6177 | 0.1959  | 5.4065 | CEU |
| Hs.396207 | Hs.396207-S | rs785509   | 1 | 1 | 46239320 | 466326 | 13.2102 | 0.6177 | 0.1959  | 5.4065 | CEU |
| Hs.396207 | Hs.396207-S | rs785510   | 1 | 1 | 46240638 | 467644 | 13.5084 | 0.6266 | 0.2035  | 5.4065 | CEU |
| Hs.396207 | Hs.396207-S | rs2458400  | 1 | 1 | 46242818 | 469824 | 13.5084 | 0.6266 | -0.2035 | 5.4065 | CEU |
| Hs.396207 | Hs.396207-S | rs785511   | 1 | 1 | 46246518 | 473524 | 5.8407  | 0.3207 | 0.1330  | 5.4065 | CEU |
| Hs.396207 | Hs.396207-S | rs785512   | 1 | 1 | 46246563 | 473569 | 7.0612  | 0.3870 | -0.1609 | 5.4065 | CEU |
| Hs.396207 | Hs.396207-S | rs809775   | 1 | 1 | 46250060 | 477066 | 5.8407  | 0.3207 | -0.1330 | 5.4065 | CEU |
| Hs.396207 | Hs.396207-S | rs785506   | 1 | 1 | 46252672 | 479678 | 13.5084 | 0.6266 | -0.2035 | 5.4065 | CEU |
| Hs.396207 | Hs.396207-S | rs1613296  | 1 | 1 | 46258872 | 485878 | 13.1143 | 0.6278 | -0.2098 | 5.4065 | CEU |
| Hs.396207 | Hs.396207-S | rs4660910  | 1 | 1 | 46260422 | 487428 | 5.5413  | 0.3093 | -0.1334 | 5.4065 | CEU |
| Hs.396207 | Hs.396207-S | rs1768801  | 1 | 1 | 46261157 | 488163 | 8.8031  | 0.5410 | 0.1893  | 5.4065 | CEU |
| Hs.396207 | Hs.396207-S | rs785481   | 1 | 1 | 46266538 | 493544 | 5.8407  | 0.3207 | 0.1330  | 5.4065 | CEU |
| Hs.396207 | Hs.396207-S | rs6675726  | 1 | 1 | 46272663 | 499669 | 5.5007  | 0.3071 | -0.1318 | 5.4065 | CEU |
| Hs.396207 | Hs.396207-S | rs785520   | 1 | 1 | 46280856 | 507862 | 5.8407  | 0.3207 | 0.1330  | 5.4065 | CEU |
| Hs.396207 | Hs.396207-S | rs785484   | 1 | 1 | 46286035 | 513041 | 13.9575 | 0.6526 | 0.2013  | 5.4065 | CEU |
| Hs.396207 | Hs.396207-S | rs785485   | 1 | 1 | 46286444 | 513450 | 5.6528  | 0.3153 | -0.1327 | 5.4065 | CEU |
| Hs.396207 | Hs.396207-S | rs785489   | 1 | 1 | 46288410 | 515416 | 5.4387  | 0.3177 | -0.1252 | 5.4065 | CEU |
| Hs.396207 | Hs.396207-S | rs785490   | 1 | 1 | 46289144 | 516150 | 13.5084 | 0.6266 | 0.2035  | 5.4065 | CEU |
| Hs.396207 | Hs.396207-S | rs785502   | 1 | 1 | 46293464 | 520470 | 5.8407  | 0.3207 | -0.1330 | 5.4065 | CEU |
| Hs.396207 | Hs.396207-S | rs785491   | 1 | 1 | 46295438 | 522444 | 6.1472  | 0.3732 | 0.1496  | 5.4065 | CEU |
| Hs.396207 | Hs.396207-S | rs785493   | 1 | 1 | 46296879 | 523885 | 13.5084 | 0.6266 | -0.2035 | 5.4065 | CEU |
| Hs.396207 | Hs.396207-S | rs785494   | 1 | 1 | 46298646 | 525652 | 5.8407  | 0.3207 | 0.1330  | 5.4065 | CEU |
| Hs.396207 | Hs.396207-S | rs785495   | 1 | 1 | 46299907 | 526913 | 5.8407  | 0.3207 | 0.1330  | 5.4065 | CEU |
| Hs.396207 | Hs.396207-S | rs10890383 | 1 | 1 | 46300523 | 527529 | 5.4119  | 0.3114 | -0.1348 | 5.4065 | CEU |
| Hs.396207 | Hs.396207-S | rs785497   | 1 | 1 | 46303923 | 530929 | 13.0158 | 0.6183 | 0.2012  | 5.4065 | CEU |
| Hs.396207 | Hs.396207-S | rs785504   | 1 | 1 | 46307716 | 534722 | 13.5084 | 0.6266 | -0.2035 | 5.4065 | CEU |
| Hs.396207 | Hs.396207-S | rs1707302  | 1 | 1 | 46312937 | 539943 | 6.7098  | 0.3750 | 0.1425  | 5.4065 | CEU |
| Hs.396207 | Hs.396207-S | rs1416706  | 1 | 1 | 46314864 | 541870 | 5.7670  | 0.3695 | -0.1530 | 5.4065 | CEU |
| Hs.396207 | Hs.396207-S | rs9429095  | 1 | 1 | 46315368 | 542374 | 6.1776  | 0.3529 | 0.1472  | 5.4065 | CEU |
| hmm8232   | hmm8232-S   | rs9793263  | 1 | 1 | 46434409 | 105335 | 7.2168  | 0.3892 | -0.3892 | 5.7109 | CEU |
| hmm8232   | hmm8232-S   | rs12137934 | 1 | 1 | 46440933 | 98811  | 11.3679 | 0.5582 | -0.4579 | 5.7109 | CEU |
| hmm8232   | hmm8232-S   | rs12146051 | 1 | 1 | 46454972 | 84772  | 11.0265 | 0.5462 | 0.4378  | 5.7109 | CEU |
| hmm8232   | hmm8232-S   | rs12142240 | 1 | 1 | 46459321 | 80423  | 11.0265 | 0.5462 | 0.4378  | 5.7109 | CEU |
| hmm8232   | hmm8232-S   | rs17361749 | 1 | 1 | 46518500 | 21244  | 15.8130 | 0.7491 | -0.5367 | 5.7109 | CEU |
| hmm8232   | hmm8232-S   | rs10489769 | 1 | 1 | 46518723 | 21021  | 15.8929 | 0.6905 | -0.4930 | 5.7109 | CEU |
| hmm8232   | hmm8232-S   | rs17357621 | 1 | 1 | 46519717 | 20027  | 17.3287 | 0.7555 | -0.5413 | 5.7109 | CEU |
| hmm8232   | hmm8232-S   | rs17357628 | 1 | 1 | 46520482 | 19262  | 18.1226 | 0.7466 | -0.5311 | 5.7109 | CEU |
| hmm8232   | hmm8232-S   | rs17357635 | 1 | 1 | 46520688 | 19056  | 17.5362 | 0.7343 | 0.5264  | 5.7109 | CEU |
| hmm8232   | hmm8232-S   | rs7525309  | 1 | 1 | 46521045 | 18699  | 17.8541 | 0.7349 | -0.5255 | 5.7109 | CEU |
| hmm8232   | hmm8232-S   | rs7548675  | 1 | 1 | 46521341 | 18403  | 9.7049  | 0.5355 | -0.4589 | 5.7109 | CEU |
| hmm8232   | hmm8232-S   | rs7515284  | 1 | 1 | 46521439 | 18305  | 17.8541 | 0.7349 | -0.5255 | 5.7109 | CEU |
| hmm8232   | hmm8232-S   | rs17361763 | 1 | 1 | 46522690 | 17054  | 17.8541 | 0.7349 | 0.5255  | 5.7109 | CEU |
| hmm8232   | hmm8232-S   | rs6684274  | 1 | 1 | 46522862 | 16882  | 17.8541 | 0.7349 | -0.5255 | 5.7109 | CEU |
| hmm8232   | hmm8232-S   | rs6696777  | 1 | 1 | 46522990 | 16754  | 17.8541 | 0.7349 | -0.5255 | 5.7109 | CEU |
| hmm8232   | hmm8232-S   | rs6659228  | 1 | 1 | 46523047 | 16697  | 17.4894 | 0.7333 | 0.5199  | 5.7109 | CEU |
| hmm8232   | hmm8232-S   | rs6697123  | 1 | 1 | 46523330 | 16414  | 17.6657 | 0.7371 | -0.5203 | 5.7109 | CEU |
| hmm8232   | hmm8232-S   | rs17357676 | 1 | 1 | 46524464 | 15280  | 17.8541 | 0.7349 | -0.5255 | 5.7109 | CEU |
| hmm8232   | hmm8232-S   | rs17361791 | 1 | 1 | 46524539 | 15205  | 17.4452 | 0.7324 | -0.5254 | 5.7109 | CEU |
| hmm8232   | hmm8232-S   | rs17361805 | 1 | 1 | 46525987 | 13757  | 17.8541 | 0.7349 | -0.5255 | 5.7109 | CEU |
| hmm8232   | hmm8232-S   | rs17361812 | 1 | 1 | 46526028 | 13716  | 17.8541 | 0.7349 | -0.5255 | 5.7109 | CEU |
| hmm8232   | hmm8232-S   | rs5013330  | 1 | 1 | 46527174 | 12570  | 10.6040 | 0.5501 | 0.6285  | 5.7109 | CEU |
| hmm8232   | hmm8232-S   | rs17357683 | 1 | 1 | 46527398 | 12346  | 17.1470 | 0.7322 | -0.5230 | 5.7109 | CEU |
| hmm8232   | hmm8232-S   | rs6667861  | 1 | 1 | 46527769 | 11975  | 17.4234 | 0.7382 | 0.5223  | 5.7109 | CEU |
| hmm8232   | hmm8232-S   | rs1057533  | 1 | 1 | 46527856 | 11888  | 17.8541 | 0.7349 | -0.5255 | 5.7109 | CEU |
| hmm8232   | hmm8232-S   | rs1057534  | 1 | 1 | 46527900 | 11844  | 17.8541 | 0.7349 | -0.5255 | 5.7109 | CEU |
| hmm8232   | hmm8232-S   | rs1057535  | 1 | 1 | 46527918 | 11826  | 17.4728 | 0.7330 | 0.5236  | 5.7109 | CEU |
| hmm8232   | hmm8232-S   | rs1475390  | 1 | 1 | 46528360 | 11384  | 17.8541 | 0.7349 | 0.5255  | 5.7109 | CEU |
| hmm8232   | hmm8232-S   | rs1475389  | 1 | 1 | 46528449 | 11295  | 17.8541 | 0.7349 | -0.5255 | 5.7109 | CEU |
| hmm8232   | hmm8232-S   | rs966907   | 1 | 1 | 46529145 | 10599  | 17.8541 | 0.7349 | 0.5255  | 5.7109 | CEU |

|          |               |            |   |   |           |        |         |        |         |        |     |
|----------|---------------|------------|---|---|-----------|--------|---------|--------|---------|--------|-----|
| hmm8232  | hmm8232-S     | rs17413694 | 1 | 1 | 46530436  | 9308   | 17.4715 | 0.7329 | -0.5237 | 5.7109 | CEU |
| hmm8232  | hmm8232-S     | rs17413701 | 1 | 1 | 46530472  | 9272   | 17.8541 | 0.7349 | -0.5255 | 5.7109 | CEU |
| hmm8232  | hmm8232-S     | rs7515598  | 1 | 1 | 46530499  | 9245   | 17.8541 | 0.7349 | -0.5255 | 5.7109 | CEU |
| hmm8232  | hmm8232-S     | rs12385696 | 1 | 1 | 46530856  | 8888   | 17.8541 | 0.7349 | 0.5255  | 5.7109 | CEU |
| hmm8232  | hmm8232-S     | rs12385693 | 1 | 1 | 46530941  | 8803   | 16.8253 | 0.7251 | -0.5220 | 5.7109 | CEU |
| hmm8232  | hmm8232-S     | rs10157084 | 1 | 1 | 46532995  | 6749   | 17.8541 | 0.7349 | -0.5255 | 5.7109 | CEU |
| hmm8232  | hmm8232-S     | rs10158572 | 1 | 1 | 46534460  | 5284   | 17.8541 | 0.7349 | -0.5255 | 5.7109 | CEU |
| hmm8232  | hmm8232-S     | rs9661240  | 1 | 1 | 46539070  | 674    | 17.8541 | 0.7349 | 0.5255  | 5.7109 | CEU |
| hmm8232  | hmm8232-S     | rs1053624  | 1 | 1 | 46539505  | 239    | 17.8541 | 0.7349 | -0.5255 | 5.7109 | CEU |
| hmm8232  | hmm8232-S     | rs6429599  | 1 | 1 | 46539891  | 147    | 16.3724 | 0.7344 | 0.5202  | 5.7109 | CEU |
| hmm8232  | hmm8232-S     | rs17361819 | 1 | 1 | 46540129  | 385    | 16.1517 | 0.7293 | -0.4982 | 5.7109 | CEU |
| hmm8232  | hmm8232-S     | rs17361833 | 1 | 1 | 46540720  | 976    | 17.5245 | 0.7341 | -0.5262 | 5.7109 | CEU |
| hmm8232  | hmm8232-S     | rs17357711 | 1 | 1 | 46541033  | 1289   | 17.8541 | 0.7349 | -0.5255 | 5.7109 | CEU |
| hmm8232  | hmm8232-S     | rs10252    | 1 | 1 | 46542450  | 2706   | 13.5154 | 0.6268 | 0.4617  | 5.7109 | CEU |
| hmm8232  | hmm8232-S     | rs12062    | 1 | 1 | 46542467  | 2723   | 17.8541 | 0.7349 | -0.5255 | 5.7109 | CEU |
| hmm8232  | hmm8232-S     | rs17357759 | 1 | 1 | 46544554  | 4810   | 15.5201 | 0.6941 | 0.5132  | 5.7109 | CEU |
| hmm8232  | hmm8232-S     | rs17361873 | 1 | 1 | 46544706  | 4962   | 16.6925 | 0.7350 | -0.5231 | 5.7109 | CEU |
| hmm8232  | hmm8232-S     | rs12075550 | 1 | 1 | 46546232  | 6488   | 13.5154 | 0.6268 | 0.4617  | 5.7109 | CEU |
| hmm8232  | hmm8232-S     | rs17361887 | 1 | 1 | 46546795  | 7051   | 17.8541 | 0.7349 | 0.5255  | 5.7109 | CEU |
| hmm8232  | hmm8232-S     | rs3863641  | 1 | 1 | 46555236  | 15492  | 13.4663 | 0.6318 | -0.4600 | 5.7109 | CEU |
| hmm8232  | hmm8232-S     | rs12073998 | 1 | 1 | 46555552  | 15808  | 11.6067 | 0.6066 | 0.4645  | 5.7109 | CEU |
| hmm8232  | hmm8232-S     | rs13374968 | 1 | 1 | 46555928  | 16184  | 17.8541 | 0.7349 | 0.5255  | 5.7109 | CEU |
| hmm8232  | hmm8232-S     | rs6658556  | 1 | 1 | 46556200  | 16456  | 17.8541 | 0.7349 | -0.5255 | 5.7109 | CEU |
| hmm8232  | hmm8232-S     | rs6695043  | 1 | 1 | 46556550  | 16806  | 17.8541 | 0.7349 | -0.5255 | 5.7109 | CEU |
| hmm8232  | hmm8232-S     | rs17361915 | 1 | 1 | 46559341  | 19597  | 13.3159 | 0.6406 | -0.4930 | 5.7109 | CEU |
| hmm8232  | hmm8232-S     | rs11211271 | 1 | 1 | 46560450  | 20706  | 13.0407 | 0.6190 | 0.4598  | 5.7109 | CEU |
| hmm8232  | hmm8232-S     | rs3991877  | 1 | 1 | 46565769  | 26025  | 16.0653 | 0.6947 | -0.5302 | 5.7109 | CEU |
| hmm8232  | hmm8232-S     | rs913168   | 1 | 1 | 46570596  | 30852  | 13.4663 | 0.6318 | -0.4600 | 5.7109 | CEU |
| hmm8232  | hmm8232-S     | rs1984490  | 1 | 1 | 46570754  | 31010  | 17.8541 | 0.7349 | 0.5255  | 5.7109 | CEU |
| hmm8232  | hmm8232-S     | rs6703374  | 1 | 1 | 46574352  | 34608  | 10.0913 | 0.5725 | -0.4936 | 5.7109 | CEU |
| hmm8232  | hmm8232-S     | rs6703669  | 1 | 1 | 46574575  | 34831  | 17.8541 | 0.7349 | -0.5255 | 5.7109 | CEU |
| hmm8232  | hmm8232-S     | rs17361936 | 1 | 1 | 46574913  | 35169  | 17.4840 | 0.7395 | -0.5230 | 5.7109 | CEU |
| hmm8232  | hmm8232-S     | rs17361950 | 1 | 1 | 46576170  | 36426  | 17.8541 | 0.7349 | -0.5255 | 5.7109 | CEU |
| hmm8232  | hmm8232-S     | rs6662982  | 1 | 1 | 46589200  | 49456  | 18.9987 | 0.7638 | 0.5371  | 5.7109 | CEU |
| MGC22773 | GI_21687083-S | rs4649996  | 1 | 1 | 74232300  | 125719 | 5.8030  | 0.3233 | 0.2012  | 5.7903 | CEU |
| MGC22773 | GI_21687083-S | rs7550195  | 1 | 1 | 74274326  | 83693  | 5.8536  | 0.3308 | 0.2030  | 5.7903 | CEU |
| MGC22773 | GI_21687083-S | rs2343864  | 1 | 1 | 74289090  | 68929  | 5.9587  | 0.3315 | 0.2032  | 5.7903 | CEU |
| MGC22773 | GI_21687083-S | rs11210417 | 1 | 1 | 74293180  | 64839  | 6.0929  | 0.3337 | 0.2007  | 5.7903 | CEU |
| MGC22773 | GI_21687083-S | rs11210418 | 1 | 1 | 74294698  | 63321  | 6.0929  | 0.3337 | -0.2007 | 5.7903 | CEU |
| MGC22773 | GI_21687083-S | rs1412825  | 1 | 1 | 74375835  | 17816  | 6.5448  | 0.3566 | -0.2038 | 5.7903 | CEU |
| MGC22773 | GI_21687083-S | rs792310   | 1 | 1 | 74377514  | 19495  | 6.4391  | 0.3562 | 0.2036  | 5.7903 | CEU |
| MGC22773 | GI_21687083-S | rs577367   | 1 | 1 | 74379707  | 21688  | 6.5448  | 0.3566 | 0.2038  | 5.7903 | CEU |
| MGC22773 | GI_21687083-S | rs487917   | 1 | 1 | 74380917  | 22898  | 6.4391  | 0.3562 | -0.2036 | 5.7903 | CEU |
| MGC22773 | GI_21687083-S | rs571848   | 1 | 1 | 74383540  | 25521  | 6.4036  | 0.3544 | -0.2061 | 5.7903 | CEU |
| MGC22773 | GI_21687083-S | rs520806   | 1 | 1 | 74385362  | 27343  | 6.5448  | 0.3566 | -0.2038 | 5.7903 | CEU |
| MGC22773 | GI_21687083-S | rs522759   | 1 | 1 | 74385603  | 27584  | 6.5448  | 0.3566 | 0.2038  | 5.7903 | CEU |
| MGC22773 | GI_21687083-S | rs545664   | 1 | 1 | 74385798  | 27779  | 6.4341  | 0.3888 | -0.1990 | 5.7903 | CEU |
| MGC22773 | GI_21687083-S | rs545721   | 1 | 1 | 74385820  | 27801  | 6.5448  | 0.3566 | 0.2038  | 5.7903 | CEU |
| MGC22773 | GI_21687083-S | rs581353   | 1 | 1 | 74387407  | 29388  | 6.4036  | 0.3544 | -0.2061 | 5.7903 | CEU |
| MGC22773 | GI_21687083-S | rs792321   | 1 | 1 | 74393989  | 35970  | 6.7006  | 0.3694 | -0.2108 | 5.7903 | CEU |
| MGC22773 | GI_21687083-S | rs495027   | 1 | 1 | 74394280  | 36261  | 6.2493  | 0.3466 | 0.2046  | 5.7903 | CEU |
| MGC22773 | GI_21687083-S | rs533371   | 1 | 1 | 74399033  | 41014  | 6.4036  | 0.3544 | -0.2061 | 5.7903 | CEU |
| GSTM1    | GI_23065546-A | rs366631   | 1 | 1 | 109964514 | 20554  | 16.3427 | 0.7076 | -2.6092 | 5.8766 | CEU |
| GSTM1    | GI_23065546-A | rs674787   | 1 | 1 | 109965953 | 21993  | 27.6708 | 0.8780 | -2.8168 | 5.8766 | CEU |
| GSTM2    | GI_23065549-S | rs674787   | 1 | 1 | 109965953 | 39735  | 7.5759  | 0.4060 | -0.6859 | 6.1976 | CEU |
| CHI3L2   | GI_11993934-S | rs942697   | 1 | 1 | 111503545 | 5615   | 6.8100  | 0.3696 | 1.5578  | 6.633  | CEU |
| ST7L     | GI_38201636-I | rs351370   | 1 | 1 | 112766701 | 29848  | 6.4771  | 0.3532 | -0.1968 | 6.1581 | CEU |
| ST7L     | GI_38201636-A | rs351372   | 1 | 1 | 112771262 | 25437  | 9.1007  | 0.4725 | 0.2089  | 6.1581 | CEU |
| ST7L     | GI_38201636-I | rs351372   | 1 | 1 | 112771262 | 25287  | 9.7076  | 0.4969 | 0.2304  | 6.1581 | CEU |

|      |               |            |   |   |           |        |        |        |         |        |     |
|------|---------------|------------|---|---|-----------|--------|--------|--------|---------|--------|-----|
| ST7L | GI_38201636-I | rs3737136  | 1 | 1 | 112772474 | 24075  | 7.2383 | 0.3902 | 0.2638  | 6.1581 | CEU |
| ST7L | GI_38201636-A | rs1006298  | 1 | 1 | 112774001 | 22698  | 9.2076 | 0.4828 | -0.2096 | 6.1581 | CEU |
| ST7L | GI_38201636-I | rs1006298  | 1 | 1 | 112774001 | 22548  | 9.7624 | 0.5051 | -0.2310 | 6.1581 | CEU |
| ST7L | GI_38201636-A | rs910697   | 1 | 1 | 112775167 | 21532  | 9.1007 | 0.4725 | 0.2089  | 6.1581 | CEU |
| ST7L | GI_38201636-I | rs910697   | 1 | 1 | 112775167 | 21382  | 9.7076 | 0.4969 | 0.2304  | 6.1581 | CEU |
| ST7L | GI_38201636-I | rs2273368  | 1 | 1 | 112775813 | 20736  | 6.8235 | 0.3703 | 0.2442  | 6.1581 | CEU |
| ST7L | GI_38201636-A | rs12728001 | 1 | 1 | 112788798 | 7901   | 6.5815 | 0.3634 | -0.1802 | 6.1581 | CEU |
| ST7L | GI_38201636-I | rs12728001 | 1 | 1 | 112788798 | 7751   | 6.5977 | 0.3642 | -0.1949 | 6.1581 | CEU |
| ST7L | GI_38201636-A | rs10776755 | 1 | 1 | 112795016 | 1683   | 8.3424 | 0.4404 | -0.1947 | 6.1581 | CEU |
| ST7L | GI_38201636-I | rs10776755 | 1 | 1 | 112795016 | 1533   | 8.4338 | 0.4443 | -0.2104 | 6.1581 | CEU |
| ST7L | GI_38201636-A | rs10745330 | 1 | 1 | 112795481 | 1218   | 8.9650 | 0.4669 | 0.2042  | 6.1581 | CEU |
| ST7L | GI_38201636-I | rs10745330 | 1 | 1 | 112795481 | 1068   | 9.7440 | 0.4983 | 0.2267  | 6.1581 | CEU |
| ST7L | GI_38201636-A | rs7544663  | 1 | 1 | 112801048 | 4349   | 8.5555 | 0.4496 | 0.2030  | 6.1581 | CEU |
| ST7L | GI_38201636-I | rs7544663  | 1 | 1 | 112801048 | 4499   | 8.8514 | 0.4621 | 0.2213  | 6.1581 | CEU |
| ST7L | GI_38201636-A | rs7513716  | 1 | 1 | 112801362 | 4663   | 8.9007 | 0.4701 | 0.2045  | 6.1581 | CEU |
| ST7L | GI_38201636-I | rs7513716  | 1 | 1 | 112801362 | 4813   | 9.6038 | 0.4989 | 0.2268  | 6.1581 | CEU |
| ST7L | GI_38201636-A | rs10857963 | 1 | 1 | 112803529 | 6830   | 8.9650 | 0.4669 | 0.2042  | 6.1581 | CEU |
| ST7L | GI_38201636-I | rs10857963 | 1 | 1 | 112803529 | 6980   | 9.7440 | 0.4983 | 0.2267  | 6.1581 | CEU |
| ST7L | GI_38201636-A | rs12126277 | 1 | 1 | 112818411 | 21712  | 8.9650 | 0.4669 | 0.2042  | 6.1581 | CEU |
| ST7L | GI_38201636-I | rs12126277 | 1 | 1 | 112818411 | 21862  | 9.7440 | 0.4983 | 0.2267  | 6.1581 | CEU |
| ST7L | GI_38201636-A | rs10776757 | 1 | 1 | 112833715 | 37016  | 8.3424 | 0.4404 | -0.1947 | 6.1581 | CEU |
| ST7L | GI_38201636-I | rs10776757 | 1 | 1 | 112833715 | 37166  | 8.4338 | 0.4443 | -0.2104 | 6.1581 | CEU |
| ST7L | GI_38201636-A | rs7554916  | 1 | 1 | 112835776 | 39077  | 8.9650 | 0.4669 | 0.2042  | 6.1581 | CEU |
| ST7L | GI_38201636-I | rs7554916  | 1 | 1 | 112835776 | 39227  | 9.7440 | 0.4983 | 0.2267  | 6.1581 | CEU |
| ST7L | GI_38201636-A | rs6666579  | 1 | 1 | 112844435 | 47736  | 8.9650 | 0.4669 | 0.2042  | 6.1581 | CEU |
| ST7L | GI_38201636-I | rs6666579  | 1 | 1 | 112844435 | 47886  | 9.7440 | 0.4983 | 0.2267  | 6.1581 | CEU |
| ST7L | GI_38201636-A | rs6682737  | 1 | 1 | 112848271 | 51572  | 8.9650 | 0.4669 | -0.2042 | 6.1581 | CEU |
| ST7L | GI_38201636-I | rs6682737  | 1 | 1 | 112848271 | 51722  | 9.7440 | 0.4983 | -0.2267 | 6.1581 | CEU |
| ST7L | GI_38201636-A | rs4839254  | 1 | 1 | 112852968 | 56269  | 6.9642 | 0.3771 | 0.1860  | 6.1581 | CEU |
| ST7L | GI_38201636-I | rs4839254  | 1 | 1 | 112852968 | 56419  | 6.6453 | 0.3616 | 0.1962  | 6.1581 | CEU |
| ST7L | GI_38201636-A | rs7522288  | 1 | 1 | 112863247 | 66548  | 7.6811 | 0.4219 | -0.1941 | 6.1581 | CEU |
| ST7L | GI_38201636-I | rs7522288  | 1 | 1 | 112863247 | 66698  | 7.7533 | 0.4253 | -0.2098 | 6.1581 | CEU |
| ST7L | GI_38201636-A | rs6700673  | 1 | 1 | 112869096 | 72397  | 7.4844 | 0.4017 | 0.1957  | 6.1581 | CEU |
| ST7L | GI_38201636-I | rs6700673  | 1 | 1 | 112869096 | 72547  | 7.6843 | 0.4110 | 0.2129  | 6.1581 | CEU |
| ST7L | GI_38201636-I | rs12122980 | 1 | 1 | 112869223 | 72674  | 6.8235 | 0.3703 | -0.2442 | 6.1581 | CEU |
| ST7L | GI_38201636-A | rs9429486  | 1 | 1 | 112869414 | 72715  | 8.4955 | 0.4527 | -0.2000 | 6.1581 | CEU |
| ST7L | GI_38201636-I | rs9429486  | 1 | 1 | 112869414 | 72865  | 8.4747 | 0.4518 | -0.2150 | 6.1581 | CEU |
| ST7L | GI_38201636-I | rs11102513 | 1 | 1 | 112872212 | 75663  | 6.8235 | 0.3703 | 0.2442  | 6.1581 | CEU |
| ST7L | GI_38201636-I | rs11102514 | 1 | 1 | 112872461 | 75912  | 6.8235 | 0.3703 | 0.2442  | 6.1581 | CEU |
| ST7L | GI_38201636-A | rs7415820  | 1 | 1 | 112881491 | 84792  | 8.9650 | 0.4669 | 0.2042  | 6.1581 | CEU |
| ST7L | GI_38201636-I | rs7415820  | 1 | 1 | 112881491 | 84942  | 9.7440 | 0.4983 | 0.2267  | 6.1581 | CEU |
| ST7L | GI_38201636-I | rs12130243 | 1 | 1 | 112881709 | 85160  | 6.8235 | 0.3703 | -0.2442 | 6.1581 | CEU |
| ST7L | GI_38201636-A | rs12046208 | 1 | 1 | 112883631 | 86932  | 8.3424 | 0.4404 | -0.1947 | 6.1581 | CEU |
| ST7L | GI_38201636-I | rs12046208 | 1 | 1 | 112883631 | 87082  | 8.4338 | 0.4443 | -0.2104 | 6.1581 | CEU |
| ST7L | GI_38201636-A | rs11584092 | 1 | 1 | 112888304 | 91605  | 6.9410 | 0.4034 | 0.1896  | 6.1581 | CEU |
| ST7L | GI_38201636-I | rs11584092 | 1 | 1 | 112888304 | 91755  | 6.8402 | 0.3983 | 0.1998  | 6.1581 | CEU |
| ST7L | GI_38201636-I | rs17030613 | 1 | 1 | 112902849 | 106300 | 6.8235 | 0.3703 | 0.2442  | 6.1581 | CEU |
| ST7L | GI_38201636-A | rs3013440  | 1 | 1 | 112907831 | 111132 | 8.9271 | 0.4712 | -0.2037 | 6.1581 | CEU |
| ST7L | GI_38201636-I | rs3013440  | 1 | 1 | 112907831 | 111282 | 9.5878 | 0.4982 | -0.2266 | 6.1581 | CEU |
| ST7L | GI_38201636-A | rs3013439  | 1 | 1 | 112912713 | 116014 | 9.1652 | 0.5064 | -0.2104 | 6.1581 | CEU |
| ST7L | GI_38201636-I | rs3013439  | 1 | 1 | 112912713 | 116164 | 9.8498 | 0.5344 | -0.2302 | 6.1581 | CEU |
| ST7L | GI_38201636-A | rs2932536  | 1 | 1 | 112914459 | 117760 | 8.8852 | 0.4754 | 0.2093  | 6.1581 | CEU |
| ST7L | GI_38201636-I | rs2932536  | 1 | 1 | 112914459 | 117910 | 9.6474 | 0.5068 | 0.2322  | 6.1581 | CEU |
| ST7L | GI_38201636-I | rs12120956 | 1 | 1 | 112914613 | 118064 | 6.1878 | 0.3484 | -0.2599 | 6.1581 | CEU |
| ST7L | GI_38201636-I | rs12756815 | 1 | 1 | 112919285 | 122736 | 7.2839 | 0.3977 | -0.2670 | 6.1581 | CEU |
| ST7L | GI_38201636-A | rs6537748  | 1 | 1 | 112926423 | 129724 | 7.3769 | 0.3967 | 0.1937  | 6.1581 | CEU |
| ST7L | GI_38201636-I | rs6537748  | 1 | 1 | 112926423 | 129874 | 7.3919 | 0.3974 | 0.2086  | 6.1581 | CEU |
| ST7L | GI_38201636-A | rs2999154  | 1 | 1 | 112934498 | 137799 | 8.9650 | 0.4669 | 0.2042  | 6.1581 | CEU |
| ST7L | GI_38201636-I | rs2999154  | 1 | 1 | 112934498 | 137949 | 9.7440 | 0.4983 | 0.2267  | 6.1581 | CEU |

|         |               |            |   |   |           |        |         |        |         |        |     |
|---------|---------------|------------|---|---|-----------|--------|---------|--------|---------|--------|-----|
| ST7L    | GI_38201636-I | rs3795819  | 1 | 1 | 112946221 | 149672 | 6.8235  | 0.3703 | -0.2442 | 6.1581 | CEU |
| ST7L    | GI_38201636-A | rs2932532  | 1 | 1 | 112946498 | 149799 | 8.9650  | 0.4669 | -0.2042 | 6.1581 | CEU |
| ST7L    | GI_38201636-I | rs2932532  | 1 | 1 | 112946498 | 149949 | 9.7440  | 0.4983 | -0.2267 | 6.1581 | CEU |
| ST7L    | GI_38201636-A | rs902289   | 1 | 1 | 112948129 | 151430 | 8.9650  | 0.4669 | -0.2042 | 6.1581 | CEU |
| ST7L    | GI_38201636-I | rs902289   | 1 | 1 | 112948129 | 151580 | 9.7440  | 0.4983 | -0.2267 | 6.1581 | CEU |
| ST7L    | GI_38201636-A | rs1110043  | 1 | 1 | 112948463 | 151764 | 6.3247  | 0.3889 | 0.1901  | 6.1581 | CEU |
| ST7L    | GI_38201636-I | rs1110043  | 1 | 1 | 112948463 | 151914 | 7.3832  | 0.4443 | 0.2189  | 6.1581 | CEU |
| ST7L    | GI_38201636-I | rs3748656  | 1 | 1 | 112948723 | 152174 | 6.8235  | 0.3703 | -0.2442 | 6.1581 | CEU |
| ST7L    | GI_38201636-I | rs1106287  | 1 | 1 | 112954164 | 157615 | 6.8235  | 0.3703 | 0.2442  | 6.1581 | CEU |
| ST7L    | GI_38201636-A | rs2999156  | 1 | 1 | 112959169 | 162470 | 6.9365  | 0.3810 | -0.1924 | 6.1581 | CEU |
| ST7L    | GI_38201636-I | rs2999156  | 1 | 1 | 112959169 | 162620 | 7.4322  | 0.4047 | -0.2136 | 6.1581 | CEU |
| ST7L    | GI_38201636-A | rs954679   | 1 | 1 | 112960407 | 163708 | 6.3424  | 0.3464 | -0.1812 | 6.1581 | CEU |
| ST7L    | GI_38201636-I | rs954679   | 1 | 1 | 112960407 | 163858 | 6.8771  | 0.3729 | -0.2019 | 6.1581 | CEU |
| DCLRE1B | GI_24431998-S | rs6674384  | 1 | 1 | 114167949 | 399    | 8.1905  | 0.4337 | -0.4862 | 5.856  | CEU |
| DCLRE1B | GI_24431998-S | rs878129   | 1 | 1 | 114171237 | 2889   | 8.7891  | 0.4595 | 0.5013  | 5.856  | CEU |
| DCLRE1B | GI_24431998-S | rs11102703 | 1 | 1 | 114178152 | 9804   | 8.7442  | 0.4576 | -0.5236 | 5.856  | CEU |
| DCLRE1B | GI_24431998-S | rs10494162 | 1 | 1 | 114185125 | 16777  | 8.9860  | 0.4736 | -0.5125 | 5.856  | CEU |
| DCLRE1B | GI_24431998-S | rs7519860  | 1 | 1 | 114194562 | 26214  | 7.4024  | 0.3979 | -0.4922 | 5.856  | CEU |
| DCLRE1B | GI_24431998-S | rs7546851  | 1 | 1 | 114196838 | 28490  | 7.7402  | 0.4190 | -0.4877 | 5.856  | CEU |
| DCLRE1B | GI_24431998-S | rs1503832  | 1 | 1 | 114201731 | 33383  | 7.0079  | 0.3792 | 0.4588  | 5.856  | CEU |
| DCLRE1B | GI_24431998-S | rs12127377 | 1 | 1 | 114202015 | 33667  | 7.3305  | 0.3999 | 0.4707  | 5.856  | CEU |
| DCLRE1B | GI_24431998-S | rs1910485  | 1 | 1 | 114202677 | 34329  | 7.0079  | 0.3792 | 0.4588  | 5.856  | CEU |
| DCLRE1B | GI_24431998-S | rs1553450  | 1 | 1 | 114202822 | 34474  | 5.9978  | 0.3767 | -0.4210 | 5.856  | CEU |
| DCLRE1B | GI_24431998-S | rs11102707 | 1 | 1 | 114205625 | 37277  | 7.5512  | 0.4048 | -0.4755 | 5.856  | CEU |
| DCLRE1B | GI_24431998-S | rs12129050 | 1 | 1 | 114208649 | 40301  | 7.3777  | 0.3968 | 0.4689  | 5.856  | CEU |
| DCLRE1B | GI_24431998-S | rs7545300  | 1 | 1 | 114215678 | 47330  | 5.8978  | 0.3236 | -0.4323 | 5.856  | CEU |
| DCLRE1B | GI_24431998-S | rs6669370  | 1 | 1 | 114218717 | 50369  | 7.1084  | 0.3893 | -0.4870 | 5.856  | CEU |
| DCLRE1B | GI_24431998-S | rs11102709 | 1 | 1 | 114224125 | 55777  | 7.5512  | 0.4048 | -0.4755 | 5.856  | CEU |
| DCLRE1B | GI_24431998-S | rs10108    | 1 | 1 | 114228372 | 60024  | 7.5512  | 0.4048 | 0.4755  | 5.856  | CEU |
| MAN1A2  | GI_40254840-S | rs1146291  | 1 | 1 | 117532159 | 245419 | 6.7895  | 0.3686 | -0.2543 | 5.9233 | CEU |
| MAN1A2  | GI_40254840-S | rs1289814  | 1 | 1 | 117533422 | 244156 | 6.7895  | 0.3686 | 0.2543  | 5.9233 | CEU |
| MAN1A2  | GI_40254840-S | rs1289836  | 1 | 1 | 117546954 | 230624 | 6.1519  | 0.3368 | -0.2442 | 5.9233 | CEU |
| MAN1A2  | GI_40254840-S | rs1418452  | 1 | 1 | 117582420 | 195158 | 16.0068 | 0.6933 | -0.4393 | 5.9233 | CEU |
| MAN1A2  | GI_40254840-S | rs17037143 | 1 | 1 | 117591358 | 186220 | 16.0068 | 0.6933 | 0.4393  | 5.9233 | CEU |
| MAN1A2  | GI_40254840-S | rs11580225 | 1 | 1 | 117597445 | 180133 | 16.0068 | 0.6933 | 0.4393  | 5.9233 | CEU |
| MAN1A2  | GI_40254840-S | rs10801956 | 1 | 1 | 117600057 | 177521 | 12.2441 | 0.6352 | 0.4528  | 5.9233 | CEU |
| MAN1A2  | GI_40254840-S | rs6669646  | 1 | 1 | 117601100 | 176478 | 16.0068 | 0.6933 | 0.4393  | 5.9233 | CEU |
| MAN1A2  | GI_40254840-S | rs6657965  | 1 | 1 | 117604860 | 172718 | 15.4390 | 0.6856 | 0.4292  | 5.9233 | CEU |
| MAN1A2  | GI_40254840-S | rs12144682 | 1 | 1 | 117605546 | 172032 | 15.4356 | 0.6855 | 0.4293  | 5.9233 | CEU |
| MAN1A2  | GI_40254840-S | rs11576919 | 1 | 1 | 117614395 | 163183 | 10.5499 | 0.5980 | -0.4346 | 5.9233 | CEU |
| MAN1A2  | GI_40254840-S | rs17037223 | 1 | 1 | 117640841 | 136737 | 16.0068 | 0.6933 | -0.4393 | 5.9233 | CEU |
| MAN1A2  | GI_40254840-S | rs17037231 | 1 | 1 | 117642984 | 134594 | 16.0068 | 0.6933 | 0.4393  | 5.9233 | CEU |
| MAN1A2  | GI_40254840-S | rs12127141 | 1 | 1 | 117645628 | 131950 | 16.0068 | 0.6933 | -0.4393 | 5.9233 | CEU |
| MAN1A2  | GI_40254840-S | rs10923281 | 1 | 1 | 117645651 | 131927 | 15.7393 | 0.7061 | -0.4597 | 5.9233 | CEU |
| MAN1A2  | GI_40254840-S | rs12065396 | 1 | 1 | 117649096 | 128482 | 8.7683  | 0.4586 | -0.3077 | 5.9233 | CEU |
| MAN1A2  | GI_40254840-S | rs11583061 | 1 | 1 | 117653569 | 124009 | 16.0068 | 0.6933 | -0.4393 | 5.9233 | CEU |
| MAN1A2  | GI_40254840-S | rs12131109 | 1 | 1 | 117654904 | 122674 | 15.6651 | 0.6913 | -0.4389 | 5.9233 | CEU |
| MAN1A2  | GI_40254840-S | rs17037253 | 1 | 1 | 117656235 | 121343 | 16.0068 | 0.6933 | -0.4393 | 5.9233 | CEU |
| MAN1A2  | GI_40254840-S | rs10923284 | 1 | 1 | 117658635 | 118943 | 14.3011 | 0.6756 | 0.4592  | 5.9233 | CEU |
| MAN1A2  | GI_40254840-S | rs4460623  | 1 | 1 | 117659287 | 118291 | 16.0068 | 0.6933 | -0.4393 | 5.9233 | CEU |
| MAN1A2  | GI_40254840-S | rs7547211  | 1 | 1 | 117663671 | 113907 | 16.0068 | 0.6933 | -0.4393 | 5.9233 | CEU |
| MAN1A2  | GI_40254840-S | rs2359247  | 1 | 1 | 117665932 | 111646 | 16.0068 | 0.6933 | -0.4393 | 5.9233 | CEU |
| MAN1A2  | GI_40254840-S | rs10923289 | 1 | 1 | 117673252 | 104326 | 16.0068 | 0.6933 | -0.4393 | 5.9233 | CEU |
| MAN1A2  | GI_40254840-S | rs1316326  | 1 | 1 | 117692797 | 84781  | 16.0068 | 0.6933 | 0.4393  | 5.9233 | CEU |
| MAN1A2  | GI_40254840-S | rs10923295 | 1 | 1 | 117693255 | 84323  | 11.3521 | 0.5705 | 0.3676  | 5.9233 | CEU |
| MAN1A2  | GI_40254840-S | rs10923296 | 1 | 1 | 117694496 | 83082  | 14.7995 | 0.6822 | 0.4250  | 5.9233 | CEU |
| MAN1A2  | GI_40254840-S | rs10923299 | 1 | 1 | 117697707 | 79871  | 7.8709  | 0.4970 | 0.3698  | 5.9233 | CEU |
| MAN1A2  | GI_40254840-S | rs11577788 | 1 | 1 | 117703691 | 73887  | 16.0068 | 0.6933 | -0.4393 | 5.9233 | CEU |
| MAN1A2  | GI_40254840-S | rs11581669 | 1 | 1 | 117708950 | 68628  | 15.8875 | 0.6967 | 0.4459  | 5.9233 | CEU |

|        |               |            |   |   |           |        |         |        |         |        |     |
|--------|---------------|------------|---|---|-----------|--------|---------|--------|---------|--------|-----|
| MAN1A2 | GI_40254840-S | rs10923303 | 1 | 1 | 117709054 | 68524  | 16.0068 | 0.6933 | -0.4393 | 5.9233 | CEU |
| MAN1A2 | GI_40254840-S | rs17037307 | 1 | 1 | 117718576 | 59002  | 15.6225 | 0.7032 | 0.4492  | 5.9233 | CEU |
| MAN1A2 | GI_40254840-S | rs17037310 | 1 | 1 | 117719082 | 58496  | 14.8146 | 0.6894 | -0.4266 | 5.9233 | CEU |
| MAN1A2 | GI_40254840-S | rs12134265 | 1 | 1 | 117720849 | 56729  | 16.0068 | 0.6933 | 0.4393  | 5.9233 | CEU |
| MAN1A2 | GI_40254840-S | rs17037323 | 1 | 1 | 117726363 | 51215  | 15.3267 | 0.6893 | 0.4422  | 5.9233 | CEU |
| MAN1A2 | GI_40254840-S | rs12129406 | 1 | 1 | 117728625 | 48953  | 13.7790 | 0.6820 | -0.4418 | 5.9233 | CEU |
| MAN1A2 | GI_40254840-S | rs12127779 | 1 | 1 | 117729458 | 48120  | 14.1620 | 0.6786 | -0.4413 | 5.9233 | CEU |
| MAN1A2 | GI_40254840-S | rs10923312 | 1 | 1 | 117729676 | 47902  | 15.8875 | 0.6967 | 0.4459  | 5.9233 | CEU |
| MAN1A2 | GI_40254840-S | rs12131343 | 1 | 1 | 117733970 | 43608  | 15.1062 | 0.6771 | 0.4622  | 5.9233 | CEU |
| MAN1A2 | GI_40254840-S | rs17037333 | 1 | 1 | 117744199 | 33379  | 16.0068 | 0.6933 | 0.4393  | 5.9233 | CEU |
| MAN1A2 | GI_40254840-S | rs17037335 | 1 | 1 | 117744677 | 32901  | 16.0068 | 0.6933 | 0.4393  | 5.9233 | CEU |
| MAN1A2 | GI_40254840-S | rs10923322 | 1 | 1 | 117752553 | 25025  | 15.1062 | 0.6771 | -0.4622 | 5.9233 | CEU |
| MAN1A2 | GI_40254840-S | rs12121530 | 1 | 1 | 117753427 | 24151  | 16.0068 | 0.6933 | -0.4393 | 5.9233 | CEU |
| MAN1A2 | GI_40254840-S | rs12091306 | 1 | 1 | 117753702 | 23876  | 14.0498 | 0.6686 | 0.4777  | 5.9233 | CEU |
| MAN1A2 | GI_40254840-S | rs10801962 | 1 | 1 | 117758336 | 19242  | 14.7247 | 0.6803 | 0.4715  | 5.9233 | CEU |
| MAN1A2 | GI_40254840-S | rs7531715  | 1 | 1 | 117760979 | 16599  | 15.8875 | 0.6967 | 0.4459  | 5.9233 | CEU |
| MAN1A2 | GI_40254840-S | rs10923326 | 1 | 1 | 117761507 | 16071  | 16.0068 | 0.6933 | -0.4393 | 5.9233 | CEU |
| MAN1A2 | GI_40254840-S | rs1934250  | 1 | 1 | 117770927 | 6651   | 15.8875 | 0.6967 | -0.4459 | 5.9233 | CEU |
| MAN1A2 | GI_40254840-S | rs12120771 | 1 | 1 | 117777961 | 383    | 15.6651 | 0.6913 | -0.4389 | 5.9233 | CEU |
| MAN1A2 | GI_40254840-S | rs1043476  | 1 | 1 | 117778501 | 923    | 16.0068 | 0.6933 | 0.4393  | 5.9233 | CEU |
| MAN1A2 | GI_40254840-S | rs12126437 | 1 | 1 | 117780555 | 2977   | 8.9184  | 0.5235 | -0.3229 | 5.9233 | CEU |
| MAN1A2 | GI_40254840-S | rs17037373 | 1 | 1 | 117789495 | 11917  | 16.0068 | 0.6933 | 0.4393  | 5.9233 | CEU |
| MAN1A2 | GI_40254840-S | rs12131251 | 1 | 1 | 117793893 | 16315  | 16.0068 | 0.6933 | 0.4393  | 5.9233 | CEU |
| MAN1A2 | GI_40254840-S | rs2358936  | 1 | 1 | 117802829 | 25251  | 16.0068 | 0.6933 | -0.4393 | 5.9233 | CEU |
| MAN1A2 | GI_40254840-S | rs10801965 | 1 | 1 | 117806038 | 28460  | 8.7683  | 0.4586 | -0.3077 | 5.9233 | CEU |
| WARS2  | GI_41352698-S | rs11582744 | 1 | 1 | 119169446 | 118290 | 6.6078  | 0.3647 | -0.3000 | 5.9895 | CEU |
| WARS2  | GI_41352698-S | rs12091291 | 1 | 1 | 119190870 | 96866  | 6.8045  | 0.3694 | -0.2926 | 5.9895 | CEU |
| WARS2  | GI_41352698-S | rs12066653 | 1 | 1 | 119194550 | 93186  | 7.4131  | 0.4150 | 0.2893  | 5.9895 | CEU |
| WARS2  | GI_41352698-S | rs17013645 | 1 | 1 | 119196891 | 90845  | 7.1346  | 0.3906 | -0.3118 | 5.9895 | CEU |
| WARS2  | GI_41352698-S | rs1155949  | 1 | 1 | 119208621 | 79115  | 6.8045  | 0.3694 | 0.2926  | 5.9895 | CEU |
| WARS2  | GI_41352698-S | rs11589179 | 1 | 1 | 119209627 | 78109  | 6.8045  | 0.3694 | -0.2926 | 5.9895 | CEU |
| WARS2  | GI_41352698-S | rs10923705 | 1 | 1 | 119210446 | 77290  | 6.8045  | 0.3694 | 0.2926  | 5.9895 | CEU |
| WARS2  | GI_41352698-S | rs6689568  | 1 | 1 | 119215003 | 72733  | 6.8045  | 0.3694 | 0.2926  | 5.9895 | CEU |
| WARS2  | GI_41352698-S | rs7545737  | 1 | 1 | 119245865 | 41871  | 6.8045  | 0.3694 | 0.2926  | 5.9895 | CEU |
| WARS2  | GI_41352698-S | rs2645303  | 1 | 1 | 119267188 | 20548  | 6.5849  | 0.3586 | 0.2512  | 5.9895 | CEU |
| WARS2  | GI_41352698-S | rs2765542  | 1 | 1 | 119272368 | 15368  | 8.0592  | 0.4279 | -0.3165 | 5.9895 | CEU |
| WARS2  | GI_41352698-S | rs2645305  | 1 | 1 | 119273407 | 14329  | 8.0592  | 0.4279 | 0.3165  | 5.9895 | CEU |
| WARS2  | GI_41352698-S | rs11806437 | 1 | 1 | 119285236 | 2500   | 7.9138  | 0.4385 | 0.3244  | 5.9895 | CEU |
| WARS2  | GI_41352698-S | rs12086    | 1 | 1 | 119285902 | 1834   | 7.8906  | 0.4259 | -0.3167 | 5.9895 | CEU |
| WARS2  | GI_41352698-S | rs1057991  | 1 | 1 | 119287212 | 524    | 7.8906  | 0.4259 | 0.3167  | 5.9895 | CEU |
| WARS2  | GI_41352698-S | rs1057990  | 1 | 1 | 119287274 | 462    | 7.8906  | 0.4259 | 0.3167  | 5.9895 | CEU |
| WARS2  | GI_41352698-S | rs2247883  | 1 | 1 | 119289879 | 2143   | 6.5849  | 0.3586 | 0.2512  | 5.9895 | CEU |
| WARS2  | GI_41352698-S | rs2765529  | 1 | 1 | 119293942 | 6206   | 8.0592  | 0.4279 | 0.3165  | 5.9895 | CEU |
| WARS2  | GI_41352698-S | rs2645295  | 1 | 1 | 119294490 | 6754   | 8.0592  | 0.4279 | -0.3165 | 5.9895 | CEU |
| WARS2  | GI_41352698-S | rs1325938  | 1 | 1 | 119294684 | 6948   | 8.0592  | 0.4279 | 0.3165  | 5.9895 | CEU |
| WARS2  | GI_41352698-S | rs2765530  | 1 | 1 | 119296438 | 8702   | 8.0592  | 0.4279 | -0.3165 | 5.9895 | CEU |
| WARS2  | GI_41352698-S | rs2765531  | 1 | 1 | 119297539 | 9803   | 8.0592  | 0.4279 | 0.3165  | 5.9895 | CEU |
| WARS2  | GI_41352698-S | rs1325940  | 1 | 1 | 119298729 | 10993  | 8.0592  | 0.4279 | -0.3165 | 5.9895 | CEU |
| WARS2  | GI_41352698-S | rs2794313  | 1 | 1 | 119299482 | 11746  | 7.8609  | 0.4245 | 0.3163  | 5.9895 | CEU |
| WARS2  | GI_41352698-S | rs2645301  | 1 | 1 | 119302462 | 14726  | 7.8513  | 0.4241 | -0.3155 | 5.9895 | CEU |
| WARS2  | GI_41352698-S | rs17023171 | 1 | 1 | 119305310 | 17574  | 7.8282  | 0.4231 | -0.3143 | 5.9895 | CEU |
| WARS2  | GI_41352698-S | rs17023174 | 1 | 1 | 119305343 | 17607  | 8.1204  | 0.4362 | -0.3213 | 5.9895 | CEU |
| WARS2  | GI_41352698-S | rs2794311  | 1 | 1 | 119307991 | 20255  | 7.2272  | 0.3897 | -0.3152 | 5.9895 | CEU |
| WARS2  | GI_41352698-S | rs6668960  | 1 | 1 | 119312854 | 25118  | 8.0592  | 0.4279 | 0.3165  | 5.9895 | CEU |
| WARS2  | GI_41352698-S | rs17023185 | 1 | 1 | 119322829 | 35093  | 7.2272  | 0.3897 | 0.3152  | 5.9895 | CEU |
| WARS2  | GI_41352698-S | rs12086549 | 1 | 1 | 119326379 | 38643  | 7.6354  | 0.4198 | 0.3141  | 5.9895 | CEU |
| WARS2  | GI_41352698-S | rs7525871  | 1 | 1 | 119333936 | 46200  | 8.0592  | 0.4279 | -0.3165 | 5.9895 | CEU |
| WARS2  | GI_41352698-S | rs10802075 | 1 | 1 | 119339269 | 51533  | 8.0592  | 0.4279 | 0.3165  | 5.9895 | CEU |
| WARS2  | GI_41352698-S | rs10923750 | 1 | 1 | 119362837 | 75101  | 7.6938  | 0.4114 | -0.3235 | 5.9895 | CEU |

|         |               |            |   |   |           |        |        |        |         |        |     |
|---------|---------------|------------|---|---|-----------|--------|--------|--------|---------|--------|-----|
| WARS2   | GI_41352698-S | rs10923754 | 1 | 1 | 119380682 | 92946  | 7.6938 | 0.4114 | -0.3235 | 5.9895 | CEU |
| WARS2   | GI_41352698-S | rs10923756 | 1 | 1 | 119386690 | 98954  | 7.4426 | 0.4052 | 0.3197  | 5.9895 | CEU |
| WARS2   | GI_41352698-S | rs3936018  | 1 | 1 | 119394412 | 106676 | 8.8001 | 0.4600 | -0.3412 | 5.9895 | CEU |
| WARS2   | GI_41352698-S | rs3934789  | 1 | 1 | 119395105 | 107369 | 7.6938 | 0.4114 | 0.3235  | 5.9895 | CEU |
| WARS2   | GI_41352698-S | rs12096448 | 1 | 1 | 119395432 | 107696 | 7.6938 | 0.4114 | -0.3235 | 5.9895 | CEU |
| WARS2   | GI_41352698-S | rs4508058  | 1 | 1 | 119396292 | 108556 | 6.4230 | 0.3505 | -0.3135 | 5.9895 | CEU |
| WARS2   | GI_41352698-S | rs12085616 | 1 | 1 | 119401190 | 113454 | 7.6938 | 0.4114 | 0.3235  | 5.9895 | CEU |
| WARS2   | GI_41352698-S | rs10923759 | 1 | 1 | 119404236 | 116500 | 7.6938 | 0.4114 | -0.3235 | 5.9895 | CEU |
| WARS2   | GI_41352698-S | rs12097967 | 1 | 1 | 119414955 | 127219 | 7.6938 | 0.4114 | 0.3235  | 5.9895 | CEU |
| WARS2   | GI_41352698-S | rs11811859 | 1 | 1 | 119419722 | 131986 | 7.2737 | 0.3972 | 0.3199  | 5.9895 | CEU |
| WARS2   | GI_41352698-S | rs6677107  | 1 | 1 | 119420807 | 133071 | 7.2737 | 0.3972 | 0.3199  | 5.9895 | CEU |
| WARS2   | GI_41352698-S | rs10923766 | 1 | 1 | 119438974 | 151238 | 7.6938 | 0.4114 | -0.3235 | 5.9895 | CEU |
| WARS2   | GI_41352698-S | rs10923767 | 1 | 1 | 119444389 | 156653 | 7.6938 | 0.4114 | 0.3235  | 5.9895 | CEU |
| WARS2   | GI_41352698-S | rs12083510 | 1 | 1 | 119458662 | 170926 | 7.2737 | 0.3972 | -0.3199 | 5.9895 | CEU |
| WARS2   | GI_41352698-S | rs4590715  | 1 | 1 | 119462243 | 174507 | 7.4601 | 0.4060 | 0.3212  | 5.9895 | CEU |
| WARS2   | GI_41352698-S | rs12092807 | 1 | 1 | 119462686 | 174950 | 7.6938 | 0.4114 | -0.3235 | 5.9895 | CEU |
| WARS2   | GI_41352698-S | rs12092428 | 1 | 1 | 119465578 | 177842 | 7.6938 | 0.4114 | 0.3235  | 5.9895 | CEU |
| WARS2   | GI_41352698-S | rs7542832  | 1 | 1 | 119474771 | 187035 | 7.6938 | 0.4114 | -0.3235 | 5.9895 | CEU |
| WARS2   | GI_41352698-S | rs10923774 | 1 | 1 | 119478251 | 190515 | 7.0153 | 0.3848 | -0.2829 | 5.9895 | CEU |
| WARS2   | GI_41352698-S | rs10923775 | 1 | 1 | 119478315 | 190579 | 7.1452 | 0.3858 | -0.2902 | 5.9895 | CEU |
| WARS2   | GI_41352698-S | rs11804736 | 1 | 1 | 119481903 | 194167 | 6.1824 | 0.3383 | 0.2721  | 5.9895 | CEU |
| ARNT    | GI_30795239-A | rs9733     | 1 | 1 | 147432034 | 163323 | 6.4512 | 0.3519 | -0.3120 | 5.6317 | CEU |
| CTSK    | GI_23110958-S | rs7367378  | 1 | 1 | 147446152 | 135993 | 6.3176 | 0.3452 | -0.1966 | 5.8398 | CEU |
| ARNT    | GI_30795239-A | rs7367378  | 1 | 1 | 147446152 | 149205 | 6.0468 | 0.3314 | -0.2825 | 5.6317 | CEU |
| CTSK    | GI_23110958-S | rs11204693 | 1 | 1 | 147461060 | 121085 | 6.3176 | 0.3452 | -0.1966 | 5.8398 | CEU |
| ARNT    | GI_30795239-A | rs11204693 | 1 | 1 | 147461060 | 134297 | 6.0468 | 0.3314 | -0.2825 | 5.6317 | CEU |
| CTSK    | GI_23110958-S | rs4970926  | 1 | 1 | 147486757 | 95388  | 6.2549 | 0.3469 | 0.1964  | 5.8398 | CEU |
| ARNT    | GI_30795239-A | rs4970926  | 1 | 1 | 147486757 | 108600 | 5.9526 | 0.3312 | 0.2825  | 5.6317 | CEU |
| CTSK    | GI_23110958-S | rs6694531  | 1 | 1 | 147496585 | 85560  | 6.3176 | 0.3452 | 0.1966  | 5.8398 | CEU |
| ARNT    | GI_30795239-A | rs6694531  | 1 | 1 | 147496585 | 98772  | 6.0468 | 0.3314 | 0.2825  | 5.6317 | CEU |
| CTSK    | GI_23110958-S | rs12568757 | 1 | 1 | 147542866 | 39279  | 7.2458 | 0.3906 | 0.2189  | 5.8398 | CEU |
| ARNT    | GI_30795239-A | rs12568757 | 1 | 1 | 147542866 | 52491  | 6.1902 | 0.3387 | 0.2997  | 5.6317 | CEU |
| CTSK    | GI_23110958-S | rs1136774  | 1 | 1 | 147551270 | 30875  | 7.2458 | 0.3906 | 0.2189  | 5.8398 | CEU |
| ARNT    | GI_30795239-A | rs1136774  | 1 | 1 | 147551270 | 44087  | 6.1902 | 0.3387 | 0.2997  | 5.6317 | CEU |
| CTSK    | GI_23110958-S | rs11204725 | 1 | 1 | 147555773 | 26372  | 7.2458 | 0.3906 | 0.2189  | 5.8398 | CEU |
| ARNT    | GI_30795239-A | rs11204725 | 1 | 1 | 147555773 | 39584  | 6.1902 | 0.3387 | 0.2997  | 5.6317 | CEU |
| CTSK    | GI_23110958-S | rs6683015  | 1 | 1 | 147560484 | 21661  | 6.2202 | 0.3714 | -0.1968 | 5.8398 | CEU |
| CTSK    | GI_23110958-S | rs11204735 | 1 | 1 | 147654740 | 72595  | 7.2458 | 0.3906 | 0.2189  | 5.8398 | CEU |
| ARNT    | GI_30795239-A | rs11204735 | 1 | 1 | 147654740 | 59383  | 6.1902 | 0.3387 | 0.2997  | 5.6317 | CEU |
| CTSK    | GI_23110958-S | rs7412746  | 1 | 1 | 147673544 | 91399  | 6.2054 | 0.4012 | -0.2083 | 5.8398 | CEU |
| CTSK    | GI_23110958-S | rs486836   | 1 | 1 | 147689040 | 106895 | 7.2458 | 0.3906 | -0.2189 | 5.8398 | CEU |
| ARNT    | GI_30795239-A | rs486836   | 1 | 1 | 147689040 | 93683  | 6.1902 | 0.3387 | -0.2997 | 5.6317 | CEU |
| CTSK    | GI_23110958-S | rs12126004 | 1 | 1 | 147702950 | 120805 | 7.0756 | 0.3986 | 0.2190  | 5.8398 | CEU |
| ARNT    | GI_30795239-A | rs12126004 | 1 | 1 | 147702950 | 107593 | 5.9051 | 0.3384 | 0.2997  | 5.6317 | CEU |
| CTSK    | GI_23110958-S | rs3754211  | 1 | 1 | 147764930 | 182785 | 7.1648 | 0.3920 | 0.2189  | 5.8398 | CEU |
| ARNT    | GI_30795239-A | rs3754211  | 1 | 1 | 147764930 | 169573 | 6.1336 | 0.3406 | 0.2998  | 5.6317 | CEU |
| FCGR2A  | GI_11056051-S | rs11801022 | 1 | 1 | 158297032 | 4783   | 7.7377 | 0.4246 | 0.4824  | 7.0868 | CEU |
| FCGR2A  | GI_11056051-S | rs17400517 | 1 | 1 | 158298314 | 3501   | 7.3362 | 0.4057 | 0.4224  | 7.0868 | CEU |
| FCGR2A  | GI_11056051-S | rs9427401  | 1 | 1 | 158305230 | 3415   | 7.3368 | 0.3949 | 0.4495  | 7.0868 | CEU |
| MGC3794 | GI_33239373-S | rs2902569  | 1 | 1 | 164849524 | 51692  | 6.6883 | 0.3637 | -0.3606 | 5.7664 | CEU |
| MGC3794 | GI_33239373-S | rs1543358  | 1 | 1 | 164863250 | 37966  | 6.6883 | 0.3637 | -0.3606 | 5.7664 | CEU |
| MGC3794 | GI_33239373-S | rs7517978  | 1 | 1 | 164869703 | 31513  | 6.5781 | 0.3632 | -0.4013 | 5.7664 | CEU |
| MGC3794 | GI_33239373-S | rs4657741  | 1 | 1 | 164880800 | 20416  | 6.3040 | 0.3649 | 0.3815  | 5.7664 | CEU |
| MGC3794 | GI_33239373-S | rs2038033  | 1 | 1 | 164883418 | 17798  | 6.6677 | 0.3783 | 0.4050  | 5.7664 | CEU |
| MGC3794 | GI_33239373-S | rs2294253  | 1 | 1 | 164888285 | 12931  | 7.0211 | 0.3799 | 0.4065  | 5.7664 | CEU |
| MGC3794 | GI_33239373-S | rs2235207  | 1 | 1 | 164890920 | 10296  | 7.4425 | 0.3998 | 0.4157  | 5.7664 | CEU |
| MGC3794 | GI_33239373-S | rs1040404  | 1 | 1 | 164891548 | 9668   | 7.4425 | 0.3998 | -0.4157 | 5.7664 | CEU |
| MGC3794 | GI_33239373-S | rs2281014  | 1 | 1 | 164895496 | 5720   | 7.6484 | 0.4148 | 0.4259  | 5.7664 | CEU |
| MGC3794 | GI_33239373-S | rs1040403  | 1 | 1 | 164895855 | 5361   | 7.4425 | 0.3998 | -0.4157 | 5.7664 | CEU |

|         |               |            |   |   |           |        |        |        |         |        |     |
|---------|---------------|------------|---|---|-----------|--------|--------|--------|---------|--------|-----|
| MGC3794 | GI_33239373-S | rs2072776  | 1 | 1 | 164901110 | 106    | 6.4492 | 0.3518 | -0.3714 | 5.7664 | CEU |
| MGC3794 | GI_33239373-S | rs10918844 | 1 | 1 | 164904282 | 3066   | 7.4425 | 0.3998 | -0.4157 | 5.7664 | CEU |
| MGC9084 | GI_15553096-S | rs3917454  | 1 | 1 | 166432511 | 61011  | 6.1336 | 0.3406 | -0.5696 | 5.9368 | CEU |
| MGC9084 | GI_15553096-S | rs12132222 | 1 | 1 | 166490222 | 3300   | 6.8455 | 0.3872 | -0.4464 | 5.9368 | CEU |
| MGC9084 | GI_15553096-S | rs12145417 | 1 | 1 | 166492553 | 969    | 6.8263 | 0.3704 | -0.4568 | 5.9368 | CEU |
| MGC9084 | GI_15553096-S | rs12145574 | 1 | 1 | 166493028 | 494    | 6.8263 | 0.3704 | -0.4568 | 5.9368 | CEU |
| MGC9084 | GI_15553096-S | rs12135361 | 1 | 1 | 166493249 | 273    | 6.8263 | 0.3704 | -0.4568 | 5.9368 | CEU |
| MGC9084 | GI_15553096-S | rs3766135  | 1 | 1 | 166500158 | 6636   | 6.8263 | 0.3704 | -0.4568 | 5.9368 | CEU |
| MGC9084 | GI_15553096-S | rs12141572 | 1 | 1 | 166501224 | 7702   | 5.9679 | 0.3469 | 0.4412  | 5.9368 | CEU |
| MGC9084 | GI_15553096-S | rs10489176 | 1 | 1 | 166502295 | 8773   | 6.8263 | 0.3704 | 0.4568  | 5.9368 | CEU |
| MGC9084 | GI_15553096-S | rs12143161 | 1 | 1 | 166511322 | 17800  | 6.9254 | 0.3804 | -0.4624 | 5.9368 | CEU |
| MGC9084 | GI_15553096-S | rs17529304 | 1 | 1 | 166512949 | 19427  | 6.8263 | 0.3704 | -0.4568 | 5.9368 | CEU |
| MGC9084 | GI_15553096-S | rs12121443 | 1 | 1 | 166524300 | 30778  | 6.8263 | 0.3704 | -0.4568 | 5.9368 | CEU |
| MGC9084 | GI_15553096-S | rs3766141  | 1 | 1 | 166524350 | 30828  | 6.6873 | 0.3687 | 0.4508  | 5.9368 | CEU |
| MGC9084 | GI_15553096-S | rs2272920  | 1 | 1 | 166531538 | 38016  | 6.8263 | 0.3704 | 0.4568  | 5.9368 | CEU |
| MGC9084 | GI_15553096-S | rs10489174 | 1 | 1 | 166531748 | 38226  | 6.6888 | 0.3688 | 0.4563  | 5.9368 | CEU |
| MGC9084 | GI_15553096-S | rs17601631 | 1 | 1 | 166532348 | 38826  | 6.8263 | 0.3704 | -0.4568 | 5.9368 | CEU |
| MGC9084 | GI_15553096-S | rs17529791 | 1 | 1 | 166535348 | 41826  | 6.8263 | 0.3704 | -0.4568 | 5.9368 | CEU |
| MGC9084 | GI_15553096-S | rs3766143  | 1 | 1 | 166535375 | 41853  | 6.8263 | 0.3704 | -0.4568 | 5.9368 | CEU |
| MGC9084 | GI_15553096-S | rs9645329  | 1 | 1 | 166536378 | 42856  | 6.8263 | 0.3704 | 0.4568  | 5.9368 | CEU |
| MGC9084 | GI_15553096-S | rs12119635 | 1 | 1 | 166537207 | 43685  | 6.8263 | 0.3704 | 0.4568  | 5.9368 | CEU |
| MGC9084 | GI_15553096-S | rs12133074 | 1 | 1 | 166540309 | 46787  | 6.8263 | 0.3704 | -0.4568 | 5.9368 | CEU |
| MGC9084 | GI_15553096-S | rs12126591 | 1 | 1 | 166541632 | 48110  | 6.8263 | 0.3704 | 0.4568  | 5.9368 | CEU |
| MGC9084 | GI_15553096-S | rs17602051 | 1 | 1 | 166543535 | 50013  | 6.8263 | 0.3704 | -0.4568 | 5.9368 | CEU |
| MGC9084 | GI_15553096-S | rs2272919  | 1 | 1 | 166543624 | 50102  | 6.8263 | 0.3704 | -0.4568 | 5.9368 | CEU |
| MGC9084 | GI_15553096-S | rs17602072 | 1 | 1 | 166544192 | 50670  | 6.8263 | 0.3704 | 0.4568  | 5.9368 | CEU |
| MGC9084 | GI_15553096-S | rs1046058  | 1 | 1 | 166554201 | 60679  | 6.8263 | 0.3704 | 0.4568  | 5.9368 | CEU |
| MGC9084 | GI_15553096-S | rs12143301 | 1 | 1 | 166555448 | 61926  | 6.7431 | 0.3715 | -0.4585 | 5.9368 | CEU |
| MGC9084 | GI_15553096-S | rs12132384 | 1 | 1 | 166555726 | 62204  | 6.7431 | 0.3715 | -0.4585 | 5.9368 | CEU |
| MGC9084 | GI_15553096-S | rs12135726 | 1 | 1 | 166555762 | 62240  | 6.7431 | 0.3715 | 0.4585  | 5.9368 | CEU |
| MGC9084 | GI_15553096-S | rs12128929 | 1 | 1 | 166557738 | 64216  | 6.8263 | 0.3704 | -0.4568 | 5.9368 | CEU |
| MGC9084 | GI_15553096-S | rs17543370 | 1 | 1 | 166559756 | 66234  | 6.8263 | 0.3704 | -0.4568 | 5.9368 | CEU |
| MGC9084 | GI_15553096-S | rs17602701 | 1 | 1 | 166559985 | 66463  | 6.8263 | 0.3704 | 0.4568  | 5.9368 | CEU |
| MGC9084 | GI_15553096-S | rs12136425 | 1 | 1 | 166561762 | 68240  | 6.9150 | 0.3799 | 0.4451  | 5.9368 | CEU |
| MGC9084 | GI_15553096-S | rs12144207 | 1 | 1 | 166562004 | 68482  | 6.8263 | 0.3704 | -0.4568 | 5.9368 | CEU |
| MGC9084 | GI_15553096-S | rs17543611 | 1 | 1 | 166567833 | 74311  | 6.6862 | 0.3686 | 0.4562  | 5.9368 | CEU |
| MGC9084 | GI_15553096-S | rs12134837 | 1 | 1 | 166568423 | 74901  | 6.8263 | 0.3704 | -0.4568 | 5.9368 | CEU |
| MGC9084 | GI_15553096-S | rs12135642 | 1 | 1 | 166568604 | 75082  | 6.8263 | 0.3704 | 0.4568  | 5.9368 | CEU |
| MGC9084 | GI_15553096-S | rs17543730 | 1 | 1 | 166570373 | 76851  | 6.8263 | 0.3704 | -0.4568 | 5.9368 | CEU |
| MGC9084 | GI_15553096-S | rs12119368 | 1 | 1 | 166571871 | 78349  | 6.8263 | 0.3704 | -0.4568 | 5.9368 | CEU |
| MGC9084 | GI_15553096-S | rs12122419 | 1 | 1 | 166574675 | 81153  | 6.8263 | 0.3704 | -0.4568 | 5.9368 | CEU |
| MGC9084 | GI_15553096-S | rs12141317 | 1 | 1 | 166575094 | 81572  | 6.0380 | 0.3455 | -0.4351 | 5.9368 | CEU |
| MGC9084 | GI_15553096-S | rs12142093 | 1 | 1 | 166575267 | 81745  | 6.8263 | 0.3704 | -0.4568 | 5.9368 | CEU |
| MGC9084 | GI_15553096-S | rs12145458 | 1 | 1 | 166575281 | 81759  | 6.8263 | 0.3704 | 0.4568  | 5.9368 | CEU |
| MGC9084 | GI_15553096-S | rs12143057 | 1 | 1 | 166575751 | 82229  | 6.8263 | 0.3704 | 0.4568  | 5.9368 | CEU |
| MGC9084 | GI_15553096-S | rs12127500 | 1 | 1 | 166584848 | 91326  | 6.8263 | 0.3704 | -0.4568 | 5.9368 | CEU |
| MGC9084 | GI_15553096-S | rs17603570 | 1 | 1 | 166585771 | 92249  | 7.0242 | 0.3961 | 0.4691  | 5.9368 | CEU |
| MGC9084 | GI_15553096-S | rs12124032 | 1 | 1 | 166586765 | 93243  | 6.5649 | 0.3841 | -0.4432 | 5.9368 | CEU |
| MGC9084 | GI_15553096-S | rs17603666 | 1 | 1 | 166587686 | 94164  | 6.8234 | 0.3754 | 0.4605  | 5.9368 | CEU |
| MGC9084 | GI_15553096-S | rs12144683 | 1 | 1 | 166588401 | 94879  | 6.8335 | 0.3812 | -0.4646 | 5.9368 | CEU |
| MGC9084 | GI_15553096-S | rs17544586 | 1 | 1 | 166589148 | 95626  | 6.8263 | 0.3704 | -0.4568 | 5.9368 | CEU |
| MGC9084 | GI_15553096-S | rs12121614 | 1 | 1 | 166592013 | 98491  | 7.0352 | 0.3858 | 0.4434  | 5.9368 | CEU |
| MGC9084 | GI_15553096-S | rs17544823 | 1 | 1 | 166592791 | 99269  | 6.8263 | 0.3704 | -0.4568 | 5.9368 | CEU |
| MGC9084 | GI_15553096-S | rs12131357 | 1 | 1 | 166593722 | 100200 | 6.8263 | 0.3704 | -0.4568 | 5.9368 | CEU |
| MGC9084 | GI_15553096-S | rs12121045 | 1 | 1 | 166593729 | 100207 | 6.7983 | 0.3742 | 0.4694  | 5.9368 | CEU |
| MGC9084 | GI_15553096-S | rs16828222 | 1 | 1 | 166605228 | 111706 | 6.8263 | 0.3704 | 0.4568  | 5.9368 | CEU |
| MGC9084 | GI_15553096-S | rs12124561 | 1 | 1 | 166607337 | 113815 | 6.8263 | 0.3704 | 0.4568  | 5.9368 | CEU |
| MGC9084 | GI_15553096-S | rs12127211 | 1 | 1 | 166607444 | 113922 | 6.8263 | 0.3704 | 0.4568  | 5.9368 | CEU |
| MGC9084 | GI_15553096-S | rs12134886 | 1 | 1 | 166607466 | 113944 | 6.8263 | 0.3704 | -0.4568 | 5.9368 | CEU |

|         |               |            |   |   |           |        |        |        |         |        |     |
|---------|---------------|------------|---|---|-----------|--------|--------|--------|---------|--------|-----|
| MGC9084 | GI_15553096-S | rs12125595 | 1 | 1 | 166608195 | 114673 | 6.8263 | 0.3704 | 0.4568  | 5.9368 | CEU |
| MGC9084 | GI_15553096-S | rs12125679 | 1 | 1 | 166608475 | 114953 | 6.7983 | 0.3742 | 0.4694  | 5.9368 | CEU |
| MGC9084 | GI_15553096-S | rs12128308 | 1 | 1 | 166608652 | 115130 | 6.8263 | 0.3704 | 0.4568  | 5.9368 | CEU |
| MGC9084 | GI_15553096-S | rs2806387  | 1 | 1 | 166620790 | 127268 | 6.8263 | 0.3704 | -0.4568 | 5.9368 | CEU |
| MGC9084 | GI_15553096-S | rs2750018  | 1 | 1 | 166620812 | 127290 | 6.8263 | 0.3704 | -0.4568 | 5.9368 | CEU |
| MGC9084 | GI_15553096-S | rs2750019  | 1 | 1 | 166620894 | 127372 | 6.8263 | 0.3704 | -0.4568 | 5.9368 | CEU |
| MGC9084 | GI_15553096-S | rs656334   | 1 | 1 | 166621458 | 127936 | 6.8263 | 0.3704 | -0.4568 | 5.9368 | CEU |
| MGC9084 | GI_15553096-S | rs2806389  | 1 | 1 | 166622030 | 128508 | 6.8263 | 0.3704 | -0.4568 | 5.9368 | CEU |
| MGC9084 | GI_15553096-S | rs4519     | 1 | 1 | 166622232 | 128710 | 6.8263 | 0.3704 | -0.4568 | 5.9368 | CEU |
| MGC9084 | GI_15553096-S | rs490469   | 1 | 1 | 166623437 | 129915 | 6.8263 | 0.3704 | -0.4568 | 5.9368 | CEU |
| MGC9084 | GI_15553096-S | rs575147   | 1 | 1 | 166623942 | 130420 | 6.8263 | 0.3704 | -0.4568 | 5.9368 | CEU |
| MGC9084 | GI_15553096-S | rs590181   | 1 | 1 | 166624319 | 130797 | 6.8263 | 0.3704 | -0.4568 | 5.9368 | CEU |
| MGC9084 | GI_15553096-S | rs544008   | 1 | 1 | 166624988 | 131466 | 6.8263 | 0.3704 | -0.4568 | 5.9368 | CEU |
| MGC9084 | GI_15553096-S | rs495092   | 1 | 1 | 166628077 | 134555 | 6.8263 | 0.3704 | 0.4568  | 5.9368 | CEU |
| MGC9084 | GI_15553096-S | rs676020   | 1 | 1 | 166629642 | 136120 | 6.8263 | 0.3704 | -0.4568 | 5.9368 | CEU |
| MGC9084 | GI_15553096-S | rs522017   | 1 | 1 | 166630678 | 137156 | 6.7983 | 0.3742 | -0.4694 | 5.9368 | CEU |
| MGC9084 | GI_15553096-S | rs647113   | 1 | 1 | 166630725 | 137203 | 6.8263 | 0.3704 | -0.4568 | 5.9368 | CEU |
| MGC9084 | GI_15553096-S | rs664598   | 1 | 1 | 166632337 | 138815 | 6.8263 | 0.3704 | 0.4568  | 5.9368 | CEU |
| MGC9084 | GI_15553096-S | rs579553   | 1 | 1 | 166632355 | 138833 | 6.8263 | 0.3704 | -0.4568 | 5.9368 | CEU |
| MGC9084 | GI_15553096-S | rs582900   | 1 | 1 | 166633615 | 140093 | 6.8263 | 0.3704 | 0.4568  | 5.9368 | CEU |
| MGC9084 | GI_15553096-S | rs601355   | 1 | 1 | 166635346 | 141824 | 6.8263 | 0.3704 | -0.4568 | 5.9368 | CEU |
| MGC9084 | GI_15553096-S | rs656848   | 1 | 1 | 166638573 | 145051 | 7.2127 | 0.3997 | 0.4966  | 5.9368 | CEU |
| MGC9084 | GI_15553096-S | rs657254   | 1 | 1 | 166638650 | 145128 | 6.8263 | 0.3704 | 0.4568  | 5.9368 | CEU |
| MGC9084 | GI_15553096-S | rs488488   | 1 | 1 | 166639655 | 146133 | 6.8586 | 0.3772 | 0.5491  | 5.9368 | CEU |
| MGC9084 | GI_15553096-S | rs486431   | 1 | 1 | 166639905 | 146383 | 7.2127 | 0.3997 | 0.4966  | 5.9368 | CEU |
| MGC9084 | GI_15553096-S | rs673789   | 1 | 1 | 166640113 | 146591 | 6.8263 | 0.3704 | 0.4568  | 5.9368 | CEU |
| MGC9084 | GI_15553096-S | rs612548   | 1 | 1 | 166642175 | 148653 | 6.8263 | 0.3704 | -0.4568 | 5.9368 | CEU |
| MGC9084 | GI_15553096-S | rs2806384  | 1 | 1 | 166643690 | 150168 | 6.8234 | 0.3754 | -0.4605 | 5.9368 | CEU |
| MGC9084 | GI_15553096-S | rs2145045  | 1 | 1 | 166645255 | 151733 | 6.7132 | 0.3700 | 0.4663  | 5.9368 | CEU |
| MGC9084 | GI_15553096-S | rs685155   | 1 | 1 | 166646865 | 153343 | 6.8263 | 0.3704 | -0.4568 | 5.9368 | CEU |
| MGC9084 | GI_15553096-S | rs686519   | 1 | 1 | 166647199 | 153677 | 6.8263 | 0.3704 | -0.4568 | 5.9368 | CEU |
| MGC9084 | GI_15553096-S | rs593406   | 1 | 1 | 166648191 | 154669 | 6.8263 | 0.3704 | -0.4568 | 5.9368 | CEU |
| MGC9084 | GI_15553096-S | rs554060   | 1 | 1 | 166651224 | 157702 | 6.7171 | 0.3702 | -0.4576 | 5.9368 | CEU |
| MGC9084 | GI_15553096-S | rs655133   | 1 | 1 | 166651373 | 157851 | 6.8263 | 0.3704 | -0.4568 | 5.9368 | CEU |
| MGC9084 | GI_15553096-S | rs549537   | 1 | 1 | 166651657 | 158135 | 6.8263 | 0.3704 | 0.4568  | 5.9368 | CEU |
| MGC9084 | GI_15553096-S | rs565626   | 1 | 1 | 166653645 | 160123 | 6.8263 | 0.3704 | -0.4568 | 5.9368 | CEU |
| MGC9084 | GI_15553096-S | rs618149   | 1 | 1 | 166655689 | 162167 | 6.8263 | 0.3704 | -0.4568 | 5.9368 | CEU |
| MGC9084 | GI_15553096-S | rs2806392  | 1 | 1 | 166658170 | 164648 | 6.8263 | 0.3704 | 0.4568  | 5.9368 | CEU |
| MGC9084 | GI_15553096-S | rs664962   | 1 | 1 | 166659234 | 165712 | 6.7983 | 0.3742 | -0.4694 | 5.9368 | CEU |
| MGC9084 | GI_15553096-S | rs560414   | 1 | 1 | 166659903 | 166381 | 6.8263 | 0.3704 | -0.4568 | 5.9368 | CEU |
| MGC9084 | GI_15553096-S | rs602556   | 1 | 1 | 166661082 | 167560 | 6.8263 | 0.3704 | 0.4568  | 5.9368 | CEU |
| MGC9084 | GI_15553096-S | rs541711   | 1 | 1 | 166661622 | 168100 | 6.8263 | 0.3704 | -0.4568 | 5.9368 | CEU |
| MGC9084 | GI_15553096-S | rs644834   | 1 | 1 | 166663656 | 170134 | 6.8263 | 0.3704 | -0.4568 | 5.9368 | CEU |
| MGC9084 | GI_15553096-S | rs674896   | 1 | 1 | 166665722 | 172200 | 6.8263 | 0.3704 | 0.4568  | 5.9368 | CEU |
| MGC9084 | GI_15553096-S | rs562837   | 1 | 1 | 166665806 | 172284 | 6.8263 | 0.3704 | -0.4568 | 5.9368 | CEU |
| MGC9084 | GI_15553096-S | rs675394   | 1 | 1 | 166665877 | 172355 | 6.8263 | 0.3704 | -0.4568 | 5.9368 | CEU |
| MGC9084 | GI_15553096-S | rs536358   | 1 | 1 | 166666376 | 172854 | 6.5301 | 0.3660 | 0.4544  | 5.9368 | CEU |
| MGC9084 | GI_15553096-S | rs578916   | 1 | 1 | 166667780 | 174258 | 6.8263 | 0.3704 | -0.4568 | 5.9368 | CEU |
| MGC9084 | GI_15553096-S | rs545963   | 1 | 1 | 166669076 | 175554 | 6.8263 | 0.3704 | 0.4568  | 5.9368 | CEU |
| MGC9084 | GI_15553096-S | rs659363   | 1 | 1 | 166671132 | 177610 | 6.8263 | 0.3704 | -0.4568 | 5.9368 | CEU |
| MGC9084 | GI_15553096-S | rs511443   | 1 | 1 | 166673419 | 179897 | 6.8263 | 0.3704 | 0.4568  | 5.9368 | CEU |
| MGC9084 | GI_15553096-S | rs654664   | 1 | 1 | 166678094 | 184572 | 6.8263 | 0.3704 | 0.4568  | 5.9368 | CEU |
| MGC9084 | GI_15553096-S | rs655474   | 1 | 1 | 166678266 | 184744 | 6.7983 | 0.3742 | 0.4694  | 5.9368 | CEU |
| MGC9084 | GI_15553096-S | rs545954   | 1 | 1 | 166678535 | 185013 | 6.8263 | 0.3704 | -0.4568 | 5.9368 | CEU |
| MGC9084 | GI_15553096-S | rs850771   | 1 | 1 | 166678611 | 185089 | 6.8263 | 0.3704 | 0.4568  | 5.9368 | CEU |
| MGC9084 | GI_15553096-S | rs607707   | 1 | 1 | 166681055 | 187533 | 6.8263 | 0.3704 | -0.4568 | 5.9368 | CEU |
| MGC9084 | GI_15553096-S | rs638486   | 1 | 1 | 166683406 | 189884 | 6.8234 | 0.3754 | 0.4605  | 5.9368 | CEU |
| MGC9084 | GI_15553096-S | rs2057249  | 1 | 1 | 166684043 | 190521 | 6.6821 | 0.3736 | 0.4595  | 5.9368 | CEU |
| MGC9084 | GI_15553096-S | rs665774   | 1 | 1 | 166684899 | 191377 | 6.8263 | 0.3704 | 0.4568  | 5.9368 | CEU |

|         |               |            |   |   |           |        |        |        |         |        |     |
|---------|---------------|------------|---|---|-----------|--------|--------|--------|---------|--------|-----|
| MGC9084 | GI_15553096-S | rs2474698  | 1 | 1 | 166686231 | 192709 | 6.8263 | 0.3704 | 0.4568  | 5.9368 | CEU |
| MGC9084 | GI_15553096-S | rs490776   | 1 | 1 | 166689409 | 195887 | 6.9254 | 0.3804 | -0.4624 | 5.9368 | CEU |
| MGC9084 | GI_15553096-S | rs506196   | 1 | 1 | 166695129 | 201607 | 6.8263 | 0.3704 | -0.4568 | 5.9368 | CEU |
| MGC9084 | GI_15553096-S | rs505336   | 1 | 1 | 166695192 | 201670 | 6.1387 | 0.3409 | -0.4305 | 5.9368 | CEU |
| MGC9084 | GI_15553096-S | rs616789   | 1 | 1 | 166695390 | 201868 | 6.7320 | 0.3709 | -0.4581 | 5.9368 | CEU |
| MGC9084 | GI_15553096-S | rs630179   | 1 | 1 | 166696032 | 202510 | 6.8263 | 0.3704 | -0.4568 | 5.9368 | CEU |
| MGC9084 | GI_15553096-S | rs495642   | 1 | 1 | 166697705 | 204183 | 6.8263 | 0.3704 | -0.4568 | 5.9368 | CEU |
| MGC9084 | GI_15553096-S | rs687195   | 1 | 1 | 166699610 | 206088 | 6.1387 | 0.3409 | -0.4305 | 5.9368 | CEU |
| MGC9084 | GI_15553096-S | rs511609   | 1 | 1 | 166701102 | 207580 | 6.8234 | 0.3754 | -0.4605 | 5.9368 | CEU |
| MGC9084 | GI_15553096-S | rs510681   | 1 | 1 | 166701232 | 207710 | 6.8263 | 0.3704 | 0.4568  | 5.9368 | CEU |
| MGC9084 | GI_15553096-S | rs483103   | 1 | 1 | 166701901 | 208379 | 6.8263 | 0.3704 | 0.4568  | 5.9368 | CEU |
| MGC9084 | GI_15553096-S | rs629408   | 1 | 1 | 166702480 | 208958 | 6.8263 | 0.3704 | 0.4568  | 5.9368 | CEU |
| MGC9084 | GI_15553096-S | rs629421   | 1 | 1 | 166702494 | 208972 | 6.8263 | 0.3704 | -0.4568 | 5.9368 | CEU |
| MGC9084 | GI_15553096-S | rs536834   | 1 | 1 | 166703450 | 209928 | 6.8263 | 0.3704 | -0.4568 | 5.9368 | CEU |
| MGC9084 | GI_15553096-S | rs1321657  | 1 | 1 | 166707498 | 213976 | 6.8263 | 0.3704 | -0.4568 | 5.9368 | CEU |
| MGC9084 | GI_15553096-S | rs606695   | 1 | 1 | 166707659 | 214137 | 6.8263 | 0.3704 | 0.4568  | 5.9368 | CEU |
| MGC9084 | GI_15553096-S | rs16862919 | 1 | 1 | 166710759 | 217237 | 6.8263 | 0.3704 | -0.4568 | 5.9368 | CEU |
| MGC9084 | GI_15553096-S | rs12143260 | 1 | 1 | 166711261 | 217739 | 6.9254 | 0.3804 | 0.4624  | 5.9368 | CEU |
| MGC9084 | GI_15553096-S | rs12124907 | 1 | 1 | 166712469 | 218947 | 6.5070 | 0.3648 | 0.4517  | 5.9368 | CEU |
| MGC9084 | GI_15553096-S | rs12144599 | 1 | 1 | 166713143 | 219621 | 6.8263 | 0.3704 | 0.4568  | 5.9368 | CEU |
| MGC9084 | GI_15553096-S | rs12143781 | 1 | 1 | 166713183 | 219661 | 6.7165 | 0.3701 | -0.4495 | 5.9368 | CEU |
| MGC9084 | GI_15553096-S | rs12127120 | 1 | 1 | 166714709 | 221187 | 6.0644 | 0.3575 | -0.4521 | 5.9368 | CEU |
| MGC9084 | GI_15553096-S | rs12145705 | 1 | 1 | 166716850 | 223328 | 6.7983 | 0.3742 | 0.4694  | 5.9368 | CEU |
| MGC9084 | GI_15553096-S | rs12123686 | 1 | 1 | 166716925 | 223403 | 6.8263 | 0.3704 | -0.4568 | 5.9368 | CEU |
| MGC9084 | GI_15553096-S | rs17349733 | 1 | 1 | 166723749 | 230227 | 6.2216 | 0.3452 | 0.4400  | 5.9368 | CEU |
| MGC9084 | GI_15553096-S | rs12132173 | 1 | 1 | 166725124 | 231602 | 6.8263 | 0.3704 | -0.4568 | 5.9368 | CEU |
| MGC9084 | GI_15553096-S | rs12118739 | 1 | 1 | 166732905 | 239383 | 6.9254 | 0.3804 | -0.4624 | 5.9368 | CEU |
| MGC9084 | GI_15553096-S | rs12119665 | 1 | 1 | 166733682 | 240160 | 6.8263 | 0.3704 | -0.4568 | 5.9368 | CEU |
| MGC9084 | GI_15553096-S | rs16862968 | 1 | 1 | 166734219 | 240697 | 6.7215 | 0.3704 | 0.4494  | 5.9368 | CEU |
| MGC9084 | GI_15553096-S | rs12121451 | 1 | 1 | 166734691 | 241169 | 6.7215 | 0.3704 | 0.4494  | 5.9368 | CEU |
| MGC9084 | GI_15553096-S | rs12121797 | 1 | 1 | 166735902 | 242380 | 6.7215 | 0.3704 | -0.4494 | 5.9368 | CEU |
| MGC9084 | GI_15553096-S | rs12122720 | 1 | 1 | 166738756 | 245234 | 6.8263 | 0.3704 | 0.4568  | 5.9368 | CEU |
| MGC9084 | GI_15553096-S | rs12119447 | 1 | 1 | 166738897 | 245375 | 6.1247 | 0.3451 | -0.4327 | 5.9368 | CEU |
| MGC9084 | GI_15553096-S | rs12120229 | 1 | 1 | 166739013 | 245491 | 6.7215 | 0.3704 | 0.4494  | 5.9368 | CEU |
| MGC9084 | GI_15553096-S | rs12133115 | 1 | 1 | 166746272 | 252750 | 6.8263 | 0.3704 | -0.4568 | 5.9368 | CEU |
| MGC9084 | GI_15553096-S | rs12135436 | 1 | 1 | 166748907 | 255385 | 6.8263 | 0.3704 | -0.4568 | 5.9368 | CEU |
| MGC9084 | GI_15553096-S | rs12124384 | 1 | 1 | 166748928 | 255406 | 6.8263 | 0.3704 | -0.4568 | 5.9368 | CEU |
| MGC9084 | GI_15553096-S | rs12131603 | 1 | 1 | 166755135 | 261613 | 6.1389 | 0.3409 | 0.4305  | 5.9368 | CEU |
| MGC9084 | GI_15553096-S | rs12139141 | 1 | 1 | 166757501 | 263979 | 6.8263 | 0.3704 | -0.4568 | 5.9368 | CEU |
| MGC9084 | GI_15553096-S | rs10494479 | 1 | 1 | 166759156 | 265634 | 6.8263 | 0.3704 | 0.4568  | 5.9368 | CEU |
| MGC9084 | GI_15553096-S | rs12145614 | 1 | 1 | 166763912 | 270390 | 6.7983 | 0.3742 | -0.4694 | 5.9368 | CEU |
| MGC9084 | GI_15553096-S | rs12137423 | 1 | 1 | 166765880 | 272358 | 6.8263 | 0.3704 | 0.4568  | 5.9368 | CEU |
| MGC9084 | GI_15553096-S | rs12137487 | 1 | 1 | 166765986 | 272464 | 6.7555 | 0.3721 | 0.4588  | 5.9368 | CEU |
| MGC9084 | GI_15553096-S | rs6427231  | 1 | 1 | 166766076 | 272554 | 6.9418 | 0.3812 | -0.4742 | 5.9368 | CEU |
| MGC9084 | GI_15553096-S | rs12133172 | 1 | 1 | 166767778 | 274256 | 6.8263 | 0.3704 | -0.4568 | 5.9368 | CEU |
| MGC9084 | GI_15553096-S | rs12136554 | 1 | 1 | 166767895 | 274373 | 6.8263 | 0.3704 | 0.4568  | 5.9368 | CEU |
| MGC9084 | GI_15553096-S | rs12141428 | 1 | 1 | 166775047 | 281525 | 6.5687 | 0.3679 | 0.4582  | 5.9368 | CEU |
| MGC9084 | GI_15553096-S | rs12141613 | 1 | 1 | 166775821 | 282299 | 6.8263 | 0.3704 | -0.4568 | 5.9368 | CEU |
| MGC9084 | GI_15553096-S | rs12119299 | 1 | 1 | 166777369 | 283847 | 6.8263 | 0.3704 | -0.4568 | 5.9368 | CEU |
| MGC9084 | GI_15553096-S | rs12141377 | 1 | 1 | 166777384 | 283862 | 6.7983 | 0.3742 | 0.4694  | 5.9368 | CEU |
| MGC9084 | GI_15553096-S | rs12121371 | 1 | 1 | 166779506 | 285984 | 6.9254 | 0.3804 | -0.4624 | 5.9368 | CEU |
| MGC9084 | GI_15553096-S | rs12121381 | 1 | 1 | 166779583 | 286061 | 6.8263 | 0.3704 | -0.4568 | 5.9368 | CEU |
| MGC9084 | GI_15553096-S | rs2421109  | 1 | 1 | 166780264 | 286742 | 6.8263 | 0.3704 | 0.4568  | 5.9368 | CEU |
| MGC9084 | GI_15553096-S | rs2421110  | 1 | 1 | 166780388 | 286866 | 6.8263 | 0.3704 | 0.4568  | 5.9368 | CEU |
| MGC9084 | GI_15553096-S | rs12122606 | 1 | 1 | 166781017 | 287495 | 6.8263 | 0.3704 | -0.4568 | 5.9368 | CEU |
| MGC9084 | GI_15553096-S | rs12142961 | 1 | 1 | 166781211 | 287689 | 6.8256 | 0.3755 | 0.4704  | 5.9368 | CEU |
| MGC9084 | GI_15553096-S | rs12145562 | 1 | 1 | 166781364 | 287842 | 6.2037 | 0.3596 | 0.4738  | 5.9368 | CEU |
| MGC9084 | GI_15553096-S | rs12143204 | 1 | 1 | 166782067 | 288545 | 7.3005 | 0.3985 | 0.4844  | 5.9368 | CEU |
| MGC9084 | GI_15553096-S | rs12142459 | 1 | 1 | 166782120 | 288598 | 6.8263 | 0.3704 | -0.4568 | 5.9368 | CEU |

|           |               |            |   |   |           |        |         |        |         |        |     |
|-----------|---------------|------------|---|---|-----------|--------|---------|--------|---------|--------|-----|
| MGC9084   | GI_15553096-S | rs12146094 | 1 | 1 | 166784195 | 290673 | 6.5792  | 0.3583 | 0.4596  | 5.9368 | CEU |
| MGC9084   | GI_15553096-S | rs12145349 | 1 | 1 | 166784373 | 290851 | 6.7128  | 0.3700 | -0.4790 | 5.9368 | CEU |
| MGC9084   | GI_15553096-S | rs12119027 | 1 | 1 | 166784401 | 290879 | 6.0678  | 0.3421 | 0.4618  | 5.9368 | CEU |
| MGC9084   | GI_15553096-S | rs12116521 | 1 | 1 | 166784749 | 291227 | 6.5792  | 0.3583 | 0.4596  | 5.9368 | CEU |
| MGC9084   | GI_15553096-S | rs7549000  | 1 | 1 | 166785745 | 292223 | 6.5792  | 0.3583 | 0.4596  | 5.9368 | CEU |
| MGC9084   | GI_15553096-S | rs12117652 | 1 | 1 | 166788400 | 294878 | 6.3113  | 0.3449 | 0.4900  | 5.9368 | CEU |
| MGC9084   | GI_15553096-S | rs12117699 | 1 | 1 | 166788530 | 295008 | 6.3113  | 0.3449 | 0.4900  | 5.9368 | CEU |
| MGC9084   | GI_15553096-S | rs12144057 | 1 | 1 | 166788678 | 295156 | 6.3113  | 0.3449 | -0.4900 | 5.9368 | CEU |
| MGC9084   | GI_15553096-S | rs12144085 | 1 | 1 | 166788712 | 295190 | 6.4635  | 0.3626 | -0.4972 | 5.9368 | CEU |
| MGC9084   | GI_15553096-S | rs12126443 | 1 | 1 | 166789575 | 296053 | 6.3287  | 0.3506 | -0.4939 | 5.9368 | CEU |
| MGC9084   | GI_15553096-S | rs12145948 | 1 | 1 | 166789761 | 296239 | 6.3113  | 0.3449 | 0.4900  | 5.9368 | CEU |
| MGC9084   | GI_15553096-S | rs12120025 | 1 | 1 | 166798554 | 305032 | 6.3113  | 0.3449 | 0.4900  | 5.9368 | CEU |
| MGC9084   | GI_15553096-S | rs12122794 | 1 | 1 | 166799121 | 305599 | 6.3113  | 0.3449 | -0.4900 | 5.9368 | CEU |
| MGC9084   | GI_15553096-S | rs12121055 | 1 | 1 | 166799570 | 306048 | 6.5428  | 0.3615 | 0.5191  | 5.9368 | CEU |
| MGC9084   | GI_15553096-S | rs12122050 | 1 | 1 | 166800326 | 306804 | 6.2335  | 0.3458 | 0.4914  | 5.9368 | CEU |
| MGC9084   | GI_15553096-S | rs12131638 | 1 | 1 | 166815649 | 322127 | 6.3113  | 0.3449 | -0.4900 | 5.9368 | CEU |
| MGC9084   | GI_15553096-S | rs12145430 | 1 | 1 | 166823496 | 329974 | 6.3113  | 0.3449 | -0.4900 | 5.9368 | CEU |
| MGC9084   | GI_15553096-S | rs1411465  | 1 | 1 | 166829552 | 336030 | 6.5097  | 0.3649 | 0.4838  | 5.9368 | CEU |
| MGC9084   | GI_15553096-S | rs12140845 | 1 | 1 | 166844229 | 350707 | 6.8452  | 0.3714 | 0.5253  | 5.9368 | CEU |
| MGC9084   | GI_15553096-S | rs12132530 | 1 | 1 | 166865856 | 372334 | 6.8452  | 0.3714 | -0.5253 | 5.9368 | CEU |
| MGC9084   | GI_15553096-S | rs12116788 | 1 | 1 | 166866260 | 372738 | 6.8452  | 0.3714 | -0.5253 | 5.9368 | CEU |
| dJ383J4.3 | GI_42655858-S | rs7539322  | 1 | 1 | 170347622 | 152854 | 9.4099  | 0.4851 | -0.9417 | 6.3928 | CEU |
| dJ383J4.3 | GI_42655858-S | rs3791022  | 1 | 1 | 170466426 | 34050  | 11.5215 | 0.5635 | 0.9786  | 6.3928 | CEU |
| dJ383J4.3 | GI_42655858-S | rs2068871  | 1 | 1 | 170527826 | 27350  | 11.5215 | 0.5635 | -0.9786 | 6.3928 | CEU |
| dJ383J4.3 | GI_42655858-S | rs16846433 | 1 | 1 | 170552250 | 51774  | 10.2110 | 0.5486 | 1.0297  | 6.3928 | CEU |
| dJ383J4.3 | GI_42655858-S | rs941987   | 1 | 1 | 170572456 | 71980  | 7.3450  | 0.3952 | 1.0068  | 6.3928 | CEU |
| dJ383J4.3 | GI_42655858-S | rs2065170  | 1 | 1 | 170576889 | 76413  | 11.5215 | 0.5635 | 0.9786  | 6.3928 | CEU |
| dJ383J4.3 | GI_42655858-S | rs16846526 | 1 | 1 | 170587894 | 87418  | 11.5215 | 0.5635 | 0.9786  | 6.3928 | CEU |
| dJ383J4.3 | GI_42655858-S | rs16846546 | 1 | 1 | 170591839 | 91363  | 11.5215 | 0.5635 | 0.9786  | 6.3928 | CEU |
| dJ383J4.3 | GI_42655858-S | rs16846561 | 1 | 1 | 170600768 | 100292 | 11.5215 | 0.5635 | -0.9786 | 6.3928 | CEU |
| dJ383J4.3 | GI_42655858-S | rs2146372  | 1 | 1 | 170601226 | 100750 | 11.5215 | 0.5635 | -0.9786 | 6.3928 | CEU |
| dJ383J4.3 | GI_42655858-S | rs2759328  | 1 | 1 | 170608362 | 107886 | 11.5215 | 0.5635 | -0.9786 | 6.3928 | CEU |
| dJ383J4.3 | GI_42655858-S | rs941988   | 1 | 1 | 170613550 | 113074 | 11.2648 | 0.5674 | 0.9655  | 6.3928 | CEU |
| dJ383J4.3 | GI_42655858-S | rs2227592  | 1 | 1 | 170617369 | 116893 | 11.5215 | 0.5635 | 0.9786  | 6.3928 | CEU |
| dJ383J4.3 | GI_42655858-S | rs2227589  | 1 | 1 | 170617873 | 117397 | 10.6181 | 0.5377 | 0.9602  | 6.3928 | CEU |
| C1orf16   | GI_42476073-A | rs12024309 | 1 | 1 | 180151638 | 103079 | 9.6174  | 0.4933 | 0.2997  | 5.7203 | CEU |
| C1orf16   | GI_42476073-A | rs9286848  | 1 | 1 | 180157906 | 96811  | 9.3433  | 0.4945 | 0.3010  | 5.7203 | CEU |
| C1orf16   | GI_42476073-A | rs2275676  | 1 | 1 | 180162479 | 92238  | 9.6174  | 0.4933 | -0.2997 | 5.7203 | CEU |
| C1orf16   | GI_42476073-A | rs2702178  | 1 | 1 | 180184202 | 70515  | 10.9569 | 0.5500 | 0.3183  | 5.7203 | CEU |
| C1orf16   | GI_42476073-A | rs2702205  | 1 | 1 | 180188855 | 65862  | 10.8360 | 0.5394 | 0.3040  | 5.7203 | CEU |
| C1orf16   | GI_42476073-A | rs2702204  | 1 | 1 | 180189053 | 65664  | 10.8360 | 0.5394 | 0.3040  | 5.7203 | CEU |
| C1orf16   | GI_42476073-A | rs4047762  | 1 | 1 | 180194791 | 59926  | 8.8113  | 0.4604 | -0.2833 | 5.7203 | CEU |
| C1orf16   | GI_42476073-A | rs2761581  | 1 | 1 | 180206507 | 48210  | 10.8360 | 0.5394 | 0.3040  | 5.7203 | CEU |
| C1orf16   | GI_42476073-A | rs10911353 | 1 | 1 | 180220860 | 33857  | 10.4144 | 0.5240 | 0.3053  | 5.7203 | CEU |
| C1orf16   | GI_42476073-A | rs12117885 | 1 | 1 | 180225871 | 28846  | 9.8428  | 0.5778 | -0.3211 | 5.7203 | CEU |
| C1orf16   | GI_42476073-A | rs6662844  | 1 | 1 | 180226110 | 28607  | 8.5016  | 0.4589 | 0.2830  | 5.7203 | CEU |
| C1orf16   | GI_42476073-A | rs789172   | 1 | 1 | 180240895 | 13822  | 8.8113  | 0.4604 | -0.2833 | 5.7203 | CEU |
| C1orf16   | GI_42476073-A | rs699246   | 1 | 1 | 180247757 | 6960   | 9.2626  | 0.4791 | 0.2932  | 5.7203 | CEU |
| C1orf16   | GI_42476073-A | rs2702182  | 1 | 1 | 180248097 | 6620   | 10.8360 | 0.5394 | -0.3040 | 5.7203 | CEU |
| C1orf16   | GI_42476073-A | rs2702180  | 1 | 1 | 180249628 | 5089   | 10.8360 | 0.5394 | -0.3040 | 5.7203 | CEU |
| C1orf16   | GI_42476073-A | rs11811630 | 1 | 1 | 180265567 | 10850  | 8.8113  | 0.4604 | -0.2833 | 5.7203 | CEU |
| C1orf16   | GI_42476073-A | rs2296164  | 1 | 1 | 180266592 | 11875  | 8.8113  | 0.4604 | -0.2833 | 5.7203 | CEU |
| C1orf16   | GI_42476073-A | rs2236385  | 1 | 1 | 180269682 | 14965  | 8.8113  | 0.4604 | -0.2833 | 5.7203 | CEU |
| C1orf16   | GI_42476073-A | rs3820691  | 1 | 1 | 180270782 | 16065  | 7.3956  | 0.4385 | 0.3010  | 5.7203 | CEU |
| C1orf16   | GI_42476073-A | rs3843293  | 1 | 1 | 180271106 | 16389  | 8.0622  | 0.4280 | -0.2697 | 5.7203 | CEU |
| C1orf16   | GI_42476073-A | rs10911358 | 1 | 1 | 180272783 | 18066  | 8.0622  | 0.4280 | 0.2697  | 5.7203 | CEU |
| C1orf16   | GI_42476073-A | rs2274064  | 1 | 1 | 180274044 | 19327  | 8.0622  | 0.4280 | 0.2697  | 5.7203 | CEU |
| C1orf16   | GI_42476073-A | rs3818364  | 1 | 1 | 180274404 | 19687  | 7.4477  | 0.4225 | -0.2668 | 5.7203 | CEU |
| C1orf16   | GI_42476073-A | rs12753665 | 1 | 1 | 180277718 | 23001  | 8.1284  | 0.4366 | 0.2703  | 5.7203 | CEU |

|              |               |            |   |   |           |        |         |        |         |        |     |
|--------------|---------------|------------|---|---|-----------|--------|---------|--------|---------|--------|-----|
| C1orf16      | GI_42476073-A | rs10911363 | 1 | 1 | 180281414 | 26697  | 7.1658  | 0.4088 | -0.2761 | 5.7203 | CEU |
| FLJ10252     | GI_8922312-S  | rs11581204 | 1 | 1 | 213859296 | 133154 | 6.4084  | 0.3498 | -0.3717 | 6.1135 | CEU |
| FLJ10252     | GI_8922312-S  | rs17654947 | 1 | 1 | 213862796 | 129654 | 6.4084  | 0.3498 | -0.3717 | 6.1135 | CEU |
| FLJ10252     | GI_8922312-S  | rs17700529 | 1 | 1 | 213862988 | 129462 | 6.4084  | 0.3498 | -0.3717 | 6.1135 | CEU |
| FLJ10252     | GI_8922312-S  | rs6604544  | 1 | 1 | 213868183 | 124267 | 6.4084  | 0.3498 | -0.3717 | 6.1135 | CEU |
| hmm26268     | hmm26268-S    | rs12022218 | 1 | 1 | 218333069 | 3193   | 7.3919  | 0.3974 | -0.3287 | 6.2237 | CEU |
| hmm26268     | hmm26268-S    | rs3010848  | 1 | 1 | 218333518 | 2744   | 13.7999 | 0.6351 | 0.2166  | 6.2237 | CEU |
| hmm26268     | hmm26268-S    | rs12026940 | 1 | 1 | 218334109 | 2153   | 7.2319  | 0.3952 | -0.3272 | 6.2237 | CEU |
| hmm26268     | hmm26268-S    | rs12030246 | 1 | 1 | 218334167 | 2095   | 7.2319  | 0.3952 | 0.3272  | 6.2237 | CEU |
| hmm26268     | hmm26268-S    | rs3010852  | 1 | 1 | 218334602 | 1660   | 13.4979 | 0.6327 | 0.2173  | 6.2237 | CEU |
| hmm26268     | hmm26268-S    | rs7551182  | 1 | 1 | 218335485 | 777    | 14.1166 | 0.6637 | -0.2351 | 6.2237 | CEU |
| hmm26268     | hmm26268-S    | rs11118855 | 1 | 1 | 218336215 | 47     | 12.9419 | 0.6226 | 0.2142  | 6.2237 | CEU |
| hmm26268     | hmm26268-S    | rs3003902  | 1 | 1 | 218336419 | 157    | 12.9662 | 0.6103 | 0.2141  | 6.2237 | CEU |
| hmm26268     | hmm26268-S    | rs12034159 | 1 | 1 | 218337932 | 1670   | 13.7999 | 0.6351 | 0.2166  | 6.2237 | CEU |
| hmm26268     | hmm26268-S    | rs9441948  | 1 | 1 | 218337962 | 1700   | 13.7999 | 0.6351 | 0.2166  | 6.2237 | CEU |
| hmm26268     | hmm26268-S    | rs7532339  | 1 | 1 | 218339435 | 3173   | 7.0716  | 0.3929 | 0.3254  | 6.2237 | CEU |
| hmm26268     | hmm26268-S    | rs11118856 | 1 | 1 | 218339816 | 3554   | 13.4979 | 0.6327 | -0.2173 | 6.2237 | CEU |
| hmm26268     | hmm26268-S    | rs12036282 | 1 | 1 | 218340189 | 3927   | 7.4748  | 0.4123 | 0.3325  | 6.2237 | CEU |
| hmm26268     | hmm26268-S    | rs11118858 | 1 | 1 | 218341353 | 5091   | 8.5678  | 0.4501 | 0.2327  | 6.2237 | CEU |
| hmm26268     | hmm26268-S    | rs6680297  | 1 | 1 | 218344970 | 8708   | 7.8678  | 0.4193 | 0.3248  | 6.2237 | CEU |
| hmm26268     | hmm26268-S    | rs6680316  | 1 | 1 | 218345021 | 8759   | 7.3086  | 0.4541 | 0.3631  | 6.2237 | CEU |
| hmm26268     | hmm26268-S    | rs10495178 | 1 | 1 | 218348833 | 12571  | 6.7520  | 0.3668 | -0.3163 | 6.2237 | CEU |
| hmm26268     | hmm26268-S    | rs17010785 | 1 | 1 | 218353599 | 17337  | 6.7520  | 0.3668 | -0.3163 | 6.2237 | CEU |
| hmm26268     | hmm26268-S    | rs4403637  | 1 | 1 | 218356929 | 20667  | 13.7782 | 0.6474 | 0.2176  | 6.2237 | CEU |
| hmm26268     | hmm26268-S    | rs12038356 | 1 | 1 | 218361067 | 24805  | 6.3879  | 0.3587 | -0.3242 | 6.2237 | CEU |
| hmm26268     | hmm26268-S    | rs11118863 | 1 | 1 | 218361410 | 25148  | 13.0561 | 0.6131 | 0.2187  | 6.2237 | CEU |
| hmm26268     | hmm26268-S    | rs12039269 | 1 | 1 | 218361832 | 25570  | 6.6031  | 0.3645 | -0.3148 | 6.2237 | CEU |
| KIAA0483     | GI_7662157-S  | rs6700284  | 1 | 1 | 220599998 | 53445  | 5.8827  | 0.3229 | 0.2798  | 5.6493 | CEU |
| KIAA0483     | GI_7662157-S  | rs7511895  | 1 | 1 | 220612899 | 40544  | 5.8827  | 0.3229 | -0.2798 | 5.6493 | CEU |
| KIAA0483     | GI_7662157-S  | rs2172361  | 1 | 1 | 220613376 | 40067  | 5.8827  | 0.3229 | 0.2798  | 5.6493 | CEU |
| KIAA0483     | GI_7662157-S  | rs12049583 | 1 | 1 | 220614871 | 38572  | 5.8827  | 0.3229 | -0.2798 | 5.6493 | CEU |
| KIAA0483     | GI_7662157-S  | rs6659234  | 1 | 1 | 220616731 | 36712  | 5.8827  | 0.3229 | -0.2798 | 5.6493 | CEU |
| KIAA0483     | GI_7662157-S  | rs6658494  | 1 | 1 | 220618754 | 34689  | 5.8827  | 0.3229 | -0.2798 | 5.6493 | CEU |
| KIAA0483     | GI_7662157-S  | rs17560970 | 1 | 1 | 220620014 | 33429  | 6.4833  | 0.3535 | -0.2984 | 5.6493 | CEU |
| KIAA0483     | GI_7662157-S  | rs6426139  | 1 | 1 | 220621863 | 31580  | 6.5276  | 0.3557 | -0.3011 | 5.6493 | CEU |
| KIAA0483     | GI_7662157-S  | rs2896985  | 1 | 1 | 220621933 | 31510  | 6.6537  | 0.3620 | 0.3087  | 5.6493 | CEU |
| KIAA0483     | GI_7662157-S  | rs7519433  | 1 | 1 | 220625738 | 27705  | 6.5276  | 0.3557 | 0.3011  | 5.6493 | CEU |
| KIAA0483     | GI_7662157-S  | rs869945   | 1 | 1 | 220628372 | 25071  | 6.5276  | 0.3557 | -0.3011 | 5.6493 | CEU |
| KIAA0483     | GI_7662157-S  | rs6691405  | 1 | 1 | 220629614 | 23829  | 6.5276  | 0.3557 | -0.3011 | 5.6493 | CEU |
| KIAA0483     | GI_7662157-S  | rs6685783  | 1 | 1 | 220629677 | 23766  | 6.5276  | 0.3557 | 0.3011  | 5.6493 | CEU |
| KIAA0483     | GI_7662157-S  | rs6688818  | 1 | 1 | 220633083 | 20360  | 5.7753  | 0.3266 | -0.2785 | 5.6493 | CEU |
| KIAA0483     | GI_7662157-S  | rs4653986  | 1 | 1 | 220637553 | 15890  | 6.8255  | 0.3704 | -0.3135 | 5.6493 | CEU |
| KIAA0483     | GI_7662157-S  | rs7518839  | 1 | 1 | 220638514 | 14929  | 6.8255  | 0.3704 | 0.3135  | 5.6493 | CEU |
| KIAA0483     | GI_7662157-S  | rs997297   | 1 | 1 | 220642227 | 11216  | 6.1186  | 0.3351 | 0.3035  | 5.6493 | CEU |
| KIAA0483     | GI_7662157-S  | rs7531891  | 1 | 1 | 220642691 | 10752  | 6.8255  | 0.3704 | -0.3135 | 5.6493 | CEU |
| KIAA0483     | GI_7662157-S  | rs10916371 | 1 | 1 | 220644897 | 8546   | 6.8255  | 0.3704 | -0.3135 | 5.6493 | CEU |
| KIAA0483     | GI_7662157-S  | rs7524705  | 1 | 1 | 220645735 | 7708   | 6.8255  | 0.3704 | -0.3135 | 5.6493 | CEU |
| KIAA0483     | GI_7662157-S  | rs1826421  | 1 | 1 | 220646182 | 7261   | 6.4173  | 0.3551 | 0.3072  | 5.6493 | CEU |
| KIAA0483     | GI_7662157-S  | rs7526252  | 1 | 1 | 220655553 | 2110   | 6.1930  | 0.3486 | 0.3055  | 5.6493 | CEU |
| KIAA0483     | GI_7662157-S  | rs10799505 | 1 | 1 | 220657758 | 4315   | 6.2391  | 0.3510 | 0.3073  | 5.6493 | CEU |
| KIAA0483     | GI_7662157-S  | rs10916403 | 1 | 1 | 220659286 | 5843   | 6.1349  | 0.3456 | 0.3106  | 5.6493 | CEU |
| KIAA0483     | GI_7662157-S  | rs16844819 | 1 | 1 | 220667668 | 14225  | 5.6717  | 0.3118 | -0.2861 | 5.6493 | CEU |
| IMAGE3451454 | GI_26024192-S | rs7555764  | 1 | 1 | 223866754 | 408743 | 5.7690  | 0.3169 | -0.1944 | 5.4284 | CEU |
| IMAGE3451454 | GI_26024192-S | rs10753434 | 1 | 1 | 223867335 | 408162 | 5.7690  | 0.3169 | -0.1944 | 5.4284 | CEU |
| IMAGE3451454 | GI_26024192-S | rs10916133 | 1 | 1 | 223872402 | 403095 | 5.7690  | 0.3169 | 0.1944  | 5.4284 | CEU |
| IMAGE3451454 | GI_26024192-S | rs4294380  | 1 | 1 | 223885720 | 389777 | 5.6385  | 0.3145 | 0.1930  | 5.4284 | CEU |
| IMAGE3451454 | GI_26024192-S | rs4233227  | 1 | 1 | 223888315 | 387182 | 5.9862  | 0.3329 | -0.1976 | 5.4284 | CEU |
| IMAGE3451454 | GI_26024192-S | rs3014272  | 1 | 1 | 223890175 | 385322 | 5.7690  | 0.3169 | -0.1944 | 5.4284 | CEU |
| MGC13186     | GI_14150099-S | rs12410594 | 1 | 1 | 229377538 | 43160  | 6.3631  | 0.3626 | 0.5786  | 6.1685 | CEU |

|          |               |            |   |   |           |        |         |        |         |        |     |
|----------|---------------|------------|---|---|-----------|--------|---------|--------|---------|--------|-----|
| MGC13186 | GI_14150099-S | rs12744791 | 1 | 1 | 229396463 | 24235  | 6.6765  | 0.3787 | -0.5671 | 6.1685 | CEU |
| MGC12458 | GI_14150107-S | rs6429515  | 1 | 1 | 241451082 | 125998 | 16.5039 | 0.7114 | 0.7989  | 6.1345 | CEU |
| MGC12458 | GI_14150107-S | rs11590498 | 1 | 1 | 241461755 | 115325 | 8.1035  | 0.4298 | 0.5492  | 6.1345 | CEU |
| MGC12458 | GI_14150107-S | rs10927361 | 1 | 1 | 241466695 | 110385 | 8.1035  | 0.4298 | -0.5492 | 6.1345 | CEU |
| MGC12458 | GI_14150107-S | rs6689242  | 1 | 1 | 241468075 | 109005 | 6.3647  | 0.3792 | -0.5399 | 6.1345 | CEU |
| MGC12458 | GI_14150107-S | rs1021282  | 1 | 1 | 241470753 | 106327 | 8.1035  | 0.4298 | -0.5492 | 6.1345 | CEU |
| MGC12458 | GI_14150107-S | rs7527944  | 1 | 1 | 241473714 | 103366 | 6.3750  | 0.3581 | 0.7482  | 6.1345 | CEU |
| MGC12458 | GI_14150107-S | rs10927363 | 1 | 1 | 241474480 | 102600 | 8.1035  | 0.4298 | -0.5492 | 6.1345 | CEU |
| MGC12458 | GI_14150107-S | rs12403396 | 1 | 1 | 241474775 | 102305 | 7.9538  | 0.4288 | -0.5523 | 6.1345 | CEU |
| MGC12458 | GI_14150107-S | rs10927364 | 1 | 1 | 241476465 | 100615 | 8.1035  | 0.4298 | -0.5492 | 6.1345 | CEU |
| MGC12458 | GI_14150107-S | rs4658434  | 1 | 1 | 241478023 | 99057  | 8.1035  | 0.4298 | 0.5492  | 6.1345 | CEU |
| MGC12458 | GI_14150107-S | rs6659494  | 1 | 1 | 241480372 | 96708  | 6.5553  | 0.3621 | -0.7352 | 6.1345 | CEU |
| MGC12458 | GI_14150107-S | rs4658683  | 1 | 1 | 241482552 | 94528  | 6.5040  | 0.3545 | 0.7256  | 6.1345 | CEU |
| MGC12458 | GI_14150107-S | rs2050632  | 1 | 1 | 241485608 | 91472  | 8.1035  | 0.4298 | 0.5492  | 6.1345 | CEU |
| MGC12458 | GI_14150107-S | rs522595   | 1 | 1 | 241485780 | 91300  | 8.1035  | 0.4298 | 0.5492  | 6.1345 | CEU |
| MGC12458 | GI_14150107-S | rs644341   | 1 | 1 | 241485863 | 91217  | 8.1035  | 0.4298 | -0.5492 | 6.1345 | CEU |
| MGC12458 | GI_14150107-S | rs643352   | 1 | 1 | 241486132 | 90948  | 8.3670  | 0.4471 | 0.5637  | 6.1345 | CEU |
| MGC12458 | GI_14150107-S | rs2632550  | 1 | 1 | 241486834 | 90246  | 6.6064  | 0.3698 | -0.7591 | 6.1345 | CEU |
| MGC12458 | GI_14150107-S | rs479597   | 1 | 1 | 241488726 | 88354  | 6.5040  | 0.3545 | -0.7256 | 6.1345 | CEU |
| MGC12458 | GI_14150107-S | rs651773   | 1 | 1 | 241490780 | 86300  | 7.1596  | 0.3865 | -0.5352 | 6.1345 | CEU |
| MGC12458 | GI_14150107-S | rs626070   | 1 | 1 | 241493372 | 83708  | 8.1035  | 0.4298 | 0.5492  | 6.1345 | CEU |
| MGC12458 | GI_14150107-S | rs2786695  | 1 | 1 | 241493786 | 83294  | 6.3765  | 0.3633 | -0.7595 | 6.1345 | CEU |
| MGC12458 | GI_14150107-S | rs4658685  | 1 | 1 | 241493912 | 83168  | 8.0568  | 0.4392 | -0.5537 | 6.1345 | CEU |
| MGC12458 | GI_14150107-S | rs2786694  | 1 | 1 | 241495055 | 82025  | 6.5040  | 0.3545 | -0.7256 | 6.1345 | CEU |
| MGC12458 | GI_14150107-S | rs2786693  | 1 | 1 | 241495087 | 81993  | 8.1035  | 0.4298 | -0.5492 | 6.1345 | CEU |
| MGC12458 | GI_14150107-S | rs2786692  | 1 | 1 | 241495925 | 81155  | 6.5040  | 0.3545 | -0.7256 | 6.1345 | CEU |
| MGC12458 | GI_14150107-S | rs672008   | 1 | 1 | 241496919 | 80161  | 8.1035  | 0.4298 | 0.5492  | 6.1345 | CEU |
| MGC12458 | GI_14150107-S | rs2786691  | 1 | 1 | 241497170 | 79910  | 8.1035  | 0.4298 | -0.5492 | 6.1345 | CEU |
| MGC12458 | GI_14150107-S | rs587414   | 1 | 1 | 241498706 | 78374  | 6.5040  | 0.3545 | 0.7256  | 6.1345 | CEU |
| MGC12458 | GI_14150107-S | rs678670   | 1 | 1 | 241498763 | 78317  | 6.5040  | 0.3545 | -0.7256 | 6.1345 | CEU |
| MGC12458 | GI_14150107-S | rs1196365  | 1 | 1 | 241505212 | 71868  | 8.1035  | 0.4298 | -0.5492 | 6.1345 | CEU |
| MGC12458 | GI_14150107-S | rs1196366  | 1 | 1 | 241505229 | 71851  | 14.5848 | 0.6699 | -0.7793 | 6.1345 | CEU |
| MGC12458 | GI_14150107-S | rs10927369 | 1 | 1 | 241506001 | 71079  | 8.1035  | 0.4298 | -0.5492 | 6.1345 | CEU |
| MGC12458 | GI_14150107-S | rs901664   | 1 | 1 | 241509620 | 67460  | 15.5419 | 0.6947 | -0.7876 | 6.1345 | CEU |
| MGC12458 | GI_14150107-S | rs901665   | 1 | 1 | 241509924 | 67156  | 16.1116 | 0.6958 | -0.7869 | 6.1345 | CEU |
| MGC12458 | GI_14150107-S | rs7528009  | 1 | 1 | 241511114 | 65966  | 8.1035  | 0.4298 | 0.5492  | 6.1345 | CEU |
| MGC12458 | GI_14150107-S | rs600025   | 1 | 1 | 241517136 | 59944  | 15.2095 | 0.6734 | 0.7266  | 6.1345 | CEU |
| MGC12458 | GI_14150107-S | rs573275   | 1 | 1 | 241517637 | 59443  | 6.6625  | 0.3624 | 0.7417  | 6.1345 | CEU |
| MGC12458 | GI_14150107-S | rs586013   | 1 | 1 | 241517934 | 59146  | 13.2188 | 0.6180 | -0.6969 | 6.1345 | CEU |
| MGC12458 | GI_14150107-S | rs632383   | 1 | 1 | 241518287 | 58793  | 13.7061 | 0.6520 | 0.7211  | 6.1345 | CEU |
| MGC12458 | GI_14150107-S | rs1979568  | 1 | 1 | 241518513 | 58567  | 14.0862 | 0.6496 | 0.7188  | 6.1345 | CEU |
| MGC12458 | GI_14150107-S | rs675033   | 1 | 1 | 241519964 | 57116  | 15.0076 | 0.6682 | 0.7215  | 6.1345 | CEU |
| MGC12458 | GI_14150107-S | rs632676   | 1 | 1 | 241521105 | 55975  | 15.0076 | 0.6682 | -0.7215 | 6.1345 | CEU |
| MGC12458 | GI_14150107-S | rs616540   | 1 | 1 | 241522450 | 54630  | 15.0076 | 0.6682 | -0.7215 | 6.1345 | CEU |
| MGC12458 | GI_14150107-S | rs665478   | 1 | 1 | 241524271 | 52809  | 15.0076 | 0.6682 | -0.7215 | 6.1345 | CEU |
| MGC12458 | GI_14150107-S | rs9428636  | 1 | 1 | 241526024 | 51056  | 14.0209 | 0.6413 | -0.7314 | 6.1345 | CEU |
| MGC12458 | GI_14150107-S | rs556935   | 1 | 1 | 241530141 | 46939  | 11.7997 | 0.6277 | 0.7430  | 6.1345 | CEU |
| MGC12458 | GI_14150107-S | rs626106   | 1 | 1 | 241530870 | 46210  | 11.2483 | 0.6012 | -0.8005 | 6.1345 | CEU |
| MGC12458 | GI_14150107-S | rs2029249  | 1 | 1 | 241531718 | 45362  | 15.0076 | 0.6682 | -0.7215 | 6.1345 | CEU |
| MGC12458 | GI_14150107-S | rs11580510 | 1 | 1 | 241531917 | 45163  | 9.1386  | 0.4800 | -0.5853 | 6.1345 | CEU |
| MGC12458 | GI_14150107-S | rs12728471 | 1 | 1 | 241531931 | 45149  | 15.0076 | 0.6682 | -0.7215 | 6.1345 | CEU |
| MGC12458 | GI_14150107-S | rs4233441  | 1 | 1 | 241535175 | 41905  | 15.0076 | 0.6682 | -0.7215 | 6.1345 | CEU |
| MGC12458 | GI_14150107-S | rs619449   | 1 | 1 | 241539091 | 37989  | 15.0076 | 0.6682 | 0.7215  | 6.1345 | CEU |
| MGC12458 | GI_14150107-S | rs588923   | 1 | 1 | 241539921 | 37159  | 14.6370 | 0.6847 | -0.7501 | 6.1345 | CEU |
| MGC12458 | GI_14150107-S | rs4658688  | 1 | 1 | 241540837 | 36243  | 14.4124 | 0.6522 | -0.7182 | 6.1345 | CEU |
| MGC12458 | GI_14150107-S | rs611185   | 1 | 1 | 241545095 | 31985  | 7.9921  | 0.4249 | 0.5780  | 6.1345 | CEU |
| MGC12458 | GI_14150107-S | rs576872   | 1 | 1 | 241549105 | 27975  | 7.5215  | 0.4383 | 0.5729  | 6.1345 | CEU |
| MGC12458 | GI_14150107-S | rs547441   | 1 | 1 | 241550008 | 27072  | 8.8269  | 0.4611 | -0.5866 | 6.1345 | CEU |
| MGC12458 | GI_14150107-S | rs664252   | 1 | 1 | 241555077 | 22003  | 7.3177  | 0.3993 | 0.5614  | 6.1345 | CEU |

|           |               |            |   |   |           |       |         |        |         |        |     |
|-----------|---------------|------------|---|---|-----------|-------|---------|--------|---------|--------|-----|
| MGC12458  | GI_14150107-S | rs500494   | 1 | 1 | 241555418 | 21662 | 7.8758  | 0.4309 | -0.5825 | 6.1345 | CEU |
| MGC12458  | GI_14150107-S | rs1538165  | 1 | 1 | 241556751 | 20329 | 6.1730  | 0.3378 | -0.4908 | 6.1345 | CEU |
| MGC12458  | GI_14150107-S | rs586865   | 1 | 1 | 241556998 | 20082 | 7.4817  | 0.4183 | 0.5667  | 6.1345 | CEU |
| MGC12458  | GI_14150107-S | rs595363   | 1 | 1 | 241563075 | 14005 | 6.7781  | 0.4331 | 0.5797  | 6.1345 | CEU |
| MGC12458  | GI_14150107-S | rs12083437 | 1 | 1 | 241567770 | 9310  | 8.0623  | 0.4280 | 0.5715  | 6.1345 | CEU |
| MGC12458  | GI_14150107-S | rs2152913  | 1 | 1 | 241568409 | 8671  | 7.3845  | 0.4580 | -0.5904 | 6.1345 | CEU |
| MGC12458  | GI_14150107-S | rs4658694  | 1 | 1 | 241570210 | 6870  | 7.7239  | 0.4481 | 0.5767  | 6.1345 | CEU |
| MGC12458  | GI_14150107-S | rs10927386 | 1 | 1 | 241571419 | 5661  | 8.4422  | 0.4563 | -0.5928 | 6.1345 | CEU |
| MGC12458  | GI_14150107-S | rs10927387 | 1 | 1 | 241571443 | 5637  | 8.8656  | 0.4746 | 0.6155  | 6.1345 | CEU |
| MGC12458  | GI_14150107-S | rs10754849 | 1 | 1 | 241573221 | 3859  | 6.1730  | 0.3378 | 0.4908  | 6.1345 | CEU |
| MGC12458  | GI_14150107-S | rs6429522  | 1 | 1 | 241574484 | 2596  | 8.8269  | 0.4611 | 0.5866  | 6.1345 | CEU |
| MGC12458  | GI_14150107-S | rs11806396 | 1 | 1 | 241578384 | 1304  | 8.1483  | 0.4375 | -0.5711 | 6.1345 | CEU |
| MGC12458  | GI_14150107-S | rs10927390 | 1 | 1 | 241580085 | 3005  | 6.1698  | 0.3687 | -0.5388 | 6.1345 | CEU |
| DTNB      | GI_37577100-A | rs1369704  | 2 | 2 | 25535241  | 23436 | 6.2312  | 0.3408 | -0.3272 | 5.9692 | CEU |
| DTNB      | GI_37577100-A | rs2384232  | 2 | 2 | 25535400  | 23595 | 6.2312  | 0.3408 | 0.3272  | 5.9692 | CEU |
| DTNB      | GI_37577100-A | rs6546148  | 2 | 2 | 25536656  | 24851 | 6.0636  | 0.3370 | -0.3260 | 5.9692 | CEU |
| CRIP1     | GI_41350204-S | rs7589801  | 2 | 2 | 46727893  | 35508 | 7.8018  | 0.4163 | 0.2372  | 6.3346 | CEU |
| CRIP1     | GI_41350204-S | rs896213   | 2 | 2 | 46729295  | 34106 | 7.5043  | 0.4081 | 0.2351  | 6.3346 | CEU |
| CRIP1     | GI_41350204-S | rs1901263  | 2 | 2 | 46730237  | 33164 | 9.0751  | 0.4714 | -0.2553 | 6.3346 | CEU |
| CRIP1     | GI_41350204-S | rs2305350  | 2 | 2 | 46731466  | 31935 | 9.4882  | 0.4882 | -0.2626 | 6.3346 | CEU |
| CRIP1     | GI_41350204-S | rs13001566 | 2 | 2 | 46741138  | 22263 | 8.1268  | 0.4309 | -0.2534 | 6.3346 | CEU |
| CRIP1     | GI_41350204-S | rs1451156  | 2 | 2 | 46744253  | 19148 | 8.1268  | 0.4309 | -0.2534 | 6.3346 | CEU |
| CRIP1     | GI_41350204-S | rs3087822  | 2 | 2 | 46763684  | 283   | 6.8534  | 0.3717 | 0.2554  | 6.3346 | CEU |
| CRIP1     | GI_41350204-S | rs6739397  | 2 | 2 | 46769972  | 6571  | 6.8534  | 0.3717 | -0.2554 | 6.3346 | CEU |
| CRIP1     | GI_41350204-S | rs12104572 | 2 | 2 | 46774117  | 10716 | 6.8534  | 0.3717 | 0.2554  | 6.3346 | CEU |
| CRIP1     | GI_41350204-S | rs6544906  | 2 | 2 | 46775523  | 12122 | 6.9305  | 0.3807 | 0.2526  | 6.3346 | CEU |
| CRIP1     | GI_41350204-S | rs13385693 | 2 | 2 | 46778809  | 15408 | 6.8534  | 0.3717 | 0.2554  | 6.3346 | CEU |
| CRIP1     | GI_41350204-S | rs6544907  | 2 | 2 | 46779970  | 16569 | 6.8534  | 0.3717 | -0.2554 | 6.3346 | CEU |
| LOC339804 | GI_37546921-S | rs1177285  | 2 | 2 | 61261788  | 40153 | 7.3970  | 0.3977 | 0.3897  | 5.6755 | CEU |
| LOC339804 | GI_37546921-S | rs1177282  | 2 | 2 | 61269428  | 32513 | 8.5771  | 0.4745 | -0.4302 | 5.6755 | CEU |
| LOC339804 | GI_37546921-S | rs1729660  | 2 | 2 | 61277463  | 24478 | 9.2264  | 0.4776 | 0.4246  | 5.6755 | CEU |
| LOC339804 | GI_37546921-S | rs11498    | 2 | 2 | 61282470  | 19471 | 7.7462  | 0.4138 | 0.3972  | 5.6755 | CEU |
| LOC339804 | GI_37546921-S | rs3213944  | 2 | 2 | 61283949  | 17992 | 10.0379 | 0.5704 | 0.4885  | 5.6755 | CEU |
| LOC339804 | GI_37546921-S | rs2441467  | 2 | 2 | 61285800  | 16141 | 6.9989  | 0.4380 | -0.4195 | 5.6755 | CEU |
| LOC339804 | GI_37546921-S | rs720201   | 2 | 2 | 61288114  | 13827 | 9.2264  | 0.4776 | 0.4246  | 5.6755 | CEU |
| LOC339804 | GI_37546921-S | rs1729653  | 2 | 2 | 61288659  | 13282 | 9.2264  | 0.4776 | 0.4246  | 5.6755 | CEU |
| LOC339804 | GI_37546921-S | rs1665270  | 2 | 2 | 61289317  | 12624 | 9.2264  | 0.4776 | -0.4246 | 5.6755 | CEU |
| LOC339804 | GI_37546921-S | rs1729652  | 2 | 2 | 61289670  | 12271 | 9.2264  | 0.4776 | -0.4246 | 5.6755 | CEU |
| LOC339804 | GI_37546921-S | rs1665271  | 2 | 2 | 61290467  | 11474 | 9.2966  | 0.4865 | 0.4216  | 5.6755 | CEU |
| LOC339804 | GI_37546921-S | rs12475591 | 2 | 2 | 61293179  | 8762  | 8.7149  | 0.4682 | -0.4196 | 5.6755 | CEU |
| LOC339804 | GI_37546921-S | rs2592493  | 2 | 2 | 61293988  | 7953  | 8.2837  | 0.4493 | 0.4210  | 5.6755 | CEU |
| LOC339804 | GI_37546921-S | rs1665263  | 2 | 2 | 61294410  | 7531  | 7.9635  | 0.4660 | 0.4051  | 5.6755 | CEU |
| LOC339804 | GI_37546921-S | rs1665260  | 2 | 2 | 61296138  | 5803  | 8.7149  | 0.4682 | 0.4196  | 5.6755 | CEU |
| LOC339804 | GI_37546921-S | rs1665259  | 2 | 2 | 61296406  | 5535  | 9.2264  | 0.4776 | -0.4246 | 5.6755 | CEU |
| LOC339804 | GI_37546921-S | rs7558954  | 2 | 2 | 61296557  | 5384  | 6.7867  | 0.3789 | -0.3859 | 5.6755 | CEU |
| LOC339804 | GI_37546921-S | rs1729671  | 2 | 2 | 61296756  | 5185  | 8.5656  | 0.4678 | 0.4196  | 5.6755 | CEU |
| LOC339804 | GI_37546921-S | rs1177309  | 2 | 2 | 61296899  | 5042  | 6.7867  | 0.3789 | -0.3859 | 5.6755 | CEU |
| LOC339804 | GI_37546921-S | rs1177308  | 2 | 2 | 61298905  | 3036  | 7.2240  | 0.3895 | -0.3910 | 5.6755 | CEU |
| LOC339804 | GI_37546921-S | rs1177303  | 2 | 2 | 61300006  | 1935  | 7.7315  | 0.4131 | 0.3892  | 5.6755 | CEU |
| LOC339804 | GI_37546921-S | rs1729674  | 2 | 2 | 61301388  | 553   | 7.2240  | 0.3895 | 0.3910  | 5.6755 | CEU |
| LOC339804 | GI_37546921-S | rs1729673  | 2 | 2 | 61301450  | 491   | 9.1326  | 0.4797 | 0.4301  | 5.6755 | CEU |
| LOC339804 | GI_37546921-S | rs3889717  | 2 | 2 | 61302442  | 501   | 7.2240  | 0.3895 | -0.3910 | 5.6755 | CEU |
| LOC339804 | GI_37546921-S | rs1615070  | 2 | 2 | 61304826  | 2885  | 6.1301  | 0.3356 | 0.3676  | 5.6755 | CEU |
| LOC339804 | GI_37546921-S | rs2600668  | 2 | 2 | 61312078  | 10137 | 7.3200  | 0.3941 | -0.3963 | 5.6755 | CEU |
| LOC339804 | GI_37546921-S | rs2167564  | 2 | 2 | 61312467  | 10526 | 9.2264  | 0.4776 | 0.4246  | 5.6755 | CEU |
| LOC339804 | GI_37546921-S | rs777584   | 2 | 2 | 61321997  | 20056 | 8.1289  | 0.4310 | -0.4581 | 5.6755 | CEU |
| LOC339803 | GI_42656315-S | rs811372   | 2 | 2 | 61341219  | 60219 | 5.8816  | 0.3228 | -0.1580 | 5.6424 | CEU |
| LOC339804 | GI_37546921-S | rs2123112  | 2 | 2 | 61353726  | 51785 | 6.0439  | 0.3312 | -0.3528 | 5.6755 | CEU |
| LOC339804 | GI_37546921-S | rs2167565  | 2 | 2 | 61388109  | 86168 | 6.3609  | 0.3474 | -0.3839 | 5.6755 | CEU |

|           |               |            |   |   |          |        |        |        |         |        |     |
|-----------|---------------|------------|---|---|----------|--------|--------|--------|---------|--------|-----|
| LOC339803 | GI_42656315-S | rs2060824  | 2 | 2 | 61396207 | 115207 | 5.8816 | 0.3228 | 0.1580  | 5.6424 | CEU |
| LOC339803 | GI_42656315-S | rs6706786  | 2 | 2 | 61400492 | 119492 | 5.8816 | 0.3228 | -0.1580 | 5.6424 | CEU |
| LOC339803 | GI_42656315-S | rs4671402  | 2 | 2 | 61406101 | 125101 | 5.8816 | 0.3228 | 0.1580  | 5.6424 | CEU |
| IMMT      | GI_5803114-S  | rs13024123 | 2 | 2 | 86182624 | 100525 | 5.7457 | 0.3400 | -0.2465 | 5.6531 | CEU |
| IMMT      | GI_5803114-S  | rs7572386  | 2 | 2 | 86183849 | 99300  | 6.1949 | 0.3390 | 0.2360  | 5.6531 | CEU |
| IMMT      | GI_5803114-S  | rs2289239  | 2 | 2 | 86187643 | 95506  | 6.1949 | 0.3390 | 0.2360  | 5.6531 | CEU |
| IMMT      | GI_5803114-S  | rs6735014  | 2 | 2 | 86208071 | 75078  | 6.2408 | 0.3461 | 0.2360  | 5.6531 | CEU |
| IMMT      | GI_5803114-S  | rs12994838 | 2 | 2 | 86212963 | 70186  | 6.1949 | 0.3390 | -0.2360 | 5.6531 | CEU |
| IMMT      | GI_5803114-S  | rs3770075  | 2 | 2 | 86213636 | 69513  | 6.1949 | 0.3390 | -0.2360 | 5.6531 | CEU |
| IMMT      | GI_5803114-S  | rs10187150 | 2 | 2 | 86229393 | 53756  | 5.8989 | 0.3332 | 0.2418  | 5.6531 | CEU |
| IMMT      | GI_5803114-S  | rs715334   | 2 | 2 | 86233729 | 49420  | 6.0032 | 0.3291 | 0.2389  | 5.6531 | CEU |
| IMMT      | GI_5803114-S  | rs10184246 | 2 | 2 | 86252986 | 30163  | 6.0032 | 0.3291 | 0.2389  | 5.6531 | CEU |
| IMMT      | GI_5803114-S  | rs2241438  | 2 | 2 | 86271883 | 11266  | 6.0032 | 0.3291 | 0.2389  | 5.6531 | CEU |
| IMMT      | GI_5803114-S  | rs11395    | 2 | 2 | 86277265 | 5884   | 6.0032 | 0.3291 | 0.2389  | 5.6531 | CEU |
| IMMT      | GI_5803114-S  | rs8244     | 2 | 2 | 86283541 | 392    | 6.0032 | 0.3291 | -0.2389 | 5.6531 | CEU |
| IMMT      | GI_5803114-S  | rs7569853  | 2 | 2 | 86288801 | 5652   | 6.4202 | 0.3504 | -0.2580 | 5.6531 | CEU |
| IMMT      | GI_5803114-S  | rs6731535  | 2 | 2 | 86291771 | 8622   | 6.4202 | 0.3504 | 0.2580  | 5.6531 | CEU |
| IMMT      | GI_5803114-S  | rs12714170 | 2 | 2 | 86294727 | 11578  | 6.4202 | 0.3504 | 0.2580  | 5.6531 | CEU |
| IMMT      | GI_5803114-S  | rs6547660  | 2 | 2 | 86294829 | 11680  | 6.4202 | 0.3504 | 0.2580  | 5.6531 | CEU |
| IMMT      | GI_5803114-S  | rs12465983 | 2 | 2 | 86295604 | 12455  | 6.4202 | 0.3504 | 0.2580  | 5.6531 | CEU |
| IMMT      | GI_5803114-S  | rs7561589  | 2 | 2 | 86296893 | 13744  | 6.4202 | 0.3504 | 0.2580  | 5.6531 | CEU |
| IMMT      | GI_5803114-S  | rs1057893  | 2 | 2 | 86297326 | 14177  | 6.4202 | 0.3504 | -0.2580 | 5.6531 | CEU |
| IMMT      | GI_5803114-S  | rs6737950  | 2 | 2 | 86300263 | 17114  | 7.3934 | 0.4084 | 0.2627  | 5.6531 | CEU |
| IMMT      | GI_5803114-S  | rs3770067  | 2 | 2 | 86303729 | 20580  | 6.4202 | 0.3504 | 0.2580  | 5.6531 | CEU |
| IMMT      | GI_5803114-S  | rs6729732  | 2 | 2 | 86307091 | 23942  | 6.4202 | 0.3504 | 0.2580  | 5.6531 | CEU |
| IMMT      | GI_5803114-S  | rs12478097 | 2 | 2 | 86307619 | 24470  | 6.4202 | 0.3504 | 0.2580  | 5.6531 | CEU |
| IMMT      | GI_5803114-S  | rs2278083  | 2 | 2 | 86308377 | 25228  | 6.4202 | 0.3504 | 0.2580  | 5.6531 | CEU |
| IMMT      | GI_5803114-S  | rs12714171 | 2 | 2 | 86308748 | 25599  | 6.4202 | 0.3504 | -0.2580 | 5.6531 | CEU |
| IMMT      | GI_5803114-S  | rs2288115  | 2 | 2 | 86309732 | 26583  | 6.4202 | 0.3504 | 0.2580  | 5.6531 | CEU |
| IMMT      | GI_5803114-S  | rs2288113  | 2 | 2 | 86309949 | 26800  | 6.4202 | 0.3504 | -0.2580 | 5.6531 | CEU |
| IMMT      | GI_5803114-S  | rs12477274 | 2 | 2 | 86310443 | 27294  | 6.4202 | 0.3504 | -0.2580 | 5.6531 | CEU |
| IMMT      | GI_5803114-S  | rs6757387  | 2 | 2 | 86310567 | 27418  | 6.4202 | 0.3504 | 0.2580  | 5.6531 | CEU |
| IMMT      | GI_5803114-S  | rs6547661  | 2 | 2 | 86310877 | 27728  | 6.4202 | 0.3504 | -0.2580 | 5.6531 | CEU |
| IMMT      | GI_5803114-S  | rs7609008  | 2 | 2 | 86311542 | 28393  | 6.4202 | 0.3504 | 0.2580  | 5.6531 | CEU |
| IMMT      | GI_5803114-S  | rs3770065  | 2 | 2 | 86313039 | 29890  | 6.4202 | 0.3504 | 0.2580  | 5.6531 | CEU |
| IMMT      | GI_5803114-S  | rs6725372  | 2 | 2 | 86313381 | 30232  | 6.4202 | 0.3504 | -0.2580 | 5.6531 | CEU |
| IMMT      | GI_5803114-S  | rs7566721  | 2 | 2 | 86314114 | 30965  | 6.4202 | 0.3504 | 0.2580  | 5.6531 | CEU |
| IMMT      | GI_5803114-S  | rs10496318 | 2 | 2 | 86314471 | 31322  | 6.4202 | 0.3504 | 0.2580  | 5.6531 | CEU |
| IMMT      | GI_5803114-S  | rs2367203  | 2 | 2 | 86314595 | 31446  | 6.4202 | 0.3504 | -0.2580 | 5.6531 | CEU |
| IMMT      | GI_5803114-S  | rs3770062  | 2 | 2 | 86315405 | 32256  | 6.4202 | 0.3504 | -0.2580 | 5.6531 | CEU |
| IMMT      | GI_5803114-S  | rs2367204  | 2 | 2 | 86316069 | 32920  | 6.4202 | 0.3504 | -0.2580 | 5.6531 | CEU |
| IMMT      | GI_5803114-S  | rs6547663  | 2 | 2 | 86318096 | 34947  | 6.4202 | 0.3504 | -0.2580 | 5.6531 | CEU |
| IMMT      | GI_5803114-S  | rs3770060  | 2 | 2 | 86318547 | 35398  | 6.4202 | 0.3504 | -0.2580 | 5.6531 | CEU |
| IMMT      | GI_5803114-S  | rs6731995  | 2 | 2 | 86320043 | 36894  | 6.4202 | 0.3504 | -0.2580 | 5.6531 | CEU |
| IMMT      | GI_5803114-S  | rs17027013 | 2 | 2 | 86321727 | 38578  | 5.7873 | 0.3371 | -0.2548 | 5.6531 | CEU |
| IMMT      | GI_5803114-S  | rs12469762 | 2 | 2 | 86322933 | 39784  | 6.4202 | 0.3504 | 0.2580  | 5.6531 | CEU |
| IMMT      | GI_5803114-S  | rs10175330 | 2 | 2 | 86325772 | 42623  | 6.4202 | 0.3504 | 0.2580  | 5.6531 | CEU |
| IMMT      | GI_5803114-S  | rs7588325  | 2 | 2 | 86327231 | 44082  | 6.5487 | 0.3618 | -0.2596 | 5.6531 | CEU |
| IMMT      | GI_5803114-S  | rs11885380 | 2 | 2 | 86331260 | 48111  | 6.4202 | 0.3504 | -0.2580 | 5.6531 | CEU |
| IMMT      | GI_5803114-S  | rs12996308 | 2 | 2 | 86331590 | 48441  | 6.4202 | 0.3504 | -0.2580 | 5.6531 | CEU |
| IMMT      | GI_5803114-S  | rs12475079 | 2 | 2 | 86332867 | 49718  | 6.4202 | 0.3504 | 0.2580  | 5.6531 | CEU |
| IMMT      | GI_5803114-S  | rs12475126 | 2 | 2 | 86332990 | 49841  | 6.4202 | 0.3504 | 0.2580  | 5.6531 | CEU |
| IMMT      | GI_5803114-S  | rs11899254 | 2 | 2 | 86333165 | 50016  | 6.4202 | 0.3504 | 0.2580  | 5.6531 | CEU |
| IMMT      | GI_5803114-S  | rs12714172 | 2 | 2 | 86333360 | 50211  | 6.4202 | 0.3504 | 0.2580  | 5.6531 | CEU |
| IMMT      | GI_5803114-S  | rs9653569  | 2 | 2 | 86333731 | 50582  | 6.5266 | 0.3557 | 0.2536  | 5.6531 | CEU |
| IMMT      | GI_5803114-S  | rs9309632  | 2 | 2 | 86334318 | 51169  | 6.4202 | 0.3504 | -0.2580 | 5.6531 | CEU |
| IMMT      | GI_5803114-S  | rs4402761  | 2 | 2 | 86334603 | 51454  | 6.4202 | 0.3504 | 0.2580  | 5.6531 | CEU |
| IMMT      | GI_5803114-S  | rs4422155  | 2 | 2 | 86334677 | 51528  | 6.4202 | 0.3504 | -0.2580 | 5.6531 | CEU |
| IMMT      | GI_5803114-S  | rs4450596  | 2 | 2 | 86334689 | 51540  | 6.4202 | 0.3504 | -0.2580 | 5.6531 | CEU |

|           |               |            |   |   |           |       |        |        |         |        |     |
|-----------|---------------|------------|---|---|-----------|-------|--------|--------|---------|--------|-----|
| IMMT      | GI_5803114-S  | rs4374375  | 2 | 2 | 86334812  | 51663 | 6.4202 | 0.3504 | 0.2580  | 5.6531 | CEU |
| IMMT      | GI_5803114-S  | rs4544439  | 2 | 2 | 86334882  | 51733 | 6.4202 | 0.3504 | 0.2580  | 5.6531 | CEU |
| TSGA10    | GI_41281983-I | rs720229   | 2 | 2 | 99162791  | 53636 | 5.7427 | 0.3155 | 0.1193  | 5.4504 | CEU |
| TSGA10    | GI_41281983-I | rs13035311 | 2 | 2 | 99175840  | 40587 | 6.3801 | 0.3483 | 0.1240  | 5.4504 | CEU |
| TSGA10    | GI_41281983-I | rs10865029 | 2 | 2 | 99176816  | 39611 | 6.3801 | 0.3483 | 0.1240  | 5.4504 | CEU |
| TSGA10    | GI_41281983-I | rs1453563  | 2 | 2 | 99178785  | 37642 | 5.5815 | 0.3070 | -0.1135 | 5.4504 | CEU |
| TSGA10    | GI_41281983-I | rs13008496 | 2 | 2 | 99181629  | 34798 | 5.6177 | 0.3328 | -0.1176 | 5.4504 | CEU |
| TSGA10    | GI_41281983-I | rs11683188 | 2 | 2 | 99183030  | 33397 | 5.5815 | 0.3070 | -0.1135 | 5.4504 | CEU |
| TSGA10    | GI_41281983-I | rs4340581  | 2 | 2 | 99183543  | 32884 | 6.3801 | 0.3483 | 0.1240  | 5.4504 | CEU |
| TSGA10    | GI_41281983-I | rs6542864  | 2 | 2 | 99183741  | 32686 | 6.3801 | 0.3483 | 0.1240  | 5.4504 | CEU |
| TSGA10    | GI_41281983-I | rs6733285  | 2 | 2 | 99184093  | 32334 | 5.5815 | 0.3070 | -0.1135 | 5.4504 | CEU |
| TSGA10    | GI_41281983-I | rs7577477  | 2 | 2 | 99186811  | 29616 | 6.3801 | 0.3483 | 0.1240  | 5.4504 | CEU |
| TSGA10    | GI_41281983-I | rs11692699 | 2 | 2 | 99189175  | 27252 | 6.3801 | 0.3483 | -0.1240 | 5.4504 | CEU |
| TSGA10    | GI_41281983-I | rs12613624 | 2 | 2 | 99191259  | 25168 | 5.5815 | 0.3070 | -0.1135 | 5.4504 | CEU |
| TSGA10    | GI_41281983-I | rs11688004 | 2 | 2 | 99193570  | 22857 | 5.5815 | 0.3070 | 0.1135  | 5.4504 | CEU |
| TSGA10    | GI_41281983-I | rs6741772  | 2 | 2 | 99197479  | 18948 | 6.3801 | 0.3483 | 0.1240  | 5.4504 | CEU |
| TSGA10    | GI_41281983-I | rs6751927  | 2 | 2 | 99198693  | 17734 | 5.7154 | 0.3383 | -0.1276 | 5.4504 | CEU |
| TSGA10    | GI_41281983-I | rs1133977  | 2 | 2 | 99200502  | 15925 | 5.5815 | 0.3070 | 0.1135  | 5.4504 | CEU |
| TSGA10    | GI_41281983-I | rs11695379 | 2 | 2 | 99200679  | 15748 | 6.3801 | 0.3483 | -0.1240 | 5.4504 | CEU |
| TSGA10    | GI_41281983-I | rs4851187  | 2 | 2 | 99204378  | 12049 | 6.3801 | 0.3483 | 0.1240  | 5.4504 | CEU |
| TSGA10    | GI_41281983-I | rs4851188  | 2 | 2 | 99204416  | 12011 | 5.5815 | 0.3070 | -0.1135 | 5.4504 | CEU |
| TSGA10    | GI_41281983-I | rs7419947  | 2 | 2 | 99207868  | 8559  | 6.3801 | 0.3483 | -0.1240 | 5.4504 | CEU |
| TSGA10    | GI_41281983-I | rs9941561  | 2 | 2 | 99212347  | 4080  | 6.3801 | 0.3483 | 0.1240  | 5.4504 | CEU |
| TSGA10    | GI_41281983-I | rs13018891 | 2 | 2 | 99213617  | 2810  | 6.3801 | 0.3483 | 0.1240  | 5.4504 | CEU |
| TSGA10    | GI_41281983-I | rs11677247 | 2 | 2 | 99214876  | 1551  | 6.3801 | 0.3483 | 0.1240  | 5.4504 | CEU |
| TSGA10    | GI_41281983-I | rs6717723  | 2 | 2 | 99215448  | 979   | 6.3801 | 0.3483 | -0.1240 | 5.4504 | CEU |
| TSGA10    | GI_41281983-I | rs6717729  | 2 | 2 | 99215459  | 968   | 6.3801 | 0.3483 | -0.1240 | 5.4504 | CEU |
| TSGA10    | GI_41281983-I | rs11683107 | 2 | 2 | 99217753  | 1326  | 5.5815 | 0.3070 | -0.1135 | 5.4504 | CEU |
| TSGA10    | GI_41281983-I | rs6542865  | 2 | 2 | 99223039  | 6612  | 6.3801 | 0.3483 | 0.1240  | 5.4504 | CEU |
| TSGA10    | GI_41281983-I | rs12995473 | 2 | 2 | 99223402  | 6975  | 6.4142 | 0.3550 | 0.1254  | 5.4504 | CEU |
| TSGA10    | GI_41281983-I | rs11123765 | 2 | 2 | 99226582  | 10155 | 6.3801 | 0.3483 | -0.1240 | 5.4504 | CEU |
| TSGA10    | GI_41281983-I | rs4850897  | 2 | 2 | 99226937  | 10510 | 5.6475 | 0.3150 | 0.1149  | 5.4504 | CEU |
| TSGA10    | GI_41281983-I | rs2516832  | 2 | 2 | 99229786  | 13359 | 6.3801 | 0.3483 | -0.1240 | 5.4504 | CEU |
| TSGA10    | GI_41281983-I | rs2516834  | 2 | 2 | 99230051  | 13624 | 6.4808 | 0.3584 | 0.1258  | 5.4504 | CEU |
| TSGA10    | GI_41281983-I | rs2632260  | 2 | 2 | 99230108  | 13681 | 6.3801 | 0.3483 | -0.1240 | 5.4504 | CEU |
| TSGA10    | GI_41281983-I | rs2516827  | 2 | 2 | 99231083  | 14656 | 6.3801 | 0.3483 | 0.1240  | 5.4504 | CEU |
| TSGA10    | GI_41281983-I | rs2516829  | 2 | 2 | 99231719  | 15292 | 6.3801 | 0.3483 | -0.1240 | 5.4504 | CEU |
| TSGA10    | GI_41281983-I | rs2516830  | 2 | 2 | 99232220  | 15793 | 5.5815 | 0.3070 | -0.1135 | 5.4504 | CEU |
| TSGA10    | GI_41281983-I | rs2632283  | 2 | 2 | 99234518  | 18091 | 5.5815 | 0.3070 | -0.1135 | 5.4504 | CEU |
| TSGA10    | GI_41281983-I | rs2632277  | 2 | 2 | 99237503  | 21076 | 6.3801 | 0.3483 | 0.1240  | 5.4504 | CEU |
| TSGA10    | GI_41281983-I | rs2516835  | 2 | 2 | 99237649  | 21222 | 5.5815 | 0.3070 | -0.1135 | 5.4504 | CEU |
| TSGA10    | GI_41281983-I | rs2309581  | 2 | 2 | 99242810  | 26383 | 6.3801 | 0.3483 | -0.1240 | 5.4504 | CEU |
| TSGA10    | GI_41281983-I | rs6727749  | 2 | 2 | 99252108  | 35681 | 5.5815 | 0.3070 | 0.1135  | 5.4504 | CEU |
| TSGA10    | GI_41281983-I | rs13033012 | 2 | 2 | 99253667  | 37240 | 5.5650 | 0.3152 | -0.1152 | 5.4504 | CEU |
| TSGA10    | GI_41281983-I | rs8179690  | 2 | 2 | 99253818  | 37391 | 6.3801 | 0.3483 | -0.1240 | 5.4504 | CEU |
| TSGA10    | GI_41281983-I | rs2171359  | 2 | 2 | 99253878  | 37451 | 6.3801 | 0.3483 | 0.1240  | 5.4504 | CEU |
| TSGA10    | GI_41281983-I | rs11689265 | 2 | 2 | 99257785  | 41358 | 6.3801 | 0.3483 | 0.1240  | 5.4504 | CEU |
| TSGA10    | GI_41281983-I | rs13030961 | 2 | 2 | 99258038  | 41611 | 6.3801 | 0.3483 | 0.1240  | 5.4504 | CEU |
| TSGA10    | GI_41281983-I | rs11883676 | 2 | 2 | 99259332  | 42905 | 6.3801 | 0.3483 | 0.1240  | 5.4504 | CEU |
| TSGA10    | GI_41281983-I | rs6708576  | 2 | 2 | 99259826  | 43399 | 6.3801 | 0.3483 | -0.1240 | 5.4504 | CEU |
| TSGA10    | GI_41281983-I | rs6753063  | 2 | 2 | 99259987  | 43560 | 6.2814 | 0.3482 | 0.1214  | 5.4504 | CEU |
| TSGA10    | GI_41281983-I | rs6756650  | 2 | 2 | 99260318  | 43891 | 6.3227 | 0.3503 | -0.1247 | 5.4504 | CEU |
| TSGA10    | GI_41281983-I | rs7605843  | 2 | 2 | 99270412  | 53985 | 6.3801 | 0.3483 | 0.1240  | 5.4504 | CEU |
| TSGA10    | GI_41281983-I | rs13798    | 2 | 2 | 99272132  | 55705 | 6.3801 | 0.3483 | -0.1240 | 5.4504 | CEU |
| TSGA10    | GI_41281983-I | rs7349217  | 2 | 2 | 99273664  | 57237 | 6.3801 | 0.3483 | -0.1240 | 5.4504 | CEU |
| Hs.169006 | Hs.169006-S   | rs11123170 | 2 | 2 | 113695171 | 19072 | 7.4636 | 0.4008 | -0.8576 | 5.6893 | CEU |
| Hs.169006 | Hs.169006-S   | rs4849177  | 2 | 2 | 113698815 | 15428 | 7.4636 | 0.4008 | 0.8576  | 5.6893 | CEU |
| Hs.169006 | Hs.169006-S   | rs3748916  | 2 | 2 | 113700264 | 13979 | 6.4435 | 0.3515 | -0.8519 | 5.6893 | CEU |
| Hs.169006 | Hs.169006-S   | rs4849179  | 2 | 2 | 113701401 | 12842 | 7.4636 | 0.4008 | -0.8576 | 5.6893 | CEU |

|           |               |            |   |   |           |        |         |        |         |        |     |
|-----------|---------------|------------|---|---|-----------|--------|---------|--------|---------|--------|-----|
| Hs.169006 | Hs.169006-S   | rs2863243  | 2 | 2 | 113705498 | 8745   | 7.4636  | 0.4008 | 0.8576  | 5.6893 | CEU |
| LOC51240  | GI_31377759-S | rs13024726 | 2 | 2 | 190318310 | 142682 | 9.7022  | 0.4967 | -0.5296 | 5.6789 | CEU |
| LOC51240  | GI_31377759-S | rs10182631 | 2 | 2 | 190325465 | 135527 | 10.1166 | 0.5189 | 0.5183  | 5.6789 | CEU |
| LOC51240  | GI_31377759-S | rs6434355  | 2 | 2 | 190327029 | 133963 | 11.0965 | 0.5487 | -0.5216 | 5.6789 | CEU |
| LOC51240  | GI_31377759-S | rs6756040  | 2 | 2 | 190327587 | 133405 | 10.3679 | 0.5284 | 0.5157  | 5.6789 | CEU |
| LOC51240  | GI_31377759-S | rs4667295  | 2 | 2 | 190329896 | 131096 | 10.6870 | 0.5340 | 0.5167  | 5.6789 | CEU |
| LOC51240  | GI_31377759-S | rs6761923  | 2 | 2 | 190333105 | 127887 | 12.7592 | 0.6039 | 0.5509  | 5.6789 | CEU |
| LOC51240  | GI_31377759-S | rs9646811  | 2 | 2 | 190334084 | 126908 | 7.8847  | 0.4758 | -0.4901 | 5.6789 | CEU |
| LOC51240  | GI_31377759-S | rs7568449  | 2 | 2 | 190346560 | 114432 | 12.7592 | 0.6039 | -0.5509 | 5.6789 | CEU |
| LOC51240  | GI_31377759-S | rs2289226  | 2 | 2 | 190351711 | 109281 | 24.5172 | 0.8435 | -0.6138 | 5.6789 | CEU |
| LOC51240  | GI_31377759-S | rs4667297  | 2 | 2 | 190354502 | 106490 | 24.5126 | 0.8434 | -0.6139 | 5.6789 | CEU |
| LOC51240  | GI_31377759-S | rs893784   | 2 | 2 | 190361789 | 99203  | 24.5172 | 0.8435 | -0.6138 | 5.6789 | CEU |
| LOC51240  | GI_31377759-S | rs10931430 | 2 | 2 | 190367692 | 93300  | 24.5172 | 0.8435 | 0.6138  | 5.6789 | CEU |
| LOC51240  | GI_31377759-S | rs11679767 | 2 | 2 | 190371806 | 89186  | 24.5126 | 0.8434 | -0.6139 | 5.6789 | CEU |
| LOC51240  | GI_31377759-S | rs920427   | 2 | 2 | 190379463 | 81529  | 19.1277 | 0.7602 | -0.5643 | 5.6789 | CEU |
| LOC51240  | GI_31377759-S | rs16831873 | 2 | 2 | 190382404 | 78588  | 11.7728 | 0.5720 | 0.5463  | 5.6789 | CEU |
| LOC51240  | GI_31377759-S | rs7571089  | 2 | 2 | 190387299 | 73693  | 24.5126 | 0.8434 | 0.6139  | 5.6789 | CEU |
| LOC51240  | GI_31377759-S | rs1437891  | 2 | 2 | 190388214 | 72778  | 20.5633 | 0.7860 | 0.5723  | 5.6789 | CEU |
| LOC51240  | GI_31377759-S | rs10195109 | 2 | 2 | 190394697 | 66295  | 20.7484 | 0.7891 | 0.5957  | 5.6789 | CEU |
| LOC51240  | GI_31377759-S | rs6434365  | 2 | 2 | 190397927 | 63065  | 20.7484 | 0.7891 | -0.5957 | 5.6789 | CEU |
| LOC51240  | GI_31377759-S | rs11901295 | 2 | 2 | 190402284 | 58708  | 18.6048 | 0.7873 | -0.6147 | 5.6789 | CEU |
| LOC51240  | GI_31377759-S | rs7557519  | 2 | 2 | 190408693 | 52299  | 20.7484 | 0.7891 | 0.5957  | 5.6789 | CEU |
| LOC51240  | GI_31377759-S | rs12693557 | 2 | 2 | 190416443 | 44549  | 23.8990 | 0.8356 | 0.6111  | 5.6789 | CEU |
| LOC51240  | GI_31377759-S | rs2033746  | 2 | 2 | 190424958 | 36034  | 23.8990 | 0.8356 | 0.6111  | 5.6789 | CEU |
| LOC51240  | GI_31377759-S | rs1550388  | 2 | 2 | 190429286 | 31706  | 20.7484 | 0.7891 | -0.5957 | 5.6789 | CEU |
| LOC51240  | GI_31377759-S | rs2033870  | 2 | 2 | 190429336 | 31656  | 23.8990 | 0.8356 | -0.6111 | 5.6789 | CEU |
| LOC51240  | GI_31377759-S | rs1225101  | 2 | 2 | 190430927 | 30065  | 18.1417 | 0.7785 | -0.5997 | 5.6789 | CEU |
| LOC51240  | GI_31377759-S | rs1898560  | 2 | 2 | 190437833 | 23159  | 20.7484 | 0.7891 | 0.5957  | 5.6789 | CEU |
| LOC51240  | GI_31377759-S | rs4666783  | 2 | 2 | 190438486 | 22506  | 20.7484 | 0.7891 | 0.5957  | 5.6789 | CEU |
| LOC51240  | GI_31377759-S | rs10210345 | 2 | 2 | 190444992 | 16000  | 23.8990 | 0.8356 | 0.6111  | 5.6789 | CEU |
| LOC51240  | GI_31377759-S | rs2278591  | 2 | 2 | 190446010 | 14982  | 11.7728 | 0.5720 | -0.5463 | 5.6789 | CEU |
| LOC51240  | GI_31377759-S | rs6719224  | 2 | 2 | 190459777 | 1215   | 20.3080 | 0.7874 | 0.5947  | 5.6789 | CEU |
| LOC51240  | GI_31377759-S | rs1055091  | 2 | 2 | 190460649 | 343    | 23.8990 | 0.8356 | 0.6111  | 5.6789 | CEU |
| LOC51240  | GI_31377759-S | rs6942     | 2 | 2 | 190461917 | 925    | 23.8990 | 0.8356 | -0.6111 | 5.6789 | CEU |
| LOC51240  | GI_31377759-S | rs3791767  | 2 | 2 | 190465421 | 4429   | 20.7484 | 0.7891 | -0.5957 | 5.6789 | CEU |
| LOC51240  | GI_31377759-S | rs7591929  | 2 | 2 | 190468763 | 7771   | 23.8990 | 0.8356 | 0.6111  | 5.6789 | CEU |
| LOC51240  | GI_31377759-S | rs5742933  | 2 | 2 | 190474822 | 13830  | 20.2823 | 0.7869 | -0.5955 | 5.6789 | CEU |
| LOC51240  | GI_31377759-S | rs1899025  | 2 | 2 | 190475088 | 14096  | 23.8990 | 0.8356 | 0.6111  | 5.6789 | CEU |
| LOC51240  | GI_31377759-S | rs3791770  | 2 | 2 | 190499341 | 38349  | 20.7484 | 0.7891 | 0.5957  | 5.6789 | CEU |
| LOC51240  | GI_31377759-S | rs3791773  | 2 | 2 | 190508138 | 47146  | 20.7484 | 0.7891 | -0.5957 | 5.6789 | CEU |
| LOC51240  | GI_31377759-S | rs5743047  | 2 | 2 | 190510174 | 49182  | 11.7728 | 0.5720 | -0.5463 | 5.6789 | CEU |
| LOC51240  | GI_31377759-S | rs1233276  | 2 | 2 | 190510288 | 49296  | 13.5256 | 0.6468 | 0.5601  | 5.6789 | CEU |
| LOC51240  | GI_31377759-S | rs1233284  | 2 | 2 | 190515277 | 54285  | 23.8990 | 0.8356 | -0.6111 | 5.6789 | CEU |
| LOC51240  | GI_31377759-S | rs1233288  | 2 | 2 | 190516231 | 55239  | 23.8990 | 0.8356 | 0.6111  | 5.6789 | CEU |
| LOC51240  | GI_31377759-S | rs1233297  | 2 | 2 | 190519681 | 58689  | 23.8990 | 0.8356 | 0.6111  | 5.6789 | CEU |
| LOC51240  | GI_31377759-S | rs7577961  | 2 | 2 | 190519772 | 58780  | 19.6054 | 0.7750 | 0.5989  | 5.6789 | CEU |
| LOC51240  | GI_31377759-S | rs5743063  | 2 | 2 | 190519955 | 58963  | 20.2080 | 0.7857 | 0.5927  | 5.6789 | CEU |
| LOC51240  | GI_31377759-S | rs5743072  | 2 | 2 | 190522430 | 61438  | 11.9058 | 0.5765 | 0.5483  | 5.6789 | CEU |
| LOC51240  | GI_31377759-S | rs2017410  | 2 | 2 | 190525464 | 64472  | 18.7330 | 0.7834 | -0.6013 | 5.6789 | CEU |
| LOC51240  | GI_31377759-S | rs1233245  | 2 | 2 | 190526000 | 65008  | 20.1957 | 0.7913 | -0.5945 | 5.6789 | CEU |
| LOC51240  | GI_31377759-S | rs6753164  | 2 | 2 | 190527378 | 66386  | 11.9058 | 0.5765 | -0.5483 | 5.6789 | CEU |
| LOC51240  | GI_31377759-S | rs1233255  | 2 | 2 | 190531598 | 70606  | 11.7082 | 0.5699 | 0.5416  | 5.6789 | CEU |
| LOC51240  | GI_31377759-S | rs1233258  | 2 | 2 | 190532540 | 71548  | 6.0842  | 0.3333 | -0.4105 | 5.6789 | CEU |
| LOC51240  | GI_31377759-S | rs17806132 | 2 | 2 | 190533793 | 72801  | 8.7972  | 0.4657 | -0.5177 | 5.6789 | CEU |
| LOC51240  | GI_31377759-S | rs256546   | 2 | 2 | 190576669 | 115677 | 13.3557 | 0.6844 | 0.5548  | 5.6789 | CEU |
| LOC51240  | GI_31377759-S | rs12475694 | 2 | 2 | 190598114 | 137122 | 15.0772 | 0.6764 | 0.5551  | 5.6789 | CEU |
| LOC51240  | GI_31377759-S | rs12466395 | 2 | 2 | 190606204 | 145212 | 6.8258  | 0.3918 | -0.4672 | 5.6789 | CEU |
| HIBCH     | GI_37594468-A | rs12693565 | 2 | 2 | 190970398 | 75123  | 5.6108  | 0.3085 | 0.2703  | 5.3731 | CEU |
| HIBCH     | GI_37594468-A | rs2664251  | 2 | 2 | 190973173 | 77898  | 5.3774  | 0.3049 | 0.2802  | 5.3731 | CEU |

|           |               |            |   |   |           |        |         |        |         |        |     |
|-----------|---------------|------------|---|---|-----------|--------|---------|--------|---------|--------|-----|
| HIBCH     | GI_37594468-A | rs2664252  | 2 | 2 | 190973853 | 78578  | 5.4377  | 0.3037 | -0.2708 | 5.3731 | CEU |
| HIBCH     | GI_37594468-A | rs2664253  | 2 | 2 | 190974064 | 78789  | 5.4972  | 0.3025 | -0.2728 | 5.3731 | CEU |
| HIBCH     | GI_37594468-A | rs291447   | 2 | 2 | 191002511 | 107236 | 5.4283  | 0.3032 | 0.2731  | 5.3731 | CEU |
| HIBCH     | GI_37594468-A | rs291449   | 2 | 2 | 191002973 | 107698 | 5.4972  | 0.3025 | 0.2728  | 5.3731 | CEU |
| HIBCH     | GI_37594468-A | rs291458   | 2 | 2 | 191006987 | 111712 | 5.4972  | 0.3025 | 0.2728  | 5.3731 | CEU |
| HIBCH     | GI_37594468-A | rs291460   | 2 | 2 | 191007091 | 111816 | 5.4972  | 0.3025 | -0.2728 | 5.3731 | CEU |
| HIBCH     | GI_37594468-A | rs291466   | 2 | 2 | 191009981 | 114706 | 5.6108  | 0.3085 | 0.2703  | 5.3731 | CEU |
| HIBCH     | GI_37594468-A | rs291468   | 2 | 2 | 191013625 | 118350 | 5.4265  | 0.3031 | 0.2830  | 5.3731 | CEU |
| HIBCH     | GI_37594468-A | rs291472   | 2 | 2 | 191016111 | 120836 | 5.6586  | 0.3111 | -0.2819 | 5.3731 | CEU |
| HIBCH     | GI_37594468-A | rs172366   | 2 | 2 | 191016739 | 121464 | 5.6586  | 0.3111 | 0.2819  | 5.3731 | CEU |
| HIBCH     | GI_37594468-A | rs291427   | 2 | 2 | 191019565 | 124290 | 5.7630  | 0.3166 | 0.2787  | 5.3731 | CEU |
| HIBCH     | GI_37594468-A | rs291429   | 2 | 2 | 191023447 | 128172 | 5.7630  | 0.3166 | -0.2787 | 5.3731 | CEU |
| HIBCH     | GI_37594468-A | rs6434387  | 2 | 2 | 191031475 | 136200 | 5.6586  | 0.3111 | 0.2819  | 5.3731 | CEU |
| Hs.431200 | Hs.431200-S   | rs12469091 | 2 | 2 | 200950241 | 55730  | 6.1125  | 0.3347 | 0.1880  | 6.0803 | CEU |
| Hs.431200 | Hs.431200-S   | rs4233994  | 2 | 2 | 200954717 | 51254  | 6.1125  | 0.3347 | -0.1880 | 6.0803 | CEU |
| PPIL3     | GI_19557635-A | rs3851973  | 2 | 2 | 201558384 | 2927   | 9.6962  | 0.4965 | 0.6042  | 7.1183 | CEU |
| PPIL3     | GI_19557635-A | rs11892119 | 2 | 2 | 201561618 | 307    | 9.4780  | 0.4938 | 0.6014  | 7.1183 | CEU |
| PPIL3     | GI_19557635-A | rs7562391  | 2 | 2 | 201561672 | 361    | 9.6962  | 0.4965 | -0.6042 | 7.1183 | CEU |
| PPIL3     | GI_19557635-A | rs7606251  | 2 | 2 | 201562240 | 929    | 14.9112 | 0.6656 | 0.6598  | 7.1183 | CEU |
| PPIL3     | GI_19557635-A | rs2136600  | 2 | 2 | 201567851 | 6540   | 14.3459 | 0.6504 | -0.6214 | 7.1183 | CEU |
| PPIL3     | GI_19557635-A | rs4035022  | 2 | 2 | 201569858 | 8547   | 9.3155  | 0.4813 | 0.5603  | 7.1183 | CEU |
| PPIL3     | GI_19557635-A | rs6747253  | 2 | 2 | 201573921 | 12610  | 9.1129  | 0.4789 | 0.5560  | 7.1183 | CEU |
| PPIL3     | GI_19557635-A | rs13384245 | 2 | 2 | 201586443 | 25132  | 9.7524  | 0.4987 | 0.5576  | 7.1183 | CEU |
| PPIL3     | GI_19557635-A | rs10204787 | 2 | 2 | 201587653 | 26342  | 9.7524  | 0.4987 | 0.5576  | 7.1183 | CEU |
| PPIL3     | GI_19557635-A | rs7588993  | 2 | 2 | 201589372 | 28061  | 12.9896 | 0.6240 | -0.6242 | 7.1183 | CEU |
| PPIL3     | GI_19557635-A | rs6435066  | 2 | 2 | 201591529 | 30218  | 13.2872 | 0.6200 | -0.6060 | 7.1183 | CEU |
| PPIL3     | GI_19557635-A | rs13396213 | 2 | 2 | 201593744 | 32433  | 13.2872 | 0.6200 | -0.6060 | 7.1183 | CEU |
| PPIL3     | GI_19557635-A | rs11894842 | 2 | 2 | 201599051 | 37740  | 13.2872 | 0.6200 | 0.6060  | 7.1183 | CEU |
| PPIL3     | GI_19557635-A | rs4381763  | 2 | 2 | 201602494 | 41183  | 8.9625  | 0.4668 | 0.5344  | 7.1183 | CEU |
| PPIL3     | GI_19557635-A | rs2307358  | 2 | 2 | 201611163 | 49852  | 8.9123  | 0.4956 | -0.5611 | 7.1183 | CEU |
| PPIL3     | GI_19557635-A | rs2307362  | 2 | 2 | 201611343 | 50032  | 9.7524  | 0.4987 | -0.5576 | 7.1183 | CEU |
| PPIL3     | GI_19557635-A | rs4622700  | 2 | 2 | 201618619 | 57308  | 9.7524  | 0.4987 | -0.5576 | 7.1183 | CEU |
| PPIL3     | GI_19557635-A | rs9288314  | 2 | 2 | 201619679 | 58368  | 9.7524  | 0.4987 | -0.5576 | 7.1183 | CEU |
| PPIL3     | GI_19557635-A | rs10183261 | 2 | 2 | 201623182 | 61871  | 8.7964  | 0.4657 | 0.5374  | 7.1183 | CEU |
| PPIL3     | GI_19557635-A | rs13408964 | 2 | 2 | 201630478 | 69167  | 9.7524  | 0.4987 | -0.5576 | 7.1183 | CEU |
| PPIL3     | GI_19557635-A | rs10167387 | 2 | 2 | 201634124 | 72813  | 13.2872 | 0.6200 | 0.6060  | 7.1183 | CEU |
| PPIL3     | GI_19557635-A | rs10205561 | 2 | 2 | 201635210 | 73899  | 8.9625  | 0.4668 | -0.5344 | 7.1183 | CEU |
| PPIL3     | GI_19557635-A | rs13429609 | 2 | 2 | 201641763 | 80452  | 9.7524  | 0.4987 | -0.5576 | 7.1183 | CEU |
| PPIL3     | GI_19557635-A | rs13392371 | 2 | 2 | 201641927 | 80616  | 9.7524  | 0.4987 | 0.5576  | 7.1183 | CEU |
| PPIL3     | GI_19557635-A | rs11892372 | 2 | 2 | 201644989 | 83678  | 13.2872 | 0.6200 | 0.6060  | 7.1183 | CEU |
| PPIL3     | GI_19557635-A | rs2307357  | 2 | 2 | 201649598 | 88287  | 8.9625  | 0.4668 | -0.5344 | 7.1183 | CEU |
| PPIL3     | GI_19557635-A | rs3087357  | 2 | 2 | 201653871 | 92560  | 8.9625  | 0.4668 | 0.5344  | 7.1183 | CEU |
| PPIL3     | GI_19557635-A | rs874358   | 2 | 2 | 201655108 | 93797  | 8.9625  | 0.4668 | 0.5344  | 7.1183 | CEU |
| PPIL3     | GI_19557635-A | rs16836477 | 2 | 2 | 201678963 | 117652 | 9.7524  | 0.4987 | -0.5576 | 7.1183 | CEU |
| PPIL3     | GI_19557635-A | rs3901120  | 2 | 2 | 201689036 | 127725 | 13.2872 | 0.6200 | 0.6060  | 7.1183 | CEU |
| PPIL3     | GI_19557635-A | rs3900738  | 2 | 2 | 201689309 | 127998 | 8.9625  | 0.4668 | -0.5344 | 7.1183 | CEU |
| PPIL3     | GI_19557635-A | rs6719992  | 2 | 2 | 201697484 | 136173 | 9.7524  | 0.4987 | -0.5576 | 7.1183 | CEU |
| PPIL3     | GI_19557635-A | rs16836568 | 2 | 2 | 201705454 | 144143 | 8.9625  | 0.4668 | -0.5344 | 7.1183 | CEU |
| PPIL3     | GI_19557635-A | rs13405753 | 2 | 2 | 201707183 | 145872 | 9.7524  | 0.4987 | -0.5576 | 7.1183 | CEU |
| PPIL3     | GI_19557635-A | rs10197103 | 2 | 2 | 201710799 | 149488 | 9.7524  | 0.4987 | -0.5576 | 7.1183 | CEU |
| PPIL3     | GI_19557635-A | rs16836591 | 2 | 2 | 201720449 | 159138 | 13.2872 | 0.6200 | -0.6060 | 7.1183 | CEU |
| PPIL3     | GI_19557635-A | rs10185136 | 2 | 2 | 201729807 | 168496 | 13.2872 | 0.6200 | -0.6060 | 7.1183 | CEU |
| PPIL3     | GI_19557635-A | rs10197833 | 2 | 2 | 201729972 | 168661 | 13.2872 | 0.6200 | 0.6060  | 7.1183 | CEU |
| PPIL3     | GI_19557635-A | rs13384791 | 2 | 2 | 201736670 | 175359 | 9.7524  | 0.4987 | -0.5576 | 7.1183 | CEU |
| PPIL3     | GI_19557635-A | rs13417843 | 2 | 2 | 201738935 | 177624 | 9.7524  | 0.4987 | -0.5576 | 7.1183 | CEU |
| PPIL3     | GI_19557635-A | rs10207746 | 2 | 2 | 201741924 | 180613 | 9.7524  | 0.4987 | 0.5576  | 7.1183 | CEU |
| PPIL3     | GI_19557635-A | rs13389349 | 2 | 2 | 201746124 | 184813 | 9.7524  | 0.4987 | 0.5576  | 7.1183 | CEU |
| PPIL3     | GI_19557635-A | rs6737556  | 2 | 2 | 201749584 | 188273 | 9.7524  | 0.4987 | -0.5576 | 7.1183 | CEU |
| PPIL3     | GI_19557635-A | rs7590522  | 2 | 2 | 201750294 | 188983 | 9.7524  | 0.4987 | -0.5576 | 7.1183 | CEU |

|           |               |            |   |   |           |        |         |        |         |        |     |
|-----------|---------------|------------|---|---|-----------|--------|---------|--------|---------|--------|-----|
| PPIL3     | GI_19557635-A | rs16842071 | 2 | 2 | 201757236 | 195925 | 13.2872 | 0.6200 | 0.6060  | 7.1183 | CEU |
| PPIL3     | GI_19557635-A | rs10194168 | 2 | 2 | 201767943 | 206632 | 9.0237  | 0.4752 | -0.5475 | 7.1183 | CEU |
| PPIL3     | GI_19557635-A | rs10194347 | 2 | 2 | 201767986 | 206675 | 9.5624  | 0.4972 | 0.5608  | 7.1183 | CEU |
| PPIL3     | GI_19557635-A | rs10205971 | 2 | 2 | 201783707 | 222396 | 9.7524  | 0.4987 | -0.5576 | 7.1183 | CEU |
| PPIL3     | GI_19557635-A | rs2110728  | 2 | 2 | 201791184 | 229873 | 9.7524  | 0.4987 | -0.5576 | 7.1183 | CEU |
| PPIL3     | GI_19557635-A | rs13410282 | 2 | 2 | 201796530 | 235219 | 13.2872 | 0.6200 | 0.6060  | 7.1183 | CEU |
| PPIL3     | GI_19557635-A | rs7583529  | 2 | 2 | 201813744 | 252433 | 11.1574 | 0.5509 | 0.5747  | 7.1183 | CEU |
| PPIL3     | GI_19557635-A | rs6728771  | 2 | 2 | 201817913 | 256602 | 11.1574 | 0.5509 | 0.5747  | 7.1183 | CEU |
| PPIL3     | GI_19557635-A | rs12620435 | 2 | 2 | 201821285 | 259974 | 10.7246 | 0.5354 | -0.8469 | 7.1183 | CEU |
| PPIL3     | GI_19557635-A | rs16836710 | 2 | 2 | 201825351 | 264040 | 10.3487 | 0.5340 | -0.5630 | 7.1183 | CEU |
| PPIL3     | GI_19557635-A | rs7560613  | 2 | 2 | 201828516 | 267205 | 10.8971 | 0.5479 | 0.5738  | 7.1183 | CEU |
| PPIL3     | GI_19557635-A | rs7573256  | 2 | 2 | 201828676 | 267365 | 11.1574 | 0.5509 | -0.5747 | 7.1183 | CEU |
| PPIL3     | GI_19557635-A | rs10190751 | 2 | 2 | 201831602 | 270291 | 11.1574 | 0.5509 | 0.5747  | 7.1183 | CEU |
| PPIL3     | GI_19557635-A | rs4487072  | 2 | 2 | 201833804 | 272493 | 11.1574 | 0.5509 | -0.5747 | 7.1183 | CEU |
| PPIL3     | GI_19557635-A | rs1981726  | 2 | 2 | 201834206 | 272895 | 10.6016 | 0.5309 | -0.5631 | 7.1183 | CEU |
| PPIL3     | GI_19557635-A | rs7573529  | 2 | 2 | 201836132 | 274821 | 11.1574 | 0.5509 | -0.5747 | 7.1183 | CEU |
| PPIL3     | GI_19557635-A | rs12104442 | 2 | 2 | 201839462 | 278151 | 11.1574 | 0.5509 | 0.5747  | 7.1183 | CEU |
| PPIL3     | GI_19557635-A | rs12721505 | 2 | 2 | 201839744 | 278433 | 8.1166  | 0.4799 | 0.4832  | 7.1183 | CEU |
| PPIL3     | GI_19557635-A | rs12105811 | 2 | 2 | 201841751 | 280440 | 7.6774  | 0.4106 | 0.5078  | 7.1183 | CEU |
| PPIL3     | GI_19557635-A | rs719125   | 2 | 2 | 201843366 | 282055 | 11.1574 | 0.5509 | 0.5747  | 7.1183 | CEU |
| PPIL3     | GI_19557635-A | rs2041766  | 2 | 2 | 201847001 | 285690 | 11.1574 | 0.5509 | 0.5747  | 7.1183 | CEU |
| PPIL3     | GI_19557635-A | rs4482462  | 2 | 2 | 201847253 | 285942 | 11.1574 | 0.5509 | 0.5747  | 7.1183 | CEU |
| FLJ40432  | GI_22749084-S | rs2254137  | 2 | 2 | 208269534 | 174891 | 5.9341  | 0.3255 | -0.2178 | 5.6298 | CEU |
| FLJ40432  | GI_22749084-S | rs2551941  | 2 | 2 | 208317649 | 126776 | 6.0462  | 0.3313 | 0.2224  | 5.6298 | CEU |
| FLJ40432  | GI_22749084-S | rs2952768  | 2 | 2 | 208319740 | 124685 | 6.0462  | 0.3313 | 0.2224  | 5.6298 | CEU |
| FLJ40432  | GI_22749084-S | rs2248061  | 2 | 2 | 208320565 | 123860 | 6.8171  | 0.3700 | 0.2741  | 5.6298 | CEU |
| FLJ40432  | GI_22749084-S | rs2709386  | 2 | 2 | 208322540 | 121885 | 6.0462  | 0.3313 | 0.2224  | 5.6298 | CEU |
| FLJ40432  | GI_22749084-S | rs2709409  | 2 | 2 | 208336739 | 107686 | 6.0462  | 0.3313 | 0.2224  | 5.6298 | CEU |
| NDUFA10   | GI_33519462-S | rs11684940 | 2 | 2 | 240610381 | 10070  | 6.1024  | 0.3342 | -0.2429 | 6.0411 | CEU |
| PASK      | GI_35038527-S | rs6437235  | 2 | 2 | 241742520 | 23448  | 6.3194  | 0.3604 | 0.6967  | 6.0493 | CEU |
| STK25     | GI_34147665-S | rs1064767  | 2 | 2 | 241887327 | 267284 | 7.5050  | 0.4027 | -0.4426 | 5.8852 | CEU |
| STK25     | GI_34147665-S | rs15129    | 2 | 2 | 241888966 | 265645 | 8.6389  | 0.4710 | -0.4597 | 5.8852 | CEU |
| Hs.311977 | Hs.311977-S   | rs2289795  | 2 | 2 | 241897555 | 206709 | 5.8841  | 0.3424 | -0.2489 | 5.625  | CEU |
| Hs.311977 | Hs.311977-S   | rs11678750 | 2 | 2 | 241920909 | 183355 | 8.5294  | 0.4542 | -0.2477 | 5.625  | CEU |
| Hs.311977 | Hs.311977-S   | rs3755324  | 2 | 2 | 241923210 | 181054 | 8.5116  | 0.4534 | 0.2475  | 5.625  | CEU |
| Hs.311977 | Hs.311977-S   | rs11675957 | 2 | 2 | 241928782 | 175482 | 8.6489  | 0.4536 | 0.2473  | 5.625  | CEU |
| Hs.311977 | Hs.311977-S   | rs6705421  | 2 | 2 | 241932662 | 171602 | 6.2005  | 0.3392 | 0.2119  | 5.625  | CEU |
| Hs.311977 | Hs.311977-S   | rs7592138  | 2 | 2 | 241938905 | 165359 | 6.2856  | 0.3436 | -0.2215 | 5.625  | CEU |
| Hs.311977 | Hs.311977-S   | rs6724257  | 2 | 2 | 241942387 | 161877 | 8.4753  | 0.4461 | 0.2504  | 5.625  | CEU |
| Hs.311977 | Hs.311977-S   | rs6704615  | 2 | 2 | 241948723 | 155541 | 6.2005  | 0.3392 | -0.2119 | 5.625  | CEU |
| Hs.311977 | Hs.311977-S   | rs10933547 | 2 | 2 | 241950433 | 153831 | 5.8697  | 0.3222 | 0.2096  | 5.625  | CEU |
| Hs.311977 | Hs.311977-S   | rs10933548 | 2 | 2 | 241954827 | 149437 | 8.2828  | 0.4553 | -0.2484 | 5.625  | CEU |
| Hs.311977 | Hs.311977-S   | rs12612578 | 2 | 2 | 241956650 | 147614 | 6.1548  | 0.3856 | -0.2229 | 5.625  | CEU |
| Hs.311977 | Hs.311977-S   | rs6743226  | 2 | 2 | 241956962 | 147302 | 5.8697  | 0.3222 | -0.2096 | 5.625  | CEU |
| Hs.311977 | Hs.311977-S   | rs4675966  | 2 | 2 | 241964332 | 139932 | 5.8697  | 0.3222 | 0.2096  | 5.625  | CEU |
| Hs.311977 | Hs.311977-S   | rs7599888  | 2 | 2 | 241968023 | 136241 | 5.8697  | 0.3222 | 0.2096  | 5.625  | CEU |
| Hs.311977 | Hs.311977-S   | rs7565186  | 2 | 2 | 241969812 | 134452 | 6.2005  | 0.3392 | 0.2119  | 5.625  | CEU |
| Hs.311977 | Hs.311977-S   | rs1106523  | 2 | 2 | 241971529 | 132735 | 8.6489  | 0.4536 | 0.2473  | 5.625  | CEU |
| STK25     | GI_34147665-S | rs7568     | 2 | 2 | 242011733 | 142878 | 10.6307 | 0.5320 | -0.4719 | 5.8852 | CEU |
| STK25     | GI_34147665-S | rs16843642 | 2 | 2 | 242071369 | 83242  | 10.6307 | 0.5320 | 0.4719  | 5.8852 | CEU |
| STK25     | GI_34147665-S | rs3771561  | 2 | 2 | 242073694 | 80917  | 10.6307 | 0.5320 | 0.4719  | 5.8852 | CEU |
| STK25     | GI_34147665-S | rs16842449 | 2 | 2 | 242074969 | 79642  | 10.6307 | 0.5320 | -0.4719 | 5.8852 | CEU |
| STK25     | GI_34147665-S | rs3771566  | 2 | 2 | 242078289 | 76322  | 10.6307 | 0.5320 | -0.4719 | 5.8852 | CEU |
| STK25     | GI_34147665-S | rs7423605  | 2 | 2 | 242083601 | 71010  | 10.3724 | 0.5286 | 0.4689  | 5.8852 | CEU |
| STK25     | GI_34147665-S | rs12612038 | 2 | 2 | 242089675 | 64936  | 10.6307 | 0.5320 | -0.4719 | 5.8852 | CEU |
| STK25     | GI_34147665-S | rs16843671 | 2 | 2 | 242094348 | 60263  | 9.7480  | 0.5108 | 0.4293  | 5.8852 | CEU |
| STK25     | GI_34147665-S | rs3755400  | 2 | 2 | 242099785 | 54826  | 11.2842 | 0.5616 | -0.4884 | 5.8852 | CEU |
| STK25     | GI_34147665-S | rs3771569  | 2 | 2 | 242102596 | 52015  | 10.6307 | 0.5320 | -0.4719 | 5.8852 | CEU |
| STK25     | GI_34147665-S | rs3821281  | 2 | 2 | 242105330 | 49281  | 10.7557 | 0.5492 | -0.4697 | 5.8852 | CEU |

|           |               |            |   |   |           |        |         |        |         |        |     |
|-----------|---------------|------------|---|---|-----------|--------|---------|--------|---------|--------|-----|
| STK25     | GI_34147665-S | rs764081   | 2 | 2 | 242114131 | 40480  | 10.6345 | 0.5321 | 0.4220  | 5.8852 | CEU |
| STK25     | GI_34147665-S | rs2240482  | 2 | 2 | 242125011 | 29600  | 12.6598 | 0.6205 | 0.4796  | 5.8852 | CEU |
| LOC132001 | GI_34147617-S | rs303854   | 3 | 3 | 11860815  | 27016  | 13.6796 | 0.6316 | -0.4121 | 5.7137 | CEU |
| LOC132001 | GI_34147617-S | rs392621   | 3 | 3 | 11861365  | 27566  | 11.0812 | 0.5482 | -0.3936 | 5.7137 | CEU |
| LOC132001 | GI_34147617-S | rs420537   | 3 | 3 | 11861751  | 27952  | 11.0812 | 0.5482 | -0.3936 | 5.7137 | CEU |
| LOC132001 | GI_34147617-S | rs404171   | 3 | 3 | 11862351  | 28552  | 9.6228  | 0.5536 | -0.3898 | 5.7137 | CEU |
| LOC132001 | GI_34147617-S | rs420599   | 3 | 3 | 11863259  | 29460  | 11.6859 | 0.6314 | 0.4013  | 5.7137 | CEU |
| LOC132001 | GI_34147617-S | rs440746   | 3 | 3 | 11863556  | 29757  | 8.8318  | 0.4613 | 0.3526  | 5.7137 | CEU |
| LOC132001 | GI_34147617-S | rs430373   | 3 | 3 | 11864365  | 30566  | 8.7121  | 0.4621 | -0.3524 | 5.7137 | CEU |
| LOC132001 | GI_34147617-S | rs1498090  | 3 | 3 | 11865647  | 31848  | 7.4455  | 0.3999 | 0.3227  | 5.7137 | CEU |
| ABHD6     | GI_34147685-S | rs11130670 | 3 | 3 | 58633494  | 378180 | 6.2899  | 0.3438 | -0.5720 | 5.4873 | CEU |
| ABHD6     | GI_34147685-S | rs1373404  | 3 | 3 | 58633996  | 378682 | 6.2899  | 0.3438 | 0.5720  | 5.4873 | CEU |
| ABHD6     | GI_34147685-S | rs1484447  | 3 | 3 | 58644608  | 389294 | 6.2899  | 0.3438 | 0.5720  | 5.4873 | CEU |
| LOC401075 | GI_42656649-S | rs13093220 | 3 | 3 | 75853445  | 10487  | 5.5998  | 0.3424 | -0.1295 | 5.4913 | CEU |
| LOC401075 | GI_42656649-S | rs2118755  | 3 | 3 | 75868920  | 4988   | 5.5722  | 0.3203 | -0.1236 | 5.4913 | CEU |
| NMNAT3    | GI_31342325-S | rs4640518  | 3 | 3 | 140902944 | 141081 | 8.4309  | 0.4558 | 0.5137  | 6.5984 | CEU |
| NMNAT3    | GI_31342325-S | rs7648532  | 3 | 3 | 140912635 | 150772 | 7.4898  | 0.4020 | -0.4868 | 6.5984 | CEU |
| Hs.333841 | Hs.333841-S   | rs9289971  | 3 | 3 | 157872649 | 119    | 6.9067  | 0.3795 | 0.2963  | 5.82   | CEU |
| Hs.135624 | Hs.135624-S   | rs7636818  | 3 | 3 | 180504817 | 66943  | 7.6584  | 0.4098 | -0.2431 | 5.663  | CEU |
| Hs.135624 | Hs.135624-S   | rs9837033  | 3 | 3 | 180505476 | 66284  | 7.3333  | 0.3947 | -0.2268 | 5.663  | CEU |
| Hs.135624 | Hs.135624-S   | rs6794192  | 3 | 3 | 180510515 | 61245  | 7.1616  | 0.3919 | -0.2253 | 5.663  | CEU |
| Hs.135624 | Hs.135624-S   | rs6804758  | 3 | 3 | 180553156 | 18604  | 6.0686  | 0.3325 | 0.2020  | 5.663  | CEU |
| Hs.135624 | Hs.135624-S   | rs9822116  | 3 | 3 | 180557317 | 14443  | 6.0686  | 0.3325 | 0.2020  | 5.663  | CEU |
| Hs.135624 | Hs.135624-S   | rs7620017  | 3 | 3 | 180558165 | 13595  | 7.0882  | 0.3831 | -0.2189 | 5.663  | CEU |
| Hs.135624 | Hs.135624-S   | rs2111534  | 3 | 3 | 180573474 | 1714   | 6.0686  | 0.3325 | 0.2020  | 5.663  | CEU |
| Hs.135624 | Hs.135624-S   | rs9865666  | 3 | 3 | 180575691 | 3931   | 6.4119  | 0.3599 | 0.2149  | 5.663  | CEU |
| Hs.135624 | Hs.135624-S   | rs6784871  | 3 | 3 | 180576500 | 4740   | 6.9329  | 0.3808 | -0.2175 | 5.663  | CEU |
| Hs.135624 | Hs.135624-S   | rs3853153  | 3 | 3 | 180589721 | 17961  | 7.0882  | 0.3831 | -0.2189 | 5.663  | CEU |
| Hs.135624 | Hs.135624-S   | rs2287209  | 3 | 3 | 180592437 | 20677  | 7.0882  | 0.3831 | 0.2189  | 5.663  | CEU |
| Hs.135624 | Hs.135624-S   | rs6443645  | 3 | 3 | 180603389 | 31629  | 6.9742  | 0.3776 | -0.2238 | 5.663  | CEU |
| Hs.135624 | Hs.135624-S   | rs3961211  | 3 | 3 | 180608098 | 36338  | 6.9742  | 0.3776 | 0.2238  | 5.663  | CEU |
| Hs.135624 | Hs.135624-S   | rs3853149  | 3 | 3 | 180612058 | 40298  | 6.7130  | 0.4036 | 0.2345  | 5.663  | CEU |
| Hs.135624 | Hs.135624-S   | rs6443647  | 3 | 3 | 180612357 | 40597  | 6.9742  | 0.3776 | 0.2238  | 5.663  | CEU |
| Hs.135624 | Hs.135624-S   | rs6803314  | 3 | 3 | 180622675 | 50915  | 6.9742  | 0.3776 | 0.2238  | 5.663  | CEU |
| Hs.135624 | Hs.135624-S   | rs6443648  | 3 | 3 | 180627142 | 55382  | 5.9270  | 0.3252 | 0.2023  | 5.663  | CEU |
| Hs.135624 | Hs.135624-S   | rs7618348  | 3 | 3 | 180627441 | 55681  | 5.8565  | 0.3215 | 0.2081  | 5.663  | CEU |
| Hs.135624 | Hs.135624-S   | rs3806682  | 3 | 3 | 180628541 | 56781  | 5.9926  | 0.3286 | 0.2095  | 5.663  | CEU |
| Hs.135624 | Hs.135624-S   | rs2024497  | 3 | 3 | 180629873 | 58113  | 5.9926  | 0.3286 | -0.2095 | 5.663  | CEU |
| LOC151963 | GI_31341922-S | rs12485900 | 3 | 3 | 194106481 | 108914 | 8.8570  | 0.4624 | -0.6770 | 6.183  | CEU |
| LOC151963 | GI_31341922-S | rs9869202  | 3 | 3 | 194107892 | 110325 | 8.8570  | 0.4624 | -0.6770 | 6.183  | CEU |
| LOC151963 | GI_31341922-S | rs10937560 | 3 | 3 | 194110118 | 112551 | 8.8570  | 0.4624 | 0.6770  | 6.183  | CEU |
| FLJ90036  | GI_31559781-S | rs6826849  | 4 | 4 | 87615     | 58253  | 5.9715  | 0.3471 | 0.2095  | 5.4462 | CEU |
| FLJ90036  | GI_31559781-S | rs6814287  | 4 | 4 | 112323    | 33545  | 6.7942  | 0.3689 | 0.2280  | 5.4462 | CEU |
| FLJ90036  | GI_31559781-S | rs10004179 | 4 | 4 | 121548    | 24320  | 6.7942  | 0.3689 | 0.2280  | 5.4462 | CEU |
| FLJ90036  | GI_31559781-S | rs6599295  | 4 | 4 | 126942    | 18926  | 6.7942  | 0.3689 | 0.2280  | 5.4462 | CEU |
| FLJ90036  | GI_31559781-S | rs11735742 | 4 | 4 | 132550    | 13318  | 6.7942  | 0.3689 | -0.2280 | 5.4462 | CEU |
| FLJ90036  | GI_31559781-S | rs6599306  | 4 | 4 | 133439    | 12429  | 6.0296  | 0.3305 | -0.2316 | 5.4462 | CEU |
| FLJ90036  | GI_31559781-S | rs6830247  | 4 | 4 | 140683    | 5185   | 6.7942  | 0.3689 | -0.2280 | 5.4462 | CEU |
| FLJ34443  | GI_31341870-S | rs4130791  | 4 | 4 | 1404514   | 25127  | 7.8130  | 0.4168 | -0.3534 | 6.4007 | CEU |
| PP784     | GI_31559785-S | rs4689034  | 4 | 4 | 6815238   | 12521  | 7.3155  | 0.3939 | 0.2846  | 6.1381 | CEU |
| PP784     | GI_31559785-S | rs4493618  | 4 | 4 | 6819275   | 8484   | 7.3155  | 0.3939 | 0.2846  | 6.1381 | CEU |
| FLJ23235  | GI_13376422-S | rs2254075  | 4 | 4 | 38852749  | 61707  | 7.8981  | 0.4207 | -0.4547 | 5.8887 | CEU |
| FLJ23235  | GI_13376422-S | rs2254212  | 4 | 4 | 38854408  | 63366  | 7.8981  | 0.4207 | 0.4547  | 5.8887 | CEU |
| FLJ23235  | GI_13376422-S | rs2711976  | 4 | 4 | 38857352  | 66310  | 7.8981  | 0.4207 | 0.4547  | 5.8887 | CEU |
| FLJ23235  | GI_13376422-S | rs2566094  | 4 | 4 | 38858940  | 67898  | 6.9258  | 0.4026 | -0.4753 | 5.8887 | CEU |
| FLJ23235  | GI_13376422-S | rs2566097  | 4 | 4 | 38859902  | 68860  | 6.2015  | 0.3704 | -0.3980 | 5.8887 | CEU |
| FLJ23235  | GI_13376422-S | rs2711981  | 4 | 4 | 38861824  | 70782  | 7.8981  | 0.4207 | -0.4547 | 5.8887 | CEU |
| FLJ23235  | GI_13376422-S | rs2712012  | 4 | 4 | 38899702  | 108660 | 6.0119  | 0.3493 | 0.4653  | 5.8887 | CEU |
| Hs.164463 | Hs.164463-S   | rs2246770  | 4 | 4 | 54397811  | 45576  | 10.7848 | 0.5376 | 0.7467  | 8.2781 | CEU |

|           |               |            |   |   |          |        |         |        |         |        |     |
|-----------|---------------|------------|---|---|----------|--------|---------|--------|---------|--------|-----|
| Hs.164463 | Hs.164463-S   | rs13126826 | 4 | 4 | 54403213 | 40174  | 11.1306 | 0.5499 | 0.7455  | 8.2781 | CEU |
| LOC375399 | GI_37540365-S | rs1048447  | 4 | 4 | 68312238 | 103237 | 6.0242  | 0.3302 | 0.1494  | 5.895  | CEU |
| LOC401135 | GI_42657007-S | rs1048447  | 4 | 4 | 68312238 | 104593 | 5.9608  | 0.3269 | 0.2245  | 5.6373 | CEU |
| LOC375399 | GI_37540365-S | rs3796715  | 4 | 4 | 68321842 | 93633  | 6.0242  | 0.3302 | -0.1494 | 5.895  | CEU |
| LOC401135 | GI_42657007-S | rs3796715  | 4 | 4 | 68321842 | 94989  | 5.9608  | 0.3269 | -0.2245 | 5.6373 | CEU |
| LOC375399 | GI_37540365-S | rs17088553 | 4 | 4 | 68341603 | 73872  | 6.0242  | 0.3302 | -0.1494 | 5.895  | CEU |
| LOC401135 | GI_42657007-S | rs17088553 | 4 | 4 | 68341603 | 75228  | 5.9608  | 0.3269 | -0.2245 | 5.6373 | CEU |
| LOC375399 | GI_37540365-S | rs6840867  | 4 | 4 | 68343820 | 71655  | 6.0242  | 0.3302 | -0.1494 | 5.895  | CEU |
| LOC401135 | GI_42657007-S | rs6840867  | 4 | 4 | 68343820 | 73011  | 5.9608  | 0.3269 | -0.2245 | 5.6373 | CEU |
| LOC375399 | GI_37540365-S | rs10010188 | 4 | 4 | 68363158 | 52317  | 6.0242  | 0.3302 | -0.1494 | 5.895  | CEU |
| LOC401135 | GI_42657007-S | rs10010188 | 4 | 4 | 68363158 | 53673  | 5.9608  | 0.3269 | -0.2245 | 5.6373 | CEU |
| LOC375399 | GI_37540365-S | rs12643686 | 4 | 4 | 68366583 | 48892  | 6.5027  | 0.3595 | -0.1571 | 5.895  | CEU |
| LOC401135 | GI_42657007-S | rs12643686 | 4 | 4 | 68366583 | 50248  | 5.7324  | 0.3196 | -0.2239 | 5.6373 | CEU |
| LOC375399 | GI_37540365-S | rs10518040 | 4 | 4 | 68368551 | 46924  | 6.0242  | 0.3302 | 0.1494  | 5.895  | CEU |
| LOC401135 | GI_42657007-S | rs10518040 | 4 | 4 | 68368551 | 48280  | 5.9608  | 0.3269 | 0.2245  | 5.6373 | CEU |
| LOC375399 | GI_37540365-S | rs17088563 | 4 | 4 | 68383208 | 32267  | 6.0558  | 0.3517 | -0.1570 | 5.895  | CEU |
| LOC375399 | GI_37540365-S | rs17634475 | 4 | 4 | 68384274 | 31201  | 6.0242  | 0.3302 | 0.1494  | 5.895  | CEU |
| LOC401135 | GI_42657007-S | rs17634475 | 4 | 4 | 68384274 | 32557  | 5.9608  | 0.3269 | 0.2245  | 5.6373 | CEU |
| LOC375399 | GI_37540365-S | rs12640455 | 4 | 4 | 68387605 | 27870  | 6.0242  | 0.3302 | -0.1494 | 5.895  | CEU |
| LOC401135 | GI_42657007-S | rs12640455 | 4 | 4 | 68387605 | 29226  | 5.9608  | 0.3269 | -0.2245 | 5.6373 | CEU |
| LOC375399 | GI_37540365-S | rs17635222 | 4 | 4 | 68415033 | 442    | 6.0242  | 0.3302 | 0.1494  | 5.895  | CEU |
| LOC401135 | GI_42657007-S | rs17635222 | 4 | 4 | 68415033 | 1798   | 5.9608  | 0.3269 | 0.2245  | 5.6373 | CEU |
| LOC375399 | GI_37540365-S | rs12651577 | 4 | 4 | 68424184 | 8709   | 6.0242  | 0.3302 | -0.1494 | 5.895  | CEU |
| LOC401135 | GI_42657007-S | rs12651577 | 4 | 4 | 68424184 | 7353   | 5.9608  | 0.3269 | -0.2245 | 5.6373 | CEU |
| LOC375399 | GI_37540365-S | rs1843593  | 4 | 4 | 68427764 | 12289  | 6.0242  | 0.3302 | 0.1494  | 5.895  | CEU |
| LOC401135 | GI_42657007-S | rs1843593  | 4 | 4 | 68427764 | 10933  | 5.9608  | 0.3269 | 0.2245  | 5.6373 | CEU |
| UGT2B17   | GI_4507820-S  | rs12511559 | 4 | 4 | 69212508 | 19321  | 7.0879  | 0.3831 | 1.2217  | 6.6258 | CEU |
| UGT2B7    | GI_4507824-S  | rs12511559 | 4 | 4 | 69212508 | 946548 | 6.5190  | 0.3553 | 0.9016  | 5.9676 | CEU |
| UGT2B17   | GI_4507820-S  | rs7435827  | 4 | 4 | 69243710 | 11881  | 7.0879  | 0.3831 | 1.2217  | 6.6258 | CEU |
| UGT2B7    | GI_4507824-S  | rs7435827  | 4 | 4 | 69243710 | 915346 | 6.5190  | 0.3553 | 0.9016  | 5.9676 | CEU |
| UGT2B17   | GI_4507820-S  | rs7442348  | 4 | 4 | 69253957 | 22128  | 7.0879  | 0.3831 | -1.2217 | 6.6258 | CEU |
| UGT2B11   | GI_4507822-S  | rs7442348  | 4 | 4 | 69253957 | 993166 | 6.6690  | 0.3627 | -1.0003 | 6.5991 | CEU |
| UGT2B7    | GI_4507824-S  | rs7442348  | 4 | 4 | 69253957 | 905099 | 6.5190  | 0.3553 | -0.9016 | 5.9676 | CEU |
| UGT2B17   | GI_4507820-S  | rs3100645  | 4 | 4 | 69671954 | 440125 | 13.1178 | 0.6149 | -1.5934 | 6.6258 | CEU |
| UGT2B11   | GI_4507822-S  | rs3100645  | 4 | 4 | 69671954 | 575169 | 13.7501 | 0.6336 | -1.3588 | 6.5991 | CEU |
| UGT2B7    | GI_4507824-S  | rs3100645  | 4 | 4 | 69671954 | 487102 | 12.9334 | 0.6093 | -1.2136 | 5.9676 | CEU |
| THAP6     | GI_37059751-S | rs1395359  | 4 | 4 | 76645091 | 165988 | 6.2267  | 0.3406 | 0.3371  | 5.8486 | CEU |
| THAP6     | GI_37059751-S | rs6841171  | 4 | 4 | 76645835 | 165244 | 6.2267  | 0.3406 | 0.3371  | 5.8486 | CEU |
| THAP6     | GI_37059751-S | rs949611   | 4 | 4 | 76660548 | 150531 | 6.2267  | 0.3406 | 0.3371  | 5.8486 | CEU |
| THAP6     | GI_37059751-S | rs786688   | 4 | 4 | 76678614 | 132465 | 6.2267  | 0.3406 | 0.3371  | 5.8486 | CEU |
| THAP6     | GI_37059751-S | rs1676917  | 4 | 4 | 76704508 | 106571 | 6.2267  | 0.3406 | 0.3371  | 5.8486 | CEU |
| THAP6     | GI_37059751-S | rs1351092  | 4 | 4 | 76705402 | 105677 | 6.2267  | 0.3406 | -0.3371 | 5.8486 | CEU |
| THAP6     | GI_37059751-S | rs7677609  | 4 | 4 | 76710166 | 100913 | 6.2267  | 0.3406 | -0.3371 | 5.8486 | CEU |
| THAP6     | GI_37059751-S | rs786684   | 4 | 4 | 76711844 | 99235  | 6.2267  | 0.3406 | -0.3371 | 5.8486 | CEU |
| THAP6     | GI_37059751-S | rs1389443  | 4 | 4 | 76711949 | 99130  | 6.1722  | 0.3426 | 0.3383  | 5.8486 | CEU |
| THAP6     | GI_37059751-S | rs786682   | 4 | 4 | 76714584 | 96495  | 6.1653  | 0.3423 | -0.3382 | 5.8486 | CEU |
| THAP6     | GI_37059751-S | rs1585662  | 4 | 4 | 76730991 | 80088  | 6.2267  | 0.3406 | 0.3371  | 5.8486 | CEU |
| THAP6     | GI_37059751-S | rs13130737 | 4 | 4 | 76734387 | 76692  | 6.1839  | 0.3639 | 0.3486  | 5.8486 | CEU |
| THAP6     | GI_37059751-S | rs11099595 | 4 | 4 | 76736972 | 74107  | 6.2267  | 0.3406 | -0.3371 | 5.8486 | CEU |
| THAP6     | GI_37059751-S | rs6814729  | 4 | 4 | 76739355 | 71724  | 6.2267  | 0.3406 | -0.3371 | 5.8486 | CEU |
| THAP6     | GI_37059751-S | rs1478174  | 4 | 4 | 76750368 | 60711  | 6.2247  | 0.3405 | -0.3322 | 5.8486 | CEU |
| THAP6     | GI_37059751-S | rs1580297  | 4 | 4 | 76760965 | 50114  | 6.7475  | 0.4054 | -0.3994 | 5.8486 | CEU |
| THAP6     | GI_37059751-S | rs1046662  | 4 | 4 | 76761762 | 49317  | 6.2247  | 0.3405 | 0.3322  | 5.8486 | CEU |
| THAP6     | GI_37059751-S | rs1841932  | 4 | 4 | 76761938 | 49141  | 6.2247  | 0.3405 | 0.3322  | 5.8486 | CEU |
| THAP6     | GI_37059751-S | rs6841882  | 4 | 4 | 76770924 | 40155  | 6.2247  | 0.3405 | -0.3322 | 5.8486 | CEU |
| THAP6     | GI_37059751-S | rs6833496  | 4 | 4 | 76773164 | 37915  | 6.2247  | 0.3405 | -0.3322 | 5.8486 | CEU |
| THAP6     | GI_37059751-S | rs11735018 | 4 | 4 | 76782250 | 28829  | 6.2247  | 0.3405 | 0.3322  | 5.8486 | CEU |
| THAP6     | GI_37059751-S | rs1841934  | 4 | 4 | 76788755 | 22324  | 6.2247  | 0.3405 | 0.3322  | 5.8486 | CEU |
| THAP6     | GI_37059751-S | rs6835579  | 4 | 4 | 76793632 | 17447  | 6.2247  | 0.3405 | 0.3322  | 5.8486 | CEU |

|           |               |            |   |   |           |        |         |        |         |        |     |
|-----------|---------------|------------|---|---|-----------|--------|---------|--------|---------|--------|-----|
| THAP6     | GI_37059751-S | rs7664140  | 4 | 4 | 76795815  | 15264  | 6.2247  | 0.3405 | 0.3322  | 5.8486 | CEU |
| THAP6     | GI_37059751-S | rs1817387  | 4 | 4 | 76803397  | 7682   | 6.2247  | 0.3405 | 0.3322  | 5.8486 | CEU |
| ASAH      | GI_30794501-S | rs6532046  | 4 | 4 | 77210018  | 10928  | 6.4532  | 0.3520 | 0.4530  | 5.6786 | CEU |
| ASAH      | GI_30794501-S | rs6826085  | 4 | 4 | 77227408  | 28318  | 6.1651  | 0.3374 | 0.3555  | 5.6786 | CEU |
| ASAH      | GI_30794501-S | rs17001247 | 4 | 4 | 77227470  | 28380  | 7.4269  | 0.3991 | 0.4582  | 5.6786 | CEU |
| ASAH      | GI_30794501-S | rs3796484  | 4 | 4 | 77231693  | 32603  | 7.5113  | 0.4084 | 0.4651  | 5.6786 | CEU |
| ASAH      | GI_30794501-S | rs2242470  | 4 | 4 | 77235867  | 36777  | 6.3309  | 0.3610 | 0.4517  | 5.6786 | CEU |
| ASAH      | GI_30794501-S | rs1857821  | 4 | 4 | 77239158  | 40068  | 7.4269  | 0.3991 | -0.4582 | 5.6786 | CEU |
| ASAH      | GI_30794501-S | rs4859578  | 4 | 4 | 77242395  | 43305  | 6.8043  | 0.3694 | -0.4426 | 5.6786 | CEU |
| ASAH      | GI_30794501-S | rs2271528  | 4 | 4 | 77246015  | 46925  | 5.8507  | 0.3258 | 0.4261  | 5.6786 | CEU |
| ASAH      | GI_30794501-S | rs4859580  | 4 | 4 | 77250859  | 51769  | 6.9917  | 0.3784 | 0.4276  | 5.6786 | CEU |
| ASAH      | GI_30794501-S | rs10031733 | 4 | 4 | 77256496  | 57406  | 7.4269  | 0.3991 | -0.4582 | 5.6786 | CEU |
| ASAH      | GI_30794501-S | rs10021434 | 4 | 4 | 77260474  | 61384  | 7.4825  | 0.4017 | 0.4079  | 5.6786 | CEU |
| ASAH      | GI_30794501-S | rs6847815  | 4 | 4 | 77266415  | 67325  | 7.4269  | 0.3991 | 0.4582  | 5.6786 | CEU |
| ASAH      | GI_30794501-S | rs2276886  | 4 | 4 | 77285607  | 86517  | 5.8896  | 0.3232 | 0.4365  | 5.6786 | CEU |
| Hs.119946 | Hs.119946-S   | rs17013974 | 4 | 4 | 89559909  | 49653  | 7.5610  | 0.4053 | 0.1772  | 6.5139 | CEU |
| Hs.119946 | Hs.119946-S   | rs17013978 | 4 | 4 | 89560376  | 49186  | 7.5610  | 0.4053 | -0.1772 | 6.5139 | CEU |
| Hs.212658 | Hs.212658-S   | rs17027585 | 4 | 4 | 99708239  | 13433  | 6.6179  | 0.3652 | -0.5064 | 6.1531 | CEU |
| PPA2      | GI_31881619-A | rs2647242  | 4 | 4 | 106637351 | 11068  | 7.8232  | 0.4285 | 0.5765  | 6.7274 | CEU |
| PPA2      | GI_31881619-A | rs924282   | 4 | 4 | 106639721 | 8698   | 8.6071  | 0.4518 | 0.5658  | 6.7274 | CEU |
| PPA2      | GI_31881619-A | rs924283   | 4 | 4 | 106639769 | 8650   | 8.6071  | 0.4518 | 0.5658  | 6.7274 | CEU |
| PPA2      | GI_31881619-A | rs11932428 | 4 | 4 | 106644740 | 3679   | 10.0827 | 0.5114 | -0.5879 | 6.7274 | CEU |
| PPA2      | GI_31881619-A | rs11932512 | 4 | 4 | 106644958 | 3461   | 8.4857  | 0.4705 | -0.5545 | 6.7274 | CEU |
| PPA2      | GI_31881619-A | rs13108489 | 4 | 4 | 106650729 | 2310   | 15.3073 | 0.6888 | -0.6622 | 6.7274 | CEU |
| KIAA1627  | GI_34147341-S | rs4834700  | 4 | 4 | 120021831 | 32623  | 5.7885  | 0.3225 | -0.2503 | 5.6662 | CEU |
| LOC132321 | GI_27735074-S | rs7687562  | 4 | 4 | 130097504 | 293707 | 5.7832  | 0.3319 | 0.4130  | 5.7819 | CEU |
| LOC132321 | GI_27735074-S | rs4975274  | 4 | 4 | 130135681 | 255530 | 6.3936  | 0.3490 | 0.4194  | 5.7819 | CEU |
| LOC132321 | GI_27735074-S | rs2162126  | 4 | 4 | 130136681 | 254530 | 6.4760  | 0.3581 | -0.4332 | 5.7819 | CEU |
| LOC132321 | GI_27735074-S | rs318502   | 4 | 4 | 130159100 | 232111 | 6.3936  | 0.3490 | -0.4194 | 5.7819 | CEU |
| LOC132321 | GI_27735074-S | rs1668289  | 4 | 4 | 130184644 | 206567 | 6.2396  | 0.3412 | -0.3805 | 5.7819 | CEU |
| LOC132321 | GI_27735074-S | rs318543   | 4 | 4 | 130193860 | 197351 | 6.2396  | 0.3412 | -0.3805 | 5.7819 | CEU |
| LOC132321 | GI_27735074-S | rs1216152  | 4 | 4 | 130198727 | 192484 | 6.2396  | 0.3412 | -0.3805 | 5.7819 | CEU |
| LOC132321 | GI_27735074-S | rs10032000 | 4 | 4 | 130220762 | 170449 | 5.8063  | 0.3189 | -0.3642 | 5.7819 | CEU |
| LOC132321 | GI_27735074-S | rs1699387  | 4 | 4 | 130389103 | 2108   | 6.1941  | 0.3389 | 0.3625  | 5.7819 | CEU |
| LOC132321 | GI_27735074-S | rs337263   | 4 | 4 | 130391270 | 59     | 6.1941  | 0.3389 | 0.3625  | 5.7819 | CEU |
| LOC132321 | GI_27735074-S | rs1699380  | 4 | 4 | 130392186 | 975    | 6.1941  | 0.3389 | 0.3625  | 5.7819 | CEU |
| LOC132321 | GI_27735074-S | rs426521   | 4 | 4 | 130393360 | 2149   | 6.1941  | 0.3389 | 0.3625  | 5.7819 | CEU |
| LOC132321 | GI_27735074-S | rs389376   | 4 | 4 | 130393784 | 2573   | 6.1941  | 0.3389 | -0.3625 | 5.7819 | CEU |
| LOC132321 | GI_27735074-S | rs390260   | 4 | 4 | 130394196 | 2985   | 6.1941  | 0.3389 | -0.3625 | 5.7819 | CEU |
| LOC132321 | GI_27735074-S | rs391396   | 4 | 4 | 130395258 | 4047   | 6.1941  | 0.3389 | 0.3625  | 5.7819 | CEU |
| LOC132321 | GI_27735074-S | rs474794   | 4 | 4 | 130396279 | 5068   | 6.1941  | 0.3389 | -0.3625 | 5.7819 | CEU |
| LOC132321 | GI_27735074-S | rs1709419  | 4 | 4 | 130396518 | 5307   | 6.1941  | 0.3389 | 0.3625  | 5.7819 | CEU |
| LOC132321 | GI_27735074-S | rs395864   | 4 | 4 | 130407696 | 16485  | 6.1941  | 0.3389 | 0.3625  | 5.7819 | CEU |
| LOC132321 | GI_27735074-S | rs337275   | 4 | 4 | 130412074 | 20863  | 6.0648  | 0.3370 | -0.3488 | 5.7819 | CEU |
| LOC132321 | GI_27735074-S | rs1757923  | 4 | 4 | 130416275 | 25064  | 6.1941  | 0.3389 | -0.3625 | 5.7819 | CEU |
| LOC132321 | GI_27735074-S | rs1709421  | 4 | 4 | 130416584 | 25373  | 6.4434  | 0.3565 | 0.3752  | 5.7819 | CEU |
| DCTD      | GI_4503276-S  | rs6834968  | 4 | 4 | 184186001 | 837    | 7.3766  | 0.4133 | -0.2844 | 5.971  | CEU |
| DCTD      | GI_4503276-S  | rs6835318  | 4 | 4 | 184186014 | 824    | 8.0315  | 0.4380 | 0.2836  | 5.971  | CEU |
| DCTD      | GI_4503276-S  | rs7677967  | 4 | 4 | 184186281 | 557    | 8.3087  | 0.4564 | -0.2926 | 5.971  | CEU |
| DCTD      | GI_4503276-S  | rs7277     | 4 | 4 | 184186662 | 176    | 8.5960  | 0.4513 | 0.2932  | 5.971  | CEU |
| Hs.5855   | Hs.5855-S     | rs1058337  | 5 | 5 | 488021    | 45708  | 6.3327  | 0.3775 | -0.8013 | 5.7468 | CEU |
| Hs.5855   | Hs.5855-S     | rs17563576 | 5 | 5 | 613476    | 79747  | 5.9753  | 0.3324 | 0.6426  | 5.7468 | CEU |
| Hs.26039  | Hs.26039-S    | rs6869047  | 5 | 5 | 10703794  | 6193   | 12.5567 | 0.6106 | -0.5657 | 6.0577 | CEU |
| Hs.26039  | Hs.26039-S    | rs6875096  | 5 | 5 | 10704986  | 5001   | 13.9187 | 0.6449 | -0.5948 | 6.0577 | CEU |
| Hs.26039  | Hs.26039-S    | rs6894331  | 5 | 5 | 10705117  | 4870   | 10.0237 | 0.5413 | 0.5998  | 6.0577 | CEU |
| Hs.26039  | Hs.26039-S    | rs6898416  | 5 | 5 | 10705313  | 4674   | 12.0965 | 0.6024 | 0.5921  | 6.0577 | CEU |
| Hs.26039  | Hs.26039-S    | rs3822410  | 5 | 5 | 10707769  | 2218   | 11.8835 | 0.5757 | 0.5581  | 6.0577 | CEU |
| Hs.26039  | Hs.26039-S    | rs3733758  | 5 | 5 | 10708842  | 1145   | 13.6963 | 0.6451 | 0.6084  | 6.0577 | CEU |
| Hs.26039  | Hs.26039-S    | rs3733761  | 5 | 5 | 10709162  | 825    | 10.8694 | 0.5948 | 0.6323  | 6.0577 | CEU |

|           |               |            |   |   |           |        |         |        |         |        |     |
|-----------|---------------|------------|---|---|-----------|--------|---------|--------|---------|--------|-----|
| Hs.26039  | Hs.26039-S    | rs3733762  | 5 | 5 | 10709186  | 801    | 12.9384 | 0.6429 | 0.6223  | 6.0577 | CEU |
| Hs.26039  | Hs.26039-S    | rs2279327  | 5 | 5 | 10709785  | 202    | 14.3226 | 0.6498 | 0.6198  | 6.0577 | CEU |
| Hs.26039  | Hs.26039-S    | rs2279325  | 5 | 5 | 10710194  | 207    | 13.5592 | 0.6478 | 0.6257  | 6.0577 | CEU |
| Hs.26039  | Hs.26039-S    | rs1109383  | 5 | 5 | 10714120  | 4133   | 13.9948 | 0.6471 | -0.6191 | 6.0577 | CEU |
| Hs.26039  | Hs.26039-S    | rs1107818  | 5 | 5 | 10714928  | 4941   | 14.0540 | 0.6487 | -0.6227 | 6.0577 | CEU |
| Hs.26039  | Hs.26039-S    | rs7712435  | 5 | 5 | 10716402  | 6415   | 14.3226 | 0.6498 | -0.6198 | 6.0577 | CEU |
| Hs.26039  | Hs.26039-S    | rs11954194 | 5 | 5 | 10718259  | 8272   | 9.4651  | 0.5058 | 0.5965  | 6.0577 | CEU |
| Hs.506072 | Hs.506072-S   | rs6451535  | 5 | 5 | 40723788  | 138673 | 6.2348  | 0.3410 | -0.2420 | 5.6336 | CEU |
| Hs.506072 | Hs.506072-S   | rs7726237  | 5 | 5 | 40724309  | 138152 | 6.2348  | 0.3410 | -0.2420 | 5.6336 | CEU |
| Hs.506072 | Hs.506072-S   | rs10060234 | 5 | 5 | 40725753  | 136708 | 6.2348  | 0.3410 | 0.2420  | 5.6336 | CEU |
| Hs.506072 | Hs.506072-S   | rs7708680  | 5 | 5 | 40733708  | 128753 | 5.9920  | 0.3332 | -0.2397 | 5.6336 | CEU |
| Hs.506072 | Hs.506072-S   | rs13355305 | 5 | 5 | 40735896  | 126565 | 6.7128  | 0.4036 | 0.2628  | 5.6336 | CEU |
| Hs.506072 | Hs.506072-S   | rs6414889  | 5 | 5 | 40738153  | 124308 | 6.2348  | 0.3410 | -0.2420 | 5.6336 | CEU |
| Hs.506072 | Hs.506072-S   | rs6414891  | 5 | 5 | 40740242  | 122219 | 6.0791  | 0.3427 | 0.2443  | 5.6336 | CEU |
| Hs.506072 | Hs.506072-S   | rs434778   | 5 | 5 | 40762253  | 100208 | 6.2893  | 0.3486 | -0.2443 | 5.6336 | CEU |
| Hs.506072 | Hs.506072-S   | rs447810   | 5 | 5 | 40762558  | 99903  | 6.2348  | 0.3410 | -0.2420 | 5.6336 | CEU |
| Hs.506072 | Hs.506072-S   | rs249414   | 5 | 5 | 40769451  | 93010  | 6.2188  | 0.3450 | -0.2436 | 5.6336 | CEU |
| Hs.506072 | Hs.506072-S   | rs171605   | 5 | 5 | 40776880  | 85581  | 6.1197  | 0.3399 | -0.2419 | 5.6336 | CEU |
| Hs.506072 | Hs.506072-S   | rs249422   | 5 | 5 | 40778299  | 84162  | 6.2348  | 0.3410 | -0.2420 | 5.6336 | CEU |
| Hs.506072 | Hs.506072-S   | rs249425   | 5 | 5 | 40788522  | 73939  | 6.2348  | 0.3410 | 0.2420  | 5.6336 | CEU |
| Hs.506072 | Hs.506072-S   | rs29744    | 5 | 5 | 40789742  | 72719  | 6.2348  | 0.3410 | -0.2420 | 5.6336 | CEU |
| Hs.482037 | Hs.482037-S   | rs6867927  | 5 | 5 | 43495733  | 55533  | 6.1227  | 0.3553 | -0.2021 | 6.0359 | CEU |
| TINP1     | GI_21359901-S | rs1048167  | 5 | 5 | 74053255  | 52264  | 7.1669  | 0.3868 | 0.3044  | 6.1543 | CEU |
| TINP1     | GI_21359901-S | rs16872220 | 5 | 5 | 74054530  | 50989  | 6.8440  | 0.3817 | 0.3101  | 6.1543 | CEU |
| TINP1     | GI_21359901-S | rs6877188  | 5 | 5 | 74067281  | 38238  | 7.1669  | 0.3868 | -0.3044 | 6.1543 | CEU |
| TINP1     | GI_21359901-S | rs16872231 | 5 | 5 | 74067872  | 37647  | 7.1669  | 0.3868 | -0.3044 | 6.1543 | CEU |
| TINP1     | GI_21359901-S | rs7713812  | 5 | 5 | 74068653  | 36866  | 7.0187  | 0.3850 | -0.3023 | 6.1543 | CEU |
| TINP1     | GI_21359901-S | rs6453076  | 5 | 5 | 74069457  | 36062  | 7.1669  | 0.3868 | -0.3044 | 6.1543 | CEU |
| TINP1     | GI_21359901-S | rs7732843  | 5 | 5 | 74070001  | 35518  | 7.1669  | 0.3868 | -0.3044 | 6.1543 | CEU |
| TINP1     | GI_21359901-S | rs16872235 | 5 | 5 | 74073142  | 32377  | 7.1669  | 0.3868 | -0.3044 | 6.1543 | CEU |
| TINP1     | GI_21359901-S | rs6453079  | 5 | 5 | 74077085  | 28434  | 7.1775  | 0.3926 | 0.3067  | 6.1543 | CEU |
| TINP1     | GI_21359901-S | rs6873998  | 5 | 5 | 74082412  | 23107  | 7.1669  | 0.3868 | 0.3044  | 6.1543 | CEU |
| TINP1     | GI_21359901-S | rs16872242 | 5 | 5 | 74083192  | 22327  | 7.1669  | 0.3868 | -0.3044 | 6.1543 | CEU |
| TINP1     | GI_21359901-S | rs6898684  | 5 | 5 | 74083719  | 21800  | 7.1669  | 0.3868 | -0.3044 | 6.1543 | CEU |
| TINP1     | GI_21359901-S | rs6873912  | 5 | 5 | 74083906  | 21613  | 7.1669  | 0.3868 | -0.3044 | 6.1543 | CEU |
| TINP1     | GI_21359901-S | rs6884338  | 5 | 5 | 74086027  | 19492  | 7.1669  | 0.3868 | -0.3044 | 6.1543 | CEU |
| TINP1     | GI_21359901-S | rs957680   | 5 | 5 | 74090965  | 14554  | 7.1669  | 0.3868 | 0.3044  | 6.1543 | CEU |
| TINP1     | GI_21359901-S | rs7705519  | 5 | 5 | 74092269  | 13250  | 6.5213  | 0.3604 | -0.2869 | 6.1543 | CEU |
| TINP1     | GI_21359901-S | rs10515192 | 5 | 5 | 74093470  | 12049  | 7.1669  | 0.3868 | -0.3044 | 6.1543 | CEU |
| TINP1     | GI_21359901-S | rs10515194 | 5 | 5 | 74095607  | 9912   | 7.1669  | 0.3868 | -0.3044 | 6.1543 | CEU |
| TINP1     | GI_21359901-S | rs6882035  | 5 | 5 | 74101577  | 3942   | 7.1669  | 0.3868 | 0.3044  | 6.1543 | CEU |
| TINP1     | GI_21359901-S | rs16872259 | 5 | 5 | 74104530  | 989    | 7.1669  | 0.3868 | 0.3044  | 6.1543 | CEU |
| TINP1     | GI_21359901-S | rs10515199 | 5 | 5 | 74135390  | 29871  | 7.5288  | 0.4038 | 0.3567  | 6.1543 | CEU |
| TINP1     | GI_21359901-S | rs6881400  | 5 | 5 | 74152776  | 47257  | 7.0418  | 0.3861 | -0.3045 | 6.1543 | CEU |
| TINP1     | GI_21359901-S | rs16872323 | 5 | 5 | 74170498  | 64979  | 7.1669  | 0.3868 | -0.3044 | 6.1543 | CEU |
| TINP1     | GI_21359901-S | rs9765469  | 5 | 5 | 74171955  | 66436  | 6.4966  | 0.3592 | -0.2955 | 6.1543 | CEU |
| TINP1     | GI_21359901-S | rs16872345 | 5 | 5 | 74185234  | 79715  | 7.1669  | 0.3868 | -0.3044 | 6.1543 | CEU |
| TINP1     | GI_21359901-S | rs16872349 | 5 | 5 | 74188193  | 82674  | 7.1669  | 0.3868 | -0.3044 | 6.1543 | CEU |
| TINP1     | GI_21359901-S | rs6861935  | 5 | 5 | 74191747  | 86228  | 7.1669  | 0.3868 | -0.3044 | 6.1543 | CEU |
| TINP1     | GI_21359901-S | rs16872362 | 5 | 5 | 74194913  | 89394  | 7.1669  | 0.3868 | -0.3044 | 6.1543 | CEU |
| FLJ10904  | GI_42716286-S | rs335632   | 5 | 5 | 76763841  | 121    | 13.4646 | 0.6450 | 1.0563  | 6.8387 | CEU |
| FLJ10904  | GI_42716286-S | rs335628   | 5 | 5 | 76765294  | 1332   | 14.1029 | 0.6437 | 1.0106  | 6.8387 | CEU |
| FLJ10904  | GI_42716286-S | rs441102   | 5 | 5 | 76774726  | 10764  | 14.1029 | 0.6437 | 1.0106  | 6.8387 | CEU |
| FLJ10904  | GI_42716286-S | rs189195   | 5 | 5 | 76783882  | 19920  | 9.1513  | 0.4746 | -0.9870 | 6.8387 | CEU |
| FLJ10904  | GI_42716286-S | rs10474515 | 5 | 5 | 76850492  | 86530  | 8.9508  | 0.4663 | -0.9097 | 6.8387 | CEU |
| CGI-111   | GI_7705613-S  | rs3944133  | 5 | 5 | 128960037 | 482948 | 5.8363  | 0.3204 | -0.4941 | 5.469  | CEU |
| CGI-111   | GI_7705613-S  | rs7712648  | 5 | 5 | 128973469 | 496380 | 5.5003  | 0.3027 | -0.3818 | 5.469  | CEU |
| CGI-111   | GI_7705613-S  | rs1946289  | 5 | 5 | 128979035 | 501946 | 5.5003  | 0.3027 | -0.3818 | 5.469  | CEU |
| CGI-111   | GI_7705613-S  | rs25821    | 5 | 5 | 129019081 | 541992 | 5.7568  | 0.3163 | -0.3934 | 5.469  | CEU |

|           |               |            |   |   |           |        |         |        |         |        |     |
|-----------|---------------|------------|---|---|-----------|--------|---------|--------|---------|--------|-----|
| CGI-111   | GI_7705613-S  | rs25816    | 5 | 5 | 129020335 | 543246 | 5.7568  | 0.3163 | 0.3934  | 5.469  | CEU |
| CGI-111   | GI_7705613-S  | rs30662    | 5 | 5 | 129036031 | 558942 | 5.7568  | 0.3163 | -0.3934 | 5.469  | CEU |
| CGI-111   | GI_7705613-S  | rs30658    | 5 | 5 | 129037957 | 560868 | 5.7568  | 0.3163 | -0.3934 | 5.469  | CEU |
| CGI-111   | GI_7705613-S  | rs30656    | 5 | 5 | 129038668 | 561579 | 5.7568  | 0.3163 | -0.3934 | 5.469  | CEU |
| CGI-111   | GI_7705613-S  | rs30649    | 5 | 5 | 129041704 | 564615 | 5.7568  | 0.3163 | 0.3934  | 5.469  | CEU |
| CGI-111   | GI_7705613-S  | rs25803    | 5 | 5 | 129056512 | 579423 | 5.7568  | 0.3163 | -0.3934 | 5.469  | CEU |
| CPEB4     | GI_32698754-S | rs6882088  | 5 | 5 | 173226782 | 90805  | 8.3102  | 0.4389 | 0.4518  | 5.846  | CEU |
| CPEB4     | GI_32698754-S | rs6864880  | 5 | 5 | 173230832 | 86755  | 7.1532  | 0.4327 | 0.4503  | 5.846  | CEU |
| CPEB4     | GI_32698754-S | rs359477   | 5 | 5 | 173238038 | 79549  | 6.5545  | 0.3571 | -0.3785 | 5.846  | CEU |
| CPEB4     | GI_32698754-S | rs7705502  | 5 | 5 | 173253421 | 64166  | 10.6748 | 0.5398 | -0.4687 | 5.846  | CEU |
| CPEB4     | GI_32698754-S | rs17695092 | 5 | 5 | 173270459 | 47128  | 10.8238 | 0.5390 | -0.4762 | 5.846  | CEU |
| CPEB4     | GI_32698754-S | rs7736263  | 5 | 5 | 173271828 | 45759  | 10.8238 | 0.5390 | 0.4762  | 5.846  | CEU |
| CPEB4     | GI_32698754-S | rs10516107 | 5 | 5 | 173280762 | 36825  | 10.8238 | 0.5390 | -0.4762 | 5.846  | CEU |
| CPEB4     | GI_32698754-S | rs1484803  | 5 | 5 | 173282446 | 35141  | 10.8238 | 0.5390 | 0.4762  | 5.846  | CEU |
| CPEB4     | GI_32698754-S | rs966544   | 5 | 5 | 173283011 | 34576  | 10.8238 | 0.5390 | 0.4762  | 5.846  | CEU |
| CPEB4     | GI_32698754-S | rs747472   | 5 | 5 | 173286120 | 31467  | 10.8238 | 0.5390 | 0.4762  | 5.846  | CEU |
| CPEB4     | GI_32698754-S | rs6861681  | 5 | 5 | 173295064 | 22523  | 7.1963  | 0.4415 | -0.4400 | 5.846  | CEU |
| CPEB4     | GI_32698754-S | rs1564823  | 5 | 5 | 173315800 | 1787   | 10.8238 | 0.5390 | -0.4762 | 5.846  | CEU |
| CPEB4     | GI_32698754-S | rs1976074  | 5 | 5 | 173317269 | 318    | 10.8238 | 0.5390 | -0.4762 | 5.846  | CEU |
| CPEB4     | GI_32698754-S | rs17696407 | 5 | 5 | 173319941 | 2354   | 10.8238 | 0.5390 | -0.4762 | 5.846  | CEU |
| SQSTM1    | GI_19923742-S | rs565280   | 5 | 5 | 179186532 | 11054  | 7.5180  | 0.4033 | -0.6265 | 6.1723 | CEU |
| SQSTM1    | GI_19923742-S | rs10277    | 5 | 5 | 179197337 | 249    | 8.5082  | 0.4475 | -0.6370 | 6.1723 | CEU |
| SQSTM1    | GI_19923742-S | rs1065154  | 5 | 5 | 179197521 | 65     | 7.5180  | 0.4033 | -0.6265 | 6.1723 | CEU |
| SQSTM1    | GI_19923742-S | rs1650893  | 5 | 5 | 179212985 | 15399  | 8.6830  | 0.4550 | 0.6525  | 6.1723 | CEU |
| TUBB      | GI_4507728-S  | rs4305774  | 6 | 6 | 3149678   | 50583  | 8.3603  | 0.4411 | -0.7248 | 6.0831 | CEU |
| TUBB      | GI_4507728-S  | rs4448135  | 6 | 6 | 3149820   | 50725  | 7.5395  | 0.4153 | -0.7001 | 6.0831 | CEU |
| TUBB      | GI_4507728-S  | rs9391984  | 6 | 6 | 3150061   | 50966  | 7.1711  | 0.4033 | 0.7188  | 6.0831 | CEU |
| TUBB      | GI_4507728-S  | rs6929344  | 6 | 6 | 3150324   | 51229  | 9.5452  | 0.4965 | -0.7410 | 6.0831 | CEU |
| TUBB      | GI_4507728-S  | rs11242827 | 6 | 6 | 3150433   | 51338  | 9.5452  | 0.4965 | -0.7410 | 6.0831 | CEU |
| TUBB      | GI_4507728-S  | rs12215375 | 6 | 6 | 3150475   | 51380  | 8.6061  | 0.4635 | -0.7192 | 6.0831 | CEU |
| TUBB      | GI_4507728-S  | rs9392468  | 6 | 6 | 3151864   | 52769  | 6.4988  | 0.3593 | -0.7229 | 6.0831 | CEU |
| LOC389362 | GI_41147302-S | rs4613858  | 6 | 6 | 3232680   | 19568  | 5.9737  | 0.3276 | 0.2965  | 5.9593 | CEU |
| LOC389362 | GI_41147302-S | rs6923235  | 6 | 6 | 3234756   | 21644  | 6.1265  | 0.3402 | 0.3069  | 5.9593 | CEU |
| LOC389362 | GI_41147302-S | rs9378356  | 6 | 6 | 3236335   | 23223  | 5.9737  | 0.3276 | -0.2965 | 5.9593 | CEU |
| Hs.158943 | Hs.158943-S   | rs6921388  | 6 | 6 | 27188184  | 650491 | 5.6943  | 0.3222 | -0.2254 | 5.1768 | CEU |
| Hs.158943 | Hs.158943-S   | rs9393790  | 6 | 6 | 27222031  | 616644 | 6.4414  | 0.3721 | -0.2370 | 5.1768 | CEU |
| Hs.158943 | Hs.158943-S   | rs9379960  | 6 | 6 | 27229304  | 609371 | 6.4414  | 0.3721 | 0.2370  | 5.1768 | CEU |
| Hs.158943 | Hs.158943-S   | rs4713069  | 6 | 6 | 27236286  | 602389 | 5.5519  | 0.3145 | 0.2173  | 5.1768 | CEU |
| Hs.158943 | Hs.158943-S   | rs9295730  | 6 | 6 | 27236785  | 601890 | 6.1342  | 0.3359 | 0.2304  | 5.1768 | CEU |
| Hs.158943 | Hs.158943-S   | rs1028308  | 6 | 6 | 27237736  | 600939 | 5.9078  | 0.3336 | -0.2309 | 5.1768 | CEU |
| Hs.158943 | Hs.158943-S   | rs9393791  | 6 | 6 | 27240508  | 598167 | 6.1342  | 0.3359 | -0.2304 | 5.1768 | CEU |
| Hs.158943 | Hs.158943-S   | rs9461335  | 6 | 6 | 27246508  | 592167 | 6.1342  | 0.3359 | 0.2304  | 5.1768 | CEU |
| Hs.519979 | Hs.519979-S   | rs1633005  | 6 | 6 | 29872451  | 132895 | 7.9837  | 0.4245 | -0.4279 | 5.8804 | CEU |
| LOC347981 | GI_30160064-S | rs11753654 | 6 | 6 | 29890600  | 71943  | 5.8673  | 0.3267 | -0.2982 | 5.7587 | CEU |
| LOC347981 | GI_30160064-S | rs2394176  | 6 | 6 | 29895217  | 67326  | 5.8533  | 0.3513 | 0.3073  | 5.7587 | CEU |
| LOC347981 | GI_30160064-S | rs2394177  | 6 | 6 | 29895348  | 67195  | 6.6829  | 0.3685 | -0.2684 | 5.7587 | CEU |
| LOC347981 | GI_30160064-S | rs4084096  | 6 | 6 | 29919847  | 42696  | 6.2310  | 0.3778 | 0.2771  | 5.7587 | CEU |
| Hs.519979 | Hs.519979-S   | rs2734986  | 6 | 6 | 29926547  | 78799  | 5.9897  | 0.3284 | 0.4962  | 5.8804 | CEU |
| Hs.519979 | Hs.519979-S   | rs2734985  | 6 | 6 | 29926641  | 78705  | 8.8025  | 0.4601 | 0.3953  | 5.8804 | CEU |
| Hs.519979 | Hs.519979-S   | rs2517868  | 6 | 6 | 29927317  | 78029  | 6.6708  | 0.3679 | 0.4190  | 5.8804 | CEU |
| Hs.519979 | Hs.519979-S   | rs7451408  | 6 | 6 | 29927520  | 77826  | 8.8025  | 0.4601 | -0.3953 | 5.8804 | CEU |
| Hs.519979 | Hs.519979-S   | rs1317834  | 6 | 6 | 29927533  | 77813  | 8.7733  | 0.4647 | 0.3997  | 5.8804 | CEU |
| LOC347981 | GI_30160064-S | rs2107198  | 6 | 6 | 29927641  | 34902  | 10.1878 | 0.5154 | -0.2798 | 5.7587 | CEU |
| Hs.519979 | Hs.519979-S   | rs2508052  | 6 | 6 | 29927981  | 77365  | 7.9837  | 0.4245 | 0.4279  | 5.8804 | CEU |
| Hs.519979 | Hs.519979-S   | rs2508051  | 6 | 6 | 29928013  | 77333  | 8.8025  | 0.4601 | 0.3953  | 5.8804 | CEU |
| Hs.519979 | Hs.519979-S   | rs9258606  | 6 | 6 | 29928149  | 77197  | 8.8025  | 0.4601 | -0.3953 | 5.8804 | CEU |
| Hs.519979 | Hs.519979-S   | rs9258610  | 6 | 6 | 29928232  | 77114  | 9.5956  | 0.5047 | -0.4039 | 5.8804 | CEU |
| Hs.519979 | Hs.519979-S   | rs5013087  | 6 | 6 | 29928308  | 77038  | 8.8025  | 0.4601 | 0.3953  | 5.8804 | CEU |
| Hs.519979 | Hs.519979-S   | rs5013088  | 6 | 6 | 29928368  | 76978  | 8.8025  | 0.4601 | -0.3953 | 5.8804 | CEU |

|           |               |           |   |   |          |        |        |        |         |        |     |
|-----------|---------------|-----------|---|---|----------|--------|--------|--------|---------|--------|-----|
| LOC347981 | GI_30160064-S | rs3862293 | 6 | 6 | 29928445 | 34098  | 6.3688 | 0.3478 | -0.2136 | 5.7587 | CEU |
| Hs.519979 | Hs.519979-S   | rs5013091 | 6 | 6 | 29928466 | 76880  | 6.9386 | 0.4217 | -0.3455 | 5.8804 | CEU |
| Hs.519979 | Hs.519979-S   | rs3128910 | 6 | 6 | 29928649 | 76697  | 7.4383 | 0.3996 | 0.3695  | 5.8804 | CEU |
| Hs.519979 | Hs.519979-S   | rs2734984 | 6 | 6 | 29928810 | 76536  | 8.8025 | 0.4601 | 0.3953  | 5.8804 | CEU |
| Hs.519979 | Hs.519979-S   | rs2734983 | 6 | 6 | 29928930 | 76416  | 5.9235 | 0.3725 | 0.3946  | 5.8804 | CEU |
| Hs.519979 | Hs.519979-S   | rs2517866 | 6 | 6 | 29929011 | 76335  | 7.9837 | 0.4245 | -0.4279 | 5.8804 | CEU |
| Hs.519979 | Hs.519979-S   | rs2247719 | 6 | 6 | 29929363 | 75983  | 8.8025 | 0.4601 | 0.3953  | 5.8804 | CEU |
| Hs.519979 | Hs.519979-S   | rs2734981 | 6 | 6 | 29929671 | 75675  | 8.8025 | 0.4601 | 0.3953  | 5.8804 | CEU |
| Hs.519979 | Hs.519979-S   | rs9258636 | 6 | 6 | 29929816 | 75530  | 7.5322 | 0.4207 | 0.4056  | 5.8804 | CEU |
| Hs.519979 | Hs.519979-S   | rs2734980 | 6 | 6 | 29929875 | 75471  | 8.8025 | 0.4601 | 0.3953  | 5.8804 | CEU |
| Hs.519979 | Hs.519979-S   | rs2517862 | 6 | 6 | 29929916 | 75430  | 7.9837 | 0.4245 | -0.4279 | 5.8804 | CEU |
| Hs.519979 | Hs.519979-S   | rs2517861 | 6 | 6 | 29929961 | 75385  | 8.8025 | 0.4601 | -0.3953 | 5.8804 | CEU |
| Hs.519979 | Hs.519979-S   | rs2517860 | 6 | 6 | 29930500 | 74846  | 8.8025 | 0.4601 | -0.3953 | 5.8804 | CEU |
| Hs.519979 | Hs.519979-S   | rs2517859 | 6 | 6 | 29930550 | 74796  | 8.8025 | 0.4601 | 0.3953  | 5.8804 | CEU |
| Hs.519979 | Hs.519979-S   | rs6919132 | 6 | 6 | 29931779 | 73567  | 8.8025 | 0.4601 | 0.3953  | 5.8804 | CEU |
| Hs.519979 | Hs.519979-S   | rs2508049 | 6 | 6 | 29931862 | 73484  | 7.9837 | 0.4245 | -0.4279 | 5.8804 | CEU |
| LOC347981 | GI_30160064-S | rs9258687 | 6 | 6 | 29932214 | 30329  | 6.3688 | 0.3478 | -0.2136 | 5.7587 | CEU |
| Hs.519979 | Hs.519979-S   | rs9258690 | 6 | 6 | 29932319 | 73027  | 8.8025 | 0.4601 | -0.3953 | 5.8804 | CEU |
| Hs.519979 | Hs.519979-S   | rs9258718 | 6 | 6 | 29933489 | 71857  | 7.4017 | 0.4453 | 0.4395  | 5.8804 | CEU |
| Hs.519979 | Hs.519979-S   | rs2517838 | 6 | 6 | 29934705 | 70641  | 7.9837 | 0.4245 | 0.4279  | 5.8804 | CEU |
| LOC347981 | GI_30160064-S | rs9258740 | 6 | 6 | 29935878 | 26665  | 6.3688 | 0.3478 | -0.2136 | 5.7587 | CEU |
| Hs.519979 | Hs.519979-S   | rs1611701 | 6 | 6 | 29935935 | 69411  | 7.9837 | 0.4245 | 0.4279  | 5.8804 | CEU |
| Hs.519979 | Hs.519979-S   | rs1611703 | 6 | 6 | 29936414 | 68932  | 7.9837 | 0.4245 | 0.4279  | 5.8804 | CEU |
| LOC347981 | GI_30160064-S | rs9258750 | 6 | 6 | 29936951 | 25592  | 6.3688 | 0.3478 | -0.2136 | 5.7587 | CEU |
| Hs.519979 | Hs.519979-S   | rs1611714 | 6 | 6 | 29937386 | 67960  | 7.9837 | 0.4245 | -0.4279 | 5.8804 | CEU |
| Hs.519979 | Hs.519979-S   | rs1611738 | 6 | 6 | 29939685 | 65661  | 7.6541 | 0.4151 | -0.4086 | 5.8804 | CEU |
| LOC347981 | GI_30160064-S | rs9258798 | 6 | 6 | 29940176 | 22367  | 6.2394 | 0.3903 | -0.2356 | 5.7587 | CEU |
| Hs.519979 | Hs.519979-S   | rs2734974 | 6 | 6 | 29941758 | 63588  | 6.7476 | 0.3769 | -0.4053 | 5.8804 | CEU |
| Hs.519979 | Hs.519979-S   | rs2517826 | 6 | 6 | 29942020 | 63326  | 8.0712 | 0.4457 | 0.4163  | 5.8804 | CEU |
| Hs.519979 | Hs.519979-S   | rs2734970 | 6 | 6 | 29942451 | 62895  | 6.6541 | 0.3620 | -0.4255 | 5.8804 | CEU |
| Hs.519979 | Hs.519979-S   | rs2734969 | 6 | 6 | 29942784 | 62562  | 6.2078 | 0.3545 | -0.4074 | 5.8804 | CEU |
| Hs.519979 | Hs.519979-S   | rs1611635 | 6 | 6 | 29944442 | 60904  | 7.7825 | 0.4266 | 0.4352  | 5.8804 | CEU |
| Hs.519979 | Hs.519979-S   | rs1611647 | 6 | 6 | 29948135 | 57211  | 7.9837 | 0.4245 | -0.4279 | 5.8804 | CEU |
| Hs.519979 | Hs.519979-S   | rs3132689 | 6 | 6 | 29990509 | 14837  | 7.2588 | 0.4254 | 0.4354  | 5.8804 | CEU |
| Hs.519979 | Hs.519979-S   | rs389600  | 6 | 6 | 30004978 | 368    | 6.6541 | 0.3620 | -0.4255 | 5.8804 | CEU |
| Hs.519979 | Hs.519979-S   | rs1655927 | 6 | 6 | 30007472 | 2126   | 6.6541 | 0.3620 | 0.4255  | 5.8804 | CEU |
| Hs.519979 | Hs.519979-S   | rs2524005 | 6 | 6 | 30007656 | 2310   | 5.9510 | 0.3264 | 0.3532  | 5.8804 | CEU |
| Hs.519979 | Hs.519979-S   | rs2860580 | 6 | 6 | 30014670 | 9324   | 6.0194 | 0.3299 | 0.3115  | 5.8804 | CEU |
| Hs.519979 | Hs.519979-S   | rs439935  | 6 | 6 | 30015940 | 10594  | 7.9837 | 0.4245 | 0.4279  | 5.8804 | CEU |
| Hs.519979 | Hs.519979-S   | rs1655921 | 6 | 6 | 30016168 | 10822  | 7.5727 | 0.4408 | -0.5030 | 5.8804 | CEU |
| LOC347981 | GI_30160064-S | rs2975046 | 6 | 6 | 30023128 | 60585  | 7.3946 | 0.3976 | 0.2146  | 5.7587 | CEU |
| Hs.519979 | Hs.519979-S   | rs1632882 | 6 | 6 | 30024347 | 19001  | 8.7702 | 0.4645 | -0.3996 | 5.8804 | CEU |
| Hs.519979 | Hs.519979-S   | rs1655900 | 6 | 6 | 30024597 | 19251  | 7.9837 | 0.4245 | -0.4279 | 5.8804 | CEU |
| Hs.519979 | Hs.519979-S   | rs1613062 | 6 | 6 | 30029079 | 23733  | 7.8194 | 0.4227 | 0.3630  | 5.8804 | CEU |
| Hs.519979 | Hs.519979-S   | rs1264807 | 6 | 6 | 30066786 | 61440  | 6.9752 | 0.3776 | -0.3795 | 5.8804 | CEU |
| Hs.519979 | Hs.519979-S   | rs1632926 | 6 | 6 | 30069253 | 63907  | 6.6722 | 0.3679 | -0.3731 | 5.8804 | CEU |
| Hs.519979 | Hs.519979-S   | rs356959  | 6 | 6 | 30074766 | 69420  | 8.1072 | 0.4357 | -0.4352 | 5.8804 | CEU |
| Hs.519979 | Hs.519979-S   | rs356971  | 6 | 6 | 30087776 | 82430  | 7.8340 | 0.4178 | 0.4227  | 5.8804 | CEU |
| Hs.519979 | Hs.519979-S   | rs3129012 | 6 | 6 | 30096621 | 91275  | 7.6369 | 0.4088 | 0.3740  | 5.8804 | CEU |
| Hs.519979 | Hs.519979-S   | rs1264709 | 6 | 6 | 30164455 | 159109 | 5.8847 | 0.3826 | -0.4065 | 5.8804 | CEU |
| Hs.519979 | Hs.519979-S   | rs1264703 | 6 | 6 | 30173395 | 168049 | 5.8892 | 0.3232 | -0.3511 | 5.8804 | CEU |
| Hs.519979 | Hs.519979-S   | rs1264702 | 6 | 6 | 30173554 | 168208 | 5.8892 | 0.3232 | 0.3511  | 5.8804 | CEU |
| Hs.519979 | Hs.519979-S   | rs1264698 | 6 | 6 | 30175156 | 169810 | 5.8892 | 0.3232 | -0.3511 | 5.8804 | CEU |
| Hs.519979 | Hs.519979-S   | rs1264697 | 6 | 6 | 30175547 | 170201 | 5.8892 | 0.3232 | -0.3511 | 5.8804 | CEU |
| Hs.519979 | Hs.519979-S   | rs1264695 | 6 | 6 | 30175871 | 170525 | 5.8892 | 0.3232 | -0.3511 | 5.8804 | CEU |
| Hs.519979 | Hs.519979-S   | rs1116221 | 6 | 6 | 30179309 | 173963 | 6.4049 | 0.3496 | -0.3649 | 5.8804 | CEU |
| Hs.519979 | Hs.519979-S   | rs2248289 | 6 | 6 | 30180700 | 175354 | 5.8892 | 0.3232 | 0.3511  | 5.8804 | CEU |
| hmm31752  | hmm31752-S    | rs3131927 | 6 | 6 | 31120975 | 11103  | 6.6136 | 0.3600 | -0.5309 | 6.5615 | CEU |
| hmm31752  | hmm31752-S    | rs2517538 | 6 | 6 | 31121520 | 10558  | 6.6136 | 0.3600 | 0.5309  | 6.5615 | CEU |

|           |               |            |   |   |          |        |         |        |         |        |     |
|-----------|---------------|------------|---|---|----------|--------|---------|--------|---------|--------|-----|
| hmm31752  | hmm31752-S    | rs2523871  | 6 | 6 | 31121988 | 10090  | 6.6239  | 0.3707 | 0.5361  | 6.5615 | CEU |
| hmm31752  | hmm31752-S    | rs2523870  | 6 | 6 | 31122095 | 9983   | 6.6136  | 0.3600 | 0.5309  | 6.5615 | CEU |
| hmm31752  | hmm31752-S    | rs2517534  | 6 | 6 | 31125313 | 6765   | 7.5495  | 0.4274 | 0.5380  | 6.5615 | CEU |
| hmm31752  | hmm31752-S    | rs2517532  | 6 | 6 | 31126386 | 5692   | 7.4457  | 0.3999 | 0.5316  | 6.5615 | CEU |
| hmm31752  | hmm31752-S    | rs2523857  | 6 | 6 | 31129483 | 2595   | 7.1117  | 0.3842 | -0.5477 | 6.5615 | CEU |
| hmm31752  | hmm31752-S    | rs2517527  | 6 | 6 | 31129526 | 2552   | 7.7339  | 0.4244 | 0.5956  | 6.5615 | CEU |
| HLA-C     | GI_19557676-S | rs1049281  | 6 | 6 | 31344546 | 175    | 7.0332  | 0.3804 | 0.3028  | 6.8804 | CEU |
| HLA-C     | GI_19557676-S | rs2844622  | 6 | 6 | 31348039 | 3318   | 7.1997  | 0.4485 | -0.3023 | 6.8804 | CEU |
| HLA-C     | GI_19557676-S | rs2249741  | 6 | 6 | 31348691 | 3970   | 10.1602 | 0.5467 | 0.3593  | 6.8804 | CEU |
| HLA-C     | GI_19557676-S | rs2249742  | 6 | 6 | 31348700 | 3979   | 7.8567  | 0.4188 | 0.3471  | 6.8804 | CEU |
| HLA-C     | GI_19557676-S | rs2844612  | 6 | 6 | 31351950 | 7229   | 7.3742  | 0.3966 | -0.2976 | 6.8804 | CEU |
| HLA-C     | GI_19557676-S | rs2844611  | 6 | 6 | 31351958 | 7237   | 7.0117  | 0.4254 | 0.3139  | 6.8804 | CEU |
| HLA-C     | GI_19557676-S | rs2524074  | 6 | 6 | 31352000 | 7279   | 7.3769  | 0.4021 | 0.2989  | 6.8804 | CEU |
| HLA-C     | GI_19557676-S | rs2524054  | 6 | 6 | 31360375 | 15654  | 6.9841  | 0.3781 | -0.2815 | 6.8804 | CEU |
| HLA-C     | GI_19557676-S | rs2853928  | 6 | 6 | 31365490 | 20769  | 7.2057  | 0.3940 | -0.2942 | 6.8804 | CEU |
| HLA-C     | GI_19557676-S | rs2524142  | 6 | 6 | 31371501 | 26780  | 7.2057  | 0.3940 | -0.2942 | 6.8804 | CEU |
| HLA-C     | GI_19557676-S | rs6457374  | 6 | 6 | 31380240 | 35519  | 7.3274  | 0.3944 | 0.2923  | 6.8804 | CEU |
| HLA-C     | GI_19557676-S | rs3094691  | 6 | 6 | 31382672 | 37951  | 7.2889  | 0.3979 | 0.3366  | 6.8804 | CEU |
| HLA-C     | GI_19557676-S | rs2523554  | 6 | 6 | 31439808 | 95087  | 7.0037  | 0.3790 | -0.3185 | 6.8804 | CEU |
| LOC282956 | GI_27483210-S | rs2844529  | 6 | 6 | 31461572 | 8979   | 6.5562  | 0.3621 | -0.1705 | 6.0339 | CEU |
| LOC282956 | GI_27483210-S | rs4081552  | 6 | 6 | 31461668 | 8883   | 7.1974  | 0.3883 | -0.1888 | 6.0339 | CEU |
| LOC282956 | GI_27483210-S | rs6909461  | 6 | 6 | 31461929 | 8622   | 6.8351  | 0.3760 | -0.1858 | 6.0339 | CEU |
| LOC282956 | GI_27483210-S | rs2853973  | 6 | 6 | 31461971 | 8580   | 7.7648  | 0.4201 | -0.1809 | 6.0339 | CEU |
| LOC282956 | GI_27483210-S | rs2428486  | 6 | 6 | 31462083 | 8468   | 7.6218  | 0.4081 | -0.1774 | 6.0339 | CEU |
| LOC282956 | GI_27483210-S | rs4711268  | 6 | 6 | 31462483 | 8068   | 6.4036  | 0.3545 | -0.1917 | 6.0339 | CEU |
| LOC282956 | GI_27483210-S | rs13437082 | 6 | 6 | 31462539 | 8012   | 6.2936  | 0.3754 | -0.1945 | 6.0339 | CEU |
| LOC282956 | GI_27483210-S | rs2596562  | 6 | 6 | 31462574 | 7977   | 7.7525  | 0.4196 | -0.1808 | 6.0339 | CEU |
| LOC282956 | GI_27483210-S | rs13437092 | 6 | 6 | 31463035 | 7516   | 7.1974  | 0.3883 | -0.1888 | 6.0339 | CEU |
| LOC282956 | GI_27483210-S | rs9348866  | 6 | 6 | 31466934 | 3617   | 7.5233  | 0.4513 | -0.1636 | 6.0339 | CEU |
| LOC282956 | GI_27483210-S | rs7771971  | 6 | 6 | 31468320 | 2231   | 7.2838  | 0.3977 | 0.1915  | 6.0339 | CEU |
| LOC282956 | GI_27483210-S | rs7751725  | 6 | 6 | 31468412 | 2139   | 7.1284  | 0.3903 | -0.1915 | 6.0339 | CEU |
| LOC282956 | GI_27483210-S | rs7752021  | 6 | 6 | 31468505 | 2046   | 7.1974  | 0.3883 | -0.1888 | 6.0339 | CEU |
| LOC282956 | GI_27483210-S | rs10947206 | 6 | 6 | 31469376 | 1175   | 7.1974  | 0.3883 | -0.1888 | 6.0339 | CEU |
| LOC282956 | GI_27483210-S | rs2523475  | 6 | 6 | 31469689 | 862    | 7.5662  | 0.4672 | 0.1801  | 6.0339 | CEU |
| LOC282956 | GI_27483210-S | rs10947208 | 6 | 6 | 31469816 | 735    | 7.1974  | 0.3883 | -0.1888 | 6.0339 | CEU |
| LOC282956 | GI_27483210-S | rs2523473  | 6 | 6 | 31469876 | 675    | 7.6218  | 0.4081 | 0.1774  | 6.0339 | CEU |
| LOC282956 | GI_27483210-S | rs2523467  | 6 | 6 | 31470909 | 358    | 7.3377  | 0.4002 | 0.1746  | 6.0339 | CEU |
| LOC282956 | GI_27483210-S | rs9501387  | 6 | 6 | 31472438 | 1887   | 7.6218  | 0.4081 | -0.1774 | 6.0339 | CEU |
| LOC282956 | GI_27483210-S | rs2523459  | 6 | 6 | 31473287 | 2736   | 7.6218  | 0.4081 | -0.1774 | 6.0339 | CEU |
| LOC282956 | GI_27483210-S | rs2428475  | 6 | 6 | 31474601 | 4050   | 7.6817  | 0.4277 | 0.1841  | 6.0339 | CEU |
| LOC282956 | GI_27483210-S | rs2428474  | 6 | 6 | 31475002 | 4451   | 7.6817  | 0.4277 | 0.1841  | 6.0339 | CEU |
| LOC282956 | GI_27483210-S | rs2523453  | 6 | 6 | 31476104 | 5553   | 7.8546  | 0.4300 | 0.1835  | 6.0339 | CEU |
| LOC282956 | GI_27483210-S | rs2523452  | 6 | 6 | 31476519 | 5968   | 7.6218  | 0.4081 | 0.1774  | 6.0339 | CEU |
| LOC282956 | GI_27483210-S | rs2844521  | 6 | 6 | 31476943 | 6392   | 7.6218  | 0.4081 | 0.1774  | 6.0339 | CEU |
| HLA-C     | GI_19557676-S | rs2534671  | 6 | 6 | 31573640 | 228919 | 6.9369  | 0.3758 | 0.3320  | 6.8804 | CEU |
| HLA-DQA2  | GI_11095446-S | rs9267954  | 6 | 6 | 32321030 | 500003 | 6.9421  | 0.3760 | 2.1534  | 5.8086 | CEU |
| HLA-DQA2  | GI_11095446-S | rs7382103  | 6 | 6 | 32338992 | 482041 | 6.5496  | 0.3568 | -2.0326 | 5.8086 | CEU |
| HLA-DQA2  | GI_11095446-S | rs9268082  | 6 | 6 | 32342931 | 478102 | 6.5496  | 0.3568 | 2.0326  | 5.8086 | CEU |
| HLA-DQA2  | GI_11095446-S | rs9268132  | 6 | 6 | 32362632 | 458401 | 6.5496  | 0.3568 | 2.0326  | 5.8086 | CEU |
| HLA-DQA2  | GI_11095446-S | rs9268145  | 6 | 6 | 32365262 | 455771 | 11.0072 | 0.5519 | -2.9080 | 5.8086 | CEU |
| HLA-DQA2  | GI_11095446-S | rs4713518  | 6 | 6 | 32365315 | 455718 | 6.5496  | 0.3568 | 2.0326  | 5.8086 | CEU |
| HLA-DQA2  | GI_11095446-S | rs560505   | 6 | 6 | 32369749 | 451284 | 6.2947  | 0.3440 | -2.0561 | 5.8086 | CEU |
| HLA-DQA2  | GI_11095446-S | rs518374   | 6 | 6 | 32373688 | 447345 | 6.5496  | 0.3568 | 2.0326  | 5.8086 | CEU |
| HLA-DQA2  | GI_11095446-S | rs565571   | 6 | 6 | 32374513 | 446520 | 6.2947  | 0.3440 | 2.0561  | 5.8086 | CEU |
| HLA-DQA2  | GI_11095446-S | rs477005   | 6 | 6 | 32378478 | 442555 | 6.2947  | 0.3440 | -2.0561 | 5.8086 | CEU |
| HLA-DQA2  | GI_11095446-S | rs1265777  | 6 | 6 | 32381136 | 439897 | 6.5496  | 0.3568 | 2.0326  | 5.8086 | CEU |
| HLA-DQA2  | GI_11095446-S | rs502626   | 6 | 6 | 32386244 | 434789 | 6.5496  | 0.3568 | -2.0326 | 5.8086 | CEU |
| HLA-DQA1  | GI_18426974-S | rs9268199  | 6 | 6 | 32386613 | 332222 | 6.8284  | 0.3705 | 3.7258  | 6.3299 | CEU |
| HLA-DQA2  | GI_11095446-S | rs6910071  | 6 | 6 | 32390832 | 430201 | 11.3460 | 0.5575 | 2.9234  | 5.8086 | CEU |

|          |               |            |   |   |          |        |         |        |         |        |     |
|----------|---------------|------------|---|---|----------|--------|---------|--------|---------|--------|-----|
| HLA-DQA2 | GI_11095446-S | rs531094   | 6 | 6 | 32394080 | 426953 | 6.5496  | 0.3568 | -2.0326 | 5.8086 | CEU |
| HLA-DQA1 | GI_18426974-S | rs9268228  | 6 | 6 | 32395097 | 323738 | 7.0830  | 0.3828 | 3.6046  | 6.3299 | CEU |
| HLA-DQA2 | GI_11095446-S | rs574710   | 6 | 6 | 32396168 | 424865 | 6.5496  | 0.3568 | 2.0326  | 5.8086 | CEU |
| HLA-DQA2 | GI_11095446-S | rs539703   | 6 | 6 | 32396440 | 424593 | 6.5496  | 0.3568 | 2.0326  | 5.8086 | CEU |
| HLA-DQA2 | GI_11095446-S | rs547077   | 6 | 6 | 32397296 | 423737 | 6.5496  | 0.3568 | -2.0326 | 5.8086 | CEU |
| HLA-DQA2 | GI_11095446-S | rs485774   | 6 | 6 | 32398932 | 422101 | 7.0386  | 0.4083 | -2.0746 | 5.8086 | CEU |
| HLA-DQA2 | GI_11095446-S | rs533885   | 6 | 6 | 32401130 | 419903 | 6.5496  | 0.3568 | -2.0326 | 5.8086 | CEU |
| HLA-DQA2 | GI_11095446-S | rs476885   | 6 | 6 | 32402690 | 418343 | 6.6530  | 0.3619 | -1.9924 | 5.8086 | CEU |
| HLA-DQA2 | GI_11095446-S | rs505274   | 6 | 6 | 32402970 | 418063 | 6.5496  | 0.3568 | -2.0326 | 5.8086 | CEU |
| HLA-DQA2 | GI_11095446-S | rs508805   | 6 | 6 | 32403328 | 417705 | 6.5496  | 0.3568 | -2.0326 | 5.8086 | CEU |
| HLA-DQA2 | GI_11095446-S | rs524578   | 6 | 6 | 32403335 | 417698 | 6.3732  | 0.3915 | 2.0543  | 5.8086 | CEU |
| HLA-DQA2 | GI_11095446-S | rs9348880  | 6 | 6 | 32404758 | 416275 | 6.5496  | 0.3568 | 2.0326  | 5.8086 | CEU |
| HLA-DQA2 | GI_11095446-S | rs9368711  | 6 | 6 | 32405134 | 415899 | 6.5496  | 0.3568 | -2.0326 | 5.8086 | CEU |
| HLA-DQA2 | GI_11095446-S | rs9368712  | 6 | 6 | 32405306 | 415727 | 6.9571  | 0.3873 | -2.0893 | 5.8086 | CEU |
| HLA-DQA2 | GI_11095446-S | rs9296021  | 6 | 6 | 32405668 | 415365 | 6.5496  | 0.3568 | 2.0326  | 5.8086 | CEU |
| HLA-DQA2 | GI_11095446-S | rs9296022  | 6 | 6 | 32405933 | 415100 | 6.5496  | 0.3568 | -2.0326 | 5.8086 | CEU |
| HLA-DQA2 | GI_11095446-S | rs742582   | 6 | 6 | 32407693 | 413340 | 6.5496  | 0.3568 | -2.0326 | 5.8086 | CEU |
| HLA-DQA2 | GI_11095446-S | rs9366793  | 6 | 6 | 32409267 | 411766 | 6.5496  | 0.3568 | -2.0326 | 5.8086 | CEU |
| HLA-DQA2 | GI_11095446-S | rs1474728  | 6 | 6 | 32410045 | 410988 | 6.5496  | 0.3568 | -2.0326 | 5.8086 | CEU |
| HLA-DQA2 | GI_11095446-S | rs6929776  | 6 | 6 | 32411489 | 409544 | 6.5496  | 0.3568 | -2.0326 | 5.8086 | CEU |
| HLA-DQA2 | GI_11095446-S | rs926591   | 6 | 6 | 32413668 | 407365 | 6.5496  | 0.3568 | 2.0326  | 5.8086 | CEU |
| HLA-DQA2 | GI_11095446-S | rs9368716  | 6 | 6 | 32414068 | 406965 | 7.2591  | 0.3965 | -2.3537 | 5.8086 | CEU |
| HLA-DQA2 | GI_11095446-S | rs3817982  | 6 | 6 | 32414240 | 406793 | 6.5496  | 0.3568 | 2.0326  | 5.8086 | CEU |
| HLA-DQA2 | GI_11095446-S | rs2022534  | 6 | 6 | 32415115 | 405918 | 6.5496  | 0.3568 | 2.0326  | 5.8086 | CEU |
| HLA-DQA2 | GI_11095446-S | rs2143465  | 6 | 6 | 32417330 | 403703 | 6.5496  | 0.3568 | 2.0326  | 5.8086 | CEU |
| HLA-DQA2 | GI_11095446-S | rs4576282  | 6 | 6 | 32420774 | 400259 | 6.5496  | 0.3568 | 2.0326  | 5.8086 | CEU |
| HLA-DQA2 | GI_11095446-S | rs4959092  | 6 | 6 | 32420989 | 400044 | 6.5496  | 0.3568 | -2.0326 | 5.8086 | CEU |
| HLA-DQA2 | GI_11095446-S | rs4959093  | 6 | 6 | 32421075 | 399958 | 6.5496  | 0.3568 | -2.0326 | 5.8086 | CEU |
| HLA-DQA2 | GI_11095446-S | rs7382512  | 6 | 6 | 32422654 | 398379 | 7.0281  | 0.3802 | -2.0798 | 5.8086 | CEU |
| HLA-DQA2 | GI_11095446-S | rs2076542  | 6 | 6 | 32425105 | 395928 | 6.6629  | 0.3950 | 2.0856  | 5.8086 | CEU |
| HLA-DQA2 | GI_11095446-S | rs2076538  | 6 | 6 | 32425449 | 395584 | 6.5496  | 0.3568 | -2.0326 | 5.8086 | CEU |
| HLA-DQA2 | GI_11095446-S | rs761187   | 6 | 6 | 32426014 | 395019 | 6.2947  | 0.3440 | -2.0561 | 5.8086 | CEU |
| HLA-DQA2 | GI_11095446-S | rs9268301  | 6 | 6 | 32427615 | 393418 | 6.8947  | 0.3897 | -2.2120 | 5.8086 | CEU |
| HLA-DQA2 | GI_11095446-S | rs9268346  | 6 | 6 | 32439905 | 381128 | 6.7560  | 0.3721 | 2.0610  | 5.8086 | CEU |
| HLA-DQA2 | GI_11095446-S | rs9268357  | 6 | 6 | 32440974 | 380059 | 6.5496  | 0.3568 | 2.0326  | 5.8086 | CEU |
| HLA-DQA2 | GI_11095446-S | rs9268362  | 6 | 6 | 32441319 | 379714 | 11.3460 | 0.5575 | 2.9234  | 5.8086 | CEU |
| HLA-DQA2 | GI_11095446-S | rs9268368  | 6 | 6 | 32441933 | 379100 | 6.2144  | 0.3549 | -2.0219 | 5.8086 | CEU |
| HLA-DQA2 | GI_11095446-S | rs9268369  | 6 | 6 | 32442202 | 378831 | 6.7560  | 0.3721 | 2.0610  | 5.8086 | CEU |
| HLA-DQA2 | GI_11095446-S | rs9268384  | 6 | 6 | 32444564 | 376469 | 6.4361  | 0.3561 | 2.0117  | 5.8086 | CEU |
| HLA-DQA2 | GI_11095446-S | rs2073044  | 6 | 6 | 32446964 | 374069 | 7.9528  | 0.4231 | -2.1842 | 5.8086 | CEU |
| HLA-DQA2 | GI_11095446-S | rs9268403  | 6 | 6 | 32449451 | 371582 | 12.8097 | 0.6055 | -2.8460 | 5.8086 | CEU |
| HLA-DQA2 | GI_11095446-S | rs12201454 | 6 | 6 | 32451664 | 369369 | 12.8097 | 0.6055 | -2.8460 | 5.8086 | CEU |
| HLA-DQA2 | GI_11095446-S | rs9268429  | 6 | 6 | 32453030 | 368003 | 10.5241 | 0.5280 | 2.5724  | 5.8086 | CEU |
| HLA-DQA2 | GI_11095446-S | rs2395153  | 6 | 6 | 32453573 | 367460 | 5.8482  | 0.3211 | 1.8451  | 5.8086 | CEU |
| HLA-DQA2 | GI_11095446-S | rs8180664  | 6 | 6 | 32455468 | 365565 | 12.8097 | 0.6055 | 2.8460  | 5.8086 | CEU |
| HLA-DQA2 | GI_11095446-S | rs2395157  | 6 | 6 | 32456123 | 364910 | 12.8097 | 0.6055 | 2.8460  | 5.8086 | CEU |
| HLA-DQA2 | GI_11095446-S | rs4424066  | 6 | 6 | 32462406 | 358627 | 5.9023  | 0.3239 | 1.8389  | 5.8086 | CEU |
| HLA-DQA2 | GI_11095446-S | rs9268473  | 6 | 6 | 32463661 | 357372 | 5.9023  | 0.3239 | 1.8389  | 5.8086 | CEU |
| HLA-DQA2 | GI_11095446-S | rs9268474  | 6 | 6 | 32465143 | 355890 | 12.8097 | 0.6055 | -2.8460 | 5.8086 | CEU |
| HLA-DQA2 | GI_11095446-S | rs9268477  | 6 | 6 | 32467099 | 353934 | 9.6379  | 0.5773 | -2.8713 | 5.8086 | CEU |
| HLA-DQA2 | GI_11095446-S | rs3817973  | 6 | 6 | 32469089 | 351944 | 5.9023  | 0.3239 | -1.8389 | 5.8086 | CEU |
| HLA-DQA2 | GI_11095446-S | rs2076533  | 6 | 6 | 32471505 | 349528 | 5.9023  | 0.3239 | -1.8389 | 5.8086 | CEU |
| HLA-DQA2 | GI_11095446-S | rs2076530  | 6 | 6 | 32471794 | 349239 | 5.9023  | 0.3239 | 1.8389  | 5.8086 | CEU |
| HLA-DQA2 | GI_11095446-S | rs9268480  | 6 | 6 | 32471822 | 349211 | 12.8097 | 0.6055 | 2.8460  | 5.8086 | CEU |
| HLA-DQA2 | GI_11095446-S | rs3817963  | 6 | 6 | 32476065 | 344968 | 12.8097 | 0.6055 | 2.8460  | 5.8086 | CEU |
| HLA-DQA2 | GI_11095446-S | rs2076525  | 6 | 6 | 32478594 | 342439 | 9.4179  | 0.5450 | 2.3970  | 5.8086 | CEU |
| HLA-DQA2 | GI_11095446-S | rs2076524  | 6 | 6 | 32478662 | 342371 | 12.8097 | 0.6055 | -2.8460 | 5.8086 | CEU |
| HLA-DQA2 | GI_11095446-S | rs2076523  | 6 | 6 | 32478813 | 342220 | 8.6983  | 0.4557 | 2.3039  | 5.8086 | CEU |
| HLA-DQA2 | GI_11095446-S | rs2076522  | 6 | 6 | 32479157 | 341876 | 12.8097 | 0.6055 | 2.8460  | 5.8086 | CEU |

|          |               |           |   |   |          |        |         |        |         |        |     |
|----------|---------------|-----------|---|---|----------|--------|---------|--------|---------|--------|-----|
| HLA-DQA2 | GI_11095446-S | rs3793126 | 6 | 6 | 32479597 | 341436 | 9.8787  | 0.5159 | 2.4011  | 5.8086 | CEU |
| HLA-DQA2 | GI_11095446-S | rs3793127 | 6 | 6 | 32479893 | 341140 | 14.1245 | 0.6443 | 2.8738  | 5.8086 | CEU |
| HLA-DQA2 | GI_11095446-S | rs3806156 | 6 | 6 | 32481676 | 339357 | 8.6983  | 0.4557 | 2.3039  | 5.8086 | CEU |
| HLA-DQA2 | GI_11095446-S | rs3806157 | 6 | 6 | 32481779 | 339254 | 8.6983  | 0.4557 | -2.3039 | 5.8086 | CEU |
| HLA-DQA2 | GI_11095446-S | rs9268491 | 6 | 6 | 32482109 | 338924 | 10.5253 | 0.5281 | 2.4201  | 5.8086 | CEU |
| HLA-DQA2 | GI_11095446-S | rs3763307 | 6 | 6 | 32482600 | 338433 | 12.8097 | 0.6055 | 2.8460  | 5.8086 | CEU |
| HLA-DQA2 | GI_11095446-S | rs9268492 | 6 | 6 | 32483258 | 337775 | 11.8909 | 0.6163 | 2.8396  | 5.8086 | CEU |
| HLA-DQA2 | GI_11095446-S | rs9268493 | 6 | 6 | 32483308 | 337725 | 10.5253 | 0.5281 | -2.4201 | 5.8086 | CEU |
| HLA-DQA2 | GI_11095446-S | rs9268494 | 6 | 6 | 32483330 | 337703 | 10.3290 | 0.5270 | 2.4057  | 5.8086 | CEU |
| HLA-DQA2 | GI_11095446-S | rs9268499 | 6 | 6 | 32483673 | 337360 | 10.5253 | 0.5281 | -2.4201 | 5.8086 | CEU |
| HLA-DQA2 | GI_11095446-S | rs3763309 | 6 | 6 | 32483951 | 337082 | 14.1245 | 0.6443 | -2.8738 | 5.8086 | CEU |
| HLA-DQA2 | GI_11095446-S | rs3763316 | 6 | 6 | 32484724 | 336309 | 10.5253 | 0.5281 | 2.4201  | 5.8086 | CEU |
| HLA-DQA2 | GI_11095446-S | rs9268516 | 6 | 6 | 32487467 | 333566 | 12.8097 | 0.6055 | 2.8460  | 5.8086 | CEU |
| HLA-DQA2 | GI_11095446-S | rs9268528 | 6 | 6 | 32491086 | 329947 | 10.7890 | 0.5569 | 2.5967  | 5.8086 | CEU |
| HLA-DQA2 | GI_11095446-S | rs9268542 | 6 | 6 | 32492699 | 328334 | 11.1996 | 0.5524 | 2.6499  | 5.8086 | CEU |
| HLA-DQA2 | GI_11095446-S | rs9268543 | 6 | 6 | 32492779 | 328254 | 15.6447 | 0.6844 | 3.2366  | 5.8086 | CEU |
| HLA-DQA2 | GI_11095446-S | rs9268544 | 6 | 6 | 32493431 | 327602 | 11.3907 | 0.5718 | -2.6657 | 5.8086 | CEU |
| HLA-DQA2 | GI_11095446-S | rs9268556 | 6 | 6 | 32494942 | 326091 | 11.1996 | 0.5524 | -2.6499 | 5.8086 | CEU |
| HLA-DQA2 | GI_11095446-S | rs2395163 | 6 | 6 | 32495787 | 325246 | 14.0543 | 0.6423 | -2.7652 | 5.8086 | CEU |
| HLA-DQA2 | GI_11095446-S | rs9268557 | 6 | 6 | 32497283 | 323750 | 5.8321  | 0.3202 | -1.8137 | 5.8086 | CEU |
| HLA-DQA2 | GI_11095446-S | rs2187818 | 6 | 6 | 32503546 | 317487 | 10.1843 | 0.5153 | -2.6702 | 5.8086 | CEU |
| HLA-DQA2 | GI_11095446-S | rs7756262 | 6 | 6 | 32506653 | 314380 | 10.1843 | 0.5153 | -2.6702 | 5.8086 | CEU |
| HLA-DQA2 | GI_11095446-S | rs4321864 | 6 | 6 | 32507165 | 313868 | 14.3046 | 0.6493 | -2.8618 | 5.8086 | CEU |
| HLA-DQA2 | GI_11095446-S | rs9268605 | 6 | 6 | 32507811 | 313222 | 10.4113 | 0.5563 | -2.6804 | 5.8086 | CEU |
| HLA-DQA2 | GI_11095446-S | rs9268606 | 6 | 6 | 32508048 | 312985 | 10.1843 | 0.5153 | -2.6702 | 5.8086 | CEU |
| HLA-DQA2 | GI_11095446-S | rs9268607 | 6 | 6 | 32508516 | 312517 | 10.1843 | 0.5153 | 2.6702  | 5.8086 | CEU |
| HLA-DQA2 | GI_11095446-S | rs9268614 | 6 | 6 | 32510756 | 310277 | 12.3428 | 0.6104 | -2.9388 | 5.8086 | CEU |
| HLA-DQA2 | GI_11095446-S | rs9268615 | 6 | 6 | 32510867 | 310166 | 8.5910  | 0.4511 | -2.4278 | 5.8086 | CEU |
| HLA-DQA2 | GI_11095446-S | rs4612206 | 6 | 6 | 32512071 | 308962 | 9.8834  | 0.5291 | 2.6529  | 5.8086 | CEU |
| HLA-DQA2 | GI_11095446-S | rs2395175 | 6 | 6 | 32513004 | 308029 | 17.4362 | 0.7260 | -3.3245 | 5.8086 | CEU |
| HLA-DQA2 | GI_11095446-S | rs9268634 | 6 | 6 | 32514508 | 306525 | 9.7915  | 0.5321 | -2.6292 | 5.8086 | CEU |
| HLA-DQA2 | GI_11095446-S | rs14004   | 6 | 6 | 32515687 | 305346 | 10.1843 | 0.5153 | -2.6702 | 5.8086 | CEU |
| HLA-DQA1 | GI_18426974-S | rs9268644 | 6 | 6 | 32516022 | 202813 | 6.4095  | 0.3650 | -3.1292 | 6.3299 | CEU |
| HLA-DQA2 | GI_11095446-S | rs9268645 | 6 | 6 | 32516505 | 304528 | 10.1843 | 0.5153 | 2.6702  | 5.8086 | CEU |
| HLA-DQA2 | GI_11095446-S | rs6926374 | 6 | 6 | 32517283 | 303750 | 7.4344  | 0.4279 | 2.2452  | 5.8086 | CEU |
| HLA-DQA2 | GI_11095446-S | rs3129882 | 6 | 6 | 32517508 | 303525 | 6.8081  | 0.3695 | -2.0962 | 5.8086 | CEU |
| HLA-DQA2 | GI_11095446-S | rs9268657 | 6 | 6 | 32517634 | 303399 | 9.7915  | 0.5321 | -2.6292 | 5.8086 | CEU |
| HLA-DQA2 | GI_11095446-S | rs2239804 | 6 | 6 | 32519501 | 301532 | 7.7073  | 0.4120 | 2.2824  | 5.8086 | CEU |
| HLA-DQA2 | GI_11095446-S | rs2239803 | 6 | 6 | 32519811 | 301222 | 7.7590  | 0.4373 | -2.3129 | 5.8086 | CEU |
| HLA-DQA2 | GI_11095446-S | rs9268831 | 6 | 6 | 32535726 | 285307 | 6.7597  | 0.3672 | 2.0461  | 5.8086 | CEU |
| HLA-DQA1 | GI_18426974-S | rs6903608 | 6 | 6 | 32536263 | 182572 | 7.5077  | 0.4028 | -3.4325 | 6.3299 | CEU |
| HLA-DQA2 | GI_11095446-S | rs9268853 | 6 | 6 | 32537621 | 283412 | 9.2510  | 0.4786 | -2.2614 | 5.8086 | CEU |
| HLA-DQA1 | GI_18426974-S | rs9268853 | 6 | 6 | 32537621 | 181214 | 9.0519  | 0.4705 | 3.6461  | 6.3299 | CEU |
| HLA-DQA2 | GI_11095446-S | rs9268858 | 6 | 6 | 32537736 | 283297 | 9.2510  | 0.4786 | -2.2614 | 5.8086 | CEU |
| HLA-DQA1 | GI_18426974-S | rs9268858 | 6 | 6 | 32537736 | 181099 | 9.0519  | 0.4705 | 3.6461  | 6.3299 | CEU |
| HLA-DQA2 | GI_11095446-S | rs9268877 | 6 | 6 | 32539125 | 281908 | 6.6456  | 0.3616 | 1.7756  | 5.8086 | CEU |
| HLA-DQA1 | GI_18426974-S | rs9268877 | 6 | 6 | 32539125 | 179710 | 12.7594 | 0.6039 | -3.6967 | 6.3299 | CEU |
| HLA-DQA1 | GI_18426974-S | rs9268882 | 6 | 6 | 32539601 | 179234 | 6.7287  | 0.3984 | 3.0808  | 6.3299 | CEU |
| HLA-DQA1 | GI_18426974-S | rs9268914 | 6 | 6 | 32540534 | 178301 | 7.0211  | 0.4134 | -3.3667 | 6.3299 | CEU |
| HLA-DQA2 | GI_11095446-S | rs9268923 | 6 | 6 | 32540813 | 280220 | 10.0553 | 0.5426 | 2.1757  | 5.8086 | CEU |
| HLA-DQA1 | GI_18426974-S | rs9268923 | 6 | 6 | 32540813 | 178022 | 11.6875 | 0.6023 | -3.6289 | 6.3299 | CEU |
| HLA-DQA2 | GI_11095446-S | rs2395185 | 6 | 6 | 32541145 | 279888 | 9.2510  | 0.4786 | 2.2614  | 5.8086 | CEU |
| HLA-DQA1 | GI_18426974-S | rs2395185 | 6 | 6 | 32541145 | 177690 | 9.0519  | 0.4705 | -3.6461 | 6.3299 | CEU |
| HLA-DQA2 | GI_11095446-S | rs9268969 | 6 | 6 | 32542327 | 278706 | 10.8524 | 0.6171 | 2.2912  | 5.8086 | CEU |
| HLA-DQA1 | GI_18426974-S | rs9268969 | 6 | 6 | 32542327 | 176508 | 11.0210 | 0.6233 | -3.6236 | 6.3299 | CEU |
| HLA-DQA2 | GI_11095446-S | rs9268979 | 6 | 6 | 32543022 | 278011 | 6.5657  | 0.3731 | -1.7614 | 5.8086 | CEU |
| HLA-DQA1 | GI_18426974-S | rs9268979 | 6 | 6 | 32543022 | 175813 | 10.2835 | 0.5380 | 3.4405  | 6.3299 | CEU |
| HLA-DQA2 | GI_11095446-S | rs9405040 | 6 | 6 | 32547371 | 273662 | 9.2510  | 0.4786 | 2.2614  | 5.8086 | CEU |
| HLA-DQA1 | GI_18426974-S | rs9405040 | 6 | 6 | 32547371 | 171464 | 9.0519  | 0.4705 | -3.6461 | 6.3299 | CEU |

|          |               |            |   |   |          |        |         |        |         |        |     |
|----------|---------------|------------|---|---|----------|--------|---------|--------|---------|--------|-----|
| HLA-DQA2 | GI_11095446-S | rs9286790  | 6 | 6 | 32547806 | 273227 | 7.8091  | 0.4521 | -2.2074 | 5.8086 | CEU |
| HLA-DQA1 | GI_18426974-S | rs9286790  | 6 | 6 | 32547806 | 171029 | 8.0836  | 0.4650 | 3.5998  | 6.3299 | CEU |
| HLA-DQA2 | GI_11095446-S | rs9269065  | 6 | 6 | 32548150 | 272883 | 6.0992  | 0.3649 | -1.8875 | 5.8086 | CEU |
| HLA-DQA1 | GI_18426974-S | rs9269065  | 6 | 6 | 32548150 | 170685 | 11.4222 | 0.6002 | 3.7293  | 6.3299 | CEU |
| HLA-DQA2 | GI_11095446-S | rs9269069  | 6 | 6 | 32548340 | 272693 | 6.3262  | 0.3505 | 1.7498  | 5.8086 | CEU |
| HLA-DQA1 | GI_18426974-S | rs9269069  | 6 | 6 | 32548340 | 170495 | 12.2738 | 0.5950 | -3.6498 | 6.3299 | CEU |
| HLA-DQA1 | GI_18426974-S | rs9269070  | 6 | 6 | 32548429 | 170406 | 10.5224 | 0.5818 | 3.8443  | 6.3299 | CEU |
| HLA-DQA2 | GI_11095446-S | rs9269071  | 6 | 6 | 32548445 | 272588 | 6.6456  | 0.3616 | -1.7756 | 5.8086 | CEU |
| HLA-DQA1 | GI_18426974-S | rs9269071  | 6 | 6 | 32548445 | 170390 | 12.7594 | 0.6039 | 3.6967  | 6.3299 | CEU |
| HLA-DQA1 | GI_18426974-S | rs9269078  | 6 | 6 | 32548857 | 169978 | 7.4667  | 0.4176 | -3.4582 | 6.3299 | CEU |
| HLA-DQA2 | GI_11095446-S | rs9269080  | 6 | 6 | 32548947 | 272086 | 6.6456  | 0.3616 | -1.7756 | 5.8086 | CEU |
| HLA-DQA1 | GI_18426974-S | rs9269080  | 6 | 6 | 32548947 | 169888 | 12.7594 | 0.6039 | 3.6967  | 6.3299 | CEU |
| HLA-DQA1 | GI_18426974-S | rs9269081  | 6 | 6 | 32549078 | 169757 | 6.9142  | 0.3747 | -3.2979 | 6.3299 | CEU |
| HLA-DQA1 | GI_18426974-S | rs7755212  | 6 | 6 | 32549386 | 169449 | 11.8933 | 0.6309 | -3.8820 | 6.3299 | CEU |
| HLA-DQA2 | GI_11095446-S | rs7739203  | 6 | 6 | 32549533 | 271500 | 7.0258  | 0.3801 | 1.7998  | 5.8086 | CEU |
| HLA-DQA1 | GI_18426974-S | rs7739203  | 6 | 6 | 32549533 | 169302 | 11.7904 | 0.5726 | -3.5652 | 6.3299 | CEU |
| HLA-DQA2 | GI_11095446-S | rs7739357  | 6 | 6 | 32549619 | 271414 | 5.8832  | 0.3701 | 1.9167  | 5.8086 | CEU |
| HLA-DQA1 | GI_18426974-S | rs7739357  | 6 | 6 | 32549619 | 169216 | 10.9682 | 0.6059 | -3.8445 | 6.3299 | CEU |
| HLA-DQA2 | GI_11095446-S | rs12194148 | 6 | 6 | 32552176 | 268857 | 5.8353  | 0.3204 | 1.8417  | 5.8086 | CEU |
| HLA-DQA2 | GI_11095446-S | rs9405112  | 6 | 6 | 32553578 | 267455 | 9.2510  | 0.4786 | -2.2614 | 5.8086 | CEU |
| HLA-DQA1 | GI_18426974-S | rs9405112  | 6 | 6 | 32553578 | 165257 | 9.0519  | 0.4705 | 3.6461  | 6.3299 | CEU |
| HLA-DQA2 | GI_11095446-S | rs9378212  | 6 | 6 | 32553669 | 267364 | 5.8666  | 0.3267 | 1.8430  | 5.8086 | CEU |
| HLA-DQA2 | GI_11095446-S | rs9378266  | 6 | 6 | 32556167 | 264866 | 5.8353  | 0.3204 | 1.8417  | 5.8086 | CEU |
| HLA-DQA2 | GI_11095446-S | rs9378213  | 6 | 6 | 32556376 | 264657 | 5.8353  | 0.3204 | -1.8417 | 5.8086 | CEU |
| HLA-DQA1 | GI_18426974-S | rs9269190  | 6 | 6 | 32556478 | 162357 | 7.5077  | 0.4028 | 3.4325  | 6.3299 | CEU |
| HLA-DQA2 | GI_11095446-S | rs9391786  | 6 | 6 | 32556539 | 264494 | 5.8353  | 0.3204 | 1.8417  | 5.8086 | CEU |
| HLA-DQA1 | GI_18426974-S | rs7749242  | 6 | 6 | 32557008 | 161827 | 7.5077  | 0.4028 | -3.4325 | 6.3299 | CEU |
| HLA-DQA1 | GI_18426974-S | rs7749092  | 6 | 6 | 32557028 | 161807 | 8.6007  | 0.4573 | 5.0820  | 6.3299 | CEU |
| HLA-DQA2 | GI_11095446-S | rs5020946  | 6 | 6 | 32558067 | 262966 | 5.8353  | 0.3204 | 1.8417  | 5.8086 | CEU |
| HLA-DQA1 | GI_18426974-S | rs12191360 | 6 | 6 | 32559339 | 159496 | 7.5077  | 0.4028 | 3.4325  | 6.3299 | CEU |
| HLA-DQA1 | GI_18426974-S | rs6916742  | 6 | 6 | 32561169 | 157666 | 12.1950 | 0.5860 | 4.4031  | 6.3299 | CEU |
| HLA-DQA2 | GI_11095446-S | rs11757159 | 6 | 6 | 32628250 | 192783 | 9.4631  | 0.4872 | 2.1819  | 5.8086 | CEU |
| HLA-DQA1 | GI_18426974-S | rs11757159 | 6 | 6 | 32628250 | 90585  | 8.5494  | 0.4493 | -3.4114 | 6.3299 | CEU |
| HLA-DQA1 | GI_18426974-S | rs701831   | 6 | 6 | 32657379 | 61456  | 6.8013  | 0.3692 | -3.7195 | 6.3299 | CEU |
| HLA-DQA2 | GI_11095446-S | rs2516049  | 6 | 6 | 32678378 | 142655 | 8.0716  | 0.4284 | 2.0953  | 5.8086 | CEU |
| HLA-DQA1 | GI_18426974-S | rs2516049  | 6 | 6 | 32678378 | 40457  | 9.6479  | 0.4945 | -3.6504 | 6.3299 | CEU |
| HLA-DQA1 | GI_18426974-S | rs9270986  | 6 | 6 | 32682038 | 36797  | 6.5892  | 0.3638 | -3.6925 | 6.3299 | CEU |
| HLA-DQA2 | GI_11095446-S | rs660895   | 6 | 6 | 32685358 | 135675 | 20.8420 | 0.7906 | 3.3260  | 5.8086 | CEU |
| HLA-DQA2 | GI_11095446-S | rs9271567  | 6 | 6 | 32698434 | 122599 | 10.9636 | 0.5983 | 2.1833  | 5.8086 | CEU |
| HLA-DQA2 | GI_11095446-S | rs9271594  | 6 | 6 | 32699191 | 121842 | 24.3559 | 0.8618 | 2.9197  | 5.8086 | CEU |
| HLA-DQA2 | GI_11095446-S | rs9271605  | 6 | 6 | 32699426 | 121607 | 15.0696 | 0.7097 | -2.6767 | 5.8086 | CEU |
| HLA-DQA1 | GI_18426974-S | rs9271605  | 6 | 6 | 32699426 | 19409  | 7.5242  | 0.4384 | 3.4305  | 6.3299 | CEU |
| HLA-DQA1 | GI_18426974-S | rs9272346  | 6 | 6 | 32712350 | 6485   | 20.3984 | 0.7832 | 4.4403  | 6.3299 | CEU |
| HLA-DQA1 | GI_18426974-S | rs9272723  | 6 | 6 | 32717405 | 1430   | 17.8764 | 0.7353 | 4.2561  | 6.3299 | CEU |
| HLA-DQA2 | GI_11095446-S | rs6928482  | 6 | 6 | 32734227 | 86806  | 6.5643  | 0.3575 | -1.9531 | 5.8086 | CEU |
| HLA-DQA1 | GI_18426974-S | rs6928482  | 6 | 6 | 32734227 | 15392  | 11.7230 | 0.5704 | 3.9759  | 6.3299 | CEU |
| HLA-DQA1 | GI_18426974-S | rs9273363  | 6 | 6 | 32734250 | 15415  | 6.5579  | 0.3572 | 3.3211  | 6.3299 | CEU |
| HLA-DQA1 | GI_18426974-S | rs9275141  | 6 | 6 | 32759095 | 40260  | 10.3708 | 0.5223 | 3.7403  | 6.3299 | CEU |
| HLA-DQA1 | GI_18426974-S | rs3021061  | 6 | 6 | 32759817 | 40982  | 6.4493  | 0.3957 | 5.8280  | 6.3299 | CEU |
| HLA-DQA1 | GI_18426974-S | rs3134975  | 6 | 6 | 32760559 | 41724  | 8.3147  | 0.4391 | -3.6501 | 6.3299 | CEU |
| HLA-DQA2 | GI_11095446-S | rs9275184  | 6 | 6 | 32762692 | 58341  | 8.8090  | 0.4603 | -2.8792 | 5.8086 | CEU |
| HLA-DQA2 | GI_11095446-S | rs9275207  | 6 | 6 | 32765688 | 55345  | 9.9727  | 0.5072 | 3.0413  | 5.8086 | CEU |
| HLA-DQA1 | GI_18426974-S | rs2157051  | 6 | 6 | 32766602 | 47767  | 6.6208  | 0.3870 | -3.3477 | 6.3299 | CEU |
| HLA-DQA1 | GI_18426974-S | rs2858330  | 6 | 6 | 32766693 | 47858  | 10.3708 | 0.5223 | -3.7403 | 6.3299 | CEU |
| HLA-DQA2 | GI_11095446-S | rs9275221  | 6 | 6 | 32767077 | 53956  | 9.6563  | 0.5009 | -3.0421 | 5.8086 | CEU |
| HLA-DQA1 | GI_18426974-S | rs3129719  | 6 | 6 | 32769757 | 50922  | 8.3147  | 0.4391 | 3.6501  | 6.3299 | CEU |
| HLA-DQA2 | GI_11095446-S | rs9275293  | 6 | 6 | 32771286 | 49747  | 9.9727  | 0.5072 | -3.0413 | 5.8086 | CEU |
| HLA-DQA2 | GI_11095446-S | rs5000634  | 6 | 6 | 32771542 | 49491  | 8.1415  | 0.4315 | -2.4034 | 5.8086 | CEU |
| HLA-DQA1 | GI_18426974-S | rs5000634  | 6 | 6 | 32771542 | 52707  | 6.5858  | 0.3586 | 3.5759  | 6.3299 | CEU |

|           |               |            |   |   |          |        |         |        |         |        |     |
|-----------|---------------|------------|---|---|----------|--------|---------|--------|---------|--------|-----|
| HLA-DQA1  | GI_18426974-S | rs3129720  | 6 | 6 | 32771609 | 52774  | 7.9258  | 0.4332 | 3.6203  | 6.3299 | CEU |
| HLA-DQA2  | GI_11095446-S | rs6457622  | 6 | 6 | 32772141 | 48892  | 8.3812  | 0.4658 | 2.4290  | 5.8086 | CEU |
| HLA-DQA1  | GI_18426974-S | rs6457622  | 6 | 6 | 32772141 | 53306  | 6.5808  | 0.3793 | -3.6350 | 6.3299 | CEU |
| HLA-DQA2  | GI_11095446-S | rs7745040  | 6 | 6 | 32772310 | 48723  | 8.1415  | 0.4315 | -2.4034 | 5.8086 | CEU |
| HLA-DQA1  | GI_18426974-S | rs7745040  | 6 | 6 | 32772310 | 53475  | 6.5858  | 0.3586 | 3.5759  | 6.3299 | CEU |
| HLA-DQA2  | GI_11095446-S | rs9275307  | 6 | 6 | 32772968 | 48065  | 9.3970  | 0.4967 | 3.0562  | 5.8086 | CEU |
| HLA-DQA2  | GI_11095446-S | rs9275310  | 6 | 6 | 32773297 | 47736  | 8.8785  | 0.4691 | -2.6247 | 5.8086 | CEU |
| HLA-DQA2  | GI_11095446-S | rs9275311  | 6 | 6 | 32773618 | 47415  | 8.9012  | 0.4701 | 2.6045  | 5.8086 | CEU |
| HLA-DQA2  | GI_11095446-S | rs9275312  | 6 | 6 | 32773706 | 47327  | 7.0140  | 0.3847 | 2.4665  | 5.8086 | CEU |
| HLA-DQA2  | GI_11095446-S | rs9275313  | 6 | 6 | 32773737 | 47296  | 6.4486  | 0.3896 | 2.5493  | 5.8086 | CEU |
| HLA-DQA2  | GI_11095446-S | rs9275319  | 6 | 6 | 32774273 | 46760  | 6.0185  | 0.3550 | 2.1220  | 5.8086 | CEU |
| HLA-DQA2  | GI_11095446-S | rs9275324  | 6 | 6 | 32774613 | 46420  | 8.5139  | 0.4717 | 2.7643  | 5.8086 | CEU |
| HLA-DQA2  | GI_11095446-S | rs9275328  | 6 | 6 | 32774800 | 46233  | 6.7582  | 0.3774 | 2.3287  | 5.8086 | CEU |
| HLA-DQA2  | GI_11095446-S | rs9275334  | 6 | 6 | 32775085 | 45948  | 9.9727  | 0.5072 | -3.0413 | 5.8086 | CEU |
| HLA-DQA1  | GI_18426974-S | rs3135006  | 6 | 6 | 32775097 | 56262  | 8.1191  | 0.4362 | -3.6345 | 6.3299 | CEU |
| HLA-DQA2  | GI_11095446-S | rs9275338  | 6 | 6 | 32775321 | 45712  | 6.0453  | 0.3459 | 2.4629  | 5.8086 | CEU |
| HLA-DQA2  | GI_11095446-S | rs9275351  | 6 | 6 | 32775771 | 45262  | 9.2800  | 0.4919 | -3.0275 | 5.8086 | CEU |
| HLA-DQA2  | GI_11095446-S | rs9275356  | 6 | 6 | 32775828 | 45205  | 9.9727  | 0.5072 | 3.0413  | 5.8086 | CEU |
| HLA-DQA1  | GI_18426974-S | rs9275562  | 6 | 6 | 32785824 | 66989  | 8.7516  | 0.4697 | 3.7330  | 6.3299 | CEU |
| HLA-DQA2  | GI_11095446-S | rs9380319  | 6 | 6 | 32785890 | 35143  | 6.4562  | 0.3571 | 1.9862  | 5.8086 | CEU |
| HLA-DQA1  | GI_18426974-S | rs9380319  | 6 | 6 | 32785890 | 67055  | 10.3907 | 0.5293 | -3.8740 | 6.3299 | CEU |
| HLA-DQA2  | GI_11095446-S | rs9275592  | 6 | 6 | 32788598 | 32435  | 9.9727  | 0.5072 | 3.0413  | 5.8086 | CEU |
| HLA-DQA2  | GI_11095446-S | rs7764856  | 6 | 6 | 32788618 | 32415  | 9.4902  | 0.4883 | -2.3629 | 5.8086 | CEU |
| HLA-DQA2  | GI_11095446-S | rs7454108  | 6 | 6 | 32789461 | 31572  | 9.9727  | 0.5072 | -3.0413 | 5.8086 | CEU |
| HLA-DQA2  | GI_11095446-S | rs3957146  | 6 | 6 | 32789508 | 31525  | 9.9727  | 0.5072 | -3.0413 | 5.8086 | CEU |
| HLA-DQA2  | GI_11095446-S | rs3998159  | 6 | 6 | 32789997 | 31036  | 8.1162  | 0.4418 | 2.8483  | 5.8086 | CEU |
| HLA-DQA2  | GI_11095446-S | rs3957148  | 6 | 6 | 32790115 | 30918  | 6.3245  | 0.3555 | 2.7268  | 5.8086 | CEU |
| HLA-DQA2  | GI_11095446-S | rs9275599  | 6 | 6 | 32790407 | 30626  | 7.6634  | 0.4155 | 2.7801  | 5.8086 | CEU |
| HLA-DQA2  | GI_11095446-S | rs3763366  | 6 | 6 | 32915424 | 94391  | 5.9729  | 0.3275 | -1.9993 | 5.8086 | CEU |
| CDKN1A    | GI_17978494-I | rs733590   | 6 | 6 | 36753181 | 1450   | 6.7874  | 0.3685 | -0.1271 | 6.5034 | CEU |
| PEX6      | GI_21361243-S | rs2234185  | 6 | 6 | 43005052 | 34851  | 7.7685  | 0.4148 | -0.4538 | 5.9148 | CEU |
| PEX6      | GI_21361243-S | rs4714634  | 6 | 6 | 43009098 | 30805  | 9.1740  | 0.4814 | -0.4981 | 5.9148 | CEU |
| PEX6      | GI_21361243-S | rs3763236  | 6 | 6 | 43010486 | 29417  | 12.3275 | 0.5903 | -0.5768 | 5.9148 | CEU |
| PEX6      | GI_21361243-S | rs1053538  | 6 | 6 | 43011741 | 28162  | 10.4747 | 0.5800 | 0.5926  | 5.9148 | CEU |
| PEX6      | GI_21361243-S | rs6941212  | 6 | 6 | 43023898 | 16005  | 12.4760 | 0.5950 | -0.5573 | 5.9148 | CEU |
| PEX6      | GI_21361243-S | rs9471976  | 6 | 6 | 43028527 | 11376  | 11.6647 | 0.5684 | 0.5341  | 5.9148 | CEU |
| PEX6      | GI_21361243-S | rs13215983 | 6 | 6 | 43032171 | 7732   | 11.4536 | 0.5675 | 0.5392  | 5.9148 | CEU |
| PEX6      | GI_21361243-S | rs9462856  | 6 | 6 | 43034002 | 5901   | 11.6647 | 0.5684 | -0.5341 | 5.9148 | CEU |
| PEX6      | GI_21361243-S | rs11752813 | 6 | 6 | 43035995 | 3908   | 12.2692 | 0.5884 | 0.5448  | 5.9148 | CEU |
| PEX6      | GI_21361243-S | rs2296805  | 6 | 6 | 43036736 | 3167   | 14.6947 | 0.6663 | -0.5935 | 5.9148 | CEU |
| PEX6      | GI_21361243-S | rs2296804  | 6 | 6 | 43039239 | 664    | 14.9901 | 0.6677 | -0.5895 | 5.9148 | CEU |
| PEX6      | GI_21361243-S | rs2274517  | 6 | 6 | 43040693 | 790    | 11.6647 | 0.5684 | -0.5341 | 5.9148 | CEU |
| PEX6      | GI_21361243-S | rs2274514  | 6 | 6 | 43042478 | 2575   | 11.6647 | 0.5684 | -0.5341 | 5.9148 | CEU |
| PEX6      | GI_21361243-S | rs3805952  | 6 | 6 | 43045104 | 5201   | 12.2692 | 0.5884 | -0.5448 | 5.9148 | CEU |
| PEX6      | GI_21361243-S | rs3805951  | 6 | 6 | 43045154 | 5251   | 11.4473 | 0.5738 | 0.5332  | 5.9148 | CEU |
| PEX6      | GI_21361243-S | rs7741302  | 6 | 6 | 43046355 | 6452   | 10.9655 | 0.5504 | 0.5229  | 5.9148 | CEU |
| PEX6      | GI_21361243-S | rs2395943  | 6 | 6 | 43048651 | 8748   | 14.9901 | 0.6677 | 0.5895  | 5.9148 | CEU |
| PEX6      | GI_21361243-S | rs9986447  | 6 | 6 | 43050757 | 10854  | 11.1605 | 0.5839 | 0.5412  | 5.9148 | CEU |
| PEX6      | GI_21361243-S | rs9462857  | 6 | 6 | 43051076 | 11173  | 10.8378 | 0.5587 | -0.5186 | 5.9148 | CEU |
| PEX6      | GI_21361243-S | rs9462859  | 6 | 6 | 43054921 | 15018  | 12.2692 | 0.5884 | -0.5448 | 5.9148 | CEU |
| PEX6      | GI_21361243-S | rs3805946  | 6 | 6 | 43063727 | 23824  | 10.1848 | 0.5343 | 0.5188  | 5.9148 | CEU |
| PEX6      | GI_21361243-S | rs12196299 | 6 | 6 | 43167339 | 127436 | 6.1041  | 0.3391 | 0.4774  | 5.9148 | CEU |
| PEX6      | GI_21361243-S | rs3805938  | 6 | 6 | 43171824 | 131921 | 6.0674  | 0.3324 | 0.4505  | 5.9148 | CEU |
| PEX6      | GI_21361243-S | rs3793017  | 6 | 6 | 43173891 | 133988 | 6.0674  | 0.3324 | -0.4505 | 5.9148 | CEU |
| Hs.485895 | Hs.485895-S   | rs2025488  | 6 | 6 | 87870921 | 125769 | 5.8086  | 0.3190 | 0.0964  | 5.6589 | CEU |
| Hs.485895 | Hs.485895-S   | rs2025489  | 6 | 6 | 87871678 | 125012 | 7.9012  | 0.4565 | 0.1262  | 5.6589 | CEU |
| Hs.485895 | Hs.485895-S   | rs7774080  | 6 | 6 | 87872220 | 124470 | 6.2656  | 0.3426 | -0.1107 | 5.6589 | CEU |
| Hs.485895 | Hs.485895-S   | rs4574603  | 6 | 6 | 87873624 | 123066 | 6.1533  | 0.3368 | 0.1114  | 5.6589 | CEU |
| Hs.485895 | Hs.485895-S   | rs1590429  | 6 | 6 | 87875112 | 121578 | 7.1098  | 0.3894 | 0.1135  | 5.6589 | CEU |

|           |             |            |   |   |          |        |        |        |         |        |     |
|-----------|-------------|------------|---|---|----------|--------|--------|--------|---------|--------|-----|
| Hs.485895 | Hs.485895-S | rs2025490  | 6 | 6 | 87875181 | 121509 | 8.6398 | 0.4532 | 0.1238  | 5.6589 | CEU |
| Hs.485895 | Hs.485895-S | rs3932521  | 6 | 6 | 87875317 | 121373 | 7.5954 | 0.4069 | -0.1159 | 5.6589 | CEU |
| Hs.485895 | Hs.485895-S | rs2031522  | 6 | 6 | 87878220 | 118470 | 8.6398 | 0.4532 | -0.1238 | 5.6589 | CEU |
| Hs.485895 | Hs.485895-S | rs2031521  | 6 | 6 | 87878340 | 118350 | 6.0161 | 0.3603 | 0.1060  | 5.6589 | CEU |
| Hs.485895 | Hs.485895-S | rs2031520  | 6 | 6 | 87878392 | 118298 | 5.8010 | 0.3539 | 0.1071  | 5.6589 | CEU |
| Hs.485895 | Hs.485895-S | rs6917931  | 6 | 6 | 87880549 | 116141 | 6.5423 | 0.3829 | -0.1100 | 5.6589 | CEU |
| Hs.485895 | Hs.485895-S | rs1075068  | 6 | 6 | 87882028 | 114662 | 7.5954 | 0.4069 | 0.1159  | 5.6589 | CEU |
| Hs.485895 | Hs.485895-S | rs9450619  | 6 | 6 | 87884546 | 112144 | 8.6398 | 0.4532 | 0.1238  | 5.6589 | CEU |
| Hs.485895 | Hs.485895-S | rs12177532 | 6 | 6 | 87884847 | 111843 | 7.5954 | 0.4069 | -0.1159 | 5.6589 | CEU |
| Hs.485895 | Hs.485895-S | rs9344676  | 6 | 6 | 87890034 | 106656 | 7.5954 | 0.4069 | -0.1159 | 5.6589 | CEU |
| Hs.485895 | Hs.485895-S | rs4391234  | 6 | 6 | 87890203 | 106487 | 7.7197 | 0.4181 | 0.1195  | 5.6589 | CEU |
| Hs.485895 | Hs.485895-S | rs6454581  | 6 | 6 | 87890787 | 105903 | 6.7992 | 0.3795 | 0.1132  | 5.6589 | CEU |
| Hs.485895 | Hs.485895-S | rs9353450  | 6 | 6 | 87893105 | 103585 | 7.5954 | 0.4069 | 0.1159  | 5.6589 | CEU |
| Hs.485895 | Hs.485895-S | rs6934717  | 6 | 6 | 87897718 | 98972  | 7.5214 | 0.4145 | -0.1179 | 5.6589 | CEU |
| Hs.485895 | Hs.485895-S | rs9353455  | 6 | 6 | 87900084 | 96606  | 6.1533 | 0.3368 | 0.1114  | 5.6589 | CEU |
| Hs.485895 | Hs.485895-S | rs9353456  | 6 | 6 | 87900363 | 96327  | 7.5954 | 0.4069 | 0.1159  | 5.6589 | CEU |
| Hs.485895 | Hs.485895-S | rs7773568  | 6 | 6 | 87902002 | 94688  | 7.6366 | 0.4088 | -0.1182 | 5.6589 | CEU |
| Hs.485895 | Hs.485895-S | rs1998765  | 6 | 6 | 87902966 | 93724  | 7.4748 | 0.4067 | 0.1159  | 5.6589 | CEU |
| Hs.485895 | Hs.485895-S | rs16878497 | 6 | 6 | 87903393 | 93297  | 8.6398 | 0.4532 | -0.1238 | 5.6589 | CEU |
| Hs.485895 | Hs.485895-S | rs6454582  | 6 | 6 | 87905021 | 91669  | 5.7418 | 0.3201 | 0.1085  | 5.6589 | CEU |
| Hs.485895 | Hs.485895-S | rs6940194  | 6 | 6 | 87905733 | 90957  | 7.5954 | 0.4069 | 0.1159  | 5.6589 | CEU |
| Hs.485895 | Hs.485895-S | rs994170   | 6 | 6 | 87912232 | 84458  | 7.5954 | 0.4069 | 0.1159  | 5.6589 | CEU |
| Hs.485895 | Hs.485895-S | rs6907805  | 6 | 6 | 87912722 | 83968  | 6.1533 | 0.3368 | 0.1114  | 5.6589 | CEU |
| Hs.485895 | Hs.485895-S | rs6454587  | 6 | 6 | 87914601 | 82089  | 6.7992 | 0.3795 | 0.1132  | 5.6589 | CEU |
| Hs.485895 | Hs.485895-S | rs9362398  | 6 | 6 | 87918814 | 77876  | 7.1742 | 0.4035 | -0.1172 | 5.6589 | CEU |
| Hs.485895 | Hs.485895-S | rs1925689  | 6 | 6 | 87920070 | 76620  | 6.1677 | 0.3473 | 0.1101  | 5.6589 | CEU |
| Hs.485895 | Hs.485895-S | rs1886752  | 6 | 6 | 87928442 | 68248  | 7.4748 | 0.4067 | 0.1159  | 5.6589 | CEU |
| Hs.485895 | Hs.485895-S | rs9351117  | 6 | 6 | 87935936 | 60754  | 7.5954 | 0.4069 | 0.1159  | 5.6589 | CEU |
| Hs.485895 | Hs.485895-S | rs9353462  | 6 | 6 | 87936431 | 60259  | 7.5954 | 0.4069 | 0.1159  | 5.6589 | CEU |
| Hs.485895 | Hs.485895-S | rs1925692  | 6 | 6 | 87940726 | 55964  | 7.4748 | 0.4067 | 0.1159  | 5.6589 | CEU |
| Hs.485895 | Hs.485895-S | rs6909021  | 6 | 6 | 87941032 | 55658  | 7.5954 | 0.4069 | 0.1159  | 5.6589 | CEU |
| Hs.485895 | Hs.485895-S | rs6909200  | 6 | 6 | 87941146 | 55544  | 7.5954 | 0.4069 | -0.1159 | 5.6589 | CEU |
| Hs.485895 | Hs.485895-S | rs7739034  | 6 | 6 | 87942905 | 53785  | 7.1234 | 0.3900 | -0.1135 | 5.6589 | CEU |
| Hs.485895 | Hs.485895-S | rs7739726  | 6 | 6 | 87943303 | 53387  | 7.5954 | 0.4069 | -0.1159 | 5.6589 | CEU |
| Hs.485895 | Hs.485895-S | rs7757827  | 6 | 6 | 87943444 | 53246  | 7.6366 | 0.4088 | 0.1182  | 5.6589 | CEU |
| Hs.485895 | Hs.485895-S | rs7768575  | 6 | 6 | 87945397 | 51293  | 7.5954 | 0.4069 | 0.1159  | 5.6589 | CEU |
| Hs.485895 | Hs.485895-S | rs6454591  | 6 | 6 | 87946003 | 50687  | 7.4091 | 0.4091 | 0.1180  | 5.6589 | CEU |
| Hs.485895 | Hs.485895-S | rs1980790  | 6 | 6 | 87946853 | 49837  | 7.4748 | 0.4067 | -0.1159 | 5.6589 | CEU |
| Hs.485895 | Hs.485895-S | rs2147917  | 6 | 6 | 87947184 | 49506  | 6.1533 | 0.3368 | 0.1114  | 5.6589 | CEU |
| Hs.485895 | Hs.485895-S | rs1080596  | 6 | 6 | 87951157 | 45533  | 7.1098 | 0.3894 | 0.1135  | 5.6589 | CEU |
| Hs.485895 | Hs.485895-S | rs6913159  | 6 | 6 | 87954518 | 42172  | 8.6398 | 0.4532 | 0.1238  | 5.6589 | CEU |
| Hs.485895 | Hs.485895-S | rs9450630  | 6 | 6 | 87955879 | 40811  | 7.1185 | 0.4246 | -0.1201 | 5.6589 | CEU |
| Hs.485895 | Hs.485895-S | rs7776407  | 6 | 6 | 87957380 | 39310  | 6.7992 | 0.3795 | 0.1132  | 5.6589 | CEU |
| Hs.485895 | Hs.485895-S | rs7742478  | 6 | 6 | 87957586 | 39104  | 7.3499 | 0.4238 | -0.1171 | 5.6589 | CEU |
| Hs.485895 | Hs.485895-S | rs4707345  | 6 | 6 | 87958944 | 37746  | 8.6398 | 0.4532 | -0.1238 | 5.6589 | CEU |
| Hs.485895 | Hs.485895-S | rs12181709 | 6 | 6 | 87959372 | 37318  | 8.6398 | 0.4532 | 0.1238  | 5.6589 | CEU |
| Hs.485895 | Hs.485895-S | rs1925695  | 6 | 6 | 87962772 | 33918  | 7.5954 | 0.4069 | -0.1159 | 5.6589 | CEU |
| Hs.485895 | Hs.485895-S | rs6940325  | 6 | 6 | 87963635 | 33055  | 8.2650 | 0.4427 | 0.1223  | 5.6589 | CEU |
| Hs.485895 | Hs.485895-S | rs4605853  | 6 | 6 | 87966096 | 30594  | 7.5954 | 0.4069 | 0.1159  | 5.6589 | CEU |
| Hs.485895 | Hs.485895-S | rs2147918  | 6 | 6 | 87967855 | 28835  | 5.9264 | 0.3346 | 0.1111  | 5.6589 | CEU |
| Hs.485895 | Hs.485895-S | rs9344691  | 6 | 6 | 87968227 | 28463  | 6.3375 | 0.3511 | -0.1122 | 5.6589 | CEU |
| Hs.485895 | Hs.485895-S | rs2147920  | 6 | 6 | 87968525 | 28165  | 7.0932 | 0.3886 | 0.1132  | 5.6589 | CEU |
| Hs.485895 | Hs.485895-S | rs2147921  | 6 | 6 | 87968580 | 28110  | 7.6188 | 0.4134 | 0.1160  | 5.6589 | CEU |
| Hs.485895 | Hs.485895-S | rs4707346  | 6 | 6 | 87970195 | 26495  | 7.5954 | 0.4069 | -0.1159 | 5.6589 | CEU |
| Hs.485895 | Hs.485895-S | rs6913932  | 6 | 6 | 87971829 | 24861  | 6.1533 | 0.3368 | 0.1114  | 5.6589 | CEU |
| Hs.485895 | Hs.485895-S | rs7752485  | 6 | 6 | 87972336 | 24354  | 7.5954 | 0.4069 | -0.1159 | 5.6589 | CEU |
| Hs.485895 | Hs.485895-S | rs7752414  | 6 | 6 | 87972541 | 24149  | 8.6398 | 0.4532 | 0.1238  | 5.6589 | CEU |
| Hs.485895 | Hs.485895-S | rs4707347  | 6 | 6 | 87974481 | 22209  | 7.3703 | 0.3964 | 0.1126  | 5.6589 | CEU |
| Hs.485895 | Hs.485895-S | rs4707348  | 6 | 6 | 87974566 | 22124  | 6.1533 | 0.3368 | 0.1114  | 5.6589 | CEU |

|           |             |            |   |   |          |       |        |        |         |        |     |
|-----------|-------------|------------|---|---|----------|-------|--------|--------|---------|--------|-----|
| Hs.485895 | Hs.485895-S | rs4110984  | 6 | 6 | 87975193 | 21497 | 7.4773 | 0.4068 | 0.1159  | 5.6589 | CEU |
| Hs.485895 | Hs.485895-S | rs7755883  | 6 | 6 | 87976321 | 20369 | 5.9531 | 0.3360 | -0.1112 | 5.6589 | CEU |
| Hs.485895 | Hs.485895-S | rs4099964  | 6 | 6 | 87978314 | 18376 | 6.1533 | 0.3368 | 0.1114  | 5.6589 | CEU |
| Hs.485895 | Hs.485895-S | rs9450636  | 6 | 6 | 87986888 | 9802  | 8.6398 | 0.4532 | 0.1238  | 5.6589 | CEU |
| Hs.485895 | Hs.485895-S | rs3904088  | 6 | 6 | 87987496 | 9194  | 7.8986 | 0.4320 | -0.1161 | 5.6589 | CEU |
| Hs.485895 | Hs.485895-S | rs9353464  | 6 | 6 | 87989958 | 6732  | 7.5954 | 0.4069 | 0.1159  | 5.6589 | CEU |
| Hs.485895 | Hs.485895-S | rs9362411  | 6 | 6 | 87990572 | 6118  | 6.1533 | 0.3368 | 0.1114  | 5.6589 | CEU |
| Hs.485895 | Hs.485895-S | rs3903920  | 6 | 6 | 87991455 | 5235  | 7.5954 | 0.4069 | 0.1159  | 5.6589 | CEU |
| Hs.485895 | Hs.485895-S | rs13201289 | 6 | 6 | 87993017 | 3673  | 8.6398 | 0.4532 | -0.1238 | 5.6589 | CEU |
| Hs.485895 | Hs.485895-S | rs7774603  | 6 | 6 | 87993744 | 2946  | 5.9547 | 0.3411 | 0.1102  | 5.6589 | CEU |
| Hs.485895 | Hs.485895-S | rs9450638  | 6 | 6 | 87994045 | 2645  | 8.6398 | 0.4532 | 0.1238  | 5.6589 | CEU |
| Hs.485895 | Hs.485895-S | rs6926831  | 6 | 6 | 87995082 | 1608  | 7.5954 | 0.4069 | -0.1159 | 5.6589 | CEU |
| Hs.485895 | Hs.485895-S | rs9344693  | 6 | 6 | 87996356 | 334   | 7.5954 | 0.4069 | -0.1159 | 5.6589 | CEU |
| Hs.485895 | Hs.485895-S | rs6932641  | 6 | 6 | 87997820 | 1130  | 8.6496 | 0.4715 | 0.1320  | 5.6589 | CEU |
| Hs.485895 | Hs.485895-S | rs6933046  | 6 | 6 | 87998138 | 1448  | 6.0548 | 0.3365 | 0.1114  | 5.6589 | CEU |
| Hs.485895 | Hs.485895-S | rs3857484  | 6 | 6 | 88000288 | 3598  | 6.1533 | 0.3368 | -0.1114 | 5.6589 | CEU |
| Hs.485895 | Hs.485895-S | rs4707355  | 6 | 6 | 88009592 | 12902 | 8.6398 | 0.4532 | -0.1238 | 5.6589 | CEU |
| Hs.485895 | Hs.485895-S | rs3846776  | 6 | 6 | 88010398 | 13708 | 6.1533 | 0.3368 | 0.1114  | 5.6589 | CEU |
| Hs.485895 | Hs.485895-S | rs9344695  | 6 | 6 | 88012963 | 16273 | 6.1533 | 0.3368 | -0.1114 | 5.6589 | CEU |
| Hs.485895 | Hs.485895-S | rs9353465  | 6 | 6 | 88013005 | 16315 | 7.5954 | 0.4069 | 0.1159  | 5.6589 | CEU |
| Hs.485895 | Hs.485895-S | rs9362414  | 6 | 6 | 88016474 | 19784 | 6.1677 | 0.3473 | -0.1101 | 5.6589 | CEU |
| Hs.485895 | Hs.485895-S | rs7758618  | 6 | 6 | 88020857 | 24167 | 6.7992 | 0.3795 | 0.1132  | 5.6589 | CEU |
| Hs.485895 | Hs.485895-S | rs6908834  | 6 | 6 | 88022247 | 25557 | 8.6398 | 0.4532 | -0.1238 | 5.6589 | CEU |
| Hs.485895 | Hs.485895-S | rs9362415  | 6 | 6 | 88025284 | 28594 | 6.1533 | 0.3368 | 0.1114  | 5.6589 | CEU |
| Hs.485895 | Hs.485895-S | rs9353468  | 6 | 6 | 88030346 | 33656 | 6.0125 | 0.3392 | 0.1109  | 5.6589 | CEU |
| Hs.485895 | Hs.485895-S | rs4707356  | 6 | 6 | 88032792 | 36102 | 7.4526 | 0.4112 | -0.1158 | 5.6589 | CEU |
| Hs.485895 | Hs.485895-S | rs9450645  | 6 | 6 | 88034494 | 37804 | 8.9974 | 0.4927 | -0.1156 | 5.6589 | CEU |
| Hs.485895 | Hs.485895-S | rs12176253 | 6 | 6 | 88035509 | 38819 | 6.1533 | 0.3368 | 0.1114  | 5.6589 | CEU |
| Hs.485895 | Hs.485895-S | rs9450646  | 6 | 6 | 88035828 | 39138 | 8.6398 | 0.4532 | -0.1238 | 5.6589 | CEU |
| Hs.485895 | Hs.485895-S | rs9450647  | 6 | 6 | 88038314 | 41624 | 6.1533 | 0.3368 | 0.1114  | 5.6589 | CEU |
| Hs.485895 | Hs.485895-S | rs4707357  | 6 | 6 | 88039715 | 43025 | 5.7418 | 0.3201 | -0.1085 | 5.6589 | CEU |
| Hs.485895 | Hs.485895-S | rs9362417  | 6 | 6 | 88040409 | 43719 | 6.1533 | 0.3368 | 0.1114  | 5.6589 | CEU |
| Hs.485895 | Hs.485895-S | rs6454598  | 6 | 6 | 88041105 | 44415 | 6.6944 | 0.3743 | 0.1152  | 5.6589 | CEU |
| Hs.485895 | Hs.485895-S | rs6454599  | 6 | 6 | 88041187 | 44497 | 6.1533 | 0.3368 | 0.1114  | 5.6589 | CEU |
| Hs.485895 | Hs.485895-S | rs6918942  | 6 | 6 | 88043135 | 46445 | 6.0444 | 0.3409 | 0.1139  | 5.6589 | CEU |
| Hs.485895 | Hs.485895-S | rs6899394  | 6 | 6 | 88043415 | 46725 | 6.1533 | 0.3368 | -0.1114 | 5.6589 | CEU |
| Hs.485895 | Hs.485895-S | rs6925648  | 6 | 6 | 88044265 | 47575 | 7.5954 | 0.4069 | -0.1159 | 5.6589 | CEU |
| Hs.485895 | Hs.485895-S | rs9351124  | 6 | 6 | 88047827 | 51137 | 7.5954 | 0.4069 | -0.1159 | 5.6589 | CEU |
| Hs.485895 | Hs.485895-S | rs6916994  | 6 | 6 | 88047955 | 51265 | 6.1533 | 0.3368 | 0.1114  | 5.6589 | CEU |
| Hs.485895 | Hs.485895-S | rs6917432  | 6 | 6 | 88048244 | 51554 | 7.5954 | 0.4069 | 0.1159  | 5.6589 | CEU |
| Hs.485895 | Hs.485895-S | rs2240459  | 6 | 6 | 88049127 | 52437 | 7.5954 | 0.4069 | -0.1159 | 5.6589 | CEU |
| Hs.485895 | Hs.485895-S | rs3812130  | 6 | 6 | 88050480 | 53790 | 6.2744 | 0.3479 | 0.1149  | 5.6589 | CEU |
| Hs.485895 | Hs.485895-S | rs6934603  | 6 | 6 | 88050734 | 54044 | 6.1533 | 0.3368 | 0.1114  | 5.6589 | CEU |
| Hs.485895 | Hs.485895-S | rs4707358  | 6 | 6 | 88051291 | 54601 | 7.5954 | 0.4069 | -0.1159 | 5.6589 | CEU |
| Hs.485895 | Hs.485895-S | rs9359743  | 6 | 6 | 88053463 | 56773 | 6.1533 | 0.3368 | -0.1114 | 5.6589 | CEU |
| Hs.485895 | Hs.485895-S | rs9450650  | 6 | 6 | 88055170 | 58480 | 5.6762 | 0.3212 | -0.1085 | 5.6589 | CEU |
| Hs.485895 | Hs.485895-S | rs9450651  | 6 | 6 | 88055360 | 58670 | 8.6398 | 0.4532 | 0.1238  | 5.6589 | CEU |
| Hs.485895 | Hs.485895-S | rs9294376  | 6 | 6 | 88057485 | 60795 | 8.6398 | 0.4532 | -0.1238 | 5.6589 | CEU |
| Hs.485895 | Hs.485895-S | rs3857488  | 6 | 6 | 88057783 | 61093 | 7.5954 | 0.4069 | 0.1159  | 5.6589 | CEU |
| Hs.485895 | Hs.485895-S | rs9450652  | 6 | 6 | 88059076 | 62386 | 6.1533 | 0.3368 | 0.1114  | 5.6589 | CEU |
| Hs.485895 | Hs.485895-S | rs9450653  | 6 | 6 | 88060840 | 64150 | 7.7346 | 0.4133 | -0.1173 | 5.6589 | CEU |
| Hs.485895 | Hs.485895-S | rs6921673  | 6 | 6 | 88061477 | 64787 | 9.7679 | 0.4993 | 0.1206  | 5.6589 | CEU |
| Hs.485895 | Hs.485895-S | rs6926686  | 6 | 6 | 88061917 | 65227 | 8.6398 | 0.4532 | 0.1238  | 5.6589 | CEU |
| Hs.485895 | Hs.485895-S | rs6938885  | 6 | 6 | 88063898 | 67208 | 6.7060 | 0.4158 | 0.1116  | 5.6589 | CEU |
| Hs.485895 | Hs.485895-S | rs6939075  | 6 | 6 | 88063925 | 67235 | 7.2445 | 0.3905 | 0.1162  | 5.6589 | CEU |
| Hs.485895 | Hs.485895-S | rs440296   | 6 | 6 | 88065140 | 68450 | 8.3670 | 0.4590 | -0.1226 | 5.6589 | CEU |
| Hs.485895 | Hs.485895-S | rs410683   | 6 | 6 | 88065639 | 68949 | 9.0730 | 0.4713 | 0.1146  | 5.6589 | CEU |
| Hs.485895 | Hs.485895-S | rs242263   | 6 | 6 | 88075032 | 78342 | 8.6417 | 0.4591 | 0.1124  | 5.6589 | CEU |
| Hs.485895 | Hs.485895-S | rs59322    | 6 | 6 | 88077240 | 80550 | 6.4138 | 0.3500 | 0.1060  | 5.6589 | CEU |

|           |               |            |   |   |          |        |        |        |         |        |     |
|-----------|---------------|------------|---|---|----------|--------|--------|--------|---------|--------|-----|
| Hs.485895 | Hs.485895-S   | rs1145712  | 6 | 6 | 88077837 | 81147  | 7.9620 | 0.4235 | 0.1148  | 5.6589 | CEU |
| Hs.485895 | Hs.485895-S   | rs413687   | 6 | 6 | 88077999 | 81309  | 8.1549 | 0.4321 | -0.1188 | 5.6589 | CEU |
| Hs.485895 | Hs.485895-S   | rs414453   | 6 | 6 | 88078305 | 81615  | 8.2289 | 0.4411 | -0.1212 | 5.6589 | CEU |
| Hs.485895 | Hs.485895-S   | rs368267   | 6 | 6 | 88078414 | 81724  | 8.1549 | 0.4321 | -0.1188 | 5.6589 | CEU |
| Hs.485895 | Hs.485895-S   | rs411606   | 6 | 6 | 88078472 | 81782  | 8.1549 | 0.4321 | 0.1188  | 5.6589 | CEU |
| Hs.485895 | Hs.485895-S   | rs1145714  | 6 | 6 | 88081237 | 84547  | 8.1549 | 0.4321 | 0.1188  | 5.6589 | CEU |
| Hs.485895 | Hs.485895-S   | rs1145715  | 6 | 6 | 88081762 | 85072  | 8.2289 | 0.4411 | -0.1212 | 5.6589 | CEU |
| Hs.485895 | Hs.485895-S   | rs1203162  | 6 | 6 | 88081937 | 85247  | 8.1549 | 0.4321 | -0.1188 | 5.6589 | CEU |
| Hs.485895 | Hs.485895-S   | rs1203163  | 6 | 6 | 88082968 | 86278  | 9.1979 | 0.4765 | 0.1161  | 5.6589 | CEU |
| Hs.485895 | Hs.485895-S   | rs1203164  | 6 | 6 | 88083682 | 86992  | 8.4061 | 0.4431 | -0.1235 | 5.6589 | CEU |
| Hs.485895 | Hs.485895-S   | rs2983136  | 6 | 6 | 88084934 | 88244  | 8.4061 | 0.4431 | -0.1235 | 5.6589 | CEU |
| Hs.485895 | Hs.485895-S   | rs242282   | 6 | 6 | 88086299 | 89609  | 8.3309 | 0.4456 | 0.1222  | 5.6589 | CEU |
| Hs.485895 | Hs.485895-S   | rs242283   | 6 | 6 | 88087650 | 90960  | 7.0745 | 0.3877 | -0.1099 | 5.6589 | CEU |
| Hs.485895 | Hs.485895-S   | rs1753152  | 6 | 6 | 88089507 | 92817  | 8.4061 | 0.4431 | -0.1235 | 5.6589 | CEU |
| Hs.485895 | Hs.485895-S   | rs1753153  | 6 | 6 | 88089553 | 92863  | 6.6273 | 0.3873 | 0.1068  | 5.6589 | CEU |
| Hs.485895 | Hs.485895-S   | rs1753154  | 6 | 6 | 88089562 | 92872  | 6.9752 | 0.3776 | 0.1101  | 5.6589 | CEU |
| Hs.485895 | Hs.485895-S   | rs1746444  | 6 | 6 | 88096587 | 99897  | 8.4061 | 0.4431 | -0.1235 | 5.6589 | CEU |
| Hs.485895 | Hs.485895-S   | rs448580   | 6 | 6 | 88097118 | 100428 | 6.9752 | 0.3776 | 0.1101  | 5.6589 | CEU |
| Hs.485895 | Hs.485895-S   | rs381782   | 6 | 6 | 88097368 | 100678 | 6.5110 | 0.3599 | 0.1070  | 5.6589 | CEU |
| Hs.485895 | Hs.485895-S   | rs451465   | 6 | 6 | 88100091 | 103401 | 7.0756 | 0.3931 | -0.1143 | 5.6589 | CEU |
| Hs.485895 | Hs.485895-S   | rs369674   | 6 | 6 | 88100121 | 103431 | 6.7086 | 0.3698 | 0.1073  | 5.6589 | CEU |
| Hs.485895 | Hs.485895-S   | rs379455   | 6 | 6 | 88100279 | 103589 | 8.4464 | 0.4449 | 0.1134  | 5.6589 | CEU |
| Hs.485895 | Hs.485895-S   | rs242275   | 6 | 6 | 88102682 | 105992 | 8.4080 | 0.4489 | 0.1244  | 5.6589 | CEU |
| Hs.485895 | Hs.485895-S   | rs242276   | 6 | 6 | 88103096 | 106406 | 8.1987 | 0.4397 | 0.1230  | 5.6589 | CEU |
| Hs.485895 | Hs.485895-S   | rs397516   | 6 | 6 | 88107771 | 111081 | 7.4007 | 0.4324 | 0.1233  | 5.6589 | CEU |
| Hs.485895 | Hs.485895-S   | rs398140   | 6 | 6 | 88107981 | 111291 | 8.3214 | 0.4451 | 0.1135  | 5.6589 | CEU |
| Hs.485895 | Hs.485895-S   | rs452315   | 6 | 6 | 88109206 | 112516 | 8.6024 | 0.4516 | -0.1167 | 5.6589 | CEU |
| Hs.485895 | Hs.485895-S   | rs377288   | 6 | 6 | 88110196 | 113506 | 8.3987 | 0.4544 | 0.1159  | 5.6589 | CEU |
| Hs.485895 | Hs.485895-S   | rs1201409  | 6 | 6 | 88111983 | 115293 | 6.7086 | 0.3698 | -0.1073 | 5.6589 | CEU |
| Hs.485895 | Hs.485895-S   | rs1188819  | 6 | 6 | 88112067 | 115377 | 8.7219 | 0.4685 | 0.1222  | 5.6589 | CEU |
| Hs.485895 | Hs.485895-S   | rs1188817  | 6 | 6 | 88112438 | 115748 | 8.6024 | 0.4516 | 0.1167  | 5.6589 | CEU |
| Hs.485895 | Hs.485895-S   | rs1188816  | 6 | 6 | 88112550 | 115860 | 8.6024 | 0.4516 | 0.1167  | 5.6589 | CEU |
| Hs.485895 | Hs.485895-S   | rs12211627 | 6 | 6 | 88113020 | 116330 | 8.6024 | 0.4516 | 0.1167  | 5.6589 | CEU |
| Hs.485895 | Hs.485895-S   | rs373646   | 6 | 6 | 88113615 | 116925 | 6.8157 | 0.3699 | 0.1073  | 5.6589 | CEU |
| Hs.485895 | Hs.485895-S   | rs381798   | 6 | 6 | 88113849 | 117159 | 8.6024 | 0.4516 | -0.1167 | 5.6589 | CEU |
| Hs.485895 | Hs.485895-S   | rs910563   | 6 | 6 | 88115604 | 118914 | 6.8157 | 0.3699 | 0.1073  | 5.6589 | CEU |
| Hs.485895 | Hs.485895-S   | rs6921504  | 6 | 6 | 88115691 | 119001 | 6.1224 | 0.3552 | -0.1089 | 5.6589 | CEU |
| Hs.485895 | Hs.485895-S   | rs242264   | 6 | 6 | 88117457 | 120767 | 8.6024 | 0.4516 | 0.1167  | 5.6589 | CEU |
| Hs.485895 | Hs.485895-S   | rs183599   | 6 | 6 | 88117743 | 121053 | 7.2020 | 0.4165 | -0.1188 | 5.6589 | CEU |
| Hs.485895 | Hs.485895-S   | rs242265   | 6 | 6 | 88117758 | 121068 | 8.4464 | 0.4449 | 0.1134  | 5.6589 | CEU |
| Hs.485895 | Hs.485895-S   | rs242267   | 6 | 6 | 88118556 | 121866 | 6.8157 | 0.3699 | -0.1073 | 5.6589 | CEU |
| Hs.485895 | Hs.485895-S   | rs242268   | 6 | 6 | 88118603 | 121913 | 8.4464 | 0.4449 | -0.1134 | 5.6589 | CEU |
| Hs.485895 | Hs.485895-S   | rs242269   | 6 | 6 | 88118708 | 122018 | 8.4464 | 0.4449 | -0.1134 | 5.6589 | CEU |
| Hs.485895 | Hs.485895-S   | rs242270   | 6 | 6 | 88118909 | 122219 | 6.8157 | 0.3699 | -0.1073 | 5.6589 | CEU |
| Hs.485895 | Hs.485895-S   | rs540975   | 6 | 6 | 88119860 | 123170 | 8.6024 | 0.4516 | -0.1167 | 5.6589 | CEU |
| Hs.485895 | Hs.485895-S   | rs541170   | 6 | 6 | 88119935 | 123245 | 8.4777 | 0.4520 | 0.1169  | 5.6589 | CEU |
| Hs.485895 | Hs.485895-S   | rs910564   | 6 | 6 | 88120530 | 123840 | 8.6024 | 0.4516 | 0.1167  | 5.6589 | CEU |
| Hs.485895 | Hs.485895-S   | rs1739886  | 6 | 6 | 88122320 | 125630 | 8.4464 | 0.4449 | 0.1134  | 5.6589 | CEU |
| Hs.485895 | Hs.485895-S   | rs406981   | 6 | 6 | 88124034 | 127344 | 8.3214 | 0.4451 | 0.1135  | 5.6589 | CEU |
| Hs.485895 | Hs.485895-S   | rs107690   | 6 | 6 | 88126071 | 129381 | 6.8157 | 0.3699 | -0.1073 | 5.6589 | CEU |
| Hs.485895 | Hs.485895-S   | rs242287   | 6 | 6 | 88128544 | 131854 | 6.7086 | 0.3698 | 0.1073  | 5.6589 | CEU |
| Hs.485895 | Hs.485895-S   | rs9359748  | 6 | 6 | 88152219 | 155529 | 6.7294 | 0.3657 | -0.1068 | 5.6589 | CEU |
| Hs.485895 | Hs.485895-S   | rs6903219  | 6 | 6 | 88153217 | 156527 | 6.7294 | 0.3657 | 0.1068  | 5.6589 | CEU |
| Hs.485895 | Hs.485895-S   | rs9362427  | 6 | 6 | 88154353 | 157663 | 6.7569 | 0.3721 | -0.1065 | 5.6589 | CEU |
| ACY1L2    | GI_37551403-S | rs9342178  | 6 | 6 | 89913169 | 15399  | 6.1804 | 0.3382 | 0.1768  | 5.8634 | CEU |
| hmm31999  | hmm31999-S    | rs6923983  | 6 | 6 | 99983940 | 3536   | 6.8476 | 0.3715 | -0.1994 | 5.9258 | CEU |
| hmm31999  | hmm31999-S    | rs7745110  | 6 | 6 | 99985340 | 4936   | 6.8848 | 0.3892 | -0.1975 | 5.9258 | CEU |
| hmm31999  | hmm31999-S    | rs6915401  | 6 | 6 | 99987560 | 7156   | 6.8476 | 0.3715 | -0.1994 | 5.9258 | CEU |
| hmm31999  | hmm31999-S    | rs3087961  | 6 | 6 | 99987787 | 7383   | 6.8476 | 0.3715 | 0.1994  | 5.9258 | CEU |

|           |               |            |   |   |           |       |         |        |         |        |     |
|-----------|---------------|------------|---|---|-----------|-------|---------|--------|---------|--------|-----|
| hmm31999  | hmm31999-S    | rs6570064  | 6 | 6 | 99989858  | 9454  | 6.7902  | 0.3738 | 0.2000  | 5.9258 | CEU |
| hmm31999  | hmm31999-S    | rs4840044  | 6 | 6 | 99994734  | 14330 | 7.3131  | 0.4046 | 0.2130  | 5.9258 | CEU |
| hmm31999  | hmm31999-S    | rs4144163  | 6 | 6 | 99996188  | 15784 | 6.8476  | 0.3715 | 0.1994  | 5.9258 | CEU |
| hmm31999  | hmm31999-S    | rs9402794  | 6 | 6 | 99999245  | 18841 | 6.8476  | 0.3715 | -0.1994 | 5.9258 | CEU |
| hmm31999  | hmm31999-S    | rs4499939  | 6 | 6 | 99999500  | 19096 | 6.1763  | 0.3380 | -0.1936 | 5.9258 | CEU |
| QRSL1     | GI_19923522-S | rs7756087  | 6 | 6 | 107146121 | 75673 | 5.7598  | 0.3164 | -0.2079 | 5.6038 | CEU |
| QRSL1     | GI_19923522-S | rs1419055  | 6 | 6 | 107191404 | 30390 | 6.0947  | 0.3386 | -0.2143 | 5.6038 | CEU |
| QRSL1     | GI_19923522-S | rs12199993 | 6 | 6 | 107192671 | 29123 | 6.5721  | 0.3579 | 0.2189  | 5.6038 | CEU |
| QRSL1     | GI_19923522-S | rs7750365  | 6 | 6 | 107195982 | 25812 | 10.8329 | 0.5393 | 0.2724  | 5.6038 | CEU |
| QRSL1     | GI_19923522-S | rs12214412 | 6 | 6 | 107196277 | 25517 | 15.4883 | 0.6805 | 0.3007  | 5.6038 | CEU |
| QRSL1     | GI_19923522-S | rs13200233 | 6 | 6 | 107196533 | 25261 | 15.4883 | 0.6805 | -0.3007 | 5.6038 | CEU |
| QRSL1     | GI_19923522-S | rs9400038  | 6 | 6 | 107197062 | 24732 | 7.9633  | 0.4236 | -0.2395 | 5.6038 | CEU |
| QRSL1     | GI_19923522-S | rs11153019 | 6 | 6 | 107197307 | 24487 | 15.4883 | 0.6805 | 0.3007  | 5.6038 | CEU |
| QRSL1     | GI_19923522-S | rs9400040  | 6 | 6 | 107197892 | 23902 | 7.7884  | 0.4157 | 0.2397  | 5.6038 | CEU |
| QRSL1     | GI_19923522-S | rs9400041  | 6 | 6 | 107197913 | 23881 | 7.7884  | 0.4212 | 0.2408  | 5.6038 | CEU |
| QRSL1     | GI_19923522-S | rs12216505 | 6 | 6 | 107199478 | 22316 | 15.4883 | 0.6805 | -0.3007 | 5.6038 | CEU |
| QRSL1     | GI_19923522-S | rs9384626  | 6 | 6 | 107199554 | 22240 | 10.9947 | 0.5451 | -0.2700 | 5.6038 | CEU |
| QRSL1     | GI_19923522-S | rs6568448  | 6 | 6 | 107200445 | 21349 | 6.4921  | 0.3589 | 0.2168  | 5.6038 | CEU |
| QRSL1     | GI_19923522-S | rs6930885  | 6 | 6 | 107200705 | 21089 | 10.4455 | 0.5377 | -0.2677 | 5.6038 | CEU |
| QRSL1     | GI_19923522-S | rs1811546  | 6 | 6 | 107204043 | 17751 | 10.9947 | 0.5451 | -0.2700 | 5.6038 | CEU |
| QRSL1     | GI_19923522-S | rs12212676 | 6 | 6 | 107204676 | 17118 | 14.1351 | 0.6642 | -0.3012 | 5.6038 | CEU |
| QRSL1     | GI_19923522-S | rs3804345  | 6 | 6 | 107204780 | 17014 | 10.4813 | 0.5590 | 0.2929  | 5.6038 | CEU |
| QRSL1     | GI_19923522-S | rs11752776 | 6 | 6 | 107205682 | 16112 | 15.4883 | 0.6805 | 0.3007  | 5.6038 | CEU |
| QRSL1     | GI_19923522-S | rs11153020 | 6 | 6 | 107205728 | 16066 | 7.6802  | 0.4163 | 0.2268  | 5.6038 | CEU |
| QRSL1     | GI_19923522-S | rs3127657  | 6 | 6 | 107211067 | 10727 | 7.9633  | 0.4236 | -0.2395 | 5.6038 | CEU |
| QRSL1     | GI_19923522-S | rs3104039  | 6 | 6 | 107213739 | 8055  | 8.3458  | 0.4706 | 0.2440  | 5.6038 | CEU |
| QRSL1     | GI_19923522-S | rs3104038  | 6 | 6 | 107216715 | 5079  | 11.9041 | 0.5828 | 0.2899  | 5.6038 | CEU |
| QRSL1     | GI_19923522-S | rs3121448  | 6 | 6 | 107220202 | 1592  | 15.2590 | 0.6811 | 0.3008  | 5.6038 | CEU |
| QRSL1     | GI_19923522-S | rs2015205  | 6 | 6 | 107220408 | 1386  | 10.9947 | 0.5451 | -0.2700 | 5.6038 | CEU |
| QRSL1     | GI_19923522-S | rs1026619  | 6 | 6 | 107221054 | 740   | 15.4883 | 0.6805 | 0.3007  | 5.6038 | CEU |
| QRSL1     | GI_19923522-S | rs3101493  | 6 | 6 | 107222087 | 293   | 13.9050 | 0.6714 | 0.2978  | 5.6038 | CEU |
| QRSL1     | GI_19923522-S | rs3121447  | 6 | 6 | 107223130 | 1336  | 10.3071 | 0.5199 | -0.2699 | 5.6038 | CEU |
| QRSL1     | GI_19923522-S | rs3121445  | 6 | 6 | 107230572 | 8778  | 12.1457 | 0.5844 | -0.3065 | 5.6038 | CEU |
| QRSL1     | GI_19923522-S | rs3121439  | 6 | 6 | 107232633 | 10839 | 14.9078 | 0.6720 | -0.3001 | 5.6038 | CEU |
| QRSL1     | GI_19923522-S | rs3121436  | 6 | 6 | 107234699 | 12905 | 15.0221 | 0.6685 | -0.2997 | 5.6038 | CEU |
| QRSL1     | GI_19923522-S | rs3121434  | 6 | 6 | 107235064 | 13270 | 15.2680 | 0.6813 | -0.3065 | 5.6038 | CEU |
| QRSL1     | GI_19923522-S | rs9384629  | 6 | 6 | 107235778 | 13984 | 7.1556  | 0.3863 | 0.2687  | 5.6038 | CEU |
| MCMD1     | GI_33469926-S | rs988098   | 6 | 6 | 119281925 | 8141  | 6.2020  | 0.3393 | -0.1943 | 5.857  | CEU |
| MCMD1     | GI_33469926-S | rs1022708  | 6 | 6 | 119293605 | 19821 | 6.1538  | 0.3369 | -0.1989 | 5.857  | CEU |
| MCMD1     | GI_33469926-S | rs1022707  | 6 | 6 | 119293670 | 19886 | 6.1538  | 0.3369 | -0.1989 | 5.857  | CEU |
| MCMD1     | GI_33469926-S | rs6918569  | 6 | 6 | 119293810 | 20026 | 6.1538  | 0.3369 | 0.1989  | 5.857  | CEU |
| MCMD1     | GI_33469926-S | rs6569031  | 6 | 6 | 119298438 | 24654 | 6.1538  | 0.3369 | 0.1989  | 5.857  | CEU |
| MCMD1     | GI_33469926-S | rs11153782 | 6 | 6 | 119302554 | 28770 | 6.1538  | 0.3369 | 0.1989  | 5.857  | CEU |
| MCMD1     | GI_33469926-S | rs6904381  | 6 | 6 | 119303615 | 29831 | 6.1538  | 0.3369 | -0.1989 | 5.857  | CEU |
| MCMD1     | GI_33469926-S | rs7381821  | 6 | 6 | 119310055 | 36271 | 6.1538  | 0.3369 | -0.1989 | 5.857  | CEU |
| MCMD1     | GI_33469926-S | rs9401106  | 6 | 6 | 119315287 | 41503 | 6.1538  | 0.3369 | -0.1989 | 5.857  | CEU |
| SOD2      | GI_10835186-S | rs7855     | 6 | 6 | 160070713 | 3351  | 7.9905  | 0.4248 | 0.4947  | 5.9832 | CEU |
| LOC135043 | GI_17463264-S | rs12206441 | 6 | 6 | 166669969 | 57037 | 6.3987  | 0.3698 | 0.2693  | 6.2592 | CEU |
| LOC135043 | GI_17463264-S | rs10946151 | 6 | 6 | 166675155 | 51851 | 7.8968  | 0.4206 | -0.3388 | 6.2592 | CEU |
| LOC135043 | GI_17463264-S | rs7748966  | 6 | 6 | 166679643 | 47363 | 10.7556 | 0.5365 | -0.3407 | 6.2592 | CEU |
| LOC401284 | GI_42657559-S | rs7748966  | 6 | 6 | 166679643 | 55400 | 8.3311  | 0.4399 | -0.1466 | 5.792  | CEU |
| LOC135043 | GI_17463264-S | rs10946155 | 6 | 6 | 166694723 | 32283 | 8.1358  | 0.4313 | 0.2739  | 6.2592 | CEU |
| LOC401284 | GI_42657559-S | rs10946155 | 6 | 6 | 166694723 | 40320 | 6.2686  | 0.3427 | 0.1162  | 5.792  | CEU |
| LOC135043 | GI_17463264-S | rs1575145  | 6 | 6 | 166696977 | 30029 | 8.1358  | 0.4313 | 0.2739  | 6.2592 | CEU |
| LOC401284 | GI_42657559-S | rs1575145  | 6 | 6 | 166696977 | 38066 | 6.2686  | 0.3427 | 0.1162  | 5.792  | CEU |
| LOC135043 | GI_17463264-S | rs10946158 | 6 | 6 | 166701700 | 25306 | 10.9307 | 0.5428 | -0.3177 | 6.2592 | CEU |
| LOC401284 | GI_42657559-S | rs10946158 | 6 | 6 | 166701700 | 33343 | 8.7069  | 0.4560 | -0.1384 | 5.792  | CEU |
| LOC135043 | GI_17463264-S | rs941683   | 6 | 6 | 166710681 | 16325 | 12.1449 | 0.5844 | -0.3296 | 6.2592 | CEU |
| LOC401284 | GI_42657559-S | rs941683   | 6 | 6 | 166710681 | 24362 | 9.3715  | 0.4835 | -0.1425 | 5.792  | CEU |

|           |               |            |   |   |           |        |         |        |         |        |     |
|-----------|---------------|------------|---|---|-----------|--------|---------|--------|---------|--------|-----|
| LOC135043 | GI_17463264-S | rs12214812 | 6 | 6 | 166713571 | 13435  | 11.5758 | 0.5717 | -0.3260 | 6.2592 | CEU |
| LOC401284 | GI_42657559-S | rs12214812 | 6 | 6 | 166713571 | 21472  | 8.7762  | 0.4648 | -0.1382 | 5.792  | CEU |
| LOC135043 | GI_17463264-S | rs11752886 | 6 | 6 | 166716710 | 10296  | 12.1449 | 0.5844 | 0.3296  | 6.2592 | CEU |
| LOC401284 | GI_42657559-S | rs11752886 | 6 | 6 | 166716710 | 18333  | 9.3715  | 0.4835 | 0.1425  | 5.792  | CEU |
| LOC135043 | GI_17463264-S | rs4144887  | 6 | 6 | 166717923 | 9083   | 7.7055  | 0.4741 | -0.3339 | 6.2592 | CEU |
| LOC401284 | GI_42657559-S | rs4144887  | 6 | 6 | 166717923 | 17120  | 6.9602  | 0.4360 | -0.1569 | 5.792  | CEU |
| LOC135043 | GI_17463264-S | rs4144886  | 6 | 6 | 166717983 | 9023   | 10.2744 | 0.5651 | 0.3220  | 6.2592 | CEU |
| LOC401284 | GI_42657559-S | rs4144886  | 6 | 6 | 166717983 | 17060  | 8.3197  | 0.4826 | 0.1377  | 5.792  | CEU |
| LOC135043 | GI_17463264-S | rs4144888  | 6 | 6 | 166718207 | 8799   | 12.1449 | 0.5844 | 0.3296  | 6.2592 | CEU |
| LOC401284 | GI_42657559-S | rs4144888  | 6 | 6 | 166718207 | 16836  | 9.3715  | 0.4835 | 0.1425  | 5.792  | CEU |
| LOC135043 | GI_17463264-S | rs12198613 | 6 | 6 | 166718318 | 8688   | 10.9777 | 0.5508 | 0.3145  | 6.2592 | CEU |
| LOC401284 | GI_42657559-S | rs12198613 | 6 | 6 | 166718318 | 16725  | 8.6775  | 0.4606 | 0.1417  | 5.792  | CEU |
| LOC135043 | GI_17463264-S | rs10455977 | 6 | 6 | 166721008 | 5998   | 7.0934  | 0.4111 | -0.2840 | 6.2592 | CEU |
| LOC135043 | GI_17463264-S | rs10455809 | 6 | 6 | 166721171 | 5835   | 11.8753 | 0.5818 | 0.3265  | 6.2592 | CEU |
| LOC401284 | GI_42657559-S | rs10455809 | 6 | 6 | 166721171 | 13872  | 9.1302  | 0.4796 | 0.1410  | 5.792  | CEU |
| LOC135043 | GI_17463264-S | rs11755305 | 6 | 6 | 166725686 | 1320   | 11.3309 | 0.5569 | 0.3217  | 6.2592 | CEU |
| LOC401284 | GI_42657559-S | rs11755305 | 6 | 6 | 166725686 | 9357   | 8.1350  | 0.4312 | 0.1347  | 5.792  | CEU |
| LOC135043 | GI_17463264-S | rs2294335  | 6 | 6 | 166726541 | 465    | 12.4357 | 0.5937 | -0.3327 | 6.2592 | CEU |
| LOC401284 | GI_42657559-S | rs2294335  | 6 | 6 | 166726541 | 8502   | 10.0070 | 0.5085 | -0.1462 | 5.792  | CEU |
| LOC135043 | GI_17463264-S | rs2294334  | 6 | 6 | 166726590 | 416    | 11.5960 | 0.5855 | 0.3312  | 6.2592 | CEU |
| LOC401284 | GI_42657559-S | rs2294334  | 6 | 6 | 166726590 | 8453   | 9.0146  | 0.4871 | 0.1415  | 5.792  | CEU |
| LOC135043 | GI_17463264-S | rs11753652 | 6 | 6 | 166727402 | 396    | 12.4357 | 0.5937 | -0.3327 | 6.2592 | CEU |
| LOC401284 | GI_42657559-S | rs11753652 | 6 | 6 | 166727402 | 7641   | 10.0070 | 0.5085 | -0.1462 | 5.792  | CEU |
| LOC90637  | GI_32698821-S | rs7809667  | 7 | 7 | 981681    | 15836  | 5.7244  | 0.3388 | 0.3252  | 5.567  | CEU |
| LOC90693  | GI_40255028-S | rs11767313 | 7 | 7 | 23357762  | 98221  | 6.4621  | 0.3524 | -0.3110 | 5.9877 | CEU |
| LOC90693  | GI_40255028-S | rs227951   | 7 | 7 | 23383869  | 72114  | 7.0502  | 0.3813 | 0.2493  | 5.9877 | CEU |
| LOC90693  | GI_40255028-S | rs798645   | 7 | 7 | 23391266  | 64717  | 6.7350  | 0.3660 | -0.2715 | 5.9877 | CEU |
| LOC90693  | GI_40255028-S | rs11980035 | 7 | 7 | 23401773  | 54210  | 9.7067  | 0.5092 | -0.3485 | 5.9877 | CEU |
| LOC90693  | GI_40255028-S | rs12700451 | 7 | 7 | 23421954  | 34029  | 9.4578  | 0.4870 | 0.3230  | 5.9877 | CEU |
| LOC90693  | GI_40255028-S | rs13227748 | 7 | 7 | 23425801  | 30182  | 9.4578  | 0.4870 | -0.3230 | 5.9877 | CEU |
| LOC90693  | GI_40255028-S | rs13230595 | 7 | 7 | 23441087  | 14896  | 9.4578  | 0.4870 | -0.3230 | 5.9877 | CEU |
| LOC90693  | GI_40255028-S | rs11771510 | 7 | 7 | 23443052  | 12931  | 7.2799  | 0.4144 | -0.2791 | 5.9877 | CEU |
| LOC90693  | GI_40255028-S | rs11772530 | 7 | 7 | 23444177  | 11806  | 9.6669  | 0.4953 | -0.3128 | 5.9877 | CEU |
| C7orf31   | GI_38570063-S | rs2523078  | 7 | 7 | 24960786  | 13065  | 6.9638  | 0.3988 | -0.1246 | 6.54   | CEU |
| FLJ22374  | GI_39752638-S | rs12701030 | 7 | 7 | 30597409  | 107718 | 7.2236  | 0.3895 | 0.1882  | 6.658  | CEU |
| FLJ22374  | GI_39752638-S | rs2269921  | 7 | 7 | 30598469  | 106658 | 7.2236  | 0.3895 | 0.1882  | 6.658  | CEU |
| FLJ22374  | GI_39752638-S | rs10278285 | 7 | 7 | 30606948  | 98179  | 7.2533  | 0.3962 | 0.1931  | 6.658  | CEU |
| FLJ22374  | GI_39752638-S | rs6979305  | 7 | 7 | 30607155  | 97972  | 7.2236  | 0.3895 | -0.1882 | 6.658  | CEU |
| FLJ22374  | GI_39752638-S | rs10282606 | 7 | 7 | 30608001  | 97126  | 7.2236  | 0.3895 | -0.1882 | 6.658  | CEU |
| FLJ22374  | GI_39752638-S | rs7781249  | 7 | 7 | 30610516  | 94611  | 7.3704  | 0.3964 | -0.1931 | 6.658  | CEU |
| FLJ22374  | GI_39752638-S | rs7785179  | 7 | 7 | 30610749  | 94378  | 7.2531  | 0.4073 | -0.1922 | 6.658  | CEU |
| FLJ22374  | GI_39752638-S | rs7803974  | 7 | 7 | 30610787  | 94340  | 7.3968  | 0.4030 | -0.1926 | 6.658  | CEU |
| HNLF      | GI_33457307-S | rs2072183  | 7 | 7 | 44352420  | 39760  | 6.4169  | 0.3502 | 0.2628  | 5.6905 | CEU |
| CHCHD2    | GI_32307179-S | rs845552   | 7 | 7 | 55019716  | 923871 | 5.7968  | 0.3184 | 0.1283  | 5.6952 | CEU |
| LOC378075 | GI_37538916-S | rs10481004 | 7 | 7 | 55542880  | 415054 | 9.0565  | 0.4952 | 0.9269  | 6.0348 | CEU |
| LOC378075 | GI_37538916-S | rs4563845  | 7 | 7 | 55552324  | 405610 | 6.8299  | 0.3706 | 0.9900  | 6.0348 | CEU |
| LOC378075 | GI_37538916-S | rs6593279  | 7 | 7 | 55578179  | 379755 | 28.7977 | 0.9135 | -1.1813 | 6.0348 | CEU |
| LOC378075 | GI_37538916-S | rs7809922  | 7 | 7 | 55597790  | 360144 | 6.1357  | 0.3359 | -1.0140 | 6.0348 | CEU |
| LOC378075 | GI_37538916-S | rs4273806  | 7 | 7 | 55607447  | 350487 | 6.1357  | 0.3359 | 1.0140  | 6.0348 | CEU |
| LOC378075 | GI_37538916-S | rs10243293 | 7 | 7 | 55616309  | 341625 | 6.1357  | 0.3359 | 1.0140  | 6.0348 | CEU |
| LOC378075 | GI_37538916-S | rs11982736 | 7 | 7 | 55629389  | 328545 | 22.3256 | 0.8138 | -1.1467 | 6.0348 | CEU |
| LOC378075 | GI_37538916-S | rs9642404  | 7 | 7 | 55631008  | 326926 | 10.9511 | 0.5436 | -1.0997 | 6.0348 | CEU |
| LOC378075 | GI_37538916-S | rs1113765  | 7 | 7 | 55663543  | 294391 | 14.2362 | 0.6474 | -0.9982 | 6.0348 | CEU |
| LOC378075 | GI_37538916-S | rs11238381 | 7 | 7 | 55666110  | 291824 | 11.9406 | 0.5776 | 0.9517  | 6.0348 | CEU |
| WBSCR27   | GI_30795189-S | rs10949827 | 7 | 7 | 72616837  | 76965  | 10.4691 | 0.5260 | -0.1945 | 5.674  | CEU |
| WBSCR27   | GI_30795189-S | rs12536661 | 7 | 7 | 72626668  | 67134  | 6.3087  | 0.3447 | -0.1732 | 5.674  | CEU |
| WBSCR27   | GI_30795189-S | rs6460055  | 7 | 7 | 72632168  | 61634  | 10.4691 | 0.5260 | -0.1945 | 5.674  | CEU |
| WBSCR27   | GI_30795189-S | rs6947264  | 7 | 7 | 72638646  | 55156  | 10.4691 | 0.5260 | -0.1945 | 5.674  | CEU |
| WBSCR27   | GI_30795189-S | rs4717815  | 7 | 7 | 72640312  | 53490  | 10.3400 | 0.5274 | -0.1954 | 5.674  | CEU |

|          |               |            |   |   |           |        |         |        |         |        |     |
|----------|---------------|------------|---|---|-----------|--------|---------|--------|---------|--------|-----|
| WBSCR27  | GI_30795189-S | rs6952976  | 7 | 7 | 72653667  | 40135  | 10.4691 | 0.5260 | -0.1945 | 5.674  | CEU |
| WBSCR27  | GI_30795189-S | rs10949828 | 7 | 7 | 72661384  | 32418  | 10.4691 | 0.5260 | 0.1945  | 5.674  | CEU |
| WBSCR27  | GI_30795189-S | rs13232536 | 7 | 7 | 72664159  | 29643  | 10.2283 | 0.5232 | -0.1940 | 5.674  | CEU |
| WBSCR27  | GI_30795189-S | rs7796554  | 7 | 7 | 72664691  | 29111  | 10.4691 | 0.5260 | -0.1945 | 5.674  | CEU |
| WBSCR27  | GI_30795189-S | rs4440516  | 7 | 7 | 72668692  | 25110  | 12.6270 | 0.5998 | 0.2060  | 5.674  | CEU |
| WBSCR27  | GI_30795189-S | rs4355658  | 7 | 7 | 72670343  | 23459  | 12.6270 | 0.5998 | -0.2060 | 5.674  | CEU |
| WBSCR27  | GI_30795189-S | rs9647713  | 7 | 7 | 72671458  | 22344  | 6.3614  | 0.3474 | -0.2296 | 5.674  | CEU |
| WBSCR27  | GI_30795189-S | rs6946037  | 7 | 7 | 72681366  | 12436  | 11.0476 | 0.5470 | -0.1950 | 5.674  | CEU |
| WBSCR27  | GI_30795189-S | rs4255023  | 7 | 7 | 72684269  | 9533   | 7.8854  | 0.4372 | -0.1854 | 5.674  | CEU |
| WBSCR27  | GI_30795189-S | rs7455225  | 7 | 7 | 72686037  | 7765   | 8.7770  | 0.4590 | -0.1775 | 5.674  | CEU |
| WBSCR27  | GI_30795189-S | rs10949830 | 7 | 7 | 72686926  | 6876   | 6.1498  | 0.3515 | 0.2368  | 5.674  | CEU |
| WBSCR27  | GI_30795189-S | rs8629     | 7 | 7 | 72690170  | 3632   | 14.2531 | 0.6478 | 0.2152  | 5.674  | CEU |
| WBSCR27  | GI_30795189-S | rs1127155  | 7 | 7 | 72691112  | 2690   | 14.2531 | 0.6478 | -0.2152 | 5.674  | CEU |
| WBSCR27  | GI_30795189-S | rs11316    | 7 | 7 | 72691206  | 2596   | 13.3590 | 0.6487 | -0.2016 | 5.674  | CEU |
| WBSCR27  | GI_30795189-S | rs13232463 | 7 | 7 | 72693950  | 148    | 14.2531 | 0.6478 | 0.2152  | 5.674  | CEU |
| WBSCR27  | GI_30795189-S | rs4304218  | 7 | 7 | 72697631  | 3829   | 14.2531 | 0.6478 | 0.2152  | 5.674  | CEU |
| WBSCR27  | GI_30795189-S | rs1073909  | 7 | 7 | 72702940  | 9138   | 14.2531 | 0.6478 | -0.2152 | 5.674  | CEU |
| WBSCR27  | GI_30795189-S | rs4999742  | 7 | 7 | 72703289  | 9487   | 6.3614  | 0.3474 | 0.2296  | 5.674  | CEU |
| WBSCR27  | GI_30795189-S | rs4717112  | 7 | 7 | 72710068  | 16266  | 14.2531 | 0.6478 | -0.2152 | 5.674  | CEU |
| WBSCR27  | GI_30795189-S | rs6949053  | 7 | 7 | 72714588  | 20786  | 14.2531 | 0.6478 | -0.2152 | 5.674  | CEU |
| WBSCR27  | GI_30795189-S | rs11770024 | 7 | 7 | 72720152  | 26350  | 14.2531 | 0.6478 | 0.2152  | 5.674  | CEU |
| TMPIT    | GI_13994299-S | rs7794040  | 7 | 7 | 75265292  | 4133   | 5.6368  | 0.3099 | 0.6356  | 5.5553 | CEU |
| TMPIT    | GI_13994299-S | rs3801472  | 7 | 7 | 75274429  | 13270  | 5.6368  | 0.3099 | -0.6356 | 5.5553 | CEU |
| TMPIT    | GI_13994299-S | rs9649665  | 7 | 7 | 75282447  | 21288  | 5.6368  | 0.3099 | 0.6356  | 5.5553 | CEU |
| MTERF    | GI_14790134-S | rs6972637  | 7 | 7 | 91251595  | 104412 | 9.7429  | 0.4983 | -0.5614 | 5.6894 | CEU |
| TRIM4    | GI_15011940-A | rs474229   | 7 | 7 | 99111209  | 22164  | 5.6906  | 0.3128 | -0.2836 | 5.4176 | CEU |
| TRIM4    | GI_15011940-A | rs1025576  | 7 | 7 | 99118275  | 15098  | 5.6906  | 0.3128 | 0.2836  | 5.4176 | CEU |
| TRIM4    | GI_15011940-A | rs2572022  | 7 | 7 | 99119380  | 13993  | 5.5993  | 0.3124 | 0.2834  | 5.4176 | CEU |
| TRIM4    | GI_15011940-A | rs2060452  | 7 | 7 | 99120124  | 13249  | 6.7313  | 0.3985 | 0.3143  | 5.4176 | CEU |
| TRIM4    | GI_15011940-A | rs2082744  | 7 | 7 | 99126067  | 7306   | 6.1048  | 0.3343 | -0.2914 | 5.4176 | CEU |
| TRIM4    | GI_15011940-A | rs2572010  | 7 | 7 | 99133194  | 179    | 6.1048  | 0.3343 | -0.2914 | 5.4176 | CEU |
| TRIM4    | GI_15011940-A | rs1048705  | 7 | 7 | 99133591  | 218    | 6.1048  | 0.3343 | -0.2914 | 5.4176 | CEU |
| TRIM4    | GI_15011940-A | rs2572009  | 7 | 7 | 99133656  | 283    | 6.1048  | 0.3343 | -0.2914 | 5.4176 | CEU |
| TRIM4    | GI_15011940-A | rs2572008  | 7 | 7 | 99135607  | 2234   | 6.1048  | 0.3343 | -0.2914 | 5.4176 | CEU |
| TRIM4    | GI_15011940-A | rs2527922  | 7 | 7 | 99137407  | 4034   | 6.1048  | 0.3343 | -0.2914 | 5.4176 | CEU |
| TRIM4    | GI_15011940-A | rs2572006  | 7 | 7 | 99138462  | 5089   | 6.1048  | 0.3343 | 0.2914  | 5.4176 | CEU |
| TRIM4    | GI_15011940-A | rs7384528  | 7 | 7 | 99138681  | 5308   | 6.7674  | 0.3727 | -0.3103 | 5.4176 | CEU |
| TRIM4    | GI_15011940-A | rs2527919  | 7 | 7 | 99139164  | 5791   | 6.8293  | 0.3706 | -0.2953 | 5.4176 | CEU |
| TRIM4    | GI_15011940-A | rs2527914  | 7 | 7 | 99142796  | 9423   | 6.1048  | 0.3343 | 0.2914  | 5.4176 | CEU |
| TRIM4    | GI_15011940-A | rs10808114 | 7 | 7 | 99143150  | 9777   | 6.2345  | 0.3780 | 0.3041  | 5.4176 | CEU |
| TRIM4    | GI_15011940-A | rs2247761  | 7 | 7 | 99145562  | 12189  | 6.1048  | 0.3343 | -0.2914 | 5.4176 | CEU |
| TRIM4    | GI_15011940-A | rs2572003  | 7 | 7 | 99145964  | 12591  | 6.1046  | 0.3391 | -0.2919 | 5.4176 | CEU |
| TRIM4    | GI_15011940-A | rs2571998  | 7 | 7 | 99156023  | 22650  | 5.5224  | 0.3083 | -0.2743 | 5.4176 | CEU |
| TRIM4    | GI_15011940-A | rs2571997  | 7 | 7 | 99159068  | 25695  | 6.1048  | 0.3343 | -0.2914 | 5.4176 | CEU |
| TRIM4    | GI_15011940-A | rs2571992  | 7 | 7 | 99164567  | 31194  | 6.1048  | 0.3343 | -0.2914 | 5.4176 | CEU |
| TRIM4    | GI_15011940-A | rs2527901  | 7 | 7 | 99169763  | 36390  | 6.0122  | 0.3343 | -0.2915 | 5.4176 | CEU |
| POLR2J   | GI_21704275-S | rs7384209  | 7 | 7 | 101644488 | 63191  | 6.2538  | 0.3468 | -0.2814 | 6.2082 | CEU |
| POLR2J   | GI_21704275-S | rs4473948  | 7 | 7 | 101706117 | 1562   | 8.1919  | 0.4338 | -0.2980 | 6.2082 | CEU |
| POLR2J   | GI_21704275-S | rs1131383  | 7 | 7 | 101707629 | 50     | 7.5492  | 0.4274 | 0.2963  | 6.2082 | CEU |
| FLJ13576 | GI_21362101-S | rs194590   | 7 | 7 | 111333793 | 666113 | 5.8191  | 0.3338 | -0.2126 | 5.7137 | CEU |
| FLJ13576 | GI_21362101-S | rs259306   | 7 | 7 | 111334509 | 665397 | 5.8824  | 0.3228 | -0.2214 | 5.7137 | CEU |
| FLJ13576 | GI_21362101-S | rs166313   | 7 | 7 | 111335423 | 664483 | 5.8824  | 0.3228 | -0.2214 | 5.7137 | CEU |
| IRF5     | GI_38683858-A | rs4728142  | 7 | 7 | 128167918 | 15224  | 8.6423  | 0.4533 | -0.5832 | 6.182  | CEU |
| IRF5     | GI_38683858-A | rs752637   | 7 | 7 | 128173371 | 9771   | 12.4912 | 0.6019 | 0.6203  | 6.182  | CEU |
| IRF5     | GI_38683858-A | rs3807306  | 7 | 7 | 128174631 | 8511   | 17.2928 | 0.7229 | -0.6945 | 6.182  | CEU |
| IRF5     | GI_38683858-A | rs7808907  | 7 | 7 | 128178035 | 5107   | 12.2051 | 0.5863 | -0.6293 | 6.182  | CEU |
| IRF5     | GI_38683858-A | rs13242262 | 7 | 7 | 128185315 | 2173   | 16.5104 | 0.7649 | 0.7398  | 6.182  | CEU |
| IRF5     | GI_38683858-A | rs2280714  | 7 | 7 | 128188676 | 5534   | 14.9661 | 0.6735 | -0.6922 | 6.182  | CEU |
| IRF5     | GI_38683858-A | rs6966125  | 7 | 7 | 128192476 | 9334   | 7.6043  | 0.4127 | -0.6259 | 6.182  | CEU |

|           |               |            |   |   |           |        |         |        |         |        |     |
|-----------|---------------|------------|---|---|-----------|--------|---------|--------|---------|--------|-----|
| IRF5      | GI_38683858-A | rs10229001 | 7 | 7 | 128193348 | 10206  | 18.4130 | 0.7524 | 0.7314  | 6.182  | CEU |
| IRF5      | GI_38683858-A | rs7385716  | 7 | 7 | 128199545 | 16403  | 18.5347 | 0.7609 | 0.7322  | 6.182  | CEU |
| IRF5      | GI_38683858-A | rs4731535  | 7 | 7 | 128199918 | 16776  | 6.1949  | 0.3390 | 0.5718  | 6.182  | CEU |
| IRF5      | GI_38683858-A | rs8043     | 7 | 7 | 128201335 | 18193  | 6.1949  | 0.3390 | 0.5718  | 6.182  | CEU |
| IRF5      | GI_38683858-A | rs1874332  | 7 | 7 | 128208564 | 25422  | 6.1949  | 0.3390 | -0.5718 | 6.182  | CEU |
| IRF5      | GI_38683858-A | rs2272347  | 7 | 7 | 128213366 | 30224  | 18.5447 | 0.7550 | 0.7316  | 6.182  | CEU |
| IRF5      | GI_38683858-A | rs7789423  | 7 | 7 | 128215155 | 32013  | 15.4431 | 0.6793 | 0.6925  | 6.182  | CEU |
| IRF5      | GI_38683858-A | rs6948928  | 7 | 7 | 128217048 | 33906  | 15.4431 | 0.6793 | -0.6925 | 6.182  | CEU |
| IRF5      | GI_38683858-A | rs6969930  | 7 | 7 | 128224264 | 41122  | 19.0053 | 0.7579 | -0.7274 | 6.182  | CEU |
| IRF5      | GI_38683858-A | rs7807018  | 7 | 7 | 128234139 | 50997  | 18.1768 | 0.7477 | 0.7138  | 6.182  | CEU |
| IRF5      | GI_38683858-A | rs6965542  | 7 | 7 | 128249869 | 66727  | 16.3653 | 0.7342 | 0.7165  | 6.182  | CEU |
| IRF5      | GI_38683858-A | rs3857852  | 7 | 7 | 128251228 | 68086  | 15.0427 | 0.6820 | -0.6872 | 6.182  | CEU |
| IRF5      | GI_38683858-A | rs12155080 | 7 | 7 | 128252690 | 69548  | 19.0053 | 0.7579 | -0.7274 | 6.182  | CEU |
| IRF5      | GI_38683858-A | rs13221560 | 7 | 7 | 128257126 | 73984  | 13.2715 | 0.6672 | 0.6730  | 6.182  | CEU |
| IRF5      | GI_38683858-A | rs10239340 | 7 | 7 | 128262461 | 79319  | 19.0053 | 0.7579 | -0.7274 | 6.182  | CEU |
| IRF5      | GI_38683858-A | rs11762968 | 7 | 7 | 128264915 | 81773  | 6.1949  | 0.3390 | -0.5718 | 6.182  | CEU |
| IRF5      | GI_38683858-A | rs1072767  | 7 | 7 | 128267156 | 84014  | 15.4431 | 0.6793 | 0.6925  | 6.182  | CEU |
| IRF5      | GI_38683858-A | rs921403   | 7 | 7 | 128270675 | 87533  | 15.6182 | 0.6837 | -0.6791 | 6.182  | CEU |
| IRF5      | GI_38683858-A | rs4731541  | 7 | 7 | 128272187 | 89045  | 17.1749 | 0.7203 | 0.6996  | 6.182  | CEU |
| IRF5      | GI_38683858-A | rs10279821 | 7 | 7 | 128277498 | 94356  | 14.2700 | 0.6483 | -0.6693 | 6.182  | CEU |
| IRF5      | GI_38683858-A | rs10156169 | 7 | 7 | 128278522 | 95380  | 14.4736 | 0.6603 | 0.6493  | 6.182  | CEU |
| IRF5      | GI_38683858-A | rs6960994  | 7 | 7 | 128286608 | 103466 | 7.2877  | 0.3925 | 0.5657  | 6.182  | CEU |
| IRF5      | GI_38683858-A | rs6961014  | 7 | 7 | 128286661 | 103519 | 7.1493  | 0.4022 | 0.5620  | 6.182  | CEU |
| IRF5      | GI_38683858-A | rs2242028  | 7 | 7 | 128288927 | 105785 | 6.6166  | 0.3703 | 0.5506  | 6.182  | CEU |
| KIAA0265  | GI_44917618-S | rs10241456 | 7 | 7 | 129306475 | 60655  | 6.7520  | 0.3881 | -0.2240 | 5.7559 | CEU |
| KIAA0265  | GI_44917618-S | rs6945486  | 7 | 7 | 129328124 | 39006  | 6.6659  | 0.3626 | 0.2160  | 5.7559 | CEU |
| KIAA0265  | GI_44917618-S | rs12531444 | 7 | 7 | 129330831 | 36299  | 6.3675  | 0.3682 | 0.2305  | 5.7559 | CEU |
| KIAA0265  | GI_44917618-S | rs1474409  | 7 | 7 | 129344813 | 22317  | 7.4114  | 0.3983 | 0.2234  | 5.7559 | CEU |
| KIAA0265  | GI_44917618-S | rs7781447  | 7 | 7 | 129346263 | 20867  | 5.9056  | 0.3240 | -0.2117 | 5.7559 | CEU |
| KIAA0265  | GI_44917618-S | rs7800870  | 7 | 7 | 129346452 | 20678  | 6.6659  | 0.3626 | -0.2160 | 5.7559 | CEU |
| KIAA0265  | GI_44917618-S | rs4324873  | 7 | 7 | 129355034 | 12096  | 8.2234  | 0.4351 | 0.2393  | 5.7559 | CEU |
| KIAA0265  | GI_44917618-S | rs12534379 | 7 | 7 | 129365068 | 2062   | 8.0377  | 0.4269 | 0.2430  | 5.7559 | CEU |
| Hs.490095 | Hs.490095-S   | rs7781989  | 7 | 7 | 130236933 | 7335   | 8.3911  | 0.4425 | 0.1698  | 8.2708 | CEU |
| Hs.490095 | Hs.490095-S   | rs7811716  | 7 | 7 | 130240994 | 3274   | 8.3911  | 0.4425 | -0.1698 | 8.2708 | CEU |
| Hs.490095 | Hs.490095-S   | rs7780763  | 7 | 7 | 130242022 | 2246   | 8.3911  | 0.4425 | 0.1698  | 8.2708 | CEU |
| Hs.490095 | Hs.490095-S   | rs7791880  | 7 | 7 | 130244703 | 435    | 8.4502  | 0.4508 | 0.1715  | 8.2708 | CEU |
| Hs.490095 | Hs.490095-S   | rs3735029  | 7 | 7 | 130246798 | 2530   | 8.3911  | 0.4425 | -0.1698 | 8.2708 | CEU |
| Hs.153573 | Hs.153573-S   | rs1424443  | 7 | 7 | 133768955 | 36052  | 6.5900  | 0.3588 | 0.1258  | 6.2513 | CEU |
| Hs.153573 | Hs.153573-S   | rs2032942  | 7 | 7 | 133771545 | 33462  | 6.5900  | 0.3588 | -0.1258 | 6.2513 | CEU |
| Hs.153573 | Hs.153573-S   | rs6972141  | 7 | 7 | 133780084 | 24923  | 6.5900  | 0.3588 | 0.1258  | 6.2513 | CEU |
| Hs.153573 | Hs.153573-S   | rs12672388 | 7 | 7 | 133782666 | 22341  | 6.5900  | 0.3588 | -0.1258 | 6.2513 | CEU |
| Hs.153573 | Hs.153573-S   | rs6467547  | 7 | 7 | 133791181 | 13826  | 6.4270  | 0.3556 | -0.1296 | 6.2513 | CEU |
| Hs.153573 | Hs.153573-S   | rs4732042  | 7 | 7 | 133792428 | 12579  | 6.5900  | 0.3588 | -0.1258 | 6.2513 | CEU |
| Hs.153573 | Hs.153573-S   | rs889874   | 7 | 7 | 133799430 | 5577   | 6.5900  | 0.3588 | 0.1258  | 6.2513 | CEU |
| Hs.153573 | Hs.153573-S   | rs1862924  | 7 | 7 | 133814075 | 9068   | 6.5142  | 0.3600 | 0.1261  | 6.2513 | CEU |
| C7orf29   | GI_19923960-S | rs1983440  | 7 | 7 | 149461589 | 5628   | 6.4381  | 0.3512 | 0.4902  | 5.67   | CEU |
| C7orf29   | GI_19923960-S | rs4554381  | 7 | 7 | 149463215 | 4002   | 6.3283  | 0.3506 | 0.4921  | 5.67   | CEU |
| C7orf29   | GI_19923960-S | rs3735172  | 7 | 7 | 149466606 | 611    | 6.4381  | 0.3512 | 0.4902  | 5.67   | CEU |
| C7orf29   | GI_19923960-S | rs3735171  | 7 | 7 | 149471530 | 4313   | 6.5056  | 0.3926 | 0.5219  | 5.67   | CEU |
| C7orf29   | GI_19923960-S | rs3735169  | 7 | 7 | 149472026 | 4809   | 6.3244  | 0.3714 | 0.5075  | 5.67   | CEU |
| C7orf29   | GI_19923960-S | rs17173617 | 7 | 7 | 149475671 | 8454   | 5.9956  | 0.3433 | 0.4627  | 5.67   | CEU |
| C7orf29   | GI_19923960-S | rs3735167  | 7 | 7 | 149477203 | 9986   | 6.4071  | 0.3546 | 0.4928  | 5.67   | CEU |
| C7orf29   | GI_19923960-S | rs6964110  | 7 | 7 | 149479484 | 12267  | 6.9360  | 0.3863 | 0.5113  | 5.67   | CEU |
| C7orf29   | GI_19923960-S | rs10282458 | 7 | 7 | 149482950 | 15733  | 6.7864  | 0.3685 | 0.4989  | 5.67   | CEU |
| C7orf29   | GI_19923960-S | rs10259796 | 7 | 7 | 149488075 | 20858  | 6.5042  | 0.3546 | 0.4892  | 5.67   | CEU |
| C7orf29   | GI_19923960-S | rs17173681 | 7 | 7 | 149497062 | 29845  | 6.6497  | 0.3618 | -0.4956 | 5.67   | CEU |
| C7orf29   | GI_19923960-S | rs17173682 | 7 | 7 | 149497250 | 30033  | 6.6497  | 0.3618 | 0.4956  | 5.67   | CEU |
| C7orf29   | GI_19923960-S | rs13230330 | 7 | 7 | 149497635 | 30418  | 5.7581  | 0.3163 | 0.4640  | 5.67   | CEU |
| C7orf29   | GI_19923960-S | rs7800196  | 7 | 7 | 149499182 | 31965  | 6.6497  | 0.3618 | -0.4956 | 5.67   | CEU |

|          |               |            |   |   |           |        |         |        |         |        |     |
|----------|---------------|------------|---|---|-----------|--------|---------|--------|---------|--------|-----|
| C7orf13  | GI_14249145-S | rs6459698  | 7 | 7 | 155929790 | 1143   | 5.8416  | 0.3207 | -0.1472 | 5.6997 | CEU |
| C7orf13  | GI_14249145-S | rs4716438  | 7 | 7 | 155941679 | 10746  | 5.7073  | 0.3229 | 0.1490  | 5.6997 | CEU |
| C7orf13  | GI_14249145-S | rs4716648  | 7 | 7 | 155948932 | 17999  | 6.0552  | 0.3414 | -0.1470 | 5.6997 | CEU |
| MYOM2    | GI_4505314-S  | rs2280902  | 8 | 8 | 2064479   | 16074  | 7.3664  | 0.3962 | -0.3484 | 6.621  | CEU |
| C8orf13  | GI_32698772-S | rs2736340  | 8 | 8 | 11381382  | 64837  | 6.2147  | 0.3400 | 0.7020  | 6.1399 | CEU |
| C8orf13  | GI_32698772-S | rs2618476  | 8 | 8 | 11389950  | 73405  | 6.2147  | 0.3400 | -0.7020 | 6.1399 | CEU |
| C8orf13  | GI_32698772-S | rs998683   | 8 | 8 | 11390409  | 73864  | 6.2147  | 0.3400 | 0.7020  | 6.1399 | CEU |
| BLK      | GI_33469981-S | rs1692799  | 8 | 8 | 11722751  | 263463 | 6.2711  | 0.3428 | -0.5283 | 6.1997 | CEU |
| BLK      | GI_33469981-S | rs1123141  | 8 | 8 | 11724244  | 264956 | 6.2711  | 0.3428 | -0.5283 | 6.1997 | CEU |
| BLK      | GI_33469981-S | rs12676995 | 8 | 8 | 11724568  | 265280 | 6.2711  | 0.3428 | 0.5283  | 6.1997 | CEU |
| FLJ21616 | GI_13375737-S | rs17443293 | 8 | 8 | 28679585  | 285436 | 8.8415  | 0.4617 | 0.4620  | 6.0534 | CEU |
| FLJ21616 | GI_13375737-S | rs17443556 | 8 | 8 | 28683760  | 281261 | 8.8415  | 0.4617 | 0.4620  | 6.0534 | CEU |
| FLJ21616 | GI_13375737-S | rs11785319 | 8 | 8 | 28691222  | 273799 | 9.7458  | 0.4984 | 0.5050  | 6.0534 | CEU |
| FLJ21616 | GI_13375737-S | rs17522554 | 8 | 8 | 28707720  | 257301 | 10.7752 | 0.5372 | 0.4950  | 6.0534 | CEU |
| FLJ21616 | GI_13375737-S | rs17451343 | 8 | 8 | 28762194  | 202827 | 12.5071 | 0.5960 | -0.5253 | 6.0534 | CEU |
| FLJ21616 | GI_13375737-S | rs11786316 | 8 | 8 | 28774749  | 190272 | 12.0117 | 0.5800 | 0.5469  | 6.0534 | CEU |
| FLJ21616 | GI_13375737-S | rs10503833 | 8 | 8 | 28775203  | 189818 | 10.5601 | 0.5294 | 0.5199  | 6.0534 | CEU |
| FLJ21616 | GI_13375737-S | rs17523818 | 8 | 8 | 28782961  | 182060 | 12.0117 | 0.5800 | -0.5469 | 6.0534 | CEU |
| FLJ21616 | GI_13375737-S | rs983365   | 8 | 8 | 28806348  | 158673 | 8.0980  | 0.4296 | -0.3612 | 6.0534 | CEU |
| FLJ21616 | GI_13375737-S | rs4732890  | 8 | 8 | 28807300  | 157721 | 8.0980  | 0.4296 | 0.3612  | 6.0534 | CEU |
| FLJ21616 | GI_13375737-S | rs4732657  | 8 | 8 | 28811907  | 153114 | 8.0980  | 0.4296 | 0.3612  | 6.0534 | CEU |
| FLJ21616 | GI_13375737-S | rs13280242 | 8 | 8 | 28812657  | 152364 | 9.9892  | 0.5079 | -0.3970 | 6.0534 | CEU |
| FLJ21616 | GI_13375737-S | rs1858462  | 8 | 8 | 28816656  | 148365 | 8.0980  | 0.4296 | -0.3612 | 6.0534 | CEU |
| FLJ21616 | GI_13375737-S | rs1512851  | 8 | 8 | 28826391  | 138630 | 12.9274 | 0.6091 | 0.4867  | 6.0534 | CEU |
| FLJ21616 | GI_13375737-S | rs17524494 | 8 | 8 | 28835122  | 129899 | 12.9274 | 0.6091 | -0.4867 | 6.0534 | CEU |
| FLJ21616 | GI_13375737-S | rs11784622 | 8 | 8 | 28838438  | 126583 | 10.2618 | 0.5438 | -0.4792 | 6.0534 | CEU |
| FLJ21616 | GI_13375737-S | rs1976610  | 8 | 8 | 28839934  | 125087 | 8.0980  | 0.4296 | 0.3612  | 6.0534 | CEU |
| FLJ21616 | GI_13375737-S | rs2203209  | 8 | 8 | 28843952  | 121069 | 7.8596  | 0.4302 | 0.3609  | 6.0534 | CEU |
| FLJ21616 | GI_13375737-S | rs2221894  | 8 | 8 | 28847078  | 117943 | 8.3540  | 0.4585 | -0.3728 | 6.0534 | CEU |
| FLJ21616 | GI_13375737-S | rs4732893  | 8 | 8 | 28850597  | 114424 | 9.3775  | 0.4838 | 0.3909  | 6.0534 | CEU |
| FLJ21616 | GI_13375737-S | rs6558085  | 8 | 8 | 28858851  | 106170 | 9.9892  | 0.5079 | 0.3970  | 6.0534 | CEU |
| FLJ21616 | GI_13375737-S | rs11136052 | 8 | 8 | 28858994  | 106027 | 8.0980  | 0.4296 | -0.3612 | 6.0534 | CEU |
| FLJ21616 | GI_13375737-S | rs2137471  | 8 | 8 | 28861568  | 103453 | 9.9892  | 0.5079 | 0.3970  | 6.0534 | CEU |
| FLJ21616 | GI_13375737-S | rs17524918 | 8 | 8 | 28861827  | 103194 | 12.9274 | 0.6091 | 0.4867  | 6.0534 | CEU |
| FLJ21616 | GI_13375737-S | rs2292478  | 8 | 8 | 28863275  | 101746 | 9.8152  | 0.5135 | 0.4030  | 6.0534 | CEU |
| FLJ21616 | GI_13375737-S | rs7465084  | 8 | 8 | 28872771  | 92250  | 9.9892  | 0.5079 | -0.3970 | 6.0534 | CEU |
| FLJ21616 | GI_13375737-S | rs4732894  | 8 | 8 | 28878970  | 86051  | 7.7678  | 0.4260 | 0.3609  | 6.0534 | CEU |
| FLJ21616 | GI_13375737-S | rs10503835 | 8 | 8 | 28879014  | 86007  | 7.9289  | 0.4221 | -0.3762 | 6.0534 | CEU |
| FLJ21616 | GI_13375737-S | rs11778263 | 8 | 8 | 28881341  | 83680  | 12.9274 | 0.6091 | -0.4867 | 6.0534 | CEU |
| FLJ21616 | GI_13375737-S | rs4732896  | 8 | 8 | 28881393  | 83628  | 9.9892  | 0.5079 | -0.3970 | 6.0534 | CEU |
| FLJ21616 | GI_13375737-S | rs17525359 | 8 | 8 | 28885336  | 79685  | 12.9274 | 0.6091 | 0.4867  | 6.0534 | CEU |
| FLJ21616 | GI_13375737-S | rs10111019 | 8 | 8 | 28886219  | 78802  | 9.4552  | 0.5054 | 0.4008  | 6.0534 | CEU |
| FLJ21616 | GI_13375737-S | rs2323134  | 8 | 8 | 28895841  | 69180  | 9.9892  | 0.5079 | -0.3970 | 6.0534 | CEU |
| FLJ21616 | GI_13375737-S | rs4407834  | 8 | 8 | 28897740  | 67281  | 7.8011  | 0.4333 | -0.3662 | 6.0534 | CEU |
| FLJ21616 | GI_13375737-S | rs12674777 | 8 | 8 | 28899640  | 65381  | 9.9892  | 0.5079 | -0.3970 | 6.0534 | CEU |
| FLJ21616 | GI_13375737-S | rs11136055 | 8 | 8 | 28911445  | 53576  | 8.0980  | 0.4296 | 0.3612  | 6.0534 | CEU |
| FLJ21616 | GI_13375737-S | rs11136056 | 8 | 8 | 28919994  | 45027  | 9.7132  | 0.5032 | 0.3948  | 6.0534 | CEU |
| FLJ21616 | GI_13375737-S | rs7842492  | 8 | 8 | 28925556  | 39465  | 9.9892  | 0.5079 | 0.3970  | 6.0534 | CEU |
| FLJ21616 | GI_13375737-S | rs7837237  | 8 | 8 | 28932140  | 32881  | 8.0980  | 0.4296 | 0.3612  | 6.0534 | CEU |
| FLJ21616 | GI_13375737-S | rs10503836 | 8 | 8 | 28941389  | 23632  | 7.2038  | 0.3886 | -0.3465 | 6.0534 | CEU |
| FLJ21616 | GI_13375737-S | rs1487969  | 8 | 8 | 28941580  | 23441  | 12.8338 | 0.6063 | 0.4398  | 6.0534 | CEU |
| FLJ21616 | GI_13375737-S | rs1487970  | 8 | 8 | 28945085  | 19936  | 9.3775  | 0.4838 | -0.3909 | 6.0534 | CEU |
| FLJ21616 | GI_13375737-S | rs6558089  | 8 | 8 | 28950156  | 14865  | 12.8338 | 0.6063 | -0.4398 | 6.0534 | CEU |
| FLJ21616 | GI_13375737-S | rs7018244  | 8 | 8 | 28950910  | 14111  | 8.0980  | 0.4296 | 0.3612  | 6.0534 | CEU |
| FLJ21616 | GI_13375737-S | rs2035644  | 8 | 8 | 28955616  | 9405   | 10.1933 | 0.5156 | 0.4000  | 6.0534 | CEU |
| FLJ21616 | GI_13375737-S | rs1948132  | 8 | 8 | 28956006  | 9015   | 10.1933 | 0.5156 | -0.4000 | 6.0534 | CEU |
| FLJ21616 | GI_13375737-S | rs13262991 | 8 | 8 | 28957262  | 7759   | 7.2038  | 0.3886 | 0.3465  | 6.0534 | CEU |
| FLJ21616 | GI_13375737-S | rs1872923  | 8 | 8 | 28957696  | 7325   | 7.2038  | 0.3886 | 0.3465  | 6.0534 | CEU |
| FLJ21616 | GI_13375737-S | rs8180944  | 8 | 8 | 28960005  | 5016   | 12.8338 | 0.6063 | -0.4398 | 6.0534 | CEU |

|           |               |            |   |   |          |        |         |        |         |        |     |
|-----------|---------------|------------|---|---|----------|--------|---------|--------|---------|--------|-----|
| FLJ21616  | GI_13375737-S | rs10088428 | 8 | 8 | 28965442 | 421    | 19.6959 | 0.7708 | -0.5126 | 6.0534 | CEU |
| FLJ21616  | GI_13375737-S | rs2279442  | 8 | 8 | 28969807 | 4786   | 7.2038  | 0.3886 | 0.3465  | 6.0534 | CEU |
| FLJ21616  | GI_13375737-S | rs4623482  | 8 | 8 | 28979213 | 14192  | 6.9550  | 0.3767 | -0.3827 | 6.0534 | CEU |
| FLJ21616  | GI_13375737-S | rs2693     | 8 | 8 | 28980777 | 15756  | 10.1933 | 0.5156 | 0.4000  | 6.0534 | CEU |
| FLJ21616  | GI_13375737-S | rs17454230 | 8 | 8 | 28982000 | 16979  | 12.9274 | 0.6091 | -0.4867 | 6.0534 | CEU |
| FLJ21616  | GI_13375737-S | rs6999630  | 8 | 8 | 28990920 | 25899  | 6.0719  | 0.3327 | 0.2948  | 6.0534 | CEU |
| FLJ21616  | GI_13375737-S | rs6558093  | 8 | 8 | 29002039 | 37018  | 6.4183  | 0.3503 | -0.2994 | 6.0534 | CEU |
| FLJ21616  | GI_13375737-S | rs17526904 | 8 | 8 | 29003762 | 38741  | 12.9274 | 0.6091 | -0.4867 | 6.0534 | CEU |
| FLJ21616  | GI_13375737-S | rs10112345 | 8 | 8 | 29020589 | 55568  | 6.1633  | 0.3373 | 0.2924  | 6.0534 | CEU |
| FLJ21616  | GI_13375737-S | rs11775127 | 8 | 8 | 29030963 | 65942  | 7.9036  | 0.4209 | -0.4495 | 6.0534 | CEU |
| FLJ21616  | GI_13375737-S | rs7836759  | 8 | 8 | 29033031 | 68010  | 8.2993  | 0.4385 | 0.3760  | 6.0534 | CEU |
| FLJ21616  | GI_13375737-S | rs17527001 | 8 | 8 | 29035945 | 70924  | 7.0395  | 0.3860 | -0.4485 | 6.0534 | CEU |
| FLJ21616  | GI_13375737-S | rs11786712 | 8 | 8 | 29040879 | 75858  | 7.5577  | 0.4106 | -0.4500 | 6.0534 | CEU |
| FLJ21616  | GI_13375737-S | rs11780819 | 8 | 8 | 29055978 | 90957  | 7.8123  | 0.4168 | -0.4506 | 6.0534 | CEU |
| FLJ21616  | GI_13375737-S | rs17455598 | 8 | 8 | 29077926 | 112905 | 6.0730  | 0.3327 | 0.4017  | 6.0534 | CEU |
| FLJ21616  | GI_13375737-S | rs17456888 | 8 | 8 | 29139846 | 174825 | 6.0730  | 0.3327 | 0.4017  | 6.0534 | CEU |
| FUT10     | GI_40805105-S | rs2732292  | 8 | 8 | 33481606 | 132900 | 5.6448  | 0.3292 | -0.0921 | 5.5919 | CEU |
| LOC340435 | GI_29735811-S | rs17758721 | 8 | 8 | 71627105 | 154822 | 8.2768  | 0.4375 | 0.1236  | 5.6202 | CEU |
| LOC340435 | GI_29735811-S | rs7012577  | 8 | 8 | 71634598 | 147329 | 10.1992 | 0.5159 | -0.1348 | 5.6202 | CEU |
| LOC340435 | GI_29735811-S | rs13251292 | 8 | 8 | 71636909 | 145018 | 9.0639  | 0.4892 | 0.1248  | 5.6202 | CEU |
| LOC340435 | GI_29735811-S | rs2035196  | 8 | 8 | 71647904 | 134023 | 9.5007  | 0.4947 | 0.1300  | 5.6202 | CEU |
| LOC340435 | GI_29735811-S | rs268561   | 8 | 8 | 71656476 | 125451 | 5.8136  | 0.3192 | 0.1051  | 5.6202 | CEU |
| LOC340435 | GI_29735811-S | rs3816745  | 8 | 8 | 71669188 | 112739 | 10.1992 | 0.5159 | -0.1348 | 5.6202 | CEU |
| LOC340435 | GI_29735811-S | rs268624   | 8 | 8 | 71671459 | 110468 | 5.7593  | 0.3306 | -0.1055 | 5.6202 | CEU |
| LOC340435 | GI_29735811-S | rs268593   | 8 | 8 | 71674931 | 106996 | 5.8136  | 0.3192 | -0.1051 | 5.6202 | CEU |
| LOC340435 | GI_29735811-S | rs268574   | 8 | 8 | 71688597 | 93330  | 5.8136  | 0.3192 | -0.1051 | 5.6202 | CEU |
| LOC340435 | GI_29735811-S | rs268615   | 8 | 8 | 71700277 | 81650  | 5.8136  | 0.3192 | -0.1051 | 5.6202 | CEU |
| LOC340435 | GI_29735811-S | rs268568   | 8 | 8 | 71707028 | 74899  | 5.8136  | 0.3192 | 0.1051  | 5.6202 | CEU |
| LOC340435 | GI_29735811-S | rs6988053  | 8 | 8 | 71709517 | 72410  | 10.1992 | 0.5159 | 0.1348  | 5.6202 | CEU |
| LOC340435 | GI_29735811-S | rs13258368 | 8 | 8 | 71711305 | 70622  | 10.1992 | 0.5159 | -0.1348 | 5.6202 | CEU |
| LOC340435 | GI_29735811-S | rs49195    | 8 | 8 | 71713262 | 68665  | 5.8136  | 0.3192 | -0.1051 | 5.6202 | CEU |
| LOC340435 | GI_29735811-S | rs383683   | 8 | 8 | 71715992 | 65935  | 5.8136  | 0.3192 | -0.1051 | 5.6202 | CEU |
| LOC340435 | GI_29735811-S | rs192388   | 8 | 8 | 71717919 | 64008  | 6.5341  | 0.3610 | 0.1106  | 5.6202 | CEU |
| LOC340435 | GI_29735811-S | rs441890   | 8 | 8 | 71727221 | 54706  | 7.5548  | 0.4050 | -0.1164 | 5.6202 | CEU |
| LOC340435 | GI_29735811-S | rs7831792  | 8 | 8 | 71727910 | 54017  | 13.2850 | 0.6200 | 0.1491  | 5.6202 | CEU |
| LOC340435 | GI_29735811-S | rs13255886 | 8 | 8 | 71728508 | 53419  | 13.2850 | 0.6200 | 0.1491  | 5.6202 | CEU |
| LOC340435 | GI_29735811-S | rs6994814  | 8 | 8 | 71731692 | 50235  | 10.4822 | 0.5265 | -0.1361 | 5.6202 | CEU |
| LOC340435 | GI_29735811-S | rs7830515  | 8 | 8 | 71732788 | 49139  | 10.4822 | 0.5265 | -0.1361 | 5.6202 | CEU |
| LOC340435 | GI_29735811-S | rs7814274  | 8 | 8 | 71732965 | 48962  | 13.2850 | 0.6200 | -0.1491 | 5.6202 | CEU |
| LOC340435 | GI_29735811-S | rs7830550  | 8 | 8 | 71732985 | 48942  | 13.2850 | 0.6200 | 0.1491  | 5.6202 | CEU |
| LOC340435 | GI_29735811-S | rs6993326  | 8 | 8 | 71738154 | 43773  | 10.4822 | 0.5265 | -0.1361 | 5.6202 | CEU |
| LOC340435 | GI_29735811-S | rs433017   | 8 | 8 | 71739130 | 42797  | 5.6651  | 0.3114 | 0.1070  | 5.6202 | CEU |
| LOC340435 | GI_29735811-S | rs10504479 | 8 | 8 | 71740069 | 41858  | 13.2850 | 0.6200 | -0.1491 | 5.6202 | CEU |
| LOC340435 | GI_29735811-S | rs380090   | 8 | 8 | 71740371 | 41556  | 5.6651  | 0.3114 | -0.1070 | 5.6202 | CEU |
| LOC340435 | GI_29735811-S | rs11987501 | 8 | 8 | 71741072 | 40855  | 10.3479 | 0.5340 | 0.1358  | 5.6202 | CEU |
| LOC340435 | GI_29735811-S | rs1993862  | 8 | 8 | 71741916 | 40011  | 13.2850 | 0.6200 | -0.1491 | 5.6202 | CEU |
| LOC340435 | GI_29735811-S | rs2279128  | 8 | 8 | 71744113 | 37814  | 10.4822 | 0.5265 | -0.1361 | 5.6202 | CEU |
| LOC340435 | GI_29735811-S | rs13271442 | 8 | 8 | 71747723 | 34204  | 13.8685 | 0.6435 | -0.1553 | 5.6202 | CEU |
| LOC340435 | GI_29735811-S | rs6472538  | 8 | 8 | 71749525 | 32402  | 14.4544 | 0.6534 | 0.1560  | 5.6202 | CEU |
| LOC340435 | GI_29735811-S | rs7017914  | 8 | 8 | 71753757 | 28170  | 14.4544 | 0.6534 | 0.1560  | 5.6202 | CEU |
| LOC340435 | GI_29735811-S | rs268634   | 8 | 8 | 71754867 | 27060  | 6.1972  | 0.3391 | -0.1151 | 5.6202 | CEU |
| LOC340435 | GI_29735811-S | rs12681420 | 8 | 8 | 71755752 | 26175  | 10.3107 | 0.5263 | 0.1361  | 5.6202 | CEU |
| LOC340435 | GI_29735811-S | rs6991329  | 8 | 8 | 71755979 | 25948  | 14.4544 | 0.6534 | -0.1560 | 5.6202 | CEU |
| LOC340435 | GI_29735811-S | rs13256250 | 8 | 8 | 71758747 | 23180  | 14.4544 | 0.6534 | 0.1560  | 5.6202 | CEU |
| LOC340435 | GI_29735811-S | rs13256093 | 8 | 8 | 71758931 | 22996  | 10.4822 | 0.5265 | 0.1361  | 5.6202 | CEU |
| LOC340435 | GI_29735811-S | rs268637   | 8 | 8 | 71762082 | 19845  | 6.1972  | 0.3391 | 0.1151  | 5.6202 | CEU |
| LOC340435 | GI_29735811-S | rs12675271 | 8 | 8 | 71764563 | 17364  | 14.4544 | 0.6534 | 0.1560  | 5.6202 | CEU |
| LOC340435 | GI_29735811-S | rs12156043 | 8 | 8 | 71776597 | 5330   | 9.1696  | 0.4874 | 0.1301  | 5.6202 | CEU |
| LOC340435 | GI_29735811-S | rs7842091  | 8 | 8 | 71777335 | 4592   | 10.4822 | 0.5265 | 0.1361  | 5.6202 | CEU |

|           |               |            |   |   |          |        |         |        |         |        |     |
|-----------|---------------|------------|---|---|----------|--------|---------|--------|---------|--------|-----|
| LOC340435 | GI_29735811-S | rs1477945  | 8 | 8 | 71778107 | 3820   | 10.4822 | 0.5265 | 0.1361  | 5.6202 | CEU |
| LOC340435 | GI_29735811-S | rs268653   | 8 | 8 | 71778270 | 3657   | 6.1972  | 0.3391 | -0.1151 | 5.6202 | CEU |
| LOC340435 | GI_29735811-S | rs13252808 | 8 | 8 | 71779209 | 2718   | 9.2805  | 0.4858 | -0.1275 | 5.6202 | CEU |
| LOC340435 | GI_29735811-S | rs268651   | 8 | 8 | 71779536 | 2391   | 6.1972  | 0.3391 | -0.1151 | 5.6202 | CEU |
| LOC340435 | GI_29735811-S | rs17760532 | 8 | 8 | 71782841 | 914    | 10.4822 | 0.5265 | 0.1361  | 5.6202 | CEU |
| LOC340435 | GI_29735811-S | rs13280922 | 8 | 8 | 71787952 | 6025   | 9.2805  | 0.4858 | 0.1275  | 5.6202 | CEU |
| LOC340435 | GI_29735811-S | rs13253842 | 8 | 8 | 71788057 | 6130   | 10.4076 | 0.5299 | -0.1405 | 5.6202 | CEU |
| LOC340435 | GI_29735811-S | rs13254908 | 8 | 8 | 71788652 | 6725   | 13.9118 | 0.6647 | 0.1541  | 5.6202 | CEU |
| LOC340435 | GI_29735811-S | rs727377   | 8 | 8 | 71788829 | 6902   | 6.1972  | 0.3391 | 0.1151  | 5.6202 | CEU |
| LOC340435 | GI_29735811-S | rs13264669 | 8 | 8 | 71789326 | 7399   | 10.5790 | 0.5301 | -0.1406 | 5.6202 | CEU |
| LOC340435 | GI_29735811-S | rs7013657  | 8 | 8 | 71800113 | 18186  | 14.4544 | 0.6534 | -0.1560 | 5.6202 | CEU |
| LOC340435 | GI_29735811-S | rs6987515  | 8 | 8 | 71802856 | 20929  | 10.4822 | 0.5265 | -0.1361 | 5.6202 | CEU |
| LOC340435 | GI_29735811-S | rs2290702  | 8 | 8 | 71809534 | 27607  | 10.4822 | 0.5265 | 0.1361  | 5.6202 | CEU |
| LOC340435 | GI_29735811-S | rs2218430  | 8 | 8 | 71810159 | 28232  | 6.1972  | 0.3391 | -0.1151 | 5.6202 | CEU |
| LOC340435 | GI_29735811-S | rs7015035  | 8 | 8 | 71816155 | 34228  | 14.4544 | 0.6534 | -0.1560 | 5.6202 | CEU |
| LOC340435 | GI_29735811-S | rs6472542  | 8 | 8 | 71816641 | 34714  | 14.4544 | 0.6534 | 0.1560  | 5.6202 | CEU |
| LOC340435 | GI_29735811-S | rs6982406  | 8 | 8 | 71817162 | 35235  | 14.4544 | 0.6534 | -0.1560 | 5.6202 | CEU |
| LOC340435 | GI_29735811-S | rs1902614  | 8 | 8 | 71818721 | 36794  | 14.4544 | 0.6534 | -0.1560 | 5.6202 | CEU |
| LOC340435 | GI_29735811-S | rs1348535  | 8 | 8 | 71825295 | 43368  | 14.4544 | 0.6534 | -0.1560 | 5.6202 | CEU |
| LOC340435 | GI_29735811-S | rs7825446  | 8 | 8 | 71826728 | 44801  | 14.4544 | 0.6534 | -0.1560 | 5.6202 | CEU |
| LOC340435 | GI_29735811-S | rs6472543  | 8 | 8 | 71826962 | 45035  | 14.4544 | 0.6534 | 0.1560  | 5.6202 | CEU |
| LOC340435 | GI_29735811-S | rs7819332  | 8 | 8 | 71830819 | 48892  | 14.4544 | 0.6534 | -0.1560 | 5.6202 | CEU |
| LOC340435 | GI_29735811-S | rs6991708  | 8 | 8 | 71831082 | 49155  | 9.7159  | 0.4972 | 0.1301  | 5.6202 | CEU |
| LOC340435 | GI_29735811-S | rs7012404  | 8 | 8 | 71831252 | 49325  | 14.4544 | 0.6534 | -0.1560 | 5.6202 | CEU |
| LOC340435 | GI_29735811-S | rs17760766 | 8 | 8 | 71833743 | 51816  | 10.4822 | 0.5265 | -0.1361 | 5.6202 | CEU |
| LOC340435 | GI_29735811-S | rs13258584 | 8 | 8 | 71834133 | 52206  | 14.4544 | 0.6534 | -0.1560 | 5.6202 | CEU |
| LOC340435 | GI_29735811-S | rs7838421  | 8 | 8 | 71834877 | 52950  | 9.7159  | 0.4972 | 0.1301  | 5.6202 | CEU |
| LOC340435 | GI_29735811-S | rs7014012  | 8 | 8 | 71835297 | 53370  | 14.4544 | 0.6534 | 0.1560  | 5.6202 | CEU |
| LOC340435 | GI_29735811-S | rs1471114  | 8 | 8 | 71838101 | 56174  | 14.4544 | 0.6534 | 0.1560  | 5.6202 | CEU |
| LOC340435 | GI_29735811-S | rs7012796  | 8 | 8 | 71838747 | 56820  | 9.7159  | 0.4972 | -0.1301 | 5.6202 | CEU |
| LOC340435 | GI_29735811-S | rs7017481  | 8 | 8 | 71839324 | 57397  | 10.4822 | 0.5265 | -0.1361 | 5.6202 | CEU |
| LOC340435 | GI_29735811-S | rs6415611  | 8 | 8 | 71840336 | 58409  | 6.1972  | 0.3391 | -0.1151 | 5.6202 | CEU |
| LOC340435 | GI_29735811-S | rs11993453 | 8 | 8 | 71840393 | 58466  | 14.3409 | 0.6567 | -0.1558 | 5.6202 | CEU |
| LOC340435 | GI_29735811-S | rs12680166 | 8 | 8 | 71841192 | 59265  | 14.3409 | 0.6567 | -0.1558 | 5.6202 | CEU |
| LOC340435 | GI_29735811-S | rs7459870  | 8 | 8 | 71845137 | 63210  | 9.4179  | 0.4975 | -0.1299 | 5.6202 | CEU |
| LOC340435 | GI_29735811-S | rs17688313 | 8 | 8 | 71846418 | 64491  | 14.4544 | 0.6534 | 0.1560  | 5.6202 | CEU |
| LOC340435 | GI_29735811-S | rs12674966 | 8 | 8 | 71846964 | 65037  | 10.6872 | 0.5340 | 0.1351  | 5.6202 | CEU |
| LOC340435 | GI_29735811-S | rs7845516  | 8 | 8 | 71848376 | 66449  | 9.7159  | 0.4972 | 0.1301  | 5.6202 | CEU |
| LOC340435 | GI_29735811-S | rs1373480  | 8 | 8 | 71849521 | 67594  | 14.4544 | 0.6534 | 0.1560  | 5.6202 | CEU |
| LOC340435 | GI_29735811-S | rs7013495  | 8 | 8 | 71856071 | 74144  | 9.7159  | 0.4972 | -0.1301 | 5.6202 | CEU |
| LOC340435 | GI_29735811-S | rs6993170  | 8 | 8 | 71856073 | 74146  | 14.2318 | 0.6537 | 0.1560  | 5.6202 | CEU |
| LOC340435 | GI_29735811-S | rs6998786  | 8 | 8 | 71857184 | 75257  | 14.4291 | 0.6657 | 0.1580  | 5.6202 | CEU |
| LOC340435 | GI_29735811-S | rs6981149  | 8 | 8 | 71857236 | 75309  | 9.4424  | 0.4985 | -0.1325 | 5.6202 | CEU |
| LOC340435 | GI_29735811-S | rs12680988 | 8 | 8 | 71858444 | 76517  | 10.6574 | 0.6178 | -0.1466 | 5.6202 | CEU |
| LOC340435 | GI_29735811-S | rs6986479  | 8 | 8 | 71860112 | 78185  | 10.1112 | 0.5187 | 0.1361  | 5.6202 | CEU |
| LOC340435 | GI_29735811-S | rs1596566  | 8 | 8 | 71861130 | 79203  | 14.4544 | 0.6534 | -0.1560 | 5.6202 | CEU |
| LOC340435 | GI_29735811-S | rs1596565  | 8 | 8 | 71861386 | 79459  | 10.1112 | 0.5187 | -0.1361 | 5.6202 | CEU |
| LOC340435 | GI_29735811-S | rs6993115  | 8 | 8 | 71861737 | 79810  | 12.0717 | 0.5820 | -0.1482 | 5.6202 | CEU |
| LOC340435 | GI_29735811-S | rs10504481 | 8 | 8 | 71862071 | 80144  | 14.4544 | 0.6534 | -0.1560 | 5.6202 | CEU |
| LOC340435 | GI_29735811-S | rs7828552  | 8 | 8 | 71862761 | 80834  | 6.1972  | 0.3391 | 0.1151  | 5.6202 | CEU |
| LOC340435 | GI_29735811-S | rs1444339  | 8 | 8 | 71863196 | 81269  | 10.4822 | 0.5265 | -0.1361 | 5.6202 | CEU |
| LOC340435 | GI_29735811-S | rs7826483  | 8 | 8 | 71865447 | 83520  | 14.4544 | 0.6534 | -0.1560 | 5.6202 | CEU |
| LOC340435 | GI_29735811-S | rs7822474  | 8 | 8 | 71868287 | 86360  | 10.4822 | 0.5265 | 0.1361  | 5.6202 | CEU |
| LOC340435 | GI_29735811-S | rs13257800 | 8 | 8 | 71876687 | 94760  | 14.4544 | 0.6534 | -0.1560 | 5.6202 | CEU |
| LOC340435 | GI_29735811-S | rs10100748 | 8 | 8 | 71879582 | 97655  | 6.1972  | 0.3391 | 0.1151  | 5.6202 | CEU |
| LOC340435 | GI_29735811-S | rs13261146 | 8 | 8 | 71889473 | 107546 | 10.4822 | 0.5265 | 0.1361  | 5.6202 | CEU |
| LOC340435 | GI_29735811-S | rs13261712 | 8 | 8 | 71894818 | 112891 | 14.4544 | 0.6534 | -0.1560 | 5.6202 | CEU |
| LOC340435 | GI_29735811-S | rs13252719 | 8 | 8 | 71897123 | 115196 | 14.0620 | 0.6489 | -0.1575 | 5.6202 | CEU |
| LOC340435 | GI_29735811-S | rs1822651  | 8 | 8 | 71899215 | 117288 | 10.4822 | 0.5265 | 0.1361  | 5.6202 | CEU |

|           |               |            |   |   |          |        |         |        |         |        |     |
|-----------|---------------|------------|---|---|----------|--------|---------|--------|---------|--------|-----|
| LOC340435 | GI_29735811-S | rs13274062 | 8 | 8 | 71899641 | 117714 | 14.4544 | 0.6534 | -0.1560 | 5.6202 | CEU |
| LOC340435 | GI_29735811-S | rs6983845  | 8 | 8 | 71909034 | 127107 | 9.7159  | 0.4972 | 0.1301  | 5.6202 | CEU |
| LOC340435 | GI_29735811-S | rs1457198  | 8 | 8 | 71909723 | 127796 | 10.4822 | 0.5265 | -0.1361 | 5.6202 | CEU |
| LOC340435 | GI_29735811-S | rs13255849 | 8 | 8 | 71915307 | 133380 | 9.7159  | 0.4972 | 0.1301  | 5.6202 | CEU |
| LOC340435 | GI_29735811-S | rs6472548  | 8 | 8 | 71916853 | 134926 | 9.7159  | 0.4972 | 0.1301  | 5.6202 | CEU |
| LOC340435 | GI_29735811-S | rs1156955  | 8 | 8 | 71917513 | 135586 | 10.4822 | 0.5265 | 0.1361  | 5.6202 | CEU |
| LOC340435 | GI_29735811-S | rs1156956  | 8 | 8 | 71917592 | 135665 | 9.7159  | 0.4972 | -0.1301 | 5.6202 | CEU |
| LOC340435 | GI_29735811-S | rs13274381 | 8 | 8 | 71927648 | 145721 | 14.4544 | 0.6534 | 0.1560  | 5.6202 | CEU |
| LOC340435 | GI_29735811-S | rs11994581 | 8 | 8 | 71936961 | 155034 | 10.4822 | 0.5265 | 0.1361  | 5.6202 | CEU |
| LOC340435 | GI_29735811-S | rs4446768  | 8 | 8 | 71940143 | 158216 | 9.7159  | 0.4972 | 0.1301  | 5.6202 | CEU |
| LOC340435 | GI_29735811-S | rs7015825  | 8 | 8 | 71941227 | 159300 | 9.3654  | 0.5215 | 0.1362  | 5.6202 | CEU |
| LOC340435 | GI_29735811-S | rs13273773 | 8 | 8 | 71941801 | 159874 | 10.4822 | 0.5265 | 0.1361  | 5.6202 | CEU |
| LOC340435 | GI_29735811-S | rs6472551  | 8 | 8 | 71944403 | 162476 | 13.9929 | 0.6406 | -0.1578 | 5.6202 | CEU |
| LOC340435 | GI_29735811-S | rs10453108 | 8 | 8 | 71945494 | 163567 | 9.7159  | 0.4972 | 0.1301  | 5.6202 | CEU |
| LOC340435 | GI_29735811-S | rs6998354  | 8 | 8 | 71948723 | 166796 | 10.4822 | 0.5265 | -0.1361 | 5.6202 | CEU |
| LOC340435 | GI_29735811-S | rs12156377 | 8 | 8 | 71950246 | 168319 | 10.4517 | 0.5316 | 0.1394  | 5.6202 | CEU |
| LOC340435 | GI_29735811-S | rs6472552  | 8 | 8 | 71951524 | 169597 | 10.4822 | 0.5265 | 0.1361  | 5.6202 | CEU |
| LOC340435 | GI_29735811-S | rs4629903  | 8 | 8 | 71967686 | 185759 | 10.4822 | 0.5265 | -0.1361 | 5.6202 | CEU |
| LOC340435 | GI_29735811-S | rs11985482 | 8 | 8 | 71973132 | 191205 | 9.7159  | 0.4972 | -0.1301 | 5.6202 | CEU |
| LOC340435 | GI_29735811-S | rs13248937 | 8 | 8 | 71981303 | 199376 | 9.5550  | 0.4909 | -0.1280 | 5.6202 | CEU |
| LOC340435 | GI_29735811-S | rs6992048  | 8 | 8 | 71986425 | 204498 | 9.7159  | 0.4972 | 0.1301  | 5.6202 | CEU |
| LOC340435 | GI_29735811-S | rs10957533 | 8 | 8 | 71987661 | 205734 | 10.4822 | 0.5265 | 0.1361  | 5.6202 | CEU |
| LOC340435 | GI_29735811-S | rs12156041 | 8 | 8 | 71989479 | 207552 | 9.8010  | 0.5129 | 0.1354  | 5.6202 | CEU |
| LOC340435 | GI_29735811-S | rs6984663  | 8 | 8 | 71990219 | 208292 | 9.7159  | 0.4972 | 0.1301  | 5.6202 | CEU |
| LOC340435 | GI_29735811-S | rs2017035  | 8 | 8 | 72004360 | 222433 | 10.4822 | 0.5265 | -0.1361 | 5.6202 | CEU |
| LOC340435 | GI_29735811-S | rs10504487 | 8 | 8 | 72006153 | 224226 | 10.3149 | 0.5264 | -0.1360 | 5.6202 | CEU |
| LOC340435 | GI_29735811-S | rs3103854  | 8 | 8 | 72006842 | 224915 | 6.1972  | 0.3391 | -0.1151 | 5.6202 | CEU |
| LOC340435 | GI_29735811-S | rs1493199  | 8 | 8 | 72009058 | 227131 | 10.4822 | 0.5265 | -0.1361 | 5.6202 | CEU |
| LOC340435 | GI_29735811-S | rs10089583 | 8 | 8 | 72012038 | 230111 | 14.4544 | 0.6534 | 0.1560  | 5.6202 | CEU |
| LOC340435 | GI_29735811-S | rs1493198  | 8 | 8 | 72014511 | 232584 | 14.8383 | 0.6637 | 0.1599  | 5.6202 | CEU |
| LOC340435 | GI_29735811-S | rs2008517  | 8 | 8 | 72019074 | 237147 | 9.7144  | 0.4972 | -0.1315 | 5.6202 | CEU |
| LOC340435 | GI_29735811-S | rs2732087  | 8 | 8 | 72022993 | 241066 | 14.8383 | 0.6637 | -0.1599 | 5.6202 | CEU |
| LOC340435 | GI_29735811-S | rs2639911  | 8 | 8 | 72023266 | 241339 | 10.4822 | 0.5265 | 0.1361  | 5.6202 | CEU |
| LOC340435 | GI_29735811-S | rs3098858  | 8 | 8 | 72025827 | 243900 | 10.4822 | 0.5265 | 0.1361  | 5.6202 | CEU |
| LOC340435 | GI_29735811-S | rs3098859  | 8 | 8 | 72027586 | 245659 | 10.4822 | 0.5265 | -0.1361 | 5.6202 | CEU |
| LOC340435 | GI_29735811-S | rs3110268  | 8 | 8 | 72028722 | 246795 | 10.4822 | 0.5265 | -0.1361 | 5.6202 | CEU |
| LOC340435 | GI_29735811-S | rs2732144  | 8 | 8 | 72029173 | 247246 | 10.4822 | 0.5265 | 0.1361  | 5.6202 | CEU |
| LOC340435 | GI_29735811-S | rs2639949  | 8 | 8 | 72029570 | 247643 | 9.1730  | 0.4937 | 0.1308  | 5.6202 | CEU |
| LOC340435 | GI_29735811-S | rs2639950  | 8 | 8 | 72029612 | 247685 | 10.4822 | 0.5265 | 0.1361  | 5.6202 | CEU |
| LOC340435 | GI_29735811-S | rs1973364  | 8 | 8 | 72029796 | 247869 | 9.7144  | 0.4972 | 0.1315  | 5.6202 | CEU |
| LOC340435 | GI_29735811-S | rs2639919  | 8 | 8 | 72037682 | 255755 | 14.8383 | 0.6637 | -0.1599 | 5.6202 | CEU |
| LOC340435 | GI_29735811-S | rs7008083  | 8 | 8 | 72047202 | 265275 | 9.7144  | 0.4972 | 0.1315  | 5.6202 | CEU |
| LOC340435 | GI_29735811-S | rs11988221 | 8 | 8 | 72051953 | 270026 | 9.7144  | 0.4972 | -0.1315 | 5.6202 | CEU |
| LOC340435 | GI_29735811-S | rs2732127  | 8 | 8 | 72059373 | 277446 | 9.7144  | 0.4972 | 0.1315  | 5.6202 | CEU |
| LOC340435 | GI_29735811-S | rs1845217  | 8 | 8 | 72059805 | 277878 | 10.3426 | 0.5338 | -0.1357 | 5.6202 | CEU |
| LOC340435 | GI_29735811-S | rs2956611  | 8 | 8 | 72060422 | 278495 | 10.4822 | 0.5265 | 0.1361  | 5.6202 | CEU |
| LOC340435 | GI_29735811-S | rs2732124  | 8 | 8 | 72061236 | 279309 | 9.7144  | 0.4972 | -0.1315 | 5.6202 | CEU |
| LOC340435 | GI_29735811-S | rs950903   | 8 | 8 | 72063328 | 281401 | 10.4822 | 0.5265 | -0.1361 | 5.6202 | CEU |
| LOC340435 | GI_29735811-S | rs6472558  | 8 | 8 | 72063697 | 281770 | 10.4822 | 0.5265 | -0.1361 | 5.6202 | CEU |
| LOC340435 | GI_29735811-S | rs2732120  | 8 | 8 | 72067547 | 285620 | 9.7144  | 0.4972 | 0.1315  | 5.6202 | CEU |
| LOC340435 | GI_29735811-S | rs2639924  | 8 | 8 | 72068095 | 286168 | 10.4822 | 0.5265 | 0.1361  | 5.6202 | CEU |
| LOC340435 | GI_29735811-S | rs2639948  | 8 | 8 | 72071040 | 289113 | 13.1578 | 0.6292 | 0.1501  | 5.6202 | CEU |
| LOC340435 | GI_29735811-S | rs2732118  | 8 | 8 | 72071219 | 289292 | 9.8001  | 0.5066 | 0.1325  | 5.6202 | CEU |
| LOC340435 | GI_29735811-S | rs2732117  | 8 | 8 | 72071632 | 289705 | 9.7144  | 0.4972 | 0.1315  | 5.6202 | CEU |
| LOC340435 | GI_29735811-S | rs2732140  | 8 | 8 | 72073280 | 291353 | 10.4822 | 0.5265 | 0.1361  | 5.6202 | CEU |
| LOC340435 | GI_29735811-S | rs2732141  | 8 | 8 | 72073461 | 291534 | 9.7973  | 0.5004 | -0.1310 | 5.6202 | CEU |
| LOC340435 | GI_29735811-S | rs2639947  | 8 | 8 | 72073991 | 292064 | 8.2415  | 0.5000 | 0.1279  | 5.6202 | CEU |
| LOC340435 | GI_29735811-S | rs2732146  | 8 | 8 | 72074672 | 292745 | 10.4822 | 0.5265 | 0.1361  | 5.6202 | CEU |
| LOC340435 | GI_29735811-S | rs2639945  | 8 | 8 | 72075093 | 293166 | 9.9548  | 0.5189 | -0.1349 | 5.6202 | CEU |

|           |               |           |   |   |          |        |         |        |         |        |     |
|-----------|---------------|-----------|---|---|----------|--------|---------|--------|---------|--------|-----|
| LOC340435 | GI_29735811-S | rs2639942 | 8 | 8 | 72075728 | 293801 | 9.7144  | 0.4972 | -0.1315 | 5.6202 | CEU |
| LOC340435 | GI_29735811-S | rs2035929 | 8 | 8 | 72075926 | 293999 | 10.4822 | 0.5265 | -0.1361 | 5.6202 | CEU |
| LOC340435 | GI_29735811-S | rs2639941 | 8 | 8 | 72076459 | 294532 | 9.2512  | 0.4970 | 0.1309  | 5.6202 | CEU |
| LOC340435 | GI_29735811-S | rs2639939 | 8 | 8 | 72076477 | 294550 | 10.4822 | 0.5265 | -0.1361 | 5.6202 | CEU |
| LOC340435 | GI_29735811-S | rs2035925 | 8 | 8 | 72076770 | 294843 | 10.4822 | 0.5265 | 0.1361  | 5.6202 | CEU |
| LOC340435 | GI_29735811-S | rs2639938 | 8 | 8 | 72076906 | 294979 | 10.4822 | 0.5265 | 0.1361  | 5.6202 | CEU |
| LOC340435 | GI_29735811-S | rs2639937 | 8 | 8 | 72076910 | 294983 | 10.4822 | 0.5265 | 0.1361  | 5.6202 | CEU |
| LOC340435 | GI_29735811-S | rs2035924 | 8 | 8 | 72077007 | 295080 | 10.4822 | 0.5265 | 0.1361  | 5.6202 | CEU |
| LOC340435 | GI_29735811-S | rs2732089 | 8 | 8 | 72077718 | 295791 | 10.4822 | 0.5265 | 0.1361  | 5.6202 | CEU |
| LOC340435 | GI_29735811-S | rs3098865 | 8 | 8 | 72078538 | 296611 | 10.4822 | 0.5265 | -0.1361 | 5.6202 | CEU |
| LOC340435 | GI_29735811-S | rs3098866 | 8 | 8 | 72079128 | 297201 | 14.8383 | 0.6637 | 0.1599  | 5.6202 | CEU |
| LOC340435 | GI_29735811-S | rs3110239 | 8 | 8 | 72079299 | 297372 | 14.8383 | 0.6637 | -0.1599 | 5.6202 | CEU |
| LOC340435 | GI_29735811-S | rs3098867 | 8 | 8 | 72079425 | 297498 | 14.8383 | 0.6637 | -0.1599 | 5.6202 | CEU |
| LOC340435 | GI_29735811-S | rs2639901 | 8 | 8 | 72080305 | 298378 | 14.8383 | 0.6637 | -0.1599 | 5.6202 | CEU |
| LOC340435 | GI_29735811-S | rs2732090 | 8 | 8 | 72080811 | 298884 | 14.8383 | 0.6637 | -0.1599 | 5.6202 | CEU |
| LOC340435 | GI_29735811-S | rs2732091 | 8 | 8 | 72080977 | 299050 | 14.8383 | 0.6637 | 0.1599  | 5.6202 | CEU |
| LOC340435 | GI_29735811-S | rs2732093 | 8 | 8 | 72081633 | 299706 | 13.3110 | 0.6207 | 0.1554  | 5.6202 | CEU |
| LOC340435 | GI_29735811-S | rs2639899 | 8 | 8 | 72082016 | 300089 | 13.3110 | 0.6207 | 0.1554  | 5.6202 | CEU |
| LOC340435 | GI_29735811-S | rs1018015 | 8 | 8 | 72082124 | 300197 | 6.1972  | 0.3391 | -0.1151 | 5.6202 | CEU |
| LOC340435 | GI_29735811-S | rs2732094 | 8 | 8 | 72082472 | 300545 | 13.3110 | 0.6207 | 0.1554  | 5.6202 | CEU |
| LOC340435 | GI_29735811-S | rs2732095 | 8 | 8 | 72082500 | 300573 | 13.3110 | 0.6207 | 0.1554  | 5.6202 | CEU |
| LOC340435 | GI_29735811-S | rs2732096 | 8 | 8 | 72082534 | 300607 | 13.3110 | 0.6207 | -0.1554 | 5.6202 | CEU |
| LOC340435 | GI_29735811-S | rs2639898 | 8 | 8 | 72082864 | 300937 | 13.3110 | 0.6207 | 0.1554  | 5.6202 | CEU |
| LOC340435 | GI_29735811-S | rs2639897 | 8 | 8 | 72083230 | 301303 | 13.3110 | 0.6207 | 0.1554  | 5.6202 | CEU |
| LOC340435 | GI_29735811-S | rs2639896 | 8 | 8 | 72083337 | 301410 | 13.3110 | 0.6207 | 0.1554  | 5.6202 | CEU |
| LOC340435 | GI_29735811-S | rs1353058 | 8 | 8 | 72084572 | 302645 | 13.3110 | 0.6207 | 0.1554  | 5.6202 | CEU |
| LOC340435 | GI_29735811-S | rs1353057 | 8 | 8 | 72084651 | 302724 | 13.3110 | 0.6207 | -0.1554 | 5.6202 | CEU |
| LOC340435 | GI_29735811-S | rs2639958 | 8 | 8 | 72084704 | 302777 | 12.5300 | 0.6097 | 0.1517  | 5.6202 | CEU |
| LOC340435 | GI_29735811-S | rs1908036 | 8 | 8 | 72084878 | 302951 | 13.3110 | 0.6207 | -0.1554 | 5.6202 | CEU |
| LOC340435 | GI_29735811-S | rs1908035 | 8 | 8 | 72084962 | 303035 | 13.3110 | 0.6207 | 0.1554  | 5.6202 | CEU |
| LOC340435 | GI_29735811-S | rs1908034 | 8 | 8 | 72085108 | 303181 | 13.3110 | 0.6207 | 0.1554  | 5.6202 | CEU |
| LOC340435 | GI_29735811-S | rs1908033 | 8 | 8 | 72085353 | 303426 | 13.3110 | 0.6207 | 0.1554  | 5.6202 | CEU |
| LOC340435 | GI_29735811-S | rs2732102 | 8 | 8 | 72085426 | 303499 | 13.3110 | 0.6207 | -0.1554 | 5.6202 | CEU |
| LOC340435 | GI_29735811-S | rs2639957 | 8 | 8 | 72085756 | 303829 | 13.3110 | 0.6207 | 0.1554  | 5.6202 | CEU |
| LOC340435 | GI_29735811-S | rs2201249 | 8 | 8 | 72085795 | 303868 | 6.1972  | 0.3391 | 0.1151  | 5.6202 | CEU |
| LOC340435 | GI_29735811-S | rs2732103 | 8 | 8 | 72086050 | 304123 | 13.3110 | 0.6207 | 0.1554  | 5.6202 | CEU |
| LOC340435 | GI_29735811-S | rs2732104 | 8 | 8 | 72086073 | 304146 | 13.3110 | 0.6207 | 0.1554  | 5.6202 | CEU |
| LOC340435 | GI_29735811-S | rs2732106 | 8 | 8 | 72086393 | 304466 | 13.3110 | 0.6207 | -0.1554 | 5.6202 | CEU |
| LOC340435 | GI_29735811-S | rs2639956 | 8 | 8 | 72086645 | 304718 | 13.3110 | 0.6207 | 0.1554  | 5.6202 | CEU |
| LOC340435 | GI_29735811-S | rs1389206 | 8 | 8 | 72087416 | 305489 | 13.3110 | 0.6207 | -0.1554 | 5.6202 | CEU |
| LOC340435 | GI_29735811-S | rs2732107 | 8 | 8 | 72087862 | 305935 | 11.7233 | 0.5704 | 0.1526  | 5.6202 | CEU |
| LOC340435 | GI_29735811-S | rs2639955 | 8 | 8 | 72087896 | 305969 | 11.7233 | 0.5704 | -0.1526 | 5.6202 | CEU |
| LOC340435 | GI_29735811-S | rs2639954 | 8 | 8 | 72088129 | 306202 | 13.3110 | 0.6207 | 0.1554  | 5.6202 | CEU |
| LOC340435 | GI_29735811-S | rs2639953 | 8 | 8 | 72088214 | 306287 | 13.3110 | 0.6207 | 0.1554  | 5.6202 | CEU |
| LOC340435 | GI_29735811-S | rs2639952 | 8 | 8 | 72088284 | 306357 | 13.3110 | 0.6207 | 0.1554  | 5.6202 | CEU |
| LOC340435 | GI_29735811-S | rs2732108 | 8 | 8 | 72088653 | 306726 | 13.3110 | 0.6207 | 0.1554  | 5.6202 | CEU |
| LOC340435 | GI_29735811-S | rs2732109 | 8 | 8 | 72088777 | 306850 | 13.1347 | 0.6219 | 0.1553  | 5.6202 | CEU |
| LOC340435 | GI_29735811-S | rs1493203 | 8 | 8 | 72089061 | 307134 | 13.3110 | 0.6207 | -0.1554 | 5.6202 | CEU |
| LOC340435 | GI_29735811-S | rs2732110 | 8 | 8 | 72089365 | 307438 | 13.3110 | 0.6207 | 0.1554  | 5.6202 | CEU |
| LOC340435 | GI_29735811-S | rs2639951 | 8 | 8 | 72089779 | 307852 | 13.3110 | 0.6207 | -0.1554 | 5.6202 | CEU |
| LOC340435 | GI_29735811-S | rs2732111 | 8 | 8 | 72089983 | 308056 | 10.4822 | 0.5265 | -0.1361 | 5.6202 | CEU |
| LOC340435 | GI_29735811-S | rs2732112 | 8 | 8 | 72090395 | 308468 | 13.3110 | 0.6207 | 0.1554  | 5.6202 | CEU |
| LOC340435 | GI_29735811-S | rs2732113 | 8 | 8 | 72091103 | 309176 | 13.3110 | 0.6207 | -0.1554 | 5.6202 | CEU |
| LOC340435 | GI_29735811-S | rs2732114 | 8 | 8 | 72091266 | 309339 | 13.3110 | 0.6207 | -0.1554 | 5.6202 | CEU |
| LOC340435 | GI_29735811-S | rs2732115 | 8 | 8 | 72091408 | 309481 | 13.3110 | 0.6207 | 0.1554  | 5.6202 | CEU |
| LOC340435 | GI_29735811-S | rs2732116 | 8 | 8 | 72091881 | 309954 | 13.3110 | 0.6207 | -0.1554 | 5.6202 | CEU |
| LOC340435 | GI_29735811-S | rs2956610 | 8 | 8 | 72092087 | 310160 | 13.3110 | 0.6207 | -0.1554 | 5.6202 | CEU |
| LOC340435 | GI_29735811-S | rs3098868 | 8 | 8 | 72092246 | 310319 | 13.3110 | 0.6207 | -0.1554 | 5.6202 | CEU |
| LOC340435 | GI_29735811-S | rs3098869 | 8 | 8 | 72092386 | 310459 | 9.6485  | 0.5006 | -0.1334 | 5.6202 | CEU |

|           |               |            |   |   |          |        |         |        |         |        |     |
|-----------|---------------|------------|---|---|----------|--------|---------|--------|---------|--------|-----|
| LOC340435 | GI_29735811-S | rs3110240  | 8 | 8 | 72092658 | 310731 | 13.3110 | 0.6207 | 0.1554  | 5.6202 | CEU |
| LOC340435 | GI_29735811-S | rs3098871  | 8 | 8 | 72092969 | 311042 | 13.3110 | 0.6207 | -0.1554 | 5.6202 | CEU |
| LOC340435 | GI_29735811-S | rs3098872  | 8 | 8 | 72094758 | 312831 | 9.7144  | 0.4972 | 0.1315  | 5.6202 | CEU |
| LOC340435 | GI_29735811-S | rs3098873  | 8 | 8 | 72095140 | 313213 | 13.3110 | 0.6207 | -0.1554 | 5.6202 | CEU |
| LOC340435 | GI_29735811-S | rs3110244  | 8 | 8 | 72095751 | 313824 | 12.0589 | 0.6011 | -0.1531 | 5.6202 | CEU |
| LOC340435 | GI_29735811-S | rs3098874  | 8 | 8 | 72096892 | 314965 | 13.3110 | 0.6207 | 0.1554  | 5.6202 | CEU |
| LOC340435 | GI_29735811-S | rs6982447  | 8 | 8 | 72097167 | 315240 | 13.3110 | 0.6207 | 0.1554  | 5.6202 | CEU |
| LOC340435 | GI_29735811-S | rs6982601  | 8 | 8 | 72097242 | 315315 | 8.5598  | 0.4498 | 0.1240  | 5.6202 | CEU |
| LOC340435 | GI_29735811-S | rs6983299  | 8 | 8 | 72097441 | 315514 | 13.3110 | 0.6207 | -0.1554 | 5.6202 | CEU |
| LOC340435 | GI_29735811-S | rs6982942  | 8 | 8 | 72097489 | 315562 | 13.3110 | 0.6207 | 0.1554  | 5.6202 | CEU |
| LOC340435 | GI_29735811-S | rs13256029 | 8 | 8 | 72098099 | 316172 | 13.3110 | 0.6207 | -0.1554 | 5.6202 | CEU |
| LOC340435 | GI_29735811-S | rs3098876  | 8 | 8 | 72098798 | 316871 | 13.3110 | 0.6207 | -0.1554 | 5.6202 | CEU |
| LOC340435 | GI_29735811-S | rs3110250  | 8 | 8 | 72098938 | 317011 | 13.3110 | 0.6207 | 0.1554  | 5.6202 | CEU |
| LOC340435 | GI_29735811-S | rs3098877  | 8 | 8 | 72099000 | 317073 | 13.3110 | 0.6207 | -0.1554 | 5.6202 | CEU |
| LOC340435 | GI_29735811-S | rs3110251  | 8 | 8 | 72099528 | 317601 | 13.3110 | 0.6207 | 0.1554  | 5.6202 | CEU |
| LOC340435 | GI_29735811-S | rs3110252  | 8 | 8 | 72099774 | 317847 | 13.3110 | 0.6207 | 0.1554  | 5.6202 | CEU |
| LOC340435 | GI_29735811-S | rs3098878  | 8 | 8 | 72100023 | 318096 | 9.7144  | 0.4972 | -0.1315 | 5.6202 | CEU |
| LOC340435 | GI_29735811-S | rs3110253  | 8 | 8 | 72100107 | 318180 | 13.3110 | 0.6207 | 0.1554  | 5.6202 | CEU |
| LOC340435 | GI_29735811-S | rs3110255  | 8 | 8 | 72100604 | 318677 | 13.3110 | 0.6207 | 0.1554  | 5.6202 | CEU |
| LOC340435 | GI_29735811-S | rs3110256  | 8 | 8 | 72100690 | 318763 | 13.3110 | 0.6207 | 0.1554  | 5.6202 | CEU |
| LOC340435 | GI_29735811-S | rs3098879  | 8 | 8 | 72101014 | 319087 | 13.3110 | 0.6207 | -0.1554 | 5.6202 | CEU |
| LOC340435 | GI_29735811-S | rs3110258  | 8 | 8 | 72101086 | 319159 | 13.3110 | 0.6207 | 0.1554  | 5.6202 | CEU |
| LOC340435 | GI_29735811-S | rs3098880  | 8 | 8 | 72101475 | 319548 | 13.3110 | 0.6207 | -0.1554 | 5.6202 | CEU |
| LOC340435 | GI_29735811-S | rs7002064  | 8 | 8 | 72102648 | 320721 | 9.7144  | 0.4972 | -0.1315 | 5.6202 | CEU |
| LOC340435 | GI_29735811-S | rs3110260  | 8 | 8 | 72103042 | 321115 | 9.7144  | 0.4972 | 0.1315  | 5.6202 | CEU |
| LOC340435 | GI_29735811-S | rs3110261  | 8 | 8 | 72104005 | 322078 | 9.7144  | 0.4972 | -0.1315 | 5.6202 | CEU |
| LOC340435 | GI_29735811-S | rs3110262  | 8 | 8 | 72104184 | 322257 | 9.7144  | 0.4972 | 0.1315  | 5.6202 | CEU |
| LOC340435 | GI_29735811-S | rs3110263  | 8 | 8 | 72105246 | 323319 | 10.4822 | 0.5265 | 0.1361  | 5.6202 | CEU |
| LOC340435 | GI_29735811-S | rs3098883  | 8 | 8 | 72106121 | 324194 | 13.1040 | 0.6210 | -0.1554 | 5.6202 | CEU |
| LOC340435 | GI_29735811-S | rs4532626  | 8 | 8 | 72107449 | 325522 | 10.4822 | 0.5265 | 0.1361  | 5.6202 | CEU |
| LOC340435 | GI_29735811-S | rs4434651  | 8 | 8 | 72109741 | 327814 | 13.3110 | 0.6207 | -0.1554 | 5.6202 | CEU |
| LOC340435 | GI_29735811-S | rs12542300 | 8 | 8 | 72113949 | 332022 | 13.3110 | 0.6207 | -0.1554 | 5.6202 | CEU |
| LOC340435 | GI_29735811-S | rs10091471 | 8 | 8 | 72116309 | 334382 | 13.3110 | 0.6207 | 0.1554  | 5.6202 | CEU |
| LOC340435 | GI_29735811-S | rs11779364 | 8 | 8 | 72117150 | 335223 | 9.1490  | 0.4927 | 0.1278  | 5.6202 | CEU |
| LOC340435 | GI_29735811-S | rs6472561  | 8 | 8 | 72117737 | 335810 | 13.3110 | 0.6207 | -0.1554 | 5.6202 | CEU |
| LOC340435 | GI_29735811-S | rs4074908  | 8 | 8 | 72117886 | 335959 | 9.7144  | 0.4972 | -0.1315 | 5.6202 | CEU |
| LOC340435 | GI_29735811-S | rs4074909  | 8 | 8 | 72118381 | 336454 | 13.3110 | 0.6207 | 0.1554  | 5.6202 | CEU |
| LOC340435 | GI_29735811-S | rs4078067  | 8 | 8 | 72119025 | 337098 | 13.3110 | 0.6207 | -0.1554 | 5.6202 | CEU |
| LOC340435 | GI_29735811-S | rs4504667  | 8 | 8 | 72119346 | 337419 | 13.3110 | 0.6207 | -0.1554 | 5.6202 | CEU |
| LOC340435 | GI_29735811-S | rs4571761  | 8 | 8 | 72119727 | 337800 | 13.3110 | 0.6207 | -0.1554 | 5.6202 | CEU |
| LOC340435 | GI_29735811-S | rs4738105  | 8 | 8 | 72121472 | 339545 | 13.3110 | 0.6207 | -0.1554 | 5.6202 | CEU |
| LOC340435 | GI_29735811-S | rs17699084 | 8 | 8 | 72125965 | 344038 | 10.7885 | 0.5377 | 0.1404  | 5.6202 | CEU |
| LOC340435 | GI_29735811-S | rs1481804  | 8 | 8 | 72131984 | 350057 | 13.1839 | 0.6169 | -0.1613 | 5.6202 | CEU |
| LOC340435 | GI_29735811-S | rs6472562  | 8 | 8 | 72132432 | 350505 | 13.6089 | 0.6295 | 0.1592  | 5.6202 | CEU |
| LOC340435 | GI_29735811-S | rs6472563  | 8 | 8 | 72132461 | 350534 | 13.6089 | 0.6295 | 0.1592  | 5.6202 | CEU |
| LOC340435 | GI_29735811-S | rs10110676 | 8 | 8 | 72133363 | 351436 | 11.1039 | 0.5490 | -0.1399 | 5.6202 | CEU |
| LOC340435 | GI_29735811-S | rs10504492 | 8 | 8 | 72140513 | 358586 | 10.7885 | 0.5377 | -0.1404 | 5.6202 | CEU |
| LOC340435 | GI_29735811-S | rs6472564  | 8 | 8 | 72140954 | 359027 | 10.7885 | 0.5377 | -0.1404 | 5.6202 | CEU |
| LOC340435 | GI_29735811-S | rs13268251 | 8 | 8 | 72141368 | 359441 | 8.4323  | 0.4500 | -0.1255 | 5.6202 | CEU |
| LOC340435 | GI_29735811-S | rs17699685 | 8 | 8 | 72141558 | 359631 | 10.7885 | 0.5377 | -0.1404 | 5.6202 | CEU |
| LOC340435 | GI_29735811-S | rs11987409 | 8 | 8 | 72142614 | 360687 | 10.5213 | 0.5470 | 0.1403  | 5.6202 | CEU |
| LOC340435 | GI_29735811-S | rs17699710 | 8 | 8 | 72142764 | 360837 | 10.7885 | 0.5377 | -0.1404 | 5.6202 | CEU |
| LOC340435 | GI_29735811-S | rs13262350 | 8 | 8 | 72144160 | 362233 | 8.5572  | 0.4496 | -0.1284 | 5.6202 | CEU |
| LOC340435 | GI_29735811-S | rs12056347 | 8 | 8 | 72147163 | 365236 | 8.5572  | 0.4496 | -0.1284 | 5.6202 | CEU |
| LOC340435 | GI_29735811-S | rs7825815  | 8 | 8 | 72148959 | 367032 | 10.2542 | 0.5241 | -0.1399 | 5.6202 | CEU |
| LOC340435 | GI_29735811-S | rs4526394  | 8 | 8 | 72150881 | 368954 | 9.3476  | 0.5010 | 0.1360  | 5.6202 | CEU |
| LOC340435 | GI_29735811-S | rs1481801  | 8 | 8 | 72152273 | 370346 | 7.9425  | 0.4227 | 0.1260  | 5.6202 | CEU |
| LOC340435 | GI_29735811-S | rs4372033  | 8 | 8 | 72152557 | 370630 | 8.5572  | 0.4496 | -0.1284 | 5.6202 | CEU |
| LOC340435 | GI_29735811-S | rs12674838 | 8 | 8 | 72152834 | 370907 | 10.7885 | 0.5377 | -0.1404 | 5.6202 | CEU |

|           |               |            |   |   |           |        |        |        |         |        |     |
|-----------|---------------|------------|---|---|-----------|--------|--------|--------|---------|--------|-----|
| LOC340435 | GI_29735811-S | rs17778232 | 8 | 8 | 72154072  | 372145 | 9.2539 | 0.5168 | -0.1382 | 5.6202 | CEU |
| LOC340435 | GI_29735811-S | rs9650238  | 8 | 8 | 72155260  | 373333 | 9.8436 | 0.5146 | -0.1394 | 5.6202 | CEU |
| LOC340435 | GI_29735811-S | rs1481796  | 8 | 8 | 72156904  | 374977 | 9.4430 | 0.4924 | -0.1320 | 5.6202 | CEU |
| LOC340435 | GI_29735811-S | rs7837005  | 8 | 8 | 72161586  | 379659 | 7.4728 | 0.4012 | -0.1203 | 5.6202 | CEU |
| LOC340435 | GI_29735811-S | rs12155783 | 8 | 8 | 72161680  | 379753 | 9.4430 | 0.4924 | 0.1320  | 5.6202 | CEU |
| LOC340435 | GI_29735811-S | rs1159724  | 8 | 8 | 72162375  | 380448 | 6.7316 | 0.3658 | 0.1139  | 5.6202 | CEU |
| LOC340435 | GI_29735811-S | rs6472566  | 8 | 8 | 72163038  | 381111 | 8.7715 | 0.4646 | -0.1320 | 5.6202 | CEU |
| LOC340435 | GI_29735811-S | rs13251367 | 8 | 8 | 72164485  | 382558 | 7.8874 | 0.4257 | -0.1245 | 5.6202 | CEU |
| LOC340435 | GI_29735811-S | rs10957534 | 8 | 8 | 72170857  | 388930 | 8.6356 | 0.4530 | 0.1288  | 5.6202 | CEU |
| LOC340435 | GI_29735811-S | rs10504497 | 8 | 8 | 72171441  | 389514 | 8.9181 | 0.4649 | -0.1301 | 5.6202 | CEU |
| LOC340435 | GI_29735811-S | rs13277069 | 8 | 8 | 72172085  | 390158 | 8.6356 | 0.4530 | -0.1288 | 5.6202 | CEU |
| LOC340435 | GI_29735811-S | rs6990397  | 8 | 8 | 72174326  | 392399 | 9.4228 | 0.5040 | 0.1383  | 5.6202 | CEU |
| CGI-62    | GI_7705774-S  | rs3899796  | 8 | 8 | 79730637  | 59414  | 7.0403 | 0.3914 | 0.4141  | 6.1907 | CEU |
| CGI-62    | GI_7705774-S  | rs1384804  | 8 | 8 | 79734777  | 55274  | 6.7894 | 0.3686 | 0.3984  | 6.1907 | CEU |
| CGI-62    | GI_7705774-S  | rs1021156  | 8 | 8 | 79738359  | 51692  | 6.7894 | 0.3686 | 0.3984  | 6.1907 | CEU |
| CGI-62    | GI_7705774-S  | rs3808619  | 8 | 8 | 79740281  | 49770  | 6.7894 | 0.3686 | -0.3984 | 6.1907 | CEU |
| CGI-62    | GI_7705774-S  | rs3736169  | 8 | 8 | 79750410  | 39641  | 6.7894 | 0.3686 | 0.3984  | 6.1907 | CEU |
| CGI-62    | GI_7705774-S  | rs7839152  | 8 | 8 | 79752567  | 37484  | 6.7894 | 0.3686 | 0.3984  | 6.1907 | CEU |
| CGI-62    | GI_7705774-S  | rs9298316  | 8 | 8 | 79754981  | 35070  | 6.7894 | 0.3686 | -0.3984 | 6.1907 | CEU |
| CGI-62    | GI_7705774-S  | rs7842142  | 8 | 8 | 79756291  | 33760  | 6.7894 | 0.3686 | -0.3984 | 6.1907 | CEU |
| CGI-62    | GI_7705774-S  | rs10093127 | 8 | 8 | 79761659  | 28392  | 6.7894 | 0.3686 | -0.3984 | 6.1907 | CEU |
| CGI-62    | GI_7705774-S  | rs1872072  | 8 | 8 | 79763975  | 26076  | 6.7894 | 0.3686 | 0.3984  | 6.1907 | CEU |
| CGI-62    | GI_7705774-S  | rs7001074  | 8 | 8 | 79766479  | 23572  | 6.7894 | 0.3686 | -0.3984 | 6.1907 | CEU |
| CGI-62    | GI_7705774-S  | rs1054283  | 8 | 8 | 79773265  | 16786  | 6.7894 | 0.3686 | 0.3984  | 6.1907 | CEU |
| CGI-62    | GI_7705774-S  | rs13280202 | 8 | 8 | 79775028  | 15023  | 6.4896 | 0.3588 | -0.3899 | 6.1907 | CEU |
| CGI-62    | GI_7705774-S  | rs7010897  | 8 | 8 | 79782909  | 7142   | 6.6077 | 0.3647 | -0.3976 | 6.1907 | CEU |
| CGI-62    | GI_7705774-S  | rs2369440  | 8 | 8 | 79784264  | 5787   | 6.7894 | 0.3686 | -0.3984 | 6.1907 | CEU |
| CGI-62    | GI_7705774-S  | rs1483573  | 8 | 8 | 79786172  | 3879   | 6.7894 | 0.3686 | -0.3984 | 6.1907 | CEU |
| CGI-62    | GI_7705774-S  | rs2953477  | 8 | 8 | 79787160  | 2891   | 6.7894 | 0.3686 | 0.3984  | 6.1907 | CEU |
| CGI-62    | GI_7705774-S  | rs2717538  | 8 | 8 | 79795704  | 5653   | 6.7894 | 0.3686 | -0.3984 | 6.1907 | CEU |
| CGI-62    | GI_7705774-S  | rs2919936  | 8 | 8 | 79796562  | 6511   | 6.7894 | 0.3686 | -0.3984 | 6.1907 | CEU |
| CGI-62    | GI_7705774-S  | rs2953475  | 8 | 8 | 79800693  | 10642  | 6.7894 | 0.3686 | -0.3984 | 6.1907 | CEU |
| CGI-62    | GI_7705774-S  | rs1441438  | 8 | 8 | 79804324  | 14273  | 6.7894 | 0.3686 | -0.3984 | 6.1907 | CEU |
| CGI-62    | GI_7705774-S  | rs1545228  | 8 | 8 | 79806992  | 16941  | 6.7894 | 0.3686 | -0.3984 | 6.1907 | CEU |
| CGI-62    | GI_7705774-S  | rs894221   | 8 | 8 | 79811612  | 21561  | 6.7894 | 0.3686 | 0.3984  | 6.1907 | CEU |
| CGI-62    | GI_7705774-S  | rs1441850  | 8 | 8 | 79820221  | 30170  | 6.7894 | 0.3686 | 0.3984  | 6.1907 | CEU |
| PKHD1L1   | GI_31377831-S | rs2980569  | 8 | 8 | 110416578 | 191677 | 7.4181 | 0.3987 | -0.4293 | 5.893  | CEU |
| PKHD1L1   | GI_31377831-S | rs2980582  | 8 | 8 | 110427418 | 180837 | 6.4697 | 0.3528 | -0.4284 | 5.893  | CEU |
| PKHD1L1   | GI_31377831-S | rs2926239  | 8 | 8 | 110427848 | 180407 | 6.7539 | 0.3669 | 0.5934  | 5.893  | CEU |
| PKHD1L1   | GI_31377831-S | rs1585294  | 8 | 8 | 110431684 | 176571 | 7.0193 | 0.3850 | -0.4245 | 5.893  | CEU |
| PKHD1L1   | GI_31377831-S | rs6983646  | 8 | 8 | 110436363 | 171892 | 7.4181 | 0.3987 | 0.4293  | 5.893  | CEU |
| Hs.171169 | Hs.171169-S   | rs9656881  | 8 | 8 | 110439824 | 177597 | 7.4031 | 0.3980 | -0.1343 | 6.355  | CEU |
| Hs.171169 | Hs.171169-S   | rs7835131  | 8 | 8 | 110440611 | 176810 | 7.3276 | 0.3998 | 0.1355  | 6.355  | CEU |
| PKHD1L1   | GI_31377831-S | rs7002606  | 8 | 8 | 110441547 | 166708 | 7.7130 | 0.4178 | -0.4015 | 5.893  | CEU |
| Hs.171169 | Hs.171169-S   | rs6982826  | 8 | 8 | 110441653 | 175768 | 7.3276 | 0.3998 | -0.1355 | 6.355  | CEU |
| PKHD1L1   | GI_31377831-S | rs6982748  | 8 | 8 | 110441844 | 166411 | 8.8481 | 0.4620 | 0.4360  | 5.893  | CEU |
| PKHD1L1   | GI_31377831-S | rs6987198  | 8 | 8 | 110442003 | 166252 | 9.0996 | 0.4784 | -0.4360 | 5.893  | CEU |
| Hs.171169 | Hs.171169-S   | rs1563581  | 8 | 8 | 110442396 | 175025 | 8.6226 | 0.5032 | -0.1540 | 6.355  | CEU |
| Hs.171169 | Hs.171169-S   | rs7008687  | 8 | 8 | 110446037 | 171384 | 7.2558 | 0.3964 | -0.1348 | 6.355  | CEU |
| PKHD1L1   | GI_31377831-S | rs10099126 | 8 | 8 | 110448791 | 159464 | 8.8481 | 0.4620 | -0.4360 | 5.893  | CEU |
| PKHD1L1   | GI_31377831-S | rs7819151  | 8 | 8 | 110449873 | 158382 | 8.8481 | 0.4620 | 0.4360  | 5.893  | CEU |
| PKHD1L1   | GI_31377831-S | rs12334438 | 8 | 8 | 110450959 | 157296 | 7.2771 | 0.3920 | -0.4351 | 5.893  | CEU |
| PKHD1L1   | GI_31377831-S | rs921960   | 8 | 8 | 110461305 | 146950 | 8.3364 | 0.4577 | -0.4283 | 5.893  | CEU |
| PKHD1L1   | GI_31377831-S | rs2168679  | 8 | 8 | 110464203 | 144052 | 8.3656 | 0.4471 | 0.4297  | 5.893  | CEU |
| Hs.171169 | Hs.171169-S   | rs17445342 | 8 | 8 | 110470812 | 146609 | 7.4031 | 0.3980 | 0.1343  | 6.355  | CEU |
| PKHD1L1   | GI_31377831-S | rs13278812 | 8 | 8 | 110472672 | 135583 | 8.8481 | 0.4620 | -0.4360 | 5.893  | CEU |
| PKHD1L1   | GI_31377831-S | rs1379370  | 8 | 8 | 110472874 | 135381 | 8.8481 | 0.4620 | -0.4360 | 5.893  | CEU |
| PKHD1L1   | GI_31377831-S | rs1457290  | 8 | 8 | 110474575 | 133680 | 8.5134 | 0.4717 | 0.4478  | 5.893  | CEU |
| PKHD1L1   | GI_31377831-S | rs1457289  | 8 | 8 | 110474727 | 133528 | 8.8481 | 0.4620 | 0.4360  | 5.893  | CEU |

|           |               |            |   |   |           |        |         |        |         |       |     |
|-----------|---------------|------------|---|---|-----------|--------|---------|--------|---------|-------|-----|
| PKHD1L1   | GI_31377831-S | rs10098672 | 8 | 8 | 110476273 | 131982 | 8.8481  | 0.4620 | 0.4360  | 5.893 | CEU |
| Hs.171169 | Hs.171169-S   | rs9656791  | 8 | 8 | 110477948 | 139473 | 8.7476  | 0.4696 | 0.1508  | 6.355 | CEU |
| PKHD1L1   | GI_31377831-S | rs1379369  | 8 | 8 | 110481695 | 126560 | 8.8481  | 0.4620 | 0.4360  | 5.893 | CEU |
| PKHD1L1   | GI_31377831-S | rs2061295  | 8 | 8 | 110482124 | 126131 | 9.0996  | 0.4784 | -0.4360 | 5.893 | CEU |
| PKHD1L1   | GI_31377831-S | rs1457287  | 8 | 8 | 110482154 | 126101 | 8.8481  | 0.4620 | 0.4360  | 5.893 | CEU |
| PKHD1L1   | GI_31377831-S | rs2061294  | 8 | 8 | 110483000 | 125255 | 8.3595  | 0.4527 | -0.4357 | 5.893 | CEU |
| PKHD1L1   | GI_31377831-S | rs1457286  | 8 | 8 | 110485989 | 122266 | 8.8481  | 0.4620 | -0.4360 | 5.893 | CEU |
| PKHD1L1   | GI_31377831-S | rs1037695  | 8 | 8 | 110488098 | 120157 | 8.8481  | 0.4620 | -0.4360 | 5.893 | CEU |
| Hs.171169 | Hs.171169-S   | rs10100944 | 8 | 8 | 110494728 | 122693 | 6.9543  | 0.4225 | 0.1480  | 6.355 | CEU |
| PKHD1L1   | GI_31377831-S | rs4604408  | 8 | 8 | 110494770 | 113485 | 6.6118  | 0.4240 | -0.4453 | 5.893 | CEU |
| Hs.171169 | Hs.171169-S   | rs7820734  | 8 | 8 | 110495527 | 121894 | 6.8171  | 0.4284 | 0.1516  | 6.355 | CEU |
| PKHD1L1   | GI_31377831-S | rs897838   | 8 | 8 | 110495783 | 112472 | 8.8481  | 0.4620 | -0.4360 | 5.893 | CEU |
| PKHD1L1   | GI_31377831-S | rs2349760  | 8 | 8 | 110496096 | 112159 | 8.8481  | 0.4620 | -0.4360 | 5.893 | CEU |
| PKHD1L1   | GI_31377831-S | rs1840908  | 8 | 8 | 110498628 | 109627 | 8.7082  | 0.4619 | -0.4360 | 5.893 | CEU |
| PKHD1L1   | GI_31377831-S | rs7840592  | 8 | 8 | 110499617 | 108638 | 8.8481  | 0.4620 | -0.4360 | 5.893 | CEU |
| PKHD1L1   | GI_31377831-S | rs6469260  | 8 | 8 | 110500234 | 108021 | 8.6296  | 0.4706 | -0.4591 | 5.893 | CEU |
| PKHD1L1   | GI_31377831-S | rs4735133  | 8 | 8 | 110506560 | 101695 | 8.8481  | 0.4620 | 0.4360  | 5.893 | CEU |
| PKHD1L1   | GI_31377831-S | rs1870107  | 8 | 8 | 110517106 | 91149  | 8.8481  | 0.4620 | 0.4360  | 5.893 | CEU |
| Hs.171169 | Hs.171169-S   | rs10093885 | 8 | 8 | 110517811 | 99610  | 8.6216  | 0.4524 | 0.1432  | 6.355 | CEU |
| Hs.171169 | Hs.171169-S   | rs7816624  | 8 | 8 | 110519268 | 98153  | 7.4031  | 0.3980 | 0.1343  | 6.355 | CEU |
| PKHD1L1   | GI_31377831-S | rs2844253  | 8 | 8 | 110521087 | 87168  | 8.4327  | 0.4443 | -0.4081 | 5.893 | CEU |
| Hs.171169 | Hs.171169-S   | rs17446406 | 8 | 8 | 110521359 | 96062  | 7.4031  | 0.3980 | 0.1343  | 6.355 | CEU |
| Hs.171169 | Hs.171169-S   | rs11785973 | 8 | 8 | 110522642 | 94779  | 7.5804  | 0.4230 | -0.1305 | 6.355 | CEU |
| PKHD1L1   | GI_31377831-S | rs1673408  | 8 | 8 | 110524497 | 83758  | 9.8906  | 0.5040 | 0.4403  | 5.893 | CEU |
| Hs.171169 | Hs.171169-S   | rs17368044 | 8 | 8 | 110527995 | 89426  | 7.4031  | 0.3980 | -0.1343 | 6.355 | CEU |
| PKHD1L1   | GI_31377831-S | rs1673407  | 8 | 8 | 110529664 | 78591  | 9.8906  | 0.5040 | -0.4403 | 5.893 | CEU |
| PKHD1L1   | GI_31377831-S | rs1673405  | 8 | 8 | 110530694 | 77561  | 9.8127  | 0.5071 | -0.4481 | 5.893 | CEU |
| PKHD1L1   | GI_31377831-S | rs1673404  | 8 | 8 | 110534236 | 74019  | 8.4327  | 0.4443 | 0.4081  | 5.893 | CEU |
| Hs.171169 | Hs.171169-S   | rs11778756 | 8 | 8 | 110534657 | 82764  | 7.4031  | 0.3980 | -0.1343 | 6.355 | CEU |
| PKHD1L1   | GI_31377831-S | rs1783163  | 8 | 8 | 110535261 | 72994  | 9.8906  | 0.5040 | -0.4403 | 5.893 | CEU |
| PKHD1L1   | GI_31377831-S | rs2607639  | 8 | 8 | 110539473 | 68782  | 8.4327  | 0.4443 | 0.4081  | 5.893 | CEU |
| PKHD1L1   | GI_31377831-S | rs2607638  | 8 | 8 | 110539887 | 68368  | 8.4327  | 0.4443 | 0.4081  | 5.893 | CEU |
| PKHD1L1   | GI_31377831-S | rs2844251  | 8 | 8 | 110540059 | 68196  | 9.7326  | 0.5040 | 0.4403  | 5.893 | CEU |
| PKHD1L1   | GI_31377831-S | rs2607637  | 8 | 8 | 110540260 | 67995  | 8.4327  | 0.4443 | 0.4081  | 5.893 | CEU |
| PKHD1L1   | GI_31377831-S | rs2844252  | 8 | 8 | 110540306 | 67949  | 8.4327  | 0.4443 | 0.4081  | 5.893 | CEU |
| PKHD1L1   | GI_31377831-S | rs1457284  | 8 | 8 | 110540600 | 67655  | 9.7313  | 0.5039 | -0.4403 | 5.893 | CEU |
| PKHD1L1   | GI_31377831-S | rs1026439  | 8 | 8 | 110543083 | 65172  | 6.7023  | 0.3644 | 0.4165  | 5.893 | CEU |
| PKHD1L1   | GI_31377831-S | rs714995   | 8 | 8 | 110543826 | 64429  | 8.4327  | 0.4443 | -0.4081 | 5.893 | CEU |
| PKHD1L1   | GI_31377831-S | rs1673401  | 8 | 8 | 110544752 | 63503  | 8.4327  | 0.4443 | 0.4081  | 5.893 | CEU |
| PKHD1L1   | GI_31377831-S | rs1783145  | 8 | 8 | 110545050 | 63205  | 8.4327  | 0.4443 | 0.4081  | 5.893 | CEU |
| PKHD1L1   | GI_31377831-S | rs1783144  | 8 | 8 | 110545167 | 63088  | 9.8906  | 0.5040 | -0.4403 | 5.893 | CEU |
| PKHD1L1   | GI_31377831-S | rs1673400  | 8 | 8 | 110545286 | 62969  | 8.4327  | 0.4443 | -0.4081 | 5.893 | CEU |
| PKHD1L1   | GI_31377831-S | rs1673398  | 8 | 8 | 110546169 | 62086  | 7.4097  | 0.4207 | -0.3945 | 5.893 | CEU |
| PKHD1L1   | GI_31377831-S | rs1627570  | 8 | 8 | 110547000 | 61255  | 7.7775  | 0.4264 | -0.3973 | 5.893 | CEU |
| PKHD1L1   | GI_31377831-S | rs1783143  | 8 | 8 | 110547650 | 60605  | 7.9347  | 0.4279 | -0.4064 | 5.893 | CEU |
| PKHD1L1   | GI_31377831-S | rs1783142  | 8 | 8 | 110547837 | 60418  | 8.4327  | 0.4443 | -0.4081 | 5.893 | CEU |
| PKHD1L1   | GI_31377831-S | rs1673396  | 8 | 8 | 110548797 | 59458  | 8.4327  | 0.4443 | 0.4081  | 5.893 | CEU |
| PKHD1L1   | GI_31377831-S | rs1471125  | 8 | 8 | 110549755 | 58500  | 8.4327  | 0.4443 | -0.4081 | 5.893 | CEU |
| PKHD1L1   | GI_31377831-S | rs1471124  | 8 | 8 | 110551558 | 56697  | 8.4327  | 0.4443 | -0.4081 | 5.893 | CEU |
| PKHD1L1   | GI_31377831-S | rs1783152  | 8 | 8 | 110552076 | 56179  | 7.9713  | 0.4295 | 0.4007  | 5.893 | CEU |
| PKHD1L1   | GI_31377831-S | rs1673393  | 8 | 8 | 110553021 | 55234  | 9.8906  | 0.5040 | 0.4403  | 5.893 | CEU |
| PKHD1L1   | GI_31377831-S | rs1783151  | 8 | 8 | 110553119 | 55136  | 8.4327  | 0.4443 | 0.4081  | 5.893 | CEU |
| PKHD1L1   | GI_31377831-S | rs1783149  | 8 | 8 | 110553988 | 54267  | 8.4327  | 0.4443 | 0.4081  | 5.893 | CEU |
| PKHD1L1   | GI_31377831-S | rs1673390  | 8 | 8 | 110554319 | 53936  | 10.1953 | 0.5219 | -0.4403 | 5.893 | CEU |
| PKHD1L1   | GI_31377831-S | rs1626759  | 8 | 8 | 110554960 | 53295  | 8.4327  | 0.4443 | 0.4081  | 5.893 | CEU |
| PKHD1L1   | GI_31377831-S | rs1457283  | 8 | 8 | 110555803 | 52452  | 7.0675  | 0.3982 | -0.3889 | 5.893 | CEU |
| PKHD1L1   | GI_31377831-S | rs1457282  | 8 | 8 | 110555942 | 52313  | 9.2028  | 0.4767 | 0.4138  | 5.893 | CEU |
| PKHD1L1   | GI_31377831-S | rs1783148  | 8 | 8 | 110558796 | 49459  | 8.7985  | 0.4657 | -0.4064 | 5.893 | CEU |
| PKHD1L1   | GI_31377831-S | rs1379361  | 8 | 8 | 110559318 | 48937  | 9.2028  | 0.4767 | -0.4138 | 5.893 | CEU |

|           |               |            |   |   |           |       |         |        |         |       |     |
|-----------|---------------|------------|---|---|-----------|-------|---------|--------|---------|-------|-----|
| PKHD1L1   | GI_31377831-S | rs1783147  | 8 | 8 | 110561016 | 47239 | 9.2028  | 0.4767 | -0.4138 | 5.893 | CEU |
| PKHD1L1   | GI_31377831-S | rs1630942  | 8 | 8 | 110561053 | 47202 | 9.2028  | 0.4767 | 0.4138  | 5.893 | CEU |
| PKHD1L1   | GI_31377831-S | rs1630134  | 8 | 8 | 110561140 | 47115 | 9.2028  | 0.4767 | -0.4138 | 5.893 | CEU |
| PKHD1L1   | GI_31377831-S | rs1026437  | 8 | 8 | 110562125 | 46130 | 9.2028  | 0.4767 | 0.4138  | 5.893 | CEU |
| PKHD1L1   | GI_31377831-S | rs2844254  | 8 | 8 | 110564368 | 43887 | 9.2028  | 0.4767 | -0.4138 | 5.893 | CEU |
| PKHD1L1   | GI_31377831-S | rs2607633  | 8 | 8 | 110565344 | 42911 | 8.0040  | 0.4254 | -0.4178 | 5.893 | CEU |
| PKHD1L1   | GI_31377831-S | rs1009371  | 8 | 8 | 110567126 | 41129 | 10.6428 | 0.5324 | 0.4409  | 5.893 | CEU |
| Hs.171169 | Hs.171169-S   | rs17375750 | 8 | 8 | 110568239 | 49182 | 7.4031  | 0.3980 | -0.1343 | 6.355 | CEU |
| PKHD1L1   | GI_31377831-S | rs1783140  | 8 | 8 | 110568520 | 39735 | 9.1698  | 0.4874 | 0.4226  | 5.893 | CEU |
| PKHD1L1   | GI_31377831-S | rs1783141  | 8 | 8 | 110569859 | 38396 | 9.2028  | 0.4767 | -0.4138 | 5.893 | CEU |
| PKHD1L1   | GI_31377831-S | rs2607631  | 8 | 8 | 110573591 | 34664 | 9.2028  | 0.4767 | -0.4138 | 5.893 | CEU |
| PKHD1L1   | GI_31377831-S | rs2607630  | 8 | 8 | 110574042 | 34213 | 5.9331  | 0.3791 | 0.3775  | 5.893 | CEU |
| PKHD1L1   | GI_31377831-S | rs2607629  | 8 | 8 | 110574354 | 33901 | 9.2028  | 0.4767 | 0.4138  | 5.893 | CEU |
| PKHD1L1   | GI_31377831-S | rs1013482  | 8 | 8 | 110574886 | 33369 | 10.6428 | 0.5324 | -0.4409 | 5.893 | CEU |
| PKHD1L1   | GI_31377831-S | rs2607628  | 8 | 8 | 110575062 | 33193 | 9.2028  | 0.4767 | -0.4138 | 5.893 | CEU |
| PKHD1L1   | GI_31377831-S | rs1563580  | 8 | 8 | 110575280 | 32975 | 6.5856  | 0.3586 | 0.5616  | 5.893 | CEU |
| PKHD1L1   | GI_31377831-S | rs2607627  | 8 | 8 | 110575834 | 32421 | 10.6428 | 0.5324 | -0.4409 | 5.893 | CEU |
| PKHD1L1   | GI_31377831-S | rs1783162  | 8 | 8 | 110577414 | 30841 | 10.6428 | 0.5324 | -0.4409 | 5.893 | CEU |
| PKHD1L1   | GI_31377831-S | rs753995   | 8 | 8 | 110581622 | 26633 | 9.2028  | 0.4767 | 0.4138  | 5.893 | CEU |
| PKHD1L1   | GI_31377831-S | rs1673422  | 8 | 8 | 110582601 | 25654 | 9.2028  | 0.4767 | -0.4138 | 5.893 | CEU |
| PKHD1L1   | GI_31377831-S | rs1783159  | 8 | 8 | 110583540 | 24715 | 10.7570 | 0.5428 | 0.4500  | 5.893 | CEU |
| PKHD1L1   | GI_31377831-S | rs1783158  | 8 | 8 | 110583563 | 24692 | 9.1519  | 0.4805 | 0.4150  | 5.893 | CEU |
| Hs.171169 | Hs.171169-S   | rs6995033  | 8 | 8 | 110584372 | 33049 | 6.8111  | 0.4087 | 0.1329  | 6.355 | CEU |
| PKHD1L1   | GI_31377831-S | rs1673421  | 8 | 8 | 110584402 | 23853 | 7.7037  | 0.4670 | -0.3974 | 5.893 | CEU |
| PKHD1L1   | GI_31377831-S | rs1673420  | 8 | 8 | 110585296 | 22959 | 7.5814  | 0.4679 | -0.3963 | 5.893 | CEU |
| PKHD1L1   | GI_31377831-S | rs1673419  | 8 | 8 | 110585433 | 22822 | 9.2028  | 0.4767 | -0.4138 | 5.893 | CEU |
| PKHD1L1   | GI_31377831-S | rs1783157  | 8 | 8 | 110585436 | 22819 | 9.2028  | 0.4767 | -0.4138 | 5.893 | CEU |
| PKHD1L1   | GI_31377831-S | rs1673416  | 8 | 8 | 110586668 | 21587 | 9.2028  | 0.4767 | 0.4138  | 5.893 | CEU |
| PKHD1L1   | GI_31377831-S | rs1673415  | 8 | 8 | 110587384 | 20871 | 9.2028  | 0.4767 | 0.4138  | 5.893 | CEU |
| PKHD1L1   | GI_31377831-S | rs1379367  | 8 | 8 | 110587710 | 20545 | 9.2028  | 0.4767 | 0.4138  | 5.893 | CEU |
| PKHD1L1   | GI_31377831-S | rs1379366  | 8 | 8 | 110587810 | 20445 | 10.6428 | 0.5324 | -0.4409 | 5.893 | CEU |
| PKHD1L1   | GI_31377831-S | rs1783154  | 8 | 8 | 110588748 | 19507 | 9.2028  | 0.4767 | -0.4138 | 5.893 | CEU |
| PKHD1L1   | GI_31377831-S | rs1783153  | 8 | 8 | 110588990 | 19265 | 10.6428 | 0.5324 | 0.4409  | 5.893 | CEU |
| PKHD1L1   | GI_31377831-S | rs2844257  | 8 | 8 | 110590653 | 17602 | 6.5856  | 0.3586 | -0.5616 | 5.893 | CEU |
| PKHD1L1   | GI_31377831-S | rs2607625  | 8 | 8 | 110590692 | 17563 | 6.5856  | 0.3586 | -0.5616 | 5.893 | CEU |
| PKHD1L1   | GI_31377831-S | rs2844258  | 8 | 8 | 110591692 | 16563 | 6.5856  | 0.3586 | 0.5616  | 5.893 | CEU |
| PKHD1L1   | GI_31377831-S | rs2844259  | 8 | 8 | 110591903 | 16352 | 6.5856  | 0.3586 | -0.5616 | 5.893 | CEU |
| PKHD1L1   | GI_31377831-S | rs2844260  | 8 | 8 | 110591948 | 16307 | 6.5856  | 0.3586 | -0.5616 | 5.893 | CEU |
| Hs.171169 | Hs.171169-S   | rs6469264  | 8 | 8 | 110594779 | 22642 | 7.2789  | 0.3975 | 0.1304  | 6.355 | CEU |
| PKHD1L1   | GI_31377831-S | rs1673412  | 8 | 8 | 110594900 | 13355 | 6.0190  | 0.3347 | -0.5328 | 5.893 | CEU |
| PKHD1L1   | GI_31377831-S | rs1783166  | 8 | 8 | 110595060 | 13195 | 10.6428 | 0.5324 | 0.4409  | 5.893 | CEU |
| PKHD1L1   | GI_31377831-S | rs1673411  | 8 | 8 | 110597325 | 10930 | 10.6428 | 0.5324 | -0.4409 | 5.893 | CEU |
| PKHD1L1   | GI_31377831-S | rs1783168  | 8 | 8 | 110598046 | 10209 | 10.6428 | 0.5324 | 0.4409  | 5.893 | CEU |
| PKHD1L1   | GI_31377831-S | rs1673410  | 8 | 8 | 110598253 | 10002 | 6.5856  | 0.3586 | 0.5616  | 5.893 | CEU |
| PKHD1L1   | GI_31377831-S | rs1673413  | 8 | 8 | 110599052 | 9203  | 6.5856  | 0.3586 | -0.5616 | 5.893 | CEU |
| PKHD1L1   | GI_31377831-S | rs1783169  | 8 | 8 | 110599950 | 8305  | 6.5856  | 0.3586 | -0.5616 | 5.893 | CEU |
| Hs.171169 | Hs.171169-S   | rs7842842  | 8 | 8 | 110600053 | 17368 | 8.6997  | 0.4615 | 0.1457  | 6.355 | CEU |
| PKHD1L1   | GI_31377831-S | rs1673409  | 8 | 8 | 110600946 | 7309  | 6.5856  | 0.3586 | -0.5616 | 5.893 | CEU |
| PKHD1L1   | GI_31377831-S | rs1783171  | 8 | 8 | 110601912 | 6343  | 6.5856  | 0.3586 | -0.5616 | 5.893 | CEU |
| PKHD1L1   | GI_31377831-S | rs1673428  | 8 | 8 | 110602120 | 6135  | 6.5856  | 0.3586 | -0.5616 | 5.893 | CEU |
| PKHD1L1   | GI_31377831-S | rs2844261  | 8 | 8 | 110602670 | 5585  | 6.5856  | 0.3586 | -0.5616 | 5.893 | CEU |
| PKHD1L1   | GI_31377831-S | rs1563578  | 8 | 8 | 110603688 | 4567  | 6.5856  | 0.3586 | -0.5616 | 5.893 | CEU |
| PKHD1L1   | GI_31377831-S | rs1457288  | 8 | 8 | 110603951 | 4304  | 9.2028  | 0.4767 | -0.4138 | 5.893 | CEU |
| PKHD1L1   | GI_31377831-S | rs897840   | 8 | 8 | 110605492 | 2763  | 6.5856  | 0.3586 | -0.5616 | 5.893 | CEU |
| PKHD1L1   | GI_31377831-S | rs897842   | 8 | 8 | 110605957 | 2298  | 6.5856  | 0.3586 | 0.5616  | 5.893 | CEU |
| PKHD1L1   | GI_31377831-S | rs1783172  | 8 | 8 | 110606128 | 2127  | 6.5856  | 0.3586 | 0.5616  | 5.893 | CEU |
| PKHD1L1   | GI_31377831-S | rs730885   | 8 | 8 | 110606593 | 1662  | 6.5856  | 0.3586 | -0.5616 | 5.893 | CEU |
| PKHD1L1   | GI_31377831-S | rs1783173  | 8 | 8 | 110607525 | 730   | 6.5856  | 0.3586 | 0.5616  | 5.893 | CEU |
| PKHD1L1   | GI_31377831-S | rs1457295  | 8 | 8 | 110608130 | 125   | 6.5856  | 0.3586 | 0.5616  | 5.893 | CEU |

|           |               |            |   |   |           |        |         |        |         |        |     |
|-----------|---------------|------------|---|---|-----------|--------|---------|--------|---------|--------|-----|
| PKHD1L1   | GI_31377831-S | rs1783174  | 8 | 8 | 110608362 | 107    | 6.5856  | 0.3586 | -0.5616 | 5.893  | CEU |
| PKHD1L1   | GI_31377831-S | rs1673383  | 8 | 8 | 110609091 | 836    | 6.5856  | 0.3586 | 0.5616  | 5.893  | CEU |
| PKHD1L1   | GI_31377831-S | rs1673384  | 8 | 8 | 110609441 | 1186   | 6.5856  | 0.3586 | -0.5616 | 5.893  | CEU |
| PKHD1L1   | GI_31377831-S | rs1673386  | 8 | 8 | 110609938 | 1683   | 6.5856  | 0.3586 | 0.5616  | 5.893  | CEU |
| PKHD1L1   | GI_31377831-S | rs1673389  | 8 | 8 | 110610255 | 2000   | 6.5856  | 0.3586 | -0.5616 | 5.893  | CEU |
| PKHD1L1   | GI_31377831-S | rs1673395  | 8 | 8 | 110610586 | 2331   | 6.5856  | 0.3586 | 0.5616  | 5.893  | CEU |
| PKHD1L1   | GI_31377831-S | rs1673399  | 8 | 8 | 110611139 | 2884   | 6.5856  | 0.3586 | 0.5616  | 5.893  | CEU |
| PKHD1L1   | GI_31377831-S | rs1617259  | 8 | 8 | 110611474 | 3219   | 6.5856  | 0.3586 | 0.5616  | 5.893  | CEU |
| PKHD1L1   | GI_31377831-S | rs2154660  | 8 | 8 | 110612697 | 4442   | 6.5856  | 0.3586 | -0.5616 | 5.893  | CEU |
| PKHD1L1   | GI_31377831-S | rs7821242  | 8 | 8 | 110613700 | 5445   | 9.2028  | 0.4767 | -0.4138 | 5.893  | CEU |
| PKHD1L1   | GI_31377831-S | rs2022935  | 8 | 8 | 110614686 | 6431   | 6.5856  | 0.3586 | -0.5616 | 5.893  | CEU |
| PKHD1L1   | GI_31377831-S | rs10108943 | 8 | 8 | 110614783 | 6528   | 10.6428 | 0.5324 | 0.4409  | 5.893  | CEU |
| PKHD1L1   | GI_31377831-S | rs10111682 | 8 | 8 | 110615076 | 6821   | 6.9306  | 0.3915 | -0.5865 | 5.893  | CEU |
| PKHD1L1   | GI_31377831-S | rs10088258 | 8 | 8 | 110616575 | 8320   | 6.5856  | 0.3586 | -0.5616 | 5.893  | CEU |
| PKHD1L1   | GI_31377831-S | rs7006166  | 8 | 8 | 110616688 | 8433   | 10.6428 | 0.5324 | -0.4409 | 5.893  | CEU |
| PKHD1L1   | GI_31377831-S | rs7011340  | 8 | 8 | 110617590 | 9335   | 6.5856  | 0.3586 | -0.5616 | 5.893  | CEU |
| PKHD1L1   | GI_31377831-S | rs7011803  | 8 | 8 | 110617624 | 9369   | 6.5856  | 0.3586 | 0.5616  | 5.893  | CEU |
| PKHD1L1   | GI_31377831-S | rs4529437  | 8 | 8 | 110619006 | 10751  | 6.5856  | 0.3586 | -0.5616 | 5.893  | CEU |
| Hs.453941 | Hs.453941-S   | rs7015718  | 8 | 8 | 119627172 | 180222 | 7.7955  | 0.4160 | -0.1377 | 6.2895 | CEU |
| Hs.453941 | Hs.453941-S   | rs16891204 | 8 | 8 | 119645121 | 162273 | 6.5880  | 0.3587 | 0.1306  | 6.2895 | CEU |
| Hs.453941 | Hs.453941-S   | rs10101026 | 8 | 8 | 119646510 | 160884 | 7.7955  | 0.4160 | 0.1377  | 6.2895 | CEU |
| Hs.453941 | Hs.453941-S   | rs16891213 | 8 | 8 | 119662099 | 145295 | 6.5872  | 0.3587 | -0.1244 | 6.2895 | CEU |
| Hs.453941 | Hs.453941-S   | rs17683196 | 8 | 8 | 119663571 | 143823 | 9.2031  | 0.4767 | 0.1470  | 6.2895 | CEU |
| Hs.453941 | Hs.453941-S   | rs10505341 | 8 | 8 | 119675719 | 131675 | 10.6489 | 0.5326 | -0.1579 | 6.2895 | CEU |
| Hs.453941 | Hs.453941-S   | rs10505340 | 8 | 8 | 119676462 | 130932 | 10.6489 | 0.5326 | -0.1579 | 6.2895 | CEU |
| Hs.453941 | Hs.453941-S   | rs2514592  | 8 | 8 | 119681861 | 125533 | 6.3376  | 0.3462 | -0.1096 | 6.2895 | CEU |
| Hs.453941 | Hs.453941-S   | rs2460964  | 8 | 8 | 119682843 | 124551 | 6.3376  | 0.3462 | 0.1096  | 6.2895 | CEU |
| Hs.453941 | Hs.453941-S   | rs2460965  | 8 | 8 | 119687942 | 119452 | 12.9390 | 0.6095 | 0.1630  | 6.2895 | CEU |
| Hs.453941 | Hs.453941-S   | rs2460966  | 8 | 8 | 119693737 | 113657 | 12.0916 | 0.5826 | -0.1649 | 6.2895 | CEU |
| Hs.453941 | Hs.453941-S   | rs2514594  | 8 | 8 | 119694330 | 113064 | 14.3231 | 0.6498 | 0.1708  | 6.2895 | CEU |
| Hs.453941 | Hs.453941-S   | rs2460967  | 8 | 8 | 119697073 | 110321 | 13.5081 | 0.6266 | 0.1628  | 6.2895 | CEU |
| Hs.453941 | Hs.453941-S   | rs2460968  | 8 | 8 | 119697411 | 109983 | 13.5081 | 0.6266 | -0.1628 | 6.2895 | CEU |
| Hs.453941 | Hs.453941-S   | rs2460970  | 8 | 8 | 119698635 | 108759 | 14.8934 | 0.6652 | 0.1700  | 6.2895 | CEU |
| Hs.453941 | Hs.453941-S   | rs880033   | 8 | 8 | 119702375 | 105019 | 14.8934 | 0.6652 | -0.1700 | 6.2895 | CEU |
| Hs.453941 | Hs.453941-S   | rs880034   | 8 | 8 | 119702442 | 104952 | 14.8934 | 0.6652 | 0.1700  | 6.2895 | CEU |
| Hs.453941 | Hs.453941-S   | rs2460972  | 8 | 8 | 119707958 | 99436  | 14.8934 | 0.6652 | -0.1700 | 6.2895 | CEU |
| Hs.453941 | Hs.453941-S   | rs2514602  | 8 | 8 | 119719731 | 87663  | 14.8934 | 0.6652 | -0.1700 | 6.2895 | CEU |
| Hs.453941 | Hs.453941-S   | rs2460975  | 8 | 8 | 119720018 | 87376  | 14.8934 | 0.6652 | -0.1700 | 6.2895 | CEU |
| Hs.453941 | Hs.453941-S   | rs2514603  | 8 | 8 | 119722156 | 85238  | 14.8934 | 0.6652 | -0.1700 | 6.2895 | CEU |
| Hs.453941 | Hs.453941-S   | rs2514605  | 8 | 8 | 119723591 | 83803  | 14.8934 | 0.6652 | 0.1700  | 6.2895 | CEU |
| Hs.453941 | Hs.453941-S   | rs2514607  | 8 | 8 | 119725499 | 81895  | 14.8934 | 0.6652 | -0.1700 | 6.2895 | CEU |
| Hs.453941 | Hs.453941-S   | rs2514608  | 8 | 8 | 119726049 | 81345  | 14.8934 | 0.6652 | -0.1700 | 6.2895 | CEU |
| Hs.453941 | Hs.453941-S   | rs2514609  | 8 | 8 | 119726405 | 80989  | 14.8934 | 0.6652 | -0.1700 | 6.2895 | CEU |
| Hs.453941 | Hs.453941-S   | rs2514610  | 8 | 8 | 119728552 | 78842  | 14.8934 | 0.6652 | 0.1700  | 6.2895 | CEU |
| Hs.453941 | Hs.453941-S   | rs2460979  | 8 | 8 | 119731021 | 76373  | 14.8934 | 0.6652 | -0.1700 | 6.2895 | CEU |
| Hs.453941 | Hs.453941-S   | rs2514576  | 8 | 8 | 119740944 | 66450  | 10.4174 | 0.5565 | 0.1721  | 6.2895 | CEU |
| Hs.453941 | Hs.453941-S   | rs17683401 | 8 | 8 | 119741016 | 66378  | 12.1289 | 0.5838 | 0.1792  | 6.2895 | CEU |
| Hs.453941 | Hs.453941-S   | rs2460982  | 8 | 8 | 119741293 | 66101  | 11.7848 | 0.5788 | -0.1816 | 6.2895 | CEU |
| Hs.453941 | Hs.453941-S   | rs2460983  | 8 | 8 | 119741315 | 66079  | 10.8310 | 0.5392 | -0.1688 | 6.2895 | CEU |
| PP3856    | GI_40255088-S | rs4874159  | 8 | 8 | 144742093 | 13960  | 6.8188  | 0.3701 | 0.6716  | 6.1095 | CEU |
| PP3856    | GI_40255088-S | rs1466219  | 8 | 8 | 144744865 | 16732  | 6.5959  | 0.3641 | 0.6641  | 6.1095 | CEU |
| PP3856    | GI_40255088-S | rs4874163  | 8 | 8 | 144745915 | 17782  | 6.8248  | 0.3755 | -0.6828 | 6.1095 | CEU |
| PP3856    | GI_40255088-S | rs4874164  | 8 | 8 | 144746191 | 18058  | 6.8188  | 0.3701 | -0.6716 | 6.1095 | CEU |
| PP3856    | GI_40255088-S | rs10282929 | 8 | 8 | 144752920 | 24787  | 9.9216  | 0.5052 | 0.7718  | 6.1095 | CEU |
| PP3856    | GI_40255088-S | rs10866913 | 8 | 8 | 144754829 | 26696  | 6.8188  | 0.3701 | -0.6716 | 6.1095 | CEU |
| PP3856    | GI_40255088-S | rs10112966 | 8 | 8 | 144755077 | 26944  | 9.9216  | 0.5052 | 0.7718  | 6.1095 | CEU |
| PP3856    | GI_40255088-S | rs4873808  | 8 | 8 | 144764993 | 36860  | 6.7723  | 0.3729 | -0.6685 | 6.1095 | CEU |
| VPS28     | GI_34452691-A | rs11992877 | 8 | 8 | 145572558 | 47468  | 6.1250  | 0.3354 | -0.4198 | 5.9314 | CEU |
| VPS28     | GI_34452691-A | rs11995759 | 8 | 8 | 145572802 | 47224  | 6.1250  | 0.3354 | 0.4198  | 5.9314 | CEU |

|        |               |            |   |   |           |        |        |        |         |        |     |
|--------|---------------|------------|---|---|-----------|--------|--------|--------|---------|--------|-----|
| RPL8   | GI_15431305-I | rs2722495  | 8 | 8 | 145942473 | 46011  | 7.4067 | 0.3981 | -0.2798 | 5.7045 | CEU |
| RPL8   | GI_15431305-I | rs7015203  | 8 | 8 | 145946826 | 41658  | 6.8087 | 0.3696 | -0.2776 | 5.7045 | CEU |
| RPL8   | GI_15431305-I | rs2730059  | 8 | 8 | 145952565 | 35919  | 6.3031 | 0.3445 | 0.2632  | 5.7045 | CEU |
| RPL8   | GI_15431305-I | rs7838846  | 8 | 8 | 145952984 | 35500  | 6.7620 | 0.3724 | -0.2785 | 5.7045 | CEU |
| RPL8   | GI_15431305-I | rs2958482  | 8 | 8 | 145955419 | 33065  | 6.8087 | 0.3696 | 0.2776  | 5.7045 | CEU |
| RPL8   | GI_15431305-I | rs2958483  | 8 | 8 | 145957852 | 30632  | 7.4067 | 0.3981 | -0.2798 | 5.7045 | CEU |
| RPL8   | GI_15431305-I | rs2955194  | 8 | 8 | 145959711 | 28773  | 7.8468 | 0.4184 | 0.2974  | 5.7045 | CEU |
| RPL8   | GI_15431305-I | rs2955195  | 8 | 8 | 145959996 | 28488  | 7.1378 | 0.3907 | -0.2809 | 5.7045 | CEU |
| RPL8   | GI_15431305-I | rs2953854  | 8 | 8 | 145961284 | 27200  | 7.2983 | 0.3930 | -0.2890 | 5.7045 | CEU |
| RPL8   | GI_15431305-I | rs2958490  | 8 | 8 | 145962187 | 26297  | 6.4969 | 0.3750 | 0.2827  | 5.7045 | CEU |
| RPL8   | GI_15431305-I | rs2958493  | 8 | 8 | 145970899 | 17585  | 6.5536 | 0.3672 | 0.2776  | 5.7045 | CEU |
| RPL8   | GI_15431305-I | rs2955202  | 8 | 8 | 145970933 | 17551  | 7.2983 | 0.3930 | -0.2890 | 5.7045 | CEU |
| RPL8   | GI_15431305-I | rs2953856  | 8 | 8 | 145971080 | 17404  | 7.2983 | 0.3930 | 0.2890  | 5.7045 | CEU |
| RPL8   | GI_15431305-I | rs2953857  | 8 | 8 | 145971225 | 17259  | 7.2983 | 0.3930 | -0.2890 | 5.7045 | CEU |
| RPL8   | GI_15431305-I | rs2958498  | 8 | 8 | 145981621 | 6863   | 7.1433 | 0.3910 | 0.2976  | 5.7045 | CEU |
| RPL8   | GI_15431305-I | rs7829963  | 8 | 8 | 145982147 | 6337   | 7.2241 | 0.3895 | 0.2878  | 5.7045 | CEU |
| RPL8   | GI_15431305-I | rs4637890  | 8 | 8 | 145983064 | 5420   | 7.0806 | 0.4046 | 0.2888  | 5.7045 | CEU |
| RPL8   | GI_15431305-I | rs11784860 | 8 | 8 | 145984603 | 3881   | 7.2241 | 0.3895 | -0.2878 | 5.7045 | CEU |
| RPL8   | GI_15431305-I | rs2953886  | 8 | 8 | 145985544 | 2940   | 7.1738 | 0.3872 | 0.2998  | 5.7045 | CEU |
| RPL8   | GI_15431305-I | rs2280933  | 8 | 8 | 145985722 | 2762   | 7.2241 | 0.3895 | 0.2878  | 5.7045 | CEU |
| RPL8   | GI_15431305-I | rs2958516  | 8 | 8 | 145989530 | 1046   | 7.1738 | 0.3872 | -0.2998 | 5.7045 | CEU |
| RPL8   | GI_15431305-I | rs3808374  | 8 | 8 | 145989584 | 1100   | 6.6222 | 0.3604 | -0.2969 | 5.7045 | CEU |
| RPL8   | GI_15431305-I | rs2958517  | 8 | 8 | 145990182 | 1698   | 7.2241 | 0.3895 | 0.2878  | 5.7045 | CEU |
| CDKN2B | GI_17981693-A | rs7042962  | 9 | 9 | 21693051  | 301630 | 8.0803 | 0.4288 | 0.4840  | 7.8007 | CEU |
| CDKN2B | GI_17981693-A | rs7874607  | 9 | 9 | 21694498  | 300183 | 8.0803 | 0.4288 | 0.4840  | 7.8007 | CEU |
| NUDT2  | GI_22265329-I | rs10814074 | 9 | 9 | 34155200  | 171054 | 7.0643 | 0.4038 | -0.5945 | 5.7636 | CEU |
| NUDT2  | GI_22265329-I | rs10814080 | 9 | 9 | 34216942  | 109312 | 8.6467 | 0.4535 | -0.5748 | 5.7636 | CEU |
| NUDT2  | GI_22265329-I | rs10814084 | 9 | 9 | 34253389  | 72865  | 8.6467 | 0.4535 | 0.5748  | 5.7636 | CEU |
| NUDT2  | GI_22265329-I | rs10814086 | 9 | 9 | 34254597  | 71657  | 8.6467 | 0.4535 | 0.5748  | 5.7636 | CEU |
| NUDT2  | GI_22265329-I | rs10972030 | 9 | 9 | 34256323  | 69931  | 6.9616 | 0.3770 | -0.3785 | 5.7636 | CEU |
| NUDT2  | GI_22265329-I | rs10972032 | 9 | 9 | 34259079  | 67175  | 8.6467 | 0.4535 | -0.5748 | 5.7636 | CEU |
| NUDT2  | GI_22265329-I | rs7868756  | 9 | 9 | 34261381  | 64873  | 8.6467 | 0.4535 | 0.5748  | 5.7636 | CEU |
| NUDT2  | GI_22265329-I | rs4878560  | 9 | 9 | 34272388  | 53866  | 8.6467 | 0.4535 | 0.5748  | 5.7636 | CEU |
| NUDT2  | GI_22265329-I | rs7028914  | 9 | 9 | 34274727  | 51527  | 8.6467 | 0.4535 | 0.5748  | 5.7636 | CEU |
| NUDT2  | GI_22265329-I | rs7028928  | 9 | 9 | 34274752  | 51502  | 8.6467 | 0.4535 | -0.5748 | 5.7636 | CEU |
| NUDT2  | GI_22265329-I | rs10814091 | 9 | 9 | 34277840  | 48414  | 8.6467 | 0.4535 | 0.5748  | 5.7636 | CEU |
| NUDT2  | GI_22265329-I | rs2380929  | 9 | 9 | 34279886  | 46368  | 6.9296 | 0.3754 | 0.3791  | 5.7636 | CEU |
| NUDT2  | GI_22265329-I | rs11795349 | 9 | 9 | 34281695  | 44559  | 6.9296 | 0.3754 | 0.3791  | 5.7636 | CEU |
| NUDT2  | GI_22265329-I | rs10758251 | 9 | 9 | 34282779  | 43475  | 6.2020 | 0.3705 | -0.3827 | 5.7636 | CEU |
| NUDT2  | GI_22265329-I | rs10814092 | 9 | 9 | 34283063  | 43191  | 6.9296 | 0.3754 | -0.3791 | 5.7636 | CEU |
| NUDT2  | GI_22265329-I | rs11792590 | 9 | 9 | 34283888  | 42366  | 6.9296 | 0.3754 | 0.3791  | 5.7636 | CEU |
| NUDT2  | GI_22265329-I | rs12377356 | 9 | 9 | 34286825  | 39429  | 6.9296 | 0.3754 | 0.3791  | 5.7636 | CEU |
| NUDT2  | GI_22265329-I | rs4242692  | 9 | 9 | 34288131  | 38123  | 6.9296 | 0.3754 | -0.3791 | 5.7636 | CEU |
| NUDT2  | GI_22265329-I | rs1105655  | 9 | 9 | 34288143  | 38111  | 6.9296 | 0.3754 | 0.3791  | 5.7636 | CEU |
| NUDT2  | GI_22265329-I | rs4480190  | 9 | 9 | 34290838  | 35416  | 6.9296 | 0.3754 | 0.3791  | 5.7636 | CEU |
| NUDT2  | GI_22265329-I | rs10972043 | 9 | 9 | 34290938  | 35316  | 6.9296 | 0.3754 | 0.3791  | 5.7636 | CEU |
| NUDT2  | GI_22265329-I | rs7042250  | 9 | 9 | 34295076  | 31178  | 8.6467 | 0.4535 | -0.5748 | 5.7636 | CEU |
| NUDT2  | GI_22265329-I | rs950546   | 9 | 9 | 34300083  | 26171  | 8.6467 | 0.4535 | -0.5748 | 5.7636 | CEU |
| NUDT2  | GI_22265329-I | rs10972047 | 9 | 9 | 34300357  | 25897  | 8.6467 | 0.4535 | 0.5748  | 5.7636 | CEU |
| NUDT2  | GI_22265329-I | rs10972048 | 9 | 9 | 34300927  | 25327  | 6.9296 | 0.3754 | -0.3791 | 5.7636 | CEU |
| NUDT2  | GI_22265329-I | rs7853609  | 9 | 9 | 34310195  | 16059  | 7.7361 | 0.4424 | 0.5895  | 5.7636 | CEU |
| NUDT2  | GI_22265329-I | rs10814098 | 9 | 9 | 34314168  | 12086  | 8.6467 | 0.4535 | 0.5748  | 5.7636 | CEU |
| NUDT2  | GI_22265329-I | rs7875342  | 9 | 9 | 34319110  | 7144   | 8.6467 | 0.4535 | -0.5748 | 5.7636 | CEU |
| NUDT2  | GI_22265329-I | rs2039344  | 9 | 9 | 34319702  | 6552   | 6.7706 | 0.4006 | 0.4007  | 5.7636 | CEU |
| NUDT2  | GI_22265329-I | rs7039222  | 9 | 9 | 34322740  | 3514   | 8.6467 | 0.4535 | -0.5748 | 5.7636 | CEU |
| NUDT2  | GI_22265329-I | rs1337593  | 9 | 9 | 34324015  | 2239   | 6.9296 | 0.3754 | 0.3791  | 5.7636 | CEU |
| NUDT2  | GI_22265329-I | rs4879775  | 9 | 9 | 34324793  | 1461   | 8.6467 | 0.4535 | 0.5748  | 5.7636 | CEU |
| NUDT2  | GI_22265329-I | rs10972062 | 9 | 9 | 34325027  | 1227   | 6.9296 | 0.3754 | -0.3791 | 5.7636 | CEU |
| NUDT2  | GI_22265329-I | rs10972067 | 9 | 9 | 34332634  | 6380   | 8.6467 | 0.4535 | -0.5748 | 5.7636 | CEU |

|           |               |            |   |   |          |        |        |        |         |        |     |
|-----------|---------------|------------|---|---|----------|--------|--------|--------|---------|--------|-----|
| NUDT2     | GI_22265329-I | rs10814105 | 9 | 9 | 34359062 | 32808  | 8.1039 | 0.4355 | -0.5708 | 5.7636 | CEU |
| NUDT2     | GI_22265329-I | rs7852399  | 9 | 9 | 34361788 | 35534  | 8.6467 | 0.4535 | -0.5748 | 5.7636 | CEU |
| NUDT2     | GI_22265329-I | rs4310287  | 9 | 9 | 34364979 | 38725  | 8.6467 | 0.4535 | -0.5748 | 5.7636 | CEU |
| NUDT2     | GI_22265329-I | rs10972092 | 9 | 9 | 34379702 | 53448  | 7.7967 | 0.4273 | -0.5789 | 5.7636 | CEU |
| FLJ20444  | GI_44888815-S | rs2307055  | 9 | 9 | 64205260 | 1127   | 8.1207 | 0.4306 | 0.6642  | 5.5015 | CEU |
| FLJ20444  | GI_44888815-S | rs4437753  | 9 | 9 | 64207426 | 1039   | 8.1207 | 0.4306 | -0.6642 | 5.5015 | CEU |
| C9orf95   | GI_8923529-S  | rs3752955  | 9 | 9 | 74914244 | 712    | 7.0110 | 0.3794 | -0.3165 | 6.0452 | CEU |
| C9orf95   | GI_8923529-S  | rs11144225 | 9 | 9 | 74936854 | 23322  | 7.5836 | 0.4063 | -0.3668 | 6.0452 | CEU |
| C9orf95   | GI_8923529-S  | rs10869500 | 9 | 9 | 74937249 | 23717  | 7.5836 | 0.4063 | -0.3668 | 6.0452 | CEU |
| C9orf95   | GI_8923529-S  | rs3824348  | 9 | 9 | 74968105 | 54573  | 7.0310 | 0.3803 | -0.3513 | 6.0452 | CEU |
| C9orf95   | GI_8923529-S  | rs6560421  | 9 | 9 | 74973970 | 60438  | 6.2995 | 0.3443 | -0.3440 | 6.0452 | CEU |
| LOC389763 | GI_41148781-S | rs12336229 | 9 | 9 | 81368930 | 470636 | 8.0424 | 0.4271 | -0.6200 | 7.8082 | CEU |
| FLJ14753  | GI_14211858-S | rs722353   | 9 | 9 | 94141540 | 160903 | 6.7599 | 0.3723 | 0.5257  | 5.8039 | CEU |
| FLJ14753  | GI_14211858-S | rs7859571  | 9 | 9 | 94211440 | 91003  | 8.4403 | 0.4446 | -0.6809 | 5.8039 | CEU |
| FLJ14753  | GI_14211858-S | rs9632920  | 9 | 9 | 94255655 | 46788  | 8.4403 | 0.4446 | -0.6809 | 5.8039 | CEU |
| FLJ14753  | GI_14211858-S | rs7036474  | 9 | 9 | 94270934 | 31509  | 8.4403 | 0.4446 | 0.6809  | 5.8039 | CEU |
| FLJ14753  | GI_14211858-S | rs7025878  | 9 | 9 | 94278347 | 24096  | 8.9292 | 0.4713 | 0.7203  | 5.8039 | CEU |
| FLJ14753  | GI_14211858-S | rs7045712  | 9 | 9 | 94287872 | 14571  | 5.9527 | 0.3265 | 0.5287  | 5.8039 | CEU |
| FLJ14753  | GI_14211858-S | rs7046779  | 9 | 9 | 94290447 | 11996  | 8.9227 | 0.4651 | -0.7144 | 5.8039 | CEU |
| FLJ14753  | GI_14211858-S | rs7034153  | 9 | 9 | 94294879 | 7564   | 6.4540 | 0.3727 | -0.6462 | 5.8039 | CEU |
| FLJ14753  | GI_14211858-S | rs7037298  | 9 | 9 | 94295718 | 6725   | 8.7592 | 0.4641 | -0.7149 | 5.8039 | CEU |
| FLJ14753  | GI_14211858-S | rs6479545  | 9 | 9 | 94296830 | 5613   | 6.7098 | 0.3916 | 0.6533  | 5.8039 | CEU |
| FLJ14753  | GI_14211858-S | rs7868703  | 9 | 9 | 94323341 | 20898  | 7.6594 | 0.4098 | -0.6012 | 5.8039 | CEU |
| FLJ14753  | GI_14211858-S | rs16911832 | 9 | 9 | 94323614 | 21171  | 8.9227 | 0.4651 | 0.7144  | 5.8039 | CEU |
| FLJ14753  | GI_14211858-S | rs7042219  | 9 | 9 | 94327241 | 24798  | 7.7020 | 0.4173 | 0.6070  | 5.8039 | CEU |
| FLJ14753  | GI_14211858-S | rs7042434  | 9 | 9 | 94334552 | 32109  | 6.2945 | 0.4063 | 0.5444  | 5.8039 | CEU |
| FLJ14753  | GI_14211858-S | rs7042468  | 9 | 9 | 94334638 | 32195  | 6.8187 | 0.3915 | 0.5730  | 5.8039 | CEU |
| FLJ14753  | GI_14211858-S | rs7028388  | 9 | 9 | 94336173 | 33730  | 7.3776 | 0.3968 | -0.5802 | 5.8039 | CEU |
| FLJ14753  | GI_14211858-S | rs6479549  | 9 | 9 | 94337287 | 34844  | 6.7998 | 0.3691 | 0.5606  | 5.8039 | CEU |
| FLJ14753  | GI_14211858-S | rs908808   | 9 | 9 | 94351543 | 49100  | 8.9227 | 0.4651 | 0.7144  | 5.8039 | CEU |
| LOC286353 | GI_27478844-S | rs6478977  | 9 | 9 | 95639831 | 8439   | 8.2418 | 0.4360 | -0.1577 | 6.562  | CEU |
| LOC286353 | GI_27478844-S | rs7871709  | 9 | 9 | 95640165 | 8105   | 8.2418 | 0.4360 | 0.1577  | 6.562  | CEU |
| LOC286353 | GI_27478844-S | rs816675   | 9 | 9 | 95648636 | 366    | 8.2418 | 0.4360 | -0.1577 | 6.562  | CEU |
| LOC286353 | GI_27478844-S | rs816673   | 9 | 9 | 95652971 | 4701   | 8.2418 | 0.4360 | 0.1577  | 6.562  | CEU |
| LOC286353 | GI_27478844-S | rs816670   | 9 | 9 | 95654989 | 6719   | 8.2418 | 0.4360 | -0.1577 | 6.562  | CEU |
| LOC286353 | GI_27478844-S | rs700962   | 9 | 9 | 95657603 | 9333   | 8.2418 | 0.4360 | 0.1577  | 6.562  | CEU |
| LOC286353 | GI_27478844-S | rs816684   | 9 | 9 | 95664544 | 16274  | 8.0079 | 0.4312 | 0.1573  | 6.562  | CEU |
| LOC286353 | GI_27478844-S | rs816683   | 9 | 9 | 95664656 | 16386  | 8.2418 | 0.4360 | 0.1577  | 6.562  | CEU |
| LOC286353 | GI_27478844-S | rs10985156 | 9 | 9 | 95673299 | 25029  | 8.2642 | 0.4734 | 0.1651  | 6.562  | CEU |
| LOC286353 | GI_27478844-S | rs13299166 | 9 | 9 | 95675086 | 26816  | 8.2418 | 0.4360 | 0.1577  | 6.562  | CEU |
| LOC286353 | GI_27478844-S | rs10818574 | 9 | 9 | 95678522 | 30252  | 8.1832 | 0.4390 | -0.1589 | 6.562  | CEU |
| LOC286353 | GI_27478844-S | rs10760189 | 9 | 9 | 95680380 | 32110  | 8.2418 | 0.4360 | 0.1577  | 6.562  | CEU |
| LOC286353 | GI_27478844-S | rs10985499 | 9 | 9 | 95682561 | 34291  | 8.2418 | 0.4360 | 0.1577  | 6.562  | CEU |
| LOC286353 | GI_27478844-S | rs10760261 | 9 | 9 | 95692066 | 43796  | 8.2418 | 0.4360 | 0.1577  | 6.562  | CEU |
| LOC286353 | GI_27478844-S | rs10760269 | 9 | 9 | 95694734 | 46464  | 8.2418 | 0.4360 | -0.1577 | 6.562  | CEU |
| LOC286353 | GI_27478844-S | rs12349742 | 9 | 9 | 95699535 | 51265  | 8.2418 | 0.4360 | -0.1577 | 6.562  | CEU |
| LOC286353 | GI_27478844-S | rs10818899 | 9 | 9 | 95701966 | 53696  | 8.2418 | 0.4360 | -0.1577 | 6.562  | CEU |
| LOC286353 | GI_27478844-S | rs689986   | 9 | 9 | 95708704 | 60434  | 8.2418 | 0.4360 | -0.1577 | 6.562  | CEU |
| LOC286353 | GI_27478844-S | rs690633   | 9 | 9 | 95709731 | 61461  | 8.2418 | 0.4360 | 0.1577  | 6.562  | CEU |
| LOC286353 | GI_27478844-S | rs689804   | 9 | 9 | 95710411 | 62141  | 7.0010 | 0.4186 | -0.1469 | 6.562  | CEU |
| LOC286353 | GI_27478844-S | rs689697   | 9 | 9 | 95718397 | 70127  | 8.2418 | 0.4360 | -0.1577 | 6.562  | CEU |
| LOC286353 | GI_27478844-S | rs690495   | 9 | 9 | 95735348 | 87078  | 6.9437 | 0.3761 | -0.1529 | 6.562  | CEU |
| HABP4     | GI_24307946-S | rs16910750 | 9 | 9 | 96164026 | 167907 | 7.9032 | 0.4209 | -0.5716 | 5.6203 | CEU |
| HABP4     | GI_24307946-S | rs10820378 | 9 | 9 | 96172304 | 159629 | 7.9032 | 0.4209 | -0.5716 | 5.6203 | CEU |
| HABP4     | GI_24307946-S | rs7028361  | 9 | 9 | 96173274 | 158659 | 7.9032 | 0.4209 | -0.5716 | 5.6203 | CEU |
| HABP4     | GI_24307946-S | rs10820386 | 9 | 9 | 96176865 | 155068 | 7.9032 | 0.4209 | -0.5716 | 5.6203 | CEU |
| HABP4     | GI_24307946-S | rs10990621 | 9 | 9 | 96180849 | 151084 | 7.0565 | 0.4034 | 0.5555  | 5.6203 | CEU |
| HABP4     | GI_24307946-S | rs9299370  | 9 | 9 | 96181400 | 150533 | 5.9224 | 0.3249 | 0.4114  | 5.6203 | CEU |
| HABP4     | GI_24307946-S | rs10820410 | 9 | 9 | 96188233 | 143700 | 5.9224 | 0.3249 | -0.4114 | 5.6203 | CEU |

|       |               |            |   |   |          |        |        |        |         |        |     |
|-------|---------------|------------|---|---|----------|--------|--------|--------|---------|--------|-----|
| HABP4 | GI_24307946-S | rs10123368 | 9 | 9 | 96190939 | 140994 | 5.9224 | 0.3249 | -0.4114 | 5.6203 | CEU |
| HABP4 | GI_24307946-S | rs10122107 | 9 | 9 | 96191257 | 140676 | 7.9032 | 0.4209 | 0.5716  | 5.6203 | CEU |
| HABP4 | GI_24307946-S | rs10990682 | 9 | 9 | 96196175 | 135758 | 5.9224 | 0.3249 | 0.4114  | 5.6203 | CEU |
| HABP4 | GI_24307946-S | rs10820447 | 9 | 9 | 96211599 | 120334 | 8.0393 | 0.4326 | 0.5791  | 5.6203 | CEU |
| HABP4 | GI_24307946-S | rs7851198  | 9 | 9 | 96211930 | 120003 | 7.9032 | 0.4209 | 0.5716  | 5.6203 | CEU |
| HABP4 | GI_24307946-S | rs10990768 | 9 | 9 | 96215078 | 116855 | 7.9032 | 0.4209 | 0.5716  | 5.6203 | CEU |
| HABP4 | GI_24307946-S | rs10820507 | 9 | 9 | 96227707 | 104226 | 7.9032 | 0.4209 | 0.5716  | 5.6203 | CEU |
| HABP4 | GI_24307946-S | rs7861768  | 9 | 9 | 96230334 | 101599 | 7.9032 | 0.4209 | 0.5716  | 5.6203 | CEU |
| HABP4 | GI_24307946-S | rs7044391  | 9 | 9 | 96239346 | 92587  | 7.9032 | 0.4209 | -0.5716 | 5.6203 | CEU |
| HABP4 | GI_24307946-S | rs10820564 | 9 | 9 | 96251186 | 80747  | 7.9032 | 0.4209 | -0.5716 | 5.6203 | CEU |
| HABP4 | GI_24307946-S | rs2145985  | 9 | 9 | 96254086 | 77847  | 7.9032 | 0.4209 | -0.5716 | 5.6203 | CEU |
| HABP4 | GI_24307946-S | rs1885427  | 9 | 9 | 96267803 | 64130  | 5.8263 | 0.3199 | -0.4083 | 5.6203 | CEU |
| HABP4 | GI_24307946-S | rs10820597 | 9 | 9 | 96267902 | 64031  | 7.2914 | 0.3927 | -0.5459 | 5.6203 | CEU |
| HABP4 | GI_24307946-S | rs10820598 | 9 | 9 | 96268810 | 63123  | 7.0190 | 0.4324 | 0.5712  | 5.6203 | CEU |
| HABP4 | GI_24307946-S | rs7857610  | 9 | 9 | 96269508 | 62425  | 7.2914 | 0.3927 | 0.5459  | 5.6203 | CEU |
| HABP4 | GI_24307946-S | rs10820604 | 9 | 9 | 96272049 | 59884  | 7.2914 | 0.3927 | 0.5459  | 5.6203 | CEU |
| HABP4 | GI_24307946-S | rs2406005  | 9 | 9 | 96277210 | 54723  | 7.2914 | 0.3927 | 0.5459  | 5.6203 | CEU |
| HABP4 | GI_24307946-S | rs7870753  | 9 | 9 | 96281140 | 50793  | 7.7339 | 0.4132 | 0.4572  | 5.6203 | CEU |
| HABP4 | GI_24307946-S | rs10761013 | 9 | 9 | 96281494 | 50439  | 9.5933 | 0.4984 | -0.5959 | 5.6203 | CEU |
| HABP4 | GI_24307946-S | rs10820626 | 9 | 9 | 96283735 | 48198  | 9.6967 | 0.4965 | 0.5926  | 5.6203 | CEU |
| HABP4 | GI_24307946-S | rs7861282  | 9 | 9 | 96284023 | 47910  | 9.6967 | 0.4965 | -0.5926 | 5.6203 | CEU |
| HABP4 | GI_24307946-S | rs7858287  | 9 | 9 | 96284071 | 47862  | 9.5614 | 0.5437 | 0.6183  | 5.6203 | CEU |
| HABP4 | GI_24307946-S | rs10820629 | 9 | 9 | 96286587 | 45346  | 9.6967 | 0.4965 | -0.5926 | 5.6203 | CEU |
| HABP4 | GI_24307946-S | rs10820634 | 9 | 9 | 96294659 | 37274  | 9.6967 | 0.4965 | -0.5926 | 5.6203 | CEU |
| HABP4 | GI_24307946-S | rs7857261  | 9 | 9 | 96299334 | 32599  | 7.7339 | 0.4132 | 0.4572  | 5.6203 | CEU |
| HABP4 | GI_24307946-S | rs3802441  | 9 | 9 | 96299950 | 31983  | 9.6967 | 0.4965 | 0.5926  | 5.6203 | CEU |
| HABP4 | GI_24307946-S | rs7870253  | 9 | 9 | 96310651 | 21282  | 7.5133 | 0.4141 | -0.4573 | 5.6203 | CEU |
| HABP4 | GI_24307946-S | rs16910858 | 9 | 9 | 96314112 | 17821  | 9.5933 | 0.4984 | -0.5959 | 5.6203 | CEU |
| HABP4 | GI_24307946-S | rs10820666 | 9 | 9 | 96314552 | 17381  | 9.6967 | 0.4965 | 0.5926  | 5.6203 | CEU |
| HABP4 | GI_24307946-S | rs10761035 | 9 | 9 | 96315647 | 16286  | 7.9527 | 0.4287 | -0.5600 | 5.6203 | CEU |
| HABP4 | GI_24307946-S | rs7038932  | 9 | 9 | 96315881 | 16052  | 9.6967 | 0.4965 | 0.5926  | 5.6203 | CEU |
| HABP4 | GI_24307946-S | rs7024214  | 9 | 9 | 96318728 | 13205  | 7.7339 | 0.4132 | -0.4572 | 5.6203 | CEU |
| HABP4 | GI_24307946-S | rs6477489  | 9 | 9 | 96319396 | 12537  | 7.7339 | 0.4132 | 0.4572  | 5.6203 | CEU |
| HABP4 | GI_24307946-S | rs10820682 | 9 | 9 | 96321142 | 10791  | 9.6967 | 0.4965 | -0.5926 | 5.6203 | CEU |
| HABP4 | GI_24307946-S | rs7865488  | 9 | 9 | 96324136 | 7797   | 9.6967 | 0.4965 | -0.5926 | 5.6203 | CEU |
| HABP4 | GI_24307946-S | rs7039472  | 9 | 9 | 96325129 | 6804   | 9.6788 | 0.5018 | 0.6028  | 5.6203 | CEU |
| HABP4 | GI_24307946-S | rs1590971  | 9 | 9 | 96325772 | 6161   | 9.6967 | 0.4965 | -0.5926 | 5.6203 | CEU |
| HABP4 | GI_24307946-S | rs10512239 | 9 | 9 | 96326567 | 5366   | 9.6967 | 0.4965 | 0.5926  | 5.6203 | CEU |
| HABP4 | GI_24307946-S | rs16910870 | 9 | 9 | 96326658 | 5275   | 9.4737 | 0.4936 | -0.5964 | 5.6203 | CEU |
| HABP4 | GI_24307946-S | rs10991346 | 9 | 9 | 96327313 | 4620   | 8.7744 | 0.4831 | 0.5970  | 5.6203 | CEU |
| HABP4 | GI_24307946-S | rs10991348 | 9 | 9 | 96327382 | 4551   | 9.5167 | 0.5079 | 0.6123  | 5.6203 | CEU |
| HABP4 | GI_24307946-S | rs7867323  | 9 | 9 | 96327612 | 4321   | 9.6967 | 0.4965 | -0.5926 | 5.6203 | CEU |
| HABP4 | GI_24307946-S | rs7848376  | 9 | 9 | 96327624 | 4309   | 7.6890 | 0.4464 | -0.6310 | 5.6203 | CEU |
| HABP4 | GI_24307946-S | rs10991354 | 9 | 9 | 96329264 | 2669   | 9.6967 | 0.4965 | -0.5926 | 5.6203 | CEU |
| HABP4 | GI_24307946-S | rs7030316  | 9 | 9 | 96330018 | 1915   | 9.6967 | 0.4965 | 0.5926  | 5.6203 | CEU |
| HABP4 | GI_24307946-S | rs1057687  | 9 | 9 | 96332019 | 86     | 9.6967 | 0.4965 | 0.5926  | 5.6203 | CEU |
| HABP4 | GI_24307946-S | rs6477493  | 9 | 9 | 96332637 | 704    | 8.0691 | 0.4283 | 0.6435  | 5.6203 | CEU |
| HABP4 | GI_24307946-S | rs10991367 | 9 | 9 | 96333488 | 1555   | 9.6967 | 0.4965 | -0.5926 | 5.6203 | CEU |
| HABP4 | GI_24307946-S | rs6477496  | 9 | 9 | 96335967 | 4034   | 9.6967 | 0.4965 | 0.5926  | 5.6203 | CEU |
| HABP4 | GI_24307946-S | rs10512238 | 9 | 9 | 96340129 | 8196   | 9.6967 | 0.4965 | -0.5926 | 5.6203 | CEU |
| HABP4 | GI_24307946-S | rs10991378 | 9 | 9 | 96340535 | 8602   | 9.6967 | 0.4965 | 0.5926  | 5.6203 | CEU |
| HABP4 | GI_24307946-S | rs7871404  | 9 | 9 | 96341851 | 9918   | 6.9294 | 0.3859 | 0.5714  | 5.6203 | CEU |
| HABP4 | GI_24307946-S | rs10820739 | 9 | 9 | 96343376 | 11443  | 9.1196 | 0.4853 | 0.5776  | 5.6203 | CEU |
| HABP4 | GI_24307946-S | rs10114668 | 9 | 9 | 96345944 | 14011  | 9.6967 | 0.4965 | -0.5926 | 5.6203 | CEU |
| HABP4 | GI_24307946-S | rs10820745 | 9 | 9 | 96351860 | 19927  | 9.6967 | 0.4965 | -0.5926 | 5.6203 | CEU |
| HABP4 | GI_24307946-S | rs10820746 | 9 | 9 | 96352126 | 20193  | 9.6967 | 0.4965 | -0.5926 | 5.6203 | CEU |
| HABP4 | GI_24307946-S | rs7856709  | 9 | 9 | 96353793 | 21860  | 9.6967 | 0.4965 | 0.5926  | 5.6203 | CEU |
| HABP4 | GI_24307946-S | rs10120119 | 9 | 9 | 96354509 | 22576  | 9.6967 | 0.4965 | 0.5926  | 5.6203 | CEU |
| HABP4 | GI_24307946-S | rs10820757 | 9 | 9 | 96361824 | 29891  | 9.6967 | 0.4965 | -0.5926 | 5.6203 | CEU |

|            |               |            |    |    |           |        |         |        |         |        |     |
|------------|---------------|------------|----|----|-----------|--------|---------|--------|---------|--------|-----|
| PCTAIRE2BP | GI_24307950-S | rs725229   | 9  | 9  | 97150269  | 187368 | 5.9659  | 0.3272 | 0.2939  | 5.9492 | CEU |
| Hs.43687   | Hs.43687-S    | rs7853349  | 9  | 9  | 97729814  | 13756  | 6.5305  | 0.3559 | -0.3216 | 5.8697 | CEU |
| Hs.43687   | Hs.43687-S    | rs12238579 | 9  | 9  | 97731613  | 11957  | 6.6867  | 0.3847 | 0.3469  | 5.8697 | CEU |
| Hs.43687   | Hs.43687-S    | rs6586     | 9  | 9  | 97746486  | 2916   | 6.5305  | 0.3559 | 0.3216  | 5.8697 | CEU |
| Hs.43687   | Hs.43687-S    | rs1561958  | 9  | 9  | 97749354  | 5784   | 6.5305  | 0.3559 | 0.3216  | 5.8697 | CEU |
| EGFL5      | GI_42659252-S | rs10818474 | 9  | 9  | 120569518 | 126464 | 6.1663  | 0.3375 | 0.3256  | 5.4907 | CEU |
| ZNF79      | GI_24307936-S | rs2243898  | 9  | 9  | 127299544 | 12379  | 6.2668  | 0.3426 | 0.2991  | 5.7046 | CEU |
| SH3GLB2    | GI_24431995-S | rs10988156 | 9  | 9  | 128770063 | 80074  | 5.6560  | 0.3109 | 0.2046  | 5.5717 | CEU |
| Hs.495422  | Hs.495422-S   | rs10751505 | 9  | 9  | 133224928 | 1454   | 7.1954  | 0.4284 | 0.0787  | 5.7974 | CEU |
| Hs.495422  | Hs.495422-S   | rs10793964 | 9  | 9  | 133228143 | 4669   | 6.7815  | 0.3682 | 0.0668  | 5.7974 | CEU |
| Hs.495422  | Hs.495422-S   | rs886090   | 9  | 9  | 133229057 | 5583   | 8.6069  | 0.4518 | -0.0799 | 5.7974 | CEU |
| ECHDC3     | GI_31542717-S | rs3829154  | 10 | 10 | 11822759  | 23045  | 8.0059  | 0.4255 | -0.3928 | 6.3837 | CEU |
| PTER       | GI_20070185-S | rs1055340  | 10 | 10 | 16595534  | 974    | 11.8775 | 0.5755 | -0.6505 | 6.1749 | CEU |
| PTER       | GI_20070185-S | rs7909832  | 10 | 10 | 16596716  | 2156   | 11.8775 | 0.5755 | 0.6505  | 6.1749 | CEU |
| PIP5K2A    | GI_20302162-S | rs13376918 | 10 | 10 | 22467406  | 398559 | 6.2480  | 0.3417 | 0.4029  | 5.7161 | CEU |
| PIP5K2A    | GI_20302162-S | rs1926693  | 10 | 10 | 22468926  | 397039 | 5.9569  | 0.3267 | 0.3753  | 5.7161 | CEU |
| PIP5K2A    | GI_20302162-S | rs12768091 | 10 | 10 | 22488091  | 377874 | 6.2480  | 0.3417 | -0.4029 | 5.7161 | CEU |
| IFIT5      | GI_6912629-S  | rs7897619  | 10 | 10 | 91080531  | 89952  | 6.0506  | 0.3316 | -0.3381 | 5.8889 | CEU |
| IFIT5      | GI_6912629-S  | rs7897873  | 10 | 10 | 91080689  | 89794  | 6.0506  | 0.3316 | -0.3381 | 5.8889 | CEU |
| IFIT5      | GI_6912629-S  | rs6586183  | 10 | 10 | 91081483  | 89000  | 6.0506  | 0.3316 | -0.3381 | 5.8889 | CEU |
| IFIT5      | GI_6912629-S  | rs12255504 | 10 | 10 | 91082169  | 88314  | 6.0506  | 0.3316 | 0.3381  | 5.8889 | CEU |
| IFIT5      | GI_6912629-S  | rs10509571 | 10 | 10 | 91082538  | 87945  | 6.5820  | 0.3584 | -0.3280 | 5.8889 | CEU |
| IFIT5      | GI_6912629-S  | rs4630205  | 10 | 10 | 91082686  | 87797  | 6.3614  | 0.3474 | -0.3242 | 5.8889 | CEU |
| IFIT5      | GI_6912629-S  | rs4339948  | 10 | 10 | 91082830  | 87653  | 6.5820  | 0.3584 | -0.3280 | 5.8889 | CEU |
| IFIT5      | GI_6912629-S  | rs7916812  | 10 | 10 | 91087988  | 82495  | 6.1254  | 0.3402 | -0.3311 | 5.8889 | CEU |
| IFIT5      | GI_6912629-S  | rs3780878  | 10 | 10 | 91089610  | 80873  | 6.0506  | 0.3316 | -0.3381 | 5.8889 | CEU |
| IFIT5      | GI_6912629-S  | rs2274878  | 10 | 10 | 91092078  | 78405  | 6.5820  | 0.3584 | 0.3280  | 5.8889 | CEU |
| IFIT5      | GI_6912629-S  | rs1591051  | 10 | 10 | 91101667  | 68816  | 6.0506  | 0.3316 | -0.3381 | 5.8889 | CEU |
| IFIT5      | GI_6912629-S  | rs10509572 | 10 | 10 | 91109624  | 60859  | 6.0506  | 0.3316 | 0.3381  | 5.8889 | CEU |
| IFIT5      | GI_6912629-S  | rs12244233 | 10 | 10 | 91114009  | 56474  | 6.0506  | 0.3316 | 0.3381  | 5.8889 | CEU |
| IFIT5      | GI_6912629-S  | rs11203099 | 10 | 10 | 91126050  | 44433  | 6.0506  | 0.3316 | 0.3381  | 5.8889 | CEU |
| IFIT5      | GI_6912629-S  | rs17120325 | 10 | 10 | 91127172  | 43311  | 5.9040  | 0.3334 | -0.3373 | 5.8889 | CEU |
| IFIT5      | GI_6912629-S  | rs10887953 | 10 | 10 | 91138622  | 31861  | 6.2666  | 0.3426 | 0.3438  | 5.8889 | CEU |
| IFIT5      | GI_6912629-S  | rs11203109 | 10 | 10 | 91147139  | 23344  | 6.2666  | 0.3426 | -0.3438 | 5.8889 | CEU |
| IFIT5      | GI_6912629-S  | rs11203115 | 10 | 10 | 91163377  | 7106   | 6.2890  | 0.3695 | -0.3793 | 5.8889 | CEU |
| IFIT5      | GI_6912629-S  | rs10887959 | 10 | 10 | 91171833  | 1350   | 6.0308  | 0.3305 | 0.3375  | 5.8889 | CEU |
| IFIT5      | GI_6912629-S  | rs17121248 | 10 | 10 | 91175676  | 5193   | 6.0308  | 0.3305 | -0.3375 | 5.8889 | CEU |
| IFIT5      | GI_6912629-S  | rs7090346  | 10 | 10 | 91183302  | 12819  | 6.5565  | 0.3572 | -0.3506 | 5.8889 | CEU |
| IFIT5      | GI_6912629-S  | rs6586196  | 10 | 10 | 91184047  | 13564  | 6.4308  | 0.3509 | -0.3491 | 5.8889 | CEU |
| ENTPD1     | GI_45580699-S | rs11188393 | 10 | 10 | 97354013  | 262184 | 6.1320  | 0.3667 | -0.2860 | 5.9859 | CEU |
| ENTPD1     | GI_45580699-S | rs12359272 | 10 | 10 | 97355153  | 261044 | 6.5023  | 0.3646 | -0.3267 | 5.9859 | CEU |
| ENTPD1     | GI_45580699-S | rs11188394 | 10 | 10 | 97355448  | 260749 | 7.1374  | 0.3854 | -0.3345 | 5.9859 | CEU |
| ENTPD1     | GI_45580699-S | rs4037     | 10 | 10 | 97355810  | 260387 | 7.1374  | 0.3854 | -0.3345 | 5.9859 | CEU |
| ENTPD1     | GI_45580699-S | rs11188398 | 10 | 10 | 97359083  | 257114 | 7.8833  | 0.4313 | 0.3591  | 5.9859 | CEU |
| ENTPD1     | GI_45580699-S | rs2296691  | 10 | 10 | 97360979  | 255218 | 7.7758  | 0.4151 | -0.3432 | 5.9859 | CEU |
| ENTPD1     | GI_45580699-S | rs10882643 | 10 | 10 | 97365161  | 251036 | 8.1505  | 0.4617 | -0.3739 | 5.9859 | CEU |
| ENTPD1     | GI_45580699-S | rs749050   | 10 | 10 | 97366105  | 250092 | 7.2982  | 0.3984 | -0.3293 | 5.9859 | CEU |
| ENTPD1     | GI_45580699-S | rs10882644 | 10 | 10 | 97378569  | 237628 | 7.7758  | 0.4151 | 0.3432  | 5.9859 | CEU |
| ENTPD1     | GI_45580699-S | rs11188407 | 10 | 10 | 97380523  | 235674 | 7.8135  | 0.4281 | 0.3391  | 5.9859 | CEU |
| ENTPD1     | GI_45580699-S | rs11188411 | 10 | 10 | 97387334  | 228863 | 7.7758  | 0.4151 | -0.3432 | 5.9859 | CEU |
| ENTPD1     | GI_45580699-S | rs4258314  | 10 | 10 | 97398593  | 217604 | 7.6451  | 0.4092 | 0.3442  | 5.9859 | CEU |
| ENTPD1     | GI_45580699-S | rs11188417 | 10 | 10 | 97401670  | 214527 | 7.7758  | 0.4151 | 0.3432  | 5.9859 | CEU |
| ENTPD1     | GI_45580699-S | rs10882649 | 10 | 10 | 97416076  | 200121 | 9.3706  | 0.4956 | 0.3890  | 5.9859 | CEU |
| ENTPD1     | GI_45580699-S | rs17461546 | 10 | 10 | 97432985  | 183212 | 9.1646  | 0.4811 | 0.3766  | 5.9859 | CEU |
| ENTPD1     | GI_45580699-S | rs12357173 | 10 | 10 | 97434593  | 181604 | 9.3297  | 0.4818 | 0.3739  | 5.9859 | CEU |
| ENTPD1     | GI_45580699-S | rs10882656 | 10 | 10 | 97464822  | 151375 | 10.4400 | 0.5249 | -0.4112 | 5.9859 | CEU |
| ENTPD1     | GI_45580699-S | rs7095587  | 10 | 10 | 97465290  | 150907 | 10.4400 | 0.5249 | 0.4112  | 5.9859 | CEU |
| ENTPD1     | GI_45580699-S | rs4918962  | 10 | 10 | 97465564  | 150633 | 9.4025  | 0.4848 | -0.3888 | 5.9859 | CEU |
| ENTPD1     | GI_45580699-S | rs10882657 | 10 | 10 | 97466569  | 149628 | 9.4025  | 0.4848 | 0.3888  | 5.9859 | CEU |

|        |               |            |    |    |          |        |         |        |         |        |     |
|--------|---------------|------------|----|----|----------|--------|---------|--------|---------|--------|-----|
| ENTPD1 | GI_45580699-S | rs1933165  | 10 | 10 | 97480377 | 135820 | 9.4025  | 0.4848 | -0.3888 | 5.9859 | CEU |
| ENTPD1 | GI_45580699-S | rs11188455 | 10 | 10 | 97480913 | 135284 | 9.3297  | 0.4818 | -0.3739 | 5.9859 | CEU |
| ENTPD1 | GI_45580699-S | rs3934409  | 10 | 10 | 97484134 | 132063 | 9.4025  | 0.4848 | -0.3888 | 5.9859 | CEU |
| ENTPD1 | GI_45580699-S | rs2861147  | 10 | 10 | 97486358 | 129839 | 9.4025  | 0.4848 | 0.3888  | 5.9859 | CEU |
| ENTPD1 | GI_45580699-S | rs2861148  | 10 | 10 | 97486538 | 129659 | 7.1616  | 0.4267 | 0.3808  | 5.9859 | CEU |
| ENTPD1 | GI_45580699-S | rs10748642 | 10 | 10 | 97492031 | 124166 | 10.4400 | 0.5249 | 0.4112  | 5.9859 | CEU |
| ENTPD1 | GI_45580699-S | rs12358481 | 10 | 10 | 97496093 | 120104 | 8.5311  | 0.4725 | 0.3639  | 5.9859 | CEU |
| ENTPD1 | GI_45580699-S | rs17462179 | 10 | 10 | 97496695 | 119502 | 9.3297  | 0.4818 | 0.3739  | 5.9859 | CEU |
| ENTPD1 | GI_45580699-S | rs7086986  | 10 | 10 | 97497302 | 118895 | 10.4400 | 0.5249 | 0.4112  | 5.9859 | CEU |
| ENTPD1 | GI_45580699-S | rs17553401 | 10 | 10 | 97497463 | 118734 | 9.3297  | 0.4818 | -0.3739 | 5.9859 | CEU |
| ENTPD1 | GI_45580699-S | rs7096317  | 10 | 10 | 97498834 | 117363 | 10.4400 | 0.5249 | -0.4112 | 5.9859 | CEU |
| ENTPD1 | GI_45580699-S | rs6584022  | 10 | 10 | 97499631 | 116566 | 10.4165 | 0.5302 | -0.4130 | 5.9859 | CEU |
| ENTPD1 | GI_45580699-S | rs6584023  | 10 | 10 | 97499767 | 116430 | 10.4400 | 0.5249 | 0.4112  | 5.9859 | CEU |
| ENTPD1 | GI_45580699-S | rs7071836  | 10 | 10 | 97501027 | 115170 | 10.4400 | 0.5249 | 0.4112  | 5.9859 | CEU |
| ENTPD1 | GI_45580699-S | rs4918966  | 10 | 10 | 97503352 | 112845 | 9.3297  | 0.4818 | 0.3739  | 5.9859 | CEU |
| ENTPD1 | GI_45580699-S | rs3176895  | 10 | 10 | 97504178 | 112019 | 9.3297  | 0.4818 | -0.3739 | 5.9859 | CEU |
| ENTPD1 | GI_45580699-S | rs10748643 | 10 | 10 | 97506754 | 109443 | 10.4400 | 0.5249 | 0.4112  | 5.9859 | CEU |
| ENTPD1 | GI_45580699-S | rs10882660 | 10 | 10 | 97507939 | 108258 | 10.4400 | 0.5249 | 0.4112  | 5.9859 | CEU |
| ENTPD1 | GI_45580699-S | rs1418709  | 10 | 10 | 97508689 | 107508 | 9.4025  | 0.4848 | 0.3888  | 5.9859 | CEU |
| ENTPD1 | GI_45580699-S | rs5014871  | 10 | 10 | 97512785 | 103412 | 10.4400 | 0.5249 | 0.4112  | 5.9859 | CEU |
| ENTPD1 | GI_45580699-S | rs4551688  | 10 | 10 | 97513770 | 102427 | 10.4400 | 0.5249 | 0.4112  | 5.9859 | CEU |
| ENTPD1 | GI_45580699-S | rs4431963  | 10 | 10 | 97519261 | 96936  | 10.4400 | 0.5249 | -0.4112 | 5.9859 | CEU |
| ENTPD1 | GI_45580699-S | rs4582902  | 10 | 10 | 97519308 | 96889  | 9.4025  | 0.4848 | 0.3888  | 5.9859 | CEU |
| ENTPD1 | GI_45580699-S | rs11188484 | 10 | 10 | 97529727 | 86470  | 9.3297  | 0.4818 | -0.3739 | 5.9859 | CEU |
| ENTPD1 | GI_45580699-S | rs1340837  | 10 | 10 | 97532025 | 84172  | 10.7256 | 0.5354 | -0.3589 | 5.9859 | CEU |
| ENTPD1 | GI_45580699-S | rs6584027  | 10 | 10 | 97534503 | 81694  | 8.1726  | 0.4691 | -0.3909 | 5.9859 | CEU |
| ENTPD1 | GI_45580699-S | rs2153913  | 10 | 10 | 97536416 | 79781  | 10.4400 | 0.5249 | 0.4112  | 5.9859 | CEU |
| ENTPD1 | GI_45580699-S | rs3929900  | 10 | 10 | 97539370 | 76827  | 9.4025  | 0.4848 | -0.3888 | 5.9859 | CEU |
| ENTPD1 | GI_45580699-S | rs2185818  | 10 | 10 | 97540730 | 75467  | 10.4400 | 0.5249 | -0.4112 | 5.9859 | CEU |
| ENTPD1 | GI_45580699-S | rs10786236 | 10 | 10 | 97542324 | 73873  | 9.5987  | 0.5048 | 0.3908  | 5.9859 | CEU |
| ENTPD1 | GI_45580699-S | rs11188486 | 10 | 10 | 97545937 | 70260  | 10.4400 | 0.5249 | 0.4112  | 5.9859 | CEU |
| ENTPD1 | GI_45580699-S | rs4396219  | 10 | 10 | 97551931 | 64266  | 9.6765  | 0.4957 | -0.4045 | 5.9859 | CEU |
| ENTPD1 | GI_45580699-S | rs4074424  | 10 | 10 | 97560401 | 55796  | 10.4400 | 0.5249 | 0.4112  | 5.9859 | CEU |
| ENTPD1 | GI_45580699-S | rs11188497 | 10 | 10 | 97562952 | 53245  | 9.0059  | 0.5131 | -0.4251 | 5.9859 | CEU |
| ENTPD1 | GI_45580699-S | rs4075311  | 10 | 10 | 97564645 | 51552  | 8.4998  | 0.4472 | 0.3489  | 5.9859 | CEU |
| ENTPD1 | GI_45580699-S | rs4075310  | 10 | 10 | 97564679 | 51518  | 10.7254 | 0.5417 | -0.4069 | 5.9859 | CEU |
| ENTPD1 | GI_45580699-S | rs10509686 | 10 | 10 | 97567736 | 48461  | 9.3297  | 0.4818 | -0.3739 | 5.9859 | CEU |
| ENTPD1 | GI_45580699-S | rs4918972  | 10 | 10 | 97569211 | 46986  | 9.3297  | 0.4818 | -0.3739 | 5.9859 | CEU |
| ENTPD1 | GI_45580699-S | rs3176891  | 10 | 10 | 97570934 | 45263  | 9.4025  | 0.4848 | -0.3888 | 5.9859 | CEU |
| ENTPD1 | GI_45580699-S | rs10882671 | 10 | 10 | 97574013 | 42184  | 9.3297  | 0.4818 | 0.3739  | 5.9859 | CEU |
| ENTPD1 | GI_45580699-S | rs10736093 | 10 | 10 | 97575004 | 41193  | 8.3133  | 0.4506 | -0.3731 | 5.9859 | CEU |
| ENTPD1 | GI_45580699-S | rs10748648 | 10 | 10 | 97576857 | 39340  | 10.4400 | 0.5249 | 0.4112  | 5.9859 | CEU |
| ENTPD1 | GI_45580699-S | rs10882673 | 10 | 10 | 97577857 | 38340  | 9.9738  | 0.5134 | 0.4014  | 5.9859 | CEU |
| ENTPD1 | GI_45580699-S | rs10882675 | 10 | 10 | 97578013 | 38184  | 9.4025  | 0.4848 | 0.3888  | 5.9859 | CEU |
| ENTPD1 | GI_45580699-S | rs10882676 | 10 | 10 | 97578187 | 38010  | 9.4025  | 0.4848 | 0.3888  | 5.9859 | CEU |
| ENTPD1 | GI_45580699-S | rs1891536  | 10 | 10 | 97581287 | 34910  | 9.3297  | 0.4818 | -0.3739 | 5.9859 | CEU |
| ENTPD1 | GI_45580699-S | rs1573112  | 10 | 10 | 97583344 | 32853  | 9.4025  | 0.4848 | 0.3888  | 5.9859 | CEU |
| ENTPD1 | GI_45580699-S | rs12354848 | 10 | 10 | 97585686 | 30511  | 8.9428  | 0.4718 | -0.3640 | 5.9859 | CEU |
| ENTPD1 | GI_45580699-S | rs1342790  | 10 | 10 | 97590529 | 25668  | 10.4400 | 0.5249 | 0.4112  | 5.9859 | CEU |
| ENTPD1 | GI_45580699-S | rs3181131  | 10 | 10 | 97592081 | 24116  | 10.3054 | 0.5261 | 0.4159  | 5.9859 | CEU |
| ENTPD1 | GI_45580699-S | rs7074403  | 10 | 10 | 97595047 | 21150  | 10.4400 | 0.5249 | 0.4112  | 5.9859 | CEU |
| ENTPD1 | GI_45580699-S | rs11188504 | 10 | 10 | 97596214 | 19983  | 9.8545  | 0.5150 | 0.3935  | 5.9859 | CEU |
| ENTPD1 | GI_45580699-S | rs7067762  | 10 | 10 | 97596833 | 19364  | 8.0674  | 0.4917 | -0.3920 | 5.9859 | CEU |
| ENTPD1 | GI_45580699-S | rs3181122  | 10 | 10 | 97597155 | 19042  | 9.3297  | 0.4818 | 0.3739  | 5.9859 | CEU |
| ENTPD1 | GI_45580699-S | rs7088584  | 10 | 10 | 97597634 | 18563  | 10.4400 | 0.5249 | 0.4112  | 5.9859 | CEU |
| ENTPD1 | GI_45580699-S | rs7089668  | 10 | 10 | 97598412 | 17785  | 9.3297  | 0.4818 | -0.3739 | 5.9859 | CEU |
| ENTPD1 | GI_45580699-S | rs7077566  | 10 | 10 | 97607933 | 8264   | 9.4604  | 0.4871 | -0.4011 | 5.9859 | CEU |
| ENTPD1 | GI_45580699-S | rs11598475 | 10 | 10 | 97611256 | 4941   | 9.6278  | 0.4938 | -0.3878 | 5.9859 | CEU |
| ENTPD1 | GI_45580699-S | rs2861153  | 10 | 10 | 97613246 | 2951   | 9.6278  | 0.4938 | 0.3878  | 5.9859 | CEU |

|          |               |            |    |    |           |        |         |        |         |        |     |
|----------|---------------|------------|----|----|-----------|--------|---------|--------|---------|--------|-----|
| ENTPD1   | GI_45580699-S | rs3176881  | 10 | 10 | 97614197  | 2000   | 9.4459  | 0.4865 | -0.3954 | 5.9859 | CEU |
| ENTPD1   | GI_45580699-S | rs2275759  | 10 | 10 | 97614699  | 1498   | 10.3881 | 0.5230 | 0.4151  | 5.9859 | CEU |
| ENTPD1   | GI_45580699-S | rs4512761  | 10 | 10 | 97615089  | 1108   | 9.6278  | 0.4938 | -0.3878 | 5.9859 | CEU |
| ENTPD1   | GI_45580699-S | rs2226163  | 10 | 10 | 97618984  | 2787   | 10.2120 | 0.5164 | -0.4026 | 5.9859 | CEU |
| ENTPD1   | GI_45580699-S | rs1935815  | 10 | 10 | 97621482  | 5285   | 9.6278  | 0.4938 | -0.3878 | 5.9859 | CEU |
| ENTPD1   | GI_45580699-S | rs2051052  | 10 | 10 | 97622072  | 5875   | 10.1629 | 0.5270 | 0.4162  | 5.9859 | CEU |
| ENTPD1   | GI_45580699-S | rs1935814  | 10 | 10 | 97633941  | 17744  | 7.3906  | 0.4083 | 0.3716  | 5.9859 | CEU |
| ENTPD1   | GI_45580699-S | rs11188516 | 10 | 10 | 97639435  | 23238  | 7.3001  | 0.4039 | 0.3591  | 5.9859 | CEU |
| ENTPD1   | GI_45580699-S | rs7074866  | 10 | 10 | 97640499  | 24302  | 7.7128  | 0.4178 | -0.3675 | 5.9859 | CEU |
| ENTPD1   | GI_45580699-S | rs7091088  | 10 | 10 | 97640730  | 24533  | 7.3906  | 0.4083 | 0.3716  | 5.9859 | CEU |
| ENTPD1   | GI_45580699-S | rs12359343 | 10 | 10 | 97650562  | 34365  | 6.0080  | 0.3294 | -0.3194 | 5.9859 | CEU |
| ENTPD1   | GI_45580699-S | rs10786247 | 10 | 10 | 97676141  | 59944  | 6.0080  | 0.3294 | 0.3194  | 5.9859 | CEU |
| ENTPD1   | GI_45580699-S | rs11188530 | 10 | 10 | 97689276  | 73079  | 6.9216  | 0.3751 | -0.3554 | 5.9859 | CEU |
| MGC10120 | GI_28603839-S | rs12218075 | 10 | 10 | 101890180 | 134317 | 7.0492  | 0.3864 | 0.5577  | 6.5842 | CEU |
| MGC10120 | GI_28603839-S | rs975752   | 10 | 10 | 101896323 | 128174 | 8.8524  | 0.4680 | -0.6654 | 6.5842 | CEU |
| MGC10120 | GI_28603839-S | rs2007210  | 10 | 10 | 101897663 | 126834 | 8.2353  | 0.4593 | -0.6661 | 6.5842 | CEU |
| MGC10120 | GI_28603839-S | rs976296   | 10 | 10 | 101898183 | 126314 | 11.6023 | 0.5663 | 0.7854  | 6.5842 | CEU |
| MGC10120 | GI_28603839-S | rs12806    | 10 | 10 | 101901132 | 123365 | 8.1645  | 0.4623 | -0.6545 | 6.5842 | CEU |
| MGC10120 | GI_28603839-S | rs12769818 | 10 | 10 | 101905619 | 118878 | 11.6023 | 0.5663 | -0.7854 | 6.5842 | CEU |
| MGC10120 | GI_28603839-S | rs10509741 | 10 | 10 | 101907356 | 117141 | 8.8789  | 0.4633 | 0.6731  | 6.5842 | CEU |
| MGC10120 | GI_28603839-S | rs10883450 | 10 | 10 | 101913411 | 111086 | 11.1981 | 0.5651 | 0.7798  | 6.5842 | CEU |
| MGC10120 | GI_28603839-S | rs10883452 | 10 | 10 | 101920930 | 103567 | 9.7289  | 0.5100 | -0.7010 | 6.5842 | CEU |
| MGC10120 | GI_28603839-S | rs3750707  | 10 | 10 | 101927959 | 96538  | 11.6023 | 0.5663 | -0.7854 | 6.5842 | CEU |
| MGC10120 | GI_28603839-S | rs6584349  | 10 | 10 | 101932546 | 91951  | 8.5351  | 0.4604 | -0.6673 | 6.5842 | CEU |
| MGC10120 | GI_28603839-S | rs4919431  | 10 | 10 | 101934315 | 90182  | 8.8789  | 0.4633 | 0.6731  | 6.5842 | CEU |
| MGC10120 | GI_28603839-S | rs4919432  | 10 | 10 | 101934376 | 90121  | 11.3102 | 0.5756 | -0.7883 | 6.5842 | CEU |
| MGC10120 | GI_28603839-S | rs3808916  | 10 | 10 | 101937727 | 86770  | 10.3995 | 0.5234 | -0.6797 | 6.5842 | CEU |
| MGC10120 | GI_28603839-S | rs7358099  | 10 | 10 | 101944992 | 79505  | 10.3995 | 0.5234 | -0.6797 | 6.5842 | CEU |
| MGC10120 | GI_28603839-S | rs6584350  | 10 | 10 | 101947205 | 77292  | 10.0482 | 0.5225 | 0.6766  | 6.5842 | CEU |
| MGC10120 | GI_28603839-S | rs12764732 | 10 | 10 | 101948760 | 75737  | 13.4081 | 0.6236 | -0.7773 | 6.5842 | CEU |
| MGC10120 | GI_28603839-S | rs12764727 | 10 | 10 | 101948787 | 75710  | 13.4081 | 0.6236 | -0.7773 | 6.5842 | CEU |
| MGC10120 | GI_28603839-S | rs17729417 | 10 | 10 | 101950132 | 74365  | 13.4081 | 0.6236 | 0.7773  | 6.5842 | CEU |
| MGC10120 | GI_28603839-S | rs7922090  | 10 | 10 | 101965259 | 59238  | 10.3995 | 0.5234 | 0.6797  | 6.5842 | CEU |
| MGC10120 | GI_28603839-S | rs12764370 | 10 | 10 | 101969472 | 55025  | 12.2223 | 0.5998 | 0.8290  | 6.5842 | CEU |
| MGC10120 | GI_28603839-S | rs11190430 | 10 | 10 | 101974535 | 49962  | 9.9958  | 0.5205 | -0.6742 | 6.5842 | CEU |
| MGC10120 | GI_28603839-S | rs12247992 | 10 | 10 | 101975077 | 49420  | 9.6396  | 0.5469 | -0.6548 | 6.5842 | CEU |
| MGC10120 | GI_28603839-S | rs12762869 | 10 | 10 | 101983702 | 40795  | 13.4081 | 0.6236 | 0.7773  | 6.5842 | CEU |
| MGC10120 | GI_28603839-S | rs7092983  | 10 | 10 | 101984471 | 40026  | 13.4081 | 0.6236 | 0.7773  | 6.5842 | CEU |
| MGC10120 | GI_28603839-S | rs12771909 | 10 | 10 | 101985275 | 39222  | 13.4081 | 0.6236 | 0.7773  | 6.5842 | CEU |
| MGC10120 | GI_28603839-S | rs3750709  | 10 | 10 | 101988042 | 36455  | 10.3995 | 0.5234 | -0.6797 | 6.5842 | CEU |
| MGC10120 | GI_28603839-S | rs17668159 | 10 | 10 | 101988820 | 35677  | 13.4081 | 0.6236 | 0.7773  | 6.5842 | CEU |
| MGC10120 | GI_28603839-S | rs7923115  | 10 | 10 | 101990210 | 34287  | 13.4441 | 0.6311 | 0.7819  | 6.5842 | CEU |
| MGC10120 | GI_28603839-S | rs12763385 | 10 | 10 | 101991221 | 33276  | 13.4081 | 0.6236 | 0.7773  | 6.5842 | CEU |
| MGC10120 | GI_28603839-S | rs11817486 | 10 | 10 | 101991761 | 32736  | 10.3995 | 0.5234 | -0.6797 | 6.5842 | CEU |
| MGC10120 | GI_28603839-S | rs17668309 | 10 | 10 | 101991783 | 32714  | 12.9920 | 0.6308 | 0.7771  | 6.5842 | CEU |
| MGC10120 | GI_28603839-S | rs7912400  | 10 | 10 | 101992668 | 31829  | 13.2128 | 0.6243 | 0.7735  | 6.5842 | CEU |
| MGC10120 | GI_28603839-S | rs2281949  | 10 | 10 | 101996392 | 28105  | 9.9905  | 0.5203 | -0.6758 | 6.5842 | CEU |
| MGC10120 | GI_28603839-S | rs7073610  | 10 | 10 | 101996615 | 27882  | 13.4081 | 0.6236 | 0.7773  | 6.5842 | CEU |
| MGC10120 | GI_28603839-S | rs17112791 | 10 | 10 | 101999700 | 24797  | 13.4081 | 0.6236 | 0.7773  | 6.5842 | CEU |
| MGC10120 | GI_28603839-S | rs7072367  | 10 | 10 | 101999970 | 24527  | 13.4081 | 0.6236 | 0.7773  | 6.5842 | CEU |
| MGC10120 | GI_28603839-S | rs7897454  | 10 | 10 | 102001692 | 22805  | 13.4081 | 0.6236 | 0.7773  | 6.5842 | CEU |
| MGC10120 | GI_28603839-S | rs2270962  | 10 | 10 | 102006034 | 18463  | 7.4714  | 0.4011 | 0.6280  | 6.5842 | CEU |
| MGC10120 | GI_28603839-S | rs17730369 | 10 | 10 | 102006580 | 17917  | 13.4081 | 0.6236 | -0.7773 | 6.5842 | CEU |
| MGC10120 | GI_28603839-S | rs7924284  | 10 | 10 | 102008079 | 16418  | 10.3995 | 0.5234 | -0.6797 | 6.5842 | CEU |
| MGC10120 | GI_28603839-S | rs7896703  | 10 | 10 | 102008621 | 15876  | 13.4441 | 0.6311 | -0.7819 | 6.5842 | CEU |
| MGC10120 | GI_28603839-S | rs12782963 | 10 | 10 | 102038198 | 13701  | 13.4081 | 0.6236 | -0.7773 | 6.5842 | CEU |
| MGC10120 | GI_28603839-S | rs2305386  | 10 | 10 | 102038259 | 13762  | 13.4081 | 0.6236 | -0.7773 | 6.5842 | CEU |
| MGC10120 | GI_28603839-S | rs6584356  | 10 | 10 | 102040232 | 15735  | 9.0042  | 0.4685 | 0.6442  | 6.5842 | CEU |
| MGC10120 | GI_28603839-S | rs2242052  | 10 | 10 | 102040504 | 16007  | 7.3394  | 0.3950 | 0.5686  | 6.5842 | CEU |

|          |               |            |    |    |           |        |         |        |         |        |     |
|----------|---------------|------------|----|----|-----------|--------|---------|--------|---------|--------|-----|
| MGC10120 | GI_28603839-S | rs11190456 | 10 | 10 | 102041753 | 17256  | 7.3394  | 0.3950 | 0.5686  | 6.5842 | CEU |
| MGC10120 | GI_28603839-S | rs12241379 | 10 | 10 | 102042363 | 17866  | 7.3394  | 0.3950 | 0.5686  | 6.5842 | CEU |
| MRPL43   | GI_28872735-A | rs1408342  | 10 | 10 | 102638742 | 97867  | 7.7327  | 0.4301 | -0.4623 | 5.9232 | CEU |
| MRPL43   | GI_28872735-A | rs10786612 | 10 | 10 | 102643755 | 92854  | 8.6572  | 0.4539 | 0.4671  | 5.9232 | CEU |
| MRPL43   | GI_28872735-A | rs4917916  | 10 | 10 | 102663282 | 73327  | 9.8524  | 0.5026 | -0.4476 | 5.9232 | CEU |
| MRPL43   | GI_28872735-A | rs12241232 | 10 | 10 | 102682594 | 54015  | 9.8524  | 0.5026 | -0.4476 | 5.9232 | CEU |
| MRPL43   | GI_28872735-A | rs7911957  | 10 | 10 | 102682960 | 53649  | 9.6729  | 0.5016 | 0.4251  | 5.9232 | CEU |
| MRPL43   | GI_28872735-A | rs10883565 | 10 | 10 | 102693424 | 43185  | 9.6129  | 0.4992 | -0.4469 | 5.9232 | CEU |
| MRPL43   | GI_28872735-A | rs1056295  | 10 | 10 | 102705173 | 31436  | 10.2073 | 0.5162 | -0.4600 | 5.9232 | CEU |
| MRPL43   | GI_28872735-A | rs927302   | 10 | 10 | 102712906 | 23703  | 10.2073 | 0.5162 | 0.4600  | 5.9232 | CEU |
| MRPL43   | GI_28872735-A | rs1570171  | 10 | 10 | 102721749 | 14860  | 12.3684 | 0.6112 | 0.4695  | 5.9232 | CEU |
| MRPL43   | GI_28872735-A | rs4919510  | 10 | 10 | 102724768 | 11841  | 12.9602 | 0.6101 | 0.4702  | 5.9232 | CEU |
| MRPL43   | GI_28872735-A | rs735137   | 10 | 10 | 102725825 | 10784  | 14.2950 | 0.6490 | -0.4812 | 5.9232 | CEU |
| MRPL43   | GI_28872735-A | rs12571302 | 10 | 10 | 102732753 | 3856   | 14.2949 | 0.6620 | -0.5234 | 5.9232 | CEU |
| MRPL43   | GI_28872735-A | rs2295716  | 10 | 10 | 102734204 | 2405   | 12.7713 | 0.6520 | 0.4974  | 5.9232 | CEU |
| MRPL43   | GI_28872735-A | rs722435   | 10 | 10 | 102735052 | 1557   | 12.5603 | 0.6527 | 0.4808  | 5.9232 | CEU |
| MRPL43   | GI_28872735-A | rs2863095  | 10 | 10 | 102736493 | 116    | 14.2950 | 0.6490 | 0.4812  | 5.9232 | CEU |
| MRPL43   | GI_28872735-A | rs3740487  | 10 | 10 | 102740773 | 4164   | 14.2950 | 0.6490 | -0.4812 | 5.9232 | CEU |
| MRPL43   | GI_28872735-A | rs3824783  | 10 | 10 | 102740841 | 4232   | 14.2950 | 0.6490 | -0.4812 | 5.9232 | CEU |
| MRPL43   | GI_28872735-A | rs3740488  | 10 | 10 | 102744023 | 7414   | 10.6261 | 0.5380 | 0.4514  | 5.9232 | CEU |
| MRPL43   | GI_28872733-I | rs3740490  | 10 | 10 | 102746733 | 10417  | 5.9755  | 0.3277 | 0.2671  | 5.9232 | CEU |
| MRPL43   | GI_28872735-A | rs3740490  | 10 | 10 | 102746733 | 10124  | 12.3185 | 0.5900 | -0.4626 | 5.9232 | CEU |
| MRPL43   | GI_28872733-I | rs750866   | 10 | 10 | 102751448 | 15132  | 5.9755  | 0.3277 | -0.2671 | 5.9232 | CEU |
| MRPL43   | GI_28872735-A | rs750866   | 10 | 10 | 102751448 | 14839  | 12.3185 | 0.5900 | 0.4626  | 5.9232 | CEU |
| MRPL43   | GI_28872733-I | rs701835   | 10 | 10 | 102752117 | 15801  | 5.9755  | 0.3277 | 0.2671  | 5.9232 | CEU |
| MRPL43   | GI_28872735-A | rs701835   | 10 | 10 | 102752117 | 15508  | 12.3185 | 0.5900 | -0.4626 | 5.9232 | CEU |
| MRPL43   | GI_28872735-A | rs807029   | 10 | 10 | 102754037 | 17428  | 6.4433  | 0.3515 | -0.3343 | 5.9232 | CEU |
| MRPL43   | GI_28872735-A | rs701836   | 10 | 10 | 102757107 | 20498  | 6.1548  | 0.3369 | -0.3270 | 5.9232 | CEU |
| USMG5    | GI_14249375-S | rs2486758  | 10 | 10 | 104587470 | 556565 | 7.0446  | 0.3810 | -1.0146 | 5.5475 | CEU |
| USMG5    | GI_14249375-S | rs6584535  | 10 | 10 | 104724602 | 419433 | 7.0577  | 0.4153 | 1.0619  | 5.5475 | CEU |
| USMG5    | GI_14249375-S | rs1163249  | 10 | 10 | 104899880 | 244155 | 7.9624  | 0.4236 | -1.1211 | 5.5475 | CEU |
| USMG5    | GI_14249375-S | rs4917384  | 10 | 10 | 104985778 | 158257 | 18.3552 | 0.7699 | 1.3874  | 5.5475 | CEU |
| USMG5    | GI_14249375-S | rs7913461  | 10 | 10 | 104991315 | 152720 | 9.9397  | 0.5059 | 1.0242  | 5.5475 | CEU |
| USMG5    | GI_14249375-S | rs1891292  | 10 | 10 | 104991500 | 152535 | 9.7689  | 0.4993 | -1.0302 | 5.5475 | CEU |
| USMG5    | GI_14249375-S | rs1891293  | 10 | 10 | 104991787 | 152248 | 9.7689  | 0.4993 | 1.0302  | 5.5475 | CEU |
| USMG5    | GI_14249375-S | rs2506961  | 10 | 10 | 104997916 | 146119 | 9.7689  | 0.4993 | 1.0302  | 5.5475 | CEU |
| USMG5    | GI_14249375-S | rs1712510  | 10 | 10 | 104999076 | 144959 | 9.7689  | 0.4993 | 1.0302  | 5.5475 | CEU |
| USMG5    | GI_14249375-S | rs1163075  | 10 | 10 | 105011253 | 132782 | 9.9397  | 0.5059 | 1.0242  | 5.5475 | CEU |
| USMG5    | GI_14249375-S | rs1163073  | 10 | 10 | 105012924 | 131111 | 23.4641 | 0.8298 | 1.4431  | 5.5475 | CEU |
| USMG5    | GI_14249375-S | rs1163081  | 10 | 10 | 105019830 | 124205 | 9.9397  | 0.5059 | -1.0242 | 5.5475 | CEU |
| USMG5    | GI_14249375-S | rs1712517  | 10 | 10 | 105023005 | 121030 | 7.4088  | 0.3982 | -0.9759 | 5.5475 | CEU |
| USMG5    | GI_14249375-S | rs1163087  | 10 | 10 | 105033279 | 110756 | 9.9397  | 0.5059 | -1.0242 | 5.5475 | CEU |
| USMG5    | GI_14249375-S | rs4918003  | 10 | 10 | 105034147 | 109888 | 8.6195  | 0.4641 | 0.9809  | 5.5475 | CEU |
| USMG5    | GI_14249375-S | rs3740381  | 10 | 10 | 105036679 | 107356 | 23.0321 | 0.8292 | -1.4443 | 5.5475 | CEU |
| USMG5    | GI_14249375-S | rs1063461  | 10 | 10 | 105039095 | 104940 | 8.6282  | 0.4527 | 0.9558  | 5.5475 | CEU |
| USMG5    | GI_14249375-S | rs4293062  | 10 | 10 | 105042614 | 101421 | 8.6282  | 0.4527 | -0.9558 | 5.5475 | CEU |
| USMG5    | GI_14249375-S | rs6584547  | 10 | 10 | 105055399 | 88636  | 7.2797  | 0.4030 | 0.9485  | 5.5475 | CEU |
| USMG5    | GI_14249375-S | rs12220267 | 10 | 10 | 105065702 | 78333  | 23.4641 | 0.8298 | 1.4431  | 5.5475 | CEU |
| USMG5    | GI_14249375-S | rs11191654 | 10 | 10 | 105067114 | 76921  | 8.5134  | 0.4478 | -0.9642 | 5.5475 | CEU |
| USMG5    | GI_14249375-S | rs4918007  | 10 | 10 | 105097460 | 46575  | 6.0385  | 0.3507 | 0.8674  | 5.5475 | CEU |
| USMG5    | GI_14249375-S | rs7074749  | 10 | 10 | 105106046 | 37989  | 7.9204  | 0.4272 | 0.9363  | 5.5475 | CEU |
| USMG5    | GI_14249375-S | rs11191666 | 10 | 10 | 105117268 | 26767  | 8.5134  | 0.4478 | 0.9642  | 5.5475 | CEU |
| USMG5    | GI_14249375-S | rs10883857 | 10 | 10 | 105117577 | 26458  | 8.5559  | 0.4613 | 0.9643  | 5.5475 | CEU |
| USMG5    | GI_14249375-S | rs7905968  | 10 | 10 | 105125309 | 18726  | 6.9211  | 0.3802 | 0.9452  | 5.5475 | CEU |
| USMG5    | GI_14249375-S | rs11191672 | 10 | 10 | 105128951 | 15084  | 7.7183  | 0.4125 | 0.9411  | 5.5475 | CEU |
| USMG5    | GI_14249375-S | rs7911488  | 10 | 10 | 105144079 | 44     | 26.7757 | 0.8737 | 1.5225  | 5.5475 | CEU |
| USMG5    | GI_14249375-S | rs11191676 | 10 | 10 | 105145056 | 1021   | 8.5134  | 0.4478 | -0.9642 | 5.5475 | CEU |
| USMG5    | GI_14249375-S | rs2292807  | 10 | 10 | 105145635 | 1600   | 8.5134  | 0.4478 | 0.9642  | 5.5475 | CEU |
| USMG5    | GI_14249375-S | rs10883863 | 10 | 10 | 105151869 | 7834   | 7.3913  | 0.4028 | 0.9493  | 5.5475 | CEU |

|          |               |            |    |    |           |        |        |        |         |        |     |
|----------|---------------|------------|----|----|-----------|--------|--------|--------|---------|--------|-----|
| USMG5    | GI_14249375-S | rs12414609 | 10 | 10 | 105152131 | 8096   | 8.6073 | 0.4576 | 0.9615  | 5.5475 | CEU |
| USMG5    | GI_14249375-S | rs7089271  | 10 | 10 | 105166904 | 22869  | 6.6418 | 0.3881 | 0.9184  | 5.5475 | CEU |
| USMG5    | GI_14249375-S | rs3740382  | 10 | 10 | 105169204 | 25169  | 7.9681 | 0.4238 | -0.9809 | 5.5475 | CEU |
| USMG5    | GI_14249375-S | rs11191686 | 10 | 10 | 105177736 | 33701  | 7.8689 | 0.4193 | -0.9504 | 5.5475 | CEU |
| USMG5    | GI_14249375-S | rs11191688 | 10 | 10 | 105182560 | 38525  | 6.9128 | 0.3798 | 0.9442  | 5.5475 | CEU |
| USMG5    | GI_14249375-S | rs10883868 | 10 | 10 | 105186804 | 42769  | 5.9800 | 0.3375 | -0.8631 | 5.5475 | CEU |
| USMG5    | GI_14249375-S | rs2281861  | 10 | 10 | 105191555 | 47520  | 6.3215 | 0.3769 | 0.9170  | 5.5475 | CEU |
| USMG5    | GI_14249375-S | rs7831     | 10 | 10 | 105195292 | 51257  | 6.7714 | 0.3678 | 0.9350  | 5.5475 | CEU |
| USMG5    | GI_14249375-S | rs6580     | 10 | 10 | 105196864 | 52829  | 5.7309 | 0.3149 | -0.8348 | 5.5475 | CEU |
| hmm665   | hmm665-S      | rs10901809 | 10 | 10 | 126400794 | 26133  | 6.0619 | 0.3321 | 0.1358  | 5.9974 | CEU |
| hmm665   | hmm665-S      | rs11245344 | 10 | 10 | 126408772 | 18155  | 6.2697 | 0.3428 | -0.1311 | 5.9974 | CEU |
| hmm665   | hmm665-S      | rs7080838  | 10 | 10 | 126409831 | 17096  | 6.2697 | 0.3428 | -0.1311 | 5.9974 | CEU |
| hmm665   | hmm665-S      | rs11245345 | 10 | 10 | 126414742 | 12185  | 6.0302 | 0.3847 | -0.1733 | 5.9974 | CEU |
| hmm665   | hmm665-S      | rs2629541  | 10 | 10 | 126415856 | 11071  | 6.3164 | 0.4009 | 0.1566  | 5.9974 | CEU |
| hmm665   | hmm665-S      | rs12570348 | 10 | 10 | 126428953 | 2026   | 6.2697 | 0.3428 | -0.1311 | 5.9974 | CEU |
| hmm665   | hmm665-S      | rs10901816 | 10 | 10 | 126430385 | 3458   | 6.2697 | 0.3428 | 0.1311  | 5.9974 | CEU |
| hmm665   | hmm665-S      | rs1055256  | 10 | 10 | 126436582 | 9655   | 6.2697 | 0.3428 | 0.1311  | 5.9974 | CEU |
| hmm665   | hmm665-S      | rs7898003  | 10 | 10 | 126441375 | 14448  | 6.2697 | 0.3428 | 0.1311  | 5.9974 | CEU |
| hmm665   | hmm665-S      | rs965484   | 10 | 10 | 126443471 | 16544  | 6.2697 | 0.3428 | 0.1311  | 5.9974 | CEU |
| hmm665   | hmm665-S      | rs2303611  | 10 | 10 | 126507979 | 81052  | 6.3982 | 0.3492 | 0.1323  | 5.9974 | CEU |
| hmm665   | hmm665-S      | rs12221075 | 10 | 10 | 126524845 | 97918  | 7.0233 | 0.3800 | 0.1530  | 5.9974 | CEU |
| hmm665   | hmm665-S      | rs11245387 | 10 | 10 | 126527815 | 100888 | 6.4163 | 0.3708 | -0.1496 | 5.9974 | CEU |
| hmm665   | hmm665-S      | rs7097177  | 10 | 10 | 126529829 | 102902 | 6.1008 | 0.3341 | -0.1386 | 5.9974 | CEU |
| hmm665   | hmm665-S      | rs12764568 | 10 | 10 | 126534636 | 107709 | 6.3982 | 0.3492 | -0.1323 | 5.9974 | CEU |
| ZRANB1   | GI_23943913-S | rs4962411  | 10 | 10 | 126607446 | 56049  | 6.3898 | 0.3488 | 0.4481  | 5.6907 | CEU |
| ZRANB1   | GI_23943913-S | rs4962710  | 10 | 10 | 126616293 | 47202  | 6.3898 | 0.3488 | -0.4481 | 5.6907 | CEU |
| ZRANB1   | GI_23943913-S | rs7074163  | 10 | 10 | 126619194 | 44301  | 6.2483 | 0.3465 | 0.4470  | 5.6907 | CEU |
| ZRANB1   | GI_23943913-S | rs2114835  | 10 | 10 | 126620547 | 42948  | 6.4490 | 0.3567 | 0.4355  | 5.6907 | CEU |
| ZRANB1   | GI_23943913-S | rs3802700  | 10 | 10 | 126650771 | 12724  | 6.4490 | 0.3567 | -0.4355 | 5.6907 | CEU |
| ZRANB1   | GI_23943913-S | rs6597870  | 10 | 10 | 126662974 | 521    | 5.7795 | 0.3221 | -0.4255 | 5.6907 | CEU |
| ZRANB1   | GI_23943913-S | rs3906796  | 10 | 10 | 126663988 | 493    | 6.3898 | 0.3488 | 0.4481  | 5.6907 | CEU |
| ZRANB1   | GI_23943913-S | rs11596226 | 10 | 10 | 126665355 | 1860   | 8.3329 | 0.4399 | -0.5712 | 5.6907 | CEU |
| UROS     | GI_4557872-S  | rs7919631  | 10 | 10 | 127457290 | 9935   | 6.0083 | 0.3341 | -0.3019 | 5.8834 | CEU |
| DPYSL4   | GI_11321616-S | rs2637629  | 10 | 10 | 133866105 | 3061   | 7.9153 | 0.4773 | 0.6557  | 7.5776 | CEU |
| FLJ22635 | GI_13376651-S | rs2242565  | 11 | 11 | 285343    | 40     | 6.5427 | 0.3565 | -0.3368 | 5.3365 | CEU |
| RPLP2    | GI_16905512-S | rs4131364  | 11 | 11 | 802188    | 1887   | 5.5964 | 0.3078 | 0.1500  | 5.5721 | CEU |
| CD151    | GI_34328913-I | rs4075289  | 11 | 11 | 820670    | 3887   | 7.6353 | 0.4087 | -0.3451 | 6.6196 | CEU |
| CD151    | GI_34328914-A | rs4075289  | 11 | 11 | 820670    | 8073   | 8.6953 | 0.4555 | -0.6549 | 6.6196 | CEU |
| CD151    | GI_34328913-I | rs7924806  | 11 | 11 | 823668    | 889    | 7.6353 | 0.4087 | -0.3451 | 6.6196 | CEU |
| CD151    | GI_34328914-A | rs7924806  | 11 | 11 | 823668    | 5075   | 8.6953 | 0.4555 | -0.6549 | 6.6196 | CEU |
| CD151    | GI_34328913-I | rs3059     | 11 | 11 | 830319    | 5762   | 7.6353 | 0.4087 | -0.3451 | 6.6196 | CEU |
| CD151    | GI_34328914-A | rs3059     | 11 | 11 | 830319    | 1576   | 8.6953 | 0.4555 | -0.6549 | 6.6196 | CEU |
| PHEMX    | GI_37595532-A | rs10831733 | 11 | 11 | 2281016   | 14857  | 7.0319 | 0.4022 | -0.3220 | 5.7747 | CEU |
| PHEMX    | GI_37595532-A | rs937614   | 11 | 11 | 2283496   | 12377  | 5.9016 | 0.3238 | -0.3301 | 5.7747 | CEU |
| CAT      | GI_4557013-S  | rs7928060  | 11 | 11 | 34377506  | 72091  | 6.2577 | 0.3421 | 0.4985  | 5.8851 | CEU |
| CAT      | GI_4557013-S  | rs7112624  | 11 | 11 | 34382536  | 67061  | 9.1700 | 0.4753 | -0.4421 | 5.8851 | CEU |
| CAT      | GI_4557013-S  | rs5026710  | 11 | 11 | 34384938  | 64659  | 7.6869 | 0.4400 | 0.4494  | 5.8851 | CEU |
| CAT      | GI_4557013-S  | rs5026713  | 11 | 11 | 34385141  | 64456  | 8.6952 | 0.4995 | 0.4511  | 5.8851 | CEU |
| CAT      | GI_4557013-S  | rs1569691  | 11 | 11 | 34385890  | 63707  | 7.6812 | 0.4277 | 0.4278  | 5.8851 | CEU |
| CAT      | GI_4557013-S  | rs1569690  | 11 | 11 | 34386017  | 63580  | 9.1700 | 0.4753 | 0.4421  | 5.8851 | CEU |
| CAT      | GI_4557013-S  | rs2022318  | 11 | 11 | 34386220  | 63377  | 7.8826 | 0.4255 | -0.4285 | 5.8851 | CEU |
| CAT      | GI_4557013-S  | rs12294809 | 11 | 11 | 34388082  | 61515  | 9.2825 | 0.5544 | 0.5270  | 5.8851 | CEU |
| CAT      | GI_4557013-S  | rs7934463  | 11 | 11 | 34388230  | 61367  | 9.1700 | 0.4753 | -0.4421 | 5.8851 | CEU |
| CAT      | GI_4557013-S  | rs6484718  | 11 | 11 | 34389333  | 60264  | 8.4167 | 0.5232 | -0.4822 | 5.8851 | CEU |
| CAT      | GI_4557013-S  | rs2901129  | 11 | 11 | 34390544  | 59053  | 8.5088 | 0.5199 | 0.4686  | 5.8851 | CEU |
| CAT      | GI_4557013-S  | rs910091   | 11 | 11 | 34393603  | 55994  | 9.5710 | 0.5101 | -0.4613 | 5.8851 | CEU |
| CAT      | GI_4557013-S  | rs910090   | 11 | 11 | 34394117  | 55480  | 8.8564 | 0.4682 | -0.4394 | 5.8851 | CEU |
| CAT      | GI_4557013-S  | rs10742318 | 11 | 11 | 34399941  | 49656  | 6.0545 | 0.3365 | 0.4451  | 5.8851 | CEU |
| CAT      | GI_4557013-S  | rs2206716  | 11 | 11 | 34400392  | 49205  | 6.8507 | 0.3716 | 0.4698  | 5.8851 | CEU |

|         |               |            |    |    |          |        |         |        |         |        |     |
|---------|---------------|------------|----|----|----------|--------|---------|--------|---------|--------|-----|
| CAT     | GI_4557013-S  | rs11032683 | 11 | 11 | 34400527 | 49070  | 6.8507  | 0.3716 | 0.4698  | 5.8851 | CEU |
| CAT     | GI_4557013-S  | rs10742319 | 11 | 11 | 34401072 | 48525  | 6.8507  | 0.3716 | -0.4698 | 5.8851 | CEU |
| CAT     | GI_4557013-S  | rs7929321  | 11 | 11 | 34402615 | 46982  | 6.8507  | 0.3716 | 0.4698  | 5.8851 | CEU |
| CAT     | GI_4557013-S  | rs1071880  | 11 | 11 | 34402797 | 46800  | 6.0086  | 0.3294 | -0.5198 | 5.8851 | CEU |
| CAT     | GI_4557013-S  | rs7943316  | 11 | 11 | 34417048 | 32549  | 7.1479  | 0.3859 | 0.4093  | 5.8851 | CEU |
| CAT     | GI_4557013-S  | rs11032699 | 11 | 11 | 34418144 | 31453  | 7.0870  | 0.3830 | -0.4089 | 5.8851 | CEU |
| CAT     | GI_4557013-S  | rs11032700 | 11 | 11 | 34418279 | 31318  | 6.8999  | 0.3792 | -0.4088 | 5.8851 | CEU |
| CAT     | GI_4557013-S  | rs525938   | 11 | 11 | 34420169 | 29428  | 6.7900  | 0.3687 | -0.3992 | 5.8851 | CEU |
| CAT     | GI_4557013-S  | rs524154   | 11 | 11 | 34420336 | 29261  | 6.0814  | 0.3584 | 0.3833  | 5.8851 | CEU |
| CAT     | GI_4557013-S  | rs484214   | 11 | 11 | 34423848 | 25749  | 6.3162  | 0.3550 | 0.3897  | 5.8851 | CEU |
| CAT     | GI_4557013-S  | rs482322   | 11 | 11 | 34424066 | 25531  | 6.7900  | 0.3687 | -0.3992 | 5.8851 | CEU |
| CAT     | GI_4557013-S  | rs769218   | 11 | 11 | 34427255 | 22342  | 6.4592  | 0.3573 | 0.5278  | 5.8851 | CEU |
| MMRP19  | GI_7705723-S  | rs2941061  | 11 | 11 | 34834337 | 32191  | 5.9992  | 0.3289 | -0.4327 | 5.7321 | CEU |
| MMRP19  | GI_7705723-S  | rs2941059  | 11 | 11 | 34836724 | 29804  | 5.9992  | 0.3289 | -0.4327 | 5.7321 | CEU |
| MMRP19  | GI_7705723-S  | rs2956079  | 11 | 11 | 34837952 | 28576  | 5.9992  | 0.3289 | 0.4327  | 5.7321 | CEU |
| MMRP19  | GI_7705723-S  | rs2915237  | 11 | 11 | 34841568 | 24960  | 5.9992  | 0.3289 | 0.4327  | 5.7321 | CEU |
| MMRP19  | GI_7705723-S  | rs2941055  | 11 | 11 | 34842226 | 24302  | 5.8921  | 0.3280 | 0.4226  | 5.7321 | CEU |
| MMRP19  | GI_7705723-S  | rs1509662  | 11 | 11 | 34845339 | 21189  | 5.9992  | 0.3289 | -0.4327 | 5.7321 | CEU |
| MMRP19  | GI_7705723-S  | rs2941052  | 11 | 11 | 34846707 | 19821  | 5.9992  | 0.3289 | -0.4327 | 5.7321 | CEU |
| MMRP19  | GI_7705723-S  | rs891550   | 11 | 11 | 34848306 | 18222  | 5.9992  | 0.3289 | 0.4327  | 5.7321 | CEU |
| MMRP19  | GI_7705723-S  | rs2915233  | 11 | 11 | 34848869 | 17659  | 5.9992  | 0.3289 | 0.4327  | 5.7321 | CEU |
| MMRP19  | GI_7705723-S  | rs919554   | 11 | 11 | 34849257 | 17271  | 5.9992  | 0.3289 | 0.4327  | 5.7321 | CEU |
| MMRP19  | GI_7705723-S  | rs6484743  | 11 | 11 | 34850742 | 15786  | 5.9992  | 0.3289 | 0.4327  | 5.7321 | CEU |
| MMRP19  | GI_7705723-S  | rs2915231  | 11 | 11 | 34851353 | 15175  | 5.9992  | 0.3289 | -0.4327 | 5.7321 | CEU |
| MMRP19  | GI_7705723-S  | rs2033357  | 11 | 11 | 34851504 | 15024  | 5.9992  | 0.3289 | -0.4327 | 5.7321 | CEU |
| MMRP19  | GI_7705723-S  | rs2033358  | 11 | 11 | 34851555 | 14973  | 5.9992  | 0.3289 | -0.4327 | 5.7321 | CEU |
| MMRP19  | GI_7705723-S  | rs2033360  | 11 | 11 | 34851847 | 14681  | 5.9992  | 0.3289 | 0.4327  | 5.7321 | CEU |
| MMRP19  | GI_7705723-S  | rs2116090  | 11 | 11 | 34853782 | 12746  | 5.9992  | 0.3289 | -0.4327 | 5.7321 | CEU |
| MMRP19  | GI_7705723-S  | rs1036070  | 11 | 11 | 34856755 | 9773   | 5.9992  | 0.3289 | 0.4327  | 5.7321 | CEU |
| MMRP19  | GI_7705723-S  | rs2956086  | 11 | 11 | 34859097 | 7431   | 5.7371  | 0.3152 | -0.3970 | 5.7321 | CEU |
| MMRP19  | GI_7705723-S  | rs2915225  | 11 | 11 | 34860089 | 6439   | 5.9992  | 0.3289 | 0.4327  | 5.7321 | CEU |
| MMRP19  | GI_7705723-S  | rs2986421  | 11 | 11 | 34887282 | 20754  | 5.8774  | 0.3272 | 0.4325  | 5.7321 | CEU |
| MMRP19  | GI_7705723-S  | rs984690   | 11 | 11 | 34892237 | 25709  | 5.9992  | 0.3289 | 0.4327  | 5.7321 | CEU |
| MMRP19  | GI_7705723-S  | rs3763923  | 11 | 11 | 34897022 | 30494  | 5.9992  | 0.3289 | -0.4327 | 5.7321 | CEU |
| MMRP19  | GI_7705723-S  | rs724714   | 11 | 11 | 34898070 | 31542  | 5.9992  | 0.3289 | 0.4327  | 5.7321 | CEU |
| MMRP19  | GI_7705723-S  | rs2986408  | 11 | 11 | 34899095 | 32567  | 5.9992  | 0.3289 | 0.4327  | 5.7321 | CEU |
| MMRP19  | GI_7705723-S  | rs2915202  | 11 | 11 | 34899805 | 33277  | 5.9992  | 0.3289 | -0.4327 | 5.7321 | CEU |
| MMRP19  | GI_7705723-S  | rs2915201  | 11 | 11 | 34900323 | 33795  | 5.9992  | 0.3289 | -0.4327 | 5.7321 | CEU |
| MMRP19  | GI_7705723-S  | rs2915199  | 11 | 11 | 34902744 | 36216  | 5.9992  | 0.3289 | 0.4327  | 5.7321 | CEU |
| MMRP19  | GI_7705723-S  | rs2915198  | 11 | 11 | 34903632 | 37104  | 5.9992  | 0.3289 | -0.4327 | 5.7321 | CEU |
| MMRP19  | GI_7705723-S  | rs1991648  | 11 | 11 | 34908569 | 42041  | 5.9992  | 0.3289 | 0.4327  | 5.7321 | CEU |
| MMRP19  | GI_7705723-S  | rs520658   | 11 | 11 | 34917484 | 50956  | 5.9992  | 0.3289 | -0.4327 | 5.7321 | CEU |
| MMRP19  | GI_7705723-S  | rs2956077  | 11 | 11 | 34919504 | 52976  | 6.0472  | 0.3361 | 0.4380  | 5.7321 | CEU |
| MMRP19  | GI_7705723-S  | rs2986406  | 11 | 11 | 34920304 | 53776  | 5.9992  | 0.3289 | -0.4327 | 5.7321 | CEU |
| MMRP19  | GI_7705723-S  | rs2985150  | 11 | 11 | 34920436 | 53908  | 5.9992  | 0.3289 | 0.4327  | 5.7321 | CEU |
| MMRP19  | GI_7705723-S  | rs2986403  | 11 | 11 | 34923122 | 56594  | 6.0946  | 0.3338 | 0.4240  | 5.7321 | CEU |
| PHACS   | GI_14211920-S | rs7928485  | 11 | 11 | 44034823 | 27046  | 10.7623 | 0.5430 | -0.4891 | 7.0988 | CEU |
| PHACS   | GI_14211920-S | rs2074038  | 11 | 11 | 44044565 | 17304  | 15.5972 | 0.6832 | 0.6895  | 7.0988 | CEU |
| PHACS   | GI_14211920-S | rs7951555  | 11 | 11 | 44047975 | 13894  | 7.6057  | 0.4128 | 0.4086  | 7.0988 | CEU |
| PHACS   | GI_14211920-S | rs11826285 | 11 | 11 | 44048254 | 13615  | 7.7494  | 0.4194 | 0.3913  | 7.0988 | CEU |
| PHACS   | GI_14211920-S | rs2074040  | 11 | 11 | 44049899 | 11970  | 7.6057  | 0.4128 | 0.4086  | 7.0988 | CEU |
| Hs.6637 | Hs.6637-S     | rs1685404  | 11 | 11 | 47200241 | 383494 | 5.4238  | 0.2985 | 0.1802  | 5.2083 | CEU |
| Hs.6637 | Hs.6637-S     | rs2291119  | 11 | 11 | 47254777 | 328958 | 6.1318  | 0.3405 | 0.2024  | 5.2083 | CEU |
| Hs.6637 | Hs.6637-S     | rs326217   | 11 | 11 | 47259851 | 323884 | 6.2532  | 0.3419 | -0.1974 | 5.2083 | CEU |
| Hs.6637 | Hs.6637-S     | rs11570094 | 11 | 11 | 47316282 | 267453 | 6.2624  | 0.3424 | -0.2152 | 5.2083 | CEU |
| Hs.6637 | Hs.6637-S     | rs2856650  | 11 | 11 | 47321775 | 261960 | 6.0837  | 0.3380 | -0.2189 | 5.2083 | CEU |
| Hs.6637 | Hs.6637-S     | rs2071304  | 11 | 11 | 47328953 | 254782 | 8.8714  | 0.4748 | -0.2487 | 5.2083 | CEU |
| Hs.6637 | Hs.6637-S     | rs1057233  | 11 | 11 | 47333024 | 250711 | 9.0364  | 0.4698 | 0.2428  | 5.2083 | CEU |
| Hs.6637 | Hs.6637-S     | rs7105851  | 11 | 11 | 47339851 | 243884 | 9.0364  | 0.4698 | -0.2428 | 5.2083 | CEU |

|         |              |            |    |    |          |        |         |        |         |        |     |
|---------|--------------|------------|----|----|----------|--------|---------|--------|---------|--------|-----|
| Hs.6637 | Hs.6637-S    | rs10838698 | 11 | 11 | 47342499 | 241236 | 8.4974  | 0.4710 | -0.2436 | 5.2083 | CEU |
| Hs.6637 | Hs.6637-S    | rs10838699 | 11 | 11 | 47342649 | 241086 | 9.0364  | 0.4698 | -0.2428 | 5.2083 | CEU |
| Hs.6637 | Hs.6637-S    | rs10769258 | 11 | 11 | 47347615 | 236120 | 9.1261  | 0.4795 | 0.2395  | 5.2083 | CEU |
| Hs.6637 | Hs.6637-S    | rs11039212 | 11 | 11 | 47349879 | 233856 | 9.0364  | 0.4698 | -0.2428 | 5.2083 | CEU |
| Hs.6637 | Hs.6637-S    | rs4992357  | 11 | 11 | 47350214 | 233521 | 8.4527  | 0.4451 | -0.2299 | 5.2083 | CEU |
| Hs.6637 | Hs.6637-S    | rs896816   | 11 | 11 | 47350914 | 232821 | 9.0364  | 0.4698 | 0.2428  | 5.2083 | CEU |
| Hs.6637 | Hs.6637-S    | rs7940536  | 11 | 11 | 47351816 | 231919 | 9.0364  | 0.4698 | -0.2428 | 5.2083 | CEU |
| Hs.6637 | Hs.6637-S    | rs11601603 | 11 | 11 | 47357747 | 225988 | 9.0364  | 0.4698 | -0.2428 | 5.2083 | CEU |
| Hs.6637 | Hs.6637-S    | rs6485753  | 11 | 11 | 47366776 | 216959 | 9.0364  | 0.4698 | 0.2428  | 5.2083 | CEU |
| Hs.6637 | Hs.6637-S    | rs4752990  | 11 | 11 | 47366969 | 216766 | 8.5174  | 0.4657 | 0.2324  | 5.2083 | CEU |
| Hs.6637 | Hs.6637-S    | rs4752993  | 11 | 11 | 47367527 | 216208 | 9.0364  | 0.4698 | -0.2428 | 5.2083 | CEU |
| Hs.6637 | Hs.6637-S    | rs4752994  | 11 | 11 | 47367641 | 216094 | 8.9434  | 0.4719 | 0.2459  | 5.2083 | CEU |
| Hs.6637 | Hs.6637-S    | rs10769262 | 11 | 11 | 47368157 | 215578 | 9.0364  | 0.4698 | -0.2428 | 5.2083 | CEU |
| Hs.6637 | Hs.6637-S    | rs11605672 | 11 | 11 | 47370309 | 213426 | 9.0364  | 0.4698 | -0.2428 | 5.2083 | CEU |
| Hs.6637 | Hs.6637-S    | rs4752999  | 11 | 11 | 47385141 | 198594 | 9.7638  | 0.5052 | -0.2419 | 5.2083 | CEU |
| Hs.6637 | Hs.6637-S    | rs755553   | 11 | 11 | 47388879 | 194856 | 9.8452  | 0.5023 | 0.2437  | 5.2083 | CEU |
| Hs.6637 | Hs.6637-S    | rs2053979  | 11 | 11 | 47396020 | 187715 | 8.3883  | 0.4996 | 0.2506  | 5.2083 | CEU |
| Hs.6637 | Hs.6637-S    | rs10742803 | 11 | 11 | 47396514 | 187221 | 7.2617  | 0.4382 | 0.2392  | 5.2083 | CEU |
| Hs.6637 | Hs.6637-S    | rs2293580  | 11 | 11 | 47396859 | 186876 | 9.8452  | 0.5023 | 0.2437  | 5.2083 | CEU |
| Hs.6637 | Hs.6637-S    | rs3781627  | 11 | 11 | 47398048 | 185687 | 10.4909 | 0.5268 | 0.2470  | 5.2083 | CEU |
| Hs.6637 | Hs.6637-S    | rs10838708 | 11 | 11 | 47398089 | 185646 | 6.1928  | 0.3486 | 0.1936  | 5.2083 | CEU |
| Hs.6637 | Hs.6637-S    | rs3781626  | 11 | 11 | 47399469 | 184266 | 9.8452  | 0.5023 | 0.2437  | 5.2083 | CEU |
| Hs.6637 | Hs.6637-S    | rs3781625  | 11 | 11 | 47399656 | 184079 | 9.8452  | 0.5023 | -0.2437 | 5.2083 | CEU |
| Hs.6637 | Hs.6637-S    | rs2868459  | 11 | 11 | 47411548 | 172187 | 9.8452  | 0.5023 | -0.2437 | 5.2083 | CEU |
| Hs.6637 | Hs.6637-S    | rs11604680 | 11 | 11 | 47414115 | 169620 | 9.5732  | 0.5038 | -0.2412 | 5.2083 | CEU |
| Hs.6637 | Hs.6637-S    | rs1317149  | 11 | 11 | 47443461 | 140274 | 10.6293 | 0.5319 | 0.2494  | 5.2083 | CEU |
| Hs.6637 | Hs.6637-S    | rs7124681  | 11 | 11 | 47486523 | 97212  | 6.6973  | 0.3641 | 0.2142  | 5.2083 | CEU |
| Hs.6637 | Hs.6637-S    | rs4752845  | 11 | 11 | 47496273 | 87462  | 10.6293 | 0.5319 | 0.2494  | 5.2083 | CEU |
| Hs.6637 | Hs.6637-S    | rs7928842  | 11 | 11 | 47522928 | 60807  | 6.6973  | 0.3641 | 0.2142  | 5.2083 | CEU |
| Hs.6637 | Hs.6637-S    | rs12419692 | 11 | 11 | 47581290 | 2445   | 10.6293 | 0.5319 | 0.2494  | 5.2083 | CEU |
| Hs.6637 | Hs.6637-S    | rs1064608  | 11 | 11 | 47597005 | 13270  | 10.6293 | 0.5319 | -0.2494 | 5.2083 | CEU |
| Hs.6637 | Hs.6637-S    | rs3817335  | 11 | 11 | 47600467 | 16732  | 10.5607 | 0.5356 | -0.2562 | 5.2083 | CEU |
| Hs.6637 | Hs.6637-S    | rs4752856  | 11 | 11 | 47604618 | 20883  | 10.6293 | 0.5319 | 0.2494  | 5.2083 | CEU |
| Hs.6637 | Hs.6637-S    | rs3817334  | 11 | 11 | 47607569 | 23834  | 6.6973  | 0.3641 | -0.2142 | 5.2083 | CEU |
| Hs.6637 | Hs.6637-S    | rs4752857  | 11 | 11 | 47612328 | 28593  | 10.6293 | 0.5319 | -0.2494 | 5.2083 | CEU |
| Hs.6637 | Hs.6637-S    | rs12794570 | 11 | 11 | 47614890 | 31155  | 8.2145  | 0.4987 | -0.2317 | 5.2083 | CEU |
| Hs.6637 | Hs.6637-S    | rs10838738 | 11 | 11 | 47619625 | 35890  | 10.6293 | 0.5319 | -0.2494 | 5.2083 | CEU |
| Hs.6637 | Hs.6637-S    | rs12787112 | 11 | 11 | 47643723 | 59988  | 10.3852 | 0.5354 | -0.2553 | 5.2083 | CEU |
| Hs.6637 | Hs.6637-S    | rs10838747 | 11 | 11 | 47672900 | 89165  | 9.9470  | 0.5186 | 0.2501  | 5.2083 | CEU |
| Hs.6637 | Hs.6637-S    | rs17788930 | 11 | 11 | 47709351 | 125616 | 10.6293 | 0.5319 | -0.2494 | 5.2083 | CEU |
| Hs.6637 | Hs.6637-S    | rs10838757 | 11 | 11 | 47719592 | 135857 | 11.0021 | 0.5782 | 0.2711  | 5.2083 | CEU |
| Hs.6637 | Hs.6637-S    | rs7927771  | 11 | 11 | 47737882 | 154147 | 10.6293 | 0.5319 | -0.2494 | 5.2083 | CEU |
| Hs.6637 | Hs.6637-S    | rs9909     | 11 | 11 | 47756351 | 172616 | 10.5607 | 0.5356 | 0.2562  | 5.2083 | CEU |
| Hs.6637 | Hs.6637-S    | rs7105282  | 11 | 11 | 47762190 | 178455 | 10.6293 | 0.5319 | 0.2494  | 5.2083 | CEU |
| Hs.6637 | Hs.6637-S    | rs2290850  | 11 | 11 | 47764350 | 180615 | 10.6293 | 0.5319 | -0.2494 | 5.2083 | CEU |
| Hs.6637 | Hs.6637-S    | rs12418852 | 11 | 11 | 47825429 | 241694 | 10.6293 | 0.5319 | -0.2494 | 5.2083 | CEU |
| Hs.6637 | Hs.6637-S    | rs11039433 | 11 | 11 | 47834069 | 250334 | 10.6293 | 0.5319 | -0.2494 | 5.2083 | CEU |
| Hs.6637 | Hs.6637-S    | rs12364432 | 11 | 11 | 47859459 | 275724 | 11.1750 | 0.5578 | 0.2584  | 5.2083 | CEU |
| Hs.6637 | Hs.6637-S    | rs4752801  | 11 | 11 | 47864217 | 280482 | 10.4964 | 0.5332 | -0.2459 | 5.2083 | CEU |
| Hs.6637 | Hs.6637-S    | rs12361256 | 11 | 11 | 47867399 | 283664 | 9.9587  | 0.5191 | 0.2366  | 5.2083 | CEU |
| TIMM10  | GI_6912707-S | rs3851117  | 11 | 11 | 56993689 | 58929  | 6.6701  | 0.3628 | -0.5739 | 5.9021 | CEU |
| TIMM10  | GI_6912707-S | rs2848634  | 11 | 11 | 57008904 | 43714  | 6.2205  | 0.3501 | -0.5679 | 5.9021 | CEU |
| TIMM10  | GI_6912707-S | rs2729384  | 11 | 11 | 57015193 | 37425  | 6.3082  | 0.3447 | -0.5591 | 5.9021 | CEU |
| TIMM10  | GI_6912707-S | rs2848640  | 11 | 11 | 57019256 | 33362  | 6.2411  | 0.3615 | 0.5736  | 5.9021 | CEU |
| TIMM10  | GI_6912707-S | rs2584856  | 11 | 11 | 57023888 | 28730  | 6.0924  | 0.3434 | -0.5585 | 5.9021 | CEU |
| TIMM10  | GI_6912707-S | rs2649667  | 11 | 11 | 57027085 | 25533  | 6.7960  | 0.3690 | 0.5778  | 5.9021 | CEU |
| TIMM10  | GI_6912707-S | rs2729371  | 11 | 11 | 57077898 | 25280  | 8.3467  | 0.4405 | -0.6651 | 5.9021 | CEU |
| TIMM10  | GI_6912707-S | rs2511983  | 11 | 11 | 57103450 | 50832  | 9.3204  | 0.4814 | 0.6939  | 5.9021 | CEU |
| TIMM10  | GI_6912707-S | rs2649662  | 11 | 11 | 57109138 | 56520  | 9.3204  | 0.4814 | 0.6939  | 5.9021 | CEU |

|          |               |            |    |    |          |        |         |        |         |        |     |
|----------|---------------|------------|----|----|----------|--------|---------|--------|---------|--------|-----|
| TIMM10   | GI_6912707-S  | rs2848630  | 11 | 11 | 57113483 | 60865  | 9.5580  | 0.4970 | 0.7056  | 5.9021 | CEU |
| TIMM10   | GI_6912707-S  | rs2649663  | 11 | 11 | 57113881 | 61263  | 9.5580  | 0.4970 | -0.7056 | 5.9021 | CEU |
| TIMM10   | GI_6912707-S  | rs2848628  | 11 | 11 | 57114290 | 61672  | 10.1739 | 0.5274 | 0.7281  | 5.9021 | CEU |
| FLJ35827 | GI_23397563-S | rs17637597 | 11 | 11 | 62195326 | 68896  | 5.8474  | 0.3210 | -0.1666 | 5.7616 | CEU |
| FLJ37970 | GI_40795670-S | rs574087   | 11 | 11 | 63859524 | 21996  | 5.8239  | 0.3198 | 0.3103  | 5.5845 | CEU |
| FLJ37970 | GI_40795670-S | rs499425   | 11 | 11 | 63862505 | 19015  | 5.6873  | 0.3218 | -0.3200 | 5.5845 | CEU |
| FLJ37970 | GI_40795670-S | rs612448   | 11 | 11 | 63881091 | 429    | 6.0096  | 0.3294 | -0.2994 | 5.5845 | CEU |
| FLJ37970 | GI_40795670-S | rs541207   | 11 | 11 | 63881718 | 198    | 6.0096  | 0.3294 | -0.2994 | 5.5845 | CEU |
| SF1      | GI_42544126-I | rs476037   | 11 | 11 | 64126116 | 174183 | 12.6475 | 0.6069 | 0.6462  | 7.1238 | CEU |
| SF1      | GI_42544126-I | rs7939965  | 11 | 11 | 64181600 | 118699 | 12.4851 | 0.5953 | 0.6202  | 7.1238 | CEU |
| SF1      | GI_42544126-I | rs11231853 | 11 | 11 | 64207055 | 93244  | 9.0364  | 0.4944 | 0.6157  | 7.1238 | CEU |
| SF1      | GI_42544126-I | rs3809076  | 11 | 11 | 64239122 | 61177  | 12.2587 | 0.5945 | 0.6201  | 7.1238 | CEU |
| SF1      | GI_42544126-I | rs693235   | 11 | 11 | 64249338 | 50961  | 14.1409 | 0.6447 | 0.6254  | 7.1238 | CEU |
| SF1      | GI_42544126-I | rs2073798  | 11 | 11 | 64267898 | 32401  | 8.0110  | 0.4257 | 0.5458  | 7.1238 | CEU |
| SF1      | GI_42544126-I | rs547066   | 11 | 11 | 64280070 | 20229  | 8.0110  | 0.4257 | -0.5458 | 7.1238 | CEU |
| SF1      | GI_42544126-I | rs589691   | 11 | 11 | 64281792 | 18507  | 14.1409 | 0.6447 | -0.6254 | 7.1238 | CEU |
| SF1      | GI_42544126-I | rs489192   | 11 | 11 | 64282220 | 18079  | 14.1409 | 0.6447 | 0.6254  | 7.1238 | CEU |
| SF1      | GI_42544126-I | rs477549   | 11 | 11 | 64283656 | 16643  | 13.0292 | 0.6253 | 0.6101  | 7.1238 | CEU |
| SF1      | GI_42544126-I | rs523200   | 11 | 11 | 64289155 | 11144  | 14.1409 | 0.6447 | 0.6254  | 7.1238 | CEU |
| SF1      | GI_42544126-I | rs680273   | 11 | 11 | 64296211 | 4088   | 14.1409 | 0.6447 | 0.6254  | 7.1238 | CEU |
| SF1      | GI_42544126-I | rs474707   | 11 | 11 | 64300711 | 412    | 14.1409 | 0.6447 | 0.6254  | 7.1238 | CEU |
| SF1      | GI_42544126-I | rs1633462  | 11 | 11 | 64302833 | 2534   | 14.1409 | 0.6447 | 0.6254  | 7.1238 | CEU |
| SF1      | GI_42544126-I | rs606458   | 11 | 11 | 64302967 | 2668   | 14.1409 | 0.6447 | 0.6254  | 7.1238 | CEU |
| SF1      | GI_42544126-I | rs607389   | 11 | 11 | 64310154 | 9855   | 15.2862 | 0.6818 | 0.6346  | 7.1238 | CEU |
| SF1      | GI_42544126-I | rs677298   | 11 | 11 | 64320784 | 20485  | 14.1409 | 0.6447 | 0.6254  | 7.1238 | CEU |
| SF1      | GI_42544126-I | rs1143937  | 11 | 11 | 64325576 | 25277  | 14.1409 | 0.6447 | 0.6254  | 7.1238 | CEU |
| SF1      | GI_42544126-I | rs669976   | 11 | 11 | 64330165 | 29866  | 8.8977  | 0.4760 | -0.5580 | 7.1238 | CEU |
| SF1      | GI_42544126-I | rs675254   | 11 | 11 | 64338146 | 37847  | 8.0110  | 0.4257 | -0.5458 | 7.1238 | CEU |
| RPS6KB2  | GI_4506738-S  | rs1476792  | 11 | 11 | 66952813 | 6532   | 8.7821  | 0.4592 | 0.2743  | 5.5123 | CEU |
| RPS6KB2  | GI_4506738-S  | rs917570   | 11 | 11 | 66953120 | 6225   | 6.8056  | 0.3694 | -0.2423 | 5.5123 | CEU |
| RPS6KB2  | GI_4506738-S  | rs1638588  | 11 | 11 | 66956282 | 3063   | 8.7821  | 0.4592 | 0.2743  | 5.5123 | CEU |
| RPS6KB2  | GI_4506738-S  | rs1790753  | 11 | 11 | 66957584 | 1761   | 8.7821  | 0.4592 | 0.2743  | 5.5123 | CEU |
| RPS6KB2  | GI_4506738-S  | rs869736   | 11 | 11 | 66962038 | 2693   | 8.7821  | 0.4592 | -0.2743 | 5.5123 | CEU |
| RPS6KB2  | GI_4506738-S  | rs2302264  | 11 | 11 | 66964002 | 4657   | 8.1700  | 0.4385 | 0.2683  | 5.5123 | CEU |
| RPS6KB2  | GI_4506738-S  | rs1638556  | 11 | 11 | 66970094 | 10749  | 8.7821  | 0.4592 | 0.2743  | 5.5123 | CEU |
| RPS6KB2  | GI_4506738-S  | rs1790761  | 11 | 11 | 66978430 | 19085  | 9.5855  | 0.5306 | 0.2978  | 5.5123 | CEU |
| RPS6KB2  | GI_4506738-S  | rs7114510  | 11 | 11 | 66981170 | 21825  | 8.3132  | 0.4391 | 0.2633  | 5.5123 | CEU |
| RPS6KB2  | GI_4506738-S  | rs11601325 | 11 | 11 | 66983582 | 24237  | 8.3132  | 0.4391 | 0.2633  | 5.5123 | CEU |
| RPS6KB2  | GI_4506738-S  | rs3741168  | 11 | 11 | 66991927 | 32582  | 8.7821  | 0.4592 | 0.2743  | 5.5123 | CEU |
| RPS6KB2  | GI_4506738-S  | rs4084113  | 11 | 11 | 67013613 | 54268  | 7.1031  | 0.3838 | 0.2385  | 5.5123 | CEU |
| RPS6KB2  | GI_4506738-S  | rs1871034  | 11 | 11 | 67049810 | 90465  | 6.7643  | 0.3725 | -0.2464 | 5.5123 | CEU |
| RPS6KB2  | GI_4506738-S  | rs4930430  | 11 | 11 | 67050774 | 91429  | 7.8425  | 0.4182 | -0.2683 | 5.5123 | CEU |
| RPS6KB2  | GI_4506738-S  | rs4930431  | 11 | 11 | 67050884 | 91539  | 7.8425  | 0.4182 | -0.2683 | 5.5123 | CEU |
| RPS6KB2  | GI_4506738-S  | rs7938563  | 11 | 11 | 67060707 | 101362 | 7.7256  | 0.4184 | -0.2667 | 5.5123 | CEU |
| RPS6KB2  | GI_4506738-S  | rs4320958  | 11 | 11 | 67066910 | 107565 | 7.8961  | 0.4319 | 0.2672  | 5.5123 | CEU |
| RPS6KB2  | GI_4506738-S  | rs6591245  | 11 | 11 | 67067512 | 108167 | 8.0179  | 0.4260 | 0.2666  | 5.5123 | CEU |
| RPS6KB2  | GI_4506738-S  | rs611663   | 11 | 11 | 67068797 | 109452 | 6.4931  | 0.3980 | 0.2609  | 5.5123 | CEU |
| RPS6KB2  | GI_4506738-S  | rs7106423  | 11 | 11 | 67070720 | 111375 | 8.1441  | 0.4373 | -0.2654 | 5.5123 | CEU |
| RPS6KB2  | GI_4506738-S  | rs7952081  | 11 | 11 | 67081509 | 122164 | 8.1246  | 0.4308 | 0.2643  | 5.5123 | CEU |
| RPS6KB2  | GI_4506738-S  | rs7395916  | 11 | 11 | 67085913 | 126568 | 7.7746  | 0.4151 | 0.2531  | 5.5123 | CEU |
| RPS6KB2  | GI_4506738-S  | rs684928   | 11 | 11 | 67086318 | 126973 | 7.3140  | 0.3938 | -0.2529 | 5.5123 | CEU |
| RPS6KB2  | GI_4506738-S  | rs638140   | 11 | 11 | 67090434 | 131089 | 7.3140  | 0.3938 | -0.2529 | 5.5123 | CEU |
| RPS6KB2  | GI_4506738-S  | rs656652   | 11 | 11 | 67100533 | 141188 | 7.3237  | 0.3996 | 0.2593  | 5.5123 | CEU |
| RPS6KB2  | GI_4506738-S  | rs625978   | 11 | 11 | 67101240 | 141895 | 6.5393  | 0.3664 | 0.2466  | 5.5123 | CEU |
| RPS6KB2  | GI_4506738-S  | rs6591251  | 11 | 11 | 67101265 | 141920 | 8.0169  | 0.4316 | 0.2646  | 5.5123 | CEU |
| RPS6KB2  | GI_4506738-S  | rs6591252  | 11 | 11 | 67102153 | 142808 | 8.1246  | 0.4308 | -0.2643 | 5.5123 | CEU |
| RPS6KB2  | GI_4506738-S  | rs614080   | 11 | 11 | 67103863 | 144518 | 7.3140  | 0.3938 | -0.2529 | 5.5123 | CEU |
| RPS6KB2  | GI_4506738-S  | rs7941395  | 11 | 11 | 67103993 | 144648 | 8.1073  | 0.4535 | -0.2849 | 5.5123 | CEU |
| RPS6KB2  | GI_4506738-S  | rs7941648  | 11 | 11 | 67104171 | 144826 | 8.1246  | 0.4308 | -0.2643 | 5.5123 | CEU |

|         |               |            |    |    |           |        |        |        |         |        |     |
|---------|---------------|------------|----|----|-----------|--------|--------|--------|---------|--------|-----|
| RPS6KB2 | GI_4506738-S  | rs2370141  | 11 | 11 | 67105105  | 145760 | 6.3988 | 0.3929 | -0.2373 | 5.5123 | CEU |
| RPS6KB2 | GI_4506738-S  | rs6591256  | 11 | 11 | 67106475  | 147130 | 8.1246 | 0.4308 | -0.2643 | 5.5123 | CEU |
| RPS6KB2 | GI_4506738-S  | rs762803   | 11 | 11 | 67108832  | 149487 | 8.5552 | 0.5072 | 0.2823  | 5.5123 | CEU |
| MRPL21  | GI_31652223-A | rs497149   | 11 | 11 | 68383215  | 32199  | 6.4358 | 0.3511 | -0.3021 | 5.5431 | CEU |
| MRPL21  | GI_31652223-A | rs604524   | 11 | 11 | 68386505  | 28909  | 7.6359 | 0.4087 | 0.3428  | 5.5431 | CEU |
| MRPL21  | GI_31652223-A | rs584108   | 11 | 11 | 68386858  | 28556  | 7.1451 | 0.3911 | 0.3204  | 5.5431 | CEU |
| MRPL21  | GI_31652223-A | rs596874   | 11 | 11 | 68387450  | 27964  | 7.2596 | 0.3912 | 0.3181  | 5.5431 | CEU |
| MRPL21  | GI_31652223-A | rs501799   | 11 | 11 | 68387816  | 27598  | 7.2596 | 0.3912 | 0.3181  | 5.5431 | CEU |
| MRPL21  | GI_31652223-A | rs557625   | 11 | 11 | 68391298  | 24116  | 6.4915 | 0.3693 | -0.3086 | 5.5431 | CEU |
| MRPL21  | GI_31652223-A | rs10792001 | 11 | 11 | 68394313  | 21101  | 7.2596 | 0.3912 | 0.3181  | 5.5431 | CEU |
| MRPL21  | GI_31652223-A | rs473997   | 11 | 11 | 68396057  | 19357  | 7.2596 | 0.3912 | 0.3181  | 5.5431 | CEU |
| MRPL21  | GI_31652223-A | rs631001   | 11 | 11 | 68399550  | 15864  | 7.4564 | 0.4058 | 0.3250  | 5.5431 | CEU |
| MRPL21  | GI_31652223-A | rs1249368  | 11 | 11 | 68402722  | 12692  | 7.1451 | 0.3911 | -0.3204 | 5.5431 | CEU |
| MRPL21  | GI_31652223-A | rs592697   | 11 | 11 | 68406640  | 8774   | 7.2596 | 0.3912 | 0.3181  | 5.5431 | CEU |
| MRPL21  | GI_31652223-A | rs686390   | 11 | 11 | 68412653  | 2761   | 7.2596 | 0.3912 | 0.3181  | 5.5431 | CEU |
| MRPL21  | GI_31652223-A | rs488363   | 11 | 11 | 68414874  | 540    | 7.2596 | 0.3912 | -0.3181 | 5.5431 | CEU |
| MRPL21  | GI_31652223-A | rs660614   | 11 | 11 | 68416064  | 650    | 7.1951 | 0.3935 | -0.3054 | 5.5431 | CEU |
| MRPL21  | GI_31652223-A | rs507520   | 11 | 11 | 68422630  | 7216   | 7.2596 | 0.3912 | 0.3181  | 5.5431 | CEU |
| MRPL21  | GI_31652223-A | rs636049   | 11 | 11 | 68423774  | 8360   | 7.2596 | 0.3912 | -0.3181 | 5.5431 | CEU |
| MRPL21  | GI_31652223-A | rs668576   | 11 | 11 | 68424784  | 9370   | 7.2596 | 0.3912 | 0.3181  | 5.5431 | CEU |
| MRPL21  | GI_31652223-A | rs482172   | 11 | 11 | 68425013  | 9599   | 7.8671 | 0.4305 | -0.3343 | 5.5431 | CEU |
| MRPL21  | GI_31652223-A | rs513359   | 11 | 11 | 68426072  | 10658  | 7.2596 | 0.3912 | -0.3181 | 5.5431 | CEU |
| MRPL21  | GI_31652223-A | rs629426   | 11 | 11 | 68427680  | 12266  | 7.3278 | 0.4053 | 0.3356  | 5.5431 | CEU |
| MRPL21  | GI_31652223-A | rs583182   | 11 | 11 | 68435210  | 19796  | 7.4564 | 0.4058 | 0.3250  | 5.5431 | CEU |
| MRPL21  | GI_31652223-A | rs673821   | 11 | 11 | 68435294  | 19880  | 7.2596 | 0.3912 | 0.3181  | 5.5431 | CEU |
| MRPL21  | GI_31652223-A | rs646586   | 11 | 11 | 68438229  | 22815  | 6.1770 | 0.3380 | 0.2711  | 5.5431 | CEU |
| MRPL21  | GI_31652223-A | rs553875   | 11 | 11 | 68451720  | 36306  | 6.9658 | 0.3772 | -0.2981 | 5.5431 | CEU |
| MRPL21  | GI_31652223-A | rs1249365  | 11 | 11 | 68455338  | 39924  | 6.9658 | 0.3772 | 0.2981  | 5.5431 | CEU |
| MRPL21  | GI_31652223-A | rs478647   | 11 | 11 | 68457000  | 41586  | 6.9658 | 0.3772 | 0.2981  | 5.5431 | CEU |
| MRPL21  | GI_31652223-A | rs622082   | 11 | 11 | 68460535  | 45121  | 6.9658 | 0.3772 | -0.2981 | 5.5431 | CEU |
| MRPL21  | GI_31652223-A | rs546382   | 11 | 11 | 68460840  | 45426  | 6.9658 | 0.3772 | -0.2981 | 5.5431 | CEU |
| MRPL21  | GI_31652223-A | rs559032   | 11 | 11 | 68467423  | 52009  | 6.9658 | 0.3772 | 0.2981  | 5.5431 | CEU |
| MRPL21  | GI_31652223-A | rs7935851  | 11 | 11 | 68487698  | 72284  | 6.3347 | 0.3460 | -0.2853 | 5.5431 | CEU |
| PPFIA1  | GI_29171752-I | rs12295241 | 11 | 11 | 69872272  | 29712  | 6.4821 | 0.3584 | -0.2680 | 6.3766 | CEU |
| FDX1    | GI_36054077-S | rs2051465  | 11 | 11 | 109749472 | 90953  | 6.1281 | 0.3355 | 0.1947  | 5.7742 | CEU |
| FDX1    | GI_36054077-S | rs12225049 | 11 | 11 | 109755549 | 84876  | 7.1481 | 0.3859 | 0.2268  | 5.7742 | CEU |
| FDX1    | GI_36054077-S | rs7950145  | 11 | 11 | 109786574 | 53851  | 7.9178 | 0.4328 | -0.2458 | 5.7742 | CEU |
| FDX1    | GI_36054077-S | rs7934248  | 11 | 11 | 109799189 | 41236  | 7.1481 | 0.3859 | 0.2268  | 5.7742 | CEU |
| FDX1    | GI_36054077-S | rs4576787  | 11 | 11 | 109822376 | 18049  | 6.6412 | 0.3614 | 0.2144  | 5.7742 | CEU |
| FDX1    | GI_36054077-S | rs920722   | 11 | 11 | 109831750 | 8675   | 6.4629 | 0.3787 | -0.2546 | 5.7742 | CEU |
| FDX1    | GI_36054077-S | rs10891118 | 11 | 11 | 109834076 | 6349   | 6.5811 | 0.3584 | -0.2114 | 5.7742 | CEU |
| FDX1    | GI_36054077-S | rs2358322  | 11 | 11 | 109835151 | 5274   | 7.4598 | 0.4416 | 0.2497  | 5.7742 | CEU |
| FDX1    | GI_36054077-S | rs11213412 | 11 | 11 | 109836110 | 4315   | 6.6412 | 0.3614 | -0.2144 | 5.7742 | CEU |
| FDX1    | GI_36054077-S | rs12221694 | 11 | 11 | 109836457 | 3968   | 6.6412 | 0.3614 | 0.2144  | 5.7742 | CEU |
| FDX1    | GI_36054077-S | rs1867199  | 11 | 11 | 109836667 | 3758   | 6.1646 | 0.3422 | -0.2055 | 5.7742 | CEU |
| FDX1    | GI_36054077-S | rs10488764 | 11 | 11 | 109836841 | 3584   | 6.6412 | 0.3614 | -0.2144 | 5.7742 | CEU |
| FDX1    | GI_36054077-S | rs1042288  | 11 | 11 | 109838818 | 1607   | 6.6412 | 0.3614 | -0.2144 | 5.7742 | CEU |
| FDX1    | GI_36054077-S | rs2044174  | 11 | 11 | 109839390 | 1035   | 6.2123 | 0.3398 | -0.2107 | 5.7742 | CEU |
| FDX1    | GI_36054077-S | rs11213415 | 11 | 11 | 109840869 | 444    | 6.2123 | 0.3398 | 0.2107  | 5.7742 | CEU |
| FDX1    | GI_36054077-S | rs17111255 | 11 | 11 | 109842283 | 1858   | 6.1191 | 0.3399 | -0.2047 | 5.7742 | CEU |
| FDX1    | GI_36054077-S | rs10891122 | 11 | 11 | 109843447 | 3022   | 6.2123 | 0.3398 | -0.2107 | 5.7742 | CEU |
| FDX1    | GI_36054077-S | rs12575576 | 11 | 11 | 109846980 | 6555   | 6.2123 | 0.3398 | 0.2107  | 5.7742 | CEU |
| FDX1    | GI_36054077-S | rs12575593 | 11 | 11 | 109847049 | 6624   | 6.2123 | 0.3398 | 0.2107  | 5.7742 | CEU |
| FDX1    | GI_36054077-S | rs10891128 | 11 | 11 | 109865132 | 24707  | 6.2123 | 0.3398 | -0.2107 | 5.7742 | CEU |
| FDX1    | GI_36054077-S | rs11213436 | 11 | 11 | 109866657 | 26232  | 6.9879 | 0.3835 | 0.2253  | 5.7742 | CEU |
| TRAPPC4 | GI_7706666-S  | rs7113731  | 11 | 11 | 118337034 | 62264  | 6.4013 | 0.3755 | 0.2748  | 6.0005 | CEU |
| TRAPPC4 | GI_7706666-S  | rs4938618  | 11 | 11 | 118373013 | 26285  | 6.2952 | 0.3440 | -0.2490 | 6.0005 | CEU |
| TRAPPC4 | GI_7706666-S  | rs4445645  | 11 | 11 | 118373960 | 25338  | 6.0106 | 0.3545 | -0.2858 | 6.0005 | CEU |
| TRAPPC4 | GI_7706666-S  | rs12786985 | 11 | 11 | 118391327 | 7971   | 6.4968 | 0.3542 | 0.2681  | 6.0005 | CEU |

|           |               |            |    |    |           |        |        |        |         |        |     |
|-----------|---------------|------------|----|----|-----------|--------|--------|--------|---------|--------|-----|
| TRAPPC4   | GI_7706666-S  | rs7131534  | 11 | 11 | 118391866 | 7432   | 6.5448 | 0.3667 | -0.2770 | 6.0005 | CEU |
| TRAPPC4   | GI_7706666-S  | rs3916581  | 11 | 11 | 118393097 | 6201   | 6.2092 | 0.3397 | 0.2466  | 6.0005 | CEU |
| TRAPPC4   | GI_7706666-S  | rs7127188  | 11 | 11 | 118398233 | 1065   | 6.4968 | 0.3542 | 0.2681  | 6.0005 | CEU |
| H17       | GI_21361764-S | rs574198   | 11 | 11 | 125575051 | 78062  | 6.3916 | 0.3489 | -0.3302 | 6.0878 | CEU |
| H17       | GI_21361764-S | rs587891   | 11 | 11 | 125586546 | 66567  | 6.3916 | 0.3489 | 0.3302  | 6.0878 | CEU |
| H17       | GI_21361764-S | rs7924793  | 11 | 11 | 125591978 | 61135  | 6.3916 | 0.3489 | -0.3302 | 6.0878 | CEU |
| SIAT4C    | GI_5454057-S  | rs11220463 | 11 | 11 | 125753421 | 36132  | 7.8696 | 0.4550 | 0.2893  | 6.9698 | CEU |
| LOC399987 | GI_42660080-S | rs3809258  | 12 | 12 | 3734571   | 1492   | 8.3153 | 0.4392 | 0.2183  | 6.5519 | CEU |
| LOC399987 | GI_42660080-S | rs9300302  | 12 | 12 | 3737732   | 1669   | 8.3153 | 0.4392 | -0.2183 | 6.5519 | CEU |
| TAPBP-R   | GI_34222333-S | rs2041384  | 12 | 12 | 6432546   | 9086   | 6.3968 | 0.3541 | 0.4835  | 5.8768 | CEU |
| TAPBP-R   | GI_34222333-S | rs2041385  | 12 | 12 | 6432554   | 9078   | 6.3968 | 0.3541 | 0.4835  | 5.8768 | CEU |
| ZNF384    | GI_36054193-S | rs2041386  | 12 | 12 | 6432799   | 213617 | 6.3284 | 0.3457 | -0.1481 | 5.8051 | CEU |
| TAPBP-R   | GI_34222333-S | rs2041388  | 12 | 12 | 6433097   | 8535   | 6.4355 | 0.3511 | -0.4771 | 5.8768 | CEU |
| TAPBP-R   | GI_34222333-S | rs2079866  | 12 | 12 | 6434109   | 7523   | 6.4355 | 0.3511 | 0.4771  | 5.8768 | CEU |
| TAPBP-R   | GI_34222333-S | rs2532497  | 12 | 12 | 6434471   | 7161   | 6.2799 | 0.3636 | 0.4706  | 5.8768 | CEU |
| TAPBP-R   | GI_34222333-S | rs2243750  | 12 | 12 | 6438048   | 3584   | 6.2449 | 0.3464 | -0.4752 | 5.8768 | CEU |
| ZNF384    | GI_36054193-S | rs1045546  | 12 | 12 | 6438168   | 208248 | 6.3284 | 0.3457 | 0.1481  | 5.8051 | CEU |
| TAPBP-R   | GI_34222333-S | rs2243977  | 12 | 12 | 6440244   | 1388   | 6.4355 | 0.3511 | 0.4771  | 5.8768 | CEU |
| TAPBP-R   | GI_34222333-S | rs2244083  | 12 | 12 | 6440800   | 832    | 6.4355 | 0.3511 | 0.4771  | 5.8768 | CEU |
| ZNF384    | GI_36054193-S | rs10849462 | 12 | 12 | 6446253   | 200163 | 6.7448 | 0.3768 | -0.1557 | 5.8051 | CEU |
| ZNF384    | GI_36054193-S | rs11064210 | 12 | 12 | 6446982   | 199434 | 6.7528 | 0.3668 | -0.1521 | 5.8051 | CEU |
| ZNF384    | GI_36054193-S | rs12422771 | 12 | 12 | 6450534   | 195882 | 6.3188 | 0.3603 | -0.1365 | 5.8051 | CEU |
| ZNF384    | GI_36054193-S | rs10492096 | 12 | 12 | 6450843   | 195573 | 6.7528 | 0.3668 | 0.1521  | 5.8051 | CEU |
| ZNF384    | GI_36054193-S | rs11064218 | 12 | 12 | 6456522   | 189894 | 6.7528 | 0.3668 | -0.1521 | 5.8051 | CEU |
| ZNF384    | GI_36054193-S | rs11064227 | 12 | 12 | 6468304   | 178112 | 5.8807 | 0.3228 | -0.1429 | 5.8051 | CEU |
| ZNF384    | GI_36054193-S | rs10774435 | 12 | 12 | 6486381   | 160035 | 5.8807 | 0.3228 | -0.1429 | 5.8051 | CEU |
| ZNF384    | GI_36054193-S | rs12371184 | 12 | 12 | 6503186   | 143230 | 5.8807 | 0.3228 | -0.1429 | 5.8051 | CEU |
| ZNF384    | GI_36054193-S | rs10849483 | 12 | 12 | 6505635   | 140781 | 5.8807 | 0.3228 | 0.1429  | 5.8051 | CEU |
| B7        | GI_42542401-A | rs2301339  | 12 | 12 | 6824885   | 68722  | 7.2077 | 0.3888 | -0.3506 | 5.7649 | CEU |
| B7        | GI_42542401-A | rs5446     | 12 | 12 | 6826723   | 66884  | 7.3696 | 0.4073 | 0.3546  | 5.7649 | CEU |
| B7        | GI_42542401-A | rs2238114  | 12 | 12 | 6836001   | 57606  | 7.5010 | 0.4025 | -0.3733 | 5.7649 | CEU |
| B7        | GI_42542401-A | rs7955412  | 12 | 12 | 6868632   | 24975  | 9.5647 | 0.4913 | -0.4121 | 5.7649 | CEU |
| B7        | GI_42542401-A | rs7138526  | 12 | 12 | 6869525   | 24082  | 9.5647 | 0.4913 | -0.4121 | 5.7649 | CEU |
| B7        | GI_42542401-A | rs2040352  | 12 | 12 | 6877265   | 16342  | 9.5647 | 0.4913 | -0.4121 | 5.7649 | CEU |
| B7        | GI_42542401-A | rs12315364 | 12 | 12 | 6879531   | 14076  | 8.2633 | 0.4426 | 0.4445  | 5.7649 | CEU |
| B7        | GI_42542401-A | rs2187611  | 12 | 12 | 6879863   | 13744  | 9.5647 | 0.4913 | 0.4121  | 5.7649 | CEU |
| B7        | GI_42542401-A | rs3759349  | 12 | 12 | 6882086   | 11521  | 9.5647 | 0.4913 | -0.4121 | 5.7649 | CEU |
| B7        | GI_42542401-A | rs3759350  | 12 | 12 | 6882208   | 11399  | 9.5647 | 0.4913 | 0.4121  | 5.7649 | CEU |
| B7        | GI_42542401-A | rs3759352  | 12 | 12 | 6882316   | 11291  | 9.5647 | 0.4913 | -0.4121 | 5.7649 | CEU |
| B7        | GI_42542401-A | rs2239163  | 12 | 12 | 6884337   | 9270   | 9.5647 | 0.4913 | 0.4121  | 5.7649 | CEU |
| B7        | GI_42542401-A | rs1007923  | 12 | 12 | 6884368   | 9239   | 9.6070 | 0.5052 | -0.4239 | 5.7649 | CEU |
| B7        | GI_42542401-A | rs10849538 | 12 | 12 | 6884868   | 8739   | 9.5647 | 0.4913 | 0.4121  | 5.7649 | CEU |
| B7        | GI_42542401-A | rs2301137  | 12 | 12 | 6889210   | 4397   | 9.4022 | 0.4848 | 0.4057  | 5.7649 | CEU |
| B7        | GI_42542401-A | rs1057077  | 12 | 12 | 6892346   | 1261   | 9.4022 | 0.4848 | -0.4057 | 5.7649 | CEU |
| B7        | GI_42542401-A | rs710415   | 12 | 12 | 6893384   | 223    | 9.4022 | 0.4848 | 0.4057  | 5.7649 | CEU |
| B7        | GI_42542401-A | rs7303722  | 12 | 12 | 6904084   | 10477  | 5.7893 | 0.3226 | -0.3415 | 5.7649 | CEU |
| B7        | GI_42542401-A | rs7965269  | 12 | 12 | 6923283   | 29676  | 6.4944 | 0.3590 | 0.3667  | 5.7649 | CEU |
| B7        | GI_42542401-A | rs1044189  | 12 | 12 | 6923410   | 29803  | 6.2319 | 0.3408 | 0.3541  | 5.7649 | CEU |
| PEX5      | GI_37059745-S | rs3816424  | 12 | 12 | 7251496   | 3666   | 5.6886 | 0.3127 | -0.2531 | 5.684  | CEU |
| KIAA1463  | GI_39930390-S | rs7968119  | 12 | 12 | 48793976  | 630939 | 7.6129 | 0.4077 | 0.6829  | 5.5001 | CEU |
| KIAA1463  | GI_39930390-S | rs7308474  | 12 | 12 | 48795850  | 629065 | 6.3311 | 0.3774 | -0.6489 | 5.5001 | CEU |
| KIAA1463  | GI_39930390-S | rs17124432 | 12 | 12 | 48797044  | 627871 | 7.6129 | 0.4077 | 0.6829  | 5.5001 | CEU |
| KIAA1463  | GI_39930390-S | rs7307230  | 12 | 12 | 48798899  | 626016 | 7.6129 | 0.4077 | -0.6829 | 5.5001 | CEU |
| KIAA1463  | GI_39930390-S | rs7961065  | 12 | 12 | 48799954  | 624961 | 7.6129 | 0.4077 | 0.6829  | 5.5001 | CEU |
| KIAA1463  | GI_39930390-S | rs7967979  | 12 | 12 | 48806943  | 617972 | 6.6193 | 0.3869 | -0.6968 | 5.5001 | CEU |
| KIAA1463  | GI_39930390-S | rs10876000 | 12 | 12 | 48808481  | 616434 | 7.6129 | 0.4077 | -0.6829 | 5.5001 | CEU |
| KIAA1463  | GI_39930390-S | rs1554845  | 12 | 12 | 48809771  | 615144 | 7.6129 | 0.4077 | 0.6829  | 5.5001 | CEU |
| KIAA1463  | GI_39930390-S | rs11169281 | 12 | 12 | 48815581  | 609334 | 7.6129 | 0.4077 | 0.6829  | 5.5001 | CEU |
| KIAA1463  | GI_39930390-S | rs11169282 | 12 | 12 | 48816238  | 608677 | 7.6129 | 0.4077 | 0.6829  | 5.5001 | CEU |

|          |               |            |    |    |          |        |         |        |         |        |     |
|----------|---------------|------------|----|----|----------|--------|---------|--------|---------|--------|-----|
| KIAA1463 | GI_39930390-S | rs7138945  | 12 | 12 | 48825686 | 599229 | 6.8804  | 0.3782 | -0.6545 | 5.5001 | CEU |
| KIAA1463 | GI_39930390-S | rs6580728  | 12 | 12 | 48827394 | 597521 | 6.6117  | 0.3865 | 0.6369  | 5.5001 | CEU |
| KIAA1463 | GI_39930390-S | rs10783338 | 12 | 12 | 48838796 | 586119 | 7.1627  | 0.3866 | -0.6598 | 5.5001 | CEU |
| KIAA1463 | GI_39930390-S | rs3184122  | 12 | 12 | 48856394 | 568521 | 8.0091  | 0.4256 | -0.6648 | 5.5001 | CEU |
| KIAA1463 | GI_39930390-S | rs9364     | 12 | 12 | 48856786 | 568129 | 8.0638  | 0.4281 | -0.6525 | 5.5001 | CEU |
| KIAA1463 | GI_39930390-S | rs7315690  | 12 | 12 | 48867757 | 557158 | 12.2697 | 0.6014 | 0.8269  | 5.5001 | CEU |
| KIAA1463 | GI_39930390-S | rs7138622  | 12 | 12 | 48869471 | 555444 | 12.2457 | 0.5876 | 0.7949  | 5.5001 | CEU |
| KIAA1463 | GI_39930390-S | rs2358538  | 12 | 12 | 48872894 | 552021 | 6.8204  | 0.3701 | 0.6185  | 5.5001 | CEU |
| KIAA1463 | GI_39930390-S | rs11169314 | 12 | 12 | 48878880 | 546035 | 8.2152  | 0.4522 | 0.7671  | 5.5001 | CEU |
| KIAA1463 | GI_39930390-S | rs11169315 | 12 | 12 | 48881530 | 543385 | 11.2333 | 0.5865 | 0.7973  | 5.5001 | CEU |
| KIAA1463 | GI_39930390-S | rs2302900  | 12 | 12 | 48885976 | 538939 | 14.7961 | 0.6690 | -0.8693 | 5.5001 | CEU |
| KIAA1463 | GI_39930390-S | rs12425705 | 12 | 12 | 48896588 | 528327 | 13.7871 | 0.6347 | -0.8315 | 5.5001 | CEU |
| KIAA1463 | GI_39930390-S | rs11169322 | 12 | 12 | 48897243 | 527672 | 13.7871 | 0.6347 | 0.8315  | 5.5001 | CEU |
| KIAA1463 | GI_39930390-S | rs12424691 | 12 | 12 | 48897744 | 527171 | 13.7871 | 0.6347 | -0.8315 | 5.5001 | CEU |
| KIAA1463 | GI_39930390-S | rs12424713 | 12 | 12 | 48897884 | 527031 | 13.5940 | 0.6421 | -0.8689 | 5.5001 | CEU |
| KIAA1463 | GI_39930390-S | rs1362983  | 12 | 12 | 48900974 | 523941 | 13.7871 | 0.6347 | -0.8315 | 5.5001 | CEU |
| KIAA1463 | GI_39930390-S | rs3812825  | 12 | 12 | 48902613 | 522302 | 13.7871 | 0.6347 | 0.8315  | 5.5001 | CEU |
| KIAA1463 | GI_39930390-S | rs2358539  | 12 | 12 | 48905885 | 519030 | 14.0133 | 0.6958 | -0.8737 | 5.5001 | CEU |
| KIAA1463 | GI_39930390-S | rs7136648  | 12 | 12 | 48911089 | 513826 | 6.4374  | 0.3512 | -0.6137 | 5.5001 | CEU |
| KIAA1463 | GI_39930390-S | rs12425229 | 12 | 12 | 48911325 | 513590 | 13.7871 | 0.6347 | 0.8315  | 5.5001 | CEU |
| KIAA1463 | GI_39930390-S | rs11169331 | 12 | 12 | 48915177 | 509738 | 13.7871 | 0.6347 | -0.8315 | 5.5001 | CEU |
| KIAA1463 | GI_39930390-S | rs11169332 | 12 | 12 | 48915879 | 509036 | 13.7871 | 0.6347 | -0.8315 | 5.5001 | CEU |
| KIAA1463 | GI_39930390-S | rs11169335 | 12 | 12 | 48922631 | 502284 | 13.7871 | 0.6347 | 0.8315  | 5.5001 | CEU |
| KIAA1463 | GI_39930390-S | rs12828340 | 12 | 12 | 48923562 | 501353 | 13.7871 | 0.6347 | -0.8315 | 5.5001 | CEU |
| KIAA1463 | GI_39930390-S | rs7979830  | 12 | 12 | 48927839 | 497076 | 13.7871 | 0.6347 | 0.8315  | 5.5001 | CEU |
| KIAA1463 | GI_39930390-S | rs7132551  | 12 | 12 | 48933021 | 491894 | 13.7871 | 0.6347 | -0.8315 | 5.5001 | CEU |
| KIAA1463 | GI_39930390-S | rs7953953  | 12 | 12 | 48933491 | 491424 | 12.8653 | 0.6269 | 0.8326  | 5.5001 | CEU |
| KIAA1463 | GI_39930390-S | rs7486747  | 12 | 12 | 48936831 | 488084 | 10.0788 | 0.5574 | -1.0169 | 5.5001 | CEU |
| KIAA1463 | GI_39930390-S | rs10783344 | 12 | 12 | 48939196 | 485719 | 13.7871 | 0.6347 | -0.8315 | 5.5001 | CEU |
| KIAA1463 | GI_39930390-S | rs6580735  | 12 | 12 | 48951494 | 473421 | 14.0959 | 0.6564 | -0.8532 | 5.5001 | CEU |
| KIAA1463 | GI_39930390-S | rs11169348 | 12 | 12 | 48952213 | 472702 | 13.7871 | 0.6347 | 0.8315  | 5.5001 | CEU |
| KIAA1463 | GI_39930390-S | rs2111988  | 12 | 12 | 48954805 | 470110 | 13.3803 | 0.6293 | 0.8296  | 5.5001 | CEU |
| KIAA1463 | GI_39930390-S | rs11169350 | 12 | 12 | 48957637 | 467278 | 13.7871 | 0.6347 | -0.8315 | 5.5001 | CEU |
| KIAA1463 | GI_39930390-S | rs10876014 | 12 | 12 | 48961020 | 463895 | 13.7871 | 0.6347 | 0.8315  | 5.5001 | CEU |
| KIAA1463 | GI_39930390-S | rs10876015 | 12 | 12 | 48963773 | 461142 | 13.7871 | 0.6347 | -0.8315 | 5.5001 | CEU |
| KIAA1463 | GI_39930390-S | rs6580736  | 12 | 12 | 48965685 | 459230 | 13.6430 | 0.6305 | -0.8431 | 5.5001 | CEU |
| KIAA1463 | GI_39930390-S | rs10876017 | 12 | 12 | 48967806 | 457109 | 13.7871 | 0.6347 | 0.8315  | 5.5001 | CEU |
| KIAA1463 | GI_39930390-S | rs7311973  | 12 | 12 | 48970012 | 454903 | 12.4263 | 0.6131 | -0.8256 | 5.5001 | CEU |
| KIAA1463 | GI_39930390-S | rs11169357 | 12 | 12 | 48976252 | 448663 | 13.7871 | 0.6347 | 0.8315  | 5.5001 | CEU |
| KIAA1463 | GI_39930390-S | rs6580738  | 12 | 12 | 48991982 | 432933 | 13.1962 | 0.6238 | 0.8394  | 5.5001 | CEU |
| KIAA1463 | GI_39930390-S | rs7489214  | 12 | 12 | 49010260 | 414655 | 13.2340 | 0.6249 | -0.8421 | 5.5001 | CEU |
| KIAA1463 | GI_39930390-S | rs7310541  | 12 | 12 | 49012232 | 412683 | 13.7871 | 0.6347 | -0.8315 | 5.5001 | CEU |
| KIAA1463 | GI_39930390-S | rs6580742  | 12 | 12 | 49014078 | 410837 | 8.4188  | 0.4437 | 0.9287  | 5.5001 | CEU |
| KIAA1463 | GI_39930390-S | rs7134595  | 12 | 12 | 49016725 | 408190 | 13.7558 | 0.6672 | 0.8276  | 5.5001 | CEU |
| KIAA1463 | GI_39930390-S | rs4768951  | 12 | 12 | 49025275 | 399640 | 13.6430 | 0.6305 | -0.8431 | 5.5001 | CEU |
| KIAA1463 | GI_39930390-S | rs7296291  | 12 | 12 | 49030386 | 394529 | 11.5058 | 0.6176 | 0.8213  | 5.5001 | CEU |
| KIAA1463 | GI_39930390-S | rs7312252  | 12 | 12 | 49030438 | 394477 | 13.7871 | 0.6347 | 0.8315  | 5.5001 | CEU |
| KIAA1463 | GI_39930390-S | rs10506292 | 12 | 12 | 49031020 | 393895 | 13.7871 | 0.6347 | 0.8315  | 5.5001 | CEU |
| KIAA1463 | GI_39930390-S | rs10876023 | 12 | 12 | 49033184 | 391731 | 13.7114 | 0.6390 | -0.8414 | 5.5001 | CEU |
| KIAA1463 | GI_39930390-S | rs4421818  | 12 | 12 | 49035561 | 389354 | 13.7871 | 0.6347 | 0.8315  | 5.5001 | CEU |
| KIAA1463 | GI_39930390-S | rs11169390 | 12 | 12 | 49036738 | 388177 | 13.0200 | 0.6184 | 0.8260  | 5.5001 | CEU |
| KIAA1463 | GI_39930390-S | rs12303082 | 12 | 12 | 49040830 | 384085 | 9.7528  | 0.5306 | 0.7449  | 5.5001 | CEU |
| KIAA1463 | GI_39930390-S | rs11833608 | 12 | 12 | 49043895 | 381020 | 13.5684 | 0.6348 | -0.8282 | 5.5001 | CEU |
| KIAA1463 | GI_39930390-S | rs7972202  | 12 | 12 | 49048756 | 376159 | 11.0182 | 0.5652 | 1.0811  | 5.5001 | CEU |
| KIAA1463 | GI_39930390-S | rs4348979  | 12 | 12 | 49049682 | 375233 | 13.7871 | 0.6347 | -0.8315 | 5.5001 | CEU |
| KIAA1463 | GI_39930390-S | rs12422417 | 12 | 12 | 49050978 | 373937 | 13.7871 | 0.6347 | 0.8315  | 5.5001 | CEU |
| KIAA1463 | GI_39930390-S | rs7975894  | 12 | 12 | 49070579 | 354336 | 8.0434  | 0.4386 | -0.9365 | 5.5001 | CEU |
| KIAA1463 | GI_39930390-S | rs7136702  | 12 | 12 | 49166483 | 258432 | 11.3875 | 0.5589 | 0.7758  | 5.5001 | CEU |
| KIAA1463 | GI_39930390-S | rs11169453 | 12 | 12 | 49172107 | 252808 | 20.9529 | 0.7981 | -0.9073 | 5.5001 | CEU |

|          |               |            |    |    |          |        |         |        |         |        |     |
|----------|---------------|------------|----|----|----------|--------|---------|--------|---------|--------|-----|
| KIAA1463 | GI_39930390-S | rs10783366 | 12 | 12 | 49182168 | 242747 | 6.2445  | 0.3415 | 0.5928  | 5.5001 | CEU |
| KIAA1463 | GI_39930390-S | rs10876041 | 12 | 12 | 49188149 | 236766 | 6.5465  | 0.3668 | -0.6195 | 5.5001 | CEU |
| KIAA1463 | GI_39930390-S | rs10876044 | 12 | 12 | 49192672 | 232243 | 6.2445  | 0.3415 | 0.5928  | 5.5001 | CEU |
| KIAA1463 | GI_39930390-S | rs11611288 | 12 | 12 | 49197368 | 227547 | 6.3578  | 0.3472 | -0.6018 | 5.5001 | CEU |
| KIAA1463 | GI_39930390-S | rs11169484 | 12 | 12 | 49221198 | 203717 | 20.9534 | 0.7925 | -0.9114 | 5.5001 | CEU |
| KIAA1463 | GI_39930390-S | rs7487429  | 12 | 12 | 49226074 | 198841 | 20.9534 | 0.7925 | 0.9114  | 5.5001 | CEU |
| KIAA1463 | GI_39930390-S | rs10876055 | 12 | 12 | 49227250 | 197665 | 20.9534 | 0.7925 | -0.9114 | 5.5001 | CEU |
| KIAA1463 | GI_39930390-S | rs11832315 | 12 | 12 | 49230199 | 194716 | 6.4255  | 0.3556 | 0.6072  | 5.5001 | CEU |
| KIAA1463 | GI_39930390-S | rs10747583 | 12 | 12 | 49233222 | 191693 | 19.8887 | 0.7980 | 0.8998  | 5.5001 | CEU |
| KIAA1463 | GI_39930390-S | rs3935870  | 12 | 12 | 49250373 | 174542 | 20.9534 | 0.7925 | 0.9114  | 5.5001 | CEU |
| KIAA1463 | GI_39930390-S | rs7305655  | 12 | 12 | 49291556 | 133359 | 6.6346  | 0.3610 | 0.5989  | 5.5001 | CEU |
| KIAA1463 | GI_39930390-S | rs11169506 | 12 | 12 | 49297523 | 127392 | 20.0527 | 0.7889 | 0.9108  | 5.5001 | CEU |
| KIAA1463 | GI_39930390-S | rs2684900  | 12 | 12 | 49305823 | 119092 | 6.3578  | 0.3472 | 0.6018  | 5.5001 | CEU |
| KIAA1463 | GI_39930390-S | rs2700479  | 12 | 12 | 49306738 | 118177 | 6.3578  | 0.3472 | -0.6018 | 5.5001 | CEU |
| KIAA1463 | GI_39930390-S | rs2700480  | 12 | 12 | 49308698 | 116217 | 6.3578  | 0.3472 | -0.6018 | 5.5001 | CEU |
| KIAA1463 | GI_39930390-S | rs12818741 | 12 | 12 | 49318682 | 106233 | 20.9534 | 0.7925 | 0.9114  | 5.5001 | CEU |
| KIAA1463 | GI_39930390-S | rs13378012 | 12 | 12 | 49326664 | 98251  | 20.9534 | 0.7925 | -0.9114 | 5.5001 | CEU |
| KIAA1463 | GI_39930390-S | rs2252589  | 12 | 12 | 49328224 | 96691  | 6.1226  | 0.3400 | -0.5975 | 5.5001 | CEU |
| KIAA1463 | GI_39930390-S | rs1316607  | 12 | 12 | 49329157 | 95758  | 20.9534 | 0.7925 | -0.9114 | 5.5001 | CEU |
| KIAA1463 | GI_39930390-S | rs2251603  | 12 | 12 | 49335920 | 88995  | 6.3578  | 0.3472 | 0.6018  | 5.5001 | CEU |
| KIAA1463 | GI_39930390-S | rs10876077 | 12 | 12 | 49337618 | 87297  | 20.9534 | 0.7925 | -0.9114 | 5.5001 | CEU |
| KIAA1463 | GI_39930390-S | rs2731442  | 12 | 12 | 49340922 | 83993  | 5.8461  | 0.3455 | 0.6175  | 5.5001 | CEU |
| KIAA1463 | GI_39930390-S | rs1521516  | 12 | 12 | 49341975 | 82940  | 6.3578  | 0.3472 | -0.6018 | 5.5001 | CEU |
| KIAA1463 | GI_39930390-S | rs2731440  | 12 | 12 | 49343894 | 81021  | 6.0240  | 0.3664 | -0.6144 | 5.5001 | CEU |
| KIAA1463 | GI_39930390-S | rs2731439  | 12 | 12 | 49346617 | 78298  | 5.9673  | 0.3320 | 0.5980  | 5.5001 | CEU |
| KIAA1463 | GI_39930390-S | rs7309964  | 12 | 12 | 49350331 | 74584  | 23.3654 | 0.8285 | 0.9806  | 5.5001 | CEU |
| KIAA1463 | GI_39930390-S | rs11169520 | 12 | 12 | 49359790 | 65125  | 23.3654 | 0.8285 | -0.9806 | 5.5001 | CEU |
| KIAA1463 | GI_39930390-S | rs12427378 | 12 | 12 | 49360466 | 64449  | 20.9534 | 0.7925 | -0.9114 | 5.5001 | CEU |
| KIAA1463 | GI_39930390-S | rs7955736  | 12 | 12 | 49361140 | 63775  | 25.5036 | 0.8601 | -0.9907 | 5.5001 | CEU |
| KIAA1463 | GI_39930390-S | rs2684889  | 12 | 12 | 49366141 | 58774  | 6.3578  | 0.3472 | -0.6018 | 5.5001 | CEU |
| KIAA1463 | GI_39930390-S | rs7137845  | 12 | 12 | 49367207 | 57708  | 20.9534 | 0.7925 | -0.9114 | 5.5001 | CEU |
| KIAA1463 | GI_39930390-S | rs2700482  | 12 | 12 | 49369532 | 55383  | 6.3578  | 0.3472 | -0.6018 | 5.5001 | CEU |
| KIAA1463 | GI_39930390-S | rs11169523 | 12 | 12 | 49372542 | 52373  | 20.9534 | 0.7925 | -0.9114 | 5.5001 | CEU |
| KIAA1463 | GI_39930390-S | rs2090852  | 12 | 12 | 49373198 | 51717  | 20.9534 | 0.7925 | -0.9114 | 5.5001 | CEU |
| KIAA1463 | GI_39930390-S | rs2139930  | 12 | 12 | 49375554 | 49361  | 20.9534 | 0.7925 | 0.9114  | 5.5001 | CEU |
| KIAA1463 | GI_39930390-S | rs11169524 | 12 | 12 | 49376001 | 48914  | 20.9534 | 0.7925 | -0.9114 | 5.5001 | CEU |
| KIAA1463 | GI_39930390-S | rs2731443  | 12 | 12 | 49380405 | 44510  | 6.3578  | 0.3472 | 0.6018  | 5.5001 | CEU |
| KIAA1463 | GI_39930390-S | rs2700485  | 12 | 12 | 49390259 | 34656  | 6.3578  | 0.3472 | -0.6018 | 5.5001 | CEU |
| KIAA1463 | GI_39930390-S | rs2731434  | 12 | 12 | 49396142 | 28773  | 6.9898  | 0.3889 | 0.6347  | 5.5001 | CEU |
| KIAA1463 | GI_39930390-S | rs7310279  | 12 | 12 | 49403496 | 21419  | 13.0976 | 0.6143 | 1.0238  | 5.5001 | CEU |
| KIAA1463 | GI_39930390-S | rs7977742  | 12 | 12 | 49416474 | 8441   | 6.1859  | 0.3385 | 0.6096  | 5.5001 | CEU |
| KIAA1463 | GI_39930390-S | rs7968440  | 12 | 12 | 49421008 | 3907   | 6.3743  | 0.3530 | -0.6062 | 5.5001 | CEU |
| KIAA1463 | GI_39930390-S | rs2280503  | 12 | 12 | 49424954 | 39     | 28.9628 | 0.8899 | -0.9427 | 5.5001 | CEU |
| KIAA1463 | GI_39930390-S | rs1047912  | 12 | 12 | 49425129 | 214    | 34.7482 | 0.9368 | 1.0285  | 5.5001 | CEU |
| KIAA1463 | GI_39930390-S | rs4307773  | 12 | 12 | 49430699 | 5784   | 12.1328 | 0.5840 | 0.7159  | 5.5001 | CEU |
| KIAA1463 | GI_39930390-S | rs12372718 | 12 | 12 | 49457357 | 32442  | 12.3407 | 0.6037 | 0.7193  | 5.5001 | CEU |
| KIAA1463 | GI_39930390-S | rs10783388 | 12 | 12 | 49467966 | 43051  | 5.8387  | 0.3206 | -0.5603 | 5.5001 | CEU |
| KIAA1463 | GI_39930390-S | rs10747592 | 12 | 12 | 49468389 | 43474  | 5.7309  | 0.3195 | 0.5624  | 5.5001 | CEU |
| KIAA1463 | GI_39930390-S | rs7133974  | 12 | 12 | 49470844 | 45929  | 12.6569 | 0.6007 | 0.7364  | 5.5001 | CEU |
| KIAA1463 | GI_39930390-S | rs7978559  | 12 | 12 | 49474905 | 49990  | 6.1211  | 0.3352 | 0.5840  | 5.5001 | CEU |
| KIAA1463 | GI_39930390-S | rs2554862  | 12 | 12 | 49488313 | 63398  | 6.1211  | 0.3352 | 0.5840  | 5.5001 | CEU |
| KIAA1463 | GI_39930390-S | rs11169567 | 12 | 12 | 49491205 | 66290  | 12.6569 | 0.6007 | -0.7364 | 5.5001 | CEU |
| KIAA1463 | GI_39930390-S | rs7306677  | 12 | 12 | 49492030 | 67115  | 12.6569 | 0.6007 | 0.7364  | 5.5001 | CEU |
| KIAA1463 | GI_39930390-S | rs829112   | 12 | 12 | 49493971 | 69056  | 6.7109  | 0.3699 | 0.6072  | 5.5001 | CEU |
| KIAA1463 | GI_39930390-S | rs11169571 | 12 | 12 | 49500032 | 75117  | 12.7434 | 0.6231 | -0.7362 | 5.5001 | CEU |
| KIAA1463 | GI_39930390-S | rs11169578 | 12 | 12 | 49505968 | 81053  | 12.6569 | 0.6007 | -0.7364 | 5.5001 | CEU |
| KIAA1463 | GI_39930390-S | rs864899   | 12 | 12 | 49507394 | 82479  | 12.1328 | 0.5840 | -0.7159 | 5.5001 | CEU |
| KIAA1463 | GI_39930390-S | rs861204   | 12 | 12 | 49524083 | 99168  | 6.1769  | 0.3380 | 0.5850  | 5.5001 | CEU |
| KIAA1463 | GI_39930390-S | rs829133   | 12 | 12 | 49536340 | 111425 | 5.5472  | 0.3506 | 0.6101  | 5.5001 | CEU |

|               |               |            |    |    |          |        |        |        |         |        |     |
|---------------|---------------|------------|----|----|----------|--------|--------|--------|---------|--------|-----|
| KIAA1463      | GI_39930390-S | rs12830125 | 12 | 12 | 49587698 | 162783 | 5.9832 | 0.3376 | -0.6365 | 5.5001 | CEU |
| KIAA1463      | GI_39930390-S | rs7306330  | 12 | 12 | 49606557 | 181642 | 7.2318 | 0.3899 | -0.6451 | 5.5001 | CEU |
| KIAA0748      | GI_7662281-S  | rs2171497  | 12 | 12 | 53630400 | 1979   | 8.3146 | 0.4391 | -0.3641 | 5.8395 | CEU |
| KIAA0748      | GI_7662281-S  | rs5004227  | 12 | 12 | 53630873 | 2452   | 7.0062 | 0.4453 | 0.3710  | 5.8395 | CEU |
| KIAA0748      | GI_7662281-S  | rs960984   | 12 | 12 | 53630950 | 2529   | 8.3146 | 0.4391 | -0.3641 | 5.8395 | CEU |
| KIAA0748      | GI_7662281-S  | rs10876666 | 12 | 12 | 53632190 | 3769   | 8.2177 | 0.4406 | 0.3654  | 5.8395 | CEU |
| KIAA0748      | GI_7662281-S  | rs7962801  | 12 | 12 | 53632502 | 4081   | 8.3146 | 0.4391 | 0.3641  | 5.8395 | CEU |
| KIAA0748      | GI_7662281-S  | rs4466933  | 12 | 12 | 53632564 | 4143   | 8.3146 | 0.4391 | 0.3641  | 5.8395 | CEU |
| KIAA0748      | GI_7662281-S  | rs2371053  | 12 | 12 | 53632688 | 4267   | 8.3146 | 0.4391 | 0.3641  | 5.8395 | CEU |
| KIAA0748      | GI_7662281-S  | rs2371052  | 12 | 12 | 53632755 | 4334   | 8.2478 | 0.4477 | -0.3660 | 5.8395 | CEU |
| KIAA0748      | GI_7662281-S  | rs2371051  | 12 | 12 | 53633081 | 4660   | 8.3146 | 0.4391 | -0.3641 | 5.8395 | CEU |
| KIAA0748      | GI_7662281-S  | rs12228758 | 12 | 12 | 53633259 | 4838   | 8.3146 | 0.4391 | 0.3641  | 5.8395 | CEU |
| KIAA0748      | GI_7662281-S  | rs12231357 | 12 | 12 | 53633278 | 4857   | 8.3146 | 0.4391 | 0.3641  | 5.8395 | CEU |
| KIAA0748      | GI_7662281-S  | rs12231376 | 12 | 12 | 53633447 | 5026   | 8.4752 | 0.4519 | 0.3685  | 5.8395 | CEU |
| KIAA0748      | GI_7662281-S  | rs11171190 | 12 | 12 | 53633985 | 5564   | 8.3146 | 0.4391 | 0.3641  | 5.8395 | CEU |
| KIAA0748      | GI_7662281-S  | rs11171191 | 12 | 12 | 53634644 | 6223   | 8.3146 | 0.4391 | -0.3641 | 5.8395 | CEU |
| KIAA0748      | GI_7662281-S  | rs10876670 | 12 | 12 | 53634895 | 6474   | 8.3146 | 0.4391 | 0.3641  | 5.8395 | CEU |
| KIAA0748      | GI_7662281-S  | rs11171192 | 12 | 12 | 53634959 | 6538   | 8.3146 | 0.4391 | 0.3641  | 5.8395 | CEU |
| KIAA0748      | GI_7662281-S  | rs7136501  | 12 | 12 | 53636061 | 7640   | 8.3146 | 0.4391 | -0.3641 | 5.8395 | CEU |
| KIAA0748      | GI_7662281-S  | rs998401   | 12 | 12 | 53641500 | 13079  | 7.2766 | 0.3920 | 0.3631  | 5.8395 | CEU |
| KIAA0748      | GI_7662281-S  | rs4759128  | 12 | 12 | 53651487 | 23066  | 7.2766 | 0.3920 | -0.3631 | 5.8395 | CEU |
| RDH5          | GI_4506462-S  | rs3138142  | 12 | 12 | 54401852 | 2824   | 6.7573 | 0.3722 | 0.3397  | 5.4072 | CEU |
| STAT6         | GI_23397677-S | rs703817   | 12 | 12 | 55776095 | 502    | 5.2546 | 0.2894 | 0.1968  | 5.1617 | CEU |
| DKFZP586D0919 | GI_24308058-S | rs2888334  | 12 | 12 | 56262914 | 199565 | 6.0823 | 0.3332 | -0.4039 | 5.496  | CEU |
| DKFZP586D0919 | GI_24308058-S | rs2306390  | 12 | 12 | 56288866 | 173613 | 5.8316 | 0.3202 | 0.3816  | 5.496  | CEU |
| DKFZP586D0919 | GI_24308058-S | rs7314152  | 12 | 12 | 56303968 | 158511 | 6.6505 | 0.3618 | -0.3845 | 5.496  | CEU |
| DKFZP586D0919 | GI_24308058-S | rs1871417  | 12 | 12 | 56305246 | 157233 | 5.6741 | 0.3580 | -0.3802 | 5.496  | CEU |
| DKFZP586D0919 | GI_24308058-S | rs10083154 | 12 | 12 | 56307200 | 155279 | 6.6505 | 0.3618 | -0.3845 | 5.496  | CEU |
| DKFZP586D0919 | GI_24308058-S | rs774887   | 12 | 12 | 56321102 | 141377 | 5.8955 | 0.3235 | -0.3533 | 5.496  | CEU |
| DKFZP586D0919 | GI_24308058-S | rs12313109 | 12 | 12 | 56333725 | 128754 | 5.8955 | 0.3235 | 0.3533  | 5.496  | CEU |
| DKFZP586D0919 | GI_24308058-S | rs11172284 | 12 | 12 | 56335586 | 126893 | 5.8955 | 0.3235 | -0.3533 | 5.496  | CEU |
| DKFZP586D0919 | GI_24308058-S | rs10876994 | 12 | 12 | 56351004 | 111475 | 7.0116 | 0.3846 | 0.4097  | 5.496  | CEU |
| DKFZP586D0919 | GI_24308058-S | rs10876995 | 12 | 12 | 56351269 | 111210 | 5.6121 | 0.3603 | -0.3630 | 5.496  | CEU |
| DKFZP586D0919 | GI_24308058-S | rs10783844 | 12 | 12 | 56384692 | 77787  | 5.7934 | 0.3228 | -0.3598 | 5.496  | CEU |
| DKFZP586D0919 | GI_24308058-S | rs10877008 | 12 | 12 | 56389859 | 72620  | 6.2509 | 0.3418 | -0.3627 | 5.496  | CEU |
| DKFZP586D0919 | GI_24308058-S | rs1050045  | 12 | 12 | 56401538 | 60941  | 6.0479 | 0.3314 | 0.3174  | 5.496  | CEU |
| DKFZP586D0919 | GI_24308058-S | rs701008   | 12 | 12 | 56403912 | 58567  | 7.5485 | 0.4047 | 0.3337  | 5.496  | CEU |
| DKFZP586D0919 | GI_24308058-S | rs10877011 | 12 | 12 | 56411259 | 51220  | 9.3901 | 0.4903 | -0.3761 | 5.496  | CEU |
| DKFZP586D0919 | GI_24308058-S | rs12368653 | 12 | 12 | 56419523 | 42956  | 6.2487 | 0.3417 | 0.3164  | 5.496  | CEU |
| DKFZP586D0919 | GI_24308058-S | rs2069502  | 12 | 12 | 56430932 | 31547  | 8.5536 | 0.4495 | -0.3672 | 5.496  | CEU |
| DKFZP586D0919 | GI_24308058-S | rs2270777  | 12 | 12 | 56431423 | 31056  | 6.2270 | 0.3504 | 0.3259  | 5.496  | CEU |
| DKFZP586D0919 | GI_24308058-S | rs703842   | 12 | 12 | 56449006 | 13473  | 7.9098 | 0.4444 | -0.3693 | 5.496  | CEU |
| DKFZP586D0919 | GI_24308058-S | rs10877013 | 12 | 12 | 56451352 | 11127  | 7.2090 | 0.4229 | 0.4076  | 5.496  | CEU |
| DKFZP586D0919 | GI_24308058-S | rs2291617  | 12 | 12 | 56452670 | 9809   | 8.5536 | 0.4495 | -0.3672 | 5.496  | CEU |
| DKFZP586D0919 | GI_24308058-S | rs10877015 | 12 | 12 | 56454055 | 8424   | 7.7486 | 0.4430 | 0.3763  | 5.496  | CEU |
| DKFZP586D0919 | GI_24308058-S | rs11172333 | 12 | 12 | 56456602 | 5877   | 8.5536 | 0.4495 | 0.3672  | 5.496  | CEU |
| DKFZP586D0919 | GI_24308058-S | rs10877019 | 12 | 12 | 56459196 | 3283   | 8.5536 | 0.4495 | 0.3672  | 5.496  | CEU |
| DKFZP586D0919 | GI_24308058-S | rs8181644  | 12 | 12 | 56459733 | 2746   | 8.7824 | 0.4651 | -0.3761 | 5.496  | CEU |
| DKFZP586D0919 | GI_24308058-S | rs923829   | 12 | 12 | 56460573 | 1906   | 8.5536 | 0.4495 | 0.3672  | 5.496  | CEU |
| DKFZP586D0919 | GI_24308058-S | rs11172335 | 12 | 12 | 56461468 | 1011   | 8.2007 | 0.4456 | 0.3730  | 5.496  | CEU |
| DKFZP586D0919 | GI_24308058-S | rs10747783 | 12 | 12 | 56462881 | 402    | 8.9359 | 0.4715 | -0.3852 | 5.496  | CEU |
| DKFZP586D0919 | GI_24308058-S | rs10431552 | 12 | 12 | 56464415 | 1936   | 8.9359 | 0.4715 | -0.3852 | 5.496  | CEU |
| DKFZP586D0919 | GI_24308058-S | rs6581155  | 12 | 12 | 56464429 | 1950   | 8.9359 | 0.4715 | 0.3852  | 5.496  | CEU |
| DKFZP586D0919 | GI_24308058-S | rs724834   | 12 | 12 | 56466683 | 4204   | 8.5536 | 0.4495 | -0.3672 | 5.496  | CEU |
| DKFZP586D0919 | GI_24308058-S | rs11172343 | 12 | 12 | 56474424 | 11945  | 8.5536 | 0.4495 | -0.3672 | 5.496  | CEU |
| DKFZP586D0919 | GI_24308058-S | rs11172344 | 12 | 12 | 56479715 | 17236  | 8.5536 | 0.4495 | -0.3672 | 5.496  | CEU |
| DKFZP586D0919 | GI_24308058-S | rs10783848 | 12 | 12 | 56482795 | 20316  | 8.1819 | 0.4569 | -0.3845 | 5.496  | CEU |
| DKFZP586D0919 | GI_24308058-S | rs3825079  | 12 | 12 | 56489621 | 27142  | 8.5536 | 0.4495 | -0.3672 | 5.496  | CEU |
| DKFZP586D0919 | GI_24308058-S | rs1021469  | 12 | 12 | 56494431 | 31952  | 6.0939 | 0.3537 | 0.3358  | 5.496  | CEU |

|               |               |            |    |    |           |       |        |        |         |        |     |
|---------------|---------------|------------|----|----|-----------|-------|--------|--------|---------|--------|-----|
| DKFZP586D0919 | GI_24308058-S | rs11172349 | 12 | 12 | 56498795  | 36316 | 8.5536 | 0.4495 | -0.3672 | 5.496  | CEU |
| DKFZP586D0919 | GI_24308058-S | rs11172351 | 12 | 12 | 56499752  | 37273 | 8.5536 | 0.4495 | 0.3672  | 5.496  | CEU |
| DKFZP586D0919 | GI_24308058-S | rs870392   | 12 | 12 | 56505440  | 42961 | 6.1178 | 0.3350 | -0.3398 | 5.496  | CEU |
| DKFZP586D0919 | GI_24308058-S | rs871871   | 12 | 12 | 56505948  | 43469 | 6.1178 | 0.3350 | 0.3398  | 5.496  | CEU |
| DKFZP586D0919 | GI_24308058-S | rs4760332  | 12 | 12 | 56508939  | 46460 | 6.1178 | 0.3350 | -0.3398 | 5.496  | CEU |
| DKFZP586D0919 | GI_24308058-S | rs1875125  | 12 | 12 | 56513508  | 51029 | 5.7890 | 0.3477 | -0.3748 | 5.496  | CEU |
| DKFZP586D0919 | GI_24308058-S | rs10783850 | 12 | 12 | 56515644  | 53165 | 6.1178 | 0.3350 | -0.3398 | 5.496  | CEU |
| DKFZP586D0919 | GI_24308058-S | rs10783851 | 12 | 12 | 56517422  | 54943 | 6.1178 | 0.3350 | -0.3398 | 5.496  | CEU |
| OAS1          | GI_8051622-I  | rs2057778  | 12 | 12 | 111813516 | 4742  | 8.3110 | 0.4390 | -0.6594 | 7.2582 | CEU |
| OAS1          | GI_8051622-I  | rs2285934  | 12 | 12 | 111814240 | 4018  | 8.3110 | 0.4390 | 0.6594  | 7.2582 | CEU |
| OAS1          | GI_8051622-I  | rs10774671 | 12 | 12 | 111819913 | 1655  | 8.3882 | 0.4481 | -0.6656 | 7.2582 | CEU |
| OAS1          | GI_8051622-I  | rs1051042  | 12 | 12 | 111819957 | 1699  | 8.3110 | 0.4390 | -0.6594 | 7.2582 | CEU |
| OAS1          | GI_8051622-I  | rs2660     | 12 | 12 | 111820162 | 1904  | 8.3110 | 0.4390 | -0.6594 | 7.2582 | CEU |
| OAS1          | GI_8051622-I  | rs7135577  | 12 | 12 | 111820826 | 2568  | 8.3882 | 0.4481 | 0.6656  | 7.2582 | CEU |
| OAS1          | GI_8051622-I  | rs4767027  | 12 | 12 | 111821877 | 3619  | 8.3110 | 0.4390 | -0.6594 | 7.2582 | CEU |
| OAS1          | GI_8051622-I  | rs4767028  | 12 | 12 | 111821908 | 3650  | 8.3110 | 0.4390 | 0.6594  | 7.2582 | CEU |
| OAS1          | GI_8051622-I  | rs4767029  | 12 | 12 | 111822038 | 3780  | 8.3110 | 0.4390 | -0.6594 | 7.2582 | CEU |
| OAS1          | GI_8051622-I  | rs4767030  | 12 | 12 | 111822297 | 4039  | 8.3110 | 0.4390 | 0.6594  | 7.2582 | CEU |
| OAS1          | GI_8051622-I  | rs10850092 | 12 | 12 | 111822423 | 4165  | 8.3110 | 0.4390 | 0.6594  | 7.2582 | CEU |
| OAS1          | GI_8051622-I  | rs6489864  | 12 | 12 | 111822745 | 4487  | 8.3110 | 0.4390 | 0.6594  | 7.2582 | CEU |
| OAS1          | GI_8051622-I  | rs6489865  | 12 | 12 | 111823022 | 4764  | 8.3110 | 0.4390 | 0.6594  | 7.2582 | CEU |
| OAS1          | GI_8051622-I  | rs10850093 | 12 | 12 | 111823188 | 4930  | 8.3110 | 0.4390 | 0.6594  | 7.2582 | CEU |
| OAS1          | GI_8051622-I  | rs10850094 | 12 | 12 | 111823283 | 5025  | 8.3110 | 0.4390 | -0.6594 | 7.2582 | CEU |
| OAS1          | GI_8051622-I  | rs10850095 | 12 | 12 | 111823295 | 5037  | 8.3110 | 0.4390 | -0.6594 | 7.2582 | CEU |
| OAS1          | GI_8051622-I  | rs10850096 | 12 | 12 | 111823506 | 5248  | 8.3110 | 0.4390 | -0.6594 | 7.2582 | CEU |
| OAS1          | GI_8051622-I  | rs10850097 | 12 | 12 | 111823837 | 5579  | 8.3110 | 0.4390 | 0.6594  | 7.2582 | CEU |
| OAS1          | GI_8051622-I  | rs10774673 | 12 | 12 | 111823878 | 5620  | 8.3882 | 0.4481 | 0.6656  | 7.2582 | CEU |
| OAS1          | GI_8051622-I  | rs10774674 | 12 | 12 | 111823894 | 5636  | 8.3110 | 0.4390 | -0.6594 | 7.2582 | CEU |
| OAS1          | GI_8051622-I  | rs11066452 | 12 | 12 | 111824294 | 6036  | 8.3110 | 0.4390 | 0.6594  | 7.2582 | CEU |
| OAS1          | GI_8051622-I  | rs10850098 | 12 | 12 | 111824778 | 6520  | 7.4672 | 0.4009 | -0.6136 | 7.2582 | CEU |
| OAS1          | GI_8051622-I  | rs10774676 | 12 | 12 | 111825127 | 6869  | 7.4672 | 0.4009 | 0.6136  | 7.2582 | CEU |
| OAS1          | GI_8051622-I  | rs4766663  | 12 | 12 | 111825694 | 7436  | 7.4672 | 0.4009 | 0.6136  | 7.2582 | CEU |
| OAS1          | GI_8051622-I  | rs4766664  | 12 | 12 | 111825717 | 7459  | 7.4672 | 0.4009 | -0.6136 | 7.2582 | CEU |
| OAS1          | GI_8051622-I  | rs4766665  | 12 | 12 | 111825829 | 7571  | 7.4672 | 0.4009 | -0.6136 | 7.2582 | CEU |
| OAS1          | GI_8051622-I  | rs4988618  | 12 | 12 | 111825898 | 7640  | 7.4672 | 0.4009 | -0.6136 | 7.2582 | CEU |
| OAS1          | GI_8051622-I  | rs6489868  | 12 | 12 | 111826412 | 8154  | 7.4672 | 0.4009 | -0.6136 | 7.2582 | CEU |
| OAS1          | GI_8051622-I  | rs4766673  | 12 | 12 | 111827881 | 9623  | 7.4672 | 0.4009 | 0.6136  | 7.2582 | CEU |
| OAS1          | GI_8051622-I  | rs4766674  | 12 | 12 | 111827921 | 9663  | 7.4672 | 0.4009 | 0.6136  | 7.2582 | CEU |
| OAS1          | GI_8051622-I  | rs7315441  | 12 | 12 | 111828407 | 10149 | 7.4672 | 0.4009 | 0.6136  | 7.2582 | CEU |
| OAS1          | GI_8051622-I  | rs7316586  | 12 | 12 | 111828548 | 10290 | 7.2753 | 0.4028 | 0.6154  | 7.2582 | CEU |
| OAS1          | GI_8051622-I  | rs7134391  | 12 | 12 | 111829411 | 11153 | 7.4672 | 0.4009 | -0.6136 | 7.2582 | CEU |
| OAS1          | GI_8051622-I  | rs1859336  | 12 | 12 | 111830029 | 11771 | 7.4672 | 0.4009 | -0.6136 | 7.2582 | CEU |
| OAS1          | GI_8051622-I  | rs6489874  | 12 | 12 | 111830615 | 12357 | 7.7568 | 0.4313 | 0.6273  | 7.2582 | CEU |
| OAS1          | GI_8051622-I  | rs7132404  | 12 | 12 | 111831325 | 13067 | 7.4672 | 0.4009 | -0.6136 | 7.2582 | CEU |
| OAS1          | GI_8051622-I  | rs4767036  | 12 | 12 | 111831897 | 13639 | 7.3337 | 0.4001 | -0.6132 | 7.2582 | CEU |
| OAS1          | GI_8051622-I  | rs7967461  | 12 | 12 | 111832479 | 14221 | 7.3337 | 0.4001 | -0.6132 | 7.2582 | CEU |
| OAS1          | GI_8051622-I  | rs1859333  | 12 | 12 | 111833686 | 15428 | 7.4672 | 0.4009 | 0.6136  | 7.2582 | CEU |
| OAS1          | GI_8051622-I  | rs1859332  | 12 | 12 | 111833834 | 15576 | 7.4096 | 0.4036 | 0.6159  | 7.2582 | CEU |
| DNAJD1        | GI_7019452-S  | rs17553284 | 13 | 13 | 42495706  | 62218 | 6.6552 | 0.3671 | -0.3825 | 5.9558 | CEU |
| DNAJD1        | GI_7019452-S  | rs11617079 | 13 | 13 | 42495865  | 62059 | 6.6552 | 0.3671 | -0.3825 | 5.9558 | CEU |
| DNAJD1        | GI_7019452-S  | rs2281777  | 13 | 13 | 42495932  | 61992 | 6.6552 | 0.3671 | -0.3825 | 5.9558 | CEU |
| DNAJD1        | GI_7019452-S  | rs2281778  | 13 | 13 | 42495977  | 61947 | 7.2584 | 0.4076 | -0.4012 | 5.9558 | CEU |
| DNAJD1        | GI_7019452-S  | rs2281780  | 13 | 13 | 42495995  | 61929 | 6.6552 | 0.3671 | -0.3825 | 5.9558 | CEU |
| DNAJD1        | GI_7019452-S  | rs9594863  | 13 | 13 | 42496125  | 61799 | 6.6552 | 0.3671 | 0.3825  | 5.9558 | CEU |
| DNAJD1        | GI_7019452-S  | rs2281782  | 13 | 13 | 42496191  | 61733 | 6.4101 | 0.3548 | -0.3788 | 5.9558 | CEU |
| DNAJD1        | GI_7019452-S  | rs17064045 | 13 | 13 | 42496322  | 61602 | 6.6552 | 0.3671 | -0.3825 | 5.9558 | CEU |
| DNAJD1        | GI_7019452-S  | rs9594865  | 13 | 13 | 42496412  | 61512 | 6.6552 | 0.3671 | 0.3825  | 5.9558 | CEU |
| DNAJD1        | GI_7019452-S  | rs17624230 | 13 | 13 | 42502332  | 55592 | 7.1363 | 0.3961 | 0.4000  | 5.9558 | CEU |
| DNAJD1        | GI_7019452-S  | rs11618553 | 13 | 13 | 42505650  | 52274 | 7.4566 | 0.4005 | -0.3991 | 5.9558 | CEU |

|           |               |            |    |    |          |        |         |        |         |        |     |
|-----------|---------------|------------|----|----|----------|--------|---------|--------|---------|--------|-----|
| DNAJD1    | GI_7019452-S  | rs17553846 | 13 | 13 | 42511458 | 46466  | 6.2888  | 0.3437 | -0.3715 | 5.9558 | CEU |
| TBC1D4    | GI_42660198-S | rs2328938  | 13 | 13 | 74768314 | 10939  | 8.6441  | 0.4592 | -0.8337 | 5.9425 | CEU |
| TBC1D4    | GI_42660198-S | rs1431833  | 13 | 13 | 74768948 | 11573  | 6.9638  | 0.3823 | 0.8080  | 5.9425 | CEU |
| TBC1D4    | GI_42660198-S | rs4885285  | 13 | 13 | 74769752 | 12377  | 8.7449  | 0.4576 | -0.8375 | 5.9425 | CEU |
| TBC1D4    | GI_42660198-S | rs2297207  | 13 | 13 | 74771788 | 14413  | 7.8076  | 0.4278 | -0.8068 | 5.9425 | CEU |
| TBC1D4    | GI_42660198-S | rs9600457  | 13 | 13 | 74772837 | 15462  | 6.7752  | 0.3679 | 0.7955  | 5.9425 | CEU |
| TBC1D4    | GI_42660198-S | rs2297208  | 13 | 13 | 74774390 | 17015  | 7.7173  | 0.4236 | -0.8158 | 5.9425 | CEU |
| TBC1D4    | GI_42660198-S | rs559237   | 13 | 13 | 74775253 | 17878  | 6.6801  | 0.3633 | 0.7669  | 5.9425 | CEU |
| Hs.264076 | Hs.264076-S   | rs1408656  | 13 | 13 | 78784655 | 111714 | 5.9636  | 0.3271 | 0.2653  | 5.7827 | CEU |
| Hs.264076 | Hs.264076-S   | rs12868295 | 13 | 13 | 78884066 | 12303  | 5.9344  | 0.3351 | -0.2650 | 5.7827 | CEU |
| RPL36AL   | GI_34335143-S | rs6572592  | 14 | 14 | 49150621 | 6454   | 6.4843  | 0.3689 | -0.2309 | 5.7362 | CEU |
| RPL36AL   | GI_34335143-S | rs3007030  | 14 | 14 | 49156313 | 762    | 6.7209  | 0.3653 | 0.2301  | 5.7362 | CEU |
| RPL36AL   | GI_34335143-S | rs1952013  | 14 | 14 | 49157107 | 32     | 6.7167  | 0.3702 | -0.2471 | 5.7362 | CEU |
| RPL36AL   | GI_34335143-S | rs2985697  | 14 | 14 | 49162652 | 5577   | 6.7209  | 0.3653 | 0.2301  | 5.7362 | CEU |
| RPL36AL   | GI_34335143-S | rs2985696  | 14 | 14 | 49164663 | 7588   | 6.7209  | 0.3653 | 0.2301  | 5.7362 | CEU |
| RPL36AL   | GI_34335143-S | rs2354448  | 14 | 14 | 49168046 | 10971  | 6.4349  | 0.3717 | -0.2447 | 5.7362 | CEU |
| RPL36AL   | GI_34335143-S | rs1952012  | 14 | 14 | 49168646 | 11571  | 6.7209  | 0.3653 | 0.2301  | 5.7362 | CEU |
| RPL36AL   | GI_34335143-S | rs2985684  | 14 | 14 | 49171432 | 14357  | 6.5238  | 0.3605 | -0.2289 | 5.7362 | CEU |
| RPL36AL   | GI_34335143-S | rs3007033  | 14 | 14 | 49173566 | 16491  | 7.0651  | 0.3820 | -0.2512 | 5.7362 | CEU |
| RPL36AL   | GI_34335143-S | rs11157696 | 14 | 14 | 49175496 | 18421  | 6.7209  | 0.3653 | 0.2301  | 5.7362 | CEU |
| RPL36AL   | GI_34335143-S | rs7146248  | 14 | 14 | 49181817 | 24742  | 6.6991  | 0.3642 | 0.2291  | 5.7362 | CEU |
| C14orf52  | GI_21553312-S | rs396974   | 14 | 14 | 64375058 | 95698  | 6.0556  | 0.3318 | -0.6890 | 6.0158 | CEU |
| C14orf52  | GI_21553312-S | rs435627   | 14 | 14 | 64375680 | 95076  | 6.0556  | 0.3318 | -0.6890 | 6.0158 | CEU |
| C14orf52  | GI_21553312-S | rs422574   | 14 | 14 | 64376195 | 94561  | 7.2428  | 0.3904 | -0.7665 | 6.0158 | CEU |
| C14orf52  | GI_21553312-S | rs230702   | 14 | 14 | 64377036 | 93720  | 7.2428  | 0.3904 | 0.7665  | 6.0158 | CEU |
| C14orf52  | GI_21553312-S | rs1535450  | 14 | 14 | 64377061 | 93695  | 7.2428  | 0.3904 | -0.7665 | 6.0158 | CEU |
| C14orf52  | GI_21553312-S | rs1475101  | 14 | 14 | 64377836 | 92920  | 7.2428  | 0.3904 | -0.7665 | 6.0158 | CEU |
| C14orf52  | GI_21553312-S | rs1570295  | 14 | 14 | 64380120 | 90636  | 7.2091  | 0.4356 | 0.8650  | 6.0158 | CEU |
| C14orf52  | GI_21553312-S | rs11623597 | 14 | 14 | 64387597 | 83159  | 7.4092  | 0.3982 | 0.9042  | 6.0158 | CEU |
| C14orf52  | GI_21553312-S | rs12147495 | 14 | 14 | 64388582 | 82174  | 7.4092  | 0.3982 | -0.9042 | 6.0158 | CEU |
| C14orf52  | GI_21553312-S | rs4902322  | 14 | 14 | 64392762 | 77994  | 7.0119  | 0.3846 | 0.8907  | 6.0158 | CEU |
| C14orf52  | GI_21553312-S | rs2828     | 14 | 14 | 64405803 | 64953  | 6.3023  | 0.3444 | -0.7014 | 6.0158 | CEU |
| C14orf52  | GI_21553312-S | rs10498519 | 14 | 14 | 64407592 | 63164  | 8.2356  | 0.4593 | 0.9657  | 6.0158 | CEU |
| C14orf52  | GI_21553312-S | rs743264   | 14 | 14 | 64426689 | 44067  | 18.9199 | 0.7563 | 1.0580  | 6.0158 | CEU |
| C14orf52  | GI_21553312-S | rs10498518 | 14 | 14 | 64427295 | 43461  | 18.9199 | 0.7563 | 1.0580  | 6.0158 | CEU |
| C14orf52  | GI_21553312-S | rs11629410 | 14 | 14 | 64427339 | 43417  | 12.7561 | 0.6038 | 0.9936  | 6.0158 | CEU |
| C14orf52  | GI_21553312-S | rs12590986 | 14 | 14 | 64427445 | 43311  | 18.9199 | 0.7563 | -1.0580 | 6.0158 | CEU |
| C14orf52  | GI_21553312-S | rs11621527 | 14 | 14 | 64427732 | 43024  | 12.7561 | 0.6038 | 0.9936  | 6.0158 | CEU |
| C14orf52  | GI_21553312-S | rs1957425  | 14 | 14 | 64428329 | 42427  | 18.9199 | 0.7563 | 1.0580  | 6.0158 | CEU |
| C14orf52  | GI_21553312-S | rs12881353 | 14 | 14 | 64433368 | 37388  | 12.7561 | 0.6038 | -0.9936 | 6.0158 | CEU |
| C14orf52  | GI_21553312-S | rs1957421  | 14 | 14 | 64433557 | 37199  | 18.8327 | 0.7606 | -1.0661 | 6.0158 | CEU |
| C14orf52  | GI_21553312-S | rs12433639 | 14 | 14 | 64435044 | 35712  | 16.0583 | 0.7548 | 1.0577  | 6.0158 | CEU |
| C14orf52  | GI_21553312-S | rs11848113 | 14 | 14 | 64436014 | 34742  | 17.9551 | 0.7493 | 1.0514  | 6.0158 | CEU |
| C14orf52  | GI_21553312-S | rs12878229 | 14 | 14 | 64436238 | 34518  | 11.9458 | 0.5907 | -0.8650 | 6.0158 | CEU |
| C14orf52  | GI_21553312-S | rs11622077 | 14 | 14 | 64436950 | 33806  | 12.2336 | 0.5936 | -0.9797 | 6.0158 | CEU |
| C14orf52  | GI_21553312-S | rs8016174  | 14 | 14 | 64440234 | 30522  | 11.6888 | 0.6094 | -0.8617 | 6.0158 | CEU |
| C14orf52  | GI_21553312-S | rs1951488  | 14 | 14 | 64441966 | 28790  | 18.9199 | 0.7563 | -1.0580 | 6.0158 | CEU |
| C14orf52  | GI_21553312-S | rs1951487  | 14 | 14 | 64442101 | 28655  | 18.9199 | 0.7563 | 1.0580  | 6.0158 | CEU |
| C14orf52  | GI_21553312-S | rs17767942 | 14 | 14 | 64442373 | 28383  | 13.3198 | 0.6210 | 1.1652  | 6.0158 | CEU |
| C14orf52  | GI_21553312-S | rs4902331  | 14 | 14 | 64442828 | 27928  | 13.3198 | 0.6210 | 1.1652  | 6.0158 | CEU |
| C14orf52  | GI_21553312-S | rs17767960 | 14 | 14 | 64444437 | 26319  | 13.3198 | 0.6210 | 1.1652  | 6.0158 | CEU |
| C14orf52  | GI_21553312-S | rs4902332  | 14 | 14 | 64445731 | 25025  | 25.2026 | 0.8517 | 1.1937  | 6.0158 | CEU |
| C14orf52  | GI_21553312-S | rs4902333  | 14 | 14 | 64445839 | 24917  | 22.0411 | 0.8373 | 1.1773  | 6.0158 | CEU |
| C14orf52  | GI_21553312-S | rs17102298 | 14 | 14 | 64446489 | 24267  | 25.2026 | 0.8517 | 1.1937  | 6.0158 | CEU |
| C14orf52  | GI_21553312-S | rs7154406  | 14 | 14 | 64446942 | 23814  | 24.1570 | 0.8492 | -1.1942 | 6.0158 | CEU |
| C14orf52  | GI_21553312-S | rs7153990  | 14 | 14 | 64447303 | 23453  | 21.2253 | 0.8429 | -1.2352 | 6.0158 | CEU |
| C14orf52  | GI_21553312-S | rs10139595 | 14 | 14 | 64448012 | 22744  | 23.5537 | 0.8468 | -1.1893 | 6.0158 | CEU |
| C14orf52  | GI_21553312-S | rs10151701 | 14 | 14 | 64448202 | 22554  | 24.5319 | 0.8487 | -1.1901 | 6.0158 | CEU |
| C14orf52  | GI_21553312-S | rs7143358  | 14 | 14 | 64448715 | 22041  | 10.5624 | 0.5420 | -0.8215 | 6.0158 | CEU |

|           |               |            |    |    |           |       |         |        |         |        |     |
|-----------|---------------|------------|----|----|-----------|-------|---------|--------|---------|--------|-----|
| C14orf52  | GI_21553312-S | rs7143432  | 14 | 14 | 64448899  | 21857 | 23.5941 | 0.8473 | 1.1983  | 6.0158 | CEU |
| C14orf52  | GI_21553312-S | rs7144811  | 14 | 14 | 64448900  | 21856 | 24.9544 | 0.8537 | -1.2036 | 6.0158 | CEU |
| C14orf52  | GI_21553312-S | rs7143764  | 14 | 14 | 64449036  | 21720 | 22.9077 | 0.8545 | 1.3463  | 6.0158 | CEU |
| C14orf52  | GI_21553312-S | rs10143017 | 14 | 14 | 64449371  | 21385 | 25.2026 | 0.8517 | -1.1937 | 6.0158 | CEU |
| C14orf52  | GI_21553312-S | rs10148687 | 14 | 14 | 64454029  | 16727 | 25.2026 | 0.8517 | 1.1937  | 6.0158 | CEU |
| C14orf52  | GI_21553312-S | rs4902334  | 14 | 14 | 64455573  | 15183 | 12.5984 | 0.5989 | -0.8729 | 6.0158 | CEU |
| C14orf52  | GI_21553312-S | rs4902335  | 14 | 14 | 64455651  | 15105 | 25.2026 | 0.8517 | 1.1937  | 6.0158 | CEU |
| C14orf52  | GI_21553312-S | rs10132742 | 14 | 14 | 64456675  | 14081 | 22.2193 | 0.8122 | 1.1732  | 6.0158 | CEU |
| C14orf52  | GI_21553312-S | rs4899152  | 14 | 14 | 64456869  | 13887 | 24.9544 | 0.8537 | -1.2036 | 6.0158 | CEU |
| C14orf52  | GI_21553312-S | rs4902336  | 14 | 14 | 64457015  | 13741 | 24.6362 | 0.8499 | 1.1966  | 6.0158 | CEU |
| C14orf52  | GI_21553312-S | rs10138534 | 14 | 14 | 64457742  | 13014 | 25.2026 | 0.8517 | 1.1937  | 6.0158 | CEU |
| C14orf52  | GI_21553312-S | rs7401853  | 14 | 14 | 64458464  | 12292 | 25.2026 | 0.8517 | 1.1937  | 6.0158 | CEU |
| C14orf52  | GI_21553312-S | rs10141986 | 14 | 14 | 64459156  | 11600 | 24.6404 | 0.8500 | 1.1825  | 6.0158 | CEU |
| C14orf52  | GI_21553312-S | rs2147616  | 14 | 14 | 64460855  | 9901  | 12.5984 | 0.5989 | -0.8729 | 6.0158 | CEU |
| C14orf52  | GI_21553312-S | rs4902343  | 14 | 14 | 64465933  | 4823  | 25.2026 | 0.8517 | 1.1937  | 6.0158 | CEU |
| C14orf52  | GI_21553312-S | rs1064108  | 14 | 14 | 64470018  | 738   | 11.1163 | 0.5494 | 0.8340  | 6.0158 | CEU |
| C14orf52  | GI_21553312-S | rs6745     | 14 | 14 | 64471448  | 692   | 25.2026 | 0.8517 | -1.1937 | 6.0158 | CEU |
| C14orf52  | GI_21553312-S | rs10149617 | 14 | 14 | 64471914  | 1158  | 25.2026 | 0.8517 | 1.1937  | 6.0158 | CEU |
| C14orf52  | GI_21553312-S | rs4902345  | 14 | 14 | 64473657  | 2901  | 25.2026 | 0.8517 | -1.1937 | 6.0158 | CEU |
| C14orf52  | GI_21553312-S | rs10132858 | 14 | 14 | 64473731  | 2975  | 22.5829 | 0.8503 | 1.1967  | 6.0158 | CEU |
| C14orf52  | GI_21553312-S | rs10133054 | 14 | 14 | 64473869  | 3113  | 23.3376 | 0.8599 | 1.1882  | 6.0158 | CEU |
| C14orf52  | GI_21553312-S | rs10133290 | 14 | 14 | 64474195  | 3439  | 25.2026 | 0.8517 | 1.1937  | 6.0158 | CEU |
| C14orf52  | GI_21553312-S | rs11623705 | 14 | 14 | 64475475  | 4719  | 13.3198 | 0.6210 | 1.1652  | 6.0158 | CEU |
| C14orf52  | GI_21553312-S | rs4902346  | 14 | 14 | 64476913  | 6157  | 24.9664 | 0.8539 | 1.1757  | 6.0158 | CEU |
| C14orf52  | GI_21553312-S | rs2412065  | 14 | 14 | 64477410  | 6654  | 25.2026 | 0.8517 | -1.1937 | 6.0158 | CEU |
| C14orf52  | GI_21553312-S | rs2737844  | 14 | 14 | 64478262  | 7506  | 12.5984 | 0.5989 | 0.8729  | 6.0158 | CEU |
| C14orf52  | GI_21553312-S | rs2296327  | 14 | 14 | 64480300  | 9544  | 8.0600  | 0.4335 | -0.7926 | 6.0158 | CEU |
| C14orf52  | GI_21553312-S | rs3742599  | 14 | 14 | 64481661  | 10905 | 16.4952 | 0.7112 | 1.1820  | 6.0158 | CEU |
| C14orf52  | GI_21553312-S | rs2277502  | 14 | 14 | 64482031  | 11275 | 14.5675 | 0.6565 | -1.1799 | 6.0158 | CEU |
| C14orf52  | GI_21553312-S | rs2277501  | 14 | 14 | 64482194  | 11438 | 7.1520  | 0.3914 | 0.6992  | 6.0158 | CEU |
| C14orf52  | GI_21553312-S | rs3087955  | 14 | 14 | 64482501  | 11745 | 7.1880  | 0.3878 | 0.6946  | 6.0158 | CEU |
| C14orf52  | GI_21553312-S | rs3759681  | 14 | 14 | 64483359  | 12603 | 9.4472  | 0.4926 | 0.8597  | 6.0158 | CEU |
| C14orf52  | GI_21553312-S | rs1886506  | 14 | 14 | 64485119  | 14363 | 15.3612 | 0.6967 | -1.1600 | 6.0158 | CEU |
| C14orf52  | GI_21553312-S | rs17752452 | 14 | 14 | 64488228  | 17472 | 14.2100 | 0.6531 | -1.1898 | 6.0158 | CEU |
| C14orf52  | GI_21553312-S | rs4902348  | 14 | 14 | 64489705  | 18949 | 14.5675 | 0.6565 | -1.1799 | 6.0158 | CEU |
| C14orf52  | GI_21553312-S | rs11621450 | 14 | 14 | 64491269  | 20513 | 14.5675 | 0.6565 | -1.1799 | 6.0158 | CEU |
| C14orf52  | GI_21553312-S | rs4902349  | 14 | 14 | 64492093  | 21337 | 14.5675 | 0.6565 | 1.1799  | 6.0158 | CEU |
| C14orf52  | GI_21553312-S | rs4902350  | 14 | 14 | 64492118  | 21362 | 14.5675 | 0.6565 | 1.1799  | 6.0158 | CEU |
| C14orf52  | GI_21553312-S | rs4902351  | 14 | 14 | 64492244  | 21488 | 14.5675 | 0.6565 | 1.1799  | 6.0158 | CEU |
| C14orf52  | GI_21553312-S | rs4902352  | 14 | 14 | 64492549  | 21793 | 7.5008  | 0.4025 | 0.7237  | 6.0158 | CEU |
| C14orf52  | GI_21553312-S | rs11623886 | 14 | 14 | 64493015  | 22259 | 7.1880  | 0.3878 | 0.6946  | 6.0158 | CEU |
| C14orf52  | GI_21553312-S | rs8007405  | 14 | 14 | 64500081  | 29325 | 6.6902  | 0.3638 | 0.6695  | 6.0158 | CEU |
| C14orf52  | GI_21553312-S | rs4899156  | 14 | 14 | 64502355  | 31599 | 14.5675 | 0.6565 | -1.1799 | 6.0158 | CEU |
| C14orf52  | GI_21553312-S | rs4899158  | 14 | 14 | 64503084  | 32328 | 6.7794  | 0.3681 | 0.6822  | 6.0158 | CEU |
| EIF2B2    | GI_7657057-S  | rs7156586  | 14 | 14 | 74575983  | 30251 | 6.2712  | 0.3428 | 0.1999  | 5.8877 | CEU |
| C14orf4   | GI_38327635-S | rs7142306  | 14 | 14 | 76552603  | 8571  | 5.9183  | 0.3247 | -0.5168 | 5.8409 | CEU |
| C14orf4   | GI_38327635-S | rs4899634  | 14 | 14 | 76575362  | 14188 | 7.6139  | 0.4077 | 0.6771  | 5.8409 | CEU |
| C14orf130 | GI_28411949-A | rs1263389  | 14 | 14 | 92737473  | 18971 | 6.7550  | 0.3670 | 0.4817  | 5.94   | CEU |
| C14orf130 | GI_28411949-A | rs3783896  | 14 | 14 | 92760054  | 3610  | 6.7550  | 0.3670 | -0.4817 | 5.94   | CEU |
| C14orf130 | GI_28411949-A | rs2905     | 14 | 14 | 92763175  | 6731  | 6.7550  | 0.3670 | -0.4817 | 5.94   | CEU |
| C14orf130 | GI_28411949-A | rs11621915 | 14 | 14 | 92763584  | 7140  | 6.7550  | 0.3670 | 0.4817  | 5.94   | CEU |
| C14orf130 | GI_28411949-A | rs11625516 | 14 | 14 | 92766070  | 9626  | 6.9125  | 0.3851 | 0.5015  | 5.94   | CEU |
| TCL6      | GI_21536345-A | rs2296310  | 14 | 14 | 95206528  | 966   | 12.6343 | 0.6000 | -0.5329 | 8.7861 | CEU |
| SIVA      | GI_11277467-I | rs1132975  | 14 | 14 | 104293082 | 81    | 5.4341  | 0.2991 | 0.2866  | 5.4112 | CEU |
| SIVA      | GI_11277467-I | rs2498804  | 14 | 14 | 104304140 | 10977 | 5.4341  | 0.2991 | 0.2866  | 5.4112 | CEU |
| SIVA      | GI_11277467-I | rs2494730  | 14 | 14 | 104304466 | 11303 | 5.4341  | 0.2991 | -0.2866 | 5.4112 | CEU |
| SIVA      | GI_11277467-I | rs2494731  | 14 | 14 | 104308725 | 15562 | 5.4341  | 0.2991 | -0.2866 | 5.4112 | CEU |
| SIVA      | GI_11277467-I | rs3803304  | 14 | 14 | 104310191 | 17028 | 6.2521  | 0.3419 | -0.3318 | 5.4112 | CEU |
| hmm3577   | hmm3577-S     | rs2753498  | 14 | 14 | 105385025 | 4287  | 6.1401  | 0.3562 | 2.8220  | 6.0741 | CEU |

|           |               |            |    |    |           |        |         |        |         |        |     |
|-----------|---------------|------------|----|----|-----------|--------|---------|--------|---------|--------|-----|
| hmm3587   | hmm3587-S     | rs17672538 | 14 | 14 | 106231839 | 8635   | 11.5678 | 0.5779 | 1.7826  | 6.0029 | CEU |
| hmm3587   | hmm3587-S     | rs7151640  | 14 | 14 | 106232962 | 7512   | 12.4113 | 0.6263 | -1.7426 | 6.0029 | CEU |
| hmm3587   | hmm3587-S     | rs7152014  | 14 | 14 | 106233168 | 7306   | 11.8584 | 0.6449 | -1.7697 | 6.0029 | CEU |
| hmm3587   | hmm3587-S     | rs12884586 | 14 | 14 | 106235525 | 4949   | 9.9842  | 0.5758 | 1.7579  | 6.0029 | CEU |
| hmm3587   | hmm3587-S     | rs12884803 | 14 | 14 | 106235665 | 4809   | 9.7742  | 0.5118 | 1.6849  | 6.0029 | CEU |
| hmm3587   | hmm3587-S     | rs12884826 | 14 | 14 | 106235739 | 4735   | 11.1084 | 0.5491 | 1.7534  | 6.0029 | CEU |
| hmm3587   | hmm3587-S     | rs12884968 | 14 | 14 | 106235800 | 4674   | 11.4454 | 0.5672 | 1.7954  | 6.0029 | CEU |
| hmm3587   | hmm3587-S     | rs4448834  | 14 | 14 | 106241443 | 969    | 8.7214  | 0.4684 | -1.6392 | 6.0029 | CEU |
| hmm3587   | hmm3587-S     | rs4774182  | 14 | 14 | 106242290 | 1816   | 7.8389  | 0.4806 | 1.6580  | 6.0029 | CEU |
| hmm3587   | hmm3587-S     | rs10141910 | 14 | 14 | 106243464 | 2990   | 8.5768  | 0.4875 | 1.7046  | 6.0029 | CEU |
| hmm3587   | hmm3587-S     | rs4259951  | 14 | 14 | 106243919 | 3445   | 9.2454  | 0.5032 | 1.7286  | 6.0029 | CEU |
| hmm3587   | hmm3587-S     | rs2904620  | 14 | 14 | 106247607 | 7133   | 8.1156  | 0.4731 | 1.6420  | 6.0029 | CEU |
| hmm3587   | hmm3587-S     | rs4774016  | 14 | 14 | 106248414 | 7940   | 7.7952  | 0.4272 | -1.5635 | 6.0029 | CEU |
| LOC283710 | GI_27483466-S | rs1060493  | 15 | 15 | 29303762  | 1273   | 5.6661  | 0.3115 | -0.3701 | 5.6316 | CEU |
| LOC283710 | GI_27483466-S | rs12903039 | 15 | 15 | 29307285  | 4796   | 6.8713  | 0.3778 | -0.4010 | 5.6316 | CEU |
| LOC283710 | GI_27483466-S | rs7165340  | 15 | 15 | 29311031  | 8542   | 6.7863  | 0.3685 | 0.3895  | 5.6316 | CEU |
| LOC283710 | GI_27483466-S | rs4779846  | 15 | 15 | 29311898  | 9409   | 6.7863  | 0.3685 | -0.3895 | 5.6316 | CEU |
| MGC20481  | GI_33086946-S | rs2412524  | 15 | 15 | 38580553  | 52222  | 5.7083  | 0.3137 | 0.3296  | 5.4035 | CEU |
| MGC20481  | GI_33086946-S | rs999197   | 15 | 15 | 38582490  | 50285  | 7.3639  | 0.3961 | -0.3590 | 5.4035 | CEU |
| MGC20481  | GI_33086946-S | rs2123534  | 15 | 15 | 38601616  | 31159  | 6.4367  | 0.4012 | -0.3404 | 5.4035 | CEU |
| MGC20481  | GI_33086946-S | rs12594548 | 15 | 15 | 38612498  | 20277  | 5.6177  | 0.3134 | 0.2954  | 5.4035 | CEU |
| MGC20481  | GI_33086946-S | rs12916323 | 15 | 15 | 38614322  | 18453  | 7.5562  | 0.4161 | 0.3664  | 5.4035 | CEU |
| MGC20481  | GI_33086946-S | rs11857247 | 15 | 15 | 38616214  | 16561  | 7.4836  | 0.4071 | 0.3629  | 5.4035 | CEU |
| MGC20481  | GI_33086946-S | rs8028910  | 15 | 15 | 38620783  | 11992  | 7.3639  | 0.3961 | -0.3590 | 5.4035 | CEU |
| MGC20481  | GI_33086946-S | rs8025458  | 15 | 15 | 38629591  | 3184   | 7.5903  | 0.4293 | -0.3571 | 5.4035 | CEU |
| MGC20481  | GI_33086946-S | rs12915563 | 15 | 15 | 38635581  | 2806   | 7.4644  | 0.4175 | 0.3556  | 5.4035 | CEU |
| MGC20481  | GI_33086946-S | rs9806410  | 15 | 15 | 38639047  | 6272   | 6.0156  | 0.3298 | 0.2933  | 5.4035 | CEU |
| MGC20481  | GI_33086946-S | rs12908114 | 15 | 15 | 38646569  | 13794  | 6.9209  | 0.3855 | 0.3426  | 5.4035 | CEU |
| MGC20481  | GI_33086946-S | rs10851396 | 15 | 15 | 38648211  | 15436  | 6.9353  | 0.3757 | 0.3394  | 5.4035 | CEU |
| MGC20481  | GI_33086946-S | rs11070279 | 15 | 15 | 38648238  | 15463  | 6.9353  | 0.3757 | 0.3394  | 5.4035 | CEU |
| MGC20481  | GI_33086946-S | rs1453183  | 15 | 15 | 38650222  | 17447  | 7.7890  | 0.4157 | 0.3596  | 5.4035 | CEU |
| MGC20481  | GI_33086946-S | rs12914501 | 15 | 15 | 38655761  | 22986  | 7.6724  | 0.4159 | -0.3553 | 5.4035 | CEU |
| MGC20481  | GI_33086946-S | rs12907448 | 15 | 15 | 38696759  | 63984  | 7.0708  | 0.4350 | 0.3709  | 5.4035 | CEU |
| MGC20481  | GI_33086946-S | rs4457966  | 15 | 15 | 38711404  | 78629  | 7.1749  | 0.4035 | -0.3559 | 5.4035 | CEU |
| MGC20481  | GI_33086946-S | rs12148185 | 15 | 15 | 38733585  | 100810 | 7.7890  | 0.4157 | -0.3596 | 5.4035 | CEU |
| MGC20481  | GI_33086946-S | rs1051482  | 15 | 15 | 38743763  | 110988 | 7.7890  | 0.4157 | 0.3596  | 5.4035 | CEU |
| MGC20481  | GI_33086946-S | rs3986319  | 15 | 15 | 38766943  | 134168 | 6.0539  | 0.3317 | 0.3229  | 5.4035 | CEU |
| MGC20481  | GI_33086946-S | rs5030783  | 15 | 15 | 38771681  | 138906 | 6.1788  | 0.3479 | -0.3199 | 5.4035 | CEU |
| MGC20481  | GI_33086946-S | rs2304583  | 15 | 15 | 38819430  | 186655 | 6.0539  | 0.3317 | 0.3229  | 5.4035 | CEU |
| MGC20481  | GI_33086946-S | rs2289219  | 15 | 15 | 38853182  | 220407 | 5.5951  | 0.3077 | 0.3116  | 5.4035 | CEU |
| MGC20481  | GI_33086946-S | rs2010300  | 15 | 15 | 38867423  | 234648 | 5.5951  | 0.3077 | -0.3116 | 5.4035 | CEU |
| MGC20481  | GI_33086946-S | rs2899000  | 15 | 15 | 38874966  | 242191 | 5.6328  | 0.3097 | 0.3053  | 5.4035 | CEU |
| RPAP1     | GI_24430138-S | rs2289739  | 15 | 15 | 39588804  | 8086   | 5.5946  | 0.3077 | -0.1625 | 5.5538 | CEU |
| RPAP1     | GI_24430138-S | rs1867419  | 15 | 15 | 39593511  | 3379   | 6.1812  | 0.3383 | -0.1685 | 5.5538 | CEU |
| TGM5      | GI_4759229-A  | rs12909095 | 15 | 15 | 41345434  | 32341  | 5.8005  | 0.3232 | 0.6786  | 5.3846 | CEU |
| TGM5      | GI_4759229-A  | rs748404   | 15 | 15 | 41346523  | 33430  | 6.5889  | 0.3638 | -0.7568 | 5.3846 | CEU |
| TGM5      | GI_4759229-A  | rs12911132 | 15 | 15 | 41347728  | 34635  | 5.8377  | 0.3205 | 0.6714  | 5.3846 | CEU |
| TGM5      | GI_4759229-A  | rs17779494 | 15 | 15 | 41366515  | 53422  | 5.8377  | 0.3205 | 0.6714  | 5.3846 | CEU |
| FLJ12994  | GI_12383091-S | rs8032242  | 15 | 15 | 54153412  | 18908  | 5.8976  | 0.3236 | -0.2234 | 5.817  | CEU |
| FLJ12994  | GI_12383091-S | rs4774231  | 15 | 15 | 54155947  | 16373  | 6.0552  | 0.3318 | 0.2278  | 5.817  | CEU |
| FLJ12994  | GI_12383091-S | rs7165270  | 15 | 15 | 54160811  | 11509  | 6.4899  | 0.3538 | 0.2232  | 5.817  | CEU |
| FLJ12994  | GI_12383091-S | rs4774232  | 15 | 15 | 54165169  | 7151   | 6.2712  | 0.3477 | -0.2225 | 5.817  | CEU |
| FLJ12994  | GI_12383091-S | rs4310791  | 15 | 15 | 54213793  | 41473  | 5.9861  | 0.3329 | 0.2185  | 5.817  | CEU |
| FLJ12994  | GI_12383091-S | rs4310792  | 15 | 15 | 54213965  | 41645  | 6.6639  | 0.3727 | 0.2300  | 5.817  | CEU |
| FLJ12994  | GI_12383091-S | rs7496025  | 15 | 15 | 54223649  | 51329  | 6.4899  | 0.3538 | -0.2232 | 5.817  | CEU |
| FLJ12994  | GI_12383091-S | rs12905899 | 15 | 15 | 54236909  | 64589  | 6.4899  | 0.3538 | 0.2232  | 5.817  | CEU |
| FLJ12994  | GI_12383091-S | rs2725870  | 15 | 15 | 54262681  | 90361  | 6.3834  | 0.3534 | 0.2217  | 5.817  | CEU |
| FLJ12994  | GI_12383091-S | rs2713941  | 15 | 15 | 54274819  | 102499 | 6.4899  | 0.3538 | -0.2232 | 5.817  | CEU |
| FLJ12994  | GI_12383091-S | rs2682045  | 15 | 15 | 54275251  | 102931 | 6.2544  | 0.3468 | -0.2342 | 5.817  | CEU |

|           |               |            |    |    |          |        |         |        |         |        |     |
|-----------|---------------|------------|----|----|----------|--------|---------|--------|---------|--------|-----|
| FLJ12994  | GI_12383091-S | rs2460647  | 15 | 15 | 54297200 | 124880 | 6.4899  | 0.3538 | 0.2232  | 5.817  | CEU |
| FLJ12994  | GI_12383091-S | rs2718941  | 15 | 15 | 54309473 | 137153 | 6.4899  | 0.3538 | -0.2232 | 5.817  | CEU |
| FLJ12994  | GI_12383091-S | rs2713924  | 15 | 15 | 54310102 | 137782 | 6.4899  | 0.3538 | -0.2232 | 5.817  | CEU |
| FLJ12994  | GI_12383091-S | rs2718915  | 15 | 15 | 54315732 | 143412 | 6.4899  | 0.3538 | 0.2232  | 5.817  | CEU |
| FLJ12994  | GI_12383091-S | rs2713933  | 15 | 15 | 54325854 | 153534 | 6.4899  | 0.3538 | 0.2232  | 5.817  | CEU |
| FLJ12994  | GI_12383091-S | rs2682051  | 15 | 15 | 54330714 | 158394 | 6.4899  | 0.3538 | 0.2232  | 5.817  | CEU |
| FLJ12994  | GI_12383091-S | rs2713936  | 15 | 15 | 54333277 | 160957 | 6.1856  | 0.3483 | 0.2232  | 5.817  | CEU |
| FLJ12994  | GI_12383091-S | rs2682054  | 15 | 15 | 54334440 | 162120 | 6.4899  | 0.3538 | -0.2232 | 5.817  | CEU |
| FLJ12994  | GI_12383091-S | rs2460650  | 15 | 15 | 54334768 | 162448 | 5.8940  | 0.3281 | -0.2153 | 5.817  | CEU |
| FLJ12994  | GI_12383091-S | rs2947021  | 15 | 15 | 54342913 | 170593 | 6.6729  | 0.3680 | 0.2357  | 5.817  | CEU |
| FLJ12994  | GI_12383091-S | rs7495406  | 15 | 15 | 54344242 | 171922 | 5.9237  | 0.3297 | -0.2214 | 5.817  | CEU |
| FLJ12994  | GI_12383091-S | rs2718934  | 15 | 15 | 54344710 | 172390 | 5.9237  | 0.3297 | 0.2214  | 5.817  | CEU |
| FLJ12994  | GI_12383091-S | rs2249090  | 15 | 15 | 54345306 | 172986 | 7.0100  | 0.3793 | 0.2346  | 5.817  | CEU |
| FLJ12994  | GI_12383091-S | rs2682070  | 15 | 15 | 54360102 | 187782 | 6.5390  | 0.3613 | -0.2225 | 5.817  | CEU |
| FLJ12994  | GI_12383091-S | rs2682071  | 15 | 15 | 54361343 | 189023 | 6.3672  | 0.3526 | 0.2222  | 5.817  | CEU |
| FLJ12994  | GI_12383091-S | rs2725854  | 15 | 15 | 54365123 | 192803 | 6.4899  | 0.3538 | -0.2232 | 5.817  | CEU |
| FLJ12994  | GI_12383091-S | rs2718952  | 15 | 15 | 54375897 | 203577 | 6.4546  | 0.3521 | -0.2176 | 5.817  | CEU |
| FLJ12994  | GI_12383091-S | rs2718955  | 15 | 15 | 54377564 | 205244 | 6.4899  | 0.3538 | 0.2232  | 5.817  | CEU |
| FLJ12994  | GI_12383091-S | rs12914567 | 15 | 15 | 54409586 | 237266 | 6.4899  | 0.3538 | 0.2232  | 5.817  | CEU |
| FLJ12994  | GI_12383091-S | rs2460646  | 15 | 15 | 54430168 | 257848 | 6.4899  | 0.3538 | -0.2232 | 5.817  | CEU |
| FLJ12994  | GI_12383091-S | rs12905782 | 15 | 15 | 54441417 | 269097 | 6.3541  | 0.3519 | 0.2161  | 5.817  | CEU |
| FLJ12994  | GI_12383091-S | rs12900678 | 15 | 15 | 54465022 | 292702 | 6.4546  | 0.3521 | -0.2176 | 5.817  | CEU |
| FLJ12994  | GI_12383091-S | rs17819438 | 15 | 15 | 54467613 | 295293 | 6.4899  | 0.3538 | -0.2232 | 5.817  | CEU |
| FLJ12994  | GI_12383091-S | rs6493856  | 15 | 15 | 54474651 | 302331 | 6.4899  | 0.3538 | 0.2232  | 5.817  | CEU |
| FLJ12994  | GI_12383091-S | rs1549452  | 15 | 15 | 54489647 | 317327 | 6.2712  | 0.3477 | -0.2225 | 5.817  | CEU |
| FLJ12994  | GI_12383091-S | rs2303441  | 15 | 15 | 54491462 | 319142 | 6.4899  | 0.3538 | -0.2232 | 5.817  | CEU |
| FLJ12994  | GI_12383091-S | rs3817406  | 15 | 15 | 54509167 | 336847 | 6.1483  | 0.3414 | -0.2140 | 5.817  | CEU |
| FLJ12994  | GI_12383091-S | rs11630363 | 15 | 15 | 54514094 | 341774 | 6.4546  | 0.3521 | 0.2176  | 5.817  | CEU |
| FLJ12994  | GI_12383091-S | rs6493858  | 15 | 15 | 54523770 | 351450 | 5.9196  | 0.3248 | 0.2076  | 5.817  | CEU |
| FLJ12994  | GI_12383091-S | rs7170307  | 15 | 15 | 54524589 | 352269 | 5.8303  | 0.3247 | -0.2006 | 5.817  | CEU |
| FLJ12994  | GI_12383091-S | rs1477590  | 15 | 15 | 54532597 | 360277 | 6.7877  | 0.3685 | 0.2133  | 5.817  | CEU |
| FLJ12994  | GI_12383091-S | rs7181320  | 15 | 15 | 54547432 | 375112 | 6.7877  | 0.3685 | -0.2133 | 5.817  | CEU |
| LOC348094 | GI_38176293-S | rs2733386  | 15 | 15 | 62622175 | 415639 | 6.2719  | 0.3429 | -0.5328 | 5.5476 | CEU |
| LOC348094 | GI_38176293-S | rs11631564 | 15 | 15 | 62760664 | 277150 | 5.8945  | 0.3281 | -0.5618 | 5.5476 | CEU |
| LOC348094 | GI_38176293-S | rs11071808 | 15 | 15 | 62806774 | 231040 | 7.2823  | 0.3976 | -0.6027 | 5.5476 | CEU |
| LOC348094 | GI_38176293-S | rs10162671 | 15 | 15 | 62817009 | 220805 | 6.7820  | 0.4265 | -0.6273 | 5.5476 | CEU |
| LOC348094 | GI_38176293-S | rs1872592  | 15 | 15 | 62900546 | 137268 | 12.0750 | 0.5821 | -0.7352 | 5.5476 | CEU |
| LOC348094 | GI_38176293-S | rs11631663 | 15 | 15 | 62904700 | 133114 | 7.9081  | 0.4267 | 0.6124  | 5.5476 | CEU |
| LOC348094 | GI_38176293-S | rs3743046  | 15 | 15 | 62904875 | 132939 | 7.3459  | 0.3953 | -0.6008 | 5.5476 | CEU |
| LOC348094 | GI_38176293-S | rs4777615  | 15 | 15 | 62911420 | 126394 | 13.3292 | 0.6277 | -0.7561 | 5.5476 | CEU |
| LOC348094 | GI_38176293-S | rs7180972  | 15 | 15 | 62915485 | 122329 | 7.3941  | 0.4084 | 0.6007  | 5.5476 | CEU |
| LOC348094 | GI_38176293-S | rs2414858  | 15 | 15 | 62915894 | 121920 | 8.2521  | 0.4421 | 0.6162  | 5.5476 | CEU |
| LOC348094 | GI_38176293-S | rs1684048  | 15 | 15 | 62920037 | 117777 | 12.9655 | 0.6167 | -0.7566 | 5.5476 | CEU |
| LOC348094 | GI_38176293-S | rs1684036  | 15 | 15 | 62922378 | 115436 | 14.6380 | 0.6584 | -0.7806 | 5.5476 | CEU |
| LOC348094 | GI_38176293-S | rs9672652  | 15 | 15 | 62922593 | 115221 | 8.9588  | 0.4666 | 0.6419  | 5.5476 | CEU |
| LOC348094 | GI_38176293-S | rs1522748  | 15 | 15 | 62923524 | 114290 | 14.4798 | 0.6605 | 0.7783  | 5.5476 | CEU |
| LOC348094 | GI_38176293-S | rs1357370  | 15 | 15 | 62924224 | 113590 | 14.6380 | 0.6584 | -0.7806 | 5.5476 | CEU |
| LOC348094 | GI_38176293-S | rs1522747  | 15 | 15 | 62926385 | 111429 | 13.7380 | 0.6463 | 0.7932  | 5.5476 | CEU |
| LOC348094 | GI_38176293-S | rs950171   | 15 | 15 | 62926989 | 110825 | 8.9588  | 0.4666 | -0.6419 | 5.5476 | CEU |
| LOC348094 | GI_38176293-S | rs1352093  | 15 | 15 | 62927573 | 110241 | 8.9588  | 0.4666 | 0.6419  | 5.5476 | CEU |
| LOC348094 | GI_38176293-S | rs7179562  | 15 | 15 | 62928994 | 108820 | 11.7556 | 0.6337 | 0.7716  | 5.5476 | CEU |
| LOC348094 | GI_38176293-S | rs9302235  | 15 | 15 | 62929878 | 107936 | 7.5299  | 0.4206 | 0.5957  | 5.5476 | CEU |
| LOC348094 | GI_38176293-S | rs1719256  | 15 | 15 | 62930756 | 107058 | 13.6515 | 0.6505 | 0.7954  | 5.5476 | CEU |
| LOC348094 | GI_38176293-S | rs865576   | 15 | 15 | 62934451 | 103363 | 14.5736 | 0.6630 | -0.7775 | 5.5476 | CEU |
| LOC348094 | GI_38176293-S | rs832879   | 15 | 15 | 62934764 | 103050 | 14.6380 | 0.6584 | -0.7806 | 5.5476 | CEU |
| LOC348094 | GI_38176293-S | rs879201   | 15 | 15 | 62935971 | 101843 | 7.4238  | 0.3989 | -0.5949 | 5.5476 | CEU |
| LOC348094 | GI_38176293-S | rs6494499  | 15 | 15 | 62937013 | 100801 | 5.5989  | 0.3719 | -0.5594 | 5.5476 | CEU |
| LOC348094 | GI_38176293-S | rs832882   | 15 | 15 | 62937890 | 99924  | 7.1845  | 0.3877 | 0.5975  | 5.5476 | CEU |
| LOC348094 | GI_38176293-S | rs832883   | 15 | 15 | 62938026 | 99788  | 12.6369 | 0.6478 | -0.8141 | 5.5476 | CEU |

|               |               |            |    |    |          |       |         |        |         |        |     |
|---------------|---------------|------------|----|----|----------|-------|---------|--------|---------|--------|-----|
| LOC348094     | GI_38176293-S | rs832884   | 15 | 15 | 62938688 | 99126 | 14.6380 | 0.6584 | 0.7806  | 5.5476 | CEU |
| LOC348094     | GI_38176293-S | rs1719277  | 15 | 15 | 62943576 | 94238 | 13.6515 | 0.6505 | -0.7954 | 5.5476 | CEU |
| LOC348094     | GI_38176293-S | rs1043697  | 15 | 15 | 62946511 | 91303 | 14.6380 | 0.6584 | -0.7806 | 5.5476 | CEU |
| LOC348094     | GI_38176293-S | rs2037517  | 15 | 15 | 62952489 | 85325 | 8.2631  | 0.4369 | -0.6226 | 5.5476 | CEU |
| LOC348094     | GI_38176293-S | rs832891   | 15 | 15 | 62954386 | 83428 | 17.8197 | 0.7342 | -0.8069 | 5.5476 | CEU |
| LOC348094     | GI_38176293-S | rs871447   | 15 | 15 | 62957490 | 80324 | 17.8197 | 0.7342 | 0.8069  | 5.5476 | CEU |
| LOC348094     | GI_38176293-S | rs869043   | 15 | 15 | 62958093 | 79721 | 8.8815  | 0.4814 | -0.6299 | 5.5476 | CEU |
| LOC348094     | GI_38176293-S | rs11633431 | 15 | 15 | 62962727 | 75087 | 8.0401  | 0.4270 | -0.6259 | 5.5476 | CEU |
| LOC348094     | GI_38176293-S | rs1719264  | 15 | 15 | 62963588 | 74226 | 16.0433 | 0.7134 | -0.7700 | 5.5476 | CEU |
| LOC348094     | GI_38176293-S | rs1916137  | 15 | 15 | 62963686 | 74128 | 7.5407  | 0.4211 | -0.6173 | 5.5476 | CEU |
| LOC348094     | GI_38176293-S | rs1916138  | 15 | 15 | 62963701 | 74113 | 8.2631  | 0.4369 | -0.6226 | 5.5476 | CEU |
| LOC348094     | GI_38176293-S | rs1719266  | 15 | 15 | 62964279 | 73535 | 15.8899 | 0.7299 | 0.8298  | 5.5476 | CEU |
| LOC348094     | GI_38176293-S | rs4238397  | 15 | 15 | 62966217 | 71597 | 17.9295 | 0.7488 | -0.8024 | 5.5476 | CEU |
| LOC348094     | GI_38176293-S | rs12916644 | 15 | 15 | 62968071 | 69743 | 14.9036 | 0.7054 | 0.8198  | 5.5476 | CEU |
| LOC348094     | GI_38176293-S | rs2220258  | 15 | 15 | 62970786 | 67028 | 8.2631  | 0.4369 | 0.6226  | 5.5476 | CEU |
| LOC348094     | GI_38176293-S | rs2200490  | 15 | 15 | 62971003 | 66811 | 8.2631  | 0.4369 | -0.6226 | 5.5476 | CEU |
| LOC348094     | GI_38176293-S | rs1719273  | 15 | 15 | 62971545 | 66269 | 17.8197 | 0.7342 | 0.8069  | 5.5476 | CEU |
| LOC348094     | GI_38176293-S | rs1684034  | 15 | 15 | 62971919 | 65895 | 17.1993 | 0.7333 | 0.8278  | 5.5476 | CEU |
| LOC348094     | GI_38176293-S | rs1628955  | 15 | 15 | 62974273 | 63541 | 16.8238 | 0.7250 | -0.8045 | 5.5476 | CEU |
| LOC348094     | GI_38176293-S | rs1684054  | 15 | 15 | 62978449 | 59365 | 17.8197 | 0.7342 | -0.8069 | 5.5476 | CEU |
| LOC348094     | GI_38176293-S | rs936867   | 15 | 15 | 62982315 | 55499 | 7.9501  | 0.4286 | -0.6207 | 5.5476 | CEU |
| LOC348094     | GI_38176293-S | rs8035615  | 15 | 15 | 62991991 | 45823 | 6.8986  | 0.3739 | -0.5834 | 5.5476 | CEU |
| IREB2         | GI_41352692-S | rs2036527  | 15 | 15 | 76638670 | 60396 | 5.9633  | 0.3270 | -0.2230 | 5.8772 | CEU |
| CTSH          | GI_23110956-A | rs11638844 | 15 | 15 | 77018573 | 17162 | 7.5513  | 0.4103 | 0.4005  | 5.7456 | CEU |
| CTSH          | GI_23110956-A | rs10400902 | 15 | 15 | 77018671 | 17260 | 7.8940  | 0.4260 | 0.4100  | 5.7456 | CEU |
| CTSH          | GI_23110956-A | rs11072815 | 15 | 15 | 77019374 | 17963 | 7.2501  | 0.4072 | 0.3821  | 5.7456 | CEU |
| CTSH          | GI_23110956-A | rs11856301 | 15 | 15 | 77019385 | 17974 | 6.2131  | 0.3768 | -0.3668 | 5.7456 | CEU |
| CTSH          | GI_23110956-A | rs2870085  | 15 | 15 | 77021323 | 19912 | 7.9917  | 0.4249 | -0.4088 | 5.7456 | CEU |
| CTSH          | GI_23110956-A | rs11855406 | 15 | 15 | 77021919 | 20508 | 8.0520  | 0.4389 | 0.3977  | 5.7456 | CEU |
| CTSH          | GI_23110956-A | rs3825932  | 15 | 15 | 77022501 | 21090 | 7.2077  | 0.3888 | -0.3937 | 5.7456 | CEU |
| CTSH          | GI_23110956-A | rs11072817 | 15 | 15 | 77023870 | 22459 | 8.2939  | 0.4439 | -0.4132 | 5.7456 | CEU |
| CTSH          | GI_23110956-A | rs1036937  | 15 | 15 | 77024235 | 22824 | 7.4781  | 0.4069 | -0.3979 | 5.7456 | CEU |
| CTSH          | GI_23110956-A | rs1036938  | 15 | 15 | 77024302 | 22891 | 8.4809  | 0.4464 | 0.4138  | 5.7456 | CEU |
| CTSH          | GI_23110956-A | rs1369324  | 15 | 15 | 77026774 | 25363 | 8.4809  | 0.4464 | -0.4138 | 5.7456 | CEU |
| LOC400410     | GI_42660516-S | rs4778733  | 15 | 15 | 77990461 | 3552  | 6.5852  | 0.3636 | -0.4060 | 6.1021 | CEU |
| LOC400410     | GI_42660516-S | rs12443213 | 15 | 15 | 77996904 | 2891  | 6.2753  | 0.3479 | 0.3890  | 6.1021 | CEU |
| LOC400410     | GI_42660516-S | rs2303824  | 15 | 15 | 78002652 | 8639  | 8.7319  | 0.4571 | 0.4066  | 6.1021 | CEU |
| LOC400410     | GI_42660516-S | rs3803540  | 15 | 15 | 78003070 | 9057  | 7.0572  | 0.3816 | 0.3914  | 6.1021 | CEU |
| LOC400410     | GI_42660516-S | rs1814345  | 15 | 15 | 78024489 | 30476 | 7.0572  | 0.3816 | -0.3914 | 6.1021 | CEU |
| IL16          | GI_27262656-I | rs4778636  | 15 | 15 | 79378694 | 9201  | 7.0568  | 0.3816 | -0.6719 | 5.9936 | CEU |
| IL16          | GI_27262656-I | rs4577037  | 15 | 15 | 79383715 | 4180  | 7.0568  | 0.3816 | -0.6719 | 5.9936 | CEU |
| IL16          | GI_27262656-I | rs1803275  | 15 | 15 | 79385471 | 2424  | 6.7990  | 0.3742 | -0.5847 | 5.9936 | CEU |
| IL16          | GI_27262656-I | rs3926277  | 15 | 15 | 79386349 | 1546  | 6.4573  | 0.3623 | -0.5763 | 5.9936 | CEU |
| IL16          | GI_27262656-I | rs3926278  | 15 | 15 | 79386410 | 1485  | 6.6839  | 0.3635 | 0.5777  | 5.9936 | CEU |
| IL16          | GI_27262656-I | rs3926279  | 15 | 15 | 79386498 | 1397  | 6.6954  | 0.3852 | 0.5819  | 5.9936 | CEU |
| IL16          | GI_27262656-I | rs4778639  | 15 | 15 | 79387506 | 389   | 7.0568  | 0.3816 | -0.6719 | 5.9936 | CEU |
| TMEM8         | GI_10864068-S | rs3830160  | 16 | 16 | 359093   | 3084  | 12.0060 | 0.5798 | -0.2785 | 5.6369 | CEU |
| TMEM8         | GI_10864068-S | rs540      | 16 | 16 | 360908   | 1269  | 12.0060 | 0.5798 | 0.2785  | 5.6369 | CEU |
| TMEM8         | GI_10864068-S | rs3743888  | 16 | 16 | 364421   | 2244  | 12.0060 | 0.5798 | -0.2785 | 5.6369 | CEU |
| TMEM8         | GI_10864068-S | rs2071916  | 16 | 16 | 366477   | 4300  | 10.5229 | 0.5342 | 0.2760  | 5.6369 | CEU |
| DKFZP566J2046 | GI_13654273-S | rs12597803 | 16 | 16 | 1806272  | 12442 | 6.5075  | 0.3547 | 0.3988  | 5.8289 | CEU |
| DKFZP566J2046 | GI_13654273-S | rs12596094 | 16 | 16 | 1806363  | 12351 | 5.9550  | 0.3313 | -0.3845 | 5.8289 | CEU |
| DKFZP566J2046 | GI_13654273-S | rs344361   | 16 | 16 | 1808555  | 10159 | 6.2146  | 0.3400 | 0.3872  | 5.8289 | CEU |
| DKFZP566J2046 | GI_13654273-S | rs2268670  | 16 | 16 | 1811330  | 7384  | 6.2146  | 0.3400 | -0.3872 | 5.8289 | CEU |
| DKFZP566J2046 | GI_13654273-S | rs3743853  | 16 | 16 | 1817559  | 1155  | 6.2146  | 0.3400 | 0.3872  | 5.8289 | CEU |
| DKFZP566J2046 | GI_13654273-S | rs9652786  | 16 | 16 | 1826523  | 7809  | 6.3987  | 0.3542 | -0.3995 | 5.8289 | CEU |
| DKFZP566J2046 | GI_13654273-S | rs9652777  | 16 | 16 | 1826610  | 7896  | 6.3987  | 0.3542 | 0.3995  | 5.8289 | CEU |
| DKFZP566J2046 | GI_13654273-S | rs3848346  | 16 | 16 | 1829822  | 11108 | 6.2146  | 0.3400 | -0.3872 | 5.8289 | CEU |
| DKFZP566J2046 | GI_13654273-S | rs3848348  | 16 | 16 | 1830057  | 11343 | 6.2146  | 0.3400 | -0.3872 | 5.8289 | CEU |

|               |               |            |    |    |          |       |        |        |         |        |     |
|---------------|---------------|------------|----|----|----------|-------|--------|--------|---------|--------|-----|
| DKFZP566J2046 | GI_13654273-S | rs9806945  | 16 | 16 | 1834962  | 16248 | 6.0831 | 0.3380 | 0.3869  | 5.8289 | CEU |
| DKFZP566J2046 | GI_13654273-S | rs11640407 | 16 | 16 | 1837495  | 18781 | 6.2146 | 0.3400 | 0.3872  | 5.8289 | CEU |
| DKFZP566J2046 | GI_13654273-S | rs11642885 | 16 | 16 | 1838377  | 19663 | 6.2146 | 0.3400 | -0.3872 | 5.8289 | CEU |
| DKFZP566J2046 | GI_13654273-S | rs2575359  | 16 | 16 | 1840036  | 21322 | 6.2146 | 0.3400 | 0.3872  | 5.8289 | CEU |
| DKFZP566J2046 | GI_13654273-S | rs1657116  | 16 | 16 | 1841479  | 22765 | 6.2235 | 0.3452 | 0.3911  | 5.8289 | CEU |
| DKFZP566J2046 | GI_13654273-S | rs1742419  | 16 | 16 | 1841810  | 23096 | 6.2146 | 0.3400 | -0.3872 | 5.8289 | CEU |
| DKFZP566J2046 | GI_13654273-S | rs1625279  | 16 | 16 | 1841845  | 23131 | 6.2146 | 0.3400 | 0.3872  | 5.8289 | CEU |
| DKFZP566J2046 | GI_13654273-S | rs1625393  | 16 | 16 | 1841894  | 23180 | 6.2146 | 0.3400 | -0.3872 | 5.8289 | CEU |
| DKFZP566J2046 | GI_13654273-S | rs1617255  | 16 | 16 | 1842890  | 24176 | 6.2146 | 0.3400 | 0.3872  | 5.8289 | CEU |
| DKFZP566J2046 | GI_13654273-S | rs1657117  | 16 | 16 | 1843652  | 24938 | 6.2146 | 0.3400 | 0.3872  | 5.8289 | CEU |
| DKFZP566J2046 | GI_13654273-S | rs1742421  | 16 | 16 | 1843935  | 25221 | 5.9318 | 0.3301 | -0.3832 | 5.8289 | CEU |
| DKFZP566J2046 | GI_13654273-S | rs1742423  | 16 | 16 | 1844323  | 25609 | 6.2146 | 0.3400 | 0.3872  | 5.8289 | CEU |
| DKFZP566J2046 | GI_13654273-S | rs11643972 | 16 | 16 | 1844546  | 25832 | 6.2146 | 0.3400 | 0.3872  | 5.8289 | CEU |
| DKFZP566J2046 | GI_13654273-S | rs11643973 | 16 | 16 | 1844557  | 25843 | 5.8547 | 0.3460 | 0.3909  | 5.8289 | CEU |
| DKFZP566J2046 | GI_13654273-S | rs7199384  | 16 | 16 | 1844588  | 25874 | 6.2146 | 0.3400 | -0.3872 | 5.8289 | CEU |
| DKFZP566J2046 | GI_13654273-S | rs1657118  | 16 | 16 | 1844641  | 25927 | 6.2146 | 0.3400 | -0.3872 | 5.8289 | CEU |
| DKFZP566J2046 | GI_13654273-S | rs1742426  | 16 | 16 | 1844812  | 26098 | 6.2146 | 0.3400 | -0.3872 | 5.8289 | CEU |
| DKFZP566J2046 | GI_13654273-S | rs1742429  | 16 | 16 | 1845007  | 26293 | 6.2146 | 0.3400 | -0.3872 | 5.8289 | CEU |
| DKFZP566J2046 | GI_13654273-S | rs2754186  | 16 | 16 | 1845764  | 27050 | 6.2146 | 0.3400 | 0.3872  | 5.8289 | CEU |
| DKFZP566J2046 | GI_13654273-S | rs1742431  | 16 | 16 | 1845875  | 27161 | 6.2146 | 0.3400 | -0.3872 | 5.8289 | CEU |
| DKFZP566J2046 | GI_13654273-S | rs1657120  | 16 | 16 | 1847224  | 28510 | 6.2355 | 0.3459 | -0.3989 | 5.8289 | CEU |
| DKFZP566J2046 | GI_13654273-S | rs1742432  | 16 | 16 | 1847303  | 28589 | 6.2146 | 0.3400 | -0.3872 | 5.8289 | CEU |
| DKFZP566J2046 | GI_13654273-S | rs428123   | 16 | 16 | 1847653  | 28939 | 6.2146 | 0.3400 | 0.3872  | 5.8289 | CEU |
| DKFZP566J2046 | GI_13654273-S | rs408286   | 16 | 16 | 1847701  | 28987 | 6.8431 | 0.3713 | -0.4308 | 5.8289 | CEU |
| DKFZP566J2046 | GI_13654273-S | rs411193   | 16 | 16 | 1847947  | 29233 | 5.8897 | 0.3327 | -0.3818 | 5.8289 | CEU |
| DKFZP566J2046 | GI_13654273-S | rs410465   | 16 | 16 | 1848219  | 29505 | 6.2146 | 0.3400 | -0.3872 | 5.8289 | CEU |
| DKFZP566J2046 | GI_13654273-S | rs1657121  | 16 | 16 | 1848340  | 29626 | 6.2146 | 0.3400 | -0.3872 | 5.8289 | CEU |
| DKFZP566J2046 | GI_13654273-S | rs1657122  | 16 | 16 | 1848501  | 29787 | 6.2146 | 0.3400 | -0.3872 | 5.8289 | CEU |
| DKFZP566J2046 | GI_13654273-S | rs449530   | 16 | 16 | 1848669  | 29955 | 6.2146 | 0.3400 | -0.3872 | 5.8289 | CEU |
| DKFZP566J2046 | GI_13654273-S | rs420681   | 16 | 16 | 1848750  | 30036 | 6.2146 | 0.3400 | -0.3872 | 5.8289 | CEU |
| DKFZP566J2046 | GI_13654273-S | rs448961   | 16 | 16 | 1848888  | 30174 | 6.2146 | 0.3400 | -0.3872 | 5.8289 | CEU |
| DKFZP566J2046 | GI_13654273-S | rs2754187  | 16 | 16 | 1849108  | 30394 | 6.2146 | 0.3400 | 0.3872  | 5.8289 | CEU |
| DKFZP566J2046 | GI_13654273-S | rs427732   | 16 | 16 | 1849841  | 31127 | 5.8799 | 0.3322 | -0.3638 | 5.8289 | CEU |
| DKFZP566J2046 | GI_13654273-S | rs433268   | 16 | 16 | 1850374  | 31660 | 6.0976 | 0.3340 | -0.3628 | 5.8289 | CEU |
| DKFZP566J2046 | GI_13654273-S | rs2492881  | 16 | 16 | 1854890  | 36176 | 5.8847 | 0.3230 | 0.4032  | 5.8289 | CEU |
| DKFZP566J2046 | GI_13654273-S | rs378201   | 16 | 16 | 1855035  | 36321 | 6.2146 | 0.3400 | 0.3872  | 5.8289 | CEU |
| DKFZP566J2046 | GI_13654273-S | rs404413   | 16 | 16 | 1855056  | 36342 | 6.4335 | 0.3948 | 0.4030  | 5.8289 | CEU |
| DKFZP566J2046 | GI_13654273-S | rs11640914 | 16 | 16 | 1855459  | 36745 | 6.2146 | 0.3400 | -0.3872 | 5.8289 | CEU |
| DKFZP566J2046 | GI_13654273-S | rs453494   | 16 | 16 | 1856104  | 37390 | 6.2146 | 0.3400 | 0.3872  | 5.8289 | CEU |
| DKFZP566J2046 | GI_13654273-S | rs404772   | 16 | 16 | 1857175  | 38461 | 6.3343 | 0.3509 | -0.3933 | 5.8289 | CEU |
| DKFZP566J2046 | GI_13654273-S | rs9935266  | 16 | 16 | 1859452  | 40738 | 6.2146 | 0.3400 | -0.3872 | 5.8289 | CEU |
| DKFZP566J2046 | GI_13654273-S | rs447782   | 16 | 16 | 1860317  | 41603 | 6.2146 | 0.3400 | -0.3872 | 5.8289 | CEU |
| DKFZP566J2046 | GI_13654273-S | rs1657094  | 16 | 16 | 1860630  | 41916 | 6.2146 | 0.3400 | 0.3872  | 5.8289 | CEU |
| DKFZP566J2046 | GI_13654273-S | rs1657095  | 16 | 16 | 1860679  | 41965 | 6.2146 | 0.3400 | -0.3872 | 5.8289 | CEU |
| DKFZP566J2046 | GI_13654273-S | rs2917523  | 16 | 16 | 1860741  | 42027 | 6.2146 | 0.3400 | 0.3872  | 5.8289 | CEU |
| DKFZP566J2046 | GI_13654273-S | rs2974856  | 16 | 16 | 1860758  | 42044 | 6.1128 | 0.3445 | 0.3926  | 5.8289 | CEU |
| DKFZP566J2046 | GI_13654273-S | rs2982235  | 16 | 16 | 1860793  | 42079 | 6.2146 | 0.3400 | -0.3872 | 5.8289 | CEU |
| DKFZP566J2046 | GI_13654273-S | rs1657129  | 16 | 16 | 1885827  | 67113 | 6.1553 | 0.3570 | -0.3956 | 5.8289 | CEU |
| SYNGR3        | GI_22091456-S | rs1046495  | 16 | 16 | 1976049  | 7853  | 7.1525 | 0.3861 | -0.2497 | 5.9935 | CEU |
| SYNGR3        | GI_22091456-S | rs1058474  | 16 | 16 | 1988797  | 4895  | 6.6957 | 0.3640 | -0.2429 | 5.9935 | CEU |
| DKFZp761A132  | GI_14150048-S | rs13334213 | 16 | 16 | 2932115  | 7436  | 6.9021 | 0.3901 | -0.1594 | 5.4623 | CEU |
| KIAA0643      | GI_13435144-S | rs12445430 | 16 | 16 | 3553127  | 25934 | 7.2492 | 0.3960 | 0.2342  | 6.2708 | CEU |
| KIAA0643      | GI_13435144-S | rs12933120 | 16 | 16 | 3574747  | 47554 | 7.1038 | 0.3838 | -0.2519 | 6.2708 | CEU |
| KIAA0643      | GI_13435144-S | rs8061528  | 16 | 16 | 3596483  | 69290 | 7.5410 | 0.4044 | 0.2349  | 6.2708 | CEU |
| KIAA0643      | GI_13435144-S | rs12924990 | 16 | 16 | 3601816  | 74623 | 7.5366 | 0.4152 | -0.2581 | 6.2708 | CEU |
| KIAA0643      | GI_13435144-S | rs11076781 | 16 | 16 | 3603232  | 76039 | 7.5410 | 0.4044 | -0.2349 | 6.2708 | CEU |
| MGC24665      | GI_24308244-S | rs4780355  | 16 | 16 | 11255359 | 97558 | 6.9401 | 0.3865 | 0.5058  | 5.9621 | CEU |
| MGC24665      | GI_24308244-S | rs243325   | 16 | 16 | 11261998 | 90919 | 8.2452 | 0.4361 | -0.5455 | 5.9621 | CEU |
| MGC24665      | GI_24308244-S | rs243317   | 16 | 16 | 11264832 | 88085 | 8.2101 | 0.4461 | -0.5528 | 5.9621 | CEU |

|           |               |            |    |    |          |        |         |        |         |        |     |
|-----------|---------------|------------|----|----|----------|--------|---------|--------|---------|--------|-----|
| MGC24665  | GI_24308244-S | rs243318   | 16 | 16 | 11265519 | 87398  | 9.1446  | 0.4926 | 0.6629  | 5.9621 | CEU |
| MGC24665  | GI_24308244-S | rs243323   | 16 | 16 | 11268703 | 84214  | 8.5539  | 0.4495 | -0.5540 | 5.9621 | CEU |
| MGC24665  | GI_24308244-S | rs367569   | 16 | 16 | 11273001 | 79916  | 6.5169  | 0.3552 | -0.5601 | 5.9621 | CEU |
| MGC24665  | GI_24308244-S | rs4451969  | 16 | 16 | 11291020 | 61897  | 10.0606 | 0.5106 | -0.5912 | 5.9621 | CEU |
| MGC24665  | GI_24308244-S | rs918738   | 16 | 16 | 11347180 | 5737   | 6.6891  | 0.3637 | 0.5005  | 5.9621 | CEU |
| CP110     | GI_34222317-S | rs1475963  | 16 | 16 | 19412783 | 59263  | 6.2620  | 0.3424 | 0.3721  | 5.8266 | CEU |
| CP110     | GI_34222317-S | rs2856608  | 16 | 16 | 19413252 | 58794  | 6.2620  | 0.3424 | 0.3721  | 5.8266 | CEU |
| CP110     | GI_34222317-S | rs2353696  | 16 | 16 | 19413314 | 58732  | 6.2620  | 0.3424 | 0.3721  | 5.8266 | CEU |
| CP110     | GI_34222317-S | rs2856613  | 16 | 16 | 19418602 | 53444  | 6.0374  | 0.3356 | 0.3644  | 5.8266 | CEU |
| CP110     | GI_34222317-S | rs7135     | 16 | 16 | 19421984 | 50062  | 6.2620  | 0.3424 | 0.3721  | 5.8266 | CEU |
| CP110     | GI_34222317-S | rs2285658  | 16 | 16 | 19424404 | 47642  | 6.2620  | 0.3424 | 0.3721  | 5.8266 | CEU |
| CP110     | GI_34222317-S | rs3794697  | 16 | 16 | 19427022 | 45024  | 6.2620  | 0.3424 | 0.3721  | 5.8266 | CEU |
| CP110     | GI_34222317-S | rs2074169  | 16 | 16 | 19429289 | 42757  | 6.2620  | 0.3424 | -0.3721 | 5.8266 | CEU |
| CP110     | GI_34222317-S | rs11640077 | 16 | 16 | 19432372 | 39674  | 6.2620  | 0.3424 | 0.3721  | 5.8266 | CEU |
| CP110     | GI_34222317-S | rs8057970  | 16 | 16 | 19433042 | 39004  | 6.0506  | 0.3462 | 0.4028  | 5.8266 | CEU |
| CP110     | GI_34222317-S | rs8057980  | 16 | 16 | 19433095 | 38951  | 6.2620  | 0.3424 | 0.3721  | 5.8266 | CEU |
| CP110     | GI_34222317-S | rs2353913  | 16 | 16 | 19434443 | 37603  | 6.2015  | 0.3441 | -0.3750 | 5.8266 | CEU |
| CP110     | GI_34222317-S | rs2009787  | 16 | 16 | 19435618 | 36428  | 5.9176  | 0.3342 | 0.3688  | 5.8266 | CEU |
| CP110     | GI_34222317-S | rs2074172  | 16 | 16 | 19436543 | 35503  | 6.0408  | 0.3358 | -0.3636 | 5.8266 | CEU |
| CP110     | GI_34222317-S | rs12927012 | 16 | 16 | 19481454 | 9408   | 6.2354  | 0.3459 | -0.3759 | 5.8266 | CEU |
| CP110     | GI_34222317-S | rs6497388  | 16 | 16 | 19526856 | 54810  | 5.8288  | 0.3200 | -0.4370 | 5.8266 | CEU |
| Hs.460359 | Hs.460359-S   | rs12708653 | 16 | 16 | 23751012 | 61283  | 6.4022  | 0.3494 | -0.1718 | 6.1233 | CEU |
| Hs.460359 | Hs.460359-S   | rs3760106  | 16 | 16 | 23753297 | 58998  | 7.6169  | 0.4079 | -0.1884 | 6.1233 | CEU |
| Hs.460359 | Hs.460359-S   | rs2575390  | 16 | 16 | 23754255 | 58040  | 6.2001  | 0.3440 | 0.1695  | 6.1233 | CEU |
| Hs.460359 | Hs.460359-S   | rs2188360  | 16 | 16 | 23761929 | 50366  | 6.3263  | 0.3456 | -0.1854 | 6.1233 | CEU |
| Hs.460359 | Hs.460359-S   | rs17809041 | 16 | 16 | 23773826 | 38469  | 6.3197  | 0.3453 | 0.2210  | 6.1233 | CEU |
| Hs.460359 | Hs.460359-S   | rs8063132  | 16 | 16 | 23797562 | 14733  | 7.5030  | 0.4026 | 0.2014  | 6.1233 | CEU |
| Hs.460359 | Hs.460359-S   | rs1557671  | 16 | 16 | 23799646 | 12649  | 7.5030  | 0.4026 | -0.2014 | 6.1233 | CEU |
| Hs.460359 | Hs.460359-S   | rs12708654 | 16 | 16 | 23801352 | 10943  | 7.5030  | 0.4026 | 0.2014  | 6.1233 | CEU |
| Hs.460359 | Hs.460359-S   | rs6497694  | 16 | 16 | 23802234 | 10061  | 7.5030  | 0.4026 | -0.2014 | 6.1233 | CEU |
| Hs.460359 | Hs.460359-S   | rs11641627 | 16 | 16 | 23804848 | 7447   | 9.2418  | 0.4783 | 0.2584  | 6.1233 | CEU |
| Hs.460359 | Hs.460359-S   | rs933292   | 16 | 16 | 23806195 | 6100   | 6.9401  | 0.3811 | 0.2218  | 6.1233 | CEU |
| Hs.460359 | Hs.460359-S   | rs16972950 | 16 | 16 | 23807173 | 5122   | 7.7382  | 0.4134 | 0.2469  | 6.1233 | CEU |
| Hs.460359 | Hs.460359-S   | rs17753569 | 16 | 16 | 23813289 | 994    | 7.7382  | 0.4134 | 0.2469  | 6.1233 | CEU |
| Hs.460359 | Hs.460359-S   | rs9922316  | 16 | 16 | 23817453 | 5158   | 7.6959  | 0.4170 | 0.2341  | 6.1233 | CEU |
| Hs.460359 | Hs.460359-S   | rs9934501  | 16 | 16 | 23818240 | 5945   | 9.2418  | 0.4783 | 0.2584  | 6.1233 | CEU |
| LCMT1     | GI_15082255-I | rs8062337  | 16 | 16 | 25034942 | 61170  | 6.6853  | 0.3635 | 0.3233  | 6.2591 | CEU |
| LCMT1     | GI_15082255-I | rs13338420 | 16 | 16 | 25041911 | 68139  | 6.6601  | 0.3673 | -0.3265 | 6.2591 | CEU |
| LCMT1     | GI_15082255-I | rs11860180 | 16 | 16 | 25043853 | 70081  | 7.6961  | 0.4170 | -0.3469 | 6.2591 | CEU |
| LCMT1     | GI_15082255-I | rs7188975  | 16 | 16 | 25044950 | 71178  | 14.7967 | 0.6626 | 0.4341  | 6.2591 | CEU |
| LCMT1     | GI_15082255-I | rs16974325 | 16 | 16 | 25045456 | 71684  | 11.1338 | 0.5500 | -0.4128 | 6.2591 | CEU |
| LCMT1     | GI_15082255-I | rs1549852  | 16 | 16 | 25046613 | 72841  | 9.1815  | 0.5207 | -0.4003 | 6.2591 | CEU |
| LCMT1     | GI_15082255-I | rs1549851  | 16 | 16 | 25049976 | 76204  | 11.1338 | 0.5500 | -0.4128 | 6.2591 | CEU |
| LCMT1     | GI_15082255-I | rs12708670 | 16 | 16 | 25053505 | 79733  | 11.1338 | 0.5500 | -0.4128 | 6.2591 | CEU |
| LCMT1     | GI_15082255-I | rs12600171 | 16 | 16 | 25054879 | 81107  | 10.9965 | 0.5515 | -0.4145 | 6.2591 | CEU |
| LCMT1     | GI_15082255-I | rs919705   | 16 | 16 | 25055429 | 81657  | 11.1338 | 0.5500 | 0.4128  | 6.2591 | CEU |
| LCMT1     | GI_15082255-I | rs11074678 | 16 | 16 | 25057227 | 83455  | 12.1079 | 0.5831 | 0.4203  | 6.2591 | CEU |
| LCMT1     | GI_15082255-I | rs277907   | 16 | 16 | 25060903 | 87131  | 11.1338 | 0.5500 | 0.4128  | 6.2591 | CEU |
| LCMT1     | GI_15082255-I | rs172134   | 16 | 16 | 25062133 | 88361  | 11.1041 | 0.5553 | 0.4202  | 6.2591 | CEU |
| LCMT1     | GI_15082255-I | rs277908   | 16 | 16 | 25062635 | 88863  | 12.1079 | 0.5831 | 0.4203  | 6.2591 | CEU |
| LCMT1     | GI_15082255-I | rs277909   | 16 | 16 | 25063704 | 89932  | 11.1338 | 0.5500 | -0.4128 | 6.2591 | CEU |
| LCMT1     | GI_15082255-I | rs277910   | 16 | 16 | 25063786 | 90014  | 11.1338 | 0.5500 | 0.4128  | 6.2591 | CEU |
| LCMT1     | GI_15082255-I | rs277914   | 16 | 16 | 25066419 | 92647  | 11.1338 | 0.5500 | 0.4128  | 6.2591 | CEU |
| LCMT1     | GI_15082255-I | rs277917   | 16 | 16 | 25066646 | 92874  | 14.7967 | 0.6626 | -0.4341 | 6.2591 | CEU |
| LCMT1     | GI_15082255-I | rs277886   | 16 | 16 | 25070005 | 96233  | 14.7967 | 0.6626 | -0.4341 | 6.2591 | CEU |
| LCMT1     | GI_15082255-I | rs277885   | 16 | 16 | 25070614 | 96842  | 11.1338 | 0.5500 | -0.4128 | 6.2591 | CEU |
| LCMT1     | GI_15082255-I | rs277884   | 16 | 16 | 25071300 | 97528  | 11.1338 | 0.5500 | 0.4128  | 6.2591 | CEU |
| LCMT1     | GI_15082255-I | rs277883   | 16 | 16 | 25072342 | 98570  | 11.1338 | 0.5500 | 0.4128  | 6.2591 | CEU |
| LCMT1     | GI_15082255-I | rs277894   | 16 | 16 | 25075486 | 101714 | 11.1338 | 0.5500 | -0.4128 | 6.2591 | CEU |

|           |               |            |    |    |          |        |         |        |         |        |     |
|-----------|---------------|------------|----|----|----------|--------|---------|--------|---------|--------|-----|
| LCMT1     | GI_15082255-I | rs277895   | 16 | 16 | 25077340 | 103568 | 11.1338 | 0.5500 | 0.4128  | 6.2591 | CEU |
| LCMT1     | GI_15082255-I | rs277897   | 16 | 16 | 25079173 | 105401 | 12.0564 | 0.5879 | 0.4234  | 6.2591 | CEU |
| LCMT1     | GI_15082255-I | rs277899   | 16 | 16 | 25079775 | 106003 | 10.5978 | 0.5370 | 0.4039  | 6.2591 | CEU |
| LCMT1     | GI_15082255-I | rs277900   | 16 | 16 | 25081500 | 107728 | 14.7967 | 0.6626 | -0.4341 | 6.2591 | CEU |
| LCMT1     | GI_15082255-I | rs277903   | 16 | 16 | 25082623 | 108851 | 13.4895 | 0.6594 | 0.4330  | 6.2591 | CEU |
| LCMT1     | GI_15082255-I | rs277891   | 16 | 16 | 25088257 | 114485 | 14.7967 | 0.6626 | 0.4341  | 6.2591 | CEU |
| LCMT1     | GI_15082255-I | rs277892   | 16 | 16 | 25088400 | 114628 | 12.1079 | 0.5831 | 0.4203  | 6.2591 | CEU |
| LCMT1     | GI_15082255-I | rs182171   | 16 | 16 | 25088443 | 114671 | 11.1338 | 0.5500 | -0.4128 | 6.2591 | CEU |
| LCMT1     | GI_15082255-I | rs277893   | 16 | 16 | 25089212 | 115440 | 14.4428 | 0.6595 | 0.4324  | 6.2591 | CEU |
| LCMT1     | GI_15082255-I | rs277888   | 16 | 16 | 25091503 | 117731 | 10.8786 | 0.5472 | -0.4104 | 6.2591 | CEU |
| LCMT1     | GI_15082255-I | rs4787305  | 16 | 16 | 25103357 | 129585 | 11.4480 | 0.5673 | -0.4239 | 6.2591 | CEU |
| LCMT1     | GI_15082255-I | rs4787696  | 16 | 16 | 25108484 | 134712 | 6.7228  | 0.3654 | 0.3710  | 6.2591 | CEU |
| LCMT1     | GI_15082255-I | rs4238912  | 16 | 16 | 25110958 | 137186 | 6.7228  | 0.3654 | -0.3710 | 6.2591 | CEU |
| LCMT1     | GI_15082255-I | rs4787308  | 16 | 16 | 25111117 | 137345 | 6.7228  | 0.3654 | -0.3710 | 6.2591 | CEU |
| LCMT1     | GI_15082255-I | rs8059001  | 16 | 16 | 25119180 | 145408 | 6.7228  | 0.3654 | -0.3710 | 6.2591 | CEU |
| LCMT1     | GI_15082255-I | rs7205902  | 16 | 16 | 25120016 | 146244 | 7.3915  | 0.3974 | 0.3724  | 6.2591 | CEU |
| IL21R     | GI_31083179-I | rs4262953  | 16 | 16 | 27310970 | 11036  | 6.0349  | 0.3307 | -0.1719 | 5.9531 | CEU |
| IL21R     | GI_31083179-I | rs2107357  | 16 | 16 | 27318330 | 3676   | 7.0087  | 0.4128 | 0.1955  | 5.9531 | CEU |
| BBS2      | GI_22208996-S | rs4783935  | 16 | 16 | 54932997 | 143177 | 6.5304  | 0.3559 | -0.3185 | 5.9144 | CEU |
| BBS2      | GI_22208996-S | rs4784658  | 16 | 16 | 54933783 | 142391 | 7.1099  | 0.3894 | -0.3263 | 5.9144 | CEU |
| BBS2      | GI_22208996-S | rs17355357 | 16 | 16 | 54958477 | 117697 | 9.3336  | 0.4820 | -0.3904 | 5.9144 | CEU |
| BBS2      | GI_22208996-S | rs9921942  | 16 | 16 | 54975837 | 100337 | 9.3336  | 0.4820 | -0.3904 | 5.9144 | CEU |
| BBS2      | GI_22208996-S | rs8060037  | 16 | 16 | 55042321 | 33853  | 8.6403  | 0.4773 | -0.3875 | 5.9144 | CEU |
| BBS2      | GI_22208996-S | rs4556786  | 16 | 16 | 55043372 | 32802  | 9.1695  | 0.4813 | 0.3923  | 5.9144 | CEU |
| BBS2      | GI_22208996-S | rs13337155 | 16 | 16 | 55062225 | 13949  | 10.6247 | 0.5317 | 0.4104  | 5.9144 | CEU |
| BBS2      | GI_22208996-S | rs9889162  | 16 | 16 | 55113289 | 37115  | 9.0298  | 0.4815 | 0.3915  | 5.9144 | CEU |
| BBS2      | GI_22208996-S | rs9940872  | 16 | 16 | 55119358 | 43184  | 7.7131  | 0.4606 | 0.3705  | 5.9144 | CEU |
| LOC283970 | GI_40217627-S | rs12596731 | 16 | 16 | 68109873 | 457977 | 5.9451  | 0.3564 | -0.6663 | 5.772  | CEU |
| LOC283970 | GI_40217627-S | rs2270838  | 16 | 16 | 68516724 | 51126  | 11.8660 | 0.5752 | 0.7725  | 5.772  | CEU |
| LOC283970 | GI_40217627-S | rs3748386  | 16 | 16 | 68532160 | 35690  | 16.4193 | 0.7031 | -0.8267 | 5.772  | CEU |
| LOC283970 | GI_40217627-S | rs9939092  | 16 | 16 | 68596778 | 28928  | 20.7681 | 0.7894 | 0.8646  | 5.772  | CEU |
| LOC283970 | GI_40217627-S | rs12930433 | 16 | 16 | 68608544 | 40694  | 19.7164 | 0.7830 | 0.8650  | 5.772  | CEU |
| LOC283970 | GI_40217627-S | rs11866381 | 16 | 16 | 68621378 | 53528  | 20.7681 | 0.7894 | -0.8646 | 5.772  | CEU |
| LOC283970 | GI_40217627-S | rs13337742 | 16 | 16 | 68629172 | 61322  | 14.2427 | 0.6605 | 0.8013  | 5.772  | CEU |
| LOC283970 | GI_40217627-S | rs8058597  | 16 | 16 | 68639715 | 71865  | 20.7681 | 0.7894 | 0.8646  | 5.772  | CEU |
| LOC283970 | GI_40217627-S | rs6499292  | 16 | 16 | 68661559 | 93709  | 20.4999 | 0.7906 | 0.8669  | 5.772  | CEU |
| LOC283970 | GI_40217627-S | rs7200430  | 16 | 16 | 69076435 | 508585 | 6.6643  | 0.3676 | -0.5892 | 5.772  | CEU |
| LOC283970 | GI_40217627-S | rs8063990  | 16 | 16 | 69084446 | 516596 | 6.7730  | 0.3678 | -0.5886 | 5.772  | CEU |
| LOC283970 | GI_40217627-S | rs8064013  | 16 | 16 | 69084526 | 516676 | 6.7730  | 0.3678 | -0.5886 | 5.772  | CEU |
| LOC283970 | GI_40217627-S | rs722579   | 16 | 16 | 69085725 | 517875 | 6.7730  | 0.3678 | -0.5886 | 5.772  | CEU |
| LOC283970 | GI_40217627-S | rs2303793  | 16 | 16 | 69087860 | 520010 | 6.7730  | 0.3678 | 0.5886  | 5.772  | CEU |
| LOC283970 | GI_40217627-S | rs11641683 | 16 | 16 | 69088048 | 520198 | 6.4346  | 0.3560 | 0.5779  | 5.772  | CEU |
| LOC283970 | GI_40217627-S | rs11645585 | 16 | 16 | 69094337 | 526487 | 6.7730  | 0.3678 | 0.5886  | 5.772  | CEU |
| LOC283970 | GI_40217627-S | rs8052125  | 16 | 16 | 69094830 | 526980 | 6.7730  | 0.3678 | 0.5886  | 5.772  | CEU |
| LOC283970 | GI_40217627-S | rs3762171  | 16 | 16 | 69103735 | 535885 | 6.6346  | 0.3661 | -0.5847 | 5.772  | CEU |
| LOC283970 | GI_40217627-S | rs8057610  | 16 | 16 | 69106088 | 538238 | 6.7730  | 0.3678 | -0.5886 | 5.772  | CEU |
| LOC283970 | GI_40217627-S | rs7204583  | 16 | 16 | 69110883 | 543033 | 6.7730  | 0.3678 | 0.5886  | 5.772  | CEU |
| LOC283970 | GI_40217627-S | rs2288491  | 16 | 16 | 69115540 | 547690 | 6.6643  | 0.3676 | 0.5892  | 5.772  | CEU |
| LOC283970 | GI_40217627-S | rs11866400 | 16 | 16 | 69123035 | 555185 | 6.0231  | 0.3301 | -0.5433 | 5.772  | CEU |
| LOC283970 | GI_40217627-S | rs11645437 | 16 | 16 | 69133353 | 565503 | 6.7730  | 0.3678 | -0.5886 | 5.772  | CEU |
| LOC283970 | GI_40217627-S | rs11075770 | 16 | 16 | 69141759 | 573909 | 6.7730  | 0.3678 | 0.5886  | 5.772  | CEU |
| LOC283970 | GI_40217627-S | rs4513092  | 16 | 16 | 69157663 | 589813 | 6.7730  | 0.3678 | -0.5886 | 5.772  | CEU |
| LOC283970 | GI_40217627-S | rs12597401 | 16 | 16 | 69159992 | 592142 | 6.7730  | 0.3678 | -0.5886 | 5.772  | CEU |
| LOC283970 | GI_40217627-S | rs4284632  | 16 | 16 | 69164056 | 596206 | 6.6560  | 0.3671 | -0.5888 | 5.772  | CEU |
| LOC283970 | GI_40217627-S | rs11645214 | 16 | 16 | 69166488 | 598638 | 6.7018  | 0.3694 | -0.5899 | 5.772  | CEU |
| LOC283970 | GI_40217627-S | rs7198317  | 16 | 16 | 69167724 | 599874 | 5.7742  | 0.3415 | 0.5552  | 5.772  | CEU |
| LOC283970 | GI_40217627-S | rs8062178  | 16 | 16 | 69168733 | 600883 | 7.0895  | 0.3938 | -0.6296 | 5.772  | CEU |
| LOC283970 | GI_40217627-S | rs11640374 | 16 | 16 | 69173484 | 605634 | 6.4929  | 0.3590 | 0.5748  | 5.772  | CEU |
| LOC283970 | GI_40217627-S | rs11645287 | 16 | 16 | 69173799 | 605949 | 6.6893  | 0.3688 | -0.5846 | 5.772  | CEU |

|              |               |            |    |    |          |        |         |        |         |        |     |
|--------------|---------------|------------|----|----|----------|--------|---------|--------|---------|--------|-----|
| LOC283970    | GI_40217627-S | rs11643373 | 16 | 16 | 69175791 | 607941 | 6.7730  | 0.3678 | 0.5886  | 5.772  | CEU |
| LOC283970    | GI_40217627-S | rs1006985  | 16 | 16 | 69194496 | 626646 | 6.1413  | 0.3362 | -0.5932 | 5.772  | CEU |
| ADAT1        | GI_7382475-S  | rs7500366  | 16 | 16 | 75175416 | 984446 | 5.6598  | 0.3111 | -0.1549 | 5.5394 | CEU |
| WVOX         | GI_18860883-I | rs8054537  | 16 | 16 | 76853337 | 16699  | 7.3785  | 0.3968 | -0.4422 | 6.4397 | CEU |
| WVOX         | GI_18860883-I | rs7189213  | 16 | 16 | 76857692 | 12344  | 7.8761  | 0.4197 | -0.4425 | 6.4397 | CEU |
| WVOX         | GI_18860883-I | rs6564520  | 16 | 16 | 76863720 | 6316   | 7.7879  | 0.4212 | -0.4232 | 6.4397 | CEU |
| FLJ12998     | GI_12232436-S | rs8047645  | 16 | 16 | 85138692 | 16578  | 7.0859  | 0.3882 | 0.6089  | 6.8281 | CEU |
| LOC348180    | GI_37541570-S | rs1317756  | 16 | 16 | 87307524 | 1587   | 6.4364  | 0.3512 | 0.1560  | 5.668  | CEU |
| SPG7         | GI_40806172-I | rs8043788  | 16 | 16 | 88077063 | 54306  | 7.6816  | 0.4108 | -0.1438 | 6.2688 | CEU |
| SPG7         | GI_40806172-I | rs3809641  | 16 | 16 | 88101667 | 29702  | 7.1255  | 0.3849 | -0.1372 | 6.2688 | CEU |
| SPG7         | GI_40806172-I | rs3922634  | 16 | 16 | 88104267 | 27102  | 7.1255  | 0.3849 | 0.1372  | 6.2688 | CEU |
| SPG7         | GI_40806172-I | rs8046182  | 16 | 16 | 88108717 | 22652  | 7.0870  | 0.3883 | 0.1367  | 6.2688 | CEU |
| SPG7         | GI_40806172-I | rs8052076  | 16 | 16 | 88111310 | 20059  | 7.0945  | 0.3996 | 0.1379  | 6.2688 | CEU |
| SPG7         | GI_40806172-I | rs11862081 | 16 | 16 | 88115989 | 15380  | 6.7683  | 0.3727 | 0.1343  | 6.2688 | CEU |
| SPG7         | GI_40806172-I | rs3803680  | 16 | 16 | 88117744 | 13625  | 7.1255  | 0.3849 | 0.1372  | 6.2688 | CEU |
| SPG7         | GI_40806172-I | rs3803679  | 16 | 16 | 88118168 | 13201  | 7.3941  | 0.4029 | 0.1426  | 6.2688 | CEU |
| SPG7         | GI_40806172-I | rs3803677  | 16 | 16 | 88123224 | 8145   | 7.1255  | 0.3849 | 0.1372  | 6.2688 | CEU |
| SPG7         | GI_40806172-I | rs3803676  | 16 | 16 | 88123607 | 7762   | 7.1255  | 0.3849 | -0.1372 | 6.2688 | CEU |
| SPG7         | GI_40806172-I | rs463701   | 16 | 16 | 88126261 | 5108   | 7.2025  | 0.3885 | 0.1401  | 6.2688 | CEU |
| SPG7         | GI_40806172-I | rs2460456  | 16 | 16 | 88129394 | 1975   | 6.3989  | 0.3493 | -0.1395 | 6.2688 | CEU |
| SPG7         | GI_40806172-I | rs11640186 | 16 | 16 | 88129507 | 1862   | 6.6061  | 0.3596 | -0.1364 | 6.2688 | CEU |
| SPG7         | GI_40806172-I | rs382745   | 16 | 16 | 88131087 | 282    | 7.2025  | 0.3885 | -0.1401 | 6.2688 | CEU |
| SPG7         | GI_40806172-I | rs2056309  | 16 | 16 | 88134915 | 3546   | 7.0743  | 0.3877 | 0.1450  | 6.2688 | CEU |
| RPL13        | GI_15431296-A | rs2377056  | 16 | 16 | 88143656 | 13371  | 5.7999  | 0.3279 | 0.4434  | 5.7899 | CEU |
| LOC374758    | GI_37544593-S | rs11150880 | 17 | 17 | 237667   | 26503  | 7.4582  | 0.4005 | 0.1803  | 7.2447 | CEU |
| LOC400566    | GI_42661283-S | rs11150880 | 17 | 17 | 237667   | 26975  | 9.2541  | 0.4788 | 0.8368  | 6.7723 | CEU |
| LOC400566    | GI_42661283-S | rs10871516 | 17 | 17 | 245185   | 19457  | 8.4334  | 0.4501 | 0.9792  | 6.7723 | CEU |
| LOC374758    | GI_37544593-S | rs4130140  | 17 | 17 | 257873   | 6297   | 15.3049 | 0.6758 | -0.3209 | 7.2447 | CEU |
| LOC400566    | GI_42661283-S | rs4130140  | 17 | 17 | 257873   | 6769   | 22.2377 | 0.8125 | -1.4952 | 6.7723 | CEU |
| LOC374758    | GI_37544593-S | rs6565724  | 17 | 17 | 271176   | 7006   | 14.4965 | 0.6610 | -0.2579 | 7.2447 | CEU |
| LOC400566    | GI_42661283-S | rs6565724  | 17 | 17 | 271176   | 6534   | 17.7402 | 0.7386 | -1.1615 | 6.7723 | CEU |
| CTNS         | GI_4826681-S  | rs161370   | 17 | 17 | 3477002  | 34422  | 6.5620  | 0.3574 | 0.2473  | 5.7857 | CEU |
| CTNS         | GI_4826681-S  | rs222790   | 17 | 17 | 3478239  | 33185  | 6.5620  | 0.3574 | 0.2473  | 5.7857 | CEU |
| CTNS         | GI_4826681-S  | rs12936393 | 17 | 17 | 3498059  | 13365  | 6.3209  | 0.3453 | -0.2681 | 5.7857 | CEU |
| CTNS         | GI_4826681-S  | rs4790530  | 17 | 17 | 3502173  | 9251   | 6.3209  | 0.3453 | 0.2681  | 5.7857 | CEU |
| UBE2G1       | GI_33359696-A | rs781859   | 17 | 17 | 3870080  | 251032 | 6.1836  | 0.3639 | 0.4653  | 5.649  | CEU |
| CHRNE        | GI_38327653-S | rs7225684  | 17 | 17 | 4688386  | 53795  | 9.6635  | 0.4952 | 0.2653  | 8.0911 | CEU |
| CHRNE        | GI_38327653-S | rs8078173  | 17 | 17 | 4709738  | 32443  | 9.4631  | 0.4994 | -0.2523 | 8.0911 | CEU |
| CHRNE        | GI_38327653-S | rs8070572  | 17 | 17 | 4713124  | 29057  | 9.2987  | 0.4866 | -0.2568 | 8.0911 | CEU |
| CHRNE        | GI_38327653-S | rs2302321  | 17 | 17 | 4728587  | 13594  | 10.4232 | 0.5243 | 0.2819  | 8.0911 | CEU |
| CHRNE        | GI_38327653-S | rs7214776  | 17 | 17 | 4752393  | 10212  | 9.6569  | 0.4949 | -0.2846 | 8.0911 | CEU |
| CHRNE        | GI_38327653-S | rs16954243 | 17 | 17 | 4753179  | 10998  | 9.6569  | 0.4949 | 0.2846  | 8.0911 | CEU |
| CHRNE        | GI_38327653-S | rs8081611  | 17 | 17 | 4754141  | 11960  | 9.6569  | 0.4949 | -0.2846 | 8.0911 | CEU |
| DKFZP566H073 | GI_14149701-S | rs12602901 | 17 | 17 | 4765410  | 23767  | 7.6875  | 0.4166 | -0.4333 | 6.1838 | CEU |
| DKFZP566H073 | GI_14149701-S | rs11078540 | 17 | 17 | 4772985  | 16192  | 7.8547  | 0.4187 | -0.4297 | 6.1838 | CEU |
| DKFZP566H073 | GI_14149701-S | rs400688   | 17 | 17 | 4780674  | 8503   | 7.9302  | 0.4277 | -0.4351 | 6.1838 | CEU |
| DKFZP566H073 | GI_14149701-S | rs238245   | 17 | 17 | 4788188  | 989    | 7.3967  | 0.4030 | 0.4131  | 6.1838 | CEU |
| DKFZP566H073 | GI_14149701-S | rs238224   | 17 | 17 | 4804133  | 14956  | 6.2198  | 0.3451 | -0.4759 | 6.1838 | CEU |
| DKFZP566H073 | GI_14149701-S | rs452825   | 17 | 17 | 4814939  | 25762  | 6.3409  | 0.3464 | -0.3924 | 6.1838 | CEU |
| DKFZP566H073 | GI_14149701-S | rs1859434  | 17 | 17 | 4823676  | 34499  | 6.3409  | 0.3464 | 0.3924  | 6.1838 | CEU |
| DKFZP566H073 | GI_14149701-S | rs238234   | 17 | 17 | 4824542  | 35365  | 6.3409  | 0.3464 | -0.3924 | 6.1838 | CEU |
| DKFZP566H073 | GI_14149701-S | rs238232   | 17 | 17 | 4826761  | 37584  | 6.3409  | 0.3464 | -0.3924 | 6.1838 | CEU |
| DKFZP566H073 | GI_14149701-S | rs238237   | 17 | 17 | 4843682  | 54505  | 6.6345  | 0.3661 | -0.4290 | 6.1838 | CEU |
| RABEP1       | GI_31377797-S | rs1065483  | 17 | 17 | 5225494  | 4174   | 6.0406  | 0.3358 | -0.3800 | 5.9965 | CEU |
| RABEP1       | GI_31377797-S | rs7426     | 17 | 17 | 5229707  | 39     | 6.0552  | 0.3318 | -0.3766 | 5.9965 | CEU |
| RABEP1       | GI_31377797-S | rs3026133  | 17 | 17 | 5249327  | 19659  | 7.9743  | 0.4297 | -0.4058 | 5.9965 | CEU |
| RABEP1       | GI_31377797-S | rs1806261  | 17 | 17 | 5257732  | 28064  | 6.0552  | 0.3318 | 0.3766  | 5.9965 | CEU |
| DERP6        | GI_44662825-I | rs222835   | 17 | 17 | 7074853  | 21588  | 7.4732  | 0.4066 | 0.2286  | 5.9783 | CEU |
| DERP6        | GI_44662825-I | rs222851   | 17 | 17 | 7079962  | 16479  | 7.8884  | 0.4315 | -0.2308 | 5.9783 | CEU |

|           |               |            |    |    |          |        |        |        |         |        |     |
|-----------|---------------|------------|----|----|----------|--------|--------|--------|---------|--------|-----|
| DERP6     | GI_44662825-I | rs222852   | 17 | 17 | 7081330  | 15111  | 6.2583 | 0.3422 | 0.2033  | 5.9783 | CEU |
| DERP6     | GI_44662825-I | rs222843   | 17 | 17 | 7086705  | 9736   | 7.6152 | 0.4078 | 0.2288  | 5.9783 | CEU |
| DERP6     | GI_44662825-I | rs402514   | 17 | 17 | 7098927  | 2486   | 8.0072 | 0.4312 | 0.2306  | 5.9783 | CEU |
| DERP6     | GI_44662825-I | rs367181   | 17 | 17 | 7101248  | 4807   | 6.2583 | 0.3422 | -0.2033 | 5.9783 | CEU |
| DERP6     | GI_44662825-I | rs4562     | 17 | 17 | 7104463  | 8022   | 8.5043 | 0.4474 | -0.2423 | 5.9783 | CEU |
| DERP6     | GI_44662825-I | rs222857   | 17 | 17 | 7105287  | 8846   | 6.2583 | 0.3422 | -0.2033 | 5.9783 | CEU |
| DERP6     | GI_44662825-I | rs2654185  | 17 | 17 | 7124086  | 27645  | 6.0257 | 0.3303 | -0.2020 | 5.9783 | CEU |
| Hs.379903 | Hs.379903-S   | rs2324082  | 17 | 17 | 15809016 | 11674  | 7.6668 | 0.4156 | -0.5930 | 5.6594 | CEU |
| Hs.379903 | Hs.379903-S   | rs2779212  | 17 | 17 | 15817380 | 3310   | 9.0785 | 0.4716 | -0.6331 | 5.6594 | CEU |
| Hs.379903 | Hs.379903-S   | rs1045599  | 17 | 17 | 15820635 | 55     | 9.0785 | 0.4716 | -0.6331 | 5.6594 | CEU |
| Hs.379903 | Hs.379903-S   | rs11654    | 17 | 17 | 15821876 | 1186   | 9.0785 | 0.4716 | -0.6331 | 5.6594 | CEU |
| Hs.379903 | Hs.379903-S   | rs2286795  | 17 | 17 | 15824534 | 3844   | 8.9849 | 0.4736 | 0.6338  | 5.6594 | CEU |
| Hs.379903 | Hs.379903-S   | rs2286796  | 17 | 17 | 15824952 | 4262   | 9.0785 | 0.4716 | 0.6331  | 5.6594 | CEU |
| Hs.379903 | Hs.379903-S   | rs8070859  | 17 | 17 | 15828514 | 7824   | 7.0320 | 0.3910 | 0.5399  | 5.6594 | CEU |
| Hs.379903 | Hs.379903-S   | rs4792709  | 17 | 17 | 15833166 | 12476  | 7.6567 | 0.4097 | 0.5563  | 5.6594 | CEU |
| Hs.379903 | Hs.379903-S   | rs6502482  | 17 | 17 | 15839966 | 19276  | 7.4199 | 0.3987 | 0.5384  | 5.6594 | CEU |
| Hs.379903 | Hs.379903-S   | rs9891938  | 17 | 17 | 15855797 | 35107  | 6.7776 | 0.4331 | 0.5911  | 5.6594 | CEU |
| Hs.379903 | Hs.379903-S   | rs11869450 | 17 | 17 | 15864434 | 43744  | 7.6567 | 0.4097 | 0.5563  | 5.6594 | CEU |
| Hs.379903 | Hs.379903-S   | rs6416868  | 17 | 17 | 15865095 | 44405  | 6.9675 | 0.3933 | 0.5447  | 5.6594 | CEU |
| Hs.379903 | Hs.379903-S   | rs11657160 | 17 | 17 | 15884056 | 63366  | 7.3153 | 0.3992 | -0.5385 | 5.6594 | CEU |
| Hs.379903 | Hs.379903-S   | rs1075901  | 17 | 17 | 15884635 | 63945  | 7.1821 | 0.4038 | 0.5380  | 5.6594 | CEU |
| Hs.379903 | Hs.379903-S   | rs3785632  | 17 | 17 | 15886333 | 65643  | 7.1484 | 0.3859 | -0.5208 | 5.6594 | CEU |
| Hs.379903 | Hs.379903-S   | rs4792717  | 17 | 17 | 15889155 | 68465  | 7.4199 | 0.3987 | 0.5384  | 5.6594 | CEU |
| Hs.379903 | Hs.379903-S   | rs2157991  | 17 | 17 | 15902676 | 81986  | 7.4199 | 0.3987 | -0.5384 | 5.6594 | CEU |
| Hs.379903 | Hs.379903-S   | rs2157990  | 17 | 17 | 15902718 | 82028  | 7.4199 | 0.3987 | 0.5384  | 5.6594 | CEU |
| Hs.379903 | Hs.379903-S   | rs2285583  | 17 | 17 | 15908868 | 88178  | 7.6567 | 0.4097 | 0.5563  | 5.6594 | CEU |
| Hs.379903 | Hs.379903-S   | rs2285582  | 17 | 17 | 15909398 | 88708  | 7.8465 | 0.4296 | 0.5687  | 5.6594 | CEU |
| Hs.379903 | Hs.379903-S   | rs3785628  | 17 | 17 | 15911407 | 90717  | 7.4199 | 0.3987 | -0.5384 | 5.6594 | CEU |
| Hs.379903 | Hs.379903-S   | rs7214695  | 17 | 17 | 15925269 | 104579 | 6.8120 | 0.3749 | 0.5132  | 5.6594 | CEU |
| Hs.379903 | Hs.379903-S   | rs7207463  | 17 | 17 | 15944984 | 124294 | 7.4423 | 0.4164 | 0.5392  | 5.6594 | CEU |
| Hs.379903 | Hs.379903-S   | rs2285580  | 17 | 17 | 15945912 | 125222 | 7.4199 | 0.3987 | 0.5384  | 5.6594 | CEU |
| Hs.379903 | Hs.379903-S   | rs11870608 | 17 | 17 | 15966395 | 145705 | 7.4199 | 0.3987 | 0.5384  | 5.6594 | CEU |
| Hs.379903 | Hs.379903-S   | rs9897388  | 17 | 17 | 15978351 | 157661 | 6.8324 | 0.4225 | -0.5705 | 5.6594 | CEU |
| Hs.379903 | Hs.379903-S   | rs2324142  | 17 | 17 | 15982031 | 161341 | 7.4199 | 0.3987 | -0.5384 | 5.6594 | CEU |
| Hs.379903 | Hs.379903-S   | rs2285579  | 17 | 17 | 15987570 | 166880 | 7.4199 | 0.3987 | -0.5384 | 5.6594 | CEU |
| Hs.379903 | Hs.379903-S   | rs178839   | 17 | 17 | 16014596 | 193906 | 7.4199 | 0.3987 | -0.5384 | 5.6594 | CEU |
| Hs.379903 | Hs.379903-S   | rs178838   | 17 | 17 | 16016626 | 195936 | 7.4199 | 0.3987 | -0.5384 | 5.6594 | CEU |
| Hs.379903 | Hs.379903-S   | rs1236276  | 17 | 17 | 16024409 | 203719 | 7.1228 | 0.3900 | -0.5383 | 5.6594 | CEU |
| Hs.379903 | Hs.379903-S   | rs178814   | 17 | 17 | 16034880 | 214190 | 7.4199 | 0.3987 | 0.5384  | 5.6594 | CEU |
| Hs.379903 | Hs.379903-S   | rs178810   | 17 | 17 | 16038155 | 217465 | 7.4199 | 0.3987 | -0.5384 | 5.6594 | CEU |
| Hs.379903 | Hs.379903-S   | rs178785   | 17 | 17 | 16077014 | 256324 | 6.2848 | 0.3435 | -0.4922 | 5.6594 | CEU |
| Hs.379903 | Hs.379903-S   | rs7210224  | 17 | 17 | 16088546 | 267856 | 5.6611 | 0.3112 | -0.4941 | 5.6594 | CEU |
| SHMT1     | GI_22547185-I | rs941451   | 17 | 17 | 18114705 | 64948  | 5.8053 | 0.3234 | -0.2737 | 5.4542 | CEU |
| SHMT1     | GI_22547185-I | rs12946752 | 17 | 17 | 18117148 | 62505  | 5.8458 | 0.3209 | 0.2950  | 5.4542 | CEU |
| SHMT1     | GI_22547185-I | rs8071231  | 17 | 17 | 18122519 | 57134  | 5.5120 | 0.3033 | 0.2738  | 5.4542 | CEU |
| SHMT1     | GI_22547185-I | rs4925160  | 17 | 17 | 18126324 | 53329  | 5.5120 | 0.3033 | 0.2738  | 5.4542 | CEU |
| SHMT1     | GI_22547185-I | rs7225932  | 17 | 17 | 18149059 | 30594  | 5.4579 | 0.3004 | -0.2970 | 5.4542 | CEU |
| SHMT1     | GI_22547185-I | rs7207123  | 17 | 17 | 18149269 | 30384  | 5.5120 | 0.3033 | -0.2738 | 5.4542 | CEU |
| SHMT1     | GI_22547185-I | rs2273030  | 17 | 17 | 18158889 | 20764  | 5.5202 | 0.3223 | -0.2853 | 5.4542 | CEU |
| SHMT1     | GI_22547185-I | rs4924845  | 17 | 17 | 18163272 | 16381  | 5.5120 | 0.3033 | 0.2738  | 5.4542 | CEU |
| SHMT1     | GI_22547185-I | rs4924847  | 17 | 17 | 18164653 | 15000  | 5.5749 | 0.3205 | -0.2829 | 5.4542 | CEU |
| SHMT1     | GI_22547185-I | rs921865   | 17 | 17 | 18164920 | 14733  | 5.5120 | 0.3033 | -0.2738 | 5.4542 | CEU |
| SHMT1     | GI_22547185-I | rs921866   | 17 | 17 | 18165207 | 14446  | 5.7324 | 0.3243 | 0.2857  | 5.4542 | CEU |
| SHMT1     | GI_22547185-I | rs921986   | 17 | 17 | 18167806 | 11847  | 5.6057 | 0.3128 | -0.2773 | 5.4542 | CEU |
| SHMT1     | GI_22547185-I | rs12939757 | 17 | 17 | 18171385 | 8268   | 5.5787 | 0.3524 | 0.2877  | 5.4542 | CEU |
| SHMT1     | GI_22547185-I | rs1979276  | 17 | 17 | 18172723 | 6930   | 5.5120 | 0.3033 | -0.2738 | 5.4542 | CEU |
| SHMT1     | GI_22547185-I | rs3783     | 17 | 17 | 18172742 | 6911   | 6.3159 | 0.3602 | -0.2930 | 5.4542 | CEU |
| SHMT1     | GI_22547185-I | rs2273028  | 17 | 17 | 18179737 | 84     | 5.5226 | 0.3129 | 0.2878  | 5.4542 | CEU |
| SHMT1     | GI_22547185-I | rs7207306  | 17 | 17 | 18188087 | 8434   | 5.6509 | 0.3107 | 0.2791  | 5.4542 | CEU |

|          |               |            |    |    |          |        |         |        |         |        |     |
|----------|---------------|------------|----|----|----------|--------|---------|--------|---------|--------|-----|
| hmm23621 | hmm23621-S    | rs4517848  | 17 | 17 | 20686412 | 151776 | 5.9719  | 0.3275 | -0.0374 | 5.3811 | CEU |
| MGC19764 | GI_42661257-S | rs12950654 | 17 | 17 | 30562589 | 55992  | 6.3613  | 0.3474 | 0.5007  | 5.8766 | CEU |
| MGC19764 | GI_42661257-S | rs10512467 | 17 | 17 | 30563550 | 55031  | 6.3613  | 0.3474 | 0.5007  | 5.8766 | CEU |
| MGC19764 | GI_42661257-S | rs7223413  | 17 | 17 | 30566189 | 52392  | 6.5881  | 0.3637 | 0.5058  | 5.8766 | CEU |
| hmm5445  | hmm5445-S     | rs7223413  | 17 | 17 | 30566189 | 52365  | 6.2800  | 0.3481 | 0.4519  | 6.0691 | CEU |
| MGC19764 | GI_42661257-S | rs11655209 | 17 | 17 | 30576002 | 42579  | 6.3613  | 0.3474 | 0.5007  | 5.8766 | CEU |
| MGC19764 | GI_42661257-S | rs12945522 | 17 | 17 | 30586993 | 31588  | 6.3613  | 0.3474 | 0.5007  | 5.8766 | CEU |
| MGC19764 | GI_42661257-S | rs7221097  | 17 | 17 | 30587220 | 31361  | 6.4784  | 0.3740 | -0.5518 | 5.8766 | CEU |
| MGC19764 | GI_42661257-S | rs11654852 | 17 | 17 | 30587382 | 31199  | 6.3947  | 0.3591 | 0.5307  | 5.8766 | CEU |
| hmm5445  | hmm5445-S     | rs11654852 | 17 | 17 | 30587382 | 31172  | 6.1812  | 0.3480 | 0.4799  | 6.0691 | CEU |
| MGC19764 | GI_42661257-S | rs11651305 | 17 | 17 | 30587415 | 31166  | 6.2470  | 0.3465 | -0.4994 | 5.8766 | CEU |
| MGC19764 | GI_42661257-S | rs11080325 | 17 | 17 | 30587822 | 30759  | 6.3613  | 0.3474 | -0.5007 | 5.8766 | CEU |
| MGC19764 | GI_42661257-S | rs12602385 | 17 | 17 | 30587869 | 30712  | 6.3613  | 0.3474 | 0.5007  | 5.8766 | CEU |
| MGC19764 | GI_42661257-S | rs12600638 | 17 | 17 | 30587994 | 30587  | 6.0624  | 0.3685 | 0.5367  | 5.8766 | CEU |
| MGC19764 | GI_42661257-S | rs12945972 | 17 | 17 | 30588134 | 30447  | 6.3613  | 0.3474 | 0.5007  | 5.8766 | CEU |
| MGC19764 | GI_42661257-S | rs11080326 | 17 | 17 | 30588522 | 30059  | 10.1671 | 0.5147 | 0.6670  | 5.8766 | CEU |
| hmm5445  | hmm5445-S     | rs11080326 | 17 | 17 | 30588522 | 30032  | 9.3018  | 0.4807 | 0.5919  | 6.0691 | CEU |
| MGC19764 | GI_42661257-S | rs11653010 | 17 | 17 | 30589462 | 29119  | 6.2998  | 0.3492 | 0.5021  | 5.8766 | CEU |
| MGC19764 | GI_42661257-S | rs11653987 | 17 | 17 | 30589492 | 29089  | 6.3613  | 0.3474 | -0.5007 | 5.8766 | CEU |
| MGC19764 | GI_42661257-S | rs11867191 | 17 | 17 | 30593227 | 25354  | 10.1671 | 0.5147 | -0.6670 | 5.8766 | CEU |
| hmm5445  | hmm5445-S     | rs11867191 | 17 | 17 | 30593227 | 25327  | 9.3018  | 0.4807 | -0.5919 | 6.0691 | CEU |
| MGC19764 | GI_42661257-S | rs883416   | 17 | 17 | 30594554 | 24027  | 10.8539 | 0.5401 | -0.6665 | 5.8766 | CEU |
| hmm5445  | hmm5445-S     | rs883416   | 17 | 17 | 30594554 | 24000  | 10.1932 | 0.5156 | -0.5978 | 6.0691 | CEU |
| MGC19764 | GI_42661257-S | rs17547894 | 17 | 17 | 30608609 | 9972   | 6.4754  | 0.3581 | 0.5036  | 5.8766 | CEU |
| MGC19764 | GI_42661257-S | rs1055636  | 17 | 17 | 30618433 | 148    | 6.5560  | 0.3571 | 0.5047  | 5.8766 | CEU |
| RAPGEFL1 | GI_7705938-S  | rs2715554  | 17 | 17 | 35742696 | 137361 | 8.1818  | 0.4390 | -0.3332 | 6.2242 | CEU |
| RAPGEFL1 | GI_7705938-S  | rs2715555  | 17 | 17 | 35798150 | 192815 | 8.0029  | 0.4426 | 0.3360  | 6.2242 | CEU |
| MGC20781 | GI_34147471-S | rs3744781  | 17 | 17 | 37235677 | 526    | 6.3120  | 0.3548 | -0.3779 | 5.5217 | CEU |
| MGC20781 | GI_34147471-S | rs9896766  | 17 | 17 | 37237170 | 2019   | 6.6833  | 0.3634 | -0.3826 | 5.5217 | CEU |
| MGC20781 | GI_34147471-S | rs1046404  | 17 | 17 | 37237334 | 2183   | 6.6833  | 0.3634 | -0.3826 | 5.5217 | CEU |
| MGC20781 | GI_34147471-S | rs1046403  | 17 | 17 | 37237346 | 2195   | 6.6833  | 0.3634 | -0.3826 | 5.5217 | CEU |
| MGC20781 | GI_34147471-S | rs4796713  | 17 | 17 | 37240887 | 5736   | 6.6833  | 0.3634 | 0.3826  | 5.5217 | CEU |
| MGC20781 | GI_34147471-S | rs4796715  | 17 | 17 | 37247297 | 12146  | 5.8790  | 0.3227 | 0.3619  | 5.5217 | CEU |
| MGC20781 | GI_34147471-S | rs1529933  | 17 | 17 | 37251667 | 16516  | 5.8790  | 0.3227 | 0.3619  | 5.5217 | CEU |
| MGC20781 | GI_34147471-S | rs4796721  | 17 | 17 | 37256947 | 21796  | 5.8790  | 0.3227 | -0.3619 | 5.5217 | CEU |
| MGC20781 | GI_34147471-S | rs3744782  | 17 | 17 | 37264505 | 29354  | 5.8068  | 0.3331 | -0.3676 | 5.5217 | CEU |
| MGC20781 | GI_34147471-S | rs9303318  | 17 | 17 | 37273611 | 38460  | 5.8790  | 0.3227 | -0.3619 | 5.5217 | CEU |
| MGC20781 | GI_34147471-S | rs9912300  | 17 | 17 | 37278790 | 43639  | 5.8790  | 0.3227 | -0.3619 | 5.5217 | CEU |
| MGC20781 | GI_34147471-S | rs3744779  | 17 | 17 | 37278979 | 43828  | 5.8790  | 0.3227 | 0.3619  | 5.5217 | CEU |
| MGC20781 | GI_34147471-S | rs8071753  | 17 | 17 | 37282067 | 46916  | 5.8790  | 0.3227 | -0.3619 | 5.5217 | CEU |
| MGC20781 | GI_34147471-S | rs8071234  | 17 | 17 | 37282094 | 46943  | 5.8790  | 0.3227 | -0.3619 | 5.5217 | CEU |
| MGC20781 | GI_34147471-S | rs4796726  | 17 | 17 | 37283979 | 48828  | 5.8790  | 0.3227 | -0.3619 | 5.5217 | CEU |
| MGC20781 | GI_34147471-S | rs4796734  | 17 | 17 | 37300095 | 64944  | 5.8867  | 0.3277 | 0.3673  | 5.5217 | CEU |
| MGC20781 | GI_34147471-S | rs4458050  | 17 | 17 | 37305248 | 70097  | 5.8790  | 0.3227 | 0.3619  | 5.5217 | CEU |
| MGC20781 | GI_34147471-S | rs9908955  | 17 | 17 | 37311007 | 75856  | 5.8668  | 0.3633 | 0.3895  | 5.5217 | CEU |
| MGC20781 | GI_34147471-S | rs9916650  | 17 | 17 | 37314376 | 79225  | 6.0216  | 0.3348 | 0.3697  | 5.5217 | CEU |
| MGC20781 | GI_34147471-S | rs6503675  | 17 | 17 | 37339191 | 104040 | 5.8790  | 0.3227 | -0.3619 | 5.5217 | CEU |
| MGC20235 | GI_21450795-S | rs2271574  | 17 | 17 | 38581174 | 145658 | 5.7239  | 0.3191 | -0.1731 | 5.4292 | CEU |
| SNX11    | GI_23111027-I | rs1468270  | 17 | 17 | 43480190 | 62906  | 6.9376  | 0.3810 | -0.1661 | 5.7111 | CEU |
| SNX11    | GI_23111027-I | rs12936731 | 17 | 17 | 43483358 | 59738  | 7.2319  | 0.3899 | 0.1677  | 5.7111 | CEU |
| SNX11    | GI_23111027-I | rs9899275  | 17 | 17 | 43484314 | 58782  | 7.2319  | 0.3899 | -0.1677 | 5.7111 | CEU |
| SNX11    | GI_23111027-I | rs9899461  | 17 | 17 | 43484352 | 58744  | 7.2319  | 0.3899 | -0.1677 | 5.7111 | CEU |
| SNX11    | GI_23111027-I | rs7212202  | 17 | 17 | 43487722 | 55374  | 7.2319  | 0.3899 | 0.1677  | 5.7111 | CEU |
| SNX11    | GI_23111027-I | rs11079806 | 17 | 17 | 43497679 | 45417  | 7.2319  | 0.3899 | 0.1677  | 5.7111 | CEU |
| SNX11    | GI_23111027-I | rs2051821  | 17 | 17 | 43498514 | 44582  | 7.2319  | 0.3899 | 0.1677  | 5.7111 | CEU |
| SNX11    | GI_23111027-I | rs11651097 | 17 | 17 | 43502038 | 41058  | 6.8708  | 0.3830 | 0.1672  | 5.7111 | CEU |
| SNX11    | GI_23111027-I | rs6847     | 17 | 17 | 43502806 | 40290  | 7.2319  | 0.3899 | -0.1677 | 5.7111 | CEU |
| SNX11    | GI_23111027-I | rs7224014  | 17 | 17 | 43505860 | 37236  | 7.2319  | 0.3899 | 0.1677  | 5.7111 | CEU |
| SNX11    | GI_23111027-I | rs2240122  | 17 | 17 | 43507558 | 35538  | 7.2319  | 0.3899 | 0.1677  | 5.7111 | CEU |

|          |               |            |    |    |          |        |         |        |         |        |     |
|----------|---------------|------------|----|----|----------|--------|---------|--------|---------|--------|-----|
| SNX11    | GI_23111027-I | rs7217496  | 17 | 17 | 43509201 | 33895  | 7.2319  | 0.3899 | -0.1677 | 5.7111 | CEU |
| SNX11    | GI_23111027-I | rs6504025  | 17 | 17 | 43521072 | 22024  | 7.2319  | 0.3899 | 0.1677  | 5.7111 | CEU |
| SNX11    | GI_23111027-I | rs7220520  | 17 | 17 | 43522941 | 20155  | 7.2319  | 0.3899 | 0.1677  | 5.7111 | CEU |
| SNX11    | GI_23111027-I | rs2109984  | 17 | 17 | 43526098 | 16998  | 7.0435  | 0.3862 | 0.1671  | 5.7111 | CEU |
| SNX11    | GI_23111027-I | rs11079808 | 17 | 17 | 43535231 | 7865   | 7.2319  | 0.3899 | 0.1677  | 5.7111 | CEU |
| SNX11    | GI_23111027-I | rs8077860  | 17 | 17 | 43540334 | 2762   | 5.9181  | 0.3294 | -0.1583 | 5.7111 | CEU |
| SNX11    | GI_23111027-I | rs8080662  | 17 | 17 | 43545818 | 2722   | 7.2319  | 0.3899 | -0.1677 | 5.7111 | CEU |
| SNX11    | GI_23111027-I | rs8066391  | 17 | 17 | 43550295 | 7199   | 7.2319  | 0.3899 | 0.1677  | 5.7111 | CEU |
| SNX11    | GI_23111027-I | rs1010228  | 17 | 17 | 43555347 | 12251  | 7.3240  | 0.3996 | 0.1703  | 5.7111 | CEU |
| SNX11    | GI_23111027-I | rs1452665  | 17 | 17 | 43652150 | 109054 | 7.5006  | 0.4079 | -0.1729 | 5.7111 | CEU |
| SNX11    | GI_23111027-I | rs2924257  | 17 | 17 | 43672554 | 129458 | 6.2265  | 0.3775 | -0.1556 | 5.7111 | CEU |
| FLJ21347 | GI_31542722-S | rs1122634  | 17 | 17 | 45976364 | 11803  | 9.3816  | 0.4839 | -0.5364 | 6.442  | CEU |
| FLJ21347 | GI_31542722-S | rs8076632  | 17 | 17 | 45980927 | 7240   | 19.0726 | 0.7592 | -0.6905 | 6.442  | CEU |
| FLJ21347 | GI_31542722-S | rs989128   | 17 | 17 | 45991533 | 3366   | 18.4896 | 0.7600 | 0.6990  | 6.442  | CEU |
| ABC1     | GI_38142463-S | rs17842773 | 17 | 17 | 55438497 | 36954  | 5.7366  | 0.3152 | -0.5274 | 5.302  | CEU |
| ABC1     | GI_38142463-S | rs8068376  | 17 | 17 | 55468702 | 6749   | 5.7016  | 0.3179 | -0.5302 | 5.302  | CEU |
| ABC1     | GI_38142463-S | rs9897112  | 17 | 17 | 55469850 | 5601   | 5.7366  | 0.3152 | 0.5274  | 5.302  | CEU |
| ABC1     | GI_38142463-S | rs16943973 | 17 | 17 | 55472211 | 3240   | 5.7366  | 0.3152 | -0.5274 | 5.302  | CEU |
| ABC1     | GI_38142463-S | rs8070456  | 17 | 17 | 55474430 | 1021   | 5.7366  | 0.3152 | 0.5274  | 5.302  | CEU |
| ABC1     | GI_38142463-S | rs16943991 | 17 | 17 | 55476235 | 784    | 5.7366  | 0.3152 | -0.5274 | 5.302  | CEU |
| ABC1     | GI_38142463-S | rs6503942  | 17 | 17 | 55477521 | 2070   | 5.7366  | 0.3152 | -0.5274 | 5.302  | CEU |
| ABC1     | GI_38142463-S | rs2302201  | 17 | 17 | 55482859 | 7408   | 6.0316  | 0.3353 | -0.5368 | 5.302  | CEU |
| ABC1     | GI_38142463-S | rs8082388  | 17 | 17 | 55485107 | 9656   | 5.7366  | 0.3152 | -0.5274 | 5.302  | CEU |
| ABC1     | GI_38142463-S | rs9900396  | 17 | 17 | 55488106 | 12655  | 6.0316  | 0.3353 | 0.5368  | 5.302  | CEU |
| ABC1     | GI_38142463-S | rs16943994 | 17 | 17 | 55490984 | 15533  | 5.4538  | 0.3046 | -0.5335 | 5.302  | CEU |
| ABC1     | GI_38142463-S | rs7220068  | 17 | 17 | 55493028 | 17577  | 5.8515  | 0.3406 | 0.5420  | 5.302  | CEU |
| ABC1     | GI_38142463-S | rs7212702  | 17 | 17 | 55495402 | 19951  | 5.7366  | 0.3152 | -0.5274 | 5.302  | CEU |
| ABC1     | GI_38142463-S | rs10515175 | 17 | 17 | 55495735 | 20284  | 5.7366  | 0.3152 | -0.5274 | 5.302  | CEU |
| ABC1     | GI_38142463-S | rs740646   | 17 | 17 | 55496972 | 21521  | 6.0316  | 0.3353 | -0.5368 | 5.302  | CEU |
| ABC1     | GI_38142463-S | rs10515176 | 17 | 17 | 55501691 | 26240  | 5.7366  | 0.3152 | -0.5274 | 5.302  | CEU |
| ABC1     | GI_38142463-S | rs7218114  | 17 | 17 | 55504859 | 29408  | 5.3908  | 0.3103 | -0.5378 | 5.302  | CEU |
| ABC1     | GI_38142463-S | rs9895182  | 17 | 17 | 55506667 | 31216  | 5.7366  | 0.3152 | -0.5274 | 5.302  | CEU |
| ABC1     | GI_38142463-S | rs3744376  | 17 | 17 | 55510846 | 35395  | 5.7366  | 0.3152 | -0.5274 | 5.302  | CEU |
| ABC1     | GI_38142463-S | rs8066241  | 17 | 17 | 55511931 | 36480  | 8.1969  | 0.4340 | -0.5659 | 5.302  | CEU |
| ABC1     | GI_38142463-S | rs9914853  | 17 | 17 | 55514084 | 38633  | 5.7366  | 0.3152 | -0.5274 | 5.302  | CEU |
| ABC1     | GI_38142463-S | rs7210612  | 17 | 17 | 55516088 | 40637  | 5.7391  | 0.3199 | 0.5313  | 5.302  | CEU |
| ABC1     | GI_38142463-S | rs7211063  | 17 | 17 | 55516281 | 40830  | 5.7366  | 0.3152 | 0.5274  | 5.302  | CEU |
| ABC1     | GI_38142463-S | rs10515177 | 17 | 17 | 55522267 | 46816  | 8.1969  | 0.4340 | 0.5659  | 5.302  | CEU |
| ABC1     | GI_38142463-S | rs9303417  | 17 | 17 | 55523104 | 47653  | 5.7366  | 0.3152 | -0.5274 | 5.302  | CEU |
| ABC1     | GI_38142463-S | rs8078068  | 17 | 17 | 55523766 | 48315  | 8.1969  | 0.4340 | 0.5659  | 5.302  | CEU |
| ABC1     | GI_38142463-S | rs7223281  | 17 | 17 | 55527229 | 51778  | 7.7289  | 0.4185 | -0.5634 | 5.302  | CEU |
| ABC1     | GI_38142463-S | rs7226234  | 17 | 17 | 55531572 | 56121  | 8.0322  | 0.4323 | -0.5652 | 5.302  | CEU |
| ABC1     | GI_38142463-S | rs7215860  | 17 | 17 | 55538338 | 62887  | 5.7366  | 0.3152 | -0.5274 | 5.302  | CEU |
| CD79B    | GI_11038675-A | rs1376110  | 17 | 17 | 59133659 | 226474 | 6.0328  | 0.3306 | 0.5142  | 5.3574 | CEU |
| CD79B    | GI_11038675-A | rs3817182  | 17 | 17 | 59137640 | 222493 | 6.1632  | 0.3421 | 0.5143  | 5.3574 | CEU |
| CD79B    | GI_11038675-A | rs1043127  | 17 | 17 | 59144942 | 215191 | 5.6511  | 0.3107 | -0.4852 | 5.3574 | CEU |
| CD79B    | GI_11038675-A | rs1982400  | 17 | 17 | 59147550 | 212583 | 5.6511  | 0.3107 | 0.4852  | 5.3574 | CEU |
| CD79B    | GI_11038675-A | rs1470697  | 17 | 17 | 59153572 | 206561 | 5.6511  | 0.3107 | 0.4852  | 5.3574 | CEU |
| CD79B    | GI_11038675-A | rs6504177  | 17 | 17 | 59166387 | 193746 | 5.6511  | 0.3107 | 0.4852  | 5.3574 | CEU |
| CD79B    | GI_11038675-A | rs6504178  | 17 | 17 | 59166465 | 193668 | 5.6511  | 0.3107 | 0.4852  | 5.3574 | CEU |
| CD79B    | GI_11038675-A | rs11079510 | 17 | 17 | 59174634 | 185499 | 5.5398  | 0.3092 | 0.4973  | 5.3574 | CEU |
| CD79B    | GI_11038675-A | rs9207     | 17 | 17 | 59177631 | 182502 | 5.6511  | 0.3107 | -0.4852 | 5.3574 | CEU |
| CD79B    | GI_11038675-A | rs8079818  | 17 | 17 | 59178399 | 181734 | 5.5360  | 0.3090 | -0.4836 | 5.3574 | CEU |
| CD79B    | GI_11038675-A | rs3785572  | 17 | 17 | 59183721 | 176412 | 5.6511  | 0.3107 | 0.4852  | 5.3574 | CEU |
| CD79B    | GI_11038675-A | rs7212196  | 17 | 17 | 59188713 | 171420 | 5.6511  | 0.3107 | 0.4852  | 5.3574 | CEU |
| CD79B    | GI_11038675-A | rs11654841 | 17 | 17 | 59191991 | 168142 | 6.1903  | 0.3485 | 0.5106  | 5.3574 | CEU |
| CD79B    | GI_11038675-A | rs3744293  | 17 | 17 | 59195520 | 164613 | 5.3813  | 0.3006 | -0.4785 | 5.3574 | CEU |
| CD79B    | GI_11038675-A | rs896064   | 17 | 17 | 59214664 | 145469 | 5.6511  | 0.3107 | -0.4852 | 5.3574 | CEU |
| CD79B    | GI_11038675-A | rs2044125  | 17 | 17 | 59216916 | 143217 | 5.6511  | 0.3107 | 0.4852  | 5.3574 | CEU |

|           |               |            |    |    |          |        |         |        |         |        |     |
|-----------|---------------|------------|----|----|----------|--------|---------|--------|---------|--------|-----|
| CD79B     | GI_11038675-A | rs2584640  | 17 | 17 | 59217220 | 142913 | 5.6511  | 0.3107 | 0.4852  | 5.3574 | CEU |
| CD79B     | GI_11038675-A | rs2597634  | 17 | 17 | 59231876 | 128257 | 5.6511  | 0.3107 | -0.4852 | 5.3574 | CEU |
| CD79B     | GI_11038675-A | rs2251164  | 17 | 17 | 59237852 | 122281 | 5.5601  | 0.3296 | 0.4822  | 5.3574 | CEU |
| CD79B     | GI_11038675-A | rs2665823  | 17 | 17 | 59239649 | 120484 | 5.5148  | 0.3124 | -0.4733 | 5.3574 | CEU |
| CD79B     | GI_11038675-A | rs1062787  | 17 | 17 | 59249736 | 110397 | 5.6511  | 0.3107 | 0.4852  | 5.3574 | CEU |
| CD79B     | GI_11038675-A | rs1062788  | 17 | 17 | 59249859 | 110274 | 5.6511  | 0.3107 | -0.4852 | 5.3574 | CEU |
| CD79B     | GI_11038675-A | rs1062791  | 17 | 17 | 59250219 | 109914 | 5.4532  | 0.3137 | -0.5064 | 5.3574 | CEU |
| CD79B     | GI_11038675-A | rs894408   | 17 | 17 | 59250546 | 109587 | 5.6511  | 0.3107 | 0.4852  | 5.3574 | CEU |
| CD79B     | GI_11038675-A | rs2727288  | 17 | 17 | 59254929 | 105204 | 5.6511  | 0.3107 | -0.4852 | 5.3574 | CEU |
| CD79B     | GI_11038675-A | rs2584627  | 17 | 17 | 59255171 | 104962 | 5.6511  | 0.3107 | -0.4852 | 5.3574 | CEU |
| CD79B     | GI_11038675-A | rs894406   | 17 | 17 | 59255389 | 104744 | 5.6511  | 0.3107 | 0.4852  | 5.3574 | CEU |
| CD79B     | GI_11038675-A | rs716880   | 17 | 17 | 59256554 | 103579 | 5.6511  | 0.3107 | -0.4852 | 5.3574 | CEU |
| CD79B     | GI_11038675-A | rs2584625  | 17 | 17 | 59257177 | 102956 | 5.6511  | 0.3107 | -0.4852 | 5.3574 | CEU |
| CD79B     | GI_11038675-A | rs2665833  | 17 | 17 | 59260578 | 99555  | 6.0553  | 0.3414 | -0.5258 | 5.3574 | CEU |
| CD79B     | GI_11038675-A | rs968719   | 17 | 17 | 59262003 | 98130  | 5.6511  | 0.3107 | 0.4852  | 5.3574 | CEU |
| CD79B     | GI_11038675-A | rs2665831  | 17 | 17 | 59266124 | 94009  | 5.6511  | 0.3107 | 0.4852  | 5.3574 | CEU |
| CD79B     | GI_11038675-A | rs2028567  | 17 | 17 | 59269058 | 91075  | 5.6511  | 0.3107 | 0.4852  | 5.3574 | CEU |
| CD79B     | GI_11038675-A | rs6504187  | 17 | 17 | 59270831 | 89302  | 5.6511  | 0.3107 | 0.4852  | 5.3574 | CEU |
| CD79B     | GI_11038675-A | rs2665797  | 17 | 17 | 59276217 | 83916  | 5.6511  | 0.3107 | -0.4852 | 5.3574 | CEU |
| CD79B     | GI_11038675-A | rs2727330  | 17 | 17 | 59279230 | 80903  | 5.6511  | 0.3107 | 0.4852  | 5.3574 | CEU |
| CD79B     | GI_11038675-A | rs2727276  | 17 | 17 | 59283441 | 76692  | 5.4475  | 0.2998 | -0.4816 | 5.3574 | CEU |
| CD79B     | GI_11038675-A | rs2584612  | 17 | 17 | 59285936 | 74197  | 5.6511  | 0.3107 | 0.4852  | 5.3574 | CEU |
| CD79B     | GI_11038675-A | rs2584610  | 17 | 17 | 59288515 | 71618  | 5.6511  | 0.3107 | -0.4852 | 5.3574 | CEU |
| CD79B     | GI_11038675-A | rs2584608  | 17 | 17 | 59290442 | 69691  | 5.6511  | 0.3107 | -0.4852 | 5.3574 | CEU |
| CD79B     | GI_11038675-A | rs2236737  | 17 | 17 | 59291832 | 68301  | 5.6511  | 0.3107 | 0.4852  | 5.3574 | CEU |
| CD79B     | GI_11038675-A | rs2236736  | 17 | 17 | 59291980 | 68153  | 5.4187  | 0.3072 | 0.4807  | 5.3574 | CEU |
| CD79B     | GI_11038675-A | rs2584597  | 17 | 17 | 59295016 | 65117  | 5.7110  | 0.3279 | -0.5038 | 5.3574 | CEU |
| CD79B     | GI_11038675-A | rs2584642  | 17 | 17 | 59296159 | 63974  | 5.4773  | 0.3104 | -0.4991 | 5.3574 | CEU |
| CD79B     | GI_11038675-A | rs2854214  | 17 | 17 | 59299181 | 60952  | 5.6511  | 0.3107 | -0.4852 | 5.3574 | CEU |
| CD79B     | GI_11038675-A | rs2854213  | 17 | 17 | 59299363 | 60770  | 5.6511  | 0.3107 | -0.4852 | 5.3574 | CEU |
| CD79B     | GI_11038675-A | rs2854198  | 17 | 17 | 59302122 | 58011  | 5.5703  | 0.3462 | 0.4801  | 5.3574 | CEU |
| CD79B     | GI_11038675-A | rs2257281  | 17 | 17 | 59302755 | 57378  | 5.9692  | 0.3274 | 0.4843  | 5.3574 | CEU |
| CD79B     | GI_11038675-A | rs2665850  | 17 | 17 | 59307844 | 52289  | 5.9380  | 0.3257 | 0.4789  | 5.3574 | CEU |
| CD79B     | GI_11038675-A | rs2854184  | 17 | 17 | 59351725 | 8408   | 5.6742  | 0.3119 | 0.4369  | 5.3574 | CEU |
| CD79B     | GI_11038675-A | rs7209608  | 17 | 17 | 59357542 | 2591   | 5.5356  | 0.3045 | -0.4535 | 5.3574 | CEU |
| CD79B     | GI_11038675-A | rs11079515 | 17 | 17 | 59359377 | 756    | 5.8317  | 0.3395 | 0.4888  | 5.3574 | CEU |
| CD79B     | GI_11038675-A | rs12946669 | 17 | 17 | 59359739 | 394    | 5.6160  | 0.3088 | 0.4691  | 5.3574 | CEU |
| FLJ46603  | GI_38348363-S | rs7221855  | 17 | 17 | 72176449 | 11060  | 15.2434 | 0.6807 | 0.9972  | 7.8278 | CEU |
| FLJ46603  | GI_38348363-S | rs9910053  | 17 | 17 | 72179402 | 8107   | 17.8991 | 0.7420 | 0.9831  | 7.8278 | CEU |
| FLJ46603  | GI_38348363-S | rs9910052  | 17 | 17 | 72180396 | 7113   | 12.5261 | 0.5966 | -0.8770 | 7.8278 | CEU |
| FLJ46603  | GI_38348363-S | rs10473    | 17 | 17 | 72184002 | 3507   | 12.5261 | 0.5966 | -0.8770 | 7.8278 | CEU |
| FLJ46603  | GI_38348363-S | rs1005645  | 17 | 17 | 72208355 | 20846  | 8.2298  | 0.4994 | -0.8493 | 7.8278 | CEU |
| FLJ46603  | GI_38348363-S | rs4789349  | 17 | 17 | 72217936 | 30427  | 18.8882 | 0.7557 | -0.9840 | 7.8278 | CEU |
| PGS1      | GI_21314623-S | rs7225914  | 17 | 17 | 73919964 | 12046  | 8.1342  | 0.4312 | 0.2426  | 6.5551 | CEU |
| PGS1      | GI_21314623-S | rs3744216  | 17 | 17 | 73922466 | 9544   | 7.2515  | 0.3962 | 0.2246  | 6.5551 | CEU |
| PGS1      | GI_21314623-S | rs1540773  | 17 | 17 | 73925980 | 6030   | 7.8761  | 0.4252 | 0.2378  | 6.5551 | CEU |
| PGS1      | GI_21314623-S | rs8071516  | 17 | 17 | 73928420 | 3590   | 8.1193  | 0.4305 | 0.2425  | 6.5551 | CEU |
| PGS1      | GI_21314623-S | rs2376585  | 17 | 17 | 73929478 | 2532   | 8.1342  | 0.4312 | -0.2426 | 6.5551 | CEU |
| PGS1      | GI_21314623-S | rs12942703 | 17 | 17 | 73931968 | 42     | 7.8674  | 0.4305 | -0.2428 | 6.5551 | CEU |
| PGS1      | GI_21314623-S | rs8069521  | 17 | 17 | 73933304 | 1294   | 8.1342  | 0.4312 | 0.2426  | 6.5551 | CEU |
| PGS1      | GI_21314623-S | rs8069689  | 17 | 17 | 73933390 | 1380   | 8.1342  | 0.4312 | -0.2426 | 6.5551 | CEU |
| PGS1      | GI_21314623-S | rs691094   | 17 | 17 | 73936771 | 4761   | 8.1049  | 0.4356 | 0.2452  | 6.5551 | CEU |
| PGS1      | GI_21314623-S | rs691277   | 17 | 17 | 73941356 | 9346   | 6.6943  | 0.3690 | -0.2266 | 6.5551 | CEU |
| GAA       | GI_11496988-S | rs12450199 | 17 | 17 | 75691187 | 16853  | 8.4808  | 0.4464 | -0.1919 | 5.8581 | CEU |
| LOC284184 | GI_27500527-S | rs906175   | 17 | 17 | 76788057 | 40246  | 11.6382 | 0.6006 | 0.6577  | 6.0555 | CEU |
| LOC284184 | GI_27500527-S | rs2659030  | 17 | 17 | 76792569 | 35734  | 9.1296  | 0.4983 | 0.5891  | 6.0555 | CEU |
| LOC284184 | GI_27500527-S | rs9896850  | 17 | 17 | 76806321 | 21982  | 6.5637  | 0.3625 | 0.4650  | 6.0555 | CEU |
| LOC284184 | GI_27500527-S | rs2725391  | 17 | 17 | 76807025 | 21278  | 15.7055 | 0.6859 | 0.6667  | 6.0555 | CEU |
| LOC284184 | GI_27500527-S | rs9319617  | 17 | 17 | 76807041 | 21262  | 14.0185 | 0.6477 | -0.6643 | 6.0555 | CEU |

|           |               |            |    |    |          |       |         |        |         |        |     |
|-----------|---------------|------------|----|----|----------|-------|---------|--------|---------|--------|-----|
| LOC284184 | GI_27500527-S | rs12939525 | 17 | 17 | 76808600 | 19703 | 7.6031  | 0.4240 | -0.5306 | 6.0555 | CEU |
| LOC284184 | GI_27500527-S | rs8073077  | 17 | 17 | 76809616 | 18687 | 7.0851  | 0.3829 | 0.4900  | 6.0555 | CEU |
| LOC284184 | GI_27500527-S | rs969413   | 17 | 17 | 76810409 | 17894 | 15.7055 | 0.6859 | 0.6667  | 6.0555 | CEU |
| LOC284184 | GI_27500527-S | rs1048775  | 17 | 17 | 76816924 | 11379 | 12.7759 | 0.6109 | -0.6192 | 6.0555 | CEU |
| LOC284184 | GI_27500527-S | rs2255166  | 17 | 17 | 76828157 | 146   | 19.2124 | 0.7678 | -0.6930 | 6.0555 | CEU |
| LOC284184 | GI_27500527-S | rs2659005  | 17 | 17 | 76833309 | 5006  | 14.1588 | 0.6452 | 0.6367  | 6.0555 | CEU |
| LOC284184 | GI_27500527-S | rs6565548  | 17 | 17 | 76836926 | 8623  | 6.7896  | 0.3686 | 0.4860  | 6.0555 | CEU |
| LOC284184 | GI_27500527-S | rs9900614  | 17 | 17 | 76844046 | 15743 | 6.7185  | 0.3652 | 0.5451  | 6.0555 | CEU |
| LOC284184 | GI_27500527-S | rs7224668  | 17 | 17 | 76850383 | 22080 | 7.9200  | 0.4216 | -0.5023 | 6.0555 | CEU |
| LOC284184 | GI_27500527-S | rs9901514  | 17 | 17 | 76852495 | 24192 | 6.2185  | 0.3402 | 0.4657  | 6.0555 | CEU |
| LOC284184 | GI_27500527-S | rs7219382  | 17 | 17 | 76855692 | 27389 | 7.0366  | 0.3806 | 0.4886  | 6.0555 | CEU |
| LOC284184 | GI_27500527-S | rs7223939  | 17 | 17 | 76856116 | 27813 | 7.1124  | 0.3842 | 0.4988  | 6.0555 | CEU |
| LOC284184 | GI_27500527-S | rs2292184  | 17 | 17 | 76859397 | 31094 | 7.0366  | 0.3806 | 0.4886  | 6.0555 | CEU |
| LOC284184 | GI_27500527-S | rs2271090  | 17 | 17 | 76861200 | 32897 | 7.0366  | 0.3806 | -0.4886 | 6.0555 | CEU |
| LOC284184 | GI_27500527-S | rs8070092  | 17 | 17 | 76861413 | 33110 | 9.0188  | 0.5137 | 0.6100  | 6.0555 | CEU |
| LOC284184 | GI_27500527-S | rs7219316  | 17 | 17 | 76862915 | 34612 | 6.3129  | 0.4073 | 0.4838  | 6.0555 | CEU |
| LOC284184 | GI_27500527-S | rs9892688  | 17 | 17 | 76867112 | 38809 | 7.0366  | 0.3806 | 0.4886  | 6.0555 | CEU |
| LOC284184 | GI_27500527-S | rs9914093  | 17 | 17 | 76875248 | 46945 | 6.5887  | 0.3638 | 0.4634  | 6.0555 | CEU |
| LOC284184 | GI_27500527-S | rs10445407 | 17 | 17 | 76876404 | 48101 | 7.7518  | 0.4140 | -0.5138 | 6.0555 | CEU |
| LOC284184 | GI_27500527-S | rs6565549  | 17 | 17 | 76882829 | 54526 | 6.6010  | 0.3594 | -0.4729 | 6.0555 | CEU |
| LOC284184 | GI_27500527-S | rs7219431  | 17 | 17 | 76888080 | 59777 | 6.1865  | 0.3385 | -0.4523 | 6.0555 | CEU |
| LOC339231 | GI_29739147-S | rs7226091  | 17 | 17 | 77247772 | 11165 | 9.9599  | 0.5067 | -0.3448 | 5.5161 | CEU |
| LOC339231 | GI_29739147-S | rs7209877  | 17 | 17 | 77248042 | 10895 | 9.6788  | 0.4958 | 0.3405  | 5.5161 | CEU |
| LOC339231 | GI_29739147-S | rs7502491  | 17 | 17 | 77254609 | 4328  | 9.9599  | 0.5067 | 0.3448  | 5.5161 | CEU |
| LOC339231 | GI_29739147-S | rs7502521  | 17 | 17 | 77254717 | 4220  | 9.9599  | 0.5067 | 0.3448  | 5.5161 | CEU |
| LOC339231 | GI_29739147-S | rs6565619  | 17 | 17 | 77256301 | 2636  | 9.9599  | 0.5067 | 0.3448  | 5.5161 | CEU |
| LOC339231 | GI_29739147-S | rs8080624  | 17 | 17 | 77261080 | 2143  | 9.2897  | 0.4986 | -0.3397 | 5.5161 | CEU |
| LOC339231 | GI_29739147-S | rs8070488  | 17 | 17 | 77274336 | 15399 | 9.6788  | 0.4958 | 0.3405  | 5.5161 | CEU |
| LOC339231 | GI_29739147-S | rs11868024 | 17 | 17 | 77286571 | 27634 | 9.6788  | 0.4958 | 0.3405  | 5.5161 | CEU |
| LOC339231 | GI_29739147-S | rs6565624  | 17 | 17 | 77288155 | 29218 | 9.6788  | 0.4958 | 0.3405  | 5.5161 | CEU |
| LOC339231 | GI_29739147-S | rs8081683  | 17 | 17 | 77291483 | 32546 | 9.0329  | 0.4697 | -0.3313 | 5.5161 | CEU |
| HSRTSBETA | GI_42544116-I | rs2847325  | 18 | 18 | 693442   | 8950  | 8.2348  | 0.4356 | 0.5452  | 6.0656 | CEU |
| HSRTSBETA | GI_42544116-I | rs2847169  | 18 | 18 | 695695   | 6697  | 8.8884  | 0.4637 | -0.5443 | 6.0656 | CEU |
| HSRTSBETA | GI_42544116-I | rs2847327  | 18 | 18 | 696047   | 6345  | 8.8578  | 0.4804 | 0.5424  | 6.0656 | CEU |
| HSRTSBETA | GI_42544116-I | rs2612102  | 18 | 18 | 696589   | 5803  | 8.7432  | 0.4634 | 0.5442  | 6.0656 | CEU |
| HSRTSBETA | GI_42544116-I | rs8090148  | 18 | 18 | 717654   | 15262 | 8.1358  | 0.4313 | 0.5192  | 6.0656 | CEU |
| HSRTSBETA | GI_42544116-I | rs7228136  | 18 | 18 | 722017   | 19625 | 9.0760  | 0.4715 | 0.5420  | 6.0656 | CEU |
| HSRTSBETA | GI_42544116-I | rs3786347  | 18 | 18 | 733226   | 30834 | 6.5541  | 0.3570 | 0.4643  | 6.0656 | CEU |
| HSRTSBETA | GI_42544116-I | rs8099748  | 18 | 18 | 734114   | 31722 | 6.5541  | 0.3570 | 0.4643  | 6.0656 | CEU |
| HSRTSBETA | GI_42544116-I | rs6506511  | 18 | 18 | 740937   | 38545 | 6.5541  | 0.3570 | -0.4643 | 6.0656 | CEU |
| HSRTSBETA | GI_42544116-I | rs10460020 | 18 | 18 | 748443   | 46051 | 7.3040  | 0.3933 | -0.4785 | 6.0656 | CEU |
| LOC400642 | GI_42661344-S | rs7238524  | 18 | 18 | 5205596  | 30755 | 7.8552  | 0.4187 | -0.6046 | 5.8566 | CEU |
| LOC400642 | GI_42661344-S | rs9959482  | 18 | 18 | 5206054  | 30297 | 6.3028  | 0.3444 | -0.4071 | 5.8566 | CEU |
| LOC400642 | GI_42661344-S | rs9957026  | 18 | 18 | 5206095  | 30256 | 6.0165  | 0.3345 | 0.4046  | 5.8566 | CEU |
| LOC400642 | GI_42661344-S | rs4798315  | 18 | 18 | 5206795  | 29556 | 6.3028  | 0.3444 | 0.4071  | 5.8566 | CEU |
| LOC400642 | GI_42661344-S | rs9964310  | 18 | 18 | 5210378  | 25973 | 6.3028  | 0.3444 | 0.4071  | 5.8566 | CEU |
| LOC400642 | GI_42661344-S | rs11662875 | 18 | 18 | 5215681  | 20670 | 5.9516  | 0.3264 | 0.5052  | 5.8566 | CEU |
| LOC400642 | GI_42661344-S | rs1847871  | 18 | 18 | 5219126  | 17225 | 6.3028  | 0.3444 | -0.4071 | 5.8566 | CEU |
| LOC400642 | GI_42661344-S | rs13370631 | 18 | 18 | 5219653  | 16698 | 6.7850  | 0.3788 | 0.4530  | 5.8566 | CEU |
| LOC400642 | GI_42661344-S | rs3887348  | 18 | 18 | 5223105  | 13246 | 7.4328  | 0.3993 | -0.4626 | 5.8566 | CEU |
| LOC400642 | GI_42661344-S | rs931833   | 18 | 18 | 5224117  | 12234 | 6.3028  | 0.3444 | -0.4071 | 5.8566 | CEU |
| LOC400642 | GI_42661344-S | rs17464416 | 18 | 18 | 5226747  | 9604  | 7.4067  | 0.4090 | 0.6374  | 5.8566 | CEU |
| LOC400642 | GI_42661344-S | rs8092760  | 18 | 18 | 5231500  | 4851  | 17.2044 | 0.7335 | 0.8561  | 5.8566 | CEU |
| LOC400642 | GI_42661344-S | rs4429380  | 18 | 18 | 5232053  | 4298  | 15.9180 | 0.7039 | 0.8185  | 5.8566 | CEU |
| LOC400642 | GI_42661344-S | rs12352    | 18 | 18 | 5233083  | 3268  | 16.8830 | 0.7138 | -0.8389 | 5.8566 | CEU |
| LOC400642 | GI_42661344-S | rs8089069  | 18 | 18 | 5233540  | 2811  | 15.7764 | 0.7070 | -0.8648 | 5.8566 | CEU |
| LOC400642 | GI_42661344-S | rs8084872  | 18 | 18 | 5233567  | 2784  | 8.7266  | 0.4941 | 0.5166  | 5.8566 | CEU |
| LOC400642 | GI_42661344-S | rs1062837  | 18 | 18 | 5234173  | 2178  | 6.5066  | 0.3547 | 0.3714  | 5.8566 | CEU |
| LOC400642 | GI_42661344-S | rs11877479 | 18 | 18 | 5235228  | 1123  | 16.8830 | 0.7138 | 0.8389  | 5.8566 | CEU |

|           |               |            |    |    |          |        |         |        |         |        |     |
|-----------|---------------|------------|----|----|----------|--------|---------|--------|---------|--------|-----|
| LOC400642 | GI_42661344-S | rs11877315 | 18 | 18 | 5235247  | 1104   | 16.3953 | 0.7088 | -0.8392 | 5.8566 | CEU |
| LOC400642 | GI_42661344-S | rs17379984 | 18 | 18 | 5235824  | 527    | 16.5577 | 0.7126 | -0.8314 | 5.8566 | CEU |
| LOC400642 | GI_42661344-S | rs8576     | 18 | 18 | 5236398  | 47     | 9.0911  | 0.4721 | 0.5013  | 5.8566 | CEU |
| LOC400642 | GI_42661344-S | rs9948693  | 18 | 18 | 5237432  | 1081   | 9.0911  | 0.4721 | 0.5013  | 5.8566 | CEU |
| LOC400642 | GI_42661344-S | rs9964260  | 18 | 18 | 5238861  | 2510   | 6.1861  | 0.3385 | 0.3735  | 5.8566 | CEU |
| LOC400642 | GI_42661344-S | rs8092448  | 18 | 18 | 5240817  | 4466   | 7.6018  | 0.4072 | 0.5256  | 5.8566 | CEU |
| LOC400642 | GI_42661344-S | rs4798330  | 18 | 18 | 5241192  | 4841   | 7.6018  | 0.4072 | -0.5256 | 5.8566 | CEU |
| LOC400642 | GI_42661344-S | rs11081182 | 18 | 18 | 5270470  | 34119  | 14.8972 | 0.6717 | 0.8256  | 5.8566 | CEU |
| LOC400642 | GI_42661344-S | rs4798335  | 18 | 18 | 5270622  | 34271  | 6.0777  | 0.3330 | 0.3793  | 5.8566 | CEU |
| LOC400642 | GI_42661344-S | rs11872923 | 18 | 18 | 5272442  | 36091  | 14.3350 | 0.6565 | 0.8213  | 5.8566 | CEU |
| LOC400642 | GI_42661344-S | rs12953610 | 18 | 18 | 5278695  | 42344  | 6.3885  | 0.3587 | 0.4193  | 5.8566 | CEU |
| LOC400642 | GI_42661344-S | rs2789     | 18 | 18 | 5279887  | 43536  | 8.1647  | 0.4326 | 0.4656  | 5.8566 | CEU |
| LOC400642 | GI_42661344-S | rs12522    | 18 | 18 | 5280282  | 43931  | 9.0911  | 0.4721 | -0.5013 | 5.8566 | CEU |
| LOC400642 | GI_42661344-S | rs9952350  | 18 | 18 | 5282983  | 46632  | 6.7367  | 0.3764 | 0.4379  | 5.8566 | CEU |
| LOC400642 | GI_42661344-S | rs9957892  | 18 | 18 | 5283875  | 47524  | 8.1647  | 0.4326 | -0.4656 | 5.8566 | CEU |
| LOC400642 | GI_42661344-S | rs9957907  | 18 | 18 | 5283893  | 47542  | 7.4503  | 0.4226 | -0.4581 | 5.8566 | CEU |
| LOC400642 | GI_42661344-S | rs11665417 | 18 | 18 | 5283943  | 47592  | 8.1647  | 0.4326 | 0.4656  | 5.8566 | CEU |
| LOC400642 | GI_42661344-S | rs9945680  | 18 | 18 | 5284323  | 47972  | 7.8286  | 0.4231 | -0.4614 | 5.8566 | CEU |
| SERPINB10 | GI_4826901-S  | rs2135434  | 18 | 18 | 59617912 | 135280 | 7.0258  | 0.3801 | -1.1262 | 5.705  | CEU |
| SERPINB10 | GI_4826901-S  | rs9967135  | 18 | 18 | 59619881 | 133311 | 7.0258  | 0.3801 | 1.1262  | 5.705  | CEU |
| SERPINB10 | GI_4826901-S  | rs17782413 | 18 | 18 | 59622503 | 130689 | 6.9296  | 0.3754 | -1.0268 | 5.705  | CEU |
| SERPINB10 | GI_4826901-S  | rs10503087 | 18 | 18 | 59627434 | 125758 | 7.0258  | 0.3801 | -1.1262 | 5.705  | CEU |
| SERPINB10 | GI_4826901-S  | rs1567053  | 18 | 18 | 59659131 | 94061  | 8.2547  | 0.4365 | 1.1443  | 5.705  | CEU |
| SERPINB10 | GI_4826901-S  | rs1567054  | 18 | 18 | 59659179 | 94013  | 8.2547  | 0.4365 | -1.1443 | 5.705  | CEU |
| SERPINB10 | GI_4826901-S  | rs7244091  | 18 | 18 | 59661316 | 91876  | 7.7822  | 0.4266 | 1.1258  | 5.705  | CEU |
| SERPINB10 | GI_4826901-S  | rs2048028  | 18 | 18 | 59662552 | 90640  | 8.2547  | 0.4365 | -1.1443 | 5.705  | CEU |
| SERPINB10 | GI_4826901-S  | rs9320027  | 18 | 18 | 59663492 | 89700  | 8.2547  | 0.4365 | -1.1443 | 5.705  | CEU |
| SERPINB10 | GI_4826901-S  | rs1948914  | 18 | 18 | 59664154 | 89038  | 8.1792  | 0.4332 | -1.0970 | 5.705  | CEU |
| SERPINB10 | GI_4826901-S  | rs9944887  | 18 | 18 | 59665948 | 87244  | 8.3728  | 0.4718 | -1.1318 | 5.705  | CEU |
| SERPINB10 | GI_4826901-S  | rs9959974  | 18 | 18 | 59666056 | 87136  | 7.2980  | 0.4153 | -1.0810 | 5.705  | CEU |
| SERPINB10 | GI_4826901-S  | rs9945681  | 18 | 18 | 59666101 | 87091  | 7.2729  | 0.4140 | 1.0489  | 5.705  | CEU |
| SERPINB10 | GI_4826901-S  | rs17071932 | 18 | 18 | 59666204 | 86988  | 8.1185  | 0.4305 | 1.0948  | 5.705  | CEU |
| SERPINB10 | GI_4826901-S  | rs9960785  | 18 | 18 | 59667093 | 86099  | 6.6667  | 0.3782 | 1.0162  | 5.705  | CEU |
| SERPINB10 | GI_4826901-S  | rs9951203  | 18 | 18 | 59667720 | 85472  | 7.9398  | 0.4281 | -1.0821 | 5.705  | CEU |
| SERPINB10 | GI_4826901-S  | rs9963905  | 18 | 18 | 59667857 | 85335  | 7.7153  | 0.4235 | 1.0497  | 5.705  | CEU |
| SERPINB10 | GI_4826901-S  | rs9320028  | 18 | 18 | 59668150 | 85042  | 8.1792  | 0.4332 | 1.0970  | 5.705  | CEU |
| SERPINB10 | GI_4826901-S  | rs8091518  | 18 | 18 | 59679155 | 74037  | 8.1792  | 0.4332 | 1.0970  | 5.705  | CEU |
| SERPINB10 | GI_4826901-S  | rs8091945  | 18 | 18 | 59680510 | 72682  | 8.7673  | 0.4586 | -1.1303 | 5.705  | CEU |
| SERPINB10 | GI_4826901-S  | rs9966495  | 18 | 18 | 59690850 | 62342  | 7.7154  | 0.4235 | -1.0762 | 5.705  | CEU |
| SERPINB10 | GI_4826901-S  | rs9951512  | 18 | 18 | 59690885 | 62307  | 8.1792  | 0.4332 | -1.0970 | 5.705  | CEU |
| SERPINB10 | GI_4826901-S  | rs9954175  | 18 | 18 | 59691368 | 61824  | 10.6335 | 0.5321 | 1.3198  | 5.705  | CEU |
| SERPINB10 | GI_4826901-S  | rs9957643  | 18 | 18 | 59692597 | 60595  | 11.2673 | 0.5547 | -1.3409 | 5.705  | CEU |
| SERPINB10 | GI_4826901-S  | rs6567399  | 18 | 18 | 59695526 | 57666  | 11.4522 | 0.5611 | 1.3509  | 5.705  | CEU |
| SERPINB10 | GI_4826901-S  | rs9951931  | 18 | 18 | 59697930 | 55262  | 11.2673 | 0.5547 | 1.3409  | 5.705  | CEU |
| SERPINB10 | GI_4826901-S  | rs9966459  | 18 | 18 | 59698270 | 54922  | 11.4522 | 0.5611 | 1.3509  | 5.705  | CEU |
| SERPINB10 | GI_4826901-S  | rs8096886  | 18 | 18 | 59698513 | 54679  | 11.2673 | 0.5547 | -1.3409 | 5.705  | CEU |
| SERPINB10 | GI_4826901-S  | rs10513933 | 18 | 18 | 59699669 | 53523  | 10.6335 | 0.5321 | 1.3198  | 5.705  | CEU |
| SERPINB10 | GI_4826901-S  | rs8097621  | 18 | 18 | 59700202 | 52990  | 11.4522 | 0.5611 | -1.3509 | 5.705  | CEU |
| SERPINB10 | GI_4826901-S  | rs9946657  | 18 | 18 | 59701565 | 51627  | 11.4522 | 0.5611 | 1.3509  | 5.705  | CEU |
| SERPINB10 | GI_4826901-S  | rs9959513  | 18 | 18 | 59701863 | 51329  | 10.6335 | 0.5321 | 1.3198  | 5.705  | CEU |
| SERPINB10 | GI_4826901-S  | rs9964989  | 18 | 18 | 59702589 | 50603  | 11.4522 | 0.5611 | -1.3509 | 5.705  | CEU |
| SERPINB10 | GI_4826901-S  | rs3760574  | 18 | 18 | 59703505 | 49687  | 11.4522 | 0.5611 | -1.3509 | 5.705  | CEU |
| SERPINB10 | GI_4826901-S  | rs2288287  | 18 | 18 | 59706274 | 46918  | 11.4522 | 0.5611 | -1.3509 | 5.705  | CEU |
| SERPINB10 | GI_4826901-S  | rs1025196  | 18 | 18 | 59708650 | 44542  | 11.2673 | 0.5547 | -1.3409 | 5.705  | CEU |
| SERPINB10 | GI_4826901-S  | rs6095     | 18 | 18 | 59709636 | 43556  | 8.6517  | 0.4842 | 1.2903  | 5.705  | CEU |
| SERPINB10 | GI_4826901-S  | rs6094     | 18 | 18 | 59709862 | 43330  | 11.4522 | 0.5611 | -1.3509 | 5.705  | CEU |
| SERPINB10 | GI_4826901-S  | rs9320029  | 18 | 18 | 59710543 | 42649  | 11.4522 | 0.5611 | -1.3509 | 5.705  | CEU |
| SERPINB10 | GI_4826901-S  | rs9630856  | 18 | 18 | 59710691 | 42501  | 8.9810  | 0.5120 | 1.3290  | 5.705  | CEU |
| SERPINB10 | GI_4826901-S  | rs9630857  | 18 | 18 | 59710766 | 42426  | 8.0264  | 0.4624 | -1.3305 | 5.705  | CEU |

|           |              |            |    |    |          |       |         |        |         |       |     |
|-----------|--------------|------------|----|----|----------|-------|---------|--------|---------|-------|-----|
| SERPINB10 | GI_4826901-S | rs9951333  | 18 | 18 | 59711133 | 42059 | 11.4522 | 0.5611 | -1.3509 | 5.705 | CEU |
| SERPINB10 | GI_4826901-S | rs9320030  | 18 | 18 | 59711516 | 41676 | 9.7126  | 0.5158 | 1.2666  | 5.705 | CEU |
| SERPINB10 | GI_4826901-S | rs9320031  | 18 | 18 | 59711631 | 41561 | 11.4522 | 0.5611 | -1.3509 | 5.705 | CEU |
| SERPINB10 | GI_4826901-S | rs9630851  | 18 | 18 | 59712038 | 41154 | 10.8969 | 0.5609 | 1.3472  | 5.705 | CEU |
| SERPINB10 | GI_4826901-S | rs9320032  | 18 | 18 | 59712191 | 41001 | 9.4668  | 0.4873 | -1.2692 | 5.705 | CEU |
| SERPINB10 | GI_4826901-S | rs3786335  | 18 | 18 | 59712501 | 40691 | 11.4522 | 0.5611 | -1.3509 | 5.705 | CEU |
| SERPINB10 | GI_4826901-S | rs7233370  | 18 | 18 | 59713351 | 39841 | 11.4181 | 0.5663 | -1.3661 | 5.705 | CEU |
| SERPINB10 | GI_4826901-S | rs7229383  | 18 | 18 | 59713371 | 39821 | 11.4522 | 0.5611 | 1.3509  | 5.705 | CEU |
| SERPINB10 | GI_4826901-S | rs1916662  | 18 | 18 | 59714021 | 39171 | 11.4522 | 0.5611 | 1.3509  | 5.705 | CEU |
| SERPINB10 | GI_4826901-S | rs3819335  | 18 | 18 | 59714172 | 39020 | 11.2673 | 0.5547 | -1.3409 | 5.705 | CEU |
| SERPINB10 | GI_4826901-S | rs1532886  | 18 | 18 | 59714445 | 38747 | 11.2673 | 0.5547 | -1.3409 | 5.705 | CEU |
| SERPINB10 | GI_4826901-S | rs1532887  | 18 | 18 | 59714686 | 38506 | 7.7622  | 0.4375 | 1.4187  | 5.705 | CEU |
| SERPINB10 | GI_4826901-S | rs1532889  | 18 | 18 | 59714820 | 38372 | 11.4522 | 0.5611 | 1.3509  | 5.705 | CEU |
| SERPINB10 | GI_4826901-S | rs2332874  | 18 | 18 | 59714990 | 38202 | 11.4522 | 0.5611 | 1.3509  | 5.705 | CEU |
| SERPINB10 | GI_4826901-S | rs2114380  | 18 | 18 | 59715086 | 38106 | 11.2673 | 0.5547 | 1.3409  | 5.705 | CEU |
| SERPINB10 | GI_4826901-S | rs6098     | 18 | 18 | 59715374 | 37818 | 11.4522 | 0.5611 | 1.3509  | 5.705 | CEU |
| SERPINB10 | GI_4826901-S | rs2278180  | 18 | 18 | 59715493 | 37699 | 11.4522 | 0.5611 | -1.3509 | 5.705 | CEU |
| SERPINB10 | GI_4826901-S | rs2278179  | 18 | 18 | 59715512 | 37680 | 11.4522 | 0.5611 | -1.3509 | 5.705 | CEU |
| SERPINB10 | GI_4826901-S | rs2278178  | 18 | 18 | 59715569 | 37623 | 11.2673 | 0.5547 | 1.3409  | 5.705 | CEU |
| SERPINB10 | GI_4826901-S | rs2278177  | 18 | 18 | 59715590 | 37602 | 9.4860  | 0.5265 | -1.3857 | 5.705 | CEU |
| SERPINB10 | GI_4826901-S | rs1916658  | 18 | 18 | 59715759 | 37433 | 11.4522 | 0.5611 | 1.3509  | 5.705 | CEU |
| SERPINB10 | GI_4826901-S | rs1916659  | 18 | 18 | 59716188 | 37004 | 11.4522 | 0.5611 | -1.3509 | 5.705 | CEU |
| SERPINB10 | GI_4826901-S | rs9947143  | 18 | 18 | 59716517 | 36675 | 11.4522 | 0.5611 | -1.3509 | 5.705 | CEU |
| SERPINB10 | GI_4826901-S | rs9955420  | 18 | 18 | 59716790 | 36402 | 11.1020 | 0.5552 | -1.3408 | 5.705 | CEU |
| SERPINB10 | GI_4826901-S | rs4599014  | 18 | 18 | 59716905 | 36287 | 11.4522 | 0.5611 | -1.3509 | 5.705 | CEU |
| SERPINB10 | GI_4826901-S | rs9950615  | 18 | 18 | 59717558 | 35634 | 11.2673 | 0.5547 | -1.3409 | 5.705 | CEU |
| SERPINB10 | GI_4826901-S | rs7505052  | 18 | 18 | 59717646 | 35546 | 10.6335 | 0.5321 | 1.3198  | 5.705 | CEU |
| SERPINB10 | GI_4826901-S | rs4349246  | 18 | 18 | 59717712 | 35480 | 9.4042  | 0.5097 | 1.3490  | 5.705 | CEU |
| SERPINB10 | GI_4826901-S | rs2332875  | 18 | 18 | 59718067 | 35125 | 11.2673 | 0.5547 | 1.3409  | 5.705 | CEU |
| SERPINB10 | GI_4826901-S | rs1544896  | 18 | 18 | 59718461 | 34731 | 11.4522 | 0.5611 | -1.3509 | 5.705 | CEU |
| SERPINB10 | GI_4826901-S | rs1544895  | 18 | 18 | 59718636 | 34556 | 10.8478 | 0.5525 | 1.3343  | 5.705 | CEU |
| SERPINB10 | GI_4826901-S | rs1544894  | 18 | 18 | 59718761 | 34431 | 11.4522 | 0.5611 | -1.3509 | 5.705 | CEU |
| SERPINB10 | GI_4826901-S | rs1544893  | 18 | 18 | 59718952 | 34240 | 11.2673 | 0.5547 | -1.3409 | 5.705 | CEU |
| SERPINB10 | GI_4826901-S | rs10513932 | 18 | 18 | 59719294 | 33898 | 11.4522 | 0.5611 | 1.3509  | 5.705 | CEU |
| SERPINB10 | GI_4826901-S | rs1916660  | 18 | 18 | 59719849 | 33343 | 11.2673 | 0.5547 | 1.3409  | 5.705 | CEU |
| SERPINB10 | GI_4826901-S | rs1015416  | 18 | 18 | 59720363 | 32829 | 11.2673 | 0.5547 | -1.3409 | 5.705 | CEU |
| SERPINB10 | GI_4826901-S | rs1863583  | 18 | 18 | 59720523 | 32669 | 11.4522 | 0.5611 | 1.3509  | 5.705 | CEU |
| SERPINB10 | GI_4826901-S | rs6102     | 18 | 18 | 59721450 | 31742 | 10.6335 | 0.5321 | -1.3198 | 5.705 | CEU |
| SERPINB10 | GI_4826901-S | rs6103     | 18 | 18 | 59721483 | 31709 | 11.4522 | 0.5611 | 1.3509  | 5.705 | CEU |
| SERPINB10 | GI_4826901-S | rs6104     | 18 | 18 | 59721509 | 31683 | 11.4522 | 0.5611 | 1.3509  | 5.705 | CEU |
| SERPINB10 | GI_4826901-S | rs12102    | 18 | 18 | 59721962 | 31230 | 11.4522 | 0.5611 | -1.3509 | 5.705 | CEU |
| SERPINB10 | GI_4826901-S | rs2114378  | 18 | 18 | 59722179 | 31013 | 11.4522 | 0.5611 | 1.3509  | 5.705 | CEU |
| SERPINB10 | GI_4826901-S | rs2140452  | 18 | 18 | 59722502 | 30690 | 11.4522 | 0.5611 | -1.3509 | 5.705 | CEU |
| SERPINB10 | GI_4826901-S | rs2332876  | 18 | 18 | 59722566 | 30626 | 7.4825  | 0.4428 | 1.3015  | 5.705 | CEU |
| SERPINB10 | GI_4826901-S | rs7231714  | 18 | 18 | 59725580 | 27612 | 11.2673 | 0.5547 | -1.3409 | 5.705 | CEU |
| SERPINB10 | GI_4826901-S | rs1006961  | 18 | 18 | 59726212 | 26980 | 11.4522 | 0.5611 | -1.3509 | 5.705 | CEU |
| SERPINB10 | GI_4826901-S | rs1006960  | 18 | 18 | 59726552 | 26640 | 11.4522 | 0.5611 | 1.3509  | 5.705 | CEU |
| SERPINB10 | GI_4826901-S | rs8089365  | 18 | 18 | 59726987 | 26205 | 11.2673 | 0.5547 | 1.3409  | 5.705 | CEU |
| SERPINB10 | GI_4826901-S | rs9948717  | 18 | 18 | 59727086 | 26106 | 8.3438  | 0.4905 | 1.2589  | 5.705 | CEU |
| SERPINB10 | GI_4826901-S | rs9963851  | 18 | 18 | 59728021 | 25171 | 9.9605  | 0.5067 | 1.3608  | 5.705 | CEU |
| SERPINB10 | GI_4826901-S | rs9966367  | 18 | 18 | 59728271 | 24921 | 8.3892  | 0.4996 | 1.3018  | 5.705 | CEU |
| SERPINB10 | GI_4826901-S | rs4499334  | 18 | 18 | 59729788 | 23404 | 9.0617  | 0.4829 | -1.4025 | 5.705 | CEU |
| SERPINB10 | GI_4826901-S | rs12717154 | 18 | 18 | 59730261 | 22931 | 10.2235 | 0.5168 | 1.3811  | 5.705 | CEU |
| SERPINB10 | GI_4826901-S | rs13371114 | 18 | 18 | 59730357 | 22835 | 8.1313  | 0.4806 | -1.2923 | 5.705 | CEU |
| SERPINB10 | GI_4826901-S | rs12327005 | 18 | 18 | 59731116 | 22076 | 9.9605  | 0.5067 | -1.3608 | 5.705 | CEU |
| SERPINB10 | GI_4826901-S | rs12327162 | 18 | 18 | 59731189 | 22003 | 10.7105 | 0.5349 | -1.3906 | 5.705 | CEU |
| SERPINB10 | GI_4826901-S | rs12327006 | 18 | 18 | 59731314 | 21878 | 9.4444  | 0.5049 | 1.3702  | 5.705 | CEU |
| SERPINB10 | GI_4826901-S | rs12327173 | 18 | 18 | 59731522 | 21670 | 8.5824  | 0.4624 | -1.3387 | 5.705 | CEU |
| SERPINB10 | GI_4826901-S | rs8086765  | 18 | 18 | 59731581 | 21611 | 10.7105 | 0.5349 | 1.3906  | 5.705 | CEU |

|           |               |            |    |    |          |       |         |        |         |        |     |
|-----------|---------------|------------|----|----|----------|-------|---------|--------|---------|--------|-----|
| SERPINB10 | GI_4826901-S  | rs8085904  | 18 | 18 | 59731660 | 21532 | 9.6058  | 0.4989 | -1.4259 | 5.705  | CEU |
| SERPINB10 | GI_4826901-S  | rs7241748  | 18 | 18 | 59733108 | 20084 | 8.7582  | 0.5093 | -1.3725 | 5.705  | CEU |
| SERPINB10 | GI_4826901-S  | rs9952843  | 18 | 18 | 59733245 | 19947 | 9.3238  | 0.4876 | -1.3993 | 5.705  | CEU |
| SERPINB10 | GI_4826901-S  | rs9953733  | 18 | 18 | 59733477 | 19715 | 9.9605  | 0.5067 | -1.3608 | 5.705  | CEU |
| SERPINB10 | GI_4826901-S  | rs17072097 | 18 | 18 | 59733731 | 19461 | 9.9605  | 0.5067 | -1.3608 | 5.705  | CEU |
| SERPINB10 | GI_4826901-S  | rs8097425  | 18 | 18 | 59733847 | 19345 | 10.7105 | 0.5349 | 1.3906  | 5.705  | CEU |
| SERPINB10 | GI_4826901-S  | rs17072102 | 18 | 18 | 59734053 | 19139 | 9.7590  | 0.5112 | -1.3798 | 5.705  | CEU |
| SERPINB10 | GI_4826901-S  | rs8084931  | 18 | 18 | 59735061 | 18131 | 9.9851  | 0.5759 | 1.4526  | 5.705  | CEU |
| SERPINB10 | GI_4826901-S  | rs17072109 | 18 | 18 | 59735622 | 17570 | 9.4668  | 0.4995 | 1.3662  | 5.705  | CEU |
| LOC284293 | GI_27485378-S | rs9320033  | 18 | 18 | 59735962 | 35624 | 7.8835  | 0.4371 | -0.8313 | 7.0894 | CEU |
| SERPINB10 | GI_4826901-S  | rs9320033  | 18 | 18 | 59735962 | 17230 | 9.9092  | 0.5235 | 1.3608  | 5.705  | CEU |
| SERPINB10 | GI_4826901-S  | rs724557   | 18 | 18 | 59736125 | 17067 | 9.9605  | 0.5067 | 1.3608  | 5.705  | CEU |
| SERPINB10 | GI_4826901-S  | rs724558   | 18 | 18 | 59736240 | 16952 | 10.2235 | 0.5168 | -1.3811 | 5.705  | CEU |
| SERPINB10 | GI_4826901-S  | rs1944273  | 18 | 18 | 59736514 | 16678 | 9.9605  | 0.5067 | 1.3608  | 5.705  | CEU |
| SERPINB10 | GI_4826901-S  | rs1944272  | 18 | 18 | 59736638 | 16554 | 9.9605  | 0.5067 | 1.3608  | 5.705  | CEU |
| SERPINB10 | GI_4826901-S  | rs1944271  | 18 | 18 | 59736845 | 16347 | 9.9605  | 0.5067 | -1.3608 | 5.705  | CEU |
| SERPINB10 | GI_4826901-S  | rs9955171  | 18 | 18 | 59736927 | 16265 | 9.9605  | 0.5067 | -1.3608 | 5.705  | CEU |
| SERPINB10 | GI_4826901-S  | rs8085490  | 18 | 18 | 59737365 | 15827 | 10.7105 | 0.5349 | -1.3906 | 5.705  | CEU |
| SERPINB10 | GI_4826901-S  | rs8099238  | 18 | 18 | 59737617 | 15575 | 9.2252  | 0.4776 | 1.3117  | 5.705  | CEU |
| SERPINB10 | GI_4826901-S  | rs9955876  | 18 | 18 | 59737855 | 15337 | 9.9605  | 0.5067 | 1.3608  | 5.705  | CEU |
| SERPINB10 | GI_4826901-S  | rs9967382  | 18 | 18 | 59738047 | 15145 | 9.6814  | 0.5019 | 1.3606  | 5.705  | CEU |
| SERPINB10 | GI_4826901-S  | rs620535   | 18 | 18 | 59738269 | 14923 | 10.2235 | 0.5168 | 1.3811  | 5.705  | CEU |
| SERPINB10 | GI_4826901-S  | rs976038   | 18 | 18 | 59738648 | 14544 | 10.7105 | 0.5349 | -1.3906 | 5.705  | CEU |
| SERPINB10 | GI_4826901-S  | rs9947135  | 18 | 18 | 59738704 | 14488 | 8.0163  | 0.4373 | 1.3749  | 5.705  | CEU |
| SERPINB10 | GI_4826901-S  | rs4350667  | 18 | 18 | 59738743 | 14449 | 10.1686 | 0.5336 | 1.3883  | 5.705  | CEU |
| SERPINB10 | GI_4826901-S  | rs9947504  | 18 | 18 | 59739063 | 14129 | 9.3238  | 0.4876 | 1.3993  | 5.705  | CEU |
| SERPINB10 | GI_4826901-S  | rs17072158 | 18 | 18 | 59739617 | 13575 | 9.1055  | 0.4727 | -1.3311 | 5.705  | CEU |
| LOC284293 | GI_27485378-S | rs9957733  | 18 | 18 | 59743343 | 28243 | 9.2596  | 0.4790 | -0.8008 | 7.0894 | CEU |
| SERPINB10 | GI_4826901-S  | rs9957733  | 18 | 18 | 59743343 | 9849  | 5.8534  | 0.3213 | 0.9582  | 5.705  | CEU |
| LOC284293 | GI_27485378-S | rs2114377  | 18 | 18 | 59743756 | 27830 | 8.3271  | 0.4397 | -0.7435 | 7.0894 | CEU |
| SERPINB10 | GI_4826901-S  | rs2114377  | 18 | 18 | 59743756 | 9436  | 5.8568  | 0.3215 | 0.9273  | 5.705  | CEU |
| LOC284293 | GI_27485378-S | rs9960901  | 18 | 18 | 59744047 | 27539 | 8.3271  | 0.4397 | 0.7435  | 7.0894 | CEU |
| SERPINB10 | GI_4826901-S  | rs9960901  | 18 | 18 | 59744047 | 9145  | 5.8568  | 0.3215 | -0.9273 | 5.705  | CEU |
| LOC284293 | GI_27485378-S | rs8093894  | 18 | 18 | 59744461 | 27125 | 8.3271  | 0.4397 | 0.7435  | 7.0894 | CEU |
| SERPINB10 | GI_4826901-S  | rs8093894  | 18 | 18 | 59744461 | 8731  | 5.8568  | 0.3215 | -0.9273 | 5.705  | CEU |
| LOC284293 | GI_27485378-S | rs8094058  | 18 | 18 | 59744599 | 26987 | 8.2855  | 0.4436 | 0.7516  | 7.0894 | CEU |
| SERPINB10 | GI_4826901-S  | rs8094058  | 18 | 18 | 59744599 | 8593  | 5.7618  | 0.3211 | -0.9324 | 5.705  | CEU |
| LOC284293 | GI_27485378-S | rs8089023  | 18 | 18 | 59744733 | 26853 | 8.3271  | 0.4397 | 0.7435  | 7.0894 | CEU |
| SERPINB10 | GI_4826901-S  | rs8089023  | 18 | 18 | 59744733 | 8459  | 5.8568  | 0.3215 | -0.9273 | 5.705  | CEU |
| LOC284293 | GI_27485378-S | rs3786340  | 18 | 18 | 59748514 | 23072 | 8.3271  | 0.4397 | -0.7435 | 7.0894 | CEU |
| SERPINB10 | GI_4826901-S  | rs3786340  | 18 | 18 | 59748514 | 4678  | 5.8568  | 0.3215 | 0.9273  | 5.705  | CEU |
| LOC284293 | GI_27485378-S | rs10163726 | 18 | 18 | 59748718 | 22868 | 8.3271  | 0.4397 | -0.7435 | 7.0894 | CEU |
| SERPINB10 | GI_4826901-S  | rs10163726 | 18 | 18 | 59748718 | 4474  | 5.8568  | 0.3215 | 0.9273  | 5.705  | CEU |
| LOC284293 | GI_27485378-S | rs9951724  | 18 | 18 | 59749057 | 22529 | 8.1766  | 0.4387 | -0.7444 | 7.0894 | CEU |
| SERPINB10 | GI_4826901-S  | rs9951724  | 18 | 18 | 59749057 | 4135  | 5.7193  | 0.3189 | 0.9246  | 5.705  | CEU |
| LOC284293 | GI_27485378-S | rs1544899  | 18 | 18 | 59749190 | 22396 | 8.3271  | 0.4397 | -0.7435 | 7.0894 | CEU |
| SERPINB10 | GI_4826901-S  | rs1544899  | 18 | 18 | 59749190 | 4002  | 5.8568  | 0.3215 | 0.9273  | 5.705  | CEU |
| LOC284293 | GI_27485378-S | rs1544898  | 18 | 18 | 59749429 | 22157 | 8.3271  | 0.4397 | 0.7435  | 7.0894 | CEU |
| SERPINB10 | GI_4826901-S  | rs1544898  | 18 | 18 | 59749429 | 3763  | 5.8568  | 0.3215 | -0.9273 | 5.705  | CEU |
| LOC284293 | GI_27485378-S | rs8096543  | 18 | 18 | 59750024 | 21562 | 8.3271  | 0.4397 | 0.7435  | 7.0894 | CEU |
| SERPINB10 | GI_4826901-S  | rs8096543  | 18 | 18 | 59750024 | 3168  | 5.8568  | 0.3215 | -0.9273 | 5.705  | CEU |
| LOC284293 | GI_27485378-S | rs4630651  | 18 | 18 | 59750481 | 21105 | 8.3271  | 0.4397 | 0.7435  | 7.0894 | CEU |
| SERPINB10 | GI_4826901-S  | rs4630651  | 18 | 18 | 59750481 | 2711  | 5.8568  | 0.3215 | -0.9273 | 5.705  | CEU |
| LOC284293 | GI_27485378-S | rs9964049  | 18 | 18 | 59751066 | 20520 | 8.3271  | 0.4397 | -0.7435 | 7.0894 | CEU |
| SERPINB10 | GI_4826901-S  | rs9964049  | 18 | 18 | 59751066 | 2126  | 5.8568  | 0.3215 | 0.9273  | 5.705  | CEU |
| LOC284293 | GI_27485378-S | rs963075   | 18 | 18 | 59751364 | 20222 | 8.3271  | 0.4397 | 0.7435  | 7.0894 | CEU |
| SERPINB10 | GI_4826901-S  | rs963075   | 18 | 18 | 59751364 | 1828  | 5.8568  | 0.3215 | -0.9273 | 5.705  | CEU |
| LOC284293 | GI_27485378-S | rs17072204 | 18 | 18 | 59752346 | 19240 | 8.9277  | 0.4653 | 0.7875  | 7.0894 | CEU |
| SERPINB10 | GI_4826901-S  | rs17072204 | 18 | 18 | 59752346 | 846   | 5.8756  | 0.3225 | -0.9572 | 5.705  | CEU |

|           |               |            |    |    |          |        |         |        |         |        |     |
|-----------|---------------|------------|----|----|----------|--------|---------|--------|---------|--------|-----|
| LOC284293 | GI_27485378-S | rs11152409 | 18 | 18 | 59755259 | 16327  | 9.2596  | 0.4790 | 0.8008  | 7.0894 | CEU |
| SERPINB10 | GI_4826901-S  | rs11152409 | 18 | 18 | 59755259 | 2067   | 5.8534  | 0.3213 | -0.9582 | 5.705  | CEU |
| LOC284293 | GI_27485378-S | rs9783897  | 18 | 18 | 59755762 | 15824  | 9.2596  | 0.4790 | -0.8008 | 7.0894 | CEU |
| SERPINB10 | GI_4826901-S  | rs9783897  | 18 | 18 | 59755762 | 2570   | 5.8534  | 0.3213 | 0.9582  | 5.705  | CEU |
| LOC284293 | GI_27485378-S | rs9783898  | 18 | 18 | 59755785 | 15801  | 9.2596  | 0.4790 | -0.8008 | 7.0894 | CEU |
| SERPINB10 | GI_4826901-S  | rs9783898  | 18 | 18 | 59755785 | 2593   | 5.8534  | 0.3213 | 0.9582  | 5.705  | CEU |
| LOC284293 | GI_27485378-S | rs9783908  | 18 | 18 | 59755942 | 15644  | 9.2596  | 0.4790 | 0.8008  | 7.0894 | CEU |
| SERPINB10 | GI_4826901-S  | rs9783908  | 18 | 18 | 59755942 | 2750   | 5.8534  | 0.3213 | -0.9582 | 5.705  | CEU |
| LOC284293 | GI_27485378-S | rs13381197 | 18 | 18 | 59757967 | 13619  | 8.9277  | 0.4653 | 0.7875  | 7.0894 | CEU |
| SERPINB10 | GI_4826901-S  | rs13381197 | 18 | 18 | 59757967 | 4775   | 5.8756  | 0.3225 | -0.9572 | 5.705  | CEU |
| LOC284293 | GI_27485378-S | rs9807138  | 18 | 18 | 59758363 | 13223  | 9.0970  | 0.4783 | 0.8024  | 7.0894 | CEU |
| SERPINB10 | GI_4826901-S  | rs9807138  | 18 | 18 | 59758363 | 5171   | 5.8306  | 0.3248 | -0.9665 | 5.705  | CEU |
| LOC284293 | GI_27485378-S | rs9955763  | 18 | 18 | 59765415 | 6171   | 8.9277  | 0.4653 | -0.7875 | 7.0894 | CEU |
| SERPINB10 | GI_4826901-S  | rs9955763  | 18 | 18 | 59765415 | 12223  | 5.8756  | 0.3225 | 0.9572  | 5.705  | CEU |
| LOC284293 | GI_27485378-S | rs13370584 | 18 | 18 | 59766324 | 5262   | 9.2596  | 0.4790 | -0.8008 | 7.0894 | CEU |
| SERPINB10 | GI_4826901-S  | rs13370584 | 18 | 18 | 59766324 | 13132  | 5.8534  | 0.3213 | 0.9582  | 5.705  | CEU |
| LOC284293 | GI_27485378-S | rs9955410  | 18 | 18 | 59771017 | 569    | 12.0001 | 0.5796 | -0.8213 | 7.0894 | CEU |
| LOC284293 | GI_27485378-S | rs9945924  | 18 | 18 | 59771746 | 160    | 15.6321 | 0.6841 | 0.9494  | 7.0894 | CEU |
| LOC284293 | GI_27485378-S | rs8090046  | 18 | 18 | 59773066 | 1480   | 15.6321 | 0.6841 | 0.9494  | 7.0894 | CEU |
| LOC284293 | GI_27485378-S | rs8095151  | 18 | 18 | 59773196 | 1610   | 15.6321 | 0.6841 | -0.9494 | 7.0894 | CEU |
| LOC284293 | GI_27485378-S | rs9952485  | 18 | 18 | 59773771 | 2185   | 9.1639  | 0.5270 | 0.7448  | 7.0894 | CEU |
| LOC284293 | GI_27485378-S | rs9962574  | 18 | 18 | 59777098 | 5512   | 12.3020 | 0.5895 | -0.8256 | 7.0894 | CEU |
| LOC284293 | GI_27485378-S | rs9963550  | 18 | 18 | 59779238 | 7652   | 15.6321 | 0.6841 | 0.9494  | 7.0894 | CEU |
| LOC284293 | GI_27485378-S | rs9949621  | 18 | 18 | 59780377 | 8791   | 12.0001 | 0.5796 | 0.8213  | 7.0894 | CEU |
| LOC284293 | GI_27485378-S | rs9950903  | 18 | 18 | 59781783 | 10197  | 12.0001 | 0.5796 | -0.8213 | 7.0894 | CEU |
| LOC284293 | GI_27485378-S | rs8090586  | 18 | 18 | 59781864 | 10278  | 12.0001 | 0.5796 | 0.8213  | 7.0894 | CEU |
| LOC284293 | GI_27485378-S | rs1006755  | 18 | 18 | 59782026 | 10440  | 12.0001 | 0.5796 | 0.8213  | 7.0894 | CEU |
| LOC284293 | GI_27485378-S | rs4510128  | 18 | 18 | 59782312 | 10726  | 15.6321 | 0.6841 | 0.9494  | 7.0894 | CEU |
| LOC284293 | GI_27485378-S | rs1006754  | 18 | 18 | 59782427 | 10841  | 13.1086 | 0.6481 | 0.9350  | 7.0894 | CEU |
| LOC284293 | GI_27485378-S | rs17072304 | 18 | 18 | 59784549 | 12963  | 15.6321 | 0.6841 | 0.9494  | 7.0894 | CEU |
| LOC284293 | GI_27485378-S | rs9961615  | 18 | 18 | 59788652 | 17066  | 7.5361  | 0.4519 | -0.7066 | 7.0894 | CEU |
| CNN2      | GI_41327728-S | rs3764642  | 19 | 19 | 991046   | 1480   | 6.5219  | 0.4259 | -0.3254 | 6.1522 | CEU |
| FLJ14009  | GI_13376098-S | rs17681742 | 19 | 19 | 2928599  | 16467  | 6.7750  | 0.3679 | -0.1886 | 6.3309 | CEU |
| PIP5K1C   | GI_31317308-S | rs17433775 | 19 | 19 | 3544004  | 37341  | 6.3428  | 0.3465 | 0.7536  | 5.9203 | CEU |
| PIP5K1C   | GI_31317308-S | rs17674528 | 19 | 19 | 3577771  | 3574   | 6.9164  | 0.3908 | 0.8394  | 5.9203 | CEU |
| PIP5K1C   | GI_31317308-S | rs16991994 | 19 | 19 | 3626725  | 45380  | 6.4489  | 0.3567 | 0.7150  | 5.9203 | CEU |
| PIP5K1C   | GI_31317308-S | rs1476591  | 19 | 19 | 3630607  | 49262  | 8.8446  | 0.4618 | 0.8180  | 5.9203 | CEU |
| PIP5K1C   | GI_31317308-S | rs1476592  | 19 | 19 | 3630740  | 49395  | 8.8446  | 0.4618 | 0.8180  | 5.9203 | CEU |
| Hs.465789 | Hs.465789-S   | rs952444   | 19 | 19 | 7992055  | 12455  | 6.0736  | 0.3327 | 0.1024  | 5.9038 | CEU |
| Hs.465789 | Hs.465789-S   | rs10411185 | 19 | 19 | 8009881  | 30281  | 6.1673  | 0.3375 | -0.1012 | 5.9038 | CEU |
| ZNF266    | GI_37622342-A | rs10414250 | 19 | 19 | 9238716  | 145624 | 7.7327  | 0.4132 | 0.2739  | 5.8472 | CEU |
| ZNF266    | GI_37622342-A | rs9305057  | 19 | 19 | 9241475  | 142865 | 7.2550  | 0.3910 | -0.2693 | 5.8472 | CEU |
| ZNF266    | GI_37622342-A | rs10408485 | 19 | 19 | 9254110  | 130230 | 8.4601  | 0.4455 | 0.2929  | 5.8472 | CEU |
| ZNF266    | GI_37622342-A | rs17204992 | 19 | 19 | 9260996  | 123344 | 8.4601  | 0.4455 | 0.2929  | 5.8472 | CEU |
| ZNF266    | GI_37622342-A | rs7247108  | 19 | 19 | 9262704  | 121636 | 8.4601  | 0.4455 | -0.2929 | 5.8472 | CEU |
| ZNF266    | GI_37622342-A | rs10422910 | 19 | 19 | 9263877  | 120463 | 8.4601  | 0.4455 | -0.2929 | 5.8472 | CEU |
| ZNF266    | GI_37622342-A | rs7252865  | 19 | 19 | 9273535  | 110805 | 9.2200  | 0.4957 | 0.3023  | 5.8472 | CEU |
| ZNF266    | GI_37622342-A | rs10745023 | 19 | 19 | 9274896  | 109444 | 7.6851  | 0.4221 | -0.2803 | 5.8472 | CEU |
| ZNF266    | GI_37622342-A | rs12150875 | 19 | 19 | 9275172  | 109168 | 7.4555  | 0.4229 | 0.2805  | 5.8472 | CEU |
| ZNF266    | GI_37622342-A | rs2033482  | 19 | 19 | 9279184  | 105156 | 8.4601  | 0.4455 | -0.2929 | 5.8472 | CEU |
| ZNF266    | GI_37622342-A | rs8112682  | 19 | 19 | 9282296  | 102044 | 7.9719  | 0.4353 | 0.2835  | 5.8472 | CEU |
| ZNF266    | GI_37622342-A | rs10402374 | 19 | 19 | 9285709  | 98631  | 7.6745  | 0.4160 | -0.2797 | 5.8472 | CEU |
| ZNF266    | GI_37622342-A | rs6512047  | 19 | 19 | 9298812  | 85528  | 7.7985  | 0.4162 | 0.2797  | 5.8472 | CEU |
| ZNF266    | GI_37622342-A | rs10401135 | 19 | 19 | 9304332  | 80008  | 9.3644  | 0.4832 | -0.2961 | 5.8472 | CEU |
| ZNF266    | GI_37622342-A | rs8113427  | 19 | 19 | 9309917  | 74423  | 8.4601  | 0.4455 | -0.2929 | 5.8472 | CEU |
| ZNF266    | GI_37622342-A | rs8110584  | 19 | 19 | 9310337  | 74003  | 8.3066  | 0.4445 | -0.2927 | 5.8472 | CEU |
| ZNF266    | GI_37622342-A | rs13535    | 19 | 19 | 9315173  | 69167  | 8.4601  | 0.4455 | 0.2929  | 5.8472 | CEU |
| ZNF266    | GI_37622342-A | rs8103043  | 19 | 19 | 9315976  | 68364  | 8.4601  | 0.4455 | -0.2929 | 5.8472 | CEU |
| ZNF266    | GI_37622342-A | rs10418104 | 19 | 19 | 9316390  | 67950  | 8.8147  | 0.4914 | 0.3123  | 5.8472 | CEU |

|        |               |            |    |    |         |       |         |        |         |        |     |
|--------|---------------|------------|----|----|---------|-------|---------|--------|---------|--------|-----|
| ZNF266 | GI_37622342-A | rs7253373  | 19 | 19 | 9317230 | 67110 | 8.3161  | 0.4449 | 0.2960  | 5.8472 | CEU |
| ZNF266 | GI_37622342-A | rs1865040  | 19 | 19 | 9318246 | 66094 | 7.7985  | 0.4162 | 0.2797  | 5.8472 | CEU |
| ZNF266 | GI_37622342-A | rs7259471  | 19 | 19 | 9329071 | 55269 | 8.4601  | 0.4455 | -0.2929 | 5.8472 | CEU |
| ZNF266 | GI_37622342-A | rs11883244 | 19 | 19 | 9329222 | 55118 | 9.3644  | 0.4832 | 0.2961  | 5.8472 | CEU |
| ZNF266 | GI_37622342-A | rs17205697 | 19 | 19 | 9330748 | 53592 | 8.4601  | 0.4455 | -0.2929 | 5.8472 | CEU |
| ZNF266 | GI_37622342-A | rs3760752  | 19 | 19 | 9332736 | 51604 | 7.7985  | 0.4162 | 0.2797  | 5.8472 | CEU |
| ZNF266 | GI_37622342-A | rs2278407  | 19 | 19 | 9334201 | 50139 | 8.4601  | 0.4455 | 0.2929  | 5.8472 | CEU |
| ZNF266 | GI_37622342-A | rs7249948  | 19 | 19 | 9335688 | 48652 | 9.1072  | 0.5039 | -0.3088 | 5.8472 | CEU |
| ZNF266 | GI_37622342-A | rs11086019 | 19 | 19 | 9336416 | 47924 | 9.3644  | 0.4832 | -0.2961 | 5.8472 | CEU |
| ZNF266 | GI_37622342-A | rs13344979 | 19 | 19 | 9337553 | 46787 | 9.3644  | 0.4832 | -0.2961 | 5.8472 | CEU |
| ZNF266 | GI_37622342-A | rs7255853  | 19 | 19 | 9339628 | 44712 | 8.4601  | 0.4455 | 0.2929  | 5.8472 | CEU |
| ZNF266 | GI_37622342-A | rs10426170 | 19 | 19 | 9340577 | 43763 | 9.3103  | 0.4932 | 0.3076  | 5.8472 | CEU |
| ZNF266 | GI_37622342-A | rs2878451  | 19 | 19 | 9341797 | 42543 | 8.4601  | 0.4455 | -0.2929 | 5.8472 | CEU |
| ZNF266 | GI_37622342-A | rs10416984 | 19 | 19 | 9343310 | 41030 | 9.3644  | 0.4832 | -0.2961 | 5.8472 | CEU |
| ZNF266 | GI_37622342-A | rs8100020  | 19 | 19 | 9345935 | 38405 | 8.4601  | 0.4455 | 0.2929  | 5.8472 | CEU |
| ZNF266 | GI_37622342-A | rs8103099  | 19 | 19 | 9346229 | 38111 | 9.3644  | 0.4832 | 0.2961  | 5.8472 | CEU |
| ZNF266 | GI_37622342-A | rs11669550 | 19 | 19 | 9348592 | 35748 | 7.8596  | 0.4189 | -0.2821 | 5.8472 | CEU |
| ZNF266 | GI_37622342-A | rs1347166  | 19 | 19 | 9348808 | 35532 | 9.3644  | 0.4832 | -0.2961 | 5.8472 | CEU |
| ZNF266 | GI_37622342-A | rs10401712 | 19 | 19 | 9349111 | 35229 | 8.4601  | 0.4455 | -0.2929 | 5.8472 | CEU |
| ZNF266 | GI_37622342-A | rs10416662 | 19 | 19 | 9349178 | 35162 | 9.3644  | 0.4832 | -0.2961 | 5.8472 | CEU |
| ZNF266 | GI_37622342-A | rs8103270  | 19 | 19 | 9349461 | 34879 | 6.4991  | 0.3543 | -0.2535 | 5.8472 | CEU |
| ZNF266 | GI_37622342-A | rs2304110  | 19 | 19 | 9350132 | 34208 | 9.3644  | 0.4832 | -0.2961 | 5.8472 | CEU |
| ZNF266 | GI_37622342-A | rs10411115 | 19 | 19 | 9351428 | 32912 | 8.4601  | 0.4455 | -0.2929 | 5.8472 | CEU |
| ZNF266 | GI_37622342-A | rs2217652  | 19 | 19 | 9351814 | 32526 | 8.4601  | 0.4455 | -0.2929 | 5.8472 | CEU |
| ZNF266 | GI_37622342-A | rs3826783  | 19 | 19 | 9353141 | 31199 | 9.3644  | 0.4832 | 0.2961  | 5.8472 | CEU |
| ZNF266 | GI_37622342-A | rs2230752  | 19 | 19 | 9353370 | 30970 | 9.3644  | 0.4832 | 0.2961  | 5.8472 | CEU |
| ZNF266 | GI_37622342-A | rs1433062  | 19 | 19 | 9355266 | 29074 | 7.7985  | 0.4162 | -0.2797 | 5.8472 | CEU |
| ZNF266 | GI_37622342-A | rs2335531  | 19 | 19 | 9357268 | 27072 | 7.2065  | 0.3940 | -0.2677 | 5.8472 | CEU |
| ZNF266 | GI_37622342-A | rs2163809  | 19 | 19 | 9357994 | 26346 | 8.2383  | 0.4533 | 0.2914  | 5.8472 | CEU |
| ZNF266 | GI_37622342-A | rs8112842  | 19 | 19 | 9359315 | 25025 | 9.3644  | 0.4832 | 0.2961  | 5.8472 | CEU |
| ZNF266 | GI_37622342-A | rs11666765 | 19 | 19 | 9361145 | 23195 | 7.7985  | 0.4162 | 0.2797  | 5.8472 | CEU |
| ZNF266 | GI_37622342-A | rs2082429  | 19 | 19 | 9361801 | 22539 | 6.9518  | 0.4099 | 0.2814  | 5.8472 | CEU |
| ZNF266 | GI_37622342-A | rs11671340 | 19 | 19 | 9362393 | 21947 | 7.2487  | 0.3960 | -0.2740 | 5.8472 | CEU |
| ZNF266 | GI_37622342-A | rs11086027 | 19 | 19 | 9363441 | 20899 | 8.4601  | 0.4455 | -0.2929 | 5.8472 | CEU |
| ZNF266 | GI_37622342-A | rs11672602 | 19 | 19 | 9363587 | 20753 | 8.4601  | 0.4455 | -0.2929 | 5.8472 | CEU |
| ZNF266 | GI_37622342-A | rs17272543 | 19 | 19 | 9364937 | 19403 | 7.7985  | 0.4162 | 0.2797  | 5.8472 | CEU |
| ZNF266 | GI_37622342-A | rs7246082  | 19 | 19 | 9365006 | 19334 | 9.3644  | 0.4832 | -0.2961 | 5.8472 | CEU |
| ZNF266 | GI_37622342-A | rs7257650  | 19 | 19 | 9365101 | 19239 | 9.3644  | 0.4832 | 0.2961  | 5.8472 | CEU |
| ZNF266 | GI_37622342-A | rs2878452  | 19 | 19 | 9365510 | 18830 | 8.0679  | 0.4456 | 0.2928  | 5.8472 | CEU |
| ZNF266 | GI_37622342-A | rs2335532  | 19 | 19 | 9365598 | 18742 | 9.3644  | 0.4832 | -0.2961 | 5.8472 | CEU |
| ZNF266 | GI_37622342-A | rs8104611  | 19 | 19 | 9366805 | 17535 | 8.4601  | 0.4455 | 0.2929  | 5.8472 | CEU |
| ZNF266 | GI_37622342-A | rs2335938  | 19 | 19 | 9367269 | 17071 | 9.3644  | 0.4832 | -0.2961 | 5.8472 | CEU |
| ZNF266 | GI_37622342-A | rs12150994 | 19 | 19 | 9369228 | 15112 | 9.3644  | 0.4832 | -0.2961 | 5.8472 | CEU |
| ZNF266 | GI_37622342-A | rs4804436  | 19 | 19 | 9376200 | 8140  | 10.0335 | 0.5096 | -0.3004 | 5.8472 | CEU |
| ZNF266 | GI_37622342-A | rs11878970 | 19 | 19 | 9378537 | 5803  | 8.3637  | 0.4846 | 0.3055  | 5.8472 | CEU |
| ZNF266 | GI_37622342-A | rs8108167  | 19 | 19 | 9379331 | 5009  | 10.0910 | 0.5179 | -0.3022 | 5.8472 | CEU |
| ZNF266 | GI_37622342-A | rs6512108  | 19 | 19 | 9379670 | 4670  | 10.0335 | 0.5096 | -0.3004 | 5.8472 | CEU |
| ZNF266 | GI_37622342-A | rs11668157 | 19 | 19 | 9379846 | 4494  | 8.2499  | 0.4363 | 0.2811  | 5.8472 | CEU |
| ZNF266 | GI_37622342-A | rs6512109  | 19 | 19 | 9380453 | 3887  | 9.0963  | 0.4723 | 0.2979  | 5.8472 | CEU |
| ZNF266 | GI_37622342-A | rs7253847  | 19 | 19 | 9380894 | 3446  | 9.0963  | 0.4723 | -0.2979 | 5.8472 | CEU |
| ZNF266 | GI_37622342-A | rs7259584  | 19 | 19 | 9381062 | 3278  | 9.0963  | 0.4723 | 0.2979  | 5.8472 | CEU |
| ZNF266 | GI_37622342-A | rs10423720 | 19 | 19 | 9382727 | 1613  | 9.0963  | 0.4723 | 0.2979  | 5.8472 | CEU |
| ZNF266 | GI_37622342-A | rs8109962  | 19 | 19 | 9383388 | 952   | 10.0335 | 0.5096 | 0.3004  | 5.8472 | CEU |
| ZNF266 | GI_37622342-A | rs8105020  | 19 | 19 | 9383477 | 863   | 9.9408  | 0.5121 | -0.3013 | 5.8472 | CEU |
| ZNF266 | GI_37622342-A | rs6512110  | 19 | 19 | 9383724 | 616   | 10.0335 | 0.5096 | 0.3004  | 5.8472 | CEU |
| ZNF266 | GI_37622342-A | rs7251490  | 19 | 19 | 9383802 | 538   | 9.0963  | 0.4723 | -0.2979 | 5.8472 | CEU |
| ZNF266 | GI_37622342-A | rs10515    | 19 | 19 | 9384724 | 384   | 9.0963  | 0.4723 | -0.2979 | 5.8472 | CEU |
| ZNF266 | GI_37622342-A | rs2241356  | 19 | 19 | 9385185 | 845   | 10.0446 | 0.5100 | 0.3127  | 5.8472 | CEU |
| ZNF266 | GI_37622342-A | rs7258150  | 19 | 19 | 9387017 | 2677  | 11.0847 | 0.5483 | -0.3147 | 5.8472 | CEU |

|        |               |            |    |    |          |        |         |        |         |        |     |
|--------|---------------|------------|----|----|----------|--------|---------|--------|---------|--------|-----|
| ZNF266 | GI_37622342-A | rs1978713  | 19 | 19 | 9390783  | 6443   | 11.0847 | 0.5483 | 0.3147  | 5.8472 | CEU |
| ZNF266 | GI_37622342-A | rs1978711  | 19 | 19 | 9391081  | 6741   | 11.4282 | 0.5797 | 0.3270  | 5.8472 | CEU |
| ZNF266 | GI_37622342-A | rs1978435  | 19 | 19 | 9392116  | 7776   | 10.0446 | 0.5100 | 0.3127  | 5.8472 | CEU |
| ZNF266 | GI_37622342-A | rs11880207 | 19 | 19 | 9392693  | 8353   | 9.7054  | 0.5801 | 0.3220  | 5.8472 | CEU |
| ZNF266 | GI_37622342-A | rs2112529  | 19 | 19 | 9393156  | 8816   | 10.0446 | 0.5100 | 0.3127  | 5.8472 | CEU |
| ZNF266 | GI_37622342-A | rs6512121  | 19 | 19 | 9394805  | 10465  | 10.3532 | 0.5217 | 0.3110  | 5.8472 | CEU |
| ZNF266 | GI_37622342-A | rs7254750  | 19 | 19 | 9395301  | 10961  | 11.0847 | 0.5483 | 0.3147  | 5.8472 | CEU |
| ZNF266 | GI_37622342-A | rs2335939  | 19 | 19 | 9395790  | 11450  | 11.0847 | 0.5483 | -0.3147 | 5.8472 | CEU |
| ZNF266 | GI_37622342-A | rs7258744  | 19 | 19 | 9395967  | 11627  | 11.0094 | 0.5649 | -0.3240 | 5.8472 | CEU |
| ZNF266 | GI_37622342-A | rs7246415  | 19 | 19 | 9395981  | 11641  | 11.0847 | 0.5483 | 0.3147  | 5.8472 | CEU |
| ZNF266 | GI_37622342-A | rs7258874  | 19 | 19 | 9396016  | 11676  | 10.0446 | 0.5100 | -0.3127 | 5.8472 | CEU |
| ZNF266 | GI_37622342-A | rs10411141 | 19 | 19 | 9397203  | 12863  | 11.0847 | 0.5483 | -0.3147 | 5.8472 | CEU |
| ZNF266 | GI_37622342-A | rs10406056 | 19 | 19 | 9397418  | 13078  | 10.6324 | 0.5320 | 0.3021  | 5.8472 | CEU |
| ZNF266 | GI_37622342-A | rs7252370  | 19 | 19 | 9398191  | 13851  | 11.0847 | 0.5483 | -0.3147 | 5.8472 | CEU |
| ZNF266 | GI_37622342-A | rs6512122  | 19 | 19 | 9398465  | 14125  | 10.0446 | 0.5100 | -0.3127 | 5.8472 | CEU |
| ZNF266 | GI_37622342-A | rs6512123  | 19 | 19 | 9398800  | 14460  | 10.0446 | 0.5100 | -0.3127 | 5.8472 | CEU |
| ZNF266 | GI_37622342-A | rs12461912 | 19 | 19 | 9400300  | 15960  | 10.0446 | 0.5100 | -0.3127 | 5.8472 | CEU |
| ZNF266 | GI_37622342-A | rs8107606  | 19 | 19 | 9400522  | 16182  | 11.0847 | 0.5483 | 0.3147  | 5.8472 | CEU |
| ZNF266 | GI_37622342-A | rs9305082  | 19 | 19 | 9401524  | 17184  | 11.0847 | 0.5483 | -0.3147 | 5.8472 | CEU |
| ZNF266 | GI_37622342-A | rs10404268 | 19 | 19 | 9402640  | 18300  | 11.0847 | 0.5483 | 0.3147  | 5.8472 | CEU |
| ZNF266 | GI_37622342-A | rs11673601 | 19 | 19 | 9403007  | 18667  | 8.2499  | 0.4363 | 0.2811  | 5.8472 | CEU |
| ZNF266 | GI_37622342-A | rs9676745  | 19 | 19 | 9403342  | 19002  | 10.0335 | 0.5096 | -0.3004 | 5.8472 | CEU |
| ZNF266 | GI_37622342-A | rs10409256 | 19 | 19 | 9404830  | 20490  | 11.0847 | 0.5483 | 0.3147  | 5.8472 | CEU |
| ZNF266 | GI_37622342-A | rs8108483  | 19 | 19 | 9406030  | 21690  | 10.8390 | 0.5522 | 0.3117  | 5.8472 | CEU |
| ZNF266 | GI_37622342-A | rs6512130  | 19 | 19 | 9407351  | 23011  | 7.0295  | 0.3964 | 0.2643  | 5.8472 | CEU |
| PBX4   | GI_15149471-S | rs10423674 | 19 | 19 | 18678903 | 854878 | 6.3257  | 0.3456 | -0.3736 | 5.8357 | CEU |
| PBX4   | GI_15149471-S | rs10221489 | 19 | 19 | 18687975 | 845806 | 6.3257  | 0.3456 | 0.3736  | 5.8357 | CEU |
| ATP13A | GI_9966896-S  | rs2304130  | 19 | 19 | 19650528 | 33481  | 7.5550  | 0.4105 | 0.4193  | 5.7332 | CEU |
| ZNF85  | GI_4508038-S  | rs7253466  | 19 | 19 | 20872859 | 52342  | 6.8323  | 0.3759 | -0.6554 | 6.277  | CEU |
| ZNF85  | GI_4508038-S  | rs11673298 | 19 | 19 | 20883019 | 42182  | 6.7395  | 0.3662 | 0.6478  | 6.277  | CEU |
| ZNF85  | GI_4508038-S  | rs11666247 | 19 | 19 | 20883984 | 41217  | 6.7395  | 0.3662 | -0.6478 | 6.277  | CEU |
| ZNF85  | GI_4508038-S  | rs11670696 | 19 | 19 | 20887566 | 37635  | 6.7395  | 0.3662 | -0.6478 | 6.277  | CEU |
| ZNF85  | GI_4508038-S  | rs10454111 | 19 | 19 | 20904788 | 20413  | 7.0152  | 0.3796 | -0.6753 | 6.277  | CEU |
| ZNF85  | GI_4508038-S  | rs11882679 | 19 | 19 | 20905108 | 20093  | 7.0152  | 0.3796 | -0.6753 | 6.277  | CEU |
| ZNF85  | GI_4508038-S  | rs11085405 | 19 | 19 | 20906969 | 18232  | 6.5299  | 0.3608 | -0.6684 | 6.277  | CEU |
| ZNF85  | GI_4508038-S  | rs11667715 | 19 | 19 | 20907506 | 17695  | 6.6005  | 0.4038 | -0.7314 | 6.277  | CEU |
| ZNF85  | GI_4508038-S  | rs12162258 | 19 | 19 | 20915759 | 9442   | 7.0152  | 0.3796 | 0.6753  | 6.277  | CEU |
| ZNF85  | GI_4508038-S  | rs11669193 | 19 | 19 | 20917241 | 7960   | 7.0152  | 0.3796 | 0.6753  | 6.277  | CEU |
| ZNF85  | GI_4508038-S  | rs11085409 | 19 | 19 | 20921070 | 4131   | 7.0152  | 0.3796 | 0.6753  | 6.277  | CEU |
| ZNF85  | GI_4508038-S  | rs10454112 | 19 | 19 | 20922094 | 3107   | 7.0152  | 0.3796 | 0.6753  | 6.277  | CEU |
| ZNF85  | GI_4508038-S  | rs10454115 | 19 | 19 | 20922109 | 3092   | 7.0152  | 0.3796 | 0.6753  | 6.277  | CEU |
| ZNF85  | GI_4508038-S  | rs17679995 | 19 | 19 | 20922587 | 2614   | 7.0152  | 0.3796 | -0.6753 | 6.277  | CEU |
| ZNF85  | GI_4508038-S  | rs11085412 | 19 | 19 | 20922800 | 2401   | 7.2537  | 0.4131 | -0.7259 | 6.277  | CEU |
| ZNF85  | GI_4508038-S  | rs11665978 | 19 | 19 | 20923710 | 1491   | 7.0152  | 0.3796 | 0.6753  | 6.277  | CEU |
| ZNF85  | GI_4508038-S  | rs11672610 | 19 | 19 | 20926103 | 902    | 6.3276  | 0.3556 | 0.6561  | 6.277  | CEU |
| ZNF85  | GI_4508038-S  | rs11669114 | 19 | 19 | 20926209 | 1008   | 7.0152  | 0.3796 | -0.6753 | 6.277  | CEU |
| ZNF85  | GI_4508038-S  | rs17618121 | 19 | 19 | 20928636 | 3435   | 7.0152  | 0.3796 | -0.6753 | 6.277  | CEU |
| ZNF85  | GI_4508038-S  | rs17618127 | 19 | 19 | 20928675 | 3474   | 7.0152  | 0.3796 | 0.6753  | 6.277  | CEU |
| ZNF85  | GI_4508038-S  | rs17618139 | 19 | 19 | 20929176 | 3975   | 7.0152  | 0.3796 | 0.6753  | 6.277  | CEU |
| ZNF85  | GI_4508038-S  | rs17680052 | 19 | 19 | 20929868 | 4667   | 6.8602  | 0.3772 | -0.6711 | 6.277  | CEU |
| ZNF493 | GI_40255231-S | rs11085441 | 19 | 19 | 21265577 | 135177 | 7.0198  | 0.3850 | 0.1750  | 5.5221 | CEU |
| ZNF493 | GI_40255231-S | rs488125   | 19 | 19 | 21266013 | 134741 | 5.5969  | 0.3078 | -0.1592 | 5.5221 | CEU |
| ZNF493 | GI_40255231-S | rs1781873  | 19 | 19 | 21269271 | 131483 | 6.5573  | 0.3572 | 0.1666  | 5.5221 | CEU |
| ZNF493 | GI_40255231-S | rs1678822  | 19 | 19 | 21270698 | 130056 | 5.5720  | 0.3110 | 0.1604  | 5.5221 | CEU |
| ZNF493 | GI_40255231-S | rs509540   | 19 | 19 | 21279212 | 121542 | 5.5969  | 0.3078 | 0.1592  | 5.5221 | CEU |
| ZNF493 | GI_40255231-S | rs11085442 | 19 | 19 | 21280804 | 119950 | 5.5828  | 0.3115 | -0.1656 | 5.5221 | CEU |
| ZNF493 | GI_40255231-S | rs685844   | 19 | 19 | 21283791 | 116963 | 5.5969  | 0.3078 | 0.1592  | 5.5221 | CEU |
| ZNF493 | GI_40255231-S | rs501647   | 19 | 19 | 21286337 | 114417 | 5.5969  | 0.3078 | 0.1592  | 5.5221 | CEU |
| ZNF493 | GI_40255231-S | rs2184487  | 19 | 19 | 21316242 | 84512  | 5.5969  | 0.3078 | 0.1592  | 5.5221 | CEU |

|           |               |            |    |    |          |       |        |        |         |        |     |
|-----------|---------------|------------|----|----|----------|-------|--------|--------|---------|--------|-----|
| ZNF493    | GI_40255231-S | rs682582   | 19 | 19 | 21324495 | 76259 | 5.5969 | 0.3078 | 0.1592  | 5.5221 | CEU |
| ZNF493    | GI_40255231-S | rs8110967  | 19 | 19 | 21332527 | 68227 | 6.5573 | 0.3572 | 0.1666  | 5.5221 | CEU |
| ZNF493    | GI_40255231-S | rs2914636  | 19 | 19 | 21333182 | 67572 | 5.5969 | 0.3078 | -0.1592 | 5.5221 | CEU |
| ZNF493    | GI_40255231-S | rs2012013  | 19 | 19 | 21333646 | 67108 | 6.0422 | 0.3407 | 0.1612  | 5.5221 | CEU |
| ZNF493    | GI_40255231-S | rs12975081 | 19 | 19 | 21336082 | 64672 | 6.5573 | 0.3572 | 0.1666  | 5.5221 | CEU |
| ZNF493    | GI_40255231-S | rs12981735 | 19 | 19 | 21336306 | 64448 | 6.6467 | 0.3827 | -0.1759 | 5.5221 | CEU |
| ZNF493    | GI_40255231-S | rs12981564 | 19 | 19 | 21336354 | 64400 | 6.4507 | 0.3568 | -0.1664 | 5.5221 | CEU |
| ZNF493    | GI_40255231-S | rs12982420 | 19 | 19 | 21336411 | 64343 | 6.5573 | 0.3572 | 0.1666  | 5.5221 | CEU |
| ZNF493    | GI_40255231-S | rs12982282 | 19 | 19 | 21336554 | 64200 | 6.4629 | 0.3575 | -0.1699 | 5.5221 | CEU |
| ZNF493    | GI_40255231-S | rs2914638  | 19 | 19 | 21336857 | 63897 | 6.5573 | 0.3572 | -0.1666 | 5.5221 | CEU |
| ZNF493    | GI_40255231-S | rs4315457  | 19 | 19 | 21338863 | 61891 | 6.5573 | 0.3572 | 0.1666  | 5.5221 | CEU |
| ZNF493    | GI_40255231-S | rs8103325  | 19 | 19 | 21340051 | 60703 | 6.8812 | 0.4251 | -0.1978 | 5.5221 | CEU |
| ZNF493    | GI_40255231-S | rs8103459  | 19 | 19 | 21340166 | 60588 | 5.8579 | 0.3748 | -0.1850 | 5.5221 | CEU |
| ZNF493    | GI_40255231-S | rs2170024  | 19 | 19 | 21345187 | 55567 | 6.5573 | 0.3572 | 0.1666  | 5.5221 | CEU |
| ZNF493    | GI_40255231-S | rs8099940  | 19 | 19 | 21345938 | 54816 | 6.4629 | 0.3575 | 0.1699  | 5.5221 | CEU |
| ZNF493    | GI_40255231-S | rs2088762  | 19 | 19 | 21349675 | 51079 | 5.6022 | 0.3597 | -0.1749 | 5.5221 | CEU |
| ZNF493    | GI_40255231-S | rs8111189  | 19 | 19 | 21350376 | 50378 | 5.5800 | 0.3114 | 0.1613  | 5.5221 | CEU |
| ZNF493    | GI_40255231-S | rs7248601  | 19 | 19 | 21355238 | 45516 | 5.7185 | 0.3666 | -0.1725 | 5.5221 | CEU |
| ZNF493    | GI_40255231-S | rs11085447 | 19 | 19 | 21360939 | 39815 | 6.0091 | 0.3294 | -0.1626 | 5.5221 | CEU |
| ZNF493    | GI_40255231-S | rs7247411  | 19 | 19 | 21367210 | 33544 | 6.5573 | 0.3572 | 0.1666  | 5.5221 | CEU |
| ZNF493    | GI_40255231-S | rs17680671 | 19 | 19 | 21368403 | 32351 | 5.8133 | 0.3192 | -0.1620 | 5.5221 | CEU |
| ZNF493    | GI_40255231-S | rs7257857  | 19 | 19 | 21371378 | 29376 | 6.5573 | 0.3572 | 0.1666  | 5.5221 | CEU |
| ZNF493    | GI_40255231-S | rs8107999  | 19 | 19 | 21378076 | 22678 | 5.8133 | 0.3192 | -0.1620 | 5.5221 | CEU |
| ZNF493    | GI_40255231-S | rs7249412  | 19 | 19 | 21378637 | 22117 | 6.5573 | 0.3572 | -0.1666 | 5.5221 | CEU |
| ZNF493    | GI_40255231-S | rs1055753  | 19 | 19 | 21380532 | 20222 | 5.6554 | 0.3109 | 0.1572  | 5.5221 | CEU |
| ZNF493    | GI_40255231-S | rs6511239  | 19 | 19 | 21380966 | 19788 | 5.7345 | 0.3292 | -0.1575 | 5.5221 | CEU |
| ZNF493    | GI_40255231-S | rs11667770 | 19 | 19 | 21386398 | 14356 | 6.5160 | 0.3759 | 0.1660  | 5.5221 | CEU |
| ZNF493    | GI_40255231-S | rs7259311  | 19 | 19 | 21390002 | 10752 | 6.5573 | 0.3572 | -0.1666 | 5.5221 | CEU |
| ZNF493    | GI_40255231-S | rs2914649  | 19 | 19 | 21407534 | 6780  | 5.8782 | 0.3473 | 0.1684  | 5.5221 | CEU |
| ZNF493    | GI_40255231-S | rs2968084  | 19 | 19 | 21407739 | 6985  | 5.8133 | 0.3192 | -0.1620 | 5.5221 | CEU |
| LOC400684 | GI_42661568-S | rs4805755  | 19 | 19 | 37546310 | 26656 | 6.0728 | 0.3327 | -0.1407 | 5.9391 | CEU |
| LOC400684 | GI_42661568-S | rs4804992  | 19 | 19 | 37550631 | 22335 | 6.0728 | 0.3327 | -0.1407 | 5.9391 | CEU |
| LOC400684 | GI_42661568-S | rs10417152 | 19 | 19 | 37580740 | 7774  | 6.0728 | 0.3327 | 0.1407  | 5.9391 | CEU |
| LOC400684 | GI_42661568-S | rs2302772  | 19 | 19 | 37593890 | 20924 | 6.0728 | 0.3327 | -0.1407 | 5.9391 | CEU |
| LOC400684 | GI_42661568-S | rs10410770 | 19 | 19 | 37594244 | 21278 | 6.0728 | 0.3327 | -0.1407 | 5.9391 | CEU |
| LOC400684 | GI_42661568-S | rs2111504  | 19 | 19 | 37609295 | 36329 | 6.0728 | 0.3327 | 0.1407  | 5.9391 | CEU |
| LOC400684 | GI_42661568-S | rs738093   | 19 | 19 | 37622347 | 49381 | 6.0728 | 0.3327 | -0.1407 | 5.9391 | CEU |
| LOC400684 | GI_42661568-S | rs4805762  | 19 | 19 | 37655794 | 82828 | 6.0728 | 0.3327 | -0.1407 | 5.9391 | CEU |
| LOC400684 | GI_42661568-S | rs16967141 | 19 | 19 | 37663063 | 90097 | 6.0728 | 0.3327 | -0.1407 | 5.9391 | CEU |
| LOC400684 | GI_42661568-S | rs1057395  | 19 | 19 | 37666578 | 93612 | 6.0728 | 0.3327 | -0.1407 | 5.9391 | CEU |
| LOC400684 | GI_42661568-S | rs737093   | 19 | 19 | 37669246 | 96280 | 6.0728 | 0.3327 | 0.1407  | 5.9391 | CEU |
| FLJ22573  | GI_13375912-S | rs12459634 | 19 | 19 | 40922014 | 290   | 6.8232 | 0.3703 | 0.6350  | 5.9448 | CEU |
| FLJ22573  | GI_13375912-S | rs10402601 | 19 | 19 | 40928749 | 6445  | 6.3378 | 0.3778 | 0.6952  | 5.9448 | CEU |
| FLJ22573  | GI_13375912-S | rs11084829 | 19 | 19 | 40949328 | 27024 | 6.0962 | 0.3387 | 0.5872  | 5.9448 | CEU |
| FLJ22573  | GI_13375912-S | rs2291067  | 19 | 19 | 40965374 | 43070 | 6.6199 | 0.3758 | 0.5972  | 5.9448 | CEU |
| SARS2     | GI_20149644-S | rs10410544 | 19 | 19 | 44077372 | 20482 | 6.2798 | 0.3433 | 0.2052  | 5.6174 | CEU |
| SARS2     | GI_20149644-S | rs9636109  | 19 | 19 | 44089473 | 8381  | 5.7075 | 0.3229 | 0.2114  | 5.6174 | CEU |
| SARS2     | GI_20149644-S | rs7508411  | 19 | 19 | 44100200 | 2346  | 6.4216 | 0.3710 | -0.2177 | 5.6174 | CEU |
| SARS2     | GI_20149644-S | rs4803034  | 19 | 19 | 44100528 | 2674  | 6.5760 | 0.3736 | -0.2292 | 5.6174 | CEU |
| SARS2     | GI_20149644-S | rs730078   | 19 | 19 | 44113228 | 15374 | 5.6635 | 0.3159 | -0.2120 | 5.6174 | CEU |
| SARS2     | GI_20149644-S | rs4801960  | 19 | 19 | 44116493 | 18639 | 5.6415 | 0.3102 | 0.2055  | 5.6174 | CEU |
| SARS2     | GI_20149644-S | rs575      | 19 | 19 | 44124623 | 26769 | 5.6415 | 0.3102 | 0.2055  | 5.6174 | CEU |
| SARS2     | GI_20149644-S | rs8113389  | 19 | 19 | 44125139 | 27285 | 5.6415 | 0.3102 | -0.2055 | 5.6174 | CEU |
| RPS16     | GI_34335151-S | rs17626    | 19 | 19 | 44618361 | 51    | 6.4522 | 0.3569 | 0.2062  | 5.6689 | CEU |
| RPS16     | GI_34335151-S | rs530411   | 19 | 19 | 44619380 | 968   | 5.8167 | 0.3194 | -0.2019 | 5.6689 | CEU |
| RPS16     | GI_34335151-S | rs11881477 | 19 | 19 | 44640619 | 22207 | 6.1321 | 0.3455 | -0.1927 | 5.6689 | CEU |
| FLJ36888  | GI_31341376-S | rs3730051  | 19 | 19 | 45436537 | 82359 | 6.6484 | 0.3668 | 0.2892  | 5.9729 | CEU |
| FLJ36888  | GI_31341376-S | rs8100018  | 19 | 19 | 45443863 | 75033 | 7.0841 | 0.3829 | -0.3033 | 5.9729 | CEU |
| FLJ36888  | GI_31341376-S | rs4802071  | 19 | 19 | 45456055 | 62841 | 6.4322 | 0.3510 | -0.2914 | 5.9729 | CEU |

|           |               |            |    |    |          |       |         |        |         |        |     |
|-----------|---------------|------------|----|----|----------|-------|---------|--------|---------|--------|-----|
| FLJ36888  | GI_31341376-S | rs3730050  | 19 | 19 | 45462822 | 56074 | 6.4322  | 0.3510 | -0.2914 | 5.9729 | CEU |
| FLJ36888  | GI_31341376-S | rs7250897  | 19 | 19 | 45475073 | 43823 | 6.4322  | 0.3510 | 0.2914  | 5.9729 | CEU |
| FLJ36888  | GI_31341376-S | rs8102171  | 19 | 19 | 45478363 | 40533 | 6.4322  | 0.3510 | -0.2914 | 5.9729 | CEU |
| FLJ36888  | GI_31341376-S | rs12974529 | 19 | 19 | 45504515 | 14381 | 6.2765  | 0.3480 | -0.2914 | 5.9729 | CEU |
| FLJ36888  | GI_31341376-S | rs7508604  | 19 | 19 | 45515811 | 3085  | 6.4811  | 0.3584 | -0.2957 | 5.9729 | CEU |
| FLJ36888  | GI_31341376-S | rs4337402  | 19 | 19 | 45521171 | 2275  | 6.2603  | 0.3423 | 0.2895  | 5.9729 | CEU |
| FLJ36888  | GI_31341376-S | rs6508936  | 19 | 19 | 45527673 | 8777  | 7.0148  | 0.3901 | 0.3088  | 5.9729 | CEU |
| FLJ36888  | GI_31341376-S | rs11668242 | 19 | 19 | 45528712 | 9816  | 6.9494  | 0.3764 | -0.3019 | 5.9729 | CEU |
| FLJ36888  | GI_31341376-S | rs7257972  | 19 | 19 | 45533154 | 14258 | 6.7844  | 0.3684 | -0.2998 | 5.9729 | CEU |
| FLJ36888  | GI_31341376-S | rs4802073  | 19 | 19 | 45535104 | 16208 | 6.7844  | 0.3684 | -0.2998 | 5.9729 | CEU |
| FLJ36888  | GI_31341376-S | rs4802074  | 19 | 19 | 45539921 | 21025 | 6.3899  | 0.3488 | 0.2900  | 5.9729 | CEU |
| FLJ36888  | GI_31341376-S | rs8110888  | 19 | 19 | 45547095 | 28199 | 6.4546  | 0.3570 | -0.2904 | 5.9729 | CEU |
| R29124_1  | GI_16117774-S | rs10411731 | 19 | 19 | 46705897 | 71706 | 5.6260  | 0.3094 | 0.1648  | 5.3376 | CEU |
| R29124_1  | GI_16117774-S | rs10412700 | 19 | 19 | 46712782 | 64821 | 6.4432  | 0.3515 | -0.1746 | 5.3376 | CEU |
| R29124_1  | GI_16117774-S | rs10406988 | 19 | 19 | 46714284 | 63319 | 6.4432  | 0.3515 | -0.1746 | 5.3376 | CEU |
| R29124_1  | GI_16117774-S | rs10410081 | 19 | 19 | 46718226 | 59377 | 6.4432  | 0.3515 | -0.1746 | 5.3376 | CEU |
| R29124_1  | GI_16117774-S | rs4803476  | 19 | 19 | 46719354 | 58249 | 6.4432  | 0.3515 | -0.1746 | 5.3376 | CEU |
| R29124_1  | GI_16117774-S | rs11668699 | 19 | 19 | 46723432 | 54171 | 6.7183  | 0.3651 | 0.1863  | 5.3376 | CEU |
| R29124_1  | GI_16117774-S | rs3826716  | 19 | 19 | 46727556 | 50047 | 6.7183  | 0.3651 | 0.1863  | 5.3376 | CEU |
| R29124_1  | GI_16117774-S | rs12462897 | 19 | 19 | 46729809 | 47794 | 6.7183  | 0.3651 | 0.1863  | 5.3376 | CEU |
| R29124_1  | GI_16117774-S | rs10424376 | 19 | 19 | 46739320 | 38283 | 8.0231  | 0.4263 | 0.2121  | 5.3376 | CEU |
| R29124_1  | GI_16117774-S | rs4802122  | 19 | 19 | 46739764 | 37839 | 9.0709  | 0.4895 | 0.2208  | 5.3376 | CEU |
| R29124_1  | GI_16117774-S | rs7255742  | 19 | 19 | 46741661 | 35942 | 8.6325  | 0.4529 | 0.2368  | 5.3376 | CEU |
| R29124_1  | GI_16117774-S | rs10420992 | 19 | 19 | 46756302 | 21301 | 7.1894  | 0.3932 | -0.2025 | 5.3376 | CEU |
| R29124_1  | GI_16117774-S | rs4803480  | 19 | 19 | 46758119 | 19484 | 6.3854  | 0.3486 | 0.2314  | 5.3376 | CEU |
| R29124_1  | GI_16117774-S | rs4803481  | 19 | 19 | 46758396 | 19207 | 7.8757  | 0.4309 | 0.2130  | 5.3376 | CEU |
| R29124_1  | GI_16117774-S | rs11083627 | 19 | 19 | 46761740 | 15863 | 7.2178  | 0.3945 | 0.2036  | 5.3376 | CEU |
| R29124_1  | GI_16117774-S | rs12150975 | 19 | 19 | 46762200 | 15403 | 6.8251  | 0.3862 | 0.2027  | 5.3376 | CEU |
| R29124_1  | GI_16117774-S | rs12983999 | 19 | 19 | 46762368 | 15235 | 7.4444  | 0.3999 | -0.2044 | 5.3376 | CEU |
| R29124_1  | GI_16117774-S | rs3745937  | 19 | 19 | 46763129 | 14474 | 6.3707  | 0.3528 | 0.2125  | 5.3376 | CEU |
| R29124_1  | GI_16117774-S | rs12462194 | 19 | 19 | 46764129 | 13474 | 7.2313  | 0.3952 | -0.2039 | 5.3376 | CEU |
| R29124_1  | GI_16117774-S | rs11882144 | 19 | 19 | 46764442 | 13161 | 6.5675  | 0.3577 | -0.2156 | 5.3376 | CEU |
| R29124_1  | GI_16117774-S | rs10420470 | 19 | 19 | 46765273 | 12330 | 7.4555  | 0.4004 | 0.2332  | 5.3376 | CEU |
| R29124_1  | GI_16117774-S | rs1860255  | 19 | 19 | 46768912 | 8691  | 8.2378  | 0.4358 | -0.2261 | 5.3376 | CEU |
| R29124_1  | GI_16117774-S | rs9304595  | 19 | 19 | 46769831 | 7772  | 7.9242  | 0.4218 | -0.2360 | 5.3376 | CEU |
| R29124_1  | GI_16117774-S | rs10406221 | 19 | 19 | 46770443 | 7160  | 8.6162  | 0.4522 | -0.2171 | 5.3376 | CEU |
| R29124_1  | GI_16117774-S | rs2191019  | 19 | 19 | 46772763 | 4840  | 8.6162  | 0.4522 | -0.2171 | 5.3376 | CEU |
| R29124_1  | GI_16117774-S | rs4141218  | 19 | 19 | 46773747 | 3856  | 8.3250  | 0.4396 | -0.2334 | 5.3376 | CEU |
| R29124_1  | GI_16117774-S | rs714106   | 19 | 19 | 46775689 | 1914  | 8.6162  | 0.4522 | -0.2171 | 5.3376 | CEU |
| R29124_1  | GI_16117774-S | rs2302188  | 19 | 19 | 46777713 | 110   | 10.6592 | 0.5330 | 0.2500  | 5.3376 | CEU |
| R29124_1  | GI_16117774-S | rs3745936  | 19 | 19 | 46784655 | 7052  | 10.5218 | 0.5279 | 0.2530  | 5.3376 | CEU |
| R29124_1  | GI_16117774-S | rs2005606  | 19 | 19 | 46784952 | 7349  | 8.6162  | 0.4522 | 0.2171  | 5.3376 | CEU |
| R29124_1  | GI_16117774-S | rs11083629 | 19 | 19 | 46786574 | 8971  | 10.6592 | 0.5330 | -0.2500 | 5.3376 | CEU |
| Hs.466924 | Hs.466924-S   | rs10405306 | 19 | 19 | 50289063 | 32955 | 11.4351 | 0.5800 | 0.1352  | 6.7458 | CEU |
| Hs.466924 | Hs.466924-S   | rs733289   | 19 | 19 | 50292426 | 29592 | 10.1021 | 0.5122 | -0.1113 | 6.7458 | CEU |
| Hs.466924 | Hs.466924-S   | rs10408366 | 19 | 19 | 50292914 | 29104 | 10.1021 | 0.5122 | 0.1113  | 6.7458 | CEU |
| Hs.466924 | Hs.466924-S   | rs10410424 | 19 | 19 | 50295079 | 26939 | 10.1021 | 0.5122 | 0.1113  | 6.7458 | CEU |
| Hs.466924 | Hs.466924-S   | rs10417618 | 19 | 19 | 50295776 | 26242 | 10.1021 | 0.5122 | -0.1113 | 6.7458 | CEU |
| Hs.466924 | Hs.466924-S   | rs17562787 | 19 | 19 | 50298979 | 23039 | 10.1021 | 0.5122 | -0.1113 | 6.7458 | CEU |
| Hs.466924 | Hs.466924-S   | rs7257599  | 19 | 19 | 50299649 | 22369 | 10.1021 | 0.5122 | -0.1113 | 6.7458 | CEU |
| Hs.466924 | Hs.466924-S   | rs12461416 | 19 | 19 | 50301006 | 21012 | 10.1021 | 0.5122 | -0.1113 | 6.7458 | CEU |
| Hs.466924 | Hs.466924-S   | rs10412988 | 19 | 19 | 50304614 | 17404 | 9.3685  | 0.5083 | 0.1092  | 6.7458 | CEU |
| Hs.466924 | Hs.466924-S   | rs10409232 | 19 | 19 | 50307005 | 15013 | 9.1848  | 0.4942 | -0.1188 | 6.7458 | CEU |
| Hs.466924 | Hs.466924-S   | rs10403214 | 19 | 19 | 50309626 | 12392 | 8.7168  | 0.4937 | -0.1085 | 6.7458 | CEU |
| Hs.466924 | Hs.466924-S   | rs10421932 | 19 | 19 | 50314023 | 7995  | 10.9519 | 0.5764 | -0.1264 | 6.7458 | CEU |
| Hs.466924 | Hs.466924-S   | rs10409138 | 19 | 19 | 50316143 | 5875  | 11.2361 | 0.5664 | 0.1218  | 6.7458 | CEU |
| Hs.466924 | Hs.466924-S   | rs10425074 | 19 | 19 | 50331964 | 9946  | 7.0199  | 0.3798 | 0.0819  | 6.7458 | CEU |
| Hs.466924 | Hs.466924-S   | rs1005451  | 19 | 19 | 50343919 | 21901 | 7.0199  | 0.3798 | -0.0819 | 6.7458 | CEU |
| Hs.466924 | Hs.466924-S   | rs11881409 | 19 | 19 | 50356058 | 34040 | 7.5377  | 0.4096 | 0.1193  | 6.7458 | CEU |

|           |               |            |    |    |          |        |         |        |         |        |     |
|-----------|---------------|------------|----|----|----------|--------|---------|--------|---------|--------|-----|
| Hs.466924 | Hs.466924-S   | rs7253652  | 19 | 19 | 50372974 | 50956  | 7.1851  | 0.3877 | -0.1168 | 6.7458 | CEU |
| Hs.466924 | Hs.466924-S   | rs6509200  | 19 | 19 | 50375288 | 53270  | 7.1851  | 0.3877 | -0.1168 | 6.7458 | CEU |
| CARD8     | GI_7662403-S  | rs1010089  | 19 | 19 | 53394031 | 9357   | 10.2012 | 0.5159 | -0.3866 | 5.8232 | CEU |
| CARD8     | GI_7662403-S  | rs2015209  | 19 | 19 | 53399477 | 3911   | 7.9230  | 0.4218 | -0.3750 | 5.8232 | CEU |
| CARD8     | GI_7662403-S  | rs4802442  | 19 | 19 | 53400939 | 2449   | 11.0054 | 0.5455 | -0.4021 | 5.8232 | CEU |
| CARD8     | GI_7662403-S  | rs11669584 | 19 | 19 | 53401992 | 1396   | 7.9230  | 0.4218 | -0.3750 | 5.8232 | CEU |
| CARD8     | GI_7662403-S  | rs11665831 | 19 | 19 | 53402009 | 1379   | 7.9230  | 0.4218 | 0.3750  | 5.8232 | CEU |
| CARD8     | GI_7662403-S  | rs1062808  | 19 | 19 | 53403288 | 100    | 7.9230  | 0.4218 | -0.3750 | 5.8232 | CEU |
| CARD8     | GI_7662403-S  | rs4802445  | 19 | 19 | 53404530 | 1142   | 10.5437 | 0.5479 | -0.4032 | 5.8232 | CEU |
| CARD8     | GI_7662403-S  | rs1971783  | 19 | 19 | 53404770 | 1382   | 7.9230  | 0.4218 | 0.3750  | 5.8232 | CEU |
| CARD8     | GI_7662403-S  | rs3745718  | 19 | 19 | 53406965 | 3577   | 11.0054 | 0.5455 | -0.4021 | 5.8232 | CEU |
| CARD8     | GI_7662403-S  | rs11669386 | 19 | 19 | 53407158 | 3770   | 11.0054 | 0.5455 | -0.4021 | 5.8232 | CEU |
| CARD8     | GI_7662403-S  | rs3786740  | 19 | 19 | 53410941 | 7553   | 9.8864  | 0.5498 | -0.3803 | 5.8232 | CEU |
| CARD8     | GI_7662403-S  | rs2009373  | 19 | 19 | 53411226 | 7838   | 11.8619 | 0.5750 | -0.4075 | 5.8232 | CEU |
| CARD8     | GI_7662403-S  | rs12052070 | 19 | 19 | 53411803 | 8415   | 11.8619 | 0.5750 | 0.4075  | 5.8232 | CEU |
| CARD8     | GI_7662403-S  | rs17294094 | 19 | 19 | 53412738 | 9350   | 11.8619 | 0.5750 | -0.4075 | 5.8232 | CEU |
| CARD8     | GI_7662403-S  | rs3826823  | 19 | 19 | 53412795 | 9407   | 11.8619 | 0.5750 | -0.4075 | 5.8232 | CEU |
| Hs.467281 | Hs.467281-S   | rs10048513 | 19 | 19 | 59396532 | 1651   | 7.1543  | 0.4201 | -0.0799 | 6.5714 | CEU |
| Hs.467281 | Hs.467281-S   | rs12980600 | 19 | 19 | 59399060 | 877    | 7.4833  | 0.4184 | 0.0786  | 6.5714 | CEU |
| Hs.467281 | Hs.467281-S   | rs3844452  | 19 | 19 | 59400458 | 2275   | 8.2021  | 0.4342 | -0.0810 | 6.5714 | CEU |
| Hs.467281 | Hs.467281-S   | rs17273267 | 19 | 19 | 59401140 | 2957   | 8.2021  | 0.4342 | -0.0810 | 6.5714 | CEU |
| Hs.467281 | Hs.467281-S   | rs17207321 | 19 | 19 | 59401255 | 3072   | 8.1649  | 0.4440 | -0.0817 | 6.5714 | CEU |
| Hs.467281 | Hs.467281-S   | rs11666543 | 19 | 19 | 59403793 | 5610   | 7.8833  | 0.4256 | -0.0803 | 6.5714 | CEU |
| ZNF587    | GI_14249531-S | rs1047128  | 19 | 19 | 63049358 | 22377  | 6.5669  | 0.3577 | -0.3132 | 5.6644 | CEU |
| ZNF587    | GI_14249531-S | rs7253130  | 19 | 19 | 63065942 | 5793   | 6.6247  | 0.3605 | 0.3287  | 5.6644 | CEU |
| LOC113386 | GI_20270320-S | rs8105935  | 19 | 19 | 63512900 | 5553   | 6.0736  | 0.3327 | -0.6463 | 5.7006 | CEU |
| MGC2752   | GI_33859747-S | rs3830     | 19 | 19 | 63558246 | 226966 | 6.4087  | 0.3498 | 0.2236  | 5.341  | CEU |
| MGC2752   | GI_33859747-S | rs12461352 | 19 | 19 | 63560992 | 224220 | 7.0818  | 0.3828 | -0.2411 | 5.341  | CEU |
| MGC2752   | GI_33859747-S | rs893188   | 19 | 19 | 63654770 | 130442 | 5.7836  | 0.3177 | -0.2639 | 5.341  | CEU |
| MGC2752   | GI_33859747-S | rs11670764 | 19 | 19 | 63684708 | 100504 | 9.7656  | 0.4992 | 0.2704  | 5.341  | CEU |
| MGC2752   | GI_33859747-S | rs8110135  | 19 | 19 | 63690276 | 94936  | 5.7042  | 0.3135 | -0.2622 | 5.341  | CEU |
| MGC2752   | GI_33859747-S | rs2278497  | 19 | 19 | 63702631 | 82581  | 14.7665 | 0.6618 | 0.3030  | 5.341  | CEU |
| MGC2752   | GI_33859747-S | rs13345233 | 19 | 19 | 63721118 | 64094  | 16.5463 | 0.7124 | -0.3301 | 5.341  | CEU |
| MGC2752   | GI_33859747-S | rs11666790 | 19 | 19 | 63725153 | 60059  | 19.2427 | 0.7624 | 0.3406  | 5.341  | CEU |
| MGC2752   | GI_33859747-S | rs7249714  | 19 | 19 | 63749895 | 35317  | 21.1758 | 0.7961 | 0.3424  | 5.341  | CEU |
| MGC2752   | GI_33859747-S | rs895374   | 19 | 19 | 63758730 | 26482  | 21.1758 | 0.7961 | -0.3424 | 5.341  | CEU |
| MGC2752   | GI_33859747-S | rs3794965  | 19 | 19 | 63761165 | 24047  | 20.8034 | 0.7957 | 0.3423  | 5.341  | CEU |
| MGC2752   | GI_33859747-S | rs10413586 | 19 | 19 | 63763133 | 22079  | 21.1758 | 0.7961 | 0.3424  | 5.341  | CEU |
| MGC2752   | GI_33859747-S | rs10448    | 19 | 19 | 63785051 | 161    | 16.7911 | 0.7117 | -0.3271 | 5.341  | CEU |
| MGC2752   | GI_33859747-S | rs4801614  | 19 | 19 | 63788762 | 3550   | 22.8227 | 0.8210 | -0.3398 | 5.341  | CEU |
| FKBP1A    | GI_17149835-I | rs6041750  | 20 | 20 | 1298709  | 1794   | 7.7100  | 0.4411 | 0.4983  | 6.1295 | CEU |
| C20orf22  | GI_34147330-S | rs6132819  | 20 | 20 | 25166618 | 56991  | 6.1017  | 0.3342 | -0.4672 | 5.7365 | CEU |
| C20orf22  | GI_34147330-S | rs6050481  | 20 | 20 | 25172580 | 51029  | 6.4726  | 0.3579 | 0.4923  | 5.7365 | CEU |
| C20orf22  | GI_34147330-S | rs6115101  | 20 | 20 | 25177564 | 46045  | 6.1017  | 0.3342 | -0.4672 | 5.7365 | CEU |
| C20orf22  | GI_34147330-S | rs6138553  | 20 | 20 | 25187233 | 36376  | 6.1017  | 0.3342 | -0.4672 | 5.7365 | CEU |
| C20orf22  | GI_34147330-S | rs2424698  | 20 | 20 | 25204106 | 19503  | 7.0948  | 0.3940 | 0.5043  | 5.7365 | CEU |
| C20orf22  | GI_34147330-S | rs2261109  | 20 | 20 | 25207200 | 16409  | 6.3475  | 0.3467 | -0.4849 | 5.7365 | CEU |
| C20orf22  | GI_34147330-S | rs2261784  | 20 | 20 | 25210396 | 13213  | 6.4593  | 0.3624 | -0.4800 | 5.7365 | CEU |
| C20orf22  | GI_34147330-S | rs2261796  | 20 | 20 | 25211277 | 12332  | 6.3475  | 0.3467 | -0.4849 | 5.7365 | CEU |
| C20orf22  | GI_34147330-S | rs2227892  | 20 | 20 | 25212814 | 10795  | 6.3288  | 0.3506 | -0.4866 | 5.7365 | CEU |
| C20orf22  | GI_34147330-S | rs2257712  | 20 | 20 | 25212910 | 10699  | 6.3298  | 0.3557 | -0.4961 | 5.7365 | CEU |
| C20orf22  | GI_34147330-S | rs2257461  | 20 | 20 | 25213554 | 10055  | 5.8889  | 0.3894 | 0.5286  | 5.7365 | CEU |
| C20orf22  | GI_34147330-S | rs2257233  | 20 | 20 | 25213984 | 9625   | 6.3475  | 0.3467 | 0.4849  | 5.7365 | CEU |
| C20orf22  | GI_34147330-S | rs2257991  | 20 | 20 | 25218339 | 5270   | 6.8774  | 0.3729 | -0.4964 | 5.7365 | CEU |
| C20orf22  | GI_34147330-S | rs2258201  | 20 | 20 | 25220490 | 3119   | 6.8774  | 0.3729 | -0.4964 | 5.7365 | CEU |
| C20orf22  | GI_34147330-S | rs2474777  | 20 | 20 | 25220633 | 2976   | 6.8774  | 0.3729 | -0.4964 | 5.7365 | CEU |
| C20orf22  | GI_34147330-S | rs2258719  | 20 | 20 | 25223843 | 234    | 6.8774  | 0.3729 | 0.4964  | 5.7365 | CEU |
| C20orf22  | GI_34147330-S | rs2258769  | 20 | 20 | 25224680 | 1071   | 6.8774  | 0.3729 | -0.4964 | 5.7365 | CEU |
| C20orf22  | GI_34147330-S | rs1046073  | 20 | 20 | 25229333 | 5724   | 6.8774  | 0.3729 | 0.4964  | 5.7365 | CEU |

|          |               |            |    |    |          |        |        |        |         |        |     |
|----------|---------------|------------|----|----|----------|--------|--------|--------|---------|--------|-----|
| C20orf22 | GI_34147330-S | rs2474780  | 20 | 20 | 25233835 | 10226  | 6.9693 | 0.3774 | -0.4835 | 5.7365 | CEU |
| C20orf22 | GI_34147330-S | rs6107027  | 20 | 20 | 25236632 | 13023  | 7.3459 | 0.4006 | 0.5061  | 5.7365 | CEU |
| C20orf22 | GI_34147330-S | rs2500432  | 20 | 20 | 25238512 | 14903  | 6.8774 | 0.3729 | 0.4964  | 5.7365 | CEU |
| C20orf22 | GI_34147330-S | rs1888999  | 20 | 20 | 25239848 | 16239  | 6.8774 | 0.3729 | -0.4964 | 5.7365 | CEU |
| C20orf22 | GI_34147330-S | rs2297496  | 20 | 20 | 25243787 | 20178  | 6.8774 | 0.3729 | 0.4964  | 5.7365 | CEU |
| C20orf22 | GI_34147330-S | rs2297497  | 20 | 20 | 25245909 | 22300  | 6.8774 | 0.3729 | 0.4964  | 5.7365 | CEU |
| C20orf22 | GI_34147330-S | rs7267979  | 20 | 20 | 25246087 | 22478  | 6.8774 | 0.3729 | -0.4964 | 5.7365 | CEU |
| C20orf22 | GI_34147330-S | rs6050532  | 20 | 20 | 25256793 | 33184  | 6.8774 | 0.3729 | -0.4964 | 5.7365 | CEU |
| C20orf22 | GI_34147330-S | rs6083804  | 20 | 20 | 25265060 | 41451  | 6.8774 | 0.3729 | -0.4964 | 5.7365 | CEU |
| C20orf22 | GI_34147330-S | rs6076336  | 20 | 20 | 25267212 | 43603  | 6.8774 | 0.3729 | -0.4964 | 5.7365 | CEU |
| C20orf22 | GI_34147330-S | rs6050544  | 20 | 20 | 25268228 | 44619  | 6.8774 | 0.3729 | 0.4964  | 5.7365 | CEU |
| C20orf22 | GI_34147330-S | rs6417588  | 20 | 20 | 25275151 | 51542  | 6.8774 | 0.3729 | 0.4964  | 5.7365 | CEU |
| C20orf22 | GI_34147330-S | rs6083809  | 20 | 20 | 25277309 | 53700  | 6.8694 | 0.3725 | -0.5018 | 5.7365 | CEU |
| C20orf22 | GI_34147330-S | rs6050559  | 20 | 20 | 25277915 | 54306  | 6.8774 | 0.3729 | 0.4964  | 5.7365 | CEU |
| C20orf22 | GI_34147330-S | rs6050561  | 20 | 20 | 25282855 | 59246  | 6.8694 | 0.3725 | -0.5018 | 5.7365 | CEU |
| C20orf22 | GI_34147330-S | rs6037097  | 20 | 20 | 25295221 | 71612  | 7.4251 | 0.4099 | 0.5285  | 5.7365 | CEU |
| C20orf22 | GI_34147330-S | rs6050565  | 20 | 20 | 25295563 | 71954  | 6.8694 | 0.3725 | 0.5018  | 5.7365 | CEU |
| C20orf22 | GI_34147330-S | rs4815411  | 20 | 20 | 25298223 | 74614  | 6.5062 | 0.3596 | -0.4929 | 5.7365 | CEU |
| C20orf22 | GI_34147330-S | rs4815412  | 20 | 20 | 25298325 | 74716  | 6.8694 | 0.3725 | 0.5018  | 5.7365 | CEU |
| C20orf22 | GI_34147330-S | rs6107031  | 20 | 20 | 25298677 | 75068  | 5.8704 | 0.3416 | -0.4931 | 5.7365 | CEU |
| C20orf22 | GI_34147330-S | rs6115159  | 20 | 20 | 25298944 | 75335  | 6.0446 | 0.3675 | 0.5014  | 5.7365 | CEU |
| C20orf22 | GI_34147330-S | rs2500399  | 20 | 20 | 25302694 | 79085  | 6.6519 | 0.3830 | 0.4955  | 5.7365 | CEU |
| C20orf22 | GI_34147330-S | rs4815413  | 20 | 20 | 25307229 | 83620  | 6.6064 | 0.3647 | -0.4761 | 5.7365 | CEU |
| C20orf22 | GI_34147330-S | rs2500405  | 20 | 20 | 25308826 | 85217  | 6.8774 | 0.3729 | -0.4964 | 5.7365 | CEU |
| C20orf22 | GI_34147330-S | rs6050573  | 20 | 20 | 25314065 | 90456  | 6.8694 | 0.3725 | 0.5018  | 5.7365 | CEU |
| C20orf22 | GI_34147330-S | rs6083828  | 20 | 20 | 25317918 | 94309  | 6.8694 | 0.3725 | 0.5018  | 5.7365 | CEU |
| C20orf22 | GI_34147330-S | rs869358   | 20 | 20 | 25322674 | 99065  | 6.9693 | 0.3774 | -0.4835 | 5.7365 | CEU |
| C20orf22 | GI_34147330-S | rs2387881  | 20 | 20 | 25326172 | 102563 | 6.8774 | 0.3729 | -0.4964 | 5.7365 | CEU |
| C20orf22 | GI_34147330-S | rs6515641  | 20 | 20 | 25327526 | 103917 | 6.8694 | 0.3725 | -0.5018 | 5.7365 | CEU |
| C20orf22 | GI_34147330-S | rs6515642  | 20 | 20 | 25328593 | 104984 | 6.8774 | 0.3729 | 0.4964  | 5.7365 | CEU |
| C20orf22 | GI_34147330-S | rs3761117  | 20 | 20 | 25336070 | 112461 | 6.1225 | 0.3552 | 0.4966  | 5.7365 | CEU |
| C20orf22 | GI_34147330-S | rs2500424  | 20 | 20 | 25339969 | 116360 | 6.8774 | 0.3729 | 0.4964  | 5.7365 | CEU |
| C20orf22 | GI_34147330-S | rs2482911  | 20 | 20 | 25343528 | 119919 | 6.8774 | 0.3729 | 0.4964  | 5.7365 | CEU |
| C20orf22 | GI_34147330-S | rs6050598  | 20 | 20 | 25345257 | 121648 | 6.8694 | 0.3725 | 0.5018  | 5.7365 | CEU |
| C20orf22 | GI_34147330-S | rs6076347  | 20 | 20 | 25346790 | 123181 | 6.8846 | 0.3784 | 0.4850  | 5.7365 | CEU |
| C20orf22 | GI_34147330-S | rs6050599  | 20 | 20 | 25348240 | 124631 | 6.2770 | 0.3634 | 0.4904  | 5.7365 | CEU |
| C20orf22 | GI_34147330-S | rs4423675  | 20 | 20 | 25350778 | 127169 | 7.3459 | 0.4006 | -0.5061 | 5.7365 | CEU |
| C20orf22 | GI_34147330-S | rs2500436  | 20 | 20 | 25354366 | 130757 | 6.8774 | 0.3729 | -0.4964 | 5.7365 | CEU |
| C20orf22 | GI_34147330-S | rs6417589  | 20 | 20 | 25359086 | 135477 | 6.8694 | 0.3725 | -0.5018 | 5.7365 | CEU |
| C20orf22 | GI_34147330-S | rs6050611  | 20 | 20 | 25362419 | 138810 | 6.8774 | 0.3729 | -0.4964 | 5.7365 | CEU |
| C20orf22 | GI_34147330-S | rs2151144  | 20 | 20 | 25362924 | 139315 | 6.3224 | 0.3454 | 0.4901  | 5.7365 | CEU |
| C20orf22 | GI_34147330-S | rs6050617  | 20 | 20 | 25369648 | 146039 | 6.8694 | 0.3725 | 0.5018  | 5.7365 | CEU |
| C20orf22 | GI_34147330-S | rs6050629  | 20 | 20 | 25378680 | 155071 | 6.3329 | 0.3509 | -0.4872 | 5.7365 | CEU |
| C20orf22 | GI_34147330-S | rs6050631  | 20 | 20 | 25379749 | 156140 | 6.8774 | 0.3729 | 0.4964  | 5.7365 | CEU |
| C20orf22 | GI_34147330-S | rs6115188  | 20 | 20 | 25380170 | 156561 | 6.9693 | 0.3774 | 0.4835  | 5.7365 | CEU |
| C20orf22 | GI_34147330-S | rs6050632  | 20 | 20 | 25380601 | 156992 | 6.8694 | 0.3725 | 0.5018  | 5.7365 | CEU |
| C20orf22 | GI_34147330-S | rs12428    | 20 | 20 | 25381821 | 158212 | 6.8694 | 0.3725 | 0.5018  | 5.7365 | CEU |
| C20orf22 | GI_34147330-S | rs7270835  | 20 | 20 | 25383067 | 159458 | 6.7035 | 0.3856 | 0.5132  | 5.7365 | CEU |
| C20orf22 | GI_34147330-S | rs11699203 | 20 | 20 | 25383169 | 159560 | 6.8467 | 0.4169 | -0.5624 | 5.7365 | CEU |
| C20orf22 | GI_34147330-S | rs6138572  | 20 | 20 | 25383934 | 160325 | 6.8774 | 0.3729 | -0.4964 | 5.7365 | CEU |
| C20orf22 | GI_34147330-S | rs454723   | 20 | 20 | 25386928 | 163319 | 6.8774 | 0.3729 | -0.4964 | 5.7365 | CEU |
| C20orf22 | GI_34147330-S | rs6138575  | 20 | 20 | 25386952 | 163343 | 6.8774 | 0.3729 | -0.4964 | 5.7365 | CEU |
| C20orf22 | GI_34147330-S | rs398036   | 20 | 20 | 25387850 | 164241 | 6.3391 | 0.3512 | -0.4819 | 5.7365 | CEU |
| C20orf22 | GI_34147330-S | rs397119   | 20 | 20 | 25388187 | 164578 | 6.8774 | 0.3729 | 0.4964  | 5.7365 | CEU |
| C20orf22 | GI_34147330-S | rs6115191  | 20 | 20 | 25388478 | 164869 | 6.3391 | 0.3512 | 0.4819  | 5.7365 | CEU |
| C20orf22 | GI_34147330-S | rs11087521 | 20 | 20 | 25388648 | 165039 | 6.6608 | 0.3726 | -0.5049 | 5.7365 | CEU |
| C20orf22 | GI_34147330-S | rs6107045  | 20 | 20 | 25389936 | 166327 | 6.8774 | 0.3729 | -0.4964 | 5.7365 | CEU |
| C20orf22 | GI_34147330-S | rs6107047  | 20 | 20 | 25390097 | 166488 | 5.8214 | 0.3390 | -0.4923 | 5.7365 | CEU |
| C20orf22 | GI_34147330-S | rs422844   | 20 | 20 | 25393591 | 169982 | 6.8774 | 0.3729 | -0.4964 | 5.7365 | CEU |

|          |               |            |    |    |          |        |         |        |         |        |     |
|----------|---------------|------------|----|----|----------|--------|---------|--------|---------|--------|-----|
| C20orf22 | GI_34147330-S | rs404148   | 20 | 20 | 25395931 | 172322 | 6.0523  | 0.3316 | -0.4533 | 5.7365 | CEU |
| C20orf22 | GI_34147330-S | rs449370   | 20 | 20 | 25399180 | 175571 | 6.0770  | 0.3329 | 0.4610  | 5.7365 | CEU |
| C20orf22 | GI_34147330-S | rs442834   | 20 | 20 | 25406096 | 182487 | 6.0770  | 0.3329 | 0.4610  | 5.7365 | CEU |
| C20orf22 | GI_34147330-S | rs417110   | 20 | 20 | 25406297 | 182688 | 6.3183  | 0.3656 | -0.4875 | 5.7365 | CEU |
| C20orf22 | GI_34147330-S | rs417130   | 20 | 20 | 25406320 | 182711 | 6.8987  | 0.3955 | -0.5108 | 5.7365 | CEU |
| C20orf22 | GI_34147330-S | rs84816    | 20 | 20 | 25407919 | 184310 | 6.3572  | 0.3677 | -0.5021 | 5.7365 | CEU |
| C20orf22 | GI_34147330-S | rs372678   | 20 | 20 | 25413248 | 189639 | 5.9929  | 0.3333 | 0.4596  | 5.7365 | CEU |
| C20orf22 | GI_34147330-S | rs446649   | 20 | 20 | 25415359 | 191750 | 6.0770  | 0.3329 | 0.4610  | 5.7365 | CEU |
| C20orf22 | GI_34147330-S | rs424487   | 20 | 20 | 25416131 | 192522 | 6.0770  | 0.3329 | 0.4610  | 5.7365 | CEU |
| C20orf22 | GI_34147330-S | rs431579   | 20 | 20 | 25418056 | 194447 | 6.8018  | 0.4275 | 0.5348  | 5.7365 | CEU |
| C20orf22 | GI_34147330-S | rs404775   | 20 | 20 | 25429117 | 205508 | 6.2229  | 0.3404 | 0.4529  | 5.7365 | CEU |
| C20orf22 | GI_34147330-S | rs374701   | 20 | 20 | 25431616 | 208007 | 6.2237  | 0.3606 | -0.4767 | 5.7365 | CEU |
| C20orf22 | GI_34147330-S | rs376742   | 20 | 20 | 25435417 | 211808 | 6.6111  | 0.3599 | 0.4727  | 5.7365 | CEU |
| C20orf22 | GI_34147330-S | rs6138588  | 20 | 20 | 25435523 | 211914 | 6.0770  | 0.3329 | 0.4610  | 5.7365 | CEU |
| C20orf22 | GI_34147330-S | rs443009   | 20 | 20 | 25447817 | 224208 | 6.2229  | 0.3404 | -0.4529 | 5.7365 | CEU |
| C20orf22 | GI_34147330-S | rs405822   | 20 | 20 | 25449314 | 225705 | 6.2229  | 0.3404 | 0.4529  | 5.7365 | CEU |
| C20orf22 | GI_34147330-S | rs409853   | 20 | 20 | 25454067 | 230458 | 5.7871  | 0.3272 | 0.4477  | 5.7365 | CEU |
| C20orf22 | GI_34147330-S | rs1541061  | 20 | 20 | 25469057 | 245448 | 6.0378  | 0.3852 | -0.5139 | 5.7365 | CEU |
| C20orf22 | GI_34147330-S | rs6138600  | 20 | 20 | 25469346 | 245737 | 6.0770  | 0.3329 | 0.4610  | 5.7365 | CEU |
| C20orf22 | GI_34147330-S | rs1983974  | 20 | 20 | 25478619 | 255010 | 6.2229  | 0.3404 | -0.4529 | 5.7365 | CEU |
| C20orf22 | GI_34147330-S | rs928121   | 20 | 20 | 25482818 | 259209 | 6.0770  | 0.3329 | 0.4610  | 5.7365 | CEU |
| C20orf22 | GI_34147330-S | rs4280527  | 20 | 20 | 25492014 | 268405 | 6.0770  | 0.3329 | 0.4610  | 5.7365 | CEU |
| C20orf22 | GI_34147330-S | rs6115214  | 20 | 20 | 25505426 | 281817 | 6.0770  | 0.3329 | -0.4610 | 5.7365 | CEU |
| C20orf22 | GI_34147330-S | rs6132848  | 20 | 20 | 25509645 | 286036 | 6.0770  | 0.3329 | 0.4610  | 5.7365 | CEU |
| C20orf22 | GI_34147330-S | rs6115215  | 20 | 20 | 25510500 | 286891 | 5.9749  | 0.3324 | 0.4604  | 5.7365 | CEU |
| CPNE1    | GI_23397697-A | rs7261862  | 20 | 20 | 33579696 | 97976  | 6.9430  | 0.3761 | 0.5135  | 6.1694 | CEU |
| CPNE1    | GI_23397697-A | rs2104417  | 20 | 20 | 33591285 | 86387  | 7.8816  | 0.4199 | 0.5534  | 6.1694 | CEU |
| CPNE1    | GI_23397697-A | rs11700250 | 20 | 20 | 33595670 | 82002  | 7.7200  | 0.4181 | -0.5525 | 6.1694 | CEU |
| CPNE1    | GI_23397697-A | rs17092784 | 20 | 20 | 33605701 | 71971  | 6.9430  | 0.3761 | 0.5135  | 6.1694 | CEU |
| CPNE1    | GI_23397697-A | rs2277862  | 20 | 20 | 33616196 | 61476  | 7.8816  | 0.4199 | 0.5534  | 6.1694 | CEU |
| CPNE1    | GI_23397697-A | rs6119625  | 20 | 20 | 33623869 | 53803  | 7.8816  | 0.4199 | -0.5534 | 6.1694 | CEU |
| CPNE1    | GI_23397697-A | rs6060491  | 20 | 20 | 33638514 | 39158  | 8.6774  | 0.4548 | -0.6478 | 6.1694 | CEU |
| CPNE1    | GI_23397697-A | rs6120992  | 20 | 20 | 33647534 | 30138  | 6.3866  | 0.3586 | -0.5531 | 6.1694 | CEU |
| CPNE1    | GI_23397697-A | rs6120998  | 20 | 20 | 33650727 | 26945  | 8.6774  | 0.4548 | 0.6478  | 6.1694 | CEU |
| CPNE1    | GI_23397697-A | rs3746410  | 20 | 20 | 33654284 | 23388  | 6.5305  | 0.3609 | -0.4048 | 6.1694 | CEU |
| CPNE1    | GI_23397697-A | rs761825   | 20 | 20 | 33657468 | 20204  | 6.7072  | 0.3646 | 0.4073  | 6.1694 | CEU |
| CPNE1    | GI_23397697-A | rs761826   | 20 | 20 | 33657657 | 20015  | 6.7072  | 0.3646 | -0.4073 | 6.1694 | CEU |
| CPNE1    | GI_23397697-A | rs6060507  | 20 | 20 | 33661748 | 15924  | 7.1983  | 0.3883 | -0.4270 | 6.1694 | CEU |
| CPNE1    | GI_23397697-A | rs6060516  | 20 | 20 | 33677782 | 110    | 6.8299  | 0.3706 | 0.4138  | 6.1694 | CEU |
| CPNE1    | GI_23397697-A | rs6060518  | 20 | 20 | 33680723 | 3051   | 6.6820  | 0.3684 | -0.4132 | 6.1694 | CEU |
| CPNE1    | GI_23397697-A | rs6579255  | 20 | 20 | 33682910 | 5238   | 6.8299  | 0.3706 | 0.4138  | 6.1694 | CEU |
| CPNE1    | GI_23397697-A | rs10211771 | 20 | 20 | 33683408 | 5736   | 6.3263  | 0.3505 | 0.4004  | 6.1694 | CEU |
| CPNE1    | GI_23397697-A | rs6060524  | 20 | 20 | 33684569 | 6897   | 8.6619  | 0.4599 | -0.5931 | 6.1694 | CEU |
| CPNE1    | GI_23397697-A | rs6060526  | 20 | 20 | 33688716 | 11044  | 6.8299  | 0.3706 | -0.4138 | 6.1694 | CEU |
| CPNE1    | GI_23397697-A | rs6060530  | 20 | 20 | 33691077 | 13405  | 7.0771  | 0.3878 | 0.4217  | 6.1694 | CEU |
| CPNE1    | GI_23397697-A | rs1118233  | 20 | 20 | 33691763 | 14091  | 12.8116 | 0.6120 | 0.6778  | 6.1694 | CEU |
| CPNE1    | GI_23397697-A | rs6058288  | 20 | 20 | 33692094 | 14422  | 7.0771  | 0.3878 | -0.4217 | 6.1694 | CEU |
| CPNE1    | GI_23397697-A | rs3787164  | 20 | 20 | 33692280 | 14608  | 6.7378  | 0.3818 | -0.4218 | 6.1694 | CEU |
| CPNE1    | GI_23397697-A | rs3787165  | 20 | 20 | 33692360 | 14688  | 6.3698  | 0.3630 | 0.4069  | 6.1694 | CEU |
| CPNE1    | GI_23397697-A | rs3787166  | 20 | 20 | 33692486 | 14814  | 7.3363  | 0.3948 | -0.4231 | 6.1694 | CEU |
| CPNE1    | GI_23397697-A | rs7273815  | 20 | 20 | 33695829 | 18157  | 12.6247 | 0.6127 | -0.6935 | 6.1694 | CEU |
| CPNE1    | GI_23397697-A | rs3787168  | 20 | 20 | 33696692 | 19020  | 6.8299  | 0.3706 | 0.4138  | 6.1694 | CEU |
| CPNE1    | GI_23397697-A | rs12480408 | 20 | 20 | 33698214 | 20542  | 12.4017 | 0.5927 | -0.6699 | 6.1694 | CEU |
| CPNE1    | GI_23397697-A | rs6060535  | 20 | 20 | 33698936 | 21264  | 12.4017 | 0.5927 | -0.6699 | 6.1694 | CEU |
| CPNE1    | GI_23397697-A | rs6060539  | 20 | 20 | 33702796 | 25124  | 6.8299  | 0.3706 | -0.4138 | 6.1694 | CEU |
| CPNE1    | GI_23397697-A | rs6121015  | 20 | 20 | 33706431 | 28759  | 6.8299  | 0.3706 | -0.4138 | 6.1694 | CEU |
| CPNE1    | GI_23397697-A | rs1040695  | 20 | 20 | 33708243 | 30571  | 6.8299  | 0.3706 | 0.4138  | 6.1694 | CEU |
| CPNE1    | GI_23397697-A | rs11696527 | 20 | 20 | 33708793 | 31121  | 12.4017 | 0.5927 | -0.6699 | 6.1694 | CEU |
| CPNE1    | GI_23397697-A | rs6058290  | 20 | 20 | 33711116 | 33444  | 6.8299  | 0.3706 | 0.4138  | 6.1694 | CEU |

|       |               |            |    |    |          |        |         |        |         |        |     |
|-------|---------------|------------|----|----|----------|--------|---------|--------|---------|--------|-----|
| CPNE1 | GI_23397697-A | rs6060541  | 20 | 20 | 33711480 | 33808  | 6.8299  | 0.3706 | -0.4138 | 6.1694 | CEU |
| CPNE1 | GI_23397697-A | rs6058293  | 20 | 20 | 33712305 | 34633  | 6.8299  | 0.3706 | 0.4138  | 6.1694 | CEU |
| CPNE1 | GI_23397697-A | rs6121026  | 20 | 20 | 33730297 | 52625  | 6.6820  | 0.3684 | -0.4132 | 6.1694 | CEU |
| CPNE1 | GI_23397697-A | rs6058296  | 20 | 20 | 33732639 | 54967  | 11.0672 | 0.5477 | -0.6291 | 6.1694 | CEU |
| CPNE1 | GI_23397697-A | rs6060557  | 20 | 20 | 33733680 | 56008  | 12.1620 | 0.5913 | -0.6693 | 6.1694 | CEU |
| CPNE1 | GI_23397697-A | rs6060558  | 20 | 20 | 33734506 | 56834  | 10.8491 | 0.5462 | -0.6285 | 6.1694 | CEU |
| CPNE1 | GI_23397697-A | rs6060567  | 20 | 20 | 33751664 | 73992  | 11.0672 | 0.5477 | 0.6291  | 6.1694 | CEU |
| CPNE1 | GI_23397697-A | rs17092980 | 20 | 20 | 33752419 | 74747  | 11.0672 | 0.5477 | 0.6291  | 6.1694 | CEU |
| CPNE1 | GI_23397697-A | rs6058302  | 20 | 20 | 33753451 | 75779  | 11.0672 | 0.5477 | -0.6291 | 6.1694 | CEU |
| CPNE1 | GI_23397697-A | rs6058303  | 20 | 20 | 33753695 | 76023  | 12.4017 | 0.5927 | -0.6699 | 6.1694 | CEU |
| CPNE1 | GI_23397697-A | rs2425071  | 20 | 20 | 33756375 | 78703  | 11.0672 | 0.5477 | 0.6291  | 6.1694 | CEU |
| CPNE1 | GI_23397697-A | rs2050729  | 20 | 20 | 33757823 | 80151  | 11.0672 | 0.5477 | 0.6291  | 6.1694 | CEU |
| CPNE1 | GI_23397697-A | rs2425078  | 20 | 20 | 33761577 | 83905  | 12.4017 | 0.5927 | 0.6699  | 6.1694 | CEU |
| CPNE1 | GI_23397697-A | rs2425079  | 20 | 20 | 33761605 | 83933  | 10.8491 | 0.5462 | 0.6285  | 6.1694 | CEU |
| CPNE1 | GI_23397697-A | rs2425090  | 20 | 20 | 33768197 | 90525  | 11.0672 | 0.5477 | 0.6291  | 6.1694 | CEU |
| CPNE1 | GI_23397697-A | rs6060578  | 20 | 20 | 33768859 | 91187  | 12.4017 | 0.5927 | -0.6699 | 6.1694 | CEU |
| CPNE1 | GI_23397697-A | rs2425094  | 20 | 20 | 33770388 | 92716  | 11.0672 | 0.5477 | 0.6291  | 6.1694 | CEU |
| CPNE1 | GI_23397697-A | rs2425102  | 20 | 20 | 33775717 | 98045  | 8.3518  | 0.4523 | 0.5773  | 6.1694 | CEU |
| CPNE1 | GI_23397697-A | rs2425103  | 20 | 20 | 33775743 | 98071  | 9.9468  | 0.5316 | 0.6037  | 6.1694 | CEU |
| CPNE1 | GI_23397697-A | rs11696947 | 20 | 20 | 33776072 | 98400  | 11.3593 | 0.5707 | -0.6587 | 6.1694 | CEU |
| CPNE1 | GI_23397697-A | rs11699044 | 20 | 20 | 33776127 | 98455  | 12.1554 | 0.5911 | -0.6682 | 6.1694 | CEU |
| CPNE1 | GI_23397697-A | rs2425109  | 20 | 20 | 33779632 | 101960 | 11.0672 | 0.5477 | -0.6291 | 6.1694 | CEU |
| CPNE1 | GI_23397697-A | rs17093026 | 20 | 20 | 33782325 | 104653 | 14.6026 | 0.6770 | -0.6928 | 6.1694 | CEU |
| CPNE1 | GI_23397697-A | rs13038622 | 20 | 20 | 33782757 | 105085 | 7.7480  | 0.4368 | -0.5916 | 6.1694 | CEU |
| CPNE1 | GI_23397697-A | rs2425114  | 20 | 20 | 33785760 | 108088 | 11.4311 | 0.5668 | 0.6373  | 6.1694 | CEU |
| CPNE1 | GI_23397697-A | rs2425116  | 20 | 20 | 33786967 | 109295 | 10.8975 | 0.5676 | 0.6393  | 6.1694 | CEU |
| CPNE1 | GI_23397697-A | rs2425117  | 20 | 20 | 33787190 | 109518 | 11.0672 | 0.5477 | -0.6291 | 6.1694 | CEU |
| CPNE1 | GI_23397697-A | rs2425119  | 20 | 20 | 33787630 | 109958 | 10.0634 | 0.5296 | 0.6401  | 6.1694 | CEU |
| CPNE1 | GI_23397697-A | rs2425120  | 20 | 20 | 33787870 | 110198 | 11.0672 | 0.5477 | -0.6291 | 6.1694 | CEU |
| CPNE1 | GI_23397697-A | rs6058312  | 20 | 20 | 33787898 | 110226 | 11.0672 | 0.5477 | -0.6291 | 6.1694 | CEU |
| CPNE1 | GI_23397697-A | rs2425122  | 20 | 20 | 33792262 | 114590 | 11.0672 | 0.5477 | -0.6291 | 6.1694 | CEU |
| CPNE1 | GI_23397697-A | rs2425125  | 20 | 20 | 33794368 | 116696 | 6.8299  | 0.3706 | 0.4138  | 6.1694 | CEU |
| CPNE1 | GI_23397697-A | rs3827029  | 20 | 20 | 33796198 | 118526 | 11.0672 | 0.5477 | -0.6291 | 6.1694 | CEU |
| CPNE1 | GI_23397697-A | rs2225950  | 20 | 20 | 33796429 | 118757 | 9.2207  | 0.5021 | -0.6440 | 6.1694 | CEU |
| CPNE1 | GI_23397697-A | rs2425131  | 20 | 20 | 33800488 | 122816 | 11.0672 | 0.5477 | 0.6291  | 6.1694 | CEU |
| CPNE1 | GI_23397697-A | rs2425132  | 20 | 20 | 33801804 | 124132 | 10.9027 | 0.5481 | -0.6305 | 6.1694 | CEU |
| CPNE1 | GI_23397697-A | rs1970357  | 20 | 20 | 33802614 | 124942 | 12.4017 | 0.5927 | 0.6699  | 6.1694 | CEU |
| CPNE1 | GI_23397697-A | rs7268195  | 20 | 20 | 33803268 | 125596 | 11.0672 | 0.5477 | 0.6291  | 6.1694 | CEU |
| CPNE1 | GI_23397697-A | rs11167275 | 20 | 20 | 33803689 | 126017 | 11.2095 | 0.5527 | 0.6655  | 6.1694 | CEU |
| CPNE1 | GI_23397697-A | rs2425137  | 20 | 20 | 33808810 | 131138 | 11.0672 | 0.5477 | 0.6291  | 6.1694 | CEU |
| CPNE1 | GI_23397697-A | rs7264869  | 20 | 20 | 33809916 | 132244 | 10.4335 | 0.5247 | -0.6314 | 6.1694 | CEU |
| CPNE1 | GI_23397697-A | rs2425141  | 20 | 20 | 33813537 | 135865 | 11.7662 | 0.5718 | -0.6766 | 6.1694 | CEU |
| CPNE1 | GI_23397697-A | rs1890470  | 20 | 20 | 33820422 | 142750 | 11.7662 | 0.5718 | -0.6766 | 6.1694 | CEU |
| CPNE1 | GI_23397697-A | rs2425149  | 20 | 20 | 33823001 | 145329 | 11.7662 | 0.5718 | 0.6766  | 6.1694 | CEU |
| CPNE1 | GI_23397697-A | rs4911519  | 20 | 20 | 33825740 | 148068 | 11.7662 | 0.5718 | 0.6766  | 6.1694 | CEU |
| CPNE1 | GI_23397697-A | rs6058322  | 20 | 20 | 33830691 | 153019 | 10.4335 | 0.5247 | -0.6314 | 6.1694 | CEU |
| CPNE1 | GI_23397697-A | rs4602287  | 20 | 20 | 33831442 | 153770 | 8.0898  | 0.4527 | 0.5292  | 6.1694 | CEU |
| CPNE1 | GI_23397697-A | rs11906854 | 20 | 20 | 33847048 | 169376 | 10.4335 | 0.5247 | -0.6314 | 6.1694 | CEU |
| CPNE1 | GI_23397697-A | rs6058325  | 20 | 20 | 33852220 | 174548 | 11.5397 | 0.5705 | 0.6758  | 6.1694 | CEU |
| CPNE1 | GI_23397697-A | rs12479473 | 20 | 20 | 33862042 | 184370 | 11.7662 | 0.5718 | 0.6766  | 6.1694 | CEU |
| CPNE1 | GI_23397697-A | rs12481545 | 20 | 20 | 33871112 | 193440 | 11.7662 | 0.5718 | -0.6766 | 6.1694 | CEU |
| CPNE1 | GI_23397697-A | rs6119655  | 20 | 20 | 33875463 | 197791 | 6.3125  | 0.3449 | 0.4035  | 6.1694 | CEU |
| CPNE1 | GI_23397697-A | rs6060624  | 20 | 20 | 33877077 | 199405 | 11.7662 | 0.5718 | -0.6766 | 6.1694 | CEU |
| CPNE1 | GI_23397697-A | rs6060625  | 20 | 20 | 33877732 | 200060 | 11.7662 | 0.5718 | -0.6766 | 6.1694 | CEU |
| CPNE1 | GI_23397697-A | rs3787169  | 20 | 20 | 33883298 | 205626 | 10.4335 | 0.5247 | 0.6314  | 6.1694 | CEU |
| CPNE1 | GI_23397697-A | rs6060632  | 20 | 20 | 33886015 | 208343 | 7.0733  | 0.3985 | 0.5935  | 6.1694 | CEU |
| CPNE1 | GI_23397697-A | rs11699844 | 20 | 20 | 33891168 | 213496 | 6.7973  | 0.3690 | 0.6675  | 6.1694 | CEU |
| CPNE1 | GI_23397697-A | rs11907811 | 20 | 20 | 33891492 | 213820 | 11.7662 | 0.5718 | -0.6766 | 6.1694 | CEU |
| CPNE1 | GI_23397697-A | rs7270009  | 20 | 20 | 33896975 | 219303 | 7.2829  | 0.4031 | -0.5417 | 6.1694 | CEU |

|           |               |            |    |    |          |        |         |        |         |        |     |
|-----------|---------------|------------|----|----|----------|--------|---------|--------|---------|--------|-----|
| CPNE1     | GI_23397697-A | rs7273668  | 20 | 20 | 33906145 | 228473 | 11.7662 | 0.5718 | 0.6766  | 6.1694 | CEU |
| CPNE1     | GI_23397697-A | rs10485510 | 20 | 20 | 33908578 | 230906 | 11.7662 | 0.5718 | 0.6766  | 6.1694 | CEU |
| CPNE1     | GI_23397697-A | rs4504072  | 20 | 20 | 33912187 | 234515 | 7.7758  | 0.4263 | 0.5967  | 6.1694 | CEU |
| CPNE1     | GI_23397697-A | rs6060642  | 20 | 20 | 33913254 | 235582 | 7.1853  | 0.3984 | -0.5924 | 6.1694 | CEU |
| CPNE1     | GI_23397697-A | rs6060643  | 20 | 20 | 33913265 | 235593 | 11.8743 | 0.5818 | -0.6819 | 6.1694 | CEU |
| CPNE1     | GI_23397697-A | rs7271036  | 20 | 20 | 33930629 | 252957 | 10.6001 | 0.5308 | 0.6728  | 6.1694 | CEU |
| CPNE1     | GI_23397697-A | rs6060669  | 20 | 20 | 33943971 | 266299 | 10.6001 | 0.5308 | -0.6728 | 6.1694 | CEU |
| CPNE1     | GI_23397697-A | rs6058354  | 20 | 20 | 33954524 | 276852 | 10.6001 | 0.5308 | 0.6728  | 6.1694 | CEU |
| CPNE1     | GI_23397697-A | rs6058356  | 20 | 20 | 33954944 | 277272 | 10.6001 | 0.5308 | -0.6728 | 6.1694 | CEU |
| CPNE1     | GI_23397697-A | rs8125393  | 20 | 20 | 33959576 | 281904 | 9.7800  | 0.5058 | -0.6625 | 6.1694 | CEU |
| CPNE1     | GI_23397697-A | rs11696912 | 20 | 20 | 33961074 | 283402 | 10.6001 | 0.5308 | 0.6728  | 6.1694 | CEU |
| CPNE1     | GI_23397697-A | rs6060676  | 20 | 20 | 33961965 | 284293 | 10.6001 | 0.5308 | 0.6728  | 6.1694 | CEU |
| CPNE1     | GI_23397697-A | rs6060677  | 20 | 20 | 33962782 | 285110 | 8.7644  | 0.4585 | -0.6080 | 6.1694 | CEU |
| CPNE1     | GI_23397697-A | rs17431878 | 20 | 20 | 33965521 | 287849 | 6.7345  | 0.3710 | 0.5863  | 6.1694 | CEU |
| CPNE1     | GI_23397697-A | rs6058364  | 20 | 20 | 33971304 | 293632 | 10.1456 | 0.5200 | 0.6816  | 6.1694 | CEU |
| CPNE1     | GI_23397697-A | rs11167279 | 20 | 20 | 33972521 | 294849 | 10.0260 | 0.5217 | 0.7056  | 6.1694 | CEU |
| CPNE1     | GI_23397697-A | rs6060704  | 20 | 20 | 33993684 | 316012 | 10.6001 | 0.5308 | -0.6728 | 6.1694 | CEU |
| CPNE1     | GI_23397697-A | rs3829829  | 20 | 20 | 34000574 | 322902 | 10.6001 | 0.5308 | -0.6728 | 6.1694 | CEU |
| CPNE1     | GI_23397697-A | rs11699815 | 20 | 20 | 34006539 | 328867 | 10.6001 | 0.5308 | 0.6728  | 6.1694 | CEU |
| CPNE1     | GI_23397697-A | rs17432470 | 20 | 20 | 34011177 | 333505 | 10.6001 | 0.5308 | 0.6728  | 6.1694 | CEU |
| CPNE1     | GI_23397697-A | rs11700299 | 20 | 20 | 34012279 | 334607 | 8.9090  | 0.4704 | -0.6576 | 6.1694 | CEU |
| CPNE1     | GI_23397697-A | rs11167280 | 20 | 20 | 34023940 | 346268 | 9.0482  | 0.4703 | 0.6567  | 6.1694 | CEU |
| CPNE1     | GI_23397697-A | rs11699653 | 20 | 20 | 34086330 | 408658 | 6.9307  | 0.3807 | 0.5070  | 6.1694 | CEU |
| LOC375097 | GI_37555934-S | rs736368   | 20 | 20 | 36454392 | 28542  | 8.0397  | 0.4270 | -0.6548 | 5.9283 | CEU |
| Hs.400876 | Hs.400876-S   | rs736368   | 20 | 20 | 36454392 | 28393  | 7.7023  | 0.4118 | -0.6980 | 5.6739 | CEU |
| LOC375097 | GI_37555934-S | rs1119803  | 20 | 20 | 36459212 | 23722  | 8.2475  | 0.4362 | 0.6616  | 5.9283 | CEU |
| Hs.400876 | Hs.400876-S   | rs1119803  | 20 | 20 | 36459212 | 23573  | 7.8491  | 0.4185 | 0.7034  | 5.6739 | CEU |
| LOC375097 | GI_37555934-S | rs6064503  | 20 | 20 | 36459793 | 23141  | 7.5481  | 0.4047 | 0.5663  | 5.9283 | CEU |
| Hs.400876 | Hs.400876-S   | rs6064503  | 20 | 20 | 36459793 | 22992  | 7.1588  | 0.3864 | 0.6008  | 5.6739 | CEU |
| LOC375097 | GI_37555934-S | rs6064505  | 20 | 20 | 36460035 | 22899  | 8.8230  | 0.4728 | -0.6727 | 5.9283 | CEU |
| Hs.400876 | Hs.400876-S   | rs6064505  | 20 | 20 | 36460035 | 22750  | 8.0048  | 0.4368 | -0.7125 | 5.6739 | CEU |
| LOC375097 | GI_37555934-S | rs1739643  | 20 | 20 | 36460620 | 22314  | 6.7528  | 0.3719 | -0.6305 | 5.9283 | CEU |
| Hs.400876 | Hs.400876-S   | rs1739643  | 20 | 20 | 36460620 | 22165  | 6.3745  | 0.3530 | -0.6658 | 5.6739 | CEU |
| LOC375097 | GI_37555934-S | rs1739644  | 20 | 20 | 36460639 | 22295  | 7.3742  | 0.3966 | 0.6167  | 5.9283 | CEU |
| Hs.400876 | Hs.400876-S   | rs1739644  | 20 | 20 | 36460639 | 22146  | 6.9646  | 0.3771 | 0.6530  | 5.6739 | CEU |
| LOC375097 | GI_37555934-S | rs4811821  | 20 | 20 | 36462427 | 20507  | 8.2908  | 0.4381 | 0.5996  | 5.9283 | CEU |
| Hs.400876 | Hs.400876-S   | rs4811821  | 20 | 20 | 36462427 | 20358  | 7.9192  | 0.4216 | 0.6384  | 5.6739 | CEU |
| LOC375097 | GI_37555934-S | rs1780634  | 20 | 20 | 36463239 | 19695  | 8.2908  | 0.4381 | 0.5996  | 5.9283 | CEU |
| Hs.400876 | Hs.400876-S   | rs1780634  | 20 | 20 | 36463239 | 19546  | 7.9192  | 0.4216 | 0.6384  | 5.6739 | CEU |
| LOC375097 | GI_37555934-S | rs1739646  | 20 | 20 | 36470998 | 11936  | 8.9656  | 0.4669 | -0.6313 | 5.9283 | CEU |
| Hs.400876 | Hs.400876-S   | rs1739646  | 20 | 20 | 36470998 | 11787  | 8.6782  | 0.4548 | -0.6762 | 5.6739 | CEU |
| LOC375097 | GI_37555934-S | rs6025497  | 20 | 20 | 36476624 | 6310   | 8.9656  | 0.4669 | -0.6313 | 5.9283 | CEU |
| Hs.400876 | Hs.400876-S   | rs6025497  | 20 | 20 | 36476624 | 6161   | 8.6782  | 0.4548 | -0.6762 | 5.6739 | CEU |
| LOC375097 | GI_37555934-S | rs1739650  | 20 | 20 | 36476911 | 6023   | 9.2179  | 0.4956 | 0.5843  | 5.9283 | CEU |
| Hs.400876 | Hs.400876-S   | rs1739650  | 20 | 20 | 36476911 | 5874   | 9.3030  | 0.4991 | 0.6332  | 5.6739 | CEU |
| LOC375097 | GI_37555934-S | rs1739652  | 20 | 20 | 36482373 | 561    | 9.0894  | 0.4720 | 0.7062  | 5.9283 | CEU |
| Hs.400876 | Hs.400876-S   | rs1739652  | 20 | 20 | 36482373 | 412    | 8.7763  | 0.4590 | 0.7557  | 5.6739 | CEU |
| LOC375097 | GI_37555934-S | rs3752277  | 20 | 20 | 36484167 | 1233   | 8.9656  | 0.4669 | -0.6313 | 5.9283 | CEU |
| Hs.400876 | Hs.400876-S   | rs3752277  | 20 | 20 | 36484167 | 1382   | 8.6782  | 0.4548 | -0.6762 | 5.6739 | CEU |
| LOC375097 | GI_37555934-S | rs3752278  | 20 | 20 | 36484231 | 1297   | 9.0894  | 0.4720 | 0.7062  | 5.9283 | CEU |
| Hs.400876 | Hs.400876-S   | rs3752278  | 20 | 20 | 36484231 | 1446   | 8.7763  | 0.4590 | 0.7557  | 5.6739 | CEU |
| LOC375097 | GI_37555934-S | rs3752279  | 20 | 20 | 36484373 | 1439   | 9.0894  | 0.4720 | -0.7062 | 5.9283 | CEU |
| Hs.400876 | Hs.400876-S   | rs3752279  | 20 | 20 | 36484373 | 1588   | 8.7763  | 0.4590 | -0.7557 | 5.6739 | CEU |
| LOC375097 | GI_37555934-S | rs3752280  | 20 | 20 | 36484421 | 1487   | 9.0894  | 0.4720 | 0.7062  | 5.9283 | CEU |
| Hs.400876 | Hs.400876-S   | rs3752280  | 20 | 20 | 36484421 | 1636   | 8.7763  | 0.4590 | 0.7557  | 5.6739 | CEU |
| LOC375097 | GI_37555934-S | rs1780636  | 20 | 20 | 36486997 | 4063   | 8.9656  | 0.4669 | -0.6313 | 5.9283 | CEU |
| Hs.400876 | Hs.400876-S   | rs1780636  | 20 | 20 | 36486997 | 4212   | 8.6782  | 0.4548 | -0.6762 | 5.6739 | CEU |
| LOC375097 | GI_37555934-S | rs752775   | 20 | 20 | 36488195 | 5261   | 8.9552  | 0.4724 | 0.6233  | 5.9283 | CEU |
| Hs.400876 | Hs.400876-S   | rs752775   | 20 | 20 | 36488195 | 5410   | 8.5854  | 0.4566 | 0.6691  | 5.6739 | CEU |

|           |               |            |    |    |          |        |         |        |         |        |     |
|-----------|---------------|------------|----|----|----------|--------|---------|--------|---------|--------|-----|
| LOC375097 | GI_37555934-S | rs752774   | 20 | 20 | 36488429 | 5495   | 9.0894  | 0.4720 | 0.7062  | 5.9283 | CEU |
| Hs.400876 | Hs.400876-S   | rs752774   | 20 | 20 | 36488429 | 5644   | 8.7763  | 0.4590 | 0.7557  | 5.6739 | CEU |
| LOC375097 | GI_37555934-S | rs707578   | 20 | 20 | 36489289 | 6355   | 8.9656  | 0.4669 | 0.6313  | 5.9283 | CEU |
| Hs.400876 | Hs.400876-S   | rs707578   | 20 | 20 | 36489289 | 6504   | 8.6782  | 0.4548 | 0.6762  | 5.6739 | CEU |
| LOC375097 | GI_37555934-S | rs788344   | 20 | 20 | 36492763 | 9829   | 9.0894  | 0.4720 | -0.7062 | 5.9283 | CEU |
| Hs.400876 | Hs.400876-S   | rs788344   | 20 | 20 | 36492763 | 9978   | 8.7763  | 0.4590 | -0.7557 | 5.6739 | CEU |
| LOC375097 | GI_37555934-S | rs788347   | 20 | 20 | 36495997 | 13063  | 8.7949  | 0.4716 | 0.7059  | 5.9283 | CEU |
| Hs.400876 | Hs.400876-S   | rs788347   | 20 | 20 | 36495997 | 13212  | 8.5239  | 0.4599 | 0.7586  | 5.6739 | CEU |
| LOC375097 | GI_37555934-S | rs788348   | 20 | 20 | 36496888 | 13954  | 9.0894  | 0.4720 | -0.7062 | 5.9283 | CEU |
| Hs.400876 | Hs.400876-S   | rs788348   | 20 | 20 | 36496888 | 14103  | 8.7763  | 0.4590 | -0.7557 | 5.6739 | CEU |
| LOC375097 | GI_37555934-S | rs788350   | 20 | 20 | 36498050 | 15116  | 9.0894  | 0.4720 | -0.7062 | 5.9283 | CEU |
| Hs.400876 | Hs.400876-S   | rs788350   | 20 | 20 | 36498050 | 15265  | 8.7763  | 0.4590 | -0.7557 | 5.6739 | CEU |
| LOC375097 | GI_37555934-S | rs6099675  | 20 | 20 | 36500903 | 17969  | 6.0171  | 0.3549 | -0.5653 | 5.9283 | CEU |
| Hs.400876 | Hs.400876-S   | rs6099675  | 20 | 20 | 36500903 | 18118  | 6.1377  | 0.3614 | -0.6141 | 5.6739 | CEU |
| LOC375097 | GI_37555934-S | rs805529   | 20 | 20 | 36506696 | 23762  | 7.7645  | 0.4316 | 0.5540  | 5.9283 | CEU |
| Hs.400876 | Hs.400876-S   | rs805529   | 20 | 20 | 36506696 | 23911  | 7.5966  | 0.4237 | 0.5971  | 5.6739 | CEU |
| LOC375097 | GI_37555934-S | rs1303567  | 20 | 20 | 36539571 | 56637  | 7.0924  | 0.3833 | 0.5264  | 5.9283 | CEU |
| Hs.400876 | Hs.400876-S   | rs1303567  | 20 | 20 | 36539571 | 56786  | 6.5759  | 0.3581 | 0.5528  | 5.6739 | CEU |
| LOC375097 | GI_37555934-S | rs1303588  | 20 | 20 | 36541160 | 58226  | 7.0924  | 0.3833 | -0.5264 | 5.9283 | CEU |
| Hs.400876 | Hs.400876-S   | rs1303588  | 20 | 20 | 36541160 | 58375  | 6.5759  | 0.3581 | -0.5528 | 5.6739 | CEU |
| LOC375097 | GI_37555934-S | rs1303581  | 20 | 20 | 36547300 | 64366  | 7.0924  | 0.3833 | -0.5264 | 5.9283 | CEU |
| Hs.400876 | Hs.400876-S   | rs1303581  | 20 | 20 | 36547300 | 64515  | 6.5759  | 0.3581 | -0.5528 | 5.6739 | CEU |
| LOC375097 | GI_37555934-S | rs1303577  | 20 | 20 | 36559271 | 76337  | 7.0924  | 0.3833 | -0.5264 | 5.9283 | CEU |
| Hs.400876 | Hs.400876-S   | rs1303577  | 20 | 20 | 36559271 | 76486  | 6.5759  | 0.3581 | -0.5528 | 5.6739 | CEU |
| LOC375097 | GI_37555934-S | rs1303575  | 20 | 20 | 36562231 | 79297  | 7.0924  | 0.3833 | 0.5264  | 5.9283 | CEU |
| Hs.400876 | Hs.400876-S   | rs1303575  | 20 | 20 | 36562231 | 79446  | 6.5759  | 0.3581 | 0.5528  | 5.6739 | CEU |
| LOC375097 | GI_37555934-S | rs1303574  | 20 | 20 | 36562655 | 79721  | 6.1987  | 0.3489 | -0.4985 | 5.9283 | CEU |
| Hs.400876 | Hs.400876-S   | rs1303574  | 20 | 20 | 36562655 | 79870  | 5.7087  | 0.3230 | -0.5214 | 5.6739 | CEU |
| LOC375097 | GI_37555934-S | rs1315305  | 20 | 20 | 36565135 | 82201  | 7.0924  | 0.3833 | -0.5264 | 5.9283 | CEU |
| Hs.400876 | Hs.400876-S   | rs1315305  | 20 | 20 | 36565135 | 82350  | 6.5759  | 0.3581 | -0.5528 | 5.6739 | CEU |
| LOC375097 | GI_37555934-S | rs11699660 | 20 | 20 | 36585303 | 102369 | 6.6035  | 0.3750 | 0.5098  | 5.9283 | CEU |
| Hs.400876 | Hs.400876-S   | rs11699660 | 20 | 20 | 36585303 | 102518 | 6.1400  | 0.3510 | 0.5331  | 5.6739 | CEU |
| Hs.517172 | Hs.517172-S   | rs6010786  | 20 | 20 | 61015159 | 16543  | 5.7759  | 0.3173 | 0.1719  | 5.7338 | CEU |
| Hs.517172 | Hs.517172-S   | rs6010789  | 20 | 20 | 61031598 | 104    | 5.7759  | 0.3173 | 0.1719  | 5.7338 | CEU |
| DSCR5     | GI_24497598-A | rs2249828  | 21 | 21 | 37354491 | 6978   | 6.3320  | 0.3508 | -0.2723 | 5.9427 | CEU |
| DSCR5     | GI_24497598-A | rs8133274  | 21 | 21 | 37369254 | 7785   | 6.3320  | 0.3508 | -0.2723 | 5.9427 | CEU |
| DSCR5     | GI_24497598-A | rs3819262  | 21 | 21 | 37382760 | 21291  | 6.3320  | 0.3508 | -0.2723 | 5.9427 | CEU |
| DSCR5     | GI_24497598-A | rs4817850  | 21 | 21 | 37391707 | 30238  | 6.3320  | 0.3508 | -0.2723 | 5.9427 | CEU |
| DSCR5     | GI_24497598-A | rs1473807  | 21 | 21 | 37395043 | 33574  | 6.6351  | 0.3610 | -0.2778 | 5.9427 | CEU |
| DSCR5     | GI_24497598-A | rs2032089  | 21 | 21 | 37399441 | 37972  | 6.5191  | 0.3654 | 0.2798  | 5.9427 | CEU |
| DSCR5     | GI_24497598-A | rs8126889  | 21 | 21 | 37403118 | 41649  | 6.3320  | 0.3508 | -0.2723 | 5.9427 | CEU |
| DSCR5     | GI_24497598-A | rs2835604  | 21 | 21 | 37411115 | 49646  | 6.6351  | 0.3610 | -0.2778 | 5.9427 | CEU |
| DSCR5     | GI_24497598-A | rs10470176 | 21 | 21 | 37426370 | 64901  | 6.1318  | 0.3782 | 0.3096  | 5.9427 | CEU |
| DSCR5     | GI_24497598-A | rs2000419  | 21 | 21 | 37433786 | 72317  | 6.2142  | 0.3497 | 0.2697  | 5.9427 | CEU |
| DSCR5     | GI_24497598-A | rs2835624  | 21 | 21 | 37434127 | 72658  | 6.3915  | 0.3489 | -0.2713 | 5.9427 | CEU |
| DSCR5     | GI_24497598-A | rs2835626  | 21 | 21 | 37434568 | 73099  | 6.3915  | 0.3489 | 0.2713  | 5.9427 | CEU |
| DSCR5     | GI_24497598-A | rs1344046  | 21 | 21 | 37439010 | 77541  | 6.1125  | 0.3395 | -0.2658 | 5.9427 | CEU |
| DSCR5     | GI_24497598-A | rs2835643  | 21 | 21 | 37465172 | 103703 | 6.3915  | 0.3489 | -0.2713 | 5.9427 | CEU |
| DSCR5     | GI_24497598-A | rs2835645  | 21 | 21 | 37468252 | 106783 | 6.3915  | 0.3489 | -0.2713 | 5.9427 | CEU |
| DSCR5     | GI_24497598-A | rs2835648  | 21 | 21 | 37469924 | 108455 | 6.1125  | 0.3395 | 0.2658  | 5.9427 | CEU |
| DSCR5     | GI_24497598-A | rs2835655  | 21 | 21 | 37485595 | 124126 | 6.3915  | 0.3489 | -0.2713 | 5.9427 | CEU |
| DSCR5     | GI_24497598-A | rs2073356  | 21 | 21 | 37522096 | 160627 | 6.1125  | 0.3395 | -0.2658 | 5.9427 | CEU |
| C21orf107 | GI_38026951-I | rs2836922  | 21 | 21 | 39438178 | 46149  | 15.9363 | 0.6979 | 0.2667  | 6.3684 | CEU |
| C21orf107 | GI_38026951-I | rs7281463  | 21 | 21 | 39442653 | 41674  | 9.7540  | 0.5048 | -0.2239 | 6.3684 | CEU |
| C21orf107 | GI_38026951-I | rs7279497  | 21 | 21 | 39453176 | 31151  | 16.1765 | 0.6974 | 0.2724  | 6.3684 | CEU |
| C21orf107 | GI_38026951-I | rs377098   | 21 | 21 | 39457086 | 27241  | 10.1238 | 0.5192 | -0.2233 | 6.3684 | CEU |
| C21orf107 | GI_38026951-I | rs418298   | 21 | 21 | 39458524 | 25803  | 10.1238 | 0.5192 | -0.2233 | 6.3684 | CEU |
| C21orf107 | GI_38026951-I | rs418359   | 21 | 21 | 39458604 | 25723  | 10.1238 | 0.5192 | -0.2233 | 6.3684 | CEU |
| C21orf107 | GI_38026951-I | rs2836926  | 21 | 21 | 39458660 | 25667  | 15.9812 | 0.6990 | -0.2719 | 6.3684 | CEU |

|           |               |            |    |    |          |        |         |        |         |        |     |
|-----------|---------------|------------|----|----|----------|--------|---------|--------|---------|--------|-----|
| C21orf107 | GI_38026951-I | rs7282604  | 21 | 21 | 39458780 | 25547  | 10.1238 | 0.5192 | -0.2233 | 6.3684 | CEU |
| C21orf107 | GI_38026951-I | rs419469   | 21 | 21 | 39459104 | 25223  | 10.1238 | 0.5192 | -0.2233 | 6.3684 | CEU |
| C21orf107 | GI_38026951-I | rs8134214  | 21 | 21 | 39464237 | 20090  | 15.9812 | 0.6990 | 0.2719  | 6.3684 | CEU |
| C21orf107 | GI_38026951-I | rs2836930  | 21 | 21 | 39467526 | 16801  | 15.9812 | 0.6990 | 0.2719  | 6.3684 | CEU |
| C21orf107 | GI_38026951-I | rs2836931  | 21 | 21 | 39468439 | 15888  | 15.6331 | 0.7035 | -0.2727 | 6.3684 | CEU |
| C21orf107 | GI_38026951-I | rs428602   | 21 | 21 | 39468874 | 15453  | 10.1238 | 0.5192 | -0.2233 | 6.3684 | CEU |
| C21orf107 | GI_38026951-I | rs2245455  | 21 | 21 | 39469957 | 14370  | 10.1238 | 0.5192 | -0.2233 | 6.3684 | CEU |
| C21orf107 | GI_38026951-I | rs2142111  | 21 | 21 | 39471159 | 13168  | 10.1238 | 0.5192 | 0.2233  | 6.3684 | CEU |
| C21orf107 | GI_38026951-I | rs6517522  | 21 | 21 | 39475715 | 8612   | 7.0932  | 0.3886 | 0.2078  | 6.3684 | CEU |
| C21orf107 | GI_38026951-I | rs2297256  | 21 | 21 | 39480291 | 4036   | 15.2608 | 0.6876 | -0.2727 | 6.3684 | CEU |
| C21orf107 | GI_38026951-I | rs2836934  | 21 | 21 | 39486755 | 2428   | 15.9812 | 0.6990 | 0.2719  | 6.3684 | CEU |
| C21orf107 | GI_38026951-I | rs2150411  | 21 | 21 | 39496422 | 12095  | 15.5199 | 0.6877 | 0.2729  | 6.3684 | CEU |
| C21orf107 | GI_38026951-I | rs4818001  | 21 | 21 | 39496958 | 12631  | 15.5199 | 0.6877 | -0.2729 | 6.3684 | CEU |
| C21orf107 | GI_38026951-I | rs8130320  | 21 | 21 | 39502128 | 17801  | 15.9812 | 0.6990 | -0.2719 | 6.3684 | CEU |
| C21orf107 | GI_38026951-I | rs8132143  | 21 | 21 | 39506128 | 21801  | 15.5199 | 0.6877 | 0.2729  | 6.3684 | CEU |
| C21orf107 | GI_38026951-I | rs8132424  | 21 | 21 | 39506282 | 21955  | 15.7007 | 0.6858 | 0.2733  | 6.3684 | CEU |
| C21orf107 | GI_38026951-I | rs2836942  | 21 | 21 | 39513251 | 28924  | 15.5199 | 0.6877 | 0.2729  | 6.3684 | CEU |
| C21orf107 | GI_38026951-I | rs2836943  | 21 | 21 | 39514481 | 30154  | 15.9812 | 0.6990 | 0.2719  | 6.3684 | CEU |
| C21orf107 | GI_38026951-I | rs2836948  | 21 | 21 | 39521547 | 37220  | 15.5199 | 0.6877 | -0.2729 | 6.3684 | CEU |
| C21orf107 | GI_38026951-I | rs17816433 | 21 | 21 | 39524326 | 39999  | 15.5199 | 0.6877 | -0.2729 | 6.3684 | CEU |
| C21orf107 | GI_38026951-I | rs2836950  | 21 | 21 | 39526299 | 41972  | 9.4729  | 0.4936 | 0.2594  | 6.3684 | CEU |
| C21orf107 | GI_38026951-I | rs11911822 | 21 | 21 | 39529713 | 45386  | 9.9894  | 0.5140 | 0.2259  | 6.3684 | CEU |
| C21orf107 | GI_38026951-I | rs2150413  | 21 | 21 | 39536748 | 52421  | 15.9812 | 0.6990 | 0.2719  | 6.3684 | CEU |
| C21orf107 | GI_38026951-I | rs2150414  | 21 | 21 | 39536858 | 52531  | 15.9812 | 0.6990 | 0.2719  | 6.3684 | CEU |
| C21orf107 | GI_38026951-I | rs2836952  | 21 | 21 | 39538521 | 54194  | 15.9812 | 0.6990 | -0.2719 | 6.3684 | CEU |
| C21orf107 | GI_38026951-I | rs2836956  | 21 | 21 | 39544888 | 60561  | 15.5872 | 0.6830 | -0.2677 | 6.3684 | CEU |
| C21orf107 | GI_38026951-I | rs2836958  | 21 | 21 | 39545396 | 61069  | 15.0705 | 0.7097 | -0.2658 | 6.3684 | CEU |
| C21orf107 | GI_38026951-I | rs2836959  | 21 | 21 | 39545538 | 61211  | 15.5199 | 0.6877 | -0.2729 | 6.3684 | CEU |
| C21orf107 | GI_38026951-I | rs7278297  | 21 | 21 | 39547622 | 63295  | 15.5199 | 0.6877 | 0.2729  | 6.3684 | CEU |
| C21orf107 | GI_38026951-I | rs2836961  | 21 | 21 | 39548890 | 64563  | 10.8031 | 0.5445 | 0.2571  | 6.3684 | CEU |
| C21orf107 | GI_38026951-I | rs7276774  | 21 | 21 | 39550595 | 66268  | 10.5290 | 0.5972 | -0.2596 | 6.3684 | CEU |
| C21orf107 | GI_38026951-I | rs2836966  | 21 | 21 | 39559391 | 75064  | 15.9812 | 0.6990 | 0.2719  | 6.3684 | CEU |
| C21orf107 | GI_38026951-I | rs2836969  | 21 | 21 | 39570135 | 85808  | 10.1238 | 0.5192 | -0.2233 | 6.3684 | CEU |
| C21orf107 | GI_38026951-I | rs2836975  | 21 | 21 | 39585490 | 101163 | 9.9894  | 0.5140 | -0.2259 | 6.3684 | CEU |
| C21orf107 | GI_38026951-I | rs2056844  | 21 | 21 | 39592330 | 108003 | 15.7007 | 0.6858 | -0.2733 | 6.3684 | CEU |
| C21orf107 | GI_38026951-I | rs7410020  | 21 | 21 | 39597363 | 113036 | 10.0105 | 0.5087 | 0.2254  | 6.3684 | CEU |
| C21orf107 | GI_38026951-I | rs2836980  | 21 | 21 | 39609488 | 125161 | 14.3000 | 0.6556 | 0.2617  | 6.3684 | CEU |
| C21orf107 | GI_38026951-I | rs2836981  | 21 | 21 | 39610235 | 125908 | 9.5632  | 0.4972 | -0.2199 | 6.3684 | CEU |
| C21orf107 | GI_38026951-I | rs2836982  | 21 | 21 | 39611041 | 126714 | 9.5632  | 0.4972 | -0.2199 | 6.3684 | CEU |
| C21orf107 | GI_38026951-I | rs2836983  | 21 | 21 | 39611206 | 126879 | 14.3000 | 0.6556 | -0.2617 | 6.3684 | CEU |
| C21orf107 | GI_38026951-I | rs7281853  | 21 | 21 | 39615360 | 131033 | 9.5632  | 0.4972 | -0.2199 | 6.3684 | CEU |
| C21orf107 | GI_38026951-I | rs7282582  | 21 | 21 | 39618844 | 134517 | 16.8314 | 0.7126 | -0.2808 | 6.3684 | CEU |
| C21orf107 | GI_38026951-I | rs11088471 | 21 | 21 | 39621183 | 136856 | 8.4591  | 0.5101 | 0.2305  | 6.3684 | CEU |
| C21orf107 | GI_38026951-I | rs2037925  | 21 | 21 | 39621801 | 137474 | 9.5632  | 0.4972 | 0.2199  | 6.3684 | CEU |
| C21orf107 | GI_38026951-I | rs2410123  | 21 | 21 | 39621963 | 137636 | 9.5632  | 0.4972 | 0.2199  | 6.3684 | CEU |
| C21orf107 | GI_38026951-I | rs2836985  | 21 | 21 | 39623039 | 138712 | 14.3000 | 0.6556 | 0.2617  | 6.3684 | CEU |
| C21orf107 | GI_38026951-I | rs2836986  | 21 | 21 | 39624006 | 139679 | 9.5632  | 0.4972 | 0.2199  | 6.3684 | CEU |
| C21orf107 | GI_38026951-I | rs2836987  | 21 | 21 | 39628464 | 144137 | 9.5632  | 0.4972 | 0.2199  | 6.3684 | CEU |
| C21orf107 | GI_38026951-I | rs2836988  | 21 | 21 | 39629845 | 145518 | 9.5632  | 0.4972 | 0.2199  | 6.3684 | CEU |
| C21orf107 | GI_38026951-I | rs2776311  | 21 | 21 | 39638755 | 154428 | 6.4045  | 0.3545 | -0.1970 | 6.3684 | CEU |
| C21orf107 | GI_38026951-I | rs741795   | 21 | 21 | 39640310 | 155983 | 6.5831  | 0.3585 | -0.1961 | 6.3684 | CEU |
| TSGA2     | GI_18254455-S | rs2839533  | 21 | 21 | 42770095 | 4102   | 6.9227  | 0.3803 | -0.4573 | 6.2779 | CEU |
| Hs.245997 | Hs.245997-S   | rs915874   | 21 | 21 | 42858085 | 6461   | 6.4768  | 0.3633 | -0.1944 | 6.1364 | CEU |
| Hs.245997 | Hs.245997-S   | rs884983   | 21 | 21 | 42858686 | 5860   | 7.0773  | 0.3826 | 0.2103  | 6.1364 | CEU |
| Hs.245997 | Hs.245997-S   | rs2839557  | 21 | 21 | 42863867 | 679    | 7.5059  | 0.4082 | -0.2077 | 6.1364 | CEU |
| Hs.245997 | Hs.245997-S   | rs3746933  | 21 | 21 | 42864660 | 114    | 7.1409  | 0.3909 | -0.2191 | 6.1364 | CEU |
| Hs.245997 | Hs.245997-S   | rs1399925  | 21 | 21 | 42865011 | 465    | 7.1409  | 0.3909 | 0.2191  | 6.1364 | CEU |
| Hs.245997 | Hs.245997-S   | rs445343   | 21 | 21 | 42866684 | 2138   | 7.5059  | 0.4082 | 0.2077  | 6.1364 | CEU |
| Hs.245997 | Hs.245997-S   | rs412212   | 21 | 21 | 42866712 | 2166   | 6.7250  | 0.3655 | 0.2125  | 6.1364 | CEU |

|              |               |            |    |    |          |        |         |        |         |        |     |
|--------------|---------------|------------|----|----|----------|--------|---------|--------|---------|--------|-----|
| Hs.245997    | Hs.245997-S   | rs445554   | 21 | 21 | 42866873 | 2327   | 6.7061  | 0.3696 | 0.1965  | 6.1364 | CEU |
| Hs.245997    | Hs.245997-S   | rs451954   | 21 | 21 | 42869023 | 4477   | 6.8093  | 0.3696 | 0.1971  | 6.1364 | CEU |
| Hs.245997    | Hs.245997-S   | rs435725   | 21 | 21 | 42870980 | 6434   | 6.8093  | 0.3696 | 0.1971  | 6.1364 | CEU |
| Hs.245997    | Hs.245997-S   | rs365443   | 21 | 21 | 42871365 | 6819   | 7.1409  | 0.3909 | 0.2191  | 6.1364 | CEU |
| Hs.245997    | Hs.245997-S   | rs401396   | 21 | 21 | 42871651 | 7105   | 8.4778  | 0.4579 | 0.2076  | 6.1364 | CEU |
| Hs.245997    | Hs.245997-S   | rs388907   | 21 | 21 | 42873435 | 8889   | 7.1409  | 0.3909 | 0.2191  | 6.1364 | CEU |
| Hs.245997    | Hs.245997-S   | rs454849   | 21 | 21 | 42874133 | 9587   | 7.1409  | 0.3909 | -0.2191 | 6.1364 | CEU |
| Hs.245997    | Hs.245997-S   | rs400625   | 21 | 21 | 42874864 | 10318  | 7.5059  | 0.4082 | 0.2077  | 6.1364 | CEU |
| Hs.245997    | Hs.245997-S   | rs368955   | 21 | 21 | 42875818 | 11272  | 6.8093  | 0.3696 | 0.1971  | 6.1364 | CEU |
| Hs.245997    | Hs.245997-S   | rs366703   | 21 | 21 | 42876537 | 11991  | 7.1409  | 0.3909 | -0.2191 | 6.1364 | CEU |
| Hs.245997    | Hs.245997-S   | rs380282   | 21 | 21 | 42876752 | 12206  | 6.7250  | 0.3655 | 0.2125  | 6.1364 | CEU |
| Hs.245997    | Hs.245997-S   | rs442723   | 21 | 21 | 42876979 | 12433  | 6.7250  | 0.3655 | -0.2125 | 6.1364 | CEU |
| Hs.245997    | Hs.245997-S   | rs449888   | 21 | 21 | 42877061 | 12515  | 6.8093  | 0.3696 | 0.1971  | 6.1364 | CEU |
| Hs.245997    | Hs.245997-S   | rs381899   | 21 | 21 | 42877191 | 12645  | 6.7250  | 0.3655 | 0.2125  | 6.1364 | CEU |
| Hs.245997    | Hs.245997-S   | rs417252   | 21 | 21 | 42877322 | 12776  | 7.4056  | 0.4035 | -0.1994 | 6.1364 | CEU |
| Hs.245997    | Hs.245997-S   | rs447167   | 21 | 21 | 42877898 | 13352  | 7.1409  | 0.3909 | -0.2191 | 6.1364 | CEU |
| Hs.245997    | Hs.245997-S   | rs1788414  | 21 | 21 | 42878403 | 13857  | 6.1376  | 0.3360 | -0.1937 | 6.1364 | CEU |
| Hs.245997    | Hs.245997-S   | rs450508   | 21 | 21 | 42879076 | 14530  | 7.8189  | 0.4226 | -0.2049 | 6.1364 | CEU |
| Hs.245997    | Hs.245997-S   | rs449014   | 21 | 21 | 42879186 | 14640  | 6.6119  | 0.3599 | -0.1993 | 6.1364 | CEU |
| Hs.245997    | Hs.245997-S   | rs408465   | 21 | 21 | 42879276 | 14730  | 7.0322  | 0.3804 | 0.1936  | 6.1364 | CEU |
| Hs.245997    | Hs.245997-S   | rs390268   | 21 | 21 | 42879293 | 14747  | 6.8362  | 0.3923 | 0.1845  | 6.1364 | CEU |
| Hs.245997    | Hs.245997-S   | rs452481   | 21 | 21 | 42879399 | 14853  | 7.1040  | 0.4000 | -0.1947 | 6.1364 | CEU |
| Hs.245997    | Hs.245997-S   | rs397322   | 21 | 21 | 42879967 | 15421  | 7.3354  | 0.4230 | -0.1955 | 6.1364 | CEU |
| Hs.245997    | Hs.245997-S   | rs1788448  | 21 | 21 | 42880315 | 15769  | 6.8774  | 0.3781 | 0.2161  | 6.1364 | CEU |
| Hs.245997    | Hs.245997-S   | rs1788449  | 21 | 21 | 42880585 | 16039  | 6.5951  | 0.3641 | 0.2058  | 6.1364 | CEU |
| Hs.245997    | Hs.245997-S   | rs401074   | 21 | 21 | 42886560 | 22014  | 6.3556  | 0.3520 | 0.2019  | 6.1364 | CEU |
| Hs.245997    | Hs.245997-S   | rs6586334  | 21 | 21 | 42891021 | 26475  | 6.3556  | 0.3520 | -0.2019 | 6.1364 | CEU |
| Hs.245997    | Hs.245997-S   | rs433632   | 21 | 21 | 42893492 | 28946  | 6.3556  | 0.3520 | 0.2019  | 6.1364 | CEU |
| Hs.245997    | Hs.245997-S   | rs395610   | 21 | 21 | 42893502 | 28956  | 6.6395  | 0.3663 | 0.1893  | 6.1364 | CEU |
| CSTB         | GI_20357564-S | rs2329573  | 21 | 21 | 44022950 | 4570   | 8.2676  | 0.4371 | 0.4009  | 6.1681 | CEU |
| CSTB         | GI_20357564-S | rs1041456  | 21 | 21 | 44030783 | 12403  | 8.2125  | 0.4403 | 0.3966  | 6.1681 | CEU |
| CSTB         | GI_20357564-S | rs2838370  | 21 | 21 | 44039381 | 21001  | 6.3637  | 0.3627 | -0.4334 | 6.1681 | CEU |
| CSTB         | GI_20357564-S | rs2838371  | 21 | 21 | 44039474 | 21094  | 8.2125  | 0.4403 | 0.3966  | 6.1681 | CEU |
| CSTB         | GI_20357564-S | rs731935   | 21 | 21 | 44044998 | 26618  | 8.2125  | 0.4403 | -0.3966 | 6.1681 | CEU |
| CSTB         | GI_20357564-S | rs4818868  | 21 | 21 | 44046486 | 28106  | 6.7857  | 0.4136 | -0.3988 | 6.1681 | CEU |
| CSTB         | GI_20357564-S | rs2838386  | 21 | 21 | 44048612 | 30232  | 8.2125  | 0.4403 | -0.3966 | 6.1681 | CEU |
| CSTB         | GI_20357564-S | rs880987   | 21 | 21 | 44048883 | 30503  | 7.1399  | 0.3908 | 0.4490  | 6.1681 | CEU |
| CSTB         | GI_20357564-S | rs6518322  | 21 | 21 | 44050296 | 31916  | 8.0999  | 0.4411 | -0.3975 | 6.1681 | CEU |
| CSTB         | GI_20357564-S | rs2329577  | 21 | 21 | 44051727 | 33347  | 8.2125  | 0.4403 | 0.3966  | 6.1681 | CEU |
| CSTB         | GI_20357564-S | rs2838387  | 21 | 21 | 44052679 | 34299  | 8.2125  | 0.4403 | -0.3966 | 6.1681 | CEU |
| CSTB         | GI_20357564-S | rs9985006  | 21 | 21 | 44056750 | 38370  | 7.1374  | 0.4319 | 0.3900  | 6.1681 | CEU |
| CSTB         | GI_20357564-S | rs2838398  | 21 | 21 | 44061717 | 43337  | 7.1361  | 0.3906 | 0.3863  | 6.1681 | CEU |
| Hs.124623    | Hs.124623-S   | rs6518350  | 21 | 21 | 44446245 | 7633   | 11.8166 | 0.5799 | 0.3024  | 7.2343 | CEU |
| Hs.124623    | Hs.124623-S   | rs7282137  | 21 | 21 | 44449095 | 4783   | 11.8166 | 0.5799 | -0.3024 | 7.2343 | CEU |
| Hs.124623    | Hs.124623-S   | rs2838522  | 21 | 21 | 44452404 | 1474   | 10.9436 | 0.5433 | -0.2694 | 7.2343 | CEU |
| DKFZp434N035 | GI_14149994-S | rs2930761  | 22 | 22 | 18753459 | 629915 | 6.8521  | 0.3717 | -0.5971 | 6.2491 | CEU |
| SNAP29       | GI_18765736-S | rs853141   | 22 | 22 | 19343827 | 224644 | 5.5626  | 0.3060 | 0.5529  | 5.5499 | CEU |
| SNAP29       | GI_18765736-S | rs5996576  | 22 | 22 | 19345402 | 223069 | 5.5626  | 0.3060 | -0.5529 | 5.5499 | CEU |
| SNAP29       | GI_18765736-S | rs674478   | 22 | 22 | 19345818 | 222653 | 5.5626  | 0.3060 | -0.5529 | 5.5499 | CEU |
| SNAP29       | GI_18765736-S | rs5760036  | 22 | 22 | 19370205 | 198266 | 5.5626  | 0.3060 | -0.5529 | 5.5499 | CEU |
| SNAP29       | GI_18765736-S | rs6004060  | 22 | 22 | 19404958 | 163513 | 5.5626  | 0.3060 | 0.5529  | 5.5499 | CEU |
| SNAP29       | GI_18765736-S | rs5760207  | 22 | 22 | 19405102 | 163369 | 5.5626  | 0.3060 | 0.5529  | 5.5499 | CEU |
| SNAP29       | GI_18765736-S | rs5760513  | 22 | 22 | 19457485 | 110986 | 5.5626  | 0.3060 | 0.5529  | 5.5499 | CEU |
| SNAP29       | GI_18765736-S | rs5760531  | 22 | 22 | 19461009 | 107462 | 5.5626  | 0.3060 | -0.5529 | 5.5499 | CEU |
| SNAP29       | GI_18765736-S | rs5751939  | 22 | 22 | 19463796 | 104675 | 5.5626  | 0.3060 | -0.5529 | 5.5499 | CEU |
| SNAP29       | GI_18765736-S | rs5760772  | 22 | 22 | 19493310 | 75161  | 5.5626  | 0.3060 | 0.5529  | 5.5499 | CEU |
| SNAP29       | GI_18765736-S | rs12162965 | 22 | 22 | 19505365 | 63106  | 5.5626  | 0.3060 | 0.5529  | 5.5499 | CEU |
| SNAP29       | GI_18765736-S | rs5760985  | 22 | 22 | 19524449 | 44022  | 5.5626  | 0.3060 | 0.5529  | 5.5499 | CEU |
| SNAP29       | GI_18765736-S | rs5752131  | 22 | 22 | 19528015 | 40456  | 5.5626  | 0.3060 | -0.5529 | 5.5499 | CEU |

|        |               |            |    |    |          |        |         |        |         |        |     |
|--------|---------------|------------|----|----|----------|--------|---------|--------|---------|--------|-----|
| SNAP29 | GI_18765736-S | rs5761195  | 22 | 22 | 19574259 | 5788   | 5.5626  | 0.3060 | 0.5529  | 5.5499 | CEU |
| SNAP29 | GI_18765736-S | rs5761259  | 22 | 22 | 19577139 | 8668   | 5.5626  | 0.3060 | -0.5529 | 5.5499 | CEU |
| SNAP29 | GI_18765736-S | rs5761323  | 22 | 22 | 19588131 | 19660  | 6.3972  | 0.3541 | 0.6192  | 5.5499 | CEU |
| SNAP29 | GI_18765736-S | rs1978098  | 22 | 22 | 19613425 | 44954  | 5.5626  | 0.3060 | 0.5529  | 5.5499 | CEU |
| GSTT1  | GI_4504184-S  | rs1007888  | 22 | 22 | 22565655 | 135301 | 12.5043 | 0.5959 | -1.1327 | 6.5906 | CEU |
| GSTT1  | GI_4504184-S  | rs2000467  | 22 | 22 | 22566087 | 134869 | 9.1344  | 0.4739 | 1.0137  | 6.5906 | CEU |
| GSTT1  | GI_4504184-S  | rs4822450  | 22 | 22 | 22567441 | 133515 | 12.6649 | 0.6010 | 1.1236  | 6.5906 | CEU |
| GSTT1  | GI_4504184-S  | rs4820571  | 22 | 22 | 22567527 | 133429 | 10.9131 | 0.5422 | 1.0716  | 6.5906 | CEU |
| GSTT1  | GI_4504184-S  | rs5751760  | 22 | 22 | 22568127 | 132829 | 12.6649 | 0.6010 | -1.1236 | 6.5906 | CEU |
| GSTT1  | GI_4504184-S  | rs5751761  | 22 | 22 | 22568290 | 132666 | 12.6649 | 0.6010 | 1.1236  | 6.5906 | CEU |
| GSTT1  | GI_4504184-S  | rs4822451  | 22 | 22 | 22572720 | 128236 | 10.0073 | 0.5086 | -1.0694 | 6.5906 | CEU |
| GSTT1  | GI_4504184-S  | rs2330635  | 22 | 22 | 22575898 | 125058 | 10.0073 | 0.5086 | -1.0694 | 6.5906 | CEU |
| GSTT1  | GI_4504184-S  | rs2877178  | 22 | 22 | 22576071 | 124885 | 10.0073 | 0.5086 | 1.0694  | 6.5906 | CEU |
| GSTT1  | GI_4504184-S  | rs3884794  | 22 | 22 | 22576320 | 124636 | 6.6827  | 0.3634 | -0.9031 | 6.5906 | CEU |
| GSTT1  | GI_4504184-S  | rs2154593  | 22 | 22 | 22576639 | 124317 | 10.0073 | 0.5086 | 1.0694  | 6.5906 | CEU |
| GSTT1  | GI_4504184-S  | rs2154594  | 22 | 22 | 22578609 | 122347 | 10.0073 | 0.5086 | 1.0694  | 6.5906 | CEU |
| GSTT1  | GI_4504184-S  | rs2186366  | 22 | 22 | 22578667 | 122289 | 10.0073 | 0.5086 | 1.0694  | 6.5906 | CEU |
| GSTT1  | GI_4504184-S  | rs4822453  | 22 | 22 | 22579416 | 121540 | 12.2859 | 0.5889 | 1.1454  | 6.5906 | CEU |
| GSTT1  | GI_4504184-S  | rs4822454  | 22 | 22 | 22579762 | 121194 | 10.0073 | 0.5086 | -1.0694 | 6.5906 | CEU |
| GSTT1  | GI_4504184-S  | rs5996631  | 22 | 22 | 22581448 | 119508 | 6.9610  | 0.3770 | 0.8909  | 6.5906 | CEU |
| GSTT1  | GI_4504184-S  | rs1002286  | 22 | 22 | 22581891 | 119065 | 12.6649 | 0.6010 | -1.1236 | 6.5906 | CEU |
| GSTT1  | GI_4504184-S  | rs4461358  | 22 | 22 | 22584660 | 116296 | 6.9610  | 0.3770 | 0.8909  | 6.5906 | CEU |
| GSTT1  | GI_4504184-S  | rs6003959  | 22 | 22 | 22588949 | 112007 | 6.6827  | 0.3634 | -0.9031 | 6.5906 | CEU |
| GSTT1  | GI_4504184-S  | rs4822458  | 22 | 22 | 22590213 | 110743 | 12.6649 | 0.6010 | 1.1236  | 6.5906 | CEU |
| GSTT1  | GI_4504184-S  | rs575959   | 22 | 22 | 22613919 | 87037  | 10.0967 | 0.5120 | 1.0323  | 6.5906 | CEU |
| GSTT1  | GI_4504184-S  | rs2739330  | 22 | 22 | 22619840 | 81116  | 11.2465 | 0.5540 | -1.0464 | 6.5906 | CEU |
| GSTT1  | GI_4504184-S  | rs4822466  | 22 | 22 | 22636758 | 64198  | 12.6649 | 0.6010 | -1.1236 | 6.5906 | CEU |
| GSTT1  | GI_4504184-S  | rs1006771  | 22 | 22 | 22638560 | 62396  | 9.5815  | 0.4919 | 1.0448  | 6.5906 | CEU |
| GSTT1  | GI_4504184-S  | rs140188   | 22 | 22 | 22648606 | 52350  | 10.0967 | 0.5120 | 1.0323  | 6.5906 | CEU |
| GSTT1  | GI_4504184-S  | rs5760147  | 22 | 22 | 22659502 | 41454  | 13.0292 | 0.6123 | -1.1561 | 6.5906 | CEU |
| GSTT1  | GI_4504184-S  | rs407257   | 22 | 22 | 22671104 | 29852  | 20.0411 | 0.7769 | -1.2768 | 6.5906 | CEU |
| GSTT1  | GI_4504184-S  | rs5760176  | 22 | 22 | 22726875 | 25919  | 17.7401 | 0.7325 | -1.1707 | 6.5906 | CEU |
| SYNGR1 | GI_22035699-A | rs909685   | 22 | 22 | 38072171 | 24459  | 9.1071  | 0.4727 | -0.7891 | 6.2987 | CEU |
| SYNGR1 | GI_39777618-I | rs909685   | 22 | 22 | 38072171 | 26570  | 9.2568  | 0.4789 | -0.7130 | 6.2987 | CEU |
| TEF    | GI_34486096-S | rs6002551  | 22 | 22 | 40662652 | 542920 | 7.2015  | 0.3885 | -0.4771 | 5.4838 | CEU |
| TEF    | GI_34486096-S | rs3752592  | 22 | 22 | 40667265 | 547533 | 7.2015  | 0.3885 | 0.4771  | 5.4838 | CEU |
| TEF    | GI_34486096-S | rs5996091  | 22 | 22 | 40668766 | 549034 | 8.0710  | 0.4284 | 0.4837  | 5.4838 | CEU |
| TEF    | GI_34486096-S | rs2157591  | 22 | 22 | 40672594 | 552862 | 7.1150  | 0.3844 | -0.4076 | 5.4838 | CEU |
| TEF    | GI_34486096-S | rs8137409  | 22 | 22 | 40684293 | 564561 | 8.0710  | 0.4284 | -0.4837 | 5.4838 | CEU |
| TEF    | GI_34486096-S | rs4822075  | 22 | 22 | 40687060 | 567328 | 8.0710  | 0.4284 | 0.4837  | 5.4838 | CEU |
| TEF    | GI_34486096-S | rs7287503  | 22 | 22 | 40896855 | 777123 | 5.8397  | 0.3252 | -0.3272 | 5.4838 | CEU |
| CGI-96 | GI_25092724-S | rs5758746  | 22 | 22 | 41198440 | 34844  | 6.0616  | 0.3321 | 0.3894  | 5.6031 | CEU |
| CGI-96 | GI_25092724-S | rs4822136  | 22 | 22 | 41205459 | 27825  | 9.0891  | 0.4720 | -0.4920 | 5.6031 | CEU |
| CGI-96 | GI_25092724-S | rs5996176  | 22 | 22 | 41205810 | 27474  | 9.0891  | 0.4720 | -0.4920 | 5.6031 | CEU |
| CGI-96 | GI_25092724-S | rs4820470  | 22 | 22 | 41230802 | 2482   | 11.2888 | 0.5555 | -0.5605 | 5.6031 | CEU |
| CGI-96 | GI_25092724-S | rs12485160 | 22 | 22 | 41232117 | 1167   | 10.8522 | 0.5463 | 0.5458  | 5.6031 | CEU |
| CGI-96 | GI_25092724-S | rs6002782  | 22 | 22 | 41243508 | 10224  | 10.3688 | 0.5223 | -0.5410 | 5.6031 | CEU |
| CGI-96 | GI_25092724-S | rs5751297  | 22 | 22 | 41243623 | 10339  | 8.4262  | 0.4556 | 0.5025  | 5.6031 | CEU |
| CGI-96 | GI_25092724-S | rs4822152  | 22 | 22 | 41245265 | 11981  | 10.0481 | 0.5423 | 0.5452  | 5.6031 | CEU |
| CGI-96 | GI_25092724-S | rs5996181  | 22 | 22 | 41245969 | 12685  | 11.2888 | 0.5555 | -0.5605 | 5.6031 | CEU |
| CGI-96 | GI_25092724-S | rs12160166 | 22 | 22 | 41248976 | 15692  | 11.2888 | 0.5555 | 0.5605  | 5.6031 | CEU |
| CGI-96 | GI_25092724-S | rs16986101 | 22 | 22 | 41249130 | 15846  | 11.9147 | 0.5832 | 0.5796  | 5.6031 | CEU |
| CGI-96 | GI_25092724-S | rs5996184  | 22 | 22 | 41250252 | 16968  | 7.5984  | 0.4420 | 0.5151  | 5.6031 | CEU |
| CGI-96 | GI_25092724-S | rs12160355 | 22 | 22 | 41252606 | 19322  | 11.2888 | 0.5555 | 0.5605  | 5.6031 | CEU |
| CGI-96 | GI_25092724-S | rs6002788  | 22 | 22 | 41252976 | 19692  | 11.2888 | 0.5555 | 0.5605  | 5.6031 | CEU |
| CGI-96 | GI_25092724-S | rs4822158  | 22 | 22 | 41253763 | 20479  | 11.2888 | 0.5555 | -0.5605 | 5.6031 | CEU |
| CGI-96 | GI_25092724-S | rs12160044 | 22 | 22 | 41256387 | 23103  | 10.1738 | 0.5404 | 0.5639  | 5.6031 | CEU |
| CGI-96 | GI_25092724-S | rs12160782 | 22 | 22 | 41256631 | 23347  | 8.2169  | 0.4523 | -0.4888 | 5.6031 | CEU |
| CGI-96 | GI_25092724-S | rs4822160  | 22 | 22 | 41256815 | 23531  | 11.2888 | 0.5555 | 0.5605  | 5.6031 | CEU |

|           |               |            |    |    |          |        |         |        |         |        |     |
|-----------|---------------|------------|----|----|----------|--------|---------|--------|---------|--------|-----|
| CGI-96    | GI_25092724-S | rs1543371  | 22 | 22 | 41256886 | 23602  | 10.9150 | 0.5485 | -0.5592 | 5.6031 | CEU |
| CGI-96    | GI_25092724-S | rs5996186  | 22 | 22 | 41257813 | 24529  | 11.2888 | 0.5555 | -0.5605 | 5.6031 | CEU |
| CGI-96    | GI_25092724-S | rs11913309 | 22 | 22 | 41261051 | 27767  | 10.4649 | 0.5384 | -0.5438 | 5.6031 | CEU |
| CGI-96    | GI_25092724-S | rs12484049 | 22 | 22 | 41263443 | 30159  | 11.2888 | 0.5555 | -0.5605 | 5.6031 | CEU |
| CGI-96    | GI_25092724-S | rs4822167  | 22 | 22 | 41265350 | 32066  | 9.6885  | 0.5022 | 0.5387  | 5.6031 | CEU |
| CGI-96    | GI_25092724-S | rs2071842  | 22 | 22 | 41308280 | 74996  | 6.9596  | 0.3769 | 0.5157  | 5.6031 | CEU |
| CGI-96    | GI_25092724-S | rs4822171  | 22 | 22 | 41309808 | 76524  | 6.9596  | 0.3769 | 0.5157  | 5.6031 | CEU |
| CGI-96    | GI_25092724-S | rs4822173  | 22 | 22 | 41320647 | 87363  | 9.9076  | 0.5047 | 0.5387  | 5.6031 | CEU |
| PACSIN2   | GI_6005825-S  | rs4822236  | 22 | 22 | 41682586 | 92113  | 6.8374  | 0.3761 | 0.3743  | 6.0276 | CEU |
| FLJ20635  | GI_8923587-S  | rs104664   | 22 | 22 | 44032391 | 24700  | 8.5231  | 0.4482 | 0.5701  | 6.851  | CEU |
| FLJ20635  | GI_8923587-S  | rs170505   | 22 | 22 | 44033557 | 23534  | 7.1336  | 0.3905 | -0.5838 | 6.851  | CEU |
| FLJ20635  | GI_8923587-S  | rs226492   | 22 | 22 | 44035026 | 22065  | 7.3097  | 0.3936 | -0.5861 | 6.851  | CEU |
| FLJ20635  | GI_8923587-S  | rs2142552  | 22 | 22 | 44040034 | 17057  | 8.5231  | 0.4482 | -0.5701 | 6.851  | CEU |
| FLJ20635  | GI_8923587-S  | rs738171   | 22 | 22 | 44041821 | 15270  | 7.3097  | 0.3936 | 0.5861  | 6.851  | CEU |
| FLJ20635  | GI_8923587-S  | rs6006986  | 22 | 22 | 44043790 | 13301  | 9.1811  | 0.5424 | -0.8885 | 6.851  | CEU |
| FLJ20635  | GI_8923587-S  | rs7285172  | 22 | 22 | 44046882 | 10209  | 8.5231  | 0.4482 | -0.5701 | 6.851  | CEU |
| FLJ20635  | GI_8923587-S  | rs2350629  | 22 | 22 | 44051587 | 5504   | 10.5796 | 0.5301 | -0.7437 | 6.851  | CEU |
| FLJ20635  | GI_8923587-S  | rs738177   | 22 | 22 | 44052076 | 5015   | 11.5697 | 0.5780 | -0.6813 | 6.851  | CEU |
| FLJ20635  | GI_8923587-S  | rs2205659  | 22 | 22 | 44052267 | 4824   | 7.2102  | 0.3889 | 0.5386  | 6.851  | CEU |
| FLJ20635  | GI_8923587-S  | rs2205660  | 22 | 22 | 44052268 | 4823   | 11.0610 | 0.5538 | 0.7332  | 6.851  | CEU |
| FLJ20635  | GI_8923587-S  | rs3827393  | 22 | 22 | 44056690 | 401    | 10.0283 | 0.5094 | 0.6635  | 6.851  | CEU |
| FLJ20635  | GI_8923587-S  | rs9614647  | 22 | 22 | 44062255 | 5164   | 10.0283 | 0.5094 | -0.6635 | 6.851  | CEU |
| FLJ20635  | GI_8923587-S  | rs6006992  | 22 | 22 | 44063297 | 6206   | 10.0283 | 0.5094 | -0.6635 | 6.851  | CEU |
| FLJ20635  | GI_8923587-S  | rs6519844  | 22 | 22 | 44064960 | 7869   | 10.0283 | 0.5094 | 0.6635  | 6.851  | CEU |
| FLJ20635  | GI_8923587-S  | rs5765271  | 22 | 22 | 44067363 | 10272  | 10.0283 | 0.5094 | 0.6635  | 6.851  | CEU |
| FLJ20635  | GI_8923587-S  | rs5765272  | 22 | 22 | 44068438 | 11347  | 10.0283 | 0.5094 | 0.6635  | 6.851  | CEU |
| FLJ20635  | GI_8923587-S  | rs5765276  | 22 | 22 | 44069399 | 12308  | 10.0283 | 0.5094 | 0.6635  | 6.851  | CEU |
| FLJ20635  | GI_8923587-S  | rs1569413  | 22 | 22 | 44076618 | 19527  | 10.0283 | 0.5094 | 0.6635  | 6.851  | CEU |
| FLJ20635  | GI_8923587-S  | rs136564   | 22 | 22 | 44085411 | 28320  | 10.0283 | 0.5094 | -0.6635 | 6.851  | CEU |
| FLJ20635  | GI_8923587-S  | rs470062   | 22 | 22 | 44087906 | 30815  | 10.0283 | 0.5094 | 0.6635  | 6.851  | CEU |
| FLJ20635  | GI_8923587-S  | rs5765304  | 22 | 22 | 44092511 | 35420  | 10.0283 | 0.5094 | -0.6635 | 6.851  | CEU |
| FLJ20635  | GI_8923587-S  | rs136584   | 22 | 22 | 44096750 | 39659  | 9.3124  | 0.4932 | -0.6240 | 6.851  | CEU |
| FLJ20635  | GI_8923587-S  | rs136604   | 22 | 22 | 44110280 | 53189  | 8.8525  | 0.4622 | -0.6434 | 6.851  | CEU |
| FLJ20635  | GI_8923587-S  | rs136606   | 22 | 22 | 44110511 | 53420  | 6.9026  | 0.3741 | -0.5918 | 6.851  | CEU |
| FLJ20635  | GI_8923587-S  | rs12162930 | 22 | 22 | 44114749 | 57658  | 10.0283 | 0.5094 | -0.6635 | 6.851  | CEU |
| FLJ20635  | GI_8923587-S  | rs136611   | 22 | 22 | 44114820 | 57729  | 10.0283 | 0.5094 | -0.6635 | 6.851  | CEU |
| FLJ20635  | GI_8923587-S  | rs5765327  | 22 | 22 | 44121463 | 64372  | 10.0283 | 0.5094 | 0.6635  | 6.851  | CEU |
| Hs.40696  | Hs.40696-S    | rs761906   | 22 | 22 | 45459178 | 19369  | 6.6898  | 0.3637 | -0.2338 | 5.7795 | CEU |
| LOC400933 | GI_42662518-S | rs763126   | 22 | 22 | 48309435 | 179971 | 11.6927 | 0.5693 | 0.2148  | 6.0938 | CEU |
| LOC400933 | GI_42662518-S | rs17182154 | 22 | 22 | 48311331 | 181867 | 13.8703 | 0.6704 | -0.2363 | 6.0938 | CEU |
| LOC400933 | GI_42662518-S | rs1476038  | 22 | 22 | 48312416 | 182952 | 8.6401  | 0.4837 | -0.1787 | 6.0938 | CEU |
| LOC400933 | GI_42662518-S | rs5769698  | 22 | 22 | 48318567 | 189103 | 11.1869 | 0.5647 | -0.2178 | 6.0938 | CEU |
| LOC400933 | GI_42662518-S | rs763127   | 22 | 22 | 48326939 | 197475 | 11.6927 | 0.5693 | -0.2148 | 6.0938 | CEU |
| LOC400933 | GI_42662518-S | rs135871   | 22 | 22 | 48329830 | 200366 | 7.1769  | 0.3926 | -0.1768 | 6.0938 | CEU |
| LOC400933 | GI_42662518-S | rs1018812  | 22 | 22 | 48330934 | 201470 | 11.6927 | 0.5693 | -0.2148 | 6.0938 | CEU |
| LOC400933 | GI_42662518-S | rs5769707  | 22 | 22 | 48334263 | 204799 | 14.7428 | 0.7301 | -0.2368 | 6.0938 | CEU |
| LOC400933 | GI_42662518-S | rs5770594  | 22 | 22 | 48339358 | 209894 | 14.6802 | 0.6595 | 0.2220  | 6.0938 | CEU |
| LOC400933 | GI_42662518-S | rs739248   | 22 | 22 | 48346066 | 216602 | 14.6802 | 0.6595 | 0.2220  | 6.0938 | CEU |
| LOC400933 | GI_42662518-S | rs9616329  | 22 | 22 | 48347175 | 217711 | 7.6734  | 0.4105 | 0.1806  | 6.0938 | CEU |
| LOC400933 | GI_42662518-S | rs5770604  | 22 | 22 | 48351533 | 222069 | 8.8579  | 0.4624 | 0.1883  | 6.0938 | CEU |
| LOC400933 | GI_42662518-S | rs4824070  | 22 | 22 | 48352382 | 222918 | 6.5064  | 0.3810 | 0.1744  | 6.0938 | CEU |
| LOC400933 | GI_42662518-S | rs2071904  | 22 | 22 | 48355338 | 225874 | 14.6802 | 0.6595 | 0.2220  | 6.0938 | CEU |
| LOC400933 | GI_42662518-S | rs739236   | 22 | 22 | 48362463 | 232999 | 7.6734  | 0.4105 | -0.1806 | 6.0938 | CEU |
| LOC400933 | GI_42662518-S | rs916360   | 22 | 22 | 48362833 | 233369 | 7.6734  | 0.4105 | 0.1806  | 6.0938 | CEU |
| LOC400933 | GI_42662518-S | rs1107514  | 22 | 22 | 48363244 | 233780 | 7.6734  | 0.4105 | -0.1806 | 6.0938 | CEU |
| LOC400933 | GI_42662518-S | rs8137111  | 22 | 22 | 48364611 | 235147 | 7.6734  | 0.4105 | 0.1806  | 6.0938 | CEU |
| LOC400933 | GI_42662518-S | rs8140095  | 22 | 22 | 48364656 | 235192 | 7.3746  | 0.4020 | -0.1844 | 6.0938 | CEU |
| LOC400933 | GI_42662518-S | rs8141219  | 22 | 22 | 48365407 | 235943 | 11.3488 | 0.5906 | -0.2229 | 6.0938 | CEU |
| LOC400933 | GI_42662518-S | rs8138399  | 22 | 22 | 48365685 | 236221 | 13.2320 | 0.6381 | -0.2153 | 6.0938 | CEU |

|           |               |            |    |    |          |        |         |        |         |        |     |
|-----------|---------------|------------|----|----|----------|--------|---------|--------|---------|--------|-----|
| LOC400933 | GI_42662518-S | rs9616333  | 22 | 22 | 48371708 | 242244 | 14.6802 | 0.6595 | 0.2220  | 6.0938 | CEU |
| LOC400933 | GI_42662518-S | rs9616714  | 22 | 22 | 48371720 | 242256 | 15.1491 | 0.7117 | 0.2396  | 6.0938 | CEU |
| LOC400933 | GI_42662518-S | rs5770622  | 22 | 22 | 48372409 | 242945 | 13.8060 | 0.6352 | 0.2159  | 6.0938 | CEU |
| LOC400933 | GI_42662518-S | rs739240   | 22 | 22 | 48373468 | 244004 | 7.6734  | 0.4105 | 0.1806  | 6.0938 | CEU |
| LOC400933 | GI_42662518-S | rs12485195 | 22 | 22 | 48374732 | 245268 | 16.2872 | 0.7599 | 0.2385  | 6.0938 | CEU |
| LOC400933 | GI_42662518-S | rs739243   | 22 | 22 | 48378072 | 248608 | 12.2115 | 0.5865 | -0.2057 | 6.0938 | CEU |
| LOC400933 | GI_42662518-S | rs7286706  | 22 | 22 | 48379207 | 249743 | 12.6780 | 0.6014 | 0.2064  | 6.0938 | CEU |
| LOC400933 | GI_42662518-S | rs6009810  | 22 | 22 | 48380401 | 250937 | 7.7797  | 0.4153 | -0.1867 | 6.0938 | CEU |
| LOC400933 | GI_42662518-S | rs739244   | 22 | 22 | 48381019 | 251555 | 7.3130  | 0.4046 | -0.1834 | 6.0938 | CEU |
| LOC400933 | GI_42662518-S | rs5770633  | 22 | 22 | 48383288 | 253824 | 7.7797  | 0.4153 | 0.1867  | 6.0938 | CEU |
| ARSA      | GI_7262293-S  | rs8142033  | 22 | 22 | 49352976 | 955    | 5.7700  | 0.3216 | 0.2865  | 5.356  | CEU |
| LOC388918 | GI_42662524-S | rs5741862  | 22 | 22 | 49353377 | 73493  | 9.4494  | 0.4927 | 0.4649  | 7.474  | CEU |
| ARSA      | GI_7262293-S  | rs6151429  | 22 | 22 | 49353621 | 310    | 5.8865  | 0.3231 | -0.2867 | 5.356  | CEU |
| ARSA      | GI_7262293-S  | rs2071421  | 22 | 22 | 49354560 | 629    | 5.4006  | 0.2973 | -0.2520 | 5.356  | CEU |
| UTS2      | GI_12056478-I | rs664689   | 1  | 1  | 7904358  | 56627  | 9.2837  | 0.5870 | 1.6215  | 6.6626 | CHB |
| UTS2      | GI_12056480-A | rs664689   | 1  | 1  | 7904358  | 59177  | 9.0423  | 0.5764 | 1.4559  | 6.6626 | CHB |
| UTS2      | GI_12056480-I | rs664689   | 1  | 1  | 7904358  | 57031  | 7.6887  | 0.5115 | 0.4024  | 6.6626 | CHB |
| UTS2      | GI_12056478-I | rs161803   | 1  | 1  | 7910055  | 62324  | 9.2275  | 0.5846 | -1.4923 | 6.6626 | CHB |
| UTS2      | GI_12056480-A | rs161803   | 1  | 1  | 7910055  | 64874  | 9.0002  | 0.5745 | -1.3405 | 6.6626 | CHB |
| UTS2      | GI_12056480-I | rs161803   | 1  | 1  | 7910055  | 62728  | 9.7910  | 0.6086 | -0.4034 | 6.6626 | CHB |
| UTS2      | GI_12056478-I | rs161826   | 1  | 1  | 7914604  | 66873  | 9.1407  | 0.5894 | 1.5195  | 6.6626 | CHB |
| UTS2      | GI_12056480-A | rs161826   | 1  | 1  | 7914604  | 69423  | 9.0009  | 0.5832 | 1.3706  | 6.6626 | CHB |
| UTS2      | GI_12056480-I | rs161826   | 1  | 1  | 7914604  | 67277  | 10.2159 | 0.6345 | 0.4180  | 6.6626 | CHB |
| UTS2      | GI_12056478-I | rs161827   | 1  | 1  | 7916300  | 68569  | 9.2275  | 0.5846 | -1.4923 | 6.6626 | CHB |
| UTS2      | GI_12056480-A | rs161827   | 1  | 1  | 7916300  | 71119  | 9.0002  | 0.5745 | -1.3405 | 6.6626 | CHB |
| UTS2      | GI_12056480-I | rs161827   | 1  | 1  | 7916300  | 68973  | 9.7910  | 0.6086 | -0.4034 | 6.6626 | CHB |
| UTS2      | GI_12056478-I | rs161818   | 1  | 1  | 7921818  | 74087  | 9.2275  | 0.5846 | 1.4923  | 6.6626 | CHB |
| UTS2      | GI_12056480-A | rs161818   | 1  | 1  | 7921818  | 76637  | 9.0002  | 0.5745 | 1.3405  | 6.6626 | CHB |
| UTS2      | GI_12056480-I | rs161818   | 1  | 1  | 7921818  | 74491  | 9.7910  | 0.6086 | 0.4034  | 6.6626 | CHB |
| UTS2      | GI_12056478-I | rs161822   | 1  | 1  | 7923405  | 75674  | 9.2275  | 0.5846 | 1.4923  | 6.6626 | CHB |
| UTS2      | GI_12056480-A | rs161822   | 1  | 1  | 7923405  | 78224  | 9.0002  | 0.5745 | 1.3405  | 6.6626 | CHB |
| UTS2      | GI_12056480-I | rs161822   | 1  | 1  | 7923405  | 76078  | 9.7910  | 0.6086 | 0.4034  | 6.6626 | CHB |
| UTS2      | GI_12056478-I | rs863171   | 1  | 1  | 7926881  | 79150  | 7.9245  | 0.5234 | -1.4237 | 6.6626 | CHB |
| UTS2      | GI_12056480-A | rs863171   | 1  | 1  | 7926881  | 81700  | 7.6776  | 0.5109 | -1.2748 | 6.6626 | CHB |
| UTS2      | GI_12056480-I | rs863171   | 1  | 1  | 7926881  | 79554  | 7.1639  | 0.4838 | -0.3635 | 6.6626 | CHB |
| UTS2      | GI_12056478-I | rs161811   | 1  | 1  | 7933868  | 86137  | 9.2275  | 0.5846 | -1.4923 | 6.6626 | CHB |
| UTS2      | GI_12056480-A | rs161811   | 1  | 1  | 7933868  | 88687  | 9.0002  | 0.5745 | -1.3405 | 6.6626 | CHB |
| UTS2      | GI_12056480-I | rs161811   | 1  | 1  | 7933868  | 86541  | 9.7910  | 0.6086 | -0.4034 | 6.6626 | CHB |
| UTS2      | GI_12056478-I | rs161810   | 1  | 1  | 7935063  | 87332  | 9.2775  | 0.5868 | 1.4527  | 6.6626 | CHB |
| UTS2      | GI_12056480-A | rs161810   | 1  | 1  | 7935063  | 89882  | 9.0866  | 0.5783 | 1.3068  | 6.6626 | CHB |
| UTS2      | GI_12056480-I | rs161810   | 1  | 1  | 7935063  | 87736  | 9.6809  | 0.6040 | 0.3905  | 6.6626 | CHB |
| UTS2      | GI_12056478-I | rs150914   | 1  | 1  | 7949702  | 101971 | 6.6673  | 0.4563 | 1.4612  | 6.6626 | CHB |
| UTS2      | GI_12056480-I | rs150914   | 1  | 1  | 7949702  | 102375 | 8.0272  | 0.5286 | 0.4156  | 6.6626 | CHB |
| UTS2      | GI_12056480-I | rs406809   | 1  | 1  | 7964681  | 117354 | 7.8616  | 0.5203 | 0.3997  | 6.6626 | CHB |
| UTS2      | GI_12056480-I | rs161808   | 1  | 1  | 7969980  | 122653 | 7.6986  | 0.5120 | 0.4093  | 6.6626 | CHB |
| UTS2      | GI_12056480-I | rs225121   | 1  | 1  | 7980813  | 133486 | 7.6986  | 0.5120 | 0.4093  | 6.6626 | CHB |
| UTS2      | GI_12056480-I | rs9434576  | 1  | 1  | 7987316  | 139989 | 7.4735  | 0.5003 | -0.4123 | 6.6626 | CHB |
| UTS2      | GI_12056480-I | rs424436   | 1  | 1  | 8016944  | 169617 | 7.2637  | 0.4892 | -0.3939 | 6.6626 | CHB |
| UTS2      | GI_12056480-I | rs448472   | 1  | 1  | 8017136  | 169809 | 7.2637  | 0.4892 | -0.3939 | 6.6626 | CHB |
| LZIC      | GI_40255081-S | rs11828    | 1  | 1  | 9921273  | 3269   | 7.7759  | 0.5159 | 0.4249  | 5.6221 | CHB |
| LZIC      | GI_40255081-S | rs1220398  | 1  | 1  | 9928605  | 4063   | 6.4616  | 0.4445 | -0.3983 | 5.6221 | CHB |
| LZIC      | GI_40255081-S | rs1234694  | 1  | 1  | 9937586  | 13044  | 7.7759  | 0.5159 | 0.4249  | 5.6221 | CHB |
| LZIC      | GI_40255081-S | rs1220421  | 1  | 1  | 9942487  | 17945  | 7.7759  | 0.5159 | -0.4249 | 5.6221 | CHB |
| LZIC      | GI_40255081-S | rs1660733  | 1  | 1  | 9945337  | 20795  | 7.7759  | 0.5159 | 0.4249  | 5.6221 | CHB |
| LZIC      | GI_40255081-S | rs2890358  | 1  | 1  | 9961806  | 37264  | 7.7759  | 0.5159 | 0.4249  | 5.6221 | CHB |
| LZIC      | GI_40255081-S | rs6661806  | 1  | 1  | 9971734  | 47192  | 7.7759  | 0.5159 | -0.4249 | 5.6221 | CHB |
| LZIC      | GI_40255081-S | rs12140058 | 1  | 1  | 9983443  | 58901  | 6.2458  | 0.4318 | 0.3783  | 5.6221 | CHB |
| Hs.211939 | Hs.211939-S   | rs2480781  | 1  | 1  | 10527807 | 44697  | 6.1045  | 0.4234 | 0.1223  | 5.5765 | CHB |
| Hs.211939 | Hs.211939-S   | rs2480775  | 1  | 1  | 10541262 | 31242  | 6.1045  | 0.4234 | -0.1223 | 5.5765 | CHB |

|           |               |            |   |   |          |        |         |        |         |        |     |
|-----------|---------------|------------|---|---|----------|--------|---------|--------|---------|--------|-----|
| Hs.211939 | Hs.211939-S   | rs710130   | 1 | 1 | 10541660 | 30844  | 6.1045  | 0.4234 | -0.1223 | 5.5765 | CHB |
| Hs.211939 | Hs.211939-S   | rs944191   | 1 | 1 | 10541717 | 30787  | 5.9769  | 0.4560 | -0.1296 | 5.5765 | CHB |
| Hs.211939 | Hs.211939-S   | rs4846230  | 1 | 1 | 10542862 | 29642  | 6.1045  | 0.4234 | -0.1223 | 5.5765 | CHB |
| Hs.211939 | Hs.211939-S   | rs2480773  | 1 | 1 | 10543356 | 29148  | 6.1045  | 0.4234 | -0.1223 | 5.5765 | CHB |
| Hs.211939 | Hs.211939-S   | rs12128630 | 1 | 1 | 10543661 | 28843  | 6.1045  | 0.4234 | -0.1223 | 5.5765 | CHB |
| Hs.211939 | Hs.211939-S   | rs2480772  | 1 | 1 | 10543726 | 28778  | 6.0044  | 0.4249 | -0.1240 | 5.5765 | CHB |
| Hs.211939 | Hs.211939-S   | rs4846231  | 1 | 1 | 10546902 | 25602  | 6.1045  | 0.4234 | 0.1223  | 5.5765 | CHB |
| Hs.211939 | Hs.211939-S   | rs4846232  | 1 | 1 | 10547076 | 25428  | 6.1045  | 0.4234 | -0.1223 | 5.5765 | CHB |
| Hs.211939 | Hs.211939-S   | rs10157111 | 1 | 1 | 10547610 | 24894  | 6.1045  | 0.4234 | 0.1223  | 5.5765 | CHB |
| Hs.211939 | Hs.211939-S   | rs10779739 | 1 | 1 | 10549455 | 23049  | 6.1045  | 0.4234 | -0.1223 | 5.5765 | CHB |
| Hs.211939 | Hs.211939-S   | rs4240915  | 1 | 1 | 10550750 | 21754  | 5.9299  | 0.4203 | 0.1231  | 5.5765 | CHB |
| Hs.211939 | Hs.211939-S   | rs9660006  | 1 | 1 | 10551538 | 20966  | 6.1045  | 0.4234 | 0.1223  | 5.5765 | CHB |
| Hs.211939 | Hs.211939-S   | rs6663688  | 1 | 1 | 10558581 | 13923  | 6.1045  | 0.4234 | 0.1223  | 5.5765 | CHB |
| Hs.211939 | Hs.211939-S   | rs12565494 | 1 | 1 | 10563828 | 8676   | 5.7293  | 0.4077 | -0.1185 | 5.5765 | CHB |
| Hs.211939 | Hs.211939-S   | rs6687502  | 1 | 1 | 10567539 | 4965   | 6.1045  | 0.4234 | -0.1223 | 5.5765 | CHB |
| Hs.211939 | Hs.211939-S   | rs6540938  | 1 | 1 | 10570725 | 1779   | 6.0729  | 0.4215 | -0.1236 | 5.5765 | CHB |
| Hs.211939 | Hs.211939-S   | rs2086650  | 1 | 1 | 10574704 | 2200   | 6.1045  | 0.4234 | 0.1223  | 5.5765 | CHB |
| Hs.211939 | Hs.211939-S   | rs747124   | 1 | 1 | 10575199 | 2695   | 6.1045  | 0.4234 | -0.1223 | 5.5765 | CHB |
| ARHGEF19  | GI_40255148-S | rs221035   | 1 | 1 | 16271835 | 1740   | 6.7311  | 0.4599 | 0.1872  | 5.6263 | CHB |
| PHC2      | GI_37595529-A | rs4653017  | 1 | 1 | 33445821 | 12751  | 9.5516  | 0.5985 | 0.3102  | 5.5696 | CHB |
| PHC2      | GI_37595529-A | rs6682438  | 1 | 1 | 33453239 | 5333   | 8.8789  | 0.6050 | -0.3088 | 5.5696 | CHB |
| PHC2      | GI_37595529-A | rs4652839  | 1 | 1 | 33454022 | 4550   | 10.2731 | 0.6280 | 0.3158  | 5.5696 | CHB |
| PHC2      | GI_37595529-A | rs5861     | 1 | 1 | 33458613 | 41     | 10.2731 | 0.6280 | -0.3158 | 5.5696 | CHB |
| PHC2      | GI_37595529-A | rs10914684 | 1 | 1 | 33464665 | 6093   | 9.2103  | 0.6014 | 0.3109  | 5.5696 | CHB |
| PHC2      | GI_37595529-A | rs10914685 | 1 | 1 | 33464683 | 6111   | 10.2731 | 0.6280 | -0.3158 | 5.5696 | CHB |
| PHC2      | GI_37595529-A | rs7513015  | 1 | 1 | 33468357 | 9785   | 10.2731 | 0.6280 | 0.3158  | 5.5696 | CHB |
| PHC2      | GI_37595529-A | rs10798939 | 1 | 1 | 33478530 | 19958  | 10.5943 | 0.6405 | -0.3167 | 5.5696 | CHB |
| PHC2      | GI_37595529-A | rs4652856  | 1 | 1 | 33487507 | 28935  | 7.6722  | 0.5106 | 0.2848  | 5.5696 | CHB |
| PHC2      | GI_37595529-A | rs4233199  | 1 | 1 | 33488655 | 30083  | 7.5670  | 0.5052 | 0.2354  | 5.5696 | CHB |
| PHC2      | GI_37595529-A | rs4653081  | 1 | 1 | 33488923 | 30351  | 7.6722  | 0.5106 | 0.2848  | 5.5696 | CHB |
| PHC2      | GI_37595529-A | rs6678247  | 1 | 1 | 33492362 | 33790  | 7.6722  | 0.5106 | -0.2848 | 5.5696 | CHB |
| PHC2      | GI_37595529-A | rs6680310  | 1 | 1 | 33497352 | 38780  | 7.6722  | 0.5106 | 0.2848  | 5.5696 | CHB |
| PHC2      | GI_37595529-A | rs4653095  | 1 | 1 | 33497927 | 39355  | 7.6722  | 0.5106 | 0.2848  | 5.5696 | CHB |
| PHC2      | GI_37595529-A | rs6675264  | 1 | 1 | 33500927 | 42355  | 7.6722  | 0.5106 | 0.2848  | 5.5696 | CHB |
| PHC2      | GI_37595529-A | rs7545416  | 1 | 1 | 33505889 | 47317  | 7.6722  | 0.5106 | 0.2848  | 5.5696 | CHB |
| PHC2      | GI_37595529-A | rs4233201  | 1 | 1 | 33511146 | 52574  | 7.6722  | 0.5106 | -0.2848 | 5.5696 | CHB |
| PHC2      | GI_37595529-A | rs4652870  | 1 | 1 | 33516833 | 58261  | 7.4274  | 0.4979 | -0.2807 | 5.5696 | CHB |
| PHC2      | GI_37595529-A | rs942485   | 1 | 1 | 33524916 | 66344  | 7.4274  | 0.4979 | 0.2807  | 5.5696 | CHB |
| PHC2      | GI_37595529-A | rs2763038  | 1 | 1 | 33527053 | 68481  | 7.1167  | 0.4894 | -0.2774 | 5.5696 | CHB |
| PHC2      | GI_37595529-A | rs10798945 | 1 | 1 | 33527966 | 69394  | 7.4274  | 0.4979 | 0.2807  | 5.5696 | CHB |
| PHC2      | GI_37595529-A | rs2247959  | 1 | 1 | 33528832 | 70260  | 6.8916  | 0.4852 | 0.2761  | 5.5696 | CHB |
| PHC2      | GI_37595529-A | rs4652871  | 1 | 1 | 33531610 | 73038  | 7.4274  | 0.4979 | 0.2807  | 5.5696 | CHB |
| PHC2      | GI_37595529-A | rs4298699  | 1 | 1 | 33535327 | 76755  | 7.4274  | 0.4979 | 0.2807  | 5.5696 | CHB |
| PHC2      | GI_37595529-A | rs4652874  | 1 | 1 | 33537367 | 78795  | 7.1372  | 0.5454 | 0.2847  | 5.5696 | CHB |
| PHC2      | GI_37595529-A | rs4653125  | 1 | 1 | 33539665 | 81093  | 7.4274  | 0.4979 | -0.2807 | 5.5696 | CHB |
| PHC2      | GI_37595529-A | rs6675663  | 1 | 1 | 33546784 | 88212  | 7.3823  | 0.5038 | 0.2841  | 5.5696 | CHB |
| PHC2      | GI_37595529-A | rs6677391  | 1 | 1 | 33551761 | 93189  | 7.2463  | 0.4965 | -0.2697 | 5.5696 | CHB |
| PHC2      | GI_37595529-A | rs10753283 | 1 | 1 | 33552336 | 93764  | 7.4274  | 0.4979 | 0.2807  | 5.5696 | CHB |
| PHC2      | GI_37595529-A | rs4652880  | 1 | 1 | 33553918 | 95346  | 7.4274  | 0.4979 | 0.2807  | 5.5696 | CHB |
| PHC2      | GI_37595529-A | rs1324480  | 1 | 1 | 33556853 | 98281  | 7.1305  | 0.4820 | 0.3149  | 5.5696 | CHB |
| PHC2      | GI_37595529-A | rs1998624  | 1 | 1 | 33560242 | 101670 | 7.4274  | 0.4979 | 0.2807  | 5.5696 | CHB |
| PHC2      | GI_37595529-A | rs1324476  | 1 | 1 | 33566337 | 107765 | 7.4274  | 0.4979 | -0.2807 | 5.5696 | CHB |
| PHC2      | GI_37595529-A | rs10798949 | 1 | 1 | 33576272 | 117700 | 6.0915  | 0.4462 | -0.2760 | 5.5696 | CHB |
| NOR1      | GI_45643130-I | rs16822818 | 1 | 1 | 36542342 | 20761  | 6.3673  | 0.4467 | -0.3175 | 6.342  | CHB |
| NOR1      | GI_45643130-I | rs10493072 | 1 | 1 | 36551294 | 11809  | 7.4431  | 0.4987 | 0.3492  | 6.342  | CHB |
| NOR1      | GI_45643130-I | rs3738835  | 1 | 1 | 36553791 | 9312   | 8.8976  | 0.5699 | -0.3558 | 6.342  | CHB |
| NOR1      | GI_45643130-I | rs3738836  | 1 | 1 | 36554101 | 9002   | 8.8976  | 0.5699 | -0.3558 | 6.342  | CHB |
| NOR1      | GI_45643130-I | rs2282354  | 1 | 1 | 36556624 | 6479   | 8.8976  | 0.5699 | 0.3558  | 6.342  | CHB |
| NOR1      | GI_45643130-I | rs16822947 | 1 | 1 | 36557358 | 5745   | 8.8976  | 0.5699 | 0.3558  | 6.342  | CHB |

|           |               |            |   |   |          |        |        |        |         |        |     |
|-----------|---------------|------------|---|---|----------|--------|--------|--------|---------|--------|-----|
| NOR1      | GI_45643130-I | rs1416840  | 1 | 1 | 36557555 | 5548   | 8.8976 | 0.5699 | 0.3558  | 6.342  | CHB |
| NOR1      | GI_45643130-I | rs16822954 | 1 | 1 | 36558098 | 5005   | 7.1404 | 0.5168 | -0.3564 | 6.342  | CHB |
| NOR1      | GI_45643130-I | rs16822960 | 1 | 1 | 36559173 | 3930   | 8.8976 | 0.5699 | -0.3558 | 6.342  | CHB |
| NOR1      | GI_45643130-I | rs1819661  | 1 | 1 | 36560128 | 2975   | 8.7510 | 0.5718 | -0.3595 | 6.342  | CHB |
| NOR1      | GI_45643130-I | rs946680   | 1 | 1 | 36566270 | 3167   | 8.8976 | 0.5699 | 0.3558  | 6.342  | CHB |
| NOR1      | GI_45643130-I | rs2282357  | 1 | 1 | 36566946 | 3843   | 8.8976 | 0.5699 | -0.3558 | 6.342  | CHB |
| NOR1      | GI_45643130-I | rs16822988 | 1 | 1 | 36575879 | 12776  | 8.9199 | 0.5795 | -0.3598 | 6.342  | CHB |
| NOR1      | GI_45643130-I | rs946681   | 1 | 1 | 36577255 | 14152  | 8.8976 | 0.5699 | 0.3558  | 6.342  | CHB |
| NOR1      | GI_45643130-I | rs3795495  | 1 | 1 | 36578660 | 15557  | 7.8149 | 0.5263 | 0.3361  | 6.342  | CHB |
| NOR1      | GI_45643130-I | rs1416841  | 1 | 1 | 36583203 | 20100  | 8.8976 | 0.5699 | -0.3558 | 6.342  | CHB |
| NOR1      | GI_45643130-I | rs10493075 | 1 | 1 | 36583635 | 20532  | 8.8976 | 0.5699 | 0.3558  | 6.342  | CHB |
| NOR1      | GI_45643130-I | rs10493076 | 1 | 1 | 36583840 | 20737  | 8.8976 | 0.5699 | -0.3558 | 6.342  | CHB |
| NOR1      | GI_45643130-I | rs16823020 | 1 | 1 | 36584033 | 20930  | 6.4523 | 0.4517 | -0.3280 | 6.342  | CHB |
| NOR1      | GI_45643130-I | rs10493077 | 1 | 1 | 36584107 | 21004  | 8.8976 | 0.5699 | -0.3558 | 6.342  | CHB |
| NOR1      | GI_45643130-I | rs16823025 | 1 | 1 | 36584198 | 21095  | 7.5743 | 0.5056 | -0.3498 | 6.342  | CHB |
| NOR1      | GI_45643130-I | rs883694   | 1 | 1 | 36589540 | 26437  | 7.8149 | 0.5263 | 0.3361  | 6.342  | CHB |
| NOR1      | GI_45643130-I | rs2275479  | 1 | 1 | 36590320 | 27217  | 8.8976 | 0.5699 | 0.3558  | 6.342  | CHB |
| NOR1      | GI_45643130-I | rs2275480  | 1 | 1 | 36590626 | 27523  | 7.1315 | 0.5163 | 0.3343  | 6.342  | CHB |
| NOR1      | GI_45643130-I | rs3738838  | 1 | 1 | 36595502 | 32399  | 8.8976 | 0.5699 | -0.3558 | 6.342  | CHB |
| NOR1      | GI_45643130-I | rs2275476  | 1 | 1 | 36595946 | 32843  | 6.7383 | 0.5029 | 0.3318  | 6.342  | CHB |
| NOR1      | GI_45643130-I | rs2275475  | 1 | 1 | 36596039 | 32936  | 8.8976 | 0.5699 | 0.3558  | 6.342  | CHB |
| NOR1      | GI_45643130-I | rs3806288  | 1 | 1 | 36599189 | 36086  | 7.0885 | 0.5634 | 0.3522  | 6.342  | CHB |
| NOR1      | GI_45643130-I | rs3806287  | 1 | 1 | 36599279 | 36176  | 8.8785 | 0.5776 | -0.3487 | 6.342  | CHB |
| NDUFS5    | GI_4758789-S  | rs4147750  | 1 | 1 | 39143150 | 17986  | 5.7344 | 0.4403 | 0.2430  | 5.5998 | CHB |
| NDUFS5    | GI_4758789-S  | rs7538228  | 1 | 1 | 39146728 | 14408  | 6.4121 | 0.4416 | 0.2415  | 5.5998 | CHB |
| NDUFS5    | GI_4758789-S  | rs2147594  | 1 | 1 | 39148759 | 12377  | 6.9450 | 0.4882 | 0.2628  | 5.5998 | CHB |
| NDUFS5    | GI_4758789-S  | rs1555745  | 1 | 1 | 39152222 | 8914   | 6.4121 | 0.4416 | -0.2415 | 5.5998 | CHB |
| NDUFS5    | GI_4758789-S  | rs1974041  | 1 | 1 | 39152530 | 8606   | 6.4121 | 0.4416 | -0.2415 | 5.5998 | CHB |
| NDUFS5    | GI_4758789-S  | rs3768324  | 1 | 1 | 39161555 | 419    | 6.5602 | 0.4502 | 0.2825  | 5.5998 | CHB |
| NDUFS5    | GI_4758789-S  | rs1555741  | 1 | 1 | 39162214 | 1078   | 6.4121 | 0.4416 | -0.2415 | 5.5998 | CHB |
| NDUFS5    | GI_4758789-S  | rs6663155  | 1 | 1 | 39167584 | 6448   | 6.4121 | 0.4416 | 0.2415  | 5.5998 | CHB |
| NDUFS5    | GI_4758789-S  | rs7554809  | 1 | 1 | 39172971 | 11835  | 6.4121 | 0.4416 | 0.2415  | 5.5998 | CHB |
| NDUFS5    | GI_4758789-S  | rs4660993  | 1 | 1 | 39174711 | 13575  | 6.4121 | 0.4416 | -0.2415 | 5.5998 | CHB |
| NDUFS5    | GI_4758789-S  | rs11205599 | 1 | 1 | 39175234 | 14098  | 6.5602 | 0.4502 | -0.2825 | 5.5998 | CHB |
| NDUFS5    | GI_4758789-S  | rs10888650 | 1 | 1 | 39176254 | 15118  | 6.5602 | 0.4502 | -0.2825 | 5.5998 | CHB |
| NDUFS5    | GI_4758789-S  | rs10888651 | 1 | 1 | 39176284 | 15148  | 6.4121 | 0.4416 | -0.2415 | 5.5998 | CHB |
| NDUFS5    | GI_4758789-S  | rs4661002  | 1 | 1 | 39177384 | 16248  | 5.6661 | 0.4192 | 0.2392  | 5.5998 | CHB |
| NDUFS5    | GI_4758789-S  | rs10749684 | 1 | 1 | 39181483 | 20347  | 6.4121 | 0.4416 | -0.2415 | 5.5998 | CHB |
| NDUFS5    | GI_4758789-S  | rs12032116 | 1 | 1 | 39189402 | 28266  | 6.5602 | 0.4502 | 0.2825  | 5.5998 | CHB |
| NDUFS5    | GI_4758789-S  | rs7535221  | 1 | 1 | 39195683 | 34547  | 6.4121 | 0.4416 | 0.2415  | 5.5998 | CHB |
| NDUFS5    | GI_4758789-S  | rs10888656 | 1 | 1 | 39195758 | 34622  | 6.6285 | 0.4620 | 0.2437  | 5.5998 | CHB |
| NDUFS5    | GI_4758789-S  | rs9786967  | 1 | 1 | 39197164 | 36028  | 6.2711 | 0.4410 | 0.2415  | 5.5998 | CHB |
| NDUFS5    | GI_4758789-S  | rs10788909 | 1 | 1 | 39197177 | 36041  | 6.4121 | 0.4416 | 0.2415  | 5.5998 | CHB |
| NDUFS5    | GI_4758789-S  | rs6600284  | 1 | 1 | 39198351 | 37215  | 6.4121 | 0.4416 | 0.2415  | 5.5998 | CHB |
| NDUFS5    | GI_4758789-S  | rs6600285  | 1 | 1 | 39200004 | 38868  | 6.4121 | 0.4416 | 0.2415  | 5.5998 | CHB |
| NDUFS5    | GI_4758789-S  | rs11205622 | 1 | 1 | 39202494 | 41358  | 7.3004 | 0.4912 | -0.2412 | 5.5998 | CHB |
| Hs.396207 | Hs.396207-S   | rs2153609  | 1 | 1 | 45483151 | 289843 | 5.7164 | 0.4069 | 0.1854  | 5.6306 | CHB |
| Hs.396207 | Hs.396207-S   | rs2185549  | 1 | 1 | 45483196 | 289798 | 6.0000 | 0.4171 | -0.1862 | 5.6306 | CHB |
| Hs.396207 | Hs.396207-S   | rs4660849  | 1 | 1 | 45488965 | 284029 | 6.0000 | 0.4171 | -0.1862 | 5.6306 | CHB |
| Hs.396207 | Hs.396207-S   | rs9429160  | 1 | 1 | 45497061 | 275933 | 6.0000 | 0.4171 | 0.1862  | 5.6306 | CHB |
| Hs.396207 | Hs.396207-S   | rs9326141  | 1 | 1 | 45498036 | 274958 | 6.0000 | 0.4171 | -0.1862 | 5.6306 | CHB |
| Hs.396207 | Hs.396207-S   | rs4660852  | 1 | 1 | 45518024 | 254970 | 6.0000 | 0.4171 | 0.1862  | 5.6306 | CHB |
| Hs.396207 | Hs.396207-S   | rs11211101 | 1 | 1 | 45518404 | 254590 | 6.0000 | 0.4171 | -0.1862 | 5.6306 | CHB |
| Hs.396207 | Hs.396207-S   | rs6657284  | 1 | 1 | 45548181 | 224813 | 6.5276 | 0.4483 | -0.1901 | 5.6306 | CHB |
| Hs.396207 | Hs.396207-S   | rs1826691  | 1 | 1 | 45550355 | 222639 | 6.5276 | 0.4483 | -0.1901 | 5.6306 | CHB |
| Hs.396207 | Hs.396207-S   | rs3790582  | 1 | 1 | 45556381 | 216613 | 6.5276 | 0.4483 | -0.1901 | 5.6306 | CHB |
| Hs.396207 | Hs.396207-S   | rs12139364 | 1 | 1 | 45559248 | 213746 | 6.9525 | 0.4723 | 0.2033  | 5.6306 | CHB |
| Hs.396207 | Hs.396207-S   | rs7531253  | 1 | 1 | 45559276 | 213718 | 6.2306 | 0.4386 | -0.1892 | 5.6306 | CHB |
| Hs.396207 | Hs.396207-S   | rs1006216  | 1 | 1 | 45579087 | 193907 | 6.5276 | 0.4483 | 0.1901  | 5.6306 | CHB |

|           |              |            |   |   |          |        |         |        |         |        |     |
|-----------|--------------|------------|---|---|----------|--------|---------|--------|---------|--------|-----|
| Hs.396207 | Hs.396207-S  | rs998199   | 1 | 1 | 45581991 | 191003 | 7.1472  | 0.4829 | 0.2007  | 5.6306 | CHB |
| Hs.396207 | Hs.396207-S  | rs7532573  | 1 | 1 | 45584985 | 188009 | 6.9525  | 0.4723 | 0.2033  | 5.6306 | CHB |
| Hs.396207 | Hs.396207-S  | rs10890330 | 1 | 1 | 45589499 | 183495 | 6.5276  | 0.4483 | -0.1901 | 5.6306 | CHB |
| Hs.396207 | Hs.396207-S  | rs2055145  | 1 | 1 | 45595588 | 177406 | 6.5276  | 0.4483 | 0.1901  | 5.6306 | CHB |
| Hs.396207 | Hs.396207-S  | rs10789463 | 1 | 1 | 45596941 | 176053 | 9.7332  | 0.6062 | -0.2203 | 5.6306 | CHB |
| Hs.396207 | Hs.396207-S  | rs12738318 | 1 | 1 | 45598682 | 174312 | 6.9525  | 0.4723 | -0.2033 | 5.6306 | CHB |
| Hs.396207 | Hs.396207-S  | rs781058   | 1 | 1 | 45604149 | 168845 | 6.9525  | 0.4723 | 0.2033  | 5.6306 | CHB |
| Hs.396207 | Hs.396207-S  | rs4660858  | 1 | 1 | 45605444 | 167550 | 6.2506  | 0.4477 | -0.1879 | 5.6306 | CHB |
| Hs.396207 | Hs.396207-S  | rs12743512 | 1 | 1 | 45623126 | 149868 | 6.6585  | 0.4637 | 0.2052  | 5.6306 | CHB |
| Hs.396207 | Hs.396207-S  | rs937291   | 1 | 1 | 45626132 | 146862 | 6.7933  | 0.4970 | -0.2047 | 5.6306 | CHB |
| Hs.396207 | Hs.396207-S  | rs12029322 | 1 | 1 | 45639539 | 133455 | 6.4528  | 0.4440 | 0.2036  | 5.6306 | CHB |
| Hs.396207 | Hs.396207-S  | rs10789465 | 1 | 1 | 45640852 | 132142 | 6.9525  | 0.4723 | 0.2033  | 5.6306 | CHB |
| Hs.396207 | Hs.396207-S  | rs2275276  | 1 | 1 | 45643021 | 129973 | 6.9525  | 0.4723 | 0.2033  | 5.6306 | CHB |
| Hs.396207 | Hs.396207-S  | rs7903     | 1 | 1 | 45645565 | 127429 | 7.2012  | 0.4858 | 0.2012  | 5.6306 | CHB |
| Hs.396207 | Hs.396207-S  | rs713358   | 1 | 1 | 45657360 | 115634 | 6.9267  | 0.4708 | 0.2070  | 5.6306 | CHB |
| Hs.396207 | Hs.396207-S  | rs868351   | 1 | 1 | 45678911 | 94083  | 6.5952  | 0.4601 | -0.2118 | 5.6306 | CHB |
| Hs.396207 | Hs.396207-S  | rs512026   | 1 | 1 | 45679039 | 93955  | 7.2012  | 0.4858 | -0.2012 | 5.6306 | CHB |
| Hs.396207 | Hs.396207-S  | rs622798   | 1 | 1 | 45684364 | 88630  | 9.2728  | 0.5865 | 0.2129  | 5.6306 | CHB |
| IPP       | GI_5174472-S | rs666720   | 1 | 1 | 45689888 | 143947 | 5.7273  | 0.4003 | 0.2060  | 5.7199 | CHB |
| Hs.396207 | Hs.396207-S  | rs666720   | 1 | 1 | 45689888 | 83106  | 12.4464 | 0.7046 | -0.2223 | 5.6306 | CHB |
| Hs.396207 | Hs.396207-S  | rs12049503 | 1 | 1 | 45690649 | 82345  | 8.2571  | 0.5398 | -0.1929 | 5.6306 | CHB |
| Hs.396207 | Hs.396207-S  | rs2993263  | 1 | 1 | 45690723 | 82271  | 9.2728  | 0.5865 | -0.2129 | 5.6306 | CHB |
| Hs.396207 | Hs.396207-S  | rs3790585  | 1 | 1 | 45692449 | 80545  | 14.4117 | 0.7602 | 0.2306  | 5.6306 | CHB |
| Hs.396207 | Hs.396207-S  | rs3014219  | 1 | 1 | 45693547 | 79447  | 9.4659  | 0.5949 | -0.2127 | 5.6306 | CHB |
| Hs.396207 | Hs.396207-S  | rs2991975  | 1 | 1 | 45693619 | 79375  | 6.2169  | 0.4624 | -0.1823 | 5.6306 | CHB |
| Hs.396207 | Hs.396207-S  | rs3014218  | 1 | 1 | 45695421 | 77573  | 9.4659  | 0.5949 | 0.2127  | 5.6306 | CHB |
| Hs.396207 | Hs.396207-S  | rs3014216  | 1 | 1 | 45704853 | 68141  | 10.8472 | 0.6676 | 0.2239  | 5.6306 | CHB |
| Hs.396207 | Hs.396207-S  | rs780957   | 1 | 1 | 45706450 | 66544  | 10.6332 | 0.6877 | 0.2145  | 5.6306 | CHB |
| Hs.396207 | Hs.396207-S  | rs780954   | 1 | 1 | 45708170 | 64824  | 18.4989 | 0.8449 | -0.2371 | 5.6306 | CHB |
| Hs.396207 | Hs.396207-S  | rs1084086  | 1 | 1 | 45710193 | 62801  | 18.4989 | 0.8449 | -0.2371 | 5.6306 | CHB |
| Hs.396207 | Hs.396207-S  | rs2152078  | 1 | 1 | 45724693 | 48301  | 18.4989 | 0.8449 | -0.2371 | 5.6306 | CHB |
| Hs.396207 | Hs.396207-S  | rs2991979  | 1 | 1 | 45724951 | 48043  | 18.4989 | 0.8449 | -0.2371 | 5.6306 | CHB |
| Hs.396207 | Hs.396207-S  | rs7548549  | 1 | 1 | 45735701 | 37293  | 11.8766 | 0.6861 | -0.2167 | 5.6306 | CHB |
| Hs.396207 | Hs.396207-S  | rs2230657  | 1 | 1 | 45742582 | 30412  | 11.4562 | 0.6718 | 0.2127  | 5.6306 | CHB |
| Hs.396207 | Hs.396207-S  | rs2050376  | 1 | 1 | 45747723 | 25271  | 11.8766 | 0.6861 | -0.2167 | 5.6306 | CHB |
| Hs.396207 | Hs.396207-S  | rs2230658  | 1 | 1 | 45747947 | 25047  | 11.8766 | 0.6861 | -0.2167 | 5.6306 | CHB |
| Hs.396207 | Hs.396207-S  | rs2230659  | 1 | 1 | 45747977 | 25017  | 11.4024 | 0.6965 | -0.2070 | 5.6306 | CHB |
| Hs.396207 | Hs.396207-S  | rs1972410  | 1 | 1 | 45750040 | 22954  | 18.4989 | 0.8449 | -0.2371 | 5.6306 | CHB |
| Hs.396207 | Hs.396207-S  | rs2991986  | 1 | 1 | 45750375 | 22619  | 11.8766 | 0.6861 | 0.2167  | 5.6306 | CHB |
| Hs.396207 | Hs.396207-S  | rs2991987  | 1 | 1 | 45750515 | 22479  | 11.4648 | 0.6808 | -0.2174 | 5.6306 | CHB |
| Hs.396207 | Hs.396207-S  | rs2253862  | 1 | 1 | 45751053 | 21941  | 16.5479 | 0.8090 | -0.2260 | 5.6306 | CHB |
| Hs.396207 | Hs.396207-S  | rs2991988  | 1 | 1 | 45751524 | 21470  | 16.6467 | 0.8184 | 0.2248  | 5.6306 | CHB |
| Hs.396207 | Hs.396207-S  | rs2991989  | 1 | 1 | 45752058 | 20936  | 15.9868 | 0.8049 | -0.2258 | 5.6306 | CHB |
| Hs.396207 | Hs.396207-S  | rs1547924  | 1 | 1 | 45754205 | 18789  | 11.8766 | 0.6861 | -0.2167 | 5.6306 | CHB |
| Hs.396207 | Hs.396207-S  | rs1547925  | 1 | 1 | 45754449 | 18545  | 16.5479 | 0.8090 | -0.2260 | 5.6306 | CHB |
| Hs.396207 | Hs.396207-S  | rs2275086  | 1 | 1 | 45754972 | 18022  | 16.5479 | 0.8090 | -0.2260 | 5.6306 | CHB |
| Hs.396207 | Hs.396207-S  | rs3014245  | 1 | 1 | 45756006 | 16988  | 16.5479 | 0.8090 | 0.2260  | 5.6306 | CHB |
| Hs.396207 | Hs.396207-S  | rs3014242  | 1 | 1 | 45756670 | 16324  | 10.5121 | 0.6642 | -0.2153 | 5.6306 | CHB |
| Hs.396207 | Hs.396207-S  | rs3014238  | 1 | 1 | 45759307 | 13687  | 10.6131 | 0.6499 | 0.2159  | 5.6306 | CHB |
| Hs.396207 | Hs.396207-S  | rs3014237  | 1 | 1 | 45759345 | 13649  | 18.4989 | 0.8449 | 0.2371  | 5.6306 | CHB |
| Hs.396207 | Hs.396207-S  | rs3014235  | 1 | 1 | 45760605 | 12389  | 16.5479 | 0.8090 | 0.2260  | 5.6306 | CHB |
| Hs.396207 | Hs.396207-S  | rs9429172  | 1 | 1 | 45761569 | 11425  | 15.0476 | 0.8498 | -0.2316 | 5.6306 | CHB |
| Hs.396207 | Hs.396207-S  | rs1250     | 1 | 1 | 45763120 | 9874   | 11.8766 | 0.6861 | 0.2167  | 5.6306 | CHB |
| Hs.396207 | Hs.396207-S  | rs4391704  | 1 | 1 | 45763329 | 9665   | 8.8112  | 0.6317 | 0.2136  | 5.6306 | CHB |
| Hs.396207 | Hs.396207-S  | rs12037459 | 1 | 1 | 45764052 | 8942   | 12.0623 | 0.7657 | -0.2162 | 5.6306 | CHB |
| Hs.396207 | Hs.396207-S  | rs12037561 | 1 | 1 | 45764365 | 8629   | 16.5479 | 0.8090 | -0.2260 | 5.6306 | CHB |
| Hs.396207 | Hs.396207-S  | rs6703748  | 1 | 1 | 45765069 | 7925   | 18.4989 | 0.8449 | -0.2371 | 5.6306 | CHB |
| Hs.396207 | Hs.396207-S  | rs10890333 | 1 | 1 | 45769415 | 3579   | 11.8766 | 0.6861 | -0.2167 | 5.6306 | CHB |
| Hs.396207 | Hs.396207-S  | rs10890334 | 1 | 1 | 45769471 | 3523   | 15.7852 | 0.8005 | 0.2198  | 5.6306 | CHB |

|           |             |            |   |   |          |        |         |        |         |        |     |
|-----------|-------------|------------|---|---|----------|--------|---------|--------|---------|--------|-----|
| Hs.396207 | Hs.396207-S | rs4431884  | 1 | 1 | 45770416 | 2578   | 11.8766 | 0.6861 | 0.2167  | 5.6306 | CHB |
| Hs.396207 | Hs.396207-S | rs6694889  | 1 | 1 | 45770899 | 2095   | 15.7546 | 0.8076 | 0.2245  | 5.6306 | CHB |
| Hs.396207 | Hs.396207-S | rs12023439 | 1 | 1 | 45773729 | 735    | 17.8555 | 0.8479 | 0.2359  | 5.6306 | CHB |
| Hs.396207 | Hs.396207-S | rs12043945 | 1 | 1 | 45776015 | 3021   | 11.8766 | 0.6861 | -0.2167 | 5.6306 | CHB |
| Hs.396207 | Hs.396207-S | rs12091503 | 1 | 1 | 45776961 | 3967   | 11.6437 | 0.6869 | -0.2164 | 5.6306 | CHB |
| Hs.396207 | Hs.396207-S | rs11211145 | 1 | 1 | 45777584 | 4590   | 18.2548 | 0.8477 | 0.2363  | 5.6306 | CHB |
| Hs.396207 | Hs.396207-S | rs5021934  | 1 | 1 | 45778397 | 5403   | 11.2134 | 0.6633 | -0.2165 | 5.6306 | CHB |
| Hs.396207 | Hs.396207-S | rs11211147 | 1 | 1 | 45779187 | 6193   | 16.3360 | 0.8505 | 0.2436  | 5.6306 | CHB |
| Hs.396207 | Hs.396207-S | rs4660312  | 1 | 1 | 45779665 | 6671   | 11.2134 | 0.6633 | 0.2165  | 5.6306 | CHB |
| Hs.396207 | Hs.396207-S | rs4660313  | 1 | 1 | 45779934 | 6940   | 18.2548 | 0.8477 | -0.2363 | 5.6306 | CHB |
| Hs.396207 | Hs.396207-S | rs4660880  | 1 | 1 | 45780133 | 7139   | 18.4989 | 0.8449 | 0.2371  | 5.6306 | CHB |
| Hs.396207 | Hs.396207-S | rs10890336 | 1 | 1 | 45780149 | 7155   | 8.8502  | 0.6440 | 0.2133  | 5.6306 | CHB |
| Hs.396207 | Hs.396207-S | rs11211149 | 1 | 1 | 45781311 | 8317   | 16.3957 | 0.8362 | -0.2351 | 5.6306 | CHB |
| Hs.396207 | Hs.396207-S | rs4468203  | 1 | 1 | 45782365 | 9371   | 9.5584  | 0.6648 | -0.2100 | 5.6306 | CHB |
| Hs.396207 | Hs.396207-S | rs11211152 | 1 | 1 | 45783250 | 10256  | 18.4989 | 0.8449 | 0.2371  | 5.6306 | CHB |
| Hs.396207 | Hs.396207-S | rs4660882  | 1 | 1 | 45785385 | 12391  | 11.2134 | 0.6633 | 0.2165  | 5.6306 | CHB |
| Hs.396207 | Hs.396207-S | rs4607935  | 1 | 1 | 45786254 | 13260  | 14.9151 | 0.7969 | 0.2249  | 5.6306 | CHB |
| Hs.396207 | Hs.396207-S | rs4609469  | 1 | 1 | 45786278 | 13284  | 11.4215 | 0.6793 | 0.2168  | 5.6306 | CHB |
| Hs.396207 | Hs.396207-S | rs12049027 | 1 | 1 | 45787277 | 14283  | 9.1967  | 0.6596 | 0.2145  | 5.6306 | CHB |
| Hs.396207 | Hs.396207-S | rs10789467 | 1 | 1 | 45787838 | 14844  | 11.8766 | 0.6861 | 0.2167  | 5.6306 | CHB |
| Hs.396207 | Hs.396207-S | rs6656279  | 1 | 1 | 45793181 | 20187  | 11.2134 | 0.6633 | 0.2165  | 5.6306 | CHB |
| Hs.396207 | Hs.396207-S | rs3811436  | 1 | 1 | 45794973 | 21979  | 16.5479 | 0.8090 | -0.2260 | 5.6306 | CHB |
| Hs.396207 | Hs.396207-S | rs12024590 | 1 | 1 | 45796589 | 23595  | 18.4989 | 0.8449 | 0.2371  | 5.6306 | CHB |
| Hs.396207 | Hs.396207-S | rs3013597  | 1 | 1 | 45797449 | 24455  | 11.4317 | 0.6976 | -0.2166 | 5.6306 | CHB |
| Hs.396207 | Hs.396207-S | rs11211157 | 1 | 1 | 45801937 | 28943  | 11.8766 | 0.6861 | -0.2167 | 5.6306 | CHB |
| Hs.396207 | Hs.396207-S | rs10430105 | 1 | 1 | 45807969 | 34975  | 16.5479 | 0.8090 | -0.2260 | 5.6306 | CHB |
| Hs.396207 | Hs.396207-S | rs11211160 | 1 | 1 | 45815322 | 42328  | 18.4989 | 0.8449 | -0.2371 | 5.6306 | CHB |
| Hs.396207 | Hs.396207-S | rs10890341 | 1 | 1 | 45816333 | 43339  | 16.5479 | 0.8090 | -0.2260 | 5.6306 | CHB |
| Hs.396207 | Hs.396207-S | rs3013595  | 1 | 1 | 45822296 | 49302  | 11.2134 | 0.6633 | -0.2165 | 5.6306 | CHB |
| Hs.396207 | Hs.396207-S | rs11211166 | 1 | 1 | 45827035 | 54041  | 11.1320 | 0.6691 | -0.2128 | 5.6306 | CHB |
| Hs.396207 | Hs.396207-S | rs10789470 | 1 | 1 | 45827424 | 54430  | 11.8766 | 0.6861 | -0.2167 | 5.6306 | CHB |
| Hs.396207 | Hs.396207-S | rs10749856 | 1 | 1 | 45833939 | 60945  | 10.7795 | 0.6474 | 0.2226  | 5.6306 | CHB |
| Hs.396207 | Hs.396207-S | rs4564187  | 1 | 1 | 45835954 | 62960  | 10.7795 | 0.6474 | -0.2226 | 5.6306 | CHB |
| Hs.396207 | Hs.396207-S | rs4274104  | 1 | 1 | 45929961 | 156967 | 10.1191 | 0.6219 | -0.2217 | 5.6306 | CHB |
| Hs.396207 | Hs.396207-S | rs11211173 | 1 | 1 | 45931396 | 158402 | 14.2172 | 0.7552 | 0.2289  | 5.6306 | CHB |
| Hs.396207 | Hs.396207-S | rs12560266 | 1 | 1 | 45933637 | 160643 | 7.9904  | 0.5814 | -0.2277 | 5.6306 | CHB |
| Hs.396207 | Hs.396207-S | rs11211176 | 1 | 1 | 45935106 | 162112 | 9.5415  | 0.6068 | 0.2219  | 5.6306 | CHB |
| Hs.396207 | Hs.396207-S | rs11211177 | 1 | 1 | 45938369 | 165375 | 16.5346 | 0.8087 | 0.3535  | 5.6306 | CHB |
| Hs.396207 | Hs.396207-S | rs11211178 | 1 | 1 | 45939586 | 166592 | 10.4313 | 0.6342 | 0.2142  | 5.6306 | CHB |
| Hs.396207 | Hs.396207-S | rs12025621 | 1 | 1 | 45940411 | 167417 | 8.8764  | 0.6245 | 0.2161  | 5.6306 | CHB |
| Hs.396207 | Hs.396207-S | rs4660314  | 1 | 1 | 45941905 | 168911 | 10.4313 | 0.6342 | -0.2142 | 5.6306 | CHB |
| Hs.396207 | Hs.396207-S | rs4660883  | 1 | 1 | 45948118 | 175124 | 10.4313 | 0.6342 | -0.2142 | 5.6306 | CHB |
| Hs.396207 | Hs.396207-S | rs6683274  | 1 | 1 | 45953658 | 180664 | 6.4148  | 0.4418 | -0.1806 | 5.6306 | CHB |
| Hs.396207 | Hs.396207-S | rs4626927  | 1 | 1 | 45960665 | 187671 | 5.9887  | 0.4164 | -0.1778 | 5.6306 | CHB |
| Hs.396207 | Hs.396207-S | rs7540578  | 1 | 1 | 45964164 | 191170 | 6.4148  | 0.4418 | 0.1806  | 5.6306 | CHB |
| Hs.396207 | Hs.396207-S | rs6690386  | 1 | 1 | 45965031 | 192037 | 8.4288  | 0.5481 | 0.1928  | 5.6306 | CHB |
| Hs.396207 | Hs.396207-S | rs6661163  | 1 | 1 | 45967024 | 194030 | 5.9887  | 0.4164 | -0.1778 | 5.6306 | CHB |
| Hs.396207 | Hs.396207-S | rs6429578  | 1 | 1 | 45969130 | 196136 | 7.8729  | 0.5379 | -0.1898 | 5.6306 | CHB |
| Hs.396207 | Hs.396207-S | rs12076580 | 1 | 1 | 45970179 | 197185 | 8.4288  | 0.5481 | -0.1928 | 5.6306 | CHB |
| Hs.396207 | Hs.396207-S | rs7539800  | 1 | 1 | 45974149 | 201155 | 8.4288  | 0.5481 | 0.1928  | 5.6306 | CHB |
| Hs.396207 | Hs.396207-S | rs10890350 | 1 | 1 | 45974398 | 201404 | 10.7262 | 0.6816 | -0.2038 | 5.6306 | CHB |
| Hs.396207 | Hs.396207-S | rs4390216  | 1 | 1 | 45978476 | 205482 | 8.4288  | 0.5481 | 0.1928  | 5.6306 | CHB |
| Hs.396207 | Hs.396207-S | rs6672115  | 1 | 1 | 45984899 | 211905 | 8.4288  | 0.5481 | -0.1928 | 5.6306 | CHB |
| Hs.396207 | Hs.396207-S | rs6429580  | 1 | 1 | 45987668 | 214674 | 8.4288  | 0.5481 | 0.1928  | 5.6306 | CHB |
| Hs.396207 | Hs.396207-S | rs6700597  | 1 | 1 | 45996266 | 223272 | 6.3233  | 0.4690 | 0.1799  | 5.6306 | CHB |
| Hs.396207 | Hs.396207-S | rs7546237  | 1 | 1 | 45997630 | 224636 | 7.1405  | 0.5260 | 0.1868  | 5.6306 | CHB |
| Hs.396207 | Hs.396207-S | rs11211200 | 1 | 1 | 46000372 | 227378 | 8.4288  | 0.5481 | -0.1928 | 5.6306 | CHB |
| Hs.396207 | Hs.396207-S | rs4376778  | 1 | 1 | 46000866 | 227872 | 5.9887  | 0.4164 | -0.1778 | 5.6306 | CHB |
| Hs.396207 | Hs.396207-S | rs6694340  | 1 | 1 | 46001436 | 228442 | 7.8150  | 0.5179 | -0.1891 | 5.6306 | CHB |

|           |             |            |   |   |          |        |        |        |         |        |     |
|-----------|-------------|------------|---|---|----------|--------|--------|--------|---------|--------|-----|
| Hs.396207 | Hs.396207-S | rs4660889  | 1 | 1 | 46009351 | 236357 | 8.4288 | 0.5481 | 0.1928  | 5.6306 | CHB |
| Hs.396207 | Hs.396207-S | rs6680380  | 1 | 1 | 46012209 | 239215 | 5.9887 | 0.4164 | 0.1778  | 5.6306 | CHB |
| Hs.396207 | Hs.396207-S | rs10890354 | 1 | 1 | 46017367 | 244373 | 5.9887 | 0.4164 | 0.1778  | 5.6306 | CHB |
| Hs.396207 | Hs.396207-S | rs4298677  | 1 | 1 | 46018639 | 245645 | 8.4288 | 0.5481 | -0.1928 | 5.6306 | CHB |
| Hs.396207 | Hs.396207-S | rs6701614  | 1 | 1 | 46021440 | 248446 | 5.6494 | 0.4027 | 0.1751  | 5.6306 | CHB |
| Hs.396207 | Hs.396207-S | rs10890355 | 1 | 1 | 46029368 | 256374 | 7.1583 | 0.5001 | -0.1762 | 5.6306 | CHB |
| Hs.396207 | Hs.396207-S | rs11211204 | 1 | 1 | 46029884 | 256890 | 7.6764 | 0.5109 | 0.1809  | 5.6306 | CHB |
| Hs.396207 | Hs.396207-S | rs7547189  | 1 | 1 | 46031534 | 258540 | 8.0760 | 0.5394 | -0.1890 | 5.6306 | CHB |
| Hs.396207 | Hs.396207-S | rs7547284  | 1 | 1 | 46031585 | 258591 | 7.4917 | 0.5096 | 0.1799  | 5.6306 | CHB |
| Hs.396207 | Hs.396207-S | rs6429582  | 1 | 1 | 46033863 | 260869 | 5.9887 | 0.4164 | 0.1778  | 5.6306 | CHB |
| Hs.396207 | Hs.396207-S | rs6675222  | 1 | 1 | 46038596 | 265602 | 8.3198 | 0.5514 | 0.1938  | 5.6306 | CHB |
| Hs.396207 | Hs.396207-S | rs4660895  | 1 | 1 | 46041759 | 268765 | 7.7662 | 0.5414 | 0.1907  | 5.6306 | CHB |
| Hs.396207 | Hs.396207-S | rs6688365  | 1 | 1 | 46041904 | 268910 | 5.8875 | 0.4176 | 0.1783  | 5.6306 | CHB |
| Hs.396207 | Hs.396207-S | rs7531911  | 1 | 1 | 46042443 | 269449 | 8.4288 | 0.5481 | 0.1928  | 5.6306 | CHB |
| Hs.396207 | Hs.396207-S | rs6656992  | 1 | 1 | 46045088 | 272094 | 5.9887 | 0.4164 | -0.1778 | 5.6306 | CHB |
| Hs.396207 | Hs.396207-S | rs11211208 | 1 | 1 | 46046276 | 273282 | 5.6842 | 0.3976 | -0.1764 | 5.6306 | CHB |
| Hs.396207 | Hs.396207-S | rs4660318  | 1 | 1 | 46046896 | 273902 | 8.4288 | 0.5481 | 0.1928  | 5.6306 | CHB |
| Hs.396207 | Hs.396207-S | rs4660319  | 1 | 1 | 46053643 | 280649 | 5.9887 | 0.4164 | -0.1778 | 5.6306 | CHB |
| Hs.396207 | Hs.396207-S | rs6682683  | 1 | 1 | 46054357 | 281363 | 8.3198 | 0.5514 | 0.1938  | 5.6306 | CHB |
| Hs.396207 | Hs.396207-S | rs11211213 | 1 | 1 | 46054537 | 281543 | 6.2465 | 0.4395 | 0.1801  | 5.6306 | CHB |
| Hs.396207 | Hs.396207-S | rs10890361 | 1 | 1 | 46058254 | 285260 | 5.9887 | 0.4164 | 0.1778  | 5.6306 | CHB |
| Hs.396207 | Hs.396207-S | rs11211217 | 1 | 1 | 46060249 | 287255 | 8.4288 | 0.5481 | 0.1928  | 5.6306 | CHB |
| Hs.396207 | Hs.396207-S | rs10789478 | 1 | 1 | 46062526 | 289532 | 7.8626 | 0.5374 | 0.1900  | 5.6306 | CHB |
| Hs.396207 | Hs.396207-S | rs12139630 | 1 | 1 | 46062955 | 289961 | 6.2465 | 0.4395 | -0.1801 | 5.6306 | CHB |
| Hs.396207 | Hs.396207-S | rs12144263 | 1 | 1 | 46064466 | 291472 | 5.9887 | 0.4164 | 0.1778  | 5.6306 | CHB |
| Hs.396207 | Hs.396207-S | rs10890363 | 1 | 1 | 46068168 | 295174 | 5.9887 | 0.4164 | -0.1778 | 5.6306 | CHB |
| Hs.396207 | Hs.396207-S | rs4539075  | 1 | 1 | 46070030 | 297036 | 8.4288 | 0.5481 | 0.1928  | 5.6306 | CHB |
| Hs.396207 | Hs.396207-S | rs12409773 | 1 | 1 | 46070851 | 297857 | 5.9887 | 0.4164 | -0.1778 | 5.6306 | CHB |
| Hs.396207 | Hs.396207-S | rs10890365 | 1 | 1 | 46071368 | 298374 | 8.4288 | 0.5481 | 0.1928  | 5.6306 | CHB |
| Hs.396207 | Hs.396207-S | rs4545281  | 1 | 1 | 46072074 | 299080 | 5.9887 | 0.4164 | -0.1778 | 5.6306 | CHB |
| Hs.396207 | Hs.396207-S | rs7512395  | 1 | 1 | 46073197 | 300203 | 8.4288 | 0.5481 | -0.1928 | 5.6306 | CHB |
| Hs.396207 | Hs.396207-S | rs7556436  | 1 | 1 | 46075900 | 302906 | 5.9887 | 0.4164 | -0.1778 | 5.6306 | CHB |
| Hs.396207 | Hs.396207-S | rs4660321  | 1 | 1 | 46078780 | 305786 | 5.9887 | 0.4164 | -0.1778 | 5.6306 | CHB |
| Hs.396207 | Hs.396207-S | rs7365705  | 1 | 1 | 46079793 | 306799 | 5.9887 | 0.4164 | 0.1778  | 5.6306 | CHB |
| Hs.396207 | Hs.396207-S | rs7527244  | 1 | 1 | 46080792 | 307798 | 8.4288 | 0.5481 | 0.1928  | 5.6306 | CHB |
| Hs.396207 | Hs.396207-S | rs9787412  | 1 | 1 | 46083616 | 310622 | 7.5556 | 0.5046 | 0.1987  | 5.6306 | CHB |
| Hs.396207 | Hs.396207-S | rs4660896  | 1 | 1 | 46084436 | 311442 | 7.3395 | 0.5015 | 0.1975  | 5.6306 | CHB |
| Hs.396207 | Hs.396207-S | rs10732844 | 1 | 1 | 46084708 | 311714 | 7.5556 | 0.5046 | -0.1987 | 5.6306 | CHB |
| Hs.396207 | Hs.396207-S | rs12133129 | 1 | 1 | 46085368 | 312374 | 7.5556 | 0.5046 | 0.1987  | 5.6306 | CHB |
| Hs.396207 | Hs.396207-S | rs11211223 | 1 | 1 | 46092625 | 319631 | 7.3391 | 0.5015 | 0.1976  | 5.6306 | CHB |
| Hs.396207 | Hs.396207-S | rs6687301  | 1 | 1 | 46094872 | 321878 | 7.5556 | 0.5046 | -0.1987 | 5.6306 | CHB |
| Hs.396207 | Hs.396207-S | rs6657720  | 1 | 1 | 46098289 | 325295 | 7.5556 | 0.5046 | -0.1987 | 5.6306 | CHB |
| Hs.396207 | Hs.396207-S | rs10890370 | 1 | 1 | 46101237 | 328243 | 7.5556 | 0.5046 | 0.1987  | 5.6306 | CHB |
| Hs.396207 | Hs.396207-S | rs7526369  | 1 | 1 | 46102580 | 329586 | 7.5556 | 0.5046 | -0.1987 | 5.6306 | CHB |
| Hs.396207 | Hs.396207-S | rs10890371 | 1 | 1 | 46102917 | 329923 | 7.5556 | 0.5046 | -0.1987 | 5.6306 | CHB |
| Hs.396207 | Hs.396207-S | rs10890372 | 1 | 1 | 46103040 | 330046 | 7.3880 | 0.5041 | -0.1991 | 5.6306 | CHB |
| Hs.396207 | Hs.396207-S | rs4074225  | 1 | 1 | 46104384 | 331390 | 7.5556 | 0.5046 | -0.1987 | 5.6306 | CHB |
| Hs.396207 | Hs.396207-S | rs10890373 | 1 | 1 | 46105775 | 332781 | 7.5556 | 0.5046 | 0.1987  | 5.6306 | CHB |
| Hs.396207 | Hs.396207-S | rs4134387  | 1 | 1 | 46107178 | 334184 | 7.5556 | 0.5046 | -0.1987 | 5.6306 | CHB |
| Hs.396207 | Hs.396207-S | rs6681068  | 1 | 1 | 46110402 | 337408 | 6.8088 | 0.4891 | -0.1940 | 5.6306 | CHB |
| Hs.396207 | Hs.396207-S | rs11211228 | 1 | 1 | 46111860 | 338866 | 7.5556 | 0.5046 | -0.1987 | 5.6306 | CHB |
| Hs.396207 | Hs.396207-S | rs12022335 | 1 | 1 | 46114752 | 341758 | 7.5556 | 0.5046 | -0.1987 | 5.6306 | CHB |
| Hs.396207 | Hs.396207-S | rs10789485 | 1 | 1 | 46119328 | 346334 | 7.5556 | 0.5046 | 0.1987  | 5.6306 | CHB |
| Hs.396207 | Hs.396207-S | rs10789486 | 1 | 1 | 46120687 | 347693 | 7.5556 | 0.5046 | 0.1987  | 5.6306 | CHB |
| Hs.396207 | Hs.396207-S | rs10890378 | 1 | 1 | 46122677 | 349683 | 7.5556 | 0.5046 | -0.1987 | 5.6306 | CHB |
| Hs.396207 | Hs.396207-S | rs11211232 | 1 | 1 | 46123166 | 350172 | 7.5556 | 0.5046 | -0.1987 | 5.6306 | CHB |
| Hs.396207 | Hs.396207-S | rs4660900  | 1 | 1 | 46131625 | 358631 | 7.5556 | 0.5046 | -0.1987 | 5.6306 | CHB |
| Hs.396207 | Hs.396207-S | rs11211235 | 1 | 1 | 46152395 | 379401 | 7.5556 | 0.5046 | -0.1987 | 5.6306 | CHB |
| Hs.396207 | Hs.396207-S | rs11211236 | 1 | 1 | 46155787 | 382793 | 7.5556 | 0.5046 | -0.1987 | 5.6306 | CHB |

|           |               |            |   |   |          |        |        |        |         |        |     |
|-----------|---------------|------------|---|---|----------|--------|--------|--------|---------|--------|-----|
| Hs.396207 | Hs.396207-S   | rs4660328  | 1 | 1 | 46156851 | 383857 | 7.5556 | 0.5046 | 0.1987  | 5.6306 | CHB |
| Hs.396207 | Hs.396207-S   | rs11211237 | 1 | 1 | 46159349 | 386355 | 6.2128 | 0.4801 | -0.1847 | 5.6306 | CHB |
| Hs.396207 | Hs.396207-S   | rs10890380 | 1 | 1 | 46161489 | 388495 | 7.5556 | 0.5046 | 0.1987  | 5.6306 | CHB |
| Hs.396207 | Hs.396207-S   | rs6429588  | 1 | 1 | 46166078 | 393084 | 7.5556 | 0.5046 | -0.1987 | 5.6306 | CHB |
| Hs.396207 | Hs.396207-S   | rs11211243 | 1 | 1 | 46167453 | 394459 | 7.5556 | 0.5046 | -0.1987 | 5.6306 | CHB |
| Hs.396207 | Hs.396207-S   | rs4660905  | 1 | 1 | 46173607 | 400613 | 7.5556 | 0.5046 | 0.1987  | 5.6306 | CHB |
| Hs.396207 | Hs.396207-S   | rs4660334  | 1 | 1 | 46174146 | 401152 | 7.5556 | 0.5046 | -0.1987 | 5.6306 | CHB |
| Hs.396207 | Hs.396207-S   | rs4073847  | 1 | 1 | 46175032 | 402038 | 7.5556 | 0.5046 | 0.1987  | 5.6306 | CHB |
| Hs.396207 | Hs.396207-S   | rs6661500  | 1 | 1 | 46177682 | 404688 | 7.5556 | 0.5046 | -0.1987 | 5.6306 | CHB |
| Hs.396207 | Hs.396207-S   | rs10890382 | 1 | 1 | 46181694 | 408700 | 7.5556 | 0.5046 | 0.1987  | 5.6306 | CHB |
| Hs.396207 | Hs.396207-S   | rs3922887  | 1 | 1 | 46185822 | 412828 | 7.5556 | 0.5046 | -0.1987 | 5.6306 | CHB |
| Hs.396207 | Hs.396207-S   | rs4660335  | 1 | 1 | 46186738 | 413744 | 7.5556 | 0.5046 | 0.1987  | 5.6306 | CHB |
| Hs.396207 | Hs.396207-S   | rs6677777  | 1 | 1 | 46187856 | 414862 | 7.5556 | 0.5046 | 0.1987  | 5.6306 | CHB |
| Hs.396207 | Hs.396207-S   | rs11211248 | 1 | 1 | 46188864 | 415870 | 7.5556 | 0.5046 | 0.1987  | 5.6306 | CHB |
| Hs.396207 | Hs.396207-S   | rs946528   | 1 | 1 | 46197582 | 424588 | 5.9273 | 0.4808 | 0.2029  | 5.6306 | CHB |
| Hs.396207 | Hs.396207-S   | rs946527   | 1 | 1 | 46197990 | 424996 | 7.5556 | 0.5046 | -0.1987 | 5.6306 | CHB |
| Hs.396207 | Hs.396207-S   | rs946524   | 1 | 1 | 46199580 | 426586 | 7.3497 | 0.5020 | 0.1983  | 5.6306 | CHB |
| Hs.396207 | Hs.396207-S   | rs785478   | 1 | 1 | 46203655 | 430661 | 7.5556 | 0.5046 | 0.1987  | 5.6306 | CHB |
| Hs.396207 | Hs.396207-S   | rs785480   | 1 | 1 | 46204184 | 431190 | 7.5556 | 0.5046 | -0.1987 | 5.6306 | CHB |
| Hs.396207 | Hs.396207-S   | rs925524   | 1 | 1 | 46208729 | 435735 | 6.5552 | 0.4499 | -0.1716 | 5.6306 | CHB |
| Hs.396207 | Hs.396207-S   | rs1622208  | 1 | 1 | 46210395 | 437401 | 7.5556 | 0.5046 | 0.1987  | 5.6306 | CHB |
| Hs.396207 | Hs.396207-S   | rs6675259  | 1 | 1 | 46214315 | 441321 | 5.8903 | 0.4505 | 0.1822  | 5.6306 | CHB |
| Hs.396207 | Hs.396207-S   | rs7538978  | 1 | 1 | 46217074 | 444080 | 7.0006 | 0.4749 | 0.1714  | 5.6306 | CHB |
| Hs.396207 | Hs.396207-S   | rs1707322  | 1 | 1 | 46217167 | 444173 | 7.0006 | 0.4749 | 0.1714  | 5.6306 | CHB |
| Hs.396207 | Hs.396207-S   | rs1707337  | 1 | 1 | 46220789 | 447795 | 7.0006 | 0.4749 | 0.1714  | 5.6306 | CHB |
| Hs.396207 | Hs.396207-S   | rs1768807  | 1 | 1 | 46222590 | 449596 | 7.0006 | 0.4749 | 0.1714  | 5.6306 | CHB |
| Hs.396207 | Hs.396207-S   | rs1707317  | 1 | 1 | 46222662 | 449668 | 7.0006 | 0.4749 | 0.1714  | 5.6306 | CHB |
| Hs.396207 | Hs.396207-S   | rs1768818  | 1 | 1 | 46226306 | 453312 | 7.0006 | 0.4749 | -0.1714 | 5.6306 | CHB |
| Hs.396207 | Hs.396207-S   | rs1768817  | 1 | 1 | 46226554 | 453560 | 7.0006 | 0.4749 | 0.1714  | 5.6306 | CHB |
| Hs.396207 | Hs.396207-S   | rs785470   | 1 | 1 | 46231642 | 458648 | 7.0006 | 0.4749 | -0.1714 | 5.6306 | CHB |
| Hs.396207 | Hs.396207-S   | rs785468   | 1 | 1 | 46233537 | 460543 | 7.0006 | 0.4749 | -0.1714 | 5.6306 | CHB |
| Hs.396207 | Hs.396207-S   | rs785467   | 1 | 1 | 46233579 | 460585 | 7.0006 | 0.4749 | 0.1714  | 5.6306 | CHB |
| Hs.396207 | Hs.396207-S   | rs785465   | 1 | 1 | 46234597 | 461603 | 7.0006 | 0.4749 | 0.1714  | 5.6306 | CHB |
| Hs.396207 | Hs.396207-S   | rs785510   | 1 | 1 | 46240638 | 467644 | 7.0006 | 0.4749 | 0.1714  | 5.6306 | CHB |
| Hs.396207 | Hs.396207-S   | rs2458400  | 1 | 1 | 46242818 | 469824 | 7.0006 | 0.4749 | -0.1714 | 5.6306 | CHB |
| Hs.396207 | Hs.396207-S   | rs785506   | 1 | 1 | 46252672 | 479678 | 7.0006 | 0.4749 | -0.1714 | 5.6306 | CHB |
| Hs.396207 | Hs.396207-S   | rs1613296  | 1 | 1 | 46258872 | 485878 | 6.8870 | 0.4767 | -0.1719 | 5.6306 | CHB |
| Hs.396207 | Hs.396207-S   | rs1768801  | 1 | 1 | 46261157 | 488163 | 6.8955 | 0.5121 | 0.1740  | 5.6306 | CHB |
| Hs.396207 | Hs.396207-S   | rs809774   | 1 | 1 | 46272264 | 499270 | 5.8243 | 0.4063 | 0.1663  | 5.6306 | CHB |
| Hs.396207 | Hs.396207-S   | rs785484   | 1 | 1 | 46286035 | 513041 | 7.0006 | 0.4749 | 0.1714  | 5.6306 | CHB |
| Hs.396207 | Hs.396207-S   | rs785493   | 1 | 1 | 46296879 | 523885 | 7.0006 | 0.4749 | -0.1714 | 5.6306 | CHB |
| Hs.396207 | Hs.396207-S   | rs785497   | 1 | 1 | 46303923 | 530929 | 7.0006 | 0.4749 | 0.1714  | 5.6306 | CHB |
| Hs.396207 | Hs.396207-S   | rs1416706  | 1 | 1 | 46314864 | 541870 | 5.9990 | 0.4245 | -0.1670 | 5.6306 | CHB |
| hmm8232   | hmm8232-S     | rs17357759 | 1 | 1 | 46544554 | 4810   | 8.1245 | 0.5784 | 0.4566  | 6.6973 | CHB |
| FLJ32112  | GI_23308504-S | rs3820112  | 1 | 1 | 54234328 | 42776  | 7.8792 | 0.5212 | 0.2753  | 5.951  | CHB |
| FLJ32112  | GI_23308504-S | rs11206284 | 1 | 1 | 54290679 | 13575  | 7.9737 | 0.5259 | 0.2744  | 5.951  | CHB |
| FLJ32112  | GI_23308504-S | rs11206285 | 1 | 1 | 54295713 | 18609  | 6.1863 | 0.4283 | 0.2355  | 5.951  | CHB |
| MGC22773  | GI_21687083-S | rs10493531 | 1 | 1 | 74229688 | 128331 | 6.3001 | 0.4427 | -0.2297 | 5.7258 | CHB |
| MGC22773  | GI_21687083-S | rs4650243  | 1 | 1 | 74230485 | 127534 | 6.3931 | 0.4483 | 0.2322  | 5.7258 | CHB |
| MGC22773  | GI_21687083-S | rs4649996  | 1 | 1 | 74232300 | 125719 | 6.5530 | 0.4498 | 0.2312  | 5.7258 | CHB |
| MGC22773  | GI_21687083-S | rs11579809 | 1 | 1 | 74244608 | 113411 | 5.7979 | 0.4359 | -0.2150 | 5.7258 | CHB |
| MGC22773  | GI_21687083-S | rs7550195  | 1 | 1 | 74274326 | 83693  | 6.1459 | 0.4414 | 0.2306  | 5.7258 | CHB |
| MGC22773  | GI_21687083-S | rs10890108 | 1 | 1 | 74283203 | 74816  | 6.5530 | 0.4498 | -0.2312 | 5.7258 | CHB |
| MGC22773  | GI_21687083-S | rs2343864  | 1 | 1 | 74289090 | 68929  | 6.5530 | 0.4498 | 0.2312  | 5.7258 | CHB |
| MGC22773  | GI_21687083-S | rs11210417 | 1 | 1 | 74293180 | 64839  | 6.5530 | 0.4498 | 0.2312  | 5.7258 | CHB |
| MGC22773  | GI_21687083-S | rs11210418 | 1 | 1 | 74294698 | 63321  | 6.5530 | 0.4498 | -0.2312 | 5.7258 | CHB |
| MGC22773  | GI_21687083-S | rs11210419 | 1 | 1 | 74298989 | 59030  | 6.5530 | 0.4498 | 0.2312  | 5.7258 | CHB |
| MGC22773  | GI_21687083-S | rs7543134  | 1 | 1 | 74314071 | 43948  | 6.5530 | 0.4498 | -0.2312 | 5.7258 | CHB |
| MGC22773  | GI_21687083-S | rs1412824  | 1 | 1 | 74372246 | 14227  | 6.9316 | 0.4711 | 0.1990  | 5.7258 | CHB |

|          |               |            |   |   |           |       |         |        |         |        |     |
|----------|---------------|------------|---|---|-----------|-------|---------|--------|---------|--------|-----|
| MGC22773 | GI_21687083-S | rs7535418  | 1 | 1 | 74372749  | 14730 | 7.6373  | 0.5532 | -0.2186 | 5.7258 | CHB |
| MGC22773 | GI_21687083-S | rs10789391 | 1 | 1 | 74374602  | 16583 | 8.3845  | 0.5460 | 0.2216  | 5.7258 | CHB |
| MGC22773 | GI_21687083-S | rs1412825  | 1 | 1 | 74375835  | 17816 | 8.3845  | 0.5460 | -0.2216 | 5.7258 | CHB |
| MGC22773 | GI_21687083-S | rs4422957  | 1 | 1 | 74376170  | 18151 | 8.3845  | 0.5460 | 0.2216  | 5.7258 | CHB |
| MGC22773 | GI_21687083-S | rs792310   | 1 | 1 | 74377514  | 19495 | 8.3845  | 0.5460 | 0.2216  | 5.7258 | CHB |
| MGC22773 | GI_21687083-S | rs577367   | 1 | 1 | 74379707  | 21688 | 7.3912  | 0.5042 | 0.2090  | 5.7258 | CHB |
| MGC22773 | GI_21687083-S | rs487917   | 1 | 1 | 74380917  | 22898 | 8.3845  | 0.5460 | -0.2216 | 5.7258 | CHB |
| MGC22773 | GI_21687083-S | rs571848   | 1 | 1 | 74383540  | 25521 | 8.3845  | 0.5460 | -0.2216 | 5.7258 | CHB |
| MGC22773 | GI_21687083-S | rs520806   | 1 | 1 | 74385362  | 27343 | 8.3845  | 0.5460 | -0.2216 | 5.7258 | CHB |
| MGC22773 | GI_21687083-S | rs522759   | 1 | 1 | 74385603  | 27584 | 8.3845  | 0.5460 | 0.2216  | 5.7258 | CHB |
| MGC22773 | GI_21687083-S | rs545721   | 1 | 1 | 74385820  | 27801 | 8.3845  | 0.5460 | 0.2216  | 5.7258 | CHB |
| MGC22773 | GI_21687083-S | rs581353   | 1 | 1 | 74387407  | 29388 | 8.3845  | 0.5460 | -0.2216 | 5.7258 | CHB |
| MGC22773 | GI_21687083-S | rs496008   | 1 | 1 | 74387827  | 29808 | 7.3532  | 0.5285 | -0.2210 | 5.7258 | CHB |
| MGC22773 | GI_21687083-S | rs485929   | 1 | 1 | 74390306  | 32287 | 8.3845  | 0.5460 | -0.2216 | 5.7258 | CHB |
| MGC22773 | GI_21687083-S | rs792321   | 1 | 1 | 74393989  | 35970 | 8.3845  | 0.5460 | -0.2216 | 5.7258 | CHB |
| MGC22773 | GI_21687083-S | rs524306   | 1 | 1 | 74394274  | 36255 | 8.6584  | 0.6143 | -0.2359 | 5.7258 | CHB |
| MGC22773 | GI_21687083-S | rs495027   | 1 | 1 | 74394280  | 36261 | 8.3845  | 0.5460 | 0.2216  | 5.7258 | CHB |
| MGC22773 | GI_21687083-S | rs533371   | 1 | 1 | 74399033  | 41014 | 8.3845  | 0.5460 | -0.2216 | 5.7258 | CHB |
| MGC22773 | GI_21687083-S | rs11210440 | 1 | 1 | 74405229  | 47210 | 8.3845  | 0.5460 | 0.2216  | 5.7258 | CHB |
| MGC22773 | GI_21687083-S | rs10890119 | 1 | 1 | 74407221  | 49202 | 8.1950  | 0.5453 | -0.2221 | 5.7258 | CHB |
| MGC22773 | GI_21687083-S | rs11210442 | 1 | 1 | 74407725  | 49706 | 6.4361  | 0.5036 | -0.2119 | 5.7258 | CHB |
| MGC22773 | GI_21687083-S | rs492302   | 1 | 1 | 74411352  | 53333 | 8.3845  | 0.5460 | -0.2216 | 5.7258 | CHB |
| MGC22773 | GI_21687083-S | rs500203   | 1 | 1 | 74413672  | 55653 | 8.3845  | 0.5460 | -0.2216 | 5.7258 | CHB |
| MGC22773 | GI_21687083-S | rs532221   | 1 | 1 | 74413971  | 55952 | 8.3845  | 0.5460 | 0.2216  | 5.7258 | CHB |
| MGC22773 | GI_21687083-S | rs568049   | 1 | 1 | 74416524  | 58505 | 8.3845  | 0.5460 | -0.2216 | 5.7258 | CHB |
| MGC22773 | GI_21687083-S | rs3765651  | 1 | 1 | 74421383  | 63364 | 8.3845  | 0.5460 | -0.2216 | 5.7258 | CHB |
| MGC22773 | GI_21687083-S | rs481387   | 1 | 1 | 74422471  | 64452 | 8.3845  | 0.5460 | 0.2216  | 5.7258 | CHB |
| GSTM1    | GI_23065546-A | rs2071487  | 1 | 1 | 109945123 | 1163  | 21.5512 | 0.8880 | 2.1913  | 6.0102 | CHB |
| GSTM2    | GI_23065549-S | rs2071487  | 1 | 1 | 109945123 | 18905 | 9.2645  | 0.5862 | 0.6208  | 5.6288 | CHB |
| GSTM2    | GI_23065549-S | rs2014578  | 1 | 1 | 109953413 | 27195 | 7.0376  | 0.4770 | -0.5817 | 5.6288 | CHB |
| GSTM1    | GI_23065546-A | rs11101985 | 1 | 1 | 109958078 | 14118 | 10.3037 | 0.6561 | 2.0448  | 6.0102 | CHB |
| GSTM2    | GI_23065549-S | rs11101985 | 1 | 1 | 109958078 | 31860 | 6.4321  | 0.4670 | 0.5896  | 5.6288 | CHB |
| GSTM1    | GI_23065546-A | rs11579576 | 1 | 1 | 109961218 | 17258 | 6.5838  | 0.4675 | 1.6996  | 6.0102 | CHB |
| GSTM1    | GI_23065546-A | rs7364941  | 1 | 1 | 109962210 | 18250 | 7.1927  | 0.5107 | 1.7804  | 6.0102 | CHB |
| GSTM1    | GI_23065546-A | rs366631   | 1 | 1 | 109964514 | 20554 | 16.2556 | 0.8030 | -2.0559 | 6.0102 | CHB |
| GSTM2    | GI_23065549-S | rs366631   | 1 | 1 | 109964514 | 38296 | 10.3029 | 0.6292 | -0.6329 | 5.6288 | CHB |
| GSTM1    | GI_23065546-A | rs11101989 | 1 | 1 | 109965783 | 21823 | 6.2723  | 0.4411 | -1.6463 | 6.0102 | CHB |
| GSTM1    | GI_23065546-A | rs674787   | 1 | 1 | 109965953 | 21993 | 18.9634 | 0.8524 | -2.5922 | 6.0102 | CHB |
| GSTM2    | GI_23065549-S | rs674787   | 1 | 1 | 109965953 | 39735 | 9.5469  | 0.5983 | -0.7566 | 5.6288 | CHB |
| CHI3L2   | GI_11993934-S | rs12048900 | 1 | 1 | 111478093 | 19837 | 9.3576  | 0.5902 | -1.5071 | 8.0943 | CHB |
| CHI3L2   | GI_11993934-S | rs12024633 | 1 | 1 | 111478204 | 19726 | 9.3458  | 0.5984 | 1.5217  | 8.0943 | CHB |
| ST7L     | GI_38201636-A | rs351372   | 1 | 1 | 112771262 | 25437 | 8.8624  | 0.5683 | 0.2807  | 5.6394 | CHB |
| ST7L     | GI_38201636-I | rs351372   | 1 | 1 | 112771262 | 25287 | 9.7179  | 0.6055 | 0.3265  | 5.6394 | CHB |
| ST7L     | GI_38201636-A | rs1006298  | 1 | 1 | 112774001 | 22698 | 8.4921  | 0.5685 | -0.2601 | 5.6394 | CHB |
| ST7L     | GI_38201636-I | rs1006298  | 1 | 1 | 112774001 | 22548 | 9.1529  | 0.5989 | -0.3086 | 5.6394 | CHB |
| ST7L     | GI_38201636-A | rs910697   | 1 | 1 | 112775167 | 21532 | 8.8624  | 0.5683 | 0.2807  | 5.6394 | CHB |
| ST7L     | GI_38201636-I | rs910697   | 1 | 1 | 112775167 | 21382 | 9.7179  | 0.6055 | 0.3265  | 5.6394 | CHB |
| ST7L     | GI_38201636-A | rs12728001 | 1 | 1 | 112788798 | 7901  | 9.3752  | 0.5910 | -0.2888 | 5.6394 | CHB |
| ST7L     | GI_38201636-I | rs12728001 | 1 | 1 | 112788798 | 7751  | 9.7394  | 0.6064 | -0.3299 | 5.6394 | CHB |
| ST7L     | GI_38201636-A | rs10745330 | 1 | 1 | 112795481 | 1218  | 9.2199  | 0.5929 | 0.2781  | 5.6394 | CHB |
| ST7L     | GI_38201636-I | rs10745330 | 1 | 1 | 112795481 | 1068  | 10.0465 | 0.6277 | 0.3239  | 5.6394 | CHB |
| ST7L     | GI_38201636-A | rs7544663  | 1 | 1 | 112801048 | 4349  | 9.5843  | 0.5999 | 0.2789  | 5.6394 | CHB |
| ST7L     | GI_38201636-I | rs7544663  | 1 | 1 | 112801048 | 4499  | 10.3350 | 0.6304 | 0.3223  | 5.6394 | CHB |
| ST7L     | GI_38201636-A | rs7513716  | 1 | 1 | 112801362 | 4663  | 9.5843  | 0.5999 | 0.2789  | 5.6394 | CHB |
| ST7L     | GI_38201636-I | rs7513716  | 1 | 1 | 112801362 | 4813  | 10.3350 | 0.6304 | 0.3223  | 5.6394 | CHB |
| ST7L     | GI_38201636-A | rs10857963 | 1 | 1 | 112803529 | 6830  | 9.5843  | 0.5999 | 0.2789  | 5.6394 | CHB |
| ST7L     | GI_38201636-I | rs10857963 | 1 | 1 | 112803529 | 6980  | 10.3350 | 0.6304 | 0.3223  | 5.6394 | CHB |
| ST7L     | GI_38201636-A | rs12126277 | 1 | 1 | 112818411 | 21712 | 9.5843  | 0.5999 | 0.2789  | 5.6394 | CHB |
| ST7L     | GI_38201636-I | rs12126277 | 1 | 1 | 112818411 | 21862 | 10.3350 | 0.6304 | 0.3223  | 5.6394 | CHB |

|         |               |            |   |   |           |        |         |        |         |        |     |
|---------|---------------|------------|---|---|-----------|--------|---------|--------|---------|--------|-----|
| ST7L    | GI_38201636-A | rs7554916  | 1 | 1 | 112835776 | 39077  | 9.5843  | 0.5999 | 0.2789  | 5.6394 | CHB |
| ST7L    | GI_38201636-I | rs7554916  | 1 | 1 | 112835776 | 39227  | 10.3350 | 0.6304 | 0.3223  | 5.6394 | CHB |
| ST7L    | GI_38201636-A | rs6666579  | 1 | 1 | 112844435 | 47736  | 9.5843  | 0.5999 | 0.2789  | 5.6394 | CHB |
| ST7L    | GI_38201636-I | rs6666579  | 1 | 1 | 112844435 | 47886  | 10.3350 | 0.6304 | 0.3223  | 5.6394 | CHB |
| ST7L    | GI_38201636-A | rs6682737  | 1 | 1 | 112848271 | 51572  | 9.5843  | 0.5999 | -0.2789 | 5.6394 | CHB |
| ST7L    | GI_38201636-I | rs6682737  | 1 | 1 | 112848271 | 51722  | 10.3350 | 0.6304 | -0.3223 | 5.6394 | CHB |
| ST7L    | GI_38201636-A | rs6700673  | 1 | 1 | 112869096 | 72397  | 9.3844  | 0.5914 | 0.2746  | 5.6394 | CHB |
| ST7L    | GI_38201636-I | rs6700673  | 1 | 1 | 112869096 | 72547  | 9.6268  | 0.6017 | 0.3124  | 5.6394 | CHB |
| ST7L    | GI_38201636-A | rs7415820  | 1 | 1 | 112881491 | 84792  | 9.3844  | 0.5914 | 0.2746  | 5.6394 | CHB |
| ST7L    | GI_38201636-I | rs7415820  | 1 | 1 | 112881491 | 84942  | 9.6268  | 0.6017 | 0.3124  | 5.6394 | CHB |
| ST7L    | GI_38201636-A | rs3013440  | 1 | 1 | 112907831 | 111132 | 8.9150  | 0.5882 | -0.2730 | 5.6394 | CHB |
| ST7L    | GI_38201636-I | rs3013440  | 1 | 1 | 112907831 | 111282 | 9.2143  | 0.6016 | -0.3095 | 5.6394 | CHB |
| ST7L    | GI_38201636-A | rs3013439  | 1 | 1 | 112912713 | 116014 | 6.6820  | 0.5187 | -0.2481 | 5.6394 | CHB |
| ST7L    | GI_38201636-I | rs3013439  | 1 | 1 | 112912713 | 116164 | 7.2470  | 0.5516 | -0.2951 | 5.6394 | CHB |
| ST7L    | GI_38201636-A | rs2932536  | 1 | 1 | 112914459 | 117760 | 8.0017  | 0.5921 | 0.2718  | 5.6394 | CHB |
| ST7L    | GI_38201636-I | rs2932536  | 1 | 1 | 112914459 | 117910 | 8.6627  | 0.6247 | 0.3099  | 5.6394 | CHB |
| ST7L    | GI_38201636-A | rs2999154  | 1 | 1 | 112934498 | 137799 | 9.3844  | 0.5914 | 0.2746  | 5.6394 | CHB |
| ST7L    | GI_38201636-I | rs2999154  | 1 | 1 | 112934498 | 137949 | 9.6268  | 0.6017 | 0.3124  | 5.6394 | CHB |
| ST7L    | GI_38201636-A | rs3795819  | 1 | 1 | 112946221 | 149522 | 6.8466  | 0.4664 | -0.2472 | 5.6394 | CHB |
| ST7L    | GI_38201636-I | rs3795819  | 1 | 1 | 112946221 | 149672 | 7.4819  | 0.5008 | -0.2886 | 5.6394 | CHB |
| ST7L    | GI_38201636-A | rs2932532  | 1 | 1 | 112946498 | 149799 | 9.2907  | 0.5873 | -0.2715 | 5.6394 | CHB |
| ST7L    | GI_38201636-I | rs2932532  | 1 | 1 | 112946498 | 149949 | 9.8074  | 0.6092 | -0.3118 | 5.6394 | CHB |
| ST7L    | GI_38201636-A | rs902289   | 1 | 1 | 112948129 | 151430 | 9.2907  | 0.5873 | -0.2715 | 5.6394 | CHB |
| ST7L    | GI_38201636-I | rs902289   | 1 | 1 | 112948129 | 151580 | 9.8074  | 0.6092 | -0.3118 | 5.6394 | CHB |
| ST7L    | GI_38201636-A | rs3748656  | 1 | 1 | 112948723 | 152024 | 6.6475  | 0.4552 | -0.2403 | 5.6394 | CHB |
| ST7L    | GI_38201636-I | rs3748656  | 1 | 1 | 112948723 | 152174 | 7.4521  | 0.4992 | -0.2834 | 5.6394 | CHB |
| ST7L    | GI_38201636-A | rs1106287  | 1 | 1 | 112954164 | 157465 | 6.6475  | 0.4552 | 0.2403  | 5.6394 | CHB |
| ST7L    | GI_38201636-I | rs1106287  | 1 | 1 | 112954164 | 157615 | 7.4521  | 0.4992 | 0.2834  | 5.6394 | CHB |
| ST7L    | GI_38201636-I | rs954679   | 1 | 1 | 112960407 | 163858 | 6.2094  | 0.4297 | -0.3217 | 5.6394 | CHB |
| DCLRE1B | GI_24431998-S | rs6674384  | 1 | 1 | 114167949 | 399    | 11.3520 | 0.6682 | -0.4924 | 5.5887 | CHB |
| DCLRE1B | GI_24431998-S | rs10858024 | 1 | 1 | 114169811 | 1463   | 6.8709  | 0.5106 | 0.3840  | 5.5887 | CHB |
| DCLRE1B | GI_24431998-S | rs878129   | 1 | 1 | 114171237 | 2889   | 11.3520 | 0.6682 | 0.4924  | 5.5887 | CHB |
| DCLRE1B | GI_24431998-S | rs11811771 | 1 | 1 | 114175091 | 6743   | 8.1111  | 0.5327 | -0.4077 | 5.5887 | CHB |
| DCLRE1B | GI_24431998-S | rs11102703 | 1 | 1 | 114178152 | 9804   | 11.3520 | 0.6682 | -0.4924 | 5.5887 | CHB |
| DCLRE1B | GI_24431998-S | rs10494162 | 1 | 1 | 114185125 | 16777  | 11.1371 | 0.6692 | -0.4835 | 5.5887 | CHB |
| DCLRE1B | GI_24431998-S | rs17032011 | 1 | 1 | 114187392 | 19044  | 6.3325  | 0.4784 | 0.3506  | 5.5887 | CHB |
| DCLRE1B | GI_24431998-S | rs11102704 | 1 | 1 | 114189539 | 21191  | 7.2989  | 0.4911 | -0.3485 | 5.5887 | CHB |
| DCLRE1B | GI_24431998-S | rs7519860  | 1 | 1 | 114194562 | 26214  | 11.3520 | 0.6682 | -0.4924 | 5.5887 | CHB |
| DCLRE1B | GI_24431998-S | rs7546851  | 1 | 1 | 114196838 | 28490  | 10.6472 | 0.6980 | -0.4901 | 5.5887 | CHB |
| DCLRE1B | GI_24431998-S | rs1503832  | 1 | 1 | 114201731 | 33383  | 11.3520 | 0.6682 | 0.4924  | 5.5887 | CHB |
| DCLRE1B | GI_24431998-S | rs12127377 | 1 | 1 | 114202015 | 33667  | 8.6453  | 0.5848 | 0.4542  | 5.5887 | CHB |
| DCLRE1B | GI_24431998-S | rs1910485  | 1 | 1 | 114202677 | 34329  | 11.3520 | 0.6682 | 0.4924  | 5.5887 | CHB |
| DCLRE1B | GI_24431998-S | rs1553450  | 1 | 1 | 114202822 | 34474  | 10.4118 | 0.6697 | -0.4149 | 5.5887 | CHB |
| DCLRE1B | GI_24431998-S | rs11102707 | 1 | 1 | 114205625 | 37277  | 10.6689 | 0.6610 | -0.4874 | 5.5887 | CHB |
| DCLRE1B | GI_24431998-S | rs7545300  | 1 | 1 | 114215678 | 47330  | 11.3520 | 0.6682 | -0.4924 | 5.5887 | CHB |
| DCLRE1B | GI_24431998-S | rs6669370  | 1 | 1 | 114218717 | 50369  | 11.3520 | 0.6682 | -0.4924 | 5.5887 | CHB |
| DCLRE1B | GI_24431998-S | rs11102709 | 1 | 1 | 114224125 | 55777  | 11.3520 | 0.6682 | -0.4924 | 5.5887 | CHB |
| DCLRE1B | GI_24431998-S | rs10108    | 1 | 1 | 114228372 | 60024  | 11.5111 | 0.6737 | 0.4950  | 5.5887 | CHB |
| DCLRE1B | GI_24431998-S | rs10494163 | 1 | 1 | 114232754 | 64406  | 12.0006 | 0.6902 | -0.4776 | 5.5887 | CHB |
| DCLRE1B | GI_24431998-S | rs7364     | 1 | 1 | 114236703 | 68355  | 11.7682 | 0.6911 | -0.4714 | 5.5887 | CHB |
| MGC5338 | GI_15011886-S | rs10494179 | 1 | 1 | 115951410 | 3277   | 6.1307  | 0.4326 | -0.2612 | 5.834  | CHB |
| MGC5338 | GI_15011886-S | rs6668400  | 1 | 1 | 115952963 | 4830   | 6.4362  | 0.4430 | 0.2640  | 5.834  | CHB |
| MGC5338 | GI_15011886-S | rs17034260 | 1 | 1 | 115957192 | 9059   | 6.6548  | 0.4635 | 0.2836  | 5.834  | CHB |
| N2N     | GI_44917616-S | rs2794067  | 1 | 1 | 142758247 | 12777  | 5.8014  | 0.4123 | -0.7436 | 5.2923 | CHB |
| N2N     | GI_44917616-S | rs12091564 | 1 | 1 | 142884648 | 113624 | 5.7478  | 0.4016 | -0.5306 | 5.2923 | CHB |
| N2N     | GI_44917616-S | rs16827051 | 1 | 1 | 142885179 | 114155 | 5.7478  | 0.4016 | -0.5306 | 5.2923 | CHB |
| N2N     | GI_44917616-S | rs16827081 | 1 | 1 | 142887086 | 116062 | 5.7123  | 0.4067 | -0.5358 | 5.2923 | CHB |
| N2N     | GI_44917616-S | rs10218795 | 1 | 1 | 142905100 | 134076 | 5.7478  | 0.4016 | 0.5306  | 5.2923 | CHB |
| N2N     | GI_44917616-S | rs7551245  | 1 | 1 | 142906706 | 135682 | 5.7478  | 0.4016 | -0.5306 | 5.2923 | CHB |

|           |               |            |   |   |           |        |         |        |         |        |     |
|-----------|---------------|------------|---|---|-----------|--------|---------|--------|---------|--------|-----|
| S100A13   | GI_41117409-S | rs2274739  | 1 | 1 | 150425206 | 13257  | 6.5009  | 0.4467 | -0.5608 | 5.5741 | CHB |
| S100A13   | GI_41117409-S | rs10797056 | 1 | 1 | 150426856 | 14907  | 6.5009  | 0.4467 | -0.5608 | 5.5741 | CHB |
| S100A13   | GI_41117409-S | rs3790412  | 1 | 1 | 150429930 | 17981  | 5.6770  | 0.4280 | 0.5402  | 5.5741 | CHB |
| S100A13   | GI_41117409-S | rs3828031  | 1 | 1 | 150430205 | 18256  | 6.5009  | 0.4467 | 0.5608  | 5.5741 | CHB |
| S100A13   | GI_41117409-S | rs7934     | 1 | 1 | 150431839 | 19890  | 6.2159  | 0.4300 | 0.5297  | 5.5741 | CHB |
| S100A13   | GI_41117409-S | rs913861   | 1 | 1 | 150435293 | 23344  | 6.5009  | 0.4467 | 0.5608  | 5.5741 | CHB |
| FREB      | GI_42544162-S | rs12408296 | 1 | 1 | 158415977 | 322    | 6.2160  | 0.4456 | -0.4671 | 6.2056 | CHB |
| FREB      | GI_42544162-S | rs1891020  | 1 | 1 | 158426112 | 10457  | 6.2300  | 0.4309 | 0.4781  | 6.2056 | CHB |
| FREB      | GI_42544162-S | rs1417582  | 1 | 1 | 158427746 | 12091  | 6.2300  | 0.4309 | -0.4781 | 6.2056 | CHB |
| MGC3794   | GI_33239373-S | rs7517978  | 1 | 1 | 164869703 | 31513  | 7.1383  | 0.4824 | -0.3105 | 5.7969 | CHB |
| MGC3794   | GI_33239373-S | rs4657739  | 1 | 1 | 164874147 | 27069  | 7.1383  | 0.4824 | -0.3105 | 5.7969 | CHB |
| MGC3794   | GI_33239373-S | rs7552728  | 1 | 1 | 164879050 | 22166  | 7.1383  | 0.4824 | -0.3105 | 5.7969 | CHB |
| MGC3794   | GI_33239373-S | rs2281016  | 1 | 1 | 164879550 | 21666  | 7.1383  | 0.4824 | 0.3105  | 5.7969 | CHB |
| MGC3794   | GI_33239373-S | rs11801584 | 1 | 1 | 164880629 | 20587  | 6.8937  | 0.4853 | -0.3118 | 5.7969 | CHB |
| MGC3794   | GI_33239373-S | rs12756816 | 1 | 1 | 164881648 | 19568  | 6.5407  | 0.4569 | -0.3059 | 5.7969 | CHB |
| MGC3794   | GI_33239373-S | rs2038033  | 1 | 1 | 164883418 | 17798  | 7.1383  | 0.4824 | 0.3105  | 5.7969 | CHB |
| MGC3794   | GI_33239373-S | rs2038035  | 1 | 1 | 164884748 | 16468  | 7.1383  | 0.4824 | 0.3105  | 5.7969 | CHB |
| MGC3794   | GI_33239373-S | rs2038034  | 1 | 1 | 164885028 | 16188  | 7.0651  | 0.5036 | 0.3171  | 5.7969 | CHB |
| MGC3794   | GI_33239373-S | rs3753935  | 1 | 1 | 164885459 | 15757  | 7.4034  | 0.5049 | 0.3140  | 5.7969 | CHB |
| MGC3794   | GI_33239373-S | rs2294253  | 1 | 1 | 164888285 | 12931  | 7.1383  | 0.4824 | 0.3105  | 5.7969 | CHB |
| MGC3794   | GI_33239373-S | rs2235207  | 1 | 1 | 164890920 | 10296  | 7.1383  | 0.4824 | 0.3105  | 5.7969 | CHB |
| MGC3794   | GI_33239373-S | rs1040404  | 1 | 1 | 164891548 | 9668   | 7.1383  | 0.4824 | -0.3105 | 5.7969 | CHB |
| MGC3794   | GI_33239373-S | rs2281014  | 1 | 1 | 164895496 | 5720   | 7.1383  | 0.4824 | 0.3105  | 5.7969 | CHB |
| MGC3794   | GI_33239373-S | rs1040403  | 1 | 1 | 164895855 | 5361   | 7.1383  | 0.4824 | -0.3105 | 5.7969 | CHB |
| MGC3794   | GI_33239373-S | rs2072778  | 1 | 1 | 164900408 | 808    | 7.1383  | 0.4824 | 0.3105  | 5.7969 | CHB |
| MGC3794   | GI_33239373-S | rs10918844 | 1 | 1 | 164904282 | 3066   | 7.1383  | 0.4824 | -0.3105 | 5.7969 | CHB |
| dJ383J4.3 | GI_42655858-S | rs7539322  | 1 | 1 | 170347622 | 152854 | 14.4940 | 0.7623 | -0.8903 | 6.6548 | CHB |
| dJ383J4.3 | GI_42655858-S | rs3791022  | 1 | 1 | 170466426 | 34050  | 14.4940 | 0.7623 | 0.8903  | 6.6548 | CHB |
| dJ383J4.3 | GI_42655858-S | rs2068871  | 1 | 1 | 170527826 | 27350  | 14.4940 | 0.7623 | -0.8903 | 6.6548 | CHB |
| dJ383J4.3 | GI_42655858-S | rs2065170  | 1 | 1 | 170576889 | 76413  | 10.3466 | 0.6309 | 0.8584  | 6.6548 | CHB |
| dJ383J4.3 | GI_42655858-S | rs16846526 | 1 | 1 | 170587894 | 87418  | 10.3466 | 0.6309 | 0.8584  | 6.6548 | CHB |
| dJ383J4.3 | GI_42655858-S | rs16846546 | 1 | 1 | 170591839 | 91363  | 10.3466 | 0.6309 | 0.8584  | 6.6548 | CHB |
| dJ383J4.3 | GI_42655858-S | rs6691053  | 1 | 1 | 170600612 | 100136 | 8.0753  | 0.5309 | -0.7901 | 6.6548 | CHB |
| dJ383J4.3 | GI_42655858-S | rs16846561 | 1 | 1 | 170600768 | 100292 | 10.3466 | 0.6309 | -0.8584 | 6.6548 | CHB |
| dJ383J4.3 | GI_42655858-S | rs2146372  | 1 | 1 | 170601226 | 100750 | 10.3466 | 0.6309 | -0.8584 | 6.6548 | CHB |
| dJ383J4.3 | GI_42655858-S | rs2759328  | 1 | 1 | 170608362 | 107886 | 10.3466 | 0.6309 | -0.8584 | 6.6548 | CHB |
| dJ383J4.3 | GI_42655858-S | rs941988   | 1 | 1 | 170613550 | 113074 | 10.3466 | 0.6309 | 0.8584  | 6.6548 | CHB |
| dJ383J4.3 | GI_42655858-S | rs2227592  | 1 | 1 | 170617369 | 116893 | 10.3466 | 0.6309 | 0.8584  | 6.6548 | CHB |
| dJ383J4.3 | GI_42655858-S | rs2227589  | 1 | 1 | 170617873 | 117397 | 10.3466 | 0.6309 | 0.8584  | 6.6548 | CHB |
| dJ383J4.3 | GI_42655858-S | rs1951626  | 1 | 1 | 170623758 | 123282 | 7.3706  | 0.4949 | -0.7659 | 6.6548 | CHB |
| dJ383J4.3 | GI_42655858-S | rs16846593 | 1 | 1 | 170629874 | 129398 | 7.8372  | 0.5191 | -0.7397 | 6.6548 | CHB |
| dJ383J4.3 | GI_42655858-S | rs6685043  | 1 | 1 | 170689170 | 188694 | 7.8372  | 0.5191 | 0.7397  | 6.6548 | CHB |
| dJ383J4.3 | GI_42655858-S | rs16846769 | 1 | 1 | 170922402 | 421926 | 8.0453  | 0.5379 | 0.7555  | 6.6548 | CHB |
| dJ383J4.3 | GI_42655858-S | rs10489254 | 1 | 1 | 170929458 | 428982 | 7.8372  | 0.5191 | -0.7397 | 6.6548 | CHB |
| dJ383J4.3 | GI_42655858-S | rs16847018 | 1 | 1 | 171151329 | 650853 | 7.3010  | 0.4994 | -0.7281 | 6.6548 | CHB |
| dJ383J4.3 | GI_42655858-S | rs16847025 | 1 | 1 | 171157515 | 657039 | 7.0745  | 0.4871 | -0.6864 | 6.6548 | CHB |
| dJ383J4.3 | GI_42655858-S | rs10489261 | 1 | 1 | 171172340 | 671864 | 7.0369  | 0.4769 | -0.6761 | 6.6548 | CHB |
| dJ383J4.3 | GI_42655858-S | rs16847121 | 1 | 1 | 171214090 | 713614 | 6.9711  | 0.4897 | 0.6885  | 6.6548 | CHB |
| dJ383J4.3 | GI_42655858-S | rs16847206 | 1 | 1 | 171272964 | 772488 | 7.0528  | 0.4859 | -0.6857 | 6.6548 | CHB |
| dJ383J4.3 | GI_42655858-S | rs7543502  | 1 | 1 | 171385358 | 884882 | 7.0369  | 0.4769 | -0.6761 | 6.6548 | CHB |
| dJ383J4.3 | GI_42655858-S | rs6673649  | 1 | 1 | 171465219 | 964743 | 7.0369  | 0.4769 | -0.6761 | 6.6548 | CHB |
| dJ383J4.3 | GI_42655858-S | rs6692753  | 1 | 1 | 171469114 | 968638 | 7.0369  | 0.4769 | -0.6761 | 6.6548 | CHB |
| C1orf16   | GI_42476073-A | rs6684015  | 1 | 1 | 180137451 | 117266 | 6.0909  | 0.4226 | -0.2200 | 5.7399 | CHB |
| C1orf16   | GI_42476073-A | rs6659327  | 1 | 1 | 180137510 | 117207 | 6.1831  | 0.4436 | 0.2195  | 5.7399 | CHB |
| C1orf16   | GI_42476073-A | rs4047801  | 1 | 1 | 180146975 | 107742 | 6.0909  | 0.4226 | 0.2200  | 5.7399 | CHB |
| C1orf16   | GI_42476073-A | rs12024309 | 1 | 1 | 180151638 | 103079 | 6.0909  | 0.4226 | 0.2200  | 5.7399 | CHB |
| C1orf16   | GI_42476073-A | rs9286848  | 1 | 1 | 180157906 | 96811  | 6.0909  | 0.4226 | 0.2200  | 5.7399 | CHB |
| C1orf16   | GI_42476073-A | rs2275676  | 1 | 1 | 180162479 | 92238  | 6.0909  | 0.4226 | -0.2200 | 5.7399 | CHB |
| C1orf16   | GI_42476073-A | rs2702178  | 1 | 1 | 180184202 | 70515  | 5.8559  | 0.4082 | 0.2201  | 5.7399 | CHB |

|          |               |            |   |   |           |        |         |        |         |        |     |
|----------|---------------|------------|---|---|-----------|--------|---------|--------|---------|--------|-----|
| C1orf16  | GI_42476073-A | rs2702205  | 1 | 1 | 180188855 | 65862  | 5.8559  | 0.4082 | 0.2201  | 5.7399 | CHB |
| C1orf16  | GI_42476073-A | rs2702204  | 1 | 1 | 180189053 | 65664  | 5.8695  | 0.4242 | 0.2199  | 5.7399 | CHB |
| C1orf16  | GI_42476073-A | rs2761581  | 1 | 1 | 180206507 | 48210  | 5.8559  | 0.4082 | 0.2201  | 5.7399 | CHB |
| C1orf16  | GI_42476073-A | rs10911353 | 1 | 1 | 180220860 | 33857  | 5.8559  | 0.4082 | 0.2201  | 5.7399 | CHB |
| C1orf16  | GI_42476073-A | rs2702182  | 1 | 1 | 180248097 | 6620   | 6.3663  | 0.4547 | -0.2393 | 5.7399 | CHB |
| C1orf16  | GI_42476073-A | rs2702180  | 1 | 1 | 180249628 | 5089   | 6.1871  | 0.4439 | -0.2353 | 5.7399 | CHB |
| hmm26268 | hmm26268-S    | rs12022218 | 1 | 1 | 218333069 | 3193   | 7.0758  | 0.4790 | -0.2394 | 5.7376 | CHB |
| hmm26268 | hmm26268-S    | rs3010848  | 1 | 1 | 218333518 | 2744   | 8.4371  | 0.5570 | 0.2481  | 5.7376 | CHB |
| hmm26268 | hmm26268-S    | rs12026940 | 1 | 1 | 218334109 | 2153   | 7.0758  | 0.4790 | -0.2394 | 5.7376 | CHB |
| hmm26268 | hmm26268-S    | rs12030246 | 1 | 1 | 218334167 | 2095   | 6.5566  | 0.4659 | 0.2351  | 5.7376 | CHB |
| hmm26268 | hmm26268-S    | rs3010852  | 1 | 1 | 218334602 | 1660   | 8.5717  | 0.5548 | 0.2396  | 5.7376 | CHB |
| hmm26268 | hmm26268-S    | rs7551182  | 1 | 1 | 218335485 | 777    | 8.5717  | 0.5548 | -0.2396 | 5.7376 | CHB |
| hmm26268 | hmm26268-S    | rs11118855 | 1 | 1 | 218336215 | 47     | 8.5717  | 0.5548 | 0.2396  | 5.7376 | CHB |
| hmm26268 | hmm26268-S    | rs3003902  | 1 | 1 | 218336419 | 157    | 8.7324  | 0.5623 | 0.2320  | 5.7376 | CHB |
| hmm26268 | hmm26268-S    | rs12034159 | 1 | 1 | 218337932 | 1670   | 8.5717  | 0.5548 | 0.2396  | 5.7376 | CHB |
| hmm26268 | hmm26268-S    | rs9441948  | 1 | 1 | 218337962 | 1700   | 8.5717  | 0.5548 | 0.2396  | 5.7376 | CHB |
| hmm26268 | hmm26268-S    | rs7532339  | 1 | 1 | 218339435 | 3173   | 6.8555  | 0.4917 | 0.2415  | 5.7376 | CHB |
| hmm26268 | hmm26268-S    | rs11118856 | 1 | 1 | 218339816 | 3554   | 8.5717  | 0.5548 | -0.2396 | 5.7376 | CHB |
| hmm26268 | hmm26268-S    | rs12036282 | 1 | 1 | 218340189 | 3927   | 6.8115  | 0.4807 | 0.2411  | 5.7376 | CHB |
| hmm26268 | hmm26268-S    | rs11118858 | 1 | 1 | 218341353 | 5091   | 6.8229  | 0.4651 | 0.2392  | 5.7376 | CHB |
| hmm26268 | hmm26268-S    | rs6680297  | 1 | 1 | 218344970 | 8708   | 7.0758  | 0.4790 | 0.2394  | 5.7376 | CHB |
| hmm26268 | hmm26268-S    | rs6680316  | 1 | 1 | 218345021 | 8759   | 5.9011  | 0.4694 | 0.2494  | 5.7376 | CHB |
| hmm26268 | hmm26268-S    | rs10495178 | 1 | 1 | 218348833 | 12571  | 6.1318  | 0.4250 | -0.2275 | 5.7376 | CHB |
| hmm26268 | hmm26268-S    | rs4403637  | 1 | 1 | 218356929 | 20667  | 7.3278  | 0.5008 | 0.2370  | 5.7376 | CHB |
| hmm26268 | hmm26268-S    | rs11118863 | 1 | 1 | 218361410 | 25148  | 7.7263  | 0.5134 | 0.2519  | 5.7376 | CHB |
| MGC12458 | GI_14150107-S | rs12139861 | 1 | 1 | 241452134 | 124946 | 7.0487  | 0.4776 | 0.5123  | 6.4402 | CHB |
| MGC12458 | GI_14150107-S | rs11590498 | 1 | 1 | 241461755 | 115325 | 7.0574  | 0.4780 | 0.5341  | 6.4402 | CHB |
| MGC12458 | GI_14150107-S | rs10927361 | 1 | 1 | 241466695 | 110385 | 7.0574  | 0.4780 | -0.5341 | 6.4402 | CHB |
| MGC12458 | GI_14150107-S | rs1021282  | 1 | 1 | 241470753 | 106327 | 7.0574  | 0.4780 | -0.5341 | 6.4402 | CHB |
| MGC12458 | GI_14150107-S | rs10927363 | 1 | 1 | 241474480 | 102600 | 7.0574  | 0.4780 | -0.5341 | 6.4402 | CHB |
| MGC12458 | GI_14150107-S | rs12403396 | 1 | 1 | 241474775 | 102305 | 7.0574  | 0.4780 | -0.5341 | 6.4402 | CHB |
| MGC12458 | GI_14150107-S | rs10927364 | 1 | 1 | 241476465 | 100615 | 7.0574  | 0.4780 | -0.5341 | 6.4402 | CHB |
| MGC12458 | GI_14150107-S | rs4658434  | 1 | 1 | 241478023 | 99057  | 7.0574  | 0.4780 | 0.5341  | 6.4402 | CHB |
| MGC12458 | GI_14150107-S | rs2050632  | 1 | 1 | 241485608 | 91472  | 7.0574  | 0.4780 | 0.5341  | 6.4402 | CHB |
| MGC12458 | GI_14150107-S | rs522595   | 1 | 1 | 241485780 | 91300  | 7.0574  | 0.4780 | 0.5341  | 6.4402 | CHB |
| MGC12458 | GI_14150107-S | rs644341   | 1 | 1 | 241485863 | 91217  | 7.0574  | 0.4780 | -0.5341 | 6.4402 | CHB |
| MGC12458 | GI_14150107-S | rs643352   | 1 | 1 | 241486132 | 90948  | 7.0574  | 0.4780 | 0.5341  | 6.4402 | CHB |
| MGC12458 | GI_14150107-S | rs10803250 | 1 | 1 | 241488109 | 88971  | 6.9512  | 0.4886 | -0.5436 | 6.4402 | CHB |
| MGC12458 | GI_14150107-S | rs651773   | 1 | 1 | 241490780 | 86300  | 7.0574  | 0.4780 | -0.5341 | 6.4402 | CHB |
| MGC12458 | GI_14150107-S | rs626070   | 1 | 1 | 241493372 | 83708  | 7.0574  | 0.4780 | 0.5341  | 6.4402 | CHB |
| MGC12458 | GI_14150107-S | rs4658685  | 1 | 1 | 241493912 | 83168  | 6.9674  | 0.4895 | -0.5302 | 6.4402 | CHB |
| MGC12458 | GI_14150107-S | rs7552510  | 1 | 1 | 241494079 | 83001  | 7.0574  | 0.4780 | 0.5341  | 6.4402 | CHB |
| MGC12458 | GI_14150107-S | rs2786693  | 1 | 1 | 241495087 | 81993  | 7.1240  | 0.4898 | -0.5422 | 6.4402 | CHB |
| MGC12458 | GI_14150107-S | rs672008   | 1 | 1 | 241496919 | 80161  | 7.0574  | 0.4780 | 0.5341  | 6.4402 | CHB |
| MGC12458 | GI_14150107-S | rs2786691  | 1 | 1 | 241497170 | 79910  | 7.0574  | 0.4780 | -0.5341 | 6.4402 | CHB |
| MGC12458 | GI_14150107-S | rs10803251 | 1 | 1 | 241499501 | 77579  | 7.0356  | 0.4933 | 0.5522  | 6.4402 | CHB |
| MGC12458 | GI_14150107-S | rs1196365  | 1 | 1 | 241505212 | 71868  | 7.0574  | 0.4780 | -0.5341 | 6.4402 | CHB |
| MGC12458 | GI_14150107-S | rs1196366  | 1 | 1 | 241505229 | 71851  | 10.8071 | 0.6485 | -0.8279 | 6.4402 | CHB |
| MGC12458 | GI_14150107-S | rs10927369 | 1 | 1 | 241506001 | 71079  | 7.0574  | 0.4780 | -0.5341 | 6.4402 | CHB |
| MGC12458 | GI_14150107-S | rs901664   | 1 | 1 | 241509620 | 67460  | 10.8071 | 0.6485 | -0.8279 | 6.4402 | CHB |
| MGC12458 | GI_14150107-S | rs901665   | 1 | 1 | 241509924 | 67156  | 10.8071 | 0.6485 | -0.8279 | 6.4402 | CHB |
| MGC12458 | GI_14150107-S | rs7528009  | 1 | 1 | 241511114 | 65966  | 7.0574  | 0.4780 | 0.5341  | 6.4402 | CHB |
| MGC12458 | GI_14150107-S | rs648282   | 1 | 1 | 241512775 | 64305  | 8.7332  | 0.6079 | 0.8045  | 6.4402 | CHB |
| MGC12458 | GI_14150107-S | rs600025   | 1 | 1 | 241517136 | 59944  | 10.8071 | 0.6485 | 0.8279  | 6.4402 | CHB |
| MGC12458 | GI_14150107-S | rs586013   | 1 | 1 | 241517934 | 59146  | 7.0574  | 0.4780 | -0.5341 | 6.4402 | CHB |
| MGC12458 | GI_14150107-S | rs632383   | 1 | 1 | 241518287 | 58793  | 10.2254 | 0.6349 | 0.8279  | 6.4402 | CHB |
| MGC12458 | GI_14150107-S | rs1979568  | 1 | 1 | 241518513 | 58567  | 10.3046 | 0.6380 | 0.8330  | 6.4402 | CHB |
| MGC12458 | GI_14150107-S | rs675033   | 1 | 1 | 241519964 | 57116  | 7.0574  | 0.4780 | 0.5341  | 6.4402 | CHB |
| MGC12458 | GI_14150107-S | rs632676   | 1 | 1 | 241521105 | 55975  | 10.9976 | 0.6642 | -0.8405 | 6.4402 | CHB |

|           |               |            |   |   |           |       |         |        |         |        |     |
|-----------|---------------|------------|---|---|-----------|-------|---------|--------|---------|--------|-----|
| MGC12458  | GI_14150107-S | rs616540   | 1 | 1 | 241522450 | 54630 | 7.0574  | 0.4780 | -0.5341 | 6.4402 | CHB |
| MGC12458  | GI_14150107-S | rs665478   | 1 | 1 | 241524271 | 52809 | 7.0574  | 0.4780 | -0.5341 | 6.4402 | CHB |
| MGC12458  | GI_14150107-S | rs9428636  | 1 | 1 | 241526024 | 51056 | 7.0574  | 0.4780 | -0.5341 | 6.4402 | CHB |
| MGC12458  | GI_14150107-S | rs626106   | 1 | 1 | 241530870 | 46210 | 10.4853 | 0.6540 | -0.8377 | 6.4402 | CHB |
| MGC12458  | GI_14150107-S | rs2029249  | 1 | 1 | 241531718 | 45362 | 7.0574  | 0.4780 | -0.5341 | 6.4402 | CHB |
| MGC12458  | GI_14150107-S | rs11580510 | 1 | 1 | 241531917 | 45163 | 7.0574  | 0.4780 | -0.5341 | 6.4402 | CHB |
| MGC12458  | GI_14150107-S | rs12728471 | 1 | 1 | 241531931 | 45149 | 7.0574  | 0.4780 | -0.5341 | 6.4402 | CHB |
| MGC12458  | GI_14150107-S | rs4233441  | 1 | 1 | 241535175 | 41905 | 7.0574  | 0.4780 | -0.5341 | 6.4402 | CHB |
| MGC12458  | GI_14150107-S | rs619449   | 1 | 1 | 241539091 | 37989 | 10.8071 | 0.6485 | 0.8279  | 6.4402 | CHB |
| MGC12458  | GI_14150107-S | rs588923   | 1 | 1 | 241539921 | 37159 | 8.1039  | 0.5872 | -0.7277 | 6.4402 | CHB |
| MGC12458  | GI_14150107-S | rs4658688  | 1 | 1 | 241540837 | 36243 | 7.0574  | 0.4780 | -0.5341 | 6.4402 | CHB |
| CGI-49    | GI_7705766-S  | rs6689579  | 1 | 1 | 243217630 | 39314 | 6.3515  | 0.4380 | 0.4564  | 5.7167 | CHB |
| CGI-49    | GI_7705766-S  | rs6426329  | 1 | 1 | 243218091 | 38853 | 6.3515  | 0.4380 | -0.4564 | 5.7167 | CHB |
| CGI-49    | GI_7705766-S  | rs7526237  | 1 | 1 | 243224175 | 32769 | 6.3515  | 0.4380 | -0.4564 | 5.7167 | CHB |
| CGI-49    | GI_7705766-S  | rs12129386 | 1 | 1 | 243228628 | 28316 | 6.3515  | 0.4380 | 0.4564  | 5.7167 | CHB |
| CGI-49    | GI_7705766-S  | rs7513496  | 1 | 1 | 243233247 | 23697 | 6.3515  | 0.4380 | -0.4564 | 5.7167 | CHB |
| CGI-49    | GI_7705766-S  | rs7550482  | 1 | 1 | 243244808 | 12136 | 6.3515  | 0.4380 | -0.4564 | 5.7167 | CHB |
| CGI-49    | GI_7705766-S  | rs1127098  | 1 | 1 | 243248431 | 8513  | 6.5481  | 0.4573 | -0.4714 | 5.7167 | CHB |
| CGI-49    | GI_7705766-S  | rs4926440  | 1 | 1 | 243255059 | 1885  | 6.3515  | 0.4380 | 0.4564  | 5.7167 | CHB |
| CGI-49    | GI_7705766-S  | rs4926449  | 1 | 1 | 243255141 | 1803  | 6.3515  | 0.4380 | -0.4564 | 5.7167 | CHB |
| CGI-49    | GI_7705766-S  | rs4926450  | 1 | 1 | 243255224 | 1720  | 6.3515  | 0.4380 | 0.4564  | 5.7167 | CHB |
| CGI-49    | GI_7705766-S  | rs1127149  | 1 | 1 | 243256915 | 29    | 6.3515  | 0.4380 | 0.4564  | 5.7167 | CHB |
| CGI-49    | GI_7705766-S  | rs6699332  | 1 | 1 | 243261052 | 4108  | 6.3515  | 0.4380 | 0.4564  | 5.7167 | CHB |
| CGI-49    | GI_7705766-S  | rs3795469  | 1 | 1 | 243261410 | 4466  | 6.3515  | 0.4380 | 0.4564  | 5.7167 | CHB |
| CGI-49    | GI_7705766-S  | rs7528002  | 1 | 1 | 243264507 | 7563  | 6.3515  | 0.4380 | -0.4564 | 5.7167 | CHB |
| CGI-49    | GI_7705766-S  | rs4926442  | 1 | 1 | 243267760 | 10816 | 6.0693  | 0.4367 | -0.4648 | 5.7167 | CHB |
| CGI-49    | GI_7705766-S  | rs4926443  | 1 | 1 | 243268148 | 11204 | 6.3515  | 0.4380 | 0.4564  | 5.7167 | CHB |
| CGI-49    | GI_7705766-S  | rs4926444  | 1 | 1 | 243268212 | 11268 | 6.3515  | 0.4380 | 0.4564  | 5.7167 | CHB |
| CGI-49    | GI_7705766-S  | rs12410595 | 1 | 1 | 243272118 | 15174 | 6.3515  | 0.4380 | 0.4564  | 5.7167 | CHB |
| CGI-49    | GI_7705766-S  | rs12409066 | 1 | 1 | 243273590 | 16646 | 6.3515  | 0.4380 | 0.4564  | 5.7167 | CHB |
| SBZF3     | GI_31742527-S | rs1691230  | 1 | 1 | 243433041 | 2000  | 5.6982  | 0.3985 | -0.2152 | 5.5966 | CHB |
| SBZF3     | GI_31742527-S | rs2818886  | 1 | 1 | 243435449 | 408   | 5.6982  | 0.3985 | -0.2152 | 5.5966 | CHB |
| Hs.421238 | Hs.421238-S   | rs12740588 | 1 | 1 | 243523902 | 87509 | 5.8376  | 0.4559 | -0.4601 | 5.6793 | CHB |
| Hs.421238 | Hs.421238-S   | rs12141826 | 1 | 1 | 243526680 | 84731 | 5.8390  | 0.4146 | 0.4218  | 5.6793 | CHB |
| Hs.421238 | Hs.421238-S   | rs1874407  | 1 | 1 | 243549518 | 61893 | 5.9860  | 0.4315 | 0.4425  | 5.6793 | CHB |
| Hs.421238 | Hs.421238-S   | rs12141797 | 1 | 1 | 243576630 | 34781 | 5.7337  | 0.4080 | 0.4185  | 5.6793 | CHB |
| Hs.421238 | Hs.421238-S   | rs2379192  | 1 | 1 | 243579379 | 32032 | 5.6983  | 0.4058 | 0.3903  | 5.6793 | CHB |
| Hs.421238 | Hs.421238-S   | rs10754536 | 1 | 1 | 243588984 | 22427 | 5.7337  | 0.4080 | 0.4185  | 5.6793 | CHB |
| Hs.421238 | Hs.421238-S   | rs10924924 | 1 | 1 | 243609361 | 2050  | 6.8266  | 0.4653 | -0.4252 | 5.6793 | CHB |
| Hs.421238 | Hs.421238-S   | rs4925715  | 1 | 1 | 243614510 | 3099  | 6.8266  | 0.4653 | -0.4252 | 5.6793 | CHB |
| Hs.421238 | Hs.421238-S   | rs12093759 | 1 | 1 | 243631914 | 20503 | 6.8302  | 0.4735 | -0.4227 | 5.6793 | CHB |
| Hs.421238 | Hs.421238-S   | rs3844080  | 1 | 1 | 243632874 | 21463 | 6.8266  | 0.4653 | 0.4252  | 5.6793 | CHB |
| Hs.421238 | Hs.421238-S   | rs10493861 | 1 | 1 | 243632958 | 21547 | 6.8266  | 0.4653 | -0.4252 | 5.6793 | CHB |
| Hs.421238 | Hs.421238-S   | rs3844079  | 1 | 1 | 243633394 | 21983 | 6.8266  | 0.4653 | 0.4252  | 5.6793 | CHB |
| Hs.421238 | Hs.421238-S   | rs7521596  | 1 | 1 | 243634732 | 23321 | 6.4790  | 0.4533 | -0.4255 | 5.6793 | CHB |
| Hs.421238 | Hs.421238-S   | rs7531763  | 1 | 1 | 243634832 | 23421 | 6.8266  | 0.4653 | 0.4252  | 5.6793 | CHB |
| Hs.421238 | Hs.421238-S   | rs16846292 | 1 | 1 | 243637489 | 26078 | 6.8266  | 0.4653 | 0.4252  | 5.6793 | CHB |
| Hs.421238 | Hs.421238-S   | rs6675536  | 1 | 1 | 243648339 | 36928 | 6.8266  | 0.4653 | 0.4252  | 5.6793 | CHB |
| Hs.421238 | Hs.421238-S   | rs9793102  | 1 | 1 | 243649301 | 37890 | 6.8266  | 0.4653 | 0.4252  | 5.6793 | CHB |
| hmm27769  | hmm27769-S    | rs6715159  | 2 | 2 | 20706311  | 12503 | 9.2678  | 0.5863 | -0.2386 | 8.8725 | CHB |
| hmm27769  | hmm27769-S    | rs6722960  | 2 | 2 | 20710329  | 8485  | 8.9658  | 0.5816 | 0.2378  | 8.8725 | CHB |
| DTNB      | GI_37577100-A | rs6761076  | 2 | 2 | 25519409  | 7604  | 8.1355  | 0.5339 | 0.4870  | 5.4743 | CHB |
| DTNB      | GI_37577100-A | rs7558082  | 2 | 2 | 25524465  | 12660 | 7.0105  | 0.4755 | -0.3893 | 5.4743 | CHB |
| DTNB      | GI_37577100-A | rs7577599  | 2 | 2 | 25524797  | 12992 | 7.8544  | 0.5199 | 0.4266  | 5.4743 | CHB |
| DTNB      | GI_37577100-A | rs17046986 | 2 | 2 | 25532551  | 20746 | 8.1355  | 0.5339 | -0.4870 | 5.4743 | CHB |
| DTNB      | GI_37577100-A | rs7571570  | 2 | 2 | 25533181  | 21376 | 8.1355  | 0.5339 | -0.4870 | 5.4743 | CHB |
| DTNB      | GI_37577100-A | rs1369704  | 2 | 2 | 25535241  | 23436 | 8.1355  | 0.5339 | -0.4870 | 5.4743 | CHB |
| DTNB      | GI_37577100-A | rs2384232  | 2 | 2 | 25535400  | 23595 | 8.1355  | 0.5339 | 0.4870  | 5.4743 | CHB |
| DTNB      | GI_37577100-A | rs10206012 | 2 | 2 | 25535837  | 24032 | 7.8795  | 0.5383 | 0.4874  | 5.4743 | CHB |

|           |               |            |   |   |          |        |        |        |         |        |     |
|-----------|---------------|------------|---|---|----------|--------|--------|--------|---------|--------|-----|
| DTNB      | GI_37577100-A | rs6546148  | 2 | 2 | 25536656 | 24851  | 8.1355 | 0.5339 | -0.4870 | 5.4743 | CHB |
| DTNB      | GI_37577100-A | rs7583617  | 2 | 2 | 25537510 | 25705  | 6.6670 | 0.4987 | 0.5009  | 5.4743 | CHB |
| DTNB      | GI_37577100-A | rs7586918  | 2 | 2 | 25538036 | 26231  | 8.1355 | 0.5339 | 0.4870  | 5.4743 | CHB |
| DTNB      | GI_37577100-A | rs6546149  | 2 | 2 | 25541089 | 29284  | 8.1355 | 0.5339 | -0.4870 | 5.4743 | CHB |
| CR1PT     | GI_41350204-S | rs1451156  | 2 | 2 | 46744253 | 19148  | 6.1087 | 0.4236 | -0.3309 | 6.1071 | CHB |
| CR1PT     | GI_41350204-S | rs13000706 | 2 | 2 | 46749898 | 13503  | 6.1087 | 0.4236 | 0.3309  | 6.1071 | CHB |
| CR1PT     | GI_41350204-S | rs1531133  | 2 | 2 | 46755282 | 8119   | 6.1087 | 0.4236 | 0.3309  | 6.1071 | CHB |
| CR1PT     | GI_41350204-S | rs3087822  | 2 | 2 | 46763684 | 283    | 6.1087 | 0.4236 | 0.3309  | 6.1071 | CHB |
| LOC339804 | GI_37546921-S | rs1729672  | 2 | 2 | 61241868 | 60073  | 5.5528 | 0.3893 | -0.4047 | 5.2862 | CHB |
| LOC339804 | GI_37546921-S | rs1177284  | 2 | 2 | 61261097 | 40844  | 6.5397 | 0.4821 | -0.3451 | 5.2862 | CHB |
| LOC339804 | GI_37546921-S | rs1177285  | 2 | 2 | 61261788 | 40153  | 7.5728 | 0.5055 | 0.4332  | 5.2862 | CHB |
| LOC339804 | GI_37546921-S | rs1177282  | 2 | 2 | 61269428 | 32513  | 7.3418 | 0.5016 | -0.4276 | 5.2862 | CHB |
| LOC339804 | GI_37546921-S | rs12473277 | 2 | 2 | 61270271 | 31670  | 9.1330 | 0.5804 | 0.5147  | 5.2862 | CHB |
| LOC339804 | GI_37546921-S | rs1729660  | 2 | 2 | 61277463 | 24478  | 8.5345 | 0.5531 | 0.4740  | 5.2862 | CHB |
| LOC339804 | GI_37546921-S | rs11498    | 2 | 2 | 61282470 | 19471  | 8.1729 | 0.5357 | 0.4433  | 5.2862 | CHB |
| LOC339804 | GI_37546921-S | rs3213944  | 2 | 2 | 61283949 | 17992  | 7.2531 | 0.5323 | 0.4394  | 5.2862 | CHB |
| LOC339804 | GI_37546921-S | rs2441467  | 2 | 2 | 61285800 | 16141  | 7.1255 | 0.5348 | -0.4497 | 5.2862 | CHB |
| LOC339804 | GI_37546921-S | rs720201   | 2 | 2 | 61288114 | 13827  | 8.5345 | 0.5531 | 0.4740  | 5.2862 | CHB |
| LOC339804 | GI_37546921-S | rs1729653  | 2 | 2 | 61288659 | 13282  | 8.4220 | 0.5563 | 0.4781  | 5.2862 | CHB |
| LOC339804 | GI_37546921-S | rs1665270  | 2 | 2 | 61289317 | 12624  | 8.5345 | 0.5531 | -0.4740 | 5.2862 | CHB |
| LOC339804 | GI_37546921-S | rs1729652  | 2 | 2 | 61289670 | 12271  | 8.5345 | 0.5531 | -0.4740 | 5.2862 | CHB |
| LOC339804 | GI_37546921-S | rs2698190  | 2 | 2 | 61290268 | 11673  | 9.2547 | 0.5945 | -0.5244 | 5.2862 | CHB |
| LOC339804 | GI_37546921-S | rs1665271  | 2 | 2 | 61290467 | 11474  | 8.5923 | 0.5644 | 0.4814  | 5.2862 | CHB |
| LOC339804 | GI_37546921-S | rs12475591 | 2 | 2 | 61293179 | 8762   | 8.3443 | 0.5526 | -0.4761 | 5.2862 | CHB |
| LOC339804 | GI_37546921-S | rs2592493  | 2 | 2 | 61293988 | 7953   | 8.3443 | 0.5526 | 0.4761  | 5.2862 | CHB |
| LOC339804 | GI_37546921-S | rs1665263  | 2 | 2 | 61294410 | 7531   | 6.0943 | 0.4820 | 0.4031  | 5.2862 | CHB |
| LOC339804 | GI_37546921-S | rs1665260  | 2 | 2 | 61296138 | 5803   | 8.3443 | 0.5526 | 0.4761  | 5.2862 | CHB |
| LOC339804 | GI_37546921-S | rs1665259  | 2 | 2 | 61296406 | 5535   | 8.5345 | 0.5531 | -0.4740 | 5.2862 | CHB |
| LOC339804 | GI_37546921-S | rs7558954  | 2 | 2 | 61296557 | 5384   | 6.6175 | 0.4695 | -0.4149 | 5.2862 | CHB |
| LOC339804 | GI_37546921-S | rs1729671  | 2 | 2 | 61296756 | 5185   | 7.7120 | 0.5477 | 0.4776  | 5.2862 | CHB |
| LOC339804 | GI_37546921-S | rs1177309  | 2 | 2 | 61296899 | 5042   | 7.9165 | 0.5230 | -0.4461 | 5.2862 | CHB |
| LOC339804 | GI_37546921-S | rs1177308  | 2 | 2 | 61298905 | 3036   | 8.4959 | 0.5513 | -0.4542 | 5.2862 | CHB |
| LOC339804 | GI_37546921-S | rs1177303  | 2 | 2 | 61300006 | 1935   | 8.5345 | 0.5531 | 0.4740  | 5.2862 | CHB |
| LOC339804 | GI_37546921-S | rs1729674  | 2 | 2 | 61301388 | 553    | 7.9165 | 0.5230 | 0.4461  | 5.2862 | CHB |
| LOC339804 | GI_37546921-S | rs1729673  | 2 | 2 | 61301450 | 491    | 8.5345 | 0.5531 | 0.4740  | 5.2862 | CHB |
| LOC339804 | GI_37546921-S | rs3889717  | 2 | 2 | 61302442 | 501    | 7.9165 | 0.5230 | -0.4461 | 5.2862 | CHB |
| LOC339804 | GI_37546921-S | rs1615070  | 2 | 2 | 61304826 | 2885   | 7.9165 | 0.5230 | 0.4461  | 5.2862 | CHB |
| LOC339804 | GI_37546921-S | rs2600668  | 2 | 2 | 61312078 | 10137  | 8.5345 | 0.5531 | -0.4740 | 5.2862 | CHB |
| LOC339804 | GI_37546921-S | rs2167564  | 2 | 2 | 61312467 | 10526  | 8.5345 | 0.5531 | 0.4740  | 5.2862 | CHB |
| LOC339804 | GI_37546921-S | rs2600669  | 2 | 2 | 61312947 | 11006  | 7.9165 | 0.5230 | 0.4461  | 5.2862 | CHB |
| LOC339804 | GI_37546921-S | rs935860   | 2 | 2 | 61318212 | 16271  | 7.1419 | 0.4826 | 0.4262  | 5.2862 | CHB |
| LOC339804 | GI_37546921-S | rs777584   | 2 | 2 | 61321997 | 20056  | 7.4485 | 0.4990 | -0.4781 | 5.2862 | CHB |
| LOC339804 | GI_37546921-S | rs777592   | 2 | 2 | 61329994 | 28053  | 6.8110 | 0.4644 | -0.4400 | 5.2862 | CHB |
| LOC339804 | GI_37546921-S | rs777587   | 2 | 2 | 61339326 | 37385  | 6.8110 | 0.4644 | -0.4400 | 5.2862 | CHB |
| LOC339804 | GI_37546921-S | rs4671397  | 2 | 2 | 61347498 | 45557  | 7.9528 | 0.5249 | 0.5254  | 5.2862 | CHB |
| LOC339804 | GI_37546921-S | rs4672424  | 2 | 2 | 61356424 | 54483  | 6.2508 | 0.4321 | 0.4001  | 5.2862 | CHB |
| LOC339804 | GI_37546921-S | rs7588041  | 2 | 2 | 61373063 | 71122  | 6.5018 | 0.4888 | -0.4246 | 5.2862 | CHB |
| LOC339804 | GI_37546921-S | rs7591772  | 2 | 2 | 61374051 | 72110  | 7.1514 | 0.4832 | -0.4461 | 5.2862 | CHB |
| LOC339804 | GI_37546921-S | rs4672427  | 2 | 2 | 61380901 | 78960  | 7.0081 | 0.4753 | -0.4692 | 5.2862 | CHB |
| LOC339804 | GI_37546921-S | rs2167565  | 2 | 2 | 61388109 | 86168  | 5.3641 | 0.3772 | -0.3941 | 5.2862 | CHB |
| LOC339804 | GI_37546921-S | rs13398770 | 2 | 2 | 61391068 | 89127  | 6.1814 | 0.4280 | -0.4444 | 5.2862 | CHB |
| LOC339804 | GI_37546921-S | rs6737373  | 2 | 2 | 61409689 | 107748 | 7.1514 | 0.4832 | 0.4461  | 5.2862 | CHB |
| LOC339804 | GI_37546921-S | rs4599092  | 2 | 2 | 61410619 | 108678 | 7.1514 | 0.4832 | 0.4461  | 5.2862 | CHB |
| LOC339804 | GI_37546921-S | rs12713435 | 2 | 2 | 61411440 | 109499 | 7.1419 | 0.4826 | -0.4262 | 5.2862 | CHB |
| LOC339804 | GI_37546921-S | rs7583383  | 2 | 2 | 61411973 | 110032 | 6.6006 | 0.4685 | 0.4223  | 5.2862 | CHB |
| LOC339804 | GI_37546921-S | rs11677775 | 2 | 2 | 61414761 | 112820 | 7.1419 | 0.4826 | 0.4262  | 5.2862 | CHB |
| LOC339804 | GI_37546921-S | rs11677776 | 2 | 2 | 61414764 | 112823 | 6.5932 | 0.4681 | 0.4095  | 5.2862 | CHB |
| LOC339804 | GI_37546921-S | rs10169662 | 2 | 2 | 61419587 | 117646 | 7.2548 | 0.4887 | 0.4485  | 5.2862 | CHB |
| LOC339804 | GI_37546921-S | rs4671403  | 2 | 2 | 61423103 | 121162 | 6.3548 | 0.4709 | 0.4091  | 5.2862 | CHB |

|           |               |            |   |   |          |        |        |        |         |        |     |
|-----------|---------------|------------|---|---|----------|--------|--------|--------|---------|--------|-----|
| LOC339804 | GI_37546921-S | rs6545852  | 2 | 2 | 61425041 | 123100 | 7.2548 | 0.4887 | 0.4485  | 5.2862 | CHB |
| LOC339804 | GI_37546921-S | rs7561697  | 2 | 2 | 61430816 | 128875 | 7.2548 | 0.4887 | 0.4485  | 5.2862 | CHB |
| LOC339804 | GI_37546921-S | rs6545855  | 2 | 2 | 61444511 | 142570 | 7.2548 | 0.4887 | 0.4485  | 5.2862 | CHB |
| LOC339804 | GI_37546921-S | rs2694619  | 2 | 2 | 61448552 | 146611 | 5.7102 | 0.3992 | 0.3895  | 5.2862 | CHB |
| LOC339804 | GI_37546921-S | rs2694618  | 2 | 2 | 61448635 | 146694 | 5.7102 | 0.3992 | 0.3895  | 5.2862 | CHB |
| LOC339804 | GI_37546921-S | rs2600664  | 2 | 2 | 61451596 | 149655 | 7.2548 | 0.4887 | -0.4485 | 5.2862 | CHB |
| LOC339804 | GI_37546921-S | rs2694633  | 2 | 2 | 61452293 | 150352 | 7.2548 | 0.4887 | 0.4485  | 5.2862 | CHB |
| LOC339804 | GI_37546921-S | rs3765051  | 2 | 2 | 61454001 | 152060 | 5.7102 | 0.3992 | -0.3895 | 5.2862 | CHB |
| LOC339804 | GI_37546921-S | rs17482440 | 2 | 2 | 61460508 | 158567 | 5.5415 | 0.4033 | -0.3971 | 5.2862 | CHB |
| LOC339804 | GI_37546921-S | rs2593623  | 2 | 2 | 61463239 | 161298 | 7.2548 | 0.4887 | 0.4485  | 5.2862 | CHB |
| LOC339804 | GI_37546921-S | rs2593624  | 2 | 2 | 61464135 | 162194 | 6.5293 | 0.5094 | 0.4852  | 5.2862 | CHB |
| LOC339804 | GI_37546921-S | rs778159   | 2 | 2 | 61468395 | 166454 | 7.2548 | 0.4887 | 0.4485  | 5.2862 | CHB |
| LOC339804 | GI_37546921-S | rs778160   | 2 | 2 | 61468815 | 166874 | 5.7102 | 0.3992 | -0.3895 | 5.2862 | CHB |
| LOC339804 | GI_37546921-S | rs1405490  | 2 | 2 | 61471731 | 169790 | 5.8448 | 0.4076 | 0.4136  | 5.2862 | CHB |
| LOC339804 | GI_37546921-S | rs4541246  | 2 | 2 | 61474926 | 172985 | 5.5652 | 0.3973 | -0.3898 | 5.2862 | CHB |
| LOC339804 | GI_37546921-S | rs811871   | 2 | 2 | 61489600 | 187659 | 5.7102 | 0.3992 | -0.3895 | 5.2862 | CHB |
| LOC339804 | GI_37546921-S | rs4411680  | 2 | 2 | 61495756 | 193815 | 5.4388 | 0.3820 | -0.3843 | 5.2862 | CHB |
| LOC339804 | GI_37546921-S | rs12992614 | 2 | 2 | 61504727 | 202786 | 5.6244 | 0.4164 | -0.3970 | 5.2862 | CHB |
| LOC339804 | GI_37546921-S | rs10177225 | 2 | 2 | 61506149 | 204208 | 5.4388 | 0.3820 | -0.3843 | 5.2862 | CHB |
| LOC339804 | GI_37546921-S | rs1900573  | 2 | 2 | 61508563 | 206622 | 5.4388 | 0.3820 | 0.3843  | 5.2862 | CHB |
| LOC339804 | GI_37546921-S | rs2421066  | 2 | 2 | 61511173 | 209232 | 5.4388 | 0.3820 | 0.3843  | 5.2862 | CHB |
| LOC339804 | GI_37546921-S | rs2593620  | 2 | 2 | 61524912 | 222971 | 5.4388 | 0.3820 | -0.3843 | 5.2862 | CHB |
| LOC339804 | GI_37546921-S | rs2463097  | 2 | 2 | 61525952 | 224011 | 5.4388 | 0.3820 | 0.3843  | 5.2862 | CHB |
| LOC339804 | GI_37546921-S | rs4672440  | 2 | 2 | 61528304 | 226363 | 5.4388 | 0.3820 | 0.3843  | 5.2862 | CHB |
| LOC339804 | GI_37546921-S | rs7581034  | 2 | 2 | 61547014 | 245073 | 5.2995 | 0.3801 | 0.3843  | 5.2862 | CHB |
| LOC339804 | GI_37546921-S | rs4672441  | 2 | 2 | 61550603 | 248662 | 5.4388 | 0.3820 | 0.3843  | 5.2862 | CHB |
| LOC339804 | GI_37546921-S | rs2084318  | 2 | 2 | 61564252 | 262311 | 5.4388 | 0.3820 | -0.3843 | 5.2862 | CHB |
| SLC1A4    | GI_21314631-S | rs13022034 | 2 | 2 | 65042576 | 119790 | 6.5640 | 0.4504 | -0.3218 | 5.5305 | CHB |
| SLC1A4    | GI_21314631-S | rs13022383 | 2 | 2 | 65042599 | 119767 | 5.6717 | 0.3968 | 0.2970  | 5.5305 | CHB |
| SLC1A4    | GI_21314631-S | rs2008831  | 2 | 2 | 65044191 | 118175 | 6.6229 | 0.4538 | 0.3448  | 5.5305 | CHB |
| SLC1A4    | GI_21314631-S | rs12473289 | 2 | 2 | 65051426 | 110940 | 6.5377 | 0.4489 | -0.3430 | 5.5305 | CHB |
| SLC1A4    | GI_21314631-S | rs17029619 | 2 | 2 | 65052800 | 109566 | 6.9874 | 0.4742 | 0.3438  | 5.5305 | CHB |
| SLC1A4    | GI_21314631-S | rs17029623 | 2 | 2 | 65055150 | 107216 | 6.9874 | 0.4742 | -0.3438 | 5.5305 | CHB |
| SLC1A4    | GI_21314631-S | rs4671629  | 2 | 2 | 65056308 | 106058 | 6.8397 | 0.4823 | -0.3442 | 5.5305 | CHB |
| SLC1A4    | GI_21314631-S | rs17029625 | 2 | 2 | 65057712 | 104654 | 6.8879 | 0.4767 | 0.3436  | 5.5305 | CHB |
| SLC1A4    | GI_21314631-S | rs4638779  | 2 | 2 | 65066923 | 95443  | 6.1811 | 0.4280 | -0.3529 | 5.5305 | CHB |
| SLC1A4    | GI_21314631-S | rs918060   | 2 | 2 | 65068109 | 94257  | 8.0381 | 0.5291 | -0.3710 | 5.5305 | CHB |
| SLC1A4    | GI_21314631-S | rs13008014 | 2 | 2 | 65070665 | 91701  | 7.8102 | 0.5177 | -0.3664 | 5.5305 | CHB |
| FLJ14668  | GI_14249519-S | rs6715047  | 2 | 2 | 70944984 | 510029 | 5.9021 | 0.4111 | 0.2355  | 5.8309 | CHB |
| UNQ2430   | GI_41190797-S | rs1257022  | 2 | 2 | 97036810 | 251149 | 5.5215 | 0.4020 | -0.3199 | 5.413  | CHB |
| UNQ2430   | GI_41190797-S | rs1257021  | 2 | 2 | 97037297 | 250662 | 5.6765 | 0.4543 | 0.3633  | 5.413  | CHB |
| UNQ2430   | GI_41190797-S | rs1796025  | 2 | 2 | 97052236 | 235723 | 5.5817 | 0.3911 | -0.3141 | 5.413  | CHB |
| UNQ2430   | GI_41190797-S | rs1257013  | 2 | 2 | 97053856 | 234103 | 5.5817 | 0.3911 | 0.3141  | 5.413  | CHB |
| UNQ2430   | GI_41190797-S | rs1257010  | 2 | 2 | 97055688 | 232271 | 5.5817 | 0.3911 | 0.3141  | 5.413  | CHB |
| UNQ2430   | GI_41190797-S | rs1257007  | 2 | 2 | 97057188 | 230771 | 5.4658 | 0.3909 | 0.3153  | 5.413  | CHB |
| TSGA10    | GI_41281983-I | rs4851178  | 2 | 2 | 99005788 | 210639 | 6.6576 | 0.4557 | -0.0974 | 5.3216 | CHB |
| TSGA10    | GI_41281983-I | rs13397765 | 2 | 2 | 99007672 | 208755 | 7.8911 | 0.5218 | 0.1075  | 5.3216 | CHB |
| TSGA10    | GI_41281983-I | rs7586608  | 2 | 2 | 99016535 | 199892 | 6.2527 | 0.4479 | 0.0968  | 5.3216 | CHB |
| TSGA10    | GI_41281983-I | rs10181422 | 2 | 2 | 99017488 | 198939 | 6.5770 | 0.4511 | -0.0978 | 5.3216 | CHB |
| TSGA10    | GI_41281983-I | rs6722164  | 2 | 2 | 99020045 | 196382 | 6.4214 | 0.4499 | -0.0970 | 5.3216 | CHB |
| TSGA10    | GI_41281983-I | rs1453564  | 2 | 2 | 99022946 | 193481 | 6.5770 | 0.4511 | -0.0978 | 5.3216 | CHB |
| TSGA10    | GI_41281983-I | rs2309520  | 2 | 2 | 99028995 | 187432 | 6.5770 | 0.4511 | -0.0978 | 5.3216 | CHB |
| TSGA10    | GI_41281983-I | rs6542847  | 2 | 2 | 99031989 | 184438 | 5.4307 | 0.3815 | -0.0880 | 5.3216 | CHB |
| TSGA10    | GI_41281983-I | rs6740054  | 2 | 2 | 99035149 | 181278 | 6.5770 | 0.4511 | -0.0978 | 5.3216 | CHB |
| TSGA10    | GI_41281983-I | rs13406288 | 2 | 2 | 99048103 | 168324 | 6.5770 | 0.4511 | 0.0978  | 5.3216 | CHB |
| TSGA10    | GI_41281983-I | rs13390672 | 2 | 2 | 99048347 | 168080 | 6.5770 | 0.4511 | -0.0978 | 5.3216 | CHB |
| TSGA10    | GI_41281983-I | rs7605218  | 2 | 2 | 99051598 | 164829 | 6.5770 | 0.4511 | -0.0978 | 5.3216 | CHB |
| TSGA10    | GI_41281983-I | rs12612688 | 2 | 2 | 99071609 | 144818 | 6.5770 | 0.4511 | -0.0978 | 5.3216 | CHB |
| TSGA10    | GI_41281983-I | rs2278895  | 2 | 2 | 99072002 | 144425 | 6.9531 | 0.4804 | 0.0996  | 5.3216 | CHB |

|           |               |            |   |   |           |        |         |        |         |        |     |
|-----------|---------------|------------|---|---|-----------|--------|---------|--------|---------|--------|-----|
| TSGA10    | GI_41281983-I | rs7571390  | 2 | 2 | 99085111  | 131316 | 6.5770  | 0.4511 | -0.0978 | 5.3216 | CHB |
| TSGA10    | GI_41281983-I | rs7371676  | 2 | 2 | 99087667  | 128760 | 6.5770  | 0.4511 | -0.0978 | 5.3216 | CHB |
| TSGA10    | GI_41281983-I | rs7605734  | 2 | 2 | 99102586  | 113841 | 6.5770  | 0.4511 | 0.0978  | 5.3216 | CHB |
| TSGA10    | GI_41281983-I | rs7606635  | 2 | 2 | 99103300  | 113127 | 6.5770  | 0.4511 | 0.0978  | 5.3216 | CHB |
| TSGA10    | GI_41281983-I | rs6707462  | 2 | 2 | 99107207  | 109220 | 5.3545  | 0.3910 | 0.0917  | 5.3216 | CHB |
| TSGA10    | GI_41281983-I | rs7570657  | 2 | 2 | 99112799  | 103628 | 6.4210  | 0.4663 | 0.1014  | 5.3216 | CHB |
| TSGA10    | GI_41281983-I | rs2084988  | 2 | 2 | 99114273  | 102154 | 6.4214  | 0.4499 | 0.0970  | 5.3216 | CHB |
| TSGA10    | GI_41281983-I | rs6735801  | 2 | 2 | 99116513  | 99914  | 6.5770  | 0.4511 | -0.0978 | 5.3216 | CHB |
| TSGA10    | GI_41281983-I | rs6752352  | 2 | 2 | 99120866  | 95561  | 6.5770  | 0.4511 | 0.0978  | 5.3216 | CHB |
| TSGA10    | GI_41281983-I | rs9710648  | 2 | 2 | 99131647  | 84780  | 5.5784  | 0.3982 | -0.0826 | 5.3216 | CHB |
| TSGA10    | GI_41281983-I | rs6756880  | 2 | 2 | 99135509  | 80918  | 5.5784  | 0.3982 | -0.0826 | 5.3216 | CHB |
| TSGA10    | GI_41281983-I | rs6750876  | 2 | 2 | 99138191  | 78236  | 6.5770  | 0.4511 | -0.0978 | 5.3216 | CHB |
| TSGA10    | GI_41281983-I | rs6754843  | 2 | 2 | 99139003  | 77424  | 5.3673  | 0.3994 | -0.0824 | 5.3216 | CHB |
| TSGA10    | GI_41281983-I | rs6737257  | 2 | 2 | 99141848  | 74579  | 5.9902  | 0.4165 | 0.0953  | 5.3216 | CHB |
| TSGA10    | GI_41281983-I | rs12470471 | 2 | 2 | 99147659  | 68768  | 6.5770  | 0.4511 | 0.0978  | 5.3216 | CHB |
| TSGA10    | GI_41281983-I | rs2123686  | 2 | 2 | 99148653  | 67774  | 6.5770  | 0.4511 | -0.0978 | 5.3216 | CHB |
| TSGA10    | GI_41281983-I | rs10181344 | 2 | 2 | 99151347  | 65080  | 5.8701  | 0.4491 | -0.0980 | 5.3216 | CHB |
| TSGA10    | GI_41281983-I | rs17708262 | 2 | 2 | 99154831  | 61596  | 6.5770  | 0.4511 | 0.0978  | 5.3216 | CHB |
| TSGA10    | GI_41281983-I | rs1563108  | 2 | 2 | 99159671  | 56756  | 6.5770  | 0.4511 | 0.0978  | 5.3216 | CHB |
| TSGA10    | GI_41281983-I | rs1563107  | 2 | 2 | 99159794  | 56633  | 6.5770  | 0.4511 | -0.0978 | 5.3216 | CHB |
| TSGA10    | GI_41281983-I | rs1453563  | 2 | 2 | 99178785  | 37642  | 6.5770  | 0.4511 | -0.0978 | 5.3216 | CHB |
| TSGA10    | GI_41281983-I | rs11683188 | 2 | 2 | 99183030  | 33397  | 6.5770  | 0.4511 | -0.0978 | 5.3216 | CHB |
| TSGA10    | GI_41281983-I | rs12613624 | 2 | 2 | 99191259  | 25168  | 6.5770  | 0.4511 | -0.0978 | 5.3216 | CHB |
| TSGA10    | GI_41281983-I | rs11688004 | 2 | 2 | 99193570  | 22857  | 6.0166  | 0.4256 | 0.0969  | 5.3216 | CHB |
| TSGA10    | GI_41281983-I | rs17759607 | 2 | 2 | 99195523  | 20904  | 5.7298  | 0.4315 | -0.0983 | 5.3216 | CHB |
| TSGA10    | GI_41281983-I | rs1133977  | 2 | 2 | 99200502  | 15925  | 6.0166  | 0.4256 | 0.0969  | 5.3216 | CHB |
| TSGA10    | GI_41281983-I | rs13008171 | 2 | 2 | 99201937  | 14490  | 5.4111  | 0.4024 | -0.0912 | 5.3216 | CHB |
| TSGA10    | GI_41281983-I | rs4851188  | 2 | 2 | 99204416  | 12011  | 6.5770  | 0.4511 | -0.0978 | 5.3216 | CHB |
| TSGA10    | GI_41281983-I | rs11683107 | 2 | 2 | 99217753  | 1326   | 6.5770  | 0.4511 | -0.0978 | 5.3216 | CHB |
| TSGA10    | GI_41281983-I | rs6542866  | 2 | 2 | 99223110  | 6683   | 5.5864  | 0.4062 | -0.0915 | 5.3216 | CHB |
| TSGA10    | GI_41281983-I | rs4850897  | 2 | 2 | 99226937  | 10510  | 6.5770  | 0.4511 | 0.0978  | 5.3216 | CHB |
| TSGA10    | GI_41281983-I | rs2516830  | 2 | 2 | 99232220  | 15793  | 6.5770  | 0.4511 | -0.0978 | 5.3216 | CHB |
| TSGA10    | GI_41281983-I | rs2632283  | 2 | 2 | 99234518  | 18091  | 6.5770  | 0.4511 | -0.0978 | 5.3216 | CHB |
| TSGA10    | GI_41281983-I | rs2516835  | 2 | 2 | 99237649  | 21222  | 6.5770  | 0.4511 | -0.0978 | 5.3216 | CHB |
| TSGA10    | GI_41281983-I | rs6727749  | 2 | 2 | 99252108  | 35681  | 6.5770  | 0.4511 | 0.0978  | 5.3216 | CHB |
| TSGA10    | GI_41281983-I | rs13033012 | 2 | 2 | 99253667  | 37240  | 6.4357  | 0.4508 | -0.0979 | 5.3216 | CHB |
| CHCHD5    | GI_34147411-S | rs6760091  | 2 | 2 | 113093982 | 33897  | 5.8545  | 0.4082 | 0.1462  | 5.4249 | CHB |
| CHCHD5    | GI_34147411-S | rs11900874 | 2 | 2 | 113103801 | 43716  | 5.4587  | 0.3833 | -0.1469 | 5.4249 | CHB |
| PAX8      | GI_37577111-A | rs11123170 | 2 | 2 | 113695171 | 3728   | 6.3434  | 0.4376 | -0.2032 | 5.9366 | CHB |
| PAX8      | GI_37577111-A | rs4849177  | 2 | 2 | 113698815 | 7372   | 6.3434  | 0.4376 | 0.2032  | 5.9366 | CHB |
| PAX8      | GI_37577111-A | rs3748916  | 2 | 2 | 113700264 | 8821   | 6.3434  | 0.4376 | -0.2032 | 5.9366 | CHB |
| PAX8      | GI_37577111-A | rs4849179  | 2 | 2 | 113701401 | 9958   | 6.3434  | 0.4376 | -0.2032 | 5.9366 | CHB |
| PAX8      | GI_37577111-A | rs2863243  | 2 | 2 | 113705498 | 14055  | 6.3434  | 0.4376 | 0.2032  | 5.9366 | CHB |
| PAX8      | GI_37577111-A | rs1110839  | 2 | 2 | 113710647 | 19204  | 7.0025  | 0.4750 | 0.2166  | 5.9366 | CHB |
| PAX8      | GI_37577111-A | rs1491586  | 2 | 2 | 113719709 | 28266  | 6.3516  | 0.4458 | 0.2338  | 5.9366 | CHB |
| PAX8      | GI_37577111-A | rs1491584  | 2 | 2 | 113720134 | 28691  | 6.5851  | 0.4516 | -0.2369 | 5.9366 | CHB |
| Hs.147006 | Hs.147006-S   | rs2289962  | 2 | 2 | 136239798 | 429927 | 11.3437 | 0.6679 | 0.3536  | 6.5324 | CHB |
| Hs.147006 | Hs.147006-S   | rs2289961  | 2 | 2 | 136239841 | 429884 | 11.3437 | 0.6679 | 0.3536  | 6.5324 | CHB |
| Hs.147006 | Hs.147006-S   | rs2289960  | 2 | 2 | 136239972 | 429753 | 11.3437 | 0.6679 | 0.3536  | 6.5324 | CHB |
| Hs.147006 | Hs.147006-S   | rs12614099 | 2 | 2 | 136301794 | 367931 | 11.3437 | 0.6679 | 0.3536  | 6.5324 | CHB |
| Hs.147006 | Hs.147006-S   | rs3739027  | 2 | 2 | 136315912 | 353813 | 11.3437 | 0.6679 | 0.3536  | 6.5324 | CHB |
| Hs.147006 | Hs.147006-S   | rs12617715 | 2 | 2 | 136372885 | 296840 | 13.5351 | 0.7368 | -0.3684 | 6.5324 | CHB |
| Hs.147006 | Hs.147006-S   | rs11903319 | 2 | 2 | 136430171 | 239554 | 15.5687 | 0.7880 | 0.3801  | 6.5324 | CHB |
| Hs.147006 | Hs.147006-S   | rs4988285  | 2 | 2 | 136431298 | 238427 | 15.5687 | 0.7880 | 0.3801  | 6.5324 | CHB |
| Hs.147006 | Hs.147006-S   | rs4988276  | 2 | 2 | 136433084 | 236641 | 15.5687 | 0.7880 | -0.3801 | 6.5324 | CHB |
| Hs.147006 | Hs.147006-S   | rs4988272  | 2 | 2 | 136435289 | 234436 | 15.5687 | 0.7880 | 0.3801  | 6.5324 | CHB |
| Hs.147006 | Hs.147006-S   | rs3754687  | 2 | 2 | 136436906 | 232819 | 15.5687 | 0.7880 | -0.3801 | 6.5324 | CHB |
| Hs.147006 | Hs.147006-S   | rs3729569  | 2 | 2 | 136437037 | 232688 | 15.5687 | 0.7880 | -0.3801 | 6.5324 | CHB |
| Hs.147006 | Hs.147006-S   | rs3769004  | 2 | 2 | 136437322 | 232403 | 15.5687 | 0.7880 | 0.3801  | 6.5324 | CHB |

|           |               |            |   |   |           |        |         |        |         |        |     |
|-----------|---------------|------------|---|---|-----------|--------|---------|--------|---------|--------|-----|
| Hs.147006 | Hs.147006-S   | rs4988265  | 2 | 2 | 136437370 | 232355 | 15.5687 | 0.7880 | -0.3801 | 6.5324 | CHB |
| Hs.147006 | Hs.147006-S   | rs3769003  | 2 | 2 | 136437422 | 232303 | 15.5687 | 0.7880 | 0.3801  | 6.5324 | CHB |
| Hs.147006 | Hs.147006-S   | rs4988262  | 2 | 2 | 136437942 | 231783 | 10.0242 | 0.6544 | -0.3353 | 6.5324 | CHB |
| Hs.147006 | Hs.147006-S   | rs4988245  | 2 | 2 | 136441032 | 228693 | 15.5687 | 0.7880 | -0.3801 | 6.5324 | CHB |
| Hs.147006 | Hs.147006-S   | rs4988222  | 2 | 2 | 136446700 | 223025 | 15.5687 | 0.7880 | 0.3801  | 6.5324 | CHB |
| Hs.147006 | Hs.147006-S   | rs4988219  | 2 | 2 | 136447094 | 222631 | 15.5687 | 0.7880 | 0.3801  | 6.5324 | CHB |
| Hs.147006 | Hs.147006-S   | rs4988213  | 2 | 2 | 136448486 | 221239 | 15.5687 | 0.7880 | 0.3801  | 6.5324 | CHB |
| Hs.147006 | Hs.147006-S   | rs4988211  | 2 | 2 | 136448687 | 221038 | 15.5687 | 0.7880 | -0.3801 | 6.5324 | CHB |
| Hs.147006 | Hs.147006-S   | rs4988203  | 2 | 2 | 136450055 | 219670 | 15.5687 | 0.7880 | -0.3801 | 6.5324 | CHB |
| Hs.147006 | Hs.147006-S   | rs12617885 | 2 | 2 | 136451826 | 217899 | 15.5687 | 0.7880 | 0.3801  | 6.5324 | CHB |
| Hs.147006 | Hs.147006-S   | rs4988196  | 2 | 2 | 136452846 | 216879 | 15.5687 | 0.7880 | 0.3801  | 6.5324 | CHB |
| Hs.147006 | Hs.147006-S   | rs3087353  | 2 | 2 | 136457449 | 212276 | 8.8441  | 0.6545 | -0.3493 | 6.5324 | CHB |
| Hs.147006 | Hs.147006-S   | rs2289048  | 2 | 2 | 136457632 | 212093 | 14.4666 | 0.7862 | 0.3882  | 6.5324 | CHB |
| Hs.147006 | Hs.147006-S   | rs2289049  | 2 | 2 | 136457855 | 211870 | 15.5687 | 0.7880 | -0.3801 | 6.5324 | CHB |
| Hs.147006 | Hs.147006-S   | rs2070068  | 2 | 2 | 136457887 | 211838 | 10.7321 | 0.6913 | 0.3511  | 6.5324 | CHB |
| Hs.147006 | Hs.147006-S   | rs3087348  | 2 | 2 | 136458046 | 211679 | 15.5687 | 0.7880 | -0.3801 | 6.5324 | CHB |
| Hs.147006 | Hs.147006-S   | rs16855656 | 2 | 2 | 136476165 | 193560 | 6.6339  | 0.4544 | 0.2450  | 6.5324 | CHB |
| Hs.147006 | Hs.147006-S   | rs309126   | 2 | 2 | 136477632 | 192093 | 6.6339  | 0.4544 | -0.2450 | 6.5324 | CHB |
| Hs.147006 | Hs.147006-S   | rs12624144 | 2 | 2 | 136568859 | 100866 | 18.1832 | 0.8396 | -0.3925 | 6.5324 | CHB |
| Hs.147006 | Hs.147006-S   | rs12613074 | 2 | 2 | 136570822 | 98903  | 18.1832 | 0.8396 | -0.3925 | 6.5324 | CHB |
| Hs.147006 | Hs.147006-S   | rs3768996  | 2 | 2 | 136575560 | 94165  | 18.1832 | 0.8396 | -0.3925 | 6.5324 | CHB |
| Hs.147006 | Hs.147006-S   | rs16832394 | 2 | 2 | 136577042 | 92683  | 18.1832 | 0.8396 | -0.3925 | 6.5324 | CHB |
| Hs.147006 | Hs.147006-S   | rs12618797 | 2 | 2 | 136580415 | 89310  | 18.1832 | 0.8396 | -0.3925 | 6.5324 | CHB |
| Hs.147006 | Hs.147006-S   | rs713391   | 2 | 2 | 136581699 | 88026  | 18.1832 | 0.8396 | 0.3925  | 6.5324 | CHB |
| Hs.147006 | Hs.147006-S   | rs7559769  | 2 | 2 | 136619085 | 50640  | 7.6787  | 0.5110 | 0.2842  | 6.5324 | CHB |
| Hs.147006 | Hs.147006-S   | rs7585965  | 2 | 2 | 136619420 | 50305  | 7.6787  | 0.5110 | -0.2842 | 6.5324 | CHB |
| Hs.147006 | Hs.147006-S   | rs12619854 | 2 | 2 | 136619501 | 50224  | 7.6787  | 0.5110 | -0.2842 | 6.5324 | CHB |
| LOC51240  | GI_31377759-S | rs3860492  | 2 | 2 | 190307251 | 153741 | 7.8113  | 0.5927 | 0.5067  | 5.7698 | CHB |
| LOC51240  | GI_31377759-S | rs7587662  | 2 | 2 | 190312748 | 148244 | 8.7474  | 0.5630 | 0.4738  | 5.7698 | CHB |
| LOC51240  | GI_31377759-S | rs1437889  | 2 | 2 | 190313316 | 147676 | 8.7474  | 0.5630 | 0.4738  | 5.7698 | CHB |
| LOC51240  | GI_31377759-S | rs1437887  | 2 | 2 | 190313632 | 147360 | 8.7474  | 0.5630 | -0.4738 | 5.7698 | CHB |
| LOC51240  | GI_31377759-S | rs6735087  | 2 | 2 | 190315547 | 145445 | 8.5130  | 0.5606 | -0.4741 | 5.7698 | CHB |
| LOC51240  | GI_31377759-S | rs4667295  | 2 | 2 | 190329896 | 131096 | 10.8020 | 0.6483 | 0.4933  | 5.7698 | CHB |
| LOC51240  | GI_31377759-S | rs6761923  | 2 | 2 | 190333105 | 127887 | 15.1230 | 0.7777 | 0.5556  | 5.7698 | CHB |
| LOC51240  | GI_31377759-S | rs9646811  | 2 | 2 | 190334084 | 126908 | 11.1372 | 0.6965 | -0.5387 | 5.7698 | CHB |
| LOC51240  | GI_31377759-S | rs7568449  | 2 | 2 | 190346560 | 114432 | 15.1230 | 0.7777 | -0.5556 | 5.7698 | CHB |
| LOC51240  | GI_31377759-S | rs2289226  | 2 | 2 | 190351711 | 109281 | 18.1315 | 0.8387 | -0.5745 | 5.7698 | CHB |
| LOC51240  | GI_31377759-S | rs4667297  | 2 | 2 | 190354502 | 106490 | 18.1315 | 0.8387 | -0.5745 | 5.7698 | CHB |
| LOC51240  | GI_31377759-S | rs893784   | 2 | 2 | 190361789 | 99203  | 18.1315 | 0.8387 | -0.5745 | 5.7698 | CHB |
| LOC51240  | GI_31377759-S | rs10931430 | 2 | 2 | 190367692 | 93300  | 18.1315 | 0.8387 | 0.5745  | 5.7698 | CHB |
| LOC51240  | GI_31377759-S | rs11679767 | 2 | 2 | 190371806 | 89186  | 17.4017 | 0.8256 | -0.5979 | 5.7698 | CHB |
| LOC51240  | GI_31377759-S | rs7571089  | 2 | 2 | 190387299 | 73693  | 18.1315 | 0.8387 | 0.5745  | 5.7698 | CHB |
| LOC51240  | GI_31377759-S | rs1437891  | 2 | 2 | 190388214 | 72778  | 17.8446 | 0.8407 | 0.5785  | 5.7698 | CHB |
| LOC51240  | GI_31377759-S | rs10195109 | 2 | 2 | 190394697 | 66295  | 11.2506 | 0.6646 | 0.6234  | 5.7698 | CHB |
| LOC51240  | GI_31377759-S | rs6434365  | 2 | 2 | 190397927 | 63065  | 11.2506 | 0.6646 | -0.6234 | 5.7698 | CHB |
| LOC51240  | GI_31377759-S | rs11901295 | 2 | 2 | 190402284 | 58708  | 10.1287 | 0.6492 | -0.6139 | 5.7698 | CHB |
| LOC51240  | GI_31377759-S | rs7557519  | 2 | 2 | 190408693 | 52299  | 11.2506 | 0.6646 | 0.6234  | 5.7698 | CHB |
| LOC51240  | GI_31377759-S | rs12693557 | 2 | 2 | 190416443 | 44549  | 18.1315 | 0.8387 | 0.5745  | 5.7698 | CHB |
| LOC51240  | GI_31377759-S | rs1550388  | 2 | 2 | 190429286 | 31706  | 11.2506 | 0.6646 | -0.6234 | 5.7698 | CHB |
| LOC51240  | GI_31377759-S | rs2033870  | 2 | 2 | 190429336 | 31656  | 18.1315 | 0.8387 | -0.5745 | 5.7698 | CHB |
| LOC51240  | GI_31377759-S | rs1225101  | 2 | 2 | 190430927 | 30065  | 10.1603 | 0.6598 | -0.6084 | 5.7698 | CHB |
| LOC51240  | GI_31377759-S | rs1898560  | 2 | 2 | 190437833 | 23159  | 11.2506 | 0.6646 | 0.6234  | 5.7698 | CHB |
| LOC51240  | GI_31377759-S | rs4666783  | 2 | 2 | 190438486 | 22506  | 11.2506 | 0.6646 | 0.6234  | 5.7698 | CHB |
| LOC51240  | GI_31377759-S | rs6719224  | 2 | 2 | 190459777 | 1215   | 11.2506 | 0.6646 | 0.6234  | 5.7698 | CHB |
| LOC51240  | GI_31377759-S | rs1055091  | 2 | 2 | 190460649 | 343    | 18.1315 | 0.8387 | 0.5745  | 5.7698 | CHB |
| LOC51240  | GI_31377759-S | rs6942     | 2 | 2 | 190461917 | 925    | 18.1315 | 0.8387 | -0.5745 | 5.7698 | CHB |
| LOC51240  | GI_31377759-S | rs3791767  | 2 | 2 | 190465421 | 4429   | 11.2506 | 0.6646 | -0.6234 | 5.7698 | CHB |
| LOC51240  | GI_31377759-S | rs7591929  | 2 | 2 | 190468763 | 7771   | 18.1315 | 0.8387 | 0.5745  | 5.7698 | CHB |
| LOC51240  | GI_31377759-S | rs5742933  | 2 | 2 | 190474822 | 13830  | 11.2506 | 0.6646 | -0.6234 | 5.7698 | CHB |

|          |               |            |   |   |           |        |         |        |         |        |     |
|----------|---------------|------------|---|---|-----------|--------|---------|--------|---------|--------|-----|
| LOC51240 | GI_31377759-S | rs1899025  | 2 | 2 | 190475088 | 14096  | 18.1315 | 0.8387 | 0.5745  | 5.7698 | CHB |
| LOC51240 | GI_31377759-S | rs1233302  | 2 | 2 | 190494386 | 33394  | 14.7897 | 0.8105 | -0.5581 | 5.7698 | CHB |
| LOC51240 | GI_31377759-S | rs3791770  | 2 | 2 | 190499341 | 38349  | 10.3018 | 0.6291 | 0.6630  | 5.7698 | CHB |
| LOC51240 | GI_31377759-S | rs3791773  | 2 | 2 | 190508138 | 47146  | 11.2506 | 0.6646 | -0.6234 | 5.7698 | CHB |
| LOC51240 | GI_31377759-S | rs1233276  | 2 | 2 | 190510288 | 49296  | 6.2077  | 0.4533 | 0.5270  | 5.7698 | CHB |
| LOC51240 | GI_31377759-S | rs1233284  | 2 | 2 | 190515277 | 54285  | 18.1315 | 0.8387 | -0.5745 | 5.7698 | CHB |
| LOC51240 | GI_31377759-S | rs1233288  | 2 | 2 | 190516231 | 55239  | 18.1315 | 0.8387 | 0.5745  | 5.7698 | CHB |
| LOC51240 | GI_31377759-S | rs1233297  | 2 | 2 | 190519681 | 58689  | 18.1315 | 0.8387 | 0.5745  | 5.7698 | CHB |
| LOC51240 | GI_31377759-S | rs7577961  | 2 | 2 | 190519772 | 58780  | 12.9525 | 0.7284 | 0.5591  | 5.7698 | CHB |
| LOC51240 | GI_31377759-S | rs5743063  | 2 | 2 | 190519955 | 58963  | 11.6368 | 0.6867 | 0.5782  | 5.7698 | CHB |
| LOC51240 | GI_31377759-S | rs1233245  | 2 | 2 | 190526000 | 65008  | 14.5835 | 0.7646 | -0.5481 | 5.7698 | CHB |
| LOC51240 | GI_31377759-S | rs1233258  | 2 | 2 | 190532540 | 71548  | 8.9306  | 0.5714 | -0.4698 | 5.7698 | CHB |
| LOC51240 | GI_31377759-S | rs5743112  | 2 | 2 | 190534488 | 73496  | 6.3460  | 0.4377 | -0.5359 | 5.7698 | CHB |
| LOC51240 | GI_31377759-S | rs5743116  | 2 | 2 | 190539474 | 78482  | 6.3460  | 0.4377 | -0.5359 | 5.7698 | CHB |
| LOC51240 | GI_31377759-S | rs733318   | 2 | 2 | 190549647 | 88655  | 6.3460  | 0.4377 | -0.5359 | 5.7698 | CHB |
| LOC51240 | GI_31377759-S | rs256567   | 2 | 2 | 190553037 | 92045  | 7.9922  | 0.5268 | 0.5085  | 5.7698 | CHB |
| LOC51240 | GI_31377759-S | rs256564   | 2 | 2 | 190555555 | 94563  | 7.9922  | 0.5268 | -0.5085 | 5.7698 | CHB |
| LOC51240 | GI_31377759-S | rs256563   | 2 | 2 | 190557338 | 96346  | 7.8084  | 0.5260 | 0.5116  | 5.7698 | CHB |
| LOC51240 | GI_31377759-S | rs1030136  | 2 | 2 | 190561166 | 100174 | 6.3460  | 0.4377 | 0.5359  | 5.7698 | CHB |
| LOC51240 | GI_31377759-S | rs256554   | 2 | 2 | 190564520 | 103528 | 5.8346  | 0.4300 | -0.4426 | 5.7698 | CHB |
| LOC51240 | GI_31377759-S | rs5743208  | 2 | 2 | 190568554 | 107562 | 6.3460  | 0.4377 | 0.5359  | 5.7698 | CHB |
| LOC51240 | GI_31377759-S | rs256550   | 2 | 2 | 190570244 | 109252 | 7.9922  | 0.5268 | -0.5085 | 5.7698 | CHB |
| LOC51240 | GI_31377759-S | rs6736360  | 2 | 2 | 190574255 | 113263 | 5.8660  | 0.4240 | 0.5323  | 5.7698 | CHB |
| LOC51240 | GI_31377759-S | rs16832155 | 2 | 2 | 190575347 | 114355 | 6.3460  | 0.4377 | 0.5359  | 5.7698 | CHB |
| LOC51240 | GI_31377759-S | rs256546   | 2 | 2 | 190576669 | 115677 | 8.5962  | 0.6015 | 0.4951  | 5.7698 | CHB |
| LOC51240 | GI_31377759-S | rs1233366  | 2 | 2 | 190582465 | 121473 | 7.9922  | 0.5268 | 0.5085  | 5.7698 | CHB |
| LOC51240 | GI_31377759-S | rs16832158 | 2 | 2 | 190584194 | 123202 | 6.3460  | 0.4377 | -0.5359 | 5.7698 | CHB |
| LOC51240 | GI_31377759-S | rs256539   | 2 | 2 | 190584326 | 123334 | 7.9922  | 0.5268 | 0.5085  | 5.7698 | CHB |
| LOC51240 | GI_31377759-S | rs7560327  | 2 | 2 | 190598028 | 137036 | 6.3460  | 0.4377 | 0.5359  | 5.7698 | CHB |
| LOC51240 | GI_31377759-S | rs12475694 | 2 | 2 | 190598114 | 137122 | 10.1604 | 0.6413 | 0.5015  | 5.7698 | CHB |
| LOC51240 | GI_31377759-S | rs2168057  | 2 | 2 | 190603210 | 142218 | 7.9922  | 0.5268 | 0.5085  | 5.7698 | CHB |
| LOC51240 | GI_31377759-S | rs4853634  | 2 | 2 | 190604737 | 143745 | 6.3460  | 0.4377 | -0.5359 | 5.7698 | CHB |
| LOC51240 | GI_31377759-S | rs12479375 | 2 | 2 | 190610992 | 150000 | 7.9922  | 0.5268 | 0.5085  | 5.7698 | CHB |
| LOC51240 | GI_31377759-S | rs9917356  | 2 | 2 | 190615500 | 154508 | 7.9922  | 0.5268 | -0.5085 | 5.7698 | CHB |
| LOC51240 | GI_31377759-S | rs7593661  | 2 | 2 | 190620195 | 159203 | 7.9922  | 0.5268 | 0.5085  | 5.7698 | CHB |
| RPL37A   | GI_16306561-S | rs12615939 | 2 | 2 | 217083875 | 105213 | 9.1826  | 0.5913 | 0.3862  | 7.5469 | CHB |
| RPL37A   | GI_16306561-S | rs16856031 | 2 | 2 | 217095621 | 93467  | 10.5265 | 0.6379 | 0.4314  | 7.5469 | CHB |
| RPL37A   | GI_16306561-S | rs16856033 | 2 | 2 | 217098568 | 90520  | 10.5265 | 0.6379 | -0.4314 | 7.5469 | CHB |
| RPL37A   | GI_16306561-S | rs16856035 | 2 | 2 | 217098606 | 90482  | 10.5265 | 0.6379 | -0.4314 | 7.5469 | CHB |
| RPL37A   | GI_16306561-S | rs16856038 | 2 | 2 | 217100778 | 88310  | 10.3162 | 0.6385 | -0.4366 | 7.5469 | CHB |
| RPL37A   | GI_16306561-S | rs12621805 | 2 | 2 | 217100957 | 88131  | 10.5265 | 0.6379 | 0.4314  | 7.5469 | CHB |
| RPL37A   | GI_16306561-S | rs3755142  | 2 | 2 | 217102433 | 86655  | 10.5265 | 0.6379 | -0.4314 | 7.5469 | CHB |
| RPL37A   | GI_16306561-S | rs3770491  | 2 | 2 | 217107405 | 81683  | 10.5265 | 0.6379 | -0.4314 | 7.5469 | CHB |
| RPL37A   | GI_16306561-S | rs3816784  | 2 | 2 | 217110913 | 78175  | 10.5265 | 0.6379 | 0.4314  | 7.5469 | CHB |
| RPL37A   | GI_16306561-S | rs2066518  | 2 | 2 | 217113894 | 75194  | 16.9018 | 0.8161 | 0.4521  | 7.5469 | CHB |
| RPL37A   | GI_16306561-S | rs3770488  | 2 | 2 | 217117579 | 71509  | 15.0272 | 0.8076 | -0.4527 | 7.5469 | CHB |
| RPL37A   | GI_16306561-S | rs3770487  | 2 | 2 | 217117613 | 71475  | 16.9018 | 0.8161 | 0.4521  | 7.5469 | CHB |
| RPL37A   | GI_16306561-S | rs16856088 | 2 | 2 | 217118220 | 70868  | 16.2738 | 0.8034 | 0.4459  | 7.5469 | CHB |
| RPL37A   | GI_16306561-S | rs3770485  | 2 | 2 | 217118416 | 70672  | 16.9018 | 0.8161 | 0.4521  | 7.5469 | CHB |
| RPL37A   | GI_16306561-S | rs12621359 | 2 | 2 | 217119330 | 69758  | 16.9018 | 0.8161 | -0.4521 | 7.5469 | CHB |
| RPL37A   | GI_16306561-S | rs12611945 | 2 | 2 | 217119515 | 69573  | 16.9018 | 0.8161 | 0.4521  | 7.5469 | CHB |
| RPL37A   | GI_16306561-S | rs3770483  | 2 | 2 | 217120269 | 68819  | 16.9018 | 0.8161 | 0.4521  | 7.5469 | CHB |
| RPL37A   | GI_16306561-S | rs16856102 | 2 | 2 | 217120743 | 68345  | 13.3570 | 0.8021 | -0.4762 | 7.5469 | CHB |
| RPL37A   | GI_16306561-S | rs2066521  | 2 | 2 | 217122924 | 66164  | 16.9018 | 0.8161 | -0.4521 | 7.5469 | CHB |
| RPL37A   | GI_16306561-S | rs12612280 | 2 | 2 | 217123766 | 65322  | 16.9018 | 0.8161 | 0.4521  | 7.5469 | CHB |
| RPL37A   | GI_16306561-S | rs16856126 | 2 | 2 | 217124692 | 64396  | 16.9018 | 0.8161 | 0.4521  | 7.5469 | CHB |
| RPL37A   | GI_16306561-S | rs16856136 | 2 | 2 | 217128131 | 60957  | 16.8019 | 0.8215 | -0.4583 | 7.5469 | CHB |
| RPL37A   | GI_16306561-S | rs3816783  | 2 | 2 | 217128593 | 60495  | 16.9018 | 0.8161 | -0.4521 | 7.5469 | CHB |
| RPL37A   | GI_16306561-S | rs12612749 | 2 | 2 | 217129141 | 59947  | 16.9018 | 0.8161 | -0.4521 | 7.5469 | CHB |

|           |               |            |   |   |           |        |         |        |         |        |     |
|-----------|---------------|------------|---|---|-----------|--------|---------|--------|---------|--------|-----|
| RPL37A    | GI_16306561-S | rs3770480  | 2 | 2 | 217129746 | 59342  | 16.9018 | 0.8161 | 0.4521  | 7.5469 | CHB |
| RPL37A    | GI_16306561-S | rs1705105  | 2 | 2 | 217131441 | 57647  | 16.9018 | 0.8161 | 0.4521  | 7.5469 | CHB |
| RPL37A    | GI_16306561-S | rs505883   | 2 | 2 | 217131540 | 57548  | 15.4177 | 0.8003 | 0.4482  | 7.5469 | CHB |
| RPL37A    | GI_16306561-S | rs560025   | 2 | 2 | 217133078 | 56010  | 16.9018 | 0.8161 | -0.4521 | 7.5469 | CHB |
| RPL37A    | GI_16306561-S | rs2627045  | 2 | 2 | 217133513 | 55575  | 16.9018 | 0.8161 | -0.4521 | 7.5469 | CHB |
| RPL37A    | GI_16306561-S | rs284548   | 2 | 2 | 217136361 | 52727  | 15.6086 | 0.8124 | -0.4573 | 7.5469 | CHB |
| RPL37A    | GI_16306561-S | rs284552   | 2 | 2 | 217138550 | 50538  | 16.9018 | 0.8161 | -0.4521 | 7.5469 | CHB |
| RPL37A    | GI_16306561-S | rs2738286  | 2 | 2 | 217140870 | 48218  | 16.9018 | 0.8161 | -0.4521 | 7.5469 | CHB |
| RPL37A    | GI_16306561-S | rs12468079 | 2 | 2 | 217144583 | 44505  | 16.9018 | 0.8161 | -0.4521 | 7.5469 | CHB |
| RPL37A    | GI_16306561-S | rs4324305  | 2 | 2 | 217155418 | 33670  | 16.2738 | 0.8034 | 0.4459  | 7.5469 | CHB |
| RPL37A    | GI_16306561-S | rs12620897 | 2 | 2 | 217161264 | 27824  | 16.2074 | 0.8171 | -0.4548 | 7.5469 | CHB |
| RPL37A    | GI_16306561-S | rs2280042  | 2 | 2 | 217167863 | 21225  | 9.4000  | 0.6685 | 0.3516  | 7.5469 | CHB |
| RPL37A    | GI_16306561-S | rs2738289  | 2 | 2 | 217169528 | 19560  | 16.9018 | 0.8161 | 0.4521  | 7.5469 | CHB |
| RPL37A    | GI_16306561-S | rs605702   | 2 | 2 | 217172200 | 16888  | 16.3355 | 0.8122 | -0.4521 | 7.5469 | CHB |
| RPL37A    | GI_16306561-S | rs654474   | 2 | 2 | 217176114 | 12974  | 16.9018 | 0.8161 | 0.4521  | 7.5469 | CHB |
| RPL37A    | GI_16306561-S | rs540809   | 2 | 2 | 217176378 | 12710  | 14.7502 | 0.7767 | 0.4271  | 7.5469 | CHB |
| RPL37A    | GI_16306561-S | rs284567   | 2 | 2 | 217177980 | 11108  | 16.2738 | 0.8034 | -0.4459 | 7.5469 | CHB |
| RPL37A    | GI_16306561-S | rs16856243 | 2 | 2 | 217183529 | 5559   | 8.4821  | 0.6059 | 0.4106  | 7.5469 | CHB |
| RPL37A    | GI_16306561-S | rs284565   | 2 | 2 | 217184312 | 4776   | 16.2738 | 0.8034 | 0.4459  | 7.5469 | CHB |
| RPL37A    | GI_16306561-S | rs3732019  | 2 | 2 | 217187892 | 1196   | 17.0486 | 0.8189 | -0.4501 | 7.5469 | CHB |
| RPL37A    | GI_16306561-S | rs3806575  | 2 | 2 | 217188440 | 648    | 15.7354 | 0.8230 | 0.4572  | 7.5469 | CHB |
| RPL37A    | GI_16306561-S | rs3755140  | 2 | 2 | 217188555 | 533    | 15.8672 | 0.8178 | 0.4581  | 7.5469 | CHB |
| RPL37A    | GI_16306561-S | rs12619115 | 2 | 2 | 217189346 | 258    | 16.5527 | 0.8392 | -0.4738 | 7.5469 | CHB |
| RPL37A    | GI_16306561-S | rs2272243  | 2 | 2 | 217190270 | 1182   | 15.9662 | 0.8199 | -0.4576 | 7.5469 | CHB |
| RPL37A    | GI_16306561-S | rs12616410 | 2 | 2 | 217193418 | 4330   | 15.9662 | 0.8199 | -0.4576 | 7.5469 | CHB |
| RPL37A    | GI_16306561-S | rs12472569 | 2 | 2 | 217206912 | 17824  | 17.0486 | 0.8189 | 0.4501  | 7.5469 | CHB |
| RPL37A    | GI_16306561-S | rs12621480 | 2 | 2 | 217210080 | 20992  | 10.9512 | 0.7291 | -0.3661 | 7.5469 | CHB |
| RPL37A    | GI_16306561-S | rs12612079 | 2 | 2 | 217224087 | 34999  | 10.5842 | 0.6577 | 0.3797  | 7.5469 | CHB |
| RPL37A    | GI_16306561-S | rs7587025  | 2 | 2 | 217229951 | 40863  | 13.1308 | 0.7253 | -0.4225 | 7.5469 | CHB |
| NDUFA10   | GI_33519462-S | rs11684940 | 2 | 2 | 240610381 | 10070  | 6.3380  | 0.4373 | -0.2891 | 6.2805 | CHB |
| NDUFA10   | GI_33519462-S | rs4077387  | 2 | 2 | 240620681 | 230    | 6.3380  | 0.4373 | -0.2891 | 6.2805 | CHB |
| NDUFA10   | GI_33519462-S | rs6755847  | 2 | 2 | 240657936 | 37485  | 6.5106  | 0.4632 | -0.3143 | 6.2805 | CHB |
| NDUFA10   | GI_33519462-S | rs1030963  | 2 | 2 | 240664424 | 43973  | 6.3380  | 0.4373 | -0.2891 | 6.2805 | CHB |
| NDUFA10   | GI_33519462-S | rs6713039  | 2 | 2 | 240666549 | 46098  | 6.3380  | 0.4373 | 0.2891  | 6.2805 | CHB |
| NDUFA10   | GI_33519462-S | rs3792087  | 2 | 2 | 240668054 | 47603  | 6.3380  | 0.4373 | -0.2891 | 6.2805 | CHB |
| NDUFA10   | GI_33519462-S | rs10804402 | 2 | 2 | 240677791 | 57340  | 6.2936  | 0.4586 | 0.3540  | 6.2805 | CHB |
| STK25     | GI_34147665-S | rs11678750 | 2 | 2 | 241920909 | 233702 | 7.7601  | 0.5235 | 0.3555  | 5.5369 | CHB |
| STK25     | GI_34147665-S | rs3755324  | 2 | 2 | 241923210 | 231401 | 7.7601  | 0.5235 | -0.3555 | 5.5369 | CHB |
| STK25     | GI_34147665-S | rs11675957 | 2 | 2 | 241928782 | 225829 | 7.5347  | 0.5035 | -0.3636 | 5.5369 | CHB |
| STK25     | GI_34147665-S | rs6724257  | 2 | 2 | 241942387 | 212224 | 7.9259  | 0.5235 | -0.3553 | 5.5369 | CHB |
| STK25     | GI_34147665-S | rs10933548 | 2 | 2 | 241954827 | 199784 | 7.8389  | 0.5451 | 0.3695  | 5.5369 | CHB |
| STK25     | GI_34147665-S | rs12612578 | 2 | 2 | 241956650 | 197961 | 5.5613  | 0.4657 | 0.3106  | 5.5369 | CHB |
| STK25     | GI_34147665-S | rs1106523  | 2 | 2 | 241971529 | 183082 | 7.9259  | 0.5235 | -0.3553 | 5.5369 | CHB |
| STK25     | GI_34147665-S | rs7568     | 2 | 2 | 242011733 | 142878 | 11.3384 | 0.6677 | -0.3877 | 5.5369 | CHB |
| STK25     | GI_34147665-S | rs16843642 | 2 | 2 | 242071369 | 83242  | 11.4460 | 0.6801 | 0.3880  | 5.5369 | CHB |
| STK25     | GI_34147665-S | rs3771561  | 2 | 2 | 242073694 | 80917  | 11.3384 | 0.6677 | 0.3877  | 5.5369 | CHB |
| STK25     | GI_34147665-S | rs16842449 | 2 | 2 | 242074969 | 79642  | 10.8231 | 0.6578 | -0.3885 | 5.5369 | CHB |
| STK25     | GI_34147665-S | rs3771566  | 2 | 2 | 242078289 | 76322  | 11.3384 | 0.6677 | -0.3877 | 5.5369 | CHB |
| STK25     | GI_34147665-S | rs7423605  | 2 | 2 | 242083601 | 71010  | 11.3384 | 0.6677 | 0.3877  | 5.5369 | CHB |
| STK25     | GI_34147665-S | rs12612038 | 2 | 2 | 242089675 | 64936  | 11.3384 | 0.6677 | -0.3877 | 5.5369 | CHB |
| STK25     | GI_34147665-S | rs16843671 | 2 | 2 | 242094348 | 60263  | 11.1843 | 0.6709 | 0.3875  | 5.5369 | CHB |
| STK25     | GI_34147665-S | rs929409   | 2 | 2 | 242096497 | 58114  | 9.0626  | 0.5773 | 0.3404  | 5.5369 | CHB |
| STK25     | GI_34147665-S | rs3755400  | 2 | 2 | 242099785 | 54826  | 11.3384 | 0.6677 | -0.3877 | 5.5369 | CHB |
| STK25     | GI_34147665-S | rs3771569  | 2 | 2 | 242102596 | 52015  | 10.4445 | 0.6347 | -0.3709 | 5.5369 | CHB |
| STK25     | GI_34147665-S | rs3821281  | 2 | 2 | 242105330 | 49281  | 11.6102 | 0.7037 | -0.4069 | 5.5369 | CHB |
| STK25     | GI_34147665-S | rs2240482  | 2 | 2 | 242125011 | 29600  | 11.9041 | 0.6870 | 0.4025  | 5.5369 | CHB |
| LOC132001 | GI_34147617-S | rs303854   | 3 | 3 | 11860815  | 27016  | 6.2282  | 0.4308 | -0.2789 | 5.896  | CHB |
| LOC132001 | GI_34147617-S | rs392621   | 3 | 3 | 11861365  | 27566  | 6.2282  | 0.4308 | -0.2789 | 5.896  | CHB |
| LOC132001 | GI_34147617-S | rs420537   | 3 | 3 | 11861751  | 27952  | 6.6154  | 0.4694 | -0.2893 | 5.896  | CHB |

|           |               |            |   |   |          |        |        |        |         |        |     |
|-----------|---------------|------------|---|---|----------|--------|--------|--------|---------|--------|-----|
| LOC132001 | GI_34147617-S | rs404171   | 3 | 3 | 11862351 | 28552  | 6.2282 | 0.4308 | -0.2789 | 5.896  | CHB |
| LOC132001 | GI_34147617-S | rs440746   | 3 | 3 | 11863556 | 29757  | 6.7190 | 0.4592 | 0.2868  | 5.896  | CHB |
| Hs.224849 | Hs.224849-S   | rs4684236  | 3 | 3 | 14675050 | 21183  | 8.8221 | 0.5664 | 0.2320  | 5.8522 | CHB |
| Hs.224849 | Hs.224849-S   | rs9830735  | 3 | 3 | 14676639 | 19594  | 8.7830 | 0.5733 | 0.2350  | 5.8522 | CHB |
| Hs.224849 | Hs.224849-S   | rs2053017  | 3 | 3 | 14677276 | 18957  | 8.8221 | 0.5664 | -0.2320 | 5.8522 | CHB |
| Hs.224849 | Hs.224849-S   | rs9840626  | 3 | 3 | 14678301 | 17932  | 7.7663 | 0.5600 | -0.2304 | 5.8522 | CHB |
| Hs.224849 | Hs.224849-S   | rs3773487  | 3 | 3 | 14681852 | 14381  | 6.9709 | 0.5259 | 0.2233  | 5.8522 | CHB |
| Hs.224849 | Hs.224849-S   | rs4684237  | 3 | 3 | 14685592 | 10641  | 6.3205 | 0.4602 | -0.2425 | 5.8522 | CHB |
| Hs.224849 | Hs.224849-S   | rs3773491  | 3 | 3 | 14687046 | 9187   | 9.5291 | 0.5976 | -0.2380 | 5.8522 | CHB |
| Hs.224849 | Hs.224849-S   | rs1901     | 3 | 3 | 14687477 | 8756   | 9.5291 | 0.5976 | -0.2380 | 5.8522 | CHB |
| Hs.224849 | Hs.224849-S   | rs11717438 | 3 | 3 | 14688062 | 8171   | 7.6080 | 0.5331 | -0.2110 | 5.8522 | CHB |
| Hs.224849 | Hs.224849-S   | rs9821143  | 3 | 3 | 14699417 | 3184   | 9.5291 | 0.5976 | 0.2380  | 5.8522 | CHB |
| FLJ12442  | GI_12597652-S | rs614288   | 3 | 3 | 52195243 | 338435 | 5.5924 | 0.3991 | -0.3465 | 5.3202 | CHB |
| FLJ12442  | GI_12597652-S | rs181274   | 3 | 3 | 52208901 | 324777 | 5.5382 | 0.3956 | -0.3453 | 5.3202 | CHB |
| FLJ12442  | GI_12597652-S | rs352171   | 3 | 3 | 52209243 | 324435 | 5.6579 | 0.4032 | 0.3546  | 5.3202 | CHB |
| FLJ12442  | GI_12597652-S | rs352170   | 3 | 3 | 52211117 | 322561 | 5.6641 | 0.3963 | 0.3453  | 5.3202 | CHB |
| FLJ12442  | GI_12597652-S | rs352169   | 3 | 3 | 52211802 | 321876 | 5.6641 | 0.3963 | -0.3453 | 5.3202 | CHB |
| FLJ12442  | GI_12597652-S | rs352168   | 3 | 3 | 52213010 | 320668 | 5.6641 | 0.3963 | 0.3453  | 5.3202 | CHB |
| FLJ12442  | GI_12597652-S | rs352167   | 3 | 3 | 52213696 | 319982 | 5.6641 | 0.3963 | -0.3453 | 5.3202 | CHB |
| FLJ12442  | GI_12597652-S | rs352166   | 3 | 3 | 52213717 | 319961 | 5.6641 | 0.3963 | 0.3453  | 5.3202 | CHB |
| FLJ12442  | GI_12597652-S | rs11712164 | 3 | 3 | 52219091 | 314587 | 5.6343 | 0.3945 | -0.3390 | 5.3202 | CHB |
| FLJ12442  | GI_12597652-S | rs164640   | 3 | 3 | 52222354 | 311324 | 5.6641 | 0.3963 | 0.3453  | 5.3202 | CHB |
| FLJ12442  | GI_12597652-S | rs352162   | 3 | 3 | 52228009 | 305669 | 6.6367 | 0.5062 | 0.3418  | 5.3202 | CHB |
| FLJ12442  | GI_12597652-S | rs187084   | 3 | 3 | 52236071 | 297607 | 5.6641 | 0.3963 | 0.3453  | 5.3202 | CHB |
| FLJ12442  | GI_12597652-S | rs353547   | 3 | 3 | 52243906 | 289772 | 5.6982 | 0.3985 | 0.3526  | 5.3202 | CHB |
| FLJ12442  | GI_12597652-S | rs7618915  | 3 | 3 | 52254634 | 279044 | 5.8878 | 0.4102 | 0.3522  | 5.3202 | CHB |
| FLJ12442  | GI_12597652-S | rs1060330  | 3 | 3 | 52263985 | 269693 | 5.8959 | 0.4107 | -0.3577 | 5.3202 | CHB |
| FLJ12442  | GI_12597652-S | rs7622851  | 3 | 3 | 52308711 | 224967 | 6.0855 | 0.4222 | -0.3392 | 5.3202 | CHB |
| FLJ12442  | GI_12597652-S | rs3844291  | 3 | 3 | 52316255 | 217423 | 5.9685 | 0.4151 | -0.3421 | 5.3202 | CHB |
| FLJ12442  | GI_12597652-S | rs730050   | 3 | 3 | 52323404 | 210274 | 5.8675 | 0.4164 | -0.3457 | 5.3202 | CHB |
| FLJ12442  | GI_12597652-S | rs3852064  | 3 | 3 | 52324452 | 209226 | 5.5554 | 0.3967 | -0.3364 | 5.3202 | CHB |
| FLJ12442  | GI_12597652-S | rs13094687 | 3 | 3 | 52425083 | 108595 | 6.7339 | 0.4601 | -0.3707 | 5.3202 | CHB |
| FLJ12442  | GI_12597652-S | rs13094915 | 3 | 3 | 52482759 | 50919  | 5.8168 | 0.4209 | 0.3217  | 5.3202 | CHB |
| FLJ12442  | GI_12597652-S | rs731831   | 3 | 3 | 52511554 | 22124  | 7.7783 | 0.5244 | 0.3325  | 5.3202 | CHB |
| FLJ12442  | GI_12597652-S | rs1010552  | 3 | 3 | 52515584 | 18094  | 5.8678 | 0.4490 | -0.3251 | 5.3202 | CHB |
| FLJ12442  | GI_12597652-S | rs1010553  | 3 | 3 | 52515813 | 17865  | 7.1190 | 0.4814 | -0.3194 | 5.3202 | CHB |
| FLJ12442  | GI_12597652-S | rs1010554  | 3 | 3 | 52517959 | 15719  | 7.9945 | 0.5269 | -0.3340 | 5.3202 | CHB |
| FLJ12442  | GI_12597652-S | rs2015971  | 3 | 3 | 52521860 | 11818  | 6.8330 | 0.4656 | 0.3213  | 5.3202 | CHB |
| FLJ12442  | GI_12597652-S | rs13081028 | 3 | 3 | 52530356 | 3322   | 7.5995 | 0.5069 | 0.3346  | 5.3202 | CHB |
| FLJ12442  | GI_12597652-S | rs9853056  | 3 | 3 | 52530997 | 2681   | 7.9404 | 0.5503 | 0.3339  | 5.3202 | CHB |
| FLJ12442  | GI_12597652-S | rs4687625  | 3 | 3 | 52538758 | 5080   | 8.8255 | 0.5932 | -0.3562 | 5.3202 | CHB |
| FLJ12442  | GI_12597652-S | rs4282054  | 3 | 3 | 52541105 | 7427   | 9.1346 | 0.5805 | 0.3559  | 5.3202 | CHB |
| FLJ12442  | GI_12597652-S | rs7614981  | 3 | 3 | 52541954 | 8276   | 8.1100 | 0.5499 | 0.3406  | 5.3202 | CHB |
| FLJ12442  | GI_12597652-S | rs12489828 | 3 | 3 | 52542054 | 8376   | 8.9373 | 0.6077 | -0.3555 | 5.3202 | CHB |
| FLJ12442  | GI_12597652-S | rs6445528  | 3 | 3 | 52547487 | 13809  | 9.1346 | 0.5805 | -0.3559 | 5.3202 | CHB |
| FLJ12442  | GI_12597652-S | rs1133415  | 3 | 3 | 52550871 | 17193  | 9.1346 | 0.5805 | 0.3559  | 5.3202 | CHB |
| FLJ12442  | GI_12597652-S | rs2878628  | 3 | 3 | 52559755 | 26077  | 9.2763 | 0.5867 | -0.3650 | 5.3202 | CHB |
| FLJ12442  | GI_12597652-S | rs2251219  | 3 | 3 | 52559827 | 26149  | 9.2763 | 0.5867 | -0.3650 | 5.3202 | CHB |
| FLJ12442  | GI_12597652-S | rs1961959  | 3 | 3 | 52560800 | 27122  | 7.3673 | 0.4947 | -0.3495 | 5.3202 | CHB |
| FLJ12442  | GI_12597652-S | rs1961958  | 3 | 3 | 52561030 | 27352  | 9.6268 | 0.6017 | 0.3633  | 5.3202 | CHB |
| FLJ12442  | GI_12597652-S | rs17052259 | 3 | 3 | 52568178 | 34500  | 9.2763 | 0.5867 | -0.3650 | 5.3202 | CHB |
| FLJ12442  | GI_12597652-S | rs3796353  | 3 | 3 | 52568270 | 34592  | 8.7531 | 0.5719 | 0.3618  | 5.3202 | CHB |
| FLJ12442  | GI_12597652-S | rs6778844  | 3 | 3 | 52571438 | 37760  | 9.2763 | 0.5867 | 0.3650  | 5.3202 | CHB |
| FLJ12442  | GI_12597652-S | rs6798246  | 3 | 3 | 52574962 | 41284  | 9.2763 | 0.5867 | 0.3650  | 5.3202 | CHB |
| FLJ12442  | GI_12597652-S | rs11714565 | 3 | 3 | 52581332 | 47654  | 9.0571 | 0.6038 | -0.3402 | 5.3202 | CHB |
| FLJ12442  | GI_12597652-S | rs6805156  | 3 | 3 | 52584402 | 50724  | 9.2763 | 0.5867 | 0.3650  | 5.3202 | CHB |
| FLJ12442  | GI_12597652-S | rs7652191  | 3 | 3 | 52585455 | 51777  | 9.2763 | 0.5867 | 0.3650  | 5.3202 | CHB |
| FLJ12442  | GI_12597652-S | rs17264436 | 3 | 3 | 52585691 | 52013  | 9.3053 | 0.5967 | 0.3655  | 5.3202 | CHB |
| FLJ12442  | GI_12597652-S | rs4687629  | 3 | 3 | 52590267 | 56589  | 9.3053 | 0.5967 | 0.3655  | 5.3202 | CHB |

|          |               |            |   |   |          |        |         |        |         |        |     |
|----------|---------------|------------|---|---|----------|--------|---------|--------|---------|--------|-----|
| FLJ12442 | GI_12597652-S | rs11720159 | 3 | 3 | 52592842 | 59164  | 9.2763  | 0.5867 | 0.3650  | 5.3202 | CHB |
| FLJ12442 | GI_12597652-S | rs11720243 | 3 | 3 | 52593058 | 59380  | 9.2695  | 0.6040 | 0.3402  | 5.3202 | CHB |
| FLJ12442 | GI_12597652-S | rs12487445 | 3 | 3 | 52593359 | 59681  | 9.2763  | 0.5867 | -0.3650 | 5.3202 | CHB |
| FLJ12442 | GI_12597652-S | rs2590838  | 3 | 3 | 52597126 | 63448  | 8.7187  | 0.5703 | -0.3600 | 5.3202 | CHB |
| FLJ12442 | GI_12597652-S | rs2336146  | 3 | 3 | 52601686 | 68008  | 7.9201  | 0.5680 | 0.4547  | 5.3202 | CHB |
| FLJ12442 | GI_12597652-S | rs2118540  | 3 | 3 | 52604426 | 70748  | 8.3975  | 0.6333 | 0.3638  | 5.3202 | CHB |
| FLJ12442 | GI_12597652-S | rs2276824  | 3 | 3 | 52612526 | 78848  | 9.2763  | 0.5867 | 0.3650  | 5.3202 | CHB |
| FLJ12442 | GI_12597652-S | rs3774366  | 3 | 3 | 52616295 | 82617  | 9.2763  | 0.5867 | -0.3650 | 5.3202 | CHB |
| FLJ12442 | GI_12597652-S | rs3774365  | 3 | 3 | 52617527 | 83849  | 9.2763  | 0.5867 | -0.3650 | 5.3202 | CHB |
| FLJ12442 | GI_12597652-S | rs12487591 | 3 | 3 | 52617976 | 84298  | 9.2763  | 0.5867 | -0.3650 | 5.3202 | CHB |
| FLJ12442 | GI_12597652-S | rs3733045  | 3 | 3 | 52618347 | 84669  | 9.2763  | 0.5867 | 0.3650  | 5.3202 | CHB |
| FLJ12442 | GI_12597652-S | rs3755806  | 3 | 3 | 52618725 | 85047  | 8.7369  | 0.5711 | -0.3569 | 5.3202 | CHB |
| FLJ12442 | GI_12597652-S | rs9879090  | 3 | 3 | 52623305 | 89627  | 8.8895  | 0.5870 | 0.3697  | 5.3202 | CHB |
| FLJ12442 | GI_12597652-S | rs13083798 | 3 | 3 | 52624788 | 91110  | 9.2763  | 0.5867 | -0.3650 | 5.3202 | CHB |
| FLJ12442 | GI_12597652-S | rs10510760 | 3 | 3 | 52625388 | 91710  | 9.2763  | 0.5867 | -0.3650 | 5.3202 | CHB |
| FLJ12442 | GI_12597652-S | rs13064064 | 3 | 3 | 52632042 | 98364  | 9.2763  | 0.5867 | 0.3650  | 5.3202 | CHB |
| FLJ12442 | GI_12597652-S | rs1561337  | 3 | 3 | 52635003 | 101325 | 9.2763  | 0.5867 | 0.3650  | 5.3202 | CHB |
| FLJ12442 | GI_12597652-S | rs4687548  | 3 | 3 | 52641690 | 108012 | 8.7531  | 0.5719 | -0.3618 | 5.3202 | CHB |
| FLJ12442 | GI_12597652-S | rs2083180  | 3 | 3 | 52643159 | 109481 | 8.6925  | 0.5964 | 0.3418  | 5.3202 | CHB |
| FLJ12442 | GI_12597652-S | rs13068293 | 3 | 3 | 52647207 | 113529 | 9.2763  | 0.5867 | 0.3650  | 5.3202 | CHB |
| FLJ12442 | GI_12597652-S | rs11130312 | 3 | 3 | 52650095 | 116417 | 8.8935  | 0.5783 | -0.3657 | 5.3202 | CHB |
| FLJ12442 | GI_12597652-S | rs13085895 | 3 | 3 | 52653310 | 119632 | 9.2763  | 0.5867 | 0.3650  | 5.3202 | CHB |
| FLJ12442 | GI_12597652-S | rs13085775 | 3 | 3 | 52653410 | 119732 | 9.2763  | 0.5867 | -0.3650 | 5.3202 | CHB |
| FLJ12442 | GI_12597652-S | rs2289250  | 3 | 3 | 52657986 | 124308 | 9.2763  | 0.5867 | -0.3650 | 5.3202 | CHB |
| FLJ12442 | GI_12597652-S | rs2336149  | 3 | 3 | 52667164 | 133486 | 8.9195  | 0.5975 | 0.3653  | 5.3202 | CHB |
| FLJ12442 | GI_12597652-S | rs7611731  | 3 | 3 | 52667761 | 134083 | 9.2763  | 0.5867 | 0.3650  | 5.3202 | CHB |
| FLJ12442 | GI_12597652-S | rs6804145  | 3 | 3 | 52669238 | 135560 | 8.8667  | 0.6141 | -0.3311 | 5.3202 | CHB |
| FLJ12442 | GI_12597652-S | rs10865973 | 3 | 3 | 52693194 | 159516 | 9.2763  | 0.5867 | -0.3650 | 5.3202 | CHB |
| FLJ12442 | GI_12597652-S | rs10865974 | 3 | 3 | 52693320 | 159642 | 9.2763  | 0.5867 | -0.3650 | 5.3202 | CHB |
| FLJ12442 | GI_12597652-S | rs1866268  | 3 | 3 | 52694438 | 160760 | 9.2763  | 0.5867 | -0.3650 | 5.3202 | CHB |
| FLJ12442 | GI_12597652-S | rs1108842  | 3 | 3 | 52695120 | 161442 | 9.2763  | 0.5867 | -0.3650 | 5.3202 | CHB |
| FLJ12442 | GI_12597652-S | rs111177   | 3 | 3 | 52696345 | 162667 | 9.2763  | 0.5867 | -0.3650 | 5.3202 | CHB |
| FLJ12442 | GI_12597652-S | rs6762813  | 3 | 3 | 52701735 | 168057 | 9.2763  | 0.5867 | -0.3650 | 5.3202 | CHB |
| FLJ12442 | GI_12597652-S | rs2289247  | 3 | 3 | 52702297 | 168619 | 9.2763  | 0.5867 | -0.3650 | 5.3202 | CHB |
| FLJ12442 | GI_12597652-S | rs6976     | 3 | 3 | 52703844 | 170166 | 9.8817  | 0.6210 | -0.3835 | 5.3202 | CHB |
| FLJ12442 | GI_12597652-S | rs3733041  | 3 | 3 | 52706638 | 172960 | 8.7951  | 0.5918 | 0.3642  | 5.3202 | CHB |
| FLJ12442 | GI_12597652-S | rs12635140 | 3 | 3 | 52713205 | 179527 | 9.2763  | 0.5867 | 0.3650  | 5.3202 | CHB |
| FLJ12442 | GI_12597652-S | rs6617     | 3 | 3 | 52715222 | 181544 | 9.2763  | 0.5867 | -0.3650 | 5.3202 | CHB |
| FLJ12442 | GI_12597652-S | rs3755798  | 3 | 3 | 52716200 | 182522 | 8.4059  | 0.5734 | 0.3691  | 5.3202 | CHB |
| FLJ12442 | GI_12597652-S | rs6445534  | 3 | 3 | 52718424 | 184746 | 10.1948 | 0.6612 | 0.3625  | 5.3202 | CHB |
| FLJ12442 | GI_12597652-S | rs11235    | 3 | 3 | 52720127 | 186449 | 8.5800  | 0.5726 | 0.3688  | 5.3202 | CHB |
| FLJ12442 | GI_12597652-S | rs2268027  | 3 | 3 | 52741646 | 207968 | 8.1974  | 0.5725 | -0.3567 | 5.3202 | CHB |
| FLJ12442 | GI_12597652-S | rs11130323 | 3 | 3 | 52745317 | 211639 | 9.2763  | 0.5867 | 0.3650  | 5.3202 | CHB |
| FLJ12442 | GI_12597652-S | rs2268026  | 3 | 3 | 52753387 | 219709 | 7.9844  | 0.5713 | -0.3657 | 5.3202 | CHB |
| FLJ12442 | GI_12597652-S | rs2072390  | 3 | 3 | 52755549 | 221871 | 9.2763  | 0.5867 | 0.3650  | 5.3202 | CHB |
| FLJ12442 | GI_12597652-S | rs13082208 | 3 | 3 | 52756579 | 222901 | 8.4845  | 0.5961 | 0.3275  | 5.3202 | CHB |
| FLJ12442 | GI_12597652-S | rs13082960 | 3 | 3 | 52760208 | 226530 | 8.5183  | 0.5788 | -0.3584 | 5.3202 | CHB |
| FLJ12442 | GI_12597652-S | rs2336545  | 3 | 3 | 52762643 | 228965 | 9.2763  | 0.5867 | 0.3650  | 5.3202 | CHB |
| FLJ12442 | GI_12597652-S | rs12497998 | 3 | 3 | 52768642 | 234964 | 7.0851  | 0.5325 | -0.3650 | 5.3202 | CHB |
| FLJ12442 | GI_12597652-S | rs2268025  | 3 | 3 | 52770264 | 236586 | 9.0076  | 0.5924 | 0.3311  | 5.3202 | CHB |
| FLJ12442 | GI_12597652-S | rs1029871  | 3 | 3 | 52772674 | 238996 | 9.2763  | 0.5867 | -0.3650 | 5.3202 | CHB |
| FLJ12442 | GI_12597652-S | rs2230535  | 3 | 3 | 52775324 | 241646 | 9.2763  | 0.5867 | 0.3650  | 5.3202 | CHB |
| FLJ12442 | GI_12597652-S | rs2230534  | 3 | 3 | 52777442 | 243764 | 9.2763  | 0.5867 | 0.3650  | 5.3202 | CHB |
| FLJ12442 | GI_12597652-S | rs998909   | 3 | 3 | 52780133 | 246455 | 8.5221  | 0.5699 | 0.3573  | 5.3202 | CHB |
| FLJ12442 | GI_12597652-S | rs11717836 | 3 | 3 | 52782776 | 249098 | 8.2393  | 0.5746 | -0.3603 | 5.3202 | CHB |
| FLJ12442 | GI_12597652-S | rs2019065  | 3 | 3 | 52784565 | 250887 | 7.8143  | 0.5179 | -0.3579 | 5.3202 | CHB |
| FLJ12442 | GI_12597652-S | rs2710323  | 3 | 3 | 52790945 | 257267 | 6.6696  | 0.4725 | -0.3353 | 5.3202 | CHB |
| FLJ12442 | GI_12597652-S | rs3774354  | 3 | 3 | 52792715 | 259037 | 6.8718  | 0.4678 | 0.3348  | 5.3202 | CHB |
| FLJ12442 | GI_12597652-S | rs3774355  | 3 | 3 | 52792818 | 259140 | 6.8718  | 0.4678 | 0.3348  | 5.3202 | CHB |

|           |               |            |   |   |           |        |        |        |         |        |     |
|-----------|---------------|------------|---|---|-----------|--------|--------|--------|---------|--------|-----|
| FLJ12442  | GI_12597652-S | rs2239551  | 3 | 3 | 52793619  | 259941 | 6.8718 | 0.4678 | -0.3348 | 5.3202 | CHB |
| FLJ12442  | GI_12597652-S | rs678      | 3 | 3 | 52796021  | 262343 | 7.7554 | 0.5149 | -0.3589 | 5.3202 | CHB |
| FLJ12442  | GI_12597652-S | rs1042779  | 3 | 3 | 52796051  | 262373 | 7.2463 | 0.4965 | -0.3494 | 5.3202 | CHB |
| FLJ12442  | GI_12597652-S | rs2286798  | 3 | 3 | 52796217  | 262539 | 7.7554 | 0.5149 | 0.3589  | 5.3202 | CHB |
| FLJ12442  | GI_12597652-S | rs2239549  | 3 | 3 | 52798166  | 264488 | 6.8784 | 0.4682 | -0.3293 | 5.3202 | CHB |
| FLJ12442  | GI_12597652-S | rs4687550  | 3 | 3 | 52798470  | 264792 | 6.8718 | 0.4678 | 0.3348  | 5.3202 | CHB |
| FLJ12442  | GI_12597652-S | rs4687551  | 3 | 3 | 52798488  | 264810 | 6.8718 | 0.4678 | 0.3348  | 5.3202 | CHB |
| FLJ12442  | GI_12597652-S | rs2270197  | 3 | 3 | 52799135  | 265457 | 6.8718 | 0.4678 | -0.3348 | 5.3202 | CHB |
| FLJ12442  | GI_12597652-S | rs6778329  | 3 | 3 | 52799650  | 265972 | 7.7556 | 0.5408 | 0.3881  | 5.3202 | CHB |
| FLJ12442  | GI_12597652-S | rs1076425  | 3 | 3 | 52800502  | 266824 | 6.8718 | 0.4678 | 0.3348  | 5.3202 | CHB |
| FLJ12442  | GI_12597652-S | rs1075653  | 3 | 3 | 52800568  | 266890 | 6.2167 | 0.4539 | -0.3249 | 5.3202 | CHB |
| FLJ12442  | GI_12597652-S | rs2071507  | 3 | 3 | 52801747  | 268069 | 7.7554 | 0.5149 | 0.3589  | 5.3202 | CHB |
| FLJ12442  | GI_12597652-S | rs2071508  | 3 | 3 | 52801886  | 268208 | 6.8718 | 0.4678 | 0.3348  | 5.3202 | CHB |
| FLJ12442  | GI_12597652-S | rs2239699  | 3 | 3 | 52802955  | 269277 | 6.3227 | 0.4966 | -0.3758 | 5.3202 | CHB |
| FLJ12442  | GI_12597652-S | rs2240920  | 3 | 3 | 52806049  | 272371 | 7.6041 | 0.5155 | 0.3671  | 5.3202 | CHB |
| FLJ12442  | GI_12597652-S | rs2240919  | 3 | 3 | 52806741  | 273063 | 7.7554 | 0.5149 | 0.3589  | 5.3202 | CHB |
| FLJ12442  | GI_12597652-S | rs2535629  | 3 | 3 | 52808259  | 274581 | 6.4306 | 0.5133 | -0.3129 | 5.3202 | CHB |
| FLJ12442  | GI_12597652-S | rs3617     | 3 | 3 | 52808845  | 275167 | 8.4576 | 0.5580 | -0.3680 | 5.3202 | CHB |
| FLJ12442  | GI_12597652-S | rs736408   | 3 | 3 | 52810394  | 276716 | 6.9607 | 0.4727 | 0.3352  | 5.3202 | CHB |
| FLJ12442  | GI_12597652-S | rs4481150  | 3 | 3 | 52812833  | 279155 | 7.8363 | 0.5361 | 0.3228  | 5.3202 | CHB |
| FLJ12442  | GI_12597652-S | rs2535627  | 3 | 3 | 52820145  | 286467 | 7.7420 | 0.5226 | -0.3126 | 5.3202 | CHB |
| FLJ12442  | GI_12597652-S | rs2071044  | 3 | 3 | 52822641  | 288963 | 7.5660 | 0.5135 | 0.3424  | 5.3202 | CHB |
| FLJ12442  | GI_12597652-S | rs2256332  | 3 | 3 | 52830905  | 297227 | 6.1856 | 0.4282 | -0.3335 | 5.3202 | CHB |
| FLJ12442  | GI_12597652-S | rs2240915  | 3 | 3 | 52834566  | 300888 | 6.1856 | 0.4282 | -0.3335 | 5.3202 | CHB |
| FLJ12442  | GI_12597652-S | rs2535633  | 3 | 3 | 52834670  | 300992 | 5.7782 | 0.4108 | 0.2976  | 5.3202 | CHB |
| FLJ12442  | GI_12597652-S | rs6445541  | 3 | 3 | 52855168  | 321490 | 5.8807 | 0.4098 | -0.3202 | 5.3202 | CHB |
| FLJ12442  | GI_12597652-S | rs9836499  | 3 | 3 | 52879564  | 345886 | 5.8100 | 0.4054 | 0.3249  | 5.3202 | CHB |
| FLJ12442  | GI_12597652-S | rs2336664  | 3 | 3 | 52880253  | 346575 | 5.8100 | 0.4054 | -0.3249 | 5.3202 | CHB |
| FLJ12442  | GI_12597652-S | rs4687680  | 3 | 3 | 52882412  | 348734 | 5.5063 | 0.3864 | 0.3108  | 5.3202 | CHB |
| FLJ12442  | GI_12597652-S | rs9850563  | 3 | 3 | 52887254  | 353576 | 5.7062 | 0.4063 | -0.3248 | 5.3202 | CHB |
| FLJ12442  | GI_12597652-S | rs12492391 | 3 | 3 | 52887336  | 353658 | 5.5063 | 0.3864 | 0.3108  | 5.3202 | CHB |
| FLJ12442  | GI_12597652-S | rs4687682  | 3 | 3 | 52891979  | 358301 | 5.8100 | 0.4054 | -0.3249 | 5.3202 | CHB |
| FLJ12442  | GI_12597652-S | rs2336668  | 3 | 3 | 52894136  | 360458 | 5.8100 | 0.4054 | 0.3249  | 5.3202 | CHB |
| FLJ12442  | GI_12597652-S | rs6795646  | 3 | 3 | 52897661  | 363983 | 5.5063 | 0.3864 | 0.3108  | 5.3202 | CHB |
| FLJ12442  | GI_12597652-S | rs9810807  | 3 | 3 | 52899267  | 365589 | 5.8100 | 0.4054 | 0.3249  | 5.3202 | CHB |
| DNASE1L3  | GI_4826697-S  | rs4681819  | 3 | 3 | 58159966  | 1323   | 5.6350 | 0.3945 | 0.8856  | 5.2419 | CHB |
| DNASE1L3  | GI_4826697-S  | rs12494813 | 3 | 3 | 58160635  | 1992   | 5.2684 | 0.3710 | 0.8429  | 5.2419 | CHB |
| DNASE1L3  | GI_4826697-S  | rs3772985  | 3 | 3 | 58161759  | 3116   | 6.7083 | 0.4748 | 0.9971  | 5.2419 | CHB |
| ESRRBL1   | GI_19923513-S | rs721328   | 3 | 3 | 109326171 | 36232  | 5.9938 | 0.4242 | -0.2516 | 5.7796 | CHB |
| BITE      | GI_13346499-S | rs12632793 | 3 | 3 | 139749294 | 53139  | 5.4332 | 0.4038 | -0.2799 | 5.168  | CHB |
| Hs.54543  | Hs.54543-S    | rs184695   | 3 | 3 | 157880091 | 67922  | 7.0331 | 0.4848 | -0.4666 | 5.678  | CHB |
| Hs.54543  | Hs.54543-S    | rs193197   | 3 | 3 | 157894434 | 53579  | 7.2411 | 0.5046 | -0.4820 | 5.678  | CHB |
| Hs.54543  | Hs.54543-S    | rs1367311  | 3 | 3 | 157901458 | 46555  | 5.9852 | 0.4162 | 0.4531  | 5.678  | CHB |
| Hs.54543  | Hs.54543-S    | rs9882795  | 3 | 3 | 157921988 | 26025  | 5.9852 | 0.4162 | 0.4531  | 5.678  | CHB |
| Hs.54543  | Hs.54543-S    | rs168247   | 3 | 3 | 157922888 | 25125  | 6.5737 | 0.4931 | 0.4309  | 5.678  | CHB |
| Hs.54543  | Hs.54543-S    | rs237250   | 3 | 3 | 157927085 | 20928  | 7.2632 | 0.4892 | -0.4736 | 5.678  | CHB |
| Hs.54543  | Hs.54543-S    | rs344003   | 3 | 3 | 157940422 | 7591   | 7.2632 | 0.4892 | -0.4736 | 5.678  | CHB |
| Hs.54543  | Hs.54543-S    | rs344034   | 3 | 3 | 157945706 | 2307   | 7.2632 | 0.4892 | 0.4736  | 5.678  | CHB |
| Hs.54543  | Hs.54543-S    | rs344028   | 3 | 3 | 157948471 | 458    | 7.2632 | 0.4892 | -0.4736 | 5.678  | CHB |
| Hs.54543  | Hs.54543-S    | rs344027   | 3 | 3 | 157951095 | 3082   | 7.8036 | 0.5174 | 0.4938  | 5.678  | CHB |
| Hs.54543  | Hs.54543-S    | rs17380954 | 3 | 3 | 157987808 | 39795  | 6.4943 | 0.4464 | -0.4779 | 5.678  | CHB |
| Hs.54543  | Hs.54543-S    | rs386736   | 3 | 3 | 157996110 | 48097  | 7.8036 | 0.5174 | 0.4938  | 5.678  | CHB |
| Hs.54543  | Hs.54543-S    | rs1430410  | 3 | 3 | 158008264 | 60251  | 6.8919 | 0.4689 | -0.4642 | 5.678  | CHB |
| Hs.54543  | Hs.54543-S    | rs9874866  | 3 | 3 | 158021372 | 73359  | 6.8919 | 0.4689 | -0.4642 | 5.678  | CHB |
| Hs.54543  | Hs.54543-S    | rs9858861  | 3 | 3 | 158025339 | 77326  | 7.2012 | 0.4858 | 0.4792  | 5.678  | CHB |
| Hs.54543  | Hs.54543-S    | rs9820830  | 3 | 3 | 158025406 | 77393  | 7.2012 | 0.4858 | -0.4792 | 5.678  | CHB |
| LOC151963 | GI_31341922-S | rs4462895  | 3 | 3 | 194096503 | 98936  | 6.4098 | 0.4742 | 0.7994  | 5.8476 | CHB |
| LOC151963 | GI_31341922-S | rs4455277  | 3 | 3 | 194097010 | 99443  | 6.7320 | 0.4600 | 0.7767  | 5.8476 | CHB |
| LOC151963 | GI_31341922-S | rs4455278  | 3 | 3 | 194097185 | 99618  | 6.7320 | 0.4600 | 0.7767  | 5.8476 | CHB |

|           |               |            |   |   |           |        |        |        |         |        |     |
|-----------|---------------|------------|---|---|-----------|--------|--------|--------|---------|--------|-----|
| LOC151963 | GI_31341922-S | rs2133864  | 3 | 3 | 194098959 | 101392 | 6.7320 | 0.4600 | -0.7767 | 5.8476 | CHB |
| LOC151963 | GI_31341922-S | rs2367133  | 3 | 3 | 194099108 | 101541 | 6.7320 | 0.4600 | 0.7767  | 5.8476 | CHB |
| LOC151963 | GI_31341922-S | rs11716375 | 3 | 3 | 194100965 | 103398 | 6.7320 | 0.4600 | -0.7767 | 5.8476 | CHB |
| LOC151963 | GI_31341922-S | rs7643379  | 3 | 3 | 194102085 | 104518 | 6.7320 | 0.4600 | -0.7767 | 5.8476 | CHB |
| LOC151963 | GI_31341922-S | rs9870304  | 3 | 3 | 194108384 | 110817 | 5.9845 | 0.4655 | 0.7985  | 5.8476 | CHB |
| MUC20     | GI_23097330-S | rs2641766  | 3 | 3 | 196908637 | 41256  | 7.2670 | 0.4894 | 0.1931  | 5.5875 | CHB |
| MUC20     | GI_23097330-S | rs2251330  | 3 | 3 | 196950134 | 241    | 9.3575 | 0.5989 | -0.2200 | 5.5875 | CHB |
| MUC20     | GI_23097330-S | rs842226   | 3 | 3 | 196968445 | 18552  | 6.9499 | 0.4802 | 0.2003  | 5.5875 | CHB |
| MUC20     | GI_23097330-S | rs2258447  | 3 | 3 | 196968840 | 18947  | 5.9087 | 0.4115 | 0.1766  | 5.5875 | CHB |
| MUC20     | GI_23097330-S | rs842225   | 3 | 3 | 196969332 | 19439  | 7.6734 | 0.5107 | -0.2037 | 5.5875 | CHB |
| MUC20     | GI_23097330-S | rs9837428  | 3 | 3 | 196976453 | 26560  | 7.2536 | 0.4887 | 0.1866  | 5.5875 | CHB |
| MUC20     | GI_23097330-S | rs2246901  | 3 | 3 | 196978593 | 28700  | 7.2536 | 0.4887 | 0.1866  | 5.5875 | CHB |
| MUC20     | GI_23097330-S | rs2246980  | 3 | 3 | 196978651 | 28758  | 6.2983 | 0.4589 | -0.1805 | 5.5875 | CHB |
| MUC20     | GI_23097330-S | rs844518   | 3 | 3 | 196982401 | 32508  | 7.2536 | 0.4887 | 0.1866  | 5.5875 | CHB |
| MUC20     | GI_23097330-S | rs2550240  | 3 | 3 | 196985463 | 35570  | 9.0512 | 0.5768 | 0.2070  | 5.5875 | CHB |
| MUC20     | GI_23097330-S | rs2688492  | 3 | 3 | 196985676 | 35783  | 7.2536 | 0.4887 | 0.1866  | 5.5875 | CHB |
| MUC20     | GI_23097330-S | rs2293232  | 3 | 3 | 196986690 | 36797  | 6.8520 | 0.4667 | 0.1887  | 5.5875 | CHB |
| MUC20     | GI_23097330-S | rs2259102  | 3 | 3 | 196986721 | 36828  | 6.1769 | 0.4277 | -0.1824 | 5.5875 | CHB |
| MUC20     | GI_23097330-S | rs2259331  | 3 | 3 | 196990805 | 40912  | 8.3953 | 0.5465 | 0.2070  | 5.5875 | CHB |
| MUC20     | GI_23097330-S | rs2259419  | 3 | 3 | 196994109 | 44216  | 6.5528 | 0.4497 | 0.1837  | 5.5875 | CHB |
| MUC20     | GI_23097330-S | rs2688513  | 3 | 3 | 196994356 | 44463  | 6.8520 | 0.4667 | 0.1887  | 5.5875 | CHB |
| MUC20     | GI_23097330-S | rs3103954  | 3 | 3 | 197004938 | 55045  | 6.8520 | 0.4667 | 0.1887  | 5.5875 | CHB |
| MUC20     | GI_23097330-S | rs2177336  | 3 | 3 | 197005186 | 55293  | 6.8520 | 0.4667 | 0.1887  | 5.5875 | CHB |
| MUC20     | GI_23097330-S | rs1106502  | 3 | 3 | 197005566 | 55673  | 6.8520 | 0.4667 | 0.1887  | 5.5875 | CHB |
| MUC20     | GI_23097330-S | rs1104760  | 3 | 3 | 197005629 | 55736  | 6.8520 | 0.4667 | 0.1887  | 5.5875 | CHB |
| MUC20     | GI_23097330-S | rs882605   | 3 | 3 | 197005861 | 55968  | 6.7803 | 0.4962 | 0.1868  | 5.5875 | CHB |
| MUC20     | GI_23097330-S | rs3107764  | 3 | 3 | 197006638 | 56745  | 8.3953 | 0.5465 | 0.2070  | 5.5875 | CHB |
| MUC20     | GI_23097330-S | rs2688488  | 3 | 3 | 197008165 | 58272  | 6.3152 | 0.4436 | 0.1863  | 5.5875 | CHB |
| MUC20     | GI_23097330-S | rs3103953  | 3 | 3 | 197008907 | 59014  | 6.8520 | 0.4667 | 0.1887  | 5.5875 | CHB |
| MUC20     | GI_23097330-S | rs9844491  | 3 | 3 | 197009841 | 59948  | 8.7781 | 0.5730 | -0.2153 | 5.5875 | CHB |
| MUC20     | GI_23097330-S | rs3103952  | 3 | 3 | 197011000 | 61107  | 6.8520 | 0.4667 | -0.1887 | 5.5875 | CHB |
| MUC20     | GI_23097330-S | rs3096337  | 3 | 3 | 197021642 | 71749  | 7.3934 | 0.4961 | 0.1880  | 5.5875 | CHB |
| MUC20     | GI_23097330-S | rs842461   | 3 | 3 | 197023924 | 74031  | 7.3934 | 0.4961 | 0.1880  | 5.5875 | CHB |
| MUC20     | GI_23097330-S | rs842458   | 3 | 3 | 197025111 | 75218  | 7.3934 | 0.4961 | -0.1880 | 5.5875 | CHB |
| MUC20     | GI_23097330-S | rs2688533  | 3 | 3 | 197029268 | 79375  | 7.3934 | 0.4961 | 0.1880  | 5.5875 | CHB |
| MUC20     | GI_23097330-S | rs2550287  | 3 | 3 | 197030264 | 80371  | 7.3934 | 0.4961 | -0.1880 | 5.5875 | CHB |
| FLJ90036  | GI_31559781-S | rs12510517 | 4 | 4 | 4705      | 141163 | 8.3105 | 0.5597 | 0.1906  | 6.0379 | CHB |
| FLJ90036  | GI_31559781-S | rs6827719  | 4 | 4 | 58063     | 87805  | 7.6274 | 0.5083 | -0.2091 | 6.0379 | CHB |
| FLJ90036  | GI_31559781-S | rs12511220 | 4 | 4 | 65174     | 80694  | 8.3212 | 0.5515 | 0.2195  | 6.0379 | CHB |
| FLJ90036  | GI_31559781-S | rs13434621 | 4 | 4 | 69535     | 76333  | 7.7029 | 0.5122 | 0.2055  | 6.0379 | CHB |
| FLJ90036  | GI_31559781-S | rs7667153  | 4 | 4 | 75422     | 70446  | 7.4994 | 0.5017 | -0.2032 | 6.0379 | CHB |
| FLJ90036  | GI_31559781-S | rs2006748  | 4 | 4 | 77113     | 68755  | 7.6274 | 0.5083 | -0.2091 | 6.0379 | CHB |
| FLJ90036  | GI_31559781-S | rs11724335 | 4 | 4 | 80883     | 64985  | 6.4727 | 0.4780 | 0.2046  | 6.0379 | CHB |
| FLJ90036  | GI_31559781-S | rs2883236  | 4 | 4 | 82605     | 63263  | 7.6274 | 0.5083 | 0.2091  | 6.0379 | CHB |
| FLJ90036  | GI_31559781-S | rs12509346 | 4 | 4 | 84380     | 61488  | 7.6274 | 0.5083 | 0.2091  | 6.0379 | CHB |
| FLJ90036  | GI_31559781-S | rs6813136  | 4 | 4 | 85506     | 60362  | 7.4994 | 0.5017 | 0.2032  | 6.0379 | CHB |
| FLJ90036  | GI_31559781-S | rs2353623  | 4 | 4 | 85560     | 60308  | 7.4994 | 0.5017 | -0.2032 | 6.0379 | CHB |
| FLJ90036  | GI_31559781-S | rs9884834  | 4 | 4 | 92571     | 53297  | 7.4994 | 0.5017 | -0.2032 | 6.0379 | CHB |
| FLJ90036  | GI_31559781-S | rs6819316  | 4 | 4 | 99596     | 46272  | 7.1804 | 0.4847 | -0.2113 | 6.0379 | CHB |
| FLJ90036  | GI_31559781-S | rs6814287  | 4 | 4 | 112323    | 33545  | 8.5776 | 0.5551 | 0.2201  | 6.0379 | CHB |
| FLJ90036  | GI_31559781-S | rs7699689  | 4 | 4 | 117452    | 28416  | 8.4933 | 0.5511 | 0.2135  | 6.0379 | CHB |
| FLJ90036  | GI_31559781-S | rs10004179 | 4 | 4 | 121548    | 24320  | 8.3084 | 0.5508 | 0.2184  | 6.0379 | CHB |
| FLJ90036  | GI_31559781-S | rs6599293  | 4 | 4 | 123027    | 22841  | 8.5776 | 0.5551 | 0.2201  | 6.0379 | CHB |
| FLJ90036  | GI_31559781-S | rs6599295  | 4 | 4 | 126942    | 18926  | 8.5776 | 0.5551 | 0.2201  | 6.0379 | CHB |
| FLJ90036  | GI_31559781-S | rs11735742 | 4 | 4 | 132550    | 13318  | 8.5776 | 0.5551 | -0.2201 | 6.0379 | CHB |
| FLJ90036  | GI_31559781-S | rs6599306  | 4 | 4 | 133439    | 12429  | 8.5776 | 0.5551 | -0.2201 | 6.0379 | CHB |
| FLJ90036  | GI_31559781-S | rs6842197  | 4 | 4 | 149061    | 3193   | 6.3784 | 0.4396 | -0.1936 | 6.0379 | CHB |
| FLJ90036  | GI_31559781-S | rs10027536 | 4 | 4 | 157596    | 11728  | 6.3784 | 0.4396 | 0.1936  | 6.0379 | CHB |
| FLJ90036  | GI_31559781-S | rs11731927 | 4 | 4 | 164105    | 18237  | 6.8643 | 0.4674 | -0.2108 | 6.0379 | CHB |

|           |               |            |   |   |          |        |        |        |         |        |     |
|-----------|---------------|------------|---|---|----------|--------|--------|--------|---------|--------|-----|
| FLJ90036  | GI_31559781-S | rs11736321 | 4 | 4 | 173278   | 27410  | 6.8643 | 0.4674 | -0.2108 | 6.0379 | CHB |
| PI4K2B    | GI_18874095-S | rs12502384 | 4 | 4 | 24880174 | 76279  | 5.9827 | 0.4160 | 0.4996  | 5.9475 | CHB |
| STIM2     | GI_21070998-S | rs7688662  | 4 | 4 | 26520738 | 182216 | 6.2313 | 0.4310 | 0.1341  | 5.6571 | CHB |
| STIM2     | GI_21070998-S | rs13114545 | 4 | 4 | 26522028 | 180926 | 5.8430 | 0.4305 | -0.1414 | 5.6571 | CHB |
| STIM2     | GI_21070998-S | rs11722323 | 4 | 4 | 26528117 | 174837 | 5.7661 | 0.4027 | 0.1373  | 5.6571 | CHB |
| STIM2     | GI_21070998-S | rs7660174  | 4 | 4 | 26528707 | 174247 | 5.7661 | 0.4027 | 0.1373  | 5.6571 | CHB |
| STIM2     | GI_21070998-S | rs7655631  | 4 | 4 | 26545607 | 157347 | 6.3575 | 0.4542 | -0.1285 | 5.6571 | CHB |
| STIM2     | GI_21070998-S | rs10022599 | 4 | 4 | 26570925 | 132029 | 6.2238 | 0.4305 | 0.1439  | 5.6571 | CHB |
| STIM2     | GI_21070998-S | rs13127603 | 4 | 4 | 26596536 | 106418 | 5.9763 | 0.4156 | -0.1335 | 5.6571 | CHB |
| STIM2     | GI_21070998-S | rs10470823 | 4 | 4 | 26616956 | 85998  | 5.9763 | 0.4156 | 0.1335  | 5.6571 | CHB |
| TLR1      | GI_41350336-S | rs11096956 | 4 | 4 | 38598746 | 21943  | 6.4975 | 0.4466 | 0.6611  | 5.7774 | CHB |
| TLR10     | GI_13569929-S | rs11725309 | 4 | 4 | 38606414 | 8932   | 6.2380 | 0.4314 | -0.4425 | 6.2034 | CHB |
| TLR10     | GI_13569929-S | rs4543123  | 4 | 4 | 38615090 | 17608  | 6.3666 | 0.4389 | -0.4591 | 6.2034 | CHB |
| Hs.214235 | Hs.214235-S   | rs4543123  | 4 | 4 | 38615090 | 3049   | 6.1558 | 0.4265 | -0.3014 | 6.0007 | CHB |
| Hs.214235 | Hs.214235-S   | rs5743595  | 4 | 4 | 38625210 | 13169  | 6.9478 | 0.4720 | -0.3215 | 6.0007 | CHB |
| Hs.214235 | Hs.214235-S   | rs5743592  | 4 | 4 | 38625629 | 13588  | 6.9478 | 0.4720 | -0.3215 | 6.0007 | CHB |
| Hs.214235 | Hs.214235-S   | rs5743565  | 4 | 4 | 38628549 | 16508  | 7.7793 | 0.5806 | 0.3286  | 6.0007 | CHB |
| Hs.214235 | Hs.214235-S   | rs5743563  | 4 | 4 | 38628585 | 16544  | 6.1458 | 0.4580 | -0.3107 | 6.0007 | CHB |
| Hs.214235 | Hs.214235-S   | rs5743557  | 4 | 4 | 38629393 | 17352  | 6.2104 | 0.4374 | 0.3026  | 6.0007 | CHB |
| FLJ13220  | GI_11345459-S | rs17461333 | 4 | 4 | 44299063 | 242782 | 5.6641 | 0.3963 | 0.3824  | 5.6256 | CHB |
| MGC45416  | GI_22748848-S | rs11727343 | 4 | 4 | 48647125 | 89840  | 5.9180 | 0.4121 | 0.3063  | 5.49   | CHB |
| MGC45416  | GI_22748848-S | rs13149083 | 4 | 4 | 48650873 | 86092  | 5.9180 | 0.4121 | 0.3063  | 5.49   | CHB |
| MGC45416  | GI_22748848-S | rs7654032  | 4 | 4 | 48651107 | 85858  | 5.9180 | 0.4121 | -0.3063 | 5.49   | CHB |
| MGC45416  | GI_22748848-S | rs7665209  | 4 | 4 | 48655615 | 81350  | 6.4545 | 0.4441 | -0.2989 | 5.49   | CHB |
| MGC45416  | GI_22748848-S | rs4694906  | 4 | 4 | 48675824 | 61141  | 5.5148 | 0.3869 | -0.2754 | 5.49   | CHB |
| MGC45416  | GI_22748848-S | rs2712156  | 4 | 4 | 48684158 | 52807  | 5.7039 | 0.4137 | 0.2985  | 5.49   | CHB |
| MGC45416  | GI_22748848-S | rs2572350  | 4 | 4 | 48686574 | 50391  | 5.7353 | 0.4008 | -0.2948 | 5.49   | CHB |
| MGC45416  | GI_22748848-S | rs3761729  | 4 | 4 | 48692865 | 44100  | 6.1610 | 0.4268 | -0.2804 | 5.49   | CHB |
| MGC45416  | GI_22748848-S | rs2712158  | 4 | 4 | 48698315 | 38650  | 6.1610 | 0.4268 | 0.2804  | 5.49   | CHB |
| MGC45416  | GI_22748848-S | rs6447666  | 4 | 4 | 48720302 | 16663  | 6.1131 | 0.4239 | 0.3134  | 5.49   | CHB |
| MGC45416  | GI_22748848-S | rs2289065  | 4 | 4 | 48735909 | 1056   | 7.7503 | 0.5146 | -0.3174 | 5.49   | CHB |
| MGC45416  | GI_22748848-S | rs2290516  | 4 | 4 | 48749282 | 12317  | 7.5462 | 0.5041 | -0.3446 | 5.49   | CHB |
| MGC45416  | GI_22748848-S | rs2085292  | 4 | 4 | 48755864 | 18899  | 7.5462 | 0.5041 | -0.3446 | 5.49   | CHB |
| MGC45416  | GI_22748848-S | rs724598   | 4 | 4 | 48756252 | 19287  | 7.5462 | 0.5041 | 0.3446  | 5.49   | CHB |
| MGC45416  | GI_22748848-S | rs10517231 | 4 | 4 | 48759323 | 22358  | 7.5462 | 0.5041 | -0.3446 | 5.49   | CHB |
| MGC45416  | GI_22748848-S | rs12504699 | 4 | 4 | 48775226 | 38261  | 7.8965 | 0.5220 | 0.3260  | 5.49   | CHB |
| MGC45416  | GI_22748848-S | rs2247481  | 4 | 4 | 48777749 | 40784  | 6.6516 | 0.4554 | -0.3179 | 5.49   | CHB |
| Hs.164463 | Hs.164463-S   | rs2246770  | 4 | 4 | 54397811 | 45576  | 8.4393 | 0.5486 | 0.3815  | 7.1266 | CHB |
| Hs.164463 | Hs.164463-S   | rs2616440  | 4 | 4 | 54398497 | 44890  | 8.4393 | 0.5486 | 0.3815  | 7.1266 | CHB |
| Hs.164463 | Hs.164463-S   | rs2616439  | 4 | 4 | 54398861 | 44526  | 7.7399 | 0.5225 | 0.3836  | 7.1266 | CHB |
| Hs.164463 | Hs.164463-S   | rs13126826 | 4 | 4 | 54403213 | 40174  | 8.4393 | 0.5486 | 0.3815  | 7.1266 | CHB |
| SPINK2    | GI_10863910-S | rs1708768  | 4 | 4 | 57531641 | 12801  | 6.7686 | 0.4620 | 0.3031  | 6.5901 | CHB |
| LOC401135 | GI_42657007-S | rs1048447  | 4 | 4 | 68312238 | 104593 | 7.8944 | 0.5219 | 0.2660  | 5.8933 | CHB |
| LOC375399 | GI_37540365-S | rs7684656  | 4 | 4 | 68318415 | 97060  | 5.7788 | 0.4035 | -0.1418 | 5.7265 | CHB |
| LOC401135 | GI_42657007-S | rs3796715  | 4 | 4 | 68321842 | 94989  | 7.7747 | 0.5243 | -0.2675 | 5.8933 | CHB |
| LOC375399 | GI_37540365-S | rs3796716  | 4 | 4 | 68321879 | 93596  | 5.7788 | 0.4035 | -0.1418 | 5.7265 | CHB |
| LOC401135 | GI_42657007-S | rs17088553 | 4 | 4 | 68341603 | 75228  | 7.8944 | 0.5219 | -0.2660 | 5.8933 | CHB |
| LOC401135 | GI_42657007-S | rs6840867  | 4 | 4 | 68343820 | 73011  | 7.8944 | 0.5219 | -0.2660 | 5.8933 | CHB |
| LOC375399 | GI_37540365-S | rs6825264  | 4 | 4 | 68346974 | 68501  | 5.7788 | 0.4035 | -0.1418 | 5.7265 | CHB |
| LOC375399 | GI_37540365-S | rs10006851 | 4 | 4 | 68353292 | 62183  | 5.7788 | 0.4035 | -0.1418 | 5.7265 | CHB |
| LOC375399 | GI_37540365-S | rs11131719 | 4 | 4 | 68357286 | 58189  | 5.7788 | 0.4035 | -0.1418 | 5.7265 | CHB |
| LOC401135 | GI_42657007-S | rs10010188 | 4 | 4 | 68363158 | 53673  | 7.8944 | 0.5219 | -0.2660 | 5.8933 | CHB |
| LOC401135 | GI_42657007-S | rs12643686 | 4 | 4 | 68366583 | 50248  | 6.1863 | 0.4359 | -0.2457 | 5.8933 | CHB |
| LOC401135 | GI_42657007-S | rs10518040 | 4 | 4 | 68368551 | 48280  | 7.8944 | 0.5219 | 0.2660  | 5.8933 | CHB |
| LOC375399 | GI_37540365-S | rs7660038  | 4 | 4 | 68374349 | 41126  | 5.7788 | 0.4035 | -0.1418 | 5.7265 | CHB |
| LOC401135 | GI_42657007-S | rs17634475 | 4 | 4 | 68384274 | 32557  | 7.7747 | 0.5243 | 0.2675  | 5.8933 | CHB |
| LOC375399 | GI_37540365-S | rs9998837  | 4 | 4 | 68385552 | 29923  | 5.7788 | 0.4035 | -0.1418 | 5.7265 | CHB |
| LOC401135 | GI_42657007-S | rs12640455 | 4 | 4 | 68387605 | 29226  | 7.8944 | 0.5219 | -0.2660 | 5.8933 | CHB |
| LOC401135 | GI_42657007-S | rs17635222 | 4 | 4 | 68415033 | 1798   | 7.6741 | 0.5191 | 0.2654  | 5.8933 | CHB |

|           |               |            |   |   |          |        |         |        |         |        |     |
|-----------|---------------|------------|---|---|----------|--------|---------|--------|---------|--------|-----|
| LOC375399 | GI_37540365-S | rs7697056  | 4 | 4 | 68415216 | 259    | 5.7788  | 0.4035 | 0.1418  | 5.7265 | CHB |
| LOC375399 | GI_37540365-S | rs1038431  | 4 | 4 | 68423031 | 7556   | 5.7788  | 0.4035 | 0.1418  | 5.7265 | CHB |
| LOC401135 | GI_42657007-S | rs10213333 | 4 | 4 | 68423318 | 6487   | 6.2487  | 0.4320 | -0.2266 | 5.8933 | CHB |
| LOC401135 | GI_42657007-S | rs12651577 | 4 | 4 | 68424184 | 7353   | 7.8944  | 0.5219 | -0.2660 | 5.8933 | CHB |
| LOC401135 | GI_42657007-S | rs1843593  | 4 | 4 | 68427764 | 10933  | 7.8944  | 0.5219 | 0.2660  | 5.8933 | CHB |
| LOC401135 | GI_42657007-S | rs10518042 | 4 | 4 | 68431669 | 14838  | 8.4350  | 0.5569 | 0.2784  | 5.8933 | CHB |
| LOC375399 | GI_37540365-S | rs17635850 | 4 | 4 | 68434135 | 18660  | 5.7788  | 0.4035 | -0.1418 | 5.7265 | CHB |
| UGT2B17   | GI_4507820-S  | rs10471154 | 4 | 4 | 69219098 | 12731  | 9.7591  | 0.6072 | -2.4592 | 6.7844 | CHB |
| UGT2B7    | GI_4507824-S  | rs10471154 | 4 | 4 | 69219098 | 939958 | 9.1983  | 0.5833 | -1.8964 | 6.4304 | CHB |
| UGT2B10   | GI_27552756-S | rs10034124 | 4 | 4 | 69222280 | 654976 | 11.1587 | 0.6973 | -0.8894 | 6.3885 | CHB |
| UGT2B17   | GI_4507820-S  | rs10034124 | 4 | 4 | 69222280 | 9549   | 30.9545 | 0.9705 | -3.4039 | 6.7844 | CHB |
| UGT2B7    | GI_4507824-S  | rs10034124 | 4 | 4 | 69222280 | 936776 | 22.2282 | 0.9176 | -2.5850 | 6.4304 | CHB |
| UGT2B17   | GI_4507820-S  | rs7435827  | 4 | 4 | 69243710 | 11881  | 12.3382 | 0.7011 | 3.1544  | 6.7844 | CHB |
| UGT2B7    | GI_4507824-S  | rs7435827  | 4 | 4 | 69243710 | 915346 | 10.3335 | 0.6304 | 2.3559  | 6.4304 | CHB |
| UGT2B17   | GI_4507820-S  | rs7434408  | 4 | 4 | 69248036 | 16207  | 9.1171  | 0.6064 | 2.5221  | 6.7844 | CHB |
| UGT2B11   | GI_4507822-S  | rs7434408  | 4 | 4 | 69248036 | 999087 | 8.4167  | 0.5739 | 2.0897  | 6.6408 | CHB |
| UGT2B7    | GI_4507824-S  | rs7434408  | 4 | 4 | 69248036 | 911020 | 7.8217  | 0.5442 | 1.8797  | 6.4304 | CHB |
| UGT2B17   | GI_4507820-S  | rs11732803 | 4 | 4 | 69253159 | 21330  | 12.3382 | 0.7011 | -3.1544 | 6.7844 | CHB |
| UGT2B11   | GI_4507822-S  | rs11732803 | 4 | 4 | 69253159 | 993964 | 11.0625 | 0.6578 | -2.6051 | 6.6408 | CHB |
| UGT2B7    | GI_4507824-S  | rs11732803 | 4 | 4 | 69253159 | 905897 | 10.3335 | 0.6304 | -2.3559 | 6.4304 | CHB |
| UGT2B17   | GI_4507820-S  | rs7442348  | 4 | 4 | 69253957 | 22128  | 10.3844 | 0.6324 | -2.5752 | 6.7844 | CHB |
| UGT2B11   | GI_4507822-S  | rs7442348  | 4 | 4 | 69253957 | 993166 | 9.6231  | 0.6016 | -2.1411 | 6.6408 | CHB |
| UGT2B7    | GI_4507824-S  | rs7442348  | 4 | 4 | 69253957 | 905099 | 8.9847  | 0.5738 | -1.9322 | 6.4304 | CHB |
| UGT2B10   | GI_27552756-S | rs13144491 | 4 | 4 | 69273573 | 603683 | 11.6815 | 0.6796 | 0.8684  | 6.3885 | CHB |
| UGT2B17   | GI_4507820-S  | rs13144491 | 4 | 4 | 69273573 | 41744  | 32.4933 | 0.9652 | 3.3331  | 6.7844 | CHB |
| UGT2B11   | GI_4507822-S  | rs13144491 | 4 | 4 | 69273573 | 973550 | 26.5280 | 0.9342 | 2.7939  | 6.6408 | CHB |
| UGT2B7    | GI_4507824-S  | rs13144491 | 4 | 4 | 69273573 | 885483 | 23.8972 | 0.9128 | 2.5502  | 6.4304 | CHB |
| UGT2B10   | GI_27552756-S | rs13348005 | 4 | 4 | 69293542 | 583714 | 11.6815 | 0.6796 | -0.8684 | 6.3885 | CHB |
| UGT2B17   | GI_4507820-S  | rs13348005 | 4 | 4 | 69293542 | 61713  | 32.4933 | 0.9652 | -3.3331 | 6.7844 | CHB |
| UGT2B11   | GI_4507822-S  | rs13348005 | 4 | 4 | 69293542 | 953581 | 26.5280 | 0.9342 | -2.7939 | 6.6408 | CHB |
| UGT2B7    | GI_4507824-S  | rs13348005 | 4 | 4 | 69293542 | 865514 | 23.8972 | 0.9128 | -2.5502 | 6.4304 | CHB |
| UGT2B10   | GI_27552756-S | rs3100645  | 4 | 4 | 69671954 | 205302 | 9.6169  | 0.6013 | -0.7242 | 6.3885 | CHB |
| UGT2B17   | GI_4507820-S  | rs3100645  | 4 | 4 | 69671954 | 440125 | 21.3845 | 0.8860 | -2.8279 | 6.7844 | CHB |
| UGT2B11   | GI_4507822-S  | rs3100645  | 4 | 4 | 69671954 | 575169 | 19.7838 | 0.8648 | -2.3803 | 6.6408 | CHB |
| UGT2B7    | GI_4507824-S  | rs3100645  | 4 | 4 | 69671954 | 487102 | 18.2512 | 0.8407 | -2.1674 | 6.4304 | CHB |
| Hs.479894 | Hs.479894-S   | rs4305590  | 4 | 4 | 70075491 | 20961  | 7.2508  | 0.4885 | 0.1723  | 7.1738 | CHB |
| Hs.479894 | Hs.479894-S   | rs13147648 | 4 | 4 | 70082423 | 14029  | 7.2508  | 0.4885 | -0.1723 | 7.1738 | CHB |
| Hs.479894 | Hs.479894-S   | rs4353969  | 4 | 4 | 70083182 | 13270  | 7.2508  | 0.4885 | 0.1723  | 7.1738 | CHB |
| Hs.479894 | Hs.479894-S   | rs4495114  | 4 | 4 | 70084504 | 11948  | 7.2508  | 0.4885 | -0.1723 | 7.1738 | CHB |
| Hs.479894 | Hs.479894-S   | rs4235111  | 4 | 4 | 70086017 | 10435  | 7.2508  | 0.4885 | -0.1723 | 7.1738 | CHB |
| Hs.479894 | Hs.479894-S   | rs4299666  | 4 | 4 | 70088357 | 8095   | 7.2508  | 0.4885 | -0.1723 | 7.1738 | CHB |
| Hs.479894 | Hs.479894-S   | rs13140844 | 4 | 4 | 70089467 | 6985   | 7.2508  | 0.4885 | 0.1723  | 7.1738 | CHB |
| Hs.479894 | Hs.479894-S   | rs7438808  | 4 | 4 | 70097144 | 692    | 7.2508  | 0.4885 | -0.1723 | 7.1738 | CHB |
| Hs.479894 | Hs.479894-S   | rs4377650  | 4 | 4 | 70097833 | 1381   | 7.2508  | 0.4885 | -0.1723 | 7.1738 | CHB |
| THAP6     | GI_37059751-S | rs7664140  | 4 | 4 | 76795815 | 15264  | 6.1827  | 0.4281 | 0.3643  | 6.0522 | CHB |
| THAP6     | GI_37059751-S | rs1817387  | 4 | 4 | 76803397 | 7682   | 6.1827  | 0.4281 | 0.3643  | 6.0522 | CHB |
| THAP6     | GI_37059751-S | rs6535523  | 4 | 4 | 76819403 | 8324   | 6.9077  | 0.4947 | -0.4200 | 6.0522 | CHB |
| MGC11324  | GI_40255053-S | rs6812240  | 4 | 4 | 84835321 | 48412  | 6.4111  | 0.4415 | -0.7034 | 5.7952 | CHB |
| MGC11324  | GI_40255053-S | rs4693092  | 4 | 4 | 84853523 | 30210  | 6.5366  | 0.4488 | -0.7318 | 5.7952 | CHB |
| MGC11324  | GI_40255053-S | rs11734158 | 4 | 4 | 84855398 | 28335  | 6.5366  | 0.4488 | 0.7318  | 5.7952 | CHB |
| MGC11324  | GI_40255053-S | rs11723311 | 4 | 4 | 84864451 | 19282  | 6.2886  | 0.4421 | -0.7365 | 5.7952 | CHB |
| MGC11324  | GI_40255053-S | rs3733329  | 4 | 4 | 84875737 | 7996   | 5.8502  | 0.4079 | -0.6994 | 5.7952 | CHB |
| MGC11324  | GI_40255053-S | rs17355391 | 4 | 4 | 84882387 | 1346   | 5.8502  | 0.4079 | -0.6994 | 5.7952 | CHB |
| MGC11324  | GI_40255053-S | rs2061409  | 4 | 4 | 84898431 | 14698  | 5.8502  | 0.4079 | 0.6994  | 5.7952 | CHB |
| MGC11324  | GI_40255053-S | rs11726790 | 4 | 4 | 84906329 | 22596  | 5.8502  | 0.4079 | -0.6994 | 5.7952 | CHB |
| MGC11324  | GI_40255053-S | rs17355663 | 4 | 4 | 84909388 | 25655  | 5.8502  | 0.4079 | 0.6994  | 5.7952 | CHB |
| Hs.480174 | Hs.480174-S   | rs965824   | 4 | 4 | 88237275 | 39588  | 6.8248  | 0.4652 | -0.2215 | 6.3269 | CHB |
| Hs.480174 | Hs.480174-S   | rs10003332 | 4 | 4 | 88252400 | 24463  | 6.8248  | 0.4652 | -0.2215 | 6.3269 | CHB |
| Hs.480174 | Hs.480174-S   | rs6815546  | 4 | 4 | 88257100 | 19763  | 7.7010  | 0.5121 | -0.2377 | 6.3269 | CHB |

|           |               |            |   |   |           |        |         |        |         |        |     |
|-----------|---------------|------------|---|---|-----------|--------|---------|--------|---------|--------|-----|
| Hs.480174 | Hs.480174-S   | rs10008600 | 4 | 4 | 88259008  | 17855  | 7.7010  | 0.5121 | 0.2377  | 6.3269 | CHB |
| Hs.480174 | Hs.480174-S   | rs2053772  | 4 | 4 | 88259200  | 17663  | 7.1372  | 0.4905 | 0.2353  | 6.3269 | CHB |
| Hs.480174 | Hs.480174-S   | rs6531942  | 4 | 4 | 88260227  | 16636  | 7.7010  | 0.5121 | -0.2377 | 6.3269 | CHB |
| Hs.480174 | Hs.480174-S   | rs7685248  | 4 | 4 | 88261252  | 15611  | 7.7010  | 0.5121 | -0.2377 | 6.3269 | CHB |
| Hs.480174 | Hs.480174-S   | rs1972969  | 4 | 4 | 88268475  | 8388   | 7.4634  | 0.5081 | 0.2366  | 6.3269 | CHB |
| Hs.480174 | Hs.480174-S   | rs4693799  | 4 | 4 | 88272474  | 4389   | 7.7010  | 0.5121 | -0.2377 | 6.3269 | CHB |
| Hs.480174 | Hs.480174-S   | rs4693155  | 4 | 4 | 88277199  | 336    | 7.7010  | 0.5121 | 0.2377  | 6.3269 | CHB |
| Hs.480174 | Hs.480174-S   | rs6531944  | 4 | 4 | 88278420  | 1557   | 7.7010  | 0.5121 | 0.2377  | 6.3269 | CHB |
| Hs.480174 | Hs.480174-S   | rs6531945  | 4 | 4 | 88278636  | 1773   | 7.7010  | 0.5121 | 0.2377  | 6.3269 | CHB |
| Hs.480174 | Hs.480174-S   | rs340631   | 4 | 4 | 88290346  | 13483  | 7.7010  | 0.5121 | -0.2377 | 6.3269 | CHB |
| Hs.480174 | Hs.480174-S   | rs340652   | 4 | 4 | 88292909  | 16046  | 7.7010  | 0.5121 | -0.2377 | 6.3269 | CHB |
| Hs.480174 | Hs.480174-S   | rs340649   | 4 | 4 | 88296416  | 19553  | 7.7010  | 0.5121 | -0.2377 | 6.3269 | CHB |
| Hs.480174 | Hs.480174-S   | rs340647   | 4 | 4 | 88299413  | 22550  | 7.7010  | 0.5121 | 0.2377  | 6.3269 | CHB |
| Hs.480174 | Hs.480174-S   | rs340644   | 4 | 4 | 88304302  | 27439  | 7.6881  | 0.5198 | -0.2404 | 6.3269 | CHB |
| Hs.480174 | Hs.480174-S   | rs340628   | 4 | 4 | 88314065  | 37202  | 6.9735  | 0.4815 | -0.2285 | 6.3269 | CHB |
| Hs.480174 | Hs.480174-S   | rs17012291 | 4 | 4 | 88327384  | 50521  | 7.4812  | 0.5090 | 0.2345  | 6.3269 | CHB |
| SNCA      | GI_6806897-A  | rs1372523  | 4 | 4 | 91133101  | 128310 | 6.9808  | 0.4989 | 0.1711  | 6.7835 | CHB |
| PPA2      | GI_31881619-A | rs2726486  | 4 | 4 | 106622285 | 26134  | 6.7175  | 0.4591 | -0.5114 | 6.1523 | CHB |
| PPA2      | GI_31881619-A | rs2647265  | 4 | 4 | 106626244 | 22175  | 11.1910 | 0.6625 | 0.6346  | 6.1523 | CHB |
| PPA2      | GI_31881619-A | rs2726456  | 4 | 4 | 106634181 | 14238  | 11.2207 | 0.7089 | -0.6472 | 6.1523 | CHB |
| PPA2      | GI_31881619-A | rs924282   | 4 | 4 | 106639721 | 8698   | 13.6914 | 0.7412 | 0.6580  | 6.1523 | CHB |
| PPA2      | GI_31881619-A | rs924283   | 4 | 4 | 106639769 | 8650   | 13.6914 | 0.7412 | 0.6580  | 6.1523 | CHB |
| PPA2      | GI_31881619-A | rs11932428 | 4 | 4 | 106644740 | 3679   | 13.6914 | 0.7412 | -0.6580 | 6.1523 | CHB |
| PPA2      | GI_31881619-A | rs11932512 | 4 | 4 | 106644958 | 3461   | 13.3702 | 0.7405 | -0.6658 | 6.1523 | CHB |
| PPA2      | GI_31881619-A | rs13108489 | 4 | 4 | 106650729 | 2310   | 13.0888 | 0.7497 | -0.6595 | 6.1523 | CHB |
| PPA2      | GI_31881619-A | rs2636693  | 4 | 4 | 106652360 | 3941   | 13.7881 | 0.7604 | 0.6634  | 6.1523 | CHB |
| PPA2      | GI_31881619-A | rs2636694  | 4 | 4 | 106653451 | 5032   | 13.6914 | 0.7412 | 0.6580  | 6.1523 | CHB |
| PPA2      | GI_31881619-A | rs2713826  | 4 | 4 | 106699232 | 50813  | 12.3241 | 0.7544 | -0.6563 | 6.1523 | CHB |
| PPA2      | GI_31881619-A | rs2046880  | 4 | 4 | 106728420 | 80001  | 12.4826 | 0.7057 | 0.6320  | 6.1523 | CHB |
| PPA2      | GI_31881619-A | rs2023840  | 4 | 4 | 106730192 | 81773  | 12.4826 | 0.7057 | -0.6320 | 6.1523 | CHB |
| PPA2      | GI_31881619-A | rs4699176  | 4 | 4 | 106746306 | 97887  | 7.6230  | 0.5081 | -0.5504 | 6.1523 | CHB |
| PPA2      | GI_31881619-A | rs2298732  | 4 | 4 | 106748697 | 100278 | 7.6230  | 0.5081 | -0.5504 | 6.1523 | CHB |
| PPA2      | GI_31881619-A | rs2866883  | 4 | 4 | 106748969 | 100550 | 6.3141  | 0.4358 | -0.5193 | 6.1523 | CHB |
| PPA2      | GI_31881619-A | rs7678401  | 4 | 4 | 106749484 | 101065 | 7.6230  | 0.5081 | 0.5504  | 6.1523 | CHB |
| PPA2      | GI_31881619-A | rs1125254  | 4 | 4 | 106762227 | 113808 | 7.6230  | 0.5081 | 0.5504  | 6.1523 | CHB |
| PPA2      | GI_31881619-A | rs3864225  | 4 | 4 | 106766083 | 117664 | 6.3141  | 0.4358 | -0.5193 | 6.1523 | CHB |
| PPA2      | GI_31881619-A | rs3855585  | 4 | 4 | 106766282 | 117863 | 6.3141  | 0.4358 | 0.5193  | 6.1523 | CHB |
| PPA2      | GI_31881619-A | rs11097891 | 4 | 4 | 106766530 | 118111 | 6.3141  | 0.4358 | -0.5193 | 6.1523 | CHB |
| PPA2      | GI_31881619-A | rs13110343 | 4 | 4 | 106766800 | 118381 | 6.3141  | 0.4358 | -0.5193 | 6.1523 | CHB |
| PPA2      | GI_31881619-A | rs2866806  | 4 | 4 | 106767091 | 118672 | 6.2435  | 0.4394 | -0.5217 | 6.1523 | CHB |
| PPA2      | GI_31881619-A | rs1490611  | 4 | 4 | 106768848 | 120429 | 7.6230  | 0.5081 | 0.5504  | 6.1523 | CHB |
| PPA2      | GI_31881619-A | rs765220   | 4 | 4 | 106769363 | 120944 | 6.8724  | 0.4841 | -0.5445 | 6.1523 | CHB |
| PPA2      | GI_31881619-A | rs757176   | 4 | 4 | 106770133 | 121714 | 7.6230  | 0.5081 | 0.5504  | 6.1523 | CHB |
| PPA2      | GI_31881619-A | rs6825111  | 4 | 4 | 106776374 | 127955 | 7.6230  | 0.5081 | -0.5504 | 6.1523 | CHB |
| PPA2      | GI_31881619-A | rs6855572  | 4 | 4 | 106776542 | 128123 | 7.6230  | 0.5081 | -0.5504 | 6.1523 | CHB |
| PPA2      | GI_31881619-A | rs6831138  | 4 | 4 | 106777184 | 128765 | 7.6230  | 0.5081 | 0.5504  | 6.1523 | CHB |
| PPA2      | GI_31881619-A | rs4698941  | 4 | 4 | 106780140 | 131721 | 7.6230  | 0.5081 | -0.5504 | 6.1523 | CHB |
| PPA2      | GI_31881619-A | rs9999896  | 4 | 4 | 106781361 | 132942 | 6.3141  | 0.4358 | 0.5193  | 6.1523 | CHB |
| PPA2      | GI_31881619-A | rs6816997  | 4 | 4 | 106782193 | 133774 | 6.3141  | 0.4358 | 0.5193  | 6.1523 | CHB |
| PPA2      | GI_31881619-A | rs6533201  | 4 | 4 | 106782852 | 134433 | 11.2649 | 0.6918 | 0.6228  | 6.1523 | CHB |
| PPA2      | GI_31881619-A | rs763289   | 4 | 4 | 106783880 | 135461 | 7.6230  | 0.5081 | 0.5504  | 6.1523 | CHB |
| PPA2      | GI_31881619-A | rs10020998 | 4 | 4 | 106786058 | 137639 | 7.6230  | 0.5081 | 0.5504  | 6.1523 | CHB |
| PPA2      | GI_31881619-A | rs10024331 | 4 | 4 | 106787273 | 138854 | 6.7440  | 0.4606 | 0.5420  | 6.1523 | CHB |
| PET112L   | GI_4758893-S  | rs2278304  | 4 | 4 | 152951014 | 1232   | 5.4722  | 0.3842 | -0.1756 | 5.3632 | CHB |
| PET112L   | GI_4758893-S  | rs1896883  | 4 | 4 | 152952978 | 3196   | 5.4722  | 0.3842 | 0.1756  | 5.3632 | CHB |
| PET112L   | GI_4758893-S  | rs17027798 | 4 | 4 | 152955145 | 5363   | 5.4201  | 0.4030 | 0.1822  | 5.3632 | CHB |
| PET112L   | GI_4758893-S  | rs6849050  | 4 | 4 | 152957507 | 7725   | 5.4722  | 0.3842 | -0.1756 | 5.3632 | CHB |
| PET112L   | GI_4758893-S  | rs2007445  | 4 | 4 | 152957975 | 8193   | 5.4722  | 0.3842 | -0.1756 | 5.3632 | CHB |
| PET112L   | GI_4758893-S  | rs4696104  | 4 | 4 | 152958056 | 8274   | 5.4722  | 0.3842 | 0.1756  | 5.3632 | CHB |

|          |               |            |   |   |           |        |         |        |         |        |     |
|----------|---------------|------------|---|---|-----------|--------|---------|--------|---------|--------|-----|
| PET112L  | GI_4758893-S  | rs6810860  | 4 | 4 | 152960769 | 10987  | 5.4722  | 0.3842 | -0.1756 | 5.3632 | CHB |
| PET112L  | GI_4758893-S  | rs6833368  | 4 | 4 | 152960782 | 11000  | 5.4722  | 0.3842 | 0.1756  | 5.3632 | CHB |
| PET112L  | GI_4758893-S  | rs6834095  | 4 | 4 | 152960883 | 11101  | 5.4722  | 0.3842 | -0.1756 | 5.3632 | CHB |
| PET112L  | GI_4758893-S  | rs6839074  | 4 | 4 | 152960962 | 11180  | 5.4722  | 0.3842 | -0.1756 | 5.3632 | CHB |
| PET112L  | GI_4758893-S  | rs6838966  | 4 | 4 | 152961080 | 11298  | 5.4722  | 0.3842 | 0.1756  | 5.3632 | CHB |
| PET112L  | GI_4758893-S  | rs10019048 | 4 | 4 | 152961220 | 11438  | 5.4722  | 0.3842 | -0.1756 | 5.3632 | CHB |
| PET112L  | GI_4758893-S  | rs10007167 | 4 | 4 | 152961260 | 11478  | 5.4722  | 0.3842 | 0.1756  | 5.3632 | CHB |
| PET112L  | GI_4758893-S  | rs6840678  | 4 | 4 | 152961936 | 12154  | 5.4722  | 0.3842 | 0.1756  | 5.3632 | CHB |
| PET112L  | GI_4758893-S  | rs6846114  | 4 | 4 | 152962163 | 12381  | 5.4722  | 0.3842 | 0.1756  | 5.3632 | CHB |
| PET112L  | GI_4758893-S  | rs6823423  | 4 | 4 | 152962328 | 12546  | 5.4722  | 0.3842 | -0.1756 | 5.3632 | CHB |
| PET112L  | GI_4758893-S  | rs4696285  | 4 | 4 | 152963054 | 13272  | 5.4722  | 0.3842 | 0.1756  | 5.3632 | CHB |
| KIAA1712 | GI_30794213-S | rs7671444  | 4 | 4 | 175518224 | 109834 | 6.4224  | 0.4500 | 0.1849  | 6.3548 | CHB |
| KIAA1712 | GI_30794213-S | rs13109634 | 4 | 4 | 175545256 | 82802  | 6.4193  | 0.4420 | 0.2034  | 6.3548 | CHB |
| KIAA1712 | GI_30794213-S | rs10520277 | 4 | 4 | 175561564 | 66494  | 6.4193  | 0.4420 | -0.2034 | 6.3548 | CHB |
| KIAA1712 | GI_30794213-S | rs7376146  | 4 | 4 | 175576120 | 51938  | 7.5734  | 0.5138 | 0.2161  | 6.3548 | CHB |
| KIAA1712 | GI_30794213-S | rs7658307  | 4 | 4 | 175581254 | 46804  | 7.2292  | 0.4874 | 0.2137  | 6.3548 | CHB |
| KIAA1712 | GI_30794213-S | rs1553669  | 4 | 4 | 175612138 | 15920  | 7.8519  | 0.5198 | 0.2198  | 6.3548 | CHB |
| DCTD     | GI_4503276-S  | rs6834938  | 4 | 4 | 184185962 | 876    | 5.9142  | 0.4609 | -0.3516 | 5.8684 | CHB |
| DCTD     | GI_4503276-S  | rs6834968  | 4 | 4 | 184186001 | 837    | 8.0835  | 0.5575 | -0.3628 | 5.8684 | CHB |
| DCTD     | GI_4503276-S  | rs6835318  | 4 | 4 | 184186014 | 824    | 8.0593  | 0.5751 | 0.3458  | 5.8684 | CHB |
| DCTD     | GI_4503276-S  | rs7677967  | 4 | 4 | 184186281 | 557    | 8.1446  | 0.5344 | -0.3548 | 5.8684 | CHB |
| BRD9     | GI_12965190-S | rs6875688  | 5 | 5 | 871479    | 45559  | 6.1247  | 0.4322 | -0.1849 | 5.7296 | CHB |
| BRD9     | GI_12965190-S | rs10040724 | 5 | 5 | 873594    | 43444  | 6.2503  | 0.4321 | 0.1871  | 5.7296 | CHB |
| BRD9     | GI_12965190-S | rs3734155  | 5 | 5 | 874390    | 42648  | 6.1247  | 0.4322 | 0.1849  | 5.7296 | CHB |
| BRD9     | GI_12965190-S | rs12655323 | 5 | 5 | 875109    | 41929  | 6.8267  | 0.4733 | 0.1915  | 5.7296 | CHB |
| BRD9     | GI_12965190-S | rs12656150 | 5 | 5 | 875123    | 41915  | 6.2503  | 0.4321 | -0.1871 | 5.7296 | CHB |
| MTRR     | GI_4505278-A  | rs9332     | 5 | 5 | 7953712   | 278    | 6.8206  | 0.5077 | -0.4118 | 5.8102 | CHB |
| MTRR     | GI_4505278-A  | rs327581   | 5 | 5 | 7967554   | 13564  | 6.1432  | 0.4257 | -0.3679 | 5.8102 | CHB |
| MTRR     | GI_4505278-A  | rs6881338  | 5 | 5 | 7972033   | 18043  | 6.9019  | 0.5124 | 0.3182  | 5.8102 | CHB |
| MTRR     | GI_4505278-A  | rs162275   | 5 | 5 | 7972099   | 18109  | 5.8789  | 0.4171 | -0.3017 | 5.8102 | CHB |
| MTRR     | GI_4505278-A  | rs2613670  | 5 | 5 | 7974873   | 20883  | 5.9375  | 0.4133 | 0.3835  | 5.8102 | CHB |
| MTRR     | GI_4505278-A  | rs4702507  | 5 | 5 | 7977130   | 23140  | 6.1432  | 0.4257 | 0.3679  | 5.8102 | CHB |
| MTRR     | GI_4505278-A  | rs227872   | 5 | 5 | 7979046   | 25056  | 6.1432  | 0.4257 | -0.3679 | 5.8102 | CHB |
| MTRR     | GI_4505278-A  | rs2640666  | 5 | 5 | 7979642   | 25652  | 5.9470  | 0.4213 | 0.3669  | 5.8102 | CHB |
| MTRR     | GI_4505278-A  | rs16879452 | 5 | 5 | 7981158   | 27168  | 5.9375  | 0.4133 | 0.3835  | 5.8102 | CHB |
| MTRR     | GI_4505278-A  | rs2640659  | 5 | 5 | 7983900   | 29910  | 5.9375  | 0.4133 | 0.3835  | 5.8102 | CHB |
| MTRR     | GI_4505278-A  | rs2624233  | 5 | 5 | 7983940   | 29950  | 5.8226  | 0.4460 | -0.3966 | 5.8102 | CHB |
| MTRR     | GI_4505278-A  | rs1532267  | 5 | 5 | 7988012   | 34022  | 5.9375  | 0.4133 | 0.3835  | 5.8102 | CHB |
| Hs.26039 | Hs.26039-S    | rs3733758  | 5 | 5 | 10708842  | 1145   | 6.7317  | 0.4599 | 0.4231  | 6.3567 | CHB |
| Hs.26039 | Hs.26039-S    | rs3733762  | 5 | 5 | 10709186  | 801    | 6.6522  | 0.4800 | 0.4543  | 6.3567 | CHB |
| Hs.26039 | Hs.26039-S    | rs2279325  | 5 | 5 | 10710194  | 207    | 6.5748  | 0.4589 | 0.4218  | 6.3567 | CHB |
| Hs.26039 | Hs.26039-S    | rs1109383  | 5 | 5 | 10714120  | 4133   | 6.7317  | 0.4599 | -0.4231 | 6.3567 | CHB |
| Hs.26039 | Hs.26039-S    | rs1107818  | 5 | 5 | 10714928  | 4941   | 6.7317  | 0.4599 | -0.4231 | 6.3567 | CHB |
| Hs.26039 | Hs.26039-S    | rs7712435  | 5 | 5 | 10716402  | 6415   | 6.7608  | 0.4695 | -0.4276 | 6.3567 | CHB |
| ENC1     | GI_4505460-S  | rs6861311  | 5 | 5 | 73817710  | 141560 | 6.0912  | 0.4302 | 0.5552  | 5.8003 | CHB |
| Hs.27167 | Hs.27167-S    | rs16875509 | 5 | 5 | 77824628  | 133857 | 6.1486  | 0.4260 | -0.2067 | 6.0393 | CHB |
| Hs.27167 | Hs.27167-S    | rs2362831  | 5 | 5 | 77829286  | 138515 | 6.5036  | 0.4547 | -0.2153 | 6.0393 | CHB |
| Hs.27167 | Hs.27167-S    | rs16875531 | 5 | 5 | 77833116  | 142345 | 6.2464  | 0.4318 | 0.2089  | 6.0393 | CHB |
| CAST     | GI_27765086-A | rs26485    | 5 | 5 | 96042233  | 89801  | 6.4693  | 0.4527 | 0.3019  | 5.6827 | CHB |
| IL4      | GI_27477091-A | rs545079   | 5 | 5 | 131398806 | 644560 | 6.6225  | 0.4782 | -0.4359 | 6.2675 | CHB |
| CPEB4    | GI_32698754-S | rs6882088  | 5 | 5 | 173226782 | 90805  | 10.1955 | 0.6250 | 0.5181  | 7.4743 | CHB |
| CPEB4    | GI_32698754-S | rs6864880  | 5 | 5 | 173230832 | 86755  | 8.7724  | 0.5907 | 0.5489  | 7.4743 | CHB |
| CPEB4    | GI_32698754-S | rs6869803  | 5 | 5 | 173231431 | 86156  | 8.6402  | 0.6135 | 0.5571  | 7.4743 | CHB |
| CPEB4    | GI_32698754-S | rs7705502  | 5 | 5 | 173253421 | 64166  | 10.1955 | 0.6250 | -0.5181 | 7.4743 | CHB |
| CPEB4    | GI_32698754-S | rs17695092 | 5 | 5 | 173270459 | 47128  | 10.1955 | 0.6250 | -0.5181 | 7.4743 | CHB |
| CPEB4    | GI_32698754-S | rs7736263  | 5 | 5 | 173271828 | 45759  | 10.1955 | 0.6250 | 0.5181  | 7.4743 | CHB |
| CPEB4    | GI_32698754-S | rs10516107 | 5 | 5 | 173280762 | 36825  | 10.1955 | 0.6250 | -0.5181 | 7.4743 | CHB |
| CPEB4    | GI_32698754-S | rs1484803  | 5 | 5 | 173282446 | 35141  | 10.1955 | 0.6250 | 0.5181  | 7.4743 | CHB |
| CPEB4    | GI_32698754-S | rs966544   | 5 | 5 | 173283011 | 34576  | 10.1955 | 0.6250 | 0.5181  | 7.4743 | CHB |

|           |               |            |   |   |           |        |         |        |         |        |     |
|-----------|---------------|------------|---|---|-----------|--------|---------|--------|---------|--------|-----|
| CPEB4     | GI_32698754-S | rs747472   | 5 | 5 | 173286120 | 31467  | 9.1449  | 0.5896 | 0.5000  | 7.4743 | CHB |
| CPEB4     | GI_32698754-S | rs6861681  | 5 | 5 | 173295064 | 22523  | 9.0526  | 0.6129 | -0.5279 | 7.4743 | CHB |
| CPEB4     | GI_32698754-S | rs1564823  | 5 | 5 | 173315800 | 1787   | 10.1955 | 0.6250 | -0.5181 | 7.4743 | CHB |
| CPEB4     | GI_32698754-S | rs1976074  | 5 | 5 | 173317269 | 318    | 10.1955 | 0.6250 | -0.5181 | 7.4743 | CHB |
| CPEB4     | GI_32698754-S | rs17696407 | 5 | 5 | 173319941 | 2354   | 9.8981  | 0.6307 | -0.5410 | 7.4743 | CHB |
| RAB24     | GI_18640747-S | rs351861   | 5 | 5 | 176474543 | 186620 | 6.0229  | 0.4184 | -0.2645 | 5.9417 | CHB |
| RAB24     | GI_18640747-S | rs4976640  | 5 | 5 | 176484613 | 176550 | 6.6776  | 0.4569 | -0.2795 | 5.9417 | CHB |
| RAB24     | GI_18640747-S | rs12519145 | 5 | 5 | 176488129 | 173034 | 6.6746  | 0.4567 | -0.2821 | 5.9417 | CHB |
| RAB24     | GI_18640747-S | rs9885210  | 5 | 5 | 176501794 | 159369 | 6.6776  | 0.4569 | 0.2795  | 5.9417 | CHB |
| RAB24     | GI_18640747-S | rs244708   | 5 | 5 | 176522191 | 138972 | 6.6776  | 0.4569 | 0.2795  | 5.9417 | CHB |
| RAB24     | GI_18640747-S | rs9313749  | 5 | 5 | 176530300 | 130863 | 6.6776  | 0.4569 | 0.2795  | 5.9417 | CHB |
| RAB24     | GI_18640747-S | rs12716330 | 5 | 5 | 176531108 | 130055 | 6.6776  | 0.4569 | 0.2795  | 5.9417 | CHB |
| RAB24     | GI_18640747-S | rs1546363  | 5 | 5 | 176533637 | 127526 | 6.9847  | 0.4821 | 0.2748  | 5.9417 | CHB |
| RAB24     | GI_18640747-S | rs1363405  | 5 | 5 | 176569488 | 91675  | 6.6776  | 0.4569 | -0.2795 | 5.9417 | CHB |
| RAB24     | GI_18640747-S | rs12187932 | 5 | 5 | 176575757 | 85406  | 6.6776  | 0.4569 | 0.2795  | 5.9417 | CHB |
| RAB24     | GI_18640747-S | rs6890580  | 5 | 5 | 176586126 | 75037  | 6.6776  | 0.4569 | 0.2795  | 5.9417 | CHB |
| RAB24     | GI_18640747-S | rs2336237  | 5 | 5 | 176598485 | 62678  | 6.6776  | 0.4569 | 0.2795  | 5.9417 | CHB |
| RAB24     | GI_18640747-S | rs7719125  | 5 | 5 | 176621772 | 39391  | 6.6776  | 0.4569 | -0.2795 | 5.9417 | CHB |
| RAB24     | GI_18640747-S | rs10037055 | 5 | 5 | 176623885 | 37278  | 6.6776  | 0.4569 | -0.2795 | 5.9417 | CHB |
| RAB24     | GI_18640747-S | rs10077929 | 5 | 5 | 176630450 | 30713  | 6.6776  | 0.4569 | 0.2795  | 5.9417 | CHB |
| RAB24     | GI_18640747-S | rs12660023 | 5 | 5 | 176633491 | 27672  | 6.6776  | 0.4569 | -0.2795 | 5.9417 | CHB |
| RAB24     | GI_18640747-S | rs6886255  | 5 | 5 | 176650967 | 10196  | 6.6776  | 0.4569 | 0.2795  | 5.9417 | CHB |
| RAB24     | GI_18640747-S | rs6872201  | 5 | 5 | 176653372 | 7791   | 6.6746  | 0.4567 | 0.2821  | 5.9417 | CHB |
| RAB24     | GI_18640747-S | rs11949767 | 5 | 5 | 176672850 | 11687  | 7.0722  | 0.4789 | 0.2786  | 5.9417 | CHB |
| SQSTM1    | GI_19923742-S | rs3734007  | 5 | 5 | 179185143 | 12443  | 6.1968  | 0.4289 | -0.5840 | 5.9031 | CHB |
| SQSTM1    | GI_19923742-S | rs2450484  | 5 | 5 | 179192448 | 5138   | 5.9375  | 0.4133 | -0.6134 | 5.9031 | CHB |
| SQSTM1    | GI_19923742-S | rs10277    | 5 | 5 | 179197337 | 249    | 5.9375  | 0.4133 | -0.6134 | 5.9031 | CHB |
| SQSTM1    | GI_19923742-S | rs1065154  | 5 | 5 | 179197521 | 65     | 5.9375  | 0.4133 | -0.6134 | 5.9031 | CHB |
| SQSTM1    | GI_19923742-S | rs748197   | 5 | 5 | 179206426 | 8840   | 6.1968  | 0.4289 | -0.5840 | 5.9031 | CHB |
| SQSTM1    | GI_19923742-S | rs269458   | 5 | 5 | 179209953 | 12367  | 5.9990  | 0.4665 | 0.6128  | 5.9031 | CHB |
| SQSTM1    | GI_19923742-S | rs11249661 | 5 | 5 | 179210480 | 12894  | 6.1968  | 0.4289 | -0.5840 | 5.9031 | CHB |
| SQSTM1    | GI_19923742-S | rs1650893  | 5 | 5 | 179212985 | 15399  | 5.9375  | 0.4133 | 0.6134  | 5.9031 | CHB |
| LOC389362 | GI_41147302-S | rs9503490  | 6 | 6 | 3196748   | 16364  | 7.9835  | 0.5264 | -0.2769 | 6.0314 | CHB |
| LOC389362 | GI_41147302-S | rs4959782  | 6 | 6 | 3197134   | 15978  | 7.9835  | 0.5264 | -0.2769 | 6.0314 | CHB |
| LOC389362 | GI_41147302-S | rs11242831 | 6 | 6 | 3200743   | 12369  | 6.9489  | 0.4721 | 0.2637  | 6.0314 | CHB |
| LOC389362 | GI_41147302-S | rs9501959  | 6 | 6 | 3200786   | 12326  | 7.9835  | 0.5264 | -0.2769 | 6.0314 | CHB |
| LOC389362 | GI_41147302-S | rs11242833 | 6 | 6 | 3200884   | 12228  | 7.9835  | 0.5264 | -0.2769 | 6.0314 | CHB |
| LOC389362 | GI_41147302-S | rs12206593 | 6 | 6 | 3200905   | 12207  | 6.9489  | 0.4721 | -0.2637 | 6.0314 | CHB |
| LOC389362 | GI_41147302-S | rs4997730  | 6 | 6 | 3201161   | 11951  | 6.9489  | 0.4721 | -0.2637 | 6.0314 | CHB |
| LOC389362 | GI_41147302-S | rs4445096  | 6 | 6 | 3201894   | 11218  | 6.9668  | 0.4895 | 0.2670  | 6.0314 | CHB |
| LOC389362 | GI_41147302-S | rs7756623  | 6 | 6 | 3203352   | 9760   | 7.9835  | 0.5264 | 0.2769  | 6.0314 | CHB |
| LOC389362 | GI_41147302-S | rs11242834 | 6 | 6 | 3204714   | 8398   | 7.9835  | 0.5264 | -0.2769 | 6.0314 | CHB |
| LOC389362 | GI_41147302-S | rs11242835 | 6 | 6 | 3206584   | 6528   | 12.7906 | 0.7236 | -0.3431 | 6.0314 | CHB |
| LOC389362 | GI_41147302-S | rs11242837 | 6 | 6 | 3206887   | 6225   | 11.9108 | 0.7321 | -0.3432 | 6.0314 | CHB |
| LOC389362 | GI_41147302-S | rs11242841 | 6 | 6 | 3207007   | 6105   | 13.2821 | 0.7296 | -0.3455 | 6.0314 | CHB |
| LOC389362 | GI_41147302-S | rs4602754  | 6 | 6 | 3207500   | 5612   | 11.5012 | 0.6734 | -0.3304 | 6.0314 | CHB |
| LOC389362 | GI_41147302-S | rs4421240  | 6 | 6 | 3207522   | 5590   | 10.3441 | 0.6395 | 0.3309  | 6.0314 | CHB |
| LOC389362 | GI_41147302-S | rs4246060  | 6 | 6 | 3207754   | 5358   | 13.2821 | 0.7296 | -0.3455 | 6.0314 | CHB |
| LOC389362 | GI_41147302-S | rs4246061  | 6 | 6 | 3207810   | 5302   | 13.2821 | 0.7296 | 0.3455  | 6.0314 | CHB |
| LOC389362 | GI_41147302-S | rs4316041  | 6 | 6 | 3208187   | 4925   | 11.5096 | 0.6912 | 0.3294  | 6.0314 | CHB |
| LOC389362 | GI_41147302-S | rs4400256  | 6 | 6 | 3208286   | 4826   | 13.2821 | 0.7296 | 0.3455  | 6.0314 | CHB |
| LOC389362 | GI_41147302-S | rs4317455  | 6 | 6 | 3208490   | 4622   | 12.0390 | 0.6915 | 0.3391  | 6.0314 | CHB |
| LOC389362 | GI_41147302-S | rs4959785  | 6 | 6 | 3209100   | 4012   | 13.2821 | 0.7296 | 0.3455  | 6.0314 | CHB |
| LOC389362 | GI_41147302-S | rs4959229  | 6 | 6 | 3209287   | 3825   | 13.2821 | 0.7296 | 0.3455  | 6.0314 | CHB |
| LOC389362 | GI_41147302-S | rs4959786  | 6 | 6 | 3209486   | 3626   | 11.1445 | 0.6608 | -0.3317 | 6.0314 | CHB |
| LOC389362 | GI_41147302-S | rs4959787  | 6 | 6 | 3209501   | 3611   | 11.3387 | 0.6677 | -0.3334 | 6.0314 | CHB |
| LOC389362 | GI_41147302-S | rs13193012 | 6 | 6 | 3209670   | 3442   | 13.2821 | 0.7296 | -0.3455 | 6.0314 | CHB |
| LOC389362 | GI_41147302-S | rs4324814  | 6 | 6 | 3209775   | 3337   | 13.2821 | 0.7296 | 0.3455  | 6.0314 | CHB |
| LOC389362 | GI_41147302-S | rs11753155 | 6 | 6 | 3209999   | 3113   | 11.3387 | 0.6677 | 0.3334  | 6.0314 | CHB |

|           |               |            |   |   |          |       |         |        |         |        |     |
|-----------|---------------|------------|---|---|----------|-------|---------|--------|---------|--------|-----|
| LOC389362 | GI_41147302-S | rs4602755  | 6 | 6 | 3210089  | 3023  | 13.3506 | 0.7400 | -0.3492 | 6.0314 | CHB |
| LOC389362 | GI_41147302-S | rs13196688 | 6 | 6 | 3210362  | 2750  | 13.2821 | 0.7296 | -0.3455 | 6.0314 | CHB |
| LOC389362 | GI_41147302-S | rs9501966  | 6 | 6 | 3210381  | 2731  | 13.2821 | 0.7296 | 0.3455  | 6.0314 | CHB |
| LOC389362 | GI_41147302-S | rs13207402 | 6 | 6 | 3210409  | 2703  | 13.2821 | 0.7296 | -0.3455 | 6.0314 | CHB |
| LOC389362 | GI_41147302-S | rs13207416 | 6 | 6 | 3210438  | 2674  | 13.2821 | 0.7296 | 0.3455  | 6.0314 | CHB |
| LOC389362 | GI_41147302-S | rs4959791  | 6 | 6 | 3210874  | 2238  | 11.7660 | 0.6999 | 0.3425  | 6.0314 | CHB |
| LOC389362 | GI_41147302-S | rs4959792  | 6 | 6 | 3211037  | 2075  | 11.5903 | 0.7216 | -0.3354 | 6.0314 | CHB |
| LOC389362 | GI_41147302-S | rs4959793  | 6 | 6 | 3211142  | 1970  | 10.1824 | 0.6903 | -0.3362 | 6.0314 | CHB |
| LOC389362 | GI_41147302-S | rs4998907  | 6 | 6 | 3211262  | 1850  | 13.1547 | 0.7344 | -0.3411 | 6.0314 | CHB |
| LOC389362 | GI_41147302-S | rs4336485  | 6 | 6 | 3211387  | 1725  | 13.2821 | 0.7296 | 0.3455  | 6.0314 | CHB |
| LOC389362 | GI_41147302-S | rs4337973  | 6 | 6 | 3211559  | 1553  | 13.1364 | 0.7254 | 0.3166  | 6.0314 | CHB |
| LOC389362 | GI_41147302-S | rs17136345 | 6 | 6 | 3211907  | 1205  | 11.7437 | 0.7458 | -0.3472 | 6.0314 | CHB |
| LOC389362 | GI_41147302-S | rs17136346 | 6 | 6 | 3211914  | 1198  | 13.0717 | 0.7319 | 0.3473  | 6.0314 | CHB |
| LOC389362 | GI_41147302-S | rs1633     | 6 | 6 | 3212535  | 577   | 7.6336  | 0.5832 | -0.2975 | 6.0314 | CHB |
| LOC389362 | GI_41147302-S | rs1634     | 6 | 6 | 3212556  | 556   | 8.4493  | 0.6250 | 0.3227  | 6.0314 | CHB |
| LOC389362 | GI_41147302-S | rs9328157  | 6 | 6 | 3212709  | 403   | 13.2821 | 0.7296 | -0.3455 | 6.0314 | CHB |
| LOC389362 | GI_41147302-S | rs3813487  | 6 | 6 | 3215063  | 1951  | 12.4311 | 0.7126 | 0.3496  | 6.0314 | CHB |
| LOC389362 | GI_41147302-S | rs1127477  | 6 | 6 | 3215509  | 2397  | 8.5931  | 0.5558 | 0.3145  | 6.0314 | CHB |
| LOC389362 | GI_41147302-S | rs7756175  | 6 | 6 | 3221744  | 8632  | 8.0794  | 0.5311 | -0.2730 | 6.0314 | CHB |
| LOC389362 | GI_41147302-S | rs7775219  | 6 | 6 | 3222297  | 9185  | 8.2720  | 0.5406 | 0.2888  | 6.0314 | CHB |
| LOC389362 | GI_41147302-S | rs11754676 | 6 | 6 | 3224786  | 11674 | 7.3212  | 0.4923 | -0.2812 | 6.0314 | CHB |
| LOC389362 | GI_41147302-S | rs4613858  | 6 | 6 | 3232680  | 19568 | 7.4690  | 0.5001 | 0.2934  | 6.0314 | CHB |
| LOC389362 | GI_41147302-S | rs4076221  | 6 | 6 | 3235725  | 22613 | 6.3262  | 0.4366 | 0.2684  | 6.0314 | CHB |
| Hs.519979 | Hs.519979-S   | rs4087726  | 6 | 6 | 30006876 | 1530  | 8.1700  | 0.5441 | 0.4007  | 5.8075 | CHB |
| Hs.519979 | Hs.519979-S   | rs1632882  | 6 | 6 | 30024347 | 19001 | 8.9179  | 0.5708 | -0.4482 | 5.8075 | CHB |
| Hs.519979 | Hs.519979-S   | rs9260632  | 6 | 6 | 30031269 | 25923 | 7.6920  | 0.5467 | 0.4341  | 5.8075 | CHB |
| Hs.519979 | Hs.519979-S   | rs2735085  | 6 | 6 | 30035074 | 29728 | 7.1170  | 0.5065 | 0.4376  | 5.8075 | CHB |
| Hs.519979 | Hs.519979-S   | rs3869062  | 6 | 6 | 30042870 | 37524 | 7.4368  | 0.5067 | 0.4282  | 5.8075 | CHB |
| Hs.519979 | Hs.519979-S   | rs9260794  | 6 | 6 | 30047656 | 42310 | 6.1410  | 0.4332 | -0.3900 | 5.8075 | CHB |
| Hs.519979 | Hs.519979-S   | rs2893999  | 6 | 6 | 30051811 | 46465 | 7.2487  | 0.4966 | -0.4190 | 5.8075 | CHB |
| LOC401245 | GI_42657607-S | rs261950   | 6 | 6 | 30377540 | 10059 | 6.7818  | 0.4628 | -0.1941 | 6.0476 | CHB |
| hmm31752  | hmm31752-S    | rs2517534  | 6 | 6 | 31125313 | 6765  | 10.5035 | 0.6457 | 0.6447  | 6.2643 | CHB |
| hmm31752  | hmm31752-S    | rs2523866  | 6 | 6 | 31125326 | 6752  | 6.8537  | 0.4748 | -0.5369 | 6.2643 | CHB |
| hmm31752  | hmm31752-S    | rs2517532  | 6 | 6 | 31126386 | 5692  | 11.1598 | 0.6614 | 0.6502  | 6.2643 | CHB |
| hmm31752  | hmm31752-S    | rs2523865  | 6 | 6 | 31126427 | 5651  | 6.6632  | 0.4561 | 0.5197  | 6.2643 | CHB |
| hmm31752  | hmm31752-S    | rs2523864  | 6 | 6 | 31126525 | 5553  | 6.6632  | 0.4561 | 0.5197  | 6.2643 | CHB |
| hmm31752  | hmm31752-S    | rs2523857  | 6 | 6 | 31129483 | 2595  | 12.3206 | 0.7006 | -0.6572 | 6.2643 | CHB |
| hmm31752  | hmm31752-S    | rs2523856  | 6 | 6 | 31129609 | 2469  | 13.3555 | 0.7486 | 0.6954  | 6.2643 | CHB |
| hmm31752  | hmm31752-S    | rs2523855  | 6 | 6 | 31130137 | 1941  | 6.8639  | 0.4837 | -0.5175 | 6.2643 | CHB |
| hmm31752  | hmm31752-S    | rs9262628  | 6 | 6 | 31131127 | 951   | 9.0123  | 0.5750 | 0.5806  | 6.2643 | CHB |
| hmm31752  | hmm31752-S    | rs2523852  | 6 | 6 | 31131847 | 231   | 9.0123  | 0.5750 | -0.5806 | 6.2643 | CHB |
| hmm31752  | hmm31752-S    | rs2523850  | 6 | 6 | 31132727 | 649   | 6.4533  | 0.4440 | 0.5192  | 6.2643 | CHB |
| hmm31752  | hmm31752-S    | rs2523849  | 6 | 6 | 31133030 | 952   | 6.4533  | 0.4440 | -0.5192 | 6.2643 | CHB |
| hmm31752  | hmm31752-S    | rs2523848  | 6 | 6 | 31133083 | 1005  | 6.4533  | 0.4440 | -0.5192 | 6.2643 | CHB |
| hmm31752  | hmm31752-S    | rs2517525  | 6 | 6 | 31133340 | 1262  | 7.8407  | 0.5363 | 0.5572  | 6.2643 | CHB |
| hmm31752  | hmm31752-S    | rs2523846  | 6 | 6 | 31134568 | 2490  | 9.0123  | 0.5750 | -0.5806 | 6.2643 | CHB |
| hmm31752  | hmm31752-S    | rs2523845  | 6 | 6 | 31135372 | 3294  | 6.4533  | 0.4440 | 0.5192  | 6.2643 | CHB |
| hmm31752  | hmm31752-S    | rs2517510  | 6 | 6 | 31138101 | 6023  | 9.0123  | 0.5750 | -0.5806 | 6.2643 | CHB |
| hmm31752  | hmm31752-S    | rs2523841  | 6 | 6 | 31138262 | 6184  | 6.4533  | 0.4440 | -0.5192 | 6.2643 | CHB |
| hmm31752  | hmm31752-S    | rs2523840  | 6 | 6 | 31138404 | 6326  | 6.4533  | 0.4440 | -0.5192 | 6.2643 | CHB |
| hmm31752  | hmm31752-S    | rs2517500  | 6 | 6 | 31141488 | 9410  | 9.0123  | 0.5750 | 0.5806  | 6.2643 | CHB |
| hmm31752  | hmm31752-S    | rs2517497  | 6 | 6 | 31144762 | 12684 | 8.3312  | 0.5519 | 0.5674  | 6.2643 | CHB |
| hmm31752  | hmm31752-S    | rs2523890  | 6 | 6 | 31147511 | 15433 | 9.0123  | 0.5750 | 0.5806  | 6.2643 | CHB |
| hmm31752  | hmm31752-S    | rs2246330  | 6 | 6 | 31149472 | 17394 | 9.0123  | 0.5750 | -0.5806 | 6.2643 | CHB |
| hmm31752  | hmm31752-S    | rs2523883  | 6 | 6 | 31150049 | 17971 | 9.0123  | 0.5750 | 0.5806  | 6.2643 | CHB |
| hmm31752  | hmm31752-S    | rs2523882  | 6 | 6 | 31150196 | 18118 | 8.6148  | 0.5743 | 0.5856  | 6.2643 | CHB |
| hmm31752  | hmm31752-S    | rs2517489  | 6 | 6 | 31150285 | 18207 | 9.0123  | 0.5750 | -0.5806 | 6.2643 | CHB |
| hmm31752  | hmm31752-S    | rs2523881  | 6 | 6 | 31150587 | 18509 | 9.0123  | 0.5750 | -0.5806 | 6.2643 | CHB |
| hmm31752  | hmm31752-S    | rs2523880  | 6 | 6 | 31150748 | 18670 | 9.0123  | 0.5750 | 0.5806  | 6.2643 | CHB |

|           |               |            |   |   |          |       |         |        |         |        |     |
|-----------|---------------|------------|---|---|----------|-------|---------|--------|---------|--------|-----|
| hmm31752  | hmm31752-S    | rs2249231  | 6 | 6 | 31151211 | 19133 | 9.0123  | 0.5750 | -0.5806 | 6.2643 | CHB |
| hmm31752  | hmm31752-S    | rs2523843  | 6 | 6 | 31154507 | 22429 | 9.0254  | 0.5932 | 0.5670  | 6.2643 | CHB |
| hmm31752  | hmm31752-S    | rs2249876  | 6 | 6 | 31156366 | 24288 | 8.9896  | 0.5740 | -0.5652 | 6.2643 | CHB |
| hmm31752  | hmm31752-S    | rs9263473  | 6 | 6 | 31158158 | 26080 | 8.3957  | 0.5550 | -0.5503 | 6.2643 | CHB |
| hmm31752  | hmm31752-S    | rs9263474  | 6 | 6 | 31158223 | 26145 | 8.4176  | 0.5833 | -0.5814 | 6.2643 | CHB |
| hmm31752  | hmm31752-S    | rs2535318  | 6 | 6 | 31159367 | 27289 | 8.9896  | 0.5740 | 0.5652  | 6.2643 | CHB |
| hmm31752  | hmm31752-S    | rs2535317  | 6 | 6 | 31159833 | 27755 | 8.9896  | 0.5740 | 0.5652  | 6.2643 | CHB |
| hmm31752  | hmm31752-S    | rs2517471  | 6 | 6 | 31160077 | 27999 | 8.9896  | 0.5740 | 0.5652  | 6.2643 | CHB |
| hmm31752  | hmm31752-S    | rs2535315  | 6 | 6 | 31160106 | 28028 | 8.9896  | 0.5740 | 0.5652  | 6.2643 | CHB |
| hmm31752  | hmm31752-S    | rs2535311  | 6 | 6 | 31160663 | 28585 | 8.8452  | 0.5761 | 0.5656  | 6.2643 | CHB |
| hmm31752  | hmm31752-S    | rs2535310  | 6 | 6 | 31161236 | 29158 | 9.2454  | 0.5940 | 0.5665  | 6.2643 | CHB |
| hmm31752  | hmm31752-S    | rs2535307  | 6 | 6 | 31161720 | 29642 | 8.3957  | 0.5550 | 0.5503  | 6.2643 | CHB |
| hmm31752  | hmm31752-S    | rs2535306  | 6 | 6 | 31161846 | 29768 | 8.9896  | 0.5740 | 0.5652  | 6.2643 | CHB |
| hmm31752  | hmm31752-S    | rs9263478  | 6 | 6 | 31162360 | 30282 | 8.2908  | 0.5678 | -0.5616 | 6.2643 | CHB |
| hmm31752  | hmm31752-S    | rs3130955  | 6 | 6 | 31162490 | 30412 | 6.4865  | 0.4459 | -0.5010 | 6.2643 | CHB |
| hmm31752  | hmm31752-S    | rs2535304  | 6 | 6 | 31162666 | 30588 | 8.4196  | 0.5650 | -0.5788 | 6.2643 | CHB |
| hmm31752  | hmm31752-S    | rs3130959  | 6 | 6 | 31164337 | 32259 | 8.9896  | 0.5740 | -0.5652 | 6.2643 | CHB |
| hmm31752  | hmm31752-S    | rs9263486  | 6 | 6 | 31164611 | 32533 | 8.9896  | 0.5740 | 0.5652  | 6.2643 | CHB |
| hmm31752  | hmm31752-S    | rs2535301  | 6 | 6 | 31166606 | 34528 | 8.9896  | 0.5740 | 0.5652  | 6.2643 | CHB |
| hmm31752  | hmm31752-S    | rs2535300  | 6 | 6 | 31167124 | 35046 | 6.6018  | 0.4526 | 0.4903  | 6.2643 | CHB |
| hmm31752  | hmm31752-S    | rs2517465  | 6 | 6 | 31167150 | 35072 | 8.1477  | 0.5796 | 0.5685  | 6.2643 | CHB |
| hmm31752  | hmm31752-S    | rs2535299  | 6 | 6 | 31167224 | 35146 | 8.8741  | 0.5863 | 0.5666  | 6.2643 | CHB |
| hmm31752  | hmm31752-S    | rs2517464  | 6 | 6 | 31167233 | 35155 | 7.6282  | 0.5829 | 0.5494  | 6.2643 | CHB |
| hmm31752  | hmm31752-S    | rs3130961  | 6 | 6 | 31167365 | 35287 | 8.9896  | 0.5740 | 0.5652  | 6.2643 | CHB |
| hmm31752  | hmm31752-S    | rs2517458  | 6 | 6 | 31167494 | 35416 | 8.8314  | 0.5668 | 0.5508  | 6.2643 | CHB |
| hmm31752  | hmm31752-S    | rs2517453  | 6 | 6 | 31168094 | 36016 | 8.9896  | 0.5740 | 0.5652  | 6.2643 | CHB |
| hmm31752  | hmm31752-S    | rs2517452  | 6 | 6 | 31168141 | 36063 | 8.3910  | 0.5548 | -0.5480 | 6.2643 | CHB |
| hmm31752  | hmm31752-S    | rs2517450  | 6 | 6 | 31169418 | 37340 | 8.9896  | 0.5740 | 0.5652  | 6.2643 | CHB |
| hmm31752  | hmm31752-S    | rs2535292  | 6 | 6 | 31170393 | 38315 | 7.8714  | 0.5379 | -0.5549 | 6.2643 | CHB |
| hmm31752  | hmm31752-S    | rs2535291  | 6 | 6 | 31170878 | 38800 | 8.9896  | 0.5740 | -0.5652 | 6.2643 | CHB |
| hmm31752  | hmm31752-S    | rs2517423  | 6 | 6 | 31172806 | 40728 | 8.9896  | 0.5740 | 0.5652  | 6.2643 | CHB |
| hmm31752  | hmm31752-S    | rs7381697  | 6 | 6 | 31176005 | 43927 | 6.9254  | 0.4708 | 0.4789  | 6.2643 | CHB |
| hmm31752  | hmm31752-S    | rs2517556  | 6 | 6 | 31176874 | 44796 | 7.8598  | 0.5554 | -0.5307 | 6.2643 | CHB |
| hmm31752  | hmm31752-S    | rs9405050  | 6 | 6 | 31179526 | 47448 | 8.9896  | 0.5740 | -0.5652 | 6.2643 | CHB |
| hmm31752  | hmm31752-S    | rs7381897  | 6 | 6 | 31181882 | 49804 | 8.6451  | 0.5669 | -0.5692 | 6.2643 | CHB |
| hmm31752  | hmm31752-S    | rs1064190  | 6 | 6 | 31183094 | 51016 | 8.9896  | 0.5740 | -0.5652 | 6.2643 | CHB |
| hmm31752  | hmm31752-S    | rs2535277  | 6 | 6 | 31184743 | 52665 | 8.5974  | 0.5825 | 0.5662  | 6.2643 | CHB |
| hmm31752  | hmm31752-S    | rs1265064  | 6 | 6 | 31185711 | 53633 | 7.9244  | 0.5780 | 0.5585  | 6.2643 | CHB |
| hmm31752  | hmm31752-S    | rs1265063  | 6 | 6 | 31185917 | 53839 | 8.9896  | 0.5740 | 0.5652  | 6.2643 | CHB |
| hmm31752  | hmm31752-S    | rs1265059  | 6 | 6 | 31186474 | 54396 | 8.9896  | 0.5740 | 0.5652  | 6.2643 | CHB |
| hmm31752  | hmm31752-S    | rs1265053  | 6 | 6 | 31187868 | 55790 | 9.5210  | 0.5972 | 0.5648  | 6.2643 | CHB |
| hmm31752  | hmm31752-S    | rs2233977  | 6 | 6 | 31187873 | 55795 | 7.1379  | 0.4824 | 0.4807  | 6.2643 | CHB |
| hmm31752  | hmm31752-S    | rs1265052  | 6 | 6 | 31188450 | 56372 | 6.6369  | 0.4546 | -0.5510 | 6.2643 | CHB |
| hmm31752  | hmm31752-S    | rs2233967  | 6 | 6 | 31188807 | 56729 | 6.5984  | 0.4524 | 0.5239  | 6.2643 | CHB |
| LOC282956 | GI_27483210-S | rs2844529  | 6 | 6 | 31461572 | 8979  | 7.9980  | 0.5532 | -0.2316 | 6.1561 | CHB |
| LOC282956 | GI_27483210-S | rs4081552  | 6 | 6 | 31461668 | 8883  | 7.7842  | 0.5164 | -0.2177 | 6.1561 | CHB |
| LOC282956 | GI_27483210-S | rs6909461  | 6 | 6 | 31461929 | 8622  | 7.6051  | 0.5155 | -0.2187 | 6.1561 | CHB |
| LOC282956 | GI_27483210-S | rs2853973  | 6 | 6 | 31461971 | 8580  | 7.8095  | 0.5260 | -0.2212 | 6.1561 | CHB |
| LOC282956 | GI_27483210-S | rs2428486  | 6 | 6 | 31462083 | 8468  | 11.0004 | 0.6556 | -0.2376 | 6.1561 | CHB |
| LOC282956 | GI_27483210-S | rs4711268  | 6 | 6 | 31462483 | 8068  | 7.6114  | 0.5158 | -0.2117 | 6.1561 | CHB |
| LOC282956 | GI_27483210-S | rs2596562  | 6 | 6 | 31462574 | 7977  | 8.4095  | 0.5557 | -0.2163 | 6.1561 | CHB |
| LOC282956 | GI_27483210-S | rs13437092 | 6 | 6 | 31463035 | 7516  | 11.1577 | 0.6700 | -0.2279 | 6.1561 | CHB |
| LOC282956 | GI_27483210-S | rs13437088 | 6 | 6 | 31463098 | 7453  | 10.8333 | 0.6582 | -0.2389 | 6.1561 | CHB |
| LOC282956 | GI_27483210-S | rs7771971  | 6 | 6 | 31468320 | 2231  | 8.4181  | 0.5476 | 0.2133  | 6.1561 | CHB |
| LOC282956 | GI_27483210-S | rs7751725  | 6 | 6 | 31468412 | 2139  | 10.4330 | 0.6343 | -0.2311 | 6.1561 | CHB |
| LOC282956 | GI_27483210-S | rs7752021  | 6 | 6 | 31468505 | 2046  | 9.5794  | 0.6084 | -0.2304 | 6.1561 | CHB |
| LOC282956 | GI_27483210-S | rs10947206 | 6 | 6 | 31469376 | 1175  | 10.1345 | 0.6313 | -0.2298 | 6.1561 | CHB |
| LOC282956 | GI_27483210-S | rs10947207 | 6 | 6 | 31469464 | 1087  | 6.6441  | 0.4629 | 0.2716  | 6.1561 | CHB |
| LOC282956 | GI_27483210-S | rs2523475  | 6 | 6 | 31469689 | 862   | 9.2127  | 0.6201 | 0.2347  | 6.1561 | CHB |

|           |               |            |   |   |          |        |         |        |         |        |     |
|-----------|---------------|------------|---|---|----------|--------|---------|--------|---------|--------|-----|
| LOC282956 | GI_27483210-S | rs10947208 | 6 | 6 | 31469816 | 735    | 10.1323 | 0.6312 | -0.2302 | 6.1561 | CHB |
| LOC282956 | GI_27483210-S | rs2523473  | 6 | 6 | 31469876 | 675    | 10.4330 | 0.6343 | 0.2311  | 6.1561 | CHB |
| LOC282956 | GI_27483210-S | rs2523467  | 6 | 6 | 31470909 | 358    | 10.4330 | 0.6343 | 0.2311  | 6.1561 | CHB |
| LOC282956 | GI_27483210-S | rs9501387  | 6 | 6 | 31472438 | 1887   | 10.1746 | 0.6329 | -0.2314 | 6.1561 | CHB |
| LOC282956 | GI_27483210-S | rs2523459  | 6 | 6 | 31473287 | 2736   | 9.6100  | 0.6010 | -0.2358 | 6.1561 | CHB |
| LOC282956 | GI_27483210-S | rs2596542  | 6 | 6 | 31474574 | 4023   | 7.3472  | 0.5019 | 0.2056  | 6.1561 | CHB |
| LOC282956 | GI_27483210-S | rs2428475  | 6 | 6 | 31474601 | 4050   | 9.7914  | 0.6355 | 0.2298  | 6.1561 | CHB |
| LOC282956 | GI_27483210-S | rs2428474  | 6 | 6 | 31475002 | 4451   | 8.1064  | 0.5497 | 0.2133  | 6.1561 | CHB |
| LOC282956 | GI_27483210-S | rs2523453  | 6 | 6 | 31476104 | 5553   | 10.1751 | 0.6329 | 0.2288  | 6.1561 | CHB |
| LOC282956 | GI_27483210-S | rs2523452  | 6 | 6 | 31476519 | 5968   | 8.4181  | 0.5476 | 0.2133  | 6.1561 | CHB |
| LOC282956 | GI_27483210-S | rs2596538  | 6 | 6 | 31476611 | 6060   | 7.4165  | 0.4973 | -0.2035 | 6.1561 | CHB |
| LOC282956 | GI_27483210-S | rs2844522  | 6 | 6 | 31476679 | 6128   | 8.9458  | 0.5720 | -0.2183 | 6.1561 | CHB |
| LOC282956 | GI_27483210-S | rs2844521  | 6 | 6 | 31476943 | 6392   | 8.4181  | 0.5476 | 0.2133  | 6.1561 | CHB |
| LOC282956 | GI_27483210-S | rs1051792  | 6 | 6 | 31486956 | 16405  | 10.4330 | 0.6343 | 0.2311  | 6.1561 | CHB |
| LOC282956 | GI_27483210-S | rs1051794  | 6 | 6 | 31487088 | 16537  | 10.4330 | 0.6343 | 0.2311  | 6.1561 | CHB |
| LOC282956 | GI_27483210-S | rs6934187  | 6 | 6 | 31488953 | 18402  | 8.8943  | 0.5784 | -0.2146 | 6.1561 | CHB |
| LOC282956 | GI_27483210-S | rs9266817  | 6 | 6 | 31489531 | 18980  | 6.1775  | 0.4874 | 0.2228  | 6.1561 | CHB |
| LOC282956 | GI_27483210-S | rs7775227  | 6 | 6 | 31490126 | 19575  | 10.4330 | 0.6343 | 0.2311  | 6.1561 | CHB |
| LOC282956 | GI_27483210-S | rs9266823  | 6 | 6 | 31490669 | 20118  | 9.4264  | 0.6200 | -0.2340 | 6.1561 | CHB |
| LOC282956 | GI_27483210-S | rs9266825  | 6 | 6 | 31490861 | 20310  | 7.8740  | 0.5960 | 0.2318  | 6.1561 | CHB |
| LOC282956 | GI_27483210-S | rs9266833  | 6 | 6 | 31491087 | 20536  | 6.6418  | 0.5263 | 0.2238  | 6.1561 | CHB |
| LOC282956 | GI_27483210-S | rs6932236  | 6 | 6 | 31491958 | 21407  | 10.4330 | 0.6343 | 0.2311  | 6.1561 | CHB |
| LOC282956 | GI_27483210-S | rs9266844  | 6 | 6 | 31492310 | 21759  | 9.1131  | 0.6157 | 0.2386  | 6.1561 | CHB |
| LOC282956 | GI_27483210-S | rs9266845  | 6 | 6 | 31492771 | 22220  | 8.9342  | 0.6076 | 0.2317  | 6.1561 | CHB |
| LOC282956 | GI_27483210-S | rs9266846  | 6 | 6 | 31492868 | 22317  | 8.8438  | 0.6230 | -0.2372 | 6.1561 | CHB |
| LOC282956 | GI_27483210-S | rs9283891  | 6 | 6 | 31496209 | 25658  | 7.5810  | 0.5804 | 0.2358  | 6.1561 | CHB |
| LOC282956 | GI_27483210-S | rs9295993  | 6 | 6 | 31496574 | 26023  | 9.0188  | 0.6412 | -0.2159 | 6.1561 | CHB |
| LOC282956 | GI_27483210-S | rs7772549  | 6 | 6 | 31515622 | 45071  | 10.4330 | 0.6343 | 0.2311  | 6.1561 | CHB |
| LOC282956 | GI_27483210-S | rs3869132  | 6 | 6 | 31518927 | 48376  | 10.1318 | 0.6312 | 0.2301  | 6.1561 | CHB |
| LOC282956 | GI_27483210-S | rs2523685  | 6 | 6 | 31534235 | 63684  | 8.7656  | 0.5638 | -0.2161 | 6.1561 | CHB |
| HLA-DRB5  | GI_26665892-S | rs9268517  | 6 | 6 | 32487718 | 105507 | 8.1935  | 0.5367 | -3.2168 | 7.8792 | CHB |
| HLA-DQA2  | GI_11095446-S | rs9268853  | 6 | 6 | 32537621 | 283412 | 12.5166 | 0.7067 | -2.7486 | 6.053  | CHB |
| HLA-DRB5  | GI_26665892-S | rs9268853  | 6 | 6 | 32537621 | 55604  | 8.0006  | 0.5272 | -2.8766 | 7.8792 | CHB |
| HLA-DQA2  | GI_11095446-S | rs9268858  | 6 | 6 | 32537736 | 283297 | 12.5166 | 0.7067 | -2.7486 | 6.053  | CHB |
| HLA-DRB5  | GI_26665892-S | rs9268858  | 6 | 6 | 32537736 | 55489  | 8.0006  | 0.5272 | -2.8766 | 7.8792 | CHB |
| HLA-DQA2  | GI_11095446-S | rs9268906  | 6 | 6 | 32540159 | 280874 | 12.0931 | 0.7195 | 2.6266  | 6.053  | CHB |
| HLA-DQA2  | GI_11095446-S | rs9268923  | 6 | 6 | 32540813 | 280220 | 12.0397 | 0.7089 | 2.6957  | 6.053  | CHB |
| HLA-DQA2  | GI_11095446-S | rs2395185  | 6 | 6 | 32541145 | 279888 | 12.5166 | 0.7067 | 2.7486  | 6.053  | CHB |
| HLA-DRB5  | GI_26665892-S | rs2395185  | 6 | 6 | 32541145 | 52080  | 8.0006  | 0.5272 | 2.8766  | 7.8792 | CHB |
| HLA-DQA2  | GI_11095446-S | rs9268969  | 6 | 6 | 32542327 | 278706 | 11.0282 | 0.7021 | 2.5931  | 6.053  | CHB |
| HLA-DRB5  | GI_26665892-S | rs9268969  | 6 | 6 | 32542327 | 50898  | 8.3125  | 0.5877 | 2.9956  | 7.8792 | CHB |
| HLA-DQA2  | GI_11095446-S | rs9268970  | 6 | 6 | 32542339 | 278694 | 12.1507 | 0.7214 | -2.7046 | 6.053  | CHB |
| HLA-DQA2  | GI_11095446-S | rs9391877  | 6 | 6 | 32546845 | 274188 | 10.1960 | 0.6807 | 2.5839  | 6.053  | CHB |
| HLA-DQA2  | GI_11095446-S | rs9405040  | 6 | 6 | 32547371 | 273662 | 12.5166 | 0.7067 | 2.7486  | 6.053  | CHB |
| HLA-DRB5  | GI_26665892-S | rs9405040  | 6 | 6 | 32547371 | 45854  | 8.0006  | 0.5272 | 2.8766  | 7.8792 | CHB |
| HLA-DQA2  | GI_11095446-S | rs9286790  | 6 | 6 | 32547806 | 273227 | 9.9172  | 0.6315 | -2.2648 | 6.053  | CHB |
| HLA-DQA2  | GI_11095446-S | rs12194148 | 6 | 6 | 32552176 | 268857 | 10.0967 | 0.6210 | 2.2613  | 6.053  | CHB |
| HLA-DQA2  | GI_11095446-S | rs9405112  | 6 | 6 | 32553578 | 267455 | 11.8742 | 0.7124 | -2.5856 | 6.053  | CHB |
| HLA-DQA2  | GI_11095446-S | rs9378212  | 6 | 6 | 32553669 | 267364 | 9.5854  | 0.6176 | 2.2792  | 6.053  | CHB |
| HLA-DQA2  | GI_11095446-S | rs9378266  | 6 | 6 | 32556167 | 264866 | 9.5898  | 0.6178 | 2.2434  | 6.053  | CHB |
| HLA-DQA2  | GI_11095446-S | rs9378213  | 6 | 6 | 32556376 | 264657 | 10.0448 | 0.6277 | -2.2558 | 6.053  | CHB |
| HLA-DQA2  | GI_11095446-S | rs9391786  | 6 | 6 | 32556539 | 264494 | 10.0448 | 0.6277 | 2.2558  | 6.053  | CHB |
| HLA-DQA2  | GI_11095446-S | rs5020946  | 6 | 6 | 32558067 | 262966 | 12.7621 | 0.7143 | 2.6771  | 6.053  | CHB |
| HLA-DQA2  | GI_11095446-S | rs6916742  | 6 | 6 | 32561169 | 259864 | 8.7167  | 0.5616 | -2.3122 | 6.053  | CHB |
| HLA-DQA2  | GI_11095446-S | rs2157337  | 6 | 6 | 32609122 | 211911 | 11.3588 | 0.6771 | 2.6051  | 6.053  | CHB |
| HLA-DRB5  | GI_26665892-S | rs2157337  | 6 | 6 | 32609122 | 15897  | 8.0133  | 0.5363 | 2.8493  | 7.8792 | CHB |
| HLA-DQA2  | GI_11095446-S | rs11757159 | 6 | 6 | 32628250 | 192783 | 8.2391  | 0.5390 | 2.1781  | 6.053  | CHB |
| HLA-DQA2  | GI_11095446-S | rs17191234 | 6 | 6 | 32672659 | 148374 | 10.4470 | 0.6348 | 2.2390  | 6.053  | CHB |
| HLA-DRB5  | GI_26665892-S | rs17191234 | 6 | 6 | 32672659 | 79434  | 8.5697  | 0.5547 | 2.5288  | 7.8792 | CHB |

|          |               |            |   |   |          |        |         |        |         |        |     |
|----------|---------------|------------|---|---|----------|--------|---------|--------|---------|--------|-----|
| HLA-DQA2 | GI_11095446-S | rs9270657  | 6 | 6 | 32673999 | 147034 | 6.8261  | 0.4652 | 2.1171  | 6.053  | CHB |
| HLA-DRB5 | GI_26665892-S | rs9270657  | 6 | 6 | 32673999 | 80774  | 14.4446 | 0.7611 | 3.2330  | 7.8792 | CHB |
| HLA-DQA2 | GI_11095446-S | rs9689336  | 6 | 6 | 32674690 | 146343 | 10.3668 | 0.6586 | -2.2173 | 6.053  | CHB |
| HLA-DQA2 | GI_11095446-S | rs9271567  | 6 | 6 | 32698434 | 122599 | 6.1591  | 0.4588 | 2.1057  | 6.053  | CHB |
| HLA-DQA2 | GI_11095446-S | rs9271568  | 6 | 6 | 32698441 | 122592 | 14.6839 | 0.7751 | -2.3409 | 6.053  | CHB |
| HLA-DRB5 | GI_26665892-S | rs9271568  | 6 | 6 | 32698441 | 105216 | 8.2589  | 0.5484 | -2.4198 | 7.8792 | CHB |
| HLA-DQA2 | GI_11095446-S | rs9271574  | 6 | 6 | 32698568 | 122465 | 14.8691 | 0.7876 | -2.8108 | 6.053  | CHB |
| HLA-DQA2 | GI_11095446-S | rs9271586  | 6 | 6 | 32698877 | 122156 | 6.2935  | 0.4671 | 1.9460  | 6.053  | CHB |
| HLA-DQA2 | GI_11095446-S | rs9271589  | 6 | 6 | 32699106 | 121927 | 13.0685 | 0.7579 | -2.5680 | 6.053  | CHB |
| HLA-DQA2 | GI_11095446-S | rs9271591  | 6 | 6 | 32699119 | 121914 | 13.8490 | 0.7620 | -2.5957 | 6.053  | CHB |
| HLA-DQA2 | GI_11095446-S | rs9271605  | 6 | 6 | 32699426 | 121607 | 14.2191 | 0.7970 | -2.7775 | 6.053  | CHB |
| HLA-DQA2 | GI_11095446-S | rs9272218  | 6 | 6 | 32710216 | 110817 | 7.6090  | 0.5331 | -2.1187 | 6.053  | CHB |
| HLA-DRB5 | GI_26665892-S | rs9272218  | 6 | 6 | 32710216 | 116991 | 13.7937 | 0.7691 | -3.0521 | 7.8792 | CHB |
| HLA-DQA1 | GI_18426974-S | rs9272346  | 6 | 6 | 32712350 | 6485   | 16.0819 | 0.7993 | 4.9279  | 6.3231 | CHB |
| HLA-DQA2 | GI_11095446-S | rs17426593 | 6 | 6 | 32716055 | 104978 | 19.3303 | 0.8581 | -3.3104 | 6.053  | CHB |
| HLA-DQA1 | GI_18426974-S | rs9272723  | 6 | 6 | 32717405 | 1430   | 13.6741 | 0.7407 | 4.7071  | 6.3231 | CHB |
| HLA-DQA1 | GI_18426974-S | rs6928482  | 6 | 6 | 32734227 | 15392  | 10.5221 | 0.6377 | 4.4987  | 6.3231 | CHB |
| HLA-DQA2 | GI_11095446-S | rs9273363  | 6 | 6 | 32734250 | 86783  | 7.6013  | 0.5419 | -2.4585 | 6.053  | CHB |
| HLA-DQA1 | GI_18426974-S | rs12918    | 6 | 6 | 32735364 | 16529  | 17.3527 | 0.8247 | -7.5820 | 6.3231 | CHB |
| hmm14647 | hmm14647-S    | rs3117035  | 6 | 6 | 33194227 | 29     | 6.1641  | 0.4270 | 0.2187  | 6.0743 | CHB |
| hmm14647 | hmm14647-S    | rs9277678  | 6 | 6 | 33195336 | 1080   | 6.1641  | 0.4270 | 0.2187  | 6.0743 | CHB |
| PEX6     | GI_21361243-S | rs4714634  | 6 | 6 | 43009098 | 30805  | 6.7778  | 0.4625 | -0.8722 | 6.4895 | CHB |
| PEX6     | GI_21361243-S | rs3763236  | 6 | 6 | 43010486 | 29417  | 12.4317 | 0.7041 | -0.6519 | 6.4895 | CHB |
| PEX6     | GI_21361243-S | rs1053538  | 6 | 6 | 43011741 | 28162  | 10.6261 | 0.6972 | 0.6412  | 6.4895 | CHB |
| GNMT     | GI_24475636-S | rs1053538  | 6 | 6 | 43011741 | 27648  | 6.5401  | 0.5004 | -0.0861 | 5.4639 | CHB |
| PEX6     | GI_21361243-S | rs6941212  | 6 | 6 | 43023898 | 16005  | 6.7778  | 0.4625 | -0.8722 | 6.4895 | CHB |
| PEX6     | GI_21361243-S | rs9471976  | 6 | 6 | 43028527 | 11376  | 8.1405  | 0.5341 | 0.7489  | 6.4895 | CHB |
| PEX6     | GI_21361243-S | rs13215983 | 6 | 6 | 43032171 | 7732   | 7.3960  | 0.5045 | 0.8101  | 6.4895 | CHB |
| PEX6     | GI_21361243-S | rs9462856  | 6 | 6 | 43034002 | 5901   | 8.1405  | 0.5341 | -0.7489 | 6.4895 | CHB |
| PEX6     | GI_21361243-S | rs11752813 | 6 | 6 | 43035995 | 3908   | 6.7778  | 0.4625 | 0.8722  | 6.4895 | CHB |
| PEX6     | GI_21361243-S | rs2296804  | 6 | 6 | 43039239 | 664    | 16.0084 | 0.7977 | -0.6963 | 6.4895 | CHB |
| GNMT     | GI_24475636-S | rs2296804  | 6 | 6 | 43039239 | 150    | 5.5901  | 0.3917 | 0.0757  | 5.4639 | CHB |
| PEX6     | GI_21361243-S | rs2274517  | 6 | 6 | 43040693 | 790    | 8.1405  | 0.5341 | -0.7489 | 6.4895 | CHB |
| PEX6     | GI_21361243-S | rs2274514  | 6 | 6 | 43042478 | 2575   | 8.1405  | 0.5341 | -0.7489 | 6.4895 | CHB |
| PEX6     | GI_21361243-S | rs3805952  | 6 | 6 | 43045104 | 5201   | 6.7778  | 0.4625 | -0.8722 | 6.4895 | CHB |
| PEX6     | GI_21361243-S | rs3805951  | 6 | 6 | 43045154 | 5251   | 6.6120  | 0.4610 | 0.8670  | 6.4895 | CHB |
| PEX6     | GI_21361243-S | rs7741302  | 6 | 6 | 43046355 | 6452   | 8.1405  | 0.5341 | 0.7489  | 6.4895 | CHB |
| PEX6     | GI_21361243-S | rs2395943  | 6 | 6 | 43048651 | 8748   | 16.0084 | 0.7977 | 0.6963  | 6.4895 | CHB |
| GNMT     | GI_24475636-S | rs2395943  | 6 | 6 | 43048651 | 9262   | 5.5901  | 0.3917 | -0.0757 | 5.4639 | CHB |
| PEX6     | GI_21361243-S | rs9986447  | 6 | 6 | 43050757 | 10854  | 6.7778  | 0.4625 | 0.8722  | 6.4895 | CHB |
| PEX6     | GI_21361243-S | rs9462857  | 6 | 6 | 43051076 | 11173  | 6.6137  | 0.4693 | -0.9132 | 6.4895 | CHB |
| PEX6     | GI_21361243-S | rs9462859  | 6 | 6 | 43054921 | 15018  | 6.7778  | 0.4625 | -0.8722 | 6.4895 | CHB |
| PEX6     | GI_21361243-S | rs2007950  | 6 | 6 | 43157439 | 117536 | 9.6621  | 0.6032 | -0.5729 | 6.4895 | CHB |
| IRAK1BP1 | GI_27498358-S | rs6454082  | 6 | 6 | 79544001 | 120522 | 8.2759  | 0.5407 | 0.3573  | 6.6426 | CHB |
| IRAK1BP1 | GI_27498358-S | rs6928279  | 6 | 6 | 79545677 | 118846 | 8.2759  | 0.5407 | 0.3573  | 6.6426 | CHB |
| IRAK1BP1 | GI_27498358-S | rs9361440  | 6 | 6 | 79546395 | 118128 | 8.1174  | 0.5415 | 0.3582  | 6.6426 | CHB |
| IRAK1BP1 | GI_27498358-S | rs9352649  | 6 | 6 | 79546502 | 118021 | 8.2759  | 0.5407 | 0.3573  | 6.6426 | CHB |
| IRAK1BP1 | GI_27498358-S | rs906320   | 6 | 6 | 79576561 | 87962  | 8.2759  | 0.5407 | 0.3573  | 6.6426 | CHB |
| IRAK1BP1 | GI_27498358-S | rs906319   | 6 | 6 | 79577408 | 87115  | 8.2759  | 0.5407 | 0.3573  | 6.6426 | CHB |
| IRAK1BP1 | GI_27498358-S | rs6454087  | 6 | 6 | 79590001 | 74522  | 8.2759  | 0.5407 | 0.3573  | 6.6426 | CHB |
| IRAK1BP1 | GI_27498358-S | rs6454088  | 6 | 6 | 79594398 | 70125  | 8.2759  | 0.5407 | 0.3573  | 6.6426 | CHB |
| IRAK1BP1 | GI_27498358-S | rs9343838  | 6 | 6 | 79595869 | 68654  | 8.2759  | 0.5407 | -0.3573 | 6.6426 | CHB |
| IRAK1BP1 | GI_27498358-S | rs1507150  | 6 | 6 | 79605316 | 59207  | 8.1131  | 0.5328 | 0.3651  | 6.6426 | CHB |
| IRAK1BP1 | GI_27498358-S | rs1507148  | 6 | 6 | 79611110 | 53413  | 8.1131  | 0.5328 | 0.3651  | 6.6426 | CHB |
| IRAK1BP1 | GI_27498358-S | rs6454089  | 6 | 6 | 79640821 | 23702  | 7.3698  | 0.5116 | 0.3583  | 6.6426 | CHB |
| IRAK1BP1 | GI_27498358-S | rs9352673  | 6 | 6 | 79659462 | 5061   | 8.0649  | 0.5476 | 0.3821  | 6.6426 | CHB |
| IRAK1BP1 | GI_27498358-S | rs9359355  | 6 | 6 | 79659533 | 4990   | 7.2519  | 0.4886 | 0.3404  | 6.6426 | CHB |
| IRAK1BP1 | GI_27498358-S | rs9361468  | 6 | 6 | 79677933 | 13410  | 8.1131  | 0.5328 | -0.3651 | 6.6426 | CHB |
| IRAK1BP1 | GI_27498358-S | rs1283320  | 6 | 6 | 79714834 | 50311  | 8.1131  | 0.5328 | 0.3651  | 6.6426 | CHB |

|           |               |            |   |   |          |        |        |        |         |        |     |
|-----------|---------------|------------|---|---|----------|--------|--------|--------|---------|--------|-----|
| IRAK1BP1  | GI_27498358-S | rs10943611 | 6 | 6 | 79747894 | 83371  | 8.1131 | 0.5328 | 0.3651  | 6.6426 | CHB |
| IRAK1BP1  | GI_27498358-S | rs1933238  | 6 | 6 | 79778128 | 113605 | 8.1131 | 0.5328 | -0.3651 | 6.6426 | CHB |
| IRAK1BP1  | GI_27498358-S | rs9968921  | 6 | 6 | 79835098 | 170575 | 8.1131 | 0.5328 | -0.3651 | 6.6426 | CHB |
| IRAK1BP1  | GI_27498358-S | rs3812161  | 6 | 6 | 79843364 | 178841 | 8.1131 | 0.5328 | -0.3651 | 6.6426 | CHB |
| RWDD2     | GI_34222125-S | rs9444029  | 6 | 6 | 83844558 | 118256 | 6.0150 | 0.4180 | -0.4443 | 5.9855 | CHB |
| RWDD2     | GI_34222125-S | rs9444033  | 6 | 6 | 83848744 | 114070 | 6.0150 | 0.4180 | 0.4443  | 5.9855 | CHB |
| RWDD2     | GI_34222125-S | rs7775624  | 6 | 6 | 83857233 | 105581 | 6.0150 | 0.4180 | -0.4443 | 5.9855 | CHB |
| RWDD2     | GI_34222125-S | rs12178155 | 6 | 6 | 83870976 | 91838  | 6.0150 | 0.4180 | 0.4443  | 5.9855 | CHB |
| RWDD2     | GI_34222125-S | rs9444037  | 6 | 6 | 83888671 | 74143  | 6.0150 | 0.4180 | 0.4443  | 5.9855 | CHB |
| RWDD2     | GI_34222125-S | rs7768488  | 6 | 6 | 83898507 | 64307  | 6.0150 | 0.4180 | 0.4443  | 5.9855 | CHB |
| RWDD2     | GI_34222125-S | rs9444039  | 6 | 6 | 83906768 | 56046  | 6.0150 | 0.4180 | 0.4443  | 5.9855 | CHB |
| RWDD2     | GI_34222125-S | rs1925781  | 6 | 6 | 83917957 | 44857  | 6.0150 | 0.4180 | -0.4443 | 5.9855 | CHB |
| RWDD2     | GI_34222125-S | rs16881908 | 6 | 6 | 83941560 | 21254  | 6.0150 | 0.4180 | -0.4443 | 5.9855 | CHB |
| RWDD2     | GI_34222125-S | rs12333004 | 6 | 6 | 83950866 | 11948  | 6.0150 | 0.4180 | -0.4443 | 5.9855 | CHB |
| RWDD2     | GI_34222125-S | rs9444040  | 6 | 6 | 83955524 | 7290   | 6.0150 | 0.4180 | 0.4443  | 5.9855 | CHB |
| Hs.485895 | Hs.485895-S   | rs2025490  | 6 | 6 | 87875181 | 121509 | 8.0891 | 0.5316 | 0.1611  | 5.549  | CHB |
| Hs.485895 | Hs.485895-S   | rs2031522  | 6 | 6 | 87878220 | 118470 | 8.0891 | 0.5316 | -0.1611 | 5.549  | CHB |
| Hs.485895 | Hs.485895-S   | rs9450619  | 6 | 6 | 87884546 | 112144 | 8.0891 | 0.5316 | 0.1611  | 5.549  | CHB |
| Hs.485895 | Hs.485895-S   | rs16878497 | 6 | 6 | 87903393 | 93297  | 8.0891 | 0.5316 | -0.1611 | 5.549  | CHB |
| Hs.485895 | Hs.485895-S   | rs6913159  | 6 | 6 | 87954518 | 42172  | 8.0891 | 0.5316 | 0.1611  | 5.549  | CHB |
| Hs.485895 | Hs.485895-S   | rs9450630  | 6 | 6 | 87955879 | 40811  | 7.6709 | 0.5550 | -0.1700 | 5.549  | CHB |
| Hs.485895 | Hs.485895-S   | rs4707345  | 6 | 6 | 87958944 | 37746  | 8.0891 | 0.5316 | -0.1611 | 5.549  | CHB |
| Hs.485895 | Hs.485895-S   | rs12181709 | 6 | 6 | 87959372 | 37318  | 8.6350 | 0.5578 | 0.1685  | 5.549  | CHB |
| Hs.485895 | Hs.485895-S   | rs6940325  | 6 | 6 | 87963635 | 33055  | 8.6350 | 0.5578 | 0.1685  | 5.549  | CHB |
| Hs.485895 | Hs.485895-S   | rs7752414  | 6 | 6 | 87972541 | 24149  | 8.6350 | 0.5578 | 0.1685  | 5.549  | CHB |
| Hs.485895 | Hs.485895-S   | rs9450636  | 6 | 6 | 87986888 | 9802   | 8.6350 | 0.5578 | 0.1685  | 5.549  | CHB |
| Hs.485895 | Hs.485895-S   | rs13201289 | 6 | 6 | 87993017 | 3673   | 8.6350 | 0.5578 | -0.1685 | 5.549  | CHB |
| Hs.485895 | Hs.485895-S   | rs9450638  | 6 | 6 | 87994045 | 2645   | 8.6350 | 0.5578 | 0.1685  | 5.549  | CHB |
| Hs.485895 | Hs.485895-S   | rs6932641  | 6 | 6 | 87997820 | 1130   | 8.6350 | 0.5578 | 0.1685  | 5.549  | CHB |
| Hs.485895 | Hs.485895-S   | rs4707355  | 6 | 6 | 88009592 | 12902  | 8.6350 | 0.5578 | -0.1685 | 5.549  | CHB |
| Hs.485895 | Hs.485895-S   | rs6908834  | 6 | 6 | 88022247 | 25557  | 8.6350 | 0.5578 | -0.1685 | 5.549  | CHB |
| Hs.485895 | Hs.485895-S   | rs9450645  | 6 | 6 | 88034494 | 37804  | 8.2654 | 0.6159 | -0.1881 | 5.549  | CHB |
| Hs.485895 | Hs.485895-S   | rs9450646  | 6 | 6 | 88035828 | 39138  | 8.6350 | 0.5578 | -0.1685 | 5.549  | CHB |
| Hs.485895 | Hs.485895-S   | rs9450651  | 6 | 6 | 88055360 | 58670  | 8.6350 | 0.5578 | 0.1685  | 5.549  | CHB |
| Hs.485895 | Hs.485895-S   | rs9294376  | 6 | 6 | 88057485 | 60795  | 8.4552 | 0.5579 | -0.1684 | 5.549  | CHB |
| Hs.485895 | Hs.485895-S   | rs9444491  | 6 | 6 | 88059104 | 62414  | 8.1093 | 0.5411 | -0.1662 | 5.549  | CHB |
| Hs.485895 | Hs.485895-S   | rs9450653  | 6 | 6 | 88060840 | 64150  | 8.6350 | 0.5578 | -0.1685 | 5.549  | CHB |
| Hs.485895 | Hs.485895-S   | rs6921673  | 6 | 6 | 88061477 | 64787  | 7.9736 | 0.5430 | 0.1675  | 5.549  | CHB |
| Hs.485895 | Hs.485895-S   | rs6926686  | 6 | 6 | 88061917 | 65227  | 8.6350 | 0.5578 | 0.1685  | 5.549  | CHB |
| Hs.485895 | Hs.485895-S   | rs6938885  | 6 | 6 | 88063898 | 67208  | 7.4760 | 0.5543 | 0.1699  | 5.549  | CHB |
| Hs.485895 | Hs.485895-S   | rs6939075  | 6 | 6 | 88063925 | 67235  | 8.6350 | 0.5578 | 0.1685  | 5.549  | CHB |
| Hs.485895 | Hs.485895-S   | rs440296   | 6 | 6 | 88065140 | 68450  | 8.6350 | 0.5578 | -0.1685 | 5.549  | CHB |
| Hs.485895 | Hs.485895-S   | rs410683   | 6 | 6 | 88065639 | 68949  | 8.2733 | 0.5406 | 0.1627  | 5.549  | CHB |
| Hs.485895 | Hs.485895-S   | rs242263   | 6 | 6 | 88075032 | 78342  | 8.0562 | 0.5300 | 0.1582  | 5.549  | CHB |
| Hs.485895 | Hs.485895-S   | rs1145712  | 6 | 6 | 88077837 | 81147  | 8.0562 | 0.5300 | 0.1582  | 5.549  | CHB |
| Hs.485895 | Hs.485895-S   | rs413687   | 6 | 6 | 88077999 | 81309  | 8.0562 | 0.5300 | -0.1582 | 5.549  | CHB |
| Hs.485895 | Hs.485895-S   | rs414453   | 6 | 6 | 88078305 | 81615  | 8.0562 | 0.5300 | -0.1582 | 5.549  | CHB |
| Hs.485895 | Hs.485895-S   | rs368267   | 6 | 6 | 88078414 | 81724  | 8.0562 | 0.5300 | -0.1582 | 5.549  | CHB |
| Hs.485895 | Hs.485895-S   | rs411606   | 6 | 6 | 88078472 | 81782  | 8.0562 | 0.5300 | 0.1582  | 5.549  | CHB |
| Hs.485895 | Hs.485895-S   | rs1145714  | 6 | 6 | 88081237 | 84547  | 8.0562 | 0.5300 | 0.1582  | 5.549  | CHB |
| Hs.485895 | Hs.485895-S   | rs1145715  | 6 | 6 | 88081762 | 85072  | 8.0562 | 0.5300 | -0.1582 | 5.549  | CHB |
| Hs.485895 | Hs.485895-S   | rs1203162  | 6 | 6 | 88081937 | 85247  | 8.0562 | 0.5300 | -0.1582 | 5.549  | CHB |
| Hs.485895 | Hs.485895-S   | rs1203163  | 6 | 6 | 88082968 | 86278  | 8.0562 | 0.5300 | 0.1582  | 5.549  | CHB |
| Hs.485895 | Hs.485895-S   | rs1203164  | 6 | 6 | 88083682 | 86992  | 8.0562 | 0.5300 | -0.1582 | 5.549  | CHB |
| Hs.485895 | Hs.485895-S   | rs2983136  | 6 | 6 | 88084934 | 88244  | 8.6846 | 0.5687 | -0.1575 | 5.549  | CHB |
| Hs.485895 | Hs.485895-S   | rs242282   | 6 | 6 | 88086299 | 89609  | 8.3951 | 0.5550 | 0.1657  | 5.549  | CHB |
| Hs.485895 | Hs.485895-S   | rs1746444  | 6 | 6 | 88096587 | 99897  | 8.0562 | 0.5300 | -0.1582 | 5.549  | CHB |
| Hs.485895 | Hs.485895-S   | rs379455   | 6 | 6 | 88100279 | 103589 | 8.0562 | 0.5300 | 0.1582  | 5.549  | CHB |
| Hs.485895 | Hs.485895-S   | rs242275   | 6 | 6 | 88102682 | 105992 | 8.0562 | 0.5300 | 0.1582  | 5.549  | CHB |

|           |               |            |   |   |           |        |         |        |         |        |     |
|-----------|---------------|------------|---|---|-----------|--------|---------|--------|---------|--------|-----|
| Hs.485895 | Hs.485895-S   | rs242276   | 6 | 6 | 88103096  | 106406 | 6.2851  | 0.4581 | 0.1583  | 5.549  | CHB |
| Hs.485895 | Hs.485895-S   | rs397516   | 6 | 6 | 88107771  | 111081 | 6.6696  | 0.4725 | 0.1534  | 5.549  | CHB |
| Hs.485895 | Hs.485895-S   | rs398140   | 6 | 6 | 88107981  | 111291 | 7.5038  | 0.5019 | 0.1570  | 5.549  | CHB |
| Hs.485895 | Hs.485895-S   | rs452315   | 6 | 6 | 88109206  | 112516 | 7.5038  | 0.5019 | -0.1570 | 5.549  | CHB |
| Hs.485895 | Hs.485895-S   | rs377288   | 6 | 6 | 88110196  | 113506 | 7.5013  | 0.5101 | 0.1522  | 5.549  | CHB |
| Hs.485895 | Hs.485895-S   | rs1188819  | 6 | 6 | 88112067  | 115377 | 6.7824  | 0.4875 | 0.1546  | 5.549  | CHB |
| Hs.485895 | Hs.485895-S   | rs1188817  | 6 | 6 | 88112438  | 115748 | 7.5038  | 0.5019 | 0.1570  | 5.549  | CHB |
| Hs.485895 | Hs.485895-S   | rs1188816  | 6 | 6 | 88112550  | 115860 | 7.0268  | 0.4845 | 0.1543  | 5.549  | CHB |
| Hs.485895 | Hs.485895-S   | rs12211627 | 6 | 6 | 88113020  | 116330 | 7.5038  | 0.5019 | 0.1570  | 5.549  | CHB |
| Hs.485895 | Hs.485895-S   | rs381798   | 6 | 6 | 88113849  | 117159 | 7.5038  | 0.5019 | -0.1570 | 5.549  | CHB |
| Hs.485895 | Hs.485895-S   | rs242264   | 6 | 6 | 88117457  | 120767 | 7.5038  | 0.5019 | 0.1570  | 5.549  | CHB |
| Hs.485895 | Hs.485895-S   | rs242265   | 6 | 6 | 88117758  | 121068 | 7.5038  | 0.5019 | 0.1570  | 5.549  | CHB |
| Hs.485895 | Hs.485895-S   | rs242268   | 6 | 6 | 88118603  | 121913 | 5.6303  | 0.4249 | -0.1428 | 5.549  | CHB |
| Hs.485895 | Hs.485895-S   | rs242269   | 6 | 6 | 88118708  | 122018 | 7.5038  | 0.5019 | -0.1570 | 5.549  | CHB |
| Hs.485895 | Hs.485895-S   | rs540975   | 6 | 6 | 88119860  | 123170 | 7.5038  | 0.5019 | -0.1570 | 5.549  | CHB |
| Hs.485895 | Hs.485895-S   | rs541170   | 6 | 6 | 88119935  | 123245 | 7.5038  | 0.5019 | 0.1570  | 5.549  | CHB |
| Hs.485895 | Hs.485895-S   | rs910564   | 6 | 6 | 88120530  | 123840 | 7.5038  | 0.5019 | 0.1570  | 5.549  | CHB |
| Hs.485895 | Hs.485895-S   | rs1739886  | 6 | 6 | 88122320  | 125630 | 7.5038  | 0.5019 | 0.1570  | 5.549  | CHB |
| Hs.485895 | Hs.485895-S   | rs406981   | 6 | 6 | 88124034  | 127344 | 7.5038  | 0.5019 | 0.1570  | 5.549  | CHB |
| RNGTT     | GI_4506562-S  | rs12173779 | 6 | 6 | 89717985  | 341168 | 6.3082  | 0.4355 | 0.5599  | 5.5603 | CHB |
| PNRC1     | GI_5802981-S  | rs16881271 | 6 | 6 | 89816225  | 35157  | 8.4176  | 0.5475 | 0.3088  | 7.3144 | CHB |
| PNRC1     | GI_5802981-S  | rs12445    | 6 | 6 | 89851115  | 267    | 8.4176  | 0.5475 | -0.3088 | 7.3144 | CHB |
| PNRC1     | GI_5802981-S  | rs1590958  | 6 | 6 | 89865656  | 14274  | 8.4176  | 0.5475 | 0.3088  | 7.3144 | CHB |
| PNRC1     | GI_5802981-S  | rs2274819  | 6 | 6 | 89871775  | 20393  | 8.4176  | 0.5475 | -0.3088 | 7.3144 | CHB |
| PNRC1     | GI_5802981-S  | rs12661431 | 6 | 6 | 89880913  | 29531  | 8.4176  | 0.5475 | -0.3088 | 7.3144 | CHB |
| PNRC1     | GI_5802981-S  | rs10944433 | 6 | 6 | 89924847  | 73465  | 8.4176  | 0.5475 | 0.3088  | 7.3144 | CHB |
| PNRC1     | GI_5802981-S  | rs10944434 | 6 | 6 | 89927303  | 75921  | 8.2765  | 0.5493 | 0.3098  | 7.3144 | CHB |
| HEBP2     | GI_41393567-S | rs9484143  | 6 | 6 | 138726192 | 42658  | 6.0279  | 0.4188 | -1.0070 | 5.846  | CHB |
| MGC35308  | GI_31341688-S | rs9364842  | 6 | 6 | 166668969 | 21424  | 6.0570  | 0.4281 | -0.8396 | 5.7391 | CHB |
| MGC35308  | GI_31341688-S | rs9364843  | 6 | 6 | 166669084 | 21309  | 6.3246  | 0.4365 | -0.8481 | 5.7391 | CHB |
| MGC35308  | GI_31341688-S | rs7759603  | 6 | 6 | 166675043 | 15350  | 8.3796  | 0.5457 | -0.9639 | 5.7391 | CHB |
| MGC35308  | GI_31341688-S | rs7763448  | 6 | 6 | 166675134 | 15259  | 8.3796  | 0.5457 | -0.9639 | 5.7391 | CHB |
| MGC35308  | GI_31341688-S | rs1033725  | 6 | 6 | 166677661 | 12732  | 6.1449  | 0.4258 | -0.6871 | 5.7391 | CHB |
| MGC35308  | GI_31341688-S | rs7748966  | 6 | 6 | 166679643 | 10750  | 8.3796  | 0.5457 | 0.9639  | 5.7391 | CHB |
| LOC392620 | GI_41147689-S | rs798565   | 7 | 7 | 2525393   | 9505   | 6.5232  | 0.4811 | 0.3175  | 6.1984 | CHB |
| GNA12     | GI_42476110-S | rs798565   | 7 | 7 | 2525393   | 18793  | 6.3414  | 0.4701 | 0.1228  | 5.7599 | CHB |
| LOC392620 | GI_41147689-S | rs798557   | 7 | 7 | 2532223   | 2675   | 9.1014  | 0.6151 | 0.3371  | 6.1984 | CHB |
| LOC392620 | GI_41147689-S | rs798556   | 7 | 7 | 2532243   | 2655   | 8.0079  | 0.5361 | -0.3127 | 6.1984 | CHB |
| LOC392620 | GI_41147689-S | rs798554   | 7 | 7 | 2533036   | 1862   | 6.2229  | 0.4628 | -0.3003 | 6.1984 | CHB |
| LOC392620 | GI_41147689-S | rs798548   | 7 | 7 | 2534176   | 722    | 8.0079  | 0.5361 | 0.3127  | 6.1984 | CHB |
| LOC392620 | GI_41147689-S | rs798544   | 7 | 7 | 2536343   | 1445   | 7.4113  | 0.4971 | -0.3024 | 6.1984 | CHB |
| LOC392620 | GI_41147689-S | rs798536   | 7 | 7 | 2539624   | 4726   | 7.2648  | 0.4893 | 0.2977  | 6.1984 | CHB |
| LOC392620 | GI_41147689-S | rs798528   | 7 | 7 | 2545672   | 10774  | 8.9164  | 0.5707 | -0.3089 | 6.1984 | CHB |
| LOC392620 | GI_41147689-S | rs798518   | 7 | 7 | 2551066   | 16168  | 8.9164  | 0.5707 | -0.3089 | 6.1984 | CHB |
| LOC392620 | GI_41147689-S | rs798512   | 7 | 7 | 2555833   | 20935  | 8.6612  | 0.5676 | -0.3066 | 6.1984 | CHB |
| LOC392620 | GI_41147689-S | rs798503   | 7 | 7 | 2562945   | 28047  | 7.4740  | 0.5172 | 0.2982  | 6.1984 | CHB |
| GNA12     | GI_42476110-S | rs798503   | 7 | 7 | 2562945   | 18759  | 5.8250  | 0.4214 | 0.1072  | 5.7599 | CHB |
| LOC392620 | GI_41147689-S | rs798500   | 7 | 7 | 2563926   | 29028  | 8.9164  | 0.5707 | 0.3089  | 6.1984 | CHB |
| LOC392620 | GI_41147689-S | rs798499   | 7 | 7 | 2565254   | 30356  | 8.6718  | 0.5769 | 0.3145  | 6.1984 | CHB |
| LOC392620 | GI_41147689-S | rs798498   | 7 | 7 | 2569123   | 34225  | 8.9164  | 0.5707 | 0.3089  | 6.1984 | CHB |
| LOC392620 | GI_41147689-S | rs798497   | 7 | 7 | 2569198   | 34300  | 8.3785  | 0.5457 | -0.3043 | 6.1984 | CHB |
| LOC392620 | GI_41147689-S | rs798495   | 7 | 7 | 2570508   | 35610  | 8.3785  | 0.5457 | 0.3043  | 6.1984 | CHB |
| LOC392620 | GI_41147689-S | rs798494   | 7 | 7 | 2571535   | 36637  | 8.3785  | 0.5457 | 0.3043  | 6.1984 | CHB |
| LOC392620 | GI_41147689-S | rs798492   | 7 | 7 | 2572425   | 37527  | 8.3785  | 0.5457 | 0.3043  | 6.1984 | CHB |
| LOC392620 | GI_41147689-S | rs798491   | 7 | 7 | 2573762   | 38864  | 8.3785  | 0.5457 | -0.3043 | 6.1984 | CHB |
| LOC392620 | GI_41147689-S | rs798490   | 7 | 7 | 2574783   | 39885  | 9.8282  | 0.6101 | -0.3172 | 6.1984 | CHB |
| LOC392620 | GI_41147689-S | rs798488   | 7 | 7 | 2575763   | 40865  | 9.8282  | 0.6101 | 0.3172  | 6.1984 | CHB |
| LOC392620 | GI_41147689-S | rs798486   | 7 | 7 | 2576278   | 41380  | 10.2453 | 0.6357 | -0.3236 | 6.1984 | CHB |
| GNA12     | GI_42476110-S | rs798486   | 7 | 7 | 2576278   | 32092  | 5.8710  | 0.4166 | -0.1045 | 5.7599 | CHB |

|           |               |           |   |   |         |        |         |        |         |        |     |
|-----------|---------------|-----------|---|---|---------|--------|---------|--------|---------|--------|-----|
| LOC392620 | GI_41147689-S | rs798485  | 7 | 7 | 2576751 | 41853  | 10.5133 | 0.6461 | -0.3167 | 6.1984 | CHB |
| GNA12     | GI_42476110-S | rs798485  | 7 | 7 | 2576751 | 32565  | 6.0344  | 0.4267 | -0.1058 | 5.7599 | CHB |
| LOC392620 | GI_41147689-S | rs1182209 | 7 | 7 | 2581836 | 46938  | 10.7173 | 0.6538 | -0.3416 | 6.1984 | CHB |
| GNA12     | GI_42476110-S | rs1182209 | 7 | 7 | 2581836 | 37650  | 7.1123  | 0.4892 | -0.1183 | 5.7599 | CHB |
| LOC392620 | GI_41147689-S | rs1182208 | 7 | 7 | 2581973 | 47075  | 7.5929  | 0.5323 | 0.3263  | 6.1984 | CHB |
| LOC392620 | GI_41147689-S | rs7777484 | 7 | 7 | 2587512 | 52614  | 10.5471 | 0.6387 | 0.3229  | 6.1984 | CHB |
| GNA12     | GI_42476110-S | rs7777484 | 7 | 7 | 2587512 | 43326  | 6.0792  | 0.4219 | 0.1047  | 5.7599 | CHB |
| LOC392620 | GI_41147689-S | rs7807978 | 7 | 7 | 2587876 | 52978  | 10.5471 | 0.6387 | 0.3229  | 6.1984 | CHB |
| GNA12     | GI_42476110-S | rs7807978 | 7 | 7 | 2587876 | 43690  | 6.0792  | 0.4219 | 0.1047  | 5.7599 | CHB |
| LOC392620 | GI_41147689-S | rs2283779 | 7 | 7 | 2588381 | 53483  | 9.9384  | 0.6415 | -0.3228 | 6.1984 | CHB |
| LOC392620 | GI_41147689-S | rs2260230 | 7 | 7 | 2596227 | 61329  | 12.0929 | 0.6933 | -0.3349 | 6.1984 | CHB |
| GNA12     | GI_42476110-S | rs2260230 | 7 | 7 | 2596227 | 52041  | 6.8575  | 0.4670 | -0.1095 | 5.7599 | CHB |
| LOC392620 | GI_41147689-S | rs2266922 | 7 | 7 | 2597948 | 63050  | 11.3801 | 0.6958 | -0.3376 | 6.1984 | CHB |
| GNA12     | GI_42476110-S | rs2266922 | 7 | 7 | 2597948 | 53762  | 6.2954  | 0.4587 | -0.1091 | 5.7599 | CHB |
| LOC392620 | GI_41147689-S | rs2527684 | 7 | 7 | 2599163 | 64265  | 12.0929 | 0.6933 | -0.3349 | 6.1984 | CHB |
| GNA12     | GI_42476110-S | rs2527684 | 7 | 7 | 2599163 | 54977  | 6.8575  | 0.4670 | -0.1095 | 5.7599 | CHB |
| LOC392620 | GI_41147689-S | rs2527687 | 7 | 7 | 2611726 | 76828  | 12.0484 | 0.7004 | -0.3382 | 6.1984 | CHB |
| GNA12     | GI_42476110-S | rs2527687 | 7 | 7 | 2611726 | 67540  | 6.8949  | 0.4771 | -0.1112 | 5.7599 | CHB |
| LOC392620 | GI_41147689-S | rs2644312 | 7 | 7 | 2614405 | 79507  | 12.0264 | 0.6911 | 0.3337  | 6.1984 | CHB |
| GNA12     | GI_42476110-S | rs2644312 | 7 | 7 | 2614405 | 70219  | 7.0178  | 0.4759 | 0.1103  | 5.7599 | CHB |
| LOC392620 | GI_41147689-S | rs2644275 | 7 | 7 | 2627251 | 92353  | 12.5045 | 0.7236 | 0.3059  | 6.1984 | CHB |
| GNA12     | GI_42476110-S | rs2644275 | 7 | 7 | 2627251 | 83065  | 6.8847  | 0.4848 | 0.1062  | 5.7599 | CHB |
| LOC392620 | GI_41147689-S | rs2644274 | 7 | 7 | 2627621 | 92723  | 12.1477 | 0.7036 | -0.3399 | 6.1984 | CHB |
| GNA12     | GI_42476110-S | rs2644274 | 7 | 7 | 2627621 | 83435  | 6.5868  | 0.4596 | -0.1086 | 5.7599 | CHB |
| LOC392620 | GI_41147689-S | rs960273  | 7 | 7 | 2631117 | 96219  | 12.0929 | 0.6933 | -0.3349 | 6.1984 | CHB |
| GNA12     | GI_42476110-S | rs960273  | 7 | 7 | 2631117 | 86931  | 6.8575  | 0.4670 | -0.1095 | 5.7599 | CHB |
| LOC392620 | GI_41147689-S | rs2644297 | 7 | 7 | 2632147 | 97249  | 12.4030 | 0.7117 | -0.3416 | 6.1984 | CHB |
| GNA12     | GI_42476110-S | rs2644297 | 7 | 7 | 2632147 | 87961  | 6.5900  | 0.4598 | -0.1087 | 5.7599 | CHB |
| LOC392620 | GI_41147689-S | rs2644296 | 7 | 7 | 2632302 | 97404  | 12.0929 | 0.6933 | -0.3349 | 6.1984 | CHB |
| GNA12     | GI_42476110-S | rs2644296 | 7 | 7 | 2632302 | 88116  | 6.8575  | 0.4670 | -0.1095 | 5.7599 | CHB |
| LOC392620 | GI_41147689-S | rs2644295 | 7 | 7 | 2633458 | 98560  | 12.0929 | 0.6933 | -0.3349 | 6.1984 | CHB |
| GNA12     | GI_42476110-S | rs2644295 | 7 | 7 | 2633458 | 89272  | 6.8575  | 0.4670 | -0.1095 | 5.7599 | CHB |
| LOC392620 | GI_41147689-S | rs1182199 | 7 | 7 | 2635783 | 100885 | 12.4487 | 0.7132 | 0.3563  | 6.1984 | CHB |
| GNA12     | GI_42476110-S | rs1182199 | 7 | 7 | 2635783 | 91597  | 7.7228  | 0.5216 | 0.1208  | 5.7599 | CHB |
| LOC392620 | GI_41147689-S | rs1182198 | 7 | 7 | 2636147 | 101249 | 12.5985 | 0.7178 | 0.3588  | 6.1984 | CHB |
| GNA12     | GI_42476110-S | rs1182198 | 7 | 7 | 2636147 | 91961  | 7.7554  | 0.5233 | 0.1211  | 5.7599 | CHB |
| LOC392620 | GI_41147689-S | rs1182197 | 7 | 7 | 2636530 | 101632 | 8.6607  | 0.5764 | -0.3017 | 6.1984 | CHB |
| LOC392620 | GI_41147689-S | rs2158694 | 7 | 7 | 2636684 | 101786 | 12.0929 | 0.6933 | -0.3349 | 6.1984 | CHB |
| GNA12     | GI_42476110-S | rs2158694 | 7 | 7 | 2636684 | 92498  | 6.8575  | 0.4670 | -0.1095 | 5.7599 | CHB |
| LOC392620 | GI_41147689-S | rs2107964 | 7 | 7 | 2636815 | 101917 | 12.8555 | 0.7171 | -0.3570 | 6.1984 | CHB |
| GNA12     | GI_42476110-S | rs2107964 | 7 | 7 | 2636815 | 92629  | 8.0298  | 0.5287 | -0.1219 | 5.7599 | CHB |
| LOC392620 | GI_41147689-S | rs1713919 | 7 | 7 | 2637947 | 103049 | 12.8555 | 0.7171 | 0.3570  | 6.1984 | CHB |
| GNA12     | GI_42476110-S | rs1713919 | 7 | 7 | 2637947 | 93761  | 8.0298  | 0.5287 | 0.1219  | 5.7599 | CHB |
| LOC392620 | GI_41147689-S | rs1182196 | 7 | 7 | 2639719 | 104821 | 12.8555 | 0.7171 | 0.3570  | 6.1984 | CHB |
| GNA12     | GI_42476110-S | rs1182196 | 7 | 7 | 2639719 | 95533  | 8.0298  | 0.5287 | 0.1219  | 5.7599 | CHB |
| LOC392620 | GI_41147689-S | rs757791  | 7 | 7 | 2640537 | 105639 | 12.4655 | 0.7137 | 0.3557  | 6.1984 | CHB |
| GNA12     | GI_42476110-S | rs757791  | 7 | 7 | 2640537 | 96351  | 8.1282  | 0.5420 | 0.1240  | 5.7599 | CHB |
| LOC392620 | GI_41147689-S | rs1182194 | 7 | 7 | 2642065 | 107167 | 10.4226 | 0.6339 | -0.3553 | 6.1984 | CHB |
| GNA12     | GI_42476110-S | rs1182194 | 7 | 7 | 2642065 | 97879  | 6.7966  | 0.4636 | -0.1209 | 5.7599 | CHB |
| LOC392620 | GI_41147689-S | rs1182191 | 7 | 7 | 2642605 | 107707 | 10.1769 | 0.6330 | 0.3488  | 6.1984 | CHB |
| GNA12     | GI_42476110-S | rs1182191 | 7 | 7 | 2642605 | 98419  | 6.5298  | 0.4563 | 0.1191  | 5.7599 | CHB |
| LOC392620 | GI_41147689-S | rs1182190 | 7 | 7 | 2642632 | 107734 | 10.3232 | 0.6387 | 0.3783  | 6.1984 | CHB |
| GNA12     | GI_42476110-S | rs1182190 | 7 | 7 | 2642632 | 98446  | 5.9387  | 0.4208 | 0.1199  | 5.7599 | CHB |
| LOC392620 | GI_41147689-S | rs1182189 | 7 | 7 | 2642763 | 107865 | 10.4226 | 0.6339 | 0.3553  | 6.1984 | CHB |
| GNA12     | GI_42476110-S | rs1182189 | 7 | 7 | 2642763 | 98577  | 6.7966  | 0.4636 | 0.1209  | 5.7599 | CHB |
| LOC392620 | GI_41147689-S | rs1182188 | 7 | 7 | 2643226 | 108328 | 10.4433 | 0.6805 | 0.3722  | 6.1984 | CHB |
| GNA12     | GI_42476110-S | rs1182188 | 7 | 7 | 2643226 | 99040  | 6.0871  | 0.4631 | 0.1219  | 5.7599 | CHB |
| LOC392620 | GI_41147689-S | rs1182185 | 7 | 7 | 2645474 | 110576 | 10.4226 | 0.6339 | -0.3553 | 6.1984 | CHB |
| GNA12     | GI_42476110-S | rs1182185 | 7 | 7 | 2645474 | 101288 | 6.7966  | 0.4636 | -0.1209 | 5.7599 | CHB |

|           |               |            |   |   |          |        |         |        |         |        |     |
|-----------|---------------|------------|---|---|----------|--------|---------|--------|---------|--------|-----|
| LOC392620 | GI_41147689-S | rs1182182  | 7 | 7 | 2646475  | 111577 | 10.4226 | 0.6339 | -0.3553 | 6.1984 | CHB |
| GNA12     | GI_42476110-S | rs1182182  | 7 | 7 | 2646475  | 102289 | 6.7966  | 0.4636 | -0.1209 | 5.7599 | CHB |
| LOC392620 | GI_41147689-S | rs1182181  | 7 | 7 | 2646488  | 111590 | 10.4226 | 0.6339 | -0.3553 | 6.1984 | CHB |
| GNA12     | GI_42476110-S | rs1182181  | 7 | 7 | 2646488  | 102302 | 6.7966  | 0.4636 | -0.1209 | 5.7599 | CHB |
| LOC392620 | GI_41147689-S | rs1182179  | 7 | 7 | 2646889  | 111991 | 10.4544 | 0.6438 | -0.3611 | 6.1984 | CHB |
| GNA12     | GI_42476110-S | rs1182179  | 7 | 7 | 2646889  | 102703 | 6.7261  | 0.4676 | -0.1225 | 5.7599 | CHB |
| LOC392620 | GI_41147689-S | rs1182177  | 7 | 7 | 2647781  | 112883 | 10.4226 | 0.6339 | -0.3553 | 6.1984 | CHB |
| GNA12     | GI_42476110-S | rs1182177  | 7 | 7 | 2647781  | 103595 | 6.7966  | 0.4636 | -0.1209 | 5.7599 | CHB |
| LOC392620 | GI_41147689-S | rs1182175  | 7 | 7 | 2648267  | 113369 | 10.4226 | 0.6339 | -0.3553 | 6.1984 | CHB |
| GNA12     | GI_42476110-S | rs1182175  | 7 | 7 | 2648267  | 104081 | 6.7966  | 0.4636 | -0.1209 | 5.7599 | CHB |
| LOC392620 | GI_41147689-S | rs1182174  | 7 | 7 | 2648661  | 113763 | 10.5344 | 0.6382 | 0.3574  | 6.1984 | CHB |
| GNA12     | GI_42476110-S | rs1182174  | 7 | 7 | 2648661  | 104475 | 7.0623  | 0.4783 | 0.1231  | 5.7599 | CHB |
| LOC392620 | GI_41147689-S | rs1183085  | 7 | 7 | 2648811  | 113913 | 10.5344 | 0.6382 | 0.3574  | 6.1984 | CHB |
| GNA12     | GI_42476110-S | rs1183085  | 7 | 7 | 2648811  | 104625 | 7.0623  | 0.4783 | 0.1231  | 5.7599 | CHB |
| LOC392620 | GI_41147689-S | rs1182171  | 7 | 7 | 2651751  | 116853 | 10.5344 | 0.6382 | -0.3574 | 6.1984 | CHB |
| GNA12     | GI_42476110-S | rs1182171  | 7 | 7 | 2651751  | 107565 | 7.0623  | 0.4783 | -0.1231 | 5.7599 | CHB |
| LOC392620 | GI_41147689-S | rs2533878  | 7 | 7 | 2651948  | 117050 | 9.8806  | 0.6210 | 0.3702  | 6.1984 | CHB |
| GNA12     | GI_42476110-S | rs2533878  | 7 | 7 | 2651948  | 107762 | 6.1764  | 0.4353 | 0.1224  | 5.7599 | CHB |
| LOC392620 | GI_41147689-S | rs1713920  | 7 | 7 | 2654176  | 119278 | 8.8044  | 0.6212 | -0.3425 | 6.1984 | CHB |
| GNA12     | GI_42476110-S | rs1713920  | 7 | 7 | 2654176  | 109990 | 6.0651  | 0.4707 | -0.1235 | 5.7599 | CHB |
| RBAK      | GI_16306485-S | rs6462770  | 7 | 7 | 4165417  | 714174 | 5.8124  | 0.4543 | 0.1206  | 5.7808 | CHB |
| RBAK      | GI_16306485-S | rs7802793  | 7 | 7 | 4173380  | 706211 | 6.2063  | 0.4533 | 0.1282  | 5.7808 | CHB |
| HRI       | GI_11125767-S | rs4560     | 7 | 7 | 5836524  | 401    | 5.4758  | 0.3844 | 0.1683  | 5.4523 | CHB |
| HRI       | GI_11125767-S | rs17343667 | 7 | 7 | 5838435  | 1510   | 5.4758  | 0.3844 | -0.1683 | 5.4523 | CHB |
| HRI       | GI_11125767-S | rs12672450 | 7 | 7 | 5847440  | 10515  | 6.5553  | 0.4499 | 0.1850  | 5.4523 | CHB |
| HRI       | GI_11125767-S | rs2302334  | 7 | 7 | 5849064  | 12139  | 6.5553  | 0.4499 | -0.1850 | 5.4523 | CHB |
| HRI       | GI_11125767-S | rs2302333  | 7 | 7 | 5850510  | 13585  | 6.5553  | 0.4499 | -0.1850 | 5.4523 | CHB |
| HRI       | GI_11125767-S | rs852154   | 7 | 7 | 5863968  | 27043  | 5.8071  | 0.4450 | -0.1730 | 5.4523 | CHB |
| HRI       | GI_11125767-S | rs655692   | 7 | 7 | 5867942  | 31017  | 5.7593  | 0.4023 | -0.1805 | 5.4523 | CHB |
| HRI       | GI_11125767-S | rs558030   | 7 | 7 | 5870908  | 33983  | 6.5553  | 0.4499 | 0.1850  | 5.4523 | CHB |
| HRI       | GI_11125767-S | rs642987   | 7 | 7 | 5875041  | 38116  | 6.4733  | 0.4530 | 0.1846  | 5.4523 | CHB |
| HRI       | GI_11125767-S | rs495124   | 7 | 7 | 5875275  | 38350  | 6.5932  | 0.4943 | -0.1935 | 5.4523 | CHB |
| HRI       | GI_11125767-S | rs631491   | 7 | 7 | 5875296  | 38371  | 6.5553  | 0.4499 | -0.1850 | 5.4523 | CHB |
| HRI       | GI_11125767-S | rs660547   | 7 | 7 | 5879972  | 43047  | 6.6538  | 0.4555 | 0.1908  | 5.4523 | CHB |
| KDEL2     | GI_8051609-S  | rs6796     | 7 | 7 | 6275607  | 378    | 6.2325  | 0.4310 | -0.3880 | 5.6324 | CHB |
| DFNA5     | GI_4758153-S  | rs13239509 | 7 | 7 | 24364378 | 146951 | 6.2305  | 0.4721 | -0.6298 | 5.9074 | CHB |
| DFNA5     | GI_4758153-S  | rs2108296  | 7 | 7 | 24368830 | 142499 | 6.6103  | 0.4863 | 0.6267  | 5.9074 | CHB |
| DFNA5     | GI_4758153-S  | rs2390980  | 7 | 7 | 24369831 | 141498 | 6.7045  | 0.4663 | 0.6275  | 5.9074 | CHB |
| DFNA5     | GI_4758153-S  | rs917263   | 7 | 7 | 24376336 | 134993 | 6.8099  | 0.4643 | 0.6272  | 5.9074 | CHB |
| DFNA5     | GI_4758153-S  | rs2711119  | 7 | 7 | 24385681 | 125648 | 6.2609  | 0.4484 | 0.8568  | 5.9074 | CHB |
| DFNA5     | GI_4758153-S  | rs27111094 | 7 | 7 | 24388200 | 123129 | 6.8203  | 0.4649 | 0.7372  | 5.9074 | CHB |
| DFNA5     | GI_4758153-S  | rs985062   | 7 | 7 | 24389714 | 121615 | 7.0090  | 0.4754 | -0.8932 | 5.9074 | CHB |
| DFNA5     | GI_4758153-S  | rs27111093 | 7 | 7 | 24390530 | 120799 | 7.4585  | 0.4995 | 0.7652  | 5.9074 | CHB |
| DFNA5     | GI_4758153-S  | rs2529038  | 7 | 7 | 24393922 | 117407 | 7.2261  | 0.4872 | 0.8158  | 5.9074 | CHB |
| DFNA5     | GI_4758153-S  | rs27111091 | 7 | 7 | 24395326 | 116003 | 7.2261  | 0.4872 | 0.8158  | 5.9074 | CHB |
| DFNA5     | GI_4758153-S  | rs4722378  | 7 | 7 | 24404485 | 106844 | 6.9513  | 0.5153 | 0.6871  | 5.9074 | CHB |
| DFNA5     | GI_4758153-S  | rs11766193 | 7 | 7 | 24409259 | 102070 | 7.3864  | 0.4957 | 0.6627  | 5.9074 | CHB |
| DFNA5     | GI_4758153-S  | rs12700538 | 7 | 7 | 24410296 | 101033 | 7.3864  | 0.4957 | 0.6627  | 5.9074 | CHB |
| DFNA5     | GI_4758153-S  | rs27111130 | 7 | 7 | 24420014 | 91315  | 7.1784  | 0.4928 | -0.8263 | 5.9074 | CHB |
| DFNA5     | GI_4758153-S  | rs12056164 | 7 | 7 | 24420070 | 91259  | 6.4992  | 0.4979 | -0.6620 | 5.9074 | CHB |
| DFNA5     | GI_4758153-S  | rs17149758 | 7 | 7 | 24422730 | 88599  | 7.2286  | 0.4955 | -0.6627 | 5.9074 | CHB |
| DFNA5     | GI_4758153-S  | rs10270776 | 7 | 7 | 24446463 | 64866  | 6.9928  | 0.4826 | 0.9061  | 5.9074 | CHB |
| DFNA5     | GI_4758153-S  | rs2721789  | 7 | 7 | 24446492 | 64837  | 7.6445  | 0.5442 | -0.9284 | 5.9074 | CHB |
| DFNA5     | GI_4758153-S  | rs13244368 | 7 | 7 | 24448003 | 63326  | 7.3864  | 0.4957 | 0.6627  | 5.9074 | CHB |
| DFNA5     | GI_4758153-S  | rs13231952 | 7 | 7 | 24450205 | 61124  | 6.6733  | 0.4812 | 0.6453  | 5.9074 | CHB |
| DFNA5     | GI_4758153-S  | rs2721790  | 7 | 7 | 24452642 | 58687  | 7.5247  | 0.5199 | 0.8584  | 5.9074 | CHB |
| DFNA5     | GI_4758153-S  | rs12700539 | 7 | 7 | 24474075 | 37254  | 7.2499  | 0.5051 | 0.6849  | 5.9074 | CHB |
| DFNA5     | GI_4758153-S  | rs6943306  | 7 | 7 | 24475235 | 36094  | 7.2261  | 0.4872 | -0.8158 | 5.9074 | CHB |
| DFNA5     | GI_4758153-S  | rs1053962  | 7 | 7 | 24476538 | 34791  | 7.0090  | 0.4754 | 0.8932  | 5.9074 | CHB |

|           |               |            |   |   |          |        |         |        |         |        |     |
|-----------|---------------|------------|---|---|----------|--------|---------|--------|---------|--------|-----|
| DFNA5     | GI_4758153-S  | rs10253880 | 7 | 7 | 24479357 | 31972  | 7.2261  | 0.4872 | -0.8158 | 5.9074 | CHB |
| DFNA5     | GI_4758153-S  | rs11769204 | 7 | 7 | 24497306 | 14023  | 6.4337  | 0.4757 | -0.6724 | 5.9074 | CHB |
| DFNA5     | GI_4758153-S  | rs2721777  | 7 | 7 | 24508986 | 2343   | 7.2261  | 0.4872 | 0.8158  | 5.9074 | CHB |
| DFNA5     | GI_4758153-S  | rs2257061  | 7 | 7 | 24513417 | 2088   | 5.9217  | 0.4275 | 0.7961  | 5.9074 | CHB |
| DFNA5     | GI_4758153-S  | rs2269812  | 7 | 7 | 24519262 | 7933   | 6.5735  | 0.4588 | 0.7950  | 5.9074 | CHB |
| DFNA5     | GI_4758153-S  | rs17149980 | 7 | 7 | 24530470 | 19141  | 6.9132  | 0.4701 | -0.8998 | 5.9074 | CHB |
| DFNA5     | GI_4758153-S  | rs17149990 | 7 | 7 | 24531037 | 19708  | 6.9132  | 0.4701 | -0.8998 | 5.9074 | CHB |
| DFNA5     | GI_4758153-S  | rs754554   | 7 | 7 | 24532058 | 20729  | 7.3039  | 0.4996 | 0.6882  | 5.9074 | CHB |
| DFNA5     | GI_4758153-S  | rs754553   | 7 | 7 | 24532092 | 20763  | 7.9729  | 0.5259 | 0.7203  | 5.9074 | CHB |
| DFNA5     | GI_4758153-S  | rs2237310  | 7 | 7 | 24532888 | 21559  | 6.8481  | 0.5093 | -0.6740 | 5.9074 | CHB |
| DFNA5     | GI_4758153-S  | rs2237313  | 7 | 7 | 24533941 | 22612  | 7.3162  | 0.5455 | -0.9795 | 5.9074 | CHB |
| DFNA5     | GI_4758153-S  | rs2237315  | 7 | 7 | 24535090 | 23761  | 7.8056  | 0.5258 | 0.7205  | 5.9074 | CHB |
| DFNA5     | GI_4758153-S  | rs12669044 | 7 | 7 | 24535590 | 24261  | 8.6112  | 0.5567 | -0.7191 | 5.9074 | CHB |
| DFNA5     | GI_4758153-S  | rs886234   | 7 | 7 | 24542471 | 31142  | 6.9165  | 0.4866 | 0.9265  | 5.9074 | CHB |
| DFNA5     | GI_4758153-S  | rs886235   | 7 | 7 | 24542481 | 31152  | 6.5394  | 0.4568 | -0.8957 | 5.9074 | CHB |
| DFNA5     | GI_4758153-S  | rs2237318  | 7 | 7 | 24542518 | 31189  | 6.9132  | 0.4701 | -0.8998 | 5.9074 | CHB |
| DFNA5     | GI_4758153-S  | rs2521763  | 7 | 7 | 24543893 | 32564  | 6.5394  | 0.4568 | 0.8957  | 5.9074 | CHB |
| DFNA5     | GI_4758153-S  | rs2237322  | 7 | 7 | 24543980 | 32651  | 6.9132  | 0.4701 | -0.8998 | 5.9074 | CHB |
| DFNA5     | GI_4758153-S  | rs2158063  | 7 | 7 | 24551111 | 39782  | 6.7474  | 0.4688 | -0.7543 | 5.9074 | CHB |
| DFNA5     | GI_4758153-S  | rs12700544 | 7 | 7 | 24553227 | 41898  | 5.9318  | 0.4621 | 0.9339  | 5.9074 | CHB |
| DFNA5     | GI_4758153-S  | rs2237323  | 7 | 7 | 24554801 | 43472  | 6.9132  | 0.4701 | -0.8998 | 5.9074 | CHB |
| DFNA5     | GI_4758153-S  | rs12700545 | 7 | 7 | 24568259 | 56930  | 6.7830  | 0.4628 | 0.6961  | 5.9074 | CHB |
| DFNA5     | GI_4758153-S  | rs17150118 | 7 | 7 | 24581608 | 70279  | 7.1955  | 0.4855 | -0.6490 | 5.9074 | CHB |
| DFNA5     | GI_4758153-S  | rs12669780 | 7 | 7 | 24581869 | 70540  | 6.9289  | 0.4959 | -0.6154 | 5.9074 | CHB |
| LOC402476 | GI_42658265-S | rs2290213  | 7 | 7 | 32371870 | 203353 | 5.8387  | 0.4146 | -0.1120 | 5.7553 | CHB |
| HNLF      | GI_33457307-S | rs217378   | 7 | 7 | 44381343 | 10837  | 6.8213  | 0.4650 | -0.2862 | 5.5874 | CHB |
| HNLF      | GI_33457307-S | rs217372   | 7 | 7 | 44385993 | 6187   | 5.6325  | 0.4251 | 0.2875  | 5.5874 | CHB |
| HNLF      | GI_33457307-S | rs17133537 | 7 | 7 | 44430980 | 38800  | 7.1291  | 0.4985 | 0.3004  | 5.5874 | CHB |
| HNLF      | GI_33457307-S | rs740094   | 7 | 7 | 44442938 | 50758  | 6.8213  | 0.4650 | -0.2862 | 5.5874 | CHB |
| LOC378075 | GI_37538916-S | rs10481004 | 7 | 7 | 55542880 | 415054 | 12.2688 | 0.6989 | 0.9211  | 5.7005 | CHB |
| LOC378075 | GI_37538916-S | rs4563845  | 7 | 7 | 55552324 | 405610 | 15.4571 | 0.8011 | 0.9201  | 5.7005 | CHB |
| LOC378075 | GI_37538916-S | rs4610703  | 7 | 7 | 55552520 | 405414 | 6.9018  | 0.4775 | -1.1886 | 5.7005 | CHB |
| LOC378075 | GI_37538916-S | rs4333543  | 7 | 7 | 55562368 | 395566 | 7.7732  | 0.5242 | 0.8937  | 5.7005 | CHB |
| LOC378075 | GI_37538916-S | rs10280445 | 7 | 7 | 55572566 | 385368 | 6.8297  | 0.5082 | -0.9189 | 5.7005 | CHB |
| LOC378075 | GI_37538916-S | rs7809922  | 7 | 7 | 55597790 | 360144 | 6.8484  | 0.4665 | -0.8145 | 5.7005 | CHB |
| LOC378075 | GI_37538916-S | rs10232851 | 7 | 7 | 55603043 | 354891 | 17.2515 | 0.8446 | -0.9991 | 5.7005 | CHB |
| LOC378075 | GI_37538916-S | rs4577914  | 7 | 7 | 55606689 | 351245 | 6.1680  | 0.4594 | -0.7683 | 5.7005 | CHB |
| LOC378075 | GI_37538916-S | rs4273806  | 7 | 7 | 55607447 | 350487 | 6.8484  | 0.4665 | 0.8145  | 5.7005 | CHB |
| LOC378075 | GI_37538916-S | rs6700     | 7 | 7 | 55615397 | 342537 | 6.8484  | 0.4665 | -0.8145 | 5.7005 | CHB |
| LOC378075 | GI_37538916-S | rs10243293 | 7 | 7 | 55616309 | 341625 | 6.2764  | 0.4493 | 0.7836  | 5.7005 | CHB |
| LOC378075 | GI_37538916-S | rs6966061  | 7 | 7 | 55622999 | 334935 | 6.7490  | 0.4609 | 0.8385  | 5.7005 | CHB |
| LOC378075 | GI_37538916-S | rs6944250  | 7 | 7 | 55628310 | 329624 | 6.7490  | 0.4609 | 0.8385  | 5.7005 | CHB |
| LOC378075 | GI_37538916-S | rs11982736 | 7 | 7 | 55629389 | 328545 | 6.7000  | 0.4581 | -0.8075 | 5.7005 | CHB |
| LOC378075 | GI_37538916-S | rs9642404  | 7 | 7 | 55631008 | 326926 | 6.7490  | 0.4609 | -0.8385 | 5.7005 | CHB |
| LOC378075 | GI_37538916-S | rs11768660 | 7 | 7 | 55658027 | 299907 | 7.1204  | 0.5345 | -0.9093 | 5.7005 | CHB |
| LOC378075 | GI_37538916-S | rs6593288  | 7 | 7 | 55718463 | 239471 | 6.0195  | 0.4258 | -0.8230 | 5.7005 | CHB |
| hmm32897  | hmm32897-S    | rs12530898 | 7 | 7 | 64995534 | 654070 | 8.1525  | 0.5432 | -0.4587 | 8.1024 | CHB |
| hmm32897  | hmm32897-S    | rs12531358 | 7 | 7 | 65004924 | 644680 | 8.3410  | 0.5439 | 0.4608  | 8.1024 | CHB |
| hmm32897  | hmm32897-S    | rs12534109 | 7 | 7 | 65057800 | 591804 | 8.3410  | 0.5439 | 0.4608  | 8.1024 | CHB |
| hmm32897  | hmm32897-S    | rs2292936  | 7 | 7 | 65061805 | 587799 | 8.3410  | 0.5439 | -0.4608 | 8.1024 | CHB |
| hmm32897  | hmm32897-S    | rs2292937  | 7 | 7 | 65061823 | 587781 | 8.3410  | 0.5439 | -0.4608 | 8.1024 | CHB |
| hmm32897  | hmm32897-S    | rs12532675 | 7 | 7 | 65150964 | 498640 | 8.3410  | 0.5439 | 0.4608  | 8.1024 | CHB |
| hmm32897  | hmm32897-S    | rs12531900 | 7 | 7 | 65171078 | 478526 | 8.3410  | 0.5439 | 0.4608  | 8.1024 | CHB |
| hmm32897  | hmm32897-S    | rs1363056  | 7 | 7 | 65261623 | 387981 | 8.1582  | 0.5435 | 0.4585  | 8.1024 | CHB |
| hmm32897  | hmm32897-S    | rs4718345  | 7 | 7 | 65338339 | 311265 | 8.3410  | 0.5439 | -0.4608 | 8.1024 | CHB |
| hmm32897  | hmm32897-S    | rs12540667 | 7 | 7 | 65343783 | 305821 | 8.3410  | 0.5439 | -0.4608 | 8.1024 | CHB |
| hmm32897  | hmm32897-S    | rs12537368 | 7 | 7 | 65343800 | 305804 | 8.3410  | 0.5439 | 0.4608  | 8.1024 | CHB |
| hmm32897  | hmm32897-S    | rs3735146  | 7 | 7 | 65414445 | 235159 | 8.3410  | 0.5439 | -0.4608 | 8.1024 | CHB |
| hmm32897  | hmm32897-S    | rs17228285 | 7 | 7 | 65476397 | 173207 | 8.3410  | 0.5439 | 0.4608  | 8.1024 | CHB |

|          |               |            |   |   |          |        |         |        |         |        |     |
|----------|---------------|------------|---|---|----------|--------|---------|--------|---------|--------|-----|
| hmm32897 | hmm32897-S    | rs4717305  | 7 | 7 | 65499604 | 150000 | 8.3410  | 0.5439 | -0.4608 | 8.1024 | CHB |
| hmm32897 | hmm32897-S    | rs2286682  | 7 | 7 | 65574028 | 75576  | 8.3410  | 0.5439 | -0.4608 | 8.1024 | CHB |
| hmm32897 | hmm32897-S    | rs12534391 | 7 | 7 | 65577572 | 72032  | 8.3410  | 0.5439 | 0.4608  | 8.1024 | CHB |
| hmm32897 | hmm32897-S    | rs4717311  | 7 | 7 | 65611695 | 37909  | 8.3410  | 0.5439 | -0.4608 | 8.1024 | CHB |
| hmm32897 | hmm32897-S    | rs7384258  | 7 | 7 | 65616927 | 32677  | 8.3410  | 0.5439 | -0.4608 | 8.1024 | CHB |
| hmm32897 | hmm32897-S    | rs4718390  | 7 | 7 | 65627657 | 21947  | 8.3410  | 0.5439 | 0.4608  | 8.1024 | CHB |
| hmm32897 | hmm32897-S    | rs4718391  | 7 | 7 | 65643494 | 6110   | 8.3410  | 0.5439 | 0.4608  | 8.1024 | CHB |
| hmm32897 | hmm32897-S    | rs3778906  | 7 | 7 | 65657350 | 7746   | 8.3410  | 0.5439 | 0.4608  | 8.1024 | CHB |
| hmm32897 | hmm32897-S    | rs12532147 | 7 | 7 | 65660100 | 10496  | 8.3410  | 0.5439 | -0.4608 | 8.1024 | CHB |
| hmm32897 | hmm32897-S    | rs12531402 | 7 | 7 | 65661658 | 12054  | 8.3410  | 0.5439 | -0.4608 | 8.1024 | CHB |
| hmm32897 | hmm32897-S    | rs4718395  | 7 | 7 | 65665299 | 15695  | 8.3410  | 0.5439 | -0.4608 | 8.1024 | CHB |
| RABGEF1  | GI_7657495-S  | rs4718398  | 7 | 7 | 65673785 | 46315  | 6.1993  | 0.4291 | 0.5550  | 5.5093 | CHB |
| hmm32897 | hmm32897-S    | rs3823608  | 7 | 7 | 65680918 | 31314  | 8.1607  | 0.5436 | 0.4584  | 8.1024 | CHB |
| hmm32897 | hmm32897-S    | rs12539848 | 7 | 7 | 65683981 | 34377  | 8.3410  | 0.5439 | -0.4608 | 8.1024 | CHB |
| hmm32897 | hmm32897-S    | rs4718407  | 7 | 7 | 65710453 | 60849  | 12.0346 | 0.7268 | -0.4726 | 8.1024 | CHB |
| hmm32897 | hmm32897-S    | rs3778911  | 7 | 7 | 65720303 | 70699  | 8.3410  | 0.5439 | 0.4608  | 8.1024 | CHB |
| hmm32897 | hmm32897-S    | rs12531377 | 7 | 7 | 65726565 | 76961  | 8.3410  | 0.5439 | -0.4608 | 8.1024 | CHB |
| hmm32897 | hmm32897-S    | rs12535268 | 7 | 7 | 65784895 | 135291 | 8.3410  | 0.5439 | 0.4608  | 8.1024 | CHB |
| RABGEF1  | GI_7657495-S  | rs4717329  | 7 | 7 | 65798534 | 78434  | 6.4691  | 0.4692 | 0.5676  | 5.5093 | CHB |
| hmm32897 | hmm32897-S    | rs12539366 | 7 | 7 | 65836330 | 186726 | 8.3410  | 0.5439 | -0.4608 | 8.1024 | CHB |
| hmm32897 | hmm32897-S    | rs12537955 | 7 | 7 | 65852343 | 202739 | 8.3410  | 0.5439 | -0.4608 | 8.1024 | CHB |
| hmm32897 | hmm32897-S    | rs12540695 | 7 | 7 | 65897727 | 248123 | 8.3410  | 0.5439 | -0.4608 | 8.1024 | CHB |
| RABGEF1  | GI_7657495-S  | rs12534401 | 7 | 7 | 65899722 | 179622 | 6.1993  | 0.4291 | -0.5550 | 5.5093 | CHB |
| FLJ13195 | GI_12597648-S | rs10085684 | 7 | 7 | 66288161 | 57930  | 5.6624  | 0.3962 | -0.1574 | 5.498  | CHB |
| WBSCR27  | GI_30795189-S | rs6946037  | 7 | 7 | 72681366 | 12436  | 12.9675 | 0.7205 | -0.2470 | 5.6105 | CHB |
| WBSCR27  | GI_30795189-S | rs4255023  | 7 | 7 | 72684269 | 9533   | 12.9675 | 0.7205 | -0.2470 | 5.6105 | CHB |
| WBSCR27  | GI_30795189-S | rs8629     | 7 | 7 | 72690170 | 3632   | 12.9675 | 0.7205 | 0.2470  | 5.6105 | CHB |
| WBSCR27  | GI_30795189-S | rs1127155  | 7 | 7 | 72691112 | 2690   | 12.9675 | 0.7205 | -0.2470 | 5.6105 | CHB |
| WBSCR27  | GI_30795189-S | rs11316    | 7 | 7 | 72691206 | 2596   | 9.3175  | 0.6061 | -0.2110 | 5.6105 | CHB |
| WBSCR27  | GI_30795189-S | rs13232463 | 7 | 7 | 72693950 | 148    | 12.9675 | 0.7205 | 0.2470  | 5.6105 | CHB |
| WBSCR27  | GI_30795189-S | rs4304218  | 7 | 7 | 72697631 | 3829   | 12.9675 | 0.7205 | 0.2470  | 5.6105 | CHB |
| WBSCR27  | GI_30795189-S | rs1073909  | 7 | 7 | 72702940 | 9138   | 12.9675 | 0.7205 | -0.2470 | 5.6105 | CHB |
| WBSCR27  | GI_30795189-S | rs4717112  | 7 | 7 | 72710068 | 16266  | 12.1852 | 0.6962 | -0.2479 | 5.6105 | CHB |
| WBSCR27  | GI_30795189-S | rs4327742  | 7 | 7 | 72712377 | 18575  | 12.1852 | 0.6962 | 0.2479  | 5.6105 | CHB |
| WBSCR27  | GI_30795189-S | rs6949053  | 7 | 7 | 72714588 | 20786  | 12.1852 | 0.6962 | -0.2479 | 5.6105 | CHB |
| WBSCR27  | GI_30795189-S | rs11770024 | 7 | 7 | 72720152 | 26350  | 12.1852 | 0.6962 | 0.2479  | 5.6105 | CHB |
| WBSCR16  | GI_22538491-I | rs12668140 | 7 | 7 | 73938858 | 495706 | 6.5128  | 0.4474 | -0.3769 | 5.4739 | CHB |
| ACN9     | GI_9910179-S  | rs12669100 | 7 | 7 | 96360530 | 94590  | 5.8959  | 0.4422 | -0.2562 | 5.8957 | CHB |
| ACN9     | GI_9910179-S  | rs17168173 | 7 | 7 | 96370364 | 84756  | 7.3078  | 0.4916 | -0.3035 | 5.8957 | CHB |
| ACN9     | GI_9910179-S  | rs17168174 | 7 | 7 | 96378623 | 76497  | 7.3078  | 0.4916 | 0.3035  | 5.8957 | CHB |
| ACN9     | GI_9910179-S  | rs17168179 | 7 | 7 | 96380187 | 74933  | 7.3078  | 0.4916 | -0.3035 | 5.8957 | CHB |
| ACN9     | GI_9910179-S  | rs6973504  | 7 | 7 | 96392135 | 62985  | 7.3078  | 0.4916 | 0.3035  | 5.8957 | CHB |
| ACN9     | GI_9910179-S  | rs10499936 | 7 | 7 | 96445652 | 9468   | 6.9919  | 0.4909 | -0.3057 | 5.8957 | CHB |
| ACN9     | GI_9910179-S  | rs11975277 | 7 | 7 | 96453222 | 1898   | 7.3078  | 0.4916 | -0.3035 | 5.8957 | CHB |
| TRIM4    | GI_15011940-A | rs474229   | 7 | 7 | 99111209 | 22164  | 6.1815  | 0.4280 | -0.3496 | 5.2577 | CHB |
| TRIM4    | GI_15011940-A | rs1025576  | 7 | 7 | 99118275 | 15098  | 6.1815  | 0.4280 | 0.3496  | 5.2577 | CHB |
| TRIM4    | GI_15011940-A | rs2572023  | 7 | 7 | 99119078 | 14295  | 5.5322  | 0.3880 | -0.3333 | 5.2577 | CHB |
| TRIM4    | GI_15011940-A | rs2572022  | 7 | 7 | 99119380 | 13993  | 6.1815  | 0.4280 | 0.3496  | 5.2577 | CHB |
| TRIM4    | GI_15011940-A | rs2060452  | 7 | 7 | 99120124 | 13249  | 5.8869  | 0.4781 | 0.3599  | 5.2577 | CHB |
| TRIM4    | GI_15011940-A | rs2527927  | 7 | 7 | 99122077 | 11296  | 5.3591  | 0.3769 | 0.3288  | 5.2577 | CHB |
| TRIM4    | GI_15011940-A | rs2082744  | 7 | 7 | 99126067 | 7306   | 5.8551  | 0.4082 | -0.3289 | 5.2577 | CHB |
| TRIM4    | GI_15011940-A | rs2572010  | 7 | 7 | 99133194 | 179    | 5.8873  | 0.4102 | -0.3435 | 5.2577 | CHB |
| TRIM4    | GI_15011940-A | rs1048705  | 7 | 7 | 99133591 | 218    | 5.8873  | 0.4102 | -0.3435 | 5.2577 | CHB |
| TRIM4    | GI_15011940-A | rs2572009  | 7 | 7 | 99133656 | 283    | 5.8873  | 0.4102 | -0.3435 | 5.2577 | CHB |
| TRIM4    | GI_15011940-A | rs2572008  | 7 | 7 | 99135607 | 2234   | 5.8873  | 0.4102 | -0.3435 | 5.2577 | CHB |
| TRIM4    | GI_15011940-A | rs2527922  | 7 | 7 | 99137407 | 4034   | 5.8873  | 0.4102 | -0.3435 | 5.2577 | CHB |
| TRIM4    | GI_15011940-A | rs2572006  | 7 | 7 | 99138462 | 5089   | 5.8873  | 0.4102 | 0.3435  | 5.2577 | CHB |
| TRIM4    | GI_15011940-A | rs7384528  | 7 | 7 | 99138681 | 5308   | 5.8873  | 0.4102 | -0.3435 | 5.2577 | CHB |
| TRIM4    | GI_15011940-A | rs2527919  | 7 | 7 | 99139164 | 5791   | 5.8873  | 0.4102 | -0.3435 | 5.2577 | CHB |

|        |               |            |   |   |           |        |         |        |         |        |     |
|--------|---------------|------------|---|---|-----------|--------|---------|--------|---------|--------|-----|
| TRIM4  | GI_15011940-A | rs2527914  | 7 | 7 | 99142796  | 9423   | 5.8873  | 0.4102 | 0.3435  | 5.2577 | CHB |
| TRIM4  | GI_15011940-A | rs10808114 | 7 | 7 | 99143150  | 9777   | 5.7700  | 0.4179 | 0.3489  | 5.2577 | CHB |
| TRIM4  | GI_15011940-A | rs2247761  | 7 | 7 | 99145562  | 12189  | 5.8873  | 0.4102 | -0.3435 | 5.2577 | CHB |
| TRIM4  | GI_15011940-A | rs2572003  | 7 | 7 | 99145964  | 12591  | 5.8070  | 0.4126 | -0.3466 | 5.2577 | CHB |
| TRIM4  | GI_15011940-A | rs7781442  | 7 | 7 | 99149874  | 16501  | 5.5308  | 0.3951 | -0.3379 | 5.2577 | CHB |
| TRIM4  | GI_15011940-A | rs2572000  | 7 | 7 | 99153975  | 20602  | 5.3591  | 0.3769 | -0.3288 | 5.2577 | CHB |
| TRIM4  | GI_15011940-A | rs2571998  | 7 | 7 | 99156023  | 22650  | 5.6074  | 0.4000 | -0.3385 | 5.2577 | CHB |
| TRIM4  | GI_15011940-A | rs1865472  | 7 | 7 | 99156214  | 22841  | 5.3591  | 0.3769 | -0.3288 | 5.2577 | CHB |
| TRIM4  | GI_15011940-A | rs2571997  | 7 | 7 | 99159068  | 25695  | 5.8873  | 0.4102 | -0.3435 | 5.2577 | CHB |
| TRIM4  | GI_15011940-A | rs2571992  | 7 | 7 | 99164567  | 31194  | 5.8873  | 0.4102 | -0.3435 | 5.2577 | CHB |
| TRIM4  | GI_15011940-A | rs1121592  | 7 | 7 | 99168282  | 34909  | 5.3591  | 0.3769 | 0.3288  | 5.2577 | CHB |
| TRIM4  | GI_15011940-A | rs2527901  | 7 | 7 | 99169763  | 36390  | 5.8873  | 0.4102 | -0.3435 | 5.2577 | CHB |
| TRIM4  | GI_15011940-A | rs2527900  | 7 | 7 | 99169892  | 36519  | 5.3395  | 0.3827 | -0.3336 | 5.2577 | CHB |
| TRIM4  | GI_15011940-A | rs2107351  | 7 | 7 | 99180602  | 47229  | 5.8462  | 0.4151 | -0.3523 | 5.2577 | CHB |
| TRIM4  | GI_15011940-A | rs2527894  | 7 | 7 | 99183492  | 50119  | 5.9864  | 0.4162 | -0.3514 | 5.2577 | CHB |
| TRIM4  | GI_15011940-A | rs1981548  | 7 | 7 | 99186011  | 52638  | 5.9864  | 0.4162 | -0.3514 | 5.2577 | CHB |
| TRIM4  | GI_15011940-A | rs2525541  | 7 | 7 | 99192181  | 58808  | 5.9864  | 0.4162 | -0.3514 | 5.2577 | CHB |
| TRIM4  | GI_15011940-A | rs7798064  | 7 | 7 | 99193506  | 60133  | 5.8663  | 0.4163 | -0.3530 | 5.2577 | CHB |
| TRIM4  | GI_15011940-A | rs2527886  | 7 | 7 | 99196819  | 63446  | 6.2763  | 0.4749 | 0.3743  | 5.2577 | CHB |
| TRIM4  | GI_15011940-A | rs2525548  | 7 | 7 | 99197818  | 64445  | 5.9864  | 0.4162 | 0.3514  | 5.2577 | CHB |
| POLR2J | GI_21704275-S | rs2270019  | 7 | 7 | 102650959 | 943280 | 6.1055  | 0.4310 | 0.3223  | 5.7472 | CHB |
| IRF5   | GI_38683858-A | rs7808907  | 7 | 7 | 128178035 | 5107   | 8.1695  | 0.5356 | -0.5565 | 5.3777 | CHB |
| IRF5   | GI_38683858-A | rs1874328  | 7 | 7 | 128179055 | 4087   | 7.6996  | 0.5120 | -0.5357 | 5.3777 | CHB |
| IRF5   | GI_38683858-A | rs13242262 | 7 | 7 | 128185315 | 2173   | 8.9648  | 0.6090 | 0.5754  | 5.3777 | CHB |
| IRF5   | GI_38683858-A | rs10488630 | 7 | 7 | 128187899 | 4757   | 7.4637  | 0.4998 | 0.5482  | 5.3777 | CHB |
| IRF5   | GI_38683858-A | rs2280714  | 7 | 7 | 128188676 | 5534   | 6.5714  | 0.4508 | -0.4886 | 5.3777 | CHB |
| IRF5   | GI_38683858-A | rs6966125  | 7 | 7 | 128192476 | 9334   | 6.5700  | 0.4507 | -0.4748 | 5.3777 | CHB |
| IRF5   | GI_38683858-A | rs10229001 | 7 | 7 | 128193348 | 10206  | 12.4432 | 0.7130 | 0.6085  | 5.3777 | CHB |
| IRF5   | GI_38683858-A | rs2172876  | 7 | 7 | 128197243 | 14101  | 11.0704 | 0.6581 | 0.5607  | 5.3777 | CHB |
| IRF5   | GI_38683858-A | rs7385716  | 7 | 7 | 128199545 | 16403  | 12.4432 | 0.7130 | 0.6085  | 5.3777 | CHB |
| IRF5   | GI_38683858-A | rs4731535  | 7 | 7 | 128199918 | 16776  | 11.0704 | 0.6581 | 0.5607  | 5.3777 | CHB |
| IRF5   | GI_38683858-A | rs8043     | 7 | 7 | 128201335 | 18193  | 11.0704 | 0.6581 | 0.5607  | 5.3777 | CHB |
| IRF5   | GI_38683858-A | rs6953869  | 7 | 7 | 128202711 | 19569  | 7.7516  | 0.6003 | 0.5496  | 5.3777 | CHB |
| IRF5   | GI_38683858-A | rs1874332  | 7 | 7 | 128208564 | 25422  | 11.0704 | 0.6581 | -0.5607 | 5.3777 | CHB |
| IRF5   | GI_38683858-A | rs7789423  | 7 | 7 | 128215155 | 32013  | 7.2259  | 0.4954 | 0.4999  | 5.3777 | CHB |
| IRF5   | GI_38683858-A | rs6948928  | 7 | 7 | 128217048 | 33906  | 7.0930  | 0.4800 | -0.4959 | 5.3777 | CHB |
| IRF5   | GI_38683858-A | rs11770317 | 7 | 7 | 128223422 | 40280  | 11.4439 | 0.6889 | -0.5835 | 5.3777 | CHB |
| IRF5   | GI_38683858-A | rs2305323  | 7 | 7 | 128227673 | 44531  | 7.4637  | 0.4998 | -0.5482 | 5.3777 | CHB |
| IRF5   | GI_38683858-A | rs3958094  | 7 | 7 | 128229218 | 46076  | 6.9992  | 0.4749 | 0.5271  | 5.3777 | CHB |
| IRF5   | GI_38683858-A | rs7807018  | 7 | 7 | 128234139 | 50997  | 12.0455 | 0.6917 | 0.5859  | 5.3777 | CHB |
| IRF5   | GI_38683858-A | rs2305324  | 7 | 7 | 128235177 | 52035  | 10.5628 | 0.6393 | -0.5662 | 5.3777 | CHB |
| IRF5   | GI_38683858-A | rs11768572 | 7 | 7 | 128239243 | 56101  | 7.0961  | 0.5143 | 0.5312  | 5.3777 | CHB |
| IRF5   | GI_38683858-A | rs11767711 | 7 | 7 | 128245783 | 62641  | 11.2109 | 0.7381 | 0.6028  | 5.3777 | CHB |
| IRF5   | GI_38683858-A | rs2305325  | 7 | 7 | 128248791 | 65649  | 10.5628 | 0.6393 | -0.5662 | 5.3777 | CHB |
| IRF5   | GI_38683858-A | rs6965542  | 7 | 7 | 128249869 | 66727  | 9.4985  | 0.6325 | 0.5704  | 5.3777 | CHB |
| IRF5   | GI_38683858-A | rs3857852  | 7 | 7 | 128251228 | 68086  | 6.5714  | 0.4508 | -0.4886 | 5.3777 | CHB |
| IRF5   | GI_38683858-A | rs12155080 | 7 | 7 | 128252690 | 69548  | 12.0455 | 0.6917 | -0.5859 | 5.3777 | CHB |
| IRF5   | GI_38683858-A | rs13221560 | 7 | 7 | 128257126 | 73984  | 6.5898  | 0.4679 | 0.5003  | 5.3777 | CHB |
| IRF5   | GI_38683858-A | rs10239340 | 7 | 7 | 128262461 | 79319  | 12.0455 | 0.6917 | -0.5859 | 5.3777 | CHB |
| IRF5   | GI_38683858-A | rs11762968 | 7 | 7 | 128264915 | 81773  | 11.3882 | 0.6781 | -0.5823 | 5.3777 | CHB |
| IRF5   | GI_38683858-A | rs9649520  | 7 | 7 | 128266596 | 83454  | 9.4584  | 0.6504 | 0.5589  | 5.3777 | CHB |
| IRF5   | GI_38683858-A | rs1072767  | 7 | 7 | 128267156 | 84014  | 6.5714  | 0.4508 | 0.4886  | 5.3777 | CHB |
| IRF5   | GI_38683858-A | rs921403   | 7 | 7 | 128270675 | 87533  | 7.0930  | 0.4800 | -0.4959 | 5.3777 | CHB |
| IRF5   | GI_38683858-A | rs4731541  | 7 | 7 | 128272187 | 89045  | 9.2098  | 0.5838 | 0.5178  | 5.3777 | CHB |
| IRF5   | GI_38683858-A | rs3807301  | 7 | 7 | 128276963 | 93821  | 7.3247  | 0.5179 | -0.5513 | 5.3777 | CHB |
| IRF5   | GI_38683858-A | rs10279821 | 7 | 7 | 128277498 | 94356  | 6.5714  | 0.4508 | -0.4886 | 5.3777 | CHB |
| IRF5   | GI_38683858-A | rs10156169 | 7 | 7 | 128278522 | 95380  | 7.0930  | 0.4800 | 0.4959  | 5.3777 | CHB |
| IRF5   | GI_38683858-A | rs11767238 | 7 | 7 | 128280289 | 97147  | 7.4637  | 0.4998 | 0.5482  | 5.3777 | CHB |
| IRF5   | GI_38683858-A | rs2167273  | 7 | 7 | 128283364 | 100222 | 10.5628 | 0.6393 | 0.5662  | 5.3777 | CHB |

|           |               |            |   |   |           |        |         |        |         |        |     |
|-----------|---------------|------------|---|---|-----------|--------|---------|--------|---------|--------|-----|
| IRF5      | GI_38683858-A | rs6960994  | 7 | 7 | 128286608 | 103466 | 10.6592 | 0.6429 | 0.5534  | 5.3777 | CHB |
| IRF5      | GI_38683858-A | rs6961014  | 7 | 7 | 128286661 | 103519 | 10.6470 | 0.6601 | 0.5724  | 5.3777 | CHB |
| IRF5      | GI_38683858-A | rs2242028  | 7 | 7 | 128288927 | 105785 | 10.6592 | 0.6429 | 0.5534  | 5.3777 | CHB |
| IRF5      | GI_38683858-A | rs2242029  | 7 | 7 | 128289230 | 106088 | 5.7494  | 0.4166 | 0.4647  | 5.3777 | CHB |
| KIAA0265  | GI_44917618-S | rs12534379 | 7 | 7 | 129365068 | 2062   | 6.2532  | 0.4323 | 0.2653  | 5.949  | CHB |
| C7orf32   | GI_42658665-S | rs7795944  | 7 | 7 | 149009114 | 6101   | 6.2549  | 0.4324 | 0.4422  | 5.9737 | CHB |
| C7orf32   | GI_42658665-S | rs4077893  | 7 | 7 | 149018598 | 3383   | 6.2549  | 0.4324 | -0.4422 | 5.9737 | CHB |
| C7orf32   | GI_42658665-S | rs4077894  | 7 | 7 | 149018925 | 3710   | 6.2549  | 0.4324 | 0.4422  | 5.9737 | CHB |
| MGC3036   | GI_13027615-S | rs7781827  | 7 | 7 | 149446506 | 26132  | 6.1638  | 0.4269 | -0.1265 | 5.7568 | CHB |
| MGC3036   | GI_13027615-S | rs2108854  | 7 | 7 | 149455056 | 17582  | 5.8283  | 0.4065 | 0.1269  | 5.7568 | CHB |
| MGC3036   | GI_13027615-S | rs11767726 | 7 | 7 | 149455744 | 16894  | 5.8283  | 0.4065 | 0.1269  | 5.7568 | CHB |
| MGC3036   | GI_13027615-S | rs2108852  | 7 | 7 | 149457276 | 15362  | 5.8283  | 0.4065 | 0.1269  | 5.7568 | CHB |
| MGC3036   | GI_13027615-S | rs1983440  | 7 | 7 | 149461589 | 11049  | 5.8283  | 0.4065 | -0.1269 | 5.7568 | CHB |
| hIAN6     | GI_28416955-S | rs13224302 | 7 | 7 | 149571975 | 41950  | 6.6722  | 0.4990 | -0.5343 | 6.0185 | CHB |
| IAN4L1    | GI_28416948-S | rs4725927  | 7 | 7 | 149829653 | 48477  | 7.1069  | 0.4807 | -0.8666 | 6.6067 | CHB |
| IAN4L1    | GI_28416948-S | rs2286900  | 7 | 7 | 149855693 | 22437  | 6.6972  | 0.4741 | 0.9165  | 6.6067 | CHB |
| IAN4L1    | GI_28416948-S | rs3735078  | 7 | 7 | 149858352 | 19778  | 7.0650  | 0.4785 | -0.8846 | 6.6067 | CHB |
| IAN4L1    | GI_28416948-S | rs3735077  | 7 | 7 | 149858568 | 19562  | 7.0650  | 0.4785 | -0.8846 | 6.6067 | CHB |
| IAN4L1    | GI_28416948-S | rs11983675 | 7 | 7 | 149859025 | 19105  | 7.0650  | 0.4785 | -0.8846 | 6.6067 | CHB |
| IAN4L1    | GI_28416948-S | rs12703097 | 7 | 7 | 149862573 | 15557  | 7.0650  | 0.4785 | 0.8846  | 6.6067 | CHB |
| IAN4L1    | GI_28416948-S | rs6945478  | 7 | 7 | 149862999 | 15131  | 7.0650  | 0.4785 | 0.8846  | 6.6067 | CHB |
| IAN4L1    | GI_28416948-S | rs2041574  | 7 | 7 | 149864402 | 13728  | 7.0146  | 0.4838 | 0.9022  | 6.6067 | CHB |
| IAN4L1    | GI_28416948-S | rs2373850  | 7 | 7 | 149865607 | 12523  | 6.6634  | 0.4640 | -0.8693 | 6.6067 | CHB |
| IAN4L1    | GI_28416948-S | rs2159842  | 7 | 7 | 149865747 | 12383  | 7.0650  | 0.4785 | -0.8846 | 6.6067 | CHB |
| IAN4L1    | GI_28416948-S | rs6971135  | 7 | 7 | 149866217 | 11913  | 7.0650  | 0.4785 | -0.8846 | 6.6067 | CHB |
| IAN4L1    | GI_28416948-S | rs9690530  | 7 | 7 | 149866533 | 11597  | 7.0650  | 0.4785 | -0.8846 | 6.6067 | CHB |
| IAN4L1    | GI_28416948-S | rs17173582 | 7 | 7 | 149867406 | 10724  | 8.4427  | 0.5487 | 0.8717  | 6.6067 | CHB |
| IAN4L1    | GI_28416948-S | rs9657891  | 7 | 7 | 149873121 | 5009   | 7.0496  | 0.4776 | 0.8083  | 6.6067 | CHB |
| IAN4L1    | GI_28416948-S | rs9657886  | 7 | 7 | 149876206 | 1924   | 6.8673  | 0.4675 | 0.8552  | 6.6067 | CHB |
| IAN4L1    | GI_28416948-S | rs2286899  | 7 | 7 | 149878362 | 232    | 8.6380  | 0.5579 | -0.9433 | 6.6067 | CHB |
| IAN4L1    | GI_28416948-S | rs4725937  | 7 | 7 | 149889385 | 11255  | 6.7124  | 0.4588 | 0.9349  | 6.6067 | CHB |
| C7orf13   | GI_14249145-S | rs6459698  | 7 | 7 | 155929790 | 1143   | 6.9816  | 0.4739 | -0.1790 | 6.003  | CHB |
| C7orf13   | GI_14249145-S | rs6980337  | 7 | 7 | 155934022 | 3089   | 6.9816  | 0.4739 | -0.1790 | 6.003  | CHB |
| C7orf13   | GI_14249145-S | rs7806832  | 7 | 7 | 155936341 | 5408   | 6.9816  | 0.4739 | 0.1790  | 6.003  | CHB |
| C7orf13   | GI_14249145-S | rs4716438  | 7 | 7 | 155941679 | 10746  | 6.9816  | 0.4739 | 0.1790  | 6.003  | CHB |
| C7orf13   | GI_14249145-S | rs6965850  | 7 | 7 | 155956213 | 25280  | 6.9816  | 0.4739 | -0.1790 | 6.003  | CHB |
| MYOM2     | GI_4505314-S  | rs2280902  | 8 | 8 | 2064479   | 16074  | 12.1683 | 0.6957 | -0.6279 | 6.1464 | CHB |
| MYOM2     | GI_4505314-S  | rs2099746  | 8 | 8 | 2082848   | 2295   | 11.5503 | 0.6751 | -0.6215 | 6.1464 | CHB |
| MYOM2     | GI_4505314-S  | rs6986035  | 8 | 8 | 2084810   | 4257   | 7.9403  | 0.5242 | -0.5455 | 6.1464 | CHB |
| MYOM2     | GI_4505314-S  | rs4876217  | 8 | 8 | 2086177   | 5624   | 7.9403  | 0.5242 | 0.5455  | 6.1464 | CHB |
| MYOM2     | GI_4505314-S  | rs7016120  | 8 | 8 | 2088145   | 7592   | 7.9403  | 0.5242 | -0.5455 | 6.1464 | CHB |
| MYOM2     | GI_4505314-S  | rs10099190 | 8 | 8 | 2088893   | 8340   | 7.9403  | 0.5242 | 0.5455  | 6.1464 | CHB |
| MYOM2     | GI_4505314-S  | rs6987264  | 8 | 8 | 2089921   | 9368   | 7.9403  | 0.5242 | 0.5455  | 6.1464 | CHB |
| MYOM2     | GI_4505314-S  | rs7012209  | 8 | 8 | 2089950   | 9397   | 7.7491  | 0.5316 | 0.5565  | 6.1464 | CHB |
| LOC340435 | GI_29735811-S | rs17758721 | 8 | 8 | 71627105  | 154822 | 9.3127  | 0.5883 | 0.2042  | 7.5028 | CHB |
| LOC340435 | GI_29735811-S | rs7012577  | 8 | 8 | 71634598  | 147329 | 9.3127  | 0.5883 | -0.2042 | 7.5028 | CHB |
| LOC340435 | GI_29735811-S | rs13251292 | 8 | 8 | 71636909  | 145018 | 8.1554  | 0.5611 | 0.2086  | 7.5028 | CHB |
| LOC340435 | GI_29735811-S | rs3816745  | 8 | 8 | 71669188  | 112739 | 9.3127  | 0.5883 | -0.2042 | 7.5028 | CHB |
| LOC340435 | GI_29735811-S | rs6988053  | 8 | 8 | 71709517  | 72410  | 9.3127  | 0.5883 | 0.2042  | 7.5028 | CHB |
| LOC340435 | GI_29735811-S | rs13258368 | 8 | 8 | 71711305  | 70622  | 9.3127  | 0.5883 | -0.2042 | 7.5028 | CHB |
| LOC340435 | GI_29735811-S | rs7831792  | 8 | 8 | 71727910  | 54017  | 9.1116  | 0.5881 | 0.2045  | 7.5028 | CHB |
| LOC340435 | GI_29735811-S | rs13255886 | 8 | 8 | 71728508  | 53419  | 9.3127  | 0.5883 | 0.2042  | 7.5028 | CHB |
| LOC340435 | GI_29735811-S | rs7830515  | 8 | 8 | 71732788  | 49139  | 9.3127  | 0.5883 | -0.2042 | 7.5028 | CHB |
| LOC340435 | GI_29735811-S | rs7814274  | 8 | 8 | 71732965  | 48962  | 9.3127  | 0.5883 | -0.2042 | 7.5028 | CHB |
| LOC340435 | GI_29735811-S | rs7830550  | 8 | 8 | 71732985  | 48942  | 9.3127  | 0.5883 | 0.2042  | 7.5028 | CHB |
| LOC340435 | GI_29735811-S | rs6993326  | 8 | 8 | 71738154  | 43773  | 9.3127  | 0.5883 | -0.2042 | 7.5028 | CHB |
| LOC340435 | GI_29735811-S | rs10504479 | 8 | 8 | 71740069  | 41858  | 9.3127  | 0.5883 | -0.2042 | 7.5028 | CHB |
| LOC340435 | GI_29735811-S | rs11987501 | 8 | 8 | 71741072  | 40855  | 9.3127  | 0.5883 | 0.2042  | 7.5028 | CHB |
| LOC340435 | GI_29735811-S | rs1993862  | 8 | 8 | 71741916  | 40011  | 9.3127  | 0.5883 | -0.2042 | 7.5028 | CHB |

|           |               |            |   |   |          |        |        |        |         |        |     |
|-----------|---------------|------------|---|---|----------|--------|--------|--------|---------|--------|-----|
| LOC340435 | GI_29735811-S | rs2279128  | 8 | 8 | 71744113 | 37814  | 9.3127 | 0.5883 | -0.2042 | 7.5028 | CHB |
| LOC340435 | GI_29735811-S | rs1477943  | 8 | 8 | 71745317 | 36610  | 8.2300 | 0.5558 | 0.2064  | 7.5028 | CHB |
| LOC340435 | GI_29735811-S | rs13271442 | 8 | 8 | 71747723 | 34204  | 9.3127 | 0.5883 | -0.2042 | 7.5028 | CHB |
| LOC340435 | GI_29735811-S | rs6472538  | 8 | 8 | 71749525 | 32402  | 9.3127 | 0.5883 | 0.2042  | 7.5028 | CHB |
| LOC340435 | GI_29735811-S | rs12681420 | 8 | 8 | 71755752 | 26175  | 9.3127 | 0.5883 | 0.2042  | 7.5028 | CHB |
| LOC340435 | GI_29735811-S | rs6991329  | 8 | 8 | 71755979 | 25948  | 9.3127 | 0.5883 | -0.2042 | 7.5028 | CHB |
| LOC340435 | GI_29735811-S | rs7831507  | 8 | 8 | 71757780 | 24147  | 9.3127 | 0.5883 | 0.2042  | 7.5028 | CHB |
| LOC340435 | GI_29735811-S | rs13256250 | 8 | 8 | 71758747 | 23180  | 9.3127 | 0.5883 | 0.2042  | 7.5028 | CHB |
| LOC340435 | GI_29735811-S | rs13256093 | 8 | 8 | 71758931 | 22996  | 9.3127 | 0.5883 | 0.2042  | 7.5028 | CHB |
| LOC340435 | GI_29735811-S | rs12675271 | 8 | 8 | 71764563 | 17364  | 9.3127 | 0.5883 | 0.2042  | 7.5028 | CHB |
| LOC340435 | GI_29735811-S | rs12156043 | 8 | 8 | 71776597 | 5330   | 9.3127 | 0.5883 | 0.2042  | 7.5028 | CHB |
| LOC340435 | GI_29735811-S | rs7842091  | 8 | 8 | 71777335 | 4592   | 9.3127 | 0.5883 | 0.2042  | 7.5028 | CHB |
| LOC340435 | GI_29735811-S | rs1477945  | 8 | 8 | 71778107 | 3820   | 9.3127 | 0.5883 | 0.2042  | 7.5028 | CHB |
| LOC340435 | GI_29735811-S | rs17760532 | 8 | 8 | 71782841 | 914    | 9.3127 | 0.5883 | 0.2042  | 7.5028 | CHB |
| LOC340435 | GI_29735811-S | rs13253842 | 8 | 8 | 71788057 | 6130   | 9.3127 | 0.5883 | -0.2042 | 7.5028 | CHB |
| LOC340435 | GI_29735811-S | rs13254908 | 8 | 8 | 71788652 | 6725   | 9.1116 | 0.5881 | 0.2045  | 7.5028 | CHB |
| LOC340435 | GI_29735811-S | rs13264669 | 8 | 8 | 71789326 | 7399   | 9.3127 | 0.5883 | -0.2042 | 7.5028 | CHB |
| LOC340435 | GI_29735811-S | rs7013657  | 8 | 8 | 71800113 | 18186  | 9.3127 | 0.5883 | -0.2042 | 7.5028 | CHB |
| LOC340435 | GI_29735811-S | rs6987515  | 8 | 8 | 71802856 | 20929  | 9.3127 | 0.5883 | -0.2042 | 7.5028 | CHB |
| LOC340435 | GI_29735811-S | rs2290702  | 8 | 8 | 71809534 | 27607  | 9.3127 | 0.5883 | 0.2042  | 7.5028 | CHB |
| LOC340435 | GI_29735811-S | rs7015035  | 8 | 8 | 71816155 | 34228  | 9.3127 | 0.5883 | -0.2042 | 7.5028 | CHB |
| LOC340435 | GI_29735811-S | rs6472542  | 8 | 8 | 71816641 | 34714  | 9.3127 | 0.5883 | 0.2042  | 7.5028 | CHB |
| LOC340435 | GI_29735811-S | rs6982406  | 8 | 8 | 71817162 | 35235  | 9.3127 | 0.5883 | -0.2042 | 7.5028 | CHB |
| LOC340435 | GI_29735811-S | rs1902614  | 8 | 8 | 71818721 | 36794  | 9.3127 | 0.5883 | -0.2042 | 7.5028 | CHB |
| LOC340435 | GI_29735811-S | rs6998024  | 8 | 8 | 71823394 | 41467  | 9.3127 | 0.5883 | -0.2042 | 7.5028 | CHB |
| LOC340435 | GI_29735811-S | rs1348535  | 8 | 8 | 71825295 | 43368  | 9.3127 | 0.5883 | -0.2042 | 7.5028 | CHB |
| LOC340435 | GI_29735811-S | rs7825446  | 8 | 8 | 71826728 | 44801  | 9.3127 | 0.5883 | -0.2042 | 7.5028 | CHB |
| LOC340435 | GI_29735811-S | rs6472543  | 8 | 8 | 71826962 | 45035  | 9.3127 | 0.5883 | 0.2042  | 7.5028 | CHB |
| LOC340435 | GI_29735811-S | rs7819332  | 8 | 8 | 71830819 | 48892  | 9.3127 | 0.5883 | -0.2042 | 7.5028 | CHB |
| LOC340435 | GI_29735811-S | rs7012404  | 8 | 8 | 71831252 | 49325  | 9.3127 | 0.5883 | -0.2042 | 7.5028 | CHB |
| LOC340435 | GI_29735811-S | rs17760766 | 8 | 8 | 71833743 | 51816  | 9.3127 | 0.5883 | -0.2042 | 7.5028 | CHB |
| LOC340435 | GI_29735811-S | rs13258584 | 8 | 8 | 71834133 | 52206  | 9.3127 | 0.5883 | -0.2042 | 7.5028 | CHB |
| LOC340435 | GI_29735811-S | rs1471114  | 8 | 8 | 71838101 | 56174  | 9.3127 | 0.5883 | 0.2042  | 7.5028 | CHB |
| LOC340435 | GI_29735811-S | rs7017481  | 8 | 8 | 71839324 | 57397  | 9.3127 | 0.5883 | -0.2042 | 7.5028 | CHB |
| LOC340435 | GI_29735811-S | rs11993453 | 8 | 8 | 71840393 | 58466  | 9.3127 | 0.5883 | -0.2042 | 7.5028 | CHB |
| LOC340435 | GI_29735811-S | rs12680166 | 8 | 8 | 71841192 | 59265  | 9.3127 | 0.5883 | -0.2042 | 7.5028 | CHB |
| LOC340435 | GI_29735811-S | rs17688313 | 8 | 8 | 71846418 | 64491  | 9.3127 | 0.5883 | 0.2042  | 7.5028 | CHB |
| LOC340435 | GI_29735811-S | rs12674966 | 8 | 8 | 71846964 | 65037  | 9.3127 | 0.5883 | 0.2042  | 7.5028 | CHB |
| LOC340435 | GI_29735811-S | rs1373480  | 8 | 8 | 71849521 | 67594  | 9.3127 | 0.5883 | 0.2042  | 7.5028 | CHB |
| LOC340435 | GI_29735811-S | rs7000647  | 8 | 8 | 71850962 | 69035  | 9.3127 | 0.5883 | -0.2042 | 7.5028 | CHB |
| LOC340435 | GI_29735811-S | rs6993170  | 8 | 8 | 71856073 | 74146  | 9.3127 | 0.5883 | 0.2042  | 7.5028 | CHB |
| LOC340435 | GI_29735811-S | rs6998989  | 8 | 8 | 71857085 | 75158  | 7.5230 | 0.5568 | -0.2078 | 7.5028 | CHB |
| LOC340435 | GI_29735811-S | rs6998786  | 8 | 8 | 71857184 | 75257  | 9.3127 | 0.5883 | 0.2042  | 7.5028 | CHB |
| LOC340435 | GI_29735811-S | rs6981149  | 8 | 8 | 71857236 | 75309  | 9.3127 | 0.5883 | -0.2042 | 7.5028 | CHB |
| LOC340435 | GI_29735811-S | rs12680988 | 8 | 8 | 71858444 | 76517  | 9.0815 | 0.5868 | -0.2039 | 7.5028 | CHB |
| LOC340435 | GI_29735811-S | rs6986479  | 8 | 8 | 71860112 | 78185  | 9.3127 | 0.5883 | 0.2042  | 7.5028 | CHB |
| LOC340435 | GI_29735811-S | rs1596566  | 8 | 8 | 71861130 | 79203  | 9.3127 | 0.5883 | -0.2042 | 7.5028 | CHB |
| LOC340435 | GI_29735811-S | rs1596565  | 8 | 8 | 71861386 | 79459  | 9.3127 | 0.5883 | -0.2042 | 7.5028 | CHB |
| LOC340435 | GI_29735811-S | rs6993115  | 8 | 8 | 71861737 | 79810  | 9.0790 | 0.5867 | -0.2035 | 7.5028 | CHB |
| LOC340435 | GI_29735811-S | rs10504481 | 8 | 8 | 71862071 | 80144  | 9.3127 | 0.5883 | -0.2042 | 7.5028 | CHB |
| LOC340435 | GI_29735811-S | rs1444339  | 8 | 8 | 71863196 | 81269  | 9.3127 | 0.5883 | -0.2042 | 7.5028 | CHB |
| LOC340435 | GI_29735811-S | rs7826483  | 8 | 8 | 71865447 | 83520  | 9.3127 | 0.5883 | -0.2042 | 7.5028 | CHB |
| LOC340435 | GI_29735811-S | rs7822474  | 8 | 8 | 71868287 | 86360  | 9.3127 | 0.5883 | 0.2042  | 7.5028 | CHB |
| LOC340435 | GI_29735811-S | rs13257800 | 8 | 8 | 71876687 | 94760  | 9.3127 | 0.5883 | -0.2042 | 7.5028 | CHB |
| LOC340435 | GI_29735811-S | rs13261146 | 8 | 8 | 71889473 | 107546 | 9.3127 | 0.5883 | 0.2042  | 7.5028 | CHB |
| LOC340435 | GI_29735811-S | rs13261712 | 8 | 8 | 71894818 | 112891 | 9.3127 | 0.5883 | -0.2042 | 7.5028 | CHB |
| LOC340435 | GI_29735811-S | rs13252719 | 8 | 8 | 71897123 | 115196 | 8.6885 | 0.5689 | -0.2116 | 7.5028 | CHB |
| LOC340435 | GI_29735811-S | rs1822651  | 8 | 8 | 71899215 | 117288 | 9.3127 | 0.5883 | 0.2042  | 7.5028 | CHB |
| LOC340435 | GI_29735811-S | rs13274062 | 8 | 8 | 71899641 | 117714 | 9.3127 | 0.5883 | -0.2042 | 7.5028 | CHB |

|           |               |            |   |   |          |        |        |        |         |        |     |
|-----------|---------------|------------|---|---|----------|--------|--------|--------|---------|--------|-----|
| LOC340435 | GI_29735811-S | rs1457198  | 8 | 8 | 71909723 | 127796 | 9.3127 | 0.5883 | -0.2042 | 7.5028 | CHB |
| LOC340435 | GI_29735811-S | rs1156955  | 8 | 8 | 71917513 | 135586 | 9.3127 | 0.5883 | 0.2042  | 7.5028 | CHB |
| LOC340435 | GI_29735811-S | rs13274381 | 8 | 8 | 71927648 | 145721 | 9.3127 | 0.5883 | 0.2042  | 7.5028 | CHB |
| LOC340435 | GI_29735811-S | rs11994581 | 8 | 8 | 71936961 | 155034 | 9.3127 | 0.5883 | 0.2042  | 7.5028 | CHB |
| LOC340435 | GI_29735811-S | rs7015825  | 8 | 8 | 71941227 | 159300 | 8.4701 | 0.5858 | 0.2021  | 7.5028 | CHB |
| LOC340435 | GI_29735811-S | rs13273773 | 8 | 8 | 71941801 | 159874 | 9.3127 | 0.5883 | 0.2042  | 7.5028 | CHB |
| LOC340435 | GI_29735811-S | rs6472551  | 8 | 8 | 71944403 | 162476 | 9.3127 | 0.5883 | -0.2042 | 7.5028 | CHB |
| LOC340435 | GI_29735811-S | rs6998354  | 8 | 8 | 71948723 | 166796 | 9.3127 | 0.5883 | -0.2042 | 7.5028 | CHB |
| LOC340435 | GI_29735811-S | rs12156377 | 8 | 8 | 71950246 | 168319 | 9.3127 | 0.5883 | 0.2042  | 7.5028 | CHB |
| LOC340435 | GI_29735811-S | rs6472552  | 8 | 8 | 71951524 | 169597 | 9.3127 | 0.5883 | 0.2042  | 7.5028 | CHB |
| LOC340435 | GI_29735811-S | rs7003788  | 8 | 8 | 71951678 | 169751 | 9.3127 | 0.5883 | 0.2042  | 7.5028 | CHB |
| LOC340435 | GI_29735811-S | rs12676282 | 8 | 8 | 71954445 | 172518 | 7.5433 | 0.5783 | 0.2110  | 7.5028 | CHB |
| LOC340435 | GI_29735811-S | rs4629903  | 8 | 8 | 71967686 | 185759 | 9.3127 | 0.5883 | -0.2042 | 7.5028 | CHB |
| LOC340435 | GI_29735811-S | rs2017035  | 8 | 8 | 72004360 | 222433 | 9.3127 | 0.5883 | -0.2042 | 7.5028 | CHB |
| LOC340435 | GI_29735811-S | rs10504487 | 8 | 8 | 72006153 | 224226 | 9.3127 | 0.5883 | -0.2042 | 7.5028 | CHB |
| LOC340435 | GI_29735811-S | rs1493199  | 8 | 8 | 72009058 | 227131 | 9.3127 | 0.5883 | -0.2042 | 7.5028 | CHB |
| LOC340435 | GI_29735811-S | rs10089583 | 8 | 8 | 72012038 | 230111 | 9.3127 | 0.5883 | 0.2042  | 7.5028 | CHB |
| LOC340435 | GI_29735811-S | rs1493198  | 8 | 8 | 72014511 | 232584 | 9.3127 | 0.5883 | 0.2042  | 7.5028 | CHB |
| LOC340435 | GI_29735811-S | rs2732087  | 8 | 8 | 72022993 | 241066 | 9.3127 | 0.5883 | -0.2042 | 7.5028 | CHB |
| LOC340435 | GI_29735811-S | rs2639911  | 8 | 8 | 72023266 | 241339 | 9.3127 | 0.5883 | 0.2042  | 7.5028 | CHB |
| LOC340435 | GI_29735811-S | rs3098859  | 8 | 8 | 72027586 | 245659 | 9.3127 | 0.5883 | -0.2042 | 7.5028 | CHB |
| LOC340435 | GI_29735811-S | rs3110268  | 8 | 8 | 72028722 | 246795 | 9.3127 | 0.5883 | -0.2042 | 7.5028 | CHB |
| LOC340435 | GI_29735811-S | rs2732144  | 8 | 8 | 72029173 | 247246 | 9.3127 | 0.5883 | 0.2042  | 7.5028 | CHB |
| LOC340435 | GI_29735811-S | rs2639949  | 8 | 8 | 72029570 | 247643 | 8.2300 | 0.5558 | 0.2064  | 7.5028 | CHB |
| LOC340435 | GI_29735811-S | rs2639950  | 8 | 8 | 72029612 | 247685 | 9.3127 | 0.5883 | 0.2042  | 7.5028 | CHB |
| LOC340435 | GI_29735811-S | rs2639919  | 8 | 8 | 72037682 | 255755 | 9.3127 | 0.5883 | -0.2042 | 7.5028 | CHB |
| LOC340435 | GI_29735811-S | rs1845217  | 8 | 8 | 72059805 | 277878 | 7.8984 | 0.5306 | -0.1672 | 7.5028 | CHB |
| LOC340435 | GI_29735811-S | rs2956611  | 8 | 8 | 72060422 | 278495 | 9.3127 | 0.5883 | 0.2042  | 7.5028 | CHB |
| LOC340435 | GI_29735811-S | rs2732125  | 8 | 8 | 72061055 | 279128 | 9.3127 | 0.5883 | 0.2042  | 7.5028 | CHB |
| LOC340435 | GI_29735811-S | rs950903   | 8 | 8 | 72063328 | 281401 | 9.3127 | 0.5883 | -0.2042 | 7.5028 | CHB |
| LOC340435 | GI_29735811-S | rs6472558  | 8 | 8 | 72063697 | 281770 | 9.3127 | 0.5883 | -0.2042 | 7.5028 | CHB |
| LOC340435 | GI_29735811-S | rs2639924  | 8 | 8 | 72068095 | 286168 | 9.3127 | 0.5883 | 0.2042  | 7.5028 | CHB |
| LOC340435 | GI_29735811-S | rs2639948  | 8 | 8 | 72071040 | 289113 | 9.3127 | 0.5883 | 0.2042  | 7.5028 | CHB |
| LOC340435 | GI_29735811-S | rs2732118  | 8 | 8 | 72071219 | 289292 | 9.1756 | 0.5910 | 0.2050  | 7.5028 | CHB |
| LOC340435 | GI_29735811-S | rs2732140  | 8 | 8 | 72073280 | 291353 | 9.3127 | 0.5883 | 0.2042  | 7.5028 | CHB |
| LOC340435 | GI_29735811-S | rs2732141  | 8 | 8 | 72073461 | 291534 | 9.3127 | 0.5883 | -0.2042 | 7.5028 | CHB |
| LOC340435 | GI_29735811-S | rs2639947  | 8 | 8 | 72073991 | 292064 | 8.2171 | 0.5552 | 0.2071  | 7.5028 | CHB |
| LOC340435 | GI_29735811-S | rs2732146  | 8 | 8 | 72074672 | 292745 | 9.3127 | 0.5883 | 0.2042  | 7.5028 | CHB |
| LOC340435 | GI_29735811-S | rs2639945  | 8 | 8 | 72075093 | 293166 | 8.4281 | 0.5566 | -0.2074 | 7.5028 | CHB |
| LOC340435 | GI_29735811-S | rs2035929  | 8 | 8 | 72075926 | 293999 | 9.3127 | 0.5883 | -0.2042 | 7.5028 | CHB |
| LOC340435 | GI_29735811-S | rs2639941  | 8 | 8 | 72076459 | 294532 | 9.0940 | 0.5873 | 0.2031  | 7.5028 | CHB |
| LOC340435 | GI_29735811-S | rs2639939  | 8 | 8 | 72076477 | 294550 | 9.3127 | 0.5883 | -0.2042 | 7.5028 | CHB |
| LOC340435 | GI_29735811-S | rs2035925  | 8 | 8 | 72076770 | 294843 | 9.3127 | 0.5883 | 0.2042  | 7.5028 | CHB |
| LOC340435 | GI_29735811-S | rs2639938  | 8 | 8 | 72076906 | 294979 | 9.3127 | 0.5883 | 0.2042  | 7.5028 | CHB |
| LOC340435 | GI_29735811-S | rs2639937  | 8 | 8 | 72076910 | 294983 | 9.3127 | 0.5883 | 0.2042  | 7.5028 | CHB |
| LOC340435 | GI_29735811-S | rs2035924  | 8 | 8 | 72077007 | 295080 | 9.3127 | 0.5883 | 0.2042  | 7.5028 | CHB |
| LOC340435 | GI_29735811-S | rs2732089  | 8 | 8 | 72077718 | 295791 | 9.3127 | 0.5883 | 0.2042  | 7.5028 | CHB |
| LOC340435 | GI_29735811-S | rs3098865  | 8 | 8 | 72078538 | 296611 | 9.3127 | 0.5883 | -0.2042 | 7.5028 | CHB |
| LOC340435 | GI_29735811-S | rs3098866  | 8 | 8 | 72079128 | 297201 | 9.3127 | 0.5883 | 0.2042  | 7.5028 | CHB |
| LOC340435 | GI_29735811-S | rs3110239  | 8 | 8 | 72079299 | 297372 | 9.3127 | 0.5883 | -0.2042 | 7.5028 | CHB |
| LOC340435 | GI_29735811-S | rs3098867  | 8 | 8 | 72079425 | 297498 | 9.3127 | 0.5883 | -0.2042 | 7.5028 | CHB |
| LOC340435 | GI_29735811-S | rs2639904  | 8 | 8 | 72079684 | 297757 | 9.3127 | 0.5883 | 0.2042  | 7.5028 | CHB |
| LOC340435 | GI_29735811-S | rs2639901  | 8 | 8 | 72080305 | 298378 | 9.3127 | 0.5883 | -0.2042 | 7.5028 | CHB |
| LOC340435 | GI_29735811-S | rs2732090  | 8 | 8 | 72080811 | 298884 | 9.3127 | 0.5883 | -0.2042 | 7.5028 | CHB |
| LOC340435 | GI_29735811-S | rs2732091  | 8 | 8 | 72080977 | 299050 | 9.3127 | 0.5883 | 0.2042  | 7.5028 | CHB |
| LOC340435 | GI_29735811-S | rs2732093  | 8 | 8 | 72081633 | 299706 | 9.3127 | 0.5883 | 0.2042  | 7.5028 | CHB |
| LOC340435 | GI_29735811-S | rs2732094  | 8 | 8 | 72082472 | 300545 | 9.3127 | 0.5883 | 0.2042  | 7.5028 | CHB |
| LOC340435 | GI_29735811-S | rs2732095  | 8 | 8 | 72082500 | 300573 | 9.3127 | 0.5883 | 0.2042  | 7.5028 | CHB |
| LOC340435 | GI_29735811-S | rs2732096  | 8 | 8 | 72082534 | 300607 | 9.3127 | 0.5883 | -0.2042 | 7.5028 | CHB |

|           |               |            |   |   |          |        |         |        |         |        |     |
|-----------|---------------|------------|---|---|----------|--------|---------|--------|---------|--------|-----|
| LOC340435 | GI_29735811-S | rs2639898  | 8 | 8 | 72082864 | 300937 | 9.3127  | 0.5883 | 0.2042  | 7.5028 | CHB |
| LOC340435 | GI_29735811-S | rs2639897  | 8 | 8 | 72083230 | 301303 | 9.3127  | 0.5883 | 0.2042  | 7.5028 | CHB |
| LOC340435 | GI_29735811-S | rs1353058  | 8 | 8 | 72084572 | 302645 | 9.3127  | 0.5883 | 0.2042  | 7.5028 | CHB |
| LOC340435 | GI_29735811-S | rs1353057  | 8 | 8 | 72084651 | 302724 | 9.3127  | 0.5883 | -0.2042 | 7.5028 | CHB |
| LOC340435 | GI_29735811-S | rs2639960  | 8 | 8 | 72084693 | 302766 | 9.3127  | 0.5883 | -0.2042 | 7.5028 | CHB |
| LOC340435 | GI_29735811-S | rs2639958  | 8 | 8 | 72084704 | 302777 | 11.2972 | 0.6749 | 0.2362  | 7.5028 | CHB |
| LOC340435 | GI_29735811-S | rs1908036  | 8 | 8 | 72084878 | 302951 | 9.3127  | 0.5883 | -0.2042 | 7.5028 | CHB |
| LOC340435 | GI_29735811-S | rs1908035  | 8 | 8 | 72084962 | 303035 | 9.3127  | 0.5883 | 0.2042  | 7.5028 | CHB |
| LOC340435 | GI_29735811-S | rs1908034  | 8 | 8 | 72085108 | 303181 | 9.3127  | 0.5883 | 0.2042  | 7.5028 | CHB |
| LOC340435 | GI_29735811-S | rs1908033  | 8 | 8 | 72085353 | 303426 | 9.3127  | 0.5883 | 0.2042  | 7.5028 | CHB |
| LOC340435 | GI_29735811-S | rs2732102  | 8 | 8 | 72085426 | 303499 | 9.3127  | 0.5883 | -0.2042 | 7.5028 | CHB |
| LOC340435 | GI_29735811-S | rs2639957  | 8 | 8 | 72085756 | 303829 | 9.3127  | 0.5883 | 0.2042  | 7.5028 | CHB |
| LOC340435 | GI_29735811-S | rs2732103  | 8 | 8 | 72086050 | 304123 | 9.3127  | 0.5883 | 0.2042  | 7.5028 | CHB |
| LOC340435 | GI_29735811-S | rs2732104  | 8 | 8 | 72086073 | 304146 | 9.3127  | 0.5883 | 0.2042  | 7.5028 | CHB |
| LOC340435 | GI_29735811-S | rs2732106  | 8 | 8 | 72086393 | 304466 | 9.3127  | 0.5883 | -0.2042 | 7.5028 | CHB |
| LOC340435 | GI_29735811-S | rs2639956  | 8 | 8 | 72086645 | 304718 | 9.3127  | 0.5883 | 0.2042  | 7.5028 | CHB |
| LOC340435 | GI_29735811-S | rs1389206  | 8 | 8 | 72087416 | 305489 | 9.3127  | 0.5883 | -0.2042 | 7.5028 | CHB |
| LOC340435 | GI_29735811-S | rs2732107  | 8 | 8 | 72087862 | 305935 | 9.3127  | 0.5883 | 0.2042  | 7.5028 | CHB |
| LOC340435 | GI_29735811-S | rs2639955  | 8 | 8 | 72087896 | 305969 | 9.3127  | 0.5883 | -0.2042 | 7.5028 | CHB |
| LOC340435 | GI_29735811-S | rs2639954  | 8 | 8 | 72088129 | 306202 | 9.3127  | 0.5883 | 0.2042  | 7.5028 | CHB |
| LOC340435 | GI_29735811-S | rs2639953  | 8 | 8 | 72088214 | 306287 | 9.3127  | 0.5883 | 0.2042  | 7.5028 | CHB |
| LOC340435 | GI_29735811-S | rs2639952  | 8 | 8 | 72088284 | 306357 | 9.3127  | 0.5883 | 0.2042  | 7.5028 | CHB |
| LOC340435 | GI_29735811-S | rs2732108  | 8 | 8 | 72088653 | 306726 | 9.3127  | 0.5883 | 0.2042  | 7.5028 | CHB |
| LOC340435 | GI_29735811-S | rs2732109  | 8 | 8 | 72088777 | 306850 | 9.0081  | 0.5924 | 0.2048  | 7.5028 | CHB |
| LOC340435 | GI_29735811-S | rs1493203  | 8 | 8 | 72089061 | 307134 | 9.3127  | 0.5883 | -0.2042 | 7.5028 | CHB |
| LOC340435 | GI_29735811-S | rs2732110  | 8 | 8 | 72089365 | 307438 | 9.3127  | 0.5883 | 0.2042  | 7.5028 | CHB |
| LOC340435 | GI_29735811-S | rs2639951  | 8 | 8 | 72089779 | 307852 | 9.3127  | 0.5883 | -0.2042 | 7.5028 | CHB |
| LOC340435 | GI_29735811-S | rs2732111  | 8 | 8 | 72089983 | 308056 | 9.3127  | 0.5883 | -0.2042 | 7.5028 | CHB |
| LOC340435 | GI_29735811-S | rs2732112  | 8 | 8 | 72090395 | 308468 | 9.3127  | 0.5883 | 0.2042  | 7.5028 | CHB |
| LOC340435 | GI_29735811-S | rs1389204  | 8 | 8 | 72090852 | 308925 | 9.3127  | 0.5883 | 0.2042  | 7.5028 | CHB |
| LOC340435 | GI_29735811-S | rs2732113  | 8 | 8 | 72091103 | 309176 | 9.3127  | 0.5883 | -0.2042 | 7.5028 | CHB |
| LOC340435 | GI_29735811-S | rs2732115  | 8 | 8 | 72091408 | 309481 | 9.3127  | 0.5883 | 0.2042  | 7.5028 | CHB |
| LOC340435 | GI_29735811-S | rs2732116  | 8 | 8 | 72091881 | 309954 | 9.3127  | 0.5883 | -0.2042 | 7.5028 | CHB |
| LOC340435 | GI_29735811-S | rs2956610  | 8 | 8 | 72092087 | 310160 | 9.3127  | 0.5883 | -0.2042 | 7.5028 | CHB |
| LOC340435 | GI_29735811-S | rs3098868  | 8 | 8 | 72092246 | 310319 | 9.3127  | 0.5883 | -0.2042 | 7.5028 | CHB |
| LOC340435 | GI_29735811-S | rs3110240  | 8 | 8 | 72092658 | 310731 | 9.3127  | 0.5883 | 0.2042  | 7.5028 | CHB |
| LOC340435 | GI_29735811-S | rs3098871  | 8 | 8 | 72092969 | 311042 | 9.3127  | 0.5883 | -0.2042 | 7.5028 | CHB |
| LOC340435 | GI_29735811-S | rs3098873  | 8 | 8 | 72095140 | 313213 | 9.3127  | 0.5883 | -0.2042 | 7.5028 | CHB |
| LOC340435 | GI_29735811-S | rs3110244  | 8 | 8 | 72095751 | 313824 | 9.0216  | 0.5930 | -0.2044 | 7.5028 | CHB |
| LOC340435 | GI_29735811-S | rs3098874  | 8 | 8 | 72096892 | 314965 | 9.3127  | 0.5883 | 0.2042  | 7.5028 | CHB |
| LOC340435 | GI_29735811-S | rs6982447  | 8 | 8 | 72097167 | 315240 | 9.3127  | 0.5883 | 0.2042  | 7.5028 | CHB |
| LOC340435 | GI_29735811-S | rs6983299  | 8 | 8 | 72097441 | 315514 | 9.3127  | 0.5883 | -0.2042 | 7.5028 | CHB |
| LOC340435 | GI_29735811-S | rs6982942  | 8 | 8 | 72097489 | 315562 | 9.3127  | 0.5883 | 0.2042  | 7.5028 | CHB |
| LOC340435 | GI_29735811-S | rs13256029 | 8 | 8 | 72098099 | 316172 | 9.3127  | 0.5883 | -0.2042 | 7.5028 | CHB |
| LOC340435 | GI_29735811-S | rs3098876  | 8 | 8 | 72098798 | 316871 | 9.3127  | 0.5883 | -0.2042 | 7.5028 | CHB |
| LOC340435 | GI_29735811-S | rs3110250  | 8 | 8 | 72098938 | 317011 | 9.3127  | 0.5883 | 0.2042  | 7.5028 | CHB |
| LOC340435 | GI_29735811-S | rs3098877  | 8 | 8 | 72099000 | 317073 | 9.3127  | 0.5883 | -0.2042 | 7.5028 | CHB |
| LOC340435 | GI_29735811-S | rs3110251  | 8 | 8 | 72099528 | 317601 | 9.3127  | 0.5883 | 0.2042  | 7.5028 | CHB |
| LOC340435 | GI_29735811-S | rs3110252  | 8 | 8 | 72099774 | 317847 | 9.3127  | 0.5883 | 0.2042  | 7.5028 | CHB |
| LOC340435 | GI_29735811-S | rs3110253  | 8 | 8 | 72100107 | 318180 | 9.3127  | 0.5883 | 0.2042  | 7.5028 | CHB |
| LOC340435 | GI_29735811-S | rs3110255  | 8 | 8 | 72100604 | 318677 | 9.3127  | 0.5883 | 0.2042  | 7.5028 | CHB |
| LOC340435 | GI_29735811-S | rs3110256  | 8 | 8 | 72100690 | 318763 | 9.3127  | 0.5883 | 0.2042  | 7.5028 | CHB |
| LOC340435 | GI_29735811-S | rs3098879  | 8 | 8 | 72101014 | 319087 | 9.3127  | 0.5883 | -0.2042 | 7.5028 | CHB |
| LOC340435 | GI_29735811-S | rs3110258  | 8 | 8 | 72101086 | 319159 | 9.3127  | 0.5883 | 0.2042  | 7.5028 | CHB |
| LOC340435 | GI_29735811-S | rs3098880  | 8 | 8 | 72101475 | 319548 | 9.3127  | 0.5883 | -0.2042 | 7.5028 | CHB |
| LOC340435 | GI_29735811-S | rs3110263  | 8 | 8 | 72105246 | 323319 | 9.3127  | 0.5883 | 0.2042  | 7.5028 | CHB |
| LOC340435 | GI_29735811-S | rs3098883  | 8 | 8 | 72106121 | 324194 | 9.3127  | 0.5883 | -0.2042 | 7.5028 | CHB |
| LOC340435 | GI_29735811-S | rs4532626  | 8 | 8 | 72107449 | 325522 | 9.3127  | 0.5883 | 0.2042  | 7.5028 | CHB |
| LOC340435 | GI_29735811-S | rs4434651  | 8 | 8 | 72109741 | 327814 | 9.3127  | 0.5883 | -0.2042 | 7.5028 | CHB |

|           |               |            |   |   |           |        |         |        |         |        |     |
|-----------|---------------|------------|---|---|-----------|--------|---------|--------|---------|--------|-----|
| LOC340435 | GI_29735811-S | rs12542300 | 8 | 8 | 72113949  | 332022 | 9.3127  | 0.5883 | -0.2042 | 7.5028 | CHB |
| LOC340435 | GI_29735811-S | rs10091471 | 8 | 8 | 72116309  | 334382 | 9.3127  | 0.5883 | 0.2042  | 7.5028 | CHB |
| LOC340435 | GI_29735811-S | rs6472561  | 8 | 8 | 72117737  | 335810 | 9.3127  | 0.5883 | -0.2042 | 7.5028 | CHB |
| LOC340435 | GI_29735811-S | rs4074909  | 8 | 8 | 72118381  | 336454 | 9.3127  | 0.5883 | 0.2042  | 7.5028 | CHB |
| LOC340435 | GI_29735811-S | rs4078067  | 8 | 8 | 72119025  | 337098 | 9.3127  | 0.5883 | -0.2042 | 7.5028 | CHB |
| LOC340435 | GI_29735811-S | rs4504667  | 8 | 8 | 72119346  | 337419 | 9.3127  | 0.5883 | -0.2042 | 7.5028 | CHB |
| LOC340435 | GI_29735811-S | rs4571761  | 8 | 8 | 72119727  | 337800 | 9.3127  | 0.5883 | -0.2042 | 7.5028 | CHB |
| LOC340435 | GI_29735811-S | rs4738105  | 8 | 8 | 72121472  | 339545 | 9.3127  | 0.5883 | -0.2042 | 7.5028 | CHB |
| PKHD1L1   | GI_31377831-S | rs2980569  | 8 | 8 | 110416578 | 191677 | 5.6697  | 0.3967 | -0.5586 | 5.4316 | CHB |
| PKHD1L1   | GI_31377831-S | rs2980570  | 8 | 8 | 110417198 | 191057 | 8.3414  | 0.5439 | -0.6797 | 5.4316 | CHB |
| PKHD1L1   | GI_31377831-S | rs2980571  | 8 | 8 | 110417425 | 190830 | 8.3414  | 0.5439 | 0.6797  | 5.4316 | CHB |
| PKHD1L1   | GI_31377831-S | rs1870389  | 8 | 8 | 110420430 | 187825 | 8.3414  | 0.5439 | 0.6797  | 5.4316 | CHB |
| PKHD1L1   | GI_31377831-S | rs1458919  | 8 | 8 | 110420434 | 187821 | 5.6697  | 0.3967 | -0.5586 | 5.4316 | CHB |
| PKHD1L1   | GI_31377831-S | rs2980582  | 8 | 8 | 110427418 | 180837 | 6.3380  | 0.4373 | -0.5712 | 5.4316 | CHB |
| PKHD1L1   | GI_31377831-S | rs2926239  | 8 | 8 | 110427848 | 180407 | 8.3414  | 0.5439 | 0.6797  | 5.4316 | CHB |
| PKHD1L1   | GI_31377831-S | rs2980585  | 8 | 8 | 110429704 | 178551 | 8.5831  | 0.5728 | 0.6880  | 5.4316 | CHB |
| PKHD1L1   | GI_31377831-S | rs2926237  | 8 | 8 | 110430021 | 178234 | 8.5831  | 0.5728 | 0.6880  | 5.4316 | CHB |
| PKHD1L1   | GI_31377831-S | rs1585294  | 8 | 8 | 110431684 | 176571 | 5.6697  | 0.3967 | -0.5586 | 5.4316 | CHB |
| PKHD1L1   | GI_31377831-S | rs11998321 | 8 | 8 | 110432563 | 175692 | 9.1908  | 0.5830 | 0.6953  | 5.4316 | CHB |
| PKHD1L1   | GI_31377831-S | rs2926233  | 8 | 8 | 110435551 | 172704 | 10.0704 | 0.6562 | -0.7255 | 5.4316 | CHB |
| PKHD1L1   | GI_31377831-S | rs11987954 | 8 | 8 | 110436187 | 172068 | 9.1908  | 0.5830 | 0.6953  | 5.4316 | CHB |
| PKHD1L1   | GI_31377831-S | rs6983646  | 8 | 8 | 110436363 | 171892 | 6.0982  | 0.4230 | 0.5655  | 5.4316 | CHB |
| PKHD1L1   | GI_31377831-S | rs2199120  | 8 | 8 | 110436829 | 171426 | 6.0982  | 0.4230 | -0.5655 | 5.4316 | CHB |
| PKHD1L1   | GI_31377831-S | rs2926225  | 8 | 8 | 110437719 | 170536 | 7.5923  | 0.5234 | -0.6245 | 5.4316 | CHB |
| PKHD1L1   | GI_31377831-S | rs2926224  | 8 | 8 | 110437983 | 170272 | 6.0982  | 0.4230 | -0.5655 | 5.4316 | CHB |
| PKHD1L1   | GI_31377831-S | rs1458920  | 8 | 8 | 110440985 | 167270 | 7.9829  | 0.5264 | 0.6627  | 5.4316 | CHB |
| PKHD1L1   | GI_31377831-S | rs12680439 | 8 | 8 | 110441470 | 166785 | 6.6813  | 0.4817 | 0.6244  | 5.4316 | CHB |
| PKHD1L1   | GI_31377831-S | rs7002606  | 8 | 8 | 110441547 | 166708 | 7.8054  | 0.5258 | -0.6627 | 5.4316 | CHB |
| PKHD1L1   | GI_31377831-S | rs7002926  | 8 | 8 | 110441762 | 166493 | 7.9829  | 0.5264 | -0.6627 | 5.4316 | CHB |
| PKHD1L1   | GI_31377831-S | rs6982748  | 8 | 8 | 110441844 | 166411 | 7.9829  | 0.5264 | 0.6627  | 5.4316 | CHB |
| PKHD1L1   | GI_31377831-S | rs6987198  | 8 | 8 | 110442003 | 166252 | 8.9421  | 0.5719 | -0.6650 | 5.4316 | CHB |
| PKHD1L1   | GI_31377831-S | rs4734212  | 8 | 8 | 110445727 | 162528 | 7.9829  | 0.5264 | 0.6627  | 5.4316 | CHB |
| PKHD1L1   | GI_31377831-S | rs10099126 | 8 | 8 | 110448791 | 159464 | 7.9829  | 0.5264 | -0.6627 | 5.4316 | CHB |
| PKHD1L1   | GI_31377831-S | rs7819141  | 8 | 8 | 110449856 | 158399 | 7.9829  | 0.5264 | 0.6627  | 5.4316 | CHB |
| PKHD1L1   | GI_31377831-S | rs7819151  | 8 | 8 | 110449873 | 158382 | 7.9829  | 0.5264 | 0.6627  | 5.4316 | CHB |
| PKHD1L1   | GI_31377831-S | rs12334438 | 8 | 8 | 110450959 | 157296 | 8.8191  | 0.5663 | -0.6671 | 5.4316 | CHB |
| PKHD1L1   | GI_31377831-S | rs13253951 | 8 | 8 | 110459380 | 148875 | 7.9829  | 0.5264 | -0.6627 | 5.4316 | CHB |
| PKHD1L1   | GI_31377831-S | rs2349436  | 8 | 8 | 110460256 | 147999 | 7.9829  | 0.5264 | 0.6627  | 5.4316 | CHB |
| PKHD1L1   | GI_31377831-S | rs921960   | 8 | 8 | 110461305 | 146950 | 7.3338  | 0.5097 | -0.6544 | 5.4316 | CHB |
| PKHD1L1   | GI_31377831-S | rs1457292  | 8 | 8 | 110461824 | 146431 | 7.5646  | 0.5134 | 0.6579  | 5.4316 | CHB |
| PKHD1L1   | GI_31377831-S | rs6993552  | 8 | 8 | 110462318 | 145937 | 7.9829  | 0.5264 | -0.6627 | 5.4316 | CHB |
| PKHD1L1   | GI_31377831-S | rs2168679  | 8 | 8 | 110464203 | 144052 | 7.9829  | 0.5264 | 0.6627  | 5.4316 | CHB |
| PKHD1L1   | GI_31377831-S | rs7016085  | 8 | 8 | 110466914 | 141341 | 7.9829  | 0.5264 | -0.6627 | 5.4316 | CHB |
| PKHD1L1   | GI_31377831-S | rs9642806  | 8 | 8 | 110471667 | 136588 | 7.9829  | 0.5264 | 0.6627  | 5.4316 | CHB |
| PKHD1L1   | GI_31377831-S | rs13278812 | 8 | 8 | 110472672 | 135583 | 7.9829  | 0.5264 | -0.6627 | 5.4316 | CHB |
| PKHD1L1   | GI_31377831-S | rs1379370  | 8 | 8 | 110472874 | 135381 | 8.8191  | 0.5663 | -0.6671 | 5.4316 | CHB |
| PKHD1L1   | GI_31377831-S | rs1457290  | 8 | 8 | 110474575 | 133680 | 8.2176  | 0.5552 | 0.6652  | 5.4316 | CHB |
| PKHD1L1   | GI_31377831-S | rs1457289  | 8 | 8 | 110474727 | 133528 | 8.8191  | 0.5663 | 0.6671  | 5.4316 | CHB |
| PKHD1L1   | GI_31377831-S | rs10098672 | 8 | 8 | 110476273 | 131982 | 7.9829  | 0.5264 | 0.6627  | 5.4316 | CHB |
| PKHD1L1   | GI_31377831-S | rs1870108  | 8 | 8 | 110476737 | 131518 | 7.9829  | 0.5264 | 0.6627  | 5.4316 | CHB |
| PKHD1L1   | GI_31377831-S | rs6993467  | 8 | 8 | 110478788 | 129467 | 8.4071  | 0.5556 | 0.6653  | 5.4316 | CHB |
| PKHD1L1   | GI_31377831-S | rs13266374 | 8 | 8 | 110478901 | 129354 | 7.5916  | 0.5148 | 0.6601  | 5.4316 | CHB |
| PKHD1L1   | GI_31377831-S | rs13266838 | 8 | 8 | 110478916 | 129339 | 8.0031  | 0.5445 | -0.6918 | 5.4316 | CHB |
| PKHD1L1   | GI_31377831-S | rs921959   | 8 | 8 | 110480514 | 127741 | 7.9829  | 0.5264 | 0.6627  | 5.4316 | CHB |
| PKHD1L1   | GI_31377831-S | rs1379369  | 8 | 8 | 110481695 | 126560 | 8.8191  | 0.5663 | 0.6671  | 5.4316 | CHB |
| PKHD1L1   | GI_31377831-S | rs2061295  | 8 | 8 | 110482124 | 126131 | 7.9829  | 0.5264 | -0.6627 | 5.4316 | CHB |
| PKHD1L1   | GI_31377831-S | rs1457287  | 8 | 8 | 110482154 | 126101 | 8.8191  | 0.5663 | 0.6671  | 5.4316 | CHB |
| PKHD1L1   | GI_31377831-S | rs10101522 | 8 | 8 | 110482225 | 126030 | 7.9829  | 0.5264 | 0.6627  | 5.4316 | CHB |
| PKHD1L1   | GI_31377831-S | rs964307   | 8 | 8 | 110482938 | 125317 | 7.9829  | 0.5264 | 0.6627  | 5.4316 | CHB |

|         |               |            |   |   |           |        |         |        |         |        |     |
|---------|---------------|------------|---|---|-----------|--------|---------|--------|---------|--------|-----|
| PKHD1L1 | GI_31377831-S | rs2061294  | 8 | 8 | 110483000 | 125255 | 8.2752  | 0.5580 | -0.6639 | 5.4316 | CHB |
| PKHD1L1 | GI_31377831-S | rs965930   | 8 | 8 | 110483752 | 124503 | 7.9829  | 0.5264 | -0.6627 | 5.4316 | CHB |
| PKHD1L1 | GI_31377831-S | rs921958   | 8 | 8 | 110485623 | 122632 | 7.9829  | 0.5264 | 0.6627  | 5.4316 | CHB |
| PKHD1L1 | GI_31377831-S | rs1457286  | 8 | 8 | 110485989 | 122266 | 8.8191  | 0.5663 | -0.6671 | 5.4316 | CHB |
| PKHD1L1 | GI_31377831-S | rs12679728 | 8 | 8 | 110487637 | 120618 | 7.9829  | 0.5264 | 0.6627  | 5.4316 | CHB |
| PKHD1L1 | GI_31377831-S | rs1037695  | 8 | 8 | 110488098 | 120157 | 8.8191  | 0.5663 | -0.6671 | 5.4316 | CHB |
| PKHD1L1 | GI_31377831-S | rs10097258 | 8 | 8 | 110488287 | 119968 | 7.9829  | 0.5264 | 0.6627  | 5.4316 | CHB |
| PKHD1L1 | GI_31377831-S | rs1824193  | 8 | 8 | 110488942 | 119313 | 7.9829  | 0.5264 | -0.6627 | 5.4316 | CHB |
| PKHD1L1 | GI_31377831-S | rs1379363  | 8 | 8 | 110489247 | 119008 | 7.9829  | 0.5264 | 0.6627  | 5.4316 | CHB |
| PKHD1L1 | GI_31377831-S | rs1379364  | 8 | 8 | 110489325 | 118930 | 7.8657  | 0.5465 | 0.6549  | 5.4316 | CHB |
| PKHD1L1 | GI_31377831-S | rs13254245 | 8 | 8 | 110489560 | 118695 | 7.9829  | 0.5264 | -0.6627 | 5.4316 | CHB |
| PKHD1L1 | GI_31377831-S | rs13252234 | 8 | 8 | 110489605 | 118650 | 7.9829  | 0.5264 | 0.6627  | 5.4316 | CHB |
| PKHD1L1 | GI_31377831-S | rs9297425  | 8 | 8 | 110490289 | 117966 | 7.9829  | 0.5264 | 0.6627  | 5.4316 | CHB |
| PKHD1L1 | GI_31377831-S | rs12546429 | 8 | 8 | 110491526 | 116729 | 7.9829  | 0.5264 | -0.6627 | 5.4316 | CHB |
| PKHD1L1 | GI_31377831-S | rs10955518 | 8 | 8 | 110493352 | 114903 | 7.9829  | 0.5264 | -0.6627 | 5.4316 | CHB |
| PKHD1L1 | GI_31377831-S | rs4604408  | 8 | 8 | 110494770 | 113485 | 8.5414  | 0.5708 | -0.6671 | 5.4316 | CHB |
| PKHD1L1 | GI_31377831-S | rs897838   | 8 | 8 | 110495783 | 112472 | 7.9829  | 0.5264 | -0.6627 | 5.4316 | CHB |
| PKHD1L1 | GI_31377831-S | rs897839   | 8 | 8 | 110496020 | 112235 | 7.9829  | 0.5264 | 0.6627  | 5.4316 | CHB |
| PKHD1L1 | GI_31377831-S | rs2349760  | 8 | 8 | 110496096 | 112159 | 8.8191  | 0.5663 | -0.6671 | 5.4316 | CHB |
| PKHD1L1 | GI_31377831-S | rs2349761  | 8 | 8 | 110496200 | 112055 | 7.9829  | 0.5264 | 0.6627  | 5.4316 | CHB |
| PKHD1L1 | GI_31377831-S | rs3911483  | 8 | 8 | 110496369 | 111886 | 7.8028  | 0.5257 | -0.6622 | 5.4316 | CHB |
| PKHD1L1 | GI_31377831-S | rs2124982  | 8 | 8 | 110496868 | 111387 | 7.9829  | 0.5264 | -0.6627 | 5.4316 | CHB |
| PKHD1L1 | GI_31377831-S | rs9656882  | 8 | 8 | 110496959 | 111296 | 7.9829  | 0.5264 | -0.6627 | 5.4316 | CHB |
| PKHD1L1 | GI_31377831-S | rs13254461 | 8 | 8 | 110498098 | 110157 | 7.9829  | 0.5264 | -0.6627 | 5.4316 | CHB |
| PKHD1L1 | GI_31377831-S | rs9656793  | 8 | 8 | 110498129 | 110126 | 7.9829  | 0.5264 | 0.6627  | 5.4316 | CHB |
| PKHD1L1 | GI_31377831-S | rs1840908  | 8 | 8 | 110498628 | 109627 | 7.9225  | 0.5405 | -0.6576 | 5.4316 | CHB |
| PKHD1L1 | GI_31377831-S | rs7840592  | 8 | 8 | 110499617 | 108638 | 7.9829  | 0.5264 | -0.6627 | 5.4316 | CHB |
| PKHD1L1 | GI_31377831-S | rs10092565 | 8 | 8 | 110499679 | 108576 | 8.2571  | 0.5483 | -0.6676 | 5.4316 | CHB |
| PKHD1L1 | GI_31377831-S | rs10092693 | 8 | 8 | 110499780 | 108475 | 7.9829  | 0.5264 | -0.6627 | 5.4316 | CHB |
| PKHD1L1 | GI_31377831-S | rs6469260  | 8 | 8 | 110500234 | 108021 | 8.3701  | 0.5717 | -0.6739 | 5.4316 | CHB |
| PKHD1L1 | GI_31377831-S | rs7016609  | 8 | 8 | 110500393 | 107862 | 7.9829  | 0.5264 | 0.6627  | 5.4316 | CHB |
| PKHD1L1 | GI_31377831-S | rs13262995 | 8 | 8 | 110504590 | 103665 | 7.9829  | 0.5264 | -0.6627 | 5.4316 | CHB |
| PKHD1L1 | GI_31377831-S | rs7015262  | 8 | 8 | 110505780 | 102475 | 7.1245  | 0.5069 | 0.6522  | 5.4316 | CHB |
| PKHD1L1 | GI_31377831-S | rs10458302 | 8 | 8 | 110505939 | 102316 | 7.9829  | 0.5264 | -0.6627 | 5.4316 | CHB |
| PKHD1L1 | GI_31377831-S | rs4735133  | 8 | 8 | 110506560 | 101695 | 8.8191  | 0.5663 | 0.6671  | 5.4316 | CHB |
| PKHD1L1 | GI_31377831-S | rs4735134  | 8 | 8 | 110506846 | 101409 | 7.9829  | 0.5264 | -0.6627 | 5.4316 | CHB |
| PKHD1L1 | GI_31377831-S | rs12544835 | 8 | 8 | 110508695 | 99560  | 6.9925  | 0.5084 | -0.6283 | 5.4316 | CHB |
| PKHD1L1 | GI_31377831-S | rs6469261  | 8 | 8 | 110509800 | 98455  | 6.7526  | 0.4611 | -0.5999 | 5.4316 | CHB |
| PKHD1L1 | GI_31377831-S | rs6469262  | 8 | 8 | 110512656 | 95599  | 7.2645  | 0.5237 | -0.6658 | 5.4316 | CHB |
| PKHD1L1 | GI_31377831-S | rs1870107  | 8 | 8 | 110517106 | 91149  | 8.8191  | 0.5663 | 0.6671  | 5.4316 | CHB |
| PKHD1L1 | GI_31377831-S | rs2844253  | 8 | 8 | 110521087 | 87168  | 11.0747 | 0.6583 | -0.6949 | 5.4316 | CHB |
| PKHD1L1 | GI_31377831-S | rs1673408  | 8 | 8 | 110524497 | 83758  | 11.0747 | 0.6583 | 0.6949  | 5.4316 | CHB |
| PKHD1L1 | GI_31377831-S | rs1673407  | 8 | 8 | 110529664 | 78591  | 11.0747 | 0.6583 | -0.6949 | 5.4316 | CHB |
| PKHD1L1 | GI_31377831-S | rs1673405  | 8 | 8 | 110530694 | 77561  | 7.0284  | 0.5292 | -0.7671 | 5.4316 | CHB |
| PKHD1L1 | GI_31377831-S | rs1563579  | 8 | 8 | 110531534 | 76721  | 9.5915  | 0.6002 | 0.6929  | 5.4316 | CHB |
| PKHD1L1 | GI_31377831-S | rs1783165  | 8 | 8 | 110533034 | 75221  | 9.9319  | 0.6144 | -0.6883 | 5.4316 | CHB |
| PKHD1L1 | GI_31377831-S | rs1673404  | 8 | 8 | 110534236 | 74019  | 9.9319  | 0.6144 | 0.6883  | 5.4316 | CHB |
| PKHD1L1 | GI_31377831-S | rs1783163  | 8 | 8 | 110535261 | 72994  | 11.0747 | 0.6583 | -0.6949 | 5.4316 | CHB |
| PKHD1L1 | GI_31377831-S | rs2607639  | 8 | 8 | 110539473 | 68782  | 9.9319  | 0.6144 | 0.6883  | 5.4316 | CHB |
| PKHD1L1 | GI_31377831-S | rs2607638  | 8 | 8 | 110539887 | 68368  | 11.0747 | 0.6583 | 0.6949  | 5.4316 | CHB |
| PKHD1L1 | GI_31377831-S | rs2844251  | 8 | 8 | 110540059 | 68196  | 10.1851 | 0.6422 | 0.7010  | 5.4316 | CHB |
| PKHD1L1 | GI_31377831-S | rs2607637  | 8 | 8 | 110540260 | 67995  | 9.9319  | 0.6144 | 0.6883  | 5.4316 | CHB |
| PKHD1L1 | GI_31377831-S | rs2844252  | 8 | 8 | 110540306 | 67949  | 11.4961 | 0.6819 | 0.6963  | 5.4316 | CHB |
| PKHD1L1 | GI_31377831-S | rs1457284  | 8 | 8 | 110540600 | 67655  | 9.4283  | 0.6295 | -0.7049 | 5.4316 | CHB |
| PKHD1L1 | GI_31377831-S | rs1026439  | 8 | 8 | 110543083 | 65172  | 11.0747 | 0.6583 | 0.6949  | 5.4316 | CHB |
| PKHD1L1 | GI_31377831-S | rs1026438  | 8 | 8 | 110543142 | 65113  | 11.0747 | 0.6583 | -0.6949 | 5.4316 | CHB |
| PKHD1L1 | GI_31377831-S | rs714994   | 8 | 8 | 110544279 | 63976  | 9.9319  | 0.6144 | 0.6883  | 5.4316 | CHB |
| PKHD1L1 | GI_31377831-S | rs1673401  | 8 | 8 | 110544752 | 63503  | 11.0747 | 0.6583 | 0.6949  | 5.4316 | CHB |
| PKHD1L1 | GI_31377831-S | rs1783145  | 8 | 8 | 110545050 | 63205  | 11.0747 | 0.6583 | 0.6949  | 5.4316 | CHB |

|         |               |           |   |   |           |       |         |        |         |        |     |
|---------|---------------|-----------|---|---|-----------|-------|---------|--------|---------|--------|-----|
| PKHD1L1 | GI_31377831-S | rs1783144 | 8 | 8 | 110545167 | 63088 | 10.6111 | 0.6498 | -0.6961 | 5.4316 | CHB |
| PKHD1L1 | GI_31377831-S | rs1673400 | 8 | 8 | 110545286 | 62969 | 11.0747 | 0.6583 | -0.6949 | 5.4316 | CHB |
| PKHD1L1 | GI_31377831-S | rs1673398 | 8 | 8 | 110546169 | 62086 | 8.4913  | 0.6165 | -0.7120 | 5.4316 | CHB |
| PKHD1L1 | GI_31377831-S | rs1627570 | 8 | 8 | 110547000 | 61255 | 8.5529  | 0.5898 | -0.6916 | 5.4316 | CHB |
| PKHD1L1 | GI_31377831-S | rs1673397 | 8 | 8 | 110547112 | 61143 | 11.0747 | 0.6583 | -0.6949 | 5.4316 | CHB |
| PKHD1L1 | GI_31377831-S | rs1783143 | 8 | 8 | 110547650 | 60605 | 11.0747 | 0.6583 | -0.6949 | 5.4316 | CHB |
| PKHD1L1 | GI_31377831-S | rs1783142 | 8 | 8 | 110547837 | 60418 | 11.0747 | 0.6583 | -0.6949 | 5.4316 | CHB |
| PKHD1L1 | GI_31377831-S | rs1673396 | 8 | 8 | 110548797 | 59458 | 10.5724 | 0.6484 | 0.6940  | 5.4316 | CHB |
| PKHD1L1 | GI_31377831-S | rs1471125 | 8 | 8 | 110549755 | 58500 | 11.0747 | 0.6583 | -0.6949 | 5.4316 | CHB |
| PKHD1L1 | GI_31377831-S | rs1471124 | 8 | 8 | 110551558 | 56697 | 11.0747 | 0.6583 | -0.6949 | 5.4316 | CHB |
| PKHD1L1 | GI_31377831-S | rs1783152 | 8 | 8 | 110552076 | 56179 | 10.0531 | 0.6370 | 0.6917  | 5.4316 | CHB |
| PKHD1L1 | GI_31377831-S | rs1673393 | 8 | 8 | 110553021 | 55234 | 10.9721 | 0.6633 | 0.6942  | 5.4316 | CHB |
| PKHD1L1 | GI_31377831-S | rs1783151 | 8 | 8 | 110553119 | 55136 | 11.0747 | 0.6583 | 0.6949  | 5.4316 | CHB |
| PKHD1L1 | GI_31377831-S | rs1783149 | 8 | 8 | 110553988 | 54267 | 11.0747 | 0.6583 | 0.6949  | 5.4316 | CHB |
| PKHD1L1 | GI_31377831-S | rs1673390 | 8 | 8 | 110554319 | 53936 | 10.8445 | 0.6586 | -0.6947 | 5.4316 | CHB |
| PKHD1L1 | GI_31377831-S | rs1626759 | 8 | 8 | 110554960 | 53295 | 11.0747 | 0.6583 | 0.6949  | 5.4316 | CHB |
| PKHD1L1 | GI_31377831-S | rs1457282 | 8 | 8 | 110555942 | 52313 | 20.0491 | 0.8685 | 0.7883  | 5.4316 | CHB |
| PKHD1L1 | GI_31377831-S | rs1783148 | 8 | 8 | 110558796 | 49459 | 17.8008 | 0.8611 | -0.7886 | 5.4316 | CHB |
| PKHD1L1 | GI_31377831-S | rs1379361 | 8 | 8 | 110559318 | 48937 | 20.0491 | 0.8685 | -0.7883 | 5.4316 | CHB |
| PKHD1L1 | GI_31377831-S | rs1783147 | 8 | 8 | 110561016 | 47239 | 20.0491 | 0.8685 | -0.7883 | 5.4316 | CHB |
| PKHD1L1 | GI_31377831-S | rs1630942 | 8 | 8 | 110561053 | 47202 | 20.0491 | 0.8685 | 0.7883  | 5.4316 | CHB |
| PKHD1L1 | GI_31377831-S | rs1630134 | 8 | 8 | 110561140 | 47115 | 20.0491 | 0.8685 | -0.7883 | 5.4316 | CHB |
| PKHD1L1 | GI_31377831-S | rs1026437 | 8 | 8 | 110562125 | 46130 | 20.0491 | 0.8685 | 0.7883  | 5.4316 | CHB |
| PKHD1L1 | GI_31377831-S | rs2607635 | 8 | 8 | 110564040 | 44215 | 11.9182 | 0.7049 | 0.8056  | 5.4316 | CHB |
| PKHD1L1 | GI_31377831-S | rs2844254 | 8 | 8 | 110564368 | 43887 | 20.0491 | 0.8685 | -0.7883 | 5.4316 | CHB |
| PKHD1L1 | GI_31377831-S | rs2607633 | 8 | 8 | 110565344 | 42911 | 20.0491 | 0.8685 | -0.7883 | 5.4316 | CHB |
| PKHD1L1 | GI_31377831-S | rs1009371 | 8 | 8 | 110567126 | 41129 | 20.0491 | 0.8685 | 0.7883  | 5.4316 | CHB |
| PKHD1L1 | GI_31377831-S | rs1783140 | 8 | 8 | 110568520 | 39735 | 19.3790 | 0.8653 | 0.7846  | 5.4316 | CHB |
| PKHD1L1 | GI_31377831-S | rs1783141 | 8 | 8 | 110569859 | 38396 | 18.1106 | 0.8383 | -0.8001 | 5.4316 | CHB |
| PKHD1L1 | GI_31377831-S | rs2607631 | 8 | 8 | 110573591 | 34664 | 20.0491 | 0.8685 | -0.7883 | 5.4316 | CHB |
| PKHD1L1 | GI_31377831-S | rs2607630 | 8 | 8 | 110574042 | 34213 | 15.8871 | 0.8419 | 0.8166  | 5.4316 | CHB |
| PKHD1L1 | GI_31377831-S | rs2607629 | 8 | 8 | 110574354 | 33901 | 20.0491 | 0.8685 | 0.7883  | 5.4316 | CHB |
| PKHD1L1 | GI_31377831-S | rs1013482 | 8 | 8 | 110574886 | 33369 | 20.0491 | 0.8685 | -0.7883 | 5.4316 | CHB |
| PKHD1L1 | GI_31377831-S | rs2607628 | 8 | 8 | 110575062 | 33193 | 20.0491 | 0.8685 | -0.7883 | 5.4316 | CHB |
| PKHD1L1 | GI_31377831-S | rs1563580 | 8 | 8 | 110575280 | 32975 | 19.4082 | 0.8592 | 0.8389  | 5.4316 | CHB |
| PKHD1L1 | GI_31377831-S | rs2607627 | 8 | 8 | 110575834 | 32421 | 20.0491 | 0.8685 | -0.7883 | 5.4316 | CHB |
| PKHD1L1 | GI_31377831-S | rs1673426 | 8 | 8 | 110576809 | 31446 | 20.0491 | 0.8685 | 0.7883  | 5.4316 | CHB |
| PKHD1L1 | GI_31377831-S | rs1783162 | 8 | 8 | 110577414 | 30841 | 20.0491 | 0.8685 | -0.7883 | 5.4316 | CHB |
| PKHD1L1 | GI_31377831-S | rs753995  | 8 | 8 | 110581622 | 26633 | 18.1106 | 0.8383 | 0.8001  | 5.4316 | CHB |
| PKHD1L1 | GI_31377831-S | rs1673422 | 8 | 8 | 110582601 | 25654 | 18.1106 | 0.8383 | -0.8001 | 5.4316 | CHB |
| PKHD1L1 | GI_31377831-S | rs1783159 | 8 | 8 | 110583540 | 24715 | 19.3849 | 0.8654 | 0.7871  | 5.4316 | CHB |
| PKHD1L1 | GI_31377831-S | rs1783158 | 8 | 8 | 110583563 | 24692 | 19.3849 | 0.8654 | 0.7871  | 5.4316 | CHB |
| PKHD1L1 | GI_31377831-S | rs1673421 | 8 | 8 | 110584402 | 23853 | 16.8205 | 0.8517 | -0.7603 | 5.4316 | CHB |
| PKHD1L1 | GI_31377831-S | rs1673420 | 8 | 8 | 110585296 | 22959 | 19.0138 | 0.8862 | -0.8214 | 5.4316 | CHB |
| PKHD1L1 | GI_31377831-S | rs1673419 | 8 | 8 | 110585433 | 22822 | 20.0491 | 0.8685 | -0.7883 | 5.4316 | CHB |
| PKHD1L1 | GI_31377831-S | rs1783157 | 8 | 8 | 110585436 | 22819 | 20.0491 | 0.8685 | -0.7883 | 5.4316 | CHB |
| PKHD1L1 | GI_31377831-S | rs1673416 | 8 | 8 | 110586668 | 21587 | 20.0491 | 0.8685 | 0.7883  | 5.4316 | CHB |
| PKHD1L1 | GI_31377831-S | rs1673415 | 8 | 8 | 110587384 | 20871 | 20.0491 | 0.8685 | 0.7883  | 5.4316 | CHB |
| PKHD1L1 | GI_31377831-S | rs1379367 | 8 | 8 | 110587710 | 20545 | 18.1106 | 0.8383 | 0.8001  | 5.4316 | CHB |
| PKHD1L1 | GI_31377831-S | rs1379366 | 8 | 8 | 110587810 | 20445 | 20.0491 | 0.8685 | -0.7883 | 5.4316 | CHB |
| PKHD1L1 | GI_31377831-S | rs1783154 | 8 | 8 | 110588748 | 19507 | 20.0491 | 0.8685 | -0.7883 | 5.4316 | CHB |
| PKHD1L1 | GI_31377831-S | rs1783153 | 8 | 8 | 110588990 | 19265 | 20.0491 | 0.8685 | 0.7883  | 5.4316 | CHB |
| PKHD1L1 | GI_31377831-S | rs2844257 | 8 | 8 | 110590653 | 17602 | 21.4107 | 0.8863 | -0.8221 | 5.4316 | CHB |
| PKHD1L1 | GI_31377831-S | rs2607625 | 8 | 8 | 110590692 | 17563 | 21.4107 | 0.8863 | -0.8221 | 5.4316 | CHB |
| PKHD1L1 | GI_31377831-S | rs2844258 | 8 | 8 | 110591692 | 16563 | 21.4107 | 0.8863 | 0.8221  | 5.4316 | CHB |
| PKHD1L1 | GI_31377831-S | rs2844259 | 8 | 8 | 110591903 | 16352 | 21.4107 | 0.8863 | -0.8221 | 5.4316 | CHB |
| PKHD1L1 | GI_31377831-S | rs2844260 | 8 | 8 | 110591948 | 16307 | 19.4082 | 0.8592 | -0.8389 | 5.4316 | CHB |
| PKHD1L1 | GI_31377831-S | rs1673412 | 8 | 8 | 110594900 | 13355 | 19.4082 | 0.8592 | -0.8389 | 5.4316 | CHB |
| PKHD1L1 | GI_31377831-S | rs1783166 | 8 | 8 | 110595060 | 13195 | 20.0491 | 0.8685 | 0.7883  | 5.4316 | CHB |

|           |               |            |   |   |           |        |         |        |         |        |     |
|-----------|---------------|------------|---|---|-----------|--------|---------|--------|---------|--------|-----|
| PKHD1L1   | GI_31377831-S | rs1673411  | 8 | 8 | 110597325 | 10930  | 20.0491 | 0.8685 | -0.7883 | 5.4316 | CHB |
| PKHD1L1   | GI_31377831-S | rs1783168  | 8 | 8 | 110598046 | 10209  | 20.0491 | 0.8685 | 0.7883  | 5.4316 | CHB |
| PKHD1L1   | GI_31377831-S | rs1673410  | 8 | 8 | 110598253 | 10002  | 21.4107 | 0.8863 | 0.8221  | 5.4316 | CHB |
| PKHD1L1   | GI_31377831-S | rs1673413  | 8 | 8 | 110599052 | 9203   | 21.4107 | 0.8863 | -0.8221 | 5.4316 | CHB |
| PKHD1L1   | GI_31377831-S | rs1783169  | 8 | 8 | 110599950 | 8305   | 19.4082 | 0.8592 | -0.8389 | 5.4316 | CHB |
| PKHD1L1   | GI_31377831-S | rs1783170  | 8 | 8 | 110600142 | 8113   | 20.0491 | 0.8685 | -0.7883 | 5.4316 | CHB |
| PKHD1L1   | GI_31377831-S | rs1673409  | 8 | 8 | 110600946 | 7309   | 21.4107 | 0.8863 | -0.8221 | 5.4316 | CHB |
| PKHD1L1   | GI_31377831-S | rs1783171  | 8 | 8 | 110601912 | 6343   | 21.4107 | 0.8863 | -0.8221 | 5.4316 | CHB |
| PKHD1L1   | GI_31377831-S | rs1673428  | 8 | 8 | 110602120 | 6135   | 21.4107 | 0.8863 | -0.8221 | 5.4316 | CHB |
| PKHD1L1   | GI_31377831-S | rs2844261  | 8 | 8 | 110602670 | 5585   | 21.4107 | 0.8863 | -0.8221 | 5.4316 | CHB |
| PKHD1L1   | GI_31377831-S | rs1563578  | 8 | 8 | 110603688 | 4567   | 21.4107 | 0.8863 | -0.8221 | 5.4316 | CHB |
| PKHD1L1   | GI_31377831-S | rs1457288  | 8 | 8 | 110603951 | 4304   | 20.0491 | 0.8685 | -0.7883 | 5.4316 | CHB |
| PKHD1L1   | GI_31377831-S | rs897840   | 8 | 8 | 110605492 | 2763   | 21.4107 | 0.8863 | -0.8221 | 5.4316 | CHB |
| PKHD1L1   | GI_31377831-S | rs897842   | 8 | 8 | 110605957 | 2298   | 21.4107 | 0.8863 | 0.8221  | 5.4316 | CHB |
| PKHD1L1   | GI_31377831-S | rs1783172  | 8 | 8 | 110606128 | 2127   | 17.0332 | 0.8186 | 0.7833  | 5.4316 | CHB |
| PKHD1L1   | GI_31377831-S | rs730885   | 8 | 8 | 110606593 | 1662   | 18.8226 | 0.8568 | -0.8407 | 5.4316 | CHB |
| PKHD1L1   | GI_31377831-S | rs1783173  | 8 | 8 | 110607525 | 730    | 19.4082 | 0.8592 | 0.8389  | 5.4316 | CHB |
| PKHD1L1   | GI_31377831-S | rs1457294  | 8 | 8 | 110608063 | 192    | 21.4107 | 0.8863 | 0.8221  | 5.4316 | CHB |
| PKHD1L1   | GI_31377831-S | rs1457295  | 8 | 8 | 110608130 | 125    | 21.4107 | 0.8863 | 0.8221  | 5.4316 | CHB |
| PKHD1L1   | GI_31377831-S | rs1783174  | 8 | 8 | 110608362 | 107    | 21.4107 | 0.8863 | -0.8221 | 5.4316 | CHB |
| PKHD1L1   | GI_31377831-S | rs1673383  | 8 | 8 | 110609091 | 836    | 21.4107 | 0.8863 | 0.8221  | 5.4316 | CHB |
| PKHD1L1   | GI_31377831-S | rs1673384  | 8 | 8 | 110609441 | 1186   | 21.4107 | 0.8863 | -0.8221 | 5.4316 | CHB |
| PKHD1L1   | GI_31377831-S | rs1673386  | 8 | 8 | 110609938 | 1683   | 19.4082 | 0.8592 | 0.8389  | 5.4316 | CHB |
| PKHD1L1   | GI_31377831-S | rs1673389  | 8 | 8 | 110610255 | 2000   | 21.4107 | 0.8863 | -0.8221 | 5.4316 | CHB |
| PKHD1L1   | GI_31377831-S | rs1673395  | 8 | 8 | 110610586 | 2331   | 21.4107 | 0.8863 | 0.8221  | 5.4316 | CHB |
| PKHD1L1   | GI_31377831-S | rs1673399  | 8 | 8 | 110611139 | 2884   | 21.4107 | 0.8863 | 0.8221  | 5.4316 | CHB |
| PKHD1L1   | GI_31377831-S | rs1617259  | 8 | 8 | 110611474 | 3219   | 21.4107 | 0.8863 | 0.8221  | 5.4316 | CHB |
| PKHD1L1   | GI_31377831-S | rs2154660  | 8 | 8 | 110612697 | 4442   | 21.4107 | 0.8863 | -0.8221 | 5.4316 | CHB |
| PKHD1L1   | GI_31377831-S | rs7821242  | 8 | 8 | 110613700 | 5445   | 20.0491 | 0.8685 | -0.7883 | 5.4316 | CHB |
| PKHD1L1   | GI_31377831-S | rs10505133 | 8 | 8 | 110614253 | 5998   | 21.0329 | 0.8876 | -0.8197 | 5.4316 | CHB |
| PKHD1L1   | GI_31377831-S | rs2022935  | 8 | 8 | 110614686 | 6431   | 19.4082 | 0.8592 | -0.8389 | 5.4316 | CHB |
| PKHD1L1   | GI_31377831-S | rs10108943 | 8 | 8 | 110614783 | 6528   | 20.0491 | 0.8685 | 0.7883  | 5.4316 | CHB |
| PKHD1L1   | GI_31377831-S | rs10111682 | 8 | 8 | 110615076 | 6821   | 19.4082 | 0.8592 | -0.8389 | 5.4316 | CHB |
| PKHD1L1   | GI_31377831-S | rs13439864 | 8 | 8 | 110615884 | 7629   | 20.7849 | 0.8845 | -0.8350 | 5.4316 | CHB |
| PKHD1L1   | GI_31377831-S | rs10088258 | 8 | 8 | 110616575 | 8320   | 19.4082 | 0.8592 | -0.8389 | 5.4316 | CHB |
| PKHD1L1   | GI_31377831-S | rs7006166  | 8 | 8 | 110616688 | 8433   | 20.0491 | 0.8685 | -0.7883 | 5.4316 | CHB |
| PKHD1L1   | GI_31377831-S | rs7011340  | 8 | 8 | 110617590 | 9335   | 21.4107 | 0.8863 | -0.8221 | 5.4316 | CHB |
| PKHD1L1   | GI_31377831-S | rs7011803  | 8 | 8 | 110617624 | 9369   | 19.4082 | 0.8592 | 0.8389  | 5.4316 | CHB |
| PKHD1L1   | GI_31377831-S | rs4529437  | 8 | 8 | 110619006 | 10751  | 19.4082 | 0.8592 | -0.8389 | 5.4316 | CHB |
| PKHD1L1   | GI_31377831-S | rs3808380  | 8 | 8 | 110620310 | 12055  | 10.7771 | 0.6473 | -0.7820 | 5.4316 | CHB |
| PKHD1L1   | GI_31377831-S | rs1044230  | 8 | 8 | 110621753 | 13498  | 19.4082 | 0.8592 | 0.8389  | 5.4316 | CHB |
| PKHD1L1   | GI_31377831-S | rs2703389  | 8 | 8 | 110626059 | 17804  | 19.4082 | 0.8592 | -0.8389 | 5.4316 | CHB |
| PKHD1L1   | GI_31377831-S | rs2703386  | 8 | 8 | 110633100 | 24845  | 20.0491 | 0.8685 | 0.7883  | 5.4316 | CHB |
| PKHD1L1   | GI_31377831-S | rs2703377  | 8 | 8 | 110635360 | 27105  | 19.4082 | 0.8592 | 0.8389  | 5.4316 | CHB |
| PKHD1L1   | GI_31377831-S | rs2022934  | 8 | 8 | 110636950 | 28695  | 20.0491 | 0.8685 | 0.7883  | 5.4316 | CHB |
| PKHD1L1   | GI_31377831-S | rs2844231  | 8 | 8 | 110639003 | 30748  | 20.0491 | 0.8685 | -0.7883 | 5.4316 | CHB |
| PKHD1L1   | GI_31377831-S | rs6995991  | 8 | 8 | 110639236 | 30981  | 9.8081  | 0.6093 | 0.6993  | 5.4316 | CHB |
| PKHD1L1   | GI_31377831-S | rs2844234  | 8 | 8 | 110651542 | 43287  | 18.2627 | 0.8409 | 0.8390  | 5.4316 | CHB |
| PKHD1L1   | GI_31377831-S | rs2703388  | 8 | 8 | 110651938 | 43683  | 16.4707 | 0.8074 | -0.8324 | 5.4316 | CHB |
| PKHD1L1   | GI_31377831-S | rs2844235  | 8 | 8 | 110663324 | 55069  | 18.2627 | 0.8409 | -0.8390 | 5.4316 | CHB |
| PKHD1L1   | GI_31377831-S | rs2844236  | 8 | 8 | 110663994 | 55739  | 18.2627 | 0.8409 | 0.8390  | 5.4316 | CHB |
| PKHD1L1   | GI_31377831-S | rs1892760  | 8 | 8 | 110666049 | 57794  | 18.2627 | 0.8409 | 0.8390  | 5.4316 | CHB |
| PKHD1L1   | GI_31377831-S | rs2236628  | 8 | 8 | 110667374 | 59119  | 18.2627 | 0.8409 | 0.8390  | 5.4316 | CHB |
| PKHD1L1   | GI_31377831-S | rs2236627  | 8 | 8 | 110667784 | 59529  | 12.1228 | 0.6942 | 0.8148  | 5.4316 | CHB |
| PKHD1L1   | GI_31377831-S | rs2703384  | 8 | 8 | 110669235 | 60980  | 19.0382 | 0.8536 | -0.7904 | 5.4316 | CHB |
| PKHD1L1   | GI_31377831-S | rs2703382  | 8 | 8 | 110672655 | 64400  | 18.2627 | 0.8409 | 0.8390  | 5.4316 | CHB |
| PKHD1L1   | GI_31377831-S | rs2154658  | 8 | 8 | 110685758 | 77503  | 7.4189  | 0.4975 | -0.7152 | 5.4316 | CHB |
| PKHD1L1   | GI_31377831-S | rs1892759  | 8 | 8 | 110686170 | 77915  | 6.9917  | 0.4744 | 0.6529  | 5.4316 | CHB |
| Hs.453941 | Hs.453941-S   | rs2514591  | 8 | 8 | 119680657 | 126737 | 11.3468 | 0.6767 | -0.1774 | 6.3249 | CHB |

|           |               |            |   |   |           |        |         |        |         |        |     |
|-----------|---------------|------------|---|---|-----------|--------|---------|--------|---------|--------|-----|
| Hs.453941 | Hs.453941-S   | rs2514592  | 8 | 8 | 119681861 | 125533 | 14.8618 | 0.7715 | -0.1920 | 6.3249 | CHB |
| Hs.453941 | Hs.453941-S   | rs2460964  | 8 | 8 | 119682843 | 124551 | 14.8618 | 0.7715 | 0.1920  | 6.3249 | CHB |
| Hs.453941 | Hs.453941-S   | rs2460965  | 8 | 8 | 119687942 | 119452 | 14.8618 | 0.7715 | 0.1920  | 6.3249 | CHB |
| Hs.453941 | Hs.453941-S   | rs2460966  | 8 | 8 | 119693737 | 113657 | 14.4155 | 0.7684 | -0.1913 | 6.3249 | CHB |
| Hs.453941 | Hs.453941-S   | rs2514594  | 8 | 8 | 119694330 | 113064 | 14.8618 | 0.7715 | 0.1920  | 6.3249 | CHB |
| Hs.453941 | Hs.453941-S   | rs2460967  | 8 | 8 | 119697073 | 110321 | 9.7704  | 0.6077 | 0.1737  | 6.3249 | CHB |
| Hs.453941 | Hs.453941-S   | rs2460968  | 8 | 8 | 119697411 | 109983 | 14.8618 | 0.7715 | -0.1920 | 6.3249 | CHB |
| Hs.453941 | Hs.453941-S   | rs2460970  | 8 | 8 | 119698635 | 108759 | 14.8618 | 0.7715 | 0.1920  | 6.3249 | CHB |
| Hs.453941 | Hs.453941-S   | rs880033   | 8 | 8 | 119702375 | 105019 | 14.8618 | 0.7715 | -0.1920 | 6.3249 | CHB |
| Hs.453941 | Hs.453941-S   | rs880034   | 8 | 8 | 119702442 | 104952 | 14.8618 | 0.7715 | 0.1920  | 6.3249 | CHB |
| Hs.453941 | Hs.453941-S   | rs2460972  | 8 | 8 | 119707958 | 99436  | 14.8618 | 0.7715 | -0.1920 | 6.3249 | CHB |
| Hs.453941 | Hs.453941-S   | rs2514602  | 8 | 8 | 119719731 | 87663  | 14.8618 | 0.7715 | -0.1920 | 6.3249 | CHB |
| Hs.453941 | Hs.453941-S   | rs2460975  | 8 | 8 | 119720018 | 87376  | 14.8618 | 0.7715 | -0.1920 | 6.3249 | CHB |
| Hs.453941 | Hs.453941-S   | rs2514603  | 8 | 8 | 119722156 | 85238  | 14.8618 | 0.7715 | -0.1920 | 6.3249 | CHB |
| Hs.453941 | Hs.453941-S   | rs2514605  | 8 | 8 | 119723591 | 83803  | 14.8618 | 0.7715 | 0.1920  | 6.3249 | CHB |
| Hs.453941 | Hs.453941-S   | rs2514607  | 8 | 8 | 119725499 | 81895  | 14.8618 | 0.7715 | -0.1920 | 6.3249 | CHB |
| Hs.453941 | Hs.453941-S   | rs2514608  | 8 | 8 | 119726049 | 81345  | 14.8618 | 0.7715 | -0.1920 | 6.3249 | CHB |
| Hs.453941 | Hs.453941-S   | rs2514609  | 8 | 8 | 119726405 | 80989  | 14.8618 | 0.7715 | -0.1920 | 6.3249 | CHB |
| Hs.453941 | Hs.453941-S   | rs2514610  | 8 | 8 | 119728552 | 78842  | 14.8618 | 0.7715 | 0.1920  | 6.3249 | CHB |
| Hs.453941 | Hs.453941-S   | rs2460979  | 8 | 8 | 119731021 | 76373  | 14.8618 | 0.7715 | -0.1920 | 6.3249 | CHB |
| Hs.453941 | Hs.453941-S   | rs2514576  | 8 | 8 | 119740944 | 66450  | 13.8050 | 0.7694 | 0.1859  | 6.3249 | CHB |
| Hs.453941 | Hs.453941-S   | rs2460982  | 8 | 8 | 119741293 | 66101  | 13.7259 | 0.7846 | -0.1959 | 6.3249 | CHB |
| Hs.453941 | Hs.453941-S   | rs2460983  | 8 | 8 | 119741315 | 66079  | 14.8618 | 0.7715 | -0.1920 | 6.3249 | CHB |
| PP3856    | GI_40255088-S | rs1062391  | 8 | 8 | 144733496 | 5363   | 7.0251  | 0.4763 | 1.4058  | 5.7933 | CHB |
| PP3856    | GI_40255088-S | rs1809148  | 8 | 8 | 144734218 | 6085   | 7.5996  | 0.5069 | -1.2263 | 5.7933 | CHB |
| PP3856    | GI_40255088-S | rs2123758  | 8 | 8 | 144734804 | 6671   | 7.0251  | 0.4763 | 1.4058  | 5.7933 | CHB |
| PP3856    | GI_40255088-S | rs1563148  | 8 | 8 | 144735462 | 7329   | 7.0251  | 0.4763 | -1.4058 | 5.7933 | CHB |
| PP3856    | GI_40255088-S | rs11136303 | 8 | 8 | 144736712 | 8579   | 7.5996  | 0.5069 | -1.2263 | 5.7933 | CHB |
| PP3856    | GI_40255088-S | rs2382961  | 8 | 8 | 144738038 | 9905   | 7.5996  | 0.5069 | 1.2263  | 5.7933 | CHB |
| PP3856    | GI_40255088-S | rs3793366  | 8 | 8 | 144738898 | 10765  | 7.5996  | 0.5069 | -1.2263 | 5.7933 | CHB |
| PP3856    | GI_40255088-S | rs2382962  | 8 | 8 | 144740535 | 12402  | 7.5996  | 0.5069 | -1.2263 | 5.7933 | CHB |
| PP3856    | GI_40255088-S | rs4874159  | 8 | 8 | 144742093 | 13960  | 12.9247 | 0.7192 | 1.3873  | 5.7933 | CHB |
| PP3856    | GI_40255088-S | rs1466219  | 8 | 8 | 144744865 | 16732  | 12.3621 | 0.7104 | 1.4012  | 5.7933 | CHB |
| PP3856    | GI_40255088-S | rs7830957  | 8 | 8 | 144745659 | 17526  | 7.5996  | 0.5069 | 1.2263  | 5.7933 | CHB |
| PP3856    | GI_40255088-S | rs7821226  | 8 | 8 | 144745701 | 17568  | 7.5996  | 0.5069 | -1.2263 | 5.7933 | CHB |
| PP3856    | GI_40255088-S | rs4874164  | 8 | 8 | 144746191 | 18058  | 12.9247 | 0.7192 | -1.3873 | 5.7933 | CHB |
| PP3856    | GI_40255088-S | rs10282929 | 8 | 8 | 144752920 | 24787  | 12.9247 | 0.7192 | 1.3873  | 5.7933 | CHB |
| PP3856    | GI_40255088-S | rs10866913 | 8 | 8 | 144754829 | 26696  | 12.9247 | 0.7192 | -1.3873 | 5.7933 | CHB |
| PP3856    | GI_40255088-S | rs10112966 | 8 | 8 | 144755077 | 26944  | 12.9247 | 0.7192 | 1.3873  | 5.7933 | CHB |
| PP3856    | GI_40255088-S | rs755217   | 8 | 8 | 144757655 | 29522  | 7.5996  | 0.5069 | -1.2263 | 5.7933 | CHB |
| PP3856    | GI_40255088-S | rs896962   | 8 | 8 | 144758235 | 30102  | 7.5996  | 0.5069 | -1.2263 | 5.7933 | CHB |
| PP3856    | GI_40255088-S | rs2242089  | 8 | 8 | 144760289 | 32156  | 7.5996  | 0.5069 | 1.2263  | 5.7933 | CHB |
| PP3856    | GI_40255088-S | rs2242088  | 8 | 8 | 144760607 | 32474  | 12.9247 | 0.7192 | -1.3873 | 5.7933 | CHB |
| PP3856    | GI_40255088-S | rs4873808  | 8 | 8 | 144764993 | 36860  | 6.5048  | 0.4548 | -1.2313 | 5.7933 | CHB |
| PP3856    | GI_40255088-S | rs4873809  | 8 | 8 | 144765210 | 37077  | 5.8811  | 0.4098 | -1.1475 | 5.7933 | CHB |
| RPL8      | GI_15431305-I | rs2958498  | 8 | 8 | 145981621 | 6863   | 5.8694  | 0.4091 | 0.2802  | 5.8    | CHB |
| RPL8      | GI_15431305-I | rs2979090  | 8 | 8 | 145981962 | 6522   | 5.8694  | 0.4091 | 0.2802  | 5.8    | CHB |
| RPL8      | GI_15431305-I | rs7829963  | 8 | 8 | 145982147 | 6337   | 5.8694  | 0.4091 | 0.2802  | 5.8    | CHB |
| RPL8      | GI_15431305-I | rs11784860 | 8 | 8 | 145984603 | 3881   | 5.8694  | 0.4091 | -0.2802 | 5.8    | CHB |
| RPL8      | GI_15431305-I | rs2953886  | 8 | 8 | 145985544 | 2940   | 5.8694  | 0.4091 | 0.2802  | 5.8    | CHB |
| RPL8      | GI_15431305-I | rs2280933  | 8 | 8 | 145985722 | 2762   | 5.8694  | 0.4091 | 0.2802  | 5.8    | CHB |
| RPL8      | GI_15431305-I | rs2954657  | 8 | 8 | 145987836 | 648    | 5.8694  | 0.4091 | -0.2802 | 5.8    | CHB |
| RPL8      | GI_15431305-I | rs2958516  | 8 | 8 | 145989530 | 1046   | 5.8694  | 0.4091 | -0.2802 | 5.8    | CHB |
| FLJ20989  | GI_12751496-S | rs11248223 | 8 | 8 | 146235432 | 16227  | 5.0379  | 0.3558 | 0.1726  | 4.9549 | CHB |
| FLJ20989  | GI_12751496-S | rs11782073 | 8 | 8 | 146271091 | 19432  | 5.2761  | 0.3715 | -0.1710 | 4.9549 | CHB |
| RLN1      | GI_20143931-S | rs4740810  | 9 | 9 | 5312687   | 12616  | 6.3780  | 0.4474 | -0.2143 | 6.0197 | CHB |
| RLN1      | GI_20143931-S | rs6476962  | 9 | 9 | 5314922   | 10381  | 6.2164  | 0.4377 | 0.2100  | 6.0197 | CHB |
| FLJ23309  | GI_37540251-S | rs10975309 | 9 | 9 | 5823337   | 48628  | 6.6206  | 0.4536 | -0.2976 | 5.7633 | CHB |
| C9orf52   | GI_22749190-S | rs10810373 | 9 | 9 | 15283620  | 121557 | 6.1094  | 0.4313 | -0.3003 | 6.019  | CHB |

|         |               |            |   |   |          |        |         |        |         |        |     |
|---------|---------------|------------|---|---|----------|--------|---------|--------|---------|--------|-----|
| C9orf52 | GI_22749190-S | rs10115392 | 9 | 9 | 15286526 | 124463 | 6.4447  | 0.4594 | -0.3238 | 6.019  | CHB |
| B4GALT1 | GI_13929461-S | rs3818593  | 9 | 9 | 33110706 | 9788   | 6.1984  | 0.4290 | -0.2702 | 5.505  | CHB |
| B4GALT1 | GI_13929461-S | rs10971418 | 9 | 9 | 33112024 | 11106  | 6.1984  | 0.4290 | 0.2702  | 5.505  | CHB |
| B4GALT1 | GI_13929461-S | rs10113903 | 9 | 9 | 33112645 | 11727  | 8.4019  | 0.5468 | 0.2758  | 5.505  | CHB |
| B4GALT1 | GI_13929461-S | rs10758188 | 9 | 9 | 33113386 | 12468  | 8.6594  | 0.5675 | -0.2721 | 5.505  | CHB |
| B4GALT1 | GI_13929461-S | rs10738905 | 9 | 9 | 33113627 | 12709  | 8.4019  | 0.5468 | -0.2758 | 5.505  | CHB |
| B4GALT1 | GI_13929461-S | rs10971419 | 9 | 9 | 33114161 | 13243  | 6.9391  | 0.5146 | 0.2675  | 5.505  | CHB |
| B4GALT1 | GI_13929461-S | rs12342831 | 9 | 9 | 33114872 | 13954  | 8.6552  | 0.5587 | 0.3045  | 5.505  | CHB |
| B4GALT1 | GI_13929461-S | rs10758189 | 9 | 9 | 33115804 | 14886  | 8.4019  | 0.5468 | 0.2758  | 5.505  | CHB |
| B4GALT1 | GI_13929461-S | rs10813950 | 9 | 9 | 33117640 | 16722  | 8.4019  | 0.5468 | 0.2758  | 5.505  | CHB |
| B4GALT1 | GI_13929461-S | rs10813951 | 9 | 9 | 33118021 | 17103  | 8.6552  | 0.5587 | -0.3045 | 5.505  | CHB |
| B4GALT1 | GI_13929461-S | rs3780491  | 9 | 9 | 33119607 | 18689  | 9.8932  | 0.6128 | 0.3115  | 5.505  | CHB |
| B4GALT1 | GI_13929461-S | rs10124479 | 9 | 9 | 33126233 | 25315  | 7.9892  | 0.5351 | 0.2720  | 5.505  | CHB |
| B4GALT1 | GI_13929461-S | rs10813954 | 9 | 9 | 33127596 | 26678  | 8.4019  | 0.5468 | -0.2758 | 5.505  | CHB |
| B4GALT1 | GI_13929461-S | rs7849148  | 9 | 9 | 33128352 | 27434  | 8.4019  | 0.5468 | -0.2758 | 5.505  | CHB |
| B4GALT1 | GI_13929461-S | rs10971424 | 9 | 9 | 33128775 | 27857  | 8.1306  | 0.5987 | 0.2843  | 5.505  | CHB |
| B4GALT1 | GI_13929461-S | rs3780486  | 9 | 9 | 33129453 | 28535  | 8.6552  | 0.5587 | 0.3045  | 5.505  | CHB |
| B4GALT1 | GI_13929461-S | rs7865745  | 9 | 9 | 33130976 | 30058  | 8.4019  | 0.5468 | 0.2758  | 5.505  | CHB |
| B4GALT1 | GI_13929461-S | rs7036812  | 9 | 9 | 33133822 | 32904  | 8.6392  | 0.5845 | 0.2937  | 5.505  | CHB |
| B4GALT1 | GI_13929461-S | rs10813957 | 9 | 9 | 33143527 | 42609  | 8.6552  | 0.5587 | -0.3045 | 5.505  | CHB |
| B4GALT1 | GI_13929461-S | rs3780480  | 9 | 9 | 33153486 | 52568  | 6.0714  | 0.4214 | 0.2827  | 5.505  | CHB |
| B4GALT1 | GI_13929461-S | rs10971438 | 9 | 9 | 33170308 | 69390  | 6.4530  | 0.4598 | -0.2547 | 5.505  | CHB |
| B4GALT1 | GI_13929461-S | rs10813960 | 9 | 9 | 33170362 | 69444  | 7.5789  | 0.5141 | -0.2962 | 5.505  | CHB |
| NUDT2   | GI_22219466-A | rs10814080 | 9 | 9 | 34216942 | 116561 | 8.2630  | 0.5401 | 0.3437  | 5.7729 | CHB |
| NUDT2   | GI_22265329-I | rs10814080 | 9 | 9 | 34216942 | 109312 | 8.2651  | 0.5402 | -0.5610 | 5.7729 | CHB |
| NUDT2   | GI_22219466-A | rs10814084 | 9 | 9 | 34253389 | 80114  | 9.4066  | 0.6011 | -0.3570 | 5.7729 | CHB |
| NUDT2   | GI_22265329-I | rs10814084 | 9 | 9 | 34253389 | 72865  | 11.2555 | 0.6735 | 0.6252  | 5.7729 | CHB |
| NUDT2   | GI_22219466-A | rs10814086 | 9 | 9 | 34254597 | 78906  | 8.6300  | 0.5576 | -0.3614 | 5.7729 | CHB |
| NUDT2   | GI_22265329-I | rs10814086 | 9 | 9 | 34254597 | 71657  | 10.6196 | 0.6414 | 0.6310  | 5.7729 | CHB |
| NUDT2   | GI_22219466-A | rs10814091 | 9 | 9 | 34277840 | 55663  | 7.9747  | 0.5344 | -0.3193 | 5.7729 | CHB |
| NUDT2   | GI_22265329-I | rs10814091 | 9 | 9 | 34277840 | 48414  | 13.1275 | 0.7336 | 0.6167  | 5.7729 | CHB |
| NUDT2   | GI_22219466-A | rs7042250  | 9 | 9 | 34295076 | 38427  | 5.8471  | 0.4077 | 0.3150  | 5.7729 | CHB |
| NUDT2   | GI_22219466-A | rs950546   | 9 | 9 | 34300083 | 33420  | 5.8471  | 0.4077 | 0.3150  | 5.7729 | CHB |
| NUDT2   | GI_22219466-A | rs10972047 | 9 | 9 | 34300357 | 33146  | 12.2178 | 0.6973 | -0.3850 | 5.7729 | CHB |
| NUDT2   | GI_22265329-I | rs10972047 | 9 | 9 | 34300357 | 25897  | 15.4539 | 0.7854 | 0.6657  | 5.7729 | CHB |
| NUDT2   | GI_22219466-A | rs7853609  | 9 | 9 | 34310195 | 23308  | 5.8507  | 0.4310 | -0.3265 | 5.7729 | CHB |
| NUDT2   | GI_22219466-A | rs10814098 | 9 | 9 | 34314168 | 19335  | 12.2178 | 0.6973 | -0.3850 | 5.7729 | CHB |
| NUDT2   | GI_22265329-I | rs10814098 | 9 | 9 | 34314168 | 12086  | 15.4539 | 0.7854 | 0.6657  | 5.7729 | CHB |
| NUDT2   | GI_22219466-A | rs7875342  | 9 | 9 | 34319110 | 14393  | 5.8471  | 0.4077 | 0.3150  | 5.7729 | CHB |
| NUDT2   | GI_22219466-A | rs7039222  | 9 | 9 | 34322740 | 10763  | 12.2178 | 0.6973 | 0.3850  | 5.7729 | CHB |
| NUDT2   | GI_22265329-I | rs7039222  | 9 | 9 | 34322740 | 3514   | 15.4539 | 0.7854 | -0.6657 | 5.7729 | CHB |
| NUDT2   | GI_22219466-A | rs4879775  | 9 | 9 | 34324793 | 8710   | 5.8471  | 0.4077 | -0.3150 | 5.7729 | CHB |
| NUDT2   | GI_22219466-A | rs10972067 | 9 | 9 | 34332634 | 869    | 5.8471  | 0.4077 | 0.3150  | 5.7729 | CHB |
| NUDT2   | GI_22219466-A | rs10814105 | 9 | 9 | 34359062 | 25559  | 10.4849 | 0.6450 | 0.3647  | 5.7729 | CHB |
| NUDT2   | GI_22265329-I | rs10814105 | 9 | 9 | 34359062 | 32808  | 12.4117 | 0.7120 | -0.6139 | 5.7729 | CHB |
| NUDT2   | GI_22219466-A | rs7852399  | 9 | 9 | 34361788 | 28285  | 6.4568  | 0.4442 | 0.3177  | 5.7729 | CHB |
| NUDT2   | GI_22219466-A | rs4310287  | 9 | 9 | 34364979 | 31476  | 11.0291 | 0.6566 | 0.3634  | 5.7729 | CHB |
| NUDT2   | GI_22265329-I | rs4310287  | 9 | 9 | 34364979 | 38725  | 13.2223 | 0.7279 | -0.6235 | 5.7729 | CHB |
| C9orf95 | GI_8923529-S  | rs2273768  | 9 | 9 | 74927820 | 14288  | 7.3872  | 0.4958 | -0.3559 | 5.8575 | CHB |
| C9orf95 | GI_8923529-S  | rs10869495 | 9 | 9 | 74929453 | 15921  | 7.3872  | 0.4958 | 0.3559  | 5.8575 | CHB |
| C9orf95 | GI_8923529-S  | rs10869497 | 9 | 9 | 74935124 | 21592  | 7.3872  | 0.4958 | 0.3559  | 5.8575 | CHB |
| C9orf95 | GI_8923529-S  | rs10869499 | 9 | 9 | 74935481 | 21949  | 7.3872  | 0.4958 | -0.3559 | 5.8575 | CHB |
| C9orf95 | GI_8923529-S  | rs11144225 | 9 | 9 | 74936854 | 23322  | 7.2354  | 0.4959 | -0.3560 | 5.8575 | CHB |
| C9orf95 | GI_8923529-S  | rs10869500 | 9 | 9 | 74937249 | 23717  | 7.2577  | 0.4971 | -0.3562 | 5.8575 | CHB |
| C9orf95 | GI_8923529-S  | rs3824348  | 9 | 9 | 74968105 | 54573  | 7.3872  | 0.4958 | -0.3559 | 5.8575 | CHB |
| C9orf95 | GI_8923529-S  | rs6560421  | 9 | 9 | 74973970 | 60438  | 7.5404  | 0.5121 | -0.3550 | 5.8575 | CHB |
| VPS13A  | GI_15619007-I | rs7868708  | 9 | 9 | 77178627 | 50725  | 6.3650  | 0.4388 | 0.5988  | 6.2178 | CHB |
| VPS13A  | GI_15619007-I | rs10491839 | 9 | 9 | 77270451 | 41099  | 7.0453  | 0.4774 | 0.5743  | 6.2178 | CHB |
| VPS13A  | GI_15619007-I | rs12352759 | 9 | 9 | 77270501 | 41149  | 6.6476  | 0.4885 | -0.5822 | 6.2178 | CHB |

|           |               |            |   |   |          |        |         |        |         |        |     |
|-----------|---------------|------------|---|---|----------|--------|---------|--------|---------|--------|-----|
| VPS13A    | GI_15619007-I | rs10747015 | 9 | 9 | 77271438 | 42086  | 6.9362  | 0.4963 | -0.4866 | 6.2178 | CHB |
| VPS13A    | GI_15619007-I | rs2377908  | 9 | 9 | 77272870 | 43518  | 6.6025  | 0.4526 | -0.4851 | 6.2178 | CHB |
| FLJ14753  | GI_14211858-S | rs9299417  | 9 | 9 | 94098937 | 203506 | 13.9588 | 0.7484 | 1.1504  | 8.447  | CHB |
| FLJ14753  | GI_14211858-S | rs4744330  | 9 | 9 | 94108304 | 194139 | 13.9588 | 0.7484 | -1.1504 | 8.447  | CHB |
| FLJ14753  | GI_14211858-S | rs11793128 | 9 | 9 | 94120238 | 182205 | 13.9588 | 0.7484 | -1.1504 | 8.447  | CHB |
| FLJ14753  | GI_14211858-S | rs7874441  | 9 | 9 | 94123177 | 179266 | 13.9588 | 0.7484 | 1.1504  | 8.447  | CHB |
| FLJ14753  | GI_14211858-S | rs1536690  | 9 | 9 | 94134865 | 167578 | 13.0632 | 0.7233 | 1.1861  | 8.447  | CHB |
| FLJ14753  | GI_14211858-S | rs722353   | 9 | 9 | 94141540 | 160903 | 9.6412  | 0.6023 | 1.0358  | 8.447  | CHB |
| FLJ14753  | GI_14211858-S | rs7859571  | 9 | 9 | 94211440 | 91003  | 13.0632 | 0.7233 | -1.1861 | 8.447  | CHB |
| FLJ14753  | GI_14211858-S | rs9632920  | 9 | 9 | 94255655 | 46788  | 13.0632 | 0.7233 | -1.1861 | 8.447  | CHB |
| FLJ14753  | GI_14211858-S | rs7036474  | 9 | 9 | 94270934 | 31509  | 13.0632 | 0.7233 | 1.1861  | 8.447  | CHB |
| FLJ14753  | GI_14211858-S | rs1878875  | 9 | 9 | 94284775 | 17668  | 13.3999 | 0.7413 | -1.2639 | 8.447  | CHB |
| FLJ14753  | GI_14211858-S | rs7045712  | 9 | 9 | 94287872 | 14571  | 13.0632 | 0.7233 | 1.1861  | 8.447  | CHB |
| FLJ14753  | GI_14211858-S | rs7046779  | 9 | 9 | 94290447 | 11996  | 13.0632 | 0.7233 | -1.1861 | 8.447  | CHB |
| FLJ14753  | GI_14211858-S | rs7037298  | 9 | 9 | 94295718 | 6725   | 13.0632 | 0.7233 | -1.1861 | 8.447  | CHB |
| FLJ14753  | GI_14211858-S | rs6479545  | 9 | 9 | 94296830 | 5613   | 13.6852 | 0.7577 | 1.2737  | 8.447  | CHB |
| FLJ14753  | GI_14211858-S | rs7868703  | 9 | 9 | 94323341 | 20898  | 8.7461  | 0.5629 | -1.0510 | 8.447  | CHB |
| FLJ14753  | GI_14211858-S | rs7042219  | 9 | 9 | 94327241 | 24798  | 8.5343  | 0.5616 | 1.0483  | 8.447  | CHB |
| FLJ14753  | GI_14211858-S | rs7042434  | 9 | 9 | 94334552 | 32109  | 10.8920 | 0.7069 | 1.2162  | 8.447  | CHB |
| FLJ14753  | GI_14211858-S | rs7042468  | 9 | 9 | 94334638 | 32195  | 11.2349 | 0.7000 | 1.2104  | 8.447  | CHB |
| FLJ14753  | GI_14211858-S | rs7028388  | 9 | 9 | 94336173 | 33730  | 8.7461  | 0.5629 | -1.0510 | 8.447  | CHB |
| FLJ14753  | GI_14211858-S | rs6479549  | 9 | 9 | 94337287 | 34844  | 8.7461  | 0.5629 | 1.0510  | 8.447  | CHB |
| LOC286353 | GI_27478844-S | rs6478977  | 9 | 9 | 95639831 | 8439   | 6.5099  | 0.4551 | -0.1468 | 5.9893 | CHB |
| LOC286353 | GI_27478844-S | rs7871709  | 9 | 9 | 95640165 | 8105   | 6.3094  | 0.4356 | 0.1456  | 5.9893 | CHB |
| LOC286353 | GI_27478844-S | rs816675   | 9 | 9 | 95648636 | 366    | 6.3094  | 0.4356 | -0.1456 | 5.9893 | CHB |
| LOC286353 | GI_27478844-S | rs816673   | 9 | 9 | 95652971 | 4701   | 6.2078  | 0.4372 | 0.1459  | 5.9893 | CHB |
| LOC286353 | GI_27478844-S | rs816670   | 9 | 9 | 95654989 | 6719   | 6.3094  | 0.4356 | -0.1456 | 5.9893 | CHB |
| LOC286353 | GI_27478844-S | rs700962   | 9 | 9 | 95657603 | 9333   | 6.2078  | 0.4372 | 0.1459  | 5.9893 | CHB |
| LOC286353 | GI_27478844-S | rs816683   | 9 | 9 | 95664656 | 16386  | 6.3094  | 0.4356 | 0.1456  | 5.9893 | CHB |
| LOC286353 | GI_27478844-S | rs10818574 | 9 | 9 | 95678522 | 30252  | 6.3094  | 0.4356 | -0.1456 | 5.9893 | CHB |
| LOC286353 | GI_27478844-S | rs10760189 | 9 | 9 | 95680380 | 32110  | 6.3094  | 0.4356 | 0.1456  | 5.9893 | CHB |
| LOC286353 | GI_27478844-S | rs10985499 | 9 | 9 | 95682561 | 34291  | 6.3094  | 0.4356 | 0.1456  | 5.9893 | CHB |
| LOC286353 | GI_27478844-S | rs10760261 | 9 | 9 | 95692066 | 43796  | 6.6935  | 0.4578 | 0.1439  | 5.9893 | CHB |
| LOC286353 | GI_27478844-S | rs10760269 | 9 | 9 | 95694734 | 46464  | 6.6935  | 0.4578 | -0.1439 | 5.9893 | CHB |
| LOC286353 | GI_27478844-S | rs12349742 | 9 | 9 | 95699535 | 51265  | 6.6935  | 0.4578 | -0.1439 | 5.9893 | CHB |
| LOC286353 | GI_27478844-S | rs10818899 | 9 | 9 | 95701966 | 53696  | 6.2994  | 0.4427 | -0.1448 | 5.9893 | CHB |
| LOC286353 | GI_27478844-S | rs689986   | 9 | 9 | 95708704 | 60434  | 6.5785  | 0.4591 | -0.1442 | 5.9893 | CHB |
| LOC286353 | GI_27478844-S | rs690633   | 9 | 9 | 95709731 | 61461  | 6.6935  | 0.4578 | 0.1439  | 5.9893 | CHB |
| LOC286353 | GI_27478844-S | rs689697   | 9 | 9 | 95718397 | 70127  | 6.6935  | 0.4578 | -0.1439 | 5.9893 | CHB |
| LOC286353 | GI_27478844-S | rs690495   | 9 | 9 | 95735348 | 87078  | 6.7087  | 0.4666 | -0.1505 | 5.9893 | CHB |
| LOC286353 | GI_27478844-S | rs12345187 | 9 | 9 | 95747925 | 99655  | 6.8187  | 0.4648 | 0.1501  | 5.9893 | CHB |
| LOC286353 | GI_27478844-S | rs1327996  | 9 | 9 | 95755547 | 107277 | 6.1788  | 0.4516 | -0.1437 | 5.9893 | CHB |
| LOC286353 | GI_27478844-S | rs617187   | 9 | 9 | 95759196 | 110926 | 6.7087  | 0.4666 | 0.1505  | 5.9893 | CHB |
| LOC286353 | GI_27478844-S | rs689619   | 9 | 9 | 95763526 | 115256 | 6.8187  | 0.4648 | 0.1501  | 5.9893 | CHB |
| LOC286353 | GI_27478844-S | rs10512245 | 9 | 9 | 95771366 | 123096 | 6.3965  | 0.4648 | -0.1574 | 5.9893 | CHB |
| LOC286353 | GI_27478844-S | rs671058   | 9 | 9 | 95773565 | 125295 | 6.3552  | 0.4623 | 0.1456  | 5.9893 | CHB |
| LOC286353 | GI_27478844-S | rs690056   | 9 | 9 | 95780541 | 132271 | 6.8187  | 0.4648 | -0.1501 | 5.9893 | CHB |
| LOC286353 | GI_27478844-S | rs682682   | 9 | 9 | 95781817 | 133547 | 6.1116  | 0.4238 | 0.1387  | 5.9893 | CHB |
| LOC286353 | GI_27478844-S | rs10988755 | 9 | 9 | 95785922 | 137652 | 6.6683  | 0.4643 | 0.1501  | 5.9893 | CHB |
| LOC286353 | GI_27478844-S | rs10988817 | 9 | 9 | 95802201 | 153931 | 6.8187  | 0.4648 | 0.1501  | 5.9893 | CHB |
| LOC286353 | GI_27478844-S | rs684455   | 9 | 9 | 95805898 | 157628 | 6.8187  | 0.4648 | -0.1501 | 5.9893 | CHB |
| LOC286353 | GI_27478844-S | rs589362   | 9 | 9 | 95808743 | 160473 | 6.8187  | 0.4648 | -0.1501 | 5.9893 | CHB |
| LOC286353 | GI_27478844-S | rs686048   | 9 | 9 | 95808937 | 160667 | 6.8187  | 0.4648 | -0.1501 | 5.9893 | CHB |
| LOC286353 | GI_27478844-S | rs649819   | 9 | 9 | 95811160 | 162890 | 6.8187  | 0.4648 | -0.1501 | 5.9893 | CHB |
| LOC286353 | GI_27478844-S | rs689761   | 9 | 9 | 95812739 | 164469 | 6.8187  | 0.4648 | 0.1501  | 5.9893 | CHB |
| LOC286353 | GI_27478844-S | rs666093   | 9 | 9 | 95825657 | 177387 | 6.8187  | 0.4648 | 0.1501  | 5.9893 | CHB |
| LOC286353 | GI_27478844-S | rs657451   | 9 | 9 | 95845333 | 197063 | 6.6268  | 0.4540 | 0.1518  | 5.9893 | CHB |
| LOC286353 | GI_27478844-S | rs625105   | 9 | 9 | 95849303 | 201033 | 6.5146  | 0.4554 | -0.1521 | 5.9893 | CHB |
| LOC286353 | GI_27478844-S | rs2943532  | 9 | 9 | 95866812 | 218542 | 6.1277  | 0.4248 | 0.1508  | 5.9893 | CHB |

|          |               |            |   |   |          |        |        |        |         |        |     |
|----------|---------------|------------|---|---|----------|--------|--------|--------|---------|--------|-----|
| Hs.43687 | Hs.43687-S    | rs1006125  | 9 | 9 | 97628174 | 115396 | 6.7464 | 0.4608 | -0.3655 | 6.3533 | CHB |
| Hs.43687 | Hs.43687-S    | rs1007506  | 9 | 9 | 97647689 | 95881  | 6.8759 | 0.4680 | 0.3586  | 6.3533 | CHB |
| Hs.43687 | Hs.43687-S    | rs10983867 | 9 | 9 | 97662639 | 80931  | 6.8715 | 0.4841 | -0.3759 | 6.3533 | CHB |
| Hs.43687 | Hs.43687-S    | rs10983868 | 9 | 9 | 97662814 | 80756  | 7.0341 | 0.4849 | 0.3753  | 6.3533 | CHB |
| Hs.43687 | Hs.43687-S    | rs7037853  | 9 | 9 | 97664686 | 78884  | 6.5812 | 0.4674 | -0.3604 | 6.3533 | CHB |
| Hs.43687 | Hs.43687-S    | rs2401639  | 9 | 9 | 97687392 | 56178  | 7.1565 | 0.4834 | 0.3063  | 6.3533 | CHB |
| Hs.43687 | Hs.43687-S    | rs10983951 | 9 | 9 | 97687567 | 56003  | 7.4485 | 0.4990 | -0.3797 | 6.3533 | CHB |
| Hs.43687 | Hs.43687-S    | rs12348691 | 9 | 9 | 97688237 | 55333  | 7.1565 | 0.4834 | 0.3063  | 6.3533 | CHB |
| Hs.43687 | Hs.43687-S    | rs13288000 | 9 | 9 | 97688535 | 55035  | 7.1565 | 0.4834 | 0.3063  | 6.3533 | CHB |
| Hs.43687 | Hs.43687-S    | rs7873389  | 9 | 9 | 97688785 | 54785  | 6.7914 | 0.4795 | -0.2926 | 6.3533 | CHB |
| Hs.43687 | Hs.43687-S    | rs10818133 | 9 | 9 | 97689903 | 53667  | 8.4320 | 0.5746 | -0.3711 | 6.3533 | CHB |
| Hs.43687 | Hs.43687-S    | rs894673   | 9 | 9 | 97691825 | 51745  | 7.1565 | 0.4834 | -0.3063 | 6.3533 | CHB |
| Hs.43687 | Hs.43687-S    | rs3758251  | 9 | 9 | 97693255 | 50315  | 7.1565 | 0.4834 | -0.3063 | 6.3533 | CHB |
| Hs.43687 | Hs.43687-S    | rs3758250  | 9 | 9 | 97693556 | 50014  | 7.4485 | 0.4990 | -0.3797 | 6.3533 | CHB |
| Hs.43687 | Hs.43687-S    | rs3758249  | 9 | 9 | 97693695 | 49875  | 7.1565 | 0.4834 | -0.3063 | 6.3533 | CHB |
| Hs.43687 | Hs.43687-S    | rs1443434  | 9 | 9 | 97697034 | 46536  | 7.1565 | 0.4834 | -0.3063 | 6.3533 | CHB |
| Hs.43687 | Hs.43687-S    | rs4460498  | 9 | 9 | 97699967 | 43603  | 6.9962 | 0.4828 | 0.2989  | 6.3533 | CHB |
| Hs.43687 | Hs.43687-S    | rs874004   | 9 | 9 | 97701673 | 41897  | 6.8504 | 0.4666 | -0.2958 | 6.3533 | CHB |
| Hs.43687 | Hs.43687-S    | rs2417575  | 9 | 9 | 97708197 | 35373  | 6.5471 | 0.4494 | 0.3517  | 6.3533 | CHB |
| Hs.43687 | Hs.43687-S    | rs2417576  | 9 | 9 | 97708262 | 35308  | 6.5471 | 0.4494 | -0.3517 | 6.3533 | CHB |
| Hs.43687 | Hs.43687-S    | rs7357707  | 9 | 9 | 97710504 | 33066  | 6.8504 | 0.4666 | -0.2958 | 6.3533 | CHB |
| Hs.43687 | Hs.43687-S    | rs1443436  | 9 | 9 | 97710853 | 32717  | 6.5471 | 0.4494 | 0.3517  | 6.3533 | CHB |
| Hs.43687 | Hs.43687-S    | rs7033315  | 9 | 9 | 97715795 | 27775  | 6.8504 | 0.4666 | -0.2958 | 6.3533 | CHB |
| Hs.43687 | Hs.43687-S    | rs12342417 | 9 | 9 | 97718620 | 24950  | 6.5471 | 0.4494 | 0.3517  | 6.3533 | CHB |
| Hs.43687 | Hs.43687-S    | rs10984103 | 9 | 9 | 97718830 | 24740  | 6.5471 | 0.4494 | -0.3517 | 6.3533 | CHB |
| Hs.43687 | Hs.43687-S    | rs2120264  | 9 | 9 | 97725283 | 18287  | 6.5471 | 0.4494 | -0.3517 | 6.3533 | CHB |
| Hs.43687 | Hs.43687-S    | rs7866436  | 9 | 9 | 97729651 | 13919  | 6.5471 | 0.4494 | 0.3517  | 6.3533 | CHB |
| Hs.43687 | Hs.43687-S    | rs7853349  | 9 | 9 | 97729814 | 13756  | 6.8504 | 0.4666 | -0.2958 | 6.3533 | CHB |
| Hs.43687 | Hs.43687-S    | rs10512255 | 9 | 9 | 97732137 | 11433  | 6.5471 | 0.4494 | 0.3517  | 6.3533 | CHB |
| Hs.43687 | Hs.43687-S    | rs12006522 | 9 | 9 | 97732266 | 11304  | 6.5205 | 0.4557 | 0.3550  | 6.3533 | CHB |
| Hs.43687 | Hs.43687-S    | rs12004762 | 9 | 9 | 97732310 | 11260  | 6.5471 | 0.4494 | -0.3517 | 6.3533 | CHB |
| Hs.43687 | Hs.43687-S    | rs7034648  | 9 | 9 | 97733648 | 9922   | 6.5471 | 0.4494 | 0.3517  | 6.3533 | CHB |
| Hs.43687 | Hs.43687-S    | rs10818234 | 9 | 9 | 97736674 | 6896   | 6.5471 | 0.4494 | 0.3517  | 6.3533 | CHB |
| Hs.43687 | Hs.43687-S    | rs10984222 | 9 | 9 | 97737108 | 6462   | 7.4485 | 0.4990 | 0.3797  | 6.3533 | CHB |
| Hs.43687 | Hs.43687-S    | rs7036589  | 9 | 9 | 97737275 | 6295   | 6.5471 | 0.4494 | -0.3517 | 6.3533 | CHB |
| Hs.43687 | Hs.43687-S    | rs7037324  | 9 | 9 | 97737873 | 5697   | 6.5471 | 0.4494 | -0.3517 | 6.3533 | CHB |
| Hs.43687 | Hs.43687-S    | rs7038998  | 9 | 9 | 97741951 | 1619   | 6.4092 | 0.4572 | -0.3578 | 6.3533 | CHB |
| Hs.43687 | Hs.43687-S    | rs10739526 | 9 | 9 | 97742226 | 1344   | 6.5471 | 0.4494 | 0.3517  | 6.3533 | CHB |
| Hs.43687 | Hs.43687-S    | rs3824495  | 9 | 9 | 97743255 | 315    | 6.5471 | 0.4494 | 0.3517  | 6.3533 | CHB |
| Hs.43687 | Hs.43687-S    | rs3808893  | 9 | 9 | 97743300 | 270    | 6.5471 | 0.4494 | -0.3517 | 6.3533 | CHB |
| Hs.43687 | Hs.43687-S    | rs10984253 | 9 | 9 | 97744029 | 459    | 6.3878 | 0.4560 | -0.3563 | 6.3533 | CHB |
| Hs.43687 | Hs.43687-S    | rs7031386  | 9 | 9 | 97745224 | 1654   | 6.5471 | 0.4494 | -0.3517 | 6.3533 | CHB |
| Hs.43687 | Hs.43687-S    | rs7048255  | 9 | 9 | 97745253 | 1683   | 6.8895 | 0.5025 | -0.4057 | 6.3533 | CHB |
| Hs.43687 | Hs.43687-S    | rs9299258  | 9 | 9 | 97746098 | 2528   | 6.6328 | 0.4788 | 0.3612  | 6.3533 | CHB |
| Hs.43687 | Hs.43687-S    | rs2282190  | 9 | 9 | 97746398 | 2828   | 6.5235 | 0.4901 | -0.3954 | 6.3533 | CHB |
| Hs.43687 | Hs.43687-S    | rs6586     | 9 | 9 | 97746486 | 2916   | 6.8504 | 0.4666 | 0.2958  | 6.3533 | CHB |
| Hs.43687 | Hs.43687-S    | rs1561961  | 9 | 9 | 97747154 | 3584   | 6.5471 | 0.4494 | 0.3517  | 6.3533 | CHB |
| Hs.43687 | Hs.43687-S    | rs1561958  | 9 | 9 | 97749354 | 5784   | 6.8504 | 0.4666 | 0.2958  | 6.3533 | CHB |
| Hs.43687 | Hs.43687-S    | rs1561957  | 9 | 9 | 97749827 | 6257   | 6.5471 | 0.4494 | -0.3517 | 6.3533 | CHB |
| Hs.43687 | Hs.43687-S    | rs2120262  | 9 | 9 | 97755531 | 11961  | 6.5471 | 0.4494 | -0.3517 | 6.3533 | CHB |
| Hs.43687 | Hs.43687-S    | rs3780420  | 9 | 9 | 97756721 | 13151  | 6.6559 | 0.4556 | -0.2741 | 6.3533 | CHB |
| Hs.43687 | Hs.43687-S    | rs3802475  | 9 | 9 | 97764274 | 20704  | 6.6559 | 0.4556 | 0.2741  | 6.3533 | CHB |
| Hs.43687 | Hs.43687-S    | rs3808895  | 9 | 9 | 97766109 | 22539  | 7.4485 | 0.4990 | -0.3797 | 6.3533 | CHB |
| Hs.43687 | Hs.43687-S    | rs10760021 | 9 | 9 | 97777203 | 33633  | 6.5226 | 0.4900 | -0.2802 | 6.3533 | CHB |
| Hs.43687 | Hs.43687-S    | rs3758253  | 9 | 9 | 97780209 | 36639  | 6.6559 | 0.4556 | 0.2741  | 6.3533 | CHB |
| Hs.43687 | Hs.43687-S    | rs3758254  | 9 | 9 | 97780556 | 36986  | 6.6559 | 0.4556 | 0.2741  | 6.3533 | CHB |
| Hs.43687 | Hs.43687-S    | rs2417577  | 9 | 9 | 97781001 | 37431  | 6.6559 | 0.4556 | 0.2741  | 6.3533 | CHB |
| Hs.43687 | Hs.43687-S    | rs4631576  | 9 | 9 | 97784765 | 41195  | 6.6559 | 0.4556 | 0.2741  | 6.3533 | CHB |
| CORO2A   | GI_34335234-A | rs2275708  | 9 | 9 | 98054873 | 88418  | 9.7024 | 0.6049 | -1.1940 | 7.3918 | CHB |

|           |               |            |   |   |           |        |         |        |         |        |     |
|-----------|---------------|------------|---|---|-----------|--------|---------|--------|---------|--------|-----|
| CORO2A    | GI_34335234-A | rs12348328 | 9 | 9 | 98056694  | 90239  | 8.1208  | 0.5332 | -1.0959 | 7.3918 | CHB |
| CORO2A    | GI_34335234-A | rs2900464  | 9 | 9 | 98059317  | 92862  | 9.7024  | 0.6049 | -1.1940 | 7.3918 | CHB |
| NIPSNAP3B | GI_21361742-S | rs4743758  | 9 | 9 | 104595369 | 20452  | 7.5185  | 0.5284 | 0.2939  | 5.6991 | CHB |
| NIPSNAP3B | GI_21361742-S | rs4742921  | 9 | 9 | 104595670 | 20151  | 7.1397  | 0.5078 | -0.3316 | 5.6991 | CHB |
| NIPSNAP3B | GI_21361742-S | rs12351593 | 9 | 9 | 104595896 | 19925  | 8.5517  | 0.5539 | -0.3428 | 5.6991 | CHB |
| NIPSNAP3B | GI_21361742-S | rs10124782 | 9 | 9 | 104598628 | 17193  | 8.5517  | 0.5539 | -0.3428 | 5.6991 | CHB |
| NIPSNAP3B | GI_21361742-S | rs2162116  | 9 | 9 | 104608968 | 6853   | 8.5517  | 0.5539 | -0.3428 | 5.6991 | CHB |
| NIPSNAP3B | GI_21361742-S | rs4149340  | 9 | 9 | 104624240 | 8419   | 8.5517  | 0.5539 | 0.3428  | 5.6991 | CHB |
| CDK5RAP2  | GI_28872785-S | rs872423   | 9 | 9 | 120229045 | 1793   | 11.5552 | 0.6753 | 0.4296  | 7.0136 | CHB |
| CDK5RAP2  | GI_28872785-S | rs7037806  | 9 | 9 | 120230679 | 159    | 11.2258 | 0.6724 | -0.4287 | 7.0136 | CHB |
| CDK5RAP2  | GI_28872785-S | rs2297456  | 9 | 9 | 120231795 | 957    | 11.5552 | 0.6753 | -0.4296 | 7.0136 | CHB |
| CDK5RAP2  | GI_28872785-S | rs10125592 | 9 | 9 | 120241289 | 10451  | 10.8127 | 0.6487 | -0.4186 | 7.0136 | CHB |
| CDK5RAP2  | GI_28872785-S | rs10119527 | 9 | 9 | 120241488 | 10650  | 10.8127 | 0.6487 | -0.4186 | 7.0136 | CHB |
| CDK5RAP2  | GI_28872785-S | rs10818455 | 9 | 9 | 120241946 | 11108  | 10.8127 | 0.6487 | -0.4186 | 7.0136 | CHB |
| CDK5RAP2  | GI_28872785-S | rs12379034 | 9 | 9 | 120242220 | 11382  | 8.6268  | 0.5660 | -0.3927 | 7.0136 | CHB |
| CDK5RAP2  | GI_28872785-S | rs12376337 | 9 | 9 | 120242349 | 11511  | 11.5552 | 0.6753 | 0.4296  | 7.0136 | CHB |
| CDK5RAP2  | GI_28872785-S | rs1547266  | 9 | 9 | 120243030 | 12192  | 11.5552 | 0.6753 | -0.4296 | 7.0136 | CHB |
| CDK5RAP2  | GI_28872785-S | rs3780673  | 9 | 9 | 120246137 | 15299  | 11.5552 | 0.6753 | -0.4296 | 7.0136 | CHB |
| CDK5RAP2  | GI_28872785-S | rs3780674  | 9 | 9 | 120246473 | 15635  | 11.5552 | 0.6753 | -0.4296 | 7.0136 | CHB |
| CDK5RAP2  | GI_28872785-S | rs10984914 | 9 | 9 | 120278149 | 47311  | 7.3695  | 0.5031 | 0.3303  | 7.0136 | CHB |
| CDK5RAP2  | GI_28872785-S | rs10984921 | 9 | 9 | 120307536 | 76698  | 7.3695  | 0.5031 | -0.3303 | 7.0136 | CHB |
| CDK5RAP2  | GI_28872785-S | rs16909810 | 9 | 9 | 120322007 | 91169  | 8.2192  | 0.5465 | 0.3414  | 7.0136 | CHB |
| CDK5RAP2  | GI_28872785-S | rs10984936 | 9 | 9 | 120359152 | 128314 | 7.7054  | 0.5123 | 0.3327  | 7.0136 | CHB |
| CDK5RAP2  | GI_28872785-S | rs2095064  | 9 | 9 | 120360504 | 129666 | 7.0510  | 0.4777 | 0.3214  | 7.0136 | CHB |
| CDK5RAP2  | GI_28872785-S | rs4837777  | 9 | 9 | 120364440 | 133602 | 7.4779  | 0.5006 | -0.3286 | 7.0136 | CHB |
| CDK5RAP2  | GI_28872785-S | rs12683306 | 9 | 9 | 120367146 | 136308 | 8.0840  | 0.5398 | 0.3401  | 7.0136 | CHB |
| CDK5RAP2  | GI_28872785-S | rs4836822  | 9 | 9 | 120370590 | 139752 | 7.3917  | 0.5043 | 0.3318  | 7.0136 | CHB |
| CDK5RAP2  | GI_28872785-S | rs2416758  | 9 | 9 | 120373064 | 142226 | 7.4123  | 0.4971 | 0.3279  | 7.0136 | CHB |
| CDK5RAP2  | GI_28872785-S | rs7867825  | 9 | 9 | 120375299 | 144461 | 7.3120  | 0.5000 | -0.3302 | 7.0136 | CHB |
| CDK5RAP2  | GI_28872785-S | rs7853010  | 9 | 9 | 120375743 | 144905 | 7.4779  | 0.5006 | 0.3286  | 7.0136 | CHB |
| CDK5RAP2  | GI_28872785-S | rs10984944 | 9 | 9 | 120376518 | 145680 | 8.1225  | 0.5418 | -0.3402 | 7.0136 | CHB |
| CDK5RAP2  | GI_28872785-S | rs12238807 | 9 | 9 | 120376999 | 146161 | 7.4779  | 0.5006 | -0.3286 | 7.0136 | CHB |
| CDK5RAP2  | GI_28872785-S | rs7868597  | 9 | 9 | 120377873 | 147035 | 8.1225  | 0.5418 | -0.3402 | 7.0136 | CHB |
| CDK5RAP2  | GI_28872785-S | rs10984948 | 9 | 9 | 120379499 | 148661 | 7.2550  | 0.4969 | -0.3286 | 7.0136 | CHB |
| CDK5RAP2  | GI_28872785-S | rs10984949 | 9 | 9 | 120379586 | 148748 | 7.2550  | 0.4969 | -0.3286 | 7.0136 | CHB |
| CDK5RAP2  | GI_28872785-S | rs1475664  | 9 | 9 | 120380208 | 149370 | 8.1225  | 0.5418 | -0.3402 | 7.0136 | CHB |
| CDK5RAP2  | GI_28872785-S | rs3750494  | 9 | 9 | 120380900 | 150062 | 7.4779  | 0.5006 | 0.3286  | 7.0136 | CHB |
| CDK5RAP2  | GI_28872785-S | rs7875141  | 9 | 9 | 120382406 | 151568 | 7.4123  | 0.4971 | -0.3279 | 7.0136 | CHB |
| SLC2A8    | GI_21361448-S | rs10760482 | 9 | 9 | 127209361 | 40030  | 5.8259  | 0.4064 | 0.2194  | 5.5919 | CHB |
| SLC2A8    | GI_21361448-S | rs2247573  | 9 | 9 | 127290500 | 41109  | 6.4498  | 0.4438 | -0.2361 | 5.5919 | CHB |
| SLC2A8    | GI_21361448-S | rs2247310  | 9 | 9 | 127292664 | 43273  | 6.9669  | 0.4731 | 0.2495  | 5.5919 | CHB |
| SLC2A8    | GI_21361448-S | rs2246011  | 9 | 9 | 127328439 | 79048  | 5.8001  | 0.4122 | 0.2358  | 5.5919 | CHB |
| SLC2A8    | GI_21361448-S | rs2254868  | 9 | 9 | 127360143 | 110752 | 5.8001  | 0.4122 | 0.2358  | 5.5919 | CHB |
| RPL12     | GI_15431291-S | rs2254622  | 9 | 9 | 127362393 | 69202  | 5.9009  | 0.4110 | -0.1591 | 5.7549 | CHB |
| C9orf88   | GI_24308286-S | rs7870985  | 9 | 9 | 127473353 | 126072 | 9.1454  | 0.5810 | -1.2331 | 7.6764 | CHB |
| C9orf88   | GI_24308286-S | rs2241168  | 9 | 9 | 127509757 | 162476 | 9.1454  | 0.5810 | -1.2331 | 7.6764 | CHB |
| C9orf88   | GI_24308286-S | rs7021441  | 9 | 9 | 127514308 | 167027 | 9.1454  | 0.5810 | 1.2331  | 7.6764 | CHB |
| C9orf88   | GI_24308286-S | rs3780660  | 9 | 9 | 127530357 | 183076 | 9.1454  | 0.5810 | -1.2331 | 7.6764 | CHB |
| C9orf88   | GI_24308286-S | rs1043433  | 9 | 9 | 127534107 | 186826 | 9.1454  | 0.5810 | -1.2331 | 7.6764 | CHB |
| C9orf88   | GI_24308286-S | rs7852090  | 9 | 9 | 127581792 | 234511 | 7.8321  | 0.5188 | -1.3136 | 7.6764 | CHB |
| C9orf88   | GI_24308286-S | rs3824522  | 9 | 9 | 127588138 | 240857 | 7.8321  | 0.5188 | 1.3136  | 7.6764 | CHB |
| C9orf88   | GI_24308286-S | rs3824521  | 9 | 9 | 127590226 | 242945 | 7.8321  | 0.5188 | -1.3136 | 7.6764 | CHB |
| C9orf88   | GI_24308286-S | rs7852016  | 9 | 9 | 127590851 | 243570 | 7.8321  | 0.5188 | 1.3136  | 7.6764 | CHB |
| C9orf88   | GI_24308286-S | rs2233500  | 9 | 9 | 127591625 | 244344 | 7.8321  | 0.5188 | -1.3136 | 7.6764 | CHB |
| C9orf88   | GI_24308286-S | rs4837179  | 9 | 9 | 127592398 | 245117 | 7.8321  | 0.5188 | -1.3136 | 7.6764 | CHB |
| C9orf88   | GI_24308286-S | rs7875568  | 9 | 9 | 127592574 | 245293 | 7.8321  | 0.5188 | -1.3136 | 7.6764 | CHB |
| C9orf88   | GI_24308286-S | rs7036428  | 9 | 9 | 127593331 | 246050 | 7.8321  | 0.5188 | 1.3136  | 7.6764 | CHB |
| C9orf88   | GI_24308286-S | rs7036654  | 9 | 9 | 127593430 | 246149 | 7.8321  | 0.5188 | 1.3136  | 7.6764 | CHB |
| C9orf88   | GI_24308286-S | rs7026434  | 9 | 9 | 127594470 | 247189 | 7.8321  | 0.5188 | -1.3136 | 7.6764 | CHB |

|           |               |            |    |    |           |        |         |        |         |        |     |
|-----------|---------------|------------|----|----|-----------|--------|---------|--------|---------|--------|-----|
| C9orf88   | GI_24308286-S | rs4836576  | 9  | 9  | 127602270 | 254989 | 7.8321  | 0.5188 | -1.3136 | 7.6764 | CHB |
| C9orf88   | GI_24308286-S | rs7847146  | 9  | 9  | 127619424 | 272143 | 7.8321  | 0.5188 | 1.3136  | 7.6764 | CHB |
| C9orf16   | GI_34147359-S | rs10987899 | 9  | 9  | 127997924 | 7591   | 5.6479  | 0.4026 | -0.1719 | 5.2994 | CHB |
| SURF1     | GI_19557683-S | rs17150482 | 9  | 9  | 133224149 | 24725  | 7.4112  | 0.5317 | -0.2689 | 6.0208 | CHB |
| SURF1     | GI_19557683-S | rs886089   | 9  | 9  | 133229020 | 19854  | 6.5265  | 0.4561 | -0.2523 | 6.0208 | CHB |
| SURF1     | GI_19557683-S | rs886090   | 9  | 9  | 133229057 | 19817  | 6.1794  | 0.4355 | -0.2367 | 6.0208 | CHB |
| SURF1     | GI_19557683-S | rs487820   | 9  | 9  | 133241923 | 6951   | 6.9327  | 0.4712 | 0.2545  | 6.0208 | CHB |
| SURF1     | GI_19557683-S | rs616836   | 9  | 9  | 133243075 | 5799   | 7.8792  | 0.5212 | 0.2658  | 6.0208 | CHB |
| SURF1     | GI_19557683-S | rs553877   | 9  | 9  | 133244509 | 4365   | 7.8792  | 0.5212 | -0.2658 | 6.0208 | CHB |
| SURF1     | GI_19557683-S | rs484248   | 9  | 9  | 133248144 | 730    | 6.7412  | 0.4684 | 0.2468  | 6.0208 | CHB |
| SURF1     | GI_19557683-S | rs599924   | 9  | 9  | 133248145 | 729    | 6.7412  | 0.4684 | -0.2468 | 6.0208 | CHB |
| SURF1     | GI_19557683-S | rs2296810  | 9  | 9  | 133257248 | 8374   | 7.8792  | 0.5212 | 0.2658  | 6.0208 | CHB |
| SURF1     | GI_19557683-S | rs1059773  | 9  | 9  | 133258419 | 9545   | 7.8792  | 0.5212 | 0.2658  | 6.0208 | CHB |
| SURF1     | GI_19557683-S | rs2494     | 9  | 9  | 133259387 | 10513  | 7.8792  | 0.5212 | -0.2658 | 6.0208 | CHB |
| SURF1     | GI_19557683-S | rs17293266 | 9  | 9  | 133262312 | 13438  | 6.7689  | 0.5047 | -0.2508 | 6.0208 | CHB |
| SURF1     | GI_19557683-S | rs1179037  | 9  | 9  | 133268063 | 19189  | 6.9327  | 0.4712 | 0.2545  | 6.0208 | CHB |
| SURF1     | GI_19557683-S | rs3124751  | 9  | 9  | 133295460 | 46586  | 6.7825  | 0.4628 | -0.2960 | 6.0208 | CHB |
| LOC401560 | GI_42659039-S | rs11145958 | 9  | 9  | 136530910 | 2422   | 8.2379  | 0.5939 | -0.9237 | 7.0615 | CHB |
| LOC206962 | GI_22046332-S | rs3812555  | 9  | 9  | 136537770 | 4385   | 7.4105  | 0.4970 | 0.7684  | 6.7499 | CHB |
| LOC401560 | GI_42659039-S | rs3812555  | 9  | 9  | 136537770 | 4438   | 7.7013  | 0.5121 | 0.6634  | 7.0615 | CHB |
| LOC206962 | GI_22046332-S | rs3812561  | 9  | 9  | 136546713 | 13328  | 10.6601 | 0.6429 | -0.9613 | 6.7499 | CHB |
| LOC401560 | GI_42659039-S | rs3812561  | 9  | 9  | 136546713 | 13381  | 11.3603 | 0.6685 | -0.8336 | 7.0615 | CHB |
| LOC206962 | GI_22046332-S | rs11145846 | 9  | 9  | 136561492 | 28107  | 10.6601 | 0.6429 | 0.9613  | 6.7499 | CHB |
| LOC401560 | GI_42659039-S | rs11145846 | 9  | 9  | 136561492 | 28160  | 11.3603 | 0.6685 | 0.8336  | 7.0615 | CHB |
| LOC206962 | GI_22046332-S | rs3812580  | 9  | 9  | 136577797 | 44412  | 7.9918  | 0.5268 | -0.9046 | 6.7499 | CHB |
| LOC401560 | GI_42659039-S | rs3812580  | 9  | 9  | 136577797 | 44465  | 8.2317  | 0.5386 | -0.7781 | 7.0615 | CHB |
| PTER      | GI_20070185-S | rs1052708  | 10 | 10 | 16593361  | 1199   | 7.2629  | 0.4892 | -0.7067 | 5.8706 | CHB |
| PTER      | GI_20070185-S | rs1055340  | 10 | 10 | 16595534  | 974    | 17.9459 | 0.8355 | -0.8514 | 5.8706 | CHB |
| PTER      | GI_20070185-S | rs7909832  | 10 | 10 | 16596716  | 2156   | 16.6725 | 0.8115 | 0.8579  | 5.8706 | CHB |
| PTER      | GI_20070185-S | rs2298126  | 10 | 10 | 16598991  | 4431   | 10.5684 | 0.6395 | 0.6825  | 5.8706 | CHB |
| LOC387647 | GI_42659552-S | rs2796332  | 10 | 10 | 29717054  | 35782  | 10.5131 | 0.6373 | -0.2739 | 5.9032 | CHB |
| LOC387647 | GI_42659552-S | rs2182757  | 10 | 10 | 29723671  | 29165  | 10.2893 | 0.6649 | -0.2746 | 5.9032 | CHB |
| LOC387647 | GI_42659552-S | rs6481579  | 10 | 10 | 29725998  | 26838  | 10.5131 | 0.6373 | -0.2739 | 5.9032 | CHB |
| LOC387647 | GI_42659552-S | rs6481580  | 10 | 10 | 29726244  | 26592  | 10.5378 | 0.6383 | 0.2680  | 5.9032 | CHB |
| LOC387647 | GI_42659552-S | rs7070414  | 10 | 10 | 29727486  | 25350  | 10.0673 | 0.6286 | 0.2715  | 5.9032 | CHB |
| LOC387647 | GI_42659552-S | rs2368416  | 10 | 10 | 29736991  | 15845  | 10.5131 | 0.6373 | 0.2739  | 5.9032 | CHB |
| LOC387647 | GI_42659552-S | rs4237392  | 10 | 10 | 29737233  | 15603  | 10.5378 | 0.6383 | -0.2680 | 5.9032 | CHB |
| LOC387647 | GI_42659552-S | rs2887242  | 10 | 10 | 29737245  | 15591  | 9.9025  | 0.6494 | -0.2581 | 5.9032 | CHB |
| LOC387647 | GI_42659552-S | rs10740802 | 10 | 10 | 29738242  | 14594  | 10.5131 | 0.6373 | 0.2739  | 5.9032 | CHB |
| LOC387647 | GI_42659552-S | rs7073366  | 10 | 10 | 29740398  | 12438  | 9.6024  | 0.6184 | 0.2642  | 5.9032 | CHB |
| LOC387647 | GI_42659552-S | rs6481586  | 10 | 10 | 29741221  | 11615  | 10.5378 | 0.6383 | -0.2680 | 5.9032 | CHB |
| LOC387647 | GI_42659552-S | rs7902800  | 10 | 10 | 29741253  | 11583  | 10.0599 | 0.6372 | -0.2701 | 5.9032 | CHB |
| LOC387647 | GI_42659552-S | rs10826616 | 10 | 10 | 29742543  | 10293  | 10.5131 | 0.6373 | 0.2739  | 5.9032 | CHB |
| LOC387647 | GI_42659552-S | rs7086784  | 10 | 10 | 29742824  | 10012  | 9.1467  | 0.6172 | 0.2748  | 5.9032 | CHB |
| LOC387647 | GI_42659552-S | rs2182400  | 10 | 10 | 29747557  | 5279   | 10.5378 | 0.6383 | -0.2680 | 5.9032 | CHB |
| LOC387647 | GI_42659552-S | rs4749421  | 10 | 10 | 29751526  | 1310   | 10.5378 | 0.6383 | 0.2680  | 5.9032 | CHB |
| LOC387647 | GI_42659552-S | rs4749422  | 10 | 10 | 29751909  | 927    | 10.4588 | 0.6440 | -0.2751 | 5.9032 | CHB |
| LOC387647 | GI_42659552-S | rs10763716 | 10 | 10 | 29753497  | 661    | 10.3524 | 0.6399 | -0.2732 | 5.9032 | CHB |
| LOC387647 | GI_42659552-S | rs10826617 | 10 | 10 | 29753937  | 1101   | 10.5378 | 0.6383 | -0.2680 | 5.9032 | CHB |
| LOC387647 | GI_42659552-S | rs7081352  | 10 | 10 | 29754515  | 1679   | 10.5378 | 0.6383 | 0.2680  | 5.9032 | CHB |
| LOC387647 | GI_42659552-S | rs7078150  | 10 | 10 | 29755085  | 2249   | 10.5378 | 0.6383 | -0.2680 | 5.9032 | CHB |
| LOC387647 | GI_42659552-S | rs10082484 | 10 | 10 | 29755467  | 2631   | 10.5378 | 0.6383 | 0.2680  | 5.9032 | CHB |
| LOC387647 | GI_42659552-S | rs8317     | 10 | 10 | 29756359  | 3523   | 10.5131 | 0.6373 | 0.2739  | 5.9032 | CHB |
| LOC387647 | GI_42659552-S | rs7392705  | 10 | 10 | 29757378  | 4542   | 10.5378 | 0.6383 | -0.2680 | 5.9032 | CHB |
| LOC387647 | GI_42659552-S | rs4747656  | 10 | 10 | 29757510  | 4674   | 10.5378 | 0.6383 | 0.2680  | 5.9032 | CHB |
| LOC387647 | GI_42659552-S | rs4749423  | 10 | 10 | 29757845  | 5009   | 10.5378 | 0.6383 | 0.2680  | 5.9032 | CHB |
| LOC387647 | GI_42659552-S | rs4749424  | 10 | 10 | 29759251  | 6415   | 10.5378 | 0.6383 | -0.2680 | 5.9032 | CHB |
| LOC387647 | GI_42659552-S | rs7077629  | 10 | 10 | 29765529  | 12693  | 10.5378 | 0.6383 | -0.2680 | 5.9032 | CHB |
| LOC387647 | GI_42659552-S | rs4749429  | 10 | 10 | 29771592  | 18756  | 10.5131 | 0.6373 | -0.2739 | 5.9032 | CHB |

|           |               |            |    |    |          |        |         |        |         |        |     |
|-----------|---------------|------------|----|----|----------|--------|---------|--------|---------|--------|-----|
| LOC387647 | GI_42659552-S | rs2368411  | 10 | 10 | 29776306 | 23470  | 10.5378 | 0.6383 | -0.2680 | 5.9032 | CHB |
| LOC387647 | GI_42659552-S | rs11007591 | 10 | 10 | 29779687 | 26851  | 10.5131 | 0.6373 | -0.2739 | 5.9032 | CHB |
| LOC387647 | GI_42659552-S | rs7081524  | 10 | 10 | 29782090 | 29254  | 6.8078  | 0.4805 | -0.2846 | 5.9032 | CHB |
| LOC387647 | GI_42659552-S | rs7916641  | 10 | 10 | 29786091 | 33255  | 10.0730 | 0.6288 | -0.2718 | 5.9032 | CHB |
| LOC387647 | GI_42659552-S | rs10740803 | 10 | 10 | 29790196 | 37360  | 10.5378 | 0.6383 | 0.2680  | 5.9032 | CHB |
| LOC387647 | GI_42659552-S | rs6481593  | 10 | 10 | 29793698 | 40862  | 10.5378 | 0.6383 | -0.2680 | 5.9032 | CHB |
| LOC387647 | GI_42659552-S | rs4749433  | 10 | 10 | 29795726 | 42890  | 8.8620  | 0.5949 | -0.2550 | 5.9032 | CHB |
| LOC387647 | GI_42659552-S | rs4749434  | 10 | 10 | 29797042 | 44206  | 8.9557  | 0.6182 | 0.2772  | 5.9032 | CHB |
| LOC387647 | GI_42659552-S | rs4747659  | 10 | 10 | 29797497 | 44661  | 10.6878 | 0.6440 | 0.2828  | 5.9032 | CHB |
| LOC387647 | GI_42659552-S | rs7906814  | 10 | 10 | 29799788 | 46952  | 9.0110  | 0.6017 | -0.2652 | 5.9032 | CHB |
| LOC387647 | GI_42659552-S | rs6481595  | 10 | 10 | 29800657 | 47821  | 10.5733 | 0.6397 | -0.2744 | 5.9032 | CHB |
| LOC387647 | GI_42659552-S | rs7897170  | 10 | 10 | 29801301 | 48465  | 9.9621  | 0.6425 | -0.2722 | 5.9032 | CHB |
| LOC387647 | GI_42659552-S | rs10826629 | 10 | 10 | 29801320 | 48484  | 10.5733 | 0.6397 | -0.2744 | 5.9032 | CHB |
| LOC387647 | GI_42659552-S | rs2281946  | 10 | 10 | 29802265 | 49429  | 10.5733 | 0.6397 | -0.2744 | 5.9032 | CHB |
| LOC387647 | GI_42659552-S | rs7097877  | 10 | 10 | 29803665 | 50829  | 10.5733 | 0.6397 | 0.2744  | 5.9032 | CHB |
| LOC387647 | GI_42659552-S | rs10763719 | 10 | 10 | 29803900 | 51064  | 10.5733 | 0.6397 | 0.2744  | 5.9032 | CHB |
| LOC387647 | GI_42659552-S | rs10740806 | 10 | 10 | 29804581 | 51745  | 10.5733 | 0.6397 | -0.2744 | 5.9032 | CHB |
| LOC387647 | GI_42659552-S | rs10826631 | 10 | 10 | 29804683 | 51847  | 10.4312 | 0.6429 | -0.2749 | 5.9032 | CHB |
| LOC387647 | GI_42659552-S | rs6481596  | 10 | 10 | 29805736 | 52900  | 6.5699  | 0.4839 | -0.2650 | 5.9032 | CHB |
| LOC387647 | GI_42659552-S | rs913034   | 10 | 10 | 29807247 | 54411  | 8.1195  | 0.5331 | 0.3042  | 5.9032 | CHB |
| LOC387647 | GI_42659552-S | rs7096453  | 10 | 10 | 29808505 | 55669  | 6.8919  | 0.4689 | 0.2881  | 5.9032 | CHB |
| LOC387647 | GI_42659552-S | rs3858231  | 10 | 10 | 29814161 | 61325  | 9.3751  | 0.5910 | 0.2744  | 5.9032 | CHB |
| LOC387647 | GI_42659552-S | rs10826644 | 10 | 10 | 29817312 | 64476  | 9.6132  | 0.6188 | 0.2690  | 5.9032 | CHB |
| LOC387647 | GI_42659552-S | rs11007619 | 10 | 10 | 29819061 | 66225  | 9.3965  | 0.5919 | -0.2681 | 5.9032 | CHB |
| LOC387647 | GI_42659552-S | rs3780853  | 10 | 10 | 29819205 | 66369  | 9.3965  | 0.5919 | 0.2681  | 5.9032 | CHB |
| LOC387647 | GI_42659552-S | rs10826645 | 10 | 10 | 29819236 | 66400  | 9.2782  | 0.6044 | -0.2760 | 5.9032 | CHB |
| LOC387647 | GI_42659552-S | rs11007621 | 10 | 10 | 29819551 | 66715  | 9.7170  | 0.6142 | 0.2796  | 5.9032 | CHB |
| LOC387647 | GI_42659552-S | rs2281940  | 10 | 10 | 29820166 | 67330  | 6.8661  | 0.5104 | -0.2728 | 5.9032 | CHB |
| LOC387647 | GI_42659552-S | rs2281941  | 10 | 10 | 29820297 | 67461  | 10.5733 | 0.6397 | -0.2744 | 5.9032 | CHB |
| C10orf64  | GI_40255173-S | rs7076662  | 10 | 10 | 49611073 | 2971   | 6.1252  | 0.4246 | -0.1872 | 5.887  | CHB |
| C10orf64  | GI_40255173-S | rs17836423 | 10 | 10 | 49617648 | 3604   | 6.0505  | 0.4201 | -0.1862 | 5.887  | CHB |
| TFAM      | GI_4507400-I  | rs10826176 | 10 | 10 | 59811543 | 14230  | 8.4023  | 0.5468 | 0.4943  | 5.8212 | CHB |
| TFAM      | GI_4507400-I  | rs11006127 | 10 | 10 | 59813027 | 12746  | 8.5598  | 0.5543 | -0.4983 | 5.8212 | CHB |
| TFAM      | GI_4507400-I  | rs16912188 | 10 | 10 | 59818757 | 7016   | 8.7181  | 0.5882 | -0.5160 | 5.8212 | CHB |
| TFAM      | GI_4507400-I  | rs16912196 | 10 | 10 | 59821152 | 4621   | 9.2756  | 0.5867 | -0.5113 | 5.8212 | CHB |
| TFAM      | GI_4507400-I  | rs16912197 | 10 | 10 | 59821248 | 4525   | 8.5529  | 0.5898 | -0.5109 | 5.8212 | CHB |
| TFAM      | GI_4507400-I  | rs16912201 | 10 | 10 | 59826692 | 919    | 9.2756  | 0.5867 | -0.5113 | 5.8212 | CHB |
| TFAM      | GI_4507400-I  | rs16912202 | 10 | 10 | 59828076 | 2303   | 9.2756  | 0.5867 | 0.5113  | 5.8212 | CHB |
| SLC25A16  | GI_31652216-S | rs10998076 | 10 | 10 | 69766492 | 146086 | 6.3610  | 0.4386 | 0.2597  | 5.6233 | CHB |
| SLC25A16  | GI_31652216-S | rs1162760  | 10 | 10 | 69768652 | 143926 | 6.3610  | 0.4386 | -0.2597 | 5.6233 | CHB |
| SLC25A16  | GI_31652216-S | rs7071140  | 10 | 10 | 69770256 | 142322 | 6.3610  | 0.4386 | 0.2597  | 5.6233 | CHB |
| SLC25A16  | GI_31652216-S | rs1162757  | 10 | 10 | 69770361 | 142217 | 6.3610  | 0.4386 | 0.2597  | 5.6233 | CHB |
| SLC25A16  | GI_31652216-S | rs17297439 | 10 | 10 | 69773467 | 139111 | 6.3610  | 0.4386 | -0.2597 | 5.6233 | CHB |
| SLC25A16  | GI_31652216-S | rs3781567  | 10 | 10 | 69775184 | 137394 | 6.3610  | 0.4386 | 0.2597  | 5.6233 | CHB |
| SLC25A16  | GI_31652216-S | rs7071697  | 10 | 10 | 69777636 | 134942 | 6.3610  | 0.4386 | -0.2597 | 5.6233 | CHB |
| SLC25A16  | GI_31652216-S | rs10823179 | 10 | 10 | 69778919 | 133659 | 6.3610  | 0.4386 | -0.2597 | 5.6233 | CHB |
| SLC25A16  | GI_31652216-S | rs10823182 | 10 | 10 | 69790113 | 122465 | 6.3207  | 0.4362 | -0.2629 | 5.6233 | CHB |
| SLC25A16  | GI_31652216-S | rs6480328  | 10 | 10 | 69794640 | 117938 | 6.5003  | 0.4467 | 0.2620  | 5.6233 | CHB |
| SLC25A16  | GI_31652216-S | rs10998088 | 10 | 10 | 69798871 | 113707 | 6.3207  | 0.4362 | 0.2629  | 5.6233 | CHB |
| SLC25A16  | GI_31652216-S | rs7086030  | 10 | 10 | 69803580 | 108998 | 6.3207  | 0.4362 | 0.2629  | 5.6233 | CHB |
| SLC25A16  | GI_31652216-S | rs7899885  | 10 | 10 | 69813780 | 98798  | 6.5003  | 0.4467 | -0.2620 | 5.6233 | CHB |
| SLC25A16  | GI_31652216-S | rs10509301 | 10 | 10 | 69814683 | 97895  | 6.1517  | 0.4338 | -0.2627 | 5.6233 | CHB |
| SLC25A16  | GI_31652216-S | rs2224665  | 10 | 10 | 69831639 | 80939  | 6.5003  | 0.4467 | -0.2620 | 5.6233 | CHB |
| SLC25A16  | GI_31652216-S | rs7912227  | 10 | 10 | 69849719 | 62859  | 6.3207  | 0.4362 | 0.2629  | 5.6233 | CHB |
| SLC25A16  | GI_31652216-S | rs7897488  | 10 | 10 | 69849752 | 62826  | 6.3207  | 0.4362 | -0.2629 | 5.6233 | CHB |
| SLC25A16  | GI_31652216-S | rs11814378 | 10 | 10 | 69853751 | 58827  | 6.3207  | 0.4362 | 0.2629  | 5.6233 | CHB |
| SLC25A16  | GI_31652216-S | rs10998172 | 10 | 10 | 69873240 | 39338  | 6.3207  | 0.4362 | -0.2629 | 5.6233 | CHB |
| SLC25A16  | GI_31652216-S | rs7074348  | 10 | 10 | 69878372 | 34206  | 6.3207  | 0.4362 | 0.2629  | 5.6233 | CHB |
| SLC25A16  | GI_31652216-S | rs10998177 | 10 | 10 | 69881043 | 31535  | 6.3362  | 0.4612 | 0.2767  | 5.6233 | CHB |

|          |               |            |    |    |          |        |        |        |         |        |     |
|----------|---------------|------------|----|----|----------|--------|--------|--------|---------|--------|-----|
| SLC25A16 | GI_31652216-S | rs10998185 | 10 | 10 | 69884059 | 28519  | 6.3207 | 0.4362 | 0.2629  | 5.6233 | CHB |
| SLC25A16 | GI_31652216-S | rs4388762  | 10 | 10 | 69891200 | 21378  | 6.3207 | 0.4362 | -0.2629 | 5.6233 | CHB |
| SLC25A16 | GI_31652216-S | rs10509302 | 10 | 10 | 69900481 | 12097  | 6.1974 | 0.4366 | -0.2677 | 5.6233 | CHB |
| SLC25A16 | GI_31652216-S | rs12767790 | 10 | 10 | 69910121 | 2457   | 6.3207 | 0.4362 | -0.2629 | 5.6233 | CHB |
| SLC25A16 | GI_31652216-S | rs12767669 | 10 | 10 | 69910240 | 2338   | 5.9479 | 0.4372 | -0.2620 | 5.6233 | CHB |
| SLC25A16 | GI_31652216-S | rs10998215 | 10 | 10 | 69911055 | 1523   | 6.3207 | 0.4362 | 0.2629  | 5.6233 | CHB |
| SLC25A16 | GI_31652216-S | rs1136645  | 10 | 10 | 69912519 | 59     | 6.3207 | 0.4362 | 0.2629  | 5.6233 | CHB |
| SLC25A16 | GI_31652216-S | rs4350264  | 10 | 10 | 69912952 | 374    | 6.3207 | 0.4362 | -0.2629 | 5.6233 | CHB |
| SLC25A16 | GI_31652216-S | rs7091312  | 10 | 10 | 69913735 | 1157   | 5.8712 | 0.4323 | -0.2498 | 5.6233 | CHB |
| SLC25A16 | GI_31652216-S | rs7906309  | 10 | 10 | 69915150 | 2572   | 6.0364 | 0.4268 | 0.2634  | 5.6233 | CHB |
| SLC25A16 | GI_31652216-S | rs7900548  | 10 | 10 | 69920626 | 8048   | 6.5003 | 0.4467 | -0.2620 | 5.6233 | CHB |
| SLC25A16 | GI_31652216-S | rs12217591 | 10 | 10 | 69921293 | 8715   | 6.3207 | 0.4362 | -0.2629 | 5.6233 | CHB |
| RPL26    | GI_17017970-S | rs7918950  | 10 | 10 | 70678711 | 749432 | 6.3037 | 0.4430 | -0.2210 | 5.9153 | CHB |
| PP       | GI_29171760-S | rs10999176 | 10 | 10 | 71627118 | 8947   | 5.9525 | 0.4142 | -0.1927 | 5.8688 | CHB |
| PP       | GI_29171760-S | rs9415004  | 10 | 10 | 71636825 | 760    | 5.9525 | 0.4142 | 0.1927  | 5.8688 | CHB |
| PP       | GI_29171760-S | rs2244916  | 10 | 10 | 71639139 | 3074   | 5.9525 | 0.4142 | -0.1927 | 5.8688 | CHB |
| PP       | GI_29171760-S | rs2184334  | 10 | 10 | 71641560 | 5495   | 5.9525 | 0.4142 | 0.1927  | 5.8688 | CHB |
| PP       | GI_29171760-S | rs7911572  | 10 | 10 | 71644474 | 8409   | 5.9525 | 0.4142 | 0.1927  | 5.8688 | CHB |
| PP       | GI_29171760-S | rs7089806  | 10 | 10 | 71662625 | 26560  | 5.9525 | 0.4142 | -0.1927 | 5.8688 | CHB |
| PRF1     | GI_40254807-S | rs4747061  | 10 | 10 | 72009074 | 18902  | 8.8526 | 0.5678 | -0.5780 | 7.4405 | CHB |
| NUDT13   | GI_34330151-S | rs3736278  | 10 | 10 | 74460386 | 100542 | 5.6053 | 0.3926 | 0.1478  | 5.1059 | CHB |
| NUDT13   | GI_34330151-S | rs12248308 | 10 | 10 | 74461628 | 99300  | 5.6053 | 0.3926 | -0.1478 | 5.1059 | CHB |
| NUDT13   | GI_34330151-S | rs7094342  | 10 | 10 | 74462172 | 98756  | 5.6053 | 0.3926 | 0.1478  | 5.1059 | CHB |
| NUDT13   | GI_34330151-S | rs7076642  | 10 | 10 | 74462469 | 98459  | 5.4408 | 0.3822 | -0.1393 | 5.1059 | CHB |
| NUDT13   | GI_34330151-S | rs12244049 | 10 | 10 | 74466669 | 94259  | 5.6053 | 0.3926 | -0.1478 | 5.1059 | CHB |
| NUDT13   | GI_34330151-S | rs12249126 | 10 | 10 | 74470638 | 90290  | 5.6053 | 0.3926 | 0.1478  | 5.1059 | CHB |
| NUDT13   | GI_34330151-S | rs10823975 | 10 | 10 | 74474450 | 86478  | 5.6053 | 0.3926 | -0.1478 | 5.1059 | CHB |
| NUDT13   | GI_34330151-S | rs11000499 | 10 | 10 | 74474938 | 85990  | 5.6053 | 0.3926 | 0.1478  | 5.1059 | CHB |
| NUDT13   | GI_34330151-S | rs16930271 | 10 | 10 | 74478991 | 81937  | 5.6053 | 0.3926 | -0.1478 | 5.1059 | CHB |
| NUDT13   | GI_34330151-S | rs6480659  | 10 | 10 | 74479623 | 81305  | 5.6053 | 0.3926 | 0.1478  | 5.1059 | CHB |
| NUDT13   | GI_34330151-S | rs7078818  | 10 | 10 | 74480549 | 80379  | 5.6053 | 0.3926 | 0.1478  | 5.1059 | CHB |
| NUDT13   | GI_34330151-S | rs12258500 | 10 | 10 | 74489027 | 71901  | 5.4336 | 0.3888 | -0.1475 | 5.1059 | CHB |
| NUDT13   | GI_34330151-S | rs12244027 | 10 | 10 | 74489595 | 71333  | 5.6053 | 0.3926 | -0.1478 | 5.1059 | CHB |
| NUDT13   | GI_34330151-S | rs12262696 | 10 | 10 | 74491111 | 69817  | 6.0815 | 0.4374 | -0.1565 | 5.1059 | CHB |
| NUDT13   | GI_34330151-S | rs12249431 | 10 | 10 | 74495202 | 65726  | 5.6053 | 0.3926 | 0.1478  | 5.1059 | CHB |
| NUDT13   | GI_34330151-S | rs7904719  | 10 | 10 | 74496637 | 64291  | 5.6053 | 0.3926 | 0.1478  | 5.1059 | CHB |
| NUDT13   | GI_34330151-S | rs4387274  | 10 | 10 | 74501304 | 59624  | 5.6053 | 0.3926 | 0.1478  | 5.1059 | CHB |
| NUDT13   | GI_34330151-S | rs10823977 | 10 | 10 | 74506792 | 54136  | 5.6053 | 0.3926 | -0.1478 | 5.1059 | CHB |
| NUDT13   | GI_34330151-S | rs12570974 | 10 | 10 | 74510261 | 50667  | 5.6053 | 0.3926 | -0.1478 | 5.1059 | CHB |
| NUDT13   | GI_34330151-S | rs12242214 | 10 | 10 | 74513083 | 47845  | 5.6053 | 0.3926 | -0.1478 | 5.1059 | CHB |
| NUDT13   | GI_34330151-S | rs12242222 | 10 | 10 | 74513132 | 47796  | 5.6053 | 0.3926 | -0.1478 | 5.1059 | CHB |
| NUDT13   | GI_34330151-S | rs11000516 | 10 | 10 | 74513969 | 46959  | 5.4164 | 0.3877 | 0.1439  | 5.1059 | CHB |
| NUDT13   | GI_34330151-S | rs7905836  | 10 | 10 | 74514395 | 46533  | 5.6053 | 0.3926 | 0.1478  | 5.1059 | CHB |
| NUDT13   | GI_34330151-S | rs7920974  | 10 | 10 | 74514557 | 46371  | 5.4164 | 0.3877 | -0.1439 | 5.1059 | CHB |
| NUDT13   | GI_34330151-S | rs7078127  | 10 | 10 | 74517640 | 43288  | 5.6053 | 0.3926 | -0.1478 | 5.1059 | CHB |
| NUDT13   | GI_34330151-S | rs6480667  | 10 | 10 | 74518880 | 42048  | 5.6053 | 0.3926 | -0.1478 | 5.1059 | CHB |
| NUDT13   | GI_34330151-S | rs6480668  | 10 | 10 | 74519332 | 41596  | 5.6053 | 0.3926 | -0.1478 | 5.1059 | CHB |
| NUDT13   | GI_34330151-S | rs7095810  | 10 | 10 | 74524150 | 36778  | 5.6053 | 0.3926 | -0.1478 | 5.1059 | CHB |
| NUDT13   | GI_34330151-S | rs7918396  | 10 | 10 | 74527553 | 33375  | 5.6053 | 0.3926 | 0.1478  | 5.1059 | CHB |
| NUDT13   | GI_34330151-S | rs7082363  | 10 | 10 | 74528776 | 32152  | 5.6053 | 0.3926 | 0.1478  | 5.1059 | CHB |
| NUDT13   | GI_34330151-S | rs7094115  | 10 | 10 | 74528868 | 32060  | 5.4029 | 0.4018 | -0.1472 | 5.1059 | CHB |
| NUDT13   | GI_34330151-S | rs7894359  | 10 | 10 | 74534394 | 26534  | 5.6053 | 0.3926 | 0.1478  | 5.1059 | CHB |
| NUDT13   | GI_34330151-S | rs872457   | 10 | 10 | 74539797 | 21131  | 5.6053 | 0.3926 | -0.1478 | 5.1059 | CHB |
| NUDT13   | GI_34330151-S | rs2280369  | 10 | 10 | 74540513 | 20415  | 5.6053 | 0.3926 | 0.1478  | 5.1059 | CHB |
| NUDT13   | GI_34330151-S | rs9971273  | 10 | 10 | 74543752 | 17176  | 5.6053 | 0.3926 | -0.1478 | 5.1059 | CHB |
| NUDT13   | GI_34330151-S | rs7916539  | 10 | 10 | 74548357 | 12571  | 5.6053 | 0.3926 | -0.1478 | 5.1059 | CHB |
| NUDT13   | GI_34330151-S | rs3829166  | 10 | 10 | 74549380 | 11548  | 5.6053 | 0.3926 | -0.1478 | 5.1059 | CHB |
| NUDT13   | GI_34330151-S | rs3750734  | 10 | 10 | 74549646 | 11282  | 5.6053 | 0.3926 | -0.1478 | 5.1059 | CHB |
| NUDT13   | GI_34330151-S | rs2394918  | 10 | 10 | 74552973 | 7955   | 5.6053 | 0.3926 | 0.1478  | 5.1059 | CHB |

|        |               |            |    |    |          |       |        |        |         |        |     |
|--------|---------------|------------|----|----|----------|-------|--------|--------|---------|--------|-----|
| NUDT13 | GI_34330151-S | rs7914726  | 10 | 10 | 74553223 | 7705  | 5.6053 | 0.3926 | 0.1478  | 5.1059 | CHB |
| NUDT13 | GI_34330151-S | rs7075865  | 10 | 10 | 74553762 | 7166  | 5.6053 | 0.3926 | 0.1478  | 5.1059 | CHB |
| NUDT13 | GI_34330151-S | rs12569493 | 10 | 10 | 74556049 | 4879  | 5.6053 | 0.3926 | 0.1478  | 5.1059 | CHB |
| NUDT13 | GI_34330151-S | rs7901631  | 10 | 10 | 74557419 | 3509  | 6.8086 | 0.4891 | 0.1645  | 5.1059 | CHB |
| NUDT13 | GI_34330151-S | rs7918236  | 10 | 10 | 74559276 | 1652  | 5.6053 | 0.3926 | 0.1478  | 5.1059 | CHB |
| NUDT13 | GI_34330151-S | rs16930362 | 10 | 10 | 74560327 | 601   | 5.6053 | 0.3926 | 0.1478  | 5.1059 | CHB |
| NUDT13 | GI_34330151-S | rs7083730  | 10 | 10 | 74560455 | 473   | 5.6053 | 0.3926 | 0.1478  | 5.1059 | CHB |
| NUDT13 | GI_34330151-S | rs2894215  | 10 | 10 | 74561195 | 267   | 5.6053 | 0.3926 | 0.1478  | 5.1059 | CHB |
| NUDT13 | GI_34330151-S | rs7079875  | 10 | 10 | 74563424 | 2496  | 5.6053 | 0.3926 | -0.1478 | 5.1059 | CHB |
| NUDT13 | GI_34330151-S | rs7080126  | 10 | 10 | 74563539 | 2611  | 5.6053 | 0.3926 | -0.1478 | 5.1059 | CHB |
| NUDT13 | GI_34330151-S | rs12571390 | 10 | 10 | 74563938 | 3010  | 5.6053 | 0.3926 | -0.1478 | 5.1059 | CHB |
| NUDT13 | GI_34330151-S | rs7908606  | 10 | 10 | 74563969 | 3041  | 5.6053 | 0.3926 | 0.1478  | 5.1059 | CHB |
| NUDT13 | GI_34330151-S | rs2271903  | 10 | 10 | 74564264 | 3336  | 6.7695 | 0.4868 | 0.1618  | 5.1059 | CHB |
| NUDT13 | GI_34330151-S | rs2271904  | 10 | 10 | 74564381 | 3453  | 5.6053 | 0.3926 | 0.1478  | 5.1059 | CHB |
| NUDT13 | GI_34330151-S | rs12249189 | 10 | 10 | 74565796 | 4868  | 5.6053 | 0.3926 | 0.1478  | 5.1059 | CHB |
| NUDT13 | GI_34330151-S | rs12260168 | 10 | 10 | 74567697 | 6769  | 5.6053 | 0.3926 | -0.1478 | 5.1059 | CHB |
| NUDT13 | GI_34330151-S | rs2271905  | 10 | 10 | 74567822 | 6894  | 5.6053 | 0.3926 | -0.1478 | 5.1059 | CHB |
| NUDT13 | GI_34330151-S | rs3817395  | 10 | 10 | 74568262 | 7334  | 5.8520 | 0.4231 | 0.1510  | 5.1059 | CHB |
| NUDT13 | GI_34330151-S | rs3736518  | 10 | 10 | 74569140 | 8212  | 5.6053 | 0.3926 | -0.1478 | 5.1059 | CHB |
| NUDT13 | GI_34330151-S | rs6480671  | 10 | 10 | 74570789 | 9861  | 5.6053 | 0.3926 | -0.1478 | 5.1059 | CHB |
| NUDT13 | GI_34330151-S | rs2395012  | 10 | 10 | 74577396 | 16468 | 5.6053 | 0.3926 | -0.1478 | 5.1059 | CHB |
| NUDT13 | GI_34330151-S | rs10437380 | 10 | 10 | 74578871 | 17943 | 5.6053 | 0.3926 | 0.1478  | 5.1059 | CHB |
| NUDT13 | GI_34330151-S | rs7072168  | 10 | 10 | 74579588 | 18660 | 5.6053 | 0.3926 | -0.1478 | 5.1059 | CHB |
| NUDT13 | GI_34330151-S | rs7069878  | 10 | 10 | 74582010 | 21082 | 5.6053 | 0.3926 | 0.1478  | 5.1059 | CHB |
| NUDT13 | GI_34330151-S | rs11000531 | 10 | 10 | 74584308 | 23380 | 5.6053 | 0.3926 | -0.1478 | 5.1059 | CHB |
| NUDT13 | GI_34330151-S | rs11000532 | 10 | 10 | 74584405 | 23477 | 5.3873 | 0.3858 | 0.1455  | 5.1059 | CHB |
| NUDT13 | GI_34330151-S | rs12240976 | 10 | 10 | 74586008 | 25080 | 5.6053 | 0.3926 | 0.1478  | 5.1059 | CHB |
| NUDT13 | GI_34330151-S | rs12241093 | 10 | 10 | 74586179 | 25251 | 5.6053 | 0.3926 | 0.1478  | 5.1059 | CHB |
| NUDT13 | GI_34330151-S | rs12260139 | 10 | 10 | 74590442 | 29514 | 5.6053 | 0.3926 | -0.1478 | 5.1059 | CHB |
| NUDT13 | GI_34330151-S | rs7069813  | 10 | 10 | 74591088 | 30160 | 5.6053 | 0.3926 | -0.1478 | 5.1059 | CHB |
| NUDT13 | GI_34330151-S | rs7092445  | 10 | 10 | 74591998 | 31070 | 5.6053 | 0.3926 | 0.1478  | 5.1059 | CHB |
| NUDT13 | GI_34330151-S | rs3812618  | 10 | 10 | 74593138 | 32210 | 5.6053 | 0.3926 | -0.1478 | 5.1059 | CHB |
| NUDT13 | GI_34330151-S | rs3812619  | 10 | 10 | 74593568 | 32640 | 5.6053 | 0.3926 | -0.1478 | 5.1059 | CHB |
| NUDT13 | GI_34330151-S | rs3763723  | 10 | 10 | 74597490 | 36562 | 5.6053 | 0.3926 | -0.1478 | 5.1059 | CHB |
| NUDT13 | GI_34330151-S | rs7917179  | 10 | 10 | 74601737 | 40809 | 5.6053 | 0.3926 | 0.1478  | 5.1059 | CHB |
| NUDT13 | GI_34330151-S | rs16930384 | 10 | 10 | 74601988 | 41060 | 5.2165 | 0.3746 | 0.1510  | 5.1059 | CHB |
| NUDT13 | GI_34330151-S | rs12244670 | 10 | 10 | 74602329 | 41401 | 5.3305 | 0.3821 | -0.1441 | 5.1059 | CHB |
| NUDT13 | GI_34330151-S | rs6480675  | 10 | 10 | 74602460 | 41532 | 5.6053 | 0.3926 | -0.1478 | 5.1059 | CHB |
| NUDT13 | GI_34330151-S | rs12261221 | 10 | 10 | 74603148 | 42220 | 5.6053 | 0.3926 | -0.1478 | 5.1059 | CHB |
| NUDT13 | GI_34330151-S | rs6480677  | 10 | 10 | 74603208 | 42280 | 5.3702 | 0.3920 | 0.1482  | 5.1059 | CHB |
| NUDT13 | GI_34330151-S | rs12256576 | 10 | 10 | 74604320 | 43392 | 5.6053 | 0.3926 | 0.1478  | 5.1059 | CHB |
| NUDT13 | GI_34330151-S | rs7923555  | 10 | 10 | 74606316 | 45388 | 5.6053 | 0.3926 | 0.1478  | 5.1059 | CHB |
| NUDT13 | GI_34330151-S | rs3750735  | 10 | 10 | 74607512 | 46584 | 5.6053 | 0.3926 | -0.1478 | 5.1059 | CHB |
| NUDT13 | GI_34330151-S | rs11000541 | 10 | 10 | 74610087 | 49159 | 5.6053 | 0.3926 | 0.1478  | 5.1059 | CHB |
| NUDT13 | GI_34330151-S | rs12268713 | 10 | 10 | 74615745 | 54817 | 5.6053 | 0.3926 | 0.1478  | 5.1059 | CHB |
| NUDT13 | GI_34330151-S | rs3998311  | 10 | 10 | 74627902 | 66974 | 6.3253 | 0.4365 | -0.1567 | 5.1059 | CHB |
| NUDT13 | GI_34330151-S | rs2394934  | 10 | 10 | 74632980 | 72052 | 6.3253 | 0.4365 | -0.1567 | 5.1059 | CHB |
| NUDT13 | GI_34330151-S | rs11000548 | 10 | 10 | 74635902 | 74974 | 9.1661 | 0.6376 | -0.1906 | 5.1059 | CHB |
| NUDT13 | GI_34330151-S | rs6480681  | 10 | 10 | 74636770 | 75842 | 6.3253 | 0.4365 | -0.1567 | 5.1059 | CHB |
| NUDT13 | GI_34330151-S | rs3736519  | 10 | 10 | 74638570 | 77642 | 6.3253 | 0.4365 | 0.1567  | 5.1059 | CHB |
| NUDT13 | GI_34330151-S | rs2394935  | 10 | 10 | 74639581 | 78653 | 6.3253 | 0.4365 | 0.1567  | 5.1059 | CHB |
| NUDT13 | GI_34330151-S | rs12261028 | 10 | 10 | 74643661 | 82733 | 5.6566 | 0.4267 | -0.1546 | 5.1059 | CHB |
| NUDT13 | GI_34330151-S | rs6480682  | 10 | 10 | 74646068 | 85140 | 5.2262 | 0.3683 | 0.1454  | 5.1059 | CHB |
| NUDT13 | GI_34330151-S | rs1867566  | 10 | 10 | 74647541 | 86613 | 6.3253 | 0.4365 | 0.1567  | 5.1059 | CHB |
| NUDT13 | GI_34330151-S | rs1867565  | 10 | 10 | 74647787 | 86859 | 6.3253 | 0.4365 | 0.1567  | 5.1059 | CHB |
| NUDT13 | GI_34330151-S | rs6480684  | 10 | 10 | 74651298 | 90370 | 5.9594 | 0.4379 | -0.1565 | 5.1059 | CHB |
| NUDT13 | GI_34330151-S | rs7913328  | 10 | 10 | 74653296 | 92368 | 6.3253 | 0.4365 | -0.1567 | 5.1059 | CHB |
| NUDT13 | GI_34330151-S | rs11000554 | 10 | 10 | 74655221 | 94293 | 6.1228 | 0.4321 | -0.1559 | 5.1059 | CHB |
| NUDT13 | GI_34330151-S | rs11000555 | 10 | 10 | 74655942 | 95014 | 6.3253 | 0.4365 | 0.1567  | 5.1059 | CHB |

|        |               |            |    |    |          |        |        |        |         |        |     |
|--------|---------------|------------|----|----|----------|--------|--------|--------|---------|--------|-----|
| NUDT13 | GI_34330151-S | rs11000556 | 10 | 10 | 74657184 | 96256  | 6.3253 | 0.4365 | -0.1567 | 5.1059 | CHB |
| NUDT13 | GI_34330151-S | rs11000557 | 10 | 10 | 74657400 | 96472  | 6.3253 | 0.4365 | -0.1567 | 5.1059 | CHB |
| NUDT13 | GI_34330151-S | rs7900359  | 10 | 10 | 74657481 | 96553  | 6.3253 | 0.4365 | 0.1567  | 5.1059 | CHB |
| NUDT13 | GI_34330151-S | rs7077186  | 10 | 10 | 74659347 | 98419  | 6.1228 | 0.4321 | 0.1559  | 5.1059 | CHB |
| NUDT13 | GI_34330151-S | rs7093566  | 10 | 10 | 74659456 | 98528  | 6.3253 | 0.4365 | 0.1567  | 5.1059 | CHB |
| NUDT13 | GI_34330151-S | rs12570053 | 10 | 10 | 74660133 | 99205  | 6.3253 | 0.4365 | -0.1567 | 5.1059 | CHB |
| NUDT13 | GI_34330151-S | rs7098383  | 10 | 10 | 74660795 | 99867  | 6.3253 | 0.4365 | -0.1567 | 5.1059 | CHB |
| NUDT13 | GI_34330151-S | rs7068969  | 10 | 10 | 74661567 | 100639 | 6.3253 | 0.4365 | -0.1567 | 5.1059 | CHB |
| NUDT13 | GI_34330151-S | rs2292948  | 10 | 10 | 74662620 | 101692 | 6.3253 | 0.4365 | 0.1567  | 5.1059 | CHB |
| NUDT13 | GI_34330151-S | rs957486   | 10 | 10 | 74663890 | 102962 | 6.3253 | 0.4365 | 0.1567  | 5.1059 | CHB |
| NUDT13 | GI_34330151-S | rs12569470 | 10 | 10 | 74665833 | 104905 | 5.3039 | 0.3733 | 0.1288  | 5.1059 | CHB |
| NUDT13 | GI_34330151-S | rs11000559 | 10 | 10 | 74666079 | 105151 | 5.3039 | 0.3733 | 0.1288  | 5.1059 | CHB |
| NUDT13 | GI_34330151-S | rs3763725  | 10 | 10 | 74670943 | 110015 | 5.8001 | 0.4048 | -0.1521 | 5.1059 | CHB |
| NUDT13 | GI_34330151-S | rs16915029 | 10 | 10 | 74672001 | 111073 | 6.3253 | 0.4365 | 0.1567  | 5.1059 | CHB |
| NUDT13 | GI_34330151-S | rs7100458  | 10 | 10 | 74673099 | 112171 | 6.3253 | 0.4365 | -0.1567 | 5.1059 | CHB |
| NUDT13 | GI_34330151-S | rs12258130 | 10 | 10 | 74675426 | 114498 | 6.3253 | 0.4365 | 0.1567  | 5.1059 | CHB |
| NUDT13 | GI_34330151-S | rs16930457 | 10 | 10 | 74676443 | 115515 | 6.3760 | 0.4722 | 0.1455  | 5.1059 | CHB |
| NUDT13 | GI_34330151-S | rs14488    | 10 | 10 | 74677281 | 116353 | 6.3253 | 0.4365 | -0.1567 | 5.1059 | CHB |
| NUDT13 | GI_34330151-S | rs16930466 | 10 | 10 | 74677594 | 116666 | 6.3253 | 0.4365 | -0.1567 | 5.1059 | CHB |
| NUDT13 | GI_34330151-S | rs2018198  | 10 | 10 | 74679113 | 118185 | 6.3253 | 0.4365 | -0.1567 | 5.1059 | CHB |
| NUDT13 | GI_34330151-S | rs7097418  | 10 | 10 | 74681002 | 120074 | 6.3564 | 0.4710 | 0.1428  | 5.1059 | CHB |
| NUDT13 | GI_34330151-S | rs6480688  | 10 | 10 | 74684319 | 123391 | 6.3253 | 0.4365 | 0.1567  | 5.1059 | CHB |
| NUDT13 | GI_34330151-S | rs7342113  | 10 | 10 | 74684469 | 123541 | 6.3253 | 0.4365 | -0.1567 | 5.1059 | CHB |
| NUDT13 | GI_34330151-S | rs16930480 | 10 | 10 | 74685936 | 125008 | 6.3253 | 0.4365 | -0.1567 | 5.1059 | CHB |
| NUDT13 | GI_34330151-S | rs7915765  | 10 | 10 | 74686858 | 125930 | 6.4928 | 0.4463 | 0.1576  | 5.1059 | CHB |
| NUDT13 | GI_34330151-S | rs11000566 | 10 | 10 | 74691688 | 130760 | 6.4928 | 0.4463 | 0.1576  | 5.1059 | CHB |
| NUDT13 | GI_34330151-S | rs3998306  | 10 | 10 | 74692076 | 131148 | 6.4928 | 0.4463 | -0.1576 | 5.1059 | CHB |
| NUDT13 | GI_34330151-S | rs4534497  | 10 | 10 | 74692347 | 131419 | 6.0218 | 0.4337 | 0.1504  | 5.1059 | CHB |
| NUDT13 | GI_34330151-S | rs12250907 | 10 | 10 | 74693254 | 132326 | 6.0855 | 0.4377 | -0.1565 | 5.1059 | CHB |
| NUDT13 | GI_34330151-S | rs11000569 | 10 | 10 | 74695120 | 134192 | 6.2825 | 0.4417 | -0.1569 | 5.1059 | CHB |
| NUDT13 | GI_34330151-S | rs11000572 | 10 | 10 | 74695383 | 134455 | 6.4928 | 0.4463 | 0.1576  | 5.1059 | CHB |
| NUDT13 | GI_34330151-S | rs11000574 | 10 | 10 | 74697215 | 136287 | 6.4928 | 0.4463 | 0.1576  | 5.1059 | CHB |
| NUDT13 | GI_34330151-S | rs11000576 | 10 | 10 | 74697604 | 136676 | 6.3329 | 0.4527 | -0.1594 | 5.1059 | CHB |
| NUDT13 | GI_34330151-S | rs11000579 | 10 | 10 | 74697968 | 137040 | 6.4928 | 0.4463 | -0.1576 | 5.1059 | CHB |
| NUDT13 | GI_34330151-S | rs5011505  | 10 | 10 | 74701784 | 140856 | 6.3253 | 0.4365 | -0.1567 | 5.1059 | CHB |
| NUDT13 | GI_34330151-S | rs11000581 | 10 | 10 | 74702936 | 142008 | 6.3253 | 0.4365 | -0.1567 | 5.1059 | CHB |
| NUDT13 | GI_34330151-S | rs4294502  | 10 | 10 | 74705263 | 144335 | 6.3253 | 0.4365 | 0.1567  | 5.1059 | CHB |
| NUDT13 | GI_34330151-S | rs3812621  | 10 | 10 | 74706865 | 145937 | 6.3253 | 0.4365 | -0.1567 | 5.1059 | CHB |
| NUDT13 | GI_34330151-S | rs12570782 | 10 | 10 | 74710197 | 149269 | 6.3253 | 0.4365 | -0.1567 | 5.1059 | CHB |
| NUDT13 | GI_34330151-S | rs11000582 | 10 | 10 | 74710664 | 149736 | 6.3253 | 0.4365 | -0.1567 | 5.1059 | CHB |
| NUDT13 | GI_34330151-S | rs4291591  | 10 | 10 | 74714843 | 153915 | 5.5450 | 0.3888 | 0.1492  | 5.1059 | CHB |
| NUDT13 | GI_34330151-S | rs12573407 | 10 | 10 | 74718832 | 157904 | 5.6817 | 0.4202 | 0.1520  | 5.1059 | CHB |
| NUDT13 | GI_34330151-S | rs7910573  | 10 | 10 | 74719004 | 158076 | 6.3253 | 0.4365 | 0.1567  | 5.1059 | CHB |
| NUDT13 | GI_34330151-S | rs7894506  | 10 | 10 | 74719413 | 158485 | 5.1400 | 0.3840 | -0.1534 | 5.1059 | CHB |
| NUDT13 | GI_34330151-S | rs16930505 | 10 | 10 | 74722082 | 161154 | 5.6259 | 0.3939 | 0.1485  | 5.1059 | CHB |
| NUDT13 | GI_34330151-S | rs7093096  | 10 | 10 | 74724331 | 163403 | 6.3253 | 0.4365 | -0.1567 | 5.1059 | CHB |
| NUDT13 | GI_34330151-S | rs11000587 | 10 | 10 | 74724574 | 163646 | 5.4375 | 0.3891 | 0.1477  | 5.1059 | CHB |
| NUDT13 | GI_34330151-S | rs6480692  | 10 | 10 | 74726869 | 165941 | 6.3253 | 0.4365 | -0.1567 | 5.1059 | CHB |
| NUDT13 | GI_34330151-S | rs7096420  | 10 | 10 | 74728363 | 167435 | 6.3253 | 0.4365 | 0.1567  | 5.1059 | CHB |
| NUDT13 | GI_34330151-S | rs7079020  | 10 | 10 | 74728607 | 167679 | 6.3253 | 0.4365 | 0.1567  | 5.1059 | CHB |
| NUDT13 | GI_34330151-S | rs11000590 | 10 | 10 | 74729506 | 168578 | 5.6259 | 0.3939 | 0.1485  | 5.1059 | CHB |
| NUDT13 | GI_34330151-S | rs7897627  | 10 | 10 | 74732610 | 171682 | 6.3253 | 0.4365 | -0.1567 | 5.1059 | CHB |
| NUDT13 | GI_34330151-S | rs11000594 | 10 | 10 | 74734573 | 173645 | 6.3253 | 0.4365 | 0.1567  | 5.1059 | CHB |
| NUDT13 | GI_34330151-S | rs4498898  | 10 | 10 | 74740167 | 179239 | 6.3253 | 0.4365 | 0.1567  | 5.1059 | CHB |
| NUDT13 | GI_34330151-S | rs6480694  | 10 | 10 | 74746510 | 185582 | 6.3253 | 0.4365 | 0.1567  | 5.1059 | CHB |
| NUDT13 | GI_34330151-S | rs963036   | 10 | 10 | 74748661 | 187733 | 6.3253 | 0.4365 | 0.1567  | 5.1059 | CHB |
| NUDT13 | GI_34330151-S | rs2183902  | 10 | 10 | 74749286 | 188358 | 6.3253 | 0.4365 | -0.1567 | 5.1059 | CHB |
| NUDT13 | GI_34330151-S | rs7096911  | 10 | 10 | 74751606 | 190678 | 6.5091 | 0.4802 | 0.1663  | 5.1059 | CHB |
| NUDT13 | GI_34330151-S | rs12240326 | 10 | 10 | 74752965 | 192037 | 6.3253 | 0.4365 | -0.1567 | 5.1059 | CHB |

|        |               |            |    |    |           |        |        |        |         |        |     |
|--------|---------------|------------|----|----|-----------|--------|--------|--------|---------|--------|-----|
| NUDT13 | GI_34330151-S | rs11000607 | 10 | 10 | 74759784  | 198856 | 5.8325 | 0.4068 | -0.1508 | 5.1059 | CHB |
| NUDT13 | GI_34330151-S | rs11000609 | 10 | 10 | 74760324  | 199396 | 5.6777 | 0.4199 | -0.1479 | 5.1059 | CHB |
| NUDT13 | GI_34330151-S | rs12259183 | 10 | 10 | 74760826  | 199898 | 5.8325 | 0.4068 | 0.1508  | 5.1059 | CHB |
| NUDT13 | GI_34330151-S | rs7100955  | 10 | 10 | 74761263  | 200335 | 6.3253 | 0.4365 | -0.1567 | 5.1059 | CHB |
| NUDT13 | GI_34330151-S | rs2183903  | 10 | 10 | 74762692  | 201764 | 5.9654 | 0.4383 | -0.1579 | 5.1059 | CHB |
| NUDT13 | GI_34330151-S | rs7910669  | 10 | 10 | 74765355  | 204427 | 6.3253 | 0.4365 | 0.1567  | 5.1059 | CHB |
| NUDT13 | GI_34330151-S | rs12249585 | 10 | 10 | 74766159  | 205231 | 6.3253 | 0.4365 | 0.1567  | 5.1059 | CHB |
| NUDT13 | GI_34330151-S | rs11000613 | 10 | 10 | 74767314  | 206386 | 6.3253 | 0.4365 | -0.1567 | 5.1059 | CHB |
| NUDT13 | GI_34330151-S | rs4506555  | 10 | 10 | 74771503  | 210575 | 6.3253 | 0.4365 | -0.1567 | 5.1059 | CHB |
| NUDT13 | GI_34330151-S | rs6480699  | 10 | 10 | 74771635  | 210707 | 6.3253 | 0.4365 | -0.1567 | 5.1059 | CHB |
| NUDT13 | GI_34330151-S | rs6480700  | 10 | 10 | 74771696  | 210768 | 5.9192 | 0.4274 | -0.1560 | 5.1059 | CHB |
| NUDT13 | GI_34330151-S | rs12251310 | 10 | 10 | 74772491  | 211563 | 6.1666 | 0.4426 | 0.1611  | 5.1059 | CHB |
| NUDT13 | GI_34330151-S | rs16930534 | 10 | 10 | 74773513  | 212585 | 6.1348 | 0.4328 | 0.1562  | 5.1059 | CHB |
| NUDT13 | GI_34330151-S | rs6480703  | 10 | 10 | 74788009  | 227081 | 6.3253 | 0.4365 | -0.1567 | 5.1059 | CHB |
| NUDT13 | GI_34330151-S | rs11000630 | 10 | 10 | 74803899  | 242971 | 6.3253 | 0.4365 | 0.1567  | 5.1059 | CHB |
| NUDT13 | GI_34330151-S | rs11000635 | 10 | 10 | 74815790  | 254862 | 5.5691 | 0.4209 | 0.1544  | 5.1059 | CHB |
| NUDT13 | GI_34330151-S | rs12261772 | 10 | 10 | 74816817  | 255889 | 6.3253 | 0.4365 | 0.1567  | 5.1059 | CHB |
| NUDT13 | GI_34330151-S | rs16930547 | 10 | 10 | 74817585  | 256657 | 6.3253 | 0.4365 | -0.1567 | 5.1059 | CHB |
| NUDT13 | GI_34330151-S | rs2234965  | 10 | 10 | 74818122  | 257194 | 6.3253 | 0.4365 | 0.1567  | 5.1059 | CHB |
| NUDT13 | GI_34330151-S | rs16930554 | 10 | 10 | 74818582  | 257654 | 6.2876 | 0.4420 | -0.1583 | 5.1059 | CHB |
| NUDT13 | GI_34330151-S | rs7072404  | 10 | 10 | 74820190  | 259262 | 5.6386 | 0.4255 | 0.1555  | 5.1059 | CHB |
| NUDT13 | GI_34330151-S | rs11000637 | 10 | 10 | 74820571  | 259643 | 5.4183 | 0.4190 | -0.1539 | 5.1059 | CHB |
| NUDT13 | GI_34330151-S | rs7096875  | 10 | 10 | 74825686  | 264758 | 6.3253 | 0.4365 | -0.1567 | 5.1059 | CHB |
| NUDT13 | GI_34330151-S | rs7100670  | 10 | 10 | 74826042  | 265114 | 5.8081 | 0.4204 | -0.1521 | 5.1059 | CHB |
| NUDT13 | GI_34330151-S | rs12258241 | 10 | 10 | 74830263  | 269335 | 6.3253 | 0.4365 | 0.1567  | 5.1059 | CHB |
| NUDT13 | GI_34330151-S | rs11000645 | 10 | 10 | 74832269  | 271341 | 6.3253 | 0.4365 | -0.1567 | 5.1059 | CHB |
| NUDT13 | GI_34330151-S | rs7074613  | 10 | 10 | 74832930  | 272002 | 6.3253 | 0.4365 | -0.1567 | 5.1059 | CHB |
| NUDT13 | GI_34330151-S | rs16930573 | 10 | 10 | 74837652  | 276724 | 6.3253 | 0.4365 | 0.1567  | 5.1059 | CHB |
| NUDT13 | GI_34330151-S | rs3812623  | 10 | 10 | 74843895  | 282967 | 6.3253 | 0.4365 | -0.1567 | 5.1059 | CHB |
| NUDT13 | GI_34330151-S | rs12571847 | 10 | 10 | 74844926  | 283998 | 6.3253 | 0.4365 | 0.1567  | 5.1059 | CHB |
| NUDT13 | GI_34330151-S | rs12570678 | 10 | 10 | 74845022  | 284094 | 6.6782 | 0.4730 | -0.1633 | 5.1059 | CHB |
| NUDT13 | GI_34330151-S | rs12570685 | 10 | 10 | 74845081  | 284153 | 6.3253 | 0.4365 | -0.1567 | 5.1059 | CHB |
| NUDT13 | GI_34330151-S | rs2297452  | 10 | 10 | 74856618  | 295690 | 6.3253 | 0.4365 | 0.1567  | 5.1059 | CHB |
| NUDT13 | GI_34330151-S | rs1332178  | 10 | 10 | 74859592  | 298664 | 5.9369 | 0.4132 | -0.1606 | 5.1059 | CHB |
| NUDT13 | GI_34330151-S | rs1041532  | 10 | 10 | 74877493  | 316565 | 5.9369 | 0.4132 | -0.1606 | 5.1059 | CHB |
| NUDT13 | GI_34330151-S | rs12571454 | 10 | 10 | 74878961  | 318033 | 6.3253 | 0.4365 | 0.1567  | 5.1059 | CHB |
| NUDT13 | GI_34330151-S | rs12245450 | 10 | 10 | 74891291  | 330363 | 6.3253 | 0.4365 | -0.1567 | 5.1059 | CHB |
| NUDT13 | GI_34330151-S | rs11000666 | 10 | 10 | 74903000  | 342072 | 6.3253 | 0.4365 | -0.1567 | 5.1059 | CHB |
| NUDT13 | GI_34330151-S | rs3763679  | 10 | 10 | 74904832  | 343904 | 5.9369 | 0.4132 | -0.1606 | 5.1059 | CHB |
| NUDT13 | GI_34330151-S | rs12569942 | 10 | 10 | 74915258  | 354330 | 5.9369 | 0.4132 | -0.1606 | 5.1059 | CHB |
| NUDT13 | GI_34330151-S | rs3793663  | 10 | 10 | 74930189  | 369261 | 6.3253 | 0.4365 | 0.1567  | 5.1059 | CHB |
| NUDT13 | GI_34330151-S | rs7098453  | 10 | 10 | 74931627  | 370699 | 6.3253 | 0.4365 | -0.1567 | 5.1059 | CHB |
| NUDT13 | GI_34330151-S | rs7899149  | 10 | 10 | 74933335  | 372407 | 6.3253 | 0.4365 | -0.1567 | 5.1059 | CHB |
| NUDT13 | GI_34330151-S | rs12572177 | 10 | 10 | 74955843  | 394915 | 6.3253 | 0.4365 | -0.1567 | 5.1059 | CHB |
| NUDT13 | GI_34330151-S | rs12268338 | 10 | 10 | 74956812  | 395884 | 5.6278 | 0.4013 | 0.1508  | 5.1059 | CHB |
| NUDT13 | GI_34330151-S | rs7074504  | 10 | 10 | 74958005  | 397077 | 6.3253 | 0.4365 | -0.1567 | 5.1059 | CHB |
| NUDT13 | GI_34330151-S | rs12255505 | 10 | 10 | 74959365  | 398437 | 6.3253 | 0.4365 | 0.1567  | 5.1059 | CHB |
| NUDT13 | GI_34330151-S | rs4745717  | 10 | 10 | 74975791  | 414863 | 6.0410 | 0.4195 | -0.1491 | 5.1059 | CHB |
| NUDT13 | GI_34330151-S | rs1880701  | 10 | 10 | 74983238  | 422310 | 6.3253 | 0.4365 | -0.1567 | 5.1059 | CHB |
| DLG5   | GI_28466996-S | rs1464111  | 10 | 10 | 79012932  | 207738 | 7.3043 | 0.5352 | 1.0611  | 6.8647 | CHB |
| MRPL43 | GI_28872735-A | rs4917915  | 10 | 10 | 102616568 | 120041 | 9.6222 | 0.6378 | -0.4331 | 5.7448 | CHB |
| MRPL43 | GI_28872735-A | rs9919402  | 10 | 10 | 102617001 | 119608 | 9.8155 | 0.6096 | -0.4332 | 5.7448 | CHB |
| MRPL43 | GI_28872735-A | rs10883547 | 10 | 10 | 102617218 | 119391 | 9.8155 | 0.6096 | 0.4332  | 5.7448 | CHB |
| MRPL43 | GI_28872735-A | rs10883548 | 10 | 10 | 102617343 | 119266 | 9.8155 | 0.6096 | 0.4332  | 5.7448 | CHB |
| MRPL43 | GI_28872735-A | rs2863071  | 10 | 10 | 102618727 | 117882 | 9.8155 | 0.6096 | 0.4332  | 5.7448 | CHB |
| MRPL43 | GI_28872735-A | rs7088572  | 10 | 10 | 102619531 | 117078 | 9.8155 | 0.6096 | 0.4332  | 5.7448 | CHB |
| MRPL43 | GI_28872735-A | rs10736151 | 10 | 10 | 102619858 | 116751 | 8.9234 | 0.5710 | -0.4283 | 5.7448 | CHB |
| MRPL43 | GI_28872735-A | rs912476   | 10 | 10 | 102619990 | 116619 | 6.6215 | 0.5150 | -0.3951 | 5.7448 | CHB |
| MRPL43 | GI_28872735-A | rs912475   | 10 | 10 | 102620673 | 115936 | 9.8155 | 0.6096 | -0.4332 | 5.7448 | CHB |

|        |               |            |    |    |           |        |         |        |         |        |     |
|--------|---------------|------------|----|----|-----------|--------|---------|--------|---------|--------|-----|
| MRPL43 | GI_28872735-A | rs10883549 | 10 | 10 | 102621253 | 115356 | 9.3295  | 0.5977 | 0.4304  | 5.7448 | CHB |
| MRPL43 | GI_28872735-A | rs7914607  | 10 | 10 | 102621634 | 114975 | 7.1976  | 0.5591 | -0.3994 | 5.7448 | CHB |
| MRPL43 | GI_28872735-A | rs7902564  | 10 | 10 | 102622612 | 113997 | 10.3342 | 0.6304 | -0.4328 | 5.7448 | CHB |
| MRPL43 | GI_28872735-A | rs10883550 | 10 | 10 | 102622963 | 113646 | 10.3342 | 0.6304 | 0.4328  | 5.7448 | CHB |
| MRPL43 | GI_28872735-A | rs10883551 | 10 | 10 | 102623049 | 113560 | 7.5205  | 0.5667 | 0.4923  | 5.7448 | CHB |
| MRPL43 | GI_28872735-A | rs10786609 | 10 | 10 | 102625475 | 111134 | 8.8929  | 0.5696 | -0.4122 | 5.7448 | CHB |
| MRPL43 | GI_28872735-A | rs6584403  | 10 | 10 | 102627973 | 108636 | 9.2982  | 0.5877 | -0.4107 | 5.7448 | CHB |
| MRPL43 | GI_28872735-A | rs912474   | 10 | 10 | 102628576 | 108033 | 8.8929  | 0.5696 | 0.4122  | 5.7448 | CHB |
| MRPL43 | GI_28872735-A | rs912473   | 10 | 10 | 102628983 | 107626 | 8.8929  | 0.5696 | -0.4122 | 5.7448 | CHB |
| MRPL43 | GI_28872735-A | rs2863072  | 10 | 10 | 102629131 | 107478 | 7.7710  | 0.5700 | 0.4385  | 5.7448 | CHB |
| MRPL43 | GI_28872735-A | rs2863073  | 10 | 10 | 102629151 | 107458 | 9.3596  | 0.6171 | -0.4380 | 5.7448 | CHB |
| MRPL43 | GI_28872735-A | rs912472   | 10 | 10 | 102629549 | 107060 | 5.9189  | 0.4121 | 0.4049  | 5.7448 | CHB |
| MRPL43 | GI_28872735-A | rs1555648  | 10 | 10 | 102629773 | 106836 | 9.7626  | 0.6161 | 0.4362  | 5.7448 | CHB |
| MRPL43 | GI_28872735-A | rs6584404  | 10 | 10 | 102630106 | 106503 | 9.9969  | 0.6829 | 0.4716  | 5.7448 | CHB |
| MRPL43 | GI_28872735-A | rs1467616  | 10 | 10 | 102631681 | 104928 | 10.4526 | 0.6350 | -0.4641 | 5.7448 | CHB |
| MRPL43 | GI_28872735-A | rs11595160 | 10 | 10 | 102633000 | 103609 | 9.9932  | 0.6628 | 0.5012  | 5.7448 | CHB |
| MRPL43 | GI_28872735-A | rs7901791  | 10 | 10 | 102635374 | 101235 | 10.4526 | 0.6350 | -0.4641 | 5.7448 | CHB |
| MRPL43 | GI_28872735-A | rs7899336  | 10 | 10 | 102637676 | 98933  | 6.6686  | 0.4564 | -0.4185 | 5.7448 | CHB |
| MRPL43 | GI_28872735-A | rs7899638  | 10 | 10 | 102637862 | 98747  | 6.4872  | 0.4619 | -0.4272 | 5.7448 | CHB |
| MRPL43 | GI_28872735-A | rs1408342  | 10 | 10 | 102638742 | 97867  | 14.7312 | 0.7683 | -0.5053 | 5.7448 | CHB |
| MRPL43 | GI_28872735-A | rs1408343  | 10 | 10 | 102638755 | 97854  | 13.3046 | 0.7387 | 0.5071  | 5.7448 | CHB |
| MRPL43 | GI_28872735-A | rs10786612 | 10 | 10 | 102643755 | 92854  | 12.3139 | 0.7004 | 0.5019  | 5.7448 | CHB |
| MRPL43 | GI_28872735-A | rs7903939  | 10 | 10 | 102648014 | 88595  | 5.8539  | 0.4312 | 0.4086  | 5.7448 | CHB |
| MRPL43 | GI_28872735-A | rs4917916  | 10 | 10 | 102663282 | 73327  | 14.7312 | 0.7683 | -0.5053 | 5.7448 | CHB |
| MRPL43 | GI_28872735-A | rs7078599  | 10 | 10 | 102671852 | 64757  | 6.4185  | 0.4420 | -0.4060 | 5.7448 | CHB |
| MRPL43 | GI_28872735-A | rs12241232 | 10 | 10 | 102682594 | 54015  | 14.7312 | 0.7683 | -0.5053 | 5.7448 | CHB |
| MRPL43 | GI_28872735-A | rs7911957  | 10 | 10 | 102682960 | 53649  | 14.7312 | 0.7683 | 0.5053  | 5.7448 | CHB |
| MRPL43 | GI_28872735-A | rs10883565 | 10 | 10 | 102693424 | 43185  | 13.6795 | 0.7660 | -0.5204 | 5.7448 | CHB |
| MRPL43 | GI_28872735-A | rs1056295  | 10 | 10 | 102705173 | 31436  | 16.9438 | 0.8169 | -0.5631 | 5.7448 | CHB |
| MRPL43 | GI_28872735-A | rs927302   | 10 | 10 | 102712906 | 23703  | 16.9438 | 0.8169 | 0.5631  | 5.7448 | CHB |
| MRPL43 | GI_28872735-A | rs2295718  | 10 | 10 | 102715643 | 20966  | 6.1489  | 0.4260 | 0.4193  | 5.7448 | CHB |
| MRPL43 | GI_28872735-A | rs4919510  | 10 | 10 | 102724768 | 11841  | 16.9438 | 0.8169 | 0.5631  | 5.7448 | CHB |
| MRPL43 | GI_28872735-A | rs735137   | 10 | 10 | 102725825 | 10784  | 16.9438 | 0.8169 | -0.5631 | 5.7448 | CHB |
| MRPL43 | GI_28872735-A | rs12571302 | 10 | 10 | 102732753 | 3856   | 16.3838 | 0.8283 | -0.5718 | 5.7448 | CHB |
| MRPL43 | GI_28872735-A | rs2295716  | 10 | 10 | 102734204 | 2405   | 15.5843 | 0.8198 | 0.5905  | 5.7448 | CHB |
| MRPL43 | GI_28872735-A | rs722435   | 10 | 10 | 102735052 | 1557   | 14.8489 | 0.7953 | 0.5468  | 5.7448 | CHB |
| MRPL43 | GI_28872735-A | rs1535349  | 10 | 10 | 102735650 | 959    | 6.1489  | 0.4260 | -0.4193 | 5.7448 | CHB |
| MRPL43 | GI_28872735-A | rs2863095  | 10 | 10 | 102736493 | 116    | 16.9438 | 0.8169 | 0.5631  | 5.7448 | CHB |
| MRPL43 | GI_28872735-A | rs3740484  | 10 | 10 | 102737353 | 744    | 13.8634 | 0.7458 | 0.5332  | 5.7448 | CHB |
| MRPL43 | GI_28872735-A | rs3740487  | 10 | 10 | 102740773 | 4164   | 16.9438 | 0.8169 | -0.5631 | 5.7448 | CHB |
| MRPL43 | GI_28872735-A | rs3824783  | 10 | 10 | 102740841 | 4232   | 16.9438 | 0.8169 | -0.5631 | 5.7448 | CHB |
| MRPL43 | GI_28872735-A | rs3740488  | 10 | 10 | 102744023 | 7414   | 16.9438 | 0.8169 | 0.5631  | 5.7448 | CHB |
| MRPL43 | GI_28872735-A | rs3740490  | 10 | 10 | 102746733 | 10124  | 16.9438 | 0.8169 | -0.5631 | 5.7448 | CHB |
| MRPL43 | GI_28872735-A | rs750866   | 10 | 10 | 102751448 | 14839  | 16.9438 | 0.8169 | 0.5631  | 5.7448 | CHB |
| MRPL43 | GI_28872735-A | rs701835   | 10 | 10 | 102752117 | 15508  | 16.9438 | 0.8169 | -0.5631 | 5.7448 | CHB |
| MRPL43 | GI_28872735-A | rs807029   | 10 | 10 | 102754037 | 17428  | 10.6324 | 0.6419 | -0.4717 | 5.7448 | CHB |
| MRPL43 | GI_28872735-A | rs807028   | 10 | 10 | 102754501 | 17892  | 5.8062  | 0.4052 | 0.4021  | 5.7448 | CHB |
| MRPL43 | GI_28872735-A | rs701836   | 10 | 10 | 102757107 | 20498  | 14.8605 | 0.7714 | -0.5185 | 5.7448 | CHB |
| SFXN2  | GI_34222270-S | rs7088470  | 10 | 10 | 104424184 | 64607  | 5.7758  | 0.4033 | 0.4660  | 5.448  | CHB |
| SFXN2  | GI_34222270-S | rs2902548  | 10 | 10 | 104477372 | 11419  | 11.8190 | 0.6842 | -0.6007 | 5.448  | CHB |
| SFXN2  | GI_34222270-S | rs2244258  | 10 | 10 | 104478890 | 9901   | 8.1474  | 0.5345 | 0.5439  | 5.448  | CHB |
| SFXN2  | GI_34222270-S | rs2244254  | 10 | 10 | 104479001 | 9790   | 8.4135  | 0.5559 | -0.5591 | 5.448  | CHB |
| SFXN2  | GI_34222270-S | rs2265308  | 10 | 10 | 104481104 | 7687   | 8.1474  | 0.5345 | -0.5439 | 5.448  | CHB |
| SFXN2  | GI_34222270-S | rs3802676  | 10 | 10 | 104481692 | 7099   | 8.1474  | 0.5345 | 0.5439  | 5.448  | CHB |
| SFXN2  | GI_34222270-S | rs2778037  | 10 | 10 | 104482697 | 6094   | 7.0597  | 0.4782 | 0.5405  | 5.448  | CHB |
| SFXN2  | GI_34222270-S | rs10883769 | 10 | 10 | 104484937 | 3854   | 8.1474  | 0.5345 | 0.5439  | 5.448  | CHB |
| SFXN2  | GI_34222270-S | rs7912571  | 10 | 10 | 104489378 | 587    | 7.3152  | 0.5174 | 0.5368  | 5.448  | CHB |
| SFXN2  | GI_34222270-S | rs7092723  | 10 | 10 | 104489754 | 963    | 8.1474  | 0.5345 | 0.5439  | 5.448  | CHB |
| SFXN2  | GI_34222270-S | rs10786706 | 10 | 10 | 104490649 | 1858   | 8.3187  | 0.5428 | -0.5447 | 5.448  | CHB |

|       |               |            |    |    |           |        |         |        |         |        |     |
|-------|---------------|------------|----|----|-----------|--------|---------|--------|---------|--------|-----|
| SFXN2 | GI_34222270-S | rs2297451  | 10 | 10 | 104493449 | 4658   | 8.1474  | 0.5345 | -0.5439 | 5.448  | CHB |
| SFXN2 | GI_34222270-S | rs3818708  | 10 | 10 | 104493574 | 4783   | 8.3187  | 0.5428 | -0.5447 | 5.448  | CHB |
| SFXN2 | GI_34222270-S | rs7074894  | 10 | 10 | 104494524 | 5733   | 8.1474  | 0.5345 | -0.5439 | 5.448  | CHB |
| SFXN2 | GI_34222270-S | rs11191383 | 10 | 10 | 104495874 | 7083   | 8.1474  | 0.5345 | -0.5439 | 5.448  | CHB |
| SFXN2 | GI_34222270-S | rs11191384 | 10 | 10 | 104496101 | 7310   | 8.1474  | 0.5345 | 0.5439  | 5.448  | CHB |
| SFXN2 | GI_34222270-S | rs7923711  | 10 | 10 | 104496533 | 7742   | 7.8713  | 0.5379 | -0.5365 | 5.448  | CHB |
| SFXN2 | GI_34222270-S | rs7342026  | 10 | 10 | 104498896 | 10105  | 8.1474  | 0.5345 | 0.5439  | 5.448  | CHB |
| SFXN2 | GI_34222270-S | rs10883772 | 10 | 10 | 104500230 | 11439  | 8.1474  | 0.5345 | 0.5439  | 5.448  | CHB |
| SFXN2 | GI_34222270-S | rs7476300  | 10 | 10 | 104500295 | 11504  | 7.1850  | 0.5016 | -0.5289 | 5.448  | CHB |
| SFXN2 | GI_34222270-S | rs7090307  | 10 | 10 | 104507109 | 18318  | 8.1474  | 0.5345 | -0.5439 | 5.448  | CHB |
| SFXN2 | GI_34222270-S | rs2902549  | 10 | 10 | 104509459 | 20668  | 8.1474  | 0.5345 | -0.5439 | 5.448  | CHB |
| SFXN2 | GI_34222270-S | rs7092340  | 10 | 10 | 104519658 | 30867  | 8.1474  | 0.5345 | 0.5439  | 5.448  | CHB |
| SFXN2 | GI_34222270-S | rs12266856 | 10 | 10 | 104521040 | 32249  | 8.1474  | 0.5345 | -0.5439 | 5.448  | CHB |
| USMG5 | GI_14249375-S | rs7913461  | 10 | 10 | 104991315 | 152720 | 9.7492  | 0.6068 | 1.2343  | 5.9097 | CHB |
| USMG5 | GI_14249375-S | rs1891292  | 10 | 10 | 104991500 | 152535 | 6.5700  | 0.4507 | -1.0351 | 5.9097 | CHB |
| USMG5 | GI_14249375-S | rs1891293  | 10 | 10 | 104991787 | 152248 | 6.5700  | 0.4507 | 1.0351  | 5.9097 | CHB |
| USMG5 | GI_14249375-S | rs2506961  | 10 | 10 | 104997916 | 146119 | 6.5700  | 0.4507 | 1.0351  | 5.9097 | CHB |
| USMG5 | GI_14249375-S | rs1712510  | 10 | 10 | 104999076 | 144959 | 6.5853  | 0.4595 | 1.0399  | 5.9097 | CHB |
| USMG5 | GI_14249375-S | rs1163075  | 10 | 10 | 105011253 | 132782 | 6.5700  | 0.4507 | 1.0351  | 5.9097 | CHB |
| USMG5 | GI_14249375-S | rs1163073  | 10 | 10 | 105012924 | 131111 | 10.8823 | 0.6513 | 1.2625  | 5.9097 | CHB |
| USMG5 | GI_14249375-S | rs1163081  | 10 | 10 | 105019830 | 124205 | 6.6201  | 0.4536 | -1.0615 | 5.9097 | CHB |
| USMG5 | GI_14249375-S | rs1712517  | 10 | 10 | 105023005 | 121030 | 6.5700  | 0.4507 | -1.0351 | 5.9097 | CHB |
| USMG5 | GI_14249375-S | rs1163087  | 10 | 10 | 105033279 | 110756 | 6.5700  | 0.4507 | -1.0351 | 5.9097 | CHB |
| USMG5 | GI_14249375-S | rs4918003  | 10 | 10 | 105034147 | 109888 | 6.3775  | 0.4473 | 1.0501  | 5.9097 | CHB |
| USMG5 | GI_14249375-S | rs3740381  | 10 | 10 | 105036679 | 107356 | 18.8459 | 0.8572 | -1.3985 | 5.9097 | CHB |
| USMG5 | GI_14249375-S | rs1063461  | 10 | 10 | 105039095 | 104940 | 8.2492  | 0.5394 | 1.0678  | 5.9097 | CHB |
| USMG5 | GI_14249375-S | rs4293062  | 10 | 10 | 105042614 | 101421 | 8.2492  | 0.5394 | -1.0678 | 5.9097 | CHB |
| USMG5 | GI_14249375-S | rs6584547  | 10 | 10 | 105055399 | 88636  | 8.2492  | 0.5394 | 1.0678  | 5.9097 | CHB |
| USMG5 | GI_14249375-S | rs12220267 | 10 | 10 | 105065702 | 78333  | 22.9002 | 0.9030 | 1.4216  | 5.9097 | CHB |
| USMG5 | GI_14249375-S | rs11191654 | 10 | 10 | 105067114 | 76921  | 8.2492  | 0.5394 | -1.0678 | 5.9097 | CHB |
| USMG5 | GI_14249375-S | rs4918007  | 10 | 10 | 105097460 | 46575  | 8.2492  | 0.5394 | 1.0678  | 5.9097 | CHB |
| USMG5 | GI_14249375-S | rs7074749  | 10 | 10 | 105106046 | 37989  | 8.2492  | 0.5394 | 1.0678  | 5.9097 | CHB |
| USMG5 | GI_14249375-S | rs11191666 | 10 | 10 | 105117268 | 26767  | 8.2492  | 0.5394 | 1.0678  | 5.9097 | CHB |
| USMG5 | GI_14249375-S | rs10883857 | 10 | 10 | 105117577 | 26458  | 8.2492  | 0.5394 | 1.0678  | 5.9097 | CHB |
| USMG5 | GI_14249375-S | rs7905968  | 10 | 10 | 105125309 | 18726  | 8.2492  | 0.5394 | 1.0678  | 5.9097 | CHB |
| USMG5 | GI_14249375-S | rs11191672 | 10 | 10 | 105128951 | 15084  | 8.2492  | 0.5394 | 1.0678  | 5.9097 | CHB |
| USMG5 | GI_14249375-S | rs7911488  | 10 | 10 | 105144079 | 44     | 22.9002 | 0.9030 | 1.4216  | 5.9097 | CHB |
| USMG5 | GI_14249375-S | rs11191676 | 10 | 10 | 105145056 | 1021   | 8.2492  | 0.5394 | -1.0678 | 5.9097 | CHB |
| USMG5 | GI_14249375-S | rs2292807  | 10 | 10 | 105145635 | 1600   | 8.2492  | 0.5394 | 1.0678  | 5.9097 | CHB |
| USMG5 | GI_14249375-S | rs10883863 | 10 | 10 | 105151869 | 7834   | 8.2492  | 0.5394 | 1.0678  | 5.9097 | CHB |
| USMG5 | GI_14249375-S | rs12414609 | 10 | 10 | 105152131 | 8096   | 8.2348  | 0.5387 | 1.0341  | 5.9097 | CHB |
| USMG5 | GI_14249375-S | rs7089271  | 10 | 10 | 105166904 | 22869  | 7.8204  | 0.5352 | 1.0572  | 5.9097 | CHB |
| USMG5 | GI_14249375-S | rs3740382  | 10 | 10 | 105169204 | 25169  | 15.2498 | 0.7807 | -1.3353 | 5.9097 | CHB |
| USMG5 | GI_14249375-S | rs11191686 | 10 | 10 | 105177736 | 33701  | 22.9002 | 0.9030 | -1.4216 | 5.9097 | CHB |
| USMG5 | GI_14249375-S | rs11191688 | 10 | 10 | 105182560 | 38525  | 14.8952 | 0.7802 | 1.3383  | 5.9097 | CHB |
| USMG5 | GI_14249375-S | rs2986014  | 10 | 10 | 105184076 | 40041  | 8.2492  | 0.5394 | 1.0678  | 5.9097 | CHB |
| USMG5 | GI_14249375-S | rs10883868 | 10 | 10 | 105186804 | 42769  | 22.9002 | 0.9030 | -1.4216 | 5.9097 | CHB |
| USMG5 | GI_14249375-S | rs2281861  | 10 | 10 | 105191555 | 47520  | 12.2049 | 0.7603 | 1.3216  | 5.9097 | CHB |
| USMG5 | GI_14249375-S | rs7831     | 10 | 10 | 105195292 | 51257  | 22.9002 | 0.9030 | 1.4216  | 5.9097 | CHB |
| USMG5 | GI_14249375-S | rs6580     | 10 | 10 | 105196864 | 52829  | 15.2498 | 0.7807 | -1.3353 | 5.9097 | CHB |
| PDCD4 | GI_34304340-A | rs942077   | 10 | 10 | 112585709 | 63897  | 7.4325  | 0.4982 | -0.4828 | 6.1353 | CHB |
| PDCD4 | GI_34304340-A | rs11195352 | 10 | 10 | 112592935 | 56671  | 7.4325  | 0.4982 | -0.4828 | 6.1353 | CHB |
| SIRT3 | GI_13775603-S | rs3741411  | 11 | 11 | 189256    | 17010  | 5.6922  | 0.3981 | -0.2752 | 5.2449 | CHB |
| SIRT3 | GI_13775603-S | rs2293168  | 11 | 11 | 201482    | 4784   | 8.8889  | 0.5781 | -0.3174 | 5.2449 | CHB |
| SIRT3 | GI_13775603-S | rs3847648  | 11 | 11 | 208613    | 2347   | 8.0122  | 0.5927 | -0.3476 | 5.2449 | CHB |
| SIRT3 | GI_13775603-S | rs4758629  | 11 | 11 | 218514    | 12248  | 8.1360  | 0.5602 | -0.3208 | 5.2449 | CHB |
| SIRT3 | GI_13775603-S | rs536715   | 11 | 11 | 220368    | 14102  | 7.5736  | 0.5139 | -0.2968 | 5.2449 | CHB |
| SIRT3 | GI_13775603-S | rs473151   | 11 | 11 | 232112    | 25846  | 7.5736  | 0.5139 | 0.2968  | 5.2449 | CHB |
| SIRT3 | GI_13775603-S | rs524555   | 11 | 11 | 236678    | 30412  | 7.5736  | 0.5139 | -0.2968 | 5.2449 | CHB |

|           |               |            |    |    |          |       |        |        |         |        |     |
|-----------|---------------|------------|----|----|----------|-------|--------|--------|---------|--------|-----|
| SIRT3     | GI_13775603-S | rs12576259 | 11 | 11 | 239834   | 33568 | 7.0010 | 0.5477 | -0.3151 | 5.2449 | CHB |
| SIRT3     | GI_13775603-S | rs3782114  | 11 | 11 | 240886   | 34620 | 6.5185 | 0.4721 | -0.3093 | 5.2449 | CHB |
| SIRT3     | GI_13775603-S | rs6540     | 11 | 11 | 242649   | 36383 | 7.3031 | 0.5080 | -0.3128 | 5.2449 | CHB |
| SIRT3     | GI_13775603-S | rs6542     | 11 | 11 | 242941   | 36675 | 6.3686 | 0.4548 | 0.2889  | 5.2449 | CHB |
| SIRT3     | GI_13775603-S | rs540078   | 11 | 11 | 244256   | 37990 | 7.3031 | 0.5080 | 0.3128  | 5.2449 | CHB |
| SIRT3     | GI_13775603-S | rs7104184  | 11 | 11 | 245014   | 38748 | 7.5842 | 0.5061 | -0.3141 | 5.2449 | CHB |
| SIRT3     | GI_13775603-S | rs2140116  | 11 | 11 | 245048   | 38782 | 6.3664 | 0.5092 | -0.2856 | 5.2449 | CHB |
| SIRT3     | GI_13775603-S | rs879872   | 11 | 11 | 246714   | 40448 | 7.0378 | 0.5021 | 0.3241  | 5.2449 | CHB |
| SIRT3     | GI_13775603-S | rs12274855 | 11 | 11 | 252234   | 45968 | 7.5842 | 0.5061 | 0.3141  | 5.2449 | CHB |
| SIRT3     | GI_13775603-S | rs1983525  | 11 | 11 | 259147   | 52881 | 5.2962 | 0.3728 | -0.2491 | 5.2449 | CHB |
| SIRT3     | GI_13775603-S | rs4758635  | 11 | 11 | 273928   | 67662 | 5.2816 | 0.3719 | -0.2882 | 5.2449 | CHB |
| FLJ22635  | GI_13376651-S | rs2242565  | 11 | 11 | 285343   | 40    | 6.1451 | 0.4258 | -0.3624 | 5.3628 | CHB |
| FLJ22635  | GI_13376651-S | rs2242566  | 11 | 11 | 285876   | 573   | 5.7549 | 0.4416 | 0.3826  | 5.3628 | CHB |
| RPLP2     | GI_16905512-S | rs7479101  | 11 | 11 | 792115   | 8186  | 5.6166 | 0.4159 | 0.1739  | 5.4179 | CHB |
| RPLP2     | GI_16905512-S | rs10902222 | 11 | 11 | 800882   | 581   | 5.6428 | 0.3950 | -0.1681 | 5.4179 | CHB |
| CD151     | GI_34328914-A | rs3059     | 11 | 11 | 830319   | 1576  | 6.8408 | 0.4661 | -0.5898 | 6.447  | CHB |
| PHEMX     | GI_37595532-A | rs7941928  | 11 | 11 | 2271980  | 23893 | 7.1032 | 0.4805 | 0.5854  | 6.0549 | CHB |
| C11orf21  | GI_7662662-S  | rs7941928  | 11 | 11 | 2271980  | 1787  | 6.5126 | 0.4474 | 0.5867  | 5.7938 | CHB |
| C11orf21  | GI_7662662-S  | rs2651836  | 11 | 11 | 2273296  | 471   | 6.0769 | 0.4624 | -0.4828 | 5.7938 | CHB |
| C11orf21  | GI_7662662-S  | rs2244891  | 11 | 11 | 2275931  | 2164  | 6.2778 | 0.4337 | -0.4708 | 5.7938 | CHB |
| C11orf21  | GI_7662662-S  | rs2651838  | 11 | 11 | 2276107  | 2340  | 6.2700 | 0.4572 | -0.6108 | 5.7938 | CHB |
| C11orf21  | GI_7662662-S  | rs756924   | 11 | 11 | 2279605  | 5838  | 6.6846 | 0.4573 | 0.4814  | 5.7938 | CHB |
| C11orf21  | GI_7662662-S  | rs2074021  | 11 | 11 | 2280104  | 6337  | 6.2778 | 0.4337 | 0.4708  | 5.7938 | CHB |
| C11orf21  | GI_7662662-S  | rs2074022  | 11 | 11 | 2280617  | 6850  | 7.7403 | 0.5225 | -0.5335 | 5.7938 | CHB |
| PHEMX     | GI_37595532-A | rs2074023  | 11 | 11 | 2282157  | 13716 | 7.5348 | 0.5118 | -0.6025 | 6.0549 | CHB |
| C11orf21  | GI_7662662-S  | rs2074023  | 11 | 11 | 2282157  | 8390  | 6.9923 | 0.4826 | -0.6059 | 5.7938 | CHB |
| C11orf21  | GI_7662662-S  | rs2521271  | 11 | 11 | 2282444  | 8677  | 5.8252 | 0.4294 | 0.4737  | 5.7938 | CHB |
| PHEMX     | GI_37595532-A | rs937614   | 11 | 11 | 2283496  | 12377 | 7.1032 | 0.4805 | -0.5854 | 6.0549 | CHB |
| C11orf21  | GI_7662662-S  | rs937614   | 11 | 11 | 2283496  | 9729  | 6.5126 | 0.4474 | -0.5867 | 5.7938 | CHB |
| C11orf21  | GI_7662662-S  | rs756926   | 11 | 11 | 2285654  | 11887 | 6.1475 | 0.4260 | 0.4789  | 5.7938 | CHB |
| C11orf21  | GI_7662662-S  | rs2651821  | 11 | 11 | 2287506  | 13739 | 6.0325 | 0.4266 | 0.4756  | 5.7938 | CHB |
| LOC256273 | GI_22062109-S | rs10840106 | 11 | 11 | 8658412  | 68139 | 6.4336 | 0.4428 | 0.4258  | 5.5161 | CHB |
| MMRP19    | GI_7705723-S  | rs1396880  | 11 | 11 | 34827128 | 39400 | 6.2806 | 0.4339 | 0.4478  | 6.0314 | CHB |
| MMRP19    | GI_7705723-S  | rs2941043  | 11 | 11 | 34827570 | 38958 | 6.2806 | 0.4339 | 0.4478  | 6.0314 | CHB |
| MMRP19    | GI_7705723-S  | rs2915179  | 11 | 11 | 34828519 | 38009 | 6.2806 | 0.4339 | 0.4478  | 6.0314 | CHB |
| MMRP19    | GI_7705723-S  | rs2941060  | 11 | 11 | 34835730 | 30798 | 6.2806 | 0.4339 | -0.4478 | 6.0314 | CHB |
| MMRP19    | GI_7705723-S  | rs6484742  | 11 | 11 | 34847955 | 18573 | 6.3139 | 0.4358 | -0.4048 | 6.0314 | CHB |
| MMRP19    | GI_7705723-S  | rs2941048  | 11 | 11 | 34849835 | 16693 | 6.3139 | 0.4358 | 0.4048  | 6.0314 | CHB |
| MMRP19    | GI_7705723-S  | rs2941047  | 11 | 11 | 34849920 | 16608 | 6.3139 | 0.4358 | 0.4048  | 6.0314 | CHB |
| MMRP19    | GI_7705723-S  | rs2956082  | 11 | 11 | 34853758 | 12770 | 6.3139 | 0.4358 | 0.4048  | 6.0314 | CHB |
| MMRP19    | GI_7705723-S  | rs2956085  | 11 | 11 | 34858679 | 7849  | 6.3139 | 0.4358 | -0.4048 | 6.0314 | CHB |
| MMRP19    | GI_7705723-S  | rs2288667  | 11 | 11 | 34860975 | 5553  | 6.3139 | 0.4358 | -0.4048 | 6.0314 | CHB |
| MMRP19    | GI_7705723-S  | rs1998603  | 11 | 11 | 34863138 | 3390  | 6.3139 | 0.4358 | -0.4048 | 6.0314 | CHB |
| MMRP19    | GI_7705723-S  | rs2985396  | 11 | 11 | 34863530 | 2998  | 6.3796 | 0.4475 | 0.4125  | 6.0314 | CHB |
| MMRP19    | GI_7705723-S  | rs2956091  | 11 | 11 | 34864657 | 1871  | 6.3796 | 0.4475 | -0.4125 | 6.0314 | CHB |
| MMRP19    | GI_7705723-S  | rs2985391  | 11 | 11 | 34866148 | 380   | 6.3796 | 0.4475 | 0.4125  | 6.0314 | CHB |
| MMRP19    | GI_7705723-S  | rs2985390  | 11 | 11 | 34866251 | 277   | 6.3139 | 0.4358 | 0.4048  | 6.0314 | CHB |
| MMRP19    | GI_7705723-S  | rs1571133  | 11 | 11 | 34866502 | 26    | 6.3139 | 0.4358 | 0.4048  | 6.0314 | CHB |
| MMRP19    | GI_7705723-S  | rs1571134  | 11 | 11 | 34866653 | 125   | 6.3139 | 0.4358 | 0.4048  | 6.0314 | CHB |
| MMRP19    | GI_7705723-S  | rs1571135  | 11 | 11 | 34866793 | 265   | 6.3139 | 0.4358 | 0.4048  | 6.0314 | CHB |
| MMRP19    | GI_7705723-S  | rs1977420  | 11 | 11 | 34866973 | 445   | 6.3139 | 0.4358 | -0.4048 | 6.0314 | CHB |
| MMRP19    | GI_7705723-S  | rs2303959  | 11 | 11 | 34868589 | 2061  | 6.3717 | 0.4550 | -0.4194 | 6.0314 | CHB |
| MMRP19    | GI_7705723-S  | rs2915224  | 11 | 11 | 34868865 | 2337  | 6.4226 | 0.4500 | -0.4145 | 6.0314 | CHB |
| MMRP19    | GI_7705723-S  | rs1430855  | 11 | 11 | 34869484 | 2956  | 6.3139 | 0.4358 | -0.4048 | 6.0314 | CHB |
| MMRP19    | GI_7705723-S  | rs2985389  | 11 | 11 | 34869740 | 3212  | 6.3139 | 0.4358 | 0.4048  | 6.0314 | CHB |
| MMRP19    | GI_7705723-S  | rs2915223  | 11 | 11 | 34870713 | 4185  | 6.3139 | 0.4358 | 0.4048  | 6.0314 | CHB |
| MMRP19    | GI_7705723-S  | rs2915222  | 11 | 11 | 34870936 | 4408  | 6.3139 | 0.4358 | -0.4048 | 6.0314 | CHB |
| MMRP19    | GI_7705723-S  | rs2915220  | 11 | 11 | 34871226 | 4698  | 6.3139 | 0.4358 | -0.4048 | 6.0314 | CHB |
| MMRP19    | GI_7705723-S  | rs2986424  | 11 | 11 | 34872022 | 5494  | 6.8875 | 0.4936 | -0.4328 | 6.0314 | CHB |

|        |               |            |    |    |          |        |         |        |         |        |     |
|--------|---------------|------------|----|----|----------|--------|---------|--------|---------|--------|-----|
| MMRP19 | GI_7705723-S  | rs2986425  | 11 | 11 | 34872332 | 5804   | 6.3139  | 0.4358 | -0.4048 | 6.0314 | CHB |
| MMRP19 | GI_7705723-S  | rs2986427  | 11 | 11 | 34872921 | 6393   | 6.3139  | 0.4358 | 0.4048  | 6.0314 | CHB |
| MMRP19 | GI_7705723-S  | rs1326940  | 11 | 11 | 34873060 | 6532   | 6.3139  | 0.4358 | -0.4048 | 6.0314 | CHB |
| MMRP19 | GI_7705723-S  | rs1326941  | 11 | 11 | 34873286 | 6758   | 6.3139  | 0.4358 | -0.4048 | 6.0314 | CHB |
| MMRP19 | GI_7705723-S  | rs1326942  | 11 | 11 | 34873361 | 6833   | 6.3139  | 0.4358 | -0.4048 | 6.0314 | CHB |
| MMRP19 | GI_7705723-S  | rs1326943  | 11 | 11 | 34873444 | 6916   | 6.3139  | 0.4358 | 0.4048  | 6.0314 | CHB |
| MMRP19 | GI_7705723-S  | rs2217478  | 11 | 11 | 34873939 | 7411   | 6.5540  | 0.4742 | 0.4263  | 6.0314 | CHB |
| MMRP19 | GI_7705723-S  | rs10836318 | 11 | 11 | 34878954 | 12426  | 6.3796  | 0.4475 | 0.4125  | 6.0314 | CHB |
| MMRP19 | GI_7705723-S  | rs11032917 | 11 | 11 | 34879179 | 12651  | 6.3796  | 0.4475 | 0.4125  | 6.0314 | CHB |
| MMRP19 | GI_7705723-S  | rs11032918 | 11 | 11 | 34879348 | 12820  | 6.3139  | 0.4358 | -0.4048 | 6.0314 | CHB |
| MMRP19 | GI_7705723-S  | rs2985381  | 11 | 11 | 34879792 | 13264  | 6.3139  | 0.4358 | -0.4048 | 6.0314 | CHB |
| MMRP19 | GI_7705723-S  | rs1960524  | 11 | 11 | 34884727 | 18199  | 6.3141  | 0.4359 | 0.4096  | 6.0314 | CHB |
| MMRP19 | GI_7705723-S  | rs1117446  | 11 | 11 | 34885098 | 18570  | 6.1549  | 0.4340 | -0.3908 | 6.0314 | CHB |
| MMRP19 | GI_7705723-S  | rs2956116  | 11 | 11 | 34891228 | 24700  | 6.2377  | 0.4552 | 0.5872  | 6.0314 | CHB |
| MMRP19 | GI_7705723-S  | rs2956114  | 11 | 11 | 34894389 | 27861  | 6.3139  | 0.4358 | -0.4048 | 6.0314 | CHB |
| MMRP19 | GI_7705723-S  | rs2956107  | 11 | 11 | 34897144 | 30616  | 6.6450  | 0.4629 | 0.4198  | 6.0314 | CHB |
| MMRP19 | GI_7705723-S  | rs2956106  | 11 | 11 | 34897558 | 31030  | 6.5352  | 0.4487 | -0.4115 | 6.0314 | CHB |
| MMRP19 | GI_7705723-S  | rs2915205  | 11 | 11 | 34897664 | 31136  | 6.5352  | 0.4487 | 0.4115  | 6.0314 | CHB |
| MMRP19 | GI_7705723-S  | rs2915204  | 11 | 11 | 34898421 | 31893  | 6.5180  | 0.4721 | -0.4150 | 6.0314 | CHB |
| MMRP19 | GI_7705723-S  | rs2915200  | 11 | 11 | 34900947 | 34419  | 6.6450  | 0.4629 | -0.4198 | 6.0314 | CHB |
| MMRP19 | GI_7705723-S  | rs2956103  | 11 | 11 | 34901029 | 34501  | 6.5659  | 0.4665 | -0.4241 | 6.0314 | CHB |
| MMRP19 | GI_7705723-S  | rs1998912  | 11 | 11 | 34904520 | 37992  | 6.5352  | 0.4487 | -0.4115 | 6.0314 | CHB |
| MMRP19 | GI_7705723-S  | rs2986410  | 11 | 11 | 34905162 | 38634  | 6.5352  | 0.4487 | 0.4115  | 6.0314 | CHB |
| MMRP19 | GI_7705723-S  | rs2985405  | 11 | 11 | 34912160 | 45632  | 6.1448  | 0.4495 | -0.4004 | 6.0314 | CHB |
| MMRP19 | GI_7705723-S  | rs2985403  | 11 | 11 | 34913650 | 47122  | 6.5352  | 0.4487 | -0.4115 | 6.0314 | CHB |
| MMRP19 | GI_7705723-S  | rs2915193  | 11 | 11 | 34916032 | 49504  | 6.5352  | 0.4487 | -0.4115 | 6.0314 | CHB |
| MMRP19 | GI_7705723-S  | rs2956087  | 11 | 11 | 34922133 | 55605  | 6.6012  | 0.4770 | -0.4179 | 6.0314 | CHB |
| MMRP19 | GI_7705723-S  | rs2243948  | 11 | 11 | 34935468 | 68940  | 6.5352  | 0.4487 | -0.4115 | 6.0314 | CHB |
| MMRP19 | GI_7705723-S  | rs10768107 | 11 | 11 | 34937948 | 71420  | 6.1999  | 0.4793 | -0.4369 | 6.0314 | CHB |
| MMRP19 | GI_7705723-S  | rs2732555  | 11 | 11 | 34938809 | 72281  | 6.5352  | 0.4487 | -0.4115 | 6.0314 | CHB |
| MMRP19 | GI_7705723-S  | rs2761820  | 11 | 11 | 34939897 | 73369  | 6.5352  | 0.4487 | 0.4115  | 6.0314 | CHB |
| MMRP19 | GI_7705723-S  | rs2762962  | 11 | 11 | 34942022 | 75494  | 6.5352  | 0.4487 | 0.4115  | 6.0314 | CHB |
| MMRP19 | GI_7705723-S  | rs497582   | 11 | 11 | 34948303 | 81775  | 6.5352  | 0.4487 | -0.4115 | 6.0314 | CHB |
| MMRP19 | GI_7705723-S  | rs504034   | 11 | 11 | 34954138 | 87610  | 6.5352  | 0.4487 | -0.4115 | 6.0314 | CHB |
| MMRP19 | GI_7705723-S  | rs2762956  | 11 | 11 | 34954866 | 88338  | 6.5352  | 0.4487 | 0.4115  | 6.0314 | CHB |
| MMRP19 | GI_7705723-S  | rs10836326 | 11 | 11 | 34956934 | 90406  | 6.5352  | 0.4487 | 0.4115  | 6.0314 | CHB |
| MMRP19 | GI_7705723-S  | rs2767038  | 11 | 11 | 34957559 | 91031  | 6.5352  | 0.4487 | -0.4115 | 6.0314 | CHB |
| MMRP19 | GI_7705723-S  | rs2025780  | 11 | 11 | 34963041 | 96513  | 6.2854  | 0.4419 | -0.4053 | 6.0314 | CHB |
| MMRP19 | GI_7705723-S  | rs2762954  | 11 | 11 | 34965809 | 99281  | 6.5352  | 0.4487 | -0.4115 | 6.0314 | CHB |
| MMRP19 | GI_7705723-S  | rs1011518  | 11 | 11 | 34967045 | 100517 | 6.5352  | 0.4487 | 0.4115  | 6.0314 | CHB |
| MMRP19 | GI_7705723-S  | rs2762953  | 11 | 11 | 34971318 | 104790 | 6.5352  | 0.4487 | -0.4115 | 6.0314 | CHB |
| MMRP19 | GI_7705723-S  | rs2732564  | 11 | 11 | 34971854 | 105326 | 6.5352  | 0.4487 | 0.4115  | 6.0314 | CHB |
| MMRP19 | GI_7705723-S  | rs2732565  | 11 | 11 | 34972678 | 106150 | 6.5352  | 0.4487 | 0.4115  | 6.0314 | CHB |
| MMRP19 | GI_7705723-S  | rs9326     | 11 | 11 | 34973781 | 107253 | 6.5352  | 0.4487 | 0.4115  | 6.0314 | CHB |
| MMRP19 | GI_7705723-S  | rs2767033  | 11 | 11 | 34979484 | 112956 | 6.5352  | 0.4487 | -0.4115 | 6.0314 | CHB |
| MMRP19 | GI_7705723-S  | rs2762969  | 11 | 11 | 34982258 | 115730 | 6.5027  | 0.4547 | 0.4181  | 6.0314 | CHB |
| MMRP19 | GI_7705723-S  | rs1544079  | 11 | 11 | 34984435 | 117907 | 6.5352  | 0.4487 | -0.4115 | 6.0314 | CHB |
| MMRP19 | GI_7705723-S  | rs523472   | 11 | 11 | 34988244 | 121716 | 6.3415  | 0.4532 | -0.4151 | 6.0314 | CHB |
| PHACS  | GI_14211920-S | rs10838224 | 11 | 11 | 44012203 | 49666  | 6.2139  | 0.4376 | -0.5199 | 5.7429 | CHB |
| PHACS  | GI_14211920-S | rs4237645  | 11 | 11 | 44032290 | 29579  | 5.8890  | 0.4103 | 0.5792  | 5.7429 | CHB |
| PHACS  | GI_14211920-S | rs7928485  | 11 | 11 | 44034823 | 27046  | 12.6721 | 0.7287 | -0.5927 | 5.7429 | CHB |
| PHACS  | GI_14211920-S | rs178501   | 11 | 11 | 44038292 | 23577  | 8.2668  | 0.5403 | -0.5435 | 5.7429 | CHB |
| PHACS  | GI_14211920-S | rs178502   | 11 | 11 | 44038932 | 22937  | 5.8701  | 0.4091 | 0.4833  | 5.7429 | CHB |
| PHACS  | GI_14211920-S | rs178503   | 11 | 11 | 44039507 | 22362  | 8.2668  | 0.5403 | -0.5435 | 5.7429 | CHB |
| PHACS  | GI_14211920-S | rs178505   | 11 | 11 | 44041425 | 20444  | 8.0367  | 0.5290 | 0.5211  | 5.7429 | CHB |
| PHACS  | GI_14211920-S | rs178506   | 11 | 11 | 44041945 | 19924  | 7.0856  | 0.4877 | -0.4987 | 5.7429 | CHB |
| PHACS  | GI_14211920-S | rs7127924  | 11 | 11 | 44042263 | 19606  | 14.7055 | 0.7676 | -0.5831 | 5.7429 | CHB |
| PHACS  | GI_14211920-S | rs2074038  | 11 | 11 | 44044565 | 17304  | 18.4369 | 0.8575 | 0.6202  | 5.7429 | CHB |
| PHACS  | GI_14211920-S | rs7951555  | 11 | 11 | 44047975 | 13894  | 14.3309 | 0.7663 | 0.6047  | 5.7429 | CHB |

|         |               |            |    |    |          |        |         |        |         |        |     |
|---------|---------------|------------|----|----|----------|--------|---------|--------|---------|--------|-----|
| PHACS   | GI_14211920-S | rs11826285 | 11 | 11 | 44048254 | 13615  | 13.0122 | 0.7302 | 0.6087  | 5.7429 | CHB |
| PHACS   | GI_14211920-S | rs2074040  | 11 | 11 | 44049899 | 11970  | 13.0122 | 0.7302 | 0.6087  | 5.7429 | CHB |
| PHACS   | GI_14211920-S | rs3094390  | 11 | 11 | 44051197 | 10672  | 7.2193  | 0.5212 | -0.4939 | 5.7429 | CHB |
| PHACS   | GI_14211920-S | rs3134907  | 11 | 11 | 44056164 | 5705   | 5.8123  | 0.4368 | 0.4795  | 5.7429 | CHB |
| PHACS   | GI_14211920-S | rs3134911  | 11 | 11 | 44064323 | 2454   | 7.5522  | 0.5044 | 0.4830  | 5.7429 | CHB |
| PHACS   | GI_14211920-S | rs4755228  | 11 | 11 | 44085866 | 23997  | 6.5264  | 0.4642 | -0.4906 | 5.7429 | CHB |
| PHACS   | GI_14211920-S | rs11037868 | 11 | 11 | 44091183 | 29314  | 8.0562  | 0.5300 | 0.4997  | 5.7429 | CHB |
| PHACS   | GI_14211920-S | rs11037870 | 11 | 11 | 44093819 | 31950  | 7.9022  | 0.5307 | -0.5144 | 5.7429 | CHB |
| PHACS   | GI_14211920-S | rs10838239 | 11 | 11 | 44112011 | 50142  | 7.3078  | 0.4916 | 0.5031  | 5.7429 | CHB |
| PHACS   | GI_14211920-S | rs11037892 | 11 | 11 | 44137897 | 76028  | 6.5119  | 0.4633 | -0.4960 | 5.7429 | CHB |
| PHACS   | GI_14211920-S | rs4755790  | 11 | 11 | 44166329 | 104460 | 7.3078  | 0.4916 | -0.5031 | 5.7429 | CHB |
| Hs.6637 | Hs.6637-S     | rs2291119  | 11 | 11 | 47254777 | 328958 | 6.9036  | 0.4696 | 0.2034  | 5.4049 | CHB |
| Hs.6637 | Hs.6637-S     | rs326217   | 11 | 11 | 47259851 | 323884 | 6.7193  | 0.4672 | -0.2019 | 5.4049 | CHB |
| Hs.6637 | Hs.6637-S     | rs11570094 | 11 | 11 | 47316282 | 267453 | 7.3562  | 0.5024 | -0.2016 | 5.4049 | CHB |
| Hs.6637 | Hs.6637-S     | rs2856650  | 11 | 11 | 47321775 | 261960 | 6.9411  | 0.4716 | -0.1951 | 5.4049 | CHB |
| Hs.6637 | Hs.6637-S     | rs2071304  | 11 | 11 | 47328953 | 254782 | 12.3035 | 0.7000 | -0.2378 | 5.4049 | CHB |
| Hs.6637 | Hs.6637-S     | rs7105851  | 11 | 11 | 47339851 | 243884 | 11.7792 | 0.6915 | -0.2267 | 5.4049 | CHB |
| Hs.6637 | Hs.6637-S     | rs10838698 | 11 | 11 | 47342499 | 241236 | 10.7500 | 0.6825 | -0.2245 | 5.4049 | CHB |
| Hs.6637 | Hs.6637-S     | rs10838699 | 11 | 11 | 47342649 | 241086 | 11.9224 | 0.6877 | -0.2283 | 5.4049 | CHB |
| Hs.6637 | Hs.6637-S     | rs10769258 | 11 | 11 | 47347615 | 236120 | 11.9224 | 0.6877 | 0.2283  | 5.4049 | CHB |
| Hs.6637 | Hs.6637-S     | rs11039212 | 11 | 11 | 47349879 | 233856 | 12.3035 | 0.7000 | -0.2378 | 5.4049 | CHB |
| Hs.6637 | Hs.6637-S     | rs4992357  | 11 | 11 | 47350214 | 233521 | 11.8859 | 0.7039 | -0.2348 | 5.4049 | CHB |
| Hs.6637 | Hs.6637-S     | rs896816   | 11 | 11 | 47350914 | 232821 | 12.0580 | 0.7007 | 0.2366  | 5.4049 | CHB |
| Hs.6637 | Hs.6637-S     | rs7940536  | 11 | 11 | 47351816 | 231919 | 12.0580 | 0.7007 | -0.2366 | 5.4049 | CHB |
| Hs.6637 | Hs.6637-S     | rs6485753  | 11 | 11 | 47366776 | 216959 | 12.3035 | 0.7000 | 0.2378  | 5.4049 | CHB |
| Hs.6637 | Hs.6637-S     | rs4752990  | 11 | 11 | 47366969 | 216766 | 11.2576 | 0.6915 | 0.2354  | 5.4049 | CHB |
| Hs.6637 | Hs.6637-S     | rs4752993  | 11 | 11 | 47367527 | 216208 | 12.0580 | 0.7007 | -0.2366 | 5.4049 | CHB |
| Hs.6637 | Hs.6637-S     | rs4752994  | 11 | 11 | 47367641 | 216094 | 12.0580 | 0.7007 | 0.2366  | 5.4049 | CHB |
| Hs.6637 | Hs.6637-S     | rs10769262 | 11 | 11 | 47368157 | 215578 | 12.0580 | 0.7007 | -0.2366 | 5.4049 | CHB |
| Hs.6637 | Hs.6637-S     | rs11605672 | 11 | 11 | 47370309 | 213426 | 12.1818 | 0.6961 | -0.2296 | 5.4049 | CHB |
| Hs.6637 | Hs.6637-S     | rs4752999  | 11 | 11 | 47385141 | 198594 | 13.7860 | 0.7437 | -0.2517 | 5.4049 | CHB |
| Hs.6637 | Hs.6637-S     | rs755553   | 11 | 11 | 47388879 | 194856 | 13.4787 | 0.7436 | 0.2504  | 5.4049 | CHB |
| Hs.6637 | Hs.6637-S     | rs2053979  | 11 | 11 | 47396020 | 187715 | 11.5692 | 0.7115 | 0.2444  | 5.4049 | CHB |
| Hs.6637 | Hs.6637-S     | rs2293580  | 11 | 11 | 47396859 | 186876 | 13.4332 | 0.7423 | 0.2514  | 5.4049 | CHB |
| Hs.6637 | Hs.6637-S     | rs3781627  | 11 | 11 | 47398048 | 185687 | 13.4787 | 0.7436 | 0.2504  | 5.4049 | CHB |
| Hs.6637 | Hs.6637-S     | rs10838708 | 11 | 11 | 47398089 | 185646 | 10.3301 | 0.6571 | 0.2431  | 5.4049 | CHB |
| Hs.6637 | Hs.6637-S     | rs3781626  | 11 | 11 | 47399469 | 184266 | 13.4787 | 0.7436 | 0.2504  | 5.4049 | CHB |
| Hs.6637 | Hs.6637-S     | rs3781625  | 11 | 11 | 47399656 | 184079 | 13.7860 | 0.7437 | -0.2517 | 5.4049 | CHB |
| Hs.6637 | Hs.6637-S     | rs2868459  | 11 | 11 | 47411548 | 172187 | 12.7568 | 0.7312 | -0.2561 | 5.4049 | CHB |
| Hs.6637 | Hs.6637-S     | rs11604680 | 11 | 11 | 47414115 | 169620 | 12.9787 | 0.7292 | -0.2409 | 5.4049 | CHB |
| Hs.6637 | Hs.6637-S     | rs1317149  | 11 | 11 | 47443461 | 140274 | 14.1294 | 0.7611 | 0.2442  | 5.4049 | CHB |
| Hs.6637 | Hs.6637-S     | rs7124681  | 11 | 11 | 47486523 | 97212  | 13.4787 | 0.7436 | 0.2504  | 5.4049 | CHB |
| Hs.6637 | Hs.6637-S     | rs2203712  | 11 | 11 | 47491540 | 92195  | 5.6850  | 0.3976 | 0.1841  | 5.4049 | CHB |
| Hs.6637 | Hs.6637-S     | rs4752845  | 11 | 11 | 47496273 | 87462  | 14.4129 | 0.7603 | 0.2454  | 5.4049 | CHB |
| Hs.6637 | Hs.6637-S     | rs7928842  | 11 | 11 | 47522928 | 60807  | 14.4129 | 0.7603 | 0.2454  | 5.4049 | CHB |
| Hs.6637 | Hs.6637-S     | rs12419692 | 11 | 11 | 47581290 | 2445   | 14.4129 | 0.7603 | 0.2454  | 5.4049 | CHB |
| Hs.6637 | Hs.6637-S     | rs1064608  | 11 | 11 | 47597005 | 13270  | 14.4129 | 0.7603 | -0.2454 | 5.4049 | CHB |
| Hs.6637 | Hs.6637-S     | rs3817335  | 11 | 11 | 47600467 | 16732  | 14.4129 | 0.7603 | -0.2454 | 5.4049 | CHB |
| Hs.6637 | Hs.6637-S     | rs4752856  | 11 | 11 | 47604618 | 20883  | 14.4129 | 0.7603 | 0.2454  | 5.4049 | CHB |
| Hs.6637 | Hs.6637-S     | rs3817334  | 11 | 11 | 47607569 | 23834  | 14.1294 | 0.7611 | -0.2442 | 5.4049 | CHB |
| Hs.6637 | Hs.6637-S     | rs4752857  | 11 | 11 | 47612328 | 28593  | 14.4129 | 0.7603 | -0.2454 | 5.4049 | CHB |
| Hs.6637 | Hs.6637-S     | rs12794570 | 11 | 11 | 47614890 | 31155  | 12.8592 | 0.7519 | -0.2451 | 5.4049 | CHB |
| Hs.6637 | Hs.6637-S     | rs10838738 | 11 | 11 | 47619625 | 35890  | 14.1294 | 0.7611 | -0.2442 | 5.4049 | CHB |
| Hs.6637 | Hs.6637-S     | rs12787112 | 11 | 11 | 47643723 | 59988  | 13.9251 | 0.7557 | -0.2352 | 5.4049 | CHB |
| Hs.6637 | Hs.6637-S     | rs10838747 | 11 | 11 | 47672900 | 89165  | 14.4129 | 0.7603 | 0.2454  | 5.4049 | CHB |
| Hs.6637 | Hs.6637-S     | rs12785949 | 11 | 11 | 47686346 | 102611 | 5.8396  | 0.4472 | 0.2012  | 5.4049 | CHB |
| Hs.6637 | Hs.6637-S     | rs17788930 | 11 | 11 | 47709351 | 125616 | 13.4345 | 0.7594 | -0.2402 | 5.4049 | CHB |
| Hs.6637 | Hs.6637-S     | rs2290851  | 11 | 11 | 47709946 | 126211 | 5.5279  | 0.3877 | 0.1905  | 5.4049 | CHB |
| Hs.6637 | Hs.6637-S     | rs1563821  | 11 | 11 | 47713144 | 129409 | 5.5279  | 0.3877 | 0.1905  | 5.4049 | CHB |

|           |               |            |    |    |          |        |         |        |         |        |     |
|-----------|---------------|------------|----|----|----------|--------|---------|--------|---------|--------|-----|
| Hs.6637   | Hs.6637-S     | rs10838757 | 11 | 11 | 47719592 | 135857 | 13.2490 | 0.7630 | 0.2328  | 5.4049 | CHB |
| Hs.6637   | Hs.6637-S     | rs6485773  | 11 | 11 | 47720085 | 136350 | 5.5279  | 0.3877 | 0.1905  | 5.4049 | CHB |
| Hs.6637   | Hs.6637-S     | rs10838758 | 11 | 11 | 47728052 | 144317 | 5.5279  | 0.3877 | -0.1905 | 5.4049 | CHB |
| Hs.6637   | Hs.6637-S     | rs7929014  | 11 | 11 | 47732859 | 149124 | 5.5279  | 0.3877 | 0.1905  | 5.4049 | CHB |
| Hs.6637   | Hs.6637-S     | rs7108479  | 11 | 11 | 47738036 | 154301 | 5.5279  | 0.3877 | 0.1905  | 5.4049 | CHB |
| Hs.6637   | Hs.6637-S     | rs11039373 | 11 | 11 | 47741861 | 158126 | 5.5279  | 0.3877 | -0.1905 | 5.4049 | CHB |
| Hs.6637   | Hs.6637-S     | rs10838759 | 11 | 11 | 47741923 | 158188 | 5.5279  | 0.3877 | -0.1905 | 5.4049 | CHB |
| Hs.6637   | Hs.6637-S     | rs11039377 | 11 | 11 | 47746352 | 162617 | 5.5279  | 0.3877 | 0.1905  | 5.4049 | CHB |
| Hs.6637   | Hs.6637-S     | rs10838763 | 11 | 11 | 47751378 | 167643 | 5.5279  | 0.3877 | 0.1905  | 5.4049 | CHB |
| Hs.6637   | Hs.6637-S     | rs9909     | 11 | 11 | 47756351 | 172616 | 12.4146 | 0.7121 | 0.2333  | 5.4049 | CHB |
| Hs.6637   | Hs.6637-S     | rs7105282  | 11 | 11 | 47762190 | 178455 | 12.7107 | 0.7127 | 0.2346  | 5.4049 | CHB |
| Hs.6637   | Hs.6637-S     | rs12226431 | 11 | 11 | 47762432 | 178697 | 5.5279  | 0.3877 | -0.1905 | 5.4049 | CHB |
| Hs.6637   | Hs.6637-S     | rs2290850  | 11 | 11 | 47764350 | 180615 | 12.7107 | 0.7127 | -0.2346 | 5.4049 | CHB |
| Hs.6637   | Hs.6637-S     | rs754434   | 11 | 11 | 47770856 | 187121 | 5.5279  | 0.3877 | 0.1905  | 5.4049 | CHB |
| Hs.6637   | Hs.6637-S     | rs3886262  | 11 | 11 | 47773586 | 189851 | 5.5279  | 0.3877 | -0.1905 | 5.4049 | CHB |
| Hs.6637   | Hs.6637-S     | rs11039402 | 11 | 11 | 47782666 | 198931 | 5.5279  | 0.3877 | 0.1905  | 5.4049 | CHB |
| Hs.6637   | Hs.6637-S     | rs10838771 | 11 | 11 | 47787908 | 204173 | 5.4502  | 0.3899 | -0.1918 | 5.4049 | CHB |
| Hs.6637   | Hs.6637-S     | rs10838773 | 11 | 11 | 47790922 | 207187 | 5.5279  | 0.3877 | -0.1905 | 5.4049 | CHB |
| Hs.6637   | Hs.6637-S     | rs10838774 | 11 | 11 | 47812690 | 228955 | 5.5279  | 0.3877 | 0.1905  | 5.4049 | CHB |
| Hs.6637   | Hs.6637-S     | rs3816605  | 11 | 11 | 47813829 | 230094 | 5.5279  | 0.3877 | -0.1905 | 5.4049 | CHB |
| Hs.6637   | Hs.6637-S     | rs10838777 | 11 | 11 | 47817530 | 233795 | 5.5279  | 0.3877 | 0.1905  | 5.4049 | CHB |
| Hs.6637   | Hs.6637-S     | rs10742824 | 11 | 11 | 47821418 | 237683 | 5.5279  | 0.3877 | 0.1905  | 5.4049 | CHB |
| Hs.6637   | Hs.6637-S     | rs10769299 | 11 | 11 | 47821736 | 238001 | 5.5279  | 0.3877 | 0.1905  | 5.4049 | CHB |
| Hs.6637   | Hs.6637-S     | rs10769300 | 11 | 11 | 47822136 | 238401 | 5.5279  | 0.3877 | 0.1905  | 5.4049 | CHB |
| Hs.6637   | Hs.6637-S     | rs12418852 | 11 | 11 | 47825429 | 241694 | 12.7107 | 0.7127 | -0.2346 | 5.4049 | CHB |
| Hs.6637   | Hs.6637-S     | rs11039433 | 11 | 11 | 47834069 | 250334 | 12.4146 | 0.7121 | -0.2333 | 5.4049 | CHB |
| Hs.6637   | Hs.6637-S     | rs12364432 | 11 | 11 | 47859459 | 275724 | 12.4146 | 0.7121 | 0.2333  | 5.4049 | CHB |
| Hs.6637   | Hs.6637-S     | rs4752801  | 11 | 11 | 47864217 | 280482 | 12.0187 | 0.6908 | -0.2234 | 5.4049 | CHB |
| Hs.6637   | Hs.6637-S     | rs12361256 | 11 | 11 | 47867399 | 283664 | 11.5147 | 0.6914 | 0.2208  | 5.4049 | CHB |
| Hs.6637   | Hs.6637-S     | rs2870080  | 11 | 11 | 48100800 | 517065 | 5.4928  | 0.3855 | 0.1927  | 5.4049 | CHB |
| Hs.6637   | Hs.6637-S     | rs1566732  | 11 | 11 | 48108070 | 524335 | 5.4928  | 0.3855 | 0.1927  | 5.4049 | CHB |
| Hs.6637   | Hs.6637-S     | rs2270994  | 11 | 11 | 48114445 | 530710 | 5.4928  | 0.3855 | -0.1927 | 5.4049 | CHB |
| TIMM10    | GI_6912707-S  | rs2511983  | 11 | 11 | 57103450 | 50832  | 8.7141  | 0.5615 | 0.7125  | 5.902  | CHB |
| TIMM10    | GI_6912707-S  | rs2649662  | 11 | 11 | 57109138 | 56520  | 8.7141  | 0.5615 | 0.7125  | 5.902  | CHB |
| TIMM10    | GI_6912707-S  | rs2848630  | 11 | 11 | 57113483 | 60865  | 8.7141  | 0.5615 | 0.7125  | 5.902  | CHB |
| TIMM10    | GI_6912707-S  | rs2649663  | 11 | 11 | 57113881 | 61263  | 8.7141  | 0.5615 | -0.7125 | 5.902  | CHB |
| TIMM10    | GI_6912707-S  | rs2848628  | 11 | 11 | 57114290 | 61672  | 8.6269  | 0.5660 | 0.7168  | 5.902  | CHB |
| LOC144097 | GI_37541019-S | rs8995     | 11 | 11 | 63351648 | 40     | 6.3148  | 0.4359 | -0.3251 | 5.9006 | CHB |
| SF1       | GI_42544126-I | rs11231853 | 11 | 11 | 64207055 | 93244  | 5.6864  | 0.3977 | 0.4484  | 5.5039 | CHB |
| SF1       | GI_42544126-I | rs3809076  | 11 | 11 | 64239122 | 61177  | 5.6864  | 0.3977 | 0.4484  | 5.5039 | CHB |
| SF1       | GI_42544126-I | rs693235   | 11 | 11 | 64249338 | 50961  | 6.5201  | 0.4479 | 0.3973  | 5.5039 | CHB |
| SF1       | GI_42544126-I | rs2073798  | 11 | 11 | 64267898 | 32401  | 11.0139 | 0.6648 | 0.4955  | 5.5039 | CHB |
| SF1       | GI_42544126-I | rs569602   | 11 | 11 | 64271082 | 29217  | 10.4217 | 0.6338 | 0.5023  | 5.5039 | CHB |
| SF1       | GI_42544126-I | rs547066   | 11 | 11 | 64280070 | 20229  | 8.2326  | 0.5472 | -0.4567 | 5.5039 | CHB |
| SF1       | GI_42544126-I | rs589691   | 11 | 11 | 64281792 | 18507  | 11.0139 | 0.6648 | -0.4955 | 5.5039 | CHB |
| SF1       | GI_42544126-I | rs489192   | 11 | 11 | 64282220 | 18079  | 11.6750 | 0.6880 | 0.4838  | 5.5039 | CHB |
| SF1       | GI_42544126-I | rs477549   | 11 | 11 | 64283656 | 16643  | 11.5859 | 0.6850 | 0.4973  | 5.5039 | CHB |
| SF1       | GI_42544126-I | rs523200   | 11 | 11 | 64289155 | 11144  | 11.2050 | 0.6717 | 0.5089  | 5.5039 | CHB |
| SF1       | GI_42544126-I | rs680273   | 11 | 11 | 64296211 | 4088   | 11.5859 | 0.6850 | 0.4973  | 5.5039 | CHB |
| SF1       | GI_42544126-I | rs474707   | 11 | 11 | 64300711 | 412    | 10.9662 | 0.6543 | 0.5044  | 5.5039 | CHB |
| SF1       | GI_42544126-I | rs1633462  | 11 | 11 | 64302833 | 2534   | 10.6266 | 0.6417 | 0.5160  | 5.5039 | CHB |
| SF1       | GI_42544126-I | rs606458   | 11 | 11 | 64302967 | 2668   | 10.6266 | 0.6417 | 0.5160  | 5.5039 | CHB |
| SF1       | GI_42544126-I | rs607389   | 11 | 11 | 64310154 | 9855   | 7.5729  | 0.5312 | 0.4778  | 5.5039 | CHB |
| SF1       | GI_42544126-I | rs11231869 | 11 | 11 | 64313708 | 13409  | 7.6131  | 0.5076 | 0.4885  | 5.5039 | CHB |
| SF1       | GI_42544126-I | rs677298   | 11 | 11 | 64320784 | 20485  | 7.8225  | 0.5267 | 0.4582  | 5.5039 | CHB |
| SF1       | GI_42544126-I | rs1143937  | 11 | 11 | 64325576 | 25277  | 6.2434  | 0.4394 | 0.4341  | 5.5039 | CHB |
| SF1       | GI_42544126-I | rs669976   | 11 | 11 | 64330165 | 29866  | 6.3184  | 0.4361 | -0.4471 | 5.5039 | CHB |
| SF1       | GI_42544126-I | rs559566   | 11 | 11 | 64338234 | 37935  | 6.1105  | 0.4237 | -0.4123 | 5.5039 | CHB |
| RPS6KB2   | GI_4506738-S  | rs1476792  | 11 | 11 | 66952813 | 6532   | 9.8528  | 0.6199 | 0.3021  | 5.9276 | CHB |

|           |               |            |    |    |          |        |         |        |         |        |     |
|-----------|---------------|------------|----|----|----------|--------|---------|--------|---------|--------|-----|
| RPS6KB2   | GI_4506738-S  | rs1638588  | 11 | 11 | 66956282 | 3063   | 11.0034 | 0.6557 | 0.3243  | 5.9276 | CHB |
| RPS6KB2   | GI_4506738-S  | rs1790753  | 11 | 11 | 66957584 | 1761   | 8.7985  | 0.5653 | 0.3161  | 5.9276 | CHB |
| RPS6KB2   | GI_4506738-S  | rs869736   | 11 | 11 | 66962038 | 2693   | 11.0034 | 0.6557 | -0.3243 | 5.9276 | CHB |
| RPS6KB2   | GI_4506738-S  | rs2302264  | 11 | 11 | 66964002 | 4657   | 8.6892  | 0.5689 | 0.3187  | 5.9276 | CHB |
| RPS6KB2   | GI_4506738-S  | rs1638556  | 11 | 11 | 66970094 | 10749  | 8.7985  | 0.5653 | 0.3161  | 5.9276 | CHB |
| RPS6KB2   | GI_4506738-S  | rs1790761  | 11 | 11 | 66978430 | 19085  | 10.0899 | 0.6667 | 0.3113  | 5.9276 | CHB |
| RPS6KB2   | GI_4506738-S  | rs3741168  | 11 | 11 | 66991927 | 32582  | 8.1705  | 0.5441 | 0.3143  | 5.9276 | CHB |
| RPS6KB2   | GI_4506738-S  | rs2276118  | 11 | 11 | 67045170 | 85825  | 8.0664  | 0.5305 | -0.2945 | 5.9276 | CHB |
| RPS6KB2   | GI_4506738-S  | rs611663   | 11 | 11 | 67068797 | 109452 | 6.2053  | 0.4705 | 0.2696  | 5.9276 | CHB |
| RPS6KB2   | GI_4506738-S  | rs638140   | 11 | 11 | 67090434 | 131089 | 6.4714  | 0.4529 | -0.2592 | 5.9276 | CHB |
| RPS6KB2   | GI_4506738-S  | rs656652   | 11 | 11 | 67100533 | 141188 | 6.0904  | 0.4225 | 0.2742  | 5.9276 | CHB |
| RPS6KB2   | GI_4506738-S  | rs614080   | 11 | 11 | 67103863 | 144518 | 6.4714  | 0.4529 | -0.2592 | 5.9276 | CHB |
| RPS6KB2   | GI_4506738-S  | rs1531514  | 11 | 11 | 67155438 | 196093 | 7.4330  | 0.4982 | 0.2830  | 5.9276 | CHB |
| RPS6KB2   | GI_4506738-S  | rs3765088  | 11 | 11 | 67156546 | 197201 | 5.9541  | 0.4143 | 0.2716  | 5.9276 | CHB |
| MRPL21    | GI_31652223-A | rs604524   | 11 | 11 | 68386505 | 28909  | 6.4170  | 0.4419 | 0.2816  | 5.7676 | CHB |
| MRPL21    | GI_31652223-A | rs584108   | 11 | 11 | 68386858 | 28556  | 6.2013  | 0.4368 | 0.2796  | 5.7676 | CHB |
| MRPL21    | GI_31652223-A | rs596874   | 11 | 11 | 68387450 | 27964  | 6.4170  | 0.4419 | 0.2816  | 5.7676 | CHB |
| MRPL21    | GI_31652223-A | rs501799   | 11 | 11 | 68387816 | 27598  | 6.4170  | 0.4419 | 0.2816  | 5.7676 | CHB |
| MRPL21    | GI_31652223-A | rs557625   | 11 | 11 | 68391298 | 24116  | 6.4170  | 0.4419 | -0.2816 | 5.7676 | CHB |
| MRPL21    | GI_31652223-A | rs10792001 | 11 | 11 | 68394313 | 21101  | 6.4170  | 0.4419 | 0.2816  | 5.7676 | CHB |
| MRPL21    | GI_31652223-A | rs473997   | 11 | 11 | 68396057 | 19357  | 6.1275  | 0.4324 | 0.2807  | 5.7676 | CHB |
| MRPL21    | GI_31652223-A | rs631001   | 11 | 11 | 68399550 | 15864  | 6.2661  | 0.4487 | 0.3092  | 5.7676 | CHB |
| MRPL21    | GI_31652223-A | rs1249368  | 11 | 11 | 68402722 | 12692  | 6.4170  | 0.4419 | -0.2816 | 5.7676 | CHB |
| MRPL21    | GI_31652223-A | rs592697   | 11 | 11 | 68406640 | 8774   | 6.4170  | 0.4419 | 0.2816  | 5.7676 | CHB |
| MRPL21    | GI_31652223-A | rs686390   | 11 | 11 | 68412653 | 2761   | 5.8201  | 0.4060 | 0.2735  | 5.7676 | CHB |
| MRPL21    | GI_31652223-A | rs514833   | 11 | 11 | 68414310 | 1104   | 8.0044  | 0.5446 | 0.3476  | 5.7676 | CHB |
| MRPL21    | GI_31652223-A | rs488363   | 11 | 11 | 68414874 | 540    | 6.4170  | 0.4419 | -0.2816 | 5.7676 | CHB |
| MRPL21    | GI_31652223-A | rs660614   | 11 | 11 | 68416064 | 650    | 6.6708  | 0.4644 | -0.2882 | 5.7676 | CHB |
| MRPL21    | GI_31652223-A | rs507520   | 11 | 11 | 68422630 | 7216   | 6.4170  | 0.4419 | 0.2816  | 5.7676 | CHB |
| MRPL21    | GI_31652223-A | rs636049   | 11 | 11 | 68423774 | 8360   | 6.0843  | 0.4297 | -0.2640 | 5.7676 | CHB |
| MRPL21    | GI_31652223-A | rs668576   | 11 | 11 | 68424784 | 9370   | 6.4170  | 0.4419 | 0.2816  | 5.7676 | CHB |
| MRPL21    | GI_31652223-A | rs482172   | 11 | 11 | 68425013 | 9599   | 6.1275  | 0.4324 | -0.2807 | 5.7676 | CHB |
| MRPL21    | GI_31652223-A | rs513359   | 11 | 11 | 68426072 | 10658  | 6.4170  | 0.4419 | -0.2816 | 5.7676 | CHB |
| MRPL21    | GI_31652223-A | rs629426   | 11 | 11 | 68427680 | 12266  | 6.1275  | 0.4324 | 0.2807  | 5.7676 | CHB |
| MRPL21    | GI_31652223-A | rs583182   | 11 | 11 | 68435210 | 19796  | 7.3884  | 0.4958 | 0.2764  | 5.7676 | CHB |
| MRPL21    | GI_31652223-A | rs673821   | 11 | 11 | 68435294 | 19880  | 6.2567  | 0.4481 | 0.3066  | 5.7676 | CHB |
| MRPL21    | GI_31652223-A | rs646586   | 11 | 11 | 68438229 | 22815  | 6.4170  | 0.4419 | 0.2816  | 5.7676 | CHB |
| MRPL21    | GI_31652223-A | rs553875   | 11 | 11 | 68451720 | 36306  | 6.4170  | 0.4419 | -0.2816 | 5.7676 | CHB |
| MRPL21    | GI_31652223-A | rs1249365  | 11 | 11 | 68455338 | 39924  | 6.4170  | 0.4419 | 0.2816  | 5.7676 | CHB |
| MRPL21    | GI_31652223-A | rs622082   | 11 | 11 | 68460535 | 45121  | 6.4170  | 0.4419 | -0.2816 | 5.7676 | CHB |
| MRPL21    | GI_31652223-A | rs546382   | 11 | 11 | 68460840 | 45426  | 6.4170  | 0.4419 | -0.2816 | 5.7676 | CHB |
| MRPL21    | GI_31652223-A | rs559032   | 11 | 11 | 68467423 | 52009  | 6.4170  | 0.4419 | 0.2816  | 5.7676 | CHB |
| MRPL21    | GI_31652223-A | rs10896384 | 11 | 11 | 68476587 | 61173  | 6.4170  | 0.4419 | 0.2816  | 5.7676 | CHB |
| TPCN2     | GI_20589957-S | rs10896398 | 11 | 11 | 68577192 | 35219  | 6.0326  | 0.4266 | 0.3289  | 5.6188 | CHB |
| LOC283204 | GI_30157198-S | rs11235559 | 11 | 11 | 72051685 | 130682 | 6.1853  | 0.4438 | 0.1579  | 5.9178 | CHB |
| FLJ11848  | GI_13376750-S | rs11235932 | 11 | 11 | 73249531 | 66679  | 6.8363  | 0.4738 | -0.2862 | 5.1596 | CHB |
| FLJ11848  | GI_13376750-S | rs11220    | 11 | 11 | 73259191 | 57019  | 7.2033  | 0.5026 | 0.3031  | 5.1596 | CHB |
| FLJ11848  | GI_13376750-S | rs1670546  | 11 | 11 | 73262821 | 53389  | 7.0497  | 0.4857 | 0.3079  | 5.1596 | CHB |
| FLJ11848  | GI_13376750-S | rs1670545  | 11 | 11 | 73263760 | 52450  | 7.2233  | 0.4870 | 0.3082  | 5.1596 | CHB |
| FLJ11848  | GI_13376750-S | rs1792199  | 11 | 11 | 73266218 | 49992  | 7.0497  | 0.4857 | -0.3079 | 5.1596 | CHB |
| FLJ11848  | GI_13376750-S | rs7105293  | 11 | 11 | 73269843 | 46367  | 7.2233  | 0.4870 | -0.3082 | 5.1596 | CHB |
| FLJ11848  | GI_13376750-S | rs10898950 | 11 | 11 | 73278536 | 37674  | 7.0497  | 0.4857 | 0.3079  | 5.1596 | CHB |
| PP1665    | GI_34147050-S | rs11606662 | 11 | 11 | 74902548 | 79136  | 12.3826 | 0.7111 | 0.8146  | 5.9657 | CHB |
| PP1665    | GI_34147050-S | rs12788428 | 11 | 11 | 74932771 | 109359 | 7.7585  | 0.5410 | -0.7640 | 5.9657 | CHB |
| FN5       | GI_9910225-S  | rs2399688  | 11 | 11 | 92944131 | 92655  | 6.2164  | 0.4377 | -0.3636 | 5.8226 | CHB |
| FN5       | GI_9910225-S  | rs11020421 | 11 | 11 | 92947125 | 95649  | 6.8698  | 0.5106 | 0.3756  | 5.8226 | CHB |
| FN5       | GI_9910225-S  | rs4753480  | 11 | 11 | 92948688 | 97212  | 6.2049  | 0.4370 | -0.3765 | 5.8226 | CHB |
| FN5       | GI_9910225-S  | rs4237559  | 11 | 11 | 92949095 | 97619  | 6.1057  | 0.4471 | -0.3935 | 5.8226 | CHB |
| FN5       | GI_9910225-S  | rs7123345  | 11 | 11 | 92951521 | 100045 | 6.3641  | 0.4388 | 0.3724  | 5.8226 | CHB |

|               |               |            |    |    |           |        |         |        |         |        |     |
|---------------|---------------|------------|----|----|-----------|--------|---------|--------|---------|--------|-----|
| FN5           | GI_9910225-S  | rs4753092  | 11 | 11 | 92970566  | 119090 | 6.2049  | 0.4370 | -0.3765 | 5.8226 | CHB |
| FN5           | GI_9910225-S  | rs4753093  | 11 | 11 | 92977144  | 125668 | 6.2937  | 0.4346 | 0.3756  | 5.8226 | CHB |
| FN5           | GI_9910225-S  | rs12222957 | 11 | 11 | 92981045  | 129569 | 5.9809  | 0.4312 | -0.3795 | 5.8226 | CHB |
| FN5           | GI_9910225-S  | rs1954783  | 11 | 11 | 92986134  | 134658 | 6.0480  | 0.4275 | 0.3818  | 5.8226 | CHB |
| FN5           | GI_9910225-S  | rs10831076 | 11 | 11 | 92990431  | 138955 | 6.5668  | 0.4665 | -0.4087 | 5.8226 | CHB |
| MGC13125      | GI_39725657-S | rs685184   | 11 | 11 | 116994855 | 870623 | 5.9201  | 0.4122 | 0.2885  | 5.7584 | CHB |
| Hs.98028      | Hs.98028-S    | rs659357   | 11 | 11 | 124165394 | 18941  | 6.4851  | 0.4458 | 0.1918  | 6.4018 | CHB |
| SIAT4C        | GI_5454057-S  | rs17135399 | 11 | 11 | 125723751 | 65802  | 6.3984  | 0.4408 | 0.2602  | 5.9111 | CHB |
| SIAT4C        | GI_5454057-S  | rs17135401 | 11 | 11 | 125723983 | 65570  | 6.3984  | 0.4408 | 0.2602  | 5.9111 | CHB |
| LOC399987     | GI_42660080-S | rs3809258  | 12 | 12 | 3734571   | 1492   | 13.5598 | 0.7375 | 0.2001  | 6.1348 | CHB |
| LOC399987     | GI_42660080-S | rs9300302  | 12 | 12 | 3737732   | 1669   | 11.8674 | 0.6858 | -0.1978 | 6.1348 | CHB |
| LOC399987     | GI_42660080-S | rs10774171 | 12 | 12 | 3738570   | 2507   | 13.8880 | 0.7465 | -0.1930 | 6.1348 | CHB |
| LOC387834     | GI_42660007-S | rs11050615 | 12 | 12 | 9427425   | 18927  | 7.1442  | 0.4828 | 0.2963  | 6.0952 | CHB |
| LOC387834     | GI_42660007-S | rs10743688 | 12 | 12 | 9429079   | 17273  | 6.5599  | 0.4661 | -0.2198 | 6.0952 | CHB |
| LOC387834     | GI_42660007-S | rs11050701 | 12 | 12 | 9440339   | 6013   | 6.6373  | 0.4625 | 0.2693  | 6.0952 | CHB |
| MGC35033      | GI_34303924-S | rs7309958  | 12 | 12 | 47123156  | 53134  | 6.1981  | 0.4290 | 0.2536  | 6.1133 | CHB |
| MGC35033      | GI_34303924-S | rs7975269  | 12 | 12 | 47130923  | 45367  | 6.1981  | 0.4290 | -0.2536 | 6.1133 | CHB |
| MGC35033      | GI_34303924-S | rs2468939  | 12 | 12 | 47134509  | 41781  | 6.1981  | 0.4290 | 0.2536  | 6.1133 | CHB |
| MGC35033      | GI_34303924-S | rs2956466  | 12 | 12 | 47140510  | 35780  | 6.1981  | 0.4290 | 0.2536  | 6.1133 | CHB |
| MGC35033      | GI_34303924-S | rs2731063  | 12 | 12 | 47162490  | 13800  | 6.1981  | 0.4290 | -0.2536 | 6.1133 | CHB |
| MGC35033      | GI_34303924-S | rs2705124  | 12 | 12 | 47166990  | 9300   | 6.1981  | 0.4290 | 0.2536  | 6.1133 | CHB |
| MGC35033      | GI_34303924-S | rs2731105  | 12 | 12 | 47171959  | 4331   | 6.1981  | 0.4290 | -0.2536 | 6.1133 | CHB |
| MGC35033      | GI_34303924-S | rs2956465  | 12 | 12 | 47177153  | 863    | 6.1981  | 0.4290 | 0.2536  | 6.1133 | CHB |
| KIAA1463      | GI_39930390-S | rs2302900  | 12 | 12 | 48885976  | 538939 | 8.3269  | 0.5432 | -1.1079 | 6.134  | CHB |
| KIAA1463      | GI_39930390-S | rs11169506 | 12 | 12 | 49297523  | 127392 | 9.1347  | 0.6166 | 0.9344  | 6.134  | CHB |
| KIAA1463      | GI_39930390-S | rs876080   | 12 | 12 | 49317031  | 107884 | 6.9686  | 0.4732 | 0.8371  | 6.134  | CHB |
| KIAA1463      | GI_39930390-S | rs12818741 | 12 | 12 | 49318682  | 106233 | 7.7014  | 0.5121 | 0.8636  | 6.134  | CHB |
| KIAA1463      | GI_39930390-S | rs13378012 | 12 | 12 | 49326664  | 98251  | 7.7014  | 0.5121 | -0.8636 | 6.134  | CHB |
| KIAA1463      | GI_39930390-S | rs1316607  | 12 | 12 | 49329157  | 95758  | 6.1581  | 0.4342 | -0.7976 | 6.134  | CHB |
| KIAA1463      | GI_39930390-S | rs7309964  | 12 | 12 | 49350331  | 74584  | 10.6830 | 0.6438 | 1.2995  | 6.134  | CHB |
| KIAA1463      | GI_39930390-S | rs11169520 | 12 | 12 | 49359790  | 65125  | 13.7844 | 0.7437 | -1.2074 | 6.134  | CHB |
| KIAA1463      | GI_39930390-S | rs7137845  | 12 | 12 | 49367207  | 57708  | 7.7014  | 0.5121 | -0.8636 | 6.134  | CHB |
| KIAA1463      | GI_39930390-S | rs2090852  | 12 | 12 | 49373198  | 51717  | 7.1952  | 0.5021 | -0.8429 | 6.134  | CHB |
| KIAA1463      | GI_39930390-S | rs2139930  | 12 | 12 | 49375554  | 49361  | 7.7014  | 0.5121 | 0.8636  | 6.134  | CHB |
| KIAA1463      | GI_39930390-S | rs11169524 | 12 | 12 | 49376001  | 48914  | 7.7014  | 0.5121 | -0.8636 | 6.134  | CHB |
| KIAA1463      | GI_39930390-S | rs4388959  | 12 | 12 | 49414681  | 10234  | 7.3425  | 0.5016 | -0.8584 | 6.134  | CHB |
| KIAA1463      | GI_39930390-S | rs3742062  | 12 | 12 | 49415099  | 9816   | 7.4457  | 0.5071 | 0.8546  | 6.134  | CHB |
| KIAA1463      | GI_39930390-S | rs2280503  | 12 | 12 | 49424954  | 39     | 7.3730  | 0.5033 | -0.8576 | 6.134  | CHB |
| KIAA1463      | GI_39930390-S | rs1047912  | 12 | 12 | 49425129  | 214    | 22.3111 | 0.9184 | 1.2981  | 6.134  | CHB |
| KIAA1463      | GI_39930390-S | rs7133974  | 12 | 12 | 49470844  | 45929  | 6.5213  | 0.4639 | 0.8722  | 6.134  | CHB |
| RBMS2         | GI_4506448-S  | rs3782235  | 12 | 12 | 55201814  | 67204  | 8.0354  | 0.5290 | 0.1452  | 5.5862 | CHB |
| RBMS2         | GI_4506448-S  | rs4759247  | 12 | 12 | 55205101  | 63917  | 8.0354  | 0.5290 | 0.1452  | 5.5862 | CHB |
| RBMS2         | GI_4506448-S  | rs1965307  | 12 | 12 | 55211798  | 57220  | 7.1336  | 0.4822 | 0.1366  | 5.5862 | CHB |
| RBMS2         | GI_4506448-S  | rs7314300  | 12 | 12 | 55215611  | 53407  | 7.1336  | 0.4822 | -0.1366 | 5.5862 | CHB |
| RBMS2         | GI_4506448-S  | rs10876902 | 12 | 12 | 55215631  | 53387  | 6.4405  | 0.4591 | 0.1378  | 5.5862 | CHB |
| RBMS2         | GI_4506448-S  | rs10876903 | 12 | 12 | 55215714  | 53304  | 6.2605  | 0.4740 | -0.1304 | 5.5862 | CHB |
| RBMS2         | GI_4506448-S  | rs11171887 | 12 | 12 | 55215786  | 53232  | 7.2093  | 0.5116 | 0.1510  | 5.5862 | CHB |
| STAT6         | GI_23397677-S | rs324010   | 12 | 12 | 55768519  | 7074   | 6.9945  | 0.4827 | -0.3432 | 5.588  | CHB |
| STAT6         | GI_23397677-S | rs324019   | 12 | 12 | 55772914  | 2679   | 5.9352  | 0.4364 | 0.3352  | 5.588  | CHB |
| STAT6         | GI_23397677-S | rs841718   | 12 | 12 | 55779263  | 3670   | 8.0010  | 0.5273 | -0.3362 | 5.588  | CHB |
| DKFZP586D0919 | GI_24308058-S | rs2069502  | 12 | 12 | 56430932  | 31547  | 6.0583  | 0.4206 | -0.2936 | 5.6398 | CHB |
| DKFZP586D0919 | GI_24308058-S | rs703842   | 12 | 12 | 56449006  | 13473  | 6.0583  | 0.4206 | -0.2936 | 5.6398 | CHB |
| DKFZP586D0919 | GI_24308058-S | rs11172333 | 12 | 12 | 56456602  | 5877   | 6.0583  | 0.4206 | 0.2936  | 5.6398 | CHB |
| DKFZP586D0919 | GI_24308058-S | rs10877019 | 12 | 12 | 56459196  | 3283   | 6.0583  | 0.4206 | 0.2936  | 5.6398 | CHB |
| DKFZP586D0919 | GI_24308058-S | rs923829   | 12 | 12 | 56460573  | 1906   | 6.0583  | 0.4206 | 0.2936  | 5.6398 | CHB |
| DKFZP586D0919 | GI_24308058-S | rs11172335 | 12 | 12 | 56461468  | 1011   | 5.9508  | 0.4216 | 0.2965  | 5.6398 | CHB |
| DKFZP586D0919 | GI_24308058-S | rs10431552 | 12 | 12 | 56464415  | 1936   | 5.7096  | 0.3992 | -0.2854 | 5.6398 | CHB |
| DKFZP586D0919 | GI_24308058-S | rs6581155  | 12 | 12 | 56464429  | 1950   | 6.8149  | 0.4726 | 0.3090  | 5.6398 | CHB |
| DKFZP586D0919 | GI_24308058-S | rs724834   | 12 | 12 | 56466683  | 4204   | 6.0583  | 0.4206 | -0.2936 | 5.6398 | CHB |

|               |               |            |    |    |           |       |         |        |         |        |     |
|---------------|---------------|------------|----|----|-----------|-------|---------|--------|---------|--------|-----|
| DKFZP586D0919 | GI_24308058-S | rs11172343 | 12 | 12 | 56474424  | 11945 | 6.0583  | 0.4206 | -0.2936 | 5.6398 | CHB |
| DKFZP586D0919 | GI_24308058-S | rs11172344 | 12 | 12 | 56479715  | 17236 | 6.0583  | 0.4206 | -0.2936 | 5.6398 | CHB |
| CHPT1         | GI_9910383-S  | rs2695290  | 12 | 12 | 100590312 | 29119 | 6.6669  | 0.4563 | 0.4429  | 5.9899 | CHB |
| CHPT1         | GI_9910383-S  | rs2695284  | 12 | 12 | 100591786 | 27645 | 6.3908  | 0.4481 | 0.4503  | 5.9899 | CHB |
| CHPT1         | GI_9910383-S  | rs2695282  | 12 | 12 | 100591970 | 27461 | 6.5000  | 0.4467 | 0.4493  | 5.9899 | CHB |
| CHPT1         | GI_9910383-S  | rs2695281  | 12 | 12 | 100592467 | 26964 | 6.5000  | 0.4467 | 0.4493  | 5.9899 | CHB |
| CHPT1         | GI_9910383-S  | rs3809260  | 12 | 12 | 100593485 | 25946 | 6.9491  | 0.4801 | -0.4548 | 5.9899 | CHB |
| CHPT1         | GI_9910383-S  | rs2288379  | 12 | 12 | 100626387 | 6956  | 6.9581  | 0.4806 | 0.4713  | 5.9899 | CHB |
| CHPT1         | GI_9910383-S  | rs11110986 | 12 | 12 | 100627558 | 8127  | 6.9581  | 0.4806 | 0.4713  | 5.9899 | CHB |
| CHPT1         | GI_9910383-S  | rs3817305  | 12 | 12 | 100654206 | 34775 | 6.0963  | 0.4229 | -0.5435 | 5.9899 | CHB |
| CHPT1         | GI_9910383-S  | rs11111024 | 12 | 12 | 100686406 | 66975 | 7.0998  | 0.4804 | 0.4711  | 5.9899 | CHB |
| CHPT1         | GI_9910383-S  | rs12322453 | 12 | 12 | 100691649 | 72218 | 6.9581  | 0.4806 | -0.4713 | 5.9899 | CHB |
| CHPT1         | GI_9910383-S  | rs10860790 | 12 | 12 | 100700197 | 80766 | 7.0788  | 0.4873 | 0.4910  | 5.9899 | CHB |
| OAS1          | GI_8051620-I  | rs3741981  | 12 | 12 | 111811590 | 8500  | 8.2922  | 0.5415 | -0.4586 | 7.4422 | CHB |
| OAS1          | GI_8051620-I  | rs2057778  | 12 | 12 | 111813516 | 6574  | 8.7792  | 0.5645 | 0.5501  | 7.4422 | CHB |
| OAS1          | GI_8051622-I  | rs2057778  | 12 | 12 | 111813516 | 4742  | 13.7884 | 0.7438 | -0.8724 | 7.4422 | CHB |
| OAS1          | GI_8051620-I  | rs2285934  | 12 | 12 | 111814240 | 5850  | 8.7792  | 0.5645 | -0.5501 | 7.4422 | CHB |
| OAS1          | GI_8051622-I  | rs2285934  | 12 | 12 | 111814240 | 4018  | 13.7884 | 0.7438 | 0.8724  | 7.4422 | CHB |
| OAS1          | GI_8051620-I  | rs10774671 | 12 | 12 | 111819913 | 177   | 8.7792  | 0.5645 | 0.5501  | 7.4422 | CHB |
| OAS1          | GI_8051622-I  | rs10774671 | 12 | 12 | 111819913 | 1655  | 13.7884 | 0.7438 | -0.8724 | 7.4422 | CHB |
| OAS1          | GI_8051620-I  | rs3177979  | 12 | 12 | 111819929 | 161   | 7.5649  | 0.5220 | 0.5321  | 7.4422 | CHB |
| OAS1          | GI_8051622-I  | rs3177979  | 12 | 12 | 111819929 | 1671  | 12.0985 | 0.7108 | -0.8620 | 7.4422 | CHB |
| OAS1          | GI_8051620-I  | rs1051042  | 12 | 12 | 111819957 | 133   | 8.1726  | 0.5442 | 0.5533  | 7.4422 | CHB |
| OAS1          | GI_8051622-I  | rs1051042  | 12 | 12 | 111819957 | 1699  | 12.6471 | 0.7193 | -0.8483 | 7.4422 | CHB |
| OAS1          | GI_8051620-I  | rs2660     | 12 | 12 | 111820162 | 72    | 8.5603  | 0.5629 | 0.5497  | 7.4422 | CHB |
| OAS1          | GI_8051622-I  | rs2660     | 12 | 12 | 111820162 | 1904  | 13.4743 | 0.7434 | -0.8733 | 7.4422 | CHB |
| OAS1          | GI_8051620-I  | rs7135577  | 12 | 12 | 111820826 | 736   | 8.5586  | 0.5628 | -0.5495 | 7.4422 | CHB |
| OAS1          | GI_8051622-I  | rs7135577  | 12 | 12 | 111820826 | 2568  | 13.4523 | 0.7428 | 0.8722  | 7.4422 | CHB |
| OAS1          | GI_8051620-I  | rs4767027  | 12 | 12 | 111821877 | 1787  | 8.7792  | 0.5645 | 0.5501  | 7.4422 | CHB |
| OAS1          | GI_8051622-I  | rs4767027  | 12 | 12 | 111821877 | 3619  | 13.7884 | 0.7438 | -0.8724 | 7.4422 | CHB |
| OAS1          | GI_8051620-I  | rs4767028  | 12 | 12 | 111821908 | 1818  | 8.7792  | 0.5645 | -0.5501 | 7.4422 | CHB |
| OAS1          | GI_8051622-I  | rs4767028  | 12 | 12 | 111821908 | 3650  | 13.7884 | 0.7438 | 0.8724  | 7.4422 | CHB |
| OAS1          | GI_8051620-I  | rs4767029  | 12 | 12 | 111822038 | 1948  | 8.7792  | 0.5645 | 0.5501  | 7.4422 | CHB |
| OAS1          | GI_8051622-I  | rs4767029  | 12 | 12 | 111822038 | 3780  | 13.7884 | 0.7438 | -0.8724 | 7.4422 | CHB |
| OAS1          | GI_8051620-I  | rs4767030  | 12 | 12 | 111822297 | 2207  | 8.7792  | 0.5645 | -0.5501 | 7.4422 | CHB |
| OAS1          | GI_8051622-I  | rs4767030  | 12 | 12 | 111822297 | 4039  | 13.7884 | 0.7438 | 0.8724  | 7.4422 | CHB |
| OAS1          | GI_8051620-I  | rs10850092 | 12 | 12 | 111822423 | 2333  | 8.7792  | 0.5645 | -0.5501 | 7.4422 | CHB |
| OAS1          | GI_8051622-I  | rs10850092 | 12 | 12 | 111822423 | 4165  | 13.7884 | 0.7438 | 0.8724  | 7.4422 | CHB |
| OAS1          | GI_8051620-I  | rs6489864  | 12 | 12 | 111822745 | 2655  | 8.7792  | 0.5645 | -0.5501 | 7.4422 | CHB |
| OAS1          | GI_8051622-I  | rs6489864  | 12 | 12 | 111822745 | 4487  | 13.7884 | 0.7438 | 0.8724  | 7.4422 | CHB |
| OAS1          | GI_8051620-I  | rs6489865  | 12 | 12 | 111823022 | 2932  | 8.7792  | 0.5645 | -0.5501 | 7.4422 | CHB |
| OAS1          | GI_8051622-I  | rs6489865  | 12 | 12 | 111823022 | 4764  | 13.7884 | 0.7438 | 0.8724  | 7.4422 | CHB |
| OAS1          | GI_8051620-I  | rs10850093 | 12 | 12 | 111823188 | 3098  | 8.7792  | 0.5645 | -0.5501 | 7.4422 | CHB |
| OAS1          | GI_8051622-I  | rs10850093 | 12 | 12 | 111823188 | 4930  | 13.7884 | 0.7438 | 0.8724  | 7.4422 | CHB |
| OAS1          | GI_8051620-I  | rs10850094 | 12 | 12 | 111823283 | 3193  | 8.7792  | 0.5645 | 0.5501  | 7.4422 | CHB |
| OAS1          | GI_8051622-I  | rs10850094 | 12 | 12 | 111823283 | 5025  | 13.7884 | 0.7438 | -0.8724 | 7.4422 | CHB |
| OAS1          | GI_8051620-I  | rs10850095 | 12 | 12 | 111823295 | 3205  | 8.7792  | 0.5645 | 0.5501  | 7.4422 | CHB |
| OAS1          | GI_8051622-I  | rs10850095 | 12 | 12 | 111823295 | 5037  | 13.7884 | 0.7438 | -0.8724 | 7.4422 | CHB |
| OAS1          | GI_8051620-I  | rs10850096 | 12 | 12 | 111823506 | 3416  | 8.7792  | 0.5645 | 0.5501  | 7.4422 | CHB |
| OAS1          | GI_8051622-I  | rs10850096 | 12 | 12 | 111823506 | 5248  | 13.7884 | 0.7438 | -0.8724 | 7.4422 | CHB |
| OAS1          | GI_8051620-I  | rs10850097 | 12 | 12 | 111823837 | 3747  | 8.7792  | 0.5645 | -0.5501 | 7.4422 | CHB |
| OAS1          | GI_8051622-I  | rs10850097 | 12 | 12 | 111823837 | 5579  | 13.7884 | 0.7438 | 0.8724  | 7.4422 | CHB |
| OAS1          | GI_8051620-I  | rs10774673 | 12 | 12 | 111823878 | 3788  | 8.7792  | 0.5645 | -0.5501 | 7.4422 | CHB |
| OAS1          | GI_8051622-I  | rs10774673 | 12 | 12 | 111823878 | 5620  | 13.7884 | 0.7438 | 0.8724  | 7.4422 | CHB |
| OAS1          | GI_8051620-I  | rs10774674 | 12 | 12 | 111823894 | 3804  | 8.7792  | 0.5645 | 0.5501  | 7.4422 | CHB |
| OAS1          | GI_8051622-I  | rs10774674 | 12 | 12 | 111823894 | 5636  | 13.7884 | 0.7438 | -0.8724 | 7.4422 | CHB |
| OAS1          | GI_8051620-I  | rs11066452 | 12 | 12 | 111824294 | 4204  | 8.7792  | 0.5645 | -0.5501 | 7.4422 | CHB |
| OAS1          | GI_8051622-I  | rs11066452 | 12 | 12 | 111824294 | 6036  | 13.7884 | 0.7438 | 0.8724  | 7.4422 | CHB |
| OAS1          | GI_8051620-I  | rs10850098 | 12 | 12 | 111824778 | 4688  | 8.7792  | 0.5645 | 0.5501  | 7.4422 | CHB |

|      |              |            |    |    |           |       |         |        |         |        |     |
|------|--------------|------------|----|----|-----------|-------|---------|--------|---------|--------|-----|
| OAS1 | GI_8051622-I | rs10850098 | 12 | 12 | 111824778 | 6520  | 13.7884 | 0.7438 | -0.8724 | 7.4422 | CHB |
| OAS1 | GI_8051620-I | rs10774676 | 12 | 12 | 111825127 | 5037  | 8.7792  | 0.5645 | -0.5501 | 7.4422 | CHB |
| OAS1 | GI_8051622-I | rs10774676 | 12 | 12 | 111825127 | 6869  | 13.7884 | 0.7438 | 0.8724  | 7.4422 | CHB |
| OAS1 | GI_8051620-I | rs10774677 | 12 | 12 | 111825141 | 5051  | 8.5586  | 0.5628 | 0.5495  | 7.4422 | CHB |
| OAS1 | GI_8051622-I | rs10774677 | 12 | 12 | 111825141 | 6883  | 13.4523 | 0.7428 | -0.8722 | 7.4422 | CHB |
| OAS1 | GI_8051620-I | rs4766663  | 12 | 12 | 111825694 | 5604  | 8.7792  | 0.5645 | -0.5501 | 7.4422 | CHB |
| OAS1 | GI_8051622-I | rs4766663  | 12 | 12 | 111825694 | 7436  | 13.7884 | 0.7438 | 0.8724  | 7.4422 | CHB |
| OAS1 | GI_8051620-I | rs4766664  | 12 | 12 | 111825717 | 5627  | 8.7792  | 0.5645 | 0.5501  | 7.4422 | CHB |
| OAS1 | GI_8051622-I | rs4766664  | 12 | 12 | 111825717 | 7459  | 13.7884 | 0.7438 | -0.8724 | 7.4422 | CHB |
| OAS1 | GI_8051620-I | rs4766665  | 12 | 12 | 111825829 | 5739  | 8.7792  | 0.5645 | 0.5501  | 7.4422 | CHB |
| OAS1 | GI_8051622-I | rs4766665  | 12 | 12 | 111825829 | 7571  | 13.7884 | 0.7438 | -0.8724 | 7.4422 | CHB |
| OAS1 | GI_8051620-I | rs4988618  | 12 | 12 | 111825898 | 5808  | 8.7792  | 0.5645 | 0.5501  | 7.4422 | CHB |
| OAS1 | GI_8051622-I | rs4988618  | 12 | 12 | 111825898 | 7640  | 13.7884 | 0.7438 | -0.8724 | 7.4422 | CHB |
| OAS1 | GI_8051620-I | rs6489868  | 12 | 12 | 111826412 | 6322  | 8.7792  | 0.5645 | 0.5501  | 7.4422 | CHB |
| OAS1 | GI_8051622-I | rs6489868  | 12 | 12 | 111826412 | 8154  | 13.7884 | 0.7438 | -0.8724 | 7.4422 | CHB |
| OAS1 | GI_8051620-I | rs4766673  | 12 | 12 | 111827881 | 7791  | 8.7792  | 0.5645 | -0.5501 | 7.4422 | CHB |
| OAS1 | GI_8051622-I | rs4766673  | 12 | 12 | 111827881 | 9623  | 13.7884 | 0.7438 | 0.8724  | 7.4422 | CHB |
| OAS1 | GI_8051620-I | rs4766674  | 12 | 12 | 111827921 | 7831  | 8.7792  | 0.5645 | -0.5501 | 7.4422 | CHB |
| OAS1 | GI_8051622-I | rs4766674  | 12 | 12 | 111827921 | 9663  | 13.7884 | 0.7438 | 0.8724  | 7.4422 | CHB |
| OAS1 | GI_8051620-I | rs4766675  | 12 | 12 | 111828173 | 8083  | 8.7792  | 0.5645 | -0.5501 | 7.4422 | CHB |
| OAS1 | GI_8051622-I | rs4766675  | 12 | 12 | 111828173 | 9915  | 13.7884 | 0.7438 | 0.8724  | 7.4422 | CHB |
| OAS1 | GI_8051620-I | rs4766676  | 12 | 12 | 111828301 | 8211  | 8.3739  | 0.5628 | -0.5438 | 7.4422 | CHB |
| OAS1 | GI_8051622-I | rs4766676  | 12 | 12 | 111828301 | 10043 | 13.8910 | 0.7632 | 0.8847  | 7.4422 | CHB |
| OAS1 | GI_8051620-I | rs7315441  | 12 | 12 | 111828407 | 8317  | 8.7792  | 0.5645 | -0.5501 | 7.4422 | CHB |
| OAS1 | GI_8051622-I | rs7315441  | 12 | 12 | 111828407 | 10149 | 13.7884 | 0.7438 | 0.8724  | 7.4422 | CHB |
| OAS1 | GI_8051620-I | rs7305035  | 12 | 12 | 111828523 | 8433  | 10.3811 | 0.6781 | 0.6579  | 7.4422 | CHB |
| OAS1 | GI_8051622-I | rs7305035  | 12 | 12 | 111828523 | 10265 | 11.2134 | 0.7087 | -0.7864 | 7.4422 | CHB |
| OAS1 | GI_8051620-I | rs7316586  | 12 | 12 | 111828548 | 8458  | 8.7792  | 0.5645 | -0.5501 | 7.4422 | CHB |
| OAS1 | GI_8051622-I | rs7316586  | 12 | 12 | 111828548 | 10290 | 13.7884 | 0.7438 | 0.8724  | 7.4422 | CHB |
| OAS1 | GI_8051620-I | rs916972   | 12 | 12 | 111828769 | 8679  | 8.7792  | 0.5645 | 0.5501  | 7.4422 | CHB |
| OAS1 | GI_8051622-I | rs916972   | 12 | 12 | 111828769 | 10511 | 13.7884 | 0.7438 | -0.8724 | 7.4422 | CHB |
| OAS1 | GI_8051620-I | rs7134391  | 12 | 12 | 111829411 | 9321  | 8.7792  | 0.5645 | 0.5501  | 7.4422 | CHB |
| OAS1 | GI_8051622-I | rs7134391  | 12 | 12 | 111829411 | 11153 | 13.7884 | 0.7438 | -0.8724 | 7.4422 | CHB |
| OAS1 | GI_8051620-I | rs1859336  | 12 | 12 | 111830029 | 9939  | 8.7792  | 0.5645 | 0.5501  | 7.4422 | CHB |
| OAS1 | GI_8051622-I | rs1859336  | 12 | 12 | 111830029 | 11771 | 13.7884 | 0.7438 | -0.8724 | 7.4422 | CHB |
| OAS1 | GI_8051620-I | rs1859335  | 12 | 12 | 111830045 | 9955  | 9.1323  | 0.6463 | 0.8042  | 7.4422 | CHB |
| OAS1 | GI_8051620-I | rs2384071  | 12 | 12 | 111830063 | 9973  | 8.1695  | 0.5711 | -0.5456 | 7.4422 | CHB |
| OAS1 | GI_8051622-I | rs2384071  | 12 | 12 | 111830063 | 11805 | 13.2311 | 0.7625 | 0.8831  | 7.4422 | CHB |
| OAS1 | GI_8051620-I | rs2384072  | 12 | 12 | 111830142 | 10052 | 8.2850  | 0.5864 | 0.5320  | 7.4422 | CHB |
| OAS1 | GI_8051622-I | rs2384072  | 12 | 12 | 111830142 | 11884 | 14.4059 | 0.8016 | -0.9036 | 7.4422 | CHB |
| OAS1 | GI_8051620-I | rs2384073  | 12 | 12 | 111830315 | 10225 | 10.4082 | 0.6602 | -0.6140 | 7.4422 | CHB |
| OAS1 | GI_8051622-I | rs2384073  | 12 | 12 | 111830315 | 12057 | 12.9649 | 0.7461 | 0.8324  | 7.4422 | CHB |
| OAS1 | GI_8051620-I | rs6489874  | 12 | 12 | 111830615 | 10525 | 8.4444  | 0.5752 | -0.5358 | 7.4422 | CHB |
| OAS1 | GI_8051622-I | rs6489874  | 12 | 12 | 111830615 | 12357 | 14.6815 | 0.7914 | 0.8940  | 7.4422 | CHB |
| OAS1 | GI_8051620-I | rs6489878  | 12 | 12 | 111830845 | 10755 | 10.0518 | 0.6555 | -0.5928 | 7.4422 | CHB |
| OAS1 | GI_8051622-I | rs6489878  | 12 | 12 | 111830845 | 12587 | 10.2495 | 0.6634 | 0.8687  | 7.4422 | CHB |
| OAS1 | GI_8051620-I | rs7298184  | 12 | 12 | 111830969 | 10879 | 8.3760  | 0.5629 | 0.5448  | 7.4422 | CHB |
| OAS1 | GI_8051622-I | rs7298184  | 12 | 12 | 111830969 | 12711 | 13.3467 | 0.7483 | -0.8782 | 7.4422 | CHB |
| OAS1 | GI_8051620-I | rs7132404  | 12 | 12 | 111831325 | 11235 | 8.7792  | 0.5645 | 0.5501  | 7.4422 | CHB |
| OAS1 | GI_8051622-I | rs7132404  | 12 | 12 | 111831325 | 13067 | 13.7884 | 0.7438 | -0.8724 | 7.4422 | CHB |
| OAS1 | GI_8051620-I | rs4767036  | 12 | 12 | 111831897 | 11807 | 8.7792  | 0.5645 | 0.5501  | 7.4422 | CHB |
| OAS1 | GI_8051622-I | rs4767036  | 12 | 12 | 111831897 | 13639 | 13.7884 | 0.7438 | -0.8724 | 7.4422 | CHB |
| OAS1 | GI_8051620-I | rs7967461  | 12 | 12 | 111832479 | 12389 | 8.7792  | 0.5645 | 0.5501  | 7.4422 | CHB |
| OAS1 | GI_8051622-I | rs7967461  | 12 | 12 | 111832479 | 14221 | 13.7884 | 0.7438 | -0.8724 | 7.4422 | CHB |
| OAS1 | GI_8051620-I | rs1859333  | 12 | 12 | 111833686 | 13596 | 8.7792  | 0.5645 | -0.5501 | 7.4422 | CHB |
| OAS1 | GI_8051622-I | rs1859333  | 12 | 12 | 111833686 | 15428 | 13.7884 | 0.7438 | 0.8724  | 7.4422 | CHB |
| OAS1 | GI_8051620-I | rs1859332  | 12 | 12 | 111833834 | 13744 | 8.6009  | 0.5648 | -0.5458 | 7.4422 | CHB |
| OAS1 | GI_8051622-I | rs1859332  | 12 | 12 | 111833834 | 15576 | 13.6401 | 0.7480 | 0.8766  | 7.4422 | CHB |
| OAS1 | GI_8051620-I | rs7966314  | 12 | 12 | 111835259 | 15169 | 8.7792  | 0.5645 | -0.5501 | 7.4422 | CHB |

|          |               |            |    |    |           |        |         |        |         |        |     |
|----------|---------------|------------|----|----|-----------|--------|---------|--------|---------|--------|-----|
| OAS1     | GI_8051622-I  | rs7966314  | 12 | 12 | 111835259 | 17001  | 13.7884 | 0.7438 | 0.8724  | 7.4422 | CHB |
| OAS1     | GI_8051620-I  | rs4767037  | 12 | 12 | 111835524 | 15434  | 8.8922  | 0.5783 | -0.5414 | 7.4422 | CHB |
| OAS1     | GI_8051622-I  | rs4767037  | 12 | 12 | 111835524 | 17266  | 14.6709 | 0.7748 | 0.8840  | 7.4422 | CHB |
| OAS1     | GI_8051620-I  | rs3759375  | 12 | 12 | 111836308 | 16218  | 8.5565  | 0.5627 | 0.5493  | 7.4422 | CHB |
| OAS1     | GI_8051622-I  | rs3759375  | 12 | 12 | 111836308 | 18050  | 13.4954 | 0.7440 | -0.8739 | 7.4422 | CHB |
| OAS1     | GI_8051620-I  | rs4767040  | 12 | 12 | 111836737 | 16647  | 8.7792  | 0.5645 | 0.5501  | 7.4422 | CHB |
| OAS1     | GI_8051622-I  | rs4767040  | 12 | 12 | 111836737 | 18479  | 13.7884 | 0.7438 | -0.8724 | 7.4422 | CHB |
| OAS1     | GI_8051620-I  | rs10774679 | 12 | 12 | 111837468 | 17378  | 8.8711  | 0.5687 | -0.5312 | 7.4422 | CHB |
| OAS1     | GI_8051622-I  | rs10774679 | 12 | 12 | 111837468 | 19210  | 11.7665 | 0.6824 | 0.8051  | 7.4422 | CHB |
| OAS1     | GI_8051620-I  | rs7132797  | 12 | 12 | 111837756 | 17666  | 8.5532  | 0.5625 | -0.5483 | 7.4422 | CHB |
| OAS1     | GI_8051622-I  | rs7132797  | 12 | 12 | 111837756 | 19498  | 14.0284 | 0.7585 | 0.8803  | 7.4422 | CHB |
| OAS1     | GI_8051622-I  | rs1156361  | 12 | 12 | 111838703 | 20445  | 8.5023  | 0.6275 | 0.7511  | 7.4422 | CHB |
| OAS1     | GI_8051622-I  | rs7299132  | 12 | 12 | 111839633 | 21375  | 9.5562  | 0.6647 | -0.7940 | 7.4422 | CHB |
| OAS1     | GI_8051620-I  | rs4238033  | 12 | 12 | 111840801 | 20711  | 8.0994  | 0.5676 | 0.5270  | 7.4422 | CHB |
| OAS1     | GI_8051622-I  | rs4238033  | 12 | 12 | 111840801 | 22543  | 11.8823 | 0.7218 | -0.8568 | 7.4422 | CHB |
| OAS1     | GI_8051620-I  | rs10735079 | 12 | 12 | 111842728 | 22638  | 8.7792  | 0.5645 | 0.5501  | 7.4422 | CHB |
| OAS1     | GI_8051622-I  | rs10735079 | 12 | 12 | 111842728 | 24470  | 13.7884 | 0.7438 | -0.8724 | 7.4422 | CHB |
| OAS1     | GI_8051620-I  | rs7977345  | 12 | 12 | 111843428 | 23338  | 8.7792  | 0.5645 | -0.5501 | 7.4422 | CHB |
| OAS1     | GI_8051622-I  | rs7977345  | 12 | 12 | 111843428 | 25170  | 13.7884 | 0.7438 | 0.8724  | 7.4422 | CHB |
| OAS1     | GI_8051620-I  | rs6489881  | 12 | 12 | 111843937 | 23847  | 8.3161  | 0.5512 | -0.5361 | 7.4422 | CHB |
| OAS1     | GI_8051622-I  | rs6489881  | 12 | 12 | 111843937 | 25679  | 13.3691 | 0.7405 | 0.8770  | 7.4422 | CHB |
| OAS1     | GI_8051620-I  | rs7131998  | 12 | 12 | 111844415 | 24325  | 8.5869  | 0.5641 | -0.5462 | 7.4422 | CHB |
| OAS1     | GI_8051622-I  | rs7131998  | 12 | 12 | 111844415 | 26157  | 13.5868 | 0.7466 | 0.8758  | 7.4422 | CHB |
| OAS1     | GI_8051622-I  | rs2269899  | 12 | 12 | 111844676 | 26418  | 11.8448 | 0.7115 | -0.8727 | 7.4422 | CHB |
| NCKX6    | GI_39995085-S | rs7962389  | 12 | 12 | 112232482 | 32690  | 6.3829  | 0.4557 | -0.2688 | 6.0341 | CHB |
| SIRT4    | GI_6912661-S  | rs16950058 | 12 | 12 | 119213237 | 306    | 6.0829  | 0.4297 | 0.3028  | 5.8176 | CHB |
| SIRT4    | GI_6912661-S  | rs12424233 | 12 | 12 | 119263263 | 49720  | 5.9813  | 0.4563 | -0.3520 | 5.8176 | CHB |
| CAMKK2   | GI_27437022-A | rs11065478 | 12 | 12 | 120099853 | 45871  | 5.6944  | 0.4055 | 0.4122  | 5.2383 | CHB |
| CAMKK2   | GI_27437022-A | rs11065504 | 12 | 12 | 120143180 | 2544   | 7.3325  | 0.5096 | -0.4802 | 5.2383 | CHB |
| CAMKK2   | GI_27437022-A | rs12819431 | 12 | 12 | 120143507 | 2217   | 6.6731  | 0.4727 | 0.4893  | 5.2383 | CHB |
| CAMKK2   | GI_27437022-A | rs3794207  | 12 | 12 | 120148798 | 3074   | 7.1793  | 0.4847 | -0.4974 | 5.2383 | CHB |
| CAMKK2   | GI_27437022-A | rs2686343  | 12 | 12 | 120148828 | 3104   | 7.4165  | 0.5056 | -0.5122 | 5.2383 | CHB |
| CAMKK2   | GI_27437022-A | rs3794205  | 12 | 12 | 120149649 | 3925   | 6.4502  | 0.4438 | 0.4833  | 5.2383 | CHB |
| CAMKK2   | GI_27437022-A | rs12823779 | 12 | 12 | 120150964 | 5240   | 7.1793  | 0.4847 | -0.4974 | 5.2383 | CHB |
| FLJ31978 | GI_21389558-S | rs11060404 | 12 | 12 | 128541635 | 547374 | 6.4809  | 0.4456 | -1.7922 | 6.4345 | CHB |
| B3GTL    | GI_34996530-S | rs7991707  | 13 | 13 | 30770181  | 33374  | 6.5255  | 0.4482 | -0.2140 | 6.1321 | CHB |
| B3GTL    | GI_34996530-S | rs876540   | 13 | 13 | 30803449  | 106    | 7.6950  | 0.5118 | -0.2347 | 6.1321 | CHB |
| B3GTL    | GI_34996530-S | rs912603   | 13 | 13 | 30803641  | 86     | 7.6950  | 0.5118 | 0.2347  | 6.1321 | CHB |
| B3GTL    | GI_34996530-S | rs2056443  | 13 | 13 | 30803942  | 387    | 7.6950  | 0.5118 | 0.2347  | 6.1321 | CHB |
| B3GTL    | GI_34996530-S | rs13080    | 13 | 13 | 30804141  | 586    | 7.6950  | 0.5118 | -0.2347 | 6.1321 | CHB |
| B3GTL    | GI_34996530-S | rs4057     | 13 | 13 | 30804291  | 736    | 7.6950  | 0.5118 | 0.2347  | 6.1321 | CHB |
| B3GTL    | GI_34996530-S | rs1409379  | 13 | 13 | 30805741  | 2186   | 7.6950  | 0.5118 | -0.2347 | 6.1321 | CHB |
| B3GTL    | GI_34996530-S | rs9545125  | 13 | 13 | 30809822  | 6267   | 7.2890  | 0.4988 | 0.2312  | 6.1321 | CHB |
| B3GTL    | GI_34996530-S | rs7999260  | 13 | 13 | 30810323  | 6768   | 6.2934  | 0.4760 | 0.2292  | 6.1321 | CHB |
| B3GTL    | GI_34996530-S | rs7983430  | 13 | 13 | 30819717  | 16162  | 7.0220  | 0.4926 | 0.2308  | 6.1321 | CHB |
| B3GTL    | GI_34996530-S | rs9574660  | 13 | 13 | 30819922  | 16367  | 7.6950  | 0.5118 | 0.2347  | 6.1321 | CHB |
| B3GTL    | GI_34996530-S | rs4943341  | 13 | 13 | 30822013  | 18458  | 7.6950  | 0.5118 | 0.2347  | 6.1321 | CHB |
| B3GTL    | GI_34996530-S | rs9601445  | 13 | 13 | 30822231  | 18676  | 7.6950  | 0.5118 | -0.2347 | 6.1321 | CHB |
| B3GTL    | GI_34996530-S | rs7333382  | 13 | 13 | 30825543  | 21988  | 7.4425  | 0.4987 | -0.2448 | 6.1321 | CHB |
| B3GTL    | GI_34996530-S | rs1590571  | 13 | 13 | 30831957  | 28402  | 6.4070  | 0.4413 | 0.2337  | 6.1321 | CHB |
| B3GTL    | GI_34996530-S | rs1590570  | 13 | 13 | 30832115  | 28560  | 6.4070  | 0.4413 | -0.2337 | 6.1321 | CHB |
| B3GTL    | GI_34996530-S | rs1326309  | 13 | 13 | 30833371  | 29816  | 6.4070  | 0.4413 | 0.2337  | 6.1321 | CHB |
| B3GTL    | GI_34996530-S | rs1326308  | 13 | 13 | 30833616  | 30061  | 6.4070  | 0.4413 | 0.2337  | 6.1321 | CHB |
| B3GTL    | GI_34996530-S | rs9565722  | 13 | 13 | 30835810  | 32255  | 6.4070  | 0.4413 | -0.2337 | 6.1321 | CHB |
| B3GTL    | GI_34996530-S | rs1326306  | 13 | 13 | 30836186  | 32631  | 6.4070  | 0.4413 | -0.2337 | 6.1321 | CHB |
| B3GTL    | GI_34996530-S | rs7328975  | 13 | 13 | 30836764  | 33209  | 6.3483  | 0.4456 | 0.2351  | 6.1321 | CHB |
| B3GTL    | GI_34996530-S | rs7335345  | 13 | 13 | 30836960  | 33405  | 6.3483  | 0.4456 | -0.2351 | 6.1321 | CHB |
| B3GTL    | GI_34996530-S | rs9531317  | 13 | 13 | 30837376  | 33821  | 6.1328  | 0.4487 | 0.2510  | 6.1321 | CHB |
| B3GTL    | GI_34996530-S | rs1121122  | 13 | 13 | 30839210  | 35655  | 6.5589  | 0.4501 | -0.2452 | 6.1321 | CHB |

|           |               |            |    |    |           |        |         |        |         |        |     |
|-----------|---------------|------------|----|----|-----------|--------|---------|--------|---------|--------|-----|
| DNAJD1    | GI_7019452-S  | rs17553284 | 13 | 13 | 42495706  | 62218  | 6.1820  | 0.4280 | -0.4763 | 5.7351 | CHB |
| DNAJD1    | GI_7019452-S  | rs11617079 | 13 | 13 | 42495865  | 62059  | 5.9781  | 0.4157 | -0.4584 | 5.7351 | CHB |
| DNAJD1    | GI_7019452-S  | rs2281777  | 13 | 13 | 42495932  | 61992  | 6.1820  | 0.4280 | -0.4763 | 5.7351 | CHB |
| DNAJD1    | GI_7019452-S  | rs2281778  | 13 | 13 | 42495977  | 61947  | 6.1820  | 0.4280 | -0.4763 | 5.7351 | CHB |
| DNAJD1    | GI_7019452-S  | rs2281780  | 13 | 13 | 42495995  | 61929  | 6.1820  | 0.4280 | -0.4763 | 5.7351 | CHB |
| DNAJD1    | GI_7019452-S  | rs9594865  | 13 | 13 | 42496412  | 61512  | 6.1820  | 0.4280 | 0.4763  | 5.7351 | CHB |
| LSR7      | GI_33354278-S | rs17066360 | 13 | 13 | 44413395  | 86606  | 5.8707  | 0.4092 | -0.3702 | 5.8556 | CHB |
| LSR7      | GI_33354278-S | rs9526021  | 13 | 13 | 44416641  | 83360  | 5.8707  | 0.4092 | -0.3702 | 5.8556 | CHB |
| Hs.123474 | Hs.123474-S   | rs17252166 | 13 | 13 | 50792215  | 134026 | 6.4560  | 0.4441 | 0.1764  | 5.6193 | CHB |
| Hs.123474 | Hs.123474-S   | rs4942995  | 13 | 13 | 50827305  | 98936  | 6.2606  | 0.4327 | -0.1622 | 5.6193 | CHB |
| Hs.123474 | Hs.123474-S   | rs17837214 | 13 | 13 | 50834201  | 92040  | 6.4560  | 0.4441 | 0.1764  | 5.6193 | CHB |
| Hs.123474 | Hs.123474-S   | rs17837215 | 13 | 13 | 50834405  | 91836  | 6.4560  | 0.4441 | -0.1764 | 5.6193 | CHB |
| Hs.123474 | Hs.123474-S   | rs17837216 | 13 | 13 | 50834636  | 91605  | 6.4560  | 0.4441 | -0.1764 | 5.6193 | CHB |
| Hs.123474 | Hs.123474-S   | rs9568580  | 13 | 13 | 50836877  | 89364  | 5.7483  | 0.4245 | -0.1740 | 5.6193 | CHB |
| Hs.123474 | Hs.123474-S   | rs4942996  | 13 | 13 | 50842792  | 83449  | 6.0877  | 0.4300 | -0.1594 | 5.6193 | CHB |
| Hs.123474 | Hs.123474-S   | rs9563049  | 13 | 13 | 50850053  | 76188  | 6.2606  | 0.4327 | 0.1622  | 5.6193 | CHB |
| Hs.123474 | Hs.123474-S   | rs17252193 | 13 | 13 | 50856119  | 70122  | 6.4560  | 0.4441 | -0.1764 | 5.6193 | CHB |
| Hs.123474 | Hs.123474-S   | rs17252200 | 13 | 13 | 50859401  | 66840  | 6.4560  | 0.4441 | 0.1764  | 5.6193 | CHB |
| Hs.123474 | Hs.123474-S   | rs9568586  | 13 | 13 | 50879170  | 47071  | 6.2606  | 0.4327 | 0.1622  | 5.6193 | CHB |
| Hs.123474 | Hs.123474-S   | rs17837217 | 13 | 13 | 50879529  | 46712  | 6.4560  | 0.4441 | 0.1764  | 5.6193 | CHB |
| Hs.123474 | Hs.123474-S   | rs11148219 | 13 | 13 | 50885719  | 40522  | 6.2606  | 0.4327 | 0.1622  | 5.6193 | CHB |
| Hs.123474 | Hs.123474-S   | rs7992891  | 13 | 13 | 50899711  | 26530  | 6.0120  | 0.4253 | -0.1655 | 5.6193 | CHB |
| Hs.123474 | Hs.123474-S   | rs1547710  | 13 | 13 | 50899986  | 26255  | 6.4560  | 0.4441 | 0.1764  | 5.6193 | CHB |
| Hs.123474 | Hs.123474-S   | rs9563055  | 13 | 13 | 50913336  | 12905  | 5.7115  | 0.4142 | -0.1685 | 5.6193 | CHB |
| Hs.123474 | Hs.123474-S   | rs4941699  | 13 | 13 | 50918259  | 7982   | 6.2606  | 0.4327 | -0.1622 | 5.6193 | CHB |
| Hs.123474 | Hs.123474-S   | rs7400282  | 13 | 13 | 50918405  | 7836   | 6.2606  | 0.4327 | 0.1622  | 5.6193 | CHB |
| Hs.123474 | Hs.123474-S   | rs8002112  | 13 | 13 | 50946898  | 20657  | 6.4560  | 0.4441 | -0.1764 | 5.6193 | CHB |
| Hs.123474 | Hs.123474-S   | rs8000429  | 13 | 13 | 50967558  | 41317  | 5.6958  | 0.4056 | 0.1708  | 5.6193 | CHB |
| Hs.123474 | Hs.123474-S   | rs9568631  | 13 | 13 | 51011043  | 84802  | 5.7605  | 0.4097 | 0.1863  | 5.6193 | CHB |
| Hs.264076 | Hs.264076-S   | rs1408656  | 13 | 13 | 78784655  | 111714 | 7.5762  | 0.5057 | 0.2950  | 5.8676 | CHB |
| Hs.264076 | Hs.264076-S   | rs17185717 | 13 | 13 | 78810900  | 85469  | 7.1137  | 0.4811 | -0.3937 | 5.8676 | CHB |
| Hs.264076 | Hs.264076-S   | rs2274554  | 13 | 13 | 78838530  | 57839  | 7.5762  | 0.5057 | -0.2950 | 5.8676 | CHB |
| Hs.264076 | Hs.264076-S   | rs1977354  | 13 | 13 | 78855409  | 40960  | 7.1137  | 0.4811 | 0.3937  | 5.8676 | CHB |
| Hs.264076 | Hs.264076-S   | rs3742121  | 13 | 13 | 78859145  | 37224  | 7.1137  | 0.4811 | -0.3937 | 5.8676 | CHB |
| Hs.264076 | Hs.264076-S   | rs12868295 | 13 | 13 | 78884066  | 12303  | 7.1445  | 0.4993 | -0.2920 | 5.8676 | CHB |
| Hs.264076 | Hs.264076-S   | rs9574424  | 13 | 13 | 78920677  | 24308  | 6.3191  | 0.4361 | -0.3831 | 5.8676 | CHB |
| Hs.264076 | Hs.264076-S   | rs953005   | 13 | 13 | 78952680  | 56311  | 6.0870  | 0.4299 | 0.3775  | 5.8676 | CHB |
| Hs.264076 | Hs.264076-S   | rs9565509  | 13 | 13 | 78955832  | 59463  | 6.0870  | 0.4299 | 0.3775  | 5.8676 | CHB |
| LOC87769  | GI_34147452-S | rs12868591 | 13 | 13 | 100006429 | 24452  | 8.0565  | 0.5300 | 0.8547  | 6.1357 | CHB |
| LOC87769  | GI_34147452-S | rs9513762  | 13 | 13 | 100015675 | 33698  | 10.3437 | 0.6308 | 0.9555  | 6.1357 | CHB |
| LOC87769  | GI_34147452-S | rs9518089  | 13 | 13 | 100015780 | 33803  | 10.0401 | 0.6275 | -0.9519 | 6.1357 | CHB |
| LOC87769  | GI_34147452-S | rs9518091  | 13 | 13 | 100016204 | 34227  | 10.0396 | 0.6275 | -0.9517 | 6.1357 | CHB |
| LOC87769  | GI_34147452-S | rs9557453  | 13 | 13 | 100025790 | 43813  | 10.3437 | 0.6308 | -0.9555 | 6.1357 | CHB |
| LOC87769  | GI_34147452-S | rs9557454  | 13 | 13 | 100026034 | 44057  | 10.3437 | 0.6308 | 0.9555  | 6.1357 | CHB |
| LOC87769  | GI_34147452-S | rs9557456  | 13 | 13 | 100026423 | 44446  | 10.3437 | 0.6308 | -0.9555 | 6.1357 | CHB |
| LOC87769  | GI_34147452-S | rs9554707  | 13 | 13 | 100037593 | 55616  | 9.6306  | 0.6019 | -0.9085 | 6.1357 | CHB |
| LOC87769  | GI_34147452-S | rs9557459  | 13 | 13 | 100037714 | 55737  | 9.6306  | 0.6019 | 0.9085  | 6.1357 | CHB |
| LOC87769  | GI_34147452-S | rs9557460  | 13 | 13 | 100039757 | 57780  | 13.6238 | 0.7476 | -1.1444 | 6.1357 | CHB |
| LOC87769  | GI_34147452-S | rs12873514 | 13 | 13 | 100040938 | 58961  | 8.1290  | 0.5336 | 0.8281  | 6.1357 | CHB |
| LOC87769  | GI_34147452-S | rs12873649 | 13 | 13 | 100041009 | 59032  | 7.7819  | 0.5246 | 0.8219  | 6.1357 | CHB |
| LOC87769  | GI_34147452-S | rs12873940 | 13 | 13 | 100041162 | 59185  | 8.1290  | 0.5336 | 0.8281  | 6.1357 | CHB |
| SLC7A7    | GI_21361562-S | rs4982673  | 14 | 14 | 22336283  | 23866  | 6.1178  | 0.4397 | 0.6998  | 5.8492 | CHB |
| SLC7A7    | GI_21361562-S | rs4982676  | 14 | 14 | 22347843  | 35426  | 7.7977  | 0.5171 | 0.8616  | 5.8492 | CHB |
| hmm3151   | hmm3151-S     | rs712314   | 14 | 14 | 34478299  | 107136 | 5.8240  | 0.4063 | -0.1658 | 5.5859 | CHB |
| hmm3151   | hmm3151-S     | rs799464   | 14 | 14 | 34485481  | 99954  | 5.8240  | 0.4063 | -0.1658 | 5.5859 | CHB |
| hmm3151   | hmm3151-S     | rs799486   | 14 | 14 | 34519218  | 66217  | 5.6810  | 0.4047 | -0.1613 | 5.5859 | CHB |
| hmm3151   | hmm3151-S     | rs799488   | 14 | 14 | 34521161  | 64274  | 5.8240  | 0.4063 | 0.1658  | 5.5859 | CHB |
| hmm3151   | hmm3151-S     | rs799498   | 14 | 14 | 34535387  | 50048  | 5.8240  | 0.4063 | -0.1658 | 5.5859 | CHB |
| hmm3151   | hmm3151-S     | rs799459   | 14 | 14 | 34555499  | 29936  | 5.6038  | 0.3998 | -0.1662 | 5.5859 | CHB |

|          |               |            |    |    |          |        |         |        |         |        |     |
|----------|---------------|------------|----|----|----------|--------|---------|--------|---------|--------|-----|
| MBIP     | GI_7706610-S  | rs2415330  | 14 | 14 | 35812371 | 25677  | 6.3513  | 0.4380 | 0.3382  | 5.7699 | CHB |
| MBIP     | GI_7706610-S  | rs3909603  | 14 | 14 | 35815689 | 22359  | 6.3513  | 0.4380 | 0.3382  | 5.7699 | CHB |
| MBIP     | GI_7706610-S  | rs17104271 | 14 | 14 | 35817728 | 20320  | 6.3513  | 0.4380 | 0.3382  | 5.7699 | CHB |
| MBIP     | GI_7706610-S  | rs8018390  | 14 | 14 | 35818292 | 19756  | 6.3513  | 0.4380 | -0.3382 | 5.7699 | CHB |
| MBIP     | GI_7706610-S  | rs17104280 | 14 | 14 | 35819663 | 18385  | 5.9203  | 0.4197 | 0.3207  | 5.7699 | CHB |
| MBIP     | GI_7706610-S  | rs17104295 | 14 | 14 | 35826802 | 11246  | 6.0445  | 0.4351 | 0.3426  | 5.7699 | CHB |
| C14orf52 | GI_21553312-S | rs11623597 | 14 | 14 | 64387597 | 83159  | 6.9264  | 0.4708 | 1.0523  | 6.4582 | CHB |
| C14orf52 | GI_21553312-S | rs12147495 | 14 | 14 | 64388582 | 82174  | 6.9264  | 0.4708 | -1.0523 | 6.4582 | CHB |
| C14orf52 | GI_21553312-S | rs4902322  | 14 | 14 | 64392762 | 77994  | 6.9264  | 0.4708 | 1.0523  | 6.4582 | CHB |
| C14orf52 | GI_21553312-S | rs4902332  | 14 | 14 | 64445731 | 25025  | 23.1426 | 0.9055 | 1.2161  | 6.4582 | CHB |
| C14orf52 | GI_21553312-S | rs4902333  | 14 | 14 | 64445839 | 24917  | 21.5762 | 0.9165 | 1.2479  | 6.4582 | CHB |
| C14orf52 | GI_21553312-S | rs17102298 | 14 | 14 | 64446489 | 24267  | 23.3177 | 0.9124 | 1.1938  | 6.4582 | CHB |
| C14orf52 | GI_21553312-S | rs7154406  | 14 | 14 | 64446942 | 23814  | 22.3996 | 0.9032 | -1.2127 | 6.4582 | CHB |
| C14orf52 | GI_21553312-S | rs7153990  | 14 | 14 | 64447303 | 23453  | 19.8438 | 0.8908 | -1.2449 | 6.4582 | CHB |
| C14orf52 | GI_21553312-S | rs10139595 | 14 | 14 | 64448012 | 22744  | 22.3996 | 0.9032 | -1.2127 | 6.4582 | CHB |
| C14orf52 | GI_21553312-S | rs10151701 | 14 | 14 | 64448202 | 22554  | 21.6559 | 0.9006 | -1.2096 | 6.4582 | CHB |
| C14orf52 | GI_21553312-S | rs7143432  | 14 | 14 | 64448899 | 21857  | 22.0147 | 0.9100 | 1.1847  | 6.4582 | CHB |
| C14orf52 | GI_21553312-S | rs7144811  | 14 | 14 | 64448900 | 21856  | 22.6486 | 0.9058 | -1.2192 | 6.4582 | CHB |
| C14orf52 | GI_21553312-S | rs7143764  | 14 | 14 | 64449036 | 21720  | 15.9907 | 0.8361 | 1.2692  | 6.4582 | CHB |
| C14orf52 | GI_21553312-S | rs10143017 | 14 | 14 | 64449371 | 21385  | 23.1426 | 0.9055 | -1.2161 | 6.4582 | CHB |
| C14orf52 | GI_21553312-S | rs10148687 | 14 | 14 | 64454029 | 16727  | 23.1426 | 0.9055 | 1.2161  | 6.4582 | CHB |
| C14orf52 | GI_21553312-S | rs4902335  | 14 | 14 | 64455651 | 15105  | 22.6192 | 0.9055 | 1.2114  | 6.4582 | CHB |
| C14orf52 | GI_21553312-S | rs10132742 | 14 | 14 | 64456675 | 14081  | 18.4091 | 0.8434 | 1.1843  | 6.4582 | CHB |
| C14orf52 | GI_21553312-S | rs4899152  | 14 | 14 | 64456869 | 13887  | 23.1426 | 0.9055 | -1.2161 | 6.4582 | CHB |
| C14orf52 | GI_21553312-S | rs4902336  | 14 | 14 | 64457015 | 13741  | 23.1426 | 0.9055 | 1.2161  | 6.4582 | CHB |
| C14orf52 | GI_21553312-S | rs10138534 | 14 | 14 | 64457742 | 13014  | 23.1426 | 0.9055 | 1.2161  | 6.4582 | CHB |
| C14orf52 | GI_21553312-S | rs7401853  | 14 | 14 | 64458464 | 12292  | 17.3358 | 0.8244 | 1.1541  | 6.4582 | CHB |
| C14orf52 | GI_21553312-S | rs10141986 | 14 | 14 | 64459156 | 11600  | 23.1426 | 0.9055 | 1.2161  | 6.4582 | CHB |
| C14orf52 | GI_21553312-S | rs4902343  | 14 | 14 | 64465933 | 4823   | 23.1426 | 0.9055 | 1.2161  | 6.4582 | CHB |
| C14orf52 | GI_21553312-S | rs10149617 | 14 | 14 | 64471914 | 1158   | 17.5679 | 0.8287 | 1.1570  | 6.4582 | CHB |
| C14orf52 | GI_21553312-S | rs4902345  | 14 | 14 | 64473657 | 2901   | 23.1426 | 0.9055 | -1.2161 | 6.4582 | CHB |
| C14orf52 | GI_21553312-S | rs10132858 | 14 | 14 | 64473731 | 2975   | 20.4407 | 0.9042 | 1.1929  | 6.4582 | CHB |
| C14orf52 | GI_21553312-S | rs10133054 | 14 | 14 | 64473869 | 3113   | 20.2224 | 0.9077 | 1.2032  | 6.4582 | CHB |
| C14orf52 | GI_21553312-S | rs10133290 | 14 | 14 | 64474195 | 3439   | 23.1426 | 0.9055 | 1.2161  | 6.4582 | CHB |
| C14orf52 | GI_21553312-S | rs11623705 | 14 | 14 | 64475475 | 4719   | 6.5967  | 0.4601 | 1.2072  | 6.4582 | CHB |
| C14orf52 | GI_21553312-S | rs4902346  | 14 | 14 | 64476913 | 6157   | 21.6541 | 0.9006 | 1.2081  | 6.4582 | CHB |
| C14orf52 | GI_21553312-S | rs2412065  | 14 | 14 | 64477410 | 6654   | 23.1426 | 0.9055 | -1.2161 | 6.4582 | CHB |
| C14orf52 | GI_21553312-S | rs11621450 | 14 | 14 | 64491269 | 20513  | 7.0609  | 0.4782 | -1.1995 | 6.4582 | CHB |
| RAB15    | GI_38371738-S | rs2296323  | 14 | 14 | 64540939 | 58465  | 6.5730  | 0.4509 | -0.6720 | 6.1496 | CHB |
| EIF2S1   | GI_34147492-S | rs10142124 | 14 | 14 | 65922259 | 999274 | 5.8747  | 0.4094 | -0.3530 | 5.5963 | CHB |
| EIF2S1   | GI_34147492-S | rs10142375 | 14 | 14 | 65922298 | 999235 | 5.8747  | 0.4094 | 0.3530  | 5.5963 | CHB |
| EIF2S1   | GI_34147492-S | rs2085482  | 14 | 14 | 65925557 | 995976 | 5.8747  | 0.4094 | 0.3530  | 5.5963 | CHB |
| EIF2S1   | GI_34147492-S | rs2319184  | 14 | 14 | 65925740 | 995793 | 6.2493  | 0.4320 | 0.3485  | 5.5963 | CHB |
| EIF2S1   | GI_34147492-S | rs1457431  | 14 | 14 | 65927667 | 993866 | 5.8747  | 0.4094 | 0.3530  | 5.5963 | CHB |
| EIF2S1   | GI_34147492-S | rs8007262  | 14 | 14 | 65931618 | 989915 | 5.7652  | 0.4100 | -0.3535 | 5.5963 | CHB |
| EIF2S1   | GI_34147492-S | rs7150418  | 14 | 14 | 65932496 | 989037 | 5.8747  | 0.4094 | -0.3530 | 5.5963 | CHB |
| EIF2S1   | GI_34147492-S | rs7150773  | 14 | 14 | 65932627 | 988906 | 5.8790  | 0.4776 | -0.3855 | 5.5963 | CHB |
| EIF2S1   | GI_34147492-S | rs1457432  | 14 | 14 | 65934852 | 986681 | 6.0576  | 0.4281 | -0.3557 | 5.5963 | CHB |
| EIF2S1   | GI_34147492-S | rs1457433  | 14 | 14 | 65934985 | 986548 | 5.8747  | 0.4094 | 0.3530  | 5.5963 | CHB |
| EIF2S1   | GI_34147492-S | rs1457434  | 14 | 14 | 65935045 | 986488 | 5.8747  | 0.4094 | -0.3530 | 5.5963 | CHB |
| EIF2S1   | GI_34147492-S | rs10134278 | 14 | 14 | 65939190 | 982343 | 5.8747  | 0.4094 | 0.3530  | 5.5963 | CHB |
| EIF2S1   | GI_34147492-S | rs12586868 | 14 | 14 | 65940494 | 981039 | 6.2493  | 0.4320 | 0.3485  | 5.5963 | CHB |
| EIF2S1   | GI_34147492-S | rs7151102  | 14 | 14 | 65941325 | 980208 | 5.8747  | 0.4094 | -0.3530 | 5.5963 | CHB |
| EIF2S1   | GI_34147492-S | rs8004856  | 14 | 14 | 65942782 | 978751 | 6.2882  | 0.4583 | 0.3487  | 5.5963 | CHB |
| EIF2S1   | GI_34147492-S | rs6573671  | 14 | 14 | 65943060 | 978473 | 5.8747  | 0.4094 | 0.3530  | 5.5963 | CHB |
| EIF2S1   | GI_34147492-S | rs1379416  | 14 | 14 | 65944456 | 977077 | 5.8747  | 0.4094 | -0.3530 | 5.5963 | CHB |
| EIF2S1   | GI_34147492-S | rs7159681  | 14 | 14 | 65945875 | 975658 | 5.8747  | 0.4094 | 0.3530  | 5.5963 | CHB |
| EIF2S1   | GI_34147492-S | rs7159364  | 14 | 14 | 65945887 | 975646 | 5.8747  | 0.4094 | -0.3530 | 5.5963 | CHB |
| EIF2S1   | GI_34147492-S | rs7160064  | 14 | 14 | 65946058 | 975475 | 5.8747  | 0.4094 | -0.3530 | 5.5963 | CHB |

|        |               |            |    |    |          |        |        |        |         |        |     |
|--------|---------------|------------|----|----|----------|--------|--------|--------|---------|--------|-----|
| EIF2S1 | GI_34147492-S | rs7158262  | 14 | 14 | 65949339 | 972194 | 5.8747 | 0.4094 | 0.3530  | 5.5963 | CHB |
| EIF2S1 | GI_34147492-S | rs9332388  | 14 | 14 | 65950415 | 971118 | 5.8747 | 0.4094 | -0.3530 | 5.5963 | CHB |
| EIF2S1 | GI_34147492-S | rs716234   | 14 | 14 | 65950544 | 970989 | 5.8747 | 0.4094 | 0.3530  | 5.5963 | CHB |
| EIF2S1 | GI_34147492-S | rs716232   | 14 | 14 | 65950702 | 970831 | 5.8747 | 0.4094 | -0.3530 | 5.5963 | CHB |
| EIF2S1 | GI_34147492-S | rs716233   | 14 | 14 | 65950769 | 970764 | 5.8747 | 0.4094 | 0.3530  | 5.5963 | CHB |
| EIF2S1 | GI_34147492-S | rs9652292  | 14 | 14 | 65954974 | 966559 | 5.6572 | 0.4267 | 0.3627  | 5.5963 | CHB |
| EIF2S1 | GI_34147492-S | rs8020532  | 14 | 14 | 65956469 | 965064 | 5.8747 | 0.4094 | -0.3530 | 5.5963 | CHB |
| EIF2S1 | GI_34147492-S | rs12589479 | 14 | 14 | 65963473 | 958060 | 5.8747 | 0.4094 | 0.3530  | 5.5963 | CHB |
| EIF2S1 | GI_34147492-S | rs2319185  | 14 | 14 | 65965319 | 956214 | 5.8747 | 0.4094 | 0.3530  | 5.5963 | CHB |
| EIF2S1 | GI_34147492-S | rs735957   | 14 | 14 | 65965477 | 956056 | 5.8747 | 0.4094 | -0.3530 | 5.5963 | CHB |
| EIF2S1 | GI_34147492-S | rs1598771  | 14 | 14 | 65965718 | 955815 | 5.9764 | 0.4231 | 0.3553  | 5.5963 | CHB |
| EIF2S1 | GI_34147492-S | rs13353130 | 14 | 14 | 65966379 | 955154 | 5.8747 | 0.4094 | 0.3530  | 5.5963 | CHB |
| EIF2S1 | GI_34147492-S | rs7149651  | 14 | 14 | 65966995 | 954538 | 5.7536 | 0.4093 | -0.3641 | 5.5963 | CHB |
| EIF2S1 | GI_34147492-S | rs1902644  | 14 | 14 | 65967909 | 953624 | 5.9441 | 0.4211 | 0.3503  | 5.5963 | CHB |
| EIF2S1 | GI_34147492-S | rs8004227  | 14 | 14 | 65969562 | 951971 | 5.8747 | 0.4094 | 0.3530  | 5.5963 | CHB |
| EIF2S1 | GI_34147492-S | rs7359130  | 14 | 14 | 65970588 | 950945 | 5.9764 | 0.4231 | -0.3553 | 5.5963 | CHB |
| EIF2S1 | GI_34147492-S | rs933039   | 14 | 14 | 65973000 | 948533 | 5.8747 | 0.4094 | 0.3530  | 5.5963 | CHB |
| EIF2S1 | GI_34147492-S | rs1585182  | 14 | 14 | 65974201 | 947332 | 5.8747 | 0.4094 | 0.3530  | 5.5963 | CHB |
| EIF2S1 | GI_34147492-S | rs2860116  | 14 | 14 | 65974235 | 947298 | 5.8747 | 0.4094 | 0.3530  | 5.5963 | CHB |
| EIF2S1 | GI_34147492-S | rs7145185  | 14 | 14 | 65975379 | 946154 | 5.8747 | 0.4094 | -0.3530 | 5.5963 | CHB |
| EIF2S1 | GI_34147492-S | rs6573672  | 14 | 14 | 65976672 | 944861 | 5.7583 | 0.4096 | 0.3521  | 5.5963 | CHB |
| EIF2S1 | GI_34147492-S | rs2219371  | 14 | 14 | 65977384 | 944149 | 5.8747 | 0.4094 | -0.3530 | 5.5963 | CHB |
| EIF2S1 | GI_34147492-S | rs8012374  | 14 | 14 | 65980729 | 940804 | 5.8747 | 0.4094 | 0.3530  | 5.5963 | CHB |
| EIF2S1 | GI_34147492-S | rs8011794  | 14 | 14 | 65981001 | 940532 | 5.8747 | 0.4094 | 0.3530  | 5.5963 | CHB |
| EIF2S1 | GI_34147492-S | rs8019603  | 14 | 14 | 65985716 | 935817 | 5.8747 | 0.4094 | 0.3530  | 5.5963 | CHB |
| EIF2S1 | GI_34147492-S | rs17827523 | 14 | 14 | 65986106 | 935427 | 5.8747 | 0.4094 | -0.3530 | 5.5963 | CHB |
| EIF2S1 | GI_34147492-S | rs1009294  | 14 | 14 | 65990132 | 931401 | 5.8747 | 0.4094 | -0.3530 | 5.5963 | CHB |
| EIF2S1 | GI_34147492-S | rs11158628 | 14 | 14 | 65991334 | 930199 | 5.8747 | 0.4094 | 0.3530  | 5.5963 | CHB |
| EIF2S1 | GI_34147492-S | rs11158629 | 14 | 14 | 65991678 | 929855 | 5.8747 | 0.4094 | -0.3530 | 5.5963 | CHB |
| EIF2S1 | GI_34147492-S | rs12586427 | 14 | 14 | 65999706 | 921827 | 5.8747 | 0.4094 | 0.3530  | 5.5963 | CHB |
| EIF2S1 | GI_34147492-S | rs7156981  | 14 | 14 | 65999921 | 921612 | 5.8747 | 0.4094 | -0.3530 | 5.5963 | CHB |
| EIF2S1 | GI_34147492-S | rs13367574 | 14 | 14 | 66003895 | 917638 | 5.8182 | 0.4133 | -0.3512 | 5.5963 | CHB |
| EIF2S1 | GI_34147492-S | rs7142154  | 14 | 14 | 66007793 | 913740 | 5.8747 | 0.4094 | 0.3530  | 5.5963 | CHB |
| EIF2S1 | GI_34147492-S | rs7141225  | 14 | 14 | 66007991 | 913542 | 5.8747 | 0.4094 | -0.3530 | 5.5963 | CHB |
| EIF2S1 | GI_34147492-S | rs10130239 | 14 | 14 | 66008550 | 912983 | 5.8747 | 0.4094 | -0.3530 | 5.5963 | CHB |
| EIF2S1 | GI_34147492-S | rs10133676 | 14 | 14 | 66009656 | 911877 | 5.8747 | 0.4094 | 0.3530  | 5.5963 | CHB |
| EIF2S1 | GI_34147492-S | rs9943992  | 14 | 14 | 66009744 | 911789 | 5.8747 | 0.4094 | 0.3530  | 5.5963 | CHB |
| EIF2S1 | GI_34147492-S | rs9944086  | 14 | 14 | 66009936 | 911597 | 5.8747 | 0.4094 | 0.3530  | 5.5963 | CHB |
| EIF2S1 | GI_34147492-S | rs10142537 | 14 | 14 | 66010269 | 911264 | 5.8747 | 0.4094 | -0.3530 | 5.5963 | CHB |
| EIF2S1 | GI_34147492-S | rs10141750 | 14 | 14 | 66016884 | 904649 | 5.8747 | 0.4094 | -0.3530 | 5.5963 | CHB |
| EIF2S1 | GI_34147492-S | rs10141991 | 14 | 14 | 66016948 | 904585 | 5.9764 | 0.4231 | -0.3553 | 5.5963 | CHB |
| EIF2S1 | GI_34147492-S | rs10148290 | 14 | 14 | 66018937 | 902596 | 5.8747 | 0.4094 | -0.3530 | 5.5963 | CHB |
| EIF2S1 | GI_34147492-S | rs10134043 | 14 | 14 | 66019803 | 901730 | 5.8747 | 0.4094 | -0.3530 | 5.5963 | CHB |
| EIF2S1 | GI_34147492-S | rs7157060  | 14 | 14 | 66021548 | 899985 | 5.8747 | 0.4094 | -0.3530 | 5.5963 | CHB |
| EIF2S1 | GI_34147492-S | rs10129809 | 14 | 14 | 66021795 | 899738 | 6.2493 | 0.4320 | 0.3485  | 5.5963 | CHB |
| EIF2S1 | GI_34147492-S | rs7147360  | 14 | 14 | 66023287 | 898246 | 5.8747 | 0.4094 | 0.3530  | 5.5963 | CHB |
| EIF2S1 | GI_34147492-S | rs1457419  | 14 | 14 | 66028359 | 893174 | 5.8747 | 0.4094 | -0.3530 | 5.5963 | CHB |
| EIF2S1 | GI_34147492-S | rs1457420  | 14 | 14 | 66028429 | 893104 | 5.8747 | 0.4094 | 0.3530  | 5.5963 | CHB |
| EIF2S1 | GI_34147492-S | rs3737161  | 14 | 14 | 66029370 | 892163 | 5.8747 | 0.4094 | 0.3530  | 5.5963 | CHB |
| EIF2S1 | GI_34147492-S | rs6573679  | 14 | 14 | 66032510 | 889023 | 5.8747 | 0.4094 | -0.3530 | 5.5963 | CHB |
| EIF2S1 | GI_34147492-S | rs7160183  | 14 | 14 | 66033945 | 887588 | 6.0576 | 0.4281 | 0.3557  | 5.5963 | CHB |
| EIF2S1 | GI_34147492-S | rs2297620  | 14 | 14 | 66034291 | 887242 | 5.8747 | 0.4094 | -0.3530 | 5.5963 | CHB |
| EIF2S1 | GI_34147492-S | rs3818770  | 14 | 14 | 66035225 | 886308 | 5.8747 | 0.4094 | 0.3530  | 5.5963 | CHB |
| EIF2S1 | GI_34147492-S | rs10143291 | 14 | 14 | 66035316 | 886217 | 5.6944 | 0.3982 | -0.3608 | 5.5963 | CHB |
| EIF2S1 | GI_34147492-S | rs1457422  | 14 | 14 | 66036270 | 885263 | 5.8747 | 0.4094 | -0.3530 | 5.5963 | CHB |
| EIF2S1 | GI_34147492-S | rs9323473  | 14 | 14 | 66038079 | 883454 | 5.8747 | 0.4094 | 0.3530  | 5.5963 | CHB |
| EIF2S1 | GI_34147492-S | rs7146723  | 14 | 14 | 66038848 | 882685 | 5.8747 | 0.4094 | -0.3530 | 5.5963 | CHB |
| EIF2S1 | GI_34147492-S | rs10220636 | 14 | 14 | 66041917 | 879616 | 5.8759 | 0.4169 | -0.3443 | 5.5963 | CHB |
| EIF2S1 | GI_34147492-S | rs928553   | 14 | 14 | 66044227 | 877306 | 5.8747 | 0.4094 | -0.3530 | 5.5963 | CHB |

|        |               |            |    |    |          |        |        |        |         |        |     |
|--------|---------------|------------|----|----|----------|--------|--------|--------|---------|--------|-----|
| EIF2S1 | GI_34147492-S | rs17827741 | 14 | 14 | 66047565 | 873968 | 5.8747 | 0.4094 | -0.3530 | 5.5963 | CHB |
| EIF2S1 | GI_34147492-S | rs2319387  | 14 | 14 | 66049246 | 872287 | 5.8747 | 0.4094 | 0.3530  | 5.5963 | CHB |
| EIF2S1 | GI_34147492-S | rs2045419  | 14 | 14 | 66052268 | 869265 | 5.7649 | 0.4100 | -0.3535 | 5.5963 | CHB |
| EIF2S1 | GI_34147492-S | rs7159063  | 14 | 14 | 66052787 | 868746 | 5.8143 | 0.4208 | -0.3555 | 5.5963 | CHB |
| EIF2S1 | GI_34147492-S | rs1379413  | 14 | 14 | 66055897 | 865636 | 5.8747 | 0.4094 | -0.3530 | 5.5963 | CHB |
| EIF2S1 | GI_34147492-S | rs7156737  | 14 | 14 | 66056366 | 865167 | 5.8747 | 0.4094 | -0.3530 | 5.5963 | CHB |
| EIF2S1 | GI_34147492-S | rs7140509  | 14 | 14 | 66056901 | 864632 | 5.8747 | 0.4094 | 0.3530  | 5.5963 | CHB |
| EIF2S1 | GI_34147492-S | rs10144449 | 14 | 14 | 66058012 | 863521 | 5.8747 | 0.4094 | 0.3530  | 5.5963 | CHB |
| EIF2S1 | GI_34147492-S | rs7154154  | 14 | 14 | 66059664 | 861869 | 5.8747 | 0.4094 | -0.3530 | 5.5963 | CHB |
| EIF2S1 | GI_34147492-S | rs13368526 | 14 | 14 | 66061630 | 859903 | 6.2493 | 0.4320 | 0.3485  | 5.5963 | CHB |
| EIF2S1 | GI_34147492-S | rs13379248 | 14 | 14 | 66069026 | 852507 | 5.8747 | 0.4094 | -0.3530 | 5.5963 | CHB |
| EIF2S1 | GI_34147492-S | rs7142097  | 14 | 14 | 66071459 | 850074 | 5.8747 | 0.4094 | 0.3530  | 5.5963 | CHB |
| EIF2S1 | GI_34147492-S | rs7145556  | 14 | 14 | 66071725 | 849808 | 5.8747 | 0.4094 | -0.3530 | 5.5963 | CHB |
| EIF2S1 | GI_34147492-S | rs10148418 | 14 | 14 | 66073626 | 847907 | 5.8747 | 0.4094 | 0.3530  | 5.5963 | CHB |
| EIF2S1 | GI_34147492-S | rs7160501  | 14 | 14 | 66074452 | 847081 | 5.8747 | 0.4094 | 0.3530  | 5.5963 | CHB |
| EIF2S1 | GI_34147492-S | rs7143629  | 14 | 14 | 66074719 | 846814 | 5.9195 | 0.4274 | 0.3505  | 5.5963 | CHB |
| EIF2S1 | GI_34147492-S | rs7143823  | 14 | 14 | 66074824 | 846709 | 5.8747 | 0.4094 | 0.3530  | 5.5963 | CHB |
| EIF2S1 | GI_34147492-S | rs7149668  | 14 | 14 | 66076533 | 845000 | 5.8747 | 0.4094 | -0.3530 | 5.5963 | CHB |
| EIF2S1 | GI_34147492-S | rs7141220  | 14 | 14 | 66079945 | 841588 | 5.8747 | 0.4094 | 0.3530  | 5.5963 | CHB |
| EIF2S1 | GI_34147492-S | rs8012784  | 14 | 14 | 66085038 | 836495 | 5.8747 | 0.4094 | 0.3530  | 5.5963 | CHB |
| EIF2S1 | GI_34147492-S | rs10133769 | 14 | 14 | 66088436 | 833097 | 5.8747 | 0.4094 | 0.3530  | 5.5963 | CHB |
| EIF2S1 | GI_34147492-S | rs8016639  | 14 | 14 | 66091265 | 830268 | 5.8747 | 0.4094 | -0.3530 | 5.5963 | CHB |
| EIF2S1 | GI_34147492-S | rs17827790 | 14 | 14 | 66094717 | 826816 | 5.6989 | 0.4058 | -0.3581 | 5.5963 | CHB |
| EIF2S1 | GI_34147492-S | rs1952068  | 14 | 14 | 66098904 | 822629 | 5.8116 | 0.4129 | -0.3541 | 5.5963 | CHB |
| EIF2S1 | GI_34147492-S | rs8017351  | 14 | 14 | 66099837 | 821696 | 6.0738 | 0.4451 | 0.3574  | 5.5963 | CHB |
| EIF2S1 | GI_34147492-S | rs7156795  | 14 | 14 | 66100648 | 820885 | 5.8747 | 0.4094 | 0.3530  | 5.5963 | CHB |
| EIF2S1 | GI_34147492-S | rs7146849  | 14 | 14 | 66101823 | 819710 | 5.9947 | 0.4321 | 0.3792  | 5.5963 | CHB |
| EIF2S1 | GI_34147492-S | rs7142929  | 14 | 14 | 66105239 | 816294 | 5.7652 | 0.4100 | -0.3535 | 5.5963 | CHB |
| EIF2S1 | GI_34147492-S | rs8004106  | 14 | 14 | 66110354 | 811179 | 5.8747 | 0.4094 | -0.3530 | 5.5963 | CHB |
| EIF2S1 | GI_34147492-S | rs10133641 | 14 | 14 | 66111193 | 810340 | 5.8747 | 0.4094 | 0.3530  | 5.5963 | CHB |
| EIF2S1 | GI_34147492-S | rs13367039 | 14 | 14 | 66111373 | 810160 | 5.8747 | 0.4094 | 0.3530  | 5.5963 | CHB |
| EIF2S1 | GI_34147492-S | rs7153313  | 14 | 14 | 66112166 | 809367 | 5.8747 | 0.4094 | 0.3530  | 5.5963 | CHB |
| EIF2S1 | GI_34147492-S | rs10143929 | 14 | 14 | 66117841 | 803692 | 5.8747 | 0.4094 | 0.3530  | 5.5963 | CHB |
| EIF2S1 | GI_34147492-S | rs10143934 | 14 | 14 | 66117858 | 803675 | 5.9254 | 0.4200 | 0.3550  | 5.5963 | CHB |
| EIF2S1 | GI_34147492-S | rs10146431 | 14 | 14 | 66123995 | 797538 | 5.8747 | 0.4094 | 0.3530  | 5.5963 | CHB |
| EIF2S1 | GI_34147492-S | rs13368404 | 14 | 14 | 66129721 | 791812 | 5.8747 | 0.4094 | -0.3530 | 5.5963 | CHB |
| EIF2S1 | GI_34147492-S | rs13368668 | 14 | 14 | 66134079 | 787454 | 5.8182 | 0.4133 | 0.3512  | 5.5963 | CHB |
| EIF2S1 | GI_34147492-S | rs9323475  | 14 | 14 | 66135922 | 785611 | 5.8747 | 0.4094 | -0.3530 | 5.5963 | CHB |
| EIF2S1 | GI_34147492-S | rs8008550  | 14 | 14 | 66139328 | 782205 | 5.8747 | 0.4094 | 0.3530  | 5.5963 | CHB |
| EIF2S1 | GI_34147492-S | rs10144894 | 14 | 14 | 66141562 | 779971 | 5.8747 | 0.4094 | 0.3530  | 5.5963 | CHB |
| EIF2S1 | GI_34147492-S | rs8021202  | 14 | 14 | 66143202 | 778331 | 5.8747 | 0.4094 | 0.3530  | 5.5963 | CHB |
| EIF2S1 | GI_34147492-S | rs8018444  | 14 | 14 | 66146264 | 775269 | 5.8747 | 0.4094 | 0.3530  | 5.5963 | CHB |
| EIF2S1 | GI_34147492-S | rs7140281  | 14 | 14 | 66146903 | 774630 | 5.8747 | 0.4094 | 0.3530  | 5.5963 | CHB |
| EIF2S1 | GI_34147492-S | rs8010110  | 14 | 14 | 66147965 | 773568 | 5.8747 | 0.4094 | 0.3530  | 5.5963 | CHB |
| EIF2S1 | GI_34147492-S | rs1958001  | 14 | 14 | 66149645 | 771888 | 5.8747 | 0.4094 | -0.3530 | 5.5963 | CHB |
| EIF2S1 | GI_34147492-S | rs8023060  | 14 | 14 | 66153725 | 767808 | 5.8747 | 0.4094 | -0.3530 | 5.5963 | CHB |
| EIF2S1 | GI_34147492-S | rs10130016 | 14 | 14 | 66154689 | 766844 | 5.8335 | 0.4143 | -0.3543 | 5.5963 | CHB |
| EIF2S1 | GI_34147492-S | rs8015958  | 14 | 14 | 66156429 | 765104 | 5.8747 | 0.4094 | -0.3530 | 5.5963 | CHB |
| EIF2S1 | GI_34147492-S | rs8016353  | 14 | 14 | 66156693 | 764840 | 5.7694 | 0.4103 | 0.3536  | 5.5963 | CHB |
| EIF2S1 | GI_34147492-S | rs8013247  | 14 | 14 | 66160801 | 760732 | 5.8894 | 0.4335 | 0.3695  | 5.5963 | CHB |
| EIF2S1 | GI_34147492-S | rs7157919  | 14 | 14 | 66162452 | 759081 | 5.8747 | 0.4094 | -0.3530 | 5.5963 | CHB |
| EIF2S1 | GI_34147492-S | rs8017245  | 14 | 14 | 66165108 | 756425 | 5.8747 | 0.4094 | 0.3530  | 5.5963 | CHB |
| EIF2S1 | GI_34147492-S | rs8014806  | 14 | 14 | 66170123 | 751410 | 5.8747 | 0.4094 | -0.3530 | 5.5963 | CHB |
| EIF2S1 | GI_34147492-S | rs8014849  | 14 | 14 | 66170197 | 751336 | 5.8747 | 0.4094 | 0.3530  | 5.5963 | CHB |
| EIF2S1 | GI_34147492-S | rs12323903 | 14 | 14 | 66170967 | 750566 | 6.0576 | 0.4281 | 0.3557  | 5.5963 | CHB |
| EIF2S1 | GI_34147492-S | rs1886778  | 14 | 14 | 66175818 | 745715 | 5.7670 | 0.4101 | 0.3535  | 5.5963 | CHB |
| EIF2S1 | GI_34147492-S | rs10144010 | 14 | 14 | 66176330 | 745203 | 5.9025 | 0.4512 | 0.3548  | 5.5963 | CHB |
| EIF2S1 | GI_34147492-S | rs9323476  | 14 | 14 | 66176387 | 745146 | 5.8747 | 0.4094 | 0.3530  | 5.5963 | CHB |
| EIF2S1 | GI_34147492-S | rs7152123  | 14 | 14 | 66177191 | 744342 | 5.8747 | 0.4094 | 0.3530  | 5.5963 | CHB |

|        |               |            |    |    |          |        |        |        |         |        |     |
|--------|---------------|------------|----|----|----------|--------|--------|--------|---------|--------|-----|
| EIF2S1 | GI_34147492-S | rs7152169  | 14 | 14 | 66177344 | 744189 | 5.8747 | 0.4094 | -0.3530 | 5.5963 | CHB |
| EIF2S1 | GI_34147492-S | rs1952070  | 14 | 14 | 66177823 | 743710 | 5.8747 | 0.4094 | 0.3530  | 5.5963 | CHB |
| EIF2S1 | GI_34147492-S | rs10133120 | 14 | 14 | 66185424 | 736109 | 5.8747 | 0.4094 | -0.3530 | 5.5963 | CHB |
| EIF2S1 | GI_34147492-S | rs11158642 | 14 | 14 | 66185483 | 736050 | 5.8747 | 0.4094 | 0.3530  | 5.5963 | CHB |
| EIF2S1 | GI_34147492-S | rs13367244 | 14 | 14 | 66186351 | 735182 | 5.8747 | 0.4094 | 0.3530  | 5.5963 | CHB |
| EIF2S1 | GI_34147492-S | rs6573695  | 14 | 14 | 66189645 | 731888 | 5.8747 | 0.4094 | 0.3530  | 5.5963 | CHB |
| EIF2S1 | GI_34147492-S | rs8007662  | 14 | 14 | 66190185 | 731348 | 6.5747 | 0.4589 | 0.3858  | 5.5963 | CHB |
| EIF2S1 | GI_34147492-S | rs8011027  | 14 | 14 | 66194538 | 726995 | 5.8747 | 0.4094 | -0.3530 | 5.5963 | CHB |
| EIF2S1 | GI_34147492-S | rs7152601  | 14 | 14 | 66198557 | 722976 | 5.8747 | 0.4094 | 0.3530  | 5.5963 | CHB |
| EIF2S1 | GI_34147492-S | rs4605098  | 14 | 14 | 66199191 | 722342 | 5.8747 | 0.4094 | 0.3530  | 5.5963 | CHB |
| EIF2S1 | GI_34147492-S | rs4644792  | 14 | 14 | 66200099 | 721434 | 5.8747 | 0.4094 | -0.3530 | 5.5963 | CHB |
| EIF2S1 | GI_34147492-S | rs7158823  | 14 | 14 | 66201598 | 719935 | 5.7652 | 0.4100 | -0.3535 | 5.5963 | CHB |
| EIF2S1 | GI_34147492-S | rs7142841  | 14 | 14 | 66208808 | 712725 | 5.8747 | 0.4094 | 0.3530  | 5.5963 | CHB |
| EIF2S1 | GI_34147492-S | rs10139822 | 14 | 14 | 66210429 | 711104 | 5.8131 | 0.4130 | 0.3706  | 5.5963 | CHB |
| EIF2S1 | GI_34147492-S | rs8013315  | 14 | 14 | 66212573 | 708960 | 5.8747 | 0.4094 | 0.3530  | 5.5963 | CHB |
| EIF2S1 | GI_34147492-S | rs8013215  | 14 | 14 | 66212690 | 708843 | 5.9057 | 0.4265 | -0.3512 | 5.5963 | CHB |
| EIF2S1 | GI_34147492-S | rs8018488  | 14 | 14 | 66212779 | 708754 | 5.8747 | 0.4094 | 0.3530  | 5.5963 | CHB |
| EIF2S1 | GI_34147492-S | rs8014297  | 14 | 14 | 66215870 | 705663 | 5.7040 | 0.4062 | -0.3583 | 5.5963 | CHB |
| EIF2S1 | GI_34147492-S | rs8015408  | 14 | 14 | 66216433 | 705100 | 5.8747 | 0.4094 | -0.3530 | 5.5963 | CHB |
| EIF2S1 | GI_34147492-S | rs4294753  | 14 | 14 | 66216826 | 704707 | 5.8747 | 0.4094 | -0.3530 | 5.5963 | CHB |
| EIF2S1 | GI_34147492-S | rs3759753  | 14 | 14 | 66217569 | 703964 | 5.8747 | 0.4094 | 0.3530  | 5.5963 | CHB |
| EIF2S1 | GI_34147492-S | rs8005352  | 14 | 14 | 66217888 | 703645 | 6.2493 | 0.4320 | -0.3485 | 5.5963 | CHB |
| EIF2S1 | GI_34147492-S | rs9783601  | 14 | 14 | 66218692 | 702841 | 6.5487 | 0.4655 | 0.3969  | 5.5963 | CHB |
| EIF2S1 | GI_34147492-S | rs6573706  | 14 | 14 | 66220517 | 701016 | 5.8747 | 0.4094 | 0.3530  | 5.5963 | CHB |
| EIF2S1 | GI_34147492-S | rs8021356  | 14 | 14 | 66225934 | 695599 | 5.8747 | 0.4094 | -0.3530 | 5.5963 | CHB |
| EIF2S1 | GI_34147492-S | rs6573710  | 14 | 14 | 66229962 | 691571 | 5.7649 | 0.4100 | 0.3535  | 5.5963 | CHB |
| EIF2S1 | GI_34147492-S | rs12101118 | 14 | 14 | 66230533 | 691000 | 5.8703 | 0.4406 | 0.3595  | 5.5963 | CHB |
| EIF2S1 | GI_34147492-S | rs7157740  | 14 | 14 | 66231094 | 690439 | 5.8747 | 0.4094 | -0.3530 | 5.5963 | CHB |
| EIF2S1 | GI_34147492-S | rs7154017  | 14 | 14 | 66233836 | 687697 | 5.8747 | 0.4094 | -0.3530 | 5.5963 | CHB |
| EIF2S1 | GI_34147492-S | rs1885198  | 14 | 14 | 66234513 | 687020 | 5.8747 | 0.4094 | -0.3530 | 5.5963 | CHB |
| EIF2S1 | GI_34147492-S | rs7161029  | 14 | 14 | 66235064 | 686469 | 5.8747 | 0.4094 | 0.3530  | 5.5963 | CHB |
| EIF2S1 | GI_34147492-S | rs1951354  | 14 | 14 | 66235643 | 685890 | 5.8747 | 0.4094 | 0.3530  | 5.5963 | CHB |
| EIF2S1 | GI_34147492-S | rs6573711  | 14 | 14 | 66247439 | 674094 | 5.8747 | 0.4094 | -0.3530 | 5.5963 | CHB |
| EIF2S1 | GI_34147492-S | rs1951357  | 14 | 14 | 66257354 | 664179 | 5.8381 | 0.4146 | -0.3628 | 5.5963 | CHB |
| EIF2S1 | GI_34147492-S | rs8012315  | 14 | 14 | 66259521 | 662012 | 5.7691 | 0.4340 | 0.3664  | 5.5963 | CHB |
| EIF2S1 | GI_34147492-S | rs8010952  | 14 | 14 | 66259603 | 661930 | 6.0502 | 0.4698 | -0.3773 | 5.5963 | CHB |
| EIF2S1 | GI_34147492-S | rs17836572 | 14 | 14 | 66262776 | 658757 | 5.8747 | 0.4094 | -0.3530 | 5.5963 | CHB |
| EIF2S1 | GI_34147492-S | rs10150268 | 14 | 14 | 66265929 | 655604 | 6.2493 | 0.4320 | 0.3485  | 5.5963 | CHB |
| EIF2S1 | GI_34147492-S | rs8007677  | 14 | 14 | 66267703 | 653830 | 5.8747 | 0.4094 | 0.3530  | 5.5963 | CHB |
| EIF2S1 | GI_34147492-S | rs7156074  | 14 | 14 | 66270929 | 650604 | 5.8747 | 0.4094 | -0.3530 | 5.5963 | CHB |
| EIF2S1 | GI_34147492-S | rs7156240  | 14 | 14 | 66271023 | 650510 | 5.8747 | 0.4094 | -0.3530 | 5.5963 | CHB |
| EIF2S1 | GI_34147492-S | rs10150028 | 14 | 14 | 66271655 | 649878 | 5.5990 | 0.3995 | 0.3584  | 5.5963 | CHB |
| EIF2S1 | GI_34147492-S | rs9323478  | 14 | 14 | 66276181 | 645352 | 5.8747 | 0.4094 | -0.3530 | 5.5963 | CHB |
| EIF2S1 | GI_34147492-S | rs9323479  | 14 | 14 | 66276240 | 645293 | 5.8747 | 0.4094 | 0.3530  | 5.5963 | CHB |
| EIF2S1 | GI_34147492-S | rs10143077 | 14 | 14 | 66276463 | 645070 | 5.8747 | 0.4094 | 0.3530  | 5.5963 | CHB |
| EIF2S1 | GI_34147492-S | rs10132261 | 14 | 14 | 66276615 | 644918 | 5.8747 | 0.4094 | 0.3530  | 5.5963 | CHB |
| EIF2S1 | GI_34147492-S | rs6573718  | 14 | 14 | 66278354 | 643179 | 5.8747 | 0.4094 | 0.3530  | 5.5963 | CHB |
| EIF2S1 | GI_34147492-S | rs6573719  | 14 | 14 | 66278401 | 643132 | 5.7792 | 0.4109 | 0.3537  | 5.5963 | CHB |
| EIF2S1 | GI_34147492-S | rs9323480  | 14 | 14 | 66280596 | 640937 | 5.8747 | 0.4094 | 0.3530  | 5.5963 | CHB |
| EIF2S1 | GI_34147492-S | rs766527   | 14 | 14 | 66281840 | 639693 | 5.8747 | 0.4094 | -0.3530 | 5.5963 | CHB |
| EIF2S1 | GI_34147492-S | rs7148224  | 14 | 14 | 66282325 | 639208 | 5.8747 | 0.4094 | -0.3530 | 5.5963 | CHB |
| EIF2S1 | GI_34147492-S | rs6573720  | 14 | 14 | 66282721 | 638812 | 6.8066 | 0.4804 | 0.3498  | 5.5963 | CHB |
| EIF2S1 | GI_34147492-S | rs8016213  | 14 | 14 | 66282985 | 638548 | 5.8747 | 0.4094 | 0.3530  | 5.5963 | CHB |
| EIF2S1 | GI_34147492-S | rs9783678  | 14 | 14 | 66284564 | 636969 | 5.8747 | 0.4094 | -0.3530 | 5.5963 | CHB |
| EIF2S1 | GI_34147492-S | rs8008369  | 14 | 14 | 66284949 | 636584 | 5.7581 | 0.4096 | 0.3533  | 5.5963 | CHB |
| EIF2S1 | GI_34147492-S | rs6573721  | 14 | 14 | 66285863 | 635670 | 5.8747 | 0.4094 | 0.3530  | 5.5963 | CHB |
| EIF2S1 | GI_34147492-S | rs7148623  | 14 | 14 | 66289570 | 631963 | 5.8747 | 0.4094 | 0.3530  | 5.5963 | CHB |
| EIF2S1 | GI_34147492-S | rs7142259  | 14 | 14 | 66289717 | 631816 | 5.8747 | 0.4094 | -0.3530 | 5.5963 | CHB |
| EIF2S1 | GI_34147492-S | rs8012158  | 14 | 14 | 66291448 | 630085 | 5.8182 | 0.4133 | -0.3512 | 5.5963 | CHB |

|        |               |            |    |    |          |        |        |        |         |        |     |
|--------|---------------|------------|----|----|----------|--------|--------|--------|---------|--------|-----|
| EIF2S1 | GI_34147492-S | rs17247749 | 14 | 14 | 66292836 | 628697 | 5.8747 | 0.4094 | -0.3530 | 5.5963 | CHB |
| EIF2S1 | GI_34147492-S | rs10129827 | 14 | 14 | 66302326 | 619207 | 5.8747 | 0.4094 | 0.3530  | 5.5963 | CHB |
| EIF2S1 | GI_34147492-S | rs10132625 | 14 | 14 | 66303059 | 618474 | 5.8747 | 0.4094 | -0.3530 | 5.5963 | CHB |
| EIF2S1 | GI_34147492-S | rs9323483  | 14 | 14 | 66309360 | 612173 | 5.8747 | 0.4094 | -0.3530 | 5.5963 | CHB |
| EIF2S1 | GI_34147492-S | rs9323484  | 14 | 14 | 66309385 | 612148 | 5.8747 | 0.4094 | -0.3530 | 5.5963 | CHB |
| EIF2S1 | GI_34147492-S | rs6573724  | 14 | 14 | 66310318 | 611215 | 5.8747 | 0.4094 | 0.3530  | 5.5963 | CHB |
| EIF2S1 | GI_34147492-S | rs7147690  | 14 | 14 | 66312090 | 609443 | 5.8747 | 0.4094 | -0.3530 | 5.5963 | CHB |
| EIF2S1 | GI_34147492-S | rs9323485  | 14 | 14 | 66313250 | 608283 | 5.8747 | 0.4094 | -0.3530 | 5.5963 | CHB |
| EIF2S1 | GI_34147492-S | rs10144919 | 14 | 14 | 66319372 | 602161 | 5.8747 | 0.4094 | -0.3530 | 5.5963 | CHB |
| EIF2S1 | GI_34147492-S | rs7142669  | 14 | 14 | 66320145 | 601388 | 5.8747 | 0.4094 | -0.3530 | 5.5963 | CHB |
| EIF2S1 | GI_34147492-S | rs7149711  | 14 | 14 | 66321476 | 600057 | 5.9254 | 0.4200 | -0.3550 | 5.5963 | CHB |
| EIF2S1 | GI_34147492-S | rs8022328  | 14 | 14 | 66322788 | 598745 | 5.8747 | 0.4094 | 0.3530  | 5.5963 | CHB |
| EIF2S1 | GI_34147492-S | rs8008773  | 14 | 14 | 66332916 | 588617 | 5.8495 | 0.4660 | -0.3466 | 5.5963 | CHB |
| EIF2S1 | GI_34147492-S | rs12587989 | 14 | 14 | 66339876 | 581657 | 5.7010 | 0.4135 | -0.3597 | 5.5963 | CHB |
| EIF2S1 | GI_34147492-S | rs4141703  | 14 | 14 | 66347197 | 574336 | 5.8747 | 0.4094 | 0.3530  | 5.5963 | CHB |
| EIF2S1 | GI_34147492-S | rs4141702  | 14 | 14 | 66347472 | 574061 | 5.8747 | 0.4094 | 0.3530  | 5.5963 | CHB |
| EIF2S1 | GI_34147492-S | rs7145718  | 14 | 14 | 66351936 | 569597 | 5.8747 | 0.4094 | -0.3530 | 5.5963 | CHB |
| EIF2S1 | GI_34147492-S | rs3784075  | 14 | 14 | 66360939 | 560594 | 5.8747 | 0.4094 | 0.3530  | 5.5963 | CHB |
| EIF2S1 | GI_34147492-S | rs8006552  | 14 | 14 | 66363822 | 557711 | 5.8747 | 0.4094 | 0.3530  | 5.5963 | CHB |
| EIF2S1 | GI_34147492-S | rs12323781 | 14 | 14 | 66364969 | 556564 | 6.2493 | 0.4320 | -0.3485 | 5.5963 | CHB |
| EIF2S1 | GI_34147492-S | rs8012660  | 14 | 14 | 66370424 | 551109 | 5.7442 | 0.4087 | 0.3527  | 5.5963 | CHB |
| EIF2S1 | GI_34147492-S | rs8018920  | 14 | 14 | 66374819 | 546714 | 5.8747 | 0.4094 | -0.3530 | 5.5963 | CHB |
| EIF2S1 | GI_34147492-S | rs10142176 | 14 | 14 | 66376569 | 544964 | 5.8747 | 0.4094 | 0.3530  | 5.5963 | CHB |
| EIF2S1 | GI_34147492-S | rs17247862 | 14 | 14 | 66382113 | 539420 | 5.8747 | 0.4094 | 0.3530  | 5.5963 | CHB |
| EIF2S1 | GI_34147492-S | rs10130604 | 14 | 14 | 66385191 | 536342 | 5.8747 | 0.4094 | -0.3530 | 5.5963 | CHB |
| EIF2S1 | GI_34147492-S | rs9323486  | 14 | 14 | 66385324 | 536209 | 5.5990 | 0.3995 | -0.3584 | 5.5963 | CHB |
| EIF2S1 | GI_34147492-S | rs10143670 | 14 | 14 | 66389277 | 532256 | 6.2493 | 0.4320 | -0.3485 | 5.5963 | CHB |
| EIF2S1 | GI_34147492-S | rs6573726  | 14 | 14 | 66394281 | 527252 | 5.8747 | 0.4094 | -0.3530 | 5.5963 | CHB |
| EIF2S1 | GI_34147492-S | rs2144909  | 14 | 14 | 66395197 | 526336 | 5.8747 | 0.4094 | 0.3530  | 5.5963 | CHB |
| EIF2S1 | GI_34147492-S | rs12590085 | 14 | 14 | 66398842 | 522691 | 6.2493 | 0.4320 | 0.3485  | 5.5963 | CHB |
| EIF2S1 | GI_34147492-S | rs1950689  | 14 | 14 | 66408431 | 513102 | 5.8378 | 0.4146 | -0.3419 | 5.5963 | CHB |
| EIF2S1 | GI_34147492-S | rs7156852  | 14 | 14 | 66410302 | 511231 | 6.9026 | 0.4858 | 0.3493  | 5.5963 | CHB |
| EIF2S1 | GI_34147492-S | rs6573727  | 14 | 14 | 66413452 | 508081 | 5.9558 | 0.4377 | -0.3432 | 5.5963 | CHB |
| EIF2S1 | GI_34147492-S | rs17836604 | 14 | 14 | 66417469 | 504064 | 6.2493 | 0.4320 | 0.3485  | 5.5963 | CHB |
| EIF2S1 | GI_34147492-S | rs8022437  | 14 | 14 | 66418094 | 503439 | 5.8747 | 0.4094 | 0.3530  | 5.5963 | CHB |
| EIF2S1 | GI_34147492-S | rs10047902 | 14 | 14 | 66418900 | 502633 | 5.8747 | 0.4094 | 0.3530  | 5.5963 | CHB |
| EIF2S1 | GI_34147492-S | rs8014841  | 14 | 14 | 66421979 | 499554 | 5.8747 | 0.4094 | -0.3530 | 5.5963 | CHB |
| EIF2S1 | GI_34147492-S | rs4578576  | 14 | 14 | 66425392 | 496141 | 5.8747 | 0.4094 | -0.3530 | 5.5963 | CHB |
| EIF2S1 | GI_34147492-S | rs7156655  | 14 | 14 | 66425814 | 495719 | 5.8747 | 0.4094 | 0.3530  | 5.5963 | CHB |
| EIF2S1 | GI_34147492-S | rs728647   | 14 | 14 | 66447808 | 473725 | 5.8747 | 0.4094 | 0.3530  | 5.5963 | CHB |
| EIF2S1 | GI_34147492-S | rs723432   | 14 | 14 | 66448768 | 472765 | 5.8747 | 0.4094 | -0.3530 | 5.5963 | CHB |
| EIF2S1 | GI_34147492-S | rs7156081  | 14 | 14 | 66453896 | 467637 | 5.8747 | 0.4094 | 0.3530  | 5.5963 | CHB |
| EIF2S1 | GI_34147492-S | rs2038398  | 14 | 14 | 66455481 | 466052 | 5.8747 | 0.4094 | 0.3530  | 5.5963 | CHB |
| EIF2S1 | GI_34147492-S | rs8022657  | 14 | 14 | 66460252 | 461281 | 5.8747 | 0.4094 | -0.3530 | 5.5963 | CHB |
| EIF2S1 | GI_34147492-S | rs10135117 | 14 | 14 | 66469144 | 452389 | 6.2493 | 0.4320 | -0.3485 | 5.5963 | CHB |
| EIF2S1 | GI_34147492-S | rs1950281  | 14 | 14 | 66471052 | 450481 | 5.9764 | 0.4231 | -0.3553 | 5.5963 | CHB |
| EIF2S1 | GI_34147492-S | rs10135701 | 14 | 14 | 66486730 | 434803 | 6.2493 | 0.4320 | -0.3485 | 5.5963 | CHB |
| EIF2S1 | GI_34147492-S | rs10147954 | 14 | 14 | 66486836 | 434697 | 6.2493 | 0.4320 | 0.3485  | 5.5963 | CHB |
| EIF2S1 | GI_34147492-S | rs12588821 | 14 | 14 | 66494253 | 427280 | 5.8747 | 0.4094 | 0.3530  | 5.5963 | CHB |
| EIF2S1 | GI_34147492-S | rs8012063  | 14 | 14 | 66504223 | 417310 | 5.8747 | 0.4094 | 0.3530  | 5.5963 | CHB |
| EIF2S1 | GI_34147492-S | rs8016725  | 14 | 14 | 66504935 | 416598 | 5.9833 | 0.4236 | -0.3547 | 5.5963 | CHB |
| EIF2S1 | GI_34147492-S | rs8013401  | 14 | 14 | 66512912 | 408621 | 5.8747 | 0.4094 | 0.3530  | 5.5963 | CHB |
| EIF2S1 | GI_34147492-S | rs6573740  | 14 | 14 | 66515522 | 406011 | 5.8747 | 0.4094 | -0.3530 | 5.5963 | CHB |
| EIF2S1 | GI_34147492-S | rs2319549  | 14 | 14 | 66523146 | 398387 | 5.8747 | 0.4094 | -0.3530 | 5.5963 | CHB |
| EIF2S1 | GI_34147492-S | rs8020095  | 14 | 14 | 66523611 | 397922 | 5.8747 | 0.4094 | 0.3530  | 5.5963 | CHB |
| EIF2S1 | GI_34147492-S | rs2013137  | 14 | 14 | 66527748 | 393785 | 5.8747 | 0.4094 | 0.3530  | 5.5963 | CHB |
| EIF2S1 | GI_34147492-S | rs7142068  | 14 | 14 | 66532765 | 388768 | 5.8747 | 0.4094 | -0.3530 | 5.5963 | CHB |
| EIF2S1 | GI_34147492-S | rs1955610  | 14 | 14 | 66540615 | 380918 | 5.8747 | 0.4094 | 0.3530  | 5.5963 | CHB |
| EIF2S1 | GI_34147492-S | rs1955608  | 14 | 14 | 66540848 | 380685 | 5.8747 | 0.4094 | -0.3530 | 5.5963 | CHB |

|        |               |            |    |    |          |        |        |        |         |        |     |
|--------|---------------|------------|----|----|----------|--------|--------|--------|---------|--------|-----|
| EIF2S1 | GI_34147492-S | rs1955606  | 14 | 14 | 66547400 | 374133 | 5.8747 | 0.4094 | 0.3530  | 5.5963 | CHB |
| EIF2S1 | GI_34147492-S | rs1955605  | 14 | 14 | 66550797 | 370736 | 5.6057 | 0.3927 | -0.3277 | 5.5963 | CHB |
| EIF2S1 | GI_34147492-S | rs10138631 | 14 | 14 | 66551129 | 370404 | 6.1831 | 0.4603 | -0.3695 | 5.5963 | CHB |
| EIF2S1 | GI_34147492-S | rs9323489  | 14 | 14 | 66554099 | 367434 | 6.2493 | 0.4320 | -0.3485 | 5.5963 | CHB |
| EIF2S1 | GI_34147492-S | rs6573745  | 14 | 14 | 66572711 | 348822 | 5.8747 | 0.4094 | -0.3530 | 5.5963 | CHB |
| EIF2S1 | GI_34147492-S | rs10220477 | 14 | 14 | 66581500 | 340033 | 5.6989 | 0.4058 | -0.3581 | 5.5963 | CHB |
| EIF2S1 | GI_34147492-S | rs8008739  | 14 | 14 | 66586544 | 334989 | 5.8747 | 0.4094 | 0.3530  | 5.5963 | CHB |
| EIF2S1 | GI_34147492-S | rs8019510  | 14 | 14 | 66593668 | 327865 | 5.8747 | 0.4094 | 0.3530  | 5.5963 | CHB |
| EIF2S1 | GI_34147492-S | rs7161664  | 14 | 14 | 66594240 | 327293 | 5.7581 | 0.4096 | -0.3533 | 5.5963 | CHB |
| EIF2S1 | GI_34147492-S | rs7141519  | 14 | 14 | 66594278 | 327255 | 5.8747 | 0.4094 | 0.3530  | 5.5963 | CHB |
| EIF2S1 | GI_34147492-S | rs9323490  | 14 | 14 | 66596090 | 325443 | 6.0105 | 0.4252 | 0.3677  | 5.5963 | CHB |
| EIF2S1 | GI_34147492-S | rs2144061  | 14 | 14 | 66596315 | 325218 | 7.1410 | 0.4826 | -0.3674 | 5.5963 | CHB |
| EIF2S1 | GI_34147492-S | rs9323491  | 14 | 14 | 66596988 | 324545 | 5.8747 | 0.4094 | -0.3530 | 5.5963 | CHB |
| EIF2S1 | GI_34147492-S | rs9323492  | 14 | 14 | 66598210 | 323323 | 5.8747 | 0.4094 | -0.3530 | 5.5963 | CHB |
| EIF2S1 | GI_34147492-S | rs10138952 | 14 | 14 | 66605772 | 315761 | 5.8747 | 0.4094 | -0.3530 | 5.5963 | CHB |
| EIF2S1 | GI_34147492-S | rs7150739  | 14 | 14 | 66608701 | 312832 | 5.8747 | 0.4094 | -0.3530 | 5.5963 | CHB |
| EIF2S1 | GI_34147492-S | rs10149600 | 14 | 14 | 66609583 | 311950 | 5.7764 | 0.4107 | -0.3517 | 5.5963 | CHB |
| EIF2S1 | GI_34147492-S | rs13367791 | 14 | 14 | 66612431 | 309102 | 5.8747 | 0.4094 | -0.3530 | 5.5963 | CHB |
| EIF2S1 | GI_34147492-S | rs10141815 | 14 | 14 | 66619556 | 301977 | 6.5747 | 0.4589 | -0.3858 | 5.5963 | CHB |
| EIF2S1 | GI_34147492-S | rs10141952 | 14 | 14 | 66669922 | 251611 | 5.6057 | 0.3927 | 0.3277  | 5.5963 | CHB |
| EIF2S1 | GI_34147492-S | rs17104103 | 14 | 14 | 66731705 | 189828 | 6.6447 | 0.4550 | 0.3947  | 5.5963 | CHB |
| EIF2S1 | GI_34147492-S | rs17104106 | 14 | 14 | 66733185 | 188348 | 6.6447 | 0.4550 | -0.3947 | 5.5963 | CHB |
| EIF2S1 | GI_34147492-S | rs17104109 | 14 | 14 | 66733703 | 187830 | 6.6447 | 0.4550 | 0.3947  | 5.5963 | CHB |
| EIF2S1 | GI_34147492-S | rs10873200 | 14 | 14 | 66736772 | 184761 | 6.6447 | 0.4550 | -0.3947 | 5.5963 | CHB |
| EIF2S1 | GI_34147492-S | rs17104114 | 14 | 14 | 66737263 | 184270 | 6.6447 | 0.4550 | 0.3947  | 5.5963 | CHB |
| EIF2S1 | GI_34147492-S | rs11158655 | 14 | 14 | 66741454 | 180079 | 6.6447 | 0.4550 | -0.3947 | 5.5963 | CHB |
| EIF2S1 | GI_34147492-S | rs10431718 | 14 | 14 | 66752389 | 169144 | 6.6447 | 0.4550 | 0.3947  | 5.5963 | CHB |
| EIF2S1 | GI_34147492-S | rs12590956 | 14 | 14 | 66761202 | 160331 | 6.5253 | 0.4560 | -0.3901 | 5.5963 | CHB |
| EIF2S1 | GI_34147492-S | rs8009318  | 14 | 14 | 66762525 | 159008 | 6.1833 | 0.4281 | 0.3673  | 5.5963 | CHB |
| EIF2S1 | GI_34147492-S | rs10141879 | 14 | 14 | 66764943 | 156590 | 6.6447 | 0.4550 | 0.3947  | 5.5963 | CHB |
| EIF2S1 | GI_34147492-S | rs10145744 | 14 | 14 | 66766669 | 154864 | 6.8227 | 0.4651 | 0.4055  | 5.5963 | CHB |
| EIF2S1 | GI_34147492-S | rs10152002 | 14 | 14 | 66768669 | 152864 | 6.8227 | 0.4651 | -0.4055 | 5.5963 | CHB |
| EIF2S1 | GI_34147492-S | rs1475127  | 14 | 14 | 66768958 | 152575 | 6.8227 | 0.4651 | -0.4055 | 5.5963 | CHB |
| EIF2S1 | GI_34147492-S | rs10147852 | 14 | 14 | 66772413 | 149120 | 6.8227 | 0.4651 | 0.4055  | 5.5963 | CHB |
| EIF2S1 | GI_34147492-S | rs10145913 | 14 | 14 | 66774743 | 146790 | 6.7269 | 0.4676 | 0.4073  | 5.5963 | CHB |
| EIF2S1 | GI_34147492-S | rs1078194  | 14 | 14 | 66777549 | 143984 | 6.8227 | 0.4651 | 0.4055  | 5.5963 | CHB |
| EIF2S1 | GI_34147492-S | rs10145586 | 14 | 14 | 66780377 | 141156 | 6.8227 | 0.4651 | 0.4055  | 5.5963 | CHB |
| EIF2S1 | GI_34147492-S | rs11158658 | 14 | 14 | 66780885 | 140648 | 6.8227 | 0.4651 | 0.4055  | 5.5963 | CHB |
| EIF2S1 | GI_34147492-S | rs8015862  | 14 | 14 | 66780927 | 140606 | 6.8227 | 0.4651 | -0.4055 | 5.5963 | CHB |
| EIF2S1 | GI_34147492-S | rs1073607  | 14 | 14 | 66782437 | 139096 | 6.8171 | 0.4727 | 0.4087  | 5.5963 | CHB |
| EIF2S1 | GI_34147492-S | rs12323494 | 14 | 14 | 66784512 | 137021 | 6.6475 | 0.4631 | 0.4222  | 5.5963 | CHB |
| EIF2S1 | GI_34147492-S | rs10459453 | 14 | 14 | 66787029 | 134504 | 6.8227 | 0.4651 | 0.4055  | 5.5963 | CHB |
| EIF2S1 | GI_34147492-S | rs6573763  | 14 | 14 | 66788081 | 133452 | 6.3934 | 0.5213 | -0.4266 | 5.5963 | CHB |
| EIF2S1 | GI_34147492-S | rs8016037  | 14 | 14 | 66788464 | 133069 | 6.8227 | 0.4651 | -0.4055 | 5.5963 | CHB |
| EIF2S1 | GI_34147492-S | rs8008236  | 14 | 14 | 66799438 | 122095 | 6.8227 | 0.4651 | -0.4055 | 5.5963 | CHB |
| EIF2S1 | GI_34147492-S | rs12589218 | 14 | 14 | 66800713 | 120820 | 6.8227 | 0.4651 | 0.4055  | 5.5963 | CHB |
| EIF2S1 | GI_34147492-S | rs9743911  | 14 | 14 | 66802700 | 118833 | 6.8227 | 0.4651 | -0.4055 | 5.5963 | CHB |
| EIF2S1 | GI_34147492-S | rs2146230  | 14 | 14 | 66804629 | 116904 | 6.8227 | 0.4651 | -0.4055 | 5.5963 | CHB |
| EIF2S1 | GI_34147492-S | rs7149535  | 14 | 14 | 66805121 | 116412 | 6.8227 | 0.4651 | 0.4055  | 5.5963 | CHB |
| EIF2S1 | GI_34147492-S | rs1318914  | 14 | 14 | 66813819 | 107714 | 6.8227 | 0.4651 | 0.4055  | 5.5963 | CHB |
| EIF2S1 | GI_34147492-S | rs8021896  | 14 | 14 | 66818999 | 102534 | 7.4263 | 0.4978 | 0.4012  | 5.5963 | CHB |
| EIF2S1 | GI_34147492-S | rs1535491  | 14 | 14 | 66822448 | 99085  | 6.8227 | 0.4651 | -0.4055 | 5.5963 | CHB |
| EIF2S1 | GI_34147492-S | rs10151464 | 14 | 14 | 66828243 | 93290  | 7.4263 | 0.4978 | -0.4012 | 5.5963 | CHB |
| EIF2S1 | GI_34147492-S | rs10140817 | 14 | 14 | 66828361 | 93172  | 7.4263 | 0.4978 | 0.4012  | 5.5963 | CHB |
| EIF2S1 | GI_34147492-S | rs10144401 | 14 | 14 | 66831608 | 89925  | 7.4263 | 0.4978 | -0.4012 | 5.5963 | CHB |
| EIF2S1 | GI_34147492-S | rs10150902 | 14 | 14 | 66833662 | 87871  | 7.4263 | 0.4978 | -0.4012 | 5.5963 | CHB |
| EIF2S1 | GI_34147492-S | rs12586552 | 14 | 14 | 66834488 | 87045  | 5.8234 | 0.4375 | 0.3845  | 5.5963 | CHB |
| EIF2S1 | GI_34147492-S | rs4286048  | 14 | 14 | 66836269 | 85264  | 7.2994 | 0.4993 | 0.3982  | 5.5963 | CHB |
| EIF2S1 | GI_34147492-S | rs10146663 | 14 | 14 | 66838930 | 82603  | 7.4263 | 0.4978 | -0.4012 | 5.5963 | CHB |

|           |               |            |    |    |          |        |         |        |         |        |     |
|-----------|---------------|------------|----|----|----------|--------|---------|--------|---------|--------|-----|
| EIF2S1    | GI_34147492-S | rs10135903 | 14 | 14 | 66840755 | 80778  | 6.7353  | 0.4763 | 0.4053  | 5.5963 | CHB |
| EIF2S1    | GI_34147492-S | rs2146229  | 14 | 14 | 66845445 | 76088  | 7.4263  | 0.4978 | 0.4012  | 5.5963 | CHB |
| EIF2S1    | GI_34147492-S | rs10129779 | 14 | 14 | 66846249 | 75284  | 5.8373  | 0.4222 | 0.3768  | 5.5963 | CHB |
| EIF2S1    | GI_34147492-S | rs1885589  | 14 | 14 | 66852734 | 68799  | 7.4263  | 0.4978 | -0.4012 | 5.5963 | CHB |
| EIF2S1    | GI_34147492-S | rs8007866  | 14 | 14 | 66857060 | 64473  | 7.4263  | 0.4978 | -0.4012 | 5.5963 | CHB |
| EIF2S1    | GI_34147492-S | rs8014966  | 14 | 14 | 66858062 | 63471  | 7.4166  | 0.5141 | 0.3971  | 5.5963 | CHB |
| EIF2S1    | GI_34147492-S | rs10138824 | 14 | 14 | 66859310 | 62223  | 7.4263  | 0.4978 | 0.4012  | 5.5963 | CHB |
| EIF2S1    | GI_34147492-S | rs2057396  | 14 | 14 | 66860786 | 60747  | 7.4263  | 0.4978 | 0.4012  | 5.5963 | CHB |
| EIF2S1    | GI_34147492-S | rs10131212 | 14 | 14 | 66862120 | 59413  | 7.3116  | 0.5000 | 0.4026  | 5.5963 | CHB |
| EIF2S1    | GI_34147492-S | rs17248616 | 14 | 14 | 66866420 | 55113  | 6.8581  | 0.4919 | 0.4013  | 5.5963 | CHB |
| EIF2S1    | GI_34147492-S | rs2236333  | 14 | 14 | 66868676 | 52857  | 7.4263  | 0.4978 | -0.4012 | 5.5963 | CHB |
| EIF2S1    | GI_34147492-S | rs2274335  | 14 | 14 | 66874076 | 47457  | 7.3849  | 0.4957 | -0.4180 | 5.5963 | CHB |
| EIF2S1    | GI_34147492-S | rs1045060  | 14 | 14 | 66875006 | 46527  | 7.3849  | 0.4957 | 0.4180  | 5.5963 | CHB |
| EIF2S1    | GI_34147492-S | rs10138755 | 14 | 14 | 66882057 | 39476  | 6.0140  | 0.4584 | 0.3921  | 5.5963 | CHB |
| EIF2S1    | GI_34147492-S | rs3818467  | 14 | 14 | 66882227 | 39306  | 7.3849  | 0.4957 | 0.4180  | 5.5963 | CHB |
| EIF2S1    | GI_34147492-S | rs2031563  | 14 | 14 | 66884273 | 37260  | 6.7725  | 0.4702 | -0.4187 | 5.5963 | CHB |
| EIF2S1    | GI_34147492-S | rs2274338  | 14 | 14 | 66885736 | 35797  | 7.3849  | 0.4957 | 0.4180  | 5.5963 | CHB |
| EIF2S1    | GI_34147492-S | rs8015641  | 14 | 14 | 66890457 | 31076  | 5.6106  | 0.4002 | -0.3969 | 5.5963 | CHB |
| EIF2S1    | GI_34147492-S | rs1536271  | 14 | 14 | 66890924 | 30609  | 7.3849  | 0.4957 | 0.4180  | 5.5963 | CHB |
| EIF2S1    | GI_34147492-S | rs1536272  | 14 | 14 | 66891054 | 30479  | 7.4524  | 0.4992 | -0.4017 | 5.5963 | CHB |
| EIF2S1    | GI_34147492-S | rs8006519  | 14 | 14 | 66892350 | 29183  | 7.3849  | 0.4957 | -0.4180 | 5.5963 | CHB |
| EIF2S1    | GI_34147492-S | rs13379368 | 14 | 14 | 66893244 | 28289  | 7.3849  | 0.4957 | 0.4180  | 5.5963 | CHB |
| EIF2S1    | GI_34147492-S | rs13379142 | 14 | 14 | 66893437 | 28096  | 8.0451  | 0.5379 | -0.4278 | 5.5963 | CHB |
| EIF2S1    | GI_34147492-S | rs10137557 | 14 | 14 | 66894077 | 27456  | 6.9677  | 0.4895 | 0.4178  | 5.5963 | CHB |
| EIF2S1    | GI_34147492-S | rs10144417 | 14 | 14 | 66896663 | 24870  | 7.3849  | 0.4957 | -0.4180 | 5.5963 | CHB |
| EIF2S1    | GI_34147492-S | rs3759755  | 14 | 14 | 66898229 | 23304  | 7.3849  | 0.4957 | -0.4180 | 5.5963 | CHB |
| EIF2S1    | GI_34147492-S | rs8006391  | 14 | 14 | 66899432 | 22101  | 7.3849  | 0.4957 | -0.4180 | 5.5963 | CHB |
| EIF2S1    | GI_34147492-S | rs7156441  | 14 | 14 | 66902990 | 18543  | 7.3849  | 0.4957 | -0.4180 | 5.5963 | CHB |
| EIF2S1    | GI_34147492-S | rs12588478 | 14 | 14 | 66907644 | 13889  | 7.3383  | 0.5014 | 0.4142  | 5.5963 | CHB |
| EIF2S1    | GI_34147492-S | rs12589671 | 14 | 14 | 66908914 | 12619  | 7.3849  | 0.4957 | -0.4180 | 5.5963 | CHB |
| EIF2S1    | GI_34147492-S | rs8008724  | 14 | 14 | 66916971 | 4562   | 7.3849  | 0.4957 | 0.4180  | 5.5963 | CHB |
| EIF2S1    | GI_34147492-S | rs2296560  | 14 | 14 | 66918647 | 2886   | 7.3849  | 0.4957 | -0.4180 | 5.5963 | CHB |
| EIF2S1    | GI_34147492-S | rs10131175 | 14 | 14 | 66922484 | 951    | 7.3849  | 0.4957 | -0.4180 | 5.5963 | CHB |
| EIF2S1    | GI_34147492-S | rs3818468  | 14 | 14 | 66932124 | 10591  | 7.4623  | 0.5080 | 0.4195  | 5.5963 | CHB |
| EIF2S1    | GI_34147492-S | rs8004332  | 14 | 14 | 66934497 | 12964  | 7.3752  | 0.4951 | -0.4257 | 5.5963 | CHB |
| EIF2S1    | GI_34147492-S | rs8004864  | 14 | 14 | 66942999 | 21466  | 7.6523  | 0.5096 | 0.4533  | 5.5963 | CHB |
| EIF2S1    | GI_34147492-S | rs8007618  | 14 | 14 | 66946945 | 25412  | 7.6523  | 0.5096 | -0.4533 | 5.5963 | CHB |
| EIF2S1    | GI_34147492-S | rs1555853  | 14 | 14 | 66948137 | 26604  | 7.6523  | 0.5096 | -0.4533 | 5.5963 | CHB |
| EIF2S1    | GI_34147492-S | rs8004267  | 14 | 14 | 66952882 | 31349  | 6.5460  | 0.4493 | 0.4361  | 5.5963 | CHB |
| C14orf130 | GI_28411949-A | rs1263389  | 14 | 14 | 92737473 | 18971  | 7.7051  | 0.5207 | 0.5218  | 5.8674 | CHB |
| C14orf130 | GI_28411949-A | rs3783896  | 14 | 14 | 92760054 | 3610   | 8.1861  | 0.5364 | -0.5272 | 5.8674 | CHB |
| C14orf130 | GI_28411949-A | rs2905     | 14 | 14 | 92763175 | 6731   | 8.9779  | 0.5735 | -0.5451 | 5.8674 | CHB |
| C14orf130 | GI_28411949-A | rs11621915 | 14 | 14 | 92763584 | 7140   | 8.9990  | 0.5831 | 0.5531  | 5.8674 | CHB |
| C14orf130 | GI_28411949-A | rs11625516 | 14 | 14 | 92766070 | 9626   | 8.1861  | 0.5364 | 0.5272  | 5.8674 | CHB |
| TCL6      | GI_21536345-A | rs17093165 | 14 | 14 | 95202248 | 5246   | 6.7412  | 0.4605 | 0.7009  | 6.3765 | CHB |
| TCL6      | GI_21536345-A | rs3759537  | 14 | 14 | 95204869 | 2625   | 8.1209  | 0.5332 | 0.7600  | 6.3765 | CHB |
| TCL6      | GI_21536345-A | rs2296310  | 14 | 14 | 95206528 | 966    | 18.3151 | 0.8418 | -0.8605 | 6.3765 | CHB |
| TCL1B     | GI_40548373-A | rs2296310  | 14 | 14 | 95206528 | 21921  | 15.3484 | 0.7830 | -0.5304 | 6.2353 | CHB |
| TCL6      | GI_21536345-A | rs2249778  | 14 | 14 | 95206547 | 947    | 13.6095 | 0.7556 | 0.7878  | 6.3765 | CHB |
| TCL1B     | GI_40548373-A | rs2249778  | 14 | 14 | 95206547 | 21902  | 11.4699 | 0.6898 | 0.4780  | 6.2353 | CHB |
| IVD       | GI_6031167-S  | rs7176722  | 15 | 15 | 38464205 | 33839  | 6.3337  | 0.4696 | -0.3632 | 5.4986 | CHB |
| IVD       | GI_6031167-S  | rs2289332  | 15 | 15 | 38471072 | 26972  | 6.3362  | 0.4371 | 0.3468  | 5.4986 | CHB |
| IVD       | GI_6031167-S  | rs11636361 | 15 | 15 | 38475120 | 22924  | 6.3362  | 0.4371 | -0.3468 | 5.4986 | CHB |
| IVD       | GI_6031167-S  | rs10518693 | 15 | 15 | 38487314 | 10730  | 6.4109  | 0.4415 | 0.3304  | 5.4986 | CHB |
| IVD       | GI_6031167-S  | rs9635324  | 15 | 15 | 38490503 | 7541   | 6.4109  | 0.4415 | 0.3304  | 5.4986 | CHB |
| IVD       | GI_6031167-S  | rs12440317 | 15 | 15 | 38491686 | 6358   | 5.7575  | 0.4333 | -0.2575 | 5.4986 | CHB |
| CCNDBP1   | GI_16554567-I | rs7181238  | 15 | 15 | 40850112 | 415497 | 8.1412  | 0.5514 | 0.2192  | 5.3464 | CHB |
| CCNDBP1   | GI_16554567-I | rs9920624  | 15 | 15 | 40860807 | 404802 | 8.9615  | 0.5727 | -0.2238 | 5.3464 | CHB |
| TGM5      | GI_4759229-A  | rs9920624  | 15 | 15 | 40860807 | 452286 | 5.4880  | 0.3852 | 0.8454  | 5.3783 | CHB |

|         |               |            |    |    |          |        |         |        |         |        |     |
|---------|---------------|------------|----|----|----------|--------|---------|--------|---------|--------|-----|
| CCNDBP1 | GI_16554567-I | rs9920562  | 15 | 15 | 40860889 | 404720 | 8.1412  | 0.5514 | 0.2192  | 5.3464 | CHB |
| CCNDBP1 | GI_16554567-I | rs9920935  | 15 | 15 | 40862494 | 403115 | 8.9615  | 0.5727 | 0.2238  | 5.3464 | CHB |
| TGM5    | GI_4759229-A  | rs9920935  | 15 | 15 | 40862494 | 450599 | 5.4880  | 0.3852 | -0.8454 | 5.3783 | CHB |
| CCNDBP1 | GI_16554567-I | rs9920092  | 15 | 15 | 40862823 | 402786 | 8.0052  | 0.5536 | 0.2162  | 5.3464 | CHB |
| CCNDBP1 | GI_16554567-I | rs16957165 | 15 | 15 | 40872184 | 393425 | 9.4894  | 0.5959 | 0.2114  | 5.3464 | CHB |
| CCNDBP1 | GI_16554567-I | rs11070380 | 15 | 15 | 40910963 | 354646 | 9.2303  | 0.5934 | 0.2118  | 5.3464 | CHB |
| CCNDBP1 | GI_16554567-I | rs16957244 | 15 | 15 | 40953321 | 312288 | 9.4894  | 0.5959 | -0.2114 | 5.3464 | CHB |
| CCNDBP1 | GI_16554567-I | rs2682073  | 15 | 15 | 40983850 | 281759 | 9.4894  | 0.5959 | 0.2114  | 5.3464 | CHB |
| CCNDBP1 | GI_16554567-I | rs7178567  | 15 | 15 | 41023904 | 241705 | 9.8365  | 0.6104 | 0.1895  | 5.3464 | CHB |
| CCNDBP1 | GI_16554567-I | rs3803341  | 15 | 15 | 41024495 | 241114 | 11.6685 | 0.6791 | 0.1833  | 5.3464 | CHB |
| CCNDBP1 | GI_16554567-I | rs2277532  | 15 | 15 | 41031991 | 233618 | 5.5451  | 0.3888 | 0.1411  | 5.3464 | CHB |
| CCNDBP1 | GI_16554567-I | rs2054389  | 15 | 15 | 41043413 | 222196 | 9.8365  | 0.6104 | -0.1895 | 5.3464 | CHB |
| CCNDBP1 | GI_16554567-I | rs8037022  | 15 | 15 | 41044767 | 220842 | 11.4410 | 0.6713 | 0.1756  | 5.3464 | CHB |
| CCNDBP1 | GI_16554567-I | rs1381855  | 15 | 15 | 41051297 | 214312 | 5.5451  | 0.3888 | -0.1411 | 5.3464 | CHB |
| CCNDBP1 | GI_16554567-I | rs12440651 | 15 | 15 | 41051690 | 213919 | 5.5451  | 0.3888 | -0.1411 | 5.3464 | CHB |
| CCNDBP1 | GI_16554567-I | rs4509988  | 15 | 15 | 41059748 | 205861 | 11.6685 | 0.6791 | 0.1833  | 5.3464 | CHB |
| CCNDBP1 | GI_16554567-I | rs1993813  | 15 | 15 | 41060543 | 205066 | 12.3673 | 0.7193 | -0.1913 | 5.3464 | CHB |
| CCNDBP1 | GI_16554567-I | rs2412746  | 15 | 15 | 41074038 | 191571 | 11.3472 | 0.6767 | 0.1826  | 5.3464 | CHB |
| CCNDBP1 | GI_16554567-I | rs2412747  | 15 | 15 | 41074095 | 191514 | 11.6685 | 0.6791 | -0.1833 | 5.3464 | CHB |
| CCNDBP1 | GI_16554567-I | rs6416436  | 15 | 15 | 41075511 | 190098 | 11.6685 | 0.6791 | -0.1833 | 5.3464 | CHB |
| CCNDBP1 | GI_16554567-I | rs8042481  | 15 | 15 | 41081510 | 184099 | 11.6685 | 0.6791 | 0.1833  | 5.3464 | CHB |
| CCNDBP1 | GI_16554567-I | rs4923955  | 15 | 15 | 41082380 | 183229 | 11.6685 | 0.6791 | -0.1833 | 5.3464 | CHB |
| CCNDBP1 | GI_16554567-I | rs1037990  | 15 | 15 | 41086979 | 178630 | 11.6685 | 0.6791 | 0.1833  | 5.3464 | CHB |
| CCNDBP1 | GI_16554567-I | rs11630595 | 15 | 15 | 41097413 | 168196 | 11.6685 | 0.6791 | -0.1833 | 5.3464 | CHB |
| CCNDBP1 | GI_16554567-I | rs11070386 | 15 | 15 | 41099902 | 165707 | 11.4426 | 0.6800 | 0.1840  | 5.3464 | CHB |
| CCNDBP1 | GI_16554567-I | rs8027733  | 15 | 15 | 41101610 | 163999 | 11.6685 | 0.6791 | -0.1833 | 5.3464 | CHB |
| CCNDBP1 | GI_16554567-I | rs4573908  | 15 | 15 | 41101784 | 163825 | 11.6685 | 0.6791 | -0.1833 | 5.3464 | CHB |
| CCNDBP1 | GI_16554567-I | rs6493076  | 15 | 15 | 41105432 | 160177 | 8.9682  | 0.5730 | 0.1958  | 5.3464 | CHB |
| CCNDBP1 | GI_16554567-I | rs3736054  | 15 | 15 | 41109405 | 156204 | 9.8365  | 0.6104 | -0.1895 | 5.3464 | CHB |
| CCNDBP1 | GI_16554567-I | rs6493077  | 15 | 15 | 41112234 | 153375 | 11.6685 | 0.6791 | 0.1833  | 5.3464 | CHB |
| CCNDBP1 | GI_16554567-I | rs3784265  | 15 | 15 | 41115955 | 149654 | 11.6685 | 0.6791 | 0.1833  | 5.3464 | CHB |
| CCNDBP1 | GI_16554567-I | rs4923956  | 15 | 15 | 41125944 | 139665 | 5.5451  | 0.3888 | 0.1411  | 5.3464 | CHB |
| CCNDBP1 | GI_16554567-I | rs2412752  | 15 | 15 | 41127265 | 138344 | 11.6685 | 0.6791 | -0.1833 | 5.3464 | CHB |
| CCNDBP1 | GI_16554567-I | rs2035170  | 15 | 15 | 41132178 | 133431 | 11.6685 | 0.6791 | -0.1833 | 5.3464 | CHB |
| CCNDBP1 | GI_16554567-I | rs4924704  | 15 | 15 | 41139333 | 126276 | 9.8365  | 0.6104 | -0.1895 | 5.3464 | CHB |
| CCNDBP1 | GI_16554567-I | rs12050604 | 15 | 15 | 41144698 | 120911 | 5.4303  | 0.3960 | 0.1387  | 5.3464 | CHB |
| CCNDBP1 | GI_16554567-I | rs2056346  | 15 | 15 | 41167320 | 98289  | 5.7079  | 0.3991 | -0.1450 | 5.3464 | CHB |
| CCNDBP1 | GI_16554567-I | rs1474200  | 15 | 15 | 41173035 | 92574  | 5.9395  | 0.4209 | -0.1465 | 5.3464 | CHB |
| CCNDBP1 | GI_16554567-I | rs11070389 | 15 | 15 | 41181608 | 84001  | 5.5451  | 0.3888 | -0.1411 | 5.3464 | CHB |
| CCNDBP1 | GI_16554567-I | rs12913112 | 15 | 15 | 41184129 | 81480  | 5.5451  | 0.3888 | 0.1411  | 5.3464 | CHB |
| CCNDBP1 | GI_16554567-I | rs11632120 | 15 | 15 | 41202665 | 62944  | 5.5410  | 0.3886 | 0.1392  | 5.3464 | CHB |
| CCNDBP1 | GI_16554567-I | rs12899266 | 15 | 15 | 41227078 | 38531  | 9.4376  | 0.6024 | -0.1971 | 5.3464 | CHB |
| CCNDBP1 | GI_16554567-I | rs7166467  | 15 | 15 | 41227814 | 37795  | 5.5410  | 0.3886 | -0.1392 | 5.3464 | CHB |
| CCNDBP1 | GI_16554567-I | rs540587   | 15 | 15 | 41265405 | 204    | 13.3917 | 0.7328 | -0.1895 | 5.3464 | CHB |
| CCNDBP1 | GI_16554567-I | rs530305   | 15 | 15 | 41283192 | 17583  | 8.0502  | 0.5559 | -0.1956 | 5.3464 | CHB |
| CCNDBP1 | GI_16554567-I | rs531850   | 15 | 15 | 41283334 | 17725  | 9.8365  | 0.6104 | 0.1895  | 5.3464 | CHB |
| CCNDBP1 | GI_16554567-I | rs494863   | 15 | 15 | 41289594 | 23985  | 13.3917 | 0.7328 | 0.1895  | 5.3464 | CHB |
| CCNDBP1 | GI_16554567-I | rs2899077  | 15 | 15 | 41297317 | 31708  | 13.3917 | 0.7328 | -0.1895 | 5.3464 | CHB |
| CCNDBP1 | GI_16554567-I | rs12592725 | 15 | 15 | 41303687 | 38078  | 8.5502  | 0.6194 | -0.1851 | 5.3464 | CHB |
| CCNDBP1 | GI_16554567-I | rs489964   | 15 | 15 | 41304846 | 39237  | 5.5410  | 0.3886 | -0.1392 | 5.3464 | CHB |
| CCNDBP1 | GI_16554567-I | rs11070396 | 15 | 15 | 41310214 | 44605  | 9.8365  | 0.6104 | 0.1895  | 5.3464 | CHB |
| CCNDBP1 | GI_16554567-I | rs502157   | 15 | 15 | 41315865 | 50256  | 5.5410  | 0.3886 | 0.1392  | 5.3464 | CHB |
| CCNDBP1 | GI_16554567-I | rs7183814  | 15 | 15 | 41316922 | 51313  | 13.3917 | 0.7328 | -0.1895 | 5.3464 | CHB |
| CCNDBP1 | GI_16554567-I | rs2241516  | 15 | 15 | 41317939 | 52330  | 9.8365  | 0.6104 | 0.1895  | 5.3464 | CHB |
| CCNDBP1 | GI_16554567-I | rs11855754 | 15 | 15 | 41322259 | 56650  | 9.7089  | 0.6139 | -0.1913 | 5.3464 | CHB |
| CCNDBP1 | GI_16554567-I | rs525403   | 15 | 15 | 41322388 | 56779  | 5.7560  | 0.4021 | 0.1427  | 5.3464 | CHB |
| CCNDBP1 | GI_16554567-I | rs16957511 | 15 | 15 | 41327409 | 61800  | 10.5260 | 0.6378 | 0.1763  | 5.3464 | CHB |
| TGM5    | GI_4759229-A  | rs512431   | 15 | 15 | 41329231 | 16138  | 8.0199  | 0.5636 | -0.6938 | 5.3783 | CHB |
| TGM5    | GI_4759229-A  | rs493177   | 15 | 15 | 41330550 | 17457  | 7.4418  | 0.4987 | -0.6548 | 5.3783 | CHB |

|         |               |            |    |    |          |        |        |        |         |        |     |
|---------|---------------|------------|----|----|----------|--------|--------|--------|---------|--------|-----|
| CCNDBP1 | GI_16554567-I | rs9652444  | 15 | 15 | 41330988 | 65379  | 6.6827 | 0.4572 | -0.1652 | 5.3464 | CHB |
| TGM5    | GI_4759229-A  | rs555001   | 15 | 15 | 41333020 | 19927  | 7.4418 | 0.4987 | -0.6548 | 5.3783 | CHB |
| TGM5    | GI_4759229-A  | rs572959   | 15 | 15 | 41337794 | 24701  | 7.4418 | 0.4987 | -0.6548 | 5.3783 | CHB |
| TGM5    | GI_4759229-A  | rs574065   | 15 | 15 | 41337947 | 24854  | 7.4418 | 0.4987 | -0.6548 | 5.3783 | CHB |
| TGM5    | GI_4759229-A  | rs524547   | 15 | 15 | 41338315 | 25222  | 7.4418 | 0.4987 | 0.6548  | 5.3783 | CHB |
| TGM5    | GI_4759229-A  | rs554001   | 15 | 15 | 41339211 | 26118  | 7.4418 | 0.4987 | -0.6548 | 5.3783 | CHB |
| TGM5    | GI_4759229-A  | rs501884   | 15 | 15 | 41341274 | 28181  | 7.4418 | 0.4987 | 0.6548  | 5.3783 | CHB |
| TGM5    | GI_4759229-A  | rs504417   | 15 | 15 | 41341518 | 28425  | 7.4418 | 0.4987 | 0.6548  | 5.3783 | CHB |
| TGM5    | GI_4759229-A  | rs1197256  | 15 | 15 | 41342991 | 29898  | 7.4418 | 0.4987 | 0.6548  | 5.3783 | CHB |
| CCNDBP1 | GI_16554567-I | rs11853991 | 15 | 15 | 41344841 | 79232  | 8.0136 | 0.5279 | -0.1471 | 5.3464 | CHB |
| TGM5    | GI_4759229-A  | rs471122   | 15 | 15 | 41345866 | 32773  | 7.4418 | 0.4987 | 0.6548  | 5.3783 | CHB |
| TGM5    | GI_4759229-A  | rs531910   | 15 | 15 | 41347899 | 34806  | 7.4418 | 0.4987 | 0.6548  | 5.3783 | CHB |
| TGM5    | GI_4759229-A  | rs493444   | 15 | 15 | 41353762 | 40669  | 7.4418 | 0.4987 | -0.6548 | 5.3783 | CHB |
| TGM5    | GI_4759229-A  | rs473554   | 15 | 15 | 41355499 | 42406  | 7.6110 | 0.5158 | -0.6761 | 5.3783 | CHB |
| TGM5    | GI_4759229-A  | rs530683   | 15 | 15 | 41356291 | 43198  | 7.4418 | 0.4987 | -0.6548 | 5.3783 | CHB |
| TGM5    | GI_4759229-A  | rs567357   | 15 | 15 | 41358682 | 45589  | 7.1389 | 0.4990 | 0.6683  | 5.3783 | CHB |
| TGM5    | GI_4759229-A  | rs513970   | 15 | 15 | 41366858 | 53765  | 7.4418 | 0.4987 | -0.6548 | 5.3783 | CHB |
| TGM5    | GI_4759229-A  | rs489509   | 15 | 15 | 41374199 | 61106  | 8.1350 | 0.5339 | 0.7117  | 5.3783 | CHB |
| TGM5    | GI_4759229-A  | rs532672   | 15 | 15 | 41374200 | 61107  | 8.1350 | 0.5339 | -0.7117 | 5.3783 | CHB |
| TGM5    | GI_4759229-A  | rs825740   | 15 | 15 | 41379700 | 66607  | 8.1350 | 0.5339 | -0.7117 | 5.3783 | CHB |
| TGM5    | GI_4759229-A  | rs825739   | 15 | 15 | 41379720 | 66627  | 7.9708 | 0.5429 | 0.7123  | 5.3783 | CHB |
| TGM5    | GI_4759229-A  | rs478104   | 15 | 15 | 41382192 | 69099  | 7.2368 | 0.4878 | -0.6967 | 5.3783 | CHB |
| TGM5    | GI_4759229-A  | rs524527   | 15 | 15 | 41386408 | 73315  | 7.2368 | 0.4878 | -0.6967 | 5.3783 | CHB |
| TGM5    | GI_4759229-A  | rs526450   | 15 | 15 | 41386617 | 73524  | 7.2368 | 0.4878 | 0.6967  | 5.3783 | CHB |
| TGM5    | GI_4759229-A  | rs510108   | 15 | 15 | 41392731 | 79638  | 7.2128 | 0.4865 | 0.7125  | 5.3783 | CHB |
| TGM5    | GI_4759229-A  | rs1095386  | 15 | 15 | 41396801 | 83708  | 6.4292 | 0.4426 | -0.6949 | 5.3783 | CHB |
| TGM5    | GI_4759229-A  | rs507178   | 15 | 15 | 41397427 | 84334  | 6.4292 | 0.4426 | -0.6949 | 5.3783 | CHB |
| TGM5    | GI_4759229-A  | rs478028   | 15 | 15 | 41398064 | 84971  | 6.3048 | 0.4430 | -0.6952 | 5.3783 | CHB |
| ELL3    | GI_13376767-S | rs552701   | 15 | 15 | 41401102 | 451307 | 5.5040 | 0.4008 | 0.4303  | 5.1519 | CHB |
| TGM5    | GI_4759229-A  | rs552701   | 15 | 15 | 41401102 | 88009  | 5.7699 | 0.4179 | 0.6576  | 5.3783 | CHB |
| TGM5    | GI_4759229-A  | rs573615   | 15 | 15 | 41401573 | 88480  | 6.4292 | 0.4426 | -0.6949 | 5.3783 | CHB |
| TGM5    | GI_4759229-A  | rs488756   | 15 | 15 | 41402016 | 88923  | 6.4292 | 0.4426 | 0.6949  | 5.3783 | CHB |
| TGM5    | GI_4759229-A  | rs956391   | 15 | 15 | 41404785 | 91692  | 6.7313 | 0.4599 | -0.6937 | 5.3783 | CHB |
| TGM5    | GI_4759229-A  | rs3742971  | 15 | 15 | 41410208 | 97115  | 6.4292 | 0.4426 | 0.6949  | 5.3783 | CHB |
| TGM5    | GI_4759229-A  | rs1549525  | 15 | 15 | 41415147 | 102054 | 6.4292 | 0.4426 | 0.6949  | 5.3783 | CHB |
| TGM5    | GI_4759229-A  | rs4547312  | 15 | 15 | 41419430 | 106337 | 6.4292 | 0.4426 | 0.6949  | 5.3783 | CHB |
| TGM5    | GI_4759229-A  | rs2278857  | 15 | 15 | 41419841 | 106748 | 6.4292 | 0.4426 | -0.6949 | 5.3783 | CHB |
| TGM5    | GI_4759229-A  | rs2278859  | 15 | 15 | 41420252 | 107159 | 6.4450 | 0.4513 | 0.6961  | 5.3783 | CHB |
| TGM5    | GI_4759229-A  | rs7170489  | 15 | 15 | 41423943 | 110850 | 5.9349 | 0.4206 | 0.6812  | 5.3783 | CHB |
| TGM5    | GI_4759229-A  | rs6493083  | 15 | 15 | 41425277 | 112184 | 6.4292 | 0.4426 | -0.6949 | 5.3783 | CHB |
| TGM5    | GI_4759229-A  | rs9920879  | 15 | 15 | 41427062 | 113969 | 6.4292 | 0.4426 | 0.6949  | 5.3783 | CHB |
| TGM5    | GI_4759229-A  | rs4296223  | 15 | 15 | 41432538 | 119445 | 6.4292 | 0.4426 | -0.6949 | 5.3783 | CHB |
| TGM5    | GI_4759229-A  | rs6493084  | 15 | 15 | 41434919 | 121826 | 6.4450 | 0.4513 | 0.6961  | 5.3783 | CHB |
| TGM5    | GI_4759229-A  | rs12905772 | 15 | 15 | 41435736 | 122643 | 6.4292 | 0.4426 | -0.6949 | 5.3783 | CHB |
| TGM5    | GI_4759229-A  | rs4075674  | 15 | 15 | 41437522 | 124429 | 6.4292 | 0.4426 | 0.6949  | 5.3783 | CHB |
| TGM5    | GI_4759229-A  | rs2412780  | 15 | 15 | 41443086 | 129993 | 5.5240 | 0.3875 | 0.6371  | 5.3783 | CHB |
| TGM5    | GI_4759229-A  | rs2412779  | 15 | 15 | 41443219 | 130126 | 5.7699 | 0.4514 | -0.6852 | 5.3783 | CHB |
| TGM5    | GI_4759229-A  | rs2278860  | 15 | 15 | 41446338 | 133245 | 6.4292 | 0.4426 | 0.6949  | 5.3783 | CHB |
| TGM5    | GI_4759229-A  | rs3809482  | 15 | 15 | 41449094 | 136001 | 6.4292 | 0.4426 | 0.6949  | 5.3783 | CHB |
| TGM5    | GI_4759229-A  | rs6493087  | 15 | 15 | 41453264 | 140171 | 6.4292 | 0.4426 | -0.6949 | 5.3783 | CHB |
| TGM5    | GI_4759229-A  | rs2412781  | 15 | 15 | 41455192 | 142099 | 6.4292 | 0.4426 | -0.6949 | 5.3783 | CHB |
| TGM5    | GI_4759229-A  | rs3213990  | 15 | 15 | 41457518 | 144425 | 6.4292 | 0.4426 | -0.6949 | 5.3783 | CHB |
| TGM5    | GI_4759229-A  | rs3213991  | 15 | 15 | 41457572 | 144479 | 5.6403 | 0.4256 | 0.6083  | 5.3783 | CHB |
| TGM5    | GI_4759229-A  | rs7163288  | 15 | 15 | 41458647 | 145554 | 6.4292 | 0.4426 | 0.6949  | 5.3783 | CHB |
| TGM5    | GI_4759229-A  | rs2243434  | 15 | 15 | 41477159 | 164066 | 6.4292 | 0.4426 | 0.6949  | 5.3783 | CHB |
| TGM5    | GI_4759229-A  | rs2444036  | 15 | 15 | 41481400 | 168307 | 6.4292 | 0.4426 | -0.6949 | 5.3783 | CHB |
| ELL3    | GI_13376767-S | rs1058298  | 15 | 15 | 41488222 | 364187 | 5.2570 | 0.3703 | -0.4337 | 5.1519 | CHB |
| ELL3    | GI_13376767-S | rs2242069  | 15 | 15 | 41500926 | 351483 | 5.2570 | 0.3703 | 0.4337  | 5.1519 | CHB |
| ELL3    | GI_13376767-S | rs689835   | 15 | 15 | 41502262 | 350147 | 5.2570 | 0.3703 | 0.4337  | 5.1519 | CHB |

|      |               |            |    |    |          |        |        |        |         |        |     |
|------|---------------|------------|----|----|----------|--------|--------|--------|---------|--------|-----|
| ELL3 | GI_13376767-S | rs690512   | 15 | 15 | 41504970 | 347439 | 5.4512 | 0.3900 | 0.4322  | 5.1519 | CHB |
| ELL3 | GI_13376767-S | rs542898   | 15 | 15 | 41506684 | 345725 | 5.2570 | 0.3703 | 0.4337  | 5.1519 | CHB |
| ELL3 | GI_13376767-S | rs689767   | 15 | 15 | 41509369 | 343040 | 5.2570 | 0.3703 | -0.4337 | 5.1519 | CHB |
| ELL3 | GI_13376767-S | rs2602141  | 15 | 15 | 41511938 | 340471 | 5.2570 | 0.3703 | -0.4337 | 5.1519 | CHB |
| ELL3 | GI_13376767-S | rs536313   | 15 | 15 | 41517290 | 335119 | 5.2570 | 0.3703 | 0.4337  | 5.1519 | CHB |
| ELL3 | GI_13376767-S | rs2467737  | 15 | 15 | 41524480 | 327929 | 5.2570 | 0.3703 | -0.4337 | 5.1519 | CHB |
| ELL3 | GI_13376767-S | rs2444029  | 15 | 15 | 41524776 | 327633 | 5.2570 | 0.3703 | -0.4337 | 5.1519 | CHB |
| ELL3 | GI_13376767-S | rs2467739  | 15 | 15 | 41527488 | 324921 | 5.2570 | 0.3703 | -0.4337 | 5.1519 | CHB |
| ELL3 | GI_13376767-S | rs2467741  | 15 | 15 | 41529918 | 322491 | 5.1523 | 0.3703 | -0.4341 | 5.1519 | CHB |
| ELL3 | GI_13376767-S | rs690367   | 15 | 15 | 41535596 | 316813 | 5.2570 | 0.3703 | 0.4337  | 5.1519 | CHB |
| ELL3 | GI_13376767-S | rs7173370  | 15 | 15 | 41537208 | 315201 | 5.2570 | 0.3703 | -0.4337 | 5.1519 | CHB |
| ELL3 | GI_13376767-S | rs2444032  | 15 | 15 | 41542638 | 309771 | 5.2570 | 0.3703 | 0.4337  | 5.1519 | CHB |
| ELL3 | GI_13376767-S | rs694725   | 15 | 15 | 41543502 | 308907 | 5.2570 | 0.3703 | 0.4337  | 5.1519 | CHB |
| ELL3 | GI_13376767-S | rs1814538  | 15 | 15 | 41547066 | 305343 | 5.2570 | 0.3703 | 0.4337  | 5.1519 | CHB |
| ELL3 | GI_13376767-S | rs689647   | 15 | 15 | 41549488 | 302921 | 5.2570 | 0.3703 | 0.4337  | 5.1519 | CHB |
| ELL3 | GI_13376767-S | rs2251538  | 15 | 15 | 41554501 | 297908 | 5.2570 | 0.3703 | -0.4337 | 5.1519 | CHB |
| ELL3 | GI_13376767-S | rs560191   | 15 | 15 | 41555066 | 297343 | 5.2570 | 0.3703 | -0.4337 | 5.1519 | CHB |
| ELL3 | GI_13376767-S | rs527921   | 15 | 15 | 41557708 | 294701 | 6.2314 | 0.4310 | 0.4645  | 5.1519 | CHB |
| ELL3 | GI_13376767-S | rs493377   | 15 | 15 | 41560759 | 291650 | 5.2570 | 0.3703 | -0.4337 | 5.1519 | CHB |
| ELL3 | GI_13376767-S | rs544122   | 15 | 15 | 41563024 | 289385 | 6.2314 | 0.4310 | -0.4645 | 5.1519 | CHB |
| ELL3 | GI_13376767-S | rs689754   | 15 | 15 | 41563187 | 289222 | 6.6134 | 0.4611 | 0.4771  | 5.1519 | CHB |
| ELL3 | GI_13376767-S | rs1079309  | 15 | 15 | 41570456 | 281953 | 5.5469 | 0.3961 | -0.4377 | 5.1519 | CHB |
| ELL3 | GI_13376767-S | rs2439850  | 15 | 15 | 41572146 | 280263 | 5.2570 | 0.3703 | 0.4337  | 5.1519 | CHB |
| ELL3 | GI_13376767-S | rs689781   | 15 | 15 | 41579389 | 273020 | 5.2570 | 0.3703 | -0.4337 | 5.1519 | CHB |
| ELL3 | GI_13376767-S | rs2253708  | 15 | 15 | 41584565 | 267844 | 5.2570 | 0.3703 | 0.4337  | 5.1519 | CHB |
| ELL3 | GI_13376767-S | rs495175   | 15 | 15 | 41585976 | 266433 | 5.2570 | 0.3703 | -0.4337 | 5.1519 | CHB |
| ELL3 | GI_13376767-S | rs2253268  | 15 | 15 | 41588260 | 264149 | 5.2570 | 0.3703 | 0.4337  | 5.1519 | CHB |
| ELL3 | GI_13376767-S | rs506120   | 15 | 15 | 41589316 | 263093 | 5.2079 | 0.3671 | 0.4407  | 5.1519 | CHB |
| ELL3 | GI_13376767-S | rs2470134  | 15 | 15 | 41637178 | 215231 | 5.5984 | 0.3922 | -0.4471 | 5.1519 | CHB |
| ELL3 | GI_13376767-S | rs2439     | 15 | 15 | 41678804 | 173605 | 5.5984 | 0.3922 | 0.4471  | 5.1519 | CHB |
| ELL3 | GI_13376767-S | rs2447196  | 15 | 15 | 41681110 | 171299 | 5.5984 | 0.3922 | -0.4471 | 5.1519 | CHB |
| ELL3 | GI_13376767-S | rs3101443  | 15 | 15 | 41699664 | 152745 | 5.2192 | 0.3678 | 0.4536  | 5.1519 | CHB |
| ELL3 | GI_13376767-S | rs2614811  | 15 | 15 | 41700779 | 151630 | 5.2192 | 0.3678 | 0.4536  | 5.1519 | CHB |
| ELL3 | GI_13376767-S | rs2447208  | 15 | 15 | 41721187 | 131222 | 5.2192 | 0.3678 | 0.4536  | 5.1519 | CHB |
| ELL3 | GI_13376767-S | rs8042868  | 15 | 15 | 41726934 | 125475 | 5.2192 | 0.3678 | 0.4536  | 5.1519 | CHB |
| ELL3 | GI_13376767-S | rs12441127 | 15 | 15 | 41808467 | 43942  | 5.2192 | 0.3678 | -0.4536 | 5.1519 | CHB |
| ELL3 | GI_13376767-S | rs2467402  | 15 | 15 | 41811782 | 40627  | 5.2505 | 0.3698 | 0.4520  | 5.1519 | CHB |
| ELL3 | GI_13376767-S | rs7175129  | 15 | 15 | 41817310 | 35099  | 5.2192 | 0.3678 | 0.4536  | 5.1519 | CHB |
| ELL3 | GI_13376767-S | rs11070408 | 15 | 15 | 41822080 | 30329  | 5.2192 | 0.3678 | -0.4536 | 5.1519 | CHB |
| ELL3 | GI_13376767-S | rs16950562 | 15 | 15 | 41823656 | 28753  | 5.2192 | 0.3678 | -0.4536 | 5.1519 | CHB |
| ELL3 | GI_13376767-S | rs10163054 | 15 | 15 | 41834930 | 17479  | 5.2192 | 0.3678 | 0.4536  | 5.1519 | CHB |
| ELL3 | GI_13376767-S | rs7174208  | 15 | 15 | 41839974 | 12435  | 5.2192 | 0.3678 | 0.4536  | 5.1519 | CHB |
| ELL3 | GI_13376767-S | rs11070410 | 15 | 15 | 41844337 | 8072   | 5.2192 | 0.3678 | -0.4536 | 5.1519 | CHB |
| ELL3 | GI_13376767-S | rs3862142  | 15 | 15 | 41852098 | 311    | 5.2192 | 0.3678 | 0.4536  | 5.1519 | CHB |
| ELL3 | GI_13376767-S | rs2788     | 15 | 15 | 41852178 | 231    | 5.2192 | 0.3678 | 0.4536  | 5.1519 | CHB |
| ELL3 | GI_13376767-S | rs8023458  | 15 | 15 | 41868231 | 15822  | 5.2192 | 0.3678 | 0.4536  | 5.1519 | CHB |
| ELL3 | GI_13376767-S | rs3759791  | 15 | 15 | 41878090 | 25681  | 5.5787 | 0.3909 | 0.4464  | 5.1519 | CHB |
| ELL3 | GI_13376767-S | rs694461   | 15 | 15 | 41883355 | 30946  | 5.2192 | 0.3678 | -0.4536 | 5.1519 | CHB |
| ELL3 | GI_13376767-S | rs16965120 | 15 | 15 | 41887634 | 35225  | 5.1593 | 0.3708 | -0.4573 | 5.1519 | CHB |
| ELL3 | GI_13376767-S | rs3825783  | 15 | 15 | 41889601 | 37192  | 5.2192 | 0.3678 | 0.4536  | 5.1519 | CHB |
| ELL3 | GI_13376767-S | rs693919   | 15 | 15 | 41889620 | 37211  | 5.2192 | 0.3678 | -0.4536 | 5.1519 | CHB |
| ELL3 | GI_13376767-S | rs3736180  | 15 | 15 | 41893916 | 41507  | 5.2192 | 0.3678 | 0.4536  | 5.1519 | CHB |
| ELL3 | GI_13376767-S | rs12440573 | 15 | 15 | 41896289 | 43880  | 5.2192 | 0.3678 | 0.4536  | 5.1519 | CHB |
| ELL3 | GI_13376767-S | rs575082   | 15 | 15 | 41897434 | 45025  | 5.2192 | 0.3678 | -0.4536 | 5.1519 | CHB |
| ELL3 | GI_13376767-S | rs3816792  | 15 | 15 | 41904278 | 51869  | 5.5787 | 0.3909 | 0.4464  | 5.1519 | CHB |
| ELL3 | GI_13376767-S | rs3759790  | 15 | 15 | 41908322 | 55913  | 5.2192 | 0.3678 | 0.4536  | 5.1519 | CHB |
| ELL3 | GI_13376767-S | rs12441984 | 15 | 15 | 41913577 | 61168  | 5.2192 | 0.3678 | 0.4536  | 5.1519 | CHB |
| ELL3 | GI_13376767-S | rs7169322  | 15 | 15 | 41918306 | 65897  | 5.2192 | 0.3678 | -0.4536 | 5.1519 | CHB |
| ELL3 | GI_13376767-S | rs8032649  | 15 | 15 | 41922214 | 69805  | 5.1624 | 0.3710 | -0.4574 | 5.1519 | CHB |

|               |               |            |    |    |          |        |         |        |         |        |     |
|---------------|---------------|------------|----|----|----------|--------|---------|--------|---------|--------|-----|
| ELL3          | GI_13376767-S | rs16977724 | 15 | 15 | 41938591 | 86182  | 5.2192  | 0.3678 | 0.4536  | 5.1519 | CHB |
| ELL3          | GI_13376767-S | rs16977798 | 15 | 15 | 41939240 | 86831  | 5.2192  | 0.3678 | -0.4536 | 5.1519 | CHB |
| ELL3          | GI_13376767-S | rs11856795 | 15 | 15 | 41947874 | 95465  | 5.2192  | 0.3678 | 0.4536  | 5.1519 | CHB |
| ELL3          | GI_13376767-S | rs9944216  | 15 | 15 | 41948065 | 95656  | 5.2192  | 0.3678 | -0.4536 | 5.1519 | CHB |
| ELL3          | GI_13376767-S | rs8023508  | 15 | 15 | 41963395 | 110986 | 5.2192  | 0.3678 | 0.4536  | 5.1519 | CHB |
| ELL3          | GI_13376767-S | rs3742982  | 15 | 15 | 41963973 | 111564 | 5.2192  | 0.3678 | 0.4536  | 5.1519 | CHB |
| ELL3          | GI_13376767-S | rs524908   | 15 | 15 | 41975283 | 122874 | 5.2192  | 0.3678 | 0.4536  | 5.1519 | CHB |
| Hs.11898      | Hs.11898-S    | rs11070906 | 15 | 15 | 50709817 | 26813  | 10.5184 | 0.6463 | 0.2077  | 6.3546 | CHB |
| Hs.11898      | Hs.11898-S    | rs8030871  | 15 | 15 | 50725393 | 11237  | 11.6210 | 0.7040 | -0.2063 | 6.3546 | CHB |
| Hs.11898      | Hs.11898-S    | rs8036979  | 15 | 15 | 50735287 | 1343   | 11.6774 | 0.6794 | -0.2059 | 6.3546 | CHB |
| Hs.11898      | Hs.11898-S    | rs11633933 | 15 | 15 | 50735649 | 981    | 11.5189 | 0.6827 | -0.2085 | 6.3546 | CHB |
| Hs.11898      | Hs.11898-S    | rs17651941 | 15 | 15 | 50735918 | 712    | 10.6570 | 0.6516 | -0.2064 | 6.3546 | CHB |
| Hs.11898      | Hs.11898-S    | rs2414172  | 15 | 15 | 50756247 | 19617  | 6.7522  | 0.4611 | 0.1732  | 6.3546 | CHB |
| LOC400410     | GI_42660516-S | rs8026997  | 15 | 15 | 77950077 | 43936  | 5.8999  | 0.4261 | 0.2540  | 5.83   | CHB |
| LOC400410     | GI_42660516-S | rs6495451  | 15 | 15 | 77951108 | 42905  | 8.9772  | 0.5734 | -0.2787 | 5.83   | CHB |
| LOC400410     | GI_42660516-S | rs1113983  | 15 | 15 | 77953652 | 40361  | 8.9772  | 0.5734 | -0.2787 | 5.83   | CHB |
| LOC400410     | GI_42660516-S | rs934134   | 15 | 15 | 77955273 | 38740  | 8.7057  | 0.5785 | 0.2795  | 5.83   | CHB |
| LOC400410     | GI_42660516-S | rs8036559  | 15 | 15 | 77957618 | 36395  | 8.9772  | 0.5734 | -0.2787 | 5.83   | CHB |
| LOC400410     | GI_42660516-S | rs2562744  | 15 | 15 | 77961443 | 32570  | 8.9772  | 0.5734 | 0.2787  | 5.83   | CHB |
| LOC400410     | GI_42660516-S | rs12438477 | 15 | 15 | 77965338 | 28675  | 8.9772  | 0.5734 | 0.2787  | 5.83   | CHB |
| LOC400410     | GI_42660516-S | rs8042012  | 15 | 15 | 77966902 | 27111  | 8.4984  | 0.5599 | -0.2735 | 5.83   | CHB |
| LOC400410     | GI_42660516-S | rs2586183  | 15 | 15 | 77967161 | 26852  | 8.9772  | 0.5734 | -0.2787 | 5.83   | CHB |
| LOC400410     | GI_42660516-S | rs2733088  | 15 | 15 | 77971712 | 22301  | 8.9772  | 0.5734 | -0.2787 | 5.83   | CHB |
| LOC400410     | GI_42660516-S | rs2586179  | 15 | 15 | 77975061 | 18952  | 10.3897 | 0.6326 | -0.2967 | 5.83   | CHB |
| LOC400410     | GI_42660516-S | rs2115539  | 15 | 15 | 77977940 | 16073  | 9.5537  | 0.5986 | -0.2827 | 5.83   | CHB |
| LOC400410     | GI_42660516-S | rs11852590 | 15 | 15 | 77987707 | 6306   | 5.9540  | 0.4143 | -0.2411 | 5.83   | CHB |
| LOC400410     | GI_42660516-S | rs7174273  | 15 | 15 | 77992623 | 1390   | 5.9692  | 0.4152 | -0.2458 | 5.83   | CHB |
| IL16          | GI_27262656-I | rs4778889  | 15 | 15 | 79376050 | 11845  | 6.7761  | 0.4624 | -0.5321 | 5.7774 | CHB |
| IL16          | GI_27262656-I | rs4778891  | 15 | 15 | 79376885 | 11010  | 9.2019  | 0.5921 | 0.6451  | 5.7774 | CHB |
| IL16          | GI_27262656-I | rs11857713 | 15 | 15 | 79378320 | 9575   | 8.7208  | 0.5883 | 0.6784  | 5.7774 | CHB |
| IL16          | GI_27262656-I | rs4778636  | 15 | 15 | 79378694 | 9201   | 9.5246  | 0.5974 | -0.6464 | 5.7774 | CHB |
| IL16          | GI_27262656-I | rs3898677  | 15 | 15 | 79383617 | 4278   | 7.9441  | 0.5244 | 0.6062  | 5.7774 | CHB |
| IL16          | GI_27262656-I | rs4577037  | 15 | 15 | 79383715 | 4180   | 8.9997  | 0.5920 | -0.6505 | 5.7774 | CHB |
| IL16          | GI_27262656-I | rs1803275  | 15 | 15 | 79385471 | 2424   | 9.6170  | 0.6100 | -0.7094 | 5.7774 | CHB |
| IL16          | GI_27262656-I | rs3926277  | 15 | 15 | 79386349 | 1546   | 7.9451  | 0.5892 | -0.6766 | 5.7774 | CHB |
| IL16          | GI_27262656-I | rs3926278  | 15 | 15 | 79386410 | 1485   | 9.6170  | 0.6100 | 0.7094  | 5.7774 | CHB |
| IL16          | GI_27262656-I | rs3926279  | 15 | 15 | 79386498 | 1397   | 8.6307  | 0.5841 | 0.6405  | 5.7774 | CHB |
| IL16          | GI_27262656-I | rs4778639  | 15 | 15 | 79387506 | 389    | 9.2019  | 0.5921 | -0.6451 | 5.7774 | CHB |
| IL16          | GI_27262656-I | rs4778640  | 15 | 15 | 79391186 | 3291   | 6.0205  | 0.4337 | 0.5480  | 5.7774 | CHB |
| SCAND2        | GI_15991818-I | rs7169769  | 15 | 15 | 82948914 | 36569  | 8.7041  | 0.5696 | 0.1088  | 5.6964 | CHB |
| SCAND2        | GI_15991818-I | rs11858419 | 15 | 15 | 82969180 | 16303  | 9.0305  | 0.5758 | -0.1070 | 5.6964 | CHB |
| SCAND2        | GI_15991818-I | rs11073686 | 15 | 15 | 83085690 | 100207 | 6.3553  | 0.4540 | -0.0980 | 5.6964 | CHB |
| SCAND2        | GI_15991818-I | rs8182086  | 15 | 15 | 83142863 | 157380 | 6.6576  | 0.4557 | 0.0971  | 5.6964 | CHB |
| SCAND2        | GI_15991818-I | rs8023889  | 15 | 15 | 83154607 | 169124 | 6.5706  | 0.4586 | -0.0883 | 5.6964 | CHB |
| AP3S2         | GI_39725670-S | rs7173483  | 15 | 15 | 88172552 | 5489   | 7.1143  | 0.4811 | 0.1034  | 5.5613 | CHB |
| AP3S2         | GI_39725670-S | rs2290351  | 15 | 15 | 88175785 | 2256   | 7.1143  | 0.4811 | 0.1034  | 5.5613 | CHB |
| AP3S2         | GI_39725670-S | rs4932145  | 15 | 15 | 88177463 | 578    | 7.1143  | 0.4811 | 0.1034  | 5.5613 | CHB |
| DKFZP566J2046 | GI_13654273-S | rs12597803 | 16 | 16 | 1806272  | 12442  | 6.9710  | 0.4897 | 0.3691  | 6.4263 | CHB |
| DKFZP566J2046 | GI_13654273-S | rs12596094 | 16 | 16 | 1806363  | 12351  | 7.7106  | 0.5296 | -0.3774 | 6.4263 | CHB |
| DKFZP566J2046 | GI_13654273-S | rs11646951 | 16 | 16 | 1808648  | 10066  | 6.6119  | 0.4776 | -0.3598 | 6.4263 | CHB |
| DKFZP566J2046 | GI_13654273-S | rs2268670  | 16 | 16 | 1811330  | 7384   | 8.4667  | 0.5499 | -0.3808 | 6.4263 | CHB |
| DKFZP566J2046 | GI_13654273-S | rs3743853  | 16 | 16 | 1817559  | 1155   | 8.4667  | 0.5499 | 0.3808  | 6.4263 | CHB |
| DKFZP566J2046 | GI_13654273-S | rs9652776  | 16 | 16 | 1826234  | 7520   | 7.7801  | 0.5513 | 0.3813  | 6.4263 | CHB |
| DKFZP566J2046 | GI_13654273-S | rs9652786  | 16 | 16 | 1826523  | 7809   | 8.2934  | 0.5501 | -0.3741 | 6.4263 | CHB |
| DKFZP566J2046 | GI_13654273-S | rs9652777  | 16 | 16 | 1826610  | 7896   | 8.4667  | 0.5499 | 0.3808  | 6.4263 | CHB |
| DKFZP566J2046 | GI_13654273-S | rs9652778  | 16 | 16 | 1826674  | 7960   | 7.4393  | 0.5623 | -0.3893 | 6.4263 | CHB |
| DKFZP566J2046 | GI_13654273-S | rs12325141 | 16 | 16 | 1826967  | 8253   | 8.4667  | 0.5499 | 0.3808  | 6.4263 | CHB |
| DKFZP566J2046 | GI_13654273-S | rs12325218 | 16 | 16 | 1826982  | 8268   | 8.0279  | 0.5458 | -0.3719 | 6.4263 | CHB |
| DKFZP566J2046 | GI_13654273-S | rs12325282 | 16 | 16 | 1827017  | 8303   | 8.6864  | 0.5776 | -0.3909 | 6.4263 | CHB |

|               |               |            |    |    |         |       |        |        |         |        |     |
|---------------|---------------|------------|----|----|---------|-------|--------|--------|---------|--------|-----|
| DKFZP566J2046 | GI_13654273-S | rs11643835 | 16 | 16 | 1827575 | 8861  | 8.6046 | 0.5650 | 0.3896  | 6.4263 | CHB |
| DKFZP566J2046 | GI_13654273-S | rs3813760  | 16 | 16 | 1829646 | 10932 | 8.4667 | 0.5499 | 0.3808  | 6.4263 | CHB |
| DKFZP566J2046 | GI_13654273-S | rs3848346  | 16 | 16 | 1829822 | 11108 | 8.4667 | 0.5499 | -0.3808 | 6.4263 | CHB |
| DKFZP566J2046 | GI_13654273-S | rs3848348  | 16 | 16 | 1830057 | 11343 | 8.4667 | 0.5499 | -0.3808 | 6.4263 | CHB |
| DKFZP566J2046 | GI_13654273-S | rs9806787  | 16 | 16 | 1833344 | 14630 | 8.4144 | 0.5738 | -0.3863 | 6.4263 | CHB |
| DKFZP566J2046 | GI_13654273-S | rs11248898 | 16 | 16 | 1833810 | 15096 | 7.9988 | 0.5443 | -0.3755 | 6.4263 | CHB |
| DKFZP566J2046 | GI_13654273-S | rs9806945  | 16 | 16 | 1834962 | 16248 | 8.4667 | 0.5499 | 0.3808  | 6.4263 | CHB |
| DKFZP566J2046 | GI_13654273-S | rs11640407 | 16 | 16 | 1837495 | 18781 | 8.4667 | 0.5499 | 0.3808  | 6.4263 | CHB |
| DKFZP566J2046 | GI_13654273-S | rs11642885 | 16 | 16 | 1838377 | 19663 | 8.5666 | 0.5632 | -0.3891 | 6.4263 | CHB |
| DKFZP566J2046 | GI_13654273-S | rs2492886  | 16 | 16 | 1839951 | 21237 | 7.9912 | 0.5529 | -0.3817 | 6.4263 | CHB |
| DKFZP566J2046 | GI_13654273-S | rs2575359  | 16 | 16 | 1840036 | 21322 | 8.5666 | 0.5632 | 0.3891  | 6.4263 | CHB |
| DKFZP566J2046 | GI_13654273-S | rs1657116  | 16 | 16 | 1841479 | 22765 | 7.8986 | 0.5306 | 0.3935  | 6.4263 | CHB |
| DKFZP566J2046 | GI_13654273-S | rs1742419  | 16 | 16 | 1841810 | 23096 | 8.4667 | 0.5499 | -0.3808 | 6.4263 | CHB |
| DKFZP566J2046 | GI_13654273-S | rs1625279  | 16 | 16 | 1841845 | 23131 | 8.4667 | 0.5499 | 0.3808  | 6.4263 | CHB |
| DKFZP566J2046 | GI_13654273-S | rs1625393  | 16 | 16 | 1841894 | 23180 | 8.4667 | 0.5499 | -0.3808 | 6.4263 | CHB |
| DKFZP566J2046 | GI_13654273-S | rs1617255  | 16 | 16 | 1842890 | 24176 | 8.4667 | 0.5499 | 0.3808  | 6.4263 | CHB |
| DKFZP566J2046 | GI_13654273-S | rs1657117  | 16 | 16 | 1843652 | 24938 | 8.4667 | 0.5499 | 0.3808  | 6.4263 | CHB |
| DKFZP566J2046 | GI_13654273-S | rs1742422  | 16 | 16 | 1843939 | 25225 | 8.1854 | 0.5448 | -0.3809 | 6.4263 | CHB |
| DKFZP566J2046 | GI_13654273-S | rs1742423  | 16 | 16 | 1844323 | 25609 | 8.4667 | 0.5499 | 0.3808  | 6.4263 | CHB |
| DKFZP566J2046 | GI_13654273-S | rs11643972 | 16 | 16 | 1844546 | 25832 | 8.4667 | 0.5499 | 0.3808  | 6.4263 | CHB |
| DKFZP566J2046 | GI_13654273-S | rs11643973 | 16 | 16 | 1844557 | 25843 | 8.5289 | 0.5702 | 0.3890  | 6.4263 | CHB |
| DKFZP566J2046 | GI_13654273-S | rs7199384  | 16 | 16 | 1844588 | 25874 | 8.4667 | 0.5499 | -0.3808 | 6.4263 | CHB |
| DKFZP566J2046 | GI_13654273-S | rs1657118  | 16 | 16 | 1844641 | 25927 | 8.4667 | 0.5499 | -0.3808 | 6.4263 | CHB |
| DKFZP566J2046 | GI_13654273-S | rs1742426  | 16 | 16 | 1844812 | 26098 | 8.4667 | 0.5499 | -0.3808 | 6.4263 | CHB |
| DKFZP566J2046 | GI_13654273-S | rs1742428  | 16 | 16 | 1844960 | 26246 | 7.6504 | 0.5265 | -0.3900 | 6.4263 | CHB |
| DKFZP566J2046 | GI_13654273-S | rs1742429  | 16 | 16 | 1845007 | 26293 | 8.4667 | 0.5499 | -0.3808 | 6.4263 | CHB |
| DKFZP566J2046 | GI_13654273-S | rs2754186  | 16 | 16 | 1845764 | 27050 | 8.4667 | 0.5499 | 0.3808  | 6.4263 | CHB |
| DKFZP566J2046 | GI_13654273-S | rs1742431  | 16 | 16 | 1845875 | 27161 | 8.4667 | 0.5499 | -0.3808 | 6.4263 | CHB |
| DKFZP566J2046 | GI_13654273-S | rs1657120  | 16 | 16 | 1847224 | 28510 | 7.7666 | 0.5506 | -0.3902 | 6.4263 | CHB |
| DKFZP566J2046 | GI_13654273-S | rs1742432  | 16 | 16 | 1847303 | 28589 | 8.4667 | 0.5499 | -0.3808 | 6.4263 | CHB |
| DKFZP566J2046 | GI_13654273-S | rs428123   | 16 | 16 | 1847653 | 28939 | 8.4667 | 0.5499 | 0.3808  | 6.4263 | CHB |
| DKFZP566J2046 | GI_13654273-S | rs408286   | 16 | 16 | 1847701 | 28987 | 8.1989 | 0.5633 | -0.3928 | 6.4263 | CHB |
| DKFZP566J2046 | GI_13654273-S | rs411193   | 16 | 16 | 1847947 | 29233 | 8.4667 | 0.5499 | -0.3808 | 6.4263 | CHB |
| DKFZP566J2046 | GI_13654273-S | rs410465   | 16 | 16 | 1848219 | 29505 | 8.4667 | 0.5499 | -0.3808 | 6.4263 | CHB |
| DKFZP566J2046 | GI_13654273-S | rs448374   | 16 | 16 | 1848257 | 29543 | 8.4667 | 0.5499 | -0.3808 | 6.4263 | CHB |
| DKFZP566J2046 | GI_13654273-S | rs1657121  | 16 | 16 | 1848340 | 29626 | 8.4667 | 0.5499 | -0.3808 | 6.4263 | CHB |
| DKFZP566J2046 | GI_13654273-S | rs1657122  | 16 | 16 | 1848501 | 29787 | 8.4667 | 0.5499 | -0.3808 | 6.4263 | CHB |
| DKFZP566J2046 | GI_13654273-S | rs449530   | 16 | 16 | 1848669 | 29955 | 8.4667 | 0.5499 | -0.3808 | 6.4263 | CHB |
| DKFZP566J2046 | GI_13654273-S | rs420681   | 16 | 16 | 1848750 | 30036 | 8.4667 | 0.5499 | -0.3808 | 6.4263 | CHB |
| DKFZP566J2046 | GI_13654273-S | rs448961   | 16 | 16 | 1848888 | 30174 | 8.4667 | 0.5499 | -0.3808 | 6.4263 | CHB |
| DKFZP566J2046 | GI_13654273-S | rs2754187  | 16 | 16 | 1849108 | 30394 | 8.4667 | 0.5499 | 0.3808  | 6.4263 | CHB |
| DKFZP566J2046 | GI_13654273-S | rs2492881  | 16 | 16 | 1854890 | 36176 | 7.9776 | 0.5261 | 0.3711  | 6.4263 | CHB |
| DKFZP566J2046 | GI_13654273-S | rs378201   | 16 | 16 | 1855035 | 36321 | 7.9776 | 0.5261 | 0.3711  | 6.4263 | CHB |
| DKFZP566J2046 | GI_13654273-S | rs404413   | 16 | 16 | 1855056 | 36342 | 7.4049 | 0.5223 | 0.3653  | 6.4263 | CHB |
| DKFZP566J2046 | GI_13654273-S | rs11640914 | 16 | 16 | 1855459 | 36745 | 7.6369 | 0.5172 | -0.3651 | 6.4263 | CHB |
| DKFZP566J2046 | GI_13654273-S | rs453494   | 16 | 16 | 1856104 | 37390 | 7.9776 | 0.5261 | 0.3711  | 6.4263 | CHB |
| DKFZP566J2046 | GI_13654273-S | rs404772   | 16 | 16 | 1857175 | 38461 | 7.8345 | 0.5273 | -0.3745 | 6.4263 | CHB |
| DKFZP566J2046 | GI_13654273-S | rs9935266  | 16 | 16 | 1859452 | 40738 | 7.9776 | 0.5261 | -0.3711 | 6.4263 | CHB |
| DKFZP566J2046 | GI_13654273-S | rs447782   | 16 | 16 | 1860317 | 41603 | 7.9776 | 0.5261 | -0.3711 | 6.4263 | CHB |
| DKFZP566J2046 | GI_13654273-S | rs1657094  | 16 | 16 | 1860630 | 41916 | 7.9776 | 0.5261 | 0.3711  | 6.4263 | CHB |
| DKFZP566J2046 | GI_13654273-S | rs1657095  | 16 | 16 | 1860679 | 41965 | 7.9776 | 0.5261 | -0.3711 | 6.4263 | CHB |
| DKFZP566J2046 | GI_13654273-S | rs2917523  | 16 | 16 | 1860741 | 42027 | 7.9776 | 0.5261 | 0.3711  | 6.4263 | CHB |
| DKFZP566J2046 | GI_13654273-S | rs2974856  | 16 | 16 | 1860758 | 42044 | 7.9776 | 0.5261 | 0.3711  | 6.4263 | CHB |
| DKFZP566J2046 | GI_13654273-S | rs2982235  | 16 | 16 | 1860793 | 42079 | 7.9776 | 0.5261 | -0.3711 | 6.4263 | CHB |
| DKFZP566J2046 | GI_13654273-S | rs173164   | 16 | 16 | 1865280 | 46566 | 6.5976 | 0.4523 | 0.3273  | 6.4263 | CHB |
| DKFZP566J2046 | GI_13654273-S | rs1742462  | 16 | 16 | 1886063 | 67349 | 6.9417 | 0.4717 | 0.3350  | 6.4263 | CHB |
| DKFZP566J2046 | GI_13654273-S | rs911391   | 16 | 16 | 1887017 | 68303 | 6.9417 | 0.4717 | -0.3350 | 6.4263 | CHB |
| DKFZP566J2046 | GI_13654273-S | rs911392   | 16 | 16 | 1887260 | 68546 | 6.9417 | 0.4717 | -0.3350 | 6.4263 | CHB |
| DKFZP566J2046 | GI_13654273-S | rs1742464  | 16 | 16 | 1887336 | 68622 | 6.9417 | 0.4717 | 0.3350  | 6.4263 | CHB |

|               |               |            |    |    |          |        |         |        |         |        |     |
|---------------|---------------|------------|----|----|----------|--------|---------|--------|---------|--------|-----|
| DKFZP566J2046 | GI_13654273-S | rs2982447  | 16 | 16 | 1887414  | 68700  | 6.9417  | 0.4717 | -0.3350 | 6.4263 | CHB |
| DKFZP566J2046 | GI_13654273-S | rs1657133  | 16 | 16 | 1890301  | 71587  | 6.9417  | 0.4717 | 0.3350  | 6.4263 | CHB |
| DKFZP566J2046 | GI_13654273-S | rs1742472  | 16 | 16 | 1893041  | 74327  | 6.9816  | 0.4903 | -0.3408 | 6.4263 | CHB |
| DKFZP566J2046 | GI_13654273-S | rs2906912  | 16 | 16 | 1893152  | 74438  | 8.2809  | 0.5673 | -0.3860 | 6.4263 | CHB |
| DKFZp761A132  | GI_14150048-S | rs2074357  | 16 | 16 | 2927003  | 12548  | 5.6039  | 0.3925 | -0.1829 | 5.3748 | CHB |
| ZNF213        | GI_32698677-S | rs224185   | 16 | 16 | 3143036  | 10533  | 5.8407  | 0.4073 | 0.1213  | 5.7435 | CHB |
| ZNF213        | GI_32698677-S | rs170381   | 16 | 16 | 3144728  | 12225  | 6.1681  | 0.4272 | 0.1257  | 5.7435 | CHB |
| LOC342346     | GI_37541802-S | rs2075637  | 16 | 16 | 4878281  | 288014 | 5.8953  | 0.4887 | -0.1501 | 5.8458 | CHB |
| FLJ32871      | GI_21389568-S | rs2541517  | 16 | 16 | 10664294 | 35278  | 6.9339  | 0.4793 | 0.3772  | 5.7997 | CHB |
| FLJ32871      | GI_21389568-S | rs1548955  | 16 | 16 | 10664795 | 35779  | 6.3853  | 0.4400 | -0.3537 | 5.7997 | CHB |
| FLJ32871      | GI_21389568-S | rs2719680  | 16 | 16 | 10667209 | 38193  | 5.9284  | 0.4279 | 0.3660  | 5.7997 | CHB |
| FLJ32871      | GI_21389568-S | rs2719681  | 16 | 16 | 10667885 | 38869  | 5.8281  | 0.4378 | -0.3556 | 5.7997 | CHB |
| FLJ32871      | GI_21389568-S | rs2541513  | 16 | 16 | 10668135 | 39119  | 7.0480  | 0.4775 | -0.3775 | 5.7997 | CHB |
| FLJ32871      | GI_21389568-S | rs9935466  | 16 | 16 | 10668664 | 39648  | 6.0983  | 0.4550 | -0.3695 | 5.7997 | CHB |
| FLJ32871      | GI_21389568-S | rs2541508  | 16 | 16 | 10669832 | 40816  | 7.0480  | 0.4775 | 0.3775  | 5.7997 | CHB |
| FLJ32871      | GI_21389568-S | rs4780974  | 16 | 16 | 10670239 | 41223  | 6.1514  | 0.4584 | -0.3711 | 5.7997 | CHB |
| FLJ32871      | GI_21389568-S | rs2719695  | 16 | 16 | 10671946 | 42930  | 7.0480  | 0.4775 | -0.3775 | 5.7997 | CHB |
| FLJ32871      | GI_21389568-S | rs9939594  | 16 | 16 | 10681786 | 52770  | 6.9125  | 0.4781 | 0.3773  | 5.7997 | CHB |
| FLJ32871      | GI_21389568-S | rs12446112 | 16 | 16 | 10683162 | 54146  | 6.4728  | 0.4451 | -0.3814 | 5.7997 | CHB |
| LOC339053     | GI_29746836-S | rs7187976  | 16 | 16 | 19615697 | 9726   | 7.1933  | 0.4854 | 0.4503  | 6.0728 | CHB |
| LOC339053     | GI_29746836-S | rs9935063  | 16 | 16 | 19618203 | 7220   | 7.1933  | 0.4854 | 0.4503  | 6.0728 | CHB |
| LOC339053     | GI_29746836-S | rs6497395  | 16 | 16 | 19618970 | 6453   | 6.4190  | 0.4420 | -0.4395 | 6.0728 | CHB |
| LOC339053     | GI_29746836-S | rs1544352  | 16 | 16 | 19621383 | 4040   | 7.1933  | 0.4854 | -0.4503 | 6.0728 | CHB |
| LOC339053     | GI_29746836-S | rs720176   | 16 | 16 | 19629016 | 3593   | 7.1933  | 0.4854 | -0.4503 | 6.0728 | CHB |
| LOC339053     | GI_29746836-S | rs11644834 | 16 | 16 | 19629810 | 4387   | 7.1933  | 0.4854 | 0.4503  | 6.0728 | CHB |
| LOC339053     | GI_29746836-S | rs3829539  | 16 | 16 | 19629867 | 4444   | 7.1933  | 0.4854 | -0.4503 | 6.0728 | CHB |
| LOC339053     | GI_29746836-S | rs2074037  | 16 | 16 | 19632631 | 7208   | 7.1933  | 0.4854 | -0.4503 | 6.0728 | CHB |
| LOC339053     | GI_29746836-S | rs4780822  | 16 | 16 | 19635499 | 10076  | 7.1933  | 0.4854 | 0.4503  | 6.0728 | CHB |
| LOC339053     | GI_29746836-S | rs11645910 | 16 | 16 | 19635956 | 10533  | 7.1933  | 0.4854 | 0.4503  | 6.0728 | CHB |
| LOC339053     | GI_29746836-S | rs4782272  | 16 | 16 | 19636517 | 11094  | 6.7012  | 0.4662 | -0.4431 | 6.0728 | CHB |
| LOC339053     | GI_29746836-S | rs6497396  | 16 | 16 | 19643198 | 17775  | 7.1933  | 0.4854 | -0.4503 | 6.0728 | CHB |
| LOC339053     | GI_29746836-S | rs7206184  | 16 | 16 | 19646503 | 21080  | 7.1933  | 0.4854 | 0.4503  | 6.0728 | CHB |
| LOC339053     | GI_29746836-S | rs739564   | 16 | 16 | 19647738 | 22315  | 7.1933  | 0.4854 | -0.4503 | 6.0728 | CHB |
| LOC339053     | GI_29746836-S | rs1858973  | 16 | 16 | 19651150 | 25727  | 6.9786  | 0.4818 | 0.4487  | 6.0728 | CHB |
| LOC339053     | GI_29746836-S | rs8055485  | 16 | 16 | 19657552 | 32129  | 7.1933  | 0.4854 | 0.4503  | 6.0728 | CHB |
| LOC339053     | GI_29746836-S | rs8056301  | 16 | 16 | 19657776 | 32353  | 7.1933  | 0.4854 | -0.4503 | 6.0728 | CHB |
| LOC339053     | GI_29746836-S | rs1858975  | 16 | 16 | 19660835 | 35412  | 7.1933  | 0.4854 | 0.4503  | 6.0728 | CHB |
| LOC339053     | GI_29746836-S | rs1858974  | 16 | 16 | 19660957 | 35534  | 7.1933  | 0.4854 | 0.4503  | 6.0728 | CHB |
| LOC339053     | GI_29746836-S | rs4782277  | 16 | 16 | 19666386 | 40963  | 7.1933  | 0.4854 | 0.4503  | 6.0728 | CHB |
| LOC339053     | GI_29746836-S | rs4782279  | 16 | 16 | 19666508 | 41085  | 7.1933  | 0.4854 | 0.4503  | 6.0728 | CHB |
| LOC339053     | GI_29746836-S | rs4780826  | 16 | 16 | 19667076 | 41653  | 7.1933  | 0.4854 | -0.4503 | 6.0728 | CHB |
| LOC339053     | GI_29746836-S | rs16951276 | 16 | 16 | 19670436 | 45013  | 7.3933  | 0.5044 | 0.4587  | 6.0728 | CHB |
| LOC339053     | GI_29746836-S | rs6497401  | 16 | 16 | 19673535 | 48112  | 7.1933  | 0.4854 | 0.4503  | 6.0728 | CHB |
| LOC339053     | GI_29746836-S | rs6497402  | 16 | 16 | 19676895 | 51472  | 7.1933  | 0.4854 | 0.4503  | 6.0728 | CHB |
| LOC339053     | GI_29746836-S | rs4782281  | 16 | 16 | 19677324 | 51901  | 7.1933  | 0.4854 | -0.4503 | 6.0728 | CHB |
| LOC339053     | GI_29746836-S | rs8052404  | 16 | 16 | 19682214 | 56791  | 7.1933  | 0.4854 | 0.4503  | 6.0728 | CHB |
| LCMT1         | GI_15082255-I | rs2288742  | 16 | 16 | 25025207 | 51435  | 6.2779  | 0.4337 | 0.2421  | 6.021  | CHB |
| LCMT1         | GI_15082255-I | rs7188975  | 16 | 16 | 25044950 | 71178  | 18.6335 | 0.8471 | 0.3508  | 6.021  | CHB |
| LCMT1         | GI_15082255-I | rs11074678 | 16 | 16 | 25057227 | 83455  | 18.6335 | 0.8471 | 0.3508  | 6.021  | CHB |
| LCMT1         | GI_15082255-I | rs277908   | 16 | 16 | 25062635 | 88863  | 18.6335 | 0.8471 | 0.3508  | 6.021  | CHB |
| LCMT1         | GI_15082255-I | rs277913   | 16 | 16 | 25066244 | 92472  | 16.2886 | 0.8574 | -0.3951 | 6.021  | CHB |
| LCMT1         | GI_15082255-I | rs277917   | 16 | 16 | 25066646 | 92874  | 18.6335 | 0.8471 | -0.3508 | 6.021  | CHB |
| LCMT1         | GI_15082255-I | rs277886   | 16 | 16 | 25070005 | 96233  | 18.6335 | 0.8471 | -0.3508 | 6.021  | CHB |
| LCMT1         | GI_15082255-I | rs277898   | 16 | 16 | 25079311 | 105539 | 16.0168 | 0.7979 | 0.3245  | 6.021  | CHB |
| LCMT1         | GI_15082255-I | rs277900   | 16 | 16 | 25081500 | 107728 | 11.3934 | 0.6872 | -0.3096 | 6.021  | CHB |
| LCMT1         | GI_15082255-I | rs277903   | 16 | 16 | 25082623 | 108851 | 14.7747 | 0.7854 | 0.3201  | 6.021  | CHB |
| LCMT1         | GI_15082255-I | rs277891   | 16 | 16 | 25088257 | 114485 | 13.4841 | 0.7354 | 0.3084  | 6.021  | CHB |
| LCMT1         | GI_15082255-I | rs277893   | 16 | 16 | 25089212 | 115440 | 16.0168 | 0.7979 | 0.3245  | 6.021  | CHB |
| LCMT1         | GI_15082255-I | rs4787697  | 16 | 16 | 25111249 | 137477 | 10.1948 | 0.6249 | 0.3067  | 6.021  | CHB |

|         |               |            |    |    |          |        |        |        |         |        |     |
|---------|---------------|------------|----|----|----------|--------|--------|--------|---------|--------|-----|
| LCMT1   | GI_15082255-I | rs889117   | 16 | 16 | 25121484 | 147712 | 6.0409 | 0.4195 | 0.2225  | 6.021  | CHB |
| TK2     | GI_33636700-S | rs8056099  | 16 | 16 | 65067654 | 34593  | 6.4686 | 0.4449 | -0.6525 | 5.7009 | CHB |
| CKLFSF3 | GI_32130529-A | rs37166    | 16 | 16 | 65072621 | 132286 | 5.5586 | 0.3897 | -0.7756 | 5.5543 | CHB |
| TK2     | GI_33636700-S | rs37166    | 16 | 16 | 65072621 | 29626  | 6.7678 | 0.4620 | -0.6702 | 5.7009 | CHB |
| TK2     | GI_33636700-S | rs40191    | 16 | 16 | 65074827 | 27420  | 5.8045 | 0.4281 | 0.5791  | 5.7009 | CHB |
| CKLFSF3 | GI_32130529-A | rs16956575 | 16 | 16 | 65079376 | 125531 | 6.4033 | 0.4569 | -0.7264 | 5.5543 | CHB |
| TK2     | GI_33636700-S | rs16956575 | 16 | 16 | 65079376 | 22871  | 7.7523 | 0.5317 | -0.6289 | 5.7009 | CHB |
| CKLF    | GI_10092611-A | rs16956585 | 16 | 16 | 65085360 | 58696  | 6.2070 | 0.4295 | 0.7314  | 5.5567 | CHB |
| CKLFSF3 | GI_32130529-A | rs16956585 | 16 | 16 | 65085360 | 119547 | 7.0115 | 0.4755 | 0.7777  | 5.5543 | CHB |
| TK2     | GI_33636700-S | rs16956585 | 16 | 16 | 65085360 | 16887  | 8.3854 | 0.5460 | 0.6623  | 5.7009 | CHB |
| TK2     | GI_33636700-S | rs1428106  | 16 | 16 | 65093758 | 8489   | 5.8460 | 0.4076 | -0.4911 | 5.7009 | CHB |
| CKLFSF3 | GI_32130529-A | rs3743711  | 16 | 16 | 65100458 | 104449 | 5.7775 | 0.4034 | -0.7225 | 5.5543 | CHB |
| TK2     | GI_33636700-S | rs3743711  | 16 | 16 | 65100458 | 1789   | 7.1619 | 0.4837 | -0.6278 | 5.7009 | CHB |
| CKLFSF3 | GI_32130529-A | rs3743712  | 16 | 16 | 65101151 | 103756 | 5.7775 | 0.4034 | 0.7225  | 5.5543 | CHB |
| TK2     | GI_33636700-S | rs3743712  | 16 | 16 | 65101151 | 1096   | 7.1619 | 0.4837 | 0.6278  | 5.7009 | CHB |
| TK2     | GI_33636700-S | rs880530   | 16 | 16 | 65102607 | 360    | 7.1505 | 0.4997 | 0.6438  | 5.7009 | CHB |
| CKLFSF3 | GI_32130529-A | rs16956603 | 16 | 16 | 65104291 | 100616 | 5.8241 | 0.4137 | 0.7399  | 5.5543 | CHB |
| TK2     | GI_33636700-S | rs16956603 | 16 | 16 | 65104291 | 2044   | 6.8623 | 0.4753 | 0.6247  | 5.7009 | CHB |
| CKLFSF3 | GI_32130529-A | rs2241618  | 16 | 16 | 65104772 | 100135 | 5.7775 | 0.4034 | 0.7225  | 5.5543 | CHB |
| TK2     | GI_33636700-S | rs2241618  | 16 | 16 | 65104772 | 2525   | 7.1619 | 0.4837 | 0.6278  | 5.7009 | CHB |
| CKLFSF3 | GI_32130529-A | rs16956609 | 16 | 16 | 65106781 | 98126  | 6.0723 | 0.4621 | -0.7688 | 5.5543 | CHB |
| TK2     | GI_33636700-S | rs16956609 | 16 | 16 | 65106781 | 4534   | 7.7087 | 0.5570 | -0.6649 | 5.7009 | CHB |
| CKLF    | GI_10092611-A | rs3826160  | 16 | 16 | 65113246 | 30810  | 5.9346 | 0.4131 | -0.7748 | 5.5567 | CHB |
| CKLFSF3 | GI_32130529-A | rs3826160  | 16 | 16 | 65113246 | 91661  | 6.6892 | 0.4575 | -0.8239 | 5.5543 | CHB |
| TK2     | GI_33636700-S | rs3826160  | 16 | 16 | 65113246 | 10999  | 7.3358 | 0.4931 | -0.6806 | 5.7009 | CHB |
| CKLFSF3 | GI_32130529-A | rs13334391 | 16 | 16 | 65114919 | 89988  | 5.7775 | 0.4034 | 0.7225  | 5.5543 | CHB |
| TK2     | GI_33636700-S | rs13334391 | 16 | 16 | 65114919 | 12672  | 7.1619 | 0.4837 | 0.6278  | 5.7009 | CHB |
| CKLF    | GI_10092611-A | rs755716   | 16 | 16 | 65119772 | 24284  | 6.6984 | 0.4827 | -0.8601 | 5.5567 | CHB |
| CKLFSF3 | GI_32130529-A | rs755716   | 16 | 16 | 65119772 | 85135  | 6.9789 | 0.4988 | -0.8790 | 5.5543 | CHB |
| TK2     | GI_33636700-S | rs755716   | 16 | 16 | 65119772 | 17525  | 7.2359 | 0.5131 | -0.7166 | 5.7009 | CHB |
| CKLF    | GI_10092611-A | rs755717   | 16 | 16 | 65119801 | 24255  | 6.2070 | 0.4295 | -0.7314 | 5.5567 | CHB |
| CKLFSF3 | GI_32130529-A | rs755717   | 16 | 16 | 65119801 | 85106  | 7.0115 | 0.4755 | -0.7777 | 5.5543 | CHB |
| TK2     | GI_33636700-S | rs755717   | 16 | 16 | 65119801 | 17554  | 8.3854 | 0.5460 | -0.6623 | 5.7009 | CHB |
| CKLFSF3 | GI_32130529-A | rs1366213  | 16 | 16 | 65132315 | 72592  | 5.9320 | 0.4204 | -0.7644 | 5.5543 | CHB |
| TK2     | GI_33636700-S | rs1366213  | 16 | 16 | 65132315 | 30068  | 6.4455 | 0.4513 | -0.6326 | 5.7009 | CHB |
| CKLFSF3 | GI_32130529-A | rs4783639  | 16 | 16 | 65134031 | 70876  | 6.2838 | 0.4341 | -0.8036 | 5.5543 | CHB |
| TK2     | GI_33636700-S | rs4783639  | 16 | 16 | 65134031 | 31784  | 6.8094 | 0.4643 | -0.6614 | 5.7009 | CHB |
| CKLF    | GI_10092611-A | rs3743713  | 16 | 16 | 65140529 | 3527   | 6.3833 | 0.4399 | 0.8108  | 5.5567 | CHB |
| CKLFSF3 | GI_32130529-A | rs3743713  | 16 | 16 | 65140529 | 64378  | 7.2341 | 0.4876 | 0.8627  | 5.5543 | CHB |
| TK2     | GI_33636700-S | rs3743713  | 16 | 16 | 65140529 | 38282  | 8.6324 | 0.5577 | 0.7333  | 5.7009 | CHB |
| TK2     | GI_33636700-S | rs725131   | 16 | 16 | 65143211 | 40964  | 6.8855 | 0.4686 | 0.5399  | 5.7009 | CHB |
| CKLFSF3 | GI_32130529-A | rs12449200 | 16 | 16 | 65148073 | 56834  | 5.7117 | 0.3993 | -0.7931 | 5.5543 | CHB |
| TK2     | GI_33636700-S | rs12449200 | 16 | 16 | 65148073 | 45826  | 6.6294 | 0.4541 | -0.6719 | 5.7009 | CHB |
| CKLFSF3 | GI_32130529-A | rs8058090  | 16 | 16 | 65150568 | 54339  | 5.7117 | 0.3993 | -0.7931 | 5.5543 | CHB |
| TK2     | GI_33636700-S | rs8058090  | 16 | 16 | 65150568 | 48321  | 6.6294 | 0.4541 | -0.6719 | 5.7009 | CHB |
| TK2     | GI_33636700-S | rs16956693 | 16 | 16 | 65151495 | 49248  | 6.5248 | 0.4481 | -0.5099 | 5.7009 | CHB |
| TK2     | GI_33636700-S | rs13332711 | 16 | 16 | 65154144 | 51897  | 6.5248 | 0.4481 | -0.5099 | 5.7009 | CHB |
| CKLFSF3 | GI_32130529-A | rs2232728  | 16 | 16 | 65157274 | 47633  | 5.7117 | 0.3993 | -0.7931 | 5.5543 | CHB |
| TK2     | GI_33636700-S | rs2232728  | 16 | 16 | 65157274 | 55027  | 6.6294 | 0.4541 | -0.6719 | 5.7009 | CHB |
| TK2     | GI_33636700-S | rs7193473  | 16 | 16 | 65157980 | 55733  | 6.8855 | 0.4686 | -0.5399 | 5.7009 | CHB |
| CKLFSF3 | GI_32130529-A | rs4783568  | 16 | 16 | 65159533 | 45374  | 5.7117 | 0.3993 | -0.7931 | 5.5543 | CHB |
| TK2     | GI_33636700-S | rs4783568  | 16 | 16 | 65159533 | 57286  | 6.6294 | 0.4541 | -0.6719 | 5.7009 | CHB |
| CKLFSF3 | GI_32130529-A | rs10500537 | 16 | 16 | 65160772 | 44135  | 5.7117 | 0.3993 | -0.7931 | 5.5543 | CHB |
| TK2     | GI_33636700-S | rs10500537 | 16 | 16 | 65160772 | 58525  | 6.6294 | 0.4541 | -0.6719 | 5.7009 | CHB |
| CKLFSF3 | GI_32130529-A | rs4783569  | 16 | 16 | 65162105 | 42802  | 5.7117 | 0.3993 | -0.7931 | 5.5543 | CHB |
| TK2     | GI_33636700-S | rs4783569  | 16 | 16 | 65162105 | 59858  | 6.6294 | 0.4541 | -0.6719 | 5.7009 | CHB |
| TK2     | GI_33636700-S | rs4783678  | 16 | 16 | 65163456 | 61209  | 6.5029 | 0.4547 | -0.6522 | 5.7009 | CHB |
| CKLFSF3 | GI_32130529-A | rs4783679  | 16 | 16 | 65163498 | 41409  | 5.7117 | 0.3993 | 0.7931  | 5.5543 | CHB |
| TK2     | GI_33636700-S | rs4783679  | 16 | 16 | 65163498 | 61251  | 6.6294 | 0.4541 | 0.6719  | 5.7009 | CHB |

|           |               |            |    |    |          |        |         |        |         |        |     |
|-----------|---------------|------------|----|----|----------|--------|---------|--------|---------|--------|-----|
| TK2       | GI_33636700-S | rs4783680  | 16 | 16 | 65163517 | 61270  | 6.1040  | 0.4309 | -0.6530 | 5.7009 | CHB |
| TK2       | GI_33636700-S | rs10500538 | 16 | 16 | 65165690 | 63443  | 6.4100  | 0.4492 | 0.7432  | 5.7009 | CHB |
| CKLFSF3   | GI_32130529-A | rs7187854  | 16 | 16 | 65165991 | 38916  | 5.7117  | 0.3993 | -0.7931 | 5.5543 | CHB |
| TK2       | GI_33636700-S | rs7187854  | 16 | 16 | 65165991 | 63744  | 6.6294  | 0.4541 | -0.6719 | 5.7009 | CHB |
| CKLFSF3   | GI_32130529-A | rs8054708  | 16 | 16 | 65167378 | 37529  | 5.7117  | 0.3993 | -0.7931 | 5.5543 | CHB |
| TK2       | GI_33636700-S | rs8054708  | 16 | 16 | 65167378 | 65131  | 6.6294  | 0.4541 | -0.6719 | 5.7009 | CHB |
| TK2       | GI_33636700-S | rs2290182  | 16 | 16 | 65171509 | 69262  | 5.8739  | 0.4094 | 0.4869  | 5.7009 | CHB |
| TK2       | GI_33636700-S | rs16956795 | 16 | 16 | 65172546 | 70299  | 6.2085  | 0.4373 | 0.6308  | 5.7009 | CHB |
| CKLFSF3   | GI_32130529-A | rs12446364 | 16 | 16 | 65173037 | 31870  | 5.7117  | 0.3993 | -0.7931 | 5.5543 | CHB |
| TK2       | GI_33636700-S | rs12446364 | 16 | 16 | 65173037 | 70790  | 6.6294  | 0.4541 | -0.6719 | 5.7009 | CHB |
| TK2       | GI_33636700-S | rs12447963 | 16 | 16 | 65174980 | 72733  | 6.4000  | 0.4487 | -0.6674 | 5.7009 | CHB |
| CKLFSF3   | GI_32130529-A | rs2305312  | 16 | 16 | 65179712 | 25195  | 5.7117  | 0.3993 | -0.7931 | 5.5543 | CHB |
| TK2       | GI_33636700-S | rs2305312  | 16 | 16 | 65179712 | 77465  | 6.6294  | 0.4541 | -0.6719 | 5.7009 | CHB |
| CKLFSF3   | GI_32130529-A | rs3816410  | 16 | 16 | 65179742 | 25165  | 5.7117  | 0.3993 | 0.7931  | 5.5543 | CHB |
| TK2       | GI_33636700-S | rs3816410  | 16 | 16 | 65179742 | 77495  | 6.6294  | 0.4541 | 0.6719  | 5.7009 | CHB |
| TK2       | GI_33636700-S | rs12448207 | 16 | 16 | 65189886 | 87639  | 6.4281  | 0.4425 | -0.5167 | 5.7009 | CHB |
| TK2       | GI_33636700-S | rs355936   | 16 | 16 | 65198619 | 96372  | 6.4281  | 0.4425 | 0.5167  | 5.7009 | CHB |
| CKLFSF3   | GI_32130529-A | rs355938   | 16 | 16 | 65200677 | 4230   | 5.9329  | 0.4130 | 0.8058  | 5.5543 | CHB |
| TK2       | GI_33636700-S | rs355938   | 16 | 16 | 65200677 | 98430  | 7.3712  | 0.4949 | 0.7000  | 5.7009 | CHB |
| TK2       | GI_33636700-S | rs355942   | 16 | 16 | 65208220 | 105973 | 6.6244  | 0.4699 | -0.7425 | 5.7009 | CHB |
| TK2       | GI_33636700-S | rs355944   | 16 | 16 | 65209746 | 107499 | 6.4281  | 0.4425 | -0.5167 | 5.7009 | CHB |
| CKLFSF3   | GI_32130529-A | rs355947   | 16 | 16 | 65213648 | 8741   | 5.9329  | 0.4130 | 0.8058  | 5.5543 | CHB |
| TK2       | GI_33636700-S | rs355947   | 16 | 16 | 65213648 | 111401 | 7.3712  | 0.4949 | 0.7000  | 5.7009 | CHB |
| TK2       | GI_33636700-S | rs355949   | 16 | 16 | 65214972 | 112725 | 6.4281  | 0.4425 | 0.5167  | 5.7009 | CHB |
| TK2       | GI_33636700-S | rs355950   | 16 | 16 | 65216525 | 114278 | 6.4281  | 0.4425 | -0.5167 | 5.7009 | CHB |
| TK2       | GI_33636700-S | rs165207   | 16 | 16 | 65217319 | 115072 | 6.4281  | 0.4425 | -0.5167 | 5.7009 | CHB |
| CKLFSF3   | GI_32130529-A | rs355974   | 16 | 16 | 65224138 | 19231  | 5.9329  | 0.4130 | -0.8058 | 5.5543 | CHB |
| TK2       | GI_33636700-S | rs355974   | 16 | 16 | 65224138 | 121891 | 7.3712  | 0.4949 | -0.7000 | 5.7009 | CHB |
| TK2       | GI_33636700-S | rs355971   | 16 | 16 | 65228152 | 125905 | 6.4281  | 0.4425 | 0.5167  | 5.7009 | CHB |
| TK2       | GI_33636700-S | rs48573    | 16 | 16 | 65229558 | 127311 | 6.4709  | 0.4528 | 0.5234  | 5.7009 | CHB |
| TK2       | GI_33636700-S | rs165203   | 16 | 16 | 65234862 | 132615 | 5.9432  | 0.4452 | 0.7303  | 5.7009 | CHB |
| CKLFSF3   | GI_32130529-A | rs165204   | 16 | 16 | 65234962 | 30055  | 5.9329  | 0.4130 | 0.8058  | 5.5543 | CHB |
| TK2       | GI_33636700-S | rs165204   | 16 | 16 | 65234962 | 132715 | 7.3712  | 0.4949 | 0.7000  | 5.7009 | CHB |
| CKLFSF3   | GI_32130529-A | rs165205   | 16 | 16 | 65235723 | 30816  | 5.9329  | 0.4130 | 0.8058  | 5.5543 | CHB |
| TK2       | GI_33636700-S | rs165205   | 16 | 16 | 65235723 | 133476 | 7.3712  | 0.4949 | 0.7000  | 5.7009 | CHB |
| TK2       | GI_33636700-S | rs355975   | 16 | 16 | 65237544 | 135297 | 6.4281  | 0.4425 | -0.5167 | 5.7009 | CHB |
| TK2       | GI_33636700-S | rs355965   | 16 | 16 | 65241531 | 139284 | 6.4281  | 0.4425 | -0.5167 | 5.7009 | CHB |
| TK2       | GI_33636700-S | rs355964   | 16 | 16 | 65241725 | 139478 | 6.4281  | 0.4425 | 0.5167  | 5.7009 | CHB |
| CKLFSF3   | GI_32130529-A | rs355963   | 16 | 16 | 65242380 | 37473  | 5.9329  | 0.4130 | -0.8058 | 5.5543 | CHB |
| TK2       | GI_33636700-S | rs355963   | 16 | 16 | 65242380 | 140133 | 7.3712  | 0.4949 | -0.7000 | 5.7009 | CHB |
| CKLFSF3   | GI_32130529-A | rs355960   | 16 | 16 | 65244211 | 39304  | 5.8516  | 0.4394 | -0.8479 | 5.5543 | CHB |
| TK2       | GI_33636700-S | rs355960   | 16 | 16 | 65244211 | 141964 | 6.5044  | 0.4799 | -0.7559 | 5.7009 | CHB |
| TK2       | GI_33636700-S | rs355959   | 16 | 16 | 65245604 | 143357 | 6.4281  | 0.4425 | -0.5167 | 5.7009 | CHB |
| TK2       | GI_33636700-S | rs355958   | 16 | 16 | 65246064 | 143817 | 6.2464  | 0.4395 | -0.5101 | 5.7009 | CHB |
| CKLFSF3   | GI_32130529-A | rs355956   | 16 | 16 | 65250873 | 45966  | 5.9329  | 0.4130 | 0.8058  | 5.5543 | CHB |
| TK2       | GI_33636700-S | rs355956   | 16 | 16 | 65250873 | 148626 | 7.3712  | 0.4949 | 0.7000  | 5.7009 | CHB |
| CKLF      | GI_10092611-A | rs355955   | 16 | 16 | 65252414 | 108358 | 5.7099  | 0.4065 | -0.8615 | 5.5567 | CHB |
| CKLFSF3   | GI_32130529-A | rs355955   | 16 | 16 | 65252414 | 47507  | 6.2396  | 0.4391 | -0.8969 | 5.5543 | CHB |
| TK2       | GI_33636700-S | rs355955   | 16 | 16 | 65252414 | 150167 | 6.4913  | 0.4540 | -0.7333 | 5.7009 | CHB |
| CKLFSF3   | GI_32130529-A | rs355977   | 16 | 16 | 65258929 | 54022  | 6.5294  | 0.4727 | 1.0618  | 5.5543 | CHB |
| TK2       | GI_33636700-S | rs355976   | 16 | 16 | 65260199 | 157952 | 6.0305  | 0.4189 | -0.5208 | 5.7009 | CHB |
| TK2       | GI_33636700-S | rs355978   | 16 | 16 | 65261520 | 159273 | 6.0305  | 0.4189 | -0.5208 | 5.7009 | CHB |
| TK2       | GI_33636700-S | rs1668005  | 16 | 16 | 65268794 | 166547 | 6.0305  | 0.4189 | -0.5208 | 5.7009 | CHB |
| TK2       | GI_33636700-S | rs355929   | 16 | 16 | 65269870 | 167623 | 6.0305  | 0.4189 | 0.5208  | 5.7009 | CHB |
| TK2       | GI_33636700-S | rs355926   | 16 | 16 | 65270602 | 168355 | 6.0305  | 0.4189 | -0.5208 | 5.7009 | CHB |
| LOC283970 | GI_40217627-S | rs1469908  | 16 | 16 | 68321913 | 245937 | 9.9005  | 0.6218 | -0.9411 | 8.1631 | CHB |
| LOC283970 | GI_40217627-S | rs2965749  | 16 | 16 | 68329415 | 238435 | 11.5830 | 0.7119 | 1.0607  | 8.1631 | CHB |
| LOC283970 | GI_40217627-S | rs3811348  | 16 | 16 | 68340356 | 227494 | 8.8184  | 0.5662 | 0.8812  | 8.1631 | CHB |
| LOC283970 | GI_40217627-S | rs7186296  | 16 | 16 | 68366499 | 201351 | 11.9869 | 0.6898 | 0.9568  | 8.1631 | CHB |

|           |               |            |    |    |          |        |         |        |         |        |     |
|-----------|---------------|------------|----|----|----------|--------|---------|--------|---------|--------|-----|
| LOC283970 | GI_40217627-S | rs12927168 | 16 | 16 | 68398157 | 169693 | 11.2622 | 0.7009 | -1.1418 | 8.1631 | CHB |
| LOC283970 | GI_40217627-S | rs11648348 | 16 | 16 | 68448223 | 119627 | 10.7955 | 0.6480 | 1.0680  | 8.1631 | CHB |
| LOC283970 | GI_40217627-S | rs7202233  | 16 | 16 | 68451933 | 115917 | 10.7955 | 0.6480 | -1.0680 | 8.1631 | CHB |
| LOC283970 | GI_40217627-S | rs3790083  | 16 | 16 | 68452787 | 115063 | 10.7955 | 0.6480 | 1.0680  | 8.1631 | CHB |
| LOC283970 | GI_40217627-S | rs11075742 | 16 | 16 | 68456435 | 111415 | 10.7955 | 0.6480 | -1.0680 | 8.1631 | CHB |
| LOC283970 | GI_40217627-S | rs4985450  | 16 | 16 | 68458607 | 109243 | 10.7955 | 0.6480 | 1.0680  | 8.1631 | CHB |
| LOC283970 | GI_40217627-S | rs1466863  | 16 | 16 | 68461639 | 106211 | 10.7955 | 0.6480 | 1.0680  | 8.1631 | CHB |
| LOC283970 | GI_40217627-S | rs6499268  | 16 | 16 | 68464030 | 103820 | 8.5003  | 0.5600 | 1.0154  | 8.1631 | CHB |
| LOC283970 | GI_40217627-S | rs2133799  | 16 | 16 | 68470527 | 97323  | 10.7955 | 0.6480 | -1.0680 | 8.1631 | CHB |
| LOC283970 | GI_40217627-S | rs10852461 | 16 | 16 | 68486347 | 81503  | 9.5658  | 0.6168 | 1.1897  | 8.1631 | CHB |
| LOC283970 | GI_40217627-S | rs3748386  | 16 | 16 | 68532160 | 35690  | 20.3254 | 0.8724 | -1.2494 | 8.1631 | CHB |
| LOC283970 | GI_40217627-S | rs9939092  | 16 | 16 | 68596778 | 28928  | 18.4366 | 0.8439 | 1.1251  | 8.1631 | CHB |
| LOC283970 | GI_40217627-S | rs12930433 | 16 | 16 | 68608544 | 40694  | 17.7559 | 0.8391 | 1.1312  | 8.1631 | CHB |
| LOC283970 | GI_40217627-S | rs8058597  | 16 | 16 | 68639715 | 71865  | 18.0164 | 0.8436 | 1.0908  | 8.1631 | CHB |
| LOC283970 | GI_40217627-S | rs6499292  | 16 | 16 | 68661559 | 93709  | 18.4366 | 0.8439 | 1.1251  | 8.1631 | CHB |
| DHX38     | GI_41406095-S | rs7197453  | 16 | 16 | 70636628 | 67375  | 8.3163  | 0.5427 | -0.1719 | 5.4025 | CHB |
| DHX38     | GI_41406095-S | rs7197869  | 16 | 16 | 70636853 | 67150  | 7.2024  | 0.4941 | -0.1572 | 5.4025 | CHB |
| DHX38     | GI_41406095-S | rs8062041  | 16 | 16 | 70646465 | 57538  | 6.2324  | 0.4909 | 0.1546  | 5.4025 | CHB |
| DHX38     | GI_41406095-S | rs2000999  | 16 | 16 | 70665594 | 38409  | 7.2849  | 0.4903 | -0.1638 | 5.4025 | CHB |
| DHX38     | GI_41406095-S | rs2550038  | 16 | 16 | 70669514 | 34489  | 6.9681  | 0.4731 | 0.1724  | 5.4025 | CHB |
| DHX38     | GI_41406095-S | rs2550035  | 16 | 16 | 70670917 | 33086  | 6.7197  | 0.4754 | -0.1748 | 5.4025 | CHB |
| DHX38     | GI_41406095-S | rs11075920 | 16 | 16 | 70672739 | 31264  | 8.9734  | 0.5733 | 0.1776  | 5.4025 | CHB |
| DHX38     | GI_41406095-S | rs10492813 | 16 | 16 | 70679964 | 24039  | 6.9681  | 0.4731 | 0.1724  | 5.4025 | CHB |
| DHX38     | GI_41406095-S | rs3852781  | 16 | 16 | 70681057 | 22946  | 6.9681  | 0.4731 | 0.1724  | 5.4025 | CHB |
| DHX38     | GI_41406095-S | rs7191127  | 16 | 16 | 70681493 | 22510  | 8.9734  | 0.5733 | 0.1776  | 5.4025 | CHB |
| DHX38     | GI_41406095-S | rs7190995  | 16 | 16 | 70681658 | 22345  | 8.9734  | 0.5733 | 0.1776  | 5.4025 | CHB |
| DHX38     | GI_41406095-S | rs2303285  | 16 | 16 | 70681996 | 22007  | 6.9681  | 0.4731 | 0.1724  | 5.4025 | CHB |
| DHX38     | GI_41406095-S | rs3764311  | 16 | 16 | 70683118 | 20885  | 6.8022  | 0.4719 | 0.1719  | 5.4025 | CHB |
| DHX38     | GI_41406095-S | rs3764312  | 16 | 16 | 70683234 | 20769  | 8.9734  | 0.5733 | 0.1776  | 5.4025 | CHB |
| DHX38     | GI_41406095-S | rs10492814 | 16 | 16 | 70684015 | 19988  | 6.9681  | 0.4731 | -0.1724 | 5.4025 | CHB |
| DHX38     | GI_41406095-S | rs12924413 | 16 | 16 | 70687246 | 16757  | 7.1715  | 0.4924 | -0.1743 | 5.4025 | CHB |
| DHX38     | GI_41406095-S | rs1050361  | 16 | 16 | 70687704 | 16299  | 6.9681  | 0.4731 | 0.1724  | 5.4025 | CHB |
| DHX38     | GI_41406095-S | rs1050362  | 16 | 16 | 70688316 | 15687  | 8.9734  | 0.5733 | -0.1776 | 5.4025 | CHB |
| DHX38     | GI_41406095-S | rs12708928 | 16 | 16 | 70694728 | 9275   | 8.4345  | 0.5748 | -0.1750 | 5.4025 | CHB |
| DHX38     | GI_41406095-S | rs2240243  | 16 | 16 | 70695062 | 8941   | 8.1702  | 0.5619 | 0.1748  | 5.4025 | CHB |
| DHX38     | GI_41406095-S | rs12325142 | 16 | 16 | 70695613 | 8390   | 8.5111  | 0.5694 | 0.1826  | 5.4025 | CHB |
| DHX38     | GI_41406095-S | rs2074626  | 16 | 16 | 70696685 | 7318   | 9.1362  | 0.5892 | 0.1867  | 5.4025 | CHB |
| DHX38     | GI_41406095-S | rs8051882  | 16 | 16 | 70699573 | 4430   | 8.9734  | 0.5733 | 0.1776  | 5.4025 | CHB |
| DHX38     | GI_41406095-S | rs9926156  | 16 | 16 | 70700396 | 3607   | 8.7840  | 0.5822 | -0.1856 | 5.4025 | CHB |
| DHX38     | GI_41406095-S | rs2241412  | 16 | 16 | 70701785 | 2218   | 8.6246  | 0.5659 | -0.1766 | 5.4025 | CHB |
| DHX38     | GI_41406095-S | rs6499560  | 16 | 16 | 70705167 | 1164   | 8.9734  | 0.5733 | 0.1776  | 5.4025 | CHB |
| DHX38     | GI_41406095-S | rs8047377  | 16 | 16 | 70705840 | 1837   | 8.2355  | 0.5388 | -0.1737 | 5.4025 | CHB |
| DHX38     | GI_41406095-S | rs6499561  | 16 | 16 | 70705905 | 1902   | 7.7143  | 0.5671 | 0.1740  | 5.4025 | CHB |
| DHX38     | GI_41406095-S | rs6416742  | 16 | 16 | 70706562 | 2559   | 8.2355  | 0.5388 | 0.1737  | 5.4025 | CHB |
| DHX38     | GI_41406095-S | rs8044555  | 16 | 16 | 70710256 | 6253   | 8.3015  | 0.5420 | -0.1793 | 5.4025 | CHB |
| DHX38     | GI_41406095-S | rs7184169  | 16 | 16 | 70710434 | 6431   | 8.8992  | 0.5875 | 0.1815  | 5.4025 | CHB |
| DHX38     | GI_41406095-S | rs8050238  | 16 | 16 | 70711688 | 7685   | 9.1362  | 0.5892 | -0.1867 | 5.4025 | CHB |
| DHX38     | GI_41406095-S | rs16973716 | 16 | 16 | 70714343 | 10340  | 5.7457  | 0.4164 | -0.1564 | 5.4025 | CHB |
| DHX38     | GI_41406095-S | rs3812987  | 16 | 16 | 70716421 | 12418  | 8.0994  | 0.5321 | 0.1703  | 5.4025 | CHB |
| DHX38     | GI_41406095-S | rs8044868  | 16 | 16 | 70719603 | 15600  | 6.1872  | 0.4283 | 0.1586  | 5.4025 | CHB |
| DHX38     | GI_41406095-S | rs6499562  | 16 | 16 | 70720356 | 16353  | 6.2474  | 0.4475 | -0.1658 | 5.4025 | CHB |
| DHX38     | GI_41406095-S | rs7188058  | 16 | 16 | 70723357 | 19354  | 9.1040  | 0.5791 | 0.1774  | 5.4025 | CHB |
| DHX38     | GI_41406095-S | rs4238964  | 16 | 16 | 70732657 | 28654  | 6.2432  | 0.4317 | 0.1576  | 5.4025 | CHB |
| DHX38     | GI_41406095-S | rs3902135  | 16 | 16 | 70733321 | 29318  | 9.1040  | 0.5791 | 0.1774  | 5.4025 | CHB |
| DHX38     | GI_41406095-S | rs7198572  | 16 | 16 | 70740721 | 36718  | 9.4701  | 0.6127 | -0.1813 | 5.4025 | CHB |
| DHX38     | GI_41406095-S | rs8052338  | 16 | 16 | 70743175 | 39172  | 6.2432  | 0.4317 | 0.1576  | 5.4025 | CHB |
| DHX38     | GI_41406095-S | rs12928732 | 16 | 16 | 70746184 | 42181  | 8.2353  | 0.5388 | 0.1778  | 5.4025 | CHB |
| DHX38     | GI_41406095-S | rs13334151 | 16 | 16 | 70747228 | 43225  | 9.1040  | 0.5791 | 0.1774  | 5.4025 | CHB |
| DHX38     | GI_41406095-S | rs7202323  | 16 | 16 | 70774614 | 70611  | 5.7757  | 0.4033 | -0.1677 | 5.4025 | CHB |

|              |               |            |    |    |          |        |         |        |         |        |     |
|--------------|---------------|------------|----|----|----------|--------|---------|--------|---------|--------|-----|
| DHX38        | GI_41406095-S | rs12935232 | 16 | 16 | 70777485 | 73482  | 5.5264  | 0.3948 | -0.1561 | 5.4025 | CHB |
| DHX38        | GI_41406095-S | rs7186908  | 16 | 16 | 70777874 | 73871  | 5.7757  | 0.4033 | -0.1677 | 5.4025 | CHB |
| LOC197322    | GI_28372536-S | rs8052780  | 16 | 16 | 87710427 | 39146  | 6.5159  | 0.4989 | -1.2516 | 5.7489 | CHB |
| LOC197322    | GI_28372536-S | rs8053537  | 16 | 16 | 87710698 | 38875  | 6.2977  | 0.4349 | 1.1806  | 5.7489 | CHB |
| LOC197322    | GI_28372536-S | rs4782327  | 16 | 16 | 87711636 | 37937  | 6.2977  | 0.4349 | -1.1806 | 5.7489 | CHB |
| LOC197322    | GI_28372536-S | rs12443551 | 16 | 16 | 87712520 | 37053  | 5.7981  | 0.4533 | -1.2050 | 5.7489 | CHB |
| LOC197322    | GI_28372536-S | rs3785414  | 16 | 16 | 87777900 | 28327  | 6.5542  | 0.4498 | 1.1514  | 5.7489 | CHB |
| SPG7         | GI_40806172-I | rs12446145 | 16 | 16 | 88070196 | 61173  | 5.8941  | 0.4106 | 0.1255  | 5.8927 | CHB |
| SPG7         | GI_40806172-I | rs3809641  | 16 | 16 | 88101667 | 29702  | 6.5840  | 0.4515 | -0.1333 | 5.8927 | CHB |
| SPG7         | GI_40806172-I | rs3922634  | 16 | 16 | 88104267 | 27102  | 6.7982  | 0.4637 | 0.1282  | 5.8927 | CHB |
| SPG7         | GI_40806172-I | rs8046182  | 16 | 16 | 88108717 | 22652  | 6.5123  | 0.4552 | 0.1310  | 5.8927 | CHB |
| SPG7         | GI_40806172-I | rs8052076  | 16 | 16 | 88111310 | 20059  | 6.7982  | 0.4637 | 0.1282  | 5.8927 | CHB |
| SPG7         | GI_40806172-I | rs11862081 | 16 | 16 | 88115989 | 15380  | 6.7982  | 0.4637 | 0.1282  | 5.8927 | CHB |
| SPG7         | GI_40806172-I | rs3803680  | 16 | 16 | 88117744 | 13625  | 6.7982  | 0.4637 | 0.1282  | 5.8927 | CHB |
| SPG7         | GI_40806172-I | rs3803679  | 16 | 16 | 88118168 | 13201  | 6.7982  | 0.4637 | 0.1282  | 5.8927 | CHB |
| SPG7         | GI_40806172-I | rs3803677  | 16 | 16 | 88123224 | 8145   | 6.7982  | 0.4637 | 0.1282  | 5.8927 | CHB |
| SPG7         | GI_40806172-I | rs3803676  | 16 | 16 | 88123607 | 7762   | 6.7982  | 0.4637 | -0.1282 | 5.8927 | CHB |
| SPG7         | GI_40806172-I | rs463701   | 16 | 16 | 88126261 | 5108   | 6.7467  | 0.4608 | 0.1270  | 5.8927 | CHB |
| SPG7         | GI_40806172-I | rs11640186 | 16 | 16 | 88129507 | 1862   | 6.7467  | 0.4608 | -0.1270 | 5.8927 | CHB |
| SPG7         | GI_40806172-I | rs382745   | 16 | 16 | 88131087 | 282    | 6.7467  | 0.4608 | -0.1270 | 5.8927 | CHB |
| LOC197322    | GI_28372536-S | rs3751691  | 16 | 16 | 88155882 | 406309 | 6.2766  | 0.4336 | -1.5302 | 5.7489 | CHB |
| LOC197322    | GI_28372536-S | rs12709088 | 16 | 16 | 88157713 | 408140 | 6.2766  | 0.4336 | -1.5302 | 5.7489 | CHB |
| LOC197322    | GI_28372536-S | rs12709089 | 16 | 16 | 88157812 | 408239 | 6.2766  | 0.4336 | -1.5302 | 5.7489 | CHB |
| LOC197322    | GI_28372536-S | rs3751688  | 16 | 16 | 88161940 | 412367 | 9.0701  | 0.5776 | 1.6639  | 5.7489 | CHB |
| LOC197322    | GI_28372536-S | rs352935   | 16 | 16 | 88176081 | 426508 | 6.4550  | 0.4441 | -1.3895 | 5.7489 | CHB |
| LOC374758    | GI_37544593-S | rs8064453  | 17 | 17 | 265835   | 1665   | 10.8492 | 0.6500 | 0.2172  | 5.9141 | CHB |
| LOC400566    | GI_42661283-S | rs8064453  | 17 | 17 | 265835   | 1193   | 11.1985 | 0.6627 | 1.0844  | 5.8798 | CHB |
| LOC374758    | GI_37544593-S | rs6565726  | 17 | 17 | 272556   | 8386   | 9.5501  | 0.5985 | -0.2066 | 5.9141 | CHB |
| LOC400566    | GI_42661283-S | rs6565726  | 17 | 17 | 272556   | 7914   | 8.6217  | 0.5572 | -0.9872 | 5.8798 | CHB |
| DKFZP566H073 | GI_14149701-S | rs17224526 | 17 | 17 | 4758349  | 30828  | 5.9662  | 0.4150 | 0.3335  | 5.7398 | CHB |
| DERP6        | GI_44662825-I | rs1875673  | 17 | 17 | 7049230  | 47211  | 7.8537  | 0.5199 | 0.2851  | 6.1747 | CHB |
| DERP6        | GI_44662825-I | rs2521985  | 17 | 17 | 7062509  | 33932  | 7.2041  | 0.4860 | 0.2686  | 6.1747 | CHB |
| DERP6        | GI_44662825-I | rs222837   | 17 | 17 | 7073280  | 23161  | 6.4414  | 0.4944 | -0.2800 | 6.1747 | CHB |
| DERP6        | GI_44662825-I | rs222835   | 17 | 17 | 7074853  | 21588  | 8.3526  | 0.5530 | 0.2843  | 6.1747 | CHB |
| DERP6        | GI_44662825-I | rs222843   | 17 | 17 | 7086705  | 9736   | 8.3669  | 0.5451 | 0.2941  | 6.1747 | CHB |
| DERP6        | GI_44662825-I | rs402514   | 17 | 17 | 7098927  | 2486   | 8.2090  | 0.5460 | 0.2950  | 6.1747 | CHB |
| DERP6        | GI_44662825-I | rs8067500  | 17 | 17 | 7113355  | 16914  | 8.0470  | 0.5295 | -0.2927 | 6.1747 | CHB |
| DERP6        | GI_44662825-I | rs5435     | 17 | 17 | 7127847  | 31406  | 6.4049  | 0.4490 | 0.3005  | 6.1747 | CHB |
| LOC400571    | GI_42661084-S | rs3803796  | 17 | 17 | 7395252  | 31126  | 6.6322  | 0.4543 | 0.3159  | 6.0675 | CHB |
| LOC400571    | GI_42661084-S | rs10438740 | 17 | 17 | 7413608  | 12770  | 6.3560  | 0.4799 | -0.2919 | 6.0675 | CHB |
| LOC400571    | GI_42661084-S | rs2270341  | 17 | 17 | 7421271  | 5107   | 7.6348  | 0.5087 | 0.2824  | 6.0675 | CHB |
| LOC400571    | GI_42661084-S | rs9901673  | 17 | 17 | 7424825  | 1553   | 7.0138  | 0.4757 | -0.3020 | 6.0675 | CHB |
| LOC400571    | GI_42661084-S | rs8066665  | 17 | 17 | 7426576  | 198    | 7.7559  | 0.5233 | 0.2925  | 6.0675 | CHB |
| LOC400571    | GI_42661084-S | rs10852891 | 17 | 17 | 7431534  | 5156   | 6.5601  | 0.4662 | -0.2870 | 6.0675 | CHB |
| LOC400571    | GI_42661084-S | rs858526   | 17 | 17 | 7440107  | 13729  | 7.6348  | 0.5087 | -0.2824 | 6.0675 | CHB |
| LOC400571    | GI_42661084-S | rs12936934 | 17 | 17 | 7441490  | 15112  | 7.1682  | 0.4841 | 0.3045  | 6.0675 | CHB |
| LOC400571    | GI_42661084-S | rs17643401 | 17 | 17 | 7445583  | 19205  | 7.8948  | 0.5765 | -0.3796 | 6.0675 | CHB |
| LOC400571    | GI_42661084-S | rs858524   | 17 | 17 | 7452012  | 25634  | 7.4301  | 0.5236 | 0.2828  | 6.0675 | CHB |
| LOC400571    | GI_42661084-S | rs2908809  | 17 | 17 | 7462425  | 36047  | 7.3208  | 0.4923 | 0.2831  | 6.0675 | CHB |
| LOC400571    | GI_42661084-S | rs9898876  | 17 | 17 | 7467687  | 41309  | 7.0138  | 0.4757 | 0.3020  | 6.0675 | CHB |
| MGC10744     | GI_34101277-A | rs2518023  | 17 | 17 | 7997331  | 20306  | 8.5367  | 0.5532 | -0.2496 | 6.0338 | CHB |
| MGC10744     | GI_34101277-A | rs2278637  | 17 | 17 | 8002827  | 14810  | 7.5191  | 0.5110 | -0.2482 | 6.0338 | CHB |
| MGC10744     | GI_34101277-A | rs8067606  | 17 | 17 | 8007508  | 10129  | 7.6742  | 0.5107 | -0.2481 | 6.0338 | CHB |
| MGC10744     | GI_34101277-A | rs9899533  | 17 | 17 | 8008770  | 8867   | 7.6742  | 0.5107 | -0.2481 | 6.0338 | CHB |
| MGC10744     | GI_34101277-A | rs8069739  | 17 | 17 | 8019490  | 1853   | 7.2679  | 0.5428 | 0.2515  | 6.0338 | CHB |
| MGC10744     | GI_34101277-A | rs8064449  | 17 | 17 | 8019754  | 2117   | 7.3808  | 0.5590 | 0.2606  | 6.0338 | CHB |
| MGC10744     | GI_34101277-A | rs3027268  | 17 | 17 | 8031764  | 14127  | 6.1493  | 0.4416 | 0.2424  | 6.0338 | CHB |
| MGC10744     | GI_34101277-A | rs1476162  | 17 | 17 | 8031808  | 14171  | 8.3845  | 0.5460 | 0.2422  | 6.0338 | CHB |
| MGC10744     | GI_34101277-A | rs9891949  | 17 | 17 | 8039908  | 22271  | 7.5758  | 0.5057 | 0.2411  | 6.0338 | CHB |

|           |               |            |    |    |          |        |         |        |         |        |     |
|-----------|---------------|------------|----|----|----------|--------|---------|--------|---------|--------|-----|
| MGC10744  | GI_34101277-A | rs9900848  | 17 | 17 | 8040096  | 22459  | 8.3845  | 0.5460 | 0.2422  | 6.0338 | CHB |
| MGC10744  | GI_34101277-A | rs11078734 | 17 | 17 | 8041949  | 24312  | 8.3845  | 0.5460 | 0.2422  | 6.0338 | CHB |
| MGC10744  | GI_34101277-A | rs1059476  | 17 | 17 | 8049056  | 31419  | 6.6363  | 0.4545 | -0.2475 | 6.0338 | CHB |
| Hs.379903 | Hs.379903-S   | rs12602291 | 17 | 17 | 15809796 | 10894  | 6.7294  | 0.4678 | 1.0989  | 6.5863 | CHB |
| Hs.379903 | Hs.379903-S   | rs8079763  | 17 | 17 | 15813700 | 6990   | 6.8735  | 0.4679 | 1.1091  | 6.5863 | CHB |
| Hs.379903 | Hs.379903-S   | rs1076423  | 17 | 17 | 15813875 | 6815   | 6.8735  | 0.4679 | 1.1091  | 6.5863 | CHB |
| Hs.379903 | Hs.379903-S   | rs1076424  | 17 | 17 | 15814042 | 6648   | 6.8735  | 0.4679 | -1.1091 | 6.5863 | CHB |
| Hs.379903 | Hs.379903-S   | rs2779212  | 17 | 17 | 15817380 | 3310   | 14.3722 | 0.7592 | -0.8532 | 6.5863 | CHB |
| Hs.379903 | Hs.379903-S   | rs1045599  | 17 | 17 | 15820635 | 55     | 14.3722 | 0.7592 | -0.8532 | 6.5863 | CHB |
| Hs.379903 | Hs.379903-S   | rs11654    | 17 | 17 | 15821876 | 1186   | 13.7731 | 0.7516 | -0.8494 | 6.5863 | CHB |
| Hs.379903 | Hs.379903-S   | rs2286795  | 17 | 17 | 15824534 | 3844   | 11.5471 | 0.6750 | 0.7971  | 6.5863 | CHB |
| Hs.379903 | Hs.379903-S   | rs2286796  | 17 | 17 | 15824952 | 4262   | 11.5471 | 0.6750 | 0.7971  | 6.5863 | CHB |
| Hs.379903 | Hs.379903-S   | rs8070859  | 17 | 17 | 15828514 | 7824   | 11.5471 | 0.6750 | 0.7971  | 6.5863 | CHB |
| Hs.379903 | Hs.379903-S   | rs4792709  | 17 | 17 | 15833166 | 12476  | 11.0635 | 0.6666 | 0.7776  | 6.5863 | CHB |
| Hs.379903 | Hs.379903-S   | rs6502482  | 17 | 17 | 15839966 | 19276  | 9.0018  | 0.5746 | 0.8177  | 6.5863 | CHB |
| Hs.379903 | Hs.379903-S   | rs2302415  | 17 | 17 | 15847116 | 26426  | 6.7844  | 0.4791 | 1.0845  | 6.5863 | CHB |
| Hs.379903 | Hs.379903-S   | rs8077373  | 17 | 17 | 15847278 | 26588  | 6.8735  | 0.4679 | 1.1091  | 6.5863 | CHB |
| Hs.379903 | Hs.379903-S   | rs6502483  | 17 | 17 | 15847611 | 26921  | 6.8735  | 0.4679 | -1.1091 | 6.5863 | CHB |
| Hs.379903 | Hs.379903-S   | rs7213125  | 17 | 17 | 15849497 | 28807  | 6.8735  | 0.4679 | -1.1091 | 6.5863 | CHB |
| Hs.379903 | Hs.379903-S   | rs7220790  | 17 | 17 | 15855711 | 35021  | 6.8735  | 0.4679 | 1.1091  | 6.5863 | CHB |
| Hs.379903 | Hs.379903-S   | rs9891938  | 17 | 17 | 15855797 | 35107  | 10.0487 | 0.6650 | 0.7914  | 6.5863 | CHB |
| Hs.379903 | Hs.379903-S   | rs8074888  | 17 | 17 | 15858630 | 37940  | 6.7149  | 0.4669 | -1.1096 | 6.5863 | CHB |
| Hs.379903 | Hs.379903-S   | rs6502486  | 17 | 17 | 15862717 | 42027  | 7.4293  | 0.5063 | 1.1316  | 6.5863 | CHB |
| Hs.379903 | Hs.379903-S   | rs11869450 | 17 | 17 | 15864434 | 43744  | 11.5471 | 0.6750 | 0.7971  | 6.5863 | CHB |
| Hs.379903 | Hs.379903-S   | rs6416868  | 17 | 17 | 15865095 | 44405  | 11.5471 | 0.6750 | 0.7971  | 6.5863 | CHB |
| Hs.379903 | Hs.379903-S   | rs4792715  | 17 | 17 | 15867948 | 47258  | 10.1702 | 0.6508 | -0.7704 | 6.5863 | CHB |
| Hs.379903 | Hs.379903-S   | rs11657160 | 17 | 17 | 15884056 | 63366  | 9.0018  | 0.5746 | -0.8177 | 6.5863 | CHB |
| Hs.379903 | Hs.379903-S   | rs1075901  | 17 | 17 | 15884635 | 63945  | 8.4529  | 0.5666 | 0.8068  | 6.5863 | CHB |
| Hs.379903 | Hs.379903-S   | rs4792717  | 17 | 17 | 15889155 | 68465  | 9.0018  | 0.5746 | 0.8177  | 6.5863 | CHB |
| Hs.379903 | Hs.379903-S   | rs2157991  | 17 | 17 | 15902676 | 81986  | 8.7330  | 0.5709 | -0.8148 | 6.5863 | CHB |
| Hs.379903 | Hs.379903-S   | rs2157990  | 17 | 17 | 15902718 | 82028  | 9.0018  | 0.5746 | 0.8177  | 6.5863 | CHB |
| Hs.379903 | Hs.379903-S   | rs2285583  | 17 | 17 | 15908868 | 88178  | 9.4634  | 0.5948 | 0.7431  | 6.5863 | CHB |
| Hs.379903 | Hs.379903-S   | rs2285582  | 17 | 17 | 15909398 | 88708  | 8.7282  | 0.5707 | 0.8119  | 6.5863 | CHB |
| Hs.379903 | Hs.379903-S   | rs3785628  | 17 | 17 | 15911407 | 90717  | 9.0018  | 0.5746 | -0.8177 | 6.5863 | CHB |
| Hs.379903 | Hs.379903-S   | rs7214695  | 17 | 17 | 15925269 | 104579 | 9.0018  | 0.5746 | 0.8177  | 6.5863 | CHB |
| Hs.379903 | Hs.379903-S   | rs7207463  | 17 | 17 | 15944984 | 124294 | 9.0018  | 0.5746 | 0.8177  | 6.5863 | CHB |
| Hs.379903 | Hs.379903-S   | rs2285580  | 17 | 17 | 15945912 | 125222 | 9.0018  | 0.5746 | 0.8177  | 6.5863 | CHB |
| Hs.379903 | Hs.379903-S   | rs11870608 | 17 | 17 | 15966395 | 145705 | 9.0018  | 0.5746 | 0.8177  | 6.5863 | CHB |
| Hs.379903 | Hs.379903-S   | rs9897388  | 17 | 17 | 15978351 | 157661 | 8.2522  | 0.5569 | -0.8087 | 6.5863 | CHB |
| Hs.379903 | Hs.379903-S   | rs2324142  | 17 | 17 | 15982031 | 161341 | 9.0018  | 0.5746 | -0.8177 | 6.5863 | CHB |
| Hs.379903 | Hs.379903-S   | rs2285579  | 17 | 17 | 15987570 | 166880 | 9.0018  | 0.5746 | -0.8177 | 6.5863 | CHB |
| Hs.379903 | Hs.379903-S   | rs178838   | 17 | 17 | 16016626 | 195936 | 9.0018  | 0.5746 | -0.8177 | 6.5863 | CHB |
| Hs.379903 | Hs.379903-S   | rs178831   | 17 | 17 | 16021574 | 200884 | 10.4989 | 0.6730 | -0.7958 | 6.5863 | CHB |
| Hs.379903 | Hs.379903-S   | rs1236276  | 17 | 17 | 16024409 | 203719 | 9.0018  | 0.5746 | -0.8177 | 6.5863 | CHB |
| Hs.379903 | Hs.379903-S   | rs178814   | 17 | 17 | 16034880 | 214190 | 8.4756  | 0.5677 | 0.8133  | 6.5863 | CHB |
| Hs.379903 | Hs.379903-S   | rs178810   | 17 | 17 | 16038155 | 217465 | 9.0018  | 0.5746 | -0.8177 | 6.5863 | CHB |
| Hs.379903 | Hs.379903-S   | rs178785   | 17 | 17 | 16077014 | 256324 | 7.8701  | 0.5207 | -0.7036 | 6.5863 | CHB |
| ERAL1     | GI_24307898-S | rs3181215  | 17 | 17 | 24101458 | 110418 | 5.5748  | 0.3907 | -0.1768 | 5.1237 | CHB |
| ERAL1     | GI_24307898-S | rs12325788 | 17 | 17 | 24104176 | 107700 | 5.7078  | 0.4473 | 0.2022  | 5.1237 | CHB |
| ERAL1     | GI_24307898-S | rs4794836  | 17 | 17 | 24106837 | 105039 | 6.1330  | 0.4251 | -0.2117 | 5.1237 | CHB |
| ERAL1     | GI_24307898-S | rs11658900 | 17 | 17 | 24119611 | 92265  | 5.5625  | 0.3899 | -0.1693 | 5.1237 | CHB |
| ERAL1     | GI_24307898-S | rs9892942  | 17 | 17 | 24202887 | 8989   | 6.2857  | 0.4342 | -0.2132 | 5.1237 | CHB |
| ERAL1     | GI_24307898-S | rs9895443  | 17 | 17 | 24207070 | 4806   | 7.3416  | 0.4934 | -0.2082 | 5.1237 | CHB |
| ERAL1     | GI_24307898-S | rs9914988  | 17 | 17 | 24207230 | 4646   | 7.3416  | 0.4934 | -0.2082 | 5.1237 | CHB |
| ERAL1     | GI_24307898-S | rs2242345  | 17 | 17 | 24209953 | 1923   | 5.7142  | 0.3995 | -0.2195 | 5.1237 | CHB |
| ERAL1     | GI_24307898-S | rs6803     | 17 | 17 | 24211915 | 39     | 7.3416  | 0.4934 | -0.2082 | 5.1237 | CHB |
| ERAL1     | GI_24307898-S | rs901975   | 17 | 17 | 24213900 | 2024   | 7.3416  | 0.4934 | -0.2082 | 5.1237 | CHB |
| ERAL1     | GI_24307898-S | rs968726   | 17 | 17 | 24218760 | 6884   | 5.7142  | 0.3995 | -0.2195 | 5.1237 | CHB |
| FLJ10458  | GI_20070287-S | rs3744362  | 17 | 17 | 30483209 | 632    | 7.4091  | 0.4969 | 0.5507  | 5.9495 | CHB |

|          |               |            |    |    |          |        |         |        |         |        |     |
|----------|---------------|------------|----|----|----------|--------|---------|--------|---------|--------|-----|
| FLJ10458 | GI_20070287-S | rs2306511  | 17 | 17 | 30484480 | 1903   | 7.4091  | 0.4969 | 0.5507  | 5.9495 | CHB |
| FLJ10458 | GI_20070287-S | rs2306512  | 17 | 17 | 30484544 | 1967   | 7.4091  | 0.4969 | -0.5507 | 5.9495 | CHB |
| FLJ10458 | GI_20070287-S | rs2306513  | 17 | 17 | 30484629 | 2052   | 7.4091  | 0.4969 | -0.5507 | 5.9495 | CHB |
| hmm5445  | hmm5445-S     | rs1982706  | 17 | 17 | 30571980 | 46574  | 5.9409  | 0.4135 | -0.5211 | 5.9182 | CHB |
| hmm5445  | hmm5445-S     | rs4796060  | 17 | 17 | 30572621 | 45933  | 5.9409  | 0.4135 | 0.5211  | 5.9182 | CHB |
| hmm5445  | hmm5445-S     | rs4796062  | 17 | 17 | 30574117 | 44437  | 5.9409  | 0.4135 | -0.5211 | 5.9182 | CHB |
| hmm5445  | hmm5445-S     | rs8065018  | 17 | 17 | 30575410 | 43144  | 5.9409  | 0.4135 | 0.5211  | 5.9182 | CHB |
| MGC19764 | GI_42661257-S | rs11080326 | 17 | 17 | 30588522 | 30059  | 6.9684  | 0.4812 | 0.4763  | 6.5093 | CHB |
| hmm5445  | hmm5445-S     | rs11080326 | 17 | 17 | 30588522 | 30032  | 7.0622  | 0.4864 | 0.4248  | 5.9182 | CHB |
| hmm5445  | hmm5445-S     | rs1480949  | 17 | 17 | 30589952 | 28602  | 5.9409  | 0.4135 | 0.5211  | 5.9182 | CHB |
| MGC19764 | GI_42661257-S | rs11867191 | 17 | 17 | 30593227 | 25354  | 7.3907  | 0.4960 | -0.4918 | 6.5093 | CHB |
| hmm5445  | hmm5445-S     | rs11867191 | 17 | 17 | 30593227 | 25327  | 7.4156  | 0.4973 | -0.4461 | 5.9182 | CHB |
| MGC19764 | GI_42661257-S | rs883416   | 17 | 17 | 30594554 | 24027  | 7.3907  | 0.4960 | -0.4918 | 6.5093 | CHB |
| hmm5445  | hmm5445-S     | rs883416   | 17 | 17 | 30594554 | 24000  | 7.4156  | 0.4973 | -0.4461 | 5.9182 | CHB |
| RAD52B   | GI_31563532-S | rs4795090  | 17 | 17 | 31147710 | 121566 | 6.3993  | 0.4408 | -0.1385 | 5.7813 | CHB |
| RAD52B   | GI_31563532-S | rs6505496  | 17 | 17 | 31153180 | 116096 | 6.3993  | 0.4408 | -0.1385 | 5.7813 | CHB |
| RAD52B   | GI_31563532-S | rs4251703  | 17 | 17 | 31159071 | 110205 | 7.3658  | 0.5114 | 0.1470  | 5.7813 | CHB |
| RAD52B   | GI_31563532-S | rs11868785 | 17 | 17 | 31163331 | 105945 | 7.5824  | 0.5060 | -0.1518 | 5.7813 | CHB |
| RAD52B   | GI_31563532-S | rs4251719  | 17 | 17 | 31166475 | 102801 | 6.3572  | 0.4384 | 0.1454  | 5.7813 | CHB |
| RAD52B   | GI_31563532-S | rs4251737  | 17 | 17 | 31170931 | 98345  | 6.3572  | 0.4384 | 0.1454  | 5.7813 | CHB |
| RAD52B   | GI_31563532-S | rs4251769  | 17 | 17 | 31188640 | 80636  | 6.3572  | 0.4384 | -0.1454 | 5.7813 | CHB |
| RAD52B   | GI_31563532-S | rs2306630  | 17 | 17 | 31206454 | 62822  | 6.3572  | 0.4384 | -0.1454 | 5.7813 | CHB |
| RAD52B   | GI_31563532-S | rs9303692  | 17 | 17 | 31212609 | 56667  | 6.3572  | 0.4384 | 0.1454  | 5.7813 | CHB |
| RAD52B   | GI_31563532-S | rs2280789  | 17 | 17 | 31231116 | 38160  | 6.2484  | 0.4397 | 0.1470  | 5.7813 | CHB |
| RAD52B   | GI_31563532-S | rs4796123  | 17 | 17 | 31235573 | 33703  | 6.0722  | 0.4369 | 0.1441  | 5.7813 | CHB |
| RAD52B   | GI_31563532-S | rs4796128  | 17 | 17 | 31250385 | 18891  | 5.8542  | 0.4081 | 0.1360  | 5.7813 | CHB |
| ZNF403   | GI_13376244-S | rs2074411  | 17 | 17 | 32953876 | 933768 | 5.8666  | 0.4089 | 0.3891  | 5.8542 | CHB |
| MGC20781 | GI_34147471-S | rs11079016 | 17 | 17 | 37229550 | 5601   | 5.6250  | 0.3939 | -0.3980 | 5.5314 | CHB |
| MGC20781 | GI_34147471-S | rs3744781  | 17 | 17 | 37235677 | 526    | 6.3714  | 0.4550 | -0.4279 | 5.5314 | CHB |
| MGC20781 | GI_34147471-S | rs9896766  | 17 | 17 | 37237170 | 2019   | 6.3766  | 0.4395 | -0.4178 | 5.5314 | CHB |
| MGC20781 | GI_34147471-S | rs1046404  | 17 | 17 | 37237334 | 2183   | 6.3766  | 0.4395 | -0.4178 | 5.5314 | CHB |
| MGC20781 | GI_34147471-S | rs1046403  | 17 | 17 | 37237346 | 2195   | 6.3766  | 0.4395 | -0.4178 | 5.5314 | CHB |
| MGC20781 | GI_34147471-S | rs4796713  | 17 | 17 | 37240887 | 5736   | 6.3766  | 0.4395 | 0.4178  | 5.5314 | CHB |
| MGC20781 | GI_34147471-S | rs4796715  | 17 | 17 | 37247297 | 12146  | 6.3766  | 0.4395 | 0.4178  | 5.5314 | CHB |
| MGC20235 | GI_21450795-S | rs16940    | 17 | 17 | 38498763 | 228069 | 5.3128  | 0.3739 | -0.2027 | 5.2588 | CHB |
| MGC20235 | GI_21450795-S | rs8070085  | 17 | 17 | 38595510 | 131322 | 5.2785  | 0.3787 | 0.1947  | 5.2588 | CHB |
| MGC20235 | GI_21450795-S | rs9646416  | 17 | 17 | 38779627 | 52795  | 5.3632  | 0.4419 | -0.2666 | 5.2588 | CHB |
| FLJ21347 | GI_31542722-S | rs2306002  | 17 | 17 | 45972828 | 15339  | 8.2948  | 0.5417 | 0.4634  | 6.6908 | CHB |
| FLJ21347 | GI_31542722-S | rs1122634  | 17 | 17 | 45976364 | 11803  | 13.8454 | 0.7454 | -0.6155 | 6.6908 | CHB |
| FLJ21347 | GI_31542722-S | rs8076632  | 17 | 17 | 45980927 | 7240   | 13.8454 | 0.7454 | -0.6155 | 6.6908 | CHB |
| FLJ21347 | GI_31542722-S | rs989128   | 17 | 17 | 45991533 | 3366   | 11.3193 | 0.6670 | 0.6091  | 6.6908 | CHB |
| FTSJ3    | GI_17017990-S | rs2854210  | 17 | 17 | 59300070 | 49238  | 5.1374  | 0.3839 | 0.1599  | 5.0074 | CHB |
| FLJ46603 | GI_38348363-S | rs9900949  | 17 | 17 | 72210160 | 22651  | 7.6284  | 0.5527 | -0.8522 | 7.5124 | CHB |
| FLJ46603 | GI_38348363-S | rs4789349  | 17 | 17 | 72217936 | 30427  | 22.9577 | 0.9089 | -1.2570 | 7.5124 | CHB |
| FLJ46603 | GI_38348363-S | rs1014390  | 17 | 17 | 72224481 | 36972  | 11.3533 | 0.6682 | 1.1129  | 7.5124 | CHB |
| EVER2    | GI_31377553-S | rs2871647  | 17 | 17 | 73649072 | 172    | 6.7109  | 0.4588 | 0.5513  | 5.842  | CHB |
| USP36    | GI_35250685-S | rs7213123  | 17 | 17 | 74176865 | 118408 | 7.1570  | 0.4835 | 0.6055  | 6.0471 | CHB |
| USP36    | GI_35250685-S | rs6501238  | 17 | 17 | 74181334 | 113939 | 7.1570  | 0.4835 | -0.6055 | 6.0471 | CHB |
| USP36    | GI_35250685-S | rs3936118  | 17 | 17 | 74185852 | 109421 | 7.1570  | 0.4835 | -0.6055 | 6.0471 | CHB |
| USP36    | GI_35250685-S | rs11657360 | 17 | 17 | 74187256 | 108017 | 7.1570  | 0.4835 | -0.6055 | 6.0471 | CHB |
| USP36    | GI_35250685-S | rs12451377 | 17 | 17 | 74189805 | 105468 | 6.2270  | 0.4307 | -0.5377 | 6.0471 | CHB |
| USP36    | GI_35250685-S | rs7225707  | 17 | 17 | 74196565 | 98708  | 6.9645  | 0.4810 | -0.6041 | 6.0471 | CHB |
| USP36    | GI_35250685-S | rs7225601  | 17 | 17 | 74196701 | 98572  | 7.4992  | 0.5100 | 0.6282  | 6.0471 | CHB |
| USP36    | GI_35250685-S | rs922838   | 17 | 17 | 74203893 | 91380  | 7.9294  | 0.5237 | -0.5408 | 6.0471 | CHB |
| USP36    | GI_35250685-S | rs10512617 | 17 | 17 | 74205146 | 90127  | 7.9294  | 0.5237 | 0.5408  | 6.0471 | CHB |
| USP36    | GI_35250685-S | rs7207392  | 17 | 17 | 74233533 | 61740  | 7.9312  | 0.5238 | 0.6049  | 6.0471 | CHB |
| USP36    | GI_35250685-S | rs17736494 | 17 | 17 | 74240263 | 55010  | 7.2073  | 0.4862 | 0.5033  | 6.0471 | CHB |
| USP36    | GI_35250685-S | rs1384367  | 17 | 17 | 74241352 | 53921  | 7.2073  | 0.4862 | 0.5033  | 6.0471 | CHB |
| USP36    | GI_35250685-S | rs4103047  | 17 | 17 | 74248785 | 46488  | 7.9312  | 0.5238 | -0.6049 | 6.0471 | CHB |

|           |               |            |    |    |          |       |         |        |         |        |     |
|-----------|---------------|------------|----|----|----------|-------|---------|--------|---------|--------|-----|
| USP36     | GI_35250685-S | rs7218899  | 17 | 17 | 74251445 | 43828 | 7.2073  | 0.4862 | 0.5033  | 6.0471 | CHB |
| USP36     | GI_35250685-S | rs6501243  | 17 | 17 | 74256150 | 39123 | 7.4018  | 0.4966 | -0.5353 | 6.0471 | CHB |
| USP36     | GI_35250685-S | rs7208285  | 17 | 17 | 74257920 | 37353 | 8.0280  | 0.5547 | -0.6662 | 6.0471 | CHB |
| USP36     | GI_35250685-S | rs12951541 | 17 | 17 | 74263706 | 31567 | 7.9312  | 0.5238 | 0.6049  | 6.0471 | CHB |
| USP36     | GI_35250685-S | rs1871935  | 17 | 17 | 74275740 | 19533 | 7.3424  | 0.4934 | 0.6059  | 6.0471 | CHB |
| USP36     | GI_35250685-S | rs7224711  | 17 | 17 | 74283883 | 11390 | 7.2073  | 0.4862 | 0.5033  | 6.0471 | CHB |
| USP36     | GI_35250685-S | rs12604076 | 17 | 17 | 74285233 | 10040 | 7.2073  | 0.4862 | -0.5033 | 6.0471 | CHB |
| USP36     | GI_35250685-S | rs8079047  | 17 | 17 | 74287268 | 8005  | 7.8692  | 0.5207 | 0.5976  | 6.0471 | CHB |
| USP36     | GI_35250685-S | rs8182269  | 17 | 17 | 74301586 | 6313  | 7.3424  | 0.4934 | 0.6059  | 6.0471 | CHB |
| USP36     | GI_35250685-S | rs1044486  | 17 | 17 | 74303774 | 8501  | 7.2073  | 0.4862 | 0.5033  | 6.0471 | CHB |
| USP36     | GI_35250685-S | rs3744802  | 17 | 17 | 74305195 | 9922  | 7.2073  | 0.4862 | 0.5033  | 6.0471 | CHB |
| USP36     | GI_35250685-S | rs3744801  | 17 | 17 | 74305323 | 10050 | 6.8405  | 0.4661 | 0.5094  | 6.0471 | CHB |
| USP36     | GI_35250685-S | rs3744800  | 17 | 17 | 74305420 | 10147 | 7.8692  | 0.5207 | 0.5976  | 6.0471 | CHB |
| USP36     | GI_35250685-S | rs3826552  | 17 | 17 | 74305480 | 10207 | 7.2073  | 0.4862 | 0.5033  | 6.0471 | CHB |
| USP36     | GI_35250685-S | rs3744799  | 17 | 17 | 74306369 | 11096 | 7.3424  | 0.4934 | 0.6059  | 6.0471 | CHB |
| USP36     | GI_35250685-S | rs2279308  | 17 | 17 | 74306576 | 11303 | 7.0270  | 0.4764 | -0.5728 | 6.0471 | CHB |
| USP36     | GI_35250685-S | rs1057040  | 17 | 17 | 74311390 | 16117 | 6.7625  | 0.4617 | 0.4969  | 6.0471 | CHB |
| USP36     | GI_35250685-S | rs3088040  | 17 | 17 | 74311455 | 16182 | 6.4394  | 0.4432 | 0.5713  | 6.0471 | CHB |
| USP36     | GI_35250685-S | rs7213204  | 17 | 17 | 74343395 | 48122 | 7.2436  | 0.4963 | -0.6424 | 6.0471 | CHB |
| USP36     | GI_35250685-S | rs4352096  | 17 | 17 | 74345511 | 50238 | 6.6913  | 0.4576 | -0.5846 | 6.0471 | CHB |
| raptor    | GI_22094986-S | rs1062935  | 17 | 17 | 76554452 | 37    | 6.3972  | 0.4407 | 0.2047  | 6.0349 | CHB |
| raptor    | GI_22094986-S | rs4969322  | 17 | 17 | 76558699 | 4284  | 6.3972  | 0.4407 | -0.2047 | 6.0349 | CHB |
| LOC284184 | GI_27500527-S | rs8069265  | 17 | 17 | 76774020 | 54283 | 7.7159  | 0.5129 | -0.8658 | 5.5274 | CHB |
| LOC284184 | GI_27500527-S | rs2279921  | 17 | 17 | 76780213 | 48090 | 7.7159  | 0.5129 | -0.8658 | 5.5274 | CHB |
| LOC284184 | GI_27500527-S | rs2279920  | 17 | 17 | 76780281 | 48022 | 7.0300  | 0.5106 | 0.8861  | 5.5274 | CHB |
| LOC284184 | GI_27500527-S | rs2279916  | 17 | 17 | 76780796 | 47507 | 7.4637  | 0.5081 | -0.8589 | 5.5274 | CHB |
| LOC284184 | GI_27500527-S | rs2279914  | 17 | 17 | 76782746 | 45557 | 7.7159  | 0.5129 | 0.8658  | 5.5274 | CHB |
| LOC284184 | GI_27500527-S | rs8071693  | 17 | 17 | 76784539 | 43764 | 5.7830  | 0.4810 | 0.8364  | 5.5274 | CHB |
| LOC284184 | GI_27500527-S | rs906175   | 17 | 17 | 76788057 | 40246 | 6.4231  | 0.4422 | 0.5534  | 5.5274 | CHB |
| LOC284184 | GI_27500527-S | rs2659030  | 17 | 17 | 76792569 | 35734 | 6.4687  | 0.4608 | 0.5729  | 5.5274 | CHB |
| LOC284184 | GI_27500527-S | rs969413   | 17 | 17 | 76810409 | 17894 | 8.6966  | 0.5606 | 0.6540  | 5.5274 | CHB |
| LOC284184 | GI_27500527-S | rs1048775  | 17 | 17 | 76816924 | 11379 | 10.3950 | 0.6328 | -0.8084 | 5.5274 | CHB |
| LOC284184 | GI_27500527-S | rs6565548  | 17 | 17 | 76836926 | 8623  | 6.0743  | 0.4216 | 0.7297  | 5.5274 | CHB |
| LOC284184 | GI_27500527-S | rs7224668  | 17 | 17 | 76850383 | 22080 | 6.4160  | 0.4418 | -0.6289 | 5.5274 | CHB |
| LOC284184 | GI_27500527-S | rs9901514  | 17 | 17 | 76852495 | 24192 | 6.0743  | 0.4216 | 0.7297  | 5.5274 | CHB |
| LOC284184 | GI_27500527-S | rs7219382  | 17 | 17 | 76855692 | 27389 | 6.0743  | 0.4216 | 0.7297  | 5.5274 | CHB |
| LOC284184 | GI_27500527-S | rs7223939  | 17 | 17 | 76856116 | 27813 | 6.0743  | 0.4216 | 0.7297  | 5.5274 | CHB |
| LOC284184 | GI_27500527-S | rs2292184  | 17 | 17 | 76859397 | 31094 | 6.0743  | 0.4216 | 0.7297  | 5.5274 | CHB |
| LOC284184 | GI_27500527-S | rs2271090  | 17 | 17 | 76861200 | 32897 | 6.0743  | 0.4216 | -0.7297 | 5.5274 | CHB |
| LOC284184 | GI_27500527-S | rs7219316  | 17 | 17 | 76862915 | 34612 | 6.0743  | 0.4216 | 0.7297  | 5.5274 | CHB |
| LOC284184 | GI_27500527-S | rs9898133  | 17 | 17 | 76864592 | 36289 | 6.8782  | 0.4762 | 0.7662  | 5.5274 | CHB |
| LOC284184 | GI_27500527-S | rs9892688  | 17 | 17 | 76867112 | 38809 | 6.0743  | 0.4216 | 0.7297  | 5.5274 | CHB |
| LOC284184 | GI_27500527-S | rs9914093  | 17 | 17 | 76875248 | 46945 | 6.0649  | 0.4529 | 0.6314  | 5.5274 | CHB |
| LOC284184 | GI_27500527-S | rs10445407 | 17 | 17 | 76876404 | 48101 | 6.6530  | 0.4555 | -0.6381 | 5.5274 | CHB |
| LOC284184 | GI_27500527-S | rs6565549  | 17 | 17 | 76882829 | 54526 | 6.6530  | 0.4555 | -0.6381 | 5.5274 | CHB |
| LOC284184 | GI_27500527-S | rs7219431  | 17 | 17 | 76888080 | 59777 | 6.6530  | 0.4555 | -0.6381 | 5.5274 | CHB |
| NPL4      | GI_8923608-S  | rs7406991  | 17 | 17 | 77159051 | 24409 | 6.5799  | 0.4935 | 0.3913  | 5.2593 | CHB |
| NPL4      | GI_8923608-S  | rs8075102  | 17 | 17 | 77169413 | 34771 | 5.7562  | 0.4505 | -0.3524 | 5.2593 | CHB |
| NPL4      | GI_8923608-S  | rs7405469  | 17 | 17 | 77177034 | 42392 | 6.2673  | 0.4331 | -0.3407 | 5.2593 | CHB |
| LOC339229 | GI_41150782-S | rs11652797 | 17 | 17 | 77184566 | 58229 | 8.9136  | 0.5706 | 0.4388  | 5.9666 | CHB |
| NPL4      | GI_8923608-S  | rs11652797 | 17 | 17 | 77184566 | 49924 | 10.4522 | 0.6350 | -0.4299 | 5.2593 | CHB |
| LOC339229 | GI_41150782-S | rs7222241  | 17 | 17 | 77185156 | 57639 | 8.9136  | 0.5706 | 0.4388  | 5.9666 | CHB |
| NPL4      | GI_8923608-S  | rs7222241  | 17 | 17 | 77185156 | 50514 | 10.4522 | 0.6350 | -0.4299 | 5.2593 | CHB |
| LOC339229 | GI_41150782-S | rs3935543  | 17 | 17 | 77190317 | 52478 | 8.9136  | 0.5706 | 0.4388  | 5.9666 | CHB |
| NPL4      | GI_8923608-S  | rs3935543  | 17 | 17 | 77190317 | 55675 | 10.4522 | 0.6350 | -0.4299 | 5.2593 | CHB |
| LOC339229 | GI_41150782-S | rs7503679  | 17 | 17 | 77194284 | 48511 | 8.9136  | 0.5706 | -0.4388 | 5.9666 | CHB |
| NPL4      | GI_8923608-S  | rs7503679  | 17 | 17 | 77194284 | 59642 | 10.4522 | 0.6350 | 0.4299  | 5.2593 | CHB |
| LOC339229 | GI_41150782-S | rs7405901  | 17 | 17 | 77198218 | 44577 | 8.9136  | 0.5706 | -0.4388 | 5.9666 | CHB |
| NPL4      | GI_8923608-S  | rs7405901  | 17 | 17 | 77198218 | 63576 | 10.4522 | 0.6350 | 0.4299  | 5.2593 | CHB |

|           |               |            |    |    |          |        |         |        |         |        |     |
|-----------|---------------|------------|----|----|----------|--------|---------|--------|---------|--------|-----|
| LOC339229 | GI_41150782-S | rs6565604  | 17 | 17 | 77199647 | 43148  | 8.9136  | 0.5706 | -0.4388 | 5.9666 | CHB |
| NPL4      | GI_8923608-S  | rs6565604  | 17 | 17 | 77199647 | 65005  | 10.4522 | 0.6350 | 0.4299  | 5.2593 | CHB |
| LOC339229 | GI_41150782-S | rs6565605  | 17 | 17 | 77199764 | 43031  | 8.9136  | 0.5706 | 0.4388  | 5.9666 | CHB |
| NPL4      | GI_8923608-S  | rs6565605  | 17 | 17 | 77199764 | 65122  | 10.4522 | 0.6350 | -0.4299 | 5.2593 | CHB |
| LOC339229 | GI_41150782-S | rs9894429  | 17 | 17 | 77207216 | 35579  | 8.9136  | 0.5706 | 0.4388  | 5.9666 | CHB |
| NPL4      | GI_8923608-S  | rs9894429  | 17 | 17 | 77207216 | 72574  | 10.4522 | 0.6350 | -0.4299 | 5.2593 | CHB |
| LOC339229 | GI_41150782-S | rs6565612  | 17 | 17 | 77213225 | 29570  | 8.9136  | 0.5706 | -0.4388 | 5.9666 | CHB |
| NPL4      | GI_8923608-S  | rs6565612  | 17 | 17 | 77213225 | 78583  | 10.4522 | 0.6350 | 0.4299  | 5.2593 | CHB |
| LOC339229 | GI_41150782-S | rs6565616  | 17 | 17 | 77222566 | 20229  | 10.6798 | 0.6437 | 0.4651  | 5.9666 | CHB |
| NPL4      | GI_8923608-S  | rs6565616  | 17 | 17 | 77222566 | 87924  | 8.7063  | 0.5611 | -0.4051 | 5.2593 | CHB |
| LOC339229 | GI_41150782-S | rs9905639  | 17 | 17 | 77224559 | 18236  | 10.6798 | 0.6437 | 0.4651  | 5.9666 | CHB |
| NPL4      | GI_8923608-S  | rs9905639  | 17 | 17 | 77224559 | 89917  | 8.7063  | 0.5611 | -0.4051 | 5.2593 | CHB |
| LOC339229 | GI_41150782-S | rs7406828  | 17 | 17 | 77229631 | 13164  | 11.9345 | 0.6881 | 0.4808  | 5.9666 | CHB |
| NPL4      | GI_8923608-S  | rs7406828  | 17 | 17 | 77229631 | 94989  | 7.6596  | 0.5100 | -0.3874 | 5.2593 | CHB |
| LOC339229 | GI_41150782-S | rs3830068  | 17 | 17 | 77233304 | 9491   | 15.2537 | 0.7808 | -0.4865 | 5.9666 | CHB |
| NPL4      | GI_8923608-S  | rs3830068  | 17 | 17 | 77233304 | 98662  | 6.9247  | 0.4707 | 0.3549  | 5.2593 | CHB |
| LOC339229 | GI_41150782-S | rs7502869  | 17 | 17 | 77241821 | 974    | 15.2446 | 0.7884 | 0.4914  | 5.9666 | CHB |
| NPL4      | GI_8923608-S  | rs7502869  | 17 | 17 | 77241821 | 107179 | 6.6801  | 0.4649 | -0.3500 | 5.2593 | CHB |
| LOC339229 | GI_41150782-S | rs7226091  | 17 | 17 | 77247772 | 4977   | 15.2537 | 0.7808 | -0.4865 | 5.9666 | CHB |
| NPL4      | GI_8923608-S  | rs7226091  | 17 | 17 | 77247772 | 113130 | 6.9247  | 0.4707 | 0.3549  | 5.2593 | CHB |
| LOC339229 | GI_41150782-S | rs7209877  | 17 | 17 | 77248042 | 5247   | 15.2537 | 0.7808 | 0.4865  | 5.9666 | CHB |
| NPL4      | GI_8923608-S  | rs7209877  | 17 | 17 | 77248042 | 113400 | 6.9247  | 0.4707 | -0.3549 | 5.2593 | CHB |
| LOC339229 | GI_41150782-S | rs3088016  | 17 | 17 | 77250454 | 7659   | 6.6467  | 0.4630 | 0.3618  | 5.9666 | CHB |
| LOC339229 | GI_41150782-S | rs7502491  | 17 | 17 | 77254609 | 11814  | 15.2537 | 0.7808 | 0.4865  | 5.9666 | CHB |
| NPL4      | GI_8923608-S  | rs7502491  | 17 | 17 | 77254609 | 119967 | 6.9247  | 0.4707 | -0.3549 | 5.2593 | CHB |
| LOC339229 | GI_41150782-S | rs7502521  | 17 | 17 | 77254717 | 11922  | 14.1979 | 0.7629 | 0.4908  | 5.9666 | CHB |
| NPL4      | GI_8923608-S  | rs7502521  | 17 | 17 | 77254717 | 120075 | 6.1868  | 0.4360 | -0.3521 | 5.2593 | CHB |
| LOC339229 | GI_41150782-S | rs6565619  | 17 | 17 | 77256301 | 13506  | 13.6943 | 0.7412 | 0.4739  | 5.9666 | CHB |
| NPL4      | GI_8923608-S  | rs6565619  | 17 | 17 | 77256301 | 121659 | 6.4650  | 0.4447 | -0.3450 | 5.2593 | CHB |
| LOC339229 | GI_41150782-S | rs8070488  | 17 | 17 | 77274336 | 31541  | 13.6943 | 0.7412 | 0.4739  | 5.9666 | CHB |
| NPL4      | GI_8923608-S  | rs8070488  | 17 | 17 | 77274336 | 139694 | 6.4650  | 0.4447 | -0.3450 | 5.2593 | CHB |
| LOC339229 | GI_41150782-S | rs12452184 | 17 | 17 | 77274831 | 32036  | 6.4716  | 0.4529 | -0.3662 | 5.9666 | CHB |
| LOC339229 | GI_41150782-S | rs1132802  | 17 | 17 | 77280678 | 37883  | 6.7365  | 0.4602 | 0.3656  | 5.9666 | CHB |
| LOC339229 | GI_41150782-S | rs11868024 | 17 | 17 | 77286571 | 43776  | 13.6943 | 0.7412 | 0.4739  | 5.9666 | CHB |
| NPL4      | GI_8923608-S  | rs11868024 | 17 | 17 | 77286571 | 151929 | 6.4650  | 0.4447 | -0.3450 | 5.2593 | CHB |
| LOC339229 | GI_41150782-S | rs6565624  | 17 | 17 | 77288155 | 45360  | 13.6943 | 0.7412 | 0.4739  | 5.9666 | CHB |
| NPL4      | GI_8923608-S  | rs6565624  | 17 | 17 | 77288155 | 153513 | 6.4650  | 0.4447 | -0.3450 | 5.2593 | CHB |
| LOC339229 | GI_41150782-S | rs8081683  | 17 | 17 | 77291483 | 48688  | 13.6943 | 0.7412 | 0.4739  | 5.9666 | CHB |
| NPL4      | GI_8923608-S  | rs8081683  | 17 | 17 | 77291483 | 156841 | 6.4650  | 0.4447 | 0.3450  | 5.2593 | CHB |
| FN3KRP    | GI_20149679-S | rs2243523  | 17 | 17 | 78273738 | 5134   | 6.5196  | 0.4557 | 0.2541  | 5.3241 | CHB |
| FN3KRP    | GI_20149679-S | rs1046875  | 17 | 17 | 78278715 | 157    | 7.1906  | 0.4853 | 0.2909  | 5.3241 | CHB |
| FN3KRP    | GI_20149679-S | rs1046896  | 17 | 17 | 78278822 | 50     | 7.1906  | 0.4853 | -0.2909 | 5.3241 | CHB |
| FN3KRP    | GI_20149679-S | rs2257084  | 17 | 17 | 78280764 | 1892   | 8.0490  | 0.5296 | 0.2848  | 5.3241 | CHB |
| hmm6136   | hmm6136-S     | rs16946883 | 18 | 18 | 556368   | 445537 | 5.5194  | 0.3872 | -0.5598 | 5.4519 | CHB |
| HSRTSBETA | GI_42544116-I | rs2847602  | 18 | 18 | 684206   | 18186  | 6.1662  | 0.4347 | -0.6388 | 5.8981 | CHB |
| HSRTSBETA | GI_42544118-A | rs2847602  | 18 | 18 | 684206   | 18825  | 6.0365  | 0.4268 | -0.3766 | 5.8981 | CHB |
| HSRTSBETA | GI_42544116-I | rs7235957  | 18 | 18 | 707229   | 4837   | 6.2654  | 0.4330 | -0.6347 | 5.8981 | CHB |
| HSRTSBETA | GI_42544118-A | rs7235957  | 18 | 18 | 707229   | 41848  | 6.2054  | 0.4294 | -0.3850 | 5.8981 | CHB |
| HSRTSBETA | GI_42544116-I | rs8090148  | 18 | 18 | 717654   | 15262  | 6.2654  | 0.4330 | 0.6347  | 5.8981 | CHB |
| HSRTSBETA | GI_42544118-A | rs8090148  | 18 | 18 | 717654   | 52273  | 6.2054  | 0.4294 | 0.3850  | 5.8981 | CHB |
| HSRTSBETA | GI_42544116-I | rs7228136  | 18 | 18 | 722017   | 19625  | 6.2654  | 0.4330 | 0.6347  | 5.8981 | CHB |
| HSRTSBETA | GI_42544118-A | rs7228136  | 18 | 18 | 722017   | 56636  | 6.2054  | 0.4294 | 0.3850  | 5.8981 | CHB |
| HSRTSBETA | GI_42544118-A | rs3865405  | 18 | 18 | 730876   | 65495  | 6.1535  | 0.4585 | 0.3959  | 5.8981 | CHB |
| LOC400642 | GI_42661344-S | rs8099603  | 18 | 18 | 5196566  | 39785  | 9.2735  | 0.5866 | -0.5818 | 8.2611 | CHB |
| LOC400642 | GI_42661344-S | rs7238524  | 18 | 18 | 5205596  | 30755  | 10.1082 | 0.6215 | -0.6271 | 8.2611 | CHB |
| LOC400642 | GI_42661344-S | rs2135308  | 18 | 18 | 5212146  | 24205  | 9.9016  | 0.6131 | -0.5310 | 8.2611 | CHB |
| LOC400642 | GI_42661344-S | rs11662875 | 18 | 18 | 5215681  | 20670  | 10.1082 | 0.6215 | 0.6271  | 8.2611 | CHB |
| LOC400642 | GI_42661344-S | rs13370631 | 18 | 18 | 5219653  | 16698  | 9.7470  | 0.6727 | 0.5299  | 8.2611 | CHB |
| LOC400642 | GI_42661344-S | rs3887348  | 18 | 18 | 5223105  | 13246  | 9.9016  | 0.6131 | -0.5310 | 8.2611 | CHB |

|           |               |            |    |    |          |        |         |        |         |        |     |
|-----------|---------------|------------|----|----|----------|--------|---------|--------|---------|--------|-----|
| LOC400642 | GI_42661344-S | rs17464416 | 18 | 18 | 5226747  | 9604   | 10.4478 | 0.6348 | 0.8064  | 8.2611 | CHB |
| LOC400642 | GI_42661344-S | rs8092760  | 18 | 18 | 5231500  | 4851   | 8.8980  | 0.5785 | 0.5989  | 8.2611 | CHB |
| LOC400642 | GI_42661344-S | rs4429380  | 18 | 18 | 5232053  | 4298   | 8.6868  | 0.5777 | 0.5974  | 8.2611 | CHB |
| LOC400642 | GI_42661344-S | rs8089069  | 18 | 18 | 5233540  | 2811   | 10.1827 | 0.6422 | -0.6344 | 8.2611 | CHB |
| LOC400642 | GI_42661344-S | rs8084872  | 18 | 18 | 5233567  | 2784   | 9.9016  | 0.6131 | 0.5310  | 8.2611 | CHB |
| LOC400642 | GI_42661344-S | rs11877479 | 18 | 18 | 5235228  | 1123   | 10.1082 | 0.6215 | 0.6271  | 8.2611 | CHB |
| LOC400642 | GI_42661344-S | rs11877315 | 18 | 18 | 5235247  | 1104   | 10.1082 | 0.6215 | -0.6271 | 8.2611 | CHB |
| LOC400642 | GI_42661344-S | rs17379984 | 18 | 18 | 5235824  | 527    | 9.8957  | 0.6216 | -0.6280 | 8.2611 | CHB |
| LOC400642 | GI_42661344-S | rs8576     | 18 | 18 | 5236398  | 47     | 9.9016  | 0.6131 | 0.5310  | 8.2611 | CHB |
| LOC400642 | GI_42661344-S | rs11872923 | 18 | 18 | 5272442  | 36091  | 9.9366  | 0.6233 | 0.6289  | 8.2611 | CHB |
| MGC4083   | GI_14210535-S | rs7244709  | 18 | 18 | 12290136 | 26060  | 7.4755  | 0.5004 | -0.6087 | 5.6743 | CHB |
| MGC4083   | GI_14210535-S | rs9303766  | 18 | 18 | 12290849 | 25347  | 7.4755  | 0.5004 | -0.6087 | 5.6743 | CHB |
| MGC4083   | GI_14210535-S | rs9807444  | 18 | 18 | 12290936 | 25260  | 7.4755  | 0.5004 | -0.6087 | 5.6743 | CHB |
| MGC4083   | GI_14210535-S | rs9303768  | 18 | 18 | 12291322 | 24874  | 7.4755  | 0.5004 | -0.6087 | 5.6743 | CHB |
| MGC4083   | GI_14210535-S | rs7504558  | 18 | 18 | 12294781 | 21415  | 7.4755  | 0.5004 | 0.6087  | 5.6743 | CHB |
| MGC4083   | GI_14210535-S | rs10853224 | 18 | 18 | 12301984 | 14212  | 6.5690  | 0.4507 | -0.6253 | 5.6743 | CHB |
| MGC4083   | GI_14210535-S | rs11080567 | 18 | 18 | 12302075 | 14121  | 6.5690  | 0.4507 | 0.6253  | 5.6743 | CHB |
| MGC4083   | GI_14210535-S | rs12960267 | 18 | 18 | 12302492 | 13704  | 7.8596  | 0.5202 | -0.6821 | 5.6743 | CHB |
| MGC4083   | GI_14210535-S | rs8083882  | 18 | 18 | 12304309 | 11887  | 6.5690  | 0.4507 | 0.6253  | 5.6743 | CHB |
| MGC4083   | GI_14210535-S | rs12607321 | 18 | 18 | 12306779 | 9417   | 6.2583  | 0.4482 | -0.6324 | 5.6743 | CHB |
| MGC4083   | GI_14210535-S | rs4796960  | 18 | 18 | 12308027 | 8169   | 6.3328  | 0.4527 | -0.6270 | 5.6743 | CHB |
| MGC4083   | GI_14210535-S | rs11663340 | 18 | 18 | 12323686 | 7490   | 7.8596  | 0.5202 | 0.6821  | 5.6743 | CHB |
| MGC4083   | GI_14210535-S | rs7231304  | 18 | 18 | 12340505 | 24309  | 7.2824  | 0.4902 | 0.6562  | 5.6743 | CHB |
| MGC4083   | GI_14210535-S | rs9966470  | 18 | 18 | 12343178 | 26982  | 7.2824  | 0.4902 | 0.6562  | 5.6743 | CHB |
| MGC4083   | GI_14210535-S | rs3819091  | 18 | 18 | 12354185 | 37989  | 6.7750  | 0.4704 | 0.6482  | 5.6743 | CHB |
| FECH      | GI_4557592-S  | rs2272783  | 18 | 18 | 53389818 | 21579  | 6.4901  | 0.4461 | 0.3273  | 5.917  | CHB |
| LOC284293 | GI_27485378-S | rs9944887  | 18 | 18 | 59665948 | 105638 | 8.4964  | 0.5871 | 0.9439  | 7.3387 | CHB |
| LOC284293 | GI_27485378-S | rs9959974  | 18 | 18 | 59666056 | 105530 | 9.5148  | 0.6841 | 0.8162  | 7.3387 | CHB |
| LOC284293 | GI_27485378-S | rs9945681  | 18 | 18 | 59666101 | 105485 | 9.9370  | 0.6605 | -1.0174 | 7.3387 | CHB |
| LOC284293 | GI_27485378-S | rs9960785  | 18 | 18 | 59667093 | 104493 | 9.3375  | 0.6658 | -1.0404 | 7.3387 | CHB |
| LOC284293 | GI_27485378-S | rs9951203  | 18 | 18 | 59667720 | 103866 | 10.6597 | 0.6606 | 0.9852  | 7.3387 | CHB |
| LOC284293 | GI_27485378-S | rs9320028  | 18 | 18 | 59668150 | 103436 | 10.4895 | 0.6364 | -1.0423 | 7.3387 | CHB |
| LOC284293 | GI_27485378-S | rs8091518  | 18 | 18 | 59679155 | 92431  | 10.4895 | 0.6364 | -1.0423 | 7.3387 | CHB |
| LOC284293 | GI_27485378-S | rs9966495  | 18 | 18 | 59690850 | 80736  | 10.0047 | 0.6442 | 1.0736  | 7.3387 | CHB |
| LOC284293 | GI_27485378-S | rs9951512  | 18 | 18 | 59690885 | 80701  | 10.4895 | 0.6364 | 1.0423  | 7.3387 | CHB |
| LOC284293 | GI_27485378-S | rs9954175  | 18 | 18 | 59691368 | 80218  | 10.4895 | 0.6364 | -1.0423 | 7.3387 | CHB |
| LOC284293 | GI_27485378-S | rs10513933 | 18 | 18 | 59699669 | 71917  | 10.4895 | 0.6364 | -1.0423 | 7.3387 | CHB |
| LOC284293 | GI_27485378-S | rs9959513  | 18 | 18 | 59701863 | 69723  | 12.9893 | 0.7211 | -1.0207 | 7.3387 | CHB |
| LOC284293 | GI_27485378-S | rs9320032  | 18 | 18 | 59712191 | 59395  | 12.9893 | 0.7211 | 1.0207  | 7.3387 | CHB |
| LOC284293 | GI_27485378-S | rs7505052  | 18 | 18 | 59717646 | 53940  | 12.9893 | 0.7211 | -1.0207 | 7.3387 | CHB |
| LOC284293 | GI_27485378-S | rs6102     | 18 | 18 | 59721450 | 50136  | 12.9893 | 0.7211 | 1.0207  | 7.3387 | CHB |
| LOC284293 | GI_27485378-S | rs2332876  | 18 | 18 | 59722566 | 49020  | 11.3714 | 0.6864 | -1.0137 | 7.3387 | CHB |
| LOC284293 | GI_27485378-S | rs9963851  | 18 | 18 | 59728021 | 43565  | 12.9893 | 0.7211 | -1.0207 | 7.3387 | CHB |
| LOC284293 | GI_27485378-S | rs4499334  | 18 | 18 | 59729788 | 41798  | 12.9893 | 0.7211 | 1.0207  | 7.3387 | CHB |
| LOC284293 | GI_27485378-S | rs12717154 | 18 | 18 | 59730261 | 41325  | 14.5089 | 0.7708 | -0.9632 | 7.3387 | CHB |
| LOC284293 | GI_27485378-S | rs13371114 | 18 | 18 | 59730357 | 41229  | 12.2440 | 0.7154 | 1.0179  | 7.3387 | CHB |
| LOC284293 | GI_27485378-S | rs12327005 | 18 | 18 | 59731116 | 40470  | 12.9893 | 0.7211 | 1.0207  | 7.3387 | CHB |
| SERPINB10 | GI_4826901-S  | rs12327162 | 18 | 18 | 59731189 | 22003  | 6.1483  | 0.4260 | -0.7778 | 6.0527 | CHB |
| LOC284293 | GI_27485378-S | rs12327006 | 18 | 18 | 59731314 | 40272  | 12.2664 | 0.7161 | -1.0224 | 7.3387 | CHB |
| LOC284293 | GI_27485378-S | rs12327173 | 18 | 18 | 59731522 | 40064  | 12.9893 | 0.7211 | 1.0207  | 7.3387 | CHB |
| SERPINB10 | GI_4826901-S  | rs8086765  | 18 | 18 | 59731581 | 21611  | 6.1483  | 0.4260 | 0.7778  | 6.0527 | CHB |
| LOC284293 | GI_27485378-S | rs8085904  | 18 | 18 | 59731660 | 39926  | 12.7896 | 0.7322 | 1.0521  | 7.3387 | CHB |
| SERPINB10 | GI_4826901-S  | rs7241748  | 18 | 18 | 59733108 | 20084  | 6.5912  | 0.4680 | -0.8221 | 6.0527 | CHB |
| LOC284293 | GI_27485378-S | rs9952843  | 18 | 18 | 59733245 | 38341  | 12.9893 | 0.7211 | 1.0207  | 7.3387 | CHB |
| LOC284293 | GI_27485378-S | rs9953733  | 18 | 18 | 59733477 | 38109  | 12.9893 | 0.7211 | 1.0207  | 7.3387 | CHB |
| LOC284293 | GI_27485378-S | rs17072097 | 18 | 18 | 59733731 | 37855  | 12.9893 | 0.7211 | 1.0207  | 7.3387 | CHB |
| SERPINB10 | GI_4826901-S  | rs8097425  | 18 | 18 | 59733847 | 19345  | 6.1483  | 0.4260 | 0.7778  | 6.0527 | CHB |
| LOC284293 | GI_27485378-S | rs17072102 | 18 | 18 | 59734053 | 37533  | 12.9893 | 0.7211 | 1.0207  | 7.3387 | CHB |
| LOC284293 | GI_27485378-S | rs17072109 | 18 | 18 | 59735622 | 35964  | 12.9893 | 0.7211 | -1.0207 | 7.3387 | CHB |

|           |               |            |    |    |          |       |         |        |         |        |     |
|-----------|---------------|------------|----|----|----------|-------|---------|--------|---------|--------|-----|
| SERPINB10 | GI_4826901-S  | rs9320033  | 18 | 18 | 59735962 | 17230 | 6.9294  | 0.4874 | 0.8208  | 6.0527 | CHB |
| LOC284293 | GI_27485378-S | rs724557   | 18 | 18 | 59736125 | 35461 | 12.9893 | 0.7211 | -1.0207 | 7.3387 | CHB |
| LOC284293 | GI_27485378-S | rs724558   | 18 | 18 | 59736240 | 35346 | 12.9893 | 0.7211 | 1.0207  | 7.3387 | CHB |
| LOC284293 | GI_27485378-S | rs1944273  | 18 | 18 | 59736514 | 35072 | 12.9893 | 0.7211 | -1.0207 | 7.3387 | CHB |
| LOC284293 | GI_27485378-S | rs1944272  | 18 | 18 | 59736638 | 34948 | 12.9893 | 0.7211 | -1.0207 | 7.3387 | CHB |
| LOC284293 | GI_27485378-S | rs1944271  | 18 | 18 | 59736845 | 34741 | 12.9893 | 0.7211 | 1.0207  | 7.3387 | CHB |
| LOC284293 | GI_27485378-S | rs9955171  | 18 | 18 | 59736927 | 34659 | 12.9893 | 0.7211 | 1.0207  | 7.3387 | CHB |
| SERPINB10 | GI_4826901-S  | rs8085490  | 18 | 18 | 59737365 | 15827 | 6.1483  | 0.4260 | -0.7778 | 6.0527 | CHB |
| SERPINB10 | GI_4826901-S  | rs8099238  | 18 | 18 | 59737617 | 15575 | 6.1483  | 0.4260 | 0.7778  | 6.0527 | CHB |
| LOC284293 | GI_27485378-S | rs9955876  | 18 | 18 | 59737855 | 33731 | 12.9893 | 0.7211 | -1.0207 | 7.3387 | CHB |
| LOC284293 | GI_27485378-S | rs9967382  | 18 | 18 | 59738047 | 33539 | 7.6618  | 0.5545 | -0.7261 | 7.3387 | CHB |
| LOC284293 | GI_27485378-S | rs620535   | 18 | 18 | 59738269 | 33317 | 12.9893 | 0.7211 | -1.0207 | 7.3387 | CHB |
| SERPINB10 | GI_4826901-S  | rs976038   | 18 | 18 | 59738648 | 14544 | 6.1483  | 0.4260 | -0.7778 | 6.0527 | CHB |
| LOC284293 | GI_27485378-S | rs9947135  | 18 | 18 | 59738704 | 32882 | 12.7889 | 0.7322 | -1.0521 | 7.3387 | CHB |
| LOC284293 | GI_27485378-S | rs4350667  | 18 | 18 | 59738743 | 32843 | 10.9240 | 0.6704 | -0.9356 | 7.3387 | CHB |
| LOC284293 | GI_27485378-S | rs9947504  | 18 | 18 | 59739063 | 32523 | 12.9893 | 0.7211 | -1.0207 | 7.3387 | CHB |
| LOC284293 | GI_27485378-S | rs17072158 | 18 | 18 | 59739617 | 31969 | 12.9893 | 0.7211 | 1.0207  | 7.3387 | CHB |
| LOC284293 | GI_27485378-S | rs9957733  | 18 | 18 | 59743343 | 28243 | 12.9893 | 0.7211 | -1.0207 | 7.3387 | CHB |
| SERPINB10 | GI_4826901-S  | rs2114377  | 18 | 18 | 59743756 | 9436  | 6.1483  | 0.4260 | 0.7778  | 6.0527 | CHB |
| SERPINB10 | GI_4826901-S  | rs9960901  | 18 | 18 | 59744047 | 9145  | 6.1483  | 0.4260 | -0.7778 | 6.0527 | CHB |
| SERPINB10 | GI_4826901-S  | rs8093894  | 18 | 18 | 59744461 | 8731  | 6.1483  | 0.4260 | -0.7778 | 6.0527 | CHB |
| SERPINB10 | GI_4826901-S  | rs8094058  | 18 | 18 | 59744599 | 8593  | 6.1483  | 0.4260 | -0.7778 | 6.0527 | CHB |
| SERPINB10 | GI_4826901-S  | rs8089023  | 18 | 18 | 59744733 | 8459  | 6.1483  | 0.4260 | -0.7778 | 6.0527 | CHB |
| SERPINB10 | GI_4826901-S  | rs3786340  | 18 | 18 | 59748514 | 4678  | 6.1483  | 0.4260 | 0.7778  | 6.0527 | CHB |
| SERPINB10 | GI_4826901-S  | rs10163726 | 18 | 18 | 59748718 | 4474  | 6.1483  | 0.4260 | 0.7778  | 6.0527 | CHB |
| SERPINB10 | GI_4826901-S  | rs9951724  | 18 | 18 | 59749057 | 4135  | 6.1483  | 0.4260 | 0.7778  | 6.0527 | CHB |
| SERPINB10 | GI_4826901-S  | rs1544899  | 18 | 18 | 59749190 | 4002  | 6.1483  | 0.4260 | 0.7778  | 6.0527 | CHB |
| SERPINB10 | GI_4826901-S  | rs1544898  | 18 | 18 | 59749429 | 3763  | 6.1483  | 0.4260 | -0.7778 | 6.0527 | CHB |
| SERPINB10 | GI_4826901-S  | rs8096543  | 18 | 18 | 59750024 | 3168  | 6.1483  | 0.4260 | -0.7778 | 6.0527 | CHB |
| SERPINB10 | GI_4826901-S  | rs4630651  | 18 | 18 | 59750481 | 2711  | 6.1483  | 0.4260 | -0.7778 | 6.0527 | CHB |
| SERPINB10 | GI_4826901-S  | rs9964049  | 18 | 18 | 59751066 | 2126  | 6.1483  | 0.4260 | 0.7778  | 6.0527 | CHB |
| SERPINB10 | GI_4826901-S  | rs963075   | 18 | 18 | 59751364 | 1828  | 6.1483  | 0.4260 | -0.7778 | 6.0527 | CHB |
| LOC284293 | GI_27485378-S | rs17072204 | 18 | 18 | 59752346 | 19240 | 12.9893 | 0.7211 | 1.0207  | 7.3387 | CHB |
| LOC284293 | GI_27485378-S | rs11152409 | 18 | 18 | 59755259 | 16327 | 12.9893 | 0.7211 | 1.0207  | 7.3387 | CHB |
| LOC284293 | GI_27485378-S | rs9783897  | 18 | 18 | 59755762 | 15824 | 12.6024 | 0.7179 | -1.0177 | 7.3387 | CHB |
| LOC284293 | GI_27485378-S | rs9783898  | 18 | 18 | 59755785 | 15801 | 12.9893 | 0.7211 | -1.0207 | 7.3387 | CHB |
| LOC284293 | GI_27485378-S | rs9783908  | 18 | 18 | 59755942 | 15644 | 10.5830 | 0.6400 | 0.9535  | 7.3387 | CHB |
| LOC284293 | GI_27485378-S | rs13381197 | 18 | 18 | 59757967 | 13619 | 12.9893 | 0.7211 | 1.0207  | 7.3387 | CHB |
| LOC284293 | GI_27485378-S | rs9807138  | 18 | 18 | 59758363 | 13223 | 12.9893 | 0.7211 | 1.0207  | 7.3387 | CHB |
| LOC284293 | GI_27485378-S | rs9955763  | 18 | 18 | 59765415 | 6171  | 12.9893 | 0.7211 | -1.0207 | 7.3387 | CHB |
| LOC284293 | GI_27485378-S | rs13370584 | 18 | 18 | 59766324 | 5262  | 12.9893 | 0.7211 | -1.0207 | 7.3387 | CHB |
| LOC284293 | GI_27485378-S | rs9955410  | 18 | 18 | 59771017 | 569   | 16.3646 | 0.8052 | -1.0054 | 7.3387 | CHB |
| LOC284293 | GI_27485378-S | rs9945924  | 18 | 18 | 59771746 | 160   | 16.3646 | 0.8052 | 1.0054  | 7.3387 | CHB |
| LOC284293 | GI_27485378-S | rs8090046  | 18 | 18 | 59773066 | 1480  | 16.3646 | 0.8052 | 1.0054  | 7.3387 | CHB |
| LOC284293 | GI_27485378-S | rs8095151  | 18 | 18 | 59773196 | 1610  | 16.3646 | 0.8052 | -1.0054 | 7.3387 | CHB |
| LOC284293 | GI_27485378-S | rs9962574  | 18 | 18 | 59777098 | 5512  | 14.1487 | 0.7534 | -0.9696 | 7.3387 | CHB |
| LOC284293 | GI_27485378-S | rs9963550  | 18 | 18 | 59779238 | 7652  | 11.4666 | 0.6988 | 0.9122  | 7.3387 | CHB |
| LOC284293 | GI_27485378-S | rs9949621  | 18 | 18 | 59780377 | 8791  | 11.5838 | 0.6762 | 0.8677  | 7.3387 | CHB |
| LOC284293 | GI_27485378-S | rs9950903  | 18 | 18 | 59781783 | 10197 | 13.8792 | 0.7463 | -0.9626 | 7.3387 | CHB |
| LOC284293 | GI_27485378-S | rs8090586  | 18 | 18 | 59781864 | 10278 | 13.8792 | 0.7463 | 0.9626  | 7.3387 | CHB |
| LOC284293 | GI_27485378-S | rs1006755  | 18 | 18 | 59782026 | 10440 | 13.8792 | 0.7463 | 0.9626  | 7.3387 | CHB |
| LOC284293 | GI_27485378-S | rs4510128  | 18 | 18 | 59782312 | 10726 | 13.8792 | 0.7463 | 0.9626  | 7.3387 | CHB |
| LOC284293 | GI_27485378-S | rs1006754  | 18 | 18 | 59782427 | 10841 | 11.2786 | 0.7015 | 0.9255  | 7.3387 | CHB |
| LOC284293 | GI_27485378-S | rs2009989  | 18 | 18 | 59784224 | 12638 | 13.8792 | 0.7463 | -0.9626 | 7.3387 | CHB |
| LOC284293 | GI_27485378-S | rs17072304 | 18 | 18 | 59784549 | 12963 | 13.8792 | 0.7463 | 0.9626  | 7.3387 | CHB |
| LOC284293 | GI_27485378-S | rs9961615  | 18 | 18 | 59788652 | 17066 | 11.9163 | 0.7138 | -0.9217 | 7.3387 | CHB |
| Hs.465789 | Hs.465789-S   | rs11260040 | 19 | 19 | 7926793  | 52807 | 8.2000  | 0.5371 | -0.1093 | 5.7897 | CHB |
| Hs.465789 | Hs.465789-S   | rs12983784 | 19 | 19 | 7931491  | 48109 | 7.6074  | 0.5156 | 0.1131  | 5.7897 | CHB |
| Hs.465789 | Hs.465789-S   | rs3826740  | 19 | 19 | 7938432  | 41168 | 5.9671  | 0.4384 | 0.0932  | 5.7897 | CHB |

|           |               |            |    |    |         |        |         |        |         |        |     |
|-----------|---------------|------------|----|----|---------|--------|---------|--------|---------|--------|-----|
| Hs.465789 | Hs.465789-S   | rs11670116 | 19 | 19 | 7981202 | 1602   | 10.1135 | 0.6217 | 0.1223  | 5.7897 | CHB |
| Hs.465789 | Hs.465789-S   | rs952444   | 19 | 19 | 7992055 | 12455  | 6.5651  | 0.4504 | 0.1159  | 5.7897 | CHB |
| Hs.465789 | Hs.465789-S   | rs882951   | 19 | 19 | 7999265 | 19665  | 6.2618  | 0.4405 | -0.1164 | 5.7897 | CHB |
| Hs.465789 | Hs.465789-S   | rs10411185 | 19 | 19 | 8009881 | 30281  | 6.5651  | 0.4504 | -0.1159 | 5.7897 | CHB |
| ZNF266    | GI_37622342-A | rs10422910 | 19 | 19 | 9263877 | 120463 | 6.7656  | 0.4698 | -0.3014 | 5.3963 | CHB |
| ZNF266    | GI_37622342-A | rs7252865  | 19 | 19 | 9273535 | 110805 | 6.6168  | 0.4534 | 0.3010  | 5.3963 | CHB |
| ZNF266    | GI_37622342-A | rs10745023 | 19 | 19 | 9274896 | 109444 | 6.4049  | 0.4489 | -0.3164 | 5.3963 | CHB |
| ZNF266    | GI_37622342-A | rs12150875 | 19 | 19 | 9275172 | 109168 | 6.5460  | 0.4493 | 0.3166  | 5.3963 | CHB |
| ZNF266    | GI_37622342-A | rs2033482  | 19 | 19 | 9279184 | 105156 | 6.6168  | 0.4534 | -0.3010 | 5.3963 | CHB |
| ZNF266    | GI_37622342-A | rs8112682  | 19 | 19 | 9282296 | 102044 | 6.5458  | 0.4653 | 0.3012  | 5.3963 | CHB |
| ZNF266    | GI_37622342-A | rs10402374 | 19 | 19 | 9285709 | 98631  | 6.5460  | 0.4493 | -0.3166 | 5.3963 | CHB |
| ZNF266    | GI_37622342-A | rs6512047  | 19 | 19 | 9298812 | 85528  | 7.1740  | 0.4844 | 0.3210  | 5.3963 | CHB |
| ZNF266    | GI_37622342-A | rs8113427  | 19 | 19 | 9309917 | 74423  | 7.1977  | 0.4857 | -0.3043 | 5.3963 | CHB |
| ZNF266    | GI_37622342-A | rs8110584  | 19 | 19 | 9310337 | 74003  | 7.1977  | 0.4857 | -0.3043 | 5.3963 | CHB |
| ZNF266    | GI_37622342-A | rs13535    | 19 | 19 | 9315173 | 69167  | 7.1977  | 0.4857 | 0.3043  | 5.3963 | CHB |
| ZNF266    | GI_37622342-A | rs8103043  | 19 | 19 | 9315976 | 68364  | 7.1977  | 0.4857 | -0.3043 | 5.3963 | CHB |
| ZNF266    | GI_37622342-A | rs10418104 | 19 | 19 | 9316390 | 67950  | 6.1039  | 0.4554 | 0.2921  | 5.3963 | CHB |
| ZNF266    | GI_37622342-A | rs1865040  | 19 | 19 | 9318246 | 66094  | 7.1740  | 0.4844 | 0.3210  | 5.3963 | CHB |
| ZNF266    | GI_37622342-A | rs11883244 | 19 | 19 | 9329222 | 55118  | 7.1977  | 0.4857 | 0.3043  | 5.3963 | CHB |
| ZNF266    | GI_37622342-A | rs17205697 | 19 | 19 | 9330748 | 53592  | 7.1977  | 0.4857 | -0.3043 | 5.3963 | CHB |
| ZNF266    | GI_37622342-A | rs2278407  | 19 | 19 | 9334201 | 50139  | 7.1977  | 0.4857 | 0.3043  | 5.3963 | CHB |
| ZNF266    | GI_37622342-A | rs7249948  | 19 | 19 | 9335688 | 48652  | 7.0741  | 0.4871 | -0.3040 | 5.3963 | CHB |
| ZNF266    | GI_37622342-A | rs11086019 | 19 | 19 | 9336416 | 47924  | 7.1521  | 0.4832 | -0.2964 | 5.3963 | CHB |
| ZNF266    | GI_37622342-A | rs13344979 | 19 | 19 | 9337553 | 46787  | 7.1977  | 0.4857 | -0.3043 | 5.3963 | CHB |
| ZNF266    | GI_37622342-A | rs7255853  | 19 | 19 | 9339628 | 44712  | 7.2298  | 0.4956 | 0.3037  | 5.3963 | CHB |
| ZNF266    | GI_37622342-A | rs10426170 | 19 | 19 | 9340577 | 43763  | 6.9780  | 0.4901 | 0.3041  | 5.3963 | CHB |
| ZNF266    | GI_37622342-A | rs2878451  | 19 | 19 | 9341797 | 42543  | 7.1977  | 0.4857 | -0.3043 | 5.3963 | CHB |
| ZNF266    | GI_37622342-A | rs10416984 | 19 | 19 | 9343310 | 41030  | 7.1977  | 0.4857 | -0.3043 | 5.3963 | CHB |
| ZNF266    | GI_37622342-A | rs8100020  | 19 | 19 | 9345935 | 38405  | 7.1977  | 0.4857 | 0.3043  | 5.3963 | CHB |
| ZNF266    | GI_37622342-A | rs8103099  | 19 | 19 | 9346229 | 38111  | 7.0568  | 0.4861 | 0.3044  | 5.3963 | CHB |
| ZNF266    | GI_37622342-A | rs1347166  | 19 | 19 | 9348808 | 35532  | 7.1977  | 0.4857 | -0.3043 | 5.3963 | CHB |
| ZNF266    | GI_37622342-A | rs10401712 | 19 | 19 | 9349111 | 35229  | 7.1977  | 0.4857 | -0.3043 | 5.3963 | CHB |
| ZNF266    | GI_37622342-A | rs10416662 | 19 | 19 | 9349178 | 35162  | 7.1977  | 0.4857 | -0.3043 | 5.3963 | CHB |
| ZNF266    | GI_37622342-A | rs8103270  | 19 | 19 | 9349461 | 34879  | 7.1740  | 0.4844 | -0.3210 | 5.3963 | CHB |
| ZNF266    | GI_37622342-A | rs2304110  | 19 | 19 | 9350132 | 34208  | 7.1977  | 0.4857 | -0.3043 | 5.3963 | CHB |
| ZNF266    | GI_37622342-A | rs10411115 | 19 | 19 | 9351428 | 32912  | 7.1977  | 0.4857 | -0.3043 | 5.3963 | CHB |
| ZNF266    | GI_37622342-A | rs2217652  | 19 | 19 | 9351814 | 32526  | 7.1977  | 0.4857 | -0.3043 | 5.3963 | CHB |
| ZNF266    | GI_37622342-A | rs3826783  | 19 | 19 | 9353141 | 31199  | 7.1977  | 0.4857 | 0.3043  | 5.3963 | CHB |
| ZNF266    | GI_37622342-A | rs2230752  | 19 | 19 | 9353370 | 30970  | 7.1977  | 0.4857 | 0.3043  | 5.3963 | CHB |
| ZNF266    | GI_37622342-A | rs1433062  | 19 | 19 | 9355266 | 29074  | 7.1740  | 0.4844 | -0.3210 | 5.3963 | CHB |
| ZNF266    | GI_37622342-A | rs2335531  | 19 | 19 | 9357268 | 27072  | 7.1740  | 0.4844 | -0.3210 | 5.3963 | CHB |
| ZNF266    | GI_37622342-A | rs2163809  | 19 | 19 | 9357994 | 26346  | 5.4021  | 0.4543 | 0.2958  | 5.3963 | CHB |
| ZNF266    | GI_37622342-A | rs8112842  | 19 | 19 | 9359315 | 25025  | 7.1977  | 0.4857 | 0.3043  | 5.3963 | CHB |
| ZNF266    | GI_37622342-A | rs11666765 | 19 | 19 | 9361145 | 23195  | 7.1742  | 0.4926 | 0.3196  | 5.3963 | CHB |
| ZNF266    | GI_37622342-A | rs2082429  | 19 | 19 | 9361801 | 22539  | 6.4318  | 0.5034 | 0.3099  | 5.3963 | CHB |
| ZNF266    | GI_37622342-A | rs11671340 | 19 | 19 | 9362393 | 21947  | 6.8401  | 0.4823 | -0.3204 | 5.3963 | CHB |
| ZNF266    | GI_37622342-A | rs11086027 | 19 | 19 | 9363441 | 20899  | 7.1977  | 0.4857 | -0.3043 | 5.3963 | CHB |
| ZNF266    | GI_37622342-A | rs11672602 | 19 | 19 | 9363587 | 20753  | 7.1977  | 0.4857 | -0.3043 | 5.3963 | CHB |
| ZNF266    | GI_37622342-A | rs17272543 | 19 | 19 | 9364937 | 19403  | 7.1740  | 0.4844 | 0.3210  | 5.3963 | CHB |
| ZNF266    | GI_37622342-A | rs7246082  | 19 | 19 | 9365006 | 19334  | 7.1977  | 0.4857 | -0.3043 | 5.3963 | CHB |
| ZNF266    | GI_37622342-A | rs7257650  | 19 | 19 | 9365101 | 19239  | 7.1977  | 0.4857 | 0.3043  | 5.3963 | CHB |
| ZNF266    | GI_37622342-A | rs2878452  | 19 | 19 | 9365510 | 18830  | 7.1338  | 0.5074 | 0.3161  | 5.3963 | CHB |
| ZNF266    | GI_37622342-A | rs2335532  | 19 | 19 | 9365598 | 18742  | 6.8567  | 0.4750 | -0.3047 | 5.3963 | CHB |
| ZNF266    | GI_37622342-A | rs8104611  | 19 | 19 | 9366805 | 17535  | 6.2983  | 0.4506 | 0.3101  | 5.3963 | CHB |
| ZNF266    | GI_37622342-A | rs2335938  | 19 | 19 | 9367269 | 17071  | 7.1977  | 0.4857 | -0.3043 | 5.3963 | CHB |
| ZNF266    | GI_37622342-A | rs12150994 | 19 | 19 | 9369228 | 15112  | 6.6469  | 0.4630 | -0.2935 | 5.3963 | CHB |
| ZNF266    | GI_37622342-A | rs4804436  | 19 | 19 | 9376200 | 8140   | 6.7930  | 0.4634 | -0.3054 | 5.3963 | CHB |
| ZNF266    | GI_37622342-A | rs8108167  | 19 | 19 | 9379331 | 5009   | 6.7930  | 0.4634 | -0.3054 | 5.3963 | CHB |
| ZNF266    | GI_37622342-A | rs6512108  | 19 | 19 | 9379670 | 4670   | 6.7930  | 0.4634 | -0.3054 | 5.3963 | CHB |

|           |               |            |    |    |          |        |        |        |         |        |     |
|-----------|---------------|------------|----|----|----------|--------|--------|--------|---------|--------|-----|
| ZNF266    | GI_37622342-A | rs11668157 | 19 | 19 | 9379846  | 4494   | 7.1740 | 0.4844 | 0.3210  | 5.3963 | CHB |
| ZNF266    | GI_37622342-A | rs6512109  | 19 | 19 | 9380453  | 3887   | 7.1977 | 0.4857 | 0.3043  | 5.3963 | CHB |
| ZNF266    | GI_37622342-A | rs7253847  | 19 | 19 | 9380894  | 3446   | 7.1977 | 0.4857 | -0.3043 | 5.3963 | CHB |
| ZNF266    | GI_37622342-A | rs7259584  | 19 | 19 | 9381062  | 3278   | 7.1977 | 0.4857 | 0.3043  | 5.3963 | CHB |
| ZNF266    | GI_37622342-A | rs10423720 | 19 | 19 | 9382727  | 1613   | 7.1977 | 0.4857 | 0.3043  | 5.3963 | CHB |
| ZNF266    | GI_37622342-A | rs8109962  | 19 | 19 | 9383388  | 952    | 6.0520 | 0.4202 | 0.2774  | 5.3963 | CHB |
| ZNF266    | GI_37622342-A | rs8105020  | 19 | 19 | 9383477  | 863    | 6.7930 | 0.4634 | -0.3054 | 5.3963 | CHB |
| ZNF266    | GI_37622342-A | rs6512110  | 19 | 19 | 9383724  | 616    | 6.7930 | 0.4634 | 0.3054  | 5.3963 | CHB |
| ZNF266    | GI_37622342-A | rs7251490  | 19 | 19 | 9383802  | 538    | 7.1977 | 0.4857 | -0.3043 | 5.3963 | CHB |
| ZNF266    | GI_37622342-A | rs10515    | 19 | 19 | 9384724  | 384    | 7.1977 | 0.4857 | -0.3043 | 5.3963 | CHB |
| ZNF266    | GI_37622342-A | rs2241356  | 19 | 19 | 9385185  | 845    | 7.1977 | 0.4857 | 0.3043  | 5.3963 | CHB |
| ZNF266    | GI_37622342-A | rs7258150  | 19 | 19 | 9387017  | 2677   | 6.7114 | 0.4667 | -0.3144 | 5.3963 | CHB |
| ZNF266    | GI_37622342-A | rs1978713  | 19 | 19 | 9390783  | 6443   | 6.3751 | 0.4394 | 0.2901  | 5.3963 | CHB |
| ZNF266    | GI_37622342-A | rs1978711  | 19 | 19 | 9391081  | 6741   | 6.2888 | 0.4583 | 0.3014  | 5.3963 | CHB |
| ZNF266    | GI_37622342-A | rs1978435  | 19 | 19 | 9392116  | 7776   | 7.3721 | 0.5032 | 0.3163  | 5.3963 | CHB |
| ZNF266    | GI_37622342-A | rs2112529  | 19 | 19 | 9393156  | 8816   | 7.1977 | 0.4857 | 0.3043  | 5.3963 | CHB |
| ZNF266    | GI_37622342-A | rs6512121  | 19 | 19 | 9394805  | 10465  | 6.7930 | 0.4634 | 0.3054  | 5.3963 | CHB |
| ZNF266    | GI_37622342-A | rs7254750  | 19 | 19 | 9395301  | 10961  | 6.5506 | 0.4656 | 0.3045  | 5.3963 | CHB |
| ZNF266    | GI_37622342-A | rs2335939  | 19 | 19 | 9395790  | 11450  | 6.5506 | 0.4656 | -0.3045 | 5.3963 | CHB |
| ZNF266    | GI_37622342-A | rs7258744  | 19 | 19 | 9395967  | 11627  | 6.1790 | 0.4434 | -0.2903 | 5.3963 | CHB |
| ZNF266    | GI_37622342-A | rs7246415  | 19 | 19 | 9395981  | 11641  | 6.7930 | 0.4634 | 0.3054  | 5.3963 | CHB |
| ZNF266    | GI_37622342-A | rs7258874  | 19 | 19 | 9396016  | 11676  | 7.1977 | 0.4857 | -0.3043 | 5.3963 | CHB |
| ZNF266    | GI_37622342-A | rs10411141 | 19 | 19 | 9397203  | 12863  | 6.5506 | 0.4656 | -0.3045 | 5.3963 | CHB |
| ZNF266    | GI_37622342-A | rs10406056 | 19 | 19 | 9397418  | 13078  | 5.8922 | 0.4179 | 0.2964  | 5.3963 | CHB |
| ZNF266    | GI_37622342-A | rs7252370  | 19 | 19 | 9398191  | 13851  | 6.2508 | 0.4560 | -0.3042 | 5.3963 | CHB |
| ZNF266    | GI_37622342-A | rs6512122  | 19 | 19 | 9398465  | 14125  | 7.1977 | 0.4857 | -0.3043 | 5.3963 | CHB |
| ZNF266    | GI_37622342-A | rs6512123  | 19 | 19 | 9398800  | 14460  | 7.1977 | 0.4857 | -0.3043 | 5.3963 | CHB |
| ZNF266    | GI_37622342-A | rs12461912 | 19 | 19 | 9400300  | 15960  | 6.9611 | 0.4891 | -0.3037 | 5.3963 | CHB |
| ZNF266    | GI_37622342-A | rs8107606  | 19 | 19 | 9400522  | 16182  | 7.1977 | 0.4857 | 0.3043  | 5.3963 | CHB |
| ZNF266    | GI_37622342-A | rs9305082  | 19 | 19 | 9401524  | 17184  | 7.1977 | 0.4857 | -0.3043 | 5.3963 | CHB |
| ZNF266    | GI_37622342-A | rs10404268 | 19 | 19 | 9402640  | 18300  | 7.1977 | 0.4857 | 0.3043  | 5.3963 | CHB |
| ZNF266    | GI_37622342-A | rs11673601 | 19 | 19 | 9403007  | 18667  | 7.1740 | 0.4844 | 0.3210  | 5.3963 | CHB |
| ZNF266    | GI_37622342-A | rs9676745  | 19 | 19 | 9403342  | 19002  | 7.1977 | 0.4857 | -0.3043 | 5.3963 | CHB |
| ZNF266    | GI_37622342-A | rs10409256 | 19 | 19 | 9404830  | 20490  | 6.9611 | 0.4891 | 0.3037  | 5.3963 | CHB |
| ZNF266    | GI_37622342-A | rs8108483  | 19 | 19 | 9406030  | 21690  | 6.5613 | 0.4924 | 0.3092  | 5.3963 | CHB |
| ZNF266    | GI_37622342-A | rs6512130  | 19 | 19 | 9407351  | 23011  | 7.5097 | 0.5370 | 0.3545  | 5.3963 | CHB |
| NR2F6     | GI_20070198-S | rs10414777 | 19 | 19 | 17197297 | 6590   | 6.1515 | 0.4671 | 0.3537  | 6.089  | CHB |
| NR2F6     | GI_20070198-S | rs2288541  | 19 | 19 | 17198308 | 5579   | 7.6915 | 0.5200 | 0.3443  | 6.089  | CHB |
| NR2F6     | GI_42661997-S | rs2288541  | 19 | 19 | 17198308 | 5555   | 6.4776 | 0.4532 | 0.2591  | 6.089  | CHB |
| NR2F6     | GI_20070198-S | rs2288540  | 19 | 19 | 17198344 | 5543   | 7.6915 | 0.5200 | 0.3443  | 6.089  | CHB |
| NR2F6     | GI_42661997-S | rs2288540  | 19 | 19 | 17198344 | 5519   | 6.4776 | 0.4532 | 0.2591  | 6.089  | CHB |
| NR2F6     | GI_20070198-S | rs7258100  | 19 | 19 | 17201400 | 2487   | 6.4434 | 0.4593 | 0.3298  | 6.089  | CHB |
| ZNF253    | GI_10567821-S | rs7508153  | 19 | 19 | 19831113 | 33501  | 5.5120 | 0.3867 | -0.2595 | 5.4647 | CHB |
| ZNF253    | GI_10567821-S | rs12610295 | 19 | 19 | 19899967 | 35353  | 5.6506 | 0.4181 | 0.2716  | 5.4647 | CHB |
| ZNF253    | GI_10567821-S | rs11666112 | 19 | 19 | 19902801 | 38187  | 5.5120 | 0.3867 | 0.2595  | 5.4647 | CHB |
| ZNF253    | GI_10567821-S | rs11085283 | 19 | 19 | 19904551 | 39937  | 5.5120 | 0.3867 | -0.2595 | 5.4647 | CHB |
| ZNF253    | GI_10567821-S | rs1019280  | 19 | 19 | 19908429 | 43815  | 5.9150 | 0.4193 | 0.2627  | 5.4647 | CHB |
| ZNF253    | GI_10567821-S | rs4809014  | 19 | 19 | 19916002 | 51388  | 5.5982 | 0.3994 | 0.2690  | 5.4647 | CHB |
| LOC388519 | GI_41151129-S | rs1725946  | 19 | 19 | 20105370 | 7483   | 6.3712 | 0.4719 | 0.1694  | 5.6568 | CHB |
| LOC388519 | GI_41151129-S | rs1654261  | 19 | 19 | 20190637 | 92750  | 6.7044 | 0.5009 | -0.1726 | 5.6568 | CHB |
| LOC388519 | GI_41151129-S | rs11667100 | 19 | 19 | 20210185 | 112298 | 5.7032 | 0.4061 | -0.1515 | 5.6568 | CHB |
| ZNF257    | GI_15627000-S | rs2079063  | 19 | 19 | 21952514 | 111760 | 6.0112 | 0.4177 | -0.1980 | 5.8448 | CHB |
| ZNF257    | GI_15627000-S | rs6511310  | 19 | 19 | 21989125 | 75149  | 6.0112 | 0.4177 | -0.1980 | 5.8448 | CHB |
| ZNF257    | GI_15627000-S | rs4932932  | 19 | 19 | 21995054 | 69220  | 6.2917 | 0.4422 | 0.2055  | 5.8448 | CHB |
| ZNF257    | GI_15627000-S | rs7253170  | 19 | 19 | 22001068 | 63206  | 6.0112 | 0.4177 | 0.1980  | 5.8448 | CHB |
| ZNF257    | GI_15627000-S | rs8103879  | 19 | 19 | 22003277 | 60997  | 6.0112 | 0.4177 | 0.1980  | 5.8448 | CHB |
| ZNF257    | GI_15627000-S | rs4932951  | 19 | 19 | 22038192 | 26082  | 6.0418 | 0.4196 | -0.1975 | 5.8448 | CHB |
| ZNF257    | GI_15627000-S | rs12461499 | 19 | 19 | 22096421 | 32147  | 6.0418 | 0.4196 | -0.1975 | 5.8448 | CHB |
| F25965    | GI_28144915-S | rs3761090  | 19 | 19 | 40841290 | 95920  | 9.3736 | 0.5909 | -0.3482 | 7.8167 | CHB |

|          |               |            |    |    |          |       |         |        |         |        |     |
|----------|---------------|------------|----|----|----------|-------|---------|--------|---------|--------|-----|
| F25965   | GI_28144915-S | rs3787052  | 19 | 19 | 40893895 | 43315 | 9.3160  | 0.5971 | 0.3442  | 7.8167 | CHB |
| CAPN12   | GI_38707980-S | rs4802770  | 19 | 19 | 43915242 | 2083  | 6.5401  | 0.4490 | -0.3611 | 5.838  | CHB |
| RPS16    | GI_34335151-S | rs31726    | 19 | 19 | 44606588 | 11824 | 6.5276  | 0.4483 | 0.1993  | 5.74   | CHB |
| RPS16    | GI_34335151-S | rs251859   | 19 | 19 | 44610569 | 7843  | 6.8480  | 0.4665 | 0.2126  | 5.74   | CHB |
| RPS16    | GI_34335151-S | rs251857   | 19 | 19 | 44611378 | 7034  | 6.8480  | 0.4665 | -0.2126 | 5.74   | CHB |
| RPS16    | GI_34335151-S | rs566130   | 19 | 19 | 44615969 | 2443  | 6.8480  | 0.4665 | -0.2126 | 5.74   | CHB |
| RPS16    | GI_34335151-S | rs17626    | 19 | 19 | 44618361 | 51    | 6.4177  | 0.4497 | 0.2107  | 5.74   | CHB |
| RPS16    | GI_34335151-S | rs530411   | 19 | 19 | 44619380 | 968   | 7.1231  | 0.4816 | -0.2112 | 5.74   | CHB |
| RPS16    | GI_34335151-S | rs2353678  | 19 | 19 | 44622899 | 4487  | 7.1231  | 0.4816 | -0.2112 | 5.74   | CHB |
| RPS16    | GI_34335151-S | rs1865091  | 19 | 19 | 44623906 | 5494  | 7.1231  | 0.4816 | -0.2112 | 5.74   | CHB |
| RPS16    | GI_34335151-S | rs2116932  | 19 | 19 | 44628533 | 10121 | 6.1661  | 0.4271 | 0.2039  | 5.74   | CHB |
| RPS16    | GI_34335151-S | rs4803240  | 19 | 19 | 44639422 | 21010 | 6.1625  | 0.4269 | -0.1995 | 5.74   | CHB |
| RPS16    | GI_34335151-S | rs2009970  | 19 | 19 | 44642926 | 24514 | 6.1625  | 0.4269 | -0.1995 | 5.74   | CHB |
| RPS16    | GI_34335151-S | rs2060271  | 19 | 19 | 44643846 | 25434 | 6.1625  | 0.4269 | 0.1995  | 5.74   | CHB |
| RPS16    | GI_34335151-S | rs1560730  | 19 | 19 | 44647631 | 29219 | 6.1625  | 0.4269 | -0.1995 | 5.74   | CHB |
| RPS16    | GI_34335151-S | rs2304219  | 19 | 19 | 44655158 | 36746 | 6.1625  | 0.4269 | -0.1995 | 5.74   | CHB |
| RPS16    | GI_34335151-S | rs2288933  | 19 | 19 | 44664103 | 45691 | 6.4641  | 0.4524 | 0.1975  | 5.74   | CHB |
| RPS16    | GI_34335151-S | rs2288934  | 19 | 19 | 44665943 | 47531 | 6.2563  | 0.4324 | -0.1967 | 5.74   | CHB |
| RPS16    | GI_34335151-S | rs4803245  | 19 | 19 | 44668304 | 49892 | 6.2563  | 0.4324 | 0.1967  | 5.74   | CHB |
| R29124_1 | GI_16117774-S | rs2317314  | 19 | 19 | 46754147 | 23456 | 7.4086  | 0.4969 | 0.2036  | 5.6082 | CHB |
| R29124_1 | GI_16117774-S | rs7251994  | 19 | 19 | 46755515 | 22088 | 7.4851  | 0.5009 | -0.2000 | 5.6082 | CHB |
| R29124_1 | GI_16117774-S | rs10420992 | 19 | 19 | 46756302 | 21301 | 8.6274  | 0.5574 | -0.2203 | 5.6082 | CHB |
| R29124_1 | GI_16117774-S | rs17724225 | 19 | 19 | 46756350 | 21253 | 7.8828  | 0.5214 | 0.2072  | 5.6082 | CHB |
| R29124_1 | GI_16117774-S | rs4803481  | 19 | 19 | 46758396 | 19207 | 7.6650  | 0.5272 | 0.2189  | 5.6082 | CHB |
| R29124_1 | GI_16117774-S | rs10421584 | 19 | 19 | 46759818 | 17785 | 7.8828  | 0.5214 | -0.2072 | 5.6082 | CHB |
| R29124_1 | GI_16117774-S | rs10421785 | 19 | 19 | 46759870 | 17733 | 7.4851  | 0.5009 | -0.2000 | 5.6082 | CHB |
| R29124_1 | GI_16117774-S | rs11083627 | 19 | 19 | 46761740 | 15863 | 7.9842  | 0.5349 | 0.2080  | 5.6082 | CHB |
| R29124_1 | GI_16117774-S | rs12150975 | 19 | 19 | 46762200 | 15403 | 7.9645  | 0.5426 | 0.2071  | 5.6082 | CHB |
| R29124_1 | GI_16117774-S | rs12983999 | 19 | 19 | 46762368 | 15235 | 7.9977  | 0.5355 | -0.2073 | 5.6082 | CHB |
| R29124_1 | GI_16117774-S | rs3745938  | 19 | 19 | 46763007 | 14596 | 8.2958  | 0.5502 | -0.2151 | 5.6082 | CHB |
| R29124_1 | GI_16117774-S | rs12462194 | 19 | 19 | 46764129 | 13474 | 10.5869 | 0.6402 | -0.2355 | 5.6082 | CHB |
| R29124_1 | GI_16117774-S | rs10409976 | 19 | 19 | 46767612 | 9991  | 9.1030  | 0.5877 | -0.2274 | 5.6082 | CHB |
| R29124_1 | GI_16117774-S | rs1860255  | 19 | 19 | 46768912 | 8691  | 9.7334  | 0.6062 | -0.2239 | 5.6082 | CHB |
| R29124_1 | GI_16117774-S | rs10406221 | 19 | 19 | 46770443 | 7160  | 10.5869 | 0.6402 | -0.2355 | 5.6082 | CHB |
| R29124_1 | GI_16117774-S | rs2191019  | 19 | 19 | 46772763 | 4840  | 9.7334  | 0.6062 | -0.2239 | 5.6082 | CHB |
| R29124_1 | GI_16117774-S | rs7257657  | 19 | 19 | 46774166 | 3437  | 7.7481  | 0.5145 | 0.2059  | 5.6082 | CHB |
| R29124_1 | GI_16117774-S | rs7247842  | 19 | 19 | 46775513 | 2090  | 8.2056  | 0.5373 | 0.2141  | 5.6082 | CHB |
| R29124_1 | GI_16117774-S | rs714106   | 19 | 19 | 46775689 | 1914  | 9.5374  | 0.6248 | -0.2233 | 5.6082 | CHB |
| R29124_1 | GI_16117774-S | rs740591   | 19 | 19 | 46776426 | 1177  | 7.2541  | 0.4969 | 0.2055  | 5.6082 | CHB |
| R29124_1 | GI_16117774-S | rs758350   | 19 | 19 | 46777002 | 601   | 8.2056  | 0.5373 | 0.2141  | 5.6082 | CHB |
| R29124_1 | GI_16117774-S | rs2302188  | 19 | 19 | 46777713 | 110   | 9.7334  | 0.6062 | 0.2239  | 5.6082 | CHB |
| R29124_1 | GI_16117774-S | rs3745936  | 19 | 19 | 46784655 | 7052  | 10.5869 | 0.6402 | 0.2355  | 5.6082 | CHB |
| R29124_1 | GI_16117774-S | rs11083629 | 19 | 19 | 46786574 | 8971  | 9.7334  | 0.6062 | -0.2239 | 5.6082 | CHB |
| R29124_1 | GI_16117774-S | rs2006209  | 19 | 19 | 46788068 | 10465 | 6.6562  | 0.4557 | -0.1810 | 5.6082 | CHB |
| R29124_1 | GI_16117774-S | rs2191241  | 19 | 19 | 46795392 | 17789 | 6.5324  | 0.4486 | -0.1745 | 5.6082 | CHB |
| ERCC1    | GI_42544170-A | rs2298881  | 19 | 19 | 50618756 | 8758  | 6.6394  | 0.4547 | 0.1670  | 5.8033 | CHB |
| FLJ10781 | GI_39780596-S | rs12609260 | 19 | 19 | 51652806 | 8962  | 10.7722 | 0.6472 | -1.0828 | 8.019  | CHB |
| FLJ10781 | GI_39780596-S | rs12609521 | 19 | 19 | 51658767 | 3001  | 10.7722 | 0.6472 | 1.0828  | 8.019  | CHB |
| FLJ10781 | GI_39780596-S | rs3745787  | 19 | 19 | 51663203 | 1435  | 24.5981 | 0.9191 | 1.1505  | 8.019  | CHB |
| FLJ10781 | GI_39780596-S | rs8107491  | 19 | 19 | 51667007 | 5239  | 24.5981 | 0.9191 | 1.1505  | 8.019  | CHB |
| FLJ10781 | GI_39780596-S | rs7254929  | 19 | 19 | 51683141 | 21373 | 9.0772  | 0.5955 | -0.9059 | 8.019  | CHB |
| FLJ10781 | GI_39780596-S | rs3745788  | 19 | 19 | 51686673 | 24905 | 8.1228  | 0.5333 | -0.9328 | 8.019  | CHB |
| FLJ10781 | GI_39780596-S | rs3810297  | 19 | 19 | 51691531 | 29763 | 8.2037  | 0.5372 | -0.9583 | 8.019  | CHB |
| PLA2G4C  | GI_4505850-S  | rs2307279  | 19 | 19 | 53300410 | 57426 | 7.4867  | 0.5010 | -0.8184 | 6.4038 | CHB |
| PLA2G4C  | GI_4505850-S  | rs251693   | 19 | 19 | 53307249 | 64265 | 7.5301  | 0.5033 | -0.8576 | 6.4038 | CHB |
| PLA2G4C  | GI_4505850-S  | rs251692   | 19 | 19 | 53310523 | 67539 | 7.5301  | 0.5033 | -0.8576 | 6.4038 | CHB |
| PLA2G4C  | GI_4505850-S  | rs156633   | 19 | 19 | 53319074 | 76090 | 7.5301  | 0.5033 | 0.8576  | 6.4038 | CHB |
| PLA2G4C  | GI_4505850-S  | rs156639   | 19 | 19 | 53323649 | 80665 | 7.6961  | 0.5202 | 0.8724  | 6.4038 | CHB |
| PLA2G4C  | GI_4505850-S  | rs411073   | 19 | 19 | 53333386 | 90402 | 7.5301  | 0.5033 | -0.8576 | 6.4038 | CHB |

|           |               |            |    |    |          |        |         |        |         |        |     |
|-----------|---------------|------------|----|----|----------|--------|---------|--------|---------|--------|-----|
| PLA2G4C   | GI_4505850-S  | rs2288878  | 19 | 19 | 53338695 | 95711  | 7.6675  | 0.5187 | 0.8796  | 6.4038 | CHB |
| PLA2G4C   | GI_4505850-S  | rs416844   | 19 | 19 | 53339559 | 96575  | 7.0853  | 0.4961 | -0.8383 | 6.4038 | CHB |
| PLA2G4C   | GI_4505850-S  | rs274897   | 19 | 19 | 53341095 | 98111  | 6.8983  | 0.4693 | -0.8852 | 6.4038 | CHB |
| PLA2G4C   | GI_4505850-S  | rs8100261  | 19 | 19 | 53347571 | 104587 | 7.3728  | 0.5033 | -0.9249 | 6.4038 | CHB |
| CARD8     | GI_7662403-S  | rs2015209  | 19 | 19 | 53399477 | 3911   | 6.1993  | 0.4291 | -0.2872 | 5.7933 | CHB |
| CARD8     | GI_7662403-S  | rs11669584 | 19 | 19 | 53401992 | 1396   | 6.1993  | 0.4291 | -0.2872 | 5.7933 | CHB |
| CARD8     | GI_7662403-S  | rs11665831 | 19 | 19 | 53402009 | 1379   | 6.1993  | 0.4291 | 0.2872  | 5.7933 | CHB |
| CARD8     | GI_7662403-S  | rs1062808  | 19 | 19 | 53403288 | 100    | 6.1993  | 0.4291 | -0.2872 | 5.7933 | CHB |
| CARD8     | GI_7662403-S  | rs1971783  | 19 | 19 | 53404770 | 1382   | 6.1993  | 0.4291 | 0.2872  | 5.7933 | CHB |
| ZNF211    | GI_38569444-S | rs10405036 | 19 | 19 | 62784856 | 60880  | 6.0386  | 0.4194 | -0.2690 | 5.8745 | CHB |
| ZNF587    | GI_14249531-S | rs1047405  | 19 | 19 | 63072690 | 955    | 6.4469  | 0.4436 | -0.2946 | 5.9804 | CHB |
| ZNF587    | GI_14249531-S | rs7245531  | 19 | 19 | 63080519 | 8784   | 6.8436  | 0.4742 | 0.3079  | 5.9804 | CHB |
| SLC27A5   | GI_13325056-S | rs893186   | 19 | 19 | 63660991 | 40813  | 5.2438  | 0.3694 | 0.3625  | 5.1715 | CHB |
| SLC27A5   | GI_13325056-S | rs4801272  | 19 | 19 | 63669275 | 32529  | 5.2438  | 0.3694 | 0.3625  | 5.1715 | CHB |
| SLC27A5   | GI_13325056-S | rs893185   | 19 | 19 | 63681307 | 20497  | 5.2438  | 0.3694 | -0.3625 | 5.1715 | CHB |
| SLC27A5   | GI_13325056-S | rs4801273  | 19 | 19 | 63692085 | 9719   | 6.7375  | 0.4603 | 0.4023  | 5.1715 | CHB |
| MGC2752   | GI_33859747-S | rs11666790 | 19 | 19 | 63725153 | 60059  | 9.6945  | 0.6046 | 0.2852  | 5.3291 | CHB |
| MGC2752   | GI_33859747-S | rs7249714  | 19 | 19 | 63749895 | 35317  | 9.6945  | 0.6046 | 0.2852  | 5.3291 | CHB |
| MGC2752   | GI_33859747-S | rs895374   | 19 | 19 | 63758730 | 26482  | 11.1597 | 0.6613 | -0.3026 | 5.3291 | CHB |
| MGC2752   | GI_33859747-S | rs3794965  | 19 | 19 | 63761165 | 24047  | 10.8957 | 0.6605 | 0.3036  | 5.3291 | CHB |
| MGC2752   | GI_33859747-S | rs10413586 | 19 | 19 | 63763133 | 22079  | 10.8105 | 0.6573 | 0.3014  | 5.3291 | CHB |
| MGC2752   | GI_33859747-S | rs4801614  | 19 | 19 | 63788762 | 3550   | 12.0997 | 0.6935 | -0.3069 | 5.3291 | CHB |
| Hs.516827 | Hs.516827-S   | rs4815580  | 20 | 20 | 333052   | 6165   | 7.6154  | 0.5077 | 0.2813  | 5.9    | CHB |
| SNRPB2    | GI_38149917-I | rs2073055  | 20 | 20 | 16658791 | 37     | 6.1566  | 0.4265 | 0.3596  | 5.8763 | CHB |
| CPNE1     | GI_23397697-A | rs6060519  | 20 | 20 | 33680797 | 3125   | 5.8331  | 0.4068 | 0.5526  | 5.759  | CHB |
| CPNE1     | GI_23397697-A | rs6060524  | 20 | 20 | 33684569 | 6897   | 6.0433  | 0.4197 | -0.6917 | 5.759  | CHB |
| CPNE1     | GI_23397697-A | rs1118233  | 20 | 20 | 33691763 | 14091  | 6.0433  | 0.4197 | 0.6917  | 5.759  | CHB |
| CPNE1     | GI_23397697-A | rs7273815  | 20 | 20 | 33695829 | 18157  | 6.0433  | 0.4197 | -0.6917 | 5.759  | CHB |
| CPNE1     | GI_23397697-A | rs12480408 | 20 | 20 | 33698214 | 20542  | 6.0433  | 0.4197 | -0.6917 | 5.759  | CHB |
| CPNE1     | GI_23397697-A | rs6060535  | 20 | 20 | 33698936 | 21264  | 6.4435  | 0.4593 | -0.7814 | 5.759  | CHB |
| CPNE1     | GI_23397697-A | rs11696527 | 20 | 20 | 33708793 | 31121  | 6.0433  | 0.4197 | -0.6917 | 5.759  | CHB |
| CPNE1     | GI_23397697-A | rs6060557  | 20 | 20 | 33733680 | 56008  | 6.0433  | 0.4197 | -0.6917 | 5.759  | CHB |
| CPNE1     | GI_23397697-A | rs6060558  | 20 | 20 | 33734506 | 56834  | 6.0433  | 0.4197 | -0.6917 | 5.759  | CHB |
| CPNE1     | GI_23397697-A | rs6060567  | 20 | 20 | 33751664 | 73992  | 6.0433  | 0.4197 | 0.6917  | 5.759  | CHB |
| CPNE1     | GI_23397697-A | rs17092980 | 20 | 20 | 33752419 | 74747  | 6.0433  | 0.4197 | 0.6917  | 5.759  | CHB |
| CPNE1     | GI_23397697-A | rs6058302  | 20 | 20 | 33753451 | 75779  | 6.4435  | 0.4593 | -0.7814 | 5.759  | CHB |
| CPNE1     | GI_23397697-A | rs2425078  | 20 | 20 | 33761577 | 83905  | 6.0433  | 0.4197 | 0.6917  | 5.759  | CHB |
| CPNE1     | GI_23397697-A | rs2425079  | 20 | 20 | 33761605 | 83933  | 6.0433  | 0.4197 | 0.6917  | 5.759  | CHB |
| CPNE1     | GI_23397697-A | rs2425090  | 20 | 20 | 33768197 | 90525  | 6.4435  | 0.4593 | 0.7814  | 5.759  | CHB |
| CPNE1     | GI_23397697-A | rs6060578  | 20 | 20 | 33768859 | 91187  | 6.0433  | 0.4197 | -0.6917 | 5.759  | CHB |
| CPNE1     | GI_23397697-A | rs2425094  | 20 | 20 | 33770388 | 92716  | 6.0433  | 0.4197 | 0.6917  | 5.759  | CHB |
| CPNE1     | GI_23397697-A | rs2425103  | 20 | 20 | 33775743 | 98071  | 6.0433  | 0.4197 | 0.6917  | 5.759  | CHB |
| CPNE1     | GI_23397697-A | rs11696947 | 20 | 20 | 33776072 | 98400  | 6.0433  | 0.4197 | -0.6917 | 5.759  | CHB |
| CPNE1     | GI_23397697-A | rs11699044 | 20 | 20 | 33776127 | 98455  | 5.9374  | 0.4207 | -0.6940 | 5.759  | CHB |
| CPNE1     | GI_23397697-A | rs2425109  | 20 | 20 | 33779632 | 101960 | 6.4435  | 0.4593 | -0.7814 | 5.759  | CHB |
| CPNE1     | GI_23397697-A | rs13038622 | 20 | 20 | 33782757 | 105085 | 6.0433  | 0.4197 | -0.6917 | 5.759  | CHB |
| CPNE1     | GI_23397697-A | rs2425114  | 20 | 20 | 33785760 | 108088 | 5.8752  | 0.4246 | 0.6872  | 5.759  | CHB |
| CPNE1     | GI_23397697-A | rs2425117  | 20 | 20 | 33787190 | 109518 | 6.0433  | 0.4197 | -0.6917 | 5.759  | CHB |
| CPNE1     | GI_23397697-A | rs2425119  | 20 | 20 | 33787630 | 109958 | 5.9108  | 0.4191 | 0.6925  | 5.759  | CHB |
| CPNE1     | GI_23397697-A | rs2425120  | 20 | 20 | 33787870 | 110198 | 6.4435  | 0.4593 | -0.7814 | 5.759  | CHB |
| CPNE1     | GI_23397697-A | rs6058312  | 20 | 20 | 33787898 | 110226 | 6.0433  | 0.4197 | -0.6917 | 5.759  | CHB |
| CPNE1     | GI_23397697-A | rs2425122  | 20 | 20 | 33792262 | 114590 | 6.4435  | 0.4593 | -0.7814 | 5.759  | CHB |
| CPNE1     | GI_23397697-A | rs3827029  | 20 | 20 | 33796198 | 118526 | 6.0433  | 0.4197 | -0.6917 | 5.759  | CHB |
| CPNE1     | GI_23397697-A | rs2425131  | 20 | 20 | 33800488 | 122816 | 6.4435  | 0.4593 | 0.7814  | 5.759  | CHB |
| CPNE1     | GI_23397697-A | rs2425132  | 20 | 20 | 33801804 | 124132 | 6.0433  | 0.4197 | -0.6917 | 5.759  | CHB |
| CPNE1     | GI_23397697-A | rs1970357  | 20 | 20 | 33802614 | 124942 | 6.0433  | 0.4197 | 0.6917  | 5.759  | CHB |
| CPNE1     | GI_23397697-A | rs7268195  | 20 | 20 | 33803268 | 125596 | 6.0433  | 0.4197 | 0.6917  | 5.759  | CHB |
| CPNE1     | GI_23397697-A | rs11167275 | 20 | 20 | 33803689 | 126017 | 6.0433  | 0.4197 | 0.6917  | 5.759  | CHB |
| CPNE1     | GI_23397697-A | rs2425137  | 20 | 20 | 33808810 | 131138 | 6.0433  | 0.4197 | 0.6917  | 5.759  | CHB |

|           |               |            |    |    |          |        |        |        |         |        |     |
|-----------|---------------|------------|----|----|----------|--------|--------|--------|---------|--------|-----|
| CPNE1     | GI_23397697-A | rs2425138  | 20 | 20 | 33809124 | 131452 | 6.4435 | 0.4593 | 0.7814  | 5.759  | CHB |
| CPNE1     | GI_23397697-A | rs7264869  | 20 | 20 | 33809916 | 132244 | 6.0433 | 0.4197 | -0.6917 | 5.759  | CHB |
| CPNE1     | GI_23397697-A | rs2425141  | 20 | 20 | 33813537 | 135865 | 6.4435 | 0.4593 | -0.7814 | 5.759  | CHB |
| CPNE1     | GI_23397697-A | rs1890470  | 20 | 20 | 33820422 | 142750 | 6.4435 | 0.4593 | -0.7814 | 5.759  | CHB |
| CPNE1     | GI_23397697-A | rs2425149  | 20 | 20 | 33823001 | 145329 | 6.0433 | 0.4197 | 0.6917  | 5.759  | CHB |
| CPNE1     | GI_23397697-A | rs6058322  | 20 | 20 | 33830691 | 153019 | 6.0433 | 0.4197 | -0.6917 | 5.759  | CHB |
| CPNE1     | GI_23397697-A | rs11906854 | 20 | 20 | 33847048 | 169376 | 6.3644 | 0.4388 | -0.6626 | 5.759  | CHB |
| CPNE1     | GI_23397697-A | rs6058325  | 20 | 20 | 33852220 | 174548 | 6.0433 | 0.4197 | 0.6917  | 5.759  | CHB |
| CPNE1     | GI_23397697-A | rs12479473 | 20 | 20 | 33862042 | 184370 | 6.0433 | 0.4197 | 0.6917  | 5.759  | CHB |
| CPNE1     | GI_23397697-A | rs12481545 | 20 | 20 | 33871112 | 193440 | 6.0433 | 0.4197 | -0.6917 | 5.759  | CHB |
| CPNE1     | GI_23397697-A | rs6060624  | 20 | 20 | 33877077 | 199405 | 6.3644 | 0.4388 | -0.6626 | 5.759  | CHB |
| CPNE1     | GI_23397697-A | rs6060625  | 20 | 20 | 33877732 | 200060 | 6.0433 | 0.4197 | -0.6917 | 5.759  | CHB |
| CPNE1     | GI_23397697-A | rs3787169  | 20 | 20 | 33883298 | 205626 | 6.0433 | 0.4197 | 0.6917  | 5.759  | CHB |
| CPNE1     | GI_23397697-A | rs11907811 | 20 | 20 | 33891492 | 213820 | 6.0433 | 0.4197 | -0.6917 | 5.759  | CHB |
| CPNE1     | GI_23397697-A | rs7273668  | 20 | 20 | 33906145 | 228473 | 6.0433 | 0.4197 | 0.6917  | 5.759  | CHB |
| CPNE1     | GI_23397697-A | rs4504072  | 20 | 20 | 33912187 | 234515 | 6.0433 | 0.4197 | 0.6917  | 5.759  | CHB |
| CPNE1     | GI_23397697-A | rs6060642  | 20 | 20 | 33913254 | 235582 | 6.0433 | 0.4197 | -0.6917 | 5.759  | CHB |
| CPNE1     | GI_23397697-A | rs6060643  | 20 | 20 | 33913265 | 235593 | 5.8202 | 0.4211 | -0.6900 | 5.759  | CHB |
| CPNE1     | GI_23397697-A | rs8116836  | 20 | 20 | 33916776 | 239104 | 6.0464 | 0.4199 | 0.6489  | 5.759  | CHB |
| CPNE1     | GI_23397697-A | rs7271036  | 20 | 20 | 33930629 | 252957 | 6.0433 | 0.4197 | 0.6917  | 5.759  | CHB |
| CPNE1     | GI_23397697-A | rs6060669  | 20 | 20 | 33943971 | 266299 | 6.0433 | 0.4197 | -0.6917 | 5.759  | CHB |
| CPNE1     | GI_23397697-A | rs6058354  | 20 | 20 | 33954524 | 276852 | 6.4435 | 0.4593 | 0.7814  | 5.759  | CHB |
| CPNE1     | GI_23397697-A | rs6058356  | 20 | 20 | 33954944 | 277272 | 6.0433 | 0.4197 | -0.6917 | 5.759  | CHB |
| CPNE1     | GI_23397697-A | rs8125393  | 20 | 20 | 33959576 | 281904 | 5.8863 | 0.4176 | -0.6900 | 5.759  | CHB |
| CPNE1     | GI_23397697-A | rs11696912 | 20 | 20 | 33961074 | 283402 | 6.0433 | 0.4197 | 0.6917  | 5.759  | CHB |
| CPNE1     | GI_23397697-A | rs6060676  | 20 | 20 | 33961965 | 284293 | 6.0433 | 0.4197 | 0.6917  | 5.759  | CHB |
| CPNE1     | GI_23397697-A | rs6060677  | 20 | 20 | 33962782 | 285110 | 6.0433 | 0.4197 | -0.6917 | 5.759  | CHB |
| CPNE1     | GI_23397697-A | rs17431878 | 20 | 20 | 33965521 | 287849 | 6.0433 | 0.4197 | 0.6917  | 5.759  | CHB |
| CPNE1     | GI_23397697-A | rs6058364  | 20 | 20 | 33971304 | 293632 | 5.9741 | 0.4230 | 0.6956  | 5.759  | CHB |
| CPNE1     | GI_23397697-A | rs11167279 | 20 | 20 | 33972521 | 294849 | 6.0433 | 0.4197 | 0.6917  | 5.759  | CHB |
| CPNE1     | GI_23397697-A | rs6060704  | 20 | 20 | 33993684 | 316012 | 6.4435 | 0.4593 | -0.7814 | 5.759  | CHB |
| CPNE1     | GI_23397697-A | rs3829829  | 20 | 20 | 34000574 | 322902 | 6.0433 | 0.4197 | -0.6917 | 5.759  | CHB |
| LOC375097 | GI_37555934-S | rs1739652  | 20 | 20 | 36482373 | 561    | 8.2393 | 0.5562 | 0.8150  | 6.1444 | CHB |
| Hs.400876 | Hs.400876-S   | rs1739652  | 20 | 20 | 36482373 | 412    | 8.7377 | 0.5800 | 0.8461  | 6.2222 | CHB |
| LOC375097 | GI_37555934-S | rs3752277  | 20 | 20 | 36484167 | 1233   | 8.6818 | 0.5600 | -0.8255 | 6.1444 | CHB |
| Hs.400876 | Hs.400876-S   | rs3752277  | 20 | 20 | 36484167 | 1382   | 9.1555 | 0.5814 | -0.8517 | 6.2222 | CHB |
| LOC375097 | GI_37555934-S | rs3752278  | 20 | 20 | 36484231 | 1297   | 8.6818 | 0.5600 | 0.8255  | 6.1444 | CHB |
| Hs.400876 | Hs.400876-S   | rs3752278  | 20 | 20 | 36484231 | 1446   | 9.1555 | 0.5814 | 0.8517  | 6.2222 | CHB |
| LOC375097 | GI_37555934-S | rs3752279  | 20 | 20 | 36484373 | 1439   | 8.2393 | 0.5562 | -0.8150 | 6.1444 | CHB |
| Hs.400876 | Hs.400876-S   | rs3752279  | 20 | 20 | 36484373 | 1588   | 8.7377 | 0.5800 | -0.8461 | 6.2222 | CHB |
| LOC375097 | GI_37555934-S | rs3752280  | 20 | 20 | 36484421 | 1487   | 8.6818 | 0.5600 | 0.8255  | 6.1444 | CHB |
| Hs.400876 | Hs.400876-S   | rs3752280  | 20 | 20 | 36484421 | 1636   | 9.1555 | 0.5814 | 0.8517  | 6.2222 | CHB |
| LOC375097 | GI_37555934-S | rs1780636  | 20 | 20 | 36486997 | 4063   | 8.6818 | 0.5600 | -0.8255 | 6.1444 | CHB |
| Hs.400876 | Hs.400876-S   | rs1780636  | 20 | 20 | 36486997 | 4212   | 9.1555 | 0.5814 | -0.8517 | 6.2222 | CHB |
| LOC375097 | GI_37555934-S | rs752775   | 20 | 20 | 36488195 | 5261   | 8.6818 | 0.5600 | 0.8255  | 6.1444 | CHB |
| Hs.400876 | Hs.400876-S   | rs752775   | 20 | 20 | 36488195 | 5410   | 9.1555 | 0.5814 | 0.8517  | 6.2222 | CHB |
| LOC375097 | GI_37555934-S | rs752774   | 20 | 20 | 36488429 | 5495   | 8.2393 | 0.5562 | 0.8150  | 6.1444 | CHB |
| Hs.400876 | Hs.400876-S   | rs752774   | 20 | 20 | 36488429 | 5644   | 8.7377 | 0.5800 | 0.8461  | 6.2222 | CHB |
| LOC375097 | GI_37555934-S | rs707578   | 20 | 20 | 36489289 | 6355   | 8.6818 | 0.5600 | 0.8255  | 6.1444 | CHB |
| Hs.400876 | Hs.400876-S   | rs707578   | 20 | 20 | 36489289 | 6504   | 9.1555 | 0.5814 | 0.8517  | 6.2222 | CHB |
| LOC375097 | GI_37555934-S | rs788347   | 20 | 20 | 36495997 | 13063  | 8.6818 | 0.5600 | 0.8255  | 6.1444 | CHB |
| Hs.400876 | Hs.400876-S   | rs788347   | 20 | 20 | 36495997 | 13212  | 9.1555 | 0.5814 | 0.8517  | 6.2222 | CHB |
| LOC375097 | GI_37555934-S | rs788348   | 20 | 20 | 36496888 | 13954  | 8.2393 | 0.5562 | -0.8150 | 6.1444 | CHB |
| Hs.400876 | Hs.400876-S   | rs788348   | 20 | 20 | 36496888 | 14103  | 8.7377 | 0.5800 | -0.8461 | 6.2222 | CHB |
| Hs.400876 | Hs.400876-S   | rs1578462  | 20 | 20 | 36497085 | 14300  | 6.2845 | 0.4580 | -0.6105 | 6.2222 | CHB |
| LOC375097 | GI_37555934-S | rs788350   | 20 | 20 | 36498050 | 15116  | 8.6818 | 0.5600 | -0.8255 | 6.1444 | CHB |
| Hs.400876 | Hs.400876-S   | rs788350   | 20 | 20 | 36498050 | 15265  | 9.1555 | 0.5814 | -0.8517 | 6.2222 | CHB |
| LOC375097 | GI_37555934-S | rs6099675  | 20 | 20 | 36500903 | 17969  | 6.2906 | 0.4670 | -0.7384 | 6.1444 | CHB |
| Hs.400876 | Hs.400876-S   | rs6099675  | 20 | 20 | 36500903 | 18118  | 6.2574 | 0.4649 | -0.7399 | 6.2222 | CHB |

|           |               |            |    |    |          |        |        |        |         |        |     |
|-----------|---------------|------------|----|----|----------|--------|--------|--------|---------|--------|-----|
| LOC375097 | GI_37555934-S | rs805527   | 20 | 20 | 36506018 | 23084  | 8.2393 | 0.5562 | -0.8150 | 6.1444 | CHB |
| Hs.400876 | Hs.400876-S   | rs805527   | 20 | 20 | 36506018 | 23233  | 8.7377 | 0.5800 | -0.8461 | 6.2222 | CHB |
| LOC375097 | GI_37555934-S | rs805528   | 20 | 20 | 36506505 | 23571  | 8.4257 | 0.5565 | 0.8203  | 6.1444 | CHB |
| Hs.400876 | Hs.400876-S   | rs805528   | 20 | 20 | 36506505 | 23720  | 8.9292 | 0.5799 | 0.8421  | 6.2222 | CHB |
| Hs.400876 | Hs.400876-S   | rs805529   | 20 | 20 | 36506696 | 23911  | 6.3716 | 0.4392 | 0.7700  | 6.2222 | CHB |
| LOC375097 | GI_37555934-S | rs805530   | 20 | 20 | 36507613 | 24679  | 8.6818 | 0.5600 | -0.8255 | 6.1444 | CHB |
| Hs.400876 | Hs.400876-S   | rs805530   | 20 | 20 | 36507613 | 24828  | 9.1555 | 0.5814 | -0.8517 | 6.2222 | CHB |
| LOC375097 | GI_37555934-S | rs805531   | 20 | 20 | 36508140 | 25206  | 8.6818 | 0.5600 | -0.8255 | 6.1444 | CHB |
| Hs.400876 | Hs.400876-S   | rs805531   | 20 | 20 | 36508140 | 25355  | 9.1555 | 0.5814 | -0.8517 | 6.2222 | CHB |
| LOC375097 | GI_37555934-S | rs12397    | 20 | 20 | 36512651 | 29717  | 8.6818 | 0.5600 | 0.8255  | 6.1444 | CHB |
| Hs.400876 | Hs.400876-S   | rs12397    | 20 | 20 | 36512651 | 29866  | 9.1555 | 0.5814 | 0.8517  | 6.2222 | CHB |
| LOC375097 | GI_37555934-S | rs805532   | 20 | 20 | 36513421 | 30487  | 8.6818 | 0.5600 | -0.8255 | 6.1444 | CHB |
| Hs.400876 | Hs.400876-S   | rs805532   | 20 | 20 | 36513421 | 30636  | 9.1555 | 0.5814 | -0.8517 | 6.2222 | CHB |
| LOC375097 | GI_37555934-S | rs805552   | 20 | 20 | 36536221 | 53287  | 8.6818 | 0.5600 | 0.8255  | 6.1444 | CHB |
| Hs.400876 | Hs.400876-S   | rs805552   | 20 | 20 | 36536221 | 53436  | 9.1555 | 0.5814 | 0.8517  | 6.2222 | CHB |
| LOC375097 | GI_37555934-S | rs1303567  | 20 | 20 | 36539571 | 56637  | 8.6818 | 0.5600 | 0.8255  | 6.1444 | CHB |
| Hs.400876 | Hs.400876-S   | rs1303567  | 20 | 20 | 36539571 | 56786  | 9.1555 | 0.5814 | 0.8517  | 6.2222 | CHB |
| LOC375097 | GI_37555934-S | rs805554   | 20 | 20 | 36540455 | 57521  | 8.6818 | 0.5600 | -0.8255 | 6.1444 | CHB |
| Hs.400876 | Hs.400876-S   | rs805554   | 20 | 20 | 36540455 | 57670  | 9.1555 | 0.5814 | -0.8517 | 6.2222 | CHB |
| LOC375097 | GI_37555934-S | rs1303588  | 20 | 20 | 36541160 | 58226  | 8.6818 | 0.5600 | -0.8255 | 6.1444 | CHB |
| Hs.400876 | Hs.400876-S   | rs1303588  | 20 | 20 | 36541160 | 58375  | 9.1555 | 0.5814 | -0.8517 | 6.2222 | CHB |
| LOC375097 | GI_37555934-S | rs1303582  | 20 | 20 | 36546349 | 63415  | 8.2393 | 0.5562 | -0.8150 | 6.1444 | CHB |
| Hs.400876 | Hs.400876-S   | rs1303582  | 20 | 20 | 36546349 | 63564  | 8.7377 | 0.5800 | -0.8461 | 6.2222 | CHB |
| LOC375097 | GI_37555934-S | rs1303581  | 20 | 20 | 36547300 | 64366  | 8.6818 | 0.5600 | -0.8255 | 6.1444 | CHB |
| Hs.400876 | Hs.400876-S   | rs1303581  | 20 | 20 | 36547300 | 64515  | 9.1555 | 0.5814 | -0.8517 | 6.2222 | CHB |
| Hs.400876 | Hs.400876-S   | rs1303577  | 20 | 20 | 36559271 | 76486  | 6.8608 | 0.4672 | -0.7455 | 6.2222 | CHB |
| LOC375097 | GI_37555934-S | rs1303575  | 20 | 20 | 36562231 | 79297  | 8.6818 | 0.5600 | 0.8255  | 6.1444 | CHB |
| Hs.400876 | Hs.400876-S   | rs1303575  | 20 | 20 | 36562231 | 79446  | 9.1555 | 0.5814 | 0.8517  | 6.2222 | CHB |
| LOC375097 | GI_37555934-S | rs1303574  | 20 | 20 | 36562655 | 79721  | 8.6818 | 0.5600 | -0.8255 | 6.1444 | CHB |
| Hs.400876 | Hs.400876-S   | rs1303574  | 20 | 20 | 36562655 | 79870  | 9.1555 | 0.5814 | -0.8517 | 6.2222 | CHB |
| LOC375097 | GI_37555934-S | rs1315305  | 20 | 20 | 36565135 | 82201  | 8.6818 | 0.5600 | -0.8255 | 6.1444 | CHB |
| Hs.400876 | Hs.400876-S   | rs1315305  | 20 | 20 | 36565135 | 82350  | 9.1555 | 0.5814 | -0.8517 | 6.2222 | CHB |
| LOC375097 | GI_37555934-S | rs1303571  | 20 | 20 | 36566533 | 83599  | 7.3354 | 0.5565 | -0.8448 | 6.1444 | CHB |
| Hs.400876 | Hs.400876-S   | rs1303571  | 20 | 20 | 36566533 | 83748  | 7.7327 | 0.5781 | -0.8582 | 6.2222 | CHB |
| LOC375097 | GI_37555934-S | rs11699660 | 20 | 20 | 36585303 | 102369 | 8.7077 | 0.5786 | 0.8437  | 6.1444 | CHB |
| Hs.400876 | Hs.400876-S   | rs11699660 | 20 | 20 | 36585303 | 102518 | 9.0906 | 0.5961 | 0.8680  | 6.2222 | CHB |
| LOC375097 | GI_37555934-S | rs805559   | 20 | 20 | 36591367 | 108433 | 7.8799 | 0.5296 | -0.7997 | 6.1444 | CHB |
| Hs.400876 | Hs.400876-S   | rs805559   | 20 | 20 | 36591367 | 108582 | 8.3136 | 0.5511 | -0.8219 | 6.2222 | CHB |
| LOC375097 | GI_37555934-S | rs805540   | 20 | 20 | 36599772 | 116838 | 8.1843 | 0.5535 | 0.6992  | 6.1444 | CHB |
| Hs.400876 | Hs.400876-S   | rs805540   | 20 | 20 | 36599772 | 116987 | 8.3080 | 0.5596 | 0.7152  | 6.2222 | CHB |
| LOC375097 | GI_37555934-S | rs4812025  | 20 | 20 | 36614832 | 131898 | 8.2393 | 0.5562 | 0.8150  | 6.1444 | CHB |
| Hs.400876 | Hs.400876-S   | rs4812025  | 20 | 20 | 36614832 | 132047 | 8.7377 | 0.5800 | 0.8461  | 6.2222 | CHB |
| LOC375097 | GI_37555934-S | rs2864932  | 20 | 20 | 36619423 | 136489 | 8.6818 | 0.5600 | 0.8255  | 6.1444 | CHB |
| Hs.400876 | Hs.400876-S   | rs2864932  | 20 | 20 | 36619423 | 136638 | 9.1555 | 0.5814 | 0.8517  | 6.2222 | CHB |
| LOC375097 | GI_37555934-S | rs2185594  | 20 | 20 | 36627668 | 144734 | 8.2393 | 0.5562 | 0.8150  | 6.1444 | CHB |
| Hs.400876 | Hs.400876-S   | rs2185594  | 20 | 20 | 36627668 | 144883 | 8.7377 | 0.5800 | 0.8461  | 6.2222 | CHB |
| LOC375097 | GI_37555934-S | rs1295992  | 20 | 20 | 36630815 | 147881 | 8.2393 | 0.5562 | 0.8150  | 6.1444 | CHB |
| Hs.400876 | Hs.400876-S   | rs1295992  | 20 | 20 | 36630815 | 148030 | 8.7377 | 0.5800 | 0.8461  | 6.2222 | CHB |
| LOC375097 | GI_37555934-S | rs2206783  | 20 | 20 | 36633736 | 150802 | 8.6818 | 0.5600 | -0.8255 | 6.1444 | CHB |
| Hs.400876 | Hs.400876-S   | rs2206783  | 20 | 20 | 36633736 | 150951 | 9.1555 | 0.5814 | -0.8517 | 6.2222 | CHB |
| LOC375097 | GI_37555934-S | rs1115600  | 20 | 20 | 36635587 | 152653 | 8.2393 | 0.5562 | -0.8150 | 6.1444 | CHB |
| Hs.400876 | Hs.400876-S   | rs1115600  | 20 | 20 | 36635587 | 152802 | 8.7377 | 0.5800 | -0.8461 | 6.2222 | CHB |
| LOC375097 | GI_37555934-S | rs6064733  | 20 | 20 | 36641941 | 159007 | 8.6818 | 0.5600 | 0.8255  | 6.1444 | CHB |
| Hs.400876 | Hs.400876-S   | rs6064733  | 20 | 20 | 36641941 | 159156 | 9.1555 | 0.5814 | 0.8517  | 6.2222 | CHB |
| LOC375097 | GI_37555934-S | rs1033516  | 20 | 20 | 36642400 | 159466 | 8.6818 | 0.5600 | -0.8255 | 6.1444 | CHB |
| Hs.400876 | Hs.400876-S   | rs1033516  | 20 | 20 | 36642400 | 159615 | 9.1555 | 0.5814 | -0.8517 | 6.2222 | CHB |
| LOC375097 | GI_37555934-S | rs4812047  | 20 | 20 | 36642920 | 159986 | 8.6818 | 0.5600 | -0.8255 | 6.1444 | CHB |
| Hs.400876 | Hs.400876-S   | rs4812047  | 20 | 20 | 36642920 | 160135 | 9.1555 | 0.5814 | -0.8517 | 6.2222 | CHB |
| LOC375097 | GI_37555934-S | rs6026642  | 20 | 20 | 36643690 | 160756 | 6.5881 | 0.4678 | 0.8933  | 6.1444 | CHB |

|           |               |            |    |    |           |        |        |        |         |        |     |
|-----------|---------------|------------|----|----|-----------|--------|--------|--------|---------|--------|-----|
| Hs.400876 | Hs.400876-S   | rs6026642  | 20 | 20 | 36643690  | 160905 | 7.6846 | 0.5282 | 0.9493  | 6.2222 | CHB |
| MYBL2     | GI_31652260-S | rs4560183  | 20 | 20 | 41646027  | 132313 | 9.6085 | 0.6010 | -0.4186 | 5.5634 | CHB |
| MYBL2     | GI_31652260-S | rs1055334  | 20 | 20 | 41650061  | 128279 | 9.0143 | 0.5751 | -0.3905 | 5.5634 | CHB |
| MYBL2     | GI_31652260-S | rs1894668  | 20 | 20 | 41652333  | 126007 | 6.6419 | 0.4709 | 0.4226  | 5.5634 | CHB |
| MYBL2     | GI_31652260-S | rs6073136  | 20 | 20 | 41652679  | 125661 | 9.1579 | 0.6273 | 0.3904  | 5.5634 | CHB |
| MYBL2     | GI_31652260-S | rs3752562  | 20 | 20 | 41653245  | 125095 | 9.0143 | 0.5751 | 0.3905  | 5.5634 | CHB |
| MYBL2     | GI_31652260-S | rs6073139  | 20 | 20 | 41655020  | 123320 | 8.4847 | 0.5681 | 0.3873  | 5.5634 | CHB |
| MYBL2     | GI_31652260-S | rs6030975  | 20 | 20 | 41656398  | 121942 | 9.0143 | 0.5751 | 0.3905  | 5.5634 | CHB |
| MYBL2     | GI_31652260-S | rs2664519  | 20 | 20 | 41658528  | 119812 | 9.0143 | 0.5751 | 0.3905  | 5.5634 | CHB |
| MYBL2     | GI_31652260-S | rs6073142  | 20 | 20 | 41660426  | 117914 | 9.0143 | 0.5751 | 0.3905  | 5.5634 | CHB |
| MYBL2     | GI_31652260-S | rs6030978  | 20 | 20 | 41664058  | 114282 | 9.0143 | 0.5751 | -0.3905 | 5.5634 | CHB |
| MYBL2     | GI_31652260-S | rs6073143  | 20 | 20 | 41664109  | 114231 | 9.0143 | 0.5751 | 0.3905  | 5.5634 | CHB |
| MYBL2     | GI_31652260-S | rs2145214  | 20 | 20 | 41670481  | 107859 | 9.0143 | 0.5751 | 0.3905  | 5.5634 | CHB |
| MYBL2     | GI_31652260-S | rs4473450  | 20 | 20 | 41676114  | 102226 | 9.0611 | 0.5859 | -0.4131 | 5.5634 | CHB |
| MYBL2     | GI_31652260-S | rs1555348  | 20 | 20 | 41682812  | 95528  | 9.0143 | 0.5751 | -0.3905 | 5.5634 | CHB |
| MYBL2     | GI_31652260-S | rs6073157  | 20 | 20 | 41686956  | 91384  | 8.3424 | 0.5439 | -0.3798 | 5.5634 | CHB |
| MYBL2     | GI_31652260-S | rs2093139  | 20 | 20 | 41689278  | 89062  | 9.0143 | 0.5751 | 0.3905  | 5.5634 | CHB |
| MYBL2     | GI_31652260-S | rs6030998  | 20 | 20 | 41692374  | 85966  | 9.0143 | 0.5751 | -0.3905 | 5.5634 | CHB |
| MYBL2     | GI_31652260-S | rs714998   | 20 | 20 | 41693050  | 85290  | 9.0143 | 0.5751 | 0.3905  | 5.5634 | CHB |
| MYBL2     | GI_31652260-S | rs6073162  | 20 | 20 | 41693661  | 84679  | 9.0143 | 0.5751 | 0.3905  | 5.5634 | CHB |
| MYBL2     | GI_31652260-S | rs6031007  | 20 | 20 | 41697916  | 80424  | 7.9925 | 0.5268 | 0.3586  | 5.5634 | CHB |
| MYBL2     | GI_31652260-S | rs2273523  | 20 | 20 | 41698140  | 80200  | 9.0143 | 0.5751 | 0.3905  | 5.5634 | CHB |
| MYBL2     | GI_31652260-S | rs6017129  | 20 | 20 | 41699064  | 79276  | 8.6422 | 0.5847 | -0.3917 | 5.5634 | CHB |
| MYBL2     | GI_31652260-S | rs6065638  | 20 | 20 | 41699114  | 79226  | 9.0143 | 0.5751 | 0.3905  | 5.5634 | CHB |
| MYBL2     | GI_31652260-S | rs383634   | 20 | 20 | 41704251  | 74089  | 9.0143 | 0.5751 | 0.3905  | 5.5634 | CHB |
| MYBL2     | GI_31652260-S | rs439115   | 20 | 20 | 41704335  | 74005  | 8.2709 | 0.5405 | 0.3978  | 5.5634 | CHB |
| MYBL2     | GI_31652260-S | rs3091647  | 20 | 20 | 417110058 | 68282  | 8.1400 | 0.5426 | 0.3866  | 5.5634 | CHB |
| MYBL2     | GI_31652260-S | rs826962   | 20 | 20 | 41713141  | 65199  | 9.0143 | 0.5751 | -0.3905 | 5.5634 | CHB |
| MYBL2     | GI_31652260-S | rs385609   | 20 | 20 | 41719304  | 59036  | 9.0143 | 0.5751 | -0.3905 | 5.5634 | CHB |
| MYBL2     | GI_31652260-S | rs826941   | 20 | 20 | 41723562  | 54778  | 9.0143 | 0.5751 | 0.3905  | 5.5634 | CHB |
| MYBL2     | GI_31652260-S | rs385345   | 20 | 20 | 41725375  | 52965  | 9.0143 | 0.5751 | -0.3905 | 5.5634 | CHB |
| MYBL2     | GI_31652260-S | rs452734   | 20 | 20 | 41727294  | 51046  | 8.7062 | 0.5697 | 0.3846  | 5.5634 | CHB |
| MYBL2     | GI_31652260-S | rs619289   | 20 | 20 | 41728027  | 50313  | 9.0143 | 0.5751 | 0.3905  | 5.5634 | CHB |
| MYBL2     | GI_31652260-S | rs285206   | 20 | 20 | 41729956  | 48384  | 9.0143 | 0.5751 | -0.3905 | 5.5634 | CHB |
| MYBL2     | GI_31652260-S | rs285205   | 20 | 20 | 41730058  | 48282  | 9.0143 | 0.5751 | -0.3905 | 5.5634 | CHB |
| MYBL2     | GI_31652260-S | rs826950   | 20 | 20 | 41735785  | 42555  | 9.0143 | 0.5751 | -0.3905 | 5.5634 | CHB |
| MYBL2     | GI_31652260-S | rs6103415  | 20 | 20 | 41741631  | 36709  | 9.0143 | 0.5751 | 0.3905  | 5.5634 | CHB |
| MYBL2     | GI_31652260-S | rs3091246  | 20 | 20 | 41742999  | 35341  | 9.0143 | 0.5751 | -0.3905 | 5.5634 | CHB |
| MYBL2     | GI_31652260-S | rs433732   | 20 | 20 | 41743432  | 34908  | 9.0143 | 0.5751 | -0.3905 | 5.5634 | CHB |
| MYBL2     | GI_31652260-S | rs419842   | 20 | 20 | 41744225  | 34115  | 9.0143 | 0.5751 | -0.3905 | 5.5634 | CHB |
| MYBL2     | GI_31652260-S | rs387769   | 20 | 20 | 41745269  | 33071  | 9.0143 | 0.5751 | -0.3905 | 5.5634 | CHB |
| MYBL2     | GI_31652260-S | rs826960   | 20 | 20 | 41748425  | 29915  | 9.0143 | 0.5751 | -0.3905 | 5.5634 | CHB |
| MYBL2     | GI_31652260-S | rs285165   | 20 | 20 | 41763213  | 15127  | 9.0143 | 0.5751 | -0.3905 | 5.5634 | CHB |
| MYBL2     | GI_31652260-S | rs826955   | 20 | 20 | 41769619  | 8721   | 8.5608 | 0.5543 | -0.3845 | 5.5634 | CHB |
| MYBL2     | GI_31652260-S | rs285171   | 20 | 20 | 41771289  | 7051   | 8.2748 | 0.5407 | -0.3791 | 5.5634 | CHB |
| MYBL2     | GI_31652260-S | rs285172   | 20 | 20 | 41774098  | 4242   | 7.4543 | 0.5434 | 0.3968  | 5.5634 | CHB |
| TOMM34    | GI_40807467-S | rs6073555  | 20 | 20 | 42897945  | 106449 | 6.6965 | 0.4579 | -0.6558 | 6.6367 | CHB |
| TOMM34    | GI_40807467-S | rs6031869  | 20 | 20 | 42994650  | 9744   | 7.8204 | 0.5182 | 0.5110  | 6.6367 | CHB |
| TOMM34    | GI_40807467-S | rs2664567  | 20 | 20 | 42994947  | 9447   | 7.8204 | 0.5182 | 0.5110  | 6.6367 | CHB |
| TOMM34    | GI_40807467-S | rs12798    | 20 | 20 | 42995068  | 9326   | 7.8204 | 0.5182 | 0.5110  | 6.6367 | CHB |
| TOMM34    | GI_40807467-S | rs12031    | 20 | 20 | 42995074  | 9320   | 8.1855 | 0.5449 | 0.5151  | 6.6367 | CHB |
| TOMM34    | GI_40807467-S | rs6031870  | 20 | 20 | 42997174  | 7220   | 7.6921 | 0.5200 | -0.5129 | 6.6367 | CHB |
| TOMM34    | GI_40807467-S | rs2273358  | 20 | 20 | 42998449  | 5945   | 7.8204 | 0.5182 | -0.5110 | 6.6367 | CHB |
| TOMM34    | GI_40807467-S | rs3746583  | 20 | 20 | 42998973  | 5421   | 7.8204 | 0.5182 | -0.5110 | 6.6367 | CHB |
| TOMM34    | GI_40807467-S | rs10485453 | 20 | 20 | 43002140  | 2254   | 9.2351 | 0.5849 | 0.5892  | 6.6367 | CHB |
| TOMM34    | GI_40807467-S | rs11907237 | 20 | 20 | 43002180  | 2214   | 9.2351 | 0.5849 | -0.5892 | 6.6367 | CHB |
| TOMM34    | GI_40807467-S | rs16989514 | 20 | 20 | 43003459  | 935    | 7.4883 | 0.5549 | 0.5418  | 6.6367 | CHB |
| TOMM34    | GI_40807467-S | rs11908348 | 20 | 20 | 43003903  | 491    | 8.1258 | 0.5419 | -0.5585 | 6.6367 | CHB |
| TOMM34    | GI_40807467-S | rs1804644  | 20 | 20 | 43005631  | 1237   | 8.2007 | 0.5543 | 0.5718  | 6.6367 | CHB |

|           |               |            |    |    |          |       |         |        |         |        |     |
|-----------|---------------|------------|----|----|----------|-------|---------|--------|---------|--------|-----|
| TOMM34    | GI_40807467-S | rs2284268  | 20 | 20 | 43015135 | 10741 | 8.8075  | 0.5833 | -0.5885 | 6.6367 | CHB |
| Hs.517172 | Hs.517172-S   | rs7271169  | 20 | 20 | 60997396 | 34306 | 5.9807  | 0.4159 | -0.1679 | 5.6025 | CHB |
| Hs.517172 | Hs.517172-S   | rs755740   | 20 | 20 | 60997925 | 33777 | 5.8497  | 0.4153 | 0.1678  | 5.6025 | CHB |
| Hs.517172 | Hs.517172-S   | rs1883847  | 20 | 20 | 60998716 | 32986 | 5.7273  | 0.4003 | -0.1945 | 5.6025 | CHB |
| Hs.517172 | Hs.517172-S   | rs1883848  | 20 | 20 | 60998751 | 32951 | 5.9807  | 0.4159 | -0.1679 | 5.6025 | CHB |
| Hs.517172 | Hs.517172-S   | rs6089810  | 20 | 20 | 61001027 | 30675 | 5.9807  | 0.4159 | 0.1679  | 5.6025 | CHB |
| Hs.517172 | Hs.517172-S   | rs6011456  | 20 | 20 | 61001169 | 30533 | 5.9807  | 0.4159 | 0.1679  | 5.6025 | CHB |
| Hs.517172 | Hs.517172-S   | rs6010786  | 20 | 20 | 61015159 | 16543 | 6.0419  | 0.4196 | 0.1711  | 5.6025 | CHB |
| Hs.517172 | Hs.517172-S   | rs6010789  | 20 | 20 | 61031598 | 104   | 6.2914  | 0.4345 | 0.1775  | 5.6025 | CHB |
| C21orf107 | GI_38026951-I | rs2836922  | 21 | 21 | 39438178 | 46149 | 10.2771 | 0.6282 | 0.3145  | 6.8477 | CHB |
| C21orf107 | GI_38026951-I | rs7281463  | 21 | 21 | 39442653 | 41674 | 7.8668  | 0.5290 | -0.2931 | 6.8477 | CHB |
| C21orf107 | GI_38026951-I | rs7279497  | 21 | 21 | 39453176 | 31151 | 10.2771 | 0.6282 | 0.3145  | 6.8477 | CHB |
| C21orf107 | GI_38026951-I | rs377098   | 21 | 21 | 39457086 | 27241 | 7.8668  | 0.5290 | -0.2931 | 6.8477 | CHB |
| C21orf107 | GI_38026951-I | rs418298   | 21 | 21 | 39458524 | 25803 | 8.1462  | 0.5344 | -0.2935 | 6.8477 | CHB |
| C21orf107 | GI_38026951-I | rs418359   | 21 | 21 | 39458604 | 25723 | 7.8120  | 0.5262 | -0.2880 | 6.8477 | CHB |
| C21orf107 | GI_38026951-I | rs2836926  | 21 | 21 | 39458660 | 25667 | 10.2771 | 0.6282 | -0.3145 | 6.8477 | CHB |
| C21orf107 | GI_38026951-I | rs7282604  | 21 | 21 | 39458780 | 25547 | 7.8668  | 0.5290 | -0.2931 | 6.8477 | CHB |
| C21orf107 | GI_38026951-I | rs419469   | 21 | 21 | 39459104 | 25223 | 8.1462  | 0.5344 | -0.2935 | 6.8477 | CHB |
| C21orf107 | GI_38026951-I | rs8134214  | 21 | 21 | 39464237 | 20090 | 10.2771 | 0.6282 | 0.3145  | 6.8477 | CHB |
| C21orf107 | GI_38026951-I | rs2836930  | 21 | 21 | 39467526 | 16801 | 10.2771 | 0.6282 | 0.3145  | 6.8477 | CHB |
| C21orf107 | GI_38026951-I | rs2836931  | 21 | 21 | 39468439 | 15888 | 9.9362  | 0.6322 | -0.3134 | 6.8477 | CHB |
| C21orf107 | GI_38026951-I | rs428602   | 21 | 21 | 39468874 | 15453 | 7.8668  | 0.5290 | -0.2931 | 6.8477 | CHB |
| C21orf107 | GI_38026951-I | rs2245455  | 21 | 21 | 39469957 | 14370 | 7.8668  | 0.5290 | -0.2931 | 6.8477 | CHB |
| C21orf107 | GI_38026951-I | rs2142111  | 21 | 21 | 39471159 | 13168 | 7.3871  | 0.5040 | 0.2886  | 6.8477 | CHB |
| C21orf107 | GI_38026951-I | rs2236437  | 21 | 21 | 39478465 | 5862  | 9.8110  | 0.6181 | 0.3343  | 6.8477 | CHB |
| C21orf107 | GI_38026951-I | rs2297256  | 21 | 21 | 39480291 | 4036  | 15.4327 | 0.7849 | -0.3678 | 6.8477 | CHB |
| C21orf107 | GI_38026951-I | rs2410104  | 21 | 21 | 39486334 | 2007  | 11.5258 | 0.6742 | -0.3635 | 6.8477 | CHB |
| C21orf107 | GI_38026951-I | rs2836934  | 21 | 21 | 39486755 | 2428  | 15.4327 | 0.7849 | 0.3678  | 6.8477 | CHB |
| C21orf107 | GI_38026951-I | rs2150410  | 21 | 21 | 39491649 | 7322  | 11.3191 | 0.6757 | -0.3660 | 6.8477 | CHB |
| C21orf107 | GI_38026951-I | rs1041439  | 21 | 21 | 39493116 | 8789  | 11.5258 | 0.6742 | 0.3635  | 6.8477 | CHB |
| C21orf107 | GI_38026951-I | rs13051430 | 21 | 21 | 39495900 | 11573 | 11.9005 | 0.6956 | -0.3703 | 6.8477 | CHB |
| C21orf107 | GI_38026951-I | rs2150411  | 21 | 21 | 39496422 | 12095 | 15.4327 | 0.7849 | 0.3678  | 6.8477 | CHB |
| C21orf107 | GI_38026951-I | rs2150412  | 21 | 21 | 39496539 | 12212 | 7.8613  | 0.5849 | -0.3724 | 6.8477 | CHB |
| C21orf107 | GI_38026951-I | rs4818001  | 21 | 21 | 39496958 | 12631 | 15.4327 | 0.7849 | -0.3678 | 6.8477 | CHB |
| C21orf107 | GI_38026951-I | rs8130320  | 21 | 21 | 39502128 | 17801 | 15.4327 | 0.7849 | -0.3678 | 6.8477 | CHB |
| C21orf107 | GI_38026951-I | rs8132230  | 21 | 21 | 39505951 | 21624 | 11.5258 | 0.6742 | -0.3635 | 6.8477 | CHB |
| C21orf107 | GI_38026951-I | rs8132143  | 21 | 21 | 39506128 | 21801 | 15.4327 | 0.7849 | 0.3678  | 6.8477 | CHB |
| C21orf107 | GI_38026951-I | rs8132424  | 21 | 21 | 39506282 | 21955 | 15.4327 | 0.7849 | 0.3678  | 6.8477 | CHB |
| C21orf107 | GI_38026951-I | rs2836942  | 21 | 21 | 39513251 | 28924 | 15.4327 | 0.7849 | 0.3678  | 6.8477 | CHB |
| C21orf107 | GI_38026951-I | rs8128118  | 21 | 21 | 39514099 | 29772 | 8.7354  | 0.6386 | 0.3545  | 6.8477 | CHB |
| C21orf107 | GI_38026951-I | rs2836943  | 21 | 21 | 39514481 | 30154 | 15.4899 | 0.7940 | 0.3678  | 6.8477 | CHB |
| C21orf107 | GI_38026951-I | rs2183575  | 21 | 21 | 39516230 | 31903 | 10.6220 | 0.6502 | 0.3643  | 6.8477 | CHB |
| C21orf107 | GI_38026951-I | rs2183576  | 21 | 21 | 39521095 | 36768 | 10.6735 | 0.6703 | 0.3672  | 6.8477 | CHB |
| C21orf107 | GI_38026951-I | rs2836948  | 21 | 21 | 39521547 | 37220 | 15.4327 | 0.7849 | -0.3678 | 6.8477 | CHB |
| C21orf107 | GI_38026951-I | rs2026266  | 21 | 21 | 39521590 | 37263 | 10.8634 | 0.6682 | 0.3588  | 6.8477 | CHB |
| C21orf107 | GI_38026951-I | rs4816619  | 21 | 21 | 39521746 | 37419 | 11.1706 | 0.6704 | 0.3630  | 6.8477 | CHB |
| C21orf107 | GI_38026951-I | rs11702268 | 21 | 21 | 39522183 | 37856 | 9.2922  | 0.5961 | -0.3295 | 6.8477 | CHB |
| C21orf107 | GI_38026951-I | rs17816433 | 21 | 21 | 39524326 | 39999 | 11.9972 | 0.6901 | -0.3325 | 6.8477 | CHB |
| C21orf107 | GI_38026951-I | rs1541101  | 21 | 21 | 39525800 | 41473 | 10.7762 | 0.6560 | 0.3602  | 6.8477 | CHB |
| C21orf107 | GI_38026951-I | rs8131263  | 21 | 21 | 39527088 | 42761 | 11.5258 | 0.6742 | 0.3635  | 6.8477 | CHB |
| C21orf107 | GI_38026951-I | rs2150413  | 21 | 21 | 39536748 | 52421 | 15.4327 | 0.7849 | 0.3678  | 6.8477 | CHB |
| C21orf107 | GI_38026951-I | rs2150414  | 21 | 21 | 39536858 | 52531 | 15.4327 | 0.7849 | 0.3678  | 6.8477 | CHB |
| C21orf107 | GI_38026951-I | rs2836952  | 21 | 21 | 39538521 | 54194 | 13.6950 | 0.7495 | -0.3655 | 6.8477 | CHB |
| C21orf107 | GI_38026951-I | rs9978591  | 21 | 21 | 39541997 | 57670 | 11.5258 | 0.6742 | -0.3635 | 6.8477 | CHB |
| C21orf107 | GI_38026951-I | rs2836956  | 21 | 21 | 39544888 | 60561 | 15.4327 | 0.7849 | -0.3678 | 6.8477 | CHB |
| C21orf107 | GI_38026951-I | rs2836958  | 21 | 21 | 39545396 | 61069 | 15.4899 | 0.7940 | -0.3678 | 6.8477 | CHB |
| C21orf107 | GI_38026951-I | rs2836959  | 21 | 21 | 39545538 | 61211 | 15.4327 | 0.7849 | -0.3678 | 6.8477 | CHB |
| C21orf107 | GI_38026951-I | rs7278297  | 21 | 21 | 39547622 | 63295 | 15.4327 | 0.7849 | 0.3678  | 6.8477 | CHB |
| C21orf107 | GI_38026951-I | rs7276774  | 21 | 21 | 39550595 | 66268 | 9.4198  | 0.6694 | -0.3480 | 6.8477 | CHB |

|           |               |            |    |    |          |        |         |        |         |        |     |
|-----------|---------------|------------|----|----|----------|--------|---------|--------|---------|--------|-----|
| C21orf107 | GI_38026951-I | rs8127391  | 21 | 21 | 39557930 | 73603  | 11.5258 | 0.6742 | -0.3635 | 6.8477 | CHB |
| C21orf107 | GI_38026951-I | rs2836966  | 21 | 21 | 39559391 | 75064  | 15.4327 | 0.7849 | 0.3678  | 6.8477 | CHB |
| C21orf107 | GI_38026951-I | rs6517531  | 21 | 21 | 39559517 | 75190  | 10.2352 | 0.6442 | 0.3619  | 6.8477 | CHB |
| C21orf107 | GI_38026951-I | rs1541100  | 21 | 21 | 39562922 | 78595  | 11.3191 | 0.6757 | 0.3660  | 6.8477 | CHB |
| C21orf107 | GI_38026951-I | rs6517532  | 21 | 21 | 39564059 | 79732  | 11.5258 | 0.6742 | 0.3635  | 6.8477 | CHB |
| C21orf107 | GI_38026951-I | rs7283439  | 21 | 21 | 39567607 | 83280  | 11.1706 | 0.6704 | -0.3630 | 6.8477 | CHB |
| C21orf107 | GI_38026951-I | rs7275773  | 21 | 21 | 39567960 | 83633  | 11.5258 | 0.6742 | -0.3635 | 6.8477 | CHB |
| C21orf107 | GI_38026951-I | rs2836969  | 21 | 21 | 39570135 | 85808  | 11.6420 | 0.6869 | -0.3518 | 6.8477 | CHB |
| C21orf107 | GI_38026951-I | rs4818011  | 21 | 21 | 39570465 | 86138  | 11.3191 | 0.6757 | 0.3660  | 6.8477 | CHB |
| C21orf107 | GI_38026951-I | rs973521   | 21 | 21 | 39572491 | 88164  | 11.1706 | 0.6704 | -0.3630 | 6.8477 | CHB |
| C21orf107 | GI_38026951-I | rs2836971  | 21 | 21 | 39573910 | 89583  | 10.0741 | 0.6470 | 0.3567  | 6.8477 | CHB |
| C21orf107 | GI_38026951-I | rs718225   | 21 | 21 | 39574486 | 90159  | 11.1706 | 0.6704 | 0.3630  | 6.8477 | CHB |
| C21orf107 | GI_38026951-I | rs2836975  | 21 | 21 | 39585490 | 101163 | 10.2103 | 0.6255 | -0.3351 | 6.8477 | CHB |
| C21orf107 | GI_38026951-I | rs2142117  | 21 | 21 | 39591175 | 106848 | 11.1706 | 0.6704 | 0.3630  | 6.8477 | CHB |
| C21orf107 | GI_38026951-I | rs1984748  | 21 | 21 | 39591768 | 107441 | 11.1706 | 0.6704 | -0.3630 | 6.8477 | CHB |
| C21orf107 | GI_38026951-I | rs2056844  | 21 | 21 | 39592330 | 108003 | 15.4327 | 0.7849 | -0.3678 | 6.8477 | CHB |
| C21orf107 | GI_38026951-I | rs7410020  | 21 | 21 | 39597363 | 113036 | 12.0086 | 0.6905 | 0.3522  | 6.8477 | CHB |
| C21orf107 | GI_38026951-I | rs8131150  | 21 | 21 | 39599185 | 114858 | 11.5258 | 0.6742 | 0.3635  | 6.8477 | CHB |
| C21orf107 | GI_38026951-I | rs2272576  | 21 | 21 | 39606259 | 121932 | 7.9396  | 0.5326 | 0.3123  | 6.8477 | CHB |
| C21orf107 | GI_38026951-I | rs2836980  | 21 | 21 | 39609488 | 125161 | 12.2043 | 0.6969 | 0.3478  | 6.8477 | CHB |
| C21orf107 | GI_38026951-I | rs2836981  | 21 | 21 | 39610235 | 125908 | 8.4175  | 0.5561 | -0.3069 | 6.8477 | CHB |
| C21orf107 | GI_38026951-I | rs2836982  | 21 | 21 | 39611041 | 126714 | 11.6420 | 0.6869 | -0.3518 | 6.8477 | CHB |
| C21orf107 | GI_38026951-I | rs2836983  | 21 | 21 | 39611206 | 126879 | 15.4327 | 0.7849 | -0.3678 | 6.8477 | CHB |
| C21orf107 | GI_38026951-I | rs7281853  | 21 | 21 | 39615360 | 131033 | 11.6420 | 0.6869 | -0.3518 | 6.8477 | CHB |
| C21orf107 | GI_38026951-I | rs7282582  | 21 | 21 | 39618844 | 134517 | 12.2043 | 0.6969 | -0.3478 | 6.8477 | CHB |
| C21orf107 | GI_38026951-I | rs11088471 | 21 | 21 | 39621183 | 136856 | 9.2584  | 0.6624 | 0.3493  | 6.8477 | CHB |
| C21orf107 | GI_38026951-I | rs2037925  | 21 | 21 | 39621801 | 137474 | 8.4175  | 0.5561 | 0.3069  | 6.8477 | CHB |
| C21orf107 | GI_38026951-I | rs2410123  | 21 | 21 | 39621963 | 137636 | 8.7068  | 0.5611 | 0.3076  | 6.8477 | CHB |
| C21orf107 | GI_38026951-I | rs2836985  | 21 | 21 | 39623039 | 138712 | 11.1752 | 0.6619 | 0.3474  | 6.8477 | CHB |
| C21orf107 | GI_38026951-I | rs2836988  | 21 | 21 | 39629845 | 145518 | 8.4175  | 0.5561 | 0.3069  | 6.8477 | CHB |
| C21orf107 | GI_38026951-I | rs726046   | 21 | 21 | 39634237 | 149910 | 9.9048  | 0.6133 | 0.3480  | 6.8477 | CHB |
| C21orf107 | GI_38026951-I | rs2070867  | 21 | 21 | 39637002 | 152675 | 9.9048  | 0.6133 | 0.3480  | 6.8477 | CHB |
| C21orf107 | GI_38026951-I | rs2735310  | 21 | 21 | 39639370 | 155043 | 8.9702  | 0.5818 | -0.3569 | 6.8477 | CHB |
| TSGA2     | GI_18254455-S | rs2839533  | 21 | 21 | 42770095 | 4102   | 8.7780  | 0.5730 | -0.6475 | 6.1853 | CHB |
| Hs.473917 | Hs.473917-S   | rs228042   | 21 | 21 | 42823373 | 3785   | 7.8204  | 0.5182 | 0.3067  | 6.7872 | CHB |
| Hs.473917 | Hs.473917-S   | rs228043   | 21 | 21 | 42823507 | 3919   | 7.5468  | 0.5125 | 0.3042  | 6.7872 | CHB |
| Hs.473917 | Hs.473917-S   | rs228045   | 21 | 21 | 42824802 | 5214   | 7.8204  | 0.5182 | -0.3067 | 6.7872 | CHB |
| Hs.473917 | Hs.473917-S   | rs228046   | 21 | 21 | 42825006 | 5418   | 7.5160  | 0.5025 | 0.3022  | 6.7872 | CHB |
| Hs.473917 | Hs.473917-S   | rs228047   | 21 | 21 | 42825058 | 5470   | 7.4045  | 0.5135 | 0.3075  | 6.7872 | CHB |
| Hs.473917 | Hs.473917-S   | rs228048   | 21 | 21 | 42825210 | 5622   | 7.5895  | 0.5147 | -0.2841 | 6.7872 | CHB |
| Hs.473917 | Hs.473917-S   | rs228050   | 21 | 21 | 42825637 | 6049   | 7.5893  | 0.5147 | 0.3065  | 6.7872 | CHB |
| Hs.473917 | Hs.473917-S   | rs228051   | 21 | 21 | 42826147 | 6559   | 7.5895  | 0.5147 | 0.2841  | 6.7872 | CHB |
| Hs.473917 | Hs.473917-S   | rs228052   | 21 | 21 | 42826723 | 7135   | 7.7369  | 0.5223 | 0.2882  | 6.7872 | CHB |
| Hs.473917 | Hs.473917-S   | rs228054   | 21 | 21 | 42827332 | 7744   | 7.6457  | 0.5176 | 0.3080  | 6.7872 | CHB |
| Hs.473917 | Hs.473917-S   | rs228055   | 21 | 21 | 42827611 | 8023   | 7.5895  | 0.5147 | -0.2841 | 6.7872 | CHB |
| Hs.473917 | Hs.473917-S   | rs228056   | 21 | 21 | 42828496 | 8908   | 7.6667  | 0.5187 | 0.2844  | 6.7872 | CHB |
| Hs.473917 | Hs.473917-S   | rs228057   | 21 | 21 | 42829123 | 9535   | 7.7369  | 0.5223 | -0.2882 | 6.7872 | CHB |
| Hs.473917 | Hs.473917-S   | rs228058   | 21 | 21 | 42829968 | 10380  | 7.5468  | 0.5125 | -0.3042 | 6.7872 | CHB |
| Hs.473917 | Hs.473917-S   | rs228059   | 21 | 21 | 42830394 | 10806  | 7.7369  | 0.5223 | 0.2882  | 6.7872 | CHB |
| Hs.473917 | Hs.473917-S   | rs228060   | 21 | 21 | 42830618 | 11030  | 7.5895  | 0.5147 | -0.2841 | 6.7872 | CHB |
| Hs.473917 | Hs.473917-S   | rs228062   | 21 | 21 | 42831984 | 12396  | 7.5160  | 0.5025 | -0.3022 | 6.7872 | CHB |
| Hs.473917 | Hs.473917-S   | rs228068   | 21 | 21 | 42833288 | 13700  | 7.8204  | 0.5182 | -0.3067 | 6.7872 | CHB |
| Hs.473917 | Hs.473917-S   | rs228069   | 21 | 21 | 42833309 | 13721  | 7.8204  | 0.5182 | -0.3067 | 6.7872 | CHB |
| Hs.473917 | Hs.473917-S   | rs228070   | 21 | 21 | 42833590 | 14002  | 7.5468  | 0.5125 | 0.3042  | 6.7872 | CHB |
| Hs.473917 | Hs.473917-S   | rs228073   | 21 | 21 | 42835327 | 15739  | 7.3815  | 0.5122 | 0.2855  | 6.7872 | CHB |
| Hs.473917 | Hs.473917-S   | rs228076   | 21 | 21 | 42837051 | 17463  | 7.5895  | 0.5147 | 0.2841  | 6.7872 | CHB |
| Hs.473917 | Hs.473917-S   | rs228077   | 21 | 21 | 42838695 | 19107  | 7.8204  | 0.5182 | -0.3067 | 6.7872 | CHB |
| Hs.473917 | Hs.473917-S   | rs228080   | 21 | 21 | 42839862 | 20274  | 7.8204  | 0.5182 | -0.3067 | 6.7872 | CHB |
| Hs.473917 | Hs.473917-S   | rs228083   | 21 | 21 | 42841135 | 21547  | 6.9218  | 0.4786 | 0.2946  | 6.7872 | CHB |

|           |               |            |    |    |          |        |         |        |         |        |     |
|-----------|---------------|------------|----|----|----------|--------|---------|--------|---------|--------|-----|
| Hs.473917 | Hs.473917-S   | rs228084   | 21 | 21 | 42841284 | 21696  | 7.8204  | 0.5182 | 0.3067  | 6.7872 | CHB |
| Hs.473917 | Hs.473917-S   | rs228085   | 21 | 21 | 42841928 | 22340  | 7.5975  | 0.5151 | -0.3067 | 6.7872 | CHB |
| Hs.245997 | Hs.245997-S   | rs915874   | 21 | 21 | 42858085 | 6461   | 7.5160  | 0.5108 | -0.3188 | 7.3172 | CHB |
| Hs.245997 | Hs.245997-S   | rs915875   | 21 | 21 | 42858194 | 6352   | 7.7636  | 0.5153 | 0.3208  | 7.3172 | CHB |
| Hs.245997 | Hs.245997-S   | rs9976677  | 21 | 21 | 42859573 | 4973   | 7.7636  | 0.5153 | 0.3208  | 7.3172 | CHB |
| Hs.245997 | Hs.245997-S   | rs2839556  | 21 | 21 | 42863019 | 1527   | 9.2719  | 0.5865 | -0.3673 | 7.3172 | CHB |
| Hs.245997 | Hs.245997-S   | rs3827235  | 21 | 21 | 42863494 | 1052   | 7.9284  | 0.5236 | -0.3182 | 7.3172 | CHB |
| Hs.245997 | Hs.245997-S   | rs3788032  | 21 | 21 | 42863768 | 778    | 7.5000  | 0.5185 | 0.2945  | 7.3172 | CHB |
| Hs.245997 | Hs.245997-S   | rs2839557  | 21 | 21 | 42863867 | 679    | 8.8135  | 0.5660 | -0.3136 | 7.3172 | CHB |
| Hs.245997 | Hs.245997-S   | rs3746933  | 21 | 21 | 42864660 | 114    | 8.8135  | 0.5660 | -0.3136 | 7.3172 | CHB |
| Hs.245997 | Hs.245997-S   | rs1399925  | 21 | 21 | 42865011 | 465    | 8.8135  | 0.5660 | 0.3136  | 7.3172 | CHB |
| Hs.245997 | Hs.245997-S   | rs400893   | 21 | 21 | 42866355 | 1809   | 8.8135  | 0.5660 | 0.3136  | 7.3172 | CHB |
| Hs.245997 | Hs.245997-S   | rs445343   | 21 | 21 | 42866684 | 2138   | 8.8135  | 0.5660 | 0.3136  | 7.3172 | CHB |
| Hs.245997 | Hs.245997-S   | rs412212   | 21 | 21 | 42866712 | 2166   | 8.8135  | 0.5660 | 0.3136  | 7.3172 | CHB |
| Hs.245997 | Hs.245997-S   | rs445554   | 21 | 21 | 42866873 | 2327   | 8.5498  | 0.5624 | 0.3099  | 7.3172 | CHB |
| Hs.245997 | Hs.245997-S   | rs451954   | 21 | 21 | 42869023 | 4477   | 8.2721  | 0.5578 | 0.3067  | 7.3172 | CHB |
| Hs.245997 | Hs.245997-S   | rs365443   | 21 | 21 | 42871365 | 6819   | 8.8135  | 0.5660 | 0.3136  | 7.3172 | CHB |
| Hs.245997 | Hs.245997-S   | rs401396   | 21 | 21 | 42871651 | 7105   | 8.8135  | 0.5660 | 0.3136  | 7.3172 | CHB |
| Hs.245997 | Hs.245997-S   | rs380152   | 21 | 21 | 42873121 | 8575   | 8.8135  | 0.5660 | 0.3136  | 7.3172 | CHB |
| Hs.245997 | Hs.245997-S   | rs388907   | 21 | 21 | 42873435 | 8889   | 8.8135  | 0.5660 | 0.3136  | 7.3172 | CHB |
| Hs.245997 | Hs.245997-S   | rs390840   | 21 | 21 | 42873970 | 9424   | 8.8135  | 0.5660 | 0.3136  | 7.3172 | CHB |
| Hs.245997 | Hs.245997-S   | rs454849   | 21 | 21 | 42874133 | 9587   | 8.8135  | 0.5660 | -0.3136 | 7.3172 | CHB |
| Hs.245997 | Hs.245997-S   | rs398717   | 21 | 21 | 42874233 | 9687   | 8.8135  | 0.5660 | 0.3136  | 7.3172 | CHB |
| Hs.245997 | Hs.245997-S   | rs400625   | 21 | 21 | 42874864 | 10318  | 8.8135  | 0.5660 | 0.3136  | 7.3172 | CHB |
| Hs.245997 | Hs.245997-S   | rs366703   | 21 | 21 | 42876537 | 11991  | 8.8135  | 0.5660 | -0.3136 | 7.3172 | CHB |
| Hs.245997 | Hs.245997-S   | rs380282   | 21 | 21 | 42876752 | 12206  | 9.2287  | 0.5933 | 0.2968  | 7.3172 | CHB |
| Hs.245997 | Hs.245997-S   | rs442723   | 21 | 21 | 42876979 | 12433  | 8.8135  | 0.5660 | -0.3136 | 7.3172 | CHB |
| Hs.245997 | Hs.245997-S   | rs449888   | 21 | 21 | 42877061 | 12515  | 7.4880  | 0.5011 | 0.2972  | 7.3172 | CHB |
| Hs.245997 | Hs.245997-S   | rs381899   | 21 | 21 | 42877191 | 12645  | 7.8131  | 0.5178 | 0.3194  | 7.3172 | CHB |
| Hs.245997 | Hs.245997-S   | rs388831   | 21 | 21 | 42877218 | 12672  | 7.8131  | 0.5178 | 0.3194  | 7.3172 | CHB |
| Hs.245997 | Hs.245997-S   | rs447167   | 21 | 21 | 42877898 | 13352  | 7.7636  | 0.5153 | -0.3208 | 7.3172 | CHB |
| Hs.245997 | Hs.245997-S   | rs1788414  | 21 | 21 | 42878403 | 13857  | 8.3496  | 0.5443 | -0.3929 | 7.3172 | CHB |
| Hs.245997 | Hs.245997-S   | rs450508   | 21 | 21 | 42879076 | 14530  | 8.3496  | 0.5443 | -0.3929 | 7.3172 | CHB |
| Hs.245997 | Hs.245997-S   | rs449014   | 21 | 21 | 42879186 | 14640  | 8.3496  | 0.5443 | -0.3929 | 7.3172 | CHB |
| Hs.245997 | Hs.245997-S   | rs408465   | 21 | 21 | 42879276 | 14730  | 8.3496  | 0.5443 | 0.3929  | 7.3172 | CHB |
| Hs.245997 | Hs.245997-S   | rs390268   | 21 | 21 | 42879293 | 14747  | 9.1916  | 0.5917 | 0.3790  | 7.3172 | CHB |
| Hs.245997 | Hs.245997-S   | rs1788448  | 21 | 21 | 42880315 | 15769  | 7.7636  | 0.5153 | 0.3208  | 7.3172 | CHB |
| Hs.245997 | Hs.245997-S   | rs6586334  | 21 | 21 | 42891021 | 26475  | 7.7550  | 0.5149 | -0.3185 | 7.3172 | CHB |
| Hs.245997 | Hs.245997-S   | rs387738   | 21 | 21 | 42891148 | 26602  | 7.7550  | 0.5149 | 0.3185  | 7.3172 | CHB |
| Hs.245997 | Hs.245997-S   | rs397620   | 21 | 21 | 42891949 | 27403  | 7.7550  | 0.5149 | 0.3185  | 7.3172 | CHB |
| Hs.245997 | Hs.245997-S   | rs379010   | 21 | 21 | 42893215 | 28669  | 7.7550  | 0.5149 | 0.3185  | 7.3172 | CHB |
| Hs.245997 | Hs.245997-S   | rs433632   | 21 | 21 | 42893492 | 28946  | 7.7550  | 0.5149 | 0.3185  | 7.3172 | CHB |
| Hs.245997 | Hs.245997-S   | rs401909   | 21 | 21 | 42893720 | 29174  | 7.7550  | 0.5149 | -0.3185 | 7.3172 | CHB |
| NDUFV3    | GI_21361323-S | rs2839603  | 21 | 21 | 43197575 | 4490   | 7.5710  | 0.5223 | 0.5179  | 7.3062 | CHB |
| Hs.124623 | Hs.124623-S   | rs7282137  | 21 | 21 | 44449095 | 4783   | 8.3609  | 0.5448 | -0.3062 | 7.2248 | CHB |
| GSTT1     | GI_4504184-S  | rs140277   | 22 | 22 | 22658101 | 42855  | 6.6062  | 0.4607 | 1.2471  | 5.9169 | CHB |
| GSTT1     | GI_4504184-S  | rs5760147  | 22 | 22 | 22659502 | 41454  | 14.2422 | 0.7559 | -1.6645 | 5.9169 | CHB |
| GSTT1     | GI_4504184-S  | rs407257   | 22 | 22 | 22671104 | 29852  | 27.6624 | 0.9417 | -1.6712 | 5.9169 | CHB |
| GSTT1     | GI_4504184-S  | rs6004035  | 22 | 22 | 22709801 | 8845   | 18.5928 | 0.8937 | -2.4011 | 5.9169 | CHB |
| GSTT1     | GI_4504184-S  | rs17004810 | 22 | 22 | 22726874 | 25918  | 11.8033 | 0.7286 | 1.4865  | 5.9169 | CHB |
| GSTT1     | GI_4504184-S  | rs5760176  | 22 | 22 | 22726875 | 25919  | 6.5147  | 0.4475 | -1.2954 | 5.9169 | CHB |
| GSTT1     | GI_4504184-S  | rs17004811 | 22 | 22 | 22729384 | 28428  | 5.9953  | 0.4168 | 1.0836  | 5.9169 | CHB |
| CRYBB2    | GI_4503062-S  | rs6519611  | 22 | 22 | 24170409 | 218080 | 37.9587 | 0.9806 | 1.4502  | 7.7278 | CHB |
| CRYBB2    | GI_4503062-S  | rs9624836  | 22 | 22 | 24170641 | 218312 | 37.9587 | 0.9806 | 1.4502  | 7.7278 | CHB |
| CRYBB2    | GI_4503062-S  | rs6004652  | 22 | 22 | 24173365 | 221036 | 37.0464 | 0.9805 | 1.4504  | 7.7278 | CHB |
| CRYBB2    | GI_4503062-S  | rs5996938  | 22 | 22 | 24175589 | 223260 | 36.3721 | 0.9790 | -1.4392 | 7.7278 | CHB |
| CRYBB2    | GI_4503062-S  | rs6004662  | 22 | 22 | 24186678 | 234349 | 37.9587 | 0.9806 | -1.4502 | 7.7278 | CHB |
| CRYBB2    | GI_4503062-S  | rs11913964 | 22 | 22 | 24188010 | 235681 | 18.1634 | 0.8392 | -1.4063 | 7.7278 | CHB |
| CRYBB2    | GI_4503062-S  | rs11912320 | 22 | 22 | 24192617 | 240288 | 16.3175 | 0.8270 | 1.4202  | 7.7278 | CHB |

|          |               |            |    |    |          |        |         |        |         |        |     |
|----------|---------------|------------|----|----|----------|--------|---------|--------|---------|--------|-----|
| CRYBB2   | GI_4503062-S  | rs760554   | 22 | 22 | 24197146 | 244817 | 18.1634 | 0.8392 | 1.4063  | 7.7278 | CHB |
| CRYBB2   | GI_4503062-S  | rs760555   | 22 | 22 | 24197391 | 245062 | 18.1634 | 0.8392 | -1.4063 | 7.7278 | CHB |
| CRYBB2   | GI_4503062-S  | rs6004667  | 22 | 22 | 24199018 | 246689 | 18.1634 | 0.8392 | -1.4063 | 7.7278 | CHB |
| CRYBB2   | GI_4503062-S  | rs6004668  | 22 | 22 | 24199056 | 246727 | 18.1634 | 0.8392 | -1.4063 | 7.7278 | CHB |
| CRYBB2   | GI_4503062-S  | rs1930961  | 22 | 22 | 24199819 | 247490 | 18.1634 | 0.8392 | -1.4063 | 7.7278 | CHB |
| CRYBB2   | GI_4503062-S  | rs5996945  | 22 | 22 | 24200127 | 247798 | 18.1634 | 0.8392 | 1.4063  | 7.7278 | CHB |
| CRYBB2   | GI_4503062-S  | rs997872   | 22 | 22 | 24203168 | 250839 | 37.9587 | 0.9806 | 1.4502  | 7.7278 | CHB |
| CRYBB2   | GI_4503062-S  | rs6004672  | 22 | 22 | 24205567 | 253238 | 37.9587 | 0.9806 | -1.4502 | 7.7278 | CHB |
| CRYBB2   | GI_4503062-S  | rs8141065  | 22 | 22 | 24209742 | 257413 | 37.9587 | 0.9806 | 1.4502  | 7.7278 | CHB |
| CRYBB2   | GI_4503062-S  | rs6004673  | 22 | 22 | 24209907 | 257578 | 37.9587 | 0.9806 | -1.4502 | 7.7278 | CHB |
| CRYBB2   | GI_4503062-S  | rs1930966  | 22 | 22 | 24210258 | 257929 | 37.9587 | 0.9806 | 1.4502  | 7.7278 | CHB |
| CRYBB2   | GI_4503062-S  | rs7292626  | 22 | 22 | 24212067 | 259738 | 8.9337  | 0.5890 | -1.3322 | 7.7278 | CHB |
| CRYBB2   | GI_4503062-S  | rs6004675  | 22 | 22 | 24213939 | 261610 | 37.9587 | 0.9806 | 1.4502  | 7.7278 | CHB |
| CRYBB2   | GI_4503062-S  | rs16980314 | 22 | 22 | 24230900 | 278571 | 37.0545 | 0.9805 | -1.4494 | 7.7278 | CHB |
| CRYBB2   | GI_4503062-S  | rs6004694  | 22 | 22 | 24253183 | 300854 | 10.2595 | 0.6362 | -1.0664 | 7.7278 | CHB |
| CRYBB2   | GI_4503062-S  | rs11914246 | 22 | 22 | 24253711 | 301382 | 8.1284  | 0.5508 | 0.9571  | 7.7278 | CHB |
| CRYBB2   | GI_4503062-S  | rs9624873  | 22 | 22 | 24255338 | 303009 | 9.0973  | 0.5788 | 0.9911  | 7.7278 | CHB |
| CSF2RB   | GI_4559407-S  | rs2284053  | 22 | 22 | 36204058 | 544955 | 6.4795  | 0.4455 | -0.1167 | 6.2481 | CHB |
| CSF2RB   | GI_4559407-S  | rs2071840  | 22 | 22 | 36206342 | 547239 | 6.4795  | 0.4455 | 0.1167  | 6.2481 | CHB |
| CSF2RB   | GI_4559407-S  | rs11089844 | 22 | 22 | 36207231 | 548128 | 6.4795  | 0.4455 | 0.1167  | 6.2481 | CHB |
| CSF2RB   | GI_4559407-S  | rs3761441  | 22 | 22 | 36208358 | 549255 | 6.4795  | 0.4455 | -0.1167 | 6.2481 | CHB |
| CSF2RB   | GI_4559407-S  | rs3817803  | 22 | 22 | 36224776 | 565673 | 6.5397  | 0.4490 | 0.1174  | 6.2481 | CHB |
| CSF2RB   | GI_4559407-S  | rs3817804  | 22 | 22 | 36225107 | 566004 | 6.5397  | 0.4490 | -0.1174 | 6.2481 | CHB |
| APOBEC3B | GI_22907024-S | rs5750715  | 22 | 22 | 37668416 | 41615  | 9.3336  | 0.6160 | 1.1413  | 6.8826 | CHB |
| APOBEC3B | GI_22907024-S | rs6001335  | 22 | 22 | 37670466 | 39565  | 9.1197  | 0.6066 | 1.1144  | 6.8826 | CHB |
| APOBEC3B | GI_22907024-S | rs2019907  | 22 | 22 | 37713920 | 3889   | 7.5303  | 0.5116 | 1.0173  | 6.8826 | CHB |
| APOBEC3B | GI_22907024-S | rs2142833  | 22 | 22 | 37716796 | 6765   | 7.5838  | 0.5144 | 1.0135  | 6.8826 | CHB |
| APOBEC3B | GI_22907024-S | rs9611070  | 22 | 22 | 37720207 | 10176  | 7.6768  | 0.5109 | -1.0163 | 6.8826 | CHB |
| APOBEC3B | GI_22907024-S | rs6001371  | 22 | 22 | 37730207 | 20176  | 7.4389  | 0.5622 | 0.9560  | 6.8826 | CHB |
| PDGFB    | GI_15451785-A | rs968451   | 22 | 22 | 37995351 | 50851  | 6.9933  | 0.4745 | -0.2074 | 6.8827 | CHB |
| FLJ20635 | GI_8923587-S  | rs104664   | 22 | 22 | 44032391 | 24700  | 13.4004 | 0.7330 | 0.8957  | 7.1451 | CHB |
| FLJ20635 | GI_8923587-S  | rs226492   | 22 | 22 | 44035026 | 22065  | 7.9658  | 0.5340 | -0.8122 | 7.1451 | CHB |
| FLJ20635 | GI_8923587-S  | rs2142552  | 22 | 22 | 44040034 | 17057  | 13.4004 | 0.7330 | -0.8957 | 7.1451 | CHB |
| FLJ20635 | GI_8923587-S  | rs738171   | 22 | 22 | 44041821 | 15270  | 13.4004 | 0.7330 | 0.8957  | 7.1451 | CHB |
| FLJ20635 | GI_8923587-S  | rs9614637  | 22 | 22 | 44042584 | 14507  | 11.0489 | 0.7029 | 0.8658  | 7.1451 | CHB |
| FLJ20635 | GI_8923587-S  | rs6006986  | 22 | 22 | 44043790 | 13301  | 7.4450  | 0.5335 | -0.8076 | 7.1451 | CHB |
| FLJ20635 | GI_8923587-S  | rs7285172  | 22 | 22 | 44046882 | 10209  | 13.4004 | 0.7330 | -0.8957 | 7.1451 | CHB |
| FLJ20635 | GI_8923587-S  | rs2205659  | 22 | 22 | 44052267 | 4824   | 9.3736  | 0.6086 | 0.9020  | 7.1451 | CHB |
| FLJ20635 | GI_8923587-S  | rs3827393  | 22 | 22 | 44056690 | 401    | 13.4004 | 0.7330 | 0.8957  | 7.1451 | CHB |
| FLJ20635 | GI_8923587-S  | rs3747240  | 22 | 22 | 44060761 | 3670   | 13.4004 | 0.7330 | 0.8957  | 7.1451 | CHB |
| FLJ20635 | GI_8923587-S  | rs9614647  | 22 | 22 | 44062255 | 5164   | 13.4004 | 0.7330 | -0.8957 | 7.1451 | CHB |
| FLJ20635 | GI_8923587-S  | rs6006992  | 22 | 22 | 44063297 | 6206   | 13.4004 | 0.7330 | -0.8957 | 7.1451 | CHB |
| FLJ20635 | GI_8923587-S  | rs6519844  | 22 | 22 | 44064960 | 7869   | 13.4004 | 0.7330 | 0.8957  | 7.1451 | CHB |
| FLJ20635 | GI_8923587-S  | rs5765271  | 22 | 22 | 44067363 | 10272  | 13.4004 | 0.7330 | 0.8957  | 7.1451 | CHB |
| FLJ20635 | GI_8923587-S  | rs5765272  | 22 | 22 | 44068438 | 11347  | 13.4004 | 0.7330 | 0.8957  | 7.1451 | CHB |
| FLJ20635 | GI_8923587-S  | rs5765276  | 22 | 22 | 44069399 | 12308  | 13.4004 | 0.7330 | 0.8957  | 7.1451 | CHB |
| FLJ20635 | GI_8923587-S  | rs1569413  | 22 | 22 | 44076618 | 19527  | 13.4004 | 0.7330 | 0.8957  | 7.1451 | CHB |
| FLJ20635 | GI_8923587-S  | rs136564   | 22 | 22 | 44085411 | 28320  | 13.4004 | 0.7330 | -0.8957 | 7.1451 | CHB |
| FLJ20635 | GI_8923587-S  | rs470062   | 22 | 22 | 44087906 | 30815  | 13.4004 | 0.7330 | 0.8957  | 7.1451 | CHB |
| FLJ20635 | GI_8923587-S  | rs5765304  | 22 | 22 | 44092511 | 35420  | 13.4004 | 0.7330 | -0.8957 | 7.1451 | CHB |
| FLJ20635 | GI_8923587-S  | rs136584   | 22 | 22 | 44096750 | 39659  | 13.4004 | 0.7330 | -0.8957 | 7.1451 | CHB |
| FLJ20635 | GI_8923587-S  | rs136604   | 22 | 22 | 44110280 | 53189  | 13.4004 | 0.7330 | -0.8957 | 7.1451 | CHB |
| FLJ20635 | GI_8923587-S  | rs12162930 | 22 | 22 | 44114749 | 57658  | 13.4004 | 0.7330 | -0.8957 | 7.1451 | CHB |
| FLJ20635 | GI_8923587-S  | rs136611   | 22 | 22 | 44114820 | 57729  | 13.4004 | 0.7330 | -0.8957 | 7.1451 | CHB |
| FLJ20635 | GI_8923587-S  | rs5765327  | 22 | 22 | 44121463 | 64372  | 13.4004 | 0.7330 | 0.8957  | 7.1451 | CHB |
| Hs.40696 | Hs.40696-S    | rs5769136  | 22 | 22 | 45477222 | 1325   | 7.6598  | 0.5100 | 0.2262  | 5.7924 | CHB |
| Hs.40696 | Hs.40696-S    | rs5769138  | 22 | 22 | 45477740 | 807    | 7.6598  | 0.5100 | 0.2262  | 5.7924 | CHB |
| Hs.40696 | Hs.40696-S    | rs2295441  | 22 | 22 | 45478963 | 416    | 8.2537  | 0.5397 | 0.2282  | 5.7924 | CHB |
| 384D8-2  | GI_23097284-I | rs763124   | 22 | 22 | 48269111 | 982713 | 5.7141  | 0.3995 | -0.1433 | 5.5359 | CHB |

|           |               |            |    |    |          |        |         |        |         |        |     |
|-----------|---------------|------------|----|----|----------|--------|---------|--------|---------|--------|-----|
| 384D8-2   | GI_23097284-I | rs2319345  | 22 | 22 | 48282545 | 969279 | 5.7141  | 0.3995 | -0.1433 | 5.5359 | CHB |
| 384D8-2   | GI_23097284-I | rs1008320  | 22 | 22 | 48289581 | 962243 | 6.1454  | 0.4258 | 0.1453  | 5.5359 | CHB |
| LOC400933 | GI_42662518-S | rs1008320  | 22 | 22 | 48289581 | 160117 | 5.8441  | 0.4075 | 0.1712  | 5.8239 | CHB |
| 384D8-2   | GI_23097284-I | rs9616685  | 22 | 22 | 48289814 | 962010 | 6.6529  | 0.4888 | 0.1635  | 5.5359 | CHB |
| 384D8-2   | GI_23097284-I | rs8136912  | 22 | 22 | 48290014 | 961810 | 6.1454  | 0.4258 | -0.1453 | 5.5359 | CHB |
| LOC400933 | GI_42662518-S | rs8136912  | 22 | 22 | 48290014 | 160550 | 5.8441  | 0.4075 | -0.1712 | 5.8239 | CHB |
| 384D8-2   | GI_23097284-I | rs5769691  | 22 | 22 | 48291659 | 960165 | 6.1454  | 0.4258 | 0.1453  | 5.5359 | CHB |
| LOC400933 | GI_42662518-S | rs5769691  | 22 | 22 | 48291659 | 162195 | 5.8441  | 0.4075 | 0.1712  | 5.8239 | CHB |
| 384D8-2   | GI_23097284-I | rs2071894  | 22 | 22 | 48298059 | 953765 | 6.1454  | 0.4258 | 0.1453  | 5.5359 | CHB |
| LOC400933 | GI_42662518-S | rs2071894  | 22 | 22 | 48298059 | 168595 | 5.8441  | 0.4075 | 0.1712  | 5.8239 | CHB |
| 384D8-2   | GI_23097284-I | rs5770562  | 22 | 22 | 48299363 | 952461 | 6.2671  | 0.4331 | -0.1517 | 5.5359 | CHB |
| 384D8-2   | GI_23097284-I | rs2071893  | 22 | 22 | 48299436 | 952388 | 6.1454  | 0.4258 | -0.1453 | 5.5359 | CHB |
| LOC400933 | GI_42662518-S | rs2071893  | 22 | 22 | 48299436 | 169972 | 5.8441  | 0.4075 | -0.1712 | 5.8239 | CHB |
| 384D8-2   | GI_23097284-I | rs10854874 | 22 | 22 | 48305549 | 946275 | 6.1454  | 0.4258 | 0.1453  | 5.5359 | CHB |
| LOC400933 | GI_42662518-S | rs10854874 | 22 | 22 | 48305549 | 176085 | 5.8441  | 0.4075 | 0.1712  | 5.8239 | CHB |
| 384D8-2   | GI_23097284-I | rs5770567  | 22 | 22 | 48305828 | 945996 | 6.3854  | 0.5208 | -0.1535 | 5.5359 | CHB |
| LOC400933 | GI_42662518-S | rs763126   | 22 | 22 | 48309435 | 179971 | 12.7974 | 0.7154 | 0.2221  | 5.8239 | CHB |
| LOC400933 | GI_42662518-S | rs2007024  | 22 | 22 | 48309676 | 180212 | 6.1694  | 0.4273 | -0.1645 | 5.8239 | CHB |
| LOC400933 | GI_42662518-S | rs17182154 | 22 | 22 | 48311331 | 181867 | 12.3885 | 0.7563 | -0.2236 | 5.8239 | CHB |
| LOC400933 | GI_42662518-S | rs5769698  | 22 | 22 | 48318567 | 189103 | 13.0516 | 0.7314 | -0.2284 | 5.8239 | CHB |
| LOC400933 | GI_42662518-S | rs2071890  | 22 | 22 | 48322152 | 192688 | 6.1694  | 0.4273 | -0.1645 | 5.8239 | CHB |
| LOC400933 | GI_42662518-S | rs763127   | 22 | 22 | 48326939 | 197475 | 12.7974 | 0.7154 | -0.2221 | 5.8239 | CHB |
| LOC400933 | GI_42662518-S | rs2051627  | 22 | 22 | 48329959 | 200495 | 6.7958  | 0.4635 | 0.1948  | 5.8239 | CHB |
| LOC400933 | GI_42662518-S | rs1018812  | 22 | 22 | 48330934 | 201470 | 12.7974 | 0.7154 | -0.2221 | 5.8239 | CHB |
| LOC400933 | GI_42662518-S | rs135875   | 22 | 22 | 48333280 | 203816 | 6.1694  | 0.4273 | 0.1645  | 5.8239 | CHB |
| LOC400933 | GI_42662518-S | rs5769707  | 22 | 22 | 48334263 | 204799 | 12.1937 | 0.7504 | -0.2165 | 5.8239 | CHB |
| LOC400933 | GI_42662518-S | rs135876   | 22 | 22 | 48334434 | 204970 | 6.8906  | 0.4769 | -0.1771 | 5.8239 | CHB |
| LOC400933 | GI_42662518-S | rs135877   | 22 | 22 | 48334863 | 205399 | 6.1694  | 0.4273 | -0.1645 | 5.8239 | CHB |
| LOC400933 | GI_42662518-S | rs135878   | 22 | 22 | 48335230 | 205766 | 6.1694  | 0.4273 | 0.1645  | 5.8239 | CHB |
| LOC400933 | GI_42662518-S | rs6009786  | 22 | 22 | 48336006 | 206542 | 6.1694  | 0.4273 | -0.1645 | 5.8239 | CHB |
| LOC400933 | GI_42662518-S | rs7288869  | 22 | 22 | 48336188 | 206724 | 12.7974 | 0.7154 | -0.2221 | 5.8239 | CHB |
| LOC400933 | GI_42662518-S | rs916362   | 22 | 22 | 48338095 | 208631 | 6.1694  | 0.4273 | -0.1645 | 5.8239 | CHB |
| LOC400933 | GI_42662518-S | rs916363   | 22 | 22 | 48338417 | 208953 | 12.2878 | 0.7439 | 0.2354  | 5.8239 | CHB |
| LOC400933 | GI_42662518-S | rs5770594  | 22 | 22 | 48339358 | 209894 | 12.7974 | 0.7154 | 0.2221  | 5.8239 | CHB |
| LOC400933 | GI_42662518-S | rs9616694  | 22 | 22 | 48340674 | 211210 | 6.1208  | 0.4320 | -0.1963 | 5.8239 | CHB |
| LOC400933 | GI_42662518-S | rs739248   | 22 | 22 | 48346066 | 216602 | 12.7974 | 0.7154 | 0.2221  | 5.8239 | CHB |
| LOC400933 | GI_42662518-S | rs9616329  | 22 | 22 | 48347175 | 217711 | 6.1694  | 0.4273 | 0.1645  | 5.8239 | CHB |
| LOC400933 | GI_42662518-S | rs5770604  | 22 | 22 | 48351533 | 222069 | 12.7974 | 0.7154 | 0.2221  | 5.8239 | CHB |
| LOC400933 | GI_42662518-S | rs2071904  | 22 | 22 | 48355338 | 225874 | 12.7974 | 0.7154 | 0.2221  | 5.8239 | CHB |
| LOC400933 | GI_42662518-S | rs739236   | 22 | 22 | 48362463 | 232999 | 7.0379  | 0.4770 | -0.1823 | 5.8239 | CHB |
| LOC400933 | GI_42662518-S | rs916360   | 22 | 22 | 48362833 | 233369 | 7.0379  | 0.4770 | 0.1823  | 5.8239 | CHB |
| LOC400933 | GI_42662518-S | rs1107514  | 22 | 22 | 48363244 | 233780 | 7.0379  | 0.4770 | -0.1823 | 5.8239 | CHB |
| LOC400933 | GI_42662518-S | rs8137111  | 22 | 22 | 48364611 | 235147 | 7.0379  | 0.4770 | 0.1823  | 5.8239 | CHB |
| LOC400933 | GI_42662518-S | rs8140095  | 22 | 22 | 48364656 | 235192 | 7.0379  | 0.4770 | -0.1823 | 5.8239 | CHB |
| LOC400933 | GI_42662518-S | rs8141219  | 22 | 22 | 48365407 | 235943 | 7.0379  | 0.4770 | -0.1823 | 5.8239 | CHB |
| LOC400933 | GI_42662518-S | rs13056592 | 22 | 22 | 48365501 | 236037 | 6.7958  | 0.4635 | 0.1948  | 5.8239 | CHB |
| LOC400933 | GI_42662518-S | rs8138399  | 22 | 22 | 48365685 | 236221 | 13.6917 | 0.7412 | -0.2294 | 5.8239 | CHB |
| LOC400933 | GI_42662518-S | rs9616333  | 22 | 22 | 48371708 | 242244 | 13.6917 | 0.7412 | 0.2294  | 5.8239 | CHB |
| LOC400933 | GI_42662518-S | rs9616714  | 22 | 22 | 48371720 | 242256 | 12.8849 | 0.7350 | 0.2323  | 5.8239 | CHB |
| LOC400933 | GI_42662518-S | rs739240   | 22 | 22 | 48373468 | 244004 | 7.0379  | 0.4770 | 0.1823  | 5.8239 | CHB |
| LOC400933 | GI_42662518-S | rs12485195 | 22 | 22 | 48374732 | 245268 | 11.2400 | 0.7493 | 0.2293  | 5.8239 | CHB |
| LOC400933 | GI_42662518-S | rs739243   | 22 | 22 | 48378072 | 248608 | 14.5217 | 0.7630 | -0.2245 | 5.8239 | CHB |
| LOC400933 | GI_42662518-S | rs7286706  | 22 | 22 | 48379207 | 249743 | 14.5217 | 0.7630 | 0.2245  | 5.8239 | CHB |
| LOC400933 | GI_42662518-S | rs6009810  | 22 | 22 | 48380401 | 250937 | 8.3378  | 0.5437 | -0.1890 | 5.8239 | CHB |
| LOC400933 | GI_42662518-S | rs739244   | 22 | 22 | 48381019 | 251555 | 8.3378  | 0.5437 | -0.1890 | 5.8239 | CHB |
| LOC400933 | GI_42662518-S | rs5770633  | 22 | 22 | 48383288 | 253824 | 8.3378  | 0.5437 | 0.1890  | 5.8239 | CHB |
| TNFRSF18  | GI_23238193-A | rs6603793  | 1  | 1  | 1590522  | 411687 | 5.1053  | 0.3743 | 0.8821  | 5.0425 | JPT |
| UTS2      | GI_12056478-I | rs664689   | 1  | 1  | 7904358  | 56627  | 8.7966  | 0.5653 | 1.2757  | 6.2768 | JPT |
| UTS2      | GI_12056480-A | rs664689   | 1  | 1  | 7904358  | 59177  | 8.8122  | 0.5660 | 1.1655  | 6.2768 | JPT |

|           |               |            |   |   |          |        |         |        |         |        |     |
|-----------|---------------|------------|---|---|----------|--------|---------|--------|---------|--------|-----|
| UTS2      | GI_12056480-I | rs664689   | 1 | 1 | 7904358  | 57031  | 7.3007  | 0.4912 | 0.2461  | 6.2768 | JPT |
| UTS2      | GI_12056478-I | rs161803   | 1 | 1 | 7910055  | 62324  | 7.6234  | 0.5165 | -1.2133 | 6.2768 | JPT |
| UTS2      | GI_12056480-A | rs161803   | 1 | 1 | 7910055  | 64874  | 7.5877  | 0.5146 | -1.1042 | 6.2768 | JPT |
| UTS2      | GI_12056478-I | rs161826   | 1 | 1 | 7914604  | 66873  | 6.9639  | 0.4893 | 1.2197  | 6.2768 | JPT |
| UTS2      | GI_12056480-A | rs161826   | 1 | 1 | 7914604  | 69423  | 6.9247  | 0.4871 | 1.1147  | 6.2768 | JPT |
| UTS2      | GI_12056478-I | rs161827   | 1 | 1 | 7916300  | 68569  | 7.5268  | 0.5114 | -1.2653 | 6.2768 | JPT |
| UTS2      | GI_12056480-A | rs161827   | 1 | 1 | 7916300  | 71119  | 7.4758  | 0.5087 | -1.1499 | 6.2768 | JPT |
| UTS2      | GI_12056480-I | rs161827   | 1 | 1 | 7916300  | 68973  | 6.2904  | 0.4422 | -0.2346 | 6.2768 | JPT |
| UTS2      | GI_12056478-I | rs161818   | 1 | 1 | 7921818  | 74087  | 7.5268  | 0.5114 | 1.2653  | 6.2768 | JPT |
| UTS2      | GI_12056480-A | rs161818   | 1 | 1 | 7921818  | 76637  | 7.4758  | 0.5087 | 1.1499  | 6.2768 | JPT |
| UTS2      | GI_12056480-I | rs161818   | 1 | 1 | 7921818  | 74491  | 6.2904  | 0.4422 | 0.2346  | 6.2768 | JPT |
| UTS2      | GI_12056478-I | rs161822   | 1 | 1 | 7923405  | 75674  | 7.9830  | 0.5264 | 1.2654  | 6.2768 | JPT |
| UTS2      | GI_12056480-A | rs161822   | 1 | 1 | 7923405  | 78224  | 7.9679  | 0.5256 | 1.1545  | 6.2768 | JPT |
| UTS2      | GI_12056480-I | rs161822   | 1 | 1 | 7923405  | 76078  | 6.9724  | 0.4734 | 0.2481  | 6.2768 | JPT |
| UTS2      | GI_12056478-I | rs161811   | 1 | 1 | 7933868  | 86137  | 7.5602  | 0.5049 | -1.2159 | 6.2768 | JPT |
| UTS2      | GI_12056480-A | rs161811   | 1 | 1 | 7933868  | 88687  | 7.6857  | 0.5113 | -1.1169 | 6.2768 | JPT |
| UTS2      | GI_12056480-I | rs161811   | 1 | 1 | 7933868  | 86541  | 7.1144  | 0.4811 | -0.2452 | 6.2768 | JPT |
| UTS2      | GI_12056478-I | rs161810   | 1 | 1 | 7935063  | 87332  | 7.1134  | 0.4892 | 1.2144  | 6.2768 | JPT |
| UTS2      | GI_12056480-A | rs161810   | 1 | 1 | 7935063  | 89882  | 7.2007  | 0.4940 | 1.1116  | 6.2768 | JPT |
| UTS2      | GI_12056480-I | rs161810   | 1 | 1 | 7935063  | 87736  | 6.4279  | 0.4503 | 0.2320  | 6.2768 | JPT |
| LZIC      | GI_40255081-S | rs11828    | 1 | 1 | 9921273  | 3269   | 9.2594  | 0.5947 | 0.2906  | 6.2496 | JPT |
| LZIC      | GI_40255081-S | rs1234694  | 1 | 1 | 9937586  | 13044  | 9.3949  | 0.6006 | 0.3026  | 6.2496 | JPT |
| LZIC      | GI_40255081-S | rs1220421  | 1 | 1 | 9942487  | 17945  | 9.3949  | 0.6006 | -0.3026 | 6.2496 | JPT |
| LZIC      | GI_40255081-S | rs1660733  | 1 | 1 | 9945337  | 20795  | 9.0499  | 0.5854 | 0.2990  | 6.2496 | JPT |
| LZIC      | GI_40255081-S | rs2890358  | 1 | 1 | 9961806  | 37264  | 9.3949  | 0.6006 | 0.3026  | 6.2496 | JPT |
| LZIC      | GI_40255081-S | rs6661806  | 1 | 1 | 9971734  | 47192  | 9.0935  | 0.5873 | -0.2967 | 6.2496 | JPT |
| LZIC      | GI_40255081-S | rs12140058 | 1 | 1 | 9983443  | 58901  | 9.6531  | 0.6116 | 0.3176  | 6.2496 | JPT |
| LZIC      | GI_40255081-S | rs6664631  | 1 | 1 | 9992370  | 67828  | 9.9172  | 0.6315 | -0.3179 | 6.2496 | JPT |
| LZIC      | GI_40255081-S | rs3003376  | 1 | 1 | 10005567 | 81025  | 10.3061 | 0.6381 | -0.3274 | 6.2496 | JPT |
| LZIC      | GI_40255081-S | rs3123522  | 1 | 1 | 10006863 | 82321  | 10.3061 | 0.6381 | -0.3274 | 6.2496 | JPT |
| LZIC      | GI_40255081-S | rs7414481  | 1 | 1 | 10016687 | 92145  | 6.2824  | 0.4497 | 0.2496  | 6.2496 | JPT |
| LZIC      | GI_40255081-S | rs7528979  | 1 | 1 | 10027723 | 103181 | 8.3040  | 0.5506 | 0.2994  | 6.2496 | JPT |
| HSPC157   | GI_7661813-S  | rs2473295  | 1 | 1 | 22100172 | 2627   | 6.7021  | 0.4744 | -0.5097 | 6.1429 | JPT |
| HSPC157   | GI_7661813-S  | rs1063117  | 1 | 1 | 22102194 | 605    | 6.6090  | 0.4609 | -0.4588 | 6.1429 | JPT |
| HSPC157   | GI_7661813-S  | rs760923   | 1 | 1 | 22102523 | 276    | 6.6090  | 0.4609 | 0.4588  | 6.1429 | JPT |
| HSPC157   | GI_7661813-S  | rs4654783  | 1 | 1 | 22184826 | 82027  | 8.5582  | 0.5542 | -0.4446 | 6.1429 | JPT |
| Hs.470569 | Hs.470569-S   | rs10798823 | 1 | 1 | 31252437 | 993856 | 6.4191  | 0.4420 | 0.0555  | 5.4604 | JPT |
| Hs.470569 | Hs.470569-S   | rs12072490 | 1 | 1 | 31257332 | 988961 | 6.2057  | 0.4371 | 0.0547  | 5.4604 | JPT |
| Hs.470569 | Hs.470569-S   | rs4245633  | 1 | 1 | 31262733 | 983560 | 6.2057  | 0.4371 | 0.0547  | 5.4604 | JPT |
| Hs.470569 | Hs.470569-S   | rs4442410  | 1 | 1 | 31263145 | 983148 | 6.2057  | 0.4371 | 0.0547  | 5.4604 | JPT |
| Hs.470569 | Hs.470569-S   | rs12062017 | 1 | 1 | 31271282 | 975011 | 6.4191  | 0.4420 | 0.0555  | 5.4604 | JPT |
| Hs.470569 | Hs.470569-S   | rs1538000  | 1 | 1 | 31271993 | 974300 | 6.2057  | 0.4371 | -0.0547 | 5.4604 | JPT |
| Hs.470569 | Hs.470569-S   | rs6691244  | 1 | 1 | 31272628 | 973665 | 6.4191  | 0.4420 | -0.0555 | 5.4604 | JPT |
| Hs.470569 | Hs.470569-S   | rs2185419  | 1 | 1 | 31275876 | 970417 | 6.2057  | 0.4371 | -0.0547 | 5.4604 | JPT |
| Hs.470569 | Hs.470569-S   | rs2095991  | 1 | 1 | 31278917 | 967376 | 6.2057  | 0.4371 | -0.0547 | 5.4604 | JPT |
| Hs.470569 | Hs.470569-S   | rs2095992  | 1 | 1 | 31278945 | 967348 | 6.4191  | 0.4420 | 0.0555  | 5.4604 | JPT |
| Hs.470569 | Hs.470569-S   | rs7553014  | 1 | 1 | 31291800 | 954493 | 6.2057  | 0.4371 | 0.0547  | 5.4604 | JPT |
| Hs.470569 | Hs.470569-S   | rs7525805  | 1 | 1 | 31308213 | 938080 | 5.4767  | 0.3916 | 0.0472  | 5.4604 | JPT |
| FLJ38984  | GI_22748804-S | rs2074676  | 1 | 1 | 35696804 | 152026 | 5.6782  | 0.4045 | -0.1743 | 5.648  | JPT |
| NOR1      | GI_45643130-I | rs16822818 | 1 | 1 | 36542342 | 20761  | 6.9684  | 0.4732 | -0.2451 | 6.3326 | JPT |
| NOR1      | GI_45643130-I | rs10493072 | 1 | 1 | 36551294 | 11809  | 11.1874 | 0.6710 | 0.3430  | 6.3326 | JPT |
| NOR1      | GI_45643130-I | rs3738835  | 1 | 1 | 36553791 | 9312   | 11.5512 | 0.6751 | -0.3433 | 6.3326 | JPT |
| NOR1      | GI_45643130-I | rs3738836  | 1 | 1 | 36554101 | 9002   | 11.9818 | 0.6982 | -0.3507 | 6.3326 | JPT |
| NOR1      | GI_45643130-I | rs2282354  | 1 | 1 | 36556624 | 6479   | 11.1874 | 0.6710 | 0.3430  | 6.3326 | JPT |
| NOR1      | GI_45643130-I | rs16822947 | 1 | 1 | 36557358 | 5745   | 11.5512 | 0.6751 | 0.3433  | 6.3326 | JPT |
| NOR1      | GI_45643130-I | rs1416840  | 1 | 1 | 36557555 | 5548   | 11.1874 | 0.6710 | 0.3430  | 6.3326 | JPT |
| NOR1      | GI_45643130-I | rs16822954 | 1 | 1 | 36558098 | 5005   | 11.5272 | 0.6918 | -0.3452 | 6.3326 | JPT |
| NOR1      | GI_45643130-I | rs16822960 | 1 | 1 | 36559173 | 3930   | 11.5512 | 0.6751 | -0.3433 | 6.3326 | JPT |
| NOR1      | GI_45643130-I | rs1819661  | 1 | 1 | 36560128 | 2975   | 11.5512 | 0.6751 | -0.3433 | 6.3326 | JPT |

|         |               |            |   |   |          |       |         |        |         |        |     |
|---------|---------------|------------|---|---|----------|-------|---------|--------|---------|--------|-----|
| NOR1    | GI_45643130-I | rs946680   | 1 | 1 | 36566270 | 3167  | 11.5512 | 0.6751 | 0.3433  | 6.3326 | JPT |
| NOR1    | GI_45643130-I | rs2282357  | 1 | 1 | 36566946 | 3843  | 11.1874 | 0.6710 | -0.3430 | 6.3326 | JPT |
| NOR1    | GI_45643130-I | rs16822988 | 1 | 1 | 36575879 | 12776 | 11.2907 | 0.6747 | -0.3453 | 6.3326 | JPT |
| NOR1    | GI_45643130-I | rs946681   | 1 | 1 | 36577255 | 14152 | 11.1874 | 0.6710 | 0.3430  | 6.3326 | JPT |
| NOR1    | GI_45643130-I | rs3795495  | 1 | 1 | 36578660 | 15557 | 11.5512 | 0.6751 | 0.3433  | 6.3326 | JPT |
| NOR1    | GI_45643130-I | rs1416841  | 1 | 1 | 36583203 | 20100 | 11.1874 | 0.6710 | -0.3430 | 6.3326 | JPT |
| NOR1    | GI_45643130-I | rs10493075 | 1 | 1 | 36583635 | 20532 | 11.5512 | 0.6751 | 0.3433  | 6.3326 | JPT |
| NOR1    | GI_45643130-I | rs10493076 | 1 | 1 | 36583840 | 20737 | 11.1874 | 0.6710 | -0.3430 | 6.3326 | JPT |
| NOR1    | GI_45643130-I | rs16823020 | 1 | 1 | 36584033 | 20930 | 11.2024 | 0.6716 | -0.3372 | 6.3326 | JPT |
| NOR1    | GI_45643130-I | rs10493077 | 1 | 1 | 36584107 | 21004 | 11.5512 | 0.6751 | -0.3433 | 6.3326 | JPT |
| NOR1    | GI_45643130-I | rs16823025 | 1 | 1 | 36584198 | 21095 | 9.2806  | 0.5869 | -0.3213 | 6.3326 | JPT |
| NOR1    | GI_45643130-I | rs883694   | 1 | 1 | 36589540 | 26437 | 11.5512 | 0.6751 | 0.3433  | 6.3326 | JPT |
| NOR1    | GI_45643130-I | rs2275479  | 1 | 1 | 36590320 | 27217 | 11.1874 | 0.6710 | 0.3430  | 6.3326 | JPT |
| NOR1    | GI_45643130-I | rs2275480  | 1 | 1 | 36590626 | 27523 | 11.2716 | 0.6740 | 0.3450  | 6.3326 | JPT |
| NOR1    | GI_45643130-I | rs3738838  | 1 | 1 | 36595502 | 32399 | 11.1874 | 0.6710 | -0.3430 | 6.3326 | JPT |
| NOR1    | GI_45643130-I | rs2275476  | 1 | 1 | 36595946 | 32843 | 11.2024 | 0.6716 | 0.3372  | 6.3326 | JPT |
| NOR1    | GI_45643130-I | rs2275475  | 1 | 1 | 36596039 | 32936 | 11.5512 | 0.6751 | 0.3433  | 6.3326 | JPT |
| NOR1    | GI_45643130-I | rs2275474  | 1 | 1 | 36598626 | 35523 | 10.3744 | 0.6588 | 0.3403  | 6.3326 | JPT |
| NOR1    | GI_45643130-I | rs3806289  | 1 | 1 | 36599081 | 35978 | 8.4091  | 0.5829 | 0.3315  | 6.3326 | JPT |
| NOR1    | GI_45643130-I | rs3806288  | 1 | 1 | 36599189 | 36086 | 10.6976 | 0.6620 | 0.3390  | 6.3326 | JPT |
| NOR1    | GI_45643130-I | rs3806287  | 1 | 1 | 36599279 | 36176 | 10.7572 | 0.6466 | -0.3367 | 6.3326 | JPT |
| NOR1    | GI_45643130-I | rs3918015  | 1 | 1 | 36607702 | 44599 | 9.9030  | 0.6132 | -0.3277 | 6.3326 | JPT |
| NDUFS5  | GI_4758789-S  | rs7553434  | 1 | 1 | 39127203 | 33933 | 6.1737  | 0.4275 | 0.2962  | 6.0252 | JPT |
| NDUFS5  | GI_4758789-S  | rs11205515 | 1 | 1 | 39127974 | 33162 | 7.6407  | 0.5090 | 0.3359  | 6.0252 | JPT |
| NDUFS5  | GI_4758789-S  | rs4147754  | 1 | 1 | 39137898 | 23238 | 11.6401 | 0.7232 | -0.3121 | 6.0252 | JPT |
| NDUFS5  | GI_4758789-S  | rs4147753  | 1 | 1 | 39139457 | 21679 | 7.8779  | 0.5857 | 0.3207  | 6.0252 | JPT |
| NDUFS5  | GI_4758789-S  | rs4147750  | 1 | 1 | 39143150 | 17986 | 11.9667 | 0.7065 | 0.2894  | 6.0252 | JPT |
| NDUFS5  | GI_4758789-S  | rs7538228  | 1 | 1 | 39146728 | 14408 | 10.2070 | 0.6342 | 0.3014  | 6.0252 | JPT |
| NDUFS5  | GI_4758789-S  | rs2147594  | 1 | 1 | 39148759 | 12377 | 6.5459  | 0.4572 | 0.2641  | 6.0252 | JPT |
| NDUFS5  | GI_4758789-S  | rs1555745  | 1 | 1 | 39152222 | 8914  | 10.4239 | 0.6339 | -0.3013 | 6.0252 | JPT |
| NDUFS5  | GI_4758789-S  | rs1974041  | 1 | 1 | 39152530 | 8606  | 10.2070 | 0.6342 | -0.3014 | 6.0252 | JPT |
| NDUFS5  | GI_4758789-S  | rs7412839  | 1 | 1 | 39158314 | 2822  | 6.0458  | 0.4274 | -0.2968 | 6.0252 | JPT |
| NDUFS5  | GI_4758789-S  | rs3768324  | 1 | 1 | 39161555 | 419   | 11.1320 | 0.6691 | 0.3080  | 6.0252 | JPT |
| NDUFS5  | GI_4758789-S  | rs1555741  | 1 | 1 | 39162214 | 1078  | 10.4239 | 0.6339 | -0.3013 | 6.0252 | JPT |
| NDUFS5  | GI_4758789-S  | rs6663155  | 1 | 1 | 39167584 | 6448  | 10.2070 | 0.6342 | 0.3014  | 6.0252 | JPT |
| NDUFS5  | GI_4758789-S  | rs7554800  | 1 | 1 | 39172936 | 11800 | 9.7577  | 0.6249 | 0.3029  | 6.0252 | JPT |
| NDUFS5  | GI_4758789-S  | rs7554809  | 1 | 1 | 39172971 | 11835 | 10.4239 | 0.6339 | 0.3013  | 6.0252 | JPT |
| NDUFS5  | GI_4758789-S  | rs4660993  | 1 | 1 | 39174711 | 13575 | 10.2070 | 0.6342 | -0.3014 | 6.0252 | JPT |
| NDUFS5  | GI_4758789-S  | rs11205599 | 1 | 1 | 39175234 | 14098 | 11.2434 | 0.6643 | -0.3064 | 6.0252 | JPT |
| NDUFS5  | GI_4758789-S  | rs10888650 | 1 | 1 | 39176254 | 15118 | 10.6259 | 0.6685 | -0.3047 | 6.0252 | JPT |
| NDUFS5  | GI_4758789-S  | rs10888651 | 1 | 1 | 39176284 | 15148 | 10.4239 | 0.6339 | -0.3013 | 6.0252 | JPT |
| NDUFS5  | GI_4758789-S  | rs4661002  | 1 | 1 | 39177384 | 16248 | 9.5342  | 0.6246 | 0.3038  | 6.0252 | JPT |
| NDUFS5  | GI_4758789-S  | rs10749684 | 1 | 1 | 39181483 | 20347 | 10.2920 | 0.6288 | -0.2942 | 6.0252 | JPT |
| NDUFS5  | GI_4758789-S  | rs10465799 | 1 | 1 | 39187099 | 25963 | 8.5672  | 0.5632 | 0.3058  | 6.0252 | JPT |
| NDUFS5  | GI_4758789-S  | rs11205611 | 1 | 1 | 39188511 | 27375 | 8.5672  | 0.5632 | -0.3058 | 6.0252 | JPT |
| NDUFS5  | GI_4758789-S  | rs12032116 | 1 | 1 | 39189402 | 28266 | 11.4224 | 0.6793 | 0.3078  | 6.0252 | JPT |
| NDUFS5  | GI_4758789-S  | rs2377582  | 1 | 1 | 39191379 | 30243 | 8.5672  | 0.5632 | 0.3058  | 6.0252 | JPT |
| NDUFS5  | GI_4758789-S  | rs6692557  | 1 | 1 | 39194294 | 33158 | 7.9870  | 0.5527 | 0.3206  | 6.0252 | JPT |
| NDUFS5  | GI_4758789-S  | rs7535221  | 1 | 1 | 39195683 | 34547 | 9.5897  | 0.6089 | 0.2892  | 6.0252 | JPT |
| NDUFS5  | GI_4758789-S  | rs10888656 | 1 | 1 | 39195758 | 34622 | 9.5940  | 0.6091 | 0.2892  | 6.0252 | JPT |
| NDUFS5  | GI_4758789-S  | rs7550065  | 1 | 1 | 39197004 | 35868 | 10.8801 | 0.6873 | -0.3145 | 6.0252 | JPT |
| NDUFS5  | GI_4758789-S  | rs9786967  | 1 | 1 | 39197164 | 36028 | 9.5657  | 0.6168 | 0.2966  | 6.0252 | JPT |
| NDUFS5  | GI_4758789-S  | rs10788909 | 1 | 1 | 39197177 | 36041 | 9.7972  | 0.6088 | 0.2892  | 6.0252 | JPT |
| NDUFS5  | GI_4758789-S  | rs6600284  | 1 | 1 | 39198351 | 37215 | 7.8433  | 0.5364 | 0.2784  | 6.0252 | JPT |
| NDUFS5  | GI_4758789-S  | rs6600285  | 1 | 1 | 39200004 | 38868 | 8.3925  | 0.5549 | 0.2826  | 6.0252 | JPT |
| NDUFS5  | GI_4758789-S  | rs11205622 | 1 | 1 | 39202494 | 41358 | 9.1572  | 0.5902 | -0.2642 | 6.0252 | JPT |
| ZMYND12 | GI_34222153-S | rs10493108 | 1 | 1 | 42577195 | 11792 | 7.0118  | 0.4755 | 0.1401  | 6.0074 | JPT |
| ZMYND12 | GI_34222153-S | rs4660226  | 1 | 1 | 42577941 | 12538 | 7.4460  | 0.5429 | 0.1652  | 6.0074 | JPT |
| ZMYND12 | GI_34222153-S | rs4660638  | 1 | 1 | 42581908 | 16505 | 6.9204  | 0.4785 | 0.1411  | 6.0074 | JPT |

|           |               |            |   |   |          |        |         |        |         |        |     |
|-----------|---------------|------------|---|---|----------|--------|---------|--------|---------|--------|-----|
| ZMYND12   | GI_34222153-S | rs16829546 | 1 | 1 | 42587168 | 21765  | 6.9812  | 0.4819 | 0.1437  | 6.0074 | JPT |
| ZMYND12   | GI_34222153-S | rs915329   | 1 | 1 | 42605500 | 40097  | 6.4048  | 0.4829 | 0.1456  | 6.0074 | JPT |
| ZMYND12   | GI_34222153-S | rs3748846  | 1 | 1 | 42608114 | 42711  | 6.9091  | 0.4779 | -0.1430 | 6.0074 | JPT |
| ZMYND12   | GI_34222153-S | rs12402795 | 1 | 1 | 42614783 | 49380  | 6.3630  | 0.4545 | 0.1369  | 6.0074 | JPT |
| ZMYND12   | GI_34222153-S | rs3748841  | 1 | 1 | 42631893 | 66490  | 6.9091  | 0.4779 | -0.1430 | 6.0074 | JPT |
| ZMYND12   | GI_34222153-S | rs2105061  | 1 | 1 | 42643428 | 78025  | 6.1747  | 0.4513 | 0.1358  | 6.0074 | JPT |
| ZMYND12   | GI_34222153-S | rs7419239  | 1 | 1 | 42647335 | 81932  | 7.0118  | 0.4755 | -0.1401 | 6.0074 | JPT |
| ZMYND12   | GI_34222153-S | rs7414611  | 1 | 1 | 42649153 | 83750  | 6.9091  | 0.4779 | 0.1430  | 6.0074 | JPT |
| ZMYND12   | GI_34222153-S | rs4607934  | 1 | 1 | 42652506 | 87103  | 7.0843  | 0.4876 | 0.1421  | 6.0074 | JPT |
| ZMYND12   | GI_34222153-S | rs4660229  | 1 | 1 | 42668418 | 103015 | 6.9091  | 0.4779 | 0.1430  | 6.0074 | JPT |
| ZMYND12   | GI_34222153-S | rs12561879 | 1 | 1 | 42676305 | 110902 | 7.0118  | 0.4755 | 0.1401  | 6.0074 | JPT |
| ZMYND12   | GI_34222153-S | rs12410599 | 1 | 1 | 42676403 | 111000 | 6.9812  | 0.4819 | 0.1437  | 6.0074 | JPT |
| ZMYND12   | GI_34222153-S | rs12404048 | 1 | 1 | 42676420 | 111017 | 6.8897  | 0.4768 | 0.1408  | 6.0074 | JPT |
| ZMYND12   | GI_34222153-S | rs7411957  | 1 | 1 | 42677111 | 111708 | 6.9091  | 0.4779 | 0.1430  | 6.0074 | JPT |
| ZMYND12   | GI_34222153-S | rs16829623 | 1 | 1 | 42678412 | 113009 | 7.0118  | 0.4755 | 0.1401  | 6.0074 | JPT |
| ZMYND12   | GI_34222153-S | rs12562251 | 1 | 1 | 42679912 | 114509 | 6.6796  | 0.5088 | 0.1461  | 6.0074 | JPT |
| ZMYND12   | GI_34222153-S | rs16829655 | 1 | 1 | 42683742 | 118339 | 7.0118  | 0.4755 | 0.1401  | 6.0074 | JPT |
| ZMYND12   | GI_34222153-S | rs4660646  | 1 | 1 | 42698881 | 133478 | 6.3630  | 0.4545 | -0.1369 | 6.0074 | JPT |
| ZMYND12   | GI_34222153-S | rs2809647  | 1 | 1 | 42709160 | 143757 | 6.8555  | 0.4832 | 0.1444  | 6.0074 | JPT |
| ZMYND12   | GI_34222153-S | rs2762697  | 1 | 1 | 42711218 | 145815 | 6.9091  | 0.4779 | 0.1430  | 6.0074 | JPT |
| ZMYND12   | GI_34222153-S | rs2809651  | 1 | 1 | 42713082 | 147679 | 6.8897  | 0.4768 | 0.1408  | 6.0074 | JPT |
| ZMYND12   | GI_34222153-S | rs1016544  | 1 | 1 | 42714850 | 149447 | 6.9091  | 0.4779 | -0.1430 | 6.0074 | JPT |
| ZMYND12   | GI_34222153-S | rs4457619  | 1 | 1 | 42719342 | 153939 | 6.1901  | 0.4523 | -0.1353 | 6.0074 | JPT |
| ZMYND12   | GI_34222153-S | rs2809658  | 1 | 1 | 42719489 | 154086 | 6.9091  | 0.4779 | -0.1430 | 6.0074 | JPT |
| ZMYND12   | GI_34222153-S | rs1324336  | 1 | 1 | 42721279 | 155876 | 7.0118  | 0.4755 | -0.1401 | 6.0074 | JPT |
| ZMYND12   | GI_34222153-S | rs1324337  | 1 | 1 | 42721342 | 155939 | 7.0118  | 0.4755 | -0.1401 | 6.0074 | JPT |
| ZMYND12   | GI_34222153-S | rs12408987 | 1 | 1 | 42721564 | 156161 | 7.0118  | 0.4755 | 0.1401  | 6.0074 | JPT |
| ZMYND12   | GI_34222153-S | rs2762693  | 1 | 1 | 42721949 | 156546 | 6.1518  | 0.4338 | -0.1466 | 6.0074 | JPT |
| ZMYND12   | GI_34222153-S | rs2762695  | 1 | 1 | 42723004 | 157601 | 7.0118  | 0.4755 | -0.1401 | 6.0074 | JPT |
| ZMYND12   | GI_34222153-S | rs11210676 | 1 | 1 | 42723286 | 157883 | 6.9091  | 0.4779 | -0.1430 | 6.0074 | JPT |
| ZMYND12   | GI_34222153-S | rs6661470  | 1 | 1 | 42724987 | 159584 | 7.0118  | 0.4755 | -0.1401 | 6.0074 | JPT |
| ZMYND12   | GI_34222153-S | rs12410069 | 1 | 1 | 42727011 | 161608 | 7.0118  | 0.4755 | 0.1401  | 6.0074 | JPT |
| ZMYND12   | GI_34222153-S | rs12410375 | 1 | 1 | 42733458 | 168055 | 6.7901  | 0.4795 | 0.1355  | 6.0074 | JPT |
| ZMYND12   | GI_34222153-S | rs11210678 | 1 | 1 | 42734772 | 169369 | 6.3058  | 0.4768 | 0.1404  | 6.0074 | JPT |
| ZMYND12   | GI_34222153-S | rs6699801  | 1 | 1 | 42737411 | 172008 | 7.0118  | 0.4755 | -0.1401 | 6.0074 | JPT |
| ZMYND12   | GI_34222153-S | rs12125647 | 1 | 1 | 42737541 | 172138 | 6.8034  | 0.4720 | 0.1390  | 6.0074 | JPT |
| ZMYND12   | GI_34222153-S | rs1535871  | 1 | 1 | 42739055 | 173652 | 7.0118  | 0.4755 | 0.1401  | 6.0074 | JPT |
| ZMYND12   | GI_34222153-S | rs6694108  | 1 | 1 | 42739359 | 173956 | 6.9091  | 0.4779 | -0.1430 | 6.0074 | JPT |
| ZMYND12   | GI_34222153-S | rs12564805 | 1 | 1 | 42744802 | 179399 | 7.0118  | 0.4755 | -0.1401 | 6.0074 | JPT |
| Hs.396207 | Hs.396207-S   | rs10789463 | 1 | 1 | 45596941 | 176053 | 5.9060  | 0.4113 | -0.1458 | 5.7936 | JPT |
| Hs.396207 | Hs.396207-S   | rs7903     | 1 | 1 | 45645565 | 127429 | 8.7341  | 0.5710 | 0.1741  | 5.7936 | JPT |
| Hs.396207 | Hs.396207-S   | rs11211129 | 1 | 1 | 45652173 | 120821 | 7.1515  | 0.5462 | -0.1692 | 5.7936 | JPT |
| Hs.396207 | Hs.396207-S   | rs713358   | 1 | 1 | 45657360 | 115634 | 11.1284 | 0.6689 | 0.2038  | 5.7936 | JPT |
| Hs.396207 | Hs.396207-S   | rs868351   | 1 | 1 | 45678911 | 94083  | 8.6685  | 0.5679 | -0.2121 | 5.7936 | JPT |
| Hs.396207 | Hs.396207-S   | rs512026   | 1 | 1 | 45679039 | 93955  | 8.0458  | 0.5379 | -0.1707 | 5.7936 | JPT |
| Hs.396207 | Hs.396207-S   | rs622798   | 1 | 1 | 45684364 | 88630  | 9.4078  | 0.6011 | 0.1854  | 5.7936 | JPT |
| IPP       | GI_5174472-S  | rs666720   | 1 | 1 | 45689888 | 143947 | 5.7305  | 0.4005 | 0.2355  | 5.673  | JPT |
| Hs.396207 | Hs.396207-S   | rs666720   | 1 | 1 | 45689888 | 83106  | 18.8390 | 0.8504 | -0.2179 | 5.7936 | JPT |
| Hs.396207 | Hs.396207-S   | rs12049503 | 1 | 1 | 45690649 | 82345  | 13.9078 | 0.7470 | -0.2182 | 5.7936 | JPT |
| Hs.396207 | Hs.396207-S   | rs2993263  | 1 | 1 | 45690723 | 82271  | 9.4078  | 0.6011 | -0.1854 | 5.7936 | JPT |
| IPP       | GI_5174472-S  | rs3790585  | 1 | 1 | 45692449 | 141386 | 6.7284  | 0.4597 | -0.2523 | 5.673  | JPT |
| Hs.396207 | Hs.396207-S   | rs3790585  | 1 | 1 | 45692449 | 80545  | 23.0392 | 0.9045 | 0.2254  | 5.7936 | JPT |
| Hs.396207 | Hs.396207-S   | rs3014219  | 1 | 1 | 45693547 | 79447  | 9.1353  | 0.5805 | -0.1746 | 5.7936 | JPT |
| Hs.396207 | Hs.396207-S   | rs3014218  | 1 | 1 | 45695421 | 77573  | 6.6371  | 0.4625 | 0.1545  | 5.7936 | JPT |
| Hs.396207 | Hs.396207-S   | rs3014216  | 1 | 1 | 45704853 | 68141  | 6.2426  | 0.4820 | 0.1619  | 5.7936 | JPT |
| Hs.396207 | Hs.396207-S   | rs780957   | 1 | 1 | 45706450 | 66544  | 6.4953  | 0.4623 | 0.1542  | 5.7936 | JPT |
| Hs.396207 | Hs.396207-S   | rs780954   | 1 | 1 | 45708170 | 64824  | 15.4286 | 0.7926 | -0.2119 | 5.7936 | JPT |
| Hs.396207 | Hs.396207-S   | rs1084086  | 1 | 1 | 45710193 | 62801  | 15.7404 | 0.7919 | -0.2135 | 5.7936 | JPT |
| Hs.396207 | Hs.396207-S   | rs2152078  | 1 | 1 | 45724693 | 48301  | 15.4286 | 0.7926 | -0.2119 | 5.7936 | JPT |

|           |              |            |   |   |          |       |         |        |         |        |     |
|-----------|--------------|------------|---|---|----------|-------|---------|--------|---------|--------|-----|
| Hs.396207 | Hs.396207-S  | rs2991979  | 1 | 1 | 45724951 | 48043 | 15.4286 | 0.7926 | -0.2119 | 5.7936 | JPT |
| Hs.396207 | Hs.396207-S  | rs7548549  | 1 | 1 | 45735701 | 37293 | 6.6371  | 0.4625 | -0.1545 | 5.7936 | JPT |
| Hs.396207 | Hs.396207-S  | rs2230657  | 1 | 1 | 45742582 | 30412 | 8.3443  | 0.5526 | 0.1714  | 5.7936 | JPT |
| Hs.396207 | Hs.396207-S  | rs2050376  | 1 | 1 | 45747723 | 25271 | 8.7664  | 0.5725 | -0.1731 | 5.7936 | JPT |
| Hs.396207 | Hs.396207-S  | rs2230658  | 1 | 1 | 45747947 | 25047 | 9.1353  | 0.5805 | -0.1746 | 5.7936 | JPT |
| Hs.396207 | Hs.396207-S  | rs2230659  | 1 | 1 | 45747977 | 25017 | 8.5154  | 0.5696 | -0.1726 | 5.7936 | JPT |
| IPP       | GI_5174472-S | rs1972410  | 1 | 1 | 45750040 | 83795 | 6.7284  | 0.4597 | 0.2523  | 5.673  | JPT |
| Hs.396207 | Hs.396207-S  | rs1972410  | 1 | 1 | 45750040 | 22954 | 23.0392 | 0.9045 | -0.2254 | 5.7936 | JPT |
| Hs.396207 | Hs.396207-S  | rs2991986  | 1 | 1 | 45750375 | 22619 | 9.1353  | 0.5805 | 0.1746  | 5.7936 | JPT |
| Hs.396207 | Hs.396207-S  | rs2991987  | 1 | 1 | 45750515 | 22479 | 8.9245  | 0.5797 | -0.1725 | 5.7936 | JPT |
| IPP       | GI_5174472-S | rs2253862  | 1 | 1 | 45751053 | 82782 | 7.7224  | 0.5216 | 0.2553  | 5.673  | JPT |
| Hs.396207 | Hs.396207-S  | rs2253862  | 1 | 1 | 45751053 | 21941 | 17.9411 | 0.8424 | -0.2049 | 5.7936 | JPT |
| IPP       | GI_5174472-S | rs2991988  | 1 | 1 | 45751524 | 82311 | 7.7257  | 0.5134 | -0.2522 | 5.673  | JPT |
| Hs.396207 | Hs.396207-S  | rs2991988  | 1 | 1 | 45751524 | 21470 | 18.3218 | 0.8419 | 0.2063  | 5.7936 | JPT |
| IPP       | GI_5174472-S | rs2991989  | 1 | 1 | 45752058 | 81777 | 7.2191  | 0.5034 | 0.2471  | 5.673  | JPT |
| Hs.396207 | Hs.396207-S  | rs2991989  | 1 | 1 | 45752058 | 20936 | 17.3778 | 0.8396 | -0.2066 | 5.7936 | JPT |
| Hs.396207 | Hs.396207-S  | rs1547924  | 1 | 1 | 45754205 | 18789 | 9.1353  | 0.5805 | -0.1746 | 5.7936 | JPT |
| IPP       | GI_5174472-S | rs1547925  | 1 | 1 | 45754449 | 79386 | 7.7257  | 0.5134 | 0.2522  | 5.673  | JPT |
| Hs.396207 | Hs.396207-S  | rs1547925  | 1 | 1 | 45754449 | 18545 | 18.3218 | 0.8419 | -0.2063 | 5.7936 | JPT |
| IPP       | GI_5174472-S | rs2275086  | 1 | 1 | 45754972 | 78863 | 7.7257  | 0.5134 | 0.2522  | 5.673  | JPT |
| Hs.396207 | Hs.396207-S  | rs2275086  | 1 | 1 | 45754972 | 18022 | 18.3218 | 0.8419 | -0.2063 | 5.7936 | JPT |
| IPP       | GI_5174472-S | rs3014245  | 1 | 1 | 45756006 | 77829 | 7.7257  | 0.5134 | -0.2522 | 5.673  | JPT |
| Hs.396207 | Hs.396207-S  | rs3014245  | 1 | 1 | 45756006 | 16988 | 18.3218 | 0.8419 | 0.2063  | 5.7936 | JPT |
| Hs.396207 | Hs.396207-S  | rs3014242  | 1 | 1 | 45756670 | 16324 | 8.1537  | 0.5433 | -0.1715 | 5.7936 | JPT |
| Hs.396207 | Hs.396207-S  | rs3014238  | 1 | 1 | 45759307 | 13687 | 9.1353  | 0.5805 | 0.1746  | 5.7936 | JPT |
| IPP       | GI_5174472-S | rs3014237  | 1 | 1 | 45759345 | 74490 | 6.7284  | 0.4597 | -0.2523 | 5.673  | JPT |
| Hs.396207 | Hs.396207-S  | rs3014237  | 1 | 1 | 45759345 | 13649 | 23.0392 | 0.9045 | 0.2254  | 5.7936 | JPT |
| IPP       | GI_5174472-S | rs3014235  | 1 | 1 | 45760605 | 73230 | 7.7257  | 0.5134 | -0.2522 | 5.673  | JPT |
| Hs.396207 | Hs.396207-S  | rs3014235  | 1 | 1 | 45760605 | 12389 | 18.3218 | 0.8419 | 0.2063  | 5.7936 | JPT |
| IPP       | GI_5174472-S | rs9429172  | 1 | 1 | 45761569 | 72266 | 6.5476  | 0.4738 | 0.2600  | 5.673  | JPT |
| Hs.396207 | Hs.396207-S  | rs9429172  | 1 | 1 | 45761569 | 11425 | 21.1932 | 0.9011 | -0.2230 | 5.7936 | JPT |
| Hs.396207 | Hs.396207-S  | rs1250     | 1 | 1 | 45763120 | 9874  | 8.7664  | 0.5725 | 0.1731  | 5.7936 | JPT |
| Hs.396207 | Hs.396207-S  | rs4391704  | 1 | 1 | 45763329 | 9665  | 6.2567  | 0.4649 | 0.1521  | 5.7936 | JPT |
| IPP       | GI_5174472-S | rs12037459 | 1 | 1 | 45764052 | 69783 | 7.1766  | 0.5476 | 0.2681  | 5.673  | JPT |
| Hs.396207 | Hs.396207-S  | rs12037459 | 1 | 1 | 45764052 | 8942  | 15.9488 | 0.8511 | -0.2065 | 5.7936 | JPT |
| IPP       | GI_5174472-S | rs12037561 | 1 | 1 | 45764365 | 69470 | 7.7257  | 0.5134 | 0.2522  | 5.673  | JPT |
| Hs.396207 | Hs.396207-S  | rs12037561 | 1 | 1 | 45764365 | 8629  | 18.3218 | 0.8419 | -0.2063 | 5.7936 | JPT |
| IPP       | GI_5174472-S | rs6703748  | 1 | 1 | 45765069 | 68766 | 6.7284  | 0.4597 | 0.2523  | 5.673  | JPT |
| Hs.396207 | Hs.396207-S  | rs6703748  | 1 | 1 | 45765069 | 7925  | 23.0392 | 0.9045 | -0.2254 | 5.7936 | JPT |
| Hs.396207 | Hs.396207-S  | rs10890333 | 1 | 1 | 45769415 | 3579  | 8.6679  | 0.5859 | -0.1759 | 5.7936 | JPT |
| IPP       | GI_5174472-S | rs10890334 | 1 | 1 | 45769471 | 64364 | 7.7257  | 0.5134 | -0.2522 | 5.673  | JPT |
| Hs.396207 | Hs.396207-S  | rs10890334 | 1 | 1 | 45769471 | 3523  | 18.3218 | 0.8419 | 0.2063  | 5.7936 | JPT |
| Hs.396207 | Hs.396207-S  | rs4431884  | 1 | 1 | 45770416 | 2578  | 8.7664  | 0.5725 | 0.1731  | 5.7936 | JPT |
| IPP       | GI_5174472-S | rs6694889  | 1 | 1 | 45770899 | 62936 | 7.5633  | 0.5133 | -0.2538 | 5.673  | JPT |
| Hs.396207 | Hs.396207-S  | rs6694889  | 1 | 1 | 45770899 | 2095  | 17.8137 | 0.8401 | 0.2050  | 5.7936 | JPT |
| IPP       | GI_5174472-S | rs12023439 | 1 | 1 | 45773729 | 60106 | 6.7284  | 0.4597 | -0.2523 | 5.673  | JPT |
| Hs.396207 | Hs.396207-S  | rs12023439 | 1 | 1 | 45773729 | 735   | 23.0392 | 0.9045 | 0.2254  | 5.7936 | JPT |
| Hs.396207 | Hs.396207-S  | rs12043945 | 1 | 1 | 45776015 | 3021  | 9.1353  | 0.5805 | -0.1746 | 5.7936 | JPT |
| Hs.396207 | Hs.396207-S  | rs12091503 | 1 | 1 | 45776961 | 3967  | 9.1353  | 0.5805 | -0.1746 | 5.7936 | JPT |
| IPP       | GI_5174472-S | rs11211145 | 1 | 1 | 45777584 | 56251 | 6.7284  | 0.4597 | -0.2523 | 5.673  | JPT |
| Hs.396207 | Hs.396207-S  | rs11211145 | 1 | 1 | 45777584 | 4590  | 23.0392 | 0.9045 | 0.2254  | 5.7936 | JPT |
| Hs.396207 | Hs.396207-S  | rs5021934  | 1 | 1 | 45778397 | 5403  | 9.1353  | 0.5805 | -0.1746 | 5.7936 | JPT |
| IPP       | GI_5174472-S | rs11211147 | 1 | 1 | 45779187 | 54648 | 6.0225  | 0.4680 | -0.2461 | 5.673  | JPT |
| Hs.396207 | Hs.396207-S  | rs11211147 | 1 | 1 | 45779187 | 6193  | 19.7158 | 0.9017 | 0.2249  | 5.7936 | JPT |
| Hs.396207 | Hs.396207-S  | rs4660312  | 1 | 1 | 45779665 | 6671  | 8.7664  | 0.5725 | 0.1731  | 5.7936 | JPT |
| IPP       | GI_5174472-S | rs4660313  | 1 | 1 | 45779934 | 53901 | 6.6100  | 0.4609 | 0.2400  | 5.673  | JPT |
| Hs.396207 | Hs.396207-S  | rs4660313  | 1 | 1 | 45779934 | 6940  | 22.7162 | 0.9065 | -0.2270 | 5.7936 | JPT |
| IPP       | GI_5174472-S | rs4660880  | 1 | 1 | 45780133 | 53702 | 6.7284  | 0.4597 | -0.2523 | 5.673  | JPT |
| Hs.396207 | Hs.396207-S  | rs4660880  | 1 | 1 | 45780133 | 7139  | 23.0392 | 0.9045 | 0.2254  | 5.7936 | JPT |

|           |              |            |   |   |          |        |         |        |         |        |     |
|-----------|--------------|------------|---|---|----------|--------|---------|--------|---------|--------|-----|
| Hs.396207 | Hs.396207-S  | rs10890336 | 1 | 1 | 45780149 | 7155   | 7.5082  | 0.5560 | 0.1798  | 5.7936 | JPT |
| IPP       | GI_5174472-S | rs11211149 | 1 | 1 | 45781311 | 52524  | 6.1581  | 0.4588 | 0.2555  | 5.673  | JPT |
| Hs.396207 | Hs.396207-S  | rs11211149 | 1 | 1 | 45781311 | 8317   | 22.0577 | 0.9159 | -0.2192 | 5.7936 | JPT |
| Hs.396207 | Hs.396207-S  | rs4468203  | 1 | 1 | 45782365 | 9371   | 8.9254  | 0.6072 | -0.1703 | 5.7936 | JPT |
| IPP       | GI_5174472-S | rs11211152 | 1 | 1 | 45783250 | 50585  | 6.7204  | 0.4672 | -0.2555 | 5.673  | JPT |
| Hs.396207 | Hs.396207-S  | rs11211152 | 1 | 1 | 45783250 | 10256  | 22.6726 | 0.9060 | 0.2239  | 5.7936 | JPT |
| Hs.396207 | Hs.396207-S  | rs4660882  | 1 | 1 | 45785385 | 12391  | 8.7664  | 0.5725 | 0.1731  | 5.7936 | JPT |
| IPP       | GI_5174472-S | rs4607935  | 1 | 1 | 45786254 | 47581  | 7.8515  | 0.5458 | -0.2610 | 5.673  | JPT |
| Hs.396207 | Hs.396207-S  | rs4607935  | 1 | 1 | 45786254 | 13260  | 16.9732 | 0.8395 | 0.2072  | 5.7936 | JPT |
| Hs.396207 | Hs.396207-S  | rs4609469  | 1 | 1 | 45786278 | 13284  | 9.1353  | 0.5805 | 0.1746  | 5.7936 | JPT |
| Hs.396207 | Hs.396207-S  | rs12049027 | 1 | 1 | 45787277 | 14283  | 7.9515  | 0.6000 | 0.1720  | 5.7936 | JPT |
| Hs.396207 | Hs.396207-S  | rs10789467 | 1 | 1 | 45787838 | 14844  | 9.1353  | 0.5805 | 0.1746  | 5.7936 | JPT |
| Hs.396207 | Hs.396207-S  | rs6656279  | 1 | 1 | 45793181 | 20187  | 8.7664  | 0.5725 | 0.1731  | 5.7936 | JPT |
| IPP       | GI_5174472-S | rs3811436  | 1 | 1 | 45794973 | 38862  | 7.7224  | 0.5216 | 0.2553  | 5.673  | JPT |
| Hs.396207 | Hs.396207-S  | rs3811436  | 1 | 1 | 45794973 | 21979  | 17.9411 | 0.8424 | -0.2049 | 5.7936 | JPT |
| IPP       | GI_5174472-S | rs12024590 | 1 | 1 | 45796589 | 37246  | 6.6120  | 0.4776 | -0.2604 | 5.673  | JPT |
| Hs.396207 | Hs.396207-S  | rs12024590 | 1 | 1 | 45796589 | 23595  | 21.3606 | 0.9030 | 0.2263  | 5.7936 | JPT |
| Hs.396207 | Hs.396207-S  | rs3013597  | 1 | 1 | 45797449 | 24455  | 9.1522  | 0.5988 | -0.1771 | 5.7936 | JPT |
| Hs.396207 | Hs.396207-S  | rs11211157 | 1 | 1 | 45801937 | 28943  | 8.7664  | 0.5725 | -0.1731 | 5.7936 | JPT |
| IPP       | GI_5174472-S | rs10430105 | 1 | 1 | 45807969 | 25866  | 7.7224  | 0.5216 | 0.2553  | 5.673  | JPT |
| Hs.396207 | Hs.396207-S  | rs10430105 | 1 | 1 | 45807969 | 34975  | 17.9411 | 0.8424 | -0.2049 | 5.7936 | JPT |
| IPP       | GI_5174472-S | rs11211160 | 1 | 1 | 45815322 | 18513  | 6.7204  | 0.4672 | 0.2555  | 5.673  | JPT |
| Hs.396207 | Hs.396207-S  | rs11211160 | 1 | 1 | 45815322 | 42328  | 22.6726 | 0.9060 | -0.2239 | 5.7936 | JPT |
| IPP       | GI_5174472-S | rs10890341 | 1 | 1 | 45816333 | 17502  | 7.4451  | 0.5071 | 0.2466  | 5.673  | JPT |
| Hs.396207 | Hs.396207-S  | rs10890341 | 1 | 1 | 45816333 | 43339  | 17.8635 | 0.8410 | -0.2069 | 5.7936 | JPT |
| Hs.396207 | Hs.396207-S  | rs3013595  | 1 | 1 | 45822296 | 49302  | 8.7664  | 0.5725 | -0.1731 | 5.7936 | JPT |
| Hs.396207 | Hs.396207-S  | rs11211166 | 1 | 1 | 45827035 | 54041  | 8.9500  | 0.6083 | -0.1829 | 5.7936 | JPT |
| Hs.396207 | Hs.396207-S  | rs10789470 | 1 | 1 | 45827424 | 54430  | 8.7664  | 0.5725 | -0.1731 | 5.7936 | JPT |
| Hs.396207 | Hs.396207-S  | rs10749856 | 1 | 1 | 45833939 | 60945  | 8.7664  | 0.5725 | 0.1731  | 5.7936 | JPT |
| Hs.396207 | Hs.396207-S  | rs4564187  | 1 | 1 | 45835954 | 62960  | 8.7664  | 0.5725 | -0.1731 | 5.7936 | JPT |
| Hs.396207 | Hs.396207-S  | rs4274104  | 1 | 1 | 45929961 | 156967 | 8.7664  | 0.5725 | -0.1731 | 5.7936 | JPT |
| IPP       | GI_5174472-S | rs11211173 | 1 | 1 | 45931396 | 97561  | 6.7204  | 0.4672 | -0.2555 | 5.673  | JPT |
| Hs.396207 | Hs.396207-S  | rs11211173 | 1 | 1 | 45931396 | 158402 | 22.6726 | 0.9060 | 0.2239  | 5.7936 | JPT |
| Hs.396207 | Hs.396207-S  | rs12560266 | 1 | 1 | 45933637 | 160643 | 8.7570  | 0.5721 | -0.1723 | 5.7936 | JPT |
| Hs.396207 | Hs.396207-S  | rs11211176 | 1 | 1 | 45935106 | 162112 | 10.0826 | 0.6205 | 0.1731  | 5.7936 | JPT |
| IPP       | GI_5174472-S | rs11211177 | 1 | 1 | 45938369 | 104534 | 7.8735  | 0.5209 | -0.3689 | 5.673  | JPT |
| Hs.396207 | Hs.396207-S  | rs11211177 | 1 | 1 | 45938369 | 165375 | 19.1736 | 0.8557 | 0.3022  | 5.7936 | JPT |
| Hs.396207 | Hs.396207-S  | rs11211178 | 1 | 1 | 45939586 | 166592 | 9.6910  | 0.6131 | 0.1717  | 5.7936 | JPT |
| Hs.396207 | Hs.396207-S  | rs4660314  | 1 | 1 | 45941905 | 168911 | 9.6910  | 0.6131 | -0.1717 | 5.7936 | JPT |
| Hs.396207 | Hs.396207-S  | rs4660883  | 1 | 1 | 45948118 | 175124 | 10.0535 | 0.6280 | -0.1675 | 5.7936 | JPT |
| Hs.396207 | Hs.396207-S  | rs6683274  | 1 | 1 | 45953658 | 180664 | 6.7387  | 0.4683 | -0.1522 | 5.7936 | JPT |
| Hs.396207 | Hs.396207-S  | rs4626927  | 1 | 1 | 45960665 | 187671 | 7.1886  | 0.4933 | -0.1548 | 5.7936 | JPT |
| Hs.396207 | Hs.396207-S  | rs10789474 | 1 | 1 | 45962060 | 189066 | 6.2545  | 0.5021 | 0.1637  | 5.7936 | JPT |
| Hs.396207 | Hs.396207-S  | rs7540578  | 1 | 1 | 45964164 | 191170 | 7.1886  | 0.4933 | 0.1548  | 5.7936 | JPT |
| Hs.396207 | Hs.396207-S  | rs6690386  | 1 | 1 | 45965031 | 192037 | 13.7036 | 0.7667 | 0.1962  | 5.7936 | JPT |
| Hs.396207 | Hs.396207-S  | rs6661163  | 1 | 1 | 45967024 | 194030 | 7.1886  | 0.4933 | -0.1548 | 5.7936 | JPT |
| Hs.396207 | Hs.396207-S  | rs6429578  | 1 | 1 | 45969130 | 196136 | 14.5133 | 0.7709 | -0.1986 | 5.7936 | JPT |
| Hs.396207 | Hs.396207-S  | rs12076580 | 1 | 1 | 45970179 | 197185 | 14.4092 | 0.7683 | -0.1963 | 5.7936 | JPT |
| Hs.396207 | Hs.396207-S  | rs7539800  | 1 | 1 | 45974149 | 201155 | 13.1692 | 0.7348 | 0.2023  | 5.7936 | JPT |
| Hs.396207 | Hs.396207-S  | rs10890350 | 1 | 1 | 45974398 | 201404 | 13.0476 | 0.7312 | -0.2024 | 5.7936 | JPT |
| Hs.396207 | Hs.396207-S  | rs4390216  | 1 | 1 | 45978476 | 205482 | 13.1692 | 0.7348 | 0.2023  | 5.7936 | JPT |
| Hs.396207 | Hs.396207-S  | rs6672115  | 1 | 1 | 45984899 | 211905 | 13.1692 | 0.7348 | -0.2023 | 5.7936 | JPT |
| Hs.396207 | Hs.396207-S  | rs4660316  | 1 | 1 | 45985203 | 212209 | 7.4740  | 0.5004 | 0.2876  | 5.7936 | JPT |
| Hs.396207 | Hs.396207-S  | rs6429580  | 1 | 1 | 45987668 | 214674 | 13.1692 | 0.7348 | 0.2023  | 5.7936 | JPT |
| Hs.396207 | Hs.396207-S  | rs6700597  | 1 | 1 | 45996266 | 223272 | 6.1994  | 0.4446 | 0.1505  | 5.7936 | JPT |
| IPP       | GI_5174472-S | rs7546237  | 1 | 1 | 45997630 | 163795 | 5.6915  | 0.4208 | -0.2270 | 5.673  | JPT |
| Hs.396207 | Hs.396207-S  | rs7546237  | 1 | 1 | 45997630 | 224636 | 11.7929 | 0.7098 | 0.1892  | 5.7936 | JPT |
| Hs.396207 | Hs.396207-S  | rs11211199 | 1 | 1 | 45998889 | 226895 | 7.3076  | 0.5260 | 0.1675  | 5.7936 | JPT |
| Hs.396207 | Hs.396207-S  | rs11211200 | 1 | 1 | 46000372 | 227378 | 13.1692 | 0.7348 | -0.2023 | 5.7936 | JPT |

|           |             |            |   |   |          |        |         |        |         |        |     |
|-----------|-------------|------------|---|---|----------|--------|---------|--------|---------|--------|-----|
| Hs.396207 | Hs.396207-S | rs4376778  | 1 | 1 | 46000866 | 227872 | 6.1593  | 0.4504 | -0.1552 | 5.7936 | JPT |
| Hs.396207 | Hs.396207-S | rs6694340  | 1 | 1 | 46001436 | 228442 | 13.1692 | 0.7348 | -0.2023 | 5.7936 | JPT |
| Hs.396207 | Hs.396207-S | rs4660889  | 1 | 1 | 46009351 | 236357 | 13.1692 | 0.7348 | 0.2023  | 5.7936 | JPT |
| Hs.396207 | Hs.396207-S | rs6680380  | 1 | 1 | 46012209 | 239215 | 6.2798  | 0.4415 | 0.1529  | 5.7936 | JPT |
| Hs.396207 | Hs.396207-S | rs10890354 | 1 | 1 | 46017367 | 244373 | 6.5814  | 0.4514 | 0.1548  | 5.7936 | JPT |
| Hs.396207 | Hs.396207-S | rs4298677  | 1 | 1 | 46018639 | 245645 | 13.5130 | 0.7362 | -0.2039 | 5.7936 | JPT |
| Hs.396207 | Hs.396207-S | rs6701614  | 1 | 1 | 46021440 | 248446 | 6.0497  | 0.4355 | 0.1527  | 5.7936 | JPT |
| Hs.396207 | Hs.396207-S | rs10890355 | 1 | 1 | 46029368 | 256374 | 13.1272 | 0.7336 | -0.2034 | 5.7936 | JPT |
| Hs.396207 | Hs.396207-S | rs11211204 | 1 | 1 | 46029884 | 256890 | 13.5130 | 0.7362 | 0.2039  | 5.7936 | JPT |
| Hs.396207 | Hs.396207-S | rs7547189  | 1 | 1 | 46031534 | 258540 | 12.7901 | 0.7322 | -0.2020 | 5.7936 | JPT |
| Hs.396207 | Hs.396207-S | rs7547284  | 1 | 1 | 46031585 | 258591 | 13.5130 | 0.7362 | 0.2039  | 5.7936 | JPT |
| Hs.396207 | Hs.396207-S | rs6429582  | 1 | 1 | 46033863 | 260869 | 6.5814  | 0.4514 | 0.1548  | 5.7936 | JPT |
| Hs.396207 | Hs.396207-S | rs6675222  | 1 | 1 | 46038596 | 265602 | 13.5130 | 0.7362 | 0.2039  | 5.7936 | JPT |
| Hs.396207 | Hs.396207-S | rs4660895  | 1 | 1 | 46041759 | 268765 | 13.0476 | 0.7312 | 0.2024  | 5.7936 | JPT |
| Hs.396207 | Hs.396207-S | rs6688365  | 1 | 1 | 46041904 | 268910 | 6.5814  | 0.4514 | 0.1548  | 5.7936 | JPT |
| Hs.396207 | Hs.396207-S | rs7531911  | 1 | 1 | 46042443 | 269449 | 13.1692 | 0.7348 | 0.2023  | 5.7936 | JPT |
| Hs.396207 | Hs.396207-S | rs6656992  | 1 | 1 | 46045088 | 272094 | 6.1593  | 0.4504 | -0.1552 | 5.7936 | JPT |
| Hs.396207 | Hs.396207-S | rs11211208 | 1 | 1 | 46046276 | 273282 | 6.3862  | 0.4478 | -0.1528 | 5.7936 | JPT |
| Hs.396207 | Hs.396207-S | rs4660318  | 1 | 1 | 46046896 | 273902 | 13.1692 | 0.7348 | 0.2023  | 5.7936 | JPT |
| Hs.396207 | Hs.396207-S | rs4660319  | 1 | 1 | 46053643 | 280649 | 6.2798  | 0.4415 | -0.1529 | 5.7936 | JPT |
| Hs.396207 | Hs.396207-S | rs11211212 | 1 | 1 | 46053659 | 280665 | 7.4740  | 0.5004 | 0.2876  | 5.7936 | JPT |
| Hs.396207 | Hs.396207-S | rs6682683  | 1 | 1 | 46054357 | 281363 | 13.5130 | 0.7362 | 0.2039  | 5.7936 | JPT |
| Hs.396207 | Hs.396207-S | rs11211213 | 1 | 1 | 46054537 | 281543 | 6.5781  | 0.4672 | 0.1576  | 5.7936 | JPT |
| Hs.396207 | Hs.396207-S | rs10890361 | 1 | 1 | 46058254 | 285260 | 6.5814  | 0.4514 | 0.1548  | 5.7936 | JPT |
| Hs.396207 | Hs.396207-S | rs11211217 | 1 | 1 | 46060249 | 287255 | 13.1692 | 0.7348 | 0.2023  | 5.7936 | JPT |
| Hs.396207 | Hs.396207-S | rs10789478 | 1 | 1 | 46062526 | 289532 | 13.6215 | 0.7475 | 0.2169  | 5.7936 | JPT |
| Hs.396207 | Hs.396207-S | rs12144263 | 1 | 1 | 46064466 | 291472 | 6.0497  | 0.4355 | 0.1527  | 5.7936 | JPT |
| Hs.396207 | Hs.396207-S | rs10890363 | 1 | 1 | 46068168 | 295174 | 6.5814  | 0.4514 | -0.1548 | 5.7936 | JPT |
| Hs.396207 | Hs.396207-S | rs4539075  | 1 | 1 | 46070030 | 297036 | 13.1692 | 0.7348 | 0.2023  | 5.7936 | JPT |
| Hs.396207 | Hs.396207-S | rs12409773 | 1 | 1 | 46070851 | 297857 | 6.5814  | 0.4514 | -0.1548 | 5.7936 | JPT |
| Hs.396207 | Hs.396207-S | rs10890365 | 1 | 1 | 46071368 | 298374 | 13.5130 | 0.7362 | 0.2039  | 5.7936 | JPT |
| Hs.396207 | Hs.396207-S | rs4545281  | 1 | 1 | 46072074 | 299080 | 6.2798  | 0.4415 | -0.1529 | 5.7936 | JPT |
| Hs.396207 | Hs.396207-S | rs7512395  | 1 | 1 | 46073197 | 300203 | 13.5130 | 0.7362 | -0.2039 | 5.7936 | JPT |
| Hs.396207 | Hs.396207-S | rs7556436  | 1 | 1 | 46075900 | 302906 | 6.5814  | 0.4514 | -0.1548 | 5.7936 | JPT |
| Hs.396207 | Hs.396207-S | rs4660321  | 1 | 1 | 46078780 | 305786 | 6.2798  | 0.4415 | -0.1529 | 5.7936 | JPT |
| Hs.396207 | Hs.396207-S | rs7365705  | 1 | 1 | 46079793 | 306799 | 6.7018  | 0.4662 | 0.1573  | 5.7936 | JPT |
| Hs.396207 | Hs.396207-S | rs7527244  | 1 | 1 | 46080792 | 307798 | 13.1692 | 0.7348 | 0.2023  | 5.7936 | JPT |
| Hs.396207 | Hs.396207-S | rs9787412  | 1 | 1 | 46083616 | 310622 | 9.5267  | 0.5975 | 0.1852  | 5.7936 | JPT |
| Hs.396207 | Hs.396207-S | rs4660896  | 1 | 1 | 46084436 | 311442 | 9.5267  | 0.5975 | 0.1852  | 5.7936 | JPT |
| Hs.396207 | Hs.396207-S | rs10732844 | 1 | 1 | 46084708 | 311714 | 7.2254  | 0.5215 | -0.1702 | 5.7936 | JPT |
| Hs.396207 | Hs.396207-S | rs12133129 | 1 | 1 | 46085368 | 312374 | 8.9730  | 0.5908 | 0.1828  | 5.7936 | JPT |
| Hs.396207 | Hs.396207-S | rs11211223 | 1 | 1 | 46092625 | 319631 | 9.5267  | 0.5975 | 0.1852  | 5.7936 | JPT |
| Hs.396207 | Hs.396207-S | rs6687301  | 1 | 1 | 46094872 | 321878 | 9.2993  | 0.5964 | -0.1856 | 5.7936 | JPT |
| Hs.396207 | Hs.396207-S | rs6657720  | 1 | 1 | 46098289 | 325295 | 9.2556  | 0.5945 | -0.1834 | 5.7936 | JPT |
| Hs.396207 | Hs.396207-S | rs10890370 | 1 | 1 | 46101237 | 328243 | 9.5267  | 0.5975 | 0.1852  | 5.7936 | JPT |
| Hs.396207 | Hs.396207-S | rs7526369  | 1 | 1 | 46102580 | 329586 | 9.2556  | 0.5945 | -0.1834 | 5.7936 | JPT |
| Hs.396207 | Hs.396207-S | rs10890371 | 1 | 1 | 46102917 | 329923 | 9.5267  | 0.5975 | -0.1852 | 5.7936 | JPT |
| Hs.396207 | Hs.396207-S | rs10890372 | 1 | 1 | 46103040 | 330046 | 9.1413  | 0.5895 | -0.1834 | 5.7936 | JPT |
| Hs.396207 | Hs.396207-S | rs4074225  | 1 | 1 | 46104384 | 331390 | 9.5267  | 0.5975 | -0.1852 | 5.7936 | JPT |
| Hs.396207 | Hs.396207-S | rs10890373 | 1 | 1 | 46105775 | 332781 | 9.5267  | 0.5975 | 0.1852  | 5.7936 | JPT |
| Hs.396207 | Hs.396207-S | rs4134387  | 1 | 1 | 46107178 | 334184 | 8.5967  | 0.5825 | -0.1823 | 5.7936 | JPT |
| Hs.396207 | Hs.396207-S | rs6681068  | 1 | 1 | 46110402 | 337408 | 8.0144  | 0.5541 | -0.1871 | 5.7936 | JPT |
| Hs.396207 | Hs.396207-S | rs11211228 | 1 | 1 | 46111860 | 338866 | 9.5267  | 0.5975 | -0.1852 | 5.7936 | JPT |
| Hs.396207 | Hs.396207-S | rs12022335 | 1 | 1 | 46114752 | 341758 | 9.2669  | 0.5950 | -0.1851 | 5.7936 | JPT |
| Hs.396207 | Hs.396207-S | rs10789485 | 1 | 1 | 46119328 | 346334 | 9.2556  | 0.5945 | 0.1834  | 5.7936 | JPT |
| Hs.396207 | Hs.396207-S | rs10789486 | 1 | 1 | 46120687 | 347693 | 9.5267  | 0.5975 | 0.1852  | 5.7936 | JPT |
| Hs.396207 | Hs.396207-S | rs10890378 | 1 | 1 | 46122677 | 349683 | 9.2556  | 0.5945 | -0.1834 | 5.7936 | JPT |
| Hs.396207 | Hs.396207-S | rs11211232 | 1 | 1 | 46123166 | 350172 | 9.2556  | 0.5945 | -0.1834 | 5.7936 | JPT |
| Hs.396207 | Hs.396207-S | rs4660900  | 1 | 1 | 46131625 | 358631 | 9.2556  | 0.5945 | -0.1834 | 5.7936 | JPT |

|           |               |            |   |   |          |        |        |        |         |        |     |
|-----------|---------------|------------|---|---|----------|--------|--------|--------|---------|--------|-----|
| Hs.396207 | Hs.396207-S   | rs11211235 | 1 | 1 | 46152395 | 379401 | 9.2556 | 0.5945 | -0.1834 | 5.7936 | JPT |
| Hs.396207 | Hs.396207-S   | rs11211236 | 1 | 1 | 46155787 | 382793 | 8.7092 | 0.5878 | -0.1826 | 5.7936 | JPT |
| Hs.396207 | Hs.396207-S   | rs4660328  | 1 | 1 | 46156851 | 383857 | 9.2556 | 0.5945 | 0.1834  | 5.7936 | JPT |
| Hs.396207 | Hs.396207-S   | rs11211237 | 1 | 1 | 46159349 | 386355 | 7.2171 | 0.5708 | -0.1898 | 5.7936 | JPT |
| Hs.396207 | Hs.396207-S   | rs10890380 | 1 | 1 | 46161489 | 388495 | 9.2556 | 0.5945 | 0.1834  | 5.7936 | JPT |
| Hs.396207 | Hs.396207-S   | rs10890381 | 1 | 1 | 46163791 | 390797 | 8.0285 | 0.5834 | -0.1844 | 5.7936 | JPT |
| Hs.396207 | Hs.396207-S   | rs6429588  | 1 | 1 | 46166078 | 393084 | 9.2556 | 0.5945 | -0.1834 | 5.7936 | JPT |
| Hs.396207 | Hs.396207-S   | rs11211243 | 1 | 1 | 46167453 | 394459 | 9.2556 | 0.5945 | -0.1834 | 5.7936 | JPT |
| Hs.396207 | Hs.396207-S   | rs4660905  | 1 | 1 | 46173607 | 400613 | 9.2556 | 0.5945 | 0.1834  | 5.7936 | JPT |
| Hs.396207 | Hs.396207-S   | rs4660334  | 1 | 1 | 46174146 | 401152 | 9.5267 | 0.5975 | -0.1852 | 5.7936 | JPT |
| Hs.396207 | Hs.396207-S   | rs4073847  | 1 | 1 | 46175032 | 402038 | 9.5267 | 0.5975 | 0.1852  | 5.7936 | JPT |
| Hs.396207 | Hs.396207-S   | rs6661500  | 1 | 1 | 46177682 | 404688 | 9.5267 | 0.5975 | -0.1852 | 5.7936 | JPT |
| Hs.396207 | Hs.396207-S   | rs10890382 | 1 | 1 | 46181694 | 408700 | 9.2556 | 0.5945 | 0.1834  | 5.7936 | JPT |
| Hs.396207 | Hs.396207-S   | rs3922887  | 1 | 1 | 46185822 | 412828 | 9.2556 | 0.5945 | -0.1834 | 5.7936 | JPT |
| Hs.396207 | Hs.396207-S   | rs4660335  | 1 | 1 | 46186738 | 413744 | 9.2556 | 0.5945 | 0.1834  | 5.7936 | JPT |
| Hs.396207 | Hs.396207-S   | rs6677777  | 1 | 1 | 46187856 | 414862 | 9.5267 | 0.5975 | 0.1852  | 5.7936 | JPT |
| Hs.396207 | Hs.396207-S   | rs11211248 | 1 | 1 | 46188864 | 415870 | 9.2556 | 0.5945 | 0.1834  | 5.7936 | JPT |
| Hs.396207 | Hs.396207-S   | rs946528   | 1 | 1 | 46197582 | 424588 | 7.5460 | 0.5785 | 0.1825  | 5.7936 | JPT |
| Hs.396207 | Hs.396207-S   | rs946527   | 1 | 1 | 46197990 | 424996 | 9.5267 | 0.5975 | -0.1852 | 5.7936 | JPT |
| Hs.396207 | Hs.396207-S   | rs946524   | 1 | 1 | 46199580 | 426586 | 9.9095 | 0.6311 | 0.1930  | 5.7936 | JPT |
| Hs.396207 | Hs.396207-S   | rs785478   | 1 | 1 | 46203655 | 430661 | 9.2556 | 0.5945 | 0.1834  | 5.7936 | JPT |
| Hs.396207 | Hs.396207-S   | rs785480   | 1 | 1 | 46204184 | 431190 | 9.5267 | 0.5975 | -0.1852 | 5.7936 | JPT |
| Hs.396207 | Hs.396207-S   | rs1622208  | 1 | 1 | 46210395 | 437401 | 7.2345 | 0.4958 | 0.1690  | 5.7936 | JPT |
| Hs.396207 | Hs.396207-S   | rs6675259  | 1 | 1 | 46214315 | 441321 | 7.7254 | 0.5676 | 0.1794  | 5.7936 | JPT |
| Hs.396207 | Hs.396207-S   | rs7538978  | 1 | 1 | 46217074 | 444080 | 6.9295 | 0.4710 | 0.1635  | 5.7936 | JPT |
| Hs.396207 | Hs.396207-S   | rs1707322  | 1 | 1 | 46217167 | 444173 | 6.6725 | 0.4645 | 0.1615  | 5.7936 | JPT |
| Hs.396207 | Hs.396207-S   | rs1707337  | 1 | 1 | 46220789 | 447795 | 6.9295 | 0.4710 | 0.1635  | 5.7936 | JPT |
| Hs.396207 | Hs.396207-S   | rs1768807  | 1 | 1 | 46222590 | 449596 | 6.6725 | 0.4645 | 0.1615  | 5.7936 | JPT |
| Hs.396207 | Hs.396207-S   | rs1707317  | 1 | 1 | 46222662 | 449668 | 6.1542 | 0.4340 | 0.1563  | 5.7936 | JPT |
| Hs.396207 | Hs.396207-S   | rs1768818  | 1 | 1 | 46226306 | 453312 | 6.6725 | 0.4645 | -0.1615 | 5.7936 | JPT |
| Hs.396207 | Hs.396207-S   | rs1768817  | 1 | 1 | 46226554 | 453560 | 6.6725 | 0.4645 | 0.1615  | 5.7936 | JPT |
| Hs.396207 | Hs.396207-S   | rs785470   | 1 | 1 | 46231642 | 458648 | 6.6725 | 0.4645 | -0.1615 | 5.7936 | JPT |
| Hs.396207 | Hs.396207-S   | rs785468   | 1 | 1 | 46233537 | 460543 | 6.9295 | 0.4710 | -0.1635 | 5.7936 | JPT |
| Hs.396207 | Hs.396207-S   | rs785467   | 1 | 1 | 46233579 | 460585 | 6.6725 | 0.4645 | 0.1615  | 5.7936 | JPT |
| Hs.396207 | Hs.396207-S   | rs785465   | 1 | 1 | 46234597 | 461603 | 6.9295 | 0.4710 | 0.1635  | 5.7936 | JPT |
| Hs.396207 | Hs.396207-S   | rs785510   | 1 | 1 | 46240638 | 467644 | 6.4438 | 0.4593 | 0.1609  | 5.7936 | JPT |
| Hs.396207 | Hs.396207-S   | rs2458400  | 1 | 1 | 46242818 | 469824 | 6.6725 | 0.4645 | -0.1615 | 5.7936 | JPT |
| Hs.396207 | Hs.396207-S   | rs785506   | 1 | 1 | 46252672 | 479678 | 6.6725 | 0.4645 | -0.1615 | 5.7936 | JPT |
| Hs.396207 | Hs.396207-S   | rs1613296  | 1 | 1 | 46258872 | 485878 | 6.4857 | 0.4618 | -0.1625 | 5.7936 | JPT |
| Hs.396207 | Hs.396207-S   | rs1768801  | 1 | 1 | 46261157 | 488163 | 5.9046 | 0.4696 | 0.1556  | 5.7936 | JPT |
| Hs.396207 | Hs.396207-S   | rs785484   | 1 | 1 | 46286035 | 513041 | 6.6725 | 0.4645 | 0.1615  | 5.7936 | JPT |
| Hs.396207 | Hs.396207-S   | rs785493   | 1 | 1 | 46296879 | 523885 | 6.9295 | 0.4710 | -0.1635 | 5.7936 | JPT |
| Hs.396207 | Hs.396207-S   | rs785497   | 1 | 1 | 46303923 | 530929 | 6.6725 | 0.4645 | 0.1615  | 5.7936 | JPT |
| MGC22773  | GI_21687083-S | rs922936   | 1 | 1 | 74188342 | 169677 | 8.1966 | 0.5454 | -0.2461 | 5.3194 | JPT |
| MGC22773  | GI_21687083-S | rs11210400 | 1 | 1 | 74202480 | 155539 | 7.8317 | 0.5358 | 0.2555  | 5.3194 | JPT |
| MGC22773  | GI_21687083-S | rs1384883  | 1 | 1 | 74213498 | 144521 | 7.8175 | 0.5264 | -0.2432 | 5.3194 | JPT |
| MGC22773  | GI_21687083-S | rs1843024  | 1 | 1 | 74214650 | 143369 | 8.2708 | 0.5490 | 0.2521  | 5.3194 | JPT |
| MGC22773  | GI_21687083-S | rs12029234 | 1 | 1 | 74220765 | 137254 | 8.5019 | 0.5515 | -0.2433 | 5.3194 | JPT |
| MGC22773  | GI_21687083-S | rs6676622  | 1 | 1 | 74221826 | 136193 | 8.1966 | 0.5454 | -0.2461 | 5.3194 | JPT |
| MGC22773  | GI_21687083-S | rs10493531 | 1 | 1 | 74229688 | 128331 | 9.0107 | 0.5836 | -0.2371 | 5.3194 | JPT |
| MGC22773  | GI_21687083-S | rs4650243  | 1 | 1 | 74230485 | 127534 | 9.1198 | 0.5798 | 0.2443  | 5.3194 | JPT |
| MGC22773  | GI_21687083-S | rs4649996  | 1 | 1 | 74232300 | 125719 | 9.0107 | 0.5836 | 0.2371  | 5.3194 | JPT |
| MGC22773  | GI_21687083-S | rs6424573  | 1 | 1 | 74234495 | 123524 | 8.2789 | 0.5409 | -0.2536 | 5.3194 | JPT |
| MGC22773  | GI_21687083-S | rs1032082  | 1 | 1 | 74244008 | 114011 | 8.1966 | 0.5454 | 0.2461  | 5.3194 | JPT |
| MGC22773  | GI_21687083-S | rs11579809 | 1 | 1 | 74244608 | 113411 | 7.4516 | 0.5248 | -0.2179 | 5.3194 | JPT |
| MGC22773  | GI_21687083-S | rs1483793  | 1 | 1 | 74247151 | 110868 | 5.3655 | 0.3917 | -0.2203 | 5.3194 | JPT |
| MGC22773  | GI_21687083-S | rs11210404 | 1 | 1 | 74250273 | 107746 | 8.1966 | 0.5454 | 0.2461  | 5.3194 | JPT |
| MGC22773  | GI_21687083-S | rs12746996 | 1 | 1 | 74252170 | 105849 | 8.0162 | 0.5452 | 0.2644  | 5.3194 | JPT |
| MGC22773  | GI_21687083-S | rs1483795  | 1 | 1 | 74254948 | 103071 | 8.1966 | 0.5454 | 0.2461  | 5.3194 | JPT |

|          |               |            |   |   |          |        |         |        |         |        |     |
|----------|---------------|------------|---|---|----------|--------|---------|--------|---------|--------|-----|
| MGC22773 | GI_21687083-S | rs2035473  | 1 | 1 | 74257247 | 100772 | 7.5990  | 0.5238 | -0.2550 | 5.3194 | JPT |
| MGC22773 | GI_21687083-S | rs1843023  | 1 | 1 | 74257548 | 100471 | 8.1966  | 0.5454 | -0.2461 | 5.3194 | JPT |
| MGC22773 | GI_21687083-S | rs11210405 | 1 | 1 | 74259536 | 98483  | 7.6519  | 0.5446 | -0.2706 | 5.3194 | JPT |
| MGC22773 | GI_21687083-S | rs7535929  | 1 | 1 | 74272023 | 85996  | 8.1966  | 0.5454 | 0.2461  | 5.3194 | JPT |
| MGC22773 | GI_21687083-S | rs10789387 | 1 | 1 | 74272432 | 85587  | 8.1966  | 0.5454 | 0.2461  | 5.3194 | JPT |
| MGC22773 | GI_21687083-S | rs11210407 | 1 | 1 | 74272624 | 85395  | 7.9900  | 0.5352 | 0.2569  | 5.3194 | JPT |
| MGC22773 | GI_21687083-S | rs7550195  | 1 | 1 | 74274326 | 83693  | 9.1198  | 0.5798 | 0.2443  | 5.3194 | JPT |
| MGC22773 | GI_21687083-S | rs12122433 | 1 | 1 | 74274897 | 83122  | 7.6102  | 0.5615 | 0.2496  | 5.3194 | JPT |
| MGC22773 | GI_21687083-S | rs10789388 | 1 | 1 | 74280773 | 77246  | 8.1966  | 0.5454 | -0.2461 | 5.3194 | JPT |
| MGC22773 | GI_21687083-S | rs12746942 | 1 | 1 | 74282012 | 76007  | 8.2519  | 0.5396 | -0.2591 | 5.3194 | JPT |
| MGC22773 | GI_21687083-S | rs10890108 | 1 | 1 | 74283203 | 74816  | 9.1198  | 0.5798 | -0.2443 | 5.3194 | JPT |
| MGC22773 | GI_21687083-S | rs4142949  | 1 | 1 | 74284276 | 73743  | 7.7838  | 0.5334 | 0.2511  | 5.3194 | JPT |
| MGC22773 | GI_21687083-S | rs4142948  | 1 | 1 | 74284372 | 73647  | 8.1966  | 0.5454 | -0.2461 | 5.3194 | JPT |
| MGC22773 | GI_21687083-S | rs2128935  | 1 | 1 | 74285757 | 72262  | 8.1966  | 0.5454 | -0.2461 | 5.3194 | JPT |
| MGC22773 | GI_21687083-S | rs2343864  | 1 | 1 | 74289090 | 68929  | 13.4273 | 0.7421 | 0.2525  | 5.3194 | JPT |
| MGC22773 | GI_21687083-S | rs4596834  | 1 | 1 | 74289979 | 68040  | 7.2366  | 0.5044 | 0.2523  | 5.3194 | JPT |
| MGC22773 | GI_21687083-S | rs11210417 | 1 | 1 | 74293180 | 64839  | 13.6424 | 0.7481 | 0.2638  | 5.3194 | JPT |
| MGC22773 | GI_21687083-S | rs11210418 | 1 | 1 | 74294698 | 63321  | 13.3388 | 0.7313 | -0.2590 | 5.3194 | JPT |
| MGC22773 | GI_21687083-S | rs6676103  | 1 | 1 | 74295054 | 62965  | 8.1966  | 0.5454 | 0.2461  | 5.3194 | JPT |
| MGC22773 | GI_21687083-S | rs11210419 | 1 | 1 | 74298989 | 59030  | 13.3388 | 0.7313 | 0.2590  | 5.3194 | JPT |
| MGC22773 | GI_21687083-S | rs12048351 | 1 | 1 | 74300938 | 57081  | 8.2708  | 0.5490 | 0.2521  | 5.3194 | JPT |
| MGC22773 | GI_21687083-S | rs12036659 | 1 | 1 | 74303726 | 54293  | 8.2708  | 0.5490 | -0.2521 | 5.3194 | JPT |
| MGC22773 | GI_21687083-S | rs1601152  | 1 | 1 | 74306922 | 51097  | 8.5988  | 0.5647 | -0.2340 | 5.3194 | JPT |
| MGC22773 | GI_21687083-S | rs7543134  | 1 | 1 | 74314071 | 43948  | 13.4273 | 0.7421 | -0.2525 | 5.3194 | JPT |
| MGC22773 | GI_21687083-S | rs12043976 | 1 | 1 | 74316209 | 41810  | 8.2519  | 0.5396 | -0.2591 | 5.3194 | JPT |
| MGC22773 | GI_21687083-S | rs12029814 | 1 | 1 | 74321553 | 36466  | 5.9229  | 0.4615 | 0.2734  | 5.3194 | JPT |
| MGC22773 | GI_21687083-S | rs1856789  | 1 | 1 | 74322707 | 35312  | 8.2708  | 0.5490 | 0.2521  | 5.3194 | JPT |
| MGC22773 | GI_21687083-S | rs12410230 | 1 | 1 | 74324140 | 33879  | 7.6334  | 0.5344 | -0.2533 | 5.3194 | JPT |
| MGC22773 | GI_21687083-S | rs10493530 | 1 | 1 | 74328443 | 29576  | 7.5104  | 0.5370 | -0.2833 | 5.3194 | JPT |
| MGC22773 | GI_21687083-S | rs7529384  | 1 | 1 | 74330117 | 27902  | 8.2708  | 0.5490 | -0.2521 | 5.3194 | JPT |
| MGC22773 | GI_21687083-S | rs12402231 | 1 | 1 | 74335095 | 22924  | 8.2708  | 0.5490 | -0.2521 | 5.3194 | JPT |
| MGC22773 | GI_21687083-S | rs10493529 | 1 | 1 | 74335469 | 22550  | 8.2708  | 0.5490 | -0.2521 | 5.3194 | JPT |
| MGC22773 | GI_21687083-S | rs12033705 | 1 | 1 | 74346181 | 11838  | 8.2708  | 0.5490 | -0.2521 | 5.3194 | JPT |
| MGC22773 | GI_21687083-S | rs11210427 | 1 | 1 | 74356537 | 1482   | 11.0789 | 0.6672 | 0.2745  | 5.3194 | JPT |
| MGC22773 | GI_21687083-S | rs12029606 | 1 | 1 | 74361611 | 3592   | 11.2131 | 0.6808 | -0.2678 | 5.3194 | JPT |
| MGC22773 | GI_21687083-S | rs1930588  | 1 | 1 | 74367377 | 9358   | 9.5340  | 0.6341 | -0.2757 | 5.3194 | JPT |
| MGC22773 | GI_21687083-S | rs1412824  | 1 | 1 | 74372246 | 14227  | 10.4153 | 0.6423 | 0.2079  | 5.3194 | JPT |
| MGC22773 | GI_21687083-S | rs7535418  | 1 | 1 | 74372749 | 14730  | 13.1045 | 0.7770 | -0.2632 | 5.3194 | JPT |
| MGC22773 | GI_21687083-S | rs10789391 | 1 | 1 | 74374602 | 16583  | 15.0717 | 0.7765 | 0.2613  | 5.3194 | JPT |
| MGC22773 | GI_21687083-S | rs1412825  | 1 | 1 | 74375835 | 17816  | 14.9484 | 0.7815 | -0.2546 | 5.3194 | JPT |
| MGC22773 | GI_21687083-S | rs4422957  | 1 | 1 | 74376170 | 18151  | 11.7477 | 0.6905 | 0.2325  | 5.3194 | JPT |
| MGC22773 | GI_21687083-S | rs792310   | 1 | 1 | 74377514 | 19495  | 15.0717 | 0.7765 | 0.2613  | 5.3194 | JPT |
| MGC22773 | GI_21687083-S | rs9804006  | 1 | 1 | 74378528 | 20509  | 10.6607 | 0.6517 | -0.2839 | 5.3194 | JPT |
| MGC22773 | GI_21687083-S | rs577367   | 1 | 1 | 74379707 | 21688  | 15.0717 | 0.7765 | 0.2613  | 5.3194 | JPT |
| MGC22773 | GI_21687083-S | rs487917   | 1 | 1 | 74380917 | 22898  | 15.0717 | 0.7765 | -0.2613 | 5.3194 | JPT |
| MGC22773 | GI_21687083-S | rs12046751 | 1 | 1 | 74382193 | 24174  | 10.6607 | 0.6517 | 0.2839  | 5.3194 | JPT |
| MGC22773 | GI_21687083-S | rs571848   | 1 | 1 | 74383540 | 25521  | 14.9484 | 0.7815 | -0.2546 | 5.3194 | JPT |
| MGC22773 | GI_21687083-S | rs956      | 1 | 1 | 74384661 | 26642  | 14.0522 | 0.7591 | 0.2523  | 5.3194 | JPT |
| MGC22773 | GI_21687083-S | rs520806   | 1 | 1 | 74385362 | 27343  | 15.0717 | 0.7765 | -0.2613 | 5.3194 | JPT |
| MGC22773 | GI_21687083-S | rs522759   | 1 | 1 | 74385603 | 27584  | 15.0717 | 0.7765 | 0.2613  | 5.3194 | JPT |
| MGC22773 | GI_21687083-S | rs545664   | 1 | 1 | 74385798 | 27779  | 14.3236 | 0.7743 | -0.2691 | 5.3194 | JPT |
| MGC22773 | GI_21687083-S | rs545721   | 1 | 1 | 74385820 | 27801  | 14.6856 | 0.7751 | 0.2607  | 5.3194 | JPT |
| MGC22773 | GI_21687083-S | rs581353   | 1 | 1 | 74387407 | 29388  | 14.9484 | 0.7815 | -0.2546 | 5.3194 | JPT |
| MGC22773 | GI_21687083-S | rs496008   | 1 | 1 | 74387827 | 29808  | 12.5910 | 0.7718 | -0.2460 | 5.3194 | JPT |
| MGC22773 | GI_21687083-S | rs485929   | 1 | 1 | 74390306 | 32287  | 14.9484 | 0.7815 | -0.2546 | 5.3194 | JPT |
| MGC22773 | GI_21687083-S | rs792321   | 1 | 1 | 74393989 | 35970  | 15.0717 | 0.7765 | -0.2613 | 5.3194 | JPT |
| MGC22773 | GI_21687083-S | rs524306   | 1 | 1 | 74394274 | 36255  | 14.8528 | 0.7954 | -0.2505 | 5.3194 | JPT |
| MGC22773 | GI_21687083-S | rs495027   | 1 | 1 | 74394280 | 36261  | 14.9484 | 0.7815 | 0.2546  | 5.3194 | JPT |
| MGC22773 | GI_21687083-S | rs533371   | 1 | 1 | 74399033 | 41014  | 14.9484 | 0.7815 | -0.2546 | 5.3194 | JPT |

|          |               |            |   |   |           |        |         |        |         |        |     |
|----------|---------------|------------|---|---|-----------|--------|---------|--------|---------|--------|-----|
| MGC22773 | GI_21687083-S | rs12024616 | 1 | 1 | 74402186  | 44167  | 10.9298 | 0.6530 | -0.2814 | 5.3194 | JPT |
| MGC22773 | GI_21687083-S | rs12031026 | 1 | 1 | 74405182  | 47163  | 10.7102 | 0.6625 | 0.2874  | 5.3194 | JPT |
| MGC22773 | GI_21687083-S | rs11210440 | 1 | 1 | 74405229  | 47210  | 15.0717 | 0.7765 | 0.2613  | 5.3194 | JPT |
| MGC22773 | GI_21687083-S | rs12038237 | 1 | 1 | 74405656  | 47637  | 10.9298 | 0.6530 | 0.2814  | 5.3194 | JPT |
| MGC22773 | GI_21687083-S | rs10890119 | 1 | 1 | 74407221  | 49202  | 13.8492 | 0.7705 | -0.2607 | 5.3194 | JPT |
| MGC22773 | GI_21687083-S | rs11210442 | 1 | 1 | 74407725  | 49706  | 11.9041 | 0.7608 | -0.2726 | 5.3194 | JPT |
| MGC22773 | GI_21687083-S | rs492302   | 1 | 1 | 74411352  | 53333  | 15.0717 | 0.7765 | -0.2613 | 5.3194 | JPT |
| MGC22773 | GI_21687083-S | rs500203   | 1 | 1 | 74413672  | 55653  | 14.9484 | 0.7815 | -0.2546 | 5.3194 | JPT |
| MGC22773 | GI_21687083-S | rs532221   | 1 | 1 | 74413971  | 55952  | 14.6856 | 0.7751 | 0.2607  | 5.3194 | JPT |
| MGC22773 | GI_21687083-S | rs568049   | 1 | 1 | 74416524  | 58505  | 14.9484 | 0.7815 | -0.2546 | 5.3194 | JPT |
| MGC22773 | GI_21687083-S | rs3765651  | 1 | 1 | 74421383  | 63364  | 14.9484 | 0.7815 | -0.2546 | 5.3194 | JPT |
| MGC22773 | GI_21687083-S | rs481387   | 1 | 1 | 74422471  | 64452  | 14.9484 | 0.7815 | 0.2546  | 5.3194 | JPT |
| CRYZ     | GI_14251216-S | rs12568674 | 1 | 1 | 74964295  | 80217  | 5.8052  | 0.4125 | -0.3517 | 5.299  | JPT |
| SNX7     | GI_23111054-A | rs571344   | 1 | 1 | 98676084  | 261589 | 9.8893  | 0.6214 | -0.3350 | 9.0611 | JPT |
| SNX7     | GI_23111054-A | rs566731   | 1 | 1 | 98676562  | 261111 | 9.8754  | 0.6208 | 0.4787  | 9.0611 | JPT |
| SNX7     | GI_23111054-A | rs1655569  | 1 | 1 | 98681230  | 256443 | 10.5120 | 0.6373 | -0.4662 | 9.0611 | JPT |
| SNX7     | GI_23111054-A | rs796399   | 1 | 1 | 98707084  | 230589 | 9.1651  | 0.5994 | 0.4520  | 9.0611 | JPT |
| SNX7     | GI_23111054-A | rs11166037 | 1 | 1 | 98731373  | 206300 | 10.0108 | 0.6353 | -0.4663 | 9.0611 | JPT |
| SNX7     | GI_23111054-A | rs4950133  | 1 | 1 | 98739502  | 198171 | 10.5120 | 0.6373 | 0.4662  | 9.0611 | JPT |
| SNX7     | GI_23111054-A | rs9285629  | 1 | 1 | 98849718  | 87955  | 13.4225 | 0.7420 | -0.5356 | 9.0611 | JPT |
| SNX7     | GI_23111054-A | rs4411174  | 1 | 1 | 98852123  | 85550  | 13.4225 | 0.7420 | 0.5356  | 9.0611 | JPT |
| SNX7     | GI_23111054-A | rs9324397  | 1 | 1 | 98853103  | 84570  | 13.1329 | 0.7423 | -0.5651 | 9.0611 | JPT |
| SNX7     | GI_23111054-A | rs9726119  | 1 | 1 | 98859688  | 77985  | 13.4225 | 0.7420 | 0.5356  | 9.0611 | JPT |
| SNX7     | GI_23111054-A | rs9726996  | 1 | 1 | 98861639  | 76034  | 13.7313 | 0.7422 | -0.5350 | 9.0611 | JPT |
| SNX7     | GI_23111054-A | rs9433747  | 1 | 1 | 98862656  | 75017  | 13.4135 | 0.7417 | 0.5641  | 9.0611 | JPT |
| SNX7     | GI_23111054-A | rs6577232  | 1 | 1 | 98864562  | 73111  | 13.0857 | 0.7409 | 0.5351  | 9.0611 | JPT |
| SNX7     | GI_23111054-A | rs9433890  | 1 | 1 | 98876957  | 60716  | 10.0916 | 0.6571 | 0.5027  | 9.0611 | JPT |
| SNX7     | GI_23111054-A | rs4351664  | 1 | 1 | 98878702  | 58971  | 13.4225 | 0.7420 | -0.5356 | 9.0611 | JPT |
| SNX7     | GI_23111054-A | rs4528139  | 1 | 1 | 98878721  | 58952  | 13.7313 | 0.7422 | -0.5350 | 9.0611 | JPT |
| SNX7     | GI_23111054-A | rs9659487  | 1 | 1 | 98880800  | 56873  | 13.4135 | 0.7417 | -0.5641 | 9.0611 | JPT |
| SNX7     | GI_23111054-A | rs9442147  | 1 | 1 | 98881219  | 56454  | 12.9549 | 0.7547 | -0.5720 | 9.0611 | JPT |
| SNX7     | GI_23111054-A | rs9434377  | 1 | 1 | 98882652  | 55021  | 13.7313 | 0.7422 | -0.5350 | 9.0611 | JPT |
| SNX7     | GI_23111054-A | rs7541470  | 1 | 1 | 99006765  | 69092  | 17.0063 | 0.8328 | 0.4917  | 9.0611 | JPT |
| SNX7     | GI_23111054-A | rs1021107  | 1 | 1 | 99008439  | 70766  | 13.7313 | 0.7422 | 0.5350  | 9.0611 | JPT |
| SNX7     | GI_23111054-A | rs17119096 | 1 | 1 | 99017865  | 80192  | 13.7313 | 0.7422 | 0.5350  | 9.0611 | JPT |
| SNX7     | GI_23111054-A | rs7544855  | 1 | 1 | 99019993  | 82320  | 13.7313 | 0.7422 | 0.5350  | 9.0611 | JPT |
| SNX7     | GI_23111054-A | rs17119110 | 1 | 1 | 99020624  | 82951  | 13.7313 | 0.7422 | 0.5350  | 9.0611 | JPT |
| SNX7     | GI_23111054-A | rs17119116 | 1 | 1 | 99023483  | 85810  | 13.7313 | 0.7422 | 0.5350  | 9.0611 | JPT |
| SNX7     | GI_23111054-A | rs17119123 | 1 | 1 | 99038365  | 100692 | 13.7313 | 0.7422 | 0.5350  | 9.0611 | JPT |
| SNX7     | GI_23111054-A | rs7517592  | 1 | 1 | 99068690  | 131017 | 13.1838 | 0.7524 | -0.5690 | 9.0611 | JPT |
| GSTM1    | GI_23065546-A | rs12745189 | 1 | 1 | 109898605 | 45355  | 6.1128  | 0.4315 | -1.1506 | 5.8966 | JPT |
| GSTM2    | GI_23065549-S | rs12745189 | 1 | 1 | 109898605 | 27613  | 7.1624  | 0.4919 | -0.5118 | 5.8806 | JPT |
| GSTM1    | GI_23065546-A | rs542338   | 1 | 1 | 109904808 | 39152  | 6.9047  | 0.4777 | -1.2520 | 5.8966 | JPT |
| GSTM2    | GI_23065549-S | rs542338   | 1 | 1 | 109904808 | 21410  | 7.0410  | 0.4852 | -0.5272 | 5.8806 | JPT |
| GSTM1    | GI_23065546-A | rs592586   | 1 | 1 | 109905432 | 38528  | 7.9433  | 0.5505 | 1.3080  | 5.8966 | JPT |
| GSTM2    | GI_23065549-S | rs592586   | 1 | 1 | 109905432 | 20786  | 7.4552  | 0.5250 | 0.5388  | 5.8806 | JPT |
| GSTM1    | GI_23065546-A | rs661417   | 1 | 1 | 109906951 | 37009  | 7.0915  | 0.4799 | -1.2702 | 5.8966 | JPT |
| GSTM2    | GI_23065549-S | rs661417   | 1 | 1 | 109906951 | 19267  | 7.2540  | 0.4887 | -0.5291 | 5.8806 | JPT |
| GSTM1    | GI_23065546-A | rs525362   | 1 | 1 | 109907156 | 36804  | 7.0915  | 0.4799 | 1.2702  | 5.8966 | JPT |
| GSTM2    | GI_23065549-S | rs525362   | 1 | 1 | 109907156 | 19062  | 7.2540  | 0.4887 | 0.5291  | 5.8806 | JPT |
| GSTM1    | GI_23065546-A | rs681991   | 1 | 1 | 109907270 | 36690  | 7.0915  | 0.4799 | 1.2702  | 5.8966 | JPT |
| GSTM2    | GI_23065549-S | rs681991   | 1 | 1 | 109907270 | 18948  | 7.2540  | 0.4887 | 0.5291  | 5.8806 | JPT |
| GSTM1    | GI_23065546-A | rs668413   | 1 | 1 | 109907986 | 35974  | 6.9047  | 0.4777 | 1.2520  | 5.8966 | JPT |
| GSTM2    | GI_23065549-S | rs668413   | 1 | 1 | 109907986 | 18232  | 7.0410  | 0.4852 | 0.5272  | 5.8806 | JPT |
| GSTM1    | GI_23065546-A | rs1010167  | 1 | 1 | 109910769 | 33191  | 6.4103  | 0.4493 | 1.2201  | 5.8966 | JPT |
| GSTM2    | GI_23065549-S | rs1010167  | 1 | 1 | 109910769 | 15449  | 6.8101  | 0.4723 | 0.5097  | 5.8806 | JPT |
| GSTM4    | GI_23065559-A | rs1010167  | 1 | 1 | 109910769 | 2775   | 6.0734  | 0.4291 | 0.3080  | 5.6235 | JPT |
| GSTM1    | GI_23065546-A | rs638820   | 1 | 1 | 109921948 | 22012  | 7.8389  | 0.5275 | -1.2662 | 5.8966 | JPT |
| GSTM2    | GI_23065549-S | rs638820   | 1 | 1 | 109921948 | 4270   | 6.3606  | 0.4463 | -0.4887 | 5.8806 | JPT |

|         |               |            |   |   |           |        |         |        |         |        |     |
|---------|---------------|------------|---|---|-----------|--------|---------|--------|---------|--------|-----|
| GSTM1   | GI_23065546-A | rs655315   | 1 | 1 | 109927220 | 16740  | 8.6864  | 0.5602 | 1.3498  | 5.8966 | JPT |
| GSTM2   | GI_23065549-S | rs655315   | 1 | 1 | 109927220 | 1002   | 7.2332  | 0.4876 | 0.5216  | 5.8806 | JPT |
| GSTM1   | GI_23065546-A | rs2071487  | 1 | 1 | 109945123 | 1163   | 24.0262 | 0.9190 | 1.6051  | 5.8966 | JPT |
| GSTM2   | GI_23065549-S | rs2071487  | 1 | 1 | 109945123 | 18905  | 7.8299  | 0.5271 | 0.5129  | 5.8806 | JPT |
| GSTM1   | GI_23065546-A | rs2014578  | 1 | 1 | 109953413 | 9453   | 29.4598 | 0.9553 | -2.2585 | 5.8966 | JPT |
| GSTM2   | GI_23065549-S | rs2014578  | 1 | 1 | 109953413 | 27195  | 6.4238  | 0.4501 | -0.6567 | 5.8806 | JPT |
| GSTM1   | GI_23065546-A | rs11101985 | 1 | 1 | 109958078 | 14118  | 10.6495 | 0.6602 | 1.3307  | 5.8966 | JPT |
| GSTM1   | GI_23065546-A | rs11579576 | 1 | 1 | 109961218 | 17258  | 7.5345  | 0.5204 | 1.1904  | 5.8966 | JPT |
| GSTM1   | GI_23065546-A | rs7364941  | 1 | 1 | 109962210 | 18250  | 7.0995  | 0.5534 | 1.2160  | 5.8966 | JPT |
| GSTM1   | GI_23065546-A | rs366631   | 1 | 1 | 109964514 | 20554  | 15.3792 | 0.7915 | -1.6521 | 5.8966 | JPT |
| GSTM2   | GI_23065549-S | rs366631   | 1 | 1 | 109964514 | 38296  | 7.3895  | 0.5041 | -0.5557 | 5.8806 | JPT |
| GSTM1   | GI_23065546-A | rs3754446  | 1 | 1 | 109965283 | 21323  | 8.8899  | 0.6251 | 1.2329  | 5.8966 | JPT |
| GSTM1   | GI_23065546-A | rs11101989 | 1 | 1 | 109965783 | 21823  | 7.6087  | 0.5243 | -1.1564 | 5.8966 | JPT |
| GSTM1   | GI_23065546-A | rs674787   | 1 | 1 | 109965953 | 21993  | 14.7211 | 0.8006 | -2.0834 | 5.8966 | JPT |
| GSTM1   | GI_23065546-A | rs929166   | 1 | 1 | 109967216 | 23256  | 8.8899  | 0.5781 | -1.1661 | 5.8966 | JPT |
| GSTM1   | GI_23065546-A | rs4970773  | 1 | 1 | 109967638 | 23678  | 8.9388  | 0.5717 | -1.2155 | 5.8966 | JPT |
| GSTM1   | GI_23065546-A | rs3768490  | 1 | 1 | 109971058 | 27098  | 8.1735  | 0.5443 | 1.2145  | 5.8966 | JPT |
| GSTM1   | GI_23065546-A | rs1854962  | 1 | 1 | 109981328 | 37368  | 6.8405  | 0.4909 | -1.1704 | 5.8966 | JPT |
| GSTM1   | GI_23065546-A | rs4970737  | 1 | 1 | 109996254 | 52294  | 7.2733  | 0.4979 | -1.1897 | 5.8966 | JPT |
| GSTM1   | GI_23065546-A | rs15864    | 1 | 1 | 110004898 | 60938  | 8.3282  | 0.5518 | 1.2731  | 5.8966 | JPT |
| ST7L    | GI_38201636-A | rs6700673  | 1 | 1 | 112869096 | 72397  | 5.6519  | 0.4028 | 0.1945  | 5.6466 | JPT |
| ST7L    | GI_38201636-A | rs7415820  | 1 | 1 | 112881491 | 84792  | 5.6519  | 0.4028 | 0.1945  | 5.6466 | JPT |
| ST7L    | GI_38201636-A | rs2932536  | 1 | 1 | 112914459 | 117760 | 5.7328  | 0.4317 | 0.1974  | 5.6466 | JPT |
| ST7L    | GI_38201636-A | rs2999154  | 1 | 1 | 112934498 | 137799 | 5.6519  | 0.4028 | 0.1945  | 5.6466 | JPT |
| ST7L    | GI_38201636-A | rs3795819  | 1 | 1 | 112946221 | 149522 | 6.0581  | 0.4206 | -0.1876 | 5.6466 | JPT |
| ST7L    | GI_38201636-A | rs2932532  | 1 | 1 | 112946498 | 149799 | 5.6519  | 0.4028 | -0.1945 | 5.6466 | JPT |
| ST7L    | GI_38201636-A | rs902289   | 1 | 1 | 112948129 | 151430 | 5.7879  | 0.4040 | -0.1945 | 5.6466 | JPT |
| ST7L    | GI_38201636-A | rs3748656  | 1 | 1 | 112948723 | 152024 | 6.0581  | 0.4206 | -0.1876 | 5.6466 | JPT |
| ST7L    | GI_38201636-A | rs1106287  | 1 | 1 | 112954164 | 157465 | 5.9241  | 0.4199 | 0.1874  | 5.6466 | JPT |
| DCLRE1B | GI_24431998-S | rs6674384  | 1 | 1 | 114167949 | 399    | 6.7261  | 0.4676 | -0.3392 | 6.002  | JPT |
| DCLRE1B | GI_24431998-S | rs878129   | 1 | 1 | 114171237 | 2889   | 6.7261  | 0.4676 | 0.3392  | 6.002  | JPT |
| DCLRE1B | GI_24431998-S | rs11102703 | 1 | 1 | 114178152 | 9804   | 6.7261  | 0.4676 | -0.3392 | 6.002  | JPT |
| DCLRE1B | GI_24431998-S | rs10494162 | 1 | 1 | 114185125 | 16777  | 6.7139  | 0.4669 | -0.3327 | 6.002  | JPT |
| DCLRE1B | GI_24431998-S | rs7519860  | 1 | 1 | 114194562 | 26214  | 6.7261  | 0.4676 | -0.3392 | 6.002  | JPT |
| DCLRE1B | GI_24431998-S | rs1503832  | 1 | 1 | 114201731 | 33383  | 6.7261  | 0.4676 | 0.3392  | 6.002  | JPT |
| DCLRE1B | GI_24431998-S | rs12127377 | 1 | 1 | 114202015 | 33667  | 6.9225  | 0.4706 | 0.3393  | 6.002  | JPT |
| DCLRE1B | GI_24431998-S | rs1910485  | 1 | 1 | 114202677 | 34329  | 6.7261  | 0.4676 | 0.3392  | 6.002  | JPT |
| DCLRE1B | GI_24431998-S | rs1553450  | 1 | 1 | 114202822 | 34474  | 8.3196  | 0.5692 | -0.3558 | 6.002  | JPT |
| DCLRE1B | GI_24431998-S | rs11102707 | 1 | 1 | 114205625 | 37277  | 6.9225  | 0.4706 | -0.3393 | 6.002  | JPT |
| DCLRE1B | GI_24431998-S | rs7545300  | 1 | 1 | 114215678 | 47330  | 6.7261  | 0.4676 | -0.3392 | 6.002  | JPT |
| DCLRE1B | GI_24431998-S | rs6669370  | 1 | 1 | 114218717 | 50369  | 7.0556  | 0.4861 | -0.3486 | 6.002  | JPT |
| DCLRE1B | GI_24431998-S | rs11102709 | 1 | 1 | 114224125 | 55777  | 6.9225  | 0.4706 | -0.3393 | 6.002  | JPT |
| DCLRE1B | GI_24431998-S | rs10108    | 1 | 1 | 114228372 | 60024  | 7.0556  | 0.4861 | 0.3486  | 6.002  | JPT |
| DCLRE1B | GI_24431998-S | rs10494163 | 1 | 1 | 114232754 | 64406  | 6.7135  | 0.4669 | -0.3390 | 6.002  | JPT |
| DCLRE1B | GI_24431998-S | rs7364     | 1 | 1 | 114236703 | 68355  | 6.8351  | 0.4658 | -0.3377 | 6.002  | JPT |
| PHTF1   | GI_5729975-S  | rs11102778 | 1 | 1 | 114566166 | 613957 | 6.3025  | 0.4509 | -0.4538 | 5.6415 | JPT |
| CTSS    | GI_23110961-S | rs2280078  | 1 | 1 | 147413254 | 102732 | 5.1881  | 0.3727 | -0.2398 | 5.1304 | JPT |
| CTSS    | GI_23110961-S | rs12402939 | 1 | 1 | 147428167 | 87819  | 5.3693  | 0.3846 | 0.2367  | 5.1304 | JPT |
| CTSS    | GI_23110961-S | rs7524620  | 1 | 1 | 147429772 | 86214  | 6.0306  | 0.4189 | 0.2478  | 5.1304 | JPT |
| CTSS    | GI_23110961-S | rs7529194  | 1 | 1 | 147435693 | 80293  | 5.9071  | 0.4189 | -0.2457 | 5.1304 | JPT |
| CTSS    | GI_23110961-S | rs6587516  | 1 | 1 | 147436294 | 79692  | 5.3271  | 0.3819 | 0.2337  | 5.1304 | JPT |
| CTSS    | GI_23110961-S | rs6678013  | 1 | 1 | 147436358 | 79628  | 5.9915  | 0.4165 | -0.2447 | 5.1304 | JPT |
| CTSS    | GI_23110961-S | rs6661415  | 1 | 1 | 147448942 | 67044  | 5.9915  | 0.4165 | -0.2447 | 5.1304 | JPT |
| CTSS    | GI_23110961-S | rs10788792 | 1 | 1 | 147451645 | 64341  | 5.3693  | 0.3846 | -0.2367 | 5.1304 | JPT |
| CTSS    | GI_23110961-S | rs11204691 | 1 | 1 | 147457412 | 58574  | 5.3271  | 0.3819 | 0.2337  | 5.1304 | JPT |
| CTSS    | GI_23110961-S | rs2867301  | 1 | 1 | 147466868 | 49118  | 5.3271  | 0.3819 | -0.2337 | 5.1304 | JPT |
| CTSS    | GI_23110961-S | rs12403255 | 1 | 1 | 147473485 | 42501  | 6.0306  | 0.4189 | 0.2478  | 5.1304 | JPT |
| CTSS    | GI_23110961-S | rs6587518  | 1 | 1 | 147474860 | 41126  | 5.3693  | 0.3846 | -0.2367 | 5.1304 | JPT |
| CTSS    | GI_23110961-S | rs7412396  | 1 | 1 | 147479870 | 36116  | 5.8277  | 0.4139 | -0.2532 | 5.1304 | JPT |

|         |               |            |   |   |           |        |        |        |         |        |     |
|---------|---------------|------------|---|---|-----------|--------|--------|--------|---------|--------|-----|
| CTSS    | GI_23110961-S | rs4540663  | 1 | 1 | 147480063 | 35923  | 5.3693 | 0.3846 | -0.2367 | 5.1304 | JPT |
| CTSS    | GI_23110961-S | rs2275236  | 1 | 1 | 147483025 | 32961  | 5.3693 | 0.3846 | 0.2367  | 5.1304 | JPT |
| CTSS    | GI_23110961-S | rs12063547 | 1 | 1 | 147487126 | 28860  | 5.7386 | 0.4159 | -0.2493 | 5.1304 | JPT |
| CTSS    | GI_23110961-S | rs2184833  | 1 | 1 | 147488556 | 27430  | 5.3693 | 0.3846 | 0.2367  | 5.1304 | JPT |
| CTSS    | GI_23110961-S | rs11807450 | 1 | 1 | 147490792 | 25194  | 5.9327 | 0.4362 | 0.2601  | 5.1304 | JPT |
| CTSS    | GI_23110961-S | rs17658705 | 1 | 1 | 147491144 | 24842  | 6.6657 | 0.4562 | 0.2664  | 5.1304 | JPT |
| CTSS    | GI_23110961-S | rs1336899  | 1 | 1 | 147491983 | 24003  | 5.3693 | 0.3846 | -0.2367 | 5.1304 | JPT |
| CTSS    | GI_23110961-S | rs1336900  | 1 | 1 | 147492106 | 23880  | 5.3693 | 0.3846 | -0.2367 | 5.1304 | JPT |
| CTSS    | GI_23110961-S | rs11586422 | 1 | 1 | 147492431 | 23555  | 5.8819 | 0.4173 | 0.2466  | 5.1304 | JPT |
| CTSS    | GI_23110961-S | rs3768005  | 1 | 1 | 147494061 | 21925  | 5.3693 | 0.3846 | -0.2367 | 5.1304 | JPT |
| CTSS    | GI_23110961-S | rs11807409 | 1 | 1 | 147496496 | 19490  | 5.8864 | 0.4176 | 0.2500  | 5.1304 | JPT |
| CTSS    | GI_23110961-S | rs11804276 | 1 | 1 | 147498834 | 17152  | 6.0306 | 0.4189 | -0.2478 | 5.1304 | JPT |
| CTSS    | GI_23110961-S | rs11803940 | 1 | 1 | 147498908 | 17078  | 5.3693 | 0.3846 | 0.2367  | 5.1304 | JPT |
| CTSS    | GI_23110961-S | rs12072339 | 1 | 1 | 147499172 | 16814  | 5.3693 | 0.3846 | 0.2367  | 5.1304 | JPT |
| CTSS    | GI_23110961-S | rs951281   | 1 | 1 | 147504195 | 11791  | 5.3693 | 0.3846 | 0.2367  | 5.1304 | JPT |
| CTSS    | GI_23110961-S | rs12086472 | 1 | 1 | 147510783 | 5203   | 5.3693 | 0.3846 | -0.2367 | 5.1304 | JPT |
| CTSS    | GI_23110961-S | rs1415148  | 1 | 1 | 147518828 | 2842   | 5.3693 | 0.3846 | -0.2367 | 5.1304 | JPT |
| CTSS    | GI_23110961-S | rs7521898  | 1 | 1 | 147520669 | 4683   | 5.3693 | 0.3846 | -0.2367 | 5.1304 | JPT |
| CTSS    | GI_23110961-S | rs7418501  | 1 | 1 | 147524969 | 8983   | 6.0306 | 0.4189 | 0.2478  | 5.1304 | JPT |
| CTSS    | GI_23110961-S | rs12089989 | 1 | 1 | 147528855 | 12869  | 5.3693 | 0.3846 | -0.2367 | 5.1304 | JPT |
| CTSS    | GI_23110961-S | rs10888390 | 1 | 1 | 147540612 | 24626  | 5.3693 | 0.3846 | -0.2367 | 5.1304 | JPT |
| CTSS    | GI_23110961-S | rs10888391 | 1 | 1 | 147543056 | 27070  | 5.3693 | 0.3846 | -0.2367 | 5.1304 | JPT |
| CTSS    | GI_23110961-S | rs2275235  | 1 | 1 | 147543352 | 27366  | 5.3693 | 0.3846 | -0.2367 | 5.1304 | JPT |
| CTSS    | GI_23110961-S | rs7417376  | 1 | 1 | 147547509 | 31523  | 5.3693 | 0.3846 | 0.2367  | 5.1304 | JPT |
| CTSS    | GI_23110961-S | rs11204726 | 1 | 1 | 147556565 | 40579  | 5.3693 | 0.3846 | -0.2367 | 5.1304 | JPT |
| CTSS    | GI_23110961-S | rs10888394 | 1 | 1 | 147562986 | 47000  | 5.3693 | 0.3846 | 0.2367  | 5.1304 | JPT |
| CTSS    | GI_23110961-S | rs10888395 | 1 | 1 | 147575244 | 59258  | 5.3693 | 0.3846 | 0.2367  | 5.1304 | JPT |
| CTSS    | GI_23110961-S | rs2864871  | 1 | 1 | 147580037 | 64051  | 5.8614 | 0.4160 | -0.2483 | 5.1304 | JPT |
| CTSS    | GI_23110961-S | rs4509581  | 1 | 1 | 147587538 | 71552  | 5.8614 | 0.4160 | 0.2483  | 5.1304 | JPT |
| CTSS    | GI_23110961-S | rs12085336 | 1 | 1 | 147588853 | 72867  | 5.8614 | 0.4160 | 0.2483  | 5.1304 | JPT |
| CTSS    | GI_23110961-S | rs11589458 | 1 | 1 | 147605689 | 89703  | 5.8614 | 0.4160 | 0.2483  | 5.1304 | JPT |
| CTSS    | GI_23110961-S | rs1889740  | 1 | 1 | 147612828 | 96842  | 5.8614 | 0.4160 | -0.2483 | 5.1304 | JPT |
| CTSS    | GI_23110961-S | rs12401316 | 1 | 1 | 147613728 | 97742  | 6.5389 | 0.4489 | 0.2589  | 5.1304 | JPT |
| CTSS    | GI_23110961-S | rs2228099  | 1 | 1 | 147621962 | 105976 | 5.8614 | 0.4160 | -0.2483 | 5.1304 | JPT |
| CTSS    | GI_23110961-S | rs2256355  | 1 | 1 | 147624867 | 108881 | 5.8614 | 0.4160 | -0.2483 | 5.1304 | JPT |
| CTSS    | GI_23110961-S | rs3768015  | 1 | 1 | 147626027 | 110041 | 6.5389 | 0.4489 | 0.2589  | 5.1304 | JPT |
| CTSS    | GI_23110961-S | rs3768013  | 1 | 1 | 147628484 | 112498 | 5.8614 | 0.4160 | 0.2483  | 5.1304 | JPT |
| CTSS    | GI_23110961-S | rs7532045  | 1 | 1 | 147634920 | 118934 | 5.8614 | 0.4160 | -0.2483 | 5.1304 | JPT |
| S100A13 | GI_41117409-S | rs2274739  | 1 | 1 | 150425206 | 13257  | 9.5507 | 0.6072 | -0.5483 | 5.6847 | JPT |
| S100A13 | GI_41117409-S | rs10797056 | 1 | 1 | 150426856 | 14907  | 9.8245 | 0.6100 | -0.5482 | 5.6847 | JPT |
| S100A13 | GI_41117409-S | rs3790412  | 1 | 1 | 150429930 | 17981  | 9.0323 | 0.6026 | 0.5498  | 5.6847 | JPT |
| S100A13 | GI_41117409-S | rs3828031  | 1 | 1 | 150430205 | 18256  | 9.5507 | 0.6072 | 0.5483  | 5.6847 | JPT |
| S100A13 | GI_41117409-S | rs7934     | 1 | 1 | 150431839 | 19890  | 7.7988 | 0.5255 | 0.5409  | 5.6847 | JPT |
| S100A13 | GI_41117409-S | rs913860   | 1 | 1 | 150433200 | 21251  | 7.2138 | 0.4947 | 0.4619  | 5.6847 | JPT |
| S100A13 | GI_41117409-S | rs913861   | 1 | 1 | 150435293 | 23344  | 9.5507 | 0.6072 | 0.5483  | 5.6847 | JPT |
| S100A13 | GI_41117409-S | rs4845563  | 1 | 1 | 150442099 | 30150  | 8.6079 | 0.5651 | 0.5313  | 5.6847 | JPT |
| S100A13 | GI_41117409-S | rs3806234  | 1 | 1 | 150444144 | 32195  | 8.6508 | 0.5671 | 0.5349  | 5.6847 | JPT |
| S100A13 | GI_41117409-S | rs7345     | 1 | 1 | 150447131 | 35182  | 9.5507 | 0.6072 | 0.5483  | 5.6847 | JPT |
| S100A13 | GI_41117409-S | rs4515830  | 1 | 1 | 150449545 | 37596  | 7.7270 | 0.5218 | 0.4880  | 5.6847 | JPT |
| S100A13 | GI_41117409-S | rs4351684  | 1 | 1 | 150449933 | 37984  | 9.8245 | 0.6100 | -0.5482 | 5.6847 | JPT |
| S100A13 | GI_41117409-S | rs3862047  | 1 | 1 | 150450690 | 38741  | 8.8591 | 0.5681 | -0.5316 | 5.6847 | JPT |
| S100A13 | GI_41117409-S | rs10797096 | 1 | 1 | 150453738 | 41789  | 8.0137 | 0.5363 | 0.5166  | 5.6847 | JPT |
| S100A13 | GI_41117409-S | rs11265625 | 1 | 1 | 150455982 | 44033  | 8.0137 | 0.5363 | -0.5166 | 5.6847 | JPT |
| S100A13 | GI_41117409-S | rs10908848 | 1 | 1 | 150458953 | 47004  | 8.0137 | 0.5363 | 0.5166  | 5.6847 | JPT |
| S100A13 | GI_41117409-S | rs6674929  | 1 | 1 | 150461734 | 49785  | 8.0137 | 0.5363 | -0.5166 | 5.6847 | JPT |
| S100A13 | GI_41117409-S | rs9661993  | 1 | 1 | 150469478 | 57529  | 8.6469 | 0.5669 | -0.5045 | 5.6847 | JPT |
| PAQR6   | GI_24432010-S | rs1543294  | 1 | 1 | 153022930 | 3518   | 5.6046 | 0.3998 | -0.1163 | 5.2775 | JPT |
| PAQR6   | GI_24432010-S | rs759328   | 1 | 1 | 153044339 | 17891  | 5.6046 | 0.3998 | -0.1163 | 5.2775 | JPT |
| PAQR6   | GI_24432010-S | rs4661037  | 1 | 1 | 153051552 | 25104  | 5.6046 | 0.3998 | -0.1163 | 5.2775 | JPT |

|           |               |            |   |   |           |        |         |        |         |        |     |
|-----------|---------------|------------|---|---|-----------|--------|---------|--------|---------|--------|-----|
| MGC3794   | GI_33239373-S | rs1406822  | 1 | 1 | 164839701 | 61515  | 5.8985  | 0.4183 | -0.3416 | 5.4807 | JPT |
| MGC3794   | GI_33239373-S | rs12736803 | 1 | 1 | 164856724 | 44492  | 7.2725  | 0.4979 | -0.3508 | 5.4807 | JPT |
| MGC3794   | GI_33239373-S | rs6681002  | 1 | 1 | 164857385 | 43831  | 7.6985  | 0.5203 | -0.3522 | 5.4807 | JPT |
| MGC3794   | GI_33239373-S | rs12742613 | 1 | 1 | 164857947 | 43269  | 7.5735  | 0.5224 | -0.3648 | 5.4807 | JPT |
| MGC3794   | GI_33239373-S | rs11807802 | 1 | 1 | 164858819 | 42397  | 7.8111  | 0.5177 | -0.3505 | 5.4807 | JPT |
| MGC3794   | GI_33239373-S | rs1543358  | 1 | 1 | 164863250 | 37966  | 5.9880  | 0.4239 | -0.3244 | 5.4807 | JPT |
| MGC3794   | GI_33239373-S | rs1535007  | 1 | 1 | 164866287 | 34929  | 7.6985  | 0.5203 | 0.3522  | 5.4807 | JPT |
| MGC3794   | GI_33239373-S | rs7517978  | 1 | 1 | 164869703 | 31513  | 9.4385  | 0.6024 | -0.3915 | 5.4807 | JPT |
| MGC3794   | GI_33239373-S | rs4657739  | 1 | 1 | 164874147 | 27069  | 10.9046 | 0.6608 | -0.4241 | 5.4807 | JPT |
| MGC3794   | GI_33239373-S | rs7552728  | 1 | 1 | 164879050 | 22166  | 9.1082  | 0.5880 | -0.4272 | 5.4807 | JPT |
| MGC3794   | GI_33239373-S | rs2281016  | 1 | 1 | 164879550 | 21666  | 10.9046 | 0.6608 | 0.4241  | 5.4807 | JPT |
| MGC3794   | GI_33239373-S | rs10918838 | 1 | 1 | 164880487 | 20729  | 10.8714 | 0.6596 | 0.4237  | 5.4807 | JPT |
| MGC3794   | GI_33239373-S | rs11801584 | 1 | 1 | 164880629 | 20587  | 10.2484 | 0.6539 | -0.4088 | 5.4807 | JPT |
| MGC3794   | GI_33239373-S | rs4657741  | 1 | 1 | 164880800 | 20416  | 7.0670  | 0.5037 | 0.3888  | 5.4807 | JPT |
| MGC3794   | GI_33239373-S | rs12756816 | 1 | 1 | 164881648 | 19568  | 10.1250 | 0.6309 | -0.4124 | 5.4807 | JPT |
| MGC3794   | GI_33239373-S | rs2038033  | 1 | 1 | 164883418 | 17798  | 11.2233 | 0.6636 | 0.4197  | 5.4807 | JPT |
| MGC3794   | GI_33239373-S | rs2038035  | 1 | 1 | 164884748 | 16468  | 10.9046 | 0.6608 | 0.4241  | 5.4807 | JPT |
| MGC3794   | GI_33239373-S | rs2038034  | 1 | 1 | 164885028 | 16188  | 11.0217 | 0.6564 | 0.4270  | 5.4807 | JPT |
| MGC3794   | GI_33239373-S | rs3753935  | 1 | 1 | 164885459 | 15757  | 8.7547  | 0.5899 | 0.4191  | 5.4807 | JPT |
| MGC3794   | GI_33239373-S | rs1320993  | 1 | 1 | 164886257 | 14959  | 10.4885 | 0.6726 | 0.4569  | 5.4807 | JPT |
| MGC3794   | GI_33239373-S | rs2294253  | 1 | 1 | 164888285 | 12931  | 10.9046 | 0.6608 | 0.4241  | 5.4807 | JPT |
| MGC3794   | GI_33239373-S | rs2235207  | 1 | 1 | 164890920 | 10296  | 10.9046 | 0.6608 | 0.4241  | 5.4807 | JPT |
| MGC3794   | GI_33239373-S | rs1040404  | 1 | 1 | 164891548 | 9668   | 10.9046 | 0.6608 | -0.4241 | 5.4807 | JPT |
| MGC3794   | GI_33239373-S | rs2281014  | 1 | 1 | 164895496 | 5720   | 11.0217 | 0.6564 | 0.4270  | 5.4807 | JPT |
| MGC3794   | GI_33239373-S | rs1040403  | 1 | 1 | 164895855 | 5361   | 10.8423 | 0.6585 | -0.4284 | 5.4807 | JPT |
| MGC3794   | GI_33239373-S | rs4534357  | 1 | 1 | 164898797 | 2419   | 6.3795  | 0.4474 | -0.3355 | 5.4807 | JPT |
| MGC3794   | GI_33239373-S | rs2072778  | 1 | 1 | 164900408 | 808    | 11.0750 | 0.6583 | 0.4225  | 5.4807 | JPT |
| MGC3794   | GI_33239373-S | rs2072776  | 1 | 1 | 164901110 | 106    | 8.5622  | 0.5544 | -0.3989 | 5.4807 | JPT |
| MGC3794   | GI_33239373-S | rs10918844 | 1 | 1 | 164904282 | 3066   | 10.8423 | 0.6585 | -0.4284 | 5.4807 | JPT |
| dJ383J4.3 | GI_42655858-S | rs6702339  | 1 | 1 | 170122865 | 377611 | 8.9033  | 0.5701 | 0.8067  | 7.1013 | JPT |
| dJ383J4.3 | GI_42655858-S | rs3934577  | 1 | 1 | 170129967 | 370509 | 8.9033  | 0.5701 | -0.8067 | 7.1013 | JPT |
| dJ383J4.3 | GI_42655858-S | rs12085083 | 1 | 1 | 170139974 | 360502 | 8.9033  | 0.5701 | -0.8067 | 7.1013 | JPT |
| dJ383J4.3 | GI_42655858-S | rs7534736  | 1 | 1 | 170145337 | 355139 | 7.3045  | 0.5081 | 0.6746  | 7.1013 | JPT |
| dJ383J4.3 | GI_42655858-S | rs6700269  | 1 | 1 | 170156279 | 344197 | 8.9033  | 0.5701 | -0.8067 | 7.1013 | JPT |
| dJ383J4.3 | GI_42655858-S | rs7539322  | 1 | 1 | 170347622 | 152854 | 9.0633  | 0.5860 | -0.8459 | 7.1013 | JPT |
| dJ383J4.3 | GI_42655858-S | rs3791022  | 1 | 1 | 170466426 | 34050  | 8.9452  | 0.5807 | 0.8318  | 7.1013 | JPT |
| dJ383J4.3 | GI_42655858-S | rs2068871  | 1 | 1 | 170527826 | 27350  | 8.9452  | 0.5807 | -0.8318 | 7.1013 | JPT |
| dJ383J4.3 | GI_42655858-S | rs2065170  | 1 | 1 | 170576889 | 76413  | 8.9452  | 0.5807 | 0.8318  | 7.1013 | JPT |
| dJ383J4.3 | GI_42655858-S | rs16846526 | 1 | 1 | 170587894 | 87418  | 9.1951  | 0.5831 | 0.8322  | 7.1013 | JPT |
| dJ383J4.3 | GI_42655858-S | rs16846546 | 1 | 1 | 170591839 | 91363  | 9.1951  | 0.5831 | 0.8322  | 7.1013 | JPT |
| dJ383J4.3 | GI_42655858-S | rs16846561 | 1 | 1 | 170600768 | 100292 | 8.6720  | 0.5770 | -0.8197 | 7.1013 | JPT |
| dJ383J4.3 | GI_42655858-S | rs2146372  | 1 | 1 | 170601226 | 100750 | 8.9452  | 0.5807 | -0.8318 | 7.1013 | JPT |
| dJ383J4.3 | GI_42655858-S | rs2759328  | 1 | 1 | 170608362 | 107886 | 9.1951  | 0.5831 | -0.8322 | 7.1013 | JPT |
| dJ383J4.3 | GI_42655858-S | rs941988   | 1 | 1 | 170613550 | 113074 | 9.1951  | 0.5831 | 0.8322  | 7.1013 | JPT |
| dJ383J4.3 | GI_42655858-S | rs2227592  | 1 | 1 | 170617369 | 116893 | 8.9452  | 0.5807 | 0.8318  | 7.1013 | JPT |
| dJ383J4.3 | GI_42655858-S | rs2227589  | 1 | 1 | 170617873 | 117397 | 9.1951  | 0.5831 | 0.8322  | 7.1013 | JPT |
| CHI3L1    | GI_4557017-S  | rs7515776  | 1 | 1 | 199887360 | 7455   | 10.4144 | 0.6335 | 0.3428  | 6.2747 | JPT |
| CHI3L1    | GI_4557017-S  | rs10399805 | 1 | 1 | 199887655 | 7750   | 9.7645  | 0.6075 | -0.3464 | 6.2747 | JPT |
| CHI3L1    | GI_4557017-S  | rs6691378  | 1 | 1 | 199888779 | 8874   | 9.0039  | 0.5747 | -0.3424 | 6.2747 | JPT |
| CHI3L1    | GI_4557017-S  | rs2886117  | 1 | 1 | 199900538 | 20633  | 8.6319  | 0.5576 | -0.3324 | 6.2747 | JPT |
| GOS2      | GI_20070269-S | rs2896936  | 1 | 1 | 205249867 | 988044 | 5.6982  | 0.4058 | -1.0450 | 5.4063 | JPT |
| FLJ14146  | GI_31542689-S | rs416768   | 1 | 1 | 217251766 | 8835   | 6.5855  | 0.4595 | -1.0281 | 6.026  | JPT |
| FLJ14146  | GI_31542689-S | rs364360   | 1 | 1 | 217253371 | 7230   | 7.9438  | 0.5328 | 1.0937  | 6.026  | JPT |
| FLJ14146  | GI_31542689-S | rs425437   | 1 | 1 | 217256903 | 3698   | 9.3382  | 0.5894 | -0.9668 | 6.026  | JPT |
| FLJ20605  | GI_31542712-S | rs425437   | 1 | 1 | 217256903 | 88767  | 6.2923  | 0.4346 | -0.7874 | 5.8965 | JPT |
| FLJ14146  | GI_31542689-S | rs437078   | 1 | 1 | 217257022 | 3579   | 9.0958  | 0.5874 | -0.9548 | 6.026  | JPT |
| FLJ20605  | GI_31542712-S | rs437078   | 1 | 1 | 217257022 | 88648  | 6.1580  | 0.4342 | -0.7678 | 5.8965 | JPT |
| FLJ14146  | GI_31542689-S | rs700036   | 1 | 1 | 217264434 | 3833   | 7.1903  | 0.4853 | 1.0566  | 6.026  | JPT |
| FLJ14146  | GI_31542689-S | rs384264   | 1 | 1 | 217265327 | 4726   | 7.9438  | 0.5328 | -1.0937 | 6.026  | JPT |

|          |               |            |   |   |           |        |         |        |         |        |     |
|----------|---------------|------------|---|---|-----------|--------|---------|--------|---------|--------|-----|
| FLJ14146 | GI_31542689-S | rs774128   | 1 | 1 | 217265785 | 5184   | 7.9438  | 0.5328 | 1.0937  | 6.026  | JPT |
| FLJ14146 | GI_31542689-S | rs17008307 | 1 | 1 | 217271782 | 11181  | 7.1903  | 0.4853 | 1.0566  | 6.026  | JPT |
| FLJ14146 | GI_31542689-S | rs414180   | 1 | 1 | 217272761 | 12160  | 7.1953  | 0.4855 | -0.8896 | 6.026  | JPT |
| FLJ14146 | GI_31542689-S | rs439513   | 1 | 1 | 217272893 | 12292  | 10.3905 | 0.6326 | -0.9971 | 6.026  | JPT |
| FLJ20605 | GI_31542712-S | rs439513   | 1 | 1 | 217272893 | 72777  | 6.2102  | 0.4297 | -0.7807 | 5.8965 | JPT |
| FLJ14146 | GI_31542689-S | rs368664   | 1 | 1 | 217275430 | 14829  | 7.5268  | 0.5031 | 1.0669  | 6.026  | JPT |
| FLJ14146 | GI_31542689-S | rs337177   | 1 | 1 | 217280955 | 20354  | 6.6881  | 0.4654 | -0.8392 | 6.026  | JPT |
| hmm26268 | hmm26268-S    | rs12022218 | 1 | 1 | 218333069 | 3193   | 10.0485 | 0.6191 | -0.2351 | 7.072  | JPT |
| hmm26268 | hmm26268-S    | rs3010848  | 1 | 1 | 218333518 | 2744   | 9.2670  | 0.5950 | 0.1912  | 7.072  | JPT |
| hmm26268 | hmm26268-S    | rs12026940 | 1 | 1 | 218334109 | 2153   | 10.0485 | 0.6191 | -0.2351 | 7.072  | JPT |
| hmm26268 | hmm26268-S    | rs12030246 | 1 | 1 | 218334167 | 2095   | 10.0485 | 0.6191 | 0.2351  | 7.072  | JPT |
| hmm26268 | hmm26268-S    | rs3010852  | 1 | 1 | 218334602 | 1660   | 9.2670  | 0.5950 | 0.1912  | 7.072  | JPT |
| hmm26268 | hmm26268-S    | rs7551182  | 1 | 1 | 218335485 | 777    | 8.0805  | 0.5574 | -0.1674 | 7.072  | JPT |
| hmm26268 | hmm26268-S    | rs11118855 | 1 | 1 | 218336215 | 47     | 9.2530  | 0.5857 | 0.1902  | 7.072  | JPT |
| hmm26268 | hmm26268-S    | rs3003902  | 1 | 1 | 218336419 | 157    | 9.3205  | 0.5973 | 0.1892  | 7.072  | JPT |
| hmm26268 | hmm26268-S    | rs12034159 | 1 | 1 | 218337932 | 1670   | 8.9458  | 0.5720 | 0.1907  | 7.072  | JPT |
| hmm26268 | hmm26268-S    | rs9441948  | 1 | 1 | 218337962 | 1700   | 8.6148  | 0.5654 | 0.1912  | 7.072  | JPT |
| hmm26268 | hmm26268-S    | rs7532339  | 1 | 1 | 218339435 | 3173   | 8.8433  | 0.5760 | 0.2271  | 7.072  | JPT |
| hmm26268 | hmm26268-S    | rs11118856 | 1 | 1 | 218339816 | 3554   | 8.9458  | 0.5720 | -0.1907 | 7.072  | JPT |
| hmm26268 | hmm26268-S    | rs12036282 | 1 | 1 | 218340189 | 3927   | 8.8651  | 0.5770 | 0.2274  | 7.072  | JPT |
| hmm26268 | hmm26268-S    | rs11118858 | 1 | 1 | 218341353 | 5091   | 9.0703  | 0.5776 | 0.2265  | 7.072  | JPT |
| hmm26268 | hmm26268-S    | rs6680297  | 1 | 1 | 218344970 | 8708   | 9.0703  | 0.5776 | 0.2265  | 7.072  | JPT |
| hmm26268 | hmm26268-S    | rs6680316  | 1 | 1 | 218345021 | 8759   | 7.8746  | 0.5562 | 0.2005  | 7.072  | JPT |
| hmm26268 | hmm26268-S    | rs10495178 | 1 | 1 | 218348833 | 12571  | 9.0703  | 0.5776 | -0.2265 | 7.072  | JPT |
| hmm26268 | hmm26268-S    | rs17010785 | 1 | 1 | 218353599 | 17337  | 7.8638  | 0.5204 | -0.1933 | 7.072  | JPT |
| hmm26268 | hmm26268-S    | rs4403637  | 1 | 1 | 218356929 | 20667  | 8.9458  | 0.5720 | 0.1907  | 7.072  | JPT |
| hmm26268 | hmm26268-S    | rs12038356 | 1 | 1 | 218361067 | 24805  | 7.6247  | 0.5165 | -0.1932 | 7.072  | JPT |
| hmm26268 | hmm26268-S    | rs11118863 | 1 | 1 | 218361410 | 25148  | 8.9458  | 0.5720 | 0.1907  | 7.072  | JPT |
| hmm26268 | hmm26268-S    | rs12039269 | 1 | 1 | 218361832 | 25570  | 7.6227  | 0.5164 | -0.1932 | 7.072  | JPT |
| MGC13186 | GI_14150099-S | rs12744791 | 1 | 1 | 229396463 | 24235  | 12.0466 | 0.7003 | -0.6978 | 7.3469 | JPT |
| MGC13186 | GI_14150099-S | rs12725558 | 1 | 1 | 229398198 | 22500  | 11.7425 | 0.6991 | 0.6971  | 7.3469 | JPT |
| MGC12458 | GI_14150107-S | rs12139861 | 1 | 1 | 241452134 | 124946 | 6.4823  | 0.4457 | 0.6088  | 6.2566 | JPT |
| MGC12458 | GI_14150107-S | rs6700087  | 1 | 1 | 241456682 | 120398 | 6.9684  | 0.4812 | 0.6663  | 6.2566 | JPT |
| MGC12458 | GI_14150107-S | rs11590498 | 1 | 1 | 241461755 | 115325 | 9.9005  | 0.6218 | 0.7427  | 6.2566 | JPT |
| MGC12458 | GI_14150107-S | rs10927361 | 1 | 1 | 241466695 | 110385 | 9.7262  | 0.6236 | -0.7267 | 6.2566 | JPT |
| MGC12458 | GI_14150107-S | rs1021282  | 1 | 1 | 241470753 | 106327 | 9.9005  | 0.6218 | -0.7427 | 6.2566 | JPT |
| MGC12458 | GI_14150107-S | rs10927363 | 1 | 1 | 241474480 | 102600 | 8.3022  | 0.5593 | -0.6613 | 6.2566 | JPT |
| MGC12458 | GI_14150107-S | rs12403396 | 1 | 1 | 241474775 | 102305 | 8.5632  | 0.5630 | -0.6686 | 6.2566 | JPT |
| MGC12458 | GI_14150107-S | rs10927364 | 1 | 1 | 241476465 | 100615 | 9.9005  | 0.6218 | -0.7427 | 6.2566 | JPT |
| MGC12458 | GI_14150107-S | rs4658434  | 1 | 1 | 241478023 | 99057  | 8.9038  | 0.5701 | 0.6727  | 6.2566 | JPT |
| MGC12458 | GI_14150107-S | rs2050632  | 1 | 1 | 241485608 | 91472  | 8.9038  | 0.5701 | 0.6727  | 6.2566 | JPT |
| MGC12458 | GI_14150107-S | rs522595   | 1 | 1 | 241485780 | 91300  | 8.9038  | 0.5701 | 0.6727  | 6.2566 | JPT |
| MGC12458 | GI_14150107-S | rs644341   | 1 | 1 | 241485863 | 91217  | 9.9005  | 0.6218 | -0.7427 | 6.2566 | JPT |
| MGC12458 | GI_14150107-S | rs643352   | 1 | 1 | 241486132 | 90948  | 8.6338  | 0.5663 | 0.6653  | 6.2566 | JPT |
| MGC12458 | GI_14150107-S | rs10803250 | 1 | 1 | 241488109 | 88971  | 8.6338  | 0.5663 | -0.6653 | 6.2566 | JPT |
| MGC12458 | GI_14150107-S | rs651773   | 1 | 1 | 241490780 | 86300  | 9.9005  | 0.6218 | -0.7427 | 6.2566 | JPT |
| MGC12458 | GI_14150107-S | rs626070   | 1 | 1 | 241493372 | 83708  | 8.9038  | 0.5701 | 0.6727  | 6.2566 | JPT |
| MGC12458 | GI_14150107-S | rs4658685  | 1 | 1 | 241493912 | 83168  | 8.6338  | 0.5663 | -0.6653 | 6.2566 | JPT |
| MGC12458 | GI_14150107-S | rs7552510  | 1 | 1 | 241494079 | 83001  | 8.6338  | 0.5663 | 0.6653  | 6.2566 | JPT |
| MGC12458 | GI_14150107-S | rs2786693  | 1 | 1 | 241495087 | 81993  | 8.0837  | 0.5575 | -0.6599 | 6.2566 | JPT |
| MGC12458 | GI_14150107-S | rs672008   | 1 | 1 | 241496919 | 80161  | 9.9005  | 0.6218 | 0.7427  | 6.2566 | JPT |
| MGC12458 | GI_14150107-S | rs2786691  | 1 | 1 | 241497170 | 79910  | 9.9005  | 0.6218 | -0.7427 | 6.2566 | JPT |
| MGC12458 | GI_14150107-S | rs10803251 | 1 | 1 | 241499501 | 77579  | 8.6338  | 0.5663 | 0.6653  | 6.2566 | JPT |
| MGC12458 | GI_14150107-S | rs1196365  | 1 | 1 | 241505212 | 71868  | 9.9005  | 0.6218 | -0.7427 | 6.2566 | JPT |
| MGC12458 | GI_14150107-S | rs1196366  | 1 | 1 | 241505229 | 71851  | 11.0091 | 0.6646 | -0.8374 | 6.2566 | JPT |
| MGC12458 | GI_14150107-S | rs10927369 | 1 | 1 | 241506001 | 71079  | 8.6338  | 0.5663 | -0.6653 | 6.2566 | JPT |
| MGC12458 | GI_14150107-S | rs901664   | 1 | 1 | 241509620 | 67460  | 10.8926 | 0.6516 | -0.8262 | 6.2566 | JPT |
| MGC12458 | GI_14150107-S | rs901665   | 1 | 1 | 241509924 | 67156  | 10.8926 | 0.6516 | -0.8262 | 6.2566 | JPT |
| MGC12458 | GI_14150107-S | rs7528009  | 1 | 1 | 241511114 | 65966  | 9.9005  | 0.6218 | 0.7427  | 6.2566 | JPT |

|           |               |            |   |   |           |        |         |        |         |        |     |
|-----------|---------------|------------|---|---|-----------|--------|---------|--------|---------|--------|-----|
| MGC12458  | GI_14150107-S | rs648282   | 1 | 1 | 241512775 | 64305  | 6.3660  | 0.4805 | 0.8066  | 6.2566 | JPT |
| MGC12458  | GI_14150107-S | rs628713   | 1 | 1 | 241515295 | 61785  | 7.4251  | 0.5060 | 0.6669  | 6.2566 | JPT |
| MGC12458  | GI_14150107-S | rs600025   | 1 | 1 | 241517136 | 59944  | 12.4087 | 0.7119 | 0.7858  | 6.2566 | JPT |
| MGC12458  | GI_14150107-S | rs586013   | 1 | 1 | 241517934 | 59146  | 13.8528 | 0.7538 | -0.7860 | 6.2566 | JPT |
| MGC12458  | GI_14150107-S | rs632383   | 1 | 1 | 241518287 | 58793  | 12.8644 | 0.7174 | 0.7915  | 6.2566 | JPT |
| MGC12458  | GI_14150107-S | rs1979568  | 1 | 1 | 241518513 | 58567  | 12.4087 | 0.7119 | 0.7858  | 6.2566 | JPT |
| MGC12458  | GI_14150107-S | rs675033   | 1 | 1 | 241519964 | 57116  | 12.3577 | 0.7018 | 0.7243  | 6.2566 | JPT |
| MGC12458  | GI_14150107-S | rs632676   | 1 | 1 | 241521105 | 55975  | 12.7658 | 0.7315 | -0.8042 | 6.2566 | JPT |
| MGC12458  | GI_14150107-S | rs616540   | 1 | 1 | 241522450 | 54630  | 13.8528 | 0.7538 | -0.7860 | 6.2566 | JPT |
| MGC12458  | GI_14150107-S | rs665478   | 1 | 1 | 241524271 | 52809  | 12.3577 | 0.7018 | -0.7243 | 6.2566 | JPT |
| MGC12458  | GI_14150107-S | rs9428636  | 1 | 1 | 241526024 | 51056  | 13.8528 | 0.7538 | -0.7860 | 6.2566 | JPT |
| MGC12458  | GI_14150107-S | rs556935   | 1 | 1 | 241530141 | 46939  | 10.1705 | 0.6898 | 0.8684  | 6.2566 | JPT |
| MGC12458  | GI_14150107-S | rs626106   | 1 | 1 | 241530870 | 46210  | 9.1158  | 0.6254 | -0.8624 | 6.2566 | JPT |
| MGC12458  | GI_14150107-S | rs2029249  | 1 | 1 | 241531718 | 45362  | 12.3577 | 0.7018 | -0.7243 | 6.2566 | JPT |
| MGC12458  | GI_14150107-S | rs11580510 | 1 | 1 | 241531917 | 45163  | 12.1124 | 0.7112 | -0.7109 | 6.2566 | JPT |
| MGC12458  | GI_14150107-S | rs12728471 | 1 | 1 | 241531931 | 45149  | 11.0757 | 0.7038 | -0.7044 | 6.2566 | JPT |
| MGC12458  | GI_14150107-S | rs4233441  | 1 | 1 | 241535175 | 41905  | 13.8528 | 0.7538 | -0.7860 | 6.2566 | JPT |
| MGC12458  | GI_14150107-S | rs619449   | 1 | 1 | 241539091 | 37989  | 12.8874 | 0.7351 | 0.7890  | 6.2566 | JPT |
| MGC12458  | GI_14150107-S | rs588923   | 1 | 1 | 241539921 | 37159  | 7.0009  | 0.5181 | -0.7993 | 6.2566 | JPT |
| MGC12458  | GI_14150107-S | rs4658688  | 1 | 1 | 241540837 | 36243  | 13.8528 | 0.7538 | -0.7860 | 6.2566 | JPT |
| MGC12458  | GI_14150107-S | rs611185   | 1 | 1 | 241545095 | 31985  | 8.9755  | 0.5820 | 0.7180  | 6.2566 | JPT |
| MGC12458  | GI_14150107-S | rs576872   | 1 | 1 | 241549105 | 27975  | 8.9755  | 0.5820 | 0.7180  | 6.2566 | JPT |
| MGC12458  | GI_14150107-S | rs547441   | 1 | 1 | 241550008 | 27072  | 8.7848  | 0.5647 | -0.7025 | 6.2566 | JPT |
| MGC12458  | GI_14150107-S | rs2843423  | 1 | 1 | 241554766 | 22314  | 8.7848  | 0.5647 | 0.7025  | 6.2566 | JPT |
| MGC12458  | GI_14150107-S | rs6692143  | 1 | 1 | 241554927 | 22153  | 9.0905  | 0.5961 | -0.6933 | 6.2566 | JPT |
| MGC12458  | GI_14150107-S | rs664252   | 1 | 1 | 241555077 | 22003  | 8.2796  | 0.5582 | 0.7043  | 6.2566 | JPT |
| MGC12458  | GI_14150107-S | rs1538165  | 1 | 1 | 241556751 | 20329  | 10.4736 | 0.6446 | -0.7501 | 6.2566 | JPT |
| MGC12458  | GI_14150107-S | rs586865   | 1 | 1 | 241556998 | 20082  | 7.1462  | 0.5171 | 0.7023  | 6.2566 | JPT |
| MGC12458  | GI_14150107-S | rs10754848 | 1 | 1 | 241559014 | 18066  | 10.4736 | 0.6446 | 0.7501  | 6.2566 | JPT |
| MGC12458  | GI_14150107-S | rs7536388  | 1 | 1 | 241561374 | 15706  | 8.0401  | 0.5840 | -0.6769 | 6.2566 | JPT |
| MGC12458  | GI_14150107-S | rs10927383 | 1 | 1 | 241564744 | 12336  | 9.2723  | 0.6041 | -0.6855 | 6.2566 | JPT |
| MGC12458  | GI_14150107-S | rs4658690  | 1 | 1 | 241565036 | 12044  | 8.1082  | 0.5410 | -0.6686 | 6.2566 | JPT |
| MGC12458  | GI_14150107-S | rs12083437 | 1 | 1 | 241567770 | 9310   | 7.2925  | 0.4990 | 0.6602  | 6.2566 | JPT |
| MGC12458  | GI_14150107-S | rs4658694  | 1 | 1 | 241570210 | 6870   | 8.1082  | 0.5410 | 0.6686  | 6.2566 | JPT |
| MGC12458  | GI_14150107-S | rs10927386 | 1 | 1 | 241571419 | 5661   | 7.5327  | 0.5382 | -0.6590 | 6.2566 | JPT |
| MGC12458  | GI_14150107-S | rs10927387 | 1 | 1 | 241571443 | 5637   | 7.2925  | 0.4990 | 0.6602  | 6.2566 | JPT |
| MGC12458  | GI_14150107-S | rs10754849 | 1 | 1 | 241573221 | 3859   | 8.1082  | 0.5410 | 0.6686  | 6.2566 | JPT |
| MGC12458  | GI_14150107-S | rs6429522  | 1 | 1 | 241574484 | 2596   | 7.7553  | 0.5233 | 0.6859  | 6.2566 | JPT |
| MGC12458  | GI_14150107-S | rs4658696  | 1 | 1 | 241577480 | 400    | 7.7059  | 0.5124 | 0.6261  | 6.2566 | JPT |
| MGC12458  | GI_14150107-S | rs11806396 | 1 | 1 | 241578384 | 1304   | 6.9538  | 0.4887 | -0.6586 | 6.2566 | JPT |
| MGC12458  | GI_14150107-S | rs10927392 | 1 | 1 | 241584251 | 7171   | 6.2942  | 0.4948 | 0.6636  | 6.2566 | JPT |
| LOC130502 | GI_37539459-S | rs13421472 | 2 | 2 | 20004440  | 14963  | 5.8991  | 0.4109 | -0.3989 | 5.5668 | JPT |
| LOC130502 | GI_37539459-S | rs11888045 | 2 | 2 | 20013518  | 5885   | 8.4034  | 0.5826 | 0.5111  | 5.5668 | JPT |
| LOC130502 | GI_37539459-S | rs7563410  | 2 | 2 | 20018564  | 839    | 8.2709  | 0.5490 | -0.4574 | 5.5668 | JPT |
| LOC130502 | GI_37539459-S | rs7572167  | 2 | 2 | 20022616  | 3213   | 8.4550  | 0.5493 | 0.4548  | 5.5668 | JPT |
| LOC130502 | GI_37539459-S | rs2304588  | 2 | 2 | 20023345  | 3942   | 8.5217  | 0.5610 | -0.4628 | 5.5668 | JPT |
| LOC130502 | GI_37539459-S | rs7594214  | 2 | 2 | 20027997  | 8594   | 6.9769  | 0.4817 | -0.4311 | 5.5668 | JPT |
| LOC130502 | GI_37539459-S | rs2293671  | 2 | 2 | 20059492  | 40089  | 8.5217  | 0.5610 | -0.4628 | 5.5668 | JPT |
| LOC130502 | GI_37539459-S | rs11096632 | 2 | 2 | 20066000  | 46597  | 8.5217  | 0.5610 | 0.4628  | 5.5668 | JPT |
| LOC130502 | GI_37539459-S | rs6707471  | 2 | 2 | 20068472  | 49069  | 8.2074  | 0.5730 | -0.4614 | 5.5668 | JPT |
| LOC130502 | GI_37539459-S | rs6719397  | 2 | 2 | 20077173  | 57770  | 8.1294  | 0.5508 | 0.4546  | 5.5668 | JPT |
| LOC130502 | GI_37539459-S | rs12620863 | 2 | 2 | 20080092  | 60689  | 8.4550  | 0.5493 | 0.4548  | 5.5668 | JPT |
| LOC130502 | GI_37539459-S | rs10169398 | 2 | 2 | 20081837  | 62434  | 8.1364  | 0.5424 | -0.4502 | 5.5668 | JPT |
| LOC130502 | GI_37539459-S | rs12613209 | 2 | 2 | 20084599  | 65196  | 7.8685  | 0.5377 | -0.4393 | 5.5668 | JPT |
| LOC130502 | GI_37539459-S | rs16987265 | 2 | 2 | 20096530  | 77127  | 8.5217  | 0.5610 | 0.4628  | 5.5668 | JPT |
| LOC130502 | GI_37539459-S | rs10197385 | 2 | 2 | 20098202  | 78799  | 8.4550  | 0.5493 | -0.4548 | 5.5668 | JPT |
| LOC130502 | GI_37539459-S | rs1381817  | 2 | 2 | 20100848  | 81445  | 8.4550  | 0.5493 | 0.4548  | 5.5668 | JPT |
| LOC130502 | GI_37539459-S | rs1060742  | 2 | 2 | 20110643  | 91240  | 7.1294  | 0.4901 | -0.4349 | 5.5668 | JPT |
| LOC130502 | GI_37539459-S | rs10495701 | 2 | 2 | 20119479  | 100076 | 8.1108  | 0.5327 | 0.4475  | 5.5668 | JPT |

|           |               |            |   |   |          |        |         |        |         |        |     |
|-----------|---------------|------------|---|---|----------|--------|---------|--------|---------|--------|-----|
| DTNB      | GI_37577100-A | rs6761076  | 2 | 2 | 25519409 | 7604   | 6.1247  | 0.4322 | 0.3241  | 5.5775 | JPT |
| DTNB      | GI_37577100-A | rs7558082  | 2 | 2 | 25524465 | 12660  | 6.1425  | 0.4257 | -0.3219 | 5.5775 | JPT |
| DTNB      | GI_37577100-A | rs7577599  | 2 | 2 | 25524797 | 12992  | 6.1247  | 0.4322 | 0.3241  | 5.5775 | JPT |
| DTNB      | GI_37577100-A | rs17046986 | 2 | 2 | 25532551 | 20746  | 6.0930  | 0.4303 | -0.3187 | 5.5775 | JPT |
| DTNB      | GI_37577100-A | rs7571570  | 2 | 2 | 25533181 | 21376  | 6.1247  | 0.4322 | -0.3241 | 5.5775 | JPT |
| DTNB      | GI_37577100-A | rs1369704  | 2 | 2 | 25535241 | 23436  | 6.1247  | 0.4322 | -0.3241 | 5.5775 | JPT |
| DTNB      | GI_37577100-A | rs2384232  | 2 | 2 | 25535400 | 23595  | 6.1247  | 0.4322 | 0.3241  | 5.5775 | JPT |
| DTNB      | GI_37577100-A | rs6546148  | 2 | 2 | 25536656 | 24851  | 6.9076  | 0.5036 | -0.3631 | 5.5775 | JPT |
| DTNB      | GI_37577100-A | rs7586918  | 2 | 2 | 25538036 | 26231  | 6.8556  | 0.4917 | 0.3593  | 5.5775 | JPT |
| DTNB      | GI_37577100-A | rs6546149  | 2 | 2 | 25541089 | 29284  | 6.1247  | 0.4322 | -0.3241 | 5.5775 | JPT |
| DTNB      | GI_37577100-A | rs10180663 | 2 | 2 | 25544893 | 33088  | 6.2227  | 0.4304 | 0.3183  | 5.5775 | JPT |
| DTNB      | GI_37577100-A | rs10189164 | 2 | 2 | 25545019 | 33214  | 6.2227  | 0.4304 | 0.3183  | 5.5775 | JPT |
| DTNB      | GI_37577100-A | rs6731296  | 2 | 2 | 25546478 | 34673  | 6.2469  | 0.4396 | -0.3214 | 5.5775 | JPT |
| Hs.468081 | Hs.468081-S   | rs12620887 | 2 | 2 | 31299580 | 817841 | 7.0841  | 0.4795 | 0.0995  | 6.3093 | JPT |
| Hs.468081 | Hs.468081-S   | rs1947027  | 2 | 2 | 31299608 | 817813 | 6.3113  | 0.4434 | 0.1025  | 6.3093 | JPT |
| Hs.468081 | Hs.468081-S   | rs12468082 | 2 | 2 | 31299904 | 817517 | 6.3440  | 0.4376 | 0.0982  | 6.3093 | JPT |
| Hs.468081 | Hs.468081-S   | rs12622868 | 2 | 2 | 31301674 | 815747 | 6.4648  | 0.4447 | -0.0914 | 6.3093 | JPT |
| Hs.468081 | Hs.468081-S   | rs10171858 | 2 | 2 | 31304865 | 812556 | 6.4648  | 0.4447 | -0.0914 | 6.3093 | JPT |
| Hs.468081 | Hs.468081-S   | rs6741329  | 2 | 2 | 31305834 | 811587 | 6.4648  | 0.4447 | 0.0914  | 6.3093 | JPT |
| Hs.468081 | Hs.468081-S   | rs1443708  | 2 | 2 | 31308452 | 808969 | 6.4648  | 0.4447 | -0.0914 | 6.3093 | JPT |
| Hs.468081 | Hs.468081-S   | rs12992405 | 2 | 2 | 31308983 | 808438 | 6.5722  | 0.4509 | 0.0920  | 6.3093 | JPT |
| Hs.468081 | Hs.468081-S   | rs4951967  | 2 | 2 | 31312839 | 804582 | 6.3758  | 0.4395 | 0.1062  | 6.3093 | JPT |
| Hs.468081 | Hs.468081-S   | rs7422120  | 2 | 2 | 31322304 | 795117 | 6.5947  | 0.4682 | 0.1053  | 6.3093 | JPT |
| Hs.468081 | Hs.468081-S   | rs764072   | 2 | 2 | 31322379 | 795042 | 6.3938  | 0.4483 | -0.0995 | 6.3093 | JPT |
| Hs.468081 | Hs.468081-S   | rs1465972  | 2 | 2 | 31322835 | 794586 | 6.5532  | 0.4498 | -0.0995 | 6.3093 | JPT |
| Hs.468081 | Hs.468081-S   | rs1465973  | 2 | 2 | 31322893 | 794528 | 6.4352  | 0.4507 | -0.0982 | 6.3093 | JPT |
| Hs.468081 | Hs.468081-S   | rs1465974  | 2 | 2 | 31322961 | 794460 | 6.5532  | 0.4498 | 0.0995  | 6.3093 | JPT |
| Hs.468081 | Hs.468081-S   | rs1465975  | 2 | 2 | 31323016 | 794405 | 6.3938  | 0.4483 | -0.0995 | 6.3093 | JPT |
| Hs.468081 | Hs.468081-S   | rs7595928  | 2 | 2 | 31323359 | 794062 | 6.5532  | 0.4498 | -0.0995 | 6.3093 | JPT |
| Hs.468081 | Hs.468081-S   | rs13382984 | 2 | 2 | 31324094 | 793327 | 6.5532  | 0.4498 | -0.0995 | 6.3093 | JPT |
| Hs.468081 | Hs.468081-S   | rs1562021  | 2 | 2 | 31324297 | 793124 | 6.5532  | 0.4498 | -0.0995 | 6.3093 | JPT |
| Hs.468081 | Hs.468081-S   | rs734281   | 2 | 2 | 31324598 | 792823 | 6.5532  | 0.4498 | 0.0995  | 6.3093 | JPT |
| Hs.468081 | Hs.468081-S   | rs12468547 | 2 | 2 | 31325220 | 792201 | 6.4352  | 0.4507 | 0.0982  | 6.3093 | JPT |
| Hs.468081 | Hs.468081-S   | rs13408524 | 2 | 2 | 31325874 | 791547 | 6.5532  | 0.4498 | -0.0995 | 6.3093 | JPT |
| SOS1      | GI_15529995-S | rs6712917  | 2 | 2 | 38923399 | 201351 | 7.3497  | 0.5020 | 0.3851  | 6.5812 | JPT |
| SOS1      | GI_15529995-S | rs1376461  | 2 | 2 | 38933286 | 191464 | 7.3497  | 0.5020 | 0.3851  | 6.5812 | JPT |
| SOS1      | GI_15529995-S | rs921433   | 2 | 2 | 38934562 | 190188 | 7.3497  | 0.5020 | 0.3851  | 6.5812 | JPT |
| SOS1      | GI_15529995-S | rs7368897  | 2 | 2 | 38935578 | 189172 | 7.5301  | 0.5033 | -0.3852 | 6.5812 | JPT |
| SOS1      | GI_15529995-S | rs3112138  | 2 | 2 | 38954290 | 170460 | 7.3419  | 0.5016 | 0.3831  | 6.5812 | JPT |
| SOS1      | GI_15529995-S | rs3112158  | 2 | 2 | 38981269 | 143481 | 7.3497  | 0.5020 | -0.3851 | 6.5812 | JPT |
| SOS1      | GI_15529995-S | rs3112160  | 2 | 2 | 38984972 | 139778 | 7.3497  | 0.5020 | -0.3851 | 6.5812 | JPT |
| SOS1      | GI_15529995-S | rs3112164  | 2 | 2 | 38999541 | 125209 | 7.5301  | 0.5033 | -0.3852 | 6.5812 | JPT |
| SOS1      | GI_15529995-S | rs3099947  | 2 | 2 | 39020038 | 104712 | 7.3497  | 0.5020 | -0.3851 | 6.5812 | JPT |
| SOS1      | GI_15529995-S | rs3099953  | 2 | 2 | 39029269 | 95481  | 7.5301  | 0.5033 | 0.3852  | 6.5812 | JPT |
| SOS1      | GI_15529995-S | rs1901290  | 2 | 2 | 39034108 | 90642  | 7.5301  | 0.5033 | -0.3852 | 6.5812 | JPT |
| SOS1      | GI_15529995-S | rs3112177  | 2 | 2 | 39038049 | 86701  | 7.5301  | 0.5033 | 0.3852  | 6.5812 | JPT |
| SOS1      | GI_15529995-S | rs7605183  | 2 | 2 | 39044718 | 80032  | 7.5301  | 0.5033 | -0.3852 | 6.5812 | JPT |
| SOS1      | GI_15529995-S | rs6544182  | 2 | 2 | 39057435 | 67315  | 7.5301  | 0.5033 | 0.3852  | 6.5812 | JPT |
| SOS1      | GI_15529995-S | rs6722478  | 2 | 2 | 39061134 | 63616  | 7.5301  | 0.5033 | 0.3852  | 6.5812 | JPT |
| SOS1      | GI_15529995-S | rs6748000  | 2 | 2 | 39068981 | 55769  | 7.3497  | 0.5020 | -0.3851 | 6.5812 | JPT |
| SOS1      | GI_15529995-S | rs17023214 | 2 | 2 | 39137566 | 12816  | 7.5301  | 0.5033 | 0.3852  | 6.5812 | JPT |
| SOS1      | GI_15529995-S | rs10495882 | 2 | 2 | 39139043 | 14293  | 7.5301  | 0.5033 | 0.3852  | 6.5812 | JPT |
| CRIPT     | GI_41350204-S | rs7589801  | 2 | 2 | 46727893 | 35508  | 8.0272  | 0.5370 | 0.2887  | 6.0901 | JPT |
| CRIPT     | GI_41350204-S | rs1901263  | 2 | 2 | 46730237 | 33164  | 6.7868  | 0.4630 | -0.2700 | 6.0901 | JPT |
| CRIPT     | GI_41350204-S | rs17818399 | 2 | 2 | 46737677 | 25724  | 10.1810 | 0.6244 | 0.3415  | 6.0901 | JPT |
| CRIPT     | GI_41350204-S | rs13001566 | 2 | 2 | 46741138 | 22263  | 8.3308  | 0.5434 | -0.2906 | 6.0901 | JPT |
| CRIPT     | GI_41350204-S | rs1451156  | 2 | 2 | 46744253 | 19148  | 8.0272  | 0.5370 | -0.2887 | 6.0901 | JPT |
| CRIPT     | GI_41350204-S | rs13000706 | 2 | 2 | 46749898 | 13503  | 8.0272  | 0.5370 | 0.2887  | 6.0901 | JPT |
| CRIPT     | GI_41350204-S | rs1531133  | 2 | 2 | 46755282 | 8119   | 9.3713  | 0.6085 | 0.3329  | 6.0901 | JPT |

|           |               |            |   |   |          |        |         |        |         |        |     |
|-----------|---------------|------------|---|---|----------|--------|---------|--------|---------|--------|-----|
| CRIPT     | GI_41350204-S | rs2346419  | 2 | 2 | 46756720 | 6681   | 10.1810 | 0.6244 | -0.3415 | 6.0901 | JPT |
| CRIPT     | GI_41350204-S | rs3087822  | 2 | 2 | 46763684 | 283    | 8.0272  | 0.5370 | 0.2887  | 6.0901 | JPT |
| CRIPT     | GI_41350204-S | rs6739397  | 2 | 2 | 46769972 | 6571   | 8.4222  | 0.5563 | -0.3155 | 6.0901 | JPT |
| CRIPT     | GI_41350204-S | rs17767994 | 2 | 2 | 46771730 | 8329   | 6.0937  | 0.4227 | -0.3058 | 6.0901 | JPT |
| CRIPT     | GI_41350204-S | rs12104572 | 2 | 2 | 46774117 | 10716  | 8.7462  | 0.5629 | 0.3171  | 6.0901 | JPT |
| CRIPT     | GI_41350204-S | rs12105006 | 2 | 2 | 46774237 | 10836  | 10.7419 | 0.6460 | -0.3509 | 6.0901 | JPT |
| CRIPT     | GI_41350204-S | rs17768132 | 2 | 2 | 46774900 | 11499  | 6.0937  | 0.4227 | 0.3058  | 6.0901 | JPT |
| CRIPT     | GI_41350204-S | rs6544906  | 2 | 2 | 46775523 | 12122  | 8.4222  | 0.5563 | 0.3155  | 6.0901 | JPT |
| CRIPT     | GI_41350204-S | rs13385693 | 2 | 2 | 46778809 | 15408  | 8.7462  | 0.5629 | 0.3171  | 6.0901 | JPT |
| CRIPT     | GI_41350204-S | rs6544907  | 2 | 2 | 46779970 | 16569  | 8.4222  | 0.5563 | -0.3155 | 6.0901 | JPT |
| CRIPT     | GI_41350204-S | rs896212   | 2 | 2 | 46781372 | 17971  | 6.0937  | 0.4227 | 0.3058  | 6.0901 | JPT |
| CRIPT     | GI_41350204-S | rs982395   | 2 | 2 | 46784696 | 21295  | 8.8853  | 0.5779 | 0.3073  | 6.0901 | JPT |
| CRIPT     | GI_41350204-S | rs10495934 | 2 | 2 | 46786397 | 22996  | 9.1682  | 0.5820 | -0.3095 | 6.0901 | JPT |
| CRIPT     | GI_41350204-S | rs7560464  | 2 | 2 | 46787685 | 24284  | 9.1682  | 0.5820 | -0.3095 | 6.0901 | JPT |
| CRIPT     | GI_41350204-S | rs6712910  | 2 | 2 | 46788609 | 25208  | 9.1682  | 0.5820 | -0.3095 | 6.0901 | JPT |
| CRIPT     | GI_41350204-S | rs6544909  | 2 | 2 | 46788897 | 25496  | 8.9656  | 0.5905 | -0.3118 | 6.0901 | JPT |
| CRIPT     | GI_41350204-S | rs13406663 | 2 | 2 | 46790025 | 26624  | 7.1736  | 0.4844 | -0.2771 | 6.0901 | JPT |
| CRIPT     | GI_41350204-S | rs4618102  | 2 | 2 | 46790579 | 27178  | 9.1682  | 0.5820 | -0.3095 | 6.0901 | JPT |
| CRIPT     | GI_41350204-S | rs2881504  | 2 | 2 | 46790720 | 27319  | 8.8853  | 0.5779 | 0.3073  | 6.0901 | JPT |
| CRIPT     | GI_41350204-S | rs6544910  | 2 | 2 | 46793197 | 29796  | 9.1275  | 0.5888 | 0.3025  | 6.0901 | JPT |
| CRIPT     | GI_41350204-S | rs1869836  | 2 | 2 | 46794044 | 30643  | 8.8853  | 0.5779 | -0.3073 | 6.0901 | JPT |
| FLJ31438  | GI_22748824-S | rs7568777  | 2 | 2 | 55295078 | 19467  | 7.3271  | 0.5008 | -0.2290 | 5.9547 | JPT |
| FLJ31438  | GI_22748824-S | rs7349405  | 2 | 2 | 55302945 | 11600  | 6.9906  | 0.4744 | -0.2316 | 5.9547 | JPT |
| FLJ31438  | GI_22748824-S | rs2576722  | 2 | 2 | 55373474 | 58929  | 6.2660  | 0.4407 | -0.2097 | 5.9547 | JPT |
| LOC339804 | GI_37546921-S | rs2564117  | 2 | 2 | 61144673 | 157268 | 5.7265  | 0.4002 | -0.3354 | 5.5299 | JPT |
| LOC339804 | GI_37546921-S | rs2564118  | 2 | 2 | 61144940 | 157001 | 5.6271  | 0.4013 | 0.3341  | 5.5299 | JPT |
| LOC339804 | GI_37546921-S | rs1177234  | 2 | 2 | 61171714 | 130227 | 6.8218  | 0.4730 | -0.3518 | 5.5299 | JPT |
| LOC339804 | GI_37546921-S | rs1177233  | 2 | 2 | 61173785 | 128156 | 6.0345  | 0.4267 | 0.3393  | 5.5299 | JPT |
| LOC339804 | GI_37546921-S | rs3108630  | 2 | 2 | 61179811 | 122130 | 6.8218  | 0.4730 | -0.3518 | 5.5299 | JPT |
| LOC339804 | GI_37546921-S | rs1177269  | 2 | 2 | 61199096 | 102845 | 5.9599  | 0.4221 | 0.3294  | 5.5299 | JPT |
| LOC339804 | GI_37546921-S | rs1729672  | 2 | 2 | 61241868 | 60073  | 8.2114  | 0.5461 | -0.4465 | 5.5299 | JPT |
| LOC339804 | GI_37546921-S | rs1177293  | 2 | 2 | 61259731 | 42210  | 7.7894  | 0.5250 | -0.4012 | 5.5299 | JPT |
| LOC339804 | GI_37546921-S | rs1177283  | 2 | 2 | 61260455 | 41486  | 10.7441 | 0.6548 | 0.4762  | 5.5299 | JPT |
| LOC339804 | GI_37546921-S | rs1177284  | 2 | 2 | 61261097 | 40844  | 10.2930 | 0.6557 | -0.4770 | 5.5299 | JPT |
| LOC339804 | GI_37546921-S | rs1177285  | 2 | 2 | 61261788 | 40153  | 14.1965 | 0.7628 | 0.5077  | 5.5299 | JPT |
| LOC339804 | GI_37546921-S | rs1177286  | 2 | 2 | 61263541 | 38400  | 7.1608  | 0.5179 | -0.3994 | 5.5299 | JPT |
| LOC339804 | GI_37546921-S | rs1177287  | 2 | 2 | 61263814 | 38127  | 8.6618  | 0.5676 | -0.4490 | 5.5299 | JPT |
| LOC339804 | GI_37546921-S | rs1177288  | 2 | 2 | 61264636 | 37305  | 9.2202  | 0.5929 | -0.4436 | 5.5299 | JPT |
| LOC339804 | GI_37546921-S | rs1177289  | 2 | 2 | 61264907 | 37034  | 9.2202  | 0.5929 | -0.4436 | 5.5299 | JPT |
| LOC339804 | GI_37546921-S | rs1177282  | 2 | 2 | 61269428 | 32513  | 14.5714 | 0.7643 | -0.5094 | 5.5299 | JPT |
| LOC339804 | GI_37546921-S | rs12473277 | 2 | 2 | 61270271 | 31670  | 11.2014 | 0.6715 | 0.4946  | 5.5299 | JPT |
| LOC339804 | GI_37546921-S | rs1729660  | 2 | 2 | 61277463 | 24478  | 14.1965 | 0.7628 | 0.5077  | 5.5299 | JPT |
| LOC339804 | GI_37546921-S | rs11498    | 2 | 2 | 61282470 | 19471  | 15.0649 | 0.7842 | 0.5184  | 5.5299 | JPT |
| LOC339804 | GI_37546921-S | rs3213944  | 2 | 2 | 61283949 | 17992  | 14.5981 | 0.7811 | 0.5206  | 5.5299 | JPT |
| LOC339804 | GI_37546921-S | rs2441467  | 2 | 2 | 61285800 | 16141  | 13.2536 | 0.7810 | -0.4928 | 5.5299 | JPT |
| LOC339804 | GI_37546921-S | rs720201   | 2 | 2 | 61288114 | 13827  | 15.0649 | 0.7842 | 0.5184  | 5.5299 | JPT |
| LOC339804 | GI_37546921-S | rs1729653  | 2 | 2 | 61288659 | 13282  | 15.4446 | 0.7852 | 0.5201  | 5.5299 | JPT |
| LOC339804 | GI_37546921-S | rs1665270  | 2 | 2 | 61289317 | 12624  | 15.4446 | 0.7852 | -0.5201 | 5.5299 | JPT |
| LOC339804 | GI_37546921-S | rs1729652  | 2 | 2 | 61289670 | 12271  | 15.0649 | 0.7842 | -0.5184 | 5.5299 | JPT |
| LOC339804 | GI_37546921-S | rs2698190  | 2 | 2 | 61290268 | 11673  | 11.9864 | 0.6898 | -0.5038 | 5.5299 | JPT |
| LOC339804 | GI_37546921-S | rs1665271  | 2 | 2 | 61290467 | 11474  | 15.4446 | 0.7852 | 0.5201  | 5.5299 | JPT |
| LOC339803 | GI_42656315-S | rs1665272  | 2 | 2 | 61290937 | 9937   | 7.2264  | 0.4872 | -0.1409 | 5.6198 | JPT |
| LOC339804 | GI_37546921-S | rs12475591 | 2 | 2 | 61293179 | 8762   | 15.4446 | 0.7852 | -0.5201 | 5.5299 | JPT |
| LOC339804 | GI_37546921-S | rs2592493  | 2 | 2 | 61293988 | 7953   | 15.4446 | 0.7852 | 0.5201  | 5.5299 | JPT |
| LOC339803 | GI_42656315-S | rs2698197  | 2 | 2 | 61294094 | 13094  | 7.2264  | 0.4872 | 0.1409  | 5.6198 | JPT |
| LOC339804 | GI_37546921-S | rs1665263  | 2 | 2 | 61294410 | 7531   | 13.9458 | 0.8168 | 0.5117  | 5.5299 | JPT |
| LOC339804 | GI_37546921-S | rs1665260  | 2 | 2 | 61296138 | 5803   | 15.4446 | 0.7852 | 0.5201  | 5.5299 | JPT |
| LOC339804 | GI_37546921-S | rs1665259  | 2 | 2 | 61296406 | 5535   | 15.0649 | 0.7842 | -0.5184 | 5.5299 | JPT |
| LOC339804 | GI_37546921-S | rs7558954  | 2 | 2 | 61296557 | 5384   | 12.0159 | 0.6907 | -0.4932 | 5.5299 | JPT |

|           |               |            |   |   |          |        |         |        |         |        |     |
|-----------|---------------|------------|---|---|----------|--------|---------|--------|---------|--------|-----|
| LOC339804 | GI_37546921-S | rs1729671  | 2 | 2 | 61296756 | 5185   | 14.8524 | 0.7873 | 0.5206  | 5.5299 | JPT |
| LOC339804 | GI_37546921-S | rs1177309  | 2 | 2 | 61296899 | 5042   | 12.0159 | 0.6907 | -0.4932 | 5.5299 | JPT |
| LOC339804 | GI_37546921-S | rs1177308  | 2 | 2 | 61298905 | 3036   | 12.0159 | 0.6907 | -0.4932 | 5.5299 | JPT |
| LOC339804 | GI_37546921-S | rs1177303  | 2 | 2 | 61300006 | 1935   | 15.4446 | 0.7852 | 0.5201  | 5.5299 | JPT |
| LOC339804 | GI_37546921-S | rs1729674  | 2 | 2 | 61301388 | 553    | 11.7146 | 0.6893 | 0.4912  | 5.5299 | JPT |
| LOC339804 | GI_37546921-S | rs1729673  | 2 | 2 | 61301450 | 491    | 15.0499 | 0.7839 | 0.5191  | 5.5299 | JPT |
| LOC339804 | GI_37546921-S | rs3889717  | 2 | 2 | 61302442 | 501    | 9.6496  | 0.6027 | -0.4666 | 5.5299 | JPT |
| LOC339803 | GI_42656315-S | rs1729662  | 2 | 2 | 61302956 | 21956  | 9.0148  | 0.5838 | 0.1441  | 5.6198 | JPT |
| LOC339804 | GI_37546921-S | rs1615070  | 2 | 2 | 61304826 | 2885   | 12.0159 | 0.6907 | 0.4932  | 5.5299 | JPT |
| LOC339803 | GI_42656315-S | rs2600671  | 2 | 2 | 61306502 | 25502  | 7.9978  | 0.5356 | -0.1458 | 5.6198 | JPT |
| LOC339804 | GI_37546921-S | rs2600668  | 2 | 2 | 61312078 | 10137  | 14.1227 | 0.7609 | -0.5153 | 5.5299 | JPT |
| LOC339804 | GI_37546921-S | rs2167564  | 2 | 2 | 61312467 | 10526  | 15.0649 | 0.7842 | 0.5184  | 5.5299 | JPT |
| LOC339804 | GI_37546921-S | rs2600669  | 2 | 2 | 61312947 | 11006  | 11.1081 | 0.6682 | 0.4887  | 5.5299 | JPT |
| LOC339803 | GI_42656315-S | rs2600665  | 2 | 2 | 61317446 | 36446  | 6.1285  | 0.4324 | -0.1282 | 5.6198 | JPT |
| LOC339804 | GI_37546921-S | rs935860   | 2 | 2 | 61318212 | 16271  | 8.4295  | 0.5481 | 0.4570  | 5.5299 | JPT |
| LOC339804 | GI_37546921-S | rs777584   | 2 | 2 | 61321997 | 20056  | 9.8446  | 0.6195 | -0.4735 | 5.5299 | JPT |
| LOC339803 | GI_42656315-S | rs777585   | 2 | 2 | 61324210 | 43210  | 5.6634  | 0.4036 | 0.1252  | 5.6198 | JPT |
| LOC339803 | GI_42656315-S | rs777590   | 2 | 2 | 61328796 | 47796  | 5.7971  | 0.4046 | 0.1252  | 5.6198 | JPT |
| LOC339803 | GI_42656315-S | rs777591   | 2 | 2 | 61329268 | 48268  | 5.7717  | 0.4104 | 0.1262  | 5.6198 | JPT |
| LOC339804 | GI_37546921-S | rs777592   | 2 | 2 | 61329994 | 28053  | 7.4344  | 0.4983 | -0.4558 | 5.5299 | JPT |
| LOC339803 | GI_42656315-S | rs777593   | 2 | 2 | 61330754 | 49754  | 6.1285  | 0.4324 | -0.1282 | 5.6198 | JPT |
| LOC339803 | GI_42656315-S | rs777589   | 2 | 2 | 61337272 | 56272  | 6.1285  | 0.4324 | 0.1282  | 5.6198 | JPT |
| LOC339803 | GI_42656315-S | rs777588   | 2 | 2 | 61338471 | 57471  | 6.1067  | 0.4235 | 0.1279  | 5.6198 | JPT |
| LOC339804 | GI_37546921-S | rs777587   | 2 | 2 | 61339326 | 37385  | 9.2846  | 0.6233 | -0.4638 | 5.5299 | JPT |
| LOC339804 | GI_37546921-S | rs4671397  | 2 | 2 | 61347498 | 45557  | 8.9227  | 0.5796 | 0.4858  | 5.5299 | JPT |
| LOC339804 | GI_37546921-S | rs4671398  | 2 | 2 | 61352158 | 50217  | 11.3467 | 0.6680 | -0.4990 | 5.5299 | JPT |
| LOC339804 | GI_37546921-S | rs2123112  | 2 | 2 | 61353726 | 51785  | 11.4121 | 0.6790 | -0.4994 | 5.5299 | JPT |
| LOC339804 | GI_37546921-S | rs6545846  | 2 | 2 | 61354561 | 52620  | 11.7506 | 0.6819 | -0.5010 | 5.5299 | JPT |
| LOC339804 | GI_37546921-S | rs4672424  | 2 | 2 | 61356424 | 54483  | 9.0137  | 0.5838 | 0.4640  | 5.5299 | JPT |
| LOC339803 | GI_42656315-S | rs6545847  | 2 | 2 | 61356984 | 75984  | 5.6634  | 0.4036 | -0.1252 | 5.6198 | JPT |
| LOC339803 | GI_42656315-S | rs2290324  | 2 | 2 | 61360427 | 79427  | 6.1285  | 0.4324 | 0.1282  | 5.6198 | JPT |
| LOC339803 | GI_42656315-S | rs6739427  | 2 | 2 | 61364530 | 83530  | 5.6634  | 0.4036 | 0.1252  | 5.6198 | JPT |
| LOC339803 | GI_42656315-S | rs4672426  | 2 | 2 | 61368799 | 87799  | 6.1285  | 0.4324 | 0.1282  | 5.6198 | JPT |
| LOC339804 | GI_37546921-S | rs7588041  | 2 | 2 | 61373063 | 71122  | 6.2346  | 0.4815 | -0.4375 | 5.5299 | JPT |
| LOC339804 | GI_37546921-S | rs7591772  | 2 | 2 | 61374051 | 72110  | 9.2666  | 0.5863 | -0.4686 | 5.5299 | JPT |
| LOC339804 | GI_37546921-S | rs4672427  | 2 | 2 | 61380901 | 78960  | 8.7333  | 0.5710 | -0.4651 | 5.5299 | JPT |
| LOC339804 | GI_37546921-S | rs2167565  | 2 | 2 | 61388109 | 86168  | 9.4338  | 0.5935 | -0.4931 | 5.5299 | JPT |
| LOC339804 | GI_37546921-S | rs6737373  | 2 | 2 | 61409689 | 107748 | 8.7333  | 0.5710 | 0.4651  | 5.5299 | JPT |
| LOC339804 | GI_37546921-S | rs4599092  | 2 | 2 | 61410619 | 108678 | 8.7333  | 0.5710 | 0.4651  | 5.5299 | JPT |
| LOC339804 | GI_37546921-S | rs12713435 | 2 | 2 | 61411440 | 109499 | 8.8582  | 0.5767 | -0.4700 | 5.5299 | JPT |
| LOC339804 | GI_37546921-S | rs7583383  | 2 | 2 | 61411973 | 110032 | 8.5938  | 0.5733 | 0.4676  | 5.5299 | JPT |
| LOC339804 | GI_37546921-S | rs11677775 | 2 | 2 | 61414761 | 112820 | 8.7333  | 0.5710 | 0.4651  | 5.5299 | JPT |
| LOC339804 | GI_37546921-S | rs11677776 | 2 | 2 | 61414764 | 112823 | 9.8263  | 0.6659 | 0.4721  | 5.5299 | JPT |
| LOC339804 | GI_37546921-S | rs10169662 | 2 | 2 | 61419587 | 117646 | 8.7333  | 0.5710 | 0.4651  | 5.5299 | JPT |
| LOC339804 | GI_37546921-S | rs4671403  | 2 | 2 | 61423103 | 121162 | 8.7333  | 0.5710 | 0.4651  | 5.5299 | JPT |
| LOC339804 | GI_37546921-S | rs6545852  | 2 | 2 | 61425041 | 123100 | 8.9941  | 0.5742 | 0.4673  | 5.5299 | JPT |
| LOC339804 | GI_37546921-S | rs7561697  | 2 | 2 | 61430816 | 128875 | 8.7333  | 0.5710 | 0.4651  | 5.5299 | JPT |
| LOC339804 | GI_37546921-S | rs6545855  | 2 | 2 | 61444511 | 142570 | 8.7333  | 0.5710 | 0.4651  | 5.5299 | JPT |
| LOC339804 | GI_37546921-S | rs2694619  | 2 | 2 | 61448552 | 146611 | 9.1195  | 0.5885 | 0.4792  | 5.5299 | JPT |
| LOC339804 | GI_37546921-S | rs2694618  | 2 | 2 | 61448635 | 146694 | 7.8748  | 0.5294 | 0.4523  | 5.5299 | JPT |
| LOC339804 | GI_37546921-S | rs2600664  | 2 | 2 | 61451596 | 149655 | 8.7332  | 0.5710 | -0.4649 | 5.5299 | JPT |
| LOC339804 | GI_37546921-S | rs2694633  | 2 | 2 | 61452293 | 150352 | 7.1935  | 0.4936 | 0.4535  | 5.5299 | JPT |
| LOC339804 | GI_37546921-S | rs3765051  | 2 | 2 | 61454001 | 152060 | 7.8748  | 0.5294 | -0.4523 | 5.5299 | JPT |
| LOC339804 | GI_37546921-S | rs17482440 | 2 | 2 | 61460508 | 158567 | 7.8778  | 0.5295 | -0.4530 | 5.5299 | JPT |
| LOC339804 | GI_37546921-S | rs2593623  | 2 | 2 | 61463239 | 161298 | 8.9941  | 0.5742 | 0.4673  | 5.5299 | JPT |
| LOC339804 | GI_37546921-S | rs2593624  | 2 | 2 | 61464135 | 162194 | 5.7307  | 0.4580 | 0.4628  | 5.5299 | JPT |
| LOC339804 | GI_37546921-S | rs778159   | 2 | 2 | 61468395 | 166454 | 8.9941  | 0.5742 | 0.4673  | 5.5299 | JPT |
| LOC339804 | GI_37546921-S | rs778160   | 2 | 2 | 61468815 | 166874 | 6.4268  | 0.4502 | -0.4368 | 5.5299 | JPT |
| LOC339804 | GI_37546921-S | rs1405490  | 2 | 2 | 61471731 | 169790 | 6.4213  | 0.4499 | 0.4339  | 5.5299 | JPT |

|           |               |            |   |   |          |        |         |        |         |        |     |
|-----------|---------------|------------|---|---|----------|--------|---------|--------|---------|--------|-----|
| LOC339804 | GI_37546921-S | rs4541246  | 2 | 2 | 61474926 | 172985 | 7.8134  | 0.5349 | -0.4532 | 5.5299 | JPT |
| LOC339804 | GI_37546921-S | rs811871   | 2 | 2 | 61489600 | 187659 | 8.7333  | 0.5710 | -0.4651 | 5.5299 | JPT |
| LOC339804 | GI_37546921-S | rs4411680  | 2 | 2 | 61495756 | 193815 | 8.7333  | 0.5710 | -0.4651 | 5.5299 | JPT |
| LOC339804 | GI_37546921-S | rs12992614 | 2 | 2 | 61504727 | 202786 | 8.4822  | 0.5680 | -0.4668 | 5.5299 | JPT |
| LOC339804 | GI_37546921-S | rs10177225 | 2 | 2 | 61506149 | 204208 | 8.5466  | 0.5801 | -0.4714 | 5.5299 | JPT |
| LOC339804 | GI_37546921-S | rs1900573  | 2 | 2 | 61508563 | 206622 | 7.1861  | 0.4932 | 0.4505  | 5.5299 | JPT |
| LOC339804 | GI_37546921-S | rs2421066  | 2 | 2 | 61511173 | 209232 | 8.7333  | 0.5710 | 0.4651  | 5.5299 | JPT |
| LOC339804 | GI_37546921-S | rs10196146 | 2 | 2 | 61517030 | 215089 | 11.3467 | 0.6680 | 0.4990  | 5.5299 | JPT |
| LOC339804 | GI_37546921-S | rs10208769 | 2 | 2 | 61517265 | 215324 | 11.3467 | 0.6680 | 0.4990  | 5.5299 | JPT |
| LOC339804 | GI_37546921-S | rs778153   | 2 | 2 | 61520303 | 218362 | 8.9941  | 0.5742 | -0.4673 | 5.5299 | JPT |
| LOC339804 | GI_37546921-S | rs2593620  | 2 | 2 | 61524912 | 222971 | 8.7333  | 0.5710 | -0.4651 | 5.5299 | JPT |
| LOC339804 | GI_37546921-S | rs2463097  | 2 | 2 | 61525952 | 224011 | 8.8726  | 0.5774 | 0.4703  | 5.5299 | JPT |
| LOC339804 | GI_37546921-S | rs4672440  | 2 | 2 | 61528304 | 226363 | 7.4344  | 0.4983 | 0.4558  | 5.5299 | JPT |
| LOC339804 | GI_37546921-S | rs7581034  | 2 | 2 | 61547014 | 245073 | 8.9941  | 0.5742 | 0.4673  | 5.5299 | JPT |
| LOC339804 | GI_37546921-S | rs4672441  | 2 | 2 | 61550603 | 248662 | 9.1388  | 0.5893 | 0.4914  | 5.5299 | JPT |
| LOC339804 | GI_37546921-S | rs2084318  | 2 | 2 | 61564252 | 262311 | 8.7333  | 0.5710 | -0.4651 | 5.5299 | JPT |
| LOC339804 | GI_37546921-S | rs6545868  | 2 | 2 | 61567016 | 265075 | 7.0465  | 0.5026 | 0.4861  | 5.5299 | JPT |
| LOC339804 | GI_37546921-S | rs967968   | 2 | 2 | 61567707 | 265766 | 6.8254  | 0.4732 | -0.4739 | 5.5299 | JPT |
| LOC339804 | GI_37546921-S | rs778139   | 2 | 2 | 61596215 | 294274 | 6.8254  | 0.4732 | 0.4739  | 5.5299 | JPT |
| MRPL53    | GI_22035595-S | rs9309483  | 2 | 2 | 74443075 | 168319 | 5.6792  | 0.3973 | 0.2898  | 5.3003 | JPT |
| MRPL53    | GI_22035595-S | rs10185658 | 2 | 2 | 74454346 | 157048 | 5.6792  | 0.3973 | -0.2898 | 5.3003 | JPT |
| MRPL53    | GI_22035595-S | rs11126430 | 2 | 2 | 74455780 | 155614 | 5.6792  | 0.3973 | -0.2898 | 5.3003 | JPT |
| MRPL53    | GI_22035595-S | rs6546902  | 2 | 2 | 74477953 | 133441 | 6.0666  | 0.4211 | 0.3012  | 5.3003 | JPT |
| MRPL53    | GI_22035595-S | rs3771744  | 2 | 2 | 74490191 | 121203 | 7.6359  | 0.5171 | 0.3295  | 5.3003 | JPT |
| MRPL53    | GI_22035595-S | rs9309485  | 2 | 2 | 74549512 | 61882  | 7.5043  | 0.5019 | -0.3239 | 5.3003 | JPT |
| MRPL53    | GI_22035595-S | rs2240444  | 2 | 2 | 74553279 | 58115  | 7.6359  | 0.5171 | -0.3295 | 5.3003 | JPT |
| MRPL53    | GI_22035595-S | rs2268421  | 2 | 2 | 74565742 | 45652  | 7.6359  | 0.5171 | 0.3295  | 5.3003 | JPT |
| MRPL53    | GI_22035595-S | rs7556852  | 2 | 2 | 74581170 | 30224  | 7.6359  | 0.5171 | -0.3295 | 5.3003 | JPT |
| MRPL53    | GI_22035595-S | rs7562663  | 2 | 2 | 74587796 | 23598  | 7.6359  | 0.5171 | 0.3295  | 5.3003 | JPT |
| MRPL53    | GI_22035595-S | rs6746854  | 2 | 2 | 74593157 | 18237  | 7.5993  | 0.5069 | 0.3023  | 5.3003 | JPT |
| MRPL53    | GI_22035595-S | rs2268417  | 2 | 2 | 74594167 | 17227  | 7.6359  | 0.5171 | 0.3295  | 5.3003 | JPT |
| MRPL53    | GI_22035595-S | rs2270016  | 2 | 2 | 74597984 | 13410  | 7.6359  | 0.5171 | 0.3295  | 5.3003 | JPT |
| MRPL53    | GI_22035595-S | rs2268416  | 2 | 2 | 74601694 | 9700   | 7.5455  | 0.5210 | -0.3212 | 5.3003 | JPT |
| MRPL53    | GI_22035595-S | rs1063588  | 2 | 2 | 74602033 | 9361   | 7.6359  | 0.5171 | 0.3295  | 5.3003 | JPT |
| MRPL53    | GI_22035595-S | rs2284708  | 2 | 2 | 74604302 | 7092   | 7.6359  | 0.5171 | -0.3295 | 5.3003 | JPT |
| MRPL53    | GI_22035595-S | rs1047911  | 2 | 2 | 74611433 | 39     | 7.6359  | 0.5171 | -0.3295 | 5.3003 | JPT |
| MRPL53    | GI_22035595-S | rs6707475  | 2 | 2 | 74622146 | 10752  | 7.6359  | 0.5171 | -0.3295 | 5.3003 | JPT |
| MRPL53    | GI_22035595-S | rs17009980 | 2 | 2 | 74631565 | 20171  | 7.3176  | 0.5088 | -0.3260 | 5.3003 | JPT |
| MRPL53    | GI_22035595-S | rs2301984  | 2 | 2 | 74632710 | 21316  | 7.6359  | 0.5171 | 0.3295  | 5.3003 | JPT |
| MRPL53    | GI_22035595-S | rs3755445  | 2 | 2 | 74633825 | 22431  | 5.7578  | 0.4172 | 0.3036  | 5.3003 | JPT |
| MRPL53    | GI_22035595-S | rs3755446  | 2 | 2 | 74633879 | 22485  | 5.5949  | 0.4145 | -0.3037 | 5.3003 | JPT |
| MRPL53    | GI_22035595-S | rs17009998 | 2 | 2 | 74636833 | 25439  | 5.9695  | 0.4227 | 0.3070  | 5.3003 | JPT |
| MRPL53    | GI_22035595-S | rs10454145 | 2 | 2 | 74637459 | 26065  | 7.7637  | 0.5237 | -0.3119 | 5.3003 | JPT |
| MRPL53    | GI_22035595-S | rs11676323 | 2 | 2 | 74641136 | 29742  | 7.6359  | 0.5171 | 0.3295  | 5.3003 | JPT |
| MRPL53    | GI_22035595-S | rs3806607  | 2 | 2 | 74647269 | 35875  | 7.6359  | 0.5171 | -0.3295 | 5.3003 | JPT |
| MRPL53    | GI_22035595-S | rs3755447  | 2 | 2 | 74651849 | 40455  | 6.8834  | 0.4765 | -0.3141 | 5.3003 | JPT |
| MRPL53    | GI_22035595-S | rs6546909  | 2 | 2 | 74657977 | 46583  | 6.8834  | 0.4765 | -0.3141 | 5.3003 | JPT |
| MRPL53    | GI_22035595-S | rs10779958 | 2 | 2 | 74667433 | 56039  | 6.7925  | 0.4713 | -0.3129 | 5.3003 | JPT |
| MRPL53    | GI_22035595-S | rs2231250  | 2 | 2 | 74667831 | 56437  | 6.8834  | 0.4765 | -0.3141 | 5.3003 | JPT |
| MRPL53    | GI_22035595-S | rs6707302  | 2 | 2 | 74673077 | 61683  | 6.8834  | 0.4765 | 0.3141  | 5.3003 | JPT |
| MRPL53    | GI_22035595-S | rs715407   | 2 | 2 | 74677348 | 65954  | 6.8834  | 0.4765 | 0.3141  | 5.3003 | JPT |
| MRPL53    | GI_22035595-S | rs11126435 | 2 | 2 | 74701355 | 89961  | 6.8834  | 0.4765 | -0.3141 | 5.3003 | JPT |
| MRPL53    | GI_22035595-S | rs2021725  | 2 | 2 | 74713872 | 102478 | 6.8834  | 0.4765 | 0.3141  | 5.3003 | JPT |
| MRPL53    | GI_22035595-S | rs752070   | 2 | 2 | 74736625 | 125231 | 6.8834  | 0.4765 | -0.3141 | 5.3003 | JPT |
| MRPL53    | GI_22035595-S | rs759075   | 2 | 2 | 74736806 | 125412 | 6.5177  | 0.4556 | 0.3052  | 5.3003 | JPT |
| MRPL53    | GI_22035595-S | rs6739708  | 2 | 2 | 74776654 | 165260 | 6.6383  | 0.4707 | -0.3114 | 5.3003 | JPT |
| MRPL53    | GI_22035595-S | rs7603085  | 2 | 2 | 74779986 | 168592 | 6.8834  | 0.4765 | -0.3141 | 5.3003 | JPT |
| MRPL53    | GI_22035595-S | rs6718184  | 2 | 2 | 74784960 | 173566 | 6.8834  | 0.4765 | -0.3141 | 5.3003 | JPT |
| MRPL53    | GI_22035595-S | rs6546917  | 2 | 2 | 74785036 | 173642 | 6.7551  | 0.4613 | -0.3082 | 5.3003 | JPT |

|          |               |            |   |   |          |        |         |        |         |        |     |
|----------|---------------|------------|---|---|----------|--------|---------|--------|---------|--------|-----|
| MRPL53   | GI_22035595-S | rs363627   | 2 | 2 | 74843090 | 231696 | 5.5292  | 0.4025 | 0.2979  | 5.3003 | JPT |
| POLE4    | GI_38455393-S | rs4853081  | 2 | 2 | 75077560 | 30753  | 6.7598  | 0.4615 | -0.3388 | 5.8207 | JPT |
| POLE4    | GI_38455393-S | rs11902447 | 2 | 2 | 75078432 | 29881  | 6.7598  | 0.4615 | 0.3388  | 5.8207 | JPT |
| POLE4    | GI_38455393-S | rs2129604  | 2 | 2 | 75094912 | 13401  | 6.5576  | 0.4579 | -0.3374 | 5.8207 | JPT |
| POLE4    | GI_38455393-S | rs3771800  | 2 | 2 | 75099524 | 8789   | 6.7598  | 0.4615 | -0.3388 | 5.8207 | JPT |
| POLE4    | GI_38455393-S | rs13402369 | 2 | 2 | 75101392 | 6921   | 6.7598  | 0.4615 | 0.3388  | 5.8207 | JPT |
| POLE4    | GI_38455393-S | rs12713820 | 2 | 2 | 75101679 | 6634   | 6.5576  | 0.4579 | -0.3374 | 5.8207 | JPT |
| POLE4    | GI_38455393-S | rs12617404 | 2 | 2 | 75102296 | 6017   | 6.7843  | 0.4709 | 0.3619  | 5.8207 | JPT |
| POLE4    | GI_38455393-S | rs12327957 | 2 | 2 | 75102954 | 5359   | 6.7598  | 0.4615 | 0.3388  | 5.8207 | JPT |
| POLE4    | GI_38455393-S | rs4330128  | 2 | 2 | 75116528 | 8215   | 6.7587  | 0.4615 | -0.3226 | 5.8207 | JPT |
| POLE4    | GI_38455393-S | rs7423348  | 2 | 2 | 75117320 | 9007   | 6.7587  | 0.4615 | 0.3226  | 5.8207 | JPT |
| POLE4    | GI_38455393-S | rs5001327  | 2 | 2 | 75119346 | 11033  | 6.7587  | 0.4615 | 0.3226  | 5.8207 | JPT |
| POLE4    | GI_38455393-S | rs3886110  | 2 | 2 | 75119487 | 11174  | 6.5647  | 0.4583 | 0.3212  | 5.8207 | JPT |
| POLE4    | GI_38455393-S | rs12620300 | 2 | 2 | 75122895 | 14582  | 6.7587  | 0.4615 | -0.3226 | 5.8207 | JPT |
| POLE4    | GI_38455393-S | rs4585057  | 2 | 2 | 75124259 | 15946  | 6.7587  | 0.4615 | 0.3226  | 5.8207 | JPT |
| POLE4    | GI_38455393-S | rs7602776  | 2 | 2 | 75129986 | 21673  | 6.7587  | 0.4615 | -0.3226 | 5.8207 | JPT |
| POLE4    | GI_38455393-S | rs923276   | 2 | 2 | 75135171 | 26858  | 6.5647  | 0.4583 | -0.3212 | 5.8207 | JPT |
| POLE4    | GI_38455393-S | rs923275   | 2 | 2 | 75135348 | 27035  | 6.5647  | 0.4583 | 0.3212  | 5.8207 | JPT |
| POLE4    | GI_38455393-S | rs17010597 | 2 | 2 | 75136366 | 28053  | 6.7587  | 0.4615 | 0.3226  | 5.8207 | JPT |
| POLE4    | GI_38455393-S | rs13410632 | 2 | 2 | 75142093 | 33780  | 6.6010  | 0.4604 | -0.3230 | 5.8207 | JPT |
| POLE4    | GI_38455393-S | rs7574356  | 2 | 2 | 75147355 | 39042  | 6.7587  | 0.4615 | -0.3226 | 5.8207 | JPT |
| POLE4    | GI_38455393-S | rs12990965 | 2 | 2 | 75147518 | 39205  | 6.7587  | 0.4615 | -0.3226 | 5.8207 | JPT |
| POLE4    | GI_38455393-S | rs7575416  | 2 | 2 | 75151280 | 42967  | 6.7587  | 0.4615 | -0.3226 | 5.8207 | JPT |
| POLE4    | GI_38455393-S | rs12713823 | 2 | 2 | 75158244 | 49931  | 6.5647  | 0.4583 | 0.3212  | 5.8207 | JPT |
| POLE4    | GI_38455393-S | rs13024157 | 2 | 2 | 75160816 | 52503  | 6.7587  | 0.4615 | 0.3226  | 5.8207 | JPT |
| POLE4    | GI_38455393-S | rs13032854 | 2 | 2 | 75162523 | 54210  | 6.7587  | 0.4615 | 0.3226  | 5.8207 | JPT |
| POLE4    | GI_38455393-S | rs2422089  | 2 | 2 | 75168901 | 60588  | 6.5647  | 0.4583 | -0.3212 | 5.8207 | JPT |
| POLE4    | GI_38455393-S | rs7589773  | 2 | 2 | 75177896 | 69583  | 6.5647  | 0.4583 | 0.3212  | 5.8207 | JPT |
| POLE4    | GI_38455393-S | rs12713826 | 2 | 2 | 75179793 | 71480  | 6.3163  | 0.4360 | -0.3109 | 5.8207 | JPT |
| POLE4    | GI_38455393-S | rs2422090  | 2 | 2 | 75180135 | 71822  | 6.7104  | 0.4667 | 0.3185  | 5.8207 | JPT |
| POLE4    | GI_38455393-S | rs2422091  | 2 | 2 | 75180168 | 71855  | 6.3163  | 0.4360 | 0.3109  | 5.8207 | JPT |
| POLE4    | GI_38455393-S | rs754978   | 2 | 2 | 75183451 | 75138  | 6.1289  | 0.4325 | 0.3095  | 5.8207 | JPT |
| POLE4    | GI_38455393-S | rs12622183 | 2 | 2 | 75185038 | 76725  | 6.7587  | 0.4615 | 0.3226  | 5.8207 | JPT |
| POLE4    | GI_38455393-S | rs713082   | 2 | 2 | 75185121 | 76808  | 6.5647  | 0.4583 | -0.3212 | 5.8207 | JPT |
| POLE4    | GI_38455393-S | rs12713828 | 2 | 2 | 75187736 | 79423  | 6.7587  | 0.4615 | -0.3226 | 5.8207 | JPT |
| hmm28069 | hmm28069-S    | rs2232745  | 2 | 2 | 85735290 | 12483  | 7.2186  | 0.4950 | 0.2215  | 5.6831 | JPT |
| hmm28069 | hmm28069-S    | rs2232750  | 2 | 2 | 85736126 | 11647  | 7.2186  | 0.4950 | 0.2215  | 5.6831 | JPT |
| hmm28069 | hmm28069-S    | rs6733550  | 2 | 2 | 85739672 | 8101   | 7.7354  | 0.5223 | -0.2136 | 5.6831 | JPT |
| hmm28069 | hmm28069-S    | rs3827550  | 2 | 2 | 85740630 | 7143   | 7.2186  | 0.4950 | 0.2215  | 5.6831 | JPT |
| hmm28069 | hmm28069-S    | rs6743051  | 2 | 2 | 85755819 | 8046   | 7.2186  | 0.4950 | 0.2215  | 5.6831 | JPT |
| hmm28069 | hmm28069-S    | rs13383605 | 2 | 2 | 85757987 | 10214  | 7.2186  | 0.4950 | -0.2215 | 5.6831 | JPT |
| hmm28069 | hmm28069-S    | rs2304564  | 2 | 2 | 85764325 | 16552  | 7.2186  | 0.4950 | 0.2215  | 5.6831 | JPT |
| hmm28069 | hmm28069-S    | rs6547629  | 2 | 2 | 85771886 | 24113  | 7.7354  | 0.5223 | 0.2136  | 5.6831 | JPT |
| hmm28069 | hmm28069-S    | rs10180770 | 2 | 2 | 85780707 | 32934  | 7.2186  | 0.4950 | 0.2215  | 5.6831 | JPT |
| hmm28069 | hmm28069-S    | rs3821020  | 2 | 2 | 85781580 | 33807  | 7.2186  | 0.4950 | 0.2215  | 5.6831 | JPT |
| hmm28069 | hmm28069-S    | rs10182351 | 2 | 2 | 85783943 | 36170  | 7.4369  | 0.4984 | -0.2227 | 5.6831 | JPT |
| hmm28069 | hmm28069-S    | rs13414982 | 2 | 2 | 85793122 | 45349  | 7.1541  | 0.4915 | -0.2592 | 5.6831 | JPT |
| hmm28069 | hmm28069-S    | rs3024831  | 2 | 2 | 85796042 | 48269  | 7.1541  | 0.4915 | 0.2592  | 5.6831 | JPT |
| hmm28069 | hmm28069-S    | rs2040349  | 2 | 2 | 85801183 | 53410  | 6.5422  | 0.4570 | -0.2242 | 5.6831 | JPT |
| hmm28069 | hmm28069-S    | rs2118177  | 2 | 2 | 85801951 | 54178  | 6.7557  | 0.4613 | -0.2255 | 5.6831 | JPT |
| POLR1A   | GI_7661685-S  | rs6760112  | 2 | 2 | 86113870 | 52869  | 7.1342  | 0.4904 | 0.4089  | 6.3169 | JPT |
| POLR1A   | GI_7661685-S  | rs1978842  | 2 | 2 | 86138197 | 28542  | 11.7421 | 0.6903 | 0.5238  | 6.3169 | JPT |
| POLR1A   | GI_7661685-S  | rs17579744 | 2 | 2 | 86142717 | 24022  | 11.7421 | 0.6903 | 0.5238  | 6.3169 | JPT |
| POLR1A   | GI_7661685-S  | rs1469981  | 2 | 2 | 86151430 | 15309  | 11.7421 | 0.6903 | 0.5238  | 6.3169 | JPT |
| POLR1A   | GI_7661685-S  | rs6741224  | 2 | 2 | 86157075 | 9664   | 11.7421 | 0.6903 | 0.5238  | 6.3169 | JPT |
| POLR1A   | GI_7661685-S  | rs3731822  | 2 | 2 | 86160152 | 6587   | 11.3603 | 0.6772 | -0.5277 | 6.3169 | JPT |
| POLR1A   | GI_7661685-S  | rs12124    | 2 | 2 | 86165166 | 1573   | 11.3603 | 0.6772 | -0.5277 | 6.3169 | JPT |
| POLR1A   | GI_7661685-S  | rs3755005  | 2 | 2 | 86173172 | 6433   | 11.3603 | 0.6772 | -0.5277 | 6.3169 | JPT |
| POLR1A   | GI_7661685-S  | rs3770091  | 2 | 2 | 86174824 | 8085   | 11.3603 | 0.6772 | 0.5277  | 6.3169 | JPT |

|           |               |            |   |   |          |        |         |        |         |        |     |
|-----------|---------------|------------|---|---|----------|--------|---------|--------|---------|--------|-----|
| POLR1A    | GI_7661685-S  | rs3770088  | 2 | 2 | 86175599 | 8860   | 8.9257  | 0.5711 | 0.4880  | 6.3169 | JPT |
| POLR1A    | GI_7661685-S  | rs3770086  | 2 | 2 | 86178936 | 12197  | 11.3603 | 0.6772 | -0.5277 | 6.3169 | JPT |
| POLR1A    | GI_7661685-S  | rs2278532  | 2 | 2 | 86182579 | 15840  | 11.3603 | 0.6772 | -0.5277 | 6.3169 | JPT |
| POLR1A    | GI_7661685-S  | rs6755228  | 2 | 2 | 86185655 | 18916  | 11.6732 | 0.6793 | 0.5216  | 6.3169 | JPT |
| POLR1A    | GI_7661685-S  | rs10184159 | 2 | 2 | 86188053 | 21314  | 11.6732 | 0.6793 | 0.5216  | 6.3169 | JPT |
| POLR1A    | GI_7661685-S  | rs3770085  | 2 | 2 | 86190605 | 23866  | 11.3603 | 0.6772 | -0.5277 | 6.3169 | JPT |
| POLR1A    | GI_7661685-S  | rs3770084  | 2 | 2 | 86190663 | 23924  | 11.3603 | 0.6772 | 0.5277  | 6.3169 | JPT |
| POLR1A    | GI_7661685-S  | rs2288116  | 2 | 2 | 86214067 | 47328  | 11.3603 | 0.6772 | 0.5277  | 6.3169 | JPT |
| POLR1A    | GI_7661685-S  | rs2241434  | 2 | 2 | 86276011 | 109272 | 7.1774  | 0.4846 | -0.3937 | 6.3169 | JPT |
| POLR1A    | GI_7661685-S  | rs3770064  | 2 | 2 | 86315073 | 148334 | 9.1561  | 0.5814 | -0.4402 | 6.3169 | JPT |
| POLR1A    | GI_7661685-S  | rs3770063  | 2 | 2 | 86315157 | 148418 | 9.1561  | 0.5814 | 0.4402  | 6.3169 | JPT |
| POLR1A    | GI_7661685-S  | rs3731817  | 2 | 2 | 86354206 | 187467 | 6.9104  | 0.4780 | -0.4768 | 6.3169 | JPT |
| POLR1A    | GI_7661685-S  | rs3731816  | 2 | 2 | 86354495 | 187756 | 6.9803  | 0.4819 | -0.4167 | 6.3169 | JPT |
| POLR1A    | GI_7661685-S  | rs3731815  | 2 | 2 | 86356176 | 189437 | 7.0930  | 0.4881 | 0.4098  | 6.3169 | JPT |
| POLR1A    | GI_7661685-S  | rs11127018 | 2 | 2 | 86366572 | 199833 | 7.2405  | 0.4961 | -0.4164 | 6.3169 | JPT |
| CIAO1     | GI_38570089-S | rs1044594  | 2 | 2 | 96359170 | 303    | 5.6874  | 0.4051 | 0.1455  | 5.3178 | JPT |
| CIAO1     | GI_38570089-S | rs3214058  | 2 | 2 | 96377354 | 18487  | 5.6874  | 0.4051 | -0.1455 | 5.3178 | JPT |
| CIAO1     | GI_38570089-S | rs17420101 | 2 | 2 | 96381490 | 22623  | 5.8746  | 0.4094 | -0.1447 | 5.3178 | JPT |
| CIAO1     | GI_38570089-S | rs17479466 | 2 | 2 | 96384733 | 25866  | 5.8746  | 0.4094 | -0.1447 | 5.3178 | JPT |
| CIAO1     | GI_38570089-S | rs3731930  | 2 | 2 | 96388535 | 29668  | 5.6874  | 0.4051 | 0.1455  | 5.3178 | JPT |
| CIAO1     | GI_38570089-S | rs4907310  | 2 | 2 | 96401987 | 43120  | 5.6874  | 0.4051 | -0.1455 | 5.3178 | JPT |
| CIAO1     | GI_38570089-S | rs1048675  | 2 | 2 | 96415758 | 56891  | 5.6874  | 0.4051 | -0.1455 | 5.3178 | JPT |
| CIAO1     | GI_38570089-S | rs11903461 | 2 | 2 | 96421454 | 62587  | 5.6874  | 0.4051 | -0.1455 | 5.3178 | JPT |
| CIAO1     | GI_38570089-S | rs2305935  | 2 | 2 | 96452121 | 93254  | 5.5591  | 0.3969 | 0.1377  | 5.3178 | JPT |
| CIAO1     | GI_38570089-S | rs2085842  | 2 | 2 | 96474382 | 115515 | 5.6874  | 0.4051 | -0.1455 | 5.3178 | JPT |
| LOC375249 | GI_37547210-S | rs7574488  | 2 | 2 | 97021492 | 208772 | 7.3939  | 0.4961 | -0.7463 | 6.1313 | JPT |
| LOC375249 | GI_37547210-S | rs1320147  | 2 | 2 | 97022500 | 207764 | 6.4041  | 0.4489 | -0.7358 | 6.1313 | JPT |
| LOC375249 | GI_37547210-S | rs13403225 | 2 | 2 | 97022701 | 207563 | 7.3939  | 0.4961 | -0.7463 | 6.1313 | JPT |
| LOC375249 | GI_37547210-S | rs7584641  | 2 | 2 | 97029529 | 200735 | 11.0243 | 0.6741 | -1.1779 | 6.1313 | JPT |
| LOC375249 | GI_37547210-S | rs10203833 | 2 | 2 | 97475777 | 245513 | 6.7637  | 0.4617 | -0.7697 | 6.1313 | JPT |
| LOC375249 | GI_37547210-S | rs2071038  | 2 | 2 | 97720154 | 489890 | 6.9405  | 0.4797 | 1.0887  | 6.1313 | JPT |
| LOC375249 | GI_37547210-S | rs6542982  | 2 | 2 | 97727628 | 497364 | 7.7121  | 0.5127 | 0.9943  | 6.1313 | JPT |
| LOC375249 | GI_37547210-S | rs6753752  | 2 | 2 | 97728640 | 498376 | 7.7121  | 0.5127 | -0.9943 | 6.1313 | JPT |
| LOC375249 | GI_37547210-S | rs2290123  | 2 | 2 | 97731009 | 500745 | 6.9405  | 0.4797 | 1.0887  | 6.1313 | JPT |
| LOC375249 | GI_37547210-S | rs17028771 | 2 | 2 | 97765245 | 534981 | 7.7121  | 0.5127 | 0.9943  | 6.1313 | JPT |
| LOC375249 | GI_37547210-S | rs2290127  | 2 | 2 | 97777553 | 547289 | 6.9405  | 0.4797 | -1.0887 | 6.1313 | JPT |
| LOC375249 | GI_37547210-S | rs17695937 | 2 | 2 | 97786393 | 556129 | 9.3522  | 0.5987 | 1.0903  | 6.1313 | JPT |
| UNQ2430   | GI_41190797-S | rs13034349 | 2 | 2 | 97787715 | 499756 | 6.1665  | 0.4347 | 0.3850  | 5.9855 | JPT |
| LOC375249 | GI_37547210-S | rs7425883  | 2 | 2 | 97790039 | 559775 | 6.9405  | 0.4797 | -1.0887 | 6.1313 | JPT |
| TSGA10    | GI_41281983-I | rs7586608  | 2 | 2 | 99016535 | 199892 | 6.1282  | 0.4248 | 0.0968  | 5.6984 | JPT |
| TSGA10    | GI_41281983-I | rs10181422 | 2 | 2 | 99017488 | 198939 | 5.8282  | 0.4140 | -0.0936 | 5.6984 | JPT |
| TSGA10    | GI_41281983-I | rs6722164  | 2 | 2 | 99020045 | 196382 | 6.1282  | 0.4248 | -0.0968 | 5.6984 | JPT |
| TSGA10    | GI_41281983-I | rs1453564  | 2 | 2 | 99022946 | 193481 | 5.8282  | 0.4140 | -0.0936 | 5.6984 | JPT |
| TSGA10    | GI_41281983-I | rs2309520  | 2 | 2 | 99028995 | 187432 | 6.1282  | 0.4248 | -0.0968 | 5.6984 | JPT |
| TSGA10    | GI_41281983-I | rs6542847  | 2 | 2 | 99031989 | 184438 | 5.8282  | 0.4140 | -0.0936 | 5.6984 | JPT |
| TSGA10    | GI_41281983-I | rs6740054  | 2 | 2 | 99035149 | 181278 | 6.1282  | 0.4248 | -0.0968 | 5.6984 | JPT |
| TSGA10    | GI_41281983-I | rs13406288 | 2 | 2 | 99048103 | 168324 | 6.1282  | 0.4248 | 0.0968  | 5.6984 | JPT |
| TSGA10    | GI_41281983-I | rs13390672 | 2 | 2 | 99048347 | 168080 | 6.1282  | 0.4248 | -0.0968 | 5.6984 | JPT |
| TSGA10    | GI_41281983-I | rs7605218  | 2 | 2 | 99051598 | 164829 | 5.8282  | 0.4140 | -0.0936 | 5.6984 | JPT |
| TSGA10    | GI_41281983-I | rs12612688 | 2 | 2 | 99071609 | 144818 | 6.1282  | 0.4248 | -0.0968 | 5.6984 | JPT |
| TSGA10    | GI_41281983-I | rs2278895  | 2 | 2 | 99072002 | 144425 | 5.8282  | 0.4140 | 0.0936  | 5.6984 | JPT |
| TSGA10    | GI_41281983-I | rs7571390  | 2 | 2 | 99085111 | 131316 | 6.1282  | 0.4248 | -0.0968 | 5.6984 | JPT |
| TSGA10    | GI_41281983-I | rs7371676  | 2 | 2 | 99087667 | 128760 | 5.8282  | 0.4140 | -0.0936 | 5.6984 | JPT |
| TSGA10    | GI_41281983-I | rs7605734  | 2 | 2 | 99102586 | 113841 | 6.1282  | 0.4248 | 0.0968  | 5.6984 | JPT |
| TSGA10    | GI_41281983-I | rs7606635  | 2 | 2 | 99103300 | 113127 | 5.8282  | 0.4140 | 0.0936  | 5.6984 | JPT |
| TSGA10    | GI_41281983-I | rs6707462  | 2 | 2 | 99107207 | 109220 | 5.7341  | 0.4157 | 0.0941  | 5.6984 | JPT |
| TSGA10    | GI_41281983-I | rs6735801  | 2 | 2 | 99116513 | 99914  | 5.8282  | 0.4140 | -0.0936 | 5.6984 | JPT |
| TSGA10    | GI_41281983-I | rs9710648  | 2 | 2 | 99131647 | 84780  | 6.1282  | 0.4248 | -0.0968 | 5.6984 | JPT |
| TSGA10    | GI_41281983-I | rs6756880  | 2 | 2 | 99135509 | 80918  | 6.3948  | 0.4484 | -0.0988 | 5.6984 | JPT |

|           |               |            |   |   |           |        |         |        |         |        |     |
|-----------|---------------|------------|---|---|-----------|--------|---------|--------|---------|--------|-----|
| TSGA10    | GI_41281983-I | rs6750876  | 2 | 2 | 99138191  | 78236  | 5.8282  | 0.4140 | -0.0936 | 5.6984 | JPT |
| TSGA10    | GI_41281983-I | rs6754843  | 2 | 2 | 99139003  | 77424  | 6.1060  | 0.4733 | -0.1019 | 5.6984 | JPT |
| TSGA10    | GI_41281983-I | rs6737257  | 2 | 2 | 99141848  | 74579  | 6.1282  | 0.4248 | 0.0968  | 5.6984 | JPT |
| TSGA10    | GI_41281983-I | rs12470471 | 2 | 2 | 99147659  | 68768  | 6.1282  | 0.4248 | 0.0968  | 5.6984 | JPT |
| TSGA10    | GI_41281983-I | rs2123686  | 2 | 2 | 99148653  | 67774  | 5.8282  | 0.4140 | -0.0936 | 5.6984 | JPT |
| LIPT1     | GI_21729877-I | rs17020569 | 2 | 2 | 99152931  | 77566  | 5.8023  | 0.4200 | -0.1347 | 5.5871 | JPT |
| TSGA10    | GI_41281983-I | rs17708262 | 2 | 2 | 99154831  | 61596  | 5.9460  | 0.4213 | 0.0962  | 5.6984 | JPT |
| TSGA10    | GI_41281983-I | rs1563108  | 2 | 2 | 99159671  | 56756  | 5.8282  | 0.4140 | 0.0936  | 5.6984 | JPT |
| TSGA10    | GI_41281983-I | rs1563107  | 2 | 2 | 99159794  | 56633  | 6.1282  | 0.4248 | -0.0968 | 5.6984 | JPT |
| TSGA10    | GI_41281983-I | rs1453563  | 2 | 2 | 99178785  | 37642  | 5.8282  | 0.4140 | -0.0936 | 5.6984 | JPT |
| TSGA10    | GI_41281983-I | rs11683188 | 2 | 2 | 99183030  | 33397  | 6.1282  | 0.4248 | -0.0968 | 5.6984 | JPT |
| TSGA10    | GI_41281983-I | rs12613624 | 2 | 2 | 99191259  | 25168  | 6.1282  | 0.4248 | -0.0968 | 5.6984 | JPT |
| TSGA10    | GI_41281983-I | rs11688004 | 2 | 2 | 99193570  | 22857  | 6.1282  | 0.4248 | 0.0968  | 5.6984 | JPT |
| TSGA10    | GI_41281983-I | rs17759607 | 2 | 2 | 99195523  | 20904  | 6.1282  | 0.4248 | -0.0968 | 5.6984 | JPT |
| TSGA10    | GI_41281983-I | rs1133977  | 2 | 2 | 99200502  | 15925  | 6.1282  | 0.4248 | 0.0968  | 5.6984 | JPT |
| TSGA10    | GI_41281983-I | rs4851188  | 2 | 2 | 99204416  | 12011  | 5.8282  | 0.4140 | -0.0936 | 5.6984 | JPT |
| TSGA10    | GI_41281983-I | rs11683107 | 2 | 2 | 99217753  | 1326   | 5.8282  | 0.4140 | -0.0936 | 5.6984 | JPT |
| TSGA10    | GI_41281983-I | rs4850897  | 2 | 2 | 99226937  | 10510  | 6.1282  | 0.4248 | 0.0968  | 5.6984 | JPT |
| TSGA10    | GI_41281983-I | rs2516830  | 2 | 2 | 99232220  | 15793  | 6.1282  | 0.4248 | -0.0968 | 5.6984 | JPT |
| TSGA10    | GI_41281983-I | rs2632283  | 2 | 2 | 99234518  | 18091  | 5.8282  | 0.4140 | -0.0936 | 5.6984 | JPT |
| TSGA10    | GI_41281983-I | rs2516835  | 2 | 2 | 99237649  | 21222  | 5.8282  | 0.4140 | -0.0936 | 5.6984 | JPT |
| TSGA10    | GI_41281983-I | rs6542868  | 2 | 2 | 99241366  | 24939  | 6.0734  | 0.4215 | 0.0945  | 5.6984 | JPT |
| TSGA10    | GI_41281983-I | rs6727749  | 2 | 2 | 99252108  | 35681  | 5.8282  | 0.4140 | 0.0936  | 5.6984 | JPT |
| TSGA10    | GI_41281983-I | rs13033012 | 2 | 2 | 99253667  | 37240  | 6.1282  | 0.4248 | -0.0968 | 5.6984 | JPT |
| Hs.147006 | Hs.147006-S   | rs2289962  | 2 | 2 | 136239798 | 429927 | 8.2752  | 0.5407 | 0.3200  | 7.2309 | JPT |
| Hs.147006 | Hs.147006-S   | rs2289961  | 2 | 2 | 136239841 | 429884 | 8.2752  | 0.5407 | 0.3200  | 7.2309 | JPT |
| Hs.147006 | Hs.147006-S   | rs2289960  | 2 | 2 | 136239972 | 429753 | 8.2752  | 0.5407 | 0.3200  | 7.2309 | JPT |
| Hs.147006 | Hs.147006-S   | rs12614099 | 2 | 2 | 136301794 | 367931 | 8.2752  | 0.5407 | 0.3200  | 7.2309 | JPT |
| Hs.147006 | Hs.147006-S   | rs3739027  | 2 | 2 | 136315912 | 353813 | 8.2752  | 0.5407 | 0.3200  | 7.2309 | JPT |
| Hs.147006 | Hs.147006-S   | rs12617715 | 2 | 2 | 136372885 | 296840 | 8.2752  | 0.5407 | -0.3200 | 7.2309 | JPT |
| Hs.147006 | Hs.147006-S   | rs11903319 | 2 | 2 | 136430171 | 239554 | 8.1734  | 0.5443 | 0.3171  | 7.2309 | JPT |
| Hs.147006 | Hs.147006-S   | rs4988285  | 2 | 2 | 136431298 | 238427 | 8.1734  | 0.5443 | 0.3171  | 7.2309 | JPT |
| Hs.147006 | Hs.147006-S   | rs4988276  | 2 | 2 | 136433084 | 236641 | 8.2752  | 0.5407 | -0.3200 | 7.2309 | JPT |
| Hs.147006 | Hs.147006-S   | rs4988272  | 2 | 2 | 136435289 | 234436 | 8.1734  | 0.5443 | 0.3171  | 7.2309 | JPT |
| Hs.147006 | Hs.147006-S   | rs3754687  | 2 | 2 | 136436906 | 232819 | 8.0705  | 0.5392 | -0.3191 | 7.2309 | JPT |
| Hs.147006 | Hs.147006-S   | rs3769004  | 2 | 2 | 136437322 | 232403 | 8.2752  | 0.5407 | 0.3200  | 7.2309 | JPT |
| Hs.147006 | Hs.147006-S   | rs4988265  | 2 | 2 | 136437370 | 232355 | 8.1734  | 0.5443 | -0.3171 | 7.2309 | JPT |
| Hs.147006 | Hs.147006-S   | rs3769003  | 2 | 2 | 136437422 | 232303 | 8.2752  | 0.5407 | 0.3200  | 7.2309 | JPT |
| Hs.147006 | Hs.147006-S   | rs4988262  | 2 | 2 | 136437942 | 231783 | 8.2752  | 0.5407 | -0.3200 | 7.2309 | JPT |
| Hs.147006 | Hs.147006-S   | rs4988245  | 2 | 2 | 136441032 | 228693 | 8.2752  | 0.5407 | -0.3200 | 7.2309 | JPT |
| Hs.147006 | Hs.147006-S   | rs4988222  | 2 | 2 | 136446700 | 223025 | 8.1734  | 0.5443 | 0.3171  | 7.2309 | JPT |
| Hs.147006 | Hs.147006-S   | rs4988219  | 2 | 2 | 136447094 | 222631 | 8.2752  | 0.5407 | 0.3200  | 7.2309 | JPT |
| Hs.147006 | Hs.147006-S   | rs4988213  | 2 | 2 | 136448486 | 221239 | 8.2752  | 0.5407 | 0.3200  | 7.2309 | JPT |
| Hs.147006 | Hs.147006-S   | rs4988211  | 2 | 2 | 136448687 | 221038 | 8.2752  | 0.5407 | -0.3200 | 7.2309 | JPT |
| Hs.147006 | Hs.147006-S   | rs4988203  | 2 | 2 | 136450055 | 219670 | 8.1734  | 0.5443 | -0.3171 | 7.2309 | JPT |
| Hs.147006 | Hs.147006-S   | rs12617885 | 2 | 2 | 136451826 | 217899 | 8.2752  | 0.5407 | 0.3200  | 7.2309 | JPT |
| Hs.147006 | Hs.147006-S   | rs4988196  | 2 | 2 | 136452846 | 216879 | 8.2752  | 0.5407 | 0.3200  | 7.2309 | JPT |
| Hs.147006 | Hs.147006-S   | rs2289049  | 2 | 2 | 136457855 | 211870 | 8.2752  | 0.5407 | -0.3200 | 7.2309 | JPT |
| Hs.147006 | Hs.147006-S   | rs3087348  | 2 | 2 | 136458046 | 211679 | 8.1734  | 0.5443 | -0.3171 | 7.2309 | JPT |
| Hs.147006 | Hs.147006-S   | rs12624144 | 2 | 2 | 136568859 | 100866 | 14.7612 | 0.7690 | -0.3288 | 7.2309 | JPT |
| Hs.147006 | Hs.147006-S   | rs12613074 | 2 | 2 | 136570822 | 98903  | 14.7612 | 0.7690 | -0.3288 | 7.2309 | JPT |
| Hs.147006 | Hs.147006-S   | rs3768996  | 2 | 2 | 136575560 | 94165  | 14.7612 | 0.7690 | -0.3288 | 7.2309 | JPT |
| Hs.147006 | Hs.147006-S   | rs16832394 | 2 | 2 | 136577042 | 92683  | 14.6723 | 0.7748 | -0.3262 | 7.2309 | JPT |
| Hs.147006 | Hs.147006-S   | rs12618797 | 2 | 2 | 136580415 | 89310  | 14.7612 | 0.7690 | -0.3288 | 7.2309 | JPT |
| Hs.147006 | Hs.147006-S   | rs713391   | 2 | 2 | 136581699 | 88026  | 14.7612 | 0.7690 | 0.3288  | 7.2309 | JPT |
| FLJ36175  | GI_22749102-S | rs12465874 | 2 | 2 | 159892396 | 25735  | 6.1627  | 0.4269 | 0.3213  | 5.8923 | JPT |
| FLJ36175  | GI_22749102-S | rs10174247 | 2 | 2 | 159898302 | 19829  | 6.4105  | 0.4573 | 0.3379  | 5.8923 | JPT |
| FLJ36175  | GI_22749102-S | rs4865041  | 2 | 2 | 159898542 | 19589  | 7.1460  | 0.4829 | -0.3573 | 5.8923 | JPT |
| FLJ36175  | GI_22749102-S | rs1065594  | 2 | 2 | 159914300 | 3831   | 6.2902  | 0.4344 | -0.3332 | 5.8923 | JPT |

|          |               |            |   |   |           |        |         |        |         |        |     |
|----------|---------------|------------|---|---|-----------|--------|---------|--------|---------|--------|-----|
| FLJ36175 | GI_22749102-S | rs10490002 | 2 | 2 | 159934765 | 16634  | 7.5285  | 0.5115 | 0.3538  | 5.8923 | JPT |
| FLJ36175 | GI_22749102-S | rs6761921  | 2 | 2 | 159948587 | 30456  | 7.7985  | 0.5171 | 0.3458  | 5.8923 | JPT |
| FLJ36175 | GI_22749102-S | rs12478479 | 2 | 2 | 159954107 | 35976  | 7.1397  | 0.5356 | 0.3345  | 5.8923 | JPT |
| FLJ36175 | GI_22749102-S | rs52848    | 2 | 2 | 159963245 | 45114  | 6.1388  | 0.4254 | -0.2956 | 5.8923 | JPT |
| FLJ36175 | GI_22749102-S | rs714156   | 2 | 2 | 159966575 | 48444  | 7.5285  | 0.5115 | 0.3538  | 5.8923 | JPT |
| FLJ36175 | GI_22749102-S | rs13026048 | 2 | 2 | 159971684 | 53553  | 6.4476  | 0.5044 | -0.3549 | 5.8923 | JPT |
| LOC51240 | GI_31377759-S | rs10497705 | 2 | 2 | 190317520 | 143472 | 6.2709  | 0.4410 | 0.4828  | 5.9079 | JPT |
| LOC51240 | GI_31377759-S | rs6434355  | 2 | 2 | 190327029 | 133963 | 6.8835  | 0.4765 | -0.4665 | 5.9079 | JPT |
| LOC51240 | GI_31377759-S | rs4667295  | 2 | 2 | 190329896 | 131096 | 12.0393 | 0.7001 | 0.5555  | 5.9079 | JPT |
| LOC51240 | GI_31377759-S | rs6761923  | 2 | 2 | 190333105 | 127887 | 11.0382 | 0.6657 | 0.5432  | 5.9079 | JPT |
| LOC51240 | GI_31377759-S | rs9646811  | 2 | 2 | 190334084 | 126908 | 10.3282 | 0.6859 | -0.5276 | 5.9079 | JPT |
| LOC51240 | GI_31377759-S | rs7568449  | 2 | 2 | 190346560 | 114432 | 17.4187 | 0.8331 | -0.6044 | 5.9079 | JPT |
| LOC51240 | GI_31377759-S | rs2289226  | 2 | 2 | 190351711 | 109281 | 17.6169 | 0.8296 | -0.5997 | 5.9079 | JPT |
| LOC51240 | GI_31377759-S | rs4667297  | 2 | 2 | 190354502 | 106490 | 17.4187 | 0.8331 | -0.6044 | 5.9079 | JPT |
| LOC51240 | GI_31377759-S | rs893784   | 2 | 2 | 190361789 | 99203  | 17.4187 | 0.8331 | -0.6044 | 5.9079 | JPT |
| LOC51240 | GI_31377759-S | rs10931430 | 2 | 2 | 190367692 | 93300  | 17.4187 | 0.8331 | 0.6044  | 5.9079 | JPT |
| LOC51240 | GI_31377759-S | rs11679767 | 2 | 2 | 190371806 | 89186  | 17.4187 | 0.8331 | -0.6044 | 5.9079 | JPT |
| LOC51240 | GI_31377759-S | rs7571089  | 2 | 2 | 190387299 | 73693  | 17.4187 | 0.8331 | 0.6044  | 5.9079 | JPT |
| LOC51240 | GI_31377759-S | rs1437891  | 2 | 2 | 190388214 | 72778  | 17.4187 | 0.8331 | 0.6044  | 5.9079 | JPT |
| LOC51240 | GI_31377759-S | rs10195109 | 2 | 2 | 190394697 | 66295  | 15.9516 | 0.8041 | 0.6843  | 5.9079 | JPT |
| LOC51240 | GI_31377759-S | rs6434365  | 2 | 2 | 190397927 | 63065  | 15.9516 | 0.8041 | -0.6843 | 5.9079 | JPT |
| LOC51240 | GI_31377759-S | rs11901295 | 2 | 2 | 190402284 | 58708  | 15.7167 | 0.8386 | -0.6952 | 5.9079 | JPT |
| LOC51240 | GI_31377759-S | rs7557519  | 2 | 2 | 190408693 | 52299  | 15.9516 | 0.8041 | 0.6843  | 5.9079 | JPT |
| LOC51240 | GI_31377759-S | rs12693557 | 2 | 2 | 190416443 | 44549  | 17.6169 | 0.8296 | 0.5997  | 5.9079 | JPT |
| LOC51240 | GI_31377759-S | rs1550388  | 2 | 2 | 190429286 | 31706  | 15.9516 | 0.8041 | -0.6843 | 5.9079 | JPT |
| LOC51240 | GI_31377759-S | rs2033870  | 2 | 2 | 190429336 | 31656  | 17.6169 | 0.8296 | -0.5997 | 5.9079 | JPT |
| LOC51240 | GI_31377759-S | rs1225101  | 2 | 2 | 190430927 | 30065  | 13.3712 | 0.8025 | -0.7171 | 5.9079 | JPT |
| LOC51240 | GI_31377759-S | rs1898560  | 2 | 2 | 190437833 | 23159  | 17.4822 | 0.8271 | 0.6859  | 5.9079 | JPT |
| LOC51240 | GI_31377759-S | rs4666783  | 2 | 2 | 190438486 | 22506  | 17.3370 | 0.8316 | 0.6945  | 5.9079 | JPT |
| LOC51240 | GI_31377759-S | rs6719224  | 2 | 2 | 190459777 | 1215   | 17.4822 | 0.8271 | 0.6859  | 5.9079 | JPT |
| LOC51240 | GI_31377759-S | rs1055091  | 2 | 2 | 190460649 | 343    | 19.2345 | 0.8631 | 0.6145  | 5.9079 | JPT |
| LOC51240 | GI_31377759-S | rs6942     | 2 | 2 | 190461917 | 925    | 19.3691 | 0.8586 | -0.6091 | 5.9079 | JPT |
| LOC51240 | GI_31377759-S | rs3791767  | 2 | 2 | 190465421 | 4429   | 17.3539 | 0.8319 | -0.6926 | 5.9079 | JPT |
| LOC51240 | GI_31377759-S | rs7591929  | 2 | 2 | 190468763 | 7771   | 19.2345 | 0.8631 | 0.6145  | 5.9079 | JPT |
| LOC51240 | GI_31377759-S | rs5742933  | 2 | 2 | 190474822 | 13830  | 16.9738 | 0.8248 | -0.6882 | 5.9079 | JPT |
| LOC51240 | GI_31377759-S | rs1899025  | 2 | 2 | 190475088 | 14096  | 19.2345 | 0.8631 | 0.6145  | 5.9079 | JPT |
| LOC51240 | GI_31377759-S | rs1233302  | 2 | 2 | 190494386 | 33394  | 17.1082 | 0.8567 | -0.6382 | 5.9079 | JPT |
| LOC51240 | GI_31377759-S | rs3791770  | 2 | 2 | 190499341 | 38349  | 17.3539 | 0.8319 | 0.6926  | 5.9079 | JPT |
| LOC51240 | GI_31377759-S | rs3791773  | 2 | 2 | 190508138 | 47146  | 17.3539 | 0.8319 | -0.6926 | 5.9079 | JPT |
| LOC51240 | GI_31377759-S | rs1233284  | 2 | 2 | 190515277 | 54285  | 19.2345 | 0.8631 | -0.6145 | 5.9079 | JPT |
| LOC51240 | GI_31377759-S | rs1233288  | 2 | 2 | 190516231 | 55239  | 19.2345 | 0.8631 | 0.6145  | 5.9079 | JPT |
| LOC51240 | GI_31377759-S | rs1233297  | 2 | 2 | 190519681 | 58689  | 16.7932 | 0.8213 | 0.6002  | 5.9079 | JPT |
| LOC51240 | GI_31377759-S | rs7577961  | 2 | 2 | 190519772 | 58780  | 16.0701 | 0.7990 | 0.6255  | 5.9079 | JPT |
| LOC51240 | GI_31377759-S | rs5743063  | 2 | 2 | 190519955 | 58963  | 16.0701 | 0.7990 | 0.6255  | 5.9079 | JPT |
| LOC51240 | GI_31377759-S | rs1233245  | 2 | 2 | 190526000 | 65008  | 13.5801 | 0.7464 | -0.5670 | 5.9079 | JPT |
| LOC51240 | GI_31377759-S | rs256546   | 2 | 2 | 190576669 | 115677 | 8.4591  | 0.5669 | 0.5124  | 5.9079 | JPT |
| LOC51240 | GI_31377759-S | rs12475694 | 2 | 2 | 190598114 | 137122 | 8.8526  | 0.5678 | 0.5303  | 5.9079 | JPT |
| ALS2CR4  | GI_22748830-S | rs2241135  | 2 | 2 | 202332738 | 16411  | 6.9005  | 0.4774 | -0.3152 | 5.4274 | JPT |
| ALS2CR4  | GI_22748830-S | rs10931966 | 2 | 2 | 202343180 | 26853  | 6.5844  | 0.4594 | 0.3079  | 5.4274 | JPT |
| RPL37A   | GI_16306561-S | rs2066518  | 2 | 2 | 217113894 | 75194  | 12.7250 | 0.7216 | 0.5529  | 8.69   | JPT |
| RPL37A   | GI_16306561-S | rs3770487  | 2 | 2 | 217117613 | 71475  | 12.4559 | 0.7048 | 0.5335  | 8.69   | JPT |
| RPL37A   | GI_16306561-S | rs16856088 | 2 | 2 | 217118220 | 70868  | 12.4559 | 0.7048 | 0.5335  | 8.69   | JPT |
| RPL37A   | GI_16306561-S | rs3770485  | 2 | 2 | 217118416 | 70672  | 12.4559 | 0.7048 | 0.5335  | 8.69   | JPT |
| RPL37A   | GI_16306561-S | rs12621359 | 2 | 2 | 217119330 | 69758  | 12.4559 | 0.7048 | -0.5335 | 8.69   | JPT |
| RPL37A   | GI_16306561-S | rs12611945 | 2 | 2 | 217119515 | 69573  | 12.4559 | 0.7048 | 0.5335  | 8.69   | JPT |
| RPL37A   | GI_16306561-S | rs3770483  | 2 | 2 | 217120269 | 68819  | 12.4559 | 0.7048 | 0.5335  | 8.69   | JPT |
| RPL37A   | GI_16306561-S | rs16856102 | 2 | 2 | 217120743 | 68345  | 13.0434 | 0.7662 | -0.4759 | 8.69   | JPT |
| RPL37A   | GI_16306561-S | rs2066521  | 2 | 2 | 217122924 | 66164  | 12.4559 | 0.7048 | -0.5335 | 8.69   | JPT |
| RPL37A   | GI_16306561-S | rs12612280 | 2 | 2 | 217123766 | 65322  | 12.4559 | 0.7048 | 0.5335  | 8.69   | JPT |

|        |               |            |   |   |           |        |         |        |         |        |     |
|--------|---------------|------------|---|---|-----------|--------|---------|--------|---------|--------|-----|
| RPL37A | GI_16306561-S | rs16856126 | 2 | 2 | 217124692 | 64396  | 12.4559 | 0.7048 | 0.5335  | 8.69   | JPT |
| RPL37A | GI_16306561-S | rs16856136 | 2 | 2 | 217128131 | 60957  | 15.0439 | 0.7918 | -0.4714 | 8.69   | JPT |
| RPL37A | GI_16306561-S | rs3816783  | 2 | 2 | 217128593 | 60495  | 12.4559 | 0.7048 | -0.5335 | 8.69   | JPT |
| RPL37A | GI_16306561-S | rs12612749 | 2 | 2 | 217129141 | 59947  | 12.4559 | 0.7048 | -0.5335 | 8.69   | JPT |
| RPL37A | GI_16306561-S | rs3770480  | 2 | 2 | 217129746 | 59342  | 12.7250 | 0.7216 | 0.5529  | 8.69   | JPT |
| RPL37A | GI_16306561-S | rs1705105  | 2 | 2 | 217131441 | 57647  | 12.7250 | 0.7216 | 0.5529  | 8.69   | JPT |
| RPL37A | GI_16306561-S | rs505883   | 2 | 2 | 217131540 | 57548  | 12.4559 | 0.7048 | 0.5335  | 8.69   | JPT |
| RPL37A | GI_16306561-S | rs560025   | 2 | 2 | 217133078 | 56010  | 12.4559 | 0.7048 | -0.5335 | 8.69   | JPT |
| RPL37A | GI_16306561-S | rs2627045  | 2 | 2 | 217133513 | 55575  | 12.4559 | 0.7048 | -0.5335 | 8.69   | JPT |
| RPL37A | GI_16306561-S | rs284548   | 2 | 2 | 217136361 | 52727  | 15.0188 | 0.7912 | -0.4675 | 8.69   | JPT |
| RPL37A | GI_16306561-S | rs284552   | 2 | 2 | 217138550 | 50538  | 12.7250 | 0.7216 | -0.5529 | 8.69   | JPT |
| RPL37A | GI_16306561-S | rs2738286  | 2 | 2 | 217140870 | 48218  | 12.4559 | 0.7048 | -0.5335 | 8.69   | JPT |
| RPL37A | GI_16306561-S | rs12468079 | 2 | 2 | 217144583 | 44505  | 12.4559 | 0.7048 | -0.5335 | 8.69   | JPT |
| RPL37A | GI_16306561-S | rs4324305  | 2 | 2 | 217155418 | 33670  | 12.4559 | 0.7048 | 0.5335  | 8.69   | JPT |
| RPL37A | GI_16306561-S | rs12620897 | 2 | 2 | 217161264 | 27824  | 12.4559 | 0.7048 | -0.5335 | 8.69   | JPT |
| RPL37A | GI_16306561-S | rs2738289  | 2 | 2 | 217169528 | 19560  | 12.4559 | 0.7048 | 0.5335  | 8.69   | JPT |
| RPL37A | GI_16306561-S | rs605702   | 2 | 2 | 217172200 | 16888  | 12.4559 | 0.7048 | -0.5335 | 8.69   | JPT |
| RPL37A | GI_16306561-S | rs654474   | 2 | 2 | 217176114 | 12974  | 12.4559 | 0.7048 | 0.5335  | 8.69   | JPT |
| RPL37A | GI_16306561-S | rs540809   | 2 | 2 | 217176378 | 12710  | 12.6927 | 0.7207 | 0.5525  | 8.69   | JPT |
| RPL37A | GI_16306561-S | rs284567   | 2 | 2 | 217177980 | 11108  | 12.7250 | 0.7216 | -0.5529 | 8.69   | JPT |
| RPL37A | GI_16306561-S | rs16856243 | 2 | 2 | 217183529 | 5559   | 10.5414 | 0.6842 | 0.4870  | 8.69   | JPT |
| RPL37A | GI_16306561-S | rs284565   | 2 | 2 | 217184312 | 4776   | 12.7250 | 0.7216 | 0.5529  | 8.69   | JPT |
| RPL37A | GI_16306561-S | rs3732019  | 2 | 2 | 217187892 | 1196   | 18.8386 | 0.8571 | -0.5394 | 8.69   | JPT |
| RPL37A | GI_16306561-S | rs3806575  | 2 | 2 | 217188440 | 648    | 12.9732 | 0.7733 | 0.4959  | 8.69   | JPT |
| RPL37A | GI_16306561-S | rs3755140  | 2 | 2 | 217188555 | 533    | 18.0737 | 0.8446 | 0.5276  | 8.69   | JPT |
| RPL37A | GI_16306561-S | rs12619115 | 2 | 2 | 217189346 | 258    | 14.7657 | 0.7852 | -0.4938 | 8.69   | JPT |
| RPL37A | GI_16306561-S | rs2272243  | 2 | 2 | 217190270 | 1182   | 17.6807 | 0.8449 | -0.5289 | 8.69   | JPT |
| RPL37A | GI_16306561-S | rs12616410 | 2 | 2 | 217193418 | 4330   | 17.6241 | 0.8439 | -0.5280 | 8.69   | JPT |
| RPL37A | GI_16306561-S | rs284536   | 2 | 2 | 217199049 | 9961   | 9.3441  | 0.6556 | -0.6112 | 8.69   | JPT |
| RPL37A | GI_16306561-S | rs12472569 | 2 | 2 | 217206912 | 17824  | 17.5040 | 0.8418 | 0.5230  | 8.69   | JPT |
| RPL37A | GI_16306561-S | rs12621480 | 2 | 2 | 217210080 | 20992  | 11.2755 | 0.6921 | -0.3945 | 8.69   | JPT |
| RPL37A | GI_16306561-S | rs12612079 | 2 | 2 | 217224087 | 34999  | 9.8271  | 0.6369 | 0.4043  | 8.69   | JPT |
| RPL37A | GI_16306561-S | rs7587025  | 2 | 2 | 217229951 | 40863  | 13.3884 | 0.7327 | -0.4775 | 8.69   | JPT |
| RPL37A | GI_16306561-S | rs16856373 | 2 | 2 | 217242368 | 53280  | 10.8467 | 0.6587 | 0.5172  | 8.69   | JPT |
| WDFY1  | GI_30795191-I | rs624086   | 2 | 2 | 224563619 | 44559  | 6.7872  | 0.4631 | -0.2192 | 6.2092 | JPT |
| WDFY1  | GI_30795191-I | rs638829   | 2 | 2 | 224577070 | 31108  | 6.7872  | 0.4631 | -0.2192 | 6.2092 | JPT |
| WDFY1  | GI_30795191-I | rs585147   | 2 | 2 | 224577147 | 31031  | 6.4871  | 0.4619 | -0.2201 | 6.2092 | JPT |
| WDFY1  | GI_30795191-I | rs616968   | 2 | 2 | 224591011 | 17167  | 6.4058  | 0.4922 | -0.2142 | 6.2092 | JPT |
| WDFY1  | GI_30795191-I | rs616901   | 2 | 2 | 224591053 | 17125  | 6.7872  | 0.4631 | -0.2192 | 6.2092 | JPT |
| WDFY1  | GI_30795191-I | rs604990   | 2 | 2 | 224591399 | 16779  | 6.7872  | 0.4631 | 0.2192  | 6.2092 | JPT |
| WDFY1  | GI_30795191-I | rs678370   | 2 | 2 | 224591755 | 16423  | 6.7872  | 0.4631 | 0.2192  | 6.2092 | JPT |
| WDFY1  | GI_30795191-I | rs548518   | 2 | 2 | 224592476 | 15702  | 6.7872  | 0.4631 | -0.2192 | 6.2092 | JPT |
| WDFY1  | GI_30795191-I | rs649260   | 2 | 2 | 224594304 | 13874  | 6.7872  | 0.4631 | -0.2192 | 6.2092 | JPT |
| WDFY1  | GI_30795191-I | rs677024   | 2 | 2 | 224595894 | 12284  | 6.7872  | 0.4631 | -0.2192 | 6.2092 | JPT |
| WDFY1  | GI_30795191-I | rs590872   | 2 | 2 | 224598860 | 9318   | 6.7872  | 0.4631 | 0.2192  | 6.2092 | JPT |
| RAMP1  | GI_5032018-S  | rs6741923  | 2 | 2 | 238581206 | 21449  | 8.8099  | 0.5834 | -0.7029 | 5.8311 | JPT |
| RAMP1  | GI_5032018-S  | rs7578855  | 2 | 2 | 238583297 | 19358  | 10.0818 | 0.6966 | -0.7952 | 5.8311 | JPT |
| STK25  | GI_34147665-S | rs1064767  | 2 | 2 | 241887327 | 267284 | 7.5032  | 0.5102 | -0.3403 | 5.6611 | JPT |
| STK25  | GI_34147665-S | rs7568     | 2 | 2 | 242011733 | 142878 | 11.7962 | 0.6921 | -0.4055 | 5.6611 | JPT |
| STK25  | GI_34147665-S | rs16843642 | 2 | 2 | 242071369 | 83242  | 11.9186 | 0.6875 | 0.4045  | 5.6611 | JPT |
| STK25  | GI_34147665-S | rs3771561  | 2 | 2 | 242073694 | 80917  | 11.7962 | 0.6921 | 0.4055  | 5.6611 | JPT |
| STK25  | GI_34147665-S | rs16842449 | 2 | 2 | 242074969 | 79642  | 12.7682 | 0.7145 | -0.4053 | 5.6611 | JPT |
| STK25  | GI_34147665-S | rs3771566  | 2 | 2 | 242078289 | 76322  | 11.7962 | 0.6921 | -0.4055 | 5.6611 | JPT |
| STK25  | GI_34147665-S | rs7423605  | 2 | 2 | 242083601 | 71010  | 11.7962 | 0.6921 | 0.4055  | 5.6611 | JPT |
| STK25  | GI_34147665-S | rs12612038 | 2 | 2 | 242089675 | 64936  | 11.9186 | 0.6875 | -0.4045 | 5.6611 | JPT |
| STK25  | GI_34147665-S | rs16843671 | 2 | 2 | 242094348 | 60263  | 10.5949 | 0.6767 | 0.3887  | 5.6611 | JPT |
| STK25  | GI_34147665-S | rs929409   | 2 | 2 | 242096497 | 58114  | 8.5913  | 0.5732 | 0.3342  | 5.6611 | JPT |
| STK25  | GI_34147665-S | rs3755400  | 2 | 2 | 242099785 | 54826  | 11.9186 | 0.6875 | -0.4045 | 5.6611 | JPT |
| STK25  | GI_34147665-S | rs3771569  | 2 | 2 | 242102596 | 52015  | 11.9186 | 0.6875 | -0.4045 | 5.6611 | JPT |

|       |               |           |   |   |           |       |         |        |         |        |     |
|-------|---------------|-----------|---|---|-----------|-------|---------|--------|---------|--------|-----|
| STK25 | GI_34147665-S | rs3821281 | 2 | 2 | 242105330 | 49281 | 11.9186 | 0.6875 | -0.4045 | 5.6611 | JPT |
| STK25 | GI_34147665-S | rs2240482 | 2 | 2 | 242125011 | 29600 | 11.7962 | 0.6921 | 0.4055  | 5.6611 | JPT |
| STK25 | GI_34147665-S | rs3771588 | 2 | 2 | 242132099 | 22512 | 6.4749  | 0.4531 | -0.3229 | 5.6611 | JPT |
| RAD18 | GI_14550404-S | rs9990224 | 3 | 3 | 8883331   | 13727 | 7.7746  | 0.5159 | 0.1238  | 5.8528 | JPT |
| RAD18 | GI_14550404-S | rs6798600 | 3 | 3 | 8887662   | 9396  | 6.5925  | 0.4599 | -0.1225 | 5.8528 | JPT |
| RAD18 | GI_14550404-S | rs658371  | 3 | 3 | 8890119   | 6939  | 6.9340  | 0.5051 | -0.1182 | 5.8528 | JPT |
| RAD18 | GI_14550404-S | rs250394  | 3 | 3 | 8890957   | 6101  | 7.7338  | 0.5138 | -0.1164 | 5.8528 | JPT |
| RAD18 | GI_14550404-S | rs250401  | 3 | 3 | 8893879   | 3179  | 7.6268  | 0.5166 | -0.1155 | 5.8528 | JPT |
| RAD18 | GI_14550404-S | rs250405  | 3 | 3 | 8900041   | 2983  | 8.2233  | 0.5645 | -0.1222 | 5.8528 | JPT |
| RAD18 | GI_14550404-S | rs166094  | 3 | 3 | 8901324   | 4266  | 6.0843  | 0.4542 | -0.1140 | 5.8528 | JPT |
| RAD18 | GI_14550404-S | rs376167  | 3 | 3 | 8902364   | 5306  | 6.9690  | 0.4813 | 0.1108  | 5.8528 | JPT |
| RAD18 | GI_14550404-S | rs124847  | 3 | 3 | 8903604   | 6546  | 6.9608  | 0.4977 | 0.1206  | 5.8528 | JPT |
| RAD18 | GI_14550404-S | rs166095  | 3 | 3 | 8903911   | 6853  | 7.1580  | 0.4835 | 0.1112  | 5.8528 | JPT |
| RAD18 | GI_14550404-S | rs620103  | 3 | 3 | 8906707   | 9649  | 7.1580  | 0.4835 | -0.1112 | 5.8528 | JPT |
| RAD18 | GI_14550404-S | rs607531  | 3 | 3 | 8907189   | 10131 | 6.9737  | 0.4815 | 0.1063  | 5.8528 | JPT |
| RAD18 | GI_14550404-S | rs604360  | 3 | 3 | 8907918   | 10860 | 6.8882  | 0.4767 | 0.1108  | 5.8528 | JPT |
| RAD18 | GI_14550404-S | rs671237  | 3 | 3 | 8907989   | 10931 | 6.8882  | 0.4767 | 0.1108  | 5.8528 | JPT |
| RAD18 | GI_14550404-S | rs593483  | 3 | 3 | 8908048   | 10990 | 6.4119  | 0.4494 | 0.1066  | 5.8528 | JPT |
| RAD18 | GI_14550404-S | rs589565  | 3 | 3 | 8908892   | 11834 | 7.1580  | 0.4835 | -0.1112 | 5.8528 | JPT |
| RAD18 | GI_14550404-S | rs686195  | 3 | 3 | 8908946   | 11888 | 6.7274  | 0.4759 | 0.1093  | 5.8528 | JPT |
| RAD18 | GI_14550404-S | rs669906  | 3 | 3 | 8909079   | 12021 | 6.0874  | 0.4459 | 0.0967  | 5.8528 | JPT |
| RAD18 | GI_14550404-S | rs193922  | 3 | 3 | 8916834   | 19776 | 6.5568  | 0.4660 | 0.1090  | 5.8528 | JPT |
| RAD18 | GI_14550404-S | rs373090  | 3 | 3 | 8917606   | 20548 | 6.8882  | 0.4767 | 0.1108  | 5.8528 | JPT |
| RAD18 | GI_14550404-S | rs547904  | 3 | 3 | 8922601   | 25543 | 7.1580  | 0.4835 | 0.1112  | 5.8528 | JPT |
| RAD18 | GI_14550404-S | rs341782  | 3 | 3 | 8924343   | 27285 | 7.1580  | 0.4835 | 0.1112  | 5.8528 | JPT |
| RAD18 | GI_14550404-S | rs341781  | 3 | 3 | 8924803   | 27745 | 6.8882  | 0.4767 | -0.1108 | 5.8528 | JPT |
| RAD18 | GI_14550404-S | rs341778  | 3 | 3 | 8926522   | 29464 | 7.1580  | 0.4835 | -0.1112 | 5.8528 | JPT |
| RAD18 | GI_14550404-S | rs341777  | 3 | 3 | 8926777   | 29719 | 7.1580  | 0.4835 | -0.1112 | 5.8528 | JPT |
| RAD18 | GI_14550404-S | rs341774  | 3 | 3 | 8927614   | 30556 | 7.1580  | 0.4835 | 0.1112  | 5.8528 | JPT |
| RAD18 | GI_14550404-S | rs341773  | 3 | 3 | 8928232   | 31174 | 6.2992  | 0.4764 | -0.1145 | 5.8528 | JPT |
| RAD18 | GI_14550404-S | rs372806  | 3 | 3 | 8929472   | 32414 | 5.9248  | 0.4441 | -0.1051 | 5.8528 | JPT |
| RAD18 | GI_14550404-S | rs373572  | 3 | 3 | 8930389   | 33331 | 6.8882  | 0.4767 | -0.1108 | 5.8528 | JPT |
| RAD18 | GI_14550404-S | rs589320  | 3 | 3 | 8931131   | 34073 | 7.1580  | 0.4835 | -0.1112 | 5.8528 | JPT |
| RAD18 | GI_14550404-S | rs589301  | 3 | 3 | 8931146   | 34088 | 7.1580  | 0.4835 | -0.1112 | 5.8528 | JPT |
| RAD18 | GI_14550404-S | rs575559  | 3 | 3 | 8931371   | 34313 | 7.1580  | 0.4835 | 0.1112  | 5.8528 | JPT |
| RAD18 | GI_14550404-S | rs574776  | 3 | 3 | 8931418   | 34360 | 7.1580  | 0.4835 | -0.1112 | 5.8528 | JPT |
| RAD18 | GI_14550404-S | rs415015  | 3 | 3 | 8932727   | 35669 | 7.1580  | 0.4835 | 0.1112  | 5.8528 | JPT |
| RAD18 | GI_14550404-S | rs407176  | 3 | 3 | 8933387   | 36329 | 6.9513  | 0.4972 | 0.1129  | 5.8528 | JPT |
| RAD18 | GI_14550404-S | rs395559  | 3 | 3 | 8933872   | 36814 | 7.0913  | 0.4880 | -0.1127 | 5.8528 | JPT |
| RAD18 | GI_14550404-S | rs564032  | 3 | 3 | 8935428   | 38370 | 7.1580  | 0.4835 | -0.1112 | 5.8528 | JPT |
| RAD18 | GI_14550404-S | rs528203  | 3 | 3 | 8937063   | 40005 | 7.1580  | 0.4835 | -0.1112 | 5.8528 | JPT |
| RAD18 | GI_14550404-S | rs674610  | 3 | 3 | 8937510   | 40452 | 6.5291  | 0.4643 | 0.1082  | 5.8528 | JPT |
| RAD18 | GI_14550404-S | rs500938  | 3 | 3 | 8937724   | 40666 | 6.4031  | 0.4828 | -0.1141 | 5.8528 | JPT |
| RAD18 | GI_14550404-S | rs1161812 | 3 | 3 | 8946650   | 49592 | 7.3998  | 0.5132 | -0.1131 | 5.8528 | JPT |
| RAD18 | GI_14550404-S | rs1161811 | 3 | 3 | 8946710   | 49652 | 7.1580  | 0.4835 | -0.1112 | 5.8528 | JPT |
| RAD18 | GI_14550404-S | rs1161808 | 3 | 3 | 8946869   | 49811 | 7.1580  | 0.4835 | 0.1112  | 5.8528 | JPT |
| RAD18 | GI_14550404-S | rs1161807 | 3 | 3 | 8946931   | 49873 | 6.3415  | 0.4452 | 0.1029  | 5.8528 | JPT |
| RAD18 | GI_14550404-S | rs1161806 | 3 | 3 | 8947027   | 49969 | 6.3009  | 0.4351 | -0.1093 | 5.8528 | JPT |
| RAD18 | GI_14550404-S | rs1161805 | 3 | 3 | 8947222   | 50164 | 7.1580  | 0.4835 | 0.1112  | 5.8528 | JPT |
| RAD18 | GI_14550404-S | rs377012  | 3 | 3 | 8948271   | 51213 | 6.8882  | 0.4767 | -0.1108 | 5.8528 | JPT |
| RAD18 | GI_14550404-S | rs1161800 | 3 | 3 | 8948542   | 51484 | 7.1580  | 0.4835 | 0.1112  | 5.8528 | JPT |
| RAD18 | GI_14550404-S | rs602193  | 3 | 3 | 8948804   | 51746 | 7.1580  | 0.4835 | 0.1112  | 5.8528 | JPT |
| RAD18 | GI_14550404-S | rs550964  | 3 | 3 | 8949093   | 52035 | 7.1580  | 0.4835 | -0.1112 | 5.8528 | JPT |
| RAD18 | GI_14550404-S | rs1161793 | 3 | 3 | 8949924   | 52866 | 7.1580  | 0.4835 | -0.1112 | 5.8528 | JPT |
| RAD18 | GI_14550404-S | rs367621  | 3 | 3 | 8950156   | 53098 | 7.1580  | 0.4835 | -0.1112 | 5.8528 | JPT |
| RAD18 | GI_14550404-S | rs408483  | 3 | 3 | 8950200   | 53142 | 7.1580  | 0.4835 | -0.1112 | 5.8528 | JPT |
| RAD18 | GI_14550404-S | rs446923  | 3 | 3 | 8950236   | 53178 | 7.1580  | 0.4835 | -0.1112 | 5.8528 | JPT |
| RAD18 | GI_14550404-S | rs375053  | 3 | 3 | 8950393   | 53335 | 6.8529  | 0.4748 | -0.1131 | 5.8528 | JPT |
| RAD18 | GI_14550404-S | rs374679  | 3 | 3 | 8950538   | 53480 | 7.1580  | 0.4835 | -0.1112 | 5.8528 | JPT |

|           |               |            |   |   |          |        |        |        |         |        |     |
|-----------|---------------|------------|---|---|----------|--------|--------|--------|---------|--------|-----|
| RAD18     | GI_14550404-S | rs447423   | 3 | 3 | 8950742  | 53684  | 7.1580 | 0.4835 | 0.1112  | 5.8528 | JPT |
| RAD18     | GI_14550404-S | rs406333   | 3 | 3 | 8951019  | 53961  | 7.1580 | 0.4835 | -0.1112 | 5.8528 | JPT |
| RAD18     | GI_14550404-S | rs435936   | 3 | 3 | 8951115  | 54057  | 7.1580 | 0.4835 | 0.1112  | 5.8528 | JPT |
| RAD18     | GI_14550404-S | rs375649   | 3 | 3 | 8951779  | 54721  | 7.2540 | 0.4969 | 0.1137  | 5.8528 | JPT |
| RAD18     | GI_14550404-S | rs171029   | 3 | 3 | 8957481  | 60423  | 6.6317 | 0.4788 | -0.1091 | 5.8528 | JPT |
| RAD18     | GI_14550404-S | rs385253   | 3 | 3 | 8959464  | 62406  | 7.1580 | 0.4835 | -0.1112 | 5.8528 | JPT |
| RAD18     | GI_14550404-S | rs518319   | 3 | 3 | 8963200  | 66142  | 7.0745 | 0.4871 | 0.1126  | 5.8528 | JPT |
| RAD18     | GI_14550404-S | rs689296   | 3 | 3 | 8963809  | 66751  | 7.1580 | 0.4835 | -0.1112 | 5.8528 | JPT |
| RAD18     | GI_14550404-S | rs341793   | 3 | 3 | 8973937  | 76879  | 6.9644 | 0.5068 | 0.1116  | 5.8528 | JPT |
| RAD18     | GI_14550404-S | rs615967   | 3 | 3 | 8980078  | 83020  | 6.3693 | 0.4391 | -0.1070 | 5.8528 | JPT |
| RAD18     | GI_14550404-S | rs588232   | 3 | 3 | 8981632  | 84574  | 6.3693 | 0.4391 | -0.1070 | 5.8528 | JPT |
| RAD18     | GI_14550404-S | rs712809   | 3 | 3 | 8984262  | 87204  | 6.0618 | 0.4208 | -0.1109 | 5.8528 | JPT |
| RAD18     | GI_14550404-S | rs560303   | 3 | 3 | 8984905  | 87847  | 6.2601 | 0.4566 | -0.1139 | 5.8528 | JPT |
| RAD18     | GI_14550404-S | rs398225   | 3 | 3 | 8987886  | 90828  | 6.4333 | 0.4670 | -0.1170 | 5.8528 | JPT |
| RAD18     | GI_14550404-S | rs369651   | 3 | 3 | 8987903  | 90845  | 6.2173 | 0.4301 | -0.1115 | 5.8528 | JPT |
| RAD18     | GI_14550404-S | rs780907   | 3 | 3 | 8990504  | 93446  | 5.9280 | 0.4202 | 0.1152  | 5.8528 | JPT |
| RAD18     | GI_14550404-S | rs628254   | 3 | 3 | 8991628  | 94570  | 6.4494 | 0.4516 | 0.1252  | 5.8528 | JPT |
| Hs.224849 | Hs.224849-S   | rs4684236  | 3 | 3 | 14675050 | 21183  | 6.7742 | 0.4623 | 0.2212  | 6.1149 | JPT |
| Hs.224849 | Hs.224849-S   | rs9830735  | 3 | 3 | 14676639 | 19594  | 6.7742 | 0.4623 | 0.2212  | 6.1149 | JPT |
| Hs.224849 | Hs.224849-S   | rs2053017  | 3 | 3 | 14677276 | 18957  | 6.5442 | 0.4571 | -0.2141 | 6.1149 | JPT |
| Hs.224849 | Hs.224849-S   | rs3773487  | 3 | 3 | 14681852 | 14381  | 6.2311 | 0.4721 | 0.2230  | 6.1149 | JPT |
| Hs.224849 | Hs.224849-S   | rs3773491  | 3 | 3 | 14687046 | 9187   | 6.5442 | 0.4571 | -0.2141 | 6.1149 | JPT |
| Hs.224849 | Hs.224849-S   | rs1901     | 3 | 3 | 14687477 | 8756   | 6.5442 | 0.4571 | -0.2141 | 6.1149 | JPT |
| Hs.224849 | Hs.224849-S   | rs11717438 | 3 | 3 | 14688062 | 8171   | 6.7420 | 0.4767 | -0.2286 | 6.1149 | JPT |
| MGC15763  | GI_19923906-S | rs6770707  | 3 | 3 | 16270269 | 47973  | 6.8056 | 0.4641 | -0.2221 | 6.1555 | JPT |
| MGC15763  | GI_19923906-S | rs842251   | 3 | 3 | 16274095 | 44147  | 6.8056 | 0.4641 | -0.2221 | 6.1555 | JPT |
| MGC15763  | GI_19923906-S | rs842253   | 3 | 3 | 16275339 | 42903  | 6.8056 | 0.4641 | 0.2221  | 6.1555 | JPT |
| MGC15763  | GI_19923906-S | rs842254   | 3 | 3 | 16275629 | 42613  | 6.8056 | 0.4641 | -0.2221 | 6.1555 | JPT |
| MGC15763  | GI_19923906-S | rs842256   | 3 | 3 | 16278651 | 39591  | 6.7077 | 0.4665 | -0.2219 | 6.1555 | JPT |
| MGC15763  | GI_19923906-S | rs859703   | 3 | 3 | 16278843 | 39399  | 6.7077 | 0.4665 | 0.2219  | 6.1555 | JPT |
| MGC15763  | GI_19923906-S | rs842257   | 3 | 3 | 16279150 | 39092  | 6.5964 | 0.4683 | -0.2217 | 6.1555 | JPT |
| MGC15763  | GI_19923906-S | rs2245721  | 3 | 3 | 16280678 | 37564  | 6.7192 | 0.4754 | -0.2226 | 6.1555 | JPT |
| MGC15763  | GI_19923906-S | rs1514892  | 3 | 3 | 16282047 | 36195  | 6.7330 | 0.4680 | 0.2174  | 6.1555 | JPT |
| MGC15763  | GI_19923906-S | rs842259   | 3 | 3 | 16287568 | 30674  | 6.8212 | 0.4650 | -0.2175 | 6.1555 | JPT |
| MGC15763  | GI_19923906-S | rs842287   | 3 | 3 | 16292947 | 25295  | 6.6796 | 0.4649 | 0.2175  | 6.1555 | JPT |
| MGC15763  | GI_19923906-S | rs1566973  | 3 | 3 | 16295105 | 23137  | 6.5085 | 0.4631 | -0.2171 | 6.1555 | JPT |
| MGC15763  | GI_19923906-S | rs1566972  | 3 | 3 | 16295364 | 22878  | 6.8212 | 0.4650 | 0.2175  | 6.1555 | JPT |
| MGC15763  | GI_19923906-S | rs842274   | 3 | 3 | 16302859 | 15383  | 6.8589 | 0.4751 | -0.2177 | 6.1555 | JPT |
| MGC15763  | GI_19923906-S | rs842273   | 3 | 3 | 16303360 | 14882  | 6.8212 | 0.4650 | -0.2175 | 6.1555 | JPT |
| MGC15763  | GI_19923906-S | rs842272   | 3 | 3 | 16307050 | 11192  | 6.6958 | 0.4658 | 0.2219  | 6.1555 | JPT |
| MGC15763  | GI_19923906-S | rs13091727 | 3 | 3 | 16313702 | 4540   | 6.6796 | 0.4649 | 0.2175  | 6.1555 | JPT |
| MGC15763  | GI_19923906-S | rs842284   | 3 | 3 | 16315672 | 2570   | 6.8589 | 0.4751 | -0.2177 | 6.1555 | JPT |
| MGC15763  | GI_19923906-S | rs842424   | 3 | 3 | 16332982 | 14740  | 6.5663 | 0.4665 | -0.2192 | 6.1555 | JPT |
| MGC15763  | GI_19923906-S | rs493626   | 3 | 3 | 16334965 | 16723  | 7.0139 | 0.4837 | 0.2173  | 6.1555 | JPT |
| MGC15763  | GI_19923906-S | rs689716   | 3 | 3 | 16335349 | 17107  | 7.1647 | 0.4839 | 0.2173  | 6.1555 | JPT |
| MGC15763  | GI_19923906-S | rs567541   | 3 | 3 | 16339621 | 21379  | 6.9208 | 0.4786 | -0.2142 | 6.1555 | JPT |
| MGC15763  | GI_19923906-S | rs690216   | 3 | 3 | 16339923 | 21681  | 6.8982 | 0.4693 | -0.2142 | 6.1555 | JPT |
| MGC15763  | GI_19923906-S | rs6765960  | 3 | 3 | 16341640 | 23398  | 6.8982 | 0.4693 | 0.2142  | 6.1555 | JPT |
| MGC15763  | GI_19923906-S | rs541299   | 3 | 3 | 16342126 | 23884  | 6.8982 | 0.4693 | -0.2142 | 6.1555 | JPT |
| MGC15763  | GI_19923906-S | rs568798   | 3 | 3 | 16342826 | 24584  | 6.8982 | 0.4693 | -0.2142 | 6.1555 | JPT |
| MGC15763  | GI_19923906-S | rs568833   | 3 | 3 | 16342840 | 24598  | 6.9208 | 0.4786 | -0.2142 | 6.1555 | JPT |
| MGC15763  | GI_19923906-S | rs690145   | 3 | 3 | 16343125 | 24883  | 6.9072 | 0.4778 | 0.2142  | 6.1555 | JPT |
| MGC15763  | GI_19923906-S | rs519819   | 3 | 3 | 16343579 | 25337  | 6.9208 | 0.4786 | -0.2142 | 6.1555 | JPT |
| MGC15763  | GI_19923906-S | rs690094   | 3 | 3 | 16343703 | 25461  | 6.7762 | 0.5051 | -0.2262 | 6.1555 | JPT |
| KIAA1449  | GI_21314694-S | rs12634131 | 3 | 3 | 38841595 | 271081 | 6.6539 | 0.4634 | 0.2478  | 5.8177 | JPT |
| KIAA1449  | GI_21314694-S | rs11707517 | 3 | 3 | 38853632 | 259044 | 6.1971 | 0.4289 | 0.2590  | 5.8177 | JPT |
| KIAA1449  | GI_21314694-S | rs4398365  | 3 | 3 | 38853808 | 258868 | 8.8522 | 0.5764 | 0.2686  | 5.8177 | JPT |
| KIAA1449  | GI_21314694-S | rs4676476  | 3 | 3 | 38857013 | 255663 | 8.7964 | 0.5652 | -0.2614 | 5.8177 | JPT |
| KIAA1449  | GI_21314694-S | rs4340642  | 3 | 3 | 38857240 | 255436 | 6.1971 | 0.4289 | 0.2590  | 5.8177 | JPT |

|          |               |            |   |   |          |        |        |        |         |        |     |
|----------|---------------|------------|---|---|----------|--------|--------|--------|---------|--------|-----|
| KIAA1449 | GI_21314694-S | rs12636895 | 3 | 3 | 38858856 | 253820 | 6.1971 | 0.4289 | -0.2590 | 5.8177 | JPT |
| KIAA1449 | GI_21314694-S | rs9859109  | 3 | 3 | 38859774 | 252902 | 6.1971 | 0.4289 | 0.2590  | 5.8177 | JPT |
| KIAA1449 | GI_21314694-S | rs13320845 | 3 | 3 | 38860544 | 252132 | 6.1704 | 0.5069 | -0.2848 | 5.8177 | JPT |
| KIAA1449 | GI_21314694-S | rs7619839  | 3 | 3 | 38861460 | 251216 | 6.5734 | 0.5221 | 0.2859  | 5.8177 | JPT |
| KIAA1449 | GI_21314694-S | rs7620018  | 3 | 3 | 38861653 | 251023 | 7.4752 | 0.5542 | 0.2592  | 5.8177 | JPT |
| KIAA1449 | GI_21314694-S | rs6776510  | 3 | 3 | 38862257 | 250419 | 6.6100 | 0.4530 | 0.2399  | 5.8177 | JPT |
| KIAA1449 | GI_21314694-S | rs9858516  | 3 | 3 | 38866552 | 246124 | 7.9082 | 0.5487 | 0.2489  | 5.8177 | JPT |
| KIAA1449 | GI_21314694-S | rs4541346  | 3 | 3 | 38868494 | 244182 | 5.9756 | 0.4231 | 0.2560  | 5.8177 | JPT |
| KIAA1449 | GI_21314694-S | rs4364115  | 3 | 3 | 38870363 | 242313 | 7.9423 | 0.5243 | 0.2475  | 5.8177 | JPT |
| KIAA1449 | GI_21314694-S | rs9852838  | 3 | 3 | 38871144 | 241532 | 6.0842 | 0.4297 | 0.2611  | 5.8177 | JPT |
| KIAA1449 | GI_21314694-S | rs11715722 | 3 | 3 | 38871641 | 241035 | 6.1971 | 0.4289 | -0.2590 | 5.8177 | JPT |
| KIAA1449 | GI_21314694-S | rs6799915  | 3 | 3 | 38877474 | 235202 | 6.7641 | 0.5337 | -0.2912 | 5.8177 | JPT |
| KIAA1449 | GI_21314694-S | rs6789111  | 3 | 3 | 38879226 | 233450 | 6.3755 | 0.4552 | -0.2376 | 5.8177 | JPT |
| KIAA1449 | GI_21314694-S | rs4481097  | 3 | 3 | 38884574 | 228102 | 6.6373 | 0.4625 | -0.2385 | 5.8177 | JPT |
| KIAA1449 | GI_21314694-S | rs3924830  | 3 | 3 | 38886101 | 226575 | 6.0329 | 0.4344 | 0.2626  | 5.8177 | JPT |
| KIAA1449 | GI_21314694-S | rs4133368  | 3 | 3 | 38886976 | 225700 | 6.0842 | 0.4297 | 0.2611  | 5.8177 | JPT |
| KIAA1449 | GI_21314694-S | rs6786732  | 3 | 3 | 38895207 | 217469 | 6.6539 | 0.4634 | 0.2478  | 5.8177 | JPT |
| KIAA1449 | GI_21314694-S | rs9818630  | 3 | 3 | 38905311 | 207365 | 8.8522 | 0.5764 | -0.2686 | 5.8177 | JPT |
| KIAA1449 | GI_21314694-S | rs4342048  | 3 | 3 | 38987947 | 124729 | 6.2251 | 0.4383 | 0.2537  | 5.8177 | JPT |
| KIAA1449 | GI_21314694-S | rs4616582  | 3 | 3 | 39003858 | 108818 | 7.2318 | 0.4875 | -0.2390 | 5.8177 | JPT |
| KIAA1449 | GI_21314694-S | rs6802490  | 3 | 3 | 39008911 | 103765 | 6.3944 | 0.4483 | -0.2457 | 5.8177 | JPT |
| KIAA1449 | GI_21314694-S | rs7619193  | 3 | 3 | 39019120 | 93556  | 6.9012 | 0.4858 | -0.2420 | 5.8177 | JPT |
| KIAA1449 | GI_21314694-S | rs883565   | 3 | 3 | 39030321 | 82355  | 6.4685 | 0.4527 | 0.2481  | 5.8177 | JPT |
| KIAA1449 | GI_21314694-S | rs4676660  | 3 | 3 | 39034196 | 78480  | 5.9825 | 0.4235 | 0.2367  | 5.8177 | JPT |
| KIAA1449 | GI_21314694-S | rs6599000  | 3 | 3 | 39036516 | 76160  | 7.2021 | 0.5025 | 0.2453  | 5.8177 | JPT |
| KIAA1449 | GI_21314694-S | rs883349   | 3 | 3 | 39042929 | 69747  | 6.0741 | 0.4291 | -0.2447 | 5.8177 | JPT |
| KIAA1449 | GI_21314694-S | rs7650682  | 3 | 3 | 39054422 | 58254  | 6.0246 | 0.4186 | -0.2362 | 5.8177 | JPT |
| KIAA1449 | GI_21314694-S | rs6599004  | 3 | 3 | 39070682 | 41994  | 7.2471 | 0.4965 | 0.2455  | 5.8177 | JPT |
| KIAA1449 | GI_21314694-S | rs6769051  | 3 | 3 | 39075205 | 37471  | 7.5588 | 0.5131 | 0.2452  | 5.8177 | JPT |
| KIAA1449 | GI_21314694-S | rs4676481  | 3 | 3 | 39085045 | 27631  | 7.2318 | 0.4875 | 0.2390  | 5.8177 | JPT |
| KIAA1449 | GI_21314694-S | rs7629839  | 3 | 3 | 39090298 | 22378  | 7.2318 | 0.4875 | -0.2390 | 5.8177 | JPT |
| KIAA1449 | GI_21314694-S | rs12636980 | 3 | 3 | 39099136 | 13540  | 6.4685 | 0.4527 | 0.2481  | 5.8177 | JPT |
| KIAA1449 | GI_21314694-S | rs2056613  | 3 | 3 | 39100297 | 12379  | 9.2568 | 0.5945 | 0.2590  | 5.8177 | JPT |
| KIAA1449 | GI_21314694-S | rs3736573  | 3 | 3 | 39104746 | 7930   | 9.2568 | 0.5945 | 0.2590  | 5.8177 | JPT |
| KIAA1449 | GI_21314694-S | rs1053530  | 3 | 3 | 39113086 | 410    | 9.2753 | 0.6043 | 0.2585  | 5.8177 | JPT |
| KIAA1449 | GI_21314694-S | rs6777651  | 3 | 3 | 39118603 | 5927   | 7.2318 | 0.4875 | -0.2390 | 5.8177 | JPT |
| KIAA1449 | GI_21314694-S | rs7633233  | 3 | 3 | 39121728 | 9052   | 6.3397 | 0.4531 | 0.2269  | 5.8177 | JPT |
| KIAA1449 | GI_21314694-S | rs7623343  | 3 | 3 | 39121796 | 9120   | 6.0246 | 0.4186 | 0.2362  | 5.8177 | JPT |
| KIAA1449 | GI_21314694-S | rs811971   | 3 | 3 | 39143287 | 30611  | 7.2807 | 0.4901 | -0.2429 | 5.8177 | JPT |
| DHX30    | GI_20336291-A | rs749511   | 3 | 3 | 47010739 | 855437 | 5.4208 | 0.3880 | 0.2554  | 5.1651 | JPT |
| DHX30    | GI_20336291-A | rs749512   | 3 | 3 | 47010904 | 855272 | 5.4208 | 0.3880 | -0.2554 | 5.1651 | JPT |
| DHX30    | GI_20336291-A | rs2278963  | 3 | 3 | 47029873 | 836303 | 5.4429 | 0.3823 | 0.2509  | 5.1651 | JPT |
| DHX30    | GI_20336291-A | rs17784127 | 3 | 3 | 47036704 | 829472 | 5.4429 | 0.3823 | 0.2509  | 5.1651 | JPT |
| DHX30    | GI_20336291-A | rs11715121 | 3 | 3 | 47047625 | 818551 | 5.4208 | 0.3880 | 0.2554  | 5.1651 | JPT |
| DHX30    | GI_20336291-A | rs11713693 | 3 | 3 | 47049910 | 816266 | 6.4862 | 0.4878 | 0.2971  | 5.1651 | JPT |
| DHX30    | GI_20336291-A | rs9845728  | 3 | 3 | 47078380 | 787796 | 5.4208 | 0.3880 | 0.2554  | 5.1651 | JPT |
| DHX30    | GI_20336291-A | rs9844122  | 3 | 3 | 47083334 | 782842 | 5.1927 | 0.4118 | 0.2616  | 5.1651 | JPT |
| DHX30    | GI_20336291-A | rs6442055  | 3 | 3 | 47085726 | 780450 | 5.4429 | 0.3823 | 0.2509  | 5.1651 | JPT |
| DHX30    | GI_20336291-A | rs7433300  | 3 | 3 | 47095644 | 770532 | 5.4208 | 0.3880 | -0.2554 | 5.1651 | JPT |
| DHX30    | GI_20336291-A | rs12631730 | 3 | 3 | 47104907 | 761269 | 5.1948 | 0.4036 | 0.2534  | 5.1651 | JPT |
| DHX30    | GI_20336291-A | rs9311403  | 3 | 3 | 47113882 | 752294 | 5.7076 | 0.4064 | -0.2588 | 5.1651 | JPT |
| DHX30    | GI_20336291-A | rs6767907  | 3 | 3 | 47137665 | 728511 | 5.4429 | 0.3823 | 0.2509  | 5.1651 | JPT |
| DHX30    | GI_20336291-A | rs9837343  | 3 | 3 | 47152392 | 713784 | 5.4208 | 0.3880 | -0.2554 | 5.1651 | JPT |
| DHX30    | GI_20336291-A | rs7620997  | 3 | 3 | 47189126 | 677050 | 5.4208 | 0.3880 | -0.2554 | 5.1651 | JPT |
| DHX30    | GI_20336291-A | rs11920354 | 3 | 3 | 47237250 | 628926 | 5.7558 | 0.4094 | 0.2609  | 5.1651 | JPT |
| DHX30    | GI_20336291-A | rs7632501  | 3 | 3 | 47243310 | 622866 | 5.7558 | 0.4094 | 0.2609  | 5.1651 | JPT |
| DHX30    | GI_20336291-A | rs11130126 | 3 | 3 | 47281898 | 584278 | 5.7558 | 0.4094 | -0.2609 | 5.1651 | JPT |
| DHX30    | GI_20336291-A | rs11920853 | 3 | 3 | 47283187 | 582989 | 5.7867 | 0.4040 | 0.2567  | 5.1651 | JPT |
| DHX30    | GI_20336291-A | rs11915074 | 3 | 3 | 47284761 | 581415 | 5.7558 | 0.4094 | -0.2609 | 5.1651 | JPT |

|           |               |            |   |   |           |        |        |        |         |        |     |
|-----------|---------------|------------|---|---|-----------|--------|--------|--------|---------|--------|-----|
| DHX30     | GI_20336291-A | rs10490798 | 3 | 3 | 47303748  | 562428 | 5.3264 | 0.3818 | -0.2517 | 5.1651 | JPT |
| DHX30     | GI_20336291-A | rs17410853 | 3 | 3 | 47338975  | 527201 | 5.7867 | 0.4040 | -0.2567 | 5.1651 | JPT |
| DHX30     | GI_20336291-A | rs2240796  | 3 | 3 | 47355503  | 510673 | 5.3264 | 0.3818 | -0.2517 | 5.1651 | JPT |
| ITIH4     | GI_40288189-S | rs3774355  | 3 | 3 | 52792818  | 29658  | 5.6655 | 0.3964 | -0.1246 | 5.4296 | JPT |
| ITIH4     | GI_40288189-S | rs2535629  | 3 | 3 | 52808259  | 14217  | 5.9369 | 0.4717 | 0.1393  | 5.4296 | JPT |
| ITIH4     | GI_40288189-S | rs3617     | 3 | 3 | 52808845  | 13631  | 6.7343 | 0.4680 | 0.1301  | 5.4296 | JPT |
| ITIH4     | GI_40288189-S | rs736408   | 3 | 3 | 52810394  | 12082  | 7.2176 | 0.4867 | -0.1418 | 5.4296 | JPT |
| ITIH4     | GI_40288189-S | rs4481150  | 3 | 3 | 52812833  | 9643   | 6.6817 | 0.4650 | -0.1290 | 5.4296 | JPT |
| ITIH4     | GI_40288189-S | rs2535627  | 3 | 3 | 52820145  | 2331   | 6.9638 | 0.4810 | 0.1335  | 5.4296 | JPT |
| ITIH4     | GI_40288189-S | rs2071044  | 3 | 3 | 52822641  | 165    | 6.9794 | 0.4988 | -0.1400 | 5.4296 | JPT |
| ITIH4     | GI_40288189-S | rs4687657  | 3 | 3 | 52827578  | 5102   | 6.1227 | 0.4321 | 0.1344  | 5.4296 | JPT |
| ITIH4     | GI_40288189-S | rs2239547  | 3 | 3 | 52830269  | 7793   | 5.9149 | 0.4193 | 0.1318  | 5.4296 | JPT |
| ITIH4     | GI_40288189-S | rs2256332  | 3 | 3 | 52830905  | 8429   | 6.7868 | 0.4630 | 0.1273  | 5.4296 | JPT |
| ITIH4     | GI_40288189-S | rs2240915  | 3 | 3 | 52834566  | 12090  | 6.7868 | 0.4630 | 0.1273  | 5.4296 | JPT |
| ITIH4     | GI_40288189-S | rs2535633  | 3 | 3 | 52834670  | 12194  | 6.2633 | 0.4485 | -0.1246 | 5.4296 | JPT |
| ITIH4     | GI_40288189-S | rs4687658  | 3 | 3 | 52835406  | 12930  | 6.2777 | 0.4337 | 0.1346  | 5.4296 | JPT |
| ITIH4     | GI_40288189-S | rs2276817  | 3 | 3 | 52835976  | 13500  | 7.7317 | 0.5307 | 0.1529  | 5.4296 | JPT |
| ITIH4     | GI_40288189-S | rs13072536 | 3 | 3 | 52836251  | 13775  | 6.4079 | 0.4413 | 0.1315  | 5.4296 | JPT |
| ITIH4     | GI_40288189-S | rs4687554  | 3 | 3 | 52839175  | 16699  | 6.0911 | 0.4380 | -0.1354 | 5.4296 | JPT |
| ITIH4     | GI_40288189-S | rs1573815  | 3 | 3 | 52845172  | 22696  | 6.2777 | 0.4337 | 0.1346  | 5.4296 | JPT |
| ITIH4     | GI_40288189-S | rs4687663  | 3 | 3 | 52845658  | 23182  | 5.4728 | 0.3842 | -0.1232 | 5.4296 | JPT |
| ITIH4     | GI_40288189-S | rs3733047  | 3 | 3 | 52846969  | 24493  | 6.2777 | 0.4337 | -0.1346 | 5.4296 | JPT |
| ITIH4     | GI_40288189-S | rs6445538  | 3 | 3 | 52849328  | 26852  | 5.9959 | 0.4402 | -0.1349 | 5.4296 | JPT |
| ITIH4     | GI_40288189-S | rs6445539  | 3 | 3 | 52849336  | 26860  | 5.9486 | 0.4214 | -0.1329 | 5.4296 | JPT |
| ITIH4     | GI_40288189-S | rs6445541  | 3 | 3 | 52855168  | 32692  | 6.7868 | 0.4630 | 0.1273  | 5.4296 | JPT |
| ITIH4     | GI_40288189-S | rs4687672  | 3 | 3 | 52855583  | 33107  | 6.2777 | 0.4337 | -0.1346 | 5.4296 | JPT |
| ITIH4     | GI_40288189-S | rs2276825  | 3 | 3 | 52861645  | 39169  | 6.2777 | 0.4337 | -0.1346 | 5.4296 | JPT |
| ITIH4     | GI_40288189-S | rs9682464  | 3 | 3 | 52863525  | 41049  | 6.2777 | 0.4337 | 0.1346  | 5.4296 | JPT |
| ITIH4     | GI_40288189-S | rs6803519  | 3 | 3 | 52864811  | 42335  | 6.2777 | 0.4337 | 0.1346  | 5.4296 | JPT |
| ITIH4     | GI_40288189-S | rs4302374  | 3 | 3 | 52880842  | 58366  | 5.4794 | 0.3846 | -0.1288 | 5.4296 | JPT |
| ITIH4     | GI_40288189-S | rs4687680  | 3 | 3 | 52882412  | 59936  | 5.4794 | 0.3846 | -0.1288 | 5.4296 | JPT |
| ITIH4     | GI_40288189-S | rs9850563  | 3 | 3 | 52887254  | 64778  | 5.4794 | 0.3846 | 0.1288  | 5.4296 | JPT |
| ITIH4     | GI_40288189-S | rs12492391 | 3 | 3 | 52887336  | 64860  | 5.4794 | 0.3846 | -0.1288 | 5.4296 | JPT |
| ITIH4     | GI_40288189-S | rs9876403  | 3 | 3 | 52891956  | 69480  | 5.4794 | 0.3846 | 0.1288  | 5.4296 | JPT |
| ITIH4     | GI_40288189-S | rs4687682  | 3 | 3 | 52891979  | 69503  | 5.8169 | 0.4132 | 0.1349  | 5.4296 | JPT |
| ITIH4     | GI_40288189-S | rs6795646  | 3 | 3 | 52897661  | 75185  | 5.4794 | 0.3846 | -0.1288 | 5.4296 | JPT |
| DNASE1L3  | GI_4826697-S  | rs9845458  | 3 | 3 | 58150400  | 8243   | 7.3131 | 0.4918 | -0.8264 | 5.3017 | JPT |
| DNASE1L3  | GI_4826697-S  | rs4681819  | 3 | 3 | 58159966  | 1323   | 7.8240 | 0.5184 | 0.8168  | 5.3017 | JPT |
| DNASE1L3  | GI_4826697-S  | rs3772985  | 3 | 3 | 58161759  | 3116   | 8.1551 | 0.5434 | 0.8583  | 5.3017 | JPT |
| MGC15606  | GI_21450780-S | rs9849770  | 3 | 3 | 102529361 | 495481 | 5.5337 | 0.4185 | 0.1672  | 5.3875 | JPT |
| MGC15606  | GI_21450780-S | rs9812849  | 3 | 3 | 102663075 | 361767 | 5.7637 | 0.4099 | -0.1675 | 5.3875 | JPT |
| ESRRBL1   | GI_19923513-S | rs162064   | 3 | 3 | 109306751 | 55652  | 6.1175 | 0.4318 | 0.1841  | 5.557  | JPT |
| ESRRBL1   | GI_19923513-S | rs326356   | 3 | 3 | 109307253 | 55150  | 6.4531 | 0.4440 | 0.1898  | 5.557  | JPT |
| ESRRBL1   | GI_19923513-S | rs17231712 | 3 | 3 | 109312252 | 50151  | 6.4531 | 0.4440 | -0.1898 | 5.557  | JPT |
| ESRRBL1   | GI_19923513-S | rs13075747 | 3 | 3 | 109312854 | 49549  | 6.4531 | 0.4440 | 0.1898  | 5.557  | JPT |
| ESRRBL1   | GI_19923513-S | rs7648181  | 3 | 3 | 109315979 | 46424  | 6.1955 | 0.4365 | -0.1809 | 5.557  | JPT |
| ESRRBL1   | GI_19923513-S | rs4855552  | 3 | 3 | 109320821 | 41582  | 6.1643 | 0.4346 | 0.1799  | 5.557  | JPT |
| ESRRBL1   | GI_19923513-S | rs4855622  | 3 | 3 | 109322422 | 39981  | 6.5374 | 0.4489 | 0.1855  | 5.557  | JPT |
| ESRRBL1   | GI_19923513-S | rs326338   | 3 | 3 | 109325694 | 36709  | 6.1175 | 0.4318 | 0.1841  | 5.557  | JPT |
| ESRRBL1   | GI_19923513-S | rs721328   | 3 | 3 | 109326171 | 36232  | 6.4531 | 0.4440 | -0.1898 | 5.557  | JPT |
| ESRRBL1   | GI_19923513-S | rs3792335  | 3 | 3 | 109376540 | 14137  | 5.7278 | 0.4077 | -0.1796 | 5.557  | JPT |
| ESRRBL1   | GI_19923513-S | rs12632400 | 3 | 3 | 109424304 | 61901  | 5.9022 | 0.4111 | -0.1830 | 5.557  | JPT |
| UMPS      | GI_4507834-S  | rs333330   | 3 | 3 | 125812221 | 133668 | 5.9112 | 0.4116 | -0.0939 | 5.7251 | JPT |
| UMPS      | GI_4507834-S  | rs3333312  | 3 | 3 | 125822164 | 123725 | 6.7851 | 0.4709 | 0.1120  | 5.7251 | JPT |
| UMPS      | GI_4507834-S  | rs582288   | 3 | 3 | 125824225 | 121664 | 6.7851 | 0.4709 | 0.1120  | 5.7251 | JPT |
| LOC132241 | GI_42656828-S | rs6791509  | 3 | 3 | 130579607 | 13310  | 5.7601 | 0.4420 | 0.1468  | 5.2794 | JPT |
| LOC132241 | GI_42656828-S | rs16859134 | 3 | 3 | 130601281 | 8364   | 6.3298 | 0.4368 | -0.1449 | 5.2794 | JPT |
| LOC132241 | GI_42656828-S | rs7622524  | 3 | 3 | 130601620 | 8703   | 6.7327 | 0.4679 | 0.1417  | 5.2794 | JPT |
| NMNAT3    | GI_31342325-S | rs9822952  | 3 | 3 | 140867955 | 106092 | 8.1591 | 0.5436 | 0.6036  | 7.0196 | JPT |

|          |               |            |   |   |           |        |         |        |         |        |     |
|----------|---------------|------------|---|---|-----------|--------|---------|--------|---------|--------|-----|
| NMNAT3   | GI_31342325-S | rs6798004  | 3 | 3 | 140875620 | 113757 | 10.1884 | 0.6515 | 0.4339  | 7.0196 | JPT |
| NMNAT3   | GI_31342325-S | rs10935342 | 3 | 3 | 140888040 | 126177 | 11.9406 | 0.6969 | 0.4676  | 7.0196 | JPT |
| NMNAT3   | GI_31342325-S | rs4640519  | 3 | 3 | 140899041 | 137178 | 9.9976  | 0.6170 | -0.4402 | 7.0196 | JPT |
| NMNAT3   | GI_31342325-S | rs9683206  | 3 | 3 | 140899516 | 137653 | 10.7407 | 0.6547 | -0.4530 | 7.0196 | JPT |
| NMNAT3   | GI_31342325-S | rs7427023  | 3 | 3 | 140899613 | 137750 | 10.6365 | 0.6508 | 0.4752  | 7.0196 | JPT |
| NMNAT3   | GI_31342325-S | rs4367021  | 3 | 3 | 140902916 | 141053 | 10.2105 | 0.6524 | 0.4403  | 7.0196 | JPT |
| NMNAT3   | GI_31342325-S | rs4640518  | 3 | 3 | 140902944 | 141081 | 10.7832 | 0.6563 | 0.4547  | 7.0196 | JPT |
| NMNAT3   | GI_31342325-S | rs10935344 | 3 | 3 | 140905475 | 143612 | 9.7185  | 0.6143 | 0.4400  | 7.0196 | JPT |
| NMNAT3   | GI_31342325-S | rs4074740  | 3 | 3 | 140906001 | 144138 | 9.9976  | 0.6170 | -0.4402 | 7.0196 | JPT |
| NMNAT3   | GI_31342325-S | rs4504138  | 3 | 3 | 140906522 | 144659 | 9.0497  | 0.6128 | -0.4411 | 7.0196 | JPT |
| NMNAT3   | GI_31342325-S | rs10804670 | 3 | 3 | 140907748 | 145885 | 9.7185  | 0.6143 | -0.4400 | 7.0196 | JPT |
| NMNAT3   | GI_31342325-S | rs11921973 | 3 | 3 | 140908720 | 146857 | 8.9508  | 0.5989 | 0.4410  | 7.0196 | JPT |
| NMNAT3   | GI_31342325-S | rs10935345 | 3 | 3 | 140910483 | 148620 | 9.7185  | 0.6143 | 0.4400  | 7.0196 | JPT |
| NMNAT3   | GI_31342325-S | rs4528899  | 3 | 3 | 140912370 | 150507 | 9.7285  | 0.6147 | 0.4414  | 7.0196 | JPT |
| NMNAT3   | GI_31342325-S | rs7648532  | 3 | 3 | 140912635 | 150772 | 9.7185  | 0.6143 | -0.4400 | 7.0196 | JPT |
| NMNAT3   | GI_31342325-S | rs4428139  | 3 | 3 | 140913091 | 151228 | 9.9976  | 0.6170 | 0.4402  | 7.0196 | JPT |
| NMNAT3   | GI_31342325-S | rs11720033 | 3 | 3 | 140914555 | 152692 | 9.9976  | 0.6170 | 0.4402  | 7.0196 | JPT |
| NMNAT3   | GI_31342325-S | rs11717128 | 3 | 3 | 140916069 | 154206 | 9.7285  | 0.6147 | -0.4414 | 7.0196 | JPT |
| NMNAT3   | GI_31342325-S | rs11717212 | 3 | 3 | 140916146 | 154283 | 9.7185  | 0.6143 | 0.4400  | 7.0196 | JPT |
| NMNAT3   | GI_31342325-S | rs9813439  | 3 | 3 | 140916734 | 154871 | 9.0274  | 0.6118 | 0.4674  | 7.0196 | JPT |
| NMNAT3   | GI_31342325-S | rs11713380 | 3 | 3 | 140917748 | 155885 | 9.0021  | 0.6107 | -0.4360 | 7.0196 | JPT |
| NMNAT3   | GI_31342325-S | rs4683681  | 3 | 3 | 140917961 | 156098 | 9.9310  | 0.6231 | 0.4445  | 7.0196 | JPT |
| NMNAT3   | GI_31342325-S | rs4389440  | 3 | 3 | 140920311 | 158448 | 9.7185  | 0.6143 | 0.4400  | 7.0196 | JPT |
| NMNAT3   | GI_31342325-S | rs4683683  | 3 | 3 | 140921187 | 159324 | 9.9976  | 0.6170 | -0.4402 | 7.0196 | JPT |
| NMNAT3   | GI_31342325-S | rs4683684  | 3 | 3 | 140921351 | 159488 | 9.7185  | 0.6143 | 0.4400  | 7.0196 | JPT |
| NMNAT3   | GI_31342325-S | rs10804671 | 3 | 3 | 140921881 | 160018 | 9.7185  | 0.6143 | -0.4400 | 7.0196 | JPT |
| NMNAT3   | GI_31342325-S | rs12629519 | 3 | 3 | 140922125 | 160262 | 9.5390  | 0.6067 | 0.4554  | 7.0196 | JPT |
| NMNAT3   | GI_31342325-S | rs11710180 | 3 | 3 | 140922300 | 160437 | 9.9976  | 0.6170 | -0.4402 | 7.0196 | JPT |
| NMNAT3   | GI_31342325-S | rs11718071 | 3 | 3 | 140922474 | 160611 | 9.9976  | 0.6170 | -0.4402 | 7.0196 | JPT |
| NMNAT3   | GI_31342325-S | rs11718895 | 3 | 3 | 140922703 | 160840 | 9.9976  | 0.6170 | -0.4402 | 7.0196 | JPT |
| NMNAT3   | GI_31342325-S | rs10935347 | 3 | 3 | 140922823 | 160960 | 9.9976  | 0.6170 | -0.4402 | 7.0196 | JPT |
| NMNAT3   | GI_31342325-S | rs9823295  | 3 | 3 | 140924169 | 162306 | 9.7185  | 0.6143 | 0.4400  | 7.0196 | JPT |
| NMNAT3   | GI_31342325-S | rs6779043  | 3 | 3 | 140926313 | 164450 | 8.7752  | 0.5729 | -0.4248 | 7.0196 | JPT |
| NMNAT3   | GI_31342325-S | rs10935348 | 3 | 3 | 140930198 | 168335 | 8.7752  | 0.5729 | 0.4248  | 7.0196 | JPT |
| NMNAT3   | GI_31342325-S | rs4399852  | 3 | 3 | 140931948 | 170085 | 9.0324  | 0.5759 | 0.4249  | 7.0196 | JPT |
| NMNAT3   | GI_31342325-S | rs4549243  | 3 | 3 | 140932606 | 170743 | 8.7752  | 0.5729 | -0.4248 | 7.0196 | JPT |
| NMNAT3   | GI_31342325-S | rs9823678  | 3 | 3 | 140933414 | 171551 | 9.0324  | 0.5759 | -0.4249 | 7.0196 | JPT |
| FLJ35036 | GI_37550554-S | rs4683404  | 3 | 3 | 142643069 | 4056   | 6.2940  | 0.4424 | 0.5544  | 5.2771 | JPT |
| FLJ35036 | GI_37550554-S | rs7626871  | 3 | 3 | 142643580 | 3545   | 6.3267  | 0.4366 | 0.5469  | 5.2771 | JPT |
| FLJ35036 | GI_37550554-S | rs16851435 | 3 | 3 | 142644883 | 2242   | 5.7621  | 0.4024 | -0.5280 | 5.2771 | JPT |
| Hs.54543 | Hs.54543-S    | rs1430410  | 3 | 3 | 158008264 | 60251  | 8.7762  | 0.5729 | -0.3493 | 6.2624 | JPT |
| Hs.54543 | Hs.54543-S    | rs9874866  | 3 | 3 | 158021372 | 73359  | 8.7762  | 0.5729 | -0.3493 | 6.2624 | JPT |
| Hs.54543 | Hs.54543-S    | rs9858861  | 3 | 3 | 158025339 | 77326  | 6.7396  | 0.4683 | 0.3192  | 6.2624 | JPT |
| Hs.54543 | Hs.54543-S    | rs9820830  | 3 | 3 | 158025406 | 77393  | 6.7396  | 0.4683 | -0.3192 | 6.2624 | JPT |
| B3GALT3  | GI_15451873-I | rs13256    | 3 | 3 | 162279207 | 5302   | 7.1887  | 0.4933 | 0.4654  | 5.902  | JPT |
| B3GALT3  | GI_15451873-I | rs11717272 | 3 | 3 | 162293057 | 8548   | 7.0925  | 0.4800 | 0.4619  | 5.902  | JPT |
| B3GALT3  | GI_15451873-I | rs4521287  | 3 | 3 | 162295454 | 10945  | 7.0925  | 0.4800 | -0.4619 | 5.902  | JPT |
| B3GALT3  | GI_15451873-I | rs11720263 | 3 | 3 | 162330995 | 46486  | 6.8542  | 0.4748 | 0.4645  | 5.902  | JPT |
| B3GALT3  | GI_15451873-I | rs7618924  | 3 | 3 | 162338301 | 53792  | 7.0925  | 0.4800 | 0.4619  | 5.902  | JPT |
| B3GALT3  | GI_15451873-I | rs6441362  | 3 | 3 | 162360315 | 75806  | 6.0664  | 0.4446 | 0.4267  | 5.902  | JPT |
| B3GALT3  | GI_15451873-I | rs6772723  | 3 | 3 | 162377776 | 93267  | 7.2751  | 0.4898 | 0.4735  | 5.902  | JPT |
| B3GALT3  | GI_15451873-I | rs1599375  | 3 | 3 | 162380473 | 95964  | 7.4637  | 0.5081 | 0.4687  | 5.902  | JPT |
| B3GALT3  | GI_15451873-I | rs16831981 | 3 | 3 | 162380482 | 95973  | 7.2751  | 0.4898 | 0.4735  | 5.902  | JPT |
| B3GALT3  | GI_15451873-I | rs1585481  | 3 | 3 | 162384183 | 99674  | 7.2751  | 0.4898 | -0.4735 | 5.902  | JPT |
| B3GALT3  | GI_15451873-I | rs11915989 | 3 | 3 | 162384961 | 100452 | 7.2751  | 0.4898 | -0.4735 | 5.902  | JPT |
| B3GALT3  | GI_15451873-I | rs7610800  | 3 | 3 | 162485284 | 200775 | 6.9914  | 0.4825 | -0.4681 | 5.902  | JPT |
| B3GALT3  | GI_15451873-I | rs4856769  | 3 | 3 | 162487251 | 202742 | 6.6559  | 0.4556 | 0.4379  | 5.902  | JPT |
| B3GALT3  | GI_15451873-I | rs1382429  | 3 | 3 | 162497855 | 213346 | 7.2319  | 0.4875 | -0.4654 | 5.902  | JPT |
| B3GALT3  | GI_15451873-I | rs11715591 | 3 | 3 | 162525839 | 241330 | 7.2319  | 0.4875 | -0.4654 | 5.902  | JPT |

|           |               |            |   |   |           |        |        |        |         |        |     |
|-----------|---------------|------------|---|---|-----------|--------|--------|--------|---------|--------|-----|
| B3GALT3   | GI_15451873-I | rs16832082 | 3 | 3 | 162526273 | 241764 | 7.2319 | 0.4875 | -0.4654 | 5.902  | JPT |
| B3GALT3   | GI_15451873-I | rs13073147 | 3 | 3 | 162527939 | 243430 | 7.2319 | 0.4875 | 0.4654  | 5.902  | JPT |
| B3GALT3   | GI_15451873-I | rs4856703  | 3 | 3 | 162530422 | 245913 | 7.1201 | 0.4980 | -0.4693 | 5.902  | JPT |
| B3GALT3   | GI_15451873-I | rs11718905 | 3 | 3 | 162534495 | 249986 | 7.2319 | 0.4875 | 0.4654  | 5.902  | JPT |
| B3GALT3   | GI_15451873-I | rs11711695 | 3 | 3 | 162540295 | 255786 | 6.6605 | 0.4559 | -0.4447 | 5.902  | JPT |
| B3GALT3   | GI_15451873-I | rs6780536  | 3 | 3 | 162541428 | 256919 | 6.4264 | 0.4502 | 0.4462  | 5.902  | JPT |
| B3GALT3   | GI_15451873-I | rs10513564 | 3 | 3 | 162542464 | 257955 | 6.4264 | 0.4502 | -0.4462 | 5.902  | JPT |
| B3GALT3   | GI_15451873-I | rs13059340 | 3 | 3 | 162545333 | 260824 | 6.6605 | 0.4559 | 0.4447  | 5.902  | JPT |
| B3GALT3   | GI_15451873-I | rs6441374  | 3 | 3 | 162547242 | 262733 | 6.6605 | 0.4559 | -0.4447 | 5.902  | JPT |
| B3GALT3   | GI_15451873-I | rs1450522  | 3 | 3 | 162560332 | 275823 | 6.5056 | 0.4630 | 0.4536  | 5.902  | JPT |
| B3GALT3   | GI_15451873-I | rs2054710  | 3 | 3 | 162573318 | 288809 | 6.3934 | 0.4483 | -0.4520 | 5.902  | JPT |
| B3GALT3   | GI_15451873-I | rs7624747  | 3 | 3 | 162690676 | 406167 | 5.9144 | 0.4193 | 0.6778  | 5.902  | JPT |
| B3GALT3   | GI_15451873-I | rs9832020  | 3 | 3 | 162691717 | 407208 | 6.5911 | 0.5035 | 0.7077  | 5.902  | JPT |
| B3GALT3   | GI_15451873-I | rs6441380  | 3 | 3 | 162696338 | 411829 | 6.1320 | 0.4750 | 0.6709  | 5.902  | JPT |
| SFRS10    | GI_4759097-S  | rs12633328 | 3 | 3 | 187110140 | 7224   | 6.6144 | 0.4612 | 0.3732  | 5.7768 | JPT |
| SFRS10    | GI_4759097-S  | rs16860317 | 3 | 3 | 187114964 | 2400   | 6.7782 | 0.4626 | 0.3777  | 5.7768 | JPT |
| SFRS10    | GI_4759097-S  | rs4321562  | 3 | 3 | 187116053 | 1311   | 7.7512 | 0.5147 | -0.3746 | 5.7768 | JPT |
| SFRS10    | GI_4759097-S  | rs16860324 | 3 | 3 | 187116111 | 1253   | 6.3950 | 0.4564 | 0.3750  | 5.7768 | JPT |
| SFRS10    | GI_4759097-S  | rs2551369  | 3 | 3 | 187123271 | 5907   | 6.6612 | 0.4805 | 0.3724  | 5.7768 | JPT |
| SFRS10    | GI_4759097-S  | rs2551372  | 3 | 3 | 187126156 | 8792   | 6.6044 | 0.4606 | -0.3791 | 5.7768 | JPT |
| SFRS10    | GI_4759097-S  | rs2247622  | 3 | 3 | 187128843 | 11479  | 6.6044 | 0.4606 | 0.3791  | 5.7768 | JPT |
| SFRS10    | GI_4759097-S  | rs2251407  | 3 | 3 | 187137626 | 20262  | 7.5527 | 0.5128 | 0.3755  | 5.7768 | JPT |
| SFRS10    | GI_4759097-S  | rs16860350 | 3 | 3 | 187143531 | 26167  | 6.8436 | 0.4742 | -0.3850 | 5.7768 | JPT |
| FLJ90036  | GI_31559781-S | rs6827719  | 4 | 4 | 58063     | 87805  | 6.5285 | 0.4483 | -0.1594 | 4.993  | JPT |
| FLJ90036  | GI_31559781-S | rs13435282 | 4 | 4 | 69340     | 76528  | 5.0914 | 0.3594 | -0.1419 | 4.993  | JPT |
| FLJ90036  | GI_31559781-S | rs13434621 | 4 | 4 | 69535     | 76333  | 5.0353 | 0.3624 | 0.1442  | 4.993  | JPT |
| FLJ90036  | GI_31559781-S | rs7667153  | 4 | 4 | 75422     | 70446  | 5.0914 | 0.3594 | -0.1419 | 4.993  | JPT |
| FLJ90036  | GI_31559781-S | rs2006748  | 4 | 4 | 77113     | 68755  | 6.5024 | 0.4547 | -0.1628 | 4.993  | JPT |
| FLJ90036  | GI_31559781-S | rs11724335 | 4 | 4 | 80883     | 64985  | 5.1449 | 0.3769 | 0.1481  | 4.993  | JPT |
| FLJ90036  | GI_31559781-S | rs2883236  | 4 | 4 | 82605     | 63263  | 6.5024 | 0.4547 | 0.1628  | 4.993  | JPT |
| FLJ90036  | GI_31559781-S | rs12509346 | 4 | 4 | 84380     | 61488  | 6.5285 | 0.4483 | 0.1594  | 4.993  | JPT |
| FLJ90036  | GI_31559781-S | rs6813136  | 4 | 4 | 85506     | 60362  | 5.0914 | 0.3594 | 0.1419  | 4.993  | JPT |
| FLJ90036  | GI_31559781-S | rs2353623  | 4 | 4 | 85560     | 60308  | 5.0353 | 0.3624 | -0.1442 | 4.993  | JPT |
| FLJ90036  | GI_31559781-S | rs9884834  | 4 | 4 | 92571     | 53297  | 5.0353 | 0.3624 | -0.1442 | 4.993  | JPT |
| FLJ90036  | GI_31559781-S | rs6814287  | 4 | 4 | 112323    | 33545  | 6.5285 | 0.4483 | 0.1594  | 4.993  | JPT |
| FLJ90036  | GI_31559781-S | rs7699689  | 4 | 4 | 117452    | 28416  | 5.0353 | 0.3624 | 0.1442  | 4.993  | JPT |
| FLJ90036  | GI_31559781-S | rs10004179 | 4 | 4 | 121548    | 24320  | 6.5024 | 0.4547 | 0.1628  | 4.993  | JPT |
| FLJ90036  | GI_31559781-S | rs6599293  | 4 | 4 | 123027    | 22841  | 6.5024 | 0.4547 | 0.1628  | 4.993  | JPT |
| FLJ90036  | GI_31559781-S | rs3829     | 4 | 4 | 124851    | 21017  | 6.6506 | 0.4799 | 0.1689  | 4.993  | JPT |
| FLJ90036  | GI_31559781-S | rs6599295  | 4 | 4 | 126942    | 18926  | 6.5024 | 0.4547 | 0.1628  | 4.993  | JPT |
| FLJ90036  | GI_31559781-S | rs11735742 | 4 | 4 | 132550    | 13318  | 6.5024 | 0.4547 | -0.1628 | 4.993  | JPT |
| ZCCHC4    | GI_42657116-S | rs1511411  | 4 | 4 | 25004195  | 43974  | 8.0618 | 0.5303 | 0.2743  | 6.7442 | JPT |
| ZCCHC4    | GI_42657116-S | rs3796779  | 4 | 4 | 25020616  | 27553  | 8.0556 | 0.5472 | -0.2793 | 6.7442 | JPT |
| STIM2     | GI_21070998-S | rs7688662  | 4 | 4 | 26520738  | 182216 | 6.9378 | 0.4715 | 0.1296  | 5.8195 | JPT |
| Hs.214235 | Hs.214235-S   | rs10856838 | 4 | 4 | 38599739  | 12302  | 5.7396 | 0.4084 | 0.2530  | 5.5297 | JPT |
| Hs.214235 | Hs.214235-S   | rs10856839 | 4 | 4 | 38599802  | 12239  | 5.5762 | 0.3908 | -0.2467 | 5.5297 | JPT |
| Hs.214235 | Hs.214235-S   | rs11466617 | 4 | 4 | 38603037  | 9004   | 5.7186 | 0.3997 | 0.2426  | 5.5297 | JPT |
| Hs.214235 | Hs.214235-S   | rs7653908  | 4 | 4 | 38604787  | 7254   | 5.8091 | 0.4204 | -0.2405 | 5.5297 | JPT |
| TLR10     | GI_13569929-S | rs11725309 | 4 | 4 | 38606414  | 8932   | 5.9282 | 0.4127 | -0.4836 | 5.8552 | JPT |
| Hs.214235 | Hs.214235-S   | rs11725309 | 4 | 4 | 38606414  | 5627   | 6.1537 | 0.4263 | -0.2423 | 5.5297 | JPT |
| TLR10     | GI_13569929-S | rs5743595  | 4 | 4 | 38625210  | 27728  | 7.0009 | 0.4830 | -0.5336 | 5.8552 | JPT |
| Hs.214235 | Hs.214235-S   | rs5743595  | 4 | 4 | 38625210  | 13169  | 6.5792 | 0.4591 | -0.2570 | 5.5297 | JPT |
| TLR10     | GI_13569929-S | rs5743592  | 4 | 4 | 38625629  | 28147  | 6.7225 | 0.4594 | -0.5088 | 5.8552 | JPT |
| Hs.214235 | Hs.214235-S   | rs5743592  | 4 | 4 | 38625629  | 13588  | 6.2171 | 0.4301 | -0.2434 | 5.5297 | JPT |
| TLR10     | GI_13569929-S | rs5743565  | 4 | 4 | 38628549  | 31067  | 9.7665 | 0.6735 | 0.5963  | 5.8552 | JPT |
| TLR6      | GI_20143970-S | rs5743565  | 4 | 4 | 38628549  | 22571  | 6.6423 | 0.5163 | 0.3434  | 6.2898 | JPT |
| Hs.214235 | Hs.214235-S   | rs5743565  | 4 | 4 | 38628549  | 16508  | 7.9558 | 0.5898 | 0.2807  | 5.5297 | JPT |
| TLR10     | GI_13569929-S | rs5743563  | 4 | 4 | 38628585  | 31103  | 6.1020 | 0.4553 | -0.4901 | 5.8552 | JPT |
| Hs.214235 | Hs.214235-S   | rs5743563  | 4 | 4 | 38628585  | 16544  | 5.8533 | 0.4395 | -0.2362 | 5.5297 | JPT |

|           |               |            |   |   |          |        |         |        |         |        |     |
|-----------|---------------|------------|---|---|----------|--------|---------|--------|---------|--------|-----|
| TLR10     | GI_13569929-S | rs5743557  | 4 | 4 | 38629393 | 31911  | 7.0009  | 0.4830 | 0.5336  | 5.8552 | JPT |
| Hs.214235 | Hs.214235-S   | rs5743557  | 4 | 4 | 38629393 | 17352  | 6.5792  | 0.4591 | 0.2570  | 5.5297 | JPT |
| Hs.214235 | Hs.214235-S   | rs5743794  | 4 | 4 | 38655293 | 43252  | 5.9021  | 0.4186 | -0.2439 | 5.5297 | JPT |
| TLR10     | GI_13569929-S | rs2174284  | 4 | 4 | 38681905 | 84423  | 6.7443  | 0.4686 | -0.5218 | 5.8552 | JPT |
| Hs.214235 | Hs.214235-S   | rs2174284  | 4 | 4 | 38681905 | 69864  | 6.4012  | 0.4487 | -0.2522 | 5.5297 | JPT |
| Hs.214235 | Hs.214235-S   | rs17582830 | 4 | 4 | 38689993 | 77952  | 5.5608  | 0.3970 | 0.2448  | 5.5297 | JPT |
| FLJ23235  | GI_13376422-S | rs2566104  | 4 | 4 | 38842478 | 51436  | 6.8815  | 0.4764 | -0.5011 | 5.8122 | JPT |
| FLJ23235  | GI_13376422-S | rs10015492 | 4 | 4 | 38844476 | 53434  | 7.2137  | 0.5031 | -0.5123 | 5.8122 | JPT |
| FLJ23235  | GI_13376422-S | rs12710812 | 4 | 4 | 38845081 | 54039  | 6.5649  | 0.4583 | 0.4858  | 5.8122 | JPT |
| FLJ23235  | GI_13376422-S | rs2711968  | 4 | 4 | 38846558 | 55516  | 7.0932  | 0.5052 | -0.4988 | 5.8122 | JPT |
| FLJ23235  | GI_13376422-S | rs2254075  | 4 | 4 | 38852749 | 61707  | 9.4225  | 0.6017 | -0.6212 | 5.8122 | JPT |
| FLJ23235  | GI_13376422-S | rs2254212  | 4 | 4 | 38854408 | 63366  | 9.4225  | 0.6017 | 0.6212  | 5.8122 | JPT |
| FLJ23235  | GI_13376422-S | rs2711976  | 4 | 4 | 38857352 | 66310  | 9.4225  | 0.6017 | 0.6212  | 5.8122 | JPT |
| FLJ23235  | GI_13376422-S | rs2566094  | 4 | 4 | 38858940 | 67898  | 8.6802  | 0.5864 | -0.6502 | 5.8122 | JPT |
| FLJ23235  | GI_13376422-S | rs2566097  | 4 | 4 | 38859902 | 68860  | 8.7320  | 0.5982 | -0.5724 | 5.8122 | JPT |
| FLJ23235  | GI_13376422-S | rs2711981  | 4 | 4 | 38861824 | 70782  | 9.4225  | 0.6017 | -0.6212 | 5.8122 | JPT |
| FLJ23235  | GI_13376422-S | rs2711982  | 4 | 4 | 38866563 | 75521  | 8.1182  | 0.5331 | 0.7050  | 5.8122 | JPT |
| FLJ23235  | GI_13376422-S | rs2711983  | 4 | 4 | 38867486 | 76444  | 8.1182  | 0.5331 | 0.7050  | 5.8122 | JPT |
| FLJ23235  | GI_13376422-S | rs6813885  | 4 | 4 | 38868473 | 77431  | 7.8645  | 0.5288 | 0.7039  | 5.8122 | JPT |
| LOC401135 | GI_42657007-S | rs1048447  | 4 | 4 | 68312238 | 104593 | 6.3108  | 0.4434 | 0.2602  | 5.5761 | JPT |
| LOC401135 | GI_42657007-S | rs3796715  | 4 | 4 | 68321842 | 94989  | 6.5256  | 0.4482 | -0.2630 | 5.5761 | JPT |
| LOC401135 | GI_42657007-S | rs17088553 | 4 | 4 | 68341603 | 75228  | 6.5036  | 0.4547 | -0.2552 | 5.5761 | JPT |
| LOC401135 | GI_42657007-S | rs10010188 | 4 | 4 | 68363158 | 53673  | 6.5256  | 0.4482 | -0.2630 | 5.5761 | JPT |
| LOC401135 | GI_42657007-S | rs12643686 | 4 | 4 | 68366583 | 50248  | 6.5256  | 0.4482 | -0.2630 | 5.5761 | JPT |
| LOC401135 | GI_42657007-S | rs10518040 | 4 | 4 | 68368551 | 48280  | 6.5256  | 0.4482 | 0.2630  | 5.5761 | JPT |
| LOC401135 | GI_42657007-S | rs17634475 | 4 | 4 | 68384274 | 32557  | 6.5256  | 0.4482 | 0.2630  | 5.5761 | JPT |
| LOC401135 | GI_42657007-S | rs12640455 | 4 | 4 | 68387605 | 29226  | 6.3108  | 0.4434 | -0.2602 | 5.5761 | JPT |
| LOC401135 | GI_42657007-S | rs17635222 | 4 | 4 | 68415033 | 1798   | 6.5256  | 0.4482 | 0.2630  | 5.5761 | JPT |
| LOC401135 | GI_42657007-S | rs10213333 | 4 | 4 | 68423318 | 6487   | 5.9030  | 0.4263 | -0.2538 | 5.5761 | JPT |
| LOC401135 | GI_42657007-S | rs12651577 | 4 | 4 | 68424184 | 7353   | 6.5256  | 0.4482 | -0.2630 | 5.5761 | JPT |
| LOC401135 | GI_42657007-S | rs1843593  | 4 | 4 | 68427764 | 10933  | 6.3108  | 0.4434 | 0.2602  | 5.5761 | JPT |
| LOC401135 | GI_42657007-S | rs10518042 | 4 | 4 | 68431669 | 14838  | 7.0868  | 0.4878 | 0.2522  | 5.5761 | JPT |
| UGT2B17   | GI_4507820-S  | rs2708697  | 4 | 4 | 69177800 | 54029  | 6.7712  | 0.4701 | 2.1049  | 6.3749 | JPT |
| UGT2B17   | GI_4507820-S  | rs10471154 | 4 | 4 | 69219098 | 12731  | 7.1067  | 0.4889 | -2.6355 | 6.3749 | JPT |
| UGT2B7    | GI_4507824-S  | rs10471154 | 4 | 4 | 69219098 | 939958 | 7.2966  | 0.4992 | -2.0719 | 6.429  | JPT |
| UGT2B10   | GI_27552756-S | rs10034124 | 4 | 4 | 69222280 | 654976 | 11.0616 | 0.6845 | -0.5559 | 6.8746 | JPT |
| UGT2B17   | GI_4507820-S  | rs10034124 | 4 | 4 | 69222280 | 9549   | 28.0870 | 0.9552 | -3.0789 | 6.3749 | JPT |
| UGT2B7    | GI_4507824-S  | rs10034124 | 4 | 4 | 69222280 | 936776 | 25.5943 | 0.9404 | -2.3698 | 6.429  | JPT |
| UGT2B10   | GI_27552756-S | rs7435827  | 4 | 4 | 69243710 | 633546 | 8.7100  | 0.5699 | 0.5536  | 6.8746 | JPT |
| UGT2B17   | GI_4507820-S  | rs7435827  | 4 | 4 | 69243710 | 11881  | 11.4411 | 0.6800 | 2.8420  | 6.3749 | JPT |
| UGT2B7    | GI_4507824-S  | rs7435827  | 4 | 4 | 69243710 | 915346 | 11.0683 | 0.6668 | 2.1912  | 6.429  | JPT |
| UGT2B10   | GI_27552756-S | rs7434408  | 4 | 4 | 69248036 | 629220 | 7.8270  | 0.5445 | 0.4868  | 6.8746 | JPT |
| UGT2B17   | GI_4507820-S  | rs7434408  | 4 | 4 | 69248036 | 16207  | 10.1516 | 0.6501 | 2.7384  | 6.3749 | JPT |
| UGT2B11   | GI_4507822-S  | rs7434408  | 4 | 4 | 69248036 | 999087 | 10.0685 | 0.6468 | 2.2744  | 6.3991 | JPT |
| UGT2B7    | GI_4507824-S  | rs7434408  | 4 | 4 | 69248036 | 911020 | 9.8007  | 0.6358 | 2.0752  | 6.429  | JPT |
| UGT2B10   | GI_27552756-S | rs11732803 | 4 | 4 | 69253159 | 624097 | 8.7100  | 0.5699 | -0.5536 | 6.8746 | JPT |
| UGT2B17   | GI_4507820-S  | rs11732803 | 4 | 4 | 69253159 | 21330  | 11.4411 | 0.6800 | -2.8420 | 6.3749 | JPT |
| UGT2B11   | GI_4507822-S  | rs11732803 | 4 | 4 | 69253159 | 993964 | 11.3464 | 0.6767 | -2.3770 | 6.3991 | JPT |
| UGT2B7    | GI_4507824-S  | rs11732803 | 4 | 4 | 69253159 | 905897 | 11.0683 | 0.6668 | -2.1912 | 6.429  | JPT |
| UGT2B10   | GI_27552756-S | rs7442348  | 4 | 4 | 69253957 | 623299 | 10.5986 | 0.6494 | -0.5118 | 6.8746 | JPT |
| UGT2B17   | GI_4507820-S  | rs7442348  | 4 | 4 | 69253957 | 22128  | 11.0203 | 0.6650 | -2.4413 | 6.3749 | JPT |
| UGT2B11   | GI_4507822-S  | rs7442348  | 4 | 4 | 69253957 | 993166 | 11.0736 | 0.6670 | -2.0495 | 6.3991 | JPT |
| UGT2B7    | GI_4507824-S  | rs7442348  | 4 | 4 | 69253957 | 905099 | 11.2610 | 0.6737 | -1.9120 | 6.429  | JPT |
| UGT2B10   | GI_27552756-S | rs13144491 | 4 | 4 | 69273573 | 603683 | 11.7383 | 0.6901 | 0.5576  | 6.8746 | JPT |
| UGT2B17   | GI_4507820-S  | rs13144491 | 4 | 4 | 69273573 | 41744  | 29.6363 | 0.9561 | 3.0803  | 6.3749 | JPT |
| UGT2B11   | GI_4507822-S  | rs13144491 | 4 | 4 | 69273573 | 973550 | 29.7187 | 0.9565 | 2.5829  | 6.3991 | JPT |
| UGT2B7    | GI_4507824-S  | rs13144491 | 4 | 4 | 69273573 | 885483 | 26.9553 | 0.9412 | 2.3792  | 6.429  | JPT |
| UGT2B10   | GI_27552756-S | rs13348005 | 4 | 4 | 69293542 | 583714 | 11.7383 | 0.6901 | -0.5576 | 6.8746 | JPT |
| UGT2B17   | GI_4507820-S  | rs13348005 | 4 | 4 | 69293542 | 61713  | 29.6363 | 0.9561 | -3.0803 | 6.3749 | JPT |

|          |               |            |   |   |           |        |         |        |         |        |     |
|----------|---------------|------------|---|---|-----------|--------|---------|--------|---------|--------|-----|
| UGT2B11  | GI_4507822-S  | rs13348005 | 4 | 4 | 69293542  | 953581 | 29.7187 | 0.9565 | -2.5829 | 6.3991 | JPT |
| UGT2B7   | GI_4507824-S  | rs13348005 | 4 | 4 | 69293542  | 865514 | 26.9553 | 0.9412 | -2.3792 | 6.429  | JPT |
| UGT2B10  | GI_27552756-S | rs3100645  | 4 | 4 | 69671954  | 205302 | 14.7923 | 0.7777 | -0.5262 | 6.8746 | JPT |
| UGT2B17  | GI_4507820-S  | rs3100645  | 4 | 4 | 69671954  | 440125 | 25.5625 | 0.9315 | -2.7088 | 6.3749 | JPT |
| UGT2B11  | GI_4507822-S  | rs3100645  | 4 | 4 | 69671954  | 575169 | 26.3493 | 0.9371 | -2.2777 | 6.3991 | JPT |
| UGT2B7   | GI_4507824-S  | rs3100645  | 4 | 4 | 69671954  | 487102 | 26.8513 | 0.9405 | -2.1184 | 6.429  | JPT |
| THAP6    | GI_37059751-S | rs1841932  | 4 | 4 | 76761938  | 49141  | 5.9064  | 0.4114 | 0.3044  | 5.6737 | JPT |
| THAP6    | GI_37059751-S | rs6535524  | 4 | 4 | 76819495  | 8416   | 6.3235  | 0.4441 | -0.3053 | 5.6737 | JPT |
| PPA2     | GI_31881619-A | rs904273   | 4 | 4 | 106596878 | 51541  | 8.1681  | 0.5355 | -0.4833 | 5.6685 | JPT |
| PPA2     | GI_31881619-A | rs1909121  | 4 | 4 | 106597688 | 50731  | 7.6504  | 0.5179 | 0.4667  | 5.6685 | JPT |
| PPA2     | GI_31881619-A | rs2726486  | 4 | 4 | 106622285 | 26134  | 8.1681  | 0.5355 | -0.4833 | 5.6685 | JPT |
| PPA2     | GI_31881619-A | rs2647265  | 4 | 4 | 106626244 | 22175  | 14.6652 | 0.7828 | 0.6453  | 5.6685 | JPT |
| PPA2     | GI_31881619-A | rs2726456  | 4 | 4 | 106634181 | 14238  | 14.5587 | 0.8309 | -0.6552 | 5.6685 | JPT |
| PPA2     | GI_31881619-A | rs924282   | 4 | 4 | 106639721 | 8698   | 15.1626 | 0.7865 | 0.6421  | 5.6685 | JPT |
| PPA2     | GI_31881619-A | rs924283   | 4 | 4 | 106639769 | 8650   | 15.1626 | 0.7865 | 0.6421  | 5.6685 | JPT |
| PPA2     | GI_31881619-A | rs2647255  | 4 | 4 | 106642497 | 5922   | 11.4247 | 0.7160 | 0.5740  | 5.6685 | JPT |
| PPA2     | GI_31881619-A | rs11932428 | 4 | 4 | 106644740 | 3679   | 15.1682 | 0.7946 | -0.6448 | 5.6685 | JPT |
| PPA2     | GI_31881619-A | rs11941401 | 4 | 4 | 106644770 | 3649   | 14.5414 | 0.8219 | 0.6681  | 5.6685 | JPT |
| PPA2     | GI_31881619-A | rs11932512 | 4 | 4 | 106644958 | 3461   | 16.1089 | 0.7999 | -0.6509 | 5.6685 | JPT |
| PPA2     | GI_31881619-A | rs13108489 | 4 | 4 | 106650729 | 2310   | 15.9729 | 0.8123 | -0.6533 | 5.6685 | JPT |
| PPA2     | GI_31881619-A | rs2636693  | 4 | 4 | 106652360 | 3941   | 16.1089 | 0.7999 | 0.6509  | 5.6685 | JPT |
| PPA2     | GI_31881619-A | rs2636694  | 4 | 4 | 106653451 | 5032   | 16.1089 | 0.7999 | 0.6509  | 5.6685 | JPT |
| PPA2     | GI_31881619-A | rs2713826  | 4 | 4 | 106699232 | 50813  | 11.5690 | 0.7208 | -0.6320 | 5.6685 | JPT |
| PPA2     | GI_31881619-A | rs2046880  | 4 | 4 | 106728420 | 80001  | 11.3316 | 0.6762 | 0.6332  | 5.6685 | JPT |
| PPA2     | GI_31881619-A | rs2023840  | 4 | 4 | 106730192 | 81773  | 11.3316 | 0.6762 | -0.6332 | 5.6685 | JPT |
| PPA2     | GI_31881619-A | rs2029513  | 4 | 4 | 106739872 | 91453  | 8.0505  | 0.5382 | 0.5943  | 5.6685 | JPT |
| PPA2     | GI_31881619-A | rs4699176  | 4 | 4 | 106746306 | 97887  | 9.6498  | 0.6027 | -0.6128 | 5.6685 | JPT |
| PPA2     | GI_31881619-A | rs2298732  | 4 | 4 | 106748697 | 100278 | 9.6498  | 0.6027 | -0.6128 | 5.6685 | JPT |
| PPA2     | GI_31881619-A | rs2866883  | 4 | 4 | 106748969 | 100550 | 9.6498  | 0.6027 | -0.6128 | 5.6685 | JPT |
| PPA2     | GI_31881619-A | rs7678401  | 4 | 4 | 106749484 | 101065 | 9.6498  | 0.6027 | 0.6128  | 5.6685 | JPT |
| PPA2     | GI_31881619-A | rs1125254  | 4 | 4 | 106762227 | 113808 | 8.7591  | 0.5721 | 0.6014  | 5.6685 | JPT |
| PPA2     | GI_31881619-A | rs3864225  | 4 | 4 | 106766083 | 117664 | 9.6498  | 0.6027 | -0.6128 | 5.6685 | JPT |
| PPA2     | GI_31881619-A | rs3855585  | 4 | 4 | 106766282 | 117863 | 9.5105  | 0.6055 | 0.6154  | 5.6685 | JPT |
| PPA2     | GI_31881619-A | rs11097891 | 4 | 4 | 106766530 | 118111 | 8.8339  | 0.5845 | -0.6095 | 5.6685 | JPT |
| PPA2     | GI_31881619-A | rs13110343 | 4 | 4 | 106766800 | 118381 | 9.6498  | 0.6027 | -0.6128 | 5.6685 | JPT |
| PPA2     | GI_31881619-A | rs2866806  | 4 | 4 | 106767091 | 118672 | 9.6498  | 0.6027 | -0.6128 | 5.6685 | JPT |
| PPA2     | GI_31881619-A | rs1490611  | 4 | 4 | 106768848 | 120429 | 7.6522  | 0.5540 | 0.6041  | 5.6685 | JPT |
| PPA2     | GI_31881619-A | rs765220   | 4 | 4 | 106769363 | 120944 | 8.6298  | 0.5750 | -0.6045 | 5.6685 | JPT |
| PPA2     | GI_31881619-A | rs757176   | 4 | 4 | 106770133 | 121714 | 8.8676  | 0.5860 | 0.6188  | 5.6685 | JPT |
| PPA2     | GI_31881619-A | rs7686073  | 4 | 4 | 106775460 | 127041 | 7.4267  | 0.5061 | -0.5963 | 5.6685 | JPT |
| PPA2     | GI_31881619-A | rs6825111  | 4 | 4 | 106776374 | 127955 | 9.5327  | 0.6065 | -0.6159 | 5.6685 | JPT |
| PPA2     | GI_31881619-A | rs6855572  | 4 | 4 | 106776542 | 128123 | 8.7804  | 0.5731 | -0.6031 | 5.6685 | JPT |
| PPA2     | GI_31881619-A | rs6831138  | 4 | 4 | 106777184 | 128765 | 9.5327  | 0.6065 | 0.6159  | 5.6685 | JPT |
| PPA2     | GI_31881619-A | rs4698941  | 4 | 4 | 106780140 | 131721 | 9.5327  | 0.6065 | -0.6159 | 5.6685 | JPT |
| PPA2     | GI_31881619-A | rs9999896  | 4 | 4 | 106781361 | 132942 | 9.3947  | 0.6095 | 0.6187  | 5.6685 | JPT |
| PPA2     | GI_31881619-A | rs6816997  | 4 | 4 | 106782193 | 133774 | 8.7804  | 0.5731 | 0.6031  | 5.6685 | JPT |
| PPA2     | GI_31881619-A | rs6533201  | 4 | 4 | 106782852 | 134433 | 8.7880  | 0.6008 | 0.6090  | 5.6685 | JPT |
| PPA2     | GI_31881619-A | rs763289   | 4 | 4 | 106783880 | 135461 | 8.7804  | 0.5731 | 0.6031  | 5.6685 | JPT |
| PPA2     | GI_31881619-A | rs10020998 | 4 | 4 | 106786058 | 137639 | 9.6498  | 0.6027 | 0.6128  | 5.6685 | JPT |
| PPA2     | GI_31881619-A | rs10024331 | 4 | 4 | 106787273 | 138854 | 9.6498  | 0.6027 | 0.6128  | 5.6685 | JPT |
| hmm30172 | hmm30172-S    | rs6817520  | 4 | 4 | 119678315 | 36660  | 6.1440  | 0.4334 | -0.1110 | 5.4561 | JPT |
| hmm30172 | hmm30172-S    | rs1818521  | 4 | 4 | 119679607 | 35368  | 6.1440  | 0.4334 | -0.1110 | 5.4561 | JPT |
| GYPE     | GI_38373678-A | rs2292362  | 4 | 4 | 144804124 | 351457 | 5.3685  | 0.3919 | 0.1277  | 5.344  | JPT |
| PET112L  | GI_4758893-S  | rs6818667  | 4 | 4 | 152956303 | 6521   | 4.9903  | 0.3891 | -0.1977 | 4.9697 | JPT |
| PET112L  | GI_4758893-S  | rs6846114  | 4 | 4 | 152962163 | 12381  | 5.0104  | 0.3540 | 0.1816  | 4.9697 | JPT |
| KIAA1712 | GI_30794213-S | rs954926   | 4 | 4 | 175514110 | 113948 | 6.4685  | 0.4527 | -0.1518 | 5.9624 | JPT |
| KIAA1712 | GI_30794213-S | rs13109634 | 4 | 4 | 175545256 | 82802  | 6.8242  | 0.4899 | 0.1598  | 5.9624 | JPT |
| KIAA1712 | GI_30794213-S | rs10520277 | 4 | 4 | 175561564 | 66494  | 6.8253  | 0.4732 | -0.1556 | 5.9624 | JPT |
| KIAA1712 | GI_30794213-S | rs7376146  | 4 | 4 | 175576120 | 51938  | 7.5826  | 0.5060 | 0.1611  | 5.9624 | JPT |

|           |               |            |   |   |           |        |        |        |         |        |     |
|-----------|---------------|------------|---|---|-----------|--------|--------|--------|---------|--------|-----|
| KIAA1712  | GI_30794213-S | rs7658307  | 4 | 4 | 175581254 | 46804  | 6.3503 | 0.4457 | 0.1513  | 5.9624 | JPT |
| KIAA1712  | GI_30794213-S | rs1553669  | 4 | 4 | 175612138 | 15920  | 7.1201 | 0.5067 | 0.1599  | 5.9624 | JPT |
| MTRR      | GI_4505278-A  | rs326123   | 5 | 5 | 7929861   | 24129  | 9.3723 | 0.5909 | 0.3264  | 6.037  | JPT |
| MTRR      | GI_4505278-A  | rs161869   | 5 | 5 | 7930831   | 23159  | 8.2400 | 0.5390 | -0.3220 | 6.037  | JPT |
| MTRR      | GI_4505278-A  | rs6555501  | 5 | 5 | 7932983   | 21007  | 6.9928 | 0.4826 | 0.3048  | 6.037  | JPT |
| MTRR      | GI_4505278-A  | rs162033   | 5 | 5 | 7933835   | 20155  | 6.9888 | 0.4743 | -0.3029 | 6.037  | JPT |
| MTRR      | GI_4505278-A  | rs327588   | 5 | 5 | 7961359   | 7369   | 7.7981 | 0.5171 | -0.3039 | 6.037  | JPT |
| C1QTNF3   | GI_13569918-I | rs253202   | 5 | 5 | 34050931  | 4884   | 6.3674 | 0.4548 | -0.1276 | 6.2305 | JPT |
| C1QTNF3   | GI_13569918-I | rs840399   | 5 | 5 | 34051438  | 4377   | 7.2610 | 0.4891 | -0.1378 | 6.2305 | JPT |
| C1QTNF3   | GI_13569918-I | rs840398   | 5 | 5 | 34051780  | 4035   | 6.3465 | 0.5080 | 0.1406  | 6.2305 | JPT |
| C1QTNF3   | GI_13569918-I | rs840397   | 5 | 5 | 34051895  | 3920   | 7.2610 | 0.4891 | -0.1378 | 6.2305 | JPT |
| C1QTNF3   | GI_13569918-I | rs840396   | 5 | 5 | 34052241  | 3574   | 7.3292 | 0.5009 | 0.1382  | 6.2305 | JPT |
| C1QTNF3   | GI_13569918-I | rs840395   | 5 | 5 | 34052311  | 3504   | 7.2610 | 0.4891 | 0.1378  | 6.2305 | JPT |
| C1QTNF3   | GI_13569918-I | rs840393   | 5 | 5 | 34053660  | 2155   | 6.9814 | 0.5078 | -0.1410 | 6.2305 | JPT |
| C1QTNF3   | GI_13569918-I | rs840391   | 5 | 5 | 34054261  | 1554   | 7.2610 | 0.4891 | 0.1378  | 6.2305 | JPT |
| C1QTNF3   | GI_13569918-I | rs6546     | 5 | 5 | 34055787  | 28     | 7.1033 | 0.4887 | 0.1377  | 6.2305 | JPT |
| C1QTNF3   | GI_13569918-I | rs840386   | 5 | 5 | 34056034  | 219    | 7.2610 | 0.4891 | -0.1378 | 6.2305 | JPT |
| C1QTNF3   | GI_13569918-I | rs840385   | 5 | 5 | 34056115  | 300    | 7.2610 | 0.4891 | 0.1378  | 6.2305 | JPT |
| C1QTNF3   | GI_13569918-I | rs840384   | 5 | 5 | 34056910  | 1095   | 7.2610 | 0.4891 | 0.1378  | 6.2305 | JPT |
| C1QTNF3   | GI_13569918-I | rs840381   | 5 | 5 | 34058118  | 2303   | 7.2610 | 0.4891 | 0.1378  | 6.2305 | JPT |
| C1QTNF3   | GI_13569918-I | rs299608   | 5 | 5 | 34060142  | 4327   | 7.1033 | 0.4887 | -0.1377 | 6.2305 | JPT |
| C1QTNF3   | GI_13569918-I | rs299607   | 5 | 5 | 34060412  | 4597   | 7.2610 | 0.4891 | -0.1378 | 6.2305 | JPT |
| C1QTNF3   | GI_13569918-I | rs299606   | 5 | 5 | 34060511  | 4696   | 7.2186 | 0.4950 | 0.1381  | 6.2305 | JPT |
| C1QTNF3   | GI_13569918-I | rs299605   | 5 | 5 | 34060701  | 4886   | 7.2610 | 0.4891 | -0.1378 | 6.2305 | JPT |
| C1QTNF3   | GI_13569918-I | rs299602   | 5 | 5 | 34061668  | 5853   | 7.1033 | 0.4887 | 0.1377  | 6.2305 | JPT |
| C1QTNF3   | GI_13569918-I | rs299596   | 5 | 5 | 34067771  | 11956  | 6.3148 | 0.4436 | 0.1251  | 6.2305 | JPT |
| C1QTNF3   | GI_13569918-I | rs299594   | 5 | 5 | 34069427  | 13612  | 6.2943 | 0.4424 | -0.1280 | 6.2305 | JPT |
| C1QTNF3   | GI_13569918-I | rs213583   | 5 | 5 | 34070570  | 14755  | 6.4539 | 0.4440 | -0.1251 | 6.2305 | JPT |
| C1QTNF3   | GI_13569918-I | rs299591   | 5 | 5 | 34070901  | 15086  | 6.3159 | 0.4437 | 0.1250  | 6.2305 | JPT |
| MAP1B     | GI_14165455-A | rs1217788  | 5 | 5 | 71406252  | 131701 | 8.0699 | 0.5569 | -0.4588 | 6.157  | JPT |
| MAP1B     | GI_14165455-A | rs1217800  | 5 | 5 | 71412888  | 125065 | 8.7911 | 0.5650 | 0.4667  | 6.157  | JPT |
| MAP1B     | GI_14165455-A | rs1217814  | 5 | 5 | 71423062  | 114891 | 8.4892 | 0.5595 | 0.4041  | 6.157  | JPT |
| MAP1B     | GI_14165455-A | rs1217816  | 5 | 5 | 71424094  | 113859 | 7.5253 | 0.5113 | 0.3859  | 6.157  | JPT |
| MAP1B     | GI_14165455-A | rs1217817  | 5 | 5 | 71425507  | 112446 | 7.6678 | 0.5104 | 0.3772  | 6.157  | JPT |
| MAP1B     | GI_14165455-A | rs3101186  | 5 | 5 | 71445325  | 92628  | 7.8788 | 0.5212 | -0.4489 | 6.157  | JPT |
| PAM       | GI_21070979-A | rs26427    | 5 | 5 | 102394682 | 1624   | 5.2594 | 0.3774 | 0.3016  | 5.2446 | JPT |
| PAM       | GI_21070979-A | rs34377    | 5 | 5 | 102428455 | 35397  | 5.6285 | 0.4167 | -0.3454 | 5.2446 | JPT |
| PAM       | GI_21070979-A | rs26525    | 5 | 5 | 102492822 | 99764  | 5.5605 | 0.3970 | 0.3225  | 5.2446 | JPT |
| PAM       | GI_21070979-A | rs32850    | 5 | 5 | 102497928 | 104870 | 5.2951 | 0.3946 | 0.3027  | 5.2446 | JPT |
| SLC23A1   | GI_44680142-A | rs6878910  | 5 | 5 | 138309160 | 422003 | 8.8066 | 0.5657 | -0.5621 | 7.7485 | JPT |
| SLC23A1   | GI_44680142-I | rs6878910  | 5 | 5 | 138309160 | 421719 | 7.7731 | 0.5158 | -0.9725 | 7.7485 | JPT |
| SLC23A1   | GI_44680142-A | rs10053642 | 5 | 5 | 138323337 | 407826 | 8.0184 | 0.5635 | -0.5608 | 7.7485 | JPT |
| LOC345462 | GI_37550406-S | rs6891216  | 5 | 5 | 178379632 | 13494  | 6.5303 | 0.4815 | -0.1219 | 5.9157 | JPT |
| LOC345462 | GI_37550406-S | rs6888539  | 5 | 5 | 178381616 | 11510  | 6.3945 | 0.4483 | -0.1155 | 5.9157 | JPT |
| LOC345462 | GI_37550406-S | rs6880315  | 5 | 5 | 178385108 | 8018   | 6.0024 | 0.4325 | -0.1156 | 5.9157 | JPT |
| LOC345462 | GI_37550406-S | rs2047354  | 5 | 5 | 178387853 | 5273   | 6.3945 | 0.4483 | -0.1155 | 5.9157 | JPT |
| LOC345462 | GI_37550406-S | rs7733072  | 5 | 5 | 178388613 | 4513   | 6.5204 | 0.4479 | 0.1170  | 5.9157 | JPT |
| LOC345462 | GI_37550406-S | rs11957976 | 5 | 5 | 178388841 | 4285   | 6.5204 | 0.4479 | -0.1170 | 5.9157 | JPT |
| LOC345462 | GI_37550406-S | rs2132671  | 5 | 5 | 178390040 | 3086   | 6.3945 | 0.4483 | -0.1155 | 5.9157 | JPT |
| LOC345462 | GI_37550406-S | rs17078991 | 5 | 5 | 178392032 | 1094   | 6.5204 | 0.4479 | 0.1170  | 5.9157 | JPT |
| LOC345462 | GI_37550406-S | rs7707587  | 5 | 5 | 178395196 | 2070   | 6.5204 | 0.4479 | -0.1170 | 5.9157 | JPT |
| LOC345462 | GI_37550406-S | rs7709054  | 5 | 5 | 178395363 | 2237   | 6.3945 | 0.4483 | 0.1155  | 5.9157 | JPT |
| LOC345462 | GI_37550406-S | rs7704565  | 5 | 5 | 178406529 | 13403  | 6.3945 | 0.4483 | -0.1155 | 5.9157 | JPT |
| LOC345462 | GI_37550406-S | rs13156530 | 5 | 5 | 178407623 | 14497  | 6.1338 | 0.4328 | 0.1152  | 5.9157 | JPT |
| LOC345462 | GI_37550406-S | rs7711420  | 5 | 5 | 178415600 | 22474  | 6.3974 | 0.4407 | -0.1034 | 5.9157 | JPT |
| LOC345462 | GI_37550406-S | rs11951738 | 5 | 5 | 178423834 | 30708  | 6.3945 | 0.4483 | -0.1155 | 5.9157 | JPT |
| LOC345462 | GI_37550406-S | rs4701030  | 5 | 5 | 178435944 | 42818  | 6.4137 | 0.4417 | 0.1200  | 5.9157 | JPT |
| LOC345462 | GI_37550406-S | rs4700780  | 5 | 5 | 178436246 | 43120  | 7.0919 | 0.4799 | 0.1195  | 5.9157 | JPT |
| NQO2      | GI_4505416-S  | rs2518581  | 6 | 6 | 2954943   | 7206   | 8.5827 | 0.5553 | -0.5911 | 5.9614 | JPT |

|           |               |            |   |   |          |        |         |        |         |        |     |
|-----------|---------------|------------|---|---|----------|--------|---------|--------|---------|--------|-----|
| NQO2      | GI_4505416-S  | rs1143684  | 6 | 6 | 2955389  | 6760   | 8.6322  | 0.5663 | -0.5849 | 5.9614 | JPT |
| NQO2      | GI_4505416-S  | rs9378353  | 6 | 6 | 2956174  | 5975   | 8.4541  | 0.5666 | 0.5819  | 5.9614 | JPT |
| NQO2      | GI_4505416-S  | rs3757081  | 6 | 6 | 2959133  | 3016   | 8.5827  | 0.5553 | -0.5911 | 5.9614 | JPT |
| NQO2      | GI_4505416-S  | rs10223369 | 6 | 6 | 2963173  | 1024   | 8.5827  | 0.5553 | 0.5911  | 5.9614 | JPT |
| NQO2      | GI_4505416-S  | rs9501910  | 6 | 6 | 2963773  | 1624   | 7.4719  | 0.5443 | 0.6163  | 5.9614 | JPT |
| NQO2      | GI_4505416-S  | rs4149370  | 6 | 6 | 2964653  | 2504   | 6.2651  | 0.4834 | 0.5480  | 5.9614 | JPT |
| NQO2      | GI_4505416-S  | rs6924045  | 6 | 6 | 2966029  | 3880   | 8.5827  | 0.5553 | -0.5911 | 5.9614 | JPT |
| NQO2      | GI_4505416-S  | rs1885300  | 6 | 6 | 2974126  | 11977  | 6.0680  | 0.4288 | 0.4514  | 5.9614 | JPT |
| NQO2      | GI_4505416-S  | rs6937771  | 6 | 6 | 2983255  | 21106  | 6.1411  | 0.4256 | 0.4585  | 5.9614 | JPT |
| NQO2      | GI_4505416-S  | rs4959226  | 6 | 6 | 2986482  | 24333  | 6.1411  | 0.4256 | -0.4585 | 5.9614 | JPT |
| LOC389362 | GI_41147302-S | rs9501959  | 6 | 6 | 3200786  | 12326  | 6.4278  | 0.4503 | -0.1573 | 6.2427 | JPT |
| LOC389362 | GI_41147302-S | rs11242837 | 6 | 6 | 3206887  | 6225   | 6.4014  | 0.5114 | -0.1787 | 6.2427 | JPT |
| LOC389362 | GI_41147302-S | rs11242841 | 6 | 6 | 3207007  | 6105   | 8.0484  | 0.5296 | -0.1769 | 6.2427 | JPT |
| LOC389362 | GI_41147302-S | rs4602754  | 6 | 6 | 3207500  | 5612   | 7.8602  | 0.5286 | -0.1766 | 6.2427 | JPT |
| LOC389362 | GI_41147302-S | rs4421240  | 6 | 6 | 3207522  | 5590   | 7.2916  | 0.4989 | 0.1714  | 6.2427 | JPT |
| LOC389362 | GI_41147302-S | rs4246060  | 6 | 6 | 3207754  | 5358   | 8.0484  | 0.5296 | -0.1769 | 6.2427 | JPT |
| LOC389362 | GI_41147302-S | rs4316041  | 6 | 6 | 3208187  | 4925   | 7.0658  | 0.5218 | 0.1771  | 6.2427 | JPT |
| LOC389362 | GI_41147302-S | rs4400256  | 6 | 6 | 3208286  | 4826   | 8.0484  | 0.5296 | 0.1769  | 6.2427 | JPT |
| LOC389362 | GI_41147302-S | rs4317455  | 6 | 6 | 3208490  | 4622   | 8.0484  | 0.5296 | 0.1769  | 6.2427 | JPT |
| LOC389362 | GI_41147302-S | rs4959785  | 6 | 6 | 3209100  | 4012   | 8.0484  | 0.5296 | 0.1769  | 6.2427 | JPT |
| LOC389362 | GI_41147302-S | rs4959229  | 6 | 6 | 3209287  | 3825   | 7.7321  | 0.5137 | 0.1717  | 6.2427 | JPT |
| LOC389362 | GI_41147302-S | rs4959786  | 6 | 6 | 3209486  | 3626   | 7.2839  | 0.5157 | -0.1885 | 6.2427 | JPT |
| LOC389362 | GI_41147302-S | rs4959787  | 6 | 6 | 3209501  | 3611   | 8.0484  | 0.5296 | -0.1769 | 6.2427 | JPT |
| LOC389362 | GI_41147302-S | rs13193012 | 6 | 6 | 3209670  | 3442   | 7.7321  | 0.5137 | -0.1717 | 6.2427 | JPT |
| LOC389362 | GI_41147302-S | rs4324814  | 6 | 6 | 3209775  | 3337   | 6.9825  | 0.4990 | 0.1783  | 6.2427 | JPT |
| LOC389362 | GI_41147302-S | rs11753155 | 6 | 6 | 3209999  | 3113   | 7.9040  | 0.5308 | 0.1797  | 6.2427 | JPT |
| LOC389362 | GI_41147302-S | rs4602755  | 6 | 6 | 3210089  | 3023   | 7.7321  | 0.5137 | -0.1717 | 6.2427 | JPT |
| LOC389362 | GI_41147302-S | rs13196688 | 6 | 6 | 3210362  | 2750   | 7.7321  | 0.5137 | -0.1717 | 6.2427 | JPT |
| LOC389362 | GI_41147302-S | rs9501966  | 6 | 6 | 3210381  | 2731   | 7.7321  | 0.5137 | 0.1717  | 6.2427 | JPT |
| LOC389362 | GI_41147302-S | rs13207402 | 6 | 6 | 3210409  | 2703   | 7.7321  | 0.5137 | -0.1717 | 6.2427 | JPT |
| LOC389362 | GI_41147302-S | rs13207416 | 6 | 6 | 3210438  | 2674   | 7.7321  | 0.5137 | 0.1717  | 6.2427 | JPT |
| LOC389362 | GI_41147302-S | rs4959792  | 6 | 6 | 3211037  | 2075   | 8.2269  | 0.5934 | -0.1765 | 6.2427 | JPT |
| LOC389362 | GI_41147302-S | rs4998907  | 6 | 6 | 3211262  | 1850   | 8.0223  | 0.5368 | -0.1693 | 6.2427 | JPT |
| LOC389362 | GI_41147302-S | rs4336485  | 6 | 6 | 3211387  | 1725   | 7.8715  | 0.5468 | 0.1724  | 6.2427 | JPT |
| LOC389362 | GI_41147302-S | rs4337973  | 6 | 6 | 3211559  | 1553   | 6.2749  | 0.4748 | 0.1584  | 6.2427 | JPT |
| LOC389362 | GI_41147302-S | rs17136345 | 6 | 6 | 3211907  | 1205   | 7.7809  | 0.5246 | -0.1730 | 6.2427 | JPT |
| LOC389362 | GI_41147302-S | rs17136346 | 6 | 6 | 3211914  | 1198   | 7.7321  | 0.5137 | 0.1717  | 6.2427 | JPT |
| LOC389362 | GI_41147302-S | rs1633     | 6 | 6 | 3212535  | 577    | 7.0303  | 0.5106 | -0.1585 | 6.2427 | JPT |
| LOC389362 | GI_41147302-S | rs9328157  | 6 | 6 | 3212709  | 403    | 7.5480  | 0.5125 | -0.1715 | 6.2427 | JPT |
| LOC389362 | GI_41147302-S | rs3813487  | 6 | 6 | 3215063  | 1951   | 7.3291  | 0.5009 | 0.1699  | 6.2427 | JPT |
| LOC389362 | GI_41147302-S | rs1127477  | 6 | 6 | 3215509  | 2397   | 7.5480  | 0.5125 | 0.1715  | 6.2427 | JPT |
| LOC221711 | GI_34916021-S | rs9379896  | 6 | 6 | 10994935 | 87288  | 6.7570  | 0.4614 | -0.2565 | 5.9123 | JPT |
| LOC221711 | GI_34916021-S | rs9348724  | 6 | 6 | 10995262 | 86961  | 6.5452  | 0.4572 | -0.2571 | 5.9123 | JPT |
| LOC221711 | GI_34916021-S | rs946351   | 6 | 6 | 11001106 | 81117  | 6.7570  | 0.4614 | 0.2565  | 5.9123 | JPT |
| hmm14470  | hmm14470-S    | rs3812105  | 6 | 6 | 25212233 | 19510  | 6.3502  | 0.4457 | 0.4862  | 6.2969 | JPT |
| hmm14470  | hmm14470-S    | rs2516577  | 6 | 6 | 25244173 | 51450  | 6.6768  | 0.4648 | 0.4909  | 6.2969 | JPT |
| LOC222701 | GI_27498465-S | rs6941992  | 6 | 6 | 28214120 | 31082  | 6.5068  | 0.4714 | 0.2072  | 5.5539 | JPT |
| LOC222701 | GI_27498465-S | rs1904840  | 6 | 6 | 28216211 | 28991  | 6.0725  | 0.4369 | 0.1966  | 5.5539 | JPT |
| LOC222701 | GI_27498465-S | rs9283884  | 6 | 6 | 28243639 | 1563   | 5.8594  | 0.4159 | 0.1806  | 5.5539 | JPT |
| LOC347981 | GI_30160064-S | rs1737055  | 6 | 6 | 29841721 | 120822 | 8.7149  | 0.5701 | -0.2350 | 6.2264 | JPT |
| LOC347981 | GI_30160064-S | rs1737052  | 6 | 6 | 29842097 | 120446 | 8.0160  | 0.5452 | 0.2359  | 6.2264 | JPT |
| LOC347981 | GI_30160064-S | rs1737046  | 6 | 6 | 29843672 | 118871 | 7.5077  | 0.5278 | -0.2273 | 6.2264 | JPT |
| LOC347981 | GI_30160064-S | rs9258295  | 6 | 6 | 29843808 | 118735 | 9.2700  | 0.6323 | -0.2488 | 6.2264 | JPT |
| LOC347981 | GI_30160064-S | rs1737043  | 6 | 6 | 29844026 | 118517 | 8.0986  | 0.5493 | 0.2334  | 6.2264 | JPT |
| LOC347981 | GI_30160064-S | rs9258302  | 6 | 6 | 29849317 | 113226 | 12.2393 | 0.6980 | 0.2497  | 6.2264 | JPT |
| LOC347981 | GI_30160064-S | rs9258303  | 6 | 6 | 29850909 | 111634 | 12.2393 | 0.6980 | -0.2497 | 6.2264 | JPT |
| LOC347981 | GI_30160064-S | rs9258436  | 6 | 6 | 29875325 | 87218  | 9.7867  | 0.6084 | 0.2256  | 6.2264 | JPT |
| LOC347981 | GI_30160064-S | rs3873243  | 6 | 6 | 29875604 | 86939  | 11.4390 | 0.6799 | -0.2498 | 6.2264 | JPT |
| LOC347981 | GI_30160064-S | rs2017525  | 6 | 6 | 29876482 | 86061  | 12.2393 | 0.6980 | 0.2497  | 6.2264 | JPT |

|           |               |            |   |   |          |       |         |        |         |        |     |
|-----------|---------------|------------|---|---|----------|-------|---------|--------|---------|--------|-----|
| LOC347981 | GI_30160064-S | rs909718   | 6 | 6 | 29876684 | 85859 | 10.0255 | 0.6182 | -0.2380 | 6.2264 | JPT |
| LOC347981 | GI_30160064-S | rs1736981  | 6 | 6 | 29878301 | 84242 | 8.1168  | 0.5415 | -0.2317 | 6.2264 | JPT |
| LOC347981 | GI_30160064-S | rs1632974  | 6 | 6 | 29885086 | 77457 | 8.8028  | 0.6112 | 0.2290  | 6.2264 | JPT |
| LOC347981 | GI_30160064-S | rs753545   | 6 | 6 | 29888919 | 73624 | 8.1353  | 0.5789 | -0.2370 | 6.2264 | JPT |
| LOC347981 | GI_30160064-S | rs4607472  | 6 | 6 | 29918522 | 44021 | 12.3043 | 0.7538 | -0.2585 | 6.2264 | JPT |
| LOC347981 | GI_30160064-S | rs2844827  | 6 | 6 | 29919216 | 43327 | 10.6503 | 0.6426 | -0.2454 | 6.2264 | JPT |
| LOC347981 | GI_30160064-S | rs4084096  | 6 | 6 | 29919847 | 42696 | 11.6189 | 0.6949 | 0.2510  | 6.2264 | JPT |
| LOC347981 | GI_30160064-S | rs5013309  | 6 | 6 | 29920421 | 42122 | 12.2393 | 0.6980 | -0.2497 | 6.2264 | JPT |
| LOC347981 | GI_30160064-S | rs2734990  | 6 | 6 | 29920484 | 42059 | 9.8889  | 0.6213 | 0.2443  | 6.2264 | JPT |
| LOC347981 | GI_30160064-S | rs2523767  | 6 | 6 | 29920786 | 41757 | 9.8889  | 0.6213 | 0.2443  | 6.2264 | JPT |
| LOC347981 | GI_30160064-S | rs2517879  | 6 | 6 | 29920953 | 41590 | 10.6530 | 0.6514 | -0.2470 | 6.2264 | JPT |
| LOC347981 | GI_30160064-S | rs3873260  | 6 | 6 | 29921661 | 40882 | 9.8889  | 0.6213 | 0.2443  | 6.2264 | JPT |
| LOC347981 | GI_30160064-S | rs6935644  | 6 | 6 | 29922319 | 40224 | 12.2393 | 0.6980 | -0.2497 | 6.2264 | JPT |
| LOC347981 | GI_30160064-S | rs9689483  | 6 | 6 | 29922939 | 39604 | 12.2393 | 0.6980 | 0.2497  | 6.2264 | JPT |
| LOC347981 | GI_30160064-S | rs6922605  | 6 | 6 | 29923723 | 38820 | 12.1290 | 0.7030 | -0.2533 | 6.2264 | JPT |
| LOC347981 | GI_30160064-S | rs9258566  | 6 | 6 | 29923733 | 38810 | 9.8763  | 0.6484 | -0.2479 | 6.2264 | JPT |
| LOC347981 | GI_30160064-S | rs2894118  | 6 | 6 | 29923963 | 38580 | 12.2393 | 0.6980 | -0.2497 | 6.2264 | JPT |
| LOC347981 | GI_30160064-S | rs2394183  | 6 | 6 | 29923989 | 38554 | 12.2393 | 0.6980 | 0.2497  | 6.2264 | JPT |
| LOC347981 | GI_30160064-S | rs2394185  | 6 | 6 | 29924350 | 38193 | 11.2793 | 0.6923 | 0.2487  | 6.2264 | JPT |
| LOC347981 | GI_30160064-S | rs2394186  | 6 | 6 | 29924400 | 38143 | 11.4390 | 0.6799 | -0.2498 | 6.2264 | JPT |
| LOC347981 | GI_30160064-S | rs9258568  | 6 | 6 | 29926210 | 36333 | 11.2131 | 0.6899 | 0.2032  | 6.2264 | JPT |
| LOC347981 | GI_30160064-S | rs9258584  | 6 | 6 | 29927201 | 35342 | 12.4853 | 0.7058 | 0.2450  | 6.2264 | JPT |
| LOC347981 | GI_30160064-S | rs2107198  | 6 | 6 | 29927641 | 34902 | 13.5769 | 0.7380 | -0.2476 | 6.2264 | JPT |
| LOC347981 | GI_30160064-S | rs3862293  | 6 | 6 | 29928445 | 34098 | 12.4853 | 0.7058 | -0.2450 | 6.2264 | JPT |
| LOC347981 | GI_30160064-S | rs2523756  | 6 | 6 | 29928696 | 33847 | 11.0252 | 0.6565 | 0.2427  | 6.2264 | JPT |
| LOC347981 | GI_30160064-S | rs9258651  | 6 | 6 | 29930334 | 32209 | 11.0252 | 0.6565 | -0.2427 | 6.2264 | JPT |
| LOC347981 | GI_30160064-S | rs2428510  | 6 | 6 | 29931006 | 31537 | 10.2658 | 0.6365 | -0.2408 | 6.2264 | JPT |
| LOC347981 | GI_30160064-S | rs2734979  | 6 | 6 | 29931140 | 31403 | 10.2658 | 0.6365 | 0.2408  | 6.2264 | JPT |
| LOC347981 | GI_30160064-S | rs6939251  | 6 | 6 | 29931708 | 30835 | 11.0252 | 0.6565 | 0.2427  | 6.2264 | JPT |
| LOC347981 | GI_30160064-S | rs6919119  | 6 | 6 | 29931761 | 30782 | 10.8757 | 0.6597 | -0.2435 | 6.2264 | JPT |
| LOC347981 | GI_30160064-S | rs6939446  | 6 | 6 | 29931798 | 30745 | 10.7757 | 0.6560 | 0.2428  | 6.2264 | JPT |
| LOC347981 | GI_30160064-S | rs6919513  | 6 | 6 | 29931973 | 30570 | 10.2328 | 0.6441 | -0.2423 | 6.2264 | JPT |
| LOC347981 | GI_30160064-S | rs9258679  | 6 | 6 | 29932038 | 30505 | 10.8757 | 0.6597 | -0.2435 | 6.2264 | JPT |
| LOC347981 | GI_30160064-S | rs9258681  | 6 | 6 | 29932075 | 30468 | 10.3940 | 0.6884 | -0.2443 | 6.2264 | JPT |
| LOC347981 | GI_30160064-S | rs9258687  | 6 | 6 | 29932214 | 30329 | 12.4853 | 0.7058 | -0.2450 | 6.2264 | JPT |
| LOC347981 | GI_30160064-S | rs9258689  | 6 | 6 | 29932266 | 30277 | 11.0252 | 0.6565 | -0.2427 | 6.2264 | JPT |
| LOC347981 | GI_30160064-S | rs7740849  | 6 | 6 | 29932824 | 29719 | 9.9072  | 0.6496 | 0.2438  | 6.2264 | JPT |
| LOC347981 | GI_30160064-S | rs1611670  | 6 | 6 | 29933218 | 29325 | 11.0252 | 0.6565 | -0.2427 | 6.2264 | JPT |
| LOC347981 | GI_30160064-S | rs9258714  | 6 | 6 | 29933413 | 29130 | 12.3531 | 0.7102 | -0.2460 | 6.2264 | JPT |
| LOC347981 | GI_30160064-S | rs12662275 | 6 | 6 | 29934193 | 28350 | 11.2821 | 0.6833 | 0.2392  | 6.2264 | JPT |
| LOC347981 | GI_30160064-S | rs9258738  | 6 | 6 | 29935369 | 27174 | 11.0252 | 0.6565 | -0.2427 | 6.2264 | JPT |
| LOC347981 | GI_30160064-S | rs9258739  | 6 | 6 | 29935642 | 26901 | 11.0252 | 0.6565 | 0.2427  | 6.2264 | JPT |
| LOC347981 | GI_30160064-S | rs1611699  | 6 | 6 | 29935732 | 26811 | 11.0252 | 0.6565 | 0.2427  | 6.2264 | JPT |
| LOC347981 | GI_30160064-S | rs9258740  | 6 | 6 | 29935878 | 26665 | 12.4853 | 0.7058 | -0.2450 | 6.2264 | JPT |
| LOC347981 | GI_30160064-S | rs1611705  | 6 | 6 | 29936472 | 26071 | 11.0252 | 0.6565 | 0.2427  | 6.2264 | JPT |
| LOC347981 | GI_30160064-S | rs1611709  | 6 | 6 | 29936865 | 25678 | 10.4173 | 0.6337 | 0.2386  | 6.2264 | JPT |
| LOC347981 | GI_30160064-S | rs1611710  | 6 | 6 | 29936895 | 25648 | 11.0252 | 0.6565 | -0.2427 | 6.2264 | JPT |
| LOC347981 | GI_30160064-S | rs9258750  | 6 | 6 | 29936951 | 25592 | 12.4853 | 0.7058 | -0.2450 | 6.2264 | JPT |
| LOC347981 | GI_30160064-S | rs1611719  | 6 | 6 | 29937615 | 24928 | 13.5769 | 0.7380 | -0.2476 | 6.2264 | JPT |
| LOC347981 | GI_30160064-S | rs1611720  | 6 | 6 | 29937973 | 24570 | 9.4923  | 0.6137 | -0.2149 | 6.2264 | JPT |
| LOC347981 | GI_30160064-S | rs9258766  | 6 | 6 | 29938390 | 24153 | 9.3296  | 0.5977 | 0.2288  | 6.2264 | JPT |
| LOC347981 | GI_30160064-S | rs1611723  | 6 | 6 | 29938484 | 24059 | 10.2658 | 0.6365 | -0.2408 | 6.2264 | JPT |
| LOC347981 | GI_30160064-S | rs9258771  | 6 | 6 | 29938631 | 23912 | 9.2088  | 0.6199 | -0.2316 | 6.2264 | JPT |
| LOC347981 | GI_30160064-S | rs1611732  | 6 | 6 | 29938987 | 23556 | 10.0796 | 0.6380 | -0.2395 | 6.2264 | JPT |
| LOC347981 | GI_30160064-S | rs1611737  | 6 | 6 | 29939550 | 22993 | 10.2658 | 0.6365 | -0.2408 | 6.2264 | JPT |
| LOC347981 | GI_30160064-S | rs1611739  | 6 | 6 | 29939777 | 22766 | 9.3296  | 0.5977 | 0.2288  | 6.2264 | JPT |
| LOC347981 | GI_30160064-S | rs9258795  | 6 | 6 | 29939995 | 22548 | 9.3296  | 0.5977 | 0.2288  | 6.2264 | JPT |
| LOC347981 | GI_30160064-S | rs9258797  | 6 | 6 | 29940149 | 22394 | 9.5677  | 0.6451 | -0.2303 | 6.2264 | JPT |
| LOC347981 | GI_30160064-S | rs9258798  | 6 | 6 | 29940176 | 22367 | 10.7685 | 0.6831 | -0.2349 | 6.2264 | JPT |

|           |               |            |   |   |          |        |         |        |         |        |     |
|-----------|---------------|------------|---|---|----------|--------|---------|--------|---------|--------|-----|
| LOC347981 | GI_30160064-S | rs9258811  | 6 | 6 | 29940505 | 22038  | 9.3296  | 0.5977 | 0.2288  | 6.2264 | JPT |
| LOC347981 | GI_30160064-S | rs3094165  | 6 | 6 | 29941520 | 21023  | 9.3832  | 0.6090 | -0.2312 | 6.2264 | JPT |
| LOC347981 | GI_30160064-S | rs2734971  | 6 | 6 | 29942428 | 20115  | 7.4147  | 0.5055 | 0.2042  | 6.2264 | JPT |
| LOC347981 | GI_30160064-S | rs4078116  | 6 | 6 | 29960516 | 2027   | 12.7477 | 0.7223 | 0.2472  | 6.2264 | JPT |
| LOC347981 | GI_30160064-S | rs2975046  | 6 | 6 | 30023128 | 60585  | 13.5769 | 0.7380 | 0.2476  | 6.2264 | JPT |
| ZNRD1     | GI_25777706-I | rs1632883  | 6 | 6 | 30023972 | 113233 | 6.8687  | 0.4839 | -0.3315 | 6.4251 | JPT |
| LOC347981 | GI_30160064-S | rs16896742 | 6 | 6 | 30030719 | 68176  | 7.0746  | 0.4955 | 0.2114  | 6.2264 | JPT |
| LOC347981 | GI_30160064-S | rs9260603  | 6 | 6 | 30030733 | 68190  | 6.9099  | 0.4948 | 0.2113  | 6.2264 | JPT |
| LOC347981 | GI_30160064-S | rs2571400  | 6 | 6 | 30035701 | 73158  | 9.3623  | 0.5991 | -0.2158 | 6.2264 | JPT |
| LOC347981 | GI_30160064-S | rs2517681  | 6 | 6 | 30040309 | 77766  | 8.6913  | 0.6060 | 0.2192  | 6.2264 | JPT |
| LOC347981 | GI_30160064-S | rs2844806  | 6 | 6 | 30041418 | 78875  | 7.5728  | 0.5595 | 0.2139  | 6.2264 | JPT |
| LOC347981 | GI_30160064-S | rs2517672  | 6 | 6 | 30045241 | 82698  | 12.0338 | 0.6913 | 0.2324  | 6.2264 | JPT |
| LOC347981 | GI_30160064-S | rs2256543  | 6 | 6 | 30045812 | 83269  | 12.0338 | 0.6913 | -0.2324 | 6.2264 | JPT |
| LOC347981 | GI_30160064-S | rs2523971  | 6 | 6 | 30046237 | 83694  | 11.2558 | 0.6735 | -0.2306 | 6.2264 | JPT |
| LOC347981 | GI_30160064-S | rs2571377  | 6 | 6 | 30046550 | 84007  | 11.9042 | 0.6957 | 0.2309  | 6.2264 | JPT |
| LOC347981 | GI_30160064-S | rs2523966  | 6 | 6 | 30047219 | 84676  | 10.6418 | 0.6784 | 0.2259  | 6.2264 | JPT |
| LOC347981 | GI_30160064-S | rs2523964  | 6 | 6 | 30047273 | 84730  | 11.9170 | 0.6961 | 0.2357  | 6.2264 | JPT |
| LOC347981 | GI_30160064-S | rs2523963  | 6 | 6 | 30047462 | 84919  | 11.2558 | 0.6735 | 0.2306  | 6.2264 | JPT |
| LOC347981 | GI_30160064-S | rs2523962  | 6 | 6 | 30047523 | 84980  | 11.2558 | 0.6735 | -0.2306 | 6.2264 | JPT |
| LOC347981 | GI_30160064-S | rs1264813  | 6 | 6 | 30047879 | 85336  | 12.0338 | 0.6913 | 0.2324  | 6.2264 | JPT |
| LOC347981 | GI_30160064-S | rs2523960  | 6 | 6 | 30047931 | 85388  | 11.9170 | 0.6961 | -0.2357 | 6.2264 | JPT |
| LOC347981 | GI_30160064-S | rs2844805  | 6 | 6 | 30048658 | 86115  | 7.5728  | 0.5404 | -0.2022 | 6.2264 | JPT |
| LOC347981 | GI_30160064-S | rs2256922  | 6 | 6 | 30048793 | 86250  | 11.7069 | 0.6891 | -0.2320 | 6.2264 | JPT |
| LOC347981 | GI_30160064-S | rs2571376  | 6 | 6 | 30049163 | 86620  | 10.7773 | 0.6741 | 0.2283  | 6.2264 | JPT |
| LOC347981 | GI_30160064-S | rs9357090  | 6 | 6 | 30049379 | 86836  | 11.7545 | 0.6995 | -0.2225 | 6.2264 | JPT |
| LOC347981 | GI_30160064-S | rs2844804  | 6 | 6 | 30050105 | 87562  | 7.9286  | 0.5589 | 0.2281  | 6.2264 | JPT |
| LOC347981 | GI_30160064-S | rs2523945  | 6 | 6 | 30050303 | 87760  | 8.4836  | 0.5592 | 0.2285  | 6.2264 | JPT |
| LOC347981 | GI_30160064-S | rs426483   | 6 | 6 | 30050569 | 88026  | 10.6457 | 0.6786 | 0.2271  | 6.2264 | JPT |
| ZNRD1     | GI_25777706-I | rs2735076  | 6 | 6 | 30051469 | 85736  | 7.2066  | 0.4943 | 0.2663  | 6.4251 | JPT |
| LOC347981 | GI_30160064-S | rs2735075  | 6 | 6 | 30052522 | 89979  | 9.2549  | 0.6034 | -0.2164 | 6.2264 | JPT |
| ZNRD1     | GI_25777706-I | rs2246199  | 6 | 6 | 30053599 | 83606  | 6.4540  | 0.4440 | 0.2675  | 6.4251 | JPT |
| ZNRD1     | GI_25777706-I | rs2108691  | 6 | 6 | 30056344 | 80861  | 6.4336  | 0.4506 | -0.2715 | 6.4251 | JPT |
| ZNRD1     | GI_25777706-I | rs2735069  | 6 | 6 | 30056461 | 80744  | 6.5719  | 0.4668 | -0.3260 | 6.4251 | JPT |
| LOC347981 | GI_30160064-S | rs2844802  | 6 | 6 | 30056791 | 94248  | 10.7299 | 0.6632 | 0.2274  | 6.2264 | JPT |
| ZNRD1     | GI_25777706-I | rs423808   | 6 | 6 | 30057102 | 80103  | 6.4540  | 0.4440 | -0.2675 | 6.4251 | JPT |
| ZNRD1     | GI_25777706-I | rs410909   | 6 | 6 | 30057147 | 80058  | 6.4540  | 0.4440 | -0.2675 | 6.4251 | JPT |
| ZNRD1     | GI_25777706-I | rs2246642  | 6 | 6 | 30057497 | 79708  | 6.4540  | 0.4440 | 0.2675  | 6.4251 | JPT |
| LOC347981 | GI_30160064-S | rs2735067  | 6 | 6 | 30059085 | 96542  | 10.9442 | 0.6623 | 0.2287  | 6.2264 | JPT |
| ZNRD1     | GI_25777706-I | rs11759891 | 6 | 6 | 30060126 | 77079  | 6.4540  | 0.4440 | 0.2675  | 6.4251 | JPT |
| ZNRD1     | GI_25777706-I | rs11755374 | 6 | 6 | 30060338 | 76867  | 6.4540  | 0.4440 | -0.2675 | 6.4251 | JPT |
| ZNRD1     | GI_25777706-I | rs11755966 | 6 | 6 | 30060910 | 76295  | 6.4540  | 0.4440 | -0.2675 | 6.4251 | JPT |
| ZNRD1     | GI_25777706-I | rs11755961 | 6 | 6 | 30061078 | 76127  | 6.4540  | 0.4440 | 0.2675  | 6.4251 | JPT |
| ZNRD1     | GI_25777706-I | rs6911583  | 6 | 6 | 30071500 | 65705  | 6.4540  | 0.4440 | -0.2675 | 6.4251 | JPT |
| ZNRD1     | GI_25777706-I | rs12110437 | 6 | 6 | 30072808 | 64397  | 6.4540  | 0.4440 | 0.2675  | 6.4251 | JPT |
| LOC347981 | GI_30160064-S | rs2530388  | 6 | 6 | 30075107 | 112564 | 10.1736 | 0.6241 | 0.2236  | 6.2264 | JPT |
| ZNRD1     | GI_25777706-I | rs12664967 | 6 | 6 | 30076159 | 61046  | 6.4540  | 0.4440 | 0.2675  | 6.4251 | JPT |
| ZNRD1     | GI_25777706-I | rs11755549 | 6 | 6 | 30078317 | 58888  | 6.4540  | 0.4440 | 0.2675  | 6.4251 | JPT |
| ZNRD1     | GI_25777706-I | rs11760176 | 6 | 6 | 30078406 | 58799  | 6.4540  | 0.4440 | 0.2675  | 6.4251 | JPT |
| ZNRD1     | GI_25777706-I | rs4313034  | 6 | 6 | 30081904 | 55301  | 7.2279  | 0.4873 | -0.2625 | 6.4251 | JPT |
| LOC347981 | GI_30160064-S | rs356968   | 6 | 6 | 30083026 | 120483 | 10.9893 | 0.6552 | 0.2165  | 6.2264 | JPT |
| ZNRD1     | GI_25777706-I | rs3765608  | 6 | 6 | 30083745 | 53460  | 6.4540  | 0.4440 | 0.2675  | 6.4251 | JPT |
| ZNRD1     | GI_25777706-I | rs12663252 | 6 | 6 | 30084720 | 52485  | 6.4540  | 0.4440 | 0.2675  | 6.4251 | JPT |
| LOC347981 | GI_30160064-S | rs356969   | 6 | 6 | 30085124 | 122581 | 8.5175  | 0.5609 | -0.2211 | 6.2264 | JPT |
| ZNRD1     | GI_25777706-I | rs12661053 | 6 | 6 | 30086006 | 51199  | 6.4540  | 0.4440 | 0.2675  | 6.4251 | JPT |
| LOC347981 | GI_30160064-S | rs356954   | 6 | 6 | 30091517 | 128974 | 10.1736 | 0.6241 | -0.2236 | 6.2264 | JPT |
| ZNRD1     | GI_25777706-I | rs6931672  | 6 | 6 | 30094121 | 43084  | 6.4540  | 0.4440 | -0.2675 | 6.4251 | JPT |
| ZNRD1     | GI_25777706-I | rs6932091  | 6 | 6 | 30094480 | 42725  | 6.4540  | 0.4440 | 0.2675  | 6.4251 | JPT |
| ZNRD1     | GI_25777706-I | rs6928966  | 6 | 6 | 30096943 | 40262  | 6.4540  | 0.4440 | -0.2675 | 6.4251 | JPT |
| LOC347981 | GI_30160064-S | rs165255   | 6 | 6 | 30097674 | 135131 | 8.9780  | 0.6002 | -0.2189 | 6.2264 | JPT |

|           |               |            |   |   |          |        |         |        |         |        |     |
|-----------|---------------|------------|---|---|----------|--------|---------|--------|---------|--------|-----|
| LOC347981 | GI_30160064-S | rs1150743  | 6 | 6 | 30100240 | 137697 | 10.1736 | 0.6241 | 0.2236  | 6.2264 | JPT |
| LOC347981 | GI_30160064-S | rs7748909  | 6 | 6 | 30103439 | 140896 | 10.1736 | 0.6241 | 0.2236  | 6.2264 | JPT |
| LOC347981 | GI_30160064-S | rs259929   | 6 | 6 | 30110031 | 147488 | 10.1736 | 0.6241 | -0.2236 | 6.2264 | JPT |
| LOC347981 | GI_30160064-S | rs259931   | 6 | 6 | 30112350 | 149807 | 10.1736 | 0.6241 | -0.2236 | 6.2264 | JPT |
| LOC347981 | GI_30160064-S | rs259934   | 6 | 6 | 30114855 | 152312 | 10.1736 | 0.6241 | 0.2236  | 6.2264 | JPT |
| LOC347981 | GI_30160064-S | rs259935   | 6 | 6 | 30115030 | 152487 | 10.1736 | 0.6241 | -0.2236 | 6.2264 | JPT |
| ZNRD1     | GI_25777706-I | rs10947047 | 6 | 6 | 30115690 | 21515  | 6.4540  | 0.4440 | -0.2675 | 6.4251 | JPT |
| ZNRD1     | GI_25777706-I | rs11962771 | 6 | 6 | 30115963 | 21242  | 6.4540  | 0.4440 | -0.2675 | 6.4251 | JPT |
| LOC347981 | GI_30160064-S | rs259938   | 6 | 6 | 30115982 | 153439 | 9.4734  | 0.6220 | 0.2273  | 6.2264 | JPT |
| LOC347981 | GI_30160064-S | rs259939   | 6 | 6 | 30119560 | 157017 | 9.2669  | 0.6039 | -0.2196 | 6.2264 | JPT |
| LOC347981 | GI_30160064-S | rs259940   | 6 | 6 | 30119913 | 157370 | 10.1736 | 0.6241 | 0.2236  | 6.2264 | JPT |
| ZNRD1     | GI_25777706-I | rs6940552  | 6 | 6 | 30120319 | 16886  | 6.4540  | 0.4440 | -0.2675 | 6.4251 | JPT |
| LOC347981 | GI_30160064-S | rs259919   | 6 | 6 | 30133482 | 170939 | 8.9780  | 0.6002 | -0.2189 | 6.2264 | JPT |
| LOC347981 | GI_30160064-S | rs1150742  | 6 | 6 | 30136810 | 174267 | 10.1736 | 0.6241 | -0.2236 | 6.2264 | JPT |
| LOC347981 | GI_30160064-S | rs1150741  | 6 | 6 | 30137630 | 175087 | 9.4518  | 0.6030 | -0.2210 | 6.2264 | JPT |
| LOC347981 | GI_30160064-S | rs1150736  | 6 | 6 | 30150934 | 188391 | 9.4518  | 0.6030 | 0.2210  | 6.2264 | JPT |
| LOC347981 | GI_30160064-S | rs1150735  | 6 | 6 | 30153178 | 190635 | 9.2669  | 0.6039 | -0.2196 | 6.2264 | JPT |
| LOC401245 | GI_42657607-S | rs2516714  | 6 | 6 | 30334283 | 33198  | 6.6457  | 0.4796 | -0.2696 | 5.9245 | JPT |
| LOC401245 | GI_42657607-S | rs2428507  | 6 | 6 | 30337285 | 30196  | 6.8515  | 0.4747 | -0.2615 | 5.9245 | JPT |
| LOC401245 | GI_42657607-S | rs2428506  | 6 | 6 | 30337747 | 29734  | 6.9900  | 0.4824 | -0.2600 | 5.9245 | JPT |
| LOC401245 | GI_42657607-S | rs2516702  | 6 | 6 | 30337969 | 29512  | 5.9414  | 0.4135 | 0.2266  | 5.9245 | JPT |
| LOC401245 | GI_42657607-S | rs2844766  | 6 | 6 | 30338640 | 28841  | 6.8334  | 0.4819 | 0.2630  | 5.9245 | JPT |
| LOC401245 | GI_42657607-S | rs2844764  | 6 | 6 | 30342647 | 24834  | 7.0005  | 0.4749 | 0.2584  | 5.9245 | JPT |
| LOC401245 | GI_42657607-S | rs2516696  | 6 | 6 | 30343025 | 24456  | 7.0005  | 0.4749 | -0.2584 | 5.9245 | JPT |
| LOC401245 | GI_42657607-S | rs2844762  | 6 | 6 | 30344733 | 22748  | 6.8515  | 0.4747 | 0.2615  | 5.9245 | JPT |
| LOC401245 | GI_42657607-S | rs6457188  | 6 | 6 | 30346863 | 20618  | 8.0922  | 0.5580 | 0.2824  | 5.9245 | JPT |
| LOC401245 | GI_42657607-S | rs968909   | 6 | 6 | 30352558 | 14923  | 6.6679  | 0.4809 | -0.2624 | 5.9245 | JPT |
| LOC401245 | GI_42657607-S | rs1264624  | 6 | 6 | 30363068 | 4413   | 6.6846  | 0.4819 | -0.2633 | 5.9245 | JPT |
| LOC401245 | GI_42657607-S | rs3734841  | 6 | 6 | 30367284 | 197    | 6.8334  | 0.4819 | -0.2630 | 5.9245 | JPT |
| LOC401245 | GI_42657607-S | rs1264619  | 6 | 6 | 30367998 | 517    | 6.0267  | 0.4187 | 0.2333  | 5.9245 | JPT |
| LOC401245 | GI_42657607-S | rs261950   | 6 | 6 | 30377540 | 10059  | 6.9430  | 0.4881 | -0.2615 | 5.9245 | JPT |
| LOC401245 | GI_42657607-S | rs261947   | 6 | 6 | 30379123 | 11642  | 7.0005  | 0.4749 | 0.2584  | 5.9245 | JPT |
| LOC401245 | GI_42657607-S | rs9380167  | 6 | 6 | 30382440 | 14959  | 7.0124  | 0.4837 | 0.2678  | 5.9245 | JPT |
| LOC401245 | GI_42657607-S | rs12055553 | 6 | 6 | 30382707 | 15226  | 7.0005  | 0.4749 | -0.2584 | 5.9245 | JPT |
| LOC401245 | GI_42657607-S | rs9295842  | 6 | 6 | 30388901 | 21420  | 7.0005  | 0.4749 | -0.2584 | 5.9245 | JPT |
| LOC401245 | GI_42657607-S | rs6912771  | 6 | 6 | 30392354 | 24873  | 7.0005  | 0.4749 | -0.2584 | 5.9245 | JPT |
| LOC401245 | GI_42657607-S | rs6924453  | 6 | 6 | 30393934 | 26453  | 6.8515  | 0.4747 | -0.2615 | 5.9245 | JPT |
| LOC401245 | GI_42657607-S | rs6931387  | 6 | 6 | 30395496 | 28015  | 6.8515  | 0.4747 | 0.2615  | 5.9245 | JPT |
| LOC401245 | GI_42657607-S | rs6900042  | 6 | 6 | 30397250 | 29769  | 6.8515  | 0.4747 | 0.2615  | 5.9245 | JPT |
| LOC401245 | GI_42657607-S | rs9368635  | 6 | 6 | 30398015 | 30534  | 7.0005  | 0.4749 | 0.2584  | 5.9245 | JPT |
| LOC401245 | GI_42657607-S | rs4711213  | 6 | 6 | 30400315 | 32834  | 6.8334  | 0.4819 | 0.2630  | 5.9245 | JPT |
| LOC401245 | GI_42657607-S | rs3094622  | 6 | 6 | 30435931 | 68450  | 6.1382  | 0.4254 | -0.3679 | 5.9245 | JPT |
| LOC401245 | GI_42657607-S | rs9261661  | 6 | 6 | 30436732 | 69251  | 6.1382  | 0.4254 | -0.3679 | 5.9245 | JPT |
| LOC401245 | GI_42657607-S | rs12181116 | 6 | 6 | 30440139 | 72658  | 6.1382  | 0.4254 | 0.3679  | 5.9245 | JPT |
| LOC401245 | GI_42657607-S | rs16897402 | 6 | 6 | 30452574 | 85093  | 6.1172  | 0.4317 | 0.3807  | 5.9245 | JPT |
| hmm31752  | hmm31752-S    | rs2251830  | 6 | 6 | 31124957 | 7121   | 7.7422  | 0.5226 | 0.5312  | 6.0444 | JPT |
| hmm31752  | hmm31752-S    | rs2517534  | 6 | 6 | 31125313 | 6765   | 15.6129 | 0.7968 | 0.6147  | 6.0444 | JPT |
| hmm31752  | hmm31752-S    | rs2523866  | 6 | 6 | 31125326 | 6752   | 8.3377  | 0.5523 | -0.5274 | 6.0444 | JPT |
| hmm31752  | hmm31752-S    | rs2517532  | 6 | 6 | 31126386 | 5692   | 14.3581 | 0.7752 | 0.6042  | 6.0444 | JPT |
| hmm31752  | hmm31752-S    | rs2523865  | 6 | 6 | 31126427 | 5651   | 8.3516  | 0.5444 | 0.5340  | 6.0444 | JPT |
| hmm31752  | hmm31752-S    | rs2523864  | 6 | 6 | 31126525 | 5553   | 7.6179  | 0.5248 | 0.5313  | 6.0444 | JPT |
| hmm31752  | hmm31752-S    | rs2523857  | 6 | 6 | 31129483 | 2595   | 12.9655 | 0.7204 | -0.5968 | 6.0444 | JPT |
| hmm31752  | hmm31752-S    | rs2517527  | 6 | 6 | 31129526 | 2552   | 11.9848 | 0.7439 | 0.5555  | 6.0444 | JPT |
| hmm31752  | hmm31752-S    | rs2523856  | 6 | 6 | 31129609 | 2469   | 14.6468 | 0.7988 | 0.6158  | 6.0444 | JPT |
| hmm31752  | hmm31752-S    | rs2523855  | 6 | 6 | 31130137 | 1941   | 7.7942  | 0.5339 | -0.5009 | 6.0444 | JPT |
| hmm31752  | hmm31752-S    | rs9262628  | 6 | 6 | 31131127 | 951    | 14.3104 | 0.7576 | 0.5777  | 6.0444 | JPT |
| hmm31752  | hmm31752-S    | rs2523852  | 6 | 6 | 31131847 | 231    | 14.3104 | 0.7576 | -0.5777 | 6.0444 | JPT |
| hmm31752  | hmm31752-S    | rs2517525  | 6 | 6 | 31133340 | 1262   | 14.3104 | 0.7576 | 0.5777  | 6.0444 | JPT |
| hmm31752  | hmm31752-S    | rs2517524  | 6 | 6 | 31133692 | 1614   | 7.7469  | 0.5228 | -0.7569 | 6.0444 | JPT |

|          |            |           |   |   |          |       |         |        |         |        |     |
|----------|------------|-----------|---|---|----------|-------|---------|--------|---------|--------|-----|
| hmm31752 | hmm31752-S | rs2523846 | 6 | 6 | 31134568 | 2490  | 14.3104 | 0.7576 | -0.5777 | 6.0444 | JPT |
| hmm31752 | hmm31752-S | rs2517510 | 6 | 6 | 31138101 | 6023  | 14.3104 | 0.7576 | -0.5777 | 6.0444 | JPT |
| hmm31752 | hmm31752-S | rs2517500 | 6 | 6 | 31141488 | 9410  | 13.3359 | 0.7480 | 0.5714  | 6.0444 | JPT |
| hmm31752 | hmm31752-S | rs2517497 | 6 | 6 | 31144762 | 12684 | 12.9810 | 0.7379 | 0.5657  | 6.0444 | JPT |
| hmm31752 | hmm31752-S | rs2523890 | 6 | 6 | 31147511 | 15433 | 12.9810 | 0.7379 | 0.5657  | 6.0444 | JPT |
| hmm31752 | hmm31752-S | rs2246330 | 6 | 6 | 31149472 | 17394 | 14.3104 | 0.7576 | -0.5777 | 6.0444 | JPT |
| hmm31752 | hmm31752-S | rs2523883 | 6 | 6 | 31150049 | 17971 | 14.3104 | 0.7576 | 0.5777  | 6.0444 | JPT |
| hmm31752 | hmm31752-S | rs2523882 | 6 | 6 | 31150196 | 18118 | 7.3897  | 0.5214 | 0.4904  | 6.0444 | JPT |
| hmm31752 | hmm31752-S | rs2517489 | 6 | 6 | 31150285 | 18207 | 14.3104 | 0.7576 | -0.5777 | 6.0444 | JPT |
| hmm31752 | hmm31752-S | rs2523881 | 6 | 6 | 31150587 | 18509 | 13.3532 | 0.7485 | -0.5737 | 6.0444 | JPT |
| hmm31752 | hmm31752-S | rs2523880 | 6 | 6 | 31150748 | 18670 | 12.9096 | 0.7358 | 0.5701  | 6.0444 | JPT |
| hmm31752 | hmm31752-S | rs2249231 | 6 | 6 | 31151211 | 19133 | 13.3359 | 0.7480 | -0.5714 | 6.0444 | JPT |
| hmm31752 | hmm31752-S | rs2523860 | 6 | 6 | 31153553 | 21475 | 10.6744 | 0.6990 | 0.5406  | 6.0444 | JPT |
| hmm31752 | hmm31752-S | rs2523843 | 6 | 6 | 31154507 | 22429 | 12.8008 | 0.7413 | 0.5663  | 6.0444 | JPT |
| hmm31752 | hmm31752-S | rs2249876 | 6 | 6 | 31156366 | 24288 | 13.3359 | 0.7480 | -0.5714 | 6.0444 | JPT |
| hmm31752 | hmm31752-S | rs3132562 | 6 | 6 | 31156971 | 24893 | 8.5879  | 0.5821 | -0.5178 | 6.0444 | JPT |
| hmm31752 | hmm31752-S | rs9263473 | 6 | 6 | 31158158 | 26080 | 12.9096 | 0.7358 | -0.5701 | 6.0444 | JPT |
| hmm31752 | hmm31752-S | rs9263474 | 6 | 6 | 31158223 | 26145 | 12.9096 | 0.7358 | -0.5701 | 6.0444 | JPT |
| hmm31752 | hmm31752-S | rs2535318 | 6 | 6 | 31159367 | 27289 | 13.4206 | 0.7504 | 0.5739  | 6.0444 | JPT |
| hmm31752 | hmm31752-S | rs2535317 | 6 | 6 | 31159833 | 27755 | 14.3104 | 0.7576 | 0.5777  | 6.0444 | JPT |
| hmm31752 | hmm31752-S | rs2517471 | 6 | 6 | 31160077 | 27999 | 13.5876 | 0.7466 | 0.5709  | 6.0444 | JPT |
| hmm31752 | hmm31752-S | rs2535315 | 6 | 6 | 31160106 | 28028 | 13.5876 | 0.7466 | 0.5709  | 6.0444 | JPT |
| hmm31752 | hmm31752-S | rs2535311 | 6 | 6 | 31160663 | 28585 | 12.7355 | 0.7394 | 0.5661  | 6.0444 | JPT |
| hmm31752 | hmm31752-S | rs2535310 | 6 | 6 | 31161236 | 29158 | 12.7131 | 0.7387 | 0.5687  | 6.0444 | JPT |
| hmm31752 | hmm31752-S | rs2535307 | 6 | 6 | 31161720 | 29642 | 14.3104 | 0.7576 | 0.5777  | 6.0444 | JPT |
| hmm31752 | hmm31752-S | rs2535306 | 6 | 6 | 31161846 | 29768 | 13.3359 | 0.7480 | 0.5714  | 6.0444 | JPT |
| hmm31752 | hmm31752-S | rs9263478 | 6 | 6 | 31162360 | 30282 | 13.8232 | 0.7530 | -0.5800 | 6.0444 | JPT |
| hmm31752 | hmm31752-S | rs2535304 | 6 | 6 | 31162666 | 30588 | 14.3104 | 0.7576 | -0.5777 | 6.0444 | JPT |
| hmm31752 | hmm31752-S | rs3130959 | 6 | 6 | 31164337 | 32259 | 14.3104 | 0.7576 | -0.5777 | 6.0444 | JPT |
| hmm31752 | hmm31752-S | rs9263486 | 6 | 6 | 31164611 | 32533 | 14.3104 | 0.7576 | 0.5777  | 6.0444 | JPT |
| hmm31752 | hmm31752-S | rs2535301 | 6 | 6 | 31166606 | 34528 | 13.5876 | 0.7466 | 0.5709  | 6.0444 | JPT |
| hmm31752 | hmm31752-S | rs2535300 | 6 | 6 | 31167124 | 35046 | 12.9001 | 0.7184 | 0.5755  | 6.0444 | JPT |
| hmm31752 | hmm31752-S | rs2517465 | 6 | 6 | 31167150 | 35072 | 13.6320 | 0.7478 | 0.5752  | 6.0444 | JPT |
| hmm31752 | hmm31752-S | rs2535299 | 6 | 6 | 31167224 | 35146 | 12.9047 | 0.7622 | 0.5736  | 6.0444 | JPT |
| hmm31752 | hmm31752-S | rs3130961 | 6 | 6 | 31167365 | 35287 | 14.3104 | 0.7576 | 0.5777  | 6.0444 | JPT |
| hmm31752 | hmm31752-S | rs2517458 | 6 | 6 | 31167494 | 35416 | 14.3104 | 0.7576 | 0.5777  | 6.0444 | JPT |
| hmm31752 | hmm31752-S | rs2517453 | 6 | 6 | 31168094 | 36016 | 14.3104 | 0.7576 | 0.5777  | 6.0444 | JPT |
| hmm31752 | hmm31752-S | rs2517452 | 6 | 6 | 31168141 | 36063 | 14.3104 | 0.7576 | -0.5777 | 6.0444 | JPT |
| hmm31752 | hmm31752-S | rs2517450 | 6 | 6 | 31169418 | 37340 | 12.9810 | 0.7379 | 0.5657  | 6.0444 | JPT |
| hmm31752 | hmm31752-S | rs2535292 | 6 | 6 | 31170393 | 38315 | 14.3104 | 0.7576 | -0.5777 | 6.0444 | JPT |
| hmm31752 | hmm31752-S | rs2517448 | 6 | 6 | 31170646 | 38568 | 7.4484  | 0.5158 | -0.4919 | 6.0444 | JPT |
| hmm31752 | hmm31752-S | rs2535291 | 6 | 6 | 31170878 | 38800 | 14.3104 | 0.7576 | -0.5777 | 6.0444 | JPT |
| hmm31752 | hmm31752-S | rs2535289 | 6 | 6 | 31171212 | 39134 | 10.3531 | 0.6580 | -0.5123 | 6.0444 | JPT |
| hmm31752 | hmm31752-S | rs2517423 | 6 | 6 | 31172806 | 40728 | 12.9810 | 0.7379 | 0.5657  | 6.0444 | JPT |
| hmm31752 | hmm31752-S | rs9263515 | 6 | 6 | 31174807 | 42729 | 9.2903  | 0.6431 | -0.5157 | 6.0444 | JPT |
| hmm31752 | hmm31752-S | rs7381697 | 6 | 6 | 31176005 | 43927 | 10.7511 | 0.6640 | 0.5336  | 6.0444 | JPT |
| hmm31752 | hmm31752-S | rs2517556 | 6 | 6 | 31176874 | 44796 | 11.2729 | 0.7204 | -0.5758 | 6.0444 | JPT |
| hmm31752 | hmm31752-S | rs9405050 | 6 | 6 | 31179526 | 47448 | 14.3104 | 0.7576 | -0.5777 | 6.0444 | JPT |
| hmm31752 | hmm31752-S | rs7381897 | 6 | 6 | 31181882 | 49804 | 12.1666 | 0.7402 | -0.5749 | 6.0444 | JPT |
| hmm31752 | hmm31752-S | rs6457327 | 6 | 6 | 31182009 | 49931 | 9.5009  | 0.6051 | -0.5361 | 6.0444 | JPT |
| hmm31752 | hmm31752-S | rs1064190 | 6 | 6 | 31183094 | 51016 | 13.5876 | 0.7466 | -0.5709 | 6.0444 | JPT |
| hmm31752 | hmm31752-S | rs9263625 | 6 | 6 | 31183140 | 51062 | 10.8449 | 0.6766 | 0.5436  | 6.0444 | JPT |
| hmm31752 | hmm31752-S | rs2535277 | 6 | 6 | 31184743 | 52665 | 14.3104 | 0.7576 | 0.5777  | 6.0444 | JPT |
| hmm31752 | hmm31752-S | rs1265064 | 6 | 6 | 31185711 | 53633 | 13.0392 | 0.7483 | 0.5724  | 6.0444 | JPT |
| hmm31752 | hmm31752-S | rs1265063 | 6 | 6 | 31185917 | 53839 | 13.5876 | 0.7466 | 0.5709  | 6.0444 | JPT |
| hmm31752 | hmm31752-S | rs1265059 | 6 | 6 | 31186474 | 54396 | 13.3359 | 0.7480 | 0.5714  | 6.0444 | JPT |
| hmm31752 | hmm31752-S | rs1265056 | 6 | 6 | 31186629 | 54551 | 14.0125 | 0.7580 | -0.5774 | 6.0444 | JPT |
| hmm31752 | hmm31752-S | rs1265053 | 6 | 6 | 31187868 | 55790 | 13.5876 | 0.7466 | 0.5709  | 6.0444 | JPT |
| hmm31752 | hmm31752-S | rs2233977 | 6 | 6 | 31187873 | 55795 | 11.2594 | 0.6736 | 0.5405  | 6.0444 | JPT |

|           |               |            |   |   |          |        |         |        |         |        |     |
|-----------|---------------|------------|---|---|----------|--------|---------|--------|---------|--------|-----|
| hmm31752  | hmm31752-S    | rs2233969  | 6 | 6 | 31188411 | 56333  | 10.1662 | 0.6325 | 0.5178  | 6.0444 | JPT |
| hmm31752  | hmm31752-S    | rs1265052  | 6 | 6 | 31188450 | 56372  | 12.6729 | 0.7116 | -0.5517 | 6.0444 | JPT |
| hmm31752  | hmm31752-S    | rs2233967  | 6 | 6 | 31188807 | 56729  | 8.0313  | 0.5288 | 0.4857  | 6.0444 | JPT |
| hmm31752  | hmm31752-S    | rs2233966  | 6 | 6 | 31188838 | 56760  | 12.3144 | 0.7004 | 0.5348  | 6.0444 | JPT |
| hmm31752  | hmm31752-S    | rs2233965  | 6 | 6 | 31188878 | 56800  | 6.8999  | 0.5031 | -0.4572 | 6.0444 | JPT |
| hmm31752  | hmm31752-S    | rs2233964  | 6 | 6 | 31188898 | 56820  | 10.1214 | 0.6982 | 0.5668  | 6.0444 | JPT |
| hmm31752  | hmm31752-S    | rs3130553  | 6 | 6 | 31190264 | 58186  | 7.7350  | 0.5222 | -0.4912 | 6.0444 | JPT |
| hmm31752  | hmm31752-S    | rs3130685  | 6 | 6 | 31314185 | 182107 | 6.9912  | 0.4908 | -0.4850 | 6.0444 | JPT |
| LOC282956 | GI_27483210-S | rs9501571  | 6 | 6 | 31441589 | 28962  | 6.5476  | 0.4494 | -0.2161 | 5.7467 | JPT |
| LOC282956 | GI_27483210-S | rs7767216  | 6 | 6 | 31443075 | 27476  | 6.5476  | 0.4494 | 0.2161  | 5.7467 | JPT |
| LOC282956 | GI_27483210-S | rs6930905  | 6 | 6 | 31448456 | 22095  | 5.9184  | 0.4196 | 0.1890  | 5.7467 | JPT |
| LOC282956 | GI_27483210-S | rs2507976  | 6 | 6 | 31459866 | 10685  | 6.9383  | 0.4715 | -0.1937 | 5.7467 | JPT |
| LOC282956 | GI_27483210-S | rs2844529  | 6 | 6 | 31461572 | 8979   | 12.6952 | 0.7207 | -0.2212 | 5.7467 | JPT |
| LOC282956 | GI_27483210-S | rs4081552  | 6 | 6 | 31461668 | 8883   | 7.8950  | 0.5220 | -0.2036 | 5.7467 | JPT |
| LOC282956 | GI_27483210-S | rs6909461  | 6 | 6 | 31461929 | 8622   | 8.5221  | 0.5525 | -0.2098 | 5.7467 | JPT |
| LOC282956 | GI_27483210-S | rs2853973  | 6 | 6 | 31461971 | 8580   | 10.7485 | 0.6550 | -0.2093 | 5.7467 | JPT |
| LOC282956 | GI_27483210-S | rs2428486  | 6 | 6 | 31462083 | 8468   | 12.9379 | 0.7196 | -0.2204 | 5.7467 | JPT |
| LOC282956 | GI_27483210-S | rs6932730  | 6 | 6 | 31462161 | 8390   | 6.5476  | 0.4494 | 0.2161  | 5.7467 | JPT |
| LOC282956 | GI_27483210-S | rs4711268  | 6 | 6 | 31462483 | 8068   | 7.8950  | 0.5220 | -0.2036 | 5.7467 | JPT |
| LOC282956 | GI_27483210-S | rs13437082 | 6 | 6 | 31462539 | 8012   | 9.1620  | 0.5904 | -0.2167 | 5.7467 | JPT |
| LOC282956 | GI_27483210-S | rs2596562  | 6 | 6 | 31462574 | 7977   | 10.9656 | 0.6543 | -0.2075 | 5.7467 | JPT |
| LOC282956 | GI_27483210-S | rs13437092 | 6 | 6 | 31463035 | 7516   | 8.7729  | 0.5642 | -0.2111 | 5.7467 | JPT |
| LOC282956 | GI_27483210-S | rs13437088 | 6 | 6 | 31463098 | 7453   | 8.5615  | 0.5629 | -0.2121 | 5.7467 | JPT |
| LOC282956 | GI_27483210-S | rs9266791  | 6 | 6 | 31466922 | 3629   | 6.2555  | 0.4401 | 0.1818  | 5.7467 | JPT |
| LOC282956 | GI_27483210-S | rs9348866  | 6 | 6 | 31466934 | 3617   | 6.5404  | 0.4911 | -0.1629 | 5.7467 | JPT |
| LOC282956 | GI_27483210-S | rs7771971  | 6 | 6 | 31468320 | 2231   | 7.8950  | 0.5220 | 0.2036  | 5.7467 | JPT |
| LOC282956 | GI_27483210-S | rs7751725  | 6 | 6 | 31468412 | 2139   | 8.1520  | 0.5347 | -0.2057 | 5.7467 | JPT |
| LOC282956 | GI_27483210-S | rs7752021  | 6 | 6 | 31468505 | 2046   | 8.1520  | 0.5347 | -0.2057 | 5.7467 | JPT |
| LOC282956 | GI_27483210-S | rs10947206 | 6 | 6 | 31469376 | 1175   | 8.1520  | 0.5347 | -0.2057 | 5.7467 | JPT |
| LOC282956 | GI_27483210-S | rs2523475  | 6 | 6 | 31469689 | 862    | 10.5522 | 0.6657 | 0.2110  | 5.7467 | JPT |
| LOC282956 | GI_27483210-S | rs10947208 | 6 | 6 | 31469816 | 735    | 8.1520  | 0.5347 | -0.2057 | 5.7467 | JPT |
| LOC282956 | GI_27483210-S | rs2523473  | 6 | 6 | 31469876 | 675    | 11.6309 | 0.6778 | 0.2125  | 5.7467 | JPT |
| LOC282956 | GI_27483210-S | rs2523467  | 6 | 6 | 31470909 | 358    | 10.0899 | 0.6384 | 0.2016  | 5.7467 | JPT |
| LOC282956 | GI_27483210-S | rs9501387  | 6 | 6 | 31472438 | 1887   | 11.6309 | 0.6778 | -0.2125 | 5.7467 | JPT |
| LOC282956 | GI_27483210-S | rs7739560  | 6 | 6 | 31472769 | 2218   | 6.6729  | 0.4645 | -0.2196 | 5.7467 | JPT |
| LOC282956 | GI_27483210-S | rs2523459  | 6 | 6 | 31473287 | 2736   | 10.4989 | 0.6455 | -0.2050 | 5.7467 | JPT |
| LOC282956 | GI_27483210-S | rs2596543  | 6 | 6 | 31473526 | 2975   | 5.9416  | 0.4288 | -0.1773 | 5.7467 | JPT |
| LOC282956 | GI_27483210-S | rs2596542  | 6 | 6 | 31474574 | 4023   | 9.8042  | 0.6454 | 0.2026  | 5.7467 | JPT |
| LOC282956 | GI_27483210-S | rs2428475  | 6 | 6 | 31474601 | 4050   | 10.4694 | 0.6719 | 0.2075  | 5.7467 | JPT |
| LOC282956 | GI_27483210-S | rs2428474  | 6 | 6 | 31475002 | 4451   | 10.0649 | 0.6466 | 0.2047  | 5.7467 | JPT |
| LOC282956 | GI_27483210-S | rs2523453  | 6 | 6 | 31476104 | 5553   | 11.6309 | 0.6778 | 0.2125  | 5.7467 | JPT |
| LOC282956 | GI_27483210-S | rs6911024  | 6 | 6 | 31476430 | 5879   | 5.8801  | 0.4249 | 0.2124  | 5.7467 | JPT |
| LOC282956 | GI_27483210-S | rs2523452  | 6 | 6 | 31476519 | 5968   | 9.5748  | 0.6172 | 0.1976  | 5.7467 | JPT |
| LOC282956 | GI_27483210-S | rs2596538  | 6 | 6 | 31476611 | 6060   | 5.9821  | 0.4235 | -0.1651 | 5.7467 | JPT |
| LOC282956 | GI_27483210-S | rs2844522  | 6 | 6 | 31476679 | 6128   | 6.2477  | 0.4396 | -0.1681 | 5.7467 | JPT |
| LOC282956 | GI_27483210-S | rs2844521  | 6 | 6 | 31476943 | 6392   | 9.8414  | 0.6194 | 0.1999  | 5.7467 | JPT |
| LOC282956 | GI_27483210-S | rs2301747  | 6 | 6 | 31479566 | 9015   | 6.4586  | 0.4521 | -0.2018 | 5.7467 | JPT |
| LOC282956 | GI_27483210-S | rs6910087  | 6 | 6 | 31485026 | 14475  | 6.5476  | 0.4494 | -0.2161 | 5.7467 | JPT |
| LOC282956 | GI_27483210-S | rs1051792  | 6 | 6 | 31486956 | 16405  | 8.1520  | 0.5347 | 0.2057  | 5.7467 | JPT |
| LOC282956 | GI_27483210-S | rs1051794  | 6 | 6 | 31487088 | 16537  | 6.9499  | 0.4802 | 0.1978  | 5.7467 | JPT |
| LOC282956 | GI_27483210-S | rs6934187  | 6 | 6 | 31488953 | 18402  | 6.9715  | 0.4983 | -0.2010 | 5.7467 | JPT |
| LOC282956 | GI_27483210-S | rs9266813  | 6 | 6 | 31489300 | 18749  | 6.1918  | 0.4524 | -0.1981 | 5.7467 | JPT |
| LOC282956 | GI_27483210-S | rs9266817  | 6 | 6 | 31489531 | 18980  | 5.8747  | 0.4494 | 0.2101  | 5.7467 | JPT |
| LOC282956 | GI_27483210-S | rs7775227  | 6 | 6 | 31490126 | 19575  | 6.9499  | 0.4802 | 0.1978  | 5.7467 | JPT |
| LOC282956 | GI_27483210-S | rs9266823  | 6 | 6 | 31490669 | 20118  | 8.1520  | 0.5347 | -0.2057 | 5.7467 | JPT |
| LOC282956 | GI_27483210-S | rs9266825  | 6 | 6 | 31490861 | 20310  | 8.0675  | 0.5567 | 0.2134  | 5.7467 | JPT |
| LOC282956 | GI_27483210-S | rs9266830  | 6 | 6 | 31491050 | 20499  | 7.5094  | 0.5370 | -0.2096 | 5.7467 | JPT |
| LOC282956 | GI_27483210-S | rs9266833  | 6 | 6 | 31491087 | 20536  | 7.1618  | 0.5272 | 0.2129  | 5.7467 | JPT |
| LOC282956 | GI_27483210-S | rs6932236  | 6 | 6 | 31491958 | 21407  | 6.9499  | 0.4802 | 0.1978  | 5.7467 | JPT |

|           |               |            |   |   |          |        |         |        |         |        |     |
|-----------|---------------|------------|---|---|----------|--------|---------|--------|---------|--------|-----|
| LOC282956 | GI_27483210-S | rs9468992  | 6 | 6 | 31492557 | 22006  | 6.7812  | 0.4707 | 0.2203  | 5.7467 | JPT |
| LOC282956 | GI_27483210-S | rs9266845  | 6 | 6 | 31492771 | 22220  | 8.1520  | 0.5347 | 0.2057  | 5.7467 | JPT |
| LOC282956 | GI_27483210-S | rs9266846  | 6 | 6 | 31492868 | 22317  | 7.7127  | 0.5297 | -0.2065 | 5.7467 | JPT |
| LOC282956 | GI_27483210-S | rs9501106  | 6 | 6 | 31496088 | 25537  | 6.5476  | 0.4494 | 0.2161  | 5.7467 | JPT |
| LOC282956 | GI_27483210-S | rs9283891  | 6 | 6 | 31496209 | 25658  | 7.1615  | 0.5179 | 0.1997  | 5.7467 | JPT |
| LOC282956 | GI_27483210-S | rs9295991  | 6 | 6 | 31496256 | 25705  | 8.5055  | 0.5691 | -0.2148 | 5.7467 | JPT |
| LOC282956 | GI_27483210-S | rs9295993  | 6 | 6 | 31496574 | 26023  | 7.2936  | 0.5346 | -0.2152 | 5.7467 | JPT |
| LOC282956 | GI_27483210-S | rs10223421 | 6 | 6 | 31498034 | 27483  | 6.4077  | 0.4655 | -0.1925 | 5.7467 | JPT |
| LOC282956 | GI_27483210-S | rs2394999  | 6 | 6 | 31508914 | 38363  | 6.5476  | 0.4494 | -0.2161 | 5.7467 | JPT |
| LOC282956 | GI_27483210-S | rs7772549  | 6 | 6 | 31515622 | 45071  | 6.6823  | 0.4733 | 0.1935  | 5.7467 | JPT |
| LOC282956 | GI_27483210-S | rs3869132  | 6 | 6 | 31518927 | 48376  | 10.2448 | 0.6446 | 0.2028  | 5.7467 | JPT |
| LOC282956 | GI_27483210-S | rs2516462  | 6 | 6 | 31524618 | 54067  | 6.9269  | 0.5139 | 0.1952  | 5.7467 | JPT |
| LOC282956 | GI_27483210-S | rs16899646 | 6 | 6 | 31524899 | 54348  | 6.5476  | 0.4494 | -0.2161 | 5.7467 | JPT |
| LOC282956 | GI_27483210-S | rs2516460  | 6 | 6 | 31526679 | 56128  | 6.2997  | 0.4350 | -0.1865 | 5.7467 | JPT |
| LOC282956 | GI_27483210-S | rs2523685  | 6 | 6 | 31534235 | 63684  | 6.4451  | 0.4594 | -0.1914 | 5.7467 | JPT |
| HLA-DQA2  | GI_11095446-S | rs9268557  | 6 | 6 | 32497283 | 323750 | 8.3045  | 0.5421 | -1.9428 | 6.4104 | JPT |
| HLA-DRB5  | GI_26665892-S | rs3129875  | 6 | 6 | 32515446 | 77779  | 10.2340 | 0.7131 | 2.8115  | 7.9732 | JPT |
| HLA-DRB5  | GI_26665892-S | rs3135392  | 6 | 6 | 32517220 | 76005  | 9.9663  | 0.6158 | -2.5822 | 7.9732 | JPT |
| HLA-DQA2  | GI_11095446-S | rs6926374  | 6 | 6 | 32517283 | 303750 | 6.7171  | 0.4591 | 1.8611  | 6.4104 | JPT |
| HLA-DQA2  | GI_11095446-S | rs9268657  | 6 | 6 | 32517634 | 303399 | 9.8993  | 0.6130 | -2.1995 | 6.4104 | JPT |
| HLA-DQA2  | GI_11095446-S | rs2239803  | 6 | 6 | 32519811 | 301222 | 6.8411  | 0.4824 | -1.8499 | 6.4104 | JPT |
| HLA-DQA2  | GI_11095446-S | rs7743415  | 6 | 6 | 32533113 | 287920 | 7.8522  | 0.5282 | 1.9202  | 6.4104 | JPT |
| HLA-DQA2  | GI_11095446-S | rs9268831  | 6 | 6 | 32535726 | 285307 | 8.8988  | 0.5699 | 2.2608  | 6.4104 | JPT |
| HLA-DQA2  | GI_11095446-S | rs9268853  | 6 | 6 | 32537621 | 283412 | 13.3966 | 0.7329 | -2.7131 | 6.4104 | JPT |
| HLA-DQA2  | GI_11095446-S | rs9268858  | 6 | 6 | 32537736 | 283297 | 13.1020 | 0.7328 | -2.7909 | 6.4104 | JPT |
| HLA-DQA2  | GI_11095446-S | rs9268906  | 6 | 6 | 32540159 | 280874 | 12.8024 | 0.7326 | 2.6918  | 6.4104 | JPT |
| HLA-DQA2  | GI_11095446-S | rs9268923  | 6 | 6 | 32540813 | 280220 | 12.8323 | 0.7335 | 2.6873  | 6.4104 | JPT |
| HLA-DQA2  | GI_11095446-S | rs2395185  | 6 | 6 | 32541145 | 279888 | 14.6466 | 0.7823 | 2.8919  | 6.4104 | JPT |
| HLA-DQA2  | GI_11095446-S | rs9268969  | 6 | 6 | 32542327 | 278706 | 11.7525 | 0.7269 | 2.6182  | 6.4104 | JPT |
| HLA-DQA2  | GI_11095446-S | rs9268970  | 6 | 6 | 32542339 | 278694 | 12.8323 | 0.7335 | -2.6873 | 6.4104 | JPT |
| HLA-DQA2  | GI_11095446-S | rs9391877  | 6 | 6 | 32546845 | 274188 | 12.3031 | 0.7352 | 2.8282  | 6.4104 | JPT |
| HLA-DQA2  | GI_11095446-S | rs9405040  | 6 | 6 | 32547371 | 273662 | 12.9263 | 0.7277 | 2.7714  | 6.4104 | JPT |
| HLA-DQA2  | GI_11095446-S | rs9286790  | 6 | 6 | 32547806 | 273227 | 8.9648  | 0.6186 | -2.3144 | 6.4104 | JPT |
| HLA-DQA2  | GI_11095446-S | rs12194148 | 6 | 6 | 32552176 | 268857 | 9.3218  | 0.5887 | 2.1821  | 6.4104 | JPT |
| HLA-DQA2  | GI_11095446-S | rs9405112  | 6 | 6 | 32553578 | 267455 | 13.3966 | 0.7329 | -2.7131 | 6.4104 | JPT |
| HLA-DQA2  | GI_11095446-S | rs9378212  | 6 | 6 | 32553669 | 267364 | 8.5235  | 0.5980 | 2.1400  | 6.4104 | JPT |
| HLA-DQA2  | GI_11095446-S | rs9378266  | 6 | 6 | 32556167 | 264866 | 9.3218  | 0.5887 | 2.1821  | 6.4104 | JPT |
| HLA-DQA2  | GI_11095446-S | rs9378213  | 6 | 6 | 32556376 | 264657 | 9.3218  | 0.5887 | -2.1821 | 6.4104 | JPT |
| HLA-DQA2  | GI_11095446-S | rs9391786  | 6 | 6 | 32556539 | 264494 | 9.3218  | 0.5887 | 2.1821  | 6.4104 | JPT |
| HLA-DQA2  | GI_11095446-S | rs5020946  | 6 | 6 | 32558067 | 262966 | 9.6887  | 0.6220 | 2.2833  | 6.4104 | JPT |
| HLA-DQA2  | GI_11095446-S | rs6916742  | 6 | 6 | 32561169 | 259864 | 7.6778  | 0.5193 | -2.3344 | 6.4104 | JPT |
| HLA-DQA1  | GI_18426974-S | rs6916742  | 6 | 6 | 32561169 | 157666 | 7.5278  | 0.5115 | 3.4698  | 7.4606 | JPT |
| HLA-DQA2  | GI_11095446-S | rs2157337  | 6 | 6 | 32609122 | 211911 | 8.8041  | 0.5742 | 2.1791  | 6.4104 | JPT |
| HLA-DQA2  | GI_11095446-S | rs17191234 | 6 | 6 | 32672659 | 148374 | 10.0679 | 0.6467 | 2.1636  | 6.4104 | JPT |
| HLA-DRB5  | GI_26665892-S | rs9270657  | 6 | 6 | 32673999 | 80774  | 11.4148 | 0.6879 | 2.7243  | 7.9732 | JPT |
| HLA-DQA2  | GI_11095446-S | rs9271568  | 6 | 6 | 32698441 | 122592 | 14.0151 | 0.8007 | -2.3580 | 6.4104 | JPT |
| HLA-DQA2  | GI_11095446-S | rs9271574  | 6 | 6 | 32698568 | 122465 | 18.9775 | 0.8592 | -2.8874 | 6.4104 | JPT |
| HLA-DQA2  | GI_11095446-S | rs9271586  | 6 | 6 | 32698877 | 122156 | 10.0543 | 0.6556 | 2.0482  | 6.4104 | JPT |
| HLA-DQA2  | GI_11095446-S | rs9271588  | 6 | 6 | 32698931 | 122102 | 9.1505  | 0.6173 | -2.0604 | 6.4104 | JPT |
| HLA-DQA2  | GI_11095446-S | rs9271589  | 6 | 6 | 32699106 | 121927 | 10.5685 | 0.6572 | -2.0614 | 6.4104 | JPT |
| HLA-DQA2  | GI_11095446-S | rs9271591  | 6 | 6 | 32699119 | 121914 | 11.3187 | 0.7029 | -2.1094 | 6.4104 | JPT |
| HLA-DQA2  | GI_11095446-S | rs9271605  | 6 | 6 | 32699426 | 121607 | 16.9306 | 0.8686 | -2.9038 | 6.4104 | JPT |
| HLA-DRB5  | GI_26665892-S | rs9271850  | 6 | 6 | 32703038 | 109813 | 10.4067 | 0.6601 | -2.4853 | 7.9732 | JPT |
| HLA-DRB5  | GI_26665892-S | rs9272218  | 6 | 6 | 32710216 | 116991 | 9.4970  | 0.6139 | -2.4868 | 7.9732 | JPT |
| HLA-DQA1  | GI_18426974-S | rs9272346  | 6 | 6 | 32712350 | 6485   | 12.1450 | 0.7123 | 4.2489  | 7.4606 | JPT |
| HLA-DQA2  | GI_11095446-S | rs17426593 | 6 | 6 | 32716055 | 104978 | 18.8734 | 0.8510 | -2.7270 | 6.4104 | JPT |
| HLA-DQA1  | GI_18426974-S | rs9272723  | 6 | 6 | 32717405 | 1430   | 7.5100  | 0.5370 | 3.5427  | 7.4606 | JPT |
| HLA-DQA1  | GI_18426974-S | rs6928482  | 6 | 6 | 32734227 | 15392  | 11.7175 | 0.6983 | 4.0696  | 7.4606 | JPT |
| HLA-DQA2  | GI_11095446-S | rs9273363  | 6 | 6 | 32734250 | 86783  | 13.5260 | 0.7449 | -2.5408 | 6.4104 | JPT |

|          |               |            |   |   |          |        |         |        |         |        |     |
|----------|---------------|------------|---|---|----------|--------|---------|--------|---------|--------|-----|
| HLA-DQA1 | GI_18426974-S | rs12918    | 6 | 6 | 32735364 | 16529  | 17.6037 | 0.8436 | -7.4153 | 7.4606 | JPT |
| HLA-DQA1 | GI_18426974-S | rs5002702  | 6 | 6 | 32767136 | 48301  | 7.6243  | 0.5340 | -3.4554 | 7.4606 | JPT |
| HLA-DQA1 | GI_18426974-S | rs4248168  | 6 | 6 | 32767721 | 48886  | 7.7566  | 0.5150 | 3.3465  | 7.4606 | JPT |
| HLA-DQA1 | GI_18426974-S | rs9275224  | 6 | 6 | 32767856 | 49021  | 7.5043  | 0.5188 | -3.4388 | 7.4606 | JPT |
| HLA-DQA1 | GI_18426974-S | rs4713581  | 6 | 6 | 32768001 | 49166  | 7.7566  | 0.5150 | 3.3465  | 7.4606 | JPT |
| HLA-DQA1 | GI_18426974-S | rs4713582  | 6 | 6 | 32768029 | 49194  | 7.7566  | 0.5150 | 3.3465  | 7.4606 | JPT |
| HLA-DQA1 | GI_18426974-S | rs9275292  | 6 | 6 | 32771267 | 52432  | 7.4888  | 0.5180 | 3.4472  | 7.4606 | JPT |
| HLA-DQA1 | GI_18426974-S | rs5000634  | 6 | 6 | 32771542 | 52707  | 12.4152 | 0.7036 | 4.0896  | 7.4606 | JPT |
| HLA-DQA1 | GI_18426974-S | rs6457619  | 6 | 6 | 32771964 | 53129  | 7.5936  | 0.5066 | -3.2347 | 7.4606 | JPT |
| HLA-DQA1 | GI_18426974-S | rs6457620  | 6 | 6 | 32771977 | 53142  | 7.7566  | 0.5150 | 3.3465  | 7.4606 | JPT |
| HLA-DQA1 | GI_18426974-S | rs6457622  | 6 | 6 | 32772141 | 53306  | 10.9198 | 0.7079 | -3.8687 | 7.4606 | JPT |
| HLA-DQA1 | GI_18426974-S | rs7745040  | 6 | 6 | 32772310 | 53475  | 12.4152 | 0.7036 | 4.0896  | 7.4606 | JPT |
| HLA-DQA1 | GI_18426974-S | rs2395522  | 6 | 6 | 32772700 | 53865  | 7.5756  | 0.5597 | 3.8114  | 7.4606 | JPT |
| PEX6     | GI_21361243-S | rs2296804  | 6 | 6 | 43039239 | 664    | 10.3137 | 0.6384 | -0.5402 | 5.6876 | JPT |
| PEX6     | GI_21361243-S | rs2395943  | 6 | 6 | 43048651 | 8748   | 10.3137 | 0.6384 | 0.5402  | 5.6876 | JPT |
| PEX6     | GI_21361243-S | rs2007950  | 6 | 6 | 43157439 | 117536 | 6.1514  | 0.4338 | -0.4317 | 5.6876 | JPT |
| PEX6     | GI_21361243-S | rs12661980 | 6 | 6 | 43161669 | 121766 | 6.1992  | 0.4793 | 0.4512  | 5.6876 | JPT |
| PEX6     | GI_21361243-S | rs3805941  | 6 | 6 | 43165559 | 125656 | 6.4327  | 0.4506 | -0.4572 | 5.6876 | JPT |
| SUPT3H   | GI_4507308-A  | rs227832   | 6 | 6 | 44789235 | 239866 | 6.8468  | 0.4664 | -0.3593 | 5.8541 | JPT |
| SUPT3H   | GI_4507308-A  | rs227835   | 6 | 6 | 44790294 | 238807 | 6.6746  | 0.4646 | -0.3614 | 5.8541 | JPT |
| SUPT3H   | GI_4507308-A  | rs227836   | 6 | 6 | 44790718 | 238383 | 6.8468  | 0.4664 | 0.3593  | 5.8541 | JPT |
| SUPT3H   | GI_4507308-A  | rs13206206 | 6 | 6 | 44792102 | 236999 | 6.8468  | 0.4664 | -0.3593 | 5.8541 | JPT |
| SUPT3H   | GI_4507308-A  | rs227839   | 6 | 6 | 44793588 | 235513 | 6.0995  | 0.4467 | 0.3303  | 5.8541 | JPT |
| SUPT3H   | GI_4507308-A  | rs227840   | 6 | 6 | 44794282 | 234819 | 6.6788  | 0.4649 | -0.3615 | 5.8541 | JPT |
| SUPT3H   | GI_4507308-A  | rs227844   | 6 | 6 | 44800190 | 228911 | 6.5308  | 0.4563 | 0.3542  | 5.8541 | JPT |
| SUPT3H   | GI_4507308-A  | rs227845   | 6 | 6 | 44803316 | 225785 | 6.8396  | 0.4823 | -0.3699 | 5.8541 | JPT |
| SUPT3H   | GI_4507308-A  | rs227847   | 6 | 6 | 44803471 | 225630 | 6.1159  | 0.4241 | 0.2908  | 5.8541 | JPT |
| SUPT3H   | GI_4507308-A  | rs227848   | 6 | 6 | 44806477 | 222624 | 5.9792  | 0.4158 | -0.2808 | 5.8541 | JPT |
| SUPT3H   | GI_4507308-A  | rs227849   | 6 | 6 | 44806686 | 222415 | 7.0812  | 0.4793 | -0.3651 | 5.8541 | JPT |
| SUPT3H   | GI_4507308-A  | rs227851   | 6 | 6 | 44807187 | 221914 | 5.8956  | 0.4107 | 0.2826  | 5.8541 | JPT |
| SUPT3H   | GI_4507308-A  | rs9472331  | 6 | 6 | 44807332 | 221769 | 7.1874  | 0.4851 | 0.3655  | 5.8541 | JPT |
| SUPT3H   | GI_4507308-A  | rs227852   | 6 | 6 | 44807537 | 221564 | 6.8468  | 0.4664 | 0.3593  | 5.8541 | JPT |
| SUPT3H   | GI_4507308-A  | rs227853   | 6 | 6 | 44807724 | 221377 | 6.5823  | 0.4593 | -0.3505 | 5.8541 | JPT |
| SUPT3H   | GI_4507308-A  | rs4714812  | 6 | 6 | 44808692 | 220409 | 6.8835  | 0.4765 | -0.3601 | 5.8541 | JPT |
| SUPT3H   | GI_4507308-A  | rs227857   | 6 | 6 | 44812370 | 216731 | 8.3055  | 0.5507 | 0.3882  | 5.8541 | JPT |
| SUPT3H   | GI_4507308-A  | rs609643   | 6 | 6 | 44813281 | 215820 | 8.4212  | 0.5563 | 0.3927  | 5.8541 | JPT |
| SUPT3H   | GI_4507308-A  | rs687878   | 6 | 6 | 44814768 | 214333 | 6.5771  | 0.4511 | 0.2835  | 5.8541 | JPT |
| SUPT3H   | GI_4507308-A  | rs4714813  | 6 | 6 | 44817868 | 211233 | 6.5771  | 0.4511 | -0.2835 | 5.8541 | JPT |
| SUPT3H   | GI_4507308-A  | rs9463017  | 6 | 6 | 44818282 | 210819 | 8.6267  | 0.5574 | -0.3907 | 5.8541 | JPT |
| SUPT3H   | GI_4507308-A  | rs9472336  | 6 | 6 | 44818370 | 210731 | 7.0812  | 0.4793 | -0.3651 | 5.8541 | JPT |
| SUPT3H   | GI_4507308-A  | rs764397   | 6 | 6 | 44818749 | 210352 | 6.9154  | 0.4783 | -0.3679 | 5.8541 | JPT |
| SUPT3H   | GI_4507308-A  | rs1418435  | 6 | 6 | 44818858 | 210243 | 8.2245  | 0.5555 | -0.3951 | 5.8541 | JPT |
| SUPT3H   | GI_4507308-A  | rs2211393  | 6 | 6 | 44824344 | 204757 | 6.9154  | 0.4783 | -0.3679 | 5.8541 | JPT |
| SUPT3H   | GI_4507308-A  | rs4714819  | 6 | 6 | 44843263 | 185838 | 6.7589  | 0.4777 | -0.3712 | 5.8541 | JPT |
| SUPT3H   | GI_4507308-A  | rs12215252 | 6 | 6 | 44844243 | 184858 | 5.9792  | 0.4158 | 0.2808  | 5.8541 | JPT |
| SUPT3H   | GI_4507308-A  | rs12192367 | 6 | 6 | 44846526 | 182575 | 6.7371  | 0.4682 | -0.3553 | 5.8541 | JPT |
| SUPT3H   | GI_4507308-A  | rs2038557  | 6 | 6 | 44848449 | 180652 | 7.0812  | 0.4793 | 0.3651  | 5.8541 | JPT |
| SUPT3H   | GI_4507308-A  | rs2038556  | 6 | 6 | 44848546 | 180555 | 6.9154  | 0.4783 | -0.3679 | 5.8541 | JPT |
| SUPT3H   | GI_4507308-A  | rs2040032  | 6 | 6 | 44850987 | 178114 | 7.0812  | 0.4793 | 0.3651  | 5.8541 | JPT |
| SUPT3H   | GI_4507308-A  | rs9472360  | 6 | 6 | 44855388 | 173713 | 7.0812  | 0.4793 | -0.3651 | 5.8541 | JPT |
| SUPT3H   | GI_4507308-A  | rs1342370  | 6 | 6 | 44855710 | 173391 | 6.7372  | 0.4602 | -0.3597 | 5.8541 | JPT |
| SUPT3H   | GI_4507308-A  | rs1418434  | 6 | 6 | 44856343 | 172758 | 7.0812  | 0.4793 | -0.3651 | 5.8541 | JPT |
| SUPT3H   | GI_4507308-A  | rs4711798  | 6 | 6 | 44858755 | 170346 | 7.0812  | 0.4793 | 0.3651  | 5.8541 | JPT |
| SUPT3H   | GI_4507308-A  | rs9472362  | 6 | 6 | 44859263 | 169838 | 7.0812  | 0.4793 | -0.3651 | 5.8541 | JPT |
| SUPT3H   | GI_4507308-A  | rs9463039  | 6 | 6 | 44860102 | 168999 | 8.6267  | 0.5574 | 0.3907  | 5.8541 | JPT |
| SUPT3H   | GI_4507308-A  | rs9463040  | 6 | 6 | 44860264 | 168837 | 8.6267  | 0.5574 | -0.3907 | 5.8541 | JPT |
| SUPT3H   | GI_4507308-A  | rs1418433  | 6 | 6 | 44860546 | 168555 | 5.9792  | 0.4158 | 0.2808  | 5.8541 | JPT |
| SUPT3H   | GI_4507308-A  | rs1557143  | 6 | 6 | 44864393 | 164708 | 6.9168  | 0.4783 | 0.3665  | 5.8541 | JPT |
| SUPT3H   | GI_4507308-A  | rs1293457  | 6 | 6 | 44866076 | 163025 | 7.0883  | 0.4797 | 0.3641  | 5.8541 | JPT |

|        |              |            |   |   |          |        |        |        |         |        |     |
|--------|--------------|------------|---|---|----------|--------|--------|--------|---------|--------|-----|
| SUPT3H | GI_4507308-A | rs2894599  | 6 | 6 | 44868838 | 160263 | 7.6643 | 0.5102 | -0.3745 | 5.8541 | JPT |
| SUPT3H | GI_4507308-A | rs4714825  | 6 | 6 | 44869524 | 159577 | 7.6643 | 0.5102 | 0.3745  | 5.8541 | JPT |
| SUPT3H | GI_4507308-A | rs2145826  | 6 | 6 | 44871759 | 157342 | 6.5017 | 0.4468 | 0.2906  | 5.8541 | JPT |
| SUPT3H | GI_4507308-A | rs720989   | 6 | 6 | 44873513 | 155588 | 7.4743 | 0.5086 | 0.3763  | 5.8541 | JPT |
| SUPT3H | GI_4507308-A | rs720988   | 6 | 6 | 44873638 | 155463 | 7.6643 | 0.5102 | -0.3745 | 5.8541 | JPT |
| SUPT3H | GI_4507308-A | rs4711799  | 6 | 6 | 44873758 | 155343 | 6.9168 | 0.4783 | 0.3665  | 5.8541 | JPT |
| SUPT3H | GI_4507308-A | rs12190136 | 6 | 6 | 44875050 | 154051 | 7.0883 | 0.4797 | -0.3641 | 5.8541 | JPT |
| SUPT3H | GI_4507308-A | rs1293467  | 6 | 6 | 44877182 | 151919 | 6.9168 | 0.4783 | -0.3665 | 5.8541 | JPT |
| SUPT3H | GI_4507308-A | rs16872574 | 6 | 6 | 44879019 | 150082 | 7.6643 | 0.5102 | 0.3745  | 5.8541 | JPT |
| SUPT3H | GI_4507308-A | rs929614   | 6 | 6 | 44879912 | 149189 | 6.9168 | 0.4783 | 0.3665  | 5.8541 | JPT |
| SUPT3H | GI_4507308-A | rs6910749  | 6 | 6 | 44881870 | 147231 | 6.2581 | 0.4738 | -0.3681 | 5.8541 | JPT |
| SUPT3H | GI_4507308-A | rs7769218  | 6 | 6 | 44891435 | 137666 | 7.5566 | 0.5489 | 0.3846  | 5.8541 | JPT |
| SUPT3H | GI_4507308-A | rs6904015  | 6 | 6 | 44893480 | 135621 | 6.7537 | 0.4774 | 0.3693  | 5.8541 | JPT |
| SUPT3H | GI_4507308-A | rs9349303  | 6 | 6 | 44900557 | 128544 | 6.5096 | 0.4632 | -0.3122 | 5.8541 | JPT |
| SUPT3H | GI_4507308-A | rs9395049  | 6 | 6 | 44900696 | 128405 | 5.9919 | 0.4241 | -0.3277 | 5.8541 | JPT |
| SUPT3H | GI_4507308-A | rs2139863  | 6 | 6 | 44904117 | 124984 | 7.6643 | 0.5102 | -0.3745 | 5.8541 | JPT |
| SUPT3H | GI_4507308-A | rs524492   | 6 | 6 | 44904574 | 124527 | 7.6643 | 0.5102 | 0.3745  | 5.8541 | JPT |
| SUPT3H | GI_4507308-A | rs9369514  | 6 | 6 | 44905249 | 123852 | 7.2826 | 0.4902 | 0.3690  | 5.8541 | JPT |
| SUPT3H | GI_4507308-A | rs3799965  | 6 | 6 | 44906595 | 122506 | 7.6879 | 0.5198 | 0.2979  | 5.8541 | JPT |
| SUPT3H | GI_4507308-A | rs3799967  | 6 | 6 | 44906679 | 122422 | 6.2811 | 0.4664 | -0.3611 | 5.8541 | JPT |
| SUPT3H | GI_4507308-A | rs1402599  | 6 | 6 | 44907635 | 121466 | 7.6643 | 0.5102 | 0.3745  | 5.8541 | JPT |
| SUPT3H | GI_4507308-A | rs542444   | 6 | 6 | 44907993 | 121108 | 7.6643 | 0.5102 | -0.3745 | 5.8541 | JPT |
| SUPT3H | GI_4507308-A | rs9472376  | 6 | 6 | 44908225 | 120876 | 7.4743 | 0.5086 | 0.3763  | 5.8541 | JPT |
| SUPT3H | GI_4507308-A | rs3823252  | 6 | 6 | 44918396 | 110705 | 7.4743 | 0.5086 | -0.3763 | 5.8541 | JPT |
| SUPT3H | GI_4507308-A | rs9369515  | 6 | 6 | 44920493 | 108608 | 6.9451 | 0.4719 | 0.2964  | 5.8541 | JPT |
| SUPT3H | GI_4507308-A | rs6910294  | 6 | 6 | 44920543 | 108558 | 7.3503 | 0.5021 | 0.3773  | 5.8541 | JPT |
| SUPT3H | GI_4507308-A | rs16869119 | 6 | 6 | 44922870 | 106231 | 7.6643 | 0.5102 | 0.3745  | 5.8541 | JPT |
| SUPT3H | GI_4507308-A | rs13206526 | 6 | 6 | 44924159 | 104942 | 6.7333 | 0.4680 | -0.3749 | 5.8541 | JPT |
| SUPT3H | GI_4507308-A | rs3799971  | 6 | 6 | 44927297 | 101804 | 8.4850 | 0.5593 | 0.3949  | 5.8541 | JPT |
| SUPT3H | GI_4507308-A | rs3799972  | 6 | 6 | 44931251 | 97850  | 7.4743 | 0.5086 | 0.3763  | 5.8541 | JPT |
| SUPT3H | GI_4507308-A | rs3799973  | 6 | 6 | 44931705 | 97396  | 7.7447 | 0.5403 | -0.3730 | 5.8541 | JPT |
| SUPT3H | GI_4507308-A | rs3799974  | 6 | 6 | 44932926 | 96175  | 7.4743 | 0.5086 | -0.3763 | 5.8541 | JPT |
| SUPT3H | GI_4507308-A | rs9395051  | 6 | 6 | 44933693 | 95408  | 8.4850 | 0.5593 | 0.3949  | 5.8541 | JPT |
| SUPT3H | GI_4507308-A | rs9369516  | 6 | 6 | 44941576 | 87525  | 8.5465 | 0.5622 | -0.3974 | 5.8541 | JPT |
| SUPT3H | GI_4507308-A | rs3799976  | 6 | 6 | 44943600 | 85501  | 8.7307 | 0.5622 | -0.3940 | 5.8541 | JPT |
| SUPT3H | GI_4507308-A | rs3799977  | 6 | 6 | 44945334 | 83767  | 8.5465 | 0.5622 | -0.3974 | 5.8541 | JPT |
| SUPT3H | GI_4507308-A | rs3799979  | 6 | 6 | 44953492 | 75609  | 8.5465 | 0.5622 | -0.3974 | 5.8541 | JPT |
| SUPT3H | GI_4507308-A | rs4714828  | 6 | 6 | 44953986 | 75115  | 8.7307 | 0.5622 | -0.3940 | 5.8541 | JPT |
| SUPT3H | GI_4507308-A | rs7754378  | 6 | 6 | 44971084 | 58017  | 8.5465 | 0.5622 | 0.3974  | 5.8541 | JPT |
| SUPT3H | GI_4507308-A | rs12529522 | 6 | 6 | 44973498 | 55603  | 7.4615 | 0.5080 | 0.3763  | 5.8541 | JPT |
| SUPT3H | GI_4507308-A | rs12530016 | 6 | 6 | 44974300 | 54801  | 7.4615 | 0.5080 | -0.3763 | 5.8541 | JPT |
| SUPT3H | GI_4507308-A | rs538801   | 6 | 6 | 44983740 | 45361  | 9.1686 | 0.5907 | 0.3838  | 5.8541 | JPT |
| SUPT3H | GI_4507308-A | rs12525009 | 6 | 6 | 44983821 | 45280  | 9.3633 | 0.5905 | 0.3806  | 5.8541 | JPT |
| SUPT3H | GI_4507308-A | rs7763421  | 6 | 6 | 44985291 | 43810  | 7.8662 | 0.5750 | 0.3803  | 5.8541 | JPT |
| SUPT3H | GI_4507308-A | rs10948183 | 6 | 6 | 44988859 | 40242  | 9.3633 | 0.5905 | -0.3806 | 5.8541 | JPT |
| SUPT3H | GI_4507308-A | rs6458415  | 6 | 6 | 44989570 | 39531  | 9.3633 | 0.5905 | 0.3806  | 5.8541 | JPT |
| SUPT3H | GI_4507308-A | rs3799981  | 6 | 6 | 44990358 | 38743  | 9.1686 | 0.5907 | -0.3838 | 5.8541 | JPT |
| SUPT3H | GI_4507308-A | rs12526711 | 6 | 6 | 44991851 | 37250  | 8.1204 | 0.5504 | 0.3798  | 5.8541 | JPT |
| SUPT3H | GI_4507308-A | rs10484627 | 6 | 6 | 44992245 | 36856  | 8.7307 | 0.5622 | -0.3940 | 5.8541 | JPT |
| SUPT3H | GI_4507308-A | rs9367211  | 6 | 6 | 44993283 | 35818  | 8.7307 | 0.5622 | 0.3940  | 5.8541 | JPT |
| SUPT3H | GI_4507308-A | rs6919161  | 6 | 6 | 44996095 | 33006  | 7.6918 | 0.5286 | 0.3543  | 5.8541 | JPT |
| SUPT3H | GI_4507308-A | rs608941   | 6 | 6 | 44996718 | 32383  | 9.1686 | 0.5907 | -0.3838 | 5.8541 | JPT |
| SUPT3H | GI_4507308-A | rs3799984  | 6 | 6 | 45001618 | 27483  | 8.5465 | 0.5622 | 0.3974  | 5.8541 | JPT |
| SUPT3H | GI_4507308-A | rs3778507  | 6 | 6 | 45004781 | 24320  | 9.1686 | 0.5907 | 0.3838  | 5.8541 | JPT |
| SUPT3H | GI_4507308-A | rs3799986  | 6 | 6 | 45008231 | 20870  | 9.1686 | 0.5907 | -0.3838 | 5.8541 | JPT |
| SUPT3H | GI_4507308-A | rs10948185 | 6 | 6 | 45009705 | 19396  | 9.3633 | 0.5905 | 0.3806  | 5.8541 | JPT |
| SUPT3H | GI_4507308-A | rs10948186 | 6 | 6 | 45011226 | 17875  | 9.3633 | 0.5905 | -0.3806 | 5.8541 | JPT |
| SUPT3H | GI_4507308-A | rs9369523  | 6 | 6 | 45016706 | 12395  | 7.9108 | 0.5488 | 0.3022  | 5.8541 | JPT |
| SUPT3H | GI_4507308-A | rs9472407  | 6 | 6 | 45016778 | 12323  | 8.6175 | 0.5835 | -0.3700 | 5.8541 | JPT |

|        |              |            |   |   |          |       |        |        |         |        |     |
|--------|--------------|------------|---|---|----------|-------|--------|--------|---------|--------|-----|
| SUPT3H | GI_4507308-A | rs12196818 | 6 | 6 | 45019392 | 9709  | 9.1686 | 0.5907 | -0.3838 | 5.8541 | JPT |
| SUPT3H | GI_4507308-A | rs4711807  | 6 | 6 | 45019630 | 9471  | 9.1686 | 0.5907 | -0.3838 | 5.8541 | JPT |
| SUPT3H | GI_4507308-A | rs7749865  | 6 | 6 | 45026384 | 2717  | 8.9869 | 0.5914 | -0.3875 | 5.8541 | JPT |
| SUPT3H | GI_4507308-A | rs12190513 | 6 | 6 | 45028657 | 444   | 8.9753 | 0.5909 | 0.3856  | 5.8541 | JPT |
| SUPT3H | GI_4507308-A | rs10948187 | 6 | 6 | 45029298 | 197   | 9.3633 | 0.5905 | -0.3806 | 5.8541 | JPT |
| SUPT3H | GI_4507308-A | rs4512220  | 6 | 6 | 45031116 | 2015  | 8.1889 | 0.5365 | -0.3611 | 5.8541 | JPT |
| SUPT3H | GI_4507308-A | rs12214778 | 6 | 6 | 45032390 | 3289  | 9.3633 | 0.5905 | 0.3806  | 5.8541 | JPT |
| SUPT3H | GI_4507308-A | rs3799987  | 6 | 6 | 45033812 | 4711  | 7.9936 | 0.5353 | -0.3632 | 5.8541 | JPT |
| SUPT3H | GI_4507308-A | rs9472409  | 6 | 6 | 45034409 | 5308  | 9.3633 | 0.5905 | 0.3806  | 5.8541 | JPT |
| SUPT3H | GI_4507308-A | rs1980265  | 6 | 6 | 45036846 | 7745  | 9.3633 | 0.5905 | 0.3806  | 5.8541 | JPT |
| SUPT3H | GI_4507308-A | rs1360195  | 6 | 6 | 45039309 | 10208 | 8.1889 | 0.5365 | 0.3611  | 5.8541 | JPT |
| SUPT3H | GI_4507308-A | rs1521355  | 6 | 6 | 45040733 | 11632 | 9.1686 | 0.5907 | 0.3838  | 5.8541 | JPT |
| SUPT3H | GI_4507308-A | rs636845   | 6 | 6 | 45043319 | 14218 | 9.1686 | 0.5907 | -0.3838 | 5.8541 | JPT |
| SUPT3H | GI_4507308-A | rs13215618 | 6 | 6 | 45044546 | 15445 | 9.3633 | 0.5905 | 0.3806  | 5.8541 | JPT |
| SUPT3H | GI_4507308-A | rs13216116 | 6 | 6 | 45044659 | 15558 | 9.3633 | 0.5905 | -0.3806 | 5.8541 | JPT |
| SUPT3H | GI_4507308-A | rs494982   | 6 | 6 | 45045233 | 16132 | 9.3633 | 0.5905 | -0.3806 | 5.8541 | JPT |
| SUPT3H | GI_4507308-A | rs10948190 | 6 | 6 | 45050278 | 21177 | 9.1686 | 0.5907 | -0.3838 | 5.8541 | JPT |
| SUPT3H | GI_4507308-A | rs2396369  | 6 | 6 | 45054441 | 25340 | 8.8834 | 0.6053 | -0.3808 | 5.8541 | JPT |
| SUPT3H | GI_4507308-A | rs9472414  | 6 | 6 | 45054484 | 25383 | 8.1889 | 0.5365 | -0.3611 | 5.8541 | JPT |
| SUPT3H | GI_4507308-A | rs2396371  | 6 | 6 | 45054528 | 25427 | 8.9869 | 0.5914 | -0.3875 | 5.8541 | JPT |
| SUPT3H | GI_4507308-A | rs10948192 | 6 | 6 | 45055299 | 26198 | 8.3507 | 0.5443 | -0.3307 | 5.8541 | JPT |
| SUPT3H | GI_4507308-A | rs1360197  | 6 | 6 | 45057608 | 28507 | 8.8149 | 0.5747 | -0.3729 | 5.8541 | JPT |
| SUPT3H | GI_4507308-A | rs6925017  | 6 | 6 | 45058806 | 29705 | 8.2873 | 0.5676 | 0.3642  | 5.8541 | JPT |
| SUPT3H | GI_4507308-A | rs9472416  | 6 | 6 | 45058941 | 29840 | 8.1362 | 0.5339 | -0.3612 | 5.8541 | JPT |
| SUPT3H | GI_4507308-A | rs10948194 | 6 | 6 | 45059968 | 30867 | 8.1362 | 0.5339 | -0.3612 | 5.8541 | JPT |
| SUPT3H | GI_4507308-A | rs9357464  | 6 | 6 | 45060419 | 31318 | 8.1362 | 0.5339 | 0.3612  | 5.8541 | JPT |
| SUPT3H | GI_4507308-A | rs976699   | 6 | 6 | 45060830 | 31729 | 7.4705 | 0.5349 | 0.3705  | 5.8541 | JPT |
| SUPT3H | GI_4507308-A | rs1329716  | 6 | 6 | 45061736 | 32635 | 7.9477 | 0.5330 | 0.3636  | 5.8541 | JPT |
| SUPT3H | GI_4507308-A | rs9296450  | 6 | 6 | 45061764 | 32663 | 7.1993 | 0.4857 | -0.3439 | 5.8541 | JPT |
| SUPT3H | GI_4507308-A | rs4714830  | 6 | 6 | 45063506 | 34405 | 7.9477 | 0.5330 | 0.3636  | 5.8541 | JPT |
| SUPT3H | GI_4507308-A | rs11967188 | 6 | 6 | 45064903 | 35802 | 8.8975 | 0.5874 | 0.3792  | 5.8541 | JPT |
| SUPT3H | GI_4507308-A | rs2396372  | 6 | 6 | 45074845 | 45744 | 7.9150 | 0.5314 | -0.3536 | 5.8541 | JPT |
| SUPT3H | GI_4507308-A | rs10948197 | 6 | 6 | 45075468 | 46367 | 8.1362 | 0.5339 | -0.3612 | 5.8541 | JPT |
| SUPT3H | GI_4507308-A | rs7775717  | 6 | 6 | 45075739 | 46638 | 8.1362 | 0.5339 | 0.3612  | 5.8541 | JPT |
| SUPT3H | GI_4507308-A | rs9472418  | 6 | 6 | 45076050 | 46949 | 6.7197 | 0.4593 | -0.2746 | 5.8541 | JPT |
| SUPT3H | GI_4507308-A | rs1329710  | 6 | 6 | 45077103 | 48002 | 7.9477 | 0.5330 | 0.3636  | 5.8541 | JPT |
| SUPT3H | GI_4507308-A | rs1159131  | 6 | 6 | 45080187 | 51086 | 7.7249 | 0.5579 | -0.3361 | 5.8541 | JPT |
| SUPT3H | GI_4507308-A | rs1023091  | 6 | 6 | 45083000 | 53899 | 7.9936 | 0.5353 | 0.3632  | 5.8541 | JPT |
| SUPT3H | GI_4507308-A | rs4714834  | 6 | 6 | 45086394 | 57293 | 7.9936 | 0.5353 | 0.3632  | 5.8541 | JPT |
| SUPT3H | GI_4507308-A | rs7381322  | 6 | 6 | 45088319 | 59218 | 8.1889 | 0.5365 | 0.3611  | 5.8541 | JPT |
| SUPT3H | GI_4507308-A | rs12528232 | 6 | 6 | 45090571 | 61470 | 7.9936 | 0.5353 | -0.3632 | 5.8541 | JPT |
| SUPT3H | GI_4507308-A | rs2396373  | 6 | 6 | 45091112 | 62011 | 8.9129 | 0.5792 | 0.3221  | 5.8541 | JPT |
| SUPT3H | GI_4507308-A | rs17424547 | 6 | 6 | 45096948 | 67847 | 9.1686 | 0.5907 | 0.3838  | 5.8541 | JPT |
| SUPT3H | GI_4507308-A | rs1028944  | 6 | 6 | 45097497 | 68396 | 7.9936 | 0.5353 | 0.3632  | 5.8541 | JPT |
| SUPT3H | GI_4507308-A | rs9381359  | 6 | 6 | 45098603 | 69502 | 8.9129 | 0.5792 | -0.3221 | 5.8541 | JPT |
| SUPT3H | GI_4507308-A | rs1971482  | 6 | 6 | 45099091 | 69990 | 9.3633 | 0.5905 | 0.3806  | 5.8541 | JPT |
| SUPT3H | GI_4507308-A | rs6925467  | 6 | 6 | 45106016 | 76915 | 9.1686 | 0.5907 | -0.3838 | 5.8541 | JPT |
| SUPT3H | GI_4507308-A | rs13209827 | 6 | 6 | 45106610 | 77509 | 8.1889 | 0.5365 | -0.3611 | 5.8541 | JPT |
| SUPT3H | GI_4507308-A | rs7742360  | 6 | 6 | 45106670 | 77569 | 9.3633 | 0.5905 | -0.3806 | 5.8541 | JPT |
| SUPT3H | GI_4507308-A | rs1329714  | 6 | 6 | 45111313 | 82212 | 6.7798 | 0.5452 | 0.3660  | 5.8541 | JPT |
| SUPT3H | GI_4507308-A | rs13201942 | 6 | 6 | 45111805 | 82704 | 7.6771 | 0.5278 | 0.3608  | 5.8541 | JPT |
| SUPT3H | GI_4507308-A | rs4398713  | 6 | 6 | 45111906 | 82805 | 9.3633 | 0.5905 | 0.3806  | 5.8541 | JPT |
| SUPT3H | GI_4507308-A | rs13205113 | 6 | 6 | 45111968 | 82867 | 8.1889 | 0.5365 | 0.3611  | 5.8541 | JPT |
| SUPT3H | GI_4507308-A | rs1329713  | 6 | 6 | 45112006 | 82905 | 9.1686 | 0.5907 | 0.3838  | 5.8541 | JPT |
| SUPT3H | GI_4507308-A | rs12528762 | 6 | 6 | 45112163 | 83062 | 8.1889 | 0.5365 | -0.3611 | 5.8541 | JPT |
| SUPT3H | GI_4507308-A | rs9369529  | 6 | 6 | 45112511 | 83410 | 9.1686 | 0.5907 | -0.3838 | 5.8541 | JPT |
| SUPT3H | GI_4507308-A | rs10948198 | 6 | 6 | 45117142 | 88041 | 9.1686 | 0.5907 | -0.3838 | 5.8541 | JPT |
| SUPT3H | GI_4507308-A | rs1023090  | 6 | 6 | 45120359 | 91258 | 9.3633 | 0.5905 | 0.3806  | 5.8541 | JPT |
| SUPT3H | GI_4507308-A | rs1041332  | 6 | 6 | 45120789 | 91688 | 9.1686 | 0.5907 | 0.3838  | 5.8541 | JPT |

|        |              |            |   |   |          |        |        |        |         |        |     |
|--------|--------------|------------|---|---|----------|--------|--------|--------|---------|--------|-----|
| SUPT3H | GI_4507308-A | rs12529490 | 6 | 6 | 45126229 | 97128  | 9.3633 | 0.5905 | 0.3806  | 5.8541 | JPT |
| SUPT3H | GI_4507308-A | rs4714836  | 6 | 6 | 45127755 | 98654  | 9.1686 | 0.5907 | -0.3838 | 5.8541 | JPT |
| SUPT3H | GI_4507308-A | rs12205071 | 6 | 6 | 45129193 | 100092 | 8.8800 | 0.5866 | -0.3799 | 5.8541 | JPT |
| SUPT3H | GI_4507308-A | rs969211   | 6 | 6 | 45130356 | 101255 | 9.1627 | 0.5904 | 0.3837  | 5.8541 | JPT |
| SUPT3H | GI_4507308-A | rs13211006 | 6 | 6 | 45131054 | 101953 | 7.8941 | 0.5303 | 0.3563  | 5.8541 | JPT |
| SUPT3H | GI_4507308-A | rs12205894 | 6 | 6 | 45131204 | 102103 | 9.3633 | 0.5905 | -0.3806 | 5.8541 | JPT |
| SUPT3H | GI_4507308-A | rs2186062  | 6 | 6 | 45131710 | 102609 | 9.3633 | 0.5905 | 0.3806  | 5.8541 | JPT |
| SUPT3H | GI_4507308-A | rs12208023 | 6 | 6 | 45132665 | 103564 | 9.1686 | 0.5907 | -0.3838 | 5.8541 | JPT |
| SUPT3H | GI_4507308-A | rs9367214  | 6 | 6 | 45133890 | 104789 | 9.1686 | 0.5907 | 0.3838  | 5.8541 | JPT |
| SUPT3H | GI_4507308-A | rs7763450  | 6 | 6 | 45137874 | 108773 | 9.1686 | 0.5907 | -0.3838 | 5.8541 | JPT |
| SUPT3H | GI_4507308-A | rs7745506  | 6 | 6 | 45137988 | 108887 | 8.0144 | 0.5364 | -0.3631 | 5.8541 | JPT |
| SUPT3H | GI_4507308-A | rs9395063  | 6 | 6 | 45148771 | 119670 | 9.9053 | 0.6220 | 0.3104  | 5.8541 | JPT |
| SUPT3H | GI_4507308-A | rs6899845  | 6 | 6 | 45151330 | 122229 | 9.3633 | 0.5905 | -0.3806 | 5.8541 | JPT |
| SUPT3H | GI_4507308-A | rs1411148  | 6 | 6 | 45151596 | 122495 | 6.5457 | 0.4914 | -0.3289 | 5.8541 | JPT |
| SUPT3H | GI_4507308-A | rs1937046  | 6 | 6 | 45156221 | 127120 | 8.9869 | 0.5914 | 0.3875  | 5.8541 | JPT |
| SUPT3H | GI_4507308-A | rs12526649 | 6 | 6 | 45157244 | 128143 | 8.1889 | 0.5365 | 0.3611  | 5.8541 | JPT |
| SUPT3H | GI_4507308-A | rs12529990 | 6 | 6 | 45157296 | 128195 | 8.1889 | 0.5365 | 0.3611  | 5.8541 | JPT |
| SUPT3H | GI_4507308-A | rs12208483 | 6 | 6 | 45157553 | 128452 | 9.3633 | 0.5905 | -0.3806 | 5.8541 | JPT |
| SUPT3H | GI_4507308-A | rs9357469  | 6 | 6 | 45157789 | 128688 | 9.0168 | 0.5839 | -0.3794 | 5.8541 | JPT |
| SUPT3H | GI_4507308-A | rs11964325 | 6 | 6 | 45161595 | 132494 | 9.3633 | 0.5905 | -0.3806 | 5.8541 | JPT |
| SUPT3H | GI_4507308-A | rs11966936 | 6 | 6 | 45161650 | 132549 | 8.9869 | 0.5914 | -0.3875 | 5.8541 | JPT |
| SUPT3H | GI_4507308-A | rs6922772  | 6 | 6 | 45167562 | 138461 | 9.3633 | 0.5905 | -0.3806 | 5.8541 | JPT |
| SUPT3H | GI_4507308-A | rs6922660  | 6 | 6 | 45167652 | 138551 | 9.1686 | 0.5907 | -0.3838 | 5.8541 | JPT |
| SUPT3H | GI_4507308-A | rs1284986  | 6 | 6 | 45171303 | 142202 | 7.9936 | 0.5353 | -0.3632 | 5.8541 | JPT |
| SUPT3H | GI_4507308-A | rs1284987  | 6 | 6 | 45171699 | 142598 | 9.3633 | 0.5905 | -0.3806 | 5.8541 | JPT |
| SUPT3H | GI_4507308-A | rs1284988  | 6 | 6 | 45172750 | 143649 | 9.1686 | 0.5907 | 0.3838  | 5.8541 | JPT |
| SUPT3H | GI_4507308-A | rs9357470  | 6 | 6 | 45173591 | 144490 | 9.1686 | 0.5907 | -0.3838 | 5.8541 | JPT |
| SUPT3H | GI_4507308-A | rs7739928  | 6 | 6 | 45176031 | 146930 | 9.3816 | 0.6089 | 0.3903  | 5.8541 | JPT |
| SUPT3H | GI_4507308-A | rs1284992  | 6 | 6 | 45179122 | 150021 | 9.3633 | 0.5905 | 0.3806  | 5.8541 | JPT |
| SUPT3H | GI_4507308-A | rs9395065  | 6 | 6 | 45182370 | 153269 | 9.0787 | 0.5867 | -0.3760 | 5.8541 | JPT |
| SUPT3H | GI_4507308-A | rs1324532  | 6 | 6 | 45183773 | 154672 | 9.3633 | 0.5905 | 0.3806  | 5.8541 | JPT |
| SUPT3H | GI_4507308-A | rs1284972  | 6 | 6 | 45185376 | 156275 | 9.1686 | 0.5907 | 0.3838  | 5.8541 | JPT |
| SUPT3H | GI_4507308-A | rs9381365  | 6 | 6 | 45185953 | 156852 | 9.0426 | 0.5940 | 0.3868  | 5.8541 | JPT |
| SUPT3H | GI_4507308-A | rs1886345  | 6 | 6 | 45186244 | 157143 | 8.4411 | 0.5660 | -0.3877 | 5.8541 | JPT |
| SUPT3H | GI_4507308-A | rs6899378  | 6 | 6 | 45188346 | 159245 | 9.1686 | 0.5907 | -0.3838 | 5.8541 | JPT |
| SUPT3H | GI_4507308-A | rs6458419  | 6 | 6 | 45193016 | 163915 | 9.3633 | 0.5905 | 0.3806  | 5.8541 | JPT |
| SUPT3H | GI_4507308-A | rs1555681  | 6 | 6 | 45194345 | 165244 | 8.9129 | 0.5792 | -0.3221 | 5.8541 | JPT |
| SUPT3H | GI_4507308-A | rs12530207 | 6 | 6 | 45196433 | 167332 | 7.9936 | 0.5353 | -0.3632 | 5.8541 | JPT |
| SUPT3H | GI_4507308-A | rs9357471  | 6 | 6 | 45198955 | 169854 | 8.9129 | 0.5792 | -0.3221 | 5.8541 | JPT |
| SUPT3H | GI_4507308-A | rs1284999  | 6 | 6 | 45202417 | 173316 | 7.8070 | 0.5346 | 0.3656  | 5.8541 | JPT |
| SUPT3H | GI_4507308-A | rs9395066  | 6 | 6 | 45203141 | 174040 | 9.1686 | 0.5907 | -0.3838 | 5.8541 | JPT |
| SUPT3H | GI_4507308-A | rs1285004  | 6 | 6 | 45206179 | 177078 | 9.3633 | 0.5905 | 0.3806  | 5.8541 | JPT |
| SUPT3H | GI_4507308-A | rs1285005  | 6 | 6 | 45208302 | 179201 | 7.9936 | 0.5353 | 0.3632  | 5.8541 | JPT |
| SUPT3H | GI_4507308-A | rs1285007  | 6 | 6 | 45210003 | 180902 | 8.1889 | 0.5365 | -0.3611 | 5.8541 | JPT |
| SUPT3H | GI_4507308-A | rs1285009  | 6 | 6 | 45210528 | 181427 | 8.1889 | 0.5365 | -0.3611 | 5.8541 | JPT |
| SUPT3H | GI_4507308-A | rs9472442  | 6 | 6 | 45210839 | 181738 | 8.1889 | 0.5365 | -0.3611 | 5.8541 | JPT |
| SUPT3H | GI_4507308-A | rs1285011  | 6 | 6 | 45211770 | 182669 | 8.1889 | 0.5365 | -0.3611 | 5.8541 | JPT |
| SUPT3H | GI_4507308-A | rs1285026  | 6 | 6 | 45228812 | 199711 | 9.1686 | 0.5907 | -0.3838 | 5.8541 | JPT |
| SUPT3H | GI_4507308-A | rs1285029  | 6 | 6 | 45230225 | 201124 | 7.9936 | 0.5353 | -0.3632 | 5.8541 | JPT |
| SUPT3H | GI_4507308-A | rs12662272 | 6 | 6 | 45231867 | 202766 | 8.0226 | 0.5455 | -0.3642 | 5.8541 | JPT |
| SUPT3H | GI_4507308-A | rs1285033  | 6 | 6 | 45235130 | 206029 | 7.9936 | 0.5353 | -0.3632 | 5.8541 | JPT |
| SUPT3H | GI_4507308-A | rs9395069  | 6 | 6 | 45236499 | 207398 | 6.8217 | 0.4650 | -0.2868 | 5.8541 | JPT |
| SUPT3H | GI_4507308-A | rs964452   | 6 | 6 | 45236720 | 207619 | 7.6464 | 0.5093 | 0.3742  | 5.8541 | JPT |
| SUPT3H | GI_4507308-A | rs6458422  | 6 | 6 | 45241332 | 212231 | 9.1686 | 0.5907 | 0.3838  | 5.8541 | JPT |
| SUPT3H | GI_4507308-A | rs1324530  | 6 | 6 | 45244325 | 215224 | 7.9936 | 0.5353 | -0.3632 | 5.8541 | JPT |
| SUPT3H | GI_4507308-A | rs1748233  | 6 | 6 | 45244902 | 215801 | 8.1889 | 0.5365 | 0.3611  | 5.8541 | JPT |
| SUPT3H | GI_4507308-A | rs6458423  | 6 | 6 | 45248623 | 219522 | 9.0676 | 0.5862 | -0.3766 | 5.8541 | JPT |
| SUPT3H | GI_4507308-A | rs1748234  | 6 | 6 | 45248831 | 219730 | 9.3633 | 0.5905 | -0.3806 | 5.8541 | JPT |
| SUPT3H | GI_4507308-A | rs1748235  | 6 | 6 | 45249339 | 220238 | 8.5009 | 0.5780 | 0.3743  | 5.8541 | JPT |

|        |              |            |   |   |          |        |        |        |         |        |     |
|--------|--------------|------------|---|---|----------|--------|--------|--------|---------|--------|-----|
| SUPT3H | GI_4507308-A | rs1748238  | 6 | 6 | 45251307 | 222206 | 7.9936 | 0.5353 | 0.3632  | 5.8541 | JPT |
| SUPT3H | GI_4507308-A | rs1284969  | 6 | 6 | 45261859 | 232758 | 9.1686 | 0.5907 | -0.3838 | 5.8541 | JPT |
| SUPT3H | GI_4507308-A | rs1797145  | 6 | 6 | 45263760 | 234659 | 9.3633 | 0.5905 | 0.3806  | 5.8541 | JPT |
| SUPT3H | GI_4507308-A | rs7740542  | 6 | 6 | 45264407 | 235306 | 8.1889 | 0.5365 | -0.3611 | 5.8541 | JPT |
| SUPT3H | GI_4507308-A | rs6936475  | 6 | 6 | 45266059 | 236958 | 7.9936 | 0.5353 | -0.3632 | 5.8541 | JPT |
| SUPT3H | GI_4507308-A | rs1629542  | 6 | 6 | 45266463 | 237362 | 9.3633 | 0.5905 | -0.3806 | 5.8541 | JPT |
| SUPT3H | GI_4507308-A | rs1748240  | 6 | 6 | 45268060 | 238959 | 7.9936 | 0.5353 | 0.3632  | 5.8541 | JPT |
| SUPT3H | GI_4507308-A | rs1748242  | 6 | 6 | 45271328 | 242227 | 9.1686 | 0.5907 | 0.3838  | 5.8541 | JPT |
| SUPT3H | GI_4507308-A | rs1285013  | 6 | 6 | 45273186 | 244085 | 8.5567 | 0.5806 | -0.3737 | 5.8541 | JPT |
| SUPT3H | GI_4507308-A | rs1285014  | 6 | 6 | 45273203 | 244102 | 9.3633 | 0.5905 | 0.3806  | 5.8541 | JPT |
| SUPT3H | GI_4507308-A | rs1285019  | 6 | 6 | 45275650 | 246549 | 9.1686 | 0.5907 | -0.3838 | 5.8541 | JPT |
| SUPT3H | GI_4507308-A | rs927658   | 6 | 6 | 45276031 | 246930 | 9.3633 | 0.5905 | 0.3806  | 5.8541 | JPT |
| SUPT3H | GI_4507308-A | rs7738526  | 6 | 6 | 45276395 | 247294 | 9.3633 | 0.5905 | 0.3806  | 5.8541 | JPT |
| SUPT3H | GI_4507308-A | rs1290386  | 6 | 6 | 45276731 | 247630 | 9.3633 | 0.5905 | -0.3806 | 5.8541 | JPT |
| SUPT3H | GI_4507308-A | rs6905396  | 6 | 6 | 45277143 | 248042 | 9.3633 | 0.5905 | -0.3806 | 5.8541 | JPT |
| SUPT3H | GI_4507308-A | rs1284955  | 6 | 6 | 45278099 | 248998 | 8.1889 | 0.5365 | -0.3611 | 5.8541 | JPT |
| SUPT3H | GI_4507308-A | rs9463076  | 6 | 6 | 45279340 | 250239 | 9.3633 | 0.5905 | 0.3806  | 5.8541 | JPT |
| SUPT3H | GI_4507308-A | rs1284961  | 6 | 6 | 45280599 | 251498 | 9.1686 | 0.5907 | 0.3838  | 5.8541 | JPT |
| SUPT3H | GI_4507308-A | rs1284962  | 6 | 6 | 45281686 | 252585 | 8.0611 | 0.5387 | -0.3506 | 5.8541 | JPT |
| SUPT3H | GI_4507308-A | rs6458425  | 6 | 6 | 45281835 | 252734 | 9.3633 | 0.5905 | -0.3806 | 5.8541 | JPT |
| SUPT3H | GI_4507308-A | rs988147   | 6 | 6 | 45282358 | 253257 | 9.3633 | 0.5905 | 0.3806  | 5.8541 | JPT |
| SUPT3H | GI_4507308-A | rs9381373  | 6 | 6 | 45283886 | 254785 | 9.3633 | 0.5905 | 0.3806  | 5.8541 | JPT |
| SUPT3H | GI_4507308-A | rs1284964  | 6 | 6 | 45284518 | 255417 | 8.1480 | 0.5517 | -0.3945 | 5.8541 | JPT |
| SUPT3H | GI_4507308-A | rs1284965  | 6 | 6 | 45284889 | 255788 | 9.0787 | 0.5867 | 0.3760  | 5.8541 | JPT |
| SUPT3H | GI_4507308-A | rs2396425  | 6 | 6 | 45285003 | 255902 | 8.9869 | 0.5914 | -0.3875 | 5.8541 | JPT |
| SUPT3H | GI_4507308-A | rs6458427  | 6 | 6 | 45287782 | 258681 | 9.0787 | 0.5867 | 0.3760  | 5.8541 | JPT |
| SUPT3H | GI_4507308-A | rs1284967  | 6 | 6 | 45288040 | 258939 | 7.8909 | 0.5302 | -0.3524 | 5.8541 | JPT |
| SUPT3H | GI_4507308-A | rs16873257 | 6 | 6 | 45288515 | 259414 | 8.1889 | 0.5365 | 0.3611  | 5.8541 | JPT |
| SUPT3H | GI_4507308-A | rs2815263  | 6 | 6 | 45288911 | 259810 | 7.9936 | 0.5353 | -0.3632 | 5.8541 | JPT |
| SUPT3H | GI_4507308-A | rs9463078  | 6 | 6 | 45289318 | 260217 | 8.3585 | 0.5620 | 0.3093  | 5.8541 | JPT |
| SUPT3H | GI_4507308-A | rs6901786  | 6 | 6 | 45294151 | 265050 | 9.3633 | 0.5905 | 0.3806  | 5.8541 | JPT |
| SUPT3H | GI_4507308-A | rs6899763  | 6 | 6 | 45297329 | 268228 | 9.1686 | 0.5907 | 0.3838  | 5.8541 | JPT |
| SUPT3H | GI_4507308-A | rs6919847  | 6 | 6 | 45297358 | 268257 | 8.6117 | 0.5926 | -0.4044 | 5.8541 | JPT |
| SUPT3H | GI_4507308-A | rs9369549  | 6 | 6 | 45298733 | 269632 | 7.8070 | 0.5346 | 0.3656  | 5.8541 | JPT |
| SUPT3H | GI_4507308-A | rs9395081  | 6 | 6 | 45298782 | 269681 | 7.9936 | 0.5353 | -0.3632 | 5.8541 | JPT |
| SUPT3H | GI_4507308-A | rs6917352  | 6 | 6 | 45299966 | 270865 | 7.9936 | 0.5353 | 0.3632  | 5.8541 | JPT |
| SUPT3H | GI_4507308-A | rs9472451  | 6 | 6 | 45306774 | 277673 | 9.1686 | 0.5907 | 0.3838  | 5.8541 | JPT |
| SUPT3H | GI_4507308-A | rs1080415  | 6 | 6 | 45307412 | 278311 | 9.1686 | 0.5907 | -0.3838 | 5.8541 | JPT |
| SUPT3H | GI_4507308-A | rs6458432  | 6 | 6 | 45312995 | 283894 | 6.5016 | 0.5077 | 0.4542  | 5.8541 | JPT |
| SUPT3H | GI_4507308-A | rs2057552  | 6 | 6 | 45322163 | 293062 | 7.9936 | 0.5353 | 0.3632  | 5.8541 | JPT |
| SUPT3H | GI_4507308-A | rs9472453  | 6 | 6 | 45322655 | 293554 | 8.1889 | 0.5365 | 0.3611  | 5.8541 | JPT |
| SUPT3H | GI_4507308-A | rs9357480  | 6 | 6 | 45327490 | 298389 | 9.1686 | 0.5907 | 0.3838  | 5.8541 | JPT |
| SUPT3H | GI_4507308-A | rs9395084  | 6 | 6 | 45328153 | 299052 | 8.8110 | 0.5834 | 0.3281  | 5.8541 | JPT |
| SUPT3H | GI_4507308-A | rs6458435  | 6 | 6 | 45330652 | 301551 | 7.9936 | 0.5353 | -0.3632 | 5.8541 | JPT |
| SUPT3H | GI_4507308-A | rs9296453  | 6 | 6 | 45335410 | 306309 | 9.1686 | 0.5907 | -0.3838 | 5.8541 | JPT |
| SUPT3H | GI_4507308-A | rs7382968  | 6 | 6 | 45339052 | 309951 | 8.3457 | 0.5798 | 0.3687  | 5.8541 | JPT |
| SUPT3H | GI_4507308-A | rs4714848  | 6 | 6 | 45339113 | 310012 | 9.1686 | 0.5907 | 0.3838  | 5.8541 | JPT |
| SUPT3H | GI_4507308-A | rs9463081  | 6 | 6 | 45341086 | 311985 | 9.1686 | 0.5907 | 0.3838  | 5.8541 | JPT |
| SUPT3H | GI_4507308-A | rs9296455  | 6 | 6 | 45344759 | 315658 | 9.0064 | 0.5834 | 0.3719  | 5.8541 | JPT |
| SUPT3H | GI_4507308-A | rs7453550  | 6 | 6 | 45348281 | 319180 | 8.1889 | 0.5365 | -0.3611 | 5.8541 | JPT |
| SUPT3H | GI_4507308-A | rs7451423  | 6 | 6 | 45349321 | 320220 | 9.3633 | 0.5905 | -0.3806 | 5.8541 | JPT |
| SUPT3H | GI_4507308-A | rs10948222 | 6 | 6 | 45352393 | 323292 | 8.1889 | 0.5365 | 0.3611  | 5.8541 | JPT |
| SUPT3H | GI_4507308-A | rs12205274 | 6 | 6 | 45353004 | 323903 | 9.1686 | 0.5907 | -0.3838 | 5.8541 | JPT |
| SUPT3H | GI_4507308-A | rs12529946 | 6 | 6 | 45363272 | 334171 | 9.1686 | 0.5907 | -0.3838 | 5.8541 | JPT |
| SUPT3H | GI_4507308-A | rs3923353  | 6 | 6 | 45364460 | 335359 | 9.1686 | 0.5907 | 0.3838  | 5.8541 | JPT |
| SUPT3H | GI_4507308-A | rs4446571  | 6 | 6 | 45365640 | 336539 | 8.9869 | 0.5914 | 0.3875  | 5.8541 | JPT |
| SUPT3H | GI_4507308-A | rs4312985  | 6 | 6 | 45366273 | 337172 | 7.5798 | 0.5502 | 0.3665  | 5.8541 | JPT |
| SUPT3H | GI_4507308-A | rs9357484  | 6 | 6 | 45373860 | 344759 | 9.1686 | 0.5907 | 0.3838  | 5.8541 | JPT |
| SUPT3H | GI_4507308-A | rs6938177  | 6 | 6 | 45379812 | 350711 | 9.1686 | 0.5907 | 0.3838  | 5.8541 | JPT |

|           |               |            |   |   |          |        |         |        |         |        |     |
|-----------|---------------|------------|---|---|----------|--------|---------|--------|---------|--------|-----|
| SUPT3H    | GI_4507308-A  | rs12662685 | 6 | 6 | 45381809 | 352708 | 8.1889  | 0.5365 | -0.3611 | 5.8541 | JPT |
| SUPT3H    | GI_4507308-A  | rs9395095  | 6 | 6 | 45381855 | 352754 | 7.1727  | 0.5096 | 0.3436  | 5.8541 | JPT |
| SUPT3H    | GI_4507308-A  | rs9369558  | 6 | 6 | 45381999 | 352898 | 9.3633  | 0.5905 | -0.3806 | 5.8541 | JPT |
| SUPT3H    | GI_4507308-A  | rs7382422  | 6 | 6 | 45385840 | 356739 | 7.8033  | 0.5433 | 0.3620  | 5.8541 | JPT |
| SUPT3H    | GI_4507308-A  | rs4072928  | 6 | 6 | 45399207 | 370106 | 8.9869  | 0.5914 | -0.3875 | 5.8541 | JPT |
| SUPT3H    | GI_4507308-A  | rs4590263  | 6 | 6 | 45399359 | 370258 | 8.1889  | 0.5365 | -0.3611 | 5.8541 | JPT |
| SUPT3H    | GI_4507308-A  | rs7757282  | 6 | 6 | 45410632 | 381531 | 9.1686  | 0.5907 | 0.3838  | 5.8541 | JPT |
| SUPT3H    | GI_4507308-A  | rs967588   | 6 | 6 | 45414449 | 385348 | 7.5779  | 0.5406 | 0.3531  | 5.8541 | JPT |
| SUPT3H    | GI_4507308-A  | rs7760112  | 6 | 6 | 45417610 | 388509 | 7.9936  | 0.5353 | -0.3632 | 5.8541 | JPT |
| SUPT3H    | GI_4507308-A  | rs16873348 | 6 | 6 | 45421722 | 392621 | 8.1889  | 0.5365 | -0.3611 | 5.8541 | JPT |
| SUPT3H    | GI_4507308-A  | rs12529295 | 6 | 6 | 45423306 | 394205 | 7.9936  | 0.5353 | -0.3632 | 5.8541 | JPT |
| SUPT3H    | GI_4507308-A  | rs2024787  | 6 | 6 | 45425980 | 396879 | 7.9936  | 0.5353 | -0.3632 | 5.8541 | JPT |
| SUPT3H    | GI_4507308-A  | rs2024786  | 6 | 6 | 45426699 | 397598 | 8.1889  | 0.5365 | -0.3611 | 5.8541 | JPT |
| SUPT3H    | GI_4507308-A  | rs6934594  | 6 | 6 | 45427854 | 398753 | 9.3633  | 0.5905 | 0.3806  | 5.8541 | JPT |
| SUPT3H    | GI_4507308-A  | rs6926638  | 6 | 6 | 45429991 | 400890 | 7.8941  | 0.5303 | -0.3563 | 5.8541 | JPT |
| SUPT3H    | GI_4507308-A  | rs6458440  | 6 | 6 | 45430201 | 401100 | 7.9936  | 0.5353 | 0.3632  | 5.8541 | JPT |
| SUPT3H    | GI_4507308-A  | rs4711814  | 6 | 6 | 45434029 | 404928 | 6.4119  | 0.4574 | -0.3319 | 5.8541 | JPT |
| SUPT3H    | GI_4507308-A  | rs1406848  | 6 | 6 | 45434840 | 405739 | 7.8748  | 0.5380 | 0.3818  | 5.8541 | JPT |
| SUPT3H    | GI_4507308-A  | rs16873364 | 6 | 6 | 45436135 | 407034 | 8.1889  | 0.5365 | -0.3611 | 5.8541 | JPT |
| SUPT3H    | GI_4507308-A  | rs16873366 | 6 | 6 | 45437171 | 408070 | 8.1889  | 0.5365 | 0.3611  | 5.8541 | JPT |
| SUPT3H    | GI_4507308-A  | rs1852986  | 6 | 6 | 45437467 | 408366 | 9.1686  | 0.5907 | -0.3838 | 5.8541 | JPT |
| SUPT3H    | GI_4507308-A  | rs12663469 | 6 | 6 | 45439447 | 410346 | 8.1889  | 0.5365 | -0.3611 | 5.8541 | JPT |
| SUPT3H    | GI_4507308-A  | rs6932926  | 6 | 6 | 45440283 | 411182 | 8.1889  | 0.5365 | 0.3611  | 5.8541 | JPT |
| SUPT3H    | GI_4507308-A  | rs16873373 | 6 | 6 | 45443679 | 414578 | 8.1889  | 0.5365 | -0.3611 | 5.8541 | JPT |
| SUPT3H    | GI_4507308-A  | rs16873379 | 6 | 6 | 45447829 | 418728 | 8.1889  | 0.5365 | -0.3611 | 5.8541 | JPT |
| SUPT3H    | GI_4507308-A  | rs6928753  | 6 | 6 | 45448048 | 418947 | 9.1686  | 0.5907 | -0.3838 | 5.8541 | JPT |
| SUPT3H    | GI_4507308-A  | rs12208924 | 6 | 6 | 45450029 | 420928 | 9.1686  | 0.5907 | 0.3838  | 5.8541 | JPT |
| SUPT3H    | GI_4507308-A  | rs4714853  | 6 | 6 | 45451849 | 422748 | 7.8070  | 0.5346 | -0.3656 | 5.8541 | JPT |
| SUPT3H    | GI_4507308-A  | rs3749863  | 6 | 6 | 45453226 | 424125 | 8.9129  | 0.5792 | 0.3221  | 5.8541 | JPT |
| SUPT3H    | GI_4507308-A  | rs3763190  | 6 | 6 | 45455622 | 426521 | 7.9936  | 0.5353 | -0.3632 | 5.8541 | JPT |
| C6orf33   | GI_19115959-S | rs4712008  | 6 | 6 | 52492743 | 112382 | 8.1115  | 0.5327 | -0.6139 | 6.7067 | JPT |
| C6orf33   | GI_19115959-S | rs2268732  | 6 | 6 | 52504461 | 124100 | 7.4487  | 0.5073 | -0.6091 | 6.7067 | JPT |
| C6orf33   | GI_19115959-S | rs9349630  | 6 | 6 | 52505589 | 125228 | 7.4825  | 0.5008 | -0.6038 | 6.7067 | JPT |
| C6orf33   | GI_19115959-S | rs1883929  | 6 | 6 | 52508784 | 128423 | 7.4487  | 0.5073 | -0.6091 | 6.7067 | JPT |
| C6orf33   | GI_19115959-S | rs2284808  | 6 | 6 | 52525470 | 145109 | 7.4825  | 0.5008 | -0.6038 | 6.7067 | JPT |
| C6orf33   | GI_19115959-S | rs2268714  | 6 | 6 | 52527329 | 146968 | 6.7326  | 0.4679 | -0.7541 | 6.7067 | JPT |
| C6orf150  | GI_31581597-S | rs311678   | 6 | 6 | 74191737 | 141    | 6.5146  | 0.4475 | -0.2265 | 6.0297 | JPT |
| Hs.485895 | Hs.485895-S   | rs7774080  | 6 | 6 | 87872220 | 124470 | 5.8940  | 0.4180 | -0.0986 | 5.7641 | JPT |
| Hs.485895 | Hs.485895-S   | rs1610330  | 6 | 6 | 87873075 | 123615 | 7.5858  | 0.5145 | -0.1405 | 5.7641 | JPT |
| Hs.485895 | Hs.485895-S   | rs4574603  | 6 | 6 | 87873624 | 123066 | 5.8940  | 0.4180 | 0.0986  | 5.7641 | JPT |
| Hs.485895 | Hs.485895-S   | rs1590429  | 6 | 6 | 87875112 | 121578 | 6.3672  | 0.4467 | 0.0999  | 5.7641 | JPT |
| Hs.485895 | Hs.485895-S   | rs2025490  | 6 | 6 | 87875181 | 121509 | 10.0740 | 0.6378 | 0.1235  | 5.7641 | JPT |
| Hs.485895 | Hs.485895-S   | rs3932521  | 6 | 6 | 87875317 | 121373 | 5.9585  | 0.4145 | -0.0984 | 5.7641 | JPT |
| Hs.485895 | Hs.485895-S   | rs2031522  | 6 | 6 | 87878220 | 118470 | 8.6885  | 0.5689 | -0.1281 | 5.7641 | JPT |
| Hs.485895 | Hs.485895-S   | rs9450619  | 6 | 6 | 87884546 | 112144 | 10.8366 | 0.6583 | 0.1286  | 5.7641 | JPT |
| Hs.485895 | Hs.485895-S   | rs12177532 | 6 | 6 | 87884847 | 111843 | 5.8940  | 0.4180 | -0.0986 | 5.7641 | JPT |
| Hs.485895 | Hs.485895-S   | rs4391234  | 6 | 6 | 87890203 | 106487 | 5.9321  | 0.4282 | 0.1011  | 5.7641 | JPT |
| Hs.485895 | Hs.485895-S   | rs6454581  | 6 | 6 | 87890787 | 105903 | 5.8940  | 0.4180 | 0.0986  | 5.7641 | JPT |
| Hs.485895 | Hs.485895-S   | rs9353450  | 6 | 6 | 87893105 | 103585 | 5.8940  | 0.4180 | 0.0986  | 5.7641 | JPT |
| Hs.485895 | Hs.485895-S   | rs6934717  | 6 | 6 | 87897718 | 98972  | 5.8940  | 0.4180 | -0.0986 | 5.7641 | JPT |
| Hs.485895 | Hs.485895-S   | rs9353455  | 6 | 6 | 87900084 | 96606  | 5.9585  | 0.4145 | 0.0984  | 5.7641 | JPT |
| Hs.485895 | Hs.485895-S   | rs9353456  | 6 | 6 | 87900363 | 96327  | 5.9585  | 0.4145 | 0.0984  | 5.7641 | JPT |
| Hs.485895 | Hs.485895-S   | rs7773568  | 6 | 6 | 87902002 | 94688  | 5.8940  | 0.4180 | -0.0986 | 5.7641 | JPT |
| Hs.485895 | Hs.485895-S   | rs1998765  | 6 | 6 | 87902966 | 93724  | 5.8940  | 0.4180 | 0.0986  | 5.7641 | JPT |
| Hs.485895 | Hs.485895-S   | rs16878497 | 6 | 6 | 87903393 | 93297  | 9.9306  | 0.6143 | -0.1256 | 5.7641 | JPT |
| Hs.485895 | Hs.485895-S   | rs6454582  | 6 | 6 | 87905021 | 91669  | 5.8940  | 0.4180 | 0.0986  | 5.7641 | JPT |
| Hs.485895 | Hs.485895-S   | rs6940194  | 6 | 6 | 87905733 | 90957  | 5.8940  | 0.4180 | 0.0986  | 5.7641 | JPT |
| Hs.485895 | Hs.485895-S   | rs994170   | 6 | 6 | 87912232 | 84458  | 5.8940  | 0.4180 | 0.0986  | 5.7641 | JPT |
| Hs.485895 | Hs.485895-S   | rs6907805  | 6 | 6 | 87912722 | 83968  | 5.8940  | 0.4180 | 0.0986  | 5.7641 | JPT |

|           |             |            |   |   |          |       |         |        |         |        |     |
|-----------|-------------|------------|---|---|----------|-------|---------|--------|---------|--------|-----|
| Hs.485895 | Hs.485895-S | rs6454587  | 6 | 6 | 87914601 | 82089 | 5.8940  | 0.4180 | 0.0986  | 5.7641 | JPT |
| Hs.485895 | Hs.485895-S | rs1925689  | 6 | 6 | 87920070 | 76620 | 5.8940  | 0.4180 | 0.0986  | 5.7641 | JPT |
| Hs.485895 | Hs.485895-S | rs9450624  | 6 | 6 | 87920859 | 75831 | 5.8044  | 0.4051 | -0.1192 | 5.7641 | JPT |
| Hs.485895 | Hs.485895-S | rs1886752  | 6 | 6 | 87928442 | 68248 | 5.8940  | 0.4180 | 0.0986  | 5.7641 | JPT |
| Hs.485895 | Hs.485895-S | rs1925692  | 6 | 6 | 87940726 | 55964 | 5.8940  | 0.4180 | 0.0986  | 5.7641 | JPT |
| Hs.485895 | Hs.485895-S | rs6909021  | 6 | 6 | 87941032 | 55658 | 5.9585  | 0.4145 | 0.0984  | 5.7641 | JPT |
| Hs.485895 | Hs.485895-S | rs6909200  | 6 | 6 | 87941146 | 55544 | 5.9585  | 0.4145 | -0.0984 | 5.7641 | JPT |
| Hs.485895 | Hs.485895-S | rs7739726  | 6 | 6 | 87943303 | 53387 | 5.8940  | 0.4180 | -0.0986 | 5.7641 | JPT |
| Hs.485895 | Hs.485895-S | rs7757827  | 6 | 6 | 87943444 | 53246 | 5.8940  | 0.4180 | 0.0986  | 5.7641 | JPT |
| Hs.485895 | Hs.485895-S | rs7768575  | 6 | 6 | 87945397 | 51293 | 5.9585  | 0.4145 | 0.0984  | 5.7641 | JPT |
| Hs.485895 | Hs.485895-S | rs1980790  | 6 | 6 | 87946853 | 49837 | 5.8940  | 0.4180 | -0.0986 | 5.7641 | JPT |
| Hs.485895 | Hs.485895-S | rs2147917  | 6 | 6 | 87947184 | 49506 | 5.9585  | 0.4145 | 0.0984  | 5.7641 | JPT |
| Hs.485895 | Hs.485895-S | rs7766324  | 6 | 6 | 87949941 | 46749 | 5.8940  | 0.4180 | 0.0986  | 5.7641 | JPT |
| Hs.485895 | Hs.485895-S | rs1080596  | 6 | 6 | 87951157 | 45533 | 5.8940  | 0.4180 | 0.0986  | 5.7641 | JPT |
| Hs.485895 | Hs.485895-S | rs6913159  | 6 | 6 | 87954518 | 42172 | 9.9306  | 0.6143 | 0.1256  | 5.7641 | JPT |
| Hs.485895 | Hs.485895-S | rs9450630  | 6 | 6 | 87955879 | 40811 | 8.8686  | 0.5861 | -0.1226 | 5.7641 | JPT |
| Hs.485895 | Hs.485895-S | rs7776407  | 6 | 6 | 87957380 | 39310 | 5.8940  | 0.4180 | 0.0986  | 5.7641 | JPT |
| Hs.485895 | Hs.485895-S | rs4707345  | 6 | 6 | 87958944 | 37746 | 9.9549  | 0.6240 | -0.1264 | 5.7641 | JPT |
| Hs.485895 | Hs.485895-S | rs12181709 | 6 | 6 | 87959372 | 37318 | 9.9549  | 0.6240 | 0.1264  | 5.7641 | JPT |
| Hs.485895 | Hs.485895-S | rs6454593  | 6 | 6 | 87961618 | 35072 | 5.8020  | 0.4279 | -0.0998 | 5.7641 | JPT |
| Hs.485895 | Hs.485895-S | rs6940325  | 6 | 6 | 87963635 | 33055 | 9.9306  | 0.6143 | 0.1256  | 5.7641 | JPT |
| Hs.485895 | Hs.485895-S | rs2147918  | 6 | 6 | 87967855 | 28835 | 5.9585  | 0.4145 | 0.0984  | 5.7641 | JPT |
| Hs.485895 | Hs.485895-S | rs9344691  | 6 | 6 | 87968227 | 28463 | 5.8940  | 0.4180 | -0.0986 | 5.7641 | JPT |
| Hs.485895 | Hs.485895-S | rs2147921  | 6 | 6 | 87968580 | 28110 | 5.9585  | 0.4145 | 0.0984  | 5.7641 | JPT |
| Hs.485895 | Hs.485895-S | rs7773715  | 6 | 6 | 87968776 | 27914 | 5.8044  | 0.4051 | -0.1192 | 5.7641 | JPT |
| Hs.485895 | Hs.485895-S | rs4707346  | 6 | 6 | 87970195 | 26495 | 5.9585  | 0.4145 | -0.0984 | 5.7641 | JPT |
| Hs.485895 | Hs.485895-S | rs6913932  | 6 | 6 | 87971829 | 24861 | 5.9585  | 0.4145 | 0.0984  | 5.7641 | JPT |
| Hs.485895 | Hs.485895-S | rs7752485  | 6 | 6 | 87972336 | 24354 | 5.8940  | 0.4180 | -0.0986 | 5.7641 | JPT |
| Hs.485895 | Hs.485895-S | rs7752414  | 6 | 6 | 87972541 | 24149 | 9.9306  | 0.6143 | 0.1256  | 5.7641 | JPT |
| Hs.485895 | Hs.485895-S | rs4707347  | 6 | 6 | 87974481 | 22209 | 5.9585  | 0.4145 | 0.0984  | 5.7641 | JPT |
| Hs.485895 | Hs.485895-S | rs4110984  | 6 | 6 | 87975193 | 21497 | 5.9585  | 0.4145 | 0.0984  | 5.7641 | JPT |
| Hs.485895 | Hs.485895-S | rs7755883  | 6 | 6 | 87976321 | 20369 | 5.9585  | 0.4145 | -0.0984 | 5.7641 | JPT |
| Hs.485895 | Hs.485895-S | rs4099964  | 6 | 6 | 87978314 | 18376 | 5.8940  | 0.4180 | 0.0986  | 5.7641 | JPT |
| Hs.485895 | Hs.485895-S | rs3857483  | 6 | 6 | 87980515 | 16175 | 5.8940  | 0.4180 | 0.0986  | 5.7641 | JPT |
| Hs.485895 | Hs.485895-S | rs9450636  | 6 | 6 | 87986888 | 9802  | 9.9549  | 0.6240 | 0.1264  | 5.7641 | JPT |
| Hs.485895 | Hs.485895-S | rs3904088  | 6 | 6 | 87987496 | 9194  | 5.8940  | 0.4180 | -0.0986 | 5.7641 | JPT |
| Hs.485895 | Hs.485895-S | rs9353464  | 6 | 6 | 87989958 | 6732  | 5.8468  | 0.4151 | 0.0983  | 5.7641 | JPT |
| Hs.485895 | Hs.485895-S | rs9362411  | 6 | 6 | 87990572 | 6118  | 5.9585  | 0.4145 | 0.0984  | 5.7641 | JPT |
| Hs.485895 | Hs.485895-S | rs13201289 | 6 | 6 | 87993017 | 3673  | 9.9306  | 0.6143 | -0.1256 | 5.7641 | JPT |
| Hs.485895 | Hs.485895-S | rs7774603  | 6 | 6 | 87993744 | 2946  | 5.9585  | 0.4145 | 0.0984  | 5.7641 | JPT |
| Hs.485895 | Hs.485895-S | rs9450638  | 6 | 6 | 87994045 | 2645  | 9.9549  | 0.6240 | 0.1264  | 5.7641 | JPT |
| Hs.485895 | Hs.485895-S | rs6926831  | 6 | 6 | 87995082 | 1608  | 5.9019  | 0.4185 | -0.1000 | 5.7641 | JPT |
| Hs.485895 | Hs.485895-S | rs9344693  | 6 | 6 | 87996356 | 334   | 5.8940  | 0.4180 | -0.0986 | 5.7641 | JPT |
| Hs.485895 | Hs.485895-S | rs6932641  | 6 | 6 | 87997820 | 1130  | 9.9306  | 0.6143 | 0.1256  | 5.7641 | JPT |
| Hs.485895 | Hs.485895-S | rs6933046  | 6 | 6 | 87998138 | 1448  | 5.9585  | 0.4145 | 0.0984  | 5.7641 | JPT |
| Hs.485895 | Hs.485895-S | rs4707355  | 6 | 6 | 88009592 | 12902 | 9.9549  | 0.6240 | -0.1264 | 5.7641 | JPT |
| Hs.485895 | Hs.485895-S | rs9344695  | 6 | 6 | 88012963 | 16273 | 5.9585  | 0.4145 | -0.0984 | 5.7641 | JPT |
| Hs.485895 | Hs.485895-S | rs9353465  | 6 | 6 | 88013005 | 16315 | 5.9585  | 0.4145 | 0.0984  | 5.7641 | JPT |
| Hs.485895 | Hs.485895-S | rs9362414  | 6 | 6 | 88016474 | 19784 | 5.8940  | 0.4180 | -0.0986 | 5.7641 | JPT |
| Hs.485895 | Hs.485895-S | rs7758618  | 6 | 6 | 88020857 | 24167 | 5.8940  | 0.4180 | 0.0986  | 5.7641 | JPT |
| Hs.485895 | Hs.485895-S | rs6908834  | 6 | 6 | 88022247 | 25557 | 9.9549  | 0.6240 | -0.1264 | 5.7641 | JPT |
| Hs.485895 | Hs.485895-S | rs9362415  | 6 | 6 | 88025284 | 28594 | 5.8940  | 0.4180 | 0.0986  | 5.7641 | JPT |
| Hs.485895 | Hs.485895-S | rs3734187  | 6 | 6 | 88026456 | 29766 | 5.8940  | 0.4180 | 0.0986  | 5.7641 | JPT |
| Hs.485895 | Hs.485895-S | rs9353468  | 6 | 6 | 88030346 | 33656 | 5.9585  | 0.4145 | 0.0984  | 5.7641 | JPT |
| Hs.485895 | Hs.485895-S | rs4707356  | 6 | 6 | 88032792 | 36102 | 5.9585  | 0.4145 | -0.0984 | 5.7641 | JPT |
| Hs.485895 | Hs.485895-S | rs9450645  | 6 | 6 | 88034494 | 37804 | 10.4801 | 0.6629 | -0.1350 | 5.7641 | JPT |
| Hs.485895 | Hs.485895-S | rs12176253 | 6 | 6 | 88035509 | 38819 | 5.9585  | 0.4145 | 0.0984  | 5.7641 | JPT |
| Hs.485895 | Hs.485895-S | rs9450646  | 6 | 6 | 88035828 | 39138 | 9.9306  | 0.6143 | -0.1256 | 5.7641 | JPT |
| Hs.485895 | Hs.485895-S | rs6454596  | 6 | 6 | 88037454 | 40764 | 5.8940  | 0.4180 | -0.0986 | 5.7641 | JPT |

|           |             |           |   |   |          |        |         |        |         |        |     |
|-----------|-------------|-----------|---|---|----------|--------|---------|--------|---------|--------|-----|
| Hs.485895 | Hs.485895-S | rs9450647 | 6 | 6 | 88038314 | 41624  | 5.9585  | 0.4145 | 0.0984  | 5.7641 | JPT |
| Hs.485895 | Hs.485895-S | rs4707357 | 6 | 6 | 88039715 | 43025  | 5.8940  | 0.4180 | -0.0986 | 5.7641 | JPT |
| Hs.485895 | Hs.485895-S | rs9362417 | 6 | 6 | 88040409 | 43719  | 5.9585  | 0.4145 | 0.0984  | 5.7641 | JPT |
| Hs.485895 | Hs.485895-S | rs6454599 | 6 | 6 | 88041187 | 44497  | 5.9585  | 0.4145 | 0.0984  | 5.7641 | JPT |
| Hs.485895 | Hs.485895-S | rs6918942 | 6 | 6 | 88043135 | 46445  | 5.8940  | 0.4180 | 0.0986  | 5.7641 | JPT |
| Hs.485895 | Hs.485895-S | rs6899394 | 6 | 6 | 88043415 | 46725  | 5.8940  | 0.4180 | -0.0986 | 5.7641 | JPT |
| Hs.485895 | Hs.485895-S | rs6925648 | 6 | 6 | 88044265 | 47575  | 5.9585  | 0.4145 | -0.0984 | 5.7641 | JPT |
| Hs.485895 | Hs.485895-S | rs9351124 | 6 | 6 | 88047827 | 51137  | 5.9585  | 0.4145 | -0.0984 | 5.7641 | JPT |
| Hs.485895 | Hs.485895-S | rs6916994 | 6 | 6 | 88047955 | 51265  | 5.9585  | 0.4145 | 0.0984  | 5.7641 | JPT |
| Hs.485895 | Hs.485895-S | rs6917432 | 6 | 6 | 88048244 | 51554  | 5.9585  | 0.4145 | 0.0984  | 5.7641 | JPT |
| Hs.485895 | Hs.485895-S | rs2240459 | 6 | 6 | 88049127 | 52437  | 5.9585  | 0.4145 | -0.0984 | 5.7641 | JPT |
| Hs.485895 | Hs.485895-S | rs2240461 | 6 | 6 | 88049809 | 53119  | 5.8044  | 0.4051 | -0.1192 | 5.7641 | JPT |
| Hs.485895 | Hs.485895-S | rs3812130 | 6 | 6 | 88050480 | 53790  | 5.8940  | 0.4180 | 0.0986  | 5.7641 | JPT |
| Hs.485895 | Hs.485895-S | rs6934603 | 6 | 6 | 88050734 | 54044  | 5.8940  | 0.4180 | 0.0986  | 5.7641 | JPT |
| Hs.485895 | Hs.485895-S | rs4707358 | 6 | 6 | 88051291 | 54601  | 5.8940  | 0.4180 | -0.0986 | 5.7641 | JPT |
| Hs.485895 | Hs.485895-S | rs9359743 | 6 | 6 | 88053463 | 56773  | 5.9585  | 0.4145 | -0.0984 | 5.7641 | JPT |
| Hs.485895 | Hs.485895-S | rs9450650 | 6 | 6 | 88055170 | 58480  | 5.9585  | 0.4145 | -0.0984 | 5.7641 | JPT |
| Hs.485895 | Hs.485895-S | rs9450651 | 6 | 6 | 88055360 | 58670  | 9.9306  | 0.6143 | 0.1256  | 5.7641 | JPT |
| Hs.485895 | Hs.485895-S | rs6940544 | 6 | 6 | 88057300 | 60610  | 5.8940  | 0.4180 | -0.0986 | 5.7641 | JPT |
| Hs.485895 | Hs.485895-S | rs9294376 | 6 | 6 | 88057485 | 60795  | 9.9549  | 0.6240 | -0.1264 | 5.7641 | JPT |
| Hs.485895 | Hs.485895-S | rs3857488 | 6 | 6 | 88057783 | 61093  | 5.8940  | 0.4180 | 0.0986  | 5.7641 | JPT |
| Hs.485895 | Hs.485895-S | rs9450652 | 6 | 6 | 88059076 | 62386  | 5.9585  | 0.4145 | 0.0984  | 5.7641 | JPT |
| Hs.485895 | Hs.485895-S | rs9444491 | 6 | 6 | 88059104 | 62414  | 9.9306  | 0.6143 | -0.1256 | 5.7641 | JPT |
| Hs.485895 | Hs.485895-S | rs9450653 | 6 | 6 | 88060840 | 64150  | 9.9549  | 0.6240 | -0.1264 | 5.7641 | JPT |
| Hs.485895 | Hs.485895-S | rs6921673 | 6 | 6 | 88061477 | 64787  | 9.9549  | 0.6240 | 0.1264  | 5.7641 | JPT |
| Hs.485895 | Hs.485895-S | rs6926686 | 6 | 6 | 88061917 | 65227  | 9.3630  | 0.6081 | 0.1259  | 5.7641 | JPT |
| Hs.485895 | Hs.485895-S | rs6938885 | 6 | 6 | 88063898 | 67208  | 7.8304  | 0.5732 | 0.1239  | 5.7641 | JPT |
| Hs.485895 | Hs.485895-S | rs6939075 | 6 | 6 | 88063925 | 67235  | 9.9549  | 0.6240 | 0.1264  | 5.7641 | JPT |
| Hs.485895 | Hs.485895-S | rs440296  | 6 | 6 | 88065140 | 68450  | 9.9306  | 0.6143 | -0.1256 | 5.7641 | JPT |
| Hs.485895 | Hs.485895-S | rs410683  | 6 | 6 | 88065639 | 68949  | 9.9306  | 0.6143 | 0.1256  | 5.7641 | JPT |
| Hs.485895 | Hs.485895-S | rs1328477 | 6 | 6 | 88065764 | 69074  | 5.9319  | 0.4204 | 0.1216  | 5.7641 | JPT |
| Hs.485895 | Hs.485895-S | rs242263  | 6 | 6 | 88075032 | 78342  | 9.9549  | 0.6240 | 0.1264  | 5.7641 | JPT |
| Hs.485895 | Hs.485895-S | rs59322   | 6 | 6 | 88077240 | 80550  | 5.9585  | 0.4145 | 0.0984  | 5.7641 | JPT |
| Hs.485895 | Hs.485895-S | rs1145712 | 6 | 6 | 88077837 | 81147  | 9.9549  | 0.6240 | 0.1264  | 5.7641 | JPT |
| Hs.485895 | Hs.485895-S | rs413687  | 6 | 6 | 88077999 | 81309  | 9.9306  | 0.6143 | -0.1256 | 5.7641 | JPT |
| Hs.485895 | Hs.485895-S | rs414453  | 6 | 6 | 88078305 | 81615  | 9.9549  | 0.6240 | -0.1264 | 5.7641 | JPT |
| Hs.485895 | Hs.485895-S | rs368267  | 6 | 6 | 88078414 | 81724  | 9.9306  | 0.6143 | -0.1256 | 5.7641 | JPT |
| Hs.485895 | Hs.485895-S | rs411606  | 6 | 6 | 88078472 | 81782  | 9.9306  | 0.6143 | 0.1256  | 5.7641 | JPT |
| Hs.485895 | Hs.485895-S | rs1145714 | 6 | 6 | 88081237 | 84547  | 9.9306  | 0.6143 | 0.1256  | 5.7641 | JPT |
| Hs.485895 | Hs.485895-S | rs1145715 | 6 | 6 | 88081762 | 85072  | 9.9549  | 0.6240 | -0.1264 | 5.7641 | JPT |
| Hs.485895 | Hs.485895-S | rs1203162 | 6 | 6 | 88081937 | 85247  | 9.9306  | 0.6143 | -0.1256 | 5.7641 | JPT |
| Hs.485895 | Hs.485895-S | rs1203163 | 6 | 6 | 88082968 | 86278  | 9.6960  | 0.6134 | 0.1255  | 5.7641 | JPT |
| Hs.485895 | Hs.485895-S | rs1203164 | 6 | 6 | 88083682 | 86992  | 9.9306  | 0.6143 | -0.1256 | 5.7641 | JPT |
| Hs.485895 | Hs.485895-S | rs2983136 | 6 | 6 | 88084934 | 88244  | 9.2162  | 0.6017 | -0.1210 | 5.7641 | JPT |
| Hs.485895 | Hs.485895-S | rs242282  | 6 | 6 | 88086299 | 89609  | 9.9306  | 0.6143 | 0.1256  | 5.7641 | JPT |
| Hs.485895 | Hs.485895-S | rs2875533 | 6 | 6 | 88087306 | 90616  | 5.8044  | 0.4051 | 0.1192  | 5.7641 | JPT |
| Hs.485895 | Hs.485895-S | rs242283  | 6 | 6 | 88087650 | 90960  | 5.9585  | 0.4145 | -0.0984 | 5.7641 | JPT |
| Hs.485895 | Hs.485895-S | rs1746444 | 6 | 6 | 88096587 | 99897  | 9.9306  | 0.6143 | -0.1256 | 5.7641 | JPT |
| Hs.485895 | Hs.485895-S | rs448580  | 6 | 6 | 88097118 | 100428 | 5.8940  | 0.4180 | 0.0986  | 5.7641 | JPT |
| Hs.485895 | Hs.485895-S | rs369674  | 6 | 6 | 88100121 | 103431 | 5.8940  | 0.4180 | 0.0986  | 5.7641 | JPT |
| Hs.485895 | Hs.485895-S | rs379455  | 6 | 6 | 88100279 | 103589 | 9.9306  | 0.6143 | 0.1256  | 5.7641 | JPT |
| Hs.485895 | Hs.485895-S | rs242275  | 6 | 6 | 88102682 | 105992 | 9.9549  | 0.6240 | 0.1264  | 5.7641 | JPT |
| Hs.485895 | Hs.485895-S | rs242276  | 6 | 6 | 88103096 | 106406 | 6.8247  | 0.5079 | 0.1211  | 5.7641 | JPT |
| Hs.485895 | Hs.485895-S | rs397516  | 6 | 6 | 88107771 | 111081 | 10.3012 | 0.6379 | 0.1292  | 5.7641 | JPT |
| Hs.485895 | Hs.485895-S | rs398140  | 6 | 6 | 88107981 | 111291 | 9.9549  | 0.6240 | 0.1264  | 5.7641 | JPT |
| Hs.485895 | Hs.485895-S | rs452315  | 6 | 6 | 88109206 | 112516 | 9.9306  | 0.6143 | -0.1256 | 5.7641 | JPT |
| Hs.485895 | Hs.485895-S | rs377288  | 6 | 6 | 88110196 | 113506 | 9.9306  | 0.6143 | 0.1256  | 5.7641 | JPT |
| Hs.485895 | Hs.485895-S | rs1201409 | 6 | 6 | 88111983 | 115293 | 5.8940  | 0.4180 | -0.0986 | 5.7641 | JPT |
| Hs.485895 | Hs.485895-S | rs1188819 | 6 | 6 | 88112067 | 115377 | 8.3851  | 0.5633 | 0.1175  | 5.7641 | JPT |

|           |               |            |   |   |           |        |         |        |         |        |     |
|-----------|---------------|------------|---|---|-----------|--------|---------|--------|---------|--------|-----|
| Hs.485895 | Hs.485895-S   | rs1188817  | 6 | 6 | 88112438  | 115748 | 9.9790  | 0.6250 | 0.1244  | 5.7641 | JPT |
| Hs.485895 | Hs.485895-S   | rs1188816  | 6 | 6 | 88112550  | 115860 | 9.8390  | 0.6193 | 0.1261  | 5.7641 | JPT |
| Hs.485895 | Hs.485895-S   | rs12211627 | 6 | 6 | 88113020  | 116330 | 9.9306  | 0.6143 | 0.1256  | 5.7641 | JPT |
| Hs.485895 | Hs.485895-S   | rs373646   | 6 | 6 | 88113615  | 116925 | 5.9585  | 0.4145 | 0.0984  | 5.7641 | JPT |
| Hs.485895 | Hs.485895-S   | rs381798   | 6 | 6 | 88113849  | 117159 | 9.9306  | 0.6143 | -0.1256 | 5.7641 | JPT |
| Hs.485895 | Hs.485895-S   | rs910563   | 6 | 6 | 88115604  | 118914 | 5.8940  | 0.4180 | 0.0986  | 5.7641 | JPT |
| Hs.485895 | Hs.485895-S   | rs6921504  | 6 | 6 | 88115691  | 119001 | 5.7722  | 0.4342 | -0.1067 | 5.7641 | JPT |
| Hs.485895 | Hs.485895-S   | rs242264   | 6 | 6 | 88117457  | 120767 | 9.9306  | 0.6143 | 0.1256  | 5.7641 | JPT |
| Hs.485895 | Hs.485895-S   | rs183599   | 6 | 6 | 88117743  | 121053 | 5.9585  | 0.4145 | -0.0984 | 5.7641 | JPT |
| Hs.485895 | Hs.485895-S   | rs242265   | 6 | 6 | 88117758  | 121068 | 9.9306  | 0.6143 | 0.1256  | 5.7641 | JPT |
| Hs.485895 | Hs.485895-S   | rs242267   | 6 | 6 | 88118556  | 121866 | 5.9585  | 0.4145 | -0.0984 | 5.7641 | JPT |
| Hs.485895 | Hs.485895-S   | rs242268   | 6 | 6 | 88118603  | 121913 | 8.3795  | 0.5814 | -0.1240 | 5.7641 | JPT |
| Hs.485895 | Hs.485895-S   | rs242269   | 6 | 6 | 88118708  | 122018 | 9.9306  | 0.6143 | -0.1256 | 5.7641 | JPT |
| Hs.485895 | Hs.485895-S   | rs242270   | 6 | 6 | 88118909  | 122219 | 5.9585  | 0.4145 | -0.0984 | 5.7641 | JPT |
| Hs.485895 | Hs.485895-S   | rs540975   | 6 | 6 | 88119860  | 123170 | 9.9306  | 0.6143 | -0.1256 | 5.7641 | JPT |
| Hs.485895 | Hs.485895-S   | rs541170   | 6 | 6 | 88119935  | 123245 | 9.9549  | 0.6240 | 0.1264  | 5.7641 | JPT |
| Hs.485895 | Hs.485895-S   | rs910564   | 6 | 6 | 88120530  | 123840 | 9.9306  | 0.6143 | 0.1256  | 5.7641 | JPT |
| Hs.485895 | Hs.485895-S   | rs1739886  | 6 | 6 | 88122320  | 125630 | 9.9306  | 0.6143 | 0.1256  | 5.7641 | JPT |
| Hs.485895 | Hs.485895-S   | rs406981   | 6 | 6 | 88124034  | 127344 | 9.9549  | 0.6240 | 0.1264  | 5.7641 | JPT |
| Hs.485895 | Hs.485895-S   | rs107690   | 6 | 6 | 88126071  | 129381 | 5.9804  | 0.4159 | -0.0968 | 5.7641 | JPT |
| Hs.485895 | Hs.485895-S   | rs242287   | 6 | 6 | 88128544  | 131854 | 5.8234  | 0.4137 | 0.1009  | 5.7641 | JPT |
| ACY1L2    | GI_37551403-S | rs693932   | 6 | 6 | 89887093  | 41475  | 6.0229  | 0.4260 | -0.1381 | 5.7413 | JPT |
| ACY1L2    | GI_37551403-S | rs679013   | 6 | 6 | 89889570  | 38998  | 6.0229  | 0.4260 | -0.1381 | 5.7413 | JPT |
| ACY1L2    | GI_37551403-S | rs401501   | 6 | 6 | 89895447  | 33121  | 6.0229  | 0.4260 | 0.1381  | 5.7413 | JPT |
| ACY1L2    | GI_37551403-S | rs431909   | 6 | 6 | 89898435  | 30133  | 6.0229  | 0.4260 | -0.1381 | 5.7413 | JPT |
| ACY1L2    | GI_37551403-S | rs2183646  | 6 | 6 | 89902271  | 26297  | 5.7850  | 0.4039 | -0.1374 | 5.7413 | JPT |
| ACY1L2    | GI_37551403-S | rs1618310  | 6 | 6 | 89902682  | 25886  | 6.0229  | 0.4260 | 0.1381  | 5.7413 | JPT |
| ACY1L2    | GI_37551403-S | rs4707518  | 6 | 6 | 89907725  | 20843  | 6.0229  | 0.4260 | -0.1381 | 5.7413 | JPT |
| ACY1L2    | GI_37551403-S | rs10223547 | 6 | 6 | 89910415  | 18153  | 5.7850  | 0.4039 | -0.1374 | 5.7413 | JPT |
| ACY1L2    | GI_37551403-S | rs7756158  | 6 | 6 | 89910835  | 17733  | 6.0229  | 0.4260 | 0.1381  | 5.7413 | JPT |
| ACY1L2    | GI_37551403-S | rs9451165  | 6 | 6 | 89912142  | 16426  | 6.0229  | 0.4260 | 0.1381  | 5.7413 | JPT |
| ACY1L2    | GI_37551403-S | rs9451167  | 6 | 6 | 89913839  | 14729  | 6.1091  | 0.4237 | 0.1372  | 5.7413 | JPT |
| ACY1L2    | GI_37551403-S | rs9444672  | 6 | 6 | 89914753  | 13815  | 5.7699  | 0.4259 | 0.1349  | 5.7413 | JPT |
| ACY1L2    | GI_37551403-S | rs6926895  | 6 | 6 | 89915570  | 12998  | 5.7850  | 0.4039 | 0.1374  | 5.7413 | JPT |
| ACY1L2    | GI_37551403-S | rs7452757  | 6 | 6 | 89920599  | 7969   | 6.1091  | 0.4237 | -0.1372 | 5.7413 | JPT |
| ACY1L2    | GI_37551403-S | rs4053639  | 6 | 6 | 89921398  | 7170   | 6.0229  | 0.4260 | -0.1381 | 5.7413 | JPT |
| ACY1L2    | GI_37551403-S | rs1929635  | 6 | 6 | 89923709  | 4859   | 5.7850  | 0.4039 | 0.1374  | 5.7413 | JPT |
| ACY1L2    | GI_37551403-S | rs9344910  | 6 | 6 | 89924699  | 3869   | 5.7850  | 0.4039 | 0.1374  | 5.7413 | JPT |
| ACY1L2    | GI_37551403-S | rs2297308  | 6 | 6 | 89925006  | 3562   | 6.0229  | 0.4260 | 0.1381  | 5.7413 | JPT |
| ACY1L2    | GI_37551403-S | rs9353649  | 6 | 6 | 89925227  | 3341   | 6.1091  | 0.4237 | -0.1372 | 5.7413 | JPT |
| ACY1L2    | GI_37551403-S | rs2297309  | 6 | 6 | 89928478  | 90     | 6.0229  | 0.4260 | 0.1381  | 5.7413 | JPT |
| ACY1L2    | GI_37551403-S | rs2150820  | 6 | 6 | 89929695  | 1127   | 6.1091  | 0.4237 | 0.1372  | 5.7413 | JPT |
| ACY1L2    | GI_37551403-S | rs7775554  | 6 | 6 | 89935887  | 7319   | 6.2423  | 0.4472 | 0.1422  | 5.7413 | JPT |
| ACY1L2    | GI_37551403-S | rs9362622  | 6 | 6 | 89938905  | 10337  | 5.7850  | 0.4039 | 0.1374  | 5.7413 | JPT |
| KIAA1913  | GI_40538800-S | rs4895867  | 6 | 6 | 130586202 | 219432 | 14.8875 | 0.7721 | 1.2443  | 6.1024 | JPT |
| KIAA1913  | GI_40538800-S | rs4897380  | 6 | 6 | 130589849 | 215785 | 16.3597 | 0.8051 | 1.2445  | 6.1024 | JPT |
| KIAA1913  | GI_40538800-S | rs10447441 | 6 | 6 | 130591445 | 214189 | 16.3597 | 0.8051 | 1.2445  | 6.1024 | JPT |
| KIAA1913  | GI_40538800-S | rs10447418 | 6 | 6 | 130591494 | 214140 | 16.3597 | 0.8051 | -1.2445 | 6.1024 | JPT |
| KIAA1913  | GI_40538800-S | rs10447419 | 6 | 6 | 130591756 | 213878 | 16.3597 | 0.8051 | 1.2445  | 6.1024 | JPT |
| KIAA1913  | GI_40538800-S | rs12192791 | 6 | 6 | 130593959 | 211675 | 16.3597 | 0.8051 | 1.2445  | 6.1024 | JPT |
| KIAA1913  | GI_40538800-S | rs12194348 | 6 | 6 | 130594437 | 211197 | 15.8815 | 0.8104 | -1.2263 | 6.1024 | JPT |
| KIAA1913  | GI_40538800-S | rs1000424  | 6 | 6 | 130595447 | 210187 | 16.3597 | 0.8051 | -1.2445 | 6.1024 | JPT |
| KIAA1913  | GI_40538800-S | rs9492501  | 6 | 6 | 130608381 | 197253 | 16.3597 | 0.8051 | -1.2445 | 6.1024 | JPT |
| KIAA1913  | GI_40538800-S | rs2024974  | 6 | 6 | 130611808 | 193826 | 15.7213 | 0.7991 | 1.2445  | 6.1024 | JPT |
| KIAA1913  | GI_40538800-S | rs990187   | 6 | 6 | 130615210 | 190424 | 15.7213 | 0.7991 | -1.2445 | 6.1024 | JPT |
| KIAA1913  | GI_40538800-S | rs2326946  | 6 | 6 | 130618308 | 187326 | 15.0739 | 0.8005 | -1.2615 | 6.1024 | JPT |
| KIAA1913  | GI_40538800-S | rs2086163  | 6 | 6 | 130618528 | 187106 | 16.3597 | 0.8051 | 1.2445  | 6.1024 | JPT |
| KIAA1913  | GI_40538800-S | rs962010   | 6 | 6 | 130619088 | 186546 | 15.7213 | 0.7991 | -1.2445 | 6.1024 | JPT |
| KIAA1913  | GI_40538800-S | rs962011   | 6 | 6 | 130619370 | 186264 | 16.3597 | 0.8051 | 1.2445  | 6.1024 | JPT |

|          |               |            |   |   |           |        |         |        |         |        |     |
|----------|---------------|------------|---|---|-----------|--------|---------|--------|---------|--------|-----|
| KIAA1913 | GI_40538800-S | rs1999683  | 6 | 6 | 130619878 | 185756 | 16.3597 | 0.8051 | 1.2445  | 6.1024 | JPT |
| KIAA1913 | GI_40538800-S | rs7751789  | 6 | 6 | 130620331 | 185303 | 16.3597 | 0.8051 | -1.2445 | 6.1024 | JPT |
| KIAA1913 | GI_40538800-S | rs7739747  | 6 | 6 | 130630866 | 174768 | 15.7213 | 0.7991 | -1.2445 | 6.1024 | JPT |
| KIAA1913 | GI_40538800-S | rs6569671  | 6 | 6 | 130632280 | 173354 | 15.7213 | 0.7991 | -1.2445 | 6.1024 | JPT |
| KIAA1913 | GI_40538800-S | rs6913808  | 6 | 6 | 130633251 | 172383 | 15.7213 | 0.7991 | -1.2445 | 6.1024 | JPT |
| KIAA1913 | GI_40538800-S | rs6918577  | 6 | 6 | 130633532 | 172102 | 16.3597 | 0.8051 | -1.2445 | 6.1024 | JPT |
| KIAA1913 | GI_40538800-S | rs6941691  | 6 | 6 | 130633554 | 172080 | 16.0275 | 0.8057 | 1.2444  | 6.1024 | JPT |
| KIAA1913 | GI_40538800-S | rs6918930  | 6 | 6 | 130633705 | 171929 | 16.3597 | 0.8051 | -1.2445 | 6.1024 | JPT |
| KIAA1913 | GI_40538800-S | rs10457545 | 6 | 6 | 130633854 | 171780 | 16.3597 | 0.8051 | 1.2445  | 6.1024 | JPT |
| KIAA1913 | GI_40538800-S | rs1478572  | 6 | 6 | 130635360 | 170274 | 16.3597 | 0.8051 | 1.2445  | 6.1024 | JPT |
| KIAA1913 | GI_40538800-S | rs4479965  | 6 | 6 | 130635380 | 170254 | 16.3597 | 0.8051 | 1.2445  | 6.1024 | JPT |
| KIAA1913 | GI_40538800-S | rs4568476  | 6 | 6 | 130635461 | 170173 | 15.3781 | 0.7994 | -1.2428 | 6.1024 | JPT |
| KIAA1913 | GI_40538800-S | rs6569672  | 6 | 6 | 130635710 | 169924 | 16.3597 | 0.8051 | -1.2445 | 6.1024 | JPT |
| KIAA1913 | GI_40538800-S | rs4513812  | 6 | 6 | 130635813 | 169821 | 16.3597 | 0.8051 | -1.2445 | 6.1024 | JPT |
| KIAA1913 | GI_40538800-S | rs6932063  | 6 | 6 | 130636079 | 169555 | 15.6854 | 0.7984 | 1.2263  | 6.1024 | JPT |
| KIAA1913 | GI_40538800-S | rs6931937  | 6 | 6 | 130636135 | 169499 | 15.7585 | 0.8077 | -1.2555 | 6.1024 | JPT |
| KIAA1913 | GI_40538800-S | rs6911840  | 6 | 6 | 130636147 | 169487 | 16.3597 | 0.8051 | 1.2445  | 6.1024 | JPT |
| KIAA1913 | GI_40538800-S | rs7772495  | 6 | 6 | 130636964 | 168670 | 16.3597 | 0.8051 | 1.2445  | 6.1024 | JPT |
| KIAA1913 | GI_40538800-S | rs11154556 | 6 | 6 | 130637227 | 168407 | 16.3597 | 0.8051 | 1.2445  | 6.1024 | JPT |
| KIAA1913 | GI_40538800-S | rs11154557 | 6 | 6 | 130637287 | 168347 | 16.3597 | 0.8051 | -1.2445 | 6.1024 | JPT |
| KIAA1913 | GI_40538800-S | rs11154558 | 6 | 6 | 130637649 | 167985 | 16.0275 | 0.8057 | 1.2444  | 6.1024 | JPT |
| KIAA1913 | GI_40538800-S | rs12189819 | 6 | 6 | 130638084 | 167550 | 15.7246 | 0.7992 | 1.2448  | 6.1024 | JPT |
| KIAA1913 | GI_40538800-S | rs4897394  | 6 | 6 | 130639247 | 166387 | 15.7213 | 0.7991 | -1.2445 | 6.1024 | JPT |
| KIAA1913 | GI_40538800-S | rs4897396  | 6 | 6 | 130639612 | 166022 | 14.5198 | 0.7958 | -1.2583 | 6.1024 | JPT |
| KIAA1913 | GI_40538800-S | rs12193492 | 6 | 6 | 130639930 | 165704 | 11.6706 | 0.7435 | -1.1734 | 6.1024 | JPT |
| KIAA1913 | GI_40538800-S | rs12206915 | 6 | 6 | 130639964 | 165670 | 15.2289 | 0.8040 | -1.2494 | 6.1024 | JPT |
| KIAA1913 | GI_40538800-S | rs12193542 | 6 | 6 | 130640033 | 165601 | 16.2217 | 0.8174 | -1.2436 | 6.1024 | JPT |
| KIAA1913 | GI_40538800-S | rs12202107 | 6 | 6 | 130640316 | 165318 | 16.3597 | 0.8051 | 1.2445  | 6.1024 | JPT |
| KIAA1913 | GI_40538800-S | rs12197027 | 6 | 6 | 130641595 | 164039 | 16.3597 | 0.8051 | -1.2445 | 6.1024 | JPT |
| KIAA1913 | GI_40538800-S | rs12210502 | 6 | 6 | 130641733 | 163901 | 16.3597 | 0.8051 | -1.2445 | 6.1024 | JPT |
| KIAA1913 | GI_40538800-S | rs12197194 | 6 | 6 | 130641749 | 163885 | 16.3597 | 0.8051 | 1.2445  | 6.1024 | JPT |
| KIAA1913 | GI_40538800-S | rs11154559 | 6 | 6 | 130642921 | 162713 | 13.3854 | 0.7756 | -1.2579 | 6.1024 | JPT |
| KIAA1913 | GI_40538800-S | rs12212688 | 6 | 6 | 130643073 | 162561 | 13.7925 | 0.7863 | -1.2502 | 6.1024 | JPT |
| KIAA1913 | GI_40538800-S | rs12214250 | 6 | 6 | 130643473 | 162161 | 15.7213 | 0.7991 | -1.2445 | 6.1024 | JPT |
| KIAA1913 | GI_40538800-S | rs2089997  | 6 | 6 | 130644811 | 160823 | 15.7213 | 0.7991 | 1.2445  | 6.1024 | JPT |
| KIAA1913 | GI_40538800-S | rs2089998  | 6 | 6 | 130644917 | 160717 | 16.3597 | 0.8051 | -1.2445 | 6.1024 | JPT |
| KIAA1913 | GI_40538800-S | rs11154560 | 6 | 6 | 130645651 | 159983 | 13.6766 | 0.8194 | 1.2108  | 6.1024 | JPT |
| KIAA1913 | GI_40538800-S | rs7765872  | 6 | 6 | 130646121 | 159513 | 16.3597 | 0.8051 | -1.2445 | 6.1024 | JPT |
| KIAA1913 | GI_40538800-S | rs7766039  | 6 | 6 | 130646204 | 159430 | 15.7850 | 0.8005 | -1.2506 | 6.1024 | JPT |
| KIAA1913 | GI_40538800-S | rs7770566  | 6 | 6 | 130646423 | 159211 | 14.8802 | 0.8043 | 1.2738  | 6.1024 | JPT |
| KIAA1913 | GI_40538800-S | rs4897398  | 6 | 6 | 130649264 | 156370 | 15.7213 | 0.7991 | 1.2445  | 6.1024 | JPT |
| KIAA1913 | GI_40538800-S | rs12333039 | 6 | 6 | 130649396 | 156238 | 11.1903 | 0.6624 | 1.1810  | 6.1024 | JPT |
| KIAA1913 | GI_40538800-S | rs9492526  | 6 | 6 | 130650354 | 155280 | 11.1345 | 0.6871 | 1.1800  | 6.1024 | JPT |
| KIAA1913 | GI_40538800-S | rs10872358 | 6 | 6 | 130650847 | 154787 | 11.1903 | 0.6624 | -1.1810 | 6.1024 | JPT |
| KIAA1913 | GI_40538800-S | rs10872359 | 6 | 6 | 130650861 | 154773 | 11.1903 | 0.6624 | -1.1810 | 6.1024 | JPT |
| KIAA1913 | GI_40538800-S | rs11154561 | 6 | 6 | 130650927 | 154707 | 11.2068 | 0.6806 | -1.1562 | 6.1024 | JPT |
| KIAA1913 | GI_40538800-S | rs11154562 | 6 | 6 | 130651243 | 154391 | 11.1903 | 0.6624 | 1.1810  | 6.1024 | JPT |
| KIAA1913 | GI_40538800-S | rs11154564 | 6 | 6 | 130651358 | 154276 | 11.1903 | 0.6624 | -1.1810 | 6.1024 | JPT |
| KIAA1913 | GI_40538800-S | rs4897399  | 6 | 6 | 130651450 | 154184 | 11.1903 | 0.6624 | -1.1810 | 6.1024 | JPT |
| KIAA1913 | GI_40538800-S | rs11154565 | 6 | 6 | 130651562 | 154072 | 11.1903 | 0.6624 | -1.1810 | 6.1024 | JPT |
| KIAA1913 | GI_40538800-S | rs4897400  | 6 | 6 | 130651582 | 154052 | 11.1903 | 0.6624 | 1.1810  | 6.1024 | JPT |
| KIAA1913 | GI_40538800-S | rs4897401  | 6 | 6 | 130651672 | 153962 | 11.1903 | 0.6624 | 1.1810  | 6.1024 | JPT |
| KIAA1913 | GI_40538800-S | rs4897402  | 6 | 6 | 130651701 | 153933 | 11.1903 | 0.6624 | -1.1810 | 6.1024 | JPT |
| KIAA1913 | GI_40538800-S | rs12213521 | 6 | 6 | 130652208 | 153426 | 10.7073 | 0.6535 | 1.1797  | 6.1024 | JPT |
| KIAA1913 | GI_40538800-S | rs4897405  | 6 | 6 | 130653866 | 151768 | 11.4907 | 0.6817 | -1.1772 | 6.1024 | JPT |
| KIAA1913 | GI_40538800-S | rs4897406  | 6 | 6 | 130653881 | 151753 | 10.9145 | 0.6612 | -1.1951 | 6.1024 | JPT |
| KIAA1913 | GI_40538800-S | rs12211647 | 6 | 6 | 130654552 | 151082 | 11.1903 | 0.6624 | 1.1810  | 6.1024 | JPT |
| KIAA1913 | GI_40538800-S | rs12211796 | 6 | 6 | 130654646 | 150988 | 11.4828 | 0.6814 | -1.1776 | 6.1024 | JPT |
| KIAA1913 | GI_40538800-S | rs12211846 | 6 | 6 | 130654693 | 150941 | 11.1903 | 0.6624 | 1.1810  | 6.1024 | JPT |

|          |               |            |   |   |           |        |         |        |         |        |     |
|----------|---------------|------------|---|---|-----------|--------|---------|--------|---------|--------|-----|
| KIAA1913 | GI_40538800-S | rs12211753 | 6 | 6 | 130654737 | 150897 | 10.9908 | 0.6640 | -1.1818 | 6.1024 | JPT |
| KIAA1913 | GI_40538800-S | rs12198283 | 6 | 6 | 130654814 | 150820 | 10.4857 | 0.7122 | -1.1943 | 6.1024 | JPT |
| KIAA1913 | GI_40538800-S | rs12198460 | 6 | 6 | 130655077 | 150557 | 9.7237  | 0.6235 | -1.1480 | 6.1024 | JPT |
| KIAA1913 | GI_40538800-S | rs12194113 | 6 | 6 | 130656028 | 149606 | 11.1903 | 0.6624 | 1.1810  | 6.1024 | JPT |
| KIAA1913 | GI_40538800-S | rs12213950 | 6 | 6 | 130656150 | 149484 | 11.1903 | 0.6624 | -1.1810 | 6.1024 | JPT |
| KIAA1913 | GI_40538800-S | rs11154567 | 6 | 6 | 130656627 | 149007 | 10.6708 | 0.6521 | 1.1829  | 6.1024 | JPT |
| KIAA1913 | GI_40538800-S | rs12194184 | 6 | 6 | 130658099 | 147535 | 11.1903 | 0.6624 | -1.1810 | 6.1024 | JPT |
| KIAA1913 | GI_40538800-S | rs11154568 | 6 | 6 | 130658363 | 147271 | 10.8372 | 0.6672 | -1.1964 | 6.1024 | JPT |
| KIAA1913 | GI_40538800-S | rs4897407  | 6 | 6 | 130658402 | 147232 | 10.6708 | 0.6521 | 1.1829  | 6.1024 | JPT |
| KIAA1913 | GI_40538800-S | rs11962431 | 6 | 6 | 130664274 | 141360 | 7.3624  | 0.5384 | 1.1948  | 6.1024 | JPT |
| KIAA1913 | GI_40538800-S | rs6938087  | 6 | 6 | 130664561 | 141073 | 11.1244 | 0.6688 | 1.1828  | 6.1024 | JPT |
| KIAA1913 | GI_40538800-S | rs7758496  | 6 | 6 | 130670682 | 134952 | 10.6708 | 0.6521 | 1.1829  | 6.1024 | JPT |
| KIAA1913 | GI_40538800-S | rs1983720  | 6 | 6 | 130674252 | 131382 | 6.3756  | 0.5098 | -1.0557 | 6.1024 | JPT |
| KIAA1913 | GI_40538800-S | rs2037020  | 6 | 6 | 130676393 | 129241 | 11.1903 | 0.6624 | -1.1810 | 6.1024 | JPT |
| KIAA1913 | GI_40538800-S | rs2037021  | 6 | 6 | 130676504 | 129130 | 11.1903 | 0.6624 | -1.1810 | 6.1024 | JPT |
| KIAA1913 | GI_40538800-S | rs2024972  | 6 | 6 | 130677226 | 128408 | 10.6708 | 0.6521 | 1.1829  | 6.1024 | JPT |
| KIAA1913 | GI_40538800-S | rs9492535  | 6 | 6 | 130678209 | 127425 | 11.1903 | 0.6624 | 1.1810  | 6.1024 | JPT |
| KIAA1913 | GI_40538800-S | rs9492536  | 6 | 6 | 130678343 | 127291 | 11.1903 | 0.6624 | 1.1810  | 6.1024 | JPT |
| KIAA1913 | GI_40538800-S | rs9492537  | 6 | 6 | 130678398 | 127236 | 10.9431 | 0.6622 | -1.1809 | 6.1024 | JPT |
| KIAA1913 | GI_40538800-S | rs9492538  | 6 | 6 | 130678417 | 127217 | 11.1903 | 0.6624 | 1.1810  | 6.1024 | JPT |
| KIAA1913 | GI_40538800-S | rs6915557  | 6 | 6 | 130678637 | 126997 | 11.1903 | 0.6624 | -1.1810 | 6.1024 | JPT |
| KIAA1913 | GI_40538800-S | rs9492542  | 6 | 6 | 130679567 | 126067 | 10.6708 | 0.6521 | -1.1829 | 6.1024 | JPT |
| KIAA1913 | GI_40538800-S | rs7740388  | 6 | 6 | 130679817 | 125817 | 10.6708 | 0.6521 | 1.1829  | 6.1024 | JPT |
| KIAA1913 | GI_40538800-S | rs7758457  | 6 | 6 | 130679842 | 125792 | 11.1903 | 0.6624 | -1.1810 | 6.1024 | JPT |
| KIAA1913 | GI_40538800-S | rs7759052  | 6 | 6 | 130680032 | 125602 | 11.1903 | 0.6624 | -1.1810 | 6.1024 | JPT |
| KIAA1913 | GI_40538800-S | rs10872360 | 6 | 6 | 130680419 | 125215 | 11.1903 | 0.6624 | 1.1810  | 6.1024 | JPT |
| KIAA1913 | GI_40538800-S | rs9492544  | 6 | 6 | 130680443 | 125191 | 11.1903 | 0.6624 | 1.1810  | 6.1024 | JPT |
| KIAA1913 | GI_40538800-S | rs9492546  | 6 | 6 | 130680602 | 125032 | 11.1903 | 0.6624 | 1.1810  | 6.1024 | JPT |
| KIAA1913 | GI_40538800-S | rs10457551 | 6 | 6 | 130680771 | 124863 | 11.1903 | 0.6624 | 1.1810  | 6.1024 | JPT |
| KIAA1913 | GI_40538800-S | rs6928320  | 6 | 6 | 130680803 | 124831 | 11.1903 | 0.6624 | 1.1810  | 6.1024 | JPT |
| KIAA1913 | GI_40538800-S | rs6928644  | 6 | 6 | 130681206 | 124428 | 11.1903 | 0.6624 | -1.1810 | 6.1024 | JPT |
| KIAA1913 | GI_40538800-S | rs4897409  | 6 | 6 | 130681805 | 123829 | 11.1903 | 0.6624 | 1.1810  | 6.1024 | JPT |
| KIAA1913 | GI_40538800-S | rs6940357  | 6 | 6 | 130682614 | 123020 | 11.1903 | 0.6624 | 1.1810  | 6.1024 | JPT |
| KIAA1913 | GI_40538800-S | rs6940373  | 6 | 6 | 130682646 | 122988 | 11.1903 | 0.6624 | 1.1810  | 6.1024 | JPT |
| KIAA1913 | GI_40538800-S | rs6940232  | 6 | 6 | 130682686 | 122948 | 11.1903 | 0.6624 | -1.1810 | 6.1024 | JPT |
| KIAA1913 | GI_40538800-S | rs9321222  | 6 | 6 | 130682917 | 122717 | 11.1903 | 0.6624 | 1.1810  | 6.1024 | JPT |
| KIAA1913 | GI_40538800-S | rs4895880  | 6 | 6 | 130683654 | 121980 | 11.1903 | 0.6624 | 1.1810  | 6.1024 | JPT |
| KIAA1913 | GI_40538800-S | rs4897410  | 6 | 6 | 130683802 | 121832 | 11.1903 | 0.6624 | -1.1810 | 6.1024 | JPT |
| KIAA1913 | GI_40538800-S | rs2326939  | 6 | 6 | 130684015 | 121619 | 11.1903 | 0.6624 | 1.1810  | 6.1024 | JPT |
| KIAA1913 | GI_40538800-S | rs7742461  | 6 | 6 | 130684242 | 121392 | 11.1903 | 0.6624 | 1.1810  | 6.1024 | JPT |
| KIAA1913 | GI_40538800-S | rs6569675  | 6 | 6 | 130684416 | 121218 | 11.1903 | 0.6624 | 1.1810  | 6.1024 | JPT |
| KIAA1913 | GI_40538800-S | rs6909415  | 6 | 6 | 130684608 | 121026 | 11.1903 | 0.6624 | 1.1810  | 6.1024 | JPT |
| KIAA1913 | GI_40538800-S | rs6909334  | 6 | 6 | 130684804 | 120830 | 11.1903 | 0.6624 | -1.1810 | 6.1024 | JPT |
| KIAA1913 | GI_40538800-S | rs6909986  | 6 | 6 | 130684914 | 120720 | 11.1903 | 0.6624 | 1.1810  | 6.1024 | JPT |
| KIAA1913 | GI_40538800-S | rs6910182  | 6 | 6 | 130685049 | 120585 | 11.1903 | 0.6624 | 1.1810  | 6.1024 | JPT |
| KIAA1913 | GI_40538800-S | rs899276   | 6 | 6 | 130685849 | 119785 | 10.6708 | 0.6521 | 1.1829  | 6.1024 | JPT |
| KIAA1913 | GI_40538800-S | rs12195758 | 6 | 6 | 130686711 | 118923 | 11.1903 | 0.6624 | 1.1810  | 6.1024 | JPT |
| KIAA1913 | GI_40538800-S | rs9398942  | 6 | 6 | 130686750 | 118884 | 11.1903 | 0.6624 | 1.1810  | 6.1024 | JPT |
| KIAA1913 | GI_40538800-S | rs724324   | 6 | 6 | 130689089 | 116545 | 10.6708 | 0.6521 | -1.1829 | 6.1024 | JPT |
| KIAA1913 | GI_40538800-S | rs1546555  | 6 | 6 | 130689687 | 115947 | 11.1903 | 0.6624 | -1.1810 | 6.1024 | JPT |
| KIAA1913 | GI_40538800-S | rs4141939  | 6 | 6 | 130691021 | 114613 | 11.1903 | 0.6624 | 1.1810  | 6.1024 | JPT |
| KIAA1913 | GI_40538800-S | rs4141940  | 6 | 6 | 130691297 | 114337 | 11.1903 | 0.6624 | 1.1810  | 6.1024 | JPT |
| KIAA1913 | GI_40538800-S | rs6569676  | 6 | 6 | 130692019 | 113615 | 11.1903 | 0.6624 | -1.1810 | 6.1024 | JPT |
| KIAA1913 | GI_40538800-S | rs4895881  | 6 | 6 | 130695294 | 110340 | 11.1903 | 0.6624 | -1.1810 | 6.1024 | JPT |
| KIAA1913 | GI_40538800-S | rs4897412  | 6 | 6 | 130695438 | 110196 | 11.1903 | 0.6624 | 1.1810  | 6.1024 | JPT |
| KIAA1913 | GI_40538800-S | rs7759745  | 6 | 6 | 130697540 | 108094 | 11.1903 | 0.6624 | -1.1810 | 6.1024 | JPT |
| KIAA1913 | GI_40538800-S | rs6935211  | 6 | 6 | 130699287 | 106347 | 10.6708 | 0.6521 | -1.1829 | 6.1024 | JPT |
| KIAA1913 | GI_40538800-S | rs4897413  | 6 | 6 | 130699411 | 106223 | 10.6708 | 0.6521 | -1.1829 | 6.1024 | JPT |
| KIAA1913 | GI_40538800-S | rs6914642  | 6 | 6 | 130706341 | 99293  | 11.0079 | 0.6646 | 1.1820  | 6.1024 | JPT |

|          |               |            |   |   |           |       |         |        |         |        |     |
|----------|---------------|------------|---|---|-----------|-------|---------|--------|---------|--------|-----|
| KIAA1913 | GI_40538800-S | rs6916087  | 6 | 6 | 130707082 | 98552 | 11.1903 | 0.6624 | 1.1810  | 6.1024 | JPT |
| KIAA1913 | GI_40538800-S | rs907785   | 6 | 6 | 130708036 | 97598 | 8.9293  | 0.6371 | -1.1774 | 6.1024 | JPT |
| KIAA1913 | GI_40538800-S | rs6915757  | 6 | 6 | 130708877 | 96757 | 10.6708 | 0.6521 | -1.1829 | 6.1024 | JPT |
| KIAA1913 | GI_40538800-S | rs10872364 | 6 | 6 | 130712337 | 93297 | 11.1903 | 0.6624 | 1.1810  | 6.1024 | JPT |
| KIAA1913 | GI_40538800-S | rs6917875  | 6 | 6 | 130717689 | 87945 | 10.6708 | 0.6521 | 1.1829  | 6.1024 | JPT |
| KIAA1913 | GI_40538800-S | rs11154572 | 6 | 6 | 130720479 | 85155 | 11.1903 | 0.6624 | -1.1810 | 6.1024 | JPT |
| KIAA1913 | GI_40538800-S | rs1398816  | 6 | 6 | 130721658 | 83976 | 11.1903 | 0.6624 | -1.1810 | 6.1024 | JPT |
| KIAA1913 | GI_40538800-S | rs905633   | 6 | 6 | 130733973 | 71661 | 10.6708 | 0.6521 | -1.1829 | 6.1024 | JPT |
| KIAA1913 | GI_40538800-S | rs4897418  | 6 | 6 | 130743923 | 61711 | 10.6708 | 0.6521 | -1.1829 | 6.1024 | JPT |
| KIAA1913 | GI_40538800-S | rs2011841  | 6 | 6 | 130745726 | 59908 | 10.6708 | 0.6521 | -1.1829 | 6.1024 | JPT |
| KIAA1913 | GI_40538800-S | rs9492566  | 6 | 6 | 130749105 | 56529 | 10.6708 | 0.6521 | -1.1829 | 6.1024 | JPT |
| KIAA1913 | GI_40538800-S | rs9492567  | 6 | 6 | 130751476 | 54158 | 11.1903 | 0.6624 | -1.1810 | 6.1024 | JPT |
| KIAA1913 | GI_40538800-S | rs9492570  | 6 | 6 | 130755149 | 50485 | 11.1903 | 0.6624 | -1.1810 | 6.1024 | JPT |
| KIAA1913 | GI_40538800-S | rs7755542  | 6 | 6 | 130762210 | 43424 | 8.7058  | 0.5697 | -1.0461 | 6.1024 | JPT |
| KIAA1913 | GI_40538800-S | rs1553993  | 6 | 6 | 130763423 | 42211 | 11.1903 | 0.6624 | -1.1810 | 6.1024 | JPT |
| KIAA1913 | GI_40538800-S | rs1513539  | 6 | 6 | 130764531 | 41103 | 10.6708 | 0.6521 | 1.1829  | 6.1024 | JPT |
| KIAA1913 | GI_40538800-S | rs1513541  | 6 | 6 | 130769657 | 35977 | 10.6708 | 0.6521 | -1.1829 | 6.1024 | JPT |
| KIAA1913 | GI_40538800-S | rs1504025  | 6 | 6 | 130773567 | 32067 | 10.6708 | 0.6521 | -1.1829 | 6.1024 | JPT |
| KIAA1913 | GI_40538800-S | rs6569682  | 6 | 6 | 130776475 | 29159 | 10.6708 | 0.6521 | 1.1829  | 6.1024 | JPT |
| KIAA1913 | GI_40538800-S | rs6941686  | 6 | 6 | 130788356 | 17278 | 11.1903 | 0.6624 | -1.1810 | 6.1024 | JPT |
| KIAA1913 | GI_40538800-S | rs10485237 | 6 | 6 | 130791153 | 14481 | 10.1200 | 0.6397 | 1.1830  | 6.1024 | JPT |
| KIAA1913 | GI_40538800-S | rs10485238 | 6 | 6 | 130792468 | 13166 | 11.1903 | 0.6624 | 1.1810  | 6.1024 | JPT |
| KIAA1913 | GI_40538800-S | rs4897423  | 6 | 6 | 130794585 | 11049 | 10.6708 | 0.6521 | 1.1829  | 6.1024 | JPT |
| KIAA1913 | GI_40538800-S | rs7775870  | 6 | 6 | 130795465 | 10169 | 10.9431 | 0.6622 | -1.1809 | 6.1024 | JPT |
| KIAA1913 | GI_40538800-S | rs6927593  | 6 | 6 | 130798637 | 6997  | 10.6708 | 0.6521 | -1.1829 | 6.1024 | JPT |
| KIAA1913 | GI_40538800-S | rs10456986 | 6 | 6 | 130800816 | 4818  | 11.1903 | 0.6624 | -1.1810 | 6.1024 | JPT |
| KIAA1913 | GI_40538800-S | rs7768817  | 6 | 6 | 130806857 | 1223  | 10.8710 | 0.6508 | -1.1515 | 6.1024 | JPT |
| KIAA1913 | GI_40538800-S | rs4897424  | 6 | 6 | 130808042 | 2408  | 11.1903 | 0.6624 | 1.1810  | 6.1024 | JPT |
| KIAA1913 | GI_40538800-S | rs4555944  | 6 | 6 | 130808797 | 3163  | 11.1903 | 0.6624 | 1.1810  | 6.1024 | JPT |
| KIAA1913 | GI_40538800-S | rs2025353  | 6 | 6 | 130809722 | 4088  | 10.6708 | 0.6521 | 1.1829  | 6.1024 | JPT |
| ALDH8A1  | GI_25952151-A | rs2072827  | 6 | 6 | 135295296 | 14842 | 6.8344  | 0.4657 | -0.1212 | 5.6563 | JPT |
| ALDH8A1  | GI_25952151-A | rs3817776  | 6 | 6 | 135298449 | 17995 | 6.6954  | 0.4658 | 0.1212  | 5.6563 | JPT |
| ALDH8A1  | GI_25952151-A | rs4445070  | 6 | 6 | 135350905 | 70451 | 6.0814  | 0.4627 | -0.1196 | 5.6563 | JPT |
| HEBP2    | GI_41393567-S | rs11964805 | 6 | 6 | 138704089 | 64761 | 7.1143  | 0.4811 | 0.9030  | 5.8553 | JPT |
| HEBP2    | GI_41393567-S | rs7740144  | 6 | 6 | 138705078 | 63772 | 6.8855  | 0.4766 | 0.8874  | 5.8553 | JPT |
| HEBP2    | GI_41393567-S | rs9495020  | 6 | 6 | 138710940 | 57910 | 6.8855  | 0.4766 | -0.8874 | 5.8553 | JPT |
| HEBP2    | GI_41393567-S | rs9495025  | 6 | 6 | 138717557 | 51293 | 7.1143  | 0.4811 | 0.9030  | 5.8553 | JPT |
| HEBP2    | GI_41393567-S | rs7748815  | 6 | 6 | 138720945 | 47905 | 6.8855  | 0.4766 | -0.8874 | 5.8553 | JPT |
| HEBP2    | GI_41393567-S | rs7753628  | 6 | 6 | 138721532 | 47318 | 7.1143  | 0.4811 | -0.9030 | 5.8553 | JPT |
| HEBP2    | GI_41393567-S | rs11970756 | 6 | 6 | 138723146 | 45704 | 6.8855  | 0.4766 | 0.8874  | 5.8553 | JPT |
| HEBP2    | GI_41393567-S | rs9495030  | 6 | 6 | 138724217 | 44633 | 6.8855  | 0.4766 | -0.8874 | 5.8553 | JPT |
| HEBP2    | GI_41393567-S | rs17067480 | 6 | 6 | 138725218 | 43632 | 7.1143  | 0.4811 | 0.9030  | 5.8553 | JPT |
| HEBP2    | GI_41393567-S | rs9484143  | 6 | 6 | 138726192 | 42658 | 6.8855  | 0.4766 | -0.8874 | 5.8553 | JPT |
| HEBP2    | GI_41393567-S | rs17067484 | 6 | 6 | 138726403 | 42447 | 7.1143  | 0.4811 | 0.9030  | 5.8553 | JPT |
| HEBP2    | GI_41393567-S | rs9689169  | 6 | 6 | 138726550 | 42300 | 6.8695  | 0.4757 | 0.8961  | 5.8553 | JPT |
| HEBP2    | GI_41393567-S | rs6933880  | 6 | 6 | 138730044 | 38806 | 6.8855  | 0.4766 | -0.8874 | 5.8553 | JPT |
| HEBP2    | GI_41393567-S | rs9495045  | 6 | 6 | 138732137 | 36713 | 6.6657  | 0.4723 | -0.8851 | 5.8553 | JPT |
| HEBP2    | GI_41393567-S | rs10223504 | 6 | 6 | 138732666 | 36184 | 7.9452  | 0.5416 | 0.9590  | 5.8553 | JPT |
| HEBP2    | GI_41393567-S | rs6570228  | 6 | 6 | 138732788 | 36062 | 8.4381  | 0.5485 | 0.9820  | 5.8553 | JPT |
| HEBP2    | GI_41393567-S | rs2076278  | 6 | 6 | 138732918 | 35932 | 7.3458  | 0.5571 | 0.9549  | 5.8553 | JPT |
| HEBP2    | GI_41393567-S | rs7752490  | 6 | 6 | 138734108 | 34742 | 8.1718  | 0.6008 | -1.0271 | 5.8553 | JPT |
| HEBP2    | GI_41393567-S | rs7756927  | 6 | 6 | 138734418 | 34432 | 8.4544  | 0.5757 | 1.0189  | 5.8553 | JPT |
| HEBP2    | GI_41393567-S | rs11966129 | 6 | 6 | 138735690 | 33160 | 8.2157  | 0.5463 | -0.9670 | 5.8553 | JPT |
| HEBP2    | GI_41393567-S | rs9495050  | 6 | 6 | 138738236 | 30614 | 8.4381  | 0.5485 | 0.9820  | 5.8553 | JPT |
| HEBP2    | GI_41393567-S | rs9495051  | 6 | 6 | 138738326 | 30524 | 8.4381  | 0.5485 | 0.9820  | 5.8553 | JPT |
| HEBP2    | GI_41393567-S | rs9495052  | 6 | 6 | 138738411 | 30439 | 8.2157  | 0.5463 | 0.9670  | 5.8553 | JPT |
| HEBP2    | GI_41393567-S | rs9495053  | 6 | 6 | 138739065 | 29785 | 8.2157  | 0.5463 | 0.9670  | 5.8553 | JPT |
| HEBP2    | GI_41393567-S | rs9495054  | 6 | 6 | 138742711 | 26139 | 6.2019  | 0.4530 | 0.8778  | 5.8553 | JPT |
| HEBP2    | GI_41393567-S | rs12181239 | 6 | 6 | 138742843 | 26007 | 8.4381  | 0.5485 | 0.9820  | 5.8553 | JPT |

|           |               |            |   |   |           |       |         |        |         |        |     |
|-----------|---------------|------------|---|---|-----------|-------|---------|--------|---------|--------|-----|
| HEBP2     | GI_41393567-S | rs6918995  | 6 | 6 | 138744490 | 24360 | 8.2157  | 0.5463 | 0.9670  | 5.8553 | JPT |
| HEBP2     | GI_41393567-S | rs9484151  | 6 | 6 | 138744898 | 23952 | 8.4381  | 0.5485 | -0.9820 | 5.8553 | JPT |
| HEBP2     | GI_41393567-S | rs9484152  | 6 | 6 | 138744936 | 23914 | 8.4381  | 0.5485 | 0.9820  | 5.8553 | JPT |
| HEBP2     | GI_41393567-S | rs2076273  | 6 | 6 | 138745333 | 23517 | 9.6363  | 0.6108 | 0.9087  | 5.8553 | JPT |
| HEBP2     | GI_41393567-S | rs2076272  | 6 | 6 | 138745455 | 23395 | 8.4381  | 0.5485 | 0.9820  | 5.8553 | JPT |
| HEBP2     | GI_41393567-S | rs11966257 | 6 | 6 | 138747488 | 21362 | 8.4381  | 0.5485 | 0.9820  | 5.8553 | JPT |
| HEBP2     | GI_41393567-S | rs9495063  | 6 | 6 | 138749877 | 18973 | 8.4381  | 0.5485 | 0.9820  | 5.8553 | JPT |
| HEBP2     | GI_41393567-S | rs9495064  | 6 | 6 | 138750902 | 17948 | 8.2157  | 0.5463 | -0.9670 | 5.8553 | JPT |
| HEBP2     | GI_41393567-S | rs9495065  | 6 | 6 | 138751549 | 17301 | 6.2626  | 0.4405 | -0.7909 | 5.8553 | JPT |
| HEBP2     | GI_41393567-S | rs9495066  | 6 | 6 | 138751653 | 17197 | 8.2157  | 0.5463 | -0.9670 | 5.8553 | JPT |
| HEBP2     | GI_41393567-S | rs7765991  | 6 | 6 | 138752217 | 16633 | 8.4381  | 0.5485 | -0.9820 | 5.8553 | JPT |
| HEBP2     | GI_41393567-S | rs9495068  | 6 | 6 | 138753988 | 14862 | 8.4381  | 0.5485 | -0.9820 | 5.8553 | JPT |
| HEBP2     | GI_41393567-S | rs9495070  | 6 | 6 | 138756312 | 12538 | 8.2157  | 0.5463 | -0.9670 | 5.8553 | JPT |
| HEBP2     | GI_41393567-S | rs17053774 | 6 | 6 | 138757930 | 10920 | 8.4381  | 0.5485 | 0.9820  | 5.8553 | JPT |
| HEBP2     | GI_41393567-S | rs6914861  | 6 | 6 | 138761445 | 7405  | 8.2157  | 0.5463 | -0.9670 | 5.8553 | JPT |
| HEBP2     | GI_41393567-S | rs3756890  | 6 | 6 | 138765462 | 3388  | 8.2157  | 0.5463 | 0.9670  | 5.8553 | JPT |
| HEBP2     | GI_41393567-S | rs9495076  | 6 | 6 | 138767550 | 1300  | 8.4381  | 0.5485 | -0.9820 | 5.8553 | JPT |
| HEBP2     | GI_41393567-S | rs6919872  | 6 | 6 | 138767876 | 974   | 8.4381  | 0.5485 | -0.9820 | 5.8553 | JPT |
| HEBP2     | GI_41393567-S | rs3734304  | 6 | 6 | 138769098 | 248   | 8.2157  | 0.5463 | -0.9670 | 5.8553 | JPT |
| HEBP2     | GI_41393567-S | rs6570232  | 6 | 6 | 138771357 | 2507  | 8.2157  | 0.5463 | 0.9670  | 5.8553 | JPT |
| HEBP2     | GI_41393567-S | rs9495079  | 6 | 6 | 138774449 | 5599  | 8.4381  | 0.5485 | 0.9820  | 5.8553 | JPT |
| HEBP2     | GI_41393567-S | rs2076279  | 6 | 6 | 138775722 | 6872  | 8.2157  | 0.5463 | 0.9670  | 5.8553 | JPT |
| HEBP2     | GI_41393567-S | rs1053657  | 6 | 6 | 138776115 | 7265  | 8.4381  | 0.5485 | -0.9820 | 5.8553 | JPT |
| HEBP2     | GI_41393567-S | rs9484159  | 6 | 6 | 138776970 | 8120  | 8.4381  | 0.5485 | 0.9820  | 5.8553 | JPT |
| HEBP2     | GI_41393567-S | rs6570234  | 6 | 6 | 138781694 | 12844 | 7.0764  | 0.4872 | 0.9782  | 5.8553 | JPT |
| HEBP2     | GI_41393567-S | rs6930305  | 6 | 6 | 138781875 | 13025 | 7.2944  | 0.4909 | 0.9821  | 5.8553 | JPT |
| LOC135043 | GI_17463264-S | rs10946155 | 6 | 6 | 166694723 | 32283 | 6.1646  | 0.4346 | 0.2838  | 6.1423 | JPT |
| LOC135043 | GI_17463264-S | rs10946158 | 6 | 6 | 166701700 | 25306 | 13.7487 | 0.7510 | -0.3427 | 6.1423 | JPT |
| LOC135043 | GI_17463264-S | rs9347123  | 6 | 6 | 166705064 | 21942 | 6.6808  | 0.4650 | 0.2745  | 6.1423 | JPT |
| LOC135043 | GI_17463264-S | rs9295336  | 6 | 6 | 166706773 | 20233 | 6.6808  | 0.4650 | 0.2745  | 6.1423 | JPT |
| LOC135043 | GI_17463264-S | rs941683   | 6 | 6 | 166710681 | 16325 | 13.7487 | 0.7510 | -0.3427 | 6.1423 | JPT |
| LOC135043 | GI_17463264-S | rs12214812 | 6 | 6 | 166713571 | 13435 | 13.0432 | 0.7397 | -0.3444 | 6.1423 | JPT |
| LOC135043 | GI_17463264-S | rs9348119  | 6 | 6 | 166714171 | 12835 | 6.6808  | 0.4650 | -0.2745 | 6.1423 | JPT |
| LOC135043 | GI_17463264-S | rs11752886 | 6 | 6 | 166716710 | 10296 | 14.0327 | 0.7504 | 0.3422  | 6.1423 | JPT |
| LOC135043 | GI_17463264-S | rs4144887  | 6 | 6 | 166717923 | 9083  | 11.6914 | 0.7156 | -0.3506 | 6.1423 | JPT |
| LOC135043 | GI_17463264-S | rs4144886  | 6 | 6 | 166717983 | 9023  | 13.4426 | 0.7425 | 0.3374  | 6.1423 | JPT |
| LOC135043 | GI_17463264-S | rs4144888  | 6 | 6 | 166718207 | 8799  | 14.0327 | 0.7504 | 0.3422  | 6.1423 | JPT |
| LOC135043 | GI_17463264-S | rs12198613 | 6 | 6 | 166718318 | 8688  | 14.0327 | 0.7504 | 0.3422  | 6.1423 | JPT |
| LOC135043 | GI_17463264-S | rs10455809 | 6 | 6 | 166721171 | 5835  | 12.7897 | 0.7499 | 0.3454  | 6.1423 | JPT |
| LOC135043 | GI_17463264-S | rs4710042  | 6 | 6 | 166722088 | 4918  | 6.2018  | 0.4369 | -0.2743 | 6.1423 | JPT |
| LOC135043 | GI_17463264-S | rs9348121  | 6 | 6 | 166725423 | 1583  | 6.8276  | 0.4653 | -0.2746 | 6.1423 | JPT |
| LOC135043 | GI_17463264-S | rs11755305 | 6 | 6 | 166725686 | 1320  | 14.0327 | 0.7504 | 0.3422  | 6.1423 | JPT |
| LOC135043 | GI_17463264-S | rs2294335  | 6 | 6 | 166726541 | 465   | 13.7487 | 0.7510 | -0.3427 | 6.1423 | JPT |
| LOC135043 | GI_17463264-S | rs2294334  | 6 | 6 | 166726590 | 416   | 13.8303 | 0.7532 | 0.3408  | 6.1423 | JPT |
| LOC135043 | GI_17463264-S | rs11753652 | 6 | 6 | 166727402 | 396   | 13.8303 | 0.7532 | -0.3408 | 6.1423 | JPT |
| LOC392620 | GI_41147689-S | rs798500   | 7 | 7 | 2563926   | 29028 | 6.4743  | 0.4452 | 0.1714  | 5.5964 | JPT |
| LOC392620 | GI_41147689-S | rs798499   | 7 | 7 | 2565254   | 30356 | 5.8896  | 0.4335 | 0.1729  | 5.5964 | JPT |
| LOC392620 | GI_41147689-S | rs798498   | 7 | 7 | 2569123   | 34225 | 5.6524  | 0.3956 | 0.1479  | 5.5964 | JPT |
| LOC392620 | GI_41147689-S | rs798497   | 7 | 7 | 2569198   | 34300 | 6.0592  | 0.4442 | -0.1768 | 5.5964 | JPT |
| LOC392620 | GI_41147689-S | rs798495   | 7 | 7 | 2570508   | 35610 | 6.4743  | 0.4452 | 0.1714  | 5.5964 | JPT |
| LOC392620 | GI_41147689-S | rs798494   | 7 | 7 | 2571535   | 36637 | 6.4743  | 0.4452 | 0.1714  | 5.5964 | JPT |
| LOC392620 | GI_41147689-S | rs798492   | 7 | 7 | 2572425   | 37527 | 5.6524  | 0.3956 | 0.1479  | 5.5964 | JPT |
| LOC392620 | GI_41147689-S | rs798491   | 7 | 7 | 2573762   | 38864 | 6.4743  | 0.4452 | -0.1714 | 5.5964 | JPT |
| LOC392620 | GI_41147689-S | rs798490   | 7 | 7 | 2574783   | 39885 | 6.4743  | 0.4452 | -0.1714 | 5.5964 | JPT |
| LOC392620 | GI_41147689-S | rs798488   | 7 | 7 | 2575763   | 40865 | 6.4743  | 0.4452 | 0.1714  | 5.5964 | JPT |
| LOC392620 | GI_41147689-S | rs798486   | 7 | 7 | 2576278   | 41380 | 7.0271  | 0.5015 | -0.1840 | 5.5964 | JPT |
| LOC392620 | GI_41147689-S | rs798485   | 7 | 7 | 2576751   | 41853 | 6.0479  | 0.4275 | -0.1674 | 5.5964 | JPT |
| LOC392620 | GI_41147689-S | rs1182208  | 7 | 7 | 2581973   | 47075 | 6.4743  | 0.4452 | 0.1714  | 5.5964 | JPT |
| LOC392620 | GI_41147689-S | rs7807978  | 7 | 7 | 2587876   | 52978 | 5.6524  | 0.3956 | 0.1479  | 5.5964 | JPT |

|           |               |            |   |   |          |        |         |        |         |        |     |
|-----------|---------------|------------|---|---|----------|--------|---------|--------|---------|--------|-----|
| LOC392620 | GI_41147689-S | rs2283779  | 7 | 7 | 2588381  | 53483  | 6.0479  | 0.4275 | -0.1674 | 5.5964 | JPT |
| LOC392620 | GI_41147689-S | rs2527684  | 7 | 7 | 2599163  | 64265  | 6.4743  | 0.4452 | -0.1714 | 5.5964 | JPT |
| LOC392620 | GI_41147689-S | rs2527687  | 7 | 7 | 2611726  | 76828  | 6.6743  | 0.4646 | -0.1780 | 5.5964 | JPT |
| LOC392620 | GI_41147689-S | rs2644312  | 7 | 7 | 2614405  | 79507  | 6.7332  | 0.4600 | 0.1759  | 5.5964 | JPT |
| LOC392620 | GI_41147689-S | rs960273   | 7 | 7 | 2631117  | 96219  | 5.6182  | 0.4241 | -0.1595 | 5.5964 | JPT |
| LOC392620 | GI_41147689-S | rs2644296  | 7 | 7 | 2632302  | 97404  | 5.6524  | 0.3956 | -0.1479 | 5.5964 | JPT |
| LOC392620 | GI_41147689-S | rs2644295  | 7 | 7 | 2633458  | 98560  | 5.6524  | 0.3956 | -0.1479 | 5.5964 | JPT |
| LOC392620 | GI_41147689-S | rs1182198  | 7 | 7 | 2636147  | 101249 | 7.2548  | 0.5231 | 0.1995  | 5.5964 | JPT |
| LOC392620 | GI_41147689-S | rs2158694  | 7 | 7 | 2636684  | 101786 | 6.3168  | 0.4360 | -0.1548 | 5.5964 | JPT |
| LOC392620 | GI_41147689-S | rs2107964  | 7 | 7 | 2636815  | 101917 | 6.3168  | 0.4360 | -0.1548 | 5.5964 | JPT |
| LOC392620 | GI_41147689-S | rs1713919  | 7 | 7 | 2637947  | 103049 | 5.9827  | 0.4160 | 0.1699  | 5.5964 | JPT |
| LOC392620 | GI_41147689-S | rs1182196  | 7 | 7 | 2639719  | 104821 | 5.6524  | 0.3956 | 0.1479  | 5.5964 | JPT |
| HRI       | GI_11125767-S | rs11769380 | 7 | 7 | 5815763  | 21162  | 5.6039  | 0.4588 | 0.2664  | 5.5422 | JPT |
| HRI       | GI_11125767-S | rs4560     | 7 | 7 | 5836524  | 401    | 5.6288  | 0.4014 | 0.2082  | 5.5422 | JPT |
| HRI       | GI_11125767-S | rs17343667 | 7 | 7 | 5838435  | 1510   | 6.0683  | 0.4447 | -0.2171 | 5.5422 | JPT |
| HRI       | GI_11125767-S | rs2302334  | 7 | 7 | 5849064  | 12139  | 5.6288  | 0.4014 | -0.2082 | 5.5422 | JPT |
| HRI       | GI_11125767-S | rs2302333  | 7 | 7 | 5850510  | 13585  | 5.9002  | 0.4342 | -0.2118 | 5.5422 | JPT |
| HRI       | GI_11125767-S | rs2302331  | 7 | 7 | 5851617  | 14692  | 6.3444  | 0.4376 | -0.2306 | 5.5422 | JPT |
| HRI       | GI_11125767-S | rs511969   | 7 | 7 | 5857551  | 20626  | 6.2486  | 0.4397 | -0.2307 | 5.5422 | JPT |
| HRI       | GI_11125767-S | rs655692   | 7 | 7 | 5867942  | 31017  | 5.6307  | 0.4334 | -0.2248 | 5.5422 | JPT |
| HRI       | GI_11125767-S | rs558030   | 7 | 7 | 5870908  | 33983  | 5.6288  | 0.4014 | 0.2082  | 5.5422 | JPT |
| HRI       | GI_11125767-S | rs642987   | 7 | 7 | 5875041  | 38116  | 6.1101  | 0.4473 | 0.2323  | 5.5422 | JPT |
| GPNMB     | GI_4505404-S  | rs10239760 | 7 | 7 | 22923190 | 164396 | 5.5552  | 0.3895 | -0.3329 | 5.4194 | JPT |
| GPNMB     | GI_4505404-S  | rs764534   | 7 | 7 | 22927175 | 160411 | 5.5552  | 0.3895 | -0.3329 | 5.4194 | JPT |
| GPNMB     | GI_4505404-S  | rs2068459  | 7 | 7 | 22927553 | 160033 | 6.4828  | 0.4700 | 0.3557  | 5.4194 | JPT |
| GPNMB     | GI_4505404-S  | rs7805206  | 7 | 7 | 22933450 | 154136 | 5.5552  | 0.3895 | -0.3329 | 5.4194 | JPT |
| GPNMB     | GI_4505404-S  | rs1468593  | 7 | 7 | 22953372 | 134214 | 6.2952  | 0.4587 | -0.3555 | 5.4194 | JPT |
| GPNMB     | GI_4505404-S  | rs6975852  | 7 | 7 | 22959894 | 127692 | 5.5552  | 0.3895 | 0.3329  | 5.4194 | JPT |
| GPNMB     | GI_4505404-S  | rs10247268 | 7 | 7 | 22960419 | 127167 | 5.5151  | 0.3941 | 0.3381  | 5.4194 | JPT |
| GPNMB     | GI_4505404-S  | rs7805071  | 7 | 7 | 22963452 | 124134 | 5.5552  | 0.3895 | -0.3329 | 5.4194 | JPT |
| GPNMB     | GI_4505404-S  | rs2141307  | 7 | 7 | 22964664 | 122922 | 5.5552  | 0.3895 | -0.3329 | 5.4194 | JPT |
| GPNMB     | GI_4505404-S  | rs2103281  | 7 | 7 | 22967471 | 120115 | 5.6106  | 0.3930 | 0.3497  | 5.4194 | JPT |
| GPNMB     | GI_4505404-S  | rs10254544 | 7 | 7 | 22993475 | 94111  | 5.7621  | 0.4098 | 0.3521  | 5.4194 | JPT |
| GPNMB     | GI_4505404-S  | rs10242104 | 7 | 7 | 22993690 | 93896  | 5.9178  | 0.4121 | -0.3598 | 5.4194 | JPT |
| GPNMB     | GI_4505404-S  | rs6955115  | 7 | 7 | 23000384 | 87202  | 5.9178  | 0.4121 | -0.3598 | 5.4194 | JPT |
| GPNMB     | GI_4505404-S  | rs6942981  | 7 | 7 | 23004788 | 82798  | 6.2563  | 0.4829 | -0.3724 | 5.4194 | JPT |
| GPNMB     | GI_4505404-S  | rs858306   | 7 | 7 | 23015994 | 71592  | 5.7926  | 0.4273 | -0.3525 | 5.4194 | JPT |
| GPNMB     | GI_4505404-S  | rs858305   | 7 | 7 | 23016070 | 71516  | 5.5976  | 0.4069 | -0.3519 | 5.4194 | JPT |
| GPNMB     | GI_4505404-S  | rs6956974  | 7 | 7 | 23025558 | 62028  | 5.6494  | 0.3954 | -0.3711 | 5.4194 | JPT |
| GPNMB     | GI_4505404-S  | rs6961109  | 7 | 7 | 23025653 | 61933  | 5.6494  | 0.3954 | 0.3711  | 5.4194 | JPT |
| GPNMB     | GI_4505404-S  | rs4719731  | 7 | 7 | 23044326 | 43260  | 5.7085  | 0.3991 | -0.3257 | 5.4194 | JPT |
| GPNMB     | GI_4505404-S  | rs3807459  | 7 | 7 | 23162991 | 75405  | 5.6179  | 0.3934 | -0.3576 | 5.4194 | JPT |
| Hs.128024 | Hs.128024-S   | rs2160195  | 7 | 7 | 38178211 | 13021  | 6.1858  | 0.4520 | -0.2233 | 5.7846 | JPT |
| ZNFN1A1   | GI_31657112-S | rs17553002 | 7 | 7 | 50251707 | 7344   | 10.4333 | 0.6343 | -1.1129 | 5.6733 | JPT |
| ZNFN1A1   | GI_31657112-S | rs17634434 | 7 | 7 | 50252989 | 8626   | 9.1017  | 0.5790 | 1.0669  | 5.6733 | JPT |
| ZNFN1A1   | GI_31657112-S | rs17553022 | 7 | 7 | 50257663 | 13300  | 9.6290  | 0.6195 | 1.1225  | 5.6733 | JPT |
| ZNFN1A1   | GI_31657112-S | rs7792486  | 7 | 7 | 50260518 | 16155  | 8.9187  | 0.5795 | -1.0749 | 5.6733 | JPT |
| ZNFN1A1   | GI_31657112-S | rs7779747  | 7 | 7 | 50265567 | 21204  | 9.1017  | 0.5790 | 1.0669  | 5.6733 | JPT |
| ZNFN1A1   | GI_31657112-S | rs7779917  | 7 | 7 | 50265720 | 21357  | 9.1017  | 0.5790 | 1.0669  | 5.6733 | JPT |
| ZNFN1A1   | GI_31657112-S | rs17634488 | 7 | 7 | 50271340 | 26977  | 8.7268  | 0.5886 | -1.1293 | 5.6733 | JPT |
| LOC378075 | GI_37538916-S | rs4563845  | 7 | 7 | 55552324 | 405610 | 9.4455  | 0.6027 | 0.6829  | 6.742  | JPT |
| LOC378075 | GI_37538916-S | rs10232851 | 7 | 7 | 55603043 | 354891 | 14.1986 | 0.7795 | -0.8774 | 6.742  | JPT |
| LOC378075 | GI_37538916-S | rs11238381 | 7 | 7 | 55666110 | 291824 | 7.9132  | 0.6088 | 0.6955  | 6.742  | JPT |
| LOC378075 | GI_37538916-S | rs6593288  | 7 | 7 | 55718463 | 239471 | 7.1238  | 0.4898 | -0.8013 | 6.742  | JPT |
| LOC378075 | GI_37538916-S | rs6975697  | 7 | 7 | 55778291 | 179643 | 6.8198  | 0.4729 | -0.7396 | 6.742  | JPT |
| LOC378075 | GI_37538916-S | rs6593291  | 7 | 7 | 55784072 | 173862 | 6.8198  | 0.4729 | -0.7396 | 6.742  | JPT |
| LOC378075 | GI_37538916-S | rs12668532 | 7 | 7 | 55811192 | 146742 | 7.1005  | 0.4804 | -0.7479 | 6.742  | JPT |
| LOC378075 | GI_37538916-S | rs7778601  | 7 | 7 | 55832102 | 125832 | 6.8198  | 0.4729 | -0.7396 | 6.742  | JPT |
| hmm32897  | hmm32897-S    | rs2272186  | 7 | 7 | 64682844 | 966760 | 6.1832  | 0.4357 | -0.3195 | 5.5963 | JPT |

|          |              |            |   |   |          |        |        |        |         |        |     |
|----------|--------------|------------|---|---|----------|--------|--------|--------|---------|--------|-----|
| RABGEF1  | GI_7657495-S | rs3735141  | 7 | 7 | 64864490 | 855610 | 9.4932 | 0.6048 | 0.5285  | 6.1969 | JPT |
| hmm32897 | hmm32897-S   | rs3735141  | 7 | 7 | 64864490 | 785114 | 6.7273 | 0.4676 | -0.2835 | 5.5963 | JPT |
| RABGEF1  | GI_7657495-S | rs12532327 | 7 | 7 | 64979569 | 740531 | 9.7275 | 0.6059 | -0.5322 | 6.1969 | JPT |
| hmm32897 | hmm32897-S   | rs12532327 | 7 | 7 | 64979569 | 670035 | 6.7440 | 0.4606 | 0.2808  | 5.5963 | JPT |
| RABGEF1  | GI_7657495-S | rs12530898 | 7 | 7 | 64995534 | 724566 | 9.0818 | 0.5868 | 0.5288  | 6.1969 | JPT |
| hmm32897 | hmm32897-S   | rs12530898 | 7 | 7 | 64995534 | 654070 | 6.0288 | 0.4264 | -0.2528 | 5.5963 | JPT |
| RABGEF1  | GI_7657495-S | rs12531358 | 7 | 7 | 65004924 | 715176 | 8.6013 | 0.5648 | -0.5104 | 6.1969 | JPT |
| hmm32897 | hmm32897-S   | rs12531358 | 7 | 7 | 65004924 | 644680 | 7.2337 | 0.4958 | 0.2857  | 5.5963 | JPT |
| RABGEF1  | GI_7657495-S | rs12534109 | 7 | 7 | 65057800 | 662300 | 9.0939 | 0.5873 | -0.5110 | 6.1969 | JPT |
| hmm32897 | hmm32897-S   | rs12534109 | 7 | 7 | 65057800 | 591804 | 7.7102 | 0.5210 | 0.2833  | 5.5963 | JPT |
| RABGEF1  | GI_7657495-S | rs2292936  | 7 | 7 | 65061805 | 658295 | 8.9708 | 0.5732 | 0.5046  | 6.1969 | JPT |
| hmm32897 | hmm32897-S   | rs2292936  | 7 | 7 | 65061805 | 587799 | 7.7699 | 0.5156 | -0.2886 | 5.5963 | JPT |
| RABGEF1  | GI_7657495-S | rs2292937  | 7 | 7 | 65061823 | 658277 | 9.7275 | 0.6059 | 0.5322  | 6.1969 | JPT |
| hmm32897 | hmm32897-S   | rs2292937  | 7 | 7 | 65061823 | 587781 | 6.7440 | 0.4606 | -0.2808 | 5.5963 | JPT |
| RABGEF1  | GI_7657495-S | rs12532675 | 7 | 7 | 65150964 | 569136 | 8.7346 | 0.5710 | -0.5008 | 6.1969 | JPT |
| hmm32897 | hmm32897-S   | rs12532675 | 7 | 7 | 65150964 | 498640 | 7.7693 | 0.5240 | 0.2916  | 5.5963 | JPT |
| RABGEF1  | GI_7657495-S | rs12531900 | 7 | 7 | 65171078 | 549022 | 8.9708 | 0.5732 | -0.5046 | 6.1969 | JPT |
| hmm32897 | hmm32897-S   | rs12531900 | 7 | 7 | 65171078 | 478526 | 7.7699 | 0.5156 | 0.2886  | 5.5963 | JPT |
| RABGEF1  | GI_7657495-S | rs1363056  | 7 | 7 | 65261623 | 458477 | 8.9708 | 0.5732 | -0.5046 | 6.1969 | JPT |
| hmm32897 | hmm32897-S   | rs1363056  | 7 | 7 | 65261623 | 387981 | 7.7699 | 0.5156 | 0.2886  | 5.5963 | JPT |
| RABGEF1  | GI_7657495-S | rs4149467  | 7 | 7 | 65265472 | 454628 | 8.3300 | 0.5790 | -0.5189 | 6.1969 | JPT |
| hmm32897 | hmm32897-S   | rs4149467  | 7 | 7 | 65265472 | 384132 | 7.2048 | 0.5204 | 0.2942  | 5.5963 | JPT |
| RABGEF1  | GI_7657495-S | rs3815684  | 7 | 7 | 65287145 | 432955 | 8.8493 | 0.5677 | 0.5507  | 6.1969 | JPT |
| hmm32897 | hmm32897-S   | rs3815684  | 7 | 7 | 65287145 | 362459 | 6.3444 | 0.4376 | -0.2926 | 5.5963 | JPT |
| hmm32897 | hmm32897-S   | rs12533387 | 7 | 7 | 65318696 | 330908 | 6.2548 | 0.4480 | 0.3142  | 5.5963 | JPT |
| RABGEF1  | GI_7657495-S | rs4718345  | 7 | 7 | 65338339 | 381761 | 8.7346 | 0.5710 | 0.5008  | 6.1969 | JPT |
| hmm32897 | hmm32897-S   | rs4718345  | 7 | 7 | 65338339 | 311265 | 7.7693 | 0.5240 | -0.2916 | 5.5963 | JPT |
| RABGEF1  | GI_7657495-S | rs12540667 | 7 | 7 | 65343783 | 376317 | 8.9708 | 0.5732 | 0.5046  | 6.1969 | JPT |
| hmm32897 | hmm32897-S   | rs12540667 | 7 | 7 | 65343783 | 305821 | 7.7699 | 0.5156 | -0.2886 | 5.5963 | JPT |
| RABGEF1  | GI_7657495-S | rs12537368 | 7 | 7 | 65343800 | 376300 | 8.7346 | 0.5710 | -0.5008 | 6.1969 | JPT |
| hmm32897 | hmm32897-S   | rs12537368 | 7 | 7 | 65343800 | 305804 | 7.7693 | 0.5240 | 0.2916  | 5.5963 | JPT |
| RABGEF1  | GI_7657495-S | rs12536818 | 7 | 7 | 65413752 | 306348 | 9.0818 | 0.5868 | 0.5288  | 6.1969 | JPT |
| hmm32897 | hmm32897-S   | rs12536818 | 7 | 7 | 65413752 | 235852 | 6.0288 | 0.4264 | -0.2528 | 5.5963 | JPT |
| RABGEF1  | GI_7657495-S | rs3735146  | 7 | 7 | 65414445 | 305655 | 8.7346 | 0.5710 | 0.5008  | 6.1969 | JPT |
| hmm32897 | hmm32897-S   | rs3735146  | 7 | 7 | 65414445 | 235159 | 7.7693 | 0.5240 | -0.2916 | 5.5963 | JPT |
| RABGEF1  | GI_7657495-S | rs12534985 | 7 | 7 | 65460597 | 259503 | 8.2733 | 0.5762 | 0.5051  | 6.1969 | JPT |
| hmm32897 | hmm32897-S   | rs12534985 | 7 | 7 | 65460597 | 189007 | 7.2771 | 0.5244 | -0.2937 | 5.5963 | JPT |
| RABGEF1  | GI_7657495-S | rs17228285 | 7 | 7 | 65476397 | 243703 | 8.9708 | 0.5732 | -0.5046 | 6.1969 | JPT |
| hmm32897 | hmm32897-S   | rs17228285 | 7 | 7 | 65476397 | 173207 | 7.7699 | 0.5156 | 0.2886  | 5.5963 | JPT |
| RABGEF1  | GI_7657495-S | rs4717305  | 7 | 7 | 65499604 | 220496 | 9.6591 | 0.6118 | 0.5362  | 6.1969 | JPT |
| hmm32897 | hmm32897-S   | rs4717305  | 7 | 7 | 65499604 | 150000 | 7.5542 | 0.5128 | -0.2945 | 5.5963 | JPT |
| hmm32897 | hmm32897-S   | rs3764902  | 7 | 7 | 65542732 | 106872 | 6.2683 | 0.4656 | 0.3367  | 5.5963 | JPT |
| RABGEF1  | GI_7657495-S | rs12532267 | 7 | 7 | 65559585 | 160515 | 8.7254 | 0.5886 | 0.5129  | 6.1969 | JPT |
| hmm32897 | hmm32897-S   | rs12532267 | 7 | 7 | 65559585 | 90019  | 7.6002 | 0.5327 | -0.2892 | 5.5963 | JPT |
| RABGEF1  | GI_7657495-S | rs2286682  | 7 | 7 | 65574028 | 146072 | 8.7346 | 0.5710 | 0.5008  | 6.1969 | JPT |
| hmm32897 | hmm32897-S   | rs2286682  | 7 | 7 | 65574028 | 75576  | 7.7693 | 0.5240 | -0.2916 | 5.5963 | JPT |
| RABGEF1  | GI_7657495-S | rs12534391 | 7 | 7 | 65577572 | 142528 | 8.6095 | 0.5740 | -0.5144 | 6.1969 | JPT |
| hmm32897 | hmm32897-S   | rs12534391 | 7 | 7 | 65577572 | 72032  | 7.1259 | 0.4983 | 0.2834  | 5.5963 | JPT |
| RABGEF1  | GI_7657495-S | rs4717311  | 7 | 7 | 65611695 | 108405 | 9.1774 | 0.6000 | 0.5108  | 6.1969 | JPT |
| hmm32897 | hmm32897-S   | rs4717311  | 7 | 7 | 65611695 | 37909  | 7.0112 | 0.4919 | -0.2631 | 5.5963 | JPT |
| RABGEF1  | GI_7657495-S | rs7384258  | 7 | 7 | 65616927 | 103173 | 9.4932 | 0.6048 | 0.5285  | 6.1969 | JPT |
| hmm32897 | hmm32897-S   | rs7384258  | 7 | 7 | 65616927 | 32677  | 6.7273 | 0.4676 | -0.2835 | 5.5963 | JPT |
| RABGEF1  | GI_7657495-S | rs4718390  | 7 | 7 | 65627657 | 92443  | 8.2517 | 0.5752 | -0.4956 | 6.1969 | JPT |
| hmm32897 | hmm32897-S   | rs4718390  | 7 | 7 | 65627657 | 21947  | 7.2621 | 0.5235 | 0.2987  | 5.5963 | JPT |
| RABGEF1  | GI_7657495-S | rs12537403 | 7 | 7 | 65632465 | 87635  | 8.9708 | 0.5732 | -0.5046 | 6.1969 | JPT |
| hmm32897 | hmm32897-S   | rs12537403 | 7 | 7 | 65632465 | 17139  | 7.7699 | 0.5156 | 0.2886  | 5.5963 | JPT |
| RABGEF1  | GI_7657495-S | rs4718391  | 7 | 7 | 65643494 | 76606  | 8.9708 | 0.5732 | -0.5046 | 6.1969 | JPT |
| hmm32897 | hmm32897-S   | rs4718391  | 7 | 7 | 65643494 | 6110   | 7.7699 | 0.5156 | 0.2886  | 5.5963 | JPT |
| RABGEF1  | GI_7657495-S | rs3778906  | 7 | 7 | 65657350 | 62750  | 8.9708 | 0.5732 | -0.5046 | 6.1969 | JPT |

|          |               |            |   |   |          |        |        |        |         |        |     |
|----------|---------------|------------|---|---|----------|--------|--------|--------|---------|--------|-----|
| hmm32897 | hmm32897-S    | rs3778906  | 7 | 7 | 65657350 | 7746   | 7.7699 | 0.5156 | 0.2886  | 5.5963 | JPT |
| RABGEF1  | GI_7657495-S  | rs12532147 | 7 | 7 | 65660100 | 60000  | 8.9708 | 0.5732 | 0.5046  | 6.1969 | JPT |
| hmm32897 | hmm32897-S    | rs12532147 | 7 | 7 | 65660100 | 10496  | 7.7699 | 0.5156 | -0.2886 | 5.5963 | JPT |
| RABGEF1  | GI_7657495-S  | rs12531402 | 7 | 7 | 65661658 | 58442  | 8.9708 | 0.5732 | 0.5046  | 6.1969 | JPT |
| hmm32897 | hmm32897-S    | rs12531402 | 7 | 7 | 65661658 | 12054  | 7.7699 | 0.5156 | -0.2886 | 5.5963 | JPT |
| RABGEF1  | GI_7657495-S  | rs4718395  | 7 | 7 | 65665299 | 54801  | 8.7346 | 0.5710 | 0.5008  | 6.1969 | JPT |
| hmm32897 | hmm32897-S    | rs4718395  | 7 | 7 | 65665299 | 15695  | 7.7693 | 0.5240 | -0.2916 | 5.5963 | JPT |
| RABGEF1  | GI_7657495-S  | rs4718398  | 7 | 7 | 65673785 | 46315  | 6.1984 | 0.4367 | 0.5075  | 6.1969 | JPT |
| hmm32897 | hmm32897-S    | rs4718398  | 7 | 7 | 65673785 | 24181  | 7.1691 | 0.4923 | -0.3259 | 5.5963 | JPT |
| RABGEF1  | GI_7657495-S  | rs3800813  | 7 | 7 | 65678788 | 41312  | 8.8198 | 0.5749 | -0.5176 | 6.1969 | JPT |
| hmm32897 | hmm32897-S    | rs3800813  | 7 | 7 | 65678788 | 29184  | 7.2473 | 0.4965 | 0.2862  | 5.5963 | JPT |
| RABGEF1  | GI_7657495-S  | rs3823608  | 7 | 7 | 65680918 | 39182  | 9.2324 | 0.6024 | -0.5265 | 6.1969 | JPT |
| hmm32897 | hmm32897-S    | rs3823608  | 7 | 7 | 65680918 | 31314  | 6.5675 | 0.4666 | 0.2838  | 5.5963 | JPT |
| RABGEF1  | GI_7657495-S  | rs12539848 | 7 | 7 | 65683981 | 36119  | 8.9708 | 0.5732 | 0.5046  | 6.1969 | JPT |
| hmm32897 | hmm32897-S    | rs12539848 | 7 | 7 | 65683981 | 34377  | 7.7699 | 0.5156 | -0.2886 | 5.5963 | JPT |
| RABGEF1  | GI_7657495-S  | rs10499785 | 7 | 7 | 65698271 | 21829  | 8.7346 | 0.5710 | 0.5008  | 6.1969 | JPT |
| hmm32897 | hmm32897-S    | rs10499785 | 7 | 7 | 65698271 | 48667  | 7.7693 | 0.5240 | -0.2916 | 5.5963 | JPT |
| RABGEF1  | GI_7657495-S  | rs4718407  | 7 | 7 | 65710453 | 9647   | 8.9841 | 0.5824 | 0.5097  | 6.1969 | JPT |
| hmm32897 | hmm32897-S    | rs4718407  | 7 | 7 | 65710453 | 60849  | 7.9753 | 0.5344 | -0.2932 | 5.5963 | JPT |
| RABGEF1  | GI_7657495-S  | rs12536130 | 7 | 7 | 65714039 | 6061   | 8.0068 | 0.5924 | 0.5376  | 6.1969 | JPT |
| hmm32897 | hmm32897-S    | rs12536130 | 7 | 7 | 65714039 | 64435  | 6.7354 | 0.5219 | -0.2679 | 5.5963 | JPT |
| RABGEF1  | GI_7657495-S  | rs3778911  | 7 | 7 | 65720303 | 203    | 9.0939 | 0.5873 | -0.5110 | 6.1969 | JPT |
| hmm32897 | hmm32897-S    | rs3778911  | 7 | 7 | 65720303 | 70699  | 7.7102 | 0.5210 | 0.2833  | 5.5963 | JPT |
| RABGEF1  | GI_7657495-S  | rs12531377 | 7 | 7 | 65726565 | 6465   | 8.7346 | 0.5710 | 0.5008  | 6.1969 | JPT |
| hmm32897 | hmm32897-S    | rs12531377 | 7 | 7 | 65726565 | 76961  | 7.7693 | 0.5240 | -0.2916 | 5.5963 | JPT |
| RABGEF1  | GI_7657495-S  | rs12535268 | 7 | 7 | 65784895 | 64795  | 8.7346 | 0.5710 | -0.5008 | 6.1969 | JPT |
| hmm32897 | hmm32897-S    | rs12535268 | 7 | 7 | 65784895 | 135291 | 7.7693 | 0.5240 | 0.2916  | 5.5963 | JPT |
| hmm32897 | hmm32897-S    | rs4717329  | 7 | 7 | 65798534 | 148930 | 6.9170 | 0.4703 | -0.3077 | 5.5963 | JPT |
| RABGEF1  | GI_7657495-S  | rs2293351  | 7 | 7 | 65831041 | 110941 | 8.8469 | 0.5851 | -0.5073 | 6.1969 | JPT |
| hmm32897 | hmm32897-S    | rs2293351  | 7 | 7 | 65831041 | 181437 | 7.6988 | 0.5290 | 0.2862  | 5.5963 | JPT |
| RABGEF1  | GI_7657495-S  | rs12539366 | 7 | 7 | 65836330 | 116230 | 8.7346 | 0.5710 | 0.5008  | 6.1969 | JPT |
| hmm32897 | hmm32897-S    | rs12539366 | 7 | 7 | 65836330 | 186726 | 7.7693 | 0.5240 | -0.2916 | 5.5963 | JPT |
| RABGEF1  | GI_7657495-S  | rs12537955 | 7 | 7 | 65852343 | 132243 | 7.0253 | 0.4763 | 0.4075  | 6.1969 | JPT |
| hmm32897 | hmm32897-S    | rs12537955 | 7 | 7 | 65852343 | 202739 | 6.4288 | 0.4426 | -0.2368 | 5.5963 | JPT |
| RABGEF1  | GI_7657495-S  | rs12540695 | 7 | 7 | 65897727 | 177627 | 8.7346 | 0.5710 | 0.5008  | 6.1969 | JPT |
| hmm32897 | hmm32897-S    | rs12540695 | 7 | 7 | 65897727 | 248123 | 7.7693 | 0.5240 | -0.2916 | 5.5963 | JPT |
| RABGEF1  | GI_7657495-S  | rs12534401 | 7 | 7 | 65899722 | 179622 | 6.1984 | 0.4367 | -0.5075 | 6.1969 | JPT |
| hmm32897 | hmm32897-S    | rs12534401 | 7 | 7 | 65899722 | 250118 | 7.1691 | 0.4923 | 0.3259  | 5.5963 | JPT |
| RABGEF1  | GI_7657495-S  | rs4718438  | 7 | 7 | 65905562 | 185462 | 7.1836 | 0.4931 | -0.4939 | 6.1969 | JPT |
| hmm32897 | hmm32897-S    | rs4718438  | 7 | 7 | 65905562 | 255958 | 6.6178 | 0.4614 | 0.2903  | 5.5963 | JPT |
| RABGEF1  | GI_7657495-S  | rs4717342  | 7 | 7 | 65922109 | 202009 | 6.6860 | 0.4735 | 0.4864  | 6.1969 | JPT |
| RABGEF1  | GI_7657495-S  | rs7385720  | 7 | 7 | 65979892 | 259792 | 7.1017 | 0.4970 | 0.5119  | 6.1969 | JPT |
| hmm32897 | hmm32897-S    | rs7385720  | 7 | 7 | 65979892 | 330288 | 5.9558 | 0.4296 | -0.2815 | 5.5963 | JPT |
| hmm32897 | hmm32897-S    | rs12537414 | 7 | 7 | 65984739 | 335135 | 6.1925 | 0.4363 | 0.3344  | 5.5963 | JPT |
| hmm32897 | hmm32897-S    | rs7801361  | 7 | 7 | 65991995 | 342391 | 6.6785 | 0.4569 | -0.2109 | 5.5963 | JPT |
| hmm32897 | hmm32897-S    | rs17144722 | 7 | 7 | 66026314 | 376710 | 6.4945 | 0.4542 | -0.2113 | 5.5963 | JPT |
| hmm32897 | hmm32897-S    | rs10228489 | 7 | 7 | 66057443 | 407839 | 6.5658 | 0.4584 | -0.2130 | 5.5963 | JPT |
| hmm32897 | hmm32897-S    | rs7783888  | 7 | 7 | 66057901 | 408297 | 6.6785 | 0.4569 | 0.2109  | 5.5963 | JPT |
| hmm32897 | hmm32897-S    | rs12530524 | 7 | 7 | 66059943 | 410339 | 6.4514 | 0.4439 | 0.2759  | 5.5963 | JPT |
| hmm32897 | hmm32897-S    | rs4718480  | 7 | 7 | 66115957 | 466353 | 6.4514 | 0.4439 | -0.2759 | 5.5963 | JPT |
| WBSCR27  | GI_30795189-S | rs4355658  | 7 | 7 | 72670343 | 23459  | 5.6713 | 0.4116 | -0.1209 | 5.4897 | JPT |
| WBSCR27  | GI_30795189-S | rs6946037  | 7 | 7 | 72681366 | 12436  | 8.0216 | 0.5367 | -0.1434 | 5.4897 | JPT |
| WBSCR27  | GI_30795189-S | rs4255023  | 7 | 7 | 72684269 | 9533   | 8.0216 | 0.5367 | -0.1434 | 5.4897 | JPT |
| WBSCR27  | GI_30795189-S | rs8629     | 7 | 7 | 72690170 | 3632   | 8.0216 | 0.5367 | 0.1434  | 5.4897 | JPT |
| WBSCR27  | GI_30795189-S | rs1127155  | 7 | 7 | 72691112 | 2690   | 8.5509 | 0.5538 | -0.1473 | 5.4897 | JPT |
| WBSCR27  | GI_30795189-S | rs11316    | 7 | 7 | 72691206 | 2596   | 7.6078 | 0.5156 | -0.1382 | 5.4897 | JPT |
| WBSCR27  | GI_30795189-S | rs13232463 | 7 | 7 | 72693950 | 148    | 8.0216 | 0.5367 | 0.1434  | 5.4897 | JPT |
| WBSCR27  | GI_30795189-S | rs4304218  | 7 | 7 | 72697631 | 3829   | 7.1204 | 0.4896 | 0.1422  | 5.4897 | JPT |
| WBSCR27  | GI_30795189-S | rs1073909  | 7 | 7 | 72702940 | 9138   | 8.0216 | 0.5367 | -0.1434 | 5.4897 | JPT |

|           |               |            |   |   |           |       |         |        |         |        |     |
|-----------|---------------|------------|---|---|-----------|-------|---------|--------|---------|--------|-----|
| WBSCR27   | GI_30795189-S | rs4717112  | 7 | 7 | 72710068  | 16266 | 6.4858  | 0.4537 | -0.1371 | 5.4897 | JPT |
| WBSCR27   | GI_30795189-S | rs4327742  | 7 | 7 | 72712377  | 18575 | 6.5714  | 0.4752 | 0.1454  | 5.4897 | JPT |
| STEAP     | GI_22027487-S | rs13224065 | 7 | 7 | 89447014  | 8383  | 7.1040  | 0.5240 | -0.8123 | 5.8996 | JPT |
| ACN9      | GI_9910179-S  | rs17168173 | 7 | 7 | 96370364  | 84756 | 6.9533  | 0.4723 | -0.2791 | 5.5551 | JPT |
| ACN9      | GI_9910179-S  | rs17168174 | 7 | 7 | 96378623  | 76497 | 6.9533  | 0.4723 | 0.2791  | 5.5551 | JPT |
| ACN9      | GI_9910179-S  | rs17168179 | 7 | 7 | 96380187  | 74933 | 6.9533  | 0.4723 | -0.2791 | 5.5551 | JPT |
| ACN9      | GI_9910179-S  | rs6973504  | 7 | 7 | 96392135  | 62985 | 6.6934  | 0.4657 | 0.2771  | 5.5551 | JPT |
| ACN9      | GI_9910179-S  | rs10499936 | 7 | 7 | 96445652  | 9468  | 6.6934  | 0.4657 | -0.2771 | 5.5551 | JPT |
| ACN9      | GI_9910179-S  | rs11975277 | 7 | 7 | 96453222  | 1898  | 6.9533  | 0.4723 | -0.2791 | 5.5551 | JPT |
| TRIM4     | GI_15011940-A | rs2527927  | 7 | 7 | 99122077  | 11296 | 6.8941  | 0.4690 | 0.4125  | 5.2347 | JPT |
| TRIM4     | GI_15011940-A | rs2082744  | 7 | 7 | 99126067  | 7306  | 6.5422  | 0.4570 | -0.3861 | 5.2347 | JPT |
| TRIM4     | GI_15011940-A | rs2572011  | 7 | 7 | 99131722  | 1651  | 6.8941  | 0.4690 | -0.4125 | 5.2347 | JPT |
| TRIM4     | GI_15011940-A | rs2572010  | 7 | 7 | 99133194  | 179   | 6.7181  | 0.4671 | -0.4134 | 5.2347 | JPT |
| TRIM4     | GI_15011940-A | rs1048705  | 7 | 7 | 99133591  | 218   | 6.7181  | 0.4671 | -0.4134 | 5.2347 | JPT |
| TRIM4     | GI_15011940-A | rs2572009  | 7 | 7 | 99133656  | 283   | 6.7181  | 0.4671 | -0.4134 | 5.2347 | JPT |
| TRIM4     | GI_15011940-A | rs2572008  | 7 | 7 | 99135607  | 2234  | 6.7181  | 0.4671 | -0.4134 | 5.2347 | JPT |
| TRIM4     | GI_15011940-A | rs2527922  | 7 | 7 | 99137407  | 4034  | 6.8941  | 0.4690 | -0.4125 | 5.2347 | JPT |
| TRIM4     | GI_15011940-A | rs2572006  | 7 | 7 | 99138462  | 5089  | 6.8390  | 0.4660 | 0.4088  | 5.2347 | JPT |
| TRIM4     | GI_15011940-A | rs7384528  | 7 | 7 | 99138681  | 5308  | 6.8941  | 0.4690 | -0.4125 | 5.2347 | JPT |
| TRIM4     | GI_15011940-A | rs2527919  | 7 | 7 | 99139164  | 5791  | 6.7181  | 0.4671 | -0.4134 | 5.2347 | JPT |
| TRIM4     | GI_15011940-A | rs2527918  | 7 | 7 | 99140123  | 6750  | 6.7157  | 0.4752 | 0.3914  | 5.2347 | JPT |
| TRIM4     | GI_15011940-A | rs2527914  | 7 | 7 | 99142796  | 9423  | 6.5189  | 0.4637 | 0.4049  | 5.2347 | JPT |
| TRIM4     | GI_15011940-A | rs10808114 | 7 | 7 | 99143150  | 9777  | 5.8444  | 0.4475 | 0.3979  | 5.2347 | JPT |
| TRIM4     | GI_15011940-A | rs2247761  | 7 | 7 | 99145562  | 12189 | 6.8941  | 0.4690 | -0.4125 | 5.2347 | JPT |
| TRIM4     | GI_15011940-A | rs2572003  | 7 | 7 | 99145964  | 12591 | 6.2053  | 0.4371 | -0.3780 | 5.2347 | JPT |
| TRIM4     | GI_15011940-A | rs7781442  | 7 | 7 | 99149874  | 16501 | 6.3959  | 0.4565 | -0.4078 | 5.2347 | JPT |
| TRIM4     | GI_15011940-A | rs2572000  | 7 | 7 | 99153975  | 20602 | 6.8941  | 0.4690 | -0.4125 | 5.2347 | JPT |
| TRIM4     | GI_15011940-A | rs2571998  | 7 | 7 | 99156023  | 22650 | 6.9516  | 0.4803 | -0.4194 | 5.2347 | JPT |
| TRIM4     | GI_15011940-A | rs1865472  | 7 | 7 | 99156214  | 22841 | 6.7181  | 0.4671 | -0.4134 | 5.2347 | JPT |
| TRIM4     | GI_15011940-A | rs2571997  | 7 | 7 | 99159068  | 25695 | 6.7181  | 0.4671 | -0.4134 | 5.2347 | JPT |
| TRIM4     | GI_15011940-A | rs2571992  | 7 | 7 | 99164567  | 31194 | 6.8941  | 0.4690 | -0.4125 | 5.2347 | JPT |
| TRIM4     | GI_15011940-A | rs2527908  | 7 | 7 | 99165214  | 31841 | 6.7181  | 0.4671 | 0.4134  | 5.2347 | JPT |
| TRIM4     | GI_15011940-A | rs1121592  | 7 | 7 | 99168282  | 34909 | 6.8941  | 0.4690 | 0.4125  | 5.2347 | JPT |
| TRIM4     | GI_15011940-A | rs2527902  | 7 | 7 | 99169722  | 36349 | 5.9138  | 0.4520 | 0.4114  | 5.2347 | JPT |
| TRIM4     | GI_15011940-A | rs2527901  | 7 | 7 | 99169763  | 36390 | 6.8941  | 0.4690 | -0.4125 | 5.2347 | JPT |
| TRIM4     | GI_15011940-A | rs2527900  | 7 | 7 | 99169892  | 36519 | 6.4225  | 0.4750 | -0.4244 | 5.2347 | JPT |
| Hs.397369 | Hs.397369-S   | rs6948536  | 7 | 7 | 100325264 | 7297  | 5.7943  | 0.4195 | -0.1733 | 5.6353 | JPT |
| Hs.397369 | Hs.397369-S   | rs12912    | 7 | 7 | 100334220 | 1659  | 6.0891  | 0.4300 | 0.1749  | 5.6353 | JPT |
| IRF5      | GI_38683858-A | rs1874328  | 7 | 7 | 128179055 | 4087  | 6.1862  | 0.4359 | -0.5158 | 5.6048 | JPT |
| IRF5      | GI_38683858-A | rs13242262 | 7 | 7 | 128185315 | 2173  | 11.2389 | 0.7001 | 0.6256  | 5.6048 | JPT |
| IRF5      | GI_38683858-A | rs2280714  | 7 | 7 | 128188676 | 5534  | 6.5520  | 0.4575 | -0.4694 | 5.6048 | JPT |
| IRF5      | GI_38683858-A | rs6966125  | 7 | 7 | 128192476 | 9334  | 6.4149  | 0.4576 | -0.4692 | 5.6048 | JPT |
| IRF5      | GI_38683858-A | rs10229001 | 7 | 7 | 128193348 | 10206 | 12.5930 | 0.7263 | 0.6216  | 5.6048 | JPT |
| IRF5      | GI_38683858-A | rs2172876  | 7 | 7 | 128197243 | 14101 | 11.9877 | 0.7253 | 0.6420  | 5.6048 | JPT |
| IRF5      | GI_38683858-A | rs7385716  | 7 | 7 | 128199545 | 16403 | 13.6334 | 0.7478 | 0.6246  | 5.6048 | JPT |
| IRF5      | GI_38683858-A | rs4731535  | 7 | 7 | 128199918 | 16776 | 13.9597 | 0.7484 | 0.6258  | 5.6048 | JPT |
| IRF5      | GI_38683858-A | rs8043     | 7 | 7 | 128201335 | 18193 | 13.4410 | 0.7425 | 0.6361  | 5.6048 | JPT |
| IRF5      | GI_38683858-A | rs6953869  | 7 | 7 | 128202711 | 19569 | 13.3161 | 0.7649 | 0.6357  | 5.6048 | JPT |
| IRF5      | GI_38683858-A | rs1874332  | 7 | 7 | 128208564 | 25422 | 13.4410 | 0.7425 | -0.6361 | 5.6048 | JPT |
| IRF5      | GI_38683858-A | rs7789423  | 7 | 7 | 128215155 | 32013 | 6.5520  | 0.4575 | 0.4694  | 5.6048 | JPT |
| IRF5      | GI_38683858-A | rs6948928  | 7 | 7 | 128217048 | 33906 | 6.9883  | 0.4742 | -0.4749 | 5.6048 | JPT |
| IRF5      | GI_38683858-A | rs11770317 | 7 | 7 | 128223422 | 40280 | 13.9597 | 0.7484 | -0.6258 | 5.6048 | JPT |
| IRF5      | GI_38683858-A | rs7807018  | 7 | 7 | 128234139 | 50997 | 13.4410 | 0.7425 | 0.6361  | 5.6048 | JPT |
| IRF5      | GI_38683858-A | rs2305324  | 7 | 7 | 128235177 | 52035 | 8.3010  | 0.5505 | -0.5839 | 5.6048 | JPT |
| IRF5      | GI_38683858-A | rs11767711 | 7 | 7 | 128245783 | 62641 | 13.6155 | 0.7730 | 0.6274  | 5.6048 | JPT |
| IRF5      | GI_38683858-A | rs2305325  | 7 | 7 | 128248791 | 65649 | 7.9422  | 0.5415 | -0.5784 | 5.6048 | JPT |
| IRF5      | GI_38683858-A | rs6965542  | 7 | 7 | 128249869 | 66727 | 8.2832  | 0.5674 | 0.5311  | 5.6048 | JPT |
| IRF5      | GI_38683858-A | rs3857852  | 7 | 7 | 128251228 | 68086 | 5.7161  | 0.4306 | -0.4598 | 5.6048 | JPT |
| IRF5      | GI_38683858-A | rs12155080 | 7 | 7 | 128252690 | 69548 | 13.9597 | 0.7484 | -0.6258 | 5.6048 | JPT |

|           |               |            |   |   |           |        |         |        |         |        |     |
|-----------|---------------|------------|---|---|-----------|--------|---------|--------|---------|--------|-----|
| IRF5      | GI_38683858-A | rs13221560 | 7 | 7 | 128257126 | 73984  | 6.9027  | 0.4944 | 0.4768  | 5.6048 | JPT |
| IRF5      | GI_38683858-A | rs10239340 | 7 | 7 | 128262461 | 79319  | 13.4410 | 0.7425 | -0.6361 | 5.6048 | JPT |
| IRF5      | GI_38683858-A | rs11762968 | 7 | 7 | 128264915 | 81773  | 13.9597 | 0.7484 | -0.6258 | 5.6048 | JPT |
| IRF5      | GI_38683858-A | rs1072767  | 7 | 7 | 128267156 | 84014  | 6.5520  | 0.4575 | 0.4694  | 5.6048 | JPT |
| IRF5      | GI_38683858-A | rs921403   | 7 | 7 | 128270675 | 87533  | 6.9883  | 0.4742 | -0.4749 | 5.6048 | JPT |
| IRF5      | GI_38683858-A | rs4731541  | 7 | 7 | 128272187 | 89045  | 13.4410 | 0.7425 | 0.6361  | 5.6048 | JPT |
| IRF5      | GI_38683858-A | rs10279821 | 7 | 7 | 128277498 | 94356  | 6.5520  | 0.4575 | -0.4694 | 5.6048 | JPT |
| IRF5      | GI_38683858-A | rs10156169 | 7 | 7 | 128278522 | 95380  | 6.0102  | 0.4330 | 0.4538  | 5.6048 | JPT |
| IRF5      | GI_38683858-A | rs2167273  | 7 | 7 | 128283364 | 100222 | 7.5377  | 0.5120 | 0.5937  | 5.6048 | JPT |
| IRF5      | GI_38683858-A | rs6960994  | 7 | 7 | 128286608 | 103466 | 13.4410 | 0.7425 | 0.6361  | 5.6048 | JPT |
| IRF5      | GI_38683858-A | rs6961014  | 7 | 7 | 128286661 | 103519 | 13.9597 | 0.7484 | 0.6258  | 5.6048 | JPT |
| IRF5      | GI_38683858-A | rs2242028  | 7 | 7 | 128288927 | 105785 | 13.9597 | 0.7484 | 0.6258  | 5.6048 | JPT |
| KIAA0265  | GI_44917618-S | rs12531444 | 7 | 7 | 129330831 | 36299  | 6.5650  | 0.4664 | 0.2377  | 6.1447 | JPT |
| KIAA0265  | GI_44917618-S | rs1474409  | 7 | 7 | 129344813 | 22317  | 6.3009  | 0.4351 | 0.2365  | 6.1447 | JPT |
| KIAA0265  | GI_44917618-S | rs4324873  | 7 | 7 | 129355034 | 12096  | 8.2943  | 0.5589 | 0.2589  | 6.1447 | JPT |
| KIAA0265  | GI_44917618-S | rs12534379 | 7 | 7 | 129365068 | 2062   | 8.5428  | 0.5709 | 0.2506  | 6.1447 | JPT |
| LOC389562 | GI_41147546-S | rs7456421  | 7 | 7 | 138868976 | 81359  | 6.7454  | 0.4607 | -0.3014 | 6.5581 | JPT |
| LOC389562 | GI_41147546-S | rs10215942 | 7 | 7 | 138897208 | 53127  | 6.8811  | 0.4683 | 0.3010  | 6.5581 | JPT |
| LOC389562 | GI_41147546-S | rs11983375 | 7 | 7 | 138899995 | 50340  | 6.8811  | 0.4683 | 0.3010  | 6.5581 | JPT |
| LOC389562 | GI_41147546-S | rs10236187 | 7 | 7 | 138900561 | 49774  | 6.8811  | 0.4683 | 0.3010  | 6.5581 | JPT |
| LOC389562 | GI_41147546-S | rs11972982 | 7 | 7 | 138901557 | 48778  | 6.8811  | 0.4683 | -0.3010 | 6.5581 | JPT |
| LOC389562 | GI_41147546-S | rs6464220  | 7 | 7 | 138907442 | 42893  | 6.7454  | 0.4607 | 0.3014  | 6.5581 | JPT |
| LOC389562 | GI_41147546-S | rs12532543 | 7 | 7 | 138909358 | 40977  | 6.8811  | 0.4683 | 0.3010  | 6.5581 | JPT |
| LOC389562 | GI_41147546-S | rs2109338  | 7 | 7 | 138912360 | 37975  | 7.2320  | 0.5312 | -0.3268 | 6.5581 | JPT |
| LOC389562 | GI_41147546-S | rs7807797  | 7 | 7 | 138915677 | 34658  | 6.7454  | 0.4607 | 0.3014  | 6.5581 | JPT |
| LOC389562 | GI_41147546-S | rs2270164  | 7 | 7 | 138935139 | 15196  | 6.7566  | 0.4693 | 0.3231  | 6.5581 | JPT |
| ABCF2     | GI_27881505-L | rs13240743 | 7 | 7 | 151004562 | 657064 | 6.0989  | 0.4306 | 0.2164  | 6.0736 | JPT |
| LOC340435 | GI_29735811-S | rs17758721 | 8 | 8 | 71627105  | 154822 | 12.2740 | 0.6991 | 0.1741  | 6.1413 | JPT |
| LOC340435 | GI_29735811-S | rs7012577  | 8 | 8 | 71634598  | 147329 | 14.3909 | 0.7597 | -0.2034 | 6.1413 | JPT |
| LOC340435 | GI_29735811-S | rs13251292 | 8 | 8 | 71636909  | 145018 | 13.2144 | 0.7532 | 0.2137  | 6.1413 | JPT |
| LOC340435 | GI_29735811-S | rs2035196  | 8 | 8 | 71647904  | 134023 | 12.2740 | 0.6991 | 0.1741  | 6.1413 | JPT |
| LOC340435 | GI_29735811-S | rs3816745  | 8 | 8 | 71669188  | 112739 | 14.3909 | 0.7597 | -0.2034 | 6.1413 | JPT |
| LOC340435 | GI_29735811-S | rs6988053  | 8 | 8 | 71709517  | 72410  | 14.9810 | 0.7823 | 0.1831  | 6.1413 | JPT |
| LOC340435 | GI_29735811-S | rs13258368 | 8 | 8 | 71711305  | 70622  | 14.9810 | 0.7823 | -0.1831 | 6.1413 | JPT |
| LOC340435 | GI_29735811-S | rs7831792  | 8 | 8 | 71727910  | 54017  | 13.9308 | 0.7559 | 0.1936  | 6.1413 | JPT |
| LOC340435 | GI_29735811-S | rs13255886 | 8 | 8 | 71728508  | 53419  | 13.9981 | 0.7577 | 0.2024  | 6.1413 | JPT |
| LOC340435 | GI_29735811-S | rs6994814  | 8 | 8 | 71731692  | 50235  | 13.9981 | 0.7577 | -0.2024 | 6.1413 | JPT |
| LOC340435 | GI_29735811-S | rs7830515  | 8 | 8 | 71732788  | 49139  | 13.9981 | 0.7577 | -0.2024 | 6.1413 | JPT |
| LOC340435 | GI_29735811-S | rs7814274  | 8 | 8 | 71732965  | 48962  | 13.9981 | 0.7577 | -0.2024 | 6.1413 | JPT |
| LOC340435 | GI_29735811-S | rs7830550  | 8 | 8 | 71732985  | 48942  | 13.2826 | 0.7639 | 0.2089  | 6.1413 | JPT |
| LOC340435 | GI_29735811-S | rs6993326  | 8 | 8 | 71738154  | 43773  | 14.3909 | 0.7597 | -0.2034 | 6.1413 | JPT |
| LOC340435 | GI_29735811-S | rs10504479 | 8 | 8 | 71740069  | 41858  | 13.9981 | 0.7577 | -0.2024 | 6.1413 | JPT |
| LOC340435 | GI_29735811-S | rs11987501 | 8 | 8 | 71741072  | 40855  | 13.9308 | 0.7559 | 0.1936  | 6.1413 | JPT |
| LOC340435 | GI_29735811-S | rs1993862  | 8 | 8 | 71741916  | 40011  | 13.9981 | 0.7577 | -0.2024 | 6.1413 | JPT |
| LOC340435 | GI_29735811-S | rs2279128  | 8 | 8 | 71744113  | 37814  | 14.9810 | 0.7823 | -0.1831 | 6.1413 | JPT |
| LOC340435 | GI_29735811-S | rs1477943  | 8 | 8 | 71745317  | 36610  | 9.1927  | 0.6702 | 0.1827  | 6.1413 | JPT |
| LOC340435 | GI_29735811-S | rs13271442 | 8 | 8 | 71747723  | 34204  | 14.3909 | 0.7597 | -0.2034 | 6.1413 | JPT |
| LOC340435 | GI_29735811-S | rs6472538  | 8 | 8 | 71749525  | 32402  | 13.9981 | 0.7577 | 0.2024  | 6.1413 | JPT |
| LOC340435 | GI_29735811-S | rs7001162  | 8 | 8 | 71750024  | 31903  | 13.8383 | 0.7702 | -0.2053 | 6.1413 | JPT |
| LOC340435 | GI_29735811-S | rs12681420 | 8 | 8 | 71755752  | 26175  | 14.3909 | 0.7597 | 0.2034  | 6.1413 | JPT |
| LOC340435 | GI_29735811-S | rs6991329  | 8 | 8 | 71755979  | 25948  | 13.9981 | 0.7577 | -0.2024 | 6.1413 | JPT |
| LOC340435 | GI_29735811-S | rs7831507  | 8 | 8 | 71757780  | 24147  | 14.3909 | 0.7597 | 0.2034  | 6.1413 | JPT |
| LOC340435 | GI_29735811-S | rs13256250 | 8 | 8 | 71758747  | 23180  | 14.3909 | 0.7597 | 0.2034  | 6.1413 | JPT |
| LOC340435 | GI_29735811-S | rs13256093 | 8 | 8 | 71758931  | 22996  | 13.9981 | 0.7577 | 0.2024  | 6.1413 | JPT |
| LOC340435 | GI_29735811-S | rs12675271 | 8 | 8 | 71764563  | 17364  | 13.9981 | 0.7577 | 0.2024  | 6.1413 | JPT |
| LOC340435 | GI_29735811-S | rs12156043 | 8 | 8 | 71776597  | 5330   | 13.5685 | 0.7545 | 0.2062  | 6.1413 | JPT |
| LOC340435 | GI_29735811-S | rs7842091  | 8 | 8 | 71777335  | 4592   | 13.9981 | 0.7577 | 0.2024  | 6.1413 | JPT |
| LOC340435 | GI_29735811-S | rs1477945  | 8 | 8 | 71778107  | 3820   | 13.8772 | 0.7628 | 0.2040  | 6.1413 | JPT |
| LOC340435 | GI_29735811-S | rs1477944  | 8 | 8 | 71778154  | 3773   | 9.5795  | 0.6868 | -0.1838 | 6.1413 | JPT |

|           |               |            |   |   |          |        |         |        |         |        |     |
|-----------|---------------|------------|---|---|----------|--------|---------|--------|---------|--------|-----|
| LOC340435 | GI_29735811-S | rs13252808 | 8 | 8 | 71779209 | 2718   | 13.5685 | 0.7545 | -0.2062 | 6.1413 | JPT |
| LOC340435 | GI_29735811-S | rs17760532 | 8 | 8 | 71782841 | 914    | 13.5986 | 0.7553 | 0.2014  | 6.1413 | JPT |
| LOC340435 | GI_29735811-S | rs13280922 | 8 | 8 | 71787952 | 6025   | 14.3909 | 0.7597 | 0.2034  | 6.1413 | JPT |
| LOC340435 | GI_29735811-S | rs13253842 | 8 | 8 | 71788057 | 6130   | 13.9308 | 0.7559 | -0.1936 | 6.1413 | JPT |
| LOC340435 | GI_29735811-S | rs13254908 | 8 | 8 | 71788652 | 6725   | 13.9552 | 0.7565 | 0.2064  | 6.1413 | JPT |
| LOC340435 | GI_29735811-S | rs13264669 | 8 | 8 | 71789326 | 7399   | 14.3909 | 0.7597 | -0.2034 | 6.1413 | JPT |
| LOC340435 | GI_29735811-S | rs7013657  | 8 | 8 | 71800113 | 18186  | 13.9981 | 0.7577 | -0.2024 | 6.1413 | JPT |
| LOC340435 | GI_29735811-S | rs6987515  | 8 | 8 | 71802856 | 20929  | 13.9981 | 0.7577 | -0.2024 | 6.1413 | JPT |
| LOC340435 | GI_29735811-S | rs2290702  | 8 | 8 | 71809534 | 27607  | 13.9981 | 0.7577 | 0.2024  | 6.1413 | JPT |
| LOC340435 | GI_29735811-S | rs7015035  | 8 | 8 | 71816155 | 34228  | 13.9981 | 0.7577 | -0.2024 | 6.1413 | JPT |
| LOC340435 | GI_29735811-S | rs6472542  | 8 | 8 | 71816641 | 34714  | 13.9981 | 0.7577 | 0.2024  | 6.1413 | JPT |
| LOC340435 | GI_29735811-S | rs6982406  | 8 | 8 | 71817162 | 35235  | 13.9981 | 0.7577 | -0.2024 | 6.1413 | JPT |
| LOC340435 | GI_29735811-S | rs1902614  | 8 | 8 | 71818721 | 36794  | 13.9981 | 0.7577 | -0.2024 | 6.1413 | JPT |
| LOC340435 | GI_29735811-S | rs6998024  | 8 | 8 | 71823394 | 41467  | 13.9981 | 0.7577 | -0.2024 | 6.1413 | JPT |
| LOC340435 | GI_29735811-S | rs1348535  | 8 | 8 | 71825295 | 43368  | 13.9981 | 0.7577 | -0.2024 | 6.1413 | JPT |
| LOC340435 | GI_29735811-S | rs7825446  | 8 | 8 | 71826728 | 44801  | 13.9981 | 0.7577 | -0.2024 | 6.1413 | JPT |
| LOC340435 | GI_29735811-S | rs6472543  | 8 | 8 | 71826962 | 45035  | 13.9981 | 0.7577 | 0.2024  | 6.1413 | JPT |
| LOC340435 | GI_29735811-S | rs7819332  | 8 | 8 | 71830819 | 48892  | 14.3909 | 0.7597 | -0.2034 | 6.1413 | JPT |
| LOC340435 | GI_29735811-S | rs6991708  | 8 | 8 | 71831082 | 49155  | 13.9981 | 0.7577 | 0.2024  | 6.1413 | JPT |
| LOC340435 | GI_29735811-S | rs7012404  | 8 | 8 | 71831252 | 49325  | 14.3909 | 0.7597 | -0.2034 | 6.1413 | JPT |
| LOC340435 | GI_29735811-S | rs17760766 | 8 | 8 | 71833743 | 51816  | 13.9981 | 0.7577 | -0.2024 | 6.1413 | JPT |
| LOC340435 | GI_29735811-S | rs13258584 | 8 | 8 | 71834133 | 52206  | 14.3909 | 0.7597 | -0.2034 | 6.1413 | JPT |
| LOC340435 | GI_29735811-S | rs7838421  | 8 | 8 | 71834877 | 52950  | 14.9183 | 0.8051 | 0.2184  | 6.1413 | JPT |
| LOC340435 | GI_29735811-S | rs1471114  | 8 | 8 | 71838101 | 56174  | 13.9981 | 0.7577 | 0.2024  | 6.1413 | JPT |
| LOC340435 | GI_29735811-S | rs7012796  | 8 | 8 | 71838747 | 56820  | 13.9981 | 0.7577 | -0.2024 | 6.1413 | JPT |
| LOC340435 | GI_29735811-S | rs7017481  | 8 | 8 | 71839324 | 57397  | 14.3909 | 0.7597 | -0.2034 | 6.1413 | JPT |
| LOC340435 | GI_29735811-S | rs11993453 | 8 | 8 | 71840393 | 58466  | 14.3909 | 0.7597 | -0.2034 | 6.1413 | JPT |
| LOC340435 | GI_29735811-S | rs12680166 | 8 | 8 | 71841192 | 59265  | 14.3909 | 0.7597 | -0.2034 | 6.1413 | JPT |
| LOC340435 | GI_29735811-S | rs7459870  | 8 | 8 | 71845137 | 63210  | 11.8120 | 0.7579 | -0.2040 | 6.1413 | JPT |
| LOC340435 | GI_29735811-S | rs17688313 | 8 | 8 | 71846418 | 64491  | 14.0317 | 0.7585 | 0.2020  | 6.1413 | JPT |
| LOC340435 | GI_29735811-S | rs12674966 | 8 | 8 | 71846964 | 65037  | 14.3909 | 0.7597 | 0.2034  | 6.1413 | JPT |
| LOC340435 | GI_29735811-S | rs7845516  | 8 | 8 | 71848376 | 66449  | 13.9981 | 0.7577 | 0.2024  | 6.1413 | JPT |
| LOC340435 | GI_29735811-S | rs1373480  | 8 | 8 | 71849521 | 67594  | 13.9981 | 0.7577 | 0.2024  | 6.1413 | JPT |
| LOC340435 | GI_29735811-S | rs7000647  | 8 | 8 | 71850962 | 69035  | 13.9981 | 0.7577 | -0.2024 | 6.1413 | JPT |
| LOC340435 | GI_29735811-S | rs11992027 | 8 | 8 | 71851424 | 69497  | 12.8883 | 0.7351 | 0.2009  | 6.1413 | JPT |
| LOC340435 | GI_29735811-S | rs13254801 | 8 | 8 | 71851538 | 69611  | 12.8883 | 0.7351 | -0.2009 | 6.1413 | JPT |
| LOC340435 | GI_29735811-S | rs7013495  | 8 | 8 | 71856071 | 74144  | 13.9981 | 0.7577 | -0.2024 | 6.1413 | JPT |
| LOC340435 | GI_29735811-S | rs6993170  | 8 | 8 | 71856073 | 74146  | 13.9837 | 0.7656 | 0.2081  | 6.1413 | JPT |
| LOC340435 | GI_29735811-S | rs6998989  | 8 | 8 | 71857085 | 75158  | 12.9871 | 0.7923 | -0.2102 | 6.1413 | JPT |
| LOC340435 | GI_29735811-S | rs6998786  | 8 | 8 | 71857184 | 75257  | 14.3909 | 0.7597 | 0.2034  | 6.1413 | JPT |
| LOC340435 | GI_29735811-S | rs6981149  | 8 | 8 | 71857236 | 75309  | 13.9552 | 0.7565 | -0.2064 | 6.1413 | JPT |
| LOC340435 | GI_29735811-S | rs12680988 | 8 | 8 | 71858444 | 76517  | 15.5144 | 0.8183 | -0.2165 | 6.1413 | JPT |
| LOC340435 | GI_29735811-S | rs6986479  | 8 | 8 | 71860112 | 78185  | 14.3909 | 0.7597 | 0.2034  | 6.1413 | JPT |
| LOC340435 | GI_29735811-S | rs1596566  | 8 | 8 | 71861130 | 79203  | 13.9981 | 0.7577 | -0.2024 | 6.1413 | JPT |
| LOC340435 | GI_29735811-S | rs1596565  | 8 | 8 | 71861386 | 79459  | 14.3909 | 0.7597 | -0.2034 | 6.1413 | JPT |
| LOC340435 | GI_29735811-S | rs6993115  | 8 | 8 | 71861737 | 79810  | 13.0933 | 0.7586 | -0.2050 | 6.1413 | JPT |
| LOC340435 | GI_29735811-S | rs10504481 | 8 | 8 | 71862071 | 80144  | 13.9981 | 0.7577 | -0.2024 | 6.1413 | JPT |
| LOC340435 | GI_29735811-S | rs1444339  | 8 | 8 | 71863196 | 81269  | 13.9981 | 0.7577 | -0.2024 | 6.1413 | JPT |
| LOC340435 | GI_29735811-S | rs7826483  | 8 | 8 | 71865447 | 83520  | 13.9981 | 0.7577 | -0.2024 | 6.1413 | JPT |
| LOC340435 | GI_29735811-S | rs7822474  | 8 | 8 | 71868287 | 86360  | 13.9981 | 0.7577 | 0.2024  | 6.1413 | JPT |
| LOC340435 | GI_29735811-S | rs13257800 | 8 | 8 | 71876687 | 94760  | 13.9981 | 0.7577 | -0.2024 | 6.1413 | JPT |
| LOC340435 | GI_29735811-S | rs13261146 | 8 | 8 | 71889473 | 107546 | 13.9981 | 0.7577 | 0.2024  | 6.1413 | JPT |
| LOC340435 | GI_29735811-S | rs13261712 | 8 | 8 | 71894818 | 112891 | 13.9981 | 0.7577 | -0.2024 | 6.1413 | JPT |
| LOC340435 | GI_29735811-S | rs13252719 | 8 | 8 | 71897123 | 115196 | 13.9981 | 0.7577 | -0.2024 | 6.1413 | JPT |
| LOC340435 | GI_29735811-S | rs1822651  | 8 | 8 | 71899215 | 117288 | 13.9981 | 0.7577 | 0.2024  | 6.1413 | JPT |
| LOC340435 | GI_29735811-S | rs13274062 | 8 | 8 | 71899641 | 117714 | 13.8302 | 0.7615 | -0.2038 | 6.1413 | JPT |
| LOC340435 | GI_29735811-S | rs6983845  | 8 | 8 | 71909034 | 127107 | 13.9981 | 0.7577 | 0.2024  | 6.1413 | JPT |
| LOC340435 | GI_29735811-S | rs1457198  | 8 | 8 | 71909723 | 127796 | 13.9981 | 0.7577 | -0.2024 | 6.1413 | JPT |
| LOC340435 | GI_29735811-S | rs13255849 | 8 | 8 | 71915307 | 133380 | 14.3909 | 0.7597 | 0.2034  | 6.1413 | JPT |

|           |               |            |   |   |          |        |         |        |         |        |     |
|-----------|---------------|------------|---|---|----------|--------|---------|--------|---------|--------|-----|
| LOC340435 | GI_29735811-S | rs6472548  | 8 | 8 | 71916853 | 134926 | 14.3909 | 0.7597 | 0.2034  | 6.1413 | JPT |
| LOC340435 | GI_29735811-S | rs1156955  | 8 | 8 | 71917513 | 135586 | 13.9981 | 0.7577 | 0.2024  | 6.1413 | JPT |
| LOC340435 | GI_29735811-S | rs1156956  | 8 | 8 | 71917592 | 135665 | 13.9981 | 0.7577 | -0.2024 | 6.1413 | JPT |
| LOC340435 | GI_29735811-S | rs13274381 | 8 | 8 | 71927648 | 145721 | 13.9981 | 0.7577 | 0.2024  | 6.1413 | JPT |
| LOC340435 | GI_29735811-S | rs11994581 | 8 | 8 | 71936961 | 155034 | 13.9981 | 0.7577 | 0.2024  | 6.1413 | JPT |
| LOC340435 | GI_29735811-S | rs4446768  | 8 | 8 | 71940143 | 158216 | 13.9981 | 0.7577 | 0.2024  | 6.1413 | JPT |
| LOC340435 | GI_29735811-S | rs7015825  | 8 | 8 | 71941227 | 159300 | 12.2985 | 0.7351 | 0.2029  | 6.1413 | JPT |
| LOC340435 | GI_29735811-S | rs13273773 | 8 | 8 | 71941801 | 159874 | 14.3909 | 0.7597 | 0.2034  | 6.1413 | JPT |
| LOC340435 | GI_29735811-S | rs6472551  | 8 | 8 | 71944403 | 162476 | 13.9981 | 0.7577 | -0.2024 | 6.1413 | JPT |
| LOC340435 | GI_29735811-S | rs10453108 | 8 | 8 | 71945494 | 163567 | 13.9981 | 0.7577 | 0.2024  | 6.1413 | JPT |
| LOC340435 | GI_29735811-S | rs6998354  | 8 | 8 | 71948723 | 166796 | 14.3909 | 0.7597 | -0.2034 | 6.1413 | JPT |
| LOC340435 | GI_29735811-S | rs12156377 | 8 | 8 | 71950246 | 168319 | 14.3909 | 0.7597 | 0.2034  | 6.1413 | JPT |
| LOC340435 | GI_29735811-S | rs6472552  | 8 | 8 | 71951524 | 169597 | 13.9981 | 0.7577 | 0.2024  | 6.1413 | JPT |
| LOC340435 | GI_29735811-S | rs7003788  | 8 | 8 | 71951678 | 169751 | 13.4687 | 0.7603 | 0.2038  | 6.1413 | JPT |
| LOC340435 | GI_29735811-S | rs12676282 | 8 | 8 | 71954445 | 172518 | 11.1352 | 0.7458 | 0.2023  | 6.1413 | JPT |
| LOC340435 | GI_29735811-S | rs4629903  | 8 | 8 | 71967686 | 185759 | 13.9981 | 0.7577 | -0.2024 | 6.1413 | JPT |
| LOC340435 | GI_29735811-S | rs11985482 | 8 | 8 | 71973132 | 191205 | 13.9981 | 0.7577 | -0.2024 | 6.1413 | JPT |
| LOC340435 | GI_29735811-S | rs13248937 | 8 | 8 | 71981303 | 199376 | 13.9981 | 0.7577 | -0.2024 | 6.1413 | JPT |
| LOC340435 | GI_29735811-S | rs6992048  | 8 | 8 | 71986425 | 204498 | 13.9981 | 0.7577 | 0.2024  | 6.1413 | JPT |
| LOC340435 | GI_29735811-S | rs10957533 | 8 | 8 | 71987661 | 205734 | 14.3909 | 0.7597 | 0.2034  | 6.1413 | JPT |
| LOC340435 | GI_29735811-S | rs12156041 | 8 | 8 | 71989479 | 207552 | 14.0612 | 0.7593 | 0.2040  | 6.1413 | JPT |
| LOC340435 | GI_29735811-S | rs6984663  | 8 | 8 | 71990219 | 208292 | 13.9981 | 0.7577 | 0.2024  | 6.1413 | JPT |
| LOC340435 | GI_29735811-S | rs2017035  | 8 | 8 | 72004360 | 222433 | 8.9828  | 0.5824 | -0.1826 | 6.1413 | JPT |
| LOC340435 | GI_29735811-S | rs10504487 | 8 | 8 | 72006153 | 224226 | 8.9828  | 0.5824 | -0.1826 | 6.1413 | JPT |
| LOC340435 | GI_29735811-S | rs1493199  | 8 | 8 | 72009058 | 227131 | 8.9828  | 0.5824 | -0.1826 | 6.1413 | JPT |
| LOC340435 | GI_29735811-S | rs10089583 | 8 | 8 | 72012038 | 230111 | 8.9828  | 0.5824 | 0.1826  | 6.1413 | JPT |
| LOC340435 | GI_29735811-S | rs1493198  | 8 | 8 | 72014511 | 232584 | 8.9828  | 0.5824 | 0.1826  | 6.1413 | JPT |
| LOC340435 | GI_29735811-S | rs2008517  | 8 | 8 | 72019074 | 237147 | 8.9828  | 0.5824 | -0.1826 | 6.1413 | JPT |
| LOC340435 | GI_29735811-S | rs2732087  | 8 | 8 | 72022993 | 241066 | 8.9828  | 0.5824 | -0.1826 | 6.1413 | JPT |
| LOC340435 | GI_29735811-S | rs2639911  | 8 | 8 | 72023266 | 241339 | 8.2624  | 0.5574 | 0.1783  | 6.1413 | JPT |
| LOC340435 | GI_29735811-S | rs3098859  | 8 | 8 | 72027586 | 245659 | 8.9828  | 0.5824 | -0.1826 | 6.1413 | JPT |
| LOC340435 | GI_29735811-S | rs3110268  | 8 | 8 | 72028722 | 246795 | 8.9828  | 0.5824 | -0.1826 | 6.1413 | JPT |
| LOC340435 | GI_29735811-S | rs2732144  | 8 | 8 | 72029173 | 247246 | 8.9828  | 0.5824 | 0.1826  | 6.1413 | JPT |
| LOC340435 | GI_29735811-S | rs2639949  | 8 | 8 | 72029570 | 247643 | 9.2591  | 0.5859 | 0.1839  | 6.1413 | JPT |
| LOC340435 | GI_29735811-S | rs2639950  | 8 | 8 | 72029612 | 247685 | 8.9828  | 0.5824 | 0.1826  | 6.1413 | JPT |
| LOC340435 | GI_29735811-S | rs1973364  | 8 | 8 | 72029796 | 247869 | 8.9828  | 0.5824 | 0.1826  | 6.1413 | JPT |
| LOC340435 | GI_29735811-S | rs2639919  | 8 | 8 | 72037682 | 255755 | 8.9828  | 0.5824 | -0.1826 | 6.1413 | JPT |
| LOC340435 | GI_29735811-S | rs7008083  | 8 | 8 | 72047202 | 265275 | 8.9828  | 0.5824 | 0.1826  | 6.1413 | JPT |
| LOC340435 | GI_29735811-S | rs11988221 | 8 | 8 | 72051953 | 270026 | 8.9828  | 0.5824 | -0.1826 | 6.1413 | JPT |
| LOC340435 | GI_29735811-S | rs2732127  | 8 | 8 | 72059373 | 277446 | 8.2624  | 0.5574 | 0.1783  | 6.1413 | JPT |
| LOC340435 | GI_29735811-S | rs1845217  | 8 | 8 | 72059805 | 277878 | 9.2591  | 0.5859 | -0.1839 | 6.1413 | JPT |
| LOC340435 | GI_29735811-S | rs2956611  | 8 | 8 | 72060422 | 278495 | 8.9828  | 0.5824 | 0.1826  | 6.1413 | JPT |
| LOC340435 | GI_29735811-S | rs2732125  | 8 | 8 | 72061055 | 279128 | 9.2591  | 0.5859 | 0.1839  | 6.1413 | JPT |
| LOC340435 | GI_29735811-S | rs2732124  | 8 | 8 | 72061236 | 279309 | 8.9828  | 0.5824 | -0.1826 | 6.1413 | JPT |
| LOC340435 | GI_29735811-S | rs950903   | 8 | 8 | 72063328 | 281401 | 8.9828  | 0.5824 | -0.1826 | 6.1413 | JPT |
| LOC340435 | GI_29735811-S | rs6472558  | 8 | 8 | 72063697 | 281770 | 8.9828  | 0.5824 | -0.1826 | 6.1413 | JPT |
| LOC340435 | GI_29735811-S | rs2732120  | 8 | 8 | 72067547 | 285620 | 8.9828  | 0.5824 | 0.1826  | 6.1413 | JPT |
| LOC340435 | GI_29735811-S | rs2639924  | 8 | 8 | 72068095 | 286168 | 8.9828  | 0.5824 | 0.1826  | 6.1413 | JPT |
| LOC340435 | GI_29735811-S | rs2639948  | 8 | 8 | 72071040 | 289113 | 9.2591  | 0.5859 | 0.1839  | 6.1413 | JPT |
| LOC340435 | GI_29735811-S | rs2732118  | 8 | 8 | 72071219 | 289292 | 9.2591  | 0.5859 | 0.1839  | 6.1413 | JPT |
| LOC340435 | GI_29735811-S | rs2732117  | 8 | 8 | 72071632 | 289705 | 8.8643  | 0.5770 | 0.1863  | 6.1413 | JPT |
| LOC340435 | GI_29735811-S | rs2732140  | 8 | 8 | 72073280 | 291353 | 8.9828  | 0.5824 | 0.1826  | 6.1413 | JPT |
| LOC340435 | GI_29735811-S | rs2732141  | 8 | 8 | 72073461 | 291534 | 8.8643  | 0.5770 | -0.1863 | 6.1413 | JPT |
| LOC340435 | GI_29735811-S | rs2639947  | 8 | 8 | 72073991 | 292064 | 7.4625  | 0.5166 | 0.1812  | 6.1413 | JPT |
| LOC340435 | GI_29735811-S | rs2732146  | 8 | 8 | 72074672 | 292745 | 8.9828  | 0.5824 | 0.1826  | 6.1413 | JPT |
| LOC340435 | GI_29735811-S | rs2639945  | 8 | 8 | 72075093 | 293166 | 9.2591  | 0.5859 | -0.1839 | 6.1413 | JPT |
| LOC340435 | GI_29735811-S | rs2639942  | 8 | 8 | 72075728 | 293801 | 8.9828  | 0.5824 | -0.1826 | 6.1413 | JPT |
| LOC340435 | GI_29735811-S | rs2035929  | 8 | 8 | 72075926 | 293999 | 8.9828  | 0.5824 | -0.1826 | 6.1413 | JPT |
| LOC340435 | GI_29735811-S | rs2639941  | 8 | 8 | 72076459 | 294532 | 8.9880  | 0.5826 | 0.1834  | 6.1413 | JPT |

|           |               |           |   |   |          |        |        |        |         |        |     |
|-----------|---------------|-----------|---|---|----------|--------|--------|--------|---------|--------|-----|
| LOC340435 | GI_29735811-S | rs2639939 | 8 | 8 | 72076477 | 294550 | 8.9828 | 0.5824 | -0.1826 | 6.1413 | JPT |
| LOC340435 | GI_29735811-S | rs2035925 | 8 | 8 | 72076770 | 294843 | 8.9828 | 0.5824 | 0.1826  | 6.1413 | JPT |
| LOC340435 | GI_29735811-S | rs2639938 | 8 | 8 | 72076906 | 294979 | 8.9828 | 0.5824 | 0.1826  | 6.1413 | JPT |
| LOC340435 | GI_29735811-S | rs2639937 | 8 | 8 | 72076910 | 294983 | 8.4795 | 0.5769 | 0.1911  | 6.1413 | JPT |
| LOC340435 | GI_29735811-S | rs2035924 | 8 | 8 | 72077007 | 295080 | 9.2591 | 0.5859 | 0.1839  | 6.1413 | JPT |
| LOC340435 | GI_29735811-S | rs2732089 | 8 | 8 | 72077718 | 295791 | 8.9828 | 0.5824 | 0.1826  | 6.1413 | JPT |
| LOC340435 | GI_29735811-S | rs3098865 | 8 | 8 | 72078538 | 296611 | 8.9828 | 0.5824 | -0.1826 | 6.1413 | JPT |
| LOC340435 | GI_29735811-S | rs3098866 | 8 | 8 | 72079128 | 297201 | 8.9828 | 0.5824 | 0.1826  | 6.1413 | JPT |
| LOC340435 | GI_29735811-S | rs3110239 | 8 | 8 | 72079299 | 297372 | 8.9828 | 0.5824 | -0.1826 | 6.1413 | JPT |
| LOC340435 | GI_29735811-S | rs3098867 | 8 | 8 | 72079425 | 297498 | 8.9828 | 0.5824 | -0.1826 | 6.1413 | JPT |
| LOC340435 | GI_29735811-S | rs2639904 | 8 | 8 | 72079684 | 297757 | 8.9828 | 0.5824 | 0.1826  | 6.1413 | JPT |
| LOC340435 | GI_29735811-S | rs2639901 | 8 | 8 | 72080305 | 298378 | 8.9828 | 0.5824 | -0.1826 | 6.1413 | JPT |
| LOC340435 | GI_29735811-S | rs2732090 | 8 | 8 | 72080811 | 298884 | 8.9828 | 0.5824 | -0.1826 | 6.1413 | JPT |
| LOC340435 | GI_29735811-S | rs2732091 | 8 | 8 | 72080977 | 299050 | 9.2591 | 0.5859 | 0.1839  | 6.1413 | JPT |
| LOC340435 | GI_29735811-S | rs2732093 | 8 | 8 | 72081633 | 299706 | 8.9828 | 0.5824 | 0.1826  | 6.1413 | JPT |
| LOC340435 | GI_29735811-S | rs2732094 | 8 | 8 | 72082472 | 300545 | 8.9828 | 0.5824 | 0.1826  | 6.1413 | JPT |
| LOC340435 | GI_29735811-S | rs2732095 | 8 | 8 | 72082500 | 300573 | 8.9828 | 0.5824 | 0.1826  | 6.1413 | JPT |
| LOC340435 | GI_29735811-S | rs2732096 | 8 | 8 | 72082534 | 300607 | 8.6303 | 0.5841 | -0.1883 | 6.1413 | JPT |
| LOC340435 | GI_29735811-S | rs2639898 | 8 | 8 | 72082864 | 300937 | 8.9828 | 0.5824 | 0.1826  | 6.1413 | JPT |
| LOC340435 | GI_29735811-S | rs2639897 | 8 | 8 | 72083230 | 301303 | 8.9828 | 0.5824 | 0.1826  | 6.1413 | JPT |
| LOC340435 | GI_29735811-S | rs2639896 | 8 | 8 | 72083337 | 301410 | 8.8423 | 0.5849 | 0.1846  | 6.1413 | JPT |
| LOC340435 | GI_29735811-S | rs1353058 | 8 | 8 | 72084572 | 302645 | 8.9828 | 0.5824 | 0.1826  | 6.1413 | JPT |
| LOC340435 | GI_29735811-S | rs1353057 | 8 | 8 | 72084651 | 302724 | 8.9828 | 0.5824 | -0.1826 | 6.1413 | JPT |
| LOC340435 | GI_29735811-S | rs2639960 | 8 | 8 | 72084693 | 302766 | 8.8540 | 0.5854 | -0.1880 | 6.1413 | JPT |
| LOC340435 | GI_29735811-S | rs2639958 | 8 | 8 | 72084704 | 302777 | 9.2591 | 0.5859 | 0.1839  | 6.1413 | JPT |
| LOC340435 | GI_29735811-S | rs1908036 | 8 | 8 | 72084878 | 302951 | 8.9828 | 0.5824 | -0.1826 | 6.1413 | JPT |
| LOC340435 | GI_29735811-S | rs1908035 | 8 | 8 | 72084962 | 303035 | 8.9828 | 0.5824 | 0.1826  | 6.1413 | JPT |
| LOC340435 | GI_29735811-S | rs1908034 | 8 | 8 | 72085108 | 303181 | 8.9828 | 0.5824 | 0.1826  | 6.1413 | JPT |
| LOC340435 | GI_29735811-S | rs1908033 | 8 | 8 | 72085353 | 303426 | 8.9828 | 0.5824 | 0.1826  | 6.1413 | JPT |
| LOC340435 | GI_29735811-S | rs2732102 | 8 | 8 | 72085426 | 303499 | 8.9828 | 0.5824 | -0.1826 | 6.1413 | JPT |
| LOC340435 | GI_29735811-S | rs2639957 | 8 | 8 | 72085756 | 303829 | 8.9828 | 0.5824 | 0.1826  | 6.1413 | JPT |
| LOC340435 | GI_29735811-S | rs2732103 | 8 | 8 | 72086050 | 304123 | 8.9828 | 0.5824 | 0.1826  | 6.1413 | JPT |
| LOC340435 | GI_29735811-S | rs2732104 | 8 | 8 | 72086073 | 304146 | 8.8540 | 0.5854 | 0.1880  | 6.1413 | JPT |
| LOC340435 | GI_29735811-S | rs2732106 | 8 | 8 | 72086393 | 304466 | 8.9828 | 0.5824 | -0.1826 | 6.1413 | JPT |
| LOC340435 | GI_29735811-S | rs2639956 | 8 | 8 | 72086645 | 304718 | 8.9828 | 0.5824 | 0.1826  | 6.1413 | JPT |
| LOC340435 | GI_29735811-S | rs1389206 | 8 | 8 | 72087416 | 305489 | 8.9828 | 0.5824 | -0.1826 | 6.1413 | JPT |
| LOC340435 | GI_29735811-S | rs2732107 | 8 | 8 | 72087862 | 305935 | 8.9828 | 0.5824 | 0.1826  | 6.1413 | JPT |
| LOC340435 | GI_29735811-S | rs2639955 | 8 | 8 | 72087896 | 305969 | 8.9828 | 0.5824 | -0.1826 | 6.1413 | JPT |
| LOC340435 | GI_29735811-S | rs2639954 | 8 | 8 | 72088129 | 306202 | 8.9828 | 0.5824 | 0.1826  | 6.1413 | JPT |
| LOC340435 | GI_29735811-S | rs2639953 | 8 | 8 | 72088214 | 306287 | 8.9828 | 0.5824 | 0.1826  | 6.1413 | JPT |
| LOC340435 | GI_29735811-S | rs2639952 | 8 | 8 | 72088284 | 306357 | 8.9828 | 0.5824 | 0.1826  | 6.1413 | JPT |
| LOC340435 | GI_29735811-S | rs2732108 | 8 | 8 | 72088653 | 306726 | 8.9828 | 0.5824 | 0.1826  | 6.1413 | JPT |
| LOC340435 | GI_29735811-S | rs2732109 | 8 | 8 | 72088777 | 306850 | 9.0064 | 0.5834 | 0.1838  | 6.1413 | JPT |
| LOC340435 | GI_29735811-S | rs1493203 | 8 | 8 | 72089061 | 307134 | 8.9828 | 0.5824 | -0.1826 | 6.1413 | JPT |
| LOC340435 | GI_29735811-S | rs2732110 | 8 | 8 | 72089365 | 307438 | 9.2591 | 0.5859 | 0.1839  | 6.1413 | JPT |
| LOC340435 | GI_29735811-S | rs2639951 | 8 | 8 | 72089779 | 307852 | 8.9828 | 0.5824 | -0.1826 | 6.1413 | JPT |
| LOC340435 | GI_29735811-S | rs2732111 | 8 | 8 | 72089983 | 308056 | 8.9828 | 0.5824 | -0.1826 | 6.1413 | JPT |
| LOC340435 | GI_29735811-S | rs2732112 | 8 | 8 | 72090395 | 308468 | 8.9828 | 0.5824 | 0.1826  | 6.1413 | JPT |
| LOC340435 | GI_29735811-S | rs2732113 | 8 | 8 | 72091103 | 309176 | 8.9828 | 0.5824 | -0.1826 | 6.1413 | JPT |
| LOC340435 | GI_29735811-S | rs2732114 | 8 | 8 | 72091266 | 309339 | 8.8643 | 0.5770 | -0.1863 | 6.1413 | JPT |
| LOC340435 | GI_29735811-S | rs2732115 | 8 | 8 | 72091408 | 309481 | 8.9828 | 0.5824 | 0.1826  | 6.1413 | JPT |
| LOC340435 | GI_29735811-S | rs2732116 | 8 | 8 | 72091881 | 309954 | 8.9828 | 0.5824 | -0.1826 | 6.1413 | JPT |
| LOC340435 | GI_29735811-S | rs2956610 | 8 | 8 | 72092087 | 310160 | 8.9828 | 0.5824 | -0.1826 | 6.1413 | JPT |
| LOC340435 | GI_29735811-S | rs3098868 | 8 | 8 | 72092246 | 310319 | 8.9828 | 0.5824 | -0.1826 | 6.1413 | JPT |
| LOC340435 | GI_29735811-S | rs3098869 | 8 | 8 | 72092386 | 310459 | 8.8643 | 0.5770 | -0.1863 | 6.1413 | JPT |
| LOC340435 | GI_29735811-S | rs3110240 | 8 | 8 | 72092658 | 310731 | 8.9828 | 0.5824 | 0.1826  | 6.1413 | JPT |
| LOC340435 | GI_29735811-S | rs3098871 | 8 | 8 | 72092969 | 311042 | 8.9828 | 0.5824 | -0.1826 | 6.1413 | JPT |
| LOC340435 | GI_29735811-S | rs3098872 | 8 | 8 | 72094758 | 312831 | 8.2624 | 0.5574 | 0.1783  | 6.1413 | JPT |
| LOC340435 | GI_29735811-S | rs3098873 | 8 | 8 | 72095140 | 313213 | 8.9828 | 0.5824 | -0.1826 | 6.1413 | JPT |

|           |               |            |   |   |          |        |         |        |         |        |     |
|-----------|---------------|------------|---|---|----------|--------|---------|--------|---------|--------|-----|
| LOC340435 | GI_29735811-S | rs3110244  | 8 | 8 | 72095751 | 313824 | 12.8237 | 0.7509 | -0.1970 | 6.1413 | JPT |
| LOC340435 | GI_29735811-S | rs3098874  | 8 | 8 | 72096892 | 314965 | 8.9828  | 0.5824 | 0.1826  | 6.1413 | JPT |
| LOC340435 | GI_29735811-S | rs6982447  | 8 | 8 | 72097167 | 315240 | 8.9828  | 0.5824 | 0.1826  | 6.1413 | JPT |
| LOC340435 | GI_29735811-S | rs6982601  | 8 | 8 | 72097242 | 315315 | 8.6303  | 0.5841 | 0.1883  | 6.1413 | JPT |
| LOC340435 | GI_29735811-S | rs6983299  | 8 | 8 | 72097441 | 315514 | 8.9828  | 0.5824 | -0.1826 | 6.1413 | JPT |
| LOC340435 | GI_29735811-S | rs6982942  | 8 | 8 | 72097489 | 315562 | 8.6303  | 0.5841 | 0.1883  | 6.1413 | JPT |
| LOC340435 | GI_29735811-S | rs13256029 | 8 | 8 | 72098099 | 316172 | 9.2591  | 0.5859 | -0.1839 | 6.1413 | JPT |
| LOC340435 | GI_29735811-S | rs3098876  | 8 | 8 | 72098798 | 316871 | 8.8643  | 0.5770 | -0.1863 | 6.1413 | JPT |
| LOC340435 | GI_29735811-S | rs3110250  | 8 | 8 | 72098938 | 317011 | 8.9828  | 0.5824 | 0.1826  | 6.1413 | JPT |
| LOC340435 | GI_29735811-S | rs3098877  | 8 | 8 | 72099000 | 317073 | 8.8540  | 0.5854 | -0.1880 | 6.1413 | JPT |
| LOC340435 | GI_29735811-S | rs3110251  | 8 | 8 | 72099528 | 317601 | 8.2179  | 0.5379 | 0.1816  | 6.1413 | JPT |
| LOC340435 | GI_29735811-S | rs3110252  | 8 | 8 | 72099774 | 317847 | 8.8643  | 0.5770 | 0.1863  | 6.1413 | JPT |
| LOC340435 | GI_29735811-S | rs3098878  | 8 | 8 | 72100023 | 318096 | 8.9828  | 0.5824 | -0.1826 | 6.1413 | JPT |
| LOC340435 | GI_29735811-S | rs3110253  | 8 | 8 | 72100107 | 318180 | 8.9828  | 0.5824 | 0.1826  | 6.1413 | JPT |
| LOC340435 | GI_29735811-S | rs3110255  | 8 | 8 | 72100604 | 318677 | 8.9828  | 0.5824 | 0.1826  | 6.1413 | JPT |
| LOC340435 | GI_29735811-S | rs3110256  | 8 | 8 | 72100690 | 318763 | 8.8643  | 0.5770 | 0.1863  | 6.1413 | JPT |
| LOC340435 | GI_29735811-S | rs3098879  | 8 | 8 | 72101014 | 319087 | 8.9828  | 0.5824 | -0.1826 | 6.1413 | JPT |
| LOC340435 | GI_29735811-S | rs3110258  | 8 | 8 | 72101086 | 319159 | 8.8061  | 0.5832 | 0.1835  | 6.1413 | JPT |
| LOC340435 | GI_29735811-S | rs3098880  | 8 | 8 | 72101475 | 319548 | 8.9828  | 0.5824 | -0.1826 | 6.1413 | JPT |
| LOC340435 | GI_29735811-S | rs7002064  | 8 | 8 | 72102648 | 320721 | 8.6499  | 0.5759 | -0.1866 | 6.1413 | JPT |
| LOC340435 | GI_29735811-S | rs3110260  | 8 | 8 | 72103042 | 321115 | 8.9828  | 0.5824 | 0.1826  | 6.1413 | JPT |
| LOC340435 | GI_29735811-S | rs3110261  | 8 | 8 | 72104005 | 322078 | 8.9828  | 0.5824 | -0.1826 | 6.1413 | JPT |
| LOC340435 | GI_29735811-S | rs3110262  | 8 | 8 | 72104184 | 322257 | 8.9828  | 0.5824 | 0.1826  | 6.1413 | JPT |
| LOC340435 | GI_29735811-S | rs3110263  | 8 | 8 | 72105246 | 323319 | 8.9828  | 0.5824 | 0.1826  | 6.1413 | JPT |
| LOC340435 | GI_29735811-S | rs3098883  | 8 | 8 | 72106121 | 324194 | 13.3932 | 0.7496 | -0.1960 | 6.1413 | JPT |
| LOC340435 | GI_29735811-S | rs4532626  | 8 | 8 | 72107449 | 325522 | 8.9828  | 0.5824 | 0.1826  | 6.1413 | JPT |
| LOC340435 | GI_29735811-S | rs4434651  | 8 | 8 | 72109741 | 327814 | 8.9828  | 0.5824 | -0.1826 | 6.1413 | JPT |
| LOC340435 | GI_29735811-S | rs12542300 | 8 | 8 | 72113949 | 332022 | 8.9828  | 0.5824 | -0.1826 | 6.1413 | JPT |
| LOC340435 | GI_29735811-S | rs10091471 | 8 | 8 | 72116309 | 334382 | 8.9828  | 0.5824 | 0.1826  | 6.1413 | JPT |
| LOC340435 | GI_29735811-S | rs11779364 | 8 | 8 | 72117150 | 335223 | 9.2591  | 0.5859 | 0.1839  | 6.1413 | JPT |
| LOC340435 | GI_29735811-S | rs6472561  | 8 | 8 | 72117737 | 335810 | 8.9828  | 0.5824 | -0.1826 | 6.1413 | JPT |
| LOC340435 | GI_29735811-S | rs4074908  | 8 | 8 | 72117886 | 335959 | 8.9828  | 0.5824 | -0.1826 | 6.1413 | JPT |
| LOC340435 | GI_29735811-S | rs4074909  | 8 | 8 | 72118381 | 336454 | 8.9828  | 0.5824 | 0.1826  | 6.1413 | JPT |
| LOC340435 | GI_29735811-S | rs4078067  | 8 | 8 | 72119025 | 337098 | 8.9828  | 0.5824 | -0.1826 | 6.1413 | JPT |
| LOC340435 | GI_29735811-S | rs4504667  | 8 | 8 | 72119346 | 337419 | 8.9828  | 0.5824 | -0.1826 | 6.1413 | JPT |
| LOC340435 | GI_29735811-S | rs4571761  | 8 | 8 | 72119727 | 337800 | 8.9828  | 0.5824 | -0.1826 | 6.1413 | JPT |
| LOC340435 | GI_29735811-S | rs4738105  | 8 | 8 | 72121472 | 339545 | 8.9828  | 0.5824 | -0.1826 | 6.1413 | JPT |
| LOC340435 | GI_29735811-S | rs17699084 | 8 | 8 | 72125965 | 344038 | 9.2591  | 0.5859 | 0.1839  | 6.1413 | JPT |
| LOC340435 | GI_29735811-S | rs6472562  | 8 | 8 | 72132432 | 350505 | 8.9828  | 0.5824 | 0.1826  | 6.1413 | JPT |
| LOC340435 | GI_29735811-S | rs6472563  | 8 | 8 | 72132461 | 350534 | 8.8540  | 0.5854 | 0.1880  | 6.1413 | JPT |
| LOC340435 | GI_29735811-S | rs10110676 | 8 | 8 | 72133363 | 351436 | 8.9828  | 0.5824 | -0.1826 | 6.1413 | JPT |
| LOC340435 | GI_29735811-S | rs10504492 | 8 | 8 | 72140513 | 358586 | 9.2591  | 0.5859 | -0.1839 | 6.1413 | JPT |
| LOC340435 | GI_29735811-S | rs6472564  | 8 | 8 | 72140954 | 359027 | 8.9828  | 0.5824 | -0.1826 | 6.1413 | JPT |
| LOC340435 | GI_29735811-S | rs13268251 | 8 | 8 | 72141368 | 359441 | 9.0076  | 0.5835 | -0.1838 | 6.1413 | JPT |
| LOC340435 | GI_29735811-S | rs17699685 | 8 | 8 | 72141558 | 359631 | 9.2591  | 0.5859 | -0.1839 | 6.1413 | JPT |
| LOC340435 | GI_29735811-S | rs11987409 | 8 | 8 | 72142614 | 360687 | 13.9308 | 0.7559 | 0.1936  | 6.1413 | JPT |
| LOC340435 | GI_29735811-S | rs17699710 | 8 | 8 | 72142764 | 360837 | 9.2591  | 0.5859 | -0.1839 | 6.1413 | JPT |
| LOC340435 | GI_29735811-S | rs7825815  | 8 | 8 | 72148959 | 367032 | 9.0862  | 0.5870 | -0.1848 | 6.1413 | JPT |
| LOC340435 | GI_29735811-S | rs4526394  | 8 | 8 | 72150881 | 368954 | 8.6034  | 0.5737 | 0.1857  | 6.1413 | JPT |
| LOC340435 | GI_29735811-S | rs12674838 | 8 | 8 | 72152834 | 370907 | 8.8318  | 0.5844 | -0.1837 | 6.1413 | JPT |
| LOC340435 | GI_29735811-S | rs17778232 | 8 | 8 | 72154072 | 372145 | 9.2591  | 0.5859 | -0.1839 | 6.1413 | JPT |
| LOC340435 | GI_29735811-S | rs9650238  | 8 | 8 | 72155260 | 373333 | 13.5697 | 0.7545 | -0.1938 | 6.1413 | JPT |
| LOC340435 | GI_29735811-S | rs12155783 | 8 | 8 | 72161680 | 379753 | 9.2591  | 0.5859 | 0.1839  | 6.1413 | JPT |
| LOC340435 | GI_29735811-S | rs1159724  | 8 | 8 | 72162375 | 380448 | 8.6521  | 0.5672 | 0.1594  | 6.1413 | JPT |
| LOC340435 | GI_29735811-S | rs6472566  | 8 | 8 | 72163038 | 381111 | 8.9828  | 0.5824 | -0.1826 | 6.1413 | JPT |
| LOC340435 | GI_29735811-S | rs10504497 | 8 | 8 | 72171441 | 389514 | 8.9828  | 0.5824 | -0.1826 | 6.1413 | JPT |
| LOC375671 | GI_37556019-S | rs13274383 | 8 | 8 | 74318024 | 13769  | 5.4701  | 0.3840 | -0.3124 | 5.4185 | JPT |
| LOC375671 | GI_37556019-S | rs2546224  | 8 | 8 | 74321015 | 10778  | 5.6391  | 0.4020 | 0.2448  | 5.4185 | JPT |
| LOC375671 | GI_37556019-S | rs2925445  | 8 | 8 | 74325923 | 5870   | 5.6391  | 0.4020 | -0.2448 | 5.4185 | JPT |

|           |               |            |   |   |          |       |         |        |         |        |     |
|-----------|---------------|------------|---|---|----------|-------|---------|--------|---------|--------|-----|
| LOC375671 | GI_37556019-S | rs2546220  | 8 | 8 | 74331172 | 621   | 5.9987  | 0.4245 | 0.2783  | 5.4185 | JPT |
| LOC375671 | GI_37556019-S | rs2546219  | 8 | 8 | 74331201 | 592   | 5.7925  | 0.4273 | 0.2831  | 5.4185 | JPT |
| LOC375671 | GI_37556019-S | rs2546217  | 8 | 8 | 74331891 | 98    | 5.6391  | 0.4020 | -0.2448 | 5.4185 | JPT |
| LOC375671 | GI_37556019-S | rs2546215  | 8 | 8 | 74334630 | 2837  | 5.6391  | 0.4020 | -0.2448 | 5.4185 | JPT |
| LOC375671 | GI_37556019-S | rs2546214  | 8 | 8 | 74334996 | 3203  | 5.6391  | 0.4020 | 0.2448  | 5.4185 | JPT |
| SNX16     | GI_23238247-A | rs11991095 | 8 | 8 | 82836383 | 38176 | 6.2606  | 0.4404 | 0.2521  | 5.5135 | JPT |
| SNX16     | GI_23238247-A | rs2087449  | 8 | 8 | 82849089 | 25470 | 5.8845  | 0.4252 | -0.2430 | 5.5135 | JPT |
| SNX16     | GI_23238247-A | rs2101513  | 8 | 8 | 82849335 | 25224 | 6.2606  | 0.4404 | 0.2521  | 5.5135 | JPT |
| SNX16     | GI_23238247-A | rs12541036 | 8 | 8 | 82849465 | 25094 | 6.2606  | 0.4404 | 0.2521  | 5.5135 | JPT |
| SNX16     | GI_23238247-A | rs6473301  | 8 | 8 | 82853895 | 20664 | 6.0343  | 0.4191 | -0.2400 | 5.5135 | JPT |
| SNX16     | GI_23238247-A | rs7815272  | 8 | 8 | 82854364 | 20195 | 6.0343  | 0.4191 | 0.2400  | 5.5135 | JPT |
| SNX16     | GI_23238247-A | rs7461058  | 8 | 8 | 82859368 | 15191 | 5.9286  | 0.4202 | -0.2441 | 5.5135 | JPT |
| SNX16     | GI_23238247-A | rs7834555  | 8 | 8 | 82860180 | 14379 | 6.4119  | 0.4494 | -0.2418 | 5.5135 | JPT |
| SNX16     | GI_23238247-A | rs7836040  | 8 | 8 | 82860883 | 13676 | 6.9258  | 0.4872 | 0.2423  | 5.5135 | JPT |
| SNX16     | GI_23238247-A | rs6473304  | 8 | 8 | 82864790 | 9769  | 5.9341  | 0.4283 | 0.2309  | 5.5135 | JPT |
| SNX16     | GI_23238247-A | rs4285442  | 8 | 8 | 82865958 | 8601  | 6.4119  | 0.4494 | -0.2418 | 5.5135 | JPT |
| SNX16     | GI_23238247-A | rs10091077 | 8 | 8 | 82868019 | 6540  | 6.3450  | 0.4377 | -0.2341 | 5.5135 | JPT |
| SNX16     | GI_23238247-A | rs6473310  | 8 | 8 | 82870536 | 4023  | 8.5044  | 0.5517 | -0.2490 | 5.5135 | JPT |
| SNX16     | GI_23238247-A | rs4272332  | 8 | 8 | 82870584 | 3975  | 10.1425 | 0.6316 | 0.2800  | 5.5135 | JPT |
| SNX16     | GI_23238247-A | rs7460277  | 8 | 8 | 82872332 | 2227  | 8.2168  | 0.5464 | 0.2503  | 5.5135 | JPT |
| SNX16     | GI_23238247-A | rs7460280  | 8 | 8 | 82872380 | 2179  | 10.1583 | 0.6322 | 0.2887  | 5.5135 | JPT |
| SNX16     | GI_23238247-A | rs1054078  | 8 | 8 | 82874708 | 149   | 8.4237  | 0.5564 | 0.2496  | 5.5135 | JPT |
| SNX16     | GI_23238247-A | rs2029416  | 8 | 8 | 82876882 | 2323  | 7.5365  | 0.5676 | 0.3014  | 5.5135 | JPT |
| SNX16     | GI_23238247-A | rs1489587  | 8 | 8 | 82878407 | 3848  | 9.7326  | 0.6238 | 0.2727  | 5.5135 | JPT |
| SNX16     | GI_23238247-A | rs2600599  | 8 | 8 | 82881555 | 6996  | 10.1425 | 0.6316 | 0.2800  | 5.5135 | JPT |
| SNX16     | GI_23238247-A | rs2600605  | 8 | 8 | 82883315 | 8756  | 10.1583 | 0.6322 | 0.2887  | 5.5135 | JPT |
| SNX16     | GI_23238247-A | rs774466   | 8 | 8 | 82883945 | 9386  | 10.1381 | 0.6227 | 0.2784  | 5.5135 | JPT |
| SNX16     | GI_23238247-A | rs774467   | 8 | 8 | 82884146 | 9587  | 9.7150  | 0.6231 | 0.2764  | 5.5135 | JPT |
| SNX16     | GI_23238247-A | rs799332   | 8 | 8 | 82884689 | 10130 | 10.1425 | 0.6316 | -0.2800 | 5.5135 | JPT |
| SNX16     | GI_23238247-A | rs10958045 | 8 | 8 | 82885549 | 10990 | 8.5044  | 0.5517 | 0.2490  | 5.5135 | JPT |
| SNX16     | GI_23238247-A | rs774468   | 8 | 8 | 82885666 | 11107 | 10.1425 | 0.6316 | -0.2800 | 5.5135 | JPT |
| SNX16     | GI_23238247-A | rs7825180  | 8 | 8 | 82886546 | 11987 | 8.5971  | 0.6114 | 0.2499  | 5.5135 | JPT |
| SNX16     | GI_23238247-A | rs774471   | 8 | 8 | 82886984 | 12425 | 8.9177  | 0.6068 | -0.2945 | 5.5135 | JPT |
| SNX16     | GI_23238247-A | rs774473   | 8 | 8 | 82887517 | 12958 | 9.0463  | 0.6127 | -0.2876 | 5.5135 | JPT |
| SNX16     | GI_23238247-A | rs774474   | 8 | 8 | 82888695 | 14136 | 9.4442  | 0.6116 | -0.2937 | 5.5135 | JPT |
| SNX16     | GI_23238247-A | rs6473311  | 8 | 8 | 82889237 | 14678 | 8.0713  | 0.5569 | 0.2530  | 5.5135 | JPT |
| SNX16     | GI_23238247-A | rs2635482  | 8 | 8 | 82890070 | 15511 | 9.5025  | 0.6233 | 0.2720  | 5.5135 | JPT |
| SNX16     | GI_23238247-A | rs2600606  | 8 | 8 | 82890075 | 15516 | 9.8390  | 0.6282 | -0.2815 | 5.5135 | JPT |
| SNX16     | GI_23238247-A | rs16909651 | 8 | 8 | 82890124 | 15565 | 9.6762  | 0.6038 | 0.2933  | 5.5135 | JPT |
| SNX16     | GI_23238247-A | rs13255262 | 8 | 8 | 82890579 | 16020 | 8.5044  | 0.5517 | 0.2490  | 5.5135 | JPT |
| SNX16     | GI_23238247-A | rs774477   | 8 | 8 | 82890858 | 16299 | 10.1425 | 0.6316 | 0.2800  | 5.5135 | JPT |
| SNX16     | GI_23238247-A | rs774479   | 8 | 8 | 82891638 | 17079 | 10.1381 | 0.6227 | -0.2784 | 5.5135 | JPT |
| SNX16     | GI_23238247-A | rs10958046 | 8 | 8 | 82891765 | 17206 | 8.5044  | 0.5517 | -0.2490 | 5.5135 | JPT |
| SNX16     | GI_23238247-A | rs7833384  | 8 | 8 | 82893470 | 18911 | 7.8968  | 0.5305 | 0.2357  | 5.5135 | JPT |
| SNX16     | GI_23238247-A | rs7833790  | 8 | 8 | 82893712 | 19153 | 8.5044  | 0.5517 | 0.2490  | 5.5135 | JPT |
| SNX16     | GI_23238247-A | rs799331   | 8 | 8 | 82895398 | 20839 | 8.3512  | 0.5801 | -0.2625 | 5.5135 | JPT |
| SNX16     | GI_23238247-A | rs774462   | 8 | 8 | 82895695 | 21136 | 9.8066  | 0.6361 | -0.2893 | 5.5135 | JPT |
| SNX16     | GI_23238247-A | rs774463   | 8 | 8 | 82895794 | 21235 | 10.1425 | 0.6316 | -0.2800 | 5.5135 | JPT |
| SNX16     | GI_23238247-A | rs774464   | 8 | 8 | 82896218 | 21659 | 9.8746  | 0.6207 | 0.2978  | 5.5135 | JPT |
| SNX16     | GI_23238247-A | rs774465   | 8 | 8 | 82896686 | 22127 | 9.1845  | 0.6285 | 0.2784  | 5.5135 | JPT |
| SNX16     | GI_23238247-A | rs4739627  | 8 | 8 | 82897212 | 22653 | 8.5044  | 0.5517 | -0.2490 | 5.5135 | JPT |
| SNX16     | GI_23238247-A | rs2635492  | 8 | 8 | 82897458 | 22899 | 10.1381 | 0.6227 | -0.2784 | 5.5135 | JPT |
| SNX16     | GI_23238247-A | rs1021328  | 8 | 8 | 82899261 | 24702 | 8.7395  | 0.5986 | 0.2906  | 5.5135 | JPT |
| SNX16     | GI_23238247-A | rs1463259  | 8 | 8 | 82900300 | 25741 | 8.3279  | 0.5696 | -0.2613 | 5.5135 | JPT |
| SNX16     | GI_23238247-A | rs12546081 | 8 | 8 | 82902603 | 28044 | 9.6509  | 0.6115 | 0.2809  | 5.5135 | JPT |
| SNX16     | GI_23238247-A | rs1470787  | 8 | 8 | 82903057 | 28498 | 10.1425 | 0.6316 | 0.2800  | 5.5135 | JPT |
| SNX16     | GI_23238247-A | rs1451995  | 8 | 8 | 82908678 | 34119 | 8.4237  | 0.5564 | -0.2496 | 5.5135 | JPT |
| SNX16     | GI_23238247-A | rs12674769 | 8 | 8 | 82911451 | 36892 | 10.1425 | 0.6316 | 0.2800  | 5.5135 | JPT |
| SNX16     | GI_23238247-A | rs12674770 | 8 | 8 | 82911483 | 36924 | 10.1381 | 0.6227 | 0.2784  | 5.5135 | JPT |

|          |               |            |   |   |           |        |         |        |         |        |     |
|----------|---------------|------------|---|---|-----------|--------|---------|--------|---------|--------|-----|
| SNX16    | GI_23238247-A | rs1814534  | 8 | 8 | 82914377  | 39818  | 10.1425 | 0.6316 | -0.2800 | 5.5135 | JPT |
| SNX16    | GI_23238247-A | rs12056632 | 8 | 8 | 82914846  | 40287  | 10.1381 | 0.6227 | -0.2784 | 5.5135 | JPT |
| SNX16    | GI_23238247-A | rs1452000  | 8 | 8 | 82929953  | 55394  | 10.1425 | 0.6316 | -0.2800 | 5.5135 | JPT |
| SNX16    | GI_23238247-A | rs12541224 | 8 | 8 | 82930729  | 56170  | 10.1583 | 0.6322 | 0.2887  | 5.5135 | JPT |
| SNX16    | GI_23238247-A | rs12676336 | 8 | 8 | 82933563  | 59004  | 8.3531  | 0.5530 | 0.2544  | 5.5135 | JPT |
| SNX16    | GI_23238247-A | rs10958047 | 8 | 8 | 82935117  | 60558  | 10.1381 | 0.6227 | 0.2784  | 5.5135 | JPT |
| SNX16    | GI_23238247-A | rs1451998  | 8 | 8 | 82935597  | 61038  | 10.1425 | 0.6316 | -0.2800 | 5.5135 | JPT |
| SNX16    | GI_23238247-A | rs1451997  | 8 | 8 | 82936608  | 62049  | 6.9543  | 0.5348 | -0.2295 | 5.5135 | JPT |
| SNX16    | GI_23238247-A | rs4540369  | 8 | 8 | 82937919  | 63360  | 10.1381 | 0.6227 | -0.2784 | 5.5135 | JPT |
| SNX16    | GI_23238247-A | rs1597755  | 8 | 8 | 82940494  | 65935  | 10.1425 | 0.6316 | -0.2800 | 5.5135 | JPT |
| SNX16    | GI_23238247-A | rs16909729 | 8 | 8 | 82955497  | 80938  | 7.1134  | 0.4811 | 0.2394  | 5.5135 | JPT |
| ATP6V1C1 | GI_19913430-S | rs1018088  | 8 | 8 | 104162535 | 12355  | 6.2159  | 0.4377 | 0.2877  | 5.6168 | JPT |
| PKHD1L1  | GI_31377831-S | rs10955508 | 8 | 8 | 110242060 | 366195 | 5.8486  | 0.4477 | -0.4520 | 5.7425 | JPT |
| PKHD1L1  | GI_31377831-S | rs10955509 | 8 | 8 | 110242408 | 365847 | 5.7496  | 0.4246 | 0.4510  | 5.7425 | JPT |
| PKHD1L1  | GI_31377831-S | rs4734197  | 8 | 8 | 110247681 | 360574 | 5.7907  | 0.4116 | -0.4799 | 5.7425 | JPT |
| PKHD1L1  | GI_31377831-S | rs4734198  | 8 | 8 | 110248128 | 360127 | 5.7907  | 0.4116 | -0.4799 | 5.7425 | JPT |
| PKHD1L1  | GI_31377831-S | rs2980570  | 8 | 8 | 110417198 | 191057 | 9.4046  | 0.6010 | -0.5688 | 5.7425 | JPT |
| PKHD1L1  | GI_31377831-S | rs2980571  | 8 | 8 | 110417425 | 190830 | 9.4046  | 0.6010 | 0.5688  | 5.7425 | JPT |
| PKHD1L1  | GI_31377831-S | rs1870389  | 8 | 8 | 110420430 | 187825 | 9.4046  | 0.6010 | 0.5688  | 5.7425 | JPT |
| PKHD1L1  | GI_31377831-S | rs2926239  | 8 | 8 | 110427848 | 180407 | 9.4046  | 0.6010 | 0.5688  | 5.7425 | JPT |
| PKHD1L1  | GI_31377831-S | rs2980585  | 8 | 8 | 110429704 | 178551 | 7.5811  | 0.5804 | 0.5249  | 5.7425 | JPT |
| PKHD1L1  | GI_31377831-S | rs2926237  | 8 | 8 | 110430021 | 178234 | 8.5823  | 0.5818 | 0.5339  | 5.7425 | JPT |
| PKHD1L1  | GI_31377831-S | rs11998321 | 8 | 8 | 110432563 | 175692 | 10.3252 | 0.6388 | 0.5713  | 5.7425 | JPT |
| PKHD1L1  | GI_31377831-S | rs2926233  | 8 | 8 | 110435551 | 172704 | 10.3252 | 0.6388 | -0.5713 | 5.7425 | JPT |
| PKHD1L1  | GI_31377831-S | rs11987954 | 8 | 8 | 110436187 | 172068 | 9.8792  | 0.6122 | 0.5635  | 5.7425 | JPT |
| PKHD1L1  | GI_31377831-S | rs1458920  | 8 | 8 | 110440985 | 167270 | 7.5868  | 0.5146 | 0.4834  | 5.7425 | JPT |
| PKHD1L1  | GI_31377831-S | rs12680439 | 8 | 8 | 110441470 | 166785 | 7.8100  | 0.5177 | 0.4806  | 5.7425 | JPT |
| PKHD1L1  | GI_31377831-S | rs7002606  | 8 | 8 | 110441547 | 166708 | 6.8281  | 0.4816 | -0.4663 | 5.7425 | JPT |
| PKHD1L1  | GI_31377831-S | rs7002926  | 8 | 8 | 110441762 | 166493 | 7.6067  | 0.5156 | -0.4900 | 5.7425 | JPT |
| PKHD1L1  | GI_31377831-S | rs6982748  | 8 | 8 | 110441844 | 166411 | 7.6067  | 0.5156 | 0.4900  | 5.7425 | JPT |
| PKHD1L1  | GI_31377831-S | rs6987198  | 8 | 8 | 110442003 | 166252 | 6.5650  | 0.4583 | -0.4768 | 5.7425 | JPT |
| PKHD1L1  | GI_31377831-S | rs4734212  | 8 | 8 | 110445727 | 162528 | 7.5868  | 0.5146 | 0.4834  | 5.7425 | JPT |
| PKHD1L1  | GI_31377831-S | rs10099126 | 8 | 8 | 110448791 | 159464 | 7.1616  | 0.4919 | -0.4858 | 5.7425 | JPT |
| PKHD1L1  | GI_31377831-S | rs7819141  | 8 | 8 | 110449856 | 158399 | 7.8100  | 0.5177 | 0.4806  | 5.7425 | JPT |
| PKHD1L1  | GI_31377831-S | rs7819151  | 8 | 8 | 110449873 | 158382 | 7.8248  | 0.5184 | 0.4865  | 5.7425 | JPT |
| PKHD1L1  | GI_31377831-S | rs12334438 | 8 | 8 | 110450959 | 157296 | 7.8248  | 0.5184 | -0.4865 | 5.7425 | JPT |
| PKHD1L1  | GI_31377831-S | rs13253951 | 8 | 8 | 110459380 | 148875 | 8.0584  | 0.5473 | -0.4880 | 5.7425 | JPT |
| PKHD1L1  | GI_31377831-S | rs2349436  | 8 | 8 | 110460256 | 147999 | 7.5868  | 0.5146 | 0.4834  | 5.7425 | JPT |
| PKHD1L1  | GI_31377831-S | rs921960   | 8 | 8 | 110461305 | 146950 | 7.7274  | 0.5305 | -0.4980 | 5.7425 | JPT |
| PKHD1L1  | GI_31377831-S | rs1457292  | 8 | 8 | 110461824 | 146431 | 7.5868  | 0.5146 | 0.4834  | 5.7425 | JPT |
| PKHD1L1  | GI_31377831-S | rs6993552  | 8 | 8 | 110462318 | 145937 | 7.8100  | 0.5177 | -0.4806 | 5.7425 | JPT |
| PKHD1L1  | GI_31377831-S | rs2168679  | 8 | 8 | 110464203 | 144052 | 7.6067  | 0.5156 | 0.4900  | 5.7425 | JPT |
| PKHD1L1  | GI_31377831-S | rs7016085  | 8 | 8 | 110466914 | 141341 | 7.5868  | 0.5146 | -0.4834 | 5.7425 | JPT |
| PKHD1L1  | GI_31377831-S | rs9642806  | 8 | 8 | 110471667 | 136588 | 7.5868  | 0.5146 | 0.4834  | 5.7425 | JPT |
| PKHD1L1  | GI_31377831-S | rs13278812 | 8 | 8 | 110472672 | 135583 | 7.8248  | 0.5184 | -0.4865 | 5.7425 | JPT |
| PKHD1L1  | GI_31377831-S | rs1379370  | 8 | 8 | 110472874 | 135381 | 7.2984  | 0.5077 | -0.4897 | 5.7425 | JPT |
| PKHD1L1  | GI_31377831-S | rs1457290  | 8 | 8 | 110474575 | 133680 | 7.0685  | 0.5038 | 0.4739  | 5.7425 | JPT |
| PKHD1L1  | GI_31377831-S | rs1457289  | 8 | 8 | 110474727 | 133528 | 7.6067  | 0.5156 | 0.4900  | 5.7425 | JPT |
| PKHD1L1  | GI_31377831-S | rs10098672 | 8 | 8 | 110476273 | 131982 | 7.8248  | 0.5184 | 0.4865  | 5.7425 | JPT |
| PKHD1L1  | GI_31377831-S | rs1870108  | 8 | 8 | 110476737 | 131518 | 7.5868  | 0.5146 | 0.4834  | 5.7425 | JPT |
| PKHD1L1  | GI_31377831-S | rs6993467  | 8 | 8 | 110478788 | 129467 | 7.8248  | 0.5184 | 0.4865  | 5.7425 | JPT |
| PKHD1L1  | GI_31377831-S | rs13266374 | 8 | 8 | 110478901 | 129354 | 7.8100  | 0.5177 | 0.4806  | 5.7425 | JPT |
| PKHD1L1  | GI_31377831-S | rs13266838 | 8 | 8 | 110478916 | 129339 | 7.2586  | 0.5143 | -0.4931 | 5.7425 | JPT |
| PKHD1L1  | GI_31377831-S | rs921959   | 8 | 8 | 110480514 | 127741 | 7.5868  | 0.5146 | 0.4834  | 5.7425 | JPT |
| PKHD1L1  | GI_31377831-S | rs1379369  | 8 | 8 | 110481695 | 126560 | 7.6067  | 0.5156 | 0.4900  | 5.7425 | JPT |
| PKHD1L1  | GI_31377831-S | rs2061295  | 8 | 8 | 110482124 | 126131 | 7.6067  | 0.5156 | -0.4900 | 5.7425 | JPT |
| PKHD1L1  | GI_31377831-S | rs1457287  | 8 | 8 | 110482154 | 126101 | 7.6067  | 0.5156 | 0.4900  | 5.7425 | JPT |
| PKHD1L1  | GI_31377831-S | rs10101522 | 8 | 8 | 110482225 | 126030 | 7.7456  | 0.5228 | 0.4773  | 5.7425 | JPT |
| PKHD1L1  | GI_31377831-S | rs964307   | 8 | 8 | 110482938 | 125317 | 7.5868  | 0.5146 | 0.4834  | 5.7425 | JPT |

|         |               |            |   |   |           |        |        |        |         |        |     |
|---------|---------------|------------|---|---|-----------|--------|--------|--------|---------|--------|-----|
| PKHD1L1 | GI_31377831-S | rs2061294  | 8 | 8 | 110483000 | 125255 | 7.2202 | 0.4950 | -0.4755 | 5.7425 | JPT |
| PKHD1L1 | GI_31377831-S | rs965930   | 8 | 8 | 110483752 | 124503 | 7.5868 | 0.5146 | -0.4834 | 5.7425 | JPT |
| PKHD1L1 | GI_31377831-S | rs921958   | 8 | 8 | 110485623 | 122632 | 7.5868 | 0.5146 | 0.4834  | 5.7425 | JPT |
| PKHD1L1 | GI_31377831-S | rs1457286  | 8 | 8 | 110485989 | 122266 | 7.6067 | 0.5156 | -0.4900 | 5.7425 | JPT |
| PKHD1L1 | GI_31377831-S | rs12679728 | 8 | 8 | 110487637 | 120618 | 7.8100 | 0.5177 | 0.4806  | 5.7425 | JPT |
| PKHD1L1 | GI_31377831-S | rs1037695  | 8 | 8 | 110488098 | 120157 | 7.6067 | 0.5156 | -0.4900 | 5.7425 | JPT |
| PKHD1L1 | GI_31377831-S | rs10097258 | 8 | 8 | 110488287 | 119968 | 7.8100 | 0.5177 | 0.4806  | 5.7425 | JPT |
| PKHD1L1 | GI_31377831-S | rs1824193  | 8 | 8 | 110488942 | 119313 | 7.5868 | 0.5146 | -0.4834 | 5.7425 | JPT |
| PKHD1L1 | GI_31377831-S | rs1379363  | 8 | 8 | 110489247 | 119008 | 7.5868 | 0.5146 | 0.4834  | 5.7425 | JPT |
| PKHD1L1 | GI_31377831-S | rs1379364  | 8 | 8 | 110489325 | 118930 | 7.3655 | 0.5201 | 0.4710  | 5.7425 | JPT |
| PKHD1L1 | GI_31377831-S | rs13254245 | 8 | 8 | 110489560 | 118695 | 7.8100 | 0.5177 | -0.4806 | 5.7425 | JPT |
| PKHD1L1 | GI_31377831-S | rs13252234 | 8 | 8 | 110489605 | 118650 | 7.8100 | 0.5177 | 0.4806  | 5.7425 | JPT |
| PKHD1L1 | GI_31377831-S | rs9297425  | 8 | 8 | 110490289 | 117966 | 7.6102 | 0.5244 | 0.4862  | 5.7425 | JPT |
| PKHD1L1 | GI_31377831-S | rs12546429 | 8 | 8 | 110491526 | 116729 | 7.5868 | 0.5146 | -0.4834 | 5.7425 | JPT |
| PKHD1L1 | GI_31377831-S | rs10955518 | 8 | 8 | 110493352 | 114903 | 7.5868 | 0.5146 | -0.4834 | 5.7425 | JPT |
| PKHD1L1 | GI_31377831-S | rs4604408  | 8 | 8 | 110494770 | 113485 | 6.0819 | 0.4812 | -0.4931 | 5.7425 | JPT |
| PKHD1L1 | GI_31377831-S | rs897838   | 8 | 8 | 110495783 | 112472 | 7.6067 | 0.5156 | -0.4900 | 5.7425 | JPT |
| PKHD1L1 | GI_31377831-S | rs897839   | 8 | 8 | 110496020 | 112235 | 7.8100 | 0.5177 | 0.4806  | 5.7425 | JPT |
| PKHD1L1 | GI_31377831-S | rs2349760  | 8 | 8 | 110496096 | 112159 | 7.6067 | 0.5156 | -0.4900 | 5.7425 | JPT |
| PKHD1L1 | GI_31377831-S | rs2349761  | 8 | 8 | 110496200 | 112055 | 7.5868 | 0.5146 | 0.4834  | 5.7425 | JPT |
| PKHD1L1 | GI_31377831-S | rs3911483  | 8 | 8 | 110496369 | 111886 | 7.7456 | 0.5228 | -0.4773 | 5.7425 | JPT |
| PKHD1L1 | GI_31377831-S | rs2124982  | 8 | 8 | 110496868 | 111387 | 7.5868 | 0.5146 | -0.4834 | 5.7425 | JPT |
| PKHD1L1 | GI_31377831-S | rs9656882  | 8 | 8 | 110496959 | 111296 | 7.8100 | 0.5177 | -0.4806 | 5.7425 | JPT |
| PKHD1L1 | GI_31377831-S | rs13254461 | 8 | 8 | 110498098 | 110157 | 7.8100 | 0.5177 | -0.4806 | 5.7425 | JPT |
| PKHD1L1 | GI_31377831-S | rs9656793  | 8 | 8 | 110498129 | 110126 | 7.8100 | 0.5177 | 0.4806  | 5.7425 | JPT |
| PKHD1L1 | GI_31377831-S | rs1840908  | 8 | 8 | 110498628 | 109627 | 7.8248 | 0.5184 | -0.4865 | 5.7425 | JPT |
| PKHD1L1 | GI_31377831-S | rs7840592  | 8 | 8 | 110499617 | 108638 | 7.6067 | 0.5156 | -0.4900 | 5.7425 | JPT |
| PKHD1L1 | GI_31377831-S | rs10092565 | 8 | 8 | 110499679 | 108576 | 7.8100 | 0.5177 | -0.4806 | 5.7425 | JPT |
| PKHD1L1 | GI_31377831-S | rs10092693 | 8 | 8 | 110499780 | 108475 | 7.5868 | 0.5146 | -0.4834 | 5.7425 | JPT |
| PKHD1L1 | GI_31377831-S | rs6469260  | 8 | 8 | 110500234 | 108021 | 7.4812 | 0.5176 | -0.4836 | 5.7425 | JPT |
| PKHD1L1 | GI_31377831-S | rs7016609  | 8 | 8 | 110500393 | 107862 | 7.8100 | 0.5177 | 0.4806  | 5.7425 | JPT |
| PKHD1L1 | GI_31377831-S | rs13262995 | 8 | 8 | 110504590 | 103665 | 7.8100 | 0.5177 | -0.4806 | 5.7425 | JPT |
| PKHD1L1 | GI_31377831-S | rs7015262  | 8 | 8 | 110505780 | 102475 | 9.2998 | 0.6239 | 0.5514  | 5.7425 | JPT |
| PKHD1L1 | GI_31377831-S | rs10458302 | 8 | 8 | 110505939 | 102316 | 7.5868 | 0.5146 | -0.4834 | 5.7425 | JPT |
| PKHD1L1 | GI_31377831-S | rs4735133  | 8 | 8 | 110506560 | 101695 | 7.6067 | 0.5156 | 0.4900  | 5.7425 | JPT |
| PKHD1L1 | GI_31377831-S | rs4735134  | 8 | 8 | 110506846 | 101409 | 7.5868 | 0.5146 | -0.4834 | 5.7425 | JPT |
| PKHD1L1 | GI_31377831-S | rs13258279 | 8 | 8 | 110507791 | 100464 | 6.0001 | 0.4324 | -0.4154 | 5.7425 | JPT |
| PKHD1L1 | GI_31377831-S | rs6469261  | 8 | 8 | 110509800 | 98455  | 7.6067 | 0.5156 | -0.4900 | 5.7425 | JPT |
| PKHD1L1 | GI_31377831-S | rs6469262  | 8 | 8 | 110512656 | 95599  | 7.8248 | 0.5184 | -0.4865 | 5.7425 | JPT |
| PKHD1L1 | GI_31377831-S | rs1870107  | 8 | 8 | 110517106 | 91149  | 7.6067 | 0.5156 | 0.4900  | 5.7425 | JPT |
| PKHD1L1 | GI_31377831-S | rs2844253  | 8 | 8 | 110521087 | 87168  | 7.9879 | 0.5351 | -0.5273 | 5.7425 | JPT |
| PKHD1L1 | GI_31377831-S | rs1673408  | 8 | 8 | 110524497 | 83758  | 7.9879 | 0.5351 | 0.5273  | 5.7425 | JPT |
| PKHD1L1 | GI_31377831-S | rs1673407  | 8 | 8 | 110529664 | 78591  | 7.9879 | 0.5351 | -0.5273 | 5.7425 | JPT |
| PKHD1L1 | GI_31377831-S | rs1563579  | 8 | 8 | 110531534 | 76721  | 6.9256 | 0.4708 | 0.4706  | 5.7425 | JPT |
| PKHD1L1 | GI_31377831-S | rs1783165  | 8 | 8 | 110533034 | 75221  | 7.9865 | 0.5350 | -0.5209 | 5.7425 | JPT |
| PKHD1L1 | GI_31377831-S | rs1673404  | 8 | 8 | 110534236 | 74019  | 8.2111 | 0.5376 | 0.5234  | 5.7425 | JPT |
| PKHD1L1 | GI_31377831-S | rs1783163  | 8 | 8 | 110535261 | 72994  | 7.9879 | 0.5351 | -0.5273 | 5.7425 | JPT |
| PKHD1L1 | GI_31377831-S | rs2607639  | 8 | 8 | 110539473 | 68782  | 7.6787 | 0.5279 | 0.5277  | 5.7425 | JPT |
| PKHD1L1 | GI_31377831-S | rs2607638  | 8 | 8 | 110539887 | 68368  | 7.9879 | 0.5351 | 0.5273  | 5.7425 | JPT |
| PKHD1L1 | GI_31377831-S | rs2844251  | 8 | 8 | 110540059 | 68196  | 8.2111 | 0.5376 | 0.5234  | 5.7425 | JPT |
| PKHD1L1 | GI_31377831-S | rs2607637  | 8 | 8 | 110540260 | 67995  | 7.9879 | 0.5351 | 0.5273  | 5.7425 | JPT |
| PKHD1L1 | GI_31377831-S | rs2844252  | 8 | 8 | 110540306 | 67949  | 8.2111 | 0.5376 | 0.5234  | 5.7425 | JPT |
| PKHD1L1 | GI_31377831-S | rs1457284  | 8 | 8 | 110540600 | 67655  | 8.2111 | 0.5376 | -0.5234 | 5.7425 | JPT |
| PKHD1L1 | GI_31377831-S | rs1026439  | 8 | 8 | 110543083 | 65172  | 7.9879 | 0.5351 | 0.5273  | 5.7425 | JPT |
| PKHD1L1 | GI_31377831-S | rs1026438  | 8 | 8 | 110543142 | 65113  | 7.9879 | 0.5351 | -0.5273 | 5.7425 | JPT |
| PKHD1L1 | GI_31377831-S | rs714994   | 8 | 8 | 110544279 | 63976  | 7.9865 | 0.5350 | 0.5209  | 5.7425 | JPT |
| PKHD1L1 | GI_31377831-S | rs1673401  | 8 | 8 | 110544752 | 63503  | 7.9879 | 0.5351 | 0.5273  | 5.7425 | JPT |
| PKHD1L1 | GI_31377831-S | rs1783145  | 8 | 8 | 110545050 | 63205  | 7.9879 | 0.5351 | 0.5273  | 5.7425 | JPT |
| PKHD1L1 | GI_31377831-S | rs1783144  | 8 | 8 | 110545167 | 63088  | 8.1205 | 0.5416 | -0.5194 | 5.7425 | JPT |

|         |               |           |   |   |           |       |         |        |         |        |     |
|---------|---------------|-----------|---|---|-----------|-------|---------|--------|---------|--------|-----|
| PKHD1L1 | GI_31377831-S | rs1673400 | 8 | 8 | 110545286 | 62969 | 7.9879  | 0.5351 | -0.5273 | 5.7425 | JPT |
| PKHD1L1 | GI_31377831-S | rs1673398 | 8 | 8 | 110546169 | 62086 | 7.8193  | 0.5726 | -0.5251 | 5.7425 | JPT |
| PKHD1L1 | GI_31377831-S | rs1627570 | 8 | 8 | 110547000 | 61255 | 7.5455  | 0.5124 | -0.5136 | 5.7425 | JPT |
| PKHD1L1 | GI_31377831-S | rs1673397 | 8 | 8 | 110547112 | 61143 | 7.9879  | 0.5351 | -0.5273 | 5.7425 | JPT |
| PKHD1L1 | GI_31377831-S | rs1783143 | 8 | 8 | 110547650 | 60605 | 7.9879  | 0.5351 | -0.5273 | 5.7425 | JPT |
| PKHD1L1 | GI_31377831-S | rs1783142 | 8 | 8 | 110547837 | 60418 | 7.9879  | 0.5351 | -0.5273 | 5.7425 | JPT |
| PKHD1L1 | GI_31377831-S | rs1673396 | 8 | 8 | 110548797 | 59458 | 7.9879  | 0.5351 | 0.5273  | 5.7425 | JPT |
| PKHD1L1 | GI_31377831-S | rs1471125 | 8 | 8 | 110549755 | 58500 | 7.9879  | 0.5351 | -0.5273 | 5.7425 | JPT |
| PKHD1L1 | GI_31377831-S | rs1471124 | 8 | 8 | 110551558 | 56697 | 7.9879  | 0.5351 | -0.5273 | 5.7425 | JPT |
| PKHD1L1 | GI_31377831-S | rs1783152 | 8 | 8 | 110552076 | 56179 | 7.8556  | 0.5284 | 0.5208  | 5.7425 | JPT |
| PKHD1L1 | GI_31377831-S | rs1673393 | 8 | 8 | 110553021 | 55234 | 7.9879  | 0.5351 | 0.5273  | 5.7425 | JPT |
| PKHD1L1 | GI_31377831-S | rs1783151 | 8 | 8 | 110553119 | 55136 | 8.2111  | 0.5376 | 0.5234  | 5.7425 | JPT |
| PKHD1L1 | GI_31377831-S | rs1783149 | 8 | 8 | 110553988 | 54267 | 7.9879  | 0.5351 | 0.5273  | 5.7425 | JPT |
| PKHD1L1 | GI_31377831-S | rs1673390 | 8 | 8 | 110554319 | 53936 | 7.8384  | 0.5362 | -0.5207 | 5.7425 | JPT |
| PKHD1L1 | GI_31377831-S | rs1626759 | 8 | 8 | 110554960 | 53295 | 7.6164  | 0.5078 | 0.5156  | 5.7425 | JPT |
| PKHD1L1 | GI_31377831-S | rs1457282 | 8 | 8 | 110555942 | 52313 | 18.6742 | 0.8545 | 0.6686  | 5.7425 | JPT |
| PKHD1L1 | GI_31377831-S | rs1783148 | 8 | 8 | 110558796 | 49459 | 14.7458 | 0.7847 | -0.6526 | 5.7425 | JPT |
| PKHD1L1 | GI_31377831-S | rs1379361 | 8 | 8 | 110559318 | 48937 | 18.6742 | 0.8545 | -0.6686 | 5.7425 | JPT |
| PKHD1L1 | GI_31377831-S | rs1783147 | 8 | 8 | 110561016 | 47239 | 18.6742 | 0.8545 | -0.6686 | 5.7425 | JPT |
| PKHD1L1 | GI_31377831-S | rs1630942 | 8 | 8 | 110561053 | 47202 | 18.6742 | 0.8545 | 0.6686  | 5.7425 | JPT |
| PKHD1L1 | GI_31377831-S | rs1630134 | 8 | 8 | 110561140 | 47115 | 18.6742 | 0.8545 | -0.6686 | 5.7425 | JPT |
| PKHD1L1 | GI_31377831-S | rs1026437 | 8 | 8 | 110562125 | 46130 | 18.6742 | 0.8545 | 0.6686  | 5.7425 | JPT |
| PKHD1L1 | GI_31377831-S | rs2607635 | 8 | 8 | 110564040 | 44215 | 18.1813 | 0.8742 | 0.6953  | 5.7425 | JPT |
| PKHD1L1 | GI_31377831-S | rs2844254 | 8 | 8 | 110564368 | 43887 | 18.6742 | 0.8545 | -0.6686 | 5.7425 | JPT |
| PKHD1L1 | GI_31377831-S | rs2607633 | 8 | 8 | 110565344 | 42911 | 18.6742 | 0.8545 | -0.6686 | 5.7425 | JPT |
| PKHD1L1 | GI_31377831-S | rs1009371 | 8 | 8 | 110567126 | 41129 | 18.6742 | 0.8545 | 0.6686  | 5.7425 | JPT |
| PKHD1L1 | GI_31377831-S | rs1783140 | 8 | 8 | 110568520 | 39735 | 19.1246 | 0.8549 | 0.6663  | 5.7425 | JPT |
| PKHD1L1 | GI_31377831-S | rs1783141 | 8 | 8 | 110569859 | 38396 | 18.6742 | 0.8545 | -0.6686 | 5.7425 | JPT |
| PKHD1L1 | GI_31377831-S | rs2607631 | 8 | 8 | 110573591 | 34664 | 18.6742 | 0.8545 | -0.6686 | 5.7425 | JPT |
| PKHD1L1 | GI_31377831-S | rs2607630 | 8 | 8 | 110574042 | 34213 | 17.0843 | 0.8563 | 0.7019  | 5.7425 | JPT |
| PKHD1L1 | GI_31377831-S | rs2607629 | 8 | 8 | 110574354 | 33901 | 18.6742 | 0.8545 | 0.6686  | 5.7425 | JPT |
| PKHD1L1 | GI_31377831-S | rs1013482 | 8 | 8 | 110574886 | 33369 | 18.6742 | 0.8545 | -0.6686 | 5.7425 | JPT |
| PKHD1L1 | GI_31377831-S | rs2607628 | 8 | 8 | 110575062 | 33193 | 18.6742 | 0.8545 | -0.6686 | 5.7425 | JPT |
| PKHD1L1 | GI_31377831-S | rs1563580 | 8 | 8 | 110575280 | 32975 | 19.3952 | 0.8655 | 0.6705  | 5.7425 | JPT |
| PKHD1L1 | GI_31377831-S | rs2607627 | 8 | 8 | 110575834 | 32421 | 18.6742 | 0.8545 | -0.6686 | 5.7425 | JPT |
| PKHD1L1 | GI_31377831-S | rs1673426 | 8 | 8 | 110576809 | 31446 | 18.6742 | 0.8545 | 0.6686  | 5.7425 | JPT |
| PKHD1L1 | GI_31377831-S | rs1783162 | 8 | 8 | 110577414 | 30841 | 18.6742 | 0.8545 | -0.6686 | 5.7425 | JPT |
| PKHD1L1 | GI_31377831-S | rs753995  | 8 | 8 | 110581622 | 26633 | 18.6742 | 0.8545 | 0.6686  | 5.7425 | JPT |
| PKHD1L1 | GI_31377831-S | rs1673422 | 8 | 8 | 110582601 | 25654 | 18.6742 | 0.8545 | -0.6686 | 5.7425 | JPT |
| PKHD1L1 | GI_31377831-S | rs1783159 | 8 | 8 | 110583540 | 24715 | 17.5612 | 0.8572 | 0.6554  | 5.7425 | JPT |
| PKHD1L1 | GI_31377831-S | rs1783158 | 8 | 8 | 110583563 | 24692 | 18.3390 | 0.8559 | 0.6605  | 5.7425 | JPT |
| PKHD1L1 | GI_31377831-S | rs1673421 | 8 | 8 | 110584402 | 23853 | 12.6022 | 0.7627 | -0.5738 | 5.7425 | JPT |
| PKHD1L1 | GI_31377831-S | rs1673420 | 8 | 8 | 110585296 | 22959 | 16.0009 | 0.8521 | -0.6736 | 5.7425 | JPT |
| PKHD1L1 | GI_31377831-S | rs1673419 | 8 | 8 | 110585433 | 22822 | 18.6742 | 0.8545 | -0.6686 | 5.7425 | JPT |
| PKHD1L1 | GI_31377831-S | rs1783157 | 8 | 8 | 110585436 | 22819 | 18.6742 | 0.8545 | -0.6686 | 5.7425 | JPT |
| PKHD1L1 | GI_31377831-S | rs1673416 | 8 | 8 | 110586668 | 21587 | 18.6742 | 0.8545 | 0.6686  | 5.7425 | JPT |
| PKHD1L1 | GI_31377831-S | rs1673415 | 8 | 8 | 110587384 | 20871 | 18.6742 | 0.8545 | 0.6686  | 5.7425 | JPT |
| PKHD1L1 | GI_31377831-S | rs1379367 | 8 | 8 | 110587710 | 20545 | 18.6742 | 0.8545 | 0.6686  | 5.7425 | JPT |
| PKHD1L1 | GI_31377831-S | rs1379366 | 8 | 8 | 110587810 | 20445 | 18.6742 | 0.8545 | -0.6686 | 5.7425 | JPT |
| PKHD1L1 | GI_31377831-S | rs1783154 | 8 | 8 | 110588748 | 19507 | 18.6742 | 0.8545 | -0.6686 | 5.7425 | JPT |
| PKHD1L1 | GI_31377831-S | rs1783153 | 8 | 8 | 110588990 | 19265 | 18.6742 | 0.8545 | 0.6686  | 5.7425 | JPT |
| PKHD1L1 | GI_31377831-S | rs2844257 | 8 | 8 | 110590653 | 17602 | 19.3952 | 0.8655 | -0.6705 | 5.7425 | JPT |
| PKHD1L1 | GI_31377831-S | rs2607625 | 8 | 8 | 110590692 | 17563 | 19.3952 | 0.8655 | -0.6705 | 5.7425 | JPT |
| PKHD1L1 | GI_31377831-S | rs2844258 | 8 | 8 | 110591692 | 16563 | 19.3952 | 0.8655 | 0.6705  | 5.7425 | JPT |
| PKHD1L1 | GI_31377831-S | rs2844259 | 8 | 8 | 110591903 | 16352 | 19.3952 | 0.8655 | -0.6705 | 5.7425 | JPT |
| PKHD1L1 | GI_31377831-S | rs2844260 | 8 | 8 | 110591948 | 16307 | 19.3952 | 0.8655 | -0.6705 | 5.7425 | JPT |
| PKHD1L1 | GI_31377831-S | rs1673412 | 8 | 8 | 110594900 | 13355 | 19.0788 | 0.8608 | -0.6799 | 5.7425 | JPT |
| PKHD1L1 | GI_31377831-S | rs1783166 | 8 | 8 | 110595060 | 13195 | 18.6742 | 0.8545 | 0.6686  | 5.7425 | JPT |
| PKHD1L1 | GI_31377831-S | rs1673411 | 8 | 8 | 110597325 | 10930 | 18.6742 | 0.8545 | -0.6686 | 5.7425 | JPT |

|         |               |            |   |   |           |       |         |        |         |        |     |
|---------|---------------|------------|---|---|-----------|-------|---------|--------|---------|--------|-----|
| PKHD1L1 | GI_31377831-S | rs1783168  | 8 | 8 | 110598046 | 10209 | 18.6742 | 0.8545 | 0.6686  | 5.7425 | JPT |
| PKHD1L1 | GI_31377831-S | rs1673410  | 8 | 8 | 110598253 | 10002 | 19.3952 | 0.8655 | 0.6705  | 5.7425 | JPT |
| PKHD1L1 | GI_31377831-S | rs1673413  | 8 | 8 | 110599052 | 9203  | 19.3952 | 0.8655 | -0.6705 | 5.7425 | JPT |
| PKHD1L1 | GI_31377831-S | rs1783169  | 8 | 8 | 110599950 | 8305  | 19.3952 | 0.8655 | -0.6705 | 5.7425 | JPT |
| PKHD1L1 | GI_31377831-S | rs1783170  | 8 | 8 | 110600142 | 8113  | 18.6742 | 0.8545 | -0.6686 | 5.7425 | JPT |
| PKHD1L1 | GI_31377831-S | rs1673409  | 8 | 8 | 110600946 | 7309  | 19.3952 | 0.8655 | -0.6705 | 5.7425 | JPT |
| PKHD1L1 | GI_31377831-S | rs1783171  | 8 | 8 | 110601912 | 6343  | 19.0788 | 0.8608 | -0.6799 | 5.7425 | JPT |
| PKHD1L1 | GI_31377831-S | rs1673428  | 8 | 8 | 110602120 | 6135  | 19.3952 | 0.8655 | -0.6705 | 5.7425 | JPT |
| PKHD1L1 | GI_31377831-S | rs2844261  | 8 | 8 | 110602670 | 5585  | 19.3952 | 0.8655 | -0.6705 | 5.7425 | JPT |
| PKHD1L1 | GI_31377831-S | rs1563578  | 8 | 8 | 110603688 | 4567  | 19.3952 | 0.8655 | -0.6705 | 5.7425 | JPT |
| PKHD1L1 | GI_31377831-S | rs1457288  | 8 | 8 | 110603951 | 4304  | 18.6742 | 0.8545 | -0.6686 | 5.7425 | JPT |
| PKHD1L1 | GI_31377831-S | rs897840   | 8 | 8 | 110605492 | 2763  | 19.3952 | 0.8655 | -0.6705 | 5.7425 | JPT |
| PKHD1L1 | GI_31377831-S | rs897842   | 8 | 8 | 110605957 | 2298  | 19.3952 | 0.8655 | 0.6705  | 5.7425 | JPT |
| PKHD1L1 | GI_31377831-S | rs1783172  | 8 | 8 | 110606128 | 2127  | 19.3952 | 0.8655 | 0.6705  | 5.7425 | JPT |
| PKHD1L1 | GI_31377831-S | rs730885   | 8 | 8 | 110606593 | 1662  | 19.3952 | 0.8655 | -0.6705 | 5.7425 | JPT |
| PKHD1L1 | GI_31377831-S | rs1783173  | 8 | 8 | 110607525 | 730   | 19.3952 | 0.8655 | 0.6705  | 5.7425 | JPT |
| PKHD1L1 | GI_31377831-S | rs1457294  | 8 | 8 | 110608063 | 192   | 19.3952 | 0.8655 | 0.6705  | 5.7425 | JPT |
| PKHD1L1 | GI_31377831-S | rs1457295  | 8 | 8 | 110608130 | 125   | 19.3952 | 0.8655 | 0.6705  | 5.7425 | JPT |
| PKHD1L1 | GI_31377831-S | rs1783174  | 8 | 8 | 110608362 | 107   | 19.3952 | 0.8655 | -0.6705 | 5.7425 | JPT |
| PKHD1L1 | GI_31377831-S | rs1673383  | 8 | 8 | 110609091 | 836   | 19.3952 | 0.8655 | 0.6705  | 5.7425 | JPT |
| PKHD1L1 | GI_31377831-S | rs1673384  | 8 | 8 | 110609441 | 1186  | 19.3952 | 0.8655 | -0.6705 | 5.7425 | JPT |
| PKHD1L1 | GI_31377831-S | rs1673386  | 8 | 8 | 110609938 | 1683  | 19.3952 | 0.8655 | 0.6705  | 5.7425 | JPT |
| PKHD1L1 | GI_31377831-S | rs1673389  | 8 | 8 | 110610255 | 2000  | 19.3952 | 0.8655 | -0.6705 | 5.7425 | JPT |
| PKHD1L1 | GI_31377831-S | rs1673395  | 8 | 8 | 110610586 | 2331  | 19.3952 | 0.8655 | 0.6705  | 5.7425 | JPT |
| PKHD1L1 | GI_31377831-S | rs1673399  | 8 | 8 | 110611139 | 2884  | 19.3952 | 0.8655 | 0.6705  | 5.7425 | JPT |
| PKHD1L1 | GI_31377831-S | rs1617259  | 8 | 8 | 110611474 | 3219  | 19.3952 | 0.8655 | 0.6705  | 5.7425 | JPT |
| PKHD1L1 | GI_31377831-S | rs2154660  | 8 | 8 | 110612697 | 4442  | 19.3952 | 0.8655 | -0.6705 | 5.7425 | JPT |
| PKHD1L1 | GI_31377831-S | rs7821242  | 8 | 8 | 110613700 | 5445  | 19.1246 | 0.8549 | -0.6663 | 5.7425 | JPT |
| PKHD1L1 | GI_31377831-S | rs10505133 | 8 | 8 | 110614253 | 5998  | 19.5561 | 0.8679 | -0.6637 | 5.7425 | JPT |
| PKHD1L1 | GI_31377831-S | rs2022935  | 8 | 8 | 110614686 | 6431  | 19.3952 | 0.8655 | -0.6705 | 5.7425 | JPT |
| PKHD1L1 | GI_31377831-S | rs10108943 | 8 | 8 | 110614783 | 6528  | 19.1246 | 0.8549 | 0.6663  | 5.7425 | JPT |
| PKHD1L1 | GI_31377831-S | rs10111682 | 8 | 8 | 110615076 | 6821  | 19.8731 | 0.8660 | -0.6685 | 5.7425 | JPT |
| PKHD1L1 | GI_31377831-S | rs13439864 | 8 | 8 | 110615884 | 7629  | 17.7247 | 0.8741 | -0.6822 | 5.7425 | JPT |
| PKHD1L1 | GI_31377831-S | rs10088258 | 8 | 8 | 110616575 | 8320  | 19.8731 | 0.8660 | -0.6685 | 5.7425 | JPT |
| PKHD1L1 | GI_31377831-S | rs7006166  | 8 | 8 | 110616688 | 8433  | 20.0058 | 0.8679 | -0.6460 | 5.7425 | JPT |
| PKHD1L1 | GI_31377831-S | rs7011340  | 8 | 8 | 110617590 | 9335  | 19.3952 | 0.8655 | -0.6705 | 5.7425 | JPT |
| PKHD1L1 | GI_31377831-S | rs7011803  | 8 | 8 | 110617624 | 9369  | 19.3952 | 0.8655 | 0.6705  | 5.7425 | JPT |
| PKHD1L1 | GI_31377831-S | rs4529437  | 8 | 8 | 110619006 | 10751 | 19.3952 | 0.8655 | -0.6705 | 5.7425 | JPT |
| PKHD1L1 | GI_31377831-S | rs3808380  | 8 | 8 | 110620310 | 12055 | 18.6742 | 0.8545 | -0.6686 | 5.7425 | JPT |
| PKHD1L1 | GI_31377831-S | rs1044230  | 8 | 8 | 110621753 | 13498 | 18.6742 | 0.8545 | 0.6686  | 5.7425 | JPT |
| PKHD1L1 | GI_31377831-S | rs2703389  | 8 | 8 | 110626059 | 17804 | 18.6742 | 0.8545 | -0.6686 | 5.7425 | JPT |
| PKHD1L1 | GI_31377831-S | rs2703386  | 8 | 8 | 110633100 | 24845 | 18.6742 | 0.8545 | 0.6686  | 5.7425 | JPT |
| PKHD1L1 | GI_31377831-S | rs2703377  | 8 | 8 | 110635360 | 27105 | 18.6742 | 0.8545 | 0.6686  | 5.7425 | JPT |
| PKHD1L1 | GI_31377831-S | rs2022934  | 8 | 8 | 110636950 | 28695 | 18.6742 | 0.8545 | 0.6686  | 5.7425 | JPT |
| PKHD1L1 | GI_31377831-S | rs2844231  | 8 | 8 | 110639003 | 30748 | 18.6742 | 0.8545 | -0.6686 | 5.7425 | JPT |
| PKHD1L1 | GI_31377831-S | rs6995991  | 8 | 8 | 110639236 | 30981 | 7.9355  | 0.5324 | 0.5110  | 5.7425 | JPT |
| PKHD1L1 | GI_31377831-S | rs2844234  | 8 | 8 | 110651542 | 43287 | 15.2561 | 0.7887 | 0.6691  | 5.7425 | JPT |
| PKHD1L1 | GI_31377831-S | rs2703388  | 8 | 8 | 110651938 | 43683 | 16.9863 | 0.8250 | -0.6858 | 5.7425 | JPT |
| PKHD1L1 | GI_31377831-S | rs2844235  | 8 | 8 | 110663324 | 55069 | 16.9863 | 0.8250 | -0.6858 | 5.7425 | JPT |
| PKHD1L1 | GI_31377831-S | rs2844236  | 8 | 8 | 110663994 | 55739 | 16.9863 | 0.8250 | 0.6858  | 5.7425 | JPT |
| PKHD1L1 | GI_31377831-S | rs1892760  | 8 | 8 | 110666049 | 57794 | 16.9863 | 0.8250 | 0.6858  | 5.7425 | JPT |
| PKHD1L1 | GI_31377831-S | rs2236628  | 8 | 8 | 110667374 | 59119 | 16.9863 | 0.8250 | 0.6858  | 5.7425 | JPT |
| PKHD1L1 | GI_31377831-S | rs2236627  | 8 | 8 | 110667784 | 59529 | 18.9581 | 0.8589 | 0.6975  | 5.7425 | JPT |
| PKHD1L1 | GI_31377831-S | rs2703384  | 8 | 8 | 110669235 | 60980 | 16.9863 | 0.8250 | -0.6858 | 5.7425 | JPT |
| PKHD1L1 | GI_31377831-S | rs2703382  | 8 | 8 | 110672655 | 64400 | 16.9863 | 0.8250 | 0.6858  | 5.7425 | JPT |
| PKHD1L1 | GI_31377831-S | rs2154658  | 8 | 8 | 110685758 | 77503 | 18.9581 | 0.8589 | -0.6975 | 5.7425 | JPT |
| PKHD1L1 | GI_31377831-S | rs1892759  | 8 | 8 | 110686170 | 77915 | 18.9581 | 0.8589 | 0.6975  | 5.7425 | JPT |
| PKHD1L1 | GI_31377831-S | rs2844238  | 8 | 8 | 110690042 | 81787 | 12.3264 | 0.7093 | 0.6733  | 5.7425 | JPT |
| PKHD1L1 | GI_31377831-S | rs1892758  | 8 | 8 | 110690534 | 82279 | 12.3264 | 0.7093 | -0.6733 | 5.7425 | JPT |

|           |               |            |   |   |           |        |         |        |         |        |     |
|-----------|---------------|------------|---|---|-----------|--------|---------|--------|---------|--------|-----|
| PKHD1L1   | GI_31377831-S | rs2703391  | 8 | 8 | 110691249 | 82994  | 12.3264 | 0.7093 | -0.6733 | 5.7425 | JPT |
| PKHD1L1   | GI_31377831-S | rs1954714  | 8 | 8 | 110692007 | 83752  | 12.3264 | 0.7093 | 0.6733  | 5.7425 | JPT |
| PKHD1L1   | GI_31377831-S | rs2844239  | 8 | 8 | 110693355 | 85100  | 12.6494 | 0.7108 | 0.6703  | 5.7425 | JPT |
| PKHD1L1   | GI_31377831-S | rs2703383  | 8 | 8 | 110693448 | 85193  | 12.3264 | 0.7093 | 0.6733  | 5.7425 | JPT |
| PKHD1L1   | GI_31377831-S | rs2844240  | 8 | 8 | 110693762 | 85507  | 12.3264 | 0.7093 | 0.6733  | 5.7425 | JPT |
| PKHD1L1   | GI_31377831-S | rs2844241  | 8 | 8 | 110693813 | 85558  | 12.3264 | 0.7093 | 0.6733  | 5.7425 | JPT |
| PKHD1L1   | GI_31377831-S | rs2703380  | 8 | 8 | 110694448 | 86193  | 11.6636 | 0.7433 | 0.6828  | 5.7425 | JPT |
| PKHD1L1   | GI_31377831-S | rs2844242  | 8 | 8 | 110694933 | 86678  | 12.3264 | 0.7093 | -0.6733 | 5.7425 | JPT |
| PKHD1L1   | GI_31377831-S | rs2844243  | 8 | 8 | 110694945 | 86690  | 11.9144 | 0.6960 | 0.6832  | 5.7425 | JPT |
| PKHD1L1   | GI_31377831-S | rs2844244  | 8 | 8 | 110695306 | 87051  | 12.3264 | 0.7093 | 0.6733  | 5.7425 | JPT |
| PKHD1L1   | GI_31377831-S | rs2703379  | 8 | 8 | 110695365 | 87110  | 12.6494 | 0.7108 | 0.6703  | 5.7425 | JPT |
| PKHD1L1   | GI_31377831-S | rs2844245  | 8 | 8 | 110696181 | 87926  | 12.3264 | 0.7093 | -0.6733 | 5.7425 | JPT |
| PKHD1L1   | GI_31377831-S | rs2844246  | 8 | 8 | 110696292 | 88037  | 12.3264 | 0.7093 | 0.6733  | 5.7425 | JPT |
| PKHD1L1   | GI_31377831-S | rs2844247  | 8 | 8 | 110696934 | 88679  | 12.3264 | 0.7093 | 0.6733  | 5.7425 | JPT |
| PKHD1L1   | GI_31377831-S | rs2022930  | 8 | 8 | 110699358 | 91103  | 12.3264 | 0.7093 | 0.6733  | 5.7425 | JPT |
| PKHD1L1   | GI_31377831-S | rs1954713  | 8 | 8 | 110699616 | 91361  | 12.3264 | 0.7093 | -0.6733 | 5.7425 | JPT |
| PKHD1L1   | GI_31377831-S | rs2844250  | 8 | 8 | 110702451 | 94196  | 12.3264 | 0.7093 | 0.6733  | 5.7425 | JPT |
| PKHD1L1   | GI_31377831-S | rs13254530 | 8 | 8 | 110704573 | 96318  | 12.3253 | 0.7093 | 0.6644  | 5.7425 | JPT |
| PKHD1L1   | GI_31377831-S | rs4367512  | 8 | 8 | 110706520 | 98265  | 12.6494 | 0.7108 | 0.6703  | 5.7425 | JPT |
| PKHD1L1   | GI_31377831-S | rs7813979  | 8 | 8 | 110710349 | 102094 | 12.3264 | 0.7093 | -0.6733 | 5.7425 | JPT |
| PKHD1L1   | GI_31377831-S | rs6982034  | 8 | 8 | 110712070 | 103815 | 12.3264 | 0.7093 | 0.6733  | 5.7425 | JPT |
| PKHD1L1   | GI_31377831-S | rs6469270  | 8 | 8 | 110712471 | 104216 | 11.6550 | 0.7052 | 0.6711  | 5.7425 | JPT |
| PKHD1L1   | GI_31377831-S | rs6469271  | 8 | 8 | 110713950 | 105695 | 12.3264 | 0.7093 | -0.6733 | 5.7425 | JPT |
| PKHD1L1   | GI_31377831-S | rs6469272  | 8 | 8 | 110714367 | 106112 | 12.3264 | 0.7093 | 0.6733  | 5.7425 | JPT |
| PKHD1L1   | GI_31377831-S | rs6469273  | 8 | 8 | 110714661 | 106406 | 12.3264 | 0.7093 | 0.6733  | 5.7425 | JPT |
| PKHD1L1   | GI_31377831-S | rs6994349  | 8 | 8 | 110714909 | 106654 | 11.3900 | 0.6961 | 0.6811  | 5.7425 | JPT |
| PKHD1L1   | GI_31377831-S | rs7003380  | 8 | 8 | 110716029 | 107774 | 12.3264 | 0.7093 | 0.6733  | 5.7425 | JPT |
| PKHD1L1   | GI_31377831-S | rs16879844 | 8 | 8 | 110717448 | 109193 | 12.6494 | 0.7108 | -0.6703 | 5.7425 | JPT |
| PKHD1L1   | GI_31377831-S | rs6469274  | 8 | 8 | 110717957 | 109702 | 12.3264 | 0.7093 | 0.6733  | 5.7425 | JPT |
| PKHD1L1   | GI_31377831-S | rs3134316  | 8 | 8 | 110743074 | 134819 | 8.6825  | 0.5775 | 0.5766  | 5.7425 | JPT |
| PKHD1L1   | GI_31377831-S | rs3134318  | 8 | 8 | 110743403 | 135148 | 9.1746  | 0.5822 | -0.5815 | 5.7425 | JPT |
| PKHD1L1   | GI_31377831-S | rs3108867  | 8 | 8 | 110745215 | 136960 | 9.1746  | 0.5822 | -0.5815 | 5.7425 | JPT |
| PKHD1L1   | GI_31377831-S | rs3108830  | 8 | 8 | 110751314 | 143059 | 7.4456  | 0.5429 | 0.5514  | 5.7425 | JPT |
| PKHD1L1   | GI_31377831-S | rs3133920  | 8 | 8 | 110752342 | 144087 | 8.9554  | 0.5725 | -0.5837 | 5.7425 | JPT |
| PKHD1L1   | GI_31377831-S | rs3134326  | 8 | 8 | 110752980 | 144725 | 8.7051  | 0.5697 | 0.5864  | 5.7425 | JPT |
| PKHD1L1   | GI_31377831-S | rs10090133 | 8 | 8 | 110757649 | 149394 | 8.6348  | 0.5664 | 0.5829  | 5.7425 | JPT |
| PKHD1L1   | GI_31377831-S | rs3108839  | 8 | 8 | 110761865 | 153610 | 9.1746  | 0.5822 | -0.5815 | 5.7425 | JPT |
| PKHD1L1   | GI_31377831-S | rs3133933  | 8 | 8 | 110765782 | 157527 | 8.7051  | 0.5697 | 0.5864  | 5.7425 | JPT |
| PKHD1L1   | GI_31377831-S | rs3108834  | 8 | 8 | 110767265 | 159010 | 9.3284  | 0.6066 | -0.5906 | 5.7425 | JPT |
| PKHD1L1   | GI_31377831-S | rs3108855  | 8 | 8 | 110771989 | 163734 | 8.9554  | 0.5725 | 0.5837  | 5.7425 | JPT |
| PKHD1L1   | GI_31377831-S | rs3134337  | 8 | 8 | 110779780 | 171525 | 8.9554  | 0.5725 | 0.5837  | 5.7425 | JPT |
| PKHD1L1   | GI_31377831-S | rs3134338  | 8 | 8 | 110780200 | 171945 | 8.9554  | 0.5725 | -0.5837 | 5.7425 | JPT |
| PKHD1L1   | GI_31377831-S | rs3108841  | 8 | 8 | 110783256 | 175001 | 8.9272  | 0.5798 | 0.5754  | 5.7425 | JPT |
| PKHD1L1   | GI_31377831-S | rs2068893  | 8 | 8 | 110784948 | 176693 | 8.5972  | 0.5560 | -0.5800 | 5.7425 | JPT |
| PKHD1L1   | GI_31377831-S | rs3133941  | 8 | 8 | 110785108 | 176853 | 8.3582  | 0.5532 | 0.5833  | 5.7425 | JPT |
| LOC377696 | GI_37555914-S | rs2514591  | 8 | 8 | 119680657 | 18483  | 9.4746  | 0.6040 | -0.5818 | 6.6362 | JPT |
| Hs.453941 | Hs.453941-S   | rs2514591  | 8 | 8 | 119680657 | 126737 | 10.6228 | 0.6503 | -0.1554 | 6.5992 | JPT |
| LOC377696 | GI_37555914-S | rs2514592  | 8 | 8 | 119681861 | 19687  | 7.5839  | 0.5144 | -0.5321 | 6.6362 | JPT |
| Hs.453941 | Hs.453941-S   | rs2514592  | 8 | 8 | 119681861 | 125533 | 9.7185  | 0.6143 | -0.1475 | 6.5992 | JPT |
| LOC377696 | GI_37555914-S | rs2460964  | 8 | 8 | 119682843 | 20669  | 7.5839  | 0.5144 | 0.5321  | 6.6362 | JPT |
| Hs.453941 | Hs.453941-S   | rs2460964  | 8 | 8 | 119682843 | 124551 | 9.7185  | 0.6143 | 0.1475  | 6.5992 | JPT |
| LOC377696 | GI_37555914-S | rs2460965  | 8 | 8 | 119687942 | 25768  | 7.5839  | 0.5144 | 0.5321  | 6.6362 | JPT |
| Hs.453941 | Hs.453941-S   | rs2460965  | 8 | 8 | 119687942 | 119452 | 9.7185  | 0.6143 | 0.1475  | 6.5992 | JPT |
| LOC377696 | GI_37555914-S | rs2460966  | 8 | 8 | 119693737 | 31563  | 9.2888  | 0.6140 | -0.5958 | 6.6362 | JPT |
| Hs.453941 | Hs.453941-S   | rs2460966  | 8 | 8 | 119693737 | 113657 | 11.3669 | 0.6953 | -0.1599 | 6.5992 | JPT |
| LOC377696 | GI_37555914-S | rs2514594  | 8 | 8 | 119694330 | 32156  | 9.4459  | 0.6027 | 0.5874  | 6.6362 | JPT |
| Hs.453941 | Hs.453941-S   | rs2514594  | 8 | 8 | 119694330 | 113064 | 10.6159 | 0.6500 | 0.1551  | 6.5992 | JPT |
| LOC377696 | GI_37555914-S | rs2460967  | 8 | 8 | 119697073 | 34899  | 7.5839  | 0.5144 | 0.5321  | 6.6362 | JPT |
| Hs.453941 | Hs.453941-S   | rs2460967  | 8 | 8 | 119697073 | 110321 | 9.7185  | 0.6143 | 0.1475  | 6.5992 | JPT |

|           |               |            |   |   |           |        |         |        |         |        |     |
|-----------|---------------|------------|---|---|-----------|--------|---------|--------|---------|--------|-----|
| LOC377696 | GI_37555914-S | rs2460968  | 8 | 8 | 119697411 | 35237  | 7.5839  | 0.5144 | -0.5321 | 6.6362 | JPT |
| Hs.453941 | Hs.453941-S   | rs2460968  | 8 | 8 | 119697411 | 109983 | 9.7185  | 0.6143 | -0.1475 | 6.5992 | JPT |
| LOC377696 | GI_37555914-S | rs2460970  | 8 | 8 | 119698635 | 36461  | 9.4459  | 0.6027 | 0.5874  | 6.6362 | JPT |
| Hs.453941 | Hs.453941-S   | rs2460970  | 8 | 8 | 119698635 | 108759 | 10.6159 | 0.6500 | 0.1551  | 6.5992 | JPT |
| LOC377696 | GI_37555914-S | rs880033   | 8 | 8 | 119702375 | 40201  | 9.4459  | 0.6027 | -0.5874 | 6.6362 | JPT |
| Hs.453941 | Hs.453941-S   | rs880033   | 8 | 8 | 119702375 | 105019 | 10.6159 | 0.6500 | -0.1551 | 6.5992 | JPT |
| LOC377696 | GI_37555914-S | rs880034   | 8 | 8 | 119702442 | 40268  | 9.4459  | 0.6027 | 0.5874  | 6.6362 | JPT |
| Hs.453941 | Hs.453941-S   | rs880034   | 8 | 8 | 119702442 | 104952 | 10.6159 | 0.6500 | 0.1551  | 6.5992 | JPT |
| LOC377696 | GI_37555914-S | rs2460972  | 8 | 8 | 119707958 | 45784  | 9.4459  | 0.6027 | -0.5874 | 6.6362 | JPT |
| Hs.453941 | Hs.453941-S   | rs2460972  | 8 | 8 | 119707958 | 99436  | 10.6159 | 0.6500 | -0.1551 | 6.5992 | JPT |
| LOC377696 | GI_37555914-S | rs2514602  | 8 | 8 | 119719731 | 57557  | 9.4459  | 0.6027 | -0.5874 | 6.6362 | JPT |
| Hs.453941 | Hs.453941-S   | rs2514602  | 8 | 8 | 119719731 | 87663  | 10.6159 | 0.6500 | -0.1551 | 6.5992 | JPT |
| LOC377696 | GI_37555914-S | rs2460975  | 8 | 8 | 119720018 | 57844  | 9.4459  | 0.6027 | -0.5874 | 6.6362 | JPT |
| Hs.453941 | Hs.453941-S   | rs2460975  | 8 | 8 | 119720018 | 87376  | 10.6159 | 0.6500 | -0.1551 | 6.5992 | JPT |
| LOC377696 | GI_37555914-S | rs2514603  | 8 | 8 | 119722156 | 59982  | 9.4459  | 0.6027 | -0.5874 | 6.6362 | JPT |
| Hs.453941 | Hs.453941-S   | rs2514603  | 8 | 8 | 119722156 | 85238  | 10.6159 | 0.6500 | -0.1551 | 6.5992 | JPT |
| LOC377696 | GI_37555914-S | rs2514605  | 8 | 8 | 119723591 | 61417  | 9.6904  | 0.6044 | 0.5873  | 6.6362 | JPT |
| Hs.453941 | Hs.453941-S   | rs2514605  | 8 | 8 | 119723591 | 83803  | 10.9099 | 0.6523 | 0.1556  | 6.5992 | JPT |
| LOC377696 | GI_37555914-S | rs2514607  | 8 | 8 | 119725499 | 63325  | 9.4459  | 0.6027 | -0.5874 | 6.6362 | JPT |
| Hs.453941 | Hs.453941-S   | rs2514607  | 8 | 8 | 119725499 | 81895  | 10.6159 | 0.6500 | -0.1551 | 6.5992 | JPT |
| LOC377696 | GI_37555914-S | rs2514608  | 8 | 8 | 119726049 | 63875  | 9.6904  | 0.6044 | -0.5873 | 6.6362 | JPT |
| Hs.453941 | Hs.453941-S   | rs2514608  | 8 | 8 | 119726049 | 81345  | 10.9099 | 0.6523 | -0.1556 | 6.5992 | JPT |
| LOC377696 | GI_37555914-S | rs2514609  | 8 | 8 | 119726405 | 64231  | 9.6904  | 0.6044 | -0.5873 | 6.6362 | JPT |
| Hs.453941 | Hs.453941-S   | rs2514609  | 8 | 8 | 119726405 | 80989  | 10.9099 | 0.6523 | -0.1556 | 6.5992 | JPT |
| LOC377696 | GI_37555914-S | rs2514610  | 8 | 8 | 119728552 | 66378  | 9.4459  | 0.6027 | 0.5874  | 6.6362 | JPT |
| Hs.453941 | Hs.453941-S   | rs2514610  | 8 | 8 | 119728552 | 78842  | 10.6159 | 0.6500 | 0.1551  | 6.5992 | JPT |
| LOC377696 | GI_37555914-S | rs2460979  | 8 | 8 | 119731021 | 68847  | 9.6904  | 0.6044 | -0.5873 | 6.6362 | JPT |
| Hs.453941 | Hs.453941-S   | rs2460979  | 8 | 8 | 119731021 | 76373  | 10.9099 | 0.6523 | -0.1556 | 6.5992 | JPT |
| LOC377696 | GI_37555914-S | rs2514576  | 8 | 8 | 119740944 | 78770  | 8.2758  | 0.5671 | 0.6460  | 6.6362 | JPT |
| Hs.453941 | Hs.453941-S   | rs2514576  | 8 | 8 | 119740944 | 66450  | 8.4427  | 0.5752 | 0.1592  | 6.5992 | JPT |
| LOC377696 | GI_37555914-S | rs2460982  | 8 | 8 | 119741293 | 79119  | 8.1850  | 0.5536 | -0.5330 | 6.6362 | JPT |
| Hs.453941 | Hs.453941-S   | rs2460982  | 8 | 8 | 119741293 | 66101  | 9.3803  | 0.6089 | -0.1472 | 6.5992 | JPT |
| LOC377696 | GI_37555914-S | rs2460983  | 8 | 8 | 119741315 | 79141  | 7.5839  | 0.5144 | -0.5321 | 6.6362 | JPT |
| Hs.453941 | Hs.453941-S   | rs2460983  | 8 | 8 | 119741315 | 66079  | 9.7185  | 0.6143 | -0.1475 | 6.5992 | JPT |
| FLJ10204  | GI_8922280-S  | rs12541494 | 8 | 8 | 124498576 | 24548  | 5.7696  | 0.4029 | 0.2283  | 5.6405 | JPT |
| FLJ10204  | GI_8922280-S  | rs13272492 | 8 | 8 | 124505250 | 17874  | 5.7692  | 0.4103 | 0.2068  | 5.6405 | JPT |
| FLJ10204  | GI_8922280-S  | rs6999234  | 8 | 8 | 124509355 | 13769  | 5.7692  | 0.4103 | -0.2068 | 5.6405 | JPT |
| FLJ10204  | GI_8922280-S  | rs13278992 | 8 | 8 | 124511368 | 11756  | 5.7692  | 0.4103 | -0.2068 | 5.6405 | JPT |
| FLJ10204  | GI_8922280-S  | rs10447969 | 8 | 8 | 124513677 | 9447   | 5.9145  | 0.4118 | -0.2076 | 5.6405 | JPT |
| FLJ10204  | GI_8922280-S  | rs11786724 | 8 | 8 | 124514450 | 8674   | 5.7692  | 0.4103 | -0.2068 | 5.6405 | JPT |
| FLJ10204  | GI_8922280-S  | rs10505436 | 8 | 8 | 124516980 | 6144   | 5.6541  | 0.4105 | -0.2050 | 5.6405 | JPT |
| FLJ10204  | GI_8922280-S  | rs11990299 | 8 | 8 | 124517302 | 5822   | 5.9145  | 0.4118 | 0.2076  | 5.6405 | JPT |
| FLJ10204  | GI_8922280-S  | rs10505437 | 8 | 8 | 124517633 | 5491   | 5.7692  | 0.4103 | -0.2068 | 5.6405 | JPT |
| FLJ10204  | GI_8922280-S  | rs7014678  | 8 | 8 | 124517917 | 5207   | 5.7692  | 0.4103 | -0.2068 | 5.6405 | JPT |
| FLJ10204  | GI_8922280-S  | rs6470147  | 8 | 8 | 124517985 | 5139   | 5.7692  | 0.4103 | 0.2068  | 5.6405 | JPT |
| FLJ10204  | GI_8922280-S  | rs3779984  | 8 | 8 | 124518449 | 4675   | 5.7692  | 0.4103 | 0.2068  | 5.6405 | JPT |
| FLJ10204  | GI_8922280-S  | rs3824250  | 8 | 8 | 124518647 | 4477   | 5.7692  | 0.4103 | -0.2068 | 5.6405 | JPT |
| FLJ10204  | GI_8922280-S  | rs11991520 | 8 | 8 | 124518853 | 4271   | 5.9145  | 0.4118 | 0.2076  | 5.6405 | JPT |
| FLJ10204  | GI_8922280-S  | rs3817716  | 8 | 8 | 124519297 | 3827   | 5.7692  | 0.4103 | -0.2068 | 5.6405 | JPT |
| FLJ10204  | GI_8922280-S  | rs3765211  | 8 | 8 | 124519366 | 3758   | 5.7692  | 0.4103 | 0.2068  | 5.6405 | JPT |
| FLJ10204  | GI_8922280-S  | rs3765212  | 8 | 8 | 124519545 | 3579   | 5.7692  | 0.4103 | -0.2068 | 5.6405 | JPT |
| FLJ10204  | GI_8922280-S  | rs11989576 | 8 | 8 | 124520185 | 2939   | 5.7666  | 0.4177 | -0.2093 | 5.6405 | JPT |
| FLJ10204  | GI_8922280-S  | rs6415480  | 8 | 8 | 124521884 | 1240   | 5.9145  | 0.4118 | 0.2076  | 5.6405 | JPT |
| FLJ10204  | GI_8922280-S  | rs13269287 | 8 | 8 | 124522843 | 281    | 5.9145  | 0.4118 | 0.2076  | 5.6405 | JPT |
| FLJ10204  | GI_8922280-S  | rs1045270  | 8 | 8 | 124522980 | 144    | 5.9145  | 0.4118 | -0.2076 | 5.6405 | JPT |
| FLJ10204  | GI_8922280-S  | rs1045284  | 8 | 8 | 124523160 | 36     | 5.7692  | 0.4103 | 0.2068  | 5.6405 | JPT |
| FLJ10204  | GI_8922280-S  | rs1045291  | 8 | 8 | 124523188 | 64     | 5.9145  | 0.4118 | 0.2076  | 5.6405 | JPT |
| FLJ10204  | GI_8922280-S  | rs7822061  | 8 | 8 | 124525908 | 2784   | 5.8550  | 0.4396 | -0.2284 | 5.6405 | JPT |
| FLJ10204  | GI_8922280-S  | rs7831029  | 8 | 8 | 124527347 | 4223   | 5.7692  | 0.4103 | -0.2068 | 5.6405 | JPT |

|          |               |            |   |   |           |        |         |        |         |        |     |
|----------|---------------|------------|---|---|-----------|--------|---------|--------|---------|--------|-----|
| FLJ10204 | GI_8922280-S  | rs4637807  | 8 | 8 | 124529096 | 5972   | 5.7692  | 0.4103 | 0.2068  | 5.6405 | JPT |
| FLJ10204 | GI_8922280-S  | rs13265801 | 8 | 8 | 124529727 | 6603   | 5.7705  | 0.4103 | -0.2073 | 5.6405 | JPT |
| FLJ10204 | GI_8922280-S  | rs3824253  | 8 | 8 | 124530255 | 7131   | 5.7692  | 0.4103 | 0.2068  | 5.6405 | JPT |
| FLJ10204 | GI_8922280-S  | rs3824255  | 8 | 8 | 124530514 | 7390   | 5.7692  | 0.4103 | 0.2068  | 5.6405 | JPT |
| FLJ10204 | GI_8922280-S  | rs7825449  | 8 | 8 | 124531866 | 8742   | 5.7692  | 0.4103 | -0.2068 | 5.6405 | JPT |
| FLJ10204 | GI_8922280-S  | rs7825955  | 8 | 8 | 124531906 | 8782   | 5.7692  | 0.4103 | 0.2068  | 5.6405 | JPT |
| FLJ10204 | GI_8922280-S  | rs13278697 | 8 | 8 | 124532661 | 9537   | 5.9145  | 0.4118 | 0.2076  | 5.6405 | JPT |
| FLJ10204 | GI_8922280-S  | rs13273789 | 8 | 8 | 124535232 | 12108  | 5.9145  | 0.4118 | 0.2076  | 5.6405 | JPT |
| FLJ10204 | GI_8922280-S  | rs6982267  | 8 | 8 | 124541670 | 18546  | 5.9145  | 0.4118 | 0.2076  | 5.6405 | JPT |
| FLJ10204 | GI_8922280-S  | rs3824252  | 8 | 8 | 124542419 | 19295  | 5.6568  | 0.4032 | 0.2209  | 5.6405 | JPT |
| FLJ10204 | GI_8922280-S  | rs7827492  | 8 | 8 | 124544167 | 21043  | 5.8156  | 0.4058 | -0.2219 | 5.6405 | JPT |
| PP3856   | GI_40255088-S | rs4874159  | 8 | 8 | 144742093 | 13960  | 8.3762  | 0.5541 | 1.1549  | 5.9283 | JPT |
| PP3856   | GI_40255088-S | rs1466219  | 8 | 8 | 144744865 | 16732  | 8.4743  | 0.5588 | 1.1651  | 5.9283 | JPT |
| PP3856   | GI_40255088-S | rs4874164  | 8 | 8 | 144746191 | 18058  | 8.3762  | 0.5541 | -1.1549 | 5.9283 | JPT |
| PP3856   | GI_40255088-S | rs10282929 | 8 | 8 | 144752920 | 24787  | 7.9062  | 0.5309 | 1.1644  | 5.9283 | JPT |
| PP3856   | GI_40255088-S | rs10866913 | 8 | 8 | 144754829 | 26696  | 7.9062  | 0.5309 | -1.1644 | 5.9283 | JPT |
| PP3856   | GI_40255088-S | rs10112966 | 8 | 8 | 144755077 | 26944  | 8.3856  | 0.5460 | 1.1649  | 5.9283 | JPT |
| PP3856   | GI_40255088-S | rs2242088  | 8 | 8 | 144760607 | 32474  | 6.5073  | 0.4549 | -1.1354 | 5.9283 | JPT |
| ANXA2    | GI_4757755-S  | rs4878501  | 9 | 9 | 32699876  | 915237 | 5.6992  | 0.4058 | 0.3195  | 5.5532 | JPT |
| B4GALT1  | GI_13929461-S | rs3818593  | 9 | 9 | 33110706  | 9788   | 5.7893  | 0.4115 | -0.3289 | 5.4782 | JPT |
| B4GALT1  | GI_13929461-S | rs10971418 | 9 | 9 | 33112024  | 11106  | 5.9147  | 0.4119 | 0.3282  | 5.4782 | JPT |
| B4GALT1  | GI_13929461-S | rs10113903 | 9 | 9 | 33112645  | 11727  | 7.4343  | 0.4983 | 0.3280  | 5.4782 | JPT |
| B4GALT1  | GI_13929461-S | rs10758188 | 9 | 9 | 33113386  | 12468  | 7.3768  | 0.5035 | -0.3285 | 5.4782 | JPT |
| B4GALT1  | GI_13929461-S | rs10738905 | 9 | 9 | 33113627  | 12709  | 7.4343  | 0.4983 | -0.3280 | 5.4782 | JPT |
| B4GALT1  | GI_13929461-S | rs10971419 | 9 | 9 | 33114161  | 13243  | 7.5648  | 0.5220 | 0.3140  | 5.4782 | JPT |
| B4GALT1  | GI_13929461-S | rs12342831 | 9 | 9 | 33114872  | 13954  | 7.5686  | 0.5053 | 0.3279  | 5.4782 | JPT |
| B4GALT1  | GI_13929461-S | rs10758189 | 9 | 9 | 33115804  | 14886  | 7.3768  | 0.5035 | 0.3285  | 5.4782 | JPT |
| B4GALT1  | GI_13929461-S | rs10813950 | 9 | 9 | 33117640  | 16722  | 7.5812  | 0.5059 | 0.3257  | 5.4782 | JPT |
| B4GALT1  | GI_13929461-S | rs10813951 | 9 | 9 | 33118021  | 17103  | 7.5808  | 0.5059 | -0.3213 | 5.4782 | JPT |
| B4GALT1  | GI_13929461-S | rs3780491  | 9 | 9 | 33119607  | 18689  | 7.2915  | 0.4989 | 0.3282  | 5.4782 | JPT |
| B4GALT1  | GI_13929461-S | rs10124479 | 9 | 9 | 33126233  | 25315  | 7.4343  | 0.4983 | 0.3280  | 5.4782 | JPT |
| B4GALT1  | GI_13929461-S | rs10813954 | 9 | 9 | 33127596  | 26678  | 7.9980  | 0.5356 | -0.3265 | 5.4782 | JPT |
| B4GALT1  | GI_13929461-S | rs7849148  | 9 | 9 | 33128352  | 27434  | 7.5495  | 0.5126 | -0.3394 | 5.4782 | JPT |
| B4GALT1  | GI_13929461-S | rs10971424 | 9 | 9 | 33128775  | 27857  | 6.8796  | 0.5206 | 0.3340  | 5.4782 | JPT |
| B4GALT1  | GI_13929461-S | rs3780486  | 9 | 9 | 33129453  | 28535  | 7.4009  | 0.5048 | 0.3278  | 5.4782 | JPT |
| B4GALT1  | GI_13929461-S | rs7865745  | 9 | 9 | 33130976  | 30058  | 7.4343  | 0.4983 | 0.3280  | 5.4782 | JPT |
| B4GALT1  | GI_13929461-S | rs7036812  | 9 | 9 | 33133822  | 32904  | 6.9533  | 0.4887 | 0.3289  | 5.4782 | JPT |
| B4GALT1  | GI_13929461-S | rs10813957 | 9 | 9 | 33143527  | 42609  | 7.4009  | 0.5048 | -0.3278 | 5.4782 | JPT |
| B4GALT1  | GI_13929461-S | rs3780480  | 9 | 9 | 33153486  | 52568  | 7.8358  | 0.5274 | 0.3308  | 5.4782 | JPT |
| NUDT2    | GI_22219466-A | rs10971957 | 9 | 9 | 34141463  | 192040 | 10.7848 | 0.6564 | 0.3285  | 5.837  | JPT |
| NUDT2    | GI_22265329-I | rs10971957 | 9 | 9 | 34141463  | 184791 | 12.8003 | 0.7239 | -0.6745 | 5.837  | JPT |
| NUDT2    | GI_22219466-A | rs11791037 | 9 | 9 | 34150775  | 182728 | 5.9266  | 0.4201 | 0.3191  | 5.837  | JPT |
| NUDT2    | GI_22265329-I | rs11791037 | 9 | 9 | 34150775  | 175479 | 7.2467  | 0.4965 | -0.6742 | 5.837  | JPT |
| NUDT2    | GI_22265329-I | rs7018487  | 9 | 9 | 34157733  | 168521 | 6.9861  | 0.4822 | 0.6614  | 5.837  | JPT |
| NUDT2    | GI_22219466-A | rs7032947  | 9 | 9 | 34187861  | 145642 | 6.0209  | 0.4183 | 0.3232  | 5.837  | JPT |
| NUDT2    | GI_22265329-I | rs7032947  | 9 | 9 | 34187861  | 138393 | 7.4236  | 0.4977 | -0.6743 | 5.837  | JPT |
| NUDT2    | GI_22265329-I | rs2094998  | 9 | 9 | 34188916  | 137338 | 6.9861  | 0.4822 | 0.6614  | 5.837  | JPT |
| NUDT2    | GI_22265329-I | rs4879760  | 9 | 9 | 34198138  | 128116 | 6.9861  | 0.4822 | 0.6614  | 5.837  | JPT |
| NUDT2    | GI_22265329-I | rs4879763  | 9 | 9 | 34209476  | 116778 | 6.9861  | 0.4822 | 0.6614  | 5.837  | JPT |
| NUDT2    | GI_22265329-I | rs4879764  | 9 | 9 | 34212444  | 113810 | 6.9861  | 0.4822 | -0.6614 | 5.837  | JPT |
| NUDT2    | GI_22219466-A | rs10814079 | 9 | 9 | 34216087  | 117416 | 6.0209  | 0.4183 | -0.3232 | 5.837  | JPT |
| NUDT2    | GI_22265329-I | rs10814079 | 9 | 9 | 34216087  | 110167 | 7.4236  | 0.4977 | 0.6743  | 5.837  | JPT |
| NUDT2    | GI_22219466-A | rs10814080 | 9 | 9 | 34216942  | 116561 | 12.8169 | 0.7244 | 0.3374  | 5.837  | JPT |
| NUDT2    | GI_22265329-I | rs10814080 | 9 | 9 | 34216942  | 109312 | 18.5160 | 0.8519 | -0.7150 | 5.837  | JPT |
| NUDT2    | GI_22265329-I | rs7040201  | 9 | 9 | 34222396  | 103858 | 6.9861  | 0.4822 | -0.6614 | 5.837  | JPT |
| NUDT2    | GI_22219466-A | rs7857658  | 9 | 9 | 34232242  | 101261 | 6.0209  | 0.4183 | -0.3232 | 5.837  | JPT |
| NUDT2    | GI_22265329-I | rs7857658  | 9 | 9 | 34232242  | 94012  | 7.4236  | 0.4977 | 0.6743  | 5.837  | JPT |
| NUDT2    | GI_22265329-I | rs10814083 | 9 | 9 | 34246347  | 79907  | 6.9861  | 0.4822 | -0.6614 | 5.837  | JPT |
| NUDT2    | GI_22219466-A | rs10814084 | 9 | 9 | 34253389  | 80114  | 12.8169 | 0.7244 | -0.3374 | 5.837  | JPT |

|           |               |            |   |   |          |       |         |        |         |        |     |
|-----------|---------------|------------|---|---|----------|-------|---------|--------|---------|--------|-----|
| NUDT2     | GI_22265329-I | rs10814084 | 9 | 9 | 34253389 | 72865 | 18.5160 | 0.8519 | 0.7150  | 5.837  | JPT |
| NUDT2     | GI_22219466-A | rs10814086 | 9 | 9 | 34254597 | 78906 | 12.8169 | 0.7244 | -0.3374 | 5.837  | JPT |
| NUDT2     | GI_22265329-I | rs10814086 | 9 | 9 | 34254597 | 71657 | 18.5160 | 0.8519 | 0.7150  | 5.837  | JPT |
| NUDT2     | GI_22265329-I | rs17350373 | 9 | 9 | 34274944 | 51310 | 6.3184  | 0.4687 | -0.4637 | 5.837  | JPT |
| NUDT2     | GI_22219466-A | rs10814091 | 9 | 9 | 34277840 | 55663 | 9.8847  | 0.6124 | -0.3303 | 5.837  | JPT |
| NUDT2     | GI_22265329-I | rs10814091 | 9 | 9 | 34277840 | 48414 | 15.4502 | 0.7853 | 0.7155  | 5.837  | JPT |
| NUDT2     | GI_22219466-A | rs10972047 | 9 | 9 | 34300357 | 33146 | 13.8219 | 0.7447 | -0.3376 | 5.837  | JPT |
| NUDT2     | GI_22265329-I | rs10972047 | 9 | 9 | 34300357 | 25897 | 21.3093 | 0.8851 | 0.7051  | 5.837  | JPT |
| NUDT2     | GI_22219466-A | rs10814098 | 9 | 9 | 34314168 | 19335 | 12.8791 | 0.7349 | -0.3309 | 5.837  | JPT |
| NUDT2     | GI_22265329-I | rs10814098 | 9 | 9 | 34314168 | 12086 | 20.3297 | 0.8847 | 0.7043  | 5.837  | JPT |
| NUDT2     | GI_22219466-A | rs7039222  | 9 | 9 | 34322740 | 10763 | 13.8219 | 0.7447 | 0.3376  | 5.837  | JPT |
| NUDT2     | GI_22265329-I | rs7039222  | 9 | 9 | 34322740 | 3514  | 21.3093 | 0.8851 | -0.7051 | 5.837  | JPT |
| NUDT2     | GI_22219466-A | rs10814105 | 9 | 9 | 34359062 | 25559 | 11.8456 | 0.7300 | 0.3520  | 5.837  | JPT |
| NUDT2     | GI_22265329-I | rs10814105 | 9 | 9 | 34359062 | 32808 | 17.1063 | 0.8567 | -0.6911 | 5.837  | JPT |
| NUDT2     | GI_22219466-A | rs7852399  | 9 | 9 | 34361788 | 28285 | 6.4661  | 0.4525 | 0.2965  | 5.837  | JPT |
| NUDT2     | GI_22265329-I | rs7852399  | 9 | 9 | 34361788 | 35534 | 6.0764  | 0.4293 | -0.5386 | 5.837  | JPT |
| NUDT2     | GI_22219466-A | rs4310287  | 9 | 9 | 34364979 | 31476 | 13.0508 | 0.7313 | 0.3298  | 5.837  | JPT |
| NUDT2     | GI_22265329-I | rs4310287  | 9 | 9 | 34364979 | 38725 | 20.4581 | 0.8803 | -0.7068 | 5.837  | JPT |
| NUDT2     | GI_22219466-A | rs3818830  | 9 | 9 | 34368999 | 35496 | 6.9213  | 0.4786 | -0.3093 | 5.837  | JPT |
| NUDT2     | GI_22265329-I | rs3818830  | 9 | 9 | 34368999 | 42745 | 9.8875  | 0.6213 | 0.6864  | 5.837  | JPT |
| Hs.402723 | Hs.402723-S   | rs4879849  | 9 | 9 | 34986014 | 74776 | 7.2646  | 0.4975 | 0.1092  | 5.7051 | JPT |
| Hs.402723 | Hs.402723-S   | rs9608     | 9 | 9 | 34988003 | 72787 | 7.6284  | 0.5167 | -0.1014 | 5.7051 | JPT |
| Hs.402723 | Hs.402723-S   | rs7856118  | 9 | 9 | 34990920 | 69870 | 9.8054  | 0.6092 | 0.1144  | 5.7051 | JPT |
| Hs.402723 | Hs.402723-S   | rs10972281 | 9 | 9 | 35000738 | 60052 | 7.9573  | 0.5335 | 0.1050  | 5.7051 | JPT |
| Hs.402723 | Hs.402723-S   | rs10972282 | 9 | 9 | 35000827 | 59963 | 7.7940  | 0.5169 | 0.1014  | 5.7051 | JPT |
| Hs.402723 | Hs.402723-S   | rs4878595  | 9 | 9 | 35001131 | 59659 | 7.6284  | 0.5167 | 0.1014  | 5.7051 | JPT |
| Hs.402723 | Hs.402723-S   | rs4879852  | 9 | 9 | 35001305 | 59485 | 9.5920  | 0.6090 | -0.1144 | 5.7051 | JPT |
| Hs.402723 | Hs.402723-S   | rs4878596  | 9 | 9 | 35002033 | 58757 | 7.6284  | 0.5167 | -0.1014 | 5.7051 | JPT |
| Hs.402723 | Hs.402723-S   | rs12002486 | 9 | 9 | 35006428 | 54362 | 9.5920  | 0.6090 | -0.1144 | 5.7051 | JPT |
| Hs.402723 | Hs.402723-S   | rs808196   | 9 | 9 | 35019581 | 41209 | 7.6284  | 0.5167 | 0.1014  | 5.7051 | JPT |
| Hs.402723 | Hs.402723-S   | rs615474   | 9 | 9 | 35033291 | 27499 | 7.6284  | 0.5167 | -0.1014 | 5.7051 | JPT |
| Hs.402723 | Hs.402723-S   | rs813422   | 9 | 9 | 35036291 | 24499 | 7.6284  | 0.5167 | 0.1014  | 5.7051 | JPT |
| Hs.402723 | Hs.402723-S   | rs7048389  | 9 | 9 | 35039508 | 21282 | 9.5920  | 0.6090 | -0.1144 | 5.7051 | JPT |
| Hs.402723 | Hs.402723-S   | rs565070   | 9 | 9 | 35044586 | 16204 | 9.5920  | 0.6090 | 0.1144  | 5.7051 | JPT |
| Hs.402723 | Hs.402723-S   | rs595429   | 9 | 9 | 35045669 | 15121 | 9.5920  | 0.6090 | 0.1144  | 5.7051 | JPT |
| Hs.402723 | Hs.402723-S   | rs2258240  | 9 | 9 | 35050955 | 9835  | 7.6284  | 0.5167 | 0.1014  | 5.7051 | JPT |
| Hs.402723 | Hs.402723-S   | rs607671   | 9 | 9 | 35052613 | 8177  | 7.6284  | 0.5167 | -0.1014 | 5.7051 | JPT |
| Hs.402723 | Hs.402723-S   | rs514492   | 9 | 9 | 35052972 | 7818  | 7.6284  | 0.5167 | -0.1014 | 5.7051 | JPT |
| Hs.402723 | Hs.402723-S   | rs568300   | 9 | 9 | 35083020 | 22230 | 9.5920  | 0.6090 | 0.1144  | 5.7051 | JPT |
| Hs.402723 | Hs.402723-S   | rs666549   | 9 | 9 | 35090468 | 29678 | 7.6284  | 0.5167 | 0.1014  | 5.7051 | JPT |
| Hs.402723 | Hs.402723-S   | rs586017   | 9 | 9 | 35090569 | 29779 | 7.6284  | 0.5167 | -0.1014 | 5.7051 | JPT |
| Hs.402723 | Hs.402723-S   | rs693325   | 9 | 9 | 35091870 | 31080 | 7.7940  | 0.5169 | -0.1014 | 5.7051 | JPT |
| Hs.402723 | Hs.402723-S   | rs630961   | 9 | 9 | 35093722 | 32932 | 9.5920  | 0.6090 | -0.1144 | 5.7051 | JPT |
| Hs.402723 | Hs.402723-S   | rs7030595  | 9 | 9 | 35095257 | 34467 | 9.5920  | 0.6090 | 0.1144  | 5.7051 | JPT |
| Hs.402723 | Hs.402723-S   | rs944700   | 9 | 9 | 35099949 | 39159 | 5.7940  | 0.4118 | -0.1035 | 5.7051 | JPT |
| VPS13A    | GI_15619007-I | rs7856203  | 9 | 9 | 77226021 | 3331  | 12.9636 | 0.7288 | 0.6844  | 6.0672 | JPT |
| VPS13A    | GI_15619007-I | rs7860800  | 9 | 9 | 77231112 | 1760  | 13.2122 | 0.7276 | -0.6797 | 6.0672 | JPT |
| VPS13A    | GI_15619007-I | rs7875619  | 9 | 9 | 77236094 | 6742  | 12.9636 | 0.7288 | -0.6844 | 6.0672 | JPT |
| VPS13A    | GI_15619007-I | rs2025845  | 9 | 9 | 77242536 | 13184 | 12.9636 | 0.7288 | 0.6844  | 6.0672 | JPT |
| VPS13A    | GI_15619007-I | rs12342273 | 9 | 9 | 77259304 | 29952 | 9.9961  | 0.6170 | 0.6047  | 6.0672 | JPT |
| VPS13A    | GI_15619007-I | rs2274486  | 9 | 9 | 77260383 | 31031 | 12.9636 | 0.7288 | -0.6844 | 6.0672 | JPT |
| VPS13A    | GI_15619007-I | rs3824402  | 9 | 9 | 77263922 | 34570 | 10.8655 | 0.6594 | -0.6587 | 6.0672 | JPT |
| VPS13A    | GI_15619007-I | rs17063625 | 9 | 9 | 77267799 | 38447 | 13.2122 | 0.7276 | 0.6797  | 6.0672 | JPT |
| VPS13A    | GI_15619007-I | rs10491839 | 9 | 9 | 77270451 | 41099 | 15.2591 | 0.7888 | 0.7107  | 6.0672 | JPT |
| VPS13A    | GI_15619007-I | rs12352759 | 9 | 9 | 77270501 | 41149 | 12.8675 | 0.7259 | -0.6445 | 6.0672 | JPT |
| VPS13A    | GI_15619007-I | rs7860724  | 9 | 9 | 77271195 | 41843 | 10.7076 | 0.6715 | 0.6274  | 6.0672 | JPT |
| VPS13A    | GI_15619007-I | rs2377908  | 9 | 9 | 77272870 | 43518 | 8.4755  | 0.5503 | -0.5259 | 6.0672 | JPT |
| VPS13A    | GI_15619007-I | rs2296781  | 9 | 9 | 77273610 | 44258 | 10.7843 | 0.6563 | 0.6165  | 6.0672 | JPT |
| VPS13A    | GI_15619007-I | rs731943   | 9 | 9 | 77274648 | 45296 | 9.8466  | 0.6196 | -0.6324 | 6.0672 | JPT |

|           |               |            |   |   |           |        |         |        |         |        |     |
|-----------|---------------|------------|---|---|-----------|--------|---------|--------|---------|--------|-----|
| VPS13A    | GI_15619007-I | rs10114048 | 9 | 9 | 77276954  | 47602  | 9.7606  | 0.6160 | -0.6292 | 6.0672 | JPT |
| VPS13A    | GI_15619007-I | rs13285446 | 9 | 9 | 77280263  | 50911  | 8.2247  | 0.5468 | 0.5324  | 6.0672 | JPT |
| VPS13A    | GI_15619007-I | rs12683817 | 9 | 9 | 77280364  | 51012  | 7.8888  | 0.5387 | 0.5229  | 6.0672 | JPT |
| VPS13A    | GI_15619007-I | rs1036955  | 9 | 9 | 77287113  | 57761  | 7.8804  | 0.5296 | -0.5470 | 6.0672 | JPT |
| VPS13A    | GI_15619007-I | rs7019154  | 9 | 9 | 77288589  | 59237  | 7.6314  | 0.5085 | -0.5154 | 6.0672 | JPT |
| FLJ14753  | GI_14211858-S | rs9299417  | 9 | 9 | 94098937  | 203506 | 7.0993  | 0.4885 | 0.7589  | 6.2583 | JPT |
| FLJ14753  | GI_14211858-S | rs4744330  | 9 | 9 | 94108304  | 194139 | 7.0993  | 0.4885 | -0.7589 | 6.2583 | JPT |
| FLJ14753  | GI_14211858-S | rs11793128 | 9 | 9 | 94120238  | 182205 | 7.2810  | 0.4901 | -0.7647 | 6.2583 | JPT |
| FLJ14753  | GI_14211858-S | rs11795331 | 9 | 9 | 94120370  | 182073 | 7.1442  | 0.4909 | 0.7561  | 6.2583 | JPT |
| FLJ14753  | GI_14211858-S | rs7874441  | 9 | 9 | 94123177  | 179266 | 7.2810  | 0.4901 | 0.7647  | 6.2583 | JPT |
| FLJ14753  | GI_14211858-S | rs1536690  | 9 | 9 | 94134865  | 167578 | 7.0993  | 0.4885 | 0.7589  | 6.2583 | JPT |
| FLJ14753  | GI_14211858-S | rs722353   | 9 | 9 | 94141540  | 160903 | 7.6883  | 0.5198 | 0.8885  | 6.2583 | JPT |
| FLJ14753  | GI_14211858-S | rs7859571  | 9 | 9 | 94211440  | 91003  | 7.9629  | 0.5338 | -0.8439 | 6.2583 | JPT |
| FLJ14753  | GI_14211858-S | rs9632920  | 9 | 9 | 94255655  | 46788  | 7.4918  | 0.5181 | -0.8862 | 6.2583 | JPT |
| FLJ14753  | GI_14211858-S | rs7036474  | 9 | 9 | 94270934  | 31509  | 7.8712  | 0.5378 | 0.8342  | 6.2583 | JPT |
| FLJ14753  | GI_14211858-S | rs7025878  | 9 | 9 | 94278347  | 24096  | 7.7989  | 0.5431 | 0.8395  | 6.2583 | JPT |
| FLJ14753  | GI_14211858-S | rs1878875  | 9 | 9 | 94284775  | 17668  | 8.3661  | 0.5624 | -0.8258 | 6.2583 | JPT |
| FLJ14753  | GI_14211858-S | rs7045712  | 9 | 9 | 94287872  | 14571  | 6.4697  | 0.4608 | 0.7812  | 6.2583 | JPT |
| FLJ14753  | GI_14211858-S | rs7046779  | 9 | 9 | 94290447  | 11996  | 7.9629  | 0.5338 | -0.8439 | 6.2583 | JPT |
| FLJ14753  | GI_14211858-S | rs7037298  | 9 | 9 | 94295718  | 6725   | 8.1442  | 0.5343 | -0.8497 | 6.2583 | JPT |
| FLJ14753  | GI_14211858-S | rs7868703  | 9 | 9 | 94323341  | 20898  | 7.8240  | 0.5354 | -0.8468 | 6.2583 | JPT |
| FLJ14753  | GI_14211858-S | rs16911832 | 9 | 9 | 94323614  | 21171  | 8.1442  | 0.5343 | 0.8497  | 6.2583 | JPT |
| FLJ14753  | GI_14211858-S | rs7042219  | 9 | 9 | 94327241  | 24798  | 7.6883  | 0.5198 | 0.8885  | 6.2583 | JPT |
| FLJ14753  | GI_14211858-S | rs7042434  | 9 | 9 | 94334552  | 32109  | 6.5507  | 0.5010 | 0.8423  | 6.2583 | JPT |
| FLJ14753  | GI_14211858-S | rs7042468  | 9 | 9 | 94334638  | 32195  | 8.1442  | 0.5343 | 0.8497  | 6.2583 | JPT |
| FLJ14753  | GI_14211858-S | rs7028388  | 9 | 9 | 94336173  | 33730  | 8.1442  | 0.5343 | -0.8497 | 6.2583 | JPT |
| FLJ14753  | GI_14211858-S | rs6479549  | 9 | 9 | 94337287  | 34844  | 8.1442  | 0.5343 | 0.8497  | 6.2583 | JPT |
| LOC286353 | GI_27478844-S | rs1836404  | 9 | 9 | 95629819  | 18451  | 6.4388  | 0.4509 | 0.1028  | 5.6105 | JPT |
| LOC286353 | GI_27478844-S | rs1369156  | 9 | 9 | 95636449  | 11821  | 6.4388  | 0.4509 | 0.1028  | 5.6105 | JPT |
| LOC286353 | GI_27478844-S | rs2897061  | 9 | 9 | 95637015  | 11255  | 5.9488  | 0.4542 | 0.1024  | 5.6105 | JPT |
| LOC286353 | GI_27478844-S | rs591486   | 9 | 9 | 95729601  | 81331  | 5.9280  | 0.4202 | -0.1032 | 5.6105 | JPT |
| C9orf102  | GI_39930392-S | rs690495   | 9 | 9 | 95735348  | 120944 | 5.7353  | 0.4081 | -0.1930 | 5.6053 | JPT |
| C9orf102  | GI_39930392-S | rs12345187 | 9 | 9 | 95747925  | 108367 | 5.7353  | 0.4081 | 0.1930  | 5.6053 | JPT |
| C9orf102  | GI_39930392-S | rs617187   | 9 | 9 | 95759196  | 97096  | 5.7353  | 0.4081 | 0.1930  | 5.6053 | JPT |
| C9orf102  | GI_39930392-S | rs689619   | 9 | 9 | 95763526  | 92766  | 5.7353  | 0.4081 | 0.1930  | 5.6053 | JPT |
| C9orf102  | GI_39930392-S | rs10512245 | 9 | 9 | 95771366  | 84926  | 6.1605  | 0.4423 | -0.2021 | 5.6053 | JPT |
| C9orf102  | GI_39930392-S | rs682682   | 9 | 9 | 95781817  | 74475  | 5.7353  | 0.4081 | 0.1930  | 5.6053 | JPT |
| C9orf102  | GI_39930392-S | rs10988817 | 9 | 9 | 95802201  | 54091  | 5.7353  | 0.4081 | 0.1930  | 5.6053 | JPT |
| C9orf102  | GI_39930392-S | rs686048   | 9 | 9 | 95808937  | 47355  | 5.7353  | 0.4081 | -0.1930 | 5.6053 | JPT |
| C9orf102  | GI_39930392-S | rs689761   | 9 | 9 | 95812739  | 43553  | 5.7353  | 0.4081 | 0.1930  | 5.6053 | JPT |
| C9orf102  | GI_39930392-S | rs666093   | 9 | 9 | 95825657  | 30635  | 5.7353  | 0.4081 | 0.1930  | 5.6053 | JPT |
| C9orf102  | GI_39930392-S | rs657451   | 9 | 9 | 95845333  | 10959  | 5.7353  | 0.4081 | 0.1930  | 5.6053 | JPT |
| C9orf102  | GI_39930392-S | rs625105   | 9 | 9 | 95849303  | 6989   | 5.7353  | 0.4081 | -0.1930 | 5.6053 | JPT |
| C9orf102  | GI_39930392-S | rs2943532  | 9 | 9 | 95866812  | 10520  | 5.7353  | 0.4081 | 0.1930  | 5.6053 | JPT |
| MRPL50    | GI_21265095-S | rs10819925 | 9 | 9 | 101230840 | 1598   | 6.8655  | 0.5103 | -0.2566 | 5.9814 | JPT |
| NIPSNAP3B | GI_21361742-S | rs4742921  | 9 | 9 | 104595670 | 20151  | 6.1978  | 0.4290 | -0.2966 | 5.9101 | JPT |
| NIPSNAP3B | GI_21361742-S | rs12351593 | 9 | 9 | 104595896 | 19925  | 6.1978  | 0.4290 | -0.2966 | 5.9101 | JPT |
| NIPSNAP3B | GI_21361742-S | rs10124782 | 9 | 9 | 104598628 | 17193  | 6.1978  | 0.4290 | -0.2966 | 5.9101 | JPT |
| NIPSNAP3B | GI_21361742-S | rs1559711  | 9 | 9 | 104608603 | 7218   | 6.4907  | 0.4974 | -0.3592 | 5.9101 | JPT |
| NIPSNAP3B | GI_21361742-S | rs3739740  | 9 | 9 | 104612714 | 3107   | 6.3313  | 0.4971 | 0.3669  | 5.9101 | JPT |
| CDK5RAP2  | GI_28872785-S | rs10818452 | 9 | 9 | 120222927 | 7911   | 5.9956  | 0.4168 | -0.3069 | 5.3383 | JPT |
| CDK5RAP2  | GI_28872785-S | rs872423   | 9 | 9 | 120229045 | 1793   | 10.7790 | 0.6561 | 0.4049  | 5.3383 | JPT |
| CDK5RAP2  | GI_28872785-S | rs7037806  | 9 | 9 | 120230679 | 159    | 10.7790 | 0.6561 | -0.4049 | 5.3383 | JPT |
| CDK5RAP2  | GI_28872785-S | rs2297456  | 9 | 9 | 120231795 | 957    | 10.7790 | 0.6561 | -0.4049 | 5.3383 | JPT |
| CDK5RAP2  | GI_28872785-S | rs10125592 | 9 | 9 | 120241289 | 10451  | 10.3000 | 0.6378 | -0.3700 | 5.3383 | JPT |
| CDK5RAP2  | GI_28872785-S | rs10119527 | 9 | 9 | 120241488 | 10650  | 10.7109 | 0.6449 | -0.3732 | 5.3383 | JPT |
| CDK5RAP2  | GI_28872785-S | rs10818455 | 9 | 9 | 120241946 | 11108  | 10.3030 | 0.6379 | -0.3704 | 5.3383 | JPT |
| CDK5RAP2  | GI_28872785-S | rs12379034 | 9 | 9 | 120242220 | 11382  | 9.3611  | 0.5904 | -0.3358 | 5.3383 | JPT |
| CDK5RAP2  | GI_28872785-S | rs12376337 | 9 | 9 | 120242349 | 11511  | 10.7109 | 0.6449 | 0.3732  | 5.3383 | JPT |

|          |               |            |   |   |           |        |         |        |         |        |     |
|----------|---------------|------------|---|---|-----------|--------|---------|--------|---------|--------|-----|
| CDK5RAP2 | GI_28872785-S | rs1547266  | 9 | 9 | 120243030 | 12192  | 10.3000 | 0.6378 | -0.3700 | 5.3383 | JPT |
| CDK5RAP2 | GI_28872785-S | rs3780673  | 9 | 9 | 120246137 | 15299  | 10.3000 | 0.6378 | -0.3700 | 5.3383 | JPT |
| CDK5RAP2 | GI_28872785-S | rs3780674  | 9 | 9 | 120246473 | 15635  | 10.3000 | 0.6378 | -0.3700 | 5.3383 | JPT |
| CDK5RAP2 | GI_28872785-S | rs10984914 | 9 | 9 | 120278149 | 47311  | 9.7197  | 0.6056 | 0.3399  | 5.3383 | JPT |
| CDK5RAP2 | GI_28872785-S | rs10984920 | 9 | 9 | 120297264 | 66426  | 10.2224 | 0.6260 | -0.4302 | 5.3383 | JPT |
| CDK5RAP2 | GI_28872785-S | rs10984921 | 9 | 9 | 120307536 | 76698  | 9.7197  | 0.6056 | -0.3399 | 5.3383 | JPT |
| CDK5RAP2 | GI_28872785-S | rs16909810 | 9 | 9 | 120322007 | 91169  | 9.7197  | 0.6056 | 0.3399  | 5.3383 | JPT |
| CDK5RAP2 | GI_28872785-S | rs2490594  | 9 | 9 | 120329298 | 98460  | 9.1367  | 0.5806 | 0.3331  | 5.3383 | JPT |
| CDK5RAP2 | GI_28872785-S | rs3849113  | 9 | 9 | 120354939 | 124101 | 8.6368  | 0.5938 | 0.3410  | 5.3383 | JPT |
| CDK5RAP2 | GI_28872785-S | rs10984936 | 9 | 9 | 120359152 | 128314 | 8.8847  | 0.5959 | 0.3391  | 5.3383 | JPT |
| CDK5RAP2 | GI_28872785-S | rs2095064  | 9 | 9 | 120360504 | 129666 | 6.8426  | 0.4742 | 0.3200  | 5.3383 | JPT |
| CDK5RAP2 | GI_28872785-S | rs4837777  | 9 | 9 | 120364440 | 133602 | 9.0476  | 0.5942 | -0.3313 | 5.3383 | JPT |
| CDK5RAP2 | GI_28872785-S | rs12683306 | 9 | 9 | 120367146 | 136308 | 9.3767  | 0.5998 | 0.3364  | 5.3383 | JPT |
| CDK5RAP2 | GI_28872785-S | rs4836822  | 9 | 9 | 120370590 | 139752 | 9.7197  | 0.6056 | 0.3399  | 5.3383 | JPT |
| CDK5RAP2 | GI_28872785-S | rs2416758  | 9 | 9 | 120373064 | 142226 | 9.3767  | 0.5998 | 0.3364  | 5.3383 | JPT |
| CDK5RAP2 | GI_28872785-S | rs7867825  | 9 | 9 | 120375299 | 144461 | 9.3767  | 0.5998 | -0.3364 | 5.3383 | JPT |
| CDK5RAP2 | GI_28872785-S | rs7853010  | 9 | 9 | 120375743 | 144905 | 9.3912  | 0.6004 | 0.3389  | 5.3383 | JPT |
| CDK5RAP2 | GI_28872785-S | rs10984944 | 9 | 9 | 120376518 | 145680 | 9.3634  | 0.5992 | -0.3364 | 5.3383 | JPT |
| CDK5RAP2 | GI_28872785-S | rs12238807 | 9 | 9 | 120376999 | 146161 | 9.3924  | 0.6004 | -0.3351 | 5.3383 | JPT |
| CDK5RAP2 | GI_28872785-S | rs7868597  | 9 | 9 | 120377873 | 147035 | 9.3767  | 0.5998 | -0.3364 | 5.3383 | JPT |
| CDK5RAP2 | GI_28872785-S | rs10984948 | 9 | 9 | 120379499 | 148661 | 9.7197  | 0.6056 | -0.3399 | 5.3383 | JPT |
| CDK5RAP2 | GI_28872785-S | rs10984949 | 9 | 9 | 120379586 | 148748 | 9.7197  | 0.6056 | -0.3399 | 5.3383 | JPT |
| CDK5RAP2 | GI_28872785-S | rs1475664  | 9 | 9 | 120380208 | 149370 | 9.3767  | 0.5998 | -0.3364 | 5.3383 | JPT |
| CDK5RAP2 | GI_28872785-S | rs3750494  | 9 | 9 | 120380900 | 150062 | 9.7197  | 0.6056 | 0.3399  | 5.3383 | JPT |
| CDK5RAP2 | GI_28872785-S | rs7875141  | 9 | 9 | 120382406 | 151568 | 8.2207  | 0.5466 | -0.3231 | 5.3383 | JPT |
| CDK5RAP2 | GI_28872785-S | rs7854663  | 9 | 9 | 120384774 | 153936 | 8.9712  | 0.5732 | -0.3137 | 5.3383 | JPT |
| CDK5RAP2 | GI_28872785-S | rs10984951 | 9 | 9 | 120386336 | 155498 | 8.9712  | 0.5732 | 0.3137  | 5.3383 | JPT |
| CDK5RAP2 | GI_28872785-S | rs914617   | 9 | 9 | 120386509 | 155671 | 8.9712  | 0.5732 | -0.3137 | 5.3383 | JPT |
| CDK5RAP2 | GI_28872785-S | rs7043614  | 9 | 9 | 120390347 | 159509 | 8.9712  | 0.5732 | 0.3137  | 5.3383 | JPT |
| CDK5RAP2 | GI_28872785-S | rs10760101 | 9 | 9 | 120391645 | 160807 | 8.9712  | 0.5732 | 0.3137  | 5.3383 | JPT |
| CDK5RAP2 | GI_28872785-S | rs954214   | 9 | 9 | 120392800 | 161962 | 8.6731  | 0.5682 | 0.3102  | 5.3383 | JPT |
| CDK5RAP2 | GI_28872785-S | rs4837779  | 9 | 9 | 120395576 | 164738 | 8.9037  | 0.6062 | 0.3385  | 5.3383 | JPT |
| CDK5RAP2 | GI_28872785-S | rs3933338  | 9 | 9 | 120398930 | 168092 | 8.6731  | 0.5682 | 0.3102  | 5.3383 | JPT |
| CDK5RAP2 | GI_28872785-S | rs10818467 | 9 | 9 | 120401867 | 171029 | 8.9712  | 0.5732 | 0.3137  | 5.3383 | JPT |
| CDK5RAP2 | GI_28872785-S | rs10984956 | 9 | 9 | 120404399 | 173561 | 8.9712  | 0.5732 | 0.3137  | 5.3383 | JPT |
| CDK5RAP2 | GI_28872785-S | rs7852102  | 9 | 9 | 120405133 | 174295 | 9.9216  | 0.6227 | -0.3466 | 5.3383 | JPT |
| CDK5RAP2 | GI_28872785-S | rs7028134  | 9 | 9 | 120406012 | 175174 | 8.9712  | 0.5732 | 0.3137  | 5.3383 | JPT |
| CDK5RAP2 | GI_28872785-S | rs7045249  | 9 | 9 | 120406544 | 175706 | 8.6731  | 0.5682 | -0.3102 | 5.3383 | JPT |
| CDK5RAP2 | GI_28872785-S | rs10984957 | 9 | 9 | 120409890 | 179052 | 8.9712  | 0.5732 | 0.3137  | 5.3383 | JPT |
| CDK5RAP2 | GI_28872785-S | rs4837782  | 9 | 9 | 120410367 | 179529 | 8.9712  | 0.5732 | -0.3137 | 5.3383 | JPT |
| CDK5RAP2 | GI_28872785-S | rs10739568 | 9 | 9 | 120410693 | 179855 | 8.9712  | 0.5732 | -0.3137 | 5.3383 | JPT |
| CDK5RAP2 | GI_28872785-S | rs10984958 | 9 | 9 | 120410942 | 180104 | 5.8618  | 0.4086 | -0.2669 | 5.3383 | JPT |
| CDK5RAP2 | GI_28872785-S | rs10760103 | 9 | 9 | 120417552 | 186714 | 8.9712  | 0.5732 | -0.3137 | 5.3383 | JPT |
| CDK5RAP2 | GI_28872785-S | rs7389978  | 9 | 9 | 120418176 | 187338 | 8.6623  | 0.5677 | 0.3126  | 5.3383 | JPT |
| CDK5RAP2 | GI_28872785-S | rs7857382  | 9 | 9 | 120420743 | 189905 | 8.9712  | 0.5732 | -0.3137 | 5.3383 | JPT |
| EGFL5    | GI_42659252-S | rs7861226  | 9 | 9 | 120430675 | 12379  | 6.2798  | 0.4415 | 0.2074  | 5.7846 | JPT |
| STOM     | GI_38016910-I | rs12347207 | 9 | 9 | 121175362 | 14591  | 6.2159  | 0.4456 | 0.4298  | 6.0529 | JPT |
| ZNF79    | GI_24307936-S | rs3824414  | 9 | 9 | 127246411 | 40754  | 5.3136  | 0.3810 | -0.2297 | 5.3117 | JPT |
| ZNF79    | GI_24307936-S | rs3802364  | 9 | 9 | 127246511 | 40654  | 5.3136  | 0.3810 | -0.2297 | 5.3117 | JPT |
| ZNF79    | GI_24307936-S | rs10987645 | 9 | 9 | 127260777 | 26388  | 5.7620  | 0.4098 | -0.2285 | 5.3117 | JPT |
| ZNF79    | GI_24307936-S | rs13292096 | 9 | 9 | 127270740 | 16425  | 6.2317  | 0.4466 | -0.2443 | 5.3117 | JPT |
| ZNF79    | GI_24307936-S | rs10739692 | 9 | 9 | 127272319 | 14846  | 6.3596  | 0.4463 | -0.2449 | 5.3117 | JPT |
| ZNF79    | GI_24307936-S | rs4628351  | 9 | 9 | 127275787 | 11378  | 6.3596  | 0.4463 | -0.2449 | 5.3117 | JPT |
| ZNF79    | GI_24307936-S | rs4504745  | 9 | 9 | 127276968 | 10197  | 6.3596  | 0.4463 | -0.2449 | 5.3117 | JPT |
| ZNF79    | GI_24307936-S | rs7853047  | 9 | 9 | 127277654 | 9511   | 6.7711  | 0.4622 | -0.2503 | 5.3117 | JPT |
| ZNF79    | GI_24307936-S | rs6478780  | 9 | 9 | 127279987 | 7178   | 6.3596  | 0.4463 | 0.2449  | 5.3117 | JPT |
| ZNF79    | GI_24307936-S | rs7869023  | 9 | 9 | 127281232 | 5933   | 6.7711  | 0.4622 | -0.2503 | 5.3117 | JPT |
| ZNF79    | GI_24307936-S | rs7869823  | 9 | 9 | 127281643 | 5522   | 6.7711  | 0.4622 | 0.2503  | 5.3117 | JPT |
| SLC2A8   | GI_21361448-S | rs2298182  | 9 | 9 | 127286223 | 36832  | 5.8304  | 0.4141 | -0.2426 | 5.6902 | JPT |

|           |               |            |    |    |           |        |         |        |         |        |     |
|-----------|---------------|------------|----|----|-----------|--------|---------|--------|---------|--------|-----|
| ZNF79     | GI_24307936-S | rs2247905  | 9  | 9  | 127287930 | 765    | 6.3596  | 0.4463 | 0.2449  | 5.3117 | JPT |
| ZNF79     | GI_24307936-S | rs2247781  | 9  | 9  | 127288478 | 1313   | 6.3596  | 0.4463 | 0.2449  | 5.3117 | JPT |
| SLC2A8    | GI_21361448-S | rs7847465  | 9  | 9  | 127288632 | 39241  | 5.8765  | 0.4095 | -0.2550 | 5.6902 | JPT |
| ZNF79     | GI_24307936-S | rs1139400  | 9  | 9  | 127289665 | 2500   | 6.5048  | 0.4470 | -0.2501 | 5.3117 | JPT |
| ZNF79     | GI_24307936-S | rs2247322  | 9  | 9  | 127292430 | 5265   | 6.3596  | 0.4463 | 0.2449  | 5.3117 | JPT |
| ZNF79     | GI_24307936-S | rs2247303  | 9  | 9  | 127292852 | 5687   | 6.3596  | 0.4463 | -0.2449 | 5.3117 | JPT |
| ZNF79     | GI_24307936-S | rs2244624  | 9  | 9  | 127293062 | 5897   | 6.7711  | 0.4622 | -0.2503 | 5.3117 | JPT |
| ZNF79     | GI_24307936-S | rs2244468  | 9  | 9  | 127294833 | 7668   | 6.3596  | 0.4463 | 0.2449  | 5.3117 | JPT |
| SLC2A8    | GI_21361448-S | rs4837154  | 9  | 9  | 127298963 | 49572  | 5.8765  | 0.4095 | -0.2550 | 5.6902 | JPT |
| ZNF79     | GI_24307936-S | rs2243906  | 9  | 9  | 127299223 | 12058  | 6.7711  | 0.4622 | -0.2503 | 5.3117 | JPT |
| ZNF79     | GI_24307936-S | rs2243903  | 9  | 9  | 127299297 | 12132  | 6.3596  | 0.4463 | 0.2449  | 5.3117 | JPT |
| ZNF79     | GI_24307936-S | rs2243784  | 9  | 9  | 127300510 | 13345  | 7.5129  | 0.5281 | 0.2544  | 5.3117 | JPT |
| ZNF79     | GI_24307936-S | rs2243767  | 9  | 9  | 127300942 | 13777  | 6.3596  | 0.4463 | 0.2449  | 5.3117 | JPT |
| ZNF79     | GI_24307936-S | rs2254437  | 9  | 9  | 127304481 | 17316  | 6.3596  | 0.4463 | -0.2449 | 5.3117 | JPT |
| ZNF79     | GI_24307936-S | rs2243608  | 9  | 9  | 127306463 | 19298  | 6.3596  | 0.4463 | 0.2449  | 5.3117 | JPT |
| ZNF79     | GI_24307936-S | rs2253669  | 9  | 9  | 127310068 | 22903  | 5.9965  | 0.4244 | -0.2334 | 5.3117 | JPT |
| ZNF79     | GI_24307936-S | rs2253639  | 9  | 9  | 127310971 | 23806  | 6.3596  | 0.4463 | -0.2449 | 5.3117 | JPT |
| ZNF79     | GI_24307936-S | rs2246000  | 9  | 9  | 127328698 | 41533  | 6.3596  | 0.4463 | 0.2449  | 5.3117 | JPT |
| ZNF79     | GI_24307936-S | rs4332224  | 9  | 9  | 127336759 | 49594  | 6.3596  | 0.4463 | 0.2449  | 5.3117 | JPT |
| ZNF79     | GI_24307936-S | rs2488903  | 9  | 9  | 127341630 | 54465  | 5.5399  | 0.3957 | -0.2375 | 5.3117 | JPT |
| ZNF79     | GI_24307936-S | rs2245051  | 9  | 9  | 127349340 | 62175  | 5.5399  | 0.3957 | -0.2375 | 5.3117 | JPT |
| ZNF79     | GI_24307936-S | rs2244843  | 9  | 9  | 127351220 | 64055  | 5.6391  | 0.4020 | -0.2370 | 5.3117 | JPT |
| ZNF79     | GI_24307936-S | rs2244830  | 9  | 9  | 127351560 | 64395  | 5.3604  | 0.3914 | 0.2541  | 5.3117 | JPT |
| SURF1     | GI_19557683-S | rs12335    | 9  | 9  | 133227388 | 21486  | 6.9472  | 0.4800 | 0.2885  | 5.9778 | JPT |
| SURF1     | GI_19557683-S | rs10793964 | 9  | 9  | 133228143 | 20731  | 6.5759  | 0.4511 | 0.2821  | 5.9778 | JPT |
| SURF1     | GI_19557683-S | rs886089   | 9  | 9  | 133229020 | 19854  | 6.2411  | 0.4392 | -0.2773 | 5.9778 | JPT |
| SURF1     | GI_19557683-S | rs120858   | 9  | 9  | 133230364 | 18510  | 6.9472  | 0.4800 | 0.2885  | 5.9778 | JPT |
| SURF1     | GI_19557683-S | rs487820   | 9  | 9  | 133241923 | 6951   | 6.9472  | 0.4800 | 0.2885  | 5.9778 | JPT |
| SURF1     | GI_19557683-S | rs616836   | 9  | 9  | 133243075 | 5799   | 6.2411  | 0.4392 | 0.2773  | 5.9778 | JPT |
| SURF1     | GI_19557683-S | rs553877   | 9  | 9  | 133244509 | 4365   | 6.2411  | 0.4392 | -0.2773 | 5.9778 | JPT |
| SURF1     | GI_19557683-S | rs484248   | 9  | 9  | 133248144 | 730    | 6.3810  | 0.4725 | 0.2856  | 5.9778 | JPT |
| SURF1     | GI_19557683-S | rs599924   | 9  | 9  | 133248145 | 729    | 6.9472  | 0.4800 | -0.2885 | 5.9778 | JPT |
| SURF1     | GI_19557683-S | rs2296810  | 9  | 9  | 133257248 | 8374   | 6.2411  | 0.4392 | 0.2773  | 5.9778 | JPT |
| SURF1     | GI_19557683-S | rs1059773  | 9  | 9  | 133258419 | 9545   | 6.2411  | 0.4392 | 0.2773  | 5.9778 | JPT |
| SURF1     | GI_19557683-S | rs2494     | 9  | 9  | 133259387 | 10513  | 6.2411  | 0.4392 | -0.2773 | 5.9778 | JPT |
| SURF1     | GI_19557683-S | rs17293266 | 9  | 9  | 133262312 | 13438  | 7.2118  | 0.5117 | -0.2959 | 5.9778 | JPT |
| SURF1     | GI_19557683-S | rs1179037  | 9  | 9  | 133268063 | 19189  | 6.9472  | 0.4800 | 0.2885  | 5.9778 | JPT |
| LOC206962 | GI_22046332-S | rs3812561  | 9  | 9  | 136546713 | 13328  | 8.0900  | 0.5401 | -0.8670 | 6.9705 | JPT |
| LOC401560 | GI_42659039-S | rs3812561  | 9  | 9  | 136546713 | 13381  | 8.8639  | 0.5770 | -0.7664 | 8.0096 | JPT |
| LOC206962 | GI_22046332-S | rs11145846 | 9  | 9  | 136561492 | 28107  | 8.2809  | 0.5410 | 0.8663  | 6.9705 | JPT |
| LOC401560 | GI_42659039-S | rs11145846 | 9  | 9  | 136561492 | 28160  | 9.0918  | 0.5786 | 0.7670  | 8.0096 | JPT |
| LOC206962 | GI_22046332-S | rs3812580  | 9  | 9  | 136577797 | 44412  | 8.0900  | 0.5401 | -0.8670 | 6.9705 | JPT |
| LOC401560 | GI_42659039-S | rs3812580  | 9  | 9  | 136577797 | 44465  | 8.8639  | 0.5770 | -0.7664 | 8.0096 | JPT |
| PTER      | GI_20070185-S | rs1055340  | 10 | 10 | 16595534  | 974    | 12.9569 | 0.7286 | -0.7499 | 7.6843 | JPT |
| PTER      | GI_20070185-S | rs7909832  | 10 | 10 | 16596716  | 2156   | 12.9569 | 0.7286 | 0.7499  | 7.6843 | JPT |
| PLXDC2    | GI_40255004-S | rs10508600 | 10 | 10 | 20207829  | 401058 | 7.3424  | 0.5016 | -0.2717 | 6.6958 | JPT |
| KIAA1074  | GI_7662473-S  | rs10764678 | 10 | 10 | 27489068  | 147109 | 6.2353  | 0.4636 | 0.1784  | 5.8404 | JPT |
| C10orf68  | GI_13375961-S | rs7086385  | 10 | 10 | 32708723  | 502999 | 7.0301  | 0.4765 | 0.1005  | 5.8161 | JPT |
| C10orf68  | GI_13375961-S | rs7086284  | 10 | 10 | 32708829  | 502893 | 8.2204  | 0.5380 | 0.1019  | 5.8161 | JPT |
| C10orf68  | GI_13375961-S | rs7087237  | 10 | 10 | 32709300  | 502422 | 6.6048  | 0.4688 | -0.0996 | 5.8161 | JPT |
| C10orf68  | GI_13375961-S | rs11008906 | 10 | 10 | 32710848  | 500874 | 7.0301  | 0.4765 | -0.1005 | 5.8161 | JPT |
| C10orf68  | GI_13375961-S | rs4749722  | 10 | 10 | 32715336  | 496386 | 7.0301  | 0.4765 | -0.1005 | 5.8161 | JPT |
| C10orf68  | GI_13375961-S | rs11008914 | 10 | 10 | 32720645  | 491077 | 7.3226  | 0.4923 | 0.1021  | 5.8161 | JPT |
| C10orf68  | GI_13375961-S | rs4747779  | 10 | 10 | 32721716  | 490006 | 7.5799  | 0.5228 | -0.1058 | 5.8161 | JPT |
| C10orf68  | GI_13375961-S | rs12572165 | 10 | 10 | 32723647  | 488075 | 7.3226  | 0.4923 | -0.1021 | 5.8161 | JPT |
| C10orf68  | GI_13375961-S | rs7922515  | 10 | 10 | 32724132  | 487590 | 7.1711  | 0.4924 | -0.1027 | 5.8161 | JPT |
| C10orf68  | GI_13375961-S | rs7099897  | 10 | 10 | 32724433  | 487289 | 7.3226  | 0.4923 | -0.1021 | 5.8161 | JPT |
| C10orf68  | GI_13375961-S | rs12573301 | 10 | 10 | 32725345  | 486377 | 7.4076  | 0.5408 | 0.1135  | 5.8161 | JPT |
| C10orf68  | GI_13375961-S | rs2370767  | 10 | 10 | 32729377  | 482345 | 6.9833  | 0.4904 | -0.1002 | 5.8161 | JPT |

|          |               |            |    |    |          |        |        |        |         |        |     |
|----------|---------------|------------|----|----|----------|--------|--------|--------|---------|--------|-----|
| C10orf68 | GI_13375961-S | rs2370768  | 10 | 10 | 32730448 | 481274 | 7.0651 | 0.4866 | 0.1014  | 5.8161 | JPT |
| C10orf68 | GI_13375961-S | rs2370772  | 10 | 10 | 32744471 | 467251 | 7.4629 | 0.5166 | -0.1082 | 5.8161 | JPT |
| C10orf68 | GI_13375961-S | rs3006715  | 10 | 10 | 32765594 | 446128 | 7.9410 | 0.5414 | -0.1117 | 5.8161 | JPT |
| C10orf68 | GI_13375961-S | rs2997515  | 10 | 10 | 32770832 | 440890 | 8.3141 | 0.5511 | -0.1139 | 5.8161 | JPT |
| C10orf68 | GI_13375961-S | rs2947067  | 10 | 10 | 32799529 | 412193 | 8.3141 | 0.5511 | -0.1139 | 5.8161 | JPT |
| C10orf68 | GI_13375961-S | rs3004208  | 10 | 10 | 32800625 | 411097 | 7.5392 | 0.5888 | 0.1138  | 5.8161 | JPT |
| C10orf68 | GI_13375961-S | rs7901257  | 10 | 10 | 32831805 | 379917 | 8.3141 | 0.5511 | 0.1139  | 5.8161 | JPT |
| C10orf68 | GI_13375961-S | rs2947051  | 10 | 10 | 32846300 | 365422 | 8.2024 | 0.5457 | 0.1119  | 5.8161 | JPT |
| C10orf68 | GI_13375961-S | rs10827071 | 10 | 10 | 32855927 | 355795 | 8.4876 | 0.5509 | -0.1133 | 5.8161 | JPT |
| C10orf68 | GI_13375961-S | rs10827072 | 10 | 10 | 32855962 | 355760 | 8.3163 | 0.5512 | -0.1140 | 5.8161 | JPT |
| C10orf68 | GI_13375961-S | rs11008963 | 10 | 10 | 32859888 | 351834 | 7.9444 | 0.5329 | -0.1121 | 5.8161 | JPT |
| C10orf68 | GI_13375961-S | rs10827075 | 10 | 10 | 32867271 | 344451 | 8.3141 | 0.5511 | -0.1139 | 5.8161 | JPT |
| C10orf68 | GI_13375961-S | rs2947066  | 10 | 10 | 32871691 | 340031 | 7.9588 | 0.5336 | -0.1161 | 5.8161 | JPT |
| C10orf68 | GI_13375961-S | rs3006744  | 10 | 10 | 32871928 | 339794 | 8.0587 | 0.5473 | 0.1113  | 5.8161 | JPT |
| C10orf68 | GI_13375961-S | rs3006745  | 10 | 10 | 32874049 | 337673 | 8.6334 | 0.5752 | 0.1154  | 5.8161 | JPT |
| C10orf68 | GI_13375961-S | rs2947077  | 10 | 10 | 32884808 | 326914 | 8.7925 | 0.5826 | -0.1171 | 5.8161 | JPT |
| C10orf68 | GI_13375961-S | rs2947078  | 10 | 10 | 32885140 | 326582 | 7.6407 | 0.5631 | 0.1151  | 5.8161 | JPT |
| C10orf68 | GI_13375961-S | rs3006743  | 10 | 10 | 32899498 | 312224 | 8.3141 | 0.5511 | -0.1139 | 5.8161 | JPT |
| C10orf68 | GI_13375961-S | rs2990962  | 10 | 10 | 32903593 | 308129 | 8.3141 | 0.5511 | -0.1139 | 5.8161 | JPT |
| C10orf68 | GI_13375961-S | rs2990963  | 10 | 10 | 32909480 | 302242 | 6.6938 | 0.4657 | -0.1002 | 5.8161 | JPT |
| C10orf68 | GI_13375961-S | rs3006739  | 10 | 10 | 32911811 | 299911 | 8.3141 | 0.5511 | 0.1139  | 5.8161 | JPT |
| C10orf68 | GI_13375961-S | rs2947085  | 10 | 10 | 32913062 | 298660 | 8.0587 | 0.5473 | 0.1113  | 5.8161 | JPT |
| C10orf68 | GI_13375961-S | rs7075843  | 10 | 10 | 32925102 | 286620 | 8.3141 | 0.5511 | -0.1139 | 5.8161 | JPT |
| C10orf68 | GI_13375961-S | rs9338799  | 10 | 10 | 32938968 | 272754 | 8.3141 | 0.5511 | -0.1139 | 5.8161 | JPT |
| C10orf68 | GI_13375961-S | rs3006748  | 10 | 10 | 32948372 | 263350 | 8.3141 | 0.5511 | 0.1139  | 5.8161 | JPT |
| C10orf68 | GI_13375961-S | rs1356892  | 10 | 10 | 32952177 | 259545 | 8.0587 | 0.5473 | -0.1113 | 5.8161 | JPT |
| C10orf68 | GI_13375961-S | rs10827086 | 10 | 10 | 32956589 | 255133 | 8.3141 | 0.5511 | 0.1139  | 5.8161 | JPT |
| C10orf68 | GI_13375961-S | rs11009005 | 10 | 10 | 32961822 | 249900 | 7.9397 | 0.5413 | 0.1117  | 5.8161 | JPT |
| C10orf68 | GI_13375961-S | rs12220874 | 10 | 10 | 32972979 | 238743 | 8.3141 | 0.5511 | 0.1139  | 5.8161 | JPT |
| C10orf68 | GI_13375961-S | rs10827091 | 10 | 10 | 32982957 | 228765 | 8.3141 | 0.5511 | 0.1139  | 5.8161 | JPT |
| C10orf68 | GI_13375961-S | rs1335993  | 10 | 10 | 32991468 | 220254 | 8.4876 | 0.5509 | 0.1133  | 5.8161 | JPT |
| C10orf68 | GI_13375961-S | rs10827097 | 10 | 10 | 32993542 | 218180 | 8.4876 | 0.5509 | 0.1133  | 5.8161 | JPT |
| C10orf68 | GI_13375961-S | rs11009027 | 10 | 10 | 33000799 | 210923 | 8.7141 | 0.5615 | -0.1207 | 5.8161 | JPT |
| C10orf68 | GI_13375961-S | rs11009028 | 10 | 10 | 33003003 | 208719 | 8.4876 | 0.5509 | -0.1133 | 5.8161 | JPT |
| C10orf68 | GI_13375961-S | rs16915634 | 10 | 10 | 33008545 | 203177 | 8.4876 | 0.5509 | -0.1133 | 5.8161 | JPT |
| C10orf68 | GI_13375961-S | rs11009030 | 10 | 10 | 33011096 | 200626 | 7.3086 | 0.4916 | 0.1072  | 5.8161 | JPT |
| C10orf68 | GI_13375961-S | rs10827102 | 10 | 10 | 33011443 | 200279 | 7.1864 | 0.4850 | 0.0911  | 5.8161 | JPT |
| C10orf68 | GI_13375961-S | rs7394139  | 10 | 10 | 33012011 | 199711 | 8.4876 | 0.5509 | 0.1133  | 5.8161 | JPT |
| C10orf68 | GI_13375961-S | rs11009046 | 10 | 10 | 33038472 | 173250 | 8.3141 | 0.5511 | 0.1139  | 5.8161 | JPT |
| C10orf68 | GI_13375961-S | rs7915146  | 10 | 10 | 33041044 | 170678 | 8.4876 | 0.5509 | -0.1133 | 5.8161 | JPT |
| C10orf68 | GI_13375961-S | rs4749750  | 10 | 10 | 33041320 | 170402 | 8.3141 | 0.5511 | 0.1139  | 5.8161 | JPT |
| C10orf68 | GI_13375961-S | rs11009051 | 10 | 10 | 33043339 | 168383 | 6.8426 | 0.4825 | -0.1057 | 5.8161 | JPT |
| C10orf68 | GI_13375961-S | rs11009052 | 10 | 10 | 33046886 | 164836 | 8.4876 | 0.5509 | 0.1133  | 5.8161 | JPT |
| C10orf68 | GI_13375961-S | rs4747786  | 10 | 10 | 33052224 | 159498 | 8.3141 | 0.5511 | -0.1139 | 5.8161 | JPT |
| C10orf68 | GI_13375961-S | rs4145862  | 10 | 10 | 33056639 | 155083 | 8.4876 | 0.5509 | -0.1133 | 5.8161 | JPT |
| C10orf68 | GI_13375961-S | rs7091133  | 10 | 10 | 33069096 | 142626 | 8.3141 | 0.5511 | -0.1139 | 5.8161 | JPT |
| C10orf68 | GI_13375961-S | rs10827119 | 10 | 10 | 33075193 | 136529 | 8.3141 | 0.5511 | 0.1139  | 5.8161 | JPT |
| C10orf68 | GI_13375961-S | rs11009064 | 10 | 10 | 33081566 | 130156 | 8.4876 | 0.5509 | 0.1133  | 5.8161 | JPT |
| C10orf68 | GI_13375961-S | rs10827125 | 10 | 10 | 33091352 | 120370 | 7.1260 | 0.4983 | 0.1132  | 5.8161 | JPT |
| C10orf68 | GI_13375961-S | rs11009068 | 10 | 10 | 33093060 | 118662 | 8.4876 | 0.5509 | -0.1133 | 5.8161 | JPT |
| C10orf68 | GI_13375961-S | rs12359061 | 10 | 10 | 33094860 | 116862 | 6.9771 | 0.5168 | 0.1140  | 5.8161 | JPT |
| C10orf68 | GI_13375961-S | rs12359069 | 10 | 10 | 33094899 | 116823 | 6.8482 | 0.5093 | 0.1117  | 5.8161 | JPT |
| C10orf68 | GI_13375961-S | rs12359085 | 10 | 10 | 33095001 | 116721 | 7.4030 | 0.5222 | 0.1135  | 5.8161 | JPT |
| C10orf68 | GI_13375961-S | rs10827127 | 10 | 10 | 33111629 | 100093 | 8.3141 | 0.5511 | 0.1139  | 5.8161 | JPT |
| C10orf68 | GI_13375961-S | rs10827131 | 10 | 10 | 33125790 | 85932  | 7.8333 | 0.5273 | -0.1115 | 5.8161 | JPT |
| C10orf68 | GI_13375961-S | rs4615926  | 10 | 10 | 33125876 | 85846  | 7.8333 | 0.5273 | -0.1115 | 5.8161 | JPT |
| C10orf68 | GI_13375961-S | rs7901041  | 10 | 10 | 33133363 | 78359  | 7.8333 | 0.5273 | 0.1115  | 5.8161 | JPT |
| C10orf68 | GI_13375961-S | rs7901284  | 10 | 10 | 33133499 | 78223  | 7.8355 | 0.5274 | -0.1115 | 5.8161 | JPT |
| C10orf68 | GI_13375961-S | rs7087288  | 10 | 10 | 33144089 | 67633  | 7.8333 | 0.5273 | -0.1115 | 5.8161 | JPT |

|          |               |            |    |    |          |        |         |        |         |        |     |
|----------|---------------|------------|----|----|----------|--------|---------|--------|---------|--------|-----|
| C10orf68 | GI_13375961-S | rs10827142 | 10 | 10 | 33173059 | 38663  | 7.2556  | 0.4970 | 0.0942  | 5.8161 | JPT |
| C10orf68 | GI_13375961-S | rs12220061 | 10 | 10 | 33180273 | 31449  | 7.9939  | 0.5269 | -0.1108 | 5.8161 | JPT |
| C10orf68 | GI_13375961-S | rs7901143  | 10 | 10 | 33182025 | 29697  | 7.9939  | 0.5269 | -0.1108 | 5.8161 | JPT |
| C10orf68 | GI_13375961-S | rs7393329  | 10 | 10 | 33184975 | 26747  | 7.7537  | 0.5232 | -0.1082 | 5.8161 | JPT |
| C10orf68 | GI_13375961-S | rs12777235 | 10 | 10 | 33185392 | 26330  | 7.3170  | 0.5088 | 0.1144  | 5.8161 | JPT |
| C10orf68 | GI_13375961-S | rs10827145 | 10 | 10 | 33191623 | 20099  | 7.8333  | 0.5273 | -0.1115 | 5.8161 | JPT |
| C10orf68 | GI_13375961-S | rs10827146 | 10 | 10 | 33193337 | 18385  | 8.5987  | 0.5735 | 0.1156  | 5.8161 | JPT |
| C10orf68 | GI_13375961-S | rs881034   | 10 | 10 | 33194916 | 16806  | 7.8333  | 0.5273 | 0.1115  | 5.8161 | JPT |
| C10orf68 | GI_13375961-S | rs10827151 | 10 | 10 | 33210776 | 946    | 7.9939  | 0.5269 | 0.1108  | 5.8161 | JPT |
| C10orf68 | GI_13375961-S | rs11009122 | 10 | 10 | 33211257 | 465    | 8.3809  | 0.5543 | -0.1138 | 5.8161 | JPT |
| C10orf68 | GI_13375961-S | rs11009126 | 10 | 10 | 33215086 | 3364   | 5.8825  | 0.4251 | -0.0874 | 5.8161 | JPT |
| C10orf68 | GI_13375961-S | rs7086237  | 10 | 10 | 33216320 | 4598   | 6.1287  | 0.4324 | 0.0854  | 5.8161 | JPT |
| C10orf68 | GI_13375961-S | rs11009130 | 10 | 10 | 33223020 | 11298  | 7.9939  | 0.5269 | 0.1108  | 5.8161 | JPT |
| C10orf68 | GI_13375961-S | rs10827155 | 10 | 10 | 33223197 | 11475  | 6.2132  | 0.4299 | -0.0825 | 5.8161 | JPT |
| C10orf68 | GI_13375961-S | rs7914799  | 10 | 10 | 33224664 | 12942  | 6.7759  | 0.4704 | 0.0926  | 5.8161 | JPT |
| C10orf68 | GI_13375961-S | rs11009132 | 10 | 10 | 33227625 | 15903  | 6.2132  | 0.4299 | 0.0825  | 5.8161 | JPT |
| C10orf68 | GI_13375961-S | rs1539385  | 10 | 10 | 33233848 | 22126  | 7.8333  | 0.5273 | -0.1115 | 5.8161 | JPT |
| C10orf68 | GI_13375961-S | rs16933787 | 10 | 10 | 33248262 | 36540  | 8.1707  | 0.5529 | 0.1136  | 5.8161 | JPT |
| C10orf68 | GI_13375961-S | rs3780876  | 10 | 10 | 33248726 | 37004  | 7.6014  | 0.5239 | 0.1088  | 5.8161 | JPT |
| C10orf68 | GI_13375961-S | rs3780871  | 10 | 10 | 33253971 | 42249  | 7.8333  | 0.5273 | -0.1115 | 5.8161 | JPT |
| C10orf68 | GI_13375961-S | rs2298141  | 10 | 10 | 33254808 | 43086  | 7.2737  | 0.5151 | 0.1103  | 5.8161 | JPT |
| C10orf68 | GI_13375961-S | rs10827162 | 10 | 10 | 33255678 | 43956  | 7.9939  | 0.5269 | 0.1108  | 5.8161 | JPT |
| C10orf68 | GI_13375961-S | rs10763902 | 10 | 10 | 33258082 | 46360  | 6.3336  | 0.4370 | -0.0844 | 5.8161 | JPT |
| C10orf68 | GI_13375961-S | rs11009151 | 10 | 10 | 33259115 | 47393  | 8.0433  | 0.5378 | 0.1126  | 5.8161 | JPT |
| C10orf68 | GI_13375961-S | rs11009152 | 10 | 10 | 33259280 | 47558  | 7.9939  | 0.5269 | -0.1108 | 5.8161 | JPT |
| C10orf68 | GI_13375961-S | rs10827163 | 10 | 10 | 33266558 | 54836  | 6.8051  | 0.4803 | -0.1042 | 5.8161 | JPT |
| C10orf68 | GI_13375961-S | rs16933819 | 10 | 10 | 33267483 | 55761  | 7.9939  | 0.5269 | -0.1108 | 5.8161 | JPT |
| C10orf68 | GI_13375961-S | rs10827166 | 10 | 10 | 33296869 | 85147  | 6.6081  | 0.4690 | 0.1119  | 5.8161 | JPT |
| C10orf68 | GI_13375961-S | rs11009161 | 10 | 10 | 33303273 | 91551  | 7.0610  | 0.4782 | -0.1191 | 5.8161 | JPT |
| TFAM     | GI_4507400-I  | rs10826176 | 10 | 10 | 59811543 | 14230  | 12.4922 | 0.7145 | 0.6169  | 5.4563 | JPT |
| TFAM     | GI_4507400-I  | rs11006127 | 10 | 10 | 59813027 | 12746  | 7.2917  | 0.4907 | -0.4959 | 5.4563 | JPT |
| TFAM     | GI_4507400-I  | rs16912188 | 10 | 10 | 59818757 | 7016   | 12.9623 | 0.7203 | -0.6197 | 5.4563 | JPT |
| TFAM     | GI_4507400-I  | rs16912196 | 10 | 10 | 59821152 | 4621   | 12.9623 | 0.7203 | -0.6197 | 5.4563 | JPT |
| TFAM     | GI_4507400-I  | rs16912197 | 10 | 10 | 59821248 | 4525   | 12.9623 | 0.7203 | -0.6197 | 5.4563 | JPT |
| TFAM     | GI_4507400-I  | rs16912201 | 10 | 10 | 59826692 | 919    | 12.9623 | 0.7203 | -0.6197 | 5.4563 | JPT |
| TFAM     | GI_4507400-I  | rs16912202 | 10 | 10 | 59828076 | 2303   | 12.9623 | 0.7203 | 0.6197  | 5.4563 | JPT |
| TFAM     | GI_4507400-I  | rs12259591 | 10 | 10 | 59828391 | 2618   | 5.7145  | 0.4223 | 0.4155  | 5.4563 | JPT |
| TFAM     | GI_4507400-I  | rs11006137 | 10 | 10 | 59834566 | 8793   | 5.5956  | 0.3920 | 0.3968  | 5.4563 | JPT |
| TFAM     | GI_4507400-I  | rs6481387  | 10 | 10 | 59837888 | 12115  | 5.5956  | 0.3920 | -0.3968 | 5.4563 | JPT |
| TFAM     | GI_4507400-I  | rs7905675  | 10 | 10 | 59838009 | 12236  | 5.5956  | 0.3920 | 0.3968  | 5.4563 | JPT |
| TNFRSF6  | GI_23510430-A | rs9658769  | 10 | 10 | 90763343 | 1837   | 5.7762  | 0.4033 | -0.2906 | 5.5486 | JPT |
| TNFRSF6  | GI_23510430-A | rs1468063  | 10 | 10 | 90765271 | 91     | 5.7762  | 0.4033 | -0.2906 | 5.5486 | JPT |
| TNFRSF6  | GI_23510430-A | rs7915235  | 10 | 10 | 90769077 | 3897   | 5.7876  | 0.4114 | -0.2899 | 5.5486 | JPT |
| TNFRSF6  | GI_23510430-A | rs10887878 | 10 | 10 | 90769207 | 4027   | 5.7532  | 0.4169 | -0.3024 | 5.5486 | JPT |
| MPHOSPH1 | GI_7705347-S  | rs727427   | 10 | 10 | 91390364 | 134203 | 6.3832  | 0.4477 | -0.2341 | 6.0155 | JPT |
| MPHOSPH1 | GI_7705347-S  | rs716781   | 10 | 10 | 91399801 | 124766 | 6.1661  | 0.4347 | 0.2293  | 6.0155 | JPT |
| MPHOSPH1 | GI_7705347-S  | rs7076259  | 10 | 10 | 91402582 | 121985 | 6.1661  | 0.4347 | -0.2293 | 6.0155 | JPT |
| MPHOSPH1 | GI_7705347-S  | rs10785894 | 10 | 10 | 91407618 | 116949 | 6.1957  | 0.4288 | -0.2269 | 6.0155 | JPT |
| MPHOSPH1 | GI_7705347-S  | rs10785895 | 10 | 10 | 91408240 | 116327 | 6.3662  | 0.4467 | -0.2438 | 6.0155 | JPT |
| MPHOSPH1 | GI_7705347-S  | rs7088570  | 10 | 10 | 91408454 | 116113 | 6.1661  | 0.4347 | 0.2293  | 6.0155 | JPT |
| MPHOSPH1 | GI_7705347-S  | rs10881615 | 10 | 10 | 91409411 | 115156 | 6.1957  | 0.4288 | -0.2269 | 6.0155 | JPT |
| MPHOSPH1 | GI_7705347-S  | rs11185831 | 10 | 10 | 91409604 | 114963 | 6.1957  | 0.4288 | 0.2269  | 6.0155 | JPT |
| MPHOSPH1 | GI_7705347-S  | rs12218194 | 10 | 10 | 91409976 | 114591 | 6.1957  | 0.4288 | 0.2269  | 6.0155 | JPT |
| MPHOSPH1 | GI_7705347-S  | rs11185833 | 10 | 10 | 91411059 | 113508 | 6.1957  | 0.4288 | 0.2269  | 6.0155 | JPT |
| MPHOSPH1 | GI_7705347-S  | rs10785896 | 10 | 10 | 91413361 | 111206 | 6.1661  | 0.4347 | -0.2293 | 6.0155 | JPT |
| MPHOSPH1 | GI_7705347-S  | rs7087240  | 10 | 10 | 91413572 | 110995 | 6.1661  | 0.4347 | 0.2293  | 6.0155 | JPT |
| MPHOSPH1 | GI_7705347-S  | rs7100603  | 10 | 10 | 91415745 | 108822 | 6.1957  | 0.4288 | -0.2269 | 6.0155 | JPT |
| MPHOSPH1 | GI_7705347-S  | rs7097496  | 10 | 10 | 91416048 | 108519 | 6.1957  | 0.4288 | 0.2269  | 6.0155 | JPT |
| MPHOSPH1 | GI_7705347-S  | rs10881619 | 10 | 10 | 91417527 | 107040 | 6.0438  | 0.4351 | -0.2295 | 6.0155 | JPT |

|          |               |            |    |    |           |        |         |        |         |        |     |
|----------|---------------|------------|----|----|-----------|--------|---------|--------|---------|--------|-----|
| MPHOSPH1 | GI_7705347-S  | rs1409358  | 10 | 10 | 91417813  | 106754 | 6.1957  | 0.4288 | 0.2269  | 6.0155 | JPT |
| MPHOSPH1 | GI_7705347-S  | rs3908479  | 10 | 10 | 91420161  | 104406 | 6.1957  | 0.4288 | -0.2269 | 6.0155 | JPT |
| MPHOSPH1 | GI_7705347-S  | rs7077349  | 10 | 10 | 91455780  | 68787  | 6.0438  | 0.4351 | -0.2295 | 6.0155 | JPT |
| MPHOSPH1 | GI_7705347-S  | rs10881631 | 10 | 10 | 91459556  | 65011  | 6.1957  | 0.4288 | -0.2269 | 6.0155 | JPT |
| MPHOSPH1 | GI_7705347-S  | rs6586218  | 10 | 10 | 91460481  | 64086  | 6.1661  | 0.4347 | -0.2293 | 6.0155 | JPT |
| MPHOSPH1 | GI_7705347-S  | rs7089473  | 10 | 10 | 91460640  | 63927  | 6.1661  | 0.4347 | -0.2293 | 6.0155 | JPT |
| MPHOSPH1 | GI_7705347-S  | rs7085805  | 10 | 10 | 91470216  | 54351  | 6.1661  | 0.4347 | -0.2293 | 6.0155 | JPT |
| MPHOSPH1 | GI_7705347-S  | rs10430645 | 10 | 10 | 91470906  | 53661  | 6.1957  | 0.4288 | 0.2269  | 6.0155 | JPT |
| MPHOSPH1 | GI_7705347-S  | rs10430646 | 10 | 10 | 91470999  | 53568  | 6.1661  | 0.4347 | 0.2293  | 6.0155 | JPT |
| MPHOSPH1 | GI_7705347-S  | rs7096466  | 10 | 10 | 91472900  | 51667  | 6.1957  | 0.4288 | -0.2269 | 6.0155 | JPT |
| MPHOSPH1 | GI_7705347-S  | rs8181361  | 10 | 10 | 91474760  | 49807  | 6.1957  | 0.4288 | -0.2269 | 6.0155 | JPT |
| MPHOSPH1 | GI_7705347-S  | rs9663129  | 10 | 10 | 91477264  | 47303  | 6.1093  | 0.4313 | 0.2183  | 6.0155 | JPT |
| MPHOSPH1 | GI_7705347-S  | rs11185861 | 10 | 10 | 91483670  | 40897  | 6.1661  | 0.4347 | -0.2293 | 6.0155 | JPT |
| MPHOSPH1 | GI_7705347-S  | rs10509579 | 10 | 10 | 91485752  | 38815  | 6.1661  | 0.4347 | -0.2293 | 6.0155 | JPT |
| MPHOSPH1 | GI_7705347-S  | rs7895379  | 10 | 10 | 91486687  | 37880  | 6.1661  | 0.4347 | -0.2293 | 6.0155 | JPT |
| MPHOSPH1 | GI_7705347-S  | rs1062465  | 10 | 10 | 91487611  | 36956  | 6.1661  | 0.4347 | -0.2293 | 6.0155 | JPT |
| MPHOSPH1 | GI_7705347-S  | rs7898670  | 10 | 10 | 91500069  | 24498  | 6.1661  | 0.4347 | -0.2293 | 6.0155 | JPT |
| MPHOSPH1 | GI_7705347-S  | rs2077946  | 10 | 10 | 91501439  | 23128  | 6.1661  | 0.4347 | 0.2293  | 6.0155 | JPT |
| MPHOSPH1 | GI_7705347-S  | rs7092444  | 10 | 10 | 91502717  | 21850  | 6.1661  | 0.4347 | 0.2293  | 6.0155 | JPT |
| MPHOSPH1 | GI_7705347-S  | rs2026550  | 10 | 10 | 91508219  | 16348  | 6.1661  | 0.4347 | 0.2293  | 6.0155 | JPT |
| MPHOSPH1 | GI_7705347-S  | rs3740037  | 10 | 10 | 91512290  | 12277  | 6.1661  | 0.4347 | -0.2293 | 6.0155 | JPT |
| MPHOSPH1 | GI_7705347-S  | rs10881664 | 10 | 10 | 91516512  | 8055   | 6.4510  | 0.4950 | 0.2472  | 6.0155 | JPT |
| MPHOSPH1 | GI_7705347-S  | rs962524   | 10 | 10 | 91518838  | 5729   | 6.1957  | 0.4288 | -0.2269 | 6.0155 | JPT |
| MPHOSPH1 | GI_7705347-S  | rs7095818  | 10 | 10 | 91519465  | 5102   | 6.1957  | 0.4288 | -0.2269 | 6.0155 | JPT |
| MPHOSPH1 | GI_7705347-S  | rs7081362  | 10 | 10 | 91521695  | 2872   | 6.1661  | 0.4347 | 0.2293  | 6.0155 | JPT |
| MPHOSPH1 | GI_7705347-S  | rs10881666 | 10 | 10 | 91522218  | 2349   | 6.1957  | 0.4288 | -0.2269 | 6.0155 | JPT |
| MPHOSPH1 | GI_7705347-S  | rs1555868  | 10 | 10 | 91523004  | 1563   | 6.1661  | 0.4347 | 0.2293  | 6.0155 | JPT |
| MPHOSPH1 | GI_7705347-S  | rs10881667 | 10 | 10 | 91524778  | 211    | 6.1957  | 0.4288 | -0.2269 | 6.0155 | JPT |
| MPHOSPH1 | GI_7705347-S  | rs10881668 | 10 | 10 | 91529447  | 4880   | 6.1957  | 0.4288 | 0.2269  | 6.0155 | JPT |
| MPHOSPH1 | GI_7705347-S  | rs10881669 | 10 | 10 | 91529987  | 5420   | 6.1957  | 0.4288 | -0.2269 | 6.0155 | JPT |
| MPHOSPH1 | GI_7705347-S  | rs10881670 | 10 | 10 | 91534724  | 10157  | 6.1661  | 0.4347 | 0.2293  | 6.0155 | JPT |
| MPHOSPH1 | GI_7705347-S  | rs2419057  | 10 | 10 | 91540999  | 16432  | 6.1661  | 0.4347 | 0.2293  | 6.0155 | JPT |
| MPHOSPH1 | GI_7705347-S  | rs10881674 | 10 | 10 | 91542910  | 18343  | 6.1957  | 0.4288 | 0.2269  | 6.0155 | JPT |
| MPHOSPH1 | GI_7705347-S  | rs4934502  | 10 | 10 | 91547203  | 22636  | 6.1957  | 0.4288 | -0.2269 | 6.0155 | JPT |
| MPHOSPH1 | GI_7705347-S  | rs1409318  | 10 | 10 | 91550416  | 25849  | 6.1661  | 0.4347 | -0.2293 | 6.0155 | JPT |
| MPHOSPH1 | GI_7705347-S  | rs1324699  | 10 | 10 | 91556037  | 31470  | 6.1661  | 0.4347 | -0.2293 | 6.0155 | JPT |
| MPHOSPH1 | GI_7705347-S  | rs1324700  | 10 | 10 | 91556182  | 31615  | 6.1957  | 0.4288 | -0.2269 | 6.0155 | JPT |
| MPHOSPH1 | GI_7705347-S  | rs913033   | 10 | 10 | 91559667  | 35100  | 6.5614  | 0.4502 | -0.2258 | 6.0155 | JPT |
| ENTPD1   | GI_45580699-S | rs7067762  | 10 | 10 | 97596833  | 19364  | 5.8760  | 0.4326 | -0.3661 | 5.6849 | JPT |
| ENTPD1   | GI_45580699-S | rs2275759  | 10 | 10 | 97614699  | 1498   | 5.7779  | 0.4108 | 0.3538  | 5.6849 | JPT |
| BLNK     | GI_40353774-S | rs1172945  | 10 | 10 | 97858110  | 92675  | 6.4653  | 0.4606 | 0.2846  | 5.9991 | JPT |
| MGC10120 | GI_28603839-S | rs17722574 | 10 | 10 | 101814651 | 209846 | 7.1367  | 0.4824 | -0.6562 | 6.2974 | JPT |
| MGC10120 | GI_28603839-S | rs7921462  | 10 | 10 | 101833130 | 191367 | 9.7864  | 0.6171 | 0.7008  | 6.2974 | JPT |
| MGC10120 | GI_28603839-S | rs1408580  | 10 | 10 | 101850621 | 173876 | 9.7864  | 0.6171 | 0.7008  | 6.2974 | JPT |
| MGC10120 | GI_28603839-S | rs7086648  | 10 | 10 | 101886696 | 137801 | 10.0759 | 0.6202 | 0.7019  | 6.2974 | JPT |
| MGC10120 | GI_28603839-S | rs12769818 | 10 | 10 | 101905619 | 118878 | 11.7808 | 0.6829 | -0.7755 | 6.2974 | JPT |
| MGC10120 | GI_28603839-S | rs12764732 | 10 | 10 | 101948760 | 75737  | 11.7808 | 0.6829 | -0.7755 | 6.2974 | JPT |
| MGC10120 | GI_28603839-S | rs12764727 | 10 | 10 | 101948787 | 75710  | 11.7808 | 0.6829 | -0.7755 | 6.2974 | JPT |
| MGC10120 | GI_28603839-S | rs17729417 | 10 | 10 | 101950132 | 74365  | 11.7808 | 0.6829 | 0.7755  | 6.2974 | JPT |
| MGC10120 | GI_28603839-S | rs12762869 | 10 | 10 | 101983702 | 40795  | 11.4576 | 0.6806 | 0.7741  | 6.2974 | JPT |
| MGC10120 | GI_28603839-S | rs7092983  | 10 | 10 | 101984471 | 40026  | 11.7808 | 0.6829 | 0.7755  | 6.2974 | JPT |
| MGC10120 | GI_28603839-S | rs12771909 | 10 | 10 | 101985275 | 39222  | 11.4576 | 0.6806 | 0.7741  | 6.2974 | JPT |
| MGC10120 | GI_28603839-S | rs17668159 | 10 | 10 | 101988820 | 35677  | 11.6012 | 0.6855 | 0.7662  | 6.2974 | JPT |
| MGC10120 | GI_28603839-S | rs7923115  | 10 | 10 | 101990210 | 34287  | 11.7808 | 0.6829 | 0.7755  | 6.2974 | JPT |
| MGC10120 | GI_28603839-S | rs12763385 | 10 | 10 | 101991221 | 33276  | 11.7808 | 0.6829 | 0.7755  | 6.2974 | JPT |
| MGC10120 | GI_28603839-S | rs7073610  | 10 | 10 | 101996615 | 27882  | 11.7808 | 0.6829 | 0.7755  | 6.2974 | JPT |
| MGC10120 | GI_28603839-S | rs17112791 | 10 | 10 | 101999700 | 24797  | 11.7808 | 0.6829 | 0.7755  | 6.2974 | JPT |
| MGC10120 | GI_28603839-S | rs7072367  | 10 | 10 | 101999970 | 24527  | 11.4576 | 0.6806 | 0.7741  | 6.2974 | JPT |
| MGC10120 | GI_28603839-S | rs7897454  | 10 | 10 | 102001692 | 22805  | 11.4576 | 0.6806 | 0.7741  | 6.2974 | JPT |

|          |               |            |    |    |           |       |         |        |         |        |     |
|----------|---------------|------------|----|----|-----------|-------|---------|--------|---------|--------|-----|
| MGC10120 | GI_28603839-S | rs17730369 | 10 | 10 | 102006580 | 17917 | 10.8501 | 0.6588 | -0.7492 | 6.2974 | JPT |
| MGC10120 | GI_28603839-S | rs7896703  | 10 | 10 | 102008621 | 15876 | 10.8501 | 0.6588 | -0.7492 | 6.2974 | JPT |
| MGC10120 | GI_28603839-S | rs12782963 | 10 | 10 | 102038198 | 13701 | 9.7090  | 0.6320 | -0.7682 | 6.2974 | JPT |
| MGC10120 | GI_28603839-S | rs2305386  | 10 | 10 | 102038259 | 13762 | 11.4576 | 0.6806 | -0.7741 | 6.2974 | JPT |
| MGC10120 | GI_28603839-S | rs6584356  | 10 | 10 | 102040232 | 15735 | 11.4576 | 0.6806 | 0.7741  | 6.2974 | JPT |
| MGC10120 | GI_28603839-S | rs11190456 | 10 | 10 | 102041753 | 17256 | 8.6271  | 0.5574 | 0.6668  | 6.2974 | JPT |
| MGC10120 | GI_28603839-S | rs12241379 | 10 | 10 | 102042363 | 17866 | 8.6271  | 0.5574 | 0.6668  | 6.2974 | JPT |
| MGC10120 | GI_28603839-S | rs12767633 | 10 | 10 | 102046430 | 21933 | 7.9666  | 0.5256 | -0.6346 | 6.2974 | JPT |
| MGC10120 | GI_28603839-S | rs2278842  | 10 | 10 | 102046735 | 22238 | 7.7254  | 0.5217 | 0.6333  | 6.2974 | JPT |
| MGC10120 | GI_28603839-S | rs12781019 | 10 | 10 | 102047558 | 23061 | 7.7254  | 0.5217 | 0.6333  | 6.2974 | JPT |
| MGC10120 | GI_28603839-S | rs2242050  | 10 | 10 | 102049319 | 24822 | 7.7254  | 0.5217 | -0.6333 | 6.2974 | JPT |
| MGC10120 | GI_28603839-S | rs11190466 | 10 | 10 | 102051898 | 27401 | 7.3154  | 0.5002 | -0.6038 | 6.2974 | JPT |
| MGC10120 | GI_28603839-S | rs17669480 | 10 | 10 | 102056055 | 31558 | 7.9666  | 0.5256 | 0.6346  | 6.2974 | JPT |
| MGC10120 | GI_28603839-S | rs17112901 | 10 | 10 | 102056175 | 31678 | 7.9666  | 0.5256 | -0.6346 | 6.2974 | JPT |
| MGC10120 | GI_28603839-S | rs11190470 | 10 | 10 | 102059064 | 34567 | 7.9666  | 0.5256 | -0.6346 | 6.2974 | JPT |
| MRPL43   | GI_28872735-A | rs7899336  | 10 | 10 | 102637676 | 98933 | 10.2855 | 0.6285 | -0.4297 | 6.0152 | JPT |
| MRPL43   | GI_28872735-A | rs7899638  | 10 | 10 | 102637862 | 98747 | 8.7554  | 0.5900 | -0.4022 | 6.0152 | JPT |
| MRPL43   | GI_28872735-A | rs1408342  | 10 | 10 | 102638742 | 97867 | 14.8843 | 0.7720 | -0.5096 | 6.0152 | JPT |
| MRPL43   | GI_28872735-A | rs1408343  | 10 | 10 | 102638755 | 97854 | 14.8843 | 0.7720 | 0.5096  | 6.0152 | JPT |
| MRPL43   | GI_28872735-A | rs10786612 | 10 | 10 | 102643755 | 92854 | 10.4594 | 0.6440 | 0.5001  | 6.0152 | JPT |
| MRPL43   | GI_28872735-A | rs7903939  | 10 | 10 | 102648014 | 88595 | 9.8306  | 0.6189 | 0.4283  | 6.0152 | JPT |
| MRPL43   | GI_28872735-A | rs4917916  | 10 | 10 | 102663282 | 73327 | 14.8843 | 0.7720 | -0.5096 | 6.0152 | JPT |
| MRPL43   | GI_28872735-A | rs7078599  | 10 | 10 | 102671852 | 64757 | 10.2855 | 0.6285 | -0.4297 | 6.0152 | JPT |
| MRPL43   | GI_28872735-A | rs12241232 | 10 | 10 | 102682594 | 54015 | 14.4456 | 0.7692 | -0.5156 | 6.0152 | JPT |
| MRPL43   | GI_28872735-A | rs7911957  | 10 | 10 | 102682960 | 53649 | 14.4456 | 0.7692 | 0.5156  | 6.0152 | JPT |
| MRPL43   | GI_28872735-A | rs10883565 | 10 | 10 | 102693424 | 43185 | 9.4086  | 0.6101 | -0.4815 | 6.0152 | JPT |
| MRPL43   | GI_28872735-A | rs1056295  | 10 | 10 | 102705173 | 31436 | 12.2501 | 0.7069 | -0.4664 | 6.0152 | JPT |
| MRPL43   | GI_28872735-A | rs927302   | 10 | 10 | 102712906 | 23703 | 15.1202 | 0.7855 | 0.4788  | 6.0152 | JPT |
| MRPL43   | GI_28872735-A | rs2295718  | 10 | 10 | 102715643 | 20966 | 12.5460 | 0.7162 | 0.4481  | 6.0152 | JPT |
| MRPL43   | GI_28872735-A | rs4919510  | 10 | 10 | 102724768 | 11841 | 15.5838 | 0.7884 | 0.4739  | 6.0152 | JPT |
| MRPL43   | GI_28872735-A | rs735137   | 10 | 10 | 102725825 | 10784 | 15.1202 | 0.7855 | -0.4788 | 6.0152 | JPT |
| MRPL43   | GI_28872735-A | rs12571302 | 10 | 10 | 102732753 | 3856  | 14.8225 | 0.7865 | -0.4568 | 6.0152 | JPT |
| MRPL43   | GI_28872735-A | rs2295716  | 10 | 10 | 102734204 | 2405  | 11.3283 | 0.7223 | 0.4734  | 6.0152 | JPT |
| MRPL43   | GI_28872735-A | rs722435   | 10 | 10 | 102735052 | 1557  | 13.1203 | 0.7506 | 0.4303  | 6.0152 | JPT |
| MRPL43   | GI_28872735-A | rs1535349  | 10 | 10 | 102735650 | 959   | 13.0272 | 0.7222 | -0.4467 | 6.0152 | JPT |
| MRPL43   | GI_28872735-A | rs2863095  | 10 | 10 | 102736493 | 116   | 15.1202 | 0.7855 | 0.4788  | 6.0152 | JPT |
| MRPL43   | GI_28872735-A | rs3740484  | 10 | 10 | 102737353 | 744   | 15.1202 | 0.7855 | 0.4788  | 6.0152 | JPT |
| MRPL43   | GI_28872735-A | rs3740487  | 10 | 10 | 102740773 | 4164  | 12.8115 | 0.7243 | -0.4502 | 6.0152 | JPT |
| MRPL43   | GI_28872735-A | rs3824783  | 10 | 10 | 102740841 | 4232  | 13.2782 | 0.7295 | -0.4473 | 6.0152 | JPT |
| MRPL43   | GI_28872735-A | rs3740488  | 10 | 10 | 102744023 | 7414  | 12.8115 | 0.7243 | 0.4502  | 6.0152 | JPT |
| MRPL43   | GI_28872735-A | rs3740490  | 10 | 10 | 102746733 | 10124 | 12.8115 | 0.7243 | -0.4502 | 6.0152 | JPT |
| MRPL43   | GI_28872735-A | rs750866   | 10 | 10 | 102751448 | 14839 | 12.8115 | 0.7243 | 0.4502  | 6.0152 | JPT |
| MRPL43   | GI_28872735-A | rs701835   | 10 | 10 | 102752117 | 15508 | 12.8115 | 0.7243 | -0.4502 | 6.0152 | JPT |
| MRPL43   | GI_28872735-A | rs807029   | 10 | 10 | 102754037 | 17428 | 10.1139 | 0.6304 | -0.4375 | 6.0152 | JPT |
| MRPL43   | GI_28872735-A | rs807028   | 10 | 10 | 102754501 | 17892 | 10.6882 | 0.6440 | 0.4007  | 6.0152 | JPT |
| MRPL43   | GI_28872735-A | rs701836   | 10 | 10 | 102757107 | 20498 | 11.5537 | 0.6839 | -0.4379 | 6.0152 | JPT |
| MRPL43   | GI_28872735-A | rs807023   | 10 | 10 | 102760072 | 23463 | 6.1705  | 0.4350 | 0.3489  | 6.0152 | JPT |
| MRPL43   | GI_28872735-A | rs807019   | 10 | 10 | 102762830 | 26221 | 6.7274  | 0.4676 | 0.3322  | 6.0152 | JPT |
| MRPL43   | GI_28872735-A | rs807018   | 10 | 10 | 102763001 | 26392 | 7.0543  | 0.4779 | -0.3351 | 6.0152 | JPT |
| SFXN2    | GI_34222270-S | rs2902548  | 10 | 10 | 104477372 | 11419 | 10.2609 | 0.6452 | -0.4959 | 5.3887 | JPT |
| SFXN2    | GI_34222270-S | rs2244258  | 10 | 10 | 104478890 | 9901  | 5.7127  | 0.3994 | 0.4960  | 5.3887 | JPT |
| SFXN2    | GI_34222270-S | rs2265308  | 10 | 10 | 104481104 | 7687  | 5.7127  | 0.3994 | -0.4960 | 5.3887 | JPT |
| SFXN2    | GI_34222270-S | rs3802676  | 10 | 10 | 104481692 | 7099  | 5.6562  | 0.4031 | 0.5025  | 5.3887 | JPT |
| SFXN2    | GI_34222270-S | rs2778037  | 10 | 10 | 104482697 | 6094  | 5.6562  | 0.4031 | 0.5025  | 5.3887 | JPT |
| SFXN2    | GI_34222270-S | rs10883769 | 10 | 10 | 104484937 | 3854  | 5.6562  | 0.4031 | 0.5025  | 5.3887 | JPT |
| SFXN2    | GI_34222270-S | rs7092723  | 10 | 10 | 104489754 | 963   | 5.6562  | 0.4031 | 0.5025  | 5.3887 | JPT |
| SFXN2    | GI_34222270-S | rs10786706 | 10 | 10 | 104490649 | 1858  | 6.4652  | 0.4525 | -0.4366 | 5.3887 | JPT |
| SFXN2    | GI_34222270-S | rs2297451  | 10 | 10 | 104493449 | 4658  | 5.4457  | 0.3896 | -0.4884 | 5.3887 | JPT |
| SFXN2    | GI_34222270-S | rs3818708  | 10 | 10 | 104493574 | 4783  | 6.4652  | 0.4525 | -0.4366 | 5.3887 | JPT |

|          |               |            |    |    |           |        |         |        |         |        |     |
|----------|---------------|------------|----|----|-----------|--------|---------|--------|---------|--------|-----|
| SFXN2    | GI_34222270-S | rs7074894  | 10 | 10 | 104494524 | 5733   | 5.7127  | 0.3994 | -0.4960 | 5.3887 | JPT |
| SFXN2    | GI_34222270-S | rs11191383 | 10 | 10 | 104495874 | 7083   | 5.7127  | 0.3994 | -0.4960 | 5.3887 | JPT |
| SFXN2    | GI_34222270-S | rs11191384 | 10 | 10 | 104496101 | 7310   | 5.7127  | 0.3994 | 0.4960  | 5.3887 | JPT |
| SFXN2    | GI_34222270-S | rs7923711  | 10 | 10 | 104496533 | 7742   | 5.3964  | 0.3938 | -0.4810 | 5.3887 | JPT |
| SFXN2    | GI_34222270-S | rs12763284 | 10 | 10 | 104498192 | 9401   | 5.5758  | 0.4213 | -0.4426 | 5.3887 | JPT |
| SFXN2    | GI_34222270-S | rs7342026  | 10 | 10 | 104498896 | 10105  | 5.7127  | 0.3994 | 0.4960  | 5.3887 | JPT |
| SFXN2    | GI_34222270-S | rs10883772 | 10 | 10 | 104500230 | 11439  | 5.6433  | 0.4023 | 0.5020  | 5.3887 | JPT |
| SFXN2    | GI_34222270-S | rs7476300  | 10 | 10 | 104500295 | 11504  | 5.7561  | 0.4171 | -0.5162 | 5.3887 | JPT |
| SFXN2    | GI_34222270-S | rs7090307  | 10 | 10 | 104507109 | 18318  | 5.6562  | 0.4031 | -0.5025 | 5.3887 | JPT |
| SFXN2    | GI_34222270-S | rs2902549  | 10 | 10 | 104509459 | 20668  | 5.6562  | 0.4031 | -0.5025 | 5.3887 | JPT |
| SFXN2    | GI_34222270-S | rs7092340  | 10 | 10 | 104519658 | 30867  | 5.6562  | 0.4031 | 0.5025  | 5.3887 | JPT |
| SFXN2    | GI_34222270-S | rs12266856 | 10 | 10 | 104521040 | 32249  | 5.6562  | 0.4031 | -0.5025 | 5.3887 | JPT |
| USMG5    | GI_14249375-S | rs7913461  | 10 | 10 | 104991315 | 152720 | 6.2851  | 0.4418 | 0.9587  | 5.5872 | JPT |
| USMG5    | GI_14249375-S | rs1163075  | 10 | 10 | 105011253 | 132782 | 6.0088  | 0.4251 | 1.0338  | 5.5872 | JPT |
| USMG5    | GI_14249375-S | rs1163073  | 10 | 10 | 105012924 | 131111 | 9.6181  | 0.6101 | 1.0489  | 5.5872 | JPT |
| USMG5    | GI_14249375-S | rs1163081  | 10 | 10 | 105019830 | 124205 | 6.0088  | 0.4251 | -1.0338 | 5.5872 | JPT |
| USMG5    | GI_14249375-S | rs1712517  | 10 | 10 | 105023005 | 121030 | 6.0088  | 0.4251 | -1.0338 | 5.5872 | JPT |
| USMG5    | GI_14249375-S | rs1163087  | 10 | 10 | 105033279 | 110756 | 6.0088  | 0.4251 | -1.0338 | 5.5872 | JPT |
| USMG5    | GI_14249375-S | rs4918003  | 10 | 10 | 105034147 | 109888 | 6.2513  | 0.4398 | 1.1049  | 5.5872 | JPT |
| USMG5    | GI_14249375-S | rs3740381  | 10 | 10 | 105036679 | 107356 | 20.7757 | 0.8783 | -1.2474 | 5.5872 | JPT |
| USMG5    | GI_14249375-S | rs1063461  | 10 | 10 | 105039095 | 104940 | 8.9890  | 0.5826 | 1.1471  | 5.5872 | JPT |
| USMG5    | GI_14249375-S | rs4293062  | 10 | 10 | 105042614 | 101421 | 8.9890  | 0.5826 | -1.1471 | 5.5872 | JPT |
| USMG5    | GI_14249375-S | rs6584547  | 10 | 10 | 105055399 | 88636  | 8.9890  | 0.5826 | 1.1471  | 5.5872 | JPT |
| USMG5    | GI_14249375-S | rs12220267 | 10 | 10 | 105065702 | 78333  | 19.8460 | 0.8657 | 1.2880  | 5.5872 | JPT |
| USMG5    | GI_14249375-S | rs11191654 | 10 | 10 | 105067114 | 76921  | 8.9890  | 0.5826 | -1.1471 | 5.5872 | JPT |
| USMG5    | GI_14249375-S | rs7093667  | 10 | 10 | 105070565 | 73470  | 6.2922  | 0.4423 | -1.0534 | 5.5872 | JPT |
| USMG5    | GI_14249375-S | rs10883855 | 10 | 10 | 105082437 | 61598  | 6.2922  | 0.4423 | -1.0534 | 5.5872 | JPT |
| USMG5    | GI_14249375-S | rs4918007  | 10 | 10 | 105097460 | 46575  | 8.9890  | 0.5826 | 1.1471  | 5.5872 | JPT |
| USMG5    | GI_14249375-S | rs7074749  | 10 | 10 | 105106046 | 37989  | 8.9890  | 0.5826 | 1.1471  | 5.5872 | JPT |
| USMG5    | GI_14249375-S | rs11191666 | 10 | 10 | 105117268 | 26767  | 8.9890  | 0.5826 | 1.1471  | 5.5872 | JPT |
| USMG5    | GI_14249375-S | rs10883857 | 10 | 10 | 105117577 | 26458  | 8.9890  | 0.5826 | 1.1471  | 5.5872 | JPT |
| USMG5    | GI_14249375-S | rs7905968  | 10 | 10 | 105125309 | 18726  | 8.9890  | 0.5826 | 1.1471  | 5.5872 | JPT |
| USMG5    | GI_14249375-S | rs11191672 | 10 | 10 | 105128951 | 15084  | 7.8626  | 0.5287 | 1.1225  | 5.5872 | JPT |
| USMG5    | GI_14249375-S | rs7911488  | 10 | 10 | 105144079 | 44     | 20.3199 | 0.8846 | 1.3180  | 5.5872 | JPT |
| USMG5    | GI_14249375-S | rs11191676 | 10 | 10 | 105145056 | 1021   | 8.9711  | 0.5732 | -1.1531 | 5.5872 | JPT |
| USMG5    | GI_14249375-S | rs2292807  | 10 | 10 | 105145635 | 1600   | 8.9890  | 0.5826 | 1.1471  | 5.5872 | JPT |
| USMG5    | GI_14249375-S | rs10883863 | 10 | 10 | 105151869 | 7834   | 8.9890  | 0.5826 | 1.1471  | 5.5872 | JPT |
| USMG5    | GI_14249375-S | rs12414609 | 10 | 10 | 105152131 | 8096   | 7.1040  | 0.4887 | 1.0179  | 5.5872 | JPT |
| USMG5    | GI_14249375-S | rs7894407  | 10 | 10 | 105166169 | 22134  | 5.7070  | 0.4063 | 1.0371  | 5.5872 | JPT |
| USMG5    | GI_14249375-S | rs7089271  | 10 | 10 | 105166904 | 22869  | 6.6626  | 0.5380 | 1.1298  | 5.5872 | JPT |
| USMG5    | GI_14249375-S | rs3740382  | 10 | 10 | 105169204 | 25169  | 16.4967 | 0.8154 | -1.2015 | 5.5872 | JPT |
| USMG5    | GI_14249375-S | rs11191686 | 10 | 10 | 105177736 | 33701  | 17.7532 | 0.8391 | -1.1950 | 5.5872 | JPT |
| USMG5    | GI_14249375-S | rs11191688 | 10 | 10 | 105182560 | 38525  | 14.4093 | 0.7683 | 1.1553  | 5.5872 | JPT |
| USMG5    | GI_14249375-S | rs2986014  | 10 | 10 | 105184076 | 40041  | 9.2174  | 0.5928 | 1.0888  | 5.5872 | JPT |
| USMG5    | GI_14249375-S | rs10883868 | 10 | 10 | 105186804 | 42769  | 17.1740 | 0.8286 | -1.2363 | 5.5872 | JPT |
| USMG5    | GI_14249375-S | rs2281861  | 10 | 10 | 105191555 | 47520  | 11.8708 | 0.7308 | 1.2289  | 5.5872 | JPT |
| USMG5    | GI_14249375-S | rs7831     | 10 | 10 | 105195292 | 51257  | 20.1499 | 0.8762 | 1.2813  | 5.5872 | JPT |
| USMG5    | GI_14249375-S | rs6580     | 10 | 10 | 105196864 | 52829  | 16.4967 | 0.8154 | -1.2015 | 5.5872 | JPT |
| C10orf88 | GI_13376420-S | rs2153669  | 10 | 10 | 124599273 | 81862  | 5.8536  | 0.4155 | 0.2667  | 5.7907 | JPT |
| C10orf88 | GI_13376420-S | rs1891110  | 10 | 10 | 124600017 | 81118  | 5.8536  | 0.4155 | 0.2667  | 5.7907 | JPT |
| C10orf88 | GI_13376420-S | rs7088051  | 10 | 10 | 124645716 | 35419  | 5.8536  | 0.4155 | -0.2667 | 5.7907 | JPT |
| C10orf88 | GI_13376420-S | rs7902274  | 10 | 10 | 124647799 | 33336  | 6.2359  | 0.4312 | -0.2687 | 5.7907 | JPT |
| C10orf88 | GI_13376420-S | rs7921647  | 10 | 10 | 124661645 | 19490  | 5.8536  | 0.4155 | -0.2667 | 5.7907 | JPT |
| C10orf88 | GI_13376420-S | rs10902843 | 10 | 10 | 124665243 | 15892  | 5.8779  | 0.4171 | -0.2676 | 5.7907 | JPT |
| C10orf88 | GI_13376420-S | rs4311998  | 10 | 10 | 124665291 | 15844  | 5.8779  | 0.4171 | -0.2676 | 5.7907 | JPT |
| DPYSL4   | GI_11321616-S | rs2637654  | 10 | 10 | 133828801 | 40365  | 6.4398  | 0.4510 | 1.2041  | 6.2538 | JPT |
| DPYSL4   | GI_11321616-S | rs12357377 | 10 | 10 | 133843968 | 25198  | 6.4398  | 0.4510 | 1.2041  | 6.2538 | JPT |
| DPYSL4   | GI_11321616-S | rs2814165  | 10 | 10 | 133844737 | 24429  | 6.3990  | 0.4650 | -1.1949 | 6.2538 | JPT |
| DPYSL4   | GI_11321616-S | rs1873504  | 10 | 10 | 133852261 | 16905  | 6.4398  | 0.4510 | -1.2041 | 6.2538 | JPT |

|          |               |            |    |    |           |       |         |        |         |        |     |
|----------|---------------|------------|----|----|-----------|-------|---------|--------|---------|--------|-----|
| DPYSL4   | GI_11321616-S | rs923662   | 10 | 10 | 133871957 | 2791  | 6.6198  | 0.4536 | -1.2107 | 6.2538 | JPT |
| DPYSL4   | GI_11321616-S | rs2637630  | 10 | 10 | 133874441 | 5275  | 6.6198  | 0.4536 | -1.2107 | 6.2538 | JPT |
| DPYSL4   | GI_11321616-S | rs1532186  | 10 | 10 | 133875288 | 6122  | 6.4398  | 0.4510 | 1.2041  | 6.2538 | JPT |
| DPYSL4   | GI_11321616-S | rs2637633  | 10 | 10 | 133882021 | 12855 | 6.4398  | 0.4510 | 1.2041  | 6.2538 | JPT |
| FLJ22635 | GI_13376651-S | rs12801980 | 11 | 11 | 283188    | 2115  | 6.6624  | 0.5276 | -0.3657 | 5.5201 | JPT |
| FLJ22635 | GI_13376651-S | rs2242565  | 11 | 11 | 285343    | 40    | 11.9290 | 0.6965 | -0.4211 | 5.5201 | JPT |
| FLJ22635 | GI_13376651-S | rs2242566  | 11 | 11 | 285876    | 573   | 11.6805 | 0.7341 | 0.3932  | 5.5201 | JPT |
| CD151    | GI_34328914-A | rs3059     | 11 | 11 | 830319    | 1576  | 6.0547  | 0.4279 | -0.6232 | 5.8242 | JPT |
| C11orf21 | GI_7662662-S  | rs2651830  | 11 | 11 | 2268813   | 4954  | 6.0731  | 0.4450 | 0.3492  | 5.9589 | JPT |
| C11orf21 | GI_7662662-S  | rs2651836  | 11 | 11 | 2273296   | 471   | 6.6242  | 0.5252 | -0.3524 | 5.9589 | JPT |
| C11orf21 | GI_7662662-S  | rs2244891  | 11 | 11 | 2275931   | 2164  | 6.5143  | 0.4554 | -0.3693 | 5.9589 | JPT |
| C11orf21 | GI_7662662-S  | rs2651838  | 11 | 11 | 2276107   | 2340  | 6.4234  | 0.4751 | -0.3565 | 5.9589 | JPT |
| C11orf21 | GI_7662662-S  | rs756924   | 11 | 11 | 2279605   | 5838  | 7.4373  | 0.5067 | 0.3569  | 5.9589 | JPT |
| C11orf21 | GI_7662662-S  | rs2074021  | 11 | 11 | 2280104   | 6337  | 7.5144  | 0.5108 | 0.3752  | 5.9589 | JPT |
| C11orf21 | GI_7662662-S  | rs2074022  | 11 | 11 | 2280617   | 6850  | 7.3766  | 0.5120 | -0.3578 | 5.9589 | JPT |
| MMRP19   | GI_7705723-S  | rs6484742  | 11 | 11 | 34847955  | 18573 | 6.8980  | 0.4693 | -0.3339 | 5.647  | JPT |
| MMRP19   | GI_7705723-S  | rs2941048  | 11 | 11 | 34849835  | 16693 | 6.8980  | 0.4693 | 0.3339  | 5.647  | JPT |
| MMRP19   | GI_7705723-S  | rs2941047  | 11 | 11 | 34849920  | 16608 | 6.8980  | 0.4693 | 0.3339  | 5.647  | JPT |
| MMRP19   | GI_7705723-S  | rs2956082  | 11 | 11 | 34853758  | 12770 | 6.8980  | 0.4693 | 0.3339  | 5.647  | JPT |
| MMRP19   | GI_7705723-S  | rs2956085  | 11 | 11 | 34858679  | 7849  | 6.8980  | 0.4693 | -0.3339 | 5.647  | JPT |
| MMRP19   | GI_7705723-S  | rs2288667  | 11 | 11 | 34860975  | 5553  | 6.7278  | 0.4677 | -0.3303 | 5.647  | JPT |
| MMRP19   | GI_7705723-S  | rs2288668  | 11 | 11 | 34861085  | 5443  | 6.8980  | 0.4693 | 0.3339  | 5.647  | JPT |
| MMRP19   | GI_7705723-S  | rs2956088  | 11 | 11 | 34862423  | 4105  | 6.0319  | 0.4265 | 0.3217  | 5.647  | JPT |
| MMRP19   | GI_7705723-S  | rs2985399  | 11 | 11 | 34862570  | 3958  | 6.8980  | 0.4693 | 0.3339  | 5.647  | JPT |
| MMRP19   | GI_7705723-S  | rs2985398  | 11 | 11 | 34862621  | 3907  | 6.8980  | 0.4693 | 0.3339  | 5.647  | JPT |
| MMRP19   | GI_7705723-S  | rs1998603  | 11 | 11 | 34863138  | 3390  | 6.8980  | 0.4693 | -0.3339 | 5.647  | JPT |
| MMRP19   | GI_7705723-S  | rs2985396  | 11 | 11 | 34863530  | 2998  | 6.8980  | 0.4693 | 0.3339  | 5.647  | JPT |
| MMRP19   | GI_7705723-S  | rs2956091  | 11 | 11 | 34864657  | 1871  | 6.8980  | 0.4693 | -0.3339 | 5.647  | JPT |
| MMRP19   | GI_7705723-S  | rs2985391  | 11 | 11 | 34866148  | 380   | 6.7164  | 0.4670 | 0.3334  | 5.647  | JPT |
| MMRP19   | GI_7705723-S  | rs2985390  | 11 | 11 | 34866251  | 277   | 6.8980  | 0.4693 | 0.3339  | 5.647  | JPT |
| MMRP19   | GI_7705723-S  | rs1571133  | 11 | 11 | 34866502  | 26    | 6.7278  | 0.4677 | 0.3303  | 5.647  | JPT |
| MMRP19   | GI_7705723-S  | rs1571134  | 11 | 11 | 34866653  | 125   | 6.8133  | 0.4725 | 0.3398  | 5.647  | JPT |
| MMRP19   | GI_7705723-S  | rs1571135  | 11 | 11 | 34866793  | 265   | 6.7164  | 0.4670 | 0.3334  | 5.647  | JPT |
| MMRP19   | GI_7705723-S  | rs1977420  | 11 | 11 | 34866973  | 445   | 6.7278  | 0.4677 | -0.3303 | 5.647  | JPT |
| MMRP19   | GI_7705723-S  | rs2303959  | 11 | 11 | 34868589  | 2061  | 6.8807  | 0.4846 | -0.3354 | 5.647  | JPT |
| MMRP19   | GI_7705723-S  | rs2915224  | 11 | 11 | 34868865  | 2337  | 6.8980  | 0.4693 | -0.3339 | 5.647  | JPT |
| MMRP19   | GI_7705723-S  | rs1430855  | 11 | 11 | 34869484  | 2956  | 6.8980  | 0.4693 | -0.3339 | 5.647  | JPT |
| MMRP19   | GI_7705723-S  | rs2985389  | 11 | 11 | 34869740  | 3212  | 6.8980  | 0.4693 | 0.3339  | 5.647  | JPT |
| MMRP19   | GI_7705723-S  | rs2915223  | 11 | 11 | 34870713  | 4185  | 6.8980  | 0.4693 | 0.3339  | 5.647  | JPT |
| MMRP19   | GI_7705723-S  | rs2915222  | 11 | 11 | 34870936  | 4408  | 6.8980  | 0.4693 | -0.3339 | 5.647  | JPT |
| MMRP19   | GI_7705723-S  | rs2915221  | 11 | 11 | 34871056  | 4528  | 6.6497  | 0.4886 | -0.3456 | 5.647  | JPT |
| MMRP19   | GI_7705723-S  | rs2915220  | 11 | 11 | 34871226  | 4698  | 6.8980  | 0.4693 | -0.3339 | 5.647  | JPT |
| MMRP19   | GI_7705723-S  | rs2986424  | 11 | 11 | 34872022  | 5494  | 6.2584  | 0.4650 | -0.3340 | 5.647  | JPT |
| MMRP19   | GI_7705723-S  | rs2986425  | 11 | 11 | 34872332  | 5804  | 6.8980  | 0.4693 | -0.3339 | 5.647  | JPT |
| MMRP19   | GI_7705723-S  | rs2986427  | 11 | 11 | 34872921  | 6393  | 6.8980  | 0.4693 | 0.3339  | 5.647  | JPT |
| MMRP19   | GI_7705723-S  | rs1326940  | 11 | 11 | 34873060  | 6532  | 6.8980  | 0.4693 | -0.3339 | 5.647  | JPT |
| MMRP19   | GI_7705723-S  | rs1326941  | 11 | 11 | 34873286  | 6758  | 6.8980  | 0.4693 | -0.3339 | 5.647  | JPT |
| MMRP19   | GI_7705723-S  | rs1326942  | 11 | 11 | 34873361  | 6833  | 6.8980  | 0.4693 | -0.3339 | 5.647  | JPT |
| MMRP19   | GI_7705723-S  | rs1326943  | 11 | 11 | 34873444  | 6916  | 6.7278  | 0.4677 | 0.3303  | 5.647  | JPT |
| MMRP19   | GI_7705723-S  | rs2217478  | 11 | 11 | 34873939  | 7411  | 6.8120  | 0.4724 | 0.3359  | 5.647  | JPT |
| MMRP19   | GI_7705723-S  | rs2986429  | 11 | 11 | 34874951  | 8423  | 6.8980  | 0.4693 | -0.3339 | 5.647  | JPT |
| MMRP19   | GI_7705723-S  | rs10836318 | 11 | 11 | 34878954  | 12426 | 6.8937  | 0.4853 | 0.3402  | 5.647  | JPT |
| MMRP19   | GI_7705723-S  | rs11032917 | 11 | 11 | 34879179  | 12651 | 6.8120  | 0.4724 | 0.3359  | 5.647  | JPT |
| MMRP19   | GI_7705723-S  | rs11032918 | 11 | 11 | 34879348  | 12820 | 5.9681  | 0.4226 | -0.3049 | 5.647  | JPT |
| MMRP19   | GI_7705723-S  | rs2985381  | 11 | 11 | 34879792  | 13264 | 6.8980  | 0.4693 | -0.3339 | 5.647  | JPT |
| MMRP19   | GI_7705723-S  | rs1117446  | 11 | 11 | 34885098  | 18570 | 6.8120  | 0.4724 | -0.3359 | 5.647  | JPT |
| MMRP19   | GI_7705723-S  | rs2956114  | 11 | 11 | 34894389  | 27861 | 6.7278  | 0.4677 | -0.3303 | 5.647  | JPT |
| MMRP19   | GI_7705723-S  | rs2956107  | 11 | 11 | 34897144  | 30616 | 6.8120  | 0.4724 | 0.3359  | 5.647  | JPT |
| MMRP19   | GI_7705723-S  | rs2956106  | 11 | 11 | 34897558  | 31030 | 6.8980  | 0.4693 | -0.3339 | 5.647  | JPT |

|          |               |            |    |    |          |        |         |        |         |        |     |
|----------|---------------|------------|----|----|----------|--------|---------|--------|---------|--------|-----|
| MMRP19   | GI_7705723-S  | rs2915205  | 11 | 11 | 34897664 | 31136  | 6.7076  | 0.4665 | 0.3369  | 5.647  | JPT |
| MMRP19   | GI_7705723-S  | rs2915204  | 11 | 11 | 34898421 | 31893  | 6.2628  | 0.4741 | -0.3352 | 5.647  | JPT |
| MMRP19   | GI_7705723-S  | rs2915200  | 11 | 11 | 34900947 | 34419  | 6.8120  | 0.4724 | -0.3359 | 5.647  | JPT |
| MMRP19   | GI_7705723-S  | rs1998912  | 11 | 11 | 34904520 | 37992  | 6.8980  | 0.4693 | -0.3339 | 5.647  | JPT |
| MMRP19   | GI_7705723-S  | rs2986410  | 11 | 11 | 34905162 | 38634  | 6.7278  | 0.4677 | 0.3303  | 5.647  | JPT |
| MMRP19   | GI_7705723-S  | rs2956081  | 11 | 11 | 34906772 | 40244  | 6.7278  | 0.4677 | 0.3303  | 5.647  | JPT |
| MMRP19   | GI_7705723-S  | rs2985405  | 11 | 11 | 34912160 | 45632  | 6.5804  | 0.4673 | -0.3376 | 5.647  | JPT |
| MMRP19   | GI_7705723-S  | rs2985403  | 11 | 11 | 34913650 | 47122  | 6.6108  | 0.4691 | -0.3252 | 5.647  | JPT |
| MMRP19   | GI_7705723-S  | rs2915193  | 11 | 11 | 34916032 | 49504  | 6.8980  | 0.4693 | -0.3339 | 5.647  | JPT |
| MMRP19   | GI_7705723-S  | rs496653   | 11 | 11 | 34918332 | 51804  | 6.0385  | 0.4194 | -0.2861 | 5.647  | JPT |
| MMRP19   | GI_7705723-S  | rs2956087  | 11 | 11 | 34922133 | 55605  | 6.5474  | 0.4738 | -0.3221 | 5.647  | JPT |
| MMRP19   | GI_7705723-S  | rs614668   | 11 | 11 | 34925099 | 58571  | 6.7174  | 0.4671 | 0.3234  | 5.647  | JPT |
| MMRP19   | GI_7705723-S  | rs2915227  | 11 | 11 | 34931643 | 65115  | 5.7397  | 0.4011 | -0.3007 | 5.647  | JPT |
| MMRP19   | GI_7705723-S  | rs2762962  | 11 | 11 | 34942022 | 75494  | 5.6839  | 0.4049 | 0.3033  | 5.647  | JPT |
| MMRP19   | GI_7705723-S  | rs2732557  | 11 | 11 | 34943087 | 76559  | 5.7397  | 0.4011 | 0.3007  | 5.647  | JPT |
| MMRP19   | GI_7705723-S  | rs10836326 | 11 | 11 | 34956934 | 90406  | 5.7397  | 0.4011 | 0.3007  | 5.647  | JPT |
| MMRP19   | GI_7705723-S  | rs2767038  | 11 | 11 | 34957559 | 91031  | 5.7397  | 0.4011 | -0.3007 | 5.647  | JPT |
| MMRP19   | GI_7705723-S  | rs2732564  | 11 | 11 | 34971854 | 105326 | 5.7397  | 0.4011 | 0.3007  | 5.647  | JPT |
| MMRP19   | GI_7705723-S  | rs2732565  | 11 | 11 | 34972678 | 106150 | 5.7397  | 0.4011 | 0.3007  | 5.647  | JPT |
| MMRP19   | GI_7705723-S  | rs2767033  | 11 | 11 | 34979484 | 112956 | 5.7397  | 0.4011 | -0.3007 | 5.647  | JPT |
| MMRP19   | GI_7705723-S  | rs1326948  | 11 | 11 | 34981352 | 114824 | 5.7397  | 0.4011 | -0.3007 | 5.647  | JPT |
| MMRP19   | GI_7705723-S  | rs2762969  | 11 | 11 | 34982258 | 115730 | 5.7397  | 0.4011 | 0.3007  | 5.647  | JPT |
| HSD17B12 | GI_7705854-S  | rs10768983 | 11 | 11 | 43796511 | 37970  | 6.3644  | 0.4466 | -0.2199 | 6.236  | JPT |
| PHACS    | GI_14211920-S | rs7928485  | 11 | 11 | 44034823 | 27046  | 8.2849  | 0.5675 | -0.4639 | 6.4001 | JPT |
| PHACS    | GI_14211920-S | rs7127924  | 11 | 11 | 44042263 | 19606  | 14.2081 | 0.7631 | -0.6341 | 6.4001 | JPT |
| PHACS    | GI_14211920-S | rs2074038  | 11 | 11 | 44044565 | 17304  | 16.6400 | 0.8258 | 0.6420  | 6.4001 | JPT |
| PHACS    | GI_14211920-S | rs7951555  | 11 | 11 | 44047975 | 13894  | 14.4883 | 0.7703 | 0.6398  | 6.4001 | JPT |
| PHACS    | GI_14211920-S | rs2074040  | 11 | 11 | 44049899 | 11970  | 9.1434  | 0.5809 | 0.5209  | 6.4001 | JPT |
| PHACS    | GI_14211920-S | rs3094390  | 11 | 11 | 44051197 | 10672  | 7.9044  | 0.5577 | -0.4788 | 6.4001 | JPT |
| PHACS    | GI_14211920-S | rs3134907  | 11 | 11 | 44056164 | 5705   | 8.4985  | 0.6274 | 0.5042  | 6.4001 | JPT |
| PHACS    | GI_14211920-S | rs3134911  | 11 | 11 | 44064323 | 2454   | 10.2449 | 0.6269 | 0.5076  | 6.4001 | JPT |
| Hs.6637  | Hs.6637-S     | rs2071304  | 11 | 11 | 47328953 | 254782 | 6.9830  | 0.4904 | -0.1693 | 5.1398 | JPT |
| Hs.6637  | Hs.6637-S     | rs7105851  | 11 | 11 | 47339851 | 243884 | 7.6023  | 0.5154 | -0.1693 | 5.1398 | JPT |
| Hs.6637  | Hs.6637-S     | rs10838698 | 11 | 11 | 47342499 | 241236 | 7.9599  | 0.5337 | -0.1725 | 5.1398 | JPT |
| Hs.6637  | Hs.6637-S     | rs10838699 | 11 | 11 | 47342649 | 241086 | 7.6023  | 0.5154 | -0.1693 | 5.1398 | JPT |
| Hs.6637  | Hs.6637-S     | rs10769258 | 11 | 11 | 47347615 | 236120 | 7.6023  | 0.5154 | 0.1693  | 5.1398 | JPT |
| Hs.6637  | Hs.6637-S     | rs11039212 | 11 | 11 | 47349879 | 233856 | 8.1324  | 0.5338 | -0.1725 | 5.1398 | JPT |
| Hs.6637  | Hs.6637-S     | rs4992357  | 11 | 11 | 47350214 | 233521 | 7.6653  | 0.5272 | -0.1730 | 5.1398 | JPT |
| Hs.6637  | Hs.6637-S     | rs896816   | 11 | 11 | 47350914 | 232821 | 8.1324  | 0.5338 | 0.1725  | 5.1398 | JPT |
| Hs.6637  | Hs.6637-S     | rs7940536  | 11 | 11 | 47351816 | 231919 | 7.2811  | 0.5155 | -0.1695 | 5.1398 | JPT |
| Hs.6637  | Hs.6637-S     | rs6485753  | 11 | 11 | 47366776 | 216959 | 7.6023  | 0.5154 | 0.1693  | 5.1398 | JPT |
| Hs.6637  | Hs.6637-S     | rs4752990  | 11 | 11 | 47366969 | 216766 | 7.1588  | 0.5001 | 0.1682  | 5.1398 | JPT |
| Hs.6637  | Hs.6637-S     | rs4752993  | 11 | 11 | 47367527 | 216208 | 8.1324  | 0.5338 | -0.1725 | 5.1398 | JPT |
| Hs.6637  | Hs.6637-S     | rs4752994  | 11 | 11 | 47367641 | 216094 | 7.6023  | 0.5154 | 0.1693  | 5.1398 | JPT |
| Hs.6637  | Hs.6637-S     | rs10769262 | 11 | 11 | 47368157 | 215578 | 8.1324  | 0.5338 | -0.1725 | 5.1398 | JPT |
| Hs.6637  | Hs.6637-S     | rs11605672 | 11 | 11 | 47370309 | 213426 | 8.1324  | 0.5338 | -0.1725 | 5.1398 | JPT |
| Hs.6637  | Hs.6637-S     | rs4752999  | 11 | 11 | 47385141 | 198594 | 14.4002 | 0.7680 | -0.2139 | 5.1398 | JPT |
| Hs.6637  | Hs.6637-S     | rs755553   | 11 | 11 | 47388879 | 194856 | 14.4002 | 0.7680 | 0.2139  | 5.1398 | JPT |
| Hs.6637  | Hs.6637-S     | rs2053979  | 11 | 11 | 47396020 | 187715 | 13.4883 | 0.7873 | 0.2192  | 5.1398 | JPT |
| Hs.6637  | Hs.6637-S     | rs2293580  | 11 | 11 | 47396859 | 186876 | 14.4002 | 0.7680 | 0.2139  | 5.1398 | JPT |
| Hs.6637  | Hs.6637-S     | rs3781627  | 11 | 11 | 47398048 | 185687 | 15.1664 | 0.7787 | 0.2134  | 5.1398 | JPT |
| Hs.6637  | Hs.6637-S     | rs10838708 | 11 | 11 | 47398089 | 185646 | 13.1642 | 0.7432 | 0.2175  | 5.1398 | JPT |
| Hs.6637  | Hs.6637-S     | rs3781626  | 11 | 11 | 47399469 | 184266 | 15.1664 | 0.7787 | 0.2134  | 5.1398 | JPT |
| Hs.6637  | Hs.6637-S     | rs3781625  | 11 | 11 | 47399656 | 184079 | 14.4002 | 0.7680 | -0.2139 | 5.1398 | JPT |
| Hs.6637  | Hs.6637-S     | rs2868459  | 11 | 11 | 47411548 | 172187 | 14.4002 | 0.7680 | -0.2139 | 5.1398 | JPT |
| Hs.6637  | Hs.6637-S     | rs11604680 | 11 | 11 | 47414115 | 169620 | 14.5862 | 0.7727 | -0.2130 | 5.1398 | JPT |
| Hs.6637  | Hs.6637-S     | rs1317149  | 11 | 11 | 47443461 | 140274 | 13.3651 | 0.7404 | 0.2176  | 5.1398 | JPT |
| Hs.6637  | Hs.6637-S     | rs7124681  | 11 | 11 | 47486523 | 97212  | 15.1664 | 0.7787 | 0.2134  | 5.1398 | JPT |
| Hs.6637  | Hs.6637-S     | rs4752845  | 11 | 11 | 47496273 | 87462  | 14.4002 | 0.7680 | 0.2139  | 5.1398 | JPT |

|           |               |            |    |    |          |        |         |        |         |        |     |
|-----------|---------------|------------|----|----|----------|--------|---------|--------|---------|--------|-----|
| Hs.6637   | Hs.6637-S     | rs7928842  | 11 | 11 | 47522928 | 60807  | 14.4002 | 0.7680 | 0.2139  | 5.1398 | JPT |
| Hs.6637   | Hs.6637-S     | rs12419692 | 11 | 11 | 47581290 | 2445   | 15.1664 | 0.7787 | 0.2134  | 5.1398 | JPT |
| Hs.6637   | Hs.6637-S     | rs1064608  | 11 | 11 | 47597005 | 13270  | 14.4002 | 0.7680 | -0.2139 | 5.1398 | JPT |
| Hs.6637   | Hs.6637-S     | rs3817335  | 11 | 11 | 47600467 | 16732  | 14.4002 | 0.7680 | -0.2139 | 5.1398 | JPT |
| Hs.6637   | Hs.6637-S     | rs4752856  | 11 | 11 | 47604618 | 20883  | 15.1664 | 0.7787 | 0.2134  | 5.1398 | JPT |
| Hs.6637   | Hs.6637-S     | rs3817334  | 11 | 11 | 47607569 | 23834  | 15.1664 | 0.7787 | -0.2134 | 5.1398 | JPT |
| Hs.6637   | Hs.6637-S     | rs4752857  | 11 | 11 | 47612328 | 28593  | 14.4002 | 0.7680 | -0.2139 | 5.1398 | JPT |
| Hs.6637   | Hs.6637-S     | rs12794570 | 11 | 11 | 47614890 | 31155  | 11.1582 | 0.7164 | -0.2070 | 5.1398 | JPT |
| Hs.6637   | Hs.6637-S     | rs10838738 | 11 | 11 | 47619625 | 35890  | 14.4002 | 0.7680 | -0.2139 | 5.1398 | JPT |
| Hs.6637   | Hs.6637-S     | rs12787112 | 11 | 11 | 47643723 | 59988  | 12.0886 | 0.6931 | -0.1989 | 5.1398 | JPT |
| Hs.6637   | Hs.6637-S     | rs10838747 | 11 | 11 | 47672900 | 89165  | 11.3968 | 0.6784 | 0.1980  | 5.1398 | JPT |
| Hs.6637   | Hs.6637-S     | rs17788930 | 11 | 11 | 47709351 | 125616 | 12.0886 | 0.6931 | -0.1989 | 5.1398 | JPT |
| Hs.6637   | Hs.6637-S     | rs10838757 | 11 | 11 | 47719592 | 135857 | 11.5795 | 0.6848 | 0.1985  | 5.1398 | JPT |
| Hs.6637   | Hs.6637-S     | rs9909     | 11 | 11 | 47756351 | 172616 | 9.1261  | 0.5977 | 0.1918  | 5.1398 | JPT |
| Hs.6637   | Hs.6637-S     | rs7105282  | 11 | 11 | 47762190 | 178455 | 9.7350  | 0.6150 | 0.2018  | 5.1398 | JPT |
| Hs.6637   | Hs.6637-S     | rs2290850  | 11 | 11 | 47764350 | 180615 | 9.0266  | 0.5843 | -0.1941 | 5.1398 | JPT |
| Hs.6637   | Hs.6637-S     | rs12418852 | 11 | 11 | 47825429 | 241694 | 9.0266  | 0.5843 | -0.1941 | 5.1398 | JPT |
| Hs.6637   | Hs.6637-S     | rs11039433 | 11 | 11 | 47834069 | 250334 | 8.1638  | 0.5525 | -0.1883 | 5.1398 | JPT |
| Hs.6637   | Hs.6637-S     | rs12364432 | 11 | 11 | 47859459 | 275724 | 9.6706  | 0.6036 | 0.1947  | 5.1398 | JPT |
| Hs.6637   | Hs.6637-S     | rs4752801  | 11 | 11 | 47864217 | 280482 | 5.3607  | 0.3841 | -0.1656 | 5.1398 | JPT |
| Hs.6637   | Hs.6637-S     | rs12361256 | 11 | 11 | 47867399 | 283664 | 5.9220  | 0.4123 | 0.1671  | 5.1398 | JPT |
| TIMM10    | GI_6912707-S  | rs2729371  | 11 | 11 | 57077898 | 25280  | 9.2889  | 0.5873 | -0.7215 | 7.0436 | JPT |
| TIMM10    | GI_6912707-S  | rs2511983  | 11 | 11 | 57103450 | 50832  | 11.1976 | 0.6714 | 0.6086  | 7.0436 | JPT |
| TIMM10    | GI_6912707-S  | rs2649662  | 11 | 11 | 57109138 | 56520  | 8.9821  | 0.5737 | 0.5826  | 7.0436 | JPT |
| TIMM10    | GI_6912707-S  | rs2729356  | 11 | 11 | 57109973 | 57355  | 8.3338  | 0.5521 | -0.5661 | 7.0436 | JPT |
| TIMM10    | GI_6912707-S  | rs2848630  | 11 | 11 | 57113483 | 60865  | 8.9821  | 0.5737 | 0.5826  | 7.0436 | JPT |
| TIMM10    | GI_6912707-S  | rs2649663  | 11 | 11 | 57113881 | 61263  | 8.9821  | 0.5737 | -0.5826 | 7.0436 | JPT |
| TIMM10    | GI_6912707-S  | rs2848628  | 11 | 11 | 57114290 | 61672  | 8.9821  | 0.5737 | 0.5826  | 7.0436 | JPT |
| TIMM10    | GI_6912707-S  | rs12801694 | 11 | 11 | 57216800 | 164182 | 7.3914  | 0.4960 | -0.7918 | 7.0436 | JPT |
| TIMM10    | GI_6912707-S  | rs12362406 | 11 | 11 | 57307361 | 254743 | 7.2349  | 0.4958 | -0.7858 | 7.0436 | JPT |
| TIMM10    | GI_6912707-S  | rs633129   | 11 | 11 | 57441772 | 389154 | 7.2043  | 0.4942 | -0.7899 | 7.0436 | JPT |
| LOC144097 | GI_37541019-S | rs643634   | 11 | 11 | 63342380 | 9308   | 6.6457  | 0.4630 | -0.2921 | 5.7683 | JPT |
| LOC144097 | GI_37541019-S | rs612010   | 11 | 11 | 63347581 | 4107   | 6.5890  | 0.4678 | -0.2972 | 5.7683 | JPT |
| LOC144097 | GI_37541019-S | rs626333   | 11 | 11 | 63348437 | 3251   | 6.6457  | 0.4630 | -0.2921 | 5.7683 | JPT |
| LOC144097 | GI_37541019-S | rs480874   | 11 | 11 | 63348541 | 3147   | 6.8574  | 0.4670 | -0.2824 | 5.7683 | JPT |
| LOC144097 | GI_37541019-S | rs8995     | 11 | 11 | 63351648 | 40     | 6.6457  | 0.4630 | -0.2921 | 5.7683 | JPT |
| LOC144097 | GI_37541019-S | rs2285030  | 11 | 11 | 63351793 | 105    | 6.6457  | 0.4630 | 0.2921  | 5.7683 | JPT |
| SF1       | GI_42544126-I | rs475688   | 11 | 11 | 64120867 | 179432 | 5.9424  | 0.4288 | -0.4233 | 5.7751 | JPT |
| SF1       | GI_42544126-I | rs476037   | 11 | 11 | 64126116 | 174183 | 7.7594  | 0.5235 | 0.4381  | 5.7751 | JPT |
| SF1       | GI_42544126-I | rs17146121 | 11 | 11 | 64143102 | 157197 | 6.9938  | 0.4996 | -0.4217 | 5.7751 | JPT |
| SF1       | GI_42544126-I | rs7939965  | 11 | 11 | 64181600 | 118699 | 9.2865  | 0.6048 | 0.5091  | 5.7751 | JPT |
| SF1       | GI_42544126-I | rs11231853 | 11 | 11 | 64207055 | 93244  | 6.9187  | 0.4784 | 0.4022  | 5.7751 | JPT |
| SF1       | GI_42544126-I | rs3809076  | 11 | 11 | 64239122 | 61177  | 8.7209  | 0.5704 | 0.4608  | 5.7751 | JPT |
| SF1       | GI_42544126-I | rs693235   | 11 | 11 | 64249338 | 50961  | 11.1073 | 0.6682 | 0.4875  | 5.7751 | JPT |
| SF1       | GI_42544126-I | rs2073798  | 11 | 11 | 64267898 | 32401  | 13.3073 | 0.7304 | 0.4948  | 5.7751 | JPT |
| SF1       | GI_42544126-I | rs569602   | 11 | 11 | 64271082 | 29217  | 13.5796 | 0.7464 | 0.5143  | 5.7751 | JPT |
| SF1       | GI_42544126-I | rs547066   | 11 | 11 | 64280070 | 20229  | 12.0787 | 0.7014 | -0.5122 | 5.7751 | JPT |
| SF1       | GI_42544126-I | rs589691   | 11 | 11 | 64281792 | 18507  | 13.5796 | 0.7464 | -0.5143 | 5.7751 | JPT |
| SF1       | GI_42544126-I | rs489192   | 11 | 11 | 64282220 | 18079  | 13.3459 | 0.7315 | 0.4744  | 5.7751 | JPT |
| SF1       | GI_42544126-I | rs477549   | 11 | 11 | 64283656 | 16643  | 13.6129 | 0.7557 | 0.5653  | 5.7751 | JPT |
| SF1       | GI_42544126-I | rs523200   | 11 | 11 | 64289155 | 11144  | 16.4601 | 0.8147 | 0.5646  | 5.7751 | JPT |
| SF1       | GI_42544126-I | rs680273   | 11 | 11 | 64296211 | 4088   | 15.8120 | 0.7934 | 0.5408  | 5.7751 | JPT |
| SF1       | GI_42544126-I | rs474707   | 11 | 11 | 64300711 | 412    | 16.4601 | 0.8147 | 0.5646  | 5.7751 | JPT |
| SF1       | GI_42544126-I | rs1633462  | 11 | 11 | 64302833 | 2534   | 14.1862 | 0.7626 | 0.5416  | 5.7751 | JPT |
| SF1       | GI_42544126-I | rs606458   | 11 | 11 | 64302967 | 2668   | 14.1862 | 0.7626 | 0.5416  | 5.7751 | JPT |
| SF1       | GI_42544126-I | rs607389   | 11 | 11 | 64310154 | 9855   | 14.4196 | 0.7850 | 0.5661  | 5.7751 | JPT |
| SF1       | GI_42544126-I | rs11231869 | 11 | 11 | 64313708 | 13409  | 14.3258 | 0.7662 | 0.5628  | 5.7751 | JPT |
| SF1       | GI_42544126-I | rs677298   | 11 | 11 | 64320784 | 20485  | 12.1515 | 0.7037 | 0.5581  | 5.7751 | JPT |
| SF1       | GI_42544126-I | rs1143937  | 11 | 11 | 64325576 | 25277  | 8.9527  | 0.5810 | 0.5295  | 5.7751 | JPT |

|         |               |            |    |    |          |        |         |        |         |        |     |
|---------|---------------|------------|----|----|----------|--------|---------|--------|---------|--------|-----|
| SF1     | GI_42544126-I | rs669976   | 11 | 11 | 64330165 | 29866  | 8.9372  | 0.5803 | -0.5054 | 5.7751 | JPT |
| SF1     | GI_42544126-I | rs559566   | 11 | 11 | 64338234 | 37935  | 8.3817  | 0.5544 | -0.4975 | 5.7751 | JPT |
| RPS6KB2 | GI_4506738-S  | rs1253784  | 11 | 11 | 66689986 | 269359 | 6.7226  | 0.4674 | 0.3948  | 6.3846 | JPT |
| RPS6KB2 | GI_4506738-S  | rs682509   | 11 | 11 | 66700430 | 258915 | 6.7226  | 0.4674 | 0.3948  | 6.3846 | JPT |
| RPS6KB2 | GI_4506738-S  | rs3741189  | 11 | 11 | 66752179 | 207166 | 6.7226  | 0.4674 | -0.3948 | 6.3846 | JPT |
| RPS6KB2 | GI_4506738-S  | rs10732253 | 11 | 11 | 66762976 | 196369 | 6.7226  | 0.4674 | -0.3948 | 6.3846 | JPT |
| RPS6KB2 | GI_4506738-S  | rs3825022  | 11 | 11 | 66769773 | 189572 | 6.7226  | 0.4674 | -0.3948 | 6.3846 | JPT |
| RPS6KB2 | GI_4506738-S  | rs1894111  | 11 | 11 | 66795188 | 164157 | 6.7226  | 0.4674 | 0.3948  | 6.3846 | JPT |
| RPS6KB2 | GI_4506738-S  | rs2066496  | 11 | 11 | 66917537 | 41808  | 6.5086  | 0.4472 | -0.2972 | 6.3846 | JPT |
| RPS6KB2 | GI_4506738-S  | rs1476792  | 11 | 11 | 66952813 | 6532   | 8.7185  | 0.5617 | 0.2965  | 6.3846 | JPT |
| RPS6KB2 | GI_4506738-S  | rs1638588  | 11 | 11 | 66956282 | 3063   | 7.8184  | 0.5265 | 0.2908  | 6.3846 | JPT |
| RPS6KB2 | GI_4506738-S  | rs1790753  | 11 | 11 | 66957584 | 1761   | 7.8184  | 0.5265 | 0.2908  | 6.3846 | JPT |
| RPS6KB2 | GI_4506738-S  | rs869736   | 11 | 11 | 66962038 | 2693   | 7.8184  | 0.5265 | -0.2908 | 6.3846 | JPT |
| RPS6KB2 | GI_4506738-S  | rs2302264  | 11 | 11 | 66964002 | 4657   | 7.8184  | 0.5265 | 0.2908  | 6.3846 | JPT |
| RPS6KB2 | GI_4506738-S  | rs1638556  | 11 | 11 | 66970094 | 10749  | 7.8184  | 0.5265 | 0.2908  | 6.3846 | JPT |
| RPS6KB2 | GI_4506738-S  | rs1790761  | 11 | 11 | 66978430 | 19085  | 8.7185  | 0.5617 | 0.2965  | 6.3846 | JPT |
| RPS6KB2 | GI_4506738-S  | rs3741168  | 11 | 11 | 66991927 | 32582  | 7.5949  | 0.5150 | 0.2744  | 6.3846 | JPT |
| GSTP1   | GI_6552334-S  | rs2276020  | 11 | 11 | 67014132 | 96080  | 6.5965  | 0.4522 | 0.3638  | 5.175  | JPT |
| GSTP1   | GI_6552334-S  | rs672432   | 11 | 11 | 67033045 | 77167  | 5.3503  | 0.3834 | -0.3324 | 5.175  | JPT |
| GSTP1   | GI_6552334-S  | rs687343   | 11 | 11 | 67034030 | 76182  | 5.3503  | 0.3834 | 0.3324  | 5.175  | JPT |
| GSTP1   | GI_6552334-S  | rs627956   | 11 | 11 | 67040431 | 69781  | 5.3503  | 0.3834 | -0.3324 | 5.175  | JPT |
| GSTP1   | GI_6552334-S  | rs604904   | 11 | 11 | 67040467 | 69745  | 5.3503  | 0.3834 | 0.3324  | 5.175  | JPT |
| GSTP1   | GI_6552334-S  | rs682208   | 11 | 11 | 67042651 | 67561  | 5.6435  | 0.3950 | -0.3386 | 5.175  | JPT |
| RPS6KB2 | GI_4506738-S  | rs2276118  | 11 | 11 | 67045170 | 85825  | 7.0877  | 0.4878 | -0.2698 | 6.3846 | JPT |
| GSTP1   | GI_6552334-S  | rs687316   | 11 | 11 | 67063408 | 46804  | 6.6899  | 0.4655 | -0.3217 | 5.175  | JPT |
| GSTP1   | GI_6552334-S  | rs661624   | 11 | 11 | 67065137 | 45075  | 6.6899  | 0.4655 | -0.3217 | 5.175  | JPT |
| GSTP1   | GI_6552334-S  | rs694616   | 11 | 11 | 67067834 | 42378  | 6.1037  | 0.4554 | 0.3577  | 5.175  | JPT |
| GSTP1   | GI_6552334-S  | rs612162   | 11 | 11 | 67068933 | 41279  | 6.6899  | 0.4655 | 0.3217  | 5.175  | JPT |
| GSTP1   | GI_6552334-S  | rs615270   | 11 | 11 | 67069632 | 40580  | 6.9268  | 0.4709 | 0.3228  | 5.175  | JPT |
| GSTP1   | GI_6552334-S  | rs644670   | 11 | 11 | 67071605 | 38607  | 6.5487  | 0.4739 | -0.3195 | 5.175  | JPT |
| GSTP1   | GI_6552334-S  | rs601531   | 11 | 11 | 67080578 | 29634  | 6.9268  | 0.4709 | 0.3228  | 5.175  | JPT |
| GSTP1   | GI_6552334-S  | rs675679   | 11 | 11 | 67095854 | 14358  | 5.8310  | 0.4466 | -0.3142 | 5.175  | JPT |
| GSTP1   | GI_6552334-S  | rs688878   | 11 | 11 | 67096525 | 13687  | 6.6899  | 0.4655 | -0.3217 | 5.175  | JPT |
| GSTP1   | GI_6552334-S  | rs612020   | 11 | 11 | 67102017 | 8195   | 6.9268  | 0.4709 | -0.3228 | 5.175  | JPT |
| GSTP1   | GI_6552334-S  | rs7927381  | 11 | 11 | 67103319 | 6893   | 6.9268  | 0.4709 | -0.3228 | 5.175  | JPT |
| GSTP1   | GI_6552334-S  | rs2169650  | 11 | 11 | 67120493 | 10281  | 5.7200  | 0.4072 | -0.3025 | 5.175  | JPT |
| GSTP1   | GI_6552334-S  | rs11227848 | 11 | 11 | 67125413 | 15201  | 5.7200  | 0.4072 | 0.3025  | 5.175  | JPT |
| RPS6KB2 | GI_4506738-S  | rs2290960  | 11 | 11 | 67166650 | 207305 | 6.6342  | 0.4623 | -0.4435 | 6.3846 | JPT |
| MRPL21  | GI_31652223-A | rs678904   | 11 | 11 | 68372176 | 43238  | 10.0812 | 0.6291 | -0.3351 | 6.4525 | JPT |
| MRPL21  | GI_31652223-A | rs497149   | 11 | 11 | 68383215 | 32199  | 11.1745 | 0.6795 | -0.3505 | 6.4525 | JPT |
| MRPL21  | GI_31652223-A | rs604524   | 11 | 11 | 68386505 | 28909  | 12.0662 | 0.7010 | 0.3562  | 6.4525 | JPT |
| MRPL21  | GI_31652223-A | rs584108   | 11 | 11 | 68386858 | 28556  | 11.0047 | 0.6557 | 0.3427  | 6.4525 | JPT |
| MRPL21  | GI_31652223-A | rs596874   | 11 | 11 | 68387450 | 27964  | 12.4712 | 0.7053 | 0.3565  | 6.4525 | JPT |
| MRPL21  | GI_31652223-A | rs501799   | 11 | 11 | 68387816 | 27598  | 12.4712 | 0.7053 | 0.3565  | 6.4525 | JPT |
| MRPL21  | GI_31652223-A | rs557625   | 11 | 11 | 68391298 | 24116  | 10.3111 | 0.6383 | -0.3564 | 6.4525 | JPT |
| MRPL21  | GI_31652223-A | rs686877   | 11 | 11 | 68393745 | 21669  | 7.5554  | 0.5790 | 0.2813  | 6.4525 | JPT |
| MRPL21  | GI_31652223-A | rs10792001 | 11 | 11 | 68394313 | 21101  | 12.1415 | 0.7034 | 0.3543  | 6.4525 | JPT |
| MRPL21  | GI_31652223-A | rs473997   | 11 | 11 | 68396057 | 19357  | 10.6380 | 0.6508 | 0.3419  | 6.4525 | JPT |
| MRPL21  | GI_31652223-A | rs631001   | 11 | 11 | 68399550 | 15864  | 9.9590  | 0.6332 | 0.3310  | 6.4525 | JPT |
| MRPL21  | GI_31652223-A | rs1249368  | 11 | 11 | 68402722 | 12692  | 12.0662 | 0.7010 | -0.3562 | 6.4525 | JPT |
| MRPL21  | GI_31652223-A | rs592697   | 11 | 11 | 68406640 | 8774   | 10.8841 | 0.6690 | 0.3412  | 6.4525 | JPT |
| MRPL21  | GI_31652223-A | rs686390   | 11 | 11 | 68412653 | 2761   | 10.3292 | 0.6479 | 0.3398  | 6.4525 | JPT |
| MRPL21  | GI_31652223-A | rs514833   | 11 | 11 | 68414310 | 1104   | 8.3118  | 0.5781 | 0.3629  | 6.4525 | JPT |
| MRPL21  | GI_31652223-A | rs488363   | 11 | 11 | 68414874 | 540    | 12.0662 | 0.7010 | -0.3562 | 6.4525 | JPT |
| MRPL21  | GI_31652223-A | rs660614   | 11 | 11 | 68416064 | 650    | 12.0662 | 0.7010 | -0.3562 | 6.4525 | JPT |
| MRPL21  | GI_31652223-A | rs507520   | 11 | 11 | 68422630 | 7216   | 11.0047 | 0.6557 | 0.3427  | 6.4525 | JPT |
| MRPL21  | GI_31652223-A | rs636049   | 11 | 11 | 68423774 | 8360   | 12.4712 | 0.7053 | -0.3565 | 6.4525 | JPT |
| MRPL21  | GI_31652223-A | rs668576   | 11 | 11 | 68424784 | 9370   | 12.4712 | 0.7053 | 0.3565  | 6.4525 | JPT |
| MRPL21  | GI_31652223-A | rs482172   | 11 | 11 | 68425013 | 9599   | 12.4712 | 0.7053 | -0.3565 | 6.4525 | JPT |

|          |               |            |    |    |           |        |         |        |         |        |     |
|----------|---------------|------------|----|----|-----------|--------|---------|--------|---------|--------|-----|
| MRPL21   | GI_31652223-A | rs513359   | 11 | 11 | 68426072  | 10658  | 12.4712 | 0.7053 | -0.3565 | 6.4525 | JPT |
| MRPL21   | GI_31652223-A | rs629426   | 11 | 11 | 68427680  | 12266  | 12.0662 | 0.7010 | 0.3562  | 6.4525 | JPT |
| MRPL21   | GI_31652223-A | rs583182   | 11 | 11 | 68435210  | 19796  | 12.4712 | 0.7053 | 0.3565  | 6.4525 | JPT |
| MRPL21   | GI_31652223-A | rs673821   | 11 | 11 | 68435294  | 19880  | 8.9837  | 0.5913 | 0.3325  | 6.4525 | JPT |
| MRPL21   | GI_31652223-A | rs646586   | 11 | 11 | 68438229  | 22815  | 12.4712 | 0.7053 | 0.3565  | 6.4525 | JPT |
| MRPL21   | GI_31652223-A | rs483626   | 11 | 11 | 68441431  | 26017  | 12.8057 | 0.7156 | -0.3591 | 6.4525 | JPT |
| MRPL21   | GI_31652223-A | rs685320   | 11 | 11 | 68448717  | 33303  | 12.3928 | 0.7114 | 0.3587  | 6.4525 | JPT |
| MRPL21   | GI_31652223-A | rs637120   | 11 | 11 | 68451157  | 35743  | 12.0892 | 0.7105 | -0.3584 | 6.4525 | JPT |
| MRPL21   | GI_31652223-A | rs553875   | 11 | 11 | 68451720  | 36306  | 11.0047 | 0.6557 | -0.3427 | 6.4525 | JPT |
| MRPL21   | GI_31652223-A | rs1249365  | 11 | 11 | 68455338  | 39924  | 11.0047 | 0.6557 | 0.3427  | 6.4525 | JPT |
| MRPL21   | GI_31652223-A | rs478647   | 11 | 11 | 68457000  | 41586  | 11.0047 | 0.6557 | 0.3427  | 6.4525 | JPT |
| MRPL21   | GI_31652223-A | rs622082   | 11 | 11 | 68460535  | 45121  | 10.6380 | 0.6508 | -0.3419 | 6.4525 | JPT |
| MRPL21   | GI_31652223-A | rs546382   | 11 | 11 | 68460840  | 45426  | 10.6380 | 0.6508 | -0.3419 | 6.4525 | JPT |
| MRPL21   | GI_31652223-A | rs568862   | 11 | 11 | 68463511  | 48097  | 12.3928 | 0.7114 | -0.3587 | 6.4525 | JPT |
| MRPL21   | GI_31652223-A | rs477935   | 11 | 11 | 68466511  | 51097  | 12.3928 | 0.7114 | -0.3587 | 6.4525 | JPT |
| MRPL21   | GI_31652223-A | rs559032   | 11 | 11 | 68467423  | 52009  | 11.0047 | 0.6557 | 0.3427  | 6.4525 | JPT |
| MRPL21   | GI_31652223-A | rs1249468  | 11 | 11 | 68468357  | 52943  | 12.3928 | 0.7114 | -0.3587 | 6.4525 | JPT |
| MRPL21   | GI_31652223-A | rs7395379  | 11 | 11 | 68469553  | 54139  | 12.6477 | 0.7193 | -0.3614 | 6.4525 | JPT |
| MRPL21   | GI_31652223-A | rs664312   | 11 | 11 | 68471319  | 55905  | 12.8057 | 0.7156 | 0.3591  | 6.4525 | JPT |
| MRPL21   | GI_31652223-A | rs520235   | 11 | 11 | 68471802  | 56388  | 12.7957 | 0.7238 | -0.3642 | 6.4525 | JPT |
| MRPL21   | GI_31652223-A | rs494607   | 11 | 11 | 68472314  | 56900  | 12.3928 | 0.7114 | 0.3587  | 6.4525 | JPT |
| MRPL21   | GI_31652223-A | rs2507833  | 11 | 11 | 68472444  | 57030  | 12.8057 | 0.7156 | -0.3591 | 6.4525 | JPT |
| MRPL21   | GI_31652223-A | rs2508849  | 11 | 11 | 68472468  | 57054  | 12.8988 | 0.7269 | -0.3631 | 6.4525 | JPT |
| MRPL21   | GI_31652223-A | rs2507832  | 11 | 11 | 68472571  | 57157  | 11.6461 | 0.7140 | -0.3595 | 6.4525 | JPT |
| MRPL21   | GI_31652223-A | rs491830   | 11 | 11 | 68472616  | 57202  | 12.8057 | 0.7156 | -0.3591 | 6.4525 | JPT |
| MRPL21   | GI_31652223-A | rs646913   | 11 | 11 | 68472871  | 57457  | 12.8057 | 0.7156 | 0.3591  | 6.4525 | JPT |
| MRPL21   | GI_31652223-A | rs6421653  | 11 | 11 | 68476174  | 60760  | 12.4150 | 0.7036 | 0.3418  | 6.4525 | JPT |
| MRPL21   | GI_31652223-A | rs10896384 | 11 | 11 | 68476587  | 61173  | 10.3678 | 0.6405 | 0.3254  | 6.4525 | JPT |
| MRPL21   | GI_31652223-A | rs4244840  | 11 | 11 | 68481831  | 66417  | 12.0115 | 0.6992 | -0.3414 | 6.4525 | JPT |
| MRPL21   | GI_31652223-A | rs7935851  | 11 | 11 | 68487698  | 72284  | 10.3678 | 0.6405 | -0.3254 | 6.4525 | JPT |
| MRPL21   | GI_31652223-A | rs7940105  | 11 | 11 | 68488602  | 73188  | 10.7273 | 0.6455 | 0.3263  | 6.4525 | JPT |
| FLJ11848 | GI_13376750-S | rs12366033 | 11 | 11 | 73056622  | 259588 | 6.2221  | 0.4381 | -0.4121 | 5.3319 | JPT |
| FLJ11848 | GI_13376750-S | rs11235844 | 11 | 11 | 73056723  | 259487 | 6.3805  | 0.4397 | 0.4119  | 5.3319 | JPT |
| FLJ11848 | GI_13376750-S | rs7106773  | 11 | 11 | 73060822  | 255388 | 6.1702  | 0.4510 | 0.4900  | 5.3319 | JPT |
| FLJ11848 | GI_13376750-S | rs3825003  | 11 | 11 | 73066760  | 249450 | 6.2221  | 0.4381 | 0.4121  | 5.3319 | JPT |
| FLJ11848 | GI_13376750-S | rs10736793 | 11 | 11 | 73080224  | 235986 | 6.2221  | 0.4381 | 0.4121  | 5.3319 | JPT |
| FLJ11848 | GI_13376750-S | rs4944028  | 11 | 11 | 73085218  | 230992 | 6.2495  | 0.4397 | -0.4042 | 5.3319 | JPT |
| FLJ11848 | GI_13376750-S | rs11235864 | 11 | 11 | 73085920  | 230290 | 6.3805  | 0.4397 | -0.4119 | 5.3319 | JPT |
| FLJ11848 | GI_13376750-S | rs6592531  | 11 | 11 | 73090002  | 226208 | 6.2221  | 0.4381 | 0.4121  | 5.3319 | JPT |
| FLJ11848 | GI_13376750-S | rs4944032  | 11 | 11 | 73090769  | 225441 | 6.3805  | 0.4397 | -0.4119 | 5.3319 | JPT |
| FLJ11848 | GI_13376750-S | rs2140892  | 11 | 11 | 73100527  | 215683 | 6.2221  | 0.4381 | 0.4121  | 5.3319 | JPT |
| FLJ11848 | GI_13376750-S | rs4944861  | 11 | 11 | 73108153  | 208057 | 5.4901  | 0.3925 | -0.3397 | 5.3319 | JPT |
| FLJ11848 | GI_13376750-S | rs7939193  | 11 | 11 | 73124017  | 192193 | 6.2221  | 0.4381 | 0.4121  | 5.3319 | JPT |
| FLJ11848 | GI_13376750-S | rs11235932 | 11 | 11 | 73249531  | 66679  | 6.7581  | 0.4614 | -0.3037 | 5.3319 | JPT |
| PP1665   | GI_34147050-S | rs11606662 | 11 | 11 | 74902548  | 79136  | 7.4025  | 0.5048 | 0.5459  | 5.4343 | JPT |
| CWF19L2  | GI_22748918-S | rs489243   | 11 | 11 | 106867903 | 165417 | 5.5691  | 0.3976 | 0.3018  | 5.569  | JPT |
| SPA17    | GI_15718773-S | rs2276189  | 11 | 11 | 124010138 | 59336  | 8.3668  | 0.5715 | -0.3816 | 5.6504 | JPT |
| SPA17    | GI_15718773-S | rs7941327  | 11 | 11 | 124012177 | 57297  | 8.2926  | 0.5501 | -0.3771 | 5.6504 | JPT |
| SPA17    | GI_15718773-S | rs7937294  | 11 | 11 | 124018485 | 50989  | 8.2926  | 0.5501 | -0.3771 | 5.6504 | JPT |
| SPA17    | GI_15718773-S | rs7940161  | 11 | 11 | 124018585 | 50889  | 8.2926  | 0.5501 | -0.3771 | 5.6504 | JPT |
| SPA17    | GI_15718773-S | rs7128043  | 11 | 11 | 124021220 | 48254  | 8.2926  | 0.5501 | 0.3771  | 5.6504 | JPT |
| SPA17    | GI_15718773-S | rs3819084  | 11 | 11 | 124022331 | 47143  | 8.0129  | 0.5450 | -0.3737 | 5.6504 | JPT |
| SPA17    | GI_15718773-S | rs1942664  | 11 | 11 | 124024143 | 45331  | 7.7965  | 0.5170 | 0.3972  | 5.6504 | JPT |
| SPA17    | GI_15718773-S | rs12295168 | 11 | 11 | 124027378 | 42096  | 8.9913  | 0.5827 | 0.3926  | 5.6504 | JPT |
| SPA17    | GI_15718773-S | rs11219743 | 11 | 11 | 124027930 | 41544  | 8.6845  | 0.5601 | 0.3805  | 5.6504 | JPT |
| SPA17    | GI_15718773-S | rs1942663  | 11 | 11 | 124029837 | 39637  | 8.2926  | 0.5501 | 0.3771  | 5.6504 | JPT |
| SPA17    | GI_15718773-S | rs7926572  | 11 | 11 | 124033151 | 36323  | 8.6845  | 0.5601 | 0.3805  | 5.6504 | JPT |
| SPA17    | GI_15718773-S | rs7124585  | 11 | 11 | 124037650 | 31824  | 8.6845  | 0.5601 | 0.3805  | 5.6504 | JPT |
| SPA17    | GI_15718773-S | rs1942662  | 11 | 11 | 124037710 | 31764  | 8.2926  | 0.5501 | -0.3771 | 5.6504 | JPT |

|           |               |            |    |    |           |       |         |        |         |        |     |
|-----------|---------------|------------|----|----|-----------|-------|---------|--------|---------|--------|-----|
| SPA17     | GI_15718773-S | rs11219749 | 11 | 11 | 124038377 | 31097 | 8.2926  | 0.5501 | -0.3771 | 5.6504 | JPT |
| SPA17     | GI_15718773-S | rs10893281 | 11 | 11 | 124040022 | 29452 | 8.6845  | 0.5601 | 0.3805  | 5.6504 | JPT |
| SPA17     | GI_15718773-S | rs7119225  | 11 | 11 | 124042004 | 27470 | 8.2926  | 0.5501 | -0.3771 | 5.6504 | JPT |
| SPA17     | GI_15718773-S | rs11825168 | 11 | 11 | 124043411 | 26063 | 8.6845  | 0.5601 | -0.3805 | 5.6504 | JPT |
| SPA17     | GI_15718773-S | rs12282107 | 11 | 11 | 124044483 | 24991 | 8.6845  | 0.5601 | 0.3805  | 5.6504 | JPT |
| SPA17     | GI_15718773-S | rs7927406  | 11 | 11 | 124049013 | 20461 | 8.2926  | 0.5501 | 0.3771  | 5.6504 | JPT |
| SPA17     | GI_15718773-S | rs7938692  | 11 | 11 | 124071401 | 1927  | 6.9700  | 0.4813 | 0.3956  | 5.6504 | JPT |
| Hs.98028  | Hs.98028-S    | rs558814   | 11 | 11 | 124180424 | 3911  | 6.0735  | 0.4215 | -0.1096 | 6.0217 | JPT |
| Hs.98028  | Hs.98028-S    | rs11824062 | 11 | 11 | 124182242 | 2093  | 6.1598  | 0.4589 | 0.1157  | 6.0217 | JPT |
| Hs.98028  | Hs.98028-S    | rs646521   | 11 | 11 | 124183151 | 1184  | 6.4870  | 0.4538 | 0.1131  | 6.0217 | JPT |
| Hs.98028  | Hs.98028-S    | rs580213   | 11 | 11 | 124183179 | 1156  | 6.5349  | 0.4566 | -0.1203 | 6.0217 | JPT |
| SIAT4C    | GI_5454057-S  | rs17135401 | 11 | 11 | 125723983 | 65570 | 7.0609  | 0.4782 | 0.2221  | 6.1223 | JPT |
| LOC399987 | GI_42660080-S | rs3809258  | 12 | 12 | 3734571   | 1492  | 11.5320 | 0.6745 | 0.1926  | 5.8943 | JPT |
| LOC399987 | GI_42660080-S | rs9300302  | 12 | 12 | 3737732   | 1669  | 12.0569 | 0.6921 | -0.1908 | 5.8943 | JPT |
| LOC399987 | GI_42660080-S | rs10774171 | 12 | 12 | 3738570   | 2507  | 10.3733 | 0.6319 | -0.1866 | 5.8943 | JPT |
| LTBR      | GI_4505038-S  | rs4301834  | 12 | 12 | 6371104   | 376   | 6.6818  | 0.4571 | 0.3778  | 6.6593 | JPT |
| LTBR      | GI_4505038-S  | rs10744706 | 12 | 12 | 6373479   | 2751  | 6.6818  | 0.4571 | 0.3778  | 6.6593 | JPT |
| LTBR      | GI_4505038-S  | rs9669611  | 12 | 12 | 6374047   | 3319  | 6.6818  | 0.4571 | 0.3778  | 6.6593 | JPT |
| LTBR      | GI_4505038-S  | rs9668139  | 12 | 12 | 6374359   | 3631  | 6.6818  | 0.4571 | 0.3778  | 6.6593 | JPT |
| LTBR      | GI_4505038-S  | rs10774430 | 12 | 12 | 6375034   | 4306  | 6.7917  | 0.5060 | 0.4764  | 6.6593 | JPT |
| TAPBP-R   | GI_34222333-S | rs2041384  | 12 | 12 | 6432546   | 9086  | 6.2505  | 0.4477 | 0.4216  | 6.0273 | JPT |
| TAPBP-R   | GI_34222333-S | rs2041385  | 12 | 12 | 6432554   | 9078  | 6.5787  | 0.4934 | 0.4280  | 6.0273 | JPT |
| TAPBP-R   | GI_34222333-S | rs2041388  | 12 | 12 | 6433097   | 8535  | 6.4022  | 0.4410 | -0.4174 | 6.0273 | JPT |
| TAPBP-R   | GI_34222333-S | rs2079866  | 12 | 12 | 6434109   | 7523  | 6.2497  | 0.4397 | 0.4142  | 6.0273 | JPT |
| TAPBP-R   | GI_34222333-S | rs2532497  | 12 | 12 | 6434471   | 7161  | 6.2497  | 0.4397 | 0.4142  | 6.0273 | JPT |
| TAPBP-R   | GI_34222333-S | rs2532496  | 12 | 12 | 6434709   | 6923  | 6.7247  | 0.4757 | -0.4227 | 6.0273 | JPT |
| TAPBP-R   | GI_34222333-S | rs2243750  | 12 | 12 | 6438048   | 3584  | 6.2497  | 0.4397 | -0.4142 | 6.0273 | JPT |
| TAPBP-R   | GI_34222333-S | rs2243977  | 12 | 12 | 6440244   | 1388  | 6.6184  | 0.4696 | 0.4337  | 6.0273 | JPT |
| TAPBP-R   | GI_34222333-S | rs2244083  | 12 | 12 | 6440800   | 832   | 6.4022  | 0.4410 | 0.4174  | 6.0273 | JPT |
| TAPBP-R   | GI_34222333-S | rs2534713  | 12 | 12 | 6442848   | 1216  | 6.4022  | 0.4410 | -0.4174 | 6.0273 | JPT |
| TAPBP-R   | GI_34222333-S | rs2534715  | 12 | 12 | 6443407   | 1775  | 6.8914  | 0.4769 | -0.4258 | 6.0273 | JPT |
| TAPBP-R   | GI_34222333-S | rs2534717  | 12 | 12 | 6444010   | 2378  | 6.4022  | 0.4410 | 0.4174  | 6.0273 | JPT |
| TAPBP-R   | GI_34222333-S | rs1017101  | 12 | 12 | 6444562   | 2930  | 6.2497  | 0.4397 | 0.4142  | 6.0273 | JPT |
| TAPBP-R   | GI_34222333-S | rs2072375  | 12 | 12 | 6445305   | 3673  | 6.2497  | 0.4397 | 0.4142  | 6.0273 | JPT |
| TAPBP-R   | GI_34222333-S | rs2240866  | 12 | 12 | 6448401   | 6769  | 6.2497  | 0.4397 | 0.4142  | 6.0273 | JPT |
| TAPBP-R   | GI_34222333-S | rs2058288  | 12 | 12 | 6449133   | 7501  | 6.2497  | 0.4397 | -0.4142 | 6.0273 | JPT |
| TAPBP-R   | GI_34222333-S | rs2534721  | 12 | 12 | 6450405   | 8773  | 6.2497  | 0.4397 | -0.4142 | 6.0273 | JPT |
| TAPBP-R   | GI_34222333-S | rs2008134  | 12 | 12 | 6458706   | 17074 | 6.2497  | 0.4397 | 0.4142  | 6.0273 | JPT |
| TAPBP-R   | GI_34222333-S | rs2109426  | 12 | 12 | 6459783   | 18151 | 6.2915  | 0.4422 | 0.4127  | 6.0273 | JPT |
| TAPBP-R   | GI_34222333-S | rs10849468 | 12 | 12 | 6466956   | 25324 | 6.3810  | 0.4475 | -0.4206 | 6.0273 | JPT |
| TAPBP-R   | GI_34222333-S | rs1001127  | 12 | 12 | 6472004   | 30372 | 6.2497  | 0.4397 | 0.4142  | 6.0273 | JPT |
| TAPBP-R   | GI_34222333-S | rs714774   | 12 | 12 | 6489545   | 47913 | 6.2497  | 0.4397 | 0.4142  | 6.0273 | JPT |
| TAPBP-R   | GI_34222333-S | rs2079867  | 12 | 12 | 6492372   | 50740 | 6.4022  | 0.4410 | -0.4174 | 6.0273 | JPT |
| B7        | GI_42542401-A | rs7314788  | 12 | 12 | 6857433   | 36174 | 6.1117  | 0.4314 | -0.4098 | 5.9359 | JPT |
| B7        | GI_42542401-A | rs9737890  | 12 | 12 | 6860714   | 32893 | 6.3071  | 0.4432 | 0.4390  | 5.9359 | JPT |
| B7        | GI_31745192-I | rs2040352  | 12 | 12 | 6877265   | 15155 | 7.8120  | 0.5262 | -0.1761 | 5.9359 | JPT |
| B7        | GI_42542401-A | rs2040352  | 12 | 12 | 6877265   | 16342 | 10.3126 | 0.6383 | -0.4407 | 5.9359 | JPT |
| B7        | GI_42542401-A | rs12315364 | 12 | 12 | 6879531   | 14076 | 8.2719  | 0.5491 | 0.6116  | 5.9359 | JPT |
| B7        | GI_31745192-I | rs3759349  | 12 | 12 | 6882086   | 10334 | 7.8120  | 0.5262 | -0.1761 | 5.9359 | JPT |
| B7        | GI_42542401-A | rs3759349  | 12 | 12 | 6882086   | 11521 | 10.3126 | 0.6383 | -0.4407 | 5.9359 | JPT |
| B7        | GI_31745192-I | rs3759350  | 12 | 12 | 6882208   | 10212 | 7.9969  | 0.5271 | 0.1759  | 5.9359 | JPT |
| B7        | GI_42542401-A | rs3759350  | 12 | 12 | 6882208   | 11399 | 10.5872 | 0.6402 | 0.4422  | 5.9359 | JPT |
| B7        | GI_31745192-I | rs3759352  | 12 | 12 | 6882316   | 10104 | 7.2238  | 0.4871 | -0.1802 | 5.9359 | JPT |
| B7        | GI_42542401-A | rs3759352  | 12 | 12 | 6882316   | 11291 | 9.0472  | 0.5766 | -0.4474 | 5.9359 | JPT |
| B7        | GI_31745192-I | rs2239163  | 12 | 12 | 6884337   | 8083  | 7.4856  | 0.5092 | 0.1799  | 5.9359 | JPT |
| B7        | GI_42542401-A | rs2239163  | 12 | 12 | 6884337   | 9270  | 10.6999 | 0.6532 | 0.4625  | 5.9359 | JPT |
| B7        | GI_31745192-I | rs3741921  | 12 | 12 | 6886710   | 5710  | 7.4856  | 0.5092 | 0.1799  | 5.9359 | JPT |
| B7        | GI_42542401-A | rs3741921  | 12 | 12 | 6886710   | 6897  | 10.6999 | 0.6532 | 0.4625  | 5.9359 | JPT |
| B7        | GI_31745192-I | rs2301137  | 12 | 12 | 6889210   | 3210  | 8.3598  | 0.5621 | 0.1903  | 5.9359 | JPT |

|           |               |            |    |    |          |        |         |        |         |        |     |
|-----------|---------------|------------|----|----|----------|--------|---------|--------|---------|--------|-----|
| B7        | GI_42542401-A | rs2301137  | 12 | 12 | 6889210  | 4397   | 8.8829  | 0.5867 | 0.4545  | 5.9359 | JPT |
| B7        | GI_31745192-I | rs1057077  | 12 | 12 | 6892346  | 74     | 7.4856  | 0.5092 | -0.1799 | 5.9359 | JPT |
| B7        | GI_42542401-A | rs1057077  | 12 | 12 | 6892346  | 1261   | 10.6999 | 0.6532 | -0.4625 | 5.9359 | JPT |
| B7        | GI_31745192-I | rs7303722  | 12 | 12 | 6904084  | 11664  | 6.3005  | 0.4428 | -0.1729 | 5.9359 | JPT |
| B7        | GI_42542401-A | rs7303722  | 12 | 12 | 6904084  | 10477  | 8.0170  | 0.5365 | -0.4324 | 5.9359 | JPT |
| B7        | GI_31745192-I | rs7965269  | 12 | 12 | 6923283  | 30863  | 6.6424  | 0.4628 | 0.1862  | 5.9359 | JPT |
| B7        | GI_31745192-I | rs1044189  | 12 | 12 | 6923410  | 30990  | 6.7115  | 0.4588 | 0.2084  | 5.9359 | JPT |
| B7        | GI_42542401-A | rs1044189  | 12 | 12 | 6923410  | 29803  | 6.0411  | 0.4196 | 0.4573  | 5.9359 | JPT |
| CLECSF2   | GI_37577106-S | rs2908700  | 12 | 12 | 9895915  | 540    | 7.3790  | 0.5121 | 0.2962  | 6.033  | JPT |
| CLECSF2   | GI_37577106-S | rs33870    | 12 | 12 | 9899130  | 2675   | 7.9212  | 0.5233 | 0.2987  | 6.033  | JPT |
| CLECSF2   | GI_37577106-S | rs33872    | 12 | 12 | 9899269  | 2814   | 7.9212  | 0.5233 | 0.2987  | 6.033  | JPT |
| CLECSF2   | GI_37577106-S | rs253154   | 12 | 12 | 9902507  | 6052   | 7.5043  | 0.5276 | 0.2992  | 6.033  | JPT |
| CLECSF2   | GI_37577106-S | rs1597097  | 12 | 12 | 9911534  | 15079  | 7.8487  | 0.5280 | 0.2992  | 6.033  | JPT |
| PROL4     | GI_6005801-S  | rs10845279 | 12 | 12 | 11040978 | 150027 | 7.1562  | 0.5464 | 0.3031  | 7.1251 | JPT |
| MGC10946  | GI_13386481-S | rs12816251 | 12 | 12 | 21584175 | 10955  | 7.0571  | 0.4780 | -0.2966 | 6.8804 | JPT |
| ABCD2     | GI_21536379-S | rs1512943  | 12 | 12 | 37967148 | 265781 | 5.9981  | 0.4245 | 0.1239  | 5.724  | JPT |
| ABCD2     | GI_21536379-S | rs7956823  | 12 | 12 | 37968703 | 264226 | 5.9447  | 0.4137 | -0.1224 | 5.724  | JPT |
| ABCD2     | GI_21536379-S | rs7980595  | 12 | 12 | 38018697 | 214232 | 5.9447  | 0.4137 | -0.1224 | 5.724  | JPT |
| ABCD2     | GI_21536379-S | rs2292491  | 12 | 12 | 38047014 | 185915 | 5.9981  | 0.4245 | -0.1239 | 5.724  | JPT |
| ABCD2     | GI_21536379-S | rs7308138  | 12 | 12 | 38051775 | 181154 | 5.7603  | 0.4173 | -0.1186 | 5.724  | JPT |
| ABCD2     | GI_21536379-S | rs1512941  | 12 | 12 | 38054623 | 178306 | 5.9981  | 0.4245 | -0.1239 | 5.724  | JPT |
| ABCD2     | GI_21536379-S | rs2175675  | 12 | 12 | 38056086 | 176843 | 5.9981  | 0.4245 | -0.1239 | 5.724  | JPT |
| ABCD2     | GI_21536379-S | rs17127094 | 12 | 12 | 38064395 | 168534 | 6.0198  | 0.4258 | -0.1213 | 5.724  | JPT |
| ABCD2     | GI_21536379-S | rs7976275  | 12 | 12 | 38068994 | 163935 | 5.9447  | 0.4137 | 0.1224  | 5.724  | JPT |
| ABCD2     | GI_21536379-S | rs7966841  | 12 | 12 | 38071223 | 161706 | 5.9981  | 0.4245 | -0.1239 | 5.724  | JPT |
| ABCD2     | GI_21536379-S | rs12228013 | 12 | 12 | 38124082 | 108847 | 5.9981  | 0.4245 | 0.1239  | 5.724  | JPT |
| ABCD2     | GI_21536379-S | rs11172144 | 12 | 12 | 38125921 | 107008 | 5.9447  | 0.4137 | 0.1224  | 5.724  | JPT |
| ABCD2     | GI_21536379-S | rs11172162 | 12 | 12 | 38129079 | 103850 | 5.9447  | 0.4137 | 0.1224  | 5.724  | JPT |
| ABCD2     | GI_21536379-S | rs7294474  | 12 | 12 | 38132394 | 100535 | 5.8086  | 0.4127 | 0.1209  | 5.724  | JPT |
| ABCD2     | GI_21536379-S | rs11172259 | 12 | 12 | 38156087 | 76842  | 6.3565  | 0.4541 | 0.1265  | 5.724  | JPT |
| ABCD2     | GI_21536379-S | rs11172455 | 12 | 12 | 38203663 | 29266  | 5.9447  | 0.4137 | -0.1224 | 5.724  | JPT |
| ABCD2     | GI_21536379-S | rs7309234  | 12 | 12 | 38214702 | 18227  | 5.9342  | 0.4283 | 0.1130  | 5.724  | JPT |
| ABCD2     | GI_21536379-S | rs11172687 | 12 | 12 | 38260869 | 27940  | 5.9981  | 0.4245 | 0.1239  | 5.724  | JPT |
| ABCD2     | GI_21536379-S | rs10877173 | 12 | 12 | 38280941 | 48012  | 5.9447  | 0.4137 | 0.1224  | 5.724  | JPT |
| ABCD2     | GI_21536379-S | rs11172794 | 12 | 12 | 38285100 | 52171  | 5.9981  | 0.4245 | 0.1239  | 5.724  | JPT |
| ABCD2     | GI_21536379-S | rs11172848 | 12 | 12 | 38294223 | 61294  | 5.9447  | 0.4137 | -0.1224 | 5.724  | JPT |
| ABCD2     | GI_21536379-S | rs4072006  | 12 | 12 | 38300694 | 67765  | 5.7464  | 0.4088 | 0.1244  | 5.724  | JPT |
| KIAA1463  | GI_39930390-S | rs11169506 | 12 | 12 | 49297523 | 127392 | 9.8332  | 0.6763 | 0.8652  | 6.8692 | JPT |
| KIAA1463  | GI_39930390-S | rs876080   | 12 | 12 | 49317031 | 107884 | 9.2370  | 0.5937 | 0.8614  | 6.8692 | JPT |
| KIAA1463  | GI_39930390-S | rs12818741 | 12 | 12 | 49318682 | 106233 | 9.9556  | 0.6241 | 0.8797  | 6.8692 | JPT |
| KIAA1463  | GI_39930390-S | rs13378012 | 12 | 12 | 49326664 | 98251  | 9.5703  | 0.5993 | -0.8625 | 6.8692 | JPT |
| KIAA1463  | GI_39930390-S | rs11169520 | 12 | 12 | 49359790 | 65125  | 9.8523  | 0.6198 | -1.1528 | 6.8692 | JPT |
| KIAA1463  | GI_39930390-S | rs7137845  | 12 | 12 | 49367207 | 57708  | 9.2370  | 0.5937 | -0.8614 | 6.8692 | JPT |
| KIAA1463  | GI_39930390-S | rs2090852  | 12 | 12 | 49373198 | 51717  | 9.5703  | 0.5993 | -0.8625 | 6.8692 | JPT |
| KIAA1463  | GI_39930390-S | rs2139930  | 12 | 12 | 49375554 | 49361  | 9.2370  | 0.5937 | 0.8614  | 6.8692 | JPT |
| KIAA1463  | GI_39930390-S | rs11169524 | 12 | 12 | 49376001 | 48914  | 9.5703  | 0.5993 | -0.8625 | 6.8692 | JPT |
| KIAA1463  | GI_39930390-S | rs4388959  | 12 | 12 | 49414681 | 10234  | 9.5703  | 0.5993 | -0.8625 | 6.8692 | JPT |
| KIAA1463  | GI_39930390-S | rs3742062  | 12 | 12 | 49415099 | 9816   | 9.2370  | 0.5937 | 0.8614  | 6.8692 | JPT |
| KIAA1463  | GI_39930390-S | rs2280503  | 12 | 12 | 49424954 | 39     | 9.2370  | 0.5937 | -0.8614 | 6.8692 | JPT |
| KIAA1463  | GI_39930390-S | rs1047912  | 12 | 12 | 49425129 | 214    | 22.6186 | 0.9413 | 1.1024  | 6.8692 | JPT |
| KIAA1463  | GI_39930390-S | rs10876084 | 12 | 12 | 49451077 | 26162  | 9.2801  | 0.5956 | 0.8306  | 6.8692 | JPT |
| KIAA1463  | GI_39930390-S | rs12372718 | 12 | 12 | 49457357 | 32442  | 8.7878  | 0.5648 | 0.8433  | 6.8692 | JPT |
| KIAA1463  | GI_39930390-S | rs7133974  | 12 | 12 | 49470844 | 45929  | 7.8089  | 0.5260 | 0.8227  | 6.8692 | JPT |
| KIAA1463  | GI_39930390-S | rs11169567 | 12 | 12 | 49491205 | 66290  | 8.4717  | 0.5587 | -0.8424 | 6.8692 | JPT |
| KIAA1463  | GI_39930390-S | rs7306677  | 12 | 12 | 49492030 | 67115  | 9.3711  | 0.5908 | 0.8566  | 6.8692 | JPT |
| KIAA1463  | GI_39930390-S | rs11169571 | 12 | 12 | 49500032 | 75117  | 9.2744  | 0.6526 | -0.8783 | 6.8692 | JPT |
| KIAA1463  | GI_39930390-S | rs11169578 | 12 | 12 | 49505968 | 81053  | 8.7878  | 0.5648 | -0.8433 | 6.8692 | JPT |
| LOC283377 | GI_37542981-S | rs7302925  | 12 | 12 | 55147725 | 1805   | 8.6502  | 0.5671 | -0.4015 | 6.844  | JPT |
| LOC283377 | GI_37542981-S | rs2657880  | 12 | 12 | 55150037 | 507    | 8.6502  | 0.5671 | 0.4015  | 6.844  | JPT |

|               |               |            |    |    |          |       |        |        |         |        |     |
|---------------|---------------|------------|----|----|----------|-------|--------|--------|---------|--------|-----|
| LOC283377     | GI_37542981-S | rs1043011  | 12 | 12 | 55151307 | 1777  | 8.6502 | 0.5671 | -0.4015 | 6.844  | JPT |
| LOC283377     | GI_37542981-S | rs2638315  | 12 | 12 | 55151323 | 1793  | 7.3672 | 0.5115 | 0.3677  | 6.844  | JPT |
| LOC283377     | GI_37542981-S | rs2657879  | 12 | 12 | 55151605 | 2075  | 8.6502 | 0.5671 | -0.4015 | 6.844  | JPT |
| RBMS2         | GI_4506448-S  | rs3782235  | 12 | 12 | 55201814 | 67204 | 6.1181 | 0.4318 | 0.1325  | 5.7382 | JPT |
| RBMS2         | GI_4506448-S  | rs4759247  | 12 | 12 | 55205101 | 63917 | 6.1181 | 0.4318 | 0.1325  | 5.7382 | JPT |
| STAT6         | GI_23397677-S | rs324010   | 12 | 12 | 55768519 | 7074  | 7.8075 | 0.5259 | -0.3157 | 5.7858 | JPT |
| STAT6         | GI_23397677-S | rs324019   | 12 | 12 | 55772914 | 2679  | 7.9797 | 0.5615 | 0.3253  | 5.7858 | JPT |
| DKFZP586D0919 | GI_24308058-S | rs2069502  | 12 | 12 | 56430932 | 31547 | 5.8760 | 0.4169 | -0.3234 | 5.7683 | JPT |
| DKFZP586D0919 | GI_24308058-S | rs703842   | 12 | 12 | 56449006 | 13473 | 6.4826 | 0.4535 | -0.3351 | 5.7683 | JPT |
| DKFZP586D0919 | GI_24308058-S | rs10877015 | 12 | 12 | 56454055 | 8424  | 6.3943 | 0.4647 | 0.3413  | 5.7683 | JPT |
| DKFZP586D0919 | GI_24308058-S | rs11172333 | 12 | 12 | 56456602 | 5877  | 6.3324 | 0.4369 | 0.3284  | 5.7683 | JPT |
| DKFZP586D0919 | GI_24308058-S | rs10877019 | 12 | 12 | 56459196 | 3283  | 6.3324 | 0.4369 | 0.3284  | 5.7683 | JPT |
| DKFZP586D0919 | GI_24308058-S | rs8181644  | 12 | 12 | 56459733 | 2746  | 6.3324 | 0.4369 | -0.3284 | 5.7683 | JPT |
| DKFZP586D0919 | GI_24308058-S | rs923829   | 12 | 12 | 56460573 | 1906  | 6.4826 | 0.4535 | 0.3351  | 5.7683 | JPT |
| DKFZP586D0919 | GI_24308058-S | rs11172335 | 12 | 12 | 56461468 | 1011  | 6.5592 | 0.4580 | 0.3384  | 5.7683 | JPT |
| DKFZP586D0919 | GI_24308058-S | rs10431552 | 12 | 12 | 56464415 | 1936  | 6.3324 | 0.4369 | -0.3284 | 5.7683 | JPT |
| DKFZP586D0919 | GI_24308058-S | rs6581155  | 12 | 12 | 56464429 | 1950  | 6.3324 | 0.4369 | 0.3284  | 5.7683 | JPT |
| DKFZP586D0919 | GI_24308058-S | rs724834   | 12 | 12 | 56466683 | 4204  | 6.4826 | 0.4535 | -0.3351 | 5.7683 | JPT |
| DKFZP586D0919 | GI_24308058-S | rs11172343 | 12 | 12 | 56474424 | 11945 | 6.3324 | 0.4369 | -0.3284 | 5.7683 | JPT |
| DKFZP586D0919 | GI_24308058-S | rs11172344 | 12 | 12 | 56479715 | 17236 | 6.4826 | 0.4535 | -0.3351 | 5.7683 | JPT |
| DKFZP586D0919 | GI_24308058-S | rs3825079  | 12 | 12 | 56489621 | 27142 | 6.3324 | 0.4369 | -0.3284 | 5.7683 | JPT |
| DKFZP586D0919 | GI_24308058-S | rs1021469  | 12 | 12 | 56494431 | 31952 | 7.0009 | 0.4830 | 0.3467  | 5.7683 | JPT |
| DKFZP586D0919 | GI_24308058-S | rs11172349 | 12 | 12 | 56498795 | 36316 | 6.3324 | 0.4369 | -0.3284 | 5.7683 | JPT |
| DKFZP586D0919 | GI_24308058-S | rs11172351 | 12 | 12 | 56499752 | 37273 | 6.3324 | 0.4369 | 0.3284  | 5.7683 | JPT |
| KUB3          | GI_32698766-S | rs10431506 | 12 | 12 | 56597791 | 38965 | 7.4706 | 0.5084 | 0.3144  | 5.5666 | JPT |
| KUB3          | GI_32698766-S | rs10747788 | 12 | 12 | 56601605 | 35151 | 8.3311 | 0.5519 | -0.3318 | 5.5666 | JPT |
| KUB3          | GI_32698766-S | rs10877040 | 12 | 12 | 56612715 | 24041 | 8.4577 | 0.5494 | 0.3265  | 5.5666 | JPT |
| KUB3          | GI_32698766-S | rs10877041 | 12 | 12 | 56614767 | 21989 | 8.4577 | 0.5494 | 0.3265  | 5.5666 | JPT |
| KUB3          | GI_32698766-S | rs2372309  | 12 | 12 | 56616087 | 20669 | 8.3311 | 0.5519 | -0.3318 | 5.5666 | JPT |
| KUB3          | GI_32698766-S | rs3751325  | 12 | 12 | 56621893 | 14863 | 8.3311 | 0.5519 | 0.3318  | 5.5666 | JPT |
| KUB3          | GI_32698766-S | rs7977671  | 12 | 12 | 56644971 | 8215  | 5.8072 | 0.4126 | -0.2763 | 5.5666 | JPT |
| KUB3          | GI_32698766-S | rs11172399 | 12 | 12 | 56645265 | 8509  | 5.7196 | 0.4071 | -0.2835 | 5.5666 | JPT |
| KUB3          | GI_32698766-S | rs7954291  | 12 | 12 | 56646767 | 10011 | 5.8163 | 0.4058 | -0.2779 | 5.5666 | JPT |
| KUB3          | GI_32698766-S | rs11172400 | 12 | 12 | 56647237 | 10481 | 5.8163 | 0.4058 | 0.2779  | 5.5666 | JPT |
| KUB3          | GI_32698766-S | rs4760349  | 12 | 12 | 56647689 | 10933 | 5.7196 | 0.4071 | 0.2835  | 5.5666 | JPT |
| KUB3          | GI_32698766-S | rs7974557  | 12 | 12 | 56648046 | 11290 | 5.7196 | 0.4071 | 0.2835  | 5.5666 | JPT |
| KUB3          | GI_32698766-S | rs4362183  | 12 | 12 | 56649511 | 12755 | 5.6883 | 0.4052 | 0.2776  | 5.5666 | JPT |
| KUB3          | GI_32698766-S | rs11172408 | 12 | 12 | 56653747 | 16991 | 5.8163 | 0.4058 | -0.2779 | 5.5666 | JPT |
| KUB3          | GI_32698766-S | rs10877045 | 12 | 12 | 56653999 | 17243 | 5.6909 | 0.4053 | -0.2779 | 5.5666 | JPT |
| KUB3          | GI_32698766-S | rs11608333 | 12 | 12 | 56655013 | 18257 | 5.7196 | 0.4071 | -0.2835 | 5.5666 | JPT |
| KUB3          | GI_32698766-S | rs12366757 | 12 | 12 | 56656200 | 19444 | 5.8163 | 0.4058 | -0.2779 | 5.5666 | JPT |
| KUB3          | GI_32698766-S | rs12366794 | 12 | 12 | 56656390 | 19634 | 5.8163 | 0.4058 | 0.2779  | 5.5666 | JPT |
| KUB3          | GI_32698766-S | rs11172410 | 12 | 12 | 56657331 | 20575 | 5.7008 | 0.4059 | -0.2772 | 5.5666 | JPT |
| KUB3          | GI_32698766-S | rs11172412 | 12 | 12 | 56660351 | 23595 | 5.8163 | 0.4058 | -0.2779 | 5.5666 | JPT |
| KUB3          | GI_32698766-S | rs12827878 | 12 | 12 | 56661171 | 24415 | 5.8637 | 0.4239 | -0.2743 | 5.5666 | JPT |
| KUB3          | GI_32698766-S | rs10877047 | 12 | 12 | 56661856 | 25100 | 5.7196 | 0.4071 | 0.2835  | 5.5666 | JPT |
| KUB3          | GI_32698766-S | rs1848129  | 12 | 12 | 56664276 | 27520 | 5.8163 | 0.4058 | -0.2779 | 5.5666 | JPT |
| KUB3          | GI_32698766-S | rs2372379  | 12 | 12 | 56665062 | 28306 | 5.7437 | 0.4163 | -0.2928 | 5.5666 | JPT |
| KUB3          | GI_32698766-S | rs7960942  | 12 | 12 | 56669847 | 33091 | 5.8163 | 0.4058 | -0.2779 | 5.5666 | JPT |
| KUB3          | GI_32698766-S | rs12828647 | 12 | 12 | 56670683 | 33927 | 5.8163 | 0.4058 | 0.2779  | 5.5666 | JPT |
| KUB3          | GI_32698766-S | rs10506393 | 12 | 12 | 56672989 | 36233 | 5.7196 | 0.4071 | -0.2835 | 5.5666 | JPT |
| KUB3          | GI_32698766-S | rs1466973  | 12 | 12 | 56673964 | 37208 | 5.7196 | 0.4071 | 0.2835  | 5.5666 | JPT |
| KUB3          | GI_32698766-S | rs1605333  | 12 | 12 | 56674499 | 37743 | 5.8163 | 0.4058 | 0.2779  | 5.5666 | JPT |
| KUB3          | GI_32698766-S | rs11172418 | 12 | 12 | 56675719 | 38963 | 6.7115 | 0.5013 | -0.3050 | 5.5666 | JPT |
| KUB3          | GI_32698766-S | rs11608939 | 12 | 12 | 56677593 | 40837 | 6.5597 | 0.4580 | -0.3034 | 5.5666 | JPT |
| KUB3          | GI_32698766-S | rs7975805  | 12 | 12 | 56678888 | 42132 | 6.5096 | 0.5286 | 0.2961  | 5.5666 | JPT |
| KUB3          | GI_32698766-S | rs11172420 | 12 | 12 | 56679770 | 43014 | 5.8163 | 0.4058 | -0.2779 | 5.5666 | JPT |
| KUB3          | GI_32698766-S | rs3913866  | 12 | 12 | 56680853 | 44097 | 5.8163 | 0.4058 | 0.2779  | 5.5666 | JPT |
| KUB3          | GI_32698766-S | rs7963367  | 12 | 12 | 56682940 | 46184 | 5.8163 | 0.4058 | 0.2779  | 5.5666 | JPT |

|          |               |            |    |    |           |        |         |        |         |        |     |
|----------|---------------|------------|----|----|-----------|--------|---------|--------|---------|--------|-----|
| KUB3     | GI_32698766-S | rs1506888  | 12 | 12 | 56683240  | 46484  | 5.7196  | 0.4071 | 0.2835  | 5.5666 | JPT |
| KUB3     | GI_32698766-S | rs951901   | 12 | 12 | 56684632  | 47876  | 5.7196  | 0.4071 | 0.2835  | 5.5666 | JPT |
| KUB3     | GI_32698766-S | rs11172425 | 12 | 12 | 56703089  | 66333  | 5.7183  | 0.4225 | 0.2986  | 5.5666 | JPT |
| KUB3     | GI_32698766-S | rs2659646  | 12 | 12 | 56746138  | 109382 | 5.9984  | 0.4404 | -0.2927 | 5.5666 | JPT |
| FLJ13615 | GI_13376688-S | rs11104738 | 12 | 12 | 87003315  | 4737   | 7.1523  | 0.4914 | 0.2220  | 5.5004 | JPT |
| FLJ13615 | GI_13376688-S | rs11104775 | 12 | 12 | 87142158  | 134106 | 7.7232  | 0.5133 | -0.2279 | 5.5004 | JPT |
| FLJ13615 | GI_13376688-S | rs11104789 | 12 | 12 | 87181269  | 173217 | 7.2460  | 0.4883 | -0.2193 | 5.5004 | JPT |
| FLJ13615 | GI_13376688-S | rs11104790 | 12 | 12 | 87181713  | 173661 | 6.3540  | 0.4382 | 0.2149  | 5.5004 | JPT |
| FLJ13615 | GI_13376688-S | rs11104800 | 12 | 12 | 87195529  | 187477 | 6.3019  | 0.4351 | -0.2157 | 5.5004 | JPT |
| FLJ13615 | GI_13376688-S | rs7484757  | 12 | 12 | 87322908  | 314856 | 5.5336  | 0.3953 | 0.1879  | 5.5004 | JPT |
| FLJ13615 | GI_13376688-S | rs10858729 | 12 | 12 | 87323634  | 315582 | 5.6230  | 0.4010 | 0.1929  | 5.5004 | JPT |
| FLJ13615 | GI_13376688-S | rs10777115 | 12 | 12 | 87328072  | 320020 | 5.6230  | 0.4010 | -0.1929 | 5.5004 | JPT |
| FLJ13615 | GI_13376688-S | rs11104867 | 12 | 12 | 87330321  | 322269 | 5.6551  | 0.3958 | 0.1886  | 5.5004 | JPT |
| FLJ13615 | GI_13376688-S | rs11104868 | 12 | 12 | 87330910  | 322858 | 5.6551  | 0.3958 | 0.1886  | 5.5004 | JPT |
| FLJ13615 | GI_13376688-S | rs7487416  | 12 | 12 | 87331987  | 323935 | 5.6230  | 0.4010 | -0.1929 | 5.5004 | JPT |
| FLJ13615 | GI_13376688-S | rs10858733 | 12 | 12 | 87338105  | 330053 | 6.6382  | 0.4970 | -0.2133 | 5.5004 | JPT |
| FLJ13615 | GI_13376688-S | rs7487564  | 12 | 12 | 87340431  | 332379 | 5.6551  | 0.3958 | 0.1886  | 5.5004 | JPT |
| FLJ13615 | GI_13376688-S | rs7979666  | 12 | 12 | 87346295  | 338243 | 5.6551  | 0.3958 | -0.1886 | 5.5004 | JPT |
| FLJ13615 | GI_13376688-S | rs10858741 | 12 | 12 | 87347886  | 339834 | 5.6230  | 0.4010 | -0.1929 | 5.5004 | JPT |
| FLJ13615 | GI_13376688-S | rs4842620  | 12 | 12 | 87348687  | 340635 | 5.6551  | 0.3958 | -0.1886 | 5.5004 | JPT |
| FLJ13615 | GI_13376688-S | rs1162374  | 12 | 12 | 87354011  | 345959 | 5.8593  | 0.4316 | 0.2002  | 5.5004 | JPT |
| FLJ13615 | GI_13376688-S | rs1162371  | 12 | 12 | 87384671  | 376619 | 5.8909  | 0.4179 | 0.2150  | 5.5004 | JPT |
| FLJ13615 | GI_13376688-S | rs1508594  | 12 | 12 | 87390359  | 382307 | 5.9272  | 0.4126 | 0.2104  | 5.5004 | JPT |
| FLJ13615 | GI_13376688-S | rs931936   | 12 | 12 | 87496400  | 488348 | 6.0437  | 0.4197 | -0.2034 | 5.5004 | JPT |
| FLJ13615 | GI_13376688-S | rs3990713  | 12 | 12 | 87503410  | 495358 | 5.9346  | 0.4283 | 0.2204  | 5.5004 | JPT |
| FLJ13615 | GI_13376688-S | rs1703078  | 12 | 12 | 87521351  | 513299 | 5.8151  | 0.4131 | -0.2067 | 5.5004 | JPT |
| GALNT4   | GI_34452724-S | rs10745506 | 12 | 12 | 88413969  | 4015   | 6.3929  | 0.4482 | 0.3493  | 5.6369 | JPT |
| CHPT1    | GI_9910383-S  | rs2695290  | 12 | 12 | 100590312 | 29119  | 7.1404  | 0.4826 | 0.4703  | 5.8316 | JPT |
| CHPT1    | GI_9910383-S  | rs2695282  | 12 | 12 | 100591970 | 27461  | 6.0178  | 0.4181 | 0.4548  | 5.8316 | JPT |
| CHPT1    | GI_9910383-S  | rs2695281  | 12 | 12 | 100592467 | 26964  | 5.8978  | 0.4183 | 0.4619  | 5.8316 | JPT |
| CHPT1    | GI_9910383-S  | rs2559855  | 12 | 12 | 100592548 | 26883  | 6.0178  | 0.4181 | -0.4548 | 5.8316 | JPT |
| CHPT1    | GI_9910383-S  | rs3809260  | 12 | 12 | 100593485 | 25946  | 5.8447  | 0.4227 | -0.4574 | 5.8316 | JPT |
| MGC40397 | GI_22748696-S | rs4331189  | 12 | 12 | 103889112 | 1126   | 7.1735  | 0.5096 | -0.2050 | 6.0042 | JPT |
| MGC10854 | GI_40254984-S | rs16940666 | 12 | 12 | 108805877 | 11456  | 5.5733  | 0.4212 | -0.2568 | 5.498  | JPT |
| MGC10854 | GI_40254984-S | rs925368   | 12 | 12 | 108853699 | 36366  | 5.6929  | 0.4054 | -0.3115 | 5.498  | JPT |
| OAS1     | GI_8051620-I  | rs2057778  | 12 | 12 | 111813516 | 6574   | 7.2869  | 0.4904 | 0.4877  | 6.2995 | JPT |
| OAS1     | GI_8051622-I  | rs2057778  | 12 | 12 | 111813516 | 4742   | 10.3692 | 0.6318 | -0.7090 | 6.2995 | JPT |
| OAS1     | GI_8051620-I  | rs2285934  | 12 | 12 | 111814240 | 5850   | 7.2813  | 0.4984 | -0.4946 | 6.2995 | JPT |
| OAS1     | GI_8051622-I  | rs2285934  | 12 | 12 | 111814240 | 4018   | 10.0505 | 0.6279 | 0.7078  | 6.2995 | JPT |
| OAS1     | GI_8051620-I  | rs10774671 | 12 | 12 | 111819913 | 177    | 6.6249  | 0.4699 | 0.4744  | 6.2995 | JPT |
| OAS1     | GI_8051622-I  | rs10774671 | 12 | 12 | 111819913 | 1655   | 10.2785 | 0.6459 | -0.7343 | 6.2995 | JPT |
| OAS1     | GI_8051620-I  | rs3177979  | 12 | 12 | 111819929 | 161    | 6.4269  | 0.4502 | 0.4656  | 6.2995 | JPT |
| OAS1     | GI_8051622-I  | rs3177979  | 12 | 12 | 111819929 | 1671   | 7.6362  | 0.5171 | -0.6370 | 6.2995 | JPT |
| OAS1     | GI_8051620-I  | rs1051042  | 12 | 12 | 111819957 | 133    | 7.2813  | 0.4984 | 0.4946  | 6.2995 | JPT |
| OAS1     | GI_8051622-I  | rs1051042  | 12 | 12 | 111819957 | 1699   | 10.0505 | 0.6279 | -0.7078 | 6.2995 | JPT |
| OAS1     | GI_8051620-I  | rs2660     | 12 | 12 | 111820162 | 72     | 7.2813  | 0.4984 | 0.4946  | 6.2995 | JPT |
| OAS1     | GI_8051622-I  | rs2660     | 12 | 12 | 111820162 | 1904   | 10.0505 | 0.6279 | -0.7078 | 6.2995 | JPT |
| OAS1     | GI_8051620-I  | rs7135577  | 12 | 12 | 111820826 | 736    | 7.2698  | 0.4977 | -0.5010 | 6.2995 | JPT |
| OAS1     | GI_8051622-I  | rs7135577  | 12 | 12 | 111820826 | 2568   | 9.7698  | 0.6164 | 0.6862  | 6.2995 | JPT |
| OAS1     | GI_8051620-I  | rs4767027  | 12 | 12 | 111821877 | 1787   | 7.2813  | 0.4984 | 0.4946  | 6.2995 | JPT |
| OAS1     | GI_8051622-I  | rs4767027  | 12 | 12 | 111821877 | 3619   | 10.0505 | 0.6279 | -0.7078 | 6.2995 | JPT |
| OAS1     | GI_8051620-I  | rs4767028  | 12 | 12 | 111821908 | 1818   | 7.2869  | 0.4904 | -0.4877 | 6.2995 | JPT |
| OAS1     | GI_8051622-I  | rs4767028  | 12 | 12 | 111821908 | 3650   | 10.3692 | 0.6318 | 0.7090  | 6.2995 | JPT |
| OAS1     | GI_8051620-I  | rs4767029  | 12 | 12 | 111822038 | 1948   | 7.2869  | 0.4904 | 0.4877  | 6.2995 | JPT |
| OAS1     | GI_8051622-I  | rs4767029  | 12 | 12 | 111822038 | 3780   | 10.3692 | 0.6318 | -0.7090 | 6.2995 | JPT |
| OAS1     | GI_8051620-I  | rs4767030  | 12 | 12 | 111822297 | 2207   | 7.2869  | 0.4904 | -0.4877 | 6.2995 | JPT |
| OAS1     | GI_8051622-I  | rs4767030  | 12 | 12 | 111822297 | 4039   | 10.3692 | 0.6318 | 0.7090  | 6.2995 | JPT |
| OAS1     | GI_8051620-I  | rs10850092 | 12 | 12 | 111822423 | 2333   | 7.2869  | 0.4904 | -0.4877 | 6.2995 | JPT |
| OAS1     | GI_8051622-I  | rs10850092 | 12 | 12 | 111822423 | 4165   | 10.3692 | 0.6318 | 0.7090  | 6.2995 | JPT |

|           |               |            |    |    |           |       |         |        |         |        |     |
|-----------|---------------|------------|----|----|-----------|-------|---------|--------|---------|--------|-----|
| OAS1      | GI_8051622-I  | rs6489864  | 12 | 12 | 111822745 | 4487  | 10.2528 | 0.6272 | 0.7174  | 6.2995 | JPT |
| OAS1      | GI_8051622-I  | rs6489865  | 12 | 12 | 111823022 | 4764  | 10.2528 | 0.6272 | 0.7174  | 6.2995 | JPT |
| OAS1      | GI_8051620-I  | rs10850093 | 12 | 12 | 111823188 | 3098  | 7.2813  | 0.4984 | -0.4946 | 6.2995 | JPT |
| OAS1      | GI_8051622-I  | rs10850093 | 12 | 12 | 111823188 | 4930  | 10.0505 | 0.6279 | 0.7078  | 6.2995 | JPT |
| OAS1      | GI_8051622-I  | rs10850094 | 12 | 12 | 111823283 | 5025  | 10.2528 | 0.6272 | -0.7174 | 6.2995 | JPT |
| OAS1      | GI_8051622-I  | rs10850095 | 12 | 12 | 111823295 | 5037  | 10.2528 | 0.6272 | -0.7174 | 6.2995 | JPT |
| OAS1      | GI_8051622-I  | rs10850096 | 12 | 12 | 111823506 | 5248  | 10.2528 | 0.6272 | -0.7174 | 6.2995 | JPT |
| OAS1      | GI_8051622-I  | rs10850097 | 12 | 12 | 111823837 | 5579  | 9.9524  | 0.6239 | 0.7168  | 6.2995 | JPT |
| OAS1      | GI_8051622-I  | rs10774673 | 12 | 12 | 111823878 | 5620  | 10.2094 | 0.6343 | 0.7362  | 6.2995 | JPT |
| OAS1      | GI_8051622-I  | rs10774674 | 12 | 12 | 111823894 | 5636  | 10.2528 | 0.6272 | -0.7174 | 6.2995 | JPT |
| OAS1      | GI_8051622-I  | rs11066452 | 12 | 12 | 111824294 | 6036  | 10.2528 | 0.6272 | 0.7174  | 6.2995 | JPT |
| OAS1      | GI_8051622-I  | rs10850098 | 12 | 12 | 111824778 | 6520  | 10.2528 | 0.6272 | -0.7174 | 6.2995 | JPT |
| OAS1      | GI_8051622-I  | rs10774676 | 12 | 12 | 111825127 | 6869  | 10.2528 | 0.6272 | 0.7174  | 6.2995 | JPT |
| OAS1      | GI_8051622-I  | rs10774677 | 12 | 12 | 111825141 | 6883  | 10.2094 | 0.6343 | -0.7362 | 6.2995 | JPT |
| OAS1      | GI_8051622-I  | rs4766663  | 12 | 12 | 111825694 | 7436  | 10.2528 | 0.6272 | 0.7174  | 6.2995 | JPT |
| OAS1      | GI_8051622-I  | rs4766664  | 12 | 12 | 111825717 | 7459  | 10.2094 | 0.6343 | -0.7362 | 6.2995 | JPT |
| OAS1      | GI_8051622-I  | rs4766665  | 12 | 12 | 111825829 | 7571  | 10.2528 | 0.6272 | -0.7174 | 6.2995 | JPT |
| OAS1      | GI_8051622-I  | rs4988618  | 12 | 12 | 111825898 | 7640  | 9.9009  | 0.6218 | -0.7249 | 6.2995 | JPT |
| OAS1      | GI_8051622-I  | rs6489868  | 12 | 12 | 111826412 | 8154  | 10.2528 | 0.6272 | -0.7174 | 6.2995 | JPT |
| OAS1      | GI_8051622-I  | rs10850100 | 12 | 12 | 111827232 | 8974  | 9.4579  | 0.6214 | -0.7291 | 6.2995 | JPT |
| OAS1      | GI_8051622-I  | rs4766673  | 12 | 12 | 111827881 | 9623  | 10.2528 | 0.6272 | 0.7174  | 6.2995 | JPT |
| OAS1      | GI_8051622-I  | rs4766674  | 12 | 12 | 111827921 | 9663  | 10.2528 | 0.6272 | 0.7174  | 6.2995 | JPT |
| OAS1      | GI_8051622-I  | rs4766675  | 12 | 12 | 111828173 | 9915  | 10.2528 | 0.6272 | 0.7174  | 6.2995 | JPT |
| OAS1      | GI_8051622-I  | rs4766676  | 12 | 12 | 111828301 | 10043 | 9.9009  | 0.6218 | 0.7249  | 6.2995 | JPT |
| OAS1      | GI_8051622-I  | rs7315441  | 12 | 12 | 111828407 | 10149 | 10.2528 | 0.6272 | 0.7174  | 6.2995 | JPT |
| OAS1      | GI_8051622-I  | rs7305035  | 12 | 12 | 111828523 | 10265 | 8.4019  | 0.5825 | -0.7137 | 6.2995 | JPT |
| OAS1      | GI_8051622-I  | rs7316586  | 12 | 12 | 111828548 | 10290 | 9.6033  | 0.6095 | 0.6946  | 6.2995 | JPT |
| OAS1      | GI_8051622-I  | rs916972   | 12 | 12 | 111828769 | 10511 | 9.9400  | 0.6234 | -0.7158 | 6.2995 | JPT |
| OAS1      | GI_8051622-I  | rs7134391  | 12 | 12 | 111829411 | 11153 | 10.2528 | 0.6272 | -0.7174 | 6.2995 | JPT |
| OAS1      | GI_8051622-I  | rs1859336  | 12 | 12 | 111830029 | 11771 | 10.2528 | 0.6272 | -0.7174 | 6.2995 | JPT |
| OAS1      | GI_8051622-I  | rs1859335  | 12 | 12 | 111830045 | 11787 | 9.7558  | 0.6248 | -0.7216 | 6.2995 | JPT |
| OAS1      | GI_8051622-I  | rs2384071  | 12 | 12 | 111830063 | 11805 | 9.9009  | 0.6218 | 0.7249  | 6.2995 | JPT |
| OAS1      | GI_8051622-I  | rs2384072  | 12 | 12 | 111830142 | 11884 | 8.0166  | 0.5729 | -0.7139 | 6.2995 | JPT |
| OAS1      | GI_8051622-I  | rs2384073  | 12 | 12 | 111830315 | 12057 | 8.1589  | 0.6001 | 0.7955  | 6.2995 | JPT |
| OAS1      | GI_8051622-I  | rs6489874  | 12 | 12 | 111830615 | 12357 | 8.8655  | 0.6141 | 0.7660  | 6.2995 | JPT |
| OAS1      | GI_8051622-I  | rs6489878  | 12 | 12 | 111830845 | 12587 | 7.9636  | 0.5902 | 0.7840  | 6.2995 | JPT |
| OAS1      | GI_8051622-I  | rs7298184  | 12 | 12 | 111830969 | 12711 | 8.9424  | 0.6080 | -0.7108 | 6.2995 | JPT |
| OAS1      | GI_8051622-I  | rs7132404  | 12 | 12 | 111831325 | 13067 | 10.2528 | 0.6272 | -0.7174 | 6.2995 | JPT |
| OAS1      | GI_8051622-I  | rs4767036  | 12 | 12 | 111831897 | 13639 | 8.9730  | 0.6093 | -0.7219 | 6.2995 | JPT |
| OAS1      | GI_8051622-I  | rs7967461  | 12 | 12 | 111832479 | 14221 | 9.9009  | 0.6218 | -0.7249 | 6.2995 | JPT |
| OAS1      | GI_8051622-I  | rs1859333  | 12 | 12 | 111833686 | 15428 | 9.9400  | 0.6234 | 0.7158  | 6.2995 | JPT |
| OAS1      | GI_8051622-I  | rs1859332  | 12 | 12 | 111833834 | 15576 | 9.2863  | 0.6048 | 0.7040  | 6.2995 | JPT |
| OAS1      | GI_8051622-I  | rs7966314  | 12 | 12 | 111835259 | 17001 | 10.2528 | 0.6272 | 0.7174  | 6.2995 | JPT |
| OAS1      | GI_8051622-I  | rs4767037  | 12 | 12 | 111835524 | 17266 | 9.5208  | 0.6149 | 0.7130  | 6.2995 | JPT |
| OAS1      | GI_8051622-I  | rs3759375  | 12 | 12 | 111836308 | 18050 | 9.0280  | 0.6024 | -0.7151 | 6.2995 | JPT |
| OAS1      | GI_8051622-I  | rs4767040  | 12 | 12 | 111836737 | 18479 | 10.2528 | 0.6272 | -0.7174 | 6.2995 | JPT |
| OAS1      | GI_8051622-I  | rs10774679 | 12 | 12 | 111837468 | 19210 | 9.9400  | 0.6234 | 0.7158  | 6.2995 | JPT |
| OAS1      | GI_8051622-I  | rs7132797  | 12 | 12 | 111837756 | 19498 | 8.8405  | 0.6033 | 0.7350  | 6.2995 | JPT |
| OAS1      | GI_8051622-I  | rs4238033  | 12 | 12 | 111840801 | 22543 | 10.2528 | 0.6272 | -0.7174 | 6.2995 | JPT |
| OAS1      | GI_8051622-I  | rs10735079 | 12 | 12 | 111842728 | 24470 | 10.2528 | 0.6272 | -0.7174 | 6.2995 | JPT |
| OAS1      | GI_8051622-I  | rs7977345  | 12 | 12 | 111843428 | 25170 | 9.7106  | 0.6229 | 0.7181  | 6.2995 | JPT |
| OAS1      | GI_8051622-I  | rs6489881  | 12 | 12 | 111843937 | 25679 | 10.2528 | 0.6272 | 0.7174  | 6.2995 | JPT |
| OAS1      | GI_8051622-I  | rs7131998  | 12 | 12 | 111844415 | 26157 | 7.4768  | 0.5005 | 0.6339  | 6.2995 | JPT |
| LOC387895 | GI_41149833-S | rs1706510  | 12 | 12 | 125741755 | 15648 | 11.0616 | 0.6665 | 0.5360  | 9.6076 | JPT |
| LOC387895 | GI_41149833-S | rs7133178  | 12 | 12 | 125741788 | 15615 | 11.4566 | 0.6805 | -0.6062 | 9.6076 | JPT |
| LOC387895 | GI_41149833-S | rs7311054  | 12 | 12 | 125747922 | 9481  | 11.4566 | 0.6805 | -0.6062 | 9.6076 | JPT |
| LOC387895 | GI_41149833-S | rs7304181  | 12 | 12 | 125750915 | 6488  | 11.7405 | 0.6816 | -0.6060 | 9.6076 | JPT |
| LOC387895 | GI_41149833-S | rs11058793 | 12 | 12 | 125754644 | 2759  | 12.9666 | 0.7204 | 0.5263  | 9.6076 | JPT |
| hmm2656   | hmm2656-S     | rs11058793 | 12 | 12 | 125754644 | 1098  | 10.1600 | 0.6235 | 0.4030  | 9.1324 | JPT |

|           |               |            |    |    |           |        |         |        |         |        |     |
|-----------|---------------|------------|----|----|-----------|--------|---------|--------|---------|--------|-----|
| LOC387895 | GI_41149833-S | rs12425458 | 12 | 12 | 125763746 | 6343   | 13.7664 | 0.7432 | 0.5183  | 9.6076 | JPT |
| hmm2656   | hmm2656-S     | rs12425458 | 12 | 12 | 125763746 | 8004   | 10.6878 | 0.6440 | 0.3970  | 9.1324 | JPT |
| LOC387895 | GI_41149833-S | rs12426807 | 12 | 12 | 125765841 | 8438   | 13.7664 | 0.7432 | -0.5183 | 9.6076 | JPT |
| hmm2656   | hmm2656-S     | rs12426807 | 12 | 12 | 125765841 | 10099  | 10.6878 | 0.6440 | -0.3970 | 9.1324 | JPT |
| LOC387895 | GI_41149833-S | rs1706505  | 12 | 12 | 125780284 | 22881  | 15.6004 | 0.7965 | -0.5532 | 9.6076 | JPT |
| hmm2656   | hmm2656-S     | rs1706505  | 12 | 12 | 125780284 | 24542  | 12.8880 | 0.7265 | -0.4343 | 9.1324 | JPT |
| LOC387895 | GI_41149833-S | rs10773325 | 12 | 12 | 125780353 | 22950  | 15.0084 | 0.7990 | 0.5563  | 9.6076 | JPT |
| hmm2656   | hmm2656-S     | rs10773325 | 12 | 12 | 125780353 | 24611  | 12.2330 | 0.7240 | 0.4338  | 9.1324 | JPT |
| LOC387895 | GI_41149833-S | rs6489124  | 12 | 12 | 125780733 | 23330  | 15.9748 | 0.7970 | -0.5528 | 9.6076 | JPT |
| hmm2656   | hmm2656-S     | rs6489124  | 12 | 12 | 125780733 | 24991  | 13.2042 | 0.7274 | -0.4342 | 9.1324 | JPT |
| LOC387895 | GI_41149833-S | rs10847212 | 12 | 12 | 125781295 | 23892  | 12.9794 | 0.7208 | -0.5107 | 9.6076 | JPT |
| hmm2656   | hmm2656-S     | rs10847212 | 12 | 12 | 125781295 | 25553  | 10.9949 | 0.6554 | -0.4004 | 9.1324 | JPT |
| LOC387895 | GI_41149833-S | rs1617132  | 12 | 12 | 125781577 | 24174  | 15.5943 | 0.7963 | -0.5530 | 9.6076 | JPT |
| hmm2656   | hmm2656-S     | rs1617132  | 12 | 12 | 125781577 | 25835  | 12.9466 | 0.7283 | -0.4353 | 9.1324 | JPT |
| B3GTL     | GI_34996530-S | rs7991707  | 13 | 13 | 30770181  | 33374  | 6.5829  | 0.4515 | -0.1914 | 6.2052 | JPT |
| B3GTL     | GI_34996530-S | rs876540   | 13 | 13 | 30803449  | 106    | 7.8905  | 0.5217 | -0.2252 | 6.2052 | JPT |
| B3GTL     | GI_34996530-S | rs912603   | 13 | 13 | 30803641  | 86     | 8.1259  | 0.5507 | 0.2389  | 6.2052 | JPT |
| B3GTL     | GI_34996530-S | rs2056443  | 13 | 13 | 30803942  | 387    | 7.5568  | 0.5130 | 0.2295  | 6.2052 | JPT |
| B3GTL     | GI_34996530-S | rs13080    | 13 | 13 | 30804141  | 586    | 7.7120  | 0.5127 | -0.2264 | 6.2052 | JPT |
| B3GTL     | GI_34996530-S | rs4057     | 13 | 13 | 30804291  | 736    | 7.4164  | 0.5056 | 0.2296  | 6.2052 | JPT |
| B3GTL     | GI_34996530-S | rs1409379  | 13 | 13 | 30805741  | 2186   | 7.4164  | 0.5056 | -0.2296 | 6.2052 | JPT |
| B3GTL     | GI_34996530-S | rs9545125  | 13 | 13 | 30809822  | 6267   | 7.4957  | 0.5098 | 0.2227  | 6.2052 | JPT |
| B3GTL     | GI_34996530-S | rs7999260  | 13 | 13 | 30810323  | 6768   | 7.9379  | 0.5502 | 0.2486  | 6.2052 | JPT |
| B3GTL     | GI_34996530-S | rs7983430  | 13 | 13 | 30819717  | 16162  | 6.9818  | 0.4903 | 0.2266  | 6.2052 | JPT |
| B3GTL     | GI_34996530-S | rs9574660  | 13 | 13 | 30819922  | 16367  | 7.7208  | 0.5131 | 0.2299  | 6.2052 | JPT |
| B3GTL     | GI_34996530-S | rs4943341  | 13 | 13 | 30822013  | 18458  | 7.7208  | 0.5131 | 0.2299  | 6.2052 | JPT |
| B3GTL     | GI_34996530-S | rs9601445  | 13 | 13 | 30822231  | 18676  | 6.8439  | 0.4911 | -0.2191 | 6.2052 | JPT |
| B3GTL     | GI_34996530-S | rs7333382  | 13 | 13 | 30825543  | 21988  | 7.0190  | 0.4840 | -0.2192 | 6.2052 | JPT |
| B3GTL     | GI_34996530-S | rs9531317  | 13 | 13 | 30837376  | 33821  | 6.4355  | 0.4588 | 0.2242  | 6.2052 | JPT |
| PFAAP5    | GI_7656970-S  | rs9595617  | 13 | 13 | 31955345  | 33933  | 6.2677  | 0.4331 | 0.3525  | 5.9823 | JPT |
| PFAAP5    | GI_7656970-S  | rs9315167  | 13 | 13 | 31967188  | 22090  | 6.2677  | 0.4331 | 0.3525  | 5.9823 | JPT |
| PFAAP5    | GI_7656970-S  | rs2239748  | 13 | 13 | 31999817  | 10539  | 6.2677  | 0.4331 | 0.3525  | 5.9823 | JPT |
| PFAAP5    | GI_7656970-S  | rs4941612  | 13 | 13 | 32021928  | 32650  | 6.2677  | 0.4331 | 0.3525  | 5.9823 | JPT |
| PFAAP5    | GI_7656970-S  | rs8000071  | 13 | 13 | 32023373  | 34095  | 6.2677  | 0.4331 | 0.3525  | 5.9823 | JPT |
| PFAAP5    | GI_7656970-S  | rs7984903  | 13 | 13 | 32024139  | 34861  | 6.2677  | 0.4331 | -0.3525 | 5.9823 | JPT |
| PFAAP5    | GI_7656970-S  | rs12323101 | 13 | 13 | 32041406  | 52128  | 6.2677  | 0.4331 | -0.3525 | 5.9823 | JPT |
| PFAAP5    | GI_7656970-S  | rs1123462  | 13 | 13 | 32043462  | 54184  | 6.2677  | 0.4331 | -0.3525 | 5.9823 | JPT |
| PFAAP5    | GI_7656970-S  | rs7332115  | 13 | 13 | 32045548  | 56270  | 6.2677  | 0.4331 | -0.3525 | 5.9823 | JPT |
| PFAAP5    | GI_7656970-S  | rs731413   | 13 | 13 | 32073656  | 84378  | 6.2677  | 0.4331 | -0.3525 | 5.9823 | JPT |
| PFAAP5    | GI_7656970-S  | rs9595893  | 13 | 13 | 32073793  | 84515  | 6.2677  | 0.4331 | 0.3525  | 5.9823 | JPT |
| PFAAP5    | GI_7656970-S  | rs9595908  | 13 | 13 | 32082288  | 93010  | 6.2677  | 0.4331 | -0.3525 | 5.9823 | JPT |
| PFAAP5    | GI_7656970-S  | rs11840502 | 13 | 13 | 32096709  | 107431 | 6.3197  | 0.4362 | -0.3286 | 5.9823 | JPT |
| PFAAP5    | GI_7656970-S  | rs9595948  | 13 | 13 | 32101656  | 112378 | 6.2677  | 0.4331 | -0.3525 | 5.9823 | JPT |
| PFAAP5    | GI_7656970-S  | rs7983457  | 13 | 13 | 32103934  | 114656 | 6.2677  | 0.4331 | -0.3525 | 5.9823 | JPT |
| PFAAP5    | GI_7656970-S  | rs12427832 | 13 | 13 | 32117033  | 127755 | 6.0002  | 0.4324 | -0.3508 | 5.9823 | JPT |
| PFAAP5    | GI_7656970-S  | rs3783267  | 13 | 13 | 32142856  | 153578 | 6.2677  | 0.4331 | -0.3525 | 5.9823 | JPT |
| PFAAP5    | GI_7656970-S  | rs9596075  | 13 | 13 | 32164284  | 175006 | 6.2677  | 0.4331 | -0.3525 | 5.9823 | JPT |
| PFAAP5    | GI_7656970-S  | rs9596076  | 13 | 13 | 32165652  | 176374 | 6.2677  | 0.4331 | 0.3525  | 5.9823 | JPT |
| PFAAP5    | GI_7656970-S  | rs17516171 | 13 | 13 | 32167051  | 177773 | 6.2677  | 0.4331 | -0.3525 | 5.9823 | JPT |
| PFAAP5    | GI_7656970-S  | rs3848087  | 13 | 13 | 32169774  | 180496 | 6.2677  | 0.4331 | 0.3525  | 5.9823 | JPT |
| PFAAP5    | GI_7656970-S  | rs9591252  | 13 | 13 | 32170434  | 181156 | 6.2677  | 0.4331 | 0.3525  | 5.9823 | JPT |
| PFAAP5    | GI_7656970-S  | rs969703   | 13 | 13 | 32180401  | 191123 | 6.1965  | 0.4365 | -0.3417 | 5.9823 | JPT |
| PFAAP5    | GI_7656970-S  | rs4057297  | 13 | 13 | 32203749  | 214471 | 6.2677  | 0.4331 | 0.3525  | 5.9823 | JPT |
| PFAAP5    | GI_7656970-S  | rs17516382 | 13 | 13 | 32207563  | 218285 | 6.2677  | 0.4331 | 0.3525  | 5.9823 | JPT |
| PFAAP5    | GI_7656970-S  | rs2213377  | 13 | 13 | 32215214  | 225936 | 6.2677  | 0.4331 | -0.3525 | 5.9823 | JPT |
| PFAAP5    | GI_7656970-S  | rs9591303  | 13 | 13 | 32220416  | 231138 | 6.2677  | 0.4331 | -0.3525 | 5.9823 | JPT |
| PFAAP5    | GI_7656970-S  | rs6561565  | 13 | 13 | 32223779  | 234501 | 6.2677  | 0.4331 | -0.3525 | 5.9823 | JPT |
| PFAAP5    | GI_7656970-S  | rs4942892  | 13 | 13 | 32226407  | 237129 | 6.2677  | 0.4331 | 0.3525  | 5.9823 | JPT |
| PFAAP5    | GI_7656970-S  | rs7322505  | 13 | 13 | 32228420  | 239142 | 6.2677  | 0.4331 | 0.3525  | 5.9823 | JPT |

|           |               |            |    |    |           |        |         |        |         |        |     |
|-----------|---------------|------------|----|----|-----------|--------|---------|--------|---------|--------|-----|
| PFAAP5    | GI_7656970-S  | rs9591311  | 13 | 13 | 32229477  | 240199 | 6.2677  | 0.4331 | 0.3525  | 5.9823 | JPT |
| PFAAP5    | GI_7656970-S  | rs4942897  | 13 | 13 | 32229753  | 240475 | 6.2677  | 0.4331 | -0.3525 | 5.9823 | JPT |
| PFAAP5    | GI_7656970-S  | rs7988089  | 13 | 13 | 32231876  | 242598 | 6.2677  | 0.4331 | 0.3525  | 5.9823 | JPT |
| PFAAP5    | GI_7656970-S  | rs2224883  | 13 | 13 | 32235891  | 246613 | 6.2677  | 0.4331 | 0.3525  | 5.9823 | JPT |
| PFAAP5    | GI_7656970-S  | rs7327412  | 13 | 13 | 32246568  | 257290 | 6.2677  | 0.4331 | -0.3525 | 5.9823 | JPT |
| PFAAP5    | GI_7656970-S  | rs9596233  | 13 | 13 | 32249016  | 259738 | 6.2677  | 0.4331 | 0.3525  | 5.9823 | JPT |
| PFAAP5    | GI_7656970-S  | rs7326102  | 13 | 13 | 32249995  | 260717 | 6.2677  | 0.4331 | 0.3525  | 5.9823 | JPT |
| PFAAP5    | GI_7656970-S  | rs7322668  | 13 | 13 | 32252436  | 263158 | 6.2677  | 0.4331 | -0.3525 | 5.9823 | JPT |
| PFAAP5    | GI_7656970-S  | rs17594908 | 13 | 13 | 32261565  | 272287 | 6.2677  | 0.4331 | 0.3525  | 5.9823 | JPT |
| LHFP      | GI_5031864-S  | rs9566425  | 13 | 13 | 38880144  | 64539  | 6.2387  | 0.4470 | 0.3775  | 6.1327 | JPT |
| LOC220097 | GI_20547709-S | rs198584   | 13 | 13 | 47933468  | 115929 | 6.4366  | 0.4508 | -0.2841 | 6.193  | JPT |
| TBC1D4    | GI_42660198-S | rs529638   | 13 | 13 | 74762518  | 5143   | 5.9678  | 0.4226 | 1.0186  | 5.6677 | JPT |
| TBC1D4    | GI_42660198-S | rs9543894  | 13 | 13 | 74765511  | 8136   | 7.9076  | 0.5310 | 0.8671  | 5.6677 | JPT |
| TBC1D4    | GI_42660198-S | rs507901   | 13 | 13 | 74767653  | 10278  | 10.7144 | 0.6627 | -0.8530 | 5.6677 | JPT |
| Hs.264076 | Hs.264076-S   | rs1408656  | 13 | 13 | 78784655  | 111714 | 8.4920  | 0.5596 | 0.3035  | 5.7036 | JPT |
| Hs.264076 | Hs.264076-S   | rs2274554  | 13 | 13 | 78838530  | 57839  | 8.4920  | 0.5596 | -0.3035 | 5.7036 | JPT |
| Hs.264076 | Hs.264076-S   | rs12868295 | 13 | 13 | 78884066  | 12303  | 7.6431  | 0.5091 | -0.2962 | 5.7036 | JPT |
| Hs.264076 | Hs.264076-S   | rs12585625 | 13 | 13 | 78910197  | 13828  | 7.9553  | 0.5334 | -0.2966 | 5.7036 | JPT |
| Hs.264076 | Hs.264076-S   | rs420387   | 13 | 13 | 78914719  | 18350  | 6.5329  | 0.4564 | -0.2765 | 5.7036 | JPT |
| Hs.264076 | Hs.264076-S   | rs7334344  | 13 | 13 | 78917639  | 21270  | 8.4770  | 0.5504 | -0.3020 | 5.7036 | JPT |
| Hs.264076 | Hs.264076-S   | rs7984163  | 13 | 13 | 79056401  | 160032 | 7.3050  | 0.4996 | 0.2702  | 5.7036 | JPT |
| Hs.264076 | Hs.264076-S   | rs4885640  | 13 | 13 | 79061430  | 165061 | 7.3050  | 0.4996 | -0.2702 | 5.7036 | JPT |
| LOC87769  | GI_34147452-S | rs12868591 | 13 | 13 | 100006429 | 24452  | 12.1293 | 0.7030 | 0.9812  | 6.9816 | JPT |
| LOC87769  | GI_34147452-S | rs9513762  | 13 | 13 | 100015675 | 33698  | 12.2489 | 0.6983 | 0.9751  | 6.9816 | JPT |
| LOC87769  | GI_34147452-S | rs9518089  | 13 | 13 | 100015780 | 33803  | 12.2489 | 0.6983 | -0.9751 | 6.9816 | JPT |
| LOC87769  | GI_34147452-S | rs9518091  | 13 | 13 | 100016204 | 34227  | 12.2489 | 0.6983 | -0.9751 | 6.9816 | JPT |
| LOC87769  | GI_34147452-S | rs9557453  | 13 | 13 | 100025790 | 43813  | 11.6369 | 0.6867 | -0.9700 | 6.9816 | JPT |
| LOC87769  | GI_34147452-S | rs9557454  | 13 | 13 | 100026034 | 44057  | 12.2489 | 0.6983 | 0.9751  | 6.9816 | JPT |
| LOC87769  | GI_34147452-S | rs9557456  | 13 | 13 | 100026423 | 44446  | 12.2489 | 0.6983 | -0.9751 | 6.9816 | JPT |
| LOC87769  | GI_34147452-S | rs9554707  | 13 | 13 | 100037593 | 55616  | 11.9597 | 0.6975 | -0.9762 | 6.9816 | JPT |
| LOC87769  | GI_34147452-S | rs9557459  | 13 | 13 | 100037714 | 55737  | 11.5794 | 0.7026 | 0.9855  | 6.9816 | JPT |
| LOC87769  | GI_34147452-S | rs9557460  | 13 | 13 | 100039757 | 57780  | 9.6628  | 0.6120 | -0.9983 | 6.9816 | JPT |
| SLC7A7    | GI_21361562-S | rs17211943 | 14 | 14 | 22333505  | 21088  | 7.3757  | 0.4952 | -0.7387 | 6.4006 | JPT |
| SLC7A7    | GI_21361562-S | rs12879369 | 14 | 14 | 22342897  | 30480  | 10.6701 | 0.6521 | -0.9530 | 6.4006 | JPT |
| SLC7A7    | GI_21361562-S | rs12884337 | 14 | 14 | 22342954  | 30537  | 13.5075 | 0.7360 | -0.8851 | 6.4006 | JPT |
| SLC7A7    | GI_21361562-S | rs2281678  | 14 | 14 | 22354008  | 41591  | 9.4016  | 0.5921 | 0.8873  | 6.4006 | JPT |
| PRKCM     | GI_4506074-S  | rs7157367  | 14 | 14 | 29375612  | 259412 | 6.2583  | 0.4402 | 0.1030  | 5.4706 | JPT |
| PRKCM     | GI_4506074-S  | rs1958980  | 14 | 14 | 29381842  | 265642 | 6.2583  | 0.4402 | 0.1030  | 5.4706 | JPT |
| PRKCM     | GI_4506074-S  | rs11851625 | 14 | 14 | 29383910  | 267710 | 6.4707  | 0.4528 | -0.1001 | 5.4706 | JPT |
| PRKCM     | GI_4506074-S  | rs10134670 | 14 | 14 | 29386693  | 270493 | 6.2583  | 0.4402 | -0.1030 | 5.4706 | JPT |
| PRKCM     | GI_4506074-S  | rs10147856 | 14 | 14 | 29386884  | 270684 | 6.3391  | 0.4451 | 0.1006  | 5.4706 | JPT |
| PRKCM     | GI_4506074-S  | rs4441176  | 14 | 14 | 29388428  | 272228 | 6.7374  | 0.4603 | 0.1023  | 5.4706 | JPT |
| PRKCM     | GI_4506074-S  | rs1953209  | 14 | 14 | 29395444  | 279244 | 6.2583  | 0.4402 | -0.1030 | 5.4706 | JPT |
| PRKCM     | GI_4506074-S  | rs1958988  | 14 | 14 | 29404718  | 288518 | 5.9611  | 0.4222 | -0.0930 | 5.4706 | JPT |
| PRKCM     | GI_4506074-S  | rs2184280  | 14 | 14 | 29430356  | 314156 | 6.2582  | 0.4325 | 0.0895  | 5.4706 | JPT |
| PRKCM     | GI_4506074-S  | rs2151746  | 14 | 14 | 29431133  | 314933 | 5.7937  | 0.4118 | 0.0887  | 5.4706 | JPT |
| PRKCM     | GI_4506074-S  | rs10142416 | 14 | 14 | 29432883  | 316683 | 6.2582  | 0.4325 | 0.0895  | 5.4706 | JPT |
| C14orf52  | GI_21553312-S | rs17767942 | 14 | 14 | 64442373  | 28383  | 9.0199  | 0.5754 | 1.1960  | 7.6337 | JPT |
| C14orf52  | GI_21553312-S | rs4902331  | 14 | 14 | 64442828  | 27928  | 9.0199  | 0.5754 | 1.1960  | 7.6337 | JPT |
| C14orf52  | GI_21553312-S | rs4902332  | 14 | 14 | 64445731  | 25025  | 18.4879 | 0.8515 | 1.3136  | 7.6337 | JPT |
| C14orf52  | GI_21553312-S | rs4902333  | 14 | 14 | 64445839  | 24917  | 16.4813 | 0.8302 | 1.2651  | 7.6337 | JPT |
| C14orf52  | GI_21553312-S | rs17102298 | 14 | 14 | 64446489  | 24267  | 18.3056 | 0.8485 | 1.3097  | 7.6337 | JPT |
| C14orf52  | GI_21553312-S | rs7154406  | 14 | 14 | 64446942  | 23814  | 18.1234 | 0.8524 | -1.3108 | 7.6337 | JPT |
| C14orf52  | GI_21553312-S | rs7153990  | 14 | 14 | 64447303  | 23453  | 18.7363 | 0.8488 | -1.3080 | 7.6337 | JPT |
| C14orf52  | GI_21553312-S | rs10139595 | 14 | 14 | 64448012  | 22744  | 18.9132 | 0.8715 | -1.4739 | 7.6337 | JPT |
| C14orf52  | GI_21553312-S | rs10151701 | 14 | 14 | 64448202  | 22554  | 18.7363 | 0.8488 | -1.3080 | 7.6337 | JPT |
| C14orf52  | GI_21553312-S | rs7143432  | 14 | 14 | 64448899  | 21857  | 14.9356 | 0.7973 | 1.1968  | 7.6337 | JPT |
| C14orf52  | GI_21553312-S | rs7144811  | 14 | 14 | 64448900  | 21856  | 18.1997 | 0.8537 | -1.3085 | 7.6337 | JPT |
| C14orf52  | GI_21553312-S | rs7143764  | 14 | 14 | 64449036  | 21720  | 16.8462 | 0.8446 | 1.2542  | 7.6337 | JPT |

|          |               |            |    |    |          |        |         |        |         |        |     |
|----------|---------------|------------|----|----|----------|--------|---------|--------|---------|--------|-----|
| C14orf52 | GI_21553312-S | rs10143017 | 14 | 14 | 64449371 | 21385  | 18.7363 | 0.8488 | -1.3080 | 7.6337 | JPT |
| C14orf52 | GI_21553312-S | rs10148687 | 14 | 14 | 64454029 | 16727  | 18.4879 | 0.8515 | 1.3136  | 7.6337 | JPT |
| C14orf52 | GI_21553312-S | rs4902335  | 14 | 14 | 64455651 | 15105  | 18.7363 | 0.8488 | 1.3080  | 7.6337 | JPT |
| C14orf52 | GI_21553312-S | rs10132742 | 14 | 14 | 64456675 | 14081  | 18.2644 | 0.8478 | 1.3070  | 7.6337 | JPT |
| C14orf52 | GI_21553312-S | rs4899152  | 14 | 14 | 64456869 | 13887  | 18.7363 | 0.8488 | -1.3080 | 7.6337 | JPT |
| C14orf52 | GI_21553312-S | rs4902336  | 14 | 14 | 64457015 | 13741  | 18.7363 | 0.8488 | 1.3080  | 7.6337 | JPT |
| C14orf52 | GI_21553312-S | rs10138534 | 14 | 14 | 64457742 | 13014  | 18.7363 | 0.8488 | 1.3080  | 7.6337 | JPT |
| C14orf52 | GI_21553312-S | rs7401853  | 14 | 14 | 64458464 | 12292  | 18.7363 | 0.8488 | 1.3080  | 7.6337 | JPT |
| C14orf52 | GI_21553312-S | rs10141986 | 14 | 14 | 64459156 | 11600  | 18.7363 | 0.8488 | 1.3080  | 7.6337 | JPT |
| C14orf52 | GI_21553312-S | rs4902343  | 14 | 14 | 64465933 | 4823   | 18.4879 | 0.8515 | 1.3136  | 7.6337 | JPT |
| C14orf52 | GI_21553312-S | rs10149617 | 14 | 14 | 64471914 | 1158   | 18.7363 | 0.8488 | 1.3080  | 7.6337 | JPT |
| C14orf52 | GI_21553312-S | rs4902345  | 14 | 14 | 64473657 | 2901   | 18.7363 | 0.8488 | -1.3080 | 7.6337 | JPT |
| C14orf52 | GI_21553312-S | rs10132858 | 14 | 14 | 64473731 | 2975   | 14.8312 | 0.8199 | 1.2345  | 7.6337 | JPT |
| C14orf52 | GI_21553312-S | rs10133054 | 14 | 14 | 64473869 | 3113   | 10.0867 | 0.6865 | 1.1357  | 7.6337 | JPT |
| C14orf52 | GI_21553312-S | rs10133290 | 14 | 14 | 64474195 | 3439   | 18.7363 | 0.8488 | 1.3080  | 7.6337 | JPT |
| C14orf52 | GI_21553312-S | rs11623705 | 14 | 14 | 64475475 | 4719   | 8.7826  | 0.5821 | 1.2723  | 7.6337 | JPT |
| C14orf52 | GI_21553312-S | rs4902346  | 14 | 14 | 64476913 | 6157   | 16.1465 | 0.8159 | 1.2846  | 7.6337 | JPT |
| C14orf52 | GI_21553312-S | rs2412065  | 14 | 14 | 64477410 | 6654   | 18.7363 | 0.8488 | -1.3080 | 7.6337 | JPT |
| C14orf52 | GI_21553312-S | rs2277502  | 14 | 14 | 64482031 | 11275  | 7.6943  | 0.5118 | -1.0719 | 7.6337 | JPT |
| C14orf52 | GI_21553312-S | rs4902348  | 14 | 14 | 64489705 | 18949  | 7.6943  | 0.5118 | -1.0719 | 7.6337 | JPT |
| C14orf52 | GI_21553312-S | rs11621450 | 14 | 14 | 64491269 | 20513  | 7.6943  | 0.5118 | -1.0719 | 7.6337 | JPT |
| C14orf52 | GI_21553312-S | rs4902349  | 14 | 14 | 64492093 | 21337  | 7.6943  | 0.5118 | 1.0719  | 7.6337 | JPT |
| C14orf52 | GI_21553312-S | rs4902350  | 14 | 14 | 64492118 | 21362  | 7.6943  | 0.5118 | 1.0719  | 7.6337 | JPT |
| C14orf52 | GI_21553312-S | rs4902351  | 14 | 14 | 64492244 | 21488  | 7.6943  | 0.5118 | 1.0719  | 7.6337 | JPT |
| EIF2S1   | GI_34147492-S | rs10142124 | 14 | 14 | 65922259 | 999274 | 7.8818  | 0.5297 | -0.3981 | 5.4988 | JPT |
| EIF2S1   | GI_34147492-S | rs10142375 | 14 | 14 | 65922298 | 999235 | 8.3872  | 0.5461 | 0.4059  | 5.4988 | JPT |
| EIF2S1   | GI_34147492-S | rs1457428  | 14 | 14 | 65924438 | 997095 | 8.4414  | 0.5751 | 0.4200  | 5.4988 | JPT |
| EIF2S1   | GI_34147492-S | rs2085482  | 14 | 14 | 65925557 | 995976 | 7.7017  | 0.5291 | 0.3927  | 5.4988 | JPT |
| EIF2S1   | GI_34147492-S | rs2319184  | 14 | 14 | 65925740 | 995793 | 9.4857  | 0.5957 | 0.4326  | 5.4988 | JPT |
| EIF2S1   | GI_34147492-S | rs1457431  | 14 | 14 | 65927667 | 993866 | 7.8847  | 0.5299 | 0.3984  | 5.4988 | JPT |
| EIF2S1   | GI_34147492-S | rs10142143 | 14 | 14 | 65929301 | 992232 | 8.3872  | 0.5461 | -0.4059 | 5.4988 | JPT |
| EIF2S1   | GI_34147492-S | rs1379414  | 14 | 14 | 65929333 | 992200 | 8.3872  | 0.5461 | -0.4059 | 5.4988 | JPT |
| EIF2S1   | GI_34147492-S | rs8007262  | 14 | 14 | 65931618 | 989915 | 7.8847  | 0.5299 | -0.3984 | 5.4988 | JPT |
| EIF2S1   | GI_34147492-S | rs7150418  | 14 | 14 | 65932496 | 989037 | 8.3872  | 0.5461 | -0.4059 | 5.4988 | JPT |
| EIF2S1   | GI_34147492-S | rs7150773  | 14 | 14 | 65932627 | 988906 | 8.7067  | 0.5971 | -0.4249 | 5.4988 | JPT |
| EIF2S1   | GI_34147492-S | rs1457432  | 14 | 14 | 65934852 | 986681 | 8.3872  | 0.5461 | -0.4059 | 5.4988 | JPT |
| EIF2S1   | GI_34147492-S | rs1457433  | 14 | 14 | 65934985 | 986548 | 8.3872  | 0.5461 | 0.4059  | 5.4988 | JPT |
| EIF2S1   | GI_34147492-S | rs1457434  | 14 | 14 | 65935045 | 986488 | 9.7551  | 0.6158 | -0.4379 | 5.4988 | JPT |
| EIF2S1   | GI_34147492-S | rs10134278 | 14 | 14 | 65939190 | 982343 | 8.3872  | 0.5461 | 0.4059  | 5.4988 | JPT |
| EIF2S1   | GI_34147492-S | rs12586868 | 14 | 14 | 65940494 | 981039 | 8.6409  | 0.5581 | 0.4108  | 5.4988 | JPT |
| EIF2S1   | GI_34147492-S | rs7151102  | 14 | 14 | 65941325 | 980208 | 7.8847  | 0.5299 | -0.3984 | 5.4988 | JPT |
| EIF2S1   | GI_34147492-S | rs8004856  | 14 | 14 | 65942782 | 978751 | 9.2274  | 0.6403 | 0.4511  | 5.4988 | JPT |
| EIF2S1   | GI_34147492-S | rs6573671  | 14 | 14 | 65943060 | 978473 | 8.3872  | 0.5461 | 0.4059  | 5.4988 | JPT |
| EIF2S1   | GI_34147492-S | rs1379416  | 14 | 14 | 65944456 | 977077 | 8.0456  | 0.5467 | -0.4127 | 5.4988 | JPT |
| EIF2S1   | GI_34147492-S | rs7159681  | 14 | 14 | 65945875 | 975658 | 8.3872  | 0.5461 | 0.4059  | 5.4988 | JPT |
| EIF2S1   | GI_34147492-S | rs7159364  | 14 | 14 | 65945887 | 975646 | 8.3872  | 0.5461 | -0.4059 | 5.4988 | JPT |
| EIF2S1   | GI_34147492-S | rs7160064  | 14 | 14 | 65946058 | 975475 | 8.4178  | 0.5561 | -0.4059 | 5.4988 | JPT |
| EIF2S1   | GI_34147492-S | rs7158262  | 14 | 14 | 65949339 | 972194 | 7.8847  | 0.5299 | 0.3984  | 5.4988 | JPT |
| EIF2S1   | GI_34147492-S | rs12588933 | 14 | 14 | 65950115 | 971418 | 8.3872  | 0.5461 | 0.4059  | 5.4988 | JPT |
| EIF2S1   | GI_34147492-S | rs9332388  | 14 | 14 | 65950415 | 971118 | 8.3872  | 0.5461 | -0.4059 | 5.4988 | JPT |
| EIF2S1   | GI_34147492-S | rs716234   | 14 | 14 | 65950544 | 970989 | 8.3872  | 0.5461 | 0.4059  | 5.4988 | JPT |
| EIF2S1   | GI_34147492-S | rs716232   | 14 | 14 | 65950702 | 970831 | 7.8847  | 0.5299 | -0.3984 | 5.4988 | JPT |
| EIF2S1   | GI_34147492-S | rs716233   | 14 | 14 | 65950769 | 970764 | 7.8847  | 0.5299 | 0.3984  | 5.4988 | JPT |
| EIF2S1   | GI_34147492-S | rs13368766 | 14 | 14 | 65953164 | 968369 | 8.3872  | 0.5461 | -0.4059 | 5.4988 | JPT |
| EIF2S1   | GI_34147492-S | rs9635252  | 14 | 14 | 65954503 | 967030 | 7.9281  | 0.5407 | 0.3999  | 5.4988 | JPT |
| EIF2S1   | GI_34147492-S | rs9652292  | 14 | 14 | 65954974 | 966559 | 6.9886  | 0.5470 | 0.3966  | 5.4988 | JPT |
| EIF2S1   | GI_34147492-S | rs8020532  | 14 | 14 | 65956469 | 965064 | 8.3872  | 0.5461 | -0.4059 | 5.4988 | JPT |
| EIF2S1   | GI_34147492-S | rs12589479 | 14 | 14 | 65963473 | 958060 | 7.5961  | 0.5067 | 0.3989  | 5.4988 | JPT |
| EIF2S1   | GI_34147492-S | rs2319185  | 14 | 14 | 65965319 | 956214 | 8.6409  | 0.5581 | 0.4108  | 5.4988 | JPT |

|        |               |            |    |    |          |        |        |        |         |        |     |
|--------|---------------|------------|----|----|----------|--------|--------|--------|---------|--------|-----|
| EIF2S1 | GI_34147492-S | rs735957   | 14 | 14 | 65965477 | 956056 | 7.8612 | 0.5287 | -0.3927 | 5.4988 | JPT |
| EIF2S1 | GI_34147492-S | rs1598771  | 14 | 14 | 65965718 | 955815 | 8.2573 | 0.5484 | 0.4059  | 5.4988 | JPT |
| EIF2S1 | GI_34147492-S | rs13353130 | 14 | 14 | 65966379 | 955154 | 8.3872 | 0.5461 | 0.4059  | 5.4988 | JPT |
| EIF2S1 | GI_34147492-S | rs7149651  | 14 | 14 | 65966995 | 954538 | 9.3689 | 0.5994 | -0.4308 | 5.4988 | JPT |
| EIF2S1 | GI_34147492-S | rs1902644  | 14 | 14 | 65967909 | 953624 | 7.8847 | 0.5299 | 0.3984  | 5.4988 | JPT |
| EIF2S1 | GI_34147492-S | rs8004227  | 14 | 14 | 65969562 | 951971 | 8.3872 | 0.5461 | 0.4059  | 5.4988 | JPT |
| EIF2S1 | GI_34147492-S | rs7359130  | 14 | 14 | 65970588 | 950945 | 9.0060 | 0.6014 | -0.4325 | 5.4988 | JPT |
| EIF2S1 | GI_34147492-S | rs1350330  | 14 | 14 | 65971333 | 950200 | 8.2690 | 0.5760 | -0.4174 | 5.4988 | JPT |
| EIF2S1 | GI_34147492-S | rs933039   | 14 | 14 | 65973000 | 948533 | 8.3872 | 0.5461 | 0.4059  | 5.4988 | JPT |
| EIF2S1 | GI_34147492-S | rs1585182  | 14 | 14 | 65974201 | 947332 | 8.3872 | 0.5461 | 0.4059  | 5.4988 | JPT |
| EIF2S1 | GI_34147492-S | rs2860116  | 14 | 14 | 65974235 | 947298 | 8.3872 | 0.5461 | 0.4059  | 5.4988 | JPT |
| EIF2S1 | GI_34147492-S | rs7145185  | 14 | 14 | 65975379 | 946154 | 8.3872 | 0.5461 | -0.4059 | 5.4988 | JPT |
| EIF2S1 | GI_34147492-S | rs928552   | 14 | 14 | 65976220 | 945313 | 8.1059 | 0.5679 | 0.4238  | 5.4988 | JPT |
| EIF2S1 | GI_34147492-S | rs6573672  | 14 | 14 | 65976672 | 944861 | 7.8847 | 0.5299 | 0.3984  | 5.4988 | JPT |
| EIF2S1 | GI_34147492-S | rs2219371  | 14 | 14 | 65977384 | 944149 | 8.3872 | 0.5461 | -0.4059 | 5.4988 | JPT |
| EIF2S1 | GI_34147492-S | rs8012374  | 14 | 14 | 65980729 | 940804 | 7.8847 | 0.5299 | 0.3984  | 5.4988 | JPT |
| EIF2S1 | GI_34147492-S | rs8011794  | 14 | 14 | 65981001 | 940532 | 7.8847 | 0.5299 | 0.3984  | 5.4988 | JPT |
| EIF2S1 | GI_34147492-S | rs8019603  | 14 | 14 | 65985716 | 935817 | 7.9804 | 0.5347 | 0.4076  | 5.4988 | JPT |
| EIF2S1 | GI_34147492-S | rs17827523 | 14 | 14 | 65986106 | 935427 | 8.2898 | 0.5499 | -0.4129 | 5.4988 | JPT |
| EIF2S1 | GI_34147492-S | rs1009294  | 14 | 14 | 65990132 | 931401 | 7.9804 | 0.5347 | -0.4076 | 5.4988 | JPT |
| EIF2S1 | GI_34147492-S | rs11158628 | 14 | 14 | 65991334 | 930199 | 8.4840 | 0.5507 | 0.4152  | 5.4988 | JPT |
| EIF2S1 | GI_34147492-S | rs11158629 | 14 | 14 | 65991678 | 929855 | 8.7895 | 0.5649 | -0.4217 | 5.4988 | JPT |
| EIF2S1 | GI_34147492-S | rs12586427 | 14 | 14 | 65999706 | 921827 | 8.4840 | 0.5507 | 0.4152  | 5.4988 | JPT |
| EIF2S1 | GI_34147492-S | rs7156981  | 14 | 14 | 65999921 | 921612 | 7.9804 | 0.5347 | -0.4076 | 5.4988 | JPT |
| EIF2S1 | GI_34147492-S | rs13367574 | 14 | 14 | 66003895 | 917638 | 7.8149 | 0.5439 | -0.4023 | 5.4988 | JPT |
| EIF2S1 | GI_34147492-S | rs8003769  | 14 | 14 | 66004664 | 916869 | 9.3655 | 0.6670 | 0.4719  | 5.4988 | JPT |
| EIF2S1 | GI_34147492-S | rs7157879  | 14 | 14 | 66007683 | 913850 | 8.8220 | 0.6427 | -0.4425 | 5.4988 | JPT |
| EIF2S1 | GI_34147492-S | rs7142154  | 14 | 14 | 66007793 | 913740 | 8.4840 | 0.5507 | 0.4152  | 5.4988 | JPT |
| EIF2S1 | GI_34147492-S | rs7141225  | 14 | 14 | 66007991 | 913542 | 8.7895 | 0.5649 | -0.4217 | 5.4988 | JPT |
| EIF2S1 | GI_34147492-S | rs10130239 | 14 | 14 | 66008550 | 912983 | 7.9804 | 0.5347 | -0.4076 | 5.4988 | JPT |
| EIF2S1 | GI_34147492-S | rs10133818 | 14 | 14 | 66009633 | 911900 | 8.0628 | 0.5753 | -0.4230 | 5.4988 | JPT |
| EIF2S1 | GI_34147492-S | rs10133676 | 14 | 14 | 66009656 | 911877 | 8.4840 | 0.5507 | 0.4152  | 5.4988 | JPT |
| EIF2S1 | GI_34147492-S | rs9943992  | 14 | 14 | 66009744 | 911789 | 8.3194 | 0.5514 | 0.4153  | 5.4988 | JPT |
| EIF2S1 | GI_34147492-S | rs9944086  | 14 | 14 | 66009936 | 911597 | 7.9804 | 0.5347 | 0.4076  | 5.4988 | JPT |
| EIF2S1 | GI_34147492-S | rs10142537 | 14 | 14 | 66010269 | 911264 | 8.4840 | 0.5507 | -0.4152 | 5.4988 | JPT |
| EIF2S1 | GI_34147492-S | rs10141750 | 14 | 14 | 66016884 | 904649 | 7.9804 | 0.5347 | -0.4076 | 5.4988 | JPT |
| EIF2S1 | GI_34147492-S | rs10141991 | 14 | 14 | 66016948 | 904585 | 8.0279 | 0.5547 | -0.4153 | 5.4988 | JPT |
| EIF2S1 | GI_34147492-S | rs10148290 | 14 | 14 | 66018937 | 902596 | 8.4840 | 0.5507 | -0.4152 | 5.4988 | JPT |
| EIF2S1 | GI_34147492-S | rs10134043 | 14 | 14 | 66019803 | 901730 | 8.4840 | 0.5507 | -0.4152 | 5.4988 | JPT |
| EIF2S1 | GI_34147492-S | rs7157060  | 14 | 14 | 66021548 | 899985 | 7.9804 | 0.5347 | -0.4076 | 5.4988 | JPT |
| EIF2S1 | GI_34147492-S | rs10129809 | 14 | 14 | 66021795 | 899738 | 7.6779 | 0.5279 | 0.3957  | 5.4988 | JPT |
| EIF2S1 | GI_34147492-S | rs7147360  | 14 | 14 | 66023287 | 898246 | 7.9804 | 0.5347 | 0.4076  | 5.4988 | JPT |
| EIF2S1 | GI_34147492-S | rs1457419  | 14 | 14 | 66028359 | 893174 | 7.9804 | 0.5347 | -0.4076 | 5.4988 | JPT |
| EIF2S1 | GI_34147492-S | rs1457420  | 14 | 14 | 66028429 | 893104 | 8.7895 | 0.5649 | 0.4217  | 5.4988 | JPT |
| EIF2S1 | GI_34147492-S | rs3737161  | 14 | 14 | 66029370 | 892163 | 8.4840 | 0.5507 | 0.4152  | 5.4988 | JPT |
| EIF2S1 | GI_34147492-S | rs6573679  | 14 | 14 | 66032510 | 889023 | 8.4840 | 0.5507 | -0.4152 | 5.4988 | JPT |
| EIF2S1 | GI_34147492-S | rs7159796  | 14 | 14 | 66033770 | 887763 | 9.0365 | 0.6318 | 0.4544  | 5.4988 | JPT |
| EIF2S1 | GI_34147492-S | rs7160183  | 14 | 14 | 66033945 | 887588 | 8.4840 | 0.5507 | 0.4152  | 5.4988 | JPT |
| EIF2S1 | GI_34147492-S | rs2297620  | 14 | 14 | 66034291 | 887242 | 8.4840 | 0.5507 | -0.4152 | 5.4988 | JPT |
| EIF2S1 | GI_34147492-S | rs3818770  | 14 | 14 | 66035225 | 886308 | 8.2964 | 0.5503 | 0.4140  | 5.4988 | JPT |
| EIF2S1 | GI_34147492-S | rs10143291 | 14 | 14 | 66035316 | 886217 | 8.4840 | 0.5507 | -0.4152 | 5.4988 | JPT |
| EIF2S1 | GI_34147492-S | rs1457422  | 14 | 14 | 66036270 | 885263 | 8.4840 | 0.5507 | -0.4152 | 5.4988 | JPT |
| EIF2S1 | GI_34147492-S | rs9323473  | 14 | 14 | 66038079 | 883454 | 7.9804 | 0.5347 | 0.4076  | 5.4988 | JPT |
| EIF2S1 | GI_34147492-S | rs7146723  | 14 | 14 | 66038848 | 882685 | 7.9804 | 0.5347 | -0.4076 | 5.4988 | JPT |
| EIF2S1 | GI_34147492-S | rs10220636 | 14 | 14 | 66041917 | 879616 | 8.7895 | 0.5649 | -0.4217 | 5.4988 | JPT |
| EIF2S1 | GI_34147492-S | rs1457423  | 14 | 14 | 66042001 | 879532 | 8.6793 | 0.5864 | -0.4308 | 5.4988 | JPT |
| EIF2S1 | GI_34147492-S | rs928553   | 14 | 14 | 66044227 | 877306 | 7.9804 | 0.5347 | -0.4076 | 5.4988 | JPT |
| EIF2S1 | GI_34147492-S | rs17827735 | 14 | 14 | 66047141 | 874392 | 8.5809 | 0.6208 | 0.4630  | 5.4988 | JPT |
| EIF2S1 | GI_34147492-S | rs17827741 | 14 | 14 | 66047565 | 873968 | 8.4840 | 0.5507 | -0.4152 | 5.4988 | JPT |

|        |               |            |    |    |          |        |        |        |         |        |     |
|--------|---------------|------------|----|----|----------|--------|--------|--------|---------|--------|-----|
| EIF2S1 | GI_34147492-S | rs2319387  | 14 | 14 | 66049246 | 872287 | 8.4840 | 0.5507 | 0.4152  | 5.4988 | JPT |
| EIF2S1 | GI_34147492-S | rs2045419  | 14 | 14 | 66052268 | 869265 | 7.9804 | 0.5347 | -0.4076 | 5.4988 | JPT |
| EIF2S1 | GI_34147492-S | rs7159063  | 14 | 14 | 66052787 | 868746 | 8.2135 | 0.5733 | -0.4437 | 5.4988 | JPT |
| EIF2S1 | GI_34147492-S | rs1379413  | 14 | 14 | 66055897 | 865636 | 7.9804 | 0.5347 | -0.4076 | 5.4988 | JPT |
| EIF2S1 | GI_34147492-S | rs7156737  | 14 | 14 | 66056366 | 865167 | 8.4840 | 0.5507 | -0.4152 | 5.4988 | JPT |
| EIF2S1 | GI_34147492-S | rs7140509  | 14 | 14 | 66056901 | 864632 | 8.4840 | 0.5507 | 0.4152  | 5.4988 | JPT |
| EIF2S1 | GI_34147492-S | rs10144449 | 14 | 14 | 66058012 | 863521 | 8.4840 | 0.5507 | 0.4152  | 5.4988 | JPT |
| EIF2S1 | GI_34147492-S | rs7154154  | 14 | 14 | 66059664 | 861869 | 8.6308 | 0.5662 | -0.4220 | 5.4988 | JPT |
| EIF2S1 | GI_34147492-S | rs13368526 | 14 | 14 | 66061630 | 859903 | 9.1985 | 0.5920 | 0.4383  | 5.4988 | JPT |
| EIF2S1 | GI_34147492-S | rs11621188 | 14 | 14 | 66066448 | 855085 | 5.7023 | 0.4136 | -0.3959 | 5.4988 | JPT |
| EIF2S1 | GI_34147492-S | rs13379248 | 14 | 14 | 66069026 | 852507 | 8.4840 | 0.5507 | -0.4152 | 5.4988 | JPT |
| EIF2S1 | GI_34147492-S | rs7142097  | 14 | 14 | 66071459 | 850074 | 7.9804 | 0.5347 | 0.4076  | 5.4988 | JPT |
| EIF2S1 | GI_34147492-S | rs7145556  | 14 | 14 | 66071725 | 849808 | 8.7895 | 0.5649 | -0.4217 | 5.4988 | JPT |
| EIF2S1 | GI_34147492-S | rs10148418 | 14 | 14 | 66073626 | 847907 | 8.7895 | 0.5649 | 0.4217  | 5.4988 | JPT |
| EIF2S1 | GI_34147492-S | rs7160501  | 14 | 14 | 66074452 | 847081 | 8.4840 | 0.5507 | 0.4152  | 5.4988 | JPT |
| EIF2S1 | GI_34147492-S | rs7143629  | 14 | 14 | 66074719 | 846814 | 8.7895 | 0.5649 | 0.4217  | 5.4988 | JPT |
| EIF2S1 | GI_34147492-S | rs7143823  | 14 | 14 | 66074824 | 846709 | 8.4840 | 0.5507 | 0.4152  | 5.4988 | JPT |
| EIF2S1 | GI_34147492-S | rs7149668  | 14 | 14 | 66076533 | 845000 | 7.9804 | 0.5347 | -0.4076 | 5.4988 | JPT |
| EIF2S1 | GI_34147492-S | rs7141220  | 14 | 14 | 66079945 | 841588 | 7.9804 | 0.5347 | 0.4076  | 5.4988 | JPT |
| EIF2S1 | GI_34147492-S | rs8012784  | 14 | 14 | 66085038 | 836495 | 8.7895 | 0.5649 | 0.4217  | 5.4988 | JPT |
| EIF2S1 | GI_34147492-S | rs10133769 | 14 | 14 | 66088436 | 833097 | 8.7895 | 0.5649 | 0.4217  | 5.4988 | JPT |
| EIF2S1 | GI_34147492-S | rs8016639  | 14 | 14 | 66091265 | 830268 | 7.9804 | 0.5347 | -0.4076 | 5.4988 | JPT |
| EIF2S1 | GI_34147492-S | rs10140083 | 14 | 14 | 66091980 | 829553 | 7.3891 | 0.5126 | -0.3798 | 5.4988 | JPT |
| EIF2S1 | GI_34147492-S | rs7151773  | 14 | 14 | 66093753 | 827780 | 9.6795 | 0.6499 | 0.4621  | 5.4988 | JPT |
| EIF2S1 | GI_34147492-S | rs17827790 | 14 | 14 | 66094717 | 826816 | 7.7655 | 0.5324 | -0.4073 | 5.4988 | JPT |
| EIF2S1 | GI_34147492-S | rs1952068  | 14 | 14 | 66098904 | 822629 | 7.8133 | 0.5349 | -0.4076 | 5.4988 | JPT |
| EIF2S1 | GI_34147492-S | rs8017351  | 14 | 14 | 66099837 | 821696 | 8.4840 | 0.5507 | 0.4152  | 5.4988 | JPT |
| EIF2S1 | GI_34147492-S | rs7156795  | 14 | 14 | 66100648 | 820885 | 7.3091 | 0.5083 | 0.3980  | 5.4988 | JPT |
| EIF2S1 | GI_34147492-S | rs7146849  | 14 | 14 | 66101823 | 819710 | 8.4840 | 0.5507 | 0.4152  | 5.4988 | JPT |
| EIF2S1 | GI_34147492-S | rs2319389  | 14 | 14 | 66102111 | 819422 | 5.6495 | 0.4027 | 0.3669  | 5.4988 | JPT |
| EIF2S1 | GI_34147492-S | rs7142929  | 14 | 14 | 66105239 | 816294 | 7.9804 | 0.5347 | -0.4076 | 5.4988 | JPT |
| EIF2S1 | GI_34147492-S | rs8004106  | 14 | 14 | 66110354 | 811179 | 8.4840 | 0.5507 | -0.4152 | 5.4988 | JPT |
| EIF2S1 | GI_34147492-S | rs10133641 | 14 | 14 | 66111193 | 810340 | 8.4840 | 0.5507 | 0.4152  | 5.4988 | JPT |
| EIF2S1 | GI_34147492-S | rs13367039 | 14 | 14 | 66111373 | 810160 | 8.4840 | 0.5507 | 0.4152  | 5.4988 | JPT |
| EIF2S1 | GI_34147492-S | rs7153313  | 14 | 14 | 66112166 | 809367 | 7.9804 | 0.5347 | 0.4076  | 5.4988 | JPT |
| EIF2S1 | GI_34147492-S | rs12590209 | 14 | 14 | 66112625 | 808908 | 6.2907 | 0.4850 | -0.3892 | 5.4988 | JPT |
| EIF2S1 | GI_34147492-S | rs7157828  | 14 | 14 | 66116313 | 805220 | 7.5406 | 0.5386 | 0.4056  | 5.4988 | JPT |
| EIF2S1 | GI_34147492-S | rs12100780 | 14 | 14 | 66116507 | 805026 | 8.1944 | 0.5540 | 0.4152  | 5.4988 | JPT |
| EIF2S1 | GI_34147492-S | rs7161397  | 14 | 14 | 66116713 | 804820 | 7.9804 | 0.5347 | -0.4076 | 5.4988 | JPT |
| EIF2S1 | GI_34147492-S | rs10143929 | 14 | 14 | 66117841 | 803692 | 8.7895 | 0.5649 | 0.4217  | 5.4988 | JPT |
| EIF2S1 | GI_34147492-S | rs10143934 | 14 | 14 | 66117858 | 803675 | 8.1538 | 0.5520 | 0.4152  | 5.4988 | JPT |
| EIF2S1 | GI_34147492-S | rs10146431 | 14 | 14 | 66123995 | 797538 | 7.9804 | 0.5347 | 0.4076  | 5.4988 | JPT |
| EIF2S1 | GI_34147492-S | rs13368404 | 14 | 14 | 66129721 | 791812 | 7.9804 | 0.5347 | -0.4076 | 5.4988 | JPT |
| EIF2S1 | GI_34147492-S | rs13368668 | 14 | 14 | 66134079 | 787454 | 7.3400 | 0.5188 | 0.3876  | 5.4988 | JPT |
| EIF2S1 | GI_34147492-S | rs9323475  | 14 | 14 | 66135922 | 785611 | 7.8043 | 0.5344 | -0.4076 | 5.4988 | JPT |
| EIF2S1 | GI_34147492-S | rs8008550  | 14 | 14 | 66139328 | 782205 | 7.9804 | 0.5347 | 0.4076  | 5.4988 | JPT |
| EIF2S1 | GI_34147492-S | rs8008596  | 14 | 14 | 66139402 | 782131 | 7.9384 | 0.5502 | -0.4211 | 5.4988 | JPT |
| EIF2S1 | GI_34147492-S | rs10144894 | 14 | 14 | 66141562 | 779971 | 8.4840 | 0.5507 | 0.4152  | 5.4988 | JPT |
| EIF2S1 | GI_34147492-S | rs8021202  | 14 | 14 | 66143202 | 778331 | 7.9804 | 0.5347 | 0.4076  | 5.4988 | JPT |
| EIF2S1 | GI_34147492-S | rs8018444  | 14 | 14 | 66146264 | 775269 | 8.4840 | 0.5507 | 0.4152  | 5.4988 | JPT |
| EIF2S1 | GI_34147492-S | rs7161707  | 14 | 14 | 66146792 | 774741 | 8.2696 | 0.5490 | 0.4211  | 5.4988 | JPT |
| EIF2S1 | GI_34147492-S | rs7140281  | 14 | 14 | 66146903 | 774630 | 8.4840 | 0.5507 | 0.4152  | 5.4988 | JPT |
| EIF2S1 | GI_34147492-S | rs8010110  | 14 | 14 | 66147965 | 773568 | 8.4840 | 0.5507 | 0.4152  | 5.4988 | JPT |
| EIF2S1 | GI_34147492-S | rs1958001  | 14 | 14 | 66149645 | 771888 | 8.6275 | 0.5749 | -0.4301 | 5.4988 | JPT |
| EIF2S1 | GI_34147492-S | rs8023060  | 14 | 14 | 66153725 | 767808 | 8.9163 | 0.5794 | -0.4333 | 5.4988 | JPT |
| EIF2S1 | GI_34147492-S | rs10130016 | 14 | 14 | 66154689 | 766844 | 7.9804 | 0.5347 | -0.4076 | 5.4988 | JPT |
| EIF2S1 | GI_34147492-S | rs8015958  | 14 | 14 | 66156429 | 765104 | 7.8091 | 0.5347 | -0.4076 | 5.4988 | JPT |
| EIF2S1 | GI_34147492-S | rs8016353  | 14 | 14 | 66156693 | 764840 | 8.5047 | 0.5691 | 0.4224  | 5.4988 | JPT |
| EIF2S1 | GI_34147492-S | rs8008296  | 14 | 14 | 66159719 | 761814 | 7.4501 | 0.5629 | 0.4314  | 5.4988 | JPT |

|        |               |            |    |    |          |        |        |        |         |        |     |
|--------|---------------|------------|----|----|----------|--------|--------|--------|---------|--------|-----|
| EIF2S1 | GI_34147492-S | rs8013247  | 14 | 14 | 66160801 | 760732 | 6.6399 | 0.5262 | 0.4079  | 5.4988 | JPT |
| EIF2S1 | GI_34147492-S | rs10135254 | 14 | 14 | 66161394 | 760139 | 7.6938 | 0.5376 | -0.4187 | 5.4988 | JPT |
| EIF2S1 | GI_34147492-S | rs7157919  | 14 | 14 | 66162452 | 759081 | 7.9804 | 0.5347 | -0.4076 | 5.4988 | JPT |
| EIF2S1 | GI_34147492-S | rs8011928  | 14 | 14 | 66164236 | 757297 | 8.3601 | 0.5621 | 0.4154  | 5.4988 | JPT |
| EIF2S1 | GI_34147492-S | rs8010897  | 14 | 14 | 66164470 | 757063 | 8.3193 | 0.5514 | -0.4151 | 5.4988 | JPT |
| EIF2S1 | GI_34147492-S | rs8015684  | 14 | 14 | 66164975 | 756558 | 8.4840 | 0.5507 | -0.4152 | 5.4988 | JPT |
| EIF2S1 | GI_34147492-S | rs8015842  | 14 | 14 | 66165065 | 756468 | 8.3193 | 0.5514 | -0.4151 | 5.4988 | JPT |
| EIF2S1 | GI_34147492-S | rs8017245  | 14 | 14 | 66165108 | 756425 | 7.9804 | 0.5347 | 0.4076  | 5.4988 | JPT |
| EIF2S1 | GI_34147492-S | rs10873195 | 14 | 14 | 66165366 | 756167 | 9.2552 | 0.6316 | -0.4650 | 5.4988 | JPT |
| EIF2S1 | GI_34147492-S | rs7140649  | 14 | 14 | 66166600 | 754933 | 8.4840 | 0.5507 | 0.4152  | 5.4988 | JPT |
| EIF2S1 | GI_34147492-S | rs8014806  | 14 | 14 | 66170123 | 751410 | 7.9804 | 0.5347 | -0.4076 | 5.4988 | JPT |
| EIF2S1 | GI_34147492-S | rs8014849  | 14 | 14 | 66170197 | 751336 | 8.5325 | 0.5616 | 0.4155  | 5.4988 | JPT |
| EIF2S1 | GI_34147492-S | rs12323903 | 14 | 14 | 66170967 | 750566 | 8.4840 | 0.5507 | 0.4152  | 5.4988 | JPT |
| EIF2S1 | GI_34147492-S | rs7342493  | 14 | 14 | 66175512 | 746021 | 8.1698 | 0.5618 | 0.4261  | 5.4988 | JPT |
| EIF2S1 | GI_34147492-S | rs1886778  | 14 | 14 | 66175818 | 745715 | 8.8836 | 0.5867 | 0.4349  | 5.4988 | JPT |
| EIF2S1 | GI_34147492-S | rs10144010 | 14 | 14 | 66176330 | 745203 | 8.3851 | 0.5913 | 0.4378  | 5.4988 | JPT |
| EIF2S1 | GI_34147492-S | rs9323476  | 14 | 14 | 66176387 | 745146 | 8.2964 | 0.5503 | 0.4140  | 5.4988 | JPT |
| EIF2S1 | GI_34147492-S | rs7152123  | 14 | 14 | 66177191 | 744342 | 7.9804 | 0.5347 | 0.4076  | 5.4988 | JPT |
| EIF2S1 | GI_34147492-S | rs7151830  | 14 | 14 | 66177279 | 744254 | 8.1744 | 0.5531 | -0.4151 | 5.4988 | JPT |
| EIF2S1 | GI_34147492-S | rs7152169  | 14 | 14 | 66177344 | 744189 | 8.7895 | 0.5649 | -0.4217 | 5.4988 | JPT |
| EIF2S1 | GI_34147492-S | rs7153011  | 14 | 14 | 66177652 | 743881 | 7.7263 | 0.5134 | 0.3947  | 5.4988 | JPT |
| EIF2S1 | GI_34147492-S | rs1952070  | 14 | 14 | 66177823 | 743710 | 7.9804 | 0.5347 | 0.4076  | 5.4988 | JPT |
| EIF2S1 | GI_34147492-S | rs7159473  | 14 | 14 | 66178304 | 743229 | 8.3415 | 0.5524 | 0.4150  | 5.4988 | JPT |
| EIF2S1 | GI_34147492-S | rs7156021  | 14 | 14 | 66183167 | 738366 | 8.3474 | 0.5706 | -0.4274 | 5.4988 | JPT |
| EIF2S1 | GI_34147492-S | rs10133120 | 14 | 14 | 66185424 | 736109 | 7.6127 | 0.5333 | -0.3994 | 5.4988 | JPT |
| EIF2S1 | GI_34147492-S | rs11158642 | 14 | 14 | 66185483 | 736050 | 8.4840 | 0.5507 | 0.4152  | 5.4988 | JPT |
| EIF2S1 | GI_34147492-S | rs2094100  | 14 | 14 | 66185956 | 735577 | 8.1426 | 0.5515 | 0.4221  | 5.4988 | JPT |
| EIF2S1 | GI_34147492-S | rs13367244 | 14 | 14 | 66186351 | 735182 | 8.4840 | 0.5507 | 0.4152  | 5.4988 | JPT |
| EIF2S1 | GI_34147492-S | rs6573695  | 14 | 14 | 66189645 | 731888 | 7.9651 | 0.5339 | 0.3955  | 5.4988 | JPT |
| EIF2S1 | GI_34147492-S | rs8007662  | 14 | 14 | 66190185 | 731348 | 8.2980 | 0.5681 | 0.4257  | 5.4988 | JPT |
| EIF2S1 | GI_34147492-S | rs8011027  | 14 | 14 | 66194538 | 726995 | 7.9804 | 0.5347 | -0.4076 | 5.4988 | JPT |
| EIF2S1 | GI_34147492-S | rs7152601  | 14 | 14 | 66198557 | 722976 | 7.9804 | 0.5347 | 0.4076  | 5.4988 | JPT |
| EIF2S1 | GI_34147492-S | rs4605098  | 14 | 14 | 66199191 | 722342 | 7.9804 | 0.5347 | 0.4076  | 5.4988 | JPT |
| EIF2S1 | GI_34147492-S | rs4644792  | 14 | 14 | 66200099 | 721434 | 8.2964 | 0.5503 | -0.4140 | 5.4988 | JPT |
| EIF2S1 | GI_34147492-S | rs7158823  | 14 | 14 | 66201598 | 719935 | 7.9804 | 0.5347 | -0.4076 | 5.4988 | JPT |
| EIF2S1 | GI_34147492-S | rs7142841  | 14 | 14 | 66208808 | 712725 | 7.3710 | 0.5032 | 0.3887  | 5.4988 | JPT |
| EIF2S1 | GI_34147492-S | rs10139822 | 14 | 14 | 66210429 | 711104 | 8.0596 | 0.5474 | 0.4115  | 5.4988 | JPT |
| EIF2S1 | GI_34147492-S | rs13367863 | 14 | 14 | 66211159 | 710374 | 8.4840 | 0.5507 | -0.4152 | 5.4988 | JPT |
| EIF2S1 | GI_34147492-S | rs8013315  | 14 | 14 | 66212573 | 708960 | 8.3193 | 0.5514 | 0.4151  | 5.4988 | JPT |
| EIF2S1 | GI_34147492-S | rs8013215  | 14 | 14 | 66212690 | 708843 | 7.7317 | 0.5487 | -0.4115 | 5.4988 | JPT |
| EIF2S1 | GI_34147492-S | rs8018488  | 14 | 14 | 66212779 | 708754 | 7.9804 | 0.5347 | 0.4076  | 5.4988 | JPT |
| EIF2S1 | GI_34147492-S | rs8014297  | 14 | 14 | 66215870 | 705663 | 8.0016 | 0.5357 | -0.4095 | 5.4988 | JPT |
| EIF2S1 | GI_34147492-S | rs8015408  | 14 | 14 | 66216433 | 705100 | 8.3075 | 0.5508 | -0.4152 | 5.4988 | JPT |
| EIF2S1 | GI_34147492-S | rs10136366 | 14 | 14 | 66216698 | 704835 | 7.0742 | 0.4955 | -0.3873 | 5.4988 | JPT |
| EIF2S1 | GI_34147492-S | rs4294753  | 14 | 14 | 66216826 | 704707 | 8.4840 | 0.5507 | -0.4152 | 5.4988 | JPT |
| EIF2S1 | GI_34147492-S | rs3759753  | 14 | 14 | 66217569 | 703964 | 7.9804 | 0.5347 | 0.4076  | 5.4988 | JPT |
| EIF2S1 | GI_34147492-S | rs8005352  | 14 | 14 | 66217888 | 703645 | 8.7895 | 0.5649 | -0.4217 | 5.4988 | JPT |
| EIF2S1 | GI_34147492-S | rs6573702  | 14 | 14 | 66218239 | 703294 | 8.7417 | 0.5713 | -0.4210 | 5.4988 | JPT |
| EIF2S1 | GI_34147492-S | rs9783601  | 14 | 14 | 66218692 | 702841 | 8.0717 | 0.5662 | 0.4202  | 5.4988 | JPT |
| EIF2S1 | GI_34147492-S | rs6573706  | 14 | 14 | 66220517 | 701016 | 8.4840 | 0.5507 | 0.4152  | 5.4988 | JPT |
| EIF2S1 | GI_34147492-S | rs8021356  | 14 | 14 | 66225934 | 695599 | 8.4840 | 0.5507 | -0.4152 | 5.4988 | JPT |
| EIF2S1 | GI_34147492-S | rs6573710  | 14 | 14 | 66229962 | 691571 | 8.3958 | 0.5550 | 0.4074  | 5.4988 | JPT |
| EIF2S1 | GI_34147492-S | rs12101118 | 14 | 14 | 66230533 | 691000 | 7.3112 | 0.5552 | 0.4288  | 5.4988 | JPT |
| EIF2S1 | GI_34147492-S | rs7158148  | 14 | 14 | 66231033 | 690500 | 8.9307 | 0.6171 | 0.4546  | 5.4988 | JPT |
| EIF2S1 | GI_34147492-S | rs7157740  | 14 | 14 | 66231094 | 690439 | 8.4840 | 0.5507 | -0.4152 | 5.4988 | JPT |
| EIF2S1 | GI_34147492-S | rs7154017  | 14 | 14 | 66233836 | 687697 | 8.4840 | 0.5507 | -0.4152 | 5.4988 | JPT |
| EIF2S1 | GI_34147492-S | rs1885198  | 14 | 14 | 66234513 | 687020 | 8.4840 | 0.5507 | -0.4152 | 5.4988 | JPT |
| EIF2S1 | GI_34147492-S | rs7161029  | 14 | 14 | 66235064 | 686469 | 8.2964 | 0.5503 | 0.4140  | 5.4988 | JPT |
| EIF2S1 | GI_34147492-S | rs1951354  | 14 | 14 | 66235643 | 685890 | 8.7895 | 0.5649 | 0.4217  | 5.4988 | JPT |

|        |               |            |    |    |          |        |        |        |         |        |     |
|--------|---------------|------------|----|----|----------|--------|--------|--------|---------|--------|-----|
| EIF2S1 | GI_34147492-S | rs13366714 | 14 | 14 | 66239224 | 682309 | 9.0126 | 0.6111 | -0.4622 | 5.4988 | JPT |
| EIF2S1 | GI_34147492-S | rs6573711  | 14 | 14 | 66247439 | 674094 | 8.4840 | 0.5507 | -0.4152 | 5.4988 | JPT |
| EIF2S1 | GI_34147492-S | rs1951355  | 14 | 14 | 66257317 | 664216 | 8.0320 | 0.5373 | 0.4115  | 5.4988 | JPT |
| EIF2S1 | GI_34147492-S | rs1951357  | 14 | 14 | 66257354 | 664179 | 7.5619 | 0.5218 | -0.4085 | 5.4988 | JPT |
| EIF2S1 | GI_34147492-S | rs12100903 | 14 | 14 | 66257989 | 663544 | 7.9804 | 0.5347 | -0.4076 | 5.4988 | JPT |
| EIF2S1 | GI_34147492-S | rs8012315  | 14 | 14 | 66259521 | 662012 | 6.9700 | 0.5072 | 0.3996  | 5.4988 | JPT |
| EIF2S1 | GI_34147492-S | rs8010952  | 14 | 14 | 66259603 | 661930 | 6.4977 | 0.4885 | -0.3917 | 5.4988 | JPT |
| EIF2S1 | GI_34147492-S | rs17836572 | 14 | 14 | 66262776 | 658757 | 8.4840 | 0.5507 | -0.4152 | 5.4988 | JPT |
| EIF2S1 | GI_34147492-S | rs10150268 | 14 | 14 | 66265929 | 655604 | 8.3584 | 0.5533 | 0.4173  | 5.4988 | JPT |
| EIF2S1 | GI_34147492-S | rs8007677  | 14 | 14 | 66267703 | 653830 | 8.4840 | 0.5507 | 0.4152  | 5.4988 | JPT |
| EIF2S1 | GI_34147492-S | rs7156074  | 14 | 14 | 66270929 | 650604 | 8.4840 | 0.5507 | -0.4152 | 5.4988 | JPT |
| EIF2S1 | GI_34147492-S | rs7156240  | 14 | 14 | 66271023 | 650510 | 7.9804 | 0.5347 | -0.4076 | 5.4988 | JPT |
| EIF2S1 | GI_34147492-S | rs10150028 | 14 | 14 | 66271655 | 649878 | 8.8417 | 0.5940 | 0.4333  | 5.4988 | JPT |
| EIF2S1 | GI_34147492-S | rs9323478  | 14 | 14 | 66276181 | 645352 | 7.9251 | 0.5319 | -0.4019 | 5.4988 | JPT |
| EIF2S1 | GI_34147492-S | rs9323479  | 14 | 14 | 66276240 | 645293 | 7.9251 | 0.5319 | 0.4019  | 5.4988 | JPT |
| EIF2S1 | GI_34147492-S | rs10143077 | 14 | 14 | 66276463 | 645070 | 8.1885 | 0.5450 | 0.4087  | 5.4988 | JPT |
| EIF2S1 | GI_34147492-S | rs10132261 | 14 | 14 | 66276615 | 644918 | 7.9251 | 0.5319 | 0.4019  | 5.4988 | JPT |
| EIF2S1 | GI_34147492-S | rs6573718  | 14 | 14 | 66278354 | 643179 | 8.0278 | 0.5458 | 0.4076  | 5.4988 | JPT |
| EIF2S1 | GI_34147492-S | rs6573719  | 14 | 14 | 66278401 | 643132 | 7.9251 | 0.5319 | 0.4019  | 5.4988 | JPT |
| EIF2S1 | GI_34147492-S | rs9323480  | 14 | 14 | 66280596 | 640937 | 7.9251 | 0.5319 | 0.4019  | 5.4988 | JPT |
| EIF2S1 | GI_34147492-S | rs766527   | 14 | 14 | 66281840 | 639693 | 7.9251 | 0.5319 | -0.4019 | 5.4988 | JPT |
| EIF2S1 | GI_34147492-S | rs7148224  | 14 | 14 | 66282325 | 639208 | 7.9804 | 0.5347 | -0.4076 | 5.4988 | JPT |
| EIF2S1 | GI_34147492-S | rs6573720  | 14 | 14 | 66282721 | 638812 | 8.8741 | 0.6048 | 0.4351  | 5.4988 | JPT |
| EIF2S1 | GI_34147492-S | rs8016213  | 14 | 14 | 66282985 | 638548 | 8.4840 | 0.5507 | 0.4152  | 5.4988 | JPT |
| EIF2S1 | GI_34147492-S | rs9783678  | 14 | 14 | 66284564 | 636969 | 8.4840 | 0.5507 | -0.4152 | 5.4988 | JPT |
| EIF2S1 | GI_34147492-S | rs8008369  | 14 | 14 | 66284949 | 636584 | 8.4840 | 0.5507 | 0.4152  | 5.4988 | JPT |
| EIF2S1 | GI_34147492-S | rs6573721  | 14 | 14 | 66285863 | 635670 | 8.4840 | 0.5507 | 0.4152  | 5.4988 | JPT |
| EIF2S1 | GI_34147492-S | rs7148623  | 14 | 14 | 66289570 | 631963 | 7.9804 | 0.5347 | 0.4076  | 5.4988 | JPT |
| EIF2S1 | GI_34147492-S | rs7142259  | 14 | 14 | 66289717 | 631816 | 8.4840 | 0.5507 | -0.4152 | 5.4988 | JPT |
| EIF2S1 | GI_34147492-S | rs8012158  | 14 | 14 | 66291448 | 630085 | 7.9804 | 0.5347 | -0.4076 | 5.4988 | JPT |
| EIF2S1 | GI_34147492-S | rs17247749 | 14 | 14 | 66292836 | 628697 | 8.4840 | 0.5507 | -0.4152 | 5.4988 | JPT |
| EIF2S1 | GI_34147492-S | rs10129827 | 14 | 14 | 66302326 | 619207 | 7.9307 | 0.5409 | 0.4141  | 5.4988 | JPT |
| EIF2S1 | GI_34147492-S | rs10132625 | 14 | 14 | 66303059 | 618474 | 8.2964 | 0.5503 | -0.4140 | 5.4988 | JPT |
| EIF2S1 | GI_34147492-S | rs11158646 | 14 | 14 | 66304463 | 617070 | 9.0766 | 0.6543 | 0.4897  | 5.4988 | JPT |
| EIF2S1 | GI_34147492-S | rs6573723  | 14 | 14 | 66305475 | 616058 | 7.9804 | 0.5347 | 0.4076  | 5.4988 | JPT |
| EIF2S1 | GI_34147492-S | rs9323483  | 14 | 14 | 66309360 | 612173 | 8.4840 | 0.5507 | -0.4152 | 5.4988 | JPT |
| EIF2S1 | GI_34147492-S | rs9323484  | 14 | 14 | 66309385 | 612148 | 8.4840 | 0.5507 | -0.4152 | 5.4988 | JPT |
| EIF2S1 | GI_34147492-S | rs6573724  | 14 | 14 | 66310318 | 611215 | 7.9804 | 0.5347 | 0.4076  | 5.4988 | JPT |
| EIF2S1 | GI_34147492-S | rs7147690  | 14 | 14 | 66312090 | 609443 | 8.4840 | 0.5507 | -0.4152 | 5.4988 | JPT |
| EIF2S1 | GI_34147492-S | rs9323485  | 14 | 14 | 66313250 | 608283 | 7.7612 | 0.5322 | -0.4069 | 5.4988 | JPT |
| EIF2S1 | GI_34147492-S | rs10144919 | 14 | 14 | 66319372 | 602161 | 8.4840 | 0.5507 | -0.4152 | 5.4988 | JPT |
| EIF2S1 | GI_34147492-S | rs7142669  | 14 | 14 | 66320145 | 601388 | 8.4840 | 0.5507 | -0.4152 | 5.4988 | JPT |
| EIF2S1 | GI_34147492-S | rs7149711  | 14 | 14 | 66321476 | 600057 | 8.6854 | 0.5687 | -0.4222 | 5.4988 | JPT |
| EIF2S1 | GI_34147492-S | rs8022328  | 14 | 14 | 66322788 | 598745 | 8.4840 | 0.5507 | 0.4152  | 5.4988 | JPT |
| EIF2S1 | GI_34147492-S | rs8008773  | 14 | 14 | 66332916 | 588617 | 7.0061 | 0.5378 | -0.4042 | 5.4988 | JPT |
| EIF2S1 | GI_34147492-S | rs12587989 | 14 | 14 | 66339876 | 581657 | 6.5419 | 0.5306 | -0.4046 | 5.4988 | JPT |
| EIF2S1 | GI_34147492-S | rs11158647 | 14 | 14 | 66347063 | 574470 | 9.0336 | 0.5935 | 0.4309  | 5.4988 | JPT |
| EIF2S1 | GI_34147492-S | rs4141703  | 14 | 14 | 66347197 | 574336 | 8.2964 | 0.5503 | 0.4140  | 5.4988 | JPT |
| EIF2S1 | GI_34147492-S | rs4141702  | 14 | 14 | 66347472 | 574061 | 7.9804 | 0.5347 | 0.4076  | 5.4988 | JPT |
| EIF2S1 | GI_34147492-S | rs7145718  | 14 | 14 | 66351936 | 569597 | 7.9804 | 0.5347 | -0.4076 | 5.4988 | JPT |
| EIF2S1 | GI_34147492-S | rs3784075  | 14 | 14 | 66360939 | 560594 | 8.2964 | 0.5503 | 0.4140  | 5.4988 | JPT |
| EIF2S1 | GI_34147492-S | rs10148975 | 14 | 14 | 66362690 | 558843 | 5.6495 | 0.4027 | 0.3669  | 5.4988 | JPT |
| EIF2S1 | GI_34147492-S | rs8006552  | 14 | 14 | 66363822 | 557711 | 7.9804 | 0.5347 | 0.4076  | 5.4988 | JPT |
| EIF2S1 | GI_34147492-S | rs12323781 | 14 | 14 | 66364969 | 556564 | 9.3414 | 0.6163 | -0.4468 | 5.4988 | JPT |
| EIF2S1 | GI_34147492-S | rs8012660  | 14 | 14 | 66370424 | 551109 | 7.9804 | 0.5347 | 0.4076  | 5.4988 | JPT |
| EIF2S1 | GI_34147492-S | rs8018920  | 14 | 14 | 66374819 | 546714 | 7.9804 | 0.5347 | -0.4076 | 5.4988 | JPT |
| EIF2S1 | GI_34147492-S | rs10142176 | 14 | 14 | 66376569 | 544964 | 8.2964 | 0.5503 | 0.4140  | 5.4988 | JPT |
| EIF2S1 | GI_34147492-S | rs17247862 | 14 | 14 | 66382113 | 539420 | 8.7895 | 0.5649 | 0.4217  | 5.4988 | JPT |
| EIF2S1 | GI_34147492-S | rs10130604 | 14 | 14 | 66385191 | 536342 | 6.5927 | 0.4681 | -0.3893 | 5.4988 | JPT |

|        |               |            |    |    |          |        |        |        |         |        |     |
|--------|---------------|------------|----|----|----------|--------|--------|--------|---------|--------|-----|
| EIF2S1 | GI_34147492-S | rs9323486  | 14 | 14 | 66385324 | 536209 | 7.3603 | 0.5111 | -0.4031 | 5.4988 | JPT |
| EIF2S1 | GI_34147492-S | rs10143670 | 14 | 14 | 66389277 | 532256 | 8.0629 | 0.5388 | -0.4266 | 5.4988 | JPT |
| EIF2S1 | GI_34147492-S | rs6573726  | 14 | 14 | 66394281 | 527252 | 8.4840 | 0.5507 | -0.4152 | 5.4988 | JPT |
| EIF2S1 | GI_34147492-S | rs2144909  | 14 | 14 | 66395197 | 526336 | 8.4840 | 0.5507 | 0.4152  | 5.4988 | JPT |
| EIF2S1 | GI_34147492-S | rs12590085 | 14 | 14 | 66398842 | 522691 | 8.8331 | 0.5669 | 0.4252  | 5.4988 | JPT |
| EIF2S1 | GI_34147492-S | rs7160476  | 14 | 14 | 66402130 | 519403 | 8.2964 | 0.5503 | -0.4140 | 5.4988 | JPT |
| EIF2S1 | GI_34147492-S | rs1950689  | 14 | 14 | 66408431 | 513102 | 7.9804 | 0.5347 | -0.4076 | 5.4988 | JPT |
| EIF2S1 | GI_34147492-S | rs7156852  | 14 | 14 | 66410302 | 511231 | 8.3202 | 0.5514 | 0.4153  | 5.4988 | JPT |
| EIF2S1 | GI_34147492-S | rs6573727  | 14 | 14 | 66413452 | 508081 | 8.4840 | 0.5507 | -0.4152 | 5.4988 | JPT |
| EIF2S1 | GI_34147492-S | rs17836604 | 14 | 14 | 66417469 | 504064 | 8.9759 | 0.5821 | 0.4270  | 5.4988 | JPT |
| EIF2S1 | GI_34147492-S | rs8022437  | 14 | 14 | 66418094 | 503439 | 8.7895 | 0.5649 | 0.4217  | 5.4988 | JPT |
| EIF2S1 | GI_34147492-S | rs10047902 | 14 | 14 | 66418900 | 502633 | 7.9804 | 0.5347 | 0.4076  | 5.4988 | JPT |
| EIF2S1 | GI_34147492-S | rs8014841  | 14 | 14 | 66421979 | 499554 | 7.9804 | 0.5347 | -0.4076 | 5.4988 | JPT |
| EIF2S1 | GI_34147492-S | rs4578576  | 14 | 14 | 66425392 | 496141 | 7.9804 | 0.5347 | -0.4076 | 5.4988 | JPT |
| EIF2S1 | GI_34147492-S | rs7156655  | 14 | 14 | 66425814 | 495719 | 7.9804 | 0.5347 | 0.4076  | 5.4988 | JPT |
| EIF2S1 | GI_34147492-S | rs728647   | 14 | 14 | 66447808 | 473725 | 7.9804 | 0.5347 | 0.4076  | 5.4988 | JPT |
| EIF2S1 | GI_34147492-S | rs723432   | 14 | 14 | 66448768 | 472765 | 7.4584 | 0.5163 | -0.3983 | 5.4988 | JPT |
| EIF2S1 | GI_34147492-S | rs7156081  | 14 | 14 | 66453896 | 467637 | 8.2964 | 0.5503 | 0.4140  | 5.4988 | JPT |
| EIF2S1 | GI_34147492-S | rs2038398  | 14 | 14 | 66455481 | 466052 | 8.7895 | 0.5649 | 0.4217  | 5.4988 | JPT |
| EIF2S1 | GI_34147492-S | rs8022657  | 14 | 14 | 66460252 | 461281 | 7.9804 | 0.5347 | -0.4076 | 5.4988 | JPT |
| EIF2S1 | GI_34147492-S | rs10135117 | 14 | 14 | 66469144 | 452389 | 7.9804 | 0.5347 | -0.4076 | 5.4988 | JPT |
| EIF2S1 | GI_34147492-S | rs1950281  | 14 | 14 | 66471052 | 450481 | 7.9804 | 0.5347 | -0.4076 | 5.4988 | JPT |
| EIF2S1 | GI_34147492-S | rs10135701 | 14 | 14 | 66486730 | 434803 | 8.2964 | 0.5503 | -0.4140 | 5.4988 | JPT |
| EIF2S1 | GI_34147492-S | rs10147954 | 14 | 14 | 66486836 | 434697 | 8.2964 | 0.5503 | 0.4140  | 5.4988 | JPT |
| EIF2S1 | GI_34147492-S | rs12588821 | 14 | 14 | 66494253 | 427280 | 7.9804 | 0.5347 | 0.4076  | 5.4988 | JPT |
| EIF2S1 | GI_34147492-S | rs8012063  | 14 | 14 | 66504223 | 417310 | 7.8950 | 0.5304 | 0.4234  | 5.4988 | JPT |
| EIF2S1 | GI_34147492-S | rs8016725  | 14 | 14 | 66504935 | 416598 | 8.0130 | 0.5450 | -0.4272 | 5.4988 | JPT |
| EIF2S1 | GI_34147492-S | rs8013401  | 14 | 14 | 66512912 | 408621 | 8.4840 | 0.5507 | 0.4152  | 5.4988 | JPT |
| EIF2S1 | GI_34147492-S | rs6573740  | 14 | 14 | 66515522 | 406011 | 7.4550 | 0.5162 | -0.3979 | 5.4988 | JPT |
| EIF2S1 | GI_34147492-S | rs2319549  | 14 | 14 | 66523146 | 398387 | 8.2964 | 0.5503 | -0.4140 | 5.4988 | JPT |
| EIF2S1 | GI_34147492-S | rs8020095  | 14 | 14 | 66523611 | 397922 | 7.9804 | 0.5347 | 0.4076  | 5.4988 | JPT |
| EIF2S1 | GI_34147492-S | rs2013137  | 14 | 14 | 66527748 | 393785 | 9.0568 | 0.5946 | 0.4388  | 5.4988 | JPT |
| EIF2S1 | GI_34147492-S | rs7152001  | 14 | 14 | 66531101 | 390432 | 8.3286 | 0.6086 | -0.4501 | 5.4988 | JPT |
| EIF2S1 | GI_34147492-S | rs7142068  | 14 | 14 | 66532765 | 388768 | 8.2964 | 0.5503 | -0.4140 | 5.4988 | JPT |
| EIF2S1 | GI_34147492-S | rs10150424 | 14 | 14 | 66539544 | 381989 | 8.2964 | 0.5503 | -0.4140 | 5.4988 | JPT |
| EIF2S1 | GI_34147492-S | rs8016391  | 14 | 14 | 66540033 | 381500 | 8.6308 | 0.5662 | 0.4220  | 5.4988 | JPT |
| EIF2S1 | GI_34147492-S | rs1955610  | 14 | 14 | 66540615 | 380918 | 8.2964 | 0.5503 | 0.4140  | 5.4988 | JPT |
| EIF2S1 | GI_34147492-S | rs1955609  | 14 | 14 | 66540824 | 380709 | 8.2964 | 0.5503 | 0.4140  | 5.4988 | JPT |
| EIF2S1 | GI_34147492-S | rs1955608  | 14 | 14 | 66540848 | 380685 | 8.6308 | 0.5662 | -0.4220 | 5.4988 | JPT |
| EIF2S1 | GI_34147492-S | rs8012944  | 14 | 14 | 66543451 | 378082 | 8.7895 | 0.5649 | -0.4217 | 5.4988 | JPT |
| EIF2S1 | GI_34147492-S | rs1955606  | 14 | 14 | 66547400 | 374133 | 7.9804 | 0.5347 | 0.4076  | 5.4988 | JPT |
| EIF2S1 | GI_34147492-S | rs1955605  | 14 | 14 | 66550797 | 370736 | 9.4080 | 0.6101 | -0.4396 | 5.4988 | JPT |
| EIF2S1 | GI_34147492-S | rs10138631 | 14 | 14 | 66551129 | 370404 | 8.9823 | 0.6098 | -0.4401 | 5.4988 | JPT |
| EIF2S1 | GI_34147492-S | rs10131242 | 14 | 14 | 66552316 | 369217 | 8.7895 | 0.5649 | 0.4217  | 5.4988 | JPT |
| EIF2S1 | GI_34147492-S | rs10142059 | 14 | 14 | 66552382 | 369151 | 8.4840 | 0.5507 | -0.4152 | 5.4988 | JPT |
| EIF2S1 | GI_34147492-S | rs7144580  | 14 | 14 | 66552641 | 368892 | 8.5082 | 0.5692 | 0.4207  | 5.4988 | JPT |
| EIF2S1 | GI_34147492-S | rs1950284  | 14 | 14 | 66553274 | 368259 | 8.7895 | 0.5649 | 0.4217  | 5.4988 | JPT |
| EIF2S1 | GI_34147492-S | rs9323489  | 14 | 14 | 66554099 | 367434 | 8.2964 | 0.5503 | -0.4140 | 5.4988 | JPT |
| EIF2S1 | GI_34147492-S | rs6573744  | 14 | 14 | 66555393 | 366140 | 8.7895 | 0.5649 | 0.4217  | 5.4988 | JPT |
| EIF2S1 | GI_34147492-S | rs1950282  | 14 | 14 | 66557382 | 364151 | 8.4840 | 0.5507 | 0.4152  | 5.4988 | JPT |
| EIF2S1 | GI_34147492-S | rs7157126  | 14 | 14 | 66557983 | 363550 | 8.4840 | 0.5507 | -0.4152 | 5.4988 | JPT |
| EIF2S1 | GI_34147492-S | rs1546940  | 14 | 14 | 66563531 | 358002 | 7.9804 | 0.5347 | 0.4076  | 5.4988 | JPT |
| EIF2S1 | GI_34147492-S | rs7149905  | 14 | 14 | 66569469 | 352064 | 7.9582 | 0.5700 | 0.4359  | 5.4988 | JPT |
| EIF2S1 | GI_34147492-S | rs7145295  | 14 | 14 | 66570480 | 351053 | 7.9804 | 0.5347 | 0.4076  | 5.4988 | JPT |
| EIF2S1 | GI_34147492-S | rs7151086  | 14 | 14 | 66571308 | 350225 | 8.0108 | 0.5539 | 0.4123  | 5.4988 | JPT |
| EIF2S1 | GI_34147492-S | rs6573745  | 14 | 14 | 66572711 | 348822 | 8.1614 | 0.5437 | -0.4034 | 5.4988 | JPT |
| EIF2S1 | GI_34147492-S | rs10136622 | 14 | 14 | 66575362 | 346171 | 7.9804 | 0.5347 | 0.4076  | 5.4988 | JPT |
| EIF2S1 | GI_34147492-S | rs6573746  | 14 | 14 | 66576406 | 345127 | 8.7895 | 0.5649 | -0.4217 | 5.4988 | JPT |
| EIF2S1 | GI_34147492-S | rs12587392 | 14 | 14 | 66580101 | 341432 | 8.6147 | 0.5834 | -0.4247 | 5.4988 | JPT |

|        |               |            |    |    |          |        |         |        |         |        |     |
|--------|---------------|------------|----|----|----------|--------|---------|--------|---------|--------|-----|
| EIF2S1 | GI_34147492-S | rs10220477 | 14 | 14 | 66581500 | 340033 | 8.6854  | 0.5687 | -0.4222 | 5.4988 | JPT |
| EIF2S1 | GI_34147492-S | rs7161698  | 14 | 14 | 66585036 | 336497 | 8.5955  | 0.5734 | 0.4039  | 5.4988 | JPT |
| EIF2S1 | GI_34147492-S | rs8008739  | 14 | 14 | 66586544 | 334989 | 8.2343  | 0.5472 | 0.4148  | 5.4988 | JPT |
| EIF2S1 | GI_34147492-S | rs6573747  | 14 | 14 | 66587601 | 333932 | 7.9804  | 0.5347 | 0.4076  | 5.4988 | JPT |
| EIF2S1 | GI_34147492-S | rs8019510  | 14 | 14 | 66593668 | 327865 | 8.6671  | 0.5679 | 0.4292  | 5.4988 | JPT |
| EIF2S1 | GI_34147492-S | rs7161664  | 14 | 14 | 66594240 | 327293 | 8.4840  | 0.5507 | -0.4152 | 5.4988 | JPT |
| EIF2S1 | GI_34147492-S | rs7141519  | 14 | 14 | 66594278 | 327255 | 8.4840  | 0.5507 | 0.4152  | 5.4988 | JPT |
| EIF2S1 | GI_34147492-S | rs9323490  | 14 | 14 | 66596090 | 325443 | 7.4762  | 0.5173 | 0.3875  | 5.4988 | JPT |
| EIF2S1 | GI_34147492-S | rs2144061  | 14 | 14 | 66596315 | 325218 | 7.9804  | 0.5347 | -0.4076 | 5.4988 | JPT |
| EIF2S1 | GI_34147492-S | rs9323491  | 14 | 14 | 66596988 | 324545 | 7.4769  | 0.5173 | -0.4002 | 5.4988 | JPT |
| EIF2S1 | GI_34147492-S | rs9323492  | 14 | 14 | 66598210 | 323323 | 8.8931  | 0.5697 | -0.4149 | 5.4988 | JPT |
| EIF2S1 | GI_34147492-S | rs8003929  | 14 | 14 | 66603026 | 318507 | 8.9161  | 0.5882 | 0.4440  | 5.4988 | JPT |
| EIF2S1 | GI_34147492-S | rs10138952 | 14 | 14 | 66605772 | 315761 | 7.8133  | 0.5349 | -0.4076 | 5.4988 | JPT |
| EIF2S1 | GI_34147492-S | rs7150739  | 14 | 14 | 66608701 | 312832 | 8.2964  | 0.5503 | -0.4140 | 5.4988 | JPT |
| EIF2S1 | GI_34147492-S | rs10149600 | 14 | 14 | 66609583 | 311950 | 7.8091  | 0.5347 | -0.4076 | 5.4988 | JPT |
| EIF2S1 | GI_34147492-S | rs13367791 | 14 | 14 | 66612431 | 309102 | 7.9804  | 0.5347 | -0.4076 | 5.4988 | JPT |
| EIF2S1 | GI_34147492-S | rs10141815 | 14 | 14 | 66619556 | 301977 | 7.7612  | 0.5322 | -0.4069 | 5.4988 | JPT |
| EIF2S1 | GI_34147492-S | rs10483793 | 14 | 14 | 66626018 | 295515 | 8.2964  | 0.5503 | -0.4140 | 5.4988 | JPT |
| EIF2S1 | GI_34147492-S | rs7158228  | 14 | 14 | 66632476 | 289057 | 9.3071  | 0.5880 | 0.4372  | 5.4988 | JPT |
| EIF2S1 | GI_34147492-S | rs7157394  | 14 | 14 | 66632522 | 289011 | 9.3071  | 0.5880 | 0.4372  | 5.4988 | JPT |
| EIF2S1 | GI_34147492-S | rs7157418  | 14 | 14 | 66632568 | 288965 | 9.3071  | 0.5880 | -0.4372 | 5.4988 | JPT |
| EIF2S1 | GI_34147492-S | rs17248252 | 14 | 14 | 66632682 | 288851 | 9.3071  | 0.5880 | 0.4372  | 5.4988 | JPT |
| EIF2S1 | GI_34147492-S | rs8009087  | 14 | 14 | 66633963 | 287570 | 7.9804  | 0.5347 | -0.4076 | 5.4988 | JPT |
| EIF2S1 | GI_34147492-S | rs768770   | 14 | 14 | 66636923 | 284610 | 8.2964  | 0.5503 | -0.4140 | 5.4988 | JPT |
| EIF2S1 | GI_34147492-S | rs7493580  | 14 | 14 | 66650203 | 271330 | 7.8420  | 0.5364 | 0.4076  | 5.4988 | JPT |
| EIF2S1 | GI_34147492-S | rs2039055  | 14 | 14 | 66650546 | 270987 | 7.9804  | 0.5347 | -0.4076 | 5.4988 | JPT |
| EIF2S1 | GI_34147492-S | rs8012776  | 14 | 14 | 66657631 | 263902 | 7.9804  | 0.5347 | -0.4076 | 5.4988 | JPT |
| EIF2S1 | GI_34147492-S | rs10141952 | 14 | 14 | 66669922 | 251611 | 8.2964  | 0.5503 | 0.4140  | 5.4988 | JPT |
| EIF2S1 | GI_34147492-S | rs10144371 | 14 | 14 | 66674390 | 247143 | 8.1779  | 0.5445 | 0.4037  | 5.4988 | JPT |
| EIF2S1 | GI_34147492-S | rs10138850 | 14 | 14 | 66676521 | 245012 | 9.3071  | 0.5880 | -0.4372 | 5.4988 | JPT |
| EIF2S1 | GI_34147492-S | rs10138865 | 14 | 14 | 66676555 | 244978 | 8.6753  | 0.5862 | -0.4430 | 5.4988 | JPT |
| EIF2S1 | GI_34147492-S | rs1918483  | 14 | 14 | 66677376 | 244157 | 9.1202  | 0.5885 | -0.4370 | 5.4988 | JPT |
| EIF2S1 | GI_34147492-S | rs7146638  | 14 | 14 | 66683145 | 238388 | 10.0226 | 0.6268 | -0.4515 | 5.4988 | JPT |
| EIF2S1 | GI_34147492-S | rs8006281  | 14 | 14 | 66686490 | 235043 | 9.2567  | 0.5945 | -0.4297 | 5.4988 | JPT |
| EIF2S1 | GI_34147492-S | rs17248357 | 14 | 14 | 66687707 | 233826 | 9.7152  | 0.6054 | 0.4457  | 5.4988 | JPT |
| EIF2S1 | GI_34147492-S | rs7147534  | 14 | 14 | 66692092 | 229441 | 8.7895  | 0.5649 | 0.4217  | 5.4988 | JPT |
| EIF2S1 | GI_34147492-S | rs7148044  | 14 | 14 | 66692323 | 229210 | 8.8699  | 0.5861 | 0.4304  | 5.4988 | JPT |
| EIF2S1 | GI_34147492-S | rs7148425  | 14 | 14 | 66692569 | 228964 | 9.3071  | 0.5880 | 0.4372  | 5.4988 | JPT |
| EIF2S1 | GI_34147492-S | rs10131984 | 14 | 14 | 66695169 | 226364 | 8.4840  | 0.5507 | 0.4152  | 5.4988 | JPT |
| EIF2S1 | GI_34147492-S | rs7151898  | 14 | 14 | 66696347 | 225186 | 7.9804  | 0.5347 | 0.4076  | 5.4988 | JPT |
| EIF2S1 | GI_34147492-S | rs3866760  | 14 | 14 | 66702333 | 219200 | 8.7895  | 0.5649 | 0.4217  | 5.4988 | JPT |
| EIF2S1 | GI_34147492-S | rs2295903  | 14 | 14 | 66704071 | 217462 | 9.5845  | 0.6087 | -0.4448 | 5.4988 | JPT |
| EIF2S1 | GI_34147492-S | rs2281676  | 14 | 14 | 66708208 | 213325 | 8.4840  | 0.5507 | 0.4152  | 5.4988 | JPT |
| EIF2S1 | GI_34147492-S | rs7154905  | 14 | 14 | 66709646 | 211887 | 7.8024  | 0.5818 | -0.4240 | 5.4988 | JPT |
| EIF2S1 | GI_34147492-S | rs6573754  | 14 | 14 | 66709924 | 211609 | 7.5490  | 0.5391 | -0.3984 | 5.4988 | JPT |
| EIF2S1 | GI_34147492-S | rs10134592 | 14 | 14 | 66710419 | 211114 | 7.8424  | 0.5545 | 0.4024  | 5.4988 | JPT |
| EIF2S1 | GI_34147492-S | rs7156119  | 14 | 14 | 66719868 | 201665 | 8.6275  | 0.5749 | -0.4301 | 5.4988 | JPT |
| EIF2S1 | GI_34147492-S | rs17248421 | 14 | 14 | 66722675 | 198858 | 9.7152  | 0.6054 | 0.4457  | 5.4988 | JPT |
| EIF2S1 | GI_34147492-S | rs6573755  | 14 | 14 | 66724229 | 197304 | 9.1985  | 0.5920 | 0.4383  | 5.4988 | JPT |
| EIF2S1 | GI_34147492-S | rs11158653 | 14 | 14 | 66728648 | 192885 | 8.1506  | 0.5346 | -0.4198 | 5.4988 | JPT |
| EIF2S1 | GI_34147492-S | rs17104103 | 14 | 14 | 66731705 | 189828 | 9.8696  | 0.6118 | 0.4382  | 5.4988 | JPT |
| EIF2S1 | GI_34147492-S | rs17104106 | 14 | 14 | 66733185 | 188348 | 10.9833 | 0.6550 | -0.4629 | 5.4988 | JPT |
| EIF2S1 | GI_34147492-S | rs17104109 | 14 | 14 | 66733703 | 187830 | 10.9833 | 0.6550 | 0.4629  | 5.4988 | JPT |
| EIF2S1 | GI_34147492-S | rs10873200 | 14 | 14 | 66736772 | 184761 | 10.4344 | 0.6431 | -0.4561 | 5.4988 | JPT |
| EIF2S1 | GI_34147492-S | rs8004488  | 14 | 14 | 66737155 | 184378 | 9.5120  | 0.5969 | -0.4315 | 5.4988 | JPT |
| EIF2S1 | GI_34147492-S | rs17104114 | 14 | 14 | 66737263 | 184270 | 9.5120  | 0.5969 | 0.4315  | 5.4988 | JPT |
| EIF2S1 | GI_34147492-S | rs11158655 | 14 | 14 | 66741454 | 180079 | 10.4344 | 0.6431 | -0.4561 | 5.4988 | JPT |
| EIF2S1 | GI_34147492-S | rs6573760  | 14 | 14 | 66747128 | 174405 | 8.8293  | 0.5843 | -0.4246 | 5.4988 | JPT |
| EIF2S1 | GI_34147492-S | rs10431718 | 14 | 14 | 66752389 | 169144 | 10.4344 | 0.6431 | 0.4561  | 5.4988 | JPT |

|        |               |            |    |    |          |        |         |        |         |        |     |
|--------|---------------|------------|----|----|----------|--------|---------|--------|---------|--------|-----|
| EIF2S1 | GI_34147492-S | rs12590956 | 14 | 14 | 66761202 | 160331 | 8.9795  | 0.5822 | -0.4246 | 5.4988 | JPT |
| EIF2S1 | GI_34147492-S | rs8009318  | 14 | 14 | 66762525 | 159008 | 10.4344 | 0.6431 | 0.4561  | 5.4988 | JPT |
| EIF2S1 | GI_34147492-S | rs10141879 | 14 | 14 | 66764943 | 156590 | 10.4949 | 0.6367 | 0.4542  | 5.4988 | JPT |
| EIF2S1 | GI_34147492-S | rs10145744 | 14 | 14 | 66766669 | 154864 | 10.9833 | 0.6550 | 0.4629  | 5.4988 | JPT |
| EIF2S1 | GI_34147492-S | rs10152002 | 14 | 14 | 66768669 | 152864 | 10.9833 | 0.6550 | -0.4629 | 5.4988 | JPT |
| EIF2S1 | GI_34147492-S | rs1475127  | 14 | 14 | 66768958 | 152575 | 9.6510  | 0.6204 | -0.4618 | 5.4988 | JPT |
| EIF2S1 | GI_34147492-S | rs1290900  | 14 | 14 | 66770921 | 150612 | 5.7095  | 0.4065 | 0.3691  | 5.4988 | JPT |
| EIF2S1 | GI_34147492-S | rs10147852 | 14 | 14 | 66772413 | 149120 | 10.4344 | 0.6431 | 0.4561  | 5.4988 | JPT |
| EIF2S1 | GI_34147492-S | rs10145913 | 14 | 14 | 66774743 | 146790 | 10.4741 | 0.6446 | 0.4467  | 5.4988 | JPT |
| EIF2S1 | GI_34147492-S | rs1078194  | 14 | 14 | 66777549 | 143984 | 8.9795  | 0.5822 | 0.4246  | 5.4988 | JPT |
| EIF2S1 | GI_34147492-S | rs10145586 | 14 | 14 | 66780377 | 141156 | 10.4324 | 0.6430 | 0.4542  | 5.4988 | JPT |
| EIF2S1 | GI_34147492-S | rs11158658 | 14 | 14 | 66780885 | 140648 | 9.9282  | 0.6142 | 0.4419  | 5.4988 | JPT |
| EIF2S1 | GI_34147492-S | rs8015862  | 14 | 14 | 66780927 | 140606 | 10.9833 | 0.6550 | -0.4629 | 5.4988 | JPT |
| EIF2S1 | GI_34147492-S | rs1073607  | 14 | 14 | 66782437 | 139096 | 10.4344 | 0.6431 | 0.4561  | 5.4988 | JPT |
| EIF2S1 | GI_34147492-S | rs12323494 | 14 | 14 | 66784512 | 137021 | 10.6348 | 0.6597 | 0.4640  | 5.4988 | JPT |
| EIF2S1 | GI_34147492-S | rs10459453 | 14 | 14 | 66787029 | 134504 | 10.4344 | 0.6431 | 0.4561  | 5.4988 | JPT |
| EIF2S1 | GI_34147492-S | rs6573763  | 14 | 14 | 66788081 | 133452 | 9.4126  | 0.6586 | -0.4529 | 5.4988 | JPT |
| EIF2S1 | GI_34147492-S | rs8016037  | 14 | 14 | 66788464 | 133069 | 10.9833 | 0.6550 | -0.4629 | 5.4988 | JPT |
| EIF2S1 | GI_34147492-S | rs8008236  | 14 | 14 | 66799438 | 122095 | 10.4344 | 0.6431 | -0.4561 | 5.4988 | JPT |
| EIF2S1 | GI_34147492-S | rs8008443  | 14 | 14 | 66799568 | 121965 | 8.3756  | 0.5455 | -0.3988 | 5.4988 | JPT |
| EIF2S1 | GI_34147492-S | rs4636843  | 14 | 14 | 66800353 | 121180 | 7.9301  | 0.5408 | 0.3980  | 5.4988 | JPT |
| EIF2S1 | GI_34147492-S | rs12589218 | 14 | 14 | 66800713 | 120820 | 10.9833 | 0.6550 | 0.4629  | 5.4988 | JPT |
| EIF2S1 | GI_34147492-S | rs9743912  | 14 | 14 | 66802614 | 118919 | 8.2425  | 0.5391 | 0.3977  | 5.4988 | JPT |
| EIF2S1 | GI_34147492-S | rs9743911  | 14 | 14 | 66802700 | 118833 | 10.9833 | 0.6550 | -0.4629 | 5.4988 | JPT |
| EIF2S1 | GI_34147492-S | rs9743983  | 14 | 14 | 66802717 | 118816 | 8.5676  | 0.5546 | -0.3956 | 5.4988 | JPT |
| EIF2S1 | GI_34147492-S | rs2146230  | 14 | 14 | 66804629 | 116904 | 10.9833 | 0.6550 | -0.4629 | 5.4988 | JPT |
| EIF2S1 | GI_34147492-S | rs7149535  | 14 | 14 | 66805121 | 116412 | 10.9833 | 0.6550 | 0.4629  | 5.4988 | JPT |
| EIF2S1 | GI_34147492-S | rs1006595  | 14 | 14 | 66808605 | 112928 | 7.8715  | 0.5292 | -0.3915 | 5.4988 | JPT |
| EIF2S1 | GI_34147492-S | rs1318914  | 14 | 14 | 66813819 | 107714 | 10.4344 | 0.6431 | 0.4561  | 5.4988 | JPT |
| EIF2S1 | GI_34147492-S | rs8021896  | 14 | 14 | 66818999 | 102534 | 10.4344 | 0.6431 | 0.4561  | 5.4988 | JPT |
| EIF2S1 | GI_34147492-S | rs1535491  | 14 | 14 | 66822448 | 99085  | 10.4344 | 0.6431 | -0.4561 | 5.4988 | JPT |
| EIF2S1 | GI_34147492-S | rs6573765  | 14 | 14 | 66825989 | 95544  | 8.2425  | 0.5391 | 0.3977  | 5.4988 | JPT |
| EIF2S1 | GI_34147492-S | rs10151464 | 14 | 14 | 66828243 | 93290  | 10.4344 | 0.6431 | -0.4561 | 5.4988 | JPT |
| EIF2S1 | GI_34147492-S | rs10140817 | 14 | 14 | 66828361 | 93172  | 10.4344 | 0.6431 | 0.4561  | 5.4988 | JPT |
| EIF2S1 | GI_34147492-S | rs10144401 | 14 | 14 | 66831608 | 89925  | 10.9833 | 0.6550 | -0.4629 | 5.4988 | JPT |
| EIF2S1 | GI_34147492-S | rs10150902 | 14 | 14 | 66833662 | 87871  | 10.1417 | 0.6405 | -0.4574 | 5.4988 | JPT |
| EIF2S1 | GI_34147492-S | rs12589091 | 14 | 14 | 66834332 | 87201  | 8.4295  | 0.6033 | 0.4308  | 5.4988 | JPT |
| EIF2S1 | GI_34147492-S | rs12586552 | 14 | 14 | 66834488 | 87045  | 8.6103  | 0.6120 | 0.4463  | 5.4988 | JPT |
| EIF2S1 | GI_34147492-S | rs1885590  | 14 | 14 | 66836055 | 85478  | 8.1251  | 0.5596 | -0.3932 | 5.4988 | JPT |
| EIF2S1 | GI_34147492-S | rs4286048  | 14 | 14 | 66836269 | 85264  | 10.2229 | 0.6437 | 0.4425  | 5.4988 | JPT |
| EIF2S1 | GI_34147492-S | rs10146722 | 14 | 14 | 66838798 | 82735  | 12.3868 | 0.7470 | 0.5083  | 5.4988 | JPT |
| EIF2S1 | GI_34147492-S | rs10146663 | 14 | 14 | 66838930 | 82603  | 10.9833 | 0.6550 | -0.4629 | 5.4988 | JPT |
| EIF2S1 | GI_34147492-S | rs10135903 | 14 | 14 | 66840755 | 80778  | 10.4344 | 0.6431 | 0.4561  | 5.4988 | JPT |
| EIF2S1 | GI_34147492-S | rs2146229  | 14 | 14 | 66845445 | 76088  | 10.9833 | 0.6550 | 0.4629  | 5.4988 | JPT |
| EIF2S1 | GI_34147492-S | rs10129779 | 14 | 14 | 66846249 | 75284  | 9.6130  | 0.6188 | 0.4434  | 5.4988 | JPT |
| EIF2S1 | GI_34147492-S | rs8015819  | 14 | 14 | 66848338 | 73195  | 9.0692  | 0.5862 | -0.4191 | 5.4988 | JPT |
| EIF2S1 | GI_34147492-S | rs12588292 | 14 | 14 | 66849259 | 72274  | 7.8715  | 0.5292 | -0.3915 | 5.4988 | JPT |
| EIF2S1 | GI_34147492-S | rs1885589  | 14 | 14 | 66852734 | 68799  | 10.2011 | 0.6429 | -0.4560 | 5.4988 | JPT |
| EIF2S1 | GI_34147492-S | rs8007866  | 14 | 14 | 66857060 | 64473  | 7.5779  | 0.5141 | -0.3789 | 5.4988 | JPT |
| EIF2S1 | GI_34147492-S | rs8014966  | 14 | 14 | 66858062 | 63471  | 10.4344 | 0.6431 | 0.4561  | 5.4988 | JPT |
| EIF2S1 | GI_34147492-S | rs10138824 | 14 | 14 | 66859310 | 62223  | 10.9833 | 0.6550 | 0.4629  | 5.4988 | JPT |
| EIF2S1 | GI_34147492-S | rs2057396  | 14 | 14 | 66860786 | 60747  | 10.4344 | 0.6431 | 0.4561  | 5.4988 | JPT |
| EIF2S1 | GI_34147492-S | rs10131212 | 14 | 14 | 66862120 | 59413  | 10.4344 | 0.6431 | 0.4561  | 5.4988 | JPT |
| EIF2S1 | GI_34147492-S | rs17248616 | 14 | 14 | 66866420 | 55113  | 12.0711 | 0.7188 | 0.4962  | 5.4988 | JPT |
| EIF2S1 | GI_34147492-S | rs2236333  | 14 | 14 | 66868676 | 52857  | 10.4344 | 0.6431 | -0.4561 | 5.4988 | JPT |
| EIF2S1 | GI_34147492-S | rs960797   | 14 | 14 | 66870069 | 51464  | 7.8715  | 0.5292 | 0.3915  | 5.4988 | JPT |
| EIF2S1 | GI_34147492-S | rs2274335  | 14 | 14 | 66874076 | 47457  | 10.4344 | 0.6431 | -0.4561 | 5.4988 | JPT |
| EIF2S1 | GI_34147492-S | rs1045060  | 14 | 14 | 66875006 | 46527  | 10.6868 | 0.6616 | 0.4709  | 5.4988 | JPT |
| EIF2S1 | GI_34147492-S | rs2319777  | 14 | 14 | 66879786 | 41747  | 7.7237  | 0.5216 | -0.3907 | 5.4988 | JPT |

|           |               |            |    |    |           |        |         |        |         |        |     |
|-----------|---------------|------------|----|----|-----------|--------|---------|--------|---------|--------|-----|
| EIF2S1    | GI_34147492-S | rs10138755 | 14 | 14 | 66882057  | 39476  | 9.6907  | 0.6602 | 0.4646  | 5.4988 | JPT |
| EIF2S1    | GI_34147492-S | rs3818467  | 14 | 14 | 66882227  | 39306  | 10.9833 | 0.6550 | 0.4629  | 5.4988 | JPT |
| EIF2S1    | GI_34147492-S | rs2031563  | 14 | 14 | 66884273  | 37260  | 10.9833 | 0.6550 | -0.4629 | 5.4988 | JPT |
| EIF2S1    | GI_34147492-S | rs2274338  | 14 | 14 | 66885736  | 35797  | 10.4344 | 0.6431 | 0.4561  | 5.4988 | JPT |
| EIF2S1    | GI_34147492-S | rs8020850  | 14 | 14 | 66889355  | 32178  | 7.8715  | 0.5292 | 0.3915  | 5.4988 | JPT |
| EIF2S1    | GI_34147492-S | rs8015641  | 14 | 14 | 66890457  | 31076  | 7.8801  | 0.5296 | -0.3858 | 5.4988 | JPT |
| EIF2S1    | GI_34147492-S | rs1536271  | 14 | 14 | 66890924  | 30609  | 10.4344 | 0.6431 | 0.4561  | 5.4988 | JPT |
| EIF2S1    | GI_34147492-S | rs1536272  | 14 | 14 | 66891054  | 30479  | 10.4344 | 0.6431 | -0.4561 | 5.4988 | JPT |
| EIF2S1    | GI_34147492-S | rs8006519  | 14 | 14 | 66892350  | 29183  | 8.8284  | 0.5842 | -0.4190 | 5.4988 | JPT |
| EIF2S1    | GI_34147492-S | rs13379368 | 14 | 14 | 66893244  | 28289  | 10.4344 | 0.6431 | 0.4561  | 5.4988 | JPT |
| EIF2S1    | GI_34147492-S | rs13379142 | 14 | 14 | 66893437  | 28096  | 12.4599 | 0.7310 | -0.4978 | 5.4988 | JPT |
| EIF2S1    | GI_34147492-S | rs10137557 | 14 | 14 | 66894077  | 27456  | 10.0236 | 0.6450 | 0.4575  | 5.4988 | JPT |
| EIF2S1    | GI_34147492-S | rs10144417 | 14 | 14 | 66896663  | 24870  | 10.9833 | 0.6550 | -0.4629 | 5.4988 | JPT |
| EIF2S1    | GI_34147492-S | rs8016024  | 14 | 14 | 66897231  | 24302  | 7.8715  | 0.5292 | 0.3915  | 5.4988 | JPT |
| EIF2S1    | GI_34147492-S | rs2031564  | 14 | 14 | 66897269  | 24264  | 7.8608  | 0.5287 | 0.3792  | 5.4988 | JPT |
| EIF2S1    | GI_34147492-S | rs3759755  | 14 | 14 | 66898229  | 23304  | 10.4344 | 0.6431 | -0.4561 | 5.4988 | JPT |
| EIF2S1    | GI_34147492-S | rs8006391  | 14 | 14 | 66899432  | 22101  | 12.7546 | 0.7312 | -0.4981 | 5.4988 | JPT |
| EIF2S1    | GI_34147492-S | rs12588458 | 14 | 14 | 66900609  | 20924  | 8.3756  | 0.5455 | -0.3988 | 5.4988 | JPT |
| EIF2S1    | GI_34147492-S | rs7156441  | 14 | 14 | 66902990  | 18543  | 10.9833 | 0.6550 | -0.4629 | 5.4988 | JPT |
| EIF2S1    | GI_34147492-S | rs12588478 | 14 | 14 | 66907644  | 13889  | 10.3535 | 0.6399 | 0.4443  | 5.4988 | JPT |
| EIF2S1    | GI_34147492-S | rs12589671 | 14 | 14 | 66908914  | 12619  | 10.4344 | 0.6431 | -0.4561 | 5.4988 | JPT |
| EIF2S1    | GI_34147492-S | rs12590065 | 14 | 14 | 66911331  | 10202  | 7.8715  | 0.5292 | 0.3915  | 5.4988 | JPT |
| EIF2S1    | GI_34147492-S | rs8008724  | 14 | 14 | 66916971  | 4562   | 10.9833 | 0.6550 | 0.4629  | 5.4988 | JPT |
| EIF2S1    | GI_34147492-S | rs2296560  | 14 | 14 | 66918647  | 2886   | 9.3374  | 0.6162 | -0.4420 | 5.4988 | JPT |
| EIF2S1    | GI_34147492-S | rs2296561  | 14 | 14 | 66918892  | 2641   | 7.7237  | 0.5216 | -0.3907 | 5.4988 | JPT |
| EIF2S1    | GI_34147492-S | rs10131175 | 14 | 14 | 66922484  | 951    | 10.4344 | 0.6431 | -0.4561 | 5.4988 | JPT |
| EIF2S1    | GI_34147492-S | rs3784085  | 14 | 14 | 66927906  | 6373   | 7.0181  | 0.4840 | -0.3829 | 5.4988 | JPT |
| EIF2S1    | GI_34147492-S | rs3818468  | 14 | 14 | 66932124  | 10591  | 9.1218  | 0.5886 | 0.4451  | 5.4988 | JPT |
| EIF2S1    | GI_34147492-S | rs8004332  | 14 | 14 | 66934497  | 12964  | 9.6562  | 0.6030 | -0.4523 | 5.4988 | JPT |
| EIF2S1    | GI_34147492-S | rs7153725  | 14 | 14 | 66936424  | 14891  | 6.9143  | 0.4782 | -0.3833 | 5.4988 | JPT |
| EIF2S1    | GI_34147492-S | rs7154607  | 14 | 14 | 66936681  | 15148  | 7.3254  | 0.5007 | -0.3978 | 5.4988 | JPT |
| EIF2S1    | GI_34147492-S | rs8004864  | 14 | 14 | 66942999  | 21466  | 9.1218  | 0.5886 | 0.4451  | 5.4988 | JPT |
| EIF2S1    | GI_34147492-S | rs8007618  | 14 | 14 | 66946945  | 25412  | 8.3867  | 0.5461 | -0.4219 | 5.4988 | JPT |
| EIF2S1    | GI_34147492-S | rs1555853  | 14 | 14 | 66948137  | 26604  | 7.8871  | 0.5300 | -0.4141 | 5.4988 | JPT |
| EIF2S1    | GI_34147492-S | rs17248895 | 14 | 14 | 66953377  | 31844  | 5.6194  | 0.3935 | -0.3779 | 5.4988 | JPT |
| EIF2S1    | GI_34147492-S | rs8020262  | 14 | 14 | 66955870  | 34337  | 7.0060  | 0.5378 | 0.4363  | 5.4988 | JPT |
| EIF2S1    | GI_34147492-S | rs8021730  | 14 | 14 | 66956534  | 35001  | 5.6194  | 0.3935 | -0.3779 | 5.4988 | JPT |
| EIF2S1    | GI_34147492-S | rs4143909  | 14 | 14 | 66957101  | 35568  | 5.5801  | 0.4058 | 0.3700  | 5.4988 | JPT |
| C14orf130 | GI_28411949-A | rs2905     | 14 | 14 | 92763175  | 6731   | 6.8540  | 0.4668 | -0.4327 | 6.0804 | JPT |
| C14orf130 | GI_28411949-A | rs11621915 | 14 | 14 | 92763584  | 7140   | 6.8540  | 0.4668 | 0.4327  | 6.0804 | JPT |
| TCL6      | GI_21536345-A | rs17093165 | 14 | 14 | 95202248  | 5246   | 11.6585 | 0.7053 | 1.1566  | 7.8659 | JPT |
| TCL1B     | GI_40548373-A | rs17093165 | 14 | 14 | 95202248  | 26201  | 9.1690  | 0.6087 | 0.7032  | 7.4355 | JPT |
| TCL6      | GI_21536345-A | rs3759537  | 14 | 14 | 95204869  | 2625   | 12.6294 | 0.7102 | 1.1639  | 7.8659 | JPT |
| TCL6      | GI_21536345-A | rs2296310  | 14 | 14 | 95206528  | 966    | 18.1118 | 0.8383 | -0.8567 | 7.8659 | JPT |
| TCL6      | GI_21536345-A | rs2249778  | 14 | 14 | 95206547  | 947    | 17.3114 | 0.8311 | 0.8111  | 7.8659 | JPT |
| SIVA      | GI_11277467-I | rs7142772  | 14 | 14 | 104271422 | 21741  | 5.8755  | 0.4169 | -0.2638 | 5.5772 | JPT |
| SIVA      | GI_11277467-I | rs4247034  | 14 | 14 | 104279924 | 13239  | 7.4124  | 0.5054 | 0.2975  | 5.5772 | JPT |
| SIVA      | GI_11277467-I | rs4983386  | 14 | 14 | 104281252 | 11911  | 7.5948  | 0.5066 | -0.2860 | 5.5772 | JPT |
| SIVA      | GI_11277467-I | rs4983543  | 14 | 14 | 104283444 | 9719   | 7.4374  | 0.5067 | -0.2862 | 5.5772 | JPT |
| SIVA      | GI_11277467-I | rs6644     | 14 | 14 | 104284388 | 8775   | 7.4374  | 0.5067 | -0.2862 | 5.5772 | JPT |
| SIVA      | GI_11277467-I | rs1132975  | 14 | 14 | 104293082 | 81     | 5.9711  | 0.4228 | 0.2965  | 5.5772 | JPT |
| SIVA      | GI_11277467-I | rs12590163 | 14 | 14 | 104294570 | 1407   | 6.7969  | 0.4716 | -0.3038 | 5.5772 | JPT |
| SIVA      | GI_11277467-I | rs2498804  | 14 | 14 | 104304140 | 10977  | 5.9711  | 0.4228 | 0.2965  | 5.5772 | JPT |
| SIVA      | GI_11277467-I | rs2494730  | 14 | 14 | 104304466 | 11303  | 5.9711  | 0.4228 | -0.2965 | 5.5772 | JPT |
| SIVA      | GI_11277467-I | rs3001371  | 14 | 14 | 104313876 | 20713  | 5.8536  | 0.4232 | 0.3013  | 5.5772 | JPT |
| IVD       | GI_6031167-S  | rs2289328  | 15 | 15 | 38492709  | 5335   | 5.7694  | 0.4029 | -0.3450 | 5.6437 | JPT |
| IVD       | GI_6031167-S  | rs2075624  | 15 | 15 | 38498015  | 29     | 7.5307  | 0.5033 | -0.2524 | 5.6437 | JPT |
| CCNDBP1   | GI_16554567-I | rs6416436  | 15 | 15 | 41075511  | 190098 | 5.1794  | 0.3652 | -0.1354 | 5.1571 | JPT |
| CCNDBP1   | GI_16554567-I | rs4923955  | 15 | 15 | 41082380  | 183229 | 5.1605  | 0.3639 | -0.1347 | 5.1571 | JPT |

|           |               |            |    |    |          |        |         |        |         |        |     |
|-----------|---------------|------------|----|----|----------|--------|---------|--------|---------|--------|-----|
| CCNDBP1   | GI_16554567-I | rs1037990  | 15 | 15 | 41086979 | 178630 | 5.1794  | 0.3652 | 0.1354  | 5.1571 | JPT |
| CCNDBP1   | GI_16554567-I | rs11630595 | 15 | 15 | 41097413 | 168196 | 5.1794  | 0.3652 | -0.1354 | 5.1571 | JPT |
| CCNDBP1   | GI_16554567-I | rs8027733  | 15 | 15 | 41101610 | 163999 | 5.1794  | 0.3652 | -0.1354 | 5.1571 | JPT |
| CCNDBP1   | GI_16554567-I | rs6493077  | 15 | 15 | 41112234 | 153375 | 5.1794  | 0.3652 | 0.1354  | 5.1571 | JPT |
| CCNDBP1   | GI_16554567-I | rs16957385 | 15 | 15 | 41144708 | 120901 | 5.1828  | 0.3795 | 0.1413  | 5.1571 | JPT |
| CCNDBP1   | GI_16554567-I | rs7174915  | 15 | 15 | 41208461 | 57148  | 5.8605  | 0.4160 | 0.1364  | 5.1571 | JPT |
| CCNDBP1   | GI_16554567-I | rs11070391 | 15 | 15 | 41220895 | 44714  | 6.8419  | 0.4824 | 0.1481  | 5.1571 | JPT |
| CCNDBP1   | GI_16554567-I | rs12899266 | 15 | 15 | 41227078 | 38531  | 6.2518  | 0.4478 | -0.1503 | 5.1571 | JPT |
| CCNDBP1   | GI_16554567-I | rs540587   | 15 | 15 | 41265405 | 204    | 8.2555  | 0.5483 | -0.1453 | 5.1571 | JPT |
| CCNDBP1   | GI_16554567-I | rs530305   | 15 | 15 | 41283192 | 17583  | 6.2394  | 0.4391 | -0.1480 | 5.1571 | JPT |
| CCNDBP1   | GI_16554567-I | rs531850   | 15 | 15 | 41283334 | 17725  | 6.2195  | 0.4379 | 0.1399  | 5.1571 | JPT |
| CCNDBP1   | GI_16554567-I | rs494863   | 15 | 15 | 41289594 | 23985  | 8.2555  | 0.5483 | 0.1453  | 5.1571 | JPT |
| CCNDBP1   | GI_16554567-I | rs2899077  | 15 | 15 | 41297317 | 31708  | 8.3337  | 0.5435 | -0.1519 | 5.1571 | JPT |
| CCNDBP1   | GI_16554567-I | rs11070396 | 15 | 15 | 41310214 | 44605  | 6.4164  | 0.4418 | 0.1474  | 5.1571 | JPT |
| CCNDBP1   | GI_16554567-I | rs7183814  | 15 | 15 | 41316922 | 51313  | 8.3337  | 0.5435 | -0.1519 | 5.1571 | JPT |
| CCNDBP1   | GI_16554567-I | rs2241516  | 15 | 15 | 41317939 | 52330  | 6.2195  | 0.4379 | 0.1399  | 5.1571 | JPT |
| CCNDBP1   | GI_16554567-I | rs11855754 | 15 | 15 | 41322259 | 56650  | 6.4164  | 0.4418 | -0.1474 | 5.1571 | JPT |
| CCNDBP1   | GI_16554567-I | rs16957511 | 15 | 15 | 41327409 | 61800  | 8.3337  | 0.5435 | 0.1519  | 5.1571 | JPT |
| Hs.11898  | Hs.11898-S    | rs11070906 | 15 | 15 | 50709817 | 26813  | 8.7921  | 0.5650 | 0.1374  | 5.7899 | JPT |
| Hs.11898  | Hs.11898-S    | rs8030871  | 15 | 15 | 50725393 | 11237  | 8.9012  | 0.5787 | -0.1368 | 5.7899 | JPT |
| Hs.11898  | Hs.11898-S    | rs8036979  | 15 | 15 | 50735287 | 1343   | 8.9307  | 0.5800 | -0.1491 | 5.7899 | JPT |
| Hs.11898  | Hs.11898-S    | rs11633933 | 15 | 15 | 50735649 | 981    | 9.5317  | 0.5977 | -0.1537 | 5.7899 | JPT |
| Hs.11898  | Hs.11898-S    | rs17651941 | 15 | 15 | 50735918 | 712    | 8.7921  | 0.5650 | -0.1374 | 5.7899 | JPT |
| CTSH      | GI_23110956-A | rs10400902 | 15 | 15 | 77018671 | 17260  | 6.1294  | 0.4325 | 0.2971  | 6.0435 | JPT |
| LOC400410 | GI_42660516-S | rs6495451  | 15 | 15 | 77951108 | 42905  | 7.9309  | 0.5238 | -0.2964 | 5.705  | JPT |
| LOC400410 | GI_42660516-S | rs1113983  | 15 | 15 | 77953652 | 40361  | 10.7622 | 0.6555 | -0.3327 | 5.705  | JPT |
| LOC400410 | GI_42660516-S | rs934134   | 15 | 15 | 77955273 | 38740  | 7.9309  | 0.5238 | 0.2964  | 5.705  | JPT |
| LOC400410 | GI_42660516-S | rs8036559  | 15 | 15 | 77957618 | 36395  | 7.9309  | 0.5238 | -0.2964 | 5.705  | JPT |
| LOC400410 | GI_42660516-S | rs2562744  | 15 | 15 | 77961443 | 32570  | 10.7622 | 0.6555 | 0.3327  | 5.705  | JPT |
| LOC400410 | GI_42660516-S | rs12438477 | 15 | 15 | 77965338 | 28675  | 10.9265 | 0.6529 | 0.3340  | 5.705  | JPT |
| LOC400410 | GI_42660516-S | rs8042012  | 15 | 15 | 77966902 | 27111  | 11.4389 | 0.6712 | -0.3340 | 5.705  | JPT |
| LOC400410 | GI_42660516-S | rs2586183  | 15 | 15 | 77967161 | 26852  | 11.2554 | 0.6735 | -0.3326 | 5.705  | JPT |
| LOC400410 | GI_42660516-S | rs2733088  | 15 | 15 | 77971712 | 22301  | 8.0871  | 0.5400 | -0.2954 | 5.705  | JPT |
| LOC400410 | GI_42660516-S | rs2586179  | 15 | 15 | 77975061 | 18952  | 11.4389 | 0.6712 | -0.3340 | 5.705  | JPT |
| LOC400410 | GI_42660516-S | rs2115539  | 15 | 15 | 77977940 | 16073  | 8.1299  | 0.5421 | -0.2950 | 5.705  | JPT |
| LOC400410 | GI_42660516-S | rs3803540  | 15 | 15 | 78003070 | 9057   | 6.6895  | 0.4655 | 0.3078  | 5.705  | JPT |
| LOC400410 | GI_42660516-S | rs1814345  | 15 | 15 | 78024489 | 30476  | 6.6895  | 0.4655 | -0.3078 | 5.705  | JPT |
| IL16      | GI_27262656-I | rs4778889  | 15 | 15 | 79376050 | 11845  | 6.6649  | 0.4723 | -0.5502 | 6.3204 | JPT |
| IL16      | GI_27262656-I | rs4778891  | 15 | 15 | 79376885 | 11010  | 6.9967  | 0.4828 | 0.5767  | 6.3204 | JPT |
| IL16      | GI_27262656-I | rs11857713 | 15 | 15 | 79378320 | 9575   | 8.0492  | 0.5468 | 0.6916  | 6.3204 | JPT |
| IL16      | GI_27262656-I | rs4778636  | 15 | 15 | 79378694 | 9201   | 7.2498  | 0.4885 | -0.5822 | 6.3204 | JPT |
| IL16      | GI_27262656-I | rs3898677  | 15 | 15 | 79383617 | 4278   | 7.0652  | 0.4866 | 0.5726  | 6.3204 | JPT |
| IL16      | GI_27262656-I | rs4577037  | 15 | 15 | 79383715 | 4180   | 6.7121  | 0.4750 | -0.5801 | 6.3204 | JPT |
| IL16      | GI_27262656-I | rs1803275  | 15 | 15 | 79385471 | 2424   | 6.7697  | 0.4701 | -0.5588 | 6.3204 | JPT |
| IL16      | GI_27262656-I | rs3926277  | 15 | 15 | 79386349 | 1546   | 6.8376  | 0.4907 | -0.5703 | 6.3204 | JPT |
| IL16      | GI_27262656-I | rs3926278  | 15 | 15 | 79386410 | 1485   | 7.2498  | 0.4885 | 0.5822  | 6.3204 | JPT |
| IL16      | GI_27262656-I | rs4778639  | 15 | 15 | 79387506 | 389    | 7.6245  | 0.5165 | -0.6054 | 6.3204 | JPT |
| STARD5    | GI_38569452-I | rs7163199  | 15 | 15 | 79432167 | 39948  | 6.7378  | 0.4682 | -0.4353 | 6.2378 | JPT |
| NR2F2     | GI_31377723-S | rs8026987  | 15 | 15 | 94383337 | 299309 | 7.7958  | 0.5170 | 1.9963  | 7.117  | JPT |
| NR2F2     | GI_31377723-S | rs8032872  | 15 | 15 | 94384299 | 298347 | 7.7958  | 0.5170 | 1.9963  | 7.117  | JPT |
| NR2F2     | GI_31377723-S | rs981922   | 15 | 15 | 94384485 | 298161 | 7.7958  | 0.5170 | 1.9963  | 7.117  | JPT |
| NR2F2     | GI_31377723-S | rs981923   | 15 | 15 | 94384637 | 298009 | 7.6958  | 0.5202 | 2.0060  | 7.117  | JPT |
| NR2F2     | GI_31377723-S | rs1450482  | 15 | 15 | 94384947 | 297699 | 8.3179  | 0.5513 | 2.0316  | 7.117  | JPT |
| NR2F2     | GI_31377723-S | rs1450483  | 15 | 15 | 94385146 | 297500 | 7.7958  | 0.5170 | 1.9963  | 7.117  | JPT |
| NR2F2     | GI_31377723-S | rs6496147  | 15 | 15 | 94386032 | 296614 | 7.7958  | 0.5170 | 1.9963  | 7.117  | JPT |
| NR2F2     | GI_31377723-S | rs1450484  | 15 | 15 | 94386371 | 296275 | 7.7958  | 0.5170 | -1.9963 | 7.117  | JPT |
| NR2F2     | GI_31377723-S | rs7175453  | 15 | 15 | 94389622 | 293024 | 7.7958  | 0.5170 | 1.9963  | 7.117  | JPT |
| NR2F2     | GI_31377723-S | rs8037914  | 15 | 15 | 94390270 | 292376 | 7.7958  | 0.5170 | -1.9963 | 7.117  | JPT |
| PRO0149   | GI_38016918-S | rs12448512 | 16 | 16 | 9122644  | 1808   | 6.7131  | 0.4589 | 0.2130  | 5.9611 | JPT |

|           |               |            |    |    |          |        |        |        |         |        |     |
|-----------|---------------|------------|----|----|----------|--------|--------|--------|---------|--------|-----|
| PRO0149   | GI_38016918-S | rs12447788 | 16 | 16 | 9122666  | 1830   | 6.7131 | 0.4589 | -0.2130 | 5.9611 | JPT |
| PRO0149   | GI_38016918-S | rs4381605  | 16 | 16 | 9123573  | 2737   | 6.7131 | 0.4589 | -0.2130 | 5.9611 | JPT |
| PRO0149   | GI_38016918-S | rs9926522  | 16 | 16 | 9124449  | 3613   | 6.8854 | 0.4766 | -0.2221 | 5.9611 | JPT |
| PRO0149   | GI_38016918-S | rs7189960  | 16 | 16 | 9130108  | 9272   | 6.7131 | 0.4589 | 0.2130  | 5.9611 | JPT |
| PRO0149   | GI_38016918-S | rs12051426 | 16 | 16 | 9130418  | 9582   | 6.5428 | 0.4570 | 0.1875  | 5.9611 | JPT |
| PRO0149   | GI_38016918-S | rs953285   | 16 | 16 | 9131542  | 10706  | 6.7265 | 0.4676 | -0.2126 | 5.9611 | JPT |
| PRO0149   | GI_38016918-S | rs953286   | 16 | 16 | 9131723  | 10887  | 6.7131 | 0.4589 | -0.2130 | 5.9611 | JPT |
| PRO0149   | GI_38016918-S | rs6498488  | 16 | 16 | 9133886  | 13050  | 6.3431 | 0.4533 | -0.2085 | 5.9611 | JPT |
| FLJ32871  | GI_21389568-S | rs2719691  | 16 | 16 | 10670082 | 41066  | 6.3205 | 0.5063 | 0.3232  | 5.9875 | JPT |
| FLJ32871  | GI_21389568-S | rs4780974  | 16 | 16 | 10670239 | 41223  | 6.0698 | 0.4448 | -0.3078 | 5.9875 | JPT |
| MGC24665  | GI_24308244-S | rs149597   | 16 | 16 | 11251443 | 101474 | 6.2789 | 0.4415 | 0.4303  | 6.0226 | JPT |
| MGC24665  | GI_24308244-S | rs243327   | 16 | 16 | 11260805 | 92112  | 7.0486 | 0.4776 | 0.4554  | 6.0226 | JPT |
| MGC24665  | GI_24308244-S | rs243325   | 16 | 16 | 11261998 | 90919  | 7.0486 | 0.4776 | -0.4554 | 6.0226 | JPT |
| MGC24665  | GI_24308244-S | rs243324   | 16 | 16 | 11262471 | 90446  | 6.8097 | 0.4723 | 0.4527  | 6.0226 | JPT |
| MGC24665  | GI_24308244-S | rs243317   | 16 | 16 | 11264832 | 88085  | 6.3880 | 0.4729 | -0.4480 | 6.0226 | JPT |
| MGC24665  | GI_24308244-S | rs243318   | 16 | 16 | 11265519 | 87398  | 6.0648 | 0.4617 | 0.4264  | 6.0226 | JPT |
| MGC24665  | GI_24308244-S | rs243323   | 16 | 16 | 11268703 | 84214  | 6.3214 | 0.4440 | -0.4409 | 6.0226 | JPT |
| MGC24665  | GI_24308244-S | rs1559394  | 16 | 16 | 11276706 | 76211  | 7.1467 | 0.4829 | -0.4175 | 6.0226 | JPT |
| MGC24665  | GI_24308244-S | rs11645592 | 16 | 16 | 11278811 | 74106  | 6.5425 | 0.4491 | 0.4438  | 6.0226 | JPT |
| MGC24665  | GI_24308244-S | rs2550475  | 16 | 16 | 11279487 | 73430  | 7.1467 | 0.4829 | -0.4175 | 6.0226 | JPT |
| MGC24665  | GI_24308244-S | rs737008   | 16 | 16 | 11282367 | 70550  | 7.1467 | 0.4829 | -0.4175 | 6.0226 | JPT |
| MGC24665  | GI_24308244-S | rs2301365  | 16 | 16 | 11282787 | 70130  | 6.3214 | 0.4440 | -0.4409 | 6.0226 | JPT |
| MGC24665  | GI_24308244-S | rs949429   | 16 | 16 | 11283530 | 69387  | 7.1467 | 0.4829 | -0.4175 | 6.0226 | JPT |
| MGC24665  | GI_24308244-S | rs4451969  | 16 | 16 | 11291020 | 61897  | 6.5425 | 0.4491 | -0.4438 | 6.0226 | JPT |
| MGC24665  | GI_24308244-S | rs4780359  | 16 | 16 | 11296981 | 55936  | 6.3112 | 0.4514 | -0.4004 | 6.0226 | JPT |
| MGC24665  | GI_24308244-S | rs11640295 | 16 | 16 | 11298229 | 54688  | 7.1467 | 0.4829 | 0.4175  | 6.0226 | JPT |
| MGC24665  | GI_24308244-S | rs8057417  | 16 | 16 | 11300273 | 52644  | 6.3214 | 0.4440 | -0.4409 | 6.0226 | JPT |
| MGC24665  | GI_24308244-S | rs7206320  | 16 | 16 | 11301186 | 51731  | 7.1467 | 0.4829 | -0.4175 | 6.0226 | JPT |
| MGC24665  | GI_24308244-S | rs4340345  | 16 | 16 | 11301629 | 51288  | 7.1467 | 0.4829 | -0.4175 | 6.0226 | JPT |
| MGC24665  | GI_24308244-S | rs4238603  | 16 | 16 | 11301903 | 51014  | 6.8889 | 0.4768 | 0.4156  | 6.0226 | JPT |
| MGC24665  | GI_24308244-S | rs11646534 | 16 | 16 | 11304584 | 48333  | 6.5425 | 0.4491 | -0.4438 | 6.0226 | JPT |
| MGC24665  | GI_24308244-S | rs1019551  | 16 | 16 | 11304608 | 48309  | 6.8889 | 0.4768 | -0.4156 | 6.0226 | JPT |
| MGC24665  | GI_24308244-S | rs4781062  | 16 | 16 | 11308917 | 44000  | 6.7420 | 0.4767 | -0.4183 | 6.0226 | JPT |
| MGC24665  | GI_24308244-S | rs7189239  | 16 | 16 | 11310016 | 42901  | 6.1680 | 0.4427 | 0.4420  | 6.0226 | JPT |
| MGC24665  | GI_24308244-S | rs1345879  | 16 | 16 | 11312263 | 40654  | 6.5425 | 0.4491 | 0.4438  | 6.0226 | JPT |
| MGC24665  | GI_24308244-S | rs12445900 | 16 | 16 | 11312331 | 40586  | 7.1467 | 0.4829 | 0.4175  | 6.0226 | JPT |
| MGC24665  | GI_24308244-S | rs12596526 | 16 | 16 | 11316193 | 36724  | 6.8362 | 0.4738 | -0.4304 | 6.0226 | JPT |
| MGC24665  | GI_24308244-S | rs12448960 | 16 | 16 | 11326879 | 26038  | 7.2469 | 0.4965 | 0.4448  | 6.0226 | JPT |
| MGC24665  | GI_24308244-S | rs11074961 | 16 | 16 | 11329746 | 23171  | 7.2751 | 0.4898 | 0.4385  | 6.0226 | JPT |
| MGC24665  | GI_24308244-S | rs7187741  | 16 | 16 | 11340604 | 12313  | 7.2751 | 0.4898 | 0.4385  | 6.0226 | JPT |
| LOC339053 | GI_29746836-S | rs7187976  | 16 | 16 | 19615697 | 9726   | 6.1255 | 0.4322 | 0.2813  | 6.0441 | JPT |
| LOC339053 | GI_29746836-S | rs9935063  | 16 | 16 | 19618203 | 7220   | 6.1255 | 0.4322 | 0.2813  | 6.0441 | JPT |
| LOC339053 | GI_29746836-S | rs6497395  | 16 | 16 | 19618970 | 6453   | 6.3355 | 0.4371 | -0.2818 | 6.0441 | JPT |
| LOC339053 | GI_29746836-S | rs1544352  | 16 | 16 | 19621383 | 4040   | 6.3355 | 0.4371 | -0.2818 | 6.0441 | JPT |
| LOC339053 | GI_29746836-S | rs8044607  | 16 | 16 | 19627447 | 2024   | 6.6673 | 0.4809 | -0.3000 | 6.0441 | JPT |
| LOC339053 | GI_29746836-S | rs720176   | 16 | 16 | 19629016 | 3593   | 6.1255 | 0.4322 | -0.2813 | 6.0441 | JPT |
| LOC339053 | GI_29746836-S | rs11644834 | 16 | 16 | 19629810 | 4387   | 6.1255 | 0.4322 | 0.2813  | 6.0441 | JPT |
| LOC339053 | GI_29746836-S | rs3829539  | 16 | 16 | 19629867 | 4444   | 6.3355 | 0.4371 | -0.2818 | 6.0441 | JPT |
| LOC339053 | GI_29746836-S | rs2074037  | 16 | 16 | 19632631 | 7208   | 6.3355 | 0.4371 | -0.2818 | 6.0441 | JPT |
| LOC339053 | GI_29746836-S | rs4780822  | 16 | 16 | 19635499 | 10076  | 6.3355 | 0.4371 | 0.2818  | 6.0441 | JPT |
| LOC339053 | GI_29746836-S | rs11645910 | 16 | 16 | 19635956 | 10533  | 6.1255 | 0.4322 | 0.2813  | 6.0441 | JPT |
| LOC339053 | GI_29746836-S | rs4782272  | 16 | 16 | 19636517 | 11094  | 6.1255 | 0.4322 | -0.2813 | 6.0441 | JPT |
| LOC339053 | GI_29746836-S | rs7206184  | 16 | 16 | 19646503 | 21080  | 6.1255 | 0.4322 | 0.2813  | 6.0441 | JPT |
| LOC339053 | GI_29746836-S | rs739564   | 16 | 16 | 19647738 | 22315  | 6.1255 | 0.4322 | -0.2813 | 6.0441 | JPT |
| LOC339053 | GI_29746836-S | rs1858973  | 16 | 16 | 19651150 | 25727  | 6.2219 | 0.4381 | 0.2840  | 6.0441 | JPT |
| LOC339053 | GI_29746836-S | rs8055485  | 16 | 16 | 19657552 | 32129  | 6.2219 | 0.4381 | 0.2840  | 6.0441 | JPT |
| LOC339053 | GI_29746836-S | rs8056301  | 16 | 16 | 19657776 | 32353  | 6.3355 | 0.4371 | -0.2818 | 6.0441 | JPT |
| LOC339053 | GI_29746836-S | rs1858975  | 16 | 16 | 19660835 | 35412  | 6.1255 | 0.4322 | 0.2813  | 6.0441 | JPT |
| LOC339053 | GI_29746836-S | rs1858974  | 16 | 16 | 19660957 | 35534  | 6.1255 | 0.4322 | 0.2813  | 6.0441 | JPT |

|           |               |            |    |    |          |        |         |        |         |        |     |
|-----------|---------------|------------|----|----|----------|--------|---------|--------|---------|--------|-----|
| LOC339053 | GI_29746836-S | rs924815   | 16 | 16 | 19664502 | 39079  | 6.3355  | 0.4371 | 0.2818  | 6.0441 | JPT |
| LOC339053 | GI_29746836-S | rs4782277  | 16 | 16 | 19666386 | 40963  | 6.1255  | 0.4322 | 0.2813  | 6.0441 | JPT |
| LOC339053 | GI_29746836-S | rs4782279  | 16 | 16 | 19666508 | 41085  | 6.1255  | 0.4322 | 0.2813  | 6.0441 | JPT |
| LOC339053 | GI_29746836-S | rs4780826  | 16 | 16 | 19667076 | 41653  | 6.3355  | 0.4371 | -0.2818 | 6.0441 | JPT |
| LOC339053 | GI_29746836-S | rs6497401  | 16 | 16 | 19673535 | 48112  | 6.1255  | 0.4322 | 0.2813  | 6.0441 | JPT |
| LOC339053 | GI_29746836-S | rs6497402  | 16 | 16 | 19676895 | 51472  | 6.3355  | 0.4371 | 0.2818  | 6.0441 | JPT |
| LOC339053 | GI_29746836-S | rs4782281  | 16 | 16 | 19677324 | 51901  | 6.3355  | 0.4371 | -0.2818 | 6.0441 | JPT |
| LOC339053 | GI_29746836-S | rs8052404  | 16 | 16 | 19682214 | 56791  | 6.1255  | 0.4322 | 0.2813  | 6.0441 | JPT |
| LOC339053 | GI_29746836-S | rs1021865  | 16 | 16 | 19692192 | 66769  | 6.3355  | 0.4371 | -0.2818 | 6.0441 | JPT |
| LOC339053 | GI_29746836-S | rs9931167  | 16 | 16 | 19700099 | 74676  | 6.3355  | 0.4371 | 0.2818  | 6.0441 | JPT |
| LOC339053 | GI_29746836-S | rs9933567  | 16 | 16 | 19700512 | 75089  | 6.0777  | 0.4293 | 0.2787  | 6.0441 | JPT |
| LOC339053 | GI_29746836-S | rs11866204 | 16 | 16 | 19702204 | 76781  | 6.0672  | 0.4365 | 0.2848  | 6.0441 | JPT |
| LOC339053 | GI_29746836-S | rs11648873 | 16 | 16 | 19702910 | 77487  | 6.1255  | 0.4322 | 0.2813  | 6.0441 | JPT |
| LOC339053 | GI_29746836-S | rs6497404  | 16 | 16 | 19707634 | 82211  | 6.3355  | 0.4371 | -0.2818 | 6.0441 | JPT |
| LOC339053 | GI_29746836-S | rs7191155  | 16 | 16 | 19707714 | 82291  | 6.9125  | 0.4864 | -0.2985 | 6.0441 | JPT |
| LOC339053 | GI_29746836-S | rs13336271 | 16 | 16 | 19709350 | 83927  | 6.1424  | 0.4493 | -0.2883 | 6.0441 | JPT |
| LOC339053 | GI_29746836-S | rs7202651  | 16 | 16 | 19709515 | 84092  | 6.3355  | 0.4371 | -0.2818 | 6.0441 | JPT |
| LOC339053 | GI_29746836-S | rs13332674 | 16 | 16 | 19710700 | 85277  | 6.0497  | 0.4276 | 0.2804  | 6.0441 | JPT |
| LOC339053 | GI_29746836-S | rs8050872  | 16 | 16 | 19711347 | 85924  | 6.2684  | 0.4408 | 0.2850  | 6.0441 | JPT |
| LOC339053 | GI_29746836-S | rs8059618  | 16 | 16 | 19715268 | 89845  | 6.1255  | 0.4322 | 0.2813  | 6.0441 | JPT |
| LOC339053 | GI_29746836-S | rs7185636  | 16 | 16 | 19715664 | 90241  | 6.1329  | 0.4327 | -0.2832 | 6.0441 | JPT |
| LOC339053 | GI_29746836-S | rs9931211  | 16 | 16 | 19721106 | 95683  | 6.1255  | 0.4322 | -0.2813 | 6.0441 | JPT |
| LOC339053 | GI_29746836-S | rs11648129 | 16 | 16 | 19728195 | 102772 | 6.1255  | 0.4322 | -0.2813 | 6.0441 | JPT |
| LOC339053 | GI_29746836-S | rs11865403 | 16 | 16 | 19731994 | 106571 | 6.3355  | 0.4371 | -0.2818 | 6.0441 | JPT |
| LOC339053 | GI_29746836-S | rs950928   | 16 | 16 | 19732139 | 106716 | 6.1255  | 0.4322 | -0.2813 | 6.0441 | JPT |
| LOC339053 | GI_29746836-S | rs8056711  | 16 | 16 | 19734035 | 108612 | 6.3355  | 0.4371 | 0.2818  | 6.0441 | JPT |
| MGC3248   | GI_34147426-S | rs249869   | 16 | 16 | 23574058 | 14332  | 5.8741  | 0.4168 | -0.2656 | 5.8537 | JPT |
| MGC3248   | GI_34147426-S | rs35585    | 16 | 16 | 23584612 | 3778   | 5.9307  | 0.4128 | 0.2601  | 5.8537 | JPT |
| MGC3248   | GI_34147426-S | rs40076    | 16 | 16 | 23599906 | 11516  | 5.8741  | 0.4168 | 0.2656  | 5.8537 | JPT |
| MGC3248   | GI_34147426-S | rs35635    | 16 | 16 | 23601271 | 12881  | 5.9307  | 0.4128 | -0.2601 | 5.8537 | JPT |
| MGC3248   | GI_34147426-S | rs26767    | 16 | 16 | 23605958 | 17568  | 6.0388  | 0.4270 | -0.2559 | 5.8537 | JPT |
| MGC3248   | GI_34147426-S | rs26764    | 16 | 16 | 23619426 | 31036  | 6.8979  | 0.4773 | 0.2832  | 5.8537 | JPT |
| LCMT1     | GI_15082255-I | rs7188975  | 16 | 16 | 25044950 | 71178  | 12.5991 | 0.7265 | 0.3197  | 5.9602 | JPT |
| LCMT1     | GI_15082255-I | rs11074678 | 16 | 16 | 25057227 | 83455  | 12.8946 | 0.7267 | 0.3196  | 5.9602 | JPT |
| LCMT1     | GI_15082255-I | rs277908   | 16 | 16 | 25062635 | 88863  | 12.8946 | 0.7267 | 0.3196  | 5.9602 | JPT |
| LCMT1     | GI_15082255-I | rs277913   | 16 | 16 | 25066244 | 92472  | 13.1718 | 0.7265 | -0.3193 | 5.9602 | JPT |
| LCMT1     | GI_15082255-I | rs277917   | 16 | 16 | 25066646 | 92874  | 12.8946 | 0.7267 | -0.3196 | 5.9602 | JPT |
| LCMT1     | GI_15082255-I | rs277886   | 16 | 16 | 25070005 | 96233  | 12.8946 | 0.7267 | -0.3196 | 5.9602 | JPT |
| LCMT1     | GI_15082255-I | rs277898   | 16 | 16 | 25079311 | 105539 | 6.8662  | 0.4755 | 0.2461  | 5.9602 | JPT |
| LCMT1     | GI_15082255-I | rs277900   | 16 | 16 | 25081500 | 107728 | 10.5544 | 0.6477 | -0.3086 | 5.9602 | JPT |
| LCMT1     | GI_15082255-I | rs277903   | 16 | 16 | 25082623 | 108851 | 9.1284  | 0.5889 | 0.2894  | 5.9602 | JPT |
| LCMT1     | GI_15082255-I | rs277891   | 16 | 16 | 25088257 | 114485 | 12.8946 | 0.7267 | 0.3196  | 5.9602 | JPT |
| LCMT1     | GI_15082255-I | rs277893   | 16 | 16 | 25089212 | 115440 | 12.8946 | 0.7267 | 0.3196  | 5.9602 | JPT |
| LCMT1     | GI_15082255-I | rs7205902  | 16 | 16 | 25120016 | 146244 | 7.2249  | 0.5037 | 0.2724  | 5.9602 | JPT |
| LCMT1     | GI_15082255-I | rs889117   | 16 | 16 | 25121484 | 147712 | 6.3002  | 0.4427 | 0.2446  | 5.9602 | JPT |
| LOC388274 | GI_41150288-S | rs17222902 | 16 | 16 | 49371498 | 43464  | 5.7947  | 0.4045 | -0.2606 | 5.7212 | JPT |
| LOC388274 | GI_41150288-S | rs17223257 | 16 | 16 | 49382332 | 54298  | 5.7947  | 0.4045 | -0.2606 | 5.7212 | JPT |
| LOC388274 | GI_41150288-S | rs16948851 | 16 | 16 | 49400910 | 72876  | 5.7624  | 0.4098 | 0.2624  | 5.7212 | JPT |
| KIAA1972  | GI_45387948-S | rs2305695  | 16 | 16 | 55725936 | 104382 | 6.6322  | 0.4622 | 0.3674  | 6.1775 | JPT |
| KIAA1972  | GI_45387948-S | rs2305691  | 16 | 16 | 55728898 | 101420 | 6.5644  | 0.4504 | -0.3764 | 6.1775 | JPT |
| KIAA1972  | GI_45387948-S | rs12596338 | 16 | 16 | 55747639 | 82679  | 7.0680  | 0.4951 | -0.3761 | 6.1775 | JPT |
| KIAA1972  | GI_45387948-S | rs4783980  | 16 | 16 | 55755350 | 74968  | 6.2894  | 0.4421 | -0.3619 | 6.1775 | JPT |
| KIAA1972  | GI_45387948-S | rs6499868  | 16 | 16 | 55771267 | 59051  | 6.5408  | 0.4490 | -0.3627 | 6.1775 | JPT |
| KIAA1972  | GI_45387948-S | rs16967424 | 16 | 16 | 55776548 | 53770  | 6.2894  | 0.4421 | 0.3619  | 6.1775 | JPT |
| TK2       | GI_33636700-S | rs725131   | 16 | 16 | 65143211 | 40964  | 5.8861  | 0.4176 | 0.6776  | 5.6265 | JPT |
| TK2       | GI_33636700-S | rs7193473  | 16 | 16 | 65157980 | 55733  | 5.8861  | 0.4176 | -0.6776 | 5.6265 | JPT |
| TK2       | GI_33636700-S | rs12448207 | 16 | 16 | 65189886 | 87639  | 6.0526  | 0.4203 | -0.6709 | 5.6265 | JPT |
| LOC283970 | GI_40217627-S | rs1549287  | 16 | 16 | 68147867 | 419983 | 6.8550  | 0.4749 | -0.9637 | 5.6888 | JPT |
| LOC283970 | GI_40217627-S | rs244422   | 16 | 16 | 68175014 | 392836 | 7.5845  | 0.5230 | -1.0001 | 5.6888 | JPT |

|           |               |            |    |    |          |        |         |        |         |        |     |
|-----------|---------------|------------|----|----|----------|--------|---------|--------|---------|--------|-----|
| LOC283970 | GI_40217627-S | rs33063    | 16 | 16 | 68197718 | 370132 | 7.0198  | 0.4841 | -0.9695 | 5.6888 | JPT |
| LOC283970 | GI_40217627-S | rs39999    | 16 | 16 | 68211197 | 356653 | 6.8681  | 0.4756 | -0.9657 | 5.6888 | JPT |
| LOC283970 | GI_40217627-S | rs9980     | 16 | 16 | 68294969 | 272881 | 7.2655  | 0.4893 | 0.9755  | 5.6888 | JPT |
| LOC283970 | GI_40217627-S | rs17299478 | 16 | 16 | 68333001 | 234849 | 11.9630 | 0.6890 | 1.1377  | 5.6888 | JPT |
| LOC283970 | GI_40217627-S | rs3748386  | 16 | 16 | 68532160 | 35690  | 12.7851 | 0.7235 | -1.0721 | 5.6888 | JPT |
| LOC283970 | GI_40217627-S | rs3748385  | 16 | 16 | 68573917 | 6067   | 17.8704 | 0.8411 | 1.2326  | 5.6888 | JPT |
| LOC283970 | GI_40217627-S | rs9939092  | 16 | 16 | 68596778 | 28928  | 20.3245 | 0.8785 | 1.1564  | 5.6888 | JPT |
| LOC283970 | GI_40217627-S | rs929840   | 16 | 16 | 68603409 | 35559  | 13.7438 | 0.7592 | 1.1675  | 5.6888 | JPT |
| LOC283970 | GI_40217627-S | rs12930433 | 16 | 16 | 68608544 | 40694  | 18.1307 | 0.8664 | 1.1773  | 5.6888 | JPT |
| LOC283970 | GI_40217627-S | rs8058597  | 16 | 16 | 68639715 | 71865  | 19.1032 | 0.8743 | 1.1525  | 5.6888 | JPT |
| LOC283970 | GI_40217627-S | rs6499292  | 16 | 16 | 68661559 | 93709  | 20.3245 | 0.8785 | 1.1564  | 5.6888 | JPT |
| LOC283970 | GI_40217627-S | rs17303895 | 16 | 16 | 68663185 | 95335  | 13.2339 | 0.7715 | 1.1124  | 5.6888 | JPT |
| COG4      | GI_21070955-A | rs16970320 | 16 | 16 | 69168567 | 96438  | 6.2747  | 0.4335 | -0.3363 | 5.985  | JPT |
| LOC374747 | GI_37541845-S | rs17624394 | 16 | 16 | 76300468 | 32644  | 6.7960  | 0.4636 | -0.3673 | 6.4836 | JPT |
| LOC388299 | GI_41150379-S | rs17624394 | 16 | 16 | 76300468 | 32614  | 7.0212  | 0.4761 | -0.2904 | 6.5493 | JPT |
| LOC374747 | GI_37541845-S | rs1868466  | 16 | 16 | 76301059 | 32053  | 6.7960  | 0.4636 | 0.3673  | 6.4836 | JPT |
| LOC388299 | GI_41150379-S | rs1868466  | 16 | 16 | 76301059 | 32023  | 7.0212  | 0.4761 | 0.2904  | 6.5493 | JPT |
| LOC374747 | GI_37541845-S | rs1868467  | 16 | 16 | 76301138 | 31974  | 6.7960  | 0.4636 | -0.3673 | 6.4836 | JPT |
| LOC388299 | GI_41150379-S | rs1868467  | 16 | 16 | 76301138 | 31944  | 7.0212  | 0.4761 | -0.2904 | 6.5493 | JPT |
| LOC374747 | GI_37541845-S | rs1868468  | 16 | 16 | 76301259 | 31853  | 6.7960  | 0.4636 | 0.3673  | 6.4836 | JPT |
| LOC388299 | GI_41150379-S | rs1868468  | 16 | 16 | 76301259 | 31823  | 7.0212  | 0.4761 | 0.2904  | 6.5493 | JPT |
| LOC374747 | GI_37541845-S | rs12599327 | 16 | 16 | 76302024 | 31088  | 6.7960  | 0.4636 | -0.3673 | 6.4836 | JPT |
| LOC388299 | GI_41150379-S | rs12599327 | 16 | 16 | 76302024 | 31058  | 7.0212  | 0.4761 | -0.2904 | 6.5493 | JPT |
| LOC374747 | GI_37541845-S | rs4567733  | 16 | 16 | 76302851 | 30261  | 6.6312  | 0.4621 | -0.3672 | 6.4836 | JPT |
| LOC388299 | GI_41150379-S | rs4567733  | 16 | 16 | 76302851 | 30231  | 6.8545  | 0.4748 | -0.2904 | 6.5493 | JPT |
| LOC374747 | GI_37541845-S | rs12448977 | 16 | 16 | 76303213 | 29899  | 6.7960  | 0.4636 | 0.3673  | 6.4836 | JPT |
| LOC388299 | GI_41150379-S | rs12448977 | 16 | 16 | 76303213 | 29869  | 7.0212  | 0.4761 | 0.2904  | 6.5493 | JPT |
| LOC374747 | GI_37541845-S | rs2442381  | 16 | 16 | 76304716 | 28396  | 6.7960  | 0.4636 | 0.3673  | 6.4836 | JPT |
| LOC388299 | GI_41150379-S | rs2442381  | 16 | 16 | 76304716 | 28366  | 7.0212  | 0.4761 | 0.2904  | 6.5493 | JPT |
| LOC374747 | GI_37541845-S | rs8051061  | 16 | 16 | 76304945 | 28167  | 6.7960  | 0.4636 | 0.3673  | 6.4836 | JPT |
| LOC388299 | GI_41150379-S | rs8051061  | 16 | 16 | 76304945 | 28137  | 7.0212  | 0.4761 | 0.2904  | 6.5493 | JPT |
| LOC374747 | GI_37541845-S | rs12926105 | 16 | 16 | 76305179 | 27933  | 6.7960  | 0.4636 | 0.3673  | 6.4836 | JPT |
| LOC388299 | GI_41150379-S | rs12926105 | 16 | 16 | 76305179 | 27903  | 7.0212  | 0.4761 | 0.2904  | 6.5493 | JPT |
| LOC374747 | GI_37541845-S | rs7184635  | 16 | 16 | 76309709 | 23403  | 6.7960  | 0.4636 | -0.3673 | 6.4836 | JPT |
| LOC388299 | GI_41150379-S | rs7184635  | 16 | 16 | 76309709 | 23373  | 7.0212  | 0.4761 | -0.2904 | 6.5493 | JPT |
| BM039     | GI_39725678-S | rs2303216  | 16 | 16 | 79567671 | 43688  | 6.9001  | 0.4694 | -0.5820 | 6.2997 | JPT |
| BM039     | GI_39725678-S | rs16954368 | 16 | 16 | 79568447 | 42912  | 6.9001  | 0.4694 | -0.5820 | 6.2997 | JPT |
| BM039     | GI_39725678-S | rs3743503  | 16 | 16 | 79613942 | 2583   | 6.9985  | 0.4829 | 0.5789  | 6.2997 | JPT |
| LOC197322 | GI_28372536-S | rs4782455  | 16 | 16 | 87696813 | 52760  | 5.8969  | 0.4108 | -1.0242 | 5.7332 | JPT |
| LOC197322 | GI_28372536-S | rs4782328  | 16 | 16 | 87709719 | 39854  | 7.4919  | 0.5181 | 1.2460  | 5.7332 | JPT |
| LOC197322 | GI_28372536-S | rs8052780  | 16 | 16 | 87710427 | 39146  | 7.1457  | 0.5081 | -1.2423 | 5.7332 | JPT |
| LOC197322 | GI_28372536-S | rs8053537  | 16 | 16 | 87710698 | 38875  | 8.6618  | 0.5590 | 1.2729  | 5.7332 | JPT |
| LOC197322 | GI_28372536-S | rs4782327  | 16 | 16 | 87711636 | 37937  | 8.9079  | 0.5790 | -1.2523 | 5.7332 | JPT |
| LOC197322 | GI_28372536-S | rs11860237 | 16 | 16 | 87713639 | 35934  | 6.7481  | 0.4856 | -1.1999 | 5.7332 | JPT |
| LOC197322 | GI_28372536-S | rs11076770 | 16 | 16 | 87733011 | 16562  | 9.2808  | 0.5869 | -1.2536 | 5.7332 | JPT |
| LOC197322 | GI_28372536-S | rs10852635 | 16 | 16 | 87733374 | 16199  | 9.2808  | 0.5869 | -1.2536 | 5.7332 | JPT |
| LOC197322 | GI_28372536-S | rs12931350 | 16 | 16 | 87735816 | 13757  | 9.2808  | 0.5869 | 1.2536  | 5.7332 | JPT |
| LOC197322 | GI_28372536-S | rs12597637 | 16 | 16 | 87749296 | 277    | 7.5984  | 0.5152 | -1.0761 | 5.7332 | JPT |
| LOC197322 | GI_28372536-S | rs4581700  | 16 | 16 | 87758090 | 8517   | 7.0256  | 0.4844 | -1.0607 | 5.7332 | JPT |
| LOC197322 | GI_28372536-S | rs12599862 | 16 | 16 | 87763436 | 13863  | 10.5140 | 0.6461 | 1.2880  | 5.7332 | JPT |
| LOC197322 | GI_28372536-S | rs3785414  | 16 | 16 | 87777900 | 28327  | 14.4858 | 0.7784 | 1.6503  | 5.7332 | JPT |
| SPG7      | GI_40806172-I | rs4785569  | 16 | 16 | 88082815 | 48554  | 6.4549  | 0.4519 | -0.1716 | 5.9354 | JPT |
| SPG7      | GI_40806172-I | rs4329923  | 16 | 16 | 88087679 | 43690  | 6.5102  | 0.4473 | 0.1677  | 5.9354 | JPT |
| SPG7      | GI_40806172-I | rs4785571  | 16 | 16 | 88092670 | 38699  | 6.3280  | 0.4367 | 0.1679  | 5.9354 | JPT |
| SPG7      | GI_40806172-I | rs9921048  | 16 | 16 | 88094785 | 36584  | 6.4549  | 0.4519 | -0.1716 | 5.9354 | JPT |
| SPG7      | GI_40806172-I | rs4347628  | 16 | 16 | 88098136 | 33233  | 6.4549  | 0.4519 | -0.1716 | 5.9354 | JPT |
| SPG7      | GI_40806172-I | rs9922341  | 16 | 16 | 88099316 | 32053  | 6.3280  | 0.4367 | 0.1679  | 5.9354 | JPT |
| SPG7      | GI_40806172-I | rs3809641  | 16 | 16 | 88101667 | 29702  | 6.2104  | 0.4453 | -0.1703 | 5.9354 | JPT |
| SPG7      | GI_40806172-I | rs3922634  | 16 | 16 | 88104267 | 27102  | 6.4549  | 0.4519 | 0.1716  | 5.9354 | JPT |

|              |               |            |    |    |          |       |         |        |         |        |     |
|--------------|---------------|------------|----|----|----------|-------|---------|--------|---------|--------|-----|
| SPG7         | GI_40806172-I | rs8046182  | 16 | 16 | 88108717 | 22652 | 6.3280  | 0.4367 | 0.1679  | 5.9354 | JPT |
| SPG7         | GI_40806172-I | rs8052076  | 16 | 16 | 88111310 | 20059 | 6.1342  | 0.4407 | 0.1715  | 5.9354 | JPT |
| SPG7         | GI_40806172-I | rs11862081 | 16 | 16 | 88115989 | 15380 | 6.3280  | 0.4367 | 0.1679  | 5.9354 | JPT |
| SPG7         | GI_40806172-I | rs3803680  | 16 | 16 | 88117744 | 13625 | 6.4549  | 0.4519 | 0.1716  | 5.9354 | JPT |
| SPG7         | GI_40806172-I | rs3803679  | 16 | 16 | 88118168 | 13201 | 6.4549  | 0.4519 | 0.1716  | 5.9354 | JPT |
| SPG7         | GI_40806172-I | rs3803677  | 16 | 16 | 88123224 | 8145  | 6.5411  | 0.4650 | 0.1710  | 5.9354 | JPT |
| SPG7         | GI_40806172-I | rs3803676  | 16 | 16 | 88123607 | 7762  | 6.7810  | 0.4627 | -0.1704 | 5.9354 | JPT |
| SPG7         | GI_40806172-I | rs463701   | 16 | 16 | 88126261 | 5108  | 6.9402  | 0.4797 | 0.1744  | 5.9354 | JPT |
| SPG7         | GI_40806172-I | rs11640186 | 16 | 16 | 88129507 | 1862  | 6.7810  | 0.4627 | -0.1704 | 5.9354 | JPT |
| SPG7         | GI_40806172-I | rs382745   | 16 | 16 | 88131087 | 282   | 6.7810  | 0.4627 | -0.1704 | 5.9354 | JPT |
| RPH3AL       | GI_31543557-S | rs1136388  | 17 | 17 | 53011    | 9370  | 6.6033  | 0.4605 | -0.4352 | 6.1725 | JPT |
| RPH3AL       | GI_31543557-S | rs7226358  | 17 | 17 | 65351    | 2970  | 6.4942  | 0.4542 | -0.3608 | 6.1725 | JPT |
| RPH3AL       | GI_31543557-S | rs8078929  | 17 | 17 | 78232    | 15851 | 8.4229  | 0.5652 | 0.5077  | 6.1725 | JPT |
| RPH3AL       | GI_31543557-S | rs4890194  | 17 | 17 | 81136    | 18755 | 8.5707  | 0.5634 | -0.5054 | 6.1725 | JPT |
| RPH3AL       | GI_31543557-S | rs4890171  | 17 | 17 | 82969    | 20588 | 6.9694  | 0.4732 | 0.4951  | 6.1725 | JPT |
| RPH3AL       | GI_31543557-S | rs4890197  | 17 | 17 | 83173    | 20792 | 6.9694  | 0.4732 | 0.4951  | 6.1725 | JPT |
| LOC400566    | GI_42661283-S | rs11150880 | 17 | 17 | 237667   | 26975 | 6.6814  | 0.4732 | 0.7851  | 5.8673 | JPT |
| LOC374758    | GI_37544593-S | rs8064453  | 17 | 17 | 265835   | 1665  | 6.2115  | 0.4374 | 0.1423  | 5.8828 | JPT |
| LOC400566    | GI_42661283-S | rs8064453  | 17 | 17 | 265835   | 1193  | 10.6679 | 0.6520 | 1.0551  | 5.8673 | JPT |
| LOC400566    | GI_42661283-S | rs6565724  | 17 | 17 | 271176   | 6534  | 6.3785  | 0.4474 | -0.7827 | 5.8673 | JPT |
| LOC374758    | GI_37544593-S | rs6565726  | 17 | 17 | 272556   | 8386  | 6.2115  | 0.4374 | -0.1423 | 5.8828 | JPT |
| LOC400566    | GI_42661283-S | rs6565726  | 17 | 17 | 272556   | 7914  | 10.6679 | 0.6520 | -1.0551 | 5.8673 | JPT |
| CTNS         | GI_4826681-S  | rs12936393 | 17 | 17 | 3498059  | 13365 | 6.5799  | 0.4513 | -0.1774 | 5.8235 | JPT |
| CTNS         | GI_4826681-S  | rs4790530  | 17 | 17 | 3502173  | 9251  | 6.5799  | 0.4513 | 0.1774  | 5.8235 | JPT |
| DKFZP566H073 | GI_14149701-S | rs238245   | 17 | 17 | 4788188  | 989   | 9.6541  | 0.6116 | 0.4535  | 5.8491 | JPT |
| DKFZP566H073 | GI_14149701-S | rs238242   | 17 | 17 | 4790519  | 1342  | 6.7853  | 0.4709 | 0.4726  | 5.8491 | JPT |
| DKFZP566H073 | GI_14149701-S | rs238224   | 17 | 17 | 4804133  | 14956 | 7.2337  | 0.5042 | -0.3893 | 5.8491 | JPT |
| DKFZP566H073 | GI_14149701-S | rs452825   | 17 | 17 | 4814939  | 25762 | 8.3640  | 0.5535 | -0.4323 | 5.8491 | JPT |
| DKFZP566H073 | GI_14149701-S | rs238230   | 17 | 17 | 4816290  | 27113 | 6.3660  | 0.4467 | 0.4363  | 5.8491 | JPT |
| DKFZP566H073 | GI_14149701-S | rs238229   | 17 | 17 | 4817844  | 28667 | 8.1354  | 0.5339 | 0.4286  | 5.8491 | JPT |
| DKFZP566H073 | GI_14149701-S | rs238228   | 17 | 17 | 4819684  | 30507 | 8.1354  | 0.5339 | 0.4286  | 5.8491 | JPT |
| DKFZP566H073 | GI_14149701-S | rs376516   | 17 | 17 | 4822500  | 33323 | 5.8804  | 0.4172 | -0.4224 | 5.8491 | JPT |
| DKFZP566H073 | GI_14149701-S | rs1859434  | 17 | 17 | 4823676  | 34499 | 7.7746  | 0.5243 | 0.4212  | 5.8491 | JPT |
| DKFZP566H073 | GI_14149701-S | rs238234   | 17 | 17 | 4824542  | 35365 | 7.7746  | 0.5243 | -0.4212 | 5.8491 | JPT |
| DKFZP566H073 | GI_14149701-S | rs238233   | 17 | 17 | 4826706  | 37529 | 6.4932  | 0.4541 | 0.4425  | 5.8491 | JPT |
| DKFZP566H073 | GI_14149701-S | rs238232   | 17 | 17 | 4826761  | 37584 | 7.7746  | 0.5243 | -0.4212 | 5.8491 | JPT |
| DKFZP566H073 | GI_14149701-S | rs238237   | 17 | 17 | 4843682  | 54505 | 6.6113  | 0.4531 | -0.3980 | 5.8491 | JPT |
| DKFZP566H073 | GI_14149701-S | rs238235   | 17 | 17 | 4865057  | 75880 | 6.2101  | 0.4374 | -0.3828 | 5.8491 | JPT |
| DERP6        | GI_44662825-I | rs1875673  | 17 | 17 | 7049230  | 47211 | 8.5218  | 0.5611 | 0.3036  | 6.0908 | JPT |
| DERP6        | GI_44662825-I | rs2521985  | 17 | 17 | 7062509  | 33932 | 8.6255  | 0.5659 | 0.3049  | 6.0908 | JPT |
| DERP6        | GI_44662825-I | rs222837   | 17 | 17 | 7073280  | 23161 | 8.2111  | 0.5549 | -0.2938 | 6.0908 | JPT |
| DERP6        | GI_44662825-I | rs222835   | 17 | 17 | 7074853  | 21588 | 8.8141  | 0.5661 | 0.3043  | 6.0908 | JPT |
| DERP6        | GI_44662825-I | rs222843   | 17 | 17 | 7086705  | 9736  | 13.2917 | 0.7383 | 0.3332  | 6.0908 | JPT |
| DERP6        | GI_44662825-I | rs402514   | 17 | 17 | 7098927  | 2486  | 13.2917 | 0.7383 | 0.3332  | 6.0908 | JPT |
| DERP6        | GI_44662825-I | rs8067500  | 17 | 17 | 7113355  | 16914 | 8.0198  | 0.5367 | -0.2781 | 6.0908 | JPT |
| DERP6        | GI_44662825-I | rs2654189  | 17 | 17 | 7118596  | 22155 | 10.0767 | 0.6290 | -0.3286 | 6.0908 | JPT |
| DERP6        | GI_44662825-I | rs5415     | 17 | 17 | 7125205  | 28764 | 8.1946  | 0.5453 | 0.2913  | 6.0908 | JPT |
| DERP6        | GI_44662825-I | rs222849   | 17 | 17 | 7126585  | 30144 | 6.5616  | 0.5214 | 0.2667  | 6.0908 | JPT |
| DERP6        | GI_44662825-I | rs5435     | 17 | 17 | 7127847  | 31406 | 7.5962  | 0.5067 | 0.2553  | 6.0908 | JPT |
| LOC400571    | GI_42661084-S | rs10438740 | 17 | 17 | 7413608  | 12770 | 7.1623  | 0.5090 | -0.2451 | 5.5651 | JPT |
| LOC400571    | GI_42661084-S | rs2270341  | 17 | 17 | 7421271  | 5107  | 8.0096  | 0.5361 | 0.2332  | 5.5651 | JPT |
| LOC400571    | GI_42661084-S | rs9901673  | 17 | 17 | 7424825  | 1553  | 6.4639  | 0.4446 | -0.2427 | 5.5651 | JPT |
| LOC400571    | GI_42661084-S | rs8066665  | 17 | 17 | 7426576  | 198   | 8.0096  | 0.5361 | 0.2332  | 5.5651 | JPT |
| LOC400571    | GI_42661084-S | rs10852891 | 17 | 17 | 7431534  | 5156  | 6.1293  | 0.4485 | -0.2413 | 5.5651 | JPT |
| LOC400571    | GI_42661084-S | rs858526   | 17 | 17 | 7440107  | 13729 | 7.4779  | 0.5088 | -0.2325 | 5.5651 | JPT |
| LOC400571    | GI_42661084-S | rs12936934 | 17 | 17 | 7441490  | 15112 | 5.6193  | 0.3935 | 0.2267  | 5.5651 | JPT |
| LOC400571    | GI_42661084-S | rs858524   | 17 | 17 | 7452012  | 25634 | 7.3117  | 0.5085 | 0.2326  | 5.5651 | JPT |
| LOC400571    | GI_42661084-S | rs2908809  | 17 | 17 | 7462425  | 36047 | 6.7063  | 0.4664 | 0.2182  | 5.5651 | JPT |
| LOC400571    | GI_42661084-S | rs9898876  | 17 | 17 | 7467687  | 41309 | 5.6824  | 0.3975 | 0.2269  | 5.5651 | JPT |

|           |               |            |    |    |          |        |         |        |         |        |     |
|-----------|---------------|------------|----|----|----------|--------|---------|--------|---------|--------|-----|
| Hs.379903 | Hs.379903-S   | rs2779211  | 17 | 17 | 15816660 | 4030   | 5.9076  | 0.4114 | 0.5015  | 5.7028 | JPT |
| Hs.379903 | Hs.379903-S   | rs2779212  | 17 | 17 | 15817380 | 3310   | 11.3804 | 0.6692 | -0.5696 | 5.7028 | JPT |
| Hs.379903 | Hs.379903-S   | rs1045599  | 17 | 17 | 15820635 | 55     | 13.8500 | 0.7621 | -0.6504 | 5.7028 | JPT |
| Hs.379903 | Hs.379903-S   | rs11654    | 17 | 17 | 15821876 | 1186   | 11.0210 | 0.6651 | -0.5624 | 5.7028 | JPT |
| Hs.379903 | Hs.379903-S   | rs2286795  | 17 | 17 | 15824534 | 3844   | 11.0210 | 0.6651 | 0.5624  | 5.7028 | JPT |
| Hs.379903 | Hs.379903-S   | rs2286796  | 17 | 17 | 15824952 | 4262   | 10.8999 | 0.6695 | 0.5692  | 5.7028 | JPT |
| Hs.379903 | Hs.379903-S   | rs10491104 | 17 | 17 | 15825286 | 4596   | 5.9076  | 0.4114 | 0.5015  | 5.7028 | JPT |
| Hs.379903 | Hs.379903-S   | rs8070859  | 17 | 17 | 15828514 | 7824   | 11.0210 | 0.6651 | 0.5624  | 5.7028 | JPT |
| Hs.379903 | Hs.379903-S   | rs4792709  | 17 | 17 | 15833166 | 12476  | 11.0210 | 0.6651 | 0.5624  | 5.7028 | JPT |
| Hs.379903 | Hs.379903-S   | rs758853   | 17 | 17 | 15844327 | 23637  | 5.9076  | 0.4114 | -0.5015 | 5.7028 | JPT |
| Hs.379903 | Hs.379903-S   | rs2041460  | 17 | 17 | 15847637 | 26947  | 5.9076  | 0.4114 | -0.5015 | 5.7028 | JPT |
| Hs.379903 | Hs.379903-S   | rs3826360  | 17 | 17 | 15851011 | 30321  | 5.9076  | 0.4114 | -0.5015 | 5.7028 | JPT |
| Hs.379903 | Hs.379903-S   | rs9891938  | 17 | 17 | 15855797 | 35107  | 10.3194 | 0.6567 | 0.5532  | 5.7028 | JPT |
| Hs.379903 | Hs.379903-S   | rs11869450 | 17 | 17 | 15864434 | 43744  | 8.8820  | 0.5778 | 0.5256  | 5.7028 | JPT |
| Hs.379903 | Hs.379903-S   | rs6416868  | 17 | 17 | 15865095 | 44405  | 11.3804 | 0.6692 | 0.5696  | 5.7028 | JPT |
| Hs.379903 | Hs.379903-S   | rs4792715  | 17 | 17 | 15867948 | 47258  | 9.0793  | 0.6141 | -0.5065 | 5.7028 | JPT |
| Hs.379903 | Hs.379903-S   | rs1079533  | 17 | 17 | 15890923 | 70233  | 5.9076  | 0.4114 | 0.5015  | 5.7028 | JPT |
| Hs.379903 | Hs.379903-S   | rs2285583  | 17 | 17 | 15908868 | 88178  | 11.3804 | 0.6692 | 0.5696  | 5.7028 | JPT |
| Hs.379903 | Hs.379903-S   | rs178831   | 17 | 17 | 16021574 | 200884 | 8.7885  | 0.6411 | -0.5541 | 5.7028 | JPT |
| SHMT1     | GI_22547185-I | rs854773   | 17 | 17 | 17995593 | 184060 | 6.0747  | 0.4451 | 0.1844  | 5.8974 | JPT |
| FLJ22729  | GI_13375953-S | rs7209032  | 17 | 17 | 26043857 | 206677 | 5.4811  | 0.3919 | 0.1769  | 5.3288 | JPT |
| FLJ22729  | GI_13375953-S | rs1808255  | 17 | 17 | 26062158 | 188376 | 5.4630  | 0.3907 | 0.1667  | 5.3288 | JPT |
| FLJ22729  | GI_13375953-S | rs11656278 | 17 | 17 | 26099314 | 151220 | 5.3803  | 0.3783 | -0.1720 | 5.3288 | JPT |
| FLJ22729  | GI_13375953-S | rs11657662 | 17 | 17 | 26100473 | 150061 | 5.3803  | 0.3783 | -0.1720 | 5.3288 | JPT |
| FLJ22729  | GI_13375953-S | rs9898084  | 17 | 17 | 26106460 | 144074 | 5.3803  | 0.3783 | 0.1720  | 5.3288 | JPT |
| FLJ22729  | GI_13375953-S | rs11656922 | 17 | 17 | 26112573 | 137961 | 5.3393  | 0.4054 | 0.1815  | 5.3288 | JPT |
| FLJ22729  | GI_13375953-S | rs8081299  | 17 | 17 | 26128422 | 122112 | 5.3803  | 0.3783 | 0.1720  | 5.3288 | JPT |
| FLJ22729  | GI_13375953-S | rs9914499  | 17 | 17 | 26131714 | 118820 | 5.3803  | 0.3783 | 0.1720  | 5.3288 | JPT |
| FLJ22729  | GI_13375953-S | rs9895785  | 17 | 17 | 26131834 | 118700 | 5.3558  | 0.3837 | 0.1746  | 5.3288 | JPT |
| FLJ22729  | GI_13375953-S | rs11653098 | 17 | 17 | 26146627 | 103907 | 5.8419  | 0.4751 | -0.1944 | 5.3288 | JPT |
| FLJ22729  | GI_13375953-S | rs11654035 | 17 | 17 | 26160552 | 89982  | 5.3803  | 0.3783 | 0.1720  | 5.3288 | JPT |
| FLJ22729  | GI_13375953-S | rs11657369 | 17 | 17 | 26160594 | 89940  | 5.3803  | 0.3783 | 0.1720  | 5.3288 | JPT |
| FLJ22729  | GI_13375953-S | rs7214570  | 17 | 17 | 26171290 | 79244  | 5.3803  | 0.3783 | 0.1720  | 5.3288 | JPT |
| FLJ22729  | GI_13375953-S | rs9912440  | 17 | 17 | 26172898 | 77636  | 5.3803  | 0.3783 | 0.1720  | 5.3288 | JPT |
| FLJ22729  | GI_13375953-S | rs9898858  | 17 | 17 | 26180337 | 70197  | 5.3803  | 0.3783 | -0.1720 | 5.3288 | JPT |
| FLJ22729  | GI_13375953-S | rs9915139  | 17 | 17 | 26182641 | 67893  | 5.3803  | 0.3783 | -0.1720 | 5.3288 | JPT |
| FLJ22729  | GI_13375953-S | rs999797   | 17 | 17 | 26183455 | 67079  | 5.9343  | 0.4283 | -0.1804 | 5.3288 | JPT |
| FLJ22729  | GI_13375953-S | rs11655623 | 17 | 17 | 26186299 | 64235  | 5.3803  | 0.3783 | 0.1720  | 5.3288 | JPT |
| FLJ22729  | GI_13375953-S | rs11651858 | 17 | 17 | 26194844 | 55690  | 5.3803  | 0.3783 | -0.1720 | 5.3288 | JPT |
| FLJ22729  | GI_13375953-S | rs9899349  | 17 | 17 | 26224248 | 26286  | 5.7403  | 0.4161 | -0.1794 | 5.3288 | JPT |
| FLJ22729  | GI_13375953-S | rs11657270 | 17 | 17 | 26238513 | 12021  | 5.3803  | 0.3783 | 0.1720  | 5.3288 | JPT |
| FLJ22729  | GI_13375953-S | rs9914242  | 17 | 17 | 26240371 | 10163  | 5.3803  | 0.3783 | 0.1720  | 5.3288 | JPT |
| FLJ22729  | GI_13375953-S | rs9913782  | 17 | 17 | 26261510 | 10976  | 5.3803  | 0.3783 | -0.1720 | 5.3288 | JPT |
| FLJ22729  | GI_13375953-S | rs9911989  | 17 | 17 | 26261828 | 11294  | 5.3803  | 0.3783 | -0.1720 | 5.3288 | JPT |
| FLJ10458  | GI_20070287-S | rs998286   | 17 | 17 | 30479133 | 3444   | 7.0131  | 0.5284 | 0.6192  | 6.2145 | JPT |
| FLJ10458  | GI_20070287-S | rs3736145  | 17 | 17 | 30481675 | 902    | 9.6808  | 0.6700 | 0.6095  | 6.2145 | JPT |
| FLJ10458  | GI_20070287-S | rs3744362  | 17 | 17 | 30483209 | 632    | 11.9591 | 0.6975 | 0.5899  | 6.2145 | JPT |
| FLJ10458  | GI_20070287-S | rs2306511  | 17 | 17 | 30484480 | 1903   | 12.3100 | 0.7002 | 0.5813  | 6.2145 | JPT |
| FLJ10458  | GI_20070287-S | rs2306512  | 17 | 17 | 30484544 | 1967   | 11.9591 | 0.6975 | -0.5899 | 6.2145 | JPT |
| FLJ10458  | GI_20070287-S | rs2306513  | 17 | 17 | 30484629 | 2052   | 11.6107 | 0.6947 | -0.5860 | 6.2145 | JPT |
| MGC19764  | GI_42661257-S | rs7211922  | 17 | 17 | 30572361 | 46220  | 6.1133  | 0.4239 | 0.7405  | 6.0664 | JPT |
| MGC19764  | GI_42661257-S | rs12947525 | 17 | 17 | 30574776 | 43805  | 6.1133  | 0.4239 | 0.7405  | 6.0664 | JPT |
| MGC19764  | GI_42661257-S | rs12945522 | 17 | 17 | 30586993 | 31588  | 6.1133  | 0.4239 | 0.7405  | 6.0664 | JPT |
| MGC19764  | GI_42661257-S | rs11654852 | 17 | 17 | 30587382 | 31199  | 6.2136  | 0.4376 | 0.7565  | 6.0664 | JPT |
| MGC19764  | GI_42661257-S | rs11651305 | 17 | 17 | 30587415 | 31166  | 6.1133  | 0.4239 | -0.7405 | 6.0664 | JPT |
| MGC19764  | GI_42661257-S | rs11080325 | 17 | 17 | 30587822 | 30759  | 6.1133  | 0.4239 | -0.7405 | 6.0664 | JPT |
| MGC19764  | GI_42661257-S | rs12602385 | 17 | 17 | 30587869 | 30712  | 6.3100  | 0.4356 | 0.6772  | 6.0664 | JPT |
| MGC19764  | GI_42661257-S | rs12945972 | 17 | 17 | 30588134 | 30447  | 6.1133  | 0.4239 | 0.7405  | 6.0664 | JPT |
| MGC19764  | GI_42661257-S | rs11080326 | 17 | 17 | 30588522 | 30059  | 10.4154 | 0.6336 | 0.6527  | 6.0664 | JPT |

|           |               |            |    |    |          |        |         |        |         |        |     |
|-----------|---------------|------------|----|----|----------|--------|---------|--------|---------|--------|-----|
| hmm5445   | hmm5445-S     | rs11080326 | 17 | 17 | 30588522 | 30032  | 9.0890  | 0.5785 | 0.5672  | 5.9194 | JPT |
| MGC19764  | GI_42661257-S | rs11867191 | 17 | 17 | 30593227 | 25354  | 10.5393 | 0.6471 | -0.6670 | 6.0664 | JPT |
| hmm5445   | hmm5445-S     | rs11867191 | 17 | 17 | 30593227 | 25327  | 8.8125  | 0.5746 | -0.5693 | 5.9194 | JPT |
| MGC19764  | GI_42661257-S | rs883416   | 17 | 17 | 30594554 | 24027  | 10.1381 | 0.6314 | -0.6497 | 6.0664 | JPT |
| hmm5445   | hmm5445-S     | rs883416   | 17 | 17 | 30594554 | 24000  | 8.8456  | 0.5761 | -0.5662 | 5.9194 | JPT |
| MGC20781  | GI_34147471-S | rs3744781  | 17 | 17 | 37235677 | 526    | 7.1357  | 0.5075 | -0.5791 | 5.3775 | JPT |
| MGC20781  | GI_34147471-S | rs9896766  | 17 | 17 | 37237170 | 2019   | 8.9273  | 0.5712 | -0.6120 | 5.3775 | JPT |
| MGC20781  | GI_34147471-S | rs1046404  | 17 | 17 | 37237334 | 2183   | 8.9273  | 0.5712 | -0.6120 | 5.3775 | JPT |
| MGC20781  | GI_34147471-S | rs1046403  | 17 | 17 | 37237346 | 2195   | 8.9273  | 0.5712 | -0.6120 | 5.3775 | JPT |
| MGC20781  | GI_34147471-S | rs4796713  | 17 | 17 | 37240887 | 5736   | 8.9511  | 0.5809 | 0.6194  | 5.3775 | JPT |
| MGC20781  | GI_34147471-S | rs4796715  | 17 | 17 | 37247297 | 12146  | 8.9511  | 0.5809 | 0.6194  | 5.3775 | JPT |
| MGC20781  | GI_34147471-S | rs1529933  | 17 | 17 | 37251667 | 16516  | 8.9273  | 0.5712 | 0.6120  | 5.3775 | JPT |
| MGC20781  | GI_34147471-S | rs4796721  | 17 | 17 | 37256947 | 21796  | 8.7371  | 0.5711 | -0.6141 | 5.3775 | JPT |
| MGC20781  | GI_34147471-S | rs3744782  | 17 | 17 | 37264505 | 29354  | 7.4463  | 0.5157 | -0.5666 | 5.3775 | JPT |
| MGC20781  | GI_34147471-S | rs9303318  | 17 | 17 | 37273611 | 38460  | 7.6987  | 0.5204 | -0.5735 | 5.3775 | JPT |
| MGC20781  | GI_34147471-S | rs9912300  | 17 | 17 | 37278790 | 43639  | 6.8611  | 0.4921 | -0.5733 | 5.3775 | JPT |
| MGC20781  | GI_34147471-S | rs3744779  | 17 | 17 | 37278979 | 43828  | 7.6731  | 0.5107 | 0.5659  | 5.3775 | JPT |
| MGC20781  | GI_34147471-S | rs8071753  | 17 | 17 | 37282067 | 46916  | 7.6731  | 0.5107 | -0.5659 | 5.3775 | JPT |
| MGC20781  | GI_34147471-S | rs8071234  | 17 | 17 | 37282094 | 46943  | 7.6731  | 0.5107 | -0.5659 | 5.3775 | JPT |
| MGC20781  | GI_34147471-S | rs4796726  | 17 | 17 | 37283979 | 48828  | 7.6987  | 0.5204 | -0.5735 | 5.3775 | JPT |
| MGC20781  | GI_34147471-S | rs4796729  | 17 | 17 | 37295202 | 60051  | 7.6987  | 0.5204 | -0.5735 | 5.3775 | JPT |
| MGC20781  | GI_34147471-S | rs12937036 | 17 | 17 | 37297994 | 62843  | 7.6731  | 0.5107 | -0.5659 | 5.3775 | JPT |
| MGC20781  | GI_34147471-S | rs4796734  | 17 | 17 | 37300095 | 64944  | 7.6987  | 0.5204 | 0.5735  | 5.3775 | JPT |
| MGC20781  | GI_34147471-S | rs4458050  | 17 | 17 | 37305248 | 70097  | 7.6987  | 0.5204 | 0.5735  | 5.3775 | JPT |
| MGC20781  | GI_34147471-S | rs9908955  | 17 | 17 | 37311007 | 75856  | 7.6329  | 0.5436 | 0.5936  | 5.3775 | JPT |
| MGC20781  | GI_34147471-S | rs9916650  | 17 | 17 | 37314376 | 79225  | 7.6987  | 0.5204 | 0.5735  | 5.3775 | JPT |
| MGC20781  | GI_34147471-S | rs2304496  | 17 | 17 | 37319012 | 83861  | 5.5263  | 0.3876 | -0.5885 | 5.3775 | JPT |
| MGC20781  | GI_34147471-S | rs2304497  | 17 | 17 | 37319300 | 84149  | 5.4911  | 0.3925 | -0.5934 | 5.3775 | JPT |
| MGC20781  | GI_34147471-S | rs2304499  | 17 | 17 | 37322139 | 86988  | 7.6987  | 0.5204 | 0.5735  | 5.3775 | JPT |
| MGC20781  | GI_34147471-S | rs12952729 | 17 | 17 | 37326803 | 91652  | 5.4911  | 0.3925 | 0.5934  | 5.3775 | JPT |
| MGC20781  | GI_34147471-S | rs6503675  | 17 | 17 | 37339191 | 104040 | 7.6130  | 0.5159 | -0.5714 | 5.3775 | JPT |
| MGC20781  | GI_34147471-S | rs3809878  | 17 | 17 | 37348361 | 113210 | 7.0592  | 0.4862 | 0.5688  | 5.3775 | JPT |
| MGC20781  | GI_34147471-S | rs4796744  | 17 | 17 | 37349999 | 114848 | 7.0592  | 0.4862 | 0.5688  | 5.3775 | JPT |
| MGC20781  | GI_34147471-S | rs4594300  | 17 | 17 | 37351713 | 116562 | 7.0592  | 0.4862 | 0.5688  | 5.3775 | JPT |
| MGC20781  | GI_34147471-S | rs4796750  | 17 | 17 | 37368070 | 132919 | 5.7263  | 0.4076 | -0.5380 | 5.3775 | JPT |
| MGC20781  | GI_34147471-S | rs8078650  | 17 | 17 | 37374297 | 139146 | 7.0592  | 0.4862 | -0.5688 | 5.3775 | JPT |
| MGC20781  | GI_34147471-S | rs4796751  | 17 | 17 | 37381063 | 145912 | 7.8526  | 0.5282 | 0.5777  | 5.3775 | JPT |
| MGC20781  | GI_34147471-S | rs6503679  | 17 | 17 | 37400496 | 165345 | 7.8526  | 0.5282 | 0.5777  | 5.3775 | JPT |
| MGC20781  | GI_34147471-S | rs11652600 | 17 | 17 | 37404105 | 168954 | 7.8526  | 0.5282 | -0.5777 | 5.3775 | JPT |
| MGC20781  | GI_34147471-S | rs4796754  | 17 | 17 | 37407211 | 172060 | 7.8526  | 0.5282 | -0.5777 | 5.3775 | JPT |
| MGC20781  | GI_34147471-S | rs4239268  | 17 | 17 | 37408303 | 173152 | 7.8252  | 0.5184 | 0.5700  | 5.3775 | JPT |
| MGC20781  | GI_34147471-S | rs4796756  | 17 | 17 | 37409324 | 174173 | 7.8526  | 0.5282 | -0.5777 | 5.3775 | JPT |
| MGC20781  | GI_34147471-S | rs4796758  | 17 | 17 | 37423045 | 187894 | 7.8526  | 0.5282 | -0.5777 | 5.3775 | JPT |
| MGC20781  | GI_34147471-S | rs4624231  | 17 | 17 | 37424656 | 189505 | 6.0115  | 0.4178 | -0.5828 | 5.3775 | JPT |
| MGC20781  | GI_34147471-S | rs4796759  | 17 | 17 | 37428367 | 193216 | 7.8252  | 0.5184 | -0.5700 | 5.3775 | JPT |
| MGC20781  | GI_34147471-S | rs4796760  | 17 | 17 | 37431741 | 196590 | 6.0115  | 0.4178 | 0.5828  | 5.3775 | JPT |
| MGC20781  | GI_34147471-S | rs2240011  | 17 | 17 | 37447235 | 212084 | 6.9543  | 0.4804 | 0.4846  | 5.3775 | JPT |
| MGC20781  | GI_34147471-S | rs7225117  | 17 | 17 | 37451242 | 216091 | 6.9543  | 0.4804 | -0.4846 | 5.3775 | JPT |
| MGC20781  | GI_34147471-S | rs4796763  | 17 | 17 | 37458592 | 223441 | 6.9543  | 0.4804 | -0.4846 | 5.3775 | JPT |
| MGC20781  | GI_34147471-S | rs6503684  | 17 | 17 | 37460910 | 225759 | 6.9543  | 0.4804 | 0.4846  | 5.3775 | JPT |
| MGC20781  | GI_34147471-S | rs2074162  | 17 | 17 | 37468202 | 233051 | 9.1482  | 0.5987 | 0.6094  | 5.3775 | JPT |
| ProSAPiP2 | GI_7662301-S  | rs8078309  | 17 | 17 | 43129071 | 15138  | 5.9252  | 0.4527 | 0.1304  | 5.533  | JPT |
| FLJ21347  | GI_31542722-S | rs1122634  | 17 | 17 | 45976364 | 11803  | 7.0815  | 0.4875 | -0.4880 | 6.2499 | JPT |
| FLJ21347  | GI_31542722-S | rs8076632  | 17 | 17 | 45980927 | 7240   | 7.0815  | 0.4875 | -0.4880 | 6.2499 | JPT |
| FLJ21347  | GI_31542722-S | rs989128   | 17 | 17 | 45991533 | 3366   | 7.0815  | 0.4875 | 0.4880  | 6.2499 | JPT |
| RAD51C    | GI_17402895-I | rs3803753  | 17 | 17 | 53895109 | 234059 | 6.5200  | 0.4557 | 0.3571  | 5.4357 | JPT |
| RAD51C    | GI_17402895-I | rs3803752  | 17 | 17 | 53895266 | 233902 | 6.5056  | 0.4549 | -0.3563 | 5.4357 | JPT |
| RAD51C    | GI_17402895-I | rs3087762  | 17 | 17 | 53923679 | 205489 | 6.5200  | 0.4557 | 0.3571  | 5.4357 | JPT |
| RAD51C    | GI_17402895-I | rs12603808 | 17 | 17 | 53933507 | 195661 | 6.5200  | 0.4557 | -0.3571 | 5.4357 | JPT |

|        |               |            |    |    |          |        |        |        |         |        |     |
|--------|---------------|------------|----|----|----------|--------|--------|--------|---------|--------|-----|
| RAD51C | GI_17402895-I | rs2240719  | 17 | 17 | 53937476 | 191692 | 6.2674 | 0.4488 | -0.3541 | 5.4357 | JPT |
| RAD51C | GI_17402895-I | rs2007993  | 17 | 17 | 53945642 | 183526 | 6.5200 | 0.4557 | -0.3571 | 5.4357 | JPT |
| RAD51C | GI_17402895-I | rs714959   | 17 | 17 | 53983600 | 145568 | 7.3517 | 0.4939 | -0.3719 | 5.4357 | JPT |
| RAD51C | GI_17402895-I | rs7212819  | 17 | 17 | 54017973 | 111195 | 6.3495 | 0.4457 | -0.3542 | 5.4357 | JPT |
| RAD51C | GI_17402895-I | rs7210432  | 17 | 17 | 54023169 | 105999 | 8.3958 | 0.5729 | 0.4302  | 5.4357 | JPT |
| RAD51C | GI_17402895-I | rs1864754  | 17 | 17 | 54043788 | 85380  | 7.3517 | 0.4939 | 0.3719  | 5.4357 | JPT |
| RAD51C | GI_17402895-I | rs411988   | 17 | 17 | 54064033 | 65135  | 7.3517 | 0.4939 | -0.3719 | 5.4357 | JPT |
| RAD51C | GI_17402895-I | rs412000   | 17 | 17 | 54064057 | 65111  | 6.2112 | 0.4453 | -0.3381 | 5.4357 | JPT |
| RAD51C | GI_17402895-I | rs17822837 | 17 | 17 | 54092837 | 36331  | 7.3517 | 0.4939 | -0.3719 | 5.4357 | JPT |
| RAD51C | GI_17402895-I | rs2116450  | 17 | 17 | 54100560 | 28608  | 7.7184 | 0.5389 | 0.4425  | 5.4357 | JPT |
| RAD51C | GI_17402895-I | rs12939313 | 17 | 17 | 54110615 | 18553  | 7.0740 | 0.4871 | 0.3688  | 5.4357 | JPT |
| RAD51C | GI_17402895-I | rs12946522 | 17 | 17 | 54123102 | 6066   | 7.3517 | 0.4939 | -0.3719 | 5.4357 | JPT |
| RAD51C | GI_17402895-I | rs17222691 | 17 | 17 | 54126095 | 3073   | 7.0740 | 0.4871 | 0.3688  | 5.4357 | JPT |
| RAD51C | GI_17402895-I | rs17822908 | 17 | 17 | 54156777 | 27609  | 6.6266 | 0.4785 | -0.3685 | 5.4357 | JPT |
| RAD51C | GI_17402895-I | rs10515159 | 17 | 17 | 54157692 | 28524  | 7.0740 | 0.4871 | -0.3688 | 5.4357 | JPT |
| RAD51C | GI_17402894-A | rs8074016  | 17 | 17 | 54195586 | 68159  | 5.5214 | 0.3873 | 0.2922  | 5.4357 | JPT |
| RAD51C | GI_17402895-I | rs8074016  | 17 | 17 | 54195586 | 66418  | 6.2350 | 0.4312 | 0.3486  | 5.4357 | JPT |
| RAD51C | GI_17402894-A | rs7224276  | 17 | 17 | 54252826 | 125399 | 5.5074 | 0.3936 | 0.2966  | 5.4357 | JPT |
| RAD51C | GI_17402895-I | rs7224276  | 17 | 17 | 54252826 | 123658 | 5.9862 | 0.4237 | 0.3452  | 5.4357 | JPT |
| RAD51C | GI_17402894-A | rs16943326 | 17 | 17 | 54405147 | 277720 | 5.5435 | 0.3959 | 0.2972  | 5.4357 | JPT |
| RAD51C | GI_17402895-I | rs16943326 | 17 | 17 | 54405147 | 275979 | 5.9864 | 0.4238 | 0.3443  | 5.4357 | JPT |
| RAD51C | GI_17402895-I | rs12600349 | 17 | 17 | 54409027 | 279859 | 6.0278 | 0.4263 | 0.3658  | 5.4357 | JPT |
| RAD51C | GI_17402895-I | rs3809724  | 17 | 17 | 54416020 | 286852 | 6.0278 | 0.4263 | 0.3658  | 5.4357 | JPT |
| RAD51C | GI_17402895-I | rs17175663 | 17 | 17 | 54463219 | 334051 | 6.2793 | 0.4338 | -0.3694 | 5.4357 | JPT |
| FTSJ3  | GI_17017990-S | rs1376110  | 17 | 17 | 59133659 | 117173 | 5.3728 | 0.3849 | -0.2003 | 5.2128 | JPT |
| FTSJ3  | GI_17017990-S | rs721575   | 17 | 17 | 59136652 | 114180 | 5.4787 | 0.3846 | -0.2001 | 5.2128 | JPT |
| FTSJ3  | GI_17017990-S | rs3817182  | 17 | 17 | 59137640 | 113192 | 5.3728 | 0.3849 | -0.2003 | 5.2128 | JPT |
| FTSJ3  | GI_17017990-S | rs1043127  | 17 | 17 | 59144942 | 105890 | 5.3728 | 0.3849 | 0.2003  | 5.2128 | JPT |
| FTSJ3  | GI_17017990-S | rs1982400  | 17 | 17 | 59147550 | 103282 | 5.3728 | 0.3849 | -0.2003 | 5.2128 | JPT |
| FTSJ3  | GI_17017990-S | rs1470697  | 17 | 17 | 59153572 | 97260  | 5.3728 | 0.3849 | -0.2003 | 5.2128 | JPT |
| FTSJ3  | GI_17017990-S | rs2137144  | 17 | 17 | 59159339 | 91493  | 5.3728 | 0.3849 | -0.2003 | 5.2128 | JPT |
| FTSJ3  | GI_17017990-S | rs6504177  | 17 | 17 | 59166387 | 84445  | 5.4787 | 0.3846 | -0.2001 | 5.2128 | JPT |
| FTSJ3  | GI_17017990-S | rs6504178  | 17 | 17 | 59166465 | 84367  | 5.4787 | 0.3846 | -0.2001 | 5.2128 | JPT |
| FTSJ3  | GI_17017990-S | rs6504179  | 17 | 17 | 59166727 | 84105  | 5.3728 | 0.3849 | -0.2003 | 5.2128 | JPT |
| FTSJ3  | GI_17017990-S | rs11079510 | 17 | 17 | 59174634 | 76198  | 5.4787 | 0.3846 | -0.2001 | 5.2128 | JPT |
| FTSJ3  | GI_17017990-S | rs9207     | 17 | 17 | 59177631 | 73201  | 5.3785 | 0.3926 | 0.2013  | 5.2128 | JPT |
| FTSJ3  | GI_17017990-S | rs8079818  | 17 | 17 | 59178399 | 72433  | 5.3728 | 0.3849 | 0.2003  | 5.2128 | JPT |
| FTSJ3  | GI_17017990-S | rs3785572  | 17 | 17 | 59183721 | 67111  | 5.3728 | 0.3849 | -0.2003 | 5.2128 | JPT |
| FTSJ3  | GI_17017990-S | rs11654841 | 17 | 17 | 59191991 | 58841  | 5.4787 | 0.3846 | -0.2001 | 5.2128 | JPT |
| FTSJ3  | GI_17017990-S | rs3744293  | 17 | 17 | 59195520 | 55312  | 5.3728 | 0.3849 | 0.2003  | 5.2128 | JPT |
| FTSJ3  | GI_17017990-S | rs3760252  | 17 | 17 | 59205918 | 44914  | 5.6693 | 0.4040 | 0.1992  | 5.2128 | JPT |
| FTSJ3  | GI_17017990-S | rs896064   | 17 | 17 | 59214664 | 36168  | 5.6624 | 0.4111 | 0.1999  | 5.2128 | JPT |
| FTSJ3  | GI_17017990-S | rs2044125  | 17 | 17 | 59216916 | 33916  | 5.7843 | 0.4038 | -0.1991 | 5.2128 | JPT |
| FTSJ3  | GI_17017990-S | rs2584640  | 17 | 17 | 59217220 | 33612  | 5.6693 | 0.4040 | -0.1992 | 5.2128 | JPT |
| FTSJ3  | GI_17017990-S | rs2597634  | 17 | 17 | 59231876 | 18956  | 5.6693 | 0.4040 | 0.1992  | 5.2128 | JPT |
| FTSJ3  | GI_17017990-S | rs2251164  | 17 | 17 | 59237852 | 12980  | 6.2246 | 0.4809 | -0.2054 | 5.2128 | JPT |
| FTSJ3  | GI_17017990-S | rs2665823  | 17 | 17 | 59239649 | 11183  | 5.8382 | 0.4471 | 0.2058  | 5.2128 | JPT |
| FTSJ3  | GI_17017990-S | rs1062787  | 17 | 17 | 59249736 | 1096   | 5.6693 | 0.4040 | -0.1992 | 5.2128 | JPT |
| FTSJ3  | GI_17017990-S | rs1062788  | 17 | 17 | 59249859 | 973    | 5.6693 | 0.4040 | 0.1992  | 5.2128 | JPT |
| FTSJ3  | GI_17017990-S | rs1062791  | 17 | 17 | 59250219 | 613    | 5.5999 | 0.4070 | 0.2048  | 5.2128 | JPT |
| FTSJ3  | GI_17017990-S | rs894408   | 17 | 17 | 59250546 | 286    | 5.6693 | 0.4040 | -0.1992 | 5.2128 | JPT |
| FTSJ3  | GI_17017990-S | rs2727288  | 17 | 17 | 59254929 | 4097   | 5.6693 | 0.4040 | 0.1992  | 5.2128 | JPT |
| FTSJ3  | GI_17017990-S | rs2584627  | 17 | 17 | 59255171 | 4339   | 5.6693 | 0.4040 | 0.1992  | 5.2128 | JPT |
| FTSJ3  | GI_17017990-S | rs894406   | 17 | 17 | 59255389 | 4557   | 5.6693 | 0.4040 | -0.1992 | 5.2128 | JPT |
| FTSJ3  | GI_17017990-S | rs716880   | 17 | 17 | 59256554 | 5722   | 5.6693 | 0.4040 | 0.1992  | 5.2128 | JPT |
| FTSJ3  | GI_17017990-S | rs2584625  | 17 | 17 | 59257177 | 6345   | 5.6693 | 0.4040 | 0.1992  | 5.2128 | JPT |
| FTSJ3  | GI_17017990-S | rs2584624  | 17 | 17 | 59258278 | 7446   | 5.6624 | 0.4111 | -0.1999 | 5.2128 | JPT |
| FTSJ3  | GI_17017990-S | rs2665833  | 17 | 17 | 59260578 | 9746   | 5.3013 | 0.3950 | 0.2103  | 5.2128 | JPT |
| FTSJ3  | GI_17017990-S | rs968719   | 17 | 17 | 59262003 | 11171  | 5.7843 | 0.4038 | -0.1991 | 5.2128 | JPT |

|           |               |            |    |    |          |       |         |        |         |        |     |
|-----------|---------------|------------|----|----|----------|-------|---------|--------|---------|--------|-----|
| FTSJ3     | GI_17017990-S | rs2665831  | 17 | 17 | 59266124 | 15292 | 5.7843  | 0.4038 | -0.1991 | 5.2128 | JPT |
| FTSJ3     | GI_17017990-S | rs2028567  | 17 | 17 | 59269058 | 18226 | 5.6693  | 0.4040 | -0.1992 | 5.2128 | JPT |
| FTSJ3     | GI_17017990-S | rs6504187  | 17 | 17 | 59270831 | 19999 | 5.6693  | 0.4040 | -0.1992 | 5.2128 | JPT |
| FTSJ3     | GI_17017990-S | rs2665797  | 17 | 17 | 59276217 | 25385 | 5.7843  | 0.4038 | 0.1991  | 5.2128 | JPT |
| FTSJ3     | GI_17017990-S | rs2665795  | 17 | 17 | 59279004 | 28172 | 5.6278  | 0.4013 | -0.2018 | 5.2128 | JPT |
| FTSJ3     | GI_17017990-S | rs2727330  | 17 | 17 | 59279230 | 28398 | 5.7843  | 0.4038 | -0.1991 | 5.2128 | JPT |
| FTSJ3     | GI_17017990-S | rs2727276  | 17 | 17 | 59283441 | 32609 | 5.5945  | 0.4067 | 0.1985  | 5.2128 | JPT |
| FTSJ3     | GI_17017990-S | rs2584612  | 17 | 17 | 59285936 | 35104 | 5.6693  | 0.4040 | -0.1992 | 5.2128 | JPT |
| FTSJ3     | GI_17017990-S | rs2584610  | 17 | 17 | 59288515 | 37683 | 5.7843  | 0.4038 | 0.1991  | 5.2128 | JPT |
| FTSJ3     | GI_17017990-S | rs2584608  | 17 | 17 | 59290442 | 39610 | 5.7843  | 0.4038 | 0.1991  | 5.2128 | JPT |
| FTSJ3     | GI_17017990-S | rs2236737  | 17 | 17 | 59291832 | 41000 | 5.7843  | 0.4038 | -0.1991 | 5.2128 | JPT |
| FTSJ3     | GI_17017990-S | rs2236736  | 17 | 17 | 59291980 | 41148 | 5.6028  | 0.3997 | -0.2029 | 5.2128 | JPT |
| FTSJ3     | GI_17017990-S | rs2584642  | 17 | 17 | 59296159 | 45327 | 5.8516  | 0.4231 | 0.2064  | 5.2128 | JPT |
| FTSJ3     | GI_17017990-S | rs2854214  | 17 | 17 | 59299181 | 48349 | 5.7843  | 0.4038 | 0.1991  | 5.2128 | JPT |
| FTSJ3     | GI_17017990-S | rs2854213  | 17 | 17 | 59299363 | 48531 | 5.6693  | 0.4040 | 0.1992  | 5.2128 | JPT |
| FTSJ3     | GI_17017990-S | rs2854210  | 17 | 17 | 59300070 | 49238 | 5.7507  | 0.4091 | 0.2042  | 5.2128 | JPT |
| FTSJ3     | GI_17017990-S | rs2854202  | 17 | 17 | 59301275 | 50443 | 5.6693  | 0.4040 | -0.1992 | 5.2128 | JPT |
| FTSJ3     | GI_17017990-S | rs2257281  | 17 | 17 | 59302755 | 51923 | 5.6693  | 0.4040 | -0.1992 | 5.2128 | JPT |
| FLJ46603  | GI_38348363-S | rs1005645  | 17 | 17 | 72208355 | 20846 | 7.3210  | 0.5361 | -0.6587 | 6.9266 | JPT |
| FLJ46603  | GI_38348363-S | rs9900949  | 17 | 17 | 72210160 | 22651 | 8.1111  | 0.5777 | -0.6578 | 6.9266 | JPT |
| FLJ46603  | GI_38348363-S | rs4789349  | 17 | 17 | 72217936 | 30427 | 25.9917 | 0.9389 | -1.0834 | 6.9266 | JPT |
| FLJ46603  | GI_38348363-S | rs1014390  | 17 | 17 | 72224481 | 36972 | 10.6339 | 0.6507 | 0.8668  | 6.9266 | JPT |
| raptor    | GI_22094986-S | rs1062935  | 17 | 17 | 76554452 | 37    | 7.6361  | 0.5171 | 0.2100  | 5.6717 | JPT |
| LOC284184 | GI_27500527-S | rs2292182  | 17 | 17 | 76778244 | 50059 | 5.8870  | 0.4176 | 0.7787  | 5.7969 | JPT |
| LOC284184 | GI_27500527-S | rs2659030  | 17 | 17 | 76792569 | 35734 | 5.8579  | 0.4158 | 0.5055  | 5.7969 | JPT |
| LOC284184 | GI_27500527-S | rs969413   | 17 | 17 | 76810409 | 17894 | 6.0618  | 0.4284 | 0.5190  | 5.7969 | JPT |
| LOC284184 | GI_27500527-S | rs1048775  | 17 | 17 | 76816924 | 11379 | 6.2943  | 0.4424 | -0.5398 | 5.7969 | JPT |
| FLJ22175  | GI_19923616-S | rs3924327  | 17 | 17 | 77128811 | 11372 | 6.5945  | 0.4600 | -0.2974 | 5.6825 | JPT |
| LOC339229 | GI_41150782-S | rs7502869  | 17 | 17 | 77241821 | 974   | 6.1463  | 0.4335 | 0.3684  | 5.4729 | JPT |
| FN3KRP    | GI_20149679-S | rs2243523  | 17 | 17 | 78273738 | 5134  | 6.4552  | 0.4519 | 0.2518  | 5.307  | JPT |
| HSRTSBETA | GI_42544118-A | rs1004474  | 18 | 18 | 650383   | 14998 | 6.3783  | 0.4396 | 0.3068  | 6.0857 | JPT |
| HSRTSBETA | GI_42544116-I | rs2244500  | 18 | 18 | 651005   | 51387 | 13.7018 | 0.7497 | -0.5824 | 6.0857 | JPT |
| HSRTSBETA | GI_42544118-A | rs2244500  | 18 | 18 | 651005   | 14376 | 7.4503  | 0.5074 | -0.3083 | 6.0857 | JPT |
| HSRTSBETA | GI_42544116-I | rs1001761  | 18 | 18 | 652103   | 50289 | 13.7018 | 0.7497 | 0.5824  | 6.0857 | JPT |
| HSRTSBETA | GI_42544118-A | rs1001761  | 18 | 18 | 652103   | 13278 | 7.4503  | 0.5074 | 0.3083  | 6.0857 | JPT |
| HSRTSBETA | GI_42544116-I | rs2612095  | 18 | 18 | 652370   | 50022 | 14.0210 | 0.7501 | -0.5831 | 6.0857 | JPT |
| HSRTSBETA | GI_42544118-A | rs2612095  | 18 | 18 | 652370   | 13011 | 7.6133  | 0.5076 | -0.3081 | 6.0857 | JPT |
| HSRTSBETA | GI_42544116-I | rs2847149  | 18 | 18 | 656371   | 46021 | 13.7018 | 0.7497 | -0.5824 | 6.0857 | JPT |
| HSRTSBETA | GI_42544118-A | rs2847149  | 18 | 18 | 656371   | 9010  | 7.4503  | 0.5074 | -0.3083 | 6.0857 | JPT |
| HSRTSBETA | GI_42544116-I | rs15872    | 18 | 18 | 658258   | 44134 | 13.9874 | 0.7492 | 0.5766  | 6.0857 | JPT |
| HSRTSBETA | GI_42544118-A | rs15872    | 18 | 18 | 658258   | 7123  | 7.4326  | 0.4982 | 0.3021  | 6.0857 | JPT |
| HSRTSBETA | GI_42544116-I | rs2847150  | 18 | 18 | 658300   | 44092 | 13.9874 | 0.7492 | -0.5766 | 6.0857 | JPT |
| HSRTSBETA | GI_42544118-A | rs2847150  | 18 | 18 | 658300   | 7081  | 7.4326  | 0.4982 | -0.3021 | 6.0857 | JPT |
| HSRTSBETA | GI_42544116-I | rs1051527  | 18 | 18 | 658376   | 44016 | 13.9874 | 0.7492 | -0.5766 | 6.0857 | JPT |
| HSRTSBETA | GI_42544118-A | rs1051527  | 18 | 18 | 658376   | 7005  | 7.4326  | 0.4982 | -0.3021 | 6.0857 | JPT |
| HSRTSBETA | GI_42544116-I | rs2853528  | 18 | 18 | 658650   | 43742 | 13.9874 | 0.7492 | 0.5766  | 6.0857 | JPT |
| HSRTSBETA | GI_42544118-A | rs2853528  | 18 | 18 | 658650   | 6731  | 7.4326  | 0.4982 | 0.3021  | 6.0857 | JPT |
| HSRTSBETA | GI_42544116-I | rs2853532  | 18 | 18 | 660414   | 41978 | 13.6630 | 0.7487 | 0.5760  | 6.0857 | JPT |
| HSRTSBETA | GI_42544118-A | rs2853532  | 18 | 18 | 660414   | 4967  | 7.2749  | 0.4980 | 0.3024  | 6.0857 | JPT |
| HSRTSBETA | GI_42544116-I | rs2612100  | 18 | 18 | 662363   | 40029 | 15.0008 | 0.7748 | -0.5806 | 6.0857 | JPT |
| HSRTSBETA | GI_42544118-A | rs2612100  | 18 | 18 | 662363   | 3018  | 8.5203  | 0.5524 | -0.3145 | 6.0857 | JPT |
| HSRTSBETA | GI_42544116-I | rs699517   | 18 | 18 | 663016   | 39376 | 15.0008 | 0.7748 | 0.5806  | 6.0857 | JPT |
| HSRTSBETA | GI_42544118-A | rs699517   | 18 | 18 | 663016   | 2365  | 8.5203  | 0.5524 | 0.3145  | 6.0857 | JPT |
| HSRTSBETA | GI_42544116-I | rs1059384  | 18 | 18 | 663995   | 38397 | 10.9329 | 0.6987 | 0.5776  | 6.0857 | JPT |
| HSRTSBETA | GI_42544118-A | rs1059384  | 18 | 18 | 663995   | 1386  | 6.1909  | 0.4696 | 0.3250  | 6.0857 | JPT |
| HSRTSBETA | GI_42544116-I | rs3744962  | 18 | 18 | 664320   | 38072 | 8.0847  | 0.5576 | 0.5700  | 6.0857 | JPT |
| HSRTSBETA | GI_42544116-I | rs11081251 | 18 | 18 | 664440   | 37952 | 14.1963 | 0.7628 | 0.5776  | 6.0857 | JPT |
| HSRTSBETA | GI_42544118-A | rs11081251 | 18 | 18 | 664440   | 941   | 7.9618  | 0.5337 | 0.3118  | 6.0857 | JPT |
| HSRTSBETA | GI_42544116-I | rs9948583  | 18 | 18 | 665000   | 37392 | 12.4105 | 0.7120 | 0.5489  | 6.0857 | JPT |

|           |               |            |    |    |          |        |         |        |         |        |     |
|-----------|---------------|------------|----|----|----------|--------|---------|--------|---------|--------|-----|
| HSRTSBETA | GI_42544118-A | rs9948583  | 18 | 18 | 665000   | 381    | 8.4916  | 0.5596 | 0.3059  | 6.0857 | JPT |
| HSRTSBETA | GI_42544118-A | rs2276115  | 18 | 18 | 665774   | 393    | 6.7634  | 0.4697 | 0.2955  | 6.0857 | JPT |
| HSRTSBETA | GI_42544118-A | rs10502290 | 18 | 18 | 665903   | 522    | 6.6809  | 0.4571 | -0.2972 | 6.0857 | JPT |
| HSRTSBETA | GI_42544116-I | rs495139   | 18 | 18 | 666008   | 36384  | 14.8663 | 0.7795 | -0.5827 | 6.0857 | JPT |
| HSRTSBETA | GI_42544118-A | rs495139   | 18 | 18 | 666008   | 627    | 9.1672  | 0.5906 | -0.3189 | 6.0857 | JPT |
| HSRTSBETA | GI_42544118-A | rs7229142  | 18 | 18 | 667214   | 1833   | 6.6809  | 0.4571 | -0.2972 | 6.0857 | JPT |
| HSRTSBETA | GI_42544118-A | rs3819101  | 18 | 18 | 667240   | 1859   | 6.5721  | 0.4587 | 0.3019  | 6.0857 | JPT |
| HSRTSBETA | GI_42544118-A | rs2298583  | 18 | 18 | 667302   | 1921   | 6.6809  | 0.4571 | 0.2972  | 6.0857 | JPT |
| HSRTSBETA | GI_42544116-I | rs2741186  | 18 | 18 | 668947   | 33445  | 12.3536 | 0.7189 | -0.5615 | 6.0857 | JPT |
| HSRTSBETA | GI_42544118-A | rs2741186  | 18 | 18 | 668947   | 3566   | 7.4015  | 0.5133 | -0.3033 | 6.0857 | JPT |
| HSRTSBETA | GI_42544116-I | rs2612091  | 18 | 18 | 673607   | 28785  | 11.3921 | 0.6962 | -0.5579 | 6.0857 | JPT |
| HSRTSBETA | GI_42544118-A | rs2612091  | 18 | 18 | 673607   | 8226   | 6.4850  | 0.4701 | -0.3059 | 6.0857 | JPT |
| HSRTSBETA | GI_42544116-I | rs2612090  | 18 | 18 | 674766   | 27626  | 8.9897  | 0.5740 | 0.5210  | 6.0857 | JPT |
| HSRTSBETA | GI_42544116-I | rs12968285 | 18 | 18 | 682282   | 20110  | 8.9582  | 0.5993 | -0.5355 | 6.0857 | JPT |
| HSRTSBETA | GI_42544116-I | rs2305995  | 18 | 18 | 683977   | 18415  | 9.0775  | 0.6141 | 0.5372  | 6.0857 | JPT |
| HSRTSBETA | GI_42544116-I | rs2847602  | 18 | 18 | 684206   | 18186  | 15.1827 | 0.7870 | -0.5798 | 6.0857 | JPT |
| HSRTSBETA | GI_42544118-A | rs2847602  | 18 | 18 | 684206   | 18825  | 7.9921  | 0.5353 | -0.3116 | 6.0857 | JPT |
| HSRTSBETA | GI_42544116-I | rs2847325  | 18 | 18 | 693442   | 8950   | 14.8609 | 0.7794 | 0.5874  | 6.0857 | JPT |
| HSRTSBETA | GI_42544118-A | rs2847325  | 18 | 18 | 693442   | 28061  | 6.4778  | 0.4532 | 0.2891  | 6.0857 | JPT |
| HSRTSBETA | GI_42544116-I | rs2847169  | 18 | 18 | 695695   | 6697   | 15.2123 | 0.7798 | -0.5880 | 6.0857 | JPT |
| HSRTSBETA | GI_42544118-A | rs2847169  | 18 | 18 | 695695   | 30314  | 6.6179  | 0.4535 | -0.2889 | 6.0857 | JPT |
| HSRTSBETA | GI_42544116-I | rs2847327  | 18 | 18 | 696047   | 6345   | 14.6482 | 0.7906 | 0.6192  | 6.0857 | JPT |
| HSRTSBETA | GI_42544116-I | rs7235957  | 18 | 18 | 707229   | 4837   | 12.3403 | 0.7098 | -0.5944 | 6.0857 | JPT |
| HSRTSBETA | GI_42544116-I | rs8090148  | 18 | 18 | 717654   | 15262  | 12.3403 | 0.7098 | 0.5944  | 6.0857 | JPT |
| HSRTSBETA | GI_42544116-I | rs7228136  | 18 | 18 | 722017   | 19625  | 12.3403 | 0.7098 | 0.5944  | 6.0857 | JPT |
| HSRTSBETA | GI_42544116-I | rs9961743  | 18 | 18 | 732858   | 30466  | 14.5069 | 0.7871 | 0.6101  | 6.0857 | JPT |
| HSRTSBETA | GI_42544118-A | rs9961743  | 18 | 18 | 732858   | 67477  | 6.1996  | 0.4529 | 0.2999  | 6.0857 | JPT |
| HSRTSBETA | GI_42544116-I | rs3786347  | 18 | 18 | 733226   | 30834  | 12.3403 | 0.7098 | 0.5944  | 6.0857 | JPT |
| HSRTSBETA | GI_42544116-I | rs8099748  | 18 | 18 | 734114   | 31722  | 11.0442 | 0.6659 | 0.5722  | 6.0857 | JPT |
| HSRTSBETA | GI_42544116-I | rs6506511  | 18 | 18 | 740937   | 38545  | 10.8591 | 0.6591 | -0.5686 | 6.0857 | JPT |
| HSRTSBETA | GI_42544116-I | rs10460020 | 18 | 18 | 748443   | 46051  | 12.3403 | 0.7098 | -0.5944 | 6.0857 | JPT |
| HSRTSBETA | GI_42544116-I | rs3897601  | 18 | 18 | 757210   | 54818  | 9.6375  | 0.6109 | 0.5440  | 6.0857 | JPT |
| HSRTSBETA | GI_42544116-I | rs9964147  | 18 | 18 | 773325   | 70933  | 9.8828  | 0.6123 | -0.5444 | 6.0857 | JPT |
| LOC400642 | GI_42661344-S | rs7238524  | 18 | 18 | 5205596  | 30755  | 13.9281 | 0.7476 | -0.8255 | 8.2643 | JPT |
| LOC400642 | GI_42661344-S | rs2135308  | 18 | 18 | 5212146  | 24205  | 13.7484 | 0.7510 | -0.8291 | 8.2643 | JPT |
| LOC400642 | GI_42661344-S | rs11662875 | 18 | 18 | 5215681  | 20670  | 11.5802 | 0.7212 | 0.7964  | 8.2643 | JPT |
| LOC400642 | GI_42661344-S | rs3887348  | 18 | 18 | 5223105  | 13246  | 12.6336 | 0.7189 | -0.7698 | 8.2643 | JPT |
| LOC400642 | GI_42661344-S | rs17464416 | 18 | 18 | 5226747  | 9604   | 13.9281 | 0.7476 | 0.8255  | 8.2643 | JPT |
| LOC400642 | GI_42661344-S | rs8092760  | 18 | 18 | 5231500  | 4851   | 10.9040 | 0.6881 | 0.6243  | 8.2643 | JPT |
| LOC400642 | GI_42661344-S | rs4429380  | 18 | 18 | 5232053  | 4298   | 11.7980 | 0.7099 | 0.6610  | 8.2643 | JPT |
| LOC400642 | GI_42661344-S | rs12352    | 18 | 18 | 5233083  | 3268   | 12.8663 | 0.7521 | -0.6851 | 8.2643 | JPT |
| LOC400642 | GI_42661344-S | rs8089069  | 18 | 18 | 5233540  | 2811   | 11.3524 | 0.7041 | -0.6079 | 8.2643 | JPT |
| LOC400642 | GI_42661344-S | rs11877479 | 18 | 18 | 5235228  | 1123   | 12.1190 | 0.7027 | 0.6560  | 8.2643 | JPT |
| LOC400642 | GI_42661344-S | rs11877315 | 18 | 18 | 5235247  | 1104   | 12.1190 | 0.7027 | -0.6560 | 8.2643 | JPT |
| LOC400642 | GI_42661344-S | rs17379984 | 18 | 18 | 5235824  | 527    | 12.5978 | 0.7093 | -0.6450 | 8.2643 | JPT |
| LOC400642 | GI_42661344-S | rs8576     | 18 | 18 | 5236398  | 47     | 12.2566 | 0.7071 | 0.6265  | 8.2643 | JPT |
| LOC400642 | GI_42661344-S | rs9948693  | 18 | 18 | 5237432  | 1081   | 8.9019  | 0.5701 | 0.5358  | 8.2643 | JPT |
| LOC400642 | GI_42661344-S | rs11081182 | 18 | 18 | 5270470  | 34119  | 13.2891 | 0.7467 | 0.6865  | 8.2643 | JPT |
| LOC400642 | GI_42661344-S | rs11872923 | 18 | 18 | 5272442  | 36091  | 11.7582 | 0.6908 | 0.6110  | 8.2643 | JPT |
| LOC400642 | GI_42661344-S | rs12953610 | 18 | 18 | 5278695  | 42344  | 8.4392  | 0.5659 | 0.5331  | 8.2643 | JPT |
| LOC400642 | GI_42661344-S | rs2789     | 18 | 18 | 5279887  | 43536  | 8.4157  | 0.5832 | 0.5482  | 8.2643 | JPT |
| LOC400642 | GI_42661344-S | rs12522    | 18 | 18 | 5280282  | 43931  | 8.6493  | 0.5670 | -0.5323 | 8.2643 | JPT |
| LOC400642 | GI_42661344-S | rs9957892  | 18 | 18 | 5283875  | 47524  | 8.9019  | 0.5701 | -0.5358 | 8.2643 | JPT |
| LOC400642 | GI_42661344-S | rs9957907  | 18 | 18 | 5283893  | 47542  | 8.3270  | 0.6085 | -0.4597 | 8.2643 | JPT |
| LOC400642 | GI_42661344-S | rs11665417 | 18 | 18 | 5283943  | 47592  | 8.9019  | 0.5701 | 0.5358  | 8.2643 | JPT |
| LOC400642 | GI_42661344-S | rs9945680  | 18 | 18 | 5284323  | 47972  | 8.7240  | 0.5705 | -0.5377 | 8.2643 | JPT |
| TAF4B     | GI_37545625-S | rs7228427  | 18 | 18 | 22572837 | 347689 | 6.1161  | 0.4317 | -0.4007 | 5.6866 | JPT |
| TAF4B     | GI_37545625-S | rs7241576  | 18 | 18 | 22577748 | 352600 | 6.1161  | 0.4317 | 0.4007  | 5.6866 | JPT |
| FECH      | GI_4557592-S  | rs317807   | 18 | 18 | 53401668 | 33429  | 6.3717  | 0.4392 | -0.3283 | 5.8768 | JPT |

|      |               |            |    |    |          |        |        |        |         |        |     |
|------|---------------|------------|----|----|----------|--------|--------|--------|---------|--------|-----|
| FECH | GI_4557592-S  | rs492274   | 18 | 18 | 53401892 | 33653  | 6.2785 | 0.4415 | 0.3289  | 5.8768 | JPT |
| FECH | GI_4557592-S  | rs317814   | 18 | 18 | 53403611 | 35372  | 6.2785 | 0.4415 | 0.3289  | 5.8768 | JPT |
| PIGN | GI_34328903-A | rs659894   | 18 | 18 | 57845899 | 17091  | 8.2653 | 0.5402 | -0.5217 | 5.8435 | JPT |
| PIGN | GI_34328903-A | rs565610   | 18 | 18 | 57848576 | 14414  | 8.2654 | 0.5488 | 0.5274  | 5.8435 | JPT |
| PIGN | GI_34328903-A | rs2003066  | 18 | 18 | 57853994 | 8996   | 6.7690 | 0.4620 | -0.2923 | 5.8435 | JPT |
| PIGN | GI_34328903-A | rs974901   | 18 | 18 | 57854418 | 8572   | 6.4904 | 0.4621 | 0.2956  | 5.8435 | JPT |
| PIGN | GI_34328903-A | rs7243674  | 18 | 18 | 57855848 | 7142   | 6.0323 | 0.4266 | -0.3249 | 5.8435 | JPT |
| PIGN | GI_34328903-A | rs11152327 | 18 | 18 | 57859445 | 3545   | 6.6292 | 0.4620 | 0.2933  | 5.8435 | JPT |
| PIGN | GI_34328903-A | rs3829634  | 18 | 18 | 57861307 | 1683   | 6.6292 | 0.4620 | 0.2933  | 5.8435 | JPT |
| PIGN | GI_34328903-A | rs9636100  | 18 | 18 | 57862290 | 700    | 6.6292 | 0.4620 | -0.2933 | 5.8435 | JPT |
| PIGN | GI_34328903-A | rs1116258  | 18 | 18 | 57865771 | 2781   | 6.6292 | 0.4620 | -0.2933 | 5.8435 | JPT |
| PIGN | GI_34328903-A | rs9966853  | 18 | 18 | 57871310 | 8320   | 6.5531 | 0.4576 | 0.2671  | 5.8435 | JPT |
| PIGN | GI_34328903-A | rs1594487  | 18 | 18 | 57871964 | 8974   | 7.3032 | 0.4995 | 0.3534  | 5.8435 | JPT |
| PIGN | GI_34328903-A | rs11659635 | 18 | 18 | 57875230 | 12240  | 6.7690 | 0.4620 | -0.2923 | 5.8435 | JPT |
| PIGN | GI_34328903-A | rs11663976 | 18 | 18 | 57877093 | 14103  | 6.6292 | 0.4620 | -0.2933 | 5.8435 | JPT |
| PIGN | GI_34328903-A | rs12605762 | 18 | 18 | 57877890 | 14900  | 6.7690 | 0.4620 | -0.2923 | 5.8435 | JPT |
| PIGN | GI_34328903-A | rs879656   | 18 | 18 | 57878366 | 15376  | 6.6292 | 0.4620 | -0.2933 | 5.8435 | JPT |
| PIGN | GI_34328903-A | rs891690   | 18 | 18 | 57879013 | 16023  | 6.6292 | 0.4620 | -0.2933 | 5.8435 | JPT |
| PIGN | GI_34328903-A | rs948687   | 18 | 18 | 57882714 | 19724  | 7.3032 | 0.4995 | 0.3534  | 5.8435 | JPT |
| PIGN | GI_34328903-A | rs543977   | 18 | 18 | 57882935 | 19945  | 8.2653 | 0.5402 | -0.5217 | 5.8435 | JPT |
| PIGN | GI_34328903-A | rs9965630  | 18 | 18 | 57883254 | 20264  | 6.6292 | 0.4620 | 0.2933  | 5.8435 | JPT |
| PIGN | GI_34328903-A | rs12458329 | 18 | 18 | 57885724 | 22734  | 6.6292 | 0.4620 | 0.2933  | 5.8435 | JPT |
| PIGN | GI_34328903-A | rs1653224  | 18 | 18 | 57886197 | 23207  | 8.2653 | 0.5402 | 0.5217  | 5.8435 | JPT |
| PIGN | GI_34328903-A | rs1030582  | 18 | 18 | 57886440 | 23450  | 6.6292 | 0.4620 | 0.2933  | 5.8435 | JPT |
| PIGN | GI_34328903-A | rs4941107  | 18 | 18 | 57902311 | 39321  | 7.3032 | 0.4995 | -0.3534 | 5.8435 | JPT |
| PIGN | GI_34328903-A | rs633490   | 18 | 18 | 57909790 | 46800  | 8.0468 | 0.5467 | -0.5208 | 5.8435 | JPT |
| PIGN | GI_34328903-A | rs583873   | 18 | 18 | 57913569 | 50579  | 7.5704 | 0.5137 | -0.5125 | 5.8435 | JPT |
| PIGN | GI_34328903-A | rs655080   | 18 | 18 | 57917416 | 54426  | 8.2654 | 0.5488 | -0.5274 | 5.8435 | JPT |
| PIGN | GI_34328903-A | rs9955716  | 18 | 18 | 57930101 | 67111  | 7.3032 | 0.4995 | -0.3534 | 5.8435 | JPT |
| PIGN | GI_34328903-A | rs17714818 | 18 | 18 | 57930689 | 67699  | 6.8526 | 0.5004 | 0.5225  | 5.8435 | JPT |
| PIGN | GI_34328903-A | rs4602128  | 18 | 18 | 57940356 | 77366  | 8.2653 | 0.5402 | -0.5217 | 5.8435 | JPT |
| PIGN | GI_34328903-A | rs17715425 | 18 | 18 | 57944675 | 81685  | 7.3933 | 0.5129 | -0.5296 | 5.8435 | JPT |
| PIGN | GI_34328903-A | rs17715489 | 18 | 18 | 57945238 | 82248  | 6.0529 | 0.4357 | -0.4599 | 5.8435 | JPT |
| PIGN | GI_34328903-A | rs3851141  | 18 | 18 | 57974715 | 111725 | 6.1621 | 0.4505 | 0.3584  | 5.8435 | JPT |
| PIGN | GI_34328903-A | rs3851142  | 18 | 18 | 57974865 | 111875 | 6.4983 | 0.4544 | 0.3619  | 5.8435 | JPT |
| PIGN | GI_34328903-A | rs1021952  | 18 | 18 | 57975189 | 112199 | 6.4620 | 0.4445 | -0.3562 | 5.8435 | JPT |
| PIGN | GI_34328903-A | rs1021953  | 18 | 18 | 57975470 | 112480 | 6.4983 | 0.4544 | -0.3619 | 5.8435 | JPT |
| PIGN | GI_34328903-A | rs931843   | 18 | 18 | 57976498 | 113508 | 6.3974 | 0.4485 | 0.3598  | 5.8435 | JPT |
| PIGN | GI_34328903-A | rs7505932  | 18 | 18 | 57976806 | 113816 | 6.4983 | 0.4544 | 0.3619  | 5.8435 | JPT |
| PIGN | GI_34328903-A | rs3794908  | 18 | 18 | 57979749 | 116759 | 6.4983 | 0.4544 | 0.3619  | 5.8435 | JPT |
| PIGN | GI_34328903-A | rs4468721  | 18 | 18 | 57980152 | 117162 | 6.4983 | 0.4544 | 0.3619  | 5.8435 | JPT |
| PIGN | GI_34328903-A | rs9953509  | 18 | 18 | 57982442 | 119452 | 6.4983 | 0.4544 | 0.3619  | 5.8435 | JPT |
| PIGN | GI_34328903-A | rs4941116  | 18 | 18 | 57986988 | 123998 | 6.4620 | 0.4445 | 0.3562  | 5.8435 | JPT |
| PIGN | GI_34328903-A | rs4941117  | 18 | 18 | 57987385 | 124395 | 6.4983 | 0.4544 | -0.3619 | 5.8435 | JPT |
| PIGN | GI_34328903-A | rs17716459 | 18 | 18 | 57991184 | 128194 | 6.4620 | 0.4445 | -0.3562 | 5.8435 | JPT |
| PIGN | GI_34328903-A | rs1567040  | 18 | 18 | 57992601 | 129611 | 6.4983 | 0.4544 | 0.3619  | 5.8435 | JPT |
| PIGN | GI_34328903-A | rs1126080  | 18 | 18 | 57993073 | 130083 | 6.4983 | 0.4544 | 0.3619  | 5.8435 | JPT |
| PIGN | GI_34328903-A | rs4245289  | 18 | 18 | 57993542 | 130552 | 6.4983 | 0.4544 | -0.3619 | 5.8435 | JPT |
| PIGN | GI_34328903-A | rs4245290  | 18 | 18 | 57994054 | 131064 | 6.4983 | 0.4544 | 0.3619  | 5.8435 | JPT |
| PIGN | GI_34328903-A | rs12456615 | 18 | 18 | 57996896 | 133906 | 6.1305 | 0.4749 | -0.4208 | 5.8435 | JPT |
| PIGN | GI_34328903-A | rs12608383 | 18 | 18 | 57996910 | 133920 | 6.3243 | 0.4605 | 0.3540  | 5.8435 | JPT |
| PIGN | GI_34328903-A | rs1605230  | 18 | 18 | 57997375 | 134385 | 6.4983 | 0.4544 | -0.3619 | 5.8435 | JPT |
| PIGN | GI_34328903-A | rs994332   | 18 | 18 | 57998878 | 135888 | 5.9445 | 0.4212 | 0.4805  | 5.8435 | JPT |
| PIGN | GI_34328903-A | rs9945824  | 18 | 18 | 57999776 | 136786 | 6.4620 | 0.4445 | 0.3562  | 5.8435 | JPT |
| PIGN | GI_34328903-A | rs2089313  | 18 | 18 | 58000521 | 137531 | 6.4983 | 0.4544 | -0.3619 | 5.8435 | JPT |
| PIGN | GI_34328903-A | rs7235710  | 18 | 18 | 58003081 | 140091 | 6.4983 | 0.4544 | 0.3619  | 5.8435 | JPT |
| PIGN | GI_34328903-A | rs10439025 | 18 | 18 | 58003712 | 140722 | 6.4983 | 0.4544 | 0.3619  | 5.8435 | JPT |
| PIGN | GI_34328903-A | rs11662963 | 18 | 18 | 58018716 | 155726 | 5.9636 | 0.4149 | -0.4755 | 5.8435 | JPT |
| PIGN | GI_34328903-A | rs9956180  | 18 | 18 | 58043161 | 180171 | 5.9445 | 0.4212 | -0.4805 | 5.8435 | JPT |

|           |               |            |    |    |          |        |         |        |         |        |     |
|-----------|---------------|------------|----|----|----------|--------|---------|--------|---------|--------|-----|
| PIGN      | GI_34328903-A | rs4941122  | 18 | 18 | 58058043 | 195053 | 5.9445  | 0.4212 | -0.4805 | 5.8435 | JPT |
| PIGN      | GI_34328903-A | rs9945414  | 18 | 18 | 58079989 | 216999 | 5.9445  | 0.4212 | -0.4805 | 5.8435 | JPT |
| PIGN      | GI_34328903-A | rs17645961 | 18 | 18 | 58086928 | 223938 | 5.9636  | 0.4149 | -0.4755 | 5.8435 | JPT |
| PIGN      | GI_34328903-A | rs4940550  | 18 | 18 | 58096152 | 233162 | 5.9445  | 0.4212 | -0.4805 | 5.8435 | JPT |
| PIGN      | GI_34328903-A | rs2980980  | 18 | 18 | 58097548 | 234558 | 6.4983  | 0.4544 | -0.3619 | 5.8435 | JPT |
| PIGN      | GI_34328903-A | rs8084388  | 18 | 18 | 58110302 | 247312 | 5.9445  | 0.4212 | -0.4805 | 5.8435 | JPT |
| PIGN      | GI_34328903-A | rs17646954 | 18 | 18 | 58110826 | 247836 | 5.9636  | 0.4149 | -0.4755 | 5.8435 | JPT |
| PIGN      | GI_34328903-A | rs17719830 | 18 | 18 | 58117169 | 254179 | 5.9636  | 0.4149 | -0.4755 | 5.8435 | JPT |
| PIGN      | GI_34328903-A | rs12457042 | 18 | 18 | 58144433 | 281443 | 5.9445  | 0.4212 | 0.4805  | 5.8435 | JPT |
| PIGN      | GI_34328903-A | rs4429388  | 18 | 18 | 58149472 | 286482 | 5.9636  | 0.4149 | 0.4755  | 5.8435 | JPT |
| LOC284293 | GI_27485378-S | rs9944887  | 18 | 18 | 59665948 | 105638 | 9.0434  | 0.6528 | 1.0015  | 6.7095 | JPT |
| LOC284293 | GI_27485378-S | rs9959974  | 18 | 18 | 59666056 | 105530 | 7.4882  | 0.5267 | 0.8059  | 6.7095 | JPT |
| LOC284293 | GI_27485378-S | rs9945681  | 18 | 18 | 59666101 | 105485 | 9.6957  | 0.6505 | -0.9872 | 6.7095 | JPT |
| LOC284293 | GI_27485378-S | rs17071932 | 18 | 18 | 59666204 | 105382 | 9.2003  | 0.6010 | -0.9185 | 6.7095 | JPT |
| LOC284293 | GI_27485378-S | rs9960785  | 18 | 18 | 59667093 | 104493 | 10.0533 | 0.6751 | -1.0004 | 6.7095 | JPT |
| LOC284293 | GI_27485378-S | rs9951203  | 18 | 18 | 59667720 | 103866 | 10.9196 | 0.6526 | 0.9621  | 6.7095 | JPT |
| LOC284293 | GI_27485378-S | rs9963905  | 18 | 18 | 59667857 | 103729 | 8.2086  | 0.6026 | -0.9387 | 6.7095 | JPT |
| LOC284293 | GI_27485378-S | rs9320028  | 18 | 18 | 59668150 | 103436 | 10.6058 | 0.6496 | -0.9589 | 6.7095 | JPT |
| LOC284293 | GI_27485378-S | rs8091518  | 18 | 18 | 59679155 | 92431  | 10.6058 | 0.6496 | -0.9589 | 6.7095 | JPT |
| SERPINB10 | GI_4826901-S  | rs8091945  | 18 | 18 | 59680510 | 72682  | 7.3469  | 0.4936 | -0.7839 | 6.069  | JPT |
| LOC284293 | GI_27485378-S | rs9966495  | 18 | 18 | 59690850 | 80736  | 10.3674 | 0.6586 | 0.9774  | 6.7095 | JPT |
| LOC284293 | GI_27485378-S | rs9951512  | 18 | 18 | 59690885 | 80701  | 10.9196 | 0.6526 | 0.9621  | 6.7095 | JPT |
| LOC284293 | GI_27485378-S | rs9954175  | 18 | 18 | 59691368 | 80218  | 10.6058 | 0.6496 | -0.9589 | 6.7095 | JPT |
| SERPINB10 | GI_4826901-S  | rs9957643  | 18 | 18 | 59692597 | 60595  | 7.2861  | 0.4986 | -0.7992 | 6.069  | JPT |
| SERPINB10 | GI_4826901-S  | rs6567399  | 18 | 18 | 59695526 | 57666  | 7.2861  | 0.4986 | 0.7992  | 6.069  | JPT |
| SERPINB10 | GI_4826901-S  | rs9951931  | 18 | 18 | 59697930 | 55262  | 7.3469  | 0.4936 | 0.7839  | 6.069  | JPT |
| SERPINB10 | GI_4826901-S  | rs9966459  | 18 | 18 | 59698270 | 54922  | 7.3469  | 0.4936 | 0.7839  | 6.069  | JPT |
| SERPINB10 | GI_4826901-S  | rs8096886  | 18 | 18 | 59698513 | 54679  | 7.2861  | 0.4986 | -0.7992 | 6.069  | JPT |
| LOC284293 | GI_27485378-S | rs10513933 | 18 | 18 | 59699669 | 71917  | 10.6058 | 0.6496 | -0.9589 | 6.7095 | JPT |
| SERPINB10 | GI_4826901-S  | rs8097621  | 18 | 18 | 59700202 | 52990  | 7.3469  | 0.4936 | -0.7839 | 6.069  | JPT |
| SERPINB10 | GI_4826901-S  | rs9946657  | 18 | 18 | 59701565 | 51627  | 8.8742  | 0.5774 | 0.8698  | 6.069  | JPT |
| LOC284293 | GI_27485378-S | rs9959513  | 18 | 18 | 59701863 | 69723  | 11.5777 | 0.6760 | -0.9679 | 6.7095 | JPT |
| SERPINB10 | GI_4826901-S  | rs9959513  | 18 | 18 | 59701863 | 51329  | 6.1718  | 0.4274 | 0.8035  | 6.069  | JPT |
| SERPINB10 | GI_4826901-S  | rs9964989  | 18 | 18 | 59702589 | 50603  | 8.8925  | 0.5696 | -0.8506 | 6.069  | JPT |
| SERPINB10 | GI_4826901-S  | rs3760574  | 18 | 18 | 59703505 | 49687  | 8.8742  | 0.5774 | -0.8698 | 6.069  | JPT |
| SERPINB10 | GI_4826901-S  | rs2288287  | 18 | 18 | 59706274 | 46918  | 8.8742  | 0.5774 | -0.8698 | 6.069  | JPT |
| SERPINB10 | GI_4826901-S  | rs1025196  | 18 | 18 | 59708650 | 44542  | 8.8742  | 0.5774 | -0.8698 | 6.069  | JPT |
| SERPINB10 | GI_4826901-S  | rs6095     | 18 | 18 | 59709636 | 43556  | 8.8925  | 0.5696 | 0.8506  | 6.069  | JPT |
| SERPINB10 | GI_4826901-S  | rs6094     | 18 | 18 | 59709862 | 43330  | 8.8742  | 0.5774 | -0.8698 | 6.069  | JPT |
| SERPINB10 | GI_4826901-S  | rs9320029  | 18 | 18 | 59710543 | 42649  | 8.5597  | 0.5628 | -0.8535 | 6.069  | JPT |
| SERPINB10 | GI_4826901-S  | rs9630856  | 18 | 18 | 59710691 | 42501  | 8.8925  | 0.5696 | 0.8506  | 6.069  | JPT |
| SERPINB10 | GI_4826901-S  | rs9630857  | 18 | 18 | 59710766 | 42426  | 7.9873  | 0.5527 | -0.8669 | 6.069  | JPT |
| SERPINB10 | GI_4826901-S  | rs9951333  | 18 | 18 | 59711133 | 42059  | 9.2301  | 0.5934 | -0.8632 | 6.069  | JPT |
| SERPINB10 | GI_4826901-S  | rs9320030  | 18 | 18 | 59711516 | 41676  | 7.6407  | 0.5348 | 0.8380  | 6.069  | JPT |
| SERPINB10 | GI_4826901-S  | rs9320031  | 18 | 18 | 59711631 | 41561  | 8.7976  | 0.5739 | -0.8556 | 6.069  | JPT |
| SERPINB10 | GI_4826901-S  | rs9636040  | 18 | 18 | 59712103 | 41089  | 8.9941  | 0.6103 | 0.8665  | 6.069  | JPT |
| LOC284293 | GI_27485378-S | rs9320032  | 18 | 18 | 59712191 | 59395  | 9.8844  | 0.6212 | 0.9205  | 6.7095 | JPT |
| SERPINB10 | GI_4826901-S  | rs9320032  | 18 | 18 | 59712191 | 41001  | 6.8868  | 0.4767 | -0.8421 | 6.069  | JPT |
| SERPINB10 | GI_4826901-S  | rs3786335  | 18 | 18 | 59712501 | 40691  | 8.8742  | 0.5774 | -0.8698 | 6.069  | JPT |
| SERPINB10 | GI_4826901-S  | rs7233370  | 18 | 18 | 59713351 | 39841  | 8.8925  | 0.5696 | -0.8506 | 6.069  | JPT |
| SERPINB10 | GI_4826901-S  | rs7229383  | 18 | 18 | 59713371 | 39821  | 8.8925  | 0.5696 | 0.8506  | 6.069  | JPT |
| SERPINB10 | GI_4826901-S  | rs2140453  | 18 | 18 | 59713769 | 39423  | 8.1554  | 0.5521 | 0.8477  | 6.069  | JPT |
| SERPINB10 | GI_4826901-S  | rs1916662  | 18 | 18 | 59714021 | 39171  | 8.8925  | 0.5696 | 0.8506  | 6.069  | JPT |
| SERPINB10 | GI_4826901-S  | rs3819335  | 18 | 18 | 59714172 | 39020  | 8.8742  | 0.5774 | -0.8698 | 6.069  | JPT |
| SERPINB10 | GI_4826901-S  | rs1532886  | 18 | 18 | 59714445 | 38747  | 8.8742  | 0.5774 | -0.8698 | 6.069  | JPT |
| SERPINB10 | GI_4826901-S  | rs1532887  | 18 | 18 | 59714686 | 38506  | 8.8742  | 0.5774 | 0.8698  | 6.069  | JPT |
| SERPINB10 | GI_4826901-S  | rs1532889  | 18 | 18 | 59714820 | 38372  | 8.8742  | 0.5774 | 0.8698  | 6.069  | JPT |
| SERPINB10 | GI_4826901-S  | rs2332874  | 18 | 18 | 59714990 | 38202  | 8.8742  | 0.5774 | 0.8698  | 6.069  | JPT |
| SERPINB10 | GI_4826901-S  | rs2114380  | 18 | 18 | 59715086 | 38106  | 8.8742  | 0.5774 | 0.8698  | 6.069  | JPT |

|           |               |            |    |    |          |       |         |        |         |        |     |
|-----------|---------------|------------|----|----|----------|-------|---------|--------|---------|--------|-----|
| SERPINB10 | GI_4826901-S  | rs6098     | 18 | 18 | 59715374 | 37818 | 8.8742  | 0.5774 | 0.8698  | 6.069  | JPT |
| SERPINB10 | GI_4826901-S  | rs2278180  | 18 | 18 | 59715493 | 37699 | 8.8742  | 0.5774 | -0.8698 | 6.069  | JPT |
| SERPINB10 | GI_4826901-S  | rs2278179  | 18 | 18 | 59715512 | 37680 | 8.8925  | 0.5696 | -0.8506 | 6.069  | JPT |
| SERPINB10 | GI_4826901-S  | rs2278178  | 18 | 18 | 59715569 | 37623 | 8.8925  | 0.5696 | 0.8506  | 6.069  | JPT |
| SERPINB10 | GI_4826901-S  | rs2278177  | 18 | 18 | 59715590 | 37602 | 8.9491  | 0.5808 | -0.8372 | 6.069  | JPT |
| SERPINB10 | GI_4826901-S  | rs1916658  | 18 | 18 | 59715759 | 37433 | 8.8742  | 0.5774 | 0.8698  | 6.069  | JPT |
| SERPINB10 | GI_4826901-S  | rs1916659  | 18 | 18 | 59716188 | 37004 | 8.8742  | 0.5774 | -0.8698 | 6.069  | JPT |
| SERPINB10 | GI_4826901-S  | rs9947143  | 18 | 18 | 59716517 | 36675 | 8.8742  | 0.5774 | -0.8698 | 6.069  | JPT |
| SERPINB10 | GI_4826901-S  | rs9955420  | 18 | 18 | 59716790 | 36402 | 9.5393  | 0.6067 | -0.8300 | 6.069  | JPT |
| SERPINB10 | GI_4826901-S  | rs4599014  | 18 | 18 | 59716905 | 36287 | 8.9522  | 0.5810 | -0.8599 | 6.069  | JPT |
| SERPINB10 | GI_4826901-S  | rs9950615  | 18 | 18 | 59717558 | 35634 | 8.8265  | 0.5753 | -0.8397 | 6.069  | JPT |
| LOC284293 | GI_27485378-S | rs7505052  | 18 | 18 | 59717646 | 53940 | 10.1922 | 0.6248 | -0.9233 | 6.7095 | JPT |
| SERPINB10 | GI_4826901-S  | rs7505052  | 18 | 18 | 59717646 | 35546 | 7.0465  | 0.4774 | 0.8392  | 6.069  | JPT |
| SERPINB10 | GI_4826901-S  | rs4349246  | 18 | 18 | 59717712 | 35480 | 6.3671  | 0.4898 | 0.8181  | 6.069  | JPT |
| SERPINB10 | GI_4826901-S  | rs2332875  | 18 | 18 | 59718067 | 35125 | 8.4699  | 0.5674 | 0.8684  | 6.069  | JPT |
| SERPINB10 | GI_4826901-S  | rs1544897  | 18 | 18 | 59718440 | 34752 | 8.1338  | 0.5423 | -0.8214 | 6.069  | JPT |
| SERPINB10 | GI_4826901-S  | rs1544896  | 18 | 18 | 59718461 | 34731 | 8.2049  | 0.5373 | -0.8071 | 6.069  | JPT |
| SERPINB10 | GI_4826901-S  | rs1544895  | 18 | 18 | 59718636 | 34556 | 8.8925  | 0.5696 | 0.8506  | 6.069  | JPT |
| SERPINB10 | GI_4826901-S  | rs1544894  | 18 | 18 | 59718761 | 34431 | 8.8742  | 0.5774 | -0.8698 | 6.069  | JPT |
| SERPINB10 | GI_4826901-S  | rs1544893  | 18 | 18 | 59718952 | 34240 | 8.8742  | 0.5774 | -0.8698 | 6.069  | JPT |
| SERPINB10 | GI_4826901-S  | rs10513932 | 18 | 18 | 59719294 | 33898 | 8.8742  | 0.5774 | 0.8698  | 6.069  | JPT |
| SERPINB10 | GI_4826901-S  | rs1916660  | 18 | 18 | 59719849 | 33343 | 8.8742  | 0.5774 | 0.8698  | 6.069  | JPT |
| SERPINB10 | GI_4826901-S  | rs1015416  | 18 | 18 | 59720363 | 32829 | 8.8925  | 0.5696 | -0.8506 | 6.069  | JPT |
| SERPINB10 | GI_4826901-S  | rs1863583  | 18 | 18 | 59720523 | 32669 | 8.7662  | 0.5905 | 0.8497  | 6.069  | JPT |
| LOC284293 | GI_27485378-S | rs6102     | 18 | 18 | 59721450 | 50136 | 9.8844  | 0.6212 | 0.9205  | 6.7095 | JPT |
| SERPINB10 | GI_4826901-S  | rs6102     | 18 | 18 | 59721450 | 31742 | 6.8868  | 0.4767 | -0.8421 | 6.069  | JPT |
| SERPINB10 | GI_4826901-S  | rs6103     | 18 | 18 | 59721483 | 31709 | 8.8742  | 0.5774 | 0.8698  | 6.069  | JPT |
| SERPINB10 | GI_4826901-S  | rs6104     | 18 | 18 | 59721509 | 31683 | 8.8742  | 0.5774 | 0.8698  | 6.069  | JPT |
| SERPINB10 | GI_4826901-S  | rs12102    | 18 | 18 | 59721962 | 31230 | 8.8742  | 0.5774 | -0.8698 | 6.069  | JPT |
| SERPINB10 | GI_4826901-S  | rs2114378  | 18 | 18 | 59722179 | 31013 | 8.8742  | 0.5774 | 0.8698  | 6.069  | JPT |
| SERPINB10 | GI_4826901-S  | rs2140452  | 18 | 18 | 59722502 | 30690 | 8.8742  | 0.5774 | -0.8698 | 6.069  | JPT |
| LOC284293 | GI_27485378-S | rs2332876  | 18 | 18 | 59722566 | 49020 | 15.6103 | 0.8045 | -0.8740 | 6.7095 | JPT |
| SERPINB10 | GI_4826901-S  | rs2332876  | 18 | 18 | 59722566 | 30626 | 7.6665  | 0.5273 | 0.8483  | 6.069  | JPT |
| SERPINB10 | GI_4826901-S  | rs7231714  | 18 | 18 | 59725580 | 27612 | 8.8742  | 0.5774 | -0.8698 | 6.069  | JPT |
| SERPINB10 | GI_4826901-S  | rs1006961  | 18 | 18 | 59726212 | 26980 | 8.8742  | 0.5774 | -0.8698 | 6.069  | JPT |
| SERPINB10 | GI_4826901-S  | rs1006960  | 18 | 18 | 59726552 | 26640 | 8.8925  | 0.5696 | 0.8506  | 6.069  | JPT |
| SERPINB10 | GI_4826901-S  | rs8089365  | 18 | 18 | 59726987 | 26205 | 8.8925  | 0.5696 | 0.8506  | 6.069  | JPT |
| SERPINB10 | GI_4826901-S  | rs9948717  | 18 | 18 | 59727086 | 26106 | 7.1000  | 0.5432 | 0.8473  | 6.069  | JPT |
| LOC284293 | GI_27485378-S | rs9963851  | 18 | 18 | 59728021 | 43565 | 10.9157 | 0.6701 | -0.9638 | 6.7095 | JPT |
| SERPINB10 | GI_4826901-S  | rs9963851  | 18 | 18 | 59728021 | 25171 | 6.5366  | 0.4648 | 0.8326  | 6.069  | JPT |
| SERPINB10 | GI_4826901-S  | rs9966367  | 18 | 18 | 59728271 | 24921 | 8.4912  | 0.5596 | 0.8345  | 6.069  | JPT |
| LOC284293 | GI_27485378-S | rs4499334  | 18 | 18 | 59729788 | 41798 | 10.5155 | 0.6832 | 0.8992  | 6.7095 | JPT |
| LOC284293 | GI_27485378-S | rs12717154 | 18 | 18 | 59730261 | 41325 | 11.5777 | 0.6760 | -0.9679 | 6.7095 | JPT |
| SERPINB10 | GI_4826901-S  | rs12717154 | 18 | 18 | 59730261 | 22931 | 6.1718  | 0.4274 | 0.8035  | 6.069  | JPT |
| LOC284293 | GI_27485378-S | rs13371114 | 18 | 18 | 59730357 | 41229 | 11.5777 | 0.6760 | 0.9679  | 6.7095 | JPT |
| SERPINB10 | GI_4826901-S  | rs13371114 | 18 | 18 | 59730357 | 22835 | 6.1718  | 0.4274 | -0.8035 | 6.069  | JPT |
| LOC284293 | GI_27485378-S | rs12327005 | 18 | 18 | 59731116 | 40470 | 11.5777 | 0.6760 | 0.9679  | 6.7095 | JPT |
| SERPINB10 | GI_4826901-S  | rs12327005 | 18 | 18 | 59731116 | 22076 | 6.1718  | 0.4274 | -0.8035 | 6.069  | JPT |
| SERPINB10 | GI_4826901-S  | rs12327162 | 18 | 18 | 59731189 | 22003 | 8.6205  | 0.5657 | -0.8489 | 6.069  | JPT |
| LOC284293 | GI_27485378-S | rs12327006 | 18 | 18 | 59731314 | 40272 | 10.9421 | 0.6711 | -0.9839 | 6.7095 | JPT |
| LOC284293 | GI_27485378-S | rs12327173 | 18 | 18 | 59731522 | 40064 | 10.1922 | 0.6248 | 0.9233  | 6.7095 | JPT |
| SERPINB10 | GI_4826901-S  | rs12327173 | 18 | 18 | 59731522 | 21670 | 7.0465  | 0.4774 | -0.8392 | 6.069  | JPT |
| SERPINB10 | GI_4826901-S  | rs8086765  | 18 | 18 | 59731581 | 21611 | 8.5744  | 0.5635 | 0.8209  | 6.069  | JPT |
| LOC284293 | GI_27485378-S | rs8085904  | 18 | 18 | 59731660 | 39926 | 11.5777 | 0.6760 | 0.9679  | 6.7095 | JPT |
| SERPINB10 | GI_4826901-S  | rs8085904  | 18 | 18 | 59731660 | 21532 | 6.1718  | 0.4274 | -0.8035 | 6.069  | JPT |
| SERPINB10 | GI_4826901-S  | rs7241748  | 18 | 18 | 59733108 | 20084 | 8.0305  | 0.5372 | -0.8391 | 6.069  | JPT |
| LOC284293 | GI_27485378-S | rs9952843  | 18 | 18 | 59733245 | 38341 | 11.5777 | 0.6760 | 0.9679  | 6.7095 | JPT |
| SERPINB10 | GI_4826901-S  | rs9952843  | 18 | 18 | 59733245 | 19947 | 6.1718  | 0.4274 | -0.8035 | 6.069  | JPT |
| LOC284293 | GI_27485378-S | rs9953733  | 18 | 18 | 59733477 | 38109 | 11.5777 | 0.6760 | 0.9679  | 6.7095 | JPT |

|           |               |            |    |    |          |       |         |        |         |        |     |
|-----------|---------------|------------|----|----|----------|-------|---------|--------|---------|--------|-----|
| SERPINB10 | GI_4826901-S  | rs9953733  | 18 | 18 | 59733477 | 19715 | 6.1718  | 0.4274 | -0.8035 | 6.069  | JPT |
| LOC284293 | GI_27485378-S | rs17072097 | 18 | 18 | 59733731 | 37855 | 11.5777 | 0.6760 | 0.9679  | 6.7095 | JPT |
| SERPINB10 | GI_4826901-S  | rs17072097 | 18 | 18 | 59733731 | 19461 | 6.1718  | 0.4274 | -0.8035 | 6.069  | JPT |
| SERPINB10 | GI_4826901-S  | rs8097425  | 18 | 18 | 59733847 | 19345 | 8.6205  | 0.5657 | 0.8489  | 6.069  | JPT |
| LOC284293 | GI_27485378-S | rs17072102 | 18 | 18 | 59734053 | 37533 | 11.5777 | 0.6760 | 0.9679  | 6.7095 | JPT |
| SERPINB10 | GI_4826901-S  | rs17072102 | 18 | 18 | 59734053 | 19139 | 6.1718  | 0.4274 | -0.8035 | 6.069  | JPT |
| SERPINB10 | GI_4826901-S  | rs8084931  | 18 | 18 | 59735061 | 18131 | 8.1538  | 0.5799 | 0.8055  | 6.069  | JPT |
| LOC284293 | GI_27485378-S | rs17072109 | 18 | 18 | 59735622 | 35964 | 10.1922 | 0.6248 | -0.9233 | 6.7095 | JPT |
| SERPINB10 | GI_4826901-S  | rs17072109 | 18 | 18 | 59735622 | 17570 | 7.0465  | 0.4774 | 0.8392  | 6.069  | JPT |
| SERPINB10 | GI_4826901-S  | rs9320033  | 18 | 18 | 59735962 | 17230 | 8.6669  | 0.5593 | 0.8322  | 6.069  | JPT |
| LOC284293 | GI_27485378-S | rs724557   | 18 | 18 | 59736125 | 35461 | 9.8844  | 0.6212 | -0.9205 | 6.7095 | JPT |
| SERPINB10 | GI_4826901-S  | rs724557   | 18 | 18 | 59736125 | 17067 | 6.8868  | 0.4767 | 0.8421  | 6.069  | JPT |
| LOC284293 | GI_27485378-S | rs724558   | 18 | 18 | 59736240 | 35346 | 9.7107  | 0.6229 | 0.9322  | 6.7095 | JPT |
| SERPINB10 | GI_4826901-S  | rs724558   | 18 | 18 | 59736240 | 16952 | 6.4895  | 0.4620 | -0.8185 | 6.069  | JPT |
| LOC284293 | GI_27485378-S | rs1944273  | 18 | 18 | 59736514 | 35072 | 9.8844  | 0.6212 | -0.9205 | 6.7095 | JPT |
| SERPINB10 | GI_4826901-S  | rs1944273  | 18 | 18 | 59736514 | 16678 | 6.8868  | 0.4767 | 0.8421  | 6.069  | JPT |
| LOC284293 | GI_27485378-S | rs1944272  | 18 | 18 | 59736638 | 34948 | 9.8844  | 0.6212 | -0.9205 | 6.7095 | JPT |
| SERPINB10 | GI_4826901-S  | rs1944272  | 18 | 18 | 59736638 | 16554 | 6.8868  | 0.4767 | 0.8421  | 6.069  | JPT |
| LOC284293 | GI_27485378-S | rs1944271  | 18 | 18 | 59736845 | 34741 | 9.8844  | 0.6212 | 0.9205  | 6.7095 | JPT |
| SERPINB10 | GI_4826901-S  | rs1944271  | 18 | 18 | 59736845 | 16347 | 6.8868  | 0.4767 | -0.8421 | 6.069  | JPT |
| LOC284293 | GI_27485378-S | rs9955171  | 18 | 18 | 59736927 | 34659 | 10.1922 | 0.6248 | 0.9233  | 6.7095 | JPT |
| SERPINB10 | GI_4826901-S  | rs9955171  | 18 | 18 | 59736927 | 16265 | 7.0465  | 0.4774 | -0.8392 | 6.069  | JPT |
| SERPINB10 | GI_4826901-S  | rs8085490  | 18 | 18 | 59737365 | 15827 | 8.6205  | 0.5657 | -0.8489 | 6.069  | JPT |
| SERPINB10 | GI_4826901-S  | rs8099238  | 18 | 18 | 59737617 | 15575 | 8.6669  | 0.5593 | 0.8322  | 6.069  | JPT |
| LOC284293 | GI_27485378-S | rs9955876  | 18 | 18 | 59737855 | 33731 | 10.1922 | 0.6248 | -0.9233 | 6.7095 | JPT |
| SERPINB10 | GI_4826901-S  | rs9955876  | 18 | 18 | 59737855 | 15337 | 7.0465  | 0.4774 | 0.8392  | 6.069  | JPT |
| LOC284293 | GI_27485378-S | rs9967382  | 18 | 18 | 59738047 | 33539 | 6.8203  | 0.4729 | -0.7078 | 6.7095 | JPT |
| SERPINB10 | GI_4826901-S  | rs9967382  | 18 | 18 | 59738047 | 15145 | 7.0271  | 0.4845 | 0.7436  | 6.069  | JPT |
| LOC284293 | GI_27485378-S | rs620535   | 18 | 18 | 59738269 | 33317 | 9.8844  | 0.6212 | -0.9205 | 6.7095 | JPT |
| SERPINB10 | GI_4826901-S  | rs620535   | 18 | 18 | 59738269 | 14923 | 6.8868  | 0.4767 | 0.8421  | 6.069  | JPT |
| SERPINB10 | GI_4826901-S  | rs976038   | 18 | 18 | 59738648 | 14544 | 8.6205  | 0.5657 | -0.8489 | 6.069  | JPT |
| LOC284293 | GI_27485378-S | rs9947135  | 18 | 18 | 59738704 | 32882 | 9.8767  | 0.6208 | -0.9279 | 6.7095 | JPT |
| SERPINB10 | GI_4826901-S  | rs9947135  | 18 | 18 | 59738704 | 14488 | 6.7691  | 0.4700 | 0.8390  | 6.069  | JPT |
| LOC284293 | GI_27485378-S | rs4350667  | 18 | 18 | 59738743 | 32843 | 9.2644  | 0.6522 | -0.9840 | 6.7095 | JPT |
| LOC284293 | GI_27485378-S | rs9947504  | 18 | 18 | 59739063 | 32523 | 10.1922 | 0.6248 | -0.9233 | 6.7095 | JPT |
| SERPINB10 | GI_4826901-S  | rs9947504  | 18 | 18 | 59739063 | 14129 | 7.0465  | 0.4774 | 0.8392  | 6.069  | JPT |
| LOC284293 | GI_27485378-S | rs17072158 | 18 | 18 | 59739617 | 31969 | 10.1922 | 0.6248 | 0.9233  | 6.7095 | JPT |
| SERPINB10 | GI_4826901-S  | rs17072158 | 18 | 18 | 59739617 | 13575 | 7.0465  | 0.4774 | -0.8392 | 6.069  | JPT |
| LOC284293 | GI_27485378-S | rs9957733  | 18 | 18 | 59743343 | 28243 | 9.8844  | 0.6212 | -0.9205 | 6.7095 | JPT |
| SERPINB10 | GI_4826901-S  | rs9957733  | 18 | 18 | 59743343 | 9849  | 6.8868  | 0.4767 | 0.8421  | 6.069  | JPT |
| SERPINB10 | GI_4826901-S  | rs2114377  | 18 | 18 | 59743756 | 9436  | 8.6205  | 0.5657 | 0.8489  | 6.069  | JPT |
| SERPINB10 | GI_4826901-S  | rs9960901  | 18 | 18 | 59744047 | 9145  | 8.6205  | 0.5657 | -0.8489 | 6.069  | JPT |
| SERPINB10 | GI_4826901-S  | rs8090188  | 18 | 18 | 59744441 | 8751  | 8.2984  | 0.6071 | 0.8029  | 6.069  | JPT |
| SERPINB10 | GI_4826901-S  | rs8093894  | 18 | 18 | 59744461 | 8731  | 8.4457  | 0.5574 | -0.8266 | 6.069  | JPT |
| SERPINB10 | GI_4826901-S  | rs8094058  | 18 | 18 | 59744599 | 8593  | 8.6669  | 0.5593 | -0.8322 | 6.069  | JPT |
| SERPINB10 | GI_4826901-S  | rs8089023  | 18 | 18 | 59744733 | 8459  | 8.6669  | 0.5593 | -0.8322 | 6.069  | JPT |
| SERPINB10 | GI_4826901-S  | rs3786340  | 18 | 18 | 59748514 | 4678  | 8.6205  | 0.5657 | 0.8489  | 6.069  | JPT |
| SERPINB10 | GI_4826901-S  | rs10163726 | 18 | 18 | 59748718 | 4474  | 8.6669  | 0.5593 | 0.8322  | 6.069  | JPT |
| SERPINB10 | GI_4826901-S  | rs9951724  | 18 | 18 | 59749057 | 4135  | 8.6669  | 0.5593 | 0.8322  | 6.069  | JPT |
| SERPINB10 | GI_4826901-S  | rs1544899  | 18 | 18 | 59749190 | 4002  | 8.6205  | 0.5657 | 0.8489  | 6.069  | JPT |
| SERPINB10 | GI_4826901-S  | rs1544898  | 18 | 18 | 59749429 | 3763  | 8.6205  | 0.5657 | -0.8489 | 6.069  | JPT |
| SERPINB10 | GI_4826901-S  | rs8096543  | 18 | 18 | 59750024 | 3168  | 8.6205  | 0.5657 | -0.8489 | 6.069  | JPT |
| SERPINB10 | GI_4826901-S  | rs4630651  | 18 | 18 | 59750481 | 2711  | 8.6205  | 0.5657 | -0.8489 | 6.069  | JPT |
| SERPINB10 | GI_4826901-S  | rs9964049  | 18 | 18 | 59751066 | 2126  | 7.5716  | 0.5054 | 0.7838  | 6.069  | JPT |
| SERPINB10 | GI_4826901-S  | rs963075   | 18 | 18 | 59751364 | 1828  | 8.6205  | 0.5657 | -0.8489 | 6.069  | JPT |
| LOC284293 | GI_27485378-S | rs17072204 | 18 | 18 | 59752346 | 19240 | 11.3205 | 0.6758 | 0.9710  | 6.7095 | JPT |
| LOC284293 | GI_27485378-S | rs11152409 | 18 | 18 | 59755259 | 16327 | 11.2420 | 0.6730 | 0.9651  | 6.7095 | JPT |
| LOC284293 | GI_27485378-S | rs9783897  | 18 | 18 | 59755762 | 15824 | 11.3565 | 0.6770 | -0.9724 | 6.7095 | JPT |
| LOC284293 | GI_27485378-S | rs9783898  | 18 | 18 | 59755785 | 15801 | 11.3565 | 0.6770 | -0.9724 | 6.7095 | JPT |

|              |               |            |    |    |          |        |         |        |         |        |     |
|--------------|---------------|------------|----|----|----------|--------|---------|--------|---------|--------|-----|
| LOC284293    | GI_27485378-S | rs9783908  | 18 | 18 | 59755942 | 15644  | 10.2367 | 0.6266 | 0.9245  | 6.7095 | JPT |
| SERPINB10    | GI_4826901-S  | rs9783908  | 18 | 18 | 59755942 | 2750   | 6.1773  | 0.4277 | -0.7964 | 6.069  | JPT |
| LOC284293    | GI_27485378-S | rs13381197 | 18 | 18 | 59757967 | 13619  | 11.2420 | 0.6730 | 0.9651  | 6.7095 | JPT |
| LOC284293    | GI_27485378-S | rs9807138  | 18 | 18 | 59758363 | 13223  | 11.2420 | 0.6730 | 0.9651  | 6.7095 | JPT |
| LOC284293    | GI_27485378-S | rs9955763  | 18 | 18 | 59765415 | 6171   | 11.2420 | 0.6730 | -0.9651 | 6.7095 | JPT |
| LOC284293    | GI_27485378-S | rs13370584 | 18 | 18 | 59766324 | 5262   | 11.2420 | 0.6730 | -0.9651 | 6.7095 | JPT |
| LOC284293    | GI_27485378-S | rs9955410  | 18 | 18 | 59771017 | 569    | 13.8846 | 0.7546 | -0.9374 | 6.7095 | JPT |
| LOC284293    | GI_27485378-S | rs9945924  | 18 | 18 | 59771746 | 160    | 14.2943 | 0.7572 | 0.9389  | 6.7095 | JPT |
| LOC284293    | GI_27485378-S | rs8090046  | 18 | 18 | 59773066 | 1480   | 13.8846 | 0.7546 | 0.9374  | 6.7095 | JPT |
| LOC284293    | GI_27485378-S | rs8095151  | 18 | 18 | 59773196 | 1610   | 13.8846 | 0.7546 | -0.9374 | 6.7095 | JPT |
| LOC284293    | GI_27485378-S | rs9962574  | 18 | 18 | 59777098 | 5512   | 13.8846 | 0.7546 | -0.9374 | 6.7095 | JPT |
| LOC284293    | GI_27485378-S | rs9963550  | 18 | 18 | 59779238 | 7652   | 14.2943 | 0.7572 | 0.9389  | 6.7095 | JPT |
| LOC284293    | GI_27485378-S | rs9949621  | 18 | 18 | 59780377 | 8791   | 13.8846 | 0.7546 | 0.9374  | 6.7095 | JPT |
| LOC284293    | GI_27485378-S | rs9950903  | 18 | 18 | 59781783 | 10197  | 14.2943 | 0.7572 | -0.9389 | 6.7095 | JPT |
| LOC284293    | GI_27485378-S | rs8090586  | 18 | 18 | 59781864 | 10278  | 14.2943 | 0.7572 | 0.9389  | 6.7095 | JPT |
| LOC284293    | GI_27485378-S | rs1006755  | 18 | 18 | 59782026 | 10440  | 13.8846 | 0.7546 | 0.9374  | 6.7095 | JPT |
| LOC284293    | GI_27485378-S | rs4510128  | 18 | 18 | 59782312 | 10726  | 13.8846 | 0.7546 | 0.9374  | 6.7095 | JPT |
| LOC284293    | GI_27485378-S | rs1006754  | 18 | 18 | 59782427 | 10841  | 14.2943 | 0.7572 | 0.9389  | 6.7095 | JPT |
| LOC284293    | GI_27485378-S | rs2009989  | 18 | 18 | 59784224 | 12638  | 14.2943 | 0.7572 | -0.9389 | 6.7095 | JPT |
| LOC284293    | GI_27485378-S | rs17072304 | 18 | 18 | 59784549 | 12963  | 14.2943 | 0.7572 | 0.9389  | 6.7095 | JPT |
| LOC284293    | GI_27485378-S | rs9961615  | 18 | 18 | 59788652 | 17066  | 11.2197 | 0.6722 | -0.9504 | 6.7095 | JPT |
| GPX4         | GI_4504106-S  | rs4807569  | 19 | 19 | 1074378  | 17586  | 6.5646  | 0.4504 | 0.2829  | 5.6578 | JPT |
| MUM1         | GI_31652258-S | rs713042   | 19 | 19 | 1308082  | 21200  | 5.5321  | 0.3952 | 0.2842  | 5.5155 | JPT |
| MUM1         | GI_31652258-S | rs2247675  | 19 | 19 | 1312793  | 16489  | 5.5321  | 0.3952 | -0.2842 | 5.5155 | JPT |
| MUM1         | GI_31652258-S | rs2526134  | 19 | 19 | 1316620  | 12662  | 5.7412  | 0.4161 | -0.2934 | 5.5155 | JPT |
| MUM1         | GI_31652258-S | rs2668419  | 19 | 19 | 1317994  | 11288  | 5.6496  | 0.4027 | -0.2852 | 5.5155 | JPT |
| MUM1         | GI_31652258-S | rs2526136  | 19 | 19 | 1319398  | 9884   | 5.5321  | 0.3952 | -0.2842 | 5.5155 | JPT |
| DAPK3        | GI_4557510-S  | rs2278438  | 19 | 19 | 3915106  | 5361   | 6.3831  | 0.4477 | -0.2980 | 5.5639 | JPT |
| DAPK3        | GI_4557510-S  | rs8113281  | 19 | 19 | 3917132  | 7387   | 6.5781  | 0.4512 | -0.2977 | 5.5639 | JPT |
| DAPK3        | GI_4557510-S  | rs1008128  | 19 | 19 | 3917520  | 7775   | 6.5781  | 0.4512 | -0.2977 | 5.5639 | JPT |
| DAPK3        | GI_4557510-S  | rs2304194  | 19 | 19 | 3920505  | 10760  | 6.3831  | 0.4477 | -0.2980 | 5.5639 | JPT |
| DAPK3        | GI_4557510-S  | rs3760895  | 19 | 19 | 3921435  | 11690  | 6.3831  | 0.4477 | 0.2980  | 5.5639 | JPT |
| Hs.465789    | Hs.465789-S   | rs11260040 | 19 | 19 | 7926793  | 52807  | 6.3501  | 0.4380 | -0.0942 | 5.6665 | JPT |
| Hs.465789    | Hs.465789-S   | rs11670116 | 19 | 19 | 7981202  | 1602   | 6.2251  | 0.4383 | 0.0940  | 5.6665 | JPT |
| MGC3262      | GI_34147591-S | rs892086   | 19 | 19 | 10698677 | 195794 | 5.6610  | 0.3961 | -0.3032 | 5.6494 | JPT |
| hmm6891      | hmm6891-S     | rs7248363  | 19 | 19 | 18328886 | 907559 | 6.2581  | 0.4325 | -0.0369 | 5.54   | JPT |
| RHPN2        | GI_37059770-S | rs358549   | 19 | 19 | 37680691 | 480710 | 5.9241  | 0.4440 | 0.4144  | 5.5516 | JPT |
| F25965       | GI_28144915-S | rs3761090  | 19 | 19 | 40841290 | 95920  | 11.0248 | 0.6652 | -0.3375 | 7.3765 | JPT |
| F25965       | GI_28144915-S | rs2267587  | 19 | 19 | 40857309 | 79901  | 9.2877  | 0.6048 | 0.3308  | 7.3765 | JPT |
| F25965       | GI_28144915-S | rs3787052  | 19 | 19 | 40893895 | 43315  | 13.6821 | 0.7492 | 0.3620  | 7.3765 | JPT |
| F25965       | GI_28144915-S | rs2242524  | 19 | 19 | 40923976 | 13234  | 11.1389 | 0.7157 | -0.3813 | 7.3765 | JPT |
| F25965       | GI_28144915-S | rs231241   | 19 | 19 | 40937253 | 43     | 9.5194  | 0.6059 | -0.2924 | 7.3765 | JPT |
| SPINT2       | GI_10863908-S | rs7253245  | 19 | 19 | 43445626 | 28992  | 7.3189  | 0.4922 | 0.6431  | 5.6055 | JPT |
| SPINT2       | GI_10863908-S | rs3786870  | 19 | 19 | 43447704 | 26914  | 7.4068  | 0.5051 | 0.6592  | 5.6055 | JPT |
| DKFZp434H247 | GI_37552078-S | rs1057745  | 19 | 19 | 44580230 | 174    | 7.5069  | 0.5021 | -0.2340 | 5.7616 | JPT |
| RPS16        | GI_34335151-S | rs17626    | 19 | 19 | 44618361 | 51     | 6.0486  | 0.4200 | 0.1658  | 5.7552 | JPT |
| RPS16        | GI_34335151-S | rs11881477 | 19 | 19 | 44640619 | 22207  | 7.0500  | 0.4776 | -0.1842 | 5.7552 | JPT |
| LOC400696    | GI_42661629-S | rs11083532 | 19 | 19 | 44861943 | 6742   | 5.6372  | 0.3946 | 0.1835  | 5.4487 | JPT |
| R29124_1     | GI_16117774-S | rs8103195  | 19 | 19 | 46708720 | 68883  | 6.0047  | 0.4249 | 0.2026  | 5.581  | JPT |
| R29124_1     | GI_16117774-S | rs10406371 | 19 | 19 | 46714129 | 63474  | 6.0047  | 0.4249 | 0.2026  | 5.581  | JPT |
| R29124_1     | GI_16117774-S | rs10424376 | 19 | 19 | 46739320 | 38283  | 6.4667  | 0.4866 | 0.2050  | 5.581  | JPT |
| R29124_1     | GI_16117774-S | rs4802122  | 19 | 19 | 46739764 | 37839  | 6.8114  | 0.4724 | 0.2080  | 5.581  | JPT |
| R29124_1     | GI_16117774-S | rs7255742  | 19 | 19 | 46741661 | 35942  | 7.2921  | 0.4907 | 0.2123  | 5.581  | JPT |
| R29124_1     | GI_16117774-S | rs2317314  | 19 | 19 | 46754147 | 23456  | 6.5432  | 0.4570 | 0.2110  | 5.581  | JPT |
| R29124_1     | GI_16117774-S | rs7251994  | 19 | 19 | 46755515 | 22088  | 6.1745  | 0.4276 | -0.1937 | 5.581  | JPT |
| R29124_1     | GI_16117774-S | rs10420992 | 19 | 19 | 46756302 | 21301  | 7.8996  | 0.5222 | -0.2140 | 5.581  | JPT |
| R29124_1     | GI_16117774-S | rs17724225 | 19 | 19 | 46756350 | 21253  | 6.7150  | 0.4590 | 0.1986  | 5.581  | JPT |
| R29124_1     | GI_16117774-S | rs4803481  | 19 | 19 | 46758396 | 19207  | 7.1669  | 0.5182 | 0.2158  | 5.581  | JPT |
| R29124_1     | GI_16117774-S | rs10421584 | 19 | 19 | 46759818 | 17785  | 6.7150  | 0.4590 | -0.1986 | 5.581  | JPT |

|           |               |            |    |    |          |        |         |        |         |        |     |
|-----------|---------------|------------|----|----|----------|--------|---------|--------|---------|--------|-----|
| R29124_1  | GI_16117774-S | rs10421785 | 19 | 19 | 46759870 | 17733  | 6.1745  | 0.4276 | -0.1937 | 5.581  | JPT |
| R29124_1  | GI_16117774-S | rs11083627 | 19 | 19 | 46761740 | 15863  | 7.8996  | 0.5222 | 0.2140  | 5.581  | JPT |
| R29124_1  | GI_16117774-S | rs12150975 | 19 | 19 | 46762200 | 15403  | 7.8014  | 0.5432 | 0.2257  | 5.581  | JPT |
| R29124_1  | GI_16117774-S | rs12983999 | 19 | 19 | 46762368 | 15235  | 7.8996  | 0.5222 | -0.2140 | 5.581  | JPT |
| R29124_1  | GI_16117774-S | rs3745938  | 19 | 19 | 46763007 | 14596  | 6.2837  | 0.4418 | -0.1940 | 5.581  | JPT |
| R29124_1  | GI_16117774-S | rs12462194 | 19 | 19 | 46764129 | 13474  | 7.8996  | 0.5222 | -0.2140 | 5.581  | JPT |
| R29124_1  | GI_16117774-S | rs10409976 | 19 | 19 | 46767612 | 9991   | 6.2572  | 0.4402 | -0.1913 | 5.581  | JPT |
| R29124_1  | GI_16117774-S | rs1860255  | 19 | 19 | 46768912 | 8691   | 6.6969  | 0.4659 | -0.2026 | 5.581  | JPT |
| R29124_1  | GI_16117774-S | rs10406221 | 19 | 19 | 46770443 | 7160   | 9.0083  | 0.5748 | -0.2286 | 5.581  | JPT |
| R29124_1  | GI_16117774-S | rs2191019  | 19 | 19 | 46772763 | 4840   | 7.5849  | 0.5145 | -0.2167 | 5.581  | JPT |
| R29124_1  | GI_16117774-S | rs7257657  | 19 | 19 | 46774166 | 3437   | 7.3701  | 0.4949 | 0.2059  | 5.581  | JPT |
| R29124_1  | GI_16117774-S | rs7247842  | 19 | 19 | 46775513 | 2090   | 7.5340  | 0.5035 | 0.2111  | 5.581  | JPT |
| R29124_1  | GI_16117774-S | rs714106   | 19 | 19 | 46775689 | 1914   | 8.3918  | 0.5637 | -0.2254 | 5.581  | JPT |
| R29124_1  | GI_16117774-S | rs740591   | 19 | 19 | 46776426 | 1177   | 6.8903  | 0.4688 | 0.2055  | 5.581  | JPT |
| R29124_1  | GI_16117774-S | rs758350   | 19 | 19 | 46777002 | 601    | 6.9138  | 0.4865 | 0.2067  | 5.581  | JPT |
| R29124_1  | GI_16117774-S | rs2302188  | 19 | 19 | 46777713 | 110    | 7.5849  | 0.5145 | 0.2167  | 5.581  | JPT |
| R29124_1  | GI_16117774-S | rs3745936  | 19 | 19 | 46784655 | 7052   | 12.9853 | 0.7294 | 0.2474  | 5.581  | JPT |
| R29124_1  | GI_16117774-S | rs11083629 | 19 | 19 | 46786574 | 8971   | 8.7007  | 0.5608 | -0.2215 | 5.581  | JPT |
| FLJ10781  | GI_39780596-S | rs12609260 | 19 | 19 | 51652806 | 8962   | 33.9870 | 0.9704 | -1.0762 | 7.8022 | JPT |
| FLJ10781  | GI_39780596-S | rs12609521 | 19 | 19 | 51658767 | 3001   | 33.2418 | 0.9705 | 1.0772  | 7.8022 | JPT |
| FLJ10781  | GI_39780596-S | rs12609529 | 19 | 19 | 51658837 | 2931   | 26.0163 | 0.9432 | 1.0573  | 7.8022 | JPT |
| FLJ10781  | GI_39780596-S | rs3745787  | 19 | 19 | 51663203 | 1435   | 13.4568 | 0.7429 | 0.8740  | 7.8022 | JPT |
| FLJ10781  | GI_39780596-S | rs8107491  | 19 | 19 | 51667007 | 5239   | 19.3410 | 0.8712 | 0.9942  | 7.8022 | JPT |
| PLA2G4C   | GI_4505850-S  | rs385203   | 19 | 19 | 53298343 | 55359  | 6.0614  | 0.4208 | -0.5929 | 5.7871 | JPT |
| PLA2G4C   | GI_4505850-S  | rs436943   | 19 | 19 | 53298474 | 55490  | 5.9191  | 0.4196 | 0.5881  | 5.7871 | JPT |
| PLA2G4C   | GI_4505850-S  | rs1653554  | 19 | 19 | 53300284 | 57300  | 5.9191  | 0.4196 | 0.5881  | 5.7871 | JPT |
| PLA2G4C   | GI_4505850-S  | rs2307279  | 19 | 19 | 53300410 | 57426  | 5.9278  | 0.4201 | -0.6845 | 5.7871 | JPT |
| RCN3      | GI_28626509-S | rs11668962 | 19 | 19 | 54410360 | 328246 | 7.7937  | 0.5252 | -0.3405 | 7.3485 | JPT |
| ZNF175    | GI_37594438-S | rs1585160  | 19 | 19 | 56750466 | 34264  | 6.0199  | 0.4336 | 0.2252  | 5.8168 | JPT |
| ZNF175    | GI_37594438-S | rs8108872  | 19 | 19 | 56756289 | 28441  | 5.9197  | 0.4122 | 0.2198  | 5.8168 | JPT |
| ZNF175    | GI_37594438-S | rs1125620  | 19 | 19 | 56761712 | 23018  | 6.1932  | 0.4363 | -0.2265 | 5.8168 | JPT |
| ZNF175    | GI_37594438-S | rs1379284  | 19 | 19 | 56763379 | 21351  | 5.9197  | 0.4122 | -0.2198 | 5.8168 | JPT |
| ZNF175    | GI_37594438-S | rs7245838  | 19 | 19 | 56766178 | 18552  | 5.9197  | 0.4122 | -0.2198 | 5.8168 | JPT |
| ZNF175    | GI_37594438-S | rs3752132  | 19 | 19 | 56766349 | 18381  | 5.9197  | 0.4122 | -0.2198 | 5.8168 | JPT |
| ZNF175    | GI_37594438-S | rs6509552  | 19 | 19 | 56767434 | 17296  | 5.9197  | 0.4122 | -0.2198 | 5.8168 | JPT |
| LILRB3    | GI_5803059-S  | rs11670810 | 19 | 19 | 59420315 | 7683   | 8.5797  | 0.5638 | 0.4598  | 7.9331 | JPT |
| LILRB3    | GI_5803059-S  | rs7247394  | 19 | 19 | 59423295 | 10663  | 8.8032  | 0.5656 | 0.4642  | 7.9331 | JPT |
| LILRB3    | GI_5803059-S  | rs11084325 | 19 | 19 | 59424868 | 12236  | 8.8032  | 0.5656 | 0.4642  | 7.9331 | JPT |
| LILRB3    | GI_5803059-S  | rs11672654 | 19 | 19 | 59425145 | 12513  | 8.8032  | 0.5656 | -0.4642 | 7.9331 | JPT |
| LOC126208 | GI_27485046-S | rs516022   | 19 | 19 | 61301183 | 10299  | 6.1000  | 0.4467 | 0.4422  | 5.7808 | JPT |
| MGC2752   | GI_33859747-S | rs11670764 | 19 | 19 | 63684708 | 100504 | 9.5642  | 0.5991 | 0.2980  | 5.2641 | JPT |
| SLC27A5   | GI_13325056-S | rs4801273  | 19 | 19 | 63692085 | 9719   | 5.6376  | 0.3947 | 0.3537  | 5.3911 | JPT |
| MGC2752   | GI_33859747-S | rs2278497  | 19 | 19 | 63702631 | 82581  | 9.0760  | 0.5865 | 0.2897  | 5.2641 | JPT |
| MGC2752   | GI_33859747-S | rs11666790 | 19 | 19 | 63725153 | 60059  | 12.9512 | 0.7284 | 0.3121  | 5.2641 | JPT |
| MGC2752   | GI_33859747-S | rs7249714  | 19 | 19 | 63749895 | 35317  | 12.9512 | 0.7284 | 0.3121  | 5.2641 | JPT |
| MGC2752   | GI_33859747-S | rs895374   | 19 | 19 | 63758730 | 26482  | 13.5371 | 0.7452 | -0.3306 | 5.2641 | JPT |
| MGC2752   | GI_33859747-S | rs3794965  | 19 | 19 | 63761165 | 24047  | 16.0593 | 0.8064 | 0.3264  | 5.2641 | JPT |
| MGC2752   | GI_33859747-S | rs10413586 | 19 | 19 | 63763133 | 22079  | 16.5731 | 0.8095 | 0.3270  | 5.2641 | JPT |
| MGC2752   | GI_33859747-S | rs4801614  | 19 | 19 | 63788762 | 3550   | 16.0593 | 0.8064 | -0.3264 | 5.2641 | JPT |
| FKBP1A    | GI_17149835-I | rs6109486  | 20 | 20 | 1259268  | 41235  | 7.0115  | 0.5006 | 0.6192  | 6.5637 | JPT |
| SNRPB2    | GI_38149917-I | rs761228   | 20 | 20 | 16650501 | 8253   | 6.7237  | 0.4595 | 0.2956  | 6.1182 | JPT |
| SNRPB2    | GI_38149917-I | rs3787509  | 20 | 20 | 16656109 | 2645   | 7.9361  | 0.5240 | -0.3335 | 6.1182 | JPT |
| SNRPB2    | GI_38149917-I | rs3787508  | 20 | 20 | 16656164 | 2590   | 7.9361  | 0.5240 | -0.3335 | 6.1182 | JPT |
| SNRPB2    | GI_38149917-I | rs2073055  | 20 | 20 | 16658791 | 37     | 8.5861  | 0.5555 | 0.3389  | 6.1182 | JPT |
| POLR3F    | GI_33598951-S | rs1988646  | 20 | 20 | 18405204 | 7868   | 6.3234  | 0.4364 | 0.2511  | 5.953  | JPT |
| POLR3F    | GI_33598951-S | rs7351208  | 20 | 20 | 18406060 | 7012   | 6.3234  | 0.4364 | 0.2511  | 5.953  | JPT |
| POLR3F    | GI_33598951-S | rs6081158  | 20 | 20 | 18407386 | 5686   | 5.9585  | 0.4220 | 0.2539  | 5.953  | JPT |
| POLR3F    | GI_33598951-S | rs6075348  | 20 | 20 | 18421042 | 7970   | 6.3234  | 0.4364 | -0.2511 | 5.953  | JPT |
| POLR3F    | GI_33598951-S | rs7262824  | 20 | 20 | 18431105 | 18033  | 7.1989  | 0.4939 | -0.2555 | 5.953  | JPT |

|        |               |            |    |    |          |        |        |        |         |        |     |
|--------|---------------|------------|----|----|----------|--------|--------|--------|---------|--------|-----|
| POLR3F | GI_33598951-S | rs2009092  | 20 | 20 | 18433412 | 20340  | 6.3234 | 0.4364 | -0.2511 | 5.953  | JPT |
| POLR3F | GI_33598951-S | rs2180661  | 20 | 20 | 18434315 | 21243  | 6.3234 | 0.4364 | 0.2511  | 5.953  | JPT |
| POLR3F | GI_33598951-S | rs1022681  | 20 | 20 | 18435014 | 21942  | 6.3234 | 0.4364 | 0.2511  | 5.953  | JPT |
| POLR3F | GI_33598951-S | rs6075351  | 20 | 20 | 18438913 | 25841  | 5.9585 | 0.4220 | -0.2539 | 5.953  | JPT |
| POLR3F | GI_33598951-S | rs1555354  | 20 | 20 | 18454825 | 41753  | 6.3234 | 0.4364 | 0.2511  | 5.953  | JPT |
| POLR3F | GI_33598951-S | rs6081183  | 20 | 20 | 18458175 | 45103  | 6.2784 | 0.4938 | 0.2495  | 5.953  | JPT |
| POLR3F | GI_33598951-S | rs6081184  | 20 | 20 | 18458182 | 45110  | 6.4805 | 0.4875 | -0.2489 | 5.953  | JPT |
| POLR3F | GI_33598951-S | rs6081187  | 20 | 20 | 18458919 | 45847  | 6.3234 | 0.4364 | 0.2511  | 5.953  | JPT |
| POLR3F | GI_33598951-S | rs6136400  | 20 | 20 | 18463877 | 50805  | 6.2676 | 0.4408 | -0.2492 | 5.953  | JPT |
| POLR3F | GI_33598951-S | rs3818218  | 20 | 20 | 18464722 | 51650  | 5.9585 | 0.4220 | -0.2539 | 5.953  | JPT |
| POLR3F | GI_33598951-S | rs6112011  | 20 | 20 | 18465418 | 52346  | 6.3234 | 0.4364 | 0.2511  | 5.953  | JPT |
| POLR3F | GI_33598951-S | rs2295557  | 20 | 20 | 18471864 | 58792  | 5.9585 | 0.4220 | 0.2539  | 5.953  | JPT |
| POLR3F | GI_33598951-S | rs4814760  | 20 | 20 | 18476254 | 63182  | 5.9585 | 0.4220 | -0.2539 | 5.953  | JPT |
| POLR3F | GI_33598951-S | rs6081207  | 20 | 20 | 18480592 | 67520  | 5.9585 | 0.4220 | 0.2539  | 5.953  | JPT |
| POLR3F | GI_33598951-S | rs1973957  | 20 | 20 | 18483502 | 70430  | 6.3234 | 0.4364 | -0.2511 | 5.953  | JPT |
| POLR3F | GI_33598951-S | rs6075365  | 20 | 20 | 18488266 | 75194  | 6.3234 | 0.4364 | -0.2511 | 5.953  | JPT |
| POLR3F | GI_33598951-S | rs11698885 | 20 | 20 | 18491691 | 78619  | 6.5765 | 0.4671 | 0.2546  | 5.953  | JPT |
| CPNE1  | GI_23397697-A | rs6060519  | 20 | 20 | 33680797 | 3125   | 7.9225 | 0.5233 | 0.5869  | 5.9756 | JPT |
| CPNE1  | GI_23397697-A | rs6060524  | 20 | 20 | 33684569 | 6897   | 7.9225 | 0.5233 | -0.5869 | 5.9756 | JPT |
| CPNE1  | GI_23397697-A | rs1118233  | 20 | 20 | 33691763 | 14091  | 7.9225 | 0.5233 | 0.5869  | 5.9756 | JPT |
| CPNE1  | GI_23397697-A | rs7273815  | 20 | 20 | 33695829 | 18157  | 6.7207 | 0.4593 | -0.5880 | 5.9756 | JPT |
| CPNE1  | GI_23397697-A | rs12480408 | 20 | 20 | 33698214 | 20542  | 7.9225 | 0.5233 | -0.5869 | 5.9756 | JPT |
| CPNE1  | GI_23397697-A | rs6060535  | 20 | 20 | 33698936 | 21264  | 7.6503 | 0.5265 | -0.5835 | 5.9756 | JPT |
| CPNE1  | GI_23397697-A | rs11696527 | 20 | 20 | 33708793 | 31121  | 7.9225 | 0.5233 | -0.5869 | 5.9756 | JPT |
| CPNE1  | GI_23397697-A | rs6060557  | 20 | 20 | 33733680 | 56008  | 7.8058 | 0.5259 | -0.5897 | 5.9756 | JPT |
| CPNE1  | GI_23397697-A | rs2425078  | 20 | 20 | 33761577 | 83905  | 7.9225 | 0.5233 | 0.5869  | 5.9756 | JPT |
| CPNE1  | GI_23397697-A | rs6060578  | 20 | 20 | 33768859 | 91187  | 7.9225 | 0.5233 | -0.5869 | 5.9756 | JPT |
| CPNE1  | GI_23397697-A | rs11696947 | 20 | 20 | 33776072 | 98400  | 8.0015 | 0.5444 | -0.5985 | 5.9756 | JPT |
| CPNE1  | GI_23397697-A | rs17093026 | 20 | 20 | 33782325 | 104653 | 7.9225 | 0.5233 | -0.5869 | 5.9756 | JPT |
| CPNE1  | GI_23397697-A | rs13038622 | 20 | 20 | 33782757 | 105085 | 7.9225 | 0.5233 | -0.5869 | 5.9756 | JPT |
| CPNE1  | GI_23397697-A | rs1970357  | 20 | 20 | 33802614 | 124942 | 7.9225 | 0.5233 | 0.5869  | 5.9756 | JPT |
| CPNE1  | GI_23397697-A | rs11167275 | 20 | 20 | 33803689 | 126017 | 7.8058 | 0.5259 | 0.5897  | 5.9756 | JPT |
| CPNE1  | GI_23397697-A | rs4602287  | 20 | 20 | 33831442 | 153770 | 6.6012 | 0.4604 | 0.4589  | 5.9756 | JPT |
| CPNE1  | GI_23397697-A | rs6058325  | 20 | 20 | 33852220 | 174548 | 7.9225 | 0.5233 | 0.5869  | 5.9756 | JPT |
| CPNE1  | GI_23397697-A | rs12479473 | 20 | 20 | 33862042 | 184370 | 7.8058 | 0.5259 | 0.5897  | 5.9756 | JPT |
| CPNE1  | GI_23397697-A | rs12481545 | 20 | 20 | 33871112 | 193440 | 7.8058 | 0.5259 | -0.5897 | 5.9756 | JPT |
| CPNE1  | GI_23397697-A | rs6060624  | 20 | 20 | 33877077 | 199405 | 7.8058 | 0.5259 | -0.5897 | 5.9756 | JPT |
| CPNE1  | GI_23397697-A | rs6060625  | 20 | 20 | 33877732 | 200060 | 7.8058 | 0.5259 | -0.5897 | 5.9756 | JPT |
| CPNE1  | GI_23397697-A | rs6060632  | 20 | 20 | 33886015 | 208343 | 7.6908 | 0.5200 | 0.5557  | 5.9756 | JPT |
| CPNE1  | GI_23397697-A | rs11907811 | 20 | 20 | 33891492 | 213820 | 7.9225 | 0.5233 | -0.5869 | 5.9756 | JPT |
| CPNE1  | GI_23397697-A | rs7270009  | 20 | 20 | 33896975 | 219303 | 7.7017 | 0.5122 | -0.5507 | 5.9756 | JPT |
| CPNE1  | GI_23397697-A | rs6060639  | 20 | 20 | 33901597 | 223925 | 6.4929 | 0.4706 | -0.6125 | 5.9756 | JPT |
| CPNE1  | GI_23397697-A | rs7273668  | 20 | 20 | 33906145 | 228473 | 7.9035 | 0.5224 | 0.6252  | 5.9756 | JPT |
| CPNE1  | GI_23397697-A | rs10485510 | 20 | 20 | 33908578 | 230906 | 7.7788 | 0.5245 | 0.6277  | 5.9756 | JPT |
| CPNE1  | GI_23397697-A | rs4504072  | 20 | 20 | 33912187 | 234515 | 7.9035 | 0.5224 | 0.6252  | 5.9756 | JPT |
| CPNE1  | GI_23397697-A | rs6060642  | 20 | 20 | 33913254 | 235582 | 7.8640 | 0.5288 | -0.6296 | 5.9756 | JPT |
| CPNE1  | GI_23397697-A | rs6060643  | 20 | 20 | 33913265 | 235593 | 7.9035 | 0.5224 | -0.6252 | 5.9756 | JPT |
| CPNE1  | GI_23397697-A | rs7271036  | 20 | 20 | 33930629 | 252957 | 7.9035 | 0.5224 | 0.6252  | 5.9756 | JPT |
| CPNE1  | GI_23397697-A | rs3787173  | 20 | 20 | 33935519 | 257847 | 7.6174 | 0.5161 | -0.6618 | 5.9756 | JPT |
| CPNE1  | GI_23397697-A | rs6060669  | 20 | 20 | 33943971 | 266299 | 7.7189 | 0.5214 | -0.6212 | 5.9756 | JPT |
| CPNE1  | GI_23397697-A | rs6058354  | 20 | 20 | 33954524 | 276852 | 7.6430 | 0.5261 | 0.6215  | 5.9756 | JPT |
| CPNE1  | GI_23397697-A | rs6058356  | 20 | 20 | 33954944 | 277272 | 7.9015 | 0.5307 | -0.6165 | 5.9756 | JPT |
| CPNE1  | GI_23397697-A | rs8125393  | 20 | 20 | 33959576 | 281904 | 7.7054 | 0.5207 | -0.6223 | 5.9756 | JPT |
| CPNE1  | GI_23397697-A | rs11696912 | 20 | 20 | 33961074 | 283402 | 7.9035 | 0.5224 | 0.6252  | 5.9756 | JPT |
| CPNE1  | GI_23397697-A | rs6060676  | 20 | 20 | 33961965 | 284293 | 7.7788 | 0.5245 | 0.6277  | 5.9756 | JPT |
| CPNE1  | GI_23397697-A | rs6060677  | 20 | 20 | 33962782 | 285110 | 7.7788 | 0.5245 | -0.6277 | 5.9756 | JPT |
| CPNE1  | GI_23397697-A | rs17431878 | 20 | 20 | 33965521 | 287849 | 7.7054 | 0.5207 | 0.6223  | 5.9756 | JPT |
| CPNE1  | GI_23397697-A | rs6058364  | 20 | 20 | 33971304 | 293632 | 7.9035 | 0.5224 | 0.6252  | 5.9756 | JPT |
| CPNE1  | GI_23397697-A | rs11167279 | 20 | 20 | 33972521 | 294849 | 7.9035 | 0.5224 | 0.6252  | 5.9756 | JPT |

|           |               |            |    |    |          |        |        |        |         |        |     |
|-----------|---------------|------------|----|----|----------|--------|--------|--------|---------|--------|-----|
| CPNE1     | GI_23397697-A | rs11699899 | 20 | 20 | 33989060 | 311388 | 7.6174 | 0.5161 | 0.6618  | 5.9756 | JPT |
| CPNE1     | GI_23397697-A | rs6060704  | 20 | 20 | 33993684 | 316012 | 7.6430 | 0.5261 | -0.6215 | 5.9756 | JPT |
| CPNE1     | GI_23397697-A | rs3829829  | 20 | 20 | 34000574 | 322902 | 7.9035 | 0.5224 | -0.6252 | 5.9756 | JPT |
| LOC375097 | GI_37555934-S | rs1739646  | 20 | 20 | 36470998 | 11936  | 8.7122 | 0.5614 | -0.8833 | 5.7917 | JPT |
| Hs.400876 | Hs.400876-S   | rs1739646  | 20 | 20 | 36470998 | 11787  | 8.4268 | 0.5480 | -0.9159 | 5.7338 | JPT |
| LOC375097 | GI_37555934-S | rs6070062  | 20 | 20 | 36476409 | 6525   | 7.7104 | 0.5126 | -0.7270 | 5.7917 | JPT |
| Hs.400876 | Hs.400876-S   | rs6070062  | 20 | 20 | 36476409 | 6376   | 7.5918 | 0.5065 | -0.7583 | 5.7338 | JPT |
| LOC375097 | GI_37555934-S | rs6025497  | 20 | 20 | 36476624 | 6310   | 7.1185 | 0.4979 | -0.8118 | 5.7917 | JPT |
| Hs.400876 | Hs.400876-S   | rs6025497  | 20 | 20 | 36476624 | 6161   | 7.0499 | 0.4941 | -0.8487 | 5.7338 | JPT |
| LOC375097 | GI_37555934-S | rs1739652  | 20 | 20 | 36482373 | 561    | 7.1185 | 0.4979 | 0.8118  | 5.7917 | JPT |
| Hs.400876 | Hs.400876-S   | rs1739652  | 20 | 20 | 36482373 | 412    | 7.0499 | 0.4941 | 0.8487  | 5.7338 | JPT |
| LOC375097 | GI_37555934-S | rs3752277  | 20 | 20 | 36484167 | 1233   | 7.7104 | 0.5126 | -0.7270 | 5.7917 | JPT |
| Hs.400876 | Hs.400876-S   | rs3752277  | 20 | 20 | 36484167 | 1382   | 7.5918 | 0.5065 | -0.7583 | 5.7338 | JPT |
| LOC375097 | GI_37555934-S | rs3752278  | 20 | 20 | 36484231 | 1297   | 7.9113 | 0.5228 | 0.8296  | 5.7917 | JPT |
| Hs.400876 | Hs.400876-S   | rs3752278  | 20 | 20 | 36484231 | 1446   | 7.7597 | 0.5151 | 0.8641  | 5.7338 | JPT |
| LOC375097 | GI_37555934-S | rs3752279  | 20 | 20 | 36484373 | 1439   | 7.1185 | 0.4979 | -0.8118 | 5.7917 | JPT |
| Hs.400876 | Hs.400876-S   | rs3752279  | 20 | 20 | 36484373 | 1588   | 7.0499 | 0.4941 | -0.8487 | 5.7338 | JPT |
| LOC375097 | GI_37555934-S | rs3752280  | 20 | 20 | 36484421 | 1487   | 7.9113 | 0.5228 | 0.8296  | 5.7917 | JPT |
| Hs.400876 | Hs.400876-S   | rs3752280  | 20 | 20 | 36484421 | 1636   | 7.7597 | 0.5151 | 0.8641  | 5.7338 | JPT |
| LOC375097 | GI_37555934-S | rs1780636  | 20 | 20 | 36486997 | 4063   | 7.5269 | 0.5114 | -0.7157 | 5.7917 | JPT |
| Hs.400876 | Hs.400876-S   | rs1780636  | 20 | 20 | 36486997 | 4212   | 7.3920 | 0.5043 | -0.7476 | 5.7338 | JPT |
| LOC375097 | GI_37555934-S | rs752775   | 20 | 20 | 36488195 | 5261   | 7.4023 | 0.5133 | 0.7200  | 5.7917 | JPT |
| Hs.400876 | Hs.400876-S   | rs752775   | 20 | 20 | 36488195 | 5410   | 7.2425 | 0.5047 | 0.7507  | 5.7338 | JPT |
| LOC375097 | GI_37555934-S | rs707578   | 20 | 20 | 36489289 | 6355   | 6.9502 | 0.4885 | 0.6921  | 5.7917 | JPT |
| Hs.400876 | Hs.400876-S   | rs707578   | 20 | 20 | 36489289 | 6504   | 6.8212 | 0.4812 | 0.7231  | 5.7338 | JPT |
| LOC375097 | GI_37555934-S | rs788347   | 20 | 20 | 36495997 | 13063  | 7.9512 | 0.5332 | 0.8626  | 5.7917 | JPT |
| Hs.400876 | Hs.400876-S   | rs788347   | 20 | 20 | 36495997 | 13212  | 7.6726 | 0.5190 | 0.8929  | 5.7338 | JPT |
| LOC375097 | GI_37555934-S | rs788348   | 20 | 20 | 36496888 | 13954  | 7.8414 | 0.5363 | -0.8687 | 5.7917 | JPT |
| Hs.400876 | Hs.400876-S   | rs788348   | 20 | 20 | 36496888 | 14103  | 7.6489 | 0.5264 | -0.9034 | 5.7338 | JPT |
| LOC375097 | GI_37555934-S | rs788350   | 20 | 20 | 36498050 | 15116  | 8.7122 | 0.5614 | -0.8833 | 5.7917 | JPT |
| Hs.400876 | Hs.400876-S   | rs788350   | 20 | 20 | 36498050 | 15265  | 8.4268 | 0.5480 | -0.9159 | 5.7338 | JPT |
| LOC375097 | GI_37555934-S | rs6099675  | 20 | 20 | 36500903 | 17969  | 7.1585 | 0.5001 | -0.8381 | 5.7917 | JPT |
| Hs.400876 | Hs.400876-S   | rs6099675  | 20 | 20 | 36500903 | 18118  | 6.8953 | 0.4854 | -0.8669 | 5.7338 | JPT |
| LOC375097 | GI_37555934-S | rs805527   | 20 | 20 | 36506018 | 23084  | 7.8414 | 0.5363 | -0.8687 | 5.7917 | JPT |
| Hs.400876 | Hs.400876-S   | rs805527   | 20 | 20 | 36506018 | 23233  | 7.6489 | 0.5264 | -0.9034 | 5.7338 | JPT |
| LOC375097 | GI_37555934-S | rs805528   | 20 | 20 | 36506505 | 23571  | 7.9565 | 0.5335 | 0.8633  | 5.7917 | JPT |
| Hs.400876 | Hs.400876-S   | rs805528   | 20 | 20 | 36506505 | 23720  | 7.6859 | 0.5197 | 0.8949  | 5.7338 | JPT |
| LOC375097 | GI_37555934-S | rs805529   | 20 | 20 | 36506696 | 23762  | 6.7001 | 0.4581 | 0.8285  | 5.7917 | JPT |
| Hs.400876 | Hs.400876-S   | rs805529   | 20 | 20 | 36506696 | 23911  | 6.4211 | 0.4421 | 0.8546  | 5.7338 | JPT |
| LOC375097 | GI_37555934-S | rs805530   | 20 | 20 | 36507613 | 24679  | 7.9565 | 0.5335 | -0.8633 | 5.7917 | JPT |
| Hs.400876 | Hs.400876-S   | rs805530   | 20 | 20 | 36507613 | 24828  | 7.6859 | 0.5197 | -0.8949 | 5.7338 | JPT |
| LOC375097 | GI_37555934-S | rs805531   | 20 | 20 | 36508140 | 25206  | 7.9565 | 0.5335 | -0.8633 | 5.7917 | JPT |
| Hs.400876 | Hs.400876-S   | rs805531   | 20 | 20 | 36508140 | 25355  | 7.6859 | 0.5197 | -0.8949 | 5.7338 | JPT |
| LOC375097 | GI_37555934-S | rs12397    | 20 | 20 | 36512651 | 29717  | 8.7122 | 0.5614 | 0.8833  | 5.7917 | JPT |
| Hs.400876 | Hs.400876-S   | rs12397    | 20 | 20 | 36512651 | 29866  | 8.4268 | 0.5480 | 0.9159  | 5.7338 | JPT |
| LOC375097 | GI_37555934-S | rs805532   | 20 | 20 | 36513421 | 30487  | 7.9565 | 0.5335 | -0.8633 | 5.7917 | JPT |
| Hs.400876 | Hs.400876-S   | rs805532   | 20 | 20 | 36513421 | 30636  | 7.6859 | 0.5197 | -0.8949 | 5.7338 | JPT |
| LOC375097 | GI_37555934-S | rs805552   | 20 | 20 | 36536221 | 53287  | 7.9565 | 0.5335 | 0.8633  | 5.7917 | JPT |
| Hs.400876 | Hs.400876-S   | rs805552   | 20 | 20 | 36536221 | 53436  | 7.6859 | 0.5197 | 0.8949  | 5.7338 | JPT |
| LOC375097 | GI_37555934-S | rs1303567  | 20 | 20 | 36539571 | 56637  | 6.2748 | 0.4335 | 0.7403  | 5.7917 | JPT |
| Hs.400876 | Hs.400876-S   | rs1303567  | 20 | 20 | 36539571 | 56786  | 6.1994 | 0.4291 | 0.7728  | 5.7338 | JPT |
| LOC375097 | GI_37555934-S | rs805554   | 20 | 20 | 36540455 | 57521  | 8.7122 | 0.5614 | -0.8833 | 5.7917 | JPT |
| Hs.400876 | Hs.400876-S   | rs805554   | 20 | 20 | 36540455 | 57670  | 8.4268 | 0.5480 | -0.9159 | 5.7338 | JPT |
| LOC375097 | GI_37555934-S | rs1303588  | 20 | 20 | 36541160 | 58226  | 8.7122 | 0.5614 | -0.8833 | 5.7917 | JPT |
| Hs.400876 | Hs.400876-S   | rs1303588  | 20 | 20 | 36541160 | 58375  | 8.4268 | 0.5480 | -0.9159 | 5.7338 | JPT |
| LOC375097 | GI_37555934-S | rs1303582  | 20 | 20 | 36546349 | 63415  | 7.8414 | 0.5363 | -0.8687 | 5.7917 | JPT |
| Hs.400876 | Hs.400876-S   | rs1303582  | 20 | 20 | 36546349 | 63564  | 7.6489 | 0.5264 | -0.9034 | 5.7338 | JPT |
| LOC375097 | GI_37555934-S | rs1303581  | 20 | 20 | 36547300 | 64366  | 8.7122 | 0.5614 | -0.8833 | 5.7917 | JPT |
| Hs.400876 | Hs.400876-S   | rs1303581  | 20 | 20 | 36547300 | 64515  | 8.4268 | 0.5480 | -0.9159 | 5.7338 | JPT |

|           |               |            |    |    |          |        |        |        |         |        |     |
|-----------|---------------|------------|----|----|----------|--------|--------|--------|---------|--------|-----|
| LOC375097 | GI_37555934-S | rs1303577  | 20 | 20 | 36559271 | 76337  | 8.7122 | 0.5614 | -0.8833 | 5.7917 | JPT |
| Hs.400876 | Hs.400876-S   | rs1303577  | 20 | 20 | 36559271 | 76486  | 8.4268 | 0.5480 | -0.9159 | 5.7338 | JPT |
| LOC375097 | GI_37555934-S | rs1303575  | 20 | 20 | 36562231 | 79297  | 8.7122 | 0.5614 | 0.8833  | 5.7917 | JPT |
| Hs.400876 | Hs.400876-S   | rs1303575  | 20 | 20 | 36562231 | 79446  | 8.4268 | 0.5480 | 0.9159  | 5.7338 | JPT |
| LOC375097 | GI_37555934-S | rs1303574  | 20 | 20 | 36562655 | 79721  | 8.7122 | 0.5614 | -0.8833 | 5.7917 | JPT |
| Hs.400876 | Hs.400876-S   | rs1303574  | 20 | 20 | 36562655 | 79870  | 8.4268 | 0.5480 | -0.9159 | 5.7338 | JPT |
| LOC375097 | GI_37555934-S | rs1315305  | 20 | 20 | 36565135 | 82201  | 7.9565 | 0.5335 | -0.8633 | 5.7917 | JPT |
| Hs.400876 | Hs.400876-S   | rs1315305  | 20 | 20 | 36565135 | 82350  | 7.6859 | 0.5197 | -0.8949 | 5.7338 | JPT |
| LOC375097 | GI_37555934-S | rs1303571  | 20 | 20 | 36566533 | 83599  | 8.1478 | 0.5607 | -0.8777 | 5.7917 | JPT |
| Hs.400876 | Hs.400876-S   | rs1303571  | 20 | 20 | 36566533 | 83748  | 7.8644 | 0.5464 | -0.9112 | 5.7338 | JPT |
| LOC375097 | GI_37555934-S | rs805559   | 20 | 20 | 36591367 | 108433 | 7.3977 | 0.5131 | -0.8671 | 5.7917 | JPT |
| Hs.400876 | Hs.400876-S   | rs805559   | 20 | 20 | 36591367 | 108582 | 7.3118 | 0.5085 | -0.9166 | 5.7338 | JPT |
| LOC375097 | GI_37555934-S | rs4812025  | 20 | 20 | 36614832 | 131898 | 7.8414 | 0.5363 | 0.8687  | 5.7917 | JPT |
| Hs.400876 | Hs.400876-S   | rs4812025  | 20 | 20 | 36614832 | 132047 | 7.6489 | 0.5264 | 0.9034  | 5.7338 | JPT |
| LOC375097 | GI_37555934-S | rs2864932  | 20 | 20 | 36619423 | 136489 | 8.7122 | 0.5614 | 0.8833  | 5.7917 | JPT |
| Hs.400876 | Hs.400876-S   | rs2864932  | 20 | 20 | 36619423 | 136638 | 8.4268 | 0.5480 | 0.9159  | 5.7338 | JPT |
| LOC375097 | GI_37555934-S | rs2185594  | 20 | 20 | 36627668 | 144734 | 7.8414 | 0.5363 | 0.8687  | 5.7917 | JPT |
| Hs.400876 | Hs.400876-S   | rs2185594  | 20 | 20 | 36627668 | 144883 | 7.6489 | 0.5264 | 0.9034  | 5.7338 | JPT |
| Hs.400876 | Hs.400876-S   | rs1295992  | 20 | 20 | 36630815 | 148030 | 5.7359 | 0.4158 | 0.7820  | 5.7338 | JPT |
| LOC375097 | GI_37555934-S | rs2206783  | 20 | 20 | 36633736 | 150802 | 8.7907 | 0.5736 | -0.9226 | 5.7917 | JPT |
| Hs.400876 | Hs.400876-S   | rs2206783  | 20 | 20 | 36633736 | 150951 | 8.2147 | 0.5463 | -0.9411 | 5.7338 | JPT |
| LOC375097 | GI_37555934-S | rs1115600  | 20 | 20 | 36635587 | 152653 | 7.8414 | 0.5363 | -0.8687 | 5.7917 | JPT |
| Hs.400876 | Hs.400876-S   | rs1115600  | 20 | 20 | 36635587 | 152802 | 7.6489 | 0.5264 | -0.9034 | 5.7338 | JPT |
| LOC375097 | GI_37555934-S | rs6064733  | 20 | 20 | 36641941 | 159007 | 7.9565 | 0.5335 | 0.8633  | 5.7917 | JPT |
| Hs.400876 | Hs.400876-S   | rs6064733  | 20 | 20 | 36641941 | 159156 | 7.6859 | 0.5197 | 0.8949  | 5.7338 | JPT |
| LOC375097 | GI_37555934-S | rs1033516  | 20 | 20 | 36642400 | 159466 | 8.7122 | 0.5614 | -0.8833 | 5.7917 | JPT |
| Hs.400876 | Hs.400876-S   | rs1033516  | 20 | 20 | 36642400 | 159615 | 8.4268 | 0.5480 | -0.9159 | 5.7338 | JPT |
| LOC375097 | GI_37555934-S | rs4812047  | 20 | 20 | 36642920 | 159986 | 8.7122 | 0.5614 | -0.8833 | 5.7917 | JPT |
| Hs.400876 | Hs.400876-S   | rs4812047  | 20 | 20 | 36642920 | 160135 | 8.4268 | 0.5480 | -0.9159 | 5.7338 | JPT |
| LOC375097 | GI_37555934-S | rs6026642  | 20 | 20 | 36643690 | 160756 | 8.7748 | 0.5729 | 0.9081  | 5.7917 | JPT |
| Hs.400876 | Hs.400876-S   | rs6026642  | 20 | 20 | 36643690 | 160905 | 8.2637 | 0.5487 | 0.9354  | 5.7338 | JPT |
| TOMM34    | GI_40807467-S | rs3746582  | 20 | 20 | 42994328 | 10066  | 7.5857 | 0.5062 | -0.5124 | 6.0637 | JPT |
| TOMM34    | GI_40807467-S | rs6031869  | 20 | 20 | 42994650 | 9744   | 7.5857 | 0.5062 | 0.5124  | 6.0637 | JPT |
| TOMM34    | GI_40807467-S | rs2664567  | 20 | 20 | 42994947 | 9447   | 7.5857 | 0.5062 | 0.5124  | 6.0637 | JPT |
| TOMM34    | GI_40807467-S | rs12798    | 20 | 20 | 42995068 | 9326   | 7.6123 | 0.5159 | 0.5191  | 6.0637 | JPT |
| TOMM34    | GI_40807467-S | rs12031    | 20 | 20 | 42995074 | 9320   | 7.7144 | 0.5298 | 0.5198  | 6.0637 | JPT |
| TOMM34    | GI_40807467-S | rs6031870  | 20 | 20 | 42997174 | 7220   | 7.5857 | 0.5062 | -0.5124 | 6.0637 | JPT |
| TOMM34    | GI_40807467-S | rs2273358  | 20 | 20 | 42998449 | 5945   | 7.5857 | 0.5062 | -0.5124 | 6.0637 | JPT |
| TOMM34    | GI_40807467-S | rs3746583  | 20 | 20 | 42998973 | 5421   | 7.6123 | 0.5159 | -0.5191 | 6.0637 | JPT |
| TOMM34    | GI_40807467-S | rs2273357  | 20 | 20 | 43000277 | 4117   | 7.7643 | 0.5504 | 0.5117  | 6.0637 | JPT |
| TOMM34    | GI_40807467-S | rs10485453 | 20 | 20 | 43002140 | 2254   | 7.6717 | 0.5190 | 0.4697  | 6.0637 | JPT |
| TOMM34    | GI_40807467-S | rs11907237 | 20 | 20 | 43002180 | 2214   | 7.6360 | 0.5088 | -0.4633 | 6.0637 | JPT |
| TOMM34    | GI_40807467-S | rs16989514 | 20 | 20 | 43003459 | 935    | 6.3207 | 0.4688 | 0.4451  | 6.0637 | JPT |
| TOMM34    | GI_40807467-S | rs11908348 | 20 | 20 | 43003903 | 491    | 6.2266 | 0.4307 | -0.3950 | 6.0637 | JPT |
| TOMM34    | GI_40807467-S | rs1804644  | 20 | 20 | 43005631 | 1237   | 6.2266 | 0.4307 | 0.3950  | 6.0637 | JPT |
| TOMM34    | GI_40807467-S | rs2284268  | 20 | 20 | 43015135 | 10741  | 7.5486 | 0.5126 | -0.4519 | 6.0637 | JPT |
| PLTP      | GI_33356542-I | rs2294213  | 20 | 20 | 43974099 | 2493   | 5.9166 | 0.4195 | 0.1634  | 5.9031 | JPT |
| BCAS1     | GI_4502372-S  | rs290431   | 20 | 20 | 52109454 | 115356 | 5.9849 | 0.4237 | -0.5756 | 5.5194 | JPT |
| BCAS1     | GI_4502372-S  | rs290432   | 20 | 20 | 52109702 | 115604 | 5.9422 | 0.4135 | 0.5746  | 5.5194 | JPT |
| BCAS1     | GI_4502372-S  | rs290436   | 20 | 20 | 52112899 | 118801 | 6.0327 | 0.4190 | -0.5723 | 5.5194 | JPT |
| BCAS1     | GI_4502372-S  | rs462174   | 20 | 20 | 52113705 | 119607 | 6.0327 | 0.4190 | -0.5723 | 5.5194 | JPT |
| BCAS1     | GI_4502372-S  | rs463420   | 20 | 20 | 52114490 | 120392 | 5.9091 | 0.4267 | -0.5317 | 5.5194 | JPT |
| BCAS1     | GI_4502372-S  | rs460470   | 20 | 20 | 52114574 | 120476 | 5.7546 | 0.4504 | 0.6237  | 5.5194 | JPT |
| BCAS1     | GI_4502372-S  | rs290449   | 20 | 20 | 52118804 | 124706 | 6.1595 | 0.4422 | 0.5901  | 5.5194 | JPT |
| NPEPL1    | GI_20070332-S | rs3746395  | 20 | 20 | 56712374 | 11837  | 6.5215 | 0.4558 | 0.2745  | 6.0066 | JPT |
| NPEPL1    | GI_20070332-S | rs6026468  | 20 | 20 | 56723754 | 457    | 6.5600 | 0.4580 | 0.2656  | 6.0066 | JPT |
| NPEPL1    | GI_20070332-S | rs8978     | 20 | 20 | 56724253 | 42     | 6.4230 | 0.4500 | 0.2698  | 6.0066 | JPT |
| NPEPL1    | GI_20070332-S | rs1886839  | 20 | 20 | 56724837 | 626    | 6.3067 | 0.4956 | 0.3063  | 6.0066 | JPT |
| NPEPL1    | GI_20070332-S | rs745405   | 20 | 20 | 56725390 | 1179   | 6.4191 | 0.4578 | 0.2772  | 6.0066 | JPT |

|           |               |            |    |    |          |        |         |        |         |        |     |
|-----------|---------------|------------|----|----|----------|--------|---------|--------|---------|--------|-----|
| NPEPL1    | GI_20070332-S | rs6026470  | 20 | 20 | 56726496 | 2285   | 6.8930  | 0.4853 | 0.2900  | 6.0066 | JPT |
| NPEPL1    | GI_20070332-S | rs2426777  | 20 | 20 | 56726525 | 2314   | 6.2673  | 0.4931 | -0.2785 | 6.0066 | JPT |
| NPEPL1    | GI_20070332-S | rs12480759 | 20 | 20 | 56726757 | 2546   | 6.4736  | 0.4452 | 0.2684  | 6.0066 | JPT |
| NPEPL1    | GI_20070332-S | rs2426778  | 20 | 20 | 56726884 | 2673   | 6.4230  | 0.4500 | -0.2698 | 6.0066 | JPT |
| NPEPL1    | GI_20070332-S | rs2246228  | 20 | 20 | 56727395 | 3184   | 6.5218  | 0.4639 | 0.2837  | 6.0066 | JPT |
| hmm26937  | hmm26937-S    | rs2427422  | 20 | 20 | 60830418 | 487868 | 5.5665  | 0.3974 | 0.0589  | 5.5024 | JPT |
| Hs.517172 | Hs.517172-S   | rs6089809  | 20 | 20 | 60993353 | 38349  | 7.6297  | 0.5168 | -0.1673 | 5.8945 | JPT |
| Hs.517172 | Hs.517172-S   | rs7271169  | 20 | 20 | 60997396 | 34306  | 9.2926  | 0.5874 | -0.1720 | 5.8945 | JPT |
| Hs.517172 | Hs.517172-S   | rs755740   | 20 | 20 | 60997925 | 33777  | 9.3971  | 0.6006 | 0.1733  | 5.8945 | JPT |
| Hs.517172 | Hs.517172-S   | rs1883848  | 20 | 20 | 60998751 | 32951  | 9.3971  | 0.6006 | -0.1733 | 5.8945 | JPT |
| Hs.517172 | Hs.517172-S   | rs6089810  | 20 | 20 | 61001027 | 30675  | 9.6516  | 0.6028 | 0.1720  | 5.8945 | JPT |
| Hs.517172 | Hs.517172-S   | rs6011456  | 20 | 20 | 61001169 | 30533  | 9.6516  | 0.6028 | 0.1720  | 5.8945 | JPT |
| Hs.517172 | Hs.517172-S   | rs6010784  | 20 | 20 | 61010764 | 20938  | 7.3368  | 0.5013 | 0.1711  | 5.8945 | JPT |
| Hs.517172 | Hs.517172-S   | rs6010786  | 20 | 20 | 61015159 | 16543  | 7.8523  | 0.5198 | 0.1692  | 5.8945 | JPT |
| Hs.517172 | Hs.517172-S   | rs6010789  | 20 | 20 | 61031598 | 104    | 8.0374  | 0.5375 | 0.1718  | 5.8945 | JPT |
| PRIC285   | GI_34335259-S | rs6062397  | 20 | 20 | 61138713 | 521324 | 5.7501  | 0.4091 | 0.3823  | 5.6523 | JPT |
| PRIC285   | GI_34335259-S | rs4809270  | 20 | 20 | 61147154 | 512883 | 5.6832  | 0.4124 | -0.3834 | 5.6523 | JPT |
| PRIC285   | GI_34335259-S | rs3911892  | 20 | 20 | 61796554 | 136517 | 5.8545  | 0.4233 | -0.3565 | 5.6523 | JPT |
| PRIC285   | GI_34335259-S | rs1291206  | 20 | 20 | 61799613 | 139576 | 5.9804  | 0.4234 | -0.3579 | 5.6523 | JPT |
| DSCR5     | GI_24497594-I | rs2249828  | 21 | 21 | 37354491 | 11851  | 6.1003  | 0.4307 | -0.1887 | 5.9315 | JPT |
| C21orf107 | GI_38026951-I | rs2836922  | 21 | 21 | 39438178 | 46149  | 8.6432  | 0.5668 | 0.3070  | 6.2707 | JPT |
| C21orf107 | GI_38026951-I | rs7281463  | 21 | 21 | 39442653 | 41674  | 11.0385 | 0.6657 | -0.3055 | 6.2707 | JPT |
| C21orf107 | GI_38026951-I | rs9977198  | 21 | 21 | 39445034 | 39293  | 12.2202 | 0.6974 | -0.3063 | 6.2707 | JPT |
| C21orf107 | GI_38026951-I | rs2037923  | 21 | 21 | 39447157 | 37170  | 11.1967 | 0.6714 | -0.3166 | 6.2707 | JPT |
| C21orf107 | GI_38026951-I | rs7279497  | 21 | 21 | 39453176 | 31151  | 10.9199 | 0.6526 | 0.3223  | 6.2707 | JPT |
| C21orf107 | GI_38026951-I | rs6517518  | 21 | 21 | 39455643 | 28684  | 11.1967 | 0.6714 | 0.3166  | 6.2707 | JPT |
| C21orf107 | GI_38026951-I | rs377098   | 21 | 21 | 39457086 | 27241  | 12.9493 | 0.7284 | -0.3097 | 6.2707 | JPT |
| C21orf107 | GI_38026951-I | rs418298   | 21 | 21 | 39458524 | 25803  | 13.2427 | 0.7285 | -0.3099 | 6.2707 | JPT |
| C21orf107 | GI_38026951-I | rs418359   | 21 | 21 | 39458604 | 25723  | 13.2427 | 0.7285 | -0.3099 | 6.2707 | JPT |
| C21orf107 | GI_38026951-I | rs2836926  | 21 | 21 | 39458660 | 25667  | 10.6750 | 0.6522 | -0.3227 | 6.2707 | JPT |
| C21orf107 | GI_38026951-I | rs7282604  | 21 | 21 | 39458780 | 25547  | 12.9493 | 0.7284 | -0.3097 | 6.2707 | JPT |
| C21orf107 | GI_38026951-I | rs419469   | 21 | 21 | 39459104 | 25223  | 13.2427 | 0.7285 | -0.3099 | 6.2707 | JPT |
| C21orf107 | GI_38026951-I | rs1235441  | 21 | 21 | 39459607 | 24720  | 13.6971 | 0.7496 | -0.3058 | 6.2707 | JPT |
| C21orf107 | GI_38026951-I | rs8134214  | 21 | 21 | 39464237 | 20090  | 10.6750 | 0.6522 | 0.3227  | 6.2707 | JPT |
| C21orf107 | GI_38026951-I | rs413078   | 21 | 21 | 39464565 | 19762  | 13.6971 | 0.7496 | 0.3058  | 6.2707 | JPT |
| C21orf107 | GI_38026951-I | rs2836930  | 21 | 21 | 39467526 | 16801  | 10.6750 | 0.6522 | 0.3227  | 6.2707 | JPT |
| C21orf107 | GI_38026951-I | rs2836931  | 21 | 21 | 39468439 | 15888  | 10.4807 | 0.6538 | -0.3212 | 6.2707 | JPT |
| C21orf107 | GI_38026951-I | rs428602   | 21 | 21 | 39468874 | 15453  | 12.9493 | 0.7284 | -0.3097 | 6.2707 | JPT |
| C21orf107 | GI_38026951-I | rs9982122  | 21 | 21 | 39469180 | 15147  | 13.9690 | 0.7487 | 0.3058  | 6.2707 | JPT |
| C21orf107 | GI_38026951-I | rs2245455  | 21 | 21 | 39469957 | 14370  | 12.9493 | 0.7284 | -0.3097 | 6.2707 | JPT |
| C21orf107 | GI_38026951-I | rs391062   | 21 | 21 | 39470137 | 14190  | 13.6971 | 0.7496 | 0.3058  | 6.2707 | JPT |
| C21orf107 | GI_38026951-I | rs6517520  | 21 | 21 | 39470768 | 13559  | 13.9690 | 0.7487 | 0.3058  | 6.2707 | JPT |
| C21orf107 | GI_38026951-I | rs2142111  | 21 | 21 | 39471159 | 13168  | 12.9493 | 0.7284 | 0.3097  | 6.2707 | JPT |
| C21orf107 | GI_38026951-I | rs2236437  | 21 | 21 | 39478465 | 5862   | 18.3698 | 0.8496 | 0.3369  | 6.2707 | JPT |
| C21orf107 | GI_38026951-I | rs2297256  | 21 | 21 | 39480291 | 4036   | 12.9472 | 0.7199 | -0.3441 | 6.2707 | JPT |
| C21orf107 | GI_38026951-I | rs2410104  | 21 | 21 | 39486334 | 2007   | 17.6368 | 0.8441 | -0.3369 | 6.2707 | JPT |
| C21orf107 | GI_38026951-I | rs2836934  | 21 | 21 | 39486755 | 2428   | 12.6531 | 0.7195 | 0.3444  | 6.2707 | JPT |
| C21orf107 | GI_38026951-I | rs2150410  | 21 | 21 | 39491649 | 7322   | 17.8243 | 0.8544 | -0.3440 | 6.2707 | JPT |
| C21orf107 | GI_38026951-I | rs1041439  | 21 | 21 | 39493116 | 8789   | 18.3698 | 0.8496 | 0.3369  | 6.2707 | JPT |
| C21orf107 | GI_38026951-I | rs13051430 | 21 | 21 | 39495900 | 11573  | 17.9005 | 0.8487 | -0.3373 | 6.2707 | JPT |
| C21orf107 | GI_38026951-I | rs2150411  | 21 | 21 | 39496422 | 12095  | 12.6531 | 0.7195 | 0.3444  | 6.2707 | JPT |
| C21orf107 | GI_38026951-I | rs2150412  | 21 | 21 | 39496539 | 12212  | 14.0744 | 0.8199 | -0.3457 | 6.2707 | JPT |
| C21orf107 | GI_38026951-I | rs4818001  | 21 | 21 | 39496958 | 12631  | 12.6531 | 0.7195 | -0.3444 | 6.2707 | JPT |
| C21orf107 | GI_38026951-I | rs8130320  | 21 | 21 | 39502128 | 17801  | 12.9472 | 0.7199 | -0.3441 | 6.2707 | JPT |
| C21orf107 | GI_38026951-I | rs8132230  | 21 | 21 | 39505951 | 21624  | 17.3970 | 0.8399 | -0.3323 | 6.2707 | JPT |
| C21orf107 | GI_38026951-I | rs8132143  | 21 | 21 | 39506128 | 21801  | 12.6531 | 0.7195 | 0.3444  | 6.2707 | JPT |
| C21orf107 | GI_38026951-I | rs8132424  | 21 | 21 | 39506282 | 21955  | 12.9472 | 0.7199 | 0.3441  | 6.2707 | JPT |
| C21orf107 | GI_38026951-I | rs2836942  | 21 | 21 | 39513251 | 28924  | 12.6531 | 0.7195 | 0.3444  | 6.2707 | JPT |
| C21orf107 | GI_38026951-I | rs8128118  | 21 | 21 | 39514099 | 29772  | 18.6786 | 0.8478 | 0.3367  | 6.2707 | JPT |

|           |               |            |    |    |          |        |         |        |         |        |     |
|-----------|---------------|------------|----|----|----------|--------|---------|--------|---------|--------|-----|
| C21orf107 | GI_38026951-I | rs2836943  | 21 | 21 | 39514481 | 30154  | 12.6531 | 0.7195 | 0.3444  | 6.2707 | JPT |
| C21orf107 | GI_38026951-I | rs2183575  | 21 | 21 | 39516230 | 31903  | 18.0145 | 0.8436 | 0.3380  | 6.2707 | JPT |
| C21orf107 | GI_38026951-I | rs2183576  | 21 | 21 | 39521095 | 36768  | 18.1977 | 0.8536 | 0.3366  | 6.2707 | JPT |
| C21orf107 | GI_38026951-I | rs2836948  | 21 | 21 | 39521547 | 37220  | 12.6531 | 0.7195 | -0.3444 | 6.2707 | JPT |
| C21orf107 | GI_38026951-I | rs2026266  | 21 | 21 | 39521590 | 37263  | 17.2480 | 0.8738 | 0.3429  | 6.2707 | JPT |
| C21orf107 | GI_38026951-I | rs4816619  | 21 | 21 | 39521746 | 37419  | 18.3698 | 0.8496 | 0.3369  | 6.2707 | JPT |
| C21orf107 | GI_38026951-I | rs11702268 | 21 | 21 | 39522183 | 37856  | 16.9698 | 0.8469 | -0.3382 | 6.2707 | JPT |
| C21orf107 | GI_38026951-I | rs17816433 | 21 | 21 | 39524326 | 39999  | 12.3072 | 0.7087 | -0.3408 | 6.2707 | JPT |
| C21orf107 | GI_38026951-I | rs1541101  | 21 | 21 | 39525800 | 41473  | 18.3698 | 0.8496 | 0.3369  | 6.2707 | JPT |
| C21orf107 | GI_38026951-I | rs8131263  | 21 | 21 | 39527088 | 42761  | 18.5998 | 0.8533 | 0.3365  | 6.2707 | JPT |
| C21orf107 | GI_38026951-I | rs2150413  | 21 | 21 | 39536748 | 52421  | 12.0996 | 0.7021 | 0.3422  | 6.2707 | JPT |
| C21orf107 | GI_38026951-I | rs2150414  | 21 | 21 | 39536858 | 52531  | 12.6531 | 0.7195 | 0.3444  | 6.2707 | JPT |
| C21orf107 | GI_38026951-I | rs2836952  | 21 | 21 | 39538521 | 54194  | 12.3883 | 0.7113 | -0.3461 | 6.2707 | JPT |
| C21orf107 | GI_38026951-I | rs9978591  | 21 | 21 | 39541997 | 57670  | 18.6786 | 0.8478 | -0.3367 | 6.2707 | JPT |
| C21orf107 | GI_38026951-I | rs2836956  | 21 | 21 | 39544888 | 60561  | 12.6531 | 0.7195 | -0.3444 | 6.2707 | JPT |
| C21orf107 | GI_38026951-I | rs2836958  | 21 | 21 | 39545396 | 61069  | 11.9546 | 0.7429 | -0.3333 | 6.2707 | JPT |
| C21orf107 | GI_38026951-I | rs2836959  | 21 | 21 | 39545538 | 61211  | 12.6531 | 0.7195 | -0.3444 | 6.2707 | JPT |
| C21orf107 | GI_38026951-I | rs7278297  | 21 | 21 | 39547622 | 63295  | 12.6531 | 0.7195 | 0.3444  | 6.2707 | JPT |
| C21orf107 | GI_38026951-I | rs7276774  | 21 | 21 | 39550595 | 66268  | 11.7820 | 0.7186 | -0.3128 | 6.2707 | JPT |
| C21orf107 | GI_38026951-I | rs8127391  | 21 | 21 | 39557930 | 73603  | 17.3970 | 0.8399 | -0.3323 | 6.2707 | JPT |
| C21orf107 | GI_38026951-I | rs2836966  | 21 | 21 | 39559391 | 75064  | 12.6531 | 0.7195 | 0.3444  | 6.2707 | JPT |
| C21orf107 | GI_38026951-I | rs6517531  | 21 | 21 | 39559517 | 75190  | 18.1078 | 0.8591 | 0.3328  | 6.2707 | JPT |
| C21orf107 | GI_38026951-I | rs1541100  | 21 | 21 | 39562922 | 78595  | 17.3343 | 0.8388 | 0.3369  | 6.2707 | JPT |
| C21orf107 | GI_38026951-I | rs6517532  | 21 | 21 | 39564059 | 79732  | 18.6786 | 0.8478 | 0.3367  | 6.2707 | JPT |
| C21orf107 | GI_38026951-I | rs7283439  | 21 | 21 | 39567607 | 83280  | 18.3698 | 0.8496 | -0.3369 | 6.2707 | JPT |
| C21orf107 | GI_38026951-I | rs7275773  | 21 | 21 | 39567960 | 83633  | 18.6786 | 0.8478 | -0.3367 | 6.2707 | JPT |
| C21orf107 | GI_38026951-I | rs2836969  | 21 | 21 | 39570135 | 85808  | 16.5423 | 0.8163 | -0.3372 | 6.2707 | JPT |
| C21orf107 | GI_38026951-I | rs4818011  | 21 | 21 | 39570465 | 86138  | 16.6635 | 0.8188 | 0.3363  | 6.2707 | JPT |
| C21orf107 | GI_38026951-I | rs973521   | 21 | 21 | 39572491 | 88164  | 18.3698 | 0.8496 | -0.3369 | 6.2707 | JPT |
| C21orf107 | GI_38026951-I | rs2836971  | 21 | 21 | 39573910 | 89583  | 15.8623 | 0.8099 | 0.3346  | 6.2707 | JPT |
| C21orf107 | GI_38026951-I | rs718225   | 21 | 21 | 39574486 | 90159  | 18.3698 | 0.8496 | 0.3369  | 6.2707 | JPT |
| C21orf107 | GI_38026951-I | rs2836975  | 21 | 21 | 39585490 | 101163 | 16.9008 | 0.8161 | -0.3373 | 6.2707 | JPT |
| C21orf107 | GI_38026951-I | rs2142117  | 21 | 21 | 39591175 | 106848 | 18.3698 | 0.8496 | 0.3369  | 6.2707 | JPT |
| C21orf107 | GI_38026951-I | rs1984748  | 21 | 21 | 39591768 | 107441 | 18.3698 | 0.8496 | -0.3369 | 6.2707 | JPT |
| C21orf107 | GI_38026951-I | rs2056844  | 21 | 21 | 39592330 | 108003 | 12.6531 | 0.7195 | -0.3444 | 6.2707 | JPT |
| C21orf107 | GI_38026951-I | rs7410020  | 21 | 21 | 39597363 | 113036 | 16.9008 | 0.8161 | 0.3373  | 6.2707 | JPT |
| C21orf107 | GI_38026951-I | rs8131150  | 21 | 21 | 39599185 | 114858 | 19.4072 | 0.8722 | 0.3491  | 6.2707 | JPT |
| C21orf107 | GI_38026951-I | rs2272576  | 21 | 21 | 39606259 | 121932 | 18.3698 | 0.8496 | 0.3369  | 6.2707 | JPT |
| C21orf107 | GI_38026951-I | rs2836980  | 21 | 21 | 39609488 | 125161 | 9.7731  | 0.6166 | 0.3129  | 6.2707 | JPT |
| C21orf107 | GI_38026951-I | rs2836981  | 21 | 21 | 39610235 | 125908 | 13.2732 | 0.7378 | -0.3200 | 6.2707 | JPT |
| C21orf107 | GI_38026951-I | rs2836982  | 21 | 21 | 39611041 | 126714 | 13.2732 | 0.7378 | -0.3200 | 6.2707 | JPT |
| C21orf107 | GI_38026951-I | rs2836983  | 21 | 21 | 39611206 | 126879 | 9.7731  | 0.6166 | -0.3129 | 6.2707 | JPT |
| C21orf107 | GI_38026951-I | rs7281853  | 21 | 21 | 39615360 | 131033 | 13.2732 | 0.7378 | -0.3200 | 6.2707 | JPT |
| C21orf107 | GI_38026951-I | rs7282582  | 21 | 21 | 39618844 | 134517 | 9.0387  | 0.5762 | -0.3125 | 6.2707 | JPT |
| C21orf107 | GI_38026951-I | rs11088471 | 21 | 21 | 39621183 | 136856 | 8.9858  | 0.6295 | 0.2988  | 6.2707 | JPT |
| C21orf107 | GI_38026951-I | rs2037925  | 21 | 21 | 39621801 | 137474 | 11.5937 | 0.6852 | 0.3150  | 6.2707 | JPT |
| C21orf107 | GI_38026951-I | rs2410123  | 21 | 21 | 39621963 | 137636 | 11.8412 | 0.6850 | 0.3151  | 6.2707 | JPT |
| C21orf107 | GI_38026951-I | rs2836985  | 21 | 21 | 39623039 | 138712 | 8.8302  | 0.5754 | 0.3125  | 6.2707 | JPT |
| C21orf107 | GI_38026951-I | rs2836988  | 21 | 21 | 39629845 | 145518 | 11.5937 | 0.6852 | 0.3150  | 6.2707 | JPT |
| C21orf107 | GI_38026951-I | rs726046   | 21 | 21 | 39634237 | 149910 | 12.8269 | 0.7247 | 0.3183  | 6.2707 | JPT |
| C21orf107 | GI_38026951-I | rs2070867  | 21 | 21 | 39637002 | 152675 | 12.8269 | 0.7247 | 0.3183  | 6.2707 | JPT |
| C21orf107 | GI_38026951-I | rs2735310  | 21 | 21 | 39639370 | 155043 | 11.6366 | 0.6867 | -0.3215 | 6.2707 | JPT |
| TSGA2     | GI_18254455-S | rs2839533  | 21 | 21 | 42770095 | 4102   | 6.0334  | 0.4266 | -0.4410 | 5.9681 | JPT |
| Hs.473917 | Hs.473917-S   | rs228045   | 21 | 21 | 42824802 | 5214   | 7.8692  | 0.5291 | -0.2200 | 7.1735 | JPT |
| Hs.473917 | Hs.473917-S   | rs228046   | 21 | 21 | 42825006 | 5418   | 7.8913  | 0.5218 | 0.2164  | 7.1735 | JPT |
| Hs.473917 | Hs.473917-S   | rs228047   | 21 | 21 | 42825058 | 5470   | 7.8913  | 0.5218 | 0.2164  | 7.1735 | JPT |
| Hs.473917 | Hs.473917-S   | rs228050   | 21 | 21 | 42825637 | 6049   | 7.8913  | 0.5218 | 0.2164  | 7.1735 | JPT |
| Hs.473917 | Hs.473917-S   | rs228054   | 21 | 21 | 42827332 | 7744   | 7.8913  | 0.5218 | 0.2164  | 7.1735 | JPT |
| Hs.473917 | Hs.473917-S   | rs228062   | 21 | 21 | 42831984 | 12396  | 7.5639  | 0.5134 | -0.2148 | 7.1735 | JPT |

|           |               |            |    |    |          |        |         |        |         |        |     |
|-----------|---------------|------------|----|----|----------|--------|---------|--------|---------|--------|-----|
| Hs.473917 | Hs.473917-S   | rs228068   | 21 | 21 | 42833288 | 13700  | 7.8913  | 0.5218 | -0.2164 | 7.1735 | JPT |
| Hs.473917 | Hs.473917-S   | rs228069   | 21 | 21 | 42833309 | 13721  | 7.8913  | 0.5218 | -0.2164 | 7.1735 | JPT |
| Hs.473917 | Hs.473917-S   | rs228070   | 21 | 21 | 42833590 | 14002  | 7.6319  | 0.5169 | 0.2133  | 7.1735 | JPT |
| Hs.473917 | Hs.473917-S   | rs228077   | 21 | 21 | 42838695 | 19107  | 7.6211  | 0.5163 | -0.2144 | 7.1735 | JPT |
| Hs.473917 | Hs.473917-S   | rs228079   | 21 | 21 | 42839213 | 19625  | 7.8913  | 0.5218 | 0.2164  | 7.1735 | JPT |
| Hs.473917 | Hs.473917-S   | rs228080   | 21 | 21 | 42839862 | 20274  | 7.8913  | 0.5218 | -0.2164 | 7.1735 | JPT |
| Hs.473917 | Hs.473917-S   | rs228083   | 21 | 21 | 42841135 | 21547  | 7.6319  | 0.5169 | 0.2133  | 7.1735 | JPT |
| Hs.473917 | Hs.473917-S   | rs228084   | 21 | 21 | 42841284 | 21696  | 7.8913  | 0.5218 | 0.2164  | 7.1735 | JPT |
| Hs.473917 | Hs.473917-S   | rs228085   | 21 | 21 | 42841928 | 22340  | 7.8913  | 0.5218 | -0.2164 | 7.1735 | JPT |
| Hs.245997 | Hs.245997-S   | rs1788414  | 21 | 21 | 42878403 | 13857  | 9.2473  | 0.5854 | -0.4034 | 7.143  | JPT |
| Hs.245997 | Hs.245997-S   | rs450508   | 21 | 21 | 42879076 | 14530  | 9.0488  | 0.5853 | -0.4049 | 7.143  | JPT |
| Hs.245997 | Hs.245997-S   | rs449014   | 21 | 21 | 42879186 | 14640  | 9.2473  | 0.5854 | -0.4034 | 7.143  | JPT |
| Hs.245997 | Hs.245997-S   | rs408465   | 21 | 21 | 42879276 | 14730  | 9.2473  | 0.5854 | 0.4034  | 7.143  | JPT |
| Hs.245997 | Hs.245997-S   | rs390268   | 21 | 21 | 42879293 | 14747  | 9.2473  | 0.5854 | 0.4034  | 7.143  | JPT |
| Hs.245997 | Hs.245997-S   | rs452481   | 21 | 21 | 42879399 | 14853  | 7.4834  | 0.5008 | -0.3800 | 7.143  | JPT |
| Hs.245997 | Hs.245997-S   | rs397322   | 21 | 21 | 42879967 | 15421  | 7.4834  | 0.5008 | -0.3800 | 7.143  | JPT |
| Hs.245997 | Hs.245997-S   | rs1788449  | 21 | 21 | 42880585 | 16039  | 9.0488  | 0.5853 | 0.4049  | 7.143  | JPT |
| NDUFV3    | GI_21361323-S | rs2246573  | 21 | 21 | 43126085 | 75980  | 7.8781  | 0.5211 | 0.7650  | 6.6508 | JPT |
| NDUFV3    | GI_21361323-S | rs12627373 | 21 | 21 | 43129905 | 72160  | 7.8781  | 0.5211 | -0.7650 | 6.6508 | JPT |
| NDUFV3    | GI_21361323-S | rs9981490  | 21 | 21 | 43132942 | 69123  | 7.6788  | 0.5193 | -0.7616 | 6.6508 | JPT |
| NDUFV3    | GI_21361323-S | rs9808758  | 21 | 21 | 43135459 | 66606  | 7.7135  | 0.5211 | 0.7589  | 6.6508 | JPT |
| NDUFV3    | GI_21361323-S | rs3746935  | 21 | 21 | 43137591 | 64474  | 7.7135  | 0.5211 | 0.7589  | 6.6508 | JPT |
| NDUFV3    | GI_21361323-S | rs3746937  | 21 | 21 | 43137755 | 64310  | 6.7274  | 0.4759 | 0.7525  | 6.6508 | JPT |
| NDUFV3    | GI_21361323-S | rs9975526  | 21 | 21 | 43139642 | 62423  | 7.8781  | 0.5211 | 0.7650  | 6.6508 | JPT |
| NDUFV3    | GI_21361323-S | rs7281655  | 21 | 21 | 43142812 | 59253  | 7.8781  | 0.5211 | -0.7650 | 6.6508 | JPT |
| NDUFV3    | GI_21361323-S | rs6586250  | 21 | 21 | 43143298 | 58767  | 7.7135  | 0.5211 | -0.7589 | 6.6508 | JPT |
| NDUFV3    | GI_21361323-S | rs884153   | 21 | 21 | 43144772 | 57293  | 7.7135  | 0.5211 | 0.7589  | 6.6508 | JPT |
| NDUFV3    | GI_21361323-S | rs8133752  | 21 | 21 | 43145058 | 57007  | 7.4916  | 0.5181 | 0.7639  | 6.6508 | JPT |
| NDUFV3    | GI_21361323-S | rs7282594  | 21 | 21 | 43146927 | 55138  | 7.7135  | 0.5211 | 0.7589  | 6.6508 | JPT |
| NDUFV3    | GI_21361323-S | rs2839589  | 21 | 21 | 43147296 | 54769  | 7.7135  | 0.5211 | 0.7589  | 6.6508 | JPT |
| NDUFV3    | GI_21361323-S | rs1107831  | 21 | 21 | 43147914 | 54151  | 7.7135  | 0.5211 | 0.7589  | 6.6508 | JPT |
| NDUFV3    | GI_21361323-S | rs2839603  | 21 | 21 | 43197575 | 4490   | 8.9241  | 0.5711 | 0.5195  | 6.6508 | JPT |
| Hs.473973 | Hs.473973-S   | rs2838456  | 21 | 21 | 44221396 | 14199  | 6.1700  | 0.4349 | -0.1149 | 5.7815 | JPT |
| UBE2L3    | GI_38157977-A | rs181360   | 22 | 22 | 20253470 | 49297  | 5.8681  | 0.4090 | 0.2171  | 5.6572 | JPT |
| UBE2L3    | GI_38157977-A | rs5998599  | 22 | 22 | 20266535 | 36232  | 5.8681  | 0.4090 | 0.2171  | 5.6572 | JPT |
| UBE2L3    | GI_38157977-A | rs5754295  | 22 | 22 | 20276294 | 26473  | 5.8252  | 0.4138 | -0.2124 | 5.6572 | JPT |
| UBE2L3    | GI_38157977-A | rs4821112  | 22 | 22 | 20289315 | 13452  | 6.3016  | 0.4351 | -0.2191 | 5.6572 | JPT |
| UBE2L3    | GI_38157977-A | rs5754352  | 22 | 22 | 20289505 | 13262  | 5.8252  | 0.4138 | 0.2124  | 5.6572 | JPT |
| UBE2L3    | GI_38157977-A | rs5998672  | 22 | 22 | 20290996 | 11771  | 5.8252  | 0.4138 | -0.2124 | 5.6572 | JPT |
| UBE2L3    | GI_38157977-A | rs738127   | 22 | 22 | 20292775 | 9992   | 5.8252  | 0.4138 | -0.2124 | 5.6572 | JPT |
| UBE2L3    | GI_38157977-A | rs738129   | 22 | 22 | 20295595 | 7172   | 5.8252  | 0.4138 | 0.2124  | 5.6572 | JPT |
| UBE2L3    | GI_38157977-A | rs11089637 | 22 | 22 | 20303650 | 883    | 5.8252  | 0.4138 | -0.2124 | 5.6572 | JPT |
| UBE2L3    | GI_38157977-A | rs12158299 | 22 | 22 | 20304138 | 1371   | 6.3016  | 0.4351 | 0.2191  | 5.6572 | JPT |
| GSTT1     | GI_4504184-S  | rs140277   | 22 | 22 | 22658101 | 42855  | 7.9479  | 0.5330 | 1.3204  | 5.9755 | JPT |
| GSTT1     | GI_4504184-S  | rs5760147  | 22 | 22 | 22659502 | 41454  | 23.8865 | 0.9177 | -1.7846 | 5.9755 | JPT |
| GSTT1     | GI_4504184-S  | rs407257   | 22 | 22 | 22671104 | 29852  | 22.8482 | 0.9078 | -1.5975 | 5.9755 | JPT |
| GSTT1     | GI_4504184-S  | rs6004035  | 22 | 22 | 22709801 | 8845   | 20.1829 | 0.9191 | -2.0743 | 5.9755 | JPT |
| GSTT1     | GI_4504184-S  | rs17004810 | 22 | 22 | 22726874 | 25918  | 10.4061 | 0.6889 | 1.4029  | 5.9755 | JPT |
| GSTT1     | GI_4504184-S  | rs5760176  | 22 | 22 | 22726875 | 25919  | 8.8348  | 0.5756 | -1.2849 | 5.9755 | JPT |
| CRYBB2    | GI_4503062-S  | rs3198642  | 22 | 22 | 24168701 | 216372 | 13.1332 | 0.7598 | 1.0941  | 8.856  | JPT |
| CRYBB2    | GI_4503062-S  | rs6519611  | 22 | 22 | 24170409 | 218080 | 34.7248 | 0.9749 | 1.3444  | 8.856  | JPT |
| CRYBB2    | GI_4503062-S  | rs9624836  | 22 | 22 | 24170641 | 218312 | 34.7248 | 0.9749 | 1.3444  | 8.856  | JPT |
| CRYBB2    | GI_4503062-S  | rs6004652  | 22 | 22 | 24173365 | 221036 | 34.7248 | 0.9749 | 1.3444  | 8.856  | JPT |
| CRYBB2    | GI_4503062-S  | rs5996938  | 22 | 22 | 24175589 | 223260 | 31.6854 | 0.9677 | -1.3587 | 8.856  | JPT |
| CRYBB2    | GI_4503062-S  | rs6004662  | 22 | 22 | 24186678 | 234349 | 34.7248 | 0.9749 | -1.3444 | 8.856  | JPT |
| CRYBB2    | GI_4503062-S  | rs11913964 | 22 | 22 | 24188010 | 235681 | 10.6595 | 0.6429 | -1.2675 | 8.856  | JPT |
| CRYBB2    | GI_4503062-S  | rs760554   | 22 | 22 | 24197146 | 244817 | 10.4008 | 0.6418 | 1.2649  | 8.856  | JPT |
| CRYBB2    | GI_4503062-S  | rs760555   | 22 | 22 | 24197391 | 245062 | 10.4008 | 0.6418 | -1.2649 | 8.856  | JPT |
| CRYBB2    | GI_4503062-S  | rs6004667  | 22 | 22 | 24199018 | 246689 | 10.6595 | 0.6429 | -1.2675 | 8.856  | JPT |

|           |               |            |    |    |          |        |         |        |         |        |     |
|-----------|---------------|------------|----|----|----------|--------|---------|--------|---------|--------|-----|
| CRYBB2    | GI_4503062-S  | rs6004668  | 22 | 22 | 24199056 | 246727 | 10.6595 | 0.6429 | -1.2675 | 8.856  | JPT |
| CRYBB2    | GI_4503062-S  | rs1930961  | 22 | 22 | 24199819 | 247490 | 10.4008 | 0.6418 | -1.2649 | 8.856  | JPT |
| CRYBB2    | GI_4503062-S  | rs5996945  | 22 | 22 | 24200127 | 247798 | 10.4008 | 0.6418 | 1.2649  | 8.856  | JPT |
| CRYBB2    | GI_4503062-S  | rs997872   | 22 | 22 | 24203168 | 250839 | 34.7248 | 0.9749 | 1.3444  | 8.856  | JPT |
| CRYBB2    | GI_4503062-S  | rs6004672  | 22 | 22 | 24205567 | 253238 | 34.7248 | 0.9749 | -1.3444 | 8.856  | JPT |
| CRYBB2    | GI_4503062-S  | rs8141065  | 22 | 22 | 24209742 | 257413 | 34.7248 | 0.9749 | 1.3444  | 8.856  | JPT |
| CRYBB2    | GI_4503062-S  | rs6004673  | 22 | 22 | 24209907 | 257578 | 35.5478 | 0.9749 | -1.3453 | 8.856  | JPT |
| CRYBB2    | GI_4503062-S  | rs1930966  | 22 | 22 | 24210258 | 257929 | 34.7248 | 0.9749 | 1.3444  | 8.856  | JPT |
| CRYBB2    | GI_4503062-S  | rs7292626  | 22 | 22 | 24212067 | 259738 | 14.4400 | 0.8024 | -1.3423 | 8.856  | JPT |
| CRYBB2    | GI_4503062-S  | rs6004675  | 22 | 22 | 24213939 | 261610 | 34.7248 | 0.9749 | 1.3444  | 8.856  | JPT |
| CRYBB2    | GI_4503062-S  | rs16980314 | 22 | 22 | 24230900 | 278571 | 35.5478 | 0.9749 | -1.3453 | 8.856  | JPT |
| CRYBB2    | GI_4503062-S  | rs6004694  | 22 | 22 | 24253183 | 300854 | 16.2149 | 0.8250 | -1.3201 | 8.856  | JPT |
| CRYBB2    | GI_4503062-S  | rs11914246 | 22 | 22 | 24253711 | 301382 | 10.7122 | 0.6626 | 1.1139  | 8.856  | JPT |
| CRYBB2    | GI_4503062-S  | rs9624873  | 22 | 22 | 24255338 | 303009 | 11.2819 | 0.6657 | 1.1177  | 8.856  | JPT |
| LOC388890 | GI_41209837-S | rs9625575  | 22 | 22 | 27529440 | 13132  | 6.3023  | 0.5052 | -0.2701 | 5.569  | JPT |
| C22orf2   | GI_21359898-S | rs138433   | 22 | 22 | 37202256 | 191851 | 8.2458  | 0.5566 | -0.3672 | 5.5706 | JPT |
| DDX17     | GI_38201709-I | rs138433   | 22 | 22 | 37202256 | 12947  | 9.1866  | 0.6004 | 0.4763  | 6.1307 | JPT |
| DDX17     | GI_38201711-I | rs138433   | 22 | 22 | 37202256 | 6449   | 7.4004  | 0.5132 | 0.3777  | 6.1307 | JPT |
| C22orf2   | GI_21359898-S | rs138435   | 22 | 22 | 37202418 | 191689 | 7.7551  | 0.5233 | -0.3619 | 5.5706 | JPT |
| DDX17     | GI_38201709-I | rs138435   | 22 | 22 | 37202418 | 12785  | 9.2270  | 0.5932 | 0.4705  | 6.1307 | JPT |
| DDX17     | GI_38201711-I | rs138435   | 22 | 22 | 37202418 | 6287   | 7.2528  | 0.4968 | 0.3769  | 6.1307 | JPT |
| C22orf2   | GI_21359898-S | rs138462   | 22 | 22 | 37229946 | 164161 | 8.0212  | 0.5283 | -0.3636 | 5.5706 | JPT |
| DDX17     | GI_38201709-I | rs138462   | 22 | 22 | 37229946 | 14743  | 9.4712  | 0.5951 | 0.4695  | 6.1307 | JPT |
| DDX17     | GI_38201711-I | rs138462   | 22 | 22 | 37229946 | 21241  | 7.4843  | 0.5009 | 0.3776  | 6.1307 | JPT |
| C22orf2   | GI_21359898-S | rs138463   | 22 | 22 | 37230064 | 164043 | 7.3343  | 0.5097 | 0.3598  | 5.5706 | JPT |
| DDX17     | GI_38201709-I | rs138463   | 22 | 22 | 37230064 | 14861  | 8.2455  | 0.5565 | -0.4595 | 6.1307 | JPT |
| DDX17     | GI_38201711-I | rs138463   | 22 | 22 | 37230064 | 21359  | 6.3057  | 0.4511 | -0.3620 | 6.1307 | JPT |
| C22orf2   | GI_21359898-S | rs138465   | 22 | 22 | 37232349 | 161758 | 7.6052  | 0.5155 | 0.3617  | 5.5706 | JPT |
| DDX17     | GI_38201709-I | rs138465   | 22 | 22 | 37232349 | 17146  | 8.2480  | 0.5479 | -0.4530 | 6.1307 | JPT |
| DDX17     | GI_38201711-I | rs138465   | 22 | 22 | 37232349 | 23644  | 6.4996  | 0.4545 | -0.3618 | 6.1307 | JPT |
| C22orf2   | GI_21359898-S | rs16999046 | 22 | 22 | 37257075 | 137032 | 8.0212  | 0.5283 | 0.3636  | 5.5706 | JPT |
| DDX17     | GI_38201709-I | rs16999046 | 22 | 22 | 37257075 | 41872  | 9.4712  | 0.5951 | -0.4695 | 6.1307 | JPT |
| DDX17     | GI_38201711-I | rs16999046 | 22 | 22 | 37257075 | 48370  | 7.4843  | 0.5009 | -0.3776 | 6.1307 | JPT |
| C22orf2   | GI_21359898-S | rs4987164  | 22 | 22 | 37259015 | 135092 | 8.0212  | 0.5283 | 0.3636  | 5.5706 | JPT |
| DDX17     | GI_38201709-I | rs4987164  | 22 | 22 | 37259015 | 43812  | 9.4712  | 0.5951 | -0.4695 | 6.1307 | JPT |
| DDX17     | GI_38201711-I | rs4987164  | 22 | 22 | 37259015 | 50310  | 7.4843  | 0.5009 | -0.3776 | 6.1307 | JPT |
| C22orf2   | GI_21359898-S | rs10427947 | 22 | 22 | 37261051 | 133056 | 8.0212  | 0.5283 | 0.3636  | 5.5706 | JPT |
| DDX17     | GI_38201709-I | rs10427947 | 22 | 22 | 37261051 | 45848  | 9.4712  | 0.5951 | -0.4695 | 6.1307 | JPT |
| DDX17     | GI_38201711-I | rs10427947 | 22 | 22 | 37261051 | 52346  | 7.4843  | 0.5009 | -0.3776 | 6.1307 | JPT |
| C22orf2   | GI_21359898-S | rs9917599  | 22 | 22 | 37261104 | 133003 | 7.9481  | 0.5331 | 0.3673  | 5.5706 | JPT |
| DDX17     | GI_38201709-I | rs9917599  | 22 | 22 | 37261104 | 45901  | 9.2150  | 0.5927 | -0.4701 | 6.1307 | JPT |
| DDX17     | GI_38201711-I | rs9917599  | 22 | 22 | 37261104 | 52399  | 7.2638  | 0.4974 | -0.3774 | 6.1307 | JPT |
| C22orf2   | GI_21359898-S | rs6001149  | 22 | 22 | 37262450 | 131657 | 8.0212  | 0.5283 | -0.3636 | 5.5706 | JPT |
| DDX17     | GI_38201709-I | rs6001149  | 22 | 22 | 37262450 | 47247  | 9.4712  | 0.5951 | 0.4695  | 6.1307 | JPT |
| DDX17     | GI_38201711-I | rs6001149  | 22 | 22 | 37262450 | 53745  | 7.4843  | 0.5009 | 0.3776  | 6.1307 | JPT |
| C22orf2   | GI_21359898-S | rs11570373 | 22 | 22 | 37289377 | 104730 | 8.0212  | 0.5283 | 0.3636  | 5.5706 | JPT |
| DDX17     | GI_38201709-I | rs11570373 | 22 | 22 | 37289377 | 74174  | 9.4712  | 0.5951 | -0.4695 | 6.1307 | JPT |
| DDX17     | GI_38201711-I | rs11570373 | 22 | 22 | 37289377 | 80672  | 7.4843  | 0.5009 | -0.3776 | 6.1307 | JPT |
| C22orf2   | GI_21359898-S | rs16999109 | 22 | 22 | 37306531 | 87576  | 9.6293  | 0.6018 | 0.4081  | 5.5706 | JPT |
| DDX17     | GI_38201709-I | rs16999109 | 22 | 22 | 37306531 | 91328  | 6.9862  | 0.4741 | -0.4440 | 6.1307 | JPT |
| C22orf2   | GI_21359898-S | rs16999114 | 22 | 22 | 37306858 | 87249  | 9.6293  | 0.6018 | -0.4081 | 5.5706 | JPT |
| DDX17     | GI_38201709-I | rs16999114 | 22 | 22 | 37306858 | 91655  | 6.9862  | 0.4741 | 0.4440  | 6.1307 | JPT |
| C22orf2   | GI_21359898-S | rs16999142 | 22 | 22 | 37323282 | 70825  | 8.7459  | 0.5715 | -0.4114 | 5.5706 | JPT |
| C22orf2   | GI_21359898-S | rs16999166 | 22 | 22 | 37352683 | 41424  | 9.6293  | 0.6018 | -0.4081 | 5.5706 | JPT |
| DDX17     | GI_38201709-I | rs16999166 | 22 | 22 | 37352683 | 137480 | 6.9862  | 0.4741 | 0.4440  | 6.1307 | JPT |
| C22orf2   | GI_21359898-S | rs16999173 | 22 | 22 | 37359286 | 34821  | 9.6293  | 0.6018 | -0.4081 | 5.5706 | JPT |
| DDX17     | GI_38201709-I | rs16999173 | 22 | 22 | 37359286 | 144083 | 6.9862  | 0.4741 | 0.4440  | 6.1307 | JPT |
| C22orf2   | GI_21359898-S | rs16999186 | 22 | 22 | 37377333 | 16774  | 9.6293  | 0.6018 | -0.4081 | 5.5706 | JPT |
| DDX17     | GI_38201709-I | rs16999186 | 22 | 22 | 37377333 | 162130 | 6.9862  | 0.4741 | 0.4440  | 6.1307 | JPT |

|           |               |            |    |    |          |        |         |        |         |        |     |
|-----------|---------------|------------|----|----|----------|--------|---------|--------|---------|--------|-----|
| C22orf2   | GI_21359898-S | rs6519132  | 22 | 22 | 37395422 | 1315   | 9.5761  | 0.6083 | -0.4124 | 5.5706 | JPT |
| DDX17     | GI_38201709-I | rs6519132  | 22 | 22 | 37395422 | 180219 | 7.7997  | 0.5255 | 0.4609  | 6.1307 | JPT |
| DDX17     | GI_38201711-I | rs6519132  | 22 | 22 | 37395422 | 186717 | 6.2066  | 0.4371 | 0.3729  | 6.1307 | JPT |
| C22orf2   | GI_21359898-S | rs16999224 | 22 | 22 | 37401087 | 6980   | 9.6293  | 0.6018 | -0.4081 | 5.5706 | JPT |
| DDX17     | GI_38201709-I | rs16999224 | 22 | 22 | 37401087 | 185884 | 6.9862  | 0.4741 | 0.4440  | 6.1307 | JPT |
| C22orf2   | GI_21359898-S | rs16999281 | 22 | 22 | 37433133 | 39026  | 9.6293  | 0.6018 | -0.4081 | 5.5706 | JPT |
| DDX17     | GI_38201709-I | rs16999281 | 22 | 22 | 37433133 | 217930 | 6.9862  | 0.4741 | 0.4440  | 6.1307 | JPT |
| C22orf2   | GI_21359898-S | rs138691   | 22 | 22 | 37439810 | 45703  | 9.6293  | 0.6018 | -0.4081 | 5.5706 | JPT |
| DDX17     | GI_38201709-I | rs138691   | 22 | 22 | 37439810 | 224607 | 6.9862  | 0.4741 | 0.4440  | 6.1307 | JPT |
| C22orf2   | GI_21359898-S | rs138694   | 22 | 22 | 37444596 | 50489  | 9.6293  | 0.6018 | -0.4081 | 5.5706 | JPT |
| DDX17     | GI_38201709-I | rs138694   | 22 | 22 | 37444596 | 229393 | 6.9862  | 0.4741 | 0.4440  | 6.1307 | JPT |
| C22orf2   | GI_21359898-S | rs138695   | 22 | 22 | 37444738 | 50631  | 9.6244  | 0.6103 | -0.4143 | 5.5706 | JPT |
| DDX17     | GI_38201709-I | rs138695   | 22 | 22 | 37444738 | 229535 | 6.7887  | 0.4711 | 0.4452  | 6.1307 | JPT |
| C22orf2   | GI_21359898-S | rs138696   | 22 | 22 | 37444994 | 50887  | 9.6244  | 0.6103 | 0.4143  | 5.5706 | JPT |
| DDX17     | GI_38201709-I | rs138696   | 22 | 22 | 37444994 | 229791 | 6.7887  | 0.4711 | -0.4452 | 6.1307 | JPT |
| C22orf2   | GI_21359898-S | rs16999297 | 22 | 22 | 37446538 | 52431  | 9.6293  | 0.6018 | -0.4081 | 5.5706 | JPT |
| DDX17     | GI_38201709-I | rs16999297 | 22 | 22 | 37446538 | 231335 | 6.9862  | 0.4741 | 0.4440  | 6.1307 | JPT |
| C22orf2   | GI_21359898-S | rs138697   | 22 | 22 | 37448826 | 54719  | 9.6293  | 0.6018 | 0.4081  | 5.5706 | JPT |
| DDX17     | GI_38201709-I | rs138697   | 22 | 22 | 37448826 | 233623 | 6.9862  | 0.4741 | -0.4440 | 6.1307 | JPT |
| C22orf2   | GI_21359898-S | rs16999301 | 22 | 22 | 37450029 | 55922  | 9.6293  | 0.6018 | 0.4081  | 5.5706 | JPT |
| DDX17     | GI_38201709-I | rs16999301 | 22 | 22 | 37450029 | 234826 | 6.9862  | 0.4741 | -0.4440 | 6.1307 | JPT |
| APOBEC3B  | GI_22907024-S | rs5750715  | 22 | 22 | 37668416 | 41615  | 8.4228  | 0.5478 | 1.0302  | 6.5819 | JPT |
| APOBEC3B  | GI_22907024-S | rs6001335  | 22 | 22 | 37670466 | 39565  | 7.3621  | 0.4945 | 0.9894  | 6.5819 | JPT |
| APOBEC3B  | GI_22907024-S | rs12157810 | 22 | 22 | 37677672 | 32359  | 6.8457  | 0.4826 | 1.0263  | 6.5819 | JPT |
| APOBEC3B  | GI_22907024-S | rs2019907  | 22 | 22 | 37713920 | 3889   | 6.7405  | 0.4684 | 0.9096  | 6.5819 | JPT |
| APOBEC3B  | GI_22907024-S | rs2142833  | 22 | 22 | 37716796 | 6765   | 7.0796  | 0.4874 | 0.9474  | 6.5819 | JPT |
| APOBEC3B  | GI_22907024-S | rs9611070  | 22 | 22 | 37720207 | 10176  | 7.0796  | 0.4874 | -0.9474 | 6.5819 | JPT |
| FLJ20635  | GI_8923587-S  | rs104664   | 22 | 22 | 44032391 | 24700  | 11.9373 | 0.6968 | 0.9962  | 7.1268 | JPT |
| FLJ20635  | GI_8923587-S  | rs226492   | 22 | 22 | 44035026 | 22065  | 12.1541 | 0.6952 | -0.9931 | 7.1268 | JPT |
| FLJ20635  | GI_8923587-S  | rs2142552  | 22 | 22 | 44040034 | 17057  | 11.9373 | 0.6968 | -0.9962 | 7.1268 | JPT |
| FLJ20635  | GI_8923587-S  | rs738171   | 22 | 22 | 44041821 | 15270  | 11.9373 | 0.6968 | 0.9962  | 7.1268 | JPT |
| FLJ20635  | GI_8923587-S  | rs9614637  | 22 | 22 | 44042584 | 14507  | 7.7369  | 0.5490 | 0.5889  | 7.1268 | JPT |
| FLJ20635  | GI_8923587-S  | rs7285172  | 22 | 22 | 44046882 | 10209  | 12.1541 | 0.6952 | -0.9931 | 7.1268 | JPT |
| FLJ20635  | GI_8923587-S  | rs738177   | 22 | 22 | 44052076 | 5015   | 10.4697 | 0.6625 | -0.9642 | 7.1268 | JPT |
| FLJ20635  | GI_8923587-S  | rs2205659  | 22 | 22 | 44052267 | 4824   | 12.1541 | 0.6952 | 0.9931  | 7.1268 | JPT |
| FLJ20635  | GI_8923587-S  | rs3827393  | 22 | 22 | 44056690 | 401    | 11.9373 | 0.6968 | 0.9962  | 7.1268 | JPT |
| FLJ20635  | GI_8923587-S  | rs3747240  | 22 | 22 | 44060761 | 3670   | 11.9373 | 0.6968 | 0.9962  | 7.1268 | JPT |
| FLJ20635  | GI_8923587-S  | rs9614647  | 22 | 22 | 44062255 | 5164   | 11.9373 | 0.6968 | -0.9962 | 7.1268 | JPT |
| FLJ20635  | GI_8923587-S  | rs6006992  | 22 | 22 | 44063297 | 6206   | 12.1541 | 0.6952 | -0.9931 | 7.1268 | JPT |
| FLJ20635  | GI_8923587-S  | rs6519844  | 22 | 22 | 44064960 | 7869   | 11.9373 | 0.6968 | 0.9962  | 7.1268 | JPT |
| FLJ20635  | GI_8923587-S  | rs5765271  | 22 | 22 | 44067363 | 10272  | 12.1541 | 0.6952 | 0.9931  | 7.1268 | JPT |
| FLJ20635  | GI_8923587-S  | rs5765272  | 22 | 22 | 44068438 | 11347  | 12.1541 | 0.6952 | 0.9931  | 7.1268 | JPT |
| FLJ20635  | GI_8923587-S  | rs5765276  | 22 | 22 | 44069399 | 12308  | 12.1541 | 0.6952 | 0.9931  | 7.1268 | JPT |
| FLJ20635  | GI_8923587-S  | rs1569413  | 22 | 22 | 44076618 | 19527  | 11.9373 | 0.6968 | 0.9962  | 7.1268 | JPT |
| FLJ20635  | GI_8923587-S  | rs136564   | 22 | 22 | 44085411 | 28320  | 11.9373 | 0.6968 | -0.9962 | 7.1268 | JPT |
| FLJ20635  | GI_8923587-S  | rs136568   | 22 | 22 | 44087226 | 30135  | 11.7262 | 0.7075 | 0.9970  | 7.1268 | JPT |
| FLJ20635  | GI_8923587-S  | rs470062   | 22 | 22 | 44087906 | 30815  | 11.9373 | 0.6968 | 0.9962  | 7.1268 | JPT |
| FLJ20635  | GI_8923587-S  | rs5765304  | 22 | 22 | 44092511 | 35420  | 11.9373 | 0.6968 | -0.9962 | 7.1268 | JPT |
| FLJ20635  | GI_8923587-S  | rs136584   | 22 | 22 | 44096750 | 39659  | 12.1541 | 0.6952 | -0.9931 | 7.1268 | JPT |
| FLJ20635  | GI_8923587-S  | rs136604   | 22 | 22 | 44110280 | 53189  | 12.5764 | 0.7171 | -1.0051 | 7.1268 | JPT |
| FLJ20635  | GI_8923587-S  | rs12162930 | 22 | 22 | 44114749 | 57658  | 12.1541 | 0.6952 | -0.9931 | 7.1268 | JPT |
| FLJ20635  | GI_8923587-S  | rs136611   | 22 | 22 | 44114820 | 57729  | 12.1541 | 0.6952 | -0.9931 | 7.1268 | JPT |
| FLJ20635  | GI_8923587-S  | rs5765327  | 22 | 22 | 44121463 | 64372  | 11.9373 | 0.6968 | 0.9962  | 7.1268 | JPT |
| FLJ20635  | GI_8923587-S  | rs1022476  | 22 | 22 | 44142252 | 85161  | 7.5183  | 0.5110 | 0.9891  | 7.1268 | JPT |
| FLJ20635  | GI_8923587-S  | rs1022479  | 22 | 22 | 44142884 | 85793  | 7.5183  | 0.5110 | 0.9891  | 7.1268 | JPT |
| FLJ20635  | GI_8923587-S  | rs1003505  | 22 | 22 | 44165218 | 108127 | 9.2900  | 0.5960 | -0.9848 | 7.1268 | JPT |
| LOC400933 | GI_42662518-S | rs9616681  | 22 | 22 | 48251577 | 122113 | 5.9831  | 0.4160 | 0.1585  | 5.9086 | JPT |
| LOC400933 | GI_42662518-S | rs2071898  | 22 | 22 | 48253628 | 124164 | 5.9831  | 0.4160 | -0.1585 | 5.9086 | JPT |
| LOC400933 | GI_42662518-S | rs763124   | 22 | 22 | 48269111 | 139647 | 7.0225  | 0.4926 | -0.1755 | 5.9086 | JPT |

|           |               |            |    |    |          |        |         |        |         |        |     |
|-----------|---------------|------------|----|----|----------|--------|---------|--------|---------|--------|-----|
| LOC400933 | GI_42662518-S | rs135819   | 22 | 22 | 48276351 | 146887 | 8.9373  | 0.5892 | 0.1836  | 5.9086 | JPT |
| LOC400933 | GI_42662518-S | rs135824   | 22 | 22 | 48279913 | 150449 | 9.2938  | 0.5962 | -0.1920 | 5.9086 | JPT |
| LOC400933 | GI_42662518-S | rs135827   | 22 | 22 | 48281090 | 151626 | 9.1842  | 0.5827 | -0.1777 | 5.9086 | JPT |
| LOC400933 | GI_42662518-S | rs135831   | 22 | 22 | 48282209 | 152745 | 7.7271  | 0.5304 | -0.1691 | 5.9086 | JPT |
| LOC400933 | GI_42662518-S | rs470058   | 22 | 22 | 48282375 | 152911 | 7.7271  | 0.5304 | -0.1691 | 5.9086 | JPT |
| LOC400933 | GI_42662518-S | rs135832   | 22 | 22 | 48282412 | 152948 | 7.8435  | 0.5278 | -0.1646 | 5.9086 | JPT |
| LOC400933 | GI_42662518-S | rs2319345  | 22 | 22 | 48282545 | 153081 | 6.2139  | 0.4455 | -0.1630 | 5.9086 | JPT |
| LOC400933 | GI_42662518-S | rs135833   | 22 | 22 | 48282905 | 153441 | 7.7271  | 0.5304 | 0.1691  | 5.9086 | JPT |
| LOC400933 | GI_42662518-S | rs135834   | 22 | 22 | 48283275 | 153811 | 7.7271  | 0.5304 | -0.1691 | 5.9086 | JPT |
| LOC400933 | GI_42662518-S | rs135846   | 22 | 22 | 48285909 | 156445 | 8.9257  | 0.5887 | 0.1727  | 5.9086 | JPT |
| LOC400933 | GI_42662518-S | rs1008320  | 22 | 22 | 48289581 | 160117 | 7.5589  | 0.5131 | 0.1638  | 5.9086 | JPT |
| LOC400933 | GI_42662518-S | rs9616685  | 22 | 22 | 48289814 | 160350 | 7.6653  | 0.5103 | 0.1635  | 5.9086 | JPT |
| LOC400933 | GI_42662518-S | rs8136912  | 22 | 22 | 48290014 | 160550 | 7.6653  | 0.5103 | -0.1635 | 5.9086 | JPT |
| LOC400933 | GI_42662518-S | rs5769691  | 22 | 22 | 48291659 | 162195 | 7.5589  | 0.5131 | 0.1638  | 5.9086 | JPT |
| LOC400933 | GI_42662518-S | rs135847   | 22 | 22 | 48292086 | 162622 | 9.0921  | 0.5786 | -0.1638 | 5.9086 | JPT |
| LOC400933 | GI_42662518-S | rs135848   | 22 | 22 | 48292810 | 163346 | 9.0921  | 0.5786 | -0.1638 | 5.9086 | JPT |
| LOC400933 | GI_42662518-S | rs135850   | 22 | 22 | 48296916 | 167452 | 10.3233 | 0.6300 | -0.1747 | 5.9086 | JPT |
| LOC400933 | GI_42662518-S | rs2071894  | 22 | 22 | 48298059 | 168595 | 8.2468  | 0.5566 | 0.1769  | 5.9086 | JPT |
| LOC400933 | GI_42662518-S | rs135853   | 22 | 22 | 48299314 | 169850 | 10.0115 | 0.6353 | 0.1792  | 5.9086 | JPT |
| LOC400933 | GI_42662518-S | rs5770562  | 22 | 22 | 48299363 | 169899 | 8.1347  | 0.5511 | -0.1790 | 5.9086 | JPT |
| LOC400933 | GI_42662518-S | rs2071893  | 22 | 22 | 48299436 | 169972 | 8.2468  | 0.5566 | -0.1769 | 5.9086 | JPT |
| LOC400933 | GI_42662518-S | rs135854   | 22 | 22 | 48299949 | 170485 | 10.1144 | 0.6305 | 0.1747  | 5.9086 | JPT |
| LOC400933 | GI_42662518-S | rs135855   | 22 | 22 | 48300092 | 170628 | 10.0115 | 0.6353 | -0.1792 | 5.9086 | JPT |
| LOC400933 | GI_42662518-S | rs2187890  | 22 | 22 | 48301620 | 172156 | 6.0262  | 0.4262 | -0.1862 | 5.9086 | JPT |
| LOC400933 | GI_42662518-S | rs135856   | 22 | 22 | 48301642 | 172178 | 10.0115 | 0.6353 | -0.1792 | 5.9086 | JPT |
| LOC400933 | GI_42662518-S | rs10854874 | 22 | 22 | 48305549 | 176085 | 7.5589  | 0.5131 | 0.1638  | 5.9086 | JPT |
| LOC400933 | GI_42662518-S | rs5770567  | 22 | 22 | 48305828 | 176364 | 6.6810  | 0.4904 | -0.1636 | 5.9086 | JPT |
| LOC400933 | GI_42662518-S | rs763126   | 22 | 22 | 48309435 | 179971 | 8.6233  | 0.5747 | 0.1882  | 5.9086 | JPT |
| LOC400933 | GI_42662518-S | rs2007024  | 22 | 22 | 48309676 | 180212 | 10.7999 | 0.6658 | -0.1928 | 5.9086 | JPT |
| LOC400933 | GI_42662518-S | rs17182154 | 22 | 22 | 48311331 | 181867 | 8.4974  | 0.5687 | -0.1830 | 5.9086 | JPT |
| LOC400933 | GI_42662518-S | rs5769698  | 22 | 22 | 48318567 | 189103 | 10.1563 | 0.6234 | -0.1902 | 5.9086 | JPT |
| LOC400933 | GI_42662518-S | rs2071890  | 22 | 22 | 48322152 | 192688 | 10.6454 | 0.6601 | -0.1842 | 5.9086 | JPT |
| LOC400933 | GI_42662518-S | rs763127   | 22 | 22 | 48326939 | 197475 | 9.8818  | 0.6300 | -0.1936 | 5.9086 | JPT |
| LOC400933 | GI_42662518-S | rs1018812  | 22 | 22 | 48330934 | 201470 | 9.8818  | 0.6300 | -0.1936 | 5.9086 | JPT |
| LOC400933 | GI_42662518-S | rs10854876 | 22 | 22 | 48331431 | 201967 | 10.7985 | 0.6481 | 0.1782  | 5.9086 | JPT |
| LOC400933 | GI_42662518-S | rs135875   | 22 | 22 | 48333280 | 203816 | 12.1159 | 0.7113 | 0.1948  | 5.9086 | JPT |
| LOC400933 | GI_42662518-S | rs5769707  | 22 | 22 | 48334263 | 204799 | 9.5340  | 0.6341 | -0.1919 | 5.9086 | JPT |
| LOC400933 | GI_42662518-S | rs135876   | 22 | 22 | 48334434 | 204970 | 10.7985 | 0.6481 | -0.1782 | 5.9086 | JPT |
| LOC400933 | GI_42662518-S | rs135877   | 22 | 22 | 48334863 | 205399 | 12.3798 | 0.7197 | -0.1920 | 5.9086 | JPT |
| LOC400933 | GI_42662518-S | rs135878   | 22 | 22 | 48335230 | 205766 | 12.5819 | 0.7348 | 0.1977  | 5.9086 | JPT |
| LOC400933 | GI_42662518-S | rs6009786  | 22 | 22 | 48336006 | 206542 | 12.3798 | 0.7197 | -0.1920 | 5.9086 | JPT |
| LOC400933 | GI_42662518-S | rs7288869  | 22 | 22 | 48336188 | 206724 | 10.3485 | 0.6487 | -0.1935 | 5.9086 | JPT |
| LOC400933 | GI_42662518-S | rs916362   | 22 | 22 | 48338095 | 208631 | 10.7985 | 0.6481 | -0.1782 | 5.9086 | JPT |
| LOC400933 | GI_42662518-S | rs916363   | 22 | 22 | 48338417 | 208953 | 9.0348  | 0.5936 | 0.1873  | 5.9086 | JPT |
| LOC400933 | GI_42662518-S | rs5770594  | 22 | 22 | 48339358 | 209894 | 10.1262 | 0.6309 | 0.1914  | 5.9086 | JPT |
| LOC400933 | GI_42662518-S | rs5770601  | 22 | 22 | 48342764 | 213300 | 10.6354 | 0.6597 | -0.1821 | 5.9086 | JPT |
| LOC400933 | GI_42662518-S | rs739248   | 22 | 22 | 48346066 | 216602 | 9.6003  | 0.6093 | 0.1811  | 5.9086 | JPT |
| LOC400933 | GI_42662518-S | rs9616329  | 22 | 22 | 48347175 | 217711 | 12.2892 | 0.7081 | 0.1913  | 5.9086 | JPT |
| LOC400933 | GI_42662518-S | rs5770604  | 22 | 22 | 48351533 | 222069 | 10.1262 | 0.6309 | 0.1914  | 5.9086 | JPT |
| LOC400933 | GI_42662518-S | rs4824070  | 22 | 22 | 48352382 | 222918 | 8.0480  | 0.5558 | 0.1918  | 5.9086 | JPT |
| LOC400933 | GI_42662518-S | rs2071904  | 22 | 22 | 48355338 | 225874 | 9.8818  | 0.6300 | 0.1936  | 5.9086 | JPT |
| LOC400933 | GI_42662518-S | rs739236   | 22 | 22 | 48362463 | 232999 | 12.1159 | 0.7113 | -0.1948 | 5.9086 | JPT |
| LOC400933 | GI_42662518-S | rs916360   | 22 | 22 | 48362833 | 233369 | 12.1159 | 0.7113 | 0.1948  | 5.9086 | JPT |
| LOC400933 | GI_42662518-S | rs1107514  | 22 | 22 | 48363244 | 233780 | 12.1159 | 0.7113 | -0.1948 | 5.9086 | JPT |
| LOC400933 | GI_42662518-S | rs8137111  | 22 | 22 | 48364611 | 235147 | 10.7985 | 0.6481 | 0.1782  | 5.9086 | JPT |
| LOC400933 | GI_42662518-S | rs8140095  | 22 | 22 | 48364656 | 235192 | 10.7985 | 0.6481 | -0.1782 | 5.9086 | JPT |
| LOC400933 | GI_42662518-S | rs8141219  | 22 | 22 | 48365407 | 235943 | 10.7613 | 0.6555 | -0.1824 | 5.9086 | JPT |
| LOC400933 | GI_42662518-S | rs8138399  | 22 | 22 | 48365685 | 236221 | 10.1563 | 0.6234 | -0.1902 | 5.9086 | JPT |
| LOC400933 | GI_42662518-S | rs9616333  | 22 | 22 | 48371708 | 242244 | 9.9195  | 0.6226 | 0.1924  | 5.9086 | JPT |

|           |               |            |    |    |          |        |         |        |         |        |     |
|-----------|---------------|------------|----|----|----------|--------|---------|--------|---------|--------|-----|
| LOC400933 | GI_42662518-S | rs9616714  | 22 | 22 | 48371720 | 242256 | 10.1563 | 0.6234 | 0.1902  | 5.9086 | JPT |
| LOC400933 | GI_42662518-S | rs5770622  | 22 | 22 | 48372409 | 242945 | 6.3724  | 0.4470 | 0.1651  | 5.9086 | JPT |
| LOC400933 | GI_42662518-S | rs739240   | 22 | 22 | 48373468 | 244004 | 12.1159 | 0.7113 | 0.1948  | 5.9086 | JPT |
| LOC400933 | GI_42662518-S | rs12485195 | 22 | 22 | 48374732 | 245268 | 10.4697 | 0.6625 | 0.2025  | 5.9086 | JPT |
| LOC400933 | GI_42662518-S | rs739243   | 22 | 22 | 48378072 | 248608 | 8.5171  | 0.5608 | -0.1794 | 5.9086 | JPT |
| LOC400933 | GI_42662518-S | rs7286706  | 22 | 22 | 48379207 | 249743 | 8.4412  | 0.5572 | 0.1822  | 5.9086 | JPT |
| LOC400933 | GI_42662518-S | rs6009810  | 22 | 22 | 48380401 | 250937 | 10.0417 | 0.6188 | -0.1813 | 5.9086 | JPT |
| LOC400933 | GI_42662518-S | rs739244   | 22 | 22 | 48381019 | 251555 | 10.0417 | 0.6188 | -0.1813 | 5.9086 | JPT |
| LOC400933 | GI_42662518-S | rs5770633  | 22 | 22 | 48383288 | 253824 | 11.2181 | 0.6721 | 0.1935  | 5.9086 | JPT |
| CHKL      | GI_23238259-I | rs2073604  | 22 | 22 | 49299069 | 8510   | 5.8441  | 0.4149 | 0.3999  | 5.5983 | JPT |
| CHKL      | GI_23238259-I | rs12627787 | 22 | 22 | 49302525 | 5054   | 6.0744  | 0.4216 | 0.4007  | 5.5983 | JPT |
| CHKL      | GI_23238259-I | rs1557503  | 22 | 22 | 49303216 | 4363   | 5.6015  | 0.4071 | 0.3943  | 5.5983 | JPT |
| CHKL      | GI_23238259-I | rs3213446  | 22 | 22 | 49305818 | 1761   | 5.6015  | 0.4071 | -0.3943 | 5.5983 | JPT |
| CHKL      | GI_23238259-I | rs3213445  | 22 | 22 | 49305982 | 1597   | 5.6660  | 0.4037 | 0.3722  | 5.5983 | JPT |
| FLJ20542  | GI_39725639-I | rs11260570 | 1  | 1  | 1241563  | 45522  | 5.4625  | 0.3006 | -0.1377 | 5.3248 | YRI |
| FLJ20542  | GI_39725639-I | rs307347   | 1  | 1  | 1300683  | 13598  | 5.8651  | 0.3363 | -0.1501 | 5.3248 | YRI |
| Hs.211939 | Hs.211939-S   | rs710130   | 1  | 1  | 10541660 | 30844  | 6.0822  | 0.3332 | -0.1197 | 5.881  | YRI |
| Hs.211939 | Hs.211939-S   | rs6663688  | 1  | 1  | 10558581 | 13923  | 7.2539  | 0.3909 | 0.1272  | 5.881  | YRI |
| Hs.211939 | Hs.211939-S   | rs11121594 | 1  | 1  | 10561188 | 11316  | 6.7579  | 0.3722 | -0.1230 | 5.881  | YRI |
| Hs.211939 | Hs.211939-S   | rs10779744 | 1  | 1  | 10563399 | 9105   | 6.6487  | 0.4193 | -0.1252 | 5.881  | YRI |
| Hs.211939 | Hs.211939-S   | rs12565494 | 1  | 1  | 10563828 | 8676   | 7.7815  | 0.4266 | -0.1296 | 5.881  | YRI |
| Hs.211939 | Hs.211939-S   | rs6687502  | 1  | 1  | 10567539 | 4965   | 7.2539  | 0.3909 | -0.1272 | 5.881  | YRI |
| Hs.211939 | Hs.211939-S   | rs6540938  | 1  | 1  | 10570725 | 1779   | 7.2539  | 0.3909 | -0.1272 | 5.881  | YRI |
| ARHGEF19  | GI_40255148-S | rs221035   | 1  | 1  | 16271835 | 1740   | 6.9089  | 0.3744 | 0.1433  | 5.961  | YRI |
| ARHGEF19  | GI_40255148-S | rs10796439 | 1  | 1  | 16274149 | 4054   | 7.0955  | 0.3834 | -0.1437 | 5.961  | YRI |
| ARHGEF19  | GI_40255148-S | rs221045   | 1  | 1  | 16275355 | 5260   | 6.0923  | 0.3702 | -0.1386 | 5.961  | YRI |
| ARHGEF19  | GI_40255148-S | rs221047   | 1  | 1  | 16275670 | 5575   | 6.6809  | 0.4145 | 0.1450  | 5.961  | YRI |
| HSPC157   | GI_7661813-S  | rs1883421  | 1  | 1  | 22101946 | 853    | 6.8397  | 0.3711 | 0.4032  | 6.2499 | YRI |
| HSPC157   | GI_7661813-S  | rs760923   | 1  | 1  | 22102523 | 276    | 6.8397  | 0.3711 | 0.4032  | 6.2499 | YRI |
| AK2       | GI_26665889-I | rs11581013 | 1  | 1  | 33122811 | 25038  | 7.4066  | 0.3981 | -0.3131 | 6.0014 | YRI |
| AK2       | GI_26665889-I | rs11810032 | 1  | 1  | 33138367 | 9482   | 8.1005  | 0.4297 | -0.3555 | 6.0014 | YRI |
| AK2       | GI_26665889-I | rs13376642 | 1  | 1  | 33147656 | 193    | 7.5364  | 0.4042 | 0.3432  | 6.0014 | YRI |
| AK2       | GI_26665889-I | rs9970553  | 1  | 1  | 33149457 | 1608   | 8.1005  | 0.4297 | -0.3555 | 6.0014 | YRI |
| AK2       | GI_26665889-I | rs10798924 | 1  | 1  | 33161853 | 14004  | 7.1133  | 0.3843 | -0.3335 | 6.0014 | YRI |
| AK2       | GI_26665889-I | rs3766810  | 1  | 1  | 33168521 | 20672  | 7.1133  | 0.3843 | 0.3335  | 6.0014 | YRI |
| AK2       | GI_26665889-I | rs11811191 | 1  | 1  | 33206037 | 58188  | 8.1005  | 0.4297 | 0.3555  | 6.0014 | YRI |
| Hs.406038 | Hs.406038-S   | rs12116935 | 1  | 1  | 36458639 | 5110   | 6.1381  | 0.3361 | 0.2314  | 5.956  | YRI |
| TRIT1     | GI_32306540-S | rs6693076  | 1  | 1  | 39972196 | 4111   | 6.0272  | 0.3303 | 0.1941  | 5.5746 | YRI |
| TRIT1     | GI_32306540-S | rs7523024  | 1  | 1  | 40015094 | 38787  | 6.5030  | 0.3545 | -0.2043 | 5.5746 | YRI |
| TRIT1     | GI_32306540-S | rs7533329  | 1  | 1  | 40015222 | 38915  | 6.5030  | 0.3545 | 0.2043  | 5.5746 | YRI |
| TRIT1     | GI_32306540-S | rs3131691  | 1  | 1  | 40026361 | 50054  | 7.6718  | 0.4104 | -0.1858 | 5.5746 | YRI |
| TRIT1     | GI_32306540-S | rs11811998 | 1  | 1  | 40027819 | 51512  | 8.7858  | 0.4652 | -0.2117 | 5.5746 | YRI |
| FLJ11838  | GI_13375918-S | rs16829554 | 1  | 1  | 42595459 | 643    | 13.5124 | 0.6267 | -0.6306 | 8.1064 | YRI |
| FLJ11838  | GI_13375918-S | rs16829567 | 1  | 1  | 42599645 | 4829   | 13.5124 | 0.6267 | -0.6306 | 8.1064 | YRI |
| FLJ11838  | GI_13375918-S | rs16829578 | 1  | 1  | 42607805 | 12989  | 13.5124 | 0.6267 | 0.6306  | 8.1064 | YRI |
| FLJ11838  | GI_13375918-S | rs16829580 | 1  | 1  | 42608257 | 13441  | 13.5124 | 0.6267 | -0.6306 | 8.1064 | YRI |
| FLJ11838  | GI_13375918-S | rs16829640 | 1  | 1  | 42681534 | 86718  | 9.3185  | 0.4814 | -0.4520 | 8.1064 | YRI |
| FLJ11838  | GI_13375918-S | rs16829690 | 1  | 1  | 42689787 | 94971  | 13.5124 | 0.6267 | -0.6306 | 8.1064 | YRI |
| Hs.396207 | Hs.396207-S   | rs2055145  | 1  | 1  | 45595588 | 177406 | 7.1399  | 0.3855 | 0.1398  | 6.5539 | YRI |
| Hs.396207 | Hs.396207-S   | rs4660863  | 1  | 1  | 45624961 | 148033 | 8.2491  | 0.4861 | -0.1574 | 6.5539 | YRI |
| IPP       | GI_5174472-S  | rs11211124 | 1  | 1  | 45631502 | 202333 | 5.4950  | 0.3114 | 0.1519  | 5.4685 | YRI |
| Hs.396207 | Hs.396207-S   | rs11211124 | 1  | 1  | 45631502 | 141492 | 8.5256  | 0.4600 | -0.1512 | 6.5539 | YRI |
| IPP       | GI_5174472-S  | rs12029322 | 1  | 1  | 45639539 | 194296 | 5.5742  | 0.3066 | -0.1525 | 5.4685 | YRI |
| Hs.396207 | Hs.396207-S   | rs12029322 | 1  | 1  | 45639539 | 133455 | 8.7403  | 0.4574 | 0.1499  | 6.5539 | YRI |
| IPP       | GI_5174472-S  | rs713358   | 1  | 1  | 45657360 | 176475 | 5.7361  | 0.3152 | -0.1475 | 5.4685 | YRI |
| Hs.396207 | Hs.396207-S   | rs713358   | 1  | 1  | 45657360 | 115634 | 7.1688  | 0.3869 | 0.1320  | 6.5539 | YRI |
| Hs.396207 | Hs.396207-S   | rs868351   | 1  | 1  | 45678911 | 94083  | 8.2593  | 0.4367 | -0.1656 | 6.5539 | YRI |
| IPP       | GI_5174472-S  | rs12049503 | 1  | 1  | 45690649 | 143186 | 6.6193  | 0.3603 | 0.1576  | 5.4685 | YRI |
| Hs.396207 | Hs.396207-S   | rs12049503 | 1  | 1  | 45690649 | 82345  | 8.2292  | 0.4354 | -0.1401 | 6.5539 | YRI |

|           |              |            |   |   |          |        |         |        |         |        |     |
|-----------|--------------|------------|---|---|----------|--------|---------|--------|---------|--------|-----|
| IPP       | GI_5174472-S | rs3790585  | 1 | 1 | 45692449 | 141386 | 7.0111  | 0.3794 | -0.1696 | 5.4685 | YRI |
| Hs.396207 | Hs.396207-S  | rs3790585  | 1 | 1 | 45692449 | 80545  | 13.1865 | 0.6170 | 0.1741  | 6.5539 | YRI |
| IPP       | GI_5174472-S | rs780954   | 1 | 1 | 45708170 | 125665 | 6.8718  | 0.3778 | 0.1696  | 5.4685 | YRI |
| Hs.396207 | Hs.396207-S  | rs780954   | 1 | 1 | 45708170 | 64824  | 14.2183 | 0.6533 | -0.1794 | 6.5539 | YRI |
| IPP       | GI_5174472-S | rs1084086  | 1 | 1 | 45710193 | 123642 | 6.5158  | 0.3551 | 0.1635  | 5.4685 | YRI |
| Hs.396207 | Hs.396207-S  | rs1084086  | 1 | 1 | 45710193 | 62801  | 15.3663 | 0.6774 | -0.1813 | 6.5539 | YRI |
| IPP       | GI_5174472-S | rs2152078  | 1 | 1 | 45724693 | 109142 | 6.5158  | 0.3551 | 0.1635  | 5.4685 | YRI |
| Hs.396207 | Hs.396207-S  | rs2152078  | 1 | 1 | 45724693 | 48301  | 15.3663 | 0.6774 | -0.1813 | 6.5539 | YRI |
| IPP       | GI_5174472-S | rs2991979  | 1 | 1 | 45724951 | 108884 | 6.5158  | 0.3551 | 0.1635  | 5.4685 | YRI |
| Hs.396207 | Hs.396207-S  | rs2991979  | 1 | 1 | 45724951 | 48043  | 15.3663 | 0.6774 | -0.1813 | 6.5539 | YRI |
| Hs.396207 | Hs.396207-S  | rs7548549  | 1 | 1 | 45735701 | 37293  | 7.5459  | 0.4046 | -0.1329 | 6.5539 | YRI |
| Hs.396207 | Hs.396207-S  | rs2230657  | 1 | 1 | 45742582 | 30412  | 8.6785  | 0.4548 | 0.1372  | 6.5539 | YRI |
| Hs.396207 | Hs.396207-S  | rs12043384 | 1 | 1 | 45744702 | 28292  | 8.0672  | 0.4282 | 0.2301  | 6.5539 | YRI |
| IPP       | GI_5174472-S | rs2050376  | 1 | 1 | 45747723 | 86112  | 6.5158  | 0.3551 | 0.1635  | 5.4685 | YRI |
| Hs.396207 | Hs.396207-S  | rs2050376  | 1 | 1 | 45747723 | 25271  | 15.3663 | 0.6774 | -0.1813 | 6.5539 | YRI |
| IPP       | GI_5174472-S | rs2230658  | 1 | 1 | 45747947 | 85888  | 6.5158  | 0.3551 | 0.1635  | 5.4685 | YRI |
| Hs.396207 | Hs.396207-S  | rs2230658  | 1 | 1 | 45747947 | 25047  | 15.3663 | 0.6774 | -0.1813 | 6.5539 | YRI |
| IPP       | GI_5174472-S | rs2230659  | 1 | 1 | 45747977 | 85858  | 6.5158  | 0.3551 | 0.1635  | 5.4685 | YRI |
| Hs.396207 | Hs.396207-S  | rs2230659  | 1 | 1 | 45747977 | 25017  | 15.3663 | 0.6774 | -0.1813 | 6.5539 | YRI |
| IPP       | GI_5174472-S | rs1972410  | 1 | 1 | 45750040 | 83795  | 6.5158  | 0.3551 | 0.1635  | 5.4685 | YRI |
| Hs.396207 | Hs.396207-S  | rs1972410  | 1 | 1 | 45750040 | 22954  | 15.3663 | 0.6774 | -0.1813 | 6.5539 | YRI |
| IPP       | GI_5174472-S | rs2991986  | 1 | 1 | 45750375 | 83460  | 6.5158  | 0.3551 | -0.1635 | 5.4685 | YRI |
| Hs.396207 | Hs.396207-S  | rs2991986  | 1 | 1 | 45750375 | 22619  | 15.3663 | 0.6774 | 0.1813  | 6.5539 | YRI |
| IPP       | GI_5174472-S | rs2991987  | 1 | 1 | 45750515 | 83320  | 6.0747  | 0.3425 | 0.1598  | 5.4685 | YRI |
| Hs.396207 | Hs.396207-S  | rs2991987  | 1 | 1 | 45750515 | 22479  | 15.0357 | 0.6818 | -0.1835 | 6.5539 | YRI |
| IPP       | GI_5174472-S | rs2253862  | 1 | 1 | 45751053 | 82782  | 6.5158  | 0.3551 | 0.1635  | 5.4685 | YRI |
| Hs.396207 | Hs.396207-S  | rs2253862  | 1 | 1 | 45751053 | 21941  | 15.3663 | 0.6774 | -0.1813 | 6.5539 | YRI |
| IPP       | GI_5174472-S | rs2991988  | 1 | 1 | 45751524 | 82311  | 6.5158  | 0.3551 | -0.1635 | 5.4685 | YRI |
| Hs.396207 | Hs.396207-S  | rs2991988  | 1 | 1 | 45751524 | 21470  | 15.3663 | 0.6774 | 0.1813  | 6.5539 | YRI |
| IPP       | GI_5174472-S | rs2991989  | 1 | 1 | 45752058 | 81777  | 6.4963  | 0.3591 | 0.1656  | 5.4685 | YRI |
| Hs.396207 | Hs.396207-S  | rs2991989  | 1 | 1 | 45752058 | 20936  | 15.9502 | 0.6983 | -0.1851 | 6.5539 | YRI |
| IPP       | GI_5174472-S | rs1547924  | 1 | 1 | 45754205 | 79630  | 7.0016  | 0.3789 | 0.1690  | 5.4685 | YRI |
| Hs.396207 | Hs.396207-S  | rs1547924  | 1 | 1 | 45754205 | 18789  | 15.8800 | 0.6902 | -0.1833 | 6.5539 | YRI |
| IPP       | GI_5174472-S | rs1547925  | 1 | 1 | 45754449 | 79386  | 6.5158  | 0.3551 | 0.1635  | 5.4685 | YRI |
| Hs.396207 | Hs.396207-S  | rs1547925  | 1 | 1 | 45754449 | 18545  | 15.3663 | 0.6774 | -0.1813 | 6.5539 | YRI |
| IPP       | GI_5174472-S | rs2275086  | 1 | 1 | 45754972 | 78863  | 6.5158  | 0.3551 | 0.1635  | 5.4685 | YRI |
| Hs.396207 | Hs.396207-S  | rs2275086  | 1 | 1 | 45754972 | 18022  | 15.3663 | 0.6774 | -0.1813 | 6.5539 | YRI |
| IPP       | GI_5174472-S | rs3014245  | 1 | 1 | 45756006 | 77829  | 6.5158  | 0.3551 | -0.1635 | 5.4685 | YRI |
| Hs.396207 | Hs.396207-S  | rs3014245  | 1 | 1 | 45756006 | 16988  | 15.3663 | 0.6774 | 0.1813  | 6.5539 | YRI |
| IPP       | GI_5174472-S | rs3014242  | 1 | 1 | 45756670 | 77165  | 6.7185  | 0.3702 | 0.1673  | 5.4685 | YRI |
| Hs.396207 | Hs.396207-S  | rs3014242  | 1 | 1 | 45756670 | 16324  | 15.1240 | 0.6776 | -0.1820 | 6.5539 | YRI |
| IPP       | GI_5174472-S | rs3014241  | 1 | 1 | 45756972 | 76863  | 5.7739  | 0.3761 | -0.1609 | 5.4685 | YRI |
| Hs.396207 | Hs.396207-S  | rs3014241  | 1 | 1 | 45756972 | 16022  | 13.5029 | 0.7039 | 0.1722  | 6.5539 | YRI |
| IPP       | GI_5174472-S | rs3014237  | 1 | 1 | 45759345 | 74490  | 6.5158  | 0.3551 | -0.1635 | 5.4685 | YRI |
| Hs.396207 | Hs.396207-S  | rs3014237  | 1 | 1 | 45759345 | 13649  | 15.3663 | 0.6774 | 0.1813  | 6.5539 | YRI |
| IPP       | GI_5174472-S | rs3014235  | 1 | 1 | 45760605 | 73230  | 6.5158  | 0.3551 | -0.1635 | 5.4685 | YRI |
| Hs.396207 | Hs.396207-S  | rs3014235  | 1 | 1 | 45760605 | 12389  | 15.3663 | 0.6774 | 0.1813  | 6.5539 | YRI |
| Hs.396207 | Hs.396207-S  | rs9429172  | 1 | 1 | 45761569 | 11425  | 25.2367 | 0.8668 | -0.2213 | 6.5539 | YRI |
| Hs.396207 | Hs.396207-S  | rs1250     | 1 | 1 | 45763120 | 9874   | 8.1772  | 0.4331 | 0.1472  | 6.5539 | YRI |
| IPP       | GI_5174472-S | rs12037561 | 1 | 1 | 45764365 | 69470  | 6.5158  | 0.3551 | 0.1635  | 5.4685 | YRI |
| Hs.396207 | Hs.396207-S  | rs12037561 | 1 | 1 | 45764365 | 8629   | 15.3663 | 0.6774 | -0.1813 | 6.5539 | YRI |
| IPP       | GI_5174472-S | rs6703748  | 1 | 1 | 45765069 | 68766  | 6.3746  | 0.3530 | 0.1637  | 5.4685 | YRI |
| Hs.396207 | Hs.396207-S  | rs6703748  | 1 | 1 | 45765069 | 7925   | 14.9819 | 0.6739 | -0.1802 | 6.5539 | YRI |
| IPP       | GI_5174472-S | rs10890333 | 1 | 1 | 45769415 | 64420  | 6.5158  | 0.3551 | 0.1635  | 5.4685 | YRI |
| Hs.396207 | Hs.396207-S  | rs10890333 | 1 | 1 | 45769415 | 3579   | 15.3663 | 0.6774 | -0.1813 | 6.5539 | YRI |
| IPP       | GI_5174472-S | rs10890334 | 1 | 1 | 45769471 | 64364  | 6.3746  | 0.3530 | -0.1637 | 5.4685 | YRI |
| Hs.396207 | Hs.396207-S  | rs10890334 | 1 | 1 | 45769471 | 3523   | 14.9819 | 0.6739 | 0.1802  | 6.5539 | YRI |
| Hs.396207 | Hs.396207-S  | rs4431884  | 1 | 1 | 45770416 | 2578   | 6.7673  | 0.3676 | 0.1245  | 6.5539 | YRI |
| IPP       | GI_5174472-S | rs6694889  | 1 | 1 | 45770899 | 62936  | 6.1036  | 0.3440 | -0.1593 | 5.4685 | YRI |

|           |              |            |   |   |          |        |         |        |         |        |     |
|-----------|--------------|------------|---|---|----------|--------|---------|--------|---------|--------|-----|
| Hs.396207 | Hs.396207-S  | rs6694889  | 1 | 1 | 45770899 | 2095   | 14.5919 | 0.6701 | 0.1799  | 6.5539 | YRI |
| Hs.396207 | Hs.396207-S  | rs12023439 | 1 | 1 | 45773729 | 735    | 27.0091 | 0.8761 | 0.2227  | 6.5539 | YRI |
| IPP       | GI_5174472-S | rs12043945 | 1 | 1 | 45776015 | 57820  | 6.5158  | 0.3551 | 0.1635  | 5.4685 | YRI |
| Hs.396207 | Hs.396207-S  | rs12043945 | 1 | 1 | 45776015 | 3021   | 15.3663 | 0.6774 | -0.1813 | 6.5539 | YRI |
| IPP       | GI_5174472-S | rs12091503 | 1 | 1 | 45776961 | 56874  | 5.6841  | 0.3170 | 0.1598  | 5.4685 | YRI |
| Hs.396207 | Hs.396207-S  | rs12091503 | 1 | 1 | 45776961 | 3967   | 13.6788 | 0.6380 | -0.1747 | 6.5539 | YRI |
| IPP       | GI_5174472-S | rs11211145 | 1 | 1 | 45777584 | 56251  | 6.3704  | 0.3528 | -0.1636 | 5.4685 | YRI |
| Hs.396207 | Hs.396207-S  | rs11211145 | 1 | 1 | 45777584 | 4590   | 15.0075 | 0.6746 | 0.1797  | 6.5539 | YRI |
| IPP       | GI_5174472-S | rs11211147 | 1 | 1 | 45779187 | 54648  | 7.0401  | 0.4471 | -0.1774 | 5.4685 | YRI |
| Hs.396207 | Hs.396207-S  | rs11211147 | 1 | 1 | 45779187 | 6193   | 12.0241 | 0.6582 | 0.1786  | 6.5539 | YRI |
| IPP       | GI_5174472-S | rs4660313  | 1 | 1 | 45779934 | 53901  | 5.6841  | 0.3170 | 0.1598  | 5.4685 | YRI |
| Hs.396207 | Hs.396207-S  | rs4660313  | 1 | 1 | 45779934 | 6940   | 13.6788 | 0.6380 | -0.1747 | 6.5539 | YRI |
| Hs.396207 | Hs.396207-S  | rs4660880  | 1 | 1 | 45780133 | 7139   | 24.1040 | 0.8434 | 0.2152  | 6.5539 | YRI |
| Hs.396207 | Hs.396207-S  | rs10890336 | 1 | 1 | 45780149 | 7155   | 11.6500 | 0.6536 | 0.1820  | 6.5539 | YRI |
| Hs.396207 | Hs.396207-S  | rs11211149 | 1 | 1 | 45781311 | 8317   | 21.8251 | 0.8399 | -0.2097 | 6.5539 | YRI |
| IPP       | GI_5174472-S | rs11211152 | 1 | 1 | 45783250 | 50585  | 6.7185  | 0.3702 | -0.1673 | 5.4685 | YRI |
| Hs.396207 | Hs.396207-S  | rs11211152 | 1 | 1 | 45783250 | 10256  | 15.1240 | 0.6776 | 0.1820  | 6.5539 | YRI |
| IPP       | GI_5174472-S | rs4607935  | 1 | 1 | 45786254 | 47581  | 6.3622  | 0.3626 | -0.1646 | 5.4685 | YRI |
| Hs.396207 | Hs.396207-S  | rs4607935  | 1 | 1 | 45786254 | 13260  | 14.4776 | 0.6736 | 0.1821  | 6.5539 | YRI |
| IPP       | GI_5174472-S | rs4609469  | 1 | 1 | 45786278 | 47557  | 6.2596  | 0.3521 | -0.1635 | 5.4685 | YRI |
| Hs.396207 | Hs.396207-S  | rs4609469  | 1 | 1 | 45786278 | 13284  | 14.6443 | 0.6715 | 0.1808  | 6.5539 | YRI |
| IPP       | GI_5174472-S | rs10789467 | 1 | 1 | 45787838 | 45997  | 6.5158  | 0.3551 | -0.1635 | 5.4685 | YRI |
| Hs.396207 | Hs.396207-S  | rs10789467 | 1 | 1 | 45787838 | 14844  | 15.3663 | 0.6774 | 0.1813  | 6.5539 | YRI |
| IPP       | GI_5174472-S | rs3811436  | 1 | 1 | 45794973 | 38862  | 6.5158  | 0.3551 | 0.1635  | 5.4685 | YRI |
| Hs.396207 | Hs.396207-S  | rs3811436  | 1 | 1 | 45794973 | 21979  | 15.3663 | 0.6774 | -0.1813 | 6.5539 | YRI |
| IPP       | GI_5174472-S | rs12024590 | 1 | 1 | 45796589 | 37246  | 6.3746  | 0.3530 | -0.1637 | 5.4685 | YRI |
| Hs.396207 | Hs.396207-S  | rs12024590 | 1 | 1 | 45796589 | 23595  | 14.9819 | 0.6739 | 0.1802  | 6.5539 | YRI |
| IPP       | GI_5174472-S | rs11211157 | 1 | 1 | 45801937 | 31898  | 6.5158  | 0.3551 | 0.1635  | 5.4685 | YRI |
| Hs.396207 | Hs.396207-S  | rs11211157 | 1 | 1 | 45801937 | 28943  | 15.3663 | 0.6774 | -0.1813 | 6.5539 | YRI |
| IPP       | GI_5174472-S | rs10430105 | 1 | 1 | 45807969 | 25866  | 6.5713  | 0.3629 | 0.1661  | 5.4685 | YRI |
| Hs.396207 | Hs.396207-S  | rs10430105 | 1 | 1 | 45807969 | 34975  | 15.3502 | 0.6834 | -0.1830 | 6.5539 | YRI |
| IPP       | GI_5174472-S | rs10890341 | 1 | 1 | 45816333 | 17502  | 6.1048  | 0.3543 | 0.1660  | 5.4685 | YRI |
| Hs.396207 | Hs.396207-S  | rs10890341 | 1 | 1 | 45816333 | 43339  | 13.9345 | 0.6653 | -0.1748 | 6.5539 | YRI |
| Hs.396207 | Hs.396207-S  | rs11211163 | 1 | 1 | 45822641 | 49647  | 8.4882  | 0.4644 | 0.1580  | 6.5539 | YRI |
| IPP       | GI_5174472-S | rs11211166 | 1 | 1 | 45827035 | 6800   | 6.3122  | 0.3498 | 0.1586  | 5.4685 | YRI |
| Hs.396207 | Hs.396207-S  | rs11211166 | 1 | 1 | 45827035 | 54041  | 14.9811 | 0.6739 | -0.1805 | 6.5539 | YRI |
| IPP       | GI_5174472-S | rs10789470 | 1 | 1 | 45827424 | 6411   | 6.5158  | 0.3551 | 0.1635  | 5.4685 | YRI |
| Hs.396207 | Hs.396207-S  | rs10789470 | 1 | 1 | 45827424 | 54430  | 15.3663 | 0.6774 | -0.1813 | 6.5539 | YRI |
| IPP       | GI_5174472-S | rs10749856 | 1 | 1 | 45833939 | 104    | 6.5158  | 0.3551 | -0.1635 | 5.4685 | YRI |
| Hs.396207 | Hs.396207-S  | rs10749856 | 1 | 1 | 45833939 | 60945  | 15.3663 | 0.6774 | 0.1813  | 6.5539 | YRI |
| IPP       | GI_5174472-S | rs4564187  | 1 | 1 | 45835954 | 2119   | 6.5158  | 0.3551 | 0.1635  | 5.4685 | YRI |
| Hs.396207 | Hs.396207-S  | rs4564187  | 1 | 1 | 45835954 | 62960  | 15.3663 | 0.6774 | -0.1813 | 6.5539 | YRI |
| IPP       | GI_5174472-S | rs11211173 | 1 | 1 | 45931396 | 97561  | 5.8079  | 0.3189 | -0.1643 | 5.4685 | YRI |
| Hs.396207 | Hs.396207-S  | rs11211173 | 1 | 1 | 45931396 | 158402 | 11.6879 | 0.5692 | 0.1761  | 6.5539 | YRI |
| Hs.396207 | Hs.396207-S  | rs12560266 | 1 | 1 | 45933637 | 160643 | 10.1461 | 0.5461 | -0.1811 | 6.5539 | YRI |
| IPP       | GI_5174472-S | rs6690386  | 1 | 1 | 45965031 | 131196 | 6.2651  | 0.3425 | -0.1611 | 5.4685 | YRI |
| Hs.396207 | Hs.396207-S  | rs6690386  | 1 | 1 | 45965031 | 192037 | 7.7923  | 0.4159 | 0.1434  | 6.5539 | YRI |
| IPP       | GI_5174472-S | rs6429578  | 1 | 1 | 45969130 | 135295 | 7.0910  | 0.3939 | 0.1653  | 5.4685 | YRI |
| Hs.396207 | Hs.396207-S  | rs6429578  | 1 | 1 | 45969130 | 196136 | 6.5884  | 0.3689 | -0.1351 | 6.5539 | YRI |
| IPP       | GI_5174472-S | rs12076580 | 1 | 1 | 45970179 | 136344 | 6.2651  | 0.3425 | 0.1611  | 5.4685 | YRI |
| Hs.396207 | Hs.396207-S  | rs12076580 | 1 | 1 | 45970179 | 197185 | 7.7923  | 0.4159 | -0.1434 | 6.5539 | YRI |
| IPP       | GI_5174472-S | rs7539800  | 1 | 1 | 45974149 | 140314 | 5.6399  | 0.3101 | -0.1533 | 5.4685 | YRI |
| Hs.396207 | Hs.396207-S  | rs7539800  | 1 | 1 | 45974149 | 201155 | 7.3467  | 0.3953 | 0.1397  | 6.5539 | YRI |
| IPP       | GI_5174472-S | rs6672115  | 1 | 1 | 45984899 | 151064 | 5.6399  | 0.3101 | 0.1533  | 5.4685 | YRI |
| Hs.396207 | Hs.396207-S  | rs6672115  | 1 | 1 | 45984899 | 211905 | 7.3467  | 0.3953 | -0.1397 | 6.5539 | YRI |
| Hs.396207 | Hs.396207-S  | rs10789478 | 1 | 1 | 46062526 | 289532 | 6.8495  | 0.3820 | 0.1369  | 6.5539 | YRI |
| IPP       | GI_5174472-S | rs7512395  | 1 | 1 | 46073197 | 239362 | 6.1324  | 0.3358 | 0.1600  | 5.4685 | YRI |
| Hs.396207 | Hs.396207-S  | rs7512395  | 1 | 1 | 46073197 | 300203 | 7.5172  | 0.4033 | -0.1417 | 6.5539 | YRI |
| IPP       | GI_5174472-S | rs4074225  | 1 | 1 | 46104384 | 270549 | 5.6399  | 0.3101 | 0.1533  | 5.4685 | YRI |

|           |              |            |   |   |          |        |         |        |         |        |     |
|-----------|--------------|------------|---|---|----------|--------|---------|--------|---------|--------|-----|
| Hs.396207 | Hs.396207-S  | rs4074225  | 1 | 1 | 46104384 | 331390 | 7.3467  | 0.3953 | -0.1397 | 6.5539 | YRI |
| IPP       | GI_5174472-S | rs10890373 | 1 | 1 | 46105775 | 271940 | 6.1324  | 0.3358 | -0.1600 | 5.4685 | YRI |
| Hs.396207 | Hs.396207-S  | rs10890373 | 1 | 1 | 46105775 | 332781 | 7.5172  | 0.4033 | 0.1417  | 6.5539 | YRI |
| IPP       | GI_5174472-S | rs4134387  | 1 | 1 | 46107178 | 273343 | 5.6311  | 0.3096 | 0.1535  | 5.4685 | YRI |
| Hs.396207 | Hs.396207-S  | rs4134387  | 1 | 1 | 46107178 | 334184 | 7.6745  | 0.4105 | -0.1425 | 6.5539 | YRI |
| IPP       | GI_5174472-S | rs10789485 | 1 | 1 | 46119328 | 285493 | 5.8141  | 0.3239 | -0.1570 | 5.4685 | YRI |
| Hs.396207 | Hs.396207-S  | rs10789485 | 1 | 1 | 46119328 | 346334 | 7.2004  | 0.3937 | 0.1400  | 6.5539 | YRI |
| IPP       | GI_5174472-S | rs11211232 | 1 | 1 | 46123166 | 289331 | 6.1324  | 0.3358 | 0.1600  | 5.4685 | YRI |
| Hs.396207 | Hs.396207-S  | rs11211232 | 1 | 1 | 46123166 | 350172 | 7.5172  | 0.4033 | -0.1417 | 6.5539 | YRI |
| IPP       | GI_5174472-S | rs10890382 | 1 | 1 | 46181694 | 347859 | 6.1324  | 0.3358 | -0.1600 | 5.4685 | YRI |
| Hs.396207 | Hs.396207-S  | rs10890382 | 1 | 1 | 46181694 | 408700 | 7.5172  | 0.4033 | 0.1417  | 6.5539 | YRI |
| IPP       | GI_5174472-S | rs4660335  | 1 | 1 | 46186738 | 352903 | 5.6399  | 0.3101 | -0.1533 | 5.4685 | YRI |
| Hs.396207 | Hs.396207-S  | rs4660335  | 1 | 1 | 46186738 | 413744 | 7.3467  | 0.3953 | 0.1397  | 6.5539 | YRI |
| IPP       | GI_5174472-S | rs6677777  | 1 | 1 | 46187856 | 354021 | 5.6399  | 0.3101 | -0.1533 | 5.4685 | YRI |
| Hs.396207 | Hs.396207-S  | rs6677777  | 1 | 1 | 46187856 | 414862 | 7.3467  | 0.3953 | 0.1397  | 6.5539 | YRI |
| IPP       | GI_5174472-S | rs1622208  | 1 | 1 | 46210395 | 376560 | 5.6399  | 0.3101 | -0.1533 | 5.4685 | YRI |
| Hs.396207 | Hs.396207-S  | rs1622208  | 1 | 1 | 46210395 | 437401 | 7.3467  | 0.3953 | 0.1397  | 6.5539 | YRI |
| IPP       | GI_5174472-S | rs785467   | 1 | 1 | 46233579 | 399744 | 5.4790  | 0.3015 | -0.1516 | 5.4685 | YRI |
| Hs.396207 | Hs.396207-S  | rs785467   | 1 | 1 | 46233579 | 460585 | 6.6639  | 0.3625 | 0.1343  | 6.5539 | YRI |
| Hs.396207 | Hs.396207-S  | rs785510   | 1 | 1 | 46240638 | 467644 | 7.0168  | 0.3797 | 0.1369  | 6.5539 | YRI |
| IPP       | GI_5174472-S | rs785484   | 1 | 1 | 46286035 | 452200 | 5.6399  | 0.3101 | -0.1533 | 5.4685 | YRI |
| Hs.396207 | Hs.396207-S  | rs785484   | 1 | 1 | 46286035 | 513041 | 7.3467  | 0.3953 | 0.1397  | 6.5539 | YRI |
| IPP       | GI_5174472-S | rs785493   | 1 | 1 | 46296879 | 463044 | 5.6399  | 0.3101 | 0.1533  | 5.4685 | YRI |
| Hs.396207 | Hs.396207-S  | rs785493   | 1 | 1 | 46296879 | 523885 | 7.3467  | 0.3953 | -0.1397 | 6.5539 | YRI |
| IPP       | GI_5174472-S | rs785497   | 1 | 1 | 46303923 | 470088 | 5.6865  | 0.3171 | -0.1558 | 5.4685 | YRI |
| Hs.396207 | Hs.396207-S  | rs785497   | 1 | 1 | 46303923 | 530929 | 7.3007  | 0.3985 | 0.1410  | 6.5539 | YRI |
| Hs.396207 | Hs.396207-S  | rs1416706  | 1 | 1 | 46314864 | 541870 | 6.9481  | 0.4097 | -0.1378 | 6.5539 | YRI |
| Hs.396207 | Hs.396207-S  | rs9429095  | 1 | 1 | 46315368 | 542374 | 9.9292  | 0.5179 | 0.1373  | 6.5539 | YRI |
| hmm8232   | hmm8232-S    | rs17361749 | 1 | 1 | 46518500 | 21244  | 10.8344 | 0.5456 | -0.5532 | 7.1896 | YRI |
| hmm8232   | hmm8232-S    | rs10489769 | 1 | 1 | 46518723 | 21021  | 15.7420 | 0.6868 | -0.5669 | 7.1896 | YRI |
| hmm8232   | hmm8232-S    | rs17357621 | 1 | 1 | 46519717 | 20027  | 13.9610 | 0.6526 | -0.5712 | 7.1896 | YRI |
| hmm8232   | hmm8232-S    | rs17357628 | 1 | 1 | 46520482 | 19262  | 16.3241 | 0.7009 | -0.5791 | 7.1896 | YRI |
| hmm8232   | hmm8232-S    | rs17357635 | 1 | 1 | 46520688 | 19056  | 16.3241 | 0.7009 | 0.5791  | 7.1896 | YRI |
| hmm8232   | hmm8232-S    | rs7525309  | 1 | 1 | 46521045 | 18699  | 15.9090 | 0.6973 | -0.5821 | 7.1896 | YRI |
| hmm8232   | hmm8232-S    | rs7548675  | 1 | 1 | 46521341 | 18403  | 7.8071  | 0.4396 | -0.4731 | 7.1896 | YRI |
| hmm8232   | hmm8232-S    | rs7515284  | 1 | 1 | 46521439 | 18305  | 16.3241 | 0.7009 | -0.5791 | 7.1896 | YRI |
| hmm8232   | hmm8232-S    | rs17361763 | 1 | 1 | 46522690 | 17054  | 16.3241 | 0.7009 | 0.5791  | 7.1896 | YRI |
| hmm8232   | hmm8232-S    | rs6684274  | 1 | 1 | 46522862 | 16882  | 16.3241 | 0.7009 | -0.5791 | 7.1896 | YRI |
| hmm8232   | hmm8232-S    | rs6696777  | 1 | 1 | 46522990 | 16754  | 16.3241 | 0.7009 | -0.5791 | 7.1896 | YRI |
| hmm8232   | hmm8232-S    | rs6659228  | 1 | 1 | 46523047 | 16697  | 16.3241 | 0.7009 | 0.5791  | 7.1896 | YRI |
| hmm8232   | hmm8232-S    | rs6697123  | 1 | 1 | 46523330 | 16414  | 16.5428 | 0.7251 | -0.5917 | 7.1896 | YRI |
| hmm8232   | hmm8232-S    | rs17357676 | 1 | 1 | 46524464 | 15280  | 16.3241 | 0.7009 | -0.5791 | 7.1896 | YRI |
| hmm8232   | hmm8232-S    | rs17361791 | 1 | 1 | 46524539 | 15205  | 16.0004 | 0.6995 | -0.5783 | 7.1896 | YRI |
| hmm8232   | hmm8232-S    | rs17361805 | 1 | 1 | 46525987 | 13757  | 16.3241 | 0.7009 | -0.5791 | 7.1896 | YRI |
| hmm8232   | hmm8232-S    | rs17361812 | 1 | 1 | 46526028 | 13716  | 16.3241 | 0.7009 | -0.5791 | 7.1896 | YRI |
| hmm8232   | hmm8232-S    | rs5013330  | 1 | 1 | 46527174 | 12570  | 10.2755 | 0.5249 | 0.6723  | 7.1896 | YRI |
| hmm8232   | hmm8232-S    | rs17357683 | 1 | 1 | 46527398 | 12346  | 16.3241 | 0.7009 | -0.5791 | 7.1896 | YRI |
| hmm8232   | hmm8232-S    | rs6667861  | 1 | 1 | 46527769 | 11975  | 16.2897 | 0.7064 | 0.5825  | 7.1896 | YRI |
| hmm8232   | hmm8232-S    | rs1057534  | 1 | 1 | 46527900 | 11844  | 16.2897 | 0.7064 | -0.5825 | 7.1896 | YRI |
| hmm8232   | hmm8232-S    | rs1057535  | 1 | 1 | 46527918 | 11826  | 16.3241 | 0.7009 | 0.5791  | 7.1896 | YRI |
| hmm8232   | hmm8232-S    | rs1475390  | 1 | 1 | 46528360 | 11384  | 16.2897 | 0.7064 | 0.5825  | 7.1896 | YRI |
| hmm8232   | hmm8232-S    | rs1475389  | 1 | 1 | 46528449 | 11295  | 15.9500 | 0.6919 | -0.5690 | 7.1896 | YRI |
| hmm8232   | hmm8232-S    | rs966907   | 1 | 1 | 46529145 | 10599  | 16.2897 | 0.7064 | 0.5825  | 7.1896 | YRI |
| hmm8232   | hmm8232-S    | rs17413694 | 1 | 1 | 46530436 | 9308   | 16.2897 | 0.7064 | -0.5825 | 7.1896 | YRI |
| hmm8232   | hmm8232-S    | rs17413701 | 1 | 1 | 46530472 | 9272   | 16.0905 | 0.7081 | -0.5783 | 7.1896 | YRI |
| hmm8232   | hmm8232-S    | rs7515598  | 1 | 1 | 46530499 | 9245   | 14.4849 | 0.6542 | -0.6020 | 7.1896 | YRI |
| hmm8232   | hmm8232-S    | rs12385696 | 1 | 1 | 46530856 | 8888   | 16.3241 | 0.7009 | 0.5791  | 7.1896 | YRI |
| hmm8232   | hmm8232-S    | rs12385693 | 1 | 1 | 46530941 | 8803   | 16.3241 | 0.7009 | -0.5791 | 7.1896 | YRI |
| hmm8232   | hmm8232-S    | rs10157084 | 1 | 1 | 46532995 | 6749   | 16.3241 | 0.7009 | -0.5791 | 7.1896 | YRI |

|           |               |            |   |   |          |        |         |        |         |        |     |
|-----------|---------------|------------|---|---|----------|--------|---------|--------|---------|--------|-----|
| hmm8232   | hmm8232-S     | rs10158572 | 1 | 1 | 46534460 | 5284   | 16.3241 | 0.7009 | -0.5791 | 7.1896 | YRI |
| hmm8232   | hmm8232-S     | rs9661240  | 1 | 1 | 46539070 | 674    | 16.3241 | 0.7009 | 0.5791  | 7.1896 | YRI |
| hmm8232   | hmm8232-S     | rs1053624  | 1 | 1 | 46539505 | 239    | 16.3241 | 0.7009 | -0.5791 | 7.1896 | YRI |
| hmm8232   | hmm8232-S     | rs6429599  | 1 | 1 | 46539891 | 147    | 16.2177 | 0.7047 | 0.5877  | 7.1896 | YRI |
| hmm8232   | hmm8232-S     | rs17361819 | 1 | 1 | 46540129 | 385    | 16.3241 | 0.7009 | -0.5791 | 7.1896 | YRI |
| hmm8232   | hmm8232-S     | rs17361833 | 1 | 1 | 46540720 | 976    | 16.4146 | 0.7157 | -0.6009 | 7.1896 | YRI |
| hmm8232   | hmm8232-S     | rs17357711 | 1 | 1 | 46541033 | 1289   | 16.3241 | 0.7009 | -0.5791 | 7.1896 | YRI |
| hmm8232   | hmm8232-S     | rs12062    | 1 | 1 | 46542467 | 2723   | 16.3241 | 0.7009 | -0.5791 | 7.1896 | YRI |
| hmm8232   | hmm8232-S     | rs17357759 | 1 | 1 | 46544554 | 4810   | 15.8259 | 0.6952 | 0.5799  | 7.1896 | YRI |
| hmm8232   | hmm8232-S     | rs17361873 | 1 | 1 | 46544706 | 4962   | 13.4854 | 0.6524 | -0.5775 | 7.1896 | YRI |
| hmm8232   | hmm8232-S     | rs17361887 | 1 | 1 | 46546795 | 7051   | 7.3078  | 0.3935 | 0.6865  | 7.1896 | YRI |
| hmm8232   | hmm8232-S     | rs13374968 | 1 | 1 | 46555928 | 16184  | 16.1530 | 0.7226 | 0.6182  | 7.1896 | YRI |
| hmm8232   | hmm8232-S     | rs6658556  | 1 | 1 | 46556200 | 16456  | 7.3078  | 0.3935 | -0.6865 | 7.1896 | YRI |
| hmm8232   | hmm8232-S     | rs6695043  | 1 | 1 | 46556550 | 16806  | 16.3241 | 0.7009 | -0.5791 | 7.1896 | YRI |
| hmm8232   | hmm8232-S     | rs17361915 | 1 | 1 | 46559341 | 19597  | 15.2868 | 0.7015 | -0.5747 | 7.1896 | YRI |
| hmm8232   | hmm8232-S     | rs6681857  | 1 | 1 | 46562144 | 22400  | 10.2199 | 0.5167 | 0.6499  | 7.1896 | YRI |
| hmm8232   | hmm8232-S     | rs3991877  | 1 | 1 | 46565769 | 26025  | 10.2199 | 0.5167 | -0.6499 | 7.1896 | YRI |
| hmm8232   | hmm8232-S     | rs1984490  | 1 | 1 | 46570754 | 31010  | 16.3241 | 0.7009 | 0.5791  | 7.1896 | YRI |
| hmm8232   | hmm8232-S     | rs6703374  | 1 | 1 | 46574352 | 34608  | 7.8071  | 0.4396 | -0.4731 | 7.1896 | YRI |
| hmm8232   | hmm8232-S     | rs6703669  | 1 | 1 | 46574575 | 34831  | 16.3241 | 0.7009 | -0.5791 | 7.1896 | YRI |
| hmm8232   | hmm8232-S     | rs17361936 | 1 | 1 | 46574913 | 35169  | 16.6133 | 0.7139 | -0.5845 | 7.1896 | YRI |
| hmm8232   | hmm8232-S     | rs17361950 | 1 | 1 | 46576170 | 36426  | 12.1197 | 0.5835 | -0.6124 | 7.1896 | YRI |
| Hs.118609 | Hs.118609-S   | rs12354192 | 1 | 1 | 53508804 | 7972   | 6.5470  | 0.3567 | 0.2181  | 6.1581 | YRI |
| Hs.118609 | Hs.118609-S   | rs11206145 | 1 | 1 | 53511411 | 5365   | 6.7862  | 0.4201 | 0.2142  | 6.1581 | YRI |
| Hs.118609 | Hs.118609-S   | rs12083302 | 1 | 1 | 53515660 | 1116   | 6.2258  | 0.3405 | 0.2142  | 6.1581 | YRI |
| Hs.118609 | Hs.118609-S   | rs12073099 | 1 | 1 | 53515877 | 899    | 6.2258  | 0.3405 | 0.2142  | 6.1581 | YRI |
| FLJ32112  | GI_23308504-S | rs1154     | 1 | 1 | 54204590 | 72514  | 9.0668  | 0.4770 | 0.2705  | 6.4384 | YRI |
| FLJ32112  | GI_23308504-S | rs7526578  | 1 | 1 | 54208501 | 68603  | 9.1548  | 0.4747 | 0.2586  | 6.4384 | YRI |
| FLJ32112  | GI_23308504-S | rs11206279 | 1 | 1 | 54231179 | 45925  | 10.2656 | 0.5184 | 0.2622  | 6.4384 | YRI |
| FLJ32112  | GI_23308504-S | rs3820112  | 1 | 1 | 54234328 | 42776  | 9.2651  | 0.4852 | 0.2373  | 6.4384 | YRI |
| FLJ32112  | GI_23308504-S | rs17109690 | 1 | 1 | 54239850 | 37254  | 10.1831 | 0.5277 | 0.2645  | 6.4384 | YRI |
| FLJ32112  | GI_23308504-S | rs950397   | 1 | 1 | 54241547 | 35557  | 10.5609 | 0.5294 | -0.2638 | 6.4384 | YRI |
| FLJ32112  | GI_23308504-S | rs11801621 | 1 | 1 | 54242018 | 35086  | 10.5609 | 0.5294 | 0.2638  | 6.4384 | YRI |
| FLJ32112  | GI_23308504-S | rs17109699 | 1 | 1 | 54244343 | 32761  | 8.6770  | 0.5128 | 0.2720  | 6.4384 | YRI |
| FLJ32112  | GI_23308504-S | rs17109707 | 1 | 1 | 54244456 | 32648  | 10.0911 | 0.5118 | 0.2689  | 6.4384 | YRI |
| FLJ32112  | GI_23308504-S | rs17109712 | 1 | 1 | 54248107 | 28997  | 10.0911 | 0.5118 | -0.2689 | 6.4384 | YRI |
| FLJ32112  | GI_23308504-S | rs10489447 | 1 | 1 | 54254383 | 22721  | 7.0857  | 0.3830 | 0.2327  | 6.4384 | YRI |
| FLJ32112  | GI_23308504-S | rs7556423  | 1 | 1 | 54258470 | 18634  | 11.7370 | 0.5772 | 0.2768  | 6.4384 | YRI |
| FLJ32112  | GI_23308504-S | rs7538004  | 1 | 1 | 54275543 | 1561   | 9.0375  | 0.4881 | 0.2568  | 6.4384 | YRI |
| FLJ32112  | GI_23308504-S | rs12093818 | 1 | 1 | 54281603 | 4499   | 7.7667  | 0.4317 | -0.2445 | 6.4384 | YRI |
| FLJ32112  | GI_23308504-S | rs12093973 | 1 | 1 | 54288933 | 11829  | 7.6435  | 0.4091 | 0.2277  | 6.4384 | YRI |
| FLJ32112  | GI_23308504-S | rs9919295  | 1 | 1 | 54290121 | 13017  | 9.3188  | 0.4814 | 0.2611  | 6.4384 | YRI |
| FLJ32112  | GI_23308504-S | rs9919296  | 1 | 1 | 54290157 | 13053  | 7.6280  | 0.4138 | 0.2285  | 6.4384 | YRI |
| FLJ32112  | GI_23308504-S | rs11206284 | 1 | 1 | 54290679 | 13575  | 14.4056 | 0.6520 | 0.2712  | 6.4384 | YRI |
| FLJ32112  | GI_23308504-S | rs17109780 | 1 | 1 | 54290689 | 13585  | 8.3985  | 0.4862 | 0.2623  | 6.4384 | YRI |
| FLJ32112  | GI_23308504-S | rs1329779  | 1 | 1 | 54291676 | 14572  | 8.1648  | 0.4382 | -0.2488 | 6.4384 | YRI |
| FLJ32112  | GI_23308504-S | rs1329780  | 1 | 1 | 54292033 | 14929  | 6.8563  | 0.3719 | 0.2300  | 6.4384 | YRI |
| FLJ32112  | GI_23308504-S | rs12062443 | 1 | 1 | 54293392 | 16288  | 8.1418  | 0.4430 | -0.2512 | 6.4384 | YRI |
| FLJ10986  | GI_21361729-S | rs17119280 | 1 | 1 | 59511182 | 340599 | 8.8979  | 0.4641 | -0.3120 | 6.8166 | YRI |
| BBP       | GI_17738309-S | rs1390450  | 1 | 1 | 61852409 | 26242  | 8.0271  | 0.4265 | 0.1973  | 6.0891 | YRI |
| BBP       | GI_17738309-S | rs11539585 | 1 | 1 | 61859040 | 19611  | 8.0271  | 0.4265 | -0.1973 | 6.0891 | YRI |
| BBP       | GI_17738309-S | rs11805607 | 1 | 1 | 61879483 | 832    | 8.0271  | 0.4265 | 0.1973  | 6.0891 | YRI |
| BBP       | GI_17738309-S | rs13375232 | 1 | 1 | 61883395 | 4744   | 8.0271  | 0.4265 | 0.1973  | 6.0891 | YRI |
| BBP       | GI_17738309-S | rs7554012  | 1 | 1 | 61902429 | 23778  | 7.8299  | 0.4231 | 0.1973  | 6.0891 | YRI |
| BBP       | GI_17738309-S | rs17122726 | 1 | 1 | 61903342 | 24691  | 7.6742  | 0.4274 | 0.1960  | 6.0891 | YRI |
| BBP       | GI_17738309-S | rs17122742 | 1 | 1 | 61911321 | 32670  | 8.0271  | 0.4265 | 0.1973  | 6.0891 | YRI |
| HHLA3     | GI_5901965-S  | rs17131275 | 1 | 1 | 70579419 | 46697  | 11.9992 | 0.5860 | -0.5038 | 7.9503 | YRI |
| HHLA3     | GI_5901965-S  | rs17131277 | 1 | 1 | 70579780 | 47058  | 12.8543 | 0.6069 | -0.5337 | 7.9503 | YRI |
| HHLA3     | GI_5901965-S  | rs17131278 | 1 | 1 | 70580039 | 47317  | 12.8543 | 0.6069 | 0.5337  | 7.9503 | YRI |

|              |               |            |   |   |           |        |         |        |         |        |     |
|--------------|---------------|------------|---|---|-----------|--------|---------|--------|---------|--------|-----|
| HHLA3        | GI_5901965-S  | rs7549628  | 1 | 1 | 70583120  | 50398  | 12.2563 | 0.6076 | -0.5354 | 7.9503 | YRI |
| HHLA3        | GI_5901965-S  | rs17131280 | 1 | 1 | 70583387  | 50665  | 14.7285 | 0.6672 | -0.6484 | 7.9503 | YRI |
| HHLA3        | GI_5901965-S  | rs17131282 | 1 | 1 | 70584056  | 51334  | 14.4773 | 0.6670 | -0.6455 | 7.9503 | YRI |
| HHLA3        | GI_5901965-S  | rs17131286 | 1 | 1 | 70585248  | 52526  | 12.8543 | 0.6069 | 0.5337  | 7.9503 | YRI |
| HHLA3        | GI_5901965-S  | rs17131287 | 1 | 1 | 70585917  | 53195  | 12.2563 | 0.6076 | 0.5354  | 7.9503 | YRI |
| HHLA3        | GI_5901965-S  | rs17131288 | 1 | 1 | 70586133  | 53411  | 11.6429 | 0.5871 | 0.5223  | 7.9503 | YRI |
| HHLA3        | GI_5901965-S  | rs17131289 | 1 | 1 | 70586176  | 53454  | 13.1412 | 0.6353 | 0.6143  | 7.9503 | YRI |
| HHLA3        | GI_5901965-S  | rs6413468  | 1 | 1 | 70588730  | 56008  | 14.7285 | 0.6672 | -0.6484 | 7.9503 | YRI |
| HHLA3        | GI_5901965-S  | rs17131292 | 1 | 1 | 70588980  | 56258  | 11.0604 | 0.5474 | 0.4954  | 7.9503 | YRI |
| HHLA3        | GI_5901965-S  | rs2151540  | 1 | 1 | 70620478  | 87756  | 14.6643 | 0.6591 | -0.6107 | 7.9503 | YRI |
| MGC22773     | GI_21687083-S | rs10157174 | 1 | 1 | 74199285  | 158734 | 9.5949  | 0.4924 | -0.5332 | 6.183  | YRI |
| MGC22773     | GI_21687083-S | rs1304154  | 1 | 1 | 74248210  | 109809 | 6.4961  | 0.3541 | -0.4010 | 6.183  | YRI |
| MGC22773     | GI_21687083-S | rs17094798 | 1 | 1 | 74252687  | 105332 | 6.6595  | 0.3673 | 0.4075  | 6.183  | YRI |
| MGC22773     | GI_21687083-S | rs17094814 | 1 | 1 | 74256332  | 101687 | 6.4961  | 0.3541 | -0.4010 | 6.183  | YRI |
| MGC22773     | GI_21687083-S | rs980700   | 1 | 1 | 74257737  | 100282 | 6.4961  | 0.3541 | -0.4010 | 6.183  | YRI |
| MGC22773     | GI_21687083-S | rs980701   | 1 | 1 | 74257804  | 100215 | 6.4961  | 0.3541 | -0.4010 | 6.183  | YRI |
| MGC22773     | GI_21687083-S | rs7355023  | 1 | 1 | 74258479  | 99540  | 6.4961  | 0.3541 | 0.4010  | 6.183  | YRI |
| MGC22773     | GI_21687083-S | rs2066181  | 1 | 1 | 74259967  | 98052  | 6.4961  | 0.3541 | -0.4010 | 6.183  | YRI |
| MGC22773     | GI_21687083-S | rs17094861 | 1 | 1 | 74264619  | 93400  | 6.4961  | 0.3541 | 0.4010  | 6.183  | YRI |
| MGC22773     | GI_21687083-S | rs17094862 | 1 | 1 | 74267709  | 90310  | 6.4961  | 0.3541 | -0.4010 | 6.183  | YRI |
| MGC22773     | GI_21687083-S | rs17094866 | 1 | 1 | 74268843  | 89176  | 6.4961  | 0.3541 | -0.4010 | 6.183  | YRI |
| MGC22773     | GI_21687083-S | rs17094867 | 1 | 1 | 74270181  | 87838  | 6.4961  | 0.3541 | -0.4010 | 6.183  | YRI |
| MGC22773     | GI_21687083-S | rs17094868 | 1 | 1 | 74270547  | 87472  | 6.4961  | 0.3541 | -0.4010 | 6.183  | YRI |
| MGC22773     | GI_21687083-S | rs7554468  | 1 | 1 | 74283794  | 74225  | 9.5768  | 0.5040 | 0.5623  | 6.183  | YRI |
| MGC22773     | GI_21687083-S | rs2069302  | 1 | 1 | 74377628  | 19609  | 10.1310 | 0.5194 | 0.5417  | 6.183  | YRI |
| RWDD3        | GI_21361481-S | rs11591183 | 1 | 1 | 95273727  | 148322 | 8.0673  | 0.4579 | 0.3318  | 6.9236 | YRI |
| RWDD3        | GI_21361481-S | rs915502   | 1 | 1 | 95308132  | 113917 | 8.2011  | 0.4398 | 0.3232  | 6.9236 | YRI |
| RWDD3        | GI_21361481-S | rs7365394  | 1 | 1 | 95308704  | 113345 | 7.4201  | 0.3987 | 0.2750  | 6.9236 | YRI |
| RWDD3        | GI_21361481-S | rs7520889  | 1 | 1 | 95309661  | 112388 | 9.5868  | 0.4982 | -0.3019 | 6.9236 | YRI |
| RWDD3        | GI_21361481-S | rs915503   | 1 | 1 | 95318860  | 103189 | 8.6802  | 0.4607 | 0.3521  | 6.9236 | YRI |
| RWDD3        | GI_21361481-S | rs7526279  | 1 | 1 | 95319777  | 102272 | 7.6561  | 0.4097 | 0.3181  | 6.9236 | YRI |
| DKFZp761A078 | GI_35038600-S | rs11166382 | 1 | 1 | 100140805 | 120728 | 7.0466  | 0.3811 | -0.2258 | 6.538  | YRI |
| DKFZp761A078 | GI_35038600-S | rs17121829 | 1 | 1 | 100251471 | 10062  | 7.7069  | 0.4120 | -0.2766 | 6.538  | YRI |
| DKFZp761A078 | GI_35038600-S | rs17121850 | 1 | 1 | 100256672 | 4861   | 7.7069  | 0.4120 | -0.2766 | 6.538  | YRI |
| DKFZp761A078 | GI_35038600-S | rs6660019  | 1 | 1 | 100262466 | 933    | 8.1766  | 0.4331 | 0.2826  | 6.538  | YRI |
| DKFZp761A078 | GI_35038600-S | rs2392134  | 1 | 1 | 100274263 | 12730  | 7.2644  | 0.4136 | -0.2770 | 6.538  | YRI |
| DKFZp761A078 | GI_35038600-S | rs6662945  | 1 | 1 | 100296767 | 35234  | 7.1954  | 0.3882 | -0.2370 | 6.538  | YRI |
| GSTM1        | GI_23065546-A | rs366732   | 1 | 1 | 109935049 | 8911   | 24.6872 | 0.8455 | -1.7603 | 6.7224 | YRI |
| GSTM2        | GI_23065549-S | rs366732   | 1 | 1 | 109935049 | 8831   | 8.7697  | 0.4587 | -0.4365 | 6.0508 | YRI |
| GSTM1        | GI_23065546-A | rs1858749  | 1 | 1 | 109953494 | 9534   | 23.5886 | 0.8315 | -1.6685 | 6.7224 | YRI |
| GSTM2        | GI_23065549-S | rs1858749  | 1 | 1 | 109953494 | 27276  | 7.3535  | 0.3956 | -0.3885 | 6.0508 | YRI |
| GSTM1        | GI_23065546-A | rs366631   | 1 | 1 | 109964514 | 20554  | 21.3261 | 0.7985 | -1.7739 | 6.7224 | YRI |
| GSTM2        | GI_23065549-S | rs366631   | 1 | 1 | 109964514 | 38296  | 8.2928  | 0.4382 | -0.4425 | 6.0508 | YRI |
| ST7L         | GI_38201636-A | rs1006298  | 1 | 1 | 112774001 | 22698  | 7.0945  | 0.3940 | -0.1556 | 6.1991 | YRI |
| ST7L         | GI_38201636-A | rs12728001 | 1 | 1 | 112788798 | 7901   | 8.1134  | 0.4303 | -0.1554 | 6.1991 | YRI |
| ST7L         | GI_38201636-A | rs10745330 | 1 | 1 | 112795481 | 1218   | 13.8511 | 0.6365 | 0.1967  | 6.1991 | YRI |
| ST7L         | GI_38201636-I | rs10745330 | 1 | 1 | 112795481 | 1068   | 9.7176  | 0.4973 | 0.1807  | 6.1991 | YRI |
| ST7L         | GI_38201636-A | rs7544663  | 1 | 1 | 112801048 | 4349   | 13.3891 | 0.6295 | 0.1920  | 6.1991 | YRI |
| ST7L         | GI_38201636-I | rs7544663  | 1 | 1 | 112801048 | 4499   | 9.2787  | 0.4857 | 0.1779  | 6.1991 | YRI |
| ST7L         | GI_38201636-A | rs7513716  | 1 | 1 | 112801362 | 4663   | 12.1045 | 0.5894 | 0.1969  | 6.1991 | YRI |
| ST7L         | GI_38201636-I | rs7513716  | 1 | 1 | 112801362 | 4813   | 8.8639  | 0.4685 | 0.1829  | 6.1991 | YRI |
| ST7L         | GI_38201636-A | rs7516421  | 1 | 1 | 112801738 | 5039   | 10.0917 | 0.5118 | -0.1981 | 6.1991 | YRI |
| ST7L         | GI_38201636-I | rs7516421  | 1 | 1 | 112801738 | 5189   | 6.2242  | 0.3404 | -0.1687 | 6.1991 | YRI |
| ST7L         | GI_38201636-A | rs10857963 | 1 | 1 | 112803529 | 6830   | 11.7448 | 0.5775 | 0.1927  | 6.1991 | YRI |
| ST7L         | GI_38201636-I | rs10857963 | 1 | 1 | 112803529 | 6980   | 7.9167  | 0.4271 | 0.1722  | 6.1991 | YRI |
| ST7L         | GI_38201636-A | rs12126277 | 1 | 1 | 112818411 | 21712  | 13.8511 | 0.6365 | 0.1967  | 6.1991 | YRI |
| ST7L         | GI_38201636-I | rs12126277 | 1 | 1 | 112818411 | 21862  | 9.7176  | 0.4973 | 0.1807  | 6.1991 | YRI |
| ST7L         | GI_38201636-A | rs10776757 | 1 | 1 | 112833715 | 37016  | 10.1257 | 0.5192 | -0.1808 | 6.1991 | YRI |
| ST7L         | GI_38201636-I | rs10776757 | 1 | 1 | 112833715 | 37166  | 8.0546  | 0.4333 | -0.1734 | 6.1991 | YRI |

|        |               |            |   |   |           |        |         |        |         |        |     |
|--------|---------------|------------|---|---|-----------|--------|---------|--------|---------|--------|-----|
| ST7L   | GI_38201636-A | rs7554916  | 1 | 1 | 112835776 | 39077  | 13.8511 | 0.6365 | 0.1967  | 6.1991 | YRI |
| ST7L   | GI_38201636-I | rs7554916  | 1 | 1 | 112835776 | 39227  | 9.7176  | 0.4973 | 0.1807  | 6.1991 | YRI |
| ST7L   | GI_38201636-A | rs6671645  | 1 | 1 | 112841170 | 44471  | 10.0917 | 0.5118 | 0.1981  | 6.1991 | YRI |
| ST7L   | GI_38201636-I | rs6671645  | 1 | 1 | 112841170 | 44621  | 6.2242  | 0.3404 | 0.1687  | 6.1991 | YRI |
| ST7L   | GI_38201636-A | rs6666579  | 1 | 1 | 112844435 | 47736  | 13.2850 | 0.6264 | 0.1920  | 6.1991 | YRI |
| ST7L   | GI_38201636-I | rs6666579  | 1 | 1 | 112844435 | 47886  | 9.1946  | 0.4823 | 0.1760  | 6.1991 | YRI |
| ST7L   | GI_38201636-A | rs6682737  | 1 | 1 | 112848271 | 51572  | 13.8511 | 0.6365 | -0.1967 | 6.1991 | YRI |
| ST7L   | GI_38201636-I | rs6682737  | 1 | 1 | 112848271 | 51722  | 9.7176  | 0.4973 | -0.1807 | 6.1991 | YRI |
| ST7L   | GI_38201636-A | rs4839254  | 1 | 1 | 112852968 | 56269  | 8.4105  | 0.4491 | 0.1667  | 6.1991 | YRI |
| ST7L   | GI_38201636-I | rs4839254  | 1 | 1 | 112852968 | 56419  | 7.3224  | 0.3995 | 0.1656  | 6.1991 | YRI |
| ST7L   | GI_38201636-A | rs6537745  | 1 | 1 | 112866122 | 69423  | 9.0391  | 0.5010 | -0.2064 | 6.1991 | YRI |
| ST7L   | GI_38201636-A | rs6700673  | 1 | 1 | 112869096 | 72397  | 13.3891 | 0.6295 | 0.1920  | 6.1991 | YRI |
| ST7L   | GI_38201636-I | rs6700673  | 1 | 1 | 112869096 | 72547  | 9.2787  | 0.4857 | 0.1779  | 6.1991 | YRI |
| ST7L   | GI_38201636-A | rs9429486  | 1 | 1 | 112869414 | 72715  | 8.2523  | 0.4479 | -0.1692 | 6.1991 | YRI |
| ST7L   | GI_38201636-I | rs9429486  | 1 | 1 | 112869414 | 72865  | 6.9736  | 0.3881 | -0.1650 | 6.1991 | YRI |
| ST7L   | GI_38201636-A | rs4838960  | 1 | 1 | 112875674 | 78975  | 9.3563  | 0.5211 | -0.1943 | 6.1991 | YRI |
| ST7L   | GI_38201636-A | rs7415820  | 1 | 1 | 112881491 | 84792  | 14.2519 | 0.6478 | 0.2078  | 6.1991 | YRI |
| ST7L   | GI_38201636-I | rs7415820  | 1 | 1 | 112881491 | 84942  | 8.9323  | 0.4655 | 0.1834  | 6.1991 | YRI |
| ST7L   | GI_38201636-A | rs12046208 | 1 | 1 | 112883631 | 86932  | 9.2466  | 0.4785 | -0.1756 | 6.1991 | YRI |
| ST7L   | GI_38201636-I | rs12046208 | 1 | 1 | 112883631 | 87082  | 7.6496  | 0.4094 | -0.1688 | 6.1991 | YRI |
| ST7L   | GI_38201636-A | rs6537747  | 1 | 1 | 112891639 | 94940  | 10.8736 | 0.5408 | -0.2133 | 6.1991 | YRI |
| ST7L   | GI_38201636-A | rs3013440  | 1 | 1 | 112907831 | 111132 | 14.2519 | 0.6478 | -0.2078 | 6.1991 | YRI |
| ST7L   | GI_38201636-I | rs3013440  | 1 | 1 | 112907831 | 111282 | 8.9323  | 0.4655 | -0.1834 | 6.1991 | YRI |
| ST7L   | GI_38201636-A | rs3013439  | 1 | 1 | 112912713 | 116014 | 13.6473 | 0.6571 | -0.2136 | 6.1991 | YRI |
| ST7L   | GI_38201636-I | rs3013439  | 1 | 1 | 112912713 | 116164 | 7.9997  | 0.4485 | -0.1810 | 6.1991 | YRI |
| ST7L   | GI_38201636-A | rs2932536  | 1 | 1 | 112914459 | 117760 | 13.0634 | 0.6683 | 0.2144  | 6.1991 | YRI |
| ST7L   | GI_38201636-I | rs2932536  | 1 | 1 | 112914459 | 117910 | 7.5622  | 0.4532 | 0.1853  | 6.1991 | YRI |
| ST7L   | GI_38201636-A | rs4839257  | 1 | 1 | 112931430 | 134731 | 10.5184 | 0.5278 | -0.2144 | 6.1991 | YRI |
| ST7L   | GI_38201636-I | rs4839257  | 1 | 1 | 112931430 | 134881 | 6.6688  | 0.3627 | -0.1854 | 6.1991 | YRI |
| ST7L   | GI_38201636-A | rs2999154  | 1 | 1 | 112934498 | 137799 | 13.2688 | 0.6195 | 0.1991  | 6.1991 | YRI |
| ST7L   | GI_38201636-I | rs2999154  | 1 | 1 | 112934498 | 137949 | 8.7255  | 0.4568 | 0.1779  | 6.1991 | YRI |
| ST7L   | GI_38201636-A | rs2932532  | 1 | 1 | 112946498 | 149799 | 13.6043 | 0.6358 | -0.2055 | 6.1991 | YRI |
| ST7L   | GI_38201636-I | rs2932532  | 1 | 1 | 112946498 | 149949 | 8.3932  | 0.4483 | -0.1794 | 6.1991 | YRI |
| ST7L   | GI_38201636-A | rs902289   | 1 | 1 | 112948129 | 151430 | 13.7673 | 0.6341 | -0.2034 | 6.1991 | YRI |
| ST7L   | GI_38201636-I | rs902289   | 1 | 1 | 112948129 | 151580 | 8.3278  | 0.4397 | -0.1765 | 6.1991 | YRI |
| ST7L   | GI_38201636-A | rs1110043  | 1 | 1 | 112948463 | 151764 | 7.3290  | 0.4288 | 0.1873  | 6.1991 | YRI |
| ST7L   | GI_38201636-I | rs1110043  | 1 | 1 | 112948463 | 151914 | 7.1186  | 0.4184 | 0.1917  | 6.1991 | YRI |
| MAN1A2 | GI_40254840-S | rs11580225 | 1 | 1 | 117597445 | 180133 | 7.2929  | 0.3981 | 0.2818  | 6.5153 | YRI |
| MAN1A2 | GI_40254840-S | rs2066374  | 1 | 1 | 117599073 | 178505 | 9.2582  | 0.4789 | 0.2773  | 6.5153 | YRI |
| MAN1A2 | GI_40254840-S | rs6657965  | 1 | 1 | 117604860 | 172718 | 8.4289  | 0.4618 | 0.2813  | 6.5153 | YRI |
| MAN1A2 | GI_40254840-S | rs17037223 | 1 | 1 | 117640841 | 136737 | 9.4495  | 0.4867 | -0.2851 | 6.5153 | YRI |
| MAN1A2 | GI_40254840-S | rs17037231 | 1 | 1 | 117642984 | 134594 | 6.6770  | 0.3631 | 0.2313  | 6.5153 | YRI |
| MAN1A2 | GI_40254840-S | rs17037253 | 1 | 1 | 117656235 | 121343 | 9.4495  | 0.4867 | -0.2851 | 6.5153 | YRI |
| MAN1A2 | GI_40254840-S | rs4460623  | 1 | 1 | 117659287 | 118291 | 9.4495  | 0.4867 | -0.2851 | 6.5153 | YRI |
| MAN1A2 | GI_40254840-S | rs7547211  | 1 | 1 | 117663671 | 113907 | 6.6770  | 0.3631 | -0.2313 | 6.5153 | YRI |
| MAN1A2 | GI_40254840-S | rs2359247  | 1 | 1 | 117665932 | 111646 | 9.4444  | 0.4925 | -0.2873 | 6.5153 | YRI |
| MAN1A2 | GI_40254840-S | rs10923289 | 1 | 1 | 117673252 | 104326 | 6.6770  | 0.3631 | -0.2313 | 6.5153 | YRI |
| MAN1A2 | GI_40254840-S | rs11577788 | 1 | 1 | 117703691 | 73887  | 9.4495  | 0.4867 | -0.2851 | 6.5153 | YRI |
| MAN1A2 | GI_40254840-S | rs10923303 | 1 | 1 | 117709054 | 68524  | 6.6770  | 0.3631 | -0.2313 | 6.5153 | YRI |
| MAN1A2 | GI_40254840-S | rs17037310 | 1 | 1 | 117719082 | 58496  | 7.8311  | 0.4289 | -0.2689 | 6.5153 | YRI |
| MAN1A2 | GI_40254840-S | rs12134265 | 1 | 1 | 117720849 | 56729  | 6.6770  | 0.3631 | 0.2313  | 6.5153 | YRI |
| MAN1A2 | GI_40254840-S | rs17037323 | 1 | 1 | 117726363 | 51215  | 9.2967  | 0.4865 | 0.2856  | 6.5153 | YRI |
| MAN1A2 | GI_40254840-S | rs12129406 | 1 | 1 | 117728625 | 48953  | 8.3345  | 0.4701 | -0.2760 | 6.5153 | YRI |
| MAN1A2 | GI_40254840-S | rs10923312 | 1 | 1 | 117729676 | 47902  | 6.6770  | 0.3631 | 0.2313  | 6.5153 | YRI |
| MAN1A2 | GI_40254840-S | rs17037333 | 1 | 1 | 117744199 | 33379  | 8.7009  | 0.4616 | 0.2732  | 6.5153 | YRI |
| MAN1A2 | GI_40254840-S | rs10923322 | 1 | 1 | 117752553 | 25025  | 9.4495  | 0.4867 | -0.2851 | 6.5153 | YRI |
| MAN1A2 | GI_40254840-S | rs12091306 | 1 | 1 | 117753702 | 23876  | 6.6770  | 0.3631 | 0.2313  | 6.5153 | YRI |
| MAN1A2 | GI_40254840-S | rs1934250  | 1 | 1 | 117770927 | 6651   | 6.6770  | 0.3631 | -0.2313 | 6.5153 | YRI |
| MAN1A2 | GI_40254840-S | rs12120771 | 1 | 1 | 117777961 | 383    | 9.4495  | 0.4867 | -0.2851 | 6.5153 | YRI |

|           |               |            |   |   |           |        |         |        |         |        |     |
|-----------|---------------|------------|---|---|-----------|--------|---------|--------|---------|--------|-----|
| MAN1A2    | GI_40254840-S | rs17037373 | 1 | 1 | 117789495 | 11917  | 6.6770  | 0.3631 | 0.2313  | 6.5153 | YRI |
| MAN1A2    | GI_40254840-S | rs12131251 | 1 | 1 | 117793893 | 16315  | 9.2443  | 0.4843 | 0.2842  | 6.5153 | YRI |
| ARNT      | GI_30795239-A | rs3754210  | 1 | 1 | 147767334 | 171977 | 6.0623  | 0.3322 | 0.2328  | 5.6893 | YRI |
| S100A10   | GI_4506760-S  | rs1532133  | 1 | 1 | 148809681 | 41033  | 6.5806  | 0.3584 | 0.5343  | 6.5537 | YRI |
| P66beta   | GI_21218437-S | rs7366237  | 1 | 1 | 150577773 | 14893  | 7.8731  | 0.4195 | -0.3421 | 5.7535 | YRI |
| P66beta   | GI_21218437-S | rs16835596 | 1 | 1 | 150583054 | 9612   | 8.6440  | 0.4534 | 0.3709  | 5.7535 | YRI |
| P66beta   | GI_21218437-S | rs16835600 | 1 | 1 | 150586502 | 6164   | 8.2540  | 0.4365 | -0.3532 | 5.7535 | YRI |
| P66beta   | GI_21218437-S | rs6676863  | 1 | 1 | 150703291 | 110625 | 8.2540  | 0.4365 | 0.3532  | 5.7535 | YRI |
| P66beta   | GI_21218437-S | rs6695083  | 1 | 1 | 150723573 | 130907 | 8.6440  | 0.4534 | -0.3709 | 5.7535 | YRI |
| MGC3794   | GI_33239373-S | rs11801584 | 1 | 1 | 164880629 | 20587  | 9.6108  | 0.5053 | -0.4185 | 6.0975 | YRI |
| MGC3794   | GI_33239373-S | rs2281014  | 1 | 1 | 164895496 | 5720   | 11.3150 | 0.5564 | 0.4740  | 6.0975 | YRI |
| MR1       | GI_4504416-S  | rs10797666 | 1 | 1 | 177750456 | 3963   | 7.2227  | 0.3895 | -0.2628 | 5.8825 | YRI |
| MR1       | GI_4504416-S  | rs3789359  | 1 | 1 | 177751838 | 2581   | 6.1354  | 0.3359 | -0.2788 | 5.8825 | YRI |
| MR1       | GI_4504416-S  | rs1052632  | 1 | 1 | 177751887 | 2532   | 6.5652  | 0.3730 | 0.2737  | 5.8825 | YRI |
| MR1       | GI_4504416-S  | rs3789357  | 1 | 1 | 177751974 | 2445   | 6.1354  | 0.3359 | 0.2788  | 5.8825 | YRI |
| MR1       | GI_4504416-S  | rs3845423  | 1 | 1 | 177753514 | 905    | 8.7393  | 0.4753 | -0.3084 | 5.8825 | YRI |
| MR1       | GI_4504416-S  | rs2877545  | 1 | 1 | 177755262 | 843    | 6.4327  | 0.3510 | -0.2826 | 5.8825 | YRI |
| MR1       | GI_4504416-S  | rs2331993  | 1 | 1 | 177755347 | 928    | 5.9470  | 0.3407 | 0.2778  | 5.8825 | YRI |
| MR1       | GI_4504416-S  | rs3747956  | 1 | 1 | 177756061 | 1642   | 6.5479  | 0.3722 | -0.2613 | 5.8825 | YRI |
| MR1       | GI_4504416-S  | rs16856699 | 1 | 1 | 177756767 | 2348   | 7.4323  | 0.3993 | 0.2565  | 5.8825 | YRI |
| RABIF     | GI_31543539-S | rs7523420  | 1 | 1 | 199597361 | 17100  | 9.5065  | 0.4889 | -0.3191 | 6.4743 | YRI |
| RABIF     | GI_31543539-S | rs10800881 | 1 | 1 | 199626397 | 46136  | 6.5687  | 0.3578 | -0.2069 | 6.4743 | YRI |
| FLJ14146  | GI_31542689-S | rs700036   | 1 | 1 | 217264434 | 3833   | 6.2060  | 0.3395 | 0.8542  | 6.1915 | YRI |
| NID       | GI_4505394-S  | rs17554536 | 1 | 1 | 232588414 | 122220 | 8.0440  | 0.4272 | -0.4609 | 6.3823 | YRI |
| MGC12458  | GI_14150107-S | rs619449   | 1 | 1 | 241539091 | 37989  | 7.5826  | 0.4063 | 0.4386  | 6.1679 | YRI |
| MGC12458  | GI_14150107-S | rs611185   | 1 | 1 | 241545095 | 31985  | 8.1207  | 0.4306 | 0.4520  | 6.1679 | YRI |
| MGC12458  | GI_14150107-S | rs576872   | 1 | 1 | 241549105 | 27975  | 8.3587  | 0.4411 | 0.4304  | 6.1679 | YRI |
| MGC12458  | GI_14150107-S | rs664252   | 1 | 1 | 241555077 | 22003  | 7.3555  | 0.4181 | 0.4519  | 6.1679 | YRI |
| MGC12458  | GI_14150107-S | rs500494   | 1 | 1 | 241555418 | 21662  | 6.7963  | 0.3960 | -0.4237 | 6.1679 | YRI |
| MGC12458  | GI_14150107-S | rs586865   | 1 | 1 | 241556998 | 20082  | 7.4232  | 0.4335 | 0.4634  | 6.1679 | YRI |
| MGC12458  | GI_14150107-S | rs12083437 | 1 | 1 | 241567770 | 9310   | 7.0383  | 0.3859 | 0.4161  | 6.1679 | YRI |
| MGC12458  | GI_14150107-S | rs10927386 | 1 | 1 | 241571419 | 5661   | 7.2004  | 0.4047 | -0.4425 | 6.1679 | YRI |
| MGC12458  | GI_14150107-S | rs10927387 | 1 | 1 | 241571443 | 5637   | 6.8366  | 0.3709 | 0.4189  | 6.1679 | YRI |
| MGC12458  | GI_14150107-S | rs6429522  | 1 | 1 | 241574484 | 2596   | 7.3681  | 0.3963 | 0.4334  | 6.1679 | YRI |
| MGC12458  | GI_14150107-S | rs11806396 | 1 | 1 | 241578384 | 1304   | 6.7482  | 0.3823 | -0.4200 | 6.1679 | YRI |
| CGI-49    | GI_7705766-S  | rs7419196  | 1 | 1 | 243217385 | 39559  | 6.5287  | 0.3879 | -0.3667 | 5.9329 | YRI |
| CGI-49    | GI_7705766-S  | rs6656460  | 1 | 1 | 243229501 | 27443  | 6.5108  | 0.3650 | 0.3677  | 5.9329 | YRI |
| CGI-49    | GI_7705766-S  | rs1127098  | 1 | 1 | 243248431 | 8513   | 8.3485  | 0.4463 | -0.5786 | 5.9329 | YRI |
| CGI-49    | GI_7705766-S  | rs6697063  | 1 | 1 | 243249902 | 7042   | 7.6183  | 0.4079 | -0.4091 | 5.9329 | YRI |
| CGI-49    | GI_7705766-S  | rs6699332  | 1 | 1 | 243261052 | 4108   | 7.7971  | 0.4161 | 0.5602  | 5.9329 | YRI |
| CGI-49    | GI_7705766-S  | rs4926442  | 1 | 1 | 243267760 | 10816  | 7.9372  | 0.4396 | -0.5615 | 5.9329 | YRI |
| CGI-49    | GI_7705766-S  | rs4926456  | 1 | 1 | 243268031 | 11087  | 6.6932  | 0.4088 | -0.5253 | 5.9329 | YRI |
| CGI-49    | GI_7705766-S  | rs4926443  | 1 | 1 | 243268148 | 11204  | 7.9931  | 0.4249 | 0.5512  | 5.9329 | YRI |
| CGI-49    | GI_7705766-S  | rs12410595 | 1 | 1 | 243272118 | 15174  | 6.3349  | 0.3461 | 0.5129  | 5.9329 | YRI |
| CGI-49    | GI_7705766-S  | rs12409066 | 1 | 1 | 243273590 | 16646  | 7.9931  | 0.4249 | 0.5512  | 5.9329 | YRI |
| SBZF3     | GI_31742527-S | rs7366445  | 1 | 1 | 243480118 | 45077  | 8.7557  | 0.4581 | -0.4140 | 6.138  | YRI |
| SBZF3     | GI_31742527-S | rs4971322  | 1 | 1 | 243480583 | 45542  | 8.2736  | 0.4489 | -0.4107 | 6.138  | YRI |
| SBZF3     | GI_31742527-S | rs12727420 | 1 | 1 | 243480739 | 45698  | 8.4865  | 0.4524 | 0.4106  | 6.138  | YRI |
| Hs.421238 | Hs.421238-S   | rs4925715  | 1 | 1 | 243614510 | 3099   | 11.5789 | 0.5655 | -0.3351 | 6.3489 | YRI |
| POMC      | GI_4505948-S  | rs17039879 | 2 | 2 | 25283128  | 12560  | 6.1988  | 0.3392 | -0.7795 | 5.8394 | YRI |
| POMC      | GI_4505948-S  | rs7565877  | 2 | 2 | 25297715  | 2027   | 7.3558  | 0.3957 | 0.7913  | 5.8394 | YRI |
| DTNB      | GI_37577100-A | rs7571570  | 2 | 2 | 25533181  | 21376  | 6.5759  | 0.3581 | -0.2995 | 5.7461 | YRI |
| SNX17     | GI_23238249-S | rs780092   | 2 | 2 | 27654805  | 143504 | 5.9496  | 0.3263 | 0.1804  | 5.5894 | YRI |
| SNX17     | GI_23238249-S | rs814295   | 2 | 2 | 27654866  | 143565 | 5.9496  | 0.3263 | 0.1804  | 5.5894 | YRI |
| CARD12    | GI_40788014-S | rs212717   | 2 | 2 | 32373291  | 11876  | 6.3939  | 0.3540 | 0.1401  | 5.5485 | YRI |
| SOS1      | GI_15529995-S | rs1531021  | 2 | 2 | 39111606  | 13144  | 10.9645 | 0.5440 | -0.3172 | 6.3168 | YRI |
| SOS1      | GI_15529995-S | rs1043793  | 2 | 2 | 39120698  | 4052   | 10.5006 | 0.5961 | 0.3381  | 6.3168 | YRI |
| SOS1      | GI_15529995-S | rs1037495  | 2 | 2 | 39121077  | 3673   | 12.4949 | 0.5956 | -0.3407 | 6.3168 | YRI |
| SOS1      | GI_15529995-S | rs963730   | 2 | 2 | 39128424  | 3674   | 11.4574 | 0.5808 | 0.3375  | 6.3168 | YRI |

|           |               |            |   |   |          |        |         |        |         |        |     |
|-----------|---------------|------------|---|---|----------|--------|---------|--------|---------|--------|-----|
| SOS1      | GI_15529995-S | rs4670902  | 2 | 2 | 39132555 | 7805   | 10.5555 | 0.5354 | -0.3122 | 6.3168 | YRI |
| SOS1      | GI_15529995-S | rs12471731 | 2 | 2 | 39136822 | 12072  | 11.7364 | 0.5708 | -0.3267 | 6.3168 | YRI |
| SOS1      | GI_15529995-S | rs6544186  | 2 | 2 | 39137922 | 13172  | 12.4949 | 0.5956 | -0.3407 | 6.3168 | YRI |
| SOS1      | GI_15529995-S | rs4670904  | 2 | 2 | 39140534 | 15784  | 10.0636 | 0.5107 | 0.3030  | 6.3168 | YRI |
| SOS1      | GI_15529995-S | rs3796038  | 2 | 2 | 39151223 | 26473  | 9.2837  | 0.4800 | -0.2890 | 6.3168 | YRI |
| SOS1      | GI_15529995-S | rs10184015 | 2 | 2 | 39154780 | 30030  | 9.1869  | 0.4760 | -0.2849 | 6.3168 | YRI |
| SOS1      | GI_15529995-S | rs1470914  | 2 | 2 | 39157407 | 32657  | 9.2837  | 0.4800 | 0.2890  | 6.3168 | YRI |
| SOS1      | GI_15529995-S | rs2123882  | 2 | 2 | 39159507 | 34757  | 8.3882  | 0.4423 | -0.2778 | 6.3168 | YRI |
| SOS1      | GI_15529995-S | rs13033392 | 2 | 2 | 39161060 | 36310  | 8.7899  | 0.4595 | -0.2752 | 6.3168 | YRI |
| SOS1      | GI_15529995-S | rs10190377 | 2 | 2 | 39162324 | 37574  | 7.9078  | 0.4211 | -0.2590 | 6.3168 | YRI |
| SOS1      | GI_15529995-S | rs7565814  | 2 | 2 | 39163278 | 38528  | 7.0649  | 0.3926 | -0.2817 | 6.3168 | YRI |
| SOS1      | GI_15529995-S | rs13031871 | 2 | 2 | 39164502 | 39752  | 10.6211 | 0.5316 | 0.3096  | 6.3168 | YRI |
| SOS1      | GI_15529995-S | rs7583010  | 2 | 2 | 39172902 | 48152  | 6.4011  | 0.3494 | -0.2670 | 6.3168 | YRI |
| SOS1      | GI_15529995-S | rs2060988  | 2 | 2 | 39194335 | 69585  | 6.6820  | 0.3684 | -0.2668 | 6.3168 | YRI |
| SOS1      | GI_15529995-S | rs10169337 | 2 | 2 | 39196313 | 71563  | 8.1067  | 0.4300 | -0.2916 | 6.3168 | YRI |
| SOS1      | GI_15529995-S | rs10205802 | 2 | 2 | 39196533 | 71783  | 8.1067  | 0.4300 | 0.2916  | 6.3168 | YRI |
| SOS1      | GI_15529995-S | rs7607509  | 2 | 2 | 39197023 | 72273  | 6.4266  | 0.3507 | -0.2685 | 6.3168 | YRI |
| SOS1      | GI_15529995-S | rs6758330  | 2 | 2 | 39199834 | 75084  | 8.1067  | 0.4300 | 0.2916  | 6.3168 | YRI |
| SOS1      | GI_15529995-S | rs10206751 | 2 | 2 | 39200655 | 75905  | 6.6699  | 0.3730 | -0.2595 | 6.3168 | YRI |
| SOS1      | GI_15529995-S | rs297131   | 2 | 2 | 39211910 | 87160  | 8.5054  | 0.4474 | -0.2745 | 6.3168 | YRI |
| SOS1      | GI_15529995-S | rs297136   | 2 | 2 | 39217140 | 92390  | 8.2510  | 0.4364 | -0.2841 | 6.3168 | YRI |
| SOS1      | GI_15529995-S | rs297120   | 2 | 2 | 39220297 | 95547  | 7.2503  | 0.3908 | 0.2621  | 6.3168 | YRI |
| SOS1      | GI_15529995-S | rs297124   | 2 | 2 | 39225297 | 100547 | 7.2503  | 0.3908 | 0.2621  | 6.3168 | YRI |
| SOS1      | GI_15529995-S | rs297142   | 2 | 2 | 39231099 | 106349 | 6.8817  | 0.3731 | 0.2595  | 6.3168 | YRI |
| SOS1      | GI_15529995-S | rs297144   | 2 | 2 | 39232488 | 107738 | 8.1067  | 0.4300 | 0.2916  | 6.3168 | YRI |
| SOS1      | GI_15529995-S | rs297161   | 2 | 2 | 39244319 | 119569 | 7.3631  | 0.3961 | 0.2673  | 6.3168 | YRI |
| SOS1      | GI_15529995-S | rs6419600  | 2 | 2 | 39254185 | 129435 | 7.1654  | 0.3868 | 0.2568  | 6.3168 | YRI |
| SOS1      | GI_15529995-S | rs12622969 | 2 | 2 | 39254834 | 130084 | 7.3075  | 0.3988 | 0.2551  | 6.3168 | YRI |
| SOS1      | GI_15529995-S | rs12620003 | 2 | 2 | 39257513 | 132763 | 6.7654  | 0.3832 | 0.2693  | 6.3168 | YRI |
| SOS1      | GI_15529995-S | rs10165968 | 2 | 2 | 39262502 | 137752 | 6.9573  | 0.3768 | -0.2610 | 6.3168 | YRI |
| SOS1      | GI_15529995-S | rs6735427  | 2 | 2 | 39288449 | 163699 | 6.5046  | 0.3546 | 0.2577  | 6.3168 | YRI |
| LRPPRC    | GI_31621304-S | rs17031753 | 2 | 2 | 44026565 | 245    | 6.3092  | 0.3496 | 0.3780  | 5.9574 | YRI |
| PIGF      | GI_27894289-A | rs1867819  | 2 | 2 | 46874390 | 143085 | 6.9912  | 0.3784 | -0.2310 | 6.2227 | YRI |
| PIGF      | GI_27894289-A | rs10167561 | 2 | 2 | 46879702 | 148397 | 6.9912  | 0.3784 | -0.2310 | 6.2227 | YRI |
| PIGF      | GI_27894289-A | rs6740539  | 2 | 2 | 46916439 | 185134 | 6.2240  | 0.3404 | -0.2527 | 6.2227 | YRI |
| PIGF      | GI_27894289-A | rs1345128  | 2 | 2 | 46918125 | 186820 | 6.2240  | 0.3404 | -0.2527 | 6.2227 | YRI |
| LOC339804 | GI_37546921-S | rs1177265  | 2 | 2 | 61250483 | 51458  | 7.2768  | 0.3920 | -0.3725 | 5.7337 | YRI |
| LOC339804 | GI_37546921-S | rs1665278  | 2 | 2 | 61253496 | 48445  | 6.2430  | 0.3414 | 0.3436  | 5.7337 | YRI |
| LOC339804 | GI_37546921-S | rs3814032  | 2 | 2 | 61261166 | 40775  | 8.9212  | 0.4650 | 0.3535  | 5.7337 | YRI |
| LOC339804 | GI_37546921-S | rs1177285  | 2 | 2 | 61261788 | 40153  | 10.5923 | 0.5305 | 0.3768  | 5.7337 | YRI |
| LOC339804 | GI_37546921-S | rs1729660  | 2 | 2 | 61277463 | 24478  | 15.4757 | 0.6802 | 0.4379  | 5.7337 | YRI |
| LOC339804 | GI_37546921-S | rs1177274  | 2 | 2 | 61280183 | 21758  | 11.8636 | 0.5751 | -0.3918 | 5.7337 | YRI |
| LOC339803 | GI_42656315-S | rs11647    | 2 | 2 | 61282415 | 1415   | 7.8751  | 0.4196 | -0.1492 | 5.9123 | YRI |
| LOC339804 | GI_37546921-S | rs11498    | 2 | 2 | 61282470 | 19471  | 12.8489 | 0.6067 | 0.3975  | 5.7337 | YRI |
| LOC339804 | GI_37546921-S | rs3213944  | 2 | 2 | 61283949 | 17992  | 12.6408 | 0.6132 | 0.4097  | 5.7337 | YRI |
| LOC339804 | GI_37546921-S | rs2441467  | 2 | 2 | 61285800 | 16141  | 14.4661 | 0.6667 | -0.4233 | 5.7337 | YRI |
| LOC339804 | GI_37546921-S | rs720201   | 2 | 2 | 61288114 | 13827  | 14.1342 | 0.6445 | 0.4276  | 5.7337 | YRI |
| LOC339804 | GI_37546921-S | rs1729653  | 2 | 2 | 61288659 | 13282  | 14.1342 | 0.6445 | 0.4276  | 5.7337 | YRI |
| LOC339804 | GI_37546921-S | rs1665270  | 2 | 2 | 61289317 | 12624  | 14.1342 | 0.6445 | -0.4276 | 5.7337 | YRI |
| LOC339804 | GI_37546921-S | rs1729652  | 2 | 2 | 61289670 | 12271  | 14.1342 | 0.6445 | -0.4276 | 5.7337 | YRI |
| LOC339804 | GI_37546921-S | rs1665271  | 2 | 2 | 61290467 | 11474  | 14.1342 | 0.6445 | 0.4276  | 5.7337 | YRI |
| LOC339804 | GI_37546921-S | rs12475591 | 2 | 2 | 61293179 | 8762   | 9.0141  | 0.4748 | -0.3940 | 5.7337 | YRI |
| LOC339804 | GI_37546921-S | rs2592493  | 2 | 2 | 61293988 | 7953   | 14.1342 | 0.6445 | 0.4276  | 5.7337 | YRI |
| LOC339804 | GI_37546921-S | rs2698197  | 2 | 2 | 61294094 | 7847   | 6.1073  | 0.3345 | 0.3321  | 5.7337 | YRI |
| LOC339804 | GI_37546921-S | rs1665263  | 2 | 2 | 61294410 | 7531   | 10.9276 | 0.6199 | 0.4480  | 5.7337 | YRI |
| LOC339804 | GI_37546921-S | rs1665260  | 2 | 2 | 61296138 | 5803   | 14.1342 | 0.6445 | 0.4276  | 5.7337 | YRI |
| LOC339804 | GI_37546921-S | rs1665259  | 2 | 2 | 61296406 | 5535   | 14.1342 | 0.6445 | -0.4276 | 5.7337 | YRI |
| LOC339804 | GI_37546921-S | rs7558954  | 2 | 2 | 61296557 | 5384   | 12.3162 | 0.6095 | -0.4134 | 5.7337 | YRI |
| LOC339804 | GI_37546921-S | rs1729671  | 2 | 2 | 61296756 | 5185   | 12.8695 | 0.6138 | 0.4175  | 5.7337 | YRI |

|           |               |            |   |   |          |        |         |        |         |        |     |
|-----------|---------------|------------|---|---|----------|--------|---------|--------|---------|--------|-----|
| LOC339804 | GI_37546921-S | rs1177309  | 2 | 2 | 61296899 | 5042   | 13.5151 | 0.6268 | -0.4180 | 5.7337 | YRI |
| LOC339804 | GI_37546921-S | rs1177308  | 2 | 2 | 61298905 | 3036   | 13.5151 | 0.6268 | -0.4180 | 5.7337 | YRI |
| LOC339804 | GI_37546921-S | rs1177303  | 2 | 2 | 61300006 | 1935   | 13.5151 | 0.6268 | 0.4180  | 5.7337 | YRI |
| LOC339804 | GI_37546921-S | rs1729674  | 2 | 2 | 61301388 | 553    | 13.5151 | 0.6268 | 0.4180  | 5.7337 | YRI |
| LOC339804 | GI_37546921-S | rs1729673  | 2 | 2 | 61301450 | 491    | 15.6265 | 0.6968 | 0.4341  | 5.7337 | YRI |
| LOC339804 | GI_37546921-S | rs3889717  | 2 | 2 | 61302442 | 501    | 16.7748 | 0.7113 | -0.4409 | 5.7337 | YRI |
| LOC339804 | GI_37546921-S | rs1615070  | 2 | 2 | 61304826 | 2885   | 16.7748 | 0.7113 | 0.4409  | 5.7337 | YRI |
| LOC339804 | GI_37546921-S | rs2600668  | 2 | 2 | 61312078 | 10137  | 6.1291  | 0.3356 | -0.3246 | 5.7337 | YRI |
| LOC339804 | GI_37546921-S | rs2167564  | 2 | 2 | 61312467 | 10526  | 6.4888  | 0.3538 | 0.3267  | 5.7337 | YRI |
| LOC339804 | GI_37546921-S | rs935860   | 2 | 2 | 61318212 | 16271  | 6.1291  | 0.3356 | 0.3246  | 5.7337 | YRI |
| LOC339804 | GI_37546921-S | rs7583383  | 2 | 2 | 61411973 | 110032 | 6.1198  | 0.3551 | 0.3197  | 5.7337 | YRI |
| LOC339804 | GI_37546921-S | rs7561697  | 2 | 2 | 61430816 | 128875 | 5.8906  | 0.3233 | 0.3080  | 5.7337 | YRI |
| LOC339804 | GI_37546921-S | rs4411680  | 2 | 2 | 61495756 | 193815 | 5.9431  | 0.3260 | -0.3411 | 5.7337 | YRI |
| LOC339804 | GI_37546921-S | rs10779948 | 2 | 2 | 61755811 | 453870 | 6.1103  | 0.3346 | -0.3241 | 5.7337 | YRI |
| SPRED2    | GI_32401444-S | rs871973   | 2 | 2 | 65468726 | 18843  | 6.3528  | 0.3470 | -0.3704 | 6.2366 | YRI |
| SPRED2    | GI_32401444-S | rs11896863 | 2 | 2 | 65495067 | 45184  | 7.0489  | 0.3864 | -0.4545 | 6.2366 | YRI |
| SPRED2    | GI_32401444-S | rs7583316  | 2 | 2 | 65511818 | 61935  | 9.6517  | 0.4947 | 0.4642  | 6.2366 | YRI |
| SPRED2    | GI_32401444-S | rs11892868 | 2 | 2 | 65529047 | 79164  | 10.4180 | 0.5241 | -0.4310 | 6.2366 | YRI |
| SNRPG     | GI_21359839-S | rs2272532  | 2 | 2 | 70432149 | 347    | 8.9539  | 0.4723 | 0.3142  | 5.8153 | YRI |
| MRPL53    | GI_22035595-S | rs1047911  | 2 | 2 | 74611433 | 39     | 7.3453  | 0.3953 | -0.3151 | 5.8605 | YRI |
| C2orf3    | GI_44890064-S | rs7573143  | 2 | 2 | 75916040 | 112738 | 6.1797  | 0.3382 | -0.2069 | 6.0196 | YRI |
| POLR1A    | GI_7661685-S  | rs12124    | 2 | 2 | 86165166 | 1573   | 11.6359 | 0.5674 | -0.4474 | 6.1281 | YRI |
| MRPL35    | GI_22035593-A | rs4832254  | 2 | 2 | 86340722 | 10723  | 6.5902  | 0.4228 | -0.2723 | 5.8347 | YRI |
| MRPL35    | GI_22035591-I | rs749579   | 2 | 2 | 86360066 | 9252   | 6.6309  | 0.3659 | 0.2732  | 5.8347 | YRI |
| MRPL35    | GI_22035591-I | rs7419344  | 2 | 2 | 86362802 | 11988  | 6.6802  | 0.3633 | -0.2681 | 5.8347 | YRI |
| MRPL35    | GI_22035593-A | rs7419344  | 2 | 2 | 86362802 | 11357  | 6.1926  | 0.3388 | -0.2385 | 5.8347 | YRI |
| MRPL35    | GI_22035593-A | rs11127018 | 2 | 2 | 86366572 | 15127  | 7.0549  | 0.3815 | -0.2368 | 5.8347 | YRI |
| TSGA10    | GI_41281983-I | rs7586608  | 2 | 2 | 99016535 | 199892 | 6.9692  | 0.3826 | 0.1235  | 6.3689 | YRI |
| TSGA10    | GI_41281983-I | rs10181422 | 2 | 2 | 99017488 | 198939 | 8.1130  | 0.4303 | -0.1215 | 6.3689 | YRI |
| TSGA10    | GI_41281983-I | rs6722164  | 2 | 2 | 99020045 | 196382 | 8.0328  | 0.4267 | -0.1210 | 6.3689 | YRI |
| TSGA10    | GI_41281983-I | rs1453564  | 2 | 2 | 99022946 | 193481 | 8.0328  | 0.4267 | -0.1210 | 6.3689 | YRI |
| TSGA10    | GI_41281983-I | rs2309520  | 2 | 2 | 99028995 | 187432 | 8.0328  | 0.4267 | -0.1210 | 6.3689 | YRI |
| TSGA10    | GI_41281983-I | rs6740054  | 2 | 2 | 99035149 | 181278 | 8.0328  | 0.4267 | -0.1210 | 6.3689 | YRI |
| TSGA10    | GI_41281983-I | rs13406288 | 2 | 2 | 99048103 | 168324 | 8.0328  | 0.4267 | 0.1210  | 6.3689 | YRI |
| TSGA10    | GI_41281983-I | rs13390672 | 2 | 2 | 99048347 | 168080 | 8.0328  | 0.4267 | -0.1210 | 6.3689 | YRI |
| TSGA10    | GI_41281983-I | rs7605218  | 2 | 2 | 99051598 | 164829 | 8.0328  | 0.4267 | -0.1210 | 6.3689 | YRI |
| TSGA10    | GI_41281983-I | rs12612688 | 2 | 2 | 99071609 | 144818 | 8.0328  | 0.4267 | -0.1210 | 6.3689 | YRI |
| TSGA10    | GI_41281983-I | rs2278895  | 2 | 2 | 99072002 | 144425 | 8.0328  | 0.4267 | 0.1210  | 6.3689 | YRI |
| TSGA10    | GI_41281983-I | rs7571390  | 2 | 2 | 99085111 | 131316 | 8.0328  | 0.4267 | -0.1210 | 6.3689 | YRI |
| TSGA10    | GI_41281983-I | rs7371676  | 2 | 2 | 99087667 | 128760 | 8.0328  | 0.4267 | -0.1210 | 6.3689 | YRI |
| TSGA10    | GI_41281983-I | rs7605734  | 2 | 2 | 99102586 | 113841 | 7.8757  | 0.4252 | 0.1215  | 6.3689 | YRI |
| TSGA10    | GI_41281983-I | rs7606635  | 2 | 2 | 99103300 | 113127 | 8.0328  | 0.4267 | 0.1210  | 6.3689 | YRI |
| TSGA10    | GI_41281983-I | rs6735801  | 2 | 2 | 99116513 | 99914  | 8.0328  | 0.4267 | -0.1210 | 6.3689 | YRI |
| TSGA10    | GI_41281983-I | rs6752352  | 2 | 2 | 99120866 | 95561  | 8.0328  | 0.4267 | 0.1210  | 6.3689 | YRI |
| TSGA10    | GI_41281983-I | rs9710648  | 2 | 2 | 99131647 | 84780  | 8.0328  | 0.4267 | -0.1210 | 6.3689 | YRI |
| TSGA10    | GI_41281983-I | rs6756880  | 2 | 2 | 99135509 | 80918  | 7.5269  | 0.4147 | -0.1197 | 6.3689 | YRI |
| TSGA10    | GI_41281983-I | rs6750876  | 2 | 2 | 99138191 | 78236  | 8.0328  | 0.4267 | -0.1210 | 6.3689 | YRI |
| TSGA10    | GI_41281983-I | rs6754843  | 2 | 2 | 99139003 | 77424  | 7.3295  | 0.4289 | -0.1047 | 6.3689 | YRI |
| TSGA10    | GI_41281983-I | rs6737257  | 2 | 2 | 99141848 | 74579  | 8.0328  | 0.4267 | 0.1210  | 6.3689 | YRI |
| TSGA10    | GI_41281983-I | rs12470471 | 2 | 2 | 99147659 | 68768  | 8.0328  | 0.4267 | 0.1210  | 6.3689 | YRI |
| TSGA10    | GI_41281983-I | rs2123686  | 2 | 2 | 99148653 | 67774  | 8.0328  | 0.4267 | -0.1210 | 6.3689 | YRI |
| TSGA10    | GI_41281983-I | rs10181344 | 2 | 2 | 99151347 | 65080  | 6.5830  | 0.4029 | -0.1200 | 6.3689 | YRI |
| TSGA10    | GI_41281983-I | rs17708262 | 2 | 2 | 99154831 | 61596  | 7.3587  | 0.4124 | 0.1206  | 6.3689 | YRI |
| TSGA10    | GI_41281983-I | rs1563107  | 2 | 2 | 99159794 | 56633  | 8.0328  | 0.4267 | -0.1210 | 6.3689 | YRI |
| TSGA10    | GI_41281983-I | rs1453563  | 2 | 2 | 99178785 | 37642  | 8.0328  | 0.4267 | -0.1210 | 6.3689 | YRI |
| TSGA10    | GI_41281983-I | rs11683188 | 2 | 2 | 99183030 | 33397  | 8.0328  | 0.4267 | -0.1210 | 6.3689 | YRI |
| TSGA10    | GI_41281983-I | rs6733285  | 2 | 2 | 99184093 | 32334  | 7.0511  | 0.4275 | -0.1118 | 6.3689 | YRI |
| TSGA10    | GI_41281983-I | rs12613624 | 2 | 2 | 99191259 | 25168  | 8.0328  | 0.4267 | -0.1210 | 6.3689 | YRI |
| TSGA10    | GI_41281983-I | rs11692336 | 2 | 2 | 99199124 | 17303  | 7.4212  | 0.4154 | -0.1208 | 6.3689 | YRI |

|           |               |            |   |   |           |        |         |        |         |        |     |
|-----------|---------------|------------|---|---|-----------|--------|---------|--------|---------|--------|-----|
| TSGA10    | GI_41281983-I | rs13008171 | 2 | 2 | 99201937  | 14490  | 7.6170  | 0.4367 | -0.1169 | 6.3689 | YRI |
| TSGA10    | GI_41281983-I | rs4850897  | 2 | 2 | 99226937  | 10510  | 8.0328  | 0.4267 | 0.1210  | 6.3689 | YRI |
| TSGA10    | GI_41281983-I | rs2516830  | 2 | 2 | 99232220  | 15793  | 8.1138  | 0.4359 | -0.1232 | 6.3689 | YRI |
| TSGA10    | GI_41281983-I | rs2632283  | 2 | 2 | 99234518  | 18091  | 8.0328  | 0.4267 | -0.1210 | 6.3689 | YRI |
| TSGA10    | GI_41281983-I | rs2516835  | 2 | 2 | 99237649  | 21222  | 8.0328  | 0.4267 | -0.1210 | 6.3689 | YRI |
| TSGA10    | GI_41281983-I | rs6727749  | 2 | 2 | 99252108  | 35681  | 8.0328  | 0.4267 | 0.1210  | 6.3689 | YRI |
| TSGA10    | GI_41281983-I | rs13033012 | 2 | 2 | 99253667  | 37240  | 7.8487  | 0.4240 | -0.1213 | 6.3689 | YRI |
| LOC205251 | GI_28372544-S | rs11898910 | 2 | 2 | 110294476 | 32896  | 8.0393  | 0.4270 | 0.2936  | 5.301  | YRI |
| LOC205251 | GI_28372544-S | rs11894410 | 2 | 2 | 110321690 | 5682   | 5.9519  | 0.3265 | -0.2529 | 5.301  | YRI |
| LOC205251 | GI_28372544-S | rs11904760 | 2 | 2 | 110332070 | 4698   | 11.7980 | 0.5729 | 0.3356  | 5.301  | YRI |
| LOC205251 | GI_28372544-S | rs10171646 | 2 | 2 | 110334732 | 7360   | 11.7980 | 0.5729 | 0.3356  | 5.301  | YRI |
| SESTD1    | GI_31342410-S | rs1307470  | 2 | 2 | 179774899 | 25172  | 6.1092  | 0.3346 | 0.3406  | 5.8914 | YRI |
| SESTD1    | GI_31342410-S | rs12615736 | 2 | 2 | 179791114 | 8957   | 6.1811  | 0.3480 | -0.3602 | 5.8914 | YRI |
| SESTD1    | GI_31342410-S | rs2289994  | 2 | 2 | 179802758 | 2687   | 6.6200  | 0.3603 | 0.3552  | 5.8914 | YRI |
| SESTD1    | GI_31342410-S | rs10930855 | 2 | 2 | 179803516 | 3445   | 5.9629  | 0.3366 | 0.3938  | 5.8914 | YRI |
| SESTD1    | GI_31342410-S | rs2289993  | 2 | 2 | 179805436 | 5365   | 6.6200  | 0.3603 | 0.3552  | 5.8914 | YRI |
| SESTD1    | GI_31342410-S | rs17454311 | 2 | 2 | 179849673 | 49602  | 6.1092  | 0.3346 | -0.3406 | 5.8914 | YRI |
| SESTD1    | GI_31342410-S | rs1844763  | 2 | 2 | 179867165 | 67094  | 5.9977  | 0.3288 | 0.3581  | 5.8914 | YRI |
| SESTD1    | GI_31342410-S | rs10164814 | 2 | 2 | 179885371 | 85300  | 5.9160  | 0.3246 | -0.3469 | 5.8914 | YRI |
| SESTD1    | GI_31342410-S | rs7601366  | 2 | 2 | 179911345 | 111274 | 6.0249  | 0.3350 | 0.3657  | 5.8914 | YRI |
| SESTD1    | GI_31342410-S | rs12693179 | 2 | 2 | 179912873 | 112802 | 6.1508  | 0.3367 | 0.3491  | 5.8914 | YRI |
| SESTD1    | GI_31342410-S | rs10181464 | 2 | 2 | 179913327 | 113256 | 6.1508  | 0.3367 | 0.3491  | 5.8914 | YRI |
| SESTD1    | GI_31342410-S | rs10439300 | 2 | 2 | 179913497 | 113426 | 6.1508  | 0.3367 | 0.3491  | 5.8914 | YRI |
| SESTD1    | GI_31342410-S | rs9288025  | 2 | 2 | 179914022 | 113951 | 6.0822  | 0.3332 | -0.3206 | 5.8914 | YRI |
| SESTD1    | GI_31342410-S | rs10208593 | 2 | 2 | 179914474 | 114403 | 6.1092  | 0.3346 | -0.3406 | 5.8914 | YRI |
| SESTD1    | GI_31342410-S | rs10164707 | 2 | 2 | 179915346 | 115275 | 6.1508  | 0.3367 | -0.3491 | 5.8914 | YRI |
| SESTD1    | GI_31342410-S | rs12987285 | 2 | 2 | 179915489 | 115418 | 6.1508  | 0.3367 | -0.3491 | 5.8914 | YRI |
| SESTD1    | GI_31342410-S | rs7608745  | 2 | 2 | 179919146 | 119075 | 6.1508  | 0.3367 | 0.3491  | 5.8914 | YRI |
| SESTD1    | GI_31342410-S | rs6743412  | 2 | 2 | 179921358 | 121287 | 6.1787  | 0.3381 | 0.3581  | 5.8914 | YRI |
| SESTD1    | GI_31342410-S | rs12621115 | 2 | 2 | 179927366 | 127295 | 6.1282  | 0.3453 | 0.3512  | 5.8914 | YRI |
| SESTD1    | GI_31342410-S | rs10209887 | 2 | 2 | 179930272 | 130201 | 6.1508  | 0.3367 | 0.3491  | 5.8914 | YRI |
| SESTD1    | GI_31342410-S | rs12617002 | 2 | 2 | 179947904 | 147833 | 6.1508  | 0.3367 | -0.3491 | 5.8914 | YRI |
| SESTD1    | GI_31342410-S | rs6759983  | 2 | 2 | 179948335 | 148264 | 6.1508  | 0.3367 | 0.3491  | 5.8914 | YRI |
| SESTD1    | GI_31342410-S | rs12622075 | 2 | 2 | 179949410 | 149339 | 6.1508  | 0.3367 | -0.3491 | 5.8914 | YRI |
| LOC51240  | GI_31377759-S | rs10931430 | 2 | 2 | 190367692 | 93300  | 8.2221  | 0.4351 | 0.5040  | 6.1786 | YRI |
| LOC51240  | GI_31377759-S | rs16831859 | 2 | 2 | 190372940 | 88052  | 6.5116  | 0.3549 | -0.5661 | 6.1786 | YRI |
| LOC51240  | GI_31377759-S | rs16831861 | 2 | 2 | 190374724 | 86268  | 6.5116  | 0.3549 | -0.5661 | 6.1786 | YRI |
| LOC51240  | GI_31377759-S | rs16831866 | 2 | 2 | 190376979 | 84013  | 6.5116  | 0.3549 | -0.5661 | 6.1786 | YRI |
| LOC51240  | GI_31377759-S | rs16831876 | 2 | 2 | 190383414 | 77578  | 6.5116  | 0.3549 | -0.5661 | 6.1786 | YRI |
| LOC51240  | GI_31377759-S | rs1437891  | 2 | 2 | 190388214 | 72778  | 8.2221  | 0.4351 | 0.5040  | 6.1786 | YRI |
| LOC51240  | GI_31377759-S | rs16831884 | 2 | 2 | 190395850 | 65142  | 6.5116  | 0.3549 | -0.5661 | 6.1786 | YRI |
| LOC51240  | GI_31377759-S | rs16831894 | 2 | 2 | 190397584 | 63408  | 6.5116  | 0.3549 | -0.5661 | 6.1786 | YRI |
| LOC51240  | GI_31377759-S | rs6434364  | 2 | 2 | 190397835 | 63157  | 6.5116  | 0.3549 | -0.5661 | 6.1786 | YRI |
| LOC51240  | GI_31377759-S | rs2252487  | 2 | 2 | 190398254 | 62738  | 6.7997  | 0.3849 | 0.5818  | 6.1786 | YRI |
| LOC51240  | GI_31377759-S | rs2262765  | 2 | 2 | 190398955 | 62037  | 6.5116  | 0.3549 | -0.5661 | 6.1786 | YRI |
| LOC51240  | GI_31377759-S | rs2255705  | 2 | 2 | 190401585 | 59407  | 6.5116  | 0.3549 | 0.5661  | 6.1786 | YRI |
| LOC51240  | GI_31377759-S | rs1899027  | 2 | 2 | 190408840 | 52152  | 6.5116  | 0.3549 | -0.5661 | 6.1786 | YRI |
| LOC51240  | GI_31377759-S | rs2256719  | 2 | 2 | 190409463 | 51529  | 6.5116  | 0.3549 | -0.5661 | 6.1786 | YRI |
| LOC51240  | GI_31377759-S | rs1225079  | 2 | 2 | 190413150 | 47842  | 6.5116  | 0.3549 | -0.5661 | 6.1786 | YRI |
| LOC51240  | GI_31377759-S | rs1225080  | 2 | 2 | 190413198 | 47794  | 6.5116  | 0.3549 | 0.5661  | 6.1786 | YRI |
| LOC51240  | GI_31377759-S | rs1225081  | 2 | 2 | 190413281 | 47711  | 6.5116  | 0.3549 | -0.5661 | 6.1786 | YRI |
| LOC51240  | GI_31377759-S | rs12693557 | 2 | 2 | 190416443 | 44549  | 8.2221  | 0.4351 | 0.5040  | 6.1786 | YRI |
| LOC51240  | GI_31377759-S | rs1225085  | 2 | 2 | 190417369 | 43623  | 6.5116  | 0.3549 | 0.5661  | 6.1786 | YRI |
| LOC51240  | GI_31377759-S | rs1225088  | 2 | 2 | 190419393 | 41599  | 6.5116  | 0.3549 | 0.5661  | 6.1786 | YRI |
| LOC51240  | GI_31377759-S | rs1225089  | 2 | 2 | 190419450 | 41542  | 6.5116  | 0.3549 | 0.5661  | 6.1786 | YRI |
| LOC51240  | GI_31377759-S | rs1225090  | 2 | 2 | 190420764 | 40228  | 6.5116  | 0.3549 | -0.5661 | 6.1786 | YRI |
| LOC51240  | GI_31377759-S | rs2249907  | 2 | 2 | 190424736 | 36256  | 6.5116  | 0.3549 | -0.5661 | 6.1786 | YRI |
| LOC51240  | GI_31377759-S | rs2164831  | 2 | 2 | 190424899 | 36093  | 6.5116  | 0.3549 | 0.5661  | 6.1786 | YRI |
| LOC51240  | GI_31377759-S | rs1225096  | 2 | 2 | 190425571 | 35421  | 6.5116  | 0.3549 | -0.5661 | 6.1786 | YRI |

|          |               |            |   |   |           |        |         |        |         |        |     |
|----------|---------------|------------|---|---|-----------|--------|---------|--------|---------|--------|-----|
| LOC51240 | GI_31377759-S | rs1225099  | 2 | 2 | 190428019 | 32973  | 6.5116  | 0.3549 | -0.5661 | 6.1786 | YRI |
| LOC51240 | GI_31377759-S | rs1225104  | 2 | 2 | 190434333 | 26659  | 6.5116  | 0.3549 | -0.5661 | 6.1786 | YRI |
| LOC51240 | GI_31377759-S | rs2254044  | 2 | 2 | 190435546 | 25446  | 6.5116  | 0.3549 | -0.5661 | 6.1786 | YRI |
| LOC51240 | GI_31377759-S | rs2254144  | 2 | 2 | 190436302 | 24690  | 6.5116  | 0.3549 | -0.5661 | 6.1786 | YRI |
| LOC51240 | GI_31377759-S | rs2254167  | 2 | 2 | 190436965 | 24027  | 6.5116  | 0.3549 | -0.5661 | 6.1786 | YRI |
| LOC51240 | GI_31377759-S | rs1225075  | 2 | 2 | 190438797 | 22195  | 6.5116  | 0.3549 | 0.5661  | 6.1786 | YRI |
| LOC51240 | GI_31377759-S | rs1899023  | 2 | 2 | 190440683 | 20309  | 6.5485  | 0.3618 | 0.5555  | 6.1786 | YRI |
| LOC51240 | GI_31377759-S | rs10210345 | 2 | 2 | 190444992 | 16000  | 8.2221  | 0.4351 | 0.5040  | 6.1786 | YRI |
| LOC51240 | GI_31377759-S | rs2244190  | 2 | 2 | 190445998 | 14994  | 6.8983  | 0.3791 | 0.6142  | 6.1786 | YRI |
| LOC51240 | GI_31377759-S | rs1225120  | 2 | 2 | 190455639 | 5353   | 6.5116  | 0.3549 | 0.5661  | 6.1786 | YRI |
| LOC51240 | GI_31377759-S | rs1225110  | 2 | 2 | 190458417 | 2575   | 6.5116  | 0.3549 | 0.5661  | 6.1786 | YRI |
| LOC51240 | GI_31377759-S | rs1225109  | 2 | 2 | 190459200 | 1792   | 6.5116  | 0.3549 | -0.5661 | 6.1786 | YRI |
| LOC51240 | GI_31377759-S | rs1225107  | 2 | 2 | 190460044 | 948    | 6.3879  | 0.3537 | 0.5608  | 6.1786 | YRI |
| LOC51240 | GI_31377759-S | rs1055091  | 2 | 2 | 190460649 | 343    | 8.2221  | 0.4351 | 0.5040  | 6.1786 | YRI |
| LOC51240 | GI_31377759-S | rs6942     | 2 | 2 | 190461917 | 925    | 8.2221  | 0.4351 | -0.5040 | 6.1786 | YRI |
| LOC51240 | GI_31377759-S | rs6725344  | 2 | 2 | 190464278 | 3286   | 6.5116  | 0.3549 | 0.5661  | 6.1786 | YRI |
| LOC51240 | GI_31377759-S | rs7591929  | 2 | 2 | 190468763 | 7771   | 8.2221  | 0.4351 | 0.5040  | 6.1786 | YRI |
| LOC51240 | GI_31377759-S | rs7606224  | 2 | 2 | 190469155 | 8163   | 6.5754  | 0.3631 | 0.5717  | 6.1786 | YRI |
| LOC51240 | GI_31377759-S | rs10168387 | 2 | 2 | 190472614 | 11622  | 6.5116  | 0.3549 | 0.5661  | 6.1786 | YRI |
| LOC51240 | GI_31377759-S | rs1899025  | 2 | 2 | 190475088 | 14096  | 8.2221  | 0.4351 | 0.5040  | 6.1786 | YRI |
| LOC51240 | GI_31377759-S | rs1233264  | 2 | 2 | 190485634 | 24642  | 6.5116  | 0.3549 | 0.5661  | 6.1786 | YRI |
| PPIL3    | GI_19557635-A | rs6435065  | 2 | 2 | 201494697 | 66614  | 7.5785  | 0.4061 | -0.6613 | 6.009  | YRI |
| PPIL3    | GI_19557635-A | rs2348316  | 2 | 2 | 201522005 | 39306  | 7.5785  | 0.4061 | 0.6613  | 6.009  | YRI |
| PPIL3    | GI_19557635-A | rs4674520  | 2 | 2 | 201538960 | 22351  | 6.6992  | 0.3642 | 0.6114  | 6.009  | YRI |
| PPIL3    | GI_19557635-A | rs11892119 | 2 | 2 | 201561618 | 307    | 11.2797 | 0.5552 | 0.4949  | 6.009  | YRI |
| PPIL3    | GI_19557635-A | rs7562391  | 2 | 2 | 201561672 | 361    | 11.2797 | 0.5552 | -0.4949 | 6.009  | YRI |
| PPIL3    | GI_19557635-A | rs7606251  | 2 | 2 | 201562240 | 929    | 17.9585 | 0.7371 | 0.6488  | 6.009  | YRI |
| PPIL3    | GI_19557635-A | rs2136600  | 2 | 2 | 201567851 | 6540   | 21.9454 | 0.8081 | -0.6835 | 6.009  | YRI |
| PPIL3    | GI_19557635-A | rs7588993  | 2 | 2 | 201589372 | 28061  | 21.4618 | 0.8062 | -0.6817 | 6.009  | YRI |
| PPIL3    | GI_19557635-A | rs6435066  | 2 | 2 | 201591529 | 30218  | 15.5957 | 0.6832 | -0.6800 | 6.009  | YRI |
| PPIL3    | GI_19557635-A | rs13396213 | 2 | 2 | 201593744 | 32433  | 16.5251 | 0.7056 | -0.6027 | 6.009  | YRI |
| PPIL3    | GI_19557635-A | rs11894842 | 2 | 2 | 201599051 | 37740  | 16.5251 | 0.7056 | 0.6027  | 6.009  | YRI |
| PPIL3    | GI_19557635-A | rs4381763  | 2 | 2 | 201602494 | 41183  | 14.0883 | 0.6432 | 0.5789  | 6.009  | YRI |
| PPIL3    | GI_19557635-A | rs2307358  | 2 | 2 | 201611163 | 49852  | 8.2822  | 0.5169 | -0.4645 | 6.009  | YRI |
| PPIL3    | GI_19557635-A | rs2307362  | 2 | 2 | 201611343 | 50032  | 9.8116  | 0.5010 | -0.4684 | 6.009  | YRI |
| PPIL3    | GI_19557635-A | rs4622700  | 2 | 2 | 201618619 | 57308  | 9.8116  | 0.5010 | -0.4684 | 6.009  | YRI |
| PPIL3    | GI_19557635-A | rs9288314  | 2 | 2 | 201619679 | 58368  | 9.2644  | 0.4913 | -0.4684 | 6.009  | YRI |
| PPIL3    | GI_19557635-A | rs10183261 | 2 | 2 | 201623182 | 61871  | 10.5343 | 0.5475 | 0.4357  | 6.009  | YRI |
| PPIL3    | GI_19557635-A | rs13408964 | 2 | 2 | 201630478 | 69167  | 9.8116  | 0.5010 | -0.4684 | 6.009  | YRI |
| PPIL3    | GI_19557635-A | rs10167387 | 2 | 2 | 201634124 | 72813  | 21.0802 | 0.8059 | 0.6818  | 6.009  | YRI |
| PPIL3    | GI_19557635-A | rs10205561 | 2 | 2 | 201635210 | 73899  | 14.0883 | 0.6432 | -0.5789 | 6.009  | YRI |
| PPIL3    | GI_19557635-A | rs13429609 | 2 | 2 | 201641763 | 80452  | 9.8116  | 0.5010 | -0.4684 | 6.009  | YRI |
| PPIL3    | GI_19557635-A | rs11892372 | 2 | 2 | 201644989 | 83678  | 21.9454 | 0.8081 | 0.6835  | 6.009  | YRI |
| PPIL3    | GI_19557635-A | rs2307357  | 2 | 2 | 201649598 | 88287  | 9.8116  | 0.5010 | -0.4684 | 6.009  | YRI |
| PPIL3    | GI_19557635-A | rs3087357  | 2 | 2 | 201653871 | 92560  | 9.8116  | 0.5010 | 0.4684  | 6.009  | YRI |
| PPIL3    | GI_19557635-A | rs874358   | 2 | 2 | 201655108 | 93797  | 9.8116  | 0.5010 | 0.4684  | 6.009  | YRI |
| PPIL3    | GI_19557635-A | rs10931929 | 2 | 2 | 201673392 | 112081 | 9.2697  | 0.4794 | 0.6814  | 6.009  | YRI |
| PPIL3    | GI_19557635-A | rs16836477 | 2 | 2 | 201678963 | 117652 | 9.8116  | 0.5010 | -0.4684 | 6.009  | YRI |
| PPIL3    | GI_19557635-A | rs3901120  | 2 | 2 | 201689036 | 127725 | 21.9454 | 0.8081 | 0.6835  | 6.009  | YRI |
| PPIL3    | GI_19557635-A | rs3900738  | 2 | 2 | 201689309 | 127998 | 14.0883 | 0.6432 | -0.5789 | 6.009  | YRI |
| PPIL3    | GI_19557635-A | rs7591222  | 2 | 2 | 201690698 | 129387 | 7.5785  | 0.4061 | 0.6613  | 6.009  | YRI |
| PPIL3    | GI_19557635-A | rs6719992  | 2 | 2 | 201697484 | 136173 | 9.8116  | 0.5010 | -0.4684 | 6.009  | YRI |
| PPIL3    | GI_19557635-A | rs16836568 | 2 | 2 | 201705454 | 144143 | 9.8116  | 0.5010 | -0.4684 | 6.009  | YRI |
| PPIL3    | GI_19557635-A | rs13405753 | 2 | 2 | 201707183 | 145872 | 9.8116  | 0.5010 | -0.4684 | 6.009  | YRI |
| PPIL3    | GI_19557635-A | rs10197103 | 2 | 2 | 201710799 | 149488 | 9.8116  | 0.5010 | -0.4684 | 6.009  | YRI |
| PPIL3    | GI_19557635-A | rs16836591 | 2 | 2 | 201720449 | 159138 | 16.5251 | 0.7056 | -0.6027 | 6.009  | YRI |
| PPIL3    | GI_19557635-A | rs10185136 | 2 | 2 | 201729807 | 168496 | 16.5251 | 0.7056 | -0.6027 | 6.009  | YRI |
| PPIL3    | GI_19557635-A | rs13384791 | 2 | 2 | 201736670 | 175359 | 9.8116  | 0.5010 | -0.4684 | 6.009  | YRI |
| PPIL3    | GI_19557635-A | rs13417843 | 2 | 2 | 201738935 | 177624 | 9.8116  | 0.5010 | -0.4684 | 6.009  | YRI |

|           |               |            |   |   |           |        |         |        |         |        |     |
|-----------|---------------|------------|---|---|-----------|--------|---------|--------|---------|--------|-----|
| PPIL3     | GI_19557635-A | rs10207746 | 2 | 2 | 201741924 | 180613 | 9.8116  | 0.5010 | 0.4684  | 6.009  | YRI |
| PPIL3     | GI_19557635-A | rs6737556  | 2 | 2 | 201749584 | 188273 | 9.8116  | 0.5010 | -0.4684 | 6.009  | YRI |
| PPIL3     | GI_19557635-A | rs16842071 | 2 | 2 | 201757236 | 195925 | 21.9454 | 0.8081 | 0.6835  | 6.009  | YRI |
| PPIL3     | GI_19557635-A | rs10194168 | 2 | 2 | 201767943 | 206632 | 8.2801  | 0.5168 | -0.4616 | 6.009  | YRI |
| PPIL3     | GI_19557635-A | rs2110728  | 2 | 2 | 201791184 | 229873 | 8.8163  | 0.4606 | -0.4237 | 6.009  | YRI |
| PPIL3     | GI_19557635-A | rs13410282 | 2 | 2 | 201796530 | 235219 | 9.7209  | 0.4974 | 0.4490  | 6.009  | YRI |
| PPIL3     | GI_19557635-A | rs7583529  | 2 | 2 | 201813744 | 252433 | 10.1024 | 0.5122 | 0.4445  | 6.009  | YRI |
| PPIL3     | GI_19557635-A | rs6728771  | 2 | 2 | 201817913 | 256602 | 10.6604 | 0.5330 | 0.5024  | 6.009  | YRI |
| PPIL3     | GI_19557635-A | rs7591912  | 2 | 2 | 201888099 | 326788 | 6.9235  | 0.3752 | 0.5931  | 6.009  | YRI |
| PPIL3     | GI_19557635-A | rs6435069  | 2 | 2 | 201904000 | 342689 | 7.0688  | 0.3821 | 0.4721  | 6.009  | YRI |
| PPIL3     | GI_19557635-A | rs7568770  | 2 | 2 | 201952214 | 390903 | 6.1336  | 0.3358 | -0.5429 | 6.009  | YRI |
| PPIL3     | GI_19557635-A | rs7579792  | 2 | 2 | 202025956 | 464645 | 6.7997  | 0.3691 | -0.5595 | 6.009  | YRI |
| RPL37A    | GI_16306561-S | rs3732019  | 2 | 2 | 217187892 | 1196   | 10.2312 | 0.5171 | -0.3946 | 7.0808 | YRI |
| RPL37A    | GI_16306561-S | rs3806575  | 2 | 2 | 217188440 | 648    | 9.6056  | 0.5384 | 0.3902  | 7.0808 | YRI |
| RPL37A    | GI_16306561-S | rs3755140  | 2 | 2 | 217188555 | 533    | 9.6880  | 0.5148 | 0.4011  | 7.0808 | YRI |
| RPL37A    | GI_16306561-S | rs12619115 | 2 | 2 | 217189346 | 258    | 9.8301  | 0.5078 | -0.3968 | 7.0808 | YRI |
| RPL37A    | GI_16306561-S | rs12616410 | 2 | 2 | 217193418 | 4330   | 9.8301  | 0.5078 | -0.3968 | 7.0808 | YRI |
| RPL37A    | GI_16306561-S | rs12472569 | 2 | 2 | 217206912 | 17824  | 10.2312 | 0.5171 | 0.3946  | 7.0808 | YRI |
| RPL37A    | GI_16306561-S | rs10932660 | 2 | 2 | 217211651 | 22563  | 7.1019  | 0.4115 | -0.3784 | 7.0808 | YRI |
| STK25     | GI_34147665-S | rs2240482  | 2 | 2 | 242125011 | 29600  | 14.8714 | 0.6646 | 0.3786  | 6.6106 | YRI |
| TRNT1     | GI_41281989-I | rs1705805  | 3 | 3 | 3164279   | 1184   | 6.6835  | 0.3634 | 0.2636  | 6.6474 | YRI |
| Hs.224849 | Hs.224849-S   | rs7651075  | 3 | 3 | 14668654  | 27579  | 6.4544  | 0.3521 | 0.1378  | 5.9065 | YRI |
| Hs.224849 | Hs.224849-S   | rs2053017  | 3 | 3 | 14677276  | 18957  | 9.8116  | 0.5071 | -0.1587 | 5.9065 | YRI |
| Hs.224849 | Hs.224849-S   | rs1901     | 3 | 3 | 14687477  | 8756   | 10.9891 | 0.5449 | -0.1557 | 5.9065 | YRI |
| Hs.224849 | Hs.224849-S   | rs11717438 | 3 | 3 | 14688062  | 8171   | 13.9004 | 0.6379 | -0.1745 | 5.9065 | YRI |
| LOC51244  | GI_31652250-S | rs7651009  | 3 | 3 | 14705731  | 16825  | 6.7739  | 0.3679 | -0.2380 | 6.2916 | YRI |
| TOP2B     | GI_19913407-S | rs17016894 | 3 | 3 | 25647782  | 32887  | 6.7476  | 0.3666 | -0.1824 | 6.3422 | YRI |
| TOP2B     | GI_19913407-S | rs11709485 | 3 | 3 | 25649488  | 34593  | 7.4820  | 0.4016 | -0.1940 | 6.3422 | YRI |
| TOP2B     | GI_19913407-S | rs10510570 | 3 | 3 | 25654478  | 39583  | 6.4262  | 0.3507 | 0.1813  | 6.3422 | YRI |
| TOP2B     | GI_19913407-S | rs12632577 | 3 | 3 | 25668982  | 54087  | 8.4095  | 0.4735 | -0.2139 | 6.3422 | YRI |
| TOP2B     | GI_19913407-S | rs11917359 | 3 | 3 | 25673708  | 58813  | 7.7297  | 0.4130 | 0.1969  | 6.3422 | YRI |
| TOP2B     | GI_19913407-S | rs6799331  | 3 | 3 | 25678644  | 63749  | 6.7476  | 0.3666 | -0.1824 | 6.3422 | YRI |
| TOP2B     | GI_19913407-S | rs4681070  | 3 | 3 | 25698365  | 83470  | 6.3724  | 0.3529 | -0.1792 | 6.3422 | YRI |
| FLJ10375  | GI_27545335-S | rs17075422 | 3 | 3 | 43283319  | 99731  | 6.8689  | 0.3725 | 0.6087  | 5.9897 | YRI |
| FLJ10375  | GI_27545335-S | rs17075424 | 3 | 3 | 43283758  | 99292  | 7.0802  | 0.3827 | -0.6495 | 5.9897 | YRI |
| FLJ10375  | GI_27545335-S | rs17075519 | 3 | 3 | 43319744  | 63306  | 7.0802  | 0.3827 | 0.6495  | 5.9897 | YRI |
| FLJ10375  | GI_27545335-S | rs984347   | 3 | 3 | 43321410  | 61640  | 7.0802  | 0.3827 | -0.6495 | 5.9897 | YRI |
| FLJ10375  | GI_27545335-S | rs17075561 | 3 | 3 | 43335883  | 47167  | 7.0802  | 0.3827 | 0.6495  | 5.9897 | YRI |
| FLJ10375  | GI_27545335-S | rs17406718 | 3 | 3 | 43343677  | 39373  | 7.0802  | 0.3827 | 0.6495  | 5.9897 | YRI |
| FLJ10375  | GI_27545335-S | rs17075574 | 3 | 3 | 43356789  | 26261  | 7.0802  | 0.3827 | 0.6495  | 5.9897 | YRI |
| FLJ10375  | GI_27545335-S | rs17075581 | 3 | 3 | 43358901  | 24149  | 7.0802  | 0.3827 | 0.6495  | 5.9897 | YRI |
| FLJ10375  | GI_27545335-S | rs17075587 | 3 | 3 | 43361864  | 21186  | 7.0802  | 0.3827 | 0.6495  | 5.9897 | YRI |
| FLJ10375  | GI_27545335-S | rs2036617  | 3 | 3 | 43364243  | 18807  | 7.1665  | 0.3921 | -0.6578 | 5.9897 | YRI |
| FLJ10375  | GI_27545335-S | rs6799735  | 3 | 3 | 43470748  | 87698  | 7.2169  | 0.3999 | -0.6372 | 5.9897 | YRI |
| FLJ10375  | GI_27545335-S | rs4368477  | 3 | 3 | 43499411  | 116361 | 6.3262  | 0.3505 | -0.6522 | 5.9897 | YRI |
| FLJ10375  | GI_27545335-S | rs17075780 | 3 | 3 | 43550366  | 167316 | 7.0802  | 0.3827 | -0.6495 | 5.9897 | YRI |
| SACM1L    | GI_41281578-S | rs7627203  | 3 | 3 | 45693182  | 68595  | 6.7822  | 0.3683 | -0.3177 | 6.0417 | YRI |
| SACM1L    | GI_41281578-S | rs17078206 | 3 | 3 | 45695803  | 65974  | 7.9106  | 0.4268 | 0.3393  | 6.0417 | YRI |
| SACM1L    | GI_41281578-S | rs9851400  | 3 | 3 | 45698894  | 62883  | 6.7923  | 0.3688 | -0.2502 | 6.0417 | YRI |
| SACM1L    | GI_41281578-S | rs17078210 | 3 | 3 | 45701602  | 60175  | 12.2601 | 0.5881 | 0.3680  | 6.0417 | YRI |
| SACM1L    | GI_41281578-S | rs1534876  | 3 | 3 | 45716261  | 45516  | 6.4579  | 0.3522 | -0.2510 | 6.0417 | YRI |
| SACM1L    | GI_41281578-S | rs2742439  | 3 | 3 | 45719252  | 42525  | 6.3066  | 0.3597 | 0.2570  | 6.0417 | YRI |
| SACM1L    | GI_41281578-S | rs17078233 | 3 | 3 | 45734879  | 26898  | 13.7436 | 0.6334 | 0.3816  | 6.0417 | YRI |
| SACM1L    | GI_41281578-S | rs17078280 | 3 | 3 | 45752117  | 9660   | 13.7436 | 0.6334 | 0.3816  | 6.0417 | YRI |
| SACM1L    | GI_41281578-S | rs17078308 | 3 | 3 | 45772995  | 11218  | 12.6649 | 0.6010 | 0.3724  | 6.0417 | YRI |
| SACM1L    | GI_41281578-S | rs6768156  | 3 | 3 | 45785608  | 23831  | 6.5855  | 0.3586 | 0.2531  | 6.0417 | YRI |
| ZNF589    | GI_7706726-S  | rs13095891 | 3 | 3 | 48356830  | 69522  | 6.0540  | 0.3317 | 0.2699  | 5.33   | YRI |
| HEMK      | GI_7705408-S  | rs11130211 | 3 | 3 | 49620213  | 977031 | 5.3159  | 0.3157 | 0.2645  | 5.3024 | YRI |
| HEMK      | GI_7705408-S  | rs1110295  | 3 | 3 | 49855947  | 741297 | 7.1485  | 0.3912 | -0.4176 | 5.3024 | YRI |

|      |              |            |   |   |          |        |         |        |         |        |     |
|------|--------------|------------|---|---|----------|--------|---------|--------|---------|--------|-----|
| HEMK | GI_7705408-S | rs17050913 | 3 | 3 | 50073341 | 523903 | 7.0205  | 0.3798 | 0.4037  | 5.3024 | YRI |
| HEMK | GI_7705408-S | rs17050922 | 3 | 3 | 50132239 | 465005 | 7.0205  | 0.3798 | -0.4037 | 5.3024 | YRI |
| HEMK | GI_7705408-S | rs7611074  | 3 | 3 | 50204033 | 393211 | 10.1123 | 0.5380 | 0.4360  | 5.3024 | YRI |
| HEMK | GI_7705408-S | rs2071203  | 3 | 3 | 50286904 | 310340 | 7.0037  | 0.3790 | 0.3377  | 5.3024 | YRI |
| HEMK | GI_7705408-S | rs6776145  | 3 | 3 | 50291123 | 306121 | 7.3278  | 0.3998 | 0.2947  | 5.3024 | YRI |
| HEMK | GI_7705408-S | rs12629572 | 3 | 3 | 50299676 | 297568 | 5.4667  | 0.3458 | 0.2804  | 5.3024 | YRI |
| HEMK | GI_7705408-S | rs2071204  | 3 | 3 | 50305991 | 291253 | 6.7247  | 0.3706 | -0.3198 | 5.3024 | YRI |
| HEMK | GI_7705408-S | rs2269432  | 3 | 3 | 50309235 | 288009 | 6.8839  | 0.3784 | 0.3392  | 5.3024 | YRI |
| HEMK | GI_7705408-S | rs2285044  | 3 | 3 | 50311665 | 285579 | 7.2509  | 0.3961 | 0.3480  | 5.3024 | YRI |
| HEMK | GI_7705408-S | rs11130248 | 3 | 3 | 50327204 | 270040 | 6.7175  | 0.3702 | -0.3345 | 5.3024 | YRI |
| HEMK | GI_7705408-S | rs3213621  | 3 | 3 | 50353632 | 243612 | 5.5254  | 0.3040 | 0.2602  | 5.3024 | YRI |
| HEMK | GI_7705408-S | rs4688679  | 3 | 3 | 50359762 | 237482 | 6.6453  | 0.3616 | 0.3414  | 5.3024 | YRI |
| HEMK | GI_7705408-S | rs2233476  | 3 | 3 | 50363387 | 233857 | 6.6453  | 0.3616 | -0.3414 | 5.3024 | YRI |
| HEMK | GI_7705408-S | rs17050976 | 3 | 3 | 50416575 | 180669 | 8.7655  | 0.4643 | 0.4139  | 5.3024 | YRI |
| HEMK | GI_7705408-S | rs17050977 | 3 | 3 | 50427476 | 169768 | 10.3461 | 0.5214 | 0.4161  | 5.3024 | YRI |
| HEMK | GI_7705408-S | rs4450808  | 3 | 3 | 50582802 | 14442  | 9.6669  | 0.5139 | -0.3589 | 5.3024 | YRI |
| HEMK | GI_7705408-S | rs636168   | 3 | 3 | 50584127 | 13117  | 10.5348 | 0.5284 | 0.3608  | 5.3024 | YRI |
| HEMK | GI_7705408-S | rs2232248  | 3 | 3 | 50584628 | 12616  | 6.8316  | 0.3707 | -0.2867 | 5.3024 | YRI |
| HEMK | GI_7705408-S | rs1208923  | 3 | 3 | 50591053 | 6191   | 10.5348 | 0.5284 | 0.3608  | 5.3024 | YRI |
| HEMK | GI_7705408-S | rs12494326 | 3 | 3 | 50604663 | 7419   | 10.4780 | 0.5389 | -0.4368 | 5.3024 | YRI |
| HEMK | GI_7705408-S | rs2239750  | 3 | 3 | 50604982 | 7738   | 8.4358  | 0.4746 | -0.4713 | 5.3024 | YRI |
| HEMK | GI_7705408-S | rs2239753  | 3 | 3 | 50620162 | 22918  | 10.5168 | 0.5340 | 0.4408  | 5.3024 | YRI |
| HEMK | GI_7705408-S | rs2239752  | 3 | 3 | 50620417 | 23173  | 10.6541 | 0.5328 | -0.4392 | 5.3024 | YRI |
| HEMK | GI_7705408-S | rs2239751  | 3 | 3 | 50622892 | 25648  | 10.3011 | 0.5322 | -0.4296 | 5.3024 | YRI |
| HEMK | GI_7705408-S | rs3792323  | 3 | 3 | 50635335 | 38091  | 8.9281  | 0.4712 | -0.4690 | 5.3024 | YRI |
| HEMK | GI_7705408-S | rs616689   | 3 | 3 | 50643536 | 46292  | 5.9668  | 0.3272 | 0.2256  | 5.3024 | YRI |
| HEMK | GI_7705408-S | rs808148   | 3 | 3 | 50653663 | 56419  | 6.0115  | 0.3343 | -0.2264 | 5.3024 | YRI |
| HEMK | GI_7705408-S | rs6771348  | 3 | 3 | 50655134 | 57890  | 5.9668  | 0.3272 | 0.2256  | 5.3024 | YRI |
| HEMK | GI_7705408-S | rs745356   | 3 | 3 | 50656340 | 59096  | 5.9668  | 0.3272 | -0.2256 | 5.3024 | YRI |
| HEMK | GI_7705408-S | rs876105   | 3 | 3 | 50658813 | 61569  | 5.9668  | 0.3272 | 0.2256  | 5.3024 | YRI |
| HEMK | GI_7705408-S | rs876103   | 3 | 3 | 50659015 | 61771  | 6.0849  | 0.3381 | 0.2266  | 5.3024 | YRI |
| HEMK | GI_7705408-S | rs9879397  | 3 | 3 | 50660646 | 63402  | 5.9668  | 0.3272 | 0.2256  | 5.3024 | YRI |
| HEMK | GI_7705408-S | rs2170840  | 3 | 3 | 50661521 | 64277  | 5.9668  | 0.3272 | -0.2256 | 5.3024 | YRI |
| HEMK | GI_7705408-S | rs12491440 | 3 | 3 | 50662866 | 65622  | 10.6541 | 0.5328 | 0.4392  | 5.3024 | YRI |
| HEMK | GI_7705408-S | rs12489607 | 3 | 3 | 50664043 | 66799  | 10.6541 | 0.5328 | -0.4392 | 5.3024 | YRI |
| HEMK | GI_7705408-S | rs4688705  | 3 | 3 | 50665574 | 68330  | 5.9267  | 0.3298 | 0.2261  | 5.3024 | YRI |
| HEMK | GI_7705408-S | rs17051043 | 3 | 3 | 50669002 | 71758  | 10.6541 | 0.5328 | -0.4392 | 5.3024 | YRI |
| HEMK | GI_7705408-S | rs17051045 | 3 | 3 | 50669630 | 72386  | 10.6541 | 0.5328 | 0.4392  | 5.3024 | YRI |
| HEMK | GI_7705408-S | rs728902   | 3 | 3 | 50670366 | 73122  | 10.6541 | 0.5328 | 0.4392  | 5.3024 | YRI |
| HEMK | GI_7705408-S | rs12492982 | 3 | 3 | 50673159 | 75915  | 6.9403  | 0.4093 | -0.4236 | 5.3024 | YRI |
| HEMK | GI_7705408-S | rs17051403 | 3 | 3 | 50726647 | 129403 | 10.6808 | 0.5400 | 0.4430  | 5.3024 | YRI |
| HEMK | GI_7705408-S | rs12495399 | 3 | 3 | 50751886 | 154642 | 10.5487 | 0.5352 | 0.4413  | 5.3024 | YRI |
| HEMK | GI_7705408-S | rs7372716  | 3 | 3 | 50793400 | 196156 | 10.6541 | 0.5328 | -0.4392 | 5.3024 | YRI |
| HEMK | GI_7705408-S | rs12487821 | 3 | 3 | 50817482 | 220238 | 10.6541 | 0.5328 | -0.4392 | 5.3024 | YRI |
| HEMK | GI_7705408-S | rs17051468 | 3 | 3 | 50843124 | 245880 | 9.0946  | 0.4722 | 0.4686  | 5.3024 | YRI |
| HEMK | GI_7705408-S | rs12492850 | 3 | 3 | 50928959 | 331715 | 9.1112  | 0.4729 | -0.4221 | 5.3024 | YRI |
| HEMK | GI_7705408-S | rs4078296  | 3 | 3 | 50943937 | 346693 | 10.6541 | 0.5328 | 0.4392  | 5.3024 | YRI |
| HEMK | GI_7705408-S | rs12488948 | 3 | 3 | 50945005 | 347761 | 10.6541 | 0.5328 | 0.4392  | 5.3024 | YRI |
| HEMK | GI_7705408-S | rs12488831 | 3 | 3 | 50955438 | 358194 | 9.1597  | 0.4809 | 0.4493  | 5.3024 | YRI |
| HEMK | GI_7705408-S | rs6446239  | 3 | 3 | 50958714 | 361470 | 5.3499  | 0.3034 | -0.2279 | 5.3024 | YRI |
| HEMK | GI_7705408-S | rs7372342  | 3 | 3 | 50959822 | 362578 | 9.5394  | 0.5025 | -0.4813 | 5.3024 | YRI |
| HEMK | GI_7705408-S | rs12488700 | 3 | 3 | 50994169 | 396925 | 8.4302  | 0.4558 | -0.4810 | 5.3024 | YRI |
| HEMK | GI_7705408-S | rs7427615  | 3 | 3 | 50996353 | 399109 | 9.0946  | 0.4722 | 0.4686  | 5.3024 | YRI |
| HEMK | GI_7705408-S | rs12496621 | 3 | 3 | 51013950 | 416706 | 9.0946  | 0.4722 | 0.4686  | 5.3024 | YRI |
| HEMK | GI_7705408-S | rs7374205  | 3 | 3 | 51061110 | 463866 | 9.0946  | 0.4722 | -0.4686 | 5.3024 | YRI |
| HEMK | GI_7705408-S | rs4927961  | 3 | 3 | 51085235 | 487991 | 9.0946  | 0.4722 | 0.4686  | 5.3024 | YRI |
| HEMK | GI_7705408-S | rs4130473  | 3 | 3 | 51187952 | 590708 | 7.9822  | 0.4244 | -0.4707 | 5.3024 | YRI |
| HEMK | GI_7705408-S | rs4346580  | 3 | 3 | 51191618 | 594374 | 8.1276  | 0.4366 | -0.4634 | 5.3024 | YRI |
| HEMK | GI_7705408-S | rs12492615 | 3 | 3 | 51192397 | 595153 | 7.6776  | 0.4161 | -0.4789 | 5.3024 | YRI |

|           |               |            |   |   |           |        |         |        |         |        |     |
|-----------|---------------|------------|---|---|-----------|--------|---------|--------|---------|--------|-----|
| HEMK      | GI_7705408-S  | rs12495561 | 3 | 3 | 51250297  | 653053 | 7.1399  | 0.3962 | -0.4522 | 5.3024 | YRI |
| HEMK      | GI_7705408-S  | rs9878592  | 3 | 3 | 51255405  | 658161 | 8.2195  | 0.4350 | -0.4054 | 5.3024 | YRI |
| HEMK      | GI_7705408-S  | rs12493034 | 3 | 3 | 51275950  | 678706 | 8.1114  | 0.4302 | -0.4481 | 5.3024 | YRI |
| HEMK      | GI_7705408-S  | rs1480359  | 3 | 3 | 51289234  | 691990 | 8.2785  | 0.4433 | 0.4677  | 5.3024 | YRI |
| HEMK      | GI_7705408-S  | rs2170177  | 3 | 3 | 51324927  | 727683 | 7.7513  | 0.4140 | -0.4516 | 5.3024 | YRI |
| HEMK      | GI_7705408-S  | rs880477   | 3 | 3 | 51352691  | 755447 | 7.9822  | 0.4244 | 0.4707  | 5.3024 | YRI |
| HEMK      | GI_7705408-S  | rs12487468 | 3 | 3 | 51364610  | 767366 | 7.9822  | 0.4244 | -0.4707 | 5.3024 | YRI |
| HEMK      | GI_7705408-S  | rs1480366  | 3 | 3 | 51368414  | 771170 | 7.9822  | 0.4244 | 0.4707  | 5.3024 | YRI |
| HEMK      | GI_7705408-S  | rs17051802 | 3 | 3 | 51477177  | 879933 | 7.5596  | 0.4107 | 0.4743  | 5.3024 | YRI |
| SLC35A5   | GI_31543636-S | rs2705517  | 3 | 3 | 113802373 | 16909  | 6.2660  | 0.3426 | 0.1598  | 6.0891 | YRI |
| LOC285256 | GI_27481220-S | rs6775459  | 3 | 3 | 130025163 | 1857   | 7.2725  | 0.3918 | 0.1120  | 6.1316 | YRI |
| BFSP2     | GI_21536442-S | rs2737717  | 3 | 3 | 134668532 | 8193   | 12.6396 | 0.6002 | 0.7060  | 5.7851 | YRI |
| BFSP2     | GI_21536442-S | rs11916977 | 3 | 3 | 134669670 | 7055   | 5.9024  | 0.3239 | 0.5532  | 5.7851 | YRI |
| BFSP2     | GI_21536442-S | rs11928329 | 3 | 3 | 134669835 | 6890   | 6.1324  | 0.3358 | 0.5578  | 5.7851 | YRI |
| NMNAT3    | GI_31342325-S | rs7648274  | 3 | 3 | 140891378 | 129515 | 11.2675 | 0.5675 | 1.0941  | 8.0773 | YRI |
| hmm29488  | hmm29488-S    | rs6784920  | 3 | 3 | 158469613 | 185551 | 6.5748  | 0.3581 | -0.0403 | 6.1033 | YRI |
| SFRS10    | GI_4759097-S  | rs16860318 | 3 | 3 | 187115732 | 1632   | 8.0876  | 0.4291 | -0.4679 | 6.702  | YRI |
| SFRS10    | GI_4759097-S  | rs4321562  | 3 | 3 | 187116053 | 1311   | 7.1982  | 0.3883 | -0.4175 | 6.702  | YRI |
| SFRS10    | GI_4759097-S  | rs16860331 | 3 | 3 | 187126935 | 9571   | 8.0876  | 0.4291 | 0.4679  | 6.702  | YRI |
| SFRS10    | GI_4759097-S  | rs16860333 | 3 | 3 | 187129794 | 12430  | 8.0876  | 0.4291 | -0.4679 | 6.702  | YRI |
| SFRS10    | GI_4759097-S  | rs7638894  | 3 | 3 | 187134317 | 16953  | 8.0876  | 0.4291 | -0.4679 | 6.702  | YRI |
| SFRS10    | GI_4759097-S  | rs4267672  | 3 | 3 | 187134571 | 17207  | 7.3473  | 0.4177 | -0.4548 | 6.702  | YRI |
| SFRS10    | GI_4759097-S  | rs2251407  | 3 | 3 | 187137626 | 20262  | 7.1982  | 0.3883 | 0.4175  | 6.702  | YRI |
| LOC151963 | GI_31341922-S | rs4455278  | 3 | 3 | 194097185 | 99618  | 7.3218  | 0.3995 | 0.8008  | 6.2048 | YRI |
| FLJ90036  | GI_31559781-S | rs6599293  | 4 | 4 | 123027    | 22841  | 15.9641 | 0.6923 | 0.2962  | 6.4334 | YRI |
| FLJ90036  | GI_31559781-S | rs11735742 | 4 | 4 | 132550    | 13318  | 15.7375 | 0.6931 | -0.2990 | 6.4334 | YRI |
| FLJ90036  | GI_31559781-S | rs7669631  | 4 | 4 | 137887    | 7981   | 8.2257  | 0.4352 | 0.3342  | 6.4334 | YRI |
| FLJ90036  | GI_31559781-S | rs6830247  | 4 | 4 | 140683    | 5185   | 15.9641 | 0.6923 | -0.2962 | 6.4334 | YRI |
| FLJ90036  | GI_31559781-S | rs12108398 | 4 | 4 | 161534    | 15666  | 6.5232  | 0.3555 | -0.2454 | 6.4334 | YRI |
| FLJ90036  | GI_31559781-S | rs7670453  | 4 | 4 | 185246    | 39378  | 15.4676 | 0.6800 | 0.2916  | 6.4334 | YRI |
| FLJ90036  | GI_31559781-S | rs7695945  | 4 | 4 | 211623    | 65755  | 6.7366  | 0.3660 | -0.2584 | 6.4334 | YRI |
| FLJ90036  | GI_31559781-S | rs7683872  | 4 | 4 | 214446    | 68578  | 10.1181 | 0.5128 | -0.3184 | 6.4334 | YRI |
| FLJ90036  | GI_31559781-S | rs7693241  | 4 | 4 | 223475    | 77607  | 6.7366  | 0.3660 | 0.2584  | 6.4334 | YRI |
| FLJ90036  | GI_31559781-S | rs7667471  | 4 | 4 | 229205    | 83337  | 10.1181 | 0.5128 | -0.3184 | 6.4334 | YRI |
| FLJ90036  | GI_31559781-S | rs6599319  | 4 | 4 | 234361    | 88493  | 6.7366  | 0.3660 | 0.2584  | 6.4334 | YRI |
| FLJ90036  | GI_31559781-S | rs6599321  | 4 | 4 | 234509    | 88641  | 6.7366  | 0.3660 | 0.2584  | 6.4334 | YRI |
| FLJ90036  | GI_31559781-S | rs7657860  | 4 | 4 | 248512    | 102644 | 6.7401  | 0.3662 | 0.2534  | 6.4334 | YRI |
| FLJ90036  | GI_31559781-S | rs7658064  | 4 | 4 | 248627    | 102759 | 6.7366  | 0.3660 | 0.2584  | 6.4334 | YRI |
| FLJ90036  | GI_31559781-S | rs6811431  | 4 | 4 | 257621    | 111753 | 6.7366  | 0.3660 | -0.2584 | 6.4334 | YRI |
| FLJ90036  | GI_31559781-S | rs2353602  | 4 | 4 | 265116    | 119248 | 6.7366  | 0.3660 | 0.2584  | 6.4334 | YRI |
| FLJ90036  | GI_31559781-S | rs6810785  | 4 | 4 | 265902    | 120034 | 6.7401  | 0.3662 | 0.2534  | 6.4334 | YRI |
| FLJ90036  | GI_31559781-S | rs6820547  | 4 | 4 | 272006    | 126138 | 6.7366  | 0.3660 | 0.2584  | 6.4334 | YRI |
| FLJ90036  | GI_31559781-S | rs6826459  | 4 | 4 | 272046    | 126178 | 6.7366  | 0.3660 | -0.2584 | 6.4334 | YRI |
| FLJ90036  | GI_31559781-S | rs7661412  | 4 | 4 | 288772    | 142904 | 7.5868  | 0.4065 | -0.3016 | 6.4334 | YRI |
| MGC21675  | GI_16418362-S | rs3811733  | 4 | 4 | 1249480   | 13914  | 6.1021  | 0.3342 | -0.1383 | 6.0039 | YRI |
| FLJ34443  | GI_31341870-S | rs7656122  | 4 | 4 | 1362872   | 16515  | 6.0474  | 0.3314 | -0.1336 | 5.9797 | YRI |
| SLA/LP    | GI_24432103-I | rs6819293  | 4 | 4 | 24835165  | 35012  | 6.2817  | 0.3482 | -0.2714 | 6.2815 | YRI |
| FLJ23235  | GI_13376422-S | rs2566104  | 4 | 4 | 38842478  | 51436  | 6.7724  | 0.3678 | -0.5035 | 5.8636 | YRI |
| FLJ23235  | GI_13376422-S | rs2254075  | 4 | 4 | 38852749  | 61707  | 9.4289  | 0.4858 | -0.5871 | 5.8636 | YRI |
| FLJ23235  | GI_13376422-S | rs2254212  | 4 | 4 | 38854408  | 63366  | 9.4289  | 0.4858 | 0.5871  | 5.8636 | YRI |
| FLJ23235  | GI_13376422-S | rs2711976  | 4 | 4 | 38857352  | 66310  | 9.4289  | 0.4858 | 0.5871  | 5.8636 | YRI |
| FLJ23235  | GI_13376422-S | rs2566094  | 4 | 4 | 38858940  | 67898  | 9.2665  | 0.4852 | -0.5889 | 5.8636 | YRI |
| FLJ23235  | GI_13376422-S | rs2566097  | 4 | 4 | 38859902  | 68860  | 6.1658  | 0.3629 | -0.5558 | 5.8636 | YRI |
| FLJ23235  | GI_13376422-S | rs2711981  | 4 | 4 | 38861824  | 70782  | 9.6239  | 0.4936 | -0.5970 | 5.8636 | YRI |
| FLJ23235  | GI_13376422-S | rs2566116  | 4 | 4 | 38875404  | 84362  | 6.3858  | 0.3486 | 0.4181  | 5.8636 | YRI |
| FLJ23235  | GI_13376422-S | rs2711952  | 4 | 4 | 38879384  | 88342  | 6.0932  | 0.3337 | 0.3915  | 5.8636 | YRI |
| FLJ23235  | GI_13376422-S | rs1367299  | 4 | 4 | 38880357  | 89315  | 6.0247  | 0.3608 | 0.3898  | 5.8636 | YRI |
| FLJ23235  | GI_13376422-S | rs2566122  | 4 | 4 | 38880931  | 98889  | 6.0932  | 0.3337 | 0.3915  | 5.8636 | YRI |
| FLJ23235  | GI_13376422-S | rs2566126  | 4 | 4 | 38884386  | 93344  | 6.3233  | 0.3714 | 0.4067  | 5.8636 | YRI |

|           |               |            |   |   |          |        |         |        |         |        |     |
|-----------|---------------|------------|---|---|----------|--------|---------|--------|---------|--------|-----|
| FLJ23235  | GI_13376422-S | rs2711943  | 4 | 4 | 38885002 | 93960  | 6.0932  | 0.3337 | -0.3915 | 5.8636 | YRI |
| FLJ23235  | GI_13376422-S | rs1006403  | 4 | 4 | 38896474 | 105432 | 6.0541  | 0.3317 | 0.3905  | 5.8636 | YRI |
| FLJ23235  | GI_13376422-S | rs2566138  | 4 | 4 | 38898511 | 107469 | 5.8680  | 0.3267 | -0.3832 | 5.8636 | YRI |
| FLJ23235  | GI_13376422-S | rs2252519  | 4 | 4 | 38900470 | 109428 | 6.0932  | 0.3337 | -0.3915 | 5.8636 | YRI |
| FLJ10525  | GI_8922490-S  | rs10517012 | 4 | 4 | 41733015 | 65628  | 7.0122  | 0.3794 | -0.2427 | 5.877  | YRI |
| FLJ10525  | GI_8922490-S  | rs1983138  | 4 | 4 | 41742296 | 56347  | 7.2325  | 0.3899 | -0.2335 | 5.877  | YRI |
| FLJ10525  | GI_8922490-S  | rs6830514  | 4 | 4 | 41797241 | 1402   | 7.0797  | 0.3827 | 0.2503  | 5.877  | YRI |
| FLJ10525  | GI_8922490-S  | rs16853828 | 4 | 4 | 41804673 | 6030   | 7.0797  | 0.3827 | 0.2503  | 5.877  | YRI |
| FLJ13220  | GI_11345459-S | rs1347900  | 4 | 4 | 44448781 | 93064  | 7.6153  | 0.4078 | -0.5992 | 6.2534 | YRI |
| FLJ13220  | GI_11345459-S | rs1439363  | 4 | 4 | 44451440 | 90405  | 7.5224  | 0.4089 | 0.5950  | 6.2534 | YRI |
| FLJ13220  | GI_11345459-S | rs2172143  | 4 | 4 | 44568916 | 27071  | 9.3151  | 0.4812 | -0.5975 | 6.2534 | YRI |
| FLJ13220  | GI_11345459-S | rs7699421  | 4 | 4 | 44631496 | 89651  | 7.9366  | 0.4224 | 0.5423  | 6.2534 | YRI |
| FLJ13220  | GI_11345459-S | rs11936248 | 4 | 4 | 44637294 | 95449  | 6.3650  | 0.3851 | -0.3763 | 6.2534 | YRI |
| FLJ13220  | GI_11345459-S | rs6447383  | 4 | 4 | 44711414 | 169569 | 7.5566  | 0.4051 | 0.5717  | 6.2534 | YRI |
| FLJ13220  | GI_11345459-S | rs1566118  | 4 | 4 | 44713642 | 171797 | 8.0562  | 0.4277 | -0.7547 | 6.2534 | YRI |
| FLJ13220  | GI_11345459-S | rs13125132 | 4 | 4 | 44839260 | 297415 | 7.2801  | 0.3922 | 0.6765  | 6.2534 | YRI |
| FLJ13220  | GI_11345459-S | rs7675796  | 4 | 4 | 44839484 | 297639 | 7.2801  | 0.3922 | 0.6765  | 6.2534 | YRI |
| FLJ13220  | GI_11345459-S | rs7681356  | 4 | 4 | 44839832 | 297987 | 7.2801  | 0.3922 | -0.6765 | 6.2534 | YRI |
| Hs.164463 | Hs.164463-S   | rs13126826 | 4 | 4 | 54403213 | 40174  | 13.1423 | 0.6157 | 0.4733  | 7.6998 | YRI |
| Hs.164463 | Hs.164463-S   | rs2590790  | 4 | 4 | 54412490 | 30897  | 7.8119  | 0.4588 | 0.4904  | 7.6998 | YRI |
| Hs.164463 | Hs.164463-S   | rs2616394  | 4 | 4 | 54415202 | 28185  | 8.9057  | 0.4644 | -0.5392 | 7.6998 | YRI |
| Hs.164463 | Hs.164463-S   | rs728586   | 4 | 4 | 54415402 | 27985  | 7.7916  | 0.4159 | -0.5048 | 7.6998 | YRI |
| Hs.164463 | Hs.164463-S   | rs2616397  | 4 | 4 | 54421616 | 21771  | 8.9057  | 0.4644 | -0.5392 | 7.6998 | YRI |
| Hs.164463 | Hs.164463-S   | rs2616403  | 4 | 4 | 54428037 | 15350  | 8.2952  | 0.4440 | 0.5244  | 7.6998 | YRI |
| LOC375399 | GI_37540365-S | rs1048447  | 4 | 4 | 68312238 | 103237 | 7.1292  | 0.3850 | 0.1494  | 6.0783 | YRI |
| LOC401135 | GI_42657007-S | rs1048447  | 4 | 4 | 68312238 | 104593 | 9.1546  | 0.4747 | 0.2746  | 6.9866 | YRI |
| LOC375399 | GI_37540365-S | rs3796715  | 4 | 4 | 68321842 | 93633  | 7.4872  | 0.4073 | -0.1418 | 6.0783 | YRI |
| LOC401135 | GI_42657007-S | rs3796715  | 4 | 4 | 68321842 | 94989  | 9.0116  | 0.4747 | -0.2540 | 6.9866 | YRI |
| LOC375399 | GI_37540365-S | rs6840867  | 4 | 4 | 68343820 | 71655  | 7.6520  | 0.4095 | -0.1422 | 6.0783 | YRI |
| LOC401135 | GI_42657007-S | rs6840867  | 4 | 4 | 68343820 | 73011  | 8.9820  | 0.4676 | -0.2519 | 6.9866 | YRI |
| LOC375399 | GI_37540365-S | rs10010188 | 4 | 4 | 68363158 | 52317  | 7.6520  | 0.4095 | -0.1422 | 6.0783 | YRI |
| LOC401135 | GI_42657007-S | rs10010188 | 4 | 4 | 68363158 | 53673  | 8.9820  | 0.4676 | -0.2519 | 6.9866 | YRI |
| LOC375399 | GI_37540365-S | rs12643686 | 4 | 4 | 68366583 | 48892  | 7.6520  | 0.4095 | -0.1422 | 6.0783 | YRI |
| LOC401135 | GI_42657007-S | rs12643686 | 4 | 4 | 68366583 | 50248  | 8.9820  | 0.4676 | -0.2519 | 6.9866 | YRI |
| LOC375399 | GI_37540365-S | rs12640455 | 4 | 4 | 68387605 | 27870  | 7.6520  | 0.4095 | -0.1422 | 6.0783 | YRI |
| LOC401135 | GI_42657007-S | rs12640455 | 4 | 4 | 68387605 | 29226  | 8.9820  | 0.4676 | -0.2519 | 6.9866 | YRI |
| LOC401135 | GI_42657007-S | rs10014944 | 4 | 4 | 68399524 | 17307  | 8.2572  | 0.4423 | -0.2500 | 6.9866 | YRI |
| LOC375399 | GI_37540365-S | rs17635222 | 4 | 4 | 68415033 | 442    | 7.6927  | 0.4113 | 0.1406  | 6.0783 | YRI |
| LOC401135 | GI_42657007-S | rs17635222 | 4 | 4 | 68415033 | 1798   | 10.5164 | 0.5277 | 0.2634  | 6.9866 | YRI |
| LOC375399 | GI_37540365-S | rs12651577 | 4 | 4 | 68424184 | 8709   | 7.2431  | 0.3904 | -0.1390 | 6.0783 | YRI |
| LOC401135 | GI_42657007-S | rs12651577 | 4 | 4 | 68424184 | 7353   | 10.0356 | 0.5096 | -0.2626 | 6.9866 | YRI |
| ASAH      | GI_30794501-S | rs13138223 | 4 | 4 | 77216794 | 17704  | 7.8376  | 0.4179 | 0.4138  | 6.0297 | YRI |
| ASAH      | GI_30794501-S | rs6826085  | 4 | 4 | 77227408 | 28318  | 7.6327  | 0.4141 | 0.4131  | 6.0297 | YRI |
| ASAH      | GI_30794501-S | rs2242471  | 4 | 4 | 77235895 | 36805  | 7.5075  | 0.4028 | -0.4054 | 6.0297 | YRI |
| ASAH      | GI_30794501-S | rs2242473  | 4 | 4 | 77236135 | 37045  | 7.3216  | 0.4106 | -0.4027 | 6.0297 | YRI |
| ASAH      | GI_30794501-S | rs17001284 | 4 | 4 | 77239950 | 40860  | 6.3973  | 0.3541 | 0.3349  | 6.0297 | YRI |
| ASAH      | GI_30794501-S | rs2273     | 4 | 4 | 77246567 | 47477  | 7.5075  | 0.4028 | 0.4054  | 6.0297 | YRI |
| ASAH      | GI_30794501-S | rs4859413  | 4 | 4 | 77255429 | 56339  | 7.3975  | 0.4031 | -0.4079 | 6.0297 | YRI |
| ASAH      | GI_30794501-S | rs4859581  | 4 | 4 | 77264153 | 65063  | 7.5075  | 0.4028 | 0.4054  | 6.0297 | YRI |
| ASAH      | GI_30794501-S | rs4282209  | 4 | 4 | 77276715 | 77625  | 7.9968  | 0.4423 | -0.3897 | 6.0297 | YRI |
| ASAH      | GI_30794501-S | rs10031452 | 4 | 4 | 77282112 | 83022  | 6.5991  | 0.3593 | 0.3600  | 6.0297 | YRI |
| ASAH      | GI_30794501-S | rs6532083  | 4 | 4 | 77286380 | 87290  | 6.5991  | 0.3593 | -0.3600 | 6.0297 | YRI |
| ASAH      | GI_30794501-S | rs12511861 | 4 | 4 | 77293277 | 94187  | 6.5760  | 0.3683 | -0.3546 | 6.0297 | YRI |
| ASAH      | GI_30794501-S | rs7670789  | 4 | 4 | 77297560 | 98470  | 6.5363  | 0.3562 | 0.3630  | 6.0297 | YRI |
| ASAH      | GI_30794501-S | rs8878     | 4 | 4 | 77299479 | 100389 | 6.5363  | 0.3562 | 0.3630  | 6.0297 | YRI |
| ASAH      | GI_30794501-S | rs4859587  | 4 | 4 | 77300475 | 101385 | 6.4418  | 0.3564 | -0.3639 | 6.0297 | YRI |
| ASAH      | GI_30794501-S | rs4859588  | 4 | 4 | 77300856 | 101766 | 6.5363  | 0.3562 | 0.3630  | 6.0297 | YRI |
| ASAH      | GI_30794501-S | rs4257674  | 4 | 4 | 77302864 | 103774 | 6.5363  | 0.3562 | -0.3630 | 6.0297 | YRI |
| ASAH      | GI_30794501-S | rs4417995  | 4 | 4 | 77303178 | 104088 | 6.3970  | 0.3492 | 0.3579  | 6.0297 | YRI |

|           |               |            |   |   |           |        |         |        |         |        |     |
|-----------|---------------|------------|---|---|-----------|--------|---------|--------|---------|--------|-----|
| ASAH      | GI_30794501-S | rs4386624  | 4 | 4 | 77303318  | 104228 | 6.5363  | 0.3562 | 0.3630  | 6.0297 | YRI |
| ASAH      | GI_30794501-S | rs9884374  | 4 | 4 | 77303897  | 104807 | 6.5363  | 0.3562 | -0.3630 | 6.0297 | YRI |
| ASAH      | GI_30794501-S | rs4241579  | 4 | 4 | 77304463  | 105373 | 6.4418  | 0.3564 | -0.3639 | 6.0297 | YRI |
| ASAH      | GI_30794501-S | rs4859590  | 4 | 4 | 77305567  | 106477 | 6.5363  | 0.3562 | -0.3630 | 6.0297 | YRI |
| ASAH      | GI_30794501-S | rs4859591  | 4 | 4 | 77305757  | 106667 | 6.4166  | 0.3551 | 0.3631  | 6.0297 | YRI |
| ASAH      | GI_30794501-S | rs4859414  | 4 | 4 | 77307176  | 108086 | 6.7214  | 0.3704 | 0.3721  | 6.0297 | YRI |
| ASAH      | GI_30794501-S | rs6845396  | 4 | 4 | 77308729  | 109639 | 6.5363  | 0.3562 | -0.3630 | 6.0297 | YRI |
| ASAH      | GI_30794501-S | rs6850760  | 4 | 4 | 77308863  | 109773 | 6.5363  | 0.3562 | 0.3630  | 6.0297 | YRI |
| ASAH      | GI_30794501-S | rs10021768 | 4 | 4 | 77308943  | 109853 | 6.5363  | 0.3562 | 0.3630  | 6.0297 | YRI |
| ASAH      | GI_30794501-S | rs4302486  | 4 | 4 | 77310256  | 111166 | 6.5363  | 0.3562 | -0.3630 | 6.0297 | YRI |
| ASAH      | GI_30794501-S | rs4512021  | 4 | 4 | 77311586  | 112496 | 6.5363  | 0.3562 | -0.3630 | 6.0297 | YRI |
| ASAH      | GI_30794501-S | rs7436646  | 4 | 4 | 77312408  | 113318 | 6.3656  | 0.3576 | 0.3651  | 6.0297 | YRI |
| ASAH      | GI_30794501-S | rs7674409  | 4 | 4 | 77315513  | 116423 | 6.5363  | 0.3562 | -0.3630 | 6.0297 | YRI |
| ASAH      | GI_30794501-S | rs4129781  | 4 | 4 | 77316567  | 117477 | 6.5363  | 0.3562 | 0.3630  | 6.0297 | YRI |
| ASAH      | GI_30794501-S | rs6532121  | 4 | 4 | 77319785  | 120695 | 6.4196  | 0.3603 | -0.3684 | 6.0297 | YRI |
| ASAH      | GI_30794501-S | rs7684461  | 4 | 4 | 77320175  | 121085 | 6.5363  | 0.3562 | 0.3630  | 6.0297 | YRI |
| ASAH      | GI_30794501-S | rs5005114  | 4 | 4 | 77343219  | 144129 | 6.4875  | 0.3858 | 0.5589  | 6.0297 | YRI |
| ASAH      | GI_30794501-S | rs4304003  | 4 | 4 | 77352642  | 153552 | 6.5363  | 0.3562 | 0.3630  | 6.0297 | YRI |
| NUDT9     | GI_37594456-A | rs6811514  | 4 | 4 | 89205195  | 468831 | 6.7686  | 0.3676 | 0.2356  | 5.8938 | YRI |
| Hs.119946 | Hs.119946-S   | rs6820201  | 4 | 4 | 89532096  | 77466  | 6.8864  | 0.3949 | -0.2028 | 6.4157 | YRI |
| Hs.119946 | Hs.119946-S   | rs17013974 | 4 | 4 | 89559909  | 49653  | 9.4997  | 0.4947 | 0.2376  | 6.4157 | YRI |
| Hs.119946 | Hs.119946-S   | rs17013978 | 4 | 4 | 89560376  | 49186  | 8.5443  | 0.4860 | -0.2356 | 6.4157 | YRI |
| Hs.119946 | Hs.119946-S   | rs7676986  | 4 | 4 | 89584852  | 24710  | 6.8127  | 0.3856 | -0.2064 | 6.4157 | YRI |
| NAP1L5    | GI_24371267-S | rs2604209  | 4 | 4 | 89978250  | 3712   | 6.2946  | 0.3440 | 0.2027  | 6.2017 | YRI |
| Hs.212658 | Hs.212658-S   | rs6532733  | 4 | 4 | 99706135  | 15537  | 8.9708  | 0.4730 | -0.4632 | 6.2131 | YRI |
| Hs.212658 | Hs.212658-S   | rs4699634  | 4 | 4 | 99721799  | 127    | 7.8687  | 0.4193 | 0.3862  | 6.2131 | YRI |
| Hs.212658 | Hs.212658-S   | rs13119703 | 4 | 4 | 99723761  | 2089   | 6.2755  | 0.3431 | -0.5204 | 6.2131 | YRI |
| PPA2      | GI_31881619-A | rs1603705  | 4 | 4 | 106576743 | 71676  | 6.1494  | 0.3514 | -0.6255 | 5.9137 | YRI |
| PPA2      | GI_31881619-A | rs2726475  | 4 | 4 | 106606706 | 41713  | 8.2797  | 0.4433 | -0.5845 | 5.9137 | YRI |
| PPA2      | GI_31881619-A | rs2647254  | 4 | 4 | 106642694 | 5725   | 9.2745  | 0.5317 | 0.7040  | 5.9137 | YRI |
| PPA2      | GI_31881619-A | rs11932512 | 4 | 4 | 106644958 | 3461   | 10.7402 | 0.5618 | -0.6370 | 5.9137 | YRI |
| PPA2      | GI_31881619-A | rs13123933 | 4 | 4 | 106645796 | 2623   | 8.7104  | 0.4620 | -0.7978 | 5.9137 | YRI |
| PPA2      | GI_31881619-A | rs2726526  | 4 | 4 | 106649725 | 1306   | 8.1598  | 0.4323 | 0.6679  | 5.9137 | YRI |
| PPA2      | GI_31881619-A | rs13108489 | 4 | 4 | 106650729 | 2310   | 20.5552 | 0.7974 | -0.7501 | 5.9137 | YRI |
| PPA2      | GI_31881619-A | rs2713831  | 4 | 4 | 106652126 | 3707   | 6.0185  | 0.3299 | 0.6444  | 5.9137 | YRI |
| PPA2      | GI_31881619-A | rs2713833  | 4 | 4 | 106654980 | 6561   | 9.5044  | 0.4949 | -0.6139 | 5.9137 | YRI |
| PPA2      | GI_31881619-A | rs2636723  | 4 | 4 | 106662275 | 13856  | 8.9168  | 0.4649 | 0.6120  | 5.9137 | YRI |
| PPA2      | GI_31881619-A | rs2713827  | 4 | 4 | 106666161 | 17742  | 11.4180 | 0.5600 | 0.6757  | 5.9137 | YRI |
| PPA2      | GI_31881619-A | rs2636732  | 4 | 4 | 106694459 | 46040  | 7.5955  | 0.4069 | 0.6514  | 5.9137 | YRI |
| PPA2      | GI_31881619-A | rs12643660 | 4 | 4 | 106744364 | 95945  | 8.4203  | 0.4554 | -0.7995 | 5.9137 | YRI |
| PPA2      | GI_31881619-A | rs12507480 | 4 | 4 | 106757180 | 108761 | 5.9493  | 0.3408 | 0.5613  | 5.9137 | YRI |
| PPA2      | GI_31881619-A | rs17008180 | 4 | 4 | 106763687 | 115268 | 8.1397  | 0.4315 | -0.5848 | 5.9137 | YRI |
| KIAA1712  | GI_30794213-S | rs11736418 | 4 | 4 | 175525211 | 102847 | 8.3924  | 0.4483 | -0.1949 | 6.65   | YRI |
| KIAA1712  | GI_30794213-S | rs11725521 | 4 | 4 | 175570334 | 57724  | 9.3990  | 0.4846 | -0.2121 | 6.65   | YRI |
| KIAA1712  | GI_30794213-S | rs7659617  | 4 | 4 | 175572410 | 55648  | 12.6670 | 0.6140 | -0.2463 | 6.65   | YRI |
| KIAA1712  | GI_30794213-S | rs7376146  | 4 | 4 | 175576120 | 51938  | 15.0871 | 0.6702 | 0.2268  | 6.65   | YRI |
| KIAA1712  | GI_30794213-S | rs7658307  | 4 | 4 | 175581254 | 46804  | 15.0871 | 0.6702 | 0.2268  | 6.65   | YRI |
| KIAA1712  | GI_30794213-S | rs4695918  | 4 | 4 | 175600182 | 27876  | 8.5726  | 0.4503 | 0.1670  | 6.65   | YRI |
| KIAA1712  | GI_30794213-S | rs1553669  | 4 | 4 | 175612138 | 15920  | 14.3397 | 0.6632 | 0.2268  | 6.65   | YRI |
| DCTD      | GI_4503276-S  | rs6835318  | 4 | 4 | 184186014 | 824    | 6.9416  | 0.3976 | 0.2781  | 6.2621 | YRI |
| DCTD      | GI_4503276-S  | rs7677967  | 4 | 4 | 184186281 | 557    | 6.4591  | 0.3523 | -0.2579 | 6.2621 | YRI |
| IRF2      | GI_4755144-S  | rs13146207 | 4 | 4 | 185686657 | 2055   | 9.3047  | 0.5122 | -0.9693 | 8.7669 | YRI |
| NKD2      | GI_31543291-S | rs6870890  | 5 | 5 | 925263    | 166476 | 7.4139  | 0.4330 | 1.2082  | 7.1592 | YRI |
| MTRR      | GI_4505278-A  | rs326210   | 5 | 5 | 7910582   | 43408  | 8.1056  | 0.4299 | 0.2461  | 6.1848 | YRI |
| MTRR      | GI_4505278-A  | rs1046014  | 5 | 5 | 7912434   | 41556  | 6.5443  | 0.3565 | -0.2396 | 6.1848 | YRI |
| MTRR      | GI_4505278-A  | rs162026   | 5 | 5 | 7914470   | 39520  | 8.0511  | 0.4331 | -0.2510 | 6.1848 | YRI |
| MTRR      | GI_4505278-A  | rs162131   | 5 | 5 | 7929751   | 24239  | 8.5965  | 0.4513 | -0.2634 | 6.1848 | YRI |
| MTRR      | GI_4505278-A  | rs162034   | 5 | 5 | 7935979   | 18011  | 9.3859  | 0.4962 | -0.2819 | 6.1848 | YRI |
| MTRR      | GI_4505278-A  | rs161871   | 5 | 5 | 7937389   | 16601  | 9.1136  | 0.4730 | -0.2744 | 6.1848 | YRI |

|           |               |            |   |   |          |        |         |        |         |        |     |
|-----------|---------------|------------|---|---|----------|--------|---------|--------|---------|--------|-----|
| MTRR      | GI_4505278-A  | rs162036   | 5 | 5 | 7938959  | 15031  | 9.1315  | 0.4797 | -0.2752 | 6.1848 | YRI |
| MTRR      | GI_4505278-A  | rs327581   | 5 | 5 | 7967554  | 13564  | 6.5700  | 0.3578 | -0.2414 | 6.1848 | YRI |
| Hs.26039  | Hs.26039-S    | rs3822410  | 5 | 5 | 10707769 | 2218   | 10.9852 | 0.5448 | 0.5165  | 6.4778 | YRI |
| Hs.26039  | Hs.26039-S    | rs3733758  | 5 | 5 | 10708842 | 1145   | 10.9852 | 0.5448 | 0.5165  | 6.4778 | YRI |
| Hs.26039  | Hs.26039-S    | rs3733761  | 5 | 5 | 10709162 | 825    | 7.1495  | 0.4601 | 0.4888  | 6.4778 | YRI |
| Hs.26039  | Hs.26039-S    | rs3733762  | 5 | 5 | 10709186 | 801    | 10.1580 | 0.5466 | 0.5228  | 6.4778 | YRI |
| Hs.26039  | Hs.26039-S    | rs2279327  | 5 | 5 | 10709785 | 202    | 10.5494 | 0.5290 | 0.5113  | 6.4778 | YRI |
| Hs.26039  | Hs.26039-S    | rs2279325  | 5 | 5 | 10710194 | 207    | 10.2915 | 0.5194 | 0.5119  | 6.4778 | YRI |
| Hs.26039  | Hs.26039-S    | rs1109383  | 5 | 5 | 10714120 | 4133   | 10.9852 | 0.5448 | -0.5165 | 6.4778 | YRI |
| Hs.26039  | Hs.26039-S    | rs1107818  | 5 | 5 | 10714928 | 4941   | 11.2776 | 0.5551 | -0.5117 | 6.4778 | YRI |
| Hs.26039  | Hs.26039-S    | rs7712435  | 5 | 5 | 10716402 | 6415   | 7.3077  | 0.3935 | -0.4255 | 6.4778 | YRI |
| Hs.482037 | Hs.482037-S   | rs6890108  | 5 | 5 | 43462224 | 89042  | 8.5937  | 0.4512 | 0.1409  | 6.5015 | YRI |
| Hs.482037 | Hs.482037-S   | rs7712723  | 5 | 5 | 43466016 | 85250  | 7.9479  | 0.4229 | 0.1346  | 6.5015 | YRI |
| Hs.482037 | Hs.482037-S   | rs16873327 | 5 | 5 | 43473387 | 77879  | 9.4792  | 0.4878 | -0.1323 | 6.5015 | YRI |
| Hs.482037 | Hs.482037-S   | rs6451694  | 5 | 5 | 43479504 | 71762  | 7.9479  | 0.4229 | -0.1346 | 6.5015 | YRI |
| Hs.482037 | Hs.482037-S   | rs7716564  | 5 | 5 | 43537149 | 14117  | 11.1495 | 0.5506 | 0.1509  | 6.5015 | YRI |
| Hs.482037 | Hs.482037-S   | rs7700826  | 5 | 5 | 43652877 | 101611 | 6.8904  | 0.3735 | -0.1238 | 6.5015 | YRI |
| Hs.482037 | Hs.482037-S   | rs16873406 | 5 | 5 | 43659422 | 108156 | 6.8904  | 0.3735 | -0.1238 | 6.5015 | YRI |
| Hs.482037 | Hs.482037-S   | rs6873555  | 5 | 5 | 43660258 | 108992 | 6.8904  | 0.3735 | 0.1238  | 6.5015 | YRI |
| Hs.482037 | Hs.482037-S   | rs7702621  | 5 | 5 | 43700995 | 149729 | 6.6568  | 0.3672 | -0.1246 | 6.5015 | YRI |
| MAP1B     | GI_14165455-A | rs1217800  | 5 | 5 | 71412888 | 125065 | 8.5304  | 0.4543 | 0.4538  | 6.6481 | YRI |
| MAP1B     | GI_14165455-A | rs17366380 | 5 | 5 | 71416415 | 121538 | 7.2306  | 0.3898 | -0.4767 | 6.6481 | YRI |
| MAP1B     | GI_14165455-A | rs1217817  | 5 | 5 | 71425507 | 112446 | 9.2504  | 0.4786 | 0.4888  | 6.6481 | YRI |
| TINP1     | GI_21359901-S | rs1048167  | 5 | 5 | 74053255 | 52264  | 8.0700  | 0.4284 | 0.2854  | 6.0317 | YRI |
| TINP1     | GI_21359901-S | rs16872220 | 5 | 5 | 74054530 | 50989  | 19.3492 | 0.7644 | 0.3251  | 6.0317 | YRI |
| TINP1     | GI_21359901-S | rs6877188  | 5 | 5 | 74067281 | 38238  | 19.3492 | 0.7644 | -0.3251 | 6.0317 | YRI |
| TINP1     | GI_21359901-S | rs16872231 | 5 | 5 | 74067872 | 37647  | 19.5338 | 0.7797 | -0.3180 | 6.0317 | YRI |
| TINP1     | GI_21359901-S | rs7713812  | 5 | 5 | 74068653 | 36866  | 19.3492 | 0.7644 | -0.3251 | 6.0317 | YRI |
| TINP1     | GI_21359901-S | rs6453076  | 5 | 5 | 74069457 | 36062  | 19.3492 | 0.7644 | -0.3251 | 6.0317 | YRI |
| TINP1     | GI_21359901-S | rs7732843  | 5 | 5 | 74070001 | 35518  | 19.9077 | 0.7804 | -0.3198 | 6.0317 | YRI |
| TINP1     | GI_21359901-S | rs6453079  | 5 | 5 | 74077085 | 28434  | 19.3492 | 0.7644 | 0.3251  | 6.0317 | YRI |
| TINP1     | GI_21359901-S | rs6873998  | 5 | 5 | 74082412 | 23107  | 18.2875 | 0.7560 | 0.3291  | 6.0317 | YRI |
| TINP1     | GI_21359901-S | rs16872242 | 5 | 5 | 74083192 | 22327  | 8.0700  | 0.4284 | -0.2854 | 6.0317 | YRI |
| TINP1     | GI_21359901-S | rs6898684  | 5 | 5 | 74083719 | 21800  | 19.3492 | 0.7644 | -0.3251 | 6.0317 | YRI |
| TINP1     | GI_21359901-S | rs6873912  | 5 | 5 | 74083906 | 21613  | 19.3492 | 0.7644 | -0.3251 | 6.0317 | YRI |
| TINP1     | GI_21359901-S | rs6884338  | 5 | 5 | 74086027 | 19492  | 19.3492 | 0.7644 | -0.3251 | 6.0317 | YRI |
| TINP1     | GI_21359901-S | rs957680   | 5 | 5 | 74090965 | 14554  | 12.5361 | 0.5969 | 0.2771  | 6.0317 | YRI |
| TINP1     | GI_21359901-S | rs7705519  | 5 | 5 | 74092269 | 13250  | 19.3492 | 0.7644 | -0.3251 | 6.0317 | YRI |
| TINP1     | GI_21359901-S | rs10515192 | 5 | 5 | 74093470 | 12049  | 17.7614 | 0.7391 | -0.3192 | 6.0317 | YRI |
| TINP1     | GI_21359901-S | rs10515194 | 5 | 5 | 74095607 | 9912   | 19.3492 | 0.7644 | -0.3251 | 6.0317 | YRI |
| TINP1     | GI_21359901-S | rs6882035  | 5 | 5 | 74101577 | 3942   | 18.9591 | 0.7630 | 0.3251  | 6.0317 | YRI |
| TINP1     | GI_21359901-S | rs16872259 | 5 | 5 | 74104530 | 989    | 8.0700  | 0.4284 | 0.2854  | 6.0317 | YRI |
| TINP1     | GI_21359901-S | rs6883420  | 5 | 5 | 74105890 | 371    | 18.1202 | 0.7589 | -0.3229 | 6.0317 | YRI |
| TINP1     | GI_21359901-S | rs3733794  | 5 | 5 | 74111966 | 6447   | 19.3492 | 0.7644 | -0.3251 | 6.0317 | YRI |
| TINP1     | GI_21359901-S | rs10515199 | 5 | 5 | 74135390 | 29871  | 6.4256  | 0.3606 | 0.3010  | 6.0317 | YRI |
| TINP1     | GI_21359901-S | rs11739122 | 5 | 5 | 74140125 | 34606  | 19.3492 | 0.7644 | -0.3251 | 6.0317 | YRI |
| TINP1     | GI_21359901-S | rs1350097  | 5 | 5 | 74143602 | 38083  | 18.8888 | 0.7617 | 0.3251  | 6.0317 | YRI |
| TINP1     | GI_21359901-S | rs6882499  | 5 | 5 | 74146165 | 40646  | 19.3492 | 0.7644 | -0.3251 | 6.0317 | YRI |
| TINP1     | GI_21359901-S | rs11749137 | 5 | 5 | 74147091 | 41572  | 19.3492 | 0.7644 | -0.3251 | 6.0317 | YRI |
| TINP1     | GI_21359901-S | rs6881400  | 5 | 5 | 74152776 | 47257  | 8.0700  | 0.4284 | -0.2854 | 6.0317 | YRI |
| TINP1     | GI_21359901-S | rs6877442  | 5 | 5 | 74155242 | 49723  | 19.3492 | 0.7644 | -0.3251 | 6.0317 | YRI |
| TINP1     | GI_21359901-S | rs1447453  | 5 | 5 | 74158084 | 52565  | 8.0866  | 0.4291 | 0.2319  | 6.0317 | YRI |
| TINP1     | GI_21359901-S | rs11741789 | 5 | 5 | 74162738 | 57219  | 8.0671  | 0.4282 | 0.2106  | 6.0317 | YRI |
| TINP1     | GI_21359901-S | rs6884843  | 5 | 5 | 74164720 | 59201  | 18.4051 | 0.7462 | 0.3203  | 6.0317 | YRI |
| TINP1     | GI_21359901-S | rs7728889  | 5 | 5 | 74181841 | 76322  | 19.3492 | 0.7644 | -0.3251 | 6.0317 | YRI |
| TINP1     | GI_21359901-S | rs16872345 | 5 | 5 | 74185234 | 79715  | 8.0700  | 0.4284 | -0.2854 | 6.0317 | YRI |
| TINP1     | GI_21359901-S | rs16872349 | 5 | 5 | 74188193 | 82674  | 8.0700  | 0.4284 | -0.2854 | 6.0317 | YRI |
| TINP1     | GI_21359901-S | rs2061162  | 5 | 5 | 74191574 | 86055  | 18.9703 | 0.7632 | -0.3235 | 6.0317 | YRI |
| TINP1     | GI_21359901-S | rs6861935  | 5 | 5 | 74191747 | 86228  | 8.0700  | 0.4284 | -0.2854 | 6.0317 | YRI |

|           |               |            |   |   |           |        |         |        |         |        |     |
|-----------|---------------|------------|---|---|-----------|--------|---------|--------|---------|--------|-----|
| TINP1     | GI_21359901-S | rs16872362 | 5 | 5 | 74194913  | 89394  | 8.0742  | 0.4342 | -0.2904 | 6.0317 | YRI |
| TINP1     | GI_21359901-S | rs11740809 | 5 | 5 | 74212599  | 107080 | 6.4514  | 0.3569 | 0.1900  | 6.0317 | YRI |
| ZCCHC9    | GI_14150026-S | rs2124889  | 5 | 5 | 80551988  | 92310  | 6.5850  | 0.3636 | 0.2521  | 6.1436 | YRI |
| ARTS-1    | GI_20149636-S | rs1862609  | 5 | 5 | 96112446  | 30850  | 6.6738  | 0.3630 | -0.3850 | 6.4559 | YRI |
| ARTS-1    | GI_20149636-S | rs17401719 | 5 | 5 | 96114802  | 28494  | 6.6738  | 0.3630 | -0.3850 | 6.4559 | YRI |
| ARTS-1    | GI_20149636-S | rs3797814  | 5 | 5 | 96117682  | 25614  | 6.6738  | 0.3630 | 0.3850  | 6.4559 | YRI |
| ARTS-1    | GI_20149636-S | rs7356594  | 5 | 5 | 96121945  | 21351  | 6.8774  | 0.3888 | 0.4196  | 6.4559 | YRI |
| ARTS-1    | GI_20149636-S | rs7063     | 5 | 5 | 96135967  | 7329   | 7.7118  | 0.4122 | -0.4193 | 6.4559 | YRI |
| ARTS-1    | GI_20149636-S | rs13160562 | 5 | 5 | 96137127  | 6169   | 7.7118  | 0.4122 | -0.4193 | 6.4559 | YRI |
| WDR36     | GI_21281676-S | rs11956837 | 5 | 5 | 110482656 | 6695   | 9.7328  | 0.5040 | 0.4535  | 5.9829 | YRI |
| CGI-109   | GI_40255262-S | rs457440   | 5 | 5 | 115142668 | 163312 | 6.2153  | 0.3400 | -0.3371 | 6.1783 | YRI |
| DMXL1     | GI_21536473-S | rs976586   | 5 | 5 | 118353971 | 258465 | 6.8829  | 0.3732 | -0.2058 | 6.1095 | YRI |
| DMXL1     | GI_21536473-S | rs3943550  | 5 | 5 | 118364004 | 248432 | 8.0288  | 0.4438 | -0.2169 | 6.1095 | YRI |
| DMXL1     | GI_21536473-S | rs6884405  | 5 | 5 | 118379978 | 232458 | 7.2951  | 0.3929 | -0.2058 | 6.1095 | YRI |
| Hs.483613 | Hs.483613-S   | rs13183870 | 5 | 5 | 141283817 | 8686   | 6.2049  | 0.3493 | 0.0901  | 5.9091 | YRI |
| Hs.483613 | Hs.483613-S   | rs13183994 | 5 | 5 | 141283872 | 8631   | 8.5549  | 0.5220 | -0.1134 | 5.9091 | YRI |
| Hs.483613 | Hs.483613-S   | rs10036567 | 5 | 5 | 141288017 | 4486   | 8.0035  | 0.4254 | 0.1059  | 5.9091 | YRI |
| MGC3265   | GI_31543180-S | rs352346   | 5 | 5 | 148706014 | 23038  | 6.4922  | 0.3540 | 0.2309  | 5.9126 | YRI |
| MGC3265   | GI_31543180-S | rs6887230  | 5 | 5 | 148706339 | 22713  | 7.6990  | 0.4286 | 0.2281  | 5.9126 | YRI |
| MGC3265   | GI_31543180-S | rs2438490  | 5 | 5 | 148706355 | 22697  | 6.3455  | 0.3515 | 0.2316  | 5.9126 | YRI |
| Hs.519704 | Hs.519704-S   | rs10069380 | 5 | 5 | 156985707 | 44446  | 8.3767  | 0.4476 | -0.1221 | 7.1431 | YRI |
| Hs.519704 | Hs.519704-S   | rs4262087  | 5 | 5 | 156995295 | 34858  | 8.2843  | 0.4435 | 0.1246  | 7.1431 | YRI |
| Hs.519704 | Hs.519704-S   | rs7448800  | 5 | 5 | 157008539 | 21614  | 8.6013  | 0.4633 | 0.1254  | 7.1431 | YRI |
| Hs.519704 | Hs.519704-S   | rs10069721 | 5 | 5 | 157010338 | 19815  | 8.5330  | 0.4544 | -0.1234 | 7.1431 | YRI |
| Hs.519704 | Hs.519704-S   | rs10051838 | 5 | 5 | 157034737 | 4584   | 8.8908  | 0.4757 | -0.1285 | 7.1431 | YRI |
| Hs.519704 | Hs.519704-S   | rs4094449  | 5 | 5 | 157036343 | 6190   | 7.2714  | 0.4522 | 0.1119  | 7.1431 | YRI |
| MGC2198   | GI_20270388-S | rs6863122  | 5 | 5 | 175743443 | 5621   | 6.6514  | 0.4065 | -0.2626 | 6.133  | YRI |
| MGC2198   | GI_20270388-S | rs1065212  | 5 | 5 | 175743739 | 5325   | 7.4151  | 0.3985 | -0.2585 | 6.133  | YRI |
| MGC2198   | GI_20270388-S | rs1065206  | 5 | 5 | 175743839 | 5225   | 6.7296  | 0.3657 | 0.2651  | 6.133  | YRI |
| SQSTM1    | GI_19923742-S | rs10277    | 5 | 5 | 179197337 | 249    | 7.0706  | 0.3822 | -0.5085 | 6.2334 | YRI |
| LOC389362 | GI_41147302-S | rs1127477  | 6 | 6 | 3215509   | 2397   | 6.7462  | 0.3716 | 0.1991  | 5.9567 | YRI |
| SLC35B3   | GI_21361502-S | rs17143697 | 6 | 6 | 8359897   | 1280   | 6.5329  | 0.3560 | -0.2840 | 6.2554 | YRI |
| SLC35B3   | GI_21361502-S | rs17143705 | 6 | 6 | 8366504   | 7887   | 6.8265  | 0.3704 | 0.2910  | 6.2554 | YRI |
| SLC35B3   | GI_21361502-S | rs17143713 | 6 | 6 | 8366962   | 8345   | 6.8265  | 0.3704 | -0.2910 | 6.2554 | YRI |
| SLC35B3   | GI_21361502-S | rs6905313  | 6 | 6 | 8375724   | 17107  | 6.5329  | 0.3560 | 0.2840  | 6.2554 | YRI |
| SLC35B3   | GI_21361502-S | rs10484748 | 6 | 6 | 8376192   | 17575  | 6.5329  | 0.3560 | 0.2840  | 6.2554 | YRI |
| SLC35B3   | GI_21361502-S | rs17143787 | 6 | 6 | 8378526   | 19909  | 6.5329  | 0.3560 | 0.2840  | 6.2554 | YRI |
| SLC35B3   | GI_21361502-S | rs17143790 | 6 | 6 | 8379307   | 20690  | 6.5329  | 0.3560 | 0.2840  | 6.2554 | YRI |
| SLC35B3   | GI_21361502-S | rs17143794 | 6 | 6 | 8379591   | 20974  | 6.5329  | 0.3560 | 0.2840  | 6.2554 | YRI |
| SLC35B3   | GI_21361502-S | rs10484747 | 6 | 6 | 8422353   | 63736  | 6.5329  | 0.3560 | 0.2840  | 6.2554 | YRI |
| SLC35B3   | GI_21361502-S | rs2223596  | 6 | 6 | 8470236   | 111619 | 6.5329  | 0.3560 | -0.2840 | 6.2554 | YRI |
| SLC35B3   | GI_21361502-S | rs17144051 | 6 | 6 | 8473362   | 114745 | 6.5329  | 0.3560 | -0.2840 | 6.2554 | YRI |
| LOC389366 | GI_42657574-S | rs6938655  | 6 | 6 | 10754304  | 25403  | 10.6784 | 0.5337 | -0.3246 | 6.1421 | YRI |
| LOC389366 | GI_42657574-S | rs12663489 | 6 | 6 | 10756118  | 23589  | 9.3905  | 0.4843 | -0.2663 | 6.1421 | YRI |
| LOC389366 | GI_42657574-S | rs12663675 | 6 | 6 | 10761112  | 18595  | 6.4477  | 0.3779 | 0.2216  | 6.1421 | YRI |
| LOC389366 | GI_42657574-S | rs12664137 | 6 | 6 | 10762799  | 16908  | 9.5799  | 0.4919 | -0.2777 | 6.1421 | YRI |
| LOC389366 | GI_42657574-S | rs3737278  | 6 | 6 | 10779750  | 43     | 11.7566 | 0.5715 | 0.2852  | 6.1421 | YRI |
| LOC389366 | GI_42657574-S | rs7757582  | 6 | 6 | 10790534  | 10827  | 8.8100  | 0.4604 | -0.2674 | 6.1421 | YRI |
| LOC389366 | GI_42657574-S | rs4712827  | 6 | 6 | 10794047  | 14340  | 6.9736  | 0.3776 | 0.2295  | 6.1421 | YRI |
| LOC389366 | GI_42657574-S | rs7744606  | 6 | 6 | 10800507  | 20800  | 10.0285 | 0.5094 | -0.2712 | 6.1421 | YRI |
| LOC389366 | GI_42657574-S | rs7745856  | 6 | 6 | 10803144  | 23437  | 16.9281 | 0.7148 | 0.3165  | 6.1421 | YRI |
| LOC389366 | GI_42657574-S | rs7764604  | 6 | 6 | 10804311  | 24604  | 16.2138 | 0.6983 | 0.3029  | 6.1421 | YRI |
| LOC389366 | GI_42657574-S | rs7766501  | 6 | 6 | 10804663  | 24956  | 16.0633 | 0.7010 | -0.3004 | 6.1421 | YRI |
| LOC389366 | GI_42657574-S | rs12662481 | 6 | 6 | 10805345  | 25638  | 15.4132 | 0.6980 | -0.2986 | 6.1421 | YRI |
| LOC389366 | GI_42657574-S | rs12661484 | 6 | 6 | 10805426  | 25719  | 14.9709 | 0.6801 | 0.3003  | 6.1421 | YRI |
| LOC389366 | GI_42657574-S | rs9467280  | 6 | 6 | 10810897  | 31190  | 6.5663  | 0.3576 | 0.2383  | 6.1421 | YRI |
| LOC389366 | GI_42657574-S | rs6939098  | 6 | 6 | 10810995  | 31288  | 6.5470  | 0.3668 | 0.2402  | 6.1421 | YRI |
| Hs.158943 | Hs.158943-S   | rs7775305  | 6 | 6 | 27445339  | 393336 | 8.7361  | 0.4573 | 0.7491  | 6.087  | YRI |
| Hs.158943 | Hs.158943-S   | rs766093   | 6 | 6 | 27476102  | 362573 | 9.9579  | 0.5067 | -0.7951 | 6.087  | YRI |

|           |               |            |   |   |          |        |         |        |         |        |     |
|-----------|---------------|------------|---|---|----------|--------|---------|--------|---------|--------|-----|
| Hs.158943 | Hs.158943-S   | rs7768826  | 6 | 6 | 27484674 | 354001 | 8.7361  | 0.4573 | 0.7491  | 6.087  | YRI |
| Hs.158943 | Hs.158943-S   | rs16899633 | 6 | 6 | 27485346 | 353329 | 8.7361  | 0.4573 | 0.7491  | 6.087  | YRI |
| Hs.158943 | Hs.158943-S   | rs7750919  | 6 | 6 | 27487845 | 350830 | 7.7898  | 0.4388 | 0.7685  | 6.087  | YRI |
| Hs.158943 | Hs.158943-S   | rs7744655  | 6 | 6 | 27492048 | 346627 | 8.5405  | 0.4547 | -0.7547 | 6.087  | YRI |
| Hs.158943 | Hs.158943-S   | rs16899778 | 6 | 6 | 27498129 | 340546 | 8.7361  | 0.4573 | -0.7491 | 6.087  | YRI |
| Hs.158943 | Hs.158943-S   | rs9468147  | 6 | 6 | 27594690 | 243985 | 12.5145 | 0.5962 | -0.7741 | 6.087  | YRI |
| Hs.158943 | Hs.158943-S   | rs6904596  | 6 | 6 | 27599278 | 239397 | 6.9355  | 0.4091 | -0.6173 | 6.087  | YRI |
| LOC222701 | GI_27498465-S | rs9468152  | 6 | 6 | 27600885 | 644317 | 6.5210  | 0.3604 | -0.2353 | 6.0106 | YRI |
| Hs.158943 | Hs.158943-S   | rs16867858 | 6 | 6 | 27637488 | 201187 | 9.0361  | 0.4698 | -0.8526 | 6.087  | YRI |
| Hs.158943 | Hs.158943-S   | rs9468160  | 6 | 6 | 27646420 | 192255 | 11.0098 | 0.5584 | 0.7892  | 6.087  | YRI |
| Hs.158943 | Hs.158943-S   | rs16867870 | 6 | 6 | 27648047 | 190628 | 10.7173 | 0.5543 | 0.6590  | 6.087  | YRI |
| Hs.158943 | Hs.158943-S   | rs6904979  | 6 | 6 | 27649995 | 188680 | 10.7591 | 0.5366 | -0.9256 | 6.087  | YRI |
| Hs.158943 | Hs.158943-S   | rs9468183  | 6 | 6 | 27719720 | 118955 | 8.8491  | 0.4620 | -0.6277 | 6.087  | YRI |
| Hs.158943 | Hs.158943-S   | rs9468189  | 6 | 6 | 27738590 | 100085 | 14.1584 | 0.6452 | 0.8092  | 6.087  | YRI |
| Hs.158943 | Hs.158943-S   | rs9468190  | 6 | 6 | 27738767 | 99908  | 14.1584 | 0.6452 | -0.8092 | 6.087  | YRI |
| Hs.158943 | Hs.158943-S   | rs16867899 | 6 | 6 | 27762711 | 75964  | 18.0129 | 0.7443 | -0.8850 | 6.087  | YRI |
| Hs.158943 | Hs.158943-S   | rs1010261  | 6 | 6 | 27763543 | 75132  | 8.8491  | 0.4620 | -0.6277 | 6.087  | YRI |
| Hs.158943 | Hs.158943-S   | rs16867901 | 6 | 6 | 27764055 | 74620  | 14.1584 | 0.6452 | -0.8092 | 6.087  | YRI |
| Hs.158943 | Hs.158943-S   | rs16867911 | 6 | 6 | 27770183 | 68492  | 12.3969 | 0.5925 | -0.7792 | 6.087  | YRI |
| Hs.158943 | Hs.158943-S   | rs9295739  | 6 | 6 | 27770374 | 68301  | 14.1584 | 0.6452 | 0.8092  | 6.087  | YRI |
| Hs.158943 | Hs.158943-S   | rs9468198  | 6 | 6 | 27788111 | 50564  | 16.7038 | 0.7288 | -0.7722 | 6.087  | YRI |
| Hs.158943 | Hs.158943-S   | rs9468202  | 6 | 6 | 27796609 | 42066  | 15.1474 | 0.6782 | 0.8284  | 6.087  | YRI |
| Hs.158943 | Hs.158943-S   | rs9468205  | 6 | 6 | 27796968 | 41707  | 9.0107  | 0.5349 | -0.7855 | 6.087  | YRI |
| Hs.158943 | Hs.158943-S   | rs11969118 | 6 | 6 | 27808801 | 29874  | 11.5185 | 0.6181 | 0.7720  | 6.087  | YRI |
| Hs.158943 | Hs.158943-S   | rs7740062  | 6 | 6 | 27813577 | 25098  | 27.2925 | 0.8743 | -0.9515 | 6.087  | YRI |
| Hs.158943 | Hs.158943-S   | rs7742752  | 6 | 6 | 27835030 | 3645   | 9.1592  | 0.4749 | -0.6930 | 6.087  | YRI |
| Hs.158943 | Hs.158943-S   | rs6901712  | 6 | 6 | 27846944 | 8269   | 11.0193 | 0.5653 | 0.7206  | 6.087  | YRI |
| Hs.158943 | Hs.158943-S   | rs6936952  | 6 | 6 | 27849116 | 10441  | 8.4967  | 0.4710 | -0.6390 | 6.087  | YRI |
| Hs.158943 | Hs.158943-S   | rs6915101  | 6 | 6 | 27849661 | 10986  | 8.3194  | 0.4509 | 0.6255  | 6.087  | YRI |
| Hs.158943 | Hs.158943-S   | rs6901437  | 6 | 6 | 27850165 | 11490  | 11.2001 | 0.5524 | -0.7127 | 6.087  | YRI |
| Hs.158943 | Hs.158943-S   | rs9468227  | 6 | 6 | 27854321 | 15646  | 10.8020 | 0.5382 | 0.7058  | 6.087  | YRI |
| Hs.158943 | Hs.158943-S   | rs9468228  | 6 | 6 | 27856928 | 18253  | 19.7321 | 0.7714 | -0.8902 | 6.087  | YRI |
| Hs.158943 | Hs.158943-S   | rs666846   | 6 | 6 | 27863882 | 25207  | 8.3568  | 0.4410 | 0.5773  | 6.087  | YRI |
| Hs.158943 | Hs.158943-S   | rs200469   | 6 | 6 | 27865939 | 27264  | 6.3500  | 0.3517 | -0.4916 | 6.087  | YRI |
| Hs.158943 | Hs.158943-S   | rs200470   | 6 | 6 | 27870166 | 31491  | 19.7321 | 0.7714 | 0.8902  | 6.087  | YRI |
| Hs.158943 | Hs.158943-S   | rs200471   | 6 | 6 | 27871772 | 33097  | 7.0182  | 0.3849 | -0.4582 | 6.087  | YRI |
| Hs.158943 | Hs.158943-S   | rs200473   | 6 | 6 | 27873143 | 34468  | 7.4917  | 0.4021 | 0.5014  | 6.087  | YRI |
| Hs.158943 | Hs.158943-S   | rs200479   | 6 | 6 | 27879663 | 40988  | 7.4917  | 0.4021 | -0.5014 | 6.087  | YRI |
| Hs.158943 | Hs.158943-S   | rs169263   | 6 | 6 | 27880636 | 41961  | 12.4908 | 0.5955 | 1.0566  | 6.087  | YRI |
| Hs.158943 | Hs.158943-S   | rs200481   | 6 | 6 | 27881811 | 43136  | 6.8878  | 0.3734 | -0.5667 | 6.087  | YRI |
| Hs.158943 | Hs.158943-S   | rs200483   | 6 | 6 | 27882803 | 44128  | 7.0886  | 0.3831 | -0.5514 | 6.087  | YRI |
| Hs.158943 | Hs.158943-S   | rs200484   | 6 | 6 | 27883653 | 44978  | 6.2588  | 0.3422 | 0.5230  | 6.087  | YRI |
| Hs.158943 | Hs.158943-S   | rs200485   | 6 | 6 | 27883676 | 45001  | 7.0886  | 0.3831 | -0.5514 | 6.087  | YRI |
| Hs.158943 | Hs.158943-S   | rs200501   | 6 | 6 | 27896921 | 58246  | 6.2588  | 0.3422 | 0.5230  | 6.087  | YRI |
| Hs.158943 | Hs.158943-S   | rs200490   | 6 | 6 | 27904914 | 66239  | 6.4495  | 0.3518 | -0.5811 | 6.087  | YRI |
| Hs.158943 | Hs.158943-S   | rs201005   | 6 | 6 | 27912139 | 73464  | 11.2468 | 0.5540 | 0.8955  | 6.087  | YRI |
| Hs.158943 | Hs.158943-S   | rs201003   | 6 | 6 | 27914146 | 75471  | 7.6410  | 0.4505 | -0.7057 | 6.087  | YRI |
| Hs.158943 | Hs.158943-S   | rs201002   | 6 | 6 | 27916171 | 77496  | 6.4495  | 0.3518 | -0.5811 | 6.087  | YRI |
| Hs.158943 | Hs.158943-S   | rs175597   | 6 | 6 | 27918605 | 79930  | 7.6684  | 0.4102 | 0.6630  | 6.087  | YRI |
| Hs.158943 | Hs.158943-S   | rs200995   | 6 | 6 | 27921673 | 82998  | 8.7335  | 0.4571 | 0.6941  | 6.087  | YRI |
| Hs.158943 | Hs.158943-S   | rs200989   | 6 | 6 | 27924421 | 85746  | 7.7833  | 0.4267 | -0.6739 | 6.087  | YRI |
| Hs.158943 | Hs.158943-S   | rs200984   | 6 | 6 | 27935656 | 96981  | 11.2468 | 0.5540 | -0.8955 | 6.087  | YRI |
| Hs.158943 | Hs.158943-S   | rs200982   | 6 | 6 | 27939223 | 100548 | 10.9888 | 0.5512 | -0.8925 | 6.087  | YRI |
| Hs.158943 | Hs.158943-S   | rs200981   | 6 | 6 | 27941153 | 102478 | 10.5921 | 0.5368 | -0.7391 | 6.087  | YRI |
| Hs.158943 | Hs.158943-S   | rs200947   | 6 | 6 | 27943110 | 104435 | 10.8083 | 0.5447 | -0.8947 | 6.087  | YRI |
| Hs.158943 | Hs.158943-S   | rs200948   | 6 | 6 | 27943251 | 104576 | 7.1588  | 0.4143 | -0.6642 | 6.087  | YRI |
| Hs.158943 | Hs.158943-S   | rs200954   | 6 | 6 | 27946743 | 108068 | 7.6684  | 0.4102 | 0.6630  | 6.087  | YRI |
| Hs.158943 | Hs.158943-S   | rs200955   | 6 | 6 | 27947291 | 108616 | 11.4823 | 0.5750 | -0.9088 | 6.087  | YRI |
| Hs.158943 | Hs.158943-S   | rs200959   | 6 | 6 | 27950026 | 111351 | 13.0776 | 0.6137 | 0.9704  | 6.087  | YRI |

|           |               |            |   |   |          |        |         |        |         |        |     |
|-----------|---------------|------------|---|---|----------|--------|---------|--------|---------|--------|-----|
| Hs.158943 | Hs.158943-S   | rs200979   | 6 | 6 | 27960336 | 121661 | 8.7335  | 0.4571 | 0.6941  | 6.087  | YRI |
| Hs.158943 | Hs.158943-S   | rs200977   | 6 | 6 | 27962280 | 123605 | 7.2630  | 0.4022 | 0.6522  | 6.087  | YRI |
| Hs.158943 | Hs.158943-S   | rs200975   | 6 | 6 | 27963604 | 124929 | 8.7335  | 0.4571 | -0.6941 | 6.087  | YRI |
| Hs.158943 | Hs.158943-S   | rs200974   | 6 | 6 | 27963824 | 125149 | 8.7335  | 0.4571 | -0.6941 | 6.087  | YRI |
| Hs.158943 | Hs.158943-S   | rs200968   | 6 | 6 | 27967547 | 128872 | 8.2805  | 0.4492 | 0.6839  | 6.087  | YRI |
| Hs.158943 | Hs.158943-S   | rs200965   | 6 | 6 | 27974363 | 135688 | 7.5145  | 0.4086 | 0.7029  | 6.087  | YRI |
| Hs.158943 | Hs.158943-S   | rs200962   | 6 | 6 | 27983676 | 145001 | 13.8319 | 0.6490 | 1.0911  | 6.087  | YRI |
| Hs.158943 | Hs.158943-S   | rs2130357  | 6 | 6 | 27994809 | 156134 | 9.2985  | 0.4927 | -0.7915 | 6.087  | YRI |
| Hs.158943 | Hs.158943-S   | rs425159   | 6 | 6 | 28010151 | 171476 | 10.9159 | 0.5423 | -1.0337 | 6.087  | YRI |
| Hs.158943 | Hs.158943-S   | rs276372   | 6 | 6 | 28015383 | 176708 | 10.9159 | 0.5423 | 1.0337  | 6.087  | YRI |
| Hs.158943 | Hs.158943-S   | rs839777   | 6 | 6 | 28017636 | 178961 | 12.4908 | 0.5955 | -1.0566 | 6.087  | YRI |
| LOC222701 | GI_27498465-S | rs9461424  | 6 | 6 | 28027380 | 217822 | 6.4909  | 0.3539 | 0.1748  | 6.0106 | YRI |
| LOC222701 | GI_27498465-S | rs9461425  | 6 | 6 | 28027667 | 217535 | 6.1574  | 0.3370 | 0.1937  | 6.0106 | YRI |
| Hs.158943 | Hs.158943-S   | rs276366   | 6 | 6 | 28035460 | 196785 | 14.4204 | 0.6589 | -1.1096 | 6.087  | YRI |
| Hs.158943 | Hs.158943-S   | rs276364   | 6 | 6 | 28039599 | 200924 | 14.0855 | 0.6496 | 1.0802  | 6.087  | YRI |
| Hs.158943 | Hs.158943-S   | rs276361   | 6 | 6 | 28047388 | 208713 | 14.3785 | 0.6513 | 1.0807  | 6.087  | YRI |
| Hs.158943 | Hs.158943-S   | rs149898   | 6 | 6 | 28066051 | 223736 | 10.9159 | 0.5423 | 1.0337  | 6.087  | YRI |
| Hs.158943 | Hs.158943-S   | rs156741   | 6 | 6 | 28070363 | 231688 | 14.3785 | 0.6513 | -1.0807 | 6.087  | YRI |
| Hs.158943 | Hs.158943-S   | rs156742   | 6 | 6 | 28071171 | 232496 | 14.3785 | 0.6513 | -1.0807 | 6.087  | YRI |
| Hs.158943 | Hs.158943-S   | rs1143887  | 6 | 6 | 28072802 | 234127 | 11.6784 | 0.5817 | 1.0490  | 6.087  | YRI |
| Hs.158943 | Hs.158943-S   | rs203886   | 6 | 6 | 28129235 | 290560 | 7.3439  | 0.3952 | -0.8191 | 6.087  | YRI |
| LOC222701 | GI_27498465-S | rs9295755  | 6 | 6 | 28141153 | 104049 | 6.9090  | 0.3744 | -0.1970 | 6.0106 | YRI |
| LOC222701 | GI_27498465-S | rs9295756  | 6 | 6 | 28141375 | 103827 | 6.9090  | 0.3744 | 0.1970  | 6.0106 | YRI |
| LOC222701 | GI_27498465-S | rs10484403 | 6 | 6 | 28141502 | 103700 | 6.9090  | 0.3744 | -0.1970 | 6.0106 | YRI |
| Hs.158943 | Hs.158943-S   | rs149952   | 6 | 6 | 28141864 | 303189 | 6.3410  | 0.3464 | 0.7821  | 6.087  | YRI |
| LOC222701 | GI_27498465-S | rs4713133  | 6 | 6 | 28142020 | 103182 | 6.1524  | 0.3735 | 0.1920  | 6.0106 | YRI |
| LOC222701 | GI_27498465-S | rs4713134  | 6 | 6 | 28142100 | 103102 | 6.2994  | 0.3542 | 0.1972  | 6.0106 | YRI |
| Hs.158943 | Hs.158943-S   | rs149957   | 6 | 6 | 28144999 | 306324 | 6.1899  | 0.3435 | 0.7801  | 6.087  | YRI |
| LOC222701 | GI_27498465-S | rs7755442  | 6 | 6 | 28146994 | 98208  | 8.7390  | 0.5084 | 0.2375  | 6.0106 | YRI |
| LOC222701 | GI_27498465-S | rs4713135  | 6 | 6 | 28147565 | 97637  | 9.8010  | 0.5463 | 0.2410  | 6.0106 | YRI |
| Hs.158943 | Hs.158943-S   | rs203870   | 6 | 6 | 28149836 | 311161 | 6.3410  | 0.3464 | -0.7821 | 6.087  | YRI |
| LOC222701 | GI_27498465-S | rs12174753 | 6 | 6 | 28150444 | 94758  | 8.5618  | 0.4803 | -0.2305 | 6.0106 | YRI |
| Hs.158943 | Hs.158943-S   | rs203874   | 6 | 6 | 28150957 | 312282 | 6.3410  | 0.3464 | -0.7821 | 6.087  | YRI |
| Hs.158943 | Hs.158943-S   | rs172164   | 6 | 6 | 28154457 | 315782 | 6.3410  | 0.3464 | 0.7821  | 6.087  | YRI |
| LOC222701 | GI_27498465-S | rs2295594  | 6 | 6 | 28161076 | 84126  | 9.0847  | 0.4838 | 0.2334  | 6.0106 | YRI |
| LOC222701 | GI_27498465-S | rs16893666 | 6 | 6 | 28162686 | 82516  | 9.7744  | 0.4995 | 0.2307  | 6.0106 | YRI |
| Hs.158943 | Hs.158943-S   | rs203865   | 6 | 6 | 28165465 | 326790 | 6.3410  | 0.3464 | -0.7821 | 6.087  | YRI |
| Hs.158943 | Hs.158943-S   | rs427348   | 6 | 6 | 28166344 | 327669 | 6.3410  | 0.3464 | -0.7821 | 6.087  | YRI |
| LOC222701 | GI_27498465-S | rs3734573  | 6 | 6 | 28167416 | 77786  | 9.7744  | 0.4995 | -0.2307 | 6.0106 | YRI |
| Hs.158943 | Hs.158943-S   | rs175955   | 6 | 6 | 28167713 | 329038 | 9.6472  | 0.4945 | -0.9656 | 6.087  | YRI |
| Hs.158943 | Hs.158943-S   | rs203894   | 6 | 6 | 28169153 | 330478 | 6.3410  | 0.3464 | -0.7821 | 6.087  | YRI |
| LOC222701 | GI_27498465-S | rs9393890  | 6 | 6 | 28171834 | 73368  | 9.0847  | 0.4838 | -0.2334 | 6.0106 | YRI |
| LOC222701 | GI_27498465-S | rs9380052  | 6 | 6 | 28172602 | 72600  | 9.7744  | 0.4995 | 0.2307  | 6.0106 | YRI |
| LOC222701 | GI_27498465-S | rs2281588  | 6 | 6 | 28180581 | 64621  | 9.7744  | 0.4995 | 0.2307  | 6.0106 | YRI |
| Hs.158943 | Hs.158943-S   | rs203885   | 6 | 6 | 28184865 | 346190 | 6.3410  | 0.3464 | -0.7821 | 6.087  | YRI |
| LOC222701 | GI_27498465-S | rs17711344 | 6 | 6 | 28185581 | 59621  | 9.7744  | 0.4995 | 0.2307  | 6.0106 | YRI |
| LOC222701 | GI_27498465-S | rs6932109  | 6 | 6 | 28186282 | 58920  | 9.7744  | 0.4995 | 0.2307  | 6.0106 | YRI |
| LOC222701 | GI_27498465-S | rs6931858  | 6 | 6 | 28186390 | 58812  | 9.7173  | 0.5360 | -0.2285 | 6.0106 | YRI |
| LOC222701 | GI_27498465-S | rs9468286  | 6 | 6 | 28187407 | 57795  | 9.7744  | 0.4995 | -0.2307 | 6.0106 | YRI |
| LOC222701 | GI_27498465-S | rs9380055  | 6 | 6 | 28189608 | 55594  | 9.7744  | 0.4995 | -0.2307 | 6.0106 | YRI |
| LOC222701 | GI_27498465-S | rs9368553  | 6 | 6 | 28190244 | 54958  | 10.6854 | 0.5466 | 0.2378  | 6.0106 | YRI |
| LOC222701 | GI_27498465-S | rs4713137  | 6 | 6 | 28191500 | 53702  | 9.4698  | 0.5190 | -0.2342 | 6.0106 | YRI |
| LOC222701 | GI_27498465-S | rs9348793  | 6 | 6 | 28192168 | 53034  | 9.6773  | 0.5080 | 0.2327  | 6.0106 | YRI |
| Hs.158943 | Hs.158943-S   | rs1770132  | 6 | 6 | 28194644 | 355969 | 6.1465  | 0.3413 | -0.7905 | 6.087  | YRI |
| LOC222701 | GI_27498465-S | rs6922063  | 6 | 6 | 28202345 | 42857  | 9.3950  | 0.4966 | 0.2325  | 6.0106 | YRI |
| LOC222701 | GI_27498465-S | rs2275508  | 6 | 6 | 28202710 | 42492  | 9.0920  | 0.4721 | 0.2260  | 6.0106 | YRI |
| LOC222701 | GI_27498465-S | rs9461433  | 6 | 6 | 28203151 | 42051  | 9.0920  | 0.4721 | -0.2260 | 6.0106 | YRI |
| LOC222701 | GI_27498465-S | rs1340004  | 6 | 6 | 28211670 | 33532  | 9.7744  | 0.4995 | 0.2307  | 6.0106 | YRI |
| LOC222701 | GI_27498465-S | rs9380057  | 6 | 6 | 28212613 | 32589  | 9.8803  | 0.5098 | -0.2330 | 6.0106 | YRI |

|           |               |            |   |   |          |        |         |        |         |        |     |
|-----------|---------------|------------|---|---|----------|--------|---------|--------|---------|--------|-----|
| LOC222701 | GI_27498465-S | rs1947862  | 6 | 6 | 28213175 | 32027  | 9.7744  | 0.4995 | 0.2307  | 6.0106 | YRI |
| LOC222701 | GI_27498465-S | rs6941992  | 6 | 6 | 28214120 | 31082  | 10.6324 | 0.5512 | 0.2393  | 6.0106 | YRI |
| LOC222701 | GI_27498465-S | rs4713143  | 6 | 6 | 28214738 | 30464  | 9.7744  | 0.4995 | -0.2307 | 6.0106 | YRI |
| LOC222701 | GI_27498465-S | rs4713144  | 6 | 6 | 28214769 | 30433  | 9.7744  | 0.4995 | -0.2307 | 6.0106 | YRI |
| LOC222701 | GI_27498465-S | rs4713145  | 6 | 6 | 28214806 | 30396  | 9.7744  | 0.4995 | 0.2307  | 6.0106 | YRI |
| Hs.158943 | Hs.158943-S   | rs1480646  | 6 | 6 | 28215261 | 376586 | 6.3410  | 0.3464 | 0.7821  | 6.087  | YRI |
| LOC222701 | GI_27498465-S | rs1904840  | 6 | 6 | 28216211 | 28991  | 10.7322 | 0.5548 | 0.2641  | 6.0106 | YRI |
| LOC222701 | GI_27498465-S | rs9368555  | 6 | 6 | 28216946 | 28256  | 10.9344 | 0.5430 | 0.2666  | 6.0106 | YRI |
| LOC222701 | GI_27498465-S | rs9393893  | 6 | 6 | 28217241 | 27961  | 10.7033 | 0.5409 | 0.2638  | 6.0106 | YRI |
| Hs.158943 | Hs.158943-S   | rs1871695  | 6 | 6 | 28217939 | 379264 | 6.3410  | 0.3464 | 0.7821  | 6.087  | YRI |
| LOC222701 | GI_27498465-S | rs868987   | 6 | 6 | 28218127 | 27075  | 11.0949 | 0.5487 | -0.2580 | 6.0106 | YRI |
| Hs.158943 | Hs.158943-S   | rs1416997  | 6 | 6 | 28219534 | 380859 | 6.2028  | 0.3442 | -0.7948 | 6.087  | YRI |
| Hs.158943 | Hs.158943-S   | rs2791334  | 6 | 6 | 28222799 | 384124 | 6.3410  | 0.3464 | 0.7821  | 6.087  | YRI |
| LOC222701 | GI_27498465-S | rs7382533  | 6 | 6 | 28223163 | 22039  | 11.0949 | 0.5487 | 0.2580  | 6.0106 | YRI |
| LOC222701 | GI_27498465-S | rs4713148  | 6 | 6 | 28223900 | 21302  | 11.0949 | 0.5487 | 0.2580  | 6.0106 | YRI |
| Hs.158943 | Hs.158943-S   | rs2622321  | 6 | 6 | 28225084 | 386409 | 6.3410  | 0.3464 | 0.7821  | 6.087  | YRI |
| LOC222701 | GI_27498465-S | rs9348794  | 6 | 6 | 28225736 | 19466  | 11.2843 | 0.5616 | 0.2612  | 6.0106 | YRI |
| Hs.158943 | Hs.158943-S   | rs2622318  | 6 | 6 | 28227865 | 389190 | 9.4234  | 0.4916 | -0.9617 | 6.087  | YRI |
| LOC222701 | GI_27498465-S | rs9295758  | 6 | 6 | 28228642 | 16560  | 11.0949 | 0.5487 | -0.2580 | 6.0106 | YRI |
| Hs.158943 | Hs.158943-S   | rs9348795  | 6 | 6 | 28228703 | 390028 | 6.3410  | 0.3464 | -0.7821 | 6.087  | YRI |
| LOC222701 | GI_27498465-S | rs17774663 | 6 | 6 | 28228877 | 16325  | 11.0949 | 0.5487 | 0.2580  | 6.0106 | YRI |
| LOC222701 | GI_27498465-S | rs9295759  | 6 | 6 | 28232448 | 12754  | 11.0949 | 0.5487 | -0.2580 | 6.0106 | YRI |
| LOC222701 | GI_27498465-S | rs9348796  | 6 | 6 | 28234181 | 11021  | 11.0949 | 0.5487 | -0.2580 | 6.0106 | YRI |
| Hs.158943 | Hs.158943-S   | rs1150674  | 6 | 6 | 28242347 | 403672 | 6.3410  | 0.3464 | 0.7821  | 6.087  | YRI |
| LOC222701 | GI_27498465-S | rs9283884  | 6 | 6 | 28243639 | 1563   | 11.0949 | 0.5487 | 0.2580  | 6.0106 | YRI |
| LOC222701 | GI_27498465-S | rs9393901  | 6 | 6 | 28244776 | 426    | 11.6212 | 0.6526 | -0.2772 | 6.0106 | YRI |
| LOC222701 | GI_27498465-S | rs9380062  | 6 | 6 | 28245548 | 346    | 7.7169  | 0.4819 | 0.2535  | 6.0106 | YRI |
| Hs.158943 | Hs.158943-S   | rs1150676  | 6 | 6 | 28247624 | 408949 | 6.3410  | 0.3464 | -0.7821 | 6.087  | YRI |
| Hs.158943 | Hs.158943-S   | rs1619221  | 6 | 6 | 28253181 | 414506 | 9.6472  | 0.4945 | -0.9656 | 6.087  | YRI |
| LOC222701 | GI_27498465-S | rs9295761  | 6 | 6 | 28255966 | 10764  | 11.0949 | 0.5487 | -0.2580 | 6.0106 | YRI |
| Hs.158943 | Hs.158943-S   | rs1225593  | 6 | 6 | 28258498 | 419823 | 9.6472  | 0.4945 | -0.9656 | 6.087  | YRI |
| Hs.158943 | Hs.158943-S   | rs1150683  | 6 | 6 | 28263293 | 424618 | 6.1899  | 0.3435 | 0.7801  | 6.087  | YRI |
| LOC222701 | GI_27498465-S | rs9295762  | 6 | 6 | 28263397 | 18195  | 6.7868  | 0.3736 | 0.2187  | 6.0106 | YRI |
| LOC347981 | GI_30160064-S | rs12527959 | 6 | 6 | 29645405 | 317138 | 6.6367  | 0.3662 | 0.2088  | 5.9057 | YRI |
| LOC347981 | GI_30160064-S | rs1003581  | 6 | 6 | 29648183 | 314360 | 6.7752  | 0.3679 | -0.2283 | 5.9057 | YRI |
| LOC347981 | GI_30160064-S | rs29240    | 6 | 6 | 29715455 | 247088 | 6.8951  | 0.3738 | 0.3112  | 5.9057 | YRI |
| LOC347981 | GI_30160064-S | rs3025623  | 6 | 6 | 29715726 | 246817 | 6.8951  | 0.3738 | -0.3112 | 5.9057 | YRI |
| LOC347981 | GI_30160064-S | rs29235    | 6 | 6 | 29732057 | 230486 | 6.7268  | 0.3656 | -0.2787 | 5.9057 | YRI |
| Hs.519979 | Hs.519979-S   | rs2747438  | 6 | 6 | 29760328 | 245018 | 8.0664  | 0.4516 | 0.5751  | 6.8597 | YRI |
| LOC347981 | GI_30160064-S | rs4607472  | 6 | 6 | 29918522 | 44021  | 7.5581  | 0.4219 | -0.3410 | 5.9057 | YRI |
| LOC347981 | GI_30160064-S | rs2894118  | 6 | 6 | 29923963 | 38580  | 8.1415  | 0.4315 | -0.3413 | 5.9057 | YRI |
| LOC347981 | GI_30160064-S | rs2394183  | 6 | 6 | 29923989 | 38554  | 8.1415  | 0.4315 | 0.3413  | 5.9057 | YRI |
| LOC347981 | GI_30160064-S | rs2394186  | 6 | 6 | 29924400 | 38143  | 7.0160  | 0.3957 | -0.3355 | 5.9057 | YRI |
| LOC347981 | GI_30160064-S | rs9258568  | 6 | 6 | 29926210 | 36333  | 6.3783  | 0.3688 | 0.2536  | 5.9057 | YRI |
| LOC347981 | GI_30160064-S | rs2107198  | 6 | 6 | 29927641 | 34902  | 9.2720  | 0.4855 | -0.2916 | 5.9057 | YRI |
| Hs.519979 | Hs.519979-S   | rs2517861  | 6 | 6 | 29929961 | 75385  | 8.9072  | 0.4645 | -0.4945 | 6.8597 | YRI |
| LOC347981 | GI_30160064-S | rs9258714  | 6 | 6 | 29933413 | 29130  | 6.0550  | 0.3465 | -0.1937 | 5.9057 | YRI |
| LOC347981 | GI_30160064-S | rs12662275 | 6 | 6 | 29934193 | 28350  | 8.6503  | 0.4975 | 0.2219  | 5.9057 | YRI |
| LOC347981 | GI_30160064-S | rs1611719  | 6 | 6 | 29937615 | 24928  | 8.1415  | 0.4315 | -0.3413 | 5.9057 | YRI |
| LOC347981 | GI_30160064-S | rs9258771  | 6 | 6 | 29938631 | 23912  | 5.9951  | 0.3383 | -0.1925 | 5.9057 | YRI |
| LOC347981 | GI_30160064-S | rs2734971  | 6 | 6 | 29942428 | 20115  | 6.1279  | 0.3503 | 0.1814  | 5.9057 | YRI |
| Hs.519979 | Hs.519979-S   | rs2571413  | 6 | 6 | 29977624 | 27722  | 9.3462  | 0.5494 | 0.5431  | 6.8597 | YRI |
| LOC347981 | GI_30160064-S | rs1611527  | 6 | 6 | 29980936 | 18393  | 8.1017  | 0.4298 | 0.1947  | 5.9057 | YRI |
| Hs.519979 | Hs.519979-S   | rs3132689  | 6 | 6 | 29990509 | 14837  | 11.6658 | 0.6016 | 0.6481  | 6.8597 | YRI |
| Hs.519979 | Hs.519979-S   | rs1655950  | 6 | 6 | 29995460 | 9886   | 9.2699  | 0.5387 | -0.4637 | 6.8597 | YRI |
| Hs.519979 | Hs.519979-S   | rs2471869  | 6 | 6 | 29998385 | 6961   | 9.1189  | 0.5180 | 0.5347  | 6.8597 | YRI |
| Hs.519979 | Hs.519979-S   | rs3115588  | 6 | 6 | 29999499 | 5847   | 11.1474 | 0.6124 | 0.6076  | 6.8597 | YRI |
| Hs.519979 | Hs.519979-S   | rs389600   | 6 | 6 | 30004978 | 368    | 13.6515 | 0.6372 | -0.6755 | 6.8597 | YRI |
| Hs.519979 | Hs.519979-S   | rs1655927  | 6 | 6 | 30007472 | 2126   | 14.2779 | 0.6485 | 0.7025  | 6.8597 | YRI |

|           |               |           |   |   |          |        |         |        |         |        |     |
|-----------|---------------|-----------|---|---|----------|--------|---------|--------|---------|--------|-----|
| Hs.519979 | Hs.519979-S   | rs439935  | 6 | 6 | 30015940 | 10594  | 15.0537 | 0.6694 | 0.6543  | 6.8597 | YRI |
| Hs.519979 | Hs.519979-S   | rs1632882 | 6 | 6 | 30024347 | 19001  | 12.6257 | 0.5998 | -0.5766 | 6.8597 | YRI |
| Hs.519979 | Hs.519979-S   | rs1655900 | 6 | 6 | 30024597 | 19251  | 12.6257 | 0.5998 | -0.5766 | 6.8597 | YRI |
| Hs.519979 | Hs.519979-S   | rs9260632 | 6 | 6 | 30031269 | 25923  | 10.5459 | 0.6136 | 0.6164  | 6.8597 | YRI |
| Hs.519979 | Hs.519979-S   | rs1632872 | 6 | 6 | 30037807 | 32461  | 9.0058  | 0.4686 | 0.5656  | 6.8597 | YRI |
| Hs.519979 | Hs.519979-S   | rs1150744 | 6 | 6 | 30045368 | 40022  | 14.3437 | 0.6633 | -0.6573 | 6.8597 | YRI |
| Hs.519979 | Hs.519979-S   | rs2523971 | 6 | 6 | 30046237 | 40891  | 15.0537 | 0.6694 | 0.6543  | 6.8597 | YRI |
| LOC347981 | GI_30160064-S | rs9260918 | 6 | 6 | 30056730 | 94187  | 8.7862  | 0.4594 | -0.2305 | 5.9057 | YRI |
| Hs.519979 | Hs.519979-S   | rs2844802 | 6 | 6 | 30056791 | 51445  | 13.1803 | 0.6168 | -0.6215 | 6.8597 | YRI |
| Hs.519979 | Hs.519979-S   | rs2735067 | 6 | 6 | 30059085 | 53739  | 12.3319 | 0.6168 | -0.6324 | 6.8597 | YRI |
| Hs.519979 | Hs.519979-S   | rs356957  | 6 | 6 | 30071946 | 66600  | 15.0537 | 0.6694 | 0.6543  | 6.8597 | YRI |
| Hs.519979 | Hs.519979-S   | rs356959  | 6 | 6 | 30074766 | 69420  | 13.1803 | 0.6168 | -0.6215 | 6.8597 | YRI |
| Hs.519979 | Hs.519979-S   | rs2530388 | 6 | 6 | 30075107 | 69761  | 8.1444  | 0.4431 | -0.4886 | 6.8597 | YRI |
| Hs.519979 | Hs.519979-S   | rs356968  | 6 | 6 | 30083026 | 77680  | 15.0537 | 0.6694 | -0.6543 | 6.8597 | YRI |
| Hs.519979 | Hs.519979-S   | rs356969  | 6 | 6 | 30085124 | 79778  | 15.0537 | 0.6694 | 0.6543  | 6.8597 | YRI |
| Hs.519979 | Hs.519979-S   | rs356971  | 6 | 6 | 30087776 | 82430  | 15.0537 | 0.6694 | 0.6543  | 6.8597 | YRI |
| Hs.519979 | Hs.519979-S   | rs356954  | 6 | 6 | 30091517 | 86171  | 14.9432 | 0.6729 | 0.6461  | 6.8597 | YRI |
| Hs.519979 | Hs.519979-S   | rs165255  | 6 | 6 | 30097674 | 92328  | 15.0537 | 0.6694 | 0.6543  | 6.8597 | YRI |
| Hs.519979 | Hs.519979-S   | rs7748909 | 6 | 6 | 30103439 | 98093  | 15.0537 | 0.6694 | -0.6543 | 6.8597 | YRI |
| Hs.519979 | Hs.519979-S   | rs259929  | 6 | 6 | 30110031 | 104685 | 15.0537 | 0.6694 | 0.6543  | 6.8597 | YRI |
| Hs.519979 | Hs.519979-S   | rs259931  | 6 | 6 | 30112350 | 107004 | 15.0537 | 0.6694 | 0.6543  | 6.8597 | YRI |
| Hs.519979 | Hs.519979-S   | rs259932  | 6 | 6 | 30112828 | 107482 | 15.0537 | 0.6694 | 0.6543  | 6.8597 | YRI |
| Hs.519979 | Hs.519979-S   | rs259934  | 6 | 6 | 30114855 | 109509 | 15.0537 | 0.6694 | -0.6543 | 6.8597 | YRI |
| Hs.519979 | Hs.519979-S   | rs259935  | 6 | 6 | 30115030 | 109684 | 8.6986  | 0.4557 | 0.4929  | 6.8597 | YRI |
| Hs.519979 | Hs.519979-S   | rs259938  | 6 | 6 | 30115982 | 110636 | 12.2333 | 0.5872 | -0.6068 | 6.8597 | YRI |
| Hs.519979 | Hs.519979-S   | rs259939  | 6 | 6 | 30119560 | 114214 | 12.2333 | 0.5872 | 0.6068  | 6.8597 | YRI |
| Hs.519979 | Hs.519979-S   | rs259940  | 6 | 6 | 30119913 | 114567 | 15.0537 | 0.6694 | -0.6543 | 6.8597 | YRI |
| Hs.519979 | Hs.519979-S   | rs259919  | 6 | 6 | 30133482 | 128136 | 15.0537 | 0.6694 | 0.6543  | 6.8597 | YRI |
| Hs.519979 | Hs.519979-S   | rs1150742 | 6 | 6 | 30136810 | 131464 | 12.8662 | 0.6137 | 0.6250  | 6.8597 | YRI |
| Hs.519979 | Hs.519979-S   | rs1150741 | 6 | 6 | 30137630 | 132284 | 14.2217 | 0.6666 | 0.6555  | 6.8597 | YRI |
| Hs.519979 | Hs.519979-S   | rs1150736 | 6 | 6 | 30150934 | 145588 | 8.1558  | 0.4496 | -0.4929 | 6.8597 | YRI |
| Hs.519979 | Hs.519979-S   | rs1150735 | 6 | 6 | 30153178 | 147832 | 12.2333 | 0.5872 | 0.6068  | 6.8597 | YRI |
| Hs.519979 | Hs.519979-S   | rs1264709 | 6 | 6 | 30164455 | 159109 | 10.4415 | 0.5788 | -0.5750 | 6.8597 | YRI |
| LOC347981 | GI_30160064-S | rs1264695 | 6 | 6 | 30175871 | 213328 | 5.9550  | 0.3266 | -0.1818 | 5.9057 | YRI |
| LOC401245 | GI_42657607-S | rs2021107 | 6 | 6 | 30336117 | 31364  | 6.6470  | 0.3616 | 0.2226  | 6.2567 | YRI |
| LOC401245 | GI_42657607-S | rs2523750 | 6 | 6 | 30336395 | 31086  | 7.2114  | 0.3889 | 0.2202  | 6.2567 | YRI |
| LOC401245 | GI_42657607-S | rs2523747 | 6 | 6 | 30336917 | 30564  | 7.2114  | 0.3889 | 0.2202  | 6.2567 | YRI |
| LOC401245 | GI_42657607-S | rs2508026 | 6 | 6 | 30337260 | 30221  | 7.0924  | 0.3885 | -0.2212 | 6.2567 | YRI |
| LOC401245 | GI_42657607-S | rs2516705 | 6 | 6 | 30337673 | 29808  | 7.2114  | 0.3889 | -0.2202 | 6.2567 | YRI |
| LOC401245 | GI_42657607-S | rs2516704 | 6 | 6 | 30337809 | 29672  | 7.2114  | 0.3889 | -0.2202 | 6.2567 | YRI |
| LOC401245 | GI_42657607-S | rs2516703 | 6 | 6 | 30337901 | 29580  | 7.2114  | 0.3889 | -0.2202 | 6.2567 | YRI |
| LOC401245 | GI_42657607-S | rs2523745 | 6 | 6 | 30338107 | 29374  | 6.6291  | 0.3710 | 0.2003  | 6.2567 | YRI |
| LOC401245 | GI_42657607-S | rs2523744 | 6 | 6 | 30338432 | 29049  | 7.2114  | 0.3889 | 0.2202  | 6.2567 | YRI |
| LOC401245 | GI_42657607-S | rs2516700 | 6 | 6 | 30339050 | 28431  | 7.2114  | 0.3889 | 0.2202  | 6.2567 | YRI |
| LOC401245 | GI_42657607-S | rs2516699 | 6 | 6 | 30339087 | 28394  | 7.2114  | 0.3889 | -0.2202 | 6.2567 | YRI |
| LOC401245 | GI_42657607-S | rs2516698 | 6 | 6 | 30340353 | 27128  | 7.1536  | 0.3862 | 0.2636  | 6.2567 | YRI |
| LOC401245 | GI_42657607-S | rs2516697 | 6 | 6 | 30340493 | 26988  | 7.2114  | 0.3889 | 0.2202  | 6.2567 | YRI |
| LOC401245 | GI_42657607-S | rs2844765 | 6 | 6 | 30342473 | 25008  | 7.2114  | 0.3889 | 0.2202  | 6.2567 | YRI |
| LOC401245 | GI_42657607-S | rs2844763 | 6 | 6 | 30343163 | 24318  | 7.2114  | 0.3889 | -0.2202 | 6.2567 | YRI |
| LOC401245 | GI_42657607-S | rs6457188 | 6 | 6 | 30346863 | 20618  | 7.4987  | 0.4024 | 0.2153  | 6.2567 | YRI |
| LOC401245 | GI_42657607-S | rs7453068 | 6 | 6 | 30348905 | 18576  | 7.2114  | 0.3889 | -0.2202 | 6.2567 | YRI |
| LOC401245 | GI_42657607-S | rs968909  | 6 | 6 | 30352558 | 14923  | 7.4987  | 0.4024 | -0.2153 | 6.2567 | YRI |
| LOC401245 | GI_42657607-S | rs2844754 | 6 | 6 | 30354191 | 13290  | 7.1536  | 0.3862 | 0.2636  | 6.2567 | YRI |
| LOC401245 | GI_42657607-S | rs1264624 | 6 | 6 | 30363068 | 4413   | 7.4987  | 0.4024 | -0.2153 | 6.2567 | YRI |
| LOC401245 | GI_42657607-S | rs3734841 | 6 | 6 | 30367284 | 197    | 7.5310  | 0.4039 | -0.2079 | 6.2567 | YRI |
| LOC401245 | GI_42657607-S | rs1045251 | 6 | 6 | 30367636 | 155    | 7.2114  | 0.3889 | -0.2202 | 6.2567 | YRI |
| LOC401245 | GI_42657607-S | rs1264619 | 6 | 6 | 30367998 | 517    | 7.4987  | 0.4024 | 0.2153  | 6.2567 | YRI |
| LOC401245 | GI_42657607-S | rs1048664 | 6 | 6 | 30370491 | 3010   | 7.1536  | 0.3862 | -0.2636 | 6.2567 | YRI |
| LOC401245 | GI_42657607-S | rs1264616 | 6 | 6 | 30372286 | 4805   | 7.2114  | 0.3889 | -0.2202 | 6.2567 | YRI |

|           |               |            |   |   |          |        |         |        |         |        |     |
|-----------|---------------|------------|---|---|----------|--------|---------|--------|---------|--------|-----|
| LOC401245 | GI_42657607-S | rs261950   | 6 | 6 | 30377540 | 10059  | 7.5310  | 0.4039 | -0.2079 | 6.2567 | YRI |
| LOC401245 | GI_42657607-S | rs261948   | 6 | 6 | 30378588 | 11107  | 7.2114  | 0.3889 | -0.2202 | 6.2567 | YRI |
| LOC401245 | GI_42657607-S | rs261947   | 6 | 6 | 30379123 | 11642  | 7.5310  | 0.4039 | 0.2079  | 6.2567 | YRI |
| LOC401245 | GI_42657607-S | rs261943   | 6 | 6 | 30381350 | 13869  | 6.8384  | 0.3814 | 0.2182  | 6.2567 | YRI |
| LOC401245 | GI_42657607-S | rs9380167  | 6 | 6 | 30382440 | 14959  | 6.4172  | 0.3551 | 0.1889  | 6.2567 | YRI |
| LOC401245 | GI_42657607-S | rs12055553 | 6 | 6 | 30382707 | 15226  | 7.5127  | 0.4085 | -0.2098 | 6.2567 | YRI |
| LOC401245 | GI_42657607-S | rs9380168  | 6 | 6 | 30383103 | 15622  | 7.2114  | 0.3889 | -0.2202 | 6.2567 | YRI |
| LOC401245 | GI_42657607-S | rs9295842  | 6 | 6 | 30388901 | 21420  | 7.5310  | 0.4039 | -0.2079 | 6.2567 | YRI |
| LOC401245 | GI_42657607-S | rs9295843  | 6 | 6 | 30389213 | 21732  | 7.2114  | 0.3889 | -0.2202 | 6.2567 | YRI |
| LOC401245 | GI_42657607-S | rs9394001  | 6 | 6 | 30390623 | 23142  | 7.1258  | 0.4068 | -0.2296 | 6.2567 | YRI |
| LOC401245 | GI_42657607-S | rs6912771  | 6 | 6 | 30392354 | 24873  | 7.5310  | 0.4039 | -0.2079 | 6.2567 | YRI |
| LOC401245 | GI_42657607-S | rs1473102  | 6 | 6 | 30393384 | 25903  | 7.2114  | 0.3889 | 0.2202  | 6.2567 | YRI |
| LOC401245 | GI_42657607-S | rs6924453  | 6 | 6 | 30393934 | 26453  | 7.0355  | 0.4023 | -0.1985 | 6.2567 | YRI |
| LOC401245 | GI_42657607-S | rs6931387  | 6 | 6 | 30395496 | 28015  | 6.7767  | 0.3731 | 0.1864  | 6.2567 | YRI |
| LOC401245 | GI_42657607-S | rs6900042  | 6 | 6 | 30397250 | 29769  | 7.8266  | 0.4174 | 0.2043  | 6.2567 | YRI |
| LOC401245 | GI_42657607-S | rs9368635  | 6 | 6 | 30398015 | 30534  | 7.4835  | 0.4127 | 0.2131  | 6.2567 | YRI |
| LOC401245 | GI_42657607-S | rs4711213  | 6 | 6 | 30400315 | 32834  | 7.8266  | 0.4174 | 0.2043  | 6.2567 | YRI |
| LOC401245 | GI_42657607-S | rs2057727  | 6 | 6 | 30405508 | 38027  | 7.1955  | 0.3882 | 0.2111  | 6.2567 | YRI |
| LOC401245 | GI_42657607-S | rs3778624  | 6 | 6 | 30410579 | 43098  | 7.1955  | 0.3882 | -0.2111 | 6.2567 | YRI |
| LOC401245 | GI_42657607-S | rs7767653  | 6 | 6 | 30412795 | 45314  | 6.7877  | 0.3737 | -0.2274 | 6.2567 | YRI |
| LOC401245 | GI_42657607-S | rs2074474  | 6 | 6 | 30417487 | 50006  | 6.9971  | 0.3787 | 0.2175  | 6.2567 | YRI |
| LOC401245 | GI_42657607-S | rs1060065  | 6 | 6 | 30422545 | 55064  | 7.2114  | 0.3889 | 0.2202  | 6.2567 | YRI |
| LOC401245 | GI_42657607-S | rs974963   | 6 | 6 | 30422546 | 55065  | 7.2114  | 0.3889 | 0.2202  | 6.2567 | YRI |
| hmm31752  | hmm31752-S    | rs2844665  | 6 | 6 | 31114834 | 17244  | 9.2485  | 0.4785 | -0.4121 | 6.9202 | YRI |
| hmm31752  | hmm31752-S    | rs2517549  | 6 | 6 | 31116577 | 15501  | 8.0134  | 0.4314 | -0.3527 | 6.9202 | YRI |
| hmm31752  | hmm31752-S    | rs2517548  | 6 | 6 | 31116797 | 15281  | 8.8003  | 0.4718 | 0.4109  | 6.9202 | YRI |
| hmm31752  | hmm31752-S    | rs9262564  | 6 | 6 | 31117116 | 14962  | 8.2004  | 0.4640 | 0.3519  | 6.9202 | YRI |
| hmm31752  | hmm31752-S    | rs9262567  | 6 | 6 | 31117188 | 14890  | 8.6622  | 0.4541 | -0.4060 | 6.9202 | YRI |
| hmm31752  | hmm31752-S    | rs10947128 | 6 | 6 | 31117214 | 14864  | 8.6232  | 0.4583 | 0.4161  | 6.9202 | YRI |
| hmm31752  | hmm31752-S    | rs2508015  | 6 | 6 | 31118179 | 13899  | 8.5780  | 0.4683 | -0.3651 | 6.9202 | YRI |
| hmm31752  | hmm31752-S    | rs2844647  | 6 | 6 | 31118992 | 13086  | 6.9353  | 0.3757 | -0.3453 | 6.9202 | YRI |
| hmm31752  | hmm31752-S    | rs2248386  | 6 | 6 | 31119226 | 12852  | 7.0215  | 0.3905 | -0.3475 | 6.9202 | YRI |
| hmm31752  | hmm31752-S    | rs2523873  | 6 | 6 | 31120242 | 11836  | 9.3991  | 0.4906 | -0.4070 | 6.9202 | YRI |
| hmm31752  | hmm31752-S    | rs3131927  | 6 | 6 | 31120975 | 11103  | 9.0460  | 0.4702 | -0.4204 | 6.9202 | YRI |
| hmm31752  | hmm31752-S    | rs2517538  | 6 | 6 | 31121520 | 10558  | 9.2485  | 0.4785 | 0.4121  | 6.9202 | YRI |
| hmm31752  | hmm31752-S    | rs2523871  | 6 | 6 | 31121988 | 10090  | 9.2485  | 0.4785 | 0.4121  | 6.9202 | YRI |
| hmm31752  | hmm31752-S    | rs2523870  | 6 | 6 | 31122095 | 9983   | 9.2485  | 0.4785 | 0.4121  | 6.9202 | YRI |
| hmm31752  | hmm31752-S    | rs2251830  | 6 | 6 | 31124957 | 7121   | 7.0164  | 0.4257 | 0.3874  | 6.9202 | YRI |
| hmm31752  | hmm31752-S    | rs2517534  | 6 | 6 | 31125313 | 6765   | 11.1659 | 0.5575 | 0.4412  | 6.9202 | YRI |
| hmm31752  | hmm31752-S    | rs2523866  | 6 | 6 | 31125326 | 6752   | 8.2395  | 0.4358 | -0.3756 | 6.9202 | YRI |
| hmm31752  | hmm31752-S    | rs2517532  | 6 | 6 | 31126386 | 5692   | 11.3650 | 0.5581 | 0.4418  | 6.9202 | YRI |
| hmm31752  | hmm31752-S    | rs2523865  | 6 | 6 | 31126427 | 5651   | 8.2395  | 0.4358 | 0.3756  | 6.9202 | YRI |
| hmm31752  | hmm31752-S    | rs2523864  | 6 | 6 | 31126525 | 5553   | 8.2395  | 0.4358 | 0.3756  | 6.9202 | YRI |
| hmm31752  | hmm31752-S    | rs2517527  | 6 | 6 | 31129526 | 2552   | 9.8001  | 0.5258 | 0.4593  | 6.9202 | YRI |
| hmm31752  | hmm31752-S    | rs2523856  | 6 | 6 | 31129609 | 2469   | 8.0052  | 0.4816 | 0.4395  | 6.9202 | YRI |
| hmm31752  | hmm31752-S    | rs2517524  | 6 | 6 | 31133692 | 1614   | 7.6966  | 0.4284 | -0.4710 | 6.9202 | YRI |
| hmm31752  | hmm31752-S    | rs3132562  | 6 | 6 | 31156971 | 24893  | 7.2265  | 0.4177 | -0.3823 | 6.9202 | YRI |
| HLA-C     | GI_19557676-S | rs3130541  | 6 | 6 | 31337020 | 7701   | 8.0481  | 0.4634 | -0.2915 | 5.8567 | YRI |
| LOC282956 | GI_27483210-S | rs2844626  | 6 | 6 | 31337531 | 133020 | 6.1920  | 0.3436 | 0.1289  | 5.966  | YRI |
| LOC282956 | GI_27483210-S | rs2524117  | 6 | 6 | 31338848 | 131703 | 6.8456  | 0.3714 | -0.1459 | 5.966  | YRI |
| LOC282956 | GI_27483210-S | rs2894199  | 6 | 6 | 31339759 | 130792 | 6.5810  | 0.3793 | -0.1424 | 5.966  | YRI |
| LOC282956 | GI_27483210-S | rs2074489  | 6 | 6 | 31348107 | 122444 | 7.5146  | 0.4199 | 0.1490  | 5.966  | YRI |
| LOC282956 | GI_27483210-S | rs4361609  | 6 | 6 | 31348614 | 121937 | 7.9025  | 0.4209 | 0.1598  | 5.966  | YRI |
| LOC282956 | GI_27483210-S | rs5010528  | 6 | 6 | 31349011 | 121540 | 8.2169  | 0.4464 | -0.1537 | 5.966  | YRI |
| LOC282956 | GI_27483210-S | rs2040748  | 6 | 6 | 31351764 | 118787 | 7.4400  | 0.4051 | 0.1512  | 5.966  | YRI |
| LOC282956 | GI_27483210-S | rs4386816  | 6 | 6 | 31355114 | 115437 | 7.9833  | 0.4245 | 0.1604  | 5.966  | YRI |
| LOC282956 | GI_27483210-S | rs9461684  | 6 | 6 | 31361423 | 109128 | 8.5433  | 0.4548 | -0.1661 | 5.966  | YRI |
| LOC282956 | GI_27483210-S | rs9468919  | 6 | 6 | 31361845 | 108706 | 8.2435  | 0.4417 | 0.1643  | 5.966  | YRI |
| LOC282956 | GI_27483210-S | rs1634752  | 6 | 6 | 31388921 | 81630  | 6.2858  | 0.3639 | 0.1407  | 5.966  | YRI |

|           |               |            |   |   |          |       |         |        |         |       |     |
|-----------|---------------|------------|---|---|----------|-------|---------|--------|---------|-------|-----|
| LOC282956 | GI_27483210-S | rs1634747  | 6 | 6 | 31389855 | 80696 | 6.7118  | 0.3860 | -0.1428 | 5.966 | YRI |
| LOC282956 | GI_27483210-S | rs1634746  | 6 | 6 | 31390756 | 79795 | 6.7118  | 0.3860 | 0.1428  | 5.966 | YRI |
| LOC282956 | GI_27483210-S | rs9264989  | 6 | 6 | 31391388 | 79163 | 6.3125  | 0.3822 | 0.1397  | 5.966 | YRI |
| LOC282956 | GI_27483210-S | rs7450827  | 6 | 6 | 31396385 | 74166 | 6.8432  | 0.3764 | 0.1418  | 5.966 | YRI |
| LOC282956 | GI_27483210-S | rs4540292  | 6 | 6 | 31425161 | 45390 | 6.3675  | 0.3629 | 0.1311  | 5.966 | YRI |
| LOC282956 | GI_27483210-S | rs2156875  | 6 | 6 | 31425326 | 45225 | 6.5954  | 0.3591 | 0.1296  | 5.966 | YRI |
| LOC282956 | GI_27483210-S | rs4394275  | 6 | 6 | 31426156 | 44395 | 7.9536  | 0.4232 | 0.1558  | 5.966 | YRI |
| LOC282956 | GI_27483210-S | rs9501374  | 6 | 6 | 31440311 | 30240 | 8.4794  | 0.4898 | -0.1882 | 5.966 | YRI |
| LOC282956 | GI_27483210-S | rs9501571  | 6 | 6 | 31441589 | 28962 | 8.6604  | 0.4540 | -0.1780 | 5.966 | YRI |
| LOC282956 | GI_27483210-S | rs9501572  | 6 | 6 | 31441799 | 28752 | 8.7211  | 0.4566 | -0.1798 | 5.966 | YRI |
| LOC282956 | GI_27483210-S | rs6457401  | 6 | 6 | 31442831 | 27720 | 8.7211  | 0.4566 | -0.1798 | 5.966 | YRI |
| LOC282956 | GI_27483210-S | rs6457402  | 6 | 6 | 31442843 | 27708 | 8.7211  | 0.4566 | -0.1798 | 5.966 | YRI |
| LOC282956 | GI_27483210-S | rs7767216  | 6 | 6 | 31443075 | 27476 | 8.6604  | 0.4540 | 0.1780  | 5.966 | YRI |
| LOC282956 | GI_27483210-S | rs7767142  | 6 | 6 | 31443290 | 27261 | 9.4275  | 0.4979 | -0.1731 | 5.966 | YRI |
| LOC282956 | GI_27483210-S | rs7743761  | 6 | 6 | 31444079 | 26472 | 9.1526  | 0.4866 | 0.1744  | 5.966 | YRI |
| LOC282956 | GI_27483210-S | rs13215664 | 6 | 6 | 31445290 | 25261 | 8.5750  | 0.4744 | 0.1856  | 5.966 | YRI |
| LOC282956 | GI_27483210-S | rs9295986  | 6 | 6 | 31446507 | 24044 | 6.1336  | 0.3506 | -0.1474 | 5.966 | YRI |
| LOC282956 | GI_27483210-S | rs6930905  | 6 | 6 | 31448456 | 22095 | 9.1563  | 0.4868 | 0.1777  | 5.966 | YRI |
| LOC282956 | GI_27483210-S | rs6936035  | 6 | 6 | 31449135 | 21416 | 8.6604  | 0.4540 | -0.1780 | 5.966 | YRI |
| LOC282956 | GI_27483210-S | rs2844551  | 6 | 6 | 31450760 | 19791 | 6.7729  | 0.4328 | 0.1624  | 5.966 | YRI |
| LOC282956 | GI_27483210-S | rs13194571 | 6 | 6 | 31450939 | 19612 | 6.3015  | 0.3938 | 0.1714  | 5.966 | YRI |
| LOC282956 | GI_27483210-S | rs7775117  | 6 | 6 | 31453465 | 17086 | 11.4285 | 0.5731 | 0.1870  | 5.966 | YRI |
| LOC282956 | GI_27483210-S | rs9501587  | 6 | 6 | 31454916 | 15635 | 9.9543  | 0.5455 | 0.1712  | 5.966 | YRI |
| LOC282956 | GI_27483210-S | rs9501588  | 6 | 6 | 31454999 | 15552 | 7.8939  | 0.4318 | 0.1570  | 5.966 | YRI |
| LOC282956 | GI_27483210-S | rs9266689  | 6 | 6 | 31456559 | 13992 | 8.7065  | 0.4618 | -0.1526 | 5.966 | YRI |
| LOC282956 | GI_27483210-S | rs2844535  | 6 | 6 | 31458282 | 12269 | 8.3113  | 0.4390 | -0.1722 | 5.966 | YRI |
| LOC282956 | GI_27483210-S | rs3016013  | 6 | 6 | 31459221 | 11330 | 7.0437  | 0.3809 | -0.1535 | 5.966 | YRI |
| LOC282956 | GI_27483210-S | rs3099848  | 6 | 6 | 31459421 | 11130 | 7.0437  | 0.3809 | 0.1535  | 5.966 | YRI |
| LOC282956 | GI_27483210-S | rs2442752  | 6 | 6 | 31459743 | 10808 | 7.5719  | 0.4112 | -0.1488 | 5.966 | YRI |
| LOC282956 | GI_27483210-S | rs7775759  | 6 | 6 | 31460425 | 10126 | 9.8344  | 0.5019 | 0.1828  | 5.966 | YRI |
| LOC282956 | GI_27483210-S | rs7741091  | 6 | 6 | 31460610 | 9941  | 9.2226  | 0.5596 | -0.1875 | 5.966 | YRI |
| LOC282956 | GI_27483210-S | rs2844529  | 6 | 6 | 31461572 | 8979  | 10.4411 | 0.5440 | -0.1789 | 5.966 | YRI |
| LOC282956 | GI_27483210-S | rs4081552  | 6 | 6 | 31461668 | 8883  | 9.8344  | 0.5019 | -0.1828 | 5.966 | YRI |
| LOC282956 | GI_27483210-S | rs6909461  | 6 | 6 | 31461929 | 8622  | 8.3331  | 0.4399 | -0.1732 | 5.966 | YRI |
| LOC282956 | GI_27483210-S | rs2853973  | 6 | 6 | 31461971 | 8580  | 9.1598  | 0.4749 | -0.1737 | 5.966 | YRI |
| LOC282956 | GI_27483210-S | rs2428486  | 6 | 6 | 31462083 | 8468  | 11.7458 | 0.5711 | -0.1781 | 5.966 | YRI |
| LOC282956 | GI_27483210-S | rs6932730  | 6 | 6 | 31462161 | 8390  | 9.3607  | 0.4891 | 0.1792  | 5.966 | YRI |
| LOC282956 | GI_27483210-S | rs4711268  | 6 | 6 | 31462483 | 8068  | 10.7425 | 0.5423 | -0.1783 | 5.966 | YRI |
| LOC282956 | GI_27483210-S | rs13437082 | 6 | 6 | 31462539 | 8012  | 11.8298 | 0.6288 | -0.1880 | 5.966 | YRI |
| LOC282956 | GI_27483210-S | rs2596562  | 6 | 6 | 31462574 | 7977  | 11.3157 | 0.5627 | -0.1785 | 5.966 | YRI |
| LOC282956 | GI_27483210-S | rs13437092 | 6 | 6 | 31463035 | 7516  | 13.0832 | 0.6139 | -0.1907 | 5.966 | YRI |
| LOC282956 | GI_27483210-S | rs13437088 | 6 | 6 | 31463098 | 7453  | 12.4240 | 0.6063 | -0.1901 | 5.966 | YRI |
| LOC282956 | GI_27483210-S | rs9348866  | 6 | 6 | 31466934 | 3617  | 9.9424  | 0.5314 | -0.1891 | 5.966 | YRI |
| LOC282956 | GI_27483210-S | rs7771971  | 6 | 6 | 31468320 | 2231  | 9.6594  | 0.4950 | 0.1801  | 5.966 | YRI |
| LOC282956 | GI_27483210-S | rs7751725  | 6 | 6 | 31468412 | 2139  | 12.7584 | 0.6039 | -0.1874 | 5.966 | YRI |
| LOC282956 | GI_27483210-S | rs7752021  | 6 | 6 | 31468505 | 2046  | 12.7584 | 0.6039 | -0.1874 | 5.966 | YRI |
| LOC282956 | GI_27483210-S | rs10947206 | 6 | 6 | 31469376 | 1175  | 12.7584 | 0.6039 | -0.1874 | 5.966 | YRI |
| LOC282956 | GI_27483210-S | rs10947207 | 6 | 6 | 31469464 | 1087  | 6.1478  | 0.3514 | 0.1872  | 5.966 | YRI |
| LOC282956 | GI_27483210-S | rs2523475  | 6 | 6 | 31469689 | 862   | 10.5007 | 0.6118 | 0.1753  | 5.966 | YRI |
| LOC282956 | GI_27483210-S | rs10947208 | 6 | 6 | 31469816 | 735   | 12.7584 | 0.6039 | -0.1874 | 5.966 | YRI |
| LOC282956 | GI_27483210-S | rs2523473  | 6 | 6 | 31469876 | 675   | 11.8816 | 0.5757 | 0.1725  | 5.966 | YRI |
| LOC282956 | GI_27483210-S | rs2523467  | 6 | 6 | 31470909 | 358   | 12.4663 | 0.5947 | 0.1783  | 5.966 | YRI |
| LOC282956 | GI_27483210-S | rs9501387  | 6 | 6 | 31472438 | 1887  | 11.8816 | 0.5757 | -0.1725 | 5.966 | YRI |
| LOC282956 | GI_27483210-S | rs7739560  | 6 | 6 | 31472769 | 2218  | 11.0500 | 0.5534 | -0.1780 | 5.966 | YRI |
| LOC282956 | GI_27483210-S | rs2523459  | 6 | 6 | 31473287 | 2736  | 11.7320 | 0.5969 | -0.1692 | 5.966 | YRI |
| LOC282956 | GI_27483210-S | rs2596542  | 6 | 6 | 31474574 | 4023  | 7.2336  | 0.4008 | 0.1433  | 5.966 | YRI |
| LOC282956 | GI_27483210-S | rs2428475  | 6 | 6 | 31474601 | 4050  | 12.0872 | 0.5954 | 0.1724  | 5.966 | YRI |
| LOC282956 | GI_27483210-S | rs2428474  | 6 | 6 | 31475002 | 4451  | 11.4533 | 0.5806 | 0.1694  | 5.966 | YRI |
| LOC282956 | GI_27483210-S | rs2523453  | 6 | 6 | 31476104 | 5553  | 11.7158 | 0.5765 | 0.1725  | 5.966 | YRI |

|           |               |            |   |   |          |       |         |        |         |        |     |
|-----------|---------------|------------|---|---|----------|-------|---------|--------|---------|--------|-----|
| LOC282956 | GI_27483210-S | rs6911024  | 6 | 6 | 31476430 | 5879  | 6.6117  | 0.3809 | 0.1656  | 5.966  | YRI |
| LOC282956 | GI_27483210-S | rs2523452  | 6 | 6 | 31476519 | 5968  | 9.2949  | 0.4804 | 0.1678  | 5.966  | YRI |
| LOC282956 | GI_27483210-S | rs2844521  | 6 | 6 | 31476943 | 6392  | 9.1860  | 0.4943 | 0.1649  | 5.966  | YRI |
| LOC282956 | GI_27483210-S | rs9295988  | 6 | 6 | 31481697 | 11146 | 8.7187  | 0.4624 | -0.1836 | 5.966  | YRI |
| LOC282956 | GI_27483210-S | rs6910087  | 6 | 6 | 31485026 | 14475 | 8.2912  | 0.4497 | -0.1763 | 5.966  | YRI |
| LOC282956 | GI_27483210-S | rs6934097  | 6 | 6 | 31488724 | 18173 | 7.0211  | 0.3960 | 0.1739  | 5.966  | YRI |
| LOC282956 | GI_27483210-S | rs9468992  | 6 | 6 | 31492557 | 22006 | 7.9334  | 0.4712 | 0.1800  | 5.966  | YRI |
| LOC282956 | GI_27483210-S | rs9501106  | 6 | 6 | 31496088 | 25537 | 7.5912  | 0.4547 | 0.1895  | 5.966  | YRI |
| LOC282956 | GI_27483210-S | rs2394999  | 6 | 6 | 31508914 | 38363 | 8.3332  | 0.4400 | -0.1806 | 5.966  | YRI |
| LOC282956 | GI_27483210-S | rs2516470  | 6 | 6 | 31515310 | 44759 | 6.0074  | 0.3341 | -0.1328 | 5.966  | YRI |
| LOC282956 | GI_27483210-S | rs9469002  | 6 | 6 | 31515751 | 45200 | 6.4730  | 0.3737 | 0.1922  | 5.966  | YRI |
| LOC282956 | GI_27483210-S | rs4713465  | 6 | 6 | 31517507 | 46956 | 7.0590  | 0.4215 | -0.2065 | 5.966  | YRI |
| LOC282956 | GI_27483210-S | rs3869130  | 6 | 6 | 31518730 | 48179 | 7.7026  | 0.4739 | 0.1545  | 5.966  | YRI |
| LOC282956 | GI_27483210-S | rs16899646 | 6 | 6 | 31524899 | 54348 | 8.6046  | 0.4517 | -0.1809 | 5.966  | YRI |
| LOC282956 | GI_27483210-S | rs3131622  | 6 | 6 | 31528479 | 57928 | 7.5317  | 0.4039 | -0.1654 | 5.966  | YRI |
| HLA-DRB5  | GI_26665892-S | rs9268614  | 6 | 6 | 32510756 | 82469 | 6.5421  | 0.3614 | -3.9272 | 6.0401 | YRI |
| HLA-DRB5  | GI_26665892-S | rs6926374  | 6 | 6 | 32517283 | 75942 | 7.9692  | 0.4239 | 2.6046  | 6.0401 | YRI |
| HLA-DRB5  | GI_26665892-S | rs9268659  | 6 | 6 | 32518919 | 74306 | 8.0326  | 0.4267 | -2.5817 | 6.0401 | YRI |
| HLA-DRB5  | GI_26665892-S | rs8084     | 6 | 6 | 32519013 | 74212 | 8.0326  | 0.4267 | 2.5817  | 6.0401 | YRI |
| HLA-DRB5  | GI_26665892-S | rs2239804  | 6 | 6 | 32519501 | 73724 | 7.9255  | 0.4391 | 2.6180  | 6.0401 | YRI |
| HLA-DRB5  | GI_26665892-S | rs7192     | 6 | 6 | 32519624 | 73601 | 8.0326  | 0.4267 | -2.5817 | 6.0401 | YRI |
| HLA-DRB5  | GI_26665892-S | rs2239803  | 6 | 6 | 32519811 | 73414 | 8.3446  | 0.4462 | -2.6514 | 6.0401 | YRI |
| HLA-DRB5  | GI_26665892-S | rs7194     | 6 | 6 | 32520458 | 72767 | 7.0437  | 0.3971 | -2.5286 | 6.0401 | YRI |
| HLA-DRB5  | GI_26665892-S | rs2213585  | 6 | 6 | 32521128 | 72097 | 8.0326  | 0.4267 | 2.5817  | 6.0401 | YRI |
| HLA-DRB5  | GI_26665892-S | rs2227139  | 6 | 6 | 32521437 | 71788 | 7.0437  | 0.3971 | 2.5286  | 6.0401 | YRI |
| HLA-DRB5  | GI_26665892-S | rs3763327  | 6 | 6 | 32521808 | 71417 | 7.0437  | 0.3971 | -2.5286 | 6.0401 | YRI |
| HLA-DRB5  | GI_26665892-S | rs9268853  | 6 | 6 | 32537621 | 55604 | 7.3930  | 0.3975 | -3.0907 | 6.0401 | YRI |
| HLA-DRB5  | GI_26665892-S | rs9268856  | 6 | 6 | 32537697 | 55528 | 6.6076  | 0.3597 | 2.2565  | 6.0401 | YRI |
| HLA-DRB5  | GI_26665892-S | rs9268858  | 6 | 6 | 32537736 | 55489 | 7.7703  | 0.4204 | -3.1594 | 6.0401 | YRI |
| HLA-DRB5  | GI_26665892-S | rs9268862  | 6 | 6 | 32538145 | 55080 | 6.6076  | 0.3597 | -2.2565 | 6.0401 | YRI |
| HLA-DRB5  | GI_26665892-S | rs4428528  | 6 | 6 | 32538340 | 54885 | 6.5085  | 0.3811 | -2.2101 | 6.0401 | YRI |
| HLA-DRB5  | GI_26665892-S | rs4434496  | 6 | 6 | 32538486 | 54739 | 6.2775  | 0.3803 | -2.2350 | 6.0401 | YRI |
| HLA-DRB5  | GI_26665892-S | rs7766843  | 6 | 6 | 32538707 | 54518 | 6.6076  | 0.3597 | -2.2565 | 6.0401 | YRI |
| HLA-DRB5  | GI_26665892-S | rs7746922  | 6 | 6 | 32538953 | 54272 | 6.6076  | 0.3597 | 2.2565  | 6.0401 | YRI |
| HLA-DRB5  | GI_26665892-S | rs9268878  | 6 | 6 | 32539270 | 53955 | 6.6076  | 0.3597 | 2.2565  | 6.0401 | YRI |
| HLA-DRB5  | GI_26665892-S | rs9268885  | 6 | 6 | 32539683 | 53542 | 6.6813  | 0.3736 | -2.2599 | 6.0401 | YRI |
| HLA-DRB5  | GI_26665892-S | rs9268906  | 6 | 6 | 32540159 | 53066 | 6.5131  | 0.3758 | 3.0306  | 6.0401 | YRI |
| HLA-DRB5  | GI_26665892-S | rs9268923  | 6 | 6 | 32540813 | 52412 | 6.7696  | 0.3780 | 3.0130  | 6.0401 | YRI |
| HLA-DRB5  | GI_26665892-S | rs2395185  | 6 | 6 | 32541145 | 52080 | 7.3930  | 0.3975 | 3.0907  | 6.0401 | YRI |
| HLA-DRB5  | GI_26665892-S | rs9268969  | 6 | 6 | 32542327 | 50898 | 6.3241  | 0.3888 | 3.2658  | 6.0401 | YRI |
| HLA-DRB5  | GI_26665892-S | rs9268970  | 6 | 6 | 32542339 | 50886 | 6.4399  | 0.3666 | -2.9614 | 6.0401 | YRI |
| HLA-DRB5  | GI_26665892-S | rs9268973  | 6 | 6 | 32542756 | 50469 | 7.0436  | 0.4207 | 2.2785  | 6.0401 | YRI |
| HLA-DRB5  | GI_26665892-S | rs9268974  | 6 | 6 | 32542808 | 50417 | 6.0723  | 0.3871 | -2.2206 | 6.0401 | YRI |
| HLA-DRB5  | GI_26665892-S | rs9268976  | 6 | 6 | 32542852 | 50373 | 6.6731  | 0.4077 | -2.2596 | 6.0401 | YRI |
| HLA-DRB5  | GI_26665892-S | rs9269043  | 6 | 6 | 32546576 | 46649 | 6.6076  | 0.3597 | 2.2565  | 6.0401 | YRI |
| HLA-DRB5  | GI_26665892-S | rs9391877  | 6 | 6 | 32546845 | 46380 | 6.4465  | 0.3670 | 3.1420  | 6.0401 | YRI |
| HLA-DRB5  | GI_26665892-S | rs9405040  | 6 | 6 | 32547371 | 45854 | 7.3930  | 0.3975 | 3.0907  | 6.0401 | YRI |
| HLA-DRB5  | GI_26665892-S | rs5026740  | 6 | 6 | 32547731 | 45494 | 6.3421  | 0.3513 | 2.2552  | 6.0401 | YRI |
| HLA-DRB5  | GI_26665892-S | rs9286790  | 6 | 6 | 32547806 | 45419 | 7.1814  | 0.4215 | -3.1345 | 6.0401 | YRI |
| HLA-DRB5  | GI_26665892-S | rs12194148 | 6 | 6 | 32552176 | 41049 | 7.4267  | 0.4044 | 3.0617  | 6.0401 | YRI |
| HLA-DRB5  | GI_26665892-S | rs9405112  | 6 | 6 | 32553578 | 39647 | 7.8761  | 0.4252 | -3.1674 | 6.0401 | YRI |
| HLA-DRB5  | GI_26665892-S | rs9378212  | 6 | 6 | 32553669 | 39556 | 7.7282  | 0.4130 | 3.1023  | 6.0401 | YRI |
| HLA-DRB5  | GI_26665892-S | rs9378266  | 6 | 6 | 32556167 | 37058 | 6.8267  | 0.4035 | 3.0094  | 6.0401 | YRI |
| HLA-DRB5  | GI_26665892-S | rs9378213  | 6 | 6 | 32556376 | 36849 | 7.9738  | 0.4297 | -3.1632 | 6.0401 | YRI |
| HLA-DRB5  | GI_26665892-S | rs9269186  | 6 | 6 | 32556394 | 36831 | 6.6076  | 0.3597 | -2.2565 | 6.0401 | YRI |
| HLA-DRB5  | GI_26665892-S | rs9391786  | 6 | 6 | 32556539 | 36686 | 7.7282  | 0.4130 | 3.1023  | 6.0401 | YRI |
| HLA-DRB5  | GI_26665892-S | rs5020946  | 6 | 6 | 32558067 | 35158 | 7.4821  | 0.4016 | 3.2208  | 6.0401 | YRI |
| HLA-DRB5  | GI_26665892-S | rs2157337  | 6 | 6 | 32609122 | 15897 | 8.2372  | 0.4594 | 3.1944  | 6.0401 | YRI |
| HLA-DRB5  | GI_26665892-S | rs9270657  | 6 | 6 | 32673999 | 80774 | 10.3870 | 0.5229 | 2.9120  | 6.0401 | YRI |

|          |               |            |   |   |           |        |         |        |         |         |     |
|----------|---------------|------------|---|---|-----------|--------|---------|--------|---------|---------|-----|
| HLA-DRB5 | GI_26665892-S | rs2858870  | 6 | 6 | 32680229  | 87004  | 6.9701  | 0.4049 | 2.9744  | 6.0401  | YRI |
| HLA-DRB5 | GI_26665892-S | rs586610   | 6 | 6 | 32680289  | 87064  | 8.3868  | 0.4599 | -3.0335 | 6.0401  | YRI |
| HLA-DRB5 | GI_26665892-S | rs615672   | 6 | 6 | 32682149  | 88924  | 9.5536  | 0.4908 | 2.8844  | 6.0401  | YRI |
| HLA-DQA2 | GI_11095446-S | rs532965   | 6 | 6 | 32685951  | 135082 | 12.7945 | 0.6384 | 2.4038  | 10.7593 | YRI |
| HLA-DQA2 | GI_11095446-S | rs3104375  | 6 | 6 | 32708079  | 112954 | 15.1288 | 0.7472 | 2.3293  | 10.7593 | YRI |
| HLA-DQA1 | GI_18426974-S | rs9272346  | 6 | 6 | 32712350  | 6485   | 20.6839 | 0.7880 | 4.5869  | 6.7284  | YRI |
| HLA-DQA2 | GI_11095446-S | rs17426593 | 6 | 6 | 32716055  | 104978 | 34.1633 | 0.9271 | -3.1004 | 10.7593 | YRI |
| HLA-DQA1 | GI_18426974-S | rs9272723  | 6 | 6 | 32717405  | 1430   | 10.1179 | 0.5128 | 3.4889  | 6.7284  | YRI |
| HLA-DQA1 | GI_18426974-S | rs7744001  | 6 | 6 | 32734064  | 15229  | 9.7173  | 0.5159 | 3.8770  | 6.7284  | YRI |
| HLA-DQA1 | GI_18426974-S | rs6928482  | 6 | 6 | 32734227  | 15392  | 11.5105 | 0.5631 | 3.9387  | 6.7284  | YRI |
| HLA-DQA1 | GI_18426974-S | rs6906021  | 6 | 6 | 32734289  | 15454  | 12.1453 | 0.6040 | 4.6989  | 6.7284  | YRI |
| HLA-DQA1 | GI_18426974-S | rs12918    | 6 | 6 | 32735364  | 16529  | 32.6524 | 0.9178 | -7.4696 | 6.7284  | YRI |
| HLA-DQA1 | GI_18426974-S | rs3891175  | 6 | 6 | 32742445  | 23610  | 6.7923  | 0.3688 | 3.4690  | 6.7284  | YRI |
| HLA-DQA1 | GI_18426974-S | rs9275141  | 6 | 6 | 32759095  | 40260  | 7.9847  | 0.4302 | 3.6860  | 6.7284  | YRI |
| HLA-DQA1 | GI_18426974-S | rs9275150  | 6 | 6 | 32759595  | 40760  | 7.8212  | 0.4227 | -2.9597 | 6.7284  | YRI |
| HLA-DQA1 | GI_18426974-S | rs3021062  | 6 | 6 | 32759719  | 40884  | 6.7920  | 0.4017 | 2.9265  | 6.7284  | YRI |
| HLA-DQA1 | GI_18426974-S | rs3021059  | 6 | 6 | 32760322  | 41487  | 7.9505  | 0.4402 | 3.0048  | 6.7284  | YRI |
| HLA-DQA1 | GI_18426974-S | rs9275162  | 6 | 6 | 32760665  | 41830  | 7.9825  | 0.4358 | 3.0355  | 6.7284  | YRI |
| HLA-DQA1 | GI_18426974-S | rs2858330  | 6 | 6 | 32766693  | 47858  | 8.1022  | 0.4298 | -3.6925 | 6.7284  | YRI |
| HLA-DQA1 | GI_18426974-S | rs2856726  | 6 | 6 | 32774699  | 55864  | 6.9961  | 0.3787 | 3.4523  | 6.7284  | YRI |
| HLA-DQA1 | GI_18426974-S | rs9380319  | 6 | 6 | 32785890  | 67055  | 7.2908  | 0.3927 | -3.4466 | 6.7284  | YRI |
| TAPBP    | GI_27436892-I | rs7755161  | 6 | 6 | 33321733  | 53759  | 7.3527  | 0.3956 | -0.5107 | 6.2209  | YRI |
| TAPBP    | GI_27436892-I | rs1801823  | 6 | 6 | 33367560  | 7932   | 8.2583  | 0.4367 | 0.5122  | 6.2209  | YRI |
| C6orf64  | GI_8922866-S  | rs9968886  | 6 | 6 | 39168456  | 11511  | 7.6117  | 0.4076 | 0.1473  | 6.6265  | YRI |
| C6orf150 | GI_31581597-S | rs311678   | 6 | 6 | 74191737  | 141    | 10.8437 | 0.5397 | -0.2624 | 5.7074  | YRI |
| RNGTT    | GI_4506562-S  | rs2756369  | 6 | 6 | 89382936  | 6119   | 9.9199  | 0.5113 | -0.4595 | 6.7838  | YRI |
| PNRC1    | GI_5802981-S  | rs12445    | 6 | 6 | 89851115  | 267    | 10.0840 | 0.5239 | -0.2152 | 6.0972  | YRI |
| PNRC1    | GI_5802981-S  | rs1590958  | 6 | 6 | 89865656  | 14274  | 7.7325  | 0.4132 | 0.1814  | 6.0972  | YRI |
| PNRC1    | GI_5802981-S  | rs2274819  | 6 | 6 | 89871775  | 20393  | 9.8836  | 0.5038 | -0.2027 | 6.0972  | YRI |
| PNRC1    | GI_5802981-S  | rs12661431 | 6 | 6 | 89880913  | 29531  | 9.8836  | 0.5038 | -0.2027 | 6.0972  | YRI |
| PNRC1    | GI_5802981-S  | rs10944434 | 6 | 6 | 89927303  | 75921  | 7.0967  | 0.4234 | 0.1838  | 6.0972  | YRI |
| hmm31999 | hmm31999-S    | rs9321515  | 6 | 6 | 99941650  | 38754  | 9.3242  | 0.4816 | 0.2023  | 6.4931  | YRI |
| hmm31999 | hmm31999-S    | rs9385739  | 6 | 6 | 99960448  | 19956  | 10.2520 | 0.5179 | 0.2028  | 6.4931  | YRI |
| hmm31999 | hmm31999-S    | rs9373152  | 6 | 6 | 99968672  | 11732  | 10.2520 | 0.5179 | -0.2028 | 6.4931  | YRI |
| hmm31999 | hmm31999-S    | rs6923983  | 6 | 6 | 99983940  | 3536   | 6.8295  | 0.3706 | -0.1817 | 6.4931  | YRI |
| hmm31999 | hmm31999-S    | rs7745110  | 6 | 6 | 99985340  | 4936   | 10.2520 | 0.5179 | -0.2028 | 6.4931  | YRI |
| hmm31999 | hmm31999-S    | rs6915401  | 6 | 6 | 99987560  | 7156   | 10.2520 | 0.5179 | -0.2028 | 6.4931  | YRI |
| hmm31999 | hmm31999-S    | rs6570064  | 6 | 6 | 99989858  | 9454   | 10.2520 | 0.5179 | 0.2028  | 6.4931  | YRI |
| hmm31999 | hmm31999-S    | rs4840044  | 6 | 6 | 99994734  | 14330  | 10.2520 | 0.5179 | 0.2028  | 6.4931  | YRI |
| hmm31999 | hmm31999-S    | rs4499939  | 6 | 6 | 99999500  | 19096  | 8.2361  | 0.4357 | -0.1883 | 6.4931  | YRI |
| QRSL1    | GI_19923522-S | rs13200233 | 6 | 6 | 107196533 | 25261  | 6.5895  | 0.3638 | -0.1625 | 6.1405  | YRI |
| QRSL1    | GI_19923522-S | rs3121448  | 6 | 6 | 107220202 | 1592   | 6.4686  | 0.3735 | 0.1847  | 6.1405  | YRI |
| QRSL1    | GI_19923522-S | rs1026619  | 6 | 6 | 107221054 | 740    | 6.5653  | 0.3576 | 0.1606  | 6.1405  | YRI |
| ZNF450   | GI_7662127-S  | rs9487114  | 6 | 6 | 109888493 | 2191   | 6.5880  | 0.3587 | 0.3780  | 6.5732  | YRI |
| ZNF450   | GI_7662127-S  | rs12180725 | 6 | 6 | 109901421 | 10737  | 6.5880  | 0.3587 | -0.3780 | 6.5732  | YRI |
| KPNA5    | GI_39812228-S | rs9488976  | 6 | 6 | 117019134 | 140966 | 6.7923  | 0.3846 | -0.3205 | 5.822   | YRI |
| HEBP2    | GI_41393567-S | rs9495020  | 6 | 6 | 138710940 | 57910  | 9.0784  | 0.4716 | -1.0050 | 6.8826  | YRI |
| HEBP2    | GI_41393567-S | rs7753628  | 6 | 6 | 138721532 | 47318  | 9.2781  | 0.4918 | -1.0155 | 6.8826  | YRI |
| HEBP2    | GI_41393567-S | rs11970756 | 6 | 6 | 138723146 | 45704  | 9.0784  | 0.4716 | 1.0050  | 6.8826  | YRI |
| HEBP2    | GI_41393567-S | rs7752490  | 6 | 6 | 138734108 | 34742  | 8.9526  | 0.4973 | -1.1207 | 6.8826  | YRI |
| HEBP2    | GI_41393567-S | rs9495052  | 6 | 6 | 138738411 | 30439  | 9.4364  | 0.4861 | 1.0246  | 6.8826  | YRI |
| HEBP2    | GI_41393567-S | rs9495053  | 6 | 6 | 138739065 | 29785  | 9.0784  | 0.4716 | 1.0050  | 6.8826  | YRI |
| HEBP2    | GI_41393567-S | rs9495054  | 6 | 6 | 138742711 | 26139  | 12.0809 | 0.6372 | 1.1810  | 6.8826  | YRI |
| HEBP2    | GI_41393567-S | rs12181239 | 6 | 6 | 138742843 | 26007  | 9.0520  | 0.4705 | 0.9806  | 6.8826  | YRI |
| HEBP2    | GI_41393567-S | rs6918995  | 6 | 6 | 138744490 | 24360  | 9.0520  | 0.4705 | 0.9806  | 6.8826  | YRI |
| HEBP2    | GI_41393567-S | rs9484152  | 6 | 6 | 138744936 | 23914  | 13.8757 | 0.6372 | 1.1612  | 6.8826  | YRI |
| HEBP2    | GI_41393567-S | rs2076273  | 6 | 6 | 138745333 | 23517  | 9.0657  | 0.4770 | 0.9852  | 6.8826  | YRI |
| HEBP2    | GI_41393567-S | rs2076272  | 6 | 6 | 138745455 | 23395  | 13.1362 | 0.6155 | 1.1326  | 6.8826  | YRI |
| HEBP2    | GI_41393567-S | rs11966257 | 6 | 6 | 138747488 | 21362  | 9.0520  | 0.4705 | 0.9806  | 6.8826  | YRI |

|           |               |            |   |   |           |        |         |        |         |        |     |
|-----------|---------------|------------|---|---|-----------|--------|---------|--------|---------|--------|-----|
| HEBP2     | GI_41393567-S | rs9495063  | 6 | 6 | 138749877 | 18973  | 10.2581 | 0.5181 | 1.0657  | 6.8826 | YRI |
| HEBP2     | GI_41393567-S | rs9495064  | 6 | 6 | 138750902 | 17948  | 13.8757 | 0.6372 | -1.1612 | 6.8826 | YRI |
| HEBP2     | GI_41393567-S | rs9495065  | 6 | 6 | 138751549 | 17301  | 14.5317 | 0.6818 | -1.1925 | 6.8826 | YRI |
| HEBP2     | GI_41393567-S | rs9495066  | 6 | 6 | 138751653 | 17197  | 13.4161 | 0.6239 | -1.2009 | 6.8826 | YRI |
| HEBP2     | GI_41393567-S | rs7765991  | 6 | 6 | 138752217 | 16633  | 12.1172 | 0.6030 | -1.2066 | 6.8826 | YRI |
| HEBP2     | GI_41393567-S | rs9495068  | 6 | 6 | 138753988 | 14862  | 8.7703  | 0.4705 | -1.0239 | 6.8826 | YRI |
| HEBP2     | GI_41393567-S | rs9495070  | 6 | 6 | 138756312 | 12538  | 8.6322  | 0.4528 | -1.0369 | 6.8826 | YRI |
| HEBP2     | GI_41393567-S | rs17053774 | 6 | 6 | 138757930 | 10920  | 16.5970 | 0.7072 | 1.2174  | 6.8826 | YRI |
| HEBP2     | GI_41393567-S | rs3756890  | 6 | 6 | 138765462 | 3388   | 9.2695  | 0.4854 | 1.0560  | 6.8826 | YRI |
| HEBP2     | GI_41393567-S | rs6919872  | 6 | 6 | 138767876 | 974    | 17.1071 | 0.7188 | -1.3009 | 6.8826 | YRI |
| HEBP2     | GI_41393567-S | rs6570232  | 6 | 6 | 138771357 | 2507   | 17.1071 | 0.7188 | 1.3009  | 6.8826 | YRI |
| LOC392620 | GI_41147689-S | rs4722006  | 7 | 7 | 2538964   | 4066   | 10.9150 | 0.5423 | -0.1696 | 6.328  | YRI |
| LOC392620 | GI_41147689-S | rs798534   | 7 | 7 | 2540848   | 5950   | 6.6006  | 0.3593 | -0.1471 | 6.328  | YRI |
| LOC392620 | GI_41147689-S | rs798518   | 7 | 7 | 2551066   | 16168  | 7.8159  | 0.4225 | -0.2355 | 6.328  | YRI |
| LOC392620 | GI_41147689-S | rs798512   | 7 | 7 | 2555833   | 20935  | 11.6556 | 0.5681 | -0.1728 | 6.328  | YRI |
| LOC392620 | GI_41147689-S | rs798503   | 7 | 7 | 2562945   | 28047  | 10.2504 | 0.5178 | 0.1637  | 6.328  | YRI |
| LOC392620 | GI_41147689-S | rs798499   | 7 | 7 | 2565254   | 30356  | 11.1874 | 0.5780 | 0.1762  | 6.328  | YRI |
| LOC392620 | GI_41147689-S | rs798498   | 7 | 7 | 2569123   | 34225  | 8.6408  | 0.4532 | 0.1943  | 6.328  | YRI |
| LOC392620 | GI_41147689-S | rs798492   | 7 | 7 | 2572425   | 37527  | 11.9551 | 0.5781 | 0.1694  | 6.328  | YRI |
| LOC392620 | GI_41147689-S | rs1182209  | 7 | 7 | 2581836   | 46938  | 8.2204  | 0.4714 | -0.1652 | 6.328  | YRI |
| LOC392620 | GI_41147689-S | rs7807978  | 7 | 7 | 2587876   | 52978  | 7.8677  | 0.4193 | 0.1488  | 6.328  | YRI |
| LOC392620 | GI_41147689-S | rs2266922  | 7 | 7 | 2597948   | 63050  | 9.4267  | 0.5107 | -0.1642 | 6.328  | YRI |
| LOC392620 | GI_41147689-S | rs2527684  | 7 | 7 | 2599163   | 64265  | 7.3978  | 0.3977 | -0.1754 | 6.328  | YRI |
| LOC392620 | GI_41147689-S | rs2644306  | 7 | 7 | 2604843   | 69945  | 7.5261  | 0.4385 | 0.1504  | 6.328  | YRI |
| LOC392620 | GI_41147689-S | rs2527686  | 7 | 7 | 2607654   | 72756  | 7.3978  | 0.3977 | -0.1754 | 6.328  | YRI |
| LOC392620 | GI_41147689-S | rs2533886  | 7 | 7 | 2608110   | 73212  | 6.5032  | 0.3595 | -0.1897 | 6.328  | YRI |
| LOC392620 | GI_41147689-S | rs757786   | 7 | 7 | 2609260   | 74362  | 9.5266  | 0.4897 | 0.1637  | 6.328  | YRI |
| LOC392620 | GI_41147689-S | rs2527687  | 7 | 7 | 2611726   | 76828  | 10.0973 | 0.5120 | -0.2176 | 6.328  | YRI |
| LOC392620 | GI_41147689-S | rs2644275  | 7 | 7 | 2627251   | 92353  | 7.1592  | 0.3972 | 0.1504  | 6.328  | YRI |
| LOC392620 | GI_41147689-S | rs2527690  | 7 | 7 | 2627491   | 92593  | 7.3679  | 0.4308 | 0.1662  | 6.328  | YRI |
| LOC392620 | GI_41147689-S | rs2644274  | 7 | 7 | 2627621   | 92723  | 6.6597  | 0.3948 | -0.1486 | 6.328  | YRI |
| LOC392620 | GI_41147689-S | rs2644297  | 7 | 7 | 2632147   | 97249  | 7.8085  | 0.4653 | -0.1584 | 6.328  | YRI |
| LOC392620 | GI_41147689-S | rs2644296  | 7 | 7 | 2632302   | 97404  | 7.6152  | 0.4133 | -0.1528 | 6.328  | YRI |
| LOC392620 | GI_41147689-S | rs2644295  | 7 | 7 | 2633458   | 98560  | 7.3081  | 0.3935 | -0.1560 | 6.328  | YRI |
| LOC392620 | GI_41147689-S | rs1182199  | 7 | 7 | 2635783   | 100885 | 7.9296  | 0.4515 | 0.1566  | 6.328  | YRI |
| LOC392620 | GI_41147689-S | rs1182197  | 7 | 7 | 2636530   | 101632 | 7.1318  | 0.4591 | -0.1638 | 6.328  | YRI |
| LOC392620 | GI_41147689-S | rs1636264  | 7 | 7 | 2637827   | 102929 | 9.3645  | 0.4832 | 0.1637  | 6.328  | YRI |
| LOC392620 | GI_41147689-S | rs757791   | 7 | 7 | 2640537   | 105639 | 9.3645  | 0.4832 | 0.1637  | 6.328  | YRI |
| LOC392620 | GI_41147689-S | rs1182194  | 7 | 7 | 2642065   | 107167 | 9.3645  | 0.4832 | -0.1637 | 6.328  | YRI |
| LOC392620 | GI_41147689-S | rs1182191  | 7 | 7 | 2642605   | 107707 | 9.3645  | 0.4832 | 0.1637  | 6.328  | YRI |
| LOC392620 | GI_41147689-S | rs1182190  | 7 | 7 | 2642632   | 107734 | 8.8184  | 0.4607 | 0.1647  | 6.328  | YRI |
| LOC392620 | GI_41147689-S | rs1182175  | 7 | 7 | 2648267   | 113369 | 9.5266  | 0.4897 | -0.1637 | 6.328  | YRI |
| LOC392620 | GI_41147689-S | rs1713920  | 7 | 7 | 2654176   | 119278 | 7.5622  | 0.4108 | -0.2004 | 6.328  | YRI |
| KIAA0415  | GI_37538331-S | rs7810433  | 7 | 7 | 4590701   | 16508  | 6.9570  | 0.3768 | -0.3896 | 6.121  | YRI |
| KIAA0415  | GI_37538331-S | rs17135130 | 7 | 7 | 4602222   | 4987   | 7.2098  | 0.4109 | 0.4043  | 6.121  | YRI |
| LOC90693  | GI_40255028-S | rs12700451 | 7 | 7 | 23421954  | 34029  | 6.4554  | 0.3521 | 0.3428  | 6.4143 | YRI |
| HIBADH    | GI_41393565-S | rs1014373  | 7 | 7 | 27344333  | 5242   | 7.8698  | 0.4194 | 0.3170  | 6.3346 | YRI |
| HIBADH    | GI_41393565-S | rs9639552  | 7 | 7 | 27348763  | 9672   | 7.3418  | 0.3951 | -0.2991 | 6.3346 | YRI |
| HIBADH    | GI_41393565-S | rs1880370  | 7 | 7 | 27356552  | 17461  | 6.4716  | 0.3630 | -0.2904 | 6.3346 | YRI |
| HIBADH    | GI_41393565-S | rs1404282  | 7 | 7 | 27358691  | 19600  | 7.8698  | 0.4194 | -0.3170 | 6.3346 | YRI |
| HIBADH    | GI_41393565-S | rs4719902  | 7 | 7 | 27361582  | 22491  | 7.8698  | 0.4194 | -0.3170 | 6.3346 | YRI |
| HIBADH    | GI_41393565-S | rs974883   | 7 | 7 | 27361974  | 22883  | 7.2230  | 0.4116 | 0.3090  | 6.3346 | YRI |
| HIBADH    | GI_41393565-S | rs1404276  | 7 | 7 | 27364087  | 24996  | 7.8698  | 0.4194 | -0.3170 | 6.3346 | YRI |
| HIBADH    | GI_41393565-S | rs12673949 | 7 | 7 | 27373874  | 34783  | 7.4382  | 0.3996 | 0.2749  | 6.3346 | YRI |
| HIBADH    | GI_41393565-S | rs6462033  | 7 | 7 | 27391925  | 52834  | 7.8623  | 0.4303 | -0.3201 | 6.3346 | YRI |
| HIBADH    | GI_41393565-S | rs1524529  | 7 | 7 | 27393655  | 54564  | 7.8698  | 0.4194 | -0.3170 | 6.3346 | YRI |
| HIBADH    | GI_41393565-S | rs1608663  | 7 | 7 | 27397016  | 57925  | 6.4363  | 0.3664 | -0.2576 | 6.3346 | YRI |
| HIBADH    | GI_41393565-S | rs1980330  | 7 | 7 | 27403563  | 64472  | 7.6948  | 0.4169 | -0.3158 | 6.3346 | YRI |
| HIBADH    | GI_41393565-S | rs1015265  | 7 | 7 | 27412849  | 73758  | 7.7166  | 0.4179 | 0.3136  | 6.3346 | YRI |

|           |               |            |   |   |          |        |         |        |         |        |     |
|-----------|---------------|------------|---|---|----------|--------|---------|--------|---------|--------|-----|
| HIBADH    | GI_41393565-S | rs2391444  | 7 | 7 | 27415660 | 76569  | 7.8698  | 0.4194 | 0.3170  | 6.3346 | YRI |
| HIBADH    | GI_41393565-S | rs2391445  | 7 | 7 | 27422111 | 83020  | 7.3418  | 0.3951 | -0.2991 | 6.3346 | YRI |
| HIBADH    | GI_41393565-S | rs2391446  | 7 | 7 | 27422160 | 83069  | 7.3418  | 0.3951 | -0.2991 | 6.3346 | YRI |
| HIBADH    | GI_41393565-S | rs961723   | 7 | 7 | 27431213 | 92122  | 7.3418  | 0.3951 | 0.2991  | 6.3346 | YRI |
| HIBADH    | GI_41393565-S | rs961724   | 7 | 7 | 27431275 | 92184  | 7.3418  | 0.3951 | -0.2991 | 6.3346 | YRI |
| HIBADH    | GI_41393565-S | rs961725   | 7 | 7 | 27431310 | 92219  | 7.3418  | 0.3951 | 0.2991  | 6.3346 | YRI |
| HIBADH    | GI_41393565-S | rs6954905  | 7 | 7 | 27438065 | 98974  | 6.7123  | 0.3699 | -0.2925 | 6.3346 | YRI |
| HIBADH    | GI_41393565-S | rs6462039  | 7 | 7 | 27439622 | 100531 | 7.3418  | 0.3951 | -0.2991 | 6.3346 | YRI |
| HIBADH    | GI_41393565-S | rs6415252  | 7 | 7 | 27442100 | 103009 | 7.1783  | 0.3927 | -0.2983 | 6.3346 | YRI |
| HIBADH    | GI_41393565-S | rs7779990  | 7 | 7 | 27445139 | 106048 | 7.3418  | 0.3951 | 0.2991  | 6.3346 | YRI |
| HIBADH    | GI_41393565-S | rs12700825 | 7 | 7 | 27445811 | 106720 | 7.3418  | 0.3951 | 0.2991  | 6.3346 | YRI |
| HIBADH    | GI_41393565-S | rs10486548 | 7 | 7 | 27445935 | 106844 | 7.3418  | 0.3951 | -0.2991 | 6.3346 | YRI |
| HIBADH    | GI_41393565-S | rs11764753 | 7 | 7 | 27446199 | 107108 | 6.9389  | 0.3811 | 0.2396  | 6.3346 | YRI |
| HIBADH    | GI_41393565-S | rs7806415  | 7 | 7 | 27446777 | 107686 | 6.6493  | 0.3720 | -0.2949 | 6.3346 | YRI |
| HIBADH    | GI_41393565-S | rs2391447  | 7 | 7 | 27447804 | 108713 | 7.3418  | 0.3951 | 0.2991  | 6.3346 | YRI |
| HIBADH    | GI_41393565-S | rs6946305  | 7 | 7 | 27454435 | 115344 | 6.6598  | 0.3890 | -0.3014 | 6.3346 | YRI |
| HIBADH    | GI_41393565-S | rs12700829 | 7 | 7 | 27460342 | 121251 | 7.3418  | 0.3951 | -0.2991 | 6.3346 | YRI |
| HIBADH    | GI_41393565-S | rs2160125  | 7 | 7 | 27461526 | 122435 | 6.6318  | 0.3711 | 0.2937  | 6.3346 | YRI |
| HIBADH    | GI_41393565-S | rs12700830 | 7 | 7 | 27462099 | 123008 | 7.0194  | 0.3850 | 0.3023  | 6.3346 | YRI |
| HIBADH    | GI_41393565-S | rs2391454  | 7 | 7 | 27463864 | 124773 | 7.1660  | 0.3921 | -0.2972 | 6.3346 | YRI |
| HIBADH    | GI_41393565-S | rs6943883  | 7 | 7 | 27466133 | 127042 | 7.7699  | 0.4261 | -0.3186 | 6.3346 | YRI |
| HIBADH    | GI_41393565-S | rs4722726  | 7 | 7 | 27467448 | 128357 | 6.7163  | 0.3807 | -0.3128 | 6.3346 | YRI |
| HIBADH    | GI_41393565-S | rs6957378  | 7 | 7 | 27470189 | 131098 | 7.3418  | 0.3951 | 0.2991  | 6.3346 | YRI |
| HIBADH    | GI_41393565-S | rs42087    | 7 | 7 | 27473722 | 134631 | 7.3418  | 0.3951 | 0.2991  | 6.3346 | YRI |
| HIBADH    | GI_41393565-S | rs42088    | 7 | 7 | 27475101 | 136010 | 7.3418  | 0.3951 | -0.2991 | 6.3346 | YRI |
| LOC402476 | GI_42658265-S | rs13223936 | 7 | 7 | 32260616 | 314607 | 6.9729  | 0.3775 | 0.1036  | 6.7047 | YRI |
| LOC402476 | GI_42658265-S | rs6962129  | 7 | 7 | 32265870 | 309353 | 6.9729  | 0.3775 | -0.1036 | 6.7047 | YRI |
| LOC402476 | GI_42658265-S | rs6944615  | 7 | 7 | 32266080 | 309143 | 6.8989  | 0.3791 | 0.1042  | 6.7047 | YRI |
| LOC402476 | GI_42658265-S | rs6462367  | 7 | 7 | 32268073 | 307150 | 6.7956  | 0.3741 | 0.1035  | 6.7047 | YRI |
| LOC402476 | GI_42658265-S | rs1580024  | 7 | 7 | 32271208 | 304015 | 6.8525  | 0.3717 | 0.1027  | 6.7047 | YRI |
| LOC402476 | GI_42658265-S | rs1610140  | 7 | 7 | 32271840 | 303383 | 6.8525  | 0.3717 | 0.1027  | 6.7047 | YRI |
| LOC402476 | GI_42658265-S | rs2893425  | 7 | 7 | 32296659 | 278564 | 7.5314  | 0.4388 | 0.0946  | 6.7047 | YRI |
| LOC402476 | GI_42658265-S | rs12673952 | 7 | 7 | 32332436 | 242787 | 7.2319  | 0.3952 | -0.1065 | 6.7047 | YRI |
| LOC402476 | GI_42658265-S | rs17161398 | 7 | 7 | 32345552 | 229671 | 9.2587  | 0.4789 | 0.1123  | 6.7047 | YRI |
| LOC402476 | GI_42658265-S | rs7786546  | 7 | 7 | 32346943 | 228280 | 7.3130  | 0.4046 | 0.1083  | 6.7047 | YRI |
| LOC402476 | GI_42658265-S | rs7780544  | 7 | 7 | 32351170 | 224053 | 7.9061  | 0.4266 | 0.1149  | 6.7047 | YRI |
| LOC402476 | GI_42658265-S | rs11980863 | 7 | 7 | 32398051 | 177172 | 7.6993  | 0.4171 | 0.1090  | 6.7047 | YRI |
| LOC402476 | GI_42658265-S | rs4720069  | 7 | 7 | 32407490 | 167733 | 7.1549  | 0.3915 | 0.1022  | 6.7047 | YRI |
| LOC402476 | GI_42658265-S | rs6950856  | 7 | 7 | 32422429 | 152794 | 9.2383  | 0.4841 | 0.1078  | 6.7047 | YRI |
| LOC402476 | GI_42658265-S | rs12669940 | 7 | 7 | 32424192 | 151031 | 9.5109  | 0.4891 | -0.1083 | 6.7047 | YRI |
| LOC402476 | GI_42658265-S | rs17170062 | 7 | 7 | 32430119 | 145104 | 7.5065  | 0.4082 | -0.1381 | 6.7047 | YRI |
| LOC402476 | GI_42658265-S | rs2893429  | 7 | 7 | 32436713 | 138510 | 10.0155 | 0.5213 | -0.1078 | 6.7047 | YRI |
| LOC402476 | GI_42658265-S | rs11978751 | 7 | 7 | 32452451 | 122772 | 10.5038 | 0.5273 | -0.1143 | 6.7047 | YRI |
| LOC402476 | GI_42658265-S | rs11984083 | 7 | 7 | 32471824 | 103399 | 11.5460 | 0.5644 | 0.1217  | 6.7047 | YRI |
| LOC402476 | GI_42658265-S | rs4723187  | 7 | 7 | 32476141 | 99082  | 11.3537 | 0.5641 | -0.1220 | 6.7047 | YRI |
| LOC402476 | GI_42658265-S | rs13225338 | 7 | 7 | 32484049 | 91174  | 10.7605 | 0.5430 | -0.1095 | 6.7047 | YRI |
| LOC402476 | GI_42658265-S | rs11983625 | 7 | 7 | 32488991 | 86232  | 8.4178  | 0.4436 | -0.1105 | 6.7047 | YRI |
| LOC402476 | GI_42658265-S | rs4723199  | 7 | 7 | 32562726 | 12497  | 7.7237  | 0.4297 | 0.1099  | 6.7047 | YRI |
| LOC402476 | GI_42658265-S | rs13228599 | 7 | 7 | 32574878 | 345    | 7.5849  | 0.4118 | -0.1070 | 6.7047 | YRI |
| LOC402476 | GI_42658265-S | rs12672074 | 7 | 7 | 32575919 | 696    | 7.3424  | 0.4060 | 0.1053  | 6.7047 | YRI |
| LOC402476 | GI_42658265-S | rs2392135  | 7 | 7 | 32580988 | 5765   | 7.8271  | 0.4175 | -0.1086 | 6.7047 | YRI |
| LOC402476 | GI_42658265-S | rs11976674 | 7 | 7 | 32582262 | 7039   | 7.6917  | 0.4168 | 0.1089  | 6.7047 | YRI |
| LOC402476 | GI_42658265-S | rs4723203  | 7 | 7 | 32588748 | 13525  | 7.8271  | 0.4175 | -0.1086 | 6.7047 | YRI |
| ZNFN1A1   | GI_31657112-S | rs17553002 | 7 | 7 | 50251707 | 7344   | 8.0221  | 0.4262 | -0.9880 | 6.3465 | YRI |
| ZNFN1A1   | GI_31657112-S | rs17634434 | 7 | 7 | 50252989 | 8626   | 8.0221  | 0.4262 | 0.9880  | 6.3465 | YRI |
| ZNFN1A1   | GI_31657112-S | rs17553022 | 7 | 7 | 50257663 | 13300  | 8.0221  | 0.4262 | 0.9880  | 6.3465 | YRI |
| ZNFN1A1   | GI_31657112-S | rs7779917  | 7 | 7 | 50265720 | 21357  | 8.0221  | 0.4262 | 0.9880  | 6.3465 | YRI |
| ZNFN1A1   | GI_31657112-S | rs17152014 | 7 | 7 | 50316512 | 72149  | 8.8615  | 0.4625 | 0.8646  | 6.3465 | YRI |
| ZNFN1A1   | GI_31657112-S | rs17133842 | 7 | 7 | 50316691 | 72328  | 6.5105  | 0.3599 | -0.9786 | 6.3465 | YRI |

|           |               |            |   |   |           |        |        |        |         |        |     |
|-----------|---------------|------------|---|---|-----------|--------|--------|--------|---------|--------|-----|
| GBAS      | GI_4503936-S  | rs11769548 | 7 | 7 | 55428976  | 412835 | 6.0618 | 0.3418 | 0.1724  | 5.5893 | YRI |
| GBAS      | GI_4503936-S  | rs7802222  | 7 | 7 | 55431927  | 409884 | 5.8788 | 0.3370 | 0.1757  | 5.5893 | YRI |
| GBAS      | GI_4503936-S  | rs6961400  | 7 | 7 | 55433294  | 408517 | 6.3028 | 0.3444 | -0.1735 | 5.5893 | YRI |
| WBSCR27   | GI_30795189-S | rs6946037  | 7 | 7 | 72681366  | 12436  | 7.4662 | 0.4009 | -0.1469 | 5.718  | YRI |
| WBSCR27   | GI_30795189-S | rs8629     | 7 | 7 | 72690170  | 3632   | 8.3609 | 0.4412 | 0.1564  | 5.718  | YRI |
| WBSCR27   | GI_30795189-S | rs11316    | 7 | 7 | 72691206  | 2596   | 7.6563 | 0.4325 | -0.1545 | 5.718  | YRI |
| WBSCR27   | GI_30795189-S | rs13232463 | 7 | 7 | 72693950  | 148    | 8.8484 | 0.4620 | 0.1631  | 5.718  | YRI |
| WBSCR27   | GI_30795189-S | rs4304218  | 7 | 7 | 72697631  | 3829   | 7.8340 | 0.4233 | 0.1558  | 5.718  | YRI |
| WBSCR27   | GI_30795189-S | rs11770024 | 7 | 7 | 72720152  | 26350  | 6.2768 | 0.3431 | 0.1455  | 5.718  | YRI |
| TP53AP1   | GI_6005909-S  | rs10499902 | 7 | 7 | 86609620  | 10225  | 6.7693 | 0.3676 | -0.2598 | 5.6259 | YRI |
| TP53AP1   | GI_6005909-S  | rs11977186 | 7 | 7 | 86609816  | 10421  | 6.8479 | 0.3819 | -0.2660 | 5.6259 | YRI |
| TP53AP1   | GI_6005909-S  | rs11975317 | 7 | 7 | 86611164  | 11769  | 6.1485 | 0.3414 | 0.2526  | 5.6259 | YRI |
| TP53AP1   | GI_6005909-S  | rs11975323 | 7 | 7 | 86611335  | 11940  | 6.5779 | 0.3632 | -0.2599 | 5.6259 | YRI |
| TP53AP1   | GI_6005909-S  | rs11976069 | 7 | 7 | 86611569  | 12174  | 6.5779 | 0.3632 | -0.2599 | 5.6259 | YRI |
| TP53AP1   | GI_6005909-S  | rs11983873 | 7 | 7 | 86619917  | 20522  | 6.4002 | 0.3543 | 0.2587  | 5.6259 | YRI |
| TP53AP1   | GI_6005909-S  | rs11983904 | 7 | 7 | 86620215  | 20820  | 6.7693 | 0.3676 | -0.2598 | 5.6259 | YRI |
| TP53AP1   | GI_6005909-S  | rs6943711  | 7 | 7 | 86622219  | 22824  | 6.2525 | 0.3467 | -0.2605 | 5.6259 | YRI |
| TP53AP1   | GI_6005909-S  | rs6943724  | 7 | 7 | 86622299  | 22904  | 6.9909 | 0.3836 | -0.2687 | 5.6259 | YRI |
| TP53AP1   | GI_6005909-S  | rs11975766 | 7 | 7 | 86623993  | 24598  | 6.9909 | 0.3836 | -0.2687 | 5.6259 | YRI |
| TRIM4     | GI_15011940-A | rs1048705  | 7 | 7 | 99133591  | 218    | 7.6594 | 0.4098 | -0.5003 | 6.1084 | YRI |
| TRIM4     | GI_15011940-A | rs2572008  | 7 | 7 | 99135607  | 2234   | 6.3381 | 0.3462 | -0.4359 | 6.1084 | YRI |
| TRIM4     | GI_15011940-A | rs2527922  | 7 | 7 | 99137407  | 4034   | 7.6594 | 0.4098 | -0.5003 | 6.1084 | YRI |
| TRIM4     | GI_15011940-A | rs12536945 | 7 | 7 | 99138123  | 4750   | 7.6594 | 0.4098 | 0.5003  | 6.1084 | YRI |
| TRIM4     | GI_15011940-A | rs2572006  | 7 | 7 | 99138462  | 5089   | 7.6594 | 0.4098 | 0.5003  | 6.1084 | YRI |
| TRIM4     | GI_15011940-A | rs7384528  | 7 | 7 | 99138681  | 5308   | 7.6594 | 0.4098 | -0.5003 | 6.1084 | YRI |
| TRIM4     | GI_15011940-A | rs2527919  | 7 | 7 | 99139164  | 5791   | 7.5092 | 0.4083 | -0.4988 | 6.1084 | YRI |
| TRIM4     | GI_15011940-A | rs2247761  | 7 | 7 | 99145562  | 12189  | 7.4446 | 0.4108 | -0.5021 | 6.1084 | YRI |
| TRIM4     | GI_15011940-A | rs2572003  | 7 | 7 | 99145964  | 12591  | 7.6594 | 0.4098 | -0.5003 | 6.1084 | YRI |
| TRIM4     | GI_15011940-A | rs2571998  | 7 | 7 | 99156023  | 22650  | 7.6594 | 0.4098 | -0.5003 | 6.1084 | YRI |
| TRIM4     | GI_15011940-A | rs2571997  | 7 | 7 | 99159068  | 25695  | 7.6594 | 0.4098 | -0.5003 | 6.1084 | YRI |
| TRIM4     | GI_15011940-A | rs12535919 | 7 | 7 | 99188480  | 55107  | 7.3897 | 0.4027 | -0.5252 | 6.1084 | YRI |
| AP4M1     | GI_14917110-S | rs2285886  | 7 | 7 | 99270946  | 78202  | 5.5219 | 0.3038 | -0.1068 | 5.452  | YRI |
| AP4M1     | GI_14917110-S | rs4729568  | 7 | 7 | 99284096  | 65052  | 7.9356 | 0.4224 | 0.1371  | 5.452  | YRI |
| AP4M1     | GI_14917110-S | rs6960432  | 7 | 7 | 99315526  | 33622  | 7.7994 | 0.4217 | 0.1370  | 5.452  | YRI |
| AP4M1     | GI_14917110-S | rs2272338  | 7 | 7 | 99352363  | 3215   | 7.9381 | 0.4280 | 0.1377  | 5.452  | YRI |
| AP4M1     | GI_14917110-S | rs3807479  | 7 | 7 | 99361552  | 12404  | 8.0167 | 0.4316 | 0.1379  | 5.452  | YRI |
| AP4M1     | GI_14917110-S | rs7785070  | 7 | 7 | 99391781  | 42633  | 7.4370 | 0.3995 | 0.1318  | 5.452  | YRI |
| LOC402573 | GI_42658526-S | rs11761784 | 7 | 7 | 99684621  | 14384  | 6.0476 | 0.3361 | 0.1532  | 5.5953 | YRI |
| LOC402573 | GI_42658526-S | rs4472444  | 7 | 7 | 99715409  | 16404  | 5.8279 | 0.3200 | -0.1502 | 5.5953 | YRI |
| SVH       | GI_31377662-S | rs1404213  | 7 | 7 | 102310866 | 22513  | 7.0346 | 0.3805 | -0.2222 | 5.5619 | YRI |
| SVH       | GI_31377662-S | rs6465890  | 7 | 7 | 102311663 | 21716  | 6.0174 | 0.3346 | -0.2257 | 5.5619 | YRI |
| SVH       | GI_31377662-S | rs4729870  | 7 | 7 | 102316698 | 16681  | 7.0011 | 0.3841 | 0.2274  | 5.5619 | YRI |
| SVH       | GI_31377662-S | rs4729871  | 7 | 7 | 102318323 | 15056  | 6.6620 | 0.3624 | -0.2259 | 5.5619 | YRI |
| SVH       | GI_31377662-S | rs1861730  | 7 | 7 | 102328551 | 4828   | 6.6620 | 0.3624 | 0.2259  | 5.5619 | YRI |
| SVH       | GI_31377662-S | rs6966872  | 7 | 7 | 102329091 | 4288   | 6.0109 | 0.3342 | 0.2143  | 5.5619 | YRI |
| SVH       | GI_31377662-S | rs4729875  | 7 | 7 | 102329632 | 3747   | 6.3661 | 0.3576 | 0.2182  | 5.5619 | YRI |
| SVH       | GI_31377662-S | rs2041949  | 7 | 7 | 102331202 | 2177   | 6.6620 | 0.3624 | -0.2259 | 5.5619 | YRI |
| SVH       | GI_31377662-S | rs2193418  | 7 | 7 | 102331362 | 2017   | 6.5483 | 0.3618 | 0.2288  | 5.5619 | YRI |
| SVH       | GI_31377662-S | rs1861728  | 7 | 7 | 102332351 | 1028   | 6.8235 | 0.3703 | 0.2250  | 5.5619 | YRI |
| SVH       | GI_31377662-S | rs6950177  | 7 | 7 | 102334634 | 1255   | 7.0346 | 0.3805 | 0.2222  | 5.5619 | YRI |
| SVH       | GI_31377662-S | rs7783856  | 7 | 7 | 102334985 | 1606   | 6.3251 | 0.3607 | -0.2164 | 5.5619 | YRI |
| SVH       | GI_31377662-S | rs7784337  | 7 | 7 | 102335044 | 1665   | 7.0346 | 0.3805 | 0.2222  | 5.5619 | YRI |
| SVH       | GI_31377662-S | rs13242079 | 7 | 7 | 102336169 | 2790   | 6.6620 | 0.3624 | 0.2259  | 5.5619 | YRI |
| SVH       | GI_31377662-S | rs3181009  | 7 | 7 | 102337844 | 4465   | 6.3747 | 0.3481 | 0.2159  | 5.5619 | YRI |
| SVH       | GI_31377662-S | rs10808125 | 7 | 7 | 102338710 | 5331   | 6.3747 | 0.3481 | 0.2159  | 5.5619 | YRI |
| SVH       | GI_31377662-S | rs6976034  | 7 | 7 | 102339301 | 5922   | 6.3747 | 0.3481 | -0.2159 | 5.5619 | YRI |
| SVH       | GI_31377662-S | rs6976794  | 7 | 7 | 102339751 | 6372   | 6.3747 | 0.3481 | -0.2159 | 5.5619 | YRI |
| SVH       | GI_31377662-S | rs1968199  | 7 | 7 | 102347722 | 14343  | 6.2667 | 0.3475 | -0.2189 | 5.5619 | YRI |
| SVH       | GI_31377662-S | rs1968198  | 7 | 7 | 102347807 | 14428  | 6.4239 | 0.3658 | 0.2237  | 5.5619 | YRI |

|         |               |            |   |   |           |        |         |        |         |        |     |
|---------|---------------|------------|---|---|-----------|--------|---------|--------|---------|--------|-----|
| SVH     | GI_31377662-S | rs7792240  | 7 | 7 | 102348894 | 15515  | 6.3747  | 0.3481 | -0.2159 | 5.5619 | YRI |
| SVH     | GI_31377662-S | rs4729882  | 7 | 7 | 102349281 | 15902  | 6.3747  | 0.3481 | -0.2159 | 5.5619 | YRI |
| SVH     | GI_31377662-S | rs1477163  | 7 | 7 | 102351385 | 18006  | 6.2667  | 0.3475 | 0.2189  | 5.5619 | YRI |
| SVH     | GI_31377662-S | rs6966961  | 7 | 7 | 102352002 | 18623  | 6.3747  | 0.3481 | 0.2159  | 5.5619 | YRI |
| SVH     | GI_31377662-S | rs6946968  | 7 | 7 | 102352035 | 18656  | 6.3747  | 0.3481 | -0.2159 | 5.5619 | YRI |
| SVH     | GI_31377662-S | rs6465898  | 7 | 7 | 102352681 | 19302  | 6.3747  | 0.3481 | 0.2159  | 5.5619 | YRI |
| SVH     | GI_31377662-S | rs1558853  | 7 | 7 | 102354725 | 21346  | 6.6745  | 0.3630 | 0.2111  | 5.5619 | YRI |
| SVH     | GI_31377662-S | rs1861725  | 7 | 7 | 102376397 | 43018  | 6.2468  | 0.3416 | 0.2159  | 5.5619 | YRI |
| SVH     | GI_31377662-S | rs6465905  | 7 | 7 | 102381086 | 47707  | 6.8269  | 0.3976 | 0.2506  | 5.5619 | YRI |
| SVH     | GI_31377662-S | rs11760826 | 7 | 7 | 102385762 | 52383  | 6.8103  | 0.3748 | -0.2216 | 5.5619 | YRI |
| IRF5    | GI_38683858-A | rs6968225  | 7 | 7 | 128157558 | 25584  | 16.5021 | 0.7113 | -0.5485 | 5.884  | YRI |
| IRF5    | GI_38683858-A | rs4728142  | 7 | 7 | 128167918 | 15224  | 8.6042  | 0.4516 | -0.5616 | 5.884  | YRI |
| IRF5    | GI_38683858-A | rs752637   | 7 | 7 | 128173371 | 9771   | 11.4499 | 0.5872 | 0.4437  | 5.884  | YRI |
| IRF5    | GI_38683858-A | rs3807306  | 7 | 7 | 128174631 | 8511   | 7.2558  | 0.3910 | -0.4512 | 5.884  | YRI |
| IRF5    | GI_38683858-A | rs7808907  | 7 | 7 | 128178035 | 5107   | 10.0333 | 0.5095 | -0.5188 | 5.884  | YRI |
| IRF5    | GI_38683858-A | rs1874328  | 7 | 7 | 128179055 | 4087   | 9.7365  | 0.4980 | -0.4899 | 5.884  | YRI |
| IRF5    | GI_38683858-A | rs13242262 | 7 | 7 | 128185315 | 2173   | 12.0567 | 0.6364 | 0.4936  | 5.884  | YRI |
| IRF5    | GI_38683858-A | rs2280714  | 7 | 7 | 128188676 | 5534   | 19.5596 | 0.7922 | -0.5770 | 5.884  | YRI |
| IRF5    | GI_38683858-A | rs10229001 | 7 | 7 | 128193348 | 10206  | 19.4539 | 0.7663 | 0.5693  | 5.884  | YRI |
| IRF5    | GI_38683858-A | rs2172876  | 7 | 7 | 128197243 | 14101  | 14.8502 | 0.6640 | 0.5003  | 5.884  | YRI |
| IRF5    | GI_38683858-A | rs7385716  | 7 | 7 | 128199545 | 16403  | 20.2954 | 0.7872 | 0.5689  | 5.884  | YRI |
| IRF5    | GI_38683858-A | rs4731535  | 7 | 7 | 128199918 | 16776  | 14.8502 | 0.6640 | 0.5003  | 5.884  | YRI |
| IRF5    | GI_38683858-A | rs8043     | 7 | 7 | 128201335 | 18193  | 14.8502 | 0.6640 | 0.5003  | 5.884  | YRI |
| IRF5    | GI_38683858-A | rs6953869  | 7 | 7 | 128202711 | 19569  | 12.7427 | 0.6812 | 0.4952  | 5.884  | YRI |
| IRF5    | GI_38683858-A | rs1874332  | 7 | 7 | 128208564 | 25422  | 14.8502 | 0.6640 | -0.5003 | 5.884  | YRI |
| IRF5    | GI_38683858-A | rs7789423  | 7 | 7 | 128215155 | 32013  | 19.9148 | 0.7747 | 0.5773  | 5.884  | YRI |
| IRF5    | GI_38683858-A | rs6948928  | 7 | 7 | 128217048 | 33906  | 19.9148 | 0.7747 | -0.5773 | 5.884  | YRI |
| IRF5    | GI_38683858-A | rs7788977  | 7 | 7 | 128218378 | 35236  | 7.4809  | 0.4016 | 0.5741  | 5.884  | YRI |
| IRF5    | GI_38683858-A | rs11770317 | 7 | 7 | 128223422 | 40280  | 13.9957 | 0.6536 | -0.4933 | 5.884  | YRI |
| IRF5    | GI_38683858-A | rs6969930  | 7 | 7 | 128224264 | 41122  | 19.3500 | 0.7885 | -0.5880 | 5.884  | YRI |
| IRF5    | GI_38683858-A | rs2076960  | 7 | 7 | 128226759 | 43617  | 7.4809  | 0.4016 | 0.5741  | 5.884  | YRI |
| IRF5    | GI_38683858-A | rs7807018  | 7 | 7 | 128234139 | 50997  | 14.8502 | 0.6640 | 0.5003  | 5.884  | YRI |
| IRF5    | GI_38683858-A | rs11767711 | 7 | 7 | 128245783 | 62641  | 12.7928 | 0.6750 | 0.4752  | 5.884  | YRI |
| IRF5    | GI_38683858-A | rs6965542  | 7 | 7 | 128249869 | 66727  | 12.5859 | 0.6250 | 0.4600  | 5.884  | YRI |
| IRF5    | GI_38683858-A | rs3857852  | 7 | 7 | 128251228 | 68086  | 19.9148 | 0.7747 | -0.5773 | 5.884  | YRI |
| IRF5    | GI_38683858-A | rs12155080 | 7 | 7 | 128252690 | 69548  | 8.8490  | 0.4620 | -0.4196 | 5.884  | YRI |
| IRF5    | GI_38683858-A | rs13221560 | 7 | 7 | 128257126 | 73984  | 18.9742 | 0.7633 | 0.5710  | 5.884  | YRI |
| IRF5    | GI_38683858-A | rs10239340 | 7 | 7 | 128262461 | 79319  | 20.6223 | 0.7870 | -0.5687 | 5.884  | YRI |
| IRF5    | GI_38683858-A | rs11762968 | 7 | 7 | 128264915 | 81773  | 14.8502 | 0.6640 | -0.5003 | 5.884  | YRI |
| IRF5    | GI_38683858-A | rs1072767  | 7 | 7 | 128267156 | 84014  | 19.9148 | 0.7747 | 0.5773  | 5.884  | YRI |
| IRF5    | GI_38683858-A | rs921403   | 7 | 7 | 128270675 | 87533  | 19.9148 | 0.7747 | -0.5773 | 5.884  | YRI |
| IRF5    | GI_38683858-A | rs4731541  | 7 | 7 | 128272187 | 89045  | 20.6223 | 0.7870 | 0.5687  | 5.884  | YRI |
| IRF5    | GI_38683858-A | rs10279821 | 7 | 7 | 128277498 | 94356  | 19.9148 | 0.7747 | -0.5773 | 5.884  | YRI |
| IRF5    | GI_38683858-A | rs10156169 | 7 | 7 | 128278522 | 95380  | 19.9148 | 0.7747 | 0.5773  | 5.884  | YRI |
| IRF5    | GI_38683858-A | rs17166957 | 7 | 7 | 128281438 | 98296  | 6.3966  | 0.3492 | -0.4694 | 5.884  | YRI |
| IRF5    | GI_38683858-A | rs17167001 | 7 | 7 | 128286578 | 103436 | 7.2857  | 0.3978 | -0.5566 | 5.884  | YRI |
| IRF5    | GI_38683858-A | rs6960994  | 7 | 7 | 128286608 | 103466 | 6.9877  | 0.3783 | 0.3844  | 5.884  | YRI |
| IRF5    | GI_38683858-A | rs6961014  | 7 | 7 | 128286661 | 103519 | 6.2782  | 0.3746 | 0.3884  | 5.884  | YRI |
| IRF5    | GI_38683858-A | rs2242028  | 7 | 7 | 128288927 | 105785 | 6.6337  | 0.3660 | 0.3779  | 5.884  | YRI |
| IRF5    | GI_38683858-A | rs2242029  | 7 | 7 | 128289230 | 106088 | 10.1401 | 0.5528 | 0.4953  | 5.884  | YRI |
| IRF5    | GI_38683858-A | rs11766016 | 7 | 7 | 128291648 | 108506 | 7.0006  | 0.3894 | 0.5726  | 5.884  | YRI |
| IRF5    | GI_38683858-A | rs11766495 | 7 | 7 | 128294957 | 111815 | 6.3966  | 0.3492 | -0.4694 | 5.884  | YRI |
| IRF5    | GI_38683858-A | rs17167079 | 7 | 7 | 128303122 | 119980 | 7.8602  | 0.4190 | 0.5904  | 5.884  | YRI |
| IRF5    | GI_38683858-A | rs1901198  | 7 | 7 | 128303740 | 120598 | 6.8173  | 0.3700 | 0.4312  | 5.884  | YRI |
| IRF5    | GI_38683858-A | rs7458937  | 7 | 7 | 128322705 | 139563 | 6.4876  | 0.3917 | 0.5133  | 5.884  | YRI |
| COPG2   | GI_6912319-S  | rs10863    | 7 | 7 | 129739540 | 1008   | 7.5496  | 0.4048 | 0.2813  | 6.1241 | YRI |
| COPG2   | GI_6912319-S  | rs7803211  | 7 | 7 | 129748552 | 8004   | 6.5118  | 0.3599 | -0.2556 | 6.1241 | YRI |
| COPG2   | GI_6912319-S  | rs6467312  | 7 | 7 | 129805299 | 64751  | 6.6407  | 0.3613 | 0.2543  | 6.1241 | YRI |
| MGC5242 | GI_13162284-S | rs2718150  | 7 | 7 | 134128062 | 179962 | 6.1875  | 0.3386 | 0.2837  | 6.0185 | YRI |

|         |               |            |   |   |           |        |        |        |         |        |     |
|---------|---------------|------------|---|---|-----------|--------|--------|--------|---------|--------|-----|
| MGC5242 | GI_13162284-S | rs2732909  | 7 | 7 | 134129203 | 178821 | 6.1875 | 0.3386 | 0.2837  | 6.0185 | YRI |
| MGC5242 | GI_13162284-S | rs2732908  | 7 | 7 | 134129377 | 178647 | 6.1803 | 0.3430 | -0.2856 | 6.0185 | YRI |
| MGC5242 | GI_13162284-S | rs2732907  | 7 | 7 | 134130320 | 177704 | 6.0862 | 0.3382 | 0.2805  | 6.0185 | YRI |
| MGC5242 | GI_13162284-S | rs2732902  | 7 | 7 | 134131361 | 176663 | 6.1875 | 0.3386 | 0.2837  | 6.0185 | YRI |
| MGC5242 | GI_13162284-S | rs2718151  | 7 | 7 | 134131445 | 176579 | 6.1875 | 0.3386 | 0.2837  | 6.0185 | YRI |
| MGC5242 | GI_13162284-S | rs2718153  | 7 | 7 | 134131762 | 176262 | 6.1875 | 0.3386 | 0.2837  | 6.0185 | YRI |
| MGC5242 | GI_13162284-S | rs2718154  | 7 | 7 | 134132646 | 175378 | 6.1875 | 0.3386 | 0.2837  | 6.0185 | YRI |
| MGC5242 | GI_13162284-S | rs2718157  | 7 | 7 | 134133424 | 174600 | 6.3429 | 0.3564 | 0.2945  | 6.0185 | YRI |
| MGC5242 | GI_13162284-S | rs2718159  | 7 | 7 | 134134782 | 173242 | 6.1875 | 0.3386 | 0.2837  | 6.0185 | YRI |
| MGC5242 | GI_13162284-S | rs2718160  | 7 | 7 | 134135313 | 172711 | 6.3856 | 0.3486 | -0.2822 | 6.0185 | YRI |
| MGC5242 | GI_13162284-S | rs4236646  | 7 | 7 | 134137040 | 170984 | 6.1014 | 0.3342 | 0.2739  | 6.0185 | YRI |
| MGC5242 | GI_13162284-S | rs4442075  | 7 | 7 | 134137391 | 170633 | 6.7089 | 0.3698 | 0.2974  | 6.0185 | YRI |
| MGC5242 | GI_13162284-S | rs4236647  | 7 | 7 | 134137655 | 170369 | 6.0577 | 0.3367 | -0.2827 | 6.0185 | YRI |
| MGC5242 | GI_13162284-S | rs4366013  | 7 | 7 | 134140511 | 167513 | 6.1670 | 0.3423 | -0.2832 | 6.0185 | YRI |
| MGC5242 | GI_13162284-S | rs4265136  | 7 | 7 | 134140620 | 167404 | 6.0996 | 0.3389 | -0.2842 | 6.0185 | YRI |
| MGC5242 | GI_13162284-S | rs4403354  | 7 | 7 | 134140903 | 167121 | 6.1571 | 0.3418 | -0.2853 | 6.0185 | YRI |
| MGC5242 | GI_13162284-S | rs4236648  | 7 | 7 | 134141294 | 166730 | 6.1875 | 0.3386 | 0.2837  | 6.0185 | YRI |
| MGC5242 | GI_13162284-S | rs6946926  | 7 | 7 | 134141880 | 166144 | 6.1875 | 0.3386 | -0.2837 | 6.0185 | YRI |
| MGC5242 | GI_13162284-S | rs6467565  | 7 | 7 | 134142204 | 165820 | 6.1875 | 0.3386 | 0.2837  | 6.0185 | YRI |
| MGC5242 | GI_13162284-S | rs4236650  | 7 | 7 | 134142916 | 165108 | 6.1348 | 0.3407 | -0.2857 | 6.0185 | YRI |
| MGC5242 | GI_13162284-S | rs4404846  | 7 | 7 | 134143699 | 164325 | 6.1875 | 0.3386 | 0.2837  | 6.0185 | YRI |
| MGC5242 | GI_13162284-S | rs4728344  | 7 | 7 | 134145343 | 162681 | 6.1875 | 0.3386 | -0.2837 | 6.0185 | YRI |
| MGC5242 | GI_13162284-S | rs10954475 | 7 | 7 | 134146342 | 161682 | 6.1015 | 0.3489 | 0.2875  | 6.0185 | YRI |
| MGC5242 | GI_13162284-S | rs4236652  | 7 | 7 | 134147340 | 160684 | 6.3067 | 0.3495 | -0.2794 | 6.0185 | YRI |
| MGC5242 | GI_13162284-S | rs4236653  | 7 | 7 | 134147456 | 160568 | 6.1803 | 0.3430 | -0.2856 | 6.0185 | YRI |
| MGC5242 | GI_13162284-S | rs6467567  | 7 | 7 | 134150210 | 157814 | 6.1875 | 0.3386 | -0.2837 | 6.0185 | YRI |
| MGC5242 | GI_13162284-S | rs6467568  | 7 | 7 | 134150226 | 157798 | 6.1875 | 0.3386 | 0.2837  | 6.0185 | YRI |
| MGC5242 | GI_13162284-S | rs4286887  | 7 | 7 | 134158530 | 149494 | 6.5910 | 0.3639 | 0.2958  | 6.0185 | YRI |
| MGC5242 | GI_13162284-S | rs4236655  | 7 | 7 | 134159111 | 148913 | 6.1875 | 0.3386 | -0.2837 | 6.0185 | YRI |
| MGC5242 | GI_13162284-S | rs4732081  | 7 | 7 | 134159474 | 148550 | 6.7054 | 0.3748 | -0.3000 | 6.0185 | YRI |
| MGC5242 | GI_13162284-S | rs4728346  | 7 | 7 | 134159807 | 148217 | 6.0944 | 0.3386 | 0.2841  | 6.0185 | YRI |
| MGC5242 | GI_13162284-S | rs4728347  | 7 | 7 | 134161007 | 147017 | 6.2770 | 0.3480 | -0.2822 | 6.0185 | YRI |
| MGC5242 | GI_13162284-S | rs9642006  | 7 | 7 | 134163177 | 144847 | 6.1875 | 0.3386 | -0.2837 | 6.0185 | YRI |
| MGC5242 | GI_13162284-S | rs9642007  | 7 | 7 | 134163202 | 144822 | 6.1875 | 0.3386 | 0.2837  | 6.0185 | YRI |
| MGC5242 | GI_13162284-S | rs11764847 | 7 | 7 | 134167106 | 140918 | 6.1875 | 0.3386 | 0.2837  | 6.0185 | YRI |
| MGC5242 | GI_13162284-S | rs9656447  | 7 | 7 | 134176806 | 131218 | 6.1875 | 0.3386 | 0.2837  | 6.0185 | YRI |
| MGC5242 | GI_13162284-S | rs2348051  | 7 | 7 | 134177097 | 130927 | 6.1875 | 0.3386 | 0.2837  | 6.0185 | YRI |
| MGC5242 | GI_13162284-S | rs2348052  | 7 | 7 | 134177695 | 130329 | 6.1875 | 0.3386 | 0.2837  | 6.0185 | YRI |
| MGC5242 | GI_13162284-S | rs2348053  | 7 | 7 | 134177813 | 130211 | 6.1875 | 0.3386 | 0.2837  | 6.0185 | YRI |
| MGC5242 | GI_13162284-S | rs4348415  | 7 | 7 | 134178252 | 129772 | 6.0566 | 0.3366 | -0.2826 | 6.0185 | YRI |
| MGC5242 | GI_13162284-S | rs7385353  | 7 | 7 | 134184149 | 123875 | 6.1875 | 0.3386 | -0.2837 | 6.0185 | YRI |
| MGC5242 | GI_13162284-S | rs2348054  | 7 | 7 | 134187406 | 120618 | 6.0566 | 0.3366 | -0.2817 | 6.0185 | YRI |
| MGC5242 | GI_13162284-S | rs2348055  | 7 | 7 | 134187696 | 120328 | 6.1875 | 0.3386 | 0.2837  | 6.0185 | YRI |
| MGC5242 | GI_13162284-S | rs7805020  | 7 | 7 | 134190169 | 117855 | 6.1875 | 0.3386 | -0.2837 | 6.0185 | YRI |
| MGC5242 | GI_13162284-S | rs7786435  | 7 | 7 | 134190329 | 117695 | 6.1875 | 0.3386 | -0.2837 | 6.0185 | YRI |
| MGC5242 | GI_13162284-S | rs4732085  | 7 | 7 | 134194443 | 113581 | 6.2598 | 0.3471 | -0.2814 | 6.0185 | YRI |
| MGC5242 | GI_13162284-S | rs7793904  | 7 | 7 | 134200693 | 107331 | 6.5910 | 0.3639 | -0.2958 | 6.0185 | YRI |
| MGC5242 | GI_13162284-S | rs7809191  | 7 | 7 | 134203806 | 104218 | 6.2268 | 0.3454 | -0.2973 | 6.0185 | YRI |
| MGC5242 | GI_13162284-S | rs2348057  | 7 | 7 | 134206261 | 101763 | 6.3856 | 0.3486 | 0.2822  | 6.0185 | YRI |
| MGC5242 | GI_13162284-S | rs7810068  | 7 | 7 | 134207587 | 100437 | 6.3856 | 0.3486 | 0.2822  | 6.0185 | YRI |
| MGC5242 | GI_13162284-S | rs2348058  | 7 | 7 | 134208239 | 99785  | 6.1875 | 0.3386 | 0.2837  | 6.0185 | YRI |
| MGC5242 | GI_13162284-S | rs10488439 | 7 | 7 | 134220453 | 87571  | 6.6983 | 0.3798 | -0.3036 | 6.0185 | YRI |
| MGC5242 | GI_13162284-S | rs2348277  | 7 | 7 | 134258172 | 49852  | 6.3856 | 0.3486 | 0.2822  | 6.0185 | YRI |
| MGC5242 | GI_13162284-S | rs2348280  | 7 | 7 | 134258705 | 49319  | 6.2268 | 0.3454 | 0.2973  | 6.0185 | YRI |
| MGC5242 | GI_13162284-S | rs2348282  | 7 | 7 | 134271108 | 36916  | 6.2268 | 0.3454 | -0.2973 | 6.0185 | YRI |
| MGC5242 | GI_13162284-S | rs2348283  | 7 | 7 | 134278412 | 29612  | 6.1875 | 0.3386 | -0.2837 | 6.0185 | YRI |
| MGC5242 | GI_13162284-S | rs10238516 | 7 | 7 | 134289098 | 18926  | 6.2915 | 0.3811 | 0.3031  | 6.0185 | YRI |
| MGC5242 | GI_13162284-S | rs6945666  | 7 | 7 | 134289309 | 18715  | 6.6540 | 0.4263 | 0.2995  | 6.0185 | YRI |
| MGC5242 | GI_13162284-S | rs2348286  | 7 | 7 | 134294366 | 13658  | 6.0800 | 0.3378 | 0.2904  | 6.0185 | YRI |

|           |               |            |   |   |           |        |         |        |         |        |     |
|-----------|---------------|------------|---|---|-----------|--------|---------|--------|---------|--------|-----|
| MGC5242   | GI_13162284-S | rs7456681  | 7 | 7 | 134298494 | 9530   | 6.2268  | 0.3454 | -0.2973 | 6.0185 | YRI |
| MGC5242   | GI_13162284-S | rs292497   | 7 | 7 | 134299874 | 8150   | 6.1875  | 0.3386 | 0.2837  | 6.0185 | YRI |
| MGC5242   | GI_13162284-S | rs292501   | 7 | 7 | 134306535 | 1489   | 6.1875  | 0.3386 | -0.2837 | 6.0185 | YRI |
| MGC5242   | GI_13162284-S | rs1254430  | 7 | 7 | 134318523 | 10499  | 6.1505  | 0.3367 | -0.2653 | 6.0185 | YRI |
| MGC5242   | GI_13162284-S | rs292546   | 7 | 7 | 134323932 | 15908  | 6.2261  | 0.3405 | 0.2820  | 6.0185 | YRI |
| MGC5242   | GI_13162284-S | rs292598   | 7 | 7 | 134350279 | 42255  | 6.0851  | 0.3586 | -0.2866 | 6.0185 | YRI |
| MGC5242   | GI_13162284-S | rs292608   | 7 | 7 | 134356692 | 48668  | 6.2261  | 0.3405 | 0.2820  | 6.0185 | YRI |
| C7orf13   | GI_14249145-S | rs7788200  | 7 | 7 | 155932719 | 1786   | 6.3345  | 0.3894 | -0.1163 | 6.2829 | YRI |
| C7orf13   | GI_14249145-S | rs10235562 | 7 | 7 | 155936470 | 5537   | 6.7495  | 0.4181 | -0.1325 | 6.2829 | YRI |
| C7orf13   | GI_14249145-S | rs10243532 | 7 | 7 | 155937938 | 7005   | 7.3954  | 0.3976 | 0.1273  | 6.2829 | YRI |
| C7orf13   | GI_14249145-S | rs10253748 | 7 | 7 | 155937991 | 7058   | 7.3954  | 0.3976 | 0.1273  | 6.2829 | YRI |
| C7orf13   | GI_14249145-S | rs7800925  | 7 | 7 | 155938273 | 7340   | 7.3954  | 0.3976 | 0.1273  | 6.2829 | YRI |
| C7orf13   | GI_14249145-S | rs4716647  | 7 | 7 | 155940337 | 9404   | 7.4671  | 0.4119 | 0.1274  | 6.2829 | YRI |
| C7orf13   | GI_14249145-S | rs4716437  | 7 | 7 | 155941511 | 10578  | 7.8064  | 0.4221 | 0.1330  | 6.2829 | YRI |
| C7orf13   | GI_14249145-S | rs10236219 | 7 | 7 | 155945794 | 14861  | 7.2109  | 0.3997 | -0.1273 | 6.2829 | YRI |
| C7orf13   | GI_14249145-S | rs10251511 | 7 | 7 | 155945876 | 14943  | 7.3954  | 0.3976 | -0.1273 | 6.2829 | YRI |
| C7orf13   | GI_14249145-S | rs6978799  | 7 | 7 | 155946312 | 15379  | 7.3954  | 0.3976 | -0.1273 | 6.2829 | YRI |
| C7orf13   | GI_14249145-S | rs1014831  | 7 | 7 | 155946547 | 15614  | 7.3954  | 0.3976 | -0.1273 | 6.2829 | YRI |
| C7orf13   | GI_14249145-S | rs2302150  | 7 | 7 | 155954339 | 23406  | 7.5298  | 0.4093 | -0.1347 | 6.2829 | YRI |
| C7orf13   | GI_14249145-S | rs2240645  | 7 | 7 | 155970624 | 39691  | 8.6707  | 0.4545 | -0.1585 | 6.2829 | YRI |
| FLJ10300  | GI_21361686-S | rs2657381  | 7 | 7 | 158150563 | 87408  | 7.1709  | 0.3870 | -0.2711 | 5.9362 | YRI |
| FLJ10300  | GI_21361686-S | rs4909278  | 7 | 7 | 158158496 | 79475  | 6.5416  | 0.3564 | 0.2615  | 5.9362 | YRI |
| FLJ22494  | GI_40254968-S | rs1005901  | 8 | 8 | 22020323  | 143    | 6.5918  | 0.3589 | 0.2473  | 6.0088 | YRI |
| FLJ22494  | GI_40254968-S | rs3739435  | 8 | 8 | 22021058  | 592    | 6.5918  | 0.3589 | -0.2473 | 6.0088 | YRI |
| FLJ22494  | GI_40254968-S | rs7836362  | 8 | 8 | 22026371  | 5905   | 6.6754  | 0.3630 | 0.2462  | 6.0088 | YRI |
| FLJ21616  | GI_13375737-S | rs7002633  | 8 | 8 | 28792835  | 172186 | 6.0809  | 0.3331 | 0.4814  | 6.0098 | YRI |
| FLJ21616  | GI_13375737-S | rs983365   | 8 | 8 | 28806348  | 158673 | 10.4976 | 0.5270 | -0.5628 | 6.0098 | YRI |
| FLJ21616  | GI_13375737-S | rs13280242 | 8 | 8 | 28812657  | 152364 | 8.6512  | 0.4595 | -0.5148 | 6.0098 | YRI |
| FLJ21616  | GI_13375737-S | rs1858462  | 8 | 8 | 28816656  | 148365 | 8.6212  | 0.4524 | -0.5316 | 6.0098 | YRI |
| FLJ21616  | GI_13375737-S | rs11987985 | 8 | 8 | 28819961  | 145060 | 6.5405  | 0.3564 | -0.4502 | 6.0098 | YRI |
| FLJ21616  | GI_13375737-S | rs2203209  | 8 | 8 | 28843952  | 121069 | 10.3713 | 0.5224 | 0.5813  | 6.0098 | YRI |
| FLJ21616  | GI_13375737-S | rs2221894  | 8 | 8 | 28847078  | 117943 | 17.5296 | 0.7280 | -0.6400 | 6.0098 | YRI |
| FLJ21616  | GI_13375737-S | rs4732893  | 8 | 8 | 28850597  | 114424 | 11.2480 | 0.5541 | 0.5837  | 6.0098 | YRI |
| FLJ21616  | GI_13375737-S | rs11136052 | 8 | 8 | 28858994  | 106027 | 10.4976 | 0.5270 | -0.5628 | 6.0098 | YRI |
| FLJ21616  | GI_13375737-S | rs2137471  | 8 | 8 | 28861568  | 103453 | 17.5296 | 0.7280 | 0.6400  | 6.0098 | YRI |
| FLJ21616  | GI_13375737-S | rs2292478  | 8 | 8 | 28863275  | 101746 | 17.5296 | 0.7280 | 0.6400  | 6.0098 | YRI |
| FLJ21616  | GI_13375737-S | rs4732894  | 8 | 8 | 28878970  | 86051  | 10.4976 | 0.5270 | 0.5628  | 6.0098 | YRI |
| FLJ21616  | GI_13375737-S | rs4732896  | 8 | 8 | 28881393  | 83628  | 17.5296 | 0.7280 | -0.6400 | 6.0098 | YRI |
| FLJ21616  | GI_13375737-S | rs3824105  | 8 | 8 | 28881597  | 83424  | 6.0249  | 0.3302 | 0.4619  | 6.0098 | YRI |
| FLJ21616  | GI_13375737-S | rs10111019 | 8 | 8 | 28886219  | 78802  | 8.8446  | 0.4618 | 0.5280  | 6.0098 | YRI |
| FLJ21616  | GI_13375737-S | rs12674777 | 8 | 8 | 28899640  | 65381  | 8.8446  | 0.4618 | -0.5280 | 6.0098 | YRI |
| FLJ21616  | GI_13375737-S | rs7823358  | 8 | 8 | 28907096  | 57925  | 6.5996  | 0.3593 | 0.4661  | 6.0098 | YRI |
| FLJ21616  | GI_13375737-S | rs7842492  | 8 | 8 | 28925556  | 39465  | 17.1124 | 0.7189 | 0.6259  | 6.0098 | YRI |
| FLJ21616  | GI_13375737-S | rs1487969  | 8 | 8 | 28941580  | 23441  | 17.5296 | 0.7280 | 0.6400  | 6.0098 | YRI |
| FLJ21616  | GI_13375737-S | rs6558089  | 8 | 8 | 28950156  | 14865  | 17.5296 | 0.7280 | -0.6400 | 6.0098 | YRI |
| FLJ21616  | GI_13375737-S | rs7018244  | 8 | 8 | 28950910  | 14111  | 10.4976 | 0.5270 | 0.5628  | 6.0098 | YRI |
| FLJ21616  | GI_13375737-S | rs1948132  | 8 | 8 | 28956006  | 9015   | 10.4976 | 0.5270 | -0.5628 | 6.0098 | YRI |
| FLJ21616  | GI_13375737-S | rs8180944  | 8 | 8 | 28960005  | 5016   | 17.5296 | 0.7280 | -0.6400 | 6.0098 | YRI |
| FLJ21616  | GI_13375737-S | rs10088428 | 8 | 8 | 28965442  | 421    | 20.0691 | 0.7774 | -0.6517 | 6.0098 | YRI |
| FLJ21616  | GI_13375737-S | rs2693     | 8 | 8 | 28980777  | 15756  | 10.0436 | 0.5099 | 0.5676  | 6.0098 | YRI |
| FLJ21616  | GI_13375737-S | rs4732901  | 8 | 8 | 28987298  | 22277  | 6.6502  | 0.3618 | 0.4835  | 6.0098 | YRI |
| LOC340435 | GI_29735811-S | rs13255886 | 8 | 8 | 71728508  | 53419  | 15.0022 | 0.6680 | 0.1639  | 6.7019 | YRI |
| LOC340435 | GI_29735811-S | rs7814274  | 8 | 8 | 71732965  | 48962  | 15.0022 | 0.6680 | -0.1639 | 6.7019 | YRI |
| LOC340435 | GI_29735811-S | rs7830550  | 8 | 8 | 71732985  | 48942  | 15.0022 | 0.6680 | 0.1639  | 6.7019 | YRI |
| LOC340435 | GI_29735811-S | rs6993326  | 8 | 8 | 71738154  | 43773  | 10.3475 | 0.5215 | -0.1677 | 6.7019 | YRI |
| LOC340435 | GI_29735811-S | rs10504479 | 8 | 8 | 71740069  | 41858  | 15.0022 | 0.6680 | -0.1639 | 6.7019 | YRI |
| LOC340435 | GI_29735811-S | rs1993862  | 8 | 8 | 71741916  | 40011  | 11.1411 | 0.5503 | -0.1447 | 6.7019 | YRI |
| LOC340435 | GI_29735811-S | rs2279128  | 8 | 8 | 71744113  | 37814  | 10.3475 | 0.5215 | -0.1677 | 6.7019 | YRI |
| LOC340435 | GI_29735811-S | rs1477943  | 8 | 8 | 71745317  | 36610  | 9.2141  | 0.5019 | 0.1592  | 6.7019 | YRI |

|           |               |            |   |   |          |        |         |        |         |        |     |
|-----------|---------------|------------|---|---|----------|--------|---------|--------|---------|--------|-----|
| LOC340435 | GI_29735811-S | rs13271442 | 8 | 8 | 71747723 | 34204  | 9.7621  | 0.4990 | -0.1352 | 6.7019 | YRI |
| LOC340435 | GI_29735811-S | rs6472538  | 8 | 8 | 71749525 | 32402  | 15.0022 | 0.6680 | 0.1639  | 6.7019 | YRI |
| LOC340435 | GI_29735811-S | rs7001162  | 8 | 8 | 71750024 | 31903  | 13.4175 | 0.6436 | -0.1620 | 6.7019 | YRI |
| LOC340435 | GI_29735811-S | rs12681420 | 8 | 8 | 71755752 | 26175  | 10.3475 | 0.5215 | 0.1677  | 6.7019 | YRI |
| LOC340435 | GI_29735811-S | rs6991329  | 8 | 8 | 71755979 | 25948  | 15.0022 | 0.6680 | -0.1639 | 6.7019 | YRI |
| LOC340435 | GI_29735811-S | rs7831507  | 8 | 8 | 71757780 | 24147  | 10.3475 | 0.5215 | 0.1677  | 6.7019 | YRI |
| LOC340435 | GI_29735811-S | rs13256093 | 8 | 8 | 71758931 | 22996  | 10.3475 | 0.5215 | 0.1677  | 6.7019 | YRI |
| LOC340435 | GI_29735811-S | rs12675271 | 8 | 8 | 71764563 | 17364  | 15.0022 | 0.6680 | 0.1639  | 6.7019 | YRI |
| LOC340435 | GI_29735811-S | rs7842091  | 8 | 8 | 71777335 | 4592   | 10.3475 | 0.5215 | 0.1677  | 6.7019 | YRI |
| LOC340435 | GI_29735811-S | rs1477945  | 8 | 8 | 71778107 | 3820   | 10.3475 | 0.5215 | 0.1677  | 6.7019 | YRI |
| LOC340435 | GI_29735811-S | rs1477944  | 8 | 8 | 71778154 | 3773   | 11.8621 | 0.6299 | -0.1508 | 6.7019 | YRI |
| LOC340435 | GI_29735811-S | rs17760532 | 8 | 8 | 71782841 | 914    | 10.3475 | 0.5215 | 0.1677  | 6.7019 | YRI |
| LOC340435 | GI_29735811-S | rs13253842 | 8 | 8 | 71788057 | 6130   | 15.3362 | 0.6830 | -0.1683 | 6.7019 | YRI |
| LOC340435 | GI_29735811-S | rs13254908 | 8 | 8 | 71788652 | 6725   | 14.7099 | 0.6667 | 0.1627  | 6.7019 | YRI |
| LOC340435 | GI_29735811-S | rs13264669 | 8 | 8 | 71789326 | 7399   | 15.0022 | 0.6680 | -0.1639 | 6.7019 | YRI |
| LOC340435 | GI_29735811-S | rs7013657  | 8 | 8 | 71800113 | 18186  | 15.0022 | 0.6680 | -0.1639 | 6.7019 | YRI |
| LOC340435 | GI_29735811-S | rs2290702  | 8 | 8 | 71809534 | 27607  | 10.3475 | 0.5215 | 0.1677  | 6.7019 | YRI |
| LOC340435 | GI_29735811-S | rs7015035  | 8 | 8 | 71816155 | 34228  | 15.0022 | 0.6680 | -0.1639 | 6.7019 | YRI |
| LOC340435 | GI_29735811-S | rs6472542  | 8 | 8 | 71816641 | 34714  | 15.0022 | 0.6680 | 0.1639  | 6.7019 | YRI |
| LOC340435 | GI_29735811-S | rs6982406  | 8 | 8 | 71817162 | 35235  | 15.0022 | 0.6680 | -0.1639 | 6.7019 | YRI |
| LOC340435 | GI_29735811-S | rs1902614  | 8 | 8 | 71818721 | 36794  | 15.0022 | 0.6680 | -0.1639 | 6.7019 | YRI |
| LOC340435 | GI_29735811-S | rs6998024  | 8 | 8 | 71823394 | 41467  | 10.4488 | 0.5252 | -0.1523 | 6.7019 | YRI |
| LOC340435 | GI_29735811-S | rs1348535  | 8 | 8 | 71825295 | 43368  | 15.0022 | 0.6680 | -0.1639 | 6.7019 | YRI |
| LOC340435 | GI_29735811-S | rs7825446  | 8 | 8 | 71826728 | 44801  | 15.0022 | 0.6680 | -0.1639 | 6.7019 | YRI |
| LOC340435 | GI_29735811-S | rs6472543  | 8 | 8 | 71826962 | 45035  | 15.0022 | 0.6680 | 0.1639  | 6.7019 | YRI |
| LOC340435 | GI_29735811-S | rs7819332  | 8 | 8 | 71830819 | 48892  | 15.0022 | 0.6680 | -0.1639 | 6.7019 | YRI |
| LOC340435 | GI_29735811-S | rs7012404  | 8 | 8 | 71831252 | 49325  | 14.6701 | 0.6656 | -0.1634 | 6.7019 | YRI |
| LOC340435 | GI_29735811-S | rs13258584 | 8 | 8 | 71834133 | 52206  | 13.3958 | 0.6430 | -0.1625 | 6.7019 | YRI |
| LOC340435 | GI_29735811-S | rs1471114  | 8 | 8 | 71838101 | 56174  | 15.0022 | 0.6680 | 0.1639  | 6.7019 | YRI |
| LOC340435 | GI_29735811-S | rs7017481  | 8 | 8 | 71839324 | 57397  | 10.3475 | 0.5215 | -0.1677 | 6.7019 | YRI |
| LOC340435 | GI_29735811-S | rs11993453 | 8 | 8 | 71840393 | 58466  | 15.0022 | 0.6680 | -0.1639 | 6.7019 | YRI |
| LOC340435 | GI_29735811-S | rs12680166 | 8 | 8 | 71841192 | 59265  | 15.0022 | 0.6680 | -0.1639 | 6.7019 | YRI |
| LOC340435 | GI_29735811-S | rs17688313 | 8 | 8 | 71846418 | 64491  | 14.6840 | 0.6660 | 0.1630  | 6.7019 | YRI |
| LOC340435 | GI_29735811-S | rs12674966 | 8 | 8 | 71846964 | 65037  | 10.7247 | 0.5416 | 0.1753  | 6.7019 | YRI |
| LOC340435 | GI_29735811-S | rs1373480  | 8 | 8 | 71849521 | 67594  | 15.0022 | 0.6680 | 0.1639  | 6.7019 | YRI |
| LOC340435 | GI_29735811-S | rs7000647  | 8 | 8 | 71850962 | 69035  | 15.0022 | 0.6680 | -0.1639 | 6.7019 | YRI |
| LOC340435 | GI_29735811-S | rs13254801 | 8 | 8 | 71851538 | 69611  | 8.9322  | 0.4899 | -0.1480 | 6.7019 | YRI |
| LOC340435 | GI_29735811-S | rs6993170  | 8 | 8 | 71856073 | 74146  | 9.0254  | 0.4694 | 0.1119  | 6.7019 | YRI |
| LOC340435 | GI_29735811-S | rs6998786  | 8 | 8 | 71857184 | 75257  | 15.3362 | 0.6830 | 0.1683  | 6.7019 | YRI |
| LOC340435 | GI_29735811-S | rs6981149  | 8 | 8 | 71857236 | 75309  | 10.7247 | 0.5416 | -0.1753 | 6.7019 | YRI |
| LOC340435 | GI_29735811-S | rs12680988 | 8 | 8 | 71858444 | 76517  | 15.0162 | 0.6946 | -0.1601 | 6.7019 | YRI |
| LOC340435 | GI_29735811-S | rs1596566  | 8 | 8 | 71861130 | 79203  | 15.0022 | 0.6680 | -0.1639 | 6.7019 | YRI |
| LOC340435 | GI_29735811-S | rs1596565  | 8 | 8 | 71861386 | 79459  | 10.3475 | 0.5215 | -0.1677 | 6.7019 | YRI |
| LOC340435 | GI_29735811-S | rs6993115  | 8 | 8 | 71861737 | 79810  | 14.6877 | 0.6661 | -0.1629 | 6.7019 | YRI |
| LOC340435 | GI_29735811-S | rs10504481 | 8 | 8 | 71862071 | 80144  | 15.0022 | 0.6680 | -0.1639 | 6.7019 | YRI |
| LOC340435 | GI_29735811-S | rs7826483  | 8 | 8 | 71865447 | 83520  | 15.0022 | 0.6680 | -0.1639 | 6.7019 | YRI |
| LOC340435 | GI_29735811-S | rs13257800 | 8 | 8 | 71876687 | 94760  | 15.0022 | 0.6680 | -0.1639 | 6.7019 | YRI |
| LOC340435 | GI_29735811-S | rs13261712 | 8 | 8 | 71894818 | 112891 | 15.0022 | 0.6680 | -0.1639 | 6.7019 | YRI |
| LOC340435 | GI_29735811-S | rs13252719 | 8 | 8 | 71897123 | 115196 | 15.8559 | 0.6896 | -0.1846 | 6.7019 | YRI |
| LOC340435 | GI_29735811-S | rs13274062 | 8 | 8 | 71899641 | 117714 | 15.0022 | 0.6680 | -0.1639 | 6.7019 | YRI |
| LOC340435 | GI_29735811-S | rs13274381 | 8 | 8 | 71927648 | 145721 | 15.0022 | 0.6680 | 0.1639  | 6.7019 | YRI |
| LOC340435 | GI_29735811-S | rs6472551  | 8 | 8 | 71944403 | 162476 | 15.0022 | 0.6680 | -0.1639 | 6.7019 | YRI |
| CGI-62    | GI_7705774-S  | rs1466526  | 8 | 8 | 79718029 | 72022  | 7.3534  | 0.3956 | -0.2901 | 5.6478 | YRI |
| CGI-62    | GI_7705774-S  | rs4739134  | 8 | 8 | 79718703 | 71348  | 7.3534  | 0.3956 | -0.2901 | 5.6478 | YRI |
| CGI-62    | GI_7705774-S  | rs900567   | 8 | 8 | 79722177 | 67874  | 7.1599  | 0.3865 | -0.2973 | 5.6478 | YRI |
| CGI-62    | GI_7705774-S  | rs12708100 | 8 | 8 | 79727624 | 62427  | 12.4583 | 0.5945 | -0.3534 | 5.6478 | YRI |
| CGI-62    | GI_7705774-S  | rs13251931 | 8 | 8 | 79728780 | 61271  | 12.4583 | 0.5945 | 0.3534  | 5.6478 | YRI |
| CGI-62    | GI_7705774-S  | rs3899796  | 8 | 8 | 79730637 | 59414  | 10.8269 | 0.5391 | 0.3612  | 5.6478 | YRI |
| CGI-62    | GI_7705774-S  | rs4739135  | 8 | 8 | 79730847 | 59204  | 12.4583 | 0.5945 | 0.3534  | 5.6478 | YRI |

|         |               |            |   |   |           |       |         |        |         |        |     |
|---------|---------------|------------|---|---|-----------|-------|---------|--------|---------|--------|-----|
| CGI-62  | GI_7705774-S  | rs2887482  | 8 | 8 | 79734423  | 55628 | 12.4583 | 0.5945 | -0.3534 | 5.6478 | YRI |
| CGI-62  | GI_7705774-S  | rs1384804  | 8 | 8 | 79734777  | 55274 | 14.0392 | 0.6419 | 0.3560  | 5.6478 | YRI |
| CGI-62  | GI_7705774-S  | rs1905364  | 8 | 8 | 79735034  | 55017 | 12.4583 | 0.5945 | -0.3534 | 5.6478 | YRI |
| CGI-62  | GI_7705774-S  | rs9298314  | 8 | 8 | 79735664  | 54387 | 12.4583 | 0.5945 | 0.3534  | 5.6478 | YRI |
| CGI-62  | GI_7705774-S  | rs1021157  | 8 | 8 | 79737728  | 52323 | 12.4583 | 0.5945 | 0.3534  | 5.6478 | YRI |
| CGI-62  | GI_7705774-S  | rs1021156  | 8 | 8 | 79738359  | 51692 | 8.2900  | 0.4381 | 0.3375  | 5.6478 | YRI |
| CGI-62  | GI_7705774-S  | rs979564   | 8 | 8 | 79738714  | 51337 | 7.9896  | 0.4248 | 0.2957  | 5.6478 | YRI |
| CGI-62  | GI_7705774-S  | rs3808619  | 8 | 8 | 79740281  | 49770 | 14.0392 | 0.6419 | -0.3560 | 5.6478 | YRI |
| CGI-62  | GI_7705774-S  | rs1384803  | 8 | 8 | 79744183  | 45868 | 13.5649 | 0.6282 | -0.3584 | 5.6478 | YRI |
| CGI-62  | GI_7705774-S  | rs4641056  | 8 | 8 | 79745051  | 45000 | 12.8185 | 0.6323 | -0.3604 | 5.6478 | YRI |
| CGI-62  | GI_7705774-S  | rs3736169  | 8 | 8 | 79750410  | 39641 | 8.2900  | 0.4381 | 0.3375  | 5.6478 | YRI |
| CGI-62  | GI_7705774-S  | rs7839152  | 8 | 8 | 79752567  | 37484 | 14.0392 | 0.6419 | 0.3560  | 5.6478 | YRI |
| CGI-62  | GI_7705774-S  | rs9643739  | 8 | 8 | 79754325  | 35726 | 7.9896  | 0.4248 | 0.2957  | 5.6478 | YRI |
| CGI-62  | GI_7705774-S  | rs9298316  | 8 | 8 | 79754981  | 35070 | 14.0392 | 0.6419 | -0.3560 | 5.6478 | YRI |
| CGI-62  | GI_7705774-S  | rs7842142  | 8 | 8 | 79756291  | 33760 | 14.0392 | 0.6419 | -0.3560 | 5.6478 | YRI |
| CGI-62  | GI_7705774-S  | rs10093127 | 8 | 8 | 79761659  | 28392 | 8.2900  | 0.4381 | -0.3375 | 5.6478 | YRI |
| CGI-62  | GI_7705774-S  | rs10113703 | 8 | 8 | 79763194  | 26857 | 13.3513 | 0.6284 | -0.3585 | 5.6478 | YRI |
| CGI-62  | GI_7705774-S  | rs1872072  | 8 | 8 | 79763975  | 26076 | 8.2900  | 0.4381 | 0.3375  | 5.6478 | YRI |
| CGI-62  | GI_7705774-S  | rs7001074  | 8 | 8 | 79766479  | 23572 | 14.0392 | 0.6419 | -0.3560 | 5.6478 | YRI |
| CGI-62  | GI_7705774-S  | rs10109359 | 8 | 8 | 79769159  | 20892 | 8.4642  | 0.4456 | -0.2961 | 5.6478 | YRI |
| CGI-62  | GI_7705774-S  | rs7017898  | 8 | 8 | 79771937  | 18114 | 13.5649 | 0.6282 | 0.3584  | 5.6478 | YRI |
| CGI-62  | GI_7705774-S  | rs1054283  | 8 | 8 | 79773265  | 16786 | 14.0392 | 0.6419 | 0.3560  | 5.6478 | YRI |
| CGI-62  | GI_7705774-S  | rs13280202 | 8 | 8 | 79775028  | 15023 | 7.7408  | 0.4247 | -0.3264 | 5.6478 | YRI |
| CGI-62  | GI_7705774-S  | rs7010299  | 8 | 8 | 79782576  | 7475  | 13.5649 | 0.6282 | -0.3584 | 5.6478 | YRI |
| CGI-62  | GI_7705774-S  | rs7010897  | 8 | 8 | 79782909  | 7142  | 12.9326 | 0.6290 | -0.3552 | 5.6478 | YRI |
| CGI-62  | GI_7705774-S  | rs2369440  | 8 | 8 | 79784264  | 5787  | 14.0392 | 0.6419 | -0.3560 | 5.6478 | YRI |
| CGI-62  | GI_7705774-S  | rs2717540  | 8 | 8 | 79784918  | 5133  | 7.9896  | 0.4248 | 0.2957  | 5.6478 | YRI |
| CGI-62  | GI_7705774-S  | rs1483573  | 8 | 8 | 79786172  | 3879  | 8.2900  | 0.4381 | -0.3375 | 5.6478 | YRI |
| CGI-62  | GI_7705774-S  | rs13267679 | 8 | 8 | 79786393  | 3658  | 8.7629  | 0.4584 | 0.2988  | 5.6478 | YRI |
| CGI-62  | GI_7705774-S  | rs2953477  | 8 | 8 | 79787160  | 2891  | 11.6647 | 0.5684 | 0.3527  | 5.6478 | YRI |
| CGI-62  | GI_7705774-S  | rs2625663  | 8 | 8 | 79792896  | 2845  | 13.5649 | 0.6282 | -0.3584 | 5.6478 | YRI |
| CGI-62  | GI_7705774-S  | rs2717538  | 8 | 8 | 79795704  | 5653  | 14.0392 | 0.6419 | -0.3560 | 5.6478 | YRI |
| CGI-62  | GI_7705774-S  | rs2919936  | 8 | 8 | 79796562  | 6511  | 8.2900  | 0.4381 | -0.3375 | 5.6478 | YRI |
| CGI-62  | GI_7705774-S  | rs2046338  | 8 | 8 | 79798524  | 8473  | 7.1288  | 0.4012 | -0.3287 | 5.6478 | YRI |
| CGI-62  | GI_7705774-S  | rs2717544  | 8 | 8 | 79799097  | 9046  | 7.9896  | 0.4248 | 0.2957  | 5.6478 | YRI |
| CGI-62  | GI_7705774-S  | rs2953475  | 8 | 8 | 79800693  | 10642 | 11.6647 | 0.5684 | -0.3527 | 5.6478 | YRI |
| CGI-62  | GI_7705774-S  | rs1441438  | 8 | 8 | 79804324  | 14273 | 14.0392 | 0.6419 | -0.3560 | 5.6478 | YRI |
| CGI-62  | GI_7705774-S  | rs1036751  | 8 | 8 | 79804461  | 14410 | 7.9896  | 0.4248 | 0.2957  | 5.6478 | YRI |
| CGI-62  | GI_7705774-S  | rs12544041 | 8 | 8 | 79806194  | 16143 | 6.9395  | 0.3919 | 0.2941  | 5.6478 | YRI |
| CGI-62  | GI_7705774-S  | rs1545228  | 8 | 8 | 79806992  | 16941 | 14.0392 | 0.6419 | -0.3560 | 5.6478 | YRI |
| CGI-62  | GI_7705774-S  | rs2583759  | 8 | 8 | 79807519  | 17468 | 7.5974  | 0.4124 | 0.2831  | 5.6478 | YRI |
| CGI-62  | GI_7705774-S  | rs894221   | 8 | 8 | 79811612  | 21561 | 13.8417 | 0.6427 | 0.3558  | 5.6478 | YRI |
| CGI-62  | GI_7705774-S  | rs894222   | 8 | 8 | 79811824  | 21773 | 7.9503  | 0.4343 | -0.2995 | 5.6478 | YRI |
| CGI-62  | GI_7705774-S  | rs2583778  | 8 | 8 | 79813696  | 23645 | 7.8105  | 0.4167 | -0.2918 | 5.6478 | YRI |
| CGI-62  | GI_7705774-S  | rs6993386  | 8 | 8 | 79816700  | 26649 | 5.8682  | 0.3221 | -0.2821 | 5.6478 | YRI |
| CGI-62  | GI_7705774-S  | rs7822425  | 8 | 8 | 79819544  | 29493 | 8.2900  | 0.4381 | 0.3375  | 5.6478 | YRI |
| CGI-62  | GI_7705774-S  | rs1441850  | 8 | 8 | 79820221  | 30170 | 14.0392 | 0.6419 | 0.3560  | 5.6478 | YRI |
| CML66   | GI_31377641-S | rs4430065  | 8 | 8 | 110256339 | 66180 | 6.0430  | 0.3312 | -0.2294 | 5.8054 | YRI |
| CML66   | GI_31377641-S | rs6469250  | 8 | 8 | 110313466 | 9053  | 5.8367  | 0.3205 | -0.2171 | 5.8054 | YRI |
| CML66   | GI_31377641-S | rs16879252 | 8 | 8 | 110328866 | 6347  | 6.7488  | 0.3666 | -0.2408 | 5.8054 | YRI |
| CML66   | GI_31377641-S | rs16879260 | 8 | 8 | 110329101 | 6582  | 6.7488  | 0.3666 | -0.2408 | 5.8054 | YRI |
| CML66   | GI_31377641-S | rs6469251  | 8 | 8 | 110374265 | 51746 | 6.3531  | 0.3470 | -0.2242 | 5.8054 | YRI |
| CML66   | GI_31377641-S | rs11997273 | 8 | 8 | 110378558 | 56039 | 6.3531  | 0.3470 | 0.2242  | 5.8054 | YRI |
| CML66   | GI_31377641-S | rs16879306 | 8 | 8 | 110404561 | 82042 | 6.7488  | 0.3666 | -0.2408 | 5.8054 | YRI |
| PKHD1L1 | GI_31377831-S | rs2607638  | 8 | 8 | 110539887 | 68368 | 6.4663  | 0.3527 | 0.3999  | 5.7819 | YRI |
| PKHD1L1 | GI_31377831-S | rs2844252  | 8 | 8 | 110540306 | 67949 | 6.4663  | 0.3527 | 0.3999  | 5.7819 | YRI |
| PKHD1L1 | GI_31377831-S | rs1026438  | 8 | 8 | 110543142 | 65113 | 6.4663  | 0.3527 | -0.3999 | 5.7819 | YRI |
| PKHD1L1 | GI_31377831-S | rs1673401  | 8 | 8 | 110544752 | 63503 | 6.4663  | 0.3527 | 0.3999  | 5.7819 | YRI |
| PKHD1L1 | GI_31377831-S | rs1783145  | 8 | 8 | 110545050 | 63205 | 6.4663  | 0.3527 | 0.3999  | 5.7819 | YRI |

|           |               |            |   |   |           |       |         |        |         |        |     |
|-----------|---------------|------------|---|---|-----------|-------|---------|--------|---------|--------|-----|
| PKHD1L1   | GI_31377831-S | rs1783144  | 8 | 8 | 110545167 | 63088 | 5.8604  | 0.3263 | -0.4502 | 5.7819 | YRI |
| PKHD1L1   | GI_31377831-S | rs1673400  | 8 | 8 | 110545286 | 62969 | 6.4663  | 0.3527 | -0.3999 | 5.7819 | YRI |
| PKHD1L1   | GI_31377831-S | rs1673398  | 8 | 8 | 110546169 | 62086 | 7.5213  | 0.4649 | -0.4833 | 5.7819 | YRI |
| PKHD1L1   | GI_31377831-S | rs1673397  | 8 | 8 | 110547112 | 61143 | 6.4663  | 0.3527 | -0.3999 | 5.7819 | YRI |
| PKHD1L1   | GI_31377831-S | rs1783143  | 8 | 8 | 110547650 | 60605 | 6.4663  | 0.3527 | -0.3999 | 5.7819 | YRI |
| PKHD1L1   | GI_31377831-S | rs1783142  | 8 | 8 | 110547837 | 60418 | 6.4663  | 0.3527 | -0.3999 | 5.7819 | YRI |
| PKHD1L1   | GI_31377831-S | rs1673396  | 8 | 8 | 110548797 | 59458 | 6.4663  | 0.3527 | 0.3999  | 5.7819 | YRI |
| PKHD1L1   | GI_31377831-S | rs1471125  | 8 | 8 | 110549755 | 58500 | 6.4663  | 0.3527 | -0.3999 | 5.7819 | YRI |
| PKHD1L1   | GI_31377831-S | rs1471124  | 8 | 8 | 110551558 | 56697 | 6.4663  | 0.3527 | -0.3999 | 5.7819 | YRI |
| PKHD1L1   | GI_31377831-S | rs1783152  | 8 | 8 | 110552076 | 56179 | 6.2588  | 0.3471 | 0.4000  | 5.7819 | YRI |
| PKHD1L1   | GI_31377831-S | rs1673393  | 8 | 8 | 110553021 | 55234 | 5.9697  | 0.3274 | 0.4504  | 5.7819 | YRI |
| PKHD1L1   | GI_31377831-S | rs1783151  | 8 | 8 | 110553119 | 55136 | 6.4663  | 0.3527 | 0.3999  | 5.7819 | YRI |
| PKHD1L1   | GI_31377831-S | rs1783149  | 8 | 8 | 110553988 | 54267 | 6.4663  | 0.3527 | 0.3999  | 5.7819 | YRI |
| PKHD1L1   | GI_31377831-S | rs1626759  | 8 | 8 | 110554960 | 53295 | 12.7766 | 0.6045 | 0.4978  | 5.7819 | YRI |
| PKHD1L1   | GI_31377831-S | rs1457282  | 8 | 8 | 110555942 | 52313 | 12.7766 | 0.6045 | 0.4978  | 5.7819 | YRI |
| PKHD1L1   | GI_31377831-S | rs1783148  | 8 | 8 | 110558796 | 49459 | 13.1159 | 0.6625 | -0.5230 | 5.7819 | YRI |
| PKHD1L1   | GI_31377831-S | rs1379361  | 8 | 8 | 110559318 | 48937 | 12.7766 | 0.6045 | -0.4978 | 5.7819 | YRI |
| PKHD1L1   | GI_31377831-S | rs1783147  | 8 | 8 | 110561016 | 47239 | 12.7766 | 0.6045 | -0.4978 | 5.7819 | YRI |
| PKHD1L1   | GI_31377831-S | rs1630942  | 8 | 8 | 110561053 | 47202 | 12.6089 | 0.6057 | 0.4985  | 5.7819 | YRI |
| PKHD1L1   | GI_31377831-S | rs1630134  | 8 | 8 | 110561140 | 47115 | 12.7766 | 0.6045 | -0.4978 | 5.7819 | YRI |
| PKHD1L1   | GI_31377831-S | rs1026437  | 8 | 8 | 110562125 | 46130 | 12.7766 | 0.6045 | 0.4978  | 5.7819 | YRI |
| PKHD1L1   | GI_31377831-S | rs2844254  | 8 | 8 | 110564368 | 43887 | 12.7766 | 0.6045 | -0.4978 | 5.7819 | YRI |
| PKHD1L1   | GI_31377831-S | rs2607633  | 8 | 8 | 110565344 | 42911 | 12.7766 | 0.6045 | -0.4978 | 5.7819 | YRI |
| PKHD1L1   | GI_31377831-S | rs1009371  | 8 | 8 | 110567126 | 41129 | 12.2433 | 0.5876 | 0.5476  | 5.7819 | YRI |
| PKHD1L1   | GI_31377831-S | rs1783140  | 8 | 8 | 110568520 | 39735 | 12.7766 | 0.6045 | 0.4978  | 5.7819 | YRI |
| PKHD1L1   | GI_31377831-S | rs16879653 | 8 | 8 | 110571643 | 36612 | 6.2213  | 0.3451 | -0.5651 | 5.7819 | YRI |
| PKHD1L1   | GI_31377831-S | rs16879659 | 8 | 8 | 110573394 | 34861 | 6.8869  | 0.3785 | 0.5760  | 5.7819 | YRI |
| PKHD1L1   | GI_31377831-S | rs2607631  | 8 | 8 | 110573591 | 34664 | 12.7766 | 0.6045 | -0.4978 | 5.7819 | YRI |
| PKHD1L1   | GI_31377831-S | rs2607630  | 8 | 8 | 110574042 | 34213 | 13.9158 | 0.6717 | 0.5446  | 5.7819 | YRI |
| PKHD1L1   | GI_31377831-S | rs2607629  | 8 | 8 | 110574354 | 33901 | 12.7766 | 0.6045 | 0.4978  | 5.7819 | YRI |
| PKHD1L1   | GI_31377831-S | rs1013482  | 8 | 8 | 110574886 | 33369 | 12.2433 | 0.5876 | -0.5476 | 5.7819 | YRI |
| PKHD1L1   | GI_31377831-S | rs2607628  | 8 | 8 | 110575062 | 33193 | 12.7766 | 0.6045 | -0.4978 | 5.7819 | YRI |
| PKHD1L1   | GI_31377831-S | rs2607627  | 8 | 8 | 110575834 | 32421 | 8.6140  | 0.4521 | -0.5286 | 5.7819 | YRI |
| PKHD1L1   | GI_31377831-S | rs1783162  | 8 | 8 | 110577414 | 30841 | 12.2433 | 0.5876 | -0.5476 | 5.7819 | YRI |
| Hs.171169 | Hs.171169-S   | rs9774677  | 8 | 8 | 110580169 | 37252 | 7.4718  | 0.4012 | -0.0719 | 5.7561 | YRI |
| PKHD1L1   | GI_31377831-S | rs1783159  | 8 | 8 | 110583540 | 24715 | 11.3550 | 0.5839 | 0.5424  | 5.7819 | YRI |
| PKHD1L1   | GI_31377831-S | rs1783158  | 8 | 8 | 110583563 | 24692 | 12.5636 | 0.6042 | 0.4972  | 5.7819 | YRI |
| PKHD1L1   | GI_31377831-S | rs1673421  | 8 | 8 | 110584402 | 23853 | 8.0502  | 0.4571 | -0.5252 | 5.7819 | YRI |
| PKHD1L1   | GI_31377831-S | rs1673419  | 8 | 8 | 110585433 | 22822 | 12.7766 | 0.6045 | -0.4978 | 5.7819 | YRI |
| PKHD1L1   | GI_31377831-S | rs1783157  | 8 | 8 | 110585436 | 22819 | 12.7766 | 0.6045 | -0.4978 | 5.7819 | YRI |
| PKHD1L1   | GI_31377831-S | rs1673416  | 8 | 8 | 110586668 | 21587 | 12.7766 | 0.6045 | 0.4978  | 5.7819 | YRI |
| PKHD1L1   | GI_31377831-S | rs1673415  | 8 | 8 | 110587384 | 20871 | 12.7766 | 0.6045 | 0.4978  | 5.7819 | YRI |
| PKHD1L1   | GI_31377831-S | rs1379366  | 8 | 8 | 110587810 | 20445 | 12.2433 | 0.5876 | -0.5476 | 5.7819 | YRI |
| PKHD1L1   | GI_31377831-S | rs1783154  | 8 | 8 | 110588748 | 19507 | 12.7766 | 0.6045 | -0.4978 | 5.7819 | YRI |
| PKHD1L1   | GI_31377831-S | rs1783153  | 8 | 8 | 110588990 | 19265 | 12.2433 | 0.5876 | 0.5476  | 5.7819 | YRI |
| PKHD1L1   | GI_31377831-S | rs2844257  | 8 | 8 | 110590653 | 17602 | 17.0162 | 0.7168 | -0.5717 | 5.7819 | YRI |
| PKHD1L1   | GI_31377831-S | rs2607625  | 8 | 8 | 110590692 | 17563 | 17.0162 | 0.7168 | -0.5717 | 5.7819 | YRI |
| PKHD1L1   | GI_31377831-S | rs2844258  | 8 | 8 | 110591692 | 16563 | 17.0162 | 0.7168 | 0.5717  | 5.7819 | YRI |
| PKHD1L1   | GI_31377831-S | rs2844259  | 8 | 8 | 110591903 | 16352 | 17.0162 | 0.7168 | -0.5717 | 5.7819 | YRI |
| PKHD1L1   | GI_31377831-S | rs1783166  | 8 | 8 | 110595060 | 13195 | 16.0912 | 0.6953 | 0.6254  | 5.7819 | YRI |
| PKHD1L1   | GI_31377831-S | rs1673411  | 8 | 8 | 110597325 | 10930 | 9.5670  | 0.4913 | -0.5659 | 5.7819 | YRI |
| PKHD1L1   | GI_31377831-S | rs1783168  | 8 | 8 | 110598046 | 10209 | 7.8902  | 0.4203 | 0.5066  | 5.7819 | YRI |
| PKHD1L1   | GI_31377831-S | rs1673410  | 8 | 8 | 110598253 | 10002 | 17.0162 | 0.7168 | 0.5717  | 5.7819 | YRI |
| PKHD1L1   | GI_31377831-S | rs1673413  | 8 | 8 | 110599052 | 9203  | 17.0162 | 0.7168 | -0.5717 | 5.7819 | YRI |
| Hs.171169 | Hs.171169-S   | rs7842842  | 8 | 8 | 110600053 | 17368 | 7.4718  | 0.4012 | 0.0719  | 5.7561 | YRI |
| PKHD1L1   | GI_31377831-S | rs1783170  | 8 | 8 | 110600142 | 8113  | 16.0912 | 0.6953 | -0.6254 | 5.7819 | YRI |
| PKHD1L1   | GI_31377831-S | rs1673409  | 8 | 8 | 110600946 | 7309  | 17.0162 | 0.7168 | -0.5717 | 5.7819 | YRI |
| PKHD1L1   | GI_31377831-S | rs1783171  | 8 | 8 | 110601912 | 6343  | 16.3129 | 0.7069 | -0.5729 | 5.7819 | YRI |
| PKHD1L1   | GI_31377831-S | rs1673428  | 8 | 8 | 110602120 | 6135  | 17.0162 | 0.7168 | -0.5717 | 5.7819 | YRI |

|           |               |            |   |   |           |        |         |        |         |        |     |
|-----------|---------------|------------|---|---|-----------|--------|---------|--------|---------|--------|-----|
| PKHD1L1   | GI_31377831-S | rs2844261  | 8 | 8 | 110602670 | 5585   | 17.0162 | 0.7168 | -0.5717 | 5.7819 | YRI |
| PKHD1L1   | GI_31377831-S | rs1563578  | 8 | 8 | 110603688 | 4567   | 17.0162 | 0.7168 | -0.5717 | 5.7819 | YRI |
| PKHD1L1   | GI_31377831-S | rs1457288  | 8 | 8 | 110603951 | 4304   | 14.1414 | 0.6447 | -0.6297 | 5.7819 | YRI |
| PKHD1L1   | GI_31377831-S | rs897840   | 8 | 8 | 110605492 | 2763   | 17.0162 | 0.7168 | -0.5717 | 5.7819 | YRI |
| PKHD1L1   | GI_31377831-S | rs897842   | 8 | 8 | 110605957 | 2298   | 17.0162 | 0.7168 | 0.5717  | 5.7819 | YRI |
| PKHD1L1   | GI_31377831-S | rs1783172  | 8 | 8 | 110606128 | 2127   | 17.0162 | 0.7168 | 0.5717  | 5.7819 | YRI |
| PKHD1L1   | GI_31377831-S | rs1457294  | 8 | 8 | 110608063 | 192    | 17.0162 | 0.7168 | 0.5717  | 5.7819 | YRI |
| PKHD1L1   | GI_31377831-S | rs1457295  | 8 | 8 | 110608130 | 125    | 17.0162 | 0.7168 | 0.5717  | 5.7819 | YRI |
| PKHD1L1   | GI_31377831-S | rs1783174  | 8 | 8 | 110608362 | 107    | 17.0162 | 0.7168 | -0.5717 | 5.7819 | YRI |
| PKHD1L1   | GI_31377831-S | rs1673383  | 8 | 8 | 110609091 | 836    | 17.0162 | 0.7168 | 0.5717  | 5.7819 | YRI |
| PKHD1L1   | GI_31377831-S | rs1673384  | 8 | 8 | 110609441 | 1186   | 17.0162 | 0.7168 | -0.5717 | 5.7819 | YRI |
| PKHD1L1   | GI_31377831-S | rs1673389  | 8 | 8 | 110610255 | 2000   | 17.0162 | 0.7168 | -0.5717 | 5.7819 | YRI |
| PKHD1L1   | GI_31377831-S | rs1673395  | 8 | 8 | 110610586 | 2331   | 17.0162 | 0.7168 | 0.5717  | 5.7819 | YRI |
| PKHD1L1   | GI_31377831-S | rs1673399  | 8 | 8 | 110611139 | 2884   | 17.0162 | 0.7168 | 0.5717  | 5.7819 | YRI |
| PKHD1L1   | GI_31377831-S | rs1617259  | 8 | 8 | 110611474 | 3219   | 17.0162 | 0.7168 | 0.5717  | 5.7819 | YRI |
| PKHD1L1   | GI_31377831-S | rs2154660  | 8 | 8 | 110612697 | 4442   | 17.0162 | 0.7168 | -0.5717 | 5.7819 | YRI |
| PKHD1L1   | GI_31377831-S | rs7821242  | 8 | 8 | 110613700 | 5445   | 13.6373 | 0.6368 | -0.6343 | 5.7819 | YRI |
| PKHD1L1   | GI_31377831-S | rs13439864 | 8 | 8 | 110615884 | 7629   | 15.3926 | 0.7611 | -0.5631 | 5.7819 | YRI |
| PKHD1L1   | GI_31377831-S | rs7006166  | 8 | 8 | 110616688 | 8433   | 10.4208 | 0.5304 | -0.5945 | 5.7819 | YRI |
| PKHD1L1   | GI_31377831-S | rs7011340  | 8 | 8 | 110617590 | 9335   | 17.0162 | 0.7168 | -0.5717 | 5.7819 | YRI |
| LOC377696 | GI_37555914-S | rs2460966  | 8 | 8 | 119693737 | 31563  | 7.9195  | 0.4216 | -0.4458 | 6.5905 | YRI |
| Hs.453941 | Hs.453941-S   | rs2460966  | 8 | 8 | 119693737 | 113657 | 11.1195 | 0.5495 | -0.1508 | 8.5987 | YRI |
| LOC377696 | GI_37555914-S | rs2514594  | 8 | 8 | 119694330 | 32156  | 7.3033  | 0.3986 | 0.2968  | 6.5905 | YRI |
| LOC377696 | GI_37555914-S | rs2460970  | 8 | 8 | 119698635 | 36461  | 9.4405  | 0.4863 | 0.4959  | 6.5905 | YRI |
| Hs.453941 | Hs.453941-S   | rs2460970  | 8 | 8 | 119698635 | 108759 | 14.7079 | 0.6602 | 0.1712  | 8.5987 | YRI |
| LOC377696 | GI_37555914-S | rs880033   | 8 | 8 | 119702375 | 40201  | 8.9732  | 0.4731 | -0.4951 | 6.5905 | YRI |
| Hs.453941 | Hs.453941-S   | rs880033   | 8 | 8 | 119702375 | 105019 | 15.4351 | 0.6855 | -0.1786 | 8.5987 | YRI |
| LOC377696 | GI_37555914-S | rs880034   | 8 | 8 | 119702442 | 40268  | 9.4319  | 0.4859 | 0.5068  | 6.5905 | YRI |
| Hs.453941 | Hs.453941-S   | rs880034   | 8 | 8 | 119702442 | 104952 | 13.7887 | 0.6347 | 0.1717  | 8.5987 | YRI |
| LOC377696 | GI_37555914-S | rs2460972  | 8 | 8 | 119707958 | 45784  | 8.6863  | 0.4551 | -0.5532 | 6.5905 | YRI |
| Hs.453941 | Hs.453941-S   | rs2460972  | 8 | 8 | 119707958 | 99436  | 11.1370 | 0.5502 | -0.1805 | 8.5987 | YRI |
| LOC377696 | GI_37555914-S | rs2514603  | 8 | 8 | 119722156 | 59982  | 8.6863  | 0.4551 | -0.5532 | 6.5905 | YRI |
| Hs.453941 | Hs.453941-S   | rs2514603  | 8 | 8 | 119722156 | 85238  | 11.1370 | 0.5502 | -0.1805 | 8.5987 | YRI |
| LOC377696 | GI_37555914-S | rs2514605  | 8 | 8 | 119723591 | 61417  | 8.6863  | 0.4551 | 0.5532  | 6.5905 | YRI |
| Hs.453941 | Hs.453941-S   | rs2514605  | 8 | 8 | 119723591 | 83803  | 11.1370 | 0.5502 | 0.1805  | 8.5987 | YRI |
| LOC377696 | GI_37555914-S | rs2514607  | 8 | 8 | 119725499 | 63325  | 8.6863  | 0.4551 | -0.5532 | 6.5905 | YRI |
| Hs.453941 | Hs.453941-S   | rs2514607  | 8 | 8 | 119725499 | 81895  | 11.1370 | 0.5502 | -0.1805 | 8.5987 | YRI |
| LOC377696 | GI_37555914-S | rs2514608  | 8 | 8 | 119726049 | 63875  | 8.6863  | 0.4551 | -0.5532 | 6.5905 | YRI |
| Hs.453941 | Hs.453941-S   | rs2514608  | 8 | 8 | 119726049 | 81345  | 11.1370 | 0.5502 | -0.1805 | 8.5987 | YRI |
| LOC377696 | GI_37555914-S | rs2514609  | 8 | 8 | 119726405 | 64231  | 8.6863  | 0.4551 | -0.5532 | 6.5905 | YRI |
| Hs.453941 | Hs.453941-S   | rs2514609  | 8 | 8 | 119726405 | 80989  | 11.1370 | 0.5502 | -0.1805 | 8.5987 | YRI |
| LOC377696 | GI_37555914-S | rs2514610  | 8 | 8 | 119728552 | 66378  | 8.6863  | 0.4551 | 0.5532  | 6.5905 | YRI |
| Hs.453941 | Hs.453941-S   | rs2514610  | 8 | 8 | 119728552 | 78842  | 11.1370 | 0.5502 | 0.1805  | 8.5987 | YRI |
| LOC377696 | GI_37555914-S | rs2460979  | 8 | 8 | 119731021 | 68847  | 7.7084  | 0.4121 | -0.4681 | 6.5905 | YRI |
| LOC377696 | GI_37555914-S | rs2514576  | 8 | 8 | 119740944 | 78770  | 7.1036  | 0.4238 | 0.5154  | 6.5905 | YRI |
| Hs.453941 | Hs.453941-S   | rs2514576  | 8 | 8 | 119740944 | 66450  | 9.9492  | 0.5523 | 0.1586  | 8.5987 | YRI |
| LOC377696 | GI_37555914-S | rs2460982  | 8 | 8 | 119741293 | 79119  | 6.8331  | 0.3812 | -0.4395 | 6.5905 | YRI |
| TOP1MT    | GI_16418460-S | rs2450772  | 8 | 8 | 144484791 | 15214  | 7.2713  | 0.3918 | -0.2706 | 5.8038 | YRI |
| TOP1MT    | GI_16418460-S | rs744113   | 8 | 8 | 144487406 | 17829  | 7.7188  | 0.4125 | 0.2670  | 5.8038 | YRI |
| TOP1MT    | GI_16418460-S | rs2450776  | 8 | 8 | 144488815 | 19238  | 6.8146  | 0.3699 | -0.2785 | 5.8038 | YRI |
| TOP1MT    | GI_16418460-S | rs2467952  | 8 | 8 | 144489470 | 19893  | 7.7188  | 0.4125 | -0.2670 | 5.8038 | YRI |
| TOP1MT    | GI_16418460-S | rs901773   | 8 | 8 | 144489976 | 20399  | 7.8242  | 0.4173 | 0.2882  | 5.8038 | YRI |
| TOP1MT    | GI_16418460-S | rs6420187  | 8 | 8 | 144490663 | 21086  | 7.7188  | 0.4125 | 0.2670  | 5.8038 | YRI |
| TOP1MT    | GI_16418460-S | rs2980262  | 8 | 8 | 144494098 | 24521  | 5.8754  | 0.3271 | -0.2428 | 5.8038 | YRI |
| TOP1MT    | GI_16418460-S | rs2977365  | 8 | 8 | 144494617 | 25040  | 5.8934  | 0.3281 | 0.2434  | 5.8038 | YRI |
| TOP1MT    | GI_16418460-S | rs2980260  | 8 | 8 | 144494894 | 25317  | 7.9043  | 0.4265 | 0.2682  | 5.8038 | YRI |
| TOP1MT    | GI_16418460-S | rs2931719  | 8 | 8 | 144495295 | 25718  | 7.7188  | 0.4125 | 0.2670  | 5.8038 | YRI |
| TOP1MT    | GI_16418460-S | rs2450781  | 8 | 8 | 144496719 | 27142  | 7.3543  | 0.3957 | -0.2723 | 5.8038 | YRI |
| TOP1MT    | GI_16418460-S | rs2467933  | 8 | 8 | 144499560 | 29983  | 5.9091  | 0.3242 | 0.2688  | 5.8038 | YRI |

|           |               |            |   |   |           |        |         |        |         |        |     |
|-----------|---------------|------------|---|---|-----------|--------|---------|--------|---------|--------|-----|
| TOP1MT    | GI_16418460-S | rs6558354  | 8 | 8 | 144507216 | 37639  | 6.0399  | 0.3310 | 0.2528  | 5.8038 | YRI |
| TOP1MT    | GI_16418460-S | rs2450758  | 8 | 8 | 144509422 | 39845  | 5.9797  | 0.3279 | 0.2432  | 5.8038 | YRI |
| RHPN1     | GI_19882236-S | rs7003432  | 8 | 8 | 144518730 | 17080  | 6.0980  | 0.3539 | 0.2796  | 5.9359 | YRI |
| PP3856    | GI_40255088-S | rs1809148  | 8 | 8 | 144734218 | 6085   | 9.1417  | 0.4742 | -0.9059 | 8.0061 | YRI |
| PP3856    | GI_40255088-S | rs755217   | 8 | 8 | 144757655 | 29522  | 8.3952  | 0.4427 | -0.9672 | 8.0061 | YRI |
| PP3856    | GI_40255088-S | rs896962   | 8 | 8 | 144758235 | 30102  | 8.3952  | 0.4427 | -0.9672 | 8.0061 | YRI |
| PP3856    | GI_40255088-S | rs2242089  | 8 | 8 | 144760289 | 32156  | 10.4984 | 0.5271 | 1.1066  | 8.0061 | YRI |
| LOC286075 | GI_31341152-S | rs11136315 | 8 | 8 | 144849455 | 196    | 6.3214  | 0.3454 | 0.1575  | 6.2487 | YRI |
| ZNF34     | GI_31543141-S | rs7829752  | 8 | 8 | 145996305 | 26858  | 5.5976  | 0.3078 | 0.1729  | 5.4346 | YRI |
| ANKRD15   | GI_23510374-A | rs4742329  | 9 | 9 | 741144    | 5431   | 9.3538  | 0.4828 | -0.2328 | 7.3518 | YRI |
| ANKRD15   | GI_23510374-A | rs4740880  | 9 | 9 | 741167    | 5454   | 10.2399 | 0.5174 | 0.2404  | 7.3518 | YRI |
| ANKRD15   | GI_23510374-A | rs12001769 | 9 | 9 | 741992    | 6279   | 10.2399 | 0.5174 | 0.2404  | 7.3518 | YRI |
| Hs.155793 | Hs.155793-S   | rs1548299  | 9 | 9 | 3640174   | 2751   | 6.8027  | 0.3744 | -0.1641 | 6.2846 | YRI |
| hmm17691  | hmm17691-S    | rs9407709  | 9 | 9 | 15991924  | 417012 | 6.1035  | 0.3542 | -0.0470 | 6.0312 | YRI |
| hmm17691  | hmm17691-S    | rs10810525 | 9 | 9 | 16028177  | 380759 | 6.5184  | 0.3553 | 0.0443  | 6.0312 | YRI |
| B4GALT1   | GI_13929461-S | rs7036812  | 9 | 9 | 33133822  | 32904  | 6.1422  | 0.3617 | 0.3879  | 6.0552 | YRI |
| NOL6      | GI_39777589-A | rs476059   | 9 | 9 | 33448577  | 2846   | 6.4810  | 0.3534 | -0.1974 | 6.2802 | YRI |
| NUDT2     | GI_22219466-A | rs1969964  | 9 | 9 | 34145112  | 188391 | 9.0939  | 0.4722 | 0.3585  | 5.7949 | YRI |
| NUDT2     | GI_22219466-A | rs7042499  | 9 | 9 | 34152975  | 180528 | 6.6176  | 0.3602 | -0.3632 | 5.7949 | YRI |
| NUDT2     | GI_22219466-A | rs7032924  | 9 | 9 | 34157694  | 175809 | 12.1016 | 0.5829 | -0.3854 | 5.7949 | YRI |
| NUDT2     | GI_22219466-A | rs2769707  | 9 | 9 | 34157721  | 175782 | 12.1016 | 0.5829 | 0.3854  | 5.7949 | YRI |
| NUDT2     | GI_22219466-A | rs2769708  | 9 | 9 | 34158112  | 175391 | 12.1016 | 0.5829 | 0.3854  | 5.7949 | YRI |
| NUDT2     | GI_22219466-A | rs2769710  | 9 | 9 | 34160980  | 172523 | 12.1016 | 0.5829 | 0.3854  | 5.7949 | YRI |
| NUDT2     | GI_22219466-A | rs1198663  | 9 | 9 | 34165561  | 167942 | 12.1016 | 0.5829 | -0.3854 | 5.7949 | YRI |
| NUDT2     | GI_22219466-A | rs4879758  | 9 | 9 | 34178403  | 155100 | 8.8719  | 0.4630 | -0.4430 | 5.7949 | YRI |
| NUDT2     | GI_22219466-A | rs10814078 | 9 | 9 | 34184053  | 149450 | 8.8719  | 0.4630 | -0.4430 | 5.7949 | YRI |
| NUDT2     | GI_22219466-A | rs10971988 | 9 | 9 | 34187250  | 146253 | 8.8719  | 0.4630 | 0.4430  | 5.7949 | YRI |
| NUDT2     | GI_22219466-A | rs7032947  | 9 | 9 | 34187861  | 145642 | 6.3121  | 0.3449 | 0.4986  | 5.7949 | YRI |
| NUDT2     | GI_22219466-A | rs7036296  | 9 | 9 | 34188002  | 145501 | 8.8719  | 0.4630 | 0.4430  | 5.7949 | YRI |
| NUDT2     | GI_22219466-A | rs2094998  | 9 | 9 | 34188916  | 144587 | 6.3121  | 0.3449 | -0.4986 | 5.7949 | YRI |
| NUDT2     | GI_22219466-A | rs7853065  | 9 | 9 | 34194241  | 139262 | 11.6013 | 0.5857 | -0.4055 | 5.7949 | YRI |
| NUDT2     | GI_22219466-A | rs4319185  | 9 | 9 | 34200872  | 132631 | 11.0942 | 0.5486 | -0.3850 | 5.7949 | YRI |
| NUDT2     | GI_22219466-A | rs1556439  | 9 | 9 | 34201942  | 131561 | 11.0942 | 0.5486 | -0.3850 | 5.7949 | YRI |
| NUDT2     | GI_22219466-A | rs7341762  | 9 | 9 | 34205270  | 128233 | 8.8706  | 0.5004 | -0.3806 | 5.7949 | YRI |
| NUDT2     | GI_22219466-A | rs10733472 | 9 | 9 | 34206384  | 127119 | 14.8585 | 0.6642 | 0.4055  | 5.7949 | YRI |
| NUDT2     | GI_22219466-A | rs10758248 | 9 | 9 | 34207135  | 126368 | 8.1708  | 0.4328 | 0.4007  | 5.7949 | YRI |
| NUDT2     | GI_22219466-A | rs4879763  | 9 | 9 | 34209476  | 124027 | 6.3121  | 0.3449 | -0.4986 | 5.7949 | YRI |
| NUDT2     | GI_22219466-A | rs4879764  | 9 | 9 | 34212444  | 121059 | 6.3121  | 0.3449 | 0.4986  | 5.7949 | YRI |
| NUDT2     | GI_22219466-A | rs10814079 | 9 | 9 | 34216087  | 117416 | 6.3121  | 0.3449 | -0.4986 | 5.7949 | YRI |
| NUDT2     | GI_22219466-A | rs9695200  | 9 | 9 | 34217873  | 115630 | 8.1708  | 0.4328 | 0.4007  | 5.7949 | YRI |
| NUDT2     | GI_22219466-A | rs7040201  | 9 | 9 | 34222396  | 111107 | 6.3121  | 0.3449 | 0.4986  | 5.7949 | YRI |
| NUDT2     | GI_22219466-A | rs7025829  | 9 | 9 | 34222465  | 111038 | 8.1708  | 0.4328 | -0.4007 | 5.7949 | YRI |
| NUDT2     | GI_22219466-A | rs4879765  | 9 | 9 | 34226552  | 106951 | 8.8719  | 0.4630 | 0.4430  | 5.7949 | YRI |
| NUDT2     | GI_22219466-A | rs10972013 | 9 | 9 | 34227044  | 106459 | 8.8719  | 0.4630 | 0.4430  | 5.7949 | YRI |
| NUDT2     | GI_22219466-A | rs7857658  | 9 | 9 | 34232242  | 101261 | 6.3121  | 0.3449 | -0.4986 | 5.7949 | YRI |
| NUDT2     | GI_22219466-A | rs4008745  | 9 | 9 | 34234227  | 99276  | 8.8719  | 0.4630 | -0.4430 | 5.7949 | YRI |
| NUDT2     | GI_22219466-A | rs2380926  | 9 | 9 | 34239354  | 94149  | 8.1708  | 0.4328 | -0.4007 | 5.7949 | YRI |
| NUDT2     | GI_22219466-A | rs1049557  | 9 | 9 | 34241943  | 91560  | 8.0620  | 0.4336 | -0.5053 | 5.7949 | YRI |
| NUDT2     | GI_22219466-A | rs1049567  | 9 | 9 | 34242127  | 91376  | 6.1400  | 0.3847 | -0.4147 | 5.7949 | YRI |
| NUDT2     | GI_22219466-A | rs10814083 | 9 | 9 | 34246347  | 87156  | 8.7416  | 0.4575 | 0.5119  | 5.7949 | YRI |
| NUDT2     | GI_22219466-A | rs7020934  | 9 | 9 | 34251117  | 82386  | 8.8719  | 0.4630 | -0.4430 | 5.7949 | YRI |
| NUDT2     | GI_22219466-A | rs10814084 | 9 | 9 | 34253389  | 80114  | 7.4451  | 0.3999 | -0.5826 | 5.7949 | YRI |
| NUDT2     | GI_22219466-A | rs10814086 | 9 | 9 | 34254597  | 78906  | 6.3121  | 0.3449 | -0.4986 | 5.7949 | YRI |
| NUDT2     | GI_22219466-A | rs10814087 | 9 | 9 | 34255763  | 77740  | 8.9432  | 0.4660 | 0.4178  | 5.7949 | YRI |
| NUDT2     | GI_22219466-A | rs10972032 | 9 | 9 | 34259079  | 74424  | 8.8719  | 0.4630 | 0.4430  | 5.7949 | YRI |
| NUDT2     | GI_22219466-A | rs7868756  | 9 | 9 | 34261381  | 72122  | 8.8719  | 0.4630 | -0.4430 | 5.7949 | YRI |
| NUDT2     | GI_22219466-A | rs1929638  | 9 | 9 | 34262258  | 71245  | 8.9432  | 0.4660 | -0.4178 | 5.7949 | YRI |
| NUDT2     | GI_22219466-A | rs2890545  | 9 | 9 | 34267053  | 66450  | 8.9432  | 0.4660 | 0.4178  | 5.7949 | YRI |
| NUDT2     | GI_22219466-A | rs7045680  | 9 | 9 | 34271390  | 62113  | 11.4266 | 0.5603 | 0.3747  | 5.7949 | YRI |

|           |               |            |   |   |          |        |         |        |         |        |     |
|-----------|---------------|------------|---|---|----------|--------|---------|--------|---------|--------|-----|
| NUDT2     | GI_22219466-A | rs7862080  | 9 | 9 | 34293922 | 39581  | 11.4266 | 0.5603 | 0.3747  | 5.7949 | YRI |
| NUDT2     | GI_22219466-A | rs7042250  | 9 | 9 | 34295076 | 38427  | 8.8719  | 0.4630 | 0.4430  | 5.7949 | YRI |
| NUDT2     | GI_22219466-A | rs10972047 | 9 | 9 | 34300357 | 33146  | 5.8971  | 0.3236 | -0.5893 | 5.7949 | YRI |
| NUDT2     | GI_22219466-A | rs7853609  | 9 | 9 | 34310195 | 23308  | 7.9161  | 0.4508 | -0.4325 | 5.7949 | YRI |
| NUDT2     | GI_22219466-A | rs7867248  | 9 | 9 | 34310264 | 23239  | 15.2667 | 0.6749 | 0.4038  | 5.7949 | YRI |
| NUDT2     | GI_22219466-A | rs10814098 | 9 | 9 | 34314168 | 19335  | 7.4451  | 0.3999 | -0.5826 | 5.7949 | YRI |
| NUDT2     | GI_22219466-A | rs2039343  | 9 | 9 | 34316936 | 16567  | 8.9432  | 0.4660 | 0.4178  | 5.7949 | YRI |
| NUDT2     | GI_22219466-A | rs7875342  | 9 | 9 | 34319110 | 14393  | 8.8719  | 0.4630 | 0.4430  | 5.7949 | YRI |
| NUDT2     | GI_22219466-A | rs2039345  | 9 | 9 | 34319839 | 13664  | 14.2160 | 0.6732 | -0.4042 | 5.7949 | YRI |
| NUDT2     | GI_22219466-A | rs7039222  | 9 | 9 | 34322740 | 10763  | 8.5100  | 0.4476 | 0.5167  | 5.7949 | YRI |
| NUDT2     | GI_22219466-A | rs4879775  | 9 | 9 | 34324793 | 8710   | 9.2715  | 0.4854 | -0.4741 | 5.7949 | YRI |
| NUDT2     | GI_22219466-A | rs7025269  | 9 | 9 | 34326266 | 7237   | 15.2667 | 0.6749 | 0.4038  | 5.7949 | YRI |
| NUDT2     | GI_22219466-A | rs7848476  | 9 | 9 | 34330521 | 2982   | 14.7176 | 0.6669 | -0.3996 | 5.7949 | YRI |
| NUDT2     | GI_22219466-A | rs10972067 | 9 | 9 | 34332634 | 869    | 8.8719  | 0.4630 | 0.4430  | 5.7949 | YRI |
| NUDT2     | GI_22219466-A | rs10814105 | 9 | 9 | 34359062 | 25559  | 7.2789  | 0.3975 | 0.4580  | 5.7949 | YRI |
| NUDT2     | GI_22219466-A | rs7852399  | 9 | 9 | 34361788 | 28285  | 6.5101  | 0.3548 | 0.3692  | 5.7949 | YRI |
| NUDT2     | GI_22219466-A | rs2381117  | 9 | 9 | 34372175 | 38672  | 11.4155 | 0.5599 | -0.3719 | 5.7949 | YRI |
| NUDT2     | GI_22219466-A | rs2890585  | 9 | 9 | 34374063 | 40560  | 7.1803  | 0.3875 | 0.3934  | 5.7949 | YRI |
| NUDT2     | GI_22219466-A | rs10119084 | 9 | 9 | 34375949 | 42446  | 11.4155 | 0.5599 | -0.3719 | 5.7949 | YRI |
| Hs.402723 | Hs.402723-S   | rs7873225  | 9 | 9 | 34991255 | 69535  | 5.9537  | 0.3265 | -0.0889 | 5.734  | YRI |
| Hs.402723 | Hs.402723-S   | rs4878595  | 9 | 9 | 35001131 | 59659  | 6.3032  | 0.3445 | 0.0782  | 5.734  | YRI |
| Hs.402723 | Hs.402723-S   | rs4878596  | 9 | 9 | 35002033 | 58757  | 6.3032  | 0.3445 | -0.0782 | 5.734  | YRI |
| Hs.402723 | Hs.402723-S   | rs2073576  | 9 | 9 | 35058948 | 1842   | 9.8584  | 0.5028 | 0.1051  | 5.734  | YRI |
| FLJ20444  | GI_44888815-S | rs7873418  | 9 | 9 | 64197638 | 8749   | 4.5189  | 0.2560 | 1.1454  | 4.3508 | YRI |
| FLJ20444  | GI_44888815-S | rs13440192 | 9 | 9 | 64205798 | 589    | 5.7770  | 0.3267 | -1.3158 | 4.3508 | YRI |
| FLJ20444  | GI_44888815-S | rs11262395 | 9 | 9 | 64207745 | 1358   | 7.9987  | 0.4252 | -1.6704 | 4.3508 | YRI |
| FLJ20444  | GI_44888815-S | rs10119939 | 9 | 9 | 64232092 | 25705  | 7.9987  | 0.4252 | -1.6704 | 4.3508 | YRI |
| FLJ20435  | GI_31340828-S | rs6606188  | 9 | 9 | 65018691 | 51597  | 5.0882  | 0.2803 | -0.1167 | 4.2427 | YRI |
| SPIN      | GI_5730064-S  | rs17054145 | 9 | 9 | 88300439 | 19432  | 7.1813  | 0.3928 | 0.2645  | 6.6355 | YRI |
| SPIN      | GI_5730064-S  | rs17054151 | 9 | 9 | 88306408 | 13463  | 7.0933  | 0.3886 | -0.2625 | 6.6355 | YRI |
| SPTLC1    | GI_30474870-I | rs12340061 | 9 | 9 | 91748143 | 173227 | 8.1050  | 0.4299 | 0.3273  | 5.8452 | YRI |
| SPTLC1    | GI_30474870-I | rs7045073  | 9 | 9 | 91766291 | 155079 | 6.0049  | 0.3711 | -0.3032 | 5.8452 | YRI |
| SPTLC1    | GI_30474870-I | rs7038823  | 9 | 9 | 91777042 | 144328 | 7.4615  | 0.4007 | 0.3476  | 5.8452 | YRI |
| SPTLC1    | GI_30474870-I | rs1534534  | 9 | 9 | 91781380 | 139990 | 7.4615  | 0.4007 | -0.3476 | 5.8452 | YRI |
| SPTLC1    | GI_30474870-A | rs10115262 | 9 | 9 | 91781821 | 140057 | 10.5300 | 0.5473 | 0.3671  | 5.8452 | YRI |
| SPTLC1    | GI_30474870-I | rs10115262 | 9 | 9 | 91781821 | 139549 | 15.5192 | 0.7007 | 0.4428  | 5.8452 | YRI |
| SPTLC1    | GI_30474870-I | rs9774945  | 9 | 9 | 91790402 | 130968 | 8.3816  | 0.4659 | -0.4074 | 5.8452 | YRI |
| SPTLC1    | GI_30474870-I | rs3750440  | 9 | 9 | 91790571 | 130799 | 6.8039  | 0.3745 | 0.3214  | 5.8452 | YRI |
| SPTLC1    | GI_30474870-A | rs10118409 | 9 | 9 | 91807503 | 114375 | 8.0098  | 0.4257 | 0.3316  | 5.8452 | YRI |
| SPTLC1    | GI_30474870-I | rs10118409 | 9 | 9 | 91807503 | 113867 | 13.4304 | 0.6243 | 0.4262  | 5.8452 | YRI |
| SPTLC1    | GI_30474870-I | rs12351358 | 9 | 9 | 91828047 | 93323  | 8.7277  | 0.5224 | 0.3506  | 5.8452 | YRI |
| SPTLC1    | GI_30474870-I | rs10125563 | 9 | 9 | 91832030 | 89340  | 8.2034  | 0.5055 | 0.3652  | 5.8452 | YRI |
| SPTLC1    | GI_30474870-I | rs6479395  | 9 | 9 | 91838053 | 83317  | 8.8178  | 0.4666 | -0.3686 | 5.8452 | YRI |
| SPTLC1    | GI_30474870-A | rs16908046 | 9 | 9 | 91838952 | 82926  | 6.9782  | 0.3883 | -0.2884 | 5.8452 | YRI |
| SPTLC1    | GI_30474870-I | rs16908046 | 9 | 9 | 91838952 | 82418  | 10.8501 | 0.5526 | -0.3650 | 5.8452 | YRI |
| SPTLC1    | GI_30474870-A | rs7867394  | 9 | 9 | 91842691 | 79187  | 8.6689  | 0.4544 | 0.3389  | 5.8452 | YRI |
| SPTLC1    | GI_30474870-I | rs7867394  | 9 | 9 | 91842691 | 78679  | 14.5695 | 0.6565 | 0.4326  | 5.8452 | YRI |
| SPTLC1    | GI_30474870-A | rs7033888  | 9 | 9 | 91843582 | 78296  | 8.5008  | 0.4530 | 0.3381  | 5.8452 | YRI |
| SPTLC1    | GI_30474870-I | rs7033888  | 9 | 9 | 91843582 | 77788  | 14.3346 | 0.6565 | 0.4331  | 5.8452 | YRI |
| SPTLC1    | GI_30474870-I | rs7045602  | 9 | 9 | 91843788 | 77582  | 8.5025  | 0.4531 | -0.3610 | 5.8452 | YRI |
| SPTLC1    | GI_30474870-I | rs7851249  | 9 | 9 | 91846202 | 75168  | 8.1997  | 0.4398 | -0.3550 | 5.8452 | YRI |
| SPTLC1    | GI_30474870-A | rs7028378  | 9 | 9 | 91855007 | 66871  | 12.5552 | 0.5975 | 0.3917  | 5.8452 | YRI |
| SPTLC1    | GI_30474870-I | rs7028378  | 9 | 9 | 91855007 | 66363  | 21.0815 | 0.7946 | 0.4807  | 5.8452 | YRI |
| SPTLC1    | GI_30474870-A | rs7039366  | 9 | 9 | 91855211 | 66667  | 12.5552 | 0.5975 | 0.3917  | 5.8452 | YRI |
| SPTLC1    | GI_30474870-I | rs7039366  | 9 | 9 | 91855211 | 66159  | 21.0815 | 0.7946 | 0.4807  | 5.8452 | YRI |
| SPTLC1    | GI_30474870-A | rs12353142 | 9 | 9 | 91857005 | 64873  | 9.7647  | 0.5310 | 0.4063  | 5.8452 | YRI |
| SPTLC1    | GI_30474870-I | rs12353142 | 9 | 9 | 91857005 | 64365  | 14.4481 | 0.6864 | 0.4661  | 5.8452 | YRI |
| SPTLC1    | GI_30474870-A | rs10115181 | 9 | 9 | 91861396 | 60482  | 7.3962  | 0.3976 | -0.3209 | 5.8452 | YRI |
| SPTLC1    | GI_30474870-I | rs10115181 | 9 | 9 | 91861396 | 59974  | 11.1424 | 0.5503 | -0.4009 | 5.8452 | YRI |

|        |               |            |   |   |          |       |         |        |         |        |     |
|--------|---------------|------------|---|---|----------|-------|---------|--------|---------|--------|-----|
| SPTLC1 | GI_30474870-A | rs7871997  | 9 | 9 | 91861919 | 59959 | 12.5552 | 0.5975 | 0.3917  | 5.8452 | YRI |
| SPTLC1 | GI_30474870-I | rs7871997  | 9 | 9 | 91861919 | 59451 | 21.0815 | 0.7946 | 0.4807  | 5.8452 | YRI |
| SPTLC1 | GI_30474870-A | rs10117113 | 9 | 9 | 91864260 | 57618 | 8.3697  | 0.4987 | 0.4339  | 5.8452 | YRI |
| SPTLC1 | GI_30474870-I | rs10117113 | 9 | 9 | 91864260 | 57110 | 12.6090 | 0.6617 | 0.5284  | 5.8452 | YRI |
| SPTLC1 | GI_30474870-A | rs13366143 | 9 | 9 | 91864408 | 57470 | 12.5552 | 0.5975 | 0.3917  | 5.8452 | YRI |
| SPTLC1 | GI_30474870-I | rs13366143 | 9 | 9 | 91864408 | 56962 | 21.0815 | 0.7946 | 0.4807  | 5.8452 | YRI |
| SPTLC1 | GI_30474870-A | rs7848959  | 9 | 9 | 91867604 | 54274 | 9.6788  | 0.5144 | -0.3733 | 5.8452 | YRI |
| SPTLC1 | GI_30474870-I | rs7848959  | 9 | 9 | 91867604 | 53766 | 15.5204 | 0.7007 | -0.4654 | 5.8452 | YRI |
| SPTLC1 | GI_30474870-A | rs10121694 | 9 | 9 | 91870871 | 51007 | 12.5552 | 0.5975 | -0.3917 | 5.8452 | YRI |
| SPTLC1 | GI_30474870-I | rs10121694 | 9 | 9 | 91870871 | 50499 | 21.0815 | 0.7946 | -0.4807 | 5.8452 | YRI |
| SPTLC1 | GI_30474870-A | rs10122415 | 9 | 9 | 91871212 | 50666 | 12.5552 | 0.5975 | 0.3917  | 5.8452 | YRI |
| SPTLC1 | GI_30474870-I | rs10122415 | 9 | 9 | 91871212 | 50158 | 21.0815 | 0.7946 | 0.4807  | 5.8452 | YRI |
| SPTLC1 | GI_30474870-A | rs10123181 | 9 | 9 | 91871886 | 49992 | 12.5552 | 0.5975 | 0.3917  | 5.8452 | YRI |
| SPTLC1 | GI_30474870-I | rs10123181 | 9 | 9 | 91871886 | 49484 | 21.0815 | 0.7946 | 0.4807  | 5.8452 | YRI |
| SPTLC1 | GI_30474870-A | rs7018595  | 9 | 9 | 91872609 | 49269 | 12.5617 | 0.6042 | 0.3884  | 5.8452 | YRI |
| SPTLC1 | GI_30474870-I | rs7018595  | 9 | 9 | 91872609 | 48761 | 20.4037 | 0.7890 | 0.4742  | 5.8452 | YRI |
| SPTLC1 | GI_30474870-A | rs7018827  | 9 | 9 | 91872750 | 49128 | 12.5552 | 0.5975 | 0.3917  | 5.8452 | YRI |
| SPTLC1 | GI_30474870-I | rs7018827  | 9 | 9 | 91872750 | 48620 | 21.0815 | 0.7946 | 0.4807  | 5.8452 | YRI |
| SPTLC1 | GI_30474870-A | rs7021285  | 9 | 9 | 91875946 | 45932 | 12.5552 | 0.5975 | 0.3917  | 5.8452 | YRI |
| SPTLC1 | GI_30474870-I | rs7021285  | 9 | 9 | 91875946 | 45424 | 21.0815 | 0.7946 | 0.4807  | 5.8452 | YRI |
| SPTLC1 | GI_30474870-A | rs16908106 | 9 | 9 | 91878408 | 43470 | 12.5552 | 0.5975 | 0.3917  | 5.8452 | YRI |
| SPTLC1 | GI_30474870-I | rs16908106 | 9 | 9 | 91878408 | 42962 | 21.0815 | 0.7946 | 0.4807  | 5.8452 | YRI |
| SPTLC1 | GI_30474870-A | rs7027257  | 9 | 9 | 91879862 | 42016 | 12.5552 | 0.5975 | -0.3917 | 5.8452 | YRI |
| SPTLC1 | GI_30474870-I | rs7027257  | 9 | 9 | 91879862 | 41508 | 21.0815 | 0.7946 | -0.4807 | 5.8452 | YRI |
| SPTLC1 | GI_30474870-A | rs3858086  | 9 | 9 | 91880410 | 41468 | 12.5552 | 0.5975 | -0.3917 | 5.8452 | YRI |
| SPTLC1 | GI_30474870-I | rs3858086  | 9 | 9 | 91880410 | 40960 | 21.0815 | 0.7946 | -0.4807 | 5.8452 | YRI |
| SPTLC1 | GI_30474870-A | rs12339869 | 9 | 9 | 91884274 | 37604 | 6.8013  | 0.3692 | 0.3344  | 5.8452 | YRI |
| SPTLC1 | GI_30474870-I | rs12339869 | 9 | 9 | 91884274 | 37096 | 7.4058  | 0.3981 | 0.3703  | 5.8452 | YRI |
| SPTLC1 | GI_30474870-A | rs16908113 | 9 | 9 | 91886316 | 35562 | 12.3086 | 0.5961 | 0.3910  | 5.8452 | YRI |
| SPTLC1 | GI_30474870-I | rs16908113 | 9 | 9 | 91886316 | 35054 | 20.7805 | 0.7953 | 0.4816  | 5.8452 | YRI |
| SPTLC1 | GI_30474870-A | rs4604504  | 9 | 9 | 91890922 | 30956 | 12.5552 | 0.5975 | -0.3917 | 5.8452 | YRI |
| SPTLC1 | GI_30474870-I | rs4604504  | 9 | 9 | 91890922 | 30448 | 21.0815 | 0.7946 | -0.4807 | 5.8452 | YRI |
| SPTLC1 | GI_30474870-A | rs4344138  | 9 | 9 | 91891068 | 30810 | 12.5552 | 0.5975 | -0.3917 | 5.8452 | YRI |
| SPTLC1 | GI_30474870-I | rs4344138  | 9 | 9 | 91891068 | 30302 | 21.0815 | 0.7946 | -0.4807 | 5.8452 | YRI |
| SPTLC1 | GI_30474870-A | rs4498616  | 9 | 9 | 91891100 | 30778 | 12.5552 | 0.5975 | 0.3917  | 5.8452 | YRI |
| SPTLC1 | GI_30474870-I | rs4498616  | 9 | 9 | 91891100 | 30270 | 21.0815 | 0.7946 | 0.4807  | 5.8452 | YRI |
| SPTLC1 | GI_30474870-A | rs12343645 | 9 | 9 | 91901964 | 19914 | 12.9366 | 0.6499 | -0.3900 | 5.8452 | YRI |
| SPTLC1 | GI_30474870-I | rs12343645 | 9 | 9 | 91901964 | 19406 | 21.7803 | 0.8393 | -0.4853 | 5.8452 | YRI |
| SPTLC1 | GI_30474870-A | rs12343647 | 9 | 9 | 91901973 | 19905 | 12.5552 | 0.5975 | -0.3917 | 5.8452 | YRI |
| SPTLC1 | GI_30474870-I | rs12343647 | 9 | 9 | 91901973 | 19397 | 21.0815 | 0.7946 | -0.4807 | 5.8452 | YRI |
| SPTLC1 | GI_30474870-A | rs12336497 | 9 | 9 | 91903404 | 18474 | 8.3638  | 0.4985 | 0.4287  | 5.8452 | YRI |
| SPTLC1 | GI_30474870-I | rs12336497 | 9 | 9 | 91903404 | 17966 | 13.1825 | 0.6793 | 0.5013  | 5.8452 | YRI |
| SPTLC1 | GI_30474870-A | rs7024215  | 9 | 9 | 91904022 | 17856 | 11.9677 | 0.5914 | -0.3980 | 5.8452 | YRI |
| SPTLC1 | GI_30474870-I | rs7024215  | 9 | 9 | 91904022 | 17348 | 19.2131 | 0.7738 | -0.4835 | 5.8452 | YRI |
| SPTLC1 | GI_30474870-A | rs7871565  | 9 | 9 | 91905055 | 16823 | 11.5968 | 0.5661 | -0.3706 | 5.8452 | YRI |
| SPTLC1 | GI_30474870-I | rs7871565  | 9 | 9 | 91905055 | 16315 | 18.4315 | 0.7467 | -0.4530 | 5.8452 | YRI |
| SPTLC1 | GI_30474870-A | rs12353321 | 9 | 9 | 91905712 | 16166 | 7.3962  | 0.3976 | -0.3209 | 5.8452 | YRI |
| SPTLC1 | GI_30474870-I | rs12353321 | 9 | 9 | 91905712 | 15658 | 11.1424 | 0.5503 | -0.4009 | 5.8452 | YRI |
| SPTLC1 | GI_30474870-A | rs16908131 | 9 | 9 | 91911410 | 10468 | 12.5552 | 0.5975 | -0.3917 | 5.8452 | YRI |
| SPTLC1 | GI_30474870-I | rs16908131 | 9 | 9 | 91911410 | 9960  | 21.0815 | 0.7946 | -0.4807 | 5.8452 | YRI |
| SPTLC1 | GI_30474870-A | rs10117143 | 9 | 9 | 91912119 | 9759  | 12.5552 | 0.5975 | 0.3917  | 5.8452 | YRI |
| SPTLC1 | GI_30474870-I | rs10117143 | 9 | 9 | 91912119 | 9251  | 21.0815 | 0.7946 | 0.4807  | 5.8452 | YRI |
| SPTLC1 | GI_30474870-A | rs7870565  | 9 | 9 | 91919061 | 2817  | 12.5552 | 0.5975 | -0.3917 | 5.8452 | YRI |
| SPTLC1 | GI_30474870-I | rs7870565  | 9 | 9 | 91919061 | 2309  | 21.0815 | 0.7946 | -0.4807 | 5.8452 | YRI |
| SPTLC1 | GI_30474870-A | rs12352341 | 9 | 9 | 91931747 | 9869  | 12.5552 | 0.5975 | 0.3917  | 5.8452 | YRI |
| SPTLC1 | GI_30474870-I | rs12352341 | 9 | 9 | 91931747 | 10377 | 21.0815 | 0.7946 | 0.4807  | 5.8452 | YRI |
| SPTLC1 | GI_30474870-A | rs12349327 | 9 | 9 | 91932383 | 10505 | 12.3077 | 0.5961 | -0.3906 | 5.8452 | YRI |
| SPTLC1 | GI_30474870-I | rs12349327 | 9 | 9 | 91932383 | 11013 | 20.6877 | 0.7938 | -0.4802 | 5.8452 | YRI |
| SPTLC1 | GI_30474870-A | rs12336689 | 9 | 9 | 91934049 | 12171 | 12.5552 | 0.5975 | 0.3917  | 5.8452 | YRI |

|          |               |            |   |   |          |        |         |        |         |        |     |
|----------|---------------|------------|---|---|----------|--------|---------|--------|---------|--------|-----|
| SPTLC1   | GI_30474870-I | rs12336689 | 9 | 9 | 91934049 | 12679  | 21.0815 | 0.7946 | 0.4807  | 5.8452 | YRI |
| SPTLC1   | GI_30474870-A | rs7021408  | 9 | 9 | 91936202 | 14324  | 12.5552 | 0.5975 | 0.3917  | 5.8452 | YRI |
| SPTLC1   | GI_30474870-I | rs7021408  | 9 | 9 | 91936202 | 14832  | 21.0815 | 0.7946 | 0.4807  | 5.8452 | YRI |
| SPTLC1   | GI_30474870-A | rs12341791 | 9 | 9 | 91937679 | 15801  | 12.3714 | 0.5981 | 0.3790  | 5.8452 | YRI |
| SPTLC1   | GI_30474870-I | rs12341791 | 9 | 9 | 91937679 | 16309  | 21.0503 | 0.7997 | 0.4707  | 5.8452 | YRI |
| SPTLC1   | GI_30474870-A | rs7025703  | 9 | 9 | 91939550 | 17672  | 12.3086 | 0.5961 | 0.3910  | 5.8452 | YRI |
| SPTLC1   | GI_30474870-I | rs7025703  | 9 | 9 | 91939550 | 18180  | 20.7805 | 0.7953 | 0.4816  | 5.8452 | YRI |
| SPTLC1   | GI_30474870-A | rs10116088 | 9 | 9 | 91940534 | 18656  | 12.5552 | 0.5975 | -0.3917 | 5.8452 | YRI |
| SPTLC1   | GI_30474870-I | rs10116088 | 9 | 9 | 91940534 | 19164  | 21.0815 | 0.7946 | -0.4807 | 5.8452 | YRI |
| SPTLC1   | GI_30474870-A | rs12338124 | 9 | 9 | 91942463 | 20585  | 12.5552 | 0.5975 | 0.3917  | 5.8452 | YRI |
| SPTLC1   | GI_30474870-I | rs12338124 | 9 | 9 | 91942463 | 21093  | 21.0815 | 0.7946 | 0.4807  | 5.8452 | YRI |
| SPTLC1   | GI_30474870-A | rs10119983 | 9 | 9 | 91953526 | 31648  | 11.1592 | 0.5573 | -0.3850 | 5.8452 | YRI |
| SPTLC1   | GI_30474870-I | rs10119983 | 9 | 9 | 91953526 | 32156  | 18.0536 | 0.7451 | -0.4742 | 5.8452 | YRI |
| SPTLC1   | GI_30474870-I | rs7858974  | 9 | 9 | 91959665 | 38295  | 5.8699  | 0.3222 | -0.3347 | 5.8452 | YRI |
| FLJ14753 | GI_14211858-S | rs9299418  | 9 | 9 | 94120792 | 181651 | 9.1441  | 0.4743 | 1.0678  | 7.3828 | YRI |
| FLJ14753 | GI_14211858-S | rs12343413 | 9 | 9 | 94141099 | 161344 | 9.0504  | 0.4704 | -1.1154 | 7.3828 | YRI |
| FLJ14753 | GI_14211858-S | rs7859571  | 9 | 9 | 94211440 | 91003  | 17.1995 | 0.7208 | -1.1690 | 7.3828 | YRI |
| FLJ14753 | GI_14211858-S | rs9632920  | 9 | 9 | 94255655 | 46788  | 16.5910 | 0.7262 | -1.0852 | 7.3828 | YRI |
| FLJ14753 | GI_14211858-S | rs7036474  | 9 | 9 | 94270934 | 31509  | 17.1995 | 0.7208 | 1.1690  | 7.3828 | YRI |
| FLJ14753 | GI_14211858-S | rs7025878  | 9 | 9 | 94278347 | 24096  | 16.8671 | 0.7260 | 1.2602  | 7.3828 | YRI |
| FLJ14753 | GI_14211858-S | rs7045712  | 9 | 9 | 94287872 | 14571  | 20.9611 | 0.8156 | 1.2886  | 7.3828 | YRI |
| FLJ14753 | GI_14211858-S | rs7046779  | 9 | 9 | 94290447 | 11996  | 22.0397 | 0.8095 | -1.2859 | 7.3828 | YRI |
| FLJ14753 | GI_14211858-S | rs7034153  | 9 | 9 | 94294879 | 7564   | 13.6062 | 0.7147 | -1.0154 | 7.3828 | YRI |
| FLJ14753 | GI_14211858-S | rs7037298  | 9 | 9 | 94295718 | 6725   | 21.6753 | 0.8095 | -1.2873 | 7.3828 | YRI |
| FLJ14753 | GI_14211858-S | rs6479545  | 9 | 9 | 94296830 | 5613   | 20.4678 | 0.8077 | 1.2939  | 7.3828 | YRI |
| FLJ14753 | GI_14211858-S | rs7868703  | 9 | 9 | 94323341 | 20898  | 9.1910  | 0.4762 | -1.0061 | 7.3828 | YRI |
| FLJ14753 | GI_14211858-S | rs7042219  | 9 | 9 | 94327241 | 24798  | 9.1910  | 0.4762 | 1.0061  | 7.3828 | YRI |
| FLJ14753 | GI_14211858-S | rs908808   | 9 | 9 | 94351543 | 49100  | 8.3747  | 0.4418 | 1.0800  | 7.3828 | YRI |
| HABP4    | GI_24307946-S | rs10820378 | 9 | 9 | 96172304 | 159629 | 7.4696  | 0.4011 | -0.3521 | 5.921  | YRI |
| HABP4    | GI_24307946-S | rs7028361  | 9 | 9 | 96173274 | 158659 | 7.4696  | 0.4011 | -0.3521 | 5.921  | YRI |
| HABP4    | GI_24307946-S | rs10820386 | 9 | 9 | 96176865 | 155068 | 7.4696  | 0.4011 | -0.3521 | 5.921  | YRI |
| HABP4    | GI_24307946-S | rs10123368 | 9 | 9 | 96190939 | 140994 | 6.5178  | 0.3552 | -0.3369 | 5.921  | YRI |
| HABP4    | GI_24307946-S | rs10990682 | 9 | 9 | 96196175 | 135758 | 6.5178  | 0.3552 | 0.3369  | 5.921  | YRI |
| HABP4    | GI_24307946-S | rs10820447 | 9 | 9 | 96211599 | 120334 | 8.8025  | 0.4601 | 0.3851  | 5.921  | YRI |
| HABP4    | GI_24307946-S | rs7851198  | 9 | 9 | 96211930 | 120003 | 8.8025  | 0.4601 | 0.3851  | 5.921  | YRI |
| HABP4    | GI_24307946-S | rs7020954  | 9 | 9 | 96224468 | 107465 | 8.1430  | 0.4316 | -0.3610 | 5.921  | YRI |
| HABP4    | GI_24307946-S | rs7861768  | 9 | 9 | 96230334 | 101599 | 7.5271  | 0.4037 | 0.3573  | 5.921  | YRI |
| HABP4    | GI_24307946-S | rs7853063  | 9 | 9 | 96233926 | 98007  | 8.5499  | 0.4493 | 0.3571  | 5.921  | YRI |
| HABP4    | GI_24307946-S | rs7044391  | 9 | 9 | 96239346 | 92587  | 8.0561  | 0.4277 | -0.3585 | 5.921  | YRI |
| HABP4    | GI_24307946-S | rs2025151  | 9 | 9 | 96241067 | 90866  | 8.0106  | 0.4257 | -0.3515 | 5.921  | YRI |
| HABP4    | GI_24307946-S | rs6479312  | 9 | 9 | 96247474 | 84459  | 8.4105  | 0.4433 | 0.3533  | 5.921  | YRI |
| HABP4    | GI_24307946-S | rs2145985  | 9 | 9 | 96254086 | 77847  | 8.0561  | 0.4277 | -0.3585 | 5.921  | YRI |
| HABP4    | GI_24307946-S | rs10122517 | 9 | 9 | 96255011 | 76922  | 8.5499  | 0.4493 | -0.3571 | 5.921  | YRI |
| HABP4    | GI_24307946-S | rs10761006 | 9 | 9 | 96258339 | 73594  | 8.0561  | 0.4277 | 0.3585  | 5.921  | YRI |
| HABP4    | GI_24307946-S | rs1885427  | 9 | 9 | 96267803 | 64130  | 8.4194  | 0.4437 | -0.3549 | 5.921  | YRI |
| HABP4    | GI_24307946-S | rs10820597 | 9 | 9 | 96267902 | 64031  | 8.0324  | 0.4267 | -0.3540 | 5.921  | YRI |
| HABP4    | GI_24307946-S | rs10820598 | 9 | 9 | 96268810 | 63123  | 7.0073  | 0.4252 | 0.3832  | 5.921  | YRI |
| HABP4    | GI_24307946-S | rs7857610  | 9 | 9 | 96269508 | 62425  | 8.0324  | 0.4267 | 0.3540  | 5.921  | YRI |
| HABP4    | GI_24307946-S | rs10820604 | 9 | 9 | 96272049 | 59884  | 8.3057  | 0.4388 | 0.3677  | 5.921  | YRI |
| HABP4    | GI_24307946-S | rs2406005  | 9 | 9 | 96277210 | 54723  | 8.1305  | 0.4310 | 0.3607  | 5.921  | YRI |
| HABP4    | GI_24307946-S | rs7870753  | 9 | 9 | 96281140 | 50793  | 7.5727  | 0.4058 | 0.3374  | 5.921  | YRI |
| HABP4    | GI_24307946-S | rs10761013 | 9 | 9 | 96281494 | 50439  | 8.1536  | 0.4321 | -0.3516 | 5.921  | YRI |
| HABP4    | GI_24307946-S | rs10820626 | 9 | 9 | 96283735 | 48198  | 8.1536  | 0.4321 | 0.3516  | 5.921  | YRI |
| HABP4    | GI_24307946-S | rs7861282  | 9 | 9 | 96284023 | 47910  | 8.2585  | 0.4367 | -0.3588 | 5.921  | YRI |
| HABP4    | GI_24307946-S | rs7858287  | 9 | 9 | 96284071 | 47862  | 8.1513  | 0.4376 | 0.3590  | 5.921  | YRI |
| HABP4    | GI_24307946-S | rs7870106  | 9 | 9 | 96290139 | 41794  | 8.4194  | 0.4437 | -0.3549 | 5.921  | YRI |
| HABP4    | GI_24307946-S | rs10820634 | 9 | 9 | 96294659 | 37274  | 8.0831  | 0.4289 | -0.3533 | 5.921  | YRI |
| HABP4    | GI_24307946-S | rs7857261  | 9 | 9 | 96299334 | 32599  | 8.9011  | 0.4642 | 0.3612  | 5.921  | YRI |
| HABP4    | GI_24307946-S | rs3802441  | 9 | 9 | 96299950 | 31983  | 8.9011  | 0.4642 | 0.3612  | 5.921  | YRI |

|           |               |            |   |   |          |        |         |        |         |        |     |
|-----------|---------------|------------|---|---|----------|--------|---------|--------|---------|--------|-----|
| HABP4     | GI_24307946-S | rs7870253  | 9 | 9 | 96310651 | 21282  | 8.1465  | 0.4679 | -0.3414 | 5.921  | YRI |
| HABP4     | GI_24307946-S | rs16910858 | 9 | 9 | 96314112 | 17821  | 8.5777  | 0.4563 | -0.3576 | 5.921  | YRI |
| HABP4     | GI_24307946-S | rs10820666 | 9 | 9 | 96314552 | 17381  | 8.9645  | 0.4668 | 0.3583  | 5.921  | YRI |
| HABP4     | GI_24307946-S | rs10761035 | 9 | 9 | 96315647 | 16286  | 7.9779  | 0.4415 | -0.3434 | 5.921  | YRI |
| HABP4     | GI_24307946-S | rs7024214  | 9 | 9 | 96318728 | 13205  | 7.9114  | 0.4213 | -0.3435 | 5.921  | YRI |
| HABP4     | GI_24307946-S | rs6477489  | 9 | 9 | 96319396 | 12537  | 8.0277  | 0.4265 | 0.3445  | 5.921  | YRI |
| HABP4     | GI_24307946-S | rs10820682 | 9 | 9 | 96321142 | 10791  | 8.9645  | 0.4668 | -0.3583 | 5.921  | YRI |
| HABP4     | GI_24307946-S | rs7039472  | 9 | 9 | 96325129 | 6804   | 8.3818  | 0.4597 | 0.3636  | 5.921  | YRI |
| HABP4     | GI_24307946-S | rs1590973  | 9 | 9 | 96325714 | 6219   | 8.9011  | 0.4642 | -0.3612 | 5.921  | YRI |
| HABP4     | GI_24307946-S | rs1590971  | 9 | 9 | 96325772 | 6161   | 8.9645  | 0.4668 | -0.3583 | 5.921  | YRI |
| HABP4     | GI_24307946-S | rs16910870 | 9 | 9 | 96326658 | 5275   | 7.9202  | 0.4330 | -0.3474 | 5.921  | YRI |
| HABP4     | GI_24307946-S | rs10991346 | 9 | 9 | 96327313 | 4620   | 8.3818  | 0.4597 | 0.3636  | 5.921  | YRI |
| HABP4     | GI_24307946-S | rs10991348 | 9 | 9 | 96327382 | 4551   | 8.8541  | 0.4622 | 0.3516  | 5.921  | YRI |
| HABP4     | GI_24307946-S | rs7867323  | 9 | 9 | 96327612 | 4321   | 8.9645  | 0.4668 | -0.3583 | 5.921  | YRI |
| HABP4     | GI_24307946-S | rs10991352 | 9 | 9 | 96329103 | 2830   | 9.2334  | 0.4839 | 0.3757  | 5.921  | YRI |
| HABP4     | GI_24307946-S | rs10991354 | 9 | 9 | 96329264 | 2669   | 8.9645  | 0.4668 | -0.3583 | 5.921  | YRI |
| HABP4     | GI_24307946-S | rs7030316  | 9 | 9 | 96330018 | 1915   | 8.9645  | 0.4668 | 0.3583  | 5.921  | YRI |
| HABP4     | GI_24307946-S | rs1057687  | 9 | 9 | 96332019 | 86     | 8.9011  | 0.4642 | 0.3612  | 5.921  | YRI |
| HABP4     | GI_24307946-S | rs10991367 | 9 | 9 | 96333488 | 1555   | 8.9011  | 0.4642 | -0.3612 | 5.921  | YRI |
| HABP4     | GI_24307946-S | rs6477496  | 9 | 9 | 96335967 | 4034   | 6.0291  | 0.3305 | 0.3097  | 5.921  | YRI |
| HABP4     | GI_24307946-S | rs10820739 | 9 | 9 | 96343376 | 11443  | 8.6542  | 0.4656 | 0.3395  | 5.921  | YRI |
| HABP4     | GI_24307946-S | rs7035310  | 9 | 9 | 96348245 | 16312  | 7.3923  | 0.3975 | -0.3421 | 5.921  | YRI |
| HABP4     | GI_24307946-S | rs7852498  | 9 | 9 | 96359976 | 28043  | 6.0767  | 0.3329 | 0.3219  | 5.921  | YRI |
| HABP4     | GI_24307946-S | rs10125239 | 9 | 9 | 96363287 | 31354  | 6.8293  | 0.3706 | -0.3166 | 5.921  | YRI |
| HABP4     | GI_24307946-S | rs7037498  | 9 | 9 | 96371681 | 39748  | 6.8293  | 0.3706 | 0.3166  | 5.921  | YRI |
| HABP4     | GI_24307946-S | rs10121119 | 9 | 9 | 96389648 | 57715  | 6.1116  | 0.3347 | 0.2831  | 5.921  | YRI |
| HABP4     | GI_24307946-S | rs7869415  | 9 | 9 | 96390732 | 58799  | 6.8293  | 0.3706 | -0.3166 | 5.921  | YRI |
| HABP4     | GI_24307946-S | rs12338220 | 9 | 9 | 96409607 | 77674  | 6.8152  | 0.3699 | 0.3313  | 5.921  | YRI |
| KIAA0972  | GI_7662423-S  | rs12115682 | 9 | 9 | 96516889 | 80951  | 7.9844  | 0.4245 | -0.1706 | 5.9654 | YRI |
| KIAA0972  | GI_7662423-S  | rs7046097  | 9 | 9 | 96551789 | 46051  | 7.8275  | 0.4595 | 0.2528  | 5.9654 | YRI |
| LOC286356 | GI_27478865-S | rs7040493  | 9 | 9 | 96699832 | 33918  | 11.6250 | 0.5670 | 0.4456  | 5.9486 | YRI |
| LOC286356 | GI_27478865-S | rs7868847  | 9 | 9 | 96704256 | 29494  | 11.2352 | 0.5536 | -0.4236 | 5.9486 | YRI |
| LOC286356 | GI_27478865-S | rs7023776  | 9 | 9 | 96720452 | 13298  | 12.5101 | 0.5961 | 0.4531  | 5.9486 | YRI |
| KIAA0972  | GI_7662423-S  | rs14479    | 9 | 9 | 96730358 | 132518 | 8.8618  | 0.4626 | 0.1677  | 5.9654 | YRI |
| LOC286356 | GI_27478865-S | rs1046795  | 9 | 9 | 96734913 | 1163   | 17.0277 | 0.7170 | -0.4957 | 5.9486 | YRI |
| LOC286356 | GI_27478865-S | rs1046794  | 9 | 9 | 96735090 | 1340   | 17.0277 | 0.7170 | -0.4957 | 5.9486 | YRI |
| LOC286356 | GI_27478865-S | rs10979481 | 9 | 9 | 96738762 | 5012   | 6.9032  | 0.4074 | 0.3324  | 5.9486 | YRI |
| LOC286356 | GI_27478865-S | rs2259450  | 9 | 9 | 96786952 | 53202  | 7.1909  | 0.4159 | -0.4053 | 5.9486 | YRI |
| LOC286356 | GI_27478865-S | rs7873123  | 9 | 9 | 96815260 | 81510  | 9.4954  | 0.5713 | 0.4413  | 5.9486 | YRI |
| LOC286356 | GI_27478865-S | rs3889406  | 9 | 9 | 96852359 | 118609 | 8.0278  | 0.4265 | 0.3584  | 5.9486 | YRI |
| Hs.43687  | Hs.43687-S    | rs10983871 | 9 | 9 | 97665373 | 78197  | 7.5898  | 0.4066 | 0.2267  | 6.0782 | YRI |
| Hs.43687  | Hs.43687-S    | rs7388958  | 9 | 9 | 97678123 | 65447  | 7.3297  | 0.4168 | 0.2004  | 6.0782 | YRI |
| Hs.43687  | Hs.43687-S    | rs10983920 | 9 | 9 | 97682168 | 61402  | 6.8750  | 0.3728 | -0.1905 | 6.0782 | YRI |
| Hs.43687  | Hs.43687-S    | rs2401639  | 9 | 9 | 97687392 | 56178  | 6.8420  | 0.3712 | 0.1908  | 6.0782 | YRI |
| Hs.43687  | Hs.43687-S    | rs4743136  | 9 | 9 | 97687614 | 55956  | 6.3896  | 0.3537 | 0.1929  | 6.0782 | YRI |
| Hs.43687  | Hs.43687-S    | rs12378536 | 9 | 9 | 97688011 | 55559  | 6.8750  | 0.3728 | 0.1905  | 6.0782 | YRI |
| Hs.43687  | Hs.43687-S    | rs12348691 | 9 | 9 | 97688237 | 55333  | 6.8420  | 0.3712 | 0.1908  | 6.0782 | YRI |
| Hs.43687  | Hs.43687-S    | rs13288000 | 9 | 9 | 97688535 | 55035  | 6.8420  | 0.3712 | 0.1908  | 6.0782 | YRI |
| Hs.43687  | Hs.43687-S    | rs7873389  | 9 | 9 | 97688785 | 54785  | 6.1359  | 0.3669 | -0.1911 | 6.0782 | YRI |
| Hs.43687  | Hs.43687-S    | rs894673   | 9 | 9 | 97691825 | 51745  | 6.8420  | 0.3712 | -0.1908 | 6.0782 | YRI |
| Hs.43687  | Hs.43687-S    | rs3758251  | 9 | 9 | 97693255 | 50315  | 6.8420  | 0.3712 | -0.1908 | 6.0782 | YRI |
| Hs.43687  | Hs.43687-S    | rs3758249  | 9 | 9 | 97693695 | 49875  | 6.8420  | 0.3712 | -0.1908 | 6.0782 | YRI |
| Hs.43687  | Hs.43687-S    | rs1443434  | 9 | 9 | 97697034 | 46536  | 6.8420  | 0.3712 | -0.1908 | 6.0782 | YRI |
| Hs.43687  | Hs.43687-S    | rs4460498  | 9 | 9 | 97699967 | 43603  | 6.5596  | 0.3623 | 0.1880  | 6.0782 | YRI |
| Hs.43687  | Hs.43687-S    | rs874004   | 9 | 9 | 97701673 | 41897  | 8.4818  | 0.4464 | -0.2084 | 6.0782 | YRI |
| Hs.43687  | Hs.43687-S    | rs7357707  | 9 | 9 | 97710504 | 33066  | 8.4818  | 0.4464 | -0.2084 | 6.0782 | YRI |
| Hs.43687  | Hs.43687-S    | rs7033315  | 9 | 9 | 97715795 | 27775  | 8.2119  | 0.4403 | -0.2072 | 6.0782 | YRI |
| Hs.43687  | Hs.43687-S    | rs10119795 | 9 | 9 | 97716894 | 26676  | 8.4818  | 0.4464 | -0.2084 | 6.0782 | YRI |
| Hs.43687  | Hs.43687-S    | rs17346310 | 9 | 9 | 97729088 | 14482  | 10.2163 | 0.5165 | -0.2524 | 6.0782 | YRI |

|           |               |            |    |    |           |        |         |        |         |        |     |
|-----------|---------------|------------|----|----|-----------|--------|---------|--------|---------|--------|-----|
| Hs.43687  | Hs.43687-S    | rs7853349  | 9  | 9  | 97729814  | 13756  | 9.9500  | 0.5063 | -0.2208 | 6.0782 | YRI |
| Hs.43687  | Hs.43687-S    | rs12238579 | 9  | 9  | 97731613  | 11957  | 8.5480  | 0.5142 | 0.2139  | 6.0782 | YRI |
| Hs.43687  | Hs.43687-S    | rs10984193 | 9  | 9  | 97731991  | 11579  | 12.5252 | 0.6030 | -0.2531 | 6.0782 | YRI |
| Hs.43687  | Hs.43687-S    | rs7040232  | 9  | 9  | 97743749  | 179    | 8.2252  | 0.4352 | 0.2364  | 6.0782 | YRI |
| Hs.43687  | Hs.43687-S    | rs6586     | 9  | 9  | 97746486  | 2916   | 12.7435 | 0.6034 | 0.2405  | 6.0782 | YRI |
| Hs.43687  | Hs.43687-S    | rs1561958  | 9  | 9  | 97749354  | 5784   | 9.2006  | 0.4766 | 0.2059  | 6.0782 | YRI |
| CORO2A    | GI_34335234-A | rs10985382 | 9  | 9  | 98039087  | 72632  | 7.6742  | 0.4105 | 0.6504  | 6.4258 | YRI |
| CORO2A    | GI_34335234-A | rs3758258  | 9  | 9  | 98058097  | 91642  | 6.6223  | 0.3604 | 0.5952  | 6.4258 | YRI |
| CORO2A    | GI_34335234-A | rs3824452  | 9  | 9  | 98059040  | 92585  | 6.6223  | 0.3604 | 0.5952  | 6.4258 | YRI |
| NR4A3     | GI_27894358-A | rs880598   | 9  | 9  | 99247939  | 427202 | 6.8868  | 0.3734 | 0.1919  | 5.986  | YRI |
| NR4A3     | GI_27894358-A | rs2034105  | 9  | 9  | 99248680  | 426461 | 6.8868  | 0.3734 | 0.1919  | 5.986  | YRI |
| NR4A3     | GI_27894358-A | rs3891576  | 9  | 9  | 99268943  | 406198 | 7.2004  | 0.3884 | -0.2150 | 5.986  | YRI |
| NR4A3     | GI_27894358-A | rs7470104  | 9  | 9  | 99271752  | 403389 | 7.2944  | 0.3982 | -0.2175 | 5.986  | YRI |
| NR4A3     | GI_27894358-A | rs7863319  | 9  | 9  | 99340111  | 335030 | 6.3003  | 0.3443 | -0.2455 | 5.986  | YRI |
| BSPRY     | GI_8923147-S  | rs7873862  | 9  | 9  | 113192950 | 20059  | 8.5655  | 0.4500 | -0.5722 | 6.112  | YRI |
| CDK5RAP2  | GI_28872785-S | rs7037806  | 9  | 9  | 120230679 | 159    | 15.3291 | 0.6893 | -0.3838 | 7.0352 | YRI |
| CDK5RAP2  | GI_28872785-S | rs10125592 | 9  | 9  | 120241289 | 10451  | 7.2269  | 0.3897 | -0.2936 | 7.0352 | YRI |
| CDK5RAP2  | GI_28872785-S | rs10818455 | 9  | 9  | 120241946 | 11108  | 9.9006  | 0.5433 | -0.3403 | 7.0352 | YRI |
| CDK5RAP2  | GI_28872785-S | rs12376337 | 9  | 9  | 120242349 | 11511  | 15.4789 | 0.6866 | 0.3579  | 7.0352 | YRI |
| CDK5RAP2  | GI_28872785-S | rs2297454  | 9  | 9  | 120251309 | 20471  | 8.0135  | 0.4314 | 0.3158  | 7.0352 | YRI |
| CDK5RAP2  | GI_28872785-S | rs10119716 | 9  | 9  | 120251836 | 20998  | 7.8048  | 0.4164 | -0.3166 | 7.0352 | YRI |
| CDK5RAP2  | GI_28872785-S | rs7853439  | 9  | 9  | 120252419 | 21581  | 8.4226  | 0.4438 | 0.3342  | 7.0352 | YRI |
| PTGS1     | GI_18104968-A | rs2282169  | 9  | 9  | 122220250 | 17191  | 8.5120  | 0.4477 | 0.4648  | 6.4452 | YRI |
| PTGS1     | GI_18104968-A | rs3842801  | 9  | 9  | 122233993 | 3448   | 7.4761  | 0.4014 | 0.4269  | 6.4452 | YRI |
| PTGS1     | GI_18104968-A | rs3842803  | 9  | 9  | 122234089 | 3352   | 7.4761  | 0.4014 | 0.4269  | 6.4452 | YRI |
| PTGS1     | GI_18104968-A | rs10306183 | 9  | 9  | 122234464 | 2977   | 7.4257  | 0.4099 | 0.4121  | 6.4452 | YRI |
| PTGS1     | GI_18104968-A | rs10306187 | 9  | 9  | 122234867 | 2574   | 7.8368  | 0.4471 | -0.4320 | 6.4452 | YRI |
| PTGS1     | GI_18104968-A | rs10306188 | 9  | 9  | 122235239 | 2202   | 8.0211  | 0.4262 | -0.4307 | 6.4452 | YRI |
| PTGS1     | GI_18104968-A | rs10306202 | 9  | 9  | 122239075 | 1634   | 8.3226  | 0.4395 | 0.4574  | 6.4452 | YRI |
| SURF6     | GI_39812452-S | rs3739890  | 9  | 9  | 133224366 | 3247   | 7.8977  | 0.4207 | -0.2825 | 6.0417 | YRI |
| SURF6     | GI_39812452-S | rs12335    | 9  | 9  | 133227388 | 225    | 10.8934 | 0.5415 | -0.3034 | 6.0417 | YRI |
| SURF6     | GI_39812452-S | rs120858   | 9  | 9  | 133230364 | 2751   | 10.8934 | 0.5415 | -0.3034 | 6.0417 | YRI |
| SURF6     | GI_39812452-S | rs487820   | 9  | 9  | 133241923 | 14310  | 12.1809 | 0.5855 | -0.3182 | 6.0417 | YRI |
| SURF6     | GI_39812452-S | rs484248   | 9  | 9  | 133248144 | 20531  | 12.1809 | 0.5855 | -0.3182 | 6.0417 | YRI |
| SURF6     | GI_39812452-S | rs599924   | 9  | 9  | 133248145 | 20532  | 12.1809 | 0.5855 | 0.3182  | 6.0417 | YRI |
| SURF6     | GI_39812452-S | rs1179037  | 9  | 9  | 133268063 | 40450  | 11.8370 | 0.5742 | -0.3206 | 6.0417 | YRI |
| SURF6     | GI_39812452-S | rs3124752  | 9  | 9  | 133294047 | 66434  | 11.3685 | 0.5582 | -0.3112 | 6.0417 | YRI |
| SURF6     | GI_39812452-S | rs3118663  | 9  | 9  | 133311307 | 83694  | 10.2322 | 0.5171 | -0.3048 | 6.0417 | YRI |
| SURF6     | GI_39812452-S | rs3124779  | 9  | 9  | 133311520 | 83907  | 10.4807 | 0.5264 | -0.2980 | 6.0417 | YRI |
| SURF6     | GI_39812452-S | rs3124776  | 9  | 9  | 133314004 | 86391  | 8.7728  | 0.4588 | 0.2981  | 6.0417 | YRI |
| PHYH      | GI_17999532-S | rs661457   | 10 | 10 | 13350742  | 12339  | 7.2217  | 0.3894 | 0.5505  | 7.1568 | YRI |
| PTER      | GI_20070185-S | rs1055340  | 10 | 10 | 16595534  | 974    | 20.0607 | 0.7773 | -0.7959 | 6.2749 | YRI |
| PIP5K2A   | GI_20302162-S | rs7894486  | 10 | 10 | 22896867  | 30902  | 6.3745  | 0.3530 | 0.4414  | 5.992  | YRI |
| LOC387647 | GI_42659552-S | rs6481580  | 10 | 10 | 29726244  | 26592  | 9.6998  | 0.5027 | 0.3195  | 6.2007 | YRI |
| LOC387647 | GI_42659552-S | rs4237392  | 10 | 10 | 29737233  | 15603  | 9.0193  | 0.4691 | -0.3113 | 6.2007 | YRI |
| LOC387647 | GI_42659552-S | rs2887242  | 10 | 10 | 29737245  | 15591  | 8.1048  | 0.4596 | -0.3257 | 6.2007 | YRI |
| LOC387647 | GI_42659552-S | rs7073366  | 10 | 10 | 29740398  | 12438  | 8.4009  | 0.4731 | 0.3369  | 6.2007 | YRI |
| LOC387647 | GI_42659552-S | rs2182400  | 10 | 10 | 29747557  | 5279   | 9.4395  | 0.4862 | -0.3390 | 6.2007 | YRI |
| LOC387647 | GI_42659552-S | rs10763716 | 10 | 10 | 29753497  | 661    | 11.7235 | 0.5704 | -0.3022 | 6.2007 | YRI |
| LOC387647 | GI_42659552-S | rs10826617 | 10 | 10 | 29753937  | 1101   | 11.7235 | 0.5704 | -0.3022 | 6.2007 | YRI |
| LOC387647 | GI_42659552-S | rs7081352  | 10 | 10 | 29754515  | 1679   | 9.4395  | 0.4862 | 0.3390  | 6.2007 | YRI |
| LOC387647 | GI_42659552-S | rs7078150  | 10 | 10 | 29755085  | 2249   | 11.7235 | 0.5704 | -0.3022 | 6.2007 | YRI |
| LOC387647 | GI_42659552-S | rs10082484 | 10 | 10 | 29755467  | 2631   | 11.7515 | 0.5713 | 0.2705  | 6.2007 | YRI |
| LOC387647 | GI_42659552-S | rs7392705  | 10 | 10 | 29757378  | 4542   | 11.7235 | 0.5704 | -0.3022 | 6.2007 | YRI |
| LOC387647 | GI_42659552-S | rs4747656  | 10 | 10 | 29757510  | 4674   | 11.5297 | 0.5702 | 0.3034  | 6.2007 | YRI |
| LOC387647 | GI_42659552-S | rs4749423  | 10 | 10 | 29757845  | 5009   | 11.7235 | 0.5704 | 0.3022  | 6.2007 | YRI |
| LOC387647 | GI_42659552-S | rs4749424  | 10 | 10 | 29759251  | 6415   | 11.7515 | 0.5713 | -0.2705 | 6.2007 | YRI |
| LOC387647 | GI_42659552-S | rs7077629  | 10 | 10 | 29765529  | 12693  | 11.7235 | 0.5704 | -0.3022 | 6.2007 | YRI |
| LOC387647 | GI_42659552-S | rs2368411  | 10 | 10 | 29776306  | 23470  | 11.7235 | 0.5704 | -0.3022 | 6.2007 | YRI |

|           |               |            |    |    |          |        |         |        |         |        |     |
|-----------|---------------|------------|----|----|----------|--------|---------|--------|---------|--------|-----|
| LOC387647 | GI_42659552-S | rs4749433  | 10 | 10 | 29795726 | 42890  | 7.2105  | 0.4052 | -0.2576 | 6.2007 | YRI |
| LOC387647 | GI_42659552-S | rs4749434  | 10 | 10 | 29797042 | 44206  | 8.9717  | 0.5048 | 0.2968  | 6.2007 | YRI |
| LOC387647 | GI_42659552-S | rs7906814  | 10 | 10 | 29799788 | 46952  | 10.1364 | 0.5324 | -0.2524 | 6.2007 | YRI |
| LOC387647 | GI_42659552-S | rs6481595  | 10 | 10 | 29800657 | 47821  | 8.4709  | 0.4459 | -0.2848 | 6.2007 | YRI |
| LOC387647 | GI_42659552-S | rs10826629 | 10 | 10 | 29801320 | 48484  | 9.9835  | 0.5076 | -0.2872 | 6.2007 | YRI |
| LOC387647 | GI_42659552-S | rs2281946  | 10 | 10 | 29802265 | 49429  | 9.9231  | 0.5053 | -0.2538 | 6.2007 | YRI |
| LOC387647 | GI_42659552-S | rs10763719 | 10 | 10 | 29803900 | 51064  | 9.9231  | 0.5053 | 0.2538  | 6.2007 | YRI |
| LOC387647 | GI_42659552-S | rs10740806 | 10 | 10 | 29804581 | 51745  | 9.5379  | 0.5024 | -0.2862 | 6.2007 | YRI |
| LOC387647 | GI_42659552-S | rs10826631 | 10 | 10 | 29804683 | 51847  | 7.8975  | 0.4206 | -0.3133 | 6.2007 | YRI |
| LOC387647 | GI_42659552-S | rs7909727  | 10 | 10 | 29805766 | 52930  | 8.9481  | 0.5106 | 0.2478  | 6.2007 | YRI |
| LOC387647 | GI_42659552-S | rs7096194  | 10 | 10 | 29808359 | 55523  | 9.8402  | 0.5021 | 0.2532  | 6.2007 | YRI |
| MAP3K8    | GI_22035597-S | rs7475513  | 10 | 10 | 30112200 | 678153 | 6.8185  | 0.3701 | -0.6510 | 6.2346 | YRI |
| ARHGAP12  | GI_26986533-S | rs12268249 | 10 | 10 | 32268470 | 133134 | 6.3036  | 0.3494 | 0.2595  | 6.0338 | YRI |
| ARHGAP12  | GI_26986533-S | rs11008749 | 10 | 10 | 32376549 | 241213 | 6.2509  | 0.3467 | -0.2514 | 6.0338 | YRI |
| hmm19532  | hmm19532-S    | rs3120272  | 10 | 10 | 43511620 | 6616   | 6.4354  | 0.3511 | 0.0697  | 6.3853 | YRI |
| hmm19532  | hmm19532-S    | rs1335897  | 10 | 10 | 43560250 | 42014  | 6.6135  | 0.4108 | -0.0762 | 6.3853 | YRI |
| SLC25A16  | GI_31652216-S | rs3758626  | 10 | 10 | 69895510 | 17068  | 9.8612  | 0.5029 | 0.1781  | 5.895  | YRI |
| SLC25A16  | GI_31652216-S | rs2281699  | 10 | 10 | 69901339 | 11239  | 9.8612  | 0.5029 | -0.1781 | 5.895  | YRI |
| SLC25A16  | GI_31652216-S | rs1535539  | 10 | 10 | 69901707 | 10871  | 10.8563 | 0.5402 | -0.1977 | 5.895  | YRI |
| DNA2L     | GI_37551214-S | rs1535539  | 10 | 10 | 69901707 | 57598  | 6.5182  | 0.3552 | 0.2229  | 5.6771 | YRI |
| SLC25A16  | GI_31652216-S | rs7478105  | 10 | 10 | 69902147 | 10431  | 8.3312  | 0.4514 | -0.1755 | 5.895  | YRI |
| DNA2L     | GI_37551214-S | rs7478105  | 10 | 10 | 69902147 | 58038  | 6.0736  | 0.3424 | 0.2164  | 5.6771 | YRI |
| SLC25A16  | GI_31652216-S | rs12774079 | 10 | 10 | 69902420 | 10158  | 6.1066  | 0.3344 | -0.1667 | 5.895  | YRI |
| SLC25A16  | GI_31652216-S | rs12774084 | 10 | 10 | 69902422 | 10156  | 6.1066  | 0.3344 | -0.1667 | 5.895  | YRI |
| SLC25A16  | GI_31652216-S | rs10998210 | 10 | 10 | 69907166 | 5412   | 12.7309 | 0.6031 | -0.2128 | 5.895  | YRI |
| SLC25A16  | GI_31652216-S | rs12767790 | 10 | 10 | 69910121 | 2457   | 6.9141  | 0.3747 | -0.1601 | 5.895  | YRI |
| DNA2L     | GI_37551214-S | rs12767790 | 10 | 10 | 69910121 | 66012  | 5.7969  | 0.3184 | 0.2043  | 5.6771 | YRI |
| SLC25A16  | GI_31652216-S | rs12767669 | 10 | 10 | 69910240 | 2338   | 10.0727 | 0.5299 | -0.1962 | 5.895  | YRI |
| DNA2L     | GI_37551214-S | rs12767669 | 10 | 10 | 69910240 | 66131  | 6.2992  | 0.3593 | 0.2231  | 5.6771 | YRI |
| SLC25A16  | GI_31652216-S | rs1136645  | 10 | 10 | 69912519 | 59     | 11.4323 | 0.5605 | 0.2032  | 5.895  | YRI |
| DNA2L     | GI_37551214-S | rs1136645  | 10 | 10 | 69912519 | 68410  | 6.1759  | 0.3380 | -0.2197 | 5.6771 | YRI |
| SLC25A16  | GI_31652216-S | rs7091312  | 10 | 10 | 69913735 | 1157   | 10.8719 | 0.6178 | -0.2011 | 5.895  | YRI |
| SLC25A16  | GI_31652216-S | rs7906309  | 10 | 10 | 69915150 | 2572   | 11.2227 | 0.5659 | 0.1933  | 5.895  | YRI |
| DNA2L     | GI_37551214-S | rs7906309  | 10 | 10 | 69915150 | 71041  | 6.4417  | 0.3615 | -0.2292 | 5.6771 | YRI |
| SLC25A16  | GI_31652216-S | rs7900548  | 10 | 10 | 69920626 | 8048   | 12.1678 | 0.5851 | -0.2061 | 5.895  | YRI |
| SLC25A16  | GI_31652216-S | rs10823224 | 10 | 10 | 69960835 | 48257  | 6.1794  | 0.3382 | 0.1673  | 5.895  | YRI |
| DNA2L     | GI_37551214-S | rs10823224 | 10 | 10 | 69960835 | 116726 | 6.2692  | 0.3427 | -0.2321 | 5.6771 | YRI |
| SLC25A16  | GI_31652216-S | rs1539316  | 10 | 10 | 69964780 | 52202  | 6.1794  | 0.3382 | -0.1673 | 5.895  | YRI |
| DNA2L     | GI_37551214-S | rs1539316  | 10 | 10 | 69964780 | 120671 | 6.2692  | 0.3427 | 0.2321  | 5.6771 | YRI |
| KIAA1274  | GI_22050996-S | rs10740349 | 10 | 10 | 71893795 | 104243 | 6.8995  | 0.3740 | -0.5991 | 6.1953 | YRI |
| KIAA1274  | GI_22050996-S | rs4747032  | 10 | 10 | 71904802 | 93236  | 8.8838  | 0.4635 | -0.6182 | 6.1953 | YRI |
| KIAA1274  | GI_22050996-S | rs1871598  | 10 | 10 | 71906235 | 91803  | 11.8543 | 0.5748 | 0.6948  | 6.1953 | YRI |
| KIAA1274  | GI_22050996-S | rs1871595  | 10 | 10 | 71910576 | 87462  | 11.8543 | 0.5748 | -0.6948 | 6.1953 | YRI |
| KIAA1274  | GI_22050996-S | rs11818000 | 10 | 10 | 71910620 | 87418  | 11.8543 | 0.5748 | 0.6948  | 6.1953 | YRI |
| KIAA1274  | GI_22050996-S | rs7915565  | 10 | 10 | 71911087 | 86951  | 11.5429 | 0.5643 | -0.6702 | 6.1953 | YRI |
| KIAA1274  | GI_22050996-S | rs7920307  | 10 | 10 | 71912380 | 85658  | 11.5429 | 0.5643 | -0.6702 | 6.1953 | YRI |
| NUDT13    | GI_34330151-S | rs7897191  | 10 | 10 | 74431509 | 129419 | 7.2773  | 0.3921 | -0.1055 | 5.4106 | YRI |
| NUDT13    | GI_34330151-S | rs7922533  | 10 | 10 | 74433359 | 127569 | 7.2773  | 0.3921 | 0.1055  | 5.4106 | YRI |
| NUDT13    | GI_34330151-S | rs2394925  | 10 | 10 | 74434119 | 126809 | 7.2773  | 0.3921 | -0.1055 | 5.4106 | YRI |
| NUDT13    | GI_34330151-S | rs12253630 | 10 | 10 | 74438930 | 121998 | 7.2773  | 0.3921 | -0.1055 | 5.4106 | YRI |
| NUDT13    | GI_34330151-S | rs7085141  | 10 | 10 | 74446787 | 114141 | 7.2773  | 0.3921 | -0.1055 | 5.4106 | YRI |
| NUDT13    | GI_34330151-S | rs12249050 | 10 | 10 | 74449543 | 111385 | 7.1466  | 0.3911 | -0.1054 | 5.4106 | YRI |
| NUDT13    | GI_34330151-S | rs12253317 | 10 | 10 | 74451536 | 109392 | 7.2773  | 0.3921 | -0.1055 | 5.4106 | YRI |
| NUDT13    | GI_34330151-S | rs3736278  | 10 | 10 | 74460386 | 100542 | 7.2773  | 0.3921 | 0.1055  | 5.4106 | YRI |
| NUDT13    | GI_34330151-S | rs7094342  | 10 | 10 | 74462172 | 98756  | 7.1511  | 0.3914 | 0.1052  | 5.4106 | YRI |
| NUDT13    | GI_34330151-S | rs7076642  | 10 | 10 | 74462469 | 98459  | 7.1511  | 0.3914 | -0.1052 | 5.4106 | YRI |
| NUDT13    | GI_34330151-S | rs12247364 | 10 | 10 | 74464041 | 96887  | 6.0899  | 0.3483 | 0.0974  | 5.4106 | YRI |
| NUDT13    | GI_34330151-S | rs6480659  | 10 | 10 | 74479623 | 81305  | 7.2773  | 0.3921 | 0.1055  | 5.4106 | YRI |
| NUDT13    | GI_34330151-S | rs7078818  | 10 | 10 | 74480549 | 80379  | 7.1581  | 0.3917 | 0.1051  | 5.4106 | YRI |

|        |               |            |    |    |          |        |        |        |         |        |     |
|--------|---------------|------------|----|----|----------|--------|--------|--------|---------|--------|-----|
| NUDT13 | GI_34330151-S | rs12244027 | 10 | 10 | 74489595 | 71333  | 7.2773 | 0.3921 | -0.1055 | 5.4106 | YRI |
| NUDT13 | GI_34330151-S | rs7904719  | 10 | 10 | 74496637 | 64291  | 7.3043 | 0.3933 | 0.1048  | 5.4106 | YRI |
| NUDT13 | GI_34330151-S | rs4387274  | 10 | 10 | 74501304 | 59624  | 7.2773 | 0.3921 | 0.1055  | 5.4106 | YRI |
| NUDT13 | GI_34330151-S | rs12570974 | 10 | 10 | 74510261 | 50667  | 6.9832 | 0.3780 | -0.1060 | 5.4106 | YRI |
| NUDT13 | GI_34330151-S | rs11000516 | 10 | 10 | 74513969 | 46959  | 7.3043 | 0.3933 | 0.1048  | 5.4106 | YRI |
| NUDT13 | GI_34330151-S | rs7905836  | 10 | 10 | 74514395 | 46533  | 7.3043 | 0.3933 | 0.1048  | 5.4106 | YRI |
| NUDT13 | GI_34330151-S | rs7920974  | 10 | 10 | 74514557 | 46371  | 7.3043 | 0.3933 | -0.1048 | 5.4106 | YRI |
| NUDT13 | GI_34330151-S | rs6480667  | 10 | 10 | 74518880 | 42048  | 7.1511 | 0.3861 | -0.1018 | 5.4106 | YRI |
| NUDT13 | GI_34330151-S | rs6480668  | 10 | 10 | 74519332 | 41596  | 7.3043 | 0.3933 | -0.1048 | 5.4106 | YRI |
| NUDT13 | GI_34330151-S | rs7095810  | 10 | 10 | 74524150 | 36778  | 7.2620 | 0.3913 | -0.1093 | 5.4106 | YRI |
| NUDT13 | GI_34330151-S | rs7918396  | 10 | 10 | 74527553 | 33375  | 6.6277 | 0.3657 | 0.1113  | 5.4106 | YRI |
| NUDT13 | GI_34330151-S | rs7082363  | 10 | 10 | 74528776 | 32152  | 7.2620 | 0.3913 | 0.1093  | 5.4106 | YRI |
| NUDT13 | GI_34330151-S | rs7094115  | 10 | 10 | 74528868 | 32060  | 7.4126 | 0.4268 | -0.1033 | 5.4106 | YRI |
| NUDT13 | GI_34330151-S | rs7894359  | 10 | 10 | 74534394 | 26534  | 7.6568 | 0.4097 | 0.1127  | 5.4106 | YRI |
| NUDT13 | GI_34330151-S | rs872457   | 10 | 10 | 74539797 | 21131  | 7.6568 | 0.4097 | -0.1127 | 5.4106 | YRI |
| NUDT13 | GI_34330151-S | rs2280369  | 10 | 10 | 74540513 | 20415  | 7.6568 | 0.4097 | 0.1127  | 5.4106 | YRI |
| NUDT13 | GI_34330151-S | rs9971273  | 10 | 10 | 74543752 | 17176  | 7.6568 | 0.4097 | -0.1127 | 5.4106 | YRI |
| NUDT13 | GI_34330151-S | rs7916539  | 10 | 10 | 74548357 | 12571  | 7.6568 | 0.4097 | -0.1127 | 5.4106 | YRI |
| NUDT13 | GI_34330151-S | rs3829166  | 10 | 10 | 74549380 | 11548  | 7.6568 | 0.4097 | -0.1127 | 5.4106 | YRI |
| NUDT13 | GI_34330151-S | rs3750734  | 10 | 10 | 74549646 | 11282  | 7.6568 | 0.4097 | -0.1127 | 5.4106 | YRI |
| NUDT13 | GI_34330151-S | rs2894215  | 10 | 10 | 74561195 | 267    | 7.6568 | 0.4097 | 0.1127  | 5.4106 | YRI |
| NUDT13 | GI_34330151-S | rs7079875  | 10 | 10 | 74563424 | 2496   | 7.6568 | 0.4097 | -0.1127 | 5.4106 | YRI |
| NUDT13 | GI_34330151-S | rs7080126  | 10 | 10 | 74563539 | 2611   | 7.6568 | 0.4097 | -0.1127 | 5.4106 | YRI |
| NUDT13 | GI_34330151-S | rs7908606  | 10 | 10 | 74563969 | 3041   | 7.6568 | 0.4097 | 0.1127  | 5.4106 | YRI |
| NUDT13 | GI_34330151-S | rs2271903  | 10 | 10 | 74564264 | 3336   | 7.0266 | 0.4262 | 0.1168  | 5.4106 | YRI |
| NUDT13 | GI_34330151-S | rs12249189 | 10 | 10 | 74565796 | 4868   | 7.3151 | 0.3992 | 0.1110  | 5.4106 | YRI |
| NUDT13 | GI_34330151-S | rs12260168 | 10 | 10 | 74567697 | 6769   | 7.6568 | 0.4097 | -0.1127 | 5.4106 | YRI |
| NUDT13 | GI_34330151-S | rs2271905  | 10 | 10 | 74567822 | 6894   | 7.6568 | 0.4097 | -0.1127 | 5.4106 | YRI |
| NUDT13 | GI_34330151-S | rs3817395  | 10 | 10 | 74568262 | 7334   | 6.6708 | 0.4014 | 0.1160  | 5.4106 | YRI |
| NUDT13 | GI_34330151-S | rs3736518  | 10 | 10 | 74569140 | 8212   | 7.5184 | 0.4087 | -0.1122 | 5.4106 | YRI |
| NUDT13 | GI_34330151-S | rs6480671  | 10 | 10 | 74570789 | 9861   | 8.2576 | 0.4366 | -0.1152 | 5.4106 | YRI |
| NUDT13 | GI_34330151-S | rs2395012  | 10 | 10 | 74577396 | 16468  | 7.6568 | 0.4097 | -0.1127 | 5.4106 | YRI |
| NUDT13 | GI_34330151-S | rs10437381 | 10 | 10 | 74579161 | 18233  | 7.3012 | 0.4096 | -0.1124 | 5.4106 | YRI |
| NUDT13 | GI_34330151-S | rs7072168  | 10 | 10 | 74579588 | 18660  | 7.6568 | 0.4097 | -0.1127 | 5.4106 | YRI |
| NUDT13 | GI_34330151-S | rs7069878  | 10 | 10 | 74582010 | 21082  | 7.6568 | 0.4097 | 0.1127  | 5.4106 | YRI |
| NUDT13 | GI_34330151-S | rs11000531 | 10 | 10 | 74584308 | 23380  | 7.6568 | 0.4097 | -0.1127 | 5.4106 | YRI |
| NUDT13 | GI_34330151-S | rs11000532 | 10 | 10 | 74584405 | 23477  | 6.5450 | 0.3830 | 0.1071  | 5.4106 | YRI |
| NUDT13 | GI_34330151-S | rs12260139 | 10 | 10 | 74590442 | 29514  | 7.6568 | 0.4097 | -0.1127 | 5.4106 | YRI |
| NUDT13 | GI_34330151-S | rs7069813  | 10 | 10 | 74591088 | 30160  | 7.3151 | 0.3992 | -0.1110 | 5.4106 | YRI |
| NUDT13 | GI_34330151-S | rs7092445  | 10 | 10 | 74591998 | 31070  | 7.6568 | 0.4097 | 0.1127  | 5.4106 | YRI |
| NUDT13 | GI_34330151-S | rs3812618  | 10 | 10 | 74593138 | 32210  | 7.6568 | 0.4097 | -0.1127 | 5.4106 | YRI |
| NUDT13 | GI_34330151-S | rs3812619  | 10 | 10 | 74593568 | 32640  | 7.4812 | 0.4016 | -0.1091 | 5.4106 | YRI |
| NUDT13 | GI_34330151-S | rs3763723  | 10 | 10 | 74597490 | 36562  | 7.6568 | 0.4097 | -0.1127 | 5.4106 | YRI |
| NUDT13 | GI_34330151-S | rs7917179  | 10 | 10 | 74601737 | 40809  | 7.6568 | 0.4097 | 0.1127  | 5.4106 | YRI |
| NUDT13 | GI_34330151-S | rs6480675  | 10 | 10 | 74602460 | 41532  | 7.6568 | 0.4097 | -0.1127 | 5.4106 | YRI |
| NUDT13 | GI_34330151-S | rs6480677  | 10 | 10 | 74603208 | 42280  | 6.4606 | 0.3843 | 0.1133  | 5.4106 | YRI |
| NUDT13 | GI_34330151-S | rs12256576 | 10 | 10 | 74604320 | 43392  | 7.6568 | 0.4097 | 0.1127  | 5.4106 | YRI |
| NUDT13 | GI_34330151-S | rs7923555  | 10 | 10 | 74606316 | 45388  | 7.6568 | 0.4097 | 0.1127  | 5.4106 | YRI |
| NUDT13 | GI_34330151-S | rs11000541 | 10 | 10 | 74610087 | 49159  | 7.6568 | 0.4097 | 0.1127  | 5.4106 | YRI |
| NUDT13 | GI_34330151-S | rs12268713 | 10 | 10 | 74615745 | 54817  | 7.6568 | 0.4097 | 0.1127  | 5.4106 | YRI |
| NUDT13 | GI_34330151-S | rs3998311  | 10 | 10 | 74627902 | 66974  | 5.9889 | 0.3284 | -0.1038 | 5.4106 | YRI |
| NUDT13 | GI_34330151-S | rs2394934  | 10 | 10 | 74632980 | 72052  | 5.7158 | 0.3187 | -0.1018 | 5.4106 | YRI |
| NUDT13 | GI_34330151-S | rs11000548 | 10 | 10 | 74635902 | 74974  | 5.9849 | 0.3531 | -0.1103 | 5.4106 | YRI |
| NUDT13 | GI_34330151-S | rs2394935  | 10 | 10 | 74639581 | 78653  | 5.9889 | 0.3284 | 0.1038  | 5.4106 | YRI |
| NUDT13 | GI_34330151-S | rs7900359  | 10 | 10 | 74657481 | 96553  | 5.9889 | 0.3284 | 0.1038  | 5.4106 | YRI |
| NUDT13 | GI_34330151-S | rs7068969  | 10 | 10 | 74661567 | 100639 | 5.5468 | 0.3051 | -0.1038 | 5.4106 | YRI |
| NUDT13 | GI_34330151-S | rs7100458  | 10 | 10 | 74673099 | 112171 | 5.9889 | 0.3284 | -0.1038 | 5.4106 | YRI |
| NUDT13 | GI_34330151-S | rs6480688  | 10 | 10 | 74684319 | 123391 | 5.9889 | 0.3284 | 0.1038  | 5.4106 | YRI |
| NUDT13 | GI_34330151-S | rs11000566 | 10 | 10 | 74691688 | 130760 | 5.9889 | 0.3284 | 0.1038  | 5.4106 | YRI |

|           |               |            |    |    |           |        |         |        |         |         |     |
|-----------|---------------|------------|----|----|-----------|--------|---------|--------|---------|---------|-----|
| NUDT13    | GI_34330151-S | rs11000576 | 10 | 10 | 74697604  | 136676 | 5.9889  | 0.3284 | -0.1038 | 5.4106  | YRI |
| NUDT13    | GI_34330151-S | rs4294502  | 10 | 10 | 74705263  | 144335 | 5.9889  | 0.3284 | 0.1038  | 5.4106  | YRI |
| NUDT13    | GI_34330151-S | rs11000590 | 10 | 10 | 74729506  | 168578 | 5.7179  | 0.3142 | 0.1011  | 5.4106  | YRI |
| NUDT13    | GI_34330151-S | rs12257098 | 10 | 10 | 74729571  | 168643 | 5.4904  | 0.3111 | 0.1037  | 5.4106  | YRI |
| NUDT13    | GI_34330151-S | rs6480694  | 10 | 10 | 74746510  | 185582 | 5.5468  | 0.3051 | 0.1038  | 5.4106  | YRI |
| NUDT13    | GI_34330151-S | rs6480703  | 10 | 10 | 74788009  | 227081 | 5.9889  | 0.3284 | -0.1038 | 5.4106  | YRI |
| NUDT13    | GI_34330151-S | rs3812623  | 10 | 10 | 74843895  | 282967 | 5.9889  | 0.3284 | -0.1038 | 5.4106  | YRI |
| NUDT13    | GI_34330151-S | rs1332178  | 10 | 10 | 74859592  | 298664 | 5.9889  | 0.3284 | -0.1038 | 5.4106  | YRI |
| NUDT13    | GI_34330151-S | rs12245450 | 10 | 10 | 74891291  | 330363 | 5.9889  | 0.3284 | -0.1038 | 5.4106  | YRI |
| NUDT13    | GI_34330151-S | rs11000666 | 10 | 10 | 74903000  | 342072 | 5.9889  | 0.3284 | -0.1038 | 5.4106  | YRI |
| NUDT13    | GI_34330151-S | rs3763679  | 10 | 10 | 74904832  | 343904 | 5.9889  | 0.3284 | -0.1038 | 5.4106  | YRI |
| NUDT13    | GI_34330151-S | rs7098453  | 10 | 10 | 74931627  | 370699 | 5.8031  | 0.3187 | -0.1029 | 5.4106  | YRI |
| NUDT13    | GI_34330151-S | rs7899149  | 10 | 10 | 74933335  | 372407 | 6.5386  | 0.3563 | -0.1073 | 5.4106  | YRI |
| NUDT13    | GI_34330151-S | rs12572177 | 10 | 10 | 74955843  | 394915 | 5.9889  | 0.3284 | -0.1038 | 5.4106  | YRI |
| NUDT13    | GI_34330151-S | rs4745717  | 10 | 10 | 74975791  | 414863 | 5.9889  | 0.3284 | -0.1038 | 5.4106  | YRI |
| NUDT13    | GI_34330151-S | rs2140933  | 10 | 10 | 75003198  | 442270 | 7.0245  | 0.3800 | 0.1166  | 5.4106  | YRI |
| NUDT13    | GI_34330151-S | rs7073027  | 10 | 10 | 75013847  | 452919 | 7.0245  | 0.3800 | 0.1166  | 5.4106  | YRI |
| NUDT13    | GI_34330151-S | rs7899274  | 10 | 10 | 75014767  | 453839 | 7.0245  | 0.3800 | 0.1166  | 5.4106  | YRI |
| NUDT13    | GI_34330151-S | rs12256735 | 10 | 10 | 75020904  | 459976 | 7.0245  | 0.3800 | 0.1166  | 5.4106  | YRI |
| NUDT13    | GI_34330151-S | rs7097343  | 10 | 10 | 75031795  | 470867 | 7.0245  | 0.3800 | 0.1166  | 5.4106  | YRI |
| NUDT13    | GI_34330151-S | rs11000723 | 10 | 10 | 75054988  | 494060 | 7.0245  | 0.3800 | 0.1166  | 5.4106  | YRI |
| Hs.146747 | Hs.146747-S   | rs3218619  | 10 | 10 | 90752781  | 13687  | 7.9124  | 0.4213 | -0.2945 | 6.6753  | YRI |
| Hs.146747 | Hs.146747-S   | rs9658756  | 10 | 10 | 90759282  | 7186   | 10.5992 | 0.5308 | 0.3991  | 6.6753  | YRI |
| Hs.146747 | Hs.146747-S   | rs9658783  | 10 | 10 | 90765731  | 737    | 10.5992 | 0.5308 | -0.3991 | 6.6753  | YRI |
| MGC10120  | GI_28603839-S | rs12769818 | 10 | 10 | 101905619 | 118878 | 15.3397 | 0.6831 | -1.7068 | 11.3457 | YRI |
| MGC10120  | GI_28603839-S | rs12764727 | 10 | 10 | 101948787 | 75710  | 17.6283 | 0.7301 | -1.4884 | 11.3457 | YRI |
| MGC10120  | GI_28603839-S | rs17729417 | 10 | 10 | 101950132 | 74365  | 17.3342 | 0.7238 | 1.5007  | 11.3457 | YRI |
| MGC10120  | GI_28603839-S | rs12762869 | 10 | 10 | 101983702 | 40795  | 21.0317 | 0.7937 | 1.5700  | 11.3457 | YRI |
| MGC10120  | GI_28603839-S | rs7092983  | 10 | 10 | 101984471 | 40026  | 20.7275 | 0.7944 | 1.5734  | 11.3457 | YRI |
| MGC10120  | GI_28603839-S | rs12771909 | 10 | 10 | 101985275 | 39222  | 21.0317 | 0.7937 | 1.5700  | 11.3457 | YRI |
| MGC10120  | GI_28603839-S | rs17668159 | 10 | 10 | 101988820 | 35677  | 15.5963 | 0.6832 | 1.7052  | 11.3457 | YRI |
| MGC10120  | GI_28603839-S | rs7923115  | 10 | 10 | 101990210 | 34287  | 15.5703 | 0.7019 | 1.7697  | 11.3457 | YRI |
| MGC10120  | GI_28603839-S | rs12763385 | 10 | 10 | 101991221 | 33276  | 15.8740 | 0.7028 | 1.7754  | 11.3457 | YRI |
| MGC10120  | GI_28603839-S | rs7912400  | 10 | 10 | 101992668 | 31829  | 19.8513 | 0.8034 | 1.6023  | 11.3457 | YRI |
| MGC10120  | GI_28603839-S | rs7073610  | 10 | 10 | 101996615 | 27882  | 15.5963 | 0.6832 | 1.7052  | 11.3457 | YRI |
| MGC10120  | GI_28603839-S | rs17112791 | 10 | 10 | 101999700 | 24797  | 21.0317 | 0.7937 | 1.5700  | 11.3457 | YRI |
| MGC10120  | GI_28603839-S | rs7072367  | 10 | 10 | 101999970 | 24527  | 21.0317 | 0.7937 | 1.5700  | 11.3457 | YRI |
| MGC10120  | GI_28603839-S | rs7897454  | 10 | 10 | 102001692 | 22805  | 20.9261 | 0.7920 | 1.5901  | 11.3457 | YRI |
| MGC10120  | GI_28603839-S | rs17730369 | 10 | 10 | 102006580 | 17917  | 20.6385 | 0.7930 | -1.5669 | 11.3457 | YRI |
| MGC10120  | GI_28603839-S | rs7896703  | 10 | 10 | 102008621 | 15876  | 11.8325 | 0.5869 | -1.5794 | 11.3457 | YRI |
| MGC10120  | GI_28603839-S | rs12782963 | 10 | 10 | 102038198 | 13701  | 15.4332 | 0.6855 | -1.7103 | 11.3457 | YRI |
| MGC10120  | GI_28603839-S | rs2305386  | 10 | 10 | 102038259 | 13762  | 15.5963 | 0.6832 | -1.7052 | 11.3457 | YRI |
| MGC10120  | GI_28603839-S | rs6584356  | 10 | 10 | 102040232 | 15735  | 15.5963 | 0.6832 | 1.7052  | 11.3457 | YRI |
| MRPL43    | GI_28872735-A | rs11595160 | 10 | 10 | 102633000 | 103609 | 7.5795  | 0.4116 | 0.3299  | 5.9999  | YRI |
| MRPL43    | GI_28872733-I | rs7901791  | 10 | 10 | 102635374 | 100942 | 7.3029  | 0.3986 | 0.2240  | 5.9999  | YRI |
| MRPL43    | GI_28872735-A | rs7901791  | 10 | 10 | 102635374 | 101235 | 9.5936  | 0.4984 | -0.3579 | 5.9999  | YRI |
| MRPL43    | GI_28872735-A | rs1408342  | 10 | 10 | 102638742 | 97867  | 7.8760  | 0.4252 | -0.3350 | 5.9999  | YRI |
| MRPL43    | GI_28872735-A | rs10786612 | 10 | 10 | 102643755 | 92854  | 7.7599  | 0.4199 | 0.3213  | 5.9999  | YRI |
| MRPL43    | GI_28872733-I | rs4917916  | 10 | 10 | 102663282 | 73034  | 13.6545 | 0.6309 | 0.2783  | 5.9999  | YRI |
| MRPL43    | GI_28872735-A | rs4917916  | 10 | 10 | 102663282 | 73327  | 17.0039 | 0.7165 | -0.4243 | 5.9999  | YRI |
| MRPL43    | GI_28872733-I | rs12241232 | 10 | 10 | 102682594 | 53722  | 13.6545 | 0.6309 | 0.2783  | 5.9999  | YRI |
| MRPL43    | GI_28872735-A | rs12241232 | 10 | 10 | 102682594 | 54015  | 17.0039 | 0.7165 | -0.4243 | 5.9999  | YRI |
| MRPL43    | GI_28872733-I | rs7911957  | 10 | 10 | 102682960 | 53356  | 13.4301 | 0.6307 | -0.2783 | 5.9999  | YRI |
| MRPL43    | GI_28872735-A | rs7911957  | 10 | 10 | 102682960 | 53649  | 16.7650 | 0.7174 | 0.4241  | 5.9999  | YRI |
| MRPL43    | GI_28872733-I | rs10883565 | 10 | 10 | 102693424 | 42892  | 12.5022 | 0.6088 | 0.2724  | 5.9999  | YRI |
| MRPL43    | GI_28872735-A | rs10883565 | 10 | 10 | 102693424 | 43185  | 13.8635 | 0.6499 | -0.3979 | 5.9999  | YRI |
| MRPL43    | GI_28872733-I | rs1056295  | 10 | 10 | 102705173 | 31143  | 15.1362 | 0.6715 | 0.2864  | 5.9999  | YRI |
| MRPL43    | GI_28872735-A | rs1056295  | 10 | 10 | 102705173 | 31436  | 19.1870 | 0.7614 | -0.4362 | 5.9999  | YRI |
| MRPL43    | GI_28872733-I | rs927302   | 10 | 10 | 102712906 | 23410  | 15.7868 | 0.6879 | -0.2942 | 5.9999  | YRI |

|          |               |            |    |    |           |       |         |        |         |        |     |
|----------|---------------|------------|----|----|-----------|-------|---------|--------|---------|--------|-----|
| MRPL43   | GI_28872735-A | rs927302   | 10 | 10 | 102712906 | 23703 | 19.9307 | 0.7750 | 0.4467  | 5.9999 | YRI |
| MRPL43   | GI_28872733-I | rs4919510  | 10 | 10 | 102724768 | 11548 | 12.5274 | 0.5967 | -0.2597 | 5.9999 | YRI |
| MRPL43   | GI_28872735-A | rs4919510  | 10 | 10 | 102724768 | 11841 | 17.2992 | 0.7230 | 0.4086  | 5.9999 | YRI |
| MRPL43   | GI_28872733-I | rs735137   | 10 | 10 | 102725825 | 10491 | 12.5274 | 0.5967 | 0.2597  | 5.9999 | YRI |
| MRPL43   | GI_28872735-A | rs735137   | 10 | 10 | 102725825 | 10784 | 17.2992 | 0.7230 | -0.4086 | 5.9999 | YRI |
| MRPL43   | GI_28872733-I | rs12571302 | 10 | 10 | 102732753 | 3563  | 16.1514 | 0.7361 | 0.2939  | 5.9999 | YRI |
| MRPL43   | GI_28872735-A | rs12571302 | 10 | 10 | 102732753 | 3856  | 23.4776 | 0.8617 | -0.4908 | 5.9999 | YRI |
| MRPL43   | GI_28872733-I | rs2295716  | 10 | 10 | 102734204 | 2112  | 10.2798 | 0.5582 | -0.2576 | 5.9999 | YRI |
| MRPL43   | GI_28872735-A | rs2295716  | 10 | 10 | 102734204 | 2405  | 15.1578 | 0.7119 | 0.4207  | 5.9999 | YRI |
| MRPL43   | GI_28872733-I | rs722435   | 10 | 10 | 102735052 | 1264  | 11.9476 | 0.6111 | -0.2724 | 5.9999 | YRI |
| MRPL43   | GI_28872735-A | rs722435   | 10 | 10 | 102735052 | 1557  | 16.1003 | 0.7281 | 0.4287  | 5.9999 | YRI |
| MRPL43   | GI_28872733-I | rs2863095  | 10 | 10 | 102736493 | 177   | 18.2983 | 0.7440 | -0.2968 | 5.9999 | YRI |
| MRPL43   | GI_28872735-A | rs2863095  | 10 | 10 | 102736493 | 116   | 22.8283 | 0.8211 | 0.4463  | 5.9999 | YRI |
| MRPL43   | GI_28872733-I | rs3740484  | 10 | 10 | 102737353 | 1037  | 12.5274 | 0.5967 | -0.2597 | 5.9999 | YRI |
| MRPL43   | GI_28872735-A | rs3740484  | 10 | 10 | 102737353 | 744   | 17.2992 | 0.7230 | 0.4086  | 5.9999 | YRI |
| MRPL43   | GI_28872733-I | rs3740487  | 10 | 10 | 102740773 | 4457  | 10.9156 | 0.5423 | 0.2665  | 5.9999 | YRI |
| MRPL43   | GI_28872735-A | rs3740487  | 10 | 10 | 102740773 | 4164  | 13.9292 | 0.6388 | -0.4135 | 5.9999 | YRI |
| MRPL43   | GI_28872733-I | rs3824783  | 10 | 10 | 102740841 | 4525  | 10.9156 | 0.5423 | 0.2665  | 5.9999 | YRI |
| MRPL43   | GI_28872735-A | rs3824783  | 10 | 10 | 102740841 | 4232  | 13.9292 | 0.6388 | -0.4135 | 5.9999 | YRI |
| MRPL43   | GI_28872733-I | rs3740488  | 10 | 10 | 102744023 | 7707  | 10.9156 | 0.5423 | -0.2665 | 5.9999 | YRI |
| MRPL43   | GI_28872735-A | rs3740488  | 10 | 10 | 102744023 | 7414  | 13.9292 | 0.6388 | 0.4135  | 5.9999 | YRI |
| MRPL43   | GI_28872733-I | rs3740490  | 10 | 10 | 102746733 | 10417 | 17.4280 | 0.7258 | 0.2888  | 5.9999 | YRI |
| MRPL43   | GI_28872735-A | rs3740490  | 10 | 10 | 102746733 | 10124 | 21.7991 | 0.8059 | -0.4355 | 5.9999 | YRI |
| MRPL43   | GI_28872733-I | rs750866   | 10 | 10 | 102751448 | 15132 | 15.0411 | 0.6690 | -0.2864 | 5.9999 | YRI |
| MRPL43   | GI_28872735-A | rs750866   | 10 | 10 | 102751448 | 14839 | 20.1939 | 0.7796 | 0.4422  | 5.9999 | YRI |
| MRPL43   | GI_28872733-I | rs701835   | 10 | 10 | 102752117 | 15801 | 15.0411 | 0.6690 | 0.2864  | 5.9999 | YRI |
| MRPL43   | GI_28872735-A | rs701835   | 10 | 10 | 102752117 | 15508 | 20.1939 | 0.7796 | -0.4422 | 5.9999 | YRI |
| MRPL43   | GI_28872733-I | rs701836   | 10 | 10 | 102757107 | 20791 | 9.6697  | 0.4954 | 0.2508  | 5.9999 | YRI |
| MRPL43   | GI_28872735-A | rs701836   | 10 | 10 | 102757107 | 20498 | 13.9129 | 0.6383 | -0.4064 | 5.9999 | YRI |
| MRPL43   | GI_28872733-I | rs807018   | 10 | 10 | 102763001 | 26685 | 7.6924  | 0.4113 | 0.2415  | 5.9999 | YRI |
| MRPL43   | GI_28872735-A | rs807018   | 10 | 10 | 102763001 | 26392 | 8.9078  | 0.4645 | -0.3669 | 5.9999 | YRI |
| SFXN2    | GI_34222270-S | rs2297450  | 10 | 10 | 104493164 | 4373  | 7.7717  | 0.4149 | 0.5187  | 5.7745 | YRI |
| SFXN2    | GI_34222270-S | rs11191393 | 10 | 10 | 104517420 | 28629 | 7.7717  | 0.4149 | -0.5187 | 5.7745 | YRI |
| SFXN2    | GI_34222270-S | rs1339919  | 10 | 10 | 104524438 | 35647 | 7.7717  | 0.4149 | 0.5187  | 5.7745 | YRI |
| C10orf26 | GI_41152103-S | rs192569   | 10 | 10 | 104567905 | 3524  | 6.1220  | 0.3400 | 0.0836  | 5.8151 | YRI |
| C10orf26 | GI_41152103-S | rs619824   | 10 | 10 | 104571278 | 6897  | 6.0350  | 0.3308 | -0.0828 | 5.8151 | YRI |
| GSTO1    | GI_4758483-S  | rs12244332 | 10 | 10 | 106010130 | 6998  | 6.8934  | 0.3737 | 0.2568  | 6.4752 | YRI |
| GSTO1    | GI_4758483-S  | rs12259337 | 10 | 10 | 106010210 | 6918  | 6.8934  | 0.3737 | 0.2568  | 6.4752 | YRI |
| GSTO1    | GI_4758483-S  | rs7083244  | 10 | 10 | 106010696 | 6432  | 6.8934  | 0.3737 | 0.2568  | 6.4752 | YRI |
| GSTO1    | GI_4758483-S  | rs7101149  | 10 | 10 | 106012625 | 4503  | 6.7993  | 0.3742 | 0.2549  | 6.4752 | YRI |
| GSTO1    | GI_4758483-S  | rs12263834 | 10 | 10 | 106013476 | 3652  | 7.1385  | 0.3962 | -0.2668 | 6.4752 | YRI |
| GSTO1    | GI_4758483-S  | rs12264196 | 10 | 10 | 106014019 | 3109  | 7.3612  | 0.4243 | -0.2619 | 6.4752 | YRI |
| GSTO1    | GI_4758483-S  | rs17116741 | 10 | 10 | 106014292 | 2836  | 6.9842  | 0.3833 | 0.2589  | 6.4752 | YRI |
| GSTO1    | GI_4758483-S  | rs12241913 | 10 | 10 | 106014447 | 2681  | 6.8934  | 0.3737 | 0.2568  | 6.4752 | YRI |
| GSTO1    | GI_4758483-S  | rs7077259  | 10 | 10 | 106014913 | 2215  | 6.8934  | 0.3737 | 0.2568  | 6.4752 | YRI |
| GSTO1    | GI_4758483-S  | rs7077635  | 10 | 10 | 106014924 | 2204  | 6.8934  | 0.3737 | -0.2568 | 6.4752 | YRI |
| GSTO1    | GI_4758483-S  | rs7077729  | 10 | 10 | 106014937 | 2191  | 6.7635  | 0.3725 | -0.2562 | 6.4752 | YRI |
| GSTO1    | GI_4758483-S  | rs7077787  | 10 | 10 | 106015139 | 1989  | 6.8934  | 0.3737 | 0.2568  | 6.4752 | YRI |
| GSTO1    | GI_4758483-S  | rs7077797  | 10 | 10 | 106015167 | 1961  | 7.4931  | 0.4131 | 0.2741  | 6.4752 | YRI |
| GSTO1    | GI_4758483-S  | rs7096068  | 10 | 10 | 106015376 | 1752  | 6.9364  | 0.3758 | -0.2512 | 6.4752 | YRI |
| GSTO1    | GI_4758483-S  | rs7099492  | 10 | 10 | 106015479 | 1649  | 6.8934  | 0.3737 | -0.2568 | 6.4752 | YRI |
| GSTO1    | GI_4758483-S  | rs7906892  | 10 | 10 | 106015980 | 1148  | 6.8934  | 0.3737 | 0.2568  | 6.4752 | YRI |
| GSTO1    | GI_4758483-S  | rs7906559  | 10 | 10 | 106016008 | 1120  | 6.8934  | 0.3737 | 0.2568  | 6.4752 | YRI |
| GSTO1    | GI_4758483-S  | rs7906957  | 10 | 10 | 106016194 | 934   | 6.8508  | 0.3821 | 0.2584  | 6.4752 | YRI |
| GSTO1    | GI_4758483-S  | rs17116751 | 10 | 10 | 106016530 | 598   | 6.8934  | 0.3737 | -0.2568 | 6.4752 | YRI |
| GSTO1    | GI_4758483-S  | rs17116753 | 10 | 10 | 106016543 | 585   | 6.9041  | 0.3794 | 0.2583  | 6.4752 | YRI |
| GSTO1    | GI_4758483-S  | rs17116754 | 10 | 10 | 106016644 | 484   | 6.8934  | 0.3737 | 0.2568  | 6.4752 | YRI |
| GSTO1    | GI_4758483-S  | rs17116755 | 10 | 10 | 106016659 | 469   | 6.8934  | 0.3737 | -0.2568 | 6.4752 | YRI |
| GSTO1    | GI_4758483-S  | rs17116758 | 10 | 10 | 106016833 | 295   | 6.9842  | 0.3833 | -0.2589 | 6.4752 | YRI |

|          |               |            |    |    |           |        |         |        |         |        |     |
|----------|---------------|------------|----|----|-----------|--------|---------|--------|---------|--------|-----|
| GSTO1    | GI_4758483-S  | rs12264646 | 10 | 10 | 106017892 | 764    | 6.8934  | 0.3737 | -0.2568 | 6.4752 | YRI |
| GSTO1    | GI_4758483-S  | rs17116770 | 10 | 10 | 106018719 | 1591   | 6.8934  | 0.3737 | 0.2568  | 6.4752 | YRI |
| GSTO1    | GI_4758483-S  | rs7089730  | 10 | 10 | 106020461 | 3333   | 6.8934  | 0.3737 | -0.2568 | 6.4752 | YRI |
| GSTO1    | GI_4758483-S  | rs7897376  | 10 | 10 | 106021020 | 3892   | 6.9842  | 0.3833 | 0.2589  | 6.4752 | YRI |
| GSTO1    | GI_4758483-S  | rs7914492  | 10 | 10 | 106021286 | 4158   | 6.8934  | 0.3737 | -0.2568 | 6.4752 | YRI |
| GSTO1    | GI_4758483-S  | rs12261808 | 10 | 10 | 106021751 | 4623   | 6.8934  | 0.3737 | 0.2568  | 6.4752 | YRI |
| GSTO1    | GI_4758483-S  | rs12247206 | 10 | 10 | 106021804 | 4676   | 6.8934  | 0.3737 | 0.2568  | 6.4752 | YRI |
| GSTO1    | GI_4758483-S  | rs12262175 | 10 | 10 | 106022115 | 4987   | 6.8000  | 0.3743 | -0.2549 | 6.4752 | YRI |
| GSTO1    | GI_4758483-S  | rs7910156  | 10 | 10 | 106022240 | 5112   | 6.8934  | 0.3737 | 0.2568  | 6.4752 | YRI |
| GSTO1    | GI_4758483-S  | rs17116784 | 10 | 10 | 106022815 | 5687   | 6.9842  | 0.3833 | -0.2589 | 6.4752 | YRI |
| GSTO1    | GI_4758483-S  | rs17116785 | 10 | 10 | 106022954 | 5826   | 6.8934  | 0.3737 | 0.2568  | 6.4752 | YRI |
| GSTO1    | GI_4758483-S  | rs11191982 | 10 | 10 | 106023311 | 6183   | 6.7680  | 0.3727 | -0.2557 | 6.4752 | YRI |
| GSTO1    | GI_4758483-S  | rs11191983 | 10 | 10 | 106023337 | 6209   | 6.8934  | 0.3737 | -0.2568 | 6.4752 | YRI |
| GSTO1    | GI_4758483-S  | rs11191984 | 10 | 10 | 106023470 | 6342   | 6.8934  | 0.3737 | -0.2568 | 6.4752 | YRI |
| GSTO1    | GI_4758483-S  | rs11191985 | 10 | 10 | 106023564 | 6436   | 6.8642  | 0.3827 | 0.2575  | 6.4752 | YRI |
| GSTO1    | GI_4758483-S  | rs11191986 | 10 | 10 | 106023684 | 6556   | 6.8934  | 0.3737 | 0.2568  | 6.4752 | YRI |
| GSTO1    | GI_4758483-S  | rs11191987 | 10 | 10 | 106023741 | 6613   | 7.1341  | 0.4072 | -0.2717 | 6.4752 | YRI |
| GSTO1    | GI_4758483-S  | rs7070750  | 10 | 10 | 106025845 | 8717   | 7.2296  | 0.3898 | 0.2629  | 6.4752 | YRI |
| GSTO1    | GI_4758483-S  | rs12245345 | 10 | 10 | 106028196 | 11068  | 6.8934  | 0.3737 | -0.2568 | 6.4752 | YRI |
| GSTO1    | GI_4758483-S  | rs12264024 | 10 | 10 | 106030242 | 13114  | 6.8934  | 0.3737 | 0.2568  | 6.4752 | YRI |
| FLJ13081 | GI_13376242-S | rs7080170  | 10 | 10 | 121671033 | 92012  | 6.0822  | 0.3380 | 0.2314  | 5.9768 | YRI |
| C10orf88 | GI_13376420-S | rs2994807  | 10 | 10 | 124637031 | 44104  | 6.1169  | 0.3497 | -0.1509 | 5.9943 | YRI |
| C10orf88 | GI_13376420-S | rs10902840 | 10 | 10 | 124652552 | 28583  | 6.0406  | 0.3562 | 0.1721  | 5.9943 | YRI |
| C10orf88 | GI_13376420-S | rs10902843 | 10 | 10 | 124665243 | 15892  | 6.4851  | 0.3536 | -0.1620 | 5.9943 | YRI |
| C10orf88 | GI_13376420-S | rs4980169  | 10 | 10 | 124682576 | 1441   | 6.4851  | 0.3536 | -0.1620 | 5.9943 | YRI |
| OAT      | GI_4557808-S  | rs9422807  | 10 | 10 | 126083981 | 7549   | 6.5628  | 0.3575 | -0.4980 | 6.1765 | YRI |
| DPYSL4   | GI_11321616-S | rs7096307  | 10 | 10 | 133833417 | 35749  | 6.3783  | 0.3482 | -0.6521 | 6.1763 | YRI |
| DPYSL4   | GI_11321616-S | rs4880341  | 10 | 10 | 133842679 | 26487  | 7.6801  | 0.4108 | -0.6681 | 6.1763 | YRI |
| DPYSL4   | GI_11321616-S | rs10781563 | 10 | 10 | 133858802 | 10364  | 7.5548  | 0.4050 | -0.7288 | 6.1763 | YRI |
| CD151    | GI_34328914-A | rs4075289  | 11 | 11 | 820670    | 8073   | 6.8161  | 0.3699 | -0.3866 | 5.8862 | YRI |
| CD151    | GI_34328914-A | rs7924806  | 11 | 11 | 823668    | 5075   | 8.3962  | 0.4484 | -0.4344 | 5.8862 | YRI |
| CD151    | GI_34328914-A | rs3059     | 11 | 11 | 830319    | 1576   | 6.3368  | 0.3462 | -0.3852 | 5.8862 | YRI |
| PHEMX    | GI_37595532-A | rs16928081 | 11 | 11 | 2277542   | 18331  | 9.5910  | 0.4983 | 1.0511  | 6.0912 | YRI |
| C11orf21 | GI_7662662-S  | rs16928081 | 11 | 11 | 2277542   | 3775   | 6.5172  | 0.3602 | 0.9081  | 5.9799 | YRI |
| PHEMX    | GI_37595532-A | rs2074021  | 11 | 11 | 2280104   | 15769  | 12.4207 | 0.5997 | 0.9362  | 6.0912 | YRI |
| C11orf21 | GI_7662662-S  | rs2074021  | 11 | 11 | 2280104   | 6337   | 9.8504  | 0.5086 | 0.8961  | 5.9799 | YRI |
| C11orf17 | GI_21361869-A | rs1900272  | 11 | 11 | 8524235   | 373495 | 7.1261  | 0.3849 | 0.2348  | 6.2241 | YRI |
| C11orf17 | GI_21361869-A | rs11041978 | 11 | 11 | 8534726   | 363004 | 7.0494  | 0.3918 | -0.2401 | 6.2241 | YRI |
| C11orf17 | GI_21361869-A | rs9300091  | 11 | 11 | 8545399   | 352331 | 6.5160  | 0.3653 | -0.2267 | 6.2241 | YRI |
| C11orf17 | GI_21361869-A | rs9300092  | 11 | 11 | 8547068   | 350662 | 7.1320  | 0.3852 | -0.2414 | 6.2241 | YRI |
| C11orf17 | GI_21361869-A | rs9300093  | 11 | 11 | 8547401   | 350329 | 6.8252  | 0.4034 | -0.2503 | 6.2241 | YRI |
| C11orf17 | GI_21361869-A | rs10769915 | 11 | 11 | 8554025   | 343705 | 7.3759  | 0.3967 | 0.2423  | 6.2241 | YRI |
| C11orf17 | GI_21361869-A | rs10769916 | 11 | 11 | 8554790   | 342940 | 7.3759  | 0.3967 | -0.2423 | 6.2241 | YRI |
| C11orf17 | GI_21361869-A | rs10160430 | 11 | 11 | 8556452   | 341278 | 7.2168  | 0.4360 | -0.2552 | 6.2241 | YRI |
| C11orf17 | GI_21361869-A | rs10840084 | 11 | 11 | 8565850   | 331880 | 7.3759  | 0.3967 | 0.2423  | 6.2241 | YRI |
| C11orf17 | GI_21361869-A | rs10840089 | 11 | 11 | 8579431   | 318299 | 6.5707  | 0.3629 | -0.2327 | 6.2241 | YRI |
| C11orf17 | GI_21361869-A | rs4929941  | 11 | 11 | 8581527   | 316203 | 6.2399  | 0.3412 | -0.2250 | 6.2241 | YRI |
| C11orf17 | GI_21361869-A | rs4929942  | 11 | 11 | 8581672   | 316058 | 6.7345  | 0.3659 | -0.2249 | 6.2241 | YRI |
| C11orf17 | GI_21361869-A | rs4929943  | 11 | 11 | 8581930   | 315800 | 6.5178  | 0.3602 | 0.2177  | 6.2241 | YRI |
| C11orf17 | GI_21361869-A | rs11042078 | 11 | 11 | 8783276   | 114454 | 6.2734  | 0.3528 | -0.3065 | 6.2241 | YRI |
| C11orf17 | GI_21361869-A | rs7123429  | 11 | 11 | 8823384   | 74346  | 8.0282  | 0.4321 | -0.2324 | 6.2241 | YRI |
| C11orf17 | GI_21361869-I | rs7123429  | 11 | 11 | 8823384   | 74697  | 8.7567  | 0.4640 | -0.2407 | 6.2241 | YRI |
| C11orf17 | GI_21361869-A | rs10840141 | 11 | 11 | 8858794   | 38936  | 8.5858  | 0.4626 | 0.3815  | 6.2241 | YRI |
| C11orf17 | GI_21361869-A | rs1560569  | 11 | 11 | 8896463   | 1267   | 7.7029  | 0.4118 | 0.2957  | 6.2241 | YRI |
| C11orf17 | GI_21361869-A | rs3751068  | 11 | 11 | 8903526   | 5796   | 8.5674  | 0.4501 | 0.2534  | 6.2241 | YRI |
| C11orf17 | GI_21361869-I | rs3751068  | 11 | 11 | 8903526   | 5445   | 7.1789  | 0.3874 | 0.2360  | 6.2241 | YRI |
| C11orf17 | GI_21361869-A | rs2163625  | 11 | 11 | 8938113   | 40383  | 7.4133  | 0.3984 | 0.2479  | 6.2241 | YRI |
| C11orf17 | GI_21361869-I | rs2163625  | 11 | 11 | 8938113   | 40032  | 6.4317  | 0.3509 | 0.2335  | 6.2241 | YRI |
| C11orf17 | GI_21361869-A | rs10840156 | 11 | 11 | 8938645   | 40915  | 6.7507  | 0.3996 | 0.2493  | 6.2241 | YRI |

|          |               |            |    |    |          |       |         |        |         |        |     |
|----------|---------------|------------|----|----|----------|-------|---------|--------|---------|--------|-----|
| C11orf17 | GI_21361869-A | rs10769977 | 11 | 11 | 8939425  | 41695 | 7.3076  | 0.3988 | 0.2470  | 6.2241 | YRI |
| C11orf17 | GI_21361869-I | rs10769977 | 11 | 11 | 8939425  | 41344 | 6.3680  | 0.3526 | 0.2322  | 6.2241 | YRI |
| C11orf17 | GI_21361869-A | rs1123936  | 11 | 11 | 8959882  | 62152 | 6.7924  | 0.3739 | 0.2381  | 6.2241 | YRI |
| C11orf17 | GI_21361869-A | rs4370967  | 11 | 11 | 8971978  | 74248 | 7.0531  | 0.4032 | 0.2468  | 6.2241 | YRI |
| NUCB2    | GI_4826869-S  | rs214083   | 11 | 11 | 17255435 | 52970 | 6.2217  | 0.3501 | -0.4716 | 5.8984 | YRI |
| TSG101   | GI_18765712-S | rs3925781  | 11 | 11 | 18481066 | 21289 | 10.3534 | 0.5217 | 0.2280  | 5.9179 | YRI |
| TSG101   | GI_18765712-S | rs12419063 | 11 | 11 | 18481894 | 22117 | 10.3534 | 0.5217 | 0.2280  | 5.9179 | YRI |
| TSG101   | GI_18765712-S | rs11024691 | 11 | 11 | 18482823 | 23046 | 6.1023  | 0.3342 | -0.1956 | 5.9179 | YRI |
| TSG101   | GI_18765712-S | rs4298881  | 11 | 11 | 18485368 | 25591 | 10.3534 | 0.5217 | 0.2280  | 5.9179 | YRI |
| TSG101   | GI_18765712-S | rs10500836 | 11 | 11 | 18485684 | 25907 | 10.3534 | 0.5217 | 0.2280  | 5.9179 | YRI |
| TSG101   | GI_18765712-S | rs10832939 | 11 | 11 | 18486623 | 26846 | 6.1023  | 0.3342 | -0.1956 | 5.9179 | YRI |
| TSG101   | GI_18765712-S | rs2292176  | 11 | 11 | 18487604 | 27827 | 6.1023  | 0.3342 | 0.1956  | 5.9179 | YRI |
| TSG101   | GI_18765712-S | rs11600246 | 11 | 11 | 18492286 | 32509 | 6.1023  | 0.3342 | -0.1956 | 5.9179 | YRI |
| TSG101   | GI_18765712-S | rs6486431  | 11 | 11 | 18498803 | 39026 | 6.4216  | 0.3554 | 0.2013  | 5.9179 | YRI |
| TSG101   | GI_18765712-S | rs4390325  | 11 | 11 | 18499446 | 39669 | 6.3285  | 0.3891 | -0.2038 | 5.9179 | YRI |
| TSG101   | GI_18765712-S | rs2088184  | 11 | 11 | 18500429 | 40652 | 6.1023  | 0.3342 | 0.1956  | 5.9179 | YRI |
| TSG101   | GI_18765712-S | rs7931630  | 11 | 11 | 18503908 | 44131 | 10.3534 | 0.5217 | -0.2280 | 5.9179 | YRI |
| TSG101   | GI_18765712-S | rs1395319  | 11 | 11 | 18504759 | 44982 | 7.8611  | 0.4817 | -0.2195 | 5.9179 | YRI |
| TSG101   | GI_18765712-S | rs1395320  | 11 | 11 | 18504771 | 44994 | 9.5557  | 0.4909 | 0.2203  | 5.9179 | YRI |
| TSG101   | GI_18765712-S | rs3802966  | 11 | 11 | 18505539 | 45762 | 6.0061  | 0.3340 | 0.1965  | 5.9179 | YRI |
| TSG101   | GI_18765712-S | rs7105889  | 11 | 11 | 18520637 | 60860 | 9.5557  | 0.4909 | -0.2203 | 5.9179 | YRI |
| TSG101   | GI_18765712-S | rs12224694 | 11 | 11 | 18521413 | 61636 | 9.2125  | 0.4830 | -0.2263 | 5.9179 | YRI |
| TSG101   | GI_18765712-S | rs10832940 | 11 | 11 | 18525921 | 66144 | 9.8685  | 0.5219 | -0.2351 | 5.9179 | YRI |
| TSG101   | GI_18765712-S | rs7107057  | 11 | 11 | 18528736 | 68959 | 9.5557  | 0.4909 | -0.2203 | 5.9179 | YRI |
| TSG101   | GI_18765712-S | rs16935538 | 11 | 11 | 18529923 | 70146 | 6.1023  | 0.3342 | 0.1956  | 5.9179 | YRI |
| TSG101   | GI_18765712-S | rs16935539 | 11 | 11 | 18530105 | 70328 | 6.1023  | 0.3342 | 0.1956  | 5.9179 | YRI |
| MMRP19   | GI_7705723-S  | rs2941052  | 11 | 11 | 34846707 | 19821 | 6.6806  | 0.3633 | -0.2095 | 6.1837 | YRI |
| MMRP19   | GI_7705723-S  | rs2915233  | 11 | 11 | 34848869 | 17659 | 6.6806  | 0.3633 | 0.2095  | 6.1837 | YRI |
| MMRP19   | GI_7705723-S  | rs2288667  | 11 | 11 | 34860975 | 5553  | 10.6769 | 0.5336 | -0.2742 | 6.1837 | YRI |
| MMRP19   | GI_7705723-S  | rs2288668  | 11 | 11 | 34861085 | 5443  | 6.3631  | 0.3524 | 0.2192  | 6.1837 | YRI |
| MMRP19   | GI_7705723-S  | rs2956088  | 11 | 11 | 34862423 | 4105  | 10.6769 | 0.5336 | 0.2742  | 6.1837 | YRI |
| MMRP19   | GI_7705723-S  | rs2985399  | 11 | 11 | 34862570 | 3958  | 10.6769 | 0.5336 | 0.2742  | 6.1837 | YRI |
| MMRP19   | GI_7705723-S  | rs2985398  | 11 | 11 | 34862621 | 3907  | 10.3902 | 0.5293 | 0.2736  | 6.1837 | YRI |
| MMRP19   | GI_7705723-S  | rs1998603  | 11 | 11 | 34863138 | 3390  | 10.6769 | 0.5336 | -0.2742 | 6.1837 | YRI |
| MMRP19   | GI_7705723-S  | rs2985396  | 11 | 11 | 34863530 | 2998  | 10.3102 | 0.5391 | 0.2705  | 6.1837 | YRI |
| MMRP19   | GI_7705723-S  | rs2956091  | 11 | 11 | 34864657 | 1871  | 10.7299 | 0.5614 | -0.2768 | 6.1837 | YRI |
| MMRP19   | GI_7705723-S  | rs2985391  | 11 | 11 | 34866148 | 380   | 11.0035 | 0.5714 | 0.2764  | 6.1837 | YRI |
| MMRP19   | GI_7705723-S  | rs2985390  | 11 | 11 | 34866251 | 277   | 6.3869  | 0.3487 | 0.2292  | 6.1837 | YRI |
| MMRP19   | GI_7705723-S  | rs1571133  | 11 | 11 | 34866502 | 26    | 11.7126 | 0.5700 | 0.2822  | 6.1837 | YRI |
| MMRP19   | GI_7705723-S  | rs1571134  | 11 | 11 | 34866653 | 125   | 10.9724 | 0.5506 | 0.2682  | 6.1837 | YRI |
| MMRP19   | GI_7705723-S  | rs1977420  | 11 | 11 | 34866973 | 445   | 6.3869  | 0.3487 | -0.2292 | 6.1837 | YRI |
| MMRP19   | GI_7705723-S  | rs2303959  | 11 | 11 | 34868589 | 2061  | 6.3099  | 0.3599 | -0.2393 | 6.1837 | YRI |
| MMRP19   | GI_7705723-S  | rs2915224  | 11 | 11 | 34868865 | 2337  | 10.6769 | 0.5336 | -0.2742 | 6.1837 | YRI |
| MMRP19   | GI_7705723-S  | rs1430855  | 11 | 11 | 34869484 | 2956  | 10.6769 | 0.5336 | -0.2742 | 6.1837 | YRI |
| MMRP19   | GI_7705723-S  | rs2985389  | 11 | 11 | 34869740 | 3212  | 10.6769 | 0.5336 | 0.2742  | 6.1837 | YRI |
| MMRP19   | GI_7705723-S  | rs2915223  | 11 | 11 | 34870713 | 4185  | 10.6769 | 0.5336 | 0.2742  | 6.1837 | YRI |
| MMRP19   | GI_7705723-S  | rs2915222  | 11 | 11 | 34870936 | 4408  | 10.6769 | 0.5336 | -0.2742 | 6.1837 | YRI |
| MMRP19   | GI_7705723-S  | rs2915221  | 11 | 11 | 34871056 | 4528  | 7.5936  | 0.4616 | -0.2642 | 6.1837 | YRI |
| MMRP19   | GI_7705723-S  | rs2915220  | 11 | 11 | 34871226 | 4698  | 10.6769 | 0.5336 | -0.2742 | 6.1837 | YRI |
| MMRP19   | GI_7705723-S  | rs2986424  | 11 | 11 | 34872022 | 5494  | 8.7228  | 0.4685 | -0.2581 | 6.1837 | YRI |
| MMRP19   | GI_7705723-S  | rs2986425  | 11 | 11 | 34872332 | 5804  | 6.3869  | 0.3487 | -0.2292 | 6.1837 | YRI |
| MMRP19   | GI_7705723-S  | rs1326940  | 11 | 11 | 34873060 | 6532  | 10.6769 | 0.5336 | -0.2742 | 6.1837 | YRI |
| MMRP19   | GI_7705723-S  | rs1326941  | 11 | 11 | 34873286 | 6758  | 10.6769 | 0.5336 | -0.2742 | 6.1837 | YRI |
| MMRP19   | GI_7705723-S  | rs1326942  | 11 | 11 | 34873361 | 6833  | 10.3902 | 0.5293 | -0.2736 | 6.1837 | YRI |
| MMRP19   | GI_7705723-S  | rs1326943  | 11 | 11 | 34873444 | 6916  | 10.6769 | 0.5336 | 0.2742  | 6.1837 | YRI |
| MMRP19   | GI_7705723-S  | rs2217478  | 11 | 11 | 34873939 | 7411  | 10.2691 | 0.5310 | 0.2721  | 6.1837 | YRI |
| MMRP19   | GI_7705723-S  | rs2986429  | 11 | 11 | 34874951 | 8423  | 6.8061  | 0.3694 | -0.2178 | 6.1837 | YRI |
| MMRP19   | GI_7705723-S  | rs11032918 | 11 | 11 | 34879348 | 12820 | 6.4526  | 0.3520 | -0.2222 | 6.1837 | YRI |
| MMRP19   | GI_7705723-S  | rs2985381  | 11 | 11 | 34879792 | 13264 | 6.3869  | 0.3487 | -0.2292 | 6.1837 | YRI |

|           |               |            |    |    |          |        |         |        |         |        |     |
|-----------|---------------|------------|----|----|----------|--------|---------|--------|---------|--------|-----|
| MMRP19    | GI_7705723-S  | rs1117446  | 11 | 11 | 34885098 | 18570  | 6.3246  | 0.3555 | -0.2322 | 6.1837 | YRI |
| MMRP19    | GI_7705723-S  | rs2956107  | 11 | 11 | 34897144 | 30616  | 6.3100  | 0.3497 | 0.2306  | 6.1837 | YRI |
| MMRP19    | GI_7705723-S  | rs2956106  | 11 | 11 | 34897558 | 31030  | 6.3869  | 0.3487 | -0.2292 | 6.1837 | YRI |
| MMRP19    | GI_7705723-S  | rs2915204  | 11 | 11 | 34898421 | 31893  | 6.3869  | 0.3487 | -0.2292 | 6.1837 | YRI |
| MMRP19    | GI_7705723-S  | rs2915200  | 11 | 11 | 34900947 | 34419  | 6.4526  | 0.3520 | -0.2222 | 6.1837 | YRI |
| MMRP19    | GI_7705723-S  | rs2956103  | 11 | 11 | 34901029 | 34501  | 6.9795  | 0.4053 | -0.2389 | 6.1837 | YRI |
| MMRP19    | GI_7705723-S  | rs1998912  | 11 | 11 | 34904520 | 37992  | 6.3869  | 0.3487 | -0.2292 | 6.1837 | YRI |
| MMRP19    | GI_7705723-S  | rs2986410  | 11 | 11 | 34905162 | 38634  | 6.3869  | 0.3487 | 0.2292  | 6.1837 | YRI |
| MMRP19    | GI_7705723-S  | rs2985403  | 11 | 11 | 34913650 | 47122  | 6.3869  | 0.3487 | -0.2292 | 6.1837 | YRI |
| MMRP19    | GI_7705723-S  | rs2915193  | 11 | 11 | 34916032 | 49504  | 6.3869  | 0.3487 | -0.2292 | 6.1837 | YRI |
| MMRP19    | GI_7705723-S  | rs2956087  | 11 | 11 | 34922133 | 55605  | 6.3869  | 0.3487 | -0.2292 | 6.1837 | YRI |
| MMRP19    | GI_7705723-S  | rs2915227  | 11 | 11 | 34931643 | 65115  | 8.1179  | 0.4305 | -0.2342 | 6.1837 | YRI |
| LOC119710 | GI_42476215-S | rs12277745 | 11 | 11 | 36543756 | 82442  | 9.0675  | 0.4770 | 0.9867  | 6.4319 | YRI |
| LOC119710 | GI_42476215-S | rs4150999  | 11 | 11 | 36545769 | 80429  | 8.2876  | 0.4495 | -0.9621 | 6.4319 | YRI |
| LOC119710 | GI_42476215-S | rs4151001  | 11 | 11 | 36546694 | 79504  | 9.2027  | 0.4826 | 1.0048  | 6.4319 | YRI |
| LOC119710 | GI_42476215-S | rs4151030  | 11 | 11 | 36552336 | 73862  | 9.5514  | 0.4907 | -0.9845 | 6.4319 | YRI |
| LOC119710 | GI_42476215-S | rs4151047  | 11 | 11 | 36557092 | 69106  | 9.5514  | 0.4907 | 0.9845  | 6.4319 | YRI |
| LOC119710 | GI_42476215-S | rs12274228 | 11 | 11 | 36563208 | 62990  | 8.4535  | 0.4509 | -0.8525 | 6.4319 | YRI |
| LOC119710 | GI_42476215-S | rs12271060 | 11 | 11 | 36565163 | 61035  | 6.6826  | 0.3634 | -0.7317 | 6.4319 | YRI |
| LOC119710 | GI_42476215-S | rs12271279 | 11 | 11 | 36565599 | 60599  | 9.4247  | 0.4917 | -1.0098 | 6.4319 | YRI |
| LOC119710 | GI_42476215-S | rs11033700 | 11 | 11 | 36567591 | 58607  | 6.6826  | 0.3634 | 0.7317  | 6.4319 | YRI |
| LOC119710 | GI_42476215-S | rs16929080 | 11 | 11 | 36568174 | 58024  | 6.6826  | 0.3634 | 0.7317  | 6.4319 | YRI |
| LOC119710 | GI_42476215-S | rs11033702 | 11 | 11 | 36568712 | 57486  | 6.6826  | 0.3634 | -0.7317 | 6.4319 | YRI |
| LOC119710 | GI_42476215-S | rs11828016 | 11 | 11 | 36569698 | 56500  | 6.6826  | 0.3634 | 0.7317  | 6.4319 | YRI |
| LOC119710 | GI_42476215-S | rs12280564 | 11 | 11 | 36570528 | 55670  | 6.6826  | 0.3634 | 0.7317  | 6.4319 | YRI |
| LOC119710 | GI_42476215-S | rs12280515 | 11 | 11 | 36570567 | 55631  | 6.6826  | 0.3634 | -0.7317 | 6.4319 | YRI |
| LOC119710 | GI_42476215-S | rs16929093 | 11 | 11 | 36571417 | 54781  | 6.6826  | 0.3634 | -0.7317 | 6.4319 | YRI |
| LOC119710 | GI_42476215-S | rs11033704 | 11 | 11 | 36574821 | 51377  | 9.5514  | 0.4907 | 0.9845  | 6.4319 | YRI |
| LOC119710 | GI_42476215-S | rs11033705 | 11 | 11 | 36578171 | 48027  | 9.5514  | 0.4907 | 0.9845  | 6.4319 | YRI |
| LOC119710 | GI_42476215-S | rs13377530 | 11 | 11 | 36580763 | 45435  | 6.8942  | 0.3789 | -0.7696 | 6.4319 | YRI |
| LOC119710 | GI_42476215-S | rs12271312 | 11 | 11 | 36582755 | 43443  | 9.4247  | 0.4917 | 1.0098  | 6.4319 | YRI |
| LOC119710 | GI_42476215-S | rs12281063 | 11 | 11 | 36588453 | 37745  | 9.2387  | 0.4781 | 0.9991  | 6.4319 | YRI |
| LOC119710 | GI_42476215-S | rs11825620 | 11 | 11 | 36594132 | 32066  | 9.5514  | 0.4907 | -0.9845 | 6.4319 | YRI |
| LOC119710 | GI_42476215-S | rs12273796 | 11 | 11 | 36603304 | 22894  | 9.3132  | 0.5060 | -1.1890 | 6.4319 | YRI |
| LOC119710 | GI_42476215-S | rs11033726 | 11 | 11 | 36608716 | 17482  | 8.6325  | 0.4834 | 1.2514  | 6.4319 | YRI |
| LOC119710 | GI_42476215-S | rs12283026 | 11 | 11 | 36617208 | 8990   | 9.5514  | 0.4907 | 0.9845  | 6.4319 | YRI |
| LOC119710 | GI_42476215-S | rs11033738 | 11 | 11 | 36633029 | 6831   | 9.2387  | 0.4781 | 0.9991  | 6.4319 | YRI |
| LOC119710 | GI_42476215-S | rs11820706 | 11 | 11 | 36666478 | 40280  | 6.5277  | 0.3879 | -1.1244 | 6.4319 | YRI |
| LOC119710 | GI_42476215-S | rs7119565  | 11 | 11 | 36682341 | 56143  | 8.5744  | 0.4504 | 0.9707  | 6.4319 | YRI |
| LOC119710 | GI_42476215-S | rs11033754 | 11 | 11 | 36689834 | 63636  | 6.5262  | 0.3556 | -0.8435 | 6.4319 | YRI |
| HSD17B12  | GI_7705854-S  | rs10838158 | 11 | 11 | 43709098 | 125383 | 10.0127 | 0.5088 | -0.2798 | 5.8242 | YRI |
| HSD17B12  | GI_7705854-S  | rs6485455  | 11 | 11 | 43710301 | 124180 | 8.4027  | 0.4606 | -0.2748 | 5.8242 | YRI |
| HSD17B12  | GI_7705854-S  | rs10768975 | 11 | 11 | 43710948 | 123533 | 10.1030 | 0.5184 | 0.2777  | 5.8242 | YRI |
| HSD17B12  | GI_7705854-S  | rs6485456  | 11 | 11 | 43723478 | 111003 | 10.0127 | 0.5088 | -0.2798 | 5.8242 | YRI |
| HSD17B12  | GI_7705854-S  | rs10742688 | 11 | 11 | 43724830 | 109651 | 10.0127 | 0.5088 | 0.2798  | 5.8242 | YRI |
| HSD17B12  | GI_7705854-S  | rs7115970  | 11 | 11 | 43725871 | 108610 | 8.6264  | 0.5034 | 0.2717  | 5.8242 | YRI |
| HSD17B12  | GI_7705854-S  | rs10768976 | 11 | 11 | 43730389 | 104092 | 9.5998  | 0.4987 | -0.2768 | 5.8242 | YRI |
| HSD17B12  | GI_7705854-S  | rs4643069  | 11 | 11 | 43732310 | 102171 | 10.0127 | 0.5088 | -0.2798 | 5.8242 | YRI |
| HSD17B12  | GI_7705854-S  | rs7110437  | 11 | 11 | 43737129 | 97352  | 9.3111  | 0.5556 | -0.2862 | 5.8242 | YRI |
| HSD17B12  | GI_7705854-S  | rs7928134  | 11 | 11 | 43742889 | 91592  | 10.1030 | 0.5184 | 0.2777  | 5.8242 | YRI |
| HSD17B12  | GI_7705854-S  | rs10838162 | 11 | 11 | 43745798 | 88683  | 10.0127 | 0.5088 | 0.2798  | 5.8242 | YRI |
| HSD17B12  | GI_7705854-S  | rs4755741  | 11 | 11 | 43759830 | 74651  | 10.0127 | 0.5088 | -0.2798 | 5.8242 | YRI |
| HSD17B12  | GI_7705854-S  | rs6485462  | 11 | 11 | 43772776 | 61705  | 7.5501  | 0.4397 | 0.2299  | 5.8242 | YRI |
| HSD17B12  | GI_7705854-S  | rs7118659  | 11 | 11 | 43773701 | 60780  | 7.5524  | 0.4398 | 0.2324  | 5.8242 | YRI |
| HSD17B12  | GI_7705854-S  | rs1878851  | 11 | 11 | 43777100 | 57381  | 10.0127 | 0.5088 | 0.2798  | 5.8242 | YRI |
| HSD17B12  | GI_7705854-S  | rs4755745  | 11 | 11 | 43777580 | 56901  | 10.0127 | 0.5088 | 0.2798  | 5.8242 | YRI |
| HSD17B12  | GI_7705854-S  | rs1518814  | 11 | 11 | 43781209 | 53272  | 10.0127 | 0.5088 | 0.2798  | 5.8242 | YRI |
| HSD17B12  | GI_7705854-S  | rs6485464  | 11 | 11 | 43782057 | 52424  | 10.0127 | 0.5088 | 0.2798  | 5.8242 | YRI |
| HSD17B12  | GI_7705854-S  | rs10768983 | 11 | 11 | 43796511 | 37970  | 10.2791 | 0.5189 | -0.2855 | 5.8242 | YRI |

|           |               |            |    |    |          |        |         |        |         |        |     |
|-----------|---------------|------------|----|----|----------|--------|---------|--------|---------|--------|-----|
| HSD17B12  | GI_7705854-S  | rs7101808  | 11 | 11 | 43800155 | 34326  | 8.4943  | 0.4469 | 0.2459  | 5.8242 | YRI |
| HSD17B12  | GI_7705854-S  | rs7131110  | 11 | 11 | 43803426 | 31055  | 10.2791 | 0.5189 | -0.2855 | 5.8242 | YRI |
| HSD17B12  | GI_7705854-S  | rs2139154  | 11 | 11 | 43815258 | 19223  | 10.2791 | 0.5189 | 0.2855  | 5.8242 | YRI |
| HSD17B12  | GI_7705854-S  | rs10734518 | 11 | 11 | 43818324 | 16157  | 6.3241  | 0.3455 | -0.2127 | 5.8242 | YRI |
| HSD17B12  | GI_7705854-S  | rs9971535  | 11 | 11 | 43818901 | 15580  | 10.2791 | 0.5189 | -0.2855 | 5.8242 | YRI |
| HSD17B12  | GI_7705854-S  | rs2176598  | 11 | 11 | 43820854 | 13627  | 8.5894  | 0.4880 | 0.2778  | 5.8242 | YRI |
| HSD17B12  | GI_7705854-S  | rs1914773  | 11 | 11 | 43822870 | 11611  | 6.3241  | 0.3455 | 0.2127  | 5.8242 | YRI |
| HSD17B12  | GI_7705854-S  | rs939015   | 11 | 11 | 43825227 | 9254   | 10.2791 | 0.5189 | 0.2855  | 5.8242 | YRI |
| HSD17B12  | GI_7705854-S  | rs10838185 | 11 | 11 | 43826515 | 7966   | 6.2300  | 0.3456 | -0.2126 | 5.8242 | YRI |
| HSD17B12  | GI_7705854-S  | rs10838186 | 11 | 11 | 43826556 | 7925   | 6.3241  | 0.3455 | 0.2127  | 5.8242 | YRI |
| HSD17B12  | GI_7705854-S  | rs11037676 | 11 | 11 | 43827788 | 6693   | 6.1538  | 0.3466 | 0.2127  | 5.8242 | YRI |
| HSD17B12  | GI_7705854-S  | rs1518822  | 11 | 11 | 43828373 | 6108   | 10.2791 | 0.5189 | 0.2855  | 5.8242 | YRI |
| HSD17B12  | GI_7705854-S  | rs1518821  | 11 | 11 | 43828572 | 5909   | 10.2791 | 0.5189 | -0.2855 | 5.8242 | YRI |
| HSD17B12  | GI_7705854-S  | rs1518820  | 11 | 11 | 43830115 | 4366   | 6.4038  | 0.3495 | -0.2989 | 5.8242 | YRI |
| HSD17B12  | GI_7705854-S  | rs3736505  | 11 | 11 | 43833011 | 1470   | 8.7150  | 0.4564 | 0.2725  | 5.8242 | YRI |
| HSD17B12  | GI_7705854-S  | rs1061810  | 11 | 11 | 43834510 | 29     | 9.5493  | 0.4906 | 0.2882  | 5.8242 | YRI |
| HSD17B12  | GI_7705854-S  | rs7120753  | 11 | 11 | 43836089 | 1608   | 6.8467  | 0.3714 | -0.2379 | 5.8242 | YRI |
| DDB2      | GI_4557514-S  | rs2013867  | 11 | 11 | 47216848 | 273    | 5.9281  | 0.3252 | -0.1533 | 5.7512 | YRI |
| TIMM10    | GI_6912707-S  | rs1001956  | 11 | 11 | 57023525 | 29093  | 9.0060  | 0.4745 | 0.8207  | 6.3446 | YRI |
| MGC:13379 | GI_19923799-S | rs10897159 | 11 | 11 | 60948930 | 26177  | 5.8925  | 0.3234 | -0.2651 | 5.8586 | YRI |
| ASRGL1    | GI_23308566-S | rs2513077  | 11 | 11 | 61862501 | 53815  | 6.7068  | 0.3646 | -0.3903 | 5.92   | YRI |
| ASRGL1    | GI_23308566-S | rs2513052  | 11 | 11 | 61864824 | 51492  | 6.2088  | 0.3397 | 0.3612  | 5.92   | YRI |
| ASRGL1    | GI_23308566-S | rs1881535  | 11 | 11 | 61878199 | 38117  | 6.4002  | 0.3493 | -0.3818 | 5.92   | YRI |
| ASRGL1    | GI_23308566-S | rs2463836  | 11 | 11 | 61883070 | 33246  | 6.4002  | 0.3493 | -0.3818 | 5.92   | YRI |
| SF1       | GI_42544126-I | rs516041   | 11 | 11 | 64248645 | 51654  | 6.4745  | 0.3531 | 0.5238  | 5.9008 | YRI |
| SF1       | GI_42544126-I | rs559977   | 11 | 11 | 64253163 | 47136  | 6.4745  | 0.3531 | 0.5238  | 5.9008 | YRI |
| SF1       | GI_42544126-I | rs553618   | 11 | 11 | 64259755 | 40544  | 7.9000  | 0.4263 | -0.5688 | 5.9008 | YRI |
| SF1       | GI_42544126-I | rs550930   | 11 | 11 | 64263891 | 36408  | 8.2441  | 0.4361 | -0.5795 | 5.9008 | YRI |
| SF1       | GI_42544126-I | rs546323   | 11 | 11 | 64264375 | 35924  | 8.2441  | 0.4361 | -0.5795 | 5.9008 | YRI |
| RPS6KB2   | GI_4506738-S  | rs10896172 | 11 | 11 | 66932268 | 27077  | 5.6187  | 0.3090 | 0.3380  | 5.5186 | YRI |
| RPS6KB2   | GI_4506738-S  | rs1558257  | 11 | 11 | 66936601 | 22744  | 6.0526  | 0.3317 | 0.3301  | 5.5186 | YRI |
| RPS6KB2   | GI_4506738-S  | rs2302264  | 11 | 11 | 66964002 | 4657   | 10.8339 | 0.5393 | 0.3764  | 5.5186 | YRI |
| RPS6KB2   | GI_4506738-S  | rs1638558  | 11 | 11 | 66975695 | 16350  | 5.5961  | 0.3123 | 0.2558  | 5.5186 | YRI |
| MRPL21    | GI_31652223-A | rs636049   | 11 | 11 | 68423774 | 8360   | 6.6177  | 0.3602 | -0.2325 | 6.0477 | YRI |
| RNF121    | GI_37588864-A | rs501308   | 11 | 11 | 71258973 | 127213 | 5.7520  | 0.3160 | -0.2001 | 5.6734 | YRI |
| LOC374421 | GI_37541454-S | rs7949850  | 11 | 11 | 93035170 | 67589  | 8.2555  | 0.4602 | 0.1781  | 5.8224 | YRI |
| LOC374421 | GI_37541454-S | rs4753488  | 11 | 11 | 93037265 | 65494  | 9.8370  | 0.5081 | 0.1960  | 5.8224 | YRI |
| LOC374421 | GI_37541454-S | rs4753489  | 11 | 11 | 93039754 | 63005  | 9.6421  | 0.4943 | -0.2080 | 5.8224 | YRI |
| LOC374421 | GI_37541454-S | rs7939847  | 11 | 11 | 93041268 | 61491  | 9.6421  | 0.4943 | -0.2080 | 5.8224 | YRI |
| LOC374421 | GI_37541454-S | rs1944101  | 11 | 11 | 93041744 | 61015  | 9.9631  | 0.5069 | 0.1958  | 5.8224 | YRI |
| LOC374421 | GI_37541454-S | rs1954994  | 11 | 11 | 93042715 | 60044  | 9.0719  | 0.4713 | 0.1853  | 5.8224 | YRI |
| LOC374421 | GI_37541454-S | rs1944102  | 11 | 11 | 93042994 | 59765  | 9.6421  | 0.4943 | -0.2080 | 5.8224 | YRI |
| LOC374421 | GI_37541454-S | rs7127033  | 11 | 11 | 93043626 | 59133  | 9.0851  | 0.4838 | -0.2040 | 5.8224 | YRI |
| LOC374421 | GI_37541454-S | rs10765624 | 11 | 11 | 93045170 | 57589  | 9.6421  | 0.4943 | 0.2080  | 5.8224 | YRI |
| LOC374421 | GI_37541454-S | rs4753095  | 11 | 11 | 93045381 | 57378  | 6.4474  | 0.4018 | -0.2304 | 5.8224 | YRI |
| LOC374421 | GI_37541454-S | rs4753096  | 11 | 11 | 93045763 | 56996  | 9.6421  | 0.4943 | -0.2080 | 5.8224 | YRI |
| LOC374421 | GI_37541454-S | rs4753490  | 11 | 11 | 93045795 | 56964  | 9.5053  | 0.4949 | 0.2068  | 5.8224 | YRI |
| LOC374421 | GI_37541454-S | rs10831085 | 11 | 11 | 93045930 | 56829  | 9.0719  | 0.4713 | 0.1853  | 5.8224 | YRI |
| LOC374421 | GI_37541454-S | rs11020477 | 11 | 11 | 93046865 | 55894  | 8.4700  | 0.4894 | -0.1925 | 5.8224 | YRI |
| LOC374421 | GI_37541454-S | rs10765627 | 11 | 11 | 93047310 | 55449  | 8.9303  | 0.4835 | -0.2095 | 5.8224 | YRI |
| LOC374421 | GI_37541454-S | rs10765628 | 11 | 11 | 93047417 | 55342  | 9.0719  | 0.4713 | -0.1853 | 5.8224 | YRI |
| LOC374421 | GI_37541454-S | rs10765629 | 11 | 11 | 93047587 | 55172  | 9.5184  | 0.4954 | 0.2085  | 5.8224 | YRI |
| LOC374421 | GI_37541454-S | rs10831088 | 11 | 11 | 93048479 | 54280  | 9.6421  | 0.4943 | 0.2080  | 5.8224 | YRI |
| LOC374421 | GI_37541454-S | rs10765631 | 11 | 11 | 93049693 | 53066  | 9.2312  | 0.4838 | 0.2055  | 5.8224 | YRI |
| LOC374421 | GI_37541454-S | rs10741471 | 11 | 11 | 93049946 | 52813  | 9.9631  | 0.5069 | 0.1958  | 5.8224 | YRI |
| LOC374421 | GI_37541454-S | rs4753097  | 11 | 11 | 93050801 | 51958  | 9.9631  | 0.5069 | -0.1958 | 5.8224 | YRI |
| LOC374421 | GI_37541454-S | rs1944100  | 11 | 11 | 93052422 | 50337  | 9.9631  | 0.5069 | -0.1958 | 5.8224 | YRI |
| LOC374421 | GI_37541454-S | rs1944106  | 11 | 11 | 93054941 | 47818  | 9.6421  | 0.4943 | -0.2080 | 5.8224 | YRI |
| LOC374421 | GI_37541454-S | rs4753098  | 11 | 11 | 93057085 | 45674  | 8.0187  | 0.4822 | -0.2097 | 5.8224 | YRI |

|           |               |            |    |    |           |        |         |        |         |        |     |
|-----------|---------------|------------|----|----|-----------|--------|---------|--------|---------|--------|-----|
| LOC374421 | GI_37541454-S | rs7926876  | 11 | 11 | 93057842  | 44917  | 8.4836  | 0.4581 | -0.1811 | 5.8224 | YRI |
| LOC374421 | GI_37541454-S | rs2186686  | 11 | 11 | 93059767  | 42992  | 9.9631  | 0.5069 | -0.1958 | 5.8224 | YRI |
| LOC374421 | GI_37541454-S | rs4303195  | 11 | 11 | 93061485  | 41274  | 9.6421  | 0.4943 | -0.2080 | 5.8224 | YRI |
| LOC374421 | GI_37541454-S | rs7937523  | 11 | 11 | 93062100  | 40659  | 9.9631  | 0.5069 | 0.1958  | 5.8224 | YRI |
| LOC374421 | GI_37541454-S | rs10741472 | 11 | 11 | 93062885  | 39874  | 9.4571  | 0.4991 | 0.2048  | 5.8224 | YRI |
| LOC374421 | GI_37541454-S | rs4753495  | 11 | 11 | 93064807  | 37952  | 9.6421  | 0.4943 | 0.2080  | 5.8224 | YRI |
| LOC374421 | GI_37541454-S | rs1011993  | 11 | 11 | 93079070  | 23689  | 10.0331 | 0.5157 | -0.2049 | 5.8224 | YRI |
| LOC374421 | GI_37541454-S | rs2186688  | 11 | 11 | 93088237  | 14522  | 7.3962  | 0.4322 | 0.1751  | 5.8224 | YRI |
| LOC374421 | GI_37541454-S | rs6416000  | 11 | 11 | 93088468  | 14291  | 9.6421  | 0.4943 | 0.2080  | 5.8224 | YRI |
| LOC374421 | GI_37541454-S | rs1784203  | 11 | 11 | 93089782  | 12977  | 9.1304  | 0.4983 | 0.1976  | 5.8224 | YRI |
| LOC374421 | GI_37541454-S | rs648162   | 11 | 11 | 93092742  | 10017  | 8.9293  | 0.4713 | 0.1854  | 5.8224 | YRI |
| LOC374421 | GI_37541454-S | rs628916   | 11 | 11 | 93096363  | 6396   | 8.0598  | 0.4335 | -0.1864 | 5.8224 | YRI |
| LOC374421 | GI_37541454-S | rs2509840  | 11 | 11 | 93101049  | 1710   | 8.9801  | 0.4675 | -0.1869 | 5.8224 | YRI |
| LOC374421 | GI_37541454-S | rs1944099  | 11 | 11 | 93101750  | 1009   | 8.1904  | 0.4452 | -0.1941 | 5.8224 | YRI |
| LOC374421 | GI_37541454-S | rs7101779  | 11 | 11 | 93102980  | 221    | 8.8509  | 0.4740 | -0.2002 | 5.8224 | YRI |
| LOC374421 | GI_37541454-S | rs630648   | 11 | 11 | 93114326  | 11567  | 9.5464  | 0.4905 | 0.2019  | 5.8224 | YRI |
| LOC374421 | GI_37541454-S | rs623510   | 11 | 11 | 93114439  | 11680  | 9.5464  | 0.4905 | -0.2019 | 5.8224 | YRI |
| LOC374421 | GI_37541454-S | rs631116   | 11 | 11 | 93114475  | 11716  | 8.5819  | 0.4507 | 0.1891  | 5.8224 | YRI |
| CWF19L2   | GI_22748918-S | rs17587175 | 11 | 11 | 106692720 | 9766   | 6.1727  | 0.3378 | 0.2520  | 6.118  | YRI |
| CWF19L2   | GI_22748918-S | rs11212198 | 11 | 11 | 106768340 | 65854  | 6.1727  | 0.3378 | 0.2520  | 6.118  | YRI |
| CWF19L2   | GI_22748918-S | rs11212209 | 11 | 11 | 106783945 | 81459  | 6.1727  | 0.3378 | 0.2520  | 6.118  | YRI |
| CWF19L2   | GI_22748918-S | rs11212210 | 11 | 11 | 106787279 | 84793  | 6.1727  | 0.3378 | 0.2520  | 6.118  | YRI |
| CWF19L2   | GI_22748918-S | rs7925025  | 11 | 11 | 106788268 | 85782  | 6.1727  | 0.3378 | 0.2520  | 6.118  | YRI |
| CWF19L2   | GI_22748918-S | rs17106965 | 11 | 11 | 106829010 | 126524 | 6.1727  | 0.3378 | -0.2520 | 6.118  | YRI |
| MGC33948  | GI_40255122-S | rs11212474 | 11 | 11 | 107368940 | 400254 | 6.1033  | 0.3596 | 0.1568  | 6.0297 | YRI |
| MGC33948  | GI_40255122-S | rs7943669  | 11 | 11 | 107378616 | 390578 | 8.5610  | 0.4498 | -0.2147 | 6.0297 | YRI |
| MGC33948  | GI_40255122-S | rs17107675 | 11 | 11 | 107406886 | 362308 | 7.3742  | 0.3966 | -0.1979 | 6.0297 | YRI |
| MGC33948  | GI_40255122-S | rs11822270 | 11 | 11 | 107462599 | 306595 | 6.5179  | 0.4121 | -0.1926 | 6.0297 | YRI |
| MGC33948  | GI_40255122-S | rs11822651 | 11 | 11 | 107467414 | 301780 | 7.3742  | 0.3966 | -0.1979 | 6.0297 | YRI |
| MGC33948  | GI_40255122-S | rs3781870  | 11 | 11 | 107481660 | 287534 | 7.3742  | 0.3966 | -0.1979 | 6.0297 | YRI |
| MGC33948  | GI_40255122-S | rs2235001  | 11 | 11 | 107619842 | 149352 | 8.4624  | 0.4456 | -0.2247 | 6.0297 | YRI |
| MGC33948  | GI_40255122-S | rs4987926  | 11 | 11 | 107622397 | 146797 | 8.9036  | 0.4643 | 0.2049  | 6.0297 | YRI |
| MGC33948  | GI_40255122-S | rs4987929  | 11 | 11 | 107623342 | 145852 | 8.9036  | 0.4643 | 0.2049  | 6.0297 | YRI |
| MGC33948  | GI_40255122-S | rs2235000  | 11 | 11 | 107626943 | 142251 | 7.8990  | 0.4207 | -0.2251 | 6.0297 | YRI |
| MGC33948  | GI_40255122-S | rs2234994  | 11 | 11 | 107644330 | 124864 | 8.4624  | 0.4456 | 0.2247  | 6.0297 | YRI |
| MGC33948  | GI_40255122-S | rs3092856  | 11 | 11 | 107664942 | 104252 | 8.4624  | 0.4456 | 0.2247  | 6.0297 | YRI |
| MGC33948  | GI_40255122-S | rs4988050  | 11 | 11 | 107681538 | 87656  | 8.4624  | 0.4456 | 0.2247  | 6.0297 | YRI |
| MGC33948  | GI_40255122-S | rs11821299 | 11 | 11 | 107722341 | 46853  | 8.4115  | 0.4434 | -0.2478 | 6.0297 | YRI |
| MGC33948  | GI_40255122-S | rs11825355 | 11 | 11 | 107724851 | 44343  | 9.8124  | 0.5329 | 0.2677  | 6.0297 | YRI |
| MGC33948  | GI_40255122-S | rs17107969 | 11 | 11 | 107726213 | 42981  | 10.3079 | 0.5200 | 0.2493  | 6.0297 | YRI |
| MGC33948  | GI_40255122-S | rs17107980 | 11 | 11 | 107732685 | 36509  | 10.3079 | 0.5200 | -0.2493 | 6.0297 | YRI |
| MGC33948  | GI_40255122-S | rs3092836  | 11 | 11 | 107742872 | 26322  | 10.3079 | 0.5200 | -0.2493 | 6.0297 | YRI |
| MGC33948  | GI_40255122-S | rs17108054 | 11 | 11 | 107848530 | 79336  | 10.5400 | 0.5286 | 0.2139  | 6.0297 | YRI |
| SPA17     | GI_15718773-S | rs4936947  | 11 | 11 | 124003995 | 65479  | 6.8371  | 0.3710 | -0.2781 | 5.9874 | YRI |
| SPA17     | GI_15718773-S | rs7941327  | 11 | 11 | 124012177 | 57297  | 7.3939  | 0.3975 | -0.2625 | 5.9874 | YRI |
| SPA17     | GI_15718773-S | rs7937294  | 11 | 11 | 124018485 | 50989  | 7.3939  | 0.3975 | -0.2625 | 5.9874 | YRI |
| SPA17     | GI_15718773-S | rs7940161  | 11 | 11 | 124018585 | 50889  | 7.3939  | 0.3975 | -0.2625 | 5.9874 | YRI |
| SPA17     | GI_15718773-S | rs3819084  | 11 | 11 | 124022331 | 47143  | 7.2616  | 0.3966 | -0.2619 | 5.9874 | YRI |
| SPA17     | GI_15718773-S | rs7943693  | 11 | 11 | 124025119 | 44355  | 6.1588  | 0.3371 | -0.2352 | 5.9874 | YRI |
| SPA17     | GI_15718773-S | rs12295168 | 11 | 11 | 124027378 | 42096  | 7.4949  | 0.4076 | 0.2683  | 5.9874 | YRI |
| SPA17     | GI_15718773-S | rs11219743 | 11 | 11 | 124027930 | 41544  | 7.3200  | 0.3994 | 0.2608  | 5.9874 | YRI |
| SPA17     | GI_15718773-S | rs7926572  | 11 | 11 | 124033151 | 36323  | 6.2309  | 0.3456 | 0.2489  | 5.9874 | YRI |
| SPA17     | GI_15718773-S | rs11219749 | 11 | 11 | 124038377 | 31097  | 6.8645  | 0.3827 | -0.2607 | 5.9874 | YRI |
| SPA17     | GI_15718773-S | rs11824359 | 11 | 11 | 124039749 | 29725  | 6.1588  | 0.3371 | 0.2352  | 5.9874 | YRI |
| SPA17     | GI_15718773-S | rs10893281 | 11 | 11 | 124040022 | 29452  | 7.3939  | 0.3975 | 0.2625  | 5.9874 | YRI |
| SPA17     | GI_15718773-S | rs7119225  | 11 | 11 | 124042004 | 27470  | 7.3939  | 0.3975 | -0.2625 | 5.9874 | YRI |
| SPA17     | GI_15718773-S | rs7105102  | 11 | 11 | 124042147 | 27327  | 6.1588  | 0.3371 | 0.2352  | 5.9874 | YRI |
| SPA17     | GI_15718773-S | rs11825168 | 11 | 11 | 124043411 | 26063  | 7.3939  | 0.3975 | -0.2625 | 5.9874 | YRI |
| SPA17     | GI_15718773-S | rs7927406  | 11 | 11 | 124049013 | 20461  | 8.5893  | 0.4510 | 0.2971  | 5.9874 | YRI |

|               |               |            |    |    |           |        |         |        |         |        |     |
|---------------|---------------|------------|----|----|-----------|--------|---------|--------|---------|--------|-----|
| SPA17         | GI_15718773-S | rs7938692  | 11 | 11 | 124071401 | 1927   | 6.5905  | 0.3588 | 0.2572  | 5.9874 | YRI |
| Hs.98028      | Hs.98028-S    | rs646521   | 11 | 11 | 124183151 | 1184   | 6.8451  | 0.3713 | 0.1511  | 6.1051 | YRI |
| JARID1A       | GI_4826967-S  | rs12317640 | 12 | 12 | 256370    | 7443   | 6.2871  | 0.3436 | -0.2031 | 5.9155 | YRI |
| LOC399987     | GI_42660080-S | rs3809258  | 12 | 12 | 3734571   | 1492   | 10.7825 | 0.5375 | 0.2064  | 6.0201 | YRI |
| LOC399987     | GI_42660080-S | rs9300302  | 12 | 12 | 3737732   | 1669   | 10.2530 | 0.5179 | -0.2022 | 6.0201 | YRI |
| CLECSF2       | GI_37577106-S | rs33870    | 12 | 12 | 9899130   | 2675   | 7.5895  | 0.4066 | 0.4483  | 6.4747 | YRI |
| DKFZP434F0318 | GI_13540611-S | rs2111941  | 12 | 12 | 12720671  | 114802 | 7.8895  | 0.4203 | -0.4266 | 6.4863 | YRI |
| DKFZP434F0318 | GI_13540611-S | rs12816452 | 12 | 12 | 12724273  | 111200 | 7.8895  | 0.4203 | 0.4266  | 6.4863 | YRI |
| DKFZP434F0318 | GI_13540611-S | rs7132848  | 12 | 12 | 12733512  | 101961 | 8.1827  | 0.4508 | 0.5027  | 6.4863 | YRI |
| DKFZP434F0318 | GI_13540611-S | rs10845611 | 12 | 12 | 12743649  | 91824  | 8.9171  | 0.4958 | -0.5179 | 6.4863 | YRI |
| Hs.39429      | Hs.39429-S    | rs2948     | 12 | 12 | 16078899  | 111    | 9.9517  | 0.5064 | -0.1234 | 6.1296 | YRI |
| Hs.39429      | Hs.39429-S    | rs10772889 | 12 | 12 | 16083004  | 4216   | 6.8482  | 0.3715 | 0.1007  | 6.1296 | YRI |
| Hs.39429      | Hs.39429-S    | rs7964268  | 12 | 12 | 16091944  | 13156  | 6.8482  | 0.3715 | 0.1007  | 6.1296 | YRI |
| KIAA1463      | GI_39930390-S | rs7309964  | 12 | 12 | 49350331  | 74584  | 25.6126 | 0.8565 | 1.4371  | 8.5727 | YRI |
| KIAA1463      | GI_39930390-S | rs11169520 | 12 | 12 | 49359790  | 65125  | 27.7457 | 0.9008 | -1.1480 | 8.5727 | YRI |
| KIAA1463      | GI_39930390-S | rs1047912  | 12 | 12 | 49425129  | 214    | 22.8689 | 0.8324 | 1.1272  | 8.5727 | YRI |
| SLC11A2       | GI_10835168-S | rs2630367  | 12 | 12 | 49641438  | 24698  | 5.9003  | 0.3238 | 0.2285  | 5.7411 | YRI |
| SLC11A2       | GI_10835168-S | rs706803   | 12 | 12 | 49660517  | 5619   | 6.1483  | 0.3366 | 0.2419  | 5.7411 | YRI |
| SLC11A2       | GI_10835168-S | rs2630362  | 12 | 12 | 49664675  | 1461   | 6.6443  | 0.3615 | -0.2495 | 5.7411 | YRI |
| SLC11A2       | GI_10835168-S | rs150909   | 12 | 12 | 49667344  | 1208   | 6.6443  | 0.3615 | -0.2495 | 5.7411 | YRI |
| SLC11A2       | GI_10835168-S | rs161044   | 12 | 12 | 49668499  | 2363   | 6.6443  | 0.3615 | 0.2495  | 5.7411 | YRI |
| SLC11A2       | GI_10835168-S | rs224566   | 12 | 12 | 49670267  | 4131   | 6.6443  | 0.3615 | 0.2495  | 5.7411 | YRI |
| SLC11A2       | GI_10835168-S | rs224569   | 12 | 12 | 49673106  | 6970   | 6.6443  | 0.3615 | 0.2495  | 5.7411 | YRI |
| SLC11A2       | GI_10835168-S | rs161045   | 12 | 12 | 49677224  | 11088  | 6.1924  | 0.3644 | -0.2554 | 5.7411 | YRI |
| SLC11A2       | GI_10835168-S | rs161046   | 12 | 12 | 49678519  | 12383  | 5.8444  | 0.3209 | -0.2353 | 5.7411 | YRI |
| SLC11A2       | GI_10835168-S | rs161047   | 12 | 12 | 49678878  | 12742  | 6.6443  | 0.3615 | -0.2495 | 5.7411 | YRI |
| SLC11A2       | GI_10835168-S | rs445520   | 12 | 12 | 49689172  | 23036  | 6.6443  | 0.3615 | 0.2495  | 5.7411 | YRI |
| SLC11A2       | GI_10835168-S | rs394384   | 12 | 12 | 49689916  | 23780  | 6.6013  | 0.3918 | -0.2553 | 5.7411 | YRI |
| SLC11A2       | GI_10835168-S | rs224573   | 12 | 12 | 49703528  | 37392  | 6.6443  | 0.3615 | 0.2495  | 5.7411 | YRI |
| SLC11A2       | GI_10835168-S | rs224574   | 12 | 12 | 49705527  | 39391  | 6.6443  | 0.3615 | -0.2495 | 5.7411 | YRI |
| SLC11A2       | GI_10835168-S | rs6580780  | 12 | 12 | 49716927  | 50791  | 5.8313  | 0.3296 | 0.2289  | 5.7411 | YRI |
| SLC11A2       | GI_10835168-S | rs7299484  | 12 | 12 | 49721177  | 55041  | 6.6443  | 0.3615 | -0.2495 | 5.7411 | YRI |
| SLC11A2       | GI_10835168-S | rs7972608  | 12 | 12 | 49728883  | 62747  | 6.3358  | 0.3510 | -0.2579 | 5.7411 | YRI |
| SLC11A2       | GI_10835168-S | rs4768959  | 12 | 12 | 49731928  | 65792  | 6.4660  | 0.3627 | -0.2530 | 5.7411 | YRI |
| SLC11A2       | GI_10835168-S | rs7974923  | 12 | 12 | 49734400  | 68264  | 6.6443  | 0.3615 | -0.2495 | 5.7411 | YRI |
| SLC11A2       | GI_10835168-S | rs7975628  | 12 | 12 | 49734791  | 68655  | 6.1951  | 0.3488 | 0.2441  | 5.7411 | YRI |
| SLC11A2       | GI_10835168-S | rs10783412 | 12 | 12 | 49752272  | 86136  | 6.3183  | 0.3551 | 0.2482  | 5.7411 | YRI |
| SLC11A2       | GI_10835168-S | rs7978782  | 12 | 12 | 49791066  | 124930 | 6.6443  | 0.3615 | 0.2495  | 5.7411 | YRI |
| USP52         | GI_41281526-S | rs10747749 | 12 | 12 | 54065470  | 931663 | 6.4451  | 0.3516 | -0.3322 | 5.8926 | YRI |
| Hs.510003     | Hs.510003-S   | rs3741600  | 12 | 12 | 67440272  | 8299   | 12.9498 | 0.6098 | -0.4829 | 6.2543 | YRI |
| Hs.510003     | Hs.510003-S   | rs11609067 | 12 | 12 | 67440397  | 8174   | 9.8888  | 0.5227 | 0.4431  | 6.2543 | YRI |
| Hs.510003     | Hs.510003-S   | rs12321570 | 12 | 12 | 67448510  | 61     | 24.9520 | 0.8487 | 0.5926  | 6.2543 | YRI |
| PPP1R12A      | GI_4505316-S  | rs2430863  | 12 | 12 | 78663339  | 7611   | 5.8864  | 0.3230 | 0.2446  | 5.8275 | YRI |
| CHPT1         | GI_9910383-S  | rs10745921 | 12 | 12 | 100589661 | 29770  | 6.9080  | 0.3960 | 0.4378  | 6.4071 | YRI |
| CHPT1         | GI_9910383-S  | rs2695290  | 12 | 12 | 100590312 | 29119  | 7.4853  | 0.4018 | 0.4536  | 6.4071 | YRI |
| CHPT1         | GI_9910383-S  | rs2695284  | 12 | 12 | 100591786 | 27645  | 7.4853  | 0.4018 | 0.4536  | 6.4071 | YRI |
| CHPT1         | GI_9910383-S  | rs2695282  | 12 | 12 | 100591970 | 27461  | 7.4853  | 0.4018 | 0.4536  | 6.4071 | YRI |
| CHPT1         | GI_9910383-S  | rs2695281  | 12 | 12 | 100592467 | 26964  | 7.4853  | 0.4018 | 0.4536  | 6.4071 | YRI |
| CHPT1         | GI_9910383-S  | rs2559855  | 12 | 12 | 100592548 | 26883  | 7.0567  | 0.3977 | -0.4665 | 6.4071 | YRI |
| CHPT1         | GI_9910383-S  | rs3809260  | 12 | 12 | 100593485 | 25946  | 7.4853  | 0.4018 | -0.4536 | 6.4071 | YRI |
| ARPC3         | GI_23397667-S | rs12310610 | 12 | 12 | 108708698 | 626988 | 8.7201  | 0.4566 | -0.3779 | 6.9052 | YRI |
| ARPC3         | GI_23397667-S | rs12305439 | 12 | 12 | 108708997 | 626689 | 8.7201  | 0.4566 | 0.3779  | 6.9052 | YRI |
| ARPC3         | GI_23397667-S | rs12315230 | 12 | 12 | 108709149 | 626537 | 8.6749  | 0.4726 | 0.3777  | 6.9052 | YRI |
| ARPC3         | GI_23397667-S | rs12305544 | 12 | 12 | 108709177 | 626509 | 8.7201  | 0.4566 | 0.3779  | 6.9052 | YRI |
| ARPC3         | GI_23397667-S | rs2338754  | 12 | 12 | 108954453 | 381233 | 9.2891  | 0.4862 | -0.3388 | 6.9052 | YRI |
| ARPC3         | GI_23397667-S | rs11064963 | 12 | 12 | 108982001 | 353685 | 7.6203  | 0.4495 | -0.3351 | 6.9052 | YRI |
| ARPC3         | GI_23397667-S | rs11065688 | 12 | 12 | 109544862 | 209176 | 8.3513  | 0.4908 | -0.3595 | 6.9052 | YRI |
| ARPC3         | GI_23397667-S | rs11065706 | 12 | 12 | 109618251 | 282565 | 9.9727  | 0.5072 | 0.3825  | 6.9052 | YRI |
| LNK           | GI_4885454-S  | rs12320499 | 12 | 12 | 110311554 | 40253  | 5.9334  | 0.3451 | -0.4621 | 5.5498 | YRI |

|          |               |            |    |    |           |        |         |        |         |        |     |
|----------|---------------|------------|----|----|-----------|--------|---------|--------|---------|--------|-----|
| LNK      | GI_4885454-S  | rs11830222 | 12 | 12 | 110315426 | 36381  | 6.9008  | 0.3792 | 0.4914  | 5.5498 | YRI |
| LNK      | GI_4885454-S  | rs11831659 | 12 | 12 | 110318398 | 33409  | 8.7888  | 0.4713 | -0.5490 | 5.5498 | YRI |
| LNK      | GI_4885454-S  | rs7972796  | 12 | 12 | 110319213 | 32594  | 7.5084  | 0.4029 | 0.5140  | 5.5498 | YRI |
| LNK      | GI_4885454-S  | rs11837210 | 12 | 12 | 110323768 | 28039  | 8.6167  | 0.4580 | 0.5540  | 5.5498 | YRI |
| LNK      | GI_4885454-S  | rs12306935 | 12 | 12 | 110325456 | 26351  | 7.5084  | 0.4029 | -0.5140 | 5.5498 | YRI |
| LNK      | GI_4885454-S  | rs12301866 | 12 | 12 | 110326309 | 25498  | 7.5084  | 0.4029 | -0.5140 | 5.5498 | YRI |
| LNK      | GI_4885454-S  | rs12312248 | 12 | 12 | 110327573 | 24234  | 7.5084  | 0.4029 | 0.5140  | 5.5498 | YRI |
| LNK      | GI_4885454-S  | rs11065900 | 12 | 12 | 110335396 | 16411  | 7.5084  | 0.4029 | 0.5140  | 5.5498 | YRI |
| LNK      | GI_4885454-S  | rs7299305  | 12 | 12 | 110336989 | 14818  | 6.7028  | 0.4222 | -0.5155 | 5.5498 | YRI |
| LNK      | GI_4885454-S  | rs12315206 | 12 | 12 | 110345074 | 6733   | 7.2937  | 0.4036 | -0.5134 | 5.5498 | YRI |
| LNK      | GI_4885454-S  | rs1107853  | 12 | 12 | 110349004 | 2803   | 7.2871  | 0.4033 | 0.5128  | 5.5498 | YRI |
| LNK      | GI_4885454-S  | rs14555    | 12 | 12 | 110352036 | 229    | 7.5084  | 0.4029 | -0.5140 | 5.5498 | YRI |
| LNK      | GI_4885454-S  | rs7311116  | 12 | 12 | 110352261 | 454    | 7.0243  | 0.3800 | -0.4933 | 5.5498 | YRI |
| LNK      | GI_4885454-S  | rs7295678  | 12 | 12 | 110354587 | 2780   | 7.5084  | 0.4029 | -0.5140 | 5.5498 | YRI |
| LNK      | GI_4885454-S  | rs7956220  | 12 | 12 | 110358619 | 6812   | 7.4663  | 0.4119 | -0.5158 | 5.5498 | YRI |
| LNK      | GI_4885454-S  | rs11065908 | 12 | 12 | 110362122 | 10315  | 8.7016  | 0.4676 | -0.5493 | 5.5498 | YRI |
| LNK      | GI_4885454-S  | rs6490140  | 12 | 12 | 110363013 | 11206  | 7.0537  | 0.3867 | 0.4999  | 5.5498 | YRI |
| LNK      | GI_4885454-S  | rs11065915 | 12 | 12 | 110368714 | 16907  | 6.5626  | 0.3897 | -0.5005 | 5.5498 | YRI |
| LNK      | GI_4885454-S  | rs12299245 | 12 | 12 | 110372740 | 20933  | 7.5084  | 0.4029 | 0.5140  | 5.5498 | YRI |
| LNK      | GI_4885454-S  | rs10161383 | 12 | 12 | 110379001 | 27194  | 7.5084  | 0.4029 | -0.5140 | 5.5498 | YRI |
| LNK      | GI_4885454-S  | rs10400565 | 12 | 12 | 110386186 | 34379  | 7.5084  | 0.4029 | -0.5140 | 5.5498 | YRI |
| LNK      | GI_4885454-S  | rs12301101 | 12 | 12 | 110387142 | 35335  | 7.5084  | 0.4029 | -0.5140 | 5.5498 | YRI |
| LNK      | GI_4885454-S  | rs10400460 | 12 | 12 | 110387966 | 36159  | 7.5084  | 0.4029 | 0.5140  | 5.5498 | YRI |
| LNK      | GI_4885454-S  | rs7136567  | 12 | 12 | 110400486 | 48679  | 7.3933  | 0.4029 | -0.5142 | 5.5498 | YRI |
| LNK      | GI_4885454-S  | rs11065934 | 12 | 12 | 110409557 | 57750  | 7.5084  | 0.4029 | -0.5140 | 5.5498 | YRI |
| LNK      | GI_4885454-S  | rs6490172  | 12 | 12 | 110412837 | 61030  | 7.5084  | 0.4029 | 0.5140  | 5.5498 | YRI |
| LNK      | GI_4885454-S  | rs11065936 | 12 | 12 | 110419751 | 67944  | 7.5084  | 0.4029 | -0.5140 | 5.5498 | YRI |
| LNK      | GI_4885454-S  | rs7134907  | 12 | 12 | 110420711 | 68904  | 6.3373  | 0.3561 | 0.4948  | 5.5498 | YRI |
| LNK      | GI_4885454-S  | rs12310120 | 12 | 12 | 110421253 | 69446  | 5.9917  | 0.3590 | 0.5000  | 5.5498 | YRI |
| LNK      | GI_4885454-S  | rs7139444  | 12 | 12 | 110424506 | 72699  | 7.5084  | 0.4029 | -0.5140 | 5.5498 | YRI |
| LNK      | GI_4885454-S  | rs7302641  | 12 | 12 | 110425644 | 73837  | 7.5084  | 0.4029 | 0.5140  | 5.5498 | YRI |
| LNK      | GI_4885454-S  | rs16941551 | 12 | 12 | 110427324 | 75517  | 7.5084  | 0.4029 | -0.5140 | 5.5498 | YRI |
| LNK      | GI_4885454-S  | rs7301374  | 12 | 12 | 110428737 | 76930  | 7.0989  | 0.3888 | 0.5094  | 5.5498 | YRI |
| LNK      | GI_4885454-S  | rs7305662  | 12 | 12 | 110431637 | 79830  | 6.6937  | 0.3851 | 0.5122  | 5.5498 | YRI |
| LNK      | GI_4885454-S  | rs7978331  | 12 | 12 | 110433953 | 82146  | 6.7466  | 0.3823 | -0.4987 | 5.5498 | YRI |
| LNK      | GI_4885454-S  | rs7136679  | 12 | 12 | 110434999 | 83192  | 7.0989  | 0.3888 | 0.5094  | 5.5498 | YRI |
| LNK      | GI_4885454-S  | rs7979403  | 12 | 12 | 110440864 | 89057  | 7.5084  | 0.4029 | -0.5140 | 5.5498 | YRI |
| LNK      | GI_4885454-S  | rs16934167 | 12 | 12 | 110441780 | 89973  | 7.5084  | 0.4029 | 0.5140  | 5.5498 | YRI |
| LNK      | GI_4885454-S  | rs7311293  | 12 | 12 | 110455826 | 104019 | 7.5084  | 0.4029 | 0.5140  | 5.5498 | YRI |
| LNK      | GI_4885454-S  | rs12301021 | 12 | 12 | 110457936 | 106129 | 7.2152  | 0.3999 | -0.5099 | 5.5498 | YRI |
| LNK      | GI_4885454-S  | rs11065951 | 12 | 12 | 110458198 | 106391 | 7.5084  | 0.4029 | -0.5140 | 5.5498 | YRI |
| LNK      | GI_4885454-S  | rs7308857  | 12 | 12 | 110461920 | 110113 | 6.2799  | 0.3531 | 0.4458  | 5.5498 | YRI |
| LNK      | GI_4885454-S  | rs13377932 | 12 | 12 | 110463737 | 111930 | 6.0972  | 0.3436 | 0.4749  | 5.5498 | YRI |
| LNK      | GI_4885454-S  | rs12314647 | 12 | 12 | 110469049 | 117242 | 7.2149  | 0.3999 | 0.5099  | 5.5498 | YRI |
| LNK      | GI_4885454-S  | rs16941578 | 12 | 12 | 110471419 | 119612 | 7.5834  | 0.4118 | -0.5156 | 5.5498 | YRI |
| LNK      | GI_4885454-S  | rs7972340  | 12 | 12 | 110472134 | 120327 | 7.5084  | 0.4029 | 0.5140  | 5.5498 | YRI |
| LNK      | GI_4885454-S  | rs12308557 | 12 | 12 | 110500837 | 149030 | 7.5084  | 0.4029 | -0.5140 | 5.5498 | YRI |
| LNK      | GI_4885454-S  | rs12316988 | 12 | 12 | 110501052 | 149245 | 7.2213  | 0.3947 | -0.5129 | 5.5498 | YRI |
| FLJ39616 | GI_34594658-S | rs12426312 | 12 | 12 | 110869469 | 128935 | 5.7380  | 0.3153 | -0.2869 | 5.6792 | YRI |
| FLJ39616 | GI_34594658-S | rs12579336 | 12 | 12 | 111078258 | 337724 | 5.7380  | 0.3153 | 0.2869  | 5.6792 | YRI |
| OAS1     | GI_8051622-I  | rs11066443 | 12 | 12 | 111800451 | 17807  | 8.6665  | 0.4543 | 0.8506  | 6.0557 | YRI |
| OAS1     | GI_8051622-I  | rs10774670 | 12 | 12 | 111804882 | 13376  | 6.1385  | 0.3409 | 0.8083  | 6.0557 | YRI |
| OAS1     | GI_8051622-I  | rs10744785 | 12 | 12 | 111807976 | 10282  | 11.0691 | 0.5478 | 0.9311  | 6.0557 | YRI |
| OAS1     | GI_8051620-I  | rs10774671 | 12 | 12 | 111819913 | 177    | 8.8002  | 0.4658 | 0.5626  | 6.0557 | YRI |
| OAS1     | GI_8051622-I  | rs10774671 | 12 | 12 | 111819913 | 1655   | 27.4047 | 0.8799 | -1.2463 | 6.0557 | YRI |
| CAMKK2   | GI_27437022-A | rs2686343  | 12 | 12 | 120148828 | 3104   | 6.7305  | 0.3814 | -0.5714 | 5.8652 | YRI |
| DIABLO   | GI_42544196-A | rs4758677  | 12 | 12 | 121199961 | 17255  | 7.1197  | 0.3952 | -0.4183 | 6.6595 | YRI |
| ARL6IP4  | GI_8923906-A  | rs11060932 | 12 | 12 | 121958529 | 33756  | 6.5109  | 0.3549 | 0.2084  | 5.9396 | YRI |
| ARL6IP4  | GI_8923906-A  | rs12311043 | 12 | 12 | 121965492 | 26793  | 6.5109  | 0.3549 | 0.2084  | 5.9396 | YRI |

|          |               |            |    |    |           |        |        |        |         |        |     |
|----------|---------------|------------|----|----|-----------|--------|--------|--------|---------|--------|-----|
| ARL6IP4  | GI_8923906-A  | rs752164   | 12 | 12 | 122032694 | 40409  | 6.1126 | 0.3347 | 0.2042  | 5.9396 | YRI |
| ARL6IP4  | GI_8923906-A  | rs7952760  | 12 | 12 | 122068527 | 76242  | 6.1126 | 0.3347 | 0.2042  | 5.9396 | YRI |
| ARL6IP4  | GI_8923906-A  | rs7964036  | 12 | 12 | 122096022 | 103737 | 6.1126 | 0.3347 | 0.2042  | 5.9396 | YRI |
| SBNO1    | GI_33620762-S | rs12310205 | 12 | 12 | 122124605 | 182838 | 6.2165 | 0.3449 | -0.1654 | 5.9573 | YRI |
| GTF2H3   | GI_28376643-S | rs6488889  | 12 | 12 | 122669673 | 317    | 6.2135 | 0.3399 | -0.2813 | 5.9202 | YRI |
| ZNF237   | GI_7657706-S  | rs9579573  | 13 | 13 | 19118129  | 192906 | 6.3399 | 0.3463 | 0.3466  | 5.8396 | YRI |
| ZNF237   | GI_7657706-S  | rs9579659  | 13 | 13 | 19157345  | 153690 | 6.0883 | 0.3335 | -0.2869 | 5.8396 | YRI |
| ZNF237   | GI_7657706-S  | rs9579660  | 13 | 13 | 19157463  | 153572 | 6.6625 | 0.3624 | -0.3185 | 5.8396 | YRI |
| ZNF237   | GI_7657706-S  | rs7996928  | 13 | 13 | 19165854  | 145181 | 7.4946 | 0.4308 | 0.3370  | 5.8396 | YRI |
| ZNF237   | GI_7657706-S  | rs9579663  | 13 | 13 | 19166933  | 144102 | 6.6625 | 0.3624 | -0.3185 | 5.8396 | YRI |
| ZNF237   | GI_7657706-S  | rs9579673  | 13 | 13 | 19208307  | 102728 | 6.6625 | 0.3624 | -0.3185 | 5.8396 | YRI |
| ZNF237   | GI_7657706-S  | rs9579674  | 13 | 13 | 19208942  | 102093 | 6.6625 | 0.3624 | 0.3185  | 5.8396 | YRI |
| ZNF237   | GI_7657706-S  | rs9579676  | 13 | 13 | 19215098  | 95937  | 7.9950 | 0.4250 | -0.3286 | 5.8396 | YRI |
| ZNF237   | GI_7657706-S  | rs9578209  | 13 | 13 | 19215298  | 95737  | 6.3399 | 0.3463 | 0.3466  | 5.8396 | YRI |
| ZNF237   | GI_7657706-S  | rs17086336 | 13 | 13 | 19219788  | 91247  | 8.4382 | 0.4445 | -0.3179 | 5.8396 | YRI |
| ZNF237   | GI_7657706-S  | rs9579677  | 13 | 13 | 19220519  | 90516  | 6.3399 | 0.3463 | 0.3466  | 5.8396 | YRI |
| ZNF237   | GI_7657706-S  | rs7320086  | 13 | 13 | 19231071  | 79964  | 7.9950 | 0.4250 | 0.3286  | 5.8396 | YRI |
| ZNF237   | GI_7657706-S  | rs17086752 | 13 | 13 | 19254998  | 56037  | 6.6625 | 0.3624 | -0.3185 | 5.8396 | YRI |
| ZNF237   | GI_7657706-S  | rs9579686  | 13 | 13 | 19273074  | 37961  | 7.9265 | 0.4219 | 0.3251  | 5.8396 | YRI |
| ZNF237   | GI_7657706-S  | rs9579694  | 13 | 13 | 19279515  | 31520  | 6.6625 | 0.3624 | 0.3185  | 5.8396 | YRI |
| ZNF237   | GI_7657706-S  | rs9579695  | 13 | 13 | 19280882  | 30153  | 7.9950 | 0.4250 | -0.3286 | 5.8396 | YRI |
| ZNF237   | GI_7657706-S  | rs9578218  | 13 | 13 | 19283207  | 27828  | 7.9950 | 0.4250 | 0.3286  | 5.8396 | YRI |
| ZNF237   | GI_7657706-S  | rs9579701  | 13 | 13 | 19291811  | 19224  | 7.9950 | 0.4250 | -0.3286 | 5.8396 | YRI |
| ZNF237   | GI_7657706-S  | rs11838644 | 13 | 13 | 19295058  | 15977  | 7.9265 | 0.4219 | 0.3251  | 5.8396 | YRI |
| ZNF237   | GI_7657706-S  | rs9579703  | 13 | 13 | 19295124  | 15911  | 7.9950 | 0.4250 | 0.3286  | 5.8396 | YRI |
| ZNF237   | GI_7657706-S  | rs9578222  | 13 | 13 | 19299310  | 11725  | 7.9950 | 0.4250 | -0.3286 | 5.8396 | YRI |
| ZNF237   | GI_7657706-S  | rs9579706  | 13 | 13 | 19300878  | 10157  | 6.6625 | 0.3624 | 0.3185  | 5.8396 | YRI |
| ZNF237   | GI_7657706-S  | rs11147487 | 13 | 13 | 19307444  | 3591   | 7.9265 | 0.4219 | 0.3251  | 5.8396 | YRI |
| ZNF237   | GI_7657706-S  | rs11840619 | 13 | 13 | 19308571  | 2464   | 7.8468 | 0.4239 | 0.3308  | 5.8396 | YRI |
| ZNF237   | GI_7657706-S  | rs11839389 | 13 | 13 | 19308910  | 2125   | 7.9950 | 0.4250 | -0.3286 | 5.8396 | YRI |
| ZNF237   | GI_7657706-S  | rs7988277  | 13 | 13 | 19309701  | 1334   | 7.9265 | 0.4219 | -0.3251 | 5.8396 | YRI |
| ZNF237   | GI_7657706-S  | rs10220121 | 13 | 13 | 19317475  | 6440   | 6.5035 | 0.3866 | 0.3218  | 5.8396 | YRI |
| ZNF237   | GI_7657706-S  | rs9578225  | 13 | 13 | 19318137  | 7102   | 7.3928 | 0.4140 | -0.3291 | 5.8396 | YRI |
| ZNF237   | GI_7657706-S  | rs9579714  | 13 | 13 | 19321616  | 10581  | 6.6625 | 0.3624 | 0.3185  | 5.8396 | YRI |
| ZNF237   | GI_7657706-S  | rs10219966 | 13 | 13 | 19322260  | 11225  | 7.7183 | 0.4125 | -0.3255 | 5.8396 | YRI |
| ZNF237   | GI_7657706-S  | rs9579717  | 13 | 13 | 19323911  | 12876  | 7.7183 | 0.4125 | 0.3255  | 5.8396 | YRI |
| ZNF237   | GI_7657706-S  | rs9579719  | 13 | 13 | 19325358  | 14323  | 7.7183 | 0.4125 | 0.3255  | 5.8396 | YRI |
| ZNF237   | GI_7657706-S  | rs10161995 | 13 | 13 | 19336935  | 25900  | 6.3399 | 0.3463 | -0.3466 | 5.8396 | YRI |
| ZNF237   | GI_7657706-S  | rs9579725  | 13 | 13 | 19340134  | 29099  | 7.2089 | 0.3941 | -0.3183 | 5.8396 | YRI |
| ZNF237   | GI_7657706-S  | rs9579726  | 13 | 13 | 19342079  | 31044  | 7.4515 | 0.4112 | 0.3168  | 5.8396 | YRI |
| ZNF237   | GI_7657706-S  | rs9579730  | 13 | 13 | 19345401  | 34366  | 7.3296 | 0.3945 | -0.3171 | 5.8396 | YRI |
| ZNF237   | GI_7657706-S  | rs7999935  | 13 | 13 | 19346857  | 35822  | 7.2711 | 0.3918 | 0.3138  | 5.8396 | YRI |
| ZNF237   | GI_7657706-S  | rs9578229  | 13 | 13 | 19350008  | 38973  | 6.6625 | 0.3624 | -0.3185 | 5.8396 | YRI |
| Hs.28465 | Hs.28465-S    | rs3910506  | 13 | 13 | 72155562  | 25346  | 5.9651 | 0.3271 | 0.3195  | 5.9051 | YRI |
| Hs.28465 | Hs.28465-S    | rs9530084  | 13 | 13 | 72175801  | 5107   | 7.0373 | 0.3806 | 0.2953  | 5.9051 | YRI |
| Hs.28465 | Hs.28465-S    | rs9543091  | 13 | 13 | 72181185  | 277    | 6.0327 | 0.3403 | 0.2745  | 5.9051 | YRI |
| Hs.28465 | Hs.28465-S    | rs2875649  | 13 | 13 | 72184458  | 3550   | 6.9835 | 0.4512 | -0.3308 | 5.9051 | YRI |
| Hs.28465 | Hs.28465-S    | rs9530089  | 13 | 13 | 72184640  | 3732   | 6.0466 | 0.3314 | -0.2819 | 5.9051 | YRI |
| Hs.28465 | Hs.28465-S    | rs716660   | 13 | 13 | 72186503  | 5595   | 7.0373 | 0.3806 | 0.2953  | 5.9051 | YRI |
| Hs.28465 | Hs.28465-S    | rs1812314  | 13 | 13 | 72186611  | 5703   | 7.0373 | 0.3806 | -0.2953 | 5.9051 | YRI |
| Hs.28465 | Hs.28465-S    | rs9285279  | 13 | 13 | 72186716  | 5808   | 7.5627 | 0.4054 | 0.3287  | 5.9051 | YRI |
| Hs.28465 | Hs.28465-S    | rs9543093  | 13 | 13 | 72187079  | 6171   | 7.0373 | 0.3806 | -0.2953 | 5.9051 | YRI |
| Hs.28465 | Hs.28465-S    | rs9530092  | 13 | 13 | 72188343  | 7435   | 6.4458 | 0.3617 | -0.2876 | 5.9051 | YRI |
| Hs.28465 | Hs.28465-S    | rs9318116  | 13 | 13 | 72189013  | 8105   | 7.2933 | 0.3928 | -0.3058 | 5.9051 | YRI |
| Hs.28465 | Hs.28465-S    | rs4885032  | 13 | 13 | 72189451  | 8543   | 7.2933 | 0.3928 | 0.3058  | 5.9051 | YRI |
| Hs.28465 | Hs.28465-S    | rs7337938  | 13 | 13 | 72190245  | 9337   | 7.2933 | 0.3928 | 0.3058  | 5.9051 | YRI |
| Hs.28465 | Hs.28465-S    | rs7326192  | 13 | 13 | 72191530  | 10622  | 7.0373 | 0.3806 | 0.2953  | 5.9051 | YRI |
| Hs.28465 | Hs.28465-S    | rs9318117  | 13 | 13 | 72192155  | 11247  | 6.9982 | 0.3840 | 0.3021  | 5.9051 | YRI |
| Hs.28465 | Hs.28465-S    | rs9543101  | 13 | 13 | 72193908  | 13000  | 7.0373 | 0.3806 | -0.2953 | 5.9051 | YRI |

|           |               |            |    |    |           |        |         |        |         |        |     |
|-----------|---------------|------------|----|----|-----------|--------|---------|--------|---------|--------|-----|
| Hs.28465  | Hs.28465-S    | rs1372001  | 13 | 13 | 72195580  | 14672  | 7.2933  | 0.3928 | 0.3058  | 5.9051 | YRI |
| Hs.28465  | Hs.28465-S    | rs1465898  | 13 | 13 | 72199408  | 18500  | 6.9577  | 0.3820 | -0.2956 | 5.9051 | YRI |
| Hs.28465  | Hs.28465-S    | rs1465897  | 13 | 13 | 72199656  | 18748  | 7.0373  | 0.3806 | -0.2953 | 5.9051 | YRI |
| Hs.28465  | Hs.28465-S    | rs4885034  | 13 | 13 | 72200482  | 19574  | 7.0857  | 0.3936 | -0.2990 | 5.9051 | YRI |
| Hs.28465  | Hs.28465-S    | rs1467603  | 13 | 13 | 72200707  | 19799  | 8.1230  | 0.4307 | 0.3185  | 5.9051 | YRI |
| Hs.28465  | Hs.28465-S    | rs1951897  | 13 | 13 | 72201593  | 20685  | 8.1338  | 0.4312 | -0.3183 | 5.9051 | YRI |
| Hs.28465  | Hs.28465-S    | rs9285280  | 13 | 13 | 72204160  | 23252  | 8.3928  | 0.4483 | -0.3286 | 5.9051 | YRI |
| Hs.28465  | Hs.28465-S    | rs4885035  | 13 | 13 | 72204433  | 23525  | 8.1338  | 0.4312 | 0.3183  | 5.9051 | YRI |
| Hs.28465  | Hs.28465-S    | rs9543104  | 13 | 13 | 72205528  | 24620  | 8.0961  | 0.4352 | 0.3252  | 5.9051 | YRI |
| Hs.28465  | Hs.28465-S    | rs7996083  | 13 | 13 | 72206902  | 25994  | 7.2307  | 0.3899 | 0.2921  | 5.9051 | YRI |
| TBC1D4    | GI_42660198-S | rs1431833  | 13 | 13 | 74768948  | 11573  | 7.2133  | 0.3890 | 0.6557  | 6.6397 | YRI |
| LOC87769  | GI_34147452-S | rs2760307  | 13 | 13 | 99988330  | 6353   | 7.7258  | 0.4129 | 0.3624  | 6.7572 | YRI |
| LOC87769  | GI_34147452-S | rs837305   | 13 | 13 | 99991706  | 9729   | 7.6448  | 0.4146 | 0.3680  | 6.7572 | YRI |
| LOC87769  | GI_34147452-S | rs837314   | 13 | 13 | 100003502 | 21525  | 6.9574  | 0.3928 | -0.3300 | 6.7572 | YRI |
| LOC87769  | GI_34147452-S | rs4772307  | 13 | 13 | 100016314 | 34337  | 7.1872  | 0.3985 | -0.3408 | 6.7572 | YRI |
| LOC87769  | GI_34147452-S | rs9518092  | 13 | 13 | 100017153 | 35176  | 7.6849  | 0.4110 | 0.3449  | 6.7572 | YRI |
| LOC87769  | GI_34147452-S | rs9518096  | 13 | 13 | 100021110 | 39133  | 7.0034  | 0.3790 | 0.3406  | 6.7572 | YRI |
| C14orf122 | GI_34222327-S | rs2277483  | 14 | 14 | 23661732  | 16390  | 6.0036  | 0.3291 | -0.1548 | 5.9028 | YRI |
| C14orf122 | GI_34222327-S | rs927494   | 14 | 14 | 23670230  | 7892   | 6.1976  | 0.3391 | -0.1559 | 5.9028 | YRI |
| C14orf122 | GI_34222327-S | rs8010715  | 14 | 14 | 23678987  | 865    | 9.2963  | 0.4805 | 0.1852  | 5.9028 | YRI |
| C14orf122 | GI_34222327-S | rs3742500  | 14 | 14 | 23681818  | 3696   | 6.1594  | 0.3371 | -0.1586 | 5.9028 | YRI |
| RPL36AL   | GI_34335143-S | rs17121543 | 14 | 14 | 49079339  | 77736  | 7.4161  | 0.3986 | -0.3265 | 5.8238 | YRI |
| RPL36AL   | GI_34335143-S | rs2281836  | 14 | 14 | 49135467  | 21608  | 6.2125  | 0.3398 | 0.2592  | 5.8238 | YRI |
| RPL36AL   | GI_34335143-S | rs6572592  | 14 | 14 | 49150621  | 6454   | 5.9266  | 0.3346 | -0.2583 | 5.8238 | YRI |
| RPL36AL   | GI_34335143-S | rs1952013  | 14 | 14 | 49157107  | 32     | 11.0864 | 0.5484 | -0.3030 | 5.8238 | YRI |
| RPL36AL   | GI_34335143-S | rs2985697  | 14 | 14 | 49162652  | 5577   | 11.4400 | 0.5607 | 0.3098  | 5.8238 | YRI |
| RPL36AL   | GI_34335143-S | rs2985696  | 14 | 14 | 49164663  | 7588   | 11.4400 | 0.5607 | 0.3098  | 5.8238 | YRI |
| RPL36AL   | GI_34335143-S | rs11157696 | 14 | 14 | 49175496  | 18421  | 8.9857  | 0.4736 | 0.2747  | 5.8238 | YRI |
| RPL36AL   | GI_34335143-S | rs8003305  | 14 | 14 | 49211074  | 53999  | 6.1718  | 0.3378 | 0.2282  | 5.8238 | YRI |
| RPL36AL   | GI_34335143-S | rs8004482  | 14 | 14 | 49211075  | 54000  | 6.1718  | 0.3378 | -0.2282 | 5.8238 | YRI |
| RPL36AL   | GI_34335143-S | rs12433138 | 14 | 14 | 49212963  | 55888  | 6.1718  | 0.3378 | 0.2282  | 5.8238 | YRI |
| DDHD1     | GI_37545942-S | rs4901334  | 14 | 14 | 52555108  | 28233  | 7.1776  | 0.3873 | 0.2773  | 5.9643 | YRI |
| DDHD1     | GI_37545942-S | rs17126054 | 14 | 14 | 52555765  | 27576  | 7.9176  | 0.4215 | 0.3226  | 5.9643 | YRI |
| DDHD1     | GI_37545942-S | rs17126064 | 14 | 14 | 52561478  | 21863  | 7.7046  | 0.4174 | -0.3177 | 5.9643 | YRI |
| DDHD1     | GI_37545942-S | rs8003676  | 14 | 14 | 52567792  | 15549  | 7.9176  | 0.4215 | -0.3226 | 5.9643 | YRI |
| DDHD1     | GI_37545942-S | rs17126068 | 14 | 14 | 52569647  | 13694  | 7.9176  | 0.4215 | -0.3226 | 5.9643 | YRI |
| DDHD1     | GI_37545942-S | rs7151619  | 14 | 14 | 52574990  | 8351   | 7.9176  | 0.4215 | -0.3226 | 5.9643 | YRI |
| DDHD1     | GI_37545942-S | rs17126074 | 14 | 14 | 52580484  | 2857   | 7.9176  | 0.4215 | 0.3226  | 5.9643 | YRI |
| DDHD1     | GI_37545942-S | rs17126081 | 14 | 14 | 52590474  | 7133   | 7.9176  | 0.4215 | -0.3226 | 5.9643 | YRI |
| DDHD1     | GI_37545942-S | rs17126082 | 14 | 14 | 52592707  | 9366   | 7.9176  | 0.4215 | -0.3226 | 5.9643 | YRI |
| DDHD1     | GI_37545942-S | rs7143059  | 14 | 14 | 52621634  | 38293  | 7.8238  | 0.4229 | 0.3270  | 5.9643 | YRI |
| DDHD1     | GI_37545942-S | rs17126123 | 14 | 14 | 52630883  | 47542  | 7.7934  | 0.4159 | 0.3235  | 5.9643 | YRI |
| DDHD1     | GI_37545942-S | rs8018948  | 14 | 14 | 52676635  | 93294  | 8.1956  | 0.4339 | -0.3285 | 5.9643 | YRI |
| DDHD1     | GI_37545942-S | rs17126206 | 14 | 14 | 52687656  | 104315 | 8.1956  | 0.4339 | -0.3285 | 5.9643 | YRI |
| DDHD1     | GI_37545942-S | rs8005652  | 14 | 14 | 52695157  | 111816 | 7.2313  | 0.3952 | -0.2958 | 5.9643 | YRI |
| DDHD1     | GI_37545942-S | rs6572877  | 14 | 14 | 52699950  | 116609 | 6.8776  | 0.3729 | 0.3055  | 5.9643 | YRI |
| DDHD1     | GI_37545942-S | rs7148866  | 14 | 14 | 52709818  | 126477 | 6.6774  | 0.3682 | 0.3024  | 5.9643 | YRI |
| DDHD1     | GI_37545942-S | rs751605   | 14 | 14 | 52729900  | 146559 | 6.2785  | 0.3432 | 0.2794  | 5.9643 | YRI |
| C14orf52  | GI_21553312-S | rs4899150  | 14 | 14 | 64414153  | 56603  | 7.0297  | 0.3803 | 0.8039  | 6.1674 | YRI |
| C14orf52  | GI_21553312-S | rs1467573  | 14 | 14 | 64417336  | 53420  | 6.2382  | 0.3412 | 0.6667  | 6.1674 | YRI |
| C14orf52  | GI_21553312-S | rs2884308  | 14 | 14 | 64420159  | 50597  | 6.2382  | 0.3412 | 0.6667  | 6.1674 | YRI |
| C14orf52  | GI_21553312-S | rs1957432  | 14 | 14 | 64422549  | 48207  | 6.2382  | 0.3412 | 0.6667  | 6.1674 | YRI |
| C14orf52  | GI_21553312-S | rs1998333  | 14 | 14 | 64423385  | 47371  | 6.2382  | 0.3412 | -0.6667 | 6.1674 | YRI |
| C14orf52  | GI_21553312-S | rs4902332  | 14 | 14 | 64445731  | 25025  | 29.4466 | 0.8941 | 1.0196  | 6.1674 | YRI |
| C14orf52  | GI_21553312-S | rs17102298 | 14 | 14 | 64446489  | 24267  | 29.4466 | 0.8941 | 1.0196  | 6.1674 | YRI |
| C14orf52  | GI_21553312-S | rs7154406  | 14 | 14 | 64446942  | 23814  | 28.6743 | 0.8916 | -1.0136 | 6.1674 | YRI |
| C14orf52  | GI_21553312-S | rs7153990  | 14 | 14 | 64447303  | 23453  | 25.9557 | 0.8841 | -1.0146 | 6.1674 | YRI |
| C14orf52  | GI_21553312-S | rs10139595 | 14 | 14 | 64448012  | 22744  | 29.1278 | 0.8955 | -1.0186 | 6.1674 | YRI |
| C14orf52  | GI_21553312-S | rs8022462  | 14 | 14 | 64448129  | 22627  | 7.8261  | 0.4174 | -0.8032 | 6.1674 | YRI |

|          |               |            |    |    |          |        |         |        |         |        |     |
|----------|---------------|------------|----|----|----------|--------|---------|--------|---------|--------|-----|
| C14orf52 | GI_21553312-S | rs10151701 | 14 | 14 | 64448202 | 22554  | 29.4466 | 0.8941 | -1.0196 | 6.1674 | YRI |
| C14orf52 | GI_21553312-S | rs7143432  | 14 | 14 | 64448899 | 21857  | 26.0558 | 0.8898 | 1.0193  | 6.1674 | YRI |
| C14orf52 | GI_21553312-S | rs7144811  | 14 | 14 | 64448900 | 21856  | 26.9734 | 0.8757 | -0.9925 | 6.1674 | YRI |
| C14orf52 | GI_21553312-S | rs7143764  | 14 | 14 | 64449036 | 21720  | 23.8384 | 0.8816 | 1.0076  | 6.1674 | YRI |
| C14orf52 | GI_21553312-S | rs10143017 | 14 | 14 | 64449371 | 21385  | 29.4466 | 0.8941 | -1.0196 | 6.1674 | YRI |
| C14orf52 | GI_21553312-S | rs12147448 | 14 | 14 | 64451517 | 19239  | 7.8261  | 0.4174 | -0.8032 | 6.1674 | YRI |
| C14orf52 | GI_21553312-S | rs10148687 | 14 | 14 | 64454029 | 16727  | 26.7611 | 0.8736 | 0.9894  | 6.1674 | YRI |
| C14orf52 | GI_21553312-S | rs17102320 | 14 | 14 | 64454446 | 16310  | 14.1856 | 0.6793 | 0.8966  | 6.1674 | YRI |
| C14orf52 | GI_21553312-S | rs4902335  | 14 | 14 | 64455651 | 15105  | 29.0220 | 0.8946 | 1.0201  | 6.1674 | YRI |
| C14orf52 | GI_21553312-S | rs10132742 | 14 | 14 | 64456675 | 14081  | 27.7779 | 0.8967 | 1.0222  | 6.1674 | YRI |
| C14orf52 | GI_21553312-S | rs4899152  | 14 | 14 | 64456869 | 13887  | 29.2764 | 0.8968 | -1.0338 | 6.1674 | YRI |
| C14orf52 | GI_21553312-S | rs4902336  | 14 | 14 | 64457015 | 13741  | 28.9695 | 0.8942 | 1.0199  | 6.1674 | YRI |
| C14orf52 | GI_21553312-S | rs10138534 | 14 | 14 | 64457742 | 13014  | 28.9695 | 0.8942 | 1.0199  | 6.1674 | YRI |
| C14orf52 | GI_21553312-S | rs7401853  | 14 | 14 | 64458464 | 12292  | 29.4466 | 0.8941 | 1.0196  | 6.1674 | YRI |
| C14orf52 | GI_21553312-S | rs10141986 | 14 | 14 | 64459156 | 11600  | 29.4466 | 0.8941 | 1.0196  | 6.1674 | YRI |
| C14orf52 | GI_21553312-S | rs4902343  | 14 | 14 | 64465933 | 4823   | 29.4466 | 0.8941 | 1.0196  | 6.1674 | YRI |
| C14orf52 | GI_21553312-S | rs9323457  | 14 | 14 | 64468536 | 2220   | 10.5695 | 0.5297 | 0.7818  | 6.1674 | YRI |
| C14orf52 | GI_21553312-S | rs10149617 | 14 | 14 | 64471914 | 1158   | 28.9779 | 0.8942 | 1.0192  | 6.1674 | YRI |
| C14orf52 | GI_21553312-S | rs4902345  | 14 | 14 | 64473657 | 2901   | 28.9695 | 0.8942 | -1.0199 | 6.1674 | YRI |
| C14orf52 | GI_21553312-S | rs10132858 | 14 | 14 | 64473731 | 2975   | 25.0849 | 0.8898 | 1.0046  | 6.1674 | YRI |
| C14orf52 | GI_21553312-S | rs10133054 | 14 | 14 | 64473869 | 3113   | 19.2325 | 0.8370 | 0.9378  | 6.1674 | YRI |
| C14orf52 | GI_21553312-S | rs10133290 | 14 | 14 | 64474195 | 3439   | 29.4466 | 0.8941 | 1.0196  | 6.1674 | YRI |
| C14orf52 | GI_21553312-S | rs4902346  | 14 | 14 | 64476913 | 6157   | 27.0509 | 0.8946 | 1.0027  | 6.1674 | YRI |
| C14orf52 | GI_21553312-S | rs2412065  | 14 | 14 | 64477410 | 6654   | 29.4466 | 0.8941 | -1.0196 | 6.1674 | YRI |
| EIF2S1   | GI_34147492-S | rs2319184  | 14 | 14 | 65925740 | 995793 | 6.7506  | 0.3667 | 0.4459  | 5.7318 | YRI |
| EIF2S1   | GI_34147492-S | rs8004856  | 14 | 14 | 65942782 | 978751 | 5.8425  | 0.3801 | 0.4149  | 5.7318 | YRI |
| EIF2S1   | GI_34147492-S | rs3818770  | 14 | 14 | 66035225 | 886308 | 7.4183  | 0.3987 | 0.4318  | 5.7318 | YRI |
| EIF2S1   | GI_34147492-S | rs10143291 | 14 | 14 | 66035316 | 886217 | 6.1796  | 0.3430 | -0.4307 | 5.7318 | YRI |
| EIF2S1   | GI_34147492-S | rs1457422  | 14 | 14 | 66036270 | 885263 | 6.3212  | 0.3503 | -0.4468 | 5.7318 | YRI |
| EIF2S1   | GI_34147492-S | rs9323473  | 14 | 14 | 66038079 | 883454 | 6.1924  | 0.3388 | 0.4265  | 5.7318 | YRI |
| EIF2S1   | GI_34147492-S | rs7146723  | 14 | 14 | 66038848 | 882685 | 6.1924  | 0.3388 | -0.4265 | 5.7318 | YRI |
| EIF2S1   | GI_34147492-S | rs10220636 | 14 | 14 | 66041917 | 879616 | 7.7362  | 0.4188 | -0.4353 | 5.7318 | YRI |
| EIF2S1   | GI_34147492-S | rs17827735 | 14 | 14 | 66047141 | 874392 | 6.4965  | 0.3982 | 0.4469  | 5.7318 | YRI |
| EIF2S1   | GI_34147492-S | rs7159063  | 14 | 14 | 66052787 | 868746 | 7.4276  | 0.4337 | -0.4587 | 5.7318 | YRI |
| EIF2S1   | GI_34147492-S | rs1379413  | 14 | 14 | 66055897 | 865636 | 5.9975  | 0.3288 | -0.4375 | 5.7318 | YRI |
| EIF2S1   | GI_34147492-S | rs10144449 | 14 | 14 | 66058012 | 863521 | 7.4183  | 0.3987 | 0.4318  | 5.7318 | YRI |
| EIF2S1   | GI_34147492-S | rs7154154  | 14 | 14 | 66059664 | 861869 | 6.7728  | 0.3729 | -0.4184 | 5.7318 | YRI |
| EIF2S1   | GI_34147492-S | rs13368526 | 14 | 14 | 66061630 | 859903 | 10.9158 | 0.5423 | 0.4496  | 5.7318 | YRI |
| EIF2S1   | GI_34147492-S | rs13379248 | 14 | 14 | 66069026 | 852507 | 6.5787  | 0.3633 | -0.4121 | 5.7318 | YRI |
| EIF2S1   | GI_34147492-S | rs7142097  | 14 | 14 | 66071459 | 850074 | 5.7727  | 0.3217 | 0.4329  | 5.7318 | YRI |
| EIF2S1   | GI_34147492-S | rs7145556  | 14 | 14 | 66071725 | 849808 | 7.4183  | 0.3987 | -0.4318 | 5.7318 | YRI |
| EIF2S1   | GI_34147492-S | rs10148418 | 14 | 14 | 66073626 | 847907 | 7.4183  | 0.3987 | 0.4318  | 5.7318 | YRI |
| EIF2S1   | GI_34147492-S | rs7160501  | 14 | 14 | 66074452 | 847081 | 5.9975  | 0.3288 | 0.4375  | 5.7318 | YRI |
| EIF2S1   | GI_34147492-S | rs7143629  | 14 | 14 | 66074719 | 846814 | 9.0883  | 0.4902 | 0.4354  | 5.7318 | YRI |
| EIF2S1   | GI_34147492-S | rs7143823  | 14 | 14 | 66074824 | 846709 | 6.6670  | 0.3626 | 0.4405  | 5.7318 | YRI |
| EIF2S1   | GI_34147492-S | rs7149668  | 14 | 14 | 66076533 | 845000 | 7.4183  | 0.3987 | -0.4318 | 5.7318 | YRI |
| EIF2S1   | GI_34147492-S | rs7141220  | 14 | 14 | 66079945 | 841588 | 5.8944  | 0.3235 | 0.4779  | 5.7318 | YRI |
| EIF2S1   | GI_34147492-S | rs8012784  | 14 | 14 | 66085038 | 836495 | 7.3121  | 0.3990 | 0.4332  | 5.7318 | YRI |
| EIF2S1   | GI_34147492-S | rs10133769 | 14 | 14 | 66088436 | 833097 | 7.6835  | 0.4164 | 0.4431  | 5.7318 | YRI |
| EIF2S1   | GI_34147492-S | rs8016639  | 14 | 14 | 66091265 | 830268 | 5.9975  | 0.3288 | -0.4375 | 5.7318 | YRI |
| EIF2S1   | GI_34147492-S | rs7151773  | 14 | 14 | 66093753 | 827780 | 8.1088  | 0.4662 | 0.4716  | 5.7318 | YRI |
| EIF2S1   | GI_34147492-S | rs17827790 | 14 | 14 | 66094717 | 826816 | 7.2976  | 0.3983 | -0.4454 | 5.7318 | YRI |
| EIF2S1   | GI_34147492-S | rs8017351  | 14 | 14 | 66099837 | 821696 | 5.8847  | 0.3891 | 0.4514  | 5.7318 | YRI |
| EIF2S1   | GI_34147492-S | rs7156795  | 14 | 14 | 66100648 | 820885 | 7.1339  | 0.3905 | 0.4207  | 5.7318 | YRI |
| EIF2S1   | GI_34147492-S | rs7146849  | 14 | 14 | 66101823 | 819710 | 6.9880  | 0.3943 | 0.4165  | 5.7318 | YRI |
| EIF2S1   | GI_34147492-S | rs7142929  | 14 | 14 | 66105239 | 816294 | 5.9975  | 0.3288 | -0.4375 | 5.7318 | YRI |
| EIF2S1   | GI_34147492-S | rs8004106  | 14 | 14 | 66110354 | 811179 | 7.4183  | 0.3987 | -0.4318 | 5.7318 | YRI |
| EIF2S1   | GI_34147492-S | rs10133641 | 14 | 14 | 66111193 | 810340 | 5.9975  | 0.3288 | 0.4375  | 5.7318 | YRI |
| EIF2S1   | GI_34147492-S | rs13367039 | 14 | 14 | 66111373 | 810160 | 6.1924  | 0.3388 | 0.4265  | 5.7318 | YRI |

|        |               |            |    |    |          |        |        |        |         |        |     |
|--------|---------------|------------|----|----|----------|--------|--------|--------|---------|--------|-----|
| EIF2S1 | GI_34147492-S | rs7153313  | 14 | 14 | 66112166 | 809367 | 5.9975 | 0.3288 | 0.4375  | 5.7318 | YRI |
| EIF2S1 | GI_34147492-S | rs12590209 | 14 | 14 | 66112625 | 808908 | 6.7172 | 0.4298 | -0.4552 | 5.7318 | YRI |
| EIF2S1 | GI_34147492-S | rs7157828  | 14 | 14 | 66116313 | 805220 | 7.0367 | 0.3912 | 0.4270  | 5.7318 | YRI |
| EIF2S1 | GI_34147492-S | rs12100780 | 14 | 14 | 66116507 | 805026 | 5.8078 | 0.3382 | 0.4902  | 5.7318 | YRI |
| EIF2S1 | GI_34147492-S | rs10143929 | 14 | 14 | 66117841 | 803692 | 7.4183 | 0.3987 | 0.4318  | 5.7318 | YRI |
| EIF2S1 | GI_34147492-S | rs10143934 | 14 | 14 | 66117858 | 803675 | 6.1924 | 0.3388 | 0.4265  | 5.7318 | YRI |
| EIF2S1 | GI_34147492-S | rs10146431 | 14 | 14 | 66123995 | 797538 | 5.9975 | 0.3288 | 0.4375  | 5.7318 | YRI |
| EIF2S1 | GI_34147492-S | rs13368404 | 14 | 14 | 66129721 | 791812 | 7.4183 | 0.3987 | -0.4318 | 5.7318 | YRI |
| EIF2S1 | GI_34147492-S | rs13368668 | 14 | 14 | 66134079 | 787454 | 6.3290 | 0.3507 | 0.4361  | 5.7318 | YRI |
| EIF2S1 | GI_34147492-S | rs9323475  | 14 | 14 | 66135922 | 785611 | 5.9975 | 0.3288 | -0.4375 | 5.7318 | YRI |
| EIF2S1 | GI_34147492-S | rs8008550  | 14 | 14 | 66139328 | 782205 | 5.9975 | 0.3288 | 0.4375  | 5.7318 | YRI |
| EIF2S1 | GI_34147492-S | rs8008596  | 14 | 14 | 66139402 | 782131 | 6.2348 | 0.3559 | -0.4376 | 5.7318 | YRI |
| EIF2S1 | GI_34147492-S | rs10144894 | 14 | 14 | 66141562 | 779971 | 7.4183 | 0.3987 | 0.4318  | 5.7318 | YRI |
| EIF2S1 | GI_34147492-S | rs8021202  | 14 | 14 | 66143202 | 778331 | 7.4183 | 0.3987 | 0.4318  | 5.7318 | YRI |
| EIF2S1 | GI_34147492-S | rs8018444  | 14 | 14 | 66146264 | 775269 | 6.7799 | 0.3785 | 0.4319  | 5.7318 | YRI |
| EIF2S1 | GI_34147492-S | rs7161707  | 14 | 14 | 66146792 | 774741 | 7.4183 | 0.3987 | 0.4318  | 5.7318 | YRI |
| EIF2S1 | GI_34147492-S | rs7140281  | 14 | 14 | 66146903 | 774630 | 7.1773 | 0.3873 | 0.4401  | 5.7318 | YRI |
| EIF2S1 | GI_34147492-S | rs8010110  | 14 | 14 | 66147965 | 773568 | 7.4183 | 0.3987 | 0.4318  | 5.7318 | YRI |
| EIF2S1 | GI_34147492-S | rs1958001  | 14 | 14 | 66149645 | 771888 | 7.2490 | 0.3960 | -0.4306 | 5.7318 | YRI |
| EIF2S1 | GI_34147492-S | rs8023060  | 14 | 14 | 66153725 | 767808 | 6.4685 | 0.3681 | -0.4182 | 5.7318 | YRI |
| EIF2S1 | GI_34147492-S | rs10130016 | 14 | 14 | 66154689 | 766844 | 5.9975 | 0.3288 | -0.4375 | 5.7318 | YRI |
| EIF2S1 | GI_34147492-S | rs8015958  | 14 | 14 | 66156429 | 765104 | 7.4183 | 0.3987 | -0.4318 | 5.7318 | YRI |
| EIF2S1 | GI_34147492-S | rs8016353  | 14 | 14 | 66156693 | 764840 | 6.9654 | 0.3877 | 0.4075  | 5.7318 | YRI |
| EIF2S1 | GI_34147492-S | rs8008296  | 14 | 14 | 66159719 | 761814 | 5.8360 | 0.3674 | 0.5191  | 5.7318 | YRI |
| EIF2S1 | GI_34147492-S | rs10135254 | 14 | 14 | 66161394 | 760139 | 6.3203 | 0.3886 | -0.3893 | 5.7318 | YRI |
| EIF2S1 | GI_34147492-S | rs7157919  | 14 | 14 | 66162452 | 759081 | 6.1924 | 0.3388 | -0.4265 | 5.7318 | YRI |
| EIF2S1 | GI_34147492-S | rs8011928  | 14 | 14 | 66164236 | 757297 | 7.6335 | 0.4197 | 0.4423  | 5.7318 | YRI |
| EIF2S1 | GI_34147492-S | rs8010897  | 14 | 14 | 66164470 | 757063 | 6.0825 | 0.3584 | -0.4306 | 5.7318 | YRI |
| EIF2S1 | GI_34147492-S | rs8015684  | 14 | 14 | 66164975 | 756558 | 6.0908 | 0.3483 | -0.4410 | 5.7318 | YRI |
| EIF2S1 | GI_34147492-S | rs8015842  | 14 | 14 | 66165065 | 756468 | 7.3063 | 0.4042 | -0.4372 | 5.7318 | YRI |
| EIF2S1 | GI_34147492-S | rs8017245  | 14 | 14 | 66165108 | 756425 | 6.1924 | 0.3388 | 0.4265  | 5.7318 | YRI |
| EIF2S1 | GI_34147492-S | rs7140649  | 14 | 14 | 66166600 | 754933 | 7.4183 | 0.3987 | 0.4318  | 5.7318 | YRI |
| EIF2S1 | GI_34147492-S | rs8014806  | 14 | 14 | 66170123 | 751410 | 6.1924 | 0.3388 | -0.4265 | 5.7318 | YRI |
| EIF2S1 | GI_34147492-S | rs8014849  | 14 | 14 | 66170197 | 751336 | 5.9975 | 0.3288 | 0.4375  | 5.7318 | YRI |
| EIF2S1 | GI_34147492-S | rs12323903 | 14 | 14 | 66170967 | 750566 | 6.7281 | 0.3656 | 0.4127  | 5.7318 | YRI |
| EIF2S1 | GI_34147492-S | rs7342493  | 14 | 14 | 66175512 | 746021 | 5.9163 | 0.3782 | 0.4182  | 5.7318 | YRI |
| EIF2S1 | GI_34147492-S | rs9323476  | 14 | 14 | 66176387 | 745146 | 7.4183 | 0.3987 | 0.4318  | 5.7318 | YRI |
| EIF2S1 | GI_34147492-S | rs7152123  | 14 | 14 | 66177191 | 744342 | 6.1924 | 0.3388 | 0.4265  | 5.7318 | YRI |
| EIF2S1 | GI_34147492-S | rs7152169  | 14 | 14 | 66177344 | 744189 | 7.4183 | 0.3987 | -0.4318 | 5.7318 | YRI |
| EIF2S1 | GI_34147492-S | rs1952070  | 14 | 14 | 66177823 | 743710 | 7.4183 | 0.3987 | 0.4318  | 5.7318 | YRI |
| EIF2S1 | GI_34147492-S | rs7159473  | 14 | 14 | 66178304 | 743229 | 7.1594 | 0.3972 | 0.4301  | 5.7318 | YRI |
| EIF2S1 | GI_34147492-S | rs7156021  | 14 | 14 | 66183167 | 738366 | 6.2691 | 0.3526 | -0.4225 | 5.7318 | YRI |
| EIF2S1 | GI_34147492-S | rs10133120 | 14 | 14 | 66185424 | 736109 | 7.2345 | 0.3953 | -0.4279 | 5.7318 | YRI |
| EIF2S1 | GI_34147492-S | rs11158642 | 14 | 14 | 66185483 | 736050 | 7.0324 | 0.3856 | 0.4705  | 5.7318 | YRI |
| EIF2S1 | GI_34147492-S | rs2094100  | 14 | 14 | 66185956 | 735577 | 5.9975 | 0.3288 | 0.4375  | 5.7318 | YRI |
| EIF2S1 | GI_34147492-S | rs6573695  | 14 | 14 | 66189645 | 731888 | 7.4183 | 0.3987 | 0.4318  | 5.7318 | YRI |
| EIF2S1 | GI_34147492-S | rs8007662  | 14 | 14 | 66190185 | 731348 | 6.6834 | 0.3685 | 0.4177  | 5.7318 | YRI |
| EIF2S1 | GI_34147492-S | rs8011027  | 14 | 14 | 66194538 | 726995 | 5.9975 | 0.3288 | -0.4375 | 5.7318 | YRI |
| EIF2S1 | GI_34147492-S | rs7152601  | 14 | 14 | 66198557 | 722976 | 5.9975 | 0.3288 | 0.4375  | 5.7318 | YRI |
| EIF2S1 | GI_34147492-S | rs4605098  | 14 | 14 | 66199191 | 722342 | 5.9975 | 0.3288 | 0.4375  | 5.7318 | YRI |
| EIF2S1 | GI_34147492-S | rs4644792  | 14 | 14 | 66200099 | 721434 | 7.4183 | 0.3987 | -0.4318 | 5.7318 | YRI |
| EIF2S1 | GI_34147492-S | rs7158823  | 14 | 14 | 66201598 | 719935 | 7.4183 | 0.3987 | -0.4318 | 5.7318 | YRI |
| EIF2S1 | GI_34147492-S | rs13367863 | 14 | 14 | 66211159 | 710374 | 6.9249 | 0.4026 | -0.4355 | 5.7318 | YRI |
| EIF2S1 | GI_34147492-S | rs8013315  | 14 | 14 | 66212573 | 708960 | 5.9680 | 0.3522 | 0.4448  | 5.7318 | YRI |
| EIF2S1 | GI_34147492-S | rs8013215  | 14 | 14 | 66212690 | 708843 | 6.5594 | 0.4079 | -0.4625 | 5.7318 | YRI |
| EIF2S1 | GI_34147492-S | rs8018488  | 14 | 14 | 66212779 | 708754 | 7.4183 | 0.3987 | 0.4318  | 5.7318 | YRI |
| EIF2S1 | GI_34147492-S | rs8014297  | 14 | 14 | 66215870 | 705663 | 8.0192 | 0.4261 | -0.4478 | 5.7318 | YRI |
| EIF2S1 | GI_34147492-S | rs8015408  | 14 | 14 | 66216433 | 705100 | 7.3121 | 0.3990 | -0.4332 | 5.7318 | YRI |
| EIF2S1 | GI_34147492-S | rs4294753  | 14 | 14 | 66216826 | 704707 | 6.5474 | 0.3567 | -0.4539 | 5.7318 | YRI |

|        |               |            |    |    |          |        |         |        |         |        |     |
|--------|---------------|------------|----|----|----------|--------|---------|--------|---------|--------|-----|
| EIF2S1 | GI_34147492-S | rs3759753  | 14 | 14 | 66217569 | 703964 | 5.9975  | 0.3288 | 0.4375  | 5.7318 | YRI |
| EIF2S1 | GI_34147492-S | rs8005352  | 14 | 14 | 66217888 | 703645 | 10.0500 | 0.5102 | -0.4339 | 5.7318 | YRI |
| EIF2S1 | GI_34147492-S | rs6573702  | 14 | 14 | 66218239 | 703294 | 7.4183  | 0.3987 | -0.4318 | 5.7318 | YRI |
| EIF2S1 | GI_34147492-S | rs9783601  | 14 | 14 | 66218692 | 702841 | 7.4183  | 0.3987 | 0.4318  | 5.7318 | YRI |
| EIF2S1 | GI_34147492-S | rs6573706  | 14 | 14 | 66220517 | 701016 | 7.4183  | 0.3987 | 0.4318  | 5.7318 | YRI |
| EIF2S1 | GI_34147492-S | rs8021356  | 14 | 14 | 66225934 | 695599 | 5.9975  | 0.3288 | -0.4375 | 5.7318 | YRI |
| EIF2S1 | GI_34147492-S | rs6573710  | 14 | 14 | 66229962 | 691571 | 7.4183  | 0.3987 | 0.4318  | 5.7318 | YRI |
| EIF2S1 | GI_34147492-S | rs12101118 | 14 | 14 | 66230533 | 691000 | 7.0262  | 0.3962 | 0.4246  | 5.7318 | YRI |
| EIF2S1 | GI_34147492-S | rs7157740  | 14 | 14 | 66231094 | 690439 | 7.4183  | 0.3987 | -0.4318 | 5.7318 | YRI |
| EIF2S1 | GI_34147492-S | rs7154017  | 14 | 14 | 66233836 | 687697 | 7.4183  | 0.3987 | -0.4318 | 5.7318 | YRI |
| EIF2S1 | GI_34147492-S | rs1885198  | 14 | 14 | 66234513 | 687020 | 7.4183  | 0.3987 | -0.4318 | 5.7318 | YRI |
| EIF2S1 | GI_34147492-S | rs7161029  | 14 | 14 | 66235064 | 686469 | 7.4183  | 0.3987 | 0.4318  | 5.7318 | YRI |
| EIF2S1 | GI_34147492-S | rs1951354  | 14 | 14 | 66235643 | 685890 | 6.7563  | 0.3721 | 0.4231  | 5.7318 | YRI |
| EIF2S1 | GI_34147492-S | rs13366714 | 14 | 14 | 66239224 | 682309 | 7.1453  | 0.4021 | -0.4209 | 5.7318 | YRI |
| EIF2S1 | GI_34147492-S | rs6573711  | 14 | 14 | 66247439 | 674094 | 6.5369  | 0.3612 | -0.4103 | 5.7318 | YRI |
| EIF2S1 | GI_34147492-S | rs1951355  | 14 | 14 | 66257317 | 664216 | 6.1924  | 0.3388 | 0.4265  | 5.7318 | YRI |
| EIF2S1 | GI_34147492-S | rs1951357  | 14 | 14 | 66257354 | 664179 | 6.4539  | 0.3570 | -0.4448 | 5.7318 | YRI |
| EIF2S1 | GI_34147492-S | rs12100903 | 14 | 14 | 66257989 | 663544 | 7.4183  | 0.3987 | -0.4318 | 5.7318 | YRI |
| EIF2S1 | GI_34147492-S | rs8012315  | 14 | 14 | 66259521 | 662012 | 6.3070  | 0.3705 | 0.4073  | 5.7318 | YRI |
| EIF2S1 | GI_34147492-S | rs8010952  | 14 | 14 | 66259603 | 661930 | 7.1063  | 0.4001 | -0.4371 | 5.7318 | YRI |
| EIF2S1 | GI_34147492-S | rs17836572 | 14 | 14 | 66262776 | 658757 | 6.1924  | 0.3388 | -0.4265 | 5.7318 | YRI |
| EIF2S1 | GI_34147492-S | rs7156074  | 14 | 14 | 66270929 | 650604 | 7.4183  | 0.3987 | -0.4318 | 5.7318 | YRI |
| EIF2S1 | GI_34147492-S | rs7156240  | 14 | 14 | 66271023 | 650510 | 6.1924  | 0.3388 | -0.4265 | 5.7318 | YRI |
| EIF2S1 | GI_34147492-S | rs10150028 | 14 | 14 | 66271655 | 649878 | 7.2306  | 0.3952 | 0.4319  | 5.7318 | YRI |
| EIF2S1 | GI_34147492-S | rs9323478  | 14 | 14 | 66276181 | 645352 | 6.0257  | 0.3350 | -0.4260 | 5.7318 | YRI |
| EIF2S1 | GI_34147492-S | rs9323479  | 14 | 14 | 66276240 | 645293 | 6.5199  | 0.3603 | 0.4402  | 5.7318 | YRI |
| EIF2S1 | GI_34147492-S | rs10143077 | 14 | 14 | 66276463 | 645070 | 7.2306  | 0.3952 | 0.4319  | 5.7318 | YRI |
| EIF2S1 | GI_34147492-S | rs10132261 | 14 | 14 | 66276615 | 644918 | 6.0257  | 0.3350 | 0.4260  | 5.7318 | YRI |
| EIF2S1 | GI_34147492-S | rs6573718  | 14 | 14 | 66278354 | 643179 | 7.4183  | 0.3987 | 0.4318  | 5.7318 | YRI |
| EIF2S1 | GI_34147492-S | rs6573719  | 14 | 14 | 66278401 | 643132 | 7.4183  | 0.3987 | 0.4318  | 5.7318 | YRI |
| EIF2S1 | GI_34147492-S | rs766527   | 14 | 14 | 66281840 | 639693 | 7.2306  | 0.3952 | -0.4319 | 5.7318 | YRI |
| EIF2S1 | GI_34147492-S | rs7148224  | 14 | 14 | 66282325 | 639208 | 6.0575  | 0.3367 | -0.4275 | 5.7318 | YRI |
| EIF2S1 | GI_34147492-S | rs6573720  | 14 | 14 | 66282721 | 638812 | 10.0500 | 0.5102 | 0.4339  | 5.7318 | YRI |
| EIF2S1 | GI_34147492-S | rs8016213  | 14 | 14 | 66282985 | 638548 | 7.4183  | 0.3987 | 0.4318  | 5.7318 | YRI |
| EIF2S1 | GI_34147492-S | rs8008369  | 14 | 14 | 66284949 | 636584 | 6.4941  | 0.3590 | 0.4373  | 5.7318 | YRI |
| EIF2S1 | GI_34147492-S | rs7148623  | 14 | 14 | 66289570 | 631963 | 7.4183  | 0.3987 | 0.4318  | 5.7318 | YRI |
| EIF2S1 | GI_34147492-S | rs7142259  | 14 | 14 | 66289717 | 631816 | 6.1924  | 0.3388 | -0.4265 | 5.7318 | YRI |
| EIF2S1 | GI_34147492-S | rs8012158  | 14 | 14 | 66291448 | 630085 | 7.0635  | 0.3925 | -0.4176 | 5.7318 | YRI |
| EIF2S1 | GI_34147492-S | rs17247749 | 14 | 14 | 66292836 | 628697 | 7.4183  | 0.3987 | -0.4318 | 5.7318 | YRI |
| EIF2S1 | GI_34147492-S | rs10132625 | 14 | 14 | 66303059 | 618474 | 7.4183  | 0.3987 | -0.4318 | 5.7318 | YRI |
| EIF2S1 | GI_34147492-S | rs6573723  | 14 | 14 | 66305475 | 616058 | 6.6332  | 0.3712 | 0.4501  | 5.7318 | YRI |
| EIF2S1 | GI_34147492-S | rs9323483  | 14 | 14 | 66309360 | 612173 | 5.9892  | 0.3284 | -0.4568 | 5.7318 | YRI |
| EIF2S1 | GI_34147492-S | rs7147690  | 14 | 14 | 66312090 | 609443 | 6.1924  | 0.3388 | -0.4265 | 5.7318 | YRI |
| EIF2S1 | GI_34147492-S | rs10144919 | 14 | 14 | 66319372 | 602161 | 7.4183  | 0.3987 | -0.4318 | 5.7318 | YRI |
| EIF2S1 | GI_34147492-S | rs7142669  | 14 | 14 | 66320145 | 601388 | 5.9892  | 0.3284 | -0.4568 | 5.7318 | YRI |
| EIF2S1 | GI_34147492-S | rs7149711  | 14 | 14 | 66321476 | 600057 | 7.4183  | 0.3987 | -0.4318 | 5.7318 | YRI |
| EIF2S1 | GI_34147492-S | rs11158647 | 14 | 14 | 66347063 | 574470 | 11.2369 | 0.5730 | 0.4497  | 5.7318 | YRI |
| EIF2S1 | GI_34147492-S | rs4141703  | 14 | 14 | 66347197 | 574336 | 7.5537  | 0.4050 | 0.4386  | 5.7318 | YRI |
| EIF2S1 | GI_34147492-S | rs12323781 | 14 | 14 | 66364969 | 556564 | 11.4184 | 0.5663 | -0.4480 | 5.7318 | YRI |
| EIF2S1 | GI_34147492-S | rs10142176 | 14 | 14 | 66376569 | 544964 | 7.5537  | 0.4050 | 0.4386  | 5.7318 | YRI |
| EIF2S1 | GI_34147492-S | rs17247862 | 14 | 14 | 66382113 | 539420 | 7.4183  | 0.3987 | 0.4318  | 5.7318 | YRI |
| EIF2S1 | GI_34147492-S | rs9323486  | 14 | 14 | 66385324 | 536209 | 6.3878  | 0.3587 | -0.4147 | 5.7318 | YRI |
| EIF2S1 | GI_34147492-S | rs10143670 | 14 | 14 | 66389277 | 532256 | 11.7313 | 0.5706 | -0.4442 | 5.7318 | YRI |
| EIF2S1 | GI_34147492-S | rs6573726  | 14 | 14 | 66394281 | 527252 | 5.8290  | 0.3247 | -0.4556 | 5.7318 | YRI |
| EIF2S1 | GI_34147492-S | rs2144909  | 14 | 14 | 66395197 | 526336 | 6.6566  | 0.3672 | 0.4632  | 5.7318 | YRI |
| EIF2S1 | GI_34147492-S | rs7160476  | 14 | 14 | 66402130 | 519403 | 7.4183  | 0.3987 | -0.4318 | 5.7318 | YRI |
| EIF2S1 | GI_34147492-S | rs6573727  | 14 | 14 | 66413452 | 508081 | 7.4183  | 0.3987 | -0.4318 | 5.7318 | YRI |
| EIF2S1 | GI_34147492-S | rs8022437  | 14 | 14 | 66418094 | 503439 | 7.4183  | 0.3987 | 0.4318  | 5.7318 | YRI |
| EIF2S1 | GI_34147492-S | rs10047902 | 14 | 14 | 66418900 | 502633 | 6.1924  | 0.3388 | 0.4265  | 5.7318 | YRI |

|        |               |            |    |    |          |        |         |        |         |        |     |
|--------|---------------|------------|----|----|----------|--------|---------|--------|---------|--------|-----|
| EIF2S1 | GI_34147492-S | rs8014841  | 14 | 14 | 66421979 | 499554 | 7.4183  | 0.3987 | -0.4318 | 5.7318 | YRI |
| EIF2S1 | GI_34147492-S | rs4578576  | 14 | 14 | 66425392 | 496141 | 7.4183  | 0.3987 | -0.4318 | 5.7318 | YRI |
| EIF2S1 | GI_34147492-S | rs7156655  | 14 | 14 | 66425814 | 495719 | 6.1924  | 0.3388 | 0.4265  | 5.7318 | YRI |
| EIF2S1 | GI_34147492-S | rs7156081  | 14 | 14 | 66453896 | 467637 | 7.1159  | 0.3844 | 0.4263  | 5.7318 | YRI |
| EIF2S1 | GI_34147492-S | rs2038398  | 14 | 14 | 66455481 | 466052 | 7.1159  | 0.3844 | 0.4263  | 5.7318 | YRI |
| EIF2S1 | GI_34147492-S | rs8022657  | 14 | 14 | 66460252 | 461281 | 6.1924  | 0.3388 | -0.4265 | 5.7318 | YRI |
| EIF2S1 | GI_34147492-S | rs10135117 | 14 | 14 | 66469144 | 452389 | 6.8128  | 0.3698 | -0.4015 | 5.7318 | YRI |
| EIF2S1 | GI_34147492-S | rs1950281  | 14 | 14 | 66471052 | 450481 | 6.5215  | 0.3604 | -0.3987 | 5.7318 | YRI |
| EIF2S1 | GI_34147492-S | rs10135701 | 14 | 14 | 66486730 | 434803 | 10.0500 | 0.5102 | -0.4339 | 5.7318 | YRI |
| EIF2S1 | GI_34147492-S | rs10147954 | 14 | 14 | 66486836 | 434697 | 9.9977  | 0.5143 | 0.4329  | 5.7318 | YRI |
| EIF2S1 | GI_34147492-S | rs8012063  | 14 | 14 | 66504223 | 417310 | 6.7257  | 0.3655 | 0.4412  | 5.7318 | YRI |
| EIF2S1 | GI_34147492-S | rs8016725  | 14 | 14 | 66504935 | 416598 | 10.0500 | 0.5102 | -0.4339 | 5.7318 | YRI |
| EIF2S1 | GI_34147492-S | rs6573740  | 14 | 14 | 66515522 | 406011 | 6.9777  | 0.3778 | -0.4192 | 5.7318 | YRI |
| EIF2S1 | GI_34147492-S | rs10150424 | 14 | 14 | 66539544 | 381989 | 7.0536  | 0.3814 | -0.4116 | 5.7318 | YRI |
| EIF2S1 | GI_34147492-S | rs8016391  | 14 | 14 | 66540033 | 381500 | 6.9777  | 0.3778 | 0.4192  | 5.7318 | YRI |
| EIF2S1 | GI_34147492-S | rs1955610  | 14 | 14 | 66540615 | 380918 | 7.0536  | 0.3814 | 0.4116  | 5.7318 | YRI |
| EIF2S1 | GI_34147492-S | rs1955609  | 14 | 14 | 66540824 | 380709 | 6.9777  | 0.3778 | 0.4192  | 5.7318 | YRI |
| EIF2S1 | GI_34147492-S | rs1955608  | 14 | 14 | 66540848 | 380685 | 6.0252  | 0.3399 | -0.3894 | 5.7318 | YRI |
| EIF2S1 | GI_34147492-S | rs8012944  | 14 | 14 | 66543451 | 378082 | 6.7029  | 0.3695 | -0.4111 | 5.7318 | YRI |
| EIF2S1 | GI_34147492-S | rs9323489  | 14 | 14 | 66554099 | 367434 | 5.8574  | 0.3215 | -0.3897 | 5.7318 | YRI |
| EIF2S1 | GI_34147492-S | rs7157126  | 14 | 14 | 66557983 | 363550 | 6.0688  | 0.3524 | -0.4371 | 5.7318 | YRI |
| EIF2S1 | GI_34147492-S | rs1546940  | 14 | 14 | 66563531 | 358002 | 6.3351  | 0.3461 | 0.4291  | 5.7318 | YRI |
| EIF2S1 | GI_34147492-S | rs7151086  | 14 | 14 | 66571308 | 350225 | 6.3220  | 0.3658 | 0.4196  | 5.7318 | YRI |
| EIF2S1 | GI_34147492-S | rs6573745  | 14 | 14 | 66572711 | 348822 | 6.0779  | 0.3377 | -0.4097 | 5.7318 | YRI |
| EIF2S1 | GI_34147492-S | rs6573746  | 14 | 14 | 66576406 | 345127 | 6.1794  | 0.3382 | -0.4083 | 5.7318 | YRI |
| EIF2S1 | GI_34147492-S | rs12587392 | 14 | 14 | 66580101 | 341432 | 5.9595  | 0.3315 | -0.3884 | 5.7318 | YRI |
| EIF2S1 | GI_34147492-S | rs10220477 | 14 | 14 | 66581500 | 340033 | 5.9595  | 0.3315 | -0.3884 | 5.7318 | YRI |
| EIF2S1 | GI_34147492-S | rs7161698  | 14 | 14 | 66585036 | 336497 | 6.5644  | 0.3626 | 0.4237  | 5.7318 | YRI |
| EIF2S1 | GI_34147492-S | rs8008739  | 14 | 14 | 66586544 | 334989 | 5.9705  | 0.3321 | 0.3958  | 5.7318 | YRI |
| EIF2S1 | GI_34147492-S | rs10141815 | 14 | 14 | 66619556 | 301977 | 6.0032  | 0.3291 | -0.3863 | 5.7318 | YRI |
| EIF2S1 | GI_34147492-S | rs10483793 | 14 | 14 | 66626018 | 295515 | 6.6459  | 0.3616 | -0.4222 | 5.7318 | YRI |
| EIF2S1 | GI_34147492-S | rs7158228  | 14 | 14 | 66632476 | 289057 | 6.1596  | 0.3520 | 0.4733  | 5.7318 | YRI |
| EIF2S1 | GI_34147492-S | rs7157418  | 14 | 14 | 66632568 | 288965 | 5.8665  | 0.3220 | -0.4319 | 5.7318 | YRI |
| EIF2S1 | GI_34147492-S | rs17248252 | 14 | 14 | 66632682 | 288851 | 5.8665  | 0.3220 | 0.4319  | 5.7318 | YRI |
| EIF2S1 | GI_34147492-S | rs768770   | 14 | 14 | 66636923 | 284610 | 7.5287  | 0.4038 | -0.4345 | 5.7318 | YRI |
| EIF2S1 | GI_34147492-S | rs7493580  | 14 | 14 | 66650203 | 271330 | 6.1810  | 0.3431 | 0.4290  | 5.7318 | YRI |
| EIF2S1 | GI_34147492-S | rs10141952 | 14 | 14 | 66669922 | 251611 | 10.6519 | 0.5327 | 0.4526  | 5.7318 | YRI |
| EIF2S1 | GI_34147492-S | rs10144371 | 14 | 14 | 66674390 | 247143 | 7.0536  | 0.3814 | 0.4116  | 5.7318 | YRI |
| EIF2S1 | GI_34147492-S | rs10138850 | 14 | 14 | 66676521 | 245012 | 6.5447  | 0.3566 | -0.4360 | 5.7318 | YRI |
| EIF2S1 | GI_34147492-S | rs10138865 | 14 | 14 | 66676555 | 244978 | 6.5248  | 0.3877 | -0.4396 | 5.7318 | YRI |
| EIF2S1 | GI_34147492-S | rs1918483  | 14 | 14 | 66677376 | 244157 | 6.0867  | 0.3587 | -0.4378 | 5.7318 | YRI |
| EIF2S1 | GI_34147492-S | rs7146638  | 14 | 14 | 66683145 | 238388 | 7.6043  | 0.4073 | -0.4508 | 5.7318 | YRI |
| EIF2S1 | GI_34147492-S | rs8006281  | 14 | 14 | 66686490 | 235043 | 7.8172  | 0.4170 | -0.4432 | 5.7318 | YRI |
| EIF2S1 | GI_34147492-S | rs17248357 | 14 | 14 | 66687707 | 233826 | 7.8875  | 0.4258 | 0.4637  | 5.7318 | YRI |
| EIF2S1 | GI_34147492-S | rs7147534  | 14 | 14 | 66692092 | 229441 | 7.6043  | 0.4073 | 0.4508  | 5.7318 | YRI |
| EIF2S1 | GI_34147492-S | rs3866760  | 14 | 14 | 66702333 | 219200 | 7.0536  | 0.3814 | 0.4116  | 5.7318 | YRI |
| EIF2S1 | GI_34147492-S | rs2295903  | 14 | 14 | 66704071 | 217462 | 7.8172  | 0.4170 | -0.4432 | 5.7318 | YRI |
| EIF2S1 | GI_34147492-S | rs7154905  | 14 | 14 | 66709646 | 211887 | 7.7076  | 0.4290 | -0.4733 | 5.7318 | YRI |
| EIF2S1 | GI_34147492-S | rs10134592 | 14 | 14 | 66710419 | 211114 | 5.9030  | 0.3596 | 0.4482  | 5.7318 | YRI |
| EIF2S1 | GI_34147492-S | rs7156119  | 14 | 14 | 66719868 | 201665 | 6.4671  | 0.3527 | -0.4182 | 5.7318 | YRI |
| EIF2S1 | GI_34147492-S | rs17248421 | 14 | 14 | 66722675 | 198858 | 7.6527  | 0.4150 | 0.4579  | 5.7318 | YRI |
| EIF2S1 | GI_34147492-S | rs6573755  | 14 | 14 | 66724229 | 197304 | 7.8965  | 0.4206 | 0.4597  | 5.7318 | YRI |
| EIF2S1 | GI_34147492-S | rs11158653 | 14 | 14 | 66728648 | 192885 | 6.1510  | 0.3367 | -0.5298 | 5.7318 | YRI |
| EIF2S1 | GI_34147492-S | rs17104103 | 14 | 14 | 66731705 | 189828 | 11.9226 | 0.5770 | 0.4955  | 5.7318 | YRI |
| EIF2S1 | GI_34147492-S | rs17104106 | 14 | 14 | 66733185 | 188348 | 11.5878 | 0.5658 | -0.4818 | 5.7318 | YRI |
| EIF2S1 | GI_34147492-S | rs17104109 | 14 | 14 | 66733703 | 187830 | 14.6505 | 0.6587 | 0.4970  | 5.7318 | YRI |
| EIF2S1 | GI_34147492-S | rs10873200 | 14 | 14 | 66736772 | 184761 | 11.7868 | 0.5725 | -0.4686 | 5.7318 | YRI |
| EIF2S1 | GI_34147492-S | rs8004488  | 14 | 14 | 66737155 | 184378 | 7.4588  | 0.4006 | -0.4791 | 5.7318 | YRI |
| EIF2S1 | GI_34147492-S | rs17104114 | 14 | 14 | 66737263 | 184270 | 8.7512  | 0.4579 | 0.4660  | 5.7318 | YRI |

|        |               |            |    |    |          |        |         |        |         |        |     |
|--------|---------------|------------|----|----|----------|--------|---------|--------|---------|--------|-----|
| EIF2S1 | GI_34147492-S | rs11158655 | 14 | 14 | 66741454 | 180079 | 11.7868 | 0.5725 | -0.4686 | 5.7318 | YRI |
| EIF2S1 | GI_34147492-S | rs6573760  | 14 | 14 | 66747128 | 174405 | 8.5111  | 0.4534 | -0.5094 | 5.7318 | YRI |
| EIF2S1 | GI_34147492-S | rs10431718 | 14 | 14 | 66752389 | 169144 | 12.3958 | 0.5925 | 0.4710  | 5.7318 | YRI |
| EIF2S1 | GI_34147492-S | rs12590956 | 14 | 14 | 66761202 | 160331 | 8.7512  | 0.4579 | -0.4660 | 5.7318 | YRI |
| EIF2S1 | GI_34147492-S | rs8009318  | 14 | 14 | 66762525 | 159008 | 16.1416 | 0.6965 | 0.4965  | 5.7318 | YRI |
| EIF2S1 | GI_34147492-S | rs10141879 | 14 | 14 | 66764943 | 156590 | 10.9390 | 0.5431 | 0.4633  | 5.7318 | YRI |
| EIF2S1 | GI_34147492-S | rs10145744 | 14 | 14 | 66766669 | 154864 | 16.1416 | 0.6965 | 0.4965  | 5.7318 | YRI |
| EIF2S1 | GI_34147492-S | rs10152002 | 14 | 14 | 66768669 | 152864 | 16.1416 | 0.6965 | -0.4965 | 5.7318 | YRI |
| EIF2S1 | GI_34147492-S | rs1475127  | 14 | 14 | 66768958 | 152575 | 15.1199 | 0.6775 | -0.4897 | 5.7318 | YRI |
| EIF2S1 | GI_34147492-S | rs10147852 | 14 | 14 | 66772413 | 149120 | 15.2919 | 0.6755 | 0.4822  | 5.7318 | YRI |
| EIF2S1 | GI_34147492-S | rs10145913 | 14 | 14 | 66774743 | 146790 | 14.2780 | 0.6615 | 0.4758  | 5.7318 | YRI |
| EIF2S1 | GI_34147492-S | rs1078194  | 14 | 14 | 66777549 | 143984 | 9.7001  | 0.5027 | 0.4614  | 5.7318 | YRI |
| EIF2S1 | GI_34147492-S | rs10145586 | 14 | 14 | 66780377 | 141156 | 14.7200 | 0.6606 | 0.4816  | 5.7318 | YRI |
| EIF2S1 | GI_34147492-S | rs8015862  | 14 | 14 | 66780927 | 140606 | 12.3958 | 0.5925 | -0.4710 | 5.7318 | YRI |
| EIF2S1 | GI_34147492-S | rs1073607  | 14 | 14 | 66782437 | 139096 | 11.9382 | 0.5905 | 0.4694  | 5.7318 | YRI |
| EIF2S1 | GI_34147492-S | rs1073605  | 14 | 14 | 66782810 | 138723 | 8.3379  | 0.4639 | 0.6498  | 5.7318 | YRI |
| EIF2S1 | GI_34147492-S | rs12323494 | 14 | 14 | 66784512 | 137021 | 14.5276 | 0.6618 | 0.4808  | 5.7318 | YRI |
| EIF2S1 | GI_34147492-S | rs10459453 | 14 | 14 | 66787029 | 134504 | 14.7200 | 0.6606 | 0.4816  | 5.7318 | YRI |
| EIF2S1 | GI_34147492-S | rs7152903  | 14 | 14 | 66787724 | 133809 | 11.0148 | 0.6002 | 0.4802  | 5.7318 | YRI |
| EIF2S1 | GI_34147492-S | rs6573763  | 14 | 14 | 66788081 | 133452 | 9.5446  | 0.5155 | -0.4475 | 5.7318 | YRI |
| EIF2S1 | GI_34147492-S | rs8016037  | 14 | 14 | 66788464 | 133069 | 14.3622 | 0.6638 | -0.4826 | 5.7318 | YRI |
| EIF2S1 | GI_34147492-S | rs8008236  | 14 | 14 | 66799438 | 122095 | 15.2082 | 0.6798 | -0.4852 | 5.7318 | YRI |
| EIF2S1 | GI_34147492-S | rs8008443  | 14 | 14 | 66799568 | 121965 | 15.6643 | 0.6849 | -0.4925 | 5.7318 | YRI |
| EIF2S1 | GI_34147492-S | rs4636843  | 14 | 14 | 66800353 | 121180 | 6.3858  | 0.3984 | 0.4626  | 5.7318 | YRI |
| EIF2S1 | GI_34147492-S | rs12589218 | 14 | 14 | 66800713 | 120820 | 15.4656 | 0.6799 | 0.4853  | 5.7318 | YRI |
| EIF2S1 | GI_34147492-S | rs9743912  | 14 | 14 | 66802614 | 118919 | 9.2427  | 0.4843 | 0.4631  | 5.7318 | YRI |
| EIF2S1 | GI_34147492-S | rs9743911  | 14 | 14 | 66802700 | 118833 | 14.6312 | 0.6711 | -0.4751 | 5.7318 | YRI |
| EIF2S1 | GI_34147492-S | rs2146230  | 14 | 14 | 66804629 | 116904 | 15.4656 | 0.6799 | -0.4853 | 5.7318 | YRI |
| EIF2S1 | GI_34147492-S | rs7149535  | 14 | 14 | 66805121 | 116412 | 15.2882 | 0.6818 | 0.4848  | 5.7318 | YRI |
| EIF2S1 | GI_34147492-S | rs1006595  | 14 | 14 | 66808605 | 112928 | 9.5381  | 0.5024 | -0.4640 | 5.7318 | YRI |
| EIF2S1 | GI_34147492-S | rs1318914  | 14 | 14 | 66813819 | 107714 | 14.5953 | 0.6636 | 0.4868  | 5.7318 | YRI |
| EIF2S1 | GI_34147492-S | rs1535491  | 14 | 14 | 66822448 | 99085  | 15.4656 | 0.6799 | -0.4853 | 5.7318 | YRI |
| EIF2S1 | GI_34147492-S | rs6573765  | 14 | 14 | 66825989 | 95544  | 6.1776  | 0.3381 | 0.5411  | 5.7318 | YRI |
| EIF2S1 | GI_34147492-S | rs10151464 | 14 | 14 | 66828243 | 93290  | 15.2378 | 0.6805 | -0.4850 | 5.7318 | YRI |
| EIF2S1 | GI_34147492-S | rs10140817 | 14 | 14 | 66828361 | 93172  | 15.0682 | 0.6892 | 0.4939  | 5.7318 | YRI |
| EIF2S1 | GI_34147492-S | rs10144401 | 14 | 14 | 66831608 | 89925  | 15.4656 | 0.6799 | -0.4853 | 5.7318 | YRI |
| EIF2S1 | GI_34147492-S | rs10150902 | 14 | 14 | 66833662 | 87871  | 15.4876 | 0.6869 | -0.4929 | 5.7318 | YRI |
| EIF2S1 | GI_34147492-S | rs12589091 | 14 | 14 | 66834332 | 87201  | 14.8215 | 0.6895 | 0.4699  | 5.7318 | YRI |
| EIF2S1 | GI_34147492-S | rs12586552 | 14 | 14 | 66834488 | 87045  | 13.8099 | 0.6829 | 0.4825  | 5.7318 | YRI |
| EIF2S1 | GI_34147492-S | rs1885590  | 14 | 14 | 66836055 | 85478  | 12.0676 | 0.6151 | -0.4767 | 5.7318 | YRI |
| EIF2S1 | GI_34147492-S | rs4286048  | 14 | 14 | 66836269 | 85264  | 15.1688 | 0.6852 | 0.4860  | 5.7318 | YRI |
| EIF2S1 | GI_34147492-S | rs10146722 | 14 | 14 | 66838798 | 82735  | 11.6796 | 0.6021 | 0.4802  | 5.7318 | YRI |
| EIF2S1 | GI_34147492-S | rs10146663 | 14 | 14 | 66838930 | 82603  | 15.0536 | 0.6823 | -0.4850 | 5.7318 | YRI |
| EIF2S1 | GI_34147492-S | rs10135903 | 14 | 14 | 66840755 | 80778  | 15.4656 | 0.6799 | 0.4853  | 5.7318 | YRI |
| EIF2S1 | GI_34147492-S | rs2146229  | 14 | 14 | 66845445 | 76088  | 12.5950 | 0.5988 | 0.4654  | 5.7318 | YRI |
| EIF2S1 | GI_34147492-S | rs10129779 | 14 | 14 | 66846249 | 75284  | 13.6212 | 0.6429 | 0.4724  | 5.7318 | YRI |
| EIF2S1 | GI_34147492-S | rs8015819  | 14 | 14 | 66848338 | 73195  | 7.9879  | 0.4419 | -0.5097 | 5.7318 | YRI |
| EIF2S1 | GI_34147492-S | rs12588292 | 14 | 14 | 66849259 | 72274  | 11.8872 | 0.5759 | -0.4767 | 5.7318 | YRI |
| EIF2S1 | GI_34147492-S | rs1885589  | 14 | 14 | 66852734 | 68799  | 15.2249 | 0.6802 | -0.4855 | 5.7318 | YRI |
| EIF2S1 | GI_34147492-S | rs8014966  | 14 | 14 | 66858062 | 63471  | 15.4656 | 0.6799 | 0.4853  | 5.7318 | YRI |
| EIF2S1 | GI_34147492-S | rs10138824 | 14 | 14 | 66859310 | 62223  | 14.0278 | 0.6415 | 0.4978  | 5.7318 | YRI |
| EIF2S1 | GI_34147492-S | rs2057396  | 14 | 14 | 66860786 | 60747  | 15.4656 | 0.6799 | 0.4853  | 5.7318 | YRI |
| EIF2S1 | GI_34147492-S | rs10131212 | 14 | 14 | 66862120 | 59413  | 15.4656 | 0.6799 | 0.4853  | 5.7318 | YRI |
| EIF2S1 | GI_34147492-S | rs17248616 | 14 | 14 | 66866420 | 55113  | 11.3189 | 0.5966 | 0.4699  | 5.7318 | YRI |
| EIF2S1 | GI_34147492-S | rs2236333  | 14 | 14 | 66868676 | 52857  | 15.4656 | 0.6799 | -0.4853 | 5.7318 | YRI |
| EIF2S1 | GI_34147492-S | rs960797   | 14 | 14 | 66870069 | 51464  | 11.8872 | 0.5759 | 0.4767  | 5.7318 | YRI |
| EIF2S1 | GI_34147492-S | rs2274335  | 14 | 14 | 66874076 | 47457  | 15.4656 | 0.6799 | -0.4853 | 5.7318 | YRI |
| EIF2S1 | GI_34147492-S | rs1045060  | 14 | 14 | 66875006 | 46527  | 15.4656 | 0.6799 | 0.4853  | 5.7318 | YRI |
| EIF2S1 | GI_34147492-S | rs2319777  | 14 | 14 | 66879786 | 41747  | 8.7196  | 0.4566 | -0.5119 | 5.7318 | YRI |

|           |               |            |    |    |          |        |         |        |         |        |     |
|-----------|---------------|------------|----|----|----------|--------|---------|--------|---------|--------|-----|
| EIF2S1    | GI_34147492-S | rs3818467  | 14 | 14 | 66882227 | 39306  | 15.4656 | 0.6799 | 0.4853  | 5.7318 | YRI |
| EIF2S1    | GI_34147492-S | rs2031563  | 14 | 14 | 66884273 | 37260  | 14.1471 | 0.6782 | -0.4881 | 5.7318 | YRI |
| EIF2S1    | GI_34147492-S | rs2274338  | 14 | 14 | 66885736 | 35797  | 15.0992 | 0.6769 | 0.4893  | 5.7318 | YRI |
| EIF2S1    | GI_34147492-S | rs8020850  | 14 | 14 | 66889355 | 32178  | 14.3287 | 0.6564 | 0.4916  | 5.7318 | YRI |
| EIF2S1    | GI_34147492-S | rs8015641  | 14 | 14 | 66890457 | 31076  | 13.1414 | 0.6421 | -0.4915 | 5.7318 | YRI |
| EIF2S1    | GI_34147492-S | rs1536271  | 14 | 14 | 66890924 | 30609  | 15.4656 | 0.6799 | 0.4853  | 5.7318 | YRI |
| EIF2S1    | GI_34147492-S | rs1536272  | 14 | 14 | 66891054 | 30479  | 15.4656 | 0.6799 | -0.4853 | 5.7318 | YRI |
| EIF2S1    | GI_34147492-S | rs8006519  | 14 | 14 | 66892350 | 29183  | 15.4846 | 0.6868 | -0.4843 | 5.7318 | YRI |
| EIF2S1    | GI_34147492-S | rs13379368 | 14 | 14 | 66893244 | 28289  | 15.4656 | 0.6799 | 0.4853  | 5.7318 | YRI |
| EIF2S1    | GI_34147492-S | rs13379142 | 14 | 14 | 66893437 | 28096  | 15.7278 | 0.6928 | -0.4810 | 5.7318 | YRI |
| EIF2S1    | GI_34147492-S | rs10144417 | 14 | 14 | 66896663 | 24870  | 15.7278 | 0.6928 | -0.4810 | 5.7318 | YRI |
| EIF2S1    | GI_34147492-S | rs8016024  | 14 | 14 | 66897231 | 24302  | 14.4074 | 0.6585 | 0.4915  | 5.7318 | YRI |
| EIF2S1    | GI_34147492-S | rs2031564  | 14 | 14 | 66897269 | 24264  | 7.9510  | 0.4402 | 0.4938  | 5.7318 | YRI |
| EIF2S1    | GI_34147492-S | rs3759755  | 14 | 14 | 66898229 | 23304  | 15.4656 | 0.6799 | -0.4853 | 5.7318 | YRI |
| EIF2S1    | GI_34147492-S | rs8006042  | 14 | 14 | 66899325 | 22208  | 12.8405 | 0.6614 | -0.4833 | 5.7318 | YRI |
| EIF2S1    | GI_34147492-S | rs8006391  | 14 | 14 | 66899432 | 22101  | 14.0455 | 0.6485 | -0.4893 | 5.7318 | YRI |
| EIF2S1    | GI_34147492-S | rs12588458 | 14 | 14 | 66900609 | 20924  | 9.2422  | 0.4842 | -0.4600 | 5.7318 | YRI |
| EIF2S1    | GI_34147492-S | rs7156441  | 14 | 14 | 66902990 | 18543  | 15.2882 | 0.6818 | -0.4848 | 5.7318 | YRI |
| EIF2S1    | GI_34147492-S | rs12590065 | 14 | 14 | 66911331 | 10202  | 14.3525 | 0.6506 | 0.4921  | 5.7318 | YRI |
| EIF2S1    | GI_34147492-S | rs8008724  | 14 | 14 | 66916971 | 4562   | 14.0278 | 0.6415 | 0.4978  | 5.7318 | YRI |
| EIF2S1    | GI_34147492-S | rs10132093 | 14 | 14 | 66917264 | 4269   | 7.4353  | 0.4341 | 0.4823  | 5.7318 | YRI |
| EIF2S1    | GI_34147492-S | rs2296560  | 14 | 14 | 66918647 | 2886   | 14.8840 | 0.6713 | -0.4840 | 5.7318 | YRI |
| EIF2S1    | GI_34147492-S | rs2296561  | 14 | 14 | 66918892 | 2641   | 8.7196  | 0.4566 | -0.5119 | 5.7318 | YRI |
| EIF2S1    | GI_34147492-S | rs10131175 | 14 | 14 | 66922484 | 951    | 15.4656 | 0.6799 | -0.4853 | 5.7318 | YRI |
| EIF2S1    | GI_34147492-S | rs3784085  | 14 | 14 | 66927906 | 6373   | 13.7431 | 0.6334 | -0.4876 | 5.7318 | YRI |
| EIF2S1    | GI_34147492-S | rs10139684 | 14 | 14 | 66929993 | 8460   | 6.6364  | 0.4253 | 0.6494  | 5.7318 | YRI |
| EIF2S1    | GI_34147492-S | rs3818468  | 14 | 14 | 66932124 | 10591  | 9.9797  | 0.5199 | 0.4502  | 5.7318 | YRI |
| EIF2S1    | GI_34147492-S | rs7153725  | 14 | 14 | 66936424 | 14891  | 7.0180  | 0.3797 | -0.3948 | 5.7318 | YRI |
| EIF2S1    | GI_34147492-S | rs9323497  | 14 | 14 | 66942881 | 21348  | 7.6584  | 0.4098 | -0.4615 | 5.7318 | YRI |
| EIF2S1    | GI_34147492-S | rs8004864  | 14 | 14 | 66942999 | 21466  | 10.0956 | 0.5119 | 0.4334  | 5.7318 | YRI |
| EIF2S1    | GI_34147492-S | rs7155726  | 14 | 14 | 66951849 | 30316  | 6.8453  | 0.3714 | -0.4064 | 5.7318 | YRI |
| Hs.304334 | Hs.304334-S   | rs8011424  | 14 | 14 | 68342009 | 9960   | 6.7098  | 0.3750 | -0.2521 | 6.5165 | YRI |
| Hs.304334 | Hs.304334-S   | rs8019383  | 14 | 14 | 68347094 | 4875   | 9.1172  | 0.4791 | 0.2674  | 6.5165 | YRI |
| Hs.304334 | Hs.304334-S   | rs10139199 | 14 | 14 | 68347553 | 4416   | 12.1533 | 0.6322 | 0.2820  | 6.5165 | YRI |
| Hs.304334 | Hs.304334-S   | rs4899260  | 14 | 14 | 68347957 | 4012   | 13.9597 | 0.6396 | 0.2902  | 6.5165 | YRI |
| Hs.304334 | Hs.304334-S   | rs4902652  | 14 | 14 | 68350062 | 1907   | 13.9597 | 0.6396 | 0.2902  | 6.5165 | YRI |
| Hs.304334 | Hs.304334-S   | rs194745   | 14 | 14 | 68354889 | 2920   | 12.7736 | 0.6108 | -0.2996 | 6.5165 | YRI |
| Hs.304334 | Hs.304334-S   | rs194743   | 14 | 14 | 68355905 | 3936   | 13.3378 | 0.6215 | 0.2903  | 6.5165 | YRI |
| Hs.304334 | Hs.304334-S   | rs194742   | 14 | 14 | 68357236 | 5267   | 13.2576 | 0.6192 | 0.3003  | 6.5165 | YRI |
| Hs.304334 | Hs.304334-S   | rs1274955  | 14 | 14 | 68359065 | 7096   | 13.2576 | 0.6192 | 0.3003  | 6.5165 | YRI |
| MAP3K9    | GI_37545956-S | rs10146889 | 14 | 14 | 70271394 | 6287   | 12.3850 | 0.5921 | -0.4326 | 6.3257 | YRI |
| MAP3K9    | GI_37545956-S | rs1859465  | 14 | 14 | 70272984 | 7877   | 11.7616 | 0.5780 | -0.4196 | 6.3257 | YRI |
| MAP3K9    | GI_37545956-S | rs4902843  | 14 | 14 | 70278778 | 13671  | 7.0173  | 0.3797 | 0.2672  | 6.3257 | YRI |
| MAP3K9    | GI_37545956-S | rs10129495 | 14 | 14 | 70285482 | 20375  | 6.7245  | 0.3655 | 0.2444  | 6.3257 | YRI |
| MAP3K9    | GI_37545956-S | rs9323548  | 14 | 14 | 70298454 | 33347  | 6.9775  | 0.3778 | -0.2574 | 6.3257 | YRI |
| MAP3K9    | GI_37545956-S | rs12886990 | 14 | 14 | 70298991 | 33884  | 9.8543  | 0.5026 | 0.3365  | 6.3257 | YRI |
| MAP3K9    | GI_37545956-S | rs12897648 | 14 | 14 | 70306650 | 41543  | 10.7012 | 0.5345 | -0.3689 | 6.3257 | YRI |
| MAP3K9    | GI_37545956-S | rs2158531  | 14 | 14 | 70316721 | 51614  | 10.7012 | 0.5345 | -0.3689 | 6.3257 | YRI |
| MAP3K9    | GI_37545956-S | rs2158530  | 14 | 14 | 70316748 | 51641  | 10.5226 | 0.5342 | -0.3700 | 6.3257 | YRI |
| MAP3K9    | GI_37545956-S | rs10131177 | 14 | 14 | 70320936 | 55829  | 6.3886  | 0.3588 | 0.3119  | 6.3257 | YRI |
| MAP3K9    | GI_37545956-S | rs8020663  | 14 | 14 | 70326948 | 61841  | 10.6420 | 0.5450 | 0.3745  | 6.3257 | YRI |
| C14orf118 | GI_40018643-A | rs10498533 | 14 | 14 | 75719885 | 18542  | 6.9681  | 0.3773 | 0.2145  | 6.7539 | YRI |
| C14orf118 | GI_40018643-A | rs12433257 | 14 | 14 | 75723379 | 15048  | 9.8933  | 0.5041 | 0.2431  | 6.7539 | YRI |
| C14orf118 | GI_40018643-A | rs4903387  | 14 | 14 | 75744972 | 6545   | 10.4159 | 0.5497 | -0.2594 | 6.7539 | YRI |
| GOLGA5    | GI_30260187-S | rs12432999 | 14 | 14 | 93271423 | 895881 | 6.1355  | 0.3407 | 0.2250  | 6.1285 | YRI |
| FAM14B    | GI_21699069-S | rs3748329  | 14 | 14 | 93596922 | 41774  | 6.8567  | 0.3823 | -0.2278 | 6.5092 | YRI |
| KIAA1622  | GI_17402883-A | rs12101216 | 14 | 14 | 93882895 | 138263 | 22.2372 | 0.8180 | 0.6392  | 9.7208 | YRI |
| KIAA1622  | GI_17402885-I | rs12101216 | 14 | 14 | 93882895 | 67608  | 28.9480 | 0.8940 | 1.8219  | 9.7208 | YRI |
| TCL6      | GI_21536345-A | rs3759541  | 14 | 14 | 95203529 | 3965   | 14.7354 | 0.6805 | 0.9591  | 6.5884 | YRI |

|          |               |            |    |    |           |        |         |        |         |        |     |
|----------|---------------|------------|----|----|-----------|--------|---------|--------|---------|--------|-----|
| TCL1B    | GI_40548373-A | rs3759541  | 14 | 14 | 95203529  | 24920  | 12.2621 | 0.6078 | 0.6184  | 6.7802 | YRI |
| TCL6     | GI_21536345-A | rs17093192 | 14 | 14 | 95203950  | 3544   | 15.9925 | 0.6929 | 0.9862  | 6.5884 | YRI |
| TCL1B    | GI_40548373-A | rs17093192 | 14 | 14 | 95203950  | 24499  | 12.9657 | 0.6103 | 0.6480  | 6.7802 | YRI |
| TCL6     | GI_21536345-A | rs2296310  | 14 | 14 | 95206528  | 966    | 23.2849 | 0.8274 | -0.9512 | 6.5884 | YRI |
| TCL1B    | GI_40548373-A | rs2296310  | 14 | 14 | 95206528  | 21921  | 16.0425 | 0.6941 | -0.6102 | 6.7802 | YRI |
| ZFYVE21  | GI_20070329-S | rs4983582  | 14 | 14 | 104062516 | 793012 | 5.7789  | 0.3174 | -0.1684 | 5.7377 | YRI |
| RAD51    | GI_19924134-A | rs2619683  | 15 | 15 | 38768635  | 42662  | 8.5608  | 0.4498 | 0.1187  | 6.2487 | YRI |
| RAD51    | GI_19924134-A | rs2619679  | 15 | 15 | 38773529  | 37768  | 8.5608  | 0.4498 | 0.1187  | 6.2487 | YRI |
| RAD51    | GI_19924134-A | rs13379583 | 15 | 15 | 38777645  | 33652  | 8.4888  | 0.4525 | 0.1194  | 6.2487 | YRI |
| RAD51    | GI_19924134-A | rs7172195  | 15 | 15 | 38782100  | 29197  | 8.5608  | 0.4498 | 0.1187  | 6.2487 | YRI |
| RAD51    | GI_19924134-A | rs12908284 | 15 | 15 | 38786796  | 24501  | 8.5608  | 0.4498 | -0.1187 | 6.2487 | YRI |
| RAD51    | GI_19924134-A | rs3092982  | 15 | 15 | 38792114  | 19183  | 7.4998  | 0.4436 | 0.1250  | 6.2487 | YRI |
| RAD51    | GI_19924134-A | rs2412546  | 15 | 15 | 38793815  | 17482  | 8.5608  | 0.4498 | -0.1187 | 6.2487 | YRI |
| RAD51    | GI_19924134-A | rs11858338 | 15 | 15 | 38795605  | 15692  | 7.3278  | 0.4551 | -0.1191 | 6.2487 | YRI |
| RAD51    | GI_19924134-A | rs12148915 | 15 | 15 | 38799030  | 12267  | 6.4287  | 0.3508 | -0.0886 | 6.2487 | YRI |
| RAD51    | GI_19924134-A | rs2412547  | 15 | 15 | 38799987  | 11310  | 8.5608  | 0.4498 | -0.1187 | 6.2487 | YRI |
| RAD51    | GI_19924134-A | rs11070291 | 15 | 15 | 38803850  | 7447   | 8.5608  | 0.4498 | 0.1187  | 6.2487 | YRI |
| RAD51    | GI_19924134-A | rs11633269 | 15 | 15 | 38807159  | 4138   | 8.2966  | 0.4499 | 0.1193  | 6.2487 | YRI |
| RAD51    | GI_19924134-A | rs7180135  | 15 | 15 | 38811386  | 89     | 6.4287  | 0.3508 | -0.0886 | 6.2487 | YRI |
| RAD51    | GI_19924134-A | rs11852786 | 15 | 15 | 38811800  | 503    | 6.6611  | 0.4009 | -0.1002 | 6.2487 | YRI |
| RAD51    | GI_19924134-A | rs2304582  | 15 | 15 | 38818157  | 6860   | 8.7562  | 0.4639 | 0.1221  | 6.2487 | YRI |
| RAD51    | GI_19924134-A | rs4923884  | 15 | 15 | 38823740  | 12443  | 6.7177  | 0.3651 | -0.1027 | 6.2487 | YRI |
| RAD51    | GI_19924134-A | rs12372947 | 15 | 15 | 38825374  | 14077  | 8.0262  | 0.4264 | 0.1149  | 6.2487 | YRI |
| RAD51    | GI_19924134-A | rs7167854  | 15 | 15 | 38825506  | 14209  | 6.5515  | 0.3569 | 0.0991  | 6.2487 | YRI |
| RAD51    | GI_19924134-A | rs11070293 | 15 | 15 | 38829167  | 17870  | 7.9938  | 0.4250 | -0.1173 | 6.2487 | YRI |
| RAD51    | GI_19924134-A | rs752012   | 15 | 15 | 38832182  | 20885  | 7.3369  | 0.3949 | -0.1046 | 6.2487 | YRI |
| RAD51    | GI_19924134-A | rs12442845 | 15 | 15 | 38836795  | 25498  | 7.5983  | 0.4070 | -0.1139 | 6.2487 | YRI |
| CCNDBP1  | GI_16554567-I | rs16957187 | 15 | 15 | 40887742  | 377867 | 5.8415  | 0.3253 | 0.1268  | 5.8217 | YRI |
| CCNDBP1  | GI_16554567-I | rs10220875 | 15 | 15 | 40888658  | 376951 | 6.6630  | 0.3624 | -0.1286 | 5.8217 | YRI |
| CCNDBP1  | GI_16554567-I | rs8032994  | 15 | 15 | 40891057  | 374552 | 6.7160  | 0.3650 | -0.1296 | 5.8217 | YRI |
| CCNDBP1  | GI_16554567-I | rs10438302 | 15 | 15 | 40906687  | 358922 | 6.0258  | 0.3303 | -0.1725 | 5.8217 | YRI |
| CCNDBP1  | GI_16554567-I | rs8039438  | 15 | 15 | 40920132  | 345477 | 6.5262  | 0.3606 | -0.1280 | 5.8217 | YRI |
| CCNDBP1  | GI_16554567-I | rs7177501  | 15 | 15 | 40932229  | 333380 | 6.7160  | 0.3650 | -0.1296 | 5.8217 | YRI |
| CCNDBP1  | GI_16554567-I | rs16957224 | 15 | 15 | 40933120  | 332489 | 6.8467  | 0.3714 | -0.1358 | 5.8217 | YRI |
| CCNDBP1  | GI_16554567-I | rs13329073 | 15 | 15 | 40977160  | 288449 | 6.4646  | 0.3526 | 0.1330  | 5.8217 | YRI |
| CCNDBP1  | GI_16554567-I | rs8028731  | 15 | 15 | 40978616  | 286993 | 6.1556  | 0.3467 | -0.1315 | 5.8217 | YRI |
| CCNDBP1  | GI_16554567-I | rs8031111  | 15 | 15 | 40991034  | 274575 | 7.1253  | 0.3848 | -0.1670 | 5.8217 | YRI |
| CCNDBP1  | GI_16554567-I | rs7164041  | 15 | 15 | 40997322  | 268287 | 7.4639  | 0.4008 | -0.1494 | 5.8217 | YRI |
| CCNDBP1  | GI_16554567-I | rs2176870  | 15 | 15 | 41223702  | 41907  | 13.0556 | 0.6131 | 0.1758  | 5.8217 | YRI |
| CCNDBP1  | GI_16554567-I | rs8030850  | 15 | 15 | 41232187  | 33422  | 7.1261  | 0.3849 | -0.1620 | 5.8217 | YRI |
| CCNDBP1  | GI_16554567-I | rs9972314  | 15 | 15 | 41243378  | 22231  | 6.7979  | 0.3690 | -0.1303 | 5.8217 | YRI |
| CCNDBP1  | GI_16554567-I | rs8040769  | 15 | 15 | 41260445  | 5164   | 6.5745  | 0.3682 | 0.1266  | 5.8217 | YRI |
| CCNDBP1  | GI_16554567-I | rs540587   | 15 | 15 | 41265405  | 204    | 17.8037 | 0.7338 | -0.1876 | 5.8217 | YRI |
| CCNDBP1  | GI_16554567-I | rs1474199  | 15 | 15 | 41269419  | 3810   | 7.1261  | 0.3849 | 0.1620  | 5.8217 | YRI |
| CCNDBP1  | GI_16554567-I | rs7162971  | 15 | 15 | 41282023  | 16414  | 7.1261  | 0.3849 | 0.1620  | 5.8217 | YRI |
| CCNDBP1  | GI_16554567-I | rs1863601  | 15 | 15 | 41282504  | 16895  | 7.6591  | 0.4098 | 0.1413  | 5.8217 | YRI |
| CCNDBP1  | GI_16554567-I | rs2271965  | 15 | 15 | 41286168  | 20559  | 6.7979  | 0.3690 | 0.1303  | 5.8217 | YRI |
| CCNDBP1  | GI_16554567-I | rs494863   | 15 | 15 | 41289594  | 23985  | 10.3383 | 0.5211 | 0.1560  | 5.8217 | YRI |
| CCNDBP1  | GI_16554567-I | rs3177296  | 15 | 15 | 41292880  | 27271  | 6.2251  | 0.3453 | 0.1286  | 5.8217 | YRI |
| CCNDBP1  | GI_16554567-I | rs8035881  | 15 | 15 | 41293185  | 27576  | 6.3446  | 0.3465 | -0.1500 | 5.8217 | YRI |
| CCNDBP1  | GI_16554567-I | rs10438267 | 15 | 15 | 41293604  | 27995  | 6.3446  | 0.3465 | 0.1500  | 5.8217 | YRI |
| CCNDBP1  | GI_16554567-I | rs2899077  | 15 | 15 | 41297317  | 31708  | 15.0869 | 0.6702 | -0.1742 | 5.8217 | YRI |
| CCNDBP1  | GI_16554567-I | rs7183814  | 15 | 15 | 41316922  | 51313  | 9.6561  | 0.4949 | -0.1468 | 5.8217 | YRI |
| CCNDBP1  | GI_16554567-I | rs16957502 | 15 | 15 | 41320291  | 54682  | 6.3176  | 0.3551 | -0.1505 | 5.8217 | YRI |
| CCNDBP1  | GI_16554567-I | rs16957507 | 15 | 15 | 41324138  | 58529  | 6.6648  | 0.3625 | 0.1463  | 5.8217 | YRI |
| CCNDBP1  | GI_16554567-I | rs542036   | 15 | 15 | 41328431  | 62822  | 7.4997  | 0.4134 | -0.1342 | 5.8217 | YRI |
| FLJ35867 | GI_31542776-S | rs1095386  | 15 | 15 | 41396801  | 43793  | 6.2433  | 0.3463 | -0.1574 | 5.383  | YRI |
| FLJ35867 | GI_31542776-S | rs7176923  | 15 | 15 | 41397169  | 43425  | 6.0551  | 0.3365 | 0.1645  | 5.383  | YRI |
| FLJ35867 | GI_31542776-S | rs7177892  | 15 | 15 | 41400661  | 39933  | 6.9066  | 0.3795 | 0.1669  | 5.383  | YRI |

|           |               |            |    |    |          |        |         |        |         |        |     |
|-----------|---------------|------------|----|----|----------|--------|---------|--------|---------|--------|-----|
| FLJ35867  | GI_31542776-S | rs7181545  | 15 | 15 | 41400853 | 39741  | 6.4618  | 0.3524 | 0.1597  | 5.383  | YRI |
| FLJ35867  | GI_31542776-S | rs17723479 | 15 | 15 | 41401604 | 38990  | 6.9066  | 0.3795 | 0.1669  | 5.383  | YRI |
| FLJ35867  | GI_31542776-S | rs17780417 | 15 | 15 | 41426754 | 13840  | 6.4618  | 0.3524 | -0.1597 | 5.383  | YRI |
| FLJ35867  | GI_31542776-S | rs7181634  | 15 | 15 | 41431193 | 9401   | 6.4618  | 0.3524 | -0.1597 | 5.383  | YRI |
| FLJ35867  | GI_31542776-S | rs10518812 | 15 | 15 | 41440229 | 365    | 6.4247  | 0.3555 | -0.1532 | 5.383  | YRI |
| FLJ35867  | GI_31542776-S | rs17780920 | 15 | 15 | 41449654 | 9060   | 6.4618  | 0.3524 | -0.1597 | 5.383  | YRI |
| FLJ35867  | GI_31542776-S | rs7180812  | 15 | 15 | 41482523 | 41929  | 6.4618  | 0.3524 | -0.1597 | 5.383  | YRI |
| FLJ35867  | GI_31542776-S | rs2230451  | 15 | 15 | 41495100 | 54506  | 5.7154  | 0.3141 | 0.1460  | 5.383  | YRI |
| FLJ35867  | GI_31542776-S | rs16957715 | 15 | 15 | 41496029 | 55435  | 7.1688  | 0.4032 | 0.1603  | 5.383  | YRI |
| FLJ35867  | GI_31542776-S | rs2242069  | 15 | 15 | 41500926 | 60332  | 6.6388  | 0.3612 | 0.1515  | 5.383  | YRI |
| FLJ35867  | GI_31542776-S | rs689835   | 15 | 15 | 41502262 | 61668  | 6.6388  | 0.3612 | 0.1515  | 5.383  | YRI |
| FLJ35867  | GI_31542776-S | rs16957730 | 15 | 15 | 41517778 | 77184  | 6.6388  | 0.3612 | -0.1515 | 5.383  | YRI |
| FLJ35867  | GI_31542776-S | rs12913977 | 15 | 15 | 41518403 | 77809  | 6.6388  | 0.3612 | 0.1515  | 5.383  | YRI |
| FLJ35867  | GI_31542776-S | rs12914122 | 15 | 15 | 41518446 | 77852  | 6.2550  | 0.3519 | 0.1508  | 5.383  | YRI |
| FLJ35867  | GI_31542776-S | rs2444029  | 15 | 15 | 41524776 | 84182  | 6.6388  | 0.3612 | -0.1515 | 5.383  | YRI |
| FLJ35867  | GI_31542776-S | rs690316   | 15 | 15 | 41525172 | 84578  | 6.6388  | 0.3612 | -0.1515 | 5.383  | YRI |
| FLJ35867  | GI_31542776-S | rs2467739  | 15 | 15 | 41527488 | 86894  | 6.6388  | 0.3612 | -0.1515 | 5.383  | YRI |
| FLJ35867  | GI_31542776-S | rs2245790  | 15 | 15 | 41531749 | 91155  | 6.6388  | 0.3612 | -0.1515 | 5.383  | YRI |
| FLJ35867  | GI_31542776-S | rs7173370  | 15 | 15 | 41537208 | 96614  | 6.6388  | 0.3612 | -0.1515 | 5.383  | YRI |
| FLJ35867  | GI_31542776-S | rs2444032  | 15 | 15 | 41542638 | 102044 | 6.6388  | 0.3612 | 0.1515  | 5.383  | YRI |
| FLJ35867  | GI_31542776-S | rs1814538  | 15 | 15 | 41547066 | 106472 | 6.6388  | 0.3612 | 0.1515  | 5.383  | YRI |
| FLJ35867  | GI_31542776-S | rs689647   | 15 | 15 | 41549488 | 108894 | 6.6388  | 0.3612 | 0.1515  | 5.383  | YRI |
| FLJ35867  | GI_31542776-S | rs2251538  | 15 | 15 | 41554501 | 113907 | 6.6388  | 0.3612 | -0.1515 | 5.383  | YRI |
| FLJ35867  | GI_31542776-S | rs7173383  | 15 | 15 | 41560328 | 119734 | 6.6388  | 0.3612 | -0.1515 | 5.383  | YRI |
| FLJ35867  | GI_31542776-S | rs2439850  | 15 | 15 | 41572146 | 131552 | 6.6388  | 0.3612 | 0.1515  | 5.383  | YRI |
| FLJ35867  | GI_31542776-S | rs2444250  | 15 | 15 | 41572343 | 131749 | 6.6388  | 0.3612 | 0.1515  | 5.383  | YRI |
| FLJ35867  | GI_31542776-S | rs689781   | 15 | 15 | 41579389 | 138795 | 6.6388  | 0.3612 | -0.1515 | 5.383  | YRI |
| FLJ35867  | GI_31542776-S | rs7177146  | 15 | 15 | 41585600 | 145006 | 5.7154  | 0.3141 | 0.1460  | 5.383  | YRI |
| FLJ35867  | GI_31542776-S | rs495175   | 15 | 15 | 41585976 | 145382 | 6.5522  | 0.3619 | -0.1523 | 5.383  | YRI |
| SORD      | GI_34147623-S | rs269868   | 15 | 15 | 43179367 | 25086  | 6.5595  | 0.3573 | 0.3011  | 5.8912 | YRI |
| Hs.11898  | Hs.11898-S    | rs4776058  | 15 | 15 | 50667555 | 69075  | 8.8529  | 0.4622 | 0.1470  | 6.4796 | YRI |
| Hs.11898  | Hs.11898-S    | rs12902679 | 15 | 15 | 50668609 | 68021  | 8.8529  | 0.4622 | 0.1470  | 6.4796 | YRI |
| Hs.11898  | Hs.11898-S    | rs12915981 | 15 | 15 | 50688725 | 47905  | 8.6327  | 0.4834 | 0.1472  | 6.4796 | YRI |
| LOC348094 | GI_38176293-S | rs1357370  | 15 | 15 | 62924224 | 113590 | 7.6973  | 0.4116 | -0.6236 | 6.9534 | YRI |
| LOC348094 | GI_38176293-S | rs832884   | 15 | 15 | 62938688 | 99126  | 10.2061 | 0.5161 | 0.6698  | 6.9534 | YRI |
| LOC348094 | GI_38176293-S | rs1719277  | 15 | 15 | 62943576 | 94238  | 7.2988  | 0.4095 | -0.4577 | 6.9534 | YRI |
| LOC348094 | GI_38176293-S | rs1043697  | 15 | 15 | 62946511 | 91303  | 10.4087 | 0.5363 | -0.6749 | 6.9534 | YRI |
| LOC348094 | GI_38176293-S | rs832891   | 15 | 15 | 62954386 | 83428  | 7.0993  | 0.3836 | -0.4621 | 6.9534 | YRI |
| LOC348094 | GI_38176293-S | rs871447   | 15 | 15 | 62957490 | 80324  | 13.7060 | 0.6324 | 0.7675  | 6.9534 | YRI |
| LOC348094 | GI_38176293-S | rs1719264  | 15 | 15 | 62963588 | 74226  | 13.7060 | 0.6324 | -0.7675 | 6.9534 | YRI |
| LOC348094 | GI_38176293-S | rs4238397  | 15 | 15 | 62966217 | 71597  | 13.7060 | 0.6324 | -0.7675 | 6.9534 | YRI |
| LOC348094 | GI_38176293-S | rs12916644 | 15 | 15 | 62968071 | 69743  | 13.5015 | 0.6328 | 0.7631  | 6.9534 | YRI |
| LOC348094 | GI_38176293-S | rs1719273  | 15 | 15 | 62971545 | 66269  | 13.7060 | 0.6324 | 0.7675  | 6.9534 | YRI |
| LOC348094 | GI_38176293-S | rs1684034  | 15 | 15 | 62971919 | 65895  | 14.2832 | 0.6617 | 0.7929  | 6.9534 | YRI |
| LOC348094 | GI_38176293-S | rs1628955  | 15 | 15 | 62974273 | 63541  | 13.7060 | 0.6324 | -0.7675 | 6.9534 | YRI |
| LOC348094 | GI_38176293-S | rs1684054  | 15 | 15 | 62978449 | 59365  | 13.7060 | 0.6324 | -0.7675 | 6.9534 | YRI |
| SCAMP5    | GI_42544128-S | rs5015024  | 15 | 15 | 72491641 | 608925 | 7.0699  | 0.3822 | -0.5640 | 6.5462 | YRI |
| SCAMP5    | GI_42544128-S | rs11632086 | 15 | 15 | 72560527 | 540039 | 11.5155 | 0.5697 | 0.8260  | 6.5462 | YRI |
| SCAMP5    | GI_42544128-S | rs16970078 | 15 | 15 | 72645025 | 455541 | 9.1246  | 0.4735 | 0.7882  | 6.5462 | YRI |
| SCAMP5    | GI_42544128-S | rs16970170 | 15 | 15 | 72655153 | 445413 | 11.7299 | 0.5706 | 0.8309  | 6.5462 | YRI |
| SCAMP5    | GI_42544128-S | rs11632547 | 15 | 15 | 72818980 | 281586 | 8.3516  | 0.4709 | -0.7529 | 6.5462 | YRI |
| SCAMP5    | GI_42544128-S | rs11632706 | 15 | 15 | 72819500 | 281066 | 7.0767  | 0.3878 | 0.6138  | 6.5462 | YRI |
| SCAMP5    | GI_42544128-S | rs2069521  | 15 | 15 | 72826020 | 274546 | 10.3947 | 0.5232 | -0.7707 | 6.5462 | YRI |
| SCAMP5    | GI_42544128-S | rs2069522  | 15 | 15 | 72826286 | 274280 | 7.2636  | 0.3914 | -0.6191 | 6.5462 | YRI |
| SCAMP5    | GI_42544128-S | rs2069526  | 15 | 15 | 72828394 | 272172 | 7.2636  | 0.3914 | -0.6191 | 6.5462 | YRI |
| SCAMP5    | GI_42544128-S | rs11631682 | 15 | 15 | 72843411 | 257155 | 8.3722  | 0.4474 | -0.7797 | 6.5462 | YRI |
| SCAMP5    | GI_42544128-S | rs11633539 | 15 | 15 | 72853349 | 247217 | 11.7299 | 0.5706 | -0.8309 | 6.5462 | YRI |
| SCAMP5    | GI_42544128-S | rs16973048 | 15 | 15 | 72929728 | 170838 | 9.5931  | 0.4984 | -0.6636 | 6.5462 | YRI |
| LOC283726 | GI_37540927-S | rs10152239 | 15 | 15 | 80235465 | 128487 | 13.2021 | 0.6305 | -0.3434 | 6.9577 | YRI |

|           |               |            |    |    |          |        |         |        |         |        |     |
|-----------|---------------|------------|----|----|----------|--------|---------|--------|---------|--------|-----|
| LOC283726 | GI_37540927-S | rs10152266 | 15 | 15 | 80237458 | 126494 | 13.8195 | 0.6421 | -0.3475 | 6.9577 | YRI |
| LOC283726 | GI_37540927-S | rs9972386  | 15 | 15 | 80241338 | 122614 | 12.8700 | 0.6138 | 0.3322  | 6.9577 | YRI |
| LOC283726 | GI_37540927-S | rs12442609 | 15 | 15 | 80246409 | 117543 | 13.7190 | 0.6327 | -0.3352 | 6.9577 | YRI |
| LOC283726 | GI_37540927-S | rs12323987 | 15 | 15 | 80265482 | 98470  | 10.6940 | 0.5601 | -0.3273 | 6.9577 | YRI |
| LOC283726 | GI_37540927-S | rs12442655 | 15 | 15 | 80269582 | 94370  | 17.8701 | 0.7476 | 0.3477  | 6.9577 | YRI |
| LOC283726 | GI_37540927-S | rs12439679 | 15 | 15 | 80278186 | 85766  | 11.0179 | 0.5459 | -0.2392 | 6.9577 | YRI |
| LOC283726 | GI_37540927-S | rs8030250  | 15 | 15 | 80306594 | 57358  | 7.0794  | 0.3879 | 0.1869  | 6.9577 | YRI |
| FLJ13119  | GI_40255246-S | rs11854157 | 15 | 15 | 80360380 | 150449 | 6.3337  | 0.3460 | -0.1436 | 5.5659 | YRI |
| FLJ13119  | GI_40255246-S | rs11856590 | 15 | 15 | 80367791 | 157860 | 6.3337  | 0.3460 | 0.1436  | 5.5659 | YRI |
| LOC283726 | GI_37540927-S | rs1267658  | 15 | 15 | 81011209 | 647257 | 12.0077 | 0.5799 | 0.2937  | 6.9577 | YRI |
| LOC283726 | GI_37540927-S | rs12441776 | 15 | 15 | 81016365 | 652413 | 11.5768 | 0.5849 | -0.3011 | 6.9577 | YRI |
| LOC283726 | GI_37540927-S | rs12324877 | 15 | 15 | 81018864 | 654912 | 11.4609 | 0.5614 | 0.2892  | 6.9577 | YRI |
| LOC283726 | GI_37540927-S | rs10163167 | 15 | 15 | 81026450 | 662498 | 10.4305 | 0.5711 | 0.2928  | 6.9577 | YRI |
| LOC283726 | GI_37540927-S | rs8023333  | 15 | 15 | 81033105 | 669153 | 12.0077 | 0.5799 | -0.2937 | 6.9577 | YRI |
| LOC283726 | GI_37540927-S | rs783543   | 15 | 15 | 81036541 | 672589 | 12.0077 | 0.5799 | -0.2937 | 6.9577 | YRI |
| LOC283726 | GI_37540927-S | rs4779032  | 15 | 15 | 81042381 | 678429 | 12.0077 | 0.5799 | 0.2937  | 6.9577 | YRI |
| LOC283726 | GI_37540927-S | rs12438371 | 15 | 15 | 81068125 | 704173 | 12.2718 | 0.5885 | 0.3015  | 6.9577 | YRI |
| LOC283726 | GI_37540927-S | rs10152286 | 15 | 15 | 81082020 | 718068 | 11.5312 | 0.5702 | 0.2963  | 6.9577 | YRI |
| LOC283726 | GI_37540927-S | rs17158391 | 15 | 15 | 81089779 | 725827 | 8.6452  | 0.4534 | -0.2778 | 6.9577 | YRI |
| LOC283726 | GI_37540927-S | rs7163990  | 15 | 15 | 81141326 | 777374 | 8.4731  | 0.4518 | 0.3011  | 6.9577 | YRI |
| LOC283726 | GI_37540927-S | rs12442733 | 15 | 15 | 81158566 | 794614 | 7.7762  | 0.4207 | -0.2747 | 6.9577 | YRI |
| LOC283726 | GI_37540927-S | rs12438565 | 15 | 15 | 81177855 | 813903 | 8.7940  | 0.4597 | -0.2957 | 6.9577 | YRI |
| LOC283726 | GI_37540927-S | rs7182320  | 15 | 15 | 81184806 | 820854 | 9.0576  | 0.4707 | -0.2706 | 6.9577 | YRI |
| LOC283726 | GI_37540927-S | rs11635460 | 15 | 15 | 81191607 | 827655 | 9.0576  | 0.4707 | -0.2706 | 6.9577 | YRI |
| LOC283726 | GI_37540927-S | rs10468219 | 15 | 15 | 81192308 | 828356 | 8.7940  | 0.4597 | -0.2957 | 6.9577 | YRI |
| LOC283726 | GI_37540927-S | rs1877242  | 15 | 15 | 81194512 | 830560 | 9.0576  | 0.4707 | -0.2706 | 6.9577 | YRI |
| LOC283726 | GI_37540927-S | rs12440776 | 15 | 15 | 81198595 | 834643 | 8.5325  | 0.4855 | -0.2925 | 6.9577 | YRI |
| LOC283726 | GI_37540927-S | rs12443184 | 15 | 15 | 81198811 | 834859 | 8.6206  | 0.4894 | -0.2959 | 6.9577 | YRI |
| LOC283726 | GI_37540927-S | rs2379997  | 15 | 15 | 81199887 | 835935 | 7.5537  | 0.4336 | 0.2562  | 6.9577 | YRI |
| LOC283726 | GI_37540927-S | rs13379712 | 15 | 15 | 81203756 | 839804 | 8.7940  | 0.4597 | 0.2957  | 6.9577 | YRI |
| Hs.311038 | Hs.311038-S   | rs16944717 | 15 | 15 | 89006626 | 2183   | 9.9251  | 0.5054 | -0.6501 | 7.777  | YRI |
| Hs.311038 | Hs.311038-S   | rs10520691 | 15 | 15 | 89031121 | 22312  | 8.3675  | 0.4414 | -0.8859 | 7.777  | YRI |
| IQGAP1    | GI_32261305-S | rs6496754  | 15 | 15 | 89395886 | 549472 | 6.2172  | 0.3713 | -0.1671 | 5.9501 | YRI |
| LOC400461 | GI_42660600-S | rs7173373  | 15 | 15 | 98192897 | 3615   | 6.5101  | 0.3548 | -0.1834 | 6.2141 | YRI |
| LOC400461 | GI_42660600-S | rs11852238 | 15 | 15 | 98203000 | 6488   | 6.3663  | 0.3526 | -0.1829 | 6.2141 | YRI |
| SELS      | GI_45439348-I | rs9874     | 15 | 15 | 99628927 | 129    | 7.6440  | 0.4091 | -0.2403 | 6.4453 | YRI |
| LOC114984 | GI_34147539-S | rs8053014  | 16 | 16 | 2869665  | 19549  | 6.1725  | 0.3378 | 0.3334  | 6.1027 | YRI |
| LOC114984 | GI_34147539-S | rs8055206  | 16 | 16 | 2872763  | 16451  | 6.1725  | 0.3378 | -0.3334 | 6.1027 | YRI |
| LOC114984 | GI_34147539-S | rs8046450  | 16 | 16 | 2872822  | 16392  | 11.7948 | 0.5923 | -0.5458 | 6.1027 | YRI |
| LOC114984 | GI_34147539-S | rs1859254  | 16 | 16 | 2887347  | 1867   | 9.4461  | 0.5318 | -0.5347 | 6.1027 | YRI |
| LOC114984 | GI_34147539-S | rs886323   | 16 | 16 | 2903811  | 14597  | 6.1603  | 0.3372 | 0.2636  | 6.1027 | YRI |
| ZNF213    | GI_32698677-S | rs9922546  | 16 | 16 | 3107796  | 24707  | 6.5891  | 0.3690 | 0.1407  | 5.7462 | YRI |
| ZNF213    | GI_32698677-S | rs2735537  | 16 | 16 | 3131357  | 1146   | 7.9724  | 0.4664 | -0.1867 | 5.7462 | YRI |
| ZNF213    | GI_32698677-S | rs2238378  | 16 | 16 | 3133218  | 715    | 9.1925  | 0.4762 | 0.1748  | 5.7462 | YRI |
| HSCARG    | GI_24476001-S | rs7191458  | 16 | 16 | 4451753  | 128    | 10.1827 | 0.5152 | 0.3876  | 5.8434 | YRI |
| HSCARG    | GI_24476001-S | rs17137051 | 16 | 16 | 4461750  | 9869   | 7.6305  | 0.4140 | -0.3921 | 5.8434 | YRI |
| HSCARG    | GI_24476001-S | rs17137053 | 16 | 16 | 4464156  | 12275  | 10.7911 | 0.5441 | -0.4013 | 5.8434 | YRI |
| HSCARG    | GI_24476001-S | rs17137056 | 16 | 16 | 4464686  | 12805  | 9.9519  | 0.5125 | 0.3854  | 5.8434 | YRI |
| HSCARG    | GI_24476001-S | rs8058798  | 16 | 16 | 4471660  | 19779  | 10.1827 | 0.5152 | -0.3876 | 5.8434 | YRI |
| HSCARG    | GI_24476001-S | rs8063956  | 16 | 16 | 4471762  | 19881  | 10.1827 | 0.5152 | 0.3876  | 5.8434 | YRI |
| HSCARG    | GI_24476001-S | rs8057858  | 16 | 16 | 4471815  | 19934  | 10.1827 | 0.5152 | 0.3876  | 5.8434 | YRI |
| HSCARG    | GI_24476001-S | rs11866840 | 16 | 16 | 4476355  | 24474  | 8.0118  | 0.4258 | -0.3978 | 5.8434 | YRI |
| HSCARG    | GI_24476001-S | rs8063084  | 16 | 16 | 4476556  | 24675  | 8.2445  | 0.4418 | -0.2904 | 5.8434 | YRI |
| HSCARG    | GI_24476001-S | rs8047271  | 16 | 16 | 4476635  | 24754  | 8.6846  | 0.4792 | -0.3154 | 5.8434 | YRI |
| HSCARG    | GI_24476001-S | rs8055559  | 16 | 16 | 4480228  | 28347  | 10.1827 | 0.5152 | -0.3876 | 5.8434 | YRI |
| HSCARG    | GI_24476001-S | rs1362627  | 16 | 16 | 4491506  | 39625  | 7.8597  | 0.4189 | -0.3929 | 5.8434 | YRI |
| HSCARG    | GI_24476001-S | rs10500325 | 16 | 16 | 4493193  | 41312  | 7.8597  | 0.4189 | 0.3929  | 5.8434 | YRI |
| HSCARG    | GI_24476001-S | rs11860985 | 16 | 16 | 4495966  | 44085  | 7.6413  | 0.4145 | 0.3925  | 5.8434 | YRI |
| HSCARG    | GI_24476001-S | rs25685    | 16 | 16 | 4496912  | 45031  | 7.6761  | 0.4275 | 0.4008  | 5.8434 | YRI |

|           |               |            |    |    |          |        |         |        |         |        |     |
|-----------|---------------|------------|----|----|----------|--------|---------|--------|---------|--------|-----|
| HSCARG    | GI_24476001-S | rs17137098 | 16 | 16 | 4500536  | 48655  | 7.8597  | 0.4189 | 0.3929  | 5.8434 | YRI |
| HSCARG    | GI_24476001-S | rs8129     | 16 | 16 | 4502352  | 50471  | 5.9040  | 0.3286 | 0.2756  | 5.8434 | YRI |
| HSCARG    | GI_24476001-S | rs12446765 | 16 | 16 | 4509626  | 57745  | 8.8895  | 0.4818 | -0.3756 | 5.8434 | YRI |
| HSCARG    | GI_24476001-S | rs9922933  | 16 | 16 | 4512603  | 60722  | 8.6130  | 0.5028 | 0.3769  | 5.8434 | YRI |
| HSCARG    | GI_24476001-S | rs8062952  | 16 | 16 | 4513230  | 61349  | 6.6892  | 0.3794 | 0.3756  | 5.8434 | YRI |
| HSCARG    | GI_24476001-S | rs8044698  | 16 | 16 | 4517070  | 65189  | 10.2367 | 0.5173 | 0.3855  | 5.8434 | YRI |
| HSCARG    | GI_24476001-S | rs841231   | 16 | 16 | 4523148  | 71267  | 6.5730  | 0.3580 | 0.2853  | 5.8434 | YRI |
| FLJ32871  | GI_21389568-S | rs2719681  | 16 | 16 | 10667885 | 38869  | 7.9038  | 0.4503 | -0.2432 | 7.7983 | YRI |
| FLJ32871  | GI_21389568-S | rs2541513  | 16 | 16 | 10668135 | 39119  | 8.2706  | 0.4372 | -0.2571 | 7.7983 | YRI |
| FLJ32871  | GI_21389568-S | rs9935466  | 16 | 16 | 10668664 | 39648  | 7.9497  | 0.4462 | -0.2376 | 7.7983 | YRI |
| FLJ32871  | GI_21389568-S | rs2719695  | 16 | 16 | 10671946 | 42930  | 8.2706  | 0.4372 | -0.2571 | 7.7983 | YRI |
| FLJ32871  | GI_21389568-S | rs2541505  | 16 | 16 | 10672073 | 43057  | 8.1913  | 0.4834 | 0.3004  | 7.7983 | YRI |
| CP110     | GI_34222317-S | rs12447418 | 16 | 16 | 19447359 | 24687  | 7.1082  | 0.3840 | 0.2824  | 6.4096 | YRI |
| LOC339053 | GI_29746836-S | rs3829539  | 16 | 16 | 19629867 | 4444   | 5.8876  | 0.3231 | -0.2449 | 5.856  | YRI |
| MGC3248   | GI_34147426-S | rs249870   | 16 | 16 | 23573679 | 14711  | 6.8927  | 0.3737 | 0.2578  | 5.9209 | YRI |
| MGC3248   | GI_34147426-S | rs7588     | 16 | 16 | 23588666 | 276    | 6.8927  | 0.3737 | -0.2578 | 5.9209 | YRI |
| MGC3248   | GI_34147426-S | rs42873    | 16 | 16 | 23602233 | 13843  | 6.8927  | 0.3737 | -0.2578 | 5.9209 | YRI |
| MGC3248   | GI_34147426-S | rs26767    | 16 | 16 | 23605958 | 17568  | 6.1357  | 0.3507 | -0.2374 | 5.9209 | YRI |
| MGC3248   | GI_34147426-S | rs27770    | 16 | 16 | 23609039 | 20649  | 6.8927  | 0.3737 | -0.2578 | 5.9209 | YRI |
| MGC3248   | GI_34147426-S | rs35633    | 16 | 16 | 23611506 | 23116  | 6.8927  | 0.3737 | 0.2578  | 5.9209 | YRI |
| LCMT1     | GI_15082255-I | rs7188975  | 16 | 16 | 25044950 | 71178  | 11.4165 | 0.5599 | 0.3587  | 6.6231 | YRI |
| LCMT1     | GI_15082255-I | rs11074678 | 16 | 16 | 25057227 | 83455  | 9.0968  | 0.4723 | 0.2994  | 6.6231 | YRI |
| LCMT1     | GI_15082255-I | rs277908   | 16 | 16 | 25062635 | 88863  | 6.7375  | 0.3661 | 0.2909  | 6.6231 | YRI |
| LCMT1     | GI_15082255-I | rs277913   | 16 | 16 | 25066244 | 92472  | 8.5793  | 0.5083 | -0.2872 | 6.6231 | YRI |
| LCMT1     | GI_15082255-I | rs277886   | 16 | 16 | 25070005 | 96233  | 13.0016 | 0.6114 | -0.3679 | 6.6231 | YRI |
| LCMT1     | GI_15082255-I | rs277900   | 16 | 16 | 25081500 | 107728 | 12.7906 | 0.6113 | -0.3679 | 6.6231 | YRI |
| LCMT1     | GI_15082255-I | rs277903   | 16 | 16 | 25082623 | 108851 | 11.7146 | 0.5963 | 0.3700  | 6.6231 | YRI |
| LCMT1     | GI_15082255-I | rs277891   | 16 | 16 | 25088257 | 114485 | 13.0016 | 0.6114 | 0.3679  | 6.6231 | YRI |
| LCMT1     | GI_15082255-I | rs277893   | 16 | 16 | 25089212 | 115440 | 13.0016 | 0.6114 | 0.3679  | 6.6231 | YRI |
| MGC3020   | GI_21314710-S | rs7498779  | 16 | 16 | 31685606 | 59601  | 5.2724  | 0.2904 | 0.1766  | 5.2644 | YRI |
| Hs.42217  | Hs.42217-S    | rs9328707  | 16 | 16 | 45716367 | 257579 | 7.9502  | 0.4230 | -0.1055 | 5.827  | YRI |
| Hs.42217  | Hs.42217-S    | rs4386162  | 16 | 16 | 45730162 | 243784 | 9.2222  | 0.4775 | -0.1019 | 5.827  | YRI |
| Hs.42217  | Hs.42217-S    | rs16952589 | 16 | 16 | 45731776 | 242170 | 7.3650  | 0.3962 | 0.1033  | 5.827  | YRI |
| Hs.42217  | Hs.42217-S    | rs16953067 | 16 | 16 | 45757666 | 216280 | 7.4867  | 0.4019 | 0.1036  | 5.827  | YRI |
| Hs.42217  | Hs.42217-S    | rs8044842  | 16 | 16 | 45829377 | 144569 | 7.4867  | 0.4019 | -0.1036 | 5.827  | YRI |
| Hs.42217  | Hs.42217-S    | rs16954067 | 16 | 16 | 45839254 | 134692 | 9.5075  | 0.4890 | 0.1033  | 5.827  | YRI |
| Hs.42217  | Hs.42217-S    | rs13339406 | 16 | 16 | 45858493 | 115453 | 9.8265  | 0.5077 | -0.1104 | 5.827  | YRI |
| Hs.42217  | Hs.42217-S    | rs16955781 | 16 | 16 | 45924772 | 49174  | 6.5916  | 0.3639 | -0.1141 | 5.827  | YRI |
| Hs.42217  | Hs.42217-S    | rs16956024 | 16 | 16 | 45948101 | 25845  | 6.0251  | 0.3302 | 0.1069  | 5.827  | YRI |
| Hs.42217  | Hs.42217-S    | rs16956093 | 16 | 16 | 45956961 | 16985  | 6.0251  | 0.3302 | -0.1069 | 5.827  | YRI |
| Hs.42217  | Hs.42217-S    | rs13339357 | 16 | 16 | 45993518 | 19572  | 6.5044  | 0.3986 | 0.1016  | 5.827  | YRI |
| Hs.42217  | Hs.42217-S    | rs13334239 | 16 | 16 | 46013255 | 39309  | 7.1560  | 0.4394 | 0.0986  | 5.827  | YRI |
| Hs.42217  | Hs.42217-S    | rs7192537  | 16 | 16 | 46016351 | 42405  | 6.4781  | 0.3532 | -0.1041 | 5.827  | YRI |
| Hs.42217  | Hs.42217-S    | rs16945372 | 16 | 16 | 46060674 | 86728  | 6.0712  | 0.3423 | 0.1107  | 5.827  | YRI |
| Hs.42217  | Hs.42217-S    | rs16945379 | 16 | 16 | 46070308 | 96362  | 6.6142  | 0.3600 | 0.1121  | 5.827  | YRI |
| Hs.42217  | Hs.42217-S    | rs7194249  | 16 | 16 | 46141373 | 167427 | 6.6142  | 0.3600 | 0.1121  | 5.827  | YRI |
| Hs.42217  | Hs.42217-S    | rs8051273  | 16 | 16 | 46143780 | 169834 | 6.6142  | 0.3600 | -0.1121 | 5.827  | YRI |
| Hs.42217  | Hs.42217-S    | rs16945460 | 16 | 16 | 46248354 | 274408 | 6.3768  | 0.3531 | -0.1107 | 5.827  | YRI |
| Hs.42217  | Hs.42217-S    | rs16945474 | 16 | 16 | 46255119 | 281173 | 6.6142  | 0.3600 | 0.1121  | 5.827  | YRI |
| Hs.42217  | Hs.42217-S    | rs16945493 | 16 | 16 | 46285584 | 311638 | 6.6142  | 0.3600 | -0.1121 | 5.827  | YRI |
| Hs.42217  | Hs.42217-S    | rs10521163 | 16 | 16 | 46288947 | 315001 | 6.4646  | 0.3526 | 0.0943  | 5.827  | YRI |
| Hs.42217  | Hs.42217-S    | rs7199371  | 16 | 16 | 46358591 | 384645 | 6.3783  | 0.3482 | 0.0961  | 5.827  | YRI |
| Hs.42217  | Hs.42217-S    | rs9923591  | 16 | 16 | 46368599 | 394653 | 6.3783  | 0.3482 | -0.0961 | 5.827  | YRI |
| Hs.42217  | Hs.42217-S    | rs8048279  | 16 | 16 | 46369551 | 395605 | 6.3783  | 0.3482 | -0.0961 | 5.827  | YRI |
| Hs.42217  | Hs.42217-S    | rs8046259  | 16 | 16 | 46371922 | 397976 | 6.3783  | 0.3482 | -0.0961 | 5.827  | YRI |
| Hs.42217  | Hs.42217-S    | rs7189446  | 16 | 16 | 46374923 | 400977 | 6.3607  | 0.3573 | 0.0984  | 5.827  | YRI |
| Hs.42217  | Hs.42217-S    | rs7202612  | 16 | 16 | 46376723 | 402777 | 6.3783  | 0.3482 | 0.0961  | 5.827  | YRI |
| Hs.42217  | Hs.42217-S    | rs7202145  | 16 | 16 | 46376825 | 402879 | 6.3783  | 0.3482 | 0.0961  | 5.827  | YRI |
| Hs.42217  | Hs.42217-S    | rs7186864  | 16 | 16 | 46378036 | 404090 | 6.3210  | 0.3502 | 0.0970  | 5.827  | YRI |

|          |               |            |    |    |          |        |         |        |         |        |     |
|----------|---------------|------------|----|----|----------|--------|---------|--------|---------|--------|-----|
| Hs.42217 | Hs.42217-S    | rs13339190 | 16 | 16 | 46386220 | 412274 | 6.3783  | 0.3482 | 0.0961  | 5.827  | YRI |
| Hs.42217 | Hs.42217-S    | rs13335089 | 16 | 16 | 46387037 | 413091 | 6.1154  | 0.3397 | -0.0944 | 5.827  | YRI |
| Hs.42217 | Hs.42217-S    | rs2101373  | 16 | 16 | 46388252 | 414306 | 6.3783  | 0.3482 | -0.0961 | 5.827  | YRI |
| Hs.42217 | Hs.42217-S    | rs13337972 | 16 | 16 | 46389226 | 415280 | 6.1304  | 0.3357 | 0.0946  | 5.827  | YRI |
| Hs.42217 | Hs.42217-S    | rs16945594 | 16 | 16 | 46390875 | 416929 | 6.6142  | 0.3600 | -0.1121 | 5.827  | YRI |
| Hs.42217 | Hs.42217-S    | rs16945604 | 16 | 16 | 46391488 | 417542 | 7.9172  | 0.4215 | -0.1115 | 5.827  | YRI |
| Hs.42217 | Hs.42217-S    | rs16945609 | 16 | 16 | 46391531 | 417585 | 6.6142  | 0.3600 | -0.1121 | 5.827  | YRI |
| Hs.42217 | Hs.42217-S    | rs16945613 | 16 | 16 | 46391563 | 417617 | 7.9172  | 0.4215 | 0.1115  | 5.827  | YRI |
| Hs.42217 | Hs.42217-S    | rs7500053  | 16 | 16 | 46392205 | 418259 | 7.9172  | 0.4215 | 0.1115  | 5.827  | YRI |
| Hs.42217 | Hs.42217-S    | rs16945617 | 16 | 16 | 46394327 | 420381 | 7.9172  | 0.4215 | -0.1115 | 5.827  | YRI |
| Hs.42217 | Hs.42217-S    | rs16945621 | 16 | 16 | 46394372 | 420426 | 6.6142  | 0.3600 | 0.1121  | 5.827  | YRI |
| Hs.42217 | Hs.42217-S    | rs16945624 | 16 | 16 | 46396057 | 422111 | 6.6142  | 0.3600 | 0.1121  | 5.827  | YRI |
| Hs.42217 | Hs.42217-S    | rs1031469  | 16 | 16 | 46397491 | 423545 | 6.7703  | 0.3781 | 0.1093  | 5.827  | YRI |
| Hs.42217 | Hs.42217-S    | rs16945629 | 16 | 16 | 46397850 | 423904 | 7.3356  | 0.4056 | -0.1090 | 5.827  | YRI |
| Hs.42217 | Hs.42217-S    | rs8062780  | 16 | 16 | 46398450 | 424504 | 6.6840  | 0.3737 | -0.0989 | 5.827  | YRI |
| Hs.42217 | Hs.42217-S    | rs9926457  | 16 | 16 | 46405964 | 432018 | 6.3783  | 0.3482 | 0.0961  | 5.827  | YRI |
| Hs.42217 | Hs.42217-S    | rs9932128  | 16 | 16 | 46407811 | 433865 | 6.3783  | 0.3482 | 0.0961  | 5.827  | YRI |
| Hs.42217 | Hs.42217-S    | rs16945641 | 16 | 16 | 46408552 | 434606 | 6.0699  | 0.3578 | -0.0906 | 5.827  | YRI |
| Hs.42217 | Hs.42217-S    | rs4271615  | 16 | 16 | 46410392 | 436446 | 6.6142  | 0.3600 | 0.1121  | 5.827  | YRI |
| Hs.42217 | Hs.42217-S    | rs7187134  | 16 | 16 | 46410554 | 436608 | 6.8728  | 0.3999 | -0.1104 | 5.827  | YRI |
| Hs.42217 | Hs.42217-S    | rs7203019  | 16 | 16 | 46410569 | 436623 | 6.4040  | 0.3545 | -0.1123 | 5.827  | YRI |
| Hs.42217 | Hs.42217-S    | rs16945652 | 16 | 16 | 46411368 | 437422 | 6.6055  | 0.4104 | 0.1123  | 5.827  | YRI |
| Hs.42217 | Hs.42217-S    | rs8055695  | 16 | 16 | 46418453 | 444507 | 6.3783  | 0.3482 | -0.0961 | 5.827  | YRI |
| Hs.42217 | Hs.42217-S    | rs16945662 | 16 | 16 | 46420933 | 446987 | 6.3783  | 0.3482 | -0.0961 | 5.827  | YRI |
| Hs.42217 | Hs.42217-S    | rs13336200 | 16 | 16 | 46421249 | 447303 | 6.3783  | 0.3482 | 0.0961  | 5.827  | YRI |
| Hs.42217 | Hs.42217-S    | rs13337281 | 16 | 16 | 46421459 | 447513 | 6.1743  | 0.3427 | 0.0920  | 5.827  | YRI |
| Hs.42217 | Hs.42217-S    | rs13338447 | 16 | 16 | 46421601 | 447655 | 7.3546  | 0.4010 | -0.1008 | 5.827  | YRI |
| Hs.42217 | Hs.42217-S    | rs8053042  | 16 | 16 | 46421717 | 447771 | 6.3783  | 0.3482 | 0.0961  | 5.827  | YRI |
| Hs.42217 | Hs.42217-S    | rs8055624  | 16 | 16 | 46422092 | 448146 | 6.4008  | 0.3543 | 0.0902  | 5.827  | YRI |
| Hs.42217 | Hs.42217-S    | rs9940610  | 16 | 16 | 46427333 | 453387 | 6.3783  | 0.3482 | -0.0961 | 5.827  | YRI |
| Hs.42217 | Hs.42217-S    | rs16945673 | 16 | 16 | 46454603 | 480657 | 6.3783  | 0.3482 | 0.0961  | 5.827  | YRI |
| GOT2     | GI_4504068-S  | rs13334922 | 16 | 16 | 57303223 | 4481   | 5.8222  | 0.3496 | 0.3467  | 5.7232 | YRI |
| GOT2     | GI_4504068-S  | rs8060056  | 16 | 16 | 57308344 | 9602   | 5.9865  | 0.3282 | -0.2618 | 5.7232 | YRI |
| PDPR     | GI_32261325-S | rs2303200  | 16 | 16 | 68735149 | 17281  | 7.1353  | 0.3906 | 0.3872  | 5.5929 | YRI |
| PDPR     | GI_32261325-S | rs2287980  | 16 | 16 | 68744771 | 7659   | 7.4176  | 0.4040 | -0.3953 | 5.5929 | YRI |
| FLJ10305 | GI_39780551-S | rs8058702  | 16 | 16 | 69359737 | 80738  | 6.0308  | 0.3305 | -0.2411 | 5.8838 | YRI |
| FLJ10305 | GI_39780551-S | rs1770429  | 16 | 16 | 69418057 | 139058 | 7.0067  | 0.4067 | -0.2368 | 5.8838 | YRI |
| BM039    | GI_39725678-S | rs16954525 | 16 | 16 | 79636464 | 25105  | 6.7563  | 0.3670 | -0.3393 | 6.1447 | YRI |
| FLJ12998 | GI_12232436-S | rs16944715 | 16 | 16 | 85122157 | 43     | 7.2259  | 0.4004 | 0.5247  | 6.7564 | YRI |
| hmm23345 | hmm23345-S    | rs16944715 | 16 | 16 | 85122157 | 8239   | 11.6177 | 0.5797 | -0.1828 | 7.6094 | YRI |
| LOC51693 | GI_7706428-S  | rs3784879  | 16 | 16 | 87441447 | 13502  | 7.3548  | 0.3957 | -0.2993 | 6.0107 | YRI |
| LOC51693 | GI_7706428-S  | rs12709105 | 16 | 16 | 87444352 | 10597  | 6.6229  | 0.3707 | 0.2855  | 6.0107 | YRI |
| LOC51693 | GI_7706428-S  | rs12932588 | 16 | 16 | 87448994 | 5955   | 8.4056  | 0.4547 | 0.2122  | 6.0107 | YRI |
| LOC51693 | GI_7706428-S  | rs12596491 | 16 | 16 | 87455918 | 969    | 6.0933  | 0.3338 | -0.1816 | 6.0107 | YRI |
| LOC51693 | GI_7706428-S  | rs889753   | 16 | 16 | 87459415 | 4466   | 6.0127  | 0.3343 | -0.2025 | 6.0107 | YRI |
| SPG7     | GI_40806172-I | rs3803676  | 16 | 16 | 88123607 | 7762   | 6.0309  | 0.3305 | -0.1491 | 5.9353 | YRI |
| SPG7     | GI_40806172-I | rs463701   | 16 | 16 | 88126261 | 5108   | 5.9621  | 0.3270 | 0.1417  | 5.9353 | YRI |
| SPG7     | GI_40806172-I | rs382745   | 16 | 16 | 88131087 | 282    | 6.6608  | 0.3623 | -0.1384 | 5.9353 | YRI |
| RPL13    | GI_15431296-A | rs12709088 | 16 | 16 | 88157713 | 686    | 7.5580  | 0.4052 | -0.4441 | 6.1053 | YRI |
| RPL13    | GI_15431296-A | rs12709089 | 16 | 16 | 88157812 | 785    | 7.9812  | 0.4357 | -0.4554 | 6.1053 | YRI |
| FANCA    | GI_4503654-S  | rs3803689  | 16 | 16 | 88327559 | 4101   | 6.3254  | 0.3456 | 0.1301  | 5.5672 | YRI |
| FANCA    | GI_4503654-S  | rs6500441  | 16 | 16 | 88356170 | 24510  | 6.6265  | 0.4115 | -0.1463 | 5.5672 | YRI |
| FANCA    | GI_4503654-S  | rs2159113  | 16 | 16 | 88359584 | 27924  | 7.4698  | 0.4011 | 0.1431  | 5.5672 | YRI |
| FANCA    | GI_4503654-S  | rs7203907  | 16 | 16 | 88361275 | 29615  | 6.6086  | 0.3981 | -0.1481 | 5.5672 | YRI |
| FANCA    | GI_4503654-S  | rs4785595  | 16 | 16 | 88363022 | 31362  | 7.3824  | 0.3970 | -0.1200 | 5.5672 | YRI |
| FANCA    | GI_4503654-S  | rs886952   | 16 | 16 | 88364282 | 32622  | 5.7489  | 0.3159 | -0.1352 | 5.5672 | YRI |
| FANCA    | GI_4503654-S  | rs8046872  | 16 | 16 | 88369053 | 37393  | 6.1427  | 0.3411 | 0.1417  | 5.5672 | YRI |
| RABEP1   | GI_31377797-S | rs1065483  | 17 | 17 | 5225494  | 4174   | 7.8572  | 0.4188 | -0.2610 | 6.116  | YRI |
| RABEP1   | GI_31377797-S | rs7426     | 17 | 17 | 5229707  | 39     | 8.5498  | 0.4493 | -0.2777 | 6.116  | YRI |

|           |               |            |    |    |          |        |         |        |         |        |     |
|-----------|---------------|------------|----|----|----------|--------|---------|--------|---------|--------|-----|
| RABEP1    | GI_31377797-S | rs17635627 | 17 | 17 | 5236783  | 7115   | 6.4502  | 0.3781 | 0.2421  | 6.116  | YRI |
| RABEP1    | GI_31377797-S | rs1806255  | 17 | 17 | 5254987  | 25319  | 6.4563  | 0.3960 | -0.2266 | 6.116  | YRI |
| RABEP1    | GI_31377797-S | rs1806261  | 17 | 17 | 5257732  | 28064  | 6.1661  | 0.3375 | 0.2462  | 6.116  | YRI |
| RABEP1    | GI_31377797-S | rs2189338  | 17 | 17 | 5267065  | 37397  | 8.5569  | 0.4496 | 0.2672  | 6.116  | YRI |
| DERP6     | GI_44662825-I | rs222843   | 17 | 17 | 7086705  | 9736   | 13.4402 | 0.6246 | 0.3871  | 6.4574 | YRI |
| DERP6     | GI_44662825-I | rs402514   | 17 | 17 | 7098927  | 2486   | 13.4402 | 0.6246 | 0.3871  | 6.4574 | YRI |
| DERP6     | GI_44662825-I | rs8067500  | 17 | 17 | 7113355  | 16914  | 13.0517 | 0.6194 | -0.3886 | 6.4574 | YRI |
| LOC400571 | GI_42661084-S | rs2270341  | 17 | 17 | 7421271  | 5107   | 6.4603  | 0.3524 | 0.3146  | 6.0287 | YRI |
| LOC400571 | GI_42661084-S | rs9901673  | 17 | 17 | 7424825  | 1553   | 7.1338  | 0.3853 | -0.3708 | 6.0287 | YRI |
| LOC400571 | GI_42661084-S | rs8066665  | 17 | 17 | 7426576  | 198    | 8.0372  | 0.4269 | 0.3503  | 6.0287 | YRI |
| LOC400571 | GI_42661084-S | rs1642772  | 17 | 17 | 7444884  | 18506  | 6.4603  | 0.3524 | 0.3146  | 6.0287 | YRI |
| MGC10744  | GI_34101277-A | rs2518023  | 17 | 17 | 7997331  | 20306  | 7.0539  | 0.3867 | -0.2127 | 6.948  | YRI |
| MGC10744  | GI_34101277-A | rs9899533  | 17 | 17 | 8008770  | 8867   | 9.2562  | 0.4848 | -0.2160 | 6.948  | YRI |
| MGC10744  | GI_34101277-A | rs1476162  | 17 | 17 | 8031808  | 14171  | 8.2674  | 0.4428 | 0.1980  | 6.948  | YRI |
| MGC10744  | GI_34101277-A | rs2278636  | 17 | 17 | 8034745  | 17108  | 7.2552  | 0.3963 | 0.2015  | 6.948  | YRI |
| MGC10744  | GI_34101277-A | rs9891949  | 17 | 17 | 8039908  | 22271  | 7.0883  | 0.3883 | 0.1910  | 6.948  | YRI |
| MGC10744  | GI_34101277-A | rs9900848  | 17 | 17 | 8040096  | 22459  | 9.3216  | 0.4815 | 0.2110  | 6.948  | YRI |
| MGC10744  | GI_34101277-A | rs11078734 | 17 | 17 | 8041949  | 24312  | 9.3216  | 0.4815 | 0.2110  | 6.948  | YRI |
| MGC10744  | GI_34101277-A | rs1059476  | 17 | 17 | 8049056  | 31419  | 8.1207  | 0.4363 | -0.1972 | 6.948  | YRI |
| FLJ34790  | GI_27734741-S | rs3027240  | 17 | 17 | 8075239  | 10245  | 6.2062  | 0.3395 | 0.3836  | 5.9857 | YRI |
| FLJ34790  | GI_27734741-S | rs3027237  | 17 | 17 | 8075871  | 10877  | 6.2062  | 0.3395 | 0.3836  | 5.9857 | YRI |
| FLJ34790  | GI_27734741-S | rs3027236  | 17 | 17 | 8075909  | 10915  | 6.2062  | 0.3395 | -0.3836 | 5.9857 | YRI |
| FLJ34790  | GI_27734741-S | rs3027235  | 17 | 17 | 8076171  | 11177  | 6.2062  | 0.3395 | -0.3836 | 5.9857 | YRI |
| Hs.379903 | Hs.379903-S   | rs2779212  | 17 | 17 | 15817380 | 3310   | 12.5078 | 0.6025 | -0.5563 | 6.0203 | YRI |
| Hs.379903 | Hs.379903-S   | rs1045599  | 17 | 17 | 15820635 | 55     | 13.8534 | 0.6366 | -0.5775 | 6.0203 | YRI |
| Hs.379903 | Hs.379903-S   | rs11654    | 17 | 17 | 15821876 | 1186   | 13.8534 | 0.6366 | -0.5775 | 6.0203 | YRI |
| Hs.379903 | Hs.379903-S   | rs2286796  | 17 | 17 | 15824952 | 4262   | 13.4267 | 0.6306 | 0.5738  | 6.0203 | YRI |
| Hs.379903 | Hs.379903-S   | rs9891938  | 17 | 17 | 15855797 | 35107  | 8.7697  | 0.5098 | 0.5534  | 6.0203 | YRI |
| NT5M      | GI_22547230-S | rs16961516 | 17 | 17 | 17148957 | 42687  | 8.2995  | 0.4385 | -0.3262 | 5.8386 | YRI |
| ATPAF2    | GI_22538424-S | rs8067146  | 17 | 17 | 17865681 | 3232   | 12.6738 | 0.6013 | 0.4221  | 7.5258 | YRI |
| MGC19764  | GI_42661257-S | rs11080326 | 17 | 17 | 30588522 | 30059  | 7.2331  | 0.3900 | 0.6321  | 7.1439 | YRI |
| hmm5445   | hmm5445-S     | rs11080326 | 17 | 17 | 30588522 | 30032  | 7.4427  | 0.3998 | 0.5415  | 6.7611 | YRI |
| MGC19764  | GI_42661257-S | rs11867191 | 17 | 17 | 30593227 | 25354  | 11.2361 | 0.5600 | -0.7034 | 7.1439 | YRI |
| hmm5445   | hmm5445-S     | rs11867191 | 17 | 17 | 30593227 | 25327  | 10.6998 | 0.5407 | -0.5871 | 6.7611 | YRI |
| MGC19764  | GI_42661257-S | rs883416   | 17 | 17 | 30594554 | 24027  | 10.5625 | 0.5294 | -0.6900 | 7.1439 | YRI |
| hmm5445   | hmm5445-S     | rs883416   | 17 | 17 | 30594554 | 24000  | 10.2431 | 0.5175 | -0.5778 | 6.7611 | YRI |
| MGC19764  | GI_42661257-S | rs12601614 | 17 | 17 | 30598366 | 20215  | 9.0312  | 0.4696 | 0.5582  | 7.1439 | YRI |
| hmm5445   | hmm5445-S     | rs12601614 | 17 | 17 | 30598366 | 20188  | 9.9402  | 0.5060 | 0.4899  | 6.7611 | YRI |
| FLJ20291  | GI_34147582-S | rs3760144  | 17 | 17 | 34210958 | 196    | 6.5097  | 0.3548 | 0.1952  | 5.7465 | YRI |
| FLJ20291  | GI_34147582-S | rs2302472  | 17 | 17 | 34216215 | 5061   | 5.9609  | 0.3414 | -0.1921 | 5.7465 | YRI |
| FLJ20291  | GI_34147582-S | rs7214654  | 17 | 17 | 34225779 | 14625  | 8.7070  | 0.4560 | -0.2286 | 5.7465 | YRI |
| ORMDL3    | GI_27544926-S | rs12936231 | 17 | 17 | 35282646 | 48452  | 8.3371  | 0.4401 | -0.2178 | 5.7968 | YRI |
| ORMDL3    | GI_27544926-S | rs8067378  | 17 | 17 | 35304874 | 26224  | 7.7676  | 0.4203 | -0.2210 | 5.7968 | YRI |
| RAPGEFL1  | GI_7705938-S  | rs9898129  | 17 | 17 | 35519475 | 85860  | 6.0459  | 0.3460 | -0.2397 | 6.0179 | YRI |
| RAPGEFL1  | GI_7705938-S  | rs9903261  | 17 | 17 | 35530994 | 74341  | 7.0006  | 0.3789 | -0.2503 | 6.0179 | YRI |
| RAPGEFL1  | GI_7705938-S  | rs16965660 | 17 | 17 | 35545347 | 59988  | 6.6492  | 0.3668 | -0.2463 | 6.0179 | YRI |
| RAPGEFL1  | GI_7705938-S  | rs9898500  | 17 | 17 | 35558907 | 46428  | 6.8765  | 0.3729 | 0.2366  | 6.0179 | YRI |
| RAPGEFL1  | GI_7705938-S  | rs8076915  | 17 | 17 | 35645052 | 39717  | 7.5713  | 0.4058 | -0.2267 | 6.0179 | YRI |
| RAPGEFL1  | GI_7705938-S  | rs8072718  | 17 | 17 | 35653135 | 47800  | 6.6876  | 0.3793 | -0.2271 | 6.0179 | YRI |
| RAPGEFL1  | GI_7705938-S  | rs12936565 | 17 | 17 | 35658563 | 53228  | 7.1495  | 0.3860 | -0.2241 | 6.0179 | YRI |
| RAPGEFL1  | GI_7705938-S  | rs1130199  | 17 | 17 | 35701095 | 95760  | 6.6232  | 0.3707 | -0.2259 | 6.0179 | YRI |
| RAPGEFL1  | GI_7705938-S  | rs9892367  | 17 | 17 | 35716914 | 111579 | 6.4384  | 0.3513 | -0.2235 | 6.0179 | YRI |
| RAPGEFL1  | GI_7705938-S  | rs8065665  | 17 | 17 | 35735789 | 130454 | 8.0636  | 0.4281 | 0.2326  | 6.0179 | YRI |
| RAPGEFL1  | GI_7705938-S  | rs7218938  | 17 | 17 | 35755369 | 150034 | 8.0429  | 0.4272 | -0.2298 | 6.0179 | YRI |
| MGC20781  | GI_34147471-S | rs1436441  | 17 | 17 | 37234774 | 377    | 5.6708  | 0.3117 | -0.3457 | 5.6402 | YRI |
| MGC20781  | GI_34147471-S | rs3744781  | 17 | 17 | 37235677 | 526    | 7.5953  | 0.4356 | -0.3514 | 5.6402 | YRI |
| MGC20781  | GI_34147471-S | rs9896766  | 17 | 17 | 37237170 | 2019   | 8.1464  | 0.4317 | -0.3416 | 5.6402 | YRI |
| MGC20781  | GI_34147471-S | rs1046404  | 17 | 17 | 37237334 | 2183   | 8.1464  | 0.4317 | -0.3416 | 5.6402 | YRI |
| MGC20781  | GI_34147471-S | rs1046403  | 17 | 17 | 37237346 | 2195   | 8.0914  | 0.4349 | -0.3459 | 5.6402 | YRI |

|          |               |            |    |    |          |        |        |        |         |        |     |
|----------|---------------|------------|----|----|----------|--------|--------|--------|---------|--------|-----|
| MGC20781 | GI_34147471-S | rs4796712  | 17 | 17 | 37240656 | 5505   | 5.7713 | 0.3170 | 0.3439  | 5.6402 | YRI |
| MGC20781 | GI_34147471-S | rs4796713  | 17 | 17 | 37240887 | 5736   | 8.1464 | 0.4317 | 0.3416  | 5.6402 | YRI |
| MGC20781 | GI_34147471-S | rs4796715  | 17 | 17 | 37247297 | 12146  | 8.5382 | 0.4488 | 0.3453  | 5.6402 | YRI |
| MGC20781 | GI_34147471-S | rs1529933  | 17 | 17 | 37251667 | 16516  | 6.7895 | 0.3686 | 0.2754  | 5.6402 | YRI |
| MGC20781 | GI_34147471-S | rs4796615  | 17 | 17 | 37258436 | 23285  | 5.6708 | 0.3117 | 0.3457  | 5.6402 | YRI |
| MGC20781 | GI_34147471-S | rs4796616  | 17 | 17 | 37258699 | 23548  | 5.6708 | 0.3117 | 0.3457  | 5.6402 | YRI |
| MGC20781 | GI_34147471-S | rs9896025  | 17 | 17 | 37258853 | 23702  | 5.6708 | 0.3117 | -0.3457 | 5.6402 | YRI |
| MGC20781 | GI_34147471-S | rs11653094 | 17 | 17 | 37259165 | 24014  | 5.6708 | 0.3117 | 0.3457  | 5.6402 | YRI |
| MGC20781 | GI_34147471-S | rs11079018 | 17 | 17 | 37259176 | 24025  | 5.6708 | 0.3117 | -0.3457 | 5.6402 | YRI |
| MGC20781 | GI_34147471-S | rs3744782  | 17 | 17 | 37264505 | 29354  | 6.5747 | 0.3631 | -0.2703 | 5.6402 | YRI |
| MGC20781 | GI_34147471-S | rs9905601  | 17 | 17 | 37268737 | 33586  | 7.9447 | 0.4228 | -0.3400 | 5.6402 | YRI |
| MGC20781 | GI_34147471-S | rs9303318  | 17 | 17 | 37273611 | 38460  | 6.1137 | 0.3348 | -0.2643 | 5.6402 | YRI |
| MGC20781 | GI_34147471-S | rs9912300  | 17 | 17 | 37278790 | 43639  | 6.7895 | 0.3686 | -0.2754 | 5.6402 | YRI |
| MGC20781 | GI_34147471-S | rs9914829  | 17 | 17 | 37278811 | 43660  | 5.6708 | 0.3117 | -0.3457 | 5.6402 | YRI |
| MGC20781 | GI_34147471-S | rs3744779  | 17 | 17 | 37278979 | 43828  | 6.5056 | 0.3546 | 0.2702  | 5.6402 | YRI |
| MGC20781 | GI_34147471-S | rs8071753  | 17 | 17 | 37282067 | 46916  | 6.5056 | 0.3546 | -0.2702 | 5.6402 | YRI |
| MGC20781 | GI_34147471-S | rs8071234  | 17 | 17 | 37282094 | 46943  | 6.7895 | 0.3686 | -0.2754 | 5.6402 | YRI |
| MGC20781 | GI_34147471-S | rs12452032 | 17 | 17 | 37288307 | 53156  | 5.6708 | 0.3117 | 0.3457  | 5.6402 | YRI |
| MGC20235 | GI_21450795-S | rs915945   | 17 | 17 | 38433390 | 293442 | 6.2413 | 0.3413 | -0.2826 | 5.7898 | YRI |
| MGC20235 | GI_21450795-S | rs8176318  | 17 | 17 | 38450800 | 276032 | 6.2413 | 0.3413 | 0.2826  | 5.7898 | YRI |
| MGC20235 | GI_21450795-S | rs3092988  | 17 | 17 | 38455228 | 271604 | 6.2413 | 0.3413 | -0.2826 | 5.7898 | YRI |
| MGC20235 | GI_21450795-S | rs8176273  | 17 | 17 | 38465179 | 261653 | 6.2413 | 0.3413 | -0.2826 | 5.7898 | YRI |
| MGC20235 | GI_21450795-S | rs8176265  | 17 | 17 | 38467522 | 259310 | 6.1958 | 0.3438 | -0.2840 | 5.7898 | YRI |
| MGC20235 | GI_21450795-S | rs8176242  | 17 | 17 | 38471400 | 255432 | 6.2413 | 0.3413 | -0.2826 | 5.7898 | YRI |
| MGC20235 | GI_21450795-S | rs4793197  | 17 | 17 | 38485428 | 241404 | 6.2413 | 0.3413 | -0.2826 | 5.7898 | YRI |
| MGC20235 | GI_21450795-S | rs1060915  | 17 | 17 | 38487996 | 238836 | 6.2413 | 0.3413 | -0.2826 | 5.7898 | YRI |
| MGC20235 | GI_21450795-S | rs16941    | 17 | 17 | 38497961 | 228871 | 6.2413 | 0.3413 | 0.2826  | 5.7898 | YRI |
| MGC20235 | GI_21450795-S | rs16940    | 17 | 17 | 38498763 | 228069 | 6.2413 | 0.3413 | -0.2826 | 5.7898 | YRI |
| MGC20235 | GI_21450795-S | rs1973646  | 17 | 17 | 38564021 | 162811 | 6.1451 | 0.3412 | -0.2830 | 5.7898 | YRI |
| MGC20235 | GI_21450795-S | rs2271573  | 17 | 17 | 38581147 | 145685 | 6.2413 | 0.3413 | 0.2826  | 5.7898 | YRI |
| MGC20235 | GI_21450795-S | rs11651623 | 17 | 17 | 38583373 | 143459 | 6.4782 | 0.3686 | -0.2881 | 5.7898 | YRI |
| MGC20235 | GI_21450795-S | rs11653460 | 17 | 17 | 38584832 | 142000 | 6.2080 | 0.3445 | 0.2842  | 5.7898 | YRI |
| MGC20235 | GI_21450795-S | rs13851    | 17 | 17 | 38727370 | 538    | 6.2413 | 0.3413 | 0.2826  | 5.7898 | YRI |
| MGC20235 | GI_21450795-S | rs9646417  | 17 | 17 | 38779779 | 52947  | 6.8931 | 0.3737 | -0.2871 | 5.7898 | YRI |
| MGC20235 | GI_21450795-S | rs1545764  | 17 | 17 | 38780091 | 53259  | 6.2413 | 0.3413 | -0.2826 | 5.7898 | YRI |
| SNX11    | GI_23111027-I | rs1468270  | 17 | 17 | 43480190 | 62906  | 7.0727 | 0.3823 | -0.1578 | 5.8891 | YRI |
| SNX11    | GI_23111027-I | rs12936731 | 17 | 17 | 43483358 | 59738  | 6.8452 | 0.3765 | 0.1595  | 5.8891 | YRI |
| SNX11    | GI_23111027-I | rs9899275  | 17 | 17 | 43484314 | 58782  | 6.6418 | 0.3664 | -0.1562 | 5.8891 | YRI |
| SNX11    | GI_23111027-I | rs9899461  | 17 | 17 | 43484352 | 58744  | 7.0727 | 0.3823 | -0.1578 | 5.8891 | YRI |
| SNX11    | GI_23111027-I | rs7212202  | 17 | 17 | 43487722 | 55374  | 7.0727 | 0.3823 | 0.1578  | 5.8891 | YRI |
| SNX11    | GI_23111027-I | rs11079806 | 17 | 17 | 43497679 | 45417  | 7.0727 | 0.3823 | 0.1578  | 5.8891 | YRI |
| SNX11    | GI_23111027-I | rs2051821  | 17 | 17 | 43498514 | 44582  | 7.0727 | 0.3823 | 0.1578  | 5.8891 | YRI |
| SNX11    | GI_23111027-I | rs11651097 | 17 | 17 | 43502038 | 41058  | 7.0727 | 0.3823 | 0.1578  | 5.8891 | YRI |
| SNX11    | GI_23111027-I | rs6847     | 17 | 17 | 43502806 | 40290  | 7.0727 | 0.3823 | -0.1578 | 5.8891 | YRI |
| SNX11    | GI_23111027-I | rs7224014  | 17 | 17 | 43505860 | 37236  | 7.0727 | 0.3823 | 0.1578  | 5.8891 | YRI |
| SNX11    | GI_23111027-I | rs2240122  | 17 | 17 | 43507558 | 35538  | 7.0727 | 0.3823 | 0.1578  | 5.8891 | YRI |
| SNX11    | GI_23111027-I | rs7217496  | 17 | 17 | 43509201 | 33895  | 6.9569 | 0.3820 | -0.1596 | 5.8891 | YRI |
| SNX11    | GI_23111027-I | rs6504025  | 17 | 17 | 43521072 | 22024  | 7.6625 | 0.4100 | 0.1597  | 5.8891 | YRI |
| SNX11    | GI_23111027-I | rs7220520  | 17 | 17 | 43522941 | 20155  | 7.0727 | 0.3823 | 0.1578  | 5.8891 | YRI |
| SNX11    | GI_23111027-I | rs2109984  | 17 | 17 | 43526098 | 16998  | 6.9822 | 0.3832 | 0.1580  | 5.8891 | YRI |
| SNX11    | GI_23111027-I | rs11079808 | 17 | 17 | 43535231 | 7865   | 7.0727 | 0.3823 | 0.1578  | 5.8891 | YRI |
| SNX11    | GI_23111027-I | rs8077860  | 17 | 17 | 43540334 | 2762   | 7.0727 | 0.3823 | -0.1578 | 5.8891 | YRI |
| SNX11    | GI_23111027-I | rs8080662  | 17 | 17 | 43545818 | 2722   | 7.0727 | 0.3823 | -0.1578 | 5.8891 | YRI |
| SNX11    | GI_23111027-I | rs8066391  | 17 | 17 | 43550295 | 7199   | 7.0727 | 0.3823 | 0.1578  | 5.8891 | YRI |
| SNX11    | GI_23111027-I | rs1010228  | 17 | 17 | 43555347 | 12251  | 7.0727 | 0.3823 | 0.1578  | 5.8891 | YRI |
| SNX11    | GI_23111027-I | rs1452665  | 17 | 17 | 43652150 | 109054 | 7.0727 | 0.3823 | -0.1578 | 5.8891 | YRI |
| NDP52    | GI_33519473-S | rs7208074  | 17 | 17 | 44249072 | 47951  | 7.6302 | 0.4085 | -0.1957 | 6.3288 | YRI |
| NDP52    | GI_33519473-S | rs8076178  | 17 | 17 | 44263279 | 33744  | 6.5091 | 0.3869 | -0.1929 | 6.3288 | YRI |
| NDP52    | GI_33519473-S | rs12450440 | 17 | 17 | 44266352 | 30671  | 7.3820 | 0.4135 | 0.1935  | 6.3288 | YRI |

|           |               |            |    |    |          |       |         |        |         |        |     |
|-----------|---------------|------------|----|----|----------|-------|---------|--------|---------|--------|-----|
| NDP52     | GI_33519473-S | rs8080446  | 17 | 17 | 44267435 | 29588 | 10.3660 | 0.5222 | 0.2140  | 6.3288 | YRI |
| NDP52     | GI_33519473-S | rs8078984  | 17 | 17 | 44267550 | 29473 | 10.3660 | 0.5222 | -0.2140 | 6.3288 | YRI |
| NDP52     | GI_33519473-S | rs8078992  | 17 | 17 | 44267572 | 29451 | 10.3660 | 0.5222 | 0.2140  | 6.3288 | YRI |
| NDP52     | GI_33519473-S | rs16944088 | 17 | 17 | 44273016 | 24007 | 9.0258  | 0.4694 | 0.2282  | 6.3288 | YRI |
| NDP52     | GI_33519473-S | rs3744604  | 17 | 17 | 44280858 | 16165 | 10.3660 | 0.5222 | -0.2140 | 6.3288 | YRI |
| NDP52     | GI_33519473-S | rs2303015  | 17 | 17 | 44284907 | 12116 | 10.3660 | 0.5222 | 0.2140  | 6.3288 | YRI |
| NDP52     | GI_33519473-S | rs11434    | 17 | 17 | 44296244 | 779   | 10.3660 | 0.5222 | -0.2140 | 6.3288 | YRI |
| NDP52     | GI_33519473-S | rs7222365  | 17 | 17 | 44296816 | 207   | 10.3660 | 0.5222 | 0.2140  | 6.3288 | YRI |
| NDP52     | GI_33519473-S | rs11654595 | 17 | 17 | 44297999 | 976   | 9.1445  | 0.4925 | 0.2076  | 6.3288 | YRI |
| NDP52     | GI_33519473-S | rs12450692 | 17 | 17 | 44300502 | 3479  | 10.1535 | 0.5266 | 0.2138  | 6.3288 | YRI |
| NDP52     | GI_33519473-S | rs12450563 | 17 | 17 | 44300565 | 3542  | 8.0631  | 0.4281 | -0.1990 | 6.3288 | YRI |
| NDP52     | GI_33519473-S | rs12453671 | 17 | 17 | 44300832 | 3809  | 8.4266  | 0.4742 | 0.1905  | 6.3288 | YRI |
| NDP52     | GI_33519473-S | rs12449856 | 17 | 17 | 44301996 | 4973  | 8.0631  | 0.4281 | 0.1990  | 6.3288 | YRI |
| NDP52     | GI_33519473-S | rs2411377  | 17 | 17 | 44303217 | 6194  | 10.3660 | 0.5222 | 0.2140  | 6.3288 | YRI |
| NDP52     | GI_33519473-S | rs8079874  | 17 | 17 | 44305974 | 8951  | 10.8014 | 0.5574 | 0.2265  | 6.3288 | YRI |
| FLJ21347  | GI_31542722-S | rs3785915  | 17 | 17 | 45968836 | 19331 | 8.3775  | 0.4419 | 0.6251  | 6.3595 | YRI |
| FLJ21347  | GI_31542722-S | rs2306002  | 17 | 17 | 45972828 | 15339 | 11.1652 | 0.5512 | 0.6695  | 6.3595 | YRI |
| FLJ21347  | GI_31542722-S | rs1122634  | 17 | 17 | 45976364 | 11803 | 11.5116 | 0.5695 | -0.6765 | 6.3595 | YRI |
| FLJ21347  | GI_31542722-S | rs8076632  | 17 | 17 | 45980927 | 7240  | 8.4255  | 0.4440 | -0.4783 | 6.3595 | YRI |
| FLJ21347  | GI_31542722-S | rs989128   | 17 | 17 | 45991533 | 3366  | 7.3092  | 0.4100 | 0.4431  | 6.3595 | YRI |
| ABC1      | GI_38142463-S | rs9895182  | 17 | 17 | 55506667 | 31216 | 6.3614  | 0.3474 | -0.2915 | 5.5663 | YRI |
| ABC1      | GI_38142463-S | rs8066241  | 17 | 17 | 55511931 | 36480 | 13.1317 | 0.6350 | -0.3391 | 5.5663 | YRI |
| ABC1      | GI_38142463-S | rs10515177 | 17 | 17 | 55522267 | 46816 | 13.6720 | 0.6314 | 0.3223  | 5.5663 | YRI |
| ABC1      | GI_38142463-S | rs9303417  | 17 | 17 | 55523104 | 47653 | 5.6410  | 0.3102 | -0.2631 | 5.5663 | YRI |
| ABC1      | GI_38142463-S | rs8078068  | 17 | 17 | 55523766 | 48315 | 13.4487 | 0.6313 | 0.3224  | 5.5663 | YRI |
| ABC1      | GI_38142463-S | rs7223281  | 17 | 17 | 55527229 | 51778 | 10.9642 | 0.5440 | -0.3154 | 5.5663 | YRI |
| ABC1      | GI_38142463-S | rs7226234  | 17 | 17 | 55531572 | 56121 | 10.7909 | 0.5441 | -0.3156 | 5.5663 | YRI |
| FLJ46603  | GI_38348363-S | rs1014390  | 17 | 17 | 72224481 | 36972 | 6.1883  | 0.3434 | 0.8910  | 6.0638 | YRI |
| FLJ46603  | GI_38348363-S | rs2058215  | 17 | 17 | 72239677 | 52168 | 7.4845  | 0.4018 | 0.6963  | 6.0638 | YRI |
| FLJ46603  | GI_38348363-S | rs237059   | 17 | 17 | 72242438 | 54929 | 8.0762  | 0.4286 | -0.7151 | 6.0638 | YRI |
| FLJ46603  | GI_38348363-S | rs237054   | 17 | 17 | 72245918 | 58409 | 8.0762  | 0.4286 | -0.7151 | 6.0638 | YRI |
| FLJ46603  | GI_38348363-S | rs237053   | 17 | 17 | 72246193 | 58684 | 7.9060  | 0.4266 | 0.7137  | 6.0638 | YRI |
| FLJ46603  | GI_38348363-S | rs2429452  | 17 | 17 | 72256609 | 69100 | 6.4979  | 0.3542 | 0.6270  | 6.0638 | YRI |
| FLJ46603  | GI_38348363-S | rs116719   | 17 | 17 | 72261926 | 74417 | 7.0103  | 0.3793 | -0.6601 | 6.0638 | YRI |
| USP36     | GI_35250685-S | rs8071632  | 17 | 17 | 74222797 | 72476 | 7.5273  | 0.4147 | -0.3120 | 6.3651 | YRI |
| USP36     | GI_35250685-S | rs16971660 | 17 | 17 | 74223282 | 71991 | 7.4909  | 0.4020 | -0.3125 | 6.3651 | YRI |
| USP36     | GI_35250685-S | rs12950520 | 17 | 17 | 74224894 | 70379 | 7.0875  | 0.3830 | 0.2982  | 6.3651 | YRI |
| USP36     | GI_35250685-S | rs12951261 | 17 | 17 | 74224911 | 70362 | 7.4312  | 0.4102 | 0.3158  | 6.3651 | YRI |
| USP36     | GI_35250685-S | rs6501240  | 17 | 17 | 74225897 | 69376 | 6.9394  | 0.3759 | 0.3263  | 6.3651 | YRI |
| USP36     | GI_35250685-S | rs16966859 | 17 | 17 | 74227156 | 68117 | 7.4909  | 0.4020 | -0.3125 | 6.3651 | YRI |
| USP36     | GI_35250685-S | rs7219351  | 17 | 17 | 74230149 | 65124 | 6.4986  | 0.3543 | 0.2817  | 6.3651 | YRI |
| USP36     | GI_35250685-S | rs8068876  | 17 | 17 | 74232404 | 62869 | 7.4909  | 0.4020 | 0.3125  | 6.3651 | YRI |
| USP36     | GI_35250685-S | rs16971666 | 17 | 17 | 74234781 | 60492 | 6.7306  | 0.3658 | -0.2950 | 6.3651 | YRI |
| USP36     | GI_35250685-S | rs16971669 | 17 | 17 | 74243933 | 51340 | 7.2428  | 0.4012 | -0.3117 | 6.3651 | YRI |
| USP36     | GI_35250685-S | rs12943994 | 17 | 17 | 74249139 | 46134 | 6.7306  | 0.3658 | 0.2950  | 6.3651 | YRI |
| USP36     | GI_35250685-S | rs6501248  | 17 | 17 | 74267767 | 27506 | 8.3585  | 0.4411 | 0.3585  | 6.3651 | YRI |
| raptor    | GI_22094986-S | rs7211288  | 17 | 17 | 76544134 | 10281 | 6.9714  | 0.4170 | -0.1647 | 5.7279 | YRI |
| raptor    | GI_22094986-S | rs1062935  | 17 | 17 | 76554452 | 37    | 6.5294  | 0.3558 | 0.2710  | 5.7279 | YRI |
| LOC339229 | GI_41150782-S | rs7502869  | 17 | 17 | 77241821 | 974   | 8.2983  | 0.4384 | 0.3149  | 5.8677 | YRI |
| LOC339231 | GI_29739147-S | rs6565619  | 17 | 17 | 77256301 | 2636  | 5.9239  | 0.3250 | 0.2615  | 5.5878 | YRI |
| LOC339231 | GI_29739147-S | rs6565620  | 17 | 17 | 77268505 | 9568  | 7.1162  | 0.3844 | -0.3072 | 5.5878 | YRI |
| CSNK1D    | GI_20544143-A | rs7215409  | 17 | 17 | 77788066 | 7554  | 8.3863  | 0.4599 | -0.2283 | 6.0702 | YRI |
| CSNK1D    | GI_20544143-A | rs1131633  | 17 | 17 | 77790638 | 4982  | 9.1515  | 0.4805 | -0.2603 | 6.0702 | YRI |
| CSNK1D    | GI_20544143-A | rs7213159  | 17 | 17 | 77816337 | 20717 | 7.1187  | 0.3898 | -0.1978 | 6.0702 | YRI |
| NARF      | GI_14165459-A | rs4789773  | 17 | 17 | 77984973 | 54139 | 6.0059  | 0.3292 | -0.1909 | 5.6786 | YRI |
| RAB40B    | GI_5803162-S  | rs11869135 | 17 | 17 | 78126062 | 82844 | 8.0632  | 0.4395 | -0.6380 | 6.8742 | YRI |
| LOC400642 | GI_42661344-S | rs8092760  | 18 | 18 | 5231500  | 4851  | 19.0304 | 0.7704 | 0.5709  | 6.201  | YRI |
| LOC400642 | GI_42661344-S | rs8084872  | 18 | 18 | 5233567  | 2784  | 7.2304  | 0.4302 | 0.4181  | 6.201  | YRI |
| LOC400642 | GI_42661344-S | rs11877479 | 18 | 18 | 5235228  | 1123  | 10.8701 | 0.5406 | 0.7384  | 6.201  | YRI |

|           |               |            |    |    |          |        |         |        |         |        |     |
|-----------|---------------|------------|----|----|----------|--------|---------|--------|---------|--------|-----|
| LOC400642 | GI_42661344-S | rs11877315 | 18 | 18 | 5235247  | 1104   | 10.0283 | 0.5155 | -0.7168 | 6.201  | YRI |
| LOC400642 | GI_42661344-S | rs17379984 | 18 | 18 | 5235824  | 527    | 10.8701 | 0.5406 | -0.7384 | 6.201  | YRI |
| LOC400642 | GI_42661344-S | rs8576     | 18 | 18 | 5236398  | 47     | 7.5979  | 0.4070 | 0.4122  | 6.201  | YRI |
| LOC400642 | GI_42661344-S | rs9948693  | 18 | 18 | 5237432  | 1081   | 7.5979  | 0.4070 | 0.4122  | 6.201  | YRI |
| RALBP1    | GI_21361362-S | rs16955185 | 18 | 18 | 9524960  | 3045   | 9.4653  | 0.4873 | 0.3800  | 6.3244 | YRI |
| RALBP1    | GI_21361362-S | rs16955209 | 18 | 18 | 9528425  | 420    | 11.4408 | 0.5607 | 0.3931  | 6.3244 | YRI |
| RALBP1    | GI_21361362-S | rs16955215 | 18 | 18 | 9528483  | 478    | 11.4408 | 0.5607 | 0.3931  | 6.3244 | YRI |
| RALBP1    | GI_21361362-S | rs16955235 | 18 | 18 | 9528981  | 976    | 11.4408 | 0.5607 | 0.3931  | 6.3244 | YRI |
| RALBP1    | GI_21361362-S | rs7231567  | 18 | 18 | 9529544  | 1539   | 11.4408 | 0.5607 | 0.3931  | 6.3244 | YRI |
| RALBP1    | GI_21361362-S | rs16955256 | 18 | 18 | 9530042  | 2037   | 11.4408 | 0.5607 | 0.3931  | 6.3244 | YRI |
| RALBP1    | GI_21361362-S | rs16955261 | 18 | 18 | 9530388  | 2383   | 11.4408 | 0.5607 | 0.3931  | 6.3244 | YRI |
| RAB31     | GI_33589860-S | rs1893126  | 18 | 18 | 9702098  | 150233 | 8.5404  | 0.4489 | 0.7041  | 6.5349 | YRI |
| SIAT8E    | GI_28373100-S | rs12457104 | 18 | 18 | 42587877 | 74587  | 10.1978 | 0.5158 | 0.3792  | 6.5646 | YRI |
| SIAT8E    | GI_28373100-S | rs3809958  | 18 | 18 | 42591684 | 78394  | 10.1978 | 0.5158 | -0.3792 | 6.5646 | YRI |
| SIAT8E    | GI_28373100-S | rs3897629  | 18 | 18 | 42594084 | 80794  | 10.1978 | 0.5158 | -0.3792 | 6.5646 | YRI |
| SIAT8E    | GI_28373100-S | rs8085750  | 18 | 18 | 42596223 | 82933  | 9.4522  | 0.5052 | -0.3824 | 6.5646 | YRI |
| SIAT8E    | GI_28373100-S | rs8087201  | 18 | 18 | 42596473 | 83183  | 10.1978 | 0.5158 | 0.3792  | 6.5646 | YRI |
| MALT1     | GI_27886565-A | rs7227586  | 18 | 18 | 54516958 | 51162  | 6.4047  | 0.3496 | -0.2551 | 5.9883 | YRI |
| MALT1     | GI_27886565-A | rs9961487  | 18 | 18 | 54522612 | 45508  | 6.1571  | 0.3468 | 0.2324  | 5.9883 | YRI |
| MALT1     | GI_27886565-A | rs9952213  | 18 | 18 | 54550359 | 17761  | 6.1686  | 0.3631 | -0.2383 | 5.9883 | YRI |
| SERPINB10 | GI_4826901-S  | rs1916660  | 18 | 18 | 59719849 | 33343  | 6.7862  | 0.3788 | 0.8151  | 6.3363 | YRI |
| SERPINB10 | GI_4826901-S  | rs1015416  | 18 | 18 | 59720363 | 32829  | 7.3360  | 0.4002 | -0.8557 | 6.3363 | YRI |
| SERPINB10 | GI_4826901-S  | rs9966367  | 18 | 18 | 59728271 | 24921  | 7.5991  | 0.4070 | 0.9627  | 6.3363 | YRI |
| SERPINB10 | GI_4826901-S  | rs12327162 | 18 | 18 | 59731189 | 22003  | 7.5991  | 0.4070 | -0.9627 | 6.3363 | YRI |
| SERPINB10 | GI_4826901-S  | rs7241748  | 18 | 18 | 59733108 | 20084  | 7.5991  | 0.4070 | -0.9627 | 6.3363 | YRI |
| SERPINB10 | GI_4826901-S  | rs9320033  | 18 | 18 | 59735962 | 17230  | 7.9427  | 0.4283 | 0.9851  | 6.3363 | YRI |
| SERPINB10 | GI_4826901-S  | rs8085490  | 18 | 18 | 59737365 | 15827  | 7.5991  | 0.4070 | -0.9627 | 6.3363 | YRI |
| SERPINB10 | GI_4826901-S  | rs8099238  | 18 | 18 | 59737617 | 15575  | 7.5991  | 0.4070 | 0.9627  | 6.3363 | YRI |
| SERPINB10 | GI_4826901-S  | rs976038   | 18 | 18 | 59738648 | 14544  | 7.5991  | 0.4070 | -0.9627 | 6.3363 | YRI |
| SERPINB10 | GI_4826901-S  | rs2114377  | 18 | 18 | 59743756 | 9436   | 7.5991  | 0.4070 | 0.9627  | 6.3363 | YRI |
| SERPINB10 | GI_4826901-S  | rs9960901  | 18 | 18 | 59744047 | 9145   | 7.5991  | 0.4070 | -0.9627 | 6.3363 | YRI |
| SERPINB10 | GI_4826901-S  | rs8090188  | 18 | 18 | 59744441 | 8751   | 8.2638  | 0.4544 | 1.0238  | 6.3363 | YRI |
| SERPINB10 | GI_4826901-S  | rs8093894  | 18 | 18 | 59744461 | 8731   | 7.5991  | 0.4070 | -0.9627 | 6.3363 | YRI |
| SERPINB10 | GI_4826901-S  | rs8094058  | 18 | 18 | 59744599 | 8593   | 7.5991  | 0.4070 | -0.9627 | 6.3363 | YRI |
| SERPINB10 | GI_4826901-S  | rs8089023  | 18 | 18 | 59744733 | 8459   | 7.5991  | 0.4070 | -0.9627 | 6.3363 | YRI |
| SERPINB10 | GI_4826901-S  | rs3786340  | 18 | 18 | 59748514 | 4678   | 7.5991  | 0.4070 | 0.9627  | 6.3363 | YRI |
| SERPINB10 | GI_4826901-S  | rs10163726 | 18 | 18 | 59748718 | 4474   | 7.5991  | 0.4070 | 0.9627  | 6.3363 | YRI |
| SERPINB10 | GI_4826901-S  | rs9951724  | 18 | 18 | 59749057 | 4135   | 7.5991  | 0.4070 | 0.9627  | 6.3363 | YRI |
| SERPINB10 | GI_4826901-S  | rs1544899  | 18 | 18 | 59749190 | 4002   | 7.5991  | 0.4070 | 0.9627  | 6.3363 | YRI |
| SERPINB10 | GI_4826901-S  | rs1544898  | 18 | 18 | 59749429 | 3763   | 7.5991  | 0.4070 | -0.9627 | 6.3363 | YRI |
| SERPINB10 | GI_4826901-S  | rs8096543  | 18 | 18 | 59750024 | 3168   | 7.2244  | 0.3949 | -0.9433 | 6.3363 | YRI |
| SERPINB10 | GI_4826901-S  | rs4630651  | 18 | 18 | 59750481 | 2711   | 7.5991  | 0.4070 | -0.9627 | 6.3363 | YRI |
| SERPINB10 | GI_4826901-S  | rs9964049  | 18 | 18 | 59751066 | 2126   | 7.5991  | 0.4070 | 0.9627  | 6.3363 | YRI |
| SERPINB10 | GI_4826901-S  | rs963075   | 18 | 18 | 59751364 | 1828   | 7.5991  | 0.4070 | -0.9627 | 6.3363 | YRI |
| LOC284293 | GI_27485378-S | rs9945924  | 18 | 18 | 59771746 | 160    | 25.5658 | 0.8559 | 1.1534  | 6.2479 | YRI |
| LOC284293 | GI_27485378-S | rs8090046  | 18 | 18 | 59773066 | 1480   | 24.8180 | 0.8521 | 1.1507  | 6.2479 | YRI |
| LOC284293 | GI_27485378-S | rs8095151  | 18 | 18 | 59773196 | 1610   | 11.8689 | 0.5753 | -1.0250 | 6.2479 | YRI |
| LOC284293 | GI_27485378-S | rs9963550  | 18 | 18 | 59779238 | 7652   | 10.1333 | 0.5195 | 0.9790  | 6.2479 | YRI |
| LOC284293 | GI_27485378-S | rs9949621  | 18 | 18 | 59780377 | 8791   | 8.6839  | 0.4550 | 1.0131  | 6.2479 | YRI |
| LOC284293 | GI_27485378-S | rs9950903  | 18 | 18 | 59781783 | 10197  | 8.6839  | 0.4550 | -1.0131 | 6.2479 | YRI |
| LOC284293 | GI_27485378-S | rs8090586  | 18 | 18 | 59781864 | 10278  | 8.6839  | 0.4550 | 1.0131  | 6.2479 | YRI |
| LOC284293 | GI_27485378-S | rs1006755  | 18 | 18 | 59782026 | 10440  | 8.6839  | 0.4550 | 1.0131  | 6.2479 | YRI |
| LOC284293 | GI_27485378-S | rs1006754  | 18 | 18 | 59782427 | 10841  | 8.4459  | 0.4952 | 0.9487  | 6.2479 | YRI |
| LOC284293 | GI_27485378-S | rs2009989  | 18 | 18 | 59784224 | 12638  | 10.3684 | 0.5222 | -0.9679 | 6.2479 | YRI |
| MRPL54    | GI_27436907-S | rs12459781 | 19 | 19 | 3713119  | 3187   | 6.9559  | 0.3767 | -0.1817 | 5.8061 | YRI |
| MRPL54    | GI_27436907-S | rs13960    | 19 | 19 | 3713698  | 2608   | 8.0747  | 0.4342 | 0.1940  | 5.8061 | YRI |
| DAPK3     | GI_4557510-S  | rs2278438  | 19 | 19 | 3915106  | 5361   | 7.5391  | 0.4043 | -0.1548 | 5.6322 | YRI |
| DAPK3     | GI_4557510-S  | rs8113281  | 19 | 19 | 3917132  | 7387   | 7.5391  | 0.4043 | -0.1548 | 5.6322 | YRI |
| MAP2K2    | GI_21614527-S | rs350911   | 19 | 19 | 4050187  | 8814   | 6.2768  | 0.3431 | -0.2645 | 6.1873 | YRI |

|           |               |            |    |    |          |        |         |        |         |        |     |
|-----------|---------------|------------|----|----|----------|--------|---------|--------|---------|--------|-----|
| ZNF557    | GI_13236592-S | rs2115475  | 19 | 19 | 7039333  | 5026   | 6.5680  | 0.3627 | 0.1381  | 5.7875 | YRI |
| ZNF266    | GI_37622342-A | rs2033482  | 19 | 19 | 9279184  | 105156 | 6.3649  | 0.3476 | -0.1891 | 5.976  | YRI |
| ZNF266    | GI_37622342-A | rs8112682  | 19 | 19 | 9282296  | 102044 | 6.0594  | 0.3417 | 0.1889  | 5.976  | YRI |
| ZNF266    | GI_37622342-A | rs11883244 | 19 | 19 | 9329222  | 55118  | 7.2122  | 0.3997 | 0.2173  | 5.976  | YRI |
| ZNF266    | GI_37622342-A | rs7249948  | 19 | 19 | 9335688  | 48652  | 6.9216  | 0.3802 | -0.2078 | 5.976  | YRI |
| ZNF266    | GI_37622342-A | rs11086019 | 19 | 19 | 9336416  | 47924  | 6.9963  | 0.3787 | -0.2083 | 5.976  | YRI |
| ZNF266    | GI_37622342-A | rs13344979 | 19 | 19 | 9337553  | 46787  | 6.9963  | 0.3787 | -0.2083 | 5.976  | YRI |
| ZNF266    | GI_37622342-A | rs10426170 | 19 | 19 | 9340577  | 43763  | 7.3351  | 0.4056 | 0.2178  | 5.976  | YRI |
| ZNF266    | GI_37622342-A | rs10416984 | 19 | 19 | 9343310  | 41030  | 7.3838  | 0.4024 | -0.2226 | 5.976  | YRI |
| ZNF266    | GI_37622342-A | rs8103099  | 19 | 19 | 9346229  | 38111  | 8.3404  | 0.4518 | 0.2106  | 5.976  | YRI |
| ZNF266    | GI_37622342-A | rs1347166  | 19 | 19 | 9348808  | 35532  | 9.7934  | 0.5003 | -0.2457 | 5.976  | YRI |
| ZNF266    | GI_37622342-A | rs10416662 | 19 | 19 | 9349178  | 35162  | 7.4497  | 0.4001 | -0.2174 | 5.976  | YRI |
| ZNF266    | GI_37622342-A | rs2304110  | 19 | 19 | 9350132  | 34208  | 9.7934  | 0.5003 | -0.2457 | 5.976  | YRI |
| ZNF266    | GI_37622342-A | rs3826783  | 19 | 19 | 9353141  | 31199  | 9.7934  | 0.5003 | 0.2457  | 5.976  | YRI |
| ZNF266    | GI_37622342-A | rs2230752  | 19 | 19 | 9353370  | 30970  | 9.6370  | 0.5002 | 0.2457  | 5.976  | YRI |
| ZNF266    | GI_37622342-A | rs2163809  | 19 | 19 | 9357994  | 26346  | 8.0800  | 0.4714 | 0.2385  | 5.976  | YRI |
| ZNF266    | GI_37622342-A | rs8112842  | 19 | 19 | 9359315  | 25025  | 9.7934  | 0.5003 | 0.2457  | 5.976  | YRI |
| ZNF266    | GI_37622342-A | rs7246082  | 19 | 19 | 9365006  | 19334  | 9.7934  | 0.5003 | -0.2457 | 5.976  | YRI |
| ZNF266    | GI_37622342-A | rs7257650  | 19 | 19 | 9365101  | 19239  | 8.9928  | 0.4800 | 0.2350  | 5.976  | YRI |
| ZNF266    | GI_37622342-A | rs2335532  | 19 | 19 | 9365598  | 18742  | 9.7934  | 0.5003 | -0.2457 | 5.976  | YRI |
| ZNF266    | GI_37622342-A | rs2335938  | 19 | 19 | 9367269  | 17071  | 9.7934  | 0.5003 | -0.2457 | 5.976  | YRI |
| ZNF266    | GI_37622342-A | rs12150994 | 19 | 19 | 9369228  | 15112  | 9.1370  | 0.4799 | -0.2344 | 5.976  | YRI |
| ZNF266    | GI_37622342-A | rs4804436  | 19 | 19 | 9376200  | 8140   | 9.8306  | 0.5017 | -0.2415 | 5.976  | YRI |
| ZNF266    | GI_37622342-A | rs11878970 | 19 | 19 | 9378537  | 5803   | 7.2239  | 0.4640 | 0.2321  | 5.976  | YRI |
| ZNF266    | GI_37622342-A | rs8108167  | 19 | 19 | 9379331  | 5009   | 7.3281  | 0.4053 | -0.2095 | 5.976  | YRI |
| ZNF266    | GI_37622342-A | rs6512108  | 19 | 19 | 9379670  | 4670   | 9.8306  | 0.5017 | -0.2415 | 5.976  | YRI |
| ZNF266    | GI_37622342-A | rs8109962  | 19 | 19 | 9383388  | 952    | 9.1618  | 0.4750 | 0.2311  | 5.976  | YRI |
| ZNF266    | GI_37622342-A | rs8105020  | 19 | 19 | 9383477  | 863    | 9.1618  | 0.4750 | -0.2311 | 5.976  | YRI |
| ZNF266    | GI_37622342-A | rs6512110  | 19 | 19 | 9383724  | 616    | 9.1618  | 0.4750 | 0.2311  | 5.976  | YRI |
| ZNF266    | GI_37622342-A | rs7258150  | 19 | 19 | 9387017  | 2677   | 7.5153  | 0.4142 | -0.2093 | 5.976  | YRI |
| ZNF266    | GI_37622342-A | rs1978713  | 19 | 19 | 9390783  | 6443   | 9.1618  | 0.4750 | 0.2311  | 5.976  | YRI |
| ZNF266    | GI_37622342-A | rs1978711  | 19 | 19 | 9391081  | 6741   | 8.7497  | 0.4821 | 0.2422  | 5.976  | YRI |
| ZNF266    | GI_37622342-A | rs11880207 | 19 | 19 | 9392693  | 8353   | 7.0783  | 0.4563 | 0.2424  | 5.976  | YRI |
| ZNF266    | GI_37622342-A | rs6512121  | 19 | 19 | 9394805  | 10465  | 9.1618  | 0.4750 | 0.2311  | 5.976  | YRI |
| ZNF266    | GI_37622342-A | rs7254750  | 19 | 19 | 9395301  | 10961  | 7.8470  | 0.4184 | 0.1986  | 5.976  | YRI |
| ZNF266    | GI_37622342-A | rs2335939  | 19 | 19 | 9395790  | 11450  | 7.7835  | 0.4155 | -0.1957 | 5.976  | YRI |
| ZNF266    | GI_37622342-A | rs7258744  | 19 | 19 | 9395967  | 11627  | 7.6141  | 0.4188 | -0.1986 | 5.976  | YRI |
| ZNF266    | GI_37622342-A | rs7246415  | 19 | 19 | 9395981  | 11641  | 7.7835  | 0.4155 | 0.1957  | 5.976  | YRI |
| ZNF266    | GI_37622342-A | rs10411141 | 19 | 19 | 9397203  | 12863  | 7.7537  | 0.4196 | -0.1989 | 5.976  | YRI |
| ZNF266    | GI_37622342-A | rs10406056 | 19 | 19 | 9397418  | 13078  | 7.6858  | 0.4165 | 0.1995  | 5.976  | YRI |
| ZNF266    | GI_37622342-A | rs7252370  | 19 | 19 | 9398191  | 13851  | 9.0167  | 0.4749 | -0.2310 | 5.976  | YRI |
| ZNF266    | GI_37622342-A | rs8107606  | 19 | 19 | 9400522  | 16182  | 9.0144  | 0.4748 | 0.2311  | 5.976  | YRI |
| ZNF266    | GI_37622342-A | rs9305082  | 19 | 19 | 9401524  | 17184  | 9.1618  | 0.4750 | -0.2311 | 5.976  | YRI |
| ZNF266    | GI_37622342-A | rs10404268 | 19 | 19 | 9402640  | 18300  | 9.0167  | 0.4749 | 0.2310  | 5.976  | YRI |
| ZNF266    | GI_37622342-A | rs9676745  | 19 | 19 | 9403342  | 19002  | 9.1618  | 0.4750 | -0.2311 | 5.976  | YRI |
| ZNF266    | GI_37622342-A | rs10409256 | 19 | 19 | 9404830  | 20490  | 9.0995  | 0.4784 | 0.2314  | 5.976  | YRI |
| PRKCL1    | GI_42476156-S | rs2241357  | 19 | 19 | 14451919 | 9297   | 7.2313  | 0.3899 | -0.3489 | 5.8932 | YRI |
| ZNF253    | GI_10567821-S | rs7254125  | 19 | 19 | 19897615 | 33001  | 6.1635  | 0.3374 | -0.2065 | 5.9587 | YRI |
| LOC199777 | GI_21699081-S | rs8100147  | 19 | 19 | 20613255 | 6823   | 7.0682  | 0.3821 | -0.4576 | 5.8097 | YRI |
| LOC199777 | GI_21699081-S | rs10413287 | 19 | 19 | 20636232 | 16154  | 6.7630  | 0.3673 | 0.4706  | 5.8097 | YRI |
| LOC199777 | GI_21699081-S | rs10413663 | 19 | 19 | 20636317 | 16239  | 6.6787  | 0.3683 | 0.4729  | 5.8097 | YRI |
| LOC199777 | GI_21699081-S | rs2115097  | 19 | 19 | 20682138 | 62060  | 6.2199  | 0.3402 | 0.4240  | 5.8097 | YRI |
| ZNF85     | GI_4508038-S  | rs2547130  | 19 | 19 | 20834838 | 90363  | 8.2413  | 0.4474 | -0.8657 | 6.1791 | YRI |
| ZNF85     | GI_4508038-S  | rs2547129  | 19 | 19 | 20834999 | 90202  | 8.2416  | 0.4416 | -0.8174 | 6.1791 | YRI |
| ZNF85     | GI_4508038-S  | rs10454111 | 19 | 19 | 20904788 | 20413  | 12.0409 | 0.5810 | -0.7747 | 6.1791 | YRI |
| ZNF85     | GI_4508038-S  | rs11085405 | 19 | 19 | 20906969 | 18232  | 7.2693  | 0.3970 | -0.5911 | 6.1791 | YRI |
| ZNF85     | GI_4508038-S  | rs11667715 | 19 | 19 | 20907506 | 17695  | 11.1848 | 0.5712 | -0.7763 | 6.1791 | YRI |
| ZNF85     | GI_4508038-S  | rs12162258 | 19 | 19 | 20915759 | 9442   | 7.4011  | 0.3979 | 0.5904  | 6.1791 | YRI |
| ZNF85     | GI_4508038-S  | rs11669193 | 19 | 19 | 20917241 | 7960   | 12.0409 | 0.5810 | 0.7747  | 6.1791 | YRI |

|        |               |            |    |    |          |        |         |        |         |        |     |
|--------|---------------|------------|----|----|----------|--------|---------|--------|---------|--------|-----|
| ZNF85  | GI_4508038-S  | rs11085409 | 19 | 19 | 20921070 | 4131   | 12.0409 | 0.5810 | 0.7747  | 6.1791 | YRI |
| ZNF85  | GI_4508038-S  | rs10454112 | 19 | 19 | 20922094 | 3107   | 12.0409 | 0.5810 | 0.7747  | 6.1791 | YRI |
| ZNF85  | GI_4508038-S  | rs10454115 | 19 | 19 | 20922109 | 3092   | 11.8484 | 0.5810 | 0.7693  | 6.1791 | YRI |
| ZNF85  | GI_4508038-S  | rs17679995 | 19 | 19 | 20922587 | 2614   | 11.2625 | 0.5609 | -0.7740 | 6.1791 | YRI |
| ZNF85  | GI_4508038-S  | rs11085412 | 19 | 19 | 20922800 | 2401   | 8.9321  | 0.4964 | -0.7192 | 6.1791 | YRI |
| ZNF85  | GI_4508038-S  | rs11665978 | 19 | 19 | 20923710 | 1491   | 12.0409 | 0.5810 | 0.7747  | 6.1791 | YRI |
| ZNF85  | GI_4508038-S  | rs11670246 | 19 | 19 | 20923969 | 1232   | 7.2746  | 0.3973 | 0.5937  | 6.1791 | YRI |
| ZNF85  | GI_4508038-S  | rs11672610 | 19 | 19 | 20926103 | 902    | 12.0409 | 0.5810 | 0.7747  | 6.1791 | YRI |
| ZNF85  | GI_4508038-S  | rs11669114 | 19 | 19 | 20926209 | 1008   | 12.0409 | 0.5810 | -0.7747 | 6.1791 | YRI |
| ZNF85  | GI_4508038-S  | rs17618121 | 19 | 19 | 20928636 | 3435   | 7.0493  | 0.3864 | -0.6560 | 6.1791 | YRI |
| ZNF85  | GI_4508038-S  | rs17618139 | 19 | 19 | 20929176 | 3975   | 12.0409 | 0.5810 | 0.7747  | 6.1791 | YRI |
| ZNF85  | GI_4508038-S  | rs17680052 | 19 | 19 | 20929868 | 4667   | 9.2814  | 0.4799 | -0.6832 | 6.1791 | YRI |
| ZNF85  | GI_4508038-S  | rs20422268 | 19 | 19 | 20937234 | 12033  | 6.6809  | 0.3633 | -0.3327 | 6.1791 | YRI |
| ZNF85  | GI_4508038-S  | rs2161464  | 19 | 19 | 20937796 | 12595  | 6.6809  | 0.3633 | 0.3327  | 6.1791 | YRI |
| ZNF85  | GI_4508038-S  | rs1004397  | 19 | 19 | 20938183 | 12982  | 6.3351  | 0.3560 | 0.3294  | 6.1791 | YRI |
| ZNF493 | GI_40255231-S | rs7252759  | 19 | 19 | 21243405 | 157349 | 6.9925  | 0.3945 | 0.1235  | 5.7794 | YRI |
| ZNF493 | GI_40255231-S | rs2061915  | 19 | 19 | 21250873 | 149881 | 7.4906  | 0.4020 | -0.1253 | 5.7794 | YRI |
| ZNF493 | GI_40255231-S | rs279797   | 19 | 19 | 21254099 | 146655 | 6.7923  | 0.3901 | -0.1221 | 5.7794 | YRI |
| ZNF493 | GI_40255231-S | rs279813   | 19 | 19 | 21260156 | 140598 | 7.4636  | 0.4008 | -0.1245 | 5.7794 | YRI |
| ZNF493 | GI_40255231-S | rs11085441 | 19 | 19 | 21265577 | 135177 | 6.7091  | 0.3859 | 0.1200  | 5.7794 | YRI |
| ZNF493 | GI_40255231-S | rs488125   | 19 | 19 | 21266013 | 134741 | 6.0504  | 0.3315 | -0.1794 | 5.7794 | YRI |
| ZNF493 | GI_40255231-S | rs504280   | 19 | 19 | 21269219 | 131535 | 6.0504  | 0.3315 | 0.1794  | 5.7794 | YRI |
| ZNF493 | GI_40255231-S | rs1781873  | 19 | 19 | 21269271 | 131483 | 6.1977  | 0.3391 | 0.1318  | 5.7794 | YRI |
| ZNF493 | GI_40255231-S | rs11085442 | 19 | 19 | 21280804 | 119950 | 6.0290  | 0.3304 | -0.1840 | 5.7794 | YRI |
| ZNF493 | GI_40255231-S | rs8110967  | 19 | 19 | 21332527 | 68227  | 7.0664  | 0.3820 | 0.1258  | 5.7794 | YRI |
| ZNF493 | GI_40255231-S | rs2012013  | 19 | 19 | 21333646 | 67108  | 6.9669  | 0.3824 | 0.1264  | 5.7794 | YRI |
| ZNF493 | GI_40255231-S | rs12975081 | 19 | 19 | 21336082 | 64672  | 7.0664  | 0.3820 | 0.1258  | 5.7794 | YRI |
| ZNF493 | GI_40255231-S | rs12981735 | 19 | 19 | 21336306 | 64448  | 6.7999  | 0.3849 | -0.1280 | 5.7794 | YRI |
| ZNF493 | GI_40255231-S | rs12981564 | 19 | 19 | 21336354 | 64400  | 7.0664  | 0.3820 | -0.1258 | 5.7794 | YRI |
| ZNF493 | GI_40255231-S | rs12982420 | 19 | 19 | 21336411 | 64343  | 7.0664  | 0.3820 | 0.1258  | 5.7794 | YRI |
| ZNF493 | GI_40255231-S | rs12982282 | 19 | 19 | 21336554 | 64200  | 6.8575  | 0.3771 | -0.1229 | 5.7794 | YRI |
| ZNF493 | GI_40255231-S | rs7508671  | 19 | 19 | 21338702 | 62052  | 6.7980  | 0.3904 | -0.1385 | 5.7794 | YRI |
| ZNF493 | GI_40255231-S | rs4315457  | 19 | 19 | 21338863 | 61891  | 7.0664  | 0.3820 | 0.1258  | 5.7794 | YRI |
| ZNF493 | GI_40255231-S | rs8103325  | 19 | 19 | 21340051 | 60703  | 6.4031  | 0.3701 | -0.1217 | 5.7794 | YRI |
| ZNF493 | GI_40255231-S | rs8103459  | 19 | 19 | 21340166 | 60588  | 5.8159  | 0.3387 | -0.1395 | 5.7794 | YRI |
| ZNF493 | GI_40255231-S | rs8099940  | 19 | 19 | 21345938 | 54816  | 6.6150  | 0.3703 | 0.1215  | 5.7794 | YRI |
| ZNF493 | GI_40255231-S | rs2088762  | 19 | 19 | 21349675 | 51079  | 5.8445  | 0.3563 | -0.1193 | 5.7794 | YRI |
| ZNF493 | GI_40255231-S | rs8111189  | 19 | 19 | 21350376 | 50378  | 6.0290  | 0.3304 | 0.1840  | 5.7794 | YRI |
| ZNF493 | GI_40255231-S | rs11085447 | 19 | 19 | 21360939 | 39815  | 6.8763  | 0.3780 | -0.1253 | 5.7794 | YRI |
| ZNF493 | GI_40255231-S | rs17680671 | 19 | 19 | 21368403 | 32351  | 6.0290  | 0.3304 | -0.1840 | 5.7794 | YRI |
| ZNF493 | GI_40255231-S | rs7257857  | 19 | 19 | 21371378 | 29376  | 6.7888  | 0.3686 | 0.1196  | 5.7794 | YRI |
| ZNF493 | GI_40255231-S | rs8107999  | 19 | 19 | 21378076 | 22678  | 6.0290  | 0.3304 | -0.1840 | 5.7794 | YRI |
| ZNF493 | GI_40255231-S | rs7249412  | 19 | 19 | 21378637 | 22117  | 6.7888  | 0.3686 | -0.1196 | 5.7794 | YRI |
| ZNF493 | GI_40255231-S | rs12981869 | 19 | 19 | 21378990 | 21764  | 6.0290  | 0.3304 | -0.1840 | 5.7794 | YRI |
| ZNF493 | GI_40255231-S | rs1055753  | 19 | 19 | 21380532 | 20222  | 6.3605  | 0.3573 | 0.1175  | 5.7794 | YRI |
| ZNF493 | GI_40255231-S | rs6511239  | 19 | 19 | 21380966 | 19788  | 7.2256  | 0.3949 | -0.1285 | 5.7794 | YRI |
| ZNF493 | GI_40255231-S | rs12975981 | 19 | 19 | 21383198 | 17556  | 6.0290  | 0.3304 | -0.1840 | 5.7794 | YRI |
| ZNF493 | GI_40255231-S | rs7259311  | 19 | 19 | 21390002 | 10752  | 6.7888  | 0.3686 | -0.1196 | 5.7794 | YRI |
| ZNF493 | GI_40255231-S | rs1012040  | 19 | 19 | 21464254 | 63500  | 5.9698  | 0.3321 | 0.1461  | 5.7794 | YRI |
| ZNF493 | GI_40255231-S | rs2133820  | 19 | 19 | 21465722 | 64968  | 6.3678  | 0.3477 | 0.1476  | 5.7794 | YRI |
| ZNF493 | GI_40255231-S | rs2650791  | 19 | 19 | 21465922 | 65168  | 6.9270  | 0.4086 | -0.1834 | 5.7794 | YRI |
| ZNF493 | GI_40255231-S | rs8100318  | 19 | 19 | 21481849 | 81095  | 6.2396  | 0.3461 | 0.1477  | 5.7794 | YRI |
| ZNF493 | GI_40255231-S | rs2062564  | 19 | 19 | 21483239 | 82485  | 6.3076  | 0.3496 | -0.1496 | 5.7794 | YRI |
| ZNF493 | GI_40255231-S | rs1984771  | 19 | 19 | 21483637 | 82883  | 6.1611  | 0.3420 | -0.1697 | 5.7794 | YRI |
| ZNF493 | GI_40255231-S | rs2650757  | 19 | 19 | 21495385 | 94631  | 6.3678  | 0.3477 | 0.1476  | 5.7794 | YRI |
| ZNF493 | GI_40255231-S | rs2681366  | 19 | 19 | 21495943 | 95189  | 7.4862  | 0.4072 | -0.1728 | 5.7794 | YRI |
| ZNF493 | GI_40255231-S | rs8110814  | 19 | 19 | 21496685 | 95931  | 6.5732  | 0.3580 | 0.1486  | 5.7794 | YRI |
| ZNF493 | GI_40255231-S | rs1607664  | 19 | 19 | 21497820 | 97066  | 6.3678  | 0.3477 | -0.1476 | 5.7794 | YRI |
| ZNF493 | GI_40255231-S | rs2562470  | 19 | 19 | 21506996 | 106242 | 6.3678  | 0.3477 | 0.1476  | 5.7794 | YRI |

|              |               |            |    |    |          |        |         |        |         |        |     |
|--------------|---------------|------------|----|----|----------|--------|---------|--------|---------|--------|-----|
| ZNF493       | GI_40255231-S | rs10406824 | 19 | 19 | 21513329 | 112575 | 6.3076  | 0.3496 | -0.1496 | 5.7794 | YRI |
| ZNF493       | GI_40255231-S | rs2562399  | 19 | 19 | 21514674 | 113920 | 6.3678  | 0.3477 | -0.1476 | 5.7794 | YRI |
| FLJ32191     | GI_34303923-S | rs1624293  | 19 | 19 | 42162844 | 149391 | 5.7472  | 0.3508 | -0.2314 | 5.4716 | YRI |
| FLJ32191     | GI_34303923-S | rs1623097  | 19 | 19 | 42165082 | 147153 | 5.8566  | 0.3309 | -0.2120 | 5.4716 | YRI |
| FLJ32191     | GI_34303923-S | rs1667351  | 19 | 19 | 42169867 | 142368 | 5.8229  | 0.3442 | -0.2075 | 5.4716 | YRI |
| FLJ32191     | GI_34303923-S | rs2547049  | 19 | 19 | 42174657 | 137578 | 5.7914  | 0.3181 | -0.2066 | 5.4716 | YRI |
| FLJ32191     | GI_34303923-S | rs1628959  | 19 | 19 | 42182216 | 130019 | 6.0853  | 0.3333 | 0.2115  | 5.4716 | YRI |
| FLJ32191     | GI_34303923-S | rs1644702  | 19 | 19 | 42183747 | 128488 | 6.4595  | 0.3523 | -0.2090 | 5.4716 | YRI |
| MRPS12       | GI_11056055-I | rs2304115  | 19 | 19 | 44113544 | 169    | 10.1464 | 0.5200 | 0.2715  | 5.9614 | YRI |
| MRPS12       | GI_11056055-I | rs16972885 | 19 | 19 | 44113591 | 122    | 11.6486 | 0.5678 | 0.2764  | 5.9614 | YRI |
| MRPS12       | GI_11056055-I | rs2304116  | 19 | 19 | 44113660 | 53     | 10.8265 | 0.5453 | -0.2726 | 5.9614 | YRI |
| MRPS12       | GI_11056055-I | rs2070250  | 19 | 19 | 44113768 | 55     | 10.8265 | 0.5453 | -0.2726 | 5.9614 | YRI |
| MRPS12       | GI_11056055-I | rs6508826  | 19 | 19 | 44117562 | 3849   | 9.3232  | 0.4876 | -0.2543 | 5.9614 | YRI |
| DKFZp434H247 | GI_37552078-S | rs1057745  | 19 | 19 | 44580230 | 174    | 6.1158  | 0.3349 | -0.2035 | 5.7549 | YRI |
| RPS16        | GI_34335151-S | rs17626    | 19 | 19 | 44618361 | 51     | 7.6124  | 0.4131 | 0.3077  | 5.9501 | YRI |
| RPS16        | GI_34335151-S | rs530411   | 19 | 19 | 44619380 | 968    | 7.0067  | 0.3844 | -0.2818 | 5.9501 | YRI |
| FCGBP        | GI_4503680-S  | rs17796901 | 19 | 19 | 45226477 | 180607 | 6.7164  | 0.3651 | -0.3595 | 6.6564 | YRI |
| FCGBP        | GI_4503680-S  | rs2767607  | 19 | 19 | 45302993 | 257123 | 6.9451  | 0.3814 | -0.3622 | 6.6564 | YRI |
| R29124_1     | GI_16117774-S | rs3745936  | 19 | 19 | 46784655 | 7052   | 8.9995  | 0.4803 | 0.2740  | 5.9667 | YRI |
| MGC2650      | GI_13129119-S | rs7246892  | 19 | 19 | 49620508 | 737621 | 6.6222  | 0.3760 | 0.4620  | 5.9206 | YRI |
| FLJ10781     | GI_39780596-S | rs10424030 | 19 | 19 | 51655667 | 6101   | 7.5117  | 0.4197 | 0.7061  | 7.1291 | YRI |
| PRRG2        | GI_4506136-S  | rs11878999 | 19 | 19 | 54809873 | 23894  | 7.2221  | 0.3894 | 0.5663  | 5.7904 | YRI |
| ZFP100       | GI_27485310-S | rs722121   | 19 | 19 | 55171976 | 71648  | 13.7606 | 0.6339 | -0.2467 | 6.5158 | YRI |
| VRK3         | GI_31982928-S | rs722121   | 19 | 19 | 55171976 | 331    | 5.6490  | 0.3106 | -0.1805 | 5.5599 | YRI |
| ZFP100       | GI_27485310-S | rs16981592 | 19 | 19 | 55172521 | 71103  | 13.7606 | 0.6339 | -0.2467 | 6.5158 | YRI |
| VRK3         | GI_31982928-S | rs16981592 | 19 | 19 | 55172521 | 876    | 5.6490  | 0.3106 | -0.1805 | 5.5599 | YRI |
| ZFP100       | GI_27485310-S | rs16981594 | 19 | 19 | 55172579 | 71045  | 12.9155 | 0.6284 | -0.2456 | 6.5158 | YRI |
| VRK3         | GI_31982928-S | rs16981594 | 19 | 19 | 55172579 | 934    | 5.6064  | 0.3222 | -0.1803 | 5.5599 | YRI |
| ZFP100       | GI_27485310-S | rs10416166 | 19 | 19 | 55172966 | 70658  | 11.9380 | 0.5776 | -0.2358 | 6.5158 | YRI |
| VRK3         | GI_31982928-S | rs10416166 | 19 | 19 | 55172966 | 1321   | 5.8706  | 0.3222 | -0.1836 | 5.5599 | YRI |
| ZFP100       | GI_27485310-S | rs205338   | 19 | 19 | 55173096 | 70528  | 13.5360 | 0.6338 | 0.2481  | 6.5158 | YRI |
| ZFP100       | GI_27485310-S | rs10416566 | 19 | 19 | 55173132 | 70492  | 13.3884 | 0.6295 | -0.2462 | 6.5158 | YRI |
| ZFP100       | GI_27485310-S | rs755969   | 19 | 19 | 55173739 | 69885  | 13.7606 | 0.6339 | 0.2467  | 6.5158 | YRI |
| VRK3         | GI_31982928-S | rs755969   | 19 | 19 | 55173739 | 2094   | 5.6490  | 0.3106 | 0.1805  | 5.5599 | YRI |
| ZFP100       | GI_27485310-S | rs16981611 | 19 | 19 | 55174292 | 69332  | 13.3902 | 0.6296 | 0.2571  | 6.5158 | YRI |
| ZFP100       | GI_27485310-S | rs16981613 | 19 | 19 | 55175482 | 68142  | 13.7606 | 0.6339 | -0.2467 | 6.5158 | YRI |
| VRK3         | GI_31982928-S | rs16981613 | 19 | 19 | 55175482 | 3837   | 5.6490  | 0.3106 | -0.1805 | 5.5599 | YRI |
| ZFP100       | GI_27485310-S | rs16981615 | 19 | 19 | 55175864 | 67760  | 13.3902 | 0.6296 | 0.2571  | 6.5158 | YRI |
| ZFP100       | GI_27485310-S | rs16981620 | 19 | 19 | 55176159 | 67465  | 8.9841  | 0.5192 | -0.2470 | 6.5158 | YRI |
| VRK3         | GI_31982928-S | rs16981620 | 19 | 19 | 55176159 | 4514   | 6.5802  | 0.4027 | -0.2719 | 5.5599 | YRI |
| ZFP100       | GI_27485310-S | rs12165126 | 19 | 19 | 55179244 | 64380  | 10.4193 | 0.5304 | -0.2448 | 6.5158 | YRI |
| ZFP100       | GI_27485310-S | rs13382171 | 19 | 19 | 55179633 | 63991  | 13.7606 | 0.6339 | -0.2467 | 6.5158 | YRI |
| VRK3         | GI_31982928-S | rs13382171 | 19 | 19 | 55179633 | 7988   | 5.6490  | 0.3106 | -0.1805 | 5.5599 | YRI |
| ZFP100       | GI_27485310-S | rs10409147 | 19 | 19 | 55181376 | 62248  | 13.7606 | 0.6339 | 0.2467  | 6.5158 | YRI |
| VRK3         | GI_31982928-S | rs10409147 | 19 | 19 | 55181376 | 9731   | 5.6490  | 0.3106 | 0.1805  | 5.5599 | YRI |
| ZFP100       | GI_27485310-S | rs11882374 | 19 | 19 | 55181637 | 61987  | 13.8699 | 0.6435 | -0.2504 | 6.5158 | YRI |
| VRK3         | GI_31982928-S | rs11882374 | 19 | 19 | 55181637 | 9992   | 5.6349  | 0.3143 | -0.1829 | 5.5599 | YRI |
| ZFP100       | GI_27485310-S | rs11879527 | 19 | 19 | 55181773 | 61851  | 13.4211 | 0.6305 | 0.2460  | 6.5158 | YRI |
| ZFP100       | GI_27485310-S | rs11879568 | 19 | 19 | 55181887 | 61737  | 13.7606 | 0.6339 | 0.2467  | 6.5158 | YRI |
| VRK3         | GI_31982928-S | rs11879568 | 19 | 19 | 55181887 | 10242  | 5.6490  | 0.3106 | 0.1805  | 5.5599 | YRI |
| ZFP100       | GI_27485310-S | rs11879639 | 19 | 19 | 55182302 | 61322  | 12.4681 | 0.6012 | 0.2451  | 6.5158 | YRI |
| VRK3         | GI_31982928-S | rs11879639 | 19 | 19 | 55182302 | 10657  | 5.7172  | 0.3187 | 0.1938  | 5.5599 | YRI |
| ZFP100       | GI_27485310-S | rs11879661 | 19 | 19 | 55182351 | 61273  | 13.4403 | 0.6310 | 0.2464  | 6.5158 | YRI |
| ZFP100       | GI_27485310-S | rs11879641 | 19 | 19 | 55182382 | 61242  | 13.7016 | 0.6387 | 0.2488  | 6.5158 | YRI |
| VRK3         | GI_31982928-S | rs11879641 | 19 | 19 | 55182382 | 10737  | 5.5813  | 0.3115 | 0.1816  | 5.5599 | YRI |
| ZFP100       | GI_27485310-S | rs11879713 | 19 | 19 | 55182580 | 61044  | 13.7016 | 0.6387 | -0.2488 | 6.5158 | YRI |
| VRK3         | GI_31982928-S | rs11879713 | 19 | 19 | 55182580 | 10935  | 5.5813  | 0.3115 | -0.1816 | 5.5599 | YRI |
| ZFP100       | GI_27485310-S | rs7254850  | 19 | 19 | 55183842 | 59782  | 13.2108 | 0.6442 | 0.2536  | 6.5158 | YRI |
| ZFP100       | GI_27485310-S | rs7254964  | 19 | 19 | 55183932 | 59692  | 11.3850 | 0.5652 | 0.2048  | 6.5158 | YRI |

|        |               |            |    |    |          |       |         |        |         |        |     |
|--------|---------------|------------|----|----|----------|-------|---------|--------|---------|--------|-----|
| ZFP100 | GI_27485310-S | rs16981637 | 19 | 19 | 55184084 | 59540 | 10.5286 | 0.5473 | 0.2561  | 6.5158 | YRI |
| VRK3   | GI_31982928-S | rs16981637 | 19 | 19 | 55184084 | 12439 | 7.0784  | 0.3988 | 0.2521  | 5.5599 | YRI |
| ZFP100 | GI_27485310-S | rs10418911 | 19 | 19 | 55184563 | 59061 | 9.8986  | 0.5364 | 0.2333  | 6.5158 | YRI |
| ZFP100 | GI_27485310-S | rs10424249 | 19 | 19 | 55184625 | 58999 | 9.8337  | 0.5338 | 0.2543  | 6.5158 | YRI |
| VRK3   | GI_31982928-S | rs10424249 | 19 | 19 | 55184625 | 12980 | 6.8027  | 0.3964 | 0.2558  | 5.5599 | YRI |
| ZFP100 | GI_27485310-S | rs8102461  | 19 | 19 | 55185804 | 57820 | 11.2055 | 0.5787 | -0.2552 | 6.5158 | YRI |
| ZFP100 | GI_27485310-S | rs10406726 | 19 | 19 | 55186297 | 57327 | 13.1033 | 0.6275 | 0.2460  | 6.5158 | YRI |
| ZFP100 | GI_27485310-S | rs10407109 | 19 | 19 | 55186375 | 57249 | 10.1185 | 0.5383 | -0.2555 | 6.5158 | YRI |
| VRK3   | GI_31982928-S | rs10407109 | 19 | 19 | 55186375 | 14730 | 6.9025  | 0.3957 | -0.2543 | 5.5599 | YRI |
| ZFP100 | GI_27485310-S | rs10423200 | 19 | 19 | 55188256 | 55368 | 13.7606 | 0.6339 | -0.2467 | 6.5158 | YRI |
| VRK3   | GI_31982928-S | rs10423200 | 19 | 19 | 55188256 | 16611 | 5.6490  | 0.3106 | -0.1805 | 5.5599 | YRI |
| ZFP100 | GI_27485310-S | rs2304113  | 19 | 19 | 55188298 | 55326 | 7.0993  | 0.3943 | 0.1620  | 6.5158 | YRI |
| ZFP100 | GI_27485310-S | rs9304691  | 19 | 19 | 55188434 | 55190 | 10.6960 | 0.5811 | -0.2608 | 6.5158 | YRI |
| ZFP100 | GI_27485310-S | rs9304695  | 19 | 19 | 55188896 | 54728 | 12.2919 | 0.6155 | 0.2451  | 6.5158 | YRI |
| ZFP100 | GI_27485310-S | rs10409085 | 19 | 19 | 55189799 | 53825 | 12.4681 | 0.6012 | 0.2451  | 6.5158 | YRI |
| VRK3   | GI_31982928-S | rs10409085 | 19 | 19 | 55189799 | 18154 | 5.7172  | 0.3187 | 0.1938  | 5.5599 | YRI |
| ZFP100 | GI_27485310-S | rs10411020 | 19 | 19 | 55189849 | 53775 | 13.3884 | 0.6295 | -0.2462 | 6.5158 | YRI |
| ZFP100 | GI_27485310-S | rs10409482 | 19 | 19 | 55189890 | 53734 | 14.8930 | 0.6847 | 0.2561  | 6.5158 | YRI |
| VRK3   | GI_31982928-S | rs10409482 | 19 | 19 | 55189890 | 18245 | 5.5749  | 0.3205 | 0.1859  | 5.5599 | YRI |
| ZFP100 | GI_27485310-S | rs10410075 | 19 | 19 | 55189950 | 53674 | 13.7606 | 0.6339 | -0.2467 | 6.5158 | YRI |
| VRK3   | GI_31982928-S | rs10410075 | 19 | 19 | 55189950 | 18305 | 5.6490  | 0.3106 | -0.1805 | 5.5599 | YRI |
| ZFP100 | GI_27485310-S | rs9304696  | 19 | 19 | 55190140 | 53484 | 13.7606 | 0.6339 | -0.2467 | 6.5158 | YRI |
| VRK3   | GI_31982928-S | rs9304696  | 19 | 19 | 55190140 | 18495 | 5.6490  | 0.3106 | -0.1805 | 5.5599 | YRI |
| ZFP100 | GI_27485310-S | rs9304697  | 19 | 19 | 55190200 | 53424 | 13.7606 | 0.6339 | -0.2467 | 6.5158 | YRI |
| VRK3   | GI_31982928-S | rs9304697  | 19 | 19 | 55190200 | 18555 | 5.6490  | 0.3106 | -0.1805 | 5.5599 | YRI |
| ZFP100 | GI_27485310-S | rs9304700  | 19 | 19 | 55190447 | 53177 | 13.7606 | 0.6339 | 0.2467  | 6.5158 | YRI |
| VRK3   | GI_31982928-S | rs9304700  | 19 | 19 | 55190447 | 18802 | 5.6490  | 0.3106 | 0.1805  | 5.5599 | YRI |
| ZFP100 | GI_27485310-S | rs11882497 | 19 | 19 | 55191520 | 52104 | 10.9922 | 0.6145 | 0.2324  | 6.5158 | YRI |
| ZFP100 | GI_27485310-S | rs11879616 | 19 | 19 | 55195868 | 47756 | 13.7606 | 0.6339 | -0.2467 | 6.5158 | YRI |
| VRK3   | GI_31982928-S | rs11879616 | 19 | 19 | 55195868 | 24223 | 5.6490  | 0.3106 | -0.1805 | 5.5599 | YRI |
| ZFP100 | GI_27485310-S | rs11879620 | 19 | 19 | 55195909 | 47715 | 13.7606 | 0.6339 | -0.2467 | 6.5158 | YRI |
| VRK3   | GI_31982928-S | rs11879620 | 19 | 19 | 55195909 | 24264 | 5.6490  | 0.3106 | -0.1805 | 5.5599 | YRI |
| ZFP100 | GI_27485310-S | rs3786675  | 19 | 19 | 55198178 | 45446 | 13.7606 | 0.6339 | 0.2467  | 6.5158 | YRI |
| VRK3   | GI_31982928-S | rs3786675  | 19 | 19 | 55198178 | 26533 | 5.6490  | 0.3106 | 0.1805  | 5.5599 | YRI |
| ZFP100 | GI_27485310-S | rs11547883 | 19 | 19 | 55202674 | 40950 | 13.6395 | 0.6434 | 0.2496  | 6.5158 | YRI |
| ZFP100 | GI_27485310-S | rs16981659 | 19 | 19 | 55204128 | 39496 | 13.7606 | 0.6339 | -0.2467 | 6.5158 | YRI |
| VRK3   | GI_31982928-S | rs16981659 | 19 | 19 | 55204128 | 32483 | 5.6490  | 0.3106 | -0.1805 | 5.5599 | YRI |
| ZFP100 | GI_27485310-S | rs10416851 | 19 | 19 | 55205377 | 38247 | 13.5460 | 0.6407 | 0.2504  | 6.5158 | YRI |
| VRK3   | GI_31982928-S | rs10416851 | 19 | 19 | 55205377 | 33732 | 6.0904  | 0.3433 | 0.1822  | 5.5599 | YRI |
| ZFP100 | GI_27485310-S | rs10417044 | 19 | 19 | 55205432 | 38192 | 11.2881 | 0.5555 | 0.2320  | 6.5158 | YRI |
| ZFP100 | GI_27485310-S | rs10418769 | 19 | 19 | 55205447 | 38177 | 13.7606 | 0.6339 | -0.2467 | 6.5158 | YRI |
| VRK3   | GI_31982928-S | rs10418769 | 19 | 19 | 55205447 | 33802 | 5.6490  | 0.3106 | -0.1805 | 5.5599 | YRI |
| ZFP100 | GI_27485310-S | rs10422826 | 19 | 19 | 55205694 | 37930 | 13.7606 | 0.6339 | -0.2467 | 6.5158 | YRI |
| VRK3   | GI_31982928-S | rs10422826 | 19 | 19 | 55205694 | 34049 | 5.6490  | 0.3106 | -0.1805 | 5.5599 | YRI |
| ZFP100 | GI_27485310-S | rs10407227 | 19 | 19 | 55207405 | 36219 | 13.7606 | 0.6339 | -0.2467 | 6.5158 | YRI |
| VRK3   | GI_31982928-S | rs10407227 | 19 | 19 | 55207405 | 35760 | 5.6490  | 0.3106 | -0.1805 | 5.5599 | YRI |
| ZFP100 | GI_27485310-S | rs10407701 | 19 | 19 | 55207616 | 36008 | 13.9877 | 0.6469 | -0.2502 | 6.5158 | YRI |
| VRK3   | GI_31982928-S | rs10407701 | 19 | 19 | 55207616 | 35971 | 5.6225  | 0.3137 | -0.1823 | 5.5599 | YRI |
| ZFP100 | GI_27485310-S | rs10426566 | 19 | 19 | 55209711 | 33913 | 10.7521 | 0.5623 | 0.2406  | 6.5158 | YRI |
| ZFP100 | GI_27485310-S | rs10416786 | 19 | 19 | 55212600 | 31024 | 10.3574 | 0.5542 | 0.2603  | 6.5158 | YRI |
| VRK3   | GI_31982928-S | rs10416786 | 19 | 19 | 55212600 | 40955 | 6.8688  | 0.3997 | 0.2549  | 5.5599 | YRI |
| ZFP100 | GI_27485310-S | rs10423869 | 19 | 19 | 55212695 | 30929 | 12.8246 | 0.6256 | -0.2379 | 6.5158 | YRI |
| ZFP100 | GI_27485310-S | rs10424288 | 19 | 19 | 55212873 | 30751 | 8.6001  | 0.5093 | -0.2475 | 6.5158 | YRI |
| VRK3   | GI_31982928-S | rs10424288 | 19 | 19 | 55212873 | 41228 | 6.6062  | 0.4104 | -0.2439 | 5.5599 | YRI |
| ZFP100 | GI_27485310-S | rs16981691 | 19 | 19 | 55213472 | 30152 | 13.7606 | 0.6339 | 0.2467  | 6.5158 | YRI |
| VRK3   | GI_31982928-S | rs16981691 | 19 | 19 | 55213472 | 41827 | 5.6490  | 0.3106 | 0.1805  | 5.5599 | YRI |
| ZFP100 | GI_27485310-S | rs10500302 | 19 | 19 | 55215534 | 28090 | 13.1717 | 0.6296 | 0.2461  | 6.5158 | YRI |
| ZFP100 | GI_27485310-S | rs10414564 | 19 | 19 | 55217452 | 26172 | 13.7606 | 0.6339 | 0.2467  | 6.5158 | YRI |
| VRK3   | GI_31982928-S | rs10414564 | 19 | 19 | 55217452 | 45807 | 5.6490  | 0.3106 | 0.1805  | 5.5599 | YRI |

|        |               |            |    |    |          |       |         |        |         |        |     |
|--------|---------------|------------|----|----|----------|-------|---------|--------|---------|--------|-----|
| ZFP100 | GI_27485310-S | rs10416182 | 19 | 19 | 55217510 | 26114 | 13.7606 | 0.6339 | -0.2467 | 6.5158 | YRI |
| VRK3   | GI_31982928-S | rs10416182 | 19 | 19 | 55217510 | 45865 | 5.6490  | 0.3106 | -0.1805 | 5.5599 | YRI |
| ZFP100 | GI_27485310-S | rs11880872 | 19 | 19 | 55218855 | 24769 | 13.7606 | 0.6339 | 0.2467  | 6.5158 | YRI |
| VRK3   | GI_31982928-S | rs11880872 | 19 | 19 | 55218855 | 47210 | 5.6490  | 0.3106 | 0.1805  | 5.5599 | YRI |
| ZFP100 | GI_27485310-S | rs10409358 | 19 | 19 | 55219725 | 23899 | 13.7606 | 0.6339 | -0.2467 | 6.5158 | YRI |
| VRK3   | GI_31982928-S | rs10409358 | 19 | 19 | 55219725 | 48080 | 5.6490  | 0.3106 | -0.1805 | 5.5599 | YRI |
| ZFP100 | GI_27485310-S | rs10410818 | 19 | 19 | 55219874 | 23750 | 13.5753 | 0.6416 | -0.2442 | 6.5158 | YRI |
| ZFP100 | GI_27485310-S | rs10411239 | 19 | 19 | 55220045 | 23579 | 13.3345 | 0.6345 | -0.2482 | 6.5158 | YRI |
| ZFP100 | GI_27485310-S | rs10410111 | 19 | 19 | 55220096 | 23528 | 13.7606 | 0.6339 | -0.2467 | 6.5158 | YRI |
| VRK3   | GI_31982928-S | rs10410111 | 19 | 19 | 55220096 | 48451 | 5.6490  | 0.3106 | -0.1805 | 5.5599 | YRI |
| ZFP100 | GI_27485310-S | rs10410420 | 19 | 19 | 55220406 | 23218 | 13.7606 | 0.6339 | 0.2467  | 6.5158 | YRI |
| VRK3   | GI_31982928-S | rs10410420 | 19 | 19 | 55220406 | 48761 | 5.6490  | 0.3106 | 0.1805  | 5.5599 | YRI |
| ZFP100 | GI_27485310-S | rs10412158 | 19 | 19 | 55220508 | 23116 | 13.7157 | 0.6391 | -0.2489 | 6.5158 | YRI |
| ZFP100 | GI_27485310-S | rs10425942 | 19 | 19 | 55222101 | 21523 | 13.7606 | 0.6339 | -0.2467 | 6.5158 | YRI |
| VRK3   | GI_31982928-S | rs10425942 | 19 | 19 | 55222101 | 50456 | 5.6490  | 0.3106 | -0.1805 | 5.5599 | YRI |
| ZFP100 | GI_27485310-S | rs10425282 | 19 | 19 | 55222517 | 21107 | 13.4110 | 0.6302 | 0.2453  | 6.5158 | YRI |
| ZFP100 | GI_27485310-S | rs10439113 | 19 | 19 | 55223758 | 19866 | 13.7606 | 0.6339 | 0.2467  | 6.5158 | YRI |
| VRK3   | GI_31982928-S | rs10439113 | 19 | 19 | 55223758 | 52113 | 5.6490  | 0.3106 | 0.1805  | 5.5599 | YRI |
| ZFP100 | GI_27485310-S | rs10422354 | 19 | 19 | 55224729 | 18895 | 13.7606 | 0.6339 | 0.2467  | 6.5158 | YRI |
| VRK3   | GI_31982928-S | rs10422354 | 19 | 19 | 55224729 | 53084 | 5.6490  | 0.3106 | 0.1805  | 5.5599 | YRI |
| ZFP100 | GI_27485310-S | rs10422936 | 19 | 19 | 55224784 | 18840 | 13.7606 | 0.6339 | -0.2467 | 6.5158 | YRI |
| VRK3   | GI_31982928-S | rs10422936 | 19 | 19 | 55224784 | 53139 | 5.6490  | 0.3106 | -0.1805 | 5.5599 | YRI |
| ZFP100 | GI_27485310-S | rs8112178  | 19 | 19 | 55225237 | 18387 | 12.5311 | 0.5968 | 0.2527  | 6.5158 | YRI |
| VRK3   | GI_31982928-S | rs8112178  | 19 | 19 | 55225237 | 53592 | 6.5273  | 0.3557 | 0.2031  | 5.5599 | YRI |
| ZFP100 | GI_27485310-S | rs11083999 | 19 | 19 | 55226041 | 17583 | 13.7606 | 0.6339 | -0.2467 | 6.5158 | YRI |
| VRK3   | GI_31982928-S | rs11083999 | 19 | 19 | 55226041 | 54396 | 5.6490  | 0.3106 | -0.1805 | 5.5599 | YRI |
| ZFP100 | GI_27485310-S | rs10405642 | 19 | 19 | 55226580 | 17044 | 13.7606 | 0.6339 | 0.2467  | 6.5158 | YRI |
| VRK3   | GI_31982928-S | rs10405642 | 19 | 19 | 55226580 | 54935 | 5.6490  | 0.3106 | 0.1805  | 5.5599 | YRI |
| ZFP100 | GI_27485310-S | rs10413334 | 19 | 19 | 55227017 | 16607 | 13.7606 | 0.6339 | -0.2467 | 6.5158 | YRI |
| VRK3   | GI_31982928-S | rs10413334 | 19 | 19 | 55227017 | 55372 | 5.6490  | 0.3106 | -0.1805 | 5.5599 | YRI |
| ZFP100 | GI_27485310-S | rs11880683 | 19 | 19 | 55228741 | 14883 | 13.3754 | 0.6291 | 0.2459  | 6.5158 | YRI |
| VRK3   | GI_31982928-S | rs11880683 | 19 | 19 | 55228741 | 57096 | 5.5994  | 0.3124 | 0.1823  | 5.5599 | YRI |
| ZFP100 | GI_27485310-S | rs11878219 | 19 | 19 | 55228897 | 14727 | 12.6422 | 0.6267 | -0.2466 | 6.5158 | YRI |
| ZFP100 | GI_27485310-S | rs10407938 | 19 | 19 | 55230059 | 13565 | 12.7896 | 0.6314 | 0.2409  | 6.5158 | YRI |
| ZFP100 | GI_27485310-S | rs10412562 | 19 | 19 | 55235855 | 7769  | 13.7606 | 0.6339 | 0.2467  | 6.5158 | YRI |
| VRK3   | GI_31982928-S | rs10412562 | 19 | 19 | 55235855 | 64210 | 5.6490  | 0.3106 | 0.1805  | 5.5599 | YRI |
| ZFP100 | GI_27485310-S | rs10419876 | 19 | 19 | 55236837 | 6787  | 13.7606 | 0.6339 | 0.2467  | 6.5158 | YRI |
| VRK3   | GI_31982928-S | rs10419876 | 19 | 19 | 55236837 | 65192 | 5.6490  | 0.3106 | 0.1805  | 5.5599 | YRI |
| ZFP100 | GI_27485310-S | rs10419911 | 19 | 19 | 55236882 | 6742  | 13.7606 | 0.6339 | 0.2467  | 6.5158 | YRI |
| VRK3   | GI_31982928-S | rs10419911 | 19 | 19 | 55236882 | 65237 | 5.6490  | 0.3106 | 0.1805  | 5.5599 | YRI |
| ZFP100 | GI_27485310-S | rs10420700 | 19 | 19 | 55237156 | 6468  | 12.7094 | 0.6088 | 0.2445  | 6.5158 | YRI |
| ZFP100 | GI_27485310-S | rs11882888 | 19 | 19 | 55237552 | 6072  | 12.7684 | 0.6307 | 0.2443  | 6.5158 | YRI |
| ZFP100 | GI_27485310-S | rs10410738 | 19 | 19 | 55239585 | 4039  | 6.6149  | 0.4109 | -0.1983 | 6.5158 | YRI |
| ZFP100 | GI_27485310-S | rs16981705 | 19 | 19 | 55240003 | 3621  | 13.5360 | 0.6338 | 0.2481  | 6.5158 | YRI |
| ZFP100 | GI_27485310-S | rs16981706 | 19 | 19 | 55240438 | 3186  | 13.3103 | 0.6472 | 0.2532  | 6.5158 | YRI |
| ZFP100 | GI_27485310-S | rs10419043 | 19 | 19 | 55240499 | 3125  | 13.7606 | 0.6339 | -0.2467 | 6.5158 | YRI |
| VRK3   | GI_31982928-S | rs10419043 | 19 | 19 | 55240499 | 68854 | 5.6490  | 0.3106 | -0.1805 | 5.5599 | YRI |
| ZFP100 | GI_27485310-S | rs10424809 | 19 | 19 | 55241473 | 2151  | 7.3600  | 0.4711 | 0.2423  | 6.5158 | YRI |
| VRK3   | GI_31982928-S | rs10424809 | 19 | 19 | 55241473 | 69828 | 6.6039  | 0.4305 | 0.3069  | 5.5599 | YRI |
| ZFP100 | GI_27485310-S | rs10426374 | 19 | 19 | 55241496 | 2128  | 13.7606 | 0.6339 | -0.2467 | 6.5158 | YRI |
| VRK3   | GI_31982928-S | rs10426374 | 19 | 19 | 55241496 | 69851 | 5.6490  | 0.3106 | -0.1805 | 5.5599 | YRI |
| ZFP100 | GI_27485310-S | rs11881187 | 19 | 19 | 55241939 | 1685  | 13.7606 | 0.6339 | 0.2467  | 6.5158 | YRI |
| VRK3   | GI_31982928-S | rs11881187 | 19 | 19 | 55241939 | 70294 | 5.6490  | 0.3106 | 0.1805  | 5.5599 | YRI |
| ZFP100 | GI_27485310-S | rs9304701  | 19 | 19 | 55242623 | 1001  | 13.7606 | 0.6339 | 0.2467  | 6.5158 | YRI |
| VRK3   | GI_31982928-S | rs9304701  | 19 | 19 | 55242623 | 70978 | 5.6490  | 0.3106 | 0.1805  | 5.5599 | YRI |
| ZFP100 | GI_27485310-S | rs16981716 | 19 | 19 | 55242863 | 761   | 13.6412 | 0.6369 | -0.2404 | 6.5158 | YRI |
| ZFP100 | GI_27485310-S | rs10412271 | 19 | 19 | 55243013 | 611   | 13.7606 | 0.6339 | 0.2467  | 6.5158 | YRI |
| VRK3   | GI_31982928-S | rs10412271 | 19 | 19 | 55243013 | 71368 | 5.6490  | 0.3106 | 0.1805  | 5.5599 | YRI |
| ZFP100 | GI_27485310-S | rs10413068 | 19 | 19 | 55243114 | 510   | 14.0897 | 0.6497 | -0.2379 | 6.5158 | YRI |

|           |               |            |    |    |          |        |         |        |         |        |     |
|-----------|---------------|------------|----|----|----------|--------|---------|--------|---------|--------|-----|
| VRK3      | GI_31982928-S | rs10413068 | 19 | 19 | 55243114 | 71469  | 5.5852  | 0.3117 | -0.1682 | 5.5599 | YRI |
| ZFP100    | GI_27485310-S | rs10415125 | 19 | 19 | 55243477 | 147    | 12.9565 | 0.6230 | -0.2531 | 6.5158 | YRI |
| ZFP100    | GI_27485310-S | rs11878761 | 19 | 19 | 55244285 | 661    | 11.8281 | 0.5739 | 0.2828  | 6.5158 | YRI |
| VRK3      | GI_31982928-S | rs11878761 | 19 | 19 | 55244285 | 72640  | 7.3364  | 0.3948 | 0.2435  | 5.5599 | YRI |
| ZFP100    | GI_27485310-S | rs9973262  | 19 | 19 | 55244706 | 1082   | 11.8281 | 0.5739 | 0.2828  | 6.5158 | YRI |
| VRK3      | GI_31982928-S | rs9973262  | 19 | 19 | 55244706 | 73061  | 7.3364  | 0.3948 | 0.2435  | 5.5599 | YRI |
| ZFP100    | GI_27485310-S | rs10416688 | 19 | 19 | 55245384 | 1760   | 14.2923 | 0.6753 | -0.2352 | 6.5158 | YRI |
| VRK3      | GI_31982928-S | rs10416688 | 19 | 19 | 55245384 | 73739  | 5.7420  | 0.3346 | -0.1694 | 5.5599 | YRI |
| ZFP100    | GI_27485310-S | rs10421463 | 19 | 19 | 55245787 | 2163   | 11.8281 | 0.5739 | -0.2828 | 6.5158 | YRI |
| VRK3      | GI_31982928-S | rs10421463 | 19 | 19 | 55245787 | 74142  | 7.3364  | 0.3948 | -0.2435 | 5.5599 | YRI |
| ZFP100    | GI_27485310-S | rs10422147 | 19 | 19 | 55246050 | 2426   | 11.4611 | 0.5678 | -0.2831 | 6.5158 | YRI |
| VRK3      | GI_31982928-S | rs10422147 | 19 | 19 | 55246050 | 74405  | 7.3567  | 0.4011 | -0.2485 | 5.5599 | YRI |
| ZFP100    | GI_27485310-S | rs11879695 | 19 | 19 | 55253943 | 10319  | 13.3754 | 0.6291 | -0.2459 | 6.5158 | YRI |
| VRK3      | GI_31982928-S | rs11879695 | 19 | 19 | 55253943 | 82298  | 5.5994  | 0.3124 | -0.1823 | 5.5599 | YRI |
| ZFP100    | GI_27485310-S | rs11879700 | 19 | 19 | 55253987 | 10363  | 13.8184 | 0.6486 | -0.2526 | 6.5158 | YRI |
| ZFP100    | GI_27485310-S | rs10424346 | 19 | 19 | 55254926 | 11302  | 13.2130 | 0.6375 | -0.2440 | 6.5158 | YRI |
| ZFP100    | GI_27485310-S | rs10422999 | 19 | 19 | 55255032 | 11408  | 12.4081 | 0.6193 | -0.2434 | 6.5158 | YRI |
| ZFP100    | GI_27485310-S | rs10424805 | 19 | 19 | 55255218 | 11594  | 9.8758  | 0.5423 | -0.2353 | 6.5158 | YRI |
| ZFP100    | GI_27485310-S | rs10423709 | 19 | 19 | 55255357 | 11733  | 8.9884  | 0.5124 | 0.2482  | 6.5158 | YRI |
| VRK3      | GI_31982928-S | rs10423709 | 19 | 19 | 55255357 | 83712  | 6.6020  | 0.3978 | 0.2627  | 5.5599 | YRI |
| ZFP100    | GI_27485310-S | rs10423788 | 19 | 19 | 55255510 | 11886  | 13.7606 | 0.6339 | 0.2467  | 6.5158 | YRI |
| VRK3      | GI_31982928-S | rs10423788 | 19 | 19 | 55255510 | 83865  | 5.6490  | 0.3106 | 0.1805  | 5.5599 | YRI |
| ZFP100    | GI_27485310-S | rs10424489 | 19 | 19 | 55255538 | 11914  | 9.0678  | 0.5374 | -0.2291 | 6.5158 | YRI |
| ZFP100    | GI_27485310-S | rs7250130  | 19 | 19 | 55277771 | 34147  | 12.0055 | 0.5798 | 0.2502  | 6.5158 | YRI |
| VRK3      | GI_31982928-S | rs7250130  | 19 | 19 | 55277771 | 106126 | 5.6378  | 0.3100 | 0.1910  | 5.5599 | YRI |
| ZFP100    | GI_27485310-S | rs11878430 | 19 | 19 | 55285805 | 42181  | 11.7446 | 0.5775 | -0.2503 | 6.5158 | YRI |
| ZFP100    | GI_27485310-S | rs10414850 | 19 | 19 | 55340131 | 96507  | 10.3796 | 0.5227 | -0.2570 | 6.5158 | YRI |
| ZFP100    | GI_27485310-S | rs8107344  | 19 | 19 | 55340394 | 96770  | 10.7270 | 0.5355 | 0.2623  | 6.5158 | YRI |
| ZFP100    | GI_27485310-S | rs10409245 | 19 | 19 | 55342689 | 99065  | 12.0055 | 0.5798 | 0.2502  | 6.5158 | YRI |
| VRK3      | GI_31982928-S | rs10409245 | 19 | 19 | 55342689 | 171044 | 5.6378  | 0.3100 | 0.1910  | 5.5599 | YRI |
| ZFP100    | GI_27485310-S | rs11881272 | 19 | 19 | 55360157 | 116533 | 7.4743  | 0.4013 | 0.2262  | 6.5158 | YRI |
| VRK3      | GI_31982928-S | rs11881272 | 19 | 19 | 55360157 | 188512 | 6.2868  | 0.3436 | 0.2166  | 5.5599 | YRI |
| ZNF160    | GI_38788301-I | rs329702   | 19 | 19 | 58277168 | 9346   | 6.9967  | 0.3787 | -0.1584 | 6.6164 | YRI |
| ZNF160    | GI_38788301-I | rs329701   | 19 | 19 | 58277915 | 8599   | 6.9967  | 0.3787 | 0.1584  | 6.6164 | YRI |
| ZNF160    | GI_38788301-I | rs329700   | 19 | 19 | 58278136 | 8378   | 6.9967  | 0.3787 | 0.1584  | 6.6164 | YRI |
| ZNF160    | GI_38788301-I | rs329699   | 19 | 19 | 58278442 | 8072   | 6.8349  | 0.3709 | 0.1444  | 6.6164 | YRI |
| ZNF160    | GI_38788301-I | rs2560953  | 19 | 19 | 58279781 | 6733   | 6.9967  | 0.3787 | 0.1584  | 6.6164 | YRI |
| RPL28     | GI_34486095-S | rs10420818 | 19 | 19 | 60588993 | 6064   | 10.4511 | 0.5379 | -0.4569 | 6.0523 | YRI |
| RPL28     | GI_34486095-S | rs10410269 | 19 | 19 | 60591293 | 3764   | 10.5671 | 0.5296 | -0.4575 | 6.0523 | YRI |
| RPL28     | GI_34486095-S | rs10411984 | 19 | 19 | 60591361 | 3696   | 10.5671 | 0.5296 | 0.4575  | 6.0523 | YRI |
| RPL28     | GI_34486095-S | rs10416908 | 19 | 19 | 60591944 | 3113   | 10.5671 | 0.5296 | -0.4575 | 6.0523 | YRI |
| RPL28     | GI_34486095-S | rs10425596 | 19 | 19 | 60592911 | 2146   | 10.5671 | 0.5296 | 0.4575  | 6.0523 | YRI |
| RPL28     | GI_34486095-S | rs10424652 | 19 | 19 | 60593122 | 1935   | 10.5671 | 0.5296 | 0.4575  | 6.0523 | YRI |
| RPL28     | GI_34486095-S | rs10425107 | 19 | 19 | 60593364 | 1693   | 10.5671 | 0.5296 | -0.4575 | 6.0523 | YRI |
| RPL28     | GI_34486095-S | rs10408088 | 19 | 19 | 60596405 | 1348   | 10.5671 | 0.5296 | -0.4575 | 6.0523 | YRI |
| RPL28     | GI_34486095-S | rs10408540 | 19 | 19 | 60596514 | 1457   | 10.5671 | 0.5296 | -0.4575 | 6.0523 | YRI |
| RPL28     | GI_34486095-S | rs10403564 | 19 | 19 | 60599106 | 4049   | 10.5671 | 0.5296 | -0.4575 | 6.0523 | YRI |
| RPL28     | GI_34486095-S | rs2891577  | 19 | 19 | 60606256 | 11199  | 7.2192  | 0.3893 | -0.3310 | 6.0523 | YRI |
| RPL28     | GI_34486095-S | rs10408448 | 19 | 19 | 60611960 | 16903  | 10.5671 | 0.5296 | -0.4575 | 6.0523 | YRI |
| RPL28     | GI_34486095-S | rs12462594 | 19 | 19 | 60614697 | 19640  | 7.2192  | 0.3893 | 0.3310  | 6.0523 | YRI |
| LOC126208 | GI_27485046-S | rs11673628 | 19 | 19 | 61314878 | 23994  | 9.1514  | 0.4746 | -0.4034 | 7.3039 | YRI |
| ZNF211    | GI_38569444-S | rs9749085  | 19 | 19 | 62834298 | 11438  | 6.9201  | 0.3750 | -0.1903 | 6.1067 | YRI |
| ZNF211    | GI_38569444-S | rs9749218  | 19 | 19 | 62834703 | 11033  | 6.9201  | 0.3750 | 0.1903  | 6.1067 | YRI |
| ZNF211    | GI_38569444-S | rs2885006  | 19 | 19 | 62838609 | 7127   | 6.9201  | 0.3750 | -0.1903 | 6.1067 | YRI |
| ZNF211    | GI_38569444-S | rs12609066 | 19 | 19 | 62841631 | 4105   | 6.1212  | 0.3400 | -0.1869 | 6.1067 | YRI |
| ZNF211    | GI_38569444-S | rs12609093 | 19 | 19 | 62841839 | 3897   | 6.1212  | 0.3400 | -0.1869 | 6.1067 | YRI |
| ZNF211    | GI_38569444-S | rs12610500 | 19 | 19 | 62841861 | 3875   | 6.1212  | 0.3400 | 0.1869  | 6.1067 | YRI |
| ZNF211    | GI_38569444-S | rs4801235  | 19 | 19 | 62842435 | 3301   | 6.3809  | 0.3484 | -0.1931 | 6.1067 | YRI |
| ZNF211    | GI_38569444-S | rs2360540  | 19 | 19 | 62843636 | 2100   | 6.1212  | 0.3400 | 0.1869  | 6.1067 | YRI |

|           |               |            |    |    |          |       |         |        |         |        |     |
|-----------|---------------|------------|----|----|----------|-------|---------|--------|---------|--------|-----|
| ZNF211    | GI_38569444-S | rs3746221  | 19 | 19 | 62843832 | 1904  | 6.1212  | 0.3400 | 0.1869  | 6.1067 | YRI |
| ZNF211    | GI_38569444-S | rs3746220  | 19 | 19 | 62843845 | 1891  | 6.1212  | 0.3400 | -0.1869 | 6.1067 | YRI |
| ZNF211    | GI_38569444-S | rs11879465 | 19 | 19 | 62844607 | 1129  | 6.9201  | 0.3750 | 0.1903  | 6.1067 | YRI |
| ZNF211    | GI_38569444-S | rs11880050 | 19 | 19 | 62844629 | 1107  | 6.1212  | 0.3400 | -0.1869 | 6.1067 | YRI |
| ZNF211    | GI_38569444-S | rs3746218  | 19 | 19 | 62844812 | 924   | 6.1212  | 0.3400 | 0.1869  | 6.1067 | YRI |
| ZNF211    | GI_38569444-S | rs3746217  | 19 | 19 | 62844821 | 915   | 6.1212  | 0.3400 | -0.1869 | 6.1067 | YRI |
| ZNF211    | GI_38569444-S | rs3746216  | 19 | 19 | 62845389 | 347   | 6.1212  | 0.3400 | 0.1869  | 6.1067 | YRI |
| ZNF211    | GI_38569444-S | rs3746210  | 19 | 19 | 62846071 | 335   | 6.9201  | 0.3750 | 0.1903  | 6.1067 | YRI |
| ZNF211    | GI_38569444-S | rs3746209  | 19 | 19 | 62846117 | 381   | 6.9201  | 0.3750 | -0.1903 | 6.1067 | YRI |
| ZNF211    | GI_38569444-S | rs11880986 | 19 | 19 | 62846285 | 549   | 6.1212  | 0.3400 | 0.1869  | 6.1067 | YRI |
| ZNF211    | GI_38569444-S | rs10404811 | 19 | 19 | 62846619 | 883   | 6.1212  | 0.3400 | -0.1869 | 6.1067 | YRI |
| ZNF211    | GI_38569444-S | rs10409262 | 19 | 19 | 62846767 | 1031  | 6.1212  | 0.3400 | -0.1869 | 6.1067 | YRI |
| ZNF211    | GI_38569444-S | rs10425321 | 19 | 19 | 62848845 | 3109  | 6.1212  | 0.3400 | -0.1869 | 6.1067 | YRI |
| ZNF211    | GI_38569444-S | rs10423688 | 19 | 19 | 62848902 | 3166  | 6.1212  | 0.3400 | 0.1869  | 6.1067 | YRI |
| ZNF586    | GI_8923076-S  | rs16960555 | 19 | 19 | 63030025 | 46324 | 6.4438  | 0.3515 | -0.2256 | 5.8229 | YRI |
| LOC113386 | GI_20270320-S | rs11882938 | 19 | 19 | 63510925 | 7528  | 8.0742  | 0.4646 | 0.3660  | 5.7791 | YRI |
| hmm25128  | hmm25128-S    | rs8100253  | 19 | 19 | 63779291 | 10162 | 6.9550  | 0.3767 | -0.0838 | 5.6312 | YRI |
| PSMF1     | GI_30581144-A | rs1217     | 20 | 20 | 1110615  | 14780 | 8.0693  | 0.4283 | 0.4884  | 6.8319 | YRI |
| FKBP1A    | GI_17149835-I | rs6041749  | 20 | 20 | 1298672  | 1831  | 11.4884 | 0.5624 | -0.7611 | 6.4499 | YRI |
| FKBP1A    | GI_17149835-I | rs6041750  | 20 | 20 | 1298709  | 1794  | 17.4739 | 0.7330 | 0.7629  | 6.4499 | YRI |
| hmm9596   | hmm9596-S     | rs6140494  | 20 | 20 | 7937180  | 26805 | 6.8190  | 0.3701 | 0.2918  | 6.4955 | YRI |
| hmm9596   | hmm9596-S     | rs4142416  | 20 | 20 | 7940324  | 29949 | 7.0063  | 0.3791 | -0.2911 | 6.4955 | YRI |
| Hs.472118 | Hs.472118-S   | rs7269654  | 20 | 20 | 10340453 | 9613  | 22.3690 | 0.8363 | -0.3110 | 8.0865 | YRI |
| Hs.472118 | Hs.472118-S   | rs8118692  | 20 | 20 | 10372721 | 41881 | 13.0608 | 0.6197 | -0.2637 | 8.0865 | YRI |
| Hs.472118 | Hs.472118-S   | rs8125436  | 20 | 20 | 10376149 | 45309 | 10.8766 | 0.5409 | 0.2190  | 8.0865 | YRI |
| SNRPB2    | GI_38149917-I | rs2073055  | 20 | 20 | 16658791 | 37    | 10.3335 | 0.5209 | 0.3238  | 7.1332 | YRI |
| POLR3F    | GI_33598951-S | rs1988646  | 20 | 20 | 18405204 | 7868  | 8.9605  | 0.4667 | 0.2409  | 5.9953 | YRI |
| POLR3F    | GI_33598951-S | rs7351208  | 20 | 20 | 18406060 | 7012  | 8.9605  | 0.4667 | 0.2409  | 5.9953 | YRI |
| POLR3F    | GI_33598951-S | rs6081158  | 20 | 20 | 18407386 | 5686  | 6.1127  | 0.3395 | 0.2029  | 5.9953 | YRI |
| POLR3F    | GI_33598951-S | rs6075348  | 20 | 20 | 18421042 | 7970  | 9.7823  | 0.4998 | -0.2551 | 5.9953 | YRI |
| POLR3F    | GI_33598951-S | rs7262824  | 20 | 20 | 18431105 | 18033 | 10.3975 | 0.5233 | -0.2640 | 5.9953 | YRI |
| POLR3F    | GI_33598951-S | rs2009092  | 20 | 20 | 18433412 | 20340 | 10.9747 | 0.5507 | -0.2695 | 5.9953 | YRI |
| POLR3F    | GI_33598951-S | rs2180661  | 20 | 20 | 18434315 | 21243 | 10.0225 | 0.5153 | 0.2628  | 5.9953 | YRI |
| POLR3F    | GI_33598951-S | rs1022681  | 20 | 20 | 18435014 | 21942 | 10.3975 | 0.5233 | 0.2640  | 5.9953 | YRI |
| POLR3F    | GI_33598951-S | rs6075350  | 20 | 20 | 18436065 | 22993 | 7.5405  | 0.4043 | -0.2330 | 5.9953 | YRI |
| POLR3F    | GI_33598951-S | rs6081176  | 20 | 20 | 18438242 | 25170 | 7.5405  | 0.4043 | 0.2330  | 5.9953 | YRI |
| POLR3F    | GI_33598951-S | rs6075351  | 20 | 20 | 18438913 | 25841 | 7.7600  | 0.4144 | -0.2432 | 5.9953 | YRI |
| POLR3F    | GI_33598951-S | rs1555354  | 20 | 20 | 18454825 | 41753 | 7.7600  | 0.4144 | 0.2432  | 5.9953 | YRI |
| POLR3F    | GI_33598951-S | rs6081183  | 20 | 20 | 18458175 | 45103 | 7.5268  | 0.4147 | 0.2432  | 5.9953 | YRI |
| POLR3F    | GI_33598951-S | rs6081184  | 20 | 20 | 18458182 | 45110 | 6.9510  | 0.4355 | -0.2424 | 5.9953 | YRI |
| POLR3F    | GI_33598951-S | rs6081187  | 20 | 20 | 18458919 | 45847 | 7.0648  | 0.4096 | 0.2381  | 5.9953 | YRI |
| POLR3F    | GI_33598951-S | rs6136400  | 20 | 20 | 18463877 | 50805 | 7.4020  | 0.4033 | -0.2438 | 5.9953 | YRI |
| POLR3F    | GI_33598951-S | rs3818218  | 20 | 20 | 18464722 | 51650 | 7.7600  | 0.4144 | -0.2432 | 5.9953 | YRI |
| POLR3F    | GI_33598951-S | rs6112011  | 20 | 20 | 18465418 | 52346 | 7.2407  | 0.3903 | 0.2335  | 5.9953 | YRI |
| POLR3F    | GI_33598951-S | rs2295557  | 20 | 20 | 18471864 | 58792 | 7.3366  | 0.4113 | 0.2329  | 5.9953 | YRI |
| POLR3F    | GI_33598951-S | rs4814760  | 20 | 20 | 18476254 | 63182 | 7.5328  | 0.4040 | -0.2442 | 5.9953 | YRI |
| POLR3F    | GI_33598951-S | rs6081207  | 20 | 20 | 18480592 | 67520 | 7.7600  | 0.4144 | 0.2432  | 5.9953 | YRI |
| POLR3F    | GI_33598951-S | rs1973957  | 20 | 20 | 18483502 | 70430 | 7.6474  | 0.4147 | -0.2432 | 5.9953 | YRI |
| POLR3F    | GI_33598951-S | rs6075363  | 20 | 20 | 18484092 | 71020 | 7.7600  | 0.4144 | -0.2432 | 5.9953 | YRI |
| POLR3F    | GI_33598951-S | rs6075365  | 20 | 20 | 18488266 | 75194 | 7.3635  | 0.4184 | -0.2432 | 5.9953 | YRI |
| POLR3F    | GI_33598951-S | rs11698885 | 20 | 20 | 18491691 | 78619 | 7.5603  | 0.4340 | 0.2463  | 5.9953 | YRI |
| POLR3F    | GI_33598951-S | rs6081215  | 20 | 20 | 18493959 | 80887 | 6.2720  | 0.3579 | -0.2201 | 5.9953 | YRI |
| C20orf22  | GI_34147330-S | rs3787078  | 20 | 20 | 25180406 | 43203 | 6.4238  | 0.3505 | 0.6716  | 6.3351 | YRI |
| C20orf22  | GI_34147330-S | rs3787081  | 20 | 20 | 25183129 | 40480 | 6.4238  | 0.3505 | -0.6716 | 6.3351 | YRI |
| C20orf22  | GI_34147330-S | rs2281559  | 20 | 20 | 25200161 | 23448 | 6.4238  | 0.3505 | 0.6716  | 6.3351 | YRI |
| C20orf22  | GI_34147330-S | rs2424698  | 20 | 20 | 25204106 | 19503 | 6.9355  | 0.3862 | 0.4801  | 6.3351 | YRI |
| C20orf22  | GI_34147330-S | rs2228976  | 20 | 20 | 25207006 | 16603 | 6.4238  | 0.3505 | 0.6716  | 6.3351 | YRI |
| C20orf22  | GI_34147330-S | rs2261109  | 20 | 20 | 25207200 | 16409 | 6.9960  | 0.3787 | -0.3866 | 6.3351 | YRI |
| C20orf22  | GI_34147330-S | rs2227891  | 20 | 20 | 25210769 | 12840 | 6.4238  | 0.3505 | -0.6716 | 6.3351 | YRI |

|           |               |            |    |    |          |        |         |        |         |        |     |
|-----------|---------------|------------|----|----|----------|--------|---------|--------|---------|--------|-----|
| C20orf22  | GI_34147330-S | rs2261796  | 20 | 20 | 25211277 | 12332  | 6.7000  | 0.3642 | -0.3669 | 6.3351 | YRI |
| C20orf22  | GI_34147330-S | rs2227892  | 20 | 20 | 25212814 | 10795  | 6.7000  | 0.3642 | -0.3669 | 6.3351 | YRI |
| C20orf22  | GI_34147330-S | rs2257233  | 20 | 20 | 25213984 | 9625   | 6.7000  | 0.3642 | 0.3669  | 6.3351 | YRI |
| C20orf22  | GI_34147330-S | rs2424701  | 20 | 20 | 25215622 | 7987   | 6.4238  | 0.3505 | 0.6716  | 6.3351 | YRI |
| C20orf22  | GI_34147330-S | rs2257991  | 20 | 20 | 25218339 | 5270   | 6.7000  | 0.3642 | -0.3669 | 6.3351 | YRI |
| C20orf22  | GI_34147330-S | rs2258201  | 20 | 20 | 25220490 | 3119   | 6.7000  | 0.3642 | -0.3669 | 6.3351 | YRI |
| C20orf22  | GI_34147330-S | rs2474777  | 20 | 20 | 25220633 | 2976   | 6.7000  | 0.3642 | -0.3669 | 6.3351 | YRI |
| C20orf22  | GI_34147330-S | rs2258719  | 20 | 20 | 25223843 | 234    | 7.1709  | 0.3870 | 0.4780  | 6.3351 | YRI |
| C20orf22  | GI_34147330-S | rs2258769  | 20 | 20 | 25224680 | 1071   | 6.7000  | 0.3642 | -0.3669 | 6.3351 | YRI |
| C20orf22  | GI_34147330-S | rs2500432  | 20 | 20 | 25238512 | 14903  | 6.5656  | 0.3576 | 0.4092  | 6.3351 | YRI |
| C20orf22  | GI_34147330-S | rs1888999  | 20 | 20 | 25239848 | 16239  | 8.2208  | 0.4350 | -0.4728 | 6.3351 | YRI |
| C20orf22  | GI_34147330-S | rs2297496  | 20 | 20 | 25243787 | 20178  | 6.7000  | 0.3642 | 0.3669  | 6.3351 | YRI |
| C20orf22  | GI_34147330-S | rs2297497  | 20 | 20 | 25245909 | 22300  | 6.7000  | 0.3642 | 0.3669  | 6.3351 | YRI |
| C20orf22  | GI_34147330-S | rs6050532  | 20 | 20 | 25256793 | 33184  | 6.7000  | 0.3642 | -0.3669 | 6.3351 | YRI |
| C20orf22  | GI_34147330-S | rs6083804  | 20 | 20 | 25265060 | 41451  | 6.7000  | 0.3642 | -0.3669 | 6.3351 | YRI |
| C20orf22  | GI_34147330-S | rs6076336  | 20 | 20 | 25267212 | 43603  | 6.7000  | 0.3642 | -0.3669 | 6.3351 | YRI |
| C20orf22  | GI_34147330-S | rs6417588  | 20 | 20 | 25275151 | 51542  | 7.1709  | 0.3870 | 0.4780  | 6.3351 | YRI |
| C20orf22  | GI_34147330-S | rs2482934  | 20 | 20 | 25287324 | 63715  | 6.4238  | 0.3505 | -0.6716 | 6.3351 | YRI |
| C20orf22  | GI_34147330-S | rs2500399  | 20 | 20 | 25302694 | 79085  | 7.0919  | 0.4232 | 0.4519  | 6.3351 | YRI |
| C20orf22  | GI_34147330-S | rs2500403  | 20 | 20 | 25307150 | 83541  | 6.4238  | 0.3505 | -0.6716 | 6.3351 | YRI |
| C20orf22  | GI_34147330-S | rs2500405  | 20 | 20 | 25308826 | 85217  | 7.1709  | 0.3870 | -0.4780 | 6.3351 | YRI |
| C20orf22  | GI_34147330-S | rs6515641  | 20 | 20 | 25327526 | 103917 | 6.7000  | 0.3642 | -0.3669 | 6.3351 | YRI |
| C20orf22  | GI_34147330-S | rs6515642  | 20 | 20 | 25328593 | 104984 | 6.6251  | 0.3606 | 0.4522  | 6.3351 | YRI |
| C20orf22  | GI_34147330-S | rs2500424  | 20 | 20 | 25339969 | 116360 | 7.1709  | 0.3870 | 0.4780  | 6.3351 | YRI |
| C20orf22  | GI_34147330-S | rs2482911  | 20 | 20 | 25343528 | 119919 | 6.5656  | 0.3576 | 0.4092  | 6.3351 | YRI |
| C20orf22  | GI_34147330-S | rs6050598  | 20 | 20 | 25345257 | 121648 | 6.7000  | 0.3642 | 0.3669  | 6.3351 | YRI |
| C20orf22  | GI_34147330-S | rs2500436  | 20 | 20 | 25354366 | 130757 | 6.5656  | 0.3576 | -0.4092 | 6.3351 | YRI |
| C20orf22  | GI_34147330-S | rs6417589  | 20 | 20 | 25359086 | 135477 | 6.7000  | 0.3642 | -0.3669 | 6.3351 | YRI |
| C20orf22  | GI_34147330-S | rs6050611  | 20 | 20 | 25362419 | 138810 | 6.5656  | 0.3576 | -0.4092 | 6.3351 | YRI |
| C20orf22  | GI_34147330-S | rs6050617  | 20 | 20 | 25369648 | 146039 | 6.7000  | 0.3642 | 0.3669  | 6.3351 | YRI |
| C20orf22  | GI_34147330-S | rs6138569  | 20 | 20 | 25373808 | 150199 | 6.4238  | 0.3505 | 0.6716  | 6.3351 | YRI |
| C20orf22  | GI_34147330-S | rs6050629  | 20 | 20 | 25378680 | 155071 | 6.7000  | 0.3642 | -0.3669 | 6.3351 | YRI |
| C20orf22  | GI_34147330-S | rs6050632  | 20 | 20 | 25380601 | 156992 | 6.7000  | 0.3642 | 0.3669  | 6.3351 | YRI |
| C20orf22  | GI_34147330-S | rs12428    | 20 | 20 | 25381821 | 158212 | 6.7000  | 0.3642 | 0.3669  | 6.3351 | YRI |
| C20orf22  | GI_34147330-S | rs6138575  | 20 | 20 | 25386952 | 163343 | 6.9874  | 0.3834 | -0.4743 | 6.3351 | YRI |
| C20orf22  | GI_34147330-S | rs422844   | 20 | 20 | 25393591 | 169982 | 6.7000  | 0.3642 | -0.3669 | 6.3351 | YRI |
| C20orf22  | GI_34147330-S | rs449370   | 20 | 20 | 25399180 | 175571 | 6.7000  | 0.3642 | 0.3669  | 6.3351 | YRI |
| C20orf22  | GI_34147330-S | rs6138601  | 20 | 20 | 25487486 | 263877 | 6.4238  | 0.3505 | -0.6716 | 6.3351 | YRI |
| TM9SF4    | GI_41281478-S | rs17093829 | 20 | 20 | 30162409 | 56058  | 6.7199  | 0.3652 | 0.2057  | 5.7292 | YRI |
| TM9SF4    | GI_41281478-S | rs7264087  | 20 | 20 | 30192161 | 26306  | 5.7390  | 0.3295 | 0.2176  | 5.7292 | YRI |
| LOC400843 | GI_42662295-S | rs633198   | 20 | 20 | 33242095 | 85741  | 6.6235  | 0.3605 | 0.1475  | 5.9381 | YRI |
| LOC400843 | GI_42662295-S | rs2093058  | 20 | 20 | 33254942 | 72894  | 7.1784  | 0.3874 | 0.1630  | 5.9381 | YRI |
| LOC400843 | GI_42662295-S | rs6058205  | 20 | 20 | 33263738 | 64098  | 9.5179  | 0.4894 | 0.1909  | 5.9381 | YRI |
| LOC400843 | GI_42662295-S | rs2275274  | 20 | 20 | 33320958 | 6878   | 9.7335  | 0.4979 | -0.1823 | 5.9381 | YRI |
| CPNE1     | GI_23397697-A | rs6060524  | 20 | 20 | 33684569 | 6897   | 9.7620  | 0.5051 | -0.6874 | 6.8147 | YRI |
| LOC375097 | GI_37555934-S | rs1739646  | 20 | 20 | 36470998 | 11936  | 6.6909  | 0.3638 | -0.5134 | 6.2847 | YRI |
| Hs.400876 | Hs.400876-S   | rs1739646  | 20 | 20 | 36470998 | 11787  | 6.8008  | 0.3692 | -0.5839 | 6.4038 | YRI |
| LOC375097 | GI_37555934-S | rs6025497  | 20 | 20 | 36476624 | 6310   | 6.9329  | 0.3756 | -0.5486 | 6.2847 | YRI |
| Hs.400876 | Hs.400876-S   | rs6025497  | 20 | 20 | 36476624 | 6161   | 6.8826  | 0.3732 | -0.6177 | 6.4038 | YRI |
| LOC375097 | GI_37555934-S | rs1739652  | 20 | 20 | 36482373 | 561    | 18.5786 | 0.7496 | 0.6526  | 6.2847 | YRI |
| Hs.400876 | Hs.400876-S   | rs1739652  | 20 | 20 | 36482373 | 412    | 19.5488 | 0.7681 | 0.7459  | 6.4038 | YRI |
| LOC375097 | GI_37555934-S | rs3752277  | 20 | 20 | 36484167 | 1233   | 15.8224 | 0.6951 | -0.6366 | 6.2847 | YRI |
| Hs.400876 | Hs.400876-S   | rs3752277  | 20 | 20 | 36484167 | 1382   | 16.3095 | 0.7068 | -0.7219 | 6.4038 | YRI |
| LOC375097 | GI_37555934-S | rs3752278  | 20 | 20 | 36484231 | 1297   | 18.5786 | 0.7496 | 0.6526  | 6.2847 | YRI |
| Hs.400876 | Hs.400876-S   | rs3752278  | 20 | 20 | 36484231 | 1446   | 19.5488 | 0.7681 | 0.7459  | 6.4038 | YRI |
| LOC375097 | GI_37555934-S | rs3752280  | 20 | 20 | 36484421 | 1487   | 11.0340 | 0.5592 | 0.5580  | 6.2847 | YRI |
| Hs.400876 | Hs.400876-S   | rs3752280  | 20 | 20 | 36484421 | 1636   | 11.9862 | 0.5921 | 0.6487  | 6.4038 | YRI |
| LOC375097 | GI_37555934-S | rs1780636  | 20 | 20 | 36486997 | 4063   | 16.8988 | 0.7141 | -0.6367 | 6.2847 | YRI |
| Hs.400876 | Hs.400876-S   | rs1780636  | 20 | 20 | 36486997 | 4212   | 17.4110 | 0.7254 | -0.7247 | 6.4038 | YRI |

|           |               |            |    |    |          |        |         |        |         |        |     |
|-----------|---------------|------------|----|----|----------|--------|---------|--------|---------|--------|-----|
| LOC375097 | GI_37555934-S | rs752775   | 20 | 20 | 36488195 | 5261   | 7.0354  | 0.4023 | 0.5273  | 6.2847 | YRI |
| Hs.400876 | Hs.400876-S   | rs752775   | 20 | 20 | 36488195 | 5410   | 7.0015  | 0.4006 | 0.5949  | 6.4038 | YRI |
| LOC375097 | GI_37555934-S | rs752774   | 20 | 20 | 36488429 | 5495   | 18.7639 | 0.7533 | 0.6443  | 6.2847 | YRI |
| Hs.400876 | Hs.400876-S   | rs752774   | 20 | 20 | 36488429 | 5644   | 19.8194 | 0.7730 | 0.7369  | 6.4038 | YRI |
| LOC375097 | GI_37555934-S | rs707578   | 20 | 20 | 36489289 | 6355   | 9.8902  | 0.5040 | 0.5705  | 6.2847 | YRI |
| Hs.400876 | Hs.400876-S   | rs707578   | 20 | 20 | 36489289 | 6504   | 10.9858 | 0.5448 | 0.6691  | 6.4038 | YRI |
| LOC375097 | GI_37555934-S | rs788347   | 20 | 20 | 36495997 | 13063  | 16.4602 | 0.7041 | 0.6380  | 6.2847 | YRI |
| Hs.400876 | Hs.400876-S   | rs788347   | 20 | 20 | 36495997 | 13212  | 17.0203 | 0.7168 | 0.7269  | 6.4038 | YRI |
| LOC375097 | GI_37555934-S | rs788348   | 20 | 20 | 36496888 | 13954  | 11.7178 | 0.5702 | -0.5630 | 6.2847 | YRI |
| Hs.400876 | Hs.400876-S   | rs788348   | 20 | 20 | 36496888 | 14103  | 12.7002 | 0.6021 | -0.6529 | 6.4038 | YRI |
| LOC375097 | GI_37555934-S | rs788350   | 20 | 20 | 36498050 | 15116  | 11.2500 | 0.5604 | -0.5537 | 6.2847 | YRI |
| Hs.400876 | Hs.400876-S   | rs788350   | 20 | 20 | 36498050 | 15265  | 12.2161 | 0.5931 | -0.6436 | 6.4038 | YRI |
| LOC375097 | GI_37555934-S | rs805529   | 20 | 20 | 36506696 | 23762  | 6.5521  | 0.3569 | 0.4253  | 6.2847 | YRI |
| Hs.400876 | Hs.400876-S   | rs805529   | 20 | 20 | 36506696 | 23911  | 7.1526  | 0.3861 | 0.4988  | 6.4038 | YRI |
| FLJ12785  | GI_31542679-S | rs2245231  | 20 | 20 | 36829534 | 4543   | 6.1923  | 0.3388 | -0.1328 | 6.1433 | YRI |
| FLJ12785  | GI_31542679-S | rs2077109  | 20 | 20 | 36852700 | 18623  | 6.4151  | 0.3653 | -0.1363 | 6.1433 | YRI |
| TOMM34    | GI_40807467-S | rs10485453 | 20 | 20 | 43002140 | 2254   | 8.3640  | 0.4413 | 0.3860  | 5.9571 | YRI |
| TOMM34    | GI_40807467-S | rs2284268  | 20 | 20 | 43015135 | 10741  | 8.3640  | 0.4413 | -0.3860 | 5.9571 | YRI |
| Hs.473309 | Hs.473309-S   | rs2427554  | 20 | 20 | 62020009 | 3031   | 5.7424  | 0.3155 | 0.0864  | 5.6193 | YRI |
| Hs.473309 | Hs.473309-S   | rs2427555  | 20 | 20 | 62021161 | 4183   | 5.8980  | 0.3283 | -0.0894 | 5.6193 | YRI |
| CBR1      | GI_4502598-S  | rs735142   | 21 | 21 | 36382034 | 15101  | 7.0623  | 0.3818 | 0.3014  | 6.9315 | YRI |
| HSF2BP    | GI_5901979-S  | rs230645   | 21 | 21 | 43743035 | 30760  | 6.9763  | 0.3777 | 0.0899  | 6.3841 | YRI |
| HSF2BP    | GI_5901979-S  | rs162381   | 21 | 21 | 43745343 | 28452  | 7.2605  | 0.3913 | 0.0912  | 6.3841 | YRI |
| HSF2BP    | GI_5901979-S  | rs91424    | 21 | 21 | 43745589 | 28206  | 7.2605  | 0.3913 | -0.0912 | 6.3841 | YRI |
| HSF2BP    | GI_5901979-S  | rs162378   | 21 | 21 | 43750333 | 23462  | 7.4522  | 0.4002 | 0.0953  | 6.3841 | YRI |
| HSF2BP    | GI_5901979-S  | rs162367   | 21 | 21 | 43759285 | 14510  | 7.4726  | 0.4012 | 0.0961  | 6.3841 | YRI |
| HSF2BP    | GI_5901979-S  | rs162388   | 21 | 21 | 43760460 | 13335  | 7.0189  | 0.3798 | 0.0923  | 6.3841 | YRI |
| HSF2BP    | GI_5901979-S  | rs167930   | 21 | 21 | 43771053 | 2742   | 6.8394  | 0.3869 | 0.0904  | 6.3841 | YRI |
| HSF2BP    | GI_5901979-S  | rs162396   | 21 | 21 | 43772235 | 1560   | 6.9170  | 0.3748 | 0.0899  | 6.3841 | YRI |
| HSF2BP    | GI_5901979-S  | rs162398   | 21 | 21 | 43773713 | 82     | 6.9170  | 0.3748 | 0.0899  | 6.3841 | YRI |
| HSF2BP    | GI_5901979-S  | rs162343   | 21 | 21 | 43781500 | 7705   | 6.9170  | 0.3748 | -0.0899 | 6.3841 | YRI |
| HSF2BP    | GI_5901979-S  | rs1836856  | 21 | 21 | 43789066 | 15271  | 8.5058  | 0.4474 | -0.1013 | 6.3841 | YRI |
| HSF2BP    | GI_5901979-S  | rs8131020  | 21 | 21 | 43805491 | 31696  | 8.5058  | 0.4474 | 0.1013  | 6.3841 | YRI |
| HSF2BP    | GI_5901979-S  | rs11701518 | 21 | 21 | 43811507 | 37712  | 8.5058  | 0.4474 | -0.1013 | 6.3841 | YRI |
| HSF2BP    | GI_5901979-S  | rs3788062  | 21 | 21 | 43815587 | 41792  | 7.9762  | 0.4242 | -0.0973 | 6.3841 | YRI |
| HSF2BP    | GI_5901979-S  | rs2838317  | 21 | 21 | 43816219 | 42424  | 8.5058  | 0.4474 | -0.1013 | 6.3841 | YRI |
| HSF2BP    | GI_5901979-S  | rs2838319  | 21 | 21 | 43816329 | 42534  | 8.5058  | 0.4474 | -0.1013 | 6.3841 | YRI |
| HSF2BP    | GI_5901979-S  | rs2838321  | 21 | 21 | 43819916 | 46121  | 7.8909  | 0.4203 | -0.0950 | 6.3841 | YRI |
| HSF2BP    | GI_5901979-S  | rs9978811  | 21 | 21 | 43823111 | 49316  | 8.5604  | 0.4802 | -0.1091 | 6.3841 | YRI |
| HSF2BP    | GI_5901979-S  | rs1378079  | 21 | 21 | 43835615 | 61820  | 7.2867  | 0.3925 | -0.0951 | 6.3841 | YRI |
| HSF2BP    | GI_5901979-S  | rs1454651  | 21 | 21 | 43836904 | 63109  | 6.9447  | 0.3762 | -0.0889 | 6.3841 | YRI |
| HSF2BP    | GI_5901979-S  | rs7279958  | 21 | 21 | 43840444 | 66649  | 8.2028  | 0.4342 | 0.0998  | 6.3841 | YRI |
| HSF2BP    | GI_5901979-S  | rs6518301  | 21 | 21 | 43841246 | 67451  | 7.1480  | 0.3859 | 0.0963  | 6.3841 | YRI |
| HSF2BP    | GI_5901979-S  | rs9981790  | 21 | 21 | 43869480 | 95685  | 6.6549  | 0.3723 | 0.0898  | 6.3841 | YRI |
| HSF2BP    | GI_5901979-S  | rs12627667 | 21 | 21 | 43895824 | 122029 | 8.2917  | 0.4381 | -0.0965 | 6.3841 | YRI |
| HSF2BP    | GI_5901979-S  | rs2838336  | 21 | 21 | 43896169 | 122374 | 8.2917  | 0.4381 | -0.0965 | 6.3841 | YRI |
| HSF2BP    | GI_5901979-S  | rs2838341  | 21 | 21 | 43900871 | 127076 | 8.2917  | 0.4381 | -0.0965 | 6.3841 | YRI |
| HSF2BP    | GI_5901979-S  | rs7279968  | 21 | 21 | 43901826 | 128031 | 8.1616  | 0.4381 | -0.0965 | 6.3841 | YRI |
| HSF2BP    | GI_5901979-S  | rs2838343  | 21 | 21 | 43902463 | 128668 | 8.7371  | 0.4573 | -0.1000 | 6.3841 | YRI |
| HSF2BP    | GI_5901979-S  | rs7276633  | 21 | 21 | 43903228 | 129433 | 7.2325  | 0.3899 | -0.0929 | 6.3841 | YRI |
| HSF2BP    | GI_5901979-S  | rs7282122  | 21 | 21 | 43906793 | 132998 | 7.5337  | 0.4040 | 0.0941  | 6.3841 | YRI |
| HSF2BP    | GI_5901979-S  | rs2250773  | 21 | 21 | 43912214 | 138419 | 6.8400  | 0.3711 | 0.0863  | 6.3841 | YRI |
| HSF2BP    | GI_5901979-S  | rs2838344  | 21 | 21 | 43914305 | 140510 | 6.8400  | 0.3711 | 0.0863  | 6.3841 | YRI |
| HSF2BP    | GI_5901979-S  | rs2251253  | 21 | 21 | 43916685 | 142890 | 6.8400  | 0.3711 | 0.0863  | 6.3841 | YRI |
| HSF2BP    | GI_5901979-S  | rs2155722  | 21 | 21 | 43920634 | 146839 | 6.8400  | 0.3711 | 0.0863  | 6.3841 | YRI |
| HSF2BP    | GI_5901979-S  | rs6518310  | 21 | 21 | 43923098 | 149303 | 7.3245  | 0.3943 | 0.0904  | 6.3841 | YRI |
| C21orf56  | GI_23346426-S | rs8133205  | 21 | 21 | 46423708 | 18182  | 9.1112  | 0.4729 | -1.1684 | 6.9928 | YRI |
| C21orf56  | GI_23346426-S | rs6518275  | 21 | 21 | 46424246 | 18720  | 9.1331  | 0.4858 | -1.1654 | 6.9928 | YRI |
| C21orf56  | GI_23346426-S | rs8133082  | 21 | 21 | 46424341 | 18815  | 11.2751 | 0.5550 | -1.2860 | 6.9928 | YRI |

|           |               |            |    |    |          |        |         |        |         |        |     |
|-----------|---------------|------------|----|----|----------|--------|---------|--------|---------|--------|-----|
| C21orf56  | GI_23346426-S | rs8134519  | 21 | 21 | 46426577 | 21051  | 7.8737  | 0.4196 | 1.0809  | 6.9928 | YRI |
| UBE2L3    | GI_38157977-A | rs181363   | 22 | 22 | 20256818 | 45949  | 6.4367  | 0.3512 | -0.1931 | 6.2102 | YRI |
| UBE2L3    | GI_38157977-A | rs878825   | 22 | 22 | 20306803 | 4036   | 7.7950  | 0.4160 | 0.1934  | 6.2102 | YRI |
| UBE2L3    | GI_38157977-A | rs2298429  | 22 | 22 | 20307814 | 5047   | 6.8181  | 0.3700 | 0.1846  | 6.2102 | YRI |
| GSTT1     | GI_4504184-S  | rs140294   | 22 | 22 | 22668889 | 32067  | 6.8017  | 0.3692 | 1.2716  | 6.3187 | YRI |
| CRYBB2    | GI_4503062-S  | rs6519611  | 22 | 22 | 24170409 | 218080 | 10.8704 | 0.5407 | 0.5929  | 7.7306 | YRI |
| Hs.150050 | Hs.150050-S   | rs6519611  | 22 | 22 | 24170409 | 70900  | 10.5082 | 0.5274 | -0.1369 | 6.2823 | YRI |
| CRYBB2    | GI_4503062-S  | rs9624836  | 22 | 22 | 24170641 | 218312 | 11.5356 | 0.5640 | 0.6072  | 7.7306 | YRI |
| Hs.150050 | Hs.150050-S   | rs9624836  | 22 | 22 | 24170641 | 70668  | 11.2292 | 0.5534 | -0.1406 | 6.2823 | YRI |
| CRYBB2    | GI_4503062-S  | rs6004662  | 22 | 22 | 24186678 | 234349 | 10.8704 | 0.5407 | -0.5929 | 7.7306 | YRI |
| Hs.150050 | Hs.150050-S   | rs6004662  | 22 | 22 | 24186678 | 54631  | 10.5082 | 0.5274 | 0.1369  | 6.2823 | YRI |
| CRYBB2    | GI_4503062-S  | rs560175   | 22 | 22 | 24190779 | 238450 | 8.4953  | 0.4470 | -0.7653 | 7.7306 | YRI |
| CRYBB2    | GI_4503062-S  | rs594239   | 22 | 22 | 24193760 | 241431 | 7.8700  | 0.4194 | -0.7422 | 7.7306 | YRI |
| Hs.150050 | Hs.150050-S   | rs594239   | 22 | 22 | 24193760 | 47549  | 7.0647  | 0.3820 | 0.1658  | 6.2823 | YRI |
| CRYBB2    | GI_4503062-S  | rs760554   | 22 | 22 | 24197146 | 244817 | 14.9274 | 0.6661 | 0.7197  | 7.7306 | YRI |
| Hs.150050 | Hs.150050-S   | rs760554   | 22 | 22 | 24197146 | 44163  | 15.4050 | 0.6784 | -0.1697 | 6.2823 | YRI |
| CRYBB2    | GI_4503062-S  | rs760555   | 22 | 22 | 24197391 | 245062 | 10.8704 | 0.5407 | -0.5929 | 7.7306 | YRI |
| Hs.150050 | Hs.150050-S   | rs760555   | 22 | 22 | 24197391 | 43918  | 10.5082 | 0.5274 | 0.1369  | 6.2823 | YRI |
| CRYBB2    | GI_4503062-S  | rs6004667  | 22 | 22 | 24199018 | 246689 | 11.3450 | 0.5638 | -0.6066 | 7.7306 | YRI |
| Hs.150050 | Hs.150050-S   | rs6004667  | 22 | 22 | 24199018 | 42291  | 10.2266 | 0.5231 | 0.1365  | 6.2823 | YRI |
| CRYBB2    | GI_4503062-S  | rs6004668  | 22 | 22 | 24199056 | 246727 | 10.8704 | 0.5407 | -0.5929 | 7.7306 | YRI |
| Hs.150050 | Hs.150050-S   | rs6004668  | 22 | 22 | 24199056 | 42253  | 10.5082 | 0.5274 | 0.1369  | 6.2823 | YRI |
| CRYBB2    | GI_4503062-S  | rs7285549  | 22 | 22 | 24199134 | 246805 | 8.9805  | 0.5120 | 0.4953  | 7.7306 | YRI |
| Hs.150050 | Hs.150050-S   | rs7285549  | 22 | 22 | 24199134 | 42175  | 9.7291  | 0.5434 | -0.1374 | 6.2823 | YRI |
| CRYBB2    | GI_4503062-S  | rs1930961  | 22 | 22 | 24199819 | 247490 | 10.8704 | 0.5407 | -0.5929 | 7.7306 | YRI |
| Hs.150050 | Hs.150050-S   | rs1930961  | 22 | 22 | 24199819 | 41490  | 10.5082 | 0.5274 | 0.1369  | 6.2823 | YRI |
| CRYBB2    | GI_4503062-S  | rs5996945  | 22 | 22 | 24200127 | 247798 | 10.8704 | 0.5407 | 0.5929  | 7.7306 | YRI |
| Hs.150050 | Hs.150050-S   | rs5996945  | 22 | 22 | 24200127 | 41182  | 10.5082 | 0.5274 | -0.1369 | 6.2823 | YRI |
| CRYBB2    | GI_4503062-S  | rs6004669  | 22 | 22 | 24200357 | 248028 | 11.2459 | 0.5801 | -0.6123 | 7.7306 | YRI |
| Hs.150050 | Hs.150050-S   | rs6004669  | 22 | 22 | 24200357 | 40952  | 9.1850  | 0.5006 | 0.1323  | 6.2823 | YRI |
| CRYBB2    | GI_4503062-S  | rs997872   | 22 | 22 | 24203168 | 250839 | 10.8704 | 0.5407 | 0.5929  | 7.7306 | YRI |
| Hs.150050 | Hs.150050-S   | rs997872   | 22 | 22 | 24203168 | 38141  | 10.5082 | 0.5274 | -0.1369 | 6.2823 | YRI |
| CRYBB2    | GI_4503062-S  | rs6004672  | 22 | 22 | 24205567 | 253238 | 11.5356 | 0.5640 | -0.6072 | 7.7306 | YRI |
| Hs.150050 | Hs.150050-S   | rs6004672  | 22 | 22 | 24205567 | 35742  | 11.2292 | 0.5534 | 0.1406  | 6.2823 | YRI |
| Hs.150050 | Hs.150050-S   | rs8141065  | 22 | 22 | 24209742 | 31567  | 6.6215  | 0.3706 | -0.1214 | 6.2823 | YRI |
| CRYBB2    | GI_4503062-S  | rs6004673  | 22 | 22 | 24209907 | 257578 | 10.7696 | 0.5562 | -0.6013 | 7.7306 | YRI |
| Hs.150050 | Hs.150050-S   | rs6004673  | 22 | 22 | 24209907 | 31402  | 9.7462  | 0.5171 | 0.1351  | 6.2823 | YRI |
| CRYBB2    | GI_4503062-S  | rs6004675  | 22 | 22 | 24213939 | 261610 | 10.8704 | 0.5407 | 0.5929  | 7.7306 | YRI |
| Hs.150050 | Hs.150050-S   | rs6004675  | 22 | 22 | 24213939 | 27370  | 10.5082 | 0.5274 | -0.1369 | 6.2823 | YRI |
| Hs.150050 | Hs.150050-S   | rs5761089  | 22 | 22 | 24222648 | 18661  | 6.9825  | 0.3886 | 0.1866  | 6.2823 | YRI |
| CRYBB2    | GI_4503062-S  | rs738194   | 22 | 22 | 24229975 | 277646 | 7.8700  | 0.4194 | -0.7422 | 7.7306 | YRI |
| Hs.150050 | Hs.150050-S   | rs738194   | 22 | 22 | 24229975 | 11334  | 7.0647  | 0.3820 | 0.1658  | 6.2823 | YRI |
| CRYBB2    | GI_4503062-S  | rs653042   | 22 | 22 | 24234071 | 281742 | 7.8700  | 0.4194 | 0.7422  | 7.7306 | YRI |
| Hs.150050 | Hs.150050-S   | rs653042   | 22 | 22 | 24234071 | 7238   | 7.0647  | 0.3820 | -0.1658 | 6.2823 | YRI |
| CRYBB2    | GI_4503062-S  | rs487272   | 22 | 22 | 24235433 | 283104 | 7.8700  | 0.4194 | 0.7422  | 7.7306 | YRI |
| Hs.150050 | Hs.150050-S   | rs487272   | 22 | 22 | 24235433 | 5876   | 7.0647  | 0.3820 | -0.1658 | 6.2823 | YRI |
| CRYBB2    | GI_4503062-S  | rs5752169  | 22 | 22 | 24242215 | 289886 | 7.7974  | 0.4216 | 0.7554  | 7.7306 | YRI |
| Hs.150050 | Hs.150050-S   | rs5752169  | 22 | 22 | 24242215 | 906    | 6.9152  | 0.3799 | -0.1677 | 6.2823 | YRI |
| MPST      | GI_23510449-S | rs5756489  | 22 | 22 | 35741697 | 8369   | 7.1411  | 0.3909 | 0.3427  | 6.0539 | YRI |
| DDX17     | GI_38201711-I | rs138435   | 22 | 22 | 37202418 | 6287   | 6.4891  | 0.3588 | 0.4511  | 6.4887 | YRI |
| C22orf2   | GI_21359898-S | rs16999109 | 22 | 22 | 37306531 | 87576  | 6.3808  | 0.3484 | 0.3655  | 6.0569 | YRI |
| C22orf2   | GI_21359898-S | rs16999114 | 22 | 22 | 37306858 | 87249  | 6.3808  | 0.3484 | -0.3655 | 6.0569 | YRI |
| C22orf2   | GI_21359898-S | rs16999142 | 22 | 22 | 37323282 | 70825  | 6.4092  | 0.3547 | -0.3695 | 6.0569 | YRI |
| C22orf2   | GI_21359898-S | rs7290217  | 22 | 22 | 37351296 | 42811  | 6.3808  | 0.3484 | 0.3655  | 6.0569 | YRI |
| C22orf2   | GI_21359898-S | rs16999166 | 22 | 22 | 37352683 | 41424  | 6.3808  | 0.3484 | -0.3655 | 6.0569 | YRI |
| C22orf2   | GI_21359898-S | rs3761455  | 22 | 22 | 37391351 | 2756   | 7.2599  | 0.3912 | 0.3448  | 6.0569 | YRI |
| C22orf2   | GI_21359898-S | rs6519132  | 22 | 22 | 37395422 | 1315   | 8.0920  | 0.4350 | -0.3549 | 6.0569 | YRI |
| C22orf2   | GI_21359898-S | rs16999224 | 22 | 22 | 37401087 | 6980   | 7.5391  | 0.4043 | -0.3086 | 6.0569 | YRI |
| C22orf2   | GI_21359898-S | rs2072800  | 22 | 22 | 37420487 | 26380  | 8.9167  | 0.4648 | -0.3567 | 6.0569 | YRI |

|          |               |            |    |    |          |       |         |        |         |         |     |
|----------|---------------|------------|----|----|----------|-------|---------|--------|---------|---------|-----|
| C22orf2  | GI_21359898-S | rs16999281 | 22 | 22 | 37433133 | 39026 | 8.9167  | 0.4648 | -0.3567 | 6.0569  | YRI |
| C22orf2  | GI_21359898-S | rs138691   | 22 | 22 | 37439810 | 45703 | 8.9167  | 0.4648 | -0.3567 | 6.0569  | YRI |
| C22orf2  | GI_21359898-S | rs138694   | 22 | 22 | 37444596 | 50489 | 8.9167  | 0.4648 | -0.3567 | 6.0569  | YRI |
| C22orf2  | GI_21359898-S | rs138695   | 22 | 22 | 37444738 | 50631 | 8.9167  | 0.4648 | -0.3567 | 6.0569  | YRI |
| C22orf2  | GI_21359898-S | rs138696   | 22 | 22 | 37444994 | 50887 | 8.9167  | 0.4648 | 0.3567  | 6.0569  | YRI |
| C22orf2  | GI_21359898-S | rs16999297 | 22 | 22 | 37446538 | 52431 | 8.9167  | 0.4648 | -0.3567 | 6.0569  | YRI |
| C22orf2  | GI_21359898-S | rs138697   | 22 | 22 | 37448826 | 54719 | 8.9167  | 0.4648 | 0.3567  | 6.0569  | YRI |
| C22orf2  | GI_21359898-S | rs16999301 | 22 | 22 | 37450029 | 55922 | 8.6680  | 0.4602 | 0.3551  | 6.0569  | YRI |
| SYNGR1   | GI_22035699-A | rs137698   | 22 | 22 | 38071303 | 25327 | 7.7319  | 0.4131 | -0.5893 | 6.0268  | YRI |
| SYNGR1   | GI_39777618-I | rs137698   | 22 | 22 | 38071303 | 27438 | 7.6015  | 0.4072 | -0.4030 | 6.0268  | YRI |
| SYNGR1   | GI_22035699-A | rs909685   | 22 | 22 | 38072171 | 24459 | 16.0636 | 0.6947 | -0.6794 | 6.0268  | YRI |
| SYNGR1   | GI_39777617-I | rs909685   | 22 | 22 | 38072171 | 33808 | 7.9214  | 0.4217 | -0.1399 | 6.0268  | YRI |
| SYNGR1   | GI_39777618-I | rs909685   | 22 | 22 | 38072171 | 26570 | 14.6006 | 0.6573 | -0.4554 | 6.0268  | YRI |
| SYNGR1   | GI_22035699-A | rs3788551  | 22 | 22 | 38077027 | 19603 | 6.7088  | 0.3647 | 0.5931  | 6.0268  | YRI |
| SYNGR1   | GI_39777618-I | rs3788551  | 22 | 22 | 38077027 | 21714 | 6.4503  | 0.3519 | 0.4016  | 6.0268  | YRI |
| BIK      | GI_21536418-S | rs9620115  | 22 | 22 | 41834166 | 15872 | 6.3431  | 0.3465 | -0.7097 | 6.2081  | YRI |
| BIK      | GI_21536418-S | rs4988386  | 22 | 22 | 41839384 | 10654 | 7.0544  | 0.3815 | -0.6801 | 6.2081  | YRI |
| BIK      | GI_21536418-S | rs4988388  | 22 | 22 | 41839606 | 10432 | 6.4106  | 0.3499 | 0.7049  | 6.2081  | YRI |
| BIK      | GI_21536418-S | rs4988389  | 22 | 22 | 41839837 | 10201 | 6.2920  | 0.3488 | 0.7051  | 6.2081  | YRI |
| BIK      | GI_21536418-S | rs8136891  | 22 | 22 | 41840201 | 9837  | 6.4106  | 0.3499 | -0.7049 | 6.2081  | YRI |
| BIK      | GI_21536418-S | rs4988394  | 22 | 22 | 41840631 | 9407  | 6.4821  | 0.3534 | 0.6891  | 6.2081  | YRI |
| BIK      | GI_21536418-S | rs4988398  | 22 | 22 | 41841224 | 8814  | 6.2920  | 0.3488 | 0.7051  | 6.2081  | YRI |
| NUP50    | GI_24497446-A | rs132858   | 22 | 22 | 43883272 | 17633 | 7.4492  | 0.4055 | 0.2082  | 5.9209  | YRI |
| NUP50    | GI_24497446-A | rs132863   | 22 | 22 | 43884964 | 15941 | 7.8174  | 0.4170 | 0.2179  | 5.9209  | YRI |
| NUP50    | GI_24497446-A | rs132871   | 22 | 22 | 43886950 | 13955 | 7.8174  | 0.4170 | -0.2179 | 5.9209  | YRI |
| NUP50    | GI_24497446-A | rs132873   | 22 | 22 | 43887239 | 13666 | 7.8174  | 0.4170 | 0.2179  | 5.9209  | YRI |
| NUP50    | GI_24497446-A | rs132874   | 22 | 22 | 43887380 | 13525 | 7.8174  | 0.4170 | 0.2179  | 5.9209  | YRI |
| NUP50    | GI_24497446-A | rs132875   | 22 | 22 | 43887449 | 13456 | 7.8174  | 0.4170 | -0.2179 | 5.9209  | YRI |
| NUP50    | GI_24497446-A | rs132881   | 22 | 22 | 43888117 | 12788 | 7.9167  | 0.4271 | -0.2272 | 5.9209  | YRI |
| NUP50    | GI_24497446-A | rs132883   | 22 | 22 | 43889048 | 11857 | 7.6823  | 0.4164 | 0.2181  | 5.9209  | YRI |
| NUP50    | GI_24497446-A | rs132884   | 22 | 22 | 43889523 | 11382 | 7.8174  | 0.4170 | 0.2179  | 5.9209  | YRI |
| NUP50    | GI_24497446-A | rs226523   | 22 | 22 | 43897647 | 3258  | 7.5512  | 0.4048 | -0.2161 | 5.9209  | YRI |
| NUP50    | GI_24497446-A | rs226524   | 22 | 22 | 43897768 | 3137  | 6.8547  | 0.3718 | -0.2033 | 5.9209  | YRI |
| NUP50    | GI_24497446-A | rs6007500  | 22 | 22 | 43904472 | 3567  | 6.0605  | 0.3321 | -0.1994 | 5.9209  | YRI |
| FLJ20635 | GI_8923587-S  | rs226503   | 22 | 22 | 44025778 | 31313 | 13.4725 | 0.6255 | 1.1561  | 10.5665 | YRI |
| FLJ20635 | GI_8923587-S  | rs226492   | 22 | 22 | 44035026 | 22065 | 10.9286 | 0.5427 | -1.0191 | 10.5665 | YRI |
| FLJ20635 | GI_8923587-S  | rs6006984  | 22 | 22 | 44035474 | 21617 | 18.3271 | 0.7446 | 0.7536  | 10.5665 | YRI |
| FLJ20635 | GI_8923587-S  | rs6519922  | 22 | 22 | 44036145 | 20946 | 18.3271 | 0.7446 | -0.7536 | 10.5665 | YRI |
| FLJ20635 | GI_8923587-S  | rs720682   | 22 | 22 | 44038396 | 18695 | 17.9901 | 0.7438 | 0.7536  | 10.5665 | YRI |
| FLJ20635 | GI_8923587-S  | rs1473953  | 22 | 22 | 44038578 | 18513 | 20.1125 | 0.7782 | 0.7818  | 10.5665 | YRI |
| FLJ20635 | GI_8923587-S  | rs6007590  | 22 | 22 | 44044121 | 12970 | 11.5477 | 0.5708 | 1.0709  | 10.5665 | YRI |
| FLJ20635 | GI_8923587-S  | rs6006988  | 22 | 22 | 44045643 | 11448 | 20.1125 | 0.7782 | 0.7818  | 10.5665 | YRI |
| FLJ20635 | GI_8923587-S  | rs2350628  | 22 | 22 | 44045813 | 11278 | 20.1125 | 0.7782 | 0.7818  | 10.5665 | YRI |
| FLJ20635 | GI_8923587-S  | rs742013   | 22 | 22 | 44045929 | 11162 | 13.4725 | 0.6255 | -1.1561 | 10.5665 | YRI |
| FLJ20635 | GI_8923587-S  | rs742014   | 22 | 22 | 44046061 | 11030 | 13.4725 | 0.6255 | 1.1561  | 10.5665 | YRI |
| FLJ20635 | GI_8923587-S  | rs736702   | 22 | 22 | 44046137 | 10954 | 13.4725 | 0.6255 | -1.1561 | 10.5665 | YRI |
| FLJ20635 | GI_8923587-S  | rs6007594  | 22 | 22 | 44048907 | 8184  | 15.5602 | 0.6823 | 0.6676  | 10.5665 | YRI |
| FLJ20635 | GI_8923587-S  | rs136584   | 22 | 22 | 44096750 | 39659 | 12.5622 | 0.6042 | -0.7141 | 10.5665 | YRI |
| FLJ20635 | GI_8923587-S  | rs6007009  | 22 | 22 | 44102045 | 44954 | 13.8782 | 0.6373 | 0.6333  | 10.5665 | YRI |
| FLJ20635 | GI_8923587-S  | rs6006743  | 22 | 22 | 44126060 | 68969 | 13.8782 | 0.6373 | 0.6333  | 10.5665 | YRI |
| FLJ20699 | GI_8923627-S  | rs11090858 | 22 | 22 | 44998516 | 11738 | 7.0520  | 0.3813 | -0.3673 | 6.2297  | YRI |
| FLJ20699 | GI_8923627-S  | rs6008497  | 22 | 22 | 44999185 | 11069 | 7.2484  | 0.3907 | 0.3583  | 6.2297  | YRI |
| FLJ20699 | GI_8923627-S  | rs6008506  | 22 | 22 | 45000540 | 9714  | 7.0520  | 0.3813 | -0.3673 | 6.2297  | YRI |
| FLJ20699 | GI_8923627-S  | rs6007794  | 22 | 22 | 45005536 | 4718  | 9.0981  | 0.4724 | -0.4093 | 6.2297  | YRI |
| FLJ20699 | GI_8923627-S  | rs6008552  | 22 | 22 | 45008727 | 1527  | 15.7108 | 0.6989 | -0.4841 | 6.2297  | YRI |
| FLJ20699 | GI_8923627-S  | rs6008553  | 22 | 22 | 45008840 | 1414  | 16.4232 | 0.7032 | -0.4739 | 6.2297  | YRI |
| FLJ20699 | GI_8923627-S  | rs8140182  | 22 | 22 | 45011919 | 1665  | 12.3565 | 0.6176 | -0.4501 | 6.2297  | YRI |
| FLJ20699 | GI_8923627-S  | rs7290732  | 22 | 22 | 45012422 | 2168  | 7.3003  | 0.3931 | -0.3631 | 6.2297  | YRI |
| FLJ20699 | GI_8923627-S  | rs6008587  | 22 | 22 | 45022510 | 12256 | 9.1994  | 0.4765 | 0.4327  | 6.2297  | YRI |

|           |               |            |    |    |          |       |         |        |         |        |     |
|-----------|---------------|------------|----|----|----------|-------|---------|--------|---------|--------|-----|
| FLJ20699  | GI_8923627-S  | rs12165597 | 22 | 22 | 45026103 | 15849 | 7.6786  | 0.4107 | 0.4142  | 6.2297 | YRI |
| FLJ20699  | GI_8923627-S  | rs6008622  | 22 | 22 | 45030400 | 20146 | 8.7996  | 0.4599 | -0.4183 | 6.2297 | YRI |
| FLJ20699  | GI_8923627-S  | rs6008625  | 22 | 22 | 45030675 | 20421 | 9.3919  | 0.4843 | 0.4199  | 6.2297 | YRI |
| FLJ20699  | GI_8923627-S  | rs6008662  | 22 | 22 | 45034436 | 24182 | 8.6102  | 0.4760 | -0.3525 | 6.2297 | YRI |
| LOC388918 | GI_42662524-S | rs131777   | 22 | 22 | 49281177 | 1293  | 6.1830  | 0.3383 | 0.4615  | 5.7552 | YRI |
| CHKL      | GI_23238259-I | rs2073604  | 22 | 22 | 49299069 | 8510  | 6.7031  | 0.3644 | 0.4411  | 5.5625 | YRI |
| CHKL      | GI_23238259-I | rs12627787 | 22 | 22 | 49302525 | 5054  | 8.2154  | 0.4348 | 0.3977  | 5.5625 | YRI |
| CHKL      | GI_23238259-I | rs2269383  | 22 | 22 | 49302919 | 4660  | 11.2416 | 0.5538 | -0.5837 | 5.5625 | YRI |
| CHKL      | GI_23238259-I | rs1557503  | 22 | 22 | 49303216 | 4363  | 9.3825  | 0.4840 | 0.4946  | 5.5625 | YRI |
| CHKL      | GI_23238259-I | rs17836732 | 22 | 22 | 49303340 | 4239  | 10.8824 | 0.5411 | -0.4989 | 5.5625 | YRI |
| CHKL      | GI_23238259-I | rs3213446  | 22 | 22 | 49305818 | 1761  | 9.3825  | 0.4840 | -0.4946 | 5.5625 | YRI |
| CHKL      | GI_23238259-I | rs3213445  | 22 | 22 | 49305982 | 1597  | 5.9582  | 0.3413 | 0.5269  | 5.5625 | YRI |
| CHKL      | GI_23238259-I | rs5770916  | 22 | 22 | 49306242 | 1337  | 7.8230  | 0.4173 | 0.4199  | 5.5625 | YRI |
| CHKL      | GI_23238259-I | rs6009931  | 22 | 22 | 49313296 | 5717  | 8.9045  | 0.4643 | -0.5215 | 5.5625 | YRI |
| CHKL      | GI_23238259-I | rs6010023  | 22 | 22 | 49318346 | 10767 | 8.9045  | 0.4643 | 0.5215  | 5.5625 | YRI |
| RABL2B    | GI_5902039-S  | rs6010088  | 22 | 22 | 49512244 | 15979 | 5.2151  | 0.2872 | 0.1994  | 5.212  | YRI |
