# Supplementary material
Source: PubMed Central journal article supplement (PMC2683249)
Supplement: NIHMS4491-supplement-3.pdf [file NIHMS4491-supplement-3.pdf]

**Significant *cis*- 1Mb associations**  
**Spearman rank correlation, individual population analysis, 0.001 permutation threshold**

| Gene       | Illumina GeneID | SNP Label     | Gene chromosome | SNP chromosome | SNP coordinate (NCBI B35) | Distance in bp SNP - probe midpoint | $-\log_{10}(\text{p-value})$ | permutation threshold (0.001) | Population |
|------------|-----------------|---------------|-----------------|----------------|---------------------------|-------------------------------------|------------------------------|-------------------------------|------------|
| rs12041371 | PHC2            | GI_37595529-A | 1               | 1              | 33430755                  | 27817                               | 7.5925                       | 5.87726                       | CEU        |
| rs4652994  | PHC2            | GI_37595529-A | 1               | 1              | 33432639                  | 25933                               | 7.0209                       | 5.87726                       | CEU        |
| rs1132790  | PHC2            | GI_37595529-A | 1               | 1              | 33434365                  | 24207                               | 7.3863                       | 5.87726                       | CEU        |
| rs10914678 | PHC2            | GI_37595529-A | 1               | 1              | 33436321                  | 22251                               | 6.5897                       | 5.87726                       | CEU        |
| rs4653002  | PHC2            | GI_37595529-A | 1               | 1              | 33439619                  | 18953                               | 7.5925                       | 5.87726                       | CEU        |
| rs4653017  | PHC2            | GI_37595529-A | 1               | 1              | 33445821                  | 12751                               | 10.0153                      | 5.87726                       | CEU        |
| rs4233197  | PHC2            | GI_37595529-A | 1               | 1              | 33452841                  | 5731                                | 7.5925                       | 5.87726                       | CEU        |
| rs6682438  | PHC2            | GI_37595529-A | 1               | 1              | 33453239                  | 5333                                | 11.3898                      | 5.87726                       | CEU        |
| rs4652839  | PHC2            | GI_37595529-A | 1               | 1              | 33454022                  | 4550                                | 12.1269                      | 5.87726                       | CEU        |
| rs5861     | PHC2            | GI_37595529-A | 1               | 1              | 33458613                  | 41                                  | 12.1269                      | 5.87726                       | CEU        |
| rs10914684 | PHC2            | GI_37595529-A | 1               | 1              | 33464665                  | 6093                                | 10.9491                      | 5.87726                       | CEU        |
| rs10914685 | PHC2            | GI_37595529-A | 1               | 1              | 33464683                  | 6111                                | 12.1269                      | 5.87726                       | CEU        |
| rs4361958  | PHC2            | GI_37595529-A | 1               | 1              | 33465647                  | 7075                                | 7.0664                       | 5.87726                       | CEU        |
| rs7513015  | PHC2            | GI_37595529-A | 1               | 1              | 33468357                  | 9785                                | 12.1269                      | 5.87726                       | CEU        |
| rs4338326  | PHC2            | GI_37595529-A | 1               | 1              | 33470231                  | 11659                               | 5.8881                       | 5.87726                       | CEU        |
| rs12138864 | PHC2            | GI_37595529-A | 1               | 1              | 33472241                  | 13669                               | 7.4532                       | 5.87726                       | CEU        |
| rs10798939 | PHC2            | GI_37595529-A | 1               | 1              | 33478530                  | 19958                               | 7.3999                       | 5.87726                       | CEU        |
| rs4652856  | PHC2            | GI_37595529-A | 1               | 1              | 33487507                  | 28935                               | 11.3593                      | 5.87726                       | CEU        |
| rs4233199  | PHC2            | GI_37595529-A | 1               | 1              | 33488655                  | 30083                               | 7.5157                       | 5.87726                       | CEU        |
| rs4653081  | PHC2            | GI_37595529-A | 1               | 1              | 33488923                  | 30351                               | 12.1269                      | 5.87726                       | CEU        |
| rs6678247  | PHC2            | GI_37595529-A | 1               | 1              | 33492362                  | 33790                               | 12.1269                      | 5.87726                       | CEU        |
| rs4653095  | PHC2            | GI_37595529-A | 1               | 1              | 33497927                  | 39355                               | 12.1269                      | 5.87726                       | CEU        |
| rs6675264  | PHC2            | GI_37595529-A | 1               | 1              | 33500927                  | 42355                               | 12.1269                      | 5.87726                       | CEU        |
| rs6425816  | PHC2            | GI_37595529-A | 1               | 1              | 33501958                  | 43386                               | 11.9826                      | 5.87726                       | CEU        |
| rs7545416  | PHC2            | GI_37595529-A | 1               | 1              | 33505889                  | 47317                               | 12.1269                      | 5.87726                       | CEU        |
| rs4233201  | PHC2            | GI_37595529-A | 1               | 1              | 33511146                  | 52574                               | 11.5583                      | 5.87726                       | CEU        |
| rs4652870  | PHC2            | GI_37595529-A | 1               | 1              | 33516833                  | 58261                               | 12.1269                      | 5.87726                       | CEU        |
| rs10798944 | PHC2            | GI_37595529-A | 1               | 1              | 33521549                  | 62977                               | 10.9449                      | 5.87726                       | CEU        |
| rs942485   | PHC2            | GI_37595529-A | 1               | 1              | 33524916                  | 66344                               | 12.1269                      | 5.87726                       | CEU        |
| rs2763038  | PHC2            | GI_37595529-A | 1               | 1              | 33527053                  | 68481                               | 12.8219                      | 5.87726                       | CEU        |
| rs2247959  | PHC2            | GI_37595529-A | 1               | 1              | 33528832                  | 70260                               | 12.1269                      | 5.87726                       | CEU        |
| rs4652871  | PHC2            | GI_37595529-A | 1               | 1              | 33531610                  | 73038                               | 12.1269                      | 5.87726                       | CEU        |
| rs4298699  | PHC2            | GI_37595529-A | 1               | 1              | 33535327                  | 76755                               | 11.7927                      | 5.87726                       | CEU        |
| rs7514553  | PHC2            | GI_37595529-A | 1               | 1              | 33536195                  | 77623                               | 11.3988                      | 5.87726                       | CEU        |
| rs4652874  | PHC2            | GI_37595529-A | 1               | 1              | 33537367                  | 78795                               | 11.5467                      | 5.87726                       | CEU        |
| rs4653125  | PHC2            | GI_37595529-A | 1               | 1              | 33539665                  | 81093                               | 10.5008                      | 5.87726                       | CEU        |
| rs6661037  | PHC2            | GI_37595529-A | 1               | 1              | 33541686                  | 83114                               | 6.8642                       | 5.87726                       | CEU        |
| rs7514303  | PHC2            | GI_37595529-A | 1               | 1              | 33542068                  | 83496                               | 10.5765                      | 5.87726                       | CEU        |
| rs6701932  | PHC2            | GI_37595529-A | 1               | 1              | 33544223                  | 85651                               | 10.4246                      | 5.87726                       | CEU        |

|            |           |               |   |   |          |        |         |         |     |
|------------|-----------|---------------|---|---|----------|--------|---------|---------|-----|
| rs6675663  | PHC2      | GI_37595529-A | 1 | 1 | 33546784 | 88212  | 11.9285 | 5.87726 | CEU |
| rs6663355  | PHC2      | GI_37595529-A | 1 | 1 | 33546901 | 88329  | 10.5758 | 5.87726 | CEU |
| rs6672188  | PHC2      | GI_37595529-A | 1 | 1 | 33547986 | 89414  | 10.048  | 5.87726 | CEU |
| rs1535916  | PHC2      | GI_37595529-A | 1 | 1 | 33549449 | 90877  | 6.3872  | 5.87726 | CEU |
| rs6677391  | PHC2      | GI_37595529-A | 1 | 1 | 33551761 | 93189  | 12.1269 | 5.87726 | CEU |
| rs10753283 | PHC2      | GI_37595529-A | 1 | 1 | 33552336 | 93764  | 12.1269 | 5.87726 | CEU |
| rs4652879  | PHC2      | GI_37595529-A | 1 | 1 | 33553657 | 95085  | 6.8642  | 5.87726 | CEU |
| rs4652880  | PHC2      | GI_37595529-A | 1 | 1 | 33553918 | 95346  | 12.1269 | 5.87726 | CEU |
| rs1998624  | PHC2      | GI_37595529-A | 1 | 1 | 33560242 | 101670 | 12.5526 | 5.87726 | CEU |
| rs1324476  | PHC2      | GI_37595529-A | 1 | 1 | 33566337 | 107765 | 9.9007  | 5.87726 | CEU |
| rs10798949 | PHC2      | GI_37595529-A | 1 | 1 | 33576272 | 117700 | 9.9411  | 5.87726 | CEU |
| rs6425819  | PHC2      | GI_37595529-A | 1 | 1 | 33578601 | 120029 | 8.0743  | 5.87726 | CEU |
| rs2336240  | PHC2      | GI_37595529-A | 1 | 1 | 33584844 | 126272 | 8.9345  | 5.87726 | CEU |
| rs631432   | FLJ31434  | GI_22749032-S | 1 | 1 | 37870464 | 65375  | 6.2554  | 6.21096 | CEU |
| rs4660652  | NDUFS5    | GI_4758789-S  | 1 | 1 | 39126952 | 34184  | 6.4242  | 5.77932 | CEU |
| rs11205515 | NDUFS5    | GI_4758789-S  | 1 | 1 | 39127974 | 33162  | 6.6215  | 5.77932 | CEU |
| rs3768324  | NDUFS5    | GI_4758789-S  | 1 | 1 | 39161555 | 419    | 8.4704  | 5.77932 | CEU |
| rs11205599 | NDUFS5    | GI_4758789-S  | 1 | 1 | 39175234 | 14098  | 8.7535  | 5.77932 | CEU |
| rs10888650 | NDUFS5    | GI_4758789-S  | 1 | 1 | 39176254 | 15118  | 8.7535  | 5.77932 | CEU |
| rs12032116 | NDUFS5    | GI_4758789-S  | 1 | 1 | 39189402 | 28266  | 8.5247  | 5.77932 | CEU |
| rs2819330  | B4GALT2   | GI_13929463-A | 1 | 1 | 43672050 | 453746 | 5.7185  | 5.70246 | CEU |
| rs3014216  | Hs.396207 | Hs.396207-S   | 1 | 1 | 45704853 | 68141  | 6.2806  | 5.72673 | CEU |
| rs780957   | Hs.396207 | Hs.396207-S   | 1 | 1 | 45706450 | 66544  | 5.831   | 5.72673 | CEU |
| rs1084086  | Hs.396207 | Hs.396207-S   | 1 | 1 | 45710193 | 62801  | 20.4772 | 5.72673 | CEU |
| rs2152078  | Hs.396207 | Hs.396207-S   | 1 | 1 | 45724693 | 48301  | 19.9796 | 5.72673 | CEU |
| rs2991979  | Hs.396207 | Hs.396207-S   | 1 | 1 | 45724951 | 48043  | 20.4772 | 5.72673 | CEU |
| rs7548549  | Hs.396207 | Hs.396207-S   | 1 | 1 | 45735701 | 37293  | 20.5903 | 5.72673 | CEU |
| rs2230657  | Hs.396207 | Hs.396207-S   | 1 | 1 | 45742582 | 30412  | 6.9544  | 5.72673 | CEU |
| rs2050376  | Hs.396207 | Hs.396207-S   | 1 | 1 | 45747723 | 25271  | 21.7042 | 5.72673 | CEU |
| rs2230658  | Hs.396207 | Hs.396207-S   | 1 | 1 | 45747947 | 25047  | 21.4557 | 5.72673 | CEU |
| rs2230659  | Hs.396207 | Hs.396207-S   | 1 | 1 | 45747977 | 25017  | 21.7042 | 5.72673 | CEU |
| rs1972410  | Hs.396207 | Hs.396207-S   | 1 | 1 | 45750040 | 22954  | 21.6529 | 5.72673 | CEU |
| rs2991986  | Hs.396207 | Hs.396207-S   | 1 | 1 | 45750375 | 22619  | 21.7042 | 5.72673 | CEU |
| rs2991987  | Hs.396207 | Hs.396207-S   | 1 | 1 | 45750515 | 22479  | 21.7042 | 5.72673 | CEU |
| rs2253862  | Hs.396207 | Hs.396207-S   | 1 | 1 | 45751053 | 21941  | 21.4364 | 5.72673 | CEU |
| rs2991988  | Hs.396207 | Hs.396207-S   | 1 | 1 | 45751524 | 21470  | 21.6529 | 5.72673 | CEU |
| rs2991989  | Hs.396207 | Hs.396207-S   | 1 | 1 | 45752058 | 20936  | 20.9858 | 5.72673 | CEU |
| rs1547924  | Hs.396207 | Hs.396207-S   | 1 | 1 | 45754205 | 18789  | 21.7042 | 5.72673 | CEU |
| rs1547925  | Hs.396207 | Hs.396207-S   | 1 | 1 | 45754449 | 18545  | 21.6529 | 5.72673 | CEU |
| rs2275086  | Hs.396207 | Hs.396207-S   | 1 | 1 | 45754972 | 18022  | 21.6529 | 5.72673 | CEU |
| rs3014245  | Hs.396207 | Hs.396207-S   | 1 | 1 | 45756006 | 16988  | 21.6529 | 5.72673 | CEU |
| rs3014242  | Hs.396207 | Hs.396207-S   | 1 | 1 | 45756670 | 16324  | 21.1849 | 5.72673 | CEU |
| rs3014237  | Hs.396207 | Hs.396207-S   | 1 | 1 | 45759345 | 13649  | 18.1648 | 5.72673 | CEU |
| rs3014235  | Hs.396207 | Hs.396207-S   | 1 | 1 | 45760605 | 12389  | 21.6529 | 5.72673 | CEU |
| rs9429172  | Hs.396207 | Hs.396207-S   | 1 | 1 | 45761569 | 11425  | 20.1806 | 5.72673 | CEU |
| rs1250     | Hs.396207 | Hs.396207-S   | 1 | 1 | 45763120 | 9874   | 20.7395 | 5.72673 | CEU |
| rs4391704  | Hs.396207 | Hs.396207-S   | 1 | 1 | 45763329 | 9665   | 6.6391  | 5.72673 | CEU |
| rs12037561 | Hs.396207 | Hs.396207-S   | 1 | 1 | 45764365 | 8629   | 21.9307 | 5.72673 | CEU |
| rs6703748  | Hs.396207 | Hs.396207-S   | 1 | 1 | 45765069 | 7925   | 18.3189 | 5.72673 | CEU |
| rs10890333 | Hs.396207 | Hs.396207-S   | 1 | 1 | 45769415 | 3579   | 22.0044 | 5.72673 | CEU |
| rs10890334 | Hs.396207 | Hs.396207-S   | 1 | 1 | 45769471 | 3523   | 18.9895 | 5.72673 | CEU |
| rs4431884  | Hs.396207 | Hs.396207-S   | 1 | 1 | 45770416 | 2578   | 21.4854 | 5.72673 | CEU |
| rs6694889  | Hs.396207 | Hs.396207-S   | 1 | 1 | 45770899 | 2095   | 20.8594 | 5.72673 | CEU |
| rs12023439 | Hs.396207 | Hs.396207-S   | 1 | 1 | 45773729 | 735    | 21.772  | 5.72673 | CEU |
| rs12043945 | Hs.396207 | Hs.396207-S   | 1 | 1 | 45776015 | 3021   | 20.6153 | 5.72673 | CEU |
| rs12091503 | Hs.396207 | Hs.396207-S   | 1 | 1 | 45776961 | 3967   | 21.8121 | 5.72673 | CEU |

|            |           |              |   |   |          |        |         |         |     |
|------------|-----------|--------------|---|---|----------|--------|---------|---------|-----|
| rs11211145 | Hs.396207 | Hs.396207-S  | 1 | 1 | 45777584 | 4590   | 21.9307 | 5.72673 | CEU |
| rs5021934  | Hs.396207 | Hs.396207-S  | 1 | 1 | 45778397 | 5403   | 6.6319  | 5.72673 | CEU |
| rs11211146 | Hs.396207 | Hs.396207-S  | 1 | 1 | 45778887 | 5893   | 18.3585 | 5.72673 | CEU |
| rs11211147 | Hs.396207 | Hs.396207-S  | 1 | 1 | 45779187 | 6193   | 18.3585 | 5.72673 | CEU |
| rs4660312  | Hs.396207 | Hs.396207-S  | 1 | 1 | 45779665 | 6671   | 6.3371  | 5.72673 | CEU |
| rs4660313  | Hs.396207 | Hs.396207-S  | 1 | 1 | 45779934 | 6940   | 21.772  | 5.72673 | CEU |
| rs4660880  | Hs.396207 | Hs.396207-S  | 1 | 1 | 45780133 | 7139   | 21.9307 | 5.72673 | CEU |
| rs10890336 | Hs.396207 | Hs.396207-S  | 1 | 1 | 45780149 | 7155   | 20.2124 | 5.72673 | CEU |
| rs11211149 | Hs.396207 | Hs.396207-S  | 1 | 1 | 45781311 | 8317   | 16.8054 | 5.72673 | CEU |
| rs11211152 | Hs.396207 | Hs.396207-S  | 1 | 1 | 45783250 | 10256  | 21.9307 | 5.72673 | CEU |
| rs4660882  | Hs.396207 | Hs.396207-S  | 1 | 1 | 45785385 | 12391  | 6.3371  | 5.72673 | CEU |
| rs4607935  | Hs.396207 | Hs.396207-S  | 1 | 1 | 45786254 | 13260  | 18.1166 | 5.72673 | CEU |
| rs4609469  | IPP       | GI_5174472-S | 1 | 1 | 45786278 | 47557  | 5.8206  | 5.43756 | CEU |
| rs4609469  | Hs.396207 | Hs.396207-S  | 1 | 1 | 45786278 | 13284  | 20.1757 | 5.72673 | CEU |
| rs12049027 | Hs.396207 | Hs.396207-S  | 1 | 1 | 45787277 | 14283  | 18.0753 | 5.72673 | CEU |
| rs10789467 | Hs.396207 | Hs.396207-S  | 1 | 1 | 45787838 | 14844  | 21.454  | 5.72673 | CEU |
| rs6656279  | Hs.396207 | Hs.396207-S  | 1 | 1 | 45793181 | 20187  | 6.4989  | 5.72673 | CEU |
| rs3811436  | IPP       | GI_5174472-S | 1 | 1 | 45794973 | 38862  | 5.4842  | 5.43756 | CEU |
| rs3811436  | Hs.396207 | Hs.396207-S  | 1 | 1 | 45794973 | 21979  | 20.8284 | 5.72673 | CEU |
| rs12024590 | IPP       | GI_5174472-S | 1 | 1 | 45796589 | 37246  | 5.6245  | 5.43756 | CEU |
| rs12024590 | Hs.396207 | Hs.396207-S  | 1 | 1 | 45796589 | 23595  | 21.4098 | 5.72673 | CEU |
| rs3013597  | Hs.396207 | Hs.396207-S  | 1 | 1 | 45797449 | 24455  | 6.8583  | 5.72673 | CEU |
| rs11211157 | Hs.396207 | Hs.396207-S  | 1 | 1 | 45801937 | 28943  | 22.0044 | 5.72673 | CEU |
| rs10430105 | Hs.396207 | Hs.396207-S  | 1 | 1 | 45807969 | 34975  | 21.4098 | 5.72673 | CEU |
| rs11211160 | Hs.396207 | Hs.396207-S  | 1 | 1 | 45815322 | 42328  | 18.1624 | 5.72673 | CEU |
| rs10890341 | IPP       | GI_5174472-S | 1 | 1 | 45816333 | 17502  | 5.4876  | 5.43756 | CEU |
| rs10890341 | Hs.396207 | Hs.396207-S  | 1 | 1 | 45816333 | 43339  | 20.0034 | 5.72673 | CEU |
| rs3013595  | Hs.396207 | Hs.396207-S  | 1 | 1 | 45822296 | 49302  | 6.3371  | 5.72673 | CEU |
| rs11211163 | Hs.396207 | Hs.396207-S  | 1 | 1 | 45822641 | 49647  | 16.3552 | 5.72673 | CEU |
| rs11211166 | Hs.396207 | Hs.396207-S  | 1 | 1 | 45827035 | 54041  | 21.6035 | 5.72673 | CEU |
| rs10789470 | Hs.396207 | Hs.396207-S  | 1 | 1 | 45827424 | 54430  | 22.0044 | 5.72673 | CEU |
| rs10749856 | Hs.396207 | Hs.396207-S  | 1 | 1 | 45833939 | 60945  | 22.0044 | 5.72673 | CEU |
| rs4564187  | Hs.396207 | Hs.396207-S  | 1 | 1 | 45835954 | 62960  | 21.4854 | 5.72673 | CEU |
| rs4274104  | Hs.396207 | Hs.396207-S  | 1 | 1 | 45929961 | 156967 | 6.1852  | 5.72673 | CEU |
| rs11211173 | Hs.396207 | Hs.396207-S  | 1 | 1 | 45931396 | 158402 | 21.9307 | 5.72673 | CEU |
| rs12560266 | Hs.396207 | Hs.396207-S  | 1 | 1 | 45933637 | 160643 | 16.4088 | 5.72673 | CEU |
| rs11211176 | Hs.396207 | Hs.396207-S  | 1 | 1 | 45935106 | 162112 | 9.6284  | 5.72673 | CEU |
| rs11211178 | Hs.396207 | Hs.396207-S  | 1 | 1 | 45939586 | 166592 | 22.0044 | 5.72673 | CEU |
| rs4660314  | Hs.396207 | Hs.396207-S  | 1 | 1 | 45941905 | 168911 | 21.4854 | 5.72673 | CEU |
| rs4660883  | Hs.396207 | Hs.396207-S  | 1 | 1 | 45948118 | 175124 | 22.0044 | 5.72673 | CEU |
| rs6683274  | Hs.396207 | Hs.396207-S  | 1 | 1 | 45953658 | 180664 | 10.2364 | 5.72673 | CEU |
| rs10789474 | Hs.396207 | Hs.396207-S  | 1 | 1 | 45962060 | 189066 | 10.8619 | 5.72673 | CEU |
| rs7540578  | Hs.396207 | Hs.396207-S  | 1 | 1 | 45964164 | 191170 | 12.6038 | 5.72673 | CEU |
| rs6690386  | Hs.396207 | Hs.396207-S  | 1 | 1 | 45965031 | 192037 | 11.5998 | 5.72673 | CEU |
| rs6429578  | Hs.396207 | Hs.396207-S  | 1 | 1 | 45969130 | 196136 | 11.5998 | 5.72673 | CEU |
| rs12076580 | Hs.396207 | Hs.396207-S  | 1 | 1 | 45970179 | 197185 | 11.5998 | 5.72673 | CEU |
| rs7539800  | IPP       | GI_5174472-S | 1 | 1 | 45974149 | 140314 | 5.4833  | 5.43756 | CEU |
| rs7539800  | Hs.396207 | Hs.396207-S  | 1 | 1 | 45974149 | 201155 | 11.2174 | 5.72673 | CEU |
| rs10890350 | IPP       | GI_5174472-S | 1 | 1 | 45974398 | 140563 | 5.8972  | 5.43756 | CEU |
| rs10890350 | Hs.396207 | Hs.396207-S  | 1 | 1 | 45974398 | 201404 | 10.1639 | 5.72673 | CEU |
| rs4390216  | IPP       | GI_5174472-S | 1 | 1 | 45978476 | 144641 | 5.4833  | 5.43756 | CEU |
| rs4390216  | Hs.396207 | Hs.396207-S  | 1 | 1 | 45978476 | 205482 | 11.2174 | 5.72673 | CEU |
| rs6672115  | IPP       | GI_5174472-S | 1 | 1 | 45984899 | 151064 | 5.4833  | 5.43756 | CEU |
| rs6672115  | Hs.396207 | Hs.396207-S  | 1 | 1 | 45984899 | 211905 | 11.2174 | 5.72673 | CEU |
| rs6429580  | IPP       | GI_5174472-S | 1 | 1 | 45987668 | 153833 | 5.4833  | 5.43756 | CEU |
| rs6429580  | Hs.396207 | Hs.396207-S  | 1 | 1 | 45987668 | 214674 | 11.2174 | 5.72673 | CEU |

|            |           |              |   |   |          |        |         |         |     |
|------------|-----------|--------------|---|---|----------|--------|---------|---------|-----|
| rs7546237  | IPP       | GI_5174472-S | 1 | 1 | 45997630 | 163795 | 6.2932  | 5.43756 | CEU |
| rs7546237  | Hs.396207 | Hs.396207-S  | 1 | 1 | 45997630 | 224636 | 10.6358 | 5.72673 | CEU |
| rs11211200 | Hs.396207 | Hs.396207-S  | 1 | 1 | 46000372 | 227378 | 11.0784 | 5.72673 | CEU |
| rs4298677  | IPP       | GI_5174472-S | 1 | 1 | 46018639 | 184804 | 5.4833  | 5.43756 | CEU |
| rs4298677  | Hs.396207 | Hs.396207-S  | 1 | 1 | 46018639 | 245645 | 11.2174 | 5.72673 | CEU |
| rs10890355 | IPP       | GI_5174472-S | 1 | 1 | 46029368 | 195533 | 6.0541  | 5.43756 | CEU |
| rs10890355 | Hs.396207 | Hs.396207-S  | 1 | 1 | 46029368 | 256374 | 10.1481 | 5.72673 | CEU |
| rs11211204 | IPP       | GI_5174472-S | 1 | 1 | 46029884 | 196049 | 5.4833  | 5.43756 | CEU |
| rs11211204 | Hs.396207 | Hs.396207-S  | 1 | 1 | 46029884 | 256890 | 11.2174 | 5.72673 | CEU |
| rs7547189  | IPP       | GI_5174472-S | 1 | 1 | 46031534 | 197699 | 5.4833  | 5.43756 | CEU |
| rs7547189  | Hs.396207 | Hs.396207-S  | 1 | 1 | 46031534 | 258540 | 11.2174 | 5.72673 | CEU |
| rs7547284  | IPP       | GI_5174472-S | 1 | 1 | 46031585 | 197750 | 5.4833  | 5.43756 | CEU |
| rs7547284  | Hs.396207 | Hs.396207-S  | 1 | 1 | 46031585 | 258591 | 11.2174 | 5.72673 | CEU |
| rs6675222  | IPP       | GI_5174472-S | 1 | 1 | 46038596 | 204761 | 5.4923  | 5.43756 | CEU |
| rs6675222  | Hs.396207 | Hs.396207-S  | 1 | 1 | 46038596 | 265602 | 10.8251 | 5.72673 | CEU |
| rs4660895  | IPP       | GI_5174472-S | 1 | 1 | 46041759 | 207924 | 6.1243  | 5.43756 | CEU |
| rs4660895  | Hs.396207 | Hs.396207-S  | 1 | 1 | 46041759 | 268765 | 11.5268 | 5.72673 | CEU |
| rs7531911  | IPP       | GI_5174472-S | 1 | 1 | 46042443 | 208608 | 5.4833  | 5.43756 | CEU |
| rs7531911  | Hs.396207 | Hs.396207-S  | 1 | 1 | 46042443 | 269449 | 11.2174 | 5.72673 | CEU |
| rs4660318  | IPP       | GI_5174472-S | 1 | 1 | 46046896 | 213061 | 5.4923  | 5.43756 | CEU |
| rs4660318  | Hs.396207 | Hs.396207-S  | 1 | 1 | 46046896 | 273902 | 10.8251 | 5.72673 | CEU |
| rs10890359 | Hs.396207 | Hs.396207-S  | 1 | 1 | 46048655 | 275661 | 8.1877  | 5.72673 | CEU |
| rs6682683  | IPP       | GI_5174472-S | 1 | 1 | 46054357 | 220522 | 5.5631  | 5.43756 | CEU |
| rs6682683  | Hs.396207 | Hs.396207-S  | 1 | 1 | 46054357 | 281363 | 10.0435 | 5.72673 | CEU |
| rs11211217 | IPP       | GI_5174472-S | 1 | 1 | 46060249 | 226414 | 5.4833  | 5.43756 | CEU |
| rs11211217 | Hs.396207 | Hs.396207-S  | 1 | 1 | 46060249 | 287255 | 11.2174 | 5.72673 | CEU |
| rs10789478 | Hs.396207 | Hs.396207-S  | 1 | 1 | 46062526 | 289532 | 7.5741  | 5.72673 | CEU |
| rs4539075  | IPP       | GI_5174472-S | 1 | 1 | 46070030 | 236195 | 5.4833  | 5.43756 | CEU |
| rs4539075  | Hs.396207 | Hs.396207-S  | 1 | 1 | 46070030 | 297036 | 11.2174 | 5.72673 | CEU |
| rs10890365 | IPP       | GI_5174472-S | 1 | 1 | 46071368 | 237533 | 5.4833  | 5.43756 | CEU |
| rs10890365 | Hs.396207 | Hs.396207-S  | 1 | 1 | 46071368 | 298374 | 11.2174 | 5.72673 | CEU |
| rs11211219 | IPP       | GI_5174472-S | 1 | 1 | 46071498 | 237663 | 5.4833  | 5.43756 | CEU |
| rs11211219 | Hs.396207 | Hs.396207-S  | 1 | 1 | 46071498 | 298504 | 11.2174 | 5.72673 | CEU |
| rs7512395  | IPP       | GI_5174472-S | 1 | 1 | 46073197 | 239362 | 5.4833  | 5.43756 | CEU |
| rs7512395  | Hs.396207 | Hs.396207-S  | 1 | 1 | 46073197 | 300203 | 11.2174 | 5.72673 | CEU |
| rs7527244  | IPP       | GI_5174472-S | 1 | 1 | 46080792 | 246957 | 5.4833  | 5.43756 | CEU |
| rs7527244  | Hs.396207 | Hs.396207-S  | 1 | 1 | 46080792 | 307798 | 11.2174 | 5.72673 | CEU |
| rs9787412  | Hs.396207 | Hs.396207-S  | 1 | 1 | 46083616 | 310622 | 10.8251 | 5.72673 | CEU |
| rs4660896  | Hs.396207 | Hs.396207-S  | 1 | 1 | 46084436 | 311442 | 10.8251 | 5.72673 | CEU |
| rs10732844 | Hs.396207 | Hs.396207-S  | 1 | 1 | 46084708 | 311714 | 10.3512 | 5.72673 | CEU |
| rs12133129 | IPP       | GI_5174472-S | 1 | 1 | 46085368 | 251533 | 5.4833  | 5.43756 | CEU |
| rs12133129 | Hs.396207 | Hs.396207-S  | 1 | 1 | 46085368 | 312374 | 11.2174 | 5.72673 | CEU |
| rs11211223 | IPP       | GI_5174472-S | 1 | 1 | 46092625 | 258790 | 5.4833  | 5.43756 | CEU |
| rs11211223 | Hs.396207 | Hs.396207-S  | 1 | 1 | 46092625 | 319631 | 11.2174 | 5.72673 | CEU |
| rs6687301  | IPP       | GI_5174472-S | 1 | 1 | 46094872 | 261037 | 5.4833  | 5.43756 | CEU |
| rs6687301  | Hs.396207 | Hs.396207-S  | 1 | 1 | 46094872 | 321878 | 11.2174 | 5.72673 | CEU |
| rs6657720  | IPP       | GI_5174472-S | 1 | 1 | 46098289 | 264454 | 5.4833  | 5.43756 | CEU |
| rs6657720  | Hs.396207 | Hs.396207-S  | 1 | 1 | 46098289 | 325295 | 11.2174 | 5.72673 | CEU |
| rs10890370 | IPP       | GI_5174472-S | 1 | 1 | 46101237 | 267402 | 5.4833  | 5.43756 | CEU |
| rs10890370 | Hs.396207 | Hs.396207-S  | 1 | 1 | 46101237 | 328243 | 11.2174 | 5.72673 | CEU |
| rs7526369  | IPP       | GI_5174472-S | 1 | 1 | 46102580 | 268745 | 5.4833  | 5.43756 | CEU |
| rs7526369  | Hs.396207 | Hs.396207-S  | 1 | 1 | 46102580 | 329586 | 11.2174 | 5.72673 | CEU |
| rs10890371 | IPP       | GI_5174472-S | 1 | 1 | 46102917 | 269082 | 6.1104  | 5.43756 | CEU |
| rs10890371 | Hs.396207 | Hs.396207-S  | 1 | 1 | 46102917 | 329923 | 10.8976 | 5.72673 | CEU |
| rs10890372 | IPP       | GI_5174472-S | 1 | 1 | 46103040 | 269205 | 5.4876  | 5.43756 | CEU |
| rs10890372 | Hs.396207 | Hs.396207-S  | 1 | 1 | 46103040 | 330046 | 9.6198  | 5.72673 | CEU |

|            |           |              |   |   |          |        |         |         |     |
|------------|-----------|--------------|---|---|----------|--------|---------|---------|-----|
| rs4074225  | Hs.396207 | Hs.396207-S  | 1 | 1 | 46104384 | 331390 | 11.0784 | 5.72673 | CEU |
| rs10890373 | IPP       | GI_5174472-S | 1 | 1 | 46105775 | 271940 | 5.4833  | 5.43756 | CEU |
| rs10890373 | Hs.396207 | Hs.396207-S  | 1 | 1 | 46105775 | 332781 | 11.2174 | 5.72673 | CEU |
| rs4134387  | Hs.396207 | Hs.396207-S  | 1 | 1 | 46107178 | 334184 | 11.0784 | 5.72673 | CEU |
| rs6681068  | Hs.396207 | Hs.396207-S  | 1 | 1 | 46110402 | 337408 | 10.678  | 5.72673 | CEU |
| rs11211228 | IPP       | GI_5174472-S | 1 | 1 | 46111860 | 278025 | 5.4833  | 5.43756 | CEU |
| rs11211228 | Hs.396207 | Hs.396207-S  | 1 | 1 | 46111860 | 338866 | 11.2174 | 5.72673 | CEU |
| rs12022335 | Hs.396207 | Hs.396207-S  | 1 | 1 | 46114752 | 341758 | 10.0056 | 5.72673 | CEU |
| rs10789485 | IPP       | GI_5174472-S | 1 | 1 | 46119328 | 285493 | 5.4833  | 5.43756 | CEU |
| rs10789485 | Hs.396207 | Hs.396207-S  | 1 | 1 | 46119328 | 346334 | 11.2174 | 5.72673 | CEU |
| rs10789486 | Hs.396207 | Hs.396207-S  | 1 | 1 | 46120687 | 347693 | 10.8251 | 5.72673 | CEU |
| rs10890378 | IPP       | GI_5174472-S | 1 | 1 | 46122677 | 288842 | 5.4833  | 5.43756 | CEU |
| rs10890378 | Hs.396207 | Hs.396207-S  | 1 | 1 | 46122677 | 349683 | 11.2174 | 5.72673 | CEU |
| rs11211232 | IPP       | GI_5174472-S | 1 | 1 | 46123166 | 289331 | 5.4833  | 5.43756 | CEU |
| rs11211232 | Hs.396207 | Hs.396207-S  | 1 | 1 | 46123166 | 350172 | 11.2174 | 5.72673 | CEU |
| rs4660900  | IPP       | GI_5174472-S | 1 | 1 | 46131625 | 297790 | 5.4923  | 5.43756 | CEU |
| rs4660900  | Hs.396207 | Hs.396207-S  | 1 | 1 | 46131625 | 358631 | 10.8251 | 5.72673 | CEU |
| rs11211235 | Hs.396207 | Hs.396207-S  | 1 | 1 | 46152395 | 379401 | 11.0784 | 5.72673 | CEU |
| rs11211236 | IPP       | GI_5174472-S | 1 | 1 | 46155787 | 321952 | 5.4833  | 5.43756 | CEU |
| rs11211236 | Hs.396207 | Hs.396207-S  | 1 | 1 | 46155787 | 382793 | 11.2174 | 5.72673 | CEU |
| rs4660328  | IPP       | GI_5174472-S | 1 | 1 | 46156851 | 323016 | 5.4833  | 5.43756 | CEU |
| rs4660328  | Hs.396207 | Hs.396207-S  | 1 | 1 | 46156851 | 383857 | 11.2174 | 5.72673 | CEU |
| rs11211237 | Hs.396207 | Hs.396207-S  | 1 | 1 | 46159349 | 386355 | 8.8724  | 5.72673 | CEU |
| rs10890380 | IPP       | GI_5174472-S | 1 | 1 | 46161489 | 327654 | 5.4833  | 5.43756 | CEU |
| rs10890380 | Hs.396207 | Hs.396207-S  | 1 | 1 | 46161489 | 388495 | 11.2174 | 5.72673 | CEU |
| rs6429588  | IPP       | GI_5174472-S | 1 | 1 | 46166078 | 332243 | 5.4833  | 5.43756 | CEU |
| rs6429588  | Hs.396207 | Hs.396207-S  | 1 | 1 | 46166078 | 393084 | 11.2174 | 5.72673 | CEU |
| rs11211243 | IPP       | GI_5174472-S | 1 | 1 | 46167453 | 333618 | 5.4833  | 5.43756 | CEU |
| rs11211243 | Hs.396207 | Hs.396207-S  | 1 | 1 | 46167453 | 394459 | 11.2174 | 5.72673 | CEU |
| rs4660905  | IPP       | GI_5174472-S | 1 | 1 | 46173607 | 339772 | 5.4923  | 5.43756 | CEU |
| rs4660905  | Hs.396207 | Hs.396207-S  | 1 | 1 | 46173607 | 400613 | 10.8251 | 5.72673 | CEU |
| rs4660334  | IPP       | GI_5174472-S | 1 | 1 | 46174146 | 340311 | 5.4833  | 5.43756 | CEU |
| rs4660334  | Hs.396207 | Hs.396207-S  | 1 | 1 | 46174146 | 401152 | 11.2174 | 5.72673 | CEU |
| rs4073847  | IPP       | GI_5174472-S | 1 | 1 | 46175032 | 341197 | 5.4833  | 5.43756 | CEU |
| rs4073847  | Hs.396207 | Hs.396207-S  | 1 | 1 | 46175032 | 402038 | 11.2174 | 5.72673 | CEU |
| rs6661500  | IPP       | GI_5174472-S | 1 | 1 | 46177682 | 343847 | 5.745   | 5.43756 | CEU |
| rs6661500  | Hs.396207 | Hs.396207-S  | 1 | 1 | 46177682 | 404688 | 10.3766 | 5.72673 | CEU |
| rs10890382 | IPP       | GI_5174472-S | 1 | 1 | 46181694 | 347859 | 5.4833  | 5.43756 | CEU |
| rs10890382 | Hs.396207 | Hs.396207-S  | 1 | 1 | 46181694 | 408700 | 11.2174 | 5.72673 | CEU |
| rs3922887  | IPP       | GI_5174472-S | 1 | 1 | 46185822 | 351987 | 5.4833  | 5.43756 | CEU |
| rs3922887  | Hs.396207 | Hs.396207-S  | 1 | 1 | 46185822 | 412828 | 11.2174 | 5.72673 | CEU |
| rs4660335  | IPP       | GI_5174472-S | 1 | 1 | 46186738 | 352903 | 5.4833  | 5.43756 | CEU |
| rs4660335  | Hs.396207 | Hs.396207-S  | 1 | 1 | 46186738 | 413744 | 11.2174 | 5.72673 | CEU |
| rs6677777  | IPP       | GI_5174472-S | 1 | 1 | 46187856 | 354021 | 5.4833  | 5.43756 | CEU |
| rs6677777  | Hs.396207 | Hs.396207-S  | 1 | 1 | 46187856 | 414862 | 11.2174 | 5.72673 | CEU |
| rs11211248 | IPP       | GI_5174472-S | 1 | 1 | 46188864 | 355029 | 5.4833  | 5.43756 | CEU |
| rs11211248 | Hs.396207 | Hs.396207-S  | 1 | 1 | 46188864 | 415870 | 11.2174 | 5.72673 | CEU |
| rs946527   | IPP       | GI_5174472-S | 1 | 1 | 46197990 | 364155 | 5.5806  | 5.43756 | CEU |
| rs946527   | Hs.396207 | Hs.396207-S  | 1 | 1 | 46197990 | 424996 | 10.0727 | 5.72673 | CEU |
| rs785478   | IPP       | GI_5174472-S | 1 | 1 | 46203655 | 369820 | 5.4833  | 5.43756 | CEU |
| rs785478   | Hs.396207 | Hs.396207-S  | 1 | 1 | 46203655 | 430661 | 11.2174 | 5.72673 | CEU |
| rs785480   | IPP       | GI_5174472-S | 1 | 1 | 46204184 | 370349 | 5.4833  | 5.43756 | CEU |
| rs785480   | Hs.396207 | Hs.396207-S  | 1 | 1 | 46204184 | 431190 | 11.2174 | 5.72673 | CEU |
| rs925524   | Hs.396207 | Hs.396207-S  | 1 | 1 | 46208729 | 435735 | 7.843   | 5.72673 | CEU |
| rs1622208  | IPP       | GI_5174472-S | 1 | 1 | 46210395 | 376560 | 5.4833  | 5.43756 | CEU |
| rs1622208  | Hs.396207 | Hs.396207-S  | 1 | 1 | 46210395 | 437401 | 11.2174 | 5.72673 | CEU |

|            |           |              |   |   |          |        |         |         |     |
|------------|-----------|--------------|---|---|----------|--------|---------|---------|-----|
| rs6675259  | Hs.396207 | Hs.396207-S  | 1 | 1 | 46214315 | 441321 | 10.1945 | 5.72673 | CEU |
| rs1768808  | Hs.396207 | Hs.396207-S  | 1 | 1 | 46215237 | 442243 | 10.7397 | 5.72673 | CEU |
| rs7538978  | Hs.396207 | Hs.396207-S  | 1 | 1 | 46217074 | 444080 | 10.8976 | 5.72673 | CEU |
| rs1707322  | IPP       | GI_5174472-S | 1 | 1 | 46217167 | 383332 | 5.4833  | 5.43756 | CEU |
| rs1707322  | Hs.396207 | Hs.396207-S  | 1 | 1 | 46217167 | 444173 | 11.2174 | 5.72673 | CEU |
| rs1707337  | IPP       | GI_5174472-S | 1 | 1 | 46220789 | 386954 | 5.4833  | 5.43756 | CEU |
| rs1707337  | Hs.396207 | Hs.396207-S  | 1 | 1 | 46220789 | 447795 | 11.2174 | 5.72673 | CEU |
| rs1768807  | IPP       | GI_5174472-S | 1 | 1 | 46222590 | 388755 | 5.4833  | 5.43756 | CEU |
| rs1768807  | Hs.396207 | Hs.396207-S  | 1 | 1 | 46222590 | 449596 | 11.2174 | 5.72673 | CEU |
| rs1768817  | Hs.396207 | Hs.396207-S  | 1 | 1 | 46226554 | 453560 | 11.0784 | 5.72673 | CEU |
| rs785468   | IPP       | GI_5174472-S | 1 | 1 | 46233537 | 399702 | 5.4833  | 5.43756 | CEU |
| rs785468   | Hs.396207 | Hs.396207-S  | 1 | 1 | 46233537 | 460543 | 11.2174 | 5.72673 | CEU |
| rs785467   | IPP       | GI_5174472-S | 1 | 1 | 46233579 | 399744 | 5.4833  | 5.43756 | CEU |
| rs785467   | Hs.396207 | Hs.396207-S  | 1 | 1 | 46233579 | 460585 | 11.2174 | 5.72673 | CEU |
| rs785465   | IPP       | GI_5174472-S | 1 | 1 | 46234597 | 400762 | 6.1104  | 5.43756 | CEU |
| rs785465   | Hs.396207 | Hs.396207-S  | 1 | 1 | 46234597 | 461603 | 10.8976 | 5.72673 | CEU |
| rs785508   | IPP       | GI_5174472-S | 1 | 1 | 46239179 | 405344 | 5.7397  | 5.43756 | CEU |
| rs785508   | Hs.396207 | Hs.396207-S  | 1 | 1 | 46239179 | 466185 | 11.3811 | 5.72673 | CEU |
| rs785509   | IPP       | GI_5174472-S | 1 | 1 | 46239320 | 405485 | 5.7397  | 5.43756 | CEU |
| rs785509   | Hs.396207 | Hs.396207-S  | 1 | 1 | 46239320 | 466326 | 11.3811 | 5.72673 | CEU |
| rs785510   | IPP       | GI_5174472-S | 1 | 1 | 46240638 | 406803 | 5.4833  | 5.43756 | CEU |
| rs785510   | Hs.396207 | Hs.396207-S  | 1 | 1 | 46240638 | 467644 | 11.2174 | 5.72673 | CEU |
| rs2458400  | IPP       | GI_5174472-S | 1 | 1 | 46242818 | 408983 | 5.4833  | 5.43756 | CEU |
| rs2458400  | Hs.396207 | Hs.396207-S  | 1 | 1 | 46242818 | 469824 | 11.2174 | 5.72673 | CEU |
| rs785506   | IPP       | GI_5174472-S | 1 | 1 | 46252672 | 418837 | 5.4833  | 5.43756 | CEU |
| rs785506   | Hs.396207 | Hs.396207-S  | 1 | 1 | 46252672 | 479678 | 11.2174 | 5.72673 | CEU |
| rs1613296  | IPP       | GI_5174472-S | 1 | 1 | 46258872 | 425037 | 5.5918  | 5.43756 | CEU |
| rs1613296  | Hs.396207 | Hs.396207-S  | 1 | 1 | 46258872 | 485878 | 10.519  | 5.72673 | CEU |
| rs1768801  | Hs.396207 | Hs.396207-S  | 1 | 1 | 46261157 | 488163 | 7.0093  | 5.72673 | CEU |
| rs785484   | IPP       | GI_5174472-S | 1 | 1 | 46286035 | 452200 | 5.4469  | 5.43756 | CEU |
| rs785484   | Hs.396207 | Hs.396207-S  | 1 | 1 | 46286035 | 513041 | 11.0607 | 5.72673 | CEU |
| rs785490   | IPP       | GI_5174472-S | 1 | 1 | 46289144 | 455309 | 5.4833  | 5.43756 | CEU |
| rs785490   | Hs.396207 | Hs.396207-S  | 1 | 1 | 46289144 | 516150 | 11.2174 | 5.72673 | CEU |
| rs785491   | Hs.396207 | Hs.396207-S  | 1 | 1 | 46295438 | 522444 | 5.9261  | 5.72673 | CEU |
| rs785493   | IPP       | GI_5174472-S | 1 | 1 | 46296879 | 463044 | 5.4833  | 5.43756 | CEU |
| rs785493   | Hs.396207 | Hs.396207-S  | 1 | 1 | 46296879 | 523885 | 11.2174 | 5.72673 | CEU |
| rs785497   | Hs.396207 | Hs.396207-S  | 1 | 1 | 46303923 | 530929 | 10.7532 | 5.72673 | CEU |
| rs785504   | IPP       | GI_5174472-S | 1 | 1 | 46307716 | 473881 | 5.4833  | 5.43756 | CEU |
| rs785504   | Hs.396207 | Hs.396207-S  | 1 | 1 | 46307716 | 534722 | 11.2174 | 5.72673 | CEU |
| rs9793263  | hmm8232   | hmm8232-S    | 1 | 1 | 46434409 | 105335 | 7.0007  | 5.44913 | CEU |
| rs12137934 | hmm8232   | hmm8232-S    | 1 | 1 | 46440933 | 98811  | 9.9558  | 5.44913 | CEU |
| rs12146051 | hmm8232   | hmm8232-S    | 1 | 1 | 46454972 | 84772  | 9.9302  | 5.44913 | CEU |
| rs12142240 | hmm8232   | hmm8232-S    | 1 | 1 | 46459321 | 80423  | 9.9302  | 5.44913 | CEU |
| rs17361749 | hmm8232   | hmm8232-S    | 1 | 1 | 46518500 | 21244  | 11.4065 | 5.44913 | CEU |
| rs10489769 | hmm8232   | hmm8232-S    | 1 | 1 | 46518723 | 21021  | 14.5107 | 5.44913 | CEU |
| rs17357621 | hmm8232   | hmm8232-S    | 1 | 1 | 46519717 | 20027  | 13.875  | 5.44913 | CEU |
| rs17357628 | hmm8232   | hmm8232-S    | 1 | 1 | 46520482 | 19262  | 15.274  | 5.44913 | CEU |
| rs17357635 | hmm8232   | hmm8232-S    | 1 | 1 | 46520688 | 19056  | 14.8251 | 5.44913 | CEU |
| rs7525309  | hmm8232   | hmm8232-S    | 1 | 1 | 46521045 | 18699  | 15.2491 | 5.44913 | CEU |
| rs7548675  | hmm8232   | hmm8232-S    | 1 | 1 | 46521341 | 18403  | 10.2546 | 5.44913 | CEU |
| rs7515284  | hmm8232   | hmm8232-S    | 1 | 1 | 46521439 | 18305  | 15.2491 | 5.44913 | CEU |
| rs17361763 | hmm8232   | hmm8232-S    | 1 | 1 | 46522690 | 17054  | 15.2491 | 5.44913 | CEU |
| rs6684274  | hmm8232   | hmm8232-S    | 1 | 1 | 46522862 | 16882  | 15.2491 | 5.44913 | CEU |
| rs6696777  | hmm8232   | hmm8232-S    | 1 | 1 | 46522990 | 16754  | 15.2491 | 5.44913 | CEU |
| rs6659228  | hmm8232   | hmm8232-S    | 1 | 1 | 46523047 | 16697  | 15.0126 | 5.44913 | CEU |
| rs6697123  | hmm8232   | hmm8232-S    | 1 | 1 | 46523330 | 16414  | 14.7159 | 5.44913 | CEU |

|            |          |               |   |   |          |        |         |         |     |
|------------|----------|---------------|---|---|----------|--------|---------|---------|-----|
| rs17357676 | hmm8232  | hmm8232-S     | 1 | 1 | 46524464 | 15280  | 15.2491 | 5.44913 | CEU |
| rs17361791 | hmm8232  | hmm8232-S     | 1 | 1 | 46524539 | 15205  | 15.0126 | 5.44913 | CEU |
| rs17361805 | hmm8232  | hmm8232-S     | 1 | 1 | 46525987 | 13757  | 15.2491 | 5.44913 | CEU |
| rs17361812 | hmm8232  | hmm8232-S     | 1 | 1 | 46526028 | 13716  | 15.2491 | 5.44913 | CEU |
| rs5013330  | hmm8232  | hmm8232-S     | 1 | 1 | 46527174 | 12570  | 12.2774 | 5.44913 | CEU |
| rs17357683 | hmm8232  | hmm8232-S     | 1 | 1 | 46527398 | 12346  | 14.276  | 5.44913 | CEU |
| rs6667861  | hmm8232  | hmm8232-S     | 1 | 1 | 46527769 | 11975  | 14.385  | 5.44913 | CEU |
| rs1057533  | hmm8232  | hmm8232-S     | 1 | 1 | 46527856 | 11888  | 15.2491 | 5.44913 | CEU |
| rs1057534  | hmm8232  | hmm8232-S     | 1 | 1 | 46527900 | 11844  | 15.2491 | 5.44913 | CEU |
| rs1057535  | hmm8232  | hmm8232-S     | 1 | 1 | 46527918 | 11826  | 14.7159 | 5.44913 | CEU |
| rs1475390  | hmm8232  | hmm8232-S     | 1 | 1 | 46528360 | 11384  | 15.2491 | 5.44913 | CEU |
| rs1475389  | hmm8232  | hmm8232-S     | 1 | 1 | 46528449 | 11295  | 15.2491 | 5.44913 | CEU |
| rs966907   | hmm8232  | hmm8232-S     | 1 | 1 | 46529145 | 10599  | 15.2491 | 5.44913 | CEU |
| rs17413694 | hmm8232  | hmm8232-S     | 1 | 1 | 46530436 | 9308   | 14.7159 | 5.44913 | CEU |
| rs17413701 | hmm8232  | hmm8232-S     | 1 | 1 | 46530472 | 9272   | 15.2491 | 5.44913 | CEU |
| rs7515598  | hmm8232  | hmm8232-S     | 1 | 1 | 46530499 | 9245   | 15.2491 | 5.44913 | CEU |
| rs12385696 | hmm8232  | hmm8232-S     | 1 | 1 | 46530856 | 8888   | 15.2491 | 5.44913 | CEU |
| rs12385693 | hmm8232  | hmm8232-S     | 1 | 1 | 46530941 | 8803   | 14.2738 | 5.44913 | CEU |
| rs10157084 | hmm8232  | hmm8232-S     | 1 | 1 | 46532995 | 6749   | 15.2491 | 5.44913 | CEU |
| rs10158572 | hmm8232  | hmm8232-S     | 1 | 1 | 46534460 | 5284   | 15.2491 | 5.44913 | CEU |
| rs9661240  | hmm8232  | hmm8232-S     | 1 | 1 | 46539070 | 674    | 15.2491 | 5.44913 | CEU |
| rs1053624  | hmm8232  | hmm8232-S     | 1 | 1 | 46539505 | 239    | 15.2491 | 5.44913 | CEU |
| rs6429599  | hmm8232  | hmm8232-S     | 1 | 1 | 46539891 | 147    | 12.8626 | 5.44913 | CEU |
| rs17361819 | hmm8232  | hmm8232-S     | 1 | 1 | 46540129 | 385    | 12.9749 | 5.44913 | CEU |
| rs17361833 | hmm8232  | hmm8232-S     | 1 | 1 | 46540720 | 976    | 14.8251 | 5.44913 | CEU |
| rs17357711 | hmm8232  | hmm8232-S     | 1 | 1 | 46541033 | 1289   | 15.2491 | 5.44913 | CEU |
| rs10252    | hmm8232  | hmm8232-S     | 1 | 1 | 46542450 | 2706   | 12.7371 | 5.44913 | CEU |
| rs12062    | hmm8232  | hmm8232-S     | 1 | 1 | 46542467 | 2723   | 15.2491 | 5.44913 | CEU |
| rs17357759 | hmm8232  | hmm8232-S     | 1 | 1 | 46544554 | 4810   | 12.865  | 5.44913 | CEU |
| rs17361873 | hmm8232  | hmm8232-S     | 1 | 1 | 46544706 | 4962   | 13.3491 | 5.44913 | CEU |
| rs12075550 | hmm8232  | hmm8232-S     | 1 | 1 | 46546232 | 6488   | 12.7371 | 5.44913 | CEU |
| rs17361887 | hmm8232  | hmm8232-S     | 1 | 1 | 46546795 | 7051   | 15.2491 | 5.44913 | CEU |
| rs3863641  | hmm8232  | hmm8232-S     | 1 | 1 | 46555236 | 15492  | 12.6326 | 5.44913 | CEU |
| rs12073998 | hmm8232  | hmm8232-S     | 1 | 1 | 46555552 | 15808  | 11.0474 | 5.44913 | CEU |
| rs13374968 | hmm8232  | hmm8232-S     | 1 | 1 | 46555928 | 16184  | 15.2491 | 5.44913 | CEU |
| rs6658556  | hmm8232  | hmm8232-S     | 1 | 1 | 46556200 | 16456  | 15.2491 | 5.44913 | CEU |
| rs6695043  | hmm8232  | hmm8232-S     | 1 | 1 | 46556550 | 16806  | 15.2491 | 5.44913 | CEU |
| rs17361915 | hmm8232  | hmm8232-S     | 1 | 1 | 46559341 | 19597  | 11.1489 | 5.44913 | CEU |
| rs11211271 | hmm8232  | hmm8232-S     | 1 | 1 | 46560450 | 20706  | 12.292  | 5.44913 | CEU |
| rs3991877  | hmm8232  | hmm8232-S     | 1 | 1 | 46565769 | 26025  | 14.745  | 5.44913 | CEU |
| rs913168   | hmm8232  | hmm8232-S     | 1 | 1 | 46570596 | 30852  | 12.6326 | 5.44913 | CEU |
| rs1984490  | hmm8232  | hmm8232-S     | 1 | 1 | 46570754 | 31010  | 15.2491 | 5.44913 | CEU |
| rs6703374  | hmm8232  | hmm8232-S     | 1 | 1 | 46574352 | 34608  | 10.4594 | 5.44913 | CEU |
| rs6703669  | hmm8232  | hmm8232-S     | 1 | 1 | 46574575 | 34831  | 15.2491 | 5.44913 | CEU |
| rs17361936 | hmm8232  | hmm8232-S     | 1 | 1 | 46574913 | 35169  | 14.385  | 5.44913 | CEU |
| rs17361950 | hmm8232  | hmm8232-S     | 1 | 1 | 46576170 | 36426  | 15.2491 | 5.44913 | CEU |
| rs6662982  | hmm8232  | hmm8232-S     | 1 | 1 | 46589200 | 49456  | 16.8396 | 5.44913 | CEU |
| rs4649996  | MGC22773 | GI_21687083-S | 1 | 1 | 74232300 | 125719 | 5.4756  | 5.45472 | CEU |
| rs7550195  | MGC22773 | GI_21687083-S | 1 | 1 | 74274326 | 83693  | 5.7408  | 5.45472 | CEU |
| rs2343864  | MGC22773 | GI_21687083-S | 1 | 1 | 74289090 | 68929  | 5.8552  | 5.45472 | CEU |
| rs11210417 | MGC22773 | GI_21687083-S | 1 | 1 | 74293180 | 64839  | 5.9568  | 5.45472 | CEU |
| rs11210418 | MGC22773 | GI_21687083-S | 1 | 1 | 74294698 | 63321  | 5.9568  | 5.45472 | CEU |
| rs1412825  | MGC22773 | GI_21687083-S | 1 | 1 | 74375835 | 17816  | 6.4766  | 5.45472 | CEU |
| rs792310   | MGC22773 | GI_21687083-S | 1 | 1 | 74377514 | 19495  | 6.3028  | 5.45472 | CEU |
| rs577367   | MGC22773 | GI_21687083-S | 1 | 1 | 74379707 | 21688  | 6.4766  | 5.45472 | CEU |
| rs487917   | MGC22773 | GI_21687083-S | 1 | 1 | 74380917 | 22898  | 6.3028  | 5.45472 | CEU |

|            |           |               |   |   |           |        |         |         |     |
|------------|-----------|---------------|---|---|-----------|--------|---------|---------|-----|
| rs571848   | MGC22773  | GI_21687083-S | 1 | 1 | 74383540  | 25521  | 6.3586  | 5.45472 | CEU |
| rs520806   | MGC22773  | GI_21687083-S | 1 | 1 | 74385362  | 27343  | 6.4766  | 5.45472 | CEU |
| rs522759   | MGC22773  | GI_21687083-S | 1 | 1 | 74385603  | 27584  | 6.4766  | 5.45472 | CEU |
| rs545664   | MGC22773  | GI_21687083-S | 1 | 1 | 74385798  | 27779  | 5.4853  | 5.45472 | CEU |
| rs545721   | MGC22773  | GI_21687083-S | 1 | 1 | 74385820  | 27801  | 6.4766  | 5.45472 | CEU |
| rs581353   | MGC22773  | GI_21687083-S | 1 | 1 | 74387407  | 29388  | 6.3586  | 5.45472 | CEU |
| rs496008   | MGC22773  | GI_21687083-S | 1 | 1 | 74387827  | 29808  | 5.9741  | 5.45472 | CEU |
| rs792321   | MGC22773  | GI_21687083-S | 1 | 1 | 74393989  | 35970  | 6.6361  | 5.45472 | CEU |
| rs524306   | MGC22773  | GI_21687083-S | 1 | 1 | 74394274  | 36255  | 6.243   | 5.45472 | CEU |
| rs495027   | MGC22773  | GI_21687083-S | 1 | 1 | 74394280  | 36261  | 5.9868  | 5.45472 | CEU |
| rs533371   | MGC22773  | GI_21687083-S | 1 | 1 | 74399033  | 41014  | 6.3586  | 5.45472 | CEU |
| rs10493866 | LOC374993 | GI_37546741-S | 1 | 1 | 93890933  | 870660 | 5.54    | 5.31015 | CEU |
| rs366631   | GSTM1     | GI_23065546-A | 1 | 1 | 109964514 | 20554  | 11.3815 | 6.02018 | CEU |
| rs674787   | GSTM1     | GI_23065546-A | 1 | 1 | 109965953 | 21993  | 16.8105 | 6.02018 | CEU |
| rs674787   | GSTM2     | GI_23065549-S | 1 | 1 | 109965953 | 39735  | 7.7931  | 5.95807 | CEU |
| rs351372   | ST7L      | GI_38201636-A | 1 | 1 | 112771262 | 25437  | 8.8271  | 6.18604 | CEU |
| rs351372   | ST7L      | GI_38201636-I | 1 | 1 | 112771262 | 25287  | 9.7874  | 6.18604 | CEU |
| rs3737136  | ST7L      | GI_38201636-I | 1 | 1 | 112772474 | 24075  | 7.392   | 6.18604 | CEU |
| rs1006298  | ST7L      | GI_38201636-A | 1 | 1 | 112774001 | 22698  | 8.9958  | 6.18604 | CEU |
| rs1006298  | ST7L      | GI_38201636-I | 1 | 1 | 112774001 | 22548  | 9.8939  | 6.18604 | CEU |
| rs910697   | ST7L      | GI_38201636-A | 1 | 1 | 112775167 | 21532  | 8.8271  | 6.18604 | CEU |
| rs910697   | ST7L      | GI_38201636-I | 1 | 1 | 112775167 | 21382  | 9.7874  | 6.18604 | CEU |
| rs2273368  | ST7L      | GI_38201636-I | 1 | 1 | 112775813 | 20736  | 7.2724  | 6.18604 | CEU |
| rs12728001 | ST7L      | GI_38201636-A | 1 | 1 | 112788798 | 7901   | 6.4855  | 6.18604 | CEU |
| rs12728001 | ST7L      | GI_38201636-I | 1 | 1 | 112788798 | 7751   | 7.1117  | 6.18604 | CEU |
| rs10776755 | ST7L      | GI_38201636-A | 1 | 1 | 112795016 | 1683   | 8.0813  | 6.18604 | CEU |
| rs10776755 | ST7L      | GI_38201636-I | 1 | 1 | 112795016 | 1533   | 8.3606  | 6.18604 | CEU |
| rs10745330 | ST7L      | GI_38201636-A | 1 | 1 | 112795481 | 1218   | 8.7205  | 6.18604 | CEU |
| rs10745330 | ST7L      | GI_38201636-I | 1 | 1 | 112795481 | 1068   | 9.8482  | 6.18604 | CEU |
| rs7544663  | ST7L      | GI_38201636-A | 1 | 1 | 112801048 | 4349   | 8.053   | 6.18604 | CEU |
| rs7544663  | ST7L      | GI_38201636-I | 1 | 1 | 112801048 | 4499   | 8.811   | 6.18604 | CEU |
| rs7513716  | ST7L      | GI_38201636-A | 1 | 1 | 112801362 | 4663   | 8.6761  | 6.18604 | CEU |
| rs7513716  | ST7L      | GI_38201636-I | 1 | 1 | 112801362 | 4813   | 9.7184  | 6.18604 | CEU |
| rs10857963 | ST7L      | GI_38201636-A | 1 | 1 | 112803529 | 6830   | 8.7205  | 6.18604 | CEU |
| rs10857963 | ST7L      | GI_38201636-I | 1 | 1 | 112803529 | 6980   | 9.8482  | 6.18604 | CEU |
| rs12126277 | ST7L      | GI_38201636-A | 1 | 1 | 112818411 | 21712  | 8.7205  | 6.18604 | CEU |
| rs12126277 | ST7L      | GI_38201636-I | 1 | 1 | 112818411 | 21862  | 9.8482  | 6.18604 | CEU |
| rs10776757 | ST7L      | GI_38201636-A | 1 | 1 | 112833715 | 37016  | 8.0813  | 6.18604 | CEU |
| rs10776757 | ST7L      | GI_38201636-I | 1 | 1 | 112833715 | 37166  | 8.3606  | 6.18604 | CEU |
| rs7554916  | ST7L      | GI_38201636-A | 1 | 1 | 112835776 | 39077  | 8.7205  | 6.18604 | CEU |
| rs7554916  | ST7L      | GI_38201636-I | 1 | 1 | 112835776 | 39227  | 9.8482  | 6.18604 | CEU |
| rs6666579  | ST7L      | GI_38201636-A | 1 | 1 | 112844435 | 47736  | 8.7205  | 6.18604 | CEU |
| rs6666579  | ST7L      | GI_38201636-I | 1 | 1 | 112844435 | 47886  | 9.8482  | 6.18604 | CEU |
| rs6682737  | ST7L      | GI_38201636-A | 1 | 1 | 112848271 | 51572  | 8.7205  | 6.18604 | CEU |
| rs6682737  | ST7L      | GI_38201636-I | 1 | 1 | 112848271 | 51722  | 9.8482  | 6.18604 | CEU |
| rs4839254  | ST7L      | GI_38201636-A | 1 | 1 | 112852968 | 56269  | 6.8339  | 6.18604 | CEU |
| rs4839254  | ST7L      | GI_38201636-I | 1 | 1 | 112852968 | 56419  | 6.8385  | 6.18604 | CEU |
| rs7522288  | ST7L      | GI_38201636-A | 1 | 1 | 112863247 | 66548  | 7.2794  | 6.18604 | CEU |
| rs7522288  | ST7L      | GI_38201636-I | 1 | 1 | 112863247 | 66698  | 7.5789  | 6.18604 | CEU |
| rs6700673  | ST7L      | GI_38201636-A | 1 | 1 | 112869096 | 72397  | 7.3827  | 6.18604 | CEU |
| rs6700673  | ST7L      | GI_38201636-I | 1 | 1 | 112869096 | 72547  | 8.0677  | 6.18604 | CEU |
| rs12122980 | ST7L      | GI_38201636-I | 1 | 1 | 112869223 | 72674  | 7.2724  | 6.18604 | CEU |
| rs9429486  | ST7L      | GI_38201636-A | 1 | 1 | 112869414 | 72715  | 8.0874  | 6.18604 | CEU |
| rs9429486  | ST7L      | GI_38201636-I | 1 | 1 | 112869414 | 72865  | 8.5158  | 6.18604 | CEU |
| rs11102513 | ST7L      | GI_38201636-I | 1 | 1 | 112872212 | 75663  | 7.2724  | 6.18604 | CEU |
| rs11102514 | ST7L      | GI_38201636-I | 1 | 1 | 112872461 | 75912  | 7.2724  | 6.18604 | CEU |



|            |         |               |   |   |           |        |         |         |     |
|------------|---------|---------------|---|---|-----------|--------|---------|---------|-----|
| rs7415820  | ST7L    | GI_38201636-A | 1 | 1 | 112881491 | 84792  | 8.7205  | 6.18604 | CEU |
| rs7415820  | ST7L    | GI_38201636-I | 1 | 1 | 112881491 | 84942  | 9.8482  | 6.18604 | CEU |
| rs12130243 | ST7L    | GI_38201636-I | 1 | 1 | 112881709 | 85160  | 7.2724  | 6.18604 | CEU |
| rs12046208 | ST7L    | GI_38201636-A | 1 | 1 | 112883631 | 86932  | 8.0813  | 6.18604 | CEU |
| rs12046208 | ST7L    | GI_38201636-I | 1 | 1 | 112883631 | 87082  | 8.3606  | 6.18604 | CEU |
| rs11584092 | ST7L    | GI_38201636-A | 1 | 1 | 112888304 | 91605  | 6.4388  | 6.18604 | CEU |
| rs11584092 | ST7L    | GI_38201636-I | 1 | 1 | 112888304 | 91755  | 6.6082  | 6.18604 | CEU |
| rs17030613 | ST7L    | GI_38201636-I | 1 | 1 | 112902849 | 106300 | 7.2724  | 6.18604 | CEU |
| rs3013440  | ST7L    | GI_38201636-A | 1 | 1 | 112907831 | 111132 | 8.6903  | 6.18604 | CEU |
| rs3013440  | ST7L    | GI_38201636-I | 1 | 1 | 112907831 | 111282 | 9.6622  | 6.18604 | CEU |
| rs3013439  | ST7L    | GI_38201636-A | 1 | 1 | 112912713 | 116014 | 9.0206  | 6.18604 | CEU |
| rs3013439  | ST7L    | GI_38201636-I | 1 | 1 | 112912713 | 116164 | 10.2801 | 6.18604 | CEU |
| rs2932536  | ST7L    | GI_38201636-A | 1 | 1 | 112914459 | 117760 | 8.7632  | 6.18604 | CEU |
| rs2932536  | ST7L    | GI_38201636-I | 1 | 1 | 112914459 | 117910 | 9.6473  | 6.18604 | CEU |
| rs12120956 | ST7L    | GI_38201636-I | 1 | 1 | 112914613 | 118064 | 6.5405  | 6.18604 | CEU |
| rs12756815 | ST7L    | GI_38201636-I | 1 | 1 | 112919285 | 122736 | 7.2655  | 6.18604 | CEU |
| rs6537748  | ST7L    | GI_38201636-A | 1 | 1 | 112926423 | 129724 | 6.7897  | 6.18604 | CEU |
| rs6537748  | ST7L    | GI_38201636-I | 1 | 1 | 112926423 | 129874 | 7.0468  | 6.18604 | CEU |
| rs2999154  | ST7L    | GI_38201636-A | 1 | 1 | 112934498 | 137799 | 8.7205  | 6.18604 | CEU |
| rs2999154  | ST7L    | GI_38201636-I | 1 | 1 | 112934498 | 137949 | 9.8482  | 6.18604 | CEU |
| rs3795819  | ST7L    | GI_38201636-I | 1 | 1 | 112946221 | 149672 | 7.2724  | 6.18604 | CEU |
| rs2932532  | ST7L    | GI_38201636-A | 1 | 1 | 112946498 | 149799 | 8.7205  | 6.18604 | CEU |
| rs2932532  | ST7L    | GI_38201636-I | 1 | 1 | 112946498 | 149949 | 9.8482  | 6.18604 | CEU |
| rs902289   | ST7L    | GI_38201636-A | 1 | 1 | 112948129 | 151430 | 8.7205  | 6.18604 | CEU |
| rs902289   | ST7L    | GI_38201636-I | 1 | 1 | 112948129 | 151580 | 9.8482  | 6.18604 | CEU |
| rs1110043  | ST7L    | GI_38201636-I | 1 | 1 | 112948463 | 151914 | 6.8044  | 6.18604 | CEU |
| rs3748656  | ST7L    | GI_38201636-I | 1 | 1 | 112948723 | 152174 | 7.2724  | 6.18604 | CEU |
| rs1106287  | ST7L    | GI_38201636-I | 1 | 1 | 112954164 | 157615 | 7.2724  | 6.18604 | CEU |
| rs2999156  | ST7L    | GI_38201636-I | 1 | 1 | 112959169 | 162620 | 7.0814  | 6.18604 | CEU |
| rs954679   | ST7L    | GI_38201636-I | 1 | 1 | 112960407 | 163858 | 6.3471  | 6.18604 | CEU |
| rs6674384  | DCLRE1B | GI_24431998-S | 1 | 1 | 114167949 | 399    | 7.554   | 5.82799 | CEU |
| rs878129   | DCLRE1B | GI_24431998-S | 1 | 1 | 114171237 | 2889   | 8.1081  | 5.82799 | CEU |
| rs11102703 | DCLRE1B | GI_24431998-S | 1 | 1 | 114178152 | 9804   | 7.7634  | 5.82799 | CEU |
| rs10494162 | DCLRE1B | GI_24431998-S | 1 | 1 | 114185125 | 16777  | 8.3099  | 5.82799 | CEU |
| rs7519860  | DCLRE1B | GI_24431998-S | 1 | 1 | 114194562 | 26214  | 6.2575  | 5.82799 | CEU |
| rs7546851  | DCLRE1B | GI_24431998-S | 1 | 1 | 114196838 | 28490  | 6.8213  | 5.82799 | CEU |
| rs1503832  | DCLRE1B | GI_24431998-S | 1 | 1 | 114201731 | 33383  | 6.14    | 5.82799 | CEU |
| rs12127377 | DCLRE1B | GI_24431998-S | 1 | 1 | 114202015 | 33667  | 6.4993  | 5.82799 | CEU |
| rs1910485  | DCLRE1B | GI_24431998-S | 1 | 1 | 114202677 | 34329  | 6.14    | 5.82799 | CEU |
| rs11102707 | DCLRE1B | GI_24431998-S | 1 | 1 | 114205625 | 37277  | 6.63    | 5.82799 | CEU |
| rs12129050 | DCLRE1B | GI_24431998-S | 1 | 1 | 114208649 | 40301  | 6.5002  | 5.82799 | CEU |
| rs6669370  | DCLRE1B | GI_24431998-S | 1 | 1 | 114218717 | 50369  | 5.8792  | 5.82799 | CEU |
| rs11102709 | DCLRE1B | GI_24431998-S | 1 | 1 | 114224125 | 55777  | 6.63    | 5.82799 | CEU |
| rs10108    | DCLRE1B | GI_24431998-S | 1 | 1 | 114228372 | 60024  | 6.63    | 5.82799 | CEU |
| rs1146291  | MAN1A2  | GI_40254840-S | 1 | 1 | 117532159 | 245419 | 8.3585  | 5.9852  | CEU |
| rs1289814  | MAN1A2  | GI_40254840-S | 1 | 1 | 117533422 | 244156 | 8.3585  | 5.9852  | CEU |
| rs1289836  | MAN1A2  | GI_40254840-S | 1 | 1 | 117546954 | 230624 | 7.1667  | 5.9852  | CEU |
| rs1418452  | MAN1A2  | GI_40254840-S | 1 | 1 | 117582420 | 195158 | 13.7561 | 5.9852  | CEU |
| rs17037143 | MAN1A2  | GI_40254840-S | 1 | 1 | 117591358 | 186220 | 13.7561 | 5.9852  | CEU |
| rs11580225 | MAN1A2  | GI_40254840-S | 1 | 1 | 117597445 | 180133 | 13.7561 | 5.9852  | CEU |
| rs10801956 | MAN1A2  | GI_40254840-S | 1 | 1 | 117600057 | 177521 | 8.8804  | 5.9852  | CEU |
| rs6669646  | MAN1A2  | GI_40254840-S | 1 | 1 | 117601100 | 176478 | 13.7561 | 5.9852  | CEU |
| rs6657965  | MAN1A2  | GI_40254840-S | 1 | 1 | 117604860 | 172718 | 13.0587 | 5.9852  | CEU |
| rs12144682 | MAN1A2  | GI_40254840-S | 1 | 1 | 117605546 | 172032 | 13.0587 | 5.9852  | CEU |
| rs11576919 | MAN1A2  | GI_40254840-S | 1 | 1 | 117614395 | 163183 | 6.5386  | 5.9852  | CEU |
| rs17037223 | MAN1A2  | GI_40254840-S | 1 | 1 | 117640841 | 136737 | 13.7561 | 5.9852  | CEU |

|            |        |               |   |   |           |        |         |         |     |
|------------|--------|---------------|---|---|-----------|--------|---------|---------|-----|
| rs17037231 | MAN1A2 | GI_40254840-S | 1 | 1 | 117642984 | 134594 | 13.7561 | 5.9852  | CEU |
| rs12127141 | MAN1A2 | GI_40254840-S | 1 | 1 | 117645628 | 131950 | 13.7561 | 5.9852  | CEU |
| rs10923281 | MAN1A2 | GI_40254840-S | 1 | 1 | 117645651 | 131927 | 11.8539 | 5.9852  | CEU |
| rs12065396 | MAN1A2 | GI_40254840-S | 1 | 1 | 117649096 | 128482 | 8.8114  | 5.9852  | CEU |
| rs11583061 | MAN1A2 | GI_40254840-S | 1 | 1 | 117653569 | 124009 | 13.7561 | 5.9852  | CEU |
| rs12131109 | MAN1A2 | GI_40254840-S | 1 | 1 | 117654904 | 122674 | 13.7256 | 5.9852  | CEU |
| rs17037253 | MAN1A2 | GI_40254840-S | 1 | 1 | 117656235 | 121343 | 13.7561 | 5.9852  | CEU |
| rs10923284 | MAN1A2 | GI_40254840-S | 1 | 1 | 117658635 | 118943 | 12.189  | 5.9852  | CEU |
| rs4460623  | MAN1A2 | GI_40254840-S | 1 | 1 | 117659287 | 118291 | 13.7561 | 5.9852  | CEU |
| rs7547211  | MAN1A2 | GI_40254840-S | 1 | 1 | 117663671 | 113907 | 13.7561 | 5.9852  | CEU |
| rs2359247  | MAN1A2 | GI_40254840-S | 1 | 1 | 117665932 | 111646 | 13.7561 | 5.9852  | CEU |
| rs10923289 | MAN1A2 | GI_40254840-S | 1 | 1 | 117673252 | 104326 | 13.7561 | 5.9852  | CEU |
| rs1316326  | MAN1A2 | GI_40254840-S | 1 | 1 | 117692797 | 84781  | 13.7561 | 5.9852  | CEU |
| rs10923295 | MAN1A2 | GI_40254840-S | 1 | 1 | 117693255 | 84323  | 10.529  | 5.9852  | CEU |
| rs10923296 | MAN1A2 | GI_40254840-S | 1 | 1 | 117694496 | 83082  | 12.3652 | 5.9852  | CEU |
| rs11577788 | MAN1A2 | GI_40254840-S | 1 | 1 | 117703691 | 73887  | 13.7561 | 5.9852  | CEU |
| rs11581669 | MAN1A2 | GI_40254840-S | 1 | 1 | 117708950 | 68628  | 13.1714 | 5.9852  | CEU |
| rs10923303 | MAN1A2 | GI_40254840-S | 1 | 1 | 117709054 | 68524  | 13.7561 | 5.9852  | CEU |
| rs17037307 | MAN1A2 | GI_40254840-S | 1 | 1 | 117718576 | 59002  | 13.1247 | 5.9852  | CEU |
| rs17037310 | MAN1A2 | GI_40254840-S | 1 | 1 | 117719082 | 58496  | 11.0506 | 5.9852  | CEU |
| rs12134265 | MAN1A2 | GI_40254840-S | 1 | 1 | 117720849 | 56729  | 13.7561 | 5.9852  | CEU |
| rs17037323 | MAN1A2 | GI_40254840-S | 1 | 1 | 117726363 | 51215  | 13.0331 | 5.9852  | CEU |
| rs12129406 | MAN1A2 | GI_40254840-S | 1 | 1 | 117728625 | 48953  | 10.9817 | 5.9852  | CEU |
| rs12127779 | MAN1A2 | GI_40254840-S | 1 | 1 | 117729458 | 48120  | 10.3963 | 5.9852  | CEU |
| rs10923312 | MAN1A2 | GI_40254840-S | 1 | 1 | 117729676 | 47902  | 13.1714 | 5.9852  | CEU |
| rs12131343 | MAN1A2 | GI_40254840-S | 1 | 1 | 117733970 | 43608  | 12.9368 | 5.9852  | CEU |
| rs17037333 | MAN1A2 | GI_40254840-S | 1 | 1 | 117744199 | 33379  | 13.7561 | 5.9852  | CEU |
| rs17037335 | MAN1A2 | GI_40254840-S | 1 | 1 | 117744677 | 32901  | 13.7561 | 5.9852  | CEU |
| rs10923322 | MAN1A2 | GI_40254840-S | 1 | 1 | 117752553 | 25025  | 12.9368 | 5.9852  | CEU |
| rs12121530 | MAN1A2 | GI_40254840-S | 1 | 1 | 117753427 | 24151  | 13.7561 | 5.9852  | CEU |
| rs12091306 | MAN1A2 | GI_40254840-S | 1 | 1 | 117753702 | 23876  | 10.9437 | 5.9852  | CEU |
| rs10801962 | MAN1A2 | GI_40254840-S | 1 | 1 | 117758336 | 19242  | 12.3334 | 5.9852  | CEU |
| rs7531715  | MAN1A2 | GI_40254840-S | 1 | 1 | 117760979 | 16599  | 13.1714 | 5.9852  | CEU |
| rs10923326 | MAN1A2 | GI_40254840-S | 1 | 1 | 117761507 | 16071  | 13.7561 | 5.9852  | CEU |
| rs1934250  | MAN1A2 | GI_40254840-S | 1 | 1 | 117770927 | 6651   | 13.1714 | 5.9852  | CEU |
| rs12120771 | MAN1A2 | GI_40254840-S | 1 | 1 | 117777961 | 383    | 13.7256 | 5.9852  | CEU |
| rs1043476  | MAN1A2 | GI_40254840-S | 1 | 1 | 117778501 | 923    | 13.7561 | 5.9852  | CEU |
| rs12126437 | MAN1A2 | GI_40254840-S | 1 | 1 | 117780555 | 2977   | 7.946   | 5.9852  | CEU |
| rs17037373 | MAN1A2 | GI_40254840-S | 1 | 1 | 117789495 | 11917  | 13.7561 | 5.9852  | CEU |
| rs12131251 | MAN1A2 | GI_40254840-S | 1 | 1 | 117793893 | 16315  | 13.7561 | 5.9852  | CEU |
| rs2358936  | MAN1A2 | GI_40254840-S | 1 | 1 | 117802829 | 25251  | 13.7561 | 5.9852  | CEU |
| rs10801965 | MAN1A2 | GI_40254840-S | 1 | 1 | 117806038 | 28460  | 8.8114  | 5.9852  | CEU |
| rs12091291 | WARS2  | GI_41352698-S | 1 | 1 | 119190870 | 96866  | 6.5625  | 6.29899 | CEU |
| rs12066653 | WARS2  | GI_41352698-S | 1 | 1 | 119194550 | 93186  | 6.9055  | 6.29899 | CEU |
| rs17013645 | WARS2  | GI_41352698-S | 1 | 1 | 119196891 | 90845  | 6.6046  | 6.29899 | CEU |
| rs1155949  | WARS2  | GI_41352698-S | 1 | 1 | 119208621 | 79115  | 6.5625  | 6.29899 | CEU |
| rs11589179 | WARS2  | GI_41352698-S | 1 | 1 | 119209627 | 78109  | 6.5625  | 6.29899 | CEU |
| rs10923705 | WARS2  | GI_41352698-S | 1 | 1 | 119210446 | 77290  | 6.5625  | 6.29899 | CEU |
| rs6689568  | WARS2  | GI_41352698-S | 1 | 1 | 119215003 | 72733  | 6.5625  | 6.29899 | CEU |
| rs7545737  | WARS2  | GI_41352698-S | 1 | 1 | 119245865 | 41871  | 6.5625  | 6.29899 | CEU |
| rs2765542  | WARS2  | GI_41352698-S | 1 | 1 | 119272368 | 15368  | 7.0796  | 6.29899 | CEU |
| rs2645305  | WARS2  | GI_41352698-S | 1 | 1 | 119273407 | 14329  | 7.0796  | 6.29899 | CEU |
| rs11806437 | WARS2  | GI_41352698-S | 1 | 1 | 119285236 | 2500   | 7.0669  | 6.29899 | CEU |
| rs12086    | WARS2  | GI_41352698-S | 1 | 1 | 119285902 | 1834   | 6.7929  | 6.29899 | CEU |
| rs1057991  | WARS2  | GI_41352698-S | 1 | 1 | 119287212 | 524    | 6.7929  | 6.29899 | CEU |
| rs1057990  | WARS2  | GI_41352698-S | 1 | 1 | 119287274 | 462    | 6.7929  | 6.29899 | CEU |

|            |         |               |   |   |           |        |        |         |     |
|------------|---------|---------------|---|---|-----------|--------|--------|---------|-----|
| rs2765529  | WARS2   | GI_41352698-S | 1 | 1 | 119293942 | 6206   | 7.0796 | 6.29899 | CEU |
| rs2645295  | WARS2   | GI_41352698-S | 1 | 1 | 119294490 | 6754   | 7.0796 | 6.29899 | CEU |
| rs1325938  | WARS2   | GI_41352698-S | 1 | 1 | 119294684 | 6948   | 7.0796 | 6.29899 | CEU |
| rs2765530  | WARS2   | GI_41352698-S | 1 | 1 | 119296438 | 8702   | 7.0796 | 6.29899 | CEU |
| rs2765531  | WARS2   | GI_41352698-S | 1 | 1 | 119297539 | 9803   | 7.0796 | 6.29899 | CEU |
| rs1325940  | WARS2   | GI_41352698-S | 1 | 1 | 119298729 | 10993  | 7.0796 | 6.29899 | CEU |
| rs2794313  | WARS2   | GI_41352698-S | 1 | 1 | 119299482 | 11746  | 6.9556 | 6.29899 | CEU |
| rs2645301  | WARS2   | GI_41352698-S | 1 | 1 | 119302462 | 14726  | 6.7473 | 6.29899 | CEU |
| rs17023171 | WARS2   | GI_41352698-S | 1 | 1 | 119305310 | 17574  | 6.7473 | 6.29899 | CEU |
| rs17023174 | WARS2   | GI_41352698-S | 1 | 1 | 119305343 | 17607  | 7.0492 | 6.29899 | CEU |
| rs2794311  | WARS2   | GI_41352698-S | 1 | 1 | 119307991 | 20255  | 6.7945 | 6.29899 | CEU |
| rs6668960  | WARS2   | GI_41352698-S | 1 | 1 | 119312854 | 25118  | 7.0796 | 6.29899 | CEU |
| rs17023185 | WARS2   | GI_41352698-S | 1 | 1 | 119322829 | 35093  | 6.7945 | 6.29899 | CEU |
| rs12086549 | WARS2   | GI_41352698-S | 1 | 1 | 119326379 | 38643  | 6.6316 | 6.29899 | CEU |
| rs7525871  | WARS2   | GI_41352698-S | 1 | 1 | 119333936 | 46200  | 7.0796 | 6.29899 | CEU |
| rs10802075 | WARS2   | GI_41352698-S | 1 | 1 | 119339269 | 51533  | 7.0796 | 6.29899 | CEU |
| rs3936018  | WARS2   | GI_41352698-S | 1 | 1 | 119394412 | 106676 | 7.2973 | 6.29899 | CEU |
| rs10923774 | WARS2   | GI_41352698-S | 1 | 1 | 119478251 | 190515 | 6.3791 | 6.29899 | CEU |
| rs10923775 | WARS2   | GI_41352698-S | 1 | 1 | 119478315 | 190579 | 6.6888 | 6.29899 | CEU |
| rs11204668 | CTSK    | GI_23110958-S | 1 | 1 | 147356759 | 225386 | 6.7151 | 5.5372  | CEU |
| rs9803935  | CTSK    | GI_23110958-S | 1 | 1 | 147365695 | 216450 | 7.1165 | 5.5372  | CEU |
| rs6698495  | CTSK    | GI_23110958-S | 1 | 1 | 147377549 | 204596 | 6.103  | 5.5372  | CEU |
| rs2048558  | CTSK    | GI_23110958-S | 1 | 1 | 147384803 | 197342 | 6.5392 | 5.5372  | CEU |
| rs11204680 | CTSK    | GI_23110958-S | 1 | 1 | 147400213 | 181932 | 7.4675 | 5.5372  | CEU |
| rs1971378  | CTSK    | GI_23110958-S | 1 | 1 | 147410334 | 171811 | 5.6907 | 5.5372  | CEU |
| rs1053732  | CTSK    | GI_23110958-S | 1 | 1 | 147410963 | 171182 | 7.5665 | 5.5372  | CEU |
| rs11204684 | CTSK    | GI_23110958-S | 1 | 1 | 147421967 | 160178 | 7.2221 | 5.5372  | CEU |
| rs9733     | ARNT    | GI_30795239-A | 1 | 1 | 147432034 | 163323 | 5.8757 | 5.5028  | CEU |
| rs7367378  | CTSK    | GI_23110958-S | 1 | 1 | 147446152 | 135993 | 6.3367 | 5.5372  | CEU |
| rs11204693 | CTSK    | GI_23110958-S | 1 | 1 | 147461060 | 121085 | 6.3367 | 5.5372  | CEU |
| rs4970926  | CTSK    | GI_23110958-S | 1 | 1 | 147486757 | 95388  | 6.2746 | 5.5372  | CEU |
| rs6694531  | CTSK    | GI_23110958-S | 1 | 1 | 147496585 | 85560  | 6.3367 | 5.5372  | CEU |
| rs12568757 | CTSK    | GI_23110958-S | 1 | 1 | 147542866 | 39279  | 6.9665 | 5.5372  | CEU |
| rs12568757 | ARNT    | GI_30795239-A | 1 | 1 | 147542866 | 52491  | 5.6312 | 5.5028  | CEU |
| rs1136774  | CTSK    | GI_23110958-S | 1 | 1 | 147551270 | 30875  | 6.9665 | 5.5372  | CEU |
| rs1136774  | ARNT    | GI_30795239-A | 1 | 1 | 147551270 | 44087  | 5.6312 | 5.5028  | CEU |
| rs11204725 | CTSK    | GI_23110958-S | 1 | 1 | 147555773 | 26372  | 6.9665 | 5.5372  | CEU |
| rs11204725 | ARNT    | GI_30795239-A | 1 | 1 | 147555773 | 39584  | 5.6312 | 5.5028  | CEU |
| rs6683015  | CTSK    | GI_23110958-S | 1 | 1 | 147560484 | 21661  | 5.8999 | 5.5372  | CEU |
| rs11204735 | CTSK    | GI_23110958-S | 1 | 1 | 147654740 | 72595  | 6.9665 | 5.5372  | CEU |
| rs11204735 | ARNT    | GI_30795239-A | 1 | 1 | 147654740 | 59383  | 5.6312 | 5.5028  | CEU |
| rs7412746  | CTSK    | GI_23110958-S | 1 | 1 | 147673544 | 91399  | 5.7095 | 5.5372  | CEU |
| rs486836   | CTSK    | GI_23110958-S | 1 | 1 | 147689040 | 106895 | 6.9665 | 5.5372  | CEU |
| rs486836   | ARNT    | GI_30795239-A | 1 | 1 | 147689040 | 93683  | 5.6312 | 5.5028  | CEU |
| rs12126004 | CTSK    | GI_23110958-S | 1 | 1 | 147702950 | 120805 | 6.976  | 5.5372  | CEU |
| rs3754211  | CTSK    | GI_23110958-S | 1 | 1 | 147764930 | 182785 | 6.957  | 5.5372  | CEU |
| rs3754211  | ARNT    | GI_30795239-A | 1 | 1 | 147764930 | 169573 | 5.5655 | 5.5028  | CEU |
| rs7529425  | FCGR2A  | GI_11056051-S | 1 | 1 | 158292654 | 9161   | 6.445  | 5.74962 | CEU |
| rs11801022 | FCGR2A  | GI_11056051-S | 1 | 1 | 158297032 | 4783   | 7.1026 | 5.74962 | CEU |
| rs17400517 | FCGR2A  | GI_11056051-S | 1 | 1 | 158298314 | 3501   | 7.727  | 5.74962 | CEU |
| rs9427401  | FCGR2A  | GI_11056051-S | 1 | 1 | 158305230 | 3415   | 7.0177 | 5.74962 | CEU |
| rs12749237 | FCGR2A  | GI_11056051-S | 1 | 1 | 158319017 | 17202  | 5.9423 | 5.74962 | CEU |
| rs7517978  | MGC3794 | GI_33239373-S | 1 | 1 | 164869703 | 31513  | 6.4803 | 6.27459 | CEU |
| rs2038033  | MGC3794 | GI_33239373-S | 1 | 1 | 164883418 | 17798  | 6.6726 | 6.27459 | CEU |
| rs2294253  | MGC3794 | GI_33239373-S | 1 | 1 | 164888285 | 12931  | 7.1445 | 6.27459 | CEU |
| rs2235207  | MGC3794 | GI_33239373-S | 1 | 1 | 164890920 | 10296  | 7.7858 | 6.27459 | CEU |

|            |           |               |   |   |           |        |         |         |     |
|------------|-----------|---------------|---|---|-----------|--------|---------|---------|-----|
| rs1040404  | MGC3794   | GI_33239373-S | 1 | 1 | 164891548 | 9668   | 7.7858  | 6.27459 | CEU |
| rs2281014  | MGC3794   | GI_33239373-S | 1 | 1 | 164895496 | 5720   | 8.2094  | 6.27459 | CEU |
| rs1040403  | MGC3794   | GI_33239373-S | 1 | 1 | 164895855 | 5361   | 7.7858  | 6.27459 | CEU |
| rs10918844 | MGC3794   | GI_33239373-S | 1 | 1 | 164904282 | 3066   | 7.7858  | 6.27459 | CEU |
| rs3791022  | dJ383J4.3 | GI_42655858-S | 1 | 1 | 170466426 | 34050  | 5.9153  | 5.60211 | CEU |
| rs2068871  | dJ383J4.3 | GI_42655858-S | 1 | 1 | 170527826 | 27350  | 5.9153  | 5.60211 | CEU |
| rs2065170  | dJ383J4.3 | GI_42655858-S | 1 | 1 | 170576889 | 76413  | 5.9153  | 5.60211 | CEU |
| rs16846526 | dJ383J4.3 | GI_42655858-S | 1 | 1 | 170587894 | 87418  | 5.9153  | 5.60211 | CEU |
| rs16846546 | dJ383J4.3 | GI_42655858-S | 1 | 1 | 170591839 | 91363  | 5.9153  | 5.60211 | CEU |
| rs16846561 | dJ383J4.3 | GI_42655858-S | 1 | 1 | 170600768 | 100292 | 5.9153  | 5.60211 | CEU |
| rs2146372  | dJ383J4.3 | GI_42655858-S | 1 | 1 | 170601226 | 100750 | 5.9153  | 5.60211 | CEU |
| rs2759328  | dJ383J4.3 | GI_42655858-S | 1 | 1 | 170608362 | 107886 | 5.9153  | 5.60211 | CEU |
| rs941988   | dJ383J4.3 | GI_42655858-S | 1 | 1 | 170613550 | 113074 | 5.8758  | 5.60211 | CEU |
| rs2227592  | dJ383J4.3 | GI_42655858-S | 1 | 1 | 170617369 | 116893 | 5.9153  | 5.60211 | CEU |
| rs1754351  | KIAA2025  | GI_37547503-S | 1 | 1 | 171463253 | 825276 | 6.6494  | 5.5218  | CEU |
| rs12024309 | C1orf16   | GI_42476073-A | 1 | 1 | 180151638 | 103079 | 8.8477  | 5.79995 | CEU |
| rs9286848  | C1orf16   | GI_42476073-A | 1 | 1 | 180157906 | 96811  | 8.8591  | 5.79995 | CEU |
| rs2275676  | C1orf16   | GI_42476073-A | 1 | 1 | 180162479 | 92238  | 8.8477  | 5.79995 | CEU |
| rs2702178  | C1orf16   | GI_42476073-A | 1 | 1 | 180184202 | 70515  | 9.2824  | 5.79995 | CEU |
| rs2702205  | C1orf16   | GI_42476073-A | 1 | 1 | 180188855 | 65862  | 9.4149  | 5.79995 | CEU |
| rs2702204  | C1orf16   | GI_42476073-A | 1 | 1 | 180189053 | 65664  | 9.4149  | 5.79995 | CEU |
| rs4047762  | C1orf16   | GI_42476073-A | 1 | 1 | 180194791 | 59926  | 7.8582  | 5.79995 | CEU |
| rs2761581  | C1orf16   | GI_42476073-A | 1 | 1 | 180206507 | 48210  | 9.4149  | 5.79995 | CEU |
| rs10911353 | C1orf16   | GI_42476073-A | 1 | 1 | 180220860 | 33857  | 8.865   | 5.79995 | CEU |
| rs12117885 | C1orf16   | GI_42476073-A | 1 | 1 | 180225871 | 28846  | 8.7003  | 5.79995 | CEU |
| rs6662844  | C1orf16   | GI_42476073-A | 1 | 1 | 180226110 | 28607  | 7.5165  | 5.79995 | CEU |
| rs789172   | C1orf16   | GI_42476073-A | 1 | 1 | 180240895 | 13822  | 7.8582  | 5.79995 | CEU |
| rs699246   | C1orf16   | GI_42476073-A | 1 | 1 | 180247757 | 6960   | 8.509   | 5.79995 | CEU |
| rs2702182  | C1orf16   | GI_42476073-A | 1 | 1 | 180248097 | 6620   | 9.4149  | 5.79995 | CEU |
| rs2702180  | C1orf16   | GI_42476073-A | 1 | 1 | 180249628 | 5089   | 9.4149  | 5.79995 | CEU |
| rs11811630 | C1orf16   | GI_42476073-A | 1 | 1 | 180265567 | 10850  | 7.8582  | 5.79995 | CEU |
| rs2296164  | C1orf16   | GI_42476073-A | 1 | 1 | 180266592 | 11875  | 7.8582  | 5.79995 | CEU |
| rs2236385  | C1orf16   | GI_42476073-A | 1 | 1 | 180269682 | 14965  | 7.8582  | 5.79995 | CEU |
| rs3820691  | C1orf16   | GI_42476073-A | 1 | 1 | 180270782 | 16065  | 6.546   | 5.79995 | CEU |
| rs3843293  | C1orf16   | GI_42476073-A | 1 | 1 | 180271106 | 16389  | 7.0376  | 5.79995 | CEU |
| rs10911358 | C1orf16   | GI_42476073-A | 1 | 1 | 180272783 | 18066  | 7.0376  | 5.79995 | CEU |
| rs2274064  | C1orf16   | GI_42476073-A | 1 | 1 | 180274044 | 19327  | 7.0376  | 5.79995 | CEU |
| rs3818364  | C1orf16   | GI_42476073-A | 1 | 1 | 180274404 | 19687  | 6.2843  | 5.79995 | CEU |
| rs12753665 | C1orf16   | GI_42476073-A | 1 | 1 | 180277718 | 23001  | 7.317   | 5.79995 | CEU |
| rs10911363 | C1orf16   | GI_42476073-A | 1 | 1 | 180281414 | 26697  | 6.5525  | 5.79995 | CEU |
| rs11118846 | hmm26268  | hmm26268-S    | 1 | 1 | 218307092 | 29170  | 6.9894  | 5.97417 | CEU |
| rs10863652 | hmm26268  | hmm26268-S    | 1 | 1 | 218311437 | 24825  | 6.5663  | 5.97417 | CEU |
| rs6604669  | hmm26268  | hmm26268-S    | 1 | 1 | 218316566 | 19696  | 6.5663  | 5.97417 | CEU |
| rs4617402  | hmm26268  | hmm26268-S    | 1 | 1 | 218318251 | 18011  | 6.5663  | 5.97417 | CEU |
| rs11118852 | hmm26268  | hmm26268-S    | 1 | 1 | 218328666 | 7596   | 6.2991  | 5.97417 | CEU |
| rs11118853 | hmm26268  | hmm26268-S    | 1 | 1 | 218328906 | 7356   | 6.3958  | 5.97417 | CEU |
| rs6665466  | hmm26268  | hmm26268-S    | 1 | 1 | 218329751 | 6511   | 6.3958  | 5.97417 | CEU |
| rs3010848  | hmm26268  | hmm26268-S    | 1 | 1 | 218333518 | 2744   | 18.2239 | 5.97417 | CEU |
| rs3010852  | hmm26268  | hmm26268-S    | 1 | 1 | 218334602 | 1660   | 17.9119 | 5.97417 | CEU |
| rs7551182  | hmm26268  | hmm26268-S    | 1 | 1 | 218335485 | 777    | 18.0391 | 5.97417 | CEU |
| rs11118855 | hmm26268  | hmm26268-S    | 1 | 1 | 218336215 | 47     | 16.5476 | 5.97417 | CEU |
| rs3003902  | hmm26268  | hmm26268-S    | 1 | 1 | 218336419 | 157    | 16.3017 | 5.97417 | CEU |
| rs12034159 | hmm26268  | hmm26268-S    | 1 | 1 | 218337932 | 1670   | 18.2239 | 5.97417 | CEU |
| rs9441948  | hmm26268  | hmm26268-S    | 1 | 1 | 218337962 | 1700   | 18.2239 | 5.97417 | CEU |
| rs11118856 | hmm26268  | hmm26268-S    | 1 | 1 | 218339816 | 3554   | 17.9119 | 5.97417 | CEU |
| rs11118858 | hmm26268  | hmm26268-S    | 1 | 1 | 218341353 | 5091   | 8.6225  | 5.97417 | CEU |

|            |              |               |   |   |           |        |         |         |     |
|------------|--------------|---------------|---|---|-----------|--------|---------|---------|-----|
| rs4403637  | hmm26268     | hmm26268-S    | 1 | 1 | 218356929 | 20667  | 18.693  | 5.97417 | CEU |
| rs11118863 | hmm26268     | hmm26268-S    | 1 | 1 | 218361410 | 25148  | 17.6362 | 5.97417 | CEU |
| rs17560970 | KIAA0483     | GI_7662157-S  | 1 | 1 | 220620014 | 33429  | 6.0077  | 5.70269 | CEU |
| rs6426139  | KIAA0483     | GI_7662157-S  | 1 | 1 | 220621863 | 31580  | 6.2421  | 5.70269 | CEU |
| rs2896985  | KIAA0483     | GI_7662157-S  | 1 | 1 | 220621933 | 31510  | 6.122   | 5.70269 | CEU |
| rs7519433  | KIAA0483     | GI_7662157-S  | 1 | 1 | 220625738 | 27705  | 6.2421  | 5.70269 | CEU |
| rs869945   | KIAA0483     | GI_7662157-S  | 1 | 1 | 220628372 | 25071  | 6.2421  | 5.70269 | CEU |
| rs6691405  | KIAA0483     | GI_7662157-S  | 1 | 1 | 220629614 | 23829  | 6.2421  | 5.70269 | CEU |
| rs6685783  | KIAA0483     | GI_7662157-S  | 1 | 1 | 220629677 | 23766  | 6.2421  | 5.70269 | CEU |
| rs6688818  | KIAA0483     | GI_7662157-S  | 1 | 1 | 220633083 | 20360  | 5.8248  | 5.70269 | CEU |
| rs4653986  | KIAA0483     | GI_7662157-S  | 1 | 1 | 220637553 | 15890  | 6.5794  | 5.70269 | CEU |
| rs7518839  | KIAA0483     | GI_7662157-S  | 1 | 1 | 220638514 | 14929  | 6.5794  | 5.70269 | CEU |
| rs997297   | KIAA0483     | GI_7662157-S  | 1 | 1 | 220642227 | 11216  | 5.8575  | 5.70269 | CEU |
| rs7531891  | KIAA0483     | GI_7662157-S  | 1 | 1 | 220642691 | 10752  | 6.5794  | 5.70269 | CEU |
| rs10916371 | KIAA0483     | GI_7662157-S  | 1 | 1 | 220644897 | 8546   | 6.5794  | 5.70269 | CEU |
| rs7524705  | KIAA0483     | GI_7662157-S  | 1 | 1 | 220645735 | 7708   | 6.5794  | 5.70269 | CEU |
| rs1826421  | KIAA0483     | GI_7662157-S  | 1 | 1 | 220646182 | 7261   | 6.105   | 5.70269 | CEU |
| rs7526252  | KIAA0483     | GI_7662157-S  | 1 | 1 | 220655553 | 2110   | 6.0336  | 5.70269 | CEU |
| rs10799505 | KIAA0483     | GI_7662157-S  | 1 | 1 | 220657758 | 4315   | 6.0924  | 5.70269 | CEU |
| rs10916403 | KIAA0483     | GI_7662157-S  | 1 | 1 | 220659286 | 5843   | 5.7929  | 5.70269 | CEU |
| rs12028523 | IMAGE3451454 | GI_26024192-S | 1 | 1 | 223851442 | 424055 | 6.0229  | 5.73949 | CEU |
| rs12057466 | IMAGE3451454 | GI_26024192-S | 1 | 1 | 223854623 | 420874 | 6.4861  | 5.73949 | CEU |
| rs7555764  | IMAGE3451454 | GI_26024192-S | 1 | 1 | 223866754 | 408743 | 6.0485  | 5.73949 | CEU |
| rs10753434 | IMAGE3451454 | GI_26024192-S | 1 | 1 | 223867335 | 408162 | 6.0485  | 5.73949 | CEU |
| rs10916133 | IMAGE3451454 | GI_26024192-S | 1 | 1 | 223872402 | 403095 | 6.0485  | 5.73949 | CEU |
| rs4294380  | IMAGE3451454 | GI_26024192-S | 1 | 1 | 223885720 | 389777 | 5.8812  | 5.73949 | CEU |
| rs4233227  | IMAGE3451454 | GI_26024192-S | 1 | 1 | 223888315 | 387182 | 6.5651  | 5.73949 | CEU |
| rs3014272  | IMAGE3451454 | GI_26024192-S | 1 | 1 | 223890175 | 385322 | 6.0485  | 5.73949 | CEU |
| rs6429515  | MGC12458     | GI_14150107-S | 1 | 1 | 241451082 | 125998 | 13.3177 | 6.62696 | CEU |
| rs11590498 | MGC12458     | GI_14150107-S | 1 | 1 | 241461755 | 115325 | 6.7492  | 6.62696 | CEU |
| rs10927361 | MGC12458     | GI_14150107-S | 1 | 1 | 241466695 | 110385 | 6.7492  | 6.62696 | CEU |
| rs1021282  | MGC12458     | GI_14150107-S | 1 | 1 | 241470753 | 106327 | 6.7492  | 6.62696 | CEU |
| rs10927363 | MGC12458     | GI_14150107-S | 1 | 1 | 241474480 | 102600 | 6.7492  | 6.62696 | CEU |
| rs12403396 | MGC12458     | GI_14150107-S | 1 | 1 | 241474775 | 102305 | 6.6914  | 6.62696 | CEU |
| rs10927364 | MGC12458     | GI_14150107-S | 1 | 1 | 241476465 | 100615 | 6.7492  | 6.62696 | CEU |
| rs4658434  | MGC12458     | GI_14150107-S | 1 | 1 | 241478023 | 99057  | 6.7492  | 6.62696 | CEU |
| rs2050632  | MGC12458     | GI_14150107-S | 1 | 1 | 241485608 | 91472  | 6.7492  | 6.62696 | CEU |
| rs522595   | MGC12458     | GI_14150107-S | 1 | 1 | 241485780 | 91300  | 6.7492  | 6.62696 | CEU |
| rs644341   | MGC12458     | GI_14150107-S | 1 | 1 | 241485863 | 91217  | 6.7492  | 6.62696 | CEU |
| rs643352   | MGC12458     | GI_14150107-S | 1 | 1 | 241486132 | 90948  | 7.1784  | 6.62696 | CEU |
| rs626070   | MGC12458     | GI_14150107-S | 1 | 1 | 241493372 | 83708  | 6.7492  | 6.62696 | CEU |
| rs4658685  | MGC12458     | GI_14150107-S | 1 | 1 | 241493912 | 83168  | 6.8439  | 6.62696 | CEU |
| rs2786693  | MGC12458     | GI_14150107-S | 1 | 1 | 241495087 | 81993  | 6.7492  | 6.62696 | CEU |
| rs672008   | MGC12458     | GI_14150107-S | 1 | 1 | 241496919 | 80161  | 6.7492  | 6.62696 | CEU |
| rs2786691  | MGC12458     | GI_14150107-S | 1 | 1 | 241497170 | 79910  | 6.7492  | 6.62696 | CEU |
| rs1196365  | MGC12458     | GI_14150107-S | 1 | 1 | 241505212 | 71868  | 6.7492  | 6.62696 | CEU |
| rs1196366  | MGC12458     | GI_14150107-S | 1 | 1 | 241505229 | 71851  | 11.667  | 6.62696 | CEU |
| rs10927369 | MGC12458     | GI_14150107-S | 1 | 1 | 241506001 | 71079  | 6.7492  | 6.62696 | CEU |
| rs901664   | MGC12458     | GI_14150107-S | 1 | 1 | 241509620 | 67460  | 12.1886 | 6.62696 | CEU |
| rs901665   | MGC12458     | GI_14150107-S | 1 | 1 | 241509924 | 67156  | 12.6718 | 6.62696 | CEU |
| rs7528009  | MGC12458     | GI_14150107-S | 1 | 1 | 241511114 | 65966  | 6.7492  | 6.62696 | CEU |
| rs600025   | MGC12458     | GI_14150107-S | 1 | 1 | 241517136 | 59944  | 15.0013 | 6.62696 | CEU |
| rs586013   | MGC12458     | GI_14150107-S | 1 | 1 | 241517934 | 59146  | 12.1163 | 6.62696 | CEU |
| rs632383   | MGC12458     | GI_14150107-S | 1 | 1 | 241518287 | 58793  | 13.2729 | 6.62696 | CEU |
| rs1979568  | MGC12458     | GI_14150107-S | 1 | 1 | 241518513 | 58567  | 13.8035 | 6.62696 | CEU |
| rs675033   | MGC12458     | GI_14150107-S | 1 | 1 | 241519964 | 57116  | 14.5769 | 6.62696 | CEU |

|            |           |               |   |   |           |        |         |         |     |
|------------|-----------|---------------|---|---|-----------|--------|---------|---------|-----|
| rs632676   | MGC12458  | GI_14150107-S | 1 | 1 | 241521105 | 55975  | 14.5769 | 6.62696 | CEU |
| rs616540   | MGC12458  | GI_14150107-S | 1 | 1 | 241522450 | 54630  | 14.5769 | 6.62696 | CEU |
| rs665478   | MGC12458  | GI_14150107-S | 1 | 1 | 241524271 | 52809  | 14.5769 | 6.62696 | CEU |
| rs9428636  | MGC12458  | GI_14150107-S | 1 | 1 | 241526024 | 51056  | 14.1433 | 6.62696 | CEU |
| rs556935   | MGC12458  | GI_14150107-S | 1 | 1 | 241530141 | 46939  | 10.1529 | 6.62696 | CEU |
| rs626106   | MGC12458  | GI_14150107-S | 1 | 1 | 241530870 | 46210  | 10.6564 | 6.62696 | CEU |
| rs2029249  | MGC12458  | GI_14150107-S | 1 | 1 | 241531718 | 45362  | 14.5769 | 6.62696 | CEU |
| rs11580510 | MGC12458  | GI_14150107-S | 1 | 1 | 241531917 | 45163  | 8.6097  | 6.62696 | CEU |
| rs12728471 | MGC12458  | GI_14150107-S | 1 | 1 | 241531931 | 45149  | 14.5769 | 6.62696 | CEU |
| rs4233441  | MGC12458  | GI_14150107-S | 1 | 1 | 241535175 | 41905  | 14.5769 | 6.62696 | CEU |
| rs619449   | MGC12458  | GI_14150107-S | 1 | 1 | 241539091 | 37989  | 14.5769 | 6.62696 | CEU |
| rs588923   | MGC12458  | GI_14150107-S | 1 | 1 | 241539921 | 37159  | 12.8336 | 6.62696 | CEU |
| rs4658688  | MGC12458  | GI_14150107-S | 1 | 1 | 241540837 | 36243  | 13.9727 | 6.62696 | CEU |
| rs611185   | MGC12458  | GI_14150107-S | 1 | 1 | 241545095 | 31985  | 7.6459  | 6.62696 | CEU |
| rs576872   | MGC12458  | GI_14150107-S | 1 | 1 | 241549105 | 27975  | 7.6364  | 6.62696 | CEU |
| rs547441   | MGC12458  | GI_14150107-S | 1 | 1 | 241550008 | 27072  | 8.5613  | 6.62696 | CEU |
| rs664252   | MGC12458  | GI_14150107-S | 1 | 1 | 241555077 | 22003  | 7.0637  | 6.62696 | CEU |
| rs500494   | MGC12458  | GI_14150107-S | 1 | 1 | 241555418 | 21662  | 7.6289  | 6.62696 | CEU |
| rs586865   | MGC12458  | GI_14150107-S | 1 | 1 | 241556998 | 20082  | 7.202   | 6.62696 | CEU |
| rs12083437 | MGC12458  | GI_14150107-S | 1 | 1 | 241567770 | 9310   | 7.5593  | 6.62696 | CEU |
| rs2152913  | MGC12458  | GI_14150107-S | 1 | 1 | 241568409 | 8671   | 7.2045  | 6.62696 | CEU |
| rs4658694  | MGC12458  | GI_14150107-S | 1 | 1 | 241570210 | 6870   | 7.8145  | 6.62696 | CEU |
| rs10927386 | MGC12458  | GI_14150107-S | 1 | 1 | 241571419 | 5661   | 8.4155  | 6.62696 | CEU |
| rs10927387 | MGC12458  | GI_14150107-S | 1 | 1 | 241571443 | 5637   | 8.406   | 6.62696 | CEU |
| rs6429522  | MGC12458  | GI_14150107-S | 1 | 1 | 241574484 | 2596   | 8.5613  | 6.62696 | CEU |
| rs11806396 | MGC12458  | GI_14150107-S | 1 | 1 | 241578384 | 1304   | 7.9643  | 6.62696 | CEU |
| rs1779962  | SBZF3     | GI_31742527-S | 1 | 1 | 243437103 | 2062   | 5.9137  | 5.8173  | CEU |
| rs17046986 | DTNB      | GI_37577100-A | 2 | 2 | 25532551  | 20746  | 6.1775  | 5.79454 | CEU |
| rs7571570  | DTNB      | GI_37577100-A | 2 | 2 | 25533181  | 21376  | 7.1749  | 5.79454 | CEU |
| rs1369704  | DTNB      | GI_37577100-A | 2 | 2 | 25535241  | 23436  | 8.4779  | 5.79454 | CEU |
| rs2384232  | DTNB      | GI_37577100-A | 2 | 2 | 25535400  | 23595  | 8.4779  | 5.79454 | CEU |
| rs10206012 | DTNB      | GI_37577100-A | 2 | 2 | 25535837  | 24032  | 7.7425  | 5.79454 | CEU |
| rs6546148  | DTNB      | GI_37577100-A | 2 | 2 | 25536656  | 24851  | 8.2537  | 5.79454 | CEU |
| rs7586918  | DTNB      | GI_37577100-A | 2 | 2 | 25538036  | 26231  | 7.5558  | 5.79454 | CEU |
| rs6543603  | GALNT14   | GI_13375743-S | 2 | 2 | 31257918  | 212671 | 7.9778  | 5.92962 | CEU |
| rs11903753 | GALNT14   | GI_13375743-S | 2 | 2 | 31258397  | 213150 | 8.5438  | 5.92962 | CEU |
| rs6750539  | Hs.515955 | Hs.515955-S   | 2 | 2 | 42949323  | 20468  | 5.9969  | 5.7614  | CEU |
| rs2119018  | Hs.515955 | Hs.515955-S   | 2 | 2 | 42970937  | 1146   | 5.99    | 5.7614  | CEU |
| rs1451153  | CRIP1     | GI_41350204-S | 2 | 2 | 46711503  | 51898  | 6.4741  | 6.40145 | CEU |
| rs7589801  | CRIP1     | GI_41350204-S | 2 | 2 | 46727893  | 35508  | 8.2584  | 6.40145 | CEU |
| rs896213   | CRIP1     | GI_41350204-S | 2 | 2 | 46729295  | 34106  | 7.6734  | 6.40145 | CEU |
| rs1901263  | CRIP1     | GI_41350204-S | 2 | 2 | 46730237  | 33164  | 9.5801  | 6.40145 | CEU |
| rs2305350  | CRIP1     | GI_41350204-S | 2 | 2 | 46731466  | 31935  | 9.9861  | 6.40145 | CEU |
| rs13001566 | CRIP1     | GI_41350204-S | 2 | 2 | 46741138  | 22263  | 8.6695  | 6.40145 | CEU |
| rs1451156  | CRIP1     | GI_41350204-S | 2 | 2 | 46744253  | 19148  | 8.6695  | 6.40145 | CEU |
| rs13000706 | CRIP1     | GI_41350204-S | 2 | 2 | 46749898  | 13503  | 6.4849  | 6.40145 | CEU |
| rs1531133  | CRIP1     | GI_41350204-S | 2 | 2 | 46755282  | 8119   | 6.4849  | 6.40145 | CEU |
| rs3087822  | CRIP1     | GI_41350204-S | 2 | 2 | 46763684  | 283    | 6.7351  | 6.40145 | CEU |
| rs6739397  | CRIP1     | GI_41350204-S | 2 | 2 | 46769972  | 6571   | 6.7351  | 6.40145 | CEU |
| rs12104572 | CRIP1     | GI_41350204-S | 2 | 2 | 46774117  | 10716  | 6.7351  | 6.40145 | CEU |
| rs6544906  | CRIP1     | GI_41350204-S | 2 | 2 | 46775523  | 12122  | 6.7273  | 6.40145 | CEU |
| rs13385693 | CRIP1     | GI_41350204-S | 2 | 2 | 46778809  | 15408  | 6.7351  | 6.40145 | CEU |
| rs6544907  | CRIP1     | GI_41350204-S | 2 | 2 | 46779970  | 16569  | 6.7351  | 6.40145 | CEU |
| rs1177285  | LOC339804 | GI_37546921-S | 2 | 2 | 61261788  | 40153  | 7.467   | 5.82639 | CEU |
| rs1177282  | LOC339804 | GI_37546921-S | 2 | 2 | 61269428  | 32513  | 8.9297  | 5.82639 | CEU |
| rs1729660  | LOC339804 | GI_37546921-S | 2 | 2 | 61277463  | 24478  | 9.1394  | 5.82639 | CEU |

|            |           |               |   |   |          |        |        |         |     |
|------------|-----------|---------------|---|---|----------|--------|--------|---------|-----|
| rs11498    | LOC339804 | GI_37546921-S | 2 | 2 | 61282470 | 19471  | 7.8789 | 5.82639 | CEU |
| rs3213944  | LOC339804 | GI_37546921-S | 2 | 2 | 61283949 | 17992  | 9.7881 | 5.82639 | CEU |
| rs2441467  | LOC339804 | GI_37546921-S | 2 | 2 | 61285800 | 16141  | 6.9218 | 5.82639 | CEU |
| rs720201   | LOC339804 | GI_37546921-S | 2 | 2 | 61288114 | 13827  | 9.1394 | 5.82639 | CEU |
| rs1729653  | LOC339804 | GI_37546921-S | 2 | 2 | 61288659 | 13282  | 9.1394 | 5.82639 | CEU |
| rs1665270  | LOC339804 | GI_37546921-S | 2 | 2 | 61289317 | 12624  | 9.1394 | 5.82639 | CEU |
| rs1729652  | LOC339804 | GI_37546921-S | 2 | 2 | 61289670 | 12271  | 9.1394 | 5.82639 | CEU |
| rs1665271  | LOC339804 | GI_37546921-S | 2 | 2 | 61290467 | 11474  | 9.1785 | 5.82639 | CEU |
| rs12475591 | LOC339804 | GI_37546921-S | 2 | 2 | 61293179 | 8762   | 8.52   | 5.82639 | CEU |
| rs2592493  | LOC339804 | GI_37546921-S | 2 | 2 | 61293988 | 7953   | 8.1279 | 5.82639 | CEU |
| rs1665263  | LOC339804 | GI_37546921-S | 2 | 2 | 61294410 | 7531   | 8.0076 | 5.82639 | CEU |
| rs1665260  | LOC339804 | GI_37546921-S | 2 | 2 | 61296138 | 5803   | 8.52   | 5.82639 | CEU |
| rs1665259  | LOC339804 | GI_37546921-S | 2 | 2 | 61296406 | 5535   | 9.1394 | 5.82639 | CEU |
| rs7558954  | LOC339804 | GI_37546921-S | 2 | 2 | 61296557 | 5384   | 6.2908 | 5.82639 | CEU |
| rs1729671  | LOC339804 | GI_37546921-S | 2 | 2 | 61296756 | 5185   | 8.3257 | 5.82639 | CEU |
| rs1177309  | LOC339804 | GI_37546921-S | 2 | 2 | 61296899 | 5042   | 6.2908 | 5.82639 | CEU |
| rs1177308  | LOC339804 | GI_37546921-S | 2 | 2 | 61298905 | 3036   | 6.7735 | 5.82639 | CEU |
| rs1177303  | LOC339804 | GI_37546921-S | 2 | 2 | 61300006 | 1935   | 7.8759 | 5.82639 | CEU |
| rs1729674  | LOC339804 | GI_37546921-S | 2 | 2 | 61301388 | 553    | 6.7735 | 5.82639 | CEU |
| rs1729673  | LOC339804 | GI_37546921-S | 2 | 2 | 61301450 | 491    | 9.0227 | 5.82639 | CEU |
| rs3889717  | LOC339804 | GI_37546921-S | 2 | 2 | 61302442 | 501    | 6.7735 | 5.82639 | CEU |
| rs1615070  | LOC339804 | GI_37546921-S | 2 | 2 | 61304826 | 2885   | 5.9489 | 5.82639 | CEU |
| rs2600668  | LOC339804 | GI_37546921-S | 2 | 2 | 61312078 | 10137  | 7.4652 | 5.82639 | CEU |
| rs2167564  | LOC339804 | GI_37546921-S | 2 | 2 | 61312467 | 10526  | 9.1394 | 5.82639 | CEU |
| rs777584   | LOC339804 | GI_37546921-S | 2 | 2 | 61321997 | 20056  | 7.5016 | 5.82639 | CEU |
| rs811372   | LOC339803 | GI_42656315-S | 2 | 2 | 61341219 | 60219  | 6.1771 | 5.58478 | CEU |
| rs7570707  | LOC339803 | GI_42656315-S | 2 | 2 | 61363395 | 82395  | 6.1897 | 5.58478 | CEU |
| rs7588041  | LOC339803 | GI_42656315-S | 2 | 2 | 61373063 | 92063  | 5.6546 | 5.58478 | CEU |
| rs2167565  | LOC339804 | GI_37546921-S | 2 | 2 | 61388109 | 86168  | 6.3355 | 5.82639 | CEU |
| rs2060824  | LOC339803 | GI_42656315-S | 2 | 2 | 61396207 | 115207 | 6.1771 | 5.58478 | CEU |
| rs6706786  | LOC339803 | GI_42656315-S | 2 | 2 | 61400492 | 119492 | 6.1771 | 5.58478 | CEU |
| rs4671402  | LOC339803 | GI_42656315-S | 2 | 2 | 61406101 | 125101 | 6.1771 | 5.58478 | CEU |
| rs7572386  | IMMT      | GI_5803114-S  | 2 | 2 | 86183849 | 99300  | 6.0619 | 5.9485  | CEU |
| rs2289239  | IMMT      | GI_5803114-S  | 2 | 2 | 86187643 | 95506  | 6.0619 | 5.9485  | CEU |
| rs6735014  | IMMT      | GI_5803114-S  | 2 | 2 | 86208071 | 75078  | 6.0784 | 5.9485  | CEU |
| rs12994838 | IMMT      | GI_5803114-S  | 2 | 2 | 86212963 | 70186  | 6.0619 | 5.9485  | CEU |
| rs3770075  | IMMT      | GI_5803114-S  | 2 | 2 | 86213636 | 69513  | 6.0619 | 5.9485  | CEU |
| rs1424522  | IMMT      | GI_5803114-S  | 2 | 2 | 86228040 | 55109  | 6.2163 | 5.9485  | CEU |
| rs10187150 | IMMT      | GI_5803114-S  | 2 | 2 | 86229393 | 53756  | 6.4359 | 5.9485  | CEU |
| rs715334   | IMMT      | GI_5803114-S  | 2 | 2 | 86233729 | 49420  | 6.6404 | 5.9485  | CEU |
| rs10184246 | IMMT      | GI_5803114-S  | 2 | 2 | 86252986 | 30163  | 6.6404 | 5.9485  | CEU |
| rs2241438  | IMMT      | GI_5803114-S  | 2 | 2 | 86271883 | 11266  | 6.6404 | 5.9485  | CEU |
| rs11395    | IMMT      | GI_5803114-S  | 2 | 2 | 86277265 | 5884   | 6.6404 | 5.9485  | CEU |
| rs8244     | IMMT      | GI_5803114-S  | 2 | 2 | 86283541 | 392    | 6.6404 | 5.9485  | CEU |
| rs1124686  | IMMT      | GI_5803114-S  | 2 | 2 | 86288132 | 4983   | 6.0643 | 5.9485  | CEU |
| rs7569853  | IMMT      | GI_5803114-S  | 2 | 2 | 86288801 | 5652   | 7.1187 | 5.9485  | CEU |
| rs6731535  | IMMT      | GI_5803114-S  | 2 | 2 | 86291771 | 8622   | 7.1187 | 5.9485  | CEU |
| rs12714170 | IMMT      | GI_5803114-S  | 2 | 2 | 86294727 | 11578  | 7.1187 | 5.9485  | CEU |
| rs6547660  | IMMT      | GI_5803114-S  | 2 | 2 | 86294829 | 11680  | 7.1187 | 5.9485  | CEU |
| rs12465983 | IMMT      | GI_5803114-S  | 2 | 2 | 86295604 | 12455  | 7.1187 | 5.9485  | CEU |
| rs7561589  | IMMT      | GI_5803114-S  | 2 | 2 | 86296893 | 13744  | 7.1187 | 5.9485  | CEU |
| rs1057893  | IMMT      | GI_5803114-S  | 2 | 2 | 86297326 | 14177  | 7.1187 | 5.9485  | CEU |
| rs6737950  | IMMT      | GI_5803114-S  | 2 | 2 | 86300263 | 17114  | 7.7822 | 5.9485  | CEU |
| rs3770067  | IMMT      | GI_5803114-S  | 2 | 2 | 86303729 | 20580  | 7.1187 | 5.9485  | CEU |
| rs6729732  | IMMT      | GI_5803114-S  | 2 | 2 | 86307091 | 23942  | 7.1187 | 5.9485  | CEU |
| rs12478097 | IMMT      | GI_5803114-S  | 2 | 2 | 86307619 | 24470  | 7.1187 | 5.9485  | CEU |

|            |       |               |   |   |          |        |        |         |     |
|------------|-------|---------------|---|---|----------|--------|--------|---------|-----|
| rs2278083  | IMMT  | GI_5803114-S  | 2 | 2 | 86308377 | 25228  | 7.1187 | 5.9485  | CEU |
| rs12714171 | IMMT  | GI_5803114-S  | 2 | 2 | 86308748 | 25599  | 7.1187 | 5.9485  | CEU |
| rs2288115  | IMMT  | GI_5803114-S  | 2 | 2 | 86309732 | 26583  | 7.1187 | 5.9485  | CEU |
| rs2288113  | IMMT  | GI_5803114-S  | 2 | 2 | 86309949 | 26800  | 7.1187 | 5.9485  | CEU |
| rs12477274 | IMMT  | GI_5803114-S  | 2 | 2 | 86310443 | 27294  | 7.1187 | 5.9485  | CEU |
| rs6757387  | IMMT  | GI_5803114-S  | 2 | 2 | 86310567 | 27418  | 7.1187 | 5.9485  | CEU |
| rs6547661  | IMMT  | GI_5803114-S  | 2 | 2 | 86310877 | 27728  | 7.1187 | 5.9485  | CEU |
| rs7609008  | IMMT  | GI_5803114-S  | 2 | 2 | 86311542 | 28393  | 7.1187 | 5.9485  | CEU |
| rs3770065  | IMMT  | GI_5803114-S  | 2 | 2 | 86313039 | 29890  | 7.1187 | 5.9485  | CEU |
| rs6725372  | IMMT  | GI_5803114-S  | 2 | 2 | 86313381 | 30232  | 7.1187 | 5.9485  | CEU |
| rs7566721  | IMMT  | GI_5803114-S  | 2 | 2 | 86314114 | 30965  | 7.1187 | 5.9485  | CEU |
| rs10496318 | IMMT  | GI_5803114-S  | 2 | 2 | 86314471 | 31322  | 7.1187 | 5.9485  | CEU |
| rs2367203  | IMMT  | GI_5803114-S  | 2 | 2 | 86314595 | 31446  | 7.1187 | 5.9485  | CEU |
| rs3770062  | IMMT  | GI_5803114-S  | 2 | 2 | 86315405 | 32256  | 7.1187 | 5.9485  | CEU |
| rs2367204  | IMMT  | GI_5803114-S  | 2 | 2 | 86316069 | 32920  | 7.1187 | 5.9485  | CEU |
| rs6547663  | IMMT  | GI_5803114-S  | 2 | 2 | 86318096 | 34947  | 7.1187 | 5.9485  | CEU |
| rs3770060  | IMMT  | GI_5803114-S  | 2 | 2 | 86318547 | 35398  | 7.1187 | 5.9485  | CEU |
| rs6731995  | IMMT  | GI_5803114-S  | 2 | 2 | 86320043 | 36894  | 7.1187 | 5.9485  | CEU |
| rs17027013 | IMMT  | GI_5803114-S  | 2 | 2 | 86321727 | 38578  | 6.3645 | 5.9485  | CEU |
| rs12469762 | IMMT  | GI_5803114-S  | 2 | 2 | 86322933 | 39784  | 7.1187 | 5.9485  | CEU |
| rs10175330 | IMMT  | GI_5803114-S  | 2 | 2 | 86325772 | 42623  | 7.1187 | 5.9485  | CEU |
| rs7588325  | IMMT  | GI_5803114-S  | 2 | 2 | 86327231 | 44082  | 7.3204 | 5.9485  | CEU |
| rs11885380 | IMMT  | GI_5803114-S  | 2 | 2 | 86331260 | 48111  | 7.1187 | 5.9485  | CEU |
| rs12996308 | IMMT  | GI_5803114-S  | 2 | 2 | 86331590 | 48441  | 7.1187 | 5.9485  | CEU |
| rs12475079 | IMMT  | GI_5803114-S  | 2 | 2 | 86332867 | 49718  | 7.1187 | 5.9485  | CEU |
| rs12475126 | IMMT  | GI_5803114-S  | 2 | 2 | 86332990 | 49841  | 7.1187 | 5.9485  | CEU |
| rs11899254 | IMMT  | GI_5803114-S  | 2 | 2 | 86333165 | 50016  | 7.1187 | 5.9485  | CEU |
| rs12714172 | IMMT  | GI_5803114-S  | 2 | 2 | 86333360 | 50211  | 7.1187 | 5.9485  | CEU |
| rs9653569  | IMMT  | GI_5803114-S  | 2 | 2 | 86333731 | 50582  | 7.3815 | 5.9485  | CEU |
| rs9309632  | IMMT  | GI_5803114-S  | 2 | 2 | 86334318 | 51169  | 7.1187 | 5.9485  | CEU |
| rs4402761  | IMMT  | GI_5803114-S  | 2 | 2 | 86334603 | 51454  | 7.1187 | 5.9485  | CEU |
| rs4422155  | IMMT  | GI_5803114-S  | 2 | 2 | 86334677 | 51528  | 7.1187 | 5.9485  | CEU |
| rs4450596  | IMMT  | GI_5803114-S  | 2 | 2 | 86334689 | 51540  | 7.1187 | 5.9485  | CEU |
| rs4374375  | IMMT  | GI_5803114-S  | 2 | 2 | 86334812 | 51663  | 7.1187 | 5.9485  | CEU |
| rs4544439  | IMMT  | GI_5803114-S  | 2 | 2 | 86334882 | 51733  | 7.1187 | 5.9485  | CEU |
| rs13027248 | IMMT  | GI_5803114-S  | 2 | 2 | 86337515 | 54366  | 6.1647 | 5.9485  | CEU |
| rs7560376  | IMMT  | GI_5803114-S  | 2 | 2 | 86339273 | 56124  | 6.3607 | 5.9485  | CEU |
| rs7563742  | IMMT  | GI_5803114-S  | 2 | 2 | 86339876 | 56727  | 6.1647 | 5.9485  | CEU |
| rs6547665  | IMMT  | GI_5803114-S  | 2 | 2 | 86343279 | 60130  | 6.1647 | 5.9485  | CEU |
| rs12714175 | IMMT  | GI_5803114-S  | 2 | 2 | 86344523 | 61374  | 6.1647 | 5.9485  | CEU |
| rs12714177 | IMMT  | GI_5803114-S  | 2 | 2 | 86345249 | 62100  | 6.3607 | 5.9485  | CEU |
| rs4907307  | CIAO1 | GI_38570089-S | 2 | 2 | 96347143 | 11724  | 5.8896 | 5.41951 | CEU |
| rs1044594  | CIAO1 | GI_38570089-S | 2 | 2 | 96359170 | 303    | 5.8896 | 5.41951 | CEU |
| rs3214058  | CIAO1 | GI_38570089-S | 2 | 2 | 96377354 | 18487  | 5.8896 | 5.41951 | CEU |
| rs17420101 | CIAO1 | GI_38570089-S | 2 | 2 | 96381490 | 22623  | 5.8896 | 5.41951 | CEU |
| rs17479466 | CIAO1 | GI_38570089-S | 2 | 2 | 96384733 | 25866  | 5.8896 | 5.41951 | CEU |
| rs3731930  | CIAO1 | GI_38570089-S | 2 | 2 | 96388535 | 29668  | 5.8896 | 5.41951 | CEU |
| rs2276649  | CIAO1 | GI_38570089-S | 2 | 2 | 96393283 | 34416  | 6.5543 | 5.41951 | CEU |
| rs4907310  | CIAO1 | GI_38570089-S | 2 | 2 | 96401987 | 43120  | 6.7119 | 5.41951 | CEU |
| rs2279105  | CIAO1 | GI_38570089-S | 2 | 2 | 96415631 | 56764  | 6.7119 | 5.41951 | CEU |
| rs1048675  | CIAO1 | GI_38570089-S | 2 | 2 | 96415758 | 56891  | 6.7119 | 5.41951 | CEU |
| rs11903461 | CIAO1 | GI_38570089-S | 2 | 2 | 96421454 | 62587  | 6.4029 | 5.41951 | CEU |
| rs7562544  | CIAO1 | GI_38570089-S | 2 | 2 | 96428559 | 69692  | 5.5816 | 5.41951 | CEU |
| rs4907311  | CIAO1 | GI_38570089-S | 2 | 2 | 96433236 | 74369  | 6.6201 | 5.41951 | CEU |
| rs2305935  | CIAO1 | GI_38570089-S | 2 | 2 | 96452121 | 93254  | 6.7119 | 5.41951 | CEU |
| rs2085842  | CIAO1 | GI_38570089-S | 2 | 2 | 96474382 | 115515 | 6.7119 | 5.41951 | CEU |



|            |           |               |   |   |           |       |        |         |     |
|------------|-----------|---------------|---|---|-----------|-------|--------|---------|-----|
| rs720229   | TSGA10    | GI_41281983-I | 2 | 2 | 99162791  | 53636 | 6.2515 | 5.7422  | CEU |
| rs13035311 | TSGA10    | GI_41281983-I | 2 | 2 | 99175840  | 40587 | 6.9213 | 5.7422  | CEU |
| rs10865029 | TSGA10    | GI_41281983-I | 2 | 2 | 99176816  | 39611 | 6.9213 | 5.7422  | CEU |
| rs1453563  | TSGA10    | GI_41281983-I | 2 | 2 | 99178785  | 37642 | 6.2058 | 5.7422  | CEU |
| rs13008496 | TSGA10    | GI_41281983-I | 2 | 2 | 99181629  | 34798 | 5.9161 | 5.7422  | CEU |
| rs11683188 | TSGA10    | GI_41281983-I | 2 | 2 | 99183030  | 33397 | 6.2058 | 5.7422  | CEU |
| rs4340581  | TSGA10    | GI_41281983-I | 2 | 2 | 99183543  | 32884 | 6.9213 | 5.7422  | CEU |
| rs6542864  | TSGA10    | GI_41281983-I | 2 | 2 | 99183741  | 32686 | 6.9213 | 5.7422  | CEU |
| rs6733285  | TSGA10    | GI_41281983-I | 2 | 2 | 99184093  | 32334 | 6.2058 | 5.7422  | CEU |
| rs7577477  | TSGA10    | GI_41281983-I | 2 | 2 | 99186811  | 29616 | 6.9213 | 5.7422  | CEU |
| rs11692699 | TSGA10    | GI_41281983-I | 2 | 2 | 99189175  | 27252 | 6.9213 | 5.7422  | CEU |
| rs12613624 | TSGA10    | GI_41281983-I | 2 | 2 | 99191259  | 25168 | 6.2058 | 5.7422  | CEU |
| rs11688004 | TSGA10    | GI_41281983-I | 2 | 2 | 99193570  | 22857 | 6.2058 | 5.7422  | CEU |
| rs17759607 | TSGA10    | GI_41281983-I | 2 | 2 | 99195523  | 20904 | 5.8012 | 5.7422  | CEU |
| rs6741772  | TSGA10    | GI_41281983-I | 2 | 2 | 99197479  | 18948 | 6.9213 | 5.7422  | CEU |
| rs6751927  | TSGA10    | GI_41281983-I | 2 | 2 | 99198693  | 17734 | 6.1092 | 5.7422  | CEU |
| rs1133977  | TSGA10    | GI_41281983-I | 2 | 2 | 99200502  | 15925 | 6.2058 | 5.7422  | CEU |
| rs11695379 | TSGA10    | GI_41281983-I | 2 | 2 | 99200679  | 15748 | 6.9213 | 5.7422  | CEU |
| rs4851187  | TSGA10    | GI_41281983-I | 2 | 2 | 99204378  | 12049 | 6.9213 | 5.7422  | CEU |
| rs4851188  | TSGA10    | GI_41281983-I | 2 | 2 | 99204416  | 12011 | 6.2058 | 5.7422  | CEU |
| rs7419947  | TSGA10    | GI_41281983-I | 2 | 2 | 99207868  | 8559  | 6.9213 | 5.7422  | CEU |
| rs9941561  | TSGA10    | GI_41281983-I | 2 | 2 | 99212347  | 4080  | 6.9213 | 5.7422  | CEU |
| rs13018891 | TSGA10    | GI_41281983-I | 2 | 2 | 99213617  | 2810  | 6.9213 | 5.7422  | CEU |
| rs11677247 | TSGA10    | GI_41281983-I | 2 | 2 | 99214876  | 1551  | 6.9213 | 5.7422  | CEU |
| rs6717723  | TSGA10    | GI_41281983-I | 2 | 2 | 99215448  | 979   | 6.9213 | 5.7422  | CEU |
| rs6717729  | TSGA10    | GI_41281983-I | 2 | 2 | 99215459  | 968   | 6.9213 | 5.7422  | CEU |
| rs11683107 | TSGA10    | GI_41281983-I | 2 | 2 | 99217753  | 1326  | 6.2058 | 5.7422  | CEU |
| rs6542865  | TSGA10    | GI_41281983-I | 2 | 2 | 99223039  | 6612  | 6.9213 | 5.7422  | CEU |
| rs6542866  | TSGA10    | GI_41281983-I | 2 | 2 | 99223110  | 6683  | 5.8817 | 5.7422  | CEU |
| rs12995473 | TSGA10    | GI_41281983-I | 2 | 2 | 99223402  | 6975  | 7.1327 | 5.7422  | CEU |
| rs11123765 | TSGA10    | GI_41281983-I | 2 | 2 | 99226582  | 10155 | 6.9213 | 5.7422  | CEU |
| rs4850897  | TSGA10    | GI_41281983-I | 2 | 2 | 99226937  | 10510 | 6.4164 | 5.7422  | CEU |
| rs2516832  | TSGA10    | GI_41281983-I | 2 | 2 | 99229786  | 13359 | 6.9213 | 5.7422  | CEU |
| rs2516834  | TSGA10    | GI_41281983-I | 2 | 2 | 99230051  | 13624 | 7.1814 | 5.7422  | CEU |
| rs2632260  | TSGA10    | GI_41281983-I | 2 | 2 | 99230108  | 13681 | 6.9213 | 5.7422  | CEU |
| rs2516827  | TSGA10    | GI_41281983-I | 2 | 2 | 99231083  | 14656 | 6.9213 | 5.7422  | CEU |
| rs2516829  | TSGA10    | GI_41281983-I | 2 | 2 | 99231719  | 15292 | 6.9213 | 5.7422  | CEU |
| rs2516830  | TSGA10    | GI_41281983-I | 2 | 2 | 99232220  | 15793 | 6.2058 | 5.7422  | CEU |
| rs2632283  | TSGA10    | GI_41281983-I | 2 | 2 | 99234518  | 18091 | 6.2058 | 5.7422  | CEU |
| rs2632277  | TSGA10    | GI_41281983-I | 2 | 2 | 99237503  | 21076 | 6.9213 | 5.7422  | CEU |
| rs2516835  | TSGA10    | GI_41281983-I | 2 | 2 | 99237649  | 21222 | 6.2058 | 5.7422  | CEU |
| rs2309581  | TSGA10    | GI_41281983-I | 2 | 2 | 99242810  | 26383 | 6.9213 | 5.7422  | CEU |
| rs6727749  | TSGA10    | GI_41281983-I | 2 | 2 | 99252108  | 35681 | 6.2058 | 5.7422  | CEU |
| rs13033012 | TSGA10    | GI_41281983-I | 2 | 2 | 99253667  | 37240 | 6.3777 | 5.7422  | CEU |
| rs8179690  | TSGA10    | GI_41281983-I | 2 | 2 | 99253818  | 37391 | 6.9213 | 5.7422  | CEU |
| rs2171359  | TSGA10    | GI_41281983-I | 2 | 2 | 99253878  | 37451 | 6.9213 | 5.7422  | CEU |
| rs11689265 | TSGA10    | GI_41281983-I | 2 | 2 | 99257785  | 41358 | 6.9213 | 5.7422  | CEU |
| rs13030961 | TSGA10    | GI_41281983-I | 2 | 2 | 99258038  | 41611 | 6.9213 | 5.7422  | CEU |
| rs11883676 | TSGA10    | GI_41281983-I | 2 | 2 | 99259332  | 42905 | 6.9213 | 5.7422  | CEU |
| rs6708576  | TSGA10    | GI_41281983-I | 2 | 2 | 99259826  | 43399 | 6.9213 | 5.7422  | CEU |
| rs6753063  | TSGA10    | GI_41281983-I | 2 | 2 | 99259987  | 43560 | 6.7794 | 5.7422  | CEU |
| rs6756650  | TSGA10    | GI_41281983-I | 2 | 2 | 99260318  | 43891 | 6.9885 | 5.7422  | CEU |
| rs7605843  | TSGA10    | GI_41281983-I | 2 | 2 | 99270412  | 53985 | 6.9213 | 5.7422  | CEU |
| rs13798    | TSGA10    | GI_41281983-I | 2 | 2 | 99272132  | 55705 | 6.9213 | 5.7422  | CEU |
| rs7349217  | TSGA10    | GI_41281983-I | 2 | 2 | 99273664  | 57237 | 6.9213 | 5.7422  | CEU |
| rs1015754  | Hs.169006 | Hs.169006-S   | 2 | 2 | 113684221 | 30022 | 5.7298 | 5.61278 | CEU |

|            |           |               |   |   |           |        |         |         |     |
|------------|-----------|---------------|---|---|-----------|--------|---------|---------|-----|
| rs11123170 | Hs.169006 | Hs.169006-S   | 2 | 2 | 113695171 | 19072  | 7.7599  | 5.61278 | CEU |
| rs4849177  | Hs.169006 | Hs.169006-S   | 2 | 2 | 113698815 | 15428  | 7.7599  | 5.61278 | CEU |
| rs3748916  | Hs.169006 | Hs.169006-S   | 2 | 2 | 113700264 | 13979  | 6.6084  | 5.61278 | CEU |
| rs4849179  | Hs.169006 | Hs.169006-S   | 2 | 2 | 113701401 | 12842  | 7.7599  | 5.61278 | CEU |
| rs2863243  | Hs.169006 | Hs.169006-S   | 2 | 2 | 113705498 | 8745   | 7.7599  | 5.61278 | CEU |
| rs13024726 | LOC51240  | GI_31377759-S | 2 | 2 | 190318310 | 142682 | 8.0058  | 5.58195 | CEU |
| rs10182631 | LOC51240  | GI_31377759-S | 2 | 2 | 190325465 | 135527 | 7.8342  | 5.58195 | CEU |
| rs6434355  | LOC51240  | GI_31377759-S | 2 | 2 | 190327029 | 133963 | 9.0456  | 5.58195 | CEU |
| rs6756040  | LOC51240  | GI_31377759-S | 2 | 2 | 190327587 | 133405 | 8.3919  | 5.58195 | CEU |
| rs4667295  | LOC51240  | GI_31377759-S | 2 | 2 | 190329896 | 131096 | 8.0547  | 5.58195 | CEU |
| rs6761923  | LOC51240  | GI_31377759-S | 2 | 2 | 190333105 | 127887 | 9.8231  | 5.58195 | CEU |
| rs7568449  | LOC51240  | GI_31377759-S | 2 | 2 | 190346560 | 114432 | 9.8231  | 5.58195 | CEU |
| rs2289226  | LOC51240  | GI_31377759-S | 2 | 2 | 190351711 | 109281 | 18.6998 | 5.58195 | CEU |
| rs4667297  | LOC51240  | GI_31377759-S | 2 | 2 | 190354502 | 106490 | 19.2168 | 5.58195 | CEU |
| rs893784   | LOC51240  | GI_31377759-S | 2 | 2 | 190361789 | 99203  | 18.6998 | 5.58195 | CEU |
| rs10931430 | LOC51240  | GI_31377759-S | 2 | 2 | 190367692 | 93300  | 18.6998 | 5.58195 | CEU |
| rs11679767 | LOC51240  | GI_31377759-S | 2 | 2 | 190371806 | 89186  | 19.2168 | 5.58195 | CEU |
| rs920427   | LOC51240  | GI_31377759-S | 2 | 2 | 190379463 | 81529  | 17.0991 | 5.58195 | CEU |
| rs16831873 | LOC51240  | GI_31377759-S | 2 | 2 | 190382404 | 78588  | 8.5658  | 5.58195 | CEU |
| rs7571089  | LOC51240  | GI_31377759-S | 2 | 2 | 190387299 | 73693  | 19.2168 | 5.58195 | CEU |
| rs1437891  | LOC51240  | GI_31377759-S | 2 | 2 | 190388214 | 72778  | 17.7572 | 5.58195 | CEU |
| rs10195109 | LOC51240  | GI_31377759-S | 2 | 2 | 190394697 | 66295  | 15.2224 | 5.58195 | CEU |
| rs6434365  | LOC51240  | GI_31377759-S | 2 | 2 | 190397927 | 63065  | 15.2224 | 5.58195 | CEU |
| rs11901295 | LOC51240  | GI_31377759-S | 2 | 2 | 190402284 | 58708  | 13.6209 | 5.58195 | CEU |
| rs7557519  | LOC51240  | GI_31377759-S | 2 | 2 | 190408693 | 52299  | 15.2224 | 5.58195 | CEU |
| rs12693557 | LOC51240  | GI_31377759-S | 2 | 2 | 190416443 | 44549  | 18.7413 | 5.58195 | CEU |
| rs2033746  | LOC51240  | GI_31377759-S | 2 | 2 | 190424958 | 36034  | 18.7413 | 5.58195 | CEU |
| rs1550388  | LOC51240  | GI_31377759-S | 2 | 2 | 190429286 | 31706  | 15.2224 | 5.58195 | CEU |
| rs2033870  | LOC51240  | GI_31377759-S | 2 | 2 | 190429336 | 31656  | 18.7413 | 5.58195 | CEU |
| rs1225101  | LOC51240  | GI_31377759-S | 2 | 2 | 190430927 | 30065  | 12.2003 | 5.58195 | CEU |
| rs1898560  | LOC51240  | GI_31377759-S | 2 | 2 | 190437833 | 23159  | 15.2224 | 5.58195 | CEU |
| rs4666783  | LOC51240  | GI_31377759-S | 2 | 2 | 190438486 | 22506  | 15.2224 | 5.58195 | CEU |
| rs10210345 | LOC51240  | GI_31377759-S | 2 | 2 | 190444992 | 16000  | 18.7413 | 5.58195 | CEU |
| rs2278591  | LOC51240  | GI_31377759-S | 2 | 2 | 190446010 | 14982  | 8.5658  | 5.58195 | CEU |
| rs6719224  | LOC51240  | GI_31377759-S | 2 | 2 | 190459777 | 1215   | 15.1935 | 5.58195 | CEU |
| rs1055091  | LOC51240  | GI_31377759-S | 2 | 2 | 190460649 | 343    | 18.7413 | 5.58195 | CEU |
| rs6942     | LOC51240  | GI_31377759-S | 2 | 2 | 190461917 | 925    | 18.7413 | 5.58195 | CEU |
| rs3791767  | LOC51240  | GI_31377759-S | 2 | 2 | 190465421 | 4429   | 15.2224 | 5.58195 | CEU |
| rs7591929  | LOC51240  | GI_31377759-S | 2 | 2 | 190468763 | 7771   | 18.7413 | 5.58195 | CEU |
| rs5742933  | LOC51240  | GI_31377759-S | 2 | 2 | 190474822 | 13830  | 14.5927 | 5.58195 | CEU |
| rs1899025  | LOC51240  | GI_31377759-S | 2 | 2 | 190475088 | 14096  | 18.7413 | 5.58195 | CEU |
| rs3791770  | LOC51240  | GI_31377759-S | 2 | 2 | 190499341 | 38349  | 15.2224 | 5.58195 | CEU |
| rs3791773  | LOC51240  | GI_31377759-S | 2 | 2 | 190508138 | 47146  | 15.2224 | 5.58195 | CEU |
| rs5743047  | LOC51240  | GI_31377759-S | 2 | 2 | 190510174 | 49182  | 8.5658  | 5.58195 | CEU |
| rs1233276  | LOC51240  | GI_31377759-S | 2 | 2 | 190510288 | 49296  | 10.5473 | 5.58195 | CEU |
| rs1233284  | LOC51240  | GI_31377759-S | 2 | 2 | 190515277 | 54285  | 18.7413 | 5.58195 | CEU |
| rs1233288  | LOC51240  | GI_31377759-S | 2 | 2 | 190516231 | 55239  | 18.7413 | 5.58195 | CEU |
| rs1233297  | LOC51240  | GI_31377759-S | 2 | 2 | 190519681 | 58689  | 18.7413 | 5.58195 | CEU |
| rs7577961  | LOC51240  | GI_31377759-S | 2 | 2 | 190519772 | 58780  | 14.8115 | 5.58195 | CEU |
| rs5743063  | LOC51240  | GI_31377759-S | 2 | 2 | 190519955 | 58963  | 14.9563 | 5.58195 | CEU |
| rs5743072  | LOC51240  | GI_31377759-S | 2 | 2 | 190522430 | 61438  | 8.7629  | 5.58195 | CEU |
| rs2017410  | LOC51240  | GI_31377759-S | 2 | 2 | 190525464 | 64472  | 14.9994 | 5.58195 | CEU |
| rs1233245  | LOC51240  | GI_31377759-S | 2 | 2 | 190526000 | 65008  | 14.6902 | 5.58195 | CEU |
| rs6753164  | LOC51240  | GI_31377759-S | 2 | 2 | 190527378 | 66386  | 8.7629  | 5.58195 | CEU |
| rs1233255  | LOC51240  | GI_31377759-S | 2 | 2 | 190531598 | 70606  | 8.8538  | 5.58195 | CEU |
| rs1233258  | LOC51240  | GI_31377759-S | 2 | 2 | 190532540 | 71548  | 5.7717  | 5.58195 | CEU |

|            |           |               |   |   |           |        |         |         |     |
|------------|-----------|---------------|---|---|-----------|--------|---------|---------|-----|
| rs17806132 | LOC51240  | GI_31377759-S | 2 | 2 | 190533793 | 72801  | 6.0877  | 5.58195 | CEU |
| rs256546   | LOC51240  | GI_31377759-S | 2 | 2 | 190576669 | 115677 | 9.6124  | 5.58195 | CEU |
| rs12475694 | LOC51240  | GI_31377759-S | 2 | 2 | 190598114 | 137122 | 11.7371 | 5.58195 | CEU |
| rs1729421  | Hs.431200 | Hs.431200-S   | 2 | 2 | 200905619 | 100352 | 5.7653  | 5.64598 | CEU |
| rs952530   | Hs.431200 | Hs.431200-S   | 2 | 2 | 200907251 | 98720  | 5.7653  | 5.64598 | CEU |
| rs1729412  | Hs.431200 | Hs.431200-S   | 2 | 2 | 200909104 | 96867  | 5.7653  | 5.64598 | CEU |
| rs12469091 | Hs.431200 | Hs.431200-S   | 2 | 2 | 200950241 | 55730  | 5.9476  | 5.64598 | CEU |
| rs4233994  | Hs.431200 | Hs.431200-S   | 2 | 2 | 200954717 | 51254  | 5.9476  | 5.64598 | CEU |
| rs7606251  | PPIL3     | GI_19557635-A | 2 | 2 | 201562240 | 929    | 10.9393 | 5.76286 | CEU |
| rs2136600  | PPIL3     | GI_19557635-A | 2 | 2 | 201567851 | 6540   | 11.0386 | 5.76286 | CEU |
| rs13384245 | PPIL3     | GI_19557635-A | 2 | 2 | 201586443 | 25132  | 6.3562  | 5.76286 | CEU |
| rs10204787 | PPIL3     | GI_19557635-A | 2 | 2 | 201587653 | 26342  | 6.3562  | 5.76286 | CEU |
| rs7588993  | PPIL3     | GI_19557635-A | 2 | 2 | 201589372 | 28061  | 8.9148  | 5.76286 | CEU |
| rs6435066  | PPIL3     | GI_19557635-A | 2 | 2 | 201591529 | 30218  | 10.0742 | 5.76286 | CEU |
| rs13396213 | PPIL3     | GI_19557635-A | 2 | 2 | 201593744 | 32433  | 10.0742 | 5.76286 | CEU |
| rs11894842 | PPIL3     | GI_19557635-A | 2 | 2 | 201599051 | 37740  | 10.0742 | 5.76286 | CEU |
| rs4381763  | PPIL3     | GI_19557635-A | 2 | 2 | 201602494 | 41183  | 5.8444  | 5.76286 | CEU |
| rs2307358  | PPIL3     | GI_19557635-A | 2 | 2 | 201611163 | 49852  | 5.8078  | 5.76286 | CEU |
| rs2307362  | PPIL3     | GI_19557635-A | 2 | 2 | 201611343 | 50032  | 6.3562  | 5.76286 | CEU |
| rs4622700  | PPIL3     | GI_19557635-A | 2 | 2 | 201618619 | 57308  | 6.3562  | 5.76286 | CEU |
| rs9288314  | PPIL3     | GI_19557635-A | 2 | 2 | 201619679 | 58368  | 6.3562  | 5.76286 | CEU |
| rs13408964 | PPIL3     | GI_19557635-A | 2 | 2 | 201630478 | 69167  | 6.3562  | 5.76286 | CEU |
| rs10167387 | PPIL3     | GI_19557635-A | 2 | 2 | 201634124 | 72813  | 10.0742 | 5.76286 | CEU |
| rs10205561 | PPIL3     | GI_19557635-A | 2 | 2 | 201635210 | 73899  | 5.8444  | 5.76286 | CEU |
| rs13429609 | PPIL3     | GI_19557635-A | 2 | 2 | 201641763 | 80452  | 6.3562  | 5.76286 | CEU |
| rs13392371 | PPIL3     | GI_19557635-A | 2 | 2 | 201641927 | 80616  | 6.3562  | 5.76286 | CEU |
| rs11892372 | PPIL3     | GI_19557635-A | 2 | 2 | 201644989 | 83678  | 10.0742 | 5.76286 | CEU |
| rs2307357  | PPIL3     | GI_19557635-A | 2 | 2 | 201649598 | 88287  | 5.8444  | 5.76286 | CEU |
| rs3087357  | PPIL3     | GI_19557635-A | 2 | 2 | 201653871 | 92560  | 5.8444  | 5.76286 | CEU |
| rs874358   | PPIL3     | GI_19557635-A | 2 | 2 | 201655108 | 93797  | 5.8444  | 5.76286 | CEU |
| rs16836477 | PPIL3     | GI_19557635-A | 2 | 2 | 201678963 | 117652 | 6.3562  | 5.76286 | CEU |
| rs3901120  | PPIL3     | GI_19557635-A | 2 | 2 | 201689036 | 127725 | 10.0742 | 5.76286 | CEU |
| rs3900738  | PPIL3     | GI_19557635-A | 2 | 2 | 201689309 | 127998 | 5.8444  | 5.76286 | CEU |
| rs6719992  | PPIL3     | GI_19557635-A | 2 | 2 | 201697484 | 136173 | 6.3562  | 5.76286 | CEU |
| rs16836568 | PPIL3     | GI_19557635-A | 2 | 2 | 201705454 | 144143 | 5.8444  | 5.76286 | CEU |
| rs13405753 | PPIL3     | GI_19557635-A | 2 | 2 | 201707183 | 145872 | 6.3562  | 5.76286 | CEU |
| rs10197103 | PPIL3     | GI_19557635-A | 2 | 2 | 201710799 | 149488 | 6.3562  | 5.76286 | CEU |
| rs16836591 | PPIL3     | GI_19557635-A | 2 | 2 | 201720449 | 159138 | 10.0742 | 5.76286 | CEU |
| rs10185136 | PPIL3     | GI_19557635-A | 2 | 2 | 201729807 | 168496 | 10.0742 | 5.76286 | CEU |
| rs10197833 | PPIL3     | GI_19557635-A | 2 | 2 | 201729972 | 168661 | 10.0742 | 5.76286 | CEU |
| rs13384791 | PPIL3     | GI_19557635-A | 2 | 2 | 201736670 | 175359 | 6.3562  | 5.76286 | CEU |
| rs13417843 | PPIL3     | GI_19557635-A | 2 | 2 | 201738935 | 177624 | 6.3562  | 5.76286 | CEU |
| rs10207746 | PPIL3     | GI_19557635-A | 2 | 2 | 201741924 | 180613 | 6.3562  | 5.76286 | CEU |
| rs13389349 | PPIL3     | GI_19557635-A | 2 | 2 | 201746124 | 184813 | 6.3562  | 5.76286 | CEU |
| rs6737556  | PPIL3     | GI_19557635-A | 2 | 2 | 201749584 | 188273 | 6.3562  | 5.76286 | CEU |
| rs7590522  | PPIL3     | GI_19557635-A | 2 | 2 | 201750294 | 188983 | 6.3562  | 5.76286 | CEU |
| rs16842071 | PPIL3     | GI_19557635-A | 2 | 2 | 201757236 | 195925 | 10.0742 | 5.76286 | CEU |
| rs10194347 | PPIL3     | GI_19557635-A | 2 | 2 | 201767986 | 206675 | 5.9997  | 5.76286 | CEU |
| rs10205971 | PPIL3     | GI_19557635-A | 2 | 2 | 201783707 | 222396 | 6.3562  | 5.76286 | CEU |
| rs2110728  | PPIL3     | GI_19557635-A | 2 | 2 | 201791184 | 229873 | 6.3562  | 5.76286 | CEU |
| rs13410282 | PPIL3     | GI_19557635-A | 2 | 2 | 201796530 | 235219 | 10.0742 | 5.76286 | CEU |
| rs7583529  | PPIL3     | GI_19557635-A | 2 | 2 | 201813744 | 252433 | 7.47    | 5.76286 | CEU |
| rs6728771  | PPIL3     | GI_19557635-A | 2 | 2 | 201817913 | 256602 | 7.47    | 5.76286 | CEU |
| rs12620435 | PPIL3     | GI_19557635-A | 2 | 2 | 201821285 | 259974 | 8.2254  | 5.76286 | CEU |
| rs16836710 | PPIL3     | GI_19557635-A | 2 | 2 | 201825351 | 264040 | 7.5627  | 5.76286 | CEU |
| rs7560613  | PPIL3     | GI_19557635-A | 2 | 2 | 201828516 | 267205 | 7.4408  | 5.76286 | CEU |

|            |           |               |   |   |           |        |         |         |     |
|------------|-----------|---------------|---|---|-----------|--------|---------|---------|-----|
| rs7573256  | PPIL3     | GI_19557635-A | 2 | 2 | 201828676 | 267365 | 7.47    | 5.76286 | CEU |
| rs10190751 | PPIL3     | GI_19557635-A | 2 | 2 | 201831602 | 270291 | 7.47    | 5.76286 | CEU |
| rs4487072  | PPIL3     | GI_19557635-A | 2 | 2 | 201833804 | 272493 | 7.47    | 5.76286 | CEU |
| rs1981726  | PPIL3     | GI_19557635-A | 2 | 2 | 201834206 | 272895 | 7.1629  | 5.76286 | CEU |
| rs7573529  | PPIL3     | GI_19557635-A | 2 | 2 | 201836132 | 274821 | 7.47    | 5.76286 | CEU |
| rs12104442 | PPIL3     | GI_19557635-A | 2 | 2 | 201839462 | 278151 | 7.47    | 5.76286 | CEU |
| rs12721505 | PPIL3     | GI_19557635-A | 2 | 2 | 201839744 | 278433 | 6.1011  | 5.76286 | CEU |
| rs719125   | PPIL3     | GI_19557635-A | 2 | 2 | 201843366 | 282055 | 7.47    | 5.76286 | CEU |
| rs2041766  | PPIL3     | GI_19557635-A | 2 | 2 | 201847001 | 285690 | 7.47    | 5.76286 | CEU |
| rs4482462  | PPIL3     | GI_19557635-A | 2 | 2 | 201847253 | 285942 | 7.47    | 5.76286 | CEU |
| rs2254137  | FLJ40432  | GI_22749084-S | 2 | 2 | 208269534 | 174891 | 6.2368  | 5.91765 | CEU |
| rs2551941  | FLJ40432  | GI_22749084-S | 2 | 2 | 208317649 | 126776 | 6.2774  | 5.91765 | CEU |
| rs2952768  | FLJ40432  | GI_22749084-S | 2 | 2 | 208319740 | 124685 | 6.2774  | 5.91765 | CEU |
| rs2248061  | FLJ40432  | GI_22749084-S | 2 | 2 | 208320565 | 123860 | 7.0941  | 5.91765 | CEU |
| rs2709386  | FLJ40432  | GI_22749084-S | 2 | 2 | 208322540 | 121885 | 6.2774  | 5.91765 | CEU |
| rs2709409  | FLJ40432  | GI_22749084-S | 2 | 2 | 208336739 | 107686 | 6.2774  | 5.91765 | CEU |
| rs3739064  | LOC151174 | GI_37547484-S | 2 | 2 | 238958386 | 42507  | 7.9718  | 5.91856 | CEU |
| rs2304674  | LOC151174 | GI_37547484-S | 2 | 2 | 238963904 | 48025  | 6.9065  | 5.91856 | CEU |
| rs11892306 | LOC151174 | GI_37547484-S | 2 | 2 | 238970479 | 54600  | 5.9907  | 5.91856 | CEU |
| rs11892309 | LOC151174 | GI_37547484-S | 2 | 2 | 238970493 | 54614  | 6.3275  | 5.91856 | CEU |
| rs6437235  | PASK      | GI_35038527-S | 2 | 2 | 241742520 | 23448  | 6.0485  | 5.81159 | CEU |
| rs1064767  | STK25     | GI_34147665-S | 2 | 2 | 241887327 | 267284 | 6.0703  | 5.75415 | CEU |
| rs15129    | STK25     | GI_34147665-S | 2 | 2 | 241888966 | 265645 | 6.6726  | 5.75415 | CEU |
| rs11678750 | Hs.311977 | Hs.311977-S   | 2 | 2 | 241920909 | 183355 | 9.0156  | 5.51628 | CEU |
| rs3755324  | Hs.311977 | Hs.311977-S   | 2 | 2 | 241923210 | 181054 | 9.0027  | 5.51628 | CEU |
| rs11675957 | Hs.311977 | Hs.311977-S   | 2 | 2 | 241928782 | 175482 | 9.1402  | 5.51628 | CEU |
| rs6705421  | Hs.311977 | Hs.311977-S   | 2 | 2 | 241932662 | 171602 | 7.1147  | 5.51628 | CEU |
| rs7592138  | Hs.311977 | Hs.311977-S   | 2 | 2 | 241938905 | 165359 | 7.2294  | 5.51628 | CEU |
| rs6724257  | Hs.311977 | Hs.311977-S   | 2 | 2 | 241942387 | 161877 | 8.8887  | 5.51628 | CEU |
| rs6704615  | Hs.311977 | Hs.311977-S   | 2 | 2 | 241948723 | 155541 | 7.1147  | 5.51628 | CEU |
| rs10933547 | Hs.311977 | Hs.311977-S   | 2 | 2 | 241950433 | 153831 | 6.5974  | 5.51628 | CEU |
| rs10933548 | Hs.311977 | Hs.311977-S   | 2 | 2 | 241954827 | 149437 | 8.7907  | 5.51628 | CEU |
| rs12612578 | Hs.311977 | Hs.311977-S   | 2 | 2 | 241956650 | 147614 | 6.5847  | 5.51628 | CEU |
| rs6743226  | Hs.311977 | Hs.311977-S   | 2 | 2 | 241956962 | 147302 | 6.5974  | 5.51628 | CEU |
| rs4675966  | Hs.311977 | Hs.311977-S   | 2 | 2 | 241964332 | 139932 | 6.5974  | 5.51628 | CEU |
| rs7599888  | Hs.311977 | Hs.311977-S   | 2 | 2 | 241968023 | 136241 | 6.5974  | 5.51628 | CEU |
| rs7565186  | Hs.311977 | Hs.311977-S   | 2 | 2 | 241969812 | 134452 | 7.1147  | 5.51628 | CEU |
| rs1106523  | Hs.311977 | Hs.311977-S   | 2 | 2 | 241971529 | 132735 | 9.1402  | 5.51628 | CEU |
| rs4303713  | Hs.311977 | Hs.311977-S   | 2 | 2 | 241977849 | 126415 | 6.2938  | 5.51628 | CEU |
| rs4234100  | Hs.311977 | Hs.311977-S   | 2 | 2 | 241985263 | 119001 | 6.2938  | 5.51628 | CEU |
| rs7568     | STK25     | GI_34147665-S | 2 | 2 | 242011733 | 142878 | 8.5545  | 5.75415 | CEU |
| rs16843642 | STK25     | GI_34147665-S | 2 | 2 | 242071369 | 83242  | 8.5545  | 5.75415 | CEU |
| rs3771561  | STK25     | GI_34147665-S | 2 | 2 | 242073694 | 80917  | 8.5545  | 5.75415 | CEU |
| rs16842449 | STK25     | GI_34147665-S | 2 | 2 | 242074969 | 79642  | 8.5545  | 5.75415 | CEU |
| rs3771566  | STK25     | GI_34147665-S | 2 | 2 | 242078289 | 76322  | 8.5545  | 5.75415 | CEU |
| rs7423605  | STK25     | GI_34147665-S | 2 | 2 | 242083601 | 71010  | 8.4215  | 5.75415 | CEU |
| rs12612038 | STK25     | GI_34147665-S | 2 | 2 | 242089675 | 64936  | 8.5545  | 5.75415 | CEU |
| rs16843671 | STK25     | GI_34147665-S | 2 | 2 | 242094348 | 60263  | 7.9034  | 5.75415 | CEU |
| rs3755400  | STK25     | GI_34147665-S | 2 | 2 | 242099785 | 54826  | 9.3533  | 5.75415 | CEU |
| rs3771569  | STK25     | GI_34147665-S | 2 | 2 | 242102596 | 52015  | 8.5545  | 5.75415 | CEU |
| rs3821281  | STK25     | GI_34147665-S | 2 | 2 | 242105330 | 49281  | 8.413   | 5.75415 | CEU |
| rs764081   | STK25     | GI_34147665-S | 2 | 2 | 242114131 | 40480  | 9.4362  | 5.75415 | CEU |
| rs2240482  | STK25     | GI_34147665-S | 2 | 2 | 242125011 | 29600  | 11.884  | 5.75415 | CEU |
| rs303854   | LOC132001 | GI_34147617-S | 3 | 3 | 11860815  | 27016  | 13.8381 | 6.12546 | CEU |
| rs392621   | LOC132001 | GI_34147617-S | 3 | 3 | 11861365  | 27566  | 12.5498 | 6.12546 | CEU |
| rs420537   | LOC132001 | GI_34147617-S | 3 | 3 | 11861751  | 27952  | 12.5498 | 6.12546 | CEU |

|            |           |               |   |   |           |        |         |         |     |
|------------|-----------|---------------|---|---|-----------|--------|---------|---------|-----|
| rs404171   | LOC132001 | GI_34147617-S | 3 | 3 | 11862351  | 28552  | 11.4984 | 6.12546 | CEU |
| rs420599   | LOC132001 | GI_34147617-S | 3 | 3 | 11863259  | 29460  | 11.9785 | 6.12546 | CEU |
| rs440746   | LOC132001 | GI_34147617-S | 3 | 3 | 11863556  | 29757  | 10.3479 | 6.12546 | CEU |
| rs430373   | LOC132001 | GI_34147617-S | 3 | 3 | 11864365  | 30566  | 10.3182 | 6.12546 | CEU |
| rs1498090  | LOC132001 | GI_34147617-S | 3 | 3 | 11865647  | 31848  | 8.3611  | 6.12546 | CEU |
| rs6776417  | Hs.224849 | Hs.224849-S   | 3 | 3 | 14674018  | 22215  | 6.1389  | 5.97824 | CEU |
| rs13100314 | LOC151878 | GI_18554511-S | 3 | 3 | 65087061  | 595702 | 6.3234  | 6.20634 | CEU |
| rs13093220 | LOC401075 | GI_42656649-S | 3 | 3 | 75853445  | 10487  | 6.1821  | 5.73125 | CEU |
| rs2118754  | LOC401075 | GI_42656649-S | 3 | 3 | 75868770  | 4838   | 5.902   | 5.73125 | CEU |
| rs2118755  | LOC401075 | GI_42656649-S | 3 | 3 | 75868920  | 4988   | 6.1401  | 5.73125 | CEU |
| rs6790146  | LOC401075 | GI_42656649-S | 3 | 3 | 75869130  | 5198   | 5.8432  | 5.73125 | CEU |
| rs11718252 | LOC401075 | GI_42656649-S | 3 | 3 | 75873850  | 9918   | 6.0107  | 5.73125 | CEU |
| rs13078579 | LOC401075 | GI_42656649-S | 3 | 3 | 76016109  | 152177 | 5.8352  | 5.73125 | CEU |
| rs9822952  | NMNAT3    | GI_31342325-S | 3 | 3 | 140867955 | 106092 | 9.0258  | 6.33901 | CEU |
| rs4640518  | NMNAT3    | GI_31342325-S | 3 | 3 | 140902944 | 141081 | 8.2506  | 6.33901 | CEU |
| rs7648532  | NMNAT3    | GI_31342325-S | 3 | 3 | 140912635 | 150772 | 7.397   | 6.33901 | CEU |
| rs4683684  | NMNAT3    | GI_31342325-S | 3 | 3 | 140921351 | 159488 | 6.8689  | 6.33901 | CEU |
| rs9289971  | Hs.333841 | Hs.333841-S   | 3 | 3 | 157872649 | 119    | 6.9294  | 5.6781  | CEU |
| rs7636818  | Hs.135624 | Hs.135624-S   | 3 | 3 | 180504817 | 66943  | 8.6347  | 6.05542 | CEU |
| rs9837033  | Hs.135624 | Hs.135624-S   | 3 | 3 | 180505476 | 66284  | 9.1269  | 6.05542 | CEU |
| rs6794192  | Hs.135624 | Hs.135624-S   | 3 | 3 | 180510515 | 61245  | 8.7034  | 6.05542 | CEU |
| rs6804758  | Hs.135624 | Hs.135624-S   | 3 | 3 | 180553156 | 18604  | 7.3703  | 6.05542 | CEU |
| rs9822116  | Hs.135624 | Hs.135624-S   | 3 | 3 | 180557317 | 14443  | 7.3703  | 6.05542 | CEU |
| rs7620017  | Hs.135624 | Hs.135624-S   | 3 | 3 | 180558165 | 13595  | 8.589   | 6.05542 | CEU |
| rs2111534  | Hs.135624 | Hs.135624-S   | 3 | 3 | 180573474 | 1714   | 7.3703  | 6.05542 | CEU |
| rs9865666  | Hs.135624 | Hs.135624-S   | 3 | 3 | 180575691 | 3931   | 7.8433  | 6.05542 | CEU |
| rs6784871  | Hs.135624 | Hs.135624-S   | 3 | 3 | 180576500 | 4740   | 8.1867  | 6.05542 | CEU |
| rs3853153  | Hs.135624 | Hs.135624-S   | 3 | 3 | 180589721 | 17961  | 8.589   | 6.05542 | CEU |
| rs2287209  | Hs.135624 | Hs.135624-S   | 3 | 3 | 180592437 | 20677  | 8.589   | 6.05542 | CEU |
| rs6443645  | Hs.135624 | Hs.135624-S   | 3 | 3 | 180603389 | 31629  | 8.7073  | 6.05542 | CEU |
| rs3961211  | Hs.135624 | Hs.135624-S   | 3 | 3 | 180608098 | 36338  | 8.7073  | 6.05542 | CEU |
| rs3853149  | Hs.135624 | Hs.135624-S   | 3 | 3 | 180612058 | 40298  | 8.4388  | 6.05542 | CEU |
| rs6443647  | Hs.135624 | Hs.135624-S   | 3 | 3 | 180612357 | 40597  | 8.7073  | 6.05542 | CEU |
| rs6803314  | Hs.135624 | Hs.135624-S   | 3 | 3 | 180622675 | 50915  | 8.7073  | 6.05542 | CEU |
| rs6443648  | Hs.135624 | Hs.135624-S   | 3 | 3 | 180627142 | 55382  | 7.1755  | 6.05542 | CEU |
| rs7618348  | Hs.135624 | Hs.135624-S   | 3 | 3 | 180627441 | 55681  | 7.128   | 6.05542 | CEU |
| rs3806682  | Hs.135624 | Hs.135624-S   | 3 | 3 | 180628541 | 56781  | 7.2463  | 6.05542 | CEU |
| rs2024497  | Hs.135624 | Hs.135624-S   | 3 | 3 | 180629873 | 58113  | 7.2463  | 6.05542 | CEU |
| rs4455277  | LOC151963 | GI_31341922-S | 3 | 3 | 194097010 | 99443  | 6.3941  | 6.0845  | CEU |
| rs2133864  | LOC151963 | GI_31341922-S | 3 | 3 | 194098959 | 101392 | 6.8579  | 6.0845  | CEU |
| rs10937559 | LOC151963 | GI_31341922-S | 3 | 3 | 194105343 | 107776 | 6.3941  | 6.0845  | CEU |
| rs12485900 | LOC151963 | GI_31341922-S | 3 | 3 | 194106481 | 108914 | 9.0969  | 6.0845  | CEU |
| rs9869202  | LOC151963 | GI_31341922-S | 3 | 3 | 194107892 | 110325 | 9.0969  | 6.0845  | CEU |
| rs10937560 | LOC151963 | GI_31341922-S | 3 | 3 | 194110118 | 112551 | 9.0969  | 6.0845  | CEU |
| rs6814287  | FLJ90036  | GI_31559781-S | 4 | 4 | 112323    | 33545  | 5.6988  | 5.49289 | CEU |
| rs10004179 | FLJ90036  | GI_31559781-S | 4 | 4 | 121548    | 24320  | 5.6988  | 5.49289 | CEU |
| rs6599295  | FLJ90036  | GI_31559781-S | 4 | 4 | 126942    | 18926  | 5.6988  | 5.49289 | CEU |
| rs11735742 | FLJ90036  | GI_31559781-S | 4 | 4 | 132550    | 13318  | 5.6988  | 5.49289 | CEU |
| rs6599306  | FLJ90036  | GI_31559781-S | 4 | 4 | 133439    | 12429  | 5.5088  | 5.49289 | CEU |
| rs6830247  | FLJ90036  | GI_31559781-S | 4 | 4 | 140683    | 5185   | 5.6988  | 5.49289 | CEU |
| rs4333131  | FLJ34443  | GI_31341870-S | 4 | 4 | 1313619   | 65768  | 6.0963  | 5.79457 | CEU |
| rs3856982  | FLJ34443  | GI_31341870-S | 4 | 4 | 1318693   | 60694  | 6.2181  | 5.79457 | CEU |
| rs10006789 | FLJ34443  | GI_31341870-S | 4 | 4 | 1320163   | 59224  | 6.2414  | 5.79457 | CEU |
| rs1882099  | FLJ34443  | GI_31341870-S | 4 | 4 | 1342515   | 36872  | 6.8254  | 5.79457 | CEU |
| rs4974559  | FLJ34443  | GI_31341870-S | 4 | 4 | 1370678   | 8709   | 6.2608  | 5.79457 | CEU |
| rs4130791  | FLJ34443  | GI_31341870-S | 4 | 4 | 1404514   | 25127  | 6.4085  | 5.79457 | CEU |

|            |           |               |   |   |           |        |         |         |     |
|------------|-----------|---------------|---|---|-----------|--------|---------|---------|-----|
| rs4689034  | PP784     | GI_31559785-S | 4 | 4 | 6815238   | 12521  | 7.2384  | 6.30344 | CEU |
| rs3822263  | PP784     | GI_31559785-S | 4 | 4 | 6815745   | 12014  | 6.3668  | 6.30344 | CEU |
| rs3822262  | PP784     | GI_31559785-S | 4 | 4 | 6815838   | 11921  | 6.3668  | 6.30344 | CEU |
| rs3822260  | PP784     | GI_31559785-S | 4 | 4 | 6815894   | 11865  | 6.3668  | 6.30344 | CEU |
| rs4493618  | PP784     | GI_31559785-S | 4 | 4 | 6819275   | 8484   | 7.2384  | 6.30344 | CEU |
| rs1281149  | SH3TC1    | GI_21361603-S | 4 | 4 | 8347845   | 12753  | 7.2599  | 6.31428 | CEU |
| rs2174284  | TLR10     | GI_13569929-S | 4 | 4 | 38681905  | 84423  | 6.5043  | 5.92074 | CEU |
| rs17582830 | TLR10     | GI_13569929-S | 4 | 4 | 38689993  | 92511  | 6.5043  | 5.92074 | CEU |
| rs17582893 | TLR10     | GI_13569929-S | 4 | 4 | 38708986  | 111504 | 6.5043  | 5.92074 | CEU |
| rs1873195  | TLR10     | GI_13569929-S | 4 | 4 | 38713739  | 116257 | 6.5043  | 5.92074 | CEU |
| rs17582921 | TLR10     | GI_13569929-S | 4 | 4 | 38715215  | 117733 | 6.2338  | 5.92074 | CEU |
| rs2254075  | FLJ23235  | GI_13376422-S | 4 | 4 | 38852749  | 61707  | 7.2009  | 6.06104 | CEU |
| rs2254212  | FLJ23235  | GI_13376422-S | 4 | 4 | 38854408  | 63366  | 7.2009  | 6.06104 | CEU |
| rs2711976  | FLJ23235  | GI_13376422-S | 4 | 4 | 38857352  | 66310  | 7.2009  | 6.06104 | CEU |
| rs2566094  | FLJ23235  | GI_13376422-S | 4 | 4 | 38858940  | 67898  | 7.2792  | 6.06104 | CEU |
| rs2566097  | FLJ23235  | GI_13376422-S | 4 | 4 | 38859902  | 68860  | 6.0999  | 6.06104 | CEU |
| rs2711981  | FLJ23235  | GI_13376422-S | 4 | 4 | 38861824  | 70782  | 7.2009  | 6.06104 | CEU |
| rs12504699 | MGC45416  | GI_22748848-S | 4 | 4 | 48775226  | 38261  | 5.5175  | 5.51529 | CEU |
| rs13126826 | Hs.164463 | Hs.164463-S   | 4 | 4 | 54403213  | 40174  | 6.3008  | 5.95972 | CEU |
| rs12643686 | LOC375399 | GI_37540365-S | 4 | 4 | 68366583  | 48892  | 6.1673  | 5.60181 | CEU |
| rs12511559 | UGT2B17   | GI_4507820-S  | 4 | 4 | 69212508  | 19321  | 6.5068  | 5.67708 | CEU |
| rs7435827  | UGT2B17   | GI_4507820-S  | 4 | 4 | 69243710  | 11881  | 6.5068  | 5.67708 | CEU |
| rs7442348  | UGT2B17   | GI_4507820-S  | 4 | 4 | 69253957  | 22128  | 6.5068  | 5.67708 | CEU |
| rs3100645  | UGT2B17   | GI_4507820-S  | 4 | 4 | 69671954  | 440125 | 7.6525  | 5.67708 | CEU |
| rs3100645  | UGT2B11   | GI_4507822-S  | 4 | 4 | 69671954  | 575169 | 9.5816  | 6.01653 | CEU |
| rs3100645  | UGT2B7    | GI_4507824-S  | 4 | 4 | 69671954  | 487102 | 8.4024  | 6.10305 | CEU |
| rs1580297  | THAP6     | GI_37059751-S | 4 | 4 | 76760965  | 50114  | 6.0267  | 5.86845 | CEU |
| rs10021434 | ASAH1     | GI_30794501-S | 4 | 4 | 77260474  | 61384  | 6.2484  | 6.21108 | CEU |
| rs11932428 | PPA2      | GI_31881619-A | 4 | 4 | 106644740 | 3679   | 6.3719  | 5.76009 | CEU |
| rs13108489 | PPA2      | GI_31881619-A | 4 | 4 | 106650729 | 2310   | 10.8017 | 5.76009 | CEU |
| rs13149379 | T2BP      | GI_38202233-S | 4 | 4 | 114408716 | 854013 | 6.028   | 5.79341 | CEU |
| rs3775836  | KIAA1627  | GI_34147341-S | 4 | 4 | 120021334 | 32126  | 5.5741  | 5.54676 | CEU |
| rs4834700  | KIAA1627  | GI_34147341-S | 4 | 4 | 120021831 | 32623  | 5.6935  | 5.54676 | CEU |
| rs4975274  | LOC132321 | GI_27735074-S | 4 | 4 | 130135681 | 255530 | 6.5628  | 6.13161 | CEU |
| rs2162126  | LOC132321 | GI_27735074-S | 4 | 4 | 130136681 | 254530 | 6.4501  | 6.13161 | CEU |
| rs318502   | LOC132321 | GI_27735074-S | 4 | 4 | 130159100 | 232111 | 6.5628  | 6.13161 | CEU |
| rs1668289  | LOC132321 | GI_27735074-S | 4 | 4 | 130184644 | 206567 | 6.3556  | 6.13161 | CEU |
| rs318543   | LOC132321 | GI_27735074-S | 4 | 4 | 130193860 | 197351 | 6.3556  | 6.13161 | CEU |
| rs1216152  | LOC132321 | GI_27735074-S | 4 | 4 | 130198727 | 192484 | 6.3556  | 6.13161 | CEU |
| rs1709421  | LOC132321 | GI_27735074-S | 4 | 4 | 130416584 | 25373  | 6.3655  | 6.13161 | CEU |
| rs6834968  | DCTD      | GI_4503276-S  | 4 | 4 | 184186001 | 837    | 7.8295  | 6.34993 | CEU |
| rs6835318  | DCTD      | GI_4503276-S  | 4 | 4 | 184186014 | 824    | 8.5137  | 6.34993 | CEU |
| rs7677967  | DCTD      | GI_4503276-S  | 4 | 4 | 184186281 | 557    | 8.9301  | 6.34993 | CEU |
| rs7277     | DCTD      | GI_4503276-S  | 4 | 4 | 184186662 | 176    | 8.9311  | 6.34993 | CEU |
| rs6869047  | Hs.26039  | Hs.26039-S    | 5 | 5 | 10703794  | 6193   | 12.295  | 6.22769 | CEU |
| rs6875096  | Hs.26039  | Hs.26039-S    | 5 | 5 | 10704986  | 5001   | 13.9388 | 6.22769 | CEU |
| rs6894331  | Hs.26039  | Hs.26039-S    | 5 | 5 | 10705117  | 4870   | 10.4164 | 6.22769 | CEU |
| rs6898416  | Hs.26039  | Hs.26039-S    | 5 | 5 | 10705313  | 4674   | 11.6557 | 6.22769 | CEU |
| rs3822410  | Hs.26039  | Hs.26039-S    | 5 | 5 | 10707769  | 2218   | 11.3486 | 6.22769 | CEU |
| rs3733758  | Hs.26039  | Hs.26039-S    | 5 | 5 | 10708842  | 1145   | 12.6007 | 6.22769 | CEU |
| rs3733761  | Hs.26039  | Hs.26039-S    | 5 | 5 | 10709162  | 825    | 9.9153  | 6.22769 | CEU |
| rs3733762  | Hs.26039  | Hs.26039-S    | 5 | 5 | 10709186  | 801    | 12.2332 | 6.22769 | CEU |
| rs2279327  | Hs.26039  | Hs.26039-S    | 5 | 5 | 10709785  | 202    | 13.381  | 6.22769 | CEU |
| rs2279325  | Hs.26039  | Hs.26039-S    | 5 | 5 | 10710194  | 207    | 12.5872 | 6.22769 | CEU |
| rs1109383  | Hs.26039  | Hs.26039-S    | 5 | 5 | 10714120  | 4133   | 12.9977 | 6.22769 | CEU |
| rs1107818  | Hs.26039  | Hs.26039-S    | 5 | 5 | 10714928  | 4941   | 13.2177 | 6.22769 | CEU |

|            |           |               |   |   |           |        |         |         |     |
|------------|-----------|---------------|---|---|-----------|--------|---------|---------|-----|
| rs7712435  | Hs.26039  | Hs.26039-S    | 5 | 5 | 10716402  | 6415   | 13.381  | 6.22769 | CEU |
| rs11954194 | Hs.26039  | Hs.26039-S    | 5 | 5 | 10718259  | 8272   | 9.2015  | 6.22769 | CEU |
| rs6451535  | Hs.506072 | Hs.506072-S   | 5 | 5 | 40723788  | 138673 | 5.8909  | 5.79845 | CEU |
| rs7726237  | Hs.506072 | Hs.506072-S   | 5 | 5 | 40724309  | 138152 | 5.8909  | 5.79845 | CEU |
| rs10060234 | Hs.506072 | Hs.506072-S   | 5 | 5 | 40725753  | 136708 | 5.8909  | 5.79845 | CEU |
| rs13355305 | Hs.506072 | Hs.506072-S   | 5 | 5 | 40735896  | 126565 | 6.8254  | 5.79845 | CEU |
| rs6414889  | Hs.506072 | Hs.506072-S   | 5 | 5 | 40738153  | 124308 | 5.8909  | 5.79845 | CEU |
| rs434778   | Hs.506072 | Hs.506072-S   | 5 | 5 | 40762253  | 100208 | 6.024   | 5.79845 | CEU |
| rs447810   | Hs.506072 | Hs.506072-S   | 5 | 5 | 40762558  | 99903  | 5.8909  | 5.79845 | CEU |
| rs249414   | Hs.506072 | Hs.506072-S   | 5 | 5 | 40769451  | 93010  | 5.9884  | 5.79845 | CEU |
| rs249422   | Hs.506072 | Hs.506072-S   | 5 | 5 | 40778299  | 84162  | 5.8909  | 5.79845 | CEU |
| rs249425   | Hs.506072 | Hs.506072-S   | 5 | 5 | 40788522  | 73939  | 5.8909  | 5.79845 | CEU |
| rs29744    | Hs.506072 | Hs.506072-S   | 5 | 5 | 40789742  | 72719  | 5.8909  | 5.79845 | CEU |
| rs335632   | FLJ10904  | GI_42716286-S | 5 | 5 | 76763841  | 121    | 7.5395  | 6.01048 | CEU |
| rs335628   | FLJ10904  | GI_42716286-S | 5 | 5 | 76765294  | 1332   | 9.7185  | 6.01048 | CEU |
| rs441102   | FLJ10904  | GI_42716286-S | 5 | 5 | 76774726  | 10764  | 9.7185  | 6.01048 | CEU |
| rs189195   | FLJ10904  | GI_42716286-S | 5 | 5 | 76783882  | 19920  | 7.6272  | 6.01048 | CEU |
| rs10474515 | FLJ10904  | GI_42716286-S | 5 | 5 | 76850492  | 86530  | 6.2945  | 6.01048 | CEU |
| rs25821    | CGI-111   | GI_7705613-S  | 5 | 5 | 129019081 | 541992 | 5.7949  | 5.4699  | CEU |
| rs25816    | CGI-111   | GI_7705613-S  | 5 | 5 | 129020335 | 543246 | 5.7949  | 5.4699  | CEU |
| rs30662    | CGI-111   | GI_7705613-S  | 5 | 5 | 129036031 | 558942 | 5.7949  | 5.4699  | CEU |
| rs30658    | CGI-111   | GI_7705613-S  | 5 | 5 | 129037957 | 560868 | 5.7949  | 5.4699  | CEU |
| rs30656    | CGI-111   | GI_7705613-S  | 5 | 5 | 129038668 | 561579 | 5.7949  | 5.4699  | CEU |
| rs30649    | CGI-111   | GI_7705613-S  | 5 | 5 | 129041704 | 564615 | 5.7949  | 5.4699  | CEU |
| rs25803    | CGI-111   | GI_7705613-S  | 5 | 5 | 129056512 | 579423 | 5.7949  | 5.4699  | CEU |
| rs11948441 | LOC51308  | GI_42476205-S | 5 | 5 | 136811422 | 999025 | 6.3339  | 5.65396 | CEU |
| rs6882032  | LOC51308  | GI_42476205-S | 5 | 5 | 136825989 | 984458 | 5.8075  | 5.65396 | CEU |
| rs6882088  | CPEB4     | GI_32698754-S | 5 | 5 | 173226782 | 90805  | 8.5947  | 6.16915 | CEU |
| rs6864880  | CPEB4     | GI_32698754-S | 5 | 5 | 173230832 | 86755  | 7.4858  | 6.16915 | CEU |
| rs359477   | CPEB4     | GI_32698754-S | 5 | 5 | 173238038 | 79549  | 7.1419  | 6.16915 | CEU |
| rs7705502  | CPEB4     | GI_32698754-S | 5 | 5 | 173253421 | 64166  | 11.6779 | 6.16915 | CEU |
| rs17695092 | CPEB4     | GI_32698754-S | 5 | 5 | 173270459 | 47128  | 11.9666 | 6.16915 | CEU |
| rs7736263  | CPEB4     | GI_32698754-S | 5 | 5 | 173271828 | 45759  | 11.9666 | 6.16915 | CEU |
| rs10516107 | CPEB4     | GI_32698754-S | 5 | 5 | 173280762 | 36825  | 11.9666 | 6.16915 | CEU |
| rs1484803  | CPEB4     | GI_32698754-S | 5 | 5 | 173282446 | 35141  | 11.9666 | 6.16915 | CEU |
| rs966544   | CPEB4     | GI_32698754-S | 5 | 5 | 173283011 | 34576  | 11.9666 | 6.16915 | CEU |
| rs747472   | CPEB4     | GI_32698754-S | 5 | 5 | 173286120 | 31467  | 11.9666 | 6.16915 | CEU |
| rs6861681  | CPEB4     | GI_32698754-S | 5 | 5 | 173295064 | 22523  | 7.3895  | 6.16915 | CEU |
| rs1564823  | CPEB4     | GI_32698754-S | 5 | 5 | 173315800 | 1787   | 11.9666 | 6.16915 | CEU |
| rs1976074  | CPEB4     | GI_32698754-S | 5 | 5 | 173317269 | 318    | 11.9666 | 6.16915 | CEU |
| rs17696407 | CPEB4     | GI_32698754-S | 5 | 5 | 173319941 | 2354   | 11.9666 | 6.16915 | CEU |
| rs565280   | SQSTM1    | GI_19923742-S | 5 | 5 | 179186532 | 11054  | 7.0654  | 6.16263 | CEU |
| rs10277    | SQSTM1    | GI_19923742-S | 5 | 5 | 179197337 | 249    | 7.9737  | 6.16263 | CEU |
| rs1065154  | SQSTM1    | GI_19923742-S | 5 | 5 | 179197521 | 65     | 7.0654  | 6.16263 | CEU |
| rs1650893  | SQSTM1    | GI_19923742-S | 5 | 5 | 179212985 | 15399  | 8.0992  | 6.16263 | CEU |
| rs4700774  | Hs.187628 | Hs.187628-S   | 5 | 5 | 180366822 | 54133  | 5.9145  | 5.88163 | CEU |
| rs7721042  | Hs.187628 | Hs.187628-S   | 5 | 5 | 180372094 | 48861  | 5.9467  | 5.88163 | CEU |
| rs3885614  | Hs.187628 | Hs.187628-S   | 5 | 5 | 180415401 | 5554   | 7.7247  | 5.88163 | CEU |
| rs4305774  | TUBB      | GI_4507728-S  | 6 | 6 | 3149678   | 50583  | 6.4198  | 6.25621 | CEU |
| rs6929344  | TUBB      | GI_4507728-S  | 6 | 6 | 3150324   | 51229  | 7.6326  | 6.25621 | CEU |
| rs11242827 | TUBB      | GI_4507728-S  | 6 | 6 | 3150433   | 51338  | 7.6326  | 6.25621 | CEU |
| rs12215375 | TUBB      | GI_4507728-S  | 6 | 6 | 3150475   | 51380  | 6.9728  | 6.25621 | CEU |
| rs10946899 | Hs.158943 | Hs.158943-S   | 6 | 6 | 27131673  | 707002 | 5.8435  | 5.6623  | CEU |
| rs9348750  | Hs.158943 | Hs.158943-S   | 6 | 6 | 27165924  | 672751 | 5.9543  | 5.6623  | CEU |
| rs6921388  | Hs.158943 | Hs.158943-S   | 6 | 6 | 27188184  | 650491 | 6.713   | 5.6623  | CEU |
| rs9393790  | Hs.158943 | Hs.158943-S   | 6 | 6 | 27222031  | 616644 | 7.7343  | 5.6623  | CEU |

|           |           |               |   |   |          |        |        |         |     |
|-----------|-----------|---------------|---|---|----------|--------|--------|---------|-----|
| rs9379960 | Hs.158943 | Hs.158943-S   | 6 | 6 | 27229304 | 609371 | 7.7343 | 5.6623  | CEU |
| rs4713069 | Hs.158943 | Hs.158943-S   | 6 | 6 | 27236286 | 602389 | 6.6532 | 5.6623  | CEU |
| rs9295730 | Hs.158943 | Hs.158943-S   | 6 | 6 | 27236785 | 601890 | 7.2025 | 5.6623  | CEU |
| rs1028308 | Hs.158943 | Hs.158943-S   | 6 | 6 | 27237736 | 600939 | 6.8437 | 5.6623  | CEU |
| rs9393791 | Hs.158943 | Hs.158943-S   | 6 | 6 | 27240508 | 598167 | 7.2025 | 5.6623  | CEU |
| rs9461335 | Hs.158943 | Hs.158943-S   | 6 | 6 | 27246508 | 592167 | 7.2025 | 5.6623  | CEU |
| rs9283880 | Hs.158943 | Hs.158943-S   | 6 | 6 | 27823222 | 15453  | 5.9683 | 5.6623  | CEU |
| rs1633005 | Hs.519979 | Hs.519979-S   | 6 | 6 | 29872451 | 132895 | 7.1154 | 6.05874 | CEU |
| rs2734985 | Hs.519979 | Hs.519979-S   | 6 | 6 | 29926641 | 78705  | 7.308  | 6.05874 | CEU |
| rs7451408 | Hs.519979 | Hs.519979-S   | 6 | 6 | 29927520 | 77826  | 7.308  | 6.05874 | CEU |
| rs1317834 | Hs.519979 | Hs.519979-S   | 6 | 6 | 29927533 | 77813  | 7.2963 | 6.05874 | CEU |
| rs2107198 | LOC347981 | GI_30160064-S | 6 | 6 | 29927641 | 34902  | 8.0881 | 5.97465 | CEU |
| rs2508052 | Hs.519979 | Hs.519979-S   | 6 | 6 | 29927981 | 77365  | 7.1154 | 6.05874 | CEU |
| rs2508051 | Hs.519979 | Hs.519979-S   | 6 | 6 | 29928013 | 77333  | 7.308  | 6.05874 | CEU |
| rs9258606 | Hs.519979 | Hs.519979-S   | 6 | 6 | 29928149 | 77197  | 7.308  | 6.05874 | CEU |
| rs9258610 | Hs.519979 | Hs.519979-S   | 6 | 6 | 29928232 | 77114  | 7.9648 | 6.05874 | CEU |
| rs5013087 | Hs.519979 | Hs.519979-S   | 6 | 6 | 29928308 | 77038  | 7.308  | 6.05874 | CEU |
| rs5013088 | Hs.519979 | Hs.519979-S   | 6 | 6 | 29928368 | 76978  | 7.308  | 6.05874 | CEU |
| rs3128910 | Hs.519979 | Hs.519979-S   | 6 | 6 | 29928649 | 76697  | 6.1477 | 6.05874 | CEU |
| rs2734984 | Hs.519979 | Hs.519979-S   | 6 | 6 | 29928810 | 76536  | 7.308  | 6.05874 | CEU |
| rs2517866 | Hs.519979 | Hs.519979-S   | 6 | 6 | 29929011 | 76335  | 7.1154 | 6.05874 | CEU |
| rs2247719 | Hs.519979 | Hs.519979-S   | 6 | 6 | 29929363 | 75983  | 7.308  | 6.05874 | CEU |
| rs2734981 | Hs.519979 | Hs.519979-S   | 6 | 6 | 29929671 | 75675  | 7.308  | 6.05874 | CEU |
| rs9258636 | Hs.519979 | Hs.519979-S   | 6 | 6 | 29929816 | 75530  | 6.711  | 6.05874 | CEU |
| rs2734980 | Hs.519979 | Hs.519979-S   | 6 | 6 | 29929875 | 75471  | 7.308  | 6.05874 | CEU |
| rs2517862 | Hs.519979 | Hs.519979-S   | 6 | 6 | 29929916 | 75430  | 7.1154 | 6.05874 | CEU |
| rs2517861 | Hs.519979 | Hs.519979-S   | 6 | 6 | 29929961 | 75385  | 7.308  | 6.05874 | CEU |
| rs2517860 | Hs.519979 | Hs.519979-S   | 6 | 6 | 29930500 | 74846  | 7.308  | 6.05874 | CEU |
| rs2517859 | Hs.519979 | Hs.519979-S   | 6 | 6 | 29930550 | 74796  | 7.308  | 6.05874 | CEU |
| rs6919132 | Hs.519979 | Hs.519979-S   | 6 | 6 | 29931779 | 73567  | 7.308  | 6.05874 | CEU |
| rs2508049 | Hs.519979 | Hs.519979-S   | 6 | 6 | 29931862 | 73484  | 7.1154 | 6.05874 | CEU |
| rs9258690 | Hs.519979 | Hs.519979-S   | 6 | 6 | 29932319 | 73027  | 7.308  | 6.05874 | CEU |
| rs2517838 | Hs.519979 | Hs.519979-S   | 6 | 6 | 29934705 | 70641  | 7.1154 | 6.05874 | CEU |
| rs1611701 | Hs.519979 | Hs.519979-S   | 6 | 6 | 29935935 | 69411  | 7.1154 | 6.05874 | CEU |
| rs1611703 | Hs.519979 | Hs.519979-S   | 6 | 6 | 29936414 | 68932  | 7.1154 | 6.05874 | CEU |
| rs1611714 | Hs.519979 | Hs.519979-S   | 6 | 6 | 29937386 | 67960  | 7.1154 | 6.05874 | CEU |
| rs1611738 | Hs.519979 | Hs.519979-S   | 6 | 6 | 29939685 | 65661  | 6.6776 | 6.05874 | CEU |
| rs2734974 | Hs.519979 | Hs.519979-S   | 6 | 6 | 29941758 | 63588  | 7.4706 | 6.05874 | CEU |
| rs2517826 | Hs.519979 | Hs.519979-S   | 6 | 6 | 29942020 | 63326  | 7.7333 | 6.05874 | CEU |
| rs2734970 | Hs.519979 | Hs.519979-S   | 6 | 6 | 29942451 | 62895  | 6.8643 | 6.05874 | CEU |
| rs1611635 | Hs.519979 | Hs.519979-S   | 6 | 6 | 29944442 | 60904  | 6.82   | 6.05874 | CEU |
| rs1611647 | Hs.519979 | Hs.519979-S   | 6 | 6 | 29948135 | 57211  | 7.1154 | 6.05874 | CEU |
| rs3132689 | Hs.519979 | Hs.519979-S   | 6 | 6 | 29990509 | 14837  | 7.398  | 6.05874 | CEU |
| rs389600  | Hs.519979 | Hs.519979-S   | 6 | 6 | 30004978 | 368    | 6.8643 | 6.05874 | CEU |
| rs1655927 | Hs.519979 | Hs.519979-S   | 6 | 6 | 30007472 | 2126   | 6.8643 | 6.05874 | CEU |
| rs439935  | Hs.519979 | Hs.519979-S   | 6 | 6 | 30015940 | 10594  | 7.1154 | 6.05874 | CEU |
| rs1655921 | Hs.519979 | Hs.519979-S   | 6 | 6 | 30016168 | 10822  | 6.8114 | 6.05874 | CEU |
| rs2975046 | LOC347981 | GI_30160064-S | 6 | 6 | 30023128 | 60585  | 6.0963 | 5.97465 | CEU |
| rs1632882 | Hs.519979 | Hs.519979-S   | 6 | 6 | 30024347 | 19001  | 7.2963 | 6.05874 | CEU |
| rs1655900 | Hs.519979 | Hs.519979-S   | 6 | 6 | 30024597 | 19251  | 7.1154 | 6.05874 | CEU |
| rs1613062 | Hs.519979 | Hs.519979-S   | 6 | 6 | 30029079 | 23733  | 6.7986 | 6.05874 | CEU |
| rs1264807 | Hs.519979 | Hs.519979-S   | 6 | 6 | 30066786 | 61440  | 6.8069 | 6.05874 | CEU |
| rs1632926 | Hs.519979 | Hs.519979-S   | 6 | 6 | 30069253 | 63907  | 6.4156 | 6.05874 | CEU |
| rs356959  | Hs.519979 | Hs.519979-S   | 6 | 6 | 30074766 | 69420  | 7.4201 | 6.05874 | CEU |
| rs356971  | Hs.519979 | Hs.519979-S   | 6 | 6 | 30087776 | 82430  | 6.9534 | 6.05874 | CEU |
| rs3129012 | Hs.519979 | Hs.519979-S   | 6 | 6 | 30096621 | 91275  | 6.8357 | 6.05874 | CEU |



|            |           |             |   |   |          |        |        |         |     |
|------------|-----------|-------------|---|---|----------|--------|--------|---------|-----|
| rs1116221  | Hs.519979 | Hs.519979-S | 6 | 6 | 30179309 | 173963 | 6.8385 | 6.05874 | CEU |
| rs2844665  | hmm31752  | hmm31752-S  | 6 | 6 | 31114834 | 17244  | 8.036  | 6.10446 | CEU |
| rs2517548  | hmm31752  | hmm31752-S  | 6 | 6 | 31116797 | 15281  | 7.3287 | 6.10446 | CEU |
| rs9262567  | hmm31752  | hmm31752-S  | 6 | 6 | 31117188 | 14890  | 8.036  | 6.10446 | CEU |
| rs10947128 | hmm31752  | hmm31752-S  | 6 | 6 | 31117214 | 14864  | 7.8705 | 6.10446 | CEU |
| rs2523873  | hmm31752  | hmm31752-S  | 6 | 6 | 31120242 | 11836  | 7.0512 | 6.10446 | CEU |
| rs3131927  | hmm31752  | hmm31752-S  | 6 | 6 | 31120975 | 11103  | 8.5794 | 6.10446 | CEU |
| rs2517538  | hmm31752  | hmm31752-S  | 6 | 6 | 31121520 | 10558  | 8.5794 | 6.10446 | CEU |
| rs2523871  | hmm31752  | hmm31752-S  | 6 | 6 | 31121988 | 10090  | 8.6102 | 6.10446 | CEU |
| rs2523870  | hmm31752  | hmm31752-S  | 6 | 6 | 31122095 | 9983   | 8.5794 | 6.10446 | CEU |
| rs2517534  | hmm31752  | hmm31752-S  | 6 | 6 | 31125313 | 6765   | 8.9542 | 6.10446 | CEU |
| rs2517532  | hmm31752  | hmm31752-S  | 6 | 6 | 31126386 | 5692   | 8.6501 | 6.10446 | CEU |
| rs2523857  | hmm31752  | hmm31752-S  | 6 | 6 | 31129483 | 2595   | 9.5536 | 6.10446 | CEU |
| rs2517527  | hmm31752  | hmm31752-S  | 6 | 6 | 31129526 | 2552   | 9.8724 | 6.10446 | CEU |
| rs2523856  | hmm31752  | hmm31752-S  | 6 | 6 | 31129609 | 2469   | 7.3408 | 6.10446 | CEU |
| rs2523855  | hmm31752  | hmm31752-S  | 6 | 6 | 31130137 | 1941   | 6.929  | 6.10446 | CEU |
| rs9262628  | hmm31752  | hmm31752-S  | 6 | 6 | 31131127 | 951    | 6.4929 | 6.10446 | CEU |
| rs2523852  | hmm31752  | hmm31752-S  | 6 | 6 | 31131847 | 231    | 6.4929 | 6.10446 | CEU |
| rs2517525  | hmm31752  | hmm31752-S  | 6 | 6 | 31133340 | 1262   | 6.6198 | 6.10446 | CEU |
| rs2523846  | hmm31752  | hmm31752-S  | 6 | 6 | 31134568 | 2490   | 6.4929 | 6.10446 | CEU |
| rs2517510  | hmm31752  | hmm31752-S  | 6 | 6 | 31138101 | 6023   | 6.4929 | 6.10446 | CEU |
| rs2517500  | hmm31752  | hmm31752-S  | 6 | 6 | 31141488 | 9410   | 6.4929 | 6.10446 | CEU |
| rs2517497  | hmm31752  | hmm31752-S  | 6 | 6 | 31144762 | 12684  | 6.4929 | 6.10446 | CEU |
| rs2246330  | hmm31752  | hmm31752-S  | 6 | 6 | 31149472 | 17394  | 6.4929 | 6.10446 | CEU |
| rs2523883  | hmm31752  | hmm31752-S  | 6 | 6 | 31150049 | 17971  | 6.4929 | 6.10446 | CEU |
| rs2517489  | hmm31752  | hmm31752-S  | 6 | 6 | 31150285 | 18207  | 6.1111 | 6.10446 | CEU |
| rs2523881  | hmm31752  | hmm31752-S  | 6 | 6 | 31150587 | 18509  | 6.4678 | 6.10446 | CEU |
| rs2523880  | hmm31752  | hmm31752-S  | 6 | 6 | 31150748 | 18670  | 6.4929 | 6.10446 | CEU |
| rs2249231  | hmm31752  | hmm31752-S  | 6 | 6 | 31151211 | 19133  | 6.4929 | 6.10446 | CEU |
| rs2523843  | hmm31752  | hmm31752-S  | 6 | 6 | 31154507 | 22429  | 6.4929 | 6.10446 | CEU |
| rs2249876  | hmm31752  | hmm31752-S  | 6 | 6 | 31156366 | 24288  | 6.4929 | 6.10446 | CEU |
| rs3132562  | hmm31752  | hmm31752-S  | 6 | 6 | 31156971 | 24893  | 6.6589 | 6.10446 | CEU |
| rs2535318  | hmm31752  | hmm31752-S  | 6 | 6 | 31159367 | 27289  | 6.6653 | 6.10446 | CEU |
| rs2535317  | hmm31752  | hmm31752-S  | 6 | 6 | 31159833 | 27755  | 6.4929 | 6.10446 | CEU |
| rs2517471  | hmm31752  | hmm31752-S  | 6 | 6 | 31160077 | 27999  | 6.4929 | 6.10446 | CEU |
| rs2535315  | hmm31752  | hmm31752-S  | 6 | 6 | 31160106 | 28028  | 6.4929 | 6.10446 | CEU |
| rs2535311  | hmm31752  | hmm31752-S  | 6 | 6 | 31160663 | 28585  | 6.4929 | 6.10446 | CEU |
| rs2535310  | hmm31752  | hmm31752-S  | 6 | 6 | 31161236 | 29158  | 6.5775 | 6.10446 | CEU |
| rs2535307  | hmm31752  | hmm31752-S  | 6 | 6 | 31161720 | 29642  | 6.4929 | 6.10446 | CEU |
| rs2535306  | hmm31752  | hmm31752-S  | 6 | 6 | 31161846 | 29768  | 6.4929 | 6.10446 | CEU |
| rs3130959  | hmm31752  | hmm31752-S  | 6 | 6 | 31164337 | 32259  | 7.5459 | 6.10446 | CEU |
| rs9263486  | hmm31752  | hmm31752-S  | 6 | 6 | 31164611 | 32533  | 7.3837 | 6.10446 | CEU |
| rs2535301  | hmm31752  | hmm31752-S  | 6 | 6 | 31166606 | 34528  | 7.3837 | 6.10446 | CEU |
| rs2517465  | hmm31752  | hmm31752-S  | 6 | 6 | 31167150 | 35072  | 7.592  | 6.10446 | CEU |
| rs2535299  | hmm31752  | hmm31752-S  | 6 | 6 | 31167224 | 35146  | 6.8469 | 6.10446 | CEU |
| rs3130961  | hmm31752  | hmm31752-S  | 6 | 6 | 31167365 | 35287  | 7.3837 | 6.10446 | CEU |
| rs2517458  | hmm31752  | hmm31752-S  | 6 | 6 | 31167494 | 35416  | 7.3837 | 6.10446 | CEU |
| rs2517453  | hmm31752  | hmm31752-S  | 6 | 6 | 31168094 | 36016  | 7.3837 | 6.10446 | CEU |
| rs2517452  | hmm31752  | hmm31752-S  | 6 | 6 | 31168141 | 36063  | 7.3837 | 6.10446 | CEU |
| rs2517450  | hmm31752  | hmm31752-S  | 6 | 6 | 31169418 | 37340  | 7.3837 | 6.10446 | CEU |
| rs2535294  | hmm31752  | hmm31752-S  | 6 | 6 | 31170112 | 38034  | 6.9353 | 6.10446 | CEU |
| rs2517448  | hmm31752  | hmm31752-S  | 6 | 6 | 31170646 | 38568  | 7.9385 | 6.10446 | CEU |
| rs2517423  | hmm31752  | hmm31752-S  | 6 | 6 | 31172806 | 40728  | 7.3837 | 6.10446 | CEU |
| rs2517556  | hmm31752  | hmm31752-S  | 6 | 6 | 31176874 | 44796  | 7.2672 | 6.10446 | CEU |
| rs9405050  | hmm31752  | hmm31752-S  | 6 | 6 | 31179526 | 47448  | 7.3837 | 6.10446 | CEU |
| rs7381897  | hmm31752  | hmm31752-S  | 6 | 6 | 31181882 | 49804  | 7.3837 | 6.10446 | CEU |

|            |           |               |   |   |          |        |         |         |     |
|------------|-----------|---------------|---|---|----------|--------|---------|---------|-----|
| rs6457327  | hmm31752  | hmm31752-S    | 6 | 6 | 31182009 | 49931  | 7.9385  | 6.10446 | CEU |
| rs1064190  | hmm31752  | hmm31752-S    | 6 | 6 | 31183094 | 51016  | 7.3837  | 6.10446 | CEU |
| rs2535277  | hmm31752  | hmm31752-S    | 6 | 6 | 31184743 | 52665  | 7.3837  | 6.10446 | CEU |
| rs1265064  | hmm31752  | hmm31752-S    | 6 | 6 | 31185711 | 53633  | 6.3286  | 6.10446 | CEU |
| rs1265063  | hmm31752  | hmm31752-S    | 6 | 6 | 31185917 | 53839  | 7.3837  | 6.10446 | CEU |
| rs1265059  | hmm31752  | hmm31752-S    | 6 | 6 | 31186474 | 54396  | 7.3837  | 6.10446 | CEU |
| rs1265053  | hmm31752  | hmm31752-S    | 6 | 6 | 31187868 | 55790  | 6.6107  | 6.10446 | CEU |
| rs2233966  | hmm31752  | hmm31752-S    | 6 | 6 | 31188838 | 56760  | 6.5137  | 6.10446 | CEU |
| rs2233942  | HLA-C     | GI_19557676-S | 6 | 6 | 31215883 | 128838 | 6.5627  | 6.3381  | CEU |
| rs2524099  | HLA-C     | GI_19557676-S | 6 | 6 | 31344030 | 691    | 6.6987  | 6.3381  | CEU |
| rs2853950  | HLA-C     | GI_19557676-S | 6 | 6 | 31344154 | 567    | 7.5507  | 6.3381  | CEU |
| rs1049281  | HLA-C     | GI_19557676-S | 6 | 6 | 31344546 | 175    | 7.5076  | 6.3381  | CEU |
| rs2001181  | HLA-C     | GI_19557676-S | 6 | 6 | 31344977 | 256    | 6.8188  | 6.3381  | CEU |
| rs9264594  | HLA-C     | GI_19557676-S | 6 | 6 | 31345027 | 306    | 7.0665  | 6.3381  | CEU |
| rs9264602  | HLA-C     | GI_19557676-S | 6 | 6 | 31345384 | 663    | 6.7317  | 6.3381  | CEU |
| rs9264604  | HLA-C     | GI_19557676-S | 6 | 6 | 31345428 | 707    | 7.0375  | 6.3381  | CEU |
| rs9264606  | HLA-C     | GI_19557676-S | 6 | 6 | 31345571 | 850    | 6.8928  | 6.3381  | CEU |
| rs9264636  | HLA-C     | GI_19557676-S | 6 | 6 | 31346276 | 1555   | 7.0348  | 6.3381  | CEU |
| rs9264647  | HLA-C     | GI_19557676-S | 6 | 6 | 31346592 | 1871   | 6.8928  | 6.3381  | CEU |
| rs9264664  | HLA-C     | GI_19557676-S | 6 | 6 | 31347206 | 2485   | 6.8928  | 6.3381  | CEU |
| rs7767581  | HLA-C     | GI_19557676-S | 6 | 6 | 31347834 | 3113   | 6.7974  | 6.3381  | CEU |
| rs2524094  | HLA-C     | GI_19557676-S | 6 | 6 | 31348020 | 3299   | 6.7046  | 6.3381  | CEU |
| rs2844622  | HLA-C     | GI_19557676-S | 6 | 6 | 31348039 | 3318   | 8.2677  | 6.3381  | CEU |
| rs2249741  | HLA-C     | GI_19557676-S | 6 | 6 | 31348691 | 3970   | 12.2762 | 6.3381  | CEU |
| rs2249742  | HLA-C     | GI_19557676-S | 6 | 6 | 31348700 | 3979   | 9.6095  | 6.3381  | CEU |
| rs7773175  | HLA-C     | GI_19557676-S | 6 | 6 | 31348938 | 4217   | 7.5521  | 6.3381  | CEU |
| rs2844612  | HLA-C     | GI_19557676-S | 6 | 6 | 31351950 | 7229   | 7.4314  | 6.3381  | CEU |
| rs2844611  | HLA-C     | GI_19557676-S | 6 | 6 | 31351958 | 7237   | 7.459   | 6.3381  | CEU |
| rs2524074  | HLA-C     | GI_19557676-S | 6 | 6 | 31352000 | 7279   | 7.5579  | 6.3381  | CEU |
| rs3930575  | HLA-C     | GI_19557676-S | 6 | 6 | 31352633 | 7912   | 6.43    | 6.3381  | CEU |
| rs2524054  | HLA-C     | GI_19557676-S | 6 | 6 | 31360375 | 15654  | 7.2192  | 6.3381  | CEU |
| rs2853928  | HLA-C     | GI_19557676-S | 6 | 6 | 31365490 | 20769  | 7.3287  | 6.3381  | CEU |
| rs2524142  | HLA-C     | GI_19557676-S | 6 | 6 | 31371501 | 26780  | 7.3287  | 6.3381  | CEU |
| rs9264779  | hmm31752  | hmm31752-S    | 6 | 6 | 31372440 | 240362 | 6.6569  | 6.10446 | CEU |
| rs2247056  | HLA-C     | GI_19557676-S | 6 | 6 | 31373469 | 28748  | 6.9036  | 6.3381  | CEU |
| rs6457374  | HLA-C     | GI_19557676-S | 6 | 6 | 31380240 | 35519  | 7.3211  | 6.3381  | CEU |
| rs9264942  | HLA-C     | GI_19557676-S | 6 | 6 | 31382359 | 37638  | 8.0842  | 6.3381  | CEU |
| rs3094691  | HLA-C     | GI_19557676-S | 6 | 6 | 31382672 | 37951  | 8.1666  | 6.3381  | CEU |
| rs2596503  | hmm31752  | hmm31752-S    | 6 | 6 | 31428789 | 296711 | 6.5856  | 6.10446 | CEU |
| rs2770     | HLA-C     | GI_19557676-S | 6 | 6 | 31429786 | 85065  | 6.8222  | 6.3381  | CEU |
| rs2523554  | HLA-C     | GI_19557676-S | 6 | 6 | 31439808 | 95087  | 7.7965  | 6.3381  | CEU |
| rs4081552  | LOC282956 | GI_27483210-S | 6 | 6 | 31461668 | 8883   | 6.6261  | 6.15291 | CEU |
| rs6909461  | LOC282956 | GI_27483210-S | 6 | 6 | 31461929 | 8622   | 6.153   | 6.15291 | CEU |
| rs2853973  | LOC282956 | GI_27483210-S | 6 | 6 | 31461971 | 8580   | 6.7385  | 6.15291 | CEU |
| rs2428486  | LOC282956 | GI_27483210-S | 6 | 6 | 31462083 | 8468   | 6.3676  | 6.15291 | CEU |
| rs2596562  | LOC282956 | GI_27483210-S | 6 | 6 | 31462574 | 7977   | 6.7385  | 6.15291 | CEU |
| rs13437092 | LOC282956 | GI_27483210-S | 6 | 6 | 31463035 | 7516   | 6.6261  | 6.15291 | CEU |
| rs9266791  | HLA-C     | GI_19557676-S | 6 | 6 | 31466922 | 122201 | 7.2974  | 6.3381  | CEU |
| rs9348866  | LOC282956 | GI_27483210-S | 6 | 6 | 31466934 | 3617   | 6.6252  | 6.15291 | CEU |
| rs7771971  | LOC282956 | GI_27483210-S | 6 | 6 | 31468320 | 2231   | 6.6768  | 6.15291 | CEU |
| rs7751725  | LOC282956 | GI_27483210-S | 6 | 6 | 31468412 | 2139   | 6.3499  | 6.15291 | CEU |
| rs7752021  | LOC282956 | GI_27483210-S | 6 | 6 | 31468505 | 2046   | 6.6261  | 6.15291 | CEU |
| rs10947206 | LOC282956 | GI_27483210-S | 6 | 6 | 31469376 | 1175   | 6.6261  | 6.15291 | CEU |
| rs2523475  | LOC282956 | GI_27483210-S | 6 | 6 | 31469689 | 862    | 6.2987  | 6.15291 | CEU |
| rs10947208 | LOC282956 | GI_27483210-S | 6 | 6 | 31469816 | 735    | 6.6261  | 6.15291 | CEU |
| rs2523473  | LOC282956 | GI_27483210-S | 6 | 6 | 31469876 | 675    | 6.3676  | 6.15291 | CEU |

|           |           |               |   |   |          |        |        |         |     |
|-----------|-----------|---------------|---|---|----------|--------|--------|---------|-----|
| rs9501387 | LOC282956 | GI_27483210-S | 6 | 6 | 31472438 | 1887   | 6.3676 | 6.15291 | CEU |
| rs2523459 | LOC282956 | GI_27483210-S | 6 | 6 | 31473287 | 2736   | 6.3676 | 6.15291 | CEU |
| rs2428475 | LOC282956 | GI_27483210-S | 6 | 6 | 31474601 | 4050   | 6.3676 | 6.15291 | CEU |
| rs2428474 | LOC282956 | GI_27483210-S | 6 | 6 | 31475002 | 4451   | 6.3676 | 6.15291 | CEU |
| rs2523453 | LOC282956 | GI_27483210-S | 6 | 6 | 31476104 | 5553   | 6.7025 | 6.15291 | CEU |
| rs2523452 | LOC282956 | GI_27483210-S | 6 | 6 | 31476519 | 5968   | 6.3676 | 6.15291 | CEU |
| rs2844521 | LOC282956 | GI_27483210-S | 6 | 6 | 31476943 | 6392   | 6.3676 | 6.15291 | CEU |
| rs2596473 | HLA-C     | GI_19557676-S | 6 | 6 | 31538778 | 194057 | 6.7182 | 6.3381  | CEU |
| rs2284178 | HLA-C     | GI_19557676-S | 6 | 6 | 31540104 | 195383 | 6.7182 | 6.3381  | CEU |
| rs2534671 | HLA-C     | GI_19557676-S | 6 | 6 | 31573640 | 228919 | 7.2886 | 6.3381  | CEU |
| rs3134603 | HLA-DQA1  | GI_18426974-S | 6 | 6 | 32233980 | 484855 | 6.1117 | 6.02662 | CEU |
| rs9267954 | HLA-DQA2  | GI_11095446-S | 6 | 6 | 32321030 | 500003 | 6.7307 | 6.273   | CEU |
| rs9267955 | HLA-DQA1  | GI_18426974-S | 6 | 6 | 32321128 | 397707 | 6.1257 | 6.02662 | CEU |
| rs9267992 | HLA-DQA1  | GI_18426974-S | 6 | 6 | 32328375 | 390460 | 6.1257 | 6.02662 | CEU |
| rs7382103 | HLA-DQA2  | GI_11095446-S | 6 | 6 | 32338992 | 482041 | 6.3045 | 6.273   | CEU |
| rs9268082 | HLA-DQA2  | GI_11095446-S | 6 | 6 | 32342931 | 478102 | 6.3045 | 6.273   | CEU |
| rs9268132 | HLA-DQA2  | GI_11095446-S | 6 | 6 | 32362632 | 458401 | 6.3045 | 6.273   | CEU |
| rs9268145 | HLA-DQA2  | GI_11095446-S | 6 | 6 | 32365262 | 455771 | 9.3925 | 6.273   | CEU |
| rs4713518 | HLA-DQA2  | GI_11095446-S | 6 | 6 | 32365315 | 455718 | 6.3045 | 6.273   | CEU |
| rs6457535 | HLA-DQA1  | GI_18426974-S | 6 | 6 | 32370384 | 348451 | 6.1257 | 6.02662 | CEU |
| rs518374  | HLA-DQA2  | GI_11095446-S | 6 | 6 | 32373688 | 447345 | 6.3045 | 6.273   | CEU |
| rs1265777 | HLA-DQA2  | GI_11095446-S | 6 | 6 | 32381136 | 439897 | 6.3045 | 6.273   | CEU |
| rs502626  | HLA-DQA2  | GI_11095446-S | 6 | 6 | 32386244 | 434789 | 6.3045 | 6.273   | CEU |
| rs9268199 | HLA-DQA1  | GI_18426974-S | 6 | 6 | 32386613 | 332222 | 7.5459 | 6.02662 | CEU |
| rs6910071 | HLA-DQA2  | GI_11095446-S | 6 | 6 | 32390832 | 430201 | 9.65   | 6.273   | CEU |
| rs531094  | HLA-DQA2  | GI_11095446-S | 6 | 6 | 32394080 | 426953 | 6.3045 | 6.273   | CEU |
| rs9268228 | HLA-DQA2  | GI_11095446-S | 6 | 6 | 32395097 | 425936 | 7.0021 | 6.273   | CEU |
| rs574710  | HLA-DQA2  | GI_11095446-S | 6 | 6 | 32396168 | 424865 | 6.3045 | 6.273   | CEU |
| rs539703  | HLA-DQA2  | GI_11095446-S | 6 | 6 | 32396440 | 424593 | 6.3045 | 6.273   | CEU |
| rs547077  | HLA-DQA2  | GI_11095446-S | 6 | 6 | 32397296 | 423737 | 6.3045 | 6.273   | CEU |
| rs485774  | HLA-DQA2  | GI_11095446-S | 6 | 6 | 32398932 | 422101 | 7.0937 | 6.273   | CEU |
| rs533885  | HLA-DQA2  | GI_11095446-S | 6 | 6 | 32401130 | 419903 | 6.3045 | 6.273   | CEU |
| rs505274  | HLA-DQA2  | GI_11095446-S | 6 | 6 | 32402970 | 418063 | 6.3045 | 6.273   | CEU |
| rs508805  | HLA-DQA2  | GI_11095446-S | 6 | 6 | 32403328 | 417705 | 6.3045 | 6.273   | CEU |
| rs9348880 | HLA-DQA2  | GI_11095446-S | 6 | 6 | 32404758 | 416275 | 6.3045 | 6.273   | CEU |
| rs9368711 | HLA-DQA2  | GI_11095446-S | 6 | 6 | 32405134 | 415899 | 6.3045 | 6.273   | CEU |
| rs9368712 | HLA-DQA2  | GI_11095446-S | 6 | 6 | 32405306 | 415727 | 6.556  | 6.273   | CEU |
| rs9296021 | HLA-DQA2  | GI_11095446-S | 6 | 6 | 32405668 | 415365 | 6.3045 | 6.273   | CEU |
| rs9296022 | HLA-DQA2  | GI_11095446-S | 6 | 6 | 32405933 | 415100 | 6.3045 | 6.273   | CEU |
| rs742582  | HLA-DQA2  | GI_11095446-S | 6 | 6 | 32407693 | 413340 | 6.3045 | 6.273   | CEU |
| rs9366793 | HLA-DQA2  | GI_11095446-S | 6 | 6 | 32409267 | 411766 | 6.3045 | 6.273   | CEU |
| rs1474728 | HLA-DQA2  | GI_11095446-S | 6 | 6 | 32410045 | 410988 | 6.3045 | 6.273   | CEU |
| rs6929776 | HLA-DQA2  | GI_11095446-S | 6 | 6 | 32411489 | 409544 | 6.3045 | 6.273   | CEU |
| rs926591  | HLA-DQA2  | GI_11095446-S | 6 | 6 | 32413668 | 407365 | 6.3045 | 6.273   | CEU |
| rs9368716 | HLA-DQA2  | GI_11095446-S | 6 | 6 | 32414068 | 406965 | 8.1115 | 6.273   | CEU |
| rs3817982 | HLA-DQA2  | GI_11095446-S | 6 | 6 | 32414240 | 406793 | 6.3045 | 6.273   | CEU |
| rs2022534 | HLA-DQA2  | GI_11095446-S | 6 | 6 | 32415115 | 405918 | 6.3045 | 6.273   | CEU |
| rs2143465 | HLA-DQA2  | GI_11095446-S | 6 | 6 | 32417330 | 403703 | 6.3045 | 6.273   | CEU |
| rs4576282 | HLA-DQA2  | GI_11095446-S | 6 | 6 | 32420774 | 400259 | 6.3045 | 6.273   | CEU |
| rs4959092 | HLA-DQA2  | GI_11095446-S | 6 | 6 | 32420989 | 400044 | 6.3045 | 6.273   | CEU |
| rs4959093 | HLA-DQA2  | GI_11095446-S | 6 | 6 | 32421075 | 399958 | 6.3045 | 6.273   | CEU |
| rs7382512 | HLA-DQA2  | GI_11095446-S | 6 | 6 | 32422654 | 398379 | 6.9705 | 6.273   | CEU |
| rs2076538 | HLA-DQA2  | GI_11095446-S | 6 | 6 | 32425449 | 395584 | 6.3045 | 6.273   | CEU |
| rs9268301 | HLA-DQA2  | GI_11095446-S | 6 | 6 | 32427615 | 393418 | 6.6122 | 6.273   | CEU |
| rs9268346 | HLA-DQA2  | GI_11095446-S | 6 | 6 | 32439905 | 381128 | 6.6875 | 6.273   | CEU |
| rs9268357 | HLA-DQA2  | GI_11095446-S | 6 | 6 | 32440974 | 380059 | 6.3045 | 6.273   | CEU |

|            |          |               |   |   |          |        |         |         |     |
|------------|----------|---------------|---|---|----------|--------|---------|---------|-----|
| rs9268362  | HLA-DQA2 | GI_11095446-S | 6 | 6 | 32441319 | 379714 | 9.65    | 6.273   | CEU |
| rs9268369  | HLA-DQA2 | GI_11095446-S | 6 | 6 | 32442202 | 378831 | 6.6875  | 6.273   | CEU |
| rs2073044  | HLA-DQA2 | GI_11095446-S | 6 | 6 | 32446964 | 374069 | 7.3598  | 6.273   | CEU |
| rs9268402  | HLA-DQA2 | GI_11095446-S | 6 | 6 | 32449331 | 371702 | 6.6432  | 6.273   | CEU |
| rs9268403  | HLA-DQA2 | GI_11095446-S | 6 | 6 | 32449451 | 371582 | 13.4124 | 6.273   | CEU |
| rs9268403  | HLA-DQA1 | GI_18426974-S | 6 | 6 | 32449451 | 269384 | 6.2666  | 6.02662 | CEU |
| rs12201454 | HLA-DQA2 | GI_11095446-S | 6 | 6 | 32451664 | 369369 | 13.4124 | 6.273   | CEU |
| rs12201454 | HLA-DQA1 | GI_18426974-S | 6 | 6 | 32451664 | 267171 | 6.2666  | 6.02662 | CEU |
| rs9268429  | HLA-DQA2 | GI_11095446-S | 6 | 6 | 32453030 | 368003 | 12.0443 | 6.273   | CEU |
| rs2395153  | HLA-DQA2 | GI_11095446-S | 6 | 6 | 32453573 | 367460 | 7.1052  | 6.273   | CEU |
| rs8180664  | HLA-DQA2 | GI_11095446-S | 6 | 6 | 32455468 | 365565 | 13.4124 | 6.273   | CEU |
| rs8180664  | HLA-DQA1 | GI_18426974-S | 6 | 6 | 32455468 | 263367 | 6.2666  | 6.02662 | CEU |
| rs2395157  | HLA-DQA2 | GI_11095446-S | 6 | 6 | 32456123 | 364910 | 13.4124 | 6.273   | CEU |
| rs2395157  | HLA-DQA1 | GI_18426974-S | 6 | 6 | 32456123 | 262712 | 6.2666  | 6.02662 | CEU |
| rs4424066  | HLA-DQA2 | GI_11095446-S | 6 | 6 | 32462406 | 358627 | 7.5288  | 6.273   | CEU |
| rs9268473  | HLA-DQA2 | GI_11095446-S | 6 | 6 | 32463661 | 357372 | 7.5288  | 6.273   | CEU |
| rs9268474  | HLA-DQA2 | GI_11095446-S | 6 | 6 | 32465143 | 355890 | 13.4124 | 6.273   | CEU |
| rs9268474  | HLA-DQA1 | GI_18426974-S | 6 | 6 | 32465143 | 253692 | 6.2666  | 6.02662 | CEU |
| rs9268477  | HLA-DQA2 | GI_11095446-S | 6 | 6 | 32467099 | 353934 | 10.5465 | 6.273   | CEU |
| rs3817973  | HLA-DQA2 | GI_11095446-S | 6 | 6 | 32469089 | 351944 | 7.5288  | 6.273   | CEU |
| rs2076533  | HLA-DQA2 | GI_11095446-S | 6 | 6 | 32471505 | 349528 | 7.5288  | 6.273   | CEU |
| rs2076530  | HLA-DQA2 | GI_11095446-S | 6 | 6 | 32471794 | 349239 | 7.5288  | 6.273   | CEU |
| rs9268480  | HLA-DQA2 | GI_11095446-S | 6 | 6 | 32471822 | 349211 | 13.4124 | 6.273   | CEU |
| rs9268480  | HLA-DQA1 | GI_18426974-S | 6 | 6 | 32471822 | 247013 | 6.2666  | 6.02662 | CEU |
| rs3817963  | HLA-DQA2 | GI_11095446-S | 6 | 6 | 32476065 | 344968 | 13.4124 | 6.273   | CEU |
| rs3817963  | HLA-DQA1 | GI_18426974-S | 6 | 6 | 32476065 | 242770 | 6.2666  | 6.02662 | CEU |
| rs2076525  | HLA-DQA2 | GI_11095446-S | 6 | 6 | 32478594 | 342439 | 11.2863 | 6.273   | CEU |
| rs2076524  | HLA-DQA2 | GI_11095446-S | 6 | 6 | 32478662 | 342371 | 13.4124 | 6.273   | CEU |
| rs2076524  | HLA-DQA1 | GI_18426974-S | 6 | 6 | 32478662 | 240173 | 6.2666  | 6.02662 | CEU |
| rs2076523  | HLA-DQA2 | GI_11095446-S | 6 | 6 | 32478813 | 342220 | 9.2305  | 6.273   | CEU |
| rs2076522  | HLA-DQA2 | GI_11095446-S | 6 | 6 | 32479157 | 341876 | 13.4124 | 6.273   | CEU |
| rs2076522  | HLA-DQA1 | GI_18426974-S | 6 | 6 | 32479157 | 239678 | 6.2666  | 6.02662 | CEU |
| rs3793126  | HLA-DQA2 | GI_11095446-S | 6 | 6 | 32479597 | 341436 | 11.207  | 6.273   | CEU |
| rs3793127  | HLA-DQA2 | GI_11095446-S | 6 | 6 | 32479893 | 341140 | 11.9971 | 6.273   | CEU |
| rs3806156  | HLA-DQA2 | GI_11095446-S | 6 | 6 | 32481676 | 339357 | 9.2305  | 6.273   | CEU |
| rs3806157  | HLA-DQA2 | GI_11095446-S | 6 | 6 | 32481779 | 339254 | 9.2305  | 6.273   | CEU |
| rs9268491  | HLA-DQA2 | GI_11095446-S | 6 | 6 | 32482109 | 338924 | 11.6091 | 6.273   | CEU |
| rs9268491  | HLA-DQA1 | GI_18426974-S | 6 | 6 | 32482109 | 236726 | 6.1046  | 6.02662 | CEU |
| rs3763307  | HLA-DQA2 | GI_11095446-S | 6 | 6 | 32482600 | 338433 | 13.4124 | 6.273   | CEU |
| rs3763307  | HLA-DQA1 | GI_18426974-S | 6 | 6 | 32482600 | 236235 | 6.2666  | 6.02662 | CEU |
| rs9268492  | HLA-DQA2 | GI_11095446-S | 6 | 6 | 32483258 | 337775 | 12.5011 | 6.273   | CEU |
| rs9268493  | HLA-DQA2 | GI_11095446-S | 6 | 6 | 32483308 | 337725 | 11.6091 | 6.273   | CEU |
| rs9268493  | HLA-DQA1 | GI_18426974-S | 6 | 6 | 32483308 | 235527 | 6.1046  | 6.02662 | CEU |
| rs9268494  | HLA-DQA2 | GI_11095446-S | 6 | 6 | 32483330 | 337703 | 11.4615 | 6.273   | CEU |
| rs9268499  | HLA-DQA2 | GI_11095446-S | 6 | 6 | 32483673 | 337360 | 11.6091 | 6.273   | CEU |
| rs9268499  | HLA-DQA1 | GI_18426974-S | 6 | 6 | 32483673 | 235162 | 6.1046  | 6.02662 | CEU |
| rs3763309  | HLA-DQA2 | GI_11095446-S | 6 | 6 | 32483951 | 337082 | 11.9971 | 6.273   | CEU |
| rs3763316  | HLA-DQA2 | GI_11095446-S | 6 | 6 | 32484724 | 336309 | 11.6091 | 6.273   | CEU |
| rs3763316  | HLA-DQA1 | GI_18426974-S | 6 | 6 | 32484724 | 234111 | 6.1046  | 6.02662 | CEU |
| rs9268501  | HLA-DQA2 | GI_11095446-S | 6 | 6 | 32484860 | 336173 | 6.6665  | 6.273   | CEU |
| rs9268502  | HLA-DQA2 | GI_11095446-S | 6 | 6 | 32484910 | 336123 | 6.6665  | 6.273   | CEU |
| rs9268504  | HLA-DQA2 | GI_11095446-S | 6 | 6 | 32485094 | 335939 | 6.6665  | 6.273   | CEU |
| rs9268506  | HLA-DQA2 | GI_11095446-S | 6 | 6 | 32485448 | 335585 | 6.6665  | 6.273   | CEU |
| rs9268507  | HLA-DQA2 | GI_11095446-S | 6 | 6 | 32485517 | 335516 | 6.6665  | 6.273   | CEU |
| rs9268508  | HLA-DQA2 | GI_11095446-S | 6 | 6 | 32485566 | 335467 | 6.6665  | 6.273   | CEU |
| rs9268513  | HLA-DQA2 | GI_11095446-S | 6 | 6 | 32486765 | 334268 | 6.6665  | 6.273   | CEU |

|           |          |               |   |   |          |        |         |         |     |
|-----------|----------|---------------|---|---|----------|--------|---------|---------|-----|
| rs5007266 | HLA-DQA2 | GI_11095446-S | 6 | 6 | 32486812 | 334221 | 6.6665  | 6.273   | CEU |
| rs5007265 | HLA-DQA2 | GI_11095446-S | 6 | 6 | 32486844 | 334189 | 6.6665  | 6.273   | CEU |
| rs5007264 | HLA-DQA2 | GI_11095446-S | 6 | 6 | 32486855 | 334178 | 6.6665  | 6.273   | CEU |
| rs5007263 | HLA-DQA2 | GI_11095446-S | 6 | 6 | 32486960 | 334073 | 6.6665  | 6.273   | CEU |
| rs5007262 | HLA-DQA2 | GI_11095446-S | 6 | 6 | 32486989 | 334044 | 6.6665  | 6.273   | CEU |
| rs5007261 | HLA-DQA2 | GI_11095446-S | 6 | 6 | 32487009 | 334024 | 6.8129  | 6.273   | CEU |
| rs5007260 | HLA-DQA2 | GI_11095446-S | 6 | 6 | 32487025 | 334008 | 6.679   | 6.273   | CEU |
| rs9268516 | HLA-DQA2 | GI_11095446-S | 6 | 6 | 32487467 | 333566 | 13.4124 | 6.273   | CEU |
| rs9268516 | HLA-DQA1 | GI_18426974-S | 6 | 6 | 32487467 | 231368 | 6.2666  | 6.02662 | CEU |
| rs6911383 | HLA-DQA2 | GI_11095446-S | 6 | 6 | 32487660 | 333373 | 6.3085  | 6.273   | CEU |
| rs6932810 | HLA-DQA2 | GI_11095446-S | 6 | 6 | 32488168 | 332865 | 6.6665  | 6.273   | CEU |
| rs6932542 | HLA-DQA2 | GI_11095446-S | 6 | 6 | 32488240 | 332793 | 6.6665  | 6.273   | CEU |
| rs9268518 | HLA-DQA2 | GI_11095446-S | 6 | 6 | 32488796 | 332237 | 6.3267  | 6.273   | CEU |
| rs9268520 | HLA-DQA2 | GI_11095446-S | 6 | 6 | 32488838 | 332195 | 6.6665  | 6.273   | CEU |
| rs6938337 | HLA-DQA2 | GI_11095446-S | 6 | 6 | 32489019 | 332014 | 6.6665  | 6.273   | CEU |
| rs9268528 | HLA-DQA2 | GI_11095446-S | 6 | 6 | 32491086 | 329947 | 9.2403  | 6.273   | CEU |
| rs9268542 | HLA-DQA2 | GI_11095446-S | 6 | 6 | 32492699 | 328334 | 9.8575  | 6.273   | CEU |
| rs9268543 | HLA-DQA2 | GI_11095446-S | 6 | 6 | 32492779 | 328254 | 12.324  | 6.273   | CEU |
| rs9268544 | HLA-DQA2 | GI_11095446-S | 6 | 6 | 32493431 | 327602 | 9.9888  | 6.273   | CEU |
| rs9268556 | HLA-DQA2 | GI_11095446-S | 6 | 6 | 32494942 | 326091 | 9.8575  | 6.273   | CEU |
| rs2395163 | HLA-DQA2 | GI_11095446-S | 6 | 6 | 32495787 | 325246 | 12.1006 | 6.273   | CEU |
| rs2187818 | HLA-DQA2 | GI_11095446-S | 6 | 6 | 32503546 | 317487 | 8.5764  | 6.273   | CEU |
| rs7756262 | HLA-DQA2 | GI_11095446-S | 6 | 6 | 32506653 | 314380 | 8.5764  | 6.273   | CEU |
| rs4321864 | HLA-DQA2 | GI_11095446-S | 6 | 6 | 32507165 | 313868 | 11.7674 | 6.273   | CEU |
| rs9268605 | HLA-DQA2 | GI_11095446-S | 6 | 6 | 32507811 | 313222 | 8.4937  | 6.273   | CEU |
| rs9268606 | HLA-DQA2 | GI_11095446-S | 6 | 6 | 32508048 | 312985 | 8.5764  | 6.273   | CEU |
| rs9268607 | HLA-DQA2 | GI_11095446-S | 6 | 6 | 32508516 | 312517 | 8.5764  | 6.273   | CEU |
| rs9268614 | HLA-DQA2 | GI_11095446-S | 6 | 6 | 32510756 | 310277 | 10.1091 | 6.273   | CEU |
| rs9268615 | HLA-DQA2 | GI_11095446-S | 6 | 6 | 32510867 | 310166 | 7.9275  | 6.273   | CEU |
| rs4612206 | HLA-DQA2 | GI_11095446-S | 6 | 6 | 32512071 | 308962 | 7.9848  | 6.273   | CEU |
| rs3129868 | HLA-DQA1 | GI_18426974-S | 6 | 6 | 32512355 | 206480 | 6.8771  | 6.02662 | CEU |
| rs2395175 | HLA-DQA2 | GI_11095446-S | 6 | 6 | 32513004 | 308029 | 13.105  | 6.273   | CEU |
| rs9268634 | HLA-DQA2 | GI_11095446-S | 6 | 6 | 32514508 | 306525 | 7.8551  | 6.273   | CEU |
| rs14004   | HLA-DQA2 | GI_11095446-S | 6 | 6 | 32515687 | 305346 | 8.5764  | 6.273   | CEU |
| rs9268644 | HLA-DQA1 | GI_18426974-S | 6 | 6 | 32516022 | 202813 | 8.56    | 6.02662 | CEU |
| rs9268645 | HLA-DQA2 | GI_11095446-S | 6 | 6 | 32516505 | 304528 | 8.5764  | 6.273   | CEU |
| rs6926374 | HLA-DQA2 | GI_11095446-S | 6 | 6 | 32517283 | 303750 | 7.7125  | 6.273   | CEU |
| rs3129882 | HLA-DQA2 | GI_11095446-S | 6 | 6 | 32517508 | 303525 | 6.5725  | 6.273   | CEU |
| rs9268657 | HLA-DQA2 | GI_11095446-S | 6 | 6 | 32517634 | 303399 | 7.8551  | 6.273   | CEU |
| rs3135391 | HLA-DQA1 | GI_18426974-S | 6 | 6 | 32518965 | 199870 | 6.4637  | 6.02662 | CEU |
| rs2239804 | HLA-DQA2 | GI_11095446-S | 6 | 6 | 32519501 | 301532 | 8.2546  | 6.273   | CEU |
| rs2239804 | HLA-DQA1 | GI_18426974-S | 6 | 6 | 32519501 | 199334 | 6.3072  | 6.02662 | CEU |
| rs2239803 | HLA-DQA2 | GI_11095446-S | 6 | 6 | 32519811 | 301222 | 8.0182  | 6.273   | CEU |
| rs2239803 | HLA-DQA1 | GI_18426974-S | 6 | 6 | 32519811 | 199024 | 6.587   | 6.02662 | CEU |
| rs3135388 | HLA-DQA1 | GI_18426974-S | 6 | 6 | 32521029 | 197806 | 6.4637  | 6.02662 | CEU |
| rs3129889 | HLA-DQA1 | GI_18426974-S | 6 | 6 | 32521523 | 197312 | 6.4637  | 6.02662 | CEU |
| rs9268831 | HLA-DQA2 | GI_11095446-S | 6 | 6 | 32535726 | 285307 | 6.9366  | 6.273   | CEU |
| rs9268831 | HLA-DQA1 | GI_18426974-S | 6 | 6 | 32535726 | 183109 | 8.0741  | 6.02662 | CEU |
| rs6903608 | HLA-DQA2 | GI_11095446-S | 6 | 6 | 32536263 | 284770 | 6.9301  | 6.273   | CEU |
| rs6903608 | HLA-DQA1 | GI_18426974-S | 6 | 6 | 32536263 | 182572 | 7.4372  | 6.02662 | CEU |
| rs9268853 | HLA-DQA2 | GI_11095446-S | 6 | 6 | 32537621 | 283412 | 12.0693 | 6.273   | CEU |
| rs9268853 | HLA-DQA1 | GI_18426974-S | 6 | 6 | 32537621 | 181214 | 10.4951 | 6.02662 | CEU |
| rs9268858 | HLA-DQA2 | GI_11095446-S | 6 | 6 | 32537736 | 283297 | 12.0693 | 6.273   | CEU |
| rs9268858 | HLA-DQA1 | GI_18426974-S | 6 | 6 | 32537736 | 181099 | 10.4951 | 6.02662 | CEU |
| rs9268877 | HLA-DQA2 | GI_11095446-S | 6 | 6 | 32539125 | 281908 | 6.8537  | 6.273   | CEU |
| rs9268877 | HLA-DQA1 | GI_18426974-S | 6 | 6 | 32539125 | 179710 | 11.4964 | 6.02662 | CEU |

|            |          |               |   |   |          |        |         |         |     |
|------------|----------|---------------|---|---|----------|--------|---------|---------|-----|
| rs9268882  | HLA-DQA2 | GI_11095446-S | 6 | 6 | 32539601 | 281432 | 6.9917  | 6.273   | CEU |
| rs9268914  | HLA-DQA1 | GI_18426974-S | 6 | 6 | 32540534 | 178301 | 6.8051  | 6.02662 | CEU |
| rs9268923  | HLA-DQA2 | GI_11095446-S | 6 | 6 | 32540813 | 280220 | 11.1428 | 6.273   | CEU |
| rs9268923  | HLA-DQA1 | GI_18426974-S | 6 | 6 | 32540813 | 178022 | 11.8283 | 6.02662 | CEU |
| rs2395185  | HLA-DQA2 | GI_11095446-S | 6 | 6 | 32541145 | 279888 | 12.0693 | 6.273   | CEU |
| rs2395185  | HLA-DQA1 | GI_18426974-S | 6 | 6 | 32541145 | 177690 | 10.4951 | 6.02662 | CEU |
| rs9268969  | HLA-DQA2 | GI_11095446-S | 6 | 6 | 32542327 | 278706 | 9.915   | 6.273   | CEU |
| rs9268969  | HLA-DQA1 | GI_18426974-S | 6 | 6 | 32542327 | 176508 | 10.9632 | 6.02662 | CEU |
| rs9268979  | HLA-DQA2 | GI_11095446-S | 6 | 6 | 32543022 | 278011 | 7.0118  | 6.273   | CEU |
| rs9268979  | HLA-DQA1 | GI_18426974-S | 6 | 6 | 32543022 | 175813 | 9.4578  | 6.02662 | CEU |
| rs9405040  | HLA-DQA2 | GI_11095446-S | 6 | 6 | 32547371 | 273662 | 12.0693 | 6.273   | CEU |
| rs9405040  | HLA-DQA1 | GI_18426974-S | 6 | 6 | 32547371 | 171464 | 10.4951 | 6.02662 | CEU |
| rs9286790  | HLA-DQA2 | GI_11095446-S | 6 | 6 | 32547806 | 273227 | 10.8437 | 6.273   | CEU |
| rs9286790  | HLA-DQA1 | GI_18426974-S | 6 | 6 | 32547806 | 171029 | 9.4017  | 6.02662 | CEU |
| rs9269065  | HLA-DQA2 | GI_11095446-S | 6 | 6 | 32548150 | 272883 | 6.457   | 6.273   | CEU |
| rs9269065  | HLA-DQA1 | GI_18426974-S | 6 | 6 | 32548150 | 170685 | 10.7708 | 6.02662 | CEU |
| rs9269069  | HLA-DQA2 | GI_11095446-S | 6 | 6 | 32548340 | 272693 | 6.5356  | 6.273   | CEU |
| rs9269069  | HLA-DQA1 | GI_18426974-S | 6 | 6 | 32548340 | 170495 | 11.0188 | 6.02662 | CEU |
| rs9269070  | HLA-DQA2 | GI_11095446-S | 6 | 6 | 32548429 | 272604 | 6.7563  | 6.273   | CEU |
| rs9269070  | HLA-DQA1 | GI_18426974-S | 6 | 6 | 32548429 | 170406 | 9.0545  | 6.02662 | CEU |
| rs9269071  | HLA-DQA2 | GI_11095446-S | 6 | 6 | 32548445 | 272588 | 6.8537  | 6.273   | CEU |
| rs9269071  | HLA-DQA1 | GI_18426974-S | 6 | 6 | 32548445 | 170390 | 11.4964 | 6.02662 | CEU |
| rs9269078  | HLA-DQA2 | GI_11095446-S | 6 | 6 | 32548857 | 272176 | 6.3869  | 6.273   | CEU |
| rs9269078  | HLA-DQA1 | GI_18426974-S | 6 | 6 | 32548857 | 169978 | 7.493   | 6.02662 | CEU |
| rs9269080  | HLA-DQA2 | GI_11095446-S | 6 | 6 | 32548947 | 272086 | 6.8537  | 6.273   | CEU |
| rs9269080  | HLA-DQA1 | GI_18426974-S | 6 | 6 | 32548947 | 169888 | 11.4964 | 6.02662 | CEU |
| rs9269081  | HLA-DQA1 | GI_18426974-S | 6 | 6 | 32549078 | 169757 | 6.5859  | 6.02662 | CEU |
| rs7755212  | HLA-DQA1 | GI_18426974-S | 6 | 6 | 32549386 | 169449 | 11.2719 | 6.02662 | CEU |
| rs7739203  | HLA-DQA2 | GI_11095446-S | 6 | 6 | 32549533 | 271500 | 7.1236  | 6.273   | CEU |
| rs7739203  | HLA-DQA1 | GI_18426974-S | 6 | 6 | 32549533 | 169302 | 11.2892 | 6.02662 | CEU |
| rs7739357  | HLA-DQA1 | GI_18426974-S | 6 | 6 | 32549619 | 169216 | 9.962   | 6.02662 | CEU |
| rs12194148 | HLA-DQA2 | GI_11095446-S | 6 | 6 | 32552176 | 268857 | 7.8637  | 6.273   | CEU |
| rs9405112  | HLA-DQA2 | GI_11095446-S | 6 | 6 | 32553578 | 267455 | 12.0693 | 6.273   | CEU |
| rs9405112  | HLA-DQA1 | GI_18426974-S | 6 | 6 | 32553578 | 165257 | 10.4951 | 6.02662 | CEU |
| rs9378212  | HLA-DQA2 | GI_11095446-S | 6 | 6 | 32553669 | 267364 | 7.8482  | 6.273   | CEU |
| rs9378266  | HLA-DQA2 | GI_11095446-S | 6 | 6 | 32556167 | 264866 | 7.8637  | 6.273   | CEU |
| rs9378213  | HLA-DQA2 | GI_11095446-S | 6 | 6 | 32556376 | 264657 | 7.8637  | 6.273   | CEU |
| rs9269190  | HLA-DQA2 | GI_11095446-S | 6 | 6 | 32556478 | 264555 | 6.9301  | 6.273   | CEU |
| rs9269190  | HLA-DQA1 | GI_18426974-S | 6 | 6 | 32556478 | 162357 | 7.4372  | 6.02662 | CEU |
| rs9391786  | HLA-DQA2 | GI_11095446-S | 6 | 6 | 32556539 | 264494 | 7.8637  | 6.273   | CEU |
| rs7749242  | HLA-DQA2 | GI_11095446-S | 6 | 6 | 32557008 | 264025 | 6.9301  | 6.273   | CEU |
| rs7749242  | HLA-DQA1 | GI_18426974-S | 6 | 6 | 32557008 | 161827 | 7.4372  | 6.02662 | CEU |
| rs7749092  | HLA-DQA1 | GI_18426974-S | 6 | 6 | 32557028 | 161807 | 6.4204  | 6.02662 | CEU |
| rs5020946  | HLA-DQA2 | GI_11095446-S | 6 | 6 | 32558067 | 262966 | 7.8637  | 6.273   | CEU |
| rs12191360 | HLA-DQA2 | GI_11095446-S | 6 | 6 | 32559339 | 261694 | 6.9301  | 6.273   | CEU |
| rs12191360 | HLA-DQA1 | GI_18426974-S | 6 | 6 | 32559339 | 159496 | 7.4372  | 6.02662 | CEU |
| rs6916742  | HLA-DQA1 | GI_18426974-S | 6 | 6 | 32561169 | 157666 | 10.075  | 6.02662 | CEU |
| rs2157337  | HLA-DQA2 | GI_11095446-S | 6 | 6 | 32609122 | 211911 | 7.4198  | 6.273   | CEU |
| rs11757159 | HLA-DQA2 | GI_11095446-S | 6 | 6 | 32628250 | 192783 | 11.278  | 6.273   | CEU |
| rs11757159 | HLA-DQA1 | GI_18426974-S | 6 | 6 | 32628250 | 90585  | 9.7052  | 6.02662 | CEU |
| rs9269794  | HLA-DRB5 | GI_26665892-S | 6 | 6 | 32657227 | 64002  | 6.7951  | 5.86305 | CEU |
| rs701831   | HLA-DQA1 | GI_18426974-S | 6 | 6 | 32657379 | 61456  | 7.2997  | 6.02662 | CEU |
| rs2516049  | HLA-DQA2 | GI_11095446-S | 6 | 6 | 32678378 | 142655 | 11.1124 | 6.273   | CEU |
| rs2516049  | HLA-DQA1 | GI_18426974-S | 6 | 6 | 32678378 | 40457  | 11.0238 | 6.02662 | CEU |
| rs9270986  | HLA-DQA1 | GI_18426974-S | 6 | 6 | 32682038 | 36797  | 6.9206  | 6.02662 | CEU |
| rs660895   | HLA-DQA2 | GI_11095446-S | 6 | 6 | 32685358 | 135675 | 12.9176 | 6.273   | CEU |

|           |          |               |   |   |          |        |         |         |     |
|-----------|----------|---------------|---|---|----------|--------|---------|---------|-----|
| rs6931337 | HLA-DQA1 | GI_18426974-S | 6 | 6 | 32692587 | 26248  | 6.4637  | 6.02662 | CEU |
| rs3135005 | HLA-DQA1 | GI_18426974-S | 6 | 6 | 32693997 | 24838  | 6.4637  | 6.02662 | CEU |
| rs9271567 | HLA-DQA2 | GI_11095446-S | 6 | 6 | 32698434 | 122599 | 11.3669 | 6.273   | CEU |
| rs9271594 | HLA-DQA2 | GI_11095446-S | 6 | 6 | 32699191 | 121842 | 17.2446 | 6.273   | CEU |
| rs9271605 | HLA-DQA2 | GI_11095446-S | 6 | 6 | 32699426 | 121607 | 15.2952 | 6.273   | CEU |
| rs9271605 | HLA-DQA1 | GI_18426974-S | 6 | 6 | 32699426 | 19409  | 8.0626  | 6.02662 | CEU |
| rs9272346 | HLA-DQA1 | GI_18426974-S | 6 | 6 | 32712350 | 6485   | 23.2284 | 6.02662 | CEU |
| rs9272723 | HLA-DQA1 | GI_18426974-S | 6 | 6 | 32717405 | 1430   | 19.4391 | 6.02662 | CEU |
| rs6928482 | HLA-DQA2 | GI_11095446-S | 6 | 6 | 32734227 | 86806  | 8.8007  | 6.273   | CEU |
| rs6928482 | HLA-DQA1 | GI_18426974-S | 6 | 6 | 32734227 | 15392  | 14.3623 | 6.02662 | CEU |
| rs9273363 | HLA-DQA1 | GI_18426974-S | 6 | 6 | 32734250 | 15415  | 6.0556  | 6.02662 | CEU |
| rs9275134 | HLA-DQA1 | GI_18426974-S | 6 | 6 | 32758590 | 39755  | 6.6405  | 6.02662 | CEU |
| rs9275141 | HLA-DQA2 | GI_11095446-S | 6 | 6 | 32759095 | 61938  | 7.6511  | 6.273   | CEU |
| rs9275141 | HLA-DQA1 | GI_18426974-S | 6 | 6 | 32759095 | 40260  | 12.3475 | 6.02662 | CEU |
| rs3134975 | HLA-DQA1 | GI_18426974-S | 6 | 6 | 32760559 | 41724  | 10.027  | 6.02662 | CEU |
| rs4947342 | HLA-DQA1 | GI_18426974-S | 6 | 6 | 32761048 | 42213  | 6.6405  | 6.02662 | CEU |
| rs2856688 | HLA-DQA1 | GI_18426974-S | 6 | 6 | 32762618 | 43783  | 6.6405  | 6.02662 | CEU |
| rs9275184 | HLA-DQA2 | GI_11095446-S | 6 | 6 | 32762692 | 58341  | 7.0052  | 6.273   | CEU |
| rs2856683 | HLA-DQA1 | GI_18426974-S | 6 | 6 | 32763196 | 44361  | 6.6405  | 6.02662 | CEU |
| rs9275207 | HLA-DQA2 | GI_11095446-S | 6 | 6 | 32765688 | 55345  | 7.4875  | 6.273   | CEU |
| rs2157051 | HLA-DQA1 | GI_18426974-S | 6 | 6 | 32766602 | 47767  | 8.5804  | 6.02662 | CEU |
| rs2858330 | HLA-DQA2 | GI_11095446-S | 6 | 6 | 32766693 | 54340  | 7.6511  | 6.273   | CEU |
| rs2858330 | HLA-DQA1 | GI_18426974-S | 6 | 6 | 32766693 | 47858  | 12.3475 | 6.02662 | CEU |
| rs9275221 | HLA-DQA2 | GI_11095446-S | 6 | 6 | 32767077 | 53956  | 7.3849  | 6.273   | CEU |
| rs3129719 | HLA-DQA1 | GI_18426974-S | 6 | 6 | 32769757 | 50922  | 10.027  | 6.02662 | CEU |
| rs9275293 | HLA-DQA2 | GI_11095446-S | 6 | 6 | 32771286 | 49747  | 7.4875  | 6.273   | CEU |
| rs9275295 | HLA-DQA2 | GI_11095446-S | 6 | 6 | 32771369 | 49664  | 7.1074  | 6.273   | CEU |
| rs5000634 | HLA-DQA2 | GI_11095446-S | 6 | 6 | 32771542 | 49491  | 8.8644  | 6.273   | CEU |
| rs5000634 | HLA-DQA1 | GI_18426974-S | 6 | 6 | 32771542 | 52707  | 8.6298  | 6.02662 | CEU |
| rs3129720 | HLA-DQA1 | GI_18426974-S | 6 | 6 | 32771609 | 52774  | 9.6776  | 6.02662 | CEU |
| rs6457622 | HLA-DQA2 | GI_11095446-S | 6 | 6 | 32772141 | 48892  | 9.9333  | 6.273   | CEU |
| rs6457622 | HLA-DQA1 | GI_18426974-S | 6 | 6 | 32772141 | 53306  | 7.0945  | 6.02662 | CEU |
| rs7745040 | HLA-DQA2 | GI_11095446-S | 6 | 6 | 32772310 | 48723  | 8.8644  | 6.273   | CEU |
| rs7745040 | HLA-DQA1 | GI_18426974-S | 6 | 6 | 32772310 | 53475  | 8.6298  | 6.02662 | CEU |
| rs2647012 | HLA-DQA1 | GI_18426974-S | 6 | 6 | 32772436 | 53601  | 6.0462  | 6.02662 | CEU |
| rs2647003 | HLA-DQA1 | GI_18426974-S | 6 | 6 | 32772858 | 54023  | 6.0531  | 6.02662 | CEU |
| rs9275307 | HLA-DQA2 | GI_11095446-S | 6 | 6 | 32772968 | 48065  | 7.34    | 6.273   | CEU |
| rs9275310 | HLA-DQA2 | GI_11095446-S | 6 | 6 | 32773297 | 47736  | 7.2386  | 6.273   | CEU |
| rs9275311 | HLA-DQA2 | GI_11095446-S | 6 | 6 | 32773618 | 47415  | 7.1537  | 6.273   | CEU |
| rs9275324 | HLA-DQA2 | GI_11095446-S | 6 | 6 | 32774613 | 46420  | 6.9402  | 6.273   | CEU |
| rs9275334 | HLA-DQA2 | GI_11095446-S | 6 | 6 | 32775085 | 45948  | 7.4875  | 6.273   | CEU |
| rs3135006 | HLA-DQA1 | GI_18426974-S | 6 | 6 | 32775097 | 56262  | 9.8557  | 6.02662 | CEU |
| rs2647040 | HLA-DQA1 | GI_18426974-S | 6 | 6 | 32775258 | 56423  | 6.0531  | 6.02662 | CEU |
| rs9275351 | HLA-DQA2 | GI_11095446-S | 6 | 6 | 32775771 | 45262  | 7.1629  | 6.273   | CEU |
| rs9275356 | HLA-DQA2 | GI_11095446-S | 6 | 6 | 32775828 | 45205  | 7.4875  | 6.273   | CEU |
| rs2858310 | HLA-DQA1 | GI_18426974-S | 6 | 6 | 32776301 | 57466  | 6.0531  | 6.02662 | CEU |
| rs9275517 | HLA-DQA2 | GI_11095446-S | 6 | 6 | 32782627 | 38406  | 7.75    | 6.273   | CEU |
| rs9275521 | HLA-DQA1 | GI_18426974-S | 6 | 6 | 32782930 | 64095  | 6.0531  | 6.02662 | CEU |
| rs9275524 | HLA-DQA2 | GI_11095446-S | 6 | 6 | 32783087 | 37946  | 7.4196  | 6.273   | CEU |
| rs9380318 | HLA-DQA2 | GI_11095446-S | 6 | 6 | 32785647 | 35386  | 7.2822  | 6.273   | CEU |
| rs9275562 | HLA-DQA1 | GI_18426974-S | 6 | 6 | 32785824 | 66989  | 10.4206 | 6.02662 | CEU |
| rs9380319 | HLA-DQA2 | GI_11095446-S | 6 | 6 | 32785890 | 35143  | 9.8338  | 6.273   | CEU |
| rs9380319 | HLA-DQA1 | GI_18426974-S | 6 | 6 | 32785890 | 67055  | 11.6422 | 6.02662 | CEU |
| rs9394114 | HLA-DQA2 | GI_11095446-S | 6 | 6 | 32785916 | 35117  | 7.4196  | 6.273   | CEU |
| rs3998157 | HLA-DQA2 | GI_11095446-S | 6 | 6 | 32786455 | 34578  | 7.0336  | 6.273   | CEU |
| rs4273729 | HLA-DQA2 | GI_11095446-S | 6 | 6 | 32786575 | 34458  | 7.4196  | 6.273   | CEU |

|            |           |               |   |   |          |        |         |         |     |
|------------|-----------|---------------|---|---|----------|--------|---------|---------|-----|
| rs9275572  | HLA-DQA2  | GI_11095446-S | 6 | 6 | 32786977 | 34056  | 7.4196  | 6.273   | CEU |
| rs9275573  | HLA-DQA2  | GI_11095446-S | 6 | 6 | 32787124 | 33909  | 7.4196  | 6.273   | CEU |
| rs9275592  | HLA-DQA2  | GI_11095446-S | 6 | 6 | 32788598 | 32435  | 7.4875  | 6.273   | CEU |
| rs7764856  | HLA-DQA2  | GI_11095446-S | 6 | 6 | 32788618 | 32415  | 6.7421  | 6.273   | CEU |
| rs7454108  | HLA-DQA2  | GI_11095446-S | 6 | 6 | 32789461 | 31572  | 7.4875  | 6.273   | CEU |
| rs3957146  | HLA-DQA2  | GI_11095446-S | 6 | 6 | 32789508 | 31525  | 7.4875  | 6.273   | CEU |
| rs3104405  | HLA-DQA1  | GI_18426974-S | 6 | 6 | 32790286 | 71451  | 6.8958  | 6.02662 | CEU |
| rs10807170 | CDKN1A    | GI_17978494-I | 6 | 6 | 36737422 | 17209  | 6.0412  | 5.99339 | CEU |
| rs4713999  | CDKN1A    | GI_17978494-I | 6 | 6 | 36741047 | 13584  | 6.054   | 5.99339 | CEU |
| rs6930083  | CDKN1A    | GI_17978494-I | 6 | 6 | 36742134 | 12497  | 6.0412  | 5.99339 | CEU |
| rs733590   | CDKN1A    | GI_17978494-I | 6 | 6 | 36753181 | 1450   | 7.2984  | 5.99339 | CEU |
| rs2395655  | CDKN1A    | GI_17978494-I | 6 | 6 | 36753674 | 957    | 6.1437  | 5.99339 | CEU |
| rs2234185  | PEX6      | GI_21361243-S | 6 | 6 | 43005052 | 34851  | 7.7037  | 6.05235 | CEU |
| rs4714634  | PEX6      | GI_21361243-S | 6 | 6 | 43009098 | 30805  | 9.1392  | 6.05235 | CEU |
| rs3763236  | PEX6      | GI_21361243-S | 6 | 6 | 43010486 | 29417  | 12.3    | 6.05235 | CEU |
| rs1053538  | PEX6      | GI_21361243-S | 6 | 6 | 43011741 | 28162  | 10.4074 | 6.05235 | CEU |
| rs6941212  | PEX6      | GI_21361243-S | 6 | 6 | 43023898 | 16005  | 11.9434 | 6.05235 | CEU |
| rs9471976  | PEX6      | GI_21361243-S | 6 | 6 | 43028527 | 11376  | 10.4943 | 6.05235 | CEU |
| rs13215983 | PEX6      | GI_21361243-S | 6 | 6 | 43032171 | 7732   | 10.4079 | 6.05235 | CEU |
| rs9462856  | PEX6      | GI_21361243-S | 6 | 6 | 43034002 | 5901   | 10.4943 | 6.05235 | CEU |
| rs11752813 | PEX6      | GI_21361243-S | 6 | 6 | 43035995 | 3908   | 12.0128 | 6.05235 | CEU |
| rs2296805  | PEX6      | GI_21361243-S | 6 | 6 | 43036736 | 3167   | 13.045  | 6.05235 | CEU |
| rs2296804  | PEX6      | GI_21361243-S | 6 | 6 | 43039239 | 664    | 13.2103 | 6.05235 | CEU |
| rs2274517  | PEX6      | GI_21361243-S | 6 | 6 | 43040693 | 790    | 10.4943 | 6.05235 | CEU |
| rs2274514  | PEX6      | GI_21361243-S | 6 | 6 | 43042478 | 2575   | 10.4943 | 6.05235 | CEU |
| rs3805952  | PEX6      | GI_21361243-S | 6 | 6 | 43045104 | 5201   | 12.0128 | 6.05235 | CEU |
| rs3805951  | PEX6      | GI_21361243-S | 6 | 6 | 43045154 | 5251   | 11.2815 | 6.05235 | CEU |
| rs7741302  | PEX6      | GI_21361243-S | 6 | 6 | 43046355 | 6452   | 9.8338  | 6.05235 | CEU |
| rs2395943  | PEX6      | GI_21361243-S | 6 | 6 | 43048651 | 8748   | 13.2103 | 6.05235 | CEU |
| rs9986447  | PEX6      | GI_21361243-S | 6 | 6 | 43050757 | 10854  | 11.0789 | 6.05235 | CEU |
| rs9462857  | PEX6      | GI_21361243-S | 6 | 6 | 43051076 | 11173  | 10.7278 | 6.05235 | CEU |
| rs9462859  | PEX6      | GI_21361243-S | 6 | 6 | 43054921 | 15018  | 12.0128 | 6.05235 | CEU |
| rs3805946  | PEX6      | GI_21361243-S | 6 | 6 | 43063727 | 23824  | 9.7368  | 6.05235 | CEU |
| rs3805938  | PEX6      | GI_21361243-S | 6 | 6 | 43171824 | 131921 | 6.2323  | 6.05235 | CEU |
| rs3793017  | PEX6      | GI_21361243-S | 6 | 6 | 43173891 | 133988 | 6.2323  | 6.05235 | CEU |
| rs2025488  | Hs.485895 | Hs.485895-S   | 6 | 6 | 87870921 | 125769 | 5.8965  | 5.81106 | CEU |
| rs2025489  | Hs.485895 | Hs.485895-S   | 6 | 6 | 87871678 | 125012 | 8.2925  | 5.81106 | CEU |
| rs7774080  | Hs.485895 | Hs.485895-S   | 6 | 6 | 87872220 | 124470 | 6.8081  | 5.81106 | CEU |
| rs4574603  | Hs.485895 | Hs.485895-S   | 6 | 6 | 87873624 | 123066 | 6.6137  | 5.81106 | CEU |
| rs1590429  | Hs.485895 | Hs.485895-S   | 6 | 6 | 87875112 | 121578 | 7.1895  | 5.81106 | CEU |
| rs2025490  | Hs.485895 | Hs.485895-S   | 6 | 6 | 87875181 | 121509 | 9.4926  | 5.81106 | CEU |
| rs3932521  | Hs.485895 | Hs.485895-S   | 6 | 6 | 87875317 | 121373 | 7.7441  | 5.81106 | CEU |
| rs2031522  | Hs.485895 | Hs.485895-S   | 6 | 6 | 87878220 | 118470 | 9.4926  | 5.81106 | CEU |
| rs2031521  | Hs.485895 | Hs.485895-S   | 6 | 6 | 87878340 | 118350 | 5.8882  | 5.81106 | CEU |
| rs6917931  | Hs.485895 | Hs.485895-S   | 6 | 6 | 87880549 | 116141 | 6.6244  | 5.81106 | CEU |
| rs1075068  | Hs.485895 | Hs.485895-S   | 6 | 6 | 87882028 | 114662 | 7.7441  | 5.81106 | CEU |
| rs9450619  | Hs.485895 | Hs.485895-S   | 6 | 6 | 87884546 | 112144 | 9.4926  | 5.81106 | CEU |
| rs12177532 | Hs.485895 | Hs.485895-S   | 6 | 6 | 87884847 | 111843 | 7.7441  | 5.81106 | CEU |
| rs9344676  | Hs.485895 | Hs.485895-S   | 6 | 6 | 87890034 | 106656 | 7.7441  | 5.81106 | CEU |
| rs4391234  | Hs.485895 | Hs.485895-S   | 6 | 6 | 87890203 | 106487 | 7.8512  | 5.81106 | CEU |
| rs6454581  | Hs.485895 | Hs.485895-S   | 6 | 6 | 87890787 | 105903 | 7.0434  | 5.81106 | CEU |
| rs9353450  | Hs.485895 | Hs.485895-S   | 6 | 6 | 87893105 | 103585 | 7.7441  | 5.81106 | CEU |
| rs6934717  | Hs.485895 | Hs.485895-S   | 6 | 6 | 87897718 | 98972  | 7.7474  | 5.81106 | CEU |
| rs9353455  | Hs.485895 | Hs.485895-S   | 6 | 6 | 87900084 | 96606  | 6.6137  | 5.81106 | CEU |
| rs9353456  | Hs.485895 | Hs.485895-S   | 6 | 6 | 87900363 | 96327  | 7.7441  | 5.81106 | CEU |
| rs7773568  | Hs.485895 | Hs.485895-S   | 6 | 6 | 87902002 | 94688  | 7.8677  | 5.81106 | CEU |



|            |           |             |   |   |          |       |        |         |     |
|------------|-----------|-------------|---|---|----------|-------|--------|---------|-----|
| rs1998765  | Hs.485895 | Hs.485895-S | 6 | 6 | 87902966 | 93724 | 7.6292 | 5.81106 | CEU |
| rs16878497 | Hs.485895 | Hs.485895-S | 6 | 6 | 87903393 | 93297 | 9.4926 | 5.81106 | CEU |
| rs6454582  | Hs.485895 | Hs.485895-S | 6 | 6 | 87905021 | 91669 | 6.1216 | 5.81106 | CEU |
| rs6940194  | Hs.485895 | Hs.485895-S | 6 | 6 | 87905733 | 90957 | 7.7441 | 5.81106 | CEU |
| rs994170   | Hs.485895 | Hs.485895-S | 6 | 6 | 87912232 | 84458 | 7.7441 | 5.81106 | CEU |
| rs6907805  | Hs.485895 | Hs.485895-S | 6 | 6 | 87912722 | 83968 | 6.6137 | 5.81106 | CEU |
| rs6454587  | Hs.485895 | Hs.485895-S | 6 | 6 | 87914601 | 82089 | 7.0434 | 5.81106 | CEU |
| rs9362398  | Hs.485895 | Hs.485895-S | 6 | 6 | 87918814 | 77876 | 7.2793 | 5.81106 | CEU |
| rs1925689  | Hs.485895 | Hs.485895-S | 6 | 6 | 87920070 | 76620 | 6.6603 | 5.81106 | CEU |
| rs1886752  | Hs.485895 | Hs.485895-S | 6 | 6 | 87928442 | 68248 | 7.6292 | 5.81106 | CEU |
| rs9351117  | Hs.485895 | Hs.485895-S | 6 | 6 | 87935936 | 60754 | 7.7441 | 5.81106 | CEU |
| rs9353462  | Hs.485895 | Hs.485895-S | 6 | 6 | 87936431 | 60259 | 7.7441 | 5.81106 | CEU |
| rs1925692  | Hs.485895 | Hs.485895-S | 6 | 6 | 87940726 | 55964 | 7.6292 | 5.81106 | CEU |
| rs6909021  | Hs.485895 | Hs.485895-S | 6 | 6 | 87941032 | 55658 | 7.7441 | 5.81106 | CEU |
| rs6909200  | Hs.485895 | Hs.485895-S | 6 | 6 | 87941146 | 55544 | 7.7441 | 5.81106 | CEU |
| rs7739034  | Hs.485895 | Hs.485895-S | 6 | 6 | 87942905 | 53785 | 7.2777 | 5.81106 | CEU |
| rs7739726  | Hs.485895 | Hs.485895-S | 6 | 6 | 87943303 | 53387 | 7.7441 | 5.81106 | CEU |
| rs7757827  | Hs.485895 | Hs.485895-S | 6 | 6 | 87943444 | 53246 | 7.8677 | 5.81106 | CEU |
| rs7768575  | Hs.485895 | Hs.485895-S | 6 | 6 | 87945397 | 51293 | 7.7441 | 5.81106 | CEU |
| rs6454591  | Hs.485895 | Hs.485895-S | 6 | 6 | 87946003 | 50687 | 7.5488 | 5.81106 | CEU |
| rs1980790  | Hs.485895 | Hs.485895-S | 6 | 6 | 87946853 | 49837 | 7.6292 | 5.81106 | CEU |
| rs2147917  | Hs.485895 | Hs.485895-S | 6 | 6 | 87947184 | 49506 | 6.6137 | 5.81106 | CEU |
| rs1080596  | Hs.485895 | Hs.485895-S | 6 | 6 | 87951157 | 45533 | 7.1895 | 5.81106 | CEU |
| rs6913159  | Hs.485895 | Hs.485895-S | 6 | 6 | 87954518 | 42172 | 9.4926 | 5.81106 | CEU |
| rs9450630  | Hs.485895 | Hs.485895-S | 6 | 6 | 87955879 | 40811 | 7.8787 | 5.81106 | CEU |
| rs7776407  | Hs.485895 | Hs.485895-S | 6 | 6 | 87957380 | 39310 | 7.0434 | 5.81106 | CEU |
| rs7742478  | Hs.485895 | Hs.485895-S | 6 | 6 | 87957586 | 39104 | 7.5132 | 5.81106 | CEU |
| rs4707345  | Hs.485895 | Hs.485895-S | 6 | 6 | 87958944 | 37746 | 9.4926 | 5.81106 | CEU |
| rs12181709 | Hs.485895 | Hs.485895-S | 6 | 6 | 87959372 | 37318 | 9.4926 | 5.81106 | CEU |
| rs1925695  | Hs.485895 | Hs.485895-S | 6 | 6 | 87962772 | 33918 | 7.7441 | 5.81106 | CEU |
| rs6940325  | Hs.485895 | Hs.485895-S | 6 | 6 | 87963635 | 33055 | 8.9845 | 5.81106 | CEU |
| rs4605853  | Hs.485895 | Hs.485895-S | 6 | 6 | 87966096 | 30594 | 7.7441 | 5.81106 | CEU |
| rs2147918  | Hs.485895 | Hs.485895-S | 6 | 6 | 87967855 | 28835 | 6.2746 | 5.81106 | CEU |
| rs9344691  | Hs.485895 | Hs.485895-S | 6 | 6 | 87968227 | 28463 | 6.798  | 5.81106 | CEU |
| rs2147920  | Hs.485895 | Hs.485895-S | 6 | 6 | 87968525 | 28165 | 7.1895 | 5.81106 | CEU |
| rs2147921  | Hs.485895 | Hs.485895-S | 6 | 6 | 87968580 | 28110 | 7.7961 | 5.81106 | CEU |
| rs4707346  | Hs.485895 | Hs.485895-S | 6 | 6 | 87970195 | 26495 | 7.7441 | 5.81106 | CEU |
| rs6913932  | Hs.485895 | Hs.485895-S | 6 | 6 | 87971829 | 24861 | 6.6137 | 5.81106 | CEU |
| rs7752485  | Hs.485895 | Hs.485895-S | 6 | 6 | 87972336 | 24354 | 7.7441 | 5.81106 | CEU |
| rs7752414  | Hs.485895 | Hs.485895-S | 6 | 6 | 87972541 | 24149 | 9.4926 | 5.81106 | CEU |
| rs4707347  | Hs.485895 | Hs.485895-S | 6 | 6 | 87974481 | 22209 | 7.5199 | 5.81106 | CEU |
| rs4707348  | Hs.485895 | Hs.485895-S | 6 | 6 | 87974566 | 22124 | 6.6137 | 5.81106 | CEU |
| rs4110984  | Hs.485895 | Hs.485895-S | 6 | 6 | 87975193 | 21497 | 7.6292 | 5.81106 | CEU |
| rs7755883  | Hs.485895 | Hs.485895-S | 6 | 6 | 87976321 | 20369 | 6.3973 | 5.81106 | CEU |
| rs4099964  | Hs.485895 | Hs.485895-S | 6 | 6 | 87978314 | 18376 | 6.6137 | 5.81106 | CEU |
| rs3857483  | Hs.485895 | Hs.485895-S | 6 | 6 | 87980515 | 16175 | 6.0957 | 5.81106 | CEU |
| rs9450636  | Hs.485895 | Hs.485895-S | 6 | 6 | 87986888 | 9802  | 9.4926 | 5.81106 | CEU |
| rs3904088  | Hs.485895 | Hs.485895-S | 6 | 6 | 87987496 | 9194  | 8.2056 | 5.81106 | CEU |
| rs9353464  | Hs.485895 | Hs.485895-S | 6 | 6 | 87989958 | 6732  | 7.7441 | 5.81106 | CEU |
| rs9362411  | Hs.485895 | Hs.485895-S | 6 | 6 | 87990572 | 6118  | 6.6137 | 5.81106 | CEU |
| rs3903920  | Hs.485895 | Hs.485895-S | 6 | 6 | 87991455 | 5235  | 7.7441 | 5.81106 | CEU |
| rs13201289 | Hs.485895 | Hs.485895-S | 6 | 6 | 87993017 | 3673  | 9.4926 | 5.81106 | CEU |
| rs7774603  | Hs.485895 | Hs.485895-S | 6 | 6 | 87993744 | 2946  | 6.443  | 5.81106 | CEU |
| rs9450638  | Hs.485895 | Hs.485895-S | 6 | 6 | 87994045 | 2645  | 9.4926 | 5.81106 | CEU |
| rs6926831  | Hs.485895 | Hs.485895-S | 6 | 6 | 87995082 | 1608  | 7.7441 | 5.81106 | CEU |
| rs9344693  | Hs.485895 | Hs.485895-S | 6 | 6 | 87996356 | 334   | 7.7441 | 5.81106 | CEU |

|            |           |             |   |   |          |       |        |         |     |
|------------|-----------|-------------|---|---|----------|-------|--------|---------|-----|
| rs6932641  | Hs.485895 | Hs.485895-S | 6 | 6 | 87997820 | 1130  | 9.4168 | 5.81106 | CEU |
| rs6933046  | Hs.485895 | Hs.485895-S | 6 | 6 | 87998138 | 1448  | 6.4738 | 5.81106 | CEU |
| rs3857484  | Hs.485895 | Hs.485895-S | 6 | 6 | 88000288 | 3598  | 6.6137 | 5.81106 | CEU |
| rs4707355  | Hs.485895 | Hs.485895-S | 6 | 6 | 88009592 | 12902 | 9.4926 | 5.81106 | CEU |
| rs3846776  | Hs.485895 | Hs.485895-S | 6 | 6 | 88010398 | 13708 | 6.6137 | 5.81106 | CEU |
| rs9344695  | Hs.485895 | Hs.485895-S | 6 | 6 | 88012963 | 16273 | 6.6137 | 5.81106 | CEU |
| rs9353465  | Hs.485895 | Hs.485895-S | 6 | 6 | 88013005 | 16315 | 7.7441 | 5.81106 | CEU |
| rs9362414  | Hs.485895 | Hs.485895-S | 6 | 6 | 88016474 | 19784 | 6.6603 | 5.81106 | CEU |
| rs7758618  | Hs.485895 | Hs.485895-S | 6 | 6 | 88020857 | 24167 | 7.0434 | 5.81106 | CEU |
| rs6908834  | Hs.485895 | Hs.485895-S | 6 | 6 | 88022247 | 25557 | 9.4926 | 5.81106 | CEU |
| rs9362415  | Hs.485895 | Hs.485895-S | 6 | 6 | 88025284 | 28594 | 6.6137 | 5.81106 | CEU |
| rs9353468  | Hs.485895 | Hs.485895-S | 6 | 6 | 88030346 | 33656 | 6.4253 | 5.81106 | CEU |
| rs4707356  | Hs.485895 | Hs.485895-S | 6 | 6 | 88032792 | 36102 | 7.5899 | 5.81106 | CEU |
| rs9450645  | Hs.485895 | Hs.485895-S | 6 | 6 | 88034494 | 37804 | 9.4266 | 5.81106 | CEU |
| rs12176253 | Hs.485895 | Hs.485895-S | 6 | 6 | 88035509 | 38819 | 6.6137 | 5.81106 | CEU |
| rs9450646  | Hs.485895 | Hs.485895-S | 6 | 6 | 88035828 | 39138 | 9.4926 | 5.81106 | CEU |
| rs6454596  | Hs.485895 | Hs.485895-S | 6 | 6 | 88037454 | 40764 | 6.0957 | 5.81106 | CEU |
| rs9450647  | Hs.485895 | Hs.485895-S | 6 | 6 | 88038314 | 41624 | 6.6137 | 5.81106 | CEU |
| rs4707357  | Hs.485895 | Hs.485895-S | 6 | 6 | 88039715 | 43025 | 6.1216 | 5.81106 | CEU |
| rs9362417  | Hs.485895 | Hs.485895-S | 6 | 6 | 88040409 | 43719 | 6.6137 | 5.81106 | CEU |
| rs6454598  | Hs.485895 | Hs.485895-S | 6 | 6 | 88041105 | 44415 | 6.7352 | 5.81106 | CEU |
| rs6454599  | Hs.485895 | Hs.485895-S | 6 | 6 | 88041187 | 44497 | 6.6137 | 5.81106 | CEU |
| rs6918942  | Hs.485895 | Hs.485895-S | 6 | 6 | 88043135 | 46445 | 6.5046 | 5.81106 | CEU |
| rs6899394  | Hs.485895 | Hs.485895-S | 6 | 6 | 88043415 | 46725 | 6.6137 | 5.81106 | CEU |
| rs6925648  | Hs.485895 | Hs.485895-S | 6 | 6 | 88044265 | 47575 | 7.7441 | 5.81106 | CEU |
| rs9351124  | Hs.485895 | Hs.485895-S | 6 | 6 | 88047827 | 51137 | 7.7441 | 5.81106 | CEU |
| rs6916994  | Hs.485895 | Hs.485895-S | 6 | 6 | 88047955 | 51265 | 6.6137 | 5.81106 | CEU |
| rs6917432  | Hs.485895 | Hs.485895-S | 6 | 6 | 88048244 | 51554 | 7.7441 | 5.81106 | CEU |
| rs2240459  | Hs.485895 | Hs.485895-S | 6 | 6 | 88049127 | 52437 | 7.7441 | 5.81106 | CEU |
| rs3812130  | Hs.485895 | Hs.485895-S | 6 | 6 | 88050480 | 53790 | 6.7808 | 5.81106 | CEU |
| rs6934603  | Hs.485895 | Hs.485895-S | 6 | 6 | 88050734 | 54044 | 6.6137 | 5.81106 | CEU |
| rs4707358  | Hs.485895 | Hs.485895-S | 6 | 6 | 88051291 | 54601 | 7.7441 | 5.81106 | CEU |
| rs9359743  | Hs.485895 | Hs.485895-S | 6 | 6 | 88053463 | 56773 | 6.6137 | 5.81106 | CEU |
| rs9450650  | Hs.485895 | Hs.485895-S | 6 | 6 | 88055170 | 58480 | 6.0679 | 5.81106 | CEU |
| rs9450651  | Hs.485895 | Hs.485895-S | 6 | 6 | 88055360 | 58670 | 9.4926 | 5.81106 | CEU |
| rs9294376  | Hs.485895 | Hs.485895-S | 6 | 6 | 88057485 | 60795 | 9.4926 | 5.81106 | CEU |
| rs3857488  | Hs.485895 | Hs.485895-S | 6 | 6 | 88057783 | 61093 | 7.7441 | 5.81106 | CEU |
| rs9450652  | Hs.485895 | Hs.485895-S | 6 | 6 | 88059076 | 62386 | 6.6137 | 5.81106 | CEU |
| rs9450653  | Hs.485895 | Hs.485895-S | 6 | 6 | 88060840 | 64150 | 8.496  | 5.81106 | CEU |
| rs6921673  | Hs.485895 | Hs.485895-S | 6 | 6 | 88061477 | 64787 | 9.8818 | 5.81106 | CEU |
| rs6926686  | Hs.485895 | Hs.485895-S | 6 | 6 | 88061917 | 65227 | 9.4926 | 5.81106 | CEU |
| rs6938885  | Hs.485895 | Hs.485895-S | 6 | 6 | 88063898 | 67208 | 7.4966 | 5.81106 | CEU |
| rs6939075  | Hs.485895 | Hs.485895-S | 6 | 6 | 88063925 | 67235 | 8.0421 | 5.81106 | CEU |
| rs440296   | Hs.485895 | Hs.485895-S | 6 | 6 | 88065140 | 68450 | 9.2648 | 5.81106 | CEU |
| rs410683   | Hs.485895 | Hs.485895-S | 6 | 6 | 88065639 | 68949 | 9.3513 | 5.81106 | CEU |
| rs242263   | Hs.485895 | Hs.485895-S | 6 | 6 | 88075032 | 78342 | 8.8445 | 5.81106 | CEU |
| rs59322    | Hs.485895 | Hs.485895-S | 6 | 6 | 88077240 | 80550 | 6.6672 | 5.81106 | CEU |
| rs1145712  | Hs.485895 | Hs.485895-S | 6 | 6 | 88077837 | 81147 | 8.9515 | 5.81106 | CEU |
| rs413687   | Hs.485895 | Hs.485895-S | 6 | 6 | 88077999 | 81309 | 9.1295 | 5.81106 | CEU |
| rs414453   | Hs.485895 | Hs.485895-S | 6 | 6 | 88078305 | 81615 | 9.245  | 5.81106 | CEU |
| rs368267   | Hs.485895 | Hs.485895-S | 6 | 6 | 88078414 | 81724 | 9.1295 | 5.81106 | CEU |
| rs411606   | Hs.485895 | Hs.485895-S | 6 | 6 | 88078472 | 81782 | 9.1295 | 5.81106 | CEU |
| rs1145714  | Hs.485895 | Hs.485895-S | 6 | 6 | 88081237 | 84547 | 9.1295 | 5.81106 | CEU |
| rs1145715  | Hs.485895 | Hs.485895-S | 6 | 6 | 88081762 | 85072 | 9.245  | 5.81106 | CEU |
| rs1203162  | Hs.485895 | Hs.485895-S | 6 | 6 | 88081937 | 85247 | 9.1295 | 5.81106 | CEU |
| rs1203163  | Hs.485895 | Hs.485895-S | 6 | 6 | 88082968 | 86278 | 10.068 | 5.81106 | CEU |

|            |           |               |   |   |           |        |         |         |     |
|------------|-----------|---------------|---|---|-----------|--------|---------|---------|-----|
| rs1203164  | Hs.485895 | Hs.485895-S   | 6 | 6 | 88083682  | 86992  | 9.4453  | 5.81106 | CEU |
| rs2983136  | Hs.485895 | Hs.485895-S   | 6 | 6 | 88084934  | 88244  | 9.4453  | 5.81106 | CEU |
| rs242282   | Hs.485895 | Hs.485895-S   | 6 | 6 | 88086299  | 89609  | 9.3869  | 5.81106 | CEU |
| rs242283   | Hs.485895 | Hs.485895-S   | 6 | 6 | 88087650  | 90960  | 7.4006  | 5.81106 | CEU |
| rs1753152  | Hs.485895 | Hs.485895-S   | 6 | 6 | 88089507  | 92817  | 9.4453  | 5.81106 | CEU |
| rs1753153  | Hs.485895 | Hs.485895-S   | 6 | 6 | 88089553  | 92863  | 6.8981  | 5.81106 | CEU |
| rs1753154  | Hs.485895 | Hs.485895-S   | 6 | 6 | 88089562  | 92872  | 7.2727  | 5.81106 | CEU |
| rs1746444  | Hs.485895 | Hs.485895-S   | 6 | 6 | 88096587  | 99897  | 9.4453  | 5.81106 | CEU |
| rs448580   | Hs.485895 | Hs.485895-S   | 6 | 6 | 88097118  | 100428 | 7.2727  | 5.81106 | CEU |
| rs381782   | Hs.485895 | Hs.485895-S   | 6 | 6 | 88097368  | 100678 | 6.7698  | 5.81106 | CEU |
| rs451465   | Hs.485895 | Hs.485895-S   | 6 | 6 | 88100091  | 103401 | 7.3807  | 5.81106 | CEU |
| rs369674   | Hs.485895 | Hs.485895-S   | 6 | 6 | 88100121  | 103431 | 6.9643  | 5.81106 | CEU |
| rs379455   | Hs.485895 | Hs.485895-S   | 6 | 6 | 88100279  | 103589 | 9.3034  | 5.81106 | CEU |
| rs242275   | Hs.485895 | Hs.485895-S   | 6 | 6 | 88102682  | 105992 | 9.4782  | 5.81106 | CEU |
| rs242276   | Hs.485895 | Hs.485895-S   | 6 | 6 | 88103096  | 106406 | 9.1519  | 5.81106 | CEU |
| rs397516   | Hs.485895 | Hs.485895-S   | 6 | 6 | 88107771  | 111081 | 7.591   | 5.81106 | CEU |
| rs398140   | Hs.485895 | Hs.485895-S   | 6 | 6 | 88107981  | 111291 | 9.1699  | 5.81106 | CEU |
| rs452315   | Hs.485895 | Hs.485895-S   | 6 | 6 | 88109206  | 112516 | 9.4627  | 5.81106 | CEU |
| rs377288   | Hs.485895 | Hs.485895-S   | 6 | 6 | 88110196  | 113506 | 9.3537  | 5.81106 | CEU |
| rs1201409  | Hs.485895 | Hs.485895-S   | 6 | 6 | 88111983  | 115293 | 6.9643  | 5.81106 | CEU |
| rs1188819  | Hs.485895 | Hs.485895-S   | 6 | 6 | 88112067  | 115377 | 9.4493  | 5.81106 | CEU |
| rs1188817  | Hs.485895 | Hs.485895-S   | 6 | 6 | 88112438  | 115748 | 9.4627  | 5.81106 | CEU |
| rs1188816  | Hs.485895 | Hs.485895-S   | 6 | 6 | 88112550  | 115860 | 9.4627  | 5.81106 | CEU |
| rs12211627 | Hs.485895 | Hs.485895-S   | 6 | 6 | 88113020  | 116330 | 9.4627  | 5.81106 | CEU |
| rs373644   | Hs.485895 | Hs.485895-S   | 6 | 6 | 88113615  | 116925 | 7.0712  | 5.81106 | CEU |
| rs381798   | Hs.485895 | Hs.485895-S   | 6 | 6 | 88113849  | 117159 | 9.4627  | 5.81106 | CEU |
| rs910563   | Hs.485895 | Hs.485895-S   | 6 | 6 | 88115604  | 118914 | 7.0712  | 5.81106 | CEU |
| rs6921504  | Hs.485895 | Hs.485895-S   | 6 | 6 | 88115691  | 119001 | 6.3883  | 5.81106 | CEU |
| rs242264   | Hs.485895 | Hs.485895-S   | 6 | 6 | 88117457  | 120767 | 9.4627  | 5.81106 | CEU |
| rs183599   | Hs.485895 | Hs.485895-S   | 6 | 6 | 88117743  | 121053 | 7.4003  | 5.81106 | CEU |
| rs242265   | Hs.485895 | Hs.485895-S   | 6 | 6 | 88117758  | 121068 | 9.3034  | 5.81106 | CEU |
| rs242267   | Hs.485895 | Hs.485895-S   | 6 | 6 | 88118556  | 121866 | 7.0712  | 5.81106 | CEU |
| rs242268   | Hs.485895 | Hs.485895-S   | 6 | 6 | 88118603  | 121913 | 9.3034  | 5.81106 | CEU |
| rs242269   | Hs.485895 | Hs.485895-S   | 6 | 6 | 88118708  | 122018 | 9.3034  | 5.81106 | CEU |
| rs242270   | Hs.485895 | Hs.485895-S   | 6 | 6 | 88118909  | 122219 | 7.0712  | 5.81106 | CEU |
| rs540975   | Hs.485895 | Hs.485895-S   | 6 | 6 | 88119860  | 123170 | 9.4627  | 5.81106 | CEU |
| rs541170   | Hs.485895 | Hs.485895-S   | 6 | 6 | 88119935  | 123245 | 9.3431  | 5.81106 | CEU |
| rs910564   | Hs.485895 | Hs.485895-S   | 6 | 6 | 88120530  | 123840 | 9.4627  | 5.81106 | CEU |
| rs1739886  | Hs.485895 | Hs.485895-S   | 6 | 6 | 88122320  | 125630 | 9.3034  | 5.81106 | CEU |
| rs406981   | Hs.485895 | Hs.485895-S   | 6 | 6 | 88124034  | 127344 | 9.1699  | 5.81106 | CEU |
| rs107690   | Hs.485895 | Hs.485895-S   | 6 | 6 | 88126071  | 129381 | 7.0712  | 5.81106 | CEU |
| rs242287   | Hs.485895 | Hs.485895-S   | 6 | 6 | 88128544  | 131854 | 6.9643  | 5.81106 | CEU |
| rs9359748  | Hs.485895 | Hs.485895-S   | 6 | 6 | 88152219  | 155529 | 6.9251  | 5.81106 | CEU |
| rs6903219  | Hs.485895 | Hs.485895-S   | 6 | 6 | 88153217  | 156527 | 6.9251  | 5.81106 | CEU |
| rs9362427  | Hs.485895 | Hs.485895-S   | 6 | 6 | 88154353  | 157663 | 6.9495  | 5.81106 | CEU |
| rs6923983  | hmm31999  | hmm31999-S    | 6 | 6 | 99983940  | 3536   | 6.943   | 5.99494 | CEU |
| rs7745110  | hmm31999  | hmm31999-S    | 6 | 6 | 99985340  | 4936   | 6.9183  | 5.99494 | CEU |
| rs6915401  | hmm31999  | hmm31999-S    | 6 | 6 | 99987560  | 7156   | 6.943   | 5.99494 | CEU |
| rs3087961  | hmm31999  | hmm31999-S    | 6 | 6 | 99987787  | 7383   | 6.943   | 5.99494 | CEU |
| rs6570064  | hmm31999  | hmm31999-S    | 6 | 6 | 99989858  | 9454   | 6.9176  | 5.99494 | CEU |
| rs4840044  | hmm31999  | hmm31999-S    | 6 | 6 | 99994734  | 14330  | 7.2869  | 5.99494 | CEU |
| rs4144163  | hmm31999  | hmm31999-S    | 6 | 6 | 99996188  | 15784  | 6.943   | 5.99494 | CEU |
| rs9402794  | hmm31999  | hmm31999-S    | 6 | 6 | 99999245  | 18841  | 6.943   | 5.99494 | CEU |
| rs4499939  | hmm31999  | hmm31999-S    | 6 | 6 | 99999500  | 19096  | 6.2241  | 5.99494 | CEU |
| rs12199993 | QRSL1     | GI_19923522-S | 6 | 6 | 107192671 | 29123  | 6.7392  | 6.10213 | CEU |
| rs7750365  | QRSL1     | GI_19923522-S | 6 | 6 | 107195982 | 25812  | 12.2241 | 6.10213 | CEU |

|            |           |               |   |   |           |       |         |         |     |
|------------|-----------|---------------|---|---|-----------|-------|---------|---------|-----|
| rs12214412 | QRSL1     | GI_19923522-S | 6 | 6 | 107196277 | 25517 | 16.0827 | 6.10213 | CEU |
| rs13200233 | QRSL1     | GI_19923522-S | 6 | 6 | 107196533 | 25261 | 16.0827 | 6.10213 | CEU |
| rs9400038  | QRSL1     | GI_19923522-S | 6 | 6 | 107197062 | 24732 | 8.7077  | 6.10213 | CEU |
| rs11153019 | QRSL1     | GI_19923522-S | 6 | 6 | 107197307 | 24487 | 16.0827 | 6.10213 | CEU |
| rs9400040  | QRSL1     | GI_19923522-S | 6 | 6 | 107197892 | 23902 | 8.3893  | 6.10213 | CEU |
| rs9400041  | QRSL1     | GI_19923522-S | 6 | 6 | 107197913 | 23881 | 8.4229  | 6.10213 | CEU |
| rs12216505 | QRSL1     | GI_19923522-S | 6 | 6 | 107199478 | 22316 | 16.0827 | 6.10213 | CEU |
| rs9384626  | QRSL1     | GI_19923522-S | 6 | 6 | 107199554 | 22240 | 11.0768 | 6.10213 | CEU |
| rs6568448  | QRSL1     | GI_19923522-S | 6 | 6 | 107200445 | 21349 | 6.7597  | 6.10213 | CEU |
| rs6930885  | QRSL1     | GI_19923522-S | 6 | 6 | 107200705 | 21089 | 10.6772 | 6.10213 | CEU |
| rs1811546  | QRSL1     | GI_19923522-S | 6 | 6 | 107204043 | 17751 | 11.0768 | 6.10213 | CEU |
| rs12212676 | QRSL1     | GI_19923522-S | 6 | 6 | 107204676 | 17118 | 14.2975 | 6.10213 | CEU |
| rs3804345  | QRSL1     | GI_19923522-S | 6 | 6 | 107204780 | 17014 | 10.0099 | 6.10213 | CEU |
| rs11752776 | QRSL1     | GI_19923522-S | 6 | 6 | 107205682 | 16112 | 16.0827 | 6.10213 | CEU |
| rs11153020 | QRSL1     | GI_19923522-S | 6 | 6 | 107205728 | 16066 | 8.5573  | 6.10213 | CEU |
| rs3127657  | QRSL1     | GI_19923522-S | 6 | 6 | 107211067 | 10727 | 8.7077  | 6.10213 | CEU |
| rs3104039  | QRSL1     | GI_19923522-S | 6 | 6 | 107213739 | 8055  | 8.3048  | 6.10213 | CEU |
| rs3104038  | QRSL1     | GI_19923522-S | 6 | 6 | 107216715 | 5079  | 12.796  | 6.10213 | CEU |
| rs3121448  | QRSL1     | GI_19923522-S | 6 | 6 | 107220202 | 1592  | 15.793  | 6.10213 | CEU |
| rs2015205  | QRSL1     | GI_19923522-S | 6 | 6 | 107220408 | 1386  | 11.0768 | 6.10213 | CEU |
| rs1026619  | QRSL1     | GI_19923522-S | 6 | 6 | 107221054 | 740   | 16.0827 | 6.10213 | CEU |
| rs3101493  | QRSL1     | GI_19923522-S | 6 | 6 | 107222087 | 293   | 14.7422 | 6.10213 | CEU |
| rs3121447  | QRSL1     | GI_19923522-S | 6 | 6 | 107223130 | 1336  | 10.0035 | 6.10213 | CEU |
| rs3121445  | QRSL1     | GI_19923522-S | 6 | 6 | 107230572 | 8778  | 12.1987 | 6.10213 | CEU |
| rs3121439  | QRSL1     | GI_19923522-S | 6 | 6 | 107232633 | 10839 | 15.0952 | 6.10213 | CEU |
| rs3121436  | QRSL1     | GI_19923522-S | 6 | 6 | 107234699 | 12905 | 14.9382 | 6.10213 | CEU |
| rs3121434  | QRSL1     | GI_19923522-S | 6 | 6 | 107235064 | 13270 | 15.2385 | 6.10213 | CEU |
| rs9384629  | QRSL1     | GI_19923522-S | 6 | 6 | 107235778 | 13984 | 6.2752  | 6.10213 | CEU |
| rs988098   | MCMDC1    | GI_33469926-S | 6 | 6 | 119281925 | 8141  | 6.2655  | 5.88587 | CEU |
| rs1022708  | MCMDC1    | GI_33469926-S | 6 | 6 | 119293605 | 19821 | 6.2795  | 5.88587 | CEU |
| rs1022707  | MCMDC1    | GI_33469926-S | 6 | 6 | 119293670 | 19886 | 6.2795  | 5.88587 | CEU |
| rs6918569  | MCMDC1    | GI_33469926-S | 6 | 6 | 119293810 | 20026 | 6.2795  | 5.88587 | CEU |
| rs6569031  | MCMDC1    | GI_33469926-S | 6 | 6 | 119298438 | 24654 | 6.2795  | 5.88587 | CEU |
| rs11153782 | MCMDC1    | GI_33469926-S | 6 | 6 | 119302554 | 28770 | 6.2795  | 5.88587 | CEU |
| rs6904381  | MCMDC1    | GI_33469926-S | 6 | 6 | 119303615 | 29831 | 6.2795  | 5.88587 | CEU |
| rs7381821  | MCMDC1    | GI_33469926-S | 6 | 6 | 119310055 | 36271 | 6.2795  | 5.88587 | CEU |
| rs9401106  | MCMDC1    | GI_33469926-S | 6 | 6 | 119315287 | 41503 | 6.2795  | 5.88587 | CEU |
| rs7855     | SOD2      | GI_10835186-S | 6 | 6 | 160070713 | 3351  | 6.7385  | 6.01002 | CEU |
| rs10946151 | LOC135043 | GI_17463264-S | 6 | 6 | 166675155 | 51851 | 6.6864  | 6.14321 | CEU |
| rs7748966  | LOC135043 | GI_17463264-S | 6 | 6 | 166679643 | 47363 | 9.8765  | 6.14321 | CEU |
| rs7748966  | LOC401284 | GI_42657559-S | 6 | 6 | 166679643 | 55400 | 8.6337  | 6.26394 | CEU |
| rs10946155 | LOC135043 | GI_17463264-S | 6 | 6 | 166694723 | 32283 | 6.8379  | 6.14321 | CEU |
| rs1575145  | LOC135043 | GI_17463264-S | 6 | 6 | 166696977 | 30029 | 6.8379  | 6.14321 | CEU |
| rs10946158 | LOC135043 | GI_17463264-S | 6 | 6 | 166701700 | 25306 | 8.1602  | 6.14321 | CEU |
| rs10946158 | LOC401284 | GI_42657559-S | 6 | 6 | 166701700 | 33343 | 8.1091  | 6.26394 | CEU |
| rs941683   | LOC135043 | GI_17463264-S | 6 | 6 | 166710681 | 16325 | 9.7138  | 6.14321 | CEU |
| rs941683   | LOC401284 | GI_42657559-S | 6 | 6 | 166710681 | 24362 | 8.8996  | 6.26394 | CEU |
| rs12214812 | LOC135043 | GI_17463264-S | 6 | 6 | 166713571 | 13435 | 8.7425  | 6.14321 | CEU |
| rs12214812 | LOC401284 | GI_42657559-S | 6 | 6 | 166713571 | 21472 | 8.0341  | 6.26394 | CEU |
| rs11752886 | LOC135043 | GI_17463264-S | 6 | 6 | 166716710 | 10296 | 9.7138  | 6.14321 | CEU |
| rs11752886 | LOC401284 | GI_42657559-S | 6 | 6 | 166716710 | 18333 | 8.8996  | 6.26394 | CEU |
| rs4144886  | LOC135043 | GI_17463264-S | 6 | 6 | 166717983 | 9023  | 8.5818  | 6.14321 | CEU |
| rs4144886  | LOC401284 | GI_42657559-S | 6 | 6 | 166717983 | 17060 | 7.947   | 6.26394 | CEU |
| rs4144888  | LOC135043 | GI_17463264-S | 6 | 6 | 166718207 | 8799  | 9.7138  | 6.14321 | CEU |
| rs4144888  | LOC401284 | GI_42657559-S | 6 | 6 | 166718207 | 16836 | 8.8996  | 6.26394 | CEU |
| rs12198613 | LOC135043 | GI_17463264-S | 6 | 6 | 166718318 | 8688  | 8.9892  | 6.14321 | CEU |

|            |           |               |   |   |           |        |         |         |     |
|------------|-----------|---------------|---|---|-----------|--------|---------|---------|-----|
| rs12198613 | LOC401284 | GI_42657559-S | 6 | 6 | 166718318 | 16725  | 8.2204  | 6.26394 | CEU |
| rs10455977 | LOC135043 | GI_17463264-S | 6 | 6 | 166721008 | 5998   | 6.1962  | 6.14321 | CEU |
| rs10455809 | LOC135043 | GI_17463264-S | 6 | 6 | 166721171 | 5835   | 9.2213  | 6.14321 | CEU |
| rs10455809 | LOC401284 | GI_42657559-S | 6 | 6 | 166721171 | 13872  | 8.4367  | 6.26394 | CEU |
| rs11755305 | LOC135043 | GI_17463264-S | 6 | 6 | 166725686 | 1320   | 8.7561  | 6.14321 | CEU |
| rs11755305 | LOC401284 | GI_42657559-S | 6 | 6 | 166725686 | 9357   | 7.5959  | 6.26394 | CEU |
| rs2294335  | LOC135043 | GI_17463264-S | 6 | 6 | 166726541 | 465    | 10.1993 | 6.14321 | CEU |
| rs2294335  | LOC401284 | GI_42657559-S | 6 | 6 | 166726541 | 8502   | 9.8022  | 6.26394 | CEU |
| rs2294334  | LOC135043 | GI_17463264-S | 6 | 6 | 166726590 | 416    | 9.1503  | 6.14321 | CEU |
| rs2294334  | LOC401284 | GI_42657559-S | 6 | 6 | 166726590 | 8453   | 8.8659  | 6.26394 | CEU |
| rs11753652 | LOC135043 | GI_17463264-S | 6 | 6 | 166727402 | 396    | 10.1993 | 6.14321 | CEU |
| rs11753652 | LOC401284 | GI_42657559-S | 6 | 6 | 166727402 | 7641   | 9.8022  | 6.26394 | CEU |
| rs10262070 | LOC389456 | GI_41147544-S | 7 | 7 | 914979    | 24218  | 7.476   | 5.77488 | CEU |
| rs7788231  | LOC389456 | GI_41147544-S | 7 | 7 | 934399    | 43638  | 6.9025  | 5.77488 | CEU |
| rs798556   | LOC392620 | GI_41147689-S | 7 | 7 | 2532243   | 2655   | 7.0236  | 6.17491 | CEU |
| rs798548   | LOC392620 | GI_41147689-S | 7 | 7 | 2534176   | 722    | 6.3811  | 6.17491 | CEU |
| rs798544   | LOC392620 | GI_41147689-S | 7 | 7 | 2536343   | 1445   | 7.0236  | 6.17491 | CEU |
| rs798536   | LOC392620 | GI_41147689-S | 7 | 7 | 2539624   | 4726   | 6.5029  | 6.17491 | CEU |
| rs798528   | LOC392620 | GI_41147689-S | 7 | 7 | 2545672   | 10774  | 7.6025  | 6.17491 | CEU |
| rs798502   | LOC392620 | GI_41147689-S | 7 | 7 | 2563121   | 28223  | 6.7684  | 6.17491 | CEU |
| rs798500   | LOC392620 | GI_41147689-S | 7 | 7 | 2563926   | 29028  | 6.8927  | 6.17491 | CEU |
| rs798498   | LOC392620 | GI_41147689-S | 7 | 7 | 2569123   | 34225  | 6.6206  | 6.17491 | CEU |
| rs798497   | LOC392620 | GI_41147689-S | 7 | 7 | 2569198   | 34300  | 7.1725  | 6.17491 | CEU |
| rs798494   | LOC392620 | GI_41147689-S | 7 | 7 | 2571535   | 36637  | 7.1903  | 6.17491 | CEU |
| rs798491   | LOC392620 | GI_41147689-S | 7 | 7 | 2573762   | 38864  | 7.1903  | 6.17491 | CEU |
| rs798490   | LOC392620 | GI_41147689-S | 7 | 7 | 2574783   | 39885  | 6.8785  | 6.17491 | CEU |
| rs798489   | LOC392620 | GI_41147689-S | 7 | 7 | 2575044   | 40146  | 7.2401  | 6.17491 | CEU |
| rs798488   | LOC392620 | GI_41147689-S | 7 | 7 | 2575763   | 40865  | 6.6171  | 6.17491 | CEU |
| rs798486   | LOC392620 | GI_41147689-S | 7 | 7 | 2576278   | 41380  | 6.5622  | 6.17491 | CEU |
| rs798485   | LOC392620 | GI_41147689-S | 7 | 7 | 2576751   | 41853  | 6.8785  | 6.17491 | CEU |
| rs1182209  | LOC392620 | GI_41147689-S | 7 | 7 | 2581836   | 46938  | 6.9808  | 6.17491 | CEU |
| rs2260230  | LOC392620 | GI_41147689-S | 7 | 7 | 2596227   | 61329  | 6.8785  | 6.17491 | CEU |
| rs2527684  | LOC392620 | GI_41147689-S | 7 | 7 | 2599163   | 64265  | 6.1987  | 6.17491 | CEU |
| rs2644312  | LOC392620 | GI_41147689-S | 7 | 7 | 2614405   | 79507  | 7.2453  | 6.17491 | CEU |
| rs2527690  | LOC392620 | GI_41147689-S | 7 | 7 | 2627491   | 92593  | 6.7837  | 6.17491 | CEU |
| rs960273   | LOC392620 | GI_41147689-S | 7 | 7 | 2631117   | 96219  | 6.8698  | 6.17491 | CEU |
| rs1182198  | LOC392620 | GI_41147689-S | 7 | 7 | 2636147   | 101249 | 6.5088  | 6.17491 | CEU |
| rs2158694  | LOC392620 | GI_41147689-S | 7 | 7 | 2636684   | 101786 | 7.2367  | 6.17491 | CEU |
| rs2107964  | LOC392620 | GI_41147689-S | 7 | 7 | 2636815   | 101917 | 6.2373  | 6.17491 | CEU |
| rs1636264  | LOC392620 | GI_41147689-S | 7 | 7 | 2637827   | 102929 | 6.6544  | 6.17491 | CEU |
| rs1713919  | LOC392620 | GI_41147689-S | 7 | 7 | 2637947   | 103049 | 7.2453  | 6.17491 | CEU |
| rs1182189  | LOC392620 | GI_41147689-S | 7 | 7 | 2642763   | 107865 | 7.6683  | 6.17491 | CEU |
| rs1182188  | LOC392620 | GI_41147689-S | 7 | 7 | 2643226   | 108328 | 7.3864  | 6.17491 | CEU |
| rs1182185  | LOC392620 | GI_41147689-S | 7 | 7 | 2645474   | 110576 | 6.6115  | 6.17491 | CEU |
| rs1182183  | LOC392620 | GI_41147689-S | 7 | 7 | 2646377   | 111479 | 6.9393  | 6.17491 | CEU |
| rs1182182  | LOC392620 | GI_41147689-S | 7 | 7 | 2646475   | 111577 | 6.9475  | 6.17491 | CEU |
| rs1182181  | LOC392620 | GI_41147689-S | 7 | 7 | 2646488   | 111590 | 7.2453  | 6.17491 | CEU |
| rs1182179  | LOC392620 | GI_41147689-S | 7 | 7 | 2646889   | 111991 | 7.2453  | 6.17491 | CEU |
| rs1182177  | LOC392620 | GI_41147689-S | 7 | 7 | 2647781   | 112883 | 7.2566  | 6.17491 | CEU |
| rs1182174  | LOC392620 | GI_41147689-S | 7 | 7 | 2648661   | 113763 | 6.6234  | 6.17491 | CEU |
| rs1182171  | LOC392620 | GI_41147689-S | 7 | 7 | 2651751   | 116853 | 7.2453  | 6.17491 | CEU |
| rs2533878  | LOC392620 | GI_41147689-S | 7 | 7 | 2651948   | 117050 | 6.962   | 6.17491 | CEU |
| rs227951   | LOC90693  | GI_40255028-S | 7 | 7 | 23383869  | 72114  | 6.2525  | 6.04254 | CEU |
| rs11980035 | LOC90693  | GI_40255028-S | 7 | 7 | 23401773  | 54210  | 10.3895 | 6.04254 | CEU |
| rs12700451 | LOC90693  | GI_40255028-S | 7 | 7 | 23421954  | 34029  | 10.3861 | 6.04254 | CEU |
| rs13227748 | LOC90693  | GI_40255028-S | 7 | 7 | 23425801  | 30182  | 10.3861 | 6.04254 | CEU |

|            |           |               |   |   |          |        |         |         |     |
|------------|-----------|---------------|---|---|----------|--------|---------|---------|-----|
| rs13230595 | LOC90693  | GI_40255028-S | 7 | 7 | 23441087 | 14896  | 10.3861 | 6.04254 | CEU |
| rs11771510 | LOC90693  | GI_40255028-S | 7 | 7 | 23443052 | 12931  | 7.1747  | 6.04254 | CEU |
| rs11772530 | LOC90693  | GI_40255028-S | 7 | 7 | 23444177 | 11806  | 10.5181 | 6.04254 | CEU |
| rs12701030 | FLJ22374  | GI_39752638-S | 7 | 7 | 30597409 | 107718 | 6.5303  | 5.99438 | CEU |
| rs2269921  | FLJ22374  | GI_39752638-S | 7 | 7 | 30598469 | 106658 | 6.5303  | 5.99438 | CEU |
| rs10278285 | FLJ22374  | GI_39752638-S | 7 | 7 | 30606948 | 98179  | 6.6401  | 5.99438 | CEU |
| rs6979305  | FLJ22374  | GI_39752638-S | 7 | 7 | 30607155 | 97972  | 6.5303  | 5.99438 | CEU |
| rs10282606 | FLJ22374  | GI_39752638-S | 7 | 7 | 30608001 | 97126  | 6.5303  | 5.99438 | CEU |
| rs7781249  | FLJ22374  | GI_39752638-S | 7 | 7 | 30610516 | 94611  | 6.7243  | 5.99438 | CEU |
| rs7785179  | FLJ22374  | GI_39752638-S | 7 | 7 | 30610749 | 94378  | 6.6733  | 5.99438 | CEU |
| rs7803974  | FLJ22374  | GI_39752638-S | 7 | 7 | 30610787 | 94340  | 6.7578  | 5.99438 | CEU |
| rs10481004 | LOC378075 | GI_37538916-S | 7 | 7 | 55542880 | 415054 | 6.2877  | 5.73584 | CEU |
| rs6593279  | LOC378075 | GI_37538916-S | 7 | 7 | 55578179 | 379755 | 13.2112 | 5.73584 | CEU |
| rs11982736 | LOC378075 | GI_37538916-S | 7 | 7 | 55629389 | 328545 | 12.7054 | 5.73584 | CEU |
| rs9642404  | LOC378075 | GI_37538916-S | 7 | 7 | 55631008 | 326926 | 7.406   | 5.73584 | CEU |
| rs1113765  | LOC378075 | GI_37538916-S | 7 | 7 | 55663543 | 294391 | 8.7759  | 5.73584 | CEU |
| rs11238381 | LOC378075 | GI_37538916-S | 7 | 7 | 55666110 | 291824 | 7.3826  | 5.73584 | CEU |
| rs10949827 | WBSCR27   | GI_30795189-S | 7 | 7 | 72616837 | 76965  | 8.2076  | 5.37492 | CEU |
| rs6460055  | WBSCR27   | GI_30795189-S | 7 | 7 | 72632168 | 61634  | 8.2076  | 5.37492 | CEU |
| rs6947264  | WBSCR27   | GI_30795189-S | 7 | 7 | 72638646 | 55156  | 8.2076  | 5.37492 | CEU |
| rs4717815  | WBSCR27   | GI_30795189-S | 7 | 7 | 72640312 | 53490  | 8.1888  | 5.37492 | CEU |
| rs6952976  | WBSCR27   | GI_30795189-S | 7 | 7 | 72653667 | 40135  | 8.2076  | 5.37492 | CEU |
| rs10949828 | WBSCR27   | GI_30795189-S | 7 | 7 | 72661384 | 32418  | 8.2076  | 5.37492 | CEU |
| rs13232536 | WBSCR27   | GI_30795189-S | 7 | 7 | 72664159 | 29643  | 8.1276  | 5.37492 | CEU |
| rs7796554  | WBSCR27   | GI_30795189-S | 7 | 7 | 72664691 | 29111  | 8.2076  | 5.37492 | CEU |
| rs4440516  | WBSCR27   | GI_30795189-S | 7 | 7 | 72668692 | 25110  | 9.8285  | 5.37492 | CEU |
| rs4355658  | WBSCR27   | GI_30795189-S | 7 | 7 | 72670343 | 23459  | 9.8285  | 5.37492 | CEU |
| rs6946037  | WBSCR27   | GI_30795189-S | 7 | 7 | 72681366 | 12436  | 8.5112  | 5.37492 | CEU |
| rs4255023  | WBSCR27   | GI_30795189-S | 7 | 7 | 72684269 | 9533   | 6.2974  | 5.37492 | CEU |
| rs7455225  | WBSCR27   | GI_30795189-S | 7 | 7 | 72686037 | 7765   | 7.0244  | 5.37492 | CEU |
| rs8629     | WBSCR27   | GI_30795189-S | 7 | 7 | 72690170 | 3632   | 11.6233 | 5.37492 | CEU |
| rs1127155  | WBSCR27   | GI_30795189-S | 7 | 7 | 72691112 | 2690   | 11.6233 | 5.37492 | CEU |
| rs11316    | WBSCR27   | GI_30795189-S | 7 | 7 | 72691206 | 2596   | 10.9932 | 5.37492 | CEU |
| rs13232463 | WBSCR27   | GI_30795189-S | 7 | 7 | 72693950 | 148    | 11.6233 | 5.37492 | CEU |
| rs4304218  | WBSCR27   | GI_30795189-S | 7 | 7 | 72697631 | 3829   | 11.6233 | 5.37492 | CEU |
| rs1073909  | WBSCR27   | GI_30795189-S | 7 | 7 | 72702940 | 9138   | 11.6233 | 5.37492 | CEU |
| rs4717112  | WBSCR27   | GI_30795189-S | 7 | 7 | 72710068 | 16266  | 11.6233 | 5.37492 | CEU |
| rs6949053  | WBSCR27   | GI_30795189-S | 7 | 7 | 72714588 | 20786  | 11.6233 | 5.37492 | CEU |
| rs11770024 | WBSCR27   | GI_30795189-S | 7 | 7 | 72720152 | 26350  | 11.6233 | 5.37492 | CEU |
| rs6972637  | MTERF     | GI_14790134-S | 7 | 7 | 91251595 | 104412 | 6.7953  | 5.78407 | CEU |
| rs474229   | TRIM4     | GI_15011940-A | 7 | 7 | 99111209 | 22164  | 5.8589  | 5.34358 | CEU |
| rs1025576  | TRIM4     | GI_15011940-A | 7 | 7 | 99118275 | 15098  | 5.8589  | 5.34358 | CEU |
| rs2572022  | TRIM4     | GI_15011940-A | 7 | 7 | 99119380 | 13993  | 5.8226  | 5.34358 | CEU |
| rs2060452  | TRIM4     | GI_15011940-A | 7 | 7 | 99120124 | 13249  | 6.9404  | 5.34358 | CEU |
| rs2082744  | TRIM4     | GI_15011940-A | 7 | 7 | 99126067 | 7306   | 5.8889  | 5.34358 | CEU |
| rs2572010  | TRIM4     | GI_15011940-A | 7 | 7 | 99133194 | 179    | 5.8889  | 5.34358 | CEU |
| rs1048705  | TRIM4     | GI_15011940-A | 7 | 7 | 99133591 | 218    | 5.8889  | 5.34358 | CEU |
| rs2572009  | TRIM4     | GI_15011940-A | 7 | 7 | 99133656 | 283    | 5.8889  | 5.34358 | CEU |
| rs2572008  | TRIM4     | GI_15011940-A | 7 | 7 | 99135607 | 2234   | 5.8889  | 5.34358 | CEU |
| rs2527922  | TRIM4     | GI_15011940-A | 7 | 7 | 99137407 | 4034   | 5.8889  | 5.34358 | CEU |
| rs2572006  | TRIM4     | GI_15011940-A | 7 | 7 | 99138462 | 5089   | 5.8889  | 5.34358 | CEU |
| rs7384528  | TRIM4     | GI_15011940-A | 7 | 7 | 99138681 | 5308   | 6.8239  | 5.34358 | CEU |
| rs2527919  | TRIM4     | GI_15011940-A | 7 | 7 | 99139164 | 5791   | 6.3426  | 5.34358 | CEU |
| rs2527914  | TRIM4     | GI_15011940-A | 7 | 7 | 99142796 | 9423   | 5.8889  | 5.34358 | CEU |
| rs10808114 | TRIM4     | GI_15011940-A | 7 | 7 | 99143150 | 9777   | 6.3773  | 5.34358 | CEU |
| rs2247761  | TRIM4     | GI_15011940-A | 7 | 7 | 99145562 | 12189  | 5.8889  | 5.34358 | CEU |

|            |           |               |   |   |           |        |         |         |     |
|------------|-----------|---------------|---|---|-----------|--------|---------|---------|-----|
| rs2572003  | TRIM4     | GI_15011940-A | 7 | 7 | 99145964  | 12591  | 5.8961  | 5.34358 | CEU |
| rs2571998  | TRIM4     | GI_15011940-A | 7 | 7 | 99156023  | 22650  | 5.3998  | 5.34358 | CEU |
| rs2571997  | TRIM4     | GI_15011940-A | 7 | 7 | 99159068  | 25695  | 5.8889  | 5.34358 | CEU |
| rs2571992  | TRIM4     | GI_15011940-A | 7 | 7 | 99164567  | 31194  | 5.8889  | 5.34358 | CEU |
| rs2527901  | TRIM4     | GI_15011940-A | 7 | 7 | 99169763  | 36390  | 5.7933  | 5.34358 | CEU |
| rs4473948  | POLR2J    | GI_21704275-S | 7 | 7 | 101706117 | 1562   | 5.794   | 5.38306 | CEU |
| rs4728142  | IRF5      | GI_38683858-A | 7 | 7 | 128167918 | 15224  | 7.8893  | 5.75312 | CEU |
| rs752637   | IRF5      | GI_38683858-A | 7 | 7 | 128173371 | 9771   | 12.3425 | 5.75312 | CEU |
| rs3807306  | IRF5      | GI_38683858-A | 7 | 7 | 128174631 | 8511   | 17.7352 | 5.75312 | CEU |
| rs7808907  | IRF5      | GI_38683858-A | 7 | 7 | 128178035 | 5107   | 12.5274 | 5.75312 | CEU |
| rs13242262 | IRF5      | GI_38683858-A | 7 | 7 | 128185315 | 2173   | 16.3888 | 5.75312 | CEU |
| rs2280714  | IRF5      | GI_38683858-A | 7 | 7 | 128188676 | 5534   | 13.8005 | 5.75312 | CEU |
| rs6966125  | IRF5      | GI_38683858-A | 7 | 7 | 128192476 | 9334   | 6.1605  | 5.75312 | CEU |
| rs10229001 | IRF5      | GI_38683858-A | 7 | 7 | 128193348 | 10206  | 17.7054 | 5.75312 | CEU |
| rs7385716  | IRF5      | GI_38683858-A | 7 | 7 | 128199545 | 16403  | 17.6856 | 5.75312 | CEU |
| rs2272347  | IRF5      | GI_38683858-A | 7 | 7 | 128213366 | 30224  | 17.7344 | 5.75312 | CEU |
| rs7789423  | IRF5      | GI_38683858-A | 7 | 7 | 128215155 | 32013  | 14.3453 | 5.75312 | CEU |
| rs6948928  | IRF5      | GI_38683858-A | 7 | 7 | 128217048 | 33906  | 14.3453 | 5.75312 | CEU |
| rs6969930  | IRF5      | GI_38683858-A | 7 | 7 | 128224264 | 41122  | 18.4071 | 5.75312 | CEU |
| rs7807018  | IRF5      | GI_38683858-A | 7 | 7 | 128234139 | 50997  | 17.5934 | 5.75312 | CEU |
| rs6965542  | IRF5      | GI_38683858-A | 7 | 7 | 128249869 | 66727  | 16.2185 | 5.75312 | CEU |
| rs3857852  | IRF5      | GI_38683858-A | 7 | 7 | 128251228 | 68086  | 14.0043 | 5.75312 | CEU |
| rs12155080 | IRF5      | GI_38683858-A | 7 | 7 | 128252690 | 69548  | 18.4071 | 5.75312 | CEU |
| rs13221560 | IRF5      | GI_38683858-A | 7 | 7 | 128257126 | 73984  | 12.4997 | 5.75312 | CEU |
| rs10239340 | IRF5      | GI_38683858-A | 7 | 7 | 128262461 | 79319  | 18.4071 | 5.75312 | CEU |
| rs1072767  | IRF5      | GI_38683858-A | 7 | 7 | 128267156 | 84014  | 14.3453 | 5.75312 | CEU |
| rs921403   | IRF5      | GI_38683858-A | 7 | 7 | 128270675 | 87533  | 14.6952 | 5.75312 | CEU |
| rs4731541  | IRF5      | GI_38683858-A | 7 | 7 | 128272187 | 89045  | 16.0678 | 5.75312 | CEU |
| rs10279821 | IRF5      | GI_38683858-A | 7 | 7 | 128277498 | 94356  | 12.8115 | 5.75312 | CEU |
| rs10156169 | IRF5      | GI_38683858-A | 7 | 7 | 128278522 | 95380  | 13.068  | 5.75312 | CEU |
| rs6960994  | IRF5      | GI_38683858-A | 7 | 7 | 128286608 | 103466 | 6.3906  | 5.75312 | CEU |
| rs6961014  | IRF5      | GI_38683858-A | 7 | 7 | 128286661 | 103519 | 5.8784  | 5.75312 | CEU |
| rs10241456 | KIAA0265  | GI_44917618-S | 7 | 7 | 129306475 | 60655  | 6.4403  | 5.83649 | CEU |
| rs6945486  | KIAA0265  | GI_44917618-S | 7 | 7 | 129328124 | 39006  | 6.0126  | 5.83649 | CEU |
| rs12531444 | KIAA0265  | GI_44917618-S | 7 | 7 | 129330831 | 36299  | 6.2493  | 5.83649 | CEU |
| rs1474409  | KIAA0265  | GI_44917618-S | 7 | 7 | 129344813 | 22317  | 7.1741  | 5.83649 | CEU |
| rs7800870  | KIAA0265  | GI_44917618-S | 7 | 7 | 129346452 | 20678  | 6.0126  | 5.83649 | CEU |
| rs4324873  | KIAA0265  | GI_44917618-S | 7 | 7 | 129355034 | 12096  | 7.9231  | 5.83649 | CEU |
| rs12534379 | KIAA0265  | GI_44917618-S | 7 | 7 | 129365068 | 2062   | 7.4542  | 5.83649 | CEU |
| rs7781989  | Hs.490095 | Hs.490095-S   | 7 | 7 | 130236933 | 7335   | 6.0443  | 5.77736 | CEU |
| rs7811716  | Hs.490095 | Hs.490095-S   | 7 | 7 | 130240994 | 3274   | 6.0443  | 5.77736 | CEU |
| rs7780763  | Hs.490095 | Hs.490095-S   | 7 | 7 | 130242022 | 2246   | 6.0443  | 5.77736 | CEU |
| rs7791880  | Hs.490095 | Hs.490095-S   | 7 | 7 | 130244703 | 435    | 6.1308  | 5.77736 | CEU |
| rs3735029  | Hs.490095 | Hs.490095-S   | 7 | 7 | 130246798 | 2530   | 6.0443  | 5.77736 | CEU |
| rs2113449  | Hs.153573 | Hs.153573-S   | 7 | 7 | 133767095 | 37912  | 6.7917  | 6.03303 | CEU |
| rs1160048  | Hs.153573 | Hs.153573-S   | 7 | 7 | 133767260 | 37747  | 6.7917  | 6.03303 | CEU |
| rs1424443  | Hs.153573 | Hs.153573-S   | 7 | 7 | 133768955 | 36052  | 7.7558  | 6.03303 | CEU |
| rs7800519  | Hs.153573 | Hs.153573-S   | 7 | 7 | 133770720 | 34287  | 6.7917  | 6.03303 | CEU |
| rs2032942  | Hs.153573 | Hs.153573-S   | 7 | 7 | 133771545 | 33462  | 7.7558  | 6.03303 | CEU |
| rs6972141  | Hs.153573 | Hs.153573-S   | 7 | 7 | 133780084 | 24923  | 7.7558  | 6.03303 | CEU |
| rs12672388 | Hs.153573 | Hs.153573-S   | 7 | 7 | 133782666 | 22341  | 7.7558  | 6.03303 | CEU |
| rs1424445  | Hs.153573 | Hs.153573-S   | 7 | 7 | 133783199 | 21808  | 6.7917  | 6.03303 | CEU |
| rs1549324  | Hs.153573 | Hs.153573-S   | 7 | 7 | 133783374 | 21633  | 6.7917  | 6.03303 | CEU |
| rs1549325  | Hs.153573 | Hs.153573-S   | 7 | 7 | 133783527 | 21480  | 6.7917  | 6.03303 | CEU |
| rs9641982  | Hs.153573 | Hs.153573-S   | 7 | 7 | 133783901 | 21106  | 6.5569  | 6.03303 | CEU |
| rs12669301 | Hs.153573 | Hs.153573-S   | 7 | 7 | 133784468 | 20539  | 6.7917  | 6.03303 | CEU |

|            |           |               |   |   |           |        |        |         |     |
|------------|-----------|---------------|---|---|-----------|--------|--------|---------|-----|
| rs6962033  | Hs.153573 | Hs.153573-S   | 7 | 7 | 133785625 | 19382  | 6.7917 | 6.03303 | CEU |
| rs3757397  | Hs.153573 | Hs.153573-S   | 7 | 7 | 133786214 | 18793  | 6.7917 | 6.03303 | CEU |
| rs1469165  | Hs.153573 | Hs.153573-S   | 7 | 7 | 133787422 | 17585  | 6.4183 | 6.03303 | CEU |
| rs6467547  | Hs.153573 | Hs.153573-S   | 7 | 7 | 133791181 | 13826  | 7.3571 | 6.03303 | CEU |
| rs3778830  | Hs.153573 | Hs.153573-S   | 7 | 7 | 133791395 | 13612  | 6.7917 | 6.03303 | CEU |
| rs2347685  | Hs.153573 | Hs.153573-S   | 7 | 7 | 133791646 | 13361  | 7.2388 | 6.03303 | CEU |
| rs2347686  | Hs.153573 | Hs.153573-S   | 7 | 7 | 133791912 | 13095  | 6.7917 | 6.03303 | CEU |
| rs4732041  | Hs.153573 | Hs.153573-S   | 7 | 7 | 133792244 | 12763  | 6.7917 | 6.03303 | CEU |
| rs4732042  | Hs.153573 | Hs.153573-S   | 7 | 7 | 133792428 | 12579  | 7.7558 | 6.03303 | CEU |
| rs4142280  | Hs.153573 | Hs.153573-S   | 7 | 7 | 133796326 | 8681   | 7.4668 | 6.03303 | CEU |
| rs10279417 | Hs.153573 | Hs.153573-S   | 7 | 7 | 133797796 | 7211   | 6.605  | 6.03303 | CEU |
| rs4732044  | Hs.153573 | Hs.153573-S   | 7 | 7 | 133798217 | 6790   | 6.7917 | 6.03303 | CEU |
| rs10224846 | Hs.153573 | Hs.153573-S   | 7 | 7 | 133798902 | 6105   | 7.1272 | 6.03303 | CEU |
| rs889874   | Hs.153573 | Hs.153573-S   | 7 | 7 | 133799430 | 5577   | 7.7558 | 6.03303 | CEU |
| rs1364439  | Hs.153573 | Hs.153573-S   | 7 | 7 | 133799531 | 5476   | 6.7917 | 6.03303 | CEU |
| rs6946952  | Hs.153573 | Hs.153573-S   | 7 | 7 | 133800197 | 4810   | 6.7917 | 6.03303 | CEU |
| rs2161802  | Hs.153573 | Hs.153573-S   | 7 | 7 | 133800739 | 4268   | 6.7917 | 6.03303 | CEU |
| rs11765679 | Hs.153573 | Hs.153573-S   | 7 | 7 | 133802011 | 2996   | 6.3297 | 6.03303 | CEU |
| rs3800694  | Hs.153573 | Hs.153573-S   | 7 | 7 | 133802323 | 2684   | 6.2711 | 6.03303 | CEU |
| rs10231475 | Hs.153573 | Hs.153573-S   | 7 | 7 | 133805636 | 629    | 6.7917 | 6.03303 | CEU |
| rs6961359  | Hs.153573 | Hs.153573-S   | 7 | 7 | 133806345 | 1338   | 6.9117 | 6.03303 | CEU |
| rs1364441  | Hs.153573 | Hs.153573-S   | 7 | 7 | 133809851 | 4844   | 6.7642 | 6.03303 | CEU |
| rs7778811  | Hs.153573 | Hs.153573-S   | 7 | 7 | 133812403 | 7396   | 6.0442 | 6.03303 | CEU |
| rs3823563  | Hs.153573 | Hs.153573-S   | 7 | 7 | 133812886 | 7879   | 6.957  | 6.03303 | CEU |
| rs1862924  | Hs.153573 | Hs.153573-S   | 7 | 7 | 133814075 | 9068   | 7.7868 | 6.03303 | CEU |
| rs918827   | Hs.153573 | Hs.153573-S   | 7 | 7 | 133826059 | 21052  | 6.957  | 6.03303 | CEU |
| rs3735171  | C7orf29   | GI_19923960-S | 7 | 7 | 149471530 | 4313   | 6.2397 | 6.01955 | CEU |
| rs6964110  | C7orf29   | GI_19923960-S | 7 | 7 | 149479484 | 12267  | 6.7118 | 6.01955 | CEU |
| rs10282458 | C7orf29   | GI_19923960-S | 7 | 7 | 149482950 | 15733  | 6.3714 | 6.01955 | CEU |
| rs17173681 | C7orf29   | GI_19923960-S | 7 | 7 | 149497062 | 29845  | 6.1282 | 6.01955 | CEU |
| rs17173682 | C7orf29   | GI_19923960-S | 7 | 7 | 149497250 | 30033  | 6.1282 | 6.01955 | CEU |
| rs7800196  | C7orf29   | GI_19923960-S | 7 | 7 | 149499182 | 31965  | 6.1282 | 6.01955 | CEU |
| rs6459698  | C7orf13   | GI_14249145-S | 7 | 7 | 155929790 | 1143   | 6.1881 | 5.77701 | CEU |
| rs6980337  | C7orf13   | GI_14249145-S | 7 | 7 | 155934022 | 3089   | 6.0683 | 5.77701 | CEU |
| rs7806832  | C7orf13   | GI_14249145-S | 7 | 7 | 155936341 | 5408   | 6.0683 | 5.77701 | CEU |
| rs4716438  | C7orf13   | GI_14249145-S | 7 | 7 | 155941679 | 10746  | 5.9828 | 5.77701 | CEU |
| rs4716648  | C7orf13   | GI_14249145-S | 7 | 7 | 155948932 | 17999  | 6.6485 | 5.77701 | CEU |
| rs2280902  | MYOM2     | GI_4505314-S  | 8 | 8 | 2064479   | 16074  | 6.8377 | 6.35954 | CEU |
| rs9949     | PPP1R3B   | GI_13375814-S | 8 | 8 | 9031922   | 1093   | 7.0617 | 6.16895 | CEU |
| rs12785    | PPP1R3B   | GI_13375814-S | 8 | 8 | 9032346   | 669    | 7.0617 | 6.16895 | CEU |
| rs330908   | PPP1R3B   | GI_13375814-S | 8 | 8 | 9032576   | 439    | 6.7382 | 6.16895 | CEU |
| rs330910   | PPP1R3B   | GI_13375814-S | 8 | 8 | 9033165   | 150    | 7.0617 | 6.16895 | CEU |
| rs330911   | PPP1R3B   | GI_13375814-S | 8 | 8 | 9033683   | 668    | 6.7382 | 6.16895 | CEU |
| rs330915   | PPP1R3B   | GI_13375814-S | 8 | 8 | 9034346   | 1331   | 6.7382 | 6.16895 | CEU |
| rs330921   | PPP1R3B   | GI_13375814-S | 8 | 8 | 9035033   | 2018   | 6.6948 | 6.16895 | CEU |
| rs330922   | PPP1R3B   | GI_13375814-S | 8 | 8 | 9035208   | 2193   | 6.8925 | 6.16895 | CEU |
| rs330923   | PPP1R3B   | GI_13375814-S | 8 | 8 | 9035287   | 2272   | 6.8925 | 6.16895 | CEU |
| rs330942   | PPP1R3B   | GI_13375814-S | 8 | 8 | 9057849   | 24834  | 6.224  | 6.16895 | CEU |
| rs330943   | PPP1R3B   | GI_13375814-S | 8 | 8 | 9058436   | 25421  | 7.9182 | 6.16895 | CEU |
| rs378974   | PPP1R3B   | GI_13375814-S | 8 | 8 | 9064049   | 31034  | 6.6641 | 6.16895 | CEU |
| rs2736340  | C8orf13   | GI_32698772-S | 8 | 8 | 11381382  | 64837  | 6.126  | 6.00089 | CEU |
| rs2618476  | C8orf13   | GI_32698772-S | 8 | 8 | 11389950  | 73405  | 6.126  | 6.00089 | CEU |
| rs998683   | C8orf13   | GI_32698772-S | 8 | 8 | 11390409  | 73864  | 6.126  | 6.00089 | CEU |
| rs2618443  | BLK       | GI_33469981-S | 8 | 8 | 11421965  | 37323  | 6.4184 | 6.31731 | CEU |
| rs1692799  | BLK       | GI_33469981-S | 8 | 8 | 11722751  | 263463 | 6.7017 | 6.31731 | CEU |
| rs1123141  | BLK       | GI_33469981-S | 8 | 8 | 11724244  | 264956 | 6.7017 | 6.31731 | CEU |



|            |          |               |   |   |          |        |         |         |     |
|------------|----------|---------------|---|---|----------|--------|---------|---------|-----|
| rs12676995 | BLK      | GI_33469981-S | 8 | 8 | 11724568 | 265280 | 6.7017  | 6.31731 | CEU |
| rs7459889  | LYSAL1   | GI_4758661-S  | 8 | 8 | 23333823 | 12706  | 6.5539  | 5.93481 | CEU |
| rs17089226 | LYSAL1   | GI_4758661-S  | 8 | 8 | 23337503 | 9026   | 6.5539  | 5.93481 | CEU |
| rs10099856 | LYSAL1   | GI_4758661-S  | 8 | 8 | 23340251 | 6278   | 6.256   | 5.93481 | CEU |
| rs11135737 | LYSAL1   | GI_4758661-S  | 8 | 8 | 23341262 | 5267   | 6.3246  | 5.93481 | CEU |
| rs12549539 | LYSAL1   | GI_4758661-S  | 8 | 8 | 23347189 | 660    | 6.5539  | 5.93481 | CEU |
| rs9987295  | LYSAL1   | GI_4758661-S  | 8 | 8 | 23363799 | 17270  | 6.4615  | 5.93481 | CEU |
| rs17443293 | FLJ21616 | GI_13375737-S | 8 | 8 | 28679585 | 285436 | 7.2431  | 5.96285 | CEU |
| rs17443556 | FLJ21616 | GI_13375737-S | 8 | 8 | 28683760 | 281261 | 7.2431  | 5.96285 | CEU |
| rs11785319 | FLJ21616 | GI_13375737-S | 8 | 8 | 28691222 | 273799 | 7.3185  | 5.96285 | CEU |
| rs17522554 | FLJ21616 | GI_13375737-S | 8 | 8 | 28707720 | 257301 | 8.1535  | 5.96285 | CEU |
| rs17451343 | FLJ21616 | GI_13375737-S | 8 | 8 | 28762194 | 202827 | 9.8847  | 5.96285 | CEU |
| rs11786316 | FLJ21616 | GI_13375737-S | 8 | 8 | 28774749 | 190272 | 9.7627  | 5.96285 | CEU |
| rs10503833 | FLJ21616 | GI_13375737-S | 8 | 8 | 28775203 | 189818 | 8.1331  | 5.96285 | CEU |
| rs17523818 | FLJ21616 | GI_13375737-S | 8 | 8 | 28782961 | 182060 | 9.7627  | 5.96285 | CEU |
| rs983365   | FLJ21616 | GI_13375737-S | 8 | 8 | 28806348 | 158673 | 7.1124  | 5.96285 | CEU |
| rs4732890  | FLJ21616 | GI_13375737-S | 8 | 8 | 28807300 | 157721 | 7.1124  | 5.96285 | CEU |
| rs4732657  | FLJ21616 | GI_13375737-S | 8 | 8 | 28811907 | 153114 | 7.1124  | 5.96285 | CEU |
| rs13280242 | FLJ21616 | GI_13375737-S | 8 | 8 | 28812657 | 152364 | 8.9641  | 5.96285 | CEU |
| rs1858462  | FLJ21616 | GI_13375737-S | 8 | 8 | 28816656 | 148365 | 7.1124  | 5.96285 | CEU |
| rs1512851  | FLJ21616 | GI_13375737-S | 8 | 8 | 28826391 | 138630 | 9.8825  | 5.96285 | CEU |
| rs17524494 | FLJ21616 | GI_13375737-S | 8 | 8 | 28835122 | 129899 | 9.8825  | 5.96285 | CEU |
| rs11784622 | FLJ21616 | GI_13375737-S | 8 | 8 | 28838438 | 126583 | 7.9876  | 5.96285 | CEU |
| rs1976610  | FLJ21616 | GI_13375737-S | 8 | 8 | 28839934 | 125087 | 7.1124  | 5.96285 | CEU |
| rs2203209  | FLJ21616 | GI_13375737-S | 8 | 8 | 28843952 | 121069 | 6.723   | 5.96285 | CEU |
| rs2221894  | FLJ21616 | GI_13375737-S | 8 | 8 | 28847078 | 117943 | 7.566   | 5.96285 | CEU |
| rs4732893  | FLJ21616 | GI_13375737-S | 8 | 8 | 28850597 | 114424 | 8.1176  | 5.96285 | CEU |
| rs6558085  | FLJ21616 | GI_13375737-S | 8 | 8 | 28858851 | 106170 | 8.9641  | 5.96285 | CEU |
| rs2137471  | FLJ21616 | GI_13375737-S | 8 | 8 | 28861568 | 103453 | 8.9641  | 5.96285 | CEU |
| rs17524918 | FLJ21616 | GI_13375737-S | 8 | 8 | 28861827 | 103194 | 9.8825  | 5.96285 | CEU |
| rs2292478  | FLJ21616 | GI_13375737-S | 8 | 8 | 28863275 | 101746 | 8.6851  | 5.96285 | CEU |
| rs7465084  | FLJ21616 | GI_13375737-S | 8 | 8 | 28872771 | 92250  | 8.9641  | 5.96285 | CEU |
| rs4732894  | FLJ21616 | GI_13375737-S | 8 | 8 | 28878970 | 86051  | 6.8215  | 5.96285 | CEU |
| rs11778263 | FLJ21616 | GI_13375737-S | 8 | 8 | 28881341 | 83680  | 9.8825  | 5.96285 | CEU |
| rs4732896  | FLJ21616 | GI_13375737-S | 8 | 8 | 28881393 | 83628  | 8.9641  | 5.96285 | CEU |
| rs17525359 | FLJ21616 | GI_13375737-S | 8 | 8 | 28885336 | 79685  | 9.8825  | 5.96285 | CEU |
| rs10111019 | FLJ21616 | GI_13375737-S | 8 | 8 | 28886219 | 78802  | 8.5727  | 5.96285 | CEU |
| rs2323134  | FLJ21616 | GI_13375737-S | 8 | 8 | 28895841 | 69180  | 8.9641  | 5.96285 | CEU |
| rs4407834  | FLJ21616 | GI_13375737-S | 8 | 8 | 28897740 | 67281  | 6.6717  | 5.96285 | CEU |
| rs12674777 | FLJ21616 | GI_13375737-S | 8 | 8 | 28899640 | 65381  | 8.9641  | 5.96285 | CEU |
| rs11136055 | FLJ21616 | GI_13375737-S | 8 | 8 | 28911445 | 53576  | 7.1124  | 5.96285 | CEU |
| rs11136056 | FLJ21616 | GI_13375737-S | 8 | 8 | 28919994 | 45027  | 8.7107  | 5.96285 | CEU |
| rs7842492  | FLJ21616 | GI_13375737-S | 8 | 8 | 28925556 | 39465  | 8.9641  | 5.96285 | CEU |
| rs7837237  | FLJ21616 | GI_13375737-S | 8 | 8 | 28932140 | 32881  | 7.1124  | 5.96285 | CEU |
| rs10503836 | FLJ21616 | GI_13375737-S | 8 | 8 | 28941389 | 23632  | 6.6435  | 5.96285 | CEU |
| rs1487969  | FLJ21616 | GI_13375737-S | 8 | 8 | 28941580 | 23441  | 11.2649 | 5.96285 | CEU |
| rs1487970  | FLJ21616 | GI_13375737-S | 8 | 8 | 28945085 | 19936  | 8.1176  | 5.96285 | CEU |
| rs6558089  | FLJ21616 | GI_13375737-S | 8 | 8 | 28950156 | 14865  | 11.2649 | 5.96285 | CEU |
| rs7018244  | FLJ21616 | GI_13375737-S | 8 | 8 | 28950910 | 14111  | 7.1124  | 5.96285 | CEU |
| rs2035644  | FLJ21616 | GI_13375737-S | 8 | 8 | 28955616 | 9405   | 8.8885  | 5.96285 | CEU |
| rs1948132  | FLJ21616 | GI_13375737-S | 8 | 8 | 28956006 | 9015   | 8.8885  | 5.96285 | CEU |
| rs13262991 | FLJ21616 | GI_13375737-S | 8 | 8 | 28957262 | 7759   | 6.6435  | 5.96285 | CEU |
| rs1872923  | FLJ21616 | GI_13375737-S | 8 | 8 | 28957696 | 7325   | 6.6435  | 5.96285 | CEU |
| rs8180944  | FLJ21616 | GI_13375737-S | 8 | 8 | 28960005 | 5016   | 11.2649 | 5.96285 | CEU |
| rs10088428 | FLJ21616 | GI_13375737-S | 8 | 8 | 28965442 | 421    | 17.0025 | 5.96285 | CEU |
| rs2279442  | FLJ21616 | GI_13375737-S | 8 | 8 | 28969807 | 4786   | 6.6435  | 5.96285 | CEU |

|            |           |               |   |   |          |        |         |         |     |
|------------|-----------|---------------|---|---|----------|--------|---------|---------|-----|
| rs2693     | FLJ21616  | GI_13375737-S | 8 | 8 | 28980777 | 15756  | 8.8885  | 5.96285 | CEU |
| rs17454230 | FLJ21616  | GI_13375737-S | 8 | 8 | 28982000 | 16979  | 9.8825  | 5.96285 | CEU |
| rs6558093  | FLJ21616  | GI_13375737-S | 8 | 8 | 29002039 | 37018  | 6.3885  | 5.96285 | CEU |
| rs17526904 | FLJ21616  | GI_13375737-S | 8 | 8 | 29003762 | 38741  | 9.8825  | 5.96285 | CEU |
| rs10112345 | FLJ21616  | GI_13375737-S | 8 | 8 | 29020589 | 55568  | 6.1036  | 5.96285 | CEU |
| rs11775127 | FLJ21616  | GI_13375737-S | 8 | 8 | 29030963 | 65942  | 6.7188  | 5.96285 | CEU |
| rs7836759  | FLJ21616  | GI_13375737-S | 8 | 8 | 29033031 | 68010  | 7.2371  | 5.96285 | CEU |
| rs17527001 | FLJ21616  | GI_13375737-S | 8 | 8 | 29035945 | 70924  | 6.1099  | 5.96285 | CEU |
| rs11786712 | FLJ21616  | GI_13375737-S | 8 | 8 | 29040879 | 75858  | 6.0153  | 5.96285 | CEU |
| rs11780819 | FLJ21616  | GI_13375737-S | 8 | 8 | 29055978 | 90957  | 6.4525  | 5.96285 | CEU |
| rs7018447  | FUT10     | GI_40805105-S | 8 | 8 | 33444597 | 95891  | 5.7333  | 5.6314  | CEU |
| rs2037213  | FUT10     | GI_40805105-S | 8 | 8 | 33461560 | 112854 | 5.7622  | 5.6314  | CEU |
| rs2676403  | FUT10     | GI_40805105-S | 8 | 8 | 33467542 | 118836 | 5.8762  | 5.6314  | CEU |
| rs2732275  | FUT10     | GI_40805105-S | 8 | 8 | 33467646 | 118940 | 5.8762  | 5.6314  | CEU |
| rs8685     | FUT10     | GI_40805105-S | 8 | 8 | 33477812 | 129106 | 5.7622  | 5.6314  | CEU |
| rs2732292  | FUT10     | GI_40805105-S | 8 | 8 | 33481606 | 132900 | 6.0185  | 5.6314  | CEU |
| rs2304748  | FUT10     | GI_40805105-S | 8 | 8 | 33489486 | 140780 | 5.8762  | 5.6314  | CEU |
| rs2732288  | FUT10     | GI_40805105-S | 8 | 8 | 33490299 | 141593 | 5.8762  | 5.6314  | CEU |
| rs17758721 | LOC340435 | GI_29735811-S | 8 | 8 | 71627105 | 154822 | 7.8895  | 6.27836 | CEU |
| rs7012577  | LOC340435 | GI_29735811-S | 8 | 8 | 71634598 | 147329 | 9.4706  | 6.27836 | CEU |
| rs13251292 | LOC340435 | GI_29735811-S | 8 | 8 | 71636909 | 145018 | 8.5486  | 6.27836 | CEU |
| rs2035196  | LOC340435 | GI_29735811-S | 8 | 8 | 71647904 | 134023 | 8.8713  | 6.27836 | CEU |
| rs3816745  | LOC340435 | GI_29735811-S | 8 | 8 | 71669188 | 112739 | 9.4706  | 6.27836 | CEU |
| rs6988053  | LOC340435 | GI_29735811-S | 8 | 8 | 71709517 | 72410  | 9.4706  | 6.27836 | CEU |
| rs13258368 | LOC340435 | GI_29735811-S | 8 | 8 | 71711305 | 70622  | 9.4706  | 6.27836 | CEU |
| rs441890   | LOC340435 | GI_29735811-S | 8 | 8 | 71727221 | 54706  | 7.0154  | 6.27836 | CEU |
| rs7831792  | LOC340435 | GI_29735811-S | 8 | 8 | 71727910 | 54017  | 13.3066 | 6.27836 | CEU |
| rs13255886 | LOC340435 | GI_29735811-S | 8 | 8 | 71728508 | 53419  | 13.3066 | 6.27836 | CEU |
| rs6994814  | LOC340435 | GI_29735811-S | 8 | 8 | 71731692 | 50235  | 9.7364  | 6.27836 | CEU |
| rs7830515  | LOC340435 | GI_29735811-S | 8 | 8 | 71732788 | 49139  | 9.7364  | 6.27836 | CEU |
| rs7814274  | LOC340435 | GI_29735811-S | 8 | 8 | 71732965 | 48962  | 13.3066 | 6.27836 | CEU |
| rs7830550  | LOC340435 | GI_29735811-S | 8 | 8 | 71732985 | 48942  | 13.3066 | 6.27836 | CEU |
| rs6993326  | LOC340435 | GI_29735811-S | 8 | 8 | 71738154 | 43773  | 9.7364  | 6.27836 | CEU |
| rs10504479 | LOC340435 | GI_29735811-S | 8 | 8 | 71740069 | 41858  | 13.3066 | 6.27836 | CEU |
| rs11987501 | LOC340435 | GI_29735811-S | 8 | 8 | 71741072 | 40855  | 9.5952  | 6.27836 | CEU |
| rs1993862  | LOC340435 | GI_29735811-S | 8 | 8 | 71741916 | 40011  | 13.3066 | 6.27836 | CEU |
| rs2279128  | LOC340435 | GI_29735811-S | 8 | 8 | 71744113 | 37814  | 9.7364  | 6.27836 | CEU |
| rs13271442 | LOC340435 | GI_29735811-S | 8 | 8 | 71747723 | 34204  | 14.1292 | 6.27836 | CEU |
| rs6472538  | LOC340435 | GI_29735811-S | 8 | 8 | 71749525 | 32402  | 14.8092 | 6.27836 | CEU |
| rs7017914  | LOC340435 | GI_29735811-S | 8 | 8 | 71753757 | 28170  | 14.8092 | 6.27836 | CEU |
| rs12681420 | LOC340435 | GI_29735811-S | 8 | 8 | 71755752 | 26175  | 9.5397  | 6.27836 | CEU |
| rs6991329  | LOC340435 | GI_29735811-S | 8 | 8 | 71755979 | 25948  | 14.8092 | 6.27836 | CEU |
| rs13256250 | LOC340435 | GI_29735811-S | 8 | 8 | 71758747 | 23180  | 14.8092 | 6.27836 | CEU |
| rs13256093 | LOC340435 | GI_29735811-S | 8 | 8 | 71758931 | 22996  | 9.7364  | 6.27836 | CEU |
| rs12675271 | LOC340435 | GI_29735811-S | 8 | 8 | 71764563 | 17364  | 14.8092 | 6.27836 | CEU |
| rs12156043 | LOC340435 | GI_29735811-S | 8 | 8 | 71776597 | 5330   | 8.5299  | 6.27836 | CEU |
| rs7842091  | LOC340435 | GI_29735811-S | 8 | 8 | 71777335 | 4592   | 9.7364  | 6.27836 | CEU |
| rs1477945  | LOC340435 | GI_29735811-S | 8 | 8 | 71778107 | 3820   | 9.7364  | 6.27836 | CEU |
| rs13252808 | LOC340435 | GI_29735811-S | 8 | 8 | 71779209 | 2718   | 8.991   | 6.27836 | CEU |
| rs17760532 | LOC340435 | GI_29735811-S | 8 | 8 | 71782841 | 914    | 9.7364  | 6.27836 | CEU |
| rs13280922 | LOC340435 | GI_29735811-S | 8 | 8 | 71787952 | 6025   | 8.991   | 6.27836 | CEU |
| rs13253842 | LOC340435 | GI_29735811-S | 8 | 8 | 71788057 | 6130   | 10.8198 | 6.27836 | CEU |
| rs13254908 | LOC340435 | GI_29735811-S | 8 | 8 | 71788652 | 6725   | 14.2488 | 6.27836 | CEU |
| rs13264669 | LOC340435 | GI_29735811-S | 8 | 8 | 71789326 | 7399   | 10.974  | 6.27836 | CEU |
| rs7013657  | LOC340435 | GI_29735811-S | 8 | 8 | 71800113 | 18186  | 14.8092 | 6.27836 | CEU |
| rs6987515  | LOC340435 | GI_29735811-S | 8 | 8 | 71802856 | 20929  | 9.7364  | 6.27836 | CEU |

|            |           |               |   |   |          |        |         |         |     |
|------------|-----------|---------------|---|---|----------|--------|---------|---------|-----|
| rs2290702  | LOC340435 | GI_29735811-S | 8 | 8 | 71809534 | 27607  | 9.7364  | 6.27836 | CEU |
| rs7015035  | LOC340435 | GI_29735811-S | 8 | 8 | 71816155 | 34228  | 14.8092 | 6.27836 | CEU |
| rs6472542  | LOC340435 | GI_29735811-S | 8 | 8 | 71816641 | 34714  | 14.8092 | 6.27836 | CEU |
| rs6982406  | LOC340435 | GI_29735811-S | 8 | 8 | 71817162 | 35235  | 14.8092 | 6.27836 | CEU |
| rs1348535  | LOC340435 | GI_29735811-S | 8 | 8 | 71825295 | 43368  | 14.8092 | 6.27836 | CEU |
| rs7825446  | LOC340435 | GI_29735811-S | 8 | 8 | 71826728 | 44801  | 14.8092 | 6.27836 | CEU |
| rs6472543  | LOC340435 | GI_29735811-S | 8 | 8 | 71826962 | 45035  | 14.8092 | 6.27836 | CEU |
| rs7819332  | LOC340435 | GI_29735811-S | 8 | 8 | 71830819 | 48892  | 14.8092 | 6.27836 | CEU |
| rs6991708  | LOC340435 | GI_29735811-S | 8 | 8 | 71831082 | 49155  | 9.4107  | 6.27836 | CEU |
| rs7012404  | LOC340435 | GI_29735811-S | 8 | 8 | 71831252 | 49325  | 14.8092 | 6.27836 | CEU |
| rs17760766 | LOC340435 | GI_29735811-S | 8 | 8 | 71833743 | 51816  | 9.7364  | 6.27836 | CEU |
| rs13258584 | LOC340435 | GI_29735811-S | 8 | 8 | 71834133 | 52206  | 14.8092 | 6.27836 | CEU |
| rs7838421  | LOC340435 | GI_29735811-S | 8 | 8 | 71834877 | 52950  | 9.4107  | 6.27836 | CEU |
| rs7014012  | LOC340435 | GI_29735811-S | 8 | 8 | 71835297 | 53370  | 14.8092 | 6.27836 | CEU |
| rs1471114  | LOC340435 | GI_29735811-S | 8 | 8 | 71838101 | 56174  | 14.8092 | 6.27836 | CEU |
| rs7012796  | LOC340435 | GI_29735811-S | 8 | 8 | 71838747 | 56820  | 9.4107  | 6.27836 | CEU |
| rs7017481  | LOC340435 | GI_29735811-S | 8 | 8 | 71839324 | 57397  | 9.7364  | 6.27836 | CEU |
| rs11993453 | LOC340435 | GI_29735811-S | 8 | 8 | 71840393 | 58466  | 14.7156 | 6.27836 | CEU |
| rs12680166 | LOC340435 | GI_29735811-S | 8 | 8 | 71841192 | 59265  | 14.7156 | 6.27836 | CEU |
| rs7459870  | LOC340435 | GI_29735811-S | 8 | 8 | 71845137 | 63210  | 9.1126  | 6.27836 | CEU |
| rs17688313 | LOC340435 | GI_29735811-S | 8 | 8 | 71846418 | 64491  | 14.8092 | 6.27836 | CEU |
| rs12674966 | LOC340435 | GI_29735811-S | 8 | 8 | 71846964 | 65037  | 9.9866  | 6.27836 | CEU |
| rs7845516  | LOC340435 | GI_29735811-S | 8 | 8 | 71848376 | 66449  | 9.4107  | 6.27836 | CEU |
| rs1373480  | LOC340435 | GI_29735811-S | 8 | 8 | 71849521 | 67594  | 14.8092 | 6.27836 | CEU |
| rs7013495  | LOC340435 | GI_29735811-S | 8 | 8 | 71856071 | 74144  | 9.4107  | 6.27836 | CEU |
| rs6993170  | LOC340435 | GI_29735811-S | 8 | 8 | 71856073 | 74146  | 14.7217 | 6.27836 | CEU |
| rs6998786  | LOC340435 | GI_29735811-S | 8 | 8 | 71857184 | 75257  | 14.5428 | 6.27836 | CEU |
| rs6981149  | LOC340435 | GI_29735811-S | 8 | 8 | 71857236 | 75309  | 8.7329  | 6.27836 | CEU |
| rs12680988 | LOC340435 | GI_29735811-S | 8 | 8 | 71858444 | 76517  | 10.8447 | 6.27836 | CEU |
| rs6986479  | LOC340435 | GI_29735811-S | 8 | 8 | 71860112 | 78185  | 9.329   | 6.27836 | CEU |
| rs1596566  | LOC340435 | GI_29735811-S | 8 | 8 | 71861130 | 79203  | 14.8092 | 6.27836 | CEU |
| rs1596565  | LOC340435 | GI_29735811-S | 8 | 8 | 71861386 | 79459  | 9.329   | 6.27836 | CEU |
| rs6993115  | LOC340435 | GI_29735811-S | 8 | 8 | 71861737 | 79810  | 12.0213 | 6.27836 | CEU |
| rs10504481 | LOC340435 | GI_29735811-S | 8 | 8 | 71862071 | 80144  | 14.8092 | 6.27836 | CEU |
| rs1444339  | LOC340435 | GI_29735811-S | 8 | 8 | 71863196 | 81269  | 9.7364  | 6.27836 | CEU |
| rs7826483  | LOC340435 | GI_29735811-S | 8 | 8 | 71865447 | 83520  | 14.8092 | 6.27836 | CEU |
| rs7822474  | LOC340435 | GI_29735811-S | 8 | 8 | 71868287 | 86360  | 9.7364  | 6.27836 | CEU |
| rs13257800 | LOC340435 | GI_29735811-S | 8 | 8 | 71876687 | 94760  | 14.8092 | 6.27836 | CEU |
| rs13261146 | LOC340435 | GI_29735811-S | 8 | 8 | 71889473 | 107546 | 9.7364  | 6.27836 | CEU |
| rs13261712 | LOC340435 | GI_29735811-S | 8 | 8 | 71894818 | 112891 | 14.8092 | 6.27836 | CEU |
| rs13252719 | LOC340435 | GI_29735811-S | 8 | 8 | 71897123 | 115196 | 14.233  | 6.27836 | CEU |
| rs1822651  | LOC340435 | GI_29735811-S | 8 | 8 | 71899215 | 117288 | 9.7364  | 6.27836 | CEU |
| rs13274062 | LOC340435 | GI_29735811-S | 8 | 8 | 71899641 | 117714 | 14.8092 | 6.27836 | CEU |
| rs6983845  | LOC340435 | GI_29735811-S | 8 | 8 | 71909034 | 127107 | 9.4107  | 6.27836 | CEU |
| rs1457198  | LOC340435 | GI_29735811-S | 8 | 8 | 71909723 | 127796 | 9.7364  | 6.27836 | CEU |
| rs13255849 | LOC340435 | GI_29735811-S | 8 | 8 | 71915307 | 133380 | 9.4107  | 6.27836 | CEU |
| rs6472548  | LOC340435 | GI_29735811-S | 8 | 8 | 71916853 | 134926 | 9.4107  | 6.27836 | CEU |
| rs1156955  | LOC340435 | GI_29735811-S | 8 | 8 | 71917513 | 135586 | 9.7364  | 6.27836 | CEU |
| rs1156956  | LOC340435 | GI_29735811-S | 8 | 8 | 71917592 | 135665 | 9.4107  | 6.27836 | CEU |
| rs13274381 | LOC340435 | GI_29735811-S | 8 | 8 | 71927648 | 145721 | 14.8092 | 6.27836 | CEU |
| rs11994581 | LOC340435 | GI_29735811-S | 8 | 8 | 71936961 | 155034 | 9.7364  | 6.27836 | CEU |
| rs4446768  | LOC340435 | GI_29735811-S | 8 | 8 | 71940143 | 158216 | 9.4107  | 6.27836 | CEU |
| rs7015825  | LOC340435 | GI_29735811-S | 8 | 8 | 71941227 | 159300 | 8.3377  | 6.27836 | CEU |
| rs13273773 | LOC340435 | GI_29735811-S | 8 | 8 | 71941801 | 159874 | 9.7364  | 6.27836 | CEU |
| rs6472551  | LOC340435 | GI_29735811-S | 8 | 8 | 71944403 | 162476 | 14.0677 | 6.27836 | CEU |
| rs10453108 | LOC340435 | GI_29735811-S | 8 | 8 | 71945494 | 163567 | 9.4107  | 6.27836 | CEU |

|            |           |               |   |   |          |        |         |         |     |
|------------|-----------|---------------|---|---|----------|--------|---------|---------|-----|
| rs6998354  | LOC340435 | GI_29735811-S | 8 | 8 | 71948723 | 166796 | 9.7364  | 6.27836 | CEU |
| rs12156377 | LOC340435 | GI_29735811-S | 8 | 8 | 71950246 | 168319 | 9.4169  | 6.27836 | CEU |
| rs6472552  | LOC340435 | GI_29735811-S | 8 | 8 | 71951524 | 169597 | 9.7364  | 6.27836 | CEU |
| rs4629903  | LOC340435 | GI_29735811-S | 8 | 8 | 71967686 | 185759 | 9.7364  | 6.27836 | CEU |
| rs11985482 | LOC340435 | GI_29735811-S | 8 | 8 | 71973132 | 191205 | 9.4107  | 6.27836 | CEU |
| rs13248937 | LOC340435 | GI_29735811-S | 8 | 8 | 71981303 | 199376 | 9.3991  | 6.27836 | CEU |
| rs6992048  | LOC340435 | GI_29735811-S | 8 | 8 | 71986425 | 204498 | 9.4107  | 6.27836 | CEU |
| rs10957533 | LOC340435 | GI_29735811-S | 8 | 8 | 71987661 | 205734 | 9.7364  | 6.27836 | CEU |
| rs12156041 | LOC340435 | GI_29735811-S | 8 | 8 | 71989479 | 207552 | 9.1032  | 6.27836 | CEU |
| rs6984663  | LOC340435 | GI_29735811-S | 8 | 8 | 71990219 | 208292 | 9.4107  | 6.27836 | CEU |
| rs2017035  | LOC340435 | GI_29735811-S | 8 | 8 | 72004360 | 222433 | 9.7364  | 6.27836 | CEU |
| rs10504487 | LOC340435 | GI_29735811-S | 8 | 8 | 72006153 | 224226 | 9.4857  | 6.27836 | CEU |
| rs1493199  | LOC340435 | GI_29735811-S | 8 | 8 | 72009058 | 227131 | 9.7364  | 6.27836 | CEU |
| rs10089583 | LOC340435 | GI_29735811-S | 8 | 8 | 72012038 | 230111 | 14.8092 | 6.27836 | CEU |
| rs1493198  | LOC340435 | GI_29735811-S | 8 | 8 | 72014511 | 232584 | 14.7507 | 6.27836 | CEU |
| rs2008517  | LOC340435 | GI_29735811-S | 8 | 8 | 72019074 | 237147 | 9.1767  | 6.27836 | CEU |
| rs2732087  | LOC340435 | GI_29735811-S | 8 | 8 | 72022993 | 241066 | 14.7507 | 6.27836 | CEU |
| rs2639911  | LOC340435 | GI_29735811-S | 8 | 8 | 72023266 | 241339 | 9.7364  | 6.27836 | CEU |
| rs3098858  | LOC340435 | GI_29735811-S | 8 | 8 | 72025827 | 243900 | 9.7364  | 6.27836 | CEU |
| rs3098859  | LOC340435 | GI_29735811-S | 8 | 8 | 72027586 | 245659 | 9.7364  | 6.27836 | CEU |
| rs3110268  | LOC340435 | GI_29735811-S | 8 | 8 | 72028722 | 246795 | 9.7364  | 6.27836 | CEU |
| rs2732144  | LOC340435 | GI_29735811-S | 8 | 8 | 72029173 | 247246 | 9.7364  | 6.27836 | CEU |
| rs2639949  | LOC340435 | GI_29735811-S | 8 | 8 | 72029570 | 247643 | 8.602   | 6.27836 | CEU |
| rs2639950  | LOC340435 | GI_29735811-S | 8 | 8 | 72029612 | 247685 | 9.7364  | 6.27836 | CEU |
| rs1973364  | LOC340435 | GI_29735811-S | 8 | 8 | 72029796 | 247869 | 9.1767  | 6.27836 | CEU |
| rs2639919  | LOC340435 | GI_29735811-S | 8 | 8 | 72037682 | 255755 | 14.7507 | 6.27836 | CEU |
| rs7008083  | LOC340435 | GI_29735811-S | 8 | 8 | 72047202 | 265275 | 9.1767  | 6.27836 | CEU |
| rs11988221 | LOC340435 | GI_29735811-S | 8 | 8 | 72051953 | 270026 | 9.1767  | 6.27836 | CEU |
| rs2732127  | LOC340435 | GI_29735811-S | 8 | 8 | 72059373 | 277446 | 9.1767  | 6.27836 | CEU |
| rs1845217  | LOC340435 | GI_29735811-S | 8 | 8 | 72059805 | 277878 | 9.4285  | 6.27836 | CEU |
| rs2956611  | LOC340435 | GI_29735811-S | 8 | 8 | 72060422 | 278495 | 9.7364  | 6.27836 | CEU |
| rs2732124  | LOC340435 | GI_29735811-S | 8 | 8 | 72061236 | 279309 | 9.1767  | 6.27836 | CEU |
| rs950903   | LOC340435 | GI_29735811-S | 8 | 8 | 72063328 | 281401 | 9.7364  | 6.27836 | CEU |
| rs6472558  | LOC340435 | GI_29735811-S | 8 | 8 | 72063697 | 281770 | 9.7364  | 6.27836 | CEU |
| rs2732120  | LOC340435 | GI_29735811-S | 8 | 8 | 72067547 | 285620 | 9.1767  | 6.27836 | CEU |
| rs2639924  | LOC340435 | GI_29735811-S | 8 | 8 | 72068095 | 286168 | 9.7364  | 6.27836 | CEU |
| rs2639948  | LOC340435 | GI_29735811-S | 8 | 8 | 72071040 | 289113 | 12.5283 | 6.27836 | CEU |
| rs2732118  | LOC340435 | GI_29735811-S | 8 | 8 | 72071219 | 289292 | 9.1331  | 6.27836 | CEU |
| rs2732117  | LOC340435 | GI_29735811-S | 8 | 8 | 72071632 | 289705 | 9.1767  | 6.27836 | CEU |
| rs2732140  | LOC340435 | GI_29735811-S | 8 | 8 | 72073280 | 291353 | 9.7364  | 6.27836 | CEU |
| rs2732141  | LOC340435 | GI_29735811-S | 8 | 8 | 72073461 | 291534 | 8.8006  | 6.27836 | CEU |
| rs2639947  | LOC340435 | GI_29735811-S | 8 | 8 | 72073991 | 292064 | 6.6582  | 6.27836 | CEU |
| rs2732146  | LOC340435 | GI_29735811-S | 8 | 8 | 72074672 | 292745 | 9.7364  | 6.27836 | CEU |
| rs2639945  | LOC340435 | GI_29735811-S | 8 | 8 | 72075093 | 293166 | 9.0282  | 6.27836 | CEU |
| rs2639942  | LOC340435 | GI_29735811-S | 8 | 8 | 72075728 | 293801 | 9.1767  | 6.27836 | CEU |
| rs2035929  | LOC340435 | GI_29735811-S | 8 | 8 | 72075926 | 293999 | 9.7364  | 6.27836 | CEU |
| rs2639941  | LOC340435 | GI_29735811-S | 8 | 8 | 72076459 | 294532 | 8.4249  | 6.27836 | CEU |
| rs2639939  | LOC340435 | GI_29735811-S | 8 | 8 | 72076477 | 294550 | 9.7364  | 6.27836 | CEU |
| rs2035925  | LOC340435 | GI_29735811-S | 8 | 8 | 72076770 | 294843 | 9.7364  | 6.27836 | CEU |
| rs2639938  | LOC340435 | GI_29735811-S | 8 | 8 | 72076906 | 294979 | 9.7364  | 6.27836 | CEU |
| rs2639937  | LOC340435 | GI_29735811-S | 8 | 8 | 72076910 | 294983 | 9.7364  | 6.27836 | CEU |
| rs2035924  | LOC340435 | GI_29735811-S | 8 | 8 | 72077007 | 295080 | 9.7364  | 6.27836 | CEU |
| rs2732089  | LOC340435 | GI_29735811-S | 8 | 8 | 72077718 | 295791 | 9.7364  | 6.27836 | CEU |
| rs3098865  | LOC340435 | GI_29735811-S | 8 | 8 | 72078538 | 296611 | 9.7364  | 6.27836 | CEU |
| rs3098866  | LOC340435 | GI_29735811-S | 8 | 8 | 72079128 | 297201 | 14.7507 | 6.27836 | CEU |
| rs3110239  | LOC340435 | GI_29735811-S | 8 | 8 | 72079299 | 297372 | 14.7507 | 6.27836 | CEU |

|            |           |               |   |   |          |        |         |         |     |
|------------|-----------|---------------|---|---|----------|--------|---------|---------|-----|
| rs3098867  | LOC340435 | GI_29735811-S | 8 | 8 | 72079425 | 297498 | 14.7507 | 6.27836 | CEU |
| rs2639901  | LOC340435 | GI_29735811-S | 8 | 8 | 72080305 | 298378 | 14.7507 | 6.27836 | CEU |
| rs2732090  | LOC340435 | GI_29735811-S | 8 | 8 | 72080811 | 298884 | 14.7507 | 6.27836 | CEU |
| rs2732091  | LOC340435 | GI_29735811-S | 8 | 8 | 72080977 | 299050 | 14.7507 | 6.27836 | CEU |
| rs2732093  | LOC340435 | GI_29735811-S | 8 | 8 | 72081633 | 299706 | 12.8818 | 6.27836 | CEU |
| rs2639899  | LOC340435 | GI_29735811-S | 8 | 8 | 72082016 | 300089 | 12.8818 | 6.27836 | CEU |
| rs2732094  | LOC340435 | GI_29735811-S | 8 | 8 | 72082472 | 300545 | 12.8818 | 6.27836 | CEU |
| rs2732095  | LOC340435 | GI_29735811-S | 8 | 8 | 72082500 | 300573 | 12.8818 | 6.27836 | CEU |
| rs2732096  | LOC340435 | GI_29735811-S | 8 | 8 | 72082534 | 300607 | 12.8818 | 6.27836 | CEU |
| rs2639898  | LOC340435 | GI_29735811-S | 8 | 8 | 72082864 | 300937 | 12.8818 | 6.27836 | CEU |
| rs2639897  | LOC340435 | GI_29735811-S | 8 | 8 | 72083230 | 301303 | 12.8818 | 6.27836 | CEU |
| rs2639896  | LOC340435 | GI_29735811-S | 8 | 8 | 72083337 | 301410 | 12.8818 | 6.27836 | CEU |
| rs1353058  | LOC340435 | GI_29735811-S | 8 | 8 | 72084572 | 302645 | 12.8818 | 6.27836 | CEU |
| rs1353057  | LOC340435 | GI_29735811-S | 8 | 8 | 72084651 | 302724 | 12.8818 | 6.27836 | CEU |
| rs2639958  | LOC340435 | GI_29735811-S | 8 | 8 | 72084704 | 302777 | 12.1332 | 6.27836 | CEU |
| rs1908036  | LOC340435 | GI_29735811-S | 8 | 8 | 72084878 | 302951 | 12.8818 | 6.27836 | CEU |
| rs1908035  | LOC340435 | GI_29735811-S | 8 | 8 | 72084962 | 303035 | 12.8818 | 6.27836 | CEU |
| rs1908034  | LOC340435 | GI_29735811-S | 8 | 8 | 72085108 | 303181 | 12.8818 | 6.27836 | CEU |
| rs1908033  | LOC340435 | GI_29735811-S | 8 | 8 | 72085353 | 303426 | 12.8818 | 6.27836 | CEU |
| rs2732102  | LOC340435 | GI_29735811-S | 8 | 8 | 72085426 | 303499 | 12.8818 | 6.27836 | CEU |
| rs2639957  | LOC340435 | GI_29735811-S | 8 | 8 | 72085756 | 303829 | 12.8818 | 6.27836 | CEU |
| rs2732103  | LOC340435 | GI_29735811-S | 8 | 8 | 72086050 | 304123 | 12.8818 | 6.27836 | CEU |
| rs2732104  | LOC340435 | GI_29735811-S | 8 | 8 | 72086073 | 304146 | 12.8818 | 6.27836 | CEU |
| rs2732106  | LOC340435 | GI_29735811-S | 8 | 8 | 72086393 | 304466 | 12.8818 | 6.27836 | CEU |
| rs2639956  | LOC340435 | GI_29735811-S | 8 | 8 | 72086645 | 304718 | 12.8818 | 6.27836 | CEU |
| rs1389206  | LOC340435 | GI_29735811-S | 8 | 8 | 72087416 | 305489 | 12.8818 | 6.27836 | CEU |
| rs2732107  | LOC340435 | GI_29735811-S | 8 | 8 | 72087862 | 305935 | 11.6574 | 6.27836 | CEU |
| rs2639955  | LOC340435 | GI_29735811-S | 8 | 8 | 72087896 | 305969 | 11.6574 | 6.27836 | CEU |
| rs2639954  | LOC340435 | GI_29735811-S | 8 | 8 | 72088129 | 306202 | 12.8818 | 6.27836 | CEU |
| rs2639953  | LOC340435 | GI_29735811-S | 8 | 8 | 72088214 | 306287 | 12.8818 | 6.27836 | CEU |
| rs2639952  | LOC340435 | GI_29735811-S | 8 | 8 | 72088284 | 306357 | 12.8818 | 6.27836 | CEU |
| rs2732108  | LOC340435 | GI_29735811-S | 8 | 8 | 72088653 | 306726 | 12.8818 | 6.27836 | CEU |
| rs2732109  | LOC340435 | GI_29735811-S | 8 | 8 | 72088777 | 306850 | 12.6947 | 6.27836 | CEU |
| rs1493203  | LOC340435 | GI_29735811-S | 8 | 8 | 72089061 | 307134 | 12.8818 | 6.27836 | CEU |
| rs2732110  | LOC340435 | GI_29735811-S | 8 | 8 | 72089365 | 307438 | 12.8818 | 6.27836 | CEU |
| rs2639951  | LOC340435 | GI_29735811-S | 8 | 8 | 72089779 | 307852 | 12.8818 | 6.27836 | CEU |
| rs2732111  | LOC340435 | GI_29735811-S | 8 | 8 | 72089983 | 308056 | 9.7364  | 6.27836 | CEU |
| rs2732112  | LOC340435 | GI_29735811-S | 8 | 8 | 72090395 | 308468 | 12.8818 | 6.27836 | CEU |
| rs2732113  | LOC340435 | GI_29735811-S | 8 | 8 | 72091103 | 309176 | 12.8818 | 6.27836 | CEU |
| rs2732114  | LOC340435 | GI_29735811-S | 8 | 8 | 72091266 | 309339 | 12.8818 | 6.27836 | CEU |
| rs2732115  | LOC340435 | GI_29735811-S | 8 | 8 | 72091408 | 309481 | 12.8818 | 6.27836 | CEU |
| rs2732116  | LOC340435 | GI_29735811-S | 8 | 8 | 72091881 | 309954 | 12.8818 | 6.27836 | CEU |
| rs2956610  | LOC340435 | GI_29735811-S | 8 | 8 | 72092087 | 310160 | 12.8818 | 6.27836 | CEU |
| rs3098868  | LOC340435 | GI_29735811-S | 8 | 8 | 72092246 | 310319 | 12.8818 | 6.27836 | CEU |
| rs3098869  | LOC340435 | GI_29735811-S | 8 | 8 | 72092386 | 310459 | 9.0053  | 6.27836 | CEU |
| rs3110240  | LOC340435 | GI_29735811-S | 8 | 8 | 72092658 | 310731 | 12.8818 | 6.27836 | CEU |
| rs3098871  | LOC340435 | GI_29735811-S | 8 | 8 | 72092969 | 311042 | 12.8818 | 6.27836 | CEU |
| rs3098872  | LOC340435 | GI_29735811-S | 8 | 8 | 72094758 | 312831 | 9.1767  | 6.27836 | CEU |
| rs3098873  | LOC340435 | GI_29735811-S | 8 | 8 | 72095140 | 313213 | 12.8818 | 6.27836 | CEU |
| rs3110244  | LOC340435 | GI_29735811-S | 8 | 8 | 72095751 | 313824 | 11.6374 | 6.27836 | CEU |
| rs3098874  | LOC340435 | GI_29735811-S | 8 | 8 | 72096892 | 314965 | 12.8818 | 6.27836 | CEU |
| rs6982447  | LOC340435 | GI_29735811-S | 8 | 8 | 72097167 | 315240 | 12.8818 | 6.27836 | CEU |
| rs6982601  | LOC340435 | GI_29735811-S | 8 | 8 | 72097242 | 315315 | 7.7575  | 6.27836 | CEU |
| rs6983299  | LOC340435 | GI_29735811-S | 8 | 8 | 72097441 | 315514 | 12.8818 | 6.27836 | CEU |
| rs6982942  | LOC340435 | GI_29735811-S | 8 | 8 | 72097489 | 315562 | 12.8818 | 6.27836 | CEU |
| rs13256029 | LOC340435 | GI_29735811-S | 8 | 8 | 72098099 | 316172 | 12.8818 | 6.27836 | CEU |

|            |           |               |   |   |          |        |         |         |     |
|------------|-----------|---------------|---|---|----------|--------|---------|---------|-----|
| rs3098876  | LOC340435 | GI_29735811-S | 8 | 8 | 72098798 | 316871 | 12.8818 | 6.27836 | CEU |
| rs3110250  | LOC340435 | GI_29735811-S | 8 | 8 | 72098938 | 317011 | 12.8818 | 6.27836 | CEU |
| rs3098877  | LOC340435 | GI_29735811-S | 8 | 8 | 72099000 | 317073 | 12.8818 | 6.27836 | CEU |
| rs3110251  | LOC340435 | GI_29735811-S | 8 | 8 | 72099528 | 317601 | 12.8818 | 6.27836 | CEU |
| rs3110252  | LOC340435 | GI_29735811-S | 8 | 8 | 72099774 | 317847 | 12.8818 | 6.27836 | CEU |
| rs3098878  | LOC340435 | GI_29735811-S | 8 | 8 | 72100023 | 318096 | 9.1767  | 6.27836 | CEU |
| rs3110253  | LOC340435 | GI_29735811-S | 8 | 8 | 72100107 | 318180 | 12.8818 | 6.27836 | CEU |
| rs3110255  | LOC340435 | GI_29735811-S | 8 | 8 | 72100604 | 318677 | 12.8818 | 6.27836 | CEU |
| rs3110256  | LOC340435 | GI_29735811-S | 8 | 8 | 72100690 | 318763 | 12.8818 | 6.27836 | CEU |
| rs3098879  | LOC340435 | GI_29735811-S | 8 | 8 | 72101014 | 319087 | 12.8818 | 6.27836 | CEU |
| rs3110258  | LOC340435 | GI_29735811-S | 8 | 8 | 72101086 | 319159 | 12.8818 | 6.27836 | CEU |
| rs3098880  | LOC340435 | GI_29735811-S | 8 | 8 | 72101475 | 319548 | 12.8818 | 6.27836 | CEU |
| rs7002064  | LOC340435 | GI_29735811-S | 8 | 8 | 72102648 | 320721 | 9.1767  | 6.27836 | CEU |
| rs3110260  | LOC340435 | GI_29735811-S | 8 | 8 | 72103042 | 321115 | 9.1767  | 6.27836 | CEU |
| rs3110261  | LOC340435 | GI_29735811-S | 8 | 8 | 72104005 | 322078 | 9.1767  | 6.27836 | CEU |
| rs3110262  | LOC340435 | GI_29735811-S | 8 | 8 | 72104184 | 322257 | 9.1767  | 6.27836 | CEU |
| rs3110263  | LOC340435 | GI_29735811-S | 8 | 8 | 72105246 | 323319 | 9.7364  | 6.27836 | CEU |
| rs3098883  | LOC340435 | GI_29735811-S | 8 | 8 | 72106121 | 324194 | 12.7749 | 6.27836 | CEU |
| rs4532626  | LOC340435 | GI_29735811-S | 8 | 8 | 72107449 | 325522 | 9.7364  | 6.27836 | CEU |
| rs4434651  | LOC340435 | GI_29735811-S | 8 | 8 | 72109741 | 327814 | 12.8818 | 6.27836 | CEU |
| rs12542300 | LOC340435 | GI_29735811-S | 8 | 8 | 72113949 | 332022 | 12.8818 | 6.27836 | CEU |
| rs10091471 | LOC340435 | GI_29735811-S | 8 | 8 | 72116309 | 334382 | 12.8818 | 6.27836 | CEU |
| rs11779364 | LOC340435 | GI_29735811-S | 8 | 8 | 72117150 | 335223 | 8.7822  | 6.27836 | CEU |
| rs6472561  | LOC340435 | GI_29735811-S | 8 | 8 | 72117737 | 335810 | 12.8818 | 6.27836 | CEU |
| rs4074908  | LOC340435 | GI_29735811-S | 8 | 8 | 72117886 | 335959 | 9.1767  | 6.27836 | CEU |
| rs4074909  | LOC340435 | GI_29735811-S | 8 | 8 | 72118381 | 336454 | 12.8818 | 6.27836 | CEU |
| rs4078067  | LOC340435 | GI_29735811-S | 8 | 8 | 72119025 | 337098 | 12.8818 | 6.27836 | CEU |
| rs4504667  | LOC340435 | GI_29735811-S | 8 | 8 | 72119346 | 337419 | 12.8818 | 6.27836 | CEU |
| rs4571761  | LOC340435 | GI_29735811-S | 8 | 8 | 72119727 | 337800 | 12.8818 | 6.27836 | CEU |
| rs4738105  | LOC340435 | GI_29735811-S | 8 | 8 | 72121472 | 339545 | 12.8818 | 6.27836 | CEU |
| rs17699084 | LOC340435 | GI_29735811-S | 8 | 8 | 72125965 | 344038 | 9.6568  | 6.27836 | CEU |
| rs1481804  | LOC340435 | GI_29735811-S | 8 | 8 | 72131984 | 350057 | 12.0068 | 6.27836 | CEU |
| rs6472562  | LOC340435 | GI_29735811-S | 8 | 8 | 72132432 | 350505 | 12.7209 | 6.27836 | CEU |
| rs6472563  | LOC340435 | GI_29735811-S | 8 | 8 | 72132461 | 350534 | 12.7209 | 6.27836 | CEU |
| rs10110676 | LOC340435 | GI_29735811-S | 8 | 8 | 72133363 | 351436 | 10.4929 | 6.27836 | CEU |
| rs10504492 | LOC340435 | GI_29735811-S | 8 | 8 | 72140513 | 358586 | 9.6568  | 6.27836 | CEU |
| rs6472564  | LOC340435 | GI_29735811-S | 8 | 8 | 72140954 | 359027 | 9.6568  | 6.27836 | CEU |
| rs13268251 | LOC340435 | GI_29735811-S | 8 | 8 | 72141368 | 359441 | 7.551   | 6.27836 | CEU |
| rs17699685 | LOC340435 | GI_29735811-S | 8 | 8 | 72141558 | 359631 | 9.6568  | 6.27836 | CEU |
| rs11987409 | LOC340435 | GI_29735811-S | 8 | 8 | 72142614 | 360687 | 9.4696  | 6.27836 | CEU |
| rs17699710 | LOC340435 | GI_29735811-S | 8 | 8 | 72142764 | 360837 | 9.6568  | 6.27836 | CEU |
| rs13262350 | LOC340435 | GI_29735811-S | 8 | 8 | 72144160 | 362233 | 7.5593  | 6.27836 | CEU |
| rs12056347 | LOC340435 | GI_29735811-S | 8 | 8 | 72147163 | 365236 | 7.5593  | 6.27836 | CEU |
| rs7825815  | LOC340435 | GI_29735811-S | 8 | 8 | 72148959 | 367032 | 9.0369  | 6.27836 | CEU |
| rs1481801  | LOC340435 | GI_29735811-S | 8 | 8 | 72152273 | 370346 | 6.9422  | 6.27836 | CEU |
| rs4372033  | LOC340435 | GI_29735811-S | 8 | 8 | 72152557 | 370630 | 7.5593  | 6.27836 | CEU |
| rs12674838 | LOC340435 | GI_29735811-S | 8 | 8 | 72152834 | 370907 | 9.6568  | 6.27836 | CEU |
| rs17778232 | LOC340435 | GI_29735811-S | 8 | 8 | 72154072 | 372145 | 8.2781  | 6.27836 | CEU |
| rs9650238  | LOC340435 | GI_29735811-S | 8 | 8 | 72155260 | 373333 | 8.6369  | 6.27836 | CEU |
| rs1481796  | LOC340435 | GI_29735811-S | 8 | 8 | 72156904 | 374977 | 8.642   | 6.27836 | CEU |
| rs7837005  | LOC340435 | GI_29735811-S | 8 | 8 | 72161586 | 379659 | 6.3455  | 6.27836 | CEU |
| rs12155783 | LOC340435 | GI_29735811-S | 8 | 8 | 72161680 | 379753 | 8.642   | 6.27836 | CEU |
| rs6472566  | LOC340435 | GI_29735811-S | 8 | 8 | 72163038 | 381111 | 8.0293  | 6.27836 | CEU |
| rs13251367 | LOC340435 | GI_29735811-S | 8 | 8 | 72164485 | 382558 | 6.7912  | 6.27836 | CEU |
| rs10957534 | LOC340435 | GI_29735811-S | 8 | 8 | 72170857 | 388930 | 7.8398  | 6.27836 | CEU |
| rs10504497 | LOC340435 | GI_29735811-S | 8 | 8 | 72171441 | 389514 | 7.9607  | 6.27836 | CEU |

|            |           |               |   |   |           |        |        |         |     |
|------------|-----------|---------------|---|---|-----------|--------|--------|---------|-----|
| rs13277069 | LOC340435 | GI_29735811-S | 8 | 8 | 72172085  | 390158 | 7.8398 | 6.27836 | CEU |
| rs6990397  | LOC340435 | GI_29735811-S | 8 | 8 | 72174326  | 392399 | 8.7266 | 6.27836 | CEU |
| rs1466526  | CGI-62    | GI_7705774-S  | 8 | 8 | 79718029  | 72022  | 6.4532 | 6.10899 | CEU |
| rs4739134  | CGI-62    | GI_7705774-S  | 8 | 8 | 79718703  | 71348  | 6.4532 | 6.10899 | CEU |
| rs1966115  | CGI-62    | GI_7705774-S  | 8 | 8 | 79719446  | 70605  | 6.4532 | 6.10899 | CEU |
| rs12114284 | CGI-62    | GI_7705774-S  | 8 | 8 | 79720996  | 69055  | 6.4532 | 6.10899 | CEU |
| rs10957896 | CGI-62    | GI_7705774-S  | 8 | 8 | 79721160  | 68891  | 6.4532 | 6.10899 | CEU |
| rs2015125  | CGI-62    | GI_7705774-S  | 8 | 8 | 79721785  | 68266  | 6.4532 | 6.10899 | CEU |
| rs1809476  | CGI-62    | GI_7705774-S  | 8 | 8 | 79721806  | 68245  | 6.4532 | 6.10899 | CEU |
| rs900567   | CGI-62    | GI_7705774-S  | 8 | 8 | 79722177  | 67874  | 6.4532 | 6.10899 | CEU |
| rs3899796  | CGI-62    | GI_7705774-S  | 8 | 8 | 79730637  | 59414  | 7.3984 | 6.10899 | CEU |
| rs1384804  | CGI-62    | GI_7705774-S  | 8 | 8 | 79734777  | 55274  | 7.2896 | 6.10899 | CEU |
| rs1021156  | CGI-62    | GI_7705774-S  | 8 | 8 | 79738359  | 51692  | 7.2896 | 6.10899 | CEU |
| rs3808619  | CGI-62    | GI_7705774-S  | 8 | 8 | 79740281  | 49770  | 7.2896 | 6.10899 | CEU |
| rs3736169  | CGI-62    | GI_7705774-S  | 8 | 8 | 79750410  | 39641  | 7.2896 | 6.10899 | CEU |
| rs7839152  | CGI-62    | GI_7705774-S  | 8 | 8 | 79752567  | 37484  | 7.2896 | 6.10899 | CEU |
| rs9298316  | CGI-62    | GI_7705774-S  | 8 | 8 | 79754981  | 35070  | 7.2896 | 6.10899 | CEU |
| rs7842142  | CGI-62    | GI_7705774-S  | 8 | 8 | 79756291  | 33760  | 7.2896 | 6.10899 | CEU |
| rs10093127 | CGI-62    | GI_7705774-S  | 8 | 8 | 79761659  | 28392  | 7.2896 | 6.10899 | CEU |
| rs1872072  | CGI-62    | GI_7705774-S  | 8 | 8 | 79763975  | 26076  | 7.2896 | 6.10899 | CEU |
| rs7001074  | CGI-62    | GI_7705774-S  | 8 | 8 | 79766479  | 23572  | 7.2896 | 6.10899 | CEU |
| rs1054283  | CGI-62    | GI_7705774-S  | 8 | 8 | 79773265  | 16786  | 7.2896 | 6.10899 | CEU |
| rs13280202 | CGI-62    | GI_7705774-S  | 8 | 8 | 79775028  | 15023  | 6.9253 | 6.10899 | CEU |
| rs10957898 | CGI-62    | GI_7705774-S  | 8 | 8 | 79779868  | 10183  | 6.4978 | 6.10899 | CEU |
| rs7010897  | CGI-62    | GI_7705774-S  | 8 | 8 | 79782909  | 7142   | 7.083  | 6.10899 | CEU |
| rs2369440  | CGI-62    | GI_7705774-S  | 8 | 8 | 79784264  | 5787   | 7.2896 | 6.10899 | CEU |
| rs1483573  | CGI-62    | GI_7705774-S  | 8 | 8 | 79786172  | 3879   | 7.2896 | 6.10899 | CEU |
| rs2953477  | CGI-62    | GI_7705774-S  | 8 | 8 | 79787160  | 2891   | 7.2896 | 6.10899 | CEU |
| rs2717538  | CGI-62    | GI_7705774-S  | 8 | 8 | 79795704  | 5653   | 7.2896 | 6.10899 | CEU |
| rs2919936  | CGI-62    | GI_7705774-S  | 8 | 8 | 79796562  | 6511   | 7.2896 | 6.10899 | CEU |
| rs2953475  | CGI-62    | GI_7705774-S  | 8 | 8 | 79800693  | 10642  | 7.2896 | 6.10899 | CEU |
| rs1441438  | CGI-62    | GI_7705774-S  | 8 | 8 | 79804324  | 14273  | 7.2896 | 6.10899 | CEU |
| rs1545228  | CGI-62    | GI_7705774-S  | 8 | 8 | 79806992  | 16941  | 7.2896 | 6.10899 | CEU |
| rs894221   | CGI-62    | GI_7705774-S  | 8 | 8 | 79811612  | 21561  | 7.2896 | 6.10899 | CEU |
| rs1441850  | CGI-62    | GI_7705774-S  | 8 | 8 | 79820221  | 30170  | 7.2896 | 6.10899 | CEU |
| rs2980569  | PKHD1L1   | GI_31377831-S | 8 | 8 | 110416578 | 191677 | 7.7404 | 5.96142 | CEU |
| rs2980582  | PKHD1L1   | GI_31377831-S | 8 | 8 | 110427418 | 180837 | 6.7212 | 5.96142 | CEU |
| rs2926239  | PKHD1L1   | GI_31377831-S | 8 | 8 | 110427848 | 180407 | 6.6736 | 5.96142 | CEU |
| rs1585294  | PKHD1L1   | GI_31377831-S | 8 | 8 | 110431684 | 176571 | 7.214  | 5.96142 | CEU |
| rs6983646  | PKHD1L1   | GI_31377831-S | 8 | 8 | 110436363 | 171892 | 7.7404 | 5.96142 | CEU |
| rs9656881  | Hs.171169 | Hs.171169-S   | 8 | 8 | 110439824 | 177597 | 6.3502 | 5.60457 | CEU |
| rs7835131  | Hs.171169 | Hs.171169-S   | 8 | 8 | 110440611 | 176810 | 6.3649 | 5.60457 | CEU |
| rs7002606  | PKHD1L1   | GI_31377831-S | 8 | 8 | 110441547 | 166708 | 7.7156 | 5.96142 | CEU |
| rs6982826  | Hs.171169 | Hs.171169-S   | 8 | 8 | 110441653 | 175768 | 6.3649 | 5.60457 | CEU |
| rs6987198  | PKHD1L1   | GI_31377831-S | 8 | 8 | 110442003 | 166252 | 8.9496 | 5.96142 | CEU |
| rs1563581  | Hs.171169 | Hs.171169-S   | 8 | 8 | 110442396 | 175025 | 5.9528 | 5.60457 | CEU |
| rs7008687  | Hs.171169 | Hs.171169-S   | 8 | 8 | 110446037 | 171384 | 6.1929 | 5.60457 | CEU |
| rs10099126 | PKHD1L1   | GI_31377831-S | 8 | 8 | 110448791 | 159464 | 8.7893 | 5.96142 | CEU |
| rs7819151  | PKHD1L1   | GI_31377831-S | 8 | 8 | 110449873 | 158382 | 8.7893 | 5.96142 | CEU |
| rs12334438 | PKHD1L1   | GI_31377831-S | 8 | 8 | 110450959 | 157296 | 7.1885 | 5.96142 | CEU |
| rs921960   | PKHD1L1   | GI_31377831-S | 8 | 8 | 110461305 | 146950 | 8.0872 | 5.96142 | CEU |
| rs2168679  | PKHD1L1   | GI_31377831-S | 8 | 8 | 110464203 | 144052 | 8.2528 | 5.96142 | CEU |
| rs17445342 | Hs.171169 | Hs.171169-S   | 8 | 8 | 110470812 | 146609 | 6.3502 | 5.60457 | CEU |
| rs13278812 | PKHD1L1   | GI_31377831-S | 8 | 8 | 110472672 | 135583 | 8.7893 | 5.96142 | CEU |
| rs1379370  | PKHD1L1   | GI_31377831-S | 8 | 8 | 110472874 | 135381 | 8.7893 | 5.96142 | CEU |
| rs1457290  | PKHD1L1   | GI_31377831-S | 8 | 8 | 110474575 | 133680 | 8.1028 | 5.96142 | CEU |

|            |           |               |   |   |           |        |         |         |     |
|------------|-----------|---------------|---|---|-----------|--------|---------|---------|-----|
| rs1457289  | PKHD1L1   | GI_31377831-S | 8 | 8 | 110474727 | 133528 | 8.7893  | 5.96142 | CEU |
| rs10098672 | PKHD1L1   | GI_31377831-S | 8 | 8 | 110476273 | 131982 | 8.7893  | 5.96142 | CEU |
| rs9656791  | Hs.171169 | Hs.171169-S   | 8 | 8 | 110477948 | 139473 | 6.4685  | 5.60457 | CEU |
| rs1379369  | PKHD1L1   | GI_31377831-S | 8 | 8 | 110481695 | 126560 | 8.7893  | 5.96142 | CEU |
| rs2061295  | PKHD1L1   | GI_31377831-S | 8 | 8 | 110482124 | 126131 | 8.9496  | 5.96142 | CEU |
| rs1457287  | PKHD1L1   | GI_31377831-S | 8 | 8 | 110482154 | 126101 | 8.7893  | 5.96142 | CEU |
| rs2061294  | PKHD1L1   | GI_31377831-S | 8 | 8 | 110483000 | 125255 | 8.3406  | 5.96142 | CEU |
| rs1457286  | PKHD1L1   | GI_31377831-S | 8 | 8 | 110485989 | 122266 | 8.7893  | 5.96142 | CEU |
| rs1037695  | PKHD1L1   | GI_31377831-S | 8 | 8 | 110488098 | 120157 | 8.7893  | 5.96142 | CEU |
| rs10100944 | Hs.171169 | Hs.171169-S   | 8 | 8 | 110494728 | 122693 | 6.4392  | 5.60457 | CEU |
| rs4604408  | PKHD1L1   | GI_31377831-S | 8 | 8 | 110494770 | 113485 | 6.818   | 5.96142 | CEU |
| rs897838   | PKHD1L1   | GI_31377831-S | 8 | 8 | 110495783 | 112472 | 8.7893  | 5.96142 | CEU |
| rs2349760  | PKHD1L1   | GI_31377831-S | 8 | 8 | 110496096 | 112159 | 8.7893  | 5.96142 | CEU |
| rs1840908  | PKHD1L1   | GI_31377831-S | 8 | 8 | 110498628 | 109627 | 8.6722  | 5.96142 | CEU |
| rs7840592  | PKHD1L1   | GI_31377831-S | 8 | 8 | 110499617 | 108638 | 8.7893  | 5.96142 | CEU |
| rs6469260  | PKHD1L1   | GI_31377831-S | 8 | 8 | 110500234 | 108021 | 8.6207  | 5.96142 | CEU |
| rs4735133  | PKHD1L1   | GI_31377831-S | 8 | 8 | 110506560 | 101695 | 8.7893  | 5.96142 | CEU |
| rs1870107  | PKHD1L1   | GI_31377831-S | 8 | 8 | 110517106 | 91149  | 8.7893  | 5.96142 | CEU |
| rs10093885 | Hs.171169 | Hs.171169-S   | 8 | 8 | 110517811 | 99610  | 7.5039  | 5.60457 | CEU |
| rs7816624  | Hs.171169 | Hs.171169-S   | 8 | 8 | 110519268 | 98153  | 6.3502  | 5.60457 | CEU |
| rs2844253  | PKHD1L1   | GI_31377831-S | 8 | 8 | 110521087 | 87168  | 8.5522  | 5.96142 | CEU |
| rs17446406 | Hs.171169 | Hs.171169-S   | 8 | 8 | 110521359 | 96062  | 6.3502  | 5.60457 | CEU |
| rs11785973 | Hs.171169 | Hs.171169-S   | 8 | 8 | 110522642 | 94779  | 6.039   | 5.60457 | CEU |
| rs1673408  | PKHD1L1   | GI_31377831-S | 8 | 8 | 110524497 | 83758  | 9.8796  | 5.96142 | CEU |
| rs17368044 | Hs.171169 | Hs.171169-S   | 8 | 8 | 110527995 | 89426  | 6.3502  | 5.60457 | CEU |
| rs1673407  | PKHD1L1   | GI_31377831-S | 8 | 8 | 110529664 | 78591  | 9.8796  | 5.96142 | CEU |
| rs1673405  | PKHD1L1   | GI_31377831-S | 8 | 8 | 110530694 | 77561  | 9.7515  | 5.96142 | CEU |
| rs1673404  | PKHD1L1   | GI_31377831-S | 8 | 8 | 110534236 | 74019  | 8.5522  | 5.96142 | CEU |
| rs11778756 | Hs.171169 | Hs.171169-S   | 8 | 8 | 110534657 | 82764  | 6.3502  | 5.60457 | CEU |
| rs1783163  | PKHD1L1   | GI_31377831-S | 8 | 8 | 110535261 | 72994  | 9.8796  | 5.96142 | CEU |
| rs2607639  | PKHD1L1   | GI_31377831-S | 8 | 8 | 110539473 | 68782  | 8.5522  | 5.96142 | CEU |
| rs2607638  | PKHD1L1   | GI_31377831-S | 8 | 8 | 110539887 | 68368  | 8.5522  | 5.96142 | CEU |
| rs2844251  | PKHD1L1   | GI_31377831-S | 8 | 8 | 110540059 | 68196  | 9.7462  | 5.96142 | CEU |
| rs2607637  | PKHD1L1   | GI_31377831-S | 8 | 8 | 110540260 | 67995  | 8.5522  | 5.96142 | CEU |
| rs1457284  | PKHD1L1   | GI_31377831-S | 8 | 8 | 110540600 | 67655  | 9.7462  | 5.96142 | CEU |
| rs1026439  | PKHD1L1   | GI_31377831-S | 8 | 8 | 110543083 | 65172  | 6.6447  | 5.96142 | CEU |
| rs714995   | PKHD1L1   | GI_31377831-S | 8 | 8 | 110543826 | 64429  | 8.5522  | 5.96142 | CEU |
| rs1673401  | PKHD1L1   | GI_31377831-S | 8 | 8 | 110544752 | 63503  | 8.5522  | 5.96142 | CEU |
| rs1783145  | PKHD1L1   | GI_31377831-S | 8 | 8 | 110545050 | 63205  | 8.5522  | 5.96142 | CEU |
| rs1783144  | PKHD1L1   | GI_31377831-S | 8 | 8 | 110545167 | 63088  | 9.8796  | 5.96142 | CEU |
| rs1673400  | PKHD1L1   | GI_31377831-S | 8 | 8 | 110545286 | 62969  | 8.5522  | 5.96142 | CEU |
| rs1673398  | PKHD1L1   | GI_31377831-S | 8 | 8 | 110546169 | 62086  | 7.5408  | 5.96142 | CEU |
| rs1627570  | PKHD1L1   | GI_31377831-S | 8 | 8 | 110547000 | 61255  | 7.8926  | 5.96142 | CEU |
| rs1783143  | PKHD1L1   | GI_31377831-S | 8 | 8 | 110547650 | 60605  | 7.9923  | 5.96142 | CEU |
| rs1783142  | PKHD1L1   | GI_31377831-S | 8 | 8 | 110547837 | 60418  | 8.5522  | 5.96142 | CEU |
| rs1673396  | PKHD1L1   | GI_31377831-S | 8 | 8 | 110548797 | 59458  | 8.5522  | 5.96142 | CEU |
| rs1471125  | PKHD1L1   | GI_31377831-S | 8 | 8 | 110549755 | 58500  | 8.5522  | 5.96142 | CEU |
| rs1471124  | PKHD1L1   | GI_31377831-S | 8 | 8 | 110551558 | 56697  | 8.5522  | 5.96142 | CEU |
| rs1783152  | PKHD1L1   | GI_31377831-S | 8 | 8 | 110552076 | 56179  | 8.0737  | 5.96142 | CEU |
| rs1673393  | PKHD1L1   | GI_31377831-S | 8 | 8 | 110553021 | 55234  | 9.8796  | 5.96142 | CEU |
| rs1783151  | PKHD1L1   | GI_31377831-S | 8 | 8 | 110553119 | 55136  | 8.5522  | 5.96142 | CEU |
| rs1783149  | PKHD1L1   | GI_31377831-S | 8 | 8 | 110553988 | 54267  | 8.5522  | 5.96142 | CEU |
| rs1673390  | PKHD1L1   | GI_31377831-S | 8 | 8 | 110554319 | 53936  | 10.0513 | 5.96142 | CEU |
| rs1626759  | PKHD1L1   | GI_31377831-S | 8 | 8 | 110554960 | 53295  | 8.5522  | 5.96142 | CEU |
| rs1457283  | PKHD1L1   | GI_31377831-S | 8 | 8 | 110555803 | 52452  | 7.2089  | 5.96142 | CEU |
| rs1457282  | PKHD1L1   | GI_31377831-S | 8 | 8 | 110555942 | 52313  | 9.2477  | 5.96142 | CEU |



|            |           |               |   |   |           |       |         |         |     |
|------------|-----------|---------------|---|---|-----------|-------|---------|---------|-----|
| rs1783148  | PKHD1L1   | GI_31377831-S | 8 | 8 | 110558796 | 49459 | 8.8211  | 5.96142 | CEU |
| rs1379361  | PKHD1L1   | GI_31377831-S | 8 | 8 | 110559318 | 48937 | 9.2477  | 5.96142 | CEU |
| rs1783147  | PKHD1L1   | GI_31377831-S | 8 | 8 | 110561016 | 47239 | 9.2477  | 5.96142 | CEU |
| rs1630942  | PKHD1L1   | GI_31377831-S | 8 | 8 | 110561053 | 47202 | 9.2477  | 5.96142 | CEU |
| rs1630134  | PKHD1L1   | GI_31377831-S | 8 | 8 | 110561140 | 47115 | 9.2477  | 5.96142 | CEU |
| rs1026437  | PKHD1L1   | GI_31377831-S | 8 | 8 | 110562125 | 46130 | 9.2477  | 5.96142 | CEU |
| rs2844254  | PKHD1L1   | GI_31377831-S | 8 | 8 | 110564368 | 43887 | 9.2477  | 5.96142 | CEU |
| rs2607633  | PKHD1L1   | GI_31377831-S | 8 | 8 | 110565344 | 42911 | 8.2565  | 5.96142 | CEU |
| rs17375750 | Hs.171169 | Hs.171169-S   | 8 | 8 | 110568239 | 49182 | 6.3502  | 5.60457 | CEU |
| rs1783140  | PKHD1L1   | GI_31377831-S | 8 | 8 | 110568520 | 39735 | 9.4253  | 5.96142 | CEU |
| rs1783141  | PKHD1L1   | GI_31377831-S | 8 | 8 | 110569859 | 38396 | 9.2477  | 5.96142 | CEU |
| rs2607631  | PKHD1L1   | GI_31377831-S | 8 | 8 | 110573591 | 34664 | 9.2477  | 5.96142 | CEU |
| rs2607630  | PKHD1L1   | GI_31377831-S | 8 | 8 | 110574042 | 34213 | 6.3682  | 5.96142 | CEU |
| rs2607629  | PKHD1L1   | GI_31377831-S | 8 | 8 | 110574354 | 33901 | 9.2477  | 5.96142 | CEU |
| rs1013482  | PKHD1L1   | GI_31377831-S | 8 | 8 | 110574886 | 33369 | 10.6679 | 5.96142 | CEU |
| rs2607628  | PKHD1L1   | GI_31377831-S | 8 | 8 | 110575062 | 33193 | 9.2477  | 5.96142 | CEU |
| rs1563580  | PKHD1L1   | GI_31377831-S | 8 | 8 | 110575280 | 32975 | 6.6283  | 5.96142 | CEU |
| rs2607627  | PKHD1L1   | GI_31377831-S | 8 | 8 | 110575834 | 32421 | 10.6679 | 5.96142 | CEU |
| rs1783162  | PKHD1L1   | GI_31377831-S | 8 | 8 | 110577414 | 30841 | 10.6679 | 5.96142 | CEU |
| rs753995   | PKHD1L1   | GI_31377831-S | 8 | 8 | 110581622 | 26633 | 9.2477  | 5.96142 | CEU |
| rs1673422  | PKHD1L1   | GI_31377831-S | 8 | 8 | 110582601 | 25654 | 9.2477  | 5.96142 | CEU |
| rs1783159  | PKHD1L1   | GI_31377831-S | 8 | 8 | 110583540 | 24715 | 10.943  | 5.96142 | CEU |
| rs1783158  | PKHD1L1   | GI_31377831-S | 8 | 8 | 110583563 | 24692 | 9.2971  | 5.96142 | CEU |
| rs6995033  | Hs.171169 | Hs.171169-S   | 8 | 8 | 110584372 | 33049 | 5.9728  | 5.60457 | CEU |
| rs1673421  | PKHD1L1   | GI_31377831-S | 8 | 8 | 110584402 | 23853 | 7.876   | 5.96142 | CEU |
| rs1673420  | PKHD1L1   | GI_31377831-S | 8 | 8 | 110585296 | 22959 | 7.7578  | 5.96142 | CEU |
| rs1673419  | PKHD1L1   | GI_31377831-S | 8 | 8 | 110585433 | 22822 | 9.2477  | 5.96142 | CEU |
| rs1783157  | PKHD1L1   | GI_31377831-S | 8 | 8 | 110585436 | 22819 | 9.2477  | 5.96142 | CEU |
| rs1673416  | PKHD1L1   | GI_31377831-S | 8 | 8 | 110586668 | 21587 | 9.2477  | 5.96142 | CEU |
| rs1673415  | PKHD1L1   | GI_31377831-S | 8 | 8 | 110587384 | 20871 | 9.2477  | 5.96142 | CEU |
| rs1379367  | PKHD1L1   | GI_31377831-S | 8 | 8 | 110587710 | 20545 | 9.2477  | 5.96142 | CEU |
| rs1379366  | PKHD1L1   | GI_31377831-S | 8 | 8 | 110587810 | 20445 | 10.6679 | 5.96142 | CEU |
| rs1783154  | PKHD1L1   | GI_31377831-S | 8 | 8 | 110588748 | 19507 | 9.2477  | 5.96142 | CEU |
| rs1783153  | PKHD1L1   | GI_31377831-S | 8 | 8 | 110588990 | 19265 | 10.6679 | 5.96142 | CEU |
| rs2844257  | PKHD1L1   | GI_31377831-S | 8 | 8 | 110590653 | 17602 | 6.6283  | 5.96142 | CEU |
| rs2607625  | PKHD1L1   | GI_31377831-S | 8 | 8 | 110590692 | 17563 | 6.6283  | 5.96142 | CEU |
| rs2844258  | PKHD1L1   | GI_31377831-S | 8 | 8 | 110591692 | 16563 | 6.6283  | 5.96142 | CEU |
| rs2844259  | PKHD1L1   | GI_31377831-S | 8 | 8 | 110591903 | 16352 | 6.6283  | 5.96142 | CEU |
| rs2844260  | PKHD1L1   | GI_31377831-S | 8 | 8 | 110591948 | 16307 | 6.6283  | 5.96142 | CEU |
| rs6469264  | Hs.171169 | Hs.171169-S   | 8 | 8 | 110594779 | 22642 | 6.0398  | 5.60457 | CEU |
| rs1673412  | PKHD1L1   | GI_31377831-S | 8 | 8 | 110594900 | 13355 | 6.0672  | 5.96142 | CEU |
| rs1783166  | PKHD1L1   | GI_31377831-S | 8 | 8 | 110595060 | 13195 | 10.6679 | 5.96142 | CEU |
| rs1673411  | PKHD1L1   | GI_31377831-S | 8 | 8 | 110597325 | 10930 | 10.6679 | 5.96142 | CEU |
| rs1783168  | PKHD1L1   | GI_31377831-S | 8 | 8 | 110598046 | 10209 | 10.6679 | 5.96142 | CEU |
| rs1673410  | PKHD1L1   | GI_31377831-S | 8 | 8 | 110598253 | 10002 | 6.6283  | 5.96142 | CEU |
| rs1673413  | PKHD1L1   | GI_31377831-S | 8 | 8 | 110599052 | 9203  | 6.6283  | 5.96142 | CEU |
| rs1783169  | PKHD1L1   | GI_31377831-S | 8 | 8 | 110599950 | 8305  | 6.6283  | 5.96142 | CEU |
| rs7842842  | Hs.171169 | Hs.171169-S   | 8 | 8 | 110600053 | 17368 | 7.7996  | 5.60457 | CEU |
| rs1673409  | PKHD1L1   | GI_31377831-S | 8 | 8 | 110600946 | 7309  | 6.6283  | 5.96142 | CEU |
| rs1783171  | PKHD1L1   | GI_31377831-S | 8 | 8 | 110601912 | 6343  | 6.6283  | 5.96142 | CEU |
| rs1673428  | PKHD1L1   | GI_31377831-S | 8 | 8 | 110602120 | 6135  | 6.6283  | 5.96142 | CEU |
| rs2844261  | PKHD1L1   | GI_31377831-S | 8 | 8 | 110602670 | 5585  | 6.6283  | 5.96142 | CEU |
| rs1563578  | PKHD1L1   | GI_31377831-S | 8 | 8 | 110603688 | 4567  | 6.6283  | 5.96142 | CEU |
| rs1457288  | PKHD1L1   | GI_31377831-S | 8 | 8 | 110603951 | 4304  | 9.2477  | 5.96142 | CEU |
| rs897840   | PKHD1L1   | GI_31377831-S | 8 | 8 | 110605492 | 2763  | 6.6283  | 5.96142 | CEU |
| rs897842   | PKHD1L1   | GI_31377831-S | 8 | 8 | 110605957 | 2298  | 6.6283  | 5.96142 | CEU |

|            |           |               |   |   |           |        |         |         |     |
|------------|-----------|---------------|---|---|-----------|--------|---------|---------|-----|
| rs1783172  | PKHD1L1   | GI_31377831-S | 8 | 8 | 110606128 | 2127   | 6.6283  | 5.96142 | CEU |
| rs730885   | PKHD1L1   | GI_31377831-S | 8 | 8 | 110606593 | 1662   | 6.6283  | 5.96142 | CEU |
| rs1783173  | PKHD1L1   | GI_31377831-S | 8 | 8 | 110607525 | 730    | 6.6283  | 5.96142 | CEU |
| rs1457295  | PKHD1L1   | GI_31377831-S | 8 | 8 | 110608130 | 125    | 6.6283  | 5.96142 | CEU |
| rs1783174  | PKHD1L1   | GI_31377831-S | 8 | 8 | 110608362 | 107    | 6.6283  | 5.96142 | CEU |
| rs1673383  | PKHD1L1   | GI_31377831-S | 8 | 8 | 110609091 | 836    | 6.6283  | 5.96142 | CEU |
| rs1673384  | PKHD1L1   | GI_31377831-S | 8 | 8 | 110609441 | 1186   | 6.6283  | 5.96142 | CEU |
| rs1673386  | PKHD1L1   | GI_31377831-S | 8 | 8 | 110609938 | 1683   | 6.6283  | 5.96142 | CEU |
| rs1673389  | PKHD1L1   | GI_31377831-S | 8 | 8 | 110610255 | 2000   | 6.6283  | 5.96142 | CEU |
| rs1673395  | PKHD1L1   | GI_31377831-S | 8 | 8 | 110610586 | 2331   | 6.6283  | 5.96142 | CEU |
| rs1673399  | PKHD1L1   | GI_31377831-S | 8 | 8 | 110611139 | 2884   | 6.6283  | 5.96142 | CEU |
| rs1617259  | PKHD1L1   | GI_31377831-S | 8 | 8 | 110611474 | 3219   | 6.6283  | 5.96142 | CEU |
| rs2154660  | PKHD1L1   | GI_31377831-S | 8 | 8 | 110612697 | 4442   | 6.6283  | 5.96142 | CEU |
| rs7821242  | PKHD1L1   | GI_31377831-S | 8 | 8 | 110613700 | 5445   | 9.2477  | 5.96142 | CEU |
| rs2022935  | PKHD1L1   | GI_31377831-S | 8 | 8 | 110614686 | 6431   | 6.6283  | 5.96142 | CEU |
| rs10108943 | PKHD1L1   | GI_31377831-S | 8 | 8 | 110614783 | 6528   | 10.6679 | 5.96142 | CEU |
| rs10111682 | PKHD1L1   | GI_31377831-S | 8 | 8 | 110615076 | 6821   | 7.4925  | 5.96142 | CEU |
| rs10088258 | PKHD1L1   | GI_31377831-S | 8 | 8 | 110616575 | 8320   | 6.6283  | 5.96142 | CEU |
| rs7006166  | PKHD1L1   | GI_31377831-S | 8 | 8 | 110616688 | 8433   | 10.6679 | 5.96142 | CEU |
| rs7011340  | PKHD1L1   | GI_31377831-S | 8 | 8 | 110617590 | 9335   | 6.6283  | 5.96142 | CEU |
| rs7011803  | PKHD1L1   | GI_31377831-S | 8 | 8 | 110617624 | 9369   | 6.6283  | 5.96142 | CEU |
| rs4529437  | PKHD1L1   | GI_31377831-S | 8 | 8 | 110619006 | 10751  | 6.6283  | 5.96142 | CEU |
| rs7015718  | Hs.453941 | Hs.453941-S   | 8 | 8 | 119627172 | 180222 | 7.1425  | 5.87331 | CEU |
| rs16891204 | Hs.453941 | Hs.453941-S   | 8 | 8 | 119645121 | 162273 | 6.2358  | 5.87331 | CEU |
| rs10101026 | Hs.453941 | Hs.453941-S   | 8 | 8 | 119646510 | 160884 | 7.1425  | 5.87331 | CEU |
| rs16891213 | Hs.453941 | Hs.453941-S   | 8 | 8 | 119662099 | 145295 | 6.0854  | 5.87331 | CEU |
| rs17683196 | Hs.453941 | Hs.453941-S   | 8 | 8 | 119663571 | 143823 | 7.8159  | 5.87331 | CEU |
| rs10505341 | Hs.453941 | Hs.453941-S   | 8 | 8 | 119675719 | 131675 | 8.2607  | 5.87331 | CEU |
| rs10505340 | Hs.453941 | Hs.453941-S   | 8 | 8 | 119676462 | 130932 | 8.2607  | 5.87331 | CEU |
| rs2460965  | Hs.453941 | Hs.453941-S   | 8 | 8 | 119687942 | 119452 | 9.3122  | 5.87331 | CEU |
| rs2460966  | Hs.453941 | Hs.453941-S   | 8 | 8 | 119693737 | 113657 | 8.8124  | 5.87331 | CEU |
| rs2514594  | Hs.453941 | Hs.453941-S   | 8 | 8 | 119694330 | 113064 | 10.0227 | 5.87331 | CEU |
| rs2460967  | Hs.453941 | Hs.453941-S   | 8 | 8 | 119697073 | 110321 | 10.2991 | 5.87331 | CEU |
| rs2460968  | Hs.453941 | Hs.453941-S   | 8 | 8 | 119697411 | 109983 | 10.2991 | 5.87331 | CEU |
| rs2460970  | Hs.453941 | Hs.453941-S   | 8 | 8 | 119698635 | 108759 | 11.0469 | 5.87331 | CEU |
| rs880033   | Hs.453941 | Hs.453941-S   | 8 | 8 | 119702375 | 105019 | 11.0469 | 5.87331 | CEU |
| rs880034   | Hs.453941 | Hs.453941-S   | 8 | 8 | 119702442 | 104952 | 11.0469 | 5.87331 | CEU |
| rs2460972  | Hs.453941 | Hs.453941-S   | 8 | 8 | 119707958 | 99436  | 11.0469 | 5.87331 | CEU |
| rs2514602  | Hs.453941 | Hs.453941-S   | 8 | 8 | 119719731 | 87663  | 11.0469 | 5.87331 | CEU |
| rs2460975  | Hs.453941 | Hs.453941-S   | 8 | 8 | 119720018 | 87376  | 11.0469 | 5.87331 | CEU |
| rs2514603  | Hs.453941 | Hs.453941-S   | 8 | 8 | 119722156 | 85238  | 11.0469 | 5.87331 | CEU |
| rs2514605  | Hs.453941 | Hs.453941-S   | 8 | 8 | 119723591 | 83803  | 11.0469 | 5.87331 | CEU |
| rs2514607  | Hs.453941 | Hs.453941-S   | 8 | 8 | 119725499 | 81895  | 11.0469 | 5.87331 | CEU |
| rs2514608  | Hs.453941 | Hs.453941-S   | 8 | 8 | 119726049 | 81345  | 11.0469 | 5.87331 | CEU |
| rs2514609  | Hs.453941 | Hs.453941-S   | 8 | 8 | 119726405 | 80989  | 11.0469 | 5.87331 | CEU |
| rs2514610  | Hs.453941 | Hs.453941-S   | 8 | 8 | 119728552 | 78842  | 11.0469 | 5.87331 | CEU |
| rs2460979  | Hs.453941 | Hs.453941-S   | 8 | 8 | 119731021 | 76373  | 11.0469 | 5.87331 | CEU |
| rs2514576  | Hs.453941 | Hs.453941-S   | 8 | 8 | 119740944 | 66450  | 8.8026  | 5.87331 | CEU |
| rs17683401 | Hs.453941 | Hs.453941-S   | 8 | 8 | 119741016 | 66378  | 9.6769  | 5.87331 | CEU |
| rs2460982  | Hs.453941 | Hs.453941-S   | 8 | 8 | 119741293 | 66101  | 9.0678  | 5.87331 | CEU |
| rs2460983  | Hs.453941 | Hs.453941-S   | 8 | 8 | 119741315 | 66079  | 8.9658  | 5.87331 | CEU |
| rs10282929 | PP3856    | GI_40255088-S | 8 | 8 | 144752920 | 24787  | 6.9816  | 5.78206 | CEU |
| rs10112966 | PP3856    | GI_40255088-S | 8 | 8 | 144755077 | 26944  | 6.9816  | 5.78206 | CEU |
| rs2722495  | RPL8      | GI_15431305-I | 8 | 8 | 145942473 | 46011  | 8.4654  | 5.72323 | CEU |
| rs7015203  | RPL8      | GI_15431305-I | 8 | 8 | 145946826 | 41658  | 7.5933  | 5.72323 | CEU |
| rs2730059  | RPL8      | GI_15431305-I | 8 | 8 | 145952565 | 35919  | 7.0203  | 5.72323 | CEU |

|            |           |               |   |   |           |        |        |         |     |
|------------|-----------|---------------|---|---|-----------|--------|--------|---------|-----|
| rs7838846  | RPL8      | GI_15431305-I | 8 | 8 | 145952984 | 35500  | 7.6229 | 5.72323 | CEU |
| rs2958480  | RPL8      | GI_15431305-I | 8 | 8 | 145954246 | 34238  | 6.2095 | 5.72323 | CEU |
| rs2958482  | RPL8      | GI_15431305-I | 8 | 8 | 145955419 | 33065  | 7.5933 | 5.72323 | CEU |
| rs2958483  | RPL8      | GI_15431305-I | 8 | 8 | 145957852 | 30632  | 8.4654 | 5.72323 | CEU |
| rs2955194  | RPL8      | GI_15431305-I | 8 | 8 | 145959711 | 28773  | 8.9209 | 5.72323 | CEU |
| rs2955195  | RPL8      | GI_15431305-I | 8 | 8 | 145959996 | 28488  | 8.1153 | 5.72323 | CEU |
| rs2953854  | RPL8      | GI_15431305-I | 8 | 8 | 145961284 | 27200  | 8.2137 | 5.72323 | CEU |
| rs2958490  | RPL8      | GI_15431305-I | 8 | 8 | 145962187 | 26297  | 7.0771 | 5.72323 | CEU |
| rs2958493  | RPL8      | GI_15431305-I | 8 | 8 | 145970899 | 17585  | 7.312  | 5.72323 | CEU |
| rs2955202  | RPL8      | GI_15431305-I | 8 | 8 | 145970933 | 17551  | 8.2137 | 5.72323 | CEU |
| rs2953856  | RPL8      | GI_15431305-I | 8 | 8 | 145971080 | 17404  | 8.2137 | 5.72323 | CEU |
| rs2953857  | RPL8      | GI_15431305-I | 8 | 8 | 145971225 | 17259  | 8.2137 | 5.72323 | CEU |
| rs2958498  | RPL8      | GI_15431305-I | 8 | 8 | 145981621 | 6863   | 9.0126 | 5.72323 | CEU |
| rs7829963  | RPL8      | GI_15431305-I | 8 | 8 | 145982147 | 6337   | 9.2085 | 5.72323 | CEU |
| rs4637890  | RPL8      | GI_15431305-I | 8 | 8 | 145983064 | 5420   | 9.1673 | 5.72323 | CEU |
| rs2955233  | RPL8      | GI_15431305-I | 8 | 8 | 145983603 | 4881   | 6.6757 | 5.72323 | CEU |
| rs11784860 | RPL8      | GI_15431305-I | 8 | 8 | 145984603 | 3881   | 9.2085 | 5.72323 | CEU |
| rs2953886  | RPL8      | GI_15431305-I | 8 | 8 | 145985544 | 2940   | 8.9992 | 5.72323 | CEU |
| rs2280933  | RPL8      | GI_15431305-I | 8 | 8 | 145985722 | 2762   | 9.2085 | 5.72323 | CEU |
| rs2958516  | RPL8      | GI_15431305-I | 8 | 8 | 145989530 | 1046   | 8.9992 | 5.72323 | CEU |
| rs3808374  | RPL8      | GI_15431305-I | 8 | 8 | 145989584 | 1100   | 8.5283 | 5.72323 | CEU |
| rs2958517  | RPL8      | GI_15431305-I | 8 | 8 | 145990182 | 1698   | 9.2085 | 5.72323 | CEU |
| rs2466401  | RPL8      | GI_15431305-I | 8 | 8 | 146013401 | 24917  | 6.2221 | 5.72323 | CEU |
| rs1735196  | RPL8      | GI_15431305-I | 8 | 8 | 146018537 | 30053  | 6.2221 | 5.72323 | CEU |
| rs2258177  | RPL8      | GI_15431305-I | 8 | 8 | 146019637 | 31153  | 6.2221 | 5.72323 | CEU |
| rs2258178  | RPL8      | GI_15431305-I | 8 | 8 | 146019643 | 31159  | 6.2221 | 5.72323 | CEU |
| rs3757941  | RPL8      | GI_15431305-I | 8 | 8 | 146021962 | 33478  | 6.2221 | 5.72323 | CEU |
| rs2727237  | RPL8      | GI_15431305-I | 8 | 8 | 146022007 | 33523  | 6.2221 | 5.72323 | CEU |
| rs1735157  | RPL8      | GI_15431305-I | 8 | 8 | 146025507 | 37023  | 5.9562 | 5.72323 | CEU |
| rs1735412  | RPL8      | GI_15431305-I | 8 | 8 | 146031789 | 43305  | 6.2221 | 5.72323 | CEU |
| rs2736648  | RPL8      | GI_15431305-I | 8 | 8 | 146032782 | 44298  | 6.0829 | 5.72323 | CEU |
| rs1735166  | RPL8      | GI_15431305-I | 8 | 8 | 146035977 | 47493  | 6.2221 | 5.72323 | CEU |
| rs1618523  | RPL8      | GI_15431305-I | 8 | 8 | 146036835 | 48351  | 5.8976 | 5.72323 | CEU |
| rs2242650  | RPL8      | GI_15431305-I | 8 | 8 | 146037222 | 48738  | 6.2221 | 5.72323 | CEU |
| rs2242651  | RPL8      | GI_15431305-I | 8 | 8 | 146037312 | 48828  | 6.2221 | 5.72323 | CEU |
| rs1735169  | RPL8      | GI_15431305-I | 8 | 8 | 146037858 | 49374  | 6.2221 | 5.72323 | CEU |
| rs9004     | RPL8      | GI_15431305-I | 8 | 8 | 146039126 | 50642  | 6.2459 | 5.72323 | CEU |
| rs1735173  | RPL8      | GI_15431305-I | 8 | 8 | 146042065 | 53581  | 6.5274 | 5.72323 | CEU |
| rs1735404  | RPL8      | GI_15431305-I | 8 | 8 | 146042717 | 54233  | 5.8976 | 5.72323 | CEU |
| rs1209892  | RPL8      | GI_15431305-I | 8 | 8 | 146045795 | 57311  | 6.2221 | 5.72323 | CEU |
| rs1209891  | RPL8      | GI_15431305-I | 8 | 8 | 146045969 | 57485  | 5.8976 | 5.72323 | CEU |
| rs1209890  | RPL8      | GI_15431305-I | 8 | 8 | 146046090 | 57606  | 6.2221 | 5.72323 | CEU |
| rs1209886  | RPL8      | GI_15431305-I | 8 | 8 | 146046250 | 57766  | 5.958  | 5.72323 | CEU |
| rs1209881  | RPL8      | GI_15431305-I | 8 | 8 | 146046636 | 58152  | 6.2221 | 5.72323 | CEU |
| rs1209879  | RPL8      | GI_15431305-I | 8 | 8 | 146047512 | 59028  | 5.8976 | 5.72323 | CEU |
| rs3866994  | RPL8      | GI_15431305-I | 8 | 8 | 146050827 | 62343  | 5.8976 | 5.72323 | CEU |
| rs3866995  | RPL8      | GI_15431305-I | 8 | 8 | 146052971 | 64487  | 5.8976 | 5.72323 | CEU |
| rs1209872  | RPL8      | GI_15431305-I | 8 | 8 | 146053639 | 65155  | 6.2221 | 5.72323 | CEU |
| rs1209867  | RPL8      | GI_15431305-I | 8 | 8 | 146059971 | 71487  | 6.2221 | 5.72323 | CEU |
| rs1209857  | RPL8      | GI_15431305-I | 8 | 8 | 146070655 | 82171  | 5.8292 | 5.72323 | CEU |
| rs1209850  | RPL8      | GI_15431305-I | 8 | 8 | 146076721 | 88237  | 6.2221 | 5.72323 | CEU |
| rs10814395 | Hs.155793 | Hs.155793-S   | 9 | 9 | 3650648   | 13225  | 6.4403 | 6.28728 | CEU |
| rs7873232  | Hs.155793 | Hs.155793-S   | 9 | 9 | 3681940   | 44517  | 6.9049 | 6.28728 | CEU |
| rs10814080 | NUDT2     | GI_22265329-I | 9 | 9 | 34216942  | 109312 | 7.481  | 5.79105 | CEU |
| rs10814084 | NUDT2     | GI_22265329-I | 9 | 9 | 34253389  | 72865  | 7.481  | 5.79105 | CEU |
| rs10814086 | NUDT2     | GI_22265329-I | 9 | 9 | 34254597  | 71657  | 7.481  | 5.79105 | CEU |

|            |           |               |   |   |          |        |         |         |     |
|------------|-----------|---------------|---|---|----------|--------|---------|---------|-----|
| rs10814087 | NUDT2     | GI_22219466-A | 9 | 9 | 34255763 | 77740  | 5.8375  | 5.79105 | CEU |
| rs10972032 | NUDT2     | GI_22265329-I | 9 | 9 | 34259079 | 67175  | 7.481   | 5.79105 | CEU |
| rs7868756  | NUDT2     | GI_22265329-I | 9 | 9 | 34261381 | 64873  | 7.481   | 5.79105 | CEU |
| rs4878560  | NUDT2     | GI_22265329-I | 9 | 9 | 34272388 | 53866  | 7.481   | 5.79105 | CEU |
| rs7028914  | NUDT2     | GI_22265329-I | 9 | 9 | 34274727 | 51527  | 7.481   | 5.79105 | CEU |
| rs7028928  | NUDT2     | GI_22265329-I | 9 | 9 | 34274752 | 51502  | 7.481   | 5.79105 | CEU |
| rs10814091 | NUDT2     | GI_22265329-I | 9 | 9 | 34277840 | 48414  | 7.481   | 5.79105 | CEU |
| rs7042250  | NUDT2     | GI_22265329-I | 9 | 9 | 34295076 | 31178  | 7.481   | 5.79105 | CEU |
| rs950546   | NUDT2     | GI_22265329-I | 9 | 9 | 34300083 | 26171  | 7.481   | 5.79105 | CEU |
| rs10972047 | NUDT2     | GI_22265329-I | 9 | 9 | 34300357 | 25897  | 7.481   | 5.79105 | CEU |
| rs7853609  | NUDT2     | GI_22265329-I | 9 | 9 | 34310195 | 16059  | 6.3124  | 5.79105 | CEU |
| rs10814098 | NUDT2     | GI_22265329-I | 9 | 9 | 34314168 | 12086  | 7.481   | 5.79105 | CEU |
| rs7875342  | NUDT2     | GI_22265329-I | 9 | 9 | 34319110 | 7144   | 7.481   | 5.79105 | CEU |
| rs7039222  | NUDT2     | GI_22265329-I | 9 | 9 | 34322740 | 3514   | 7.481   | 5.79105 | CEU |
| rs4879775  | NUDT2     | GI_22265329-I | 9 | 9 | 34324793 | 1461   | 7.481   | 5.79105 | CEU |
| rs10972067 | NUDT2     | GI_22265329-I | 9 | 9 | 34332634 | 6380   | 7.481   | 5.79105 | CEU |
| rs10814105 | NUDT2     | GI_22265329-I | 9 | 9 | 34359062 | 32808  | 6.8362  | 5.79105 | CEU |
| rs7852399  | NUDT2     | GI_22265329-I | 9 | 9 | 34361788 | 35534  | 7.481   | 5.79105 | CEU |
| rs4310287  | NUDT2     | GI_22265329-I | 9 | 9 | 34364979 | 38725  | 7.481   | 5.79105 | CEU |
| rs10972092 | NUDT2     | GI_22265329-I | 9 | 9 | 34379702 | 53448  | 6.3736  | 5.79105 | CEU |
| rs4471150  | FLJ20444  | GI_44888815-S | 9 | 9 | 64139653 | 66734  | 6.1309  | 4.27414 | CEU |
| rs2307055  | FLJ20444  | GI_44888815-S | 9 | 9 | 64205260 | 1127   | 11.7199 | 4.27414 | CEU |
| rs4437753  | FLJ20444  | GI_44888815-S | 9 | 9 | 64207426 | 1039   | 11.7199 | 4.27414 | CEU |
| rs3752955  | C9orf95   | GI_8923529-S  | 9 | 9 | 74914244 | 712    | 6.4236  | 6.15095 | CEU |
| rs11144225 | C9orf95   | GI_8923529-S  | 9 | 9 | 74936854 | 23322  | 6.4541  | 6.15095 | CEU |
| rs10869500 | C9orf95   | GI_8923529-S  | 9 | 9 | 74937249 | 23717  | 6.4541  | 6.15095 | CEU |
| rs3824348  | C9orf95   | GI_8923529-S  | 9 | 9 | 74968105 | 54573  | 6.27    | 6.15095 | CEU |
| rs722353   | FLJ14753  | GI_14211858-S | 9 | 9 | 94141540 | 160903 | 7.4091  | 5.73152 | CEU |
| rs7859571  | FLJ14753  | GI_14211858-S | 9 | 9 | 94211440 | 91003  | 7.481   | 5.73152 | CEU |
| rs9632920  | FLJ14753  | GI_14211858-S | 9 | 9 | 94255655 | 46788  | 7.481   | 5.73152 | CEU |
| rs7036474  | FLJ14753  | GI_14211858-S | 9 | 9 | 94270934 | 31509  | 7.481   | 5.73152 | CEU |
| rs7025878  | FLJ14753  | GI_14211858-S | 9 | 9 | 94278347 | 24096  | 7.6867  | 5.73152 | CEU |
| rs7045712  | FLJ14753  | GI_14211858-S | 9 | 9 | 94287872 | 14571  | 6.3618  | 5.73152 | CEU |
| rs7046779  | FLJ14753  | GI_14211858-S | 9 | 9 | 94290447 | 11996  | 7.6684  | 5.73152 | CEU |
| rs7037298  | FLJ14753  | GI_14211858-S | 9 | 9 | 94295718 | 6725   | 7.6178  | 5.73152 | CEU |
| rs6479545  | FLJ14753  | GI_14211858-S | 9 | 9 | 94296830 | 5613   | 5.9528  | 5.73152 | CEU |
| rs7868703  | FLJ14753  | GI_14211858-S | 9 | 9 | 94323341 | 20898  | 7.6023  | 5.73152 | CEU |
| rs16911832 | FLJ14753  | GI_14211858-S | 9 | 9 | 94323614 | 21171  | 7.6684  | 5.73152 | CEU |
| rs7042219  | FLJ14753  | GI_14211858-S | 9 | 9 | 94327241 | 24798  | 7.6162  | 5.73152 | CEU |
| rs7042434  | FLJ14753  | GI_14211858-S | 9 | 9 | 94334552 | 32109  | 6.2122  | 5.73152 | CEU |
| rs7042468  | FLJ14753  | GI_14211858-S | 9 | 9 | 94334638 | 32195  | 6.9262  | 5.73152 | CEU |
| rs7028388  | FLJ14753  | GI_14211858-S | 9 | 9 | 94336173 | 33730  | 7.4293  | 5.73152 | CEU |
| rs6479549  | FLJ14753  | GI_14211858-S | 9 | 9 | 94337287 | 34844  | 6.4929  | 5.73152 | CEU |
| rs908808   | FLJ14753  | GI_14211858-S | 9 | 9 | 94351543 | 49100  | 7.6684  | 5.73152 | CEU |
| rs6478977  | LOC286353 | GI_27478844-S | 9 | 9 | 95639831 | 8439   | 6.5517  | 6.35644 | CEU |
| rs7871709  | LOC286353 | GI_27478844-S | 9 | 9 | 95640165 | 8105   | 6.5517  | 6.35644 | CEU |
| rs816675   | LOC286353 | GI_27478844-S | 9 | 9 | 95648636 | 366    | 6.5517  | 6.35644 | CEU |
| rs816673   | LOC286353 | GI_27478844-S | 9 | 9 | 95652971 | 4701   | 6.5517  | 6.35644 | CEU |
| rs816670   | LOC286353 | GI_27478844-S | 9 | 9 | 95654989 | 6719   | 6.5517  | 6.35644 | CEU |
| rs700962   | LOC286353 | GI_27478844-S | 9 | 9 | 95657603 | 9333   | 6.5517  | 6.35644 | CEU |
| rs816683   | LOC286353 | GI_27478844-S | 9 | 9 | 95664656 | 16386  | 6.5517  | 6.35644 | CEU |
| rs13299166 | LOC286353 | GI_27478844-S | 9 | 9 | 95675086 | 26816  | 6.5517  | 6.35644 | CEU |
| rs10818574 | LOC286353 | GI_27478844-S | 9 | 9 | 95678522 | 30252  | 6.4005  | 6.35644 | CEU |
| rs10760189 | LOC286353 | GI_27478844-S | 9 | 9 | 95680380 | 32110  | 6.5517  | 6.35644 | CEU |
| rs10985499 | LOC286353 | GI_27478844-S | 9 | 9 | 95682561 | 34291  | 6.5517  | 6.35644 | CEU |
| rs10760261 | LOC286353 | GI_27478844-S | 9 | 9 | 95692066 | 43796  | 6.5517  | 6.35644 | CEU |

|            |           |               |   |   |          |        |        |         |     |
|------------|-----------|---------------|---|---|----------|--------|--------|---------|-----|
| rs10760269 | LOC286353 | GI_27478844-S | 9 | 9 | 95694734 | 46464  | 6.5517 | 6.35644 | CEU |
| rs12349742 | LOC286353 | GI_27478844-S | 9 | 9 | 95699535 | 51265  | 6.5517 | 6.35644 | CEU |
| rs10818899 | LOC286353 | GI_27478844-S | 9 | 9 | 95701966 | 53696  | 6.5517 | 6.35644 | CEU |
| rs689986   | LOC286353 | GI_27478844-S | 9 | 9 | 95708704 | 60434  | 6.5517 | 6.35644 | CEU |
| rs690633   | LOC286353 | GI_27478844-S | 9 | 9 | 95709731 | 61461  | 6.5517 | 6.35644 | CEU |
| rs689697   | LOC286353 | GI_27478844-S | 9 | 9 | 95718397 | 70127  | 6.5517 | 6.35644 | CEU |
| rs16910750 | HABP4     | GI_24307946-S | 9 | 9 | 96164026 | 167907 | 6.4253 | 5.78759 | CEU |
| rs10820378 | HABP4     | GI_24307946-S | 9 | 9 | 96172304 | 159629 | 6.4253 | 5.78759 | CEU |
| rs7028361  | HABP4     | GI_24307946-S | 9 | 9 | 96173274 | 158659 | 6.4253 | 5.78759 | CEU |
| rs10820386 | HABP4     | GI_24307946-S | 9 | 9 | 96176865 | 155068 | 6.4253 | 5.78759 | CEU |
| rs10122107 | HABP4     | GI_24307946-S | 9 | 9 | 96191257 | 140676 | 6.4253 | 5.78759 | CEU |
| rs10820447 | HABP4     | GI_24307946-S | 9 | 9 | 96211599 | 120334 | 6.5417 | 5.78759 | CEU |
| rs7851198  | HABP4     | GI_24307946-S | 9 | 9 | 96211930 | 120003 | 6.4253 | 5.78759 | CEU |
| rs10990768 | HABP4     | GI_24307946-S | 9 | 9 | 96215078 | 116855 | 6.4253 | 5.78759 | CEU |
| rs10820507 | HABP4     | GI_24307946-S | 9 | 9 | 96227707 | 104226 | 6.4253 | 5.78759 | CEU |
| rs7861768  | HABP4     | GI_24307946-S | 9 | 9 | 96230334 | 101599 | 6.4253 | 5.78759 | CEU |
| rs10820564 | HABP4     | GI_24307946-S | 9 | 9 | 96251186 | 80747  | 6.4253 | 5.78759 | CEU |
| rs2145985  | HABP4     | GI_24307946-S | 9 | 9 | 96254086 | 77847  | 6.4253 | 5.78759 | CEU |
| rs10820597 | HABP4     | GI_24307946-S | 9 | 9 | 96267902 | 64031  | 5.8553 | 5.78759 | CEU |
| rs7857610  | HABP4     | GI_24307946-S | 9 | 9 | 96269508 | 62425  | 5.8553 | 5.78759 | CEU |
| rs10820604 | HABP4     | GI_24307946-S | 9 | 9 | 96272049 | 59884  | 5.8553 | 5.78759 | CEU |
| rs2406005  | HABP4     | GI_24307946-S | 9 | 9 | 96277210 | 54723  | 5.8553 | 5.78759 | CEU |
| rs7870753  | HABP4     | GI_24307946-S | 9 | 9 | 96281140 | 50793  | 7.4216 | 5.78759 | CEU |
| rs10761013 | HABP4     | GI_24307946-S | 9 | 9 | 96281494 | 50439  | 8.3619 | 5.78759 | CEU |
| rs10820626 | HABP4     | GI_24307946-S | 9 | 9 | 96283735 | 48198  | 8.436  | 5.78759 | CEU |
| rs7861282  | HABP4     | GI_24307946-S | 9 | 9 | 96284023 | 47910  | 8.436  | 5.78759 | CEU |
| rs7858287  | HABP4     | GI_24307946-S | 9 | 9 | 96284071 | 47862  | 8.8265 | 5.78759 | CEU |
| rs10820629 | HABP4     | GI_24307946-S | 9 | 9 | 96286587 | 45346  | 8.436  | 5.78759 | CEU |
| rs10820634 | HABP4     | GI_24307946-S | 9 | 9 | 96294659 | 37274  | 8.436  | 5.78759 | CEU |
| rs7857261  | HABP4     | GI_24307946-S | 9 | 9 | 96299334 | 32599  | 7.4216 | 5.78759 | CEU |
| rs3802441  | HABP4     | GI_24307946-S | 9 | 9 | 96299950 | 31983  | 8.436  | 5.78759 | CEU |
| rs7870253  | HABP4     | GI_24307946-S | 9 | 9 | 96310651 | 21282  | 7.2894 | 5.78759 | CEU |
| rs16910858 | HABP4     | GI_24307946-S | 9 | 9 | 96314112 | 17821  | 8.3619 | 5.78759 | CEU |
| rs10820666 | HABP4     | GI_24307946-S | 9 | 9 | 96314552 | 17381  | 8.436  | 5.78759 | CEU |
| rs10761035 | HABP4     | GI_24307946-S | 9 | 9 | 96315647 | 16286  | 7.701  | 5.78759 | CEU |
| rs7038932  | HABP4     | GI_24307946-S | 9 | 9 | 96315881 | 16052  | 8.436  | 5.78759 | CEU |
| rs7024214  | HABP4     | GI_24307946-S | 9 | 9 | 96318728 | 13205  | 7.4216 | 5.78759 | CEU |
| rs6477489  | HABP4     | GI_24307946-S | 9 | 9 | 96319396 | 12537  | 7.4216 | 5.78759 | CEU |
| rs10820682 | HABP4     | GI_24307946-S | 9 | 9 | 96321142 | 10791  | 8.436  | 5.78759 | CEU |
| rs7865488  | HABP4     | GI_24307946-S | 9 | 9 | 96324136 | 7797   | 8.436  | 5.78759 | CEU |
| rs7039472  | HABP4     | GI_24307946-S | 9 | 9 | 96325129 | 6804   | 8.2989 | 5.78759 | CEU |
| rs1590971  | HABP4     | GI_24307946-S | 9 | 9 | 96325772 | 6161   | 8.436  | 5.78759 | CEU |
| rs10512239 | HABP4     | GI_24307946-S | 9 | 9 | 96326567 | 5366   | 8.436  | 5.78759 | CEU |
| rs16910870 | HABP4     | GI_24307946-S | 9 | 9 | 96326658 | 5275   | 8.0446 | 5.78759 | CEU |
| rs10991346 | HABP4     | GI_24307946-S | 9 | 9 | 96327313 | 4620   | 7.3137 | 5.78759 | CEU |
| rs10991348 | HABP4     | GI_24307946-S | 9 | 9 | 96327382 | 4551   | 8.0446 | 5.78759 | CEU |
| rs7867323  | HABP4     | GI_24307946-S | 9 | 9 | 96327612 | 4321   | 8.436  | 5.78759 | CEU |
| rs7848376  | HABP4     | GI_24307946-S | 9 | 9 | 96327624 | 4309   | 5.9963 | 5.78759 | CEU |
| rs10991354 | HABP4     | GI_24307946-S | 9 | 9 | 96329264 | 2669   | 8.436  | 5.78759 | CEU |
| rs7030316  | HABP4     | GI_24307946-S | 9 | 9 | 96330018 | 1915   | 8.436  | 5.78759 | CEU |
| rs1057687  | HABP4     | GI_24307946-S | 9 | 9 | 96332019 | 86     | 8.436  | 5.78759 | CEU |
| rs6477493  | HABP4     | GI_24307946-S | 9 | 9 | 96332637 | 704    | 8.1069 | 5.78759 | CEU |
| rs10991367 | HABP4     | GI_24307946-S | 9 | 9 | 96333488 | 1555   | 8.436  | 5.78759 | CEU |
| rs6477496  | HABP4     | GI_24307946-S | 9 | 9 | 96335967 | 4034   | 8.436  | 5.78759 | CEU |
| rs10512238 | HABP4     | GI_24307946-S | 9 | 9 | 96340129 | 8196   | 8.436  | 5.78759 | CEU |
| rs10991378 | HABP4     | GI_24307946-S | 9 | 9 | 96340535 | 8602   | 8.436  | 5.78759 | CEU |

|            |            |               |    |    |           |        |         |         |     |
|------------|------------|---------------|----|----|-----------|--------|---------|---------|-----|
| rs7871404  | HABP4      | GI_24307946-S | 9  | 9  | 96341851  | 9918   | 6.9961  | 5.78759 | CEU |
| rs10820739 | HABP4      | GI_24307946-S | 9  | 9  | 96343376  | 11443  | 7.726   | 5.78759 | CEU |
| rs10114668 | HABP4      | GI_24307946-S | 9  | 9  | 96345944  | 14011  | 8.436   | 5.78759 | CEU |
| rs10820745 | HABP4      | GI_24307946-S | 9  | 9  | 96351860  | 19927  | 8.436   | 5.78759 | CEU |
| rs10820746 | HABP4      | GI_24307946-S | 9  | 9  | 96352126  | 20193  | 8.436   | 5.78759 | CEU |
| rs7856709  | HABP4      | GI_24307946-S | 9  | 9  | 96353793  | 21860  | 8.436   | 5.78759 | CEU |
| rs10120119 | HABP4      | GI_24307946-S | 9  | 9  | 96354509  | 22576  | 8.436   | 5.78759 | CEU |
| rs10820757 | HABP4      | GI_24307946-S | 9  | 9  | 96361824  | 29891  | 8.436   | 5.78759 | CEU |
| rs725229   | PCTAIRE2BP | GI_24307950-S | 9  | 9  | 97150269  | 187368 | 6.4668  | 5.65726 | CEU |
| rs12238579 | Hs.43687   | Hs.43687-S    | 9  | 9  | 97731613  | 11957  | 5.9409  | 5.90683 | CEU |
| rs10818474 | EGFL5      | GI_42659252-S | 9  | 9  | 120569518 | 126464 | 6.667   | 5.85999 | CEU |
| rs2243898  | ZNF79      | GI_24307936-S | 9  | 9  | 127299544 | 12379  | 6.3868  | 6.11588 | CEU |
| rs10751505 | Hs.495422  | Hs.495422-S   | 9  | 9  | 133224928 | 1454   | 7.2025  | 6.02591 | CEU |
| rs10793964 | Hs.495422  | Hs.495422-S   | 9  | 9  | 133228143 | 4669   | 6.7608  | 6.02591 | CEU |
| rs886090   | Hs.495422  | Hs.495422-S   | 9  | 9  | 133229057 | 5583   | 9.0924  | 6.02591 | CEU |
| rs12763    | SURF1      | GI_19557683-S | 9  | 9  | 133256814 | 7940   | 5.9159  | 5.79157 | CEU |
| rs2296810  | SURF1      | GI_19557683-S | 9  | 9  | 133257248 | 8374   | 5.9159  | 5.79157 | CEU |
| rs1059773  | SURF1      | GI_19557683-S | 9  | 9  | 133258419 | 9545   | 6.0682  | 5.79157 | CEU |
| rs2494     | SURF1      | GI_19557683-S | 9  | 9  | 133259387 | 10513  | 5.9159  | 5.79157 | CEU |
| rs3829154  | ECHDC3     | GI_31542717-S | 10 | 10 | 11822759  | 23045  | 7.011   | 5.94199 | CEU |
| rs1055340  | PTER       | GI_20070185-S | 10 | 10 | 16595534  | 974    | 11.1292 | 5.87123 | CEU |
| rs7909832  | PTER       | GI_20070185-S | 10 | 10 | 16596716  | 2156   | 11.1292 | 5.87123 | CEU |
| rs13376918 | PIP5K2A    | GI_20302162-S | 10 | 10 | 22467406  | 398559 | 6.7207  | 5.45287 | CEU |
| rs1926693  | PIP5K2A    | GI_20302162-S | 10 | 10 | 22468926  | 397039 | 6.4217  | 5.45287 | CEU |
| rs12415931 | PIP5K2A    | GI_20302162-S | 10 | 10 | 22483292  | 382673 | 6.2292  | 5.45287 | CEU |
| rs11597659 | PIP5K2A    | GI_20302162-S | 10 | 10 | 22487143  | 378822 | 6.2292  | 5.45287 | CEU |
| rs11593338 | PIP5K2A    | GI_20302162-S | 10 | 10 | 22487485  | 378480 | 6.2292  | 5.45287 | CEU |
| rs11593347 | PIP5K2A    | GI_20302162-S | 10 | 10 | 22487576  | 378389 | 6.2292  | 5.45287 | CEU |
| rs12768091 | PIP5K2A    | GI_20302162-S | 10 | 10 | 22488091  | 377874 | 6.7207  | 5.45287 | CEU |
| rs11592959 | PIP5K2A    | GI_20302162-S | 10 | 10 | 22489063  | 376902 | 6.2292  | 5.45287 | CEU |
| rs10887953 | IFIT5      | GI_6912629-S  | 10 | 10 | 91138622  | 31861  | 6.3133  | 6.22153 | CEU |
| rs11203109 | IFIT5      | GI_6912629-S  | 10 | 10 | 91147139  | 23344  | 6.3133  | 6.22153 | CEU |
| rs11203115 | IFIT5      | GI_6912629-S  | 10 | 10 | 91163377  | 7106   | 6.6496  | 6.22153 | CEU |
| rs7090346  | IFIT5      | GI_6912629-S  | 10 | 10 | 91183302  | 12819  | 7.0545  | 6.22153 | CEU |
| rs6586196  | IFIT5      | GI_6912629-S  | 10 | 10 | 91184047  | 13564  | 6.6528  | 6.22153 | CEU |
| rs12359272 | ENTPD1     | GI_45580699-S | 10 | 10 | 97355153  | 261044 | 6.3148  | 5.78005 | CEU |
| rs11188394 | ENTPD1     | GI_45580699-S | 10 | 10 | 97355448  | 260749 | 6.8256  | 5.78005 | CEU |
| rs4037     | ENTPD1     | GI_45580699-S | 10 | 10 | 97355810  | 260387 | 6.8256  | 5.78005 | CEU |
| rs11188398 | ENTPD1     | GI_45580699-S | 10 | 10 | 97359083  | 257114 | 7.5632  | 5.78005 | CEU |
| rs2296691  | ENTPD1     | GI_45580699-S | 10 | 10 | 97360979  | 255218 | 7.4829  | 5.78005 | CEU |
| rs10882643 | ENTPD1     | GI_45580699-S | 10 | 10 | 97365161  | 251036 | 7.9982  | 5.78005 | CEU |
| rs749050   | ENTPD1     | GI_45580699-S | 10 | 10 | 97366105  | 250092 | 7.0877  | 5.78005 | CEU |
| rs10882644 | ENTPD1     | GI_45580699-S | 10 | 10 | 97378569  | 237628 | 7.4829  | 5.78005 | CEU |
| rs11188407 | ENTPD1     | GI_45580699-S | 10 | 10 | 97380523  | 235674 | 7.4635  | 5.78005 | CEU |
| rs11188411 | ENTPD1     | GI_45580699-S | 10 | 10 | 97387334  | 228863 | 7.4829  | 5.78005 | CEU |
| rs4258314  | ENTPD1     | GI_45580699-S | 10 | 10 | 97398593  | 217604 | 7.2154  | 5.78005 | CEU |
| rs11188417 | ENTPD1     | GI_45580699-S | 10 | 10 | 97401670  | 214527 | 7.4829  | 5.78005 | CEU |
| rs10882649 | ENTPD1     | GI_45580699-S | 10 | 10 | 97416076  | 200121 | 9.3169  | 5.78005 | CEU |
| rs7920801  | ENTPD1     | GI_45580699-S | 10 | 10 | 97421829  | 194368 | 6.5073  | 5.78005 | CEU |
| rs10882651 | ENTPD1     | GI_45580699-S | 10 | 10 | 97428813  | 187384 | 6.0116  | 5.78005 | CEU |
| rs10882652 | ENTPD1     | GI_45580699-S | 10 | 10 | 97431316  | 184881 | 6.0116  | 5.78005 | CEU |
| rs17461546 | ENTPD1     | GI_45580699-S | 10 | 10 | 97432985  | 183212 | 8.7411  | 5.78005 | CEU |
| rs12357173 | ENTPD1     | GI_45580699-S | 10 | 10 | 97434593  | 181604 | 9.0351  | 5.78005 | CEU |
| rs2297788  | ENTPD1     | GI_45580699-S | 10 | 10 | 97436196  | 180001 | 6.0116  | 5.78005 | CEU |
| rs7079312  | ENTPD1     | GI_45580699-S | 10 | 10 | 97449685  | 166512 | 5.8221  | 5.78005 | CEU |
| rs12244559 | ENTPD1     | GI_45580699-S | 10 | 10 | 97461915  | 154282 | 6.0116  | 5.78005 | CEU |

|            |        |               |    |    |          |        |         |         |     |
|------------|--------|---------------|----|----|----------|--------|---------|---------|-----|
| rs10882656 | ENTPD1 | GI_45580699-S | 10 | 10 | 97464822 | 151375 | 10.8586 | 5.78005 | CEU |
| rs7095587  | ENTPD1 | GI_45580699-S | 10 | 10 | 97465290 | 150907 | 10.8586 | 5.78005 | CEU |
| rs4918962  | ENTPD1 | GI_45580699-S | 10 | 10 | 97465564 | 150633 | 9.6502  | 5.78005 | CEU |
| rs10882657 | ENTPD1 | GI_45580699-S | 10 | 10 | 97466569 | 149628 | 9.6502  | 5.78005 | CEU |
| rs1933165  | ENTPD1 | GI_45580699-S | 10 | 10 | 97480377 | 135820 | 9.6502  | 5.78005 | CEU |
| rs11188455 | ENTPD1 | GI_45580699-S | 10 | 10 | 97480913 | 135284 | 9.0351  | 5.78005 | CEU |
| rs3934409  | ENTPD1 | GI_45580699-S | 10 | 10 | 97484134 | 132063 | 9.6502  | 5.78005 | CEU |
| rs2861147  | ENTPD1 | GI_45580699-S | 10 | 10 | 97486358 | 129839 | 9.6502  | 5.78005 | CEU |
| rs2861148  | ENTPD1 | GI_45580699-S | 10 | 10 | 97486538 | 129659 | 6.9987  | 5.78005 | CEU |
| rs10748642 | ENTPD1 | GI_45580699-S | 10 | 10 | 97492031 | 124166 | 10.8586 | 5.78005 | CEU |
| rs12358481 | ENTPD1 | GI_45580699-S | 10 | 10 | 97496093 | 120104 | 8.4187  | 5.78005 | CEU |
| rs17462179 | ENTPD1 | GI_45580699-S | 10 | 10 | 97496695 | 119502 | 9.0351  | 5.78005 | CEU |
| rs7086986  | ENTPD1 | GI_45580699-S | 10 | 10 | 97497302 | 118895 | 10.8586 | 5.78005 | CEU |
| rs17553401 | ENTPD1 | GI_45580699-S | 10 | 10 | 97497463 | 118734 | 9.0351  | 5.78005 | CEU |
| rs7096317  | ENTPD1 | GI_45580699-S | 10 | 10 | 97498834 | 117363 | 10.8586 | 5.78005 | CEU |
| rs6584022  | ENTPD1 | GI_45580699-S | 10 | 10 | 97499631 | 116566 | 10.9812 | 5.78005 | CEU |
| rs6584023  | ENTPD1 | GI_45580699-S | 10 | 10 | 97499767 | 116430 | 10.8586 | 5.78005 | CEU |
| rs7071836  | ENTPD1 | GI_45580699-S | 10 | 10 | 97501027 | 115170 | 10.8586 | 5.78005 | CEU |
| rs4918966  | ENTPD1 | GI_45580699-S | 10 | 10 | 97503352 | 112845 | 9.0351  | 5.78005 | CEU |
| rs3176895  | ENTPD1 | GI_45580699-S | 10 | 10 | 97504178 | 112019 | 9.0351  | 5.78005 | CEU |
| rs10748643 | ENTPD1 | GI_45580699-S | 10 | 10 | 97506754 | 109443 | 10.8586 | 5.78005 | CEU |
| rs10882660 | ENTPD1 | GI_45580699-S | 10 | 10 | 97507939 | 108258 | 10.8586 | 5.78005 | CEU |
| rs1418709  | ENTPD1 | GI_45580699-S | 10 | 10 | 97508689 | 107508 | 9.6502  | 5.78005 | CEU |
| rs5014871  | ENTPD1 | GI_45580699-S | 10 | 10 | 97512785 | 103412 | 10.8586 | 5.78005 | CEU |
| rs4551688  | ENTPD1 | GI_45580699-S | 10 | 10 | 97513770 | 102427 | 10.8586 | 5.78005 | CEU |
| rs4431963  | ENTPD1 | GI_45580699-S | 10 | 10 | 97519261 | 96936  | 10.8586 | 5.78005 | CEU |
| rs4582902  | ENTPD1 | GI_45580699-S | 10 | 10 | 97519308 | 96889  | 9.6502  | 5.78005 | CEU |
| rs11188484 | ENTPD1 | GI_45580699-S | 10 | 10 | 97529727 | 86470  | 9.0351  | 5.78005 | CEU |
| rs1340837  | ENTPD1 | GI_45580699-S | 10 | 10 | 97532025 | 84172  | 10.4573 | 5.78005 | CEU |
| rs6584027  | ENTPD1 | GI_45580699-S | 10 | 10 | 97534503 | 81694  | 8.0753  | 5.78005 | CEU |
| rs2153913  | ENTPD1 | GI_45580699-S | 10 | 10 | 97536416 | 79781  | 10.8586 | 5.78005 | CEU |
| rs3929900  | ENTPD1 | GI_45580699-S | 10 | 10 | 97539370 | 76827  | 9.6502  | 5.78005 | CEU |
| rs2185818  | ENTPD1 | GI_45580699-S | 10 | 10 | 97540730 | 75467  | 10.8586 | 5.78005 | CEU |
| rs10786236 | ENTPD1 | GI_45580699-S | 10 | 10 | 97542324 | 73873  | 9.4796  | 5.78005 | CEU |
| rs11188486 | ENTPD1 | GI_45580699-S | 10 | 10 | 97545937 | 70260  | 10.8586 | 5.78005 | CEU |
| rs4396219  | ENTPD1 | GI_45580699-S | 10 | 10 | 97551931 | 64266  | 9.8241  | 5.78005 | CEU |
| rs4074424  | ENTPD1 | GI_45580699-S | 10 | 10 | 97560401 | 55796  | 10.8586 | 5.78005 | CEU |
| rs11188497 | ENTPD1 | GI_45580699-S | 10 | 10 | 97562952 | 53245  | 9.106   | 5.78005 | CEU |
| rs4075311  | ENTPD1 | GI_45580699-S | 10 | 10 | 97564645 | 51552  | 8.5158  | 5.78005 | CEU |
| rs4075310  | ENTPD1 | GI_45580699-S | 10 | 10 | 97564679 | 51518  | 10.9351 | 5.78005 | CEU |
| rs10509686 | ENTPD1 | GI_45580699-S | 10 | 10 | 97567736 | 48461  | 9.0351  | 5.78005 | CEU |
| rs4918972  | ENTPD1 | GI_45580699-S | 10 | 10 | 97569211 | 46986  | 9.0351  | 5.78005 | CEU |
| rs3176891  | ENTPD1 | GI_45580699-S | 10 | 10 | 97570934 | 45263  | 9.6502  | 5.78005 | CEU |
| rs10882671 | ENTPD1 | GI_45580699-S | 10 | 10 | 97574013 | 42184  | 9.0351  | 5.78005 | CEU |
| rs10736093 | ENTPD1 | GI_45580699-S | 10 | 10 | 97575004 | 41193  | 8.5542  | 5.78005 | CEU |
| rs10748648 | ENTPD1 | GI_45580699-S | 10 | 10 | 97576857 | 39340  | 10.8586 | 5.78005 | CEU |
| rs10882673 | ENTPD1 | GI_45580699-S | 10 | 10 | 97577857 | 38340  | 10.3565 | 5.78005 | CEU |
| rs10882675 | ENTPD1 | GI_45580699-S | 10 | 10 | 97578013 | 38184  | 9.6502  | 5.78005 | CEU |
| rs10882676 | ENTPD1 | GI_45580699-S | 10 | 10 | 97578187 | 38010  | 9.6502  | 5.78005 | CEU |
| rs1891536  | ENTPD1 | GI_45580699-S | 10 | 10 | 97581287 | 34910  | 9.0351  | 5.78005 | CEU |
| rs1573112  | ENTPD1 | GI_45580699-S | 10 | 10 | 97583344 | 32853  | 9.6502  | 5.78005 | CEU |
| rs12354848 | ENTPD1 | GI_45580699-S | 10 | 10 | 97585686 | 30511  | 8.6397  | 5.78005 | CEU |
| rs4614366  | ENTPD1 | GI_45580699-S | 10 | 10 | 97586266 | 29931  | 6.0116  | 5.78005 | CEU |
| rs1342790  | ENTPD1 | GI_45580699-S | 10 | 10 | 97590529 | 25668  | 10.8586 | 5.78005 | CEU |
| rs3181131  | ENTPD1 | GI_45580699-S | 10 | 10 | 97592081 | 24116  | 10.5497 | 5.78005 | CEU |
| rs3181129  | ENTPD1 | GI_45580699-S | 10 | 10 | 97593168 | 23029  | 6.0116  | 5.78005 | CEU |

|            |          |               |    |    |           |       |         |         |     |
|------------|----------|---------------|----|----|-----------|-------|---------|---------|-----|
| rs7074403  | ENTPD1   | GI_45580699-S | 10 | 10 | 97595047  | 21150 | 10.8586 | 5.78005 | CEU |
| rs11188504 | ENTPD1   | GI_45580699-S | 10 | 10 | 97596214  | 19983 | 9.8598  | 5.78005 | CEU |
| rs7067762  | ENTPD1   | GI_45580699-S | 10 | 10 | 97596833  | 19364 | 7.7002  | 5.78005 | CEU |
| rs3181122  | ENTPD1   | GI_45580699-S | 10 | 10 | 97597155  | 19042 | 9.0351  | 5.78005 | CEU |
| rs7088584  | ENTPD1   | GI_45580699-S | 10 | 10 | 97597634  | 18563 | 10.8586 | 5.78005 | CEU |
| rs7089668  | ENTPD1   | GI_45580699-S | 10 | 10 | 97598412  | 17785 | 9.0351  | 5.78005 | CEU |
| rs7077566  | ENTPD1   | GI_45580699-S | 10 | 10 | 97607933  | 8264  | 9.1516  | 5.78005 | CEU |
| rs11598475 | ENTPD1   | GI_45580699-S | 10 | 10 | 97611256  | 4941  | 9.1139  | 5.78005 | CEU |
| rs2861153  | ENTPD1   | GI_45580699-S | 10 | 10 | 97613246  | 2951  | 9.1139  | 5.78005 | CEU |
| rs3176881  | ENTPD1   | GI_45580699-S | 10 | 10 | 97614197  | 2000  | 9.5074  | 5.78005 | CEU |
| rs2275759  | ENTPD1   | GI_45580699-S | 10 | 10 | 97614699  | 1498  | 10.6156 | 5.78005 | CEU |
| rs4512761  | ENTPD1   | GI_45580699-S | 10 | 10 | 97615089  | 1108  | 9.1139  | 5.78005 | CEU |
| rs2226163  | ENTPD1   | GI_45580699-S | 10 | 10 | 97618984  | 2787  | 10.6262 | 5.78005 | CEU |
| rs1935815  | ENTPD1   | GI_45580699-S | 10 | 10 | 97621482  | 5285  | 9.1139  | 5.78005 | CEU |
| rs2051052  | ENTPD1   | GI_45580699-S | 10 | 10 | 97622072  | 5875  | 10.5324 | 5.78005 | CEU |
| rs1935814  | ENTPD1   | GI_45580699-S | 10 | 10 | 97633941  | 17744 | 7.1394  | 5.78005 | CEU |
| rs11188516 | ENTPD1   | GI_45580699-S | 10 | 10 | 97639435  | 23238 | 6.9847  | 5.78005 | CEU |
| rs7074866  | ENTPD1   | GI_45580699-S | 10 | 10 | 97640499  | 24302 | 7.5658  | 5.78005 | CEU |
| rs7091088  | ENTPD1   | GI_45580699-S | 10 | 10 | 97640730  | 24533 | 7.1394  | 5.78005 | CEU |
| rs11188530 | ENTPD1   | GI_45580699-S | 10 | 10 | 97689276  | 73079 | 6.2552  | 5.78005 | CEU |
| rs12764732 | MGC10120 | GI_28603839-S | 10 | 10 | 101948760 | 75737 | 6.0615  | 5.97536 | CEU |
| rs12764727 | MGC10120 | GI_28603839-S | 10 | 10 | 101948787 | 75710 | 6.0615  | 5.97536 | CEU |
| rs17729417 | MGC10120 | GI_28603839-S | 10 | 10 | 101950132 | 74365 | 6.0615  | 5.97536 | CEU |
| rs12762869 | MGC10120 | GI_28603839-S | 10 | 10 | 101983702 | 40795 | 6.0615  | 5.97536 | CEU |
| rs7092983  | MGC10120 | GI_28603839-S | 10 | 10 | 101984471 | 40026 | 6.0615  | 5.97536 | CEU |
| rs12771909 | MGC10120 | GI_28603839-S | 10 | 10 | 101985275 | 39222 | 6.0615  | 5.97536 | CEU |
| rs17668159 | MGC10120 | GI_28603839-S | 10 | 10 | 101988820 | 35677 | 6.0615  | 5.97536 | CEU |
| rs7923115  | MGC10120 | GI_28603839-S | 10 | 10 | 101990210 | 34287 | 6.0611  | 5.97536 | CEU |
| rs12763385 | MGC10120 | GI_28603839-S | 10 | 10 | 101991221 | 33276 | 6.0615  | 5.97536 | CEU |
| rs17668309 | MGC10120 | GI_28603839-S | 10 | 10 | 101991783 | 32714 | 6.0601  | 5.97536 | CEU |
| rs7912400  | MGC10120 | GI_28603839-S | 10 | 10 | 101992668 | 31829 | 6.0611  | 5.97536 | CEU |
| rs7073610  | MGC10120 | GI_28603839-S | 10 | 10 | 101996615 | 27882 | 6.0615  | 5.97536 | CEU |
| rs17112791 | MGC10120 | GI_28603839-S | 10 | 10 | 101999700 | 24797 | 6.0615  | 5.97536 | CEU |
| rs7072367  | MGC10120 | GI_28603839-S | 10 | 10 | 101999970 | 24527 | 6.0615  | 5.97536 | CEU |
| rs7897454  | MGC10120 | GI_28603839-S | 10 | 10 | 102001692 | 22805 | 6.0615  | 5.97536 | CEU |
| rs17730369 | MGC10120 | GI_28603839-S | 10 | 10 | 102006580 | 17917 | 6.0615  | 5.97536 | CEU |
| rs7896703  | MGC10120 | GI_28603839-S | 10 | 10 | 102008621 | 15876 | 6.0611  | 5.97536 | CEU |
| rs12782963 | MGC10120 | GI_28603839-S | 10 | 10 | 102038198 | 13701 | 6.0615  | 5.97536 | CEU |
| rs2305386  | MGC10120 | GI_28603839-S | 10 | 10 | 102038259 | 13762 | 6.0615  | 5.97536 | CEU |
| rs1408342  | MRPL43   | GI_28872735-A | 10 | 10 | 102638742 | 97867 | 7.3924  | 5.87947 | CEU |
| rs10786612 | MRPL43   | GI_28872735-A | 10 | 10 | 102643755 | 92854 | 8.4117  | 5.87947 | CEU |
| rs4917916  | MRPL43   | GI_28872735-A | 10 | 10 | 102663282 | 73327 | 10.191  | 5.87947 | CEU |
| rs12241232 | MRPL43   | GI_28872735-A | 10 | 10 | 102682594 | 54015 | 10.191  | 5.87947 | CEU |
| rs7911957  | MRPL43   | GI_28872735-A | 10 | 10 | 102682960 | 53649 | 9.7015  | 5.87947 | CEU |
| rs10883565 | MRPL43   | GI_28872735-A | 10 | 10 | 102693424 | 43185 | 10.0648 | 5.87947 | CEU |
| rs1056295  | MRPL43   | GI_28872735-A | 10 | 10 | 102705173 | 31436 | 10.3884 | 5.87947 | CEU |
| rs927302   | MRPL43   | GI_28872735-A | 10 | 10 | 102712906 | 23703 | 10.3884 | 5.87947 | CEU |
| rs1570171  | MRPL43   | GI_28872735-A | 10 | 10 | 102721749 | 14860 | 11.9954 | 5.87947 | CEU |
| rs4919510  | MRPL43   | GI_28872735-A | 10 | 10 | 102724768 | 11841 | 12.3042 | 5.87947 | CEU |
| rs735137   | MRPL43   | GI_28872733-I | 10 | 10 | 102725825 | 10491 | 6.1433  | 5.87947 | CEU |
| rs735137   | MRPL43   | GI_28872735-A | 10 | 10 | 102725825 | 10784 | 13.67   | 5.87947 | CEU |
| rs12571302 | MRPL43   | GI_28872735-A | 10 | 10 | 102732753 | 3856  | 12.4711 | 5.87947 | CEU |
| rs2295716  | MRPL43   | GI_28872735-A | 10 | 10 | 102734204 | 2405  | 12.4044 | 5.87947 | CEU |
| rs722435   | MRPL43   | GI_28872733-I | 10 | 10 | 102735052 | 1264  | 6.202   | 5.87947 | CEU |
| rs722435   | MRPL43   | GI_28872735-A | 10 | 10 | 102735052 | 1557  | 12.5969 | 5.87947 | CEU |
| rs2863095  | MRPL43   | GI_28872733-I | 10 | 10 | 102736493 | 177   | 6.1433  | 5.87947 | CEU |



|            |        |               |    |    |           |        |         |         |     |
|------------|--------|---------------|----|----|-----------|--------|---------|---------|-----|
| rs2863095  | MRPL43 | GI_28872735-A | 10 | 10 | 102736493 | 116    | 13.67   | 5.87947 | CEU |
| rs3740487  | MRPL43 | GI_28872733-I | 10 | 10 | 102740773 | 4457   | 6.1433  | 5.87947 | CEU |
| rs3740487  | MRPL43 | GI_28872735-A | 10 | 10 | 102740773 | 4164   | 13.67   | 5.87947 | CEU |
| rs3824783  | MRPL43 | GI_28872733-I | 10 | 10 | 102740841 | 4525   | 6.1433  | 5.87947 | CEU |
| rs3824783  | MRPL43 | GI_28872735-A | 10 | 10 | 102740841 | 4232   | 13.67   | 5.87947 | CEU |
| rs3740488  | MRPL43 | GI_28872733-I | 10 | 10 | 102744023 | 7707   | 6.0596  | 5.87947 | CEU |
| rs3740488  | MRPL43 | GI_28872735-A | 10 | 10 | 102744023 | 7414   | 11.0305 | 5.87947 | CEU |
| rs3740490  | MRPL43 | GI_28872733-I | 10 | 10 | 102746733 | 10417  | 6.497   | 5.87947 | CEU |
| rs3740490  | MRPL43 | GI_28872735-A | 10 | 10 | 102746733 | 10124  | 11.8383 | 5.87947 | CEU |
| rs750866   | MRPL43 | GI_28872733-I | 10 | 10 | 102751448 | 15132  | 6.497   | 5.87947 | CEU |
| rs750866   | MRPL43 | GI_28872735-A | 10 | 10 | 102751448 | 14839  | 11.8383 | 5.87947 | CEU |
| rs701835   | MRPL43 | GI_28872733-I | 10 | 10 | 102752117 | 15801  | 6.497   | 5.87947 | CEU |
| rs701835   | MRPL43 | GI_28872735-A | 10 | 10 | 102752117 | 15508  | 11.8383 | 5.87947 | CEU |
| rs807029   | MRPL43 | GI_28872735-A | 10 | 10 | 102754037 | 17428  | 6.016   | 5.87947 | CEU |
| rs1163249  | USMG5  | GI_14249375-S | 10 | 10 | 104899880 | 244155 | 6.3481  | 5.85096 | CEU |
| rs4917384  | USMG5  | GI_14249375-S | 10 | 10 | 104985778 | 158257 | 15.3036 | 5.85096 | CEU |
| rs7913461  | USMG5  | GI_14249375-S | 10 | 10 | 104991315 | 152720 | 9.7893  | 5.85096 | CEU |
| rs1891292  | USMG5  | GI_14249375-S | 10 | 10 | 104991500 | 152535 | 9.9145  | 5.85096 | CEU |
| rs1891293  | USMG5  | GI_14249375-S | 10 | 10 | 104991787 | 152248 | 9.9145  | 5.85096 | CEU |
| rs2506961  | USMG5  | GI_14249375-S | 10 | 10 | 104997916 | 146119 | 9.9145  | 5.85096 | CEU |
| rs1712510  | USMG5  | GI_14249375-S | 10 | 10 | 104999076 | 144959 | 9.9145  | 5.85096 | CEU |
| rs1163075  | USMG5  | GI_14249375-S | 10 | 10 | 105011253 | 132782 | 9.7893  | 5.85096 | CEU |
| rs1163073  | USMG5  | GI_14249375-S | 10 | 10 | 105012924 | 131111 | 19.7079 | 5.85096 | CEU |
| rs1163081  | USMG5  | GI_14249375-S | 10 | 10 | 105019830 | 124205 | 9.7893  | 5.85096 | CEU |
| rs1712517  | USMG5  | GI_14249375-S | 10 | 10 | 105023005 | 121030 | 7.7029  | 5.85096 | CEU |
| rs1163087  | USMG5  | GI_14249375-S | 10 | 10 | 105033279 | 110756 | 9.7893  | 5.85096 | CEU |
| rs4918003  | USMG5  | GI_14249375-S | 10 | 10 | 105034147 | 109888 | 8.783   | 5.85096 | CEU |
| rs3740381  | USMG5  | GI_14249375-S | 10 | 10 | 105036679 | 107356 | 19.5111 | 5.85096 | CEU |
| rs1063461  | USMG5  | GI_14249375-S | 10 | 10 | 105039095 | 104940 | 8.0545  | 5.85096 | CEU |
| rs4293062  | USMG5  | GI_14249375-S | 10 | 10 | 105042614 | 101421 | 8.0545  | 5.85096 | CEU |
| rs6584547  | USMG5  | GI_14249375-S | 10 | 10 | 105055399 | 88636  | 7.1091  | 5.85096 | CEU |
| rs12220267 | USMG5  | GI_14249375-S | 10 | 10 | 105065702 | 78333  | 19.7079 | 5.85096 | CEU |
| rs11191654 | USMG5  | GI_14249375-S | 10 | 10 | 105067114 | 76921  | 8.157   | 5.85096 | CEU |
| rs7074749  | USMG5  | GI_14249375-S | 10 | 10 | 105106046 | 37989  | 7.6438  | 5.85096 | CEU |
| rs11191666 | USMG5  | GI_14249375-S | 10 | 10 | 105117268 | 26767  | 8.157   | 5.85096 | CEU |
| rs10883857 | USMG5  | GI_14249375-S | 10 | 10 | 105117577 | 26458  | 8.2073  | 5.85096 | CEU |
| rs7905968  | USMG5  | GI_14249375-S | 10 | 10 | 105125309 | 18726  | 6.7281  | 5.85096 | CEU |
| rs11191672 | USMG5  | GI_14249375-S | 10 | 10 | 105128951 | 15084  | 7.2773  | 5.85096 | CEU |
| rs7911488  | USMG5  | GI_14249375-S | 10 | 10 | 105144079 | 44     | 20.5647 | 5.85096 | CEU |
| rs2292807  | USMG5  | GI_14249375-S | 10 | 10 | 105145635 | 1600   | 8.157   | 5.85096 | CEU |
| rs10883863 | USMG5  | GI_14249375-S | 10 | 10 | 105151869 | 7834   | 7.2897  | 5.85096 | CEU |
| rs12414609 | USMG5  | GI_14249375-S | 10 | 10 | 105152131 | 8096   | 8.2747  | 5.85096 | CEU |
| rs7089271  | USMG5  | GI_14249375-S | 10 | 10 | 105166904 | 22869  | 5.8919  | 5.85096 | CEU |
| rs3740382  | USMG5  | GI_14249375-S | 10 | 10 | 105169204 | 25169  | 7.0819  | 5.85096 | CEU |
| rs11191686 | USMG5  | GI_14249375-S | 10 | 10 | 105177736 | 33701  | 6.8563  | 5.85096 | CEU |
| rs11191688 | USMG5  | GI_14249375-S | 10 | 10 | 105182560 | 38525  | 6.1346  | 5.85096 | CEU |
| rs7831     | USMG5  | GI_14249375-S | 10 | 10 | 105195292 | 51257  | 6.0381  | 5.85096 | CEU |
| rs11245344 | hmm665 | hmm665-S      | 10 | 10 | 126408772 | 18155  | 6.5381  | 6.02479 | CEU |
| rs7080838  | hmm665 | hmm665-S      | 10 | 10 | 126409831 | 17096  | 6.5381  | 6.02479 | CEU |
| rs4962691  | hmm665 | hmm665-S      | 10 | 10 | 126414127 | 12800  | 6.4536  | 6.02479 | CEU |
| rs12570348 | hmm665 | hmm665-S      | 10 | 10 | 126428953 | 2026   | 6.5381  | 6.02479 | CEU |
| rs10901816 | hmm665 | hmm665-S      | 10 | 10 | 126430385 | 3458   | 6.5381  | 6.02479 | CEU |
| rs1055256  | hmm665 | hmm665-S      | 10 | 10 | 126436582 | 9655   | 6.5381  | 6.02479 | CEU |
| rs7898003  | hmm665 | hmm665-S      | 10 | 10 | 126441375 | 14448  | 6.5381  | 6.02479 | CEU |
| rs965484   | hmm665 | hmm665-S      | 10 | 10 | 126443471 | 16544  | 6.5381  | 6.02479 | CEU |
| rs10901823 | hmm665 | hmm665-S      | 10 | 10 | 126478650 | 51723  | 6.3435  | 6.02479 | CEU |

|            |         |               |    |    |           |        |        |         |     |
|------------|---------|---------------|----|----|-----------|--------|--------|---------|-----|
| rs2303611  | hmm665  | hmm665-S      | 10 | 10 | 126507979 | 81052  | 6.8537 | 6.02479 | CEU |
| rs12221075 | hmm665  | hmm665-S      | 10 | 10 | 126524845 | 97918  | 6.2705 | 6.02479 | CEU |
| rs11245387 | hmm665  | hmm665-S      | 10 | 10 | 126527815 | 100888 | 6.4621 | 6.02479 | CEU |
| rs12764568 | hmm665  | hmm665-S      | 10 | 10 | 126534636 | 107709 | 6.8537 | 6.02479 | CEU |
| rs11596226 | ZRANB1  | GI_23943913-S | 10 | 10 | 126665355 | 1860   | 6.4871 | 6.01035 | CEU |
| rs7919631  | UROS    | GI_4557872-S  | 10 | 10 | 127457290 | 9935   | 6.5735 | 6.39996 | CEU |
| rs3740179  | UROS    | GI_4557872-S  | 10 | 10 | 127473563 | 6338   | 6.4503 | 6.39996 | CEU |
| rs506274   | MGMT    | GI_4505176-S  | 10 | 10 | 131299382 | 155857 | 6.5248 | 6.18742 | CEU |
| rs538969   | MGMT    | GI_4505176-S  | 10 | 10 | 131300598 | 154641 | 6.2637 | 6.18742 | CEU |
| rs12250002 | MGMT    | GI_4505176-S  | 10 | 10 | 131301237 | 154002 | 6.741  | 6.18742 | CEU |
| rs569235   | MGMT    | GI_4505176-S  | 10 | 10 | 131301610 | 153629 | 6.6509 | 6.18742 | CEU |
| rs11016847 | MGMT    | GI_4505176-S  | 10 | 10 | 131302147 | 153092 | 6.2563 | 6.18742 | CEU |
| rs10829610 | MGMT    | GI_4505176-S  | 10 | 10 | 131321058 | 134181 | 6.741  | 6.18742 | CEU |
| rs546333   | MGMT    | GI_4505176-S  | 10 | 10 | 131321114 | 134125 | 6.741  | 6.18742 | CEU |
| rs4750760  | MGMT    | GI_4505176-S  | 10 | 10 | 131330308 | 124931 | 6.4194 | 6.18742 | CEU |
| rs4751108  | MGMT    | GI_4505176-S  | 10 | 10 | 131330419 | 124820 | 6.4194 | 6.18742 | CEU |
| rs12264213 | MGMT    | GI_4505176-S  | 10 | 10 | 131331239 | 124000 | 6.7346 | 6.18742 | CEU |
| rs4880241  | DPYSL4  | GI_11321616-S | 10 | 10 | 133827088 | 42078  | 8.0831 | 6.02939 | CEU |
| rs7915260  | DPYSL4  | GI_11321616-S | 10 | 10 | 133827521 | 41645  | 8.0831 | 6.02939 | CEU |
| rs7896248  | DPYSL4  | GI_11321616-S | 10 | 10 | 133827559 | 41607  | 8.0831 | 6.02939 | CEU |
| rs7096307  | DPYSL4  | GI_11321616-S | 10 | 10 | 133833417 | 35749  | 8.0831 | 6.02939 | CEU |
| rs4880341  | DPYSL4  | GI_11321616-S | 10 | 10 | 133842679 | 26487  | 8.0831 | 6.02939 | CEU |
| rs12357377 | DPYSL4  | GI_11321616-S | 10 | 10 | 133843968 | 25198  | 6.4925 | 6.02939 | CEU |
| rs10781563 | DPYSL4  | GI_11321616-S | 10 | 10 | 133858802 | 10364  | 7.9758 | 6.02939 | CEU |
| rs871883   | DPYSL4  | GI_11321616-S | 10 | 10 | 133863846 | 5320   | 6.8987 | 6.02939 | CEU |
| rs2637629  | DPYSL4  | GI_11321616-S | 10 | 10 | 133866105 | 3061   | 6.9723 | 6.02939 | CEU |
| rs902627   | DPYSL4  | GI_11321616-S | 10 | 10 | 133867991 | 1175   | 8.6945 | 6.02939 | CEU |
| rs10831733 | PHEMX   | GI_37595532-A | 11 | 11 | 2281016   | 14857  | 7.0708 | 6.11398 | CEU |
| rs937614   | PHEMX   | GI_37595532-A | 11 | 11 | 2283496   | 12377  | 6.3791 | 6.11398 | CEU |
| rs7112624  | CAT     | GI_4557013-S  | 11 | 11 | 34382536  | 67061  | 8.0477 | 6.19104 | CEU |
| rs5026710  | CAT     | GI_4557013-S  | 11 | 11 | 34384938  | 64659  | 6.3123 | 6.19104 | CEU |
| rs5026713  | CAT     | GI_4557013-S  | 11 | 11 | 34385141  | 64456  | 7.6644 | 6.19104 | CEU |
| rs1569691  | CAT     | GI_4557013-S  | 11 | 11 | 34385890  | 63707  | 6.4043 | 6.19104 | CEU |
| rs1569690  | CAT     | GI_4557013-S  | 11 | 11 | 34386017  | 63580  | 8.0477 | 6.19104 | CEU |
| rs2022318  | CAT     | GI_4557013-S  | 11 | 11 | 34386220  | 63377  | 6.6551 | 6.19104 | CEU |
| rs12294809 | CAT     | GI_4557013-S  | 11 | 11 | 34388082  | 61515  | 7.7353 | 6.19104 | CEU |
| rs7934463  | CAT     | GI_4557013-S  | 11 | 11 | 34388230  | 61367  | 8.0477 | 6.19104 | CEU |
| rs6484718  | CAT     | GI_4557013-S  | 11 | 11 | 34389333  | 60264  | 7.0276 | 6.19104 | CEU |
| rs2901129  | CAT     | GI_4557013-S  | 11 | 11 | 34390544  | 59053  | 7.7959 | 6.19104 | CEU |
| rs910091   | CAT     | GI_4557013-S  | 11 | 11 | 34393603  | 55994  | 8.8684 | 6.19104 | CEU |
| rs910090   | CAT     | GI_4557013-S  | 11 | 11 | 34394117  | 55480  | 7.7955 | 6.19104 | CEU |
| rs10742318 | CAT     | GI_4557013-S  | 11 | 11 | 34399941  | 49656  | 6.4888 | 6.19104 | CEU |
| rs2206716  | CAT     | GI_4557013-S  | 11 | 11 | 34400392  | 49205  | 7.5039 | 6.19104 | CEU |
| rs11032683 | CAT     | GI_4557013-S  | 11 | 11 | 34400527  | 49070  | 7.5039 | 6.19104 | CEU |
| rs10742319 | CAT     | GI_4557013-S  | 11 | 11 | 34401072  | 48525  | 7.5039 | 6.19104 | CEU |
| rs7929321  | CAT     | GI_4557013-S  | 11 | 11 | 34402615  | 46982  | 7.5039 | 6.19104 | CEU |
| rs7943316  | CAT     | GI_4557013-S  | 11 | 11 | 34417048  | 32549  | 6.423  | 6.19104 | CEU |
| rs11032699 | CAT     | GI_4557013-S  | 11 | 11 | 34418144  | 31453  | 6.2976 | 6.19104 | CEU |
| rs2074038  | PHACS   | GI_14211920-S | 11 | 11 | 44044565  | 17304  | 8.7396 | 6.2139  | CEU |
| rs1685404  | Hs.6637 | Hs.6637-S     | 11 | 11 | 47200241  | 383494 | 6.0127 | 5.48785 | CEU |
| rs2291119  | Hs.6637 | Hs.6637-S     | 11 | 11 | 47254777  | 328958 | 6.6495 | 5.48785 | CEU |
| rs326217   | Hs.6637 | Hs.6637-S     | 11 | 11 | 47259851  | 323884 | 7.0314 | 5.48785 | CEU |
| rs11570094 | Hs.6637 | Hs.6637-S     | 11 | 11 | 47316282  | 267453 | 6.949  | 5.48785 | CEU |
| rs2856650  | Hs.6637 | Hs.6637-S     | 11 | 11 | 47321775  | 261960 | 6.6051 | 5.48785 | CEU |
| rs2071304  | Hs.6637 | Hs.6637-S     | 11 | 11 | 47328953  | 254782 | 8.5484 | 5.48785 | CEU |
| rs1057233  | Hs.6637 | Hs.6637-S     | 11 | 11 | 47333024  | 250711 | 9.106  | 5.48785 | CEU |

|            |         |              |    |    |          |        |         |         |     |
|------------|---------|--------------|----|----|----------|--------|---------|---------|-----|
| rs7105851  | Hs.6637 | Hs.6637-S    | 11 | 11 | 47339851 | 243884 | 9.106   | 5.48785 | CEU |
| rs10838698 | Hs.6637 | Hs.6637-S    | 11 | 11 | 47342499 | 241236 | 8.6089  | 5.48785 | CEU |
| rs10838699 | Hs.6637 | Hs.6637-S    | 11 | 11 | 47342649 | 241086 | 9.106   | 5.48785 | CEU |
| rs10769258 | Hs.6637 | Hs.6637-S    | 11 | 11 | 47347615 | 236120 | 9.0354  | 5.48785 | CEU |
| rs11039212 | Hs.6637 | Hs.6637-S    | 11 | 11 | 47349879 | 233856 | 9.106   | 5.48785 | CEU |
| rs4992357  | Hs.6637 | Hs.6637-S    | 11 | 11 | 47350214 | 233521 | 8.6772  | 5.48785 | CEU |
| rs896816   | Hs.6637 | Hs.6637-S    | 11 | 11 | 47350914 | 232821 | 9.106   | 5.48785 | CEU |
| rs7940536  | Hs.6637 | Hs.6637-S    | 11 | 11 | 47351816 | 231919 | 9.106   | 5.48785 | CEU |
| rs11601603 | Hs.6637 | Hs.6637-S    | 11 | 11 | 47357747 | 225988 | 9.106   | 5.48785 | CEU |
| rs6485753  | Hs.6637 | Hs.6637-S    | 11 | 11 | 47366776 | 216959 | 9.106   | 5.48785 | CEU |
| rs4752990  | Hs.6637 | Hs.6637-S    | 11 | 11 | 47366969 | 216766 | 8.3965  | 5.48785 | CEU |
| rs4752993  | Hs.6637 | Hs.6637-S    | 11 | 11 | 47367527 | 216208 | 9.106   | 5.48785 | CEU |
| rs4752994  | Hs.6637 | Hs.6637-S    | 11 | 11 | 47367641 | 216094 | 8.8781  | 5.48785 | CEU |
| rs10769262 | Hs.6637 | Hs.6637-S    | 11 | 11 | 47368157 | 215578 | 9.106   | 5.48785 | CEU |
| rs11605672 | Hs.6637 | Hs.6637-S    | 11 | 11 | 47370309 | 213426 | 9.106   | 5.48785 | CEU |
| rs4752999  | Hs.6637 | Hs.6637-S    | 11 | 11 | 47385141 | 198594 | 9.5675  | 5.48785 | CEU |
| rs755553   | Hs.6637 | Hs.6637-S    | 11 | 11 | 47388879 | 194856 | 9.7258  | 5.48785 | CEU |
| rs2053979  | Hs.6637 | Hs.6637-S    | 11 | 11 | 47396020 | 187715 | 8.6311  | 5.48785 | CEU |
| rs10742803 | Hs.6637 | Hs.6637-S    | 11 | 11 | 47396514 | 187221 | 6.9349  | 5.48785 | CEU |
| rs2293580  | Hs.6637 | Hs.6637-S    | 11 | 11 | 47396859 | 186876 | 9.7258  | 5.48785 | CEU |
| rs3781627  | Hs.6637 | Hs.6637-S    | 11 | 11 | 47398048 | 185687 | 10.6807 | 5.48785 | CEU |
| rs10838708 | Hs.6637 | Hs.6637-S    | 11 | 11 | 47398089 | 185646 | 6.1569  | 5.48785 | CEU |
| rs3781626  | Hs.6637 | Hs.6637-S    | 11 | 11 | 47399469 | 184266 | 9.7258  | 5.48785 | CEU |
| rs3781625  | Hs.6637 | Hs.6637-S    | 11 | 11 | 47399656 | 184079 | 9.7258  | 5.48785 | CEU |
| rs2868459  | Hs.6637 | Hs.6637-S    | 11 | 11 | 47411548 | 172187 | 9.7258  | 5.48785 | CEU |
| rs11604680 | Hs.6637 | Hs.6637-S    | 11 | 11 | 47414115 | 169620 | 9.5951  | 5.48785 | CEU |
| rs1317149  | Hs.6637 | Hs.6637-S    | 11 | 11 | 47443461 | 140274 | 10.3005 | 5.48785 | CEU |
| rs7124681  | Hs.6637 | Hs.6637-S    | 11 | 11 | 47486523 | 97212  | 7.3919  | 5.48785 | CEU |
| rs4752845  | Hs.6637 | Hs.6637-S    | 11 | 11 | 47496273 | 87462  | 10.3005 | 5.48785 | CEU |
| rs7928842  | Hs.6637 | Hs.6637-S    | 11 | 11 | 47522928 | 60807  | 7.3919  | 5.48785 | CEU |
| rs12419692 | Hs.6637 | Hs.6637-S    | 11 | 11 | 47581290 | 2445   | 10.3005 | 5.48785 | CEU |
| rs1064608  | Hs.6637 | Hs.6637-S    | 11 | 11 | 47597005 | 13270  | 10.3005 | 5.48785 | CEU |
| rs3817335  | Hs.6637 | Hs.6637-S    | 11 | 11 | 47600467 | 16732  | 9.876   | 5.48785 | CEU |
| rs4752856  | Hs.6637 | Hs.6637-S    | 11 | 11 | 47604618 | 20883  | 10.3005 | 5.48785 | CEU |
| rs3817334  | Hs.6637 | Hs.6637-S    | 11 | 11 | 47607569 | 23834  | 7.3919  | 5.48785 | CEU |
| rs4752857  | Hs.6637 | Hs.6637-S    | 11 | 11 | 47612328 | 28593  | 10.3005 | 5.48785 | CEU |
| rs12794570 | Hs.6637 | Hs.6637-S    | 11 | 11 | 47614890 | 31155  | 7.6017  | 5.48785 | CEU |
| rs10838738 | Hs.6637 | Hs.6637-S    | 11 | 11 | 47619625 | 35890  | 10.3005 | 5.48785 | CEU |
| rs12787112 | Hs.6637 | Hs.6637-S    | 11 | 11 | 47643723 | 59988  | 9.6123  | 5.48785 | CEU |
| rs10838747 | Hs.6637 | Hs.6637-S    | 11 | 11 | 47672900 | 89165  | 9.4803  | 5.48785 | CEU |
| rs17788930 | Hs.6637 | Hs.6637-S    | 11 | 11 | 47709351 | 125616 | 10.3005 | 5.48785 | CEU |
| rs10838757 | Hs.6637 | Hs.6637-S    | 11 | 11 | 47719592 | 135857 | 10.9668 | 5.48785 | CEU |
| rs7927771  | Hs.6637 | Hs.6637-S    | 11 | 11 | 47737882 | 154147 | 10.3005 | 5.48785 | CEU |
| rs9909     | Hs.6637 | Hs.6637-S    | 11 | 11 | 47756351 | 172616 | 9.876   | 5.48785 | CEU |
| rs7105282  | Hs.6637 | Hs.6637-S    | 11 | 11 | 47762190 | 178455 | 10.3005 | 5.48785 | CEU |
| rs2290850  | Hs.6637 | Hs.6637-S    | 11 | 11 | 47764350 | 180615 | 10.3005 | 5.48785 | CEU |
| rs12418852 | Hs.6637 | Hs.6637-S    | 11 | 11 | 47825429 | 241694 | 10.3005 | 5.48785 | CEU |
| rs11039433 | Hs.6637 | Hs.6637-S    | 11 | 11 | 47834069 | 250334 | 10.3005 | 5.48785 | CEU |
| rs12364432 | Hs.6637 | Hs.6637-S    | 11 | 11 | 47859459 | 275724 | 11.1805 | 5.48785 | CEU |
| rs4752801  | Hs.6637 | Hs.6637-S    | 11 | 11 | 47864217 | 280482 | 10.6008 | 5.48785 | CEU |
| rs12361256 | Hs.6637 | Hs.6637-S    | 11 | 11 | 47867399 | 283664 | 10.2316 | 5.48785 | CEU |
| rs3851117  | TIMM10  | GI_6912707-S | 11 | 11 | 56993689 | 58929  | 6.5709  | 5.75936 | CEU |
| rs2848634  | TIMM10  | GI_6912707-S | 11 | 11 | 57008904 | 43714  | 6.2618  | 5.75936 | CEU |
| rs2729384  | TIMM10  | GI_6912707-S | 11 | 11 | 57015193 | 37425  | 6.3183  | 5.75936 | CEU |
| rs2848640  | TIMM10  | GI_6912707-S | 11 | 11 | 57019256 | 33362  | 6.2107  | 5.75936 | CEU |
| rs2584856  | TIMM10  | GI_6912707-S | 11 | 11 | 57023888 | 28730  | 5.9815  | 5.75936 | CEU |

|            |          |               |    |    |          |        |        |         |     |
|------------|----------|---------------|----|----|----------|--------|--------|---------|-----|
| rs2649667  | TIMM10   | GI_6912707-S  | 11 | 11 | 57027085 | 25533  | 6.808  | 5.75936 | CEU |
| rs2729371  | TIMM10   | GI_6912707-S  | 11 | 11 | 57077898 | 25280  | 7.2394 | 5.75936 | CEU |
| rs2511983  | TIMM10   | GI_6912707-S  | 11 | 11 | 57103450 | 50832  | 8.5316 | 5.75936 | CEU |
| rs2649662  | TIMM10   | GI_6912707-S  | 11 | 11 | 57109138 | 56520  | 8.5316 | 5.75936 | CEU |
| rs2848630  | TIMM10   | GI_6912707-S  | 11 | 11 | 57113483 | 60865  | 8.7084 | 5.75936 | CEU |
| rs2649663  | TIMM10   | GI_6912707-S  | 11 | 11 | 57113881 | 61263  | 8.7084 | 5.75936 | CEU |
| rs2848628  | TIMM10   | GI_6912707-S  | 11 | 11 | 57114290 | 61672  | 9.4877 | 5.75936 | CEU |
| rs11230553 | FLJ20487 | GI_8923449-S  | 11 | 11 | 60517106 | 453518 | 5.9257 | 5.63072 | CEU |
| rs4489748  | FLJ35827 | GI_23397563-S | 11 | 11 | 62189391 | 62961  | 6.6871 | 5.90926 | CEU |
| rs11231181 | FLJ35827 | GI_23397563-S | 11 | 11 | 62190749 | 64319  | 6.6871 | 5.90926 | CEU |
| rs17637597 | FLJ35827 | GI_23397563-S | 11 | 11 | 62195326 | 68896  | 6.9728 | 5.90926 | CEU |
| rs574087   | FLJ37970 | GI_40795670-S | 11 | 11 | 63859524 | 21996  | 5.5193 | 5.45396 | CEU |
| rs612448   | FLJ37970 | GI_40795670-S | 11 | 11 | 63881091 | 429    | 5.7317 | 5.45396 | CEU |
| rs541207   | FLJ37970 | GI_40795670-S | 11 | 11 | 63881718 | 198    | 5.7317 | 5.45396 | CEU |
| rs7939965  | SF1      | GI_42544126-I | 11 | 11 | 64181600 | 118699 | 5.6217 | 5.54277 | CEU |
| rs3809076  | SF1      | GI_42544126-I | 11 | 11 | 64239122 | 61177  | 5.5966 | 5.54277 | CEU |
| rs693235   | SF1      | GI_42544126-I | 11 | 11 | 64249338 | 50961  | 6.4769 | 5.54277 | CEU |
| rs589691   | SF1      | GI_42544126-I | 11 | 11 | 64281792 | 18507  | 6.4769 | 5.54277 | CEU |
| rs489192   | SF1      | GI_42544126-I | 11 | 11 | 64282220 | 18079  | 6.4769 | 5.54277 | CEU |
| rs477549   | SF1      | GI_42544126-I | 11 | 11 | 64283656 | 16643  | 5.7519 | 5.54277 | CEU |
| rs523200   | SF1      | GI_42544126-I | 11 | 11 | 64289155 | 11144  | 6.4769 | 5.54277 | CEU |
| rs680273   | SF1      | GI_42544126-I | 11 | 11 | 64296211 | 4088   | 6.4769 | 5.54277 | CEU |
| rs474707   | SF1      | GI_42544126-I | 11 | 11 | 64300711 | 412    | 6.4769 | 5.54277 | CEU |
| rs1633462  | SF1      | GI_42544126-I | 11 | 11 | 64302833 | 2534   | 6.4769 | 5.54277 | CEU |
| rs606458   | SF1      | GI_42544126-I | 11 | 11 | 64302967 | 2668   | 6.4769 | 5.54277 | CEU |
| rs607389   | SF1      | GI_42544126-I | 11 | 11 | 64310154 | 9855   | 6.6468 | 5.54277 | CEU |
| rs677298   | SF1      | GI_42544126-I | 11 | 11 | 64320784 | 20485  | 6.4769 | 5.54277 | CEU |
| rs1143937  | SF1      | GI_42544126-I | 11 | 11 | 64325576 | 25277  | 6.4769 | 5.54277 | CEU |
| rs1476792  | RPS6KB2  | GI_4506738-S  | 11 | 11 | 66952813 | 6532   | 7.6197 | 5.3743  | CEU |
| rs917570   | RPS6KB2  | GI_4506738-S  | 11 | 11 | 66953120 | 6225   | 5.632  | 5.3743  | CEU |
| rs1638588  | RPS6KB2  | GI_4506738-S  | 11 | 11 | 66956282 | 3063   | 7.6197 | 5.3743  | CEU |
| rs1790753  | RPS6KB2  | GI_4506738-S  | 11 | 11 | 66957584 | 1761   | 7.6197 | 5.3743  | CEU |
| rs869736   | RPS6KB2  | GI_4506738-S  | 11 | 11 | 66962038 | 2693   | 7.6197 | 5.3743  | CEU |
| rs2302264  | RPS6KB2  | GI_4506738-S  | 11 | 11 | 66964002 | 4657   | 7.0062 | 5.3743  | CEU |
| rs1638556  | RPS6KB2  | GI_4506738-S  | 11 | 11 | 66970094 | 10749  | 7.6197 | 5.3743  | CEU |
| rs1790761  | RPS6KB2  | GI_4506738-S  | 11 | 11 | 66978430 | 19085  | 8.8409 | 5.3743  | CEU |
| rs7114510  | RPS6KB2  | GI_4506738-S  | 11 | 11 | 66981170 | 21825  | 6.5649 | 5.3743  | CEU |
| rs11601325 | RPS6KB2  | GI_4506738-S  | 11 | 11 | 66983582 | 24237  | 6.5649 | 5.3743  | CEU |
| rs3741168  | RPS6KB2  | GI_4506738-S  | 11 | 11 | 66991927 | 32582  | 7.6197 | 5.3743  | CEU |
| rs1871034  | RPS6KB2  | GI_4506738-S  | 11 | 11 | 67049810 | 90465  | 5.8619 | 5.3743  | CEU |
| rs4930430  | RPS6KB2  | GI_4506738-S  | 11 | 11 | 67050774 | 91429  | 6.7576 | 5.3743  | CEU |
| rs4930431  | RPS6KB2  | GI_4506738-S  | 11 | 11 | 67050884 | 91539  | 6.7576 | 5.3743  | CEU |
| rs7938563  | RPS6KB2  | GI_4506738-S  | 11 | 11 | 67060707 | 101362 | 6.7102 | 5.3743  | CEU |
| rs4320958  | RPS6KB2  | GI_4506738-S  | 11 | 11 | 67066910 | 107565 | 7.0639 | 5.3743  | CEU |
| rs6591245  | RPS6KB2  | GI_4506738-S  | 11 | 11 | 67067512 | 108167 | 7.1004 | 5.3743  | CEU |
| rs611663   | RPS6KB2  | GI_4506738-S  | 11 | 11 | 67068797 | 109452 | 6.3741 | 5.3743  | CEU |
| rs7106423  | RPS6KB2  | GI_4506738-S  | 11 | 11 | 67070720 | 111375 | 7.4538 | 5.3743  | CEU |
| rs7952081  | RPS6KB2  | GI_4506738-S  | 11 | 11 | 67081509 | 122164 | 7.3421 | 5.3743  | CEU |
| rs7395916  | RPS6KB2  | GI_4506738-S  | 11 | 11 | 67085913 | 126568 | 6.997  | 5.3743  | CEU |
| rs684928   | RPS6KB2  | GI_4506738-S  | 11 | 11 | 67086318 | 126973 | 6.987  | 5.3743  | CEU |
| rs638140   | RPS6KB2  | GI_4506738-S  | 11 | 11 | 67090434 | 131089 | 6.987  | 5.3743  | CEU |
| rs656652   | RPS6KB2  | GI_4506738-S  | 11 | 11 | 67100533 | 141188 | 6.9993 | 5.3743  | CEU |
| rs625978   | RPS6KB2  | GI_4506738-S  | 11 | 11 | 67101240 | 141895 | 6.0965 | 5.3743  | CEU |
| rs6591251  | RPS6KB2  | GI_4506738-S  | 11 | 11 | 67101265 | 141920 | 7.3225 | 5.3743  | CEU |
| rs6591252  | RPS6KB2  | GI_4506738-S  | 11 | 11 | 67102153 | 142808 | 7.3421 | 5.3743  | CEU |
| rs614080   | RPS6KB2  | GI_4506738-S  | 11 | 11 | 67103863 | 144518 | 6.987  | 5.3743  | CEU |

|            |         |               |    |    |           |        |        |         |     |
|------------|---------|---------------|----|----|-----------|--------|--------|---------|-----|
| rs7941395  | RPS6KB2 | GI_4506738-S  | 11 | 11 | 67103993  | 144648 | 7.4105 | 5.3743  | CEU |
| rs7941648  | RPS6KB2 | GI_4506738-S  | 11 | 11 | 67104171  | 144826 | 7.3421 | 5.3743  | CEU |
| rs2370141  | RPS6KB2 | GI_4506738-S  | 11 | 11 | 67105105  | 145760 | 5.8217 | 5.3743  | CEU |
| rs6591256  | RPS6KB2 | GI_4506738-S  | 11 | 11 | 67106475  | 147130 | 7.3421 | 5.3743  | CEU |
| rs762803   | RPS6KB2 | GI_4506738-S  | 11 | 11 | 67108832  | 149487 | 8.5499 | 5.3743  | CEU |
| rs497149   | MRPL21  | GI_31652223-A | 11 | 11 | 68383215  | 32199  | 7.082  | 5.57    | CEU |
| rs604524   | MRPL21  | GI_31652223-A | 11 | 11 | 68386505  | 28909  | 8.3862 | 5.57    | CEU |
| rs584108   | MRPL21  | GI_31652223-A | 11 | 11 | 68386858  | 28556  | 8.1732 | 5.57    | CEU |
| rs596874   | MRPL21  | GI_31652223-A | 11 | 11 | 68387450  | 27964  | 8.2958 | 5.57    | CEU |
| rs501799   | MRPL21  | GI_31652223-A | 11 | 11 | 68387816  | 27598  | 8.2958 | 5.57    | CEU |
| rs557625   | MRPL21  | GI_31652223-A | 11 | 11 | 68391298  | 24116  | 7.4156 | 5.57    | CEU |
| rs10792001 | MRPL21  | GI_31652223-A | 11 | 11 | 68394313  | 21101  | 8.2958 | 5.57    | CEU |
| rs473997   | MRPL21  | GI_31652223-A | 11 | 11 | 68396057  | 19357  | 8.2958 | 5.57    | CEU |
| rs631001   | MRPL21  | GI_31652223-A | 11 | 11 | 68399550  | 15864  | 8.6694 | 5.57    | CEU |
| rs1249368  | MRPL21  | GI_31652223-A | 11 | 11 | 68402722  | 12692  | 8.1732 | 5.57    | CEU |
| rs592697   | MRPL21  | GI_31652223-A | 11 | 11 | 68406640  | 8774   | 8.2958 | 5.57    | CEU |
| rs686390   | MRPL21  | GI_31652223-A | 11 | 11 | 68412653  | 2761   | 8.2958 | 5.57    | CEU |
| rs488363   | MRPL21  | GI_31652223-A | 11 | 11 | 68414874  | 540    | 8.2958 | 5.57    | CEU |
| rs660614   | MRPL21  | GI_31652223-A | 11 | 11 | 68416064  | 650    | 8.0211 | 5.57    | CEU |
| rs507520   | MRPL21  | GI_31652223-A | 11 | 11 | 68422630  | 7216   | 8.2958 | 5.57    | CEU |
| rs668576   | MRPL21  | GI_31652223-A | 11 | 11 | 68424784  | 9370   | 8.2958 | 5.57    | CEU |
| rs482172   | MRPL21  | GI_31652223-A | 11 | 11 | 68425013  | 9599   | 9.5018 | 5.57    | CEU |
| rs513359   | MRPL21  | GI_31652223-A | 11 | 11 | 68426072  | 10658  | 8.2958 | 5.57    | CEU |
| rs629426   | MRPL21  | GI_31652223-A | 11 | 11 | 68427680  | 12266  | 8.8105 | 5.57    | CEU |
| rs583182   | MRPL21  | GI_31652223-A | 11 | 11 | 68435210  | 19796  | 8.6694 | 5.57    | CEU |
| rs673821   | MRPL21  | GI_31652223-A | 11 | 11 | 68435294  | 19880  | 8.2958 | 5.57    | CEU |
| rs646586   | MRPL21  | GI_31652223-A | 11 | 11 | 68438229  | 22815  | 7.6713 | 5.57    | CEU |
| rs553875   | MRPL21  | GI_31652223-A | 11 | 11 | 68451720  | 36306  | 8.1606 | 5.57    | CEU |
| rs1249365  | MRPL21  | GI_31652223-A | 11 | 11 | 68455338  | 39924  | 8.1606 | 5.57    | CEU |
| rs478647   | MRPL21  | GI_31652223-A | 11 | 11 | 68457000  | 41586  | 8.1606 | 5.57    | CEU |
| rs622082   | MRPL21  | GI_31652223-A | 11 | 11 | 68460535  | 45121  | 8.1606 | 5.57    | CEU |
| rs546382   | MRPL21  | GI_31652223-A | 11 | 11 | 68460840  | 45426  | 8.1606 | 5.57    | CEU |
| rs559032   | MRPL21  | GI_31652223-A | 11 | 11 | 68467423  | 52009  | 8.1606 | 5.57    | CEU |
| rs10896384 | MRPL21  | GI_31652223-A | 11 | 11 | 68476587  | 61173  | 5.91   | 5.57    | CEU |
| rs7935851  | MRPL21  | GI_31652223-A | 11 | 11 | 68487698  | 72284  | 7.2291 | 5.57    | CEU |
| rs12295241 | PPFIA1  | GI_29171752-I | 11 | 11 | 69872272  | 29712  | 7.4343 | 6.2268  | CEU |
| rs11823006 | AQP11   | GI_27370564-S | 11 | 11 | 77363644  | 365471 | 6.0039 | 5.64519 | CEU |
| rs2051465  | FDX1    | GI_36054077-S | 11 | 11 | 109749472 | 90953  | 6.5977 | 6.12844 | CEU |
| rs12225049 | FDX1    | GI_36054077-S | 11 | 11 | 109755549 | 84876  | 6.8952 | 6.12844 | CEU |
| rs7950145  | FDX1    | GI_36054077-S | 11 | 11 | 109786574 | 53851  | 7.8855 | 6.12844 | CEU |
| rs4576787  | FDX1    | GI_36054077-S | 11 | 11 | 109822376 | 18049  | 6.3449 | 6.12844 | CEU |
| rs10891118 | FDX1    | GI_36054077-S | 11 | 11 | 109834076 | 6349   | 6.1974 | 6.12844 | CEU |
| rs2358322  | FDX1    | GI_36054077-S | 11 | 11 | 109835151 | 5274   | 7.7177 | 6.12844 | CEU |
| rs11213412 | FDX1    | GI_36054077-S | 11 | 11 | 109836110 | 4315   | 6.3449 | 6.12844 | CEU |
| rs12221694 | FDX1    | GI_36054077-S | 11 | 11 | 109836457 | 3968   | 6.3449 | 6.12844 | CEU |
| rs10488764 | FDX1    | GI_36054077-S | 11 | 11 | 109836841 | 3584   | 6.3449 | 6.12844 | CEU |
| rs1042288  | FDX1    | GI_36054077-S | 11 | 11 | 109838818 | 1607   | 6.3449 | 6.12844 | CEU |
| rs11213436 | FDX1    | GI_36054077-S | 11 | 11 | 109866657 | 26232  | 6.8255 | 6.12844 | CEU |
| rs7113731  | TRAPPC4 | GI_7706666-S  | 11 | 11 | 118337034 | 62264  | 6.5515 | 5.93597 | CEU |
| rs3890562  | TRAPPC4 | GI_7706666-S  | 11 | 11 | 118342323 | 56975  | 6.1278 | 5.93597 | CEU |
| rs4938618  | TRAPPC4 | GI_7706666-S  | 11 | 11 | 118373013 | 26285  | 6.3168 | 5.93597 | CEU |
| rs3916581  | TRAPPC4 | GI_7706666-S  | 11 | 11 | 118393097 | 6201   | 6.1146 | 5.93597 | CEU |
| rs487793   | H17     | GI_21361764-S | 11 | 11 | 125564025 | 89088  | 6.7698 | 6.08093 | CEU |
| rs555228   | H17     | GI_21361764-S | 11 | 11 | 125565293 | 87820  | 6.7698 | 6.08093 | CEU |
| rs574198   | H17     | GI_21361764-S | 11 | 11 | 125575051 | 78062  | 7.547  | 6.08093 | CEU |
| rs492154   | H17     | GI_21361764-S | 11 | 11 | 125575824 | 77289  | 7.2412 | 6.08093 | CEU |

|            |           |               |    |    |           |        |        |         |     |
|------------|-----------|---------------|----|----|-----------|--------|--------|---------|-----|
| rs627911   | H17       | GI_21361764-S | 11 | 11 | 125577898 | 75215  | 6.2277 | 6.08093 | CEU |
| rs676982   | H17       | GI_21361764-S | 11 | 11 | 125580429 | 72684  | 7.2412 | 6.08093 | CEU |
| rs659551   | H17       | GI_21361764-S | 11 | 11 | 125582034 | 71079  | 7.2412 | 6.08093 | CEU |
| rs631372   | H17       | GI_21361764-S | 11 | 11 | 125583711 | 69402  | 7.2412 | 6.08093 | CEU |
| rs608367   | H17       | GI_21361764-S | 11 | 11 | 125585967 | 67146  | 7.2412 | 6.08093 | CEU |
| rs587891   | H17       | GI_21361764-S | 11 | 11 | 125586546 | 66567  | 7.547  | 6.08093 | CEU |
| rs624590   | H17       | GI_21361764-S | 11 | 11 | 125588547 | 64566  | 7.2412 | 6.08093 | CEU |
| rs599647   | H17       | GI_21361764-S | 11 | 11 | 125590241 | 62872  | 7.2412 | 6.08093 | CEU |
| rs7924793  | H17       | GI_21361764-S | 11 | 11 | 125591978 | 61135  | 7.547  | 6.08093 | CEU |
| rs595660   | H17       | GI_21361764-S | 11 | 11 | 125592248 | 60865  | 7.2412 | 6.08093 | CEU |
| rs638766   | H17       | GI_21361764-S | 11 | 11 | 125639908 | 13205  | 6.4631 | 6.08093 | CEU |
| rs1786702  | H17       | GI_21361764-S | 11 | 11 | 125644310 | 8803   | 7.2412 | 6.08093 | CEU |
| rs1786703  | H17       | GI_21361764-S | 11 | 11 | 125644523 | 8590   | 6.6602 | 6.08093 | CEU |
| rs634696   | H17       | GI_21361764-S | 11 | 11 | 125645564 | 7549   | 7.4934 | 6.08093 | CEU |
| rs478309   | H17       | GI_21361764-S | 11 | 11 | 125645678 | 7435   | 7.2412 | 6.08093 | CEU |
| rs591163   | H17       | GI_21361764-S | 11 | 11 | 125653642 | 529    | 7.2412 | 6.08093 | CEU |
| rs625413   | H17       | GI_21361764-S | 11 | 11 | 125669559 | 16446  | 6.2884 | 6.08093 | CEU |
| rs3809258  | LOC399987 | GI_42660080-S | 12 | 12 | 3734571   | 1492   | 9.5869 | 6.12575 | CEU |
| rs9300302  | LOC399987 | GI_42660080-S | 12 | 12 | 3737732   | 1669   | 9.5869 | 6.12575 | CEU |
| rs2041384  | TAPBP-R   | GI_34222333-S | 12 | 12 | 6432546   | 9086   | 6.803  | 5.95226 | CEU |
| rs2041385  | TAPBP-R   | GI_34222333-S | 12 | 12 | 6432554   | 9078   | 6.803  | 5.95226 | CEU |
| rs2041386  | ZNF384    | GI_36054193-S | 12 | 12 | 6432799   | 213617 | 6.8387 | 6.10022 | CEU |
| rs2041388  | TAPBP-R   | GI_34222333-S | 12 | 12 | 6433097   | 8535   | 6.801  | 5.95226 | CEU |
| rs2079866  | TAPBP-R   | GI_34222333-S | 12 | 12 | 6434109   | 7523   | 6.801  | 5.95226 | CEU |
| rs2532497  | TAPBP-R   | GI_34222333-S | 12 | 12 | 6434471   | 7161   | 6.7321 | 5.95226 | CEU |
| rs2243750  | TAPBP-R   | GI_34222333-S | 12 | 12 | 6438048   | 3584   | 6.5405 | 5.95226 | CEU |
| rs1045546  | ZNF384    | GI_36054193-S | 12 | 12 | 6438168   | 208248 | 6.8387 | 6.10022 | CEU |
| rs2243977  | TAPBP-R   | GI_34222333-S | 12 | 12 | 6440244   | 1388   | 6.801  | 5.95226 | CEU |
| rs2244083  | TAPBP-R   | GI_34222333-S | 12 | 12 | 6440800   | 832    | 6.801  | 5.95226 | CEU |
| rs10849462 | ZNF384    | GI_36054193-S | 12 | 12 | 6446253   | 200163 | 7.5932 | 6.10022 | CEU |
| rs11064210 | ZNF384    | GI_36054193-S | 12 | 12 | 6446982   | 199434 | 7.42   | 6.10022 | CEU |
| rs12422771 | ZNF384    | GI_36054193-S | 12 | 12 | 6450534   | 195882 | 6.6598 | 6.10022 | CEU |
| rs10492096 | ZNF384    | GI_36054193-S | 12 | 12 | 6450843   | 195573 | 7.42   | 6.10022 | CEU |
| rs11064218 | ZNF384    | GI_36054193-S | 12 | 12 | 6456522   | 189894 | 7.42   | 6.10022 | CEU |
| rs11064227 | ZNF384    | GI_36054193-S | 12 | 12 | 6468304   | 178112 | 6.4179 | 6.10022 | CEU |
| rs10774435 | ZNF384    | GI_36054193-S | 12 | 12 | 6486381   | 160035 | 6.4179 | 6.10022 | CEU |
| rs12371184 | ZNF384    | GI_36054193-S | 12 | 12 | 6503186   | 143230 | 6.4179 | 6.10022 | CEU |
| rs10849483 | ZNF384    | GI_36054193-S | 12 | 12 | 6505635   | 140781 | 6.4179 | 6.10022 | CEU |
| rs2301339  | B7        | GI_42542401-A | 12 | 12 | 6824885   | 68722  | 6.8661 | 5.96238 | CEU |
| rs5446     | B7        | GI_42542401-A | 12 | 12 | 6826723   | 66884  | 6.8311 | 5.96238 | CEU |
| rs2238114  | B7        | GI_42542401-A | 12 | 12 | 6836001   | 57606  | 7.1097 | 5.96238 | CEU |
| rs7955412  | B7        | GI_42542401-A | 12 | 12 | 6868632   | 24975  | 9.3889 | 5.96238 | CEU |
| rs7138526  | B7        | GI_42542401-A | 12 | 12 | 6869525   | 24082  | 9.3889 | 5.96238 | CEU |
| rs2040352  | B7        | GI_42542401-A | 12 | 12 | 6877265   | 16342  | 9.3889 | 5.96238 | CEU |
| rs12315364 | B7        | GI_42542401-A | 12 | 12 | 6879531   | 14076  | 7.8752 | 5.96238 | CEU |
| rs2187611  | B7        | GI_42542401-A | 12 | 12 | 6879863   | 13744  | 9.3889 | 5.96238 | CEU |
| rs3759349  | B7        | GI_42542401-A | 12 | 12 | 6882086   | 11521  | 9.3889 | 5.96238 | CEU |
| rs3759350  | B7        | GI_42542401-A | 12 | 12 | 6882208   | 11399  | 9.3889 | 5.96238 | CEU |
| rs3759352  | B7        | GI_42542401-A | 12 | 12 | 6882316   | 11291  | 9.3889 | 5.96238 | CEU |
| rs2239163  | B7        | GI_42542401-A | 12 | 12 | 6884337   | 9270   | 9.3889 | 5.96238 | CEU |
| rs1007923  | B7        | GI_42542401-A | 12 | 12 | 6884368   | 9239   | 9.3903 | 5.96238 | CEU |
| rs10849538 | B7        | GI_42542401-A | 12 | 12 | 6884868   | 8739   | 9.3889 | 5.96238 | CEU |
| rs2301137  | B7        | GI_42542401-A | 12 | 12 | 6889210   | 4397   | 9.2889 | 5.96238 | CEU |
| rs1057077  | B7        | GI_42542401-A | 12 | 12 | 6892346   | 1261   | 9.2889 | 5.96238 | CEU |
| rs710415   | B7        | GI_42542401-A | 12 | 12 | 6893384   | 223    | 9.2889 | 5.96238 | CEU |
| rs7965269  | B7        | GI_42542401-A | 12 | 12 | 6923283   | 29676  | 6.9809 | 5.96238 | CEU |

|            |          |               |    |    |          |        |         |         |     |
|------------|----------|---------------|----|----|----------|--------|---------|---------|-----|
| rs1044189  | B7       | GI_42542401-A | 12 | 12 | 6923410  | 29803  | 6.6222  | 5.96238 | CEU |
| rs7968119  | KIAA1463 | GI_39930390-S | 12 | 12 | 48793976 | 630939 | 6.4799  | 5.69988 | CEU |
| rs17124432 | KIAA1463 | GI_39930390-S | 12 | 12 | 48797044 | 627871 | 6.4799  | 5.69988 | CEU |
| rs7307230  | KIAA1463 | GI_39930390-S | 12 | 12 | 48798899 | 626016 | 6.4799  | 5.69988 | CEU |
| rs7961065  | KIAA1463 | GI_39930390-S | 12 | 12 | 48799954 | 624961 | 6.4799  | 5.69988 | CEU |
| rs10876000 | KIAA1463 | GI_39930390-S | 12 | 12 | 48808481 | 616434 | 6.4799  | 5.69988 | CEU |
| rs1554845  | KIAA1463 | GI_39930390-S | 12 | 12 | 48809771 | 615144 | 6.4799  | 5.69988 | CEU |
| rs11169281 | KIAA1463 | GI_39930390-S | 12 | 12 | 48815581 | 609334 | 6.4799  | 5.69988 | CEU |
| rs7138945  | KIAA1463 | GI_39930390-S | 12 | 12 | 48825686 | 599229 | 6.0223  | 5.69988 | CEU |
| rs10783338 | KIAA1463 | GI_39930390-S | 12 | 12 | 48838796 | 586119 | 6.1692  | 5.69988 | CEU |
| rs3184122  | KIAA1463 | GI_39930390-S | 12 | 12 | 48856394 | 568521 | 7.029   | 5.69988 | CEU |
| rs9364     | KIAA1463 | GI_39930390-S | 12 | 12 | 48856786 | 568129 | 7.1671  | 5.69988 | CEU |
| rs7315690  | KIAA1463 | GI_39930390-S | 12 | 12 | 48867757 | 557158 | 10.8884 | 5.69988 | CEU |
| rs7138622  | KIAA1463 | GI_39930390-S | 12 | 12 | 48869471 | 555444 | 10.5605 | 5.69988 | CEU |
| rs11169314 | KIAA1463 | GI_39930390-S | 12 | 12 | 48878880 | 546035 | 6.7976  | 5.69988 | CEU |
| rs11169315 | KIAA1463 | GI_39930390-S | 12 | 12 | 48881530 | 543385 | 9.9765  | 5.69988 | CEU |
| rs2302900  | KIAA1463 | GI_39930390-S | 12 | 12 | 48885976 | 538939 | 12.9031 | 5.69988 | CEU |
| rs12425705 | KIAA1463 | GI_39930390-S | 12 | 12 | 48896588 | 528327 | 12.2043 | 5.69988 | CEU |
| rs11169322 | KIAA1463 | GI_39930390-S | 12 | 12 | 48897243 | 527672 | 12.2043 | 5.69988 | CEU |
| rs12424691 | KIAA1463 | GI_39930390-S | 12 | 12 | 48897744 | 527171 | 12.2043 | 5.69988 | CEU |
| rs12424713 | KIAA1463 | GI_39930390-S | 12 | 12 | 48897884 | 527031 | 12.179  | 5.69988 | CEU |
| rs1362983  | KIAA1463 | GI_39930390-S | 12 | 12 | 48900974 | 523941 | 12.2043 | 5.69988 | CEU |
| rs3812825  | KIAA1463 | GI_39930390-S | 12 | 12 | 48902613 | 522302 | 12.2043 | 5.69988 | CEU |
| rs2358539  | KIAA1463 | GI_39930390-S | 12 | 12 | 48905885 | 519030 | 12.5972 | 5.69988 | CEU |
| rs12425229 | KIAA1463 | GI_39930390-S | 12 | 12 | 48911325 | 513590 | 12.2043 | 5.69988 | CEU |
| rs11169331 | KIAA1463 | GI_39930390-S | 12 | 12 | 48915177 | 509738 | 12.2043 | 5.69988 | CEU |
| rs11169332 | KIAA1463 | GI_39930390-S | 12 | 12 | 48915879 | 509036 | 12.2043 | 5.69988 | CEU |
| rs11169335 | KIAA1463 | GI_39930390-S | 12 | 12 | 48922631 | 502284 | 12.2043 | 5.69988 | CEU |
| rs12828340 | KIAA1463 | GI_39930390-S | 12 | 12 | 48923562 | 501353 | 12.2043 | 5.69988 | CEU |
| rs7979830  | KIAA1463 | GI_39930390-S | 12 | 12 | 48927839 | 497076 | 12.2043 | 5.69988 | CEU |
| rs7132551  | KIAA1463 | GI_39930390-S | 12 | 12 | 48933021 | 491894 | 12.2043 | 5.69988 | CEU |
| rs7953953  | KIAA1463 | GI_39930390-S | 12 | 12 | 48933491 | 491424 | 11.2477 | 5.69988 | CEU |
| rs7486747  | KIAA1463 | GI_39930390-S | 12 | 12 | 48936831 | 488084 | 8.5523  | 5.69988 | CEU |
| rs10783344 | KIAA1463 | GI_39930390-S | 12 | 12 | 48939196 | 485719 | 12.2043 | 5.69988 | CEU |
| rs6580735  | KIAA1463 | GI_39930390-S | 12 | 12 | 48951494 | 473421 | 12.4444 | 5.69988 | CEU |
| rs11169348 | KIAA1463 | GI_39930390-S | 12 | 12 | 48952213 | 472702 | 12.2043 | 5.69988 | CEU |
| rs2111988  | KIAA1463 | GI_39930390-S | 12 | 12 | 48954805 | 470110 | 11.9864 | 5.69988 | CEU |
| rs11169350 | KIAA1463 | GI_39930390-S | 12 | 12 | 48957637 | 467278 | 12.2043 | 5.69988 | CEU |
| rs10876014 | KIAA1463 | GI_39930390-S | 12 | 12 | 48961020 | 463895 | 12.2043 | 5.69988 | CEU |
| rs10876015 | KIAA1463 | GI_39930390-S | 12 | 12 | 48963773 | 461142 | 12.2043 | 5.69988 | CEU |
| rs6580736  | KIAA1463 | GI_39930390-S | 12 | 12 | 48965685 | 459230 | 11.66   | 5.69988 | CEU |
| rs10876017 | KIAA1463 | GI_39930390-S | 12 | 12 | 48967806 | 457109 | 12.2043 | 5.69988 | CEU |
| rs7311973  | KIAA1463 | GI_39930390-S | 12 | 12 | 48970012 | 454903 | 11.2104 | 5.69988 | CEU |
| rs11169357 | KIAA1463 | GI_39930390-S | 12 | 12 | 48976252 | 448663 | 12.2043 | 5.69988 | CEU |
| rs6580738  | KIAA1463 | GI_39930390-S | 12 | 12 | 48991982 | 432933 | 11.3216 | 5.69988 | CEU |
| rs7489214  | KIAA1463 | GI_39930390-S | 12 | 12 | 49010260 | 414655 | 11.4634 | 5.69988 | CEU |
| rs7310541  | KIAA1463 | GI_39930390-S | 12 | 12 | 49012232 | 412683 | 12.2043 | 5.69988 | CEU |
| rs6580742  | KIAA1463 | GI_39930390-S | 12 | 12 | 49014078 | 410837 | 8.1411  | 5.69988 | CEU |
| rs7134595  | KIAA1463 | GI_39930390-S | 12 | 12 | 49016725 | 408190 | 11.8868 | 5.69988 | CEU |
| rs4768951  | KIAA1463 | GI_39930390-S | 12 | 12 | 49025275 | 399640 | 11.66   | 5.69988 | CEU |
| rs7296291  | KIAA1463 | GI_39930390-S | 12 | 12 | 49030386 | 394529 | 10.6183 | 5.69988 | CEU |
| rs7312252  | KIAA1463 | GI_39930390-S | 12 | 12 | 49030438 | 394477 | 12.2043 | 5.69988 | CEU |
| rs10506292 | KIAA1463 | GI_39930390-S | 12 | 12 | 49031020 | 393895 | 12.2043 | 5.69988 | CEU |
| rs10876023 | KIAA1463 | GI_39930390-S | 12 | 12 | 49033184 | 391731 | 12.062  | 5.69988 | CEU |
| rs4421818  | KIAA1463 | GI_39930390-S | 12 | 12 | 49035561 | 389354 | 12.2043 | 5.69988 | CEU |
| rs11169390 | KIAA1463 | GI_39930390-S | 12 | 12 | 49036738 | 388177 | 11.559  | 5.69988 | CEU |

|            |          |               |    |    |          |        |         |         |     |
|------------|----------|---------------|----|----|----------|--------|---------|---------|-----|
| rs12303082 | KIAA1463 | GI_39930390-S | 12 | 12 | 49040830 | 384085 | 7.8418  | 5.69988 | CEU |
| rs11833608 | KIAA1463 | GI_39930390-S | 12 | 12 | 49043895 | 381020 | 12.0038 | 5.69988 | CEU |
| rs7972202  | KIAA1463 | GI_39930390-S | 12 | 12 | 49048756 | 376159 | 9.3776  | 5.69988 | CEU |
| rs4348979  | KIAA1463 | GI_39930390-S | 12 | 12 | 49049682 | 375233 | 12.2043 | 5.69988 | CEU |
| rs12422417 | KIAA1463 | GI_39930390-S | 12 | 12 | 49050978 | 373937 | 12.2043 | 5.69988 | CEU |
| rs7975894  | KIAA1463 | GI_39930390-S | 12 | 12 | 49070579 | 354336 | 7.8198  | 5.69988 | CEU |
| rs7136702  | KIAA1463 | GI_39930390-S | 12 | 12 | 49166483 | 258432 | 10.3344 | 5.69988 | CEU |
| rs11169453 | KIAA1463 | GI_39930390-S | 12 | 12 | 49172107 | 252808 | 15.8943 | 5.69988 | CEU |
| rs11169484 | KIAA1463 | GI_39930390-S | 12 | 12 | 49221198 | 203717 | 16.0981 | 5.69988 | CEU |
| rs7487429  | KIAA1463 | GI_39930390-S | 12 | 12 | 49226074 | 198841 | 16.0981 | 5.69988 | CEU |
| rs10876055 | KIAA1463 | GI_39930390-S | 12 | 12 | 49227250 | 197665 | 16.0981 | 5.69988 | CEU |
| rs10747583 | KIAA1463 | GI_39930390-S | 12 | 12 | 49233222 | 191693 | 14.8558 | 5.69988 | CEU |
| rs3935870  | KIAA1463 | GI_39930390-S | 12 | 12 | 49250373 | 174542 | 16.0981 | 5.69988 | CEU |
| rs11169506 | KIAA1463 | GI_39930390-S | 12 | 12 | 49297523 | 127392 | 15.6829 | 5.69988 | CEU |
| rs12818741 | KIAA1463 | GI_39930390-S | 12 | 12 | 49318682 | 106233 | 16.0981 | 5.69988 | CEU |
| rs13378012 | KIAA1463 | GI_39930390-S | 12 | 12 | 49326664 | 98251  | 16.0981 | 5.69988 | CEU |
| rs1316607  | KIAA1463 | GI_39930390-S | 12 | 12 | 49329157 | 95758  | 16.0981 | 5.69988 | CEU |
| rs10876077 | KIAA1463 | GI_39930390-S | 12 | 12 | 49337618 | 87297  | 16.0981 | 5.69988 | CEU |
| rs7309964  | KIAA1463 | GI_39930390-S | 12 | 12 | 49350331 | 74584  | 17.3477 | 5.69988 | CEU |
| rs11169520 | KIAA1463 | GI_39930390-S | 12 | 12 | 49359790 | 65125  | 17.3477 | 5.69988 | CEU |
| rs12427378 | KIAA1463 | GI_39930390-S | 12 | 12 | 49360466 | 64449  | 16.0981 | 5.69988 | CEU |
| rs7955736  | KIAA1463 | GI_39930390-S | 12 | 12 | 49361140 | 63775  | 18.6754 | 5.69988 | CEU |
| rs7137845  | KIAA1463 | GI_39930390-S | 12 | 12 | 49367207 | 57708  | 16.0981 | 5.69988 | CEU |
| rs11169523 | KIAA1463 | GI_39930390-S | 12 | 12 | 49372542 | 52373  | 16.0981 | 5.69988 | CEU |
| rs2090852  | KIAA1463 | GI_39930390-S | 12 | 12 | 49373198 | 51717  | 16.0981 | 5.69988 | CEU |
| rs2139930  | KIAA1463 | GI_39930390-S | 12 | 12 | 49375554 | 49361  | 16.0981 | 5.69988 | CEU |
| rs11169524 | KIAA1463 | GI_39930390-S | 12 | 12 | 49376001 | 48914  | 16.0981 | 5.69988 | CEU |
| rs2731434  | KIAA1463 | GI_39930390-S | 12 | 12 | 49396142 | 28773  | 5.7451  | 5.69988 | CEU |
| rs7310279  | KIAA1463 | GI_39930390-S | 12 | 12 | 49403496 | 21419  | 11.8204 | 5.69988 | CEU |
| rs2280503  | KIAA1463 | GI_39930390-S | 12 | 12 | 49424954 | 39     | 21.1648 | 5.69988 | CEU |
| rs1047912  | KIAA1463 | GI_39930390-S | 12 | 12 | 49425129 | 214    | 22.2519 | 5.69988 | CEU |
| rs4307773  | KIAA1463 | GI_39930390-S | 12 | 12 | 49430699 | 5784   | 10.6166 | 5.69988 | CEU |
| rs12372718 | KIAA1463 | GI_39930390-S | 12 | 12 | 49457357 | 32442  | 11.0385 | 5.69988 | CEU |
| rs7133974  | KIAA1463 | GI_39930390-S | 12 | 12 | 49470844 | 45929  | 11.2192 | 5.69988 | CEU |
| rs11169567 | KIAA1463 | GI_39930390-S | 12 | 12 | 49491205 | 66290  | 11.2192 | 5.69988 | CEU |
| rs7306677  | KIAA1463 | GI_39930390-S | 12 | 12 | 49492030 | 67115  | 11.2192 | 5.69988 | CEU |
| rs829112   | KIAA1463 | GI_39930390-S | 12 | 12 | 49493971 | 69056  | 5.7524  | 5.69988 | CEU |
| rs11169571 | KIAA1463 | GI_39930390-S | 12 | 12 | 49500032 | 75117  | 11.1608 | 5.69988 | CEU |
| rs11169578 | KIAA1463 | GI_39930390-S | 12 | 12 | 49505968 | 81053  | 11.2192 | 5.69988 | CEU |
| rs864899   | KIAA1463 | GI_39930390-S | 12 | 12 | 49507394 | 82479  | 10.6166 | 5.69988 | CEU |
| rs861204   | KIAA1463 | GI_39930390-S | 12 | 12 | 49524083 | 99168  | 6.0019  | 5.69988 | CEU |
| rs12830125 | KIAA1463 | GI_39930390-S | 12 | 12 | 49587698 | 162783 | 5.8143  | 5.69988 | CEU |
| rs7306330  | KIAA1463 | GI_39930390-S | 12 | 12 | 49606557 | 181642 | 6.4119  | 5.69988 | CEU |
| rs2171497  | KIAA0748 | GI_7662281-S  | 12 | 12 | 53630400 | 1979   | 6.2737  | 6.22192 | CEU |
| rs960984   | KIAA0748 | GI_7662281-S  | 12 | 12 | 53630950 | 2529   | 6.2737  | 6.22192 | CEU |
| rs7962801  | KIAA0748 | GI_7662281-S  | 12 | 12 | 53632502 | 4081   | 6.2737  | 6.22192 | CEU |
| rs4466933  | KIAA0748 | GI_7662281-S  | 12 | 12 | 53632564 | 4143   | 6.2737  | 6.22192 | CEU |
| rs2371053  | KIAA0748 | GI_7662281-S  | 12 | 12 | 53632688 | 4267   | 6.2737  | 6.22192 | CEU |
| rs2371052  | KIAA0748 | GI_7662281-S  | 12 | 12 | 53632755 | 4334   | 6.2726  | 6.22192 | CEU |
| rs2371051  | KIAA0748 | GI_7662281-S  | 12 | 12 | 53633081 | 4660   | 6.2737  | 6.22192 | CEU |
| rs12228758 | KIAA0748 | GI_7662281-S  | 12 | 12 | 53633259 | 4838   | 6.2737  | 6.22192 | CEU |
| rs12231357 | KIAA0748 | GI_7662281-S  | 12 | 12 | 53633278 | 4857   | 6.2737  | 6.22192 | CEU |
| rs12231376 | KIAA0748 | GI_7662281-S  | 12 | 12 | 53633447 | 5026   | 6.3312  | 6.22192 | CEU |
| rs11171190 | KIAA0748 | GI_7662281-S  | 12 | 12 | 53633985 | 5564   | 6.2737  | 6.22192 | CEU |
| rs11171191 | KIAA0748 | GI_7662281-S  | 12 | 12 | 53634644 | 6223   | 6.2737  | 6.22192 | CEU |
| rs10876670 | KIAA0748 | GI_7662281-S  | 12 | 12 | 53634895 | 6474   | 6.2737  | 6.22192 | CEU |



|            |               |               |    |    |           |        |        |         |     |
|------------|---------------|---------------|----|----|-----------|--------|--------|---------|-----|
| rs11171192 | KIAA0748      | GI_7662281-S  | 12 | 12 | 53634959  | 6538   | 6.2737 | 6.22192 | CEU |
| rs7136501  | KIAA0748      | GI_7662281-S  | 12 | 12 | 53636061  | 7640   | 6.2737 | 6.22192 | CEU |
| rs3138142  | RDH5          | GI_4506462-S  | 12 | 12 | 54401852  | 2824   | 6.2699 | 5.74087 | CEU |
| rs3782235  | RBMS2         | GI_4506448-S  | 12 | 12 | 55201814  | 67204  | 5.4603 | 5.42284 | CEU |
| rs2888334  | DKFZP586D0919 | GI_24308058-S | 12 | 12 | 56262914  | 199565 | 6.1354 | 5.78194 | CEU |
| rs7314152  | DKFZP586D0919 | GI_24308058-S | 12 | 12 | 56303968  | 158511 | 6.5306 | 5.78194 | CEU |
| rs10083154 | DKFZP586D0919 | GI_24308058-S | 12 | 12 | 56307200  | 155279 | 6.5306 | 5.78194 | CEU |
| rs774887   | DKFZP586D0919 | GI_24308058-S | 12 | 12 | 56321102  | 141377 | 5.9641 | 5.78194 | CEU |
| rs12313109 | DKFZP586D0919 | GI_24308058-S | 12 | 12 | 56333725  | 128754 | 5.9641 | 5.78194 | CEU |
| rs11172284 | DKFZP586D0919 | GI_24308058-S | 12 | 12 | 56335586  | 126893 | 5.9641 | 5.78194 | CEU |
| rs10876994 | DKFZP586D0919 | GI_24308058-S | 12 | 12 | 56351004  | 111475 | 6.7124 | 5.78194 | CEU |
| rs10876995 | DKFZP586D0919 | GI_24308058-S | 12 | 12 | 56351269  | 111210 | 5.9852 | 5.78194 | CEU |
| rs10877008 | DKFZP586D0919 | GI_24308058-S | 12 | 12 | 56389859  | 72620  | 6.0626 | 5.78194 | CEU |
| rs701008   | DKFZP586D0919 | GI_24308058-S | 12 | 12 | 56403912  | 58567  | 6.6644 | 5.78194 | CEU |
| rs10877011 | DKFZP586D0919 | GI_24308058-S | 12 | 12 | 56411259  | 51220  | 8.8837 | 5.78194 | CEU |
| rs12368653 | DKFZP586D0919 | GI_24308058-S | 12 | 12 | 56419523  | 42956  | 6.101  | 5.78194 | CEU |
| rs2069502  | DKFZP586D0919 | GI_24308058-S | 12 | 12 | 56430932  | 31547  | 7.8383 | 5.78194 | CEU |
| rs2270777  | DKFZP586D0919 | GI_24308058-S | 12 | 12 | 56431423  | 31056  | 6.0596 | 5.78194 | CEU |
| rs703842   | DKFZP586D0919 | GI_24308058-S | 12 | 12 | 56449006  | 13473  | 7.1552 | 5.78194 | CEU |
| rs10877013 | DKFZP586D0919 | GI_24308058-S | 12 | 12 | 56451352  | 11127  | 6.4774 | 5.78194 | CEU |
| rs2291617  | DKFZP586D0919 | GI_24308058-S | 12 | 12 | 56452670  | 9809   | 7.8383 | 5.78194 | CEU |
| rs10877015 | DKFZP586D0919 | GI_24308058-S | 12 | 12 | 56454055  | 8424   | 7.0854 | 5.78194 | CEU |
| rs11172333 | DKFZP586D0919 | GI_24308058-S | 12 | 12 | 56456602  | 5877   | 7.8383 | 5.78194 | CEU |
| rs10877019 | DKFZP586D0919 | GI_24308058-S | 12 | 12 | 56459196  | 3283   | 7.8383 | 5.78194 | CEU |
| rs8181644  | DKFZP586D0919 | GI_24308058-S | 12 | 12 | 56459733  | 2746   | 8.1318 | 5.78194 | CEU |
| rs923829   | DKFZP586D0919 | GI_24308058-S | 12 | 12 | 56460573  | 1906   | 7.8383 | 5.78194 | CEU |
| rs11172335 | DKFZP586D0919 | GI_24308058-S | 12 | 12 | 56461468  | 1011   | 7.3763 | 5.78194 | CEU |
| rs10747783 | DKFZP586D0919 | GI_24308058-S | 12 | 12 | 56462881  | 402    | 7.9776 | 5.78194 | CEU |
| rs10431552 | DKFZP586D0919 | GI_24308058-S | 12 | 12 | 56464415  | 1936   | 7.9776 | 5.78194 | CEU |
| rs6581155  | DKFZP586D0919 | GI_24308058-S | 12 | 12 | 56464429  | 1950   | 7.9776 | 5.78194 | CEU |
| rs724834   | DKFZP586D0919 | GI_24308058-S | 12 | 12 | 56466683  | 4204   | 7.8383 | 5.78194 | CEU |
| rs11172343 | DKFZP586D0919 | GI_24308058-S | 12 | 12 | 56474424  | 11945  | 7.8383 | 5.78194 | CEU |
| rs11172344 | DKFZP586D0919 | GI_24308058-S | 12 | 12 | 56479715  | 17236  | 7.8383 | 5.78194 | CEU |
| rs10783848 | DKFZP586D0919 | GI_24308058-S | 12 | 12 | 56482795  | 20316  | 6.9468 | 5.78194 | CEU |
| rs3825079  | DKFZP586D0919 | GI_24308058-S | 12 | 12 | 56489621  | 27142  | 7.8383 | 5.78194 | CEU |
| rs11172349 | DKFZP586D0919 | GI_24308058-S | 12 | 12 | 56498795  | 36316  | 7.8383 | 5.78194 | CEU |
| rs11172351 | DKFZP586D0919 | GI_24308058-S | 12 | 12 | 56499752  | 37273  | 7.8383 | 5.78194 | CEU |
| rs3809260  | CHPT1         | GI_9910383-S  | 12 | 12 | 100593485 | 25946  | 5.9086 | 5.70749 | CEU |
| rs2057778  | OAS1          | GI_8051620-I  | 12 | 12 | 111813516 | 6574   | 7.5155 | 5.97382 | CEU |
| rs2057778  | OAS1          | GI_8051622-I  | 12 | 12 | 111813516 | 4742   | 7.1053 | 5.97382 | CEU |
| rs2285934  | OAS1          | GI_8051620-I  | 12 | 12 | 111814240 | 5850   | 7.5155 | 5.97382 | CEU |
| rs2285934  | OAS1          | GI_8051622-I  | 12 | 12 | 111814240 | 4018   | 7.1053 | 5.97382 | CEU |
| rs10774671 | OAS1          | GI_8051620-I  | 12 | 12 | 111819913 | 177    | 7.4224 | 5.97382 | CEU |
| rs10774671 | OAS1          | GI_8051622-I  | 12 | 12 | 111819913 | 1655   | 7.1504 | 5.97382 | CEU |
| rs1051042  | OAS1          | GI_8051620-I  | 12 | 12 | 111819957 | 133    | 7.5155 | 5.97382 | CEU |
| rs1051042  | OAS1          | GI_8051622-I  | 12 | 12 | 111819957 | 1699   | 7.1053 | 5.97382 | CEU |
| rs2660     | OAS1          | GI_8051620-I  | 12 | 12 | 111820162 | 72     | 7.5155 | 5.97382 | CEU |
| rs2660     | OAS1          | GI_8051622-I  | 12 | 12 | 111820162 | 1904   | 7.1053 | 5.97382 | CEU |
| rs7135577  | OAS1          | GI_8051620-I  | 12 | 12 | 111820826 | 736    | 7.4224 | 5.97382 | CEU |
| rs7135577  | OAS1          | GI_8051622-I  | 12 | 12 | 111820826 | 2568   | 7.1504 | 5.97382 | CEU |
| rs4767027  | OAS1          | GI_8051620-I  | 12 | 12 | 111821877 | 1787   | 7.5155 | 5.97382 | CEU |
| rs4767027  | OAS1          | GI_8051622-I  | 12 | 12 | 111821877 | 3619   | 7.1053 | 5.97382 | CEU |
| rs4767028  | OAS1          | GI_8051620-I  | 12 | 12 | 111821908 | 1818   | 7.5155 | 5.97382 | CEU |
| rs4767028  | OAS1          | GI_8051622-I  | 12 | 12 | 111821908 | 3650   | 7.1053 | 5.97382 | CEU |
| rs4767029  | OAS1          | GI_8051620-I  | 12 | 12 | 111822038 | 1948   | 7.5155 | 5.97382 | CEU |
| rs4767029  | OAS1          | GI_8051622-I  | 12 | 12 | 111822038 | 3780   | 7.1053 | 5.97382 | CEU |

|            |      |              |    |    |           |       |        |         |     |
|------------|------|--------------|----|----|-----------|-------|--------|---------|-----|
| rs4767030  | OAS1 | GI_8051620-I | 12 | 12 | 111822297 | 2207  | 7.5155 | 5.97382 | CEU |
| rs4767030  | OAS1 | GI_8051622-I | 12 | 12 | 111822297 | 4039  | 7.1053 | 5.97382 | CEU |
| rs10850092 | OAS1 | GI_8051620-I | 12 | 12 | 111822423 | 2333  | 7.5155 | 5.97382 | CEU |
| rs10850092 | OAS1 | GI_8051622-I | 12 | 12 | 111822423 | 4165  | 7.1053 | 5.97382 | CEU |
| rs6489864  | OAS1 | GI_8051620-I | 12 | 12 | 111822745 | 2655  | 7.5155 | 5.97382 | CEU |
| rs6489864  | OAS1 | GI_8051622-I | 12 | 12 | 111822745 | 4487  | 7.1053 | 5.97382 | CEU |
| rs6489865  | OAS1 | GI_8051620-I | 12 | 12 | 111823022 | 2932  | 7.5155 | 5.97382 | CEU |
| rs6489865  | OAS1 | GI_8051622-I | 12 | 12 | 111823022 | 4764  | 7.1053 | 5.97382 | CEU |
| rs10850093 | OAS1 | GI_8051620-I | 12 | 12 | 111823188 | 3098  | 7.5155 | 5.97382 | CEU |
| rs10850093 | OAS1 | GI_8051622-I | 12 | 12 | 111823188 | 4930  | 7.1053 | 5.97382 | CEU |
| rs10850094 | OAS1 | GI_8051620-I | 12 | 12 | 111823283 | 3193  | 7.5155 | 5.97382 | CEU |
| rs10850094 | OAS1 | GI_8051622-I | 12 | 12 | 111823283 | 5025  | 7.1053 | 5.97382 | CEU |
| rs10850095 | OAS1 | GI_8051620-I | 12 | 12 | 111823295 | 3205  | 7.5155 | 5.97382 | CEU |
| rs10850095 | OAS1 | GI_8051622-I | 12 | 12 | 111823295 | 5037  | 7.1053 | 5.97382 | CEU |
| rs10850096 | OAS1 | GI_8051620-I | 12 | 12 | 111823506 | 3416  | 7.5155 | 5.97382 | CEU |
| rs10850096 | OAS1 | GI_8051622-I | 12 | 12 | 111823506 | 5248  | 7.1053 | 5.97382 | CEU |
| rs10850097 | OAS1 | GI_8051620-I | 12 | 12 | 111823837 | 3747  | 7.5155 | 5.97382 | CEU |
| rs10850097 | OAS1 | GI_8051622-I | 12 | 12 | 111823837 | 5579  | 7.1053 | 5.97382 | CEU |
| rs10774673 | OAS1 | GI_8051620-I | 12 | 12 | 111823878 | 3788  | 7.4224 | 5.97382 | CEU |
| rs10774673 | OAS1 | GI_8051622-I | 12 | 12 | 111823878 | 5620  | 7.1504 | 5.97382 | CEU |
| rs10774674 | OAS1 | GI_8051620-I | 12 | 12 | 111823894 | 3804  | 7.5155 | 5.97382 | CEU |
| rs10774674 | OAS1 | GI_8051622-I | 12 | 12 | 111823894 | 5636  | 7.1053 | 5.97382 | CEU |
| rs11066452 | OAS1 | GI_8051620-I | 12 | 12 | 111824294 | 4204  | 7.5155 | 5.97382 | CEU |
| rs11066452 | OAS1 | GI_8051622-I | 12 | 12 | 111824294 | 6036  | 7.1053 | 5.97382 | CEU |
| rs10850098 | OAS1 | GI_8051622-I | 12 | 12 | 111824778 | 6520  | 6.643  | 5.97382 | CEU |
| rs10774676 | OAS1 | GI_8051622-I | 12 | 12 | 111825127 | 6869  | 6.643  | 5.97382 | CEU |
| rs10774677 | OAS1 | GI_8051622-I | 12 | 12 | 111825141 | 6883  | 6.2348 | 5.97382 | CEU |
| rs4766663  | OAS1 | GI_8051622-I | 12 | 12 | 111825694 | 7436  | 6.643  | 5.97382 | CEU |
| rs4766664  | OAS1 | GI_8051622-I | 12 | 12 | 111825717 | 7459  | 6.643  | 5.97382 | CEU |
| rs4766665  | OAS1 | GI_8051622-I | 12 | 12 | 111825829 | 7571  | 6.643  | 5.97382 | CEU |
| rs4988618  | OAS1 | GI_8051622-I | 12 | 12 | 111825898 | 7640  | 6.643  | 5.97382 | CEU |
| rs6489868  | OAS1 | GI_8051622-I | 12 | 12 | 111826412 | 8154  | 6.643  | 5.97382 | CEU |
| rs6489870  | OAS1 | GI_8051622-I | 12 | 12 | 111826692 | 8434  | 6.0364 | 5.97382 | CEU |
| rs4766673  | OAS1 | GI_8051622-I | 12 | 12 | 111827881 | 9623  | 6.643  | 5.97382 | CEU |
| rs4766674  | OAS1 | GI_8051622-I | 12 | 12 | 111827921 | 9663  | 6.643  | 5.97382 | CEU |
| rs4766675  | OAS1 | GI_8051622-I | 12 | 12 | 111828173 | 9915  | 6.0613 | 5.97382 | CEU |
| rs4766676  | OAS1 | GI_8051622-I | 12 | 12 | 111828301 | 10043 | 6.6035 | 5.97382 | CEU |
| rs7315441  | OAS1 | GI_8051622-I | 12 | 12 | 111828407 | 10149 | 6.643  | 5.97382 | CEU |
| rs7316586  | OAS1 | GI_8051622-I | 12 | 12 | 111828548 | 10290 | 6.4834 | 5.97382 | CEU |
| rs7134391  | OAS1 | GI_8051622-I | 12 | 12 | 111829411 | 11153 | 6.643  | 5.97382 | CEU |
| rs1859336  | OAS1 | GI_8051622-I | 12 | 12 | 111830029 | 11771 | 6.643  | 5.97382 | CEU |
| rs2384071  | OAS1 | GI_8051622-I | 12 | 12 | 111830063 | 11805 | 6.3548 | 5.97382 | CEU |
| rs6489874  | OAS1 | GI_8051622-I | 12 | 12 | 111830615 | 12357 | 7.0164 | 5.97382 | CEU |
| rs6489878  | OAS1 | GI_8051622-I | 12 | 12 | 111830845 | 12587 | 6.0371 | 5.97382 | CEU |
| rs7298184  | OAS1 | GI_8051622-I | 12 | 12 | 111830969 | 12711 | 6.4208 | 5.97382 | CEU |
| rs7132404  | OAS1 | GI_8051622-I | 12 | 12 | 111831325 | 13067 | 6.643  | 5.97382 | CEU |
| rs4767036  | OAS1 | GI_8051622-I | 12 | 12 | 111831897 | 13639 | 6.5238 | 5.97382 | CEU |
| rs7967461  | OAS1 | GI_8051622-I | 12 | 12 | 111832479 | 14221 | 6.5238 | 5.97382 | CEU |
| rs1859333  | OAS1 | GI_8051622-I | 12 | 12 | 111833686 | 15428 | 6.643  | 5.97382 | CEU |
| rs1859332  | OAS1 | GI_8051622-I | 12 | 12 | 111833834 | 15576 | 6.6058 | 5.97382 | CEU |
| rs7966314  | OAS1 | GI_8051622-I | 12 | 12 | 111835259 | 17001 | 6.1831 | 5.97382 | CEU |
| rs4767037  | OAS1 | GI_8051622-I | 12 | 12 | 111835524 | 17266 | 6.0572 | 5.97382 | CEU |
| rs3759375  | OAS1 | GI_8051622-I | 12 | 12 | 111836308 | 18050 | 6.1945 | 5.97382 | CEU |
| rs4767040  | OAS1 | GI_8051622-I | 12 | 12 | 111836737 | 18479 | 6.1831 | 5.97382 | CEU |
| rs10774679 | OAS1 | GI_8051622-I | 12 | 12 | 111837468 | 19210 | 6.1831 | 5.97382 | CEU |
| rs7132797  | OAS1 | GI_8051622-I | 12 | 12 | 111837756 | 19498 | 6.2752 | 5.97382 | CEU |

|            |          |               |    |    |           |        |         |         |     |
|------------|----------|---------------|----|----|-----------|--------|---------|---------|-----|
| rs4238033  | OAS1     | GI_8051622-I  | 12 | 12 | 111840801 | 22543  | 6.0545  | 5.97382 | CEU |
| rs10735079 | OAS1     | GI_8051622-I  | 12 | 12 | 111842728 | 24470  | 6.1885  | 5.97382 | CEU |
| rs6489881  | OAS1     | GI_8051622-I  | 12 | 12 | 111843937 | 25679  | 6.4517  | 5.97382 | CEU |
| rs1533703  | CDK2AP1  | GI_17978492-S | 12 | 12 | 122266973 | 3619   | 5.4794  | 5.33544 | CEU |
| rs2328938  | TBC1D4   | GI_42660198-S | 13 | 13 | 74768314  | 10939  | 6.0847  | 6.04603 | CEU |
| rs4885285  | TBC1D4   | GI_42660198-S | 13 | 13 | 74769752  | 12377  | 6.3096  | 6.04603 | CEU |
| rs7157367  | PRKCM    | GI_4506074-S  | 14 | 14 | 29375612  | 259412 | 6.1951  | 5.89474 | CEU |
| rs1958980  | PRKCM    | GI_4506074-S  | 14 | 14 | 29381842  | 265642 | 6.7323  | 5.89474 | CEU |
| rs10134670 | PRKCM    | GI_4506074-S  | 14 | 14 | 29386693  | 270493 | 6.1951  | 5.89474 | CEU |
| rs4441176  | PRKCM    | GI_4506074-S  | 14 | 14 | 29388428  | 272228 | 6.1951  | 5.89474 | CEU |
| rs1953209  | PRKCM    | GI_4506074-S  | 14 | 14 | 29395444  | 279244 | 6.1951  | 5.89474 | CEU |
| rs4900925  | RPL36AL  | GI_34335143-S | 14 | 14 | 49082075  | 75000  | 6.1904  | 6.03577 | CEU |
| rs12897941 | RPL36AL  | GI_34335143-S | 14 | 14 | 49086451  | 70624  | 6.1904  | 6.03577 | CEU |
| rs6572592  | RPL36AL  | GI_34335143-S | 14 | 14 | 49150621  | 6454   | 7.0727  | 6.03577 | CEU |
| rs3007030  | RPL36AL  | GI_34335143-S | 14 | 14 | 49156313  | 762    | 7.2383  | 6.03577 | CEU |
| rs1952013  | RPL36AL  | GI_34335143-S | 14 | 14 | 49157107  | 32     | 6.3171  | 6.03577 | CEU |
| rs2985697  | RPL36AL  | GI_34335143-S | 14 | 14 | 49162652  | 5577   | 7.2383  | 6.03577 | CEU |
| rs2985696  | RPL36AL  | GI_34335143-S | 14 | 14 | 49164663  | 7588   | 7.2383  | 6.03577 | CEU |
| rs2354448  | RPL36AL  | GI_34335143-S | 14 | 14 | 49168046  | 10971  | 6.2895  | 6.03577 | CEU |
| rs1952012  | RPL36AL  | GI_34335143-S | 14 | 14 | 49168646  | 11571  | 7.2383  | 6.03577 | CEU |
| rs2985684  | RPL36AL  | GI_34335143-S | 14 | 14 | 49171432  | 14357  | 7.0063  | 6.03577 | CEU |
| rs3007033  | RPL36AL  | GI_34335143-S | 14 | 14 | 49173566  | 16491  | 6.7621  | 6.03577 | CEU |
| rs11157696 | RPL36AL  | GI_34335143-S | 14 | 14 | 49175496  | 18421  | 7.2383  | 6.03577 | CEU |
| rs7146248  | RPL36AL  | GI_34335143-S | 14 | 14 | 49181817  | 24742  | 7.1714  | 6.03577 | CEU |
| rs396974   | C14orf52 | GI_21553312-S | 14 | 14 | 64375058  | 95698  | 5.9853  | 5.86197 | CEU |
| rs435627   | C14orf52 | GI_21553312-S | 14 | 14 | 64375680  | 95076  | 5.9853  | 5.86197 | CEU |
| rs1570295  | C14orf52 | GI_21553312-S | 14 | 14 | 64380120  | 90636  | 6.1734  | 5.86197 | CEU |
| rs11623597 | C14orf52 | GI_21553312-S | 14 | 14 | 64387597  | 83159  | 6.2152  | 5.86197 | CEU |
| rs12147495 | C14orf52 | GI_21553312-S | 14 | 14 | 64388582  | 82174  | 6.2152  | 5.86197 | CEU |
| rs2828     | C14orf52 | GI_21553312-S | 14 | 14 | 64405803  | 64953  | 6.147   | 5.86197 | CEU |
| rs10498519 | C14orf52 | GI_21553312-S | 14 | 14 | 64407592  | 63164  | 6.8105  | 5.86197 | CEU |
| rs743264   | C14orf52 | GI_21553312-S | 14 | 14 | 64426689  | 44067  | 14.879  | 5.86197 | CEU |
| rs10498518 | C14orf52 | GI_21553312-S | 14 | 14 | 64427295  | 43461  | 14.879  | 5.86197 | CEU |
| rs11629410 | C14orf52 | GI_21553312-S | 14 | 14 | 64427339  | 43417  | 10.2261 | 5.86197 | CEU |
| rs12590986 | C14orf52 | GI_21553312-S | 14 | 14 | 64427445  | 43311  | 14.879  | 5.86197 | CEU |
| rs11621527 | C14orf52 | GI_21553312-S | 14 | 14 | 64427732  | 43024  | 10.2261 | 5.86197 | CEU |
| rs1957425  | C14orf52 | GI_21553312-S | 14 | 14 | 64428329  | 42427  | 14.879  | 5.86197 | CEU |
| rs12881353 | C14orf52 | GI_21553312-S | 14 | 14 | 64433368  | 37388  | 10.2261 | 5.86197 | CEU |
| rs1957421  | C14orf52 | GI_21553312-S | 14 | 14 | 64433557  | 37199  | 14.965  | 5.86197 | CEU |
| rs12433639 | C14orf52 | GI_21553312-S | 14 | 14 | 64435044  | 35712  | 13.5105 | 5.86197 | CEU |
| rs11848113 | C14orf52 | GI_21553312-S | 14 | 14 | 64436014  | 34742  | 13.743  | 5.86197 | CEU |
| rs12878229 | C14orf52 | GI_21553312-S | 14 | 14 | 64436238  | 34518  | 10.8297 | 5.86197 | CEU |
| rs11622077 | C14orf52 | GI_21553312-S | 14 | 14 | 64436950  | 33806  | 9.6343  | 5.86197 | CEU |
| rs8016174  | C14orf52 | GI_21553312-S | 14 | 14 | 64440234  | 30522  | 10.3791 | 5.86197 | CEU |
| rs1951488  | C14orf52 | GI_21553312-S | 14 | 14 | 64441966  | 28790  | 14.879  | 5.86197 | CEU |
| rs1951487  | C14orf52 | GI_21553312-S | 14 | 14 | 64442101  | 28655  | 14.879  | 5.86197 | CEU |
| rs17767942 | C14orf52 | GI_21553312-S | 14 | 14 | 64442373  | 28383  | 10.3003 | 5.86197 | CEU |
| rs4902331  | C14orf52 | GI_21553312-S | 14 | 14 | 64442828  | 27928  | 10.3003 | 5.86197 | CEU |
| rs17767960 | C14orf52 | GI_21553312-S | 14 | 14 | 64444437  | 26319  | 10.3003 | 5.86197 | CEU |
| rs4902332  | C14orf52 | GI_21553312-S | 14 | 14 | 64445731  | 25025  | 16.4076 | 5.86197 | CEU |
| rs4902333  | C14orf52 | GI_21553312-S | 14 | 14 | 64445839  | 24917  | 12.9168 | 5.86197 | CEU |
| rs17102298 | C14orf52 | GI_21553312-S | 14 | 14 | 64446489  | 24267  | 16.4076 | 5.86197 | CEU |
| rs7154406  | C14orf52 | GI_21553312-S | 14 | 14 | 64446942  | 23814  | 15.7095 | 5.86197 | CEU |
| rs7153990  | C14orf52 | GI_21553312-S | 14 | 14 | 64447303  | 23453  | 11.3697 | 5.86197 | CEU |
| rs10139595 | C14orf52 | GI_21553312-S | 14 | 14 | 64448012  | 22744  | 14.3528 | 5.86197 | CEU |
| rs10151701 | C14orf52 | GI_21553312-S | 14 | 14 | 64448202  | 22554  | 15.7378 | 5.86197 | CEU |

|            |           |               |    |    |          |        |         |         |     |
|------------|-----------|---------------|----|----|----------|--------|---------|---------|-----|
| rs7143358  | C14orf52  | GI_21553312-S | 14 | 14 | 64448715 | 22041  | 9.6707  | 5.86197 | CEU |
| rs7143432  | C14orf52  | GI_21553312-S | 14 | 14 | 64448899 | 21857  | 14.3528 | 5.86197 | CEU |
| rs7144811  | C14orf52  | GI_21553312-S | 14 | 14 | 64448900 | 21856  | 15.7378 | 5.86197 | CEU |
| rs7143764  | C14orf52  | GI_21553312-S | 14 | 14 | 64449036 | 21720  | 11.9582 | 5.86197 | CEU |
| rs10143017 | C14orf52  | GI_21553312-S | 14 | 14 | 64449371 | 21385  | 16.4076 | 5.86197 | CEU |
| rs10148687 | C14orf52  | GI_21553312-S | 14 | 14 | 64454029 | 16727  | 16.4076 | 5.86197 | CEU |
| rs4902334  | C14orf52  | GI_21553312-S | 14 | 14 | 64455573 | 15183  | 11.4894 | 5.86197 | CEU |
| rs4902335  | C14orf52  | GI_21553312-S | 14 | 14 | 64455651 | 15105  | 16.4076 | 5.86197 | CEU |
| rs10132742 | C14orf52  | GI_21553312-S | 14 | 14 | 64456675 | 14081  | 15.2435 | 5.86197 | CEU |
| rs4899152  | C14orf52  | GI_21553312-S | 14 | 14 | 64456869 | 13887  | 15.7378 | 5.86197 | CEU |
| rs4902336  | C14orf52  | GI_21553312-S | 14 | 14 | 64457015 | 13741  | 15.7378 | 5.86197 | CEU |
| rs10138534 | C14orf52  | GI_21553312-S | 14 | 14 | 64457742 | 13014  | 16.4076 | 5.86197 | CEU |
| rs7401853  | C14orf52  | GI_21553312-S | 14 | 14 | 64458464 | 12292  | 16.4076 | 5.86197 | CEU |
| rs10141986 | C14orf52  | GI_21553312-S | 14 | 14 | 64459156 | 11600  | 15.7378 | 5.86197 | CEU |
| rs2147616  | C14orf52  | GI_21553312-S | 14 | 14 | 64460855 | 9901   | 11.4894 | 5.86197 | CEU |
| rs4902343  | C14orf52  | GI_21553312-S | 14 | 14 | 64465933 | 4823   | 16.4076 | 5.86197 | CEU |
| rs1064108  | C14orf52  | GI_21553312-S | 14 | 14 | 64470018 | 738    | 10.2873 | 5.86197 | CEU |
| rs6745     | C14orf52  | GI_21553312-S | 14 | 14 | 64471448 | 692    | 16.4076 | 5.86197 | CEU |
| rs10149617 | C14orf52  | GI_21553312-S | 14 | 14 | 64471914 | 1158   | 16.4076 | 5.86197 | CEU |
| rs4902345  | C14orf52  | GI_21553312-S | 14 | 14 | 64473657 | 2901   | 16.4076 | 5.86197 | CEU |
| rs10132858 | C14orf52  | GI_21553312-S | 14 | 14 | 64473731 | 2975   | 15.544  | 5.86197 | CEU |
| rs10133054 | C14orf52  | GI_21553312-S | 14 | 14 | 64473869 | 3113   | 16.0898 | 5.86197 | CEU |
| rs10133290 | C14orf52  | GI_21553312-S | 14 | 14 | 64474195 | 3439   | 16.4076 | 5.86197 | CEU |
| rs11623705 | C14orf52  | GI_21553312-S | 14 | 14 | 64475475 | 4719   | 10.3003 | 5.86197 | CEU |
| rs4902346  | C14orf52  | GI_21553312-S | 14 | 14 | 64476913 | 6157   | 15.7886 | 5.86197 | CEU |
| rs2412065  | C14orf52  | GI_21553312-S | 14 | 14 | 64477410 | 6654   | 16.4076 | 5.86197 | CEU |
| rs2737844  | C14orf52  | GI_21553312-S | 14 | 14 | 64478262 | 7506   | 11.4894 | 5.86197 | CEU |
| rs2296327  | C14orf52  | GI_21553312-S | 14 | 14 | 64480300 | 9544   | 6.1328  | 5.86197 | CEU |
| rs3742599  | C14orf52  | GI_21553312-S | 14 | 14 | 64481661 | 10905  | 11.7281 | 5.86197 | CEU |
| rs2277502  | C14orf52  | GI_21553312-S | 14 | 14 | 64482031 | 11275  | 10.9317 | 5.86197 | CEU |
| rs2277501  | C14orf52  | GI_21553312-S | 14 | 14 | 64482194 | 11438  | 7.1263  | 5.86197 | CEU |
| rs3087955  | C14orf52  | GI_21553312-S | 14 | 14 | 64482501 | 11745  | 7.2664  | 5.86197 | CEU |
| rs3759681  | C14orf52  | GI_21553312-S | 14 | 14 | 64483359 | 12603  | 8.9618  | 5.86197 | CEU |
| rs1886506  | C14orf52  | GI_21553312-S | 14 | 14 | 64485119 | 14363  | 10.4784 | 5.86197 | CEU |
| rs17752452 | C14orf52  | GI_21553312-S | 14 | 14 | 64488228 | 17472  | 10.4233 | 5.86197 | CEU |
| rs4902348  | C14orf52  | GI_21553312-S | 14 | 14 | 64489705 | 18949  | 10.9317 | 5.86197 | CEU |
| rs11621450 | C14orf52  | GI_21553312-S | 14 | 14 | 64491269 | 20513  | 10.9317 | 5.86197 | CEU |
| rs4902349  | C14orf52  | GI_21553312-S | 14 | 14 | 64492093 | 21337  | 10.9317 | 5.86197 | CEU |
| rs4902350  | C14orf52  | GI_21553312-S | 14 | 14 | 64492118 | 21362  | 10.9317 | 5.86197 | CEU |
| rs4902351  | C14orf52  | GI_21553312-S | 14 | 14 | 64492244 | 21488  | 10.9317 | 5.86197 | CEU |
| rs4902352  | C14orf52  | GI_21553312-S | 14 | 14 | 64492549 | 21793  | 7.2784  | 5.86197 | CEU |
| rs11623886 | C14orf52  | GI_21553312-S | 14 | 14 | 64493015 | 22259  | 7.2664  | 5.86197 | CEU |
| rs8007405  | C14orf52  | GI_21553312-S | 14 | 14 | 64500081 | 29325  | 6.7836  | 5.86197 | CEU |
| rs4899156  | C14orf52  | GI_21553312-S | 14 | 14 | 64502355 | 31599  | 10.9317 | 5.86197 | CEU |
| rs4899158  | C14orf52  | GI_21553312-S | 14 | 14 | 64503084 | 32328  | 6.712   | 5.86197 | CEU |
| rs2075025  | ABCD4     | GI_10947128-A | 14 | 14 | 73266439 | 555646 | 6.2645  | 5.58908 | CEU |
| rs12432637 | C14orf118 | GI_40018643-A | 14 | 14 | 75726530 | 11897  | 6.6422  | 6.13624 | CEU |
| rs7142306  | C14orf4   | GI_38327635-S | 14 | 14 | 76552603 | 8571   | 6.9342  | 6.42824 | CEU |
| rs4899634  | C14orf4   | GI_38327635-S | 14 | 14 | 76575362 | 14188  | 7.6187  | 6.42824 | CEU |
| rs1263389  | C14orf130 | GI_28411949-A | 14 | 14 | 92737473 | 18971  | 7.6619  | 6.30483 | CEU |
| rs3783896  | C14orf130 | GI_28411949-A | 14 | 14 | 92760054 | 3610   | 7.6619  | 6.30483 | CEU |
| rs2905     | C14orf130 | GI_28411949-A | 14 | 14 | 92763175 | 6731   | 7.6619  | 6.30483 | CEU |
| rs11621915 | C14orf130 | GI_28411949-A | 14 | 14 | 92763584 | 7140   | 7.6619  | 6.30483 | CEU |
| rs11625516 | C14orf130 | GI_28411949-A | 14 | 14 | 92766070 | 9626   | 7.6531  | 6.30483 | CEU |
| rs909287   | KIAA1622  | GI_17402885-I | 14 | 14 | 93878417 | 63130  | 10.4779 | 6.40098 | CEU |
| rs11629326 | KIAA1622  | GI_17402885-I | 14 | 14 | 93878584 | 63297  | 10.4779 | 6.40098 | CEU |

|            |           |               |    |    |           |        |         |         |     |
|------------|-----------|---------------|----|----|-----------|--------|---------|---------|-----|
| rs1956174  | KIAA1622  | GI_17402885-I | 14 | 14 | 93885874  | 70587  | 10.1718 | 6.40098 | CEU |
| rs2749530  | KIAA1622  | GI_17402885-I | 14 | 14 | 93886052  | 70765  | 8.9978  | 6.40098 | CEU |
| rs2749529  | KIAA1622  | GI_17402885-I | 14 | 14 | 93890212  | 74925  | 8.9978  | 6.40098 | CEU |
| rs4905188  | KIAA1622  | GI_17402885-I | 14 | 14 | 93890990  | 75703  | 10.4779 | 6.40098 | CEU |
| rs2749527  | KIAA1622  | GI_17402885-I | 14 | 14 | 93896821  | 81534  | 7.4595  | 6.40098 | CEU |
| rs12588394 | KIAA1622  | GI_17402885-I | 14 | 14 | 93899421  | 84134  | 10.1718 | 6.40098 | CEU |
| rs3819333  | KIAA1622  | GI_17402885-I | 14 | 14 | 93900308  | 85021  | 10.1718 | 6.40098 | CEU |
| rs941595   | KIAA1622  | GI_17402885-I | 14 | 14 | 93901769  | 86482  | 10.4779 | 6.40098 | CEU |
| rs1950652  | KIAA1622  | GI_17402885-I | 14 | 14 | 93904089  | 88802  | 9.587   | 6.40098 | CEU |
| rs3762132  | KIAA1622  | GI_17402885-I | 14 | 14 | 93904328  | 89041  | 9.037   | 6.40098 | CEU |
| rs3762130  | KIAA1622  | GI_17402885-I | 14 | 14 | 93904614  | 89327  | 10.0596 | 6.40098 | CEU |
| rs3748319  | KIAA1622  | GI_17402885-I | 14 | 14 | 93905400  | 90113  | 10.0596 | 6.40098 | CEU |
| rs4900229  | KIAA1622  | GI_17402885-I | 14 | 14 | 93906282  | 90995  | 9.7391  | 6.40098 | CEU |
| rs1243171  | KIAA1622  | GI_17402885-I | 14 | 14 | 93906537  | 91250  | 7.6564  | 6.40098 | CEU |
| rs3803304  | SIVA      | GI_11277467-I | 14 | 14 | 104310191 | 17028  | 5.9444  | 5.72686 | CEU |
| rs756584   | hmm3587   | hmm3587-S     | 14 | 14 | 106206762 | 33712  | 5.3773  | 5.25834 | CEU |
| rs17672538 | hmm3587   | hmm3587-S     | 14 | 14 | 106231839 | 8635   | 14.1322 | 5.25834 | CEU |
| rs7151640  | hmm3587   | hmm3587-S     | 14 | 14 | 106232962 | 7512   | 13.6582 | 5.25834 | CEU |
| rs7152014  | hmm3587   | hmm3587-S     | 14 | 14 | 106233168 | 7306   | 12.4138 | 5.25834 | CEU |
| rs12884586 | hmm3587   | hmm3587-S     | 14 | 14 | 106235525 | 4949   | 11.394  | 5.25834 | CEU |
| rs12884803 | hmm3587   | hmm3587-S     | 14 | 14 | 106235665 | 4809   | 12.8488 | 5.25834 | CEU |
| rs12884826 | hmm3587   | hmm3587-S     | 14 | 14 | 106235739 | 4735   | 14.8293 | 5.25834 | CEU |
| rs12884968 | hmm3587   | hmm3587-S     | 14 | 14 | 106235800 | 4674   | 14.7227 | 5.25834 | CEU |
| rs4448834  | hmm3587   | hmm3587-S     | 14 | 14 | 106241443 | 969    | 11.3414 | 5.25834 | CEU |
| rs4774182  | hmm3587   | hmm3587-S     | 14 | 14 | 106242290 | 1816   | 9.0554  | 5.25834 | CEU |
| rs10141910 | hmm3587   | hmm3587-S     | 14 | 14 | 106243464 | 2990   | 10.647  | 5.25834 | CEU |
| rs4259951  | hmm3587   | hmm3587-S     | 14 | 14 | 106243919 | 3445   | 11.2581 | 5.25834 | CEU |
| rs2904620  | hmm3587   | hmm3587-S     | 14 | 14 | 106247607 | 7133   | 10.1463 | 5.25834 | CEU |
| rs4774016  | hmm3587   | hmm3587-S     | 14 | 14 | 106248414 | 7940   | 9.6309  | 5.25834 | CEU |
| rs1060493  | LOC283710 | GI_27483466-S | 15 | 15 | 29303762  | 1273   | 6.1745  | 5.78306 | CEU |
| rs12903039 | LOC283710 | GI_27483466-S | 15 | 15 | 29307285  | 4796   | 6.831   | 5.78306 | CEU |
| rs7165340  | LOC283710 | GI_27483466-S | 15 | 15 | 29311031  | 8542   | 6.8314  | 5.78306 | CEU |
| rs4779846  | LOC283710 | GI_27483466-S | 15 | 15 | 29311898  | 9409   | 6.8314  | 5.78306 | CEU |
| rs999197   | MGC20481  | GI_33086946-S | 15 | 15 | 38582490  | 50285  | 6.3266  | 5.69471 | CEU |
| rs12916323 | MGC20481  | GI_33086946-S | 15 | 15 | 38614322  | 18453  | 6.8257  | 5.69471 | CEU |
| rs11857247 | MGC20481  | GI_33086946-S | 15 | 15 | 38616214  | 16561  | 6.5874  | 5.69471 | CEU |
| rs8028910  | MGC20481  | GI_33086946-S | 15 | 15 | 38620783  | 11992  | 6.3266  | 5.69471 | CEU |
| rs8025458  | MGC20481  | GI_33086946-S | 15 | 15 | 38629591  | 3184   | 6.4831  | 5.69471 | CEU |
| rs12915563 | MGC20481  | GI_33086946-S | 15 | 15 | 38635581  | 2806   | 6.5309  | 5.69471 | CEU |
| rs12908114 | MGC20481  | GI_33086946-S | 15 | 15 | 38646569  | 13794  | 5.9741  | 5.69471 | CEU |
| rs10851396 | MGC20481  | GI_33086946-S | 15 | 15 | 38648211  | 15436  | 5.9186  | 5.69471 | CEU |
| rs11070279 | MGC20481  | GI_33086946-S | 15 | 15 | 38648238  | 15463  | 5.9186  | 5.69471 | CEU |
| rs1453183  | MGC20481  | GI_33086946-S | 15 | 15 | 38650222  | 17447  | 6.8076  | 5.69471 | CEU |
| rs12914501 | MGC20481  | GI_33086946-S | 15 | 15 | 38655761  | 22986  | 6.5942  | 5.69471 | CEU |
| rs12907448 | MGC20481  | GI_33086946-S | 15 | 15 | 38696759  | 63984  | 6.2558  | 5.69471 | CEU |
| rs4457966  | MGC20481  | GI_33086946-S | 15 | 15 | 38711404  | 78629  | 6.0494  | 5.69471 | CEU |
| rs12148185 | MGC20481  | GI_33086946-S | 15 | 15 | 38733585  | 100810 | 6.8076  | 5.69471 | CEU |
| rs1051482  | MGC20481  | GI_33086946-S | 15 | 15 | 38743763  | 110988 | 6.8076  | 5.69471 | CEU |
| rs1867419  | RPAP1     | GI_24430138-S | 15 | 15 | 39593511  | 3379   | 6.3894  | 6.00205 | CEU |
| rs11633933 | Hs.11898  | Hs.11898-S    | 15 | 15 | 50735649  | 981    | 5.5786  | 5.5741  | CEU |
| rs8032242  | FLJ12994  | GI_12383091-S | 15 | 15 | 54153412  | 18908  | 6.33    | 5.8449  | CEU |
| rs4774231  | FLJ12994  | GI_12383091-S | 15 | 15 | 54155947  | 16373  | 6.4286  | 5.8449  | CEU |
| rs7165270  | FLJ12994  | GI_12383091-S | 15 | 15 | 54160811  | 11509  | 7.2311  | 5.8449  | CEU |
| rs4774232  | FLJ12994  | GI_12383091-S | 15 | 15 | 54165169  | 7151   | 6.9421  | 5.8449  | CEU |
| rs9672886  | FLJ12994  | GI_12383091-S | 15 | 15 | 54196511  | 24191  | 6.0166  | 5.8449  | CEU |
| rs4310791  | FLJ12994  | GI_12383091-S | 15 | 15 | 54213793  | 41473  | 6.7142  | 5.8449  | CEU |

|            |           |               |    |    |          |        |         |         |     |
|------------|-----------|---------------|----|----|----------|--------|---------|---------|-----|
| rs4310792  | FLJ12994  | GI_12383091-S | 15 | 15 | 54213965 | 41645  | 7.4329  | 5.8449  | CEU |
| rs1372753  | FLJ12994  | GI_12383091-S | 15 | 15 | 54220532 | 48212  | 5.9587  | 5.8449  | CEU |
| rs7496025  | FLJ12994  | GI_12383091-S | 15 | 15 | 54223649 | 51329  | 7.2311  | 5.8449  | CEU |
| rs12905899 | FLJ12994  | GI_12383091-S | 15 | 15 | 54236909 | 64589  | 7.2311  | 5.8449  | CEU |
| rs12911427 | FLJ12994  | GI_12383091-S | 15 | 15 | 54245116 | 72796  | 5.8464  | 5.8449  | CEU |
| rs2725870  | FLJ12994  | GI_12383091-S | 15 | 15 | 54262681 | 90361  | 7.054   | 5.8449  | CEU |
| rs2713941  | FLJ12994  | GI_12383091-S | 15 | 15 | 54274819 | 102499 | 7.2311  | 5.8449  | CEU |
| rs2460647  | FLJ12994  | GI_12383091-S | 15 | 15 | 54297200 | 124880 | 7.2311  | 5.8449  | CEU |
| rs2718941  | FLJ12994  | GI_12383091-S | 15 | 15 | 54309473 | 137153 | 7.2311  | 5.8449  | CEU |
| rs2713924  | FLJ12994  | GI_12383091-S | 15 | 15 | 54310102 | 137782 | 7.2311  | 5.8449  | CEU |
| rs2718915  | FLJ12994  | GI_12383091-S | 15 | 15 | 54315732 | 143412 | 7.2311  | 5.8449  | CEU |
| rs2713933  | FLJ12994  | GI_12383091-S | 15 | 15 | 54325854 | 153534 | 7.2311  | 5.8449  | CEU |
| rs2713936  | FLJ12994  | GI_12383091-S | 15 | 15 | 54333277 | 160957 | 7.0004  | 5.8449  | CEU |
| rs2682054  | FLJ12994  | GI_12383091-S | 15 | 15 | 54334440 | 162120 | 7.2311  | 5.8449  | CEU |
| rs2460650  | FLJ12994  | GI_12383091-S | 15 | 15 | 54334768 | 162448 | 6.6861  | 5.8449  | CEU |
| rs2947021  | FLJ12994  | GI_12383091-S | 15 | 15 | 54342913 | 170593 | 6.9669  | 5.8449  | CEU |
| rs7495406  | FLJ12994  | GI_12383091-S | 15 | 15 | 54344242 | 171922 | 6.2831  | 5.8449  | CEU |
| rs2718934  | FLJ12994  | GI_12383091-S | 15 | 15 | 54344710 | 172390 | 6.2831  | 5.8449  | CEU |
| rs2249090  | FLJ12994  | GI_12383091-S | 15 | 15 | 54345306 | 172986 | 7.4149  | 5.8449  | CEU |
| rs2682070  | FLJ12994  | GI_12383091-S | 15 | 15 | 54360102 | 187782 | 7.2547  | 5.8449  | CEU |
| rs2682071  | FLJ12994  | GI_12383091-S | 15 | 15 | 54361343 | 189023 | 7.0953  | 5.8449  | CEU |
| rs2725854  | FLJ12994  | GI_12383091-S | 15 | 15 | 54365123 | 192803 | 7.2311  | 5.8449  | CEU |
| rs2718952  | FLJ12994  | GI_12383091-S | 15 | 15 | 54375897 | 203577 | 7.1827  | 5.8449  | CEU |
| rs2718955  | FLJ12994  | GI_12383091-S | 15 | 15 | 54377564 | 205244 | 7.2311  | 5.8449  | CEU |
| rs12914567 | FLJ12994  | GI_12383091-S | 15 | 15 | 54409586 | 237266 | 7.2311  | 5.8449  | CEU |
| rs2460646  | FLJ12994  | GI_12383091-S | 15 | 15 | 54430168 | 257848 | 7.2311  | 5.8449  | CEU |
| rs12905782 | FLJ12994  | GI_12383091-S | 15 | 15 | 54441417 | 269097 | 7.2006  | 5.8449  | CEU |
| rs12900678 | FLJ12994  | GI_12383091-S | 15 | 15 | 54465022 | 292702 | 7.1827  | 5.8449  | CEU |
| rs17819438 | FLJ12994  | GI_12383091-S | 15 | 15 | 54467613 | 295293 | 7.2311  | 5.8449  | CEU |
| rs6493856  | FLJ12994  | GI_12383091-S | 15 | 15 | 54474651 | 302331 | 7.2311  | 5.8449  | CEU |
| rs1549452  | FLJ12994  | GI_12383091-S | 15 | 15 | 54489647 | 317327 | 6.9421  | 5.8449  | CEU |
| rs2303441  | FLJ12994  | GI_12383091-S | 15 | 15 | 54491462 | 319142 | 7.2311  | 5.8449  | CEU |
| rs3817406  | FLJ12994  | GI_12383091-S | 15 | 15 | 54509167 | 336847 | 6.7852  | 5.8449  | CEU |
| rs11630363 | FLJ12994  | GI_12383091-S | 15 | 15 | 54514094 | 341774 | 7.1827  | 5.8449  | CEU |
| rs6493858  | FLJ12994  | GI_12383091-S | 15 | 15 | 54523770 | 351450 | 6.4335  | 5.8449  | CEU |
| rs7170307  | FLJ12994  | GI_12383091-S | 15 | 15 | 54524589 | 352269 | 6.3375  | 5.8449  | CEU |
| rs1477590  | FLJ12994  | GI_12383091-S | 15 | 15 | 54532597 | 360277 | 7.5924  | 5.8449  | CEU |
| rs7181320  | FLJ12994  | GI_12383091-S | 15 | 15 | 54547432 | 375112 | 7.5924  | 5.8449  | CEU |
| rs2733386  | LOC348094 | GI_38176293-S | 15 | 15 | 62622175 | 415639 | 6.212   | 5.30427 | CEU |
| rs11633399 | LOC348094 | GI_38176293-S | 15 | 15 | 62749683 | 288131 | 5.8651  | 5.30427 | CEU |
| rs11631564 | LOC348094 | GI_38176293-S | 15 | 15 | 62760664 | 277150 | 6.4163  | 5.30427 | CEU |
| rs11071808 | LOC348094 | GI_38176293-S | 15 | 15 | 62806774 | 231040 | 7.195   | 5.30427 | CEU |
| rs10162671 | LOC348094 | GI_38176293-S | 15 | 15 | 62817009 | 220805 | 7.2913  | 5.30427 | CEU |
| rs11634670 | LOC348094 | GI_38176293-S | 15 | 15 | 62896404 | 141410 | 5.6083  | 5.30427 | CEU |
| rs1872592  | LOC348094 | GI_38176293-S | 15 | 15 | 62900546 | 137268 | 12.7267 | 5.30427 | CEU |
| rs11631663 | LOC348094 | GI_38176293-S | 15 | 15 | 62904700 | 133114 | 9.7925  | 5.30427 | CEU |
| rs4777615  | LOC348094 | GI_38176293-S | 15 | 15 | 62911420 | 126394 | 14.2909 | 5.30427 | CEU |
| rs7180972  | LOC348094 | GI_38176293-S | 15 | 15 | 62915485 | 122329 | 9.2486  | 5.30427 | CEU |
| rs2414858  | LOC348094 | GI_38176293-S | 15 | 15 | 62915894 | 121920 | 10.0778 | 5.30427 | CEU |
| rs1684048  | LOC348094 | GI_38176293-S | 15 | 15 | 62920037 | 117777 | 13.9399 | 5.30427 | CEU |
| rs1684036  | LOC348094 | GI_38176293-S | 15 | 15 | 62922378 | 115436 | 15.7785 | 5.30427 | CEU |
| rs9672652  | LOC348094 | GI_38176293-S | 15 | 15 | 62922593 | 115221 | 11.0045 | 5.30427 | CEU |
| rs1522748  | LOC348094 | GI_38176293-S | 15 | 15 | 62923524 | 114290 | 15.5675 | 5.30427 | CEU |
| rs1357370  | LOC348094 | GI_38176293-S | 15 | 15 | 62924224 | 113590 | 15.7785 | 5.30427 | CEU |
| rs1522747  | LOC348094 | GI_38176293-S | 15 | 15 | 62926385 | 111429 | 14.9614 | 5.30427 | CEU |
| rs950171   | LOC348094 | GI_38176293-S | 15 | 15 | 62926989 | 110825 | 11.0045 | 5.30427 | CEU |

|            |           |               |    |    |          |        |         |         |     |
|------------|-----------|---------------|----|----|----------|--------|---------|---------|-----|
| rs1352093  | LOC348094 | GI_38176293-S | 15 | 15 | 62927573 | 110241 | 11.0045 | 5.30427 | CEU |
| rs7179562  | LOC348094 | GI_38176293-S | 15 | 15 | 62928994 | 108820 | 12.9293 | 5.30427 | CEU |
| rs9302235  | LOC348094 | GI_38176293-S | 15 | 15 | 62929878 | 107936 | 8.7534  | 5.30427 | CEU |
| rs1719256  | LOC348094 | GI_38176293-S | 15 | 15 | 62930756 | 107058 | 14.9412 | 5.30427 | CEU |
| rs865576   | LOC348094 | GI_38176293-S | 15 | 15 | 62934451 | 103363 | 15.6446 | 5.30427 | CEU |
| rs832879   | LOC348094 | GI_38176293-S | 15 | 15 | 62934764 | 103050 | 15.7785 | 5.30427 | CEU |
| rs879201   | LOC348094 | GI_38176293-S | 15 | 15 | 62935971 | 101843 | 8.4553  | 5.30427 | CEU |
| rs6494499  | LOC348094 | GI_38176293-S | 15 | 15 | 62937013 | 100801 | 6.7246  | 5.30427 | CEU |
| rs832882   | LOC348094 | GI_38176293-S | 15 | 15 | 62937890 | 99924  | 8.053   | 5.30427 | CEU |
| rs832883   | LOC348094 | GI_38176293-S | 15 | 15 | 62938026 | 99788  | 13.6122 | 5.30427 | CEU |
| rs832884   | LOC348094 | GI_38176293-S | 15 | 15 | 62938688 | 99126  | 15.7785 | 5.30427 | CEU |
| rs1719277  | LOC348094 | GI_38176293-S | 15 | 15 | 62943576 | 94238  | 14.9412 | 5.30427 | CEU |
| rs1043697  | LOC348094 | GI_38176293-S | 15 | 15 | 62946511 | 91303  | 15.7785 | 5.30427 | CEU |
| rs2037517  | LOC348094 | GI_38176293-S | 15 | 15 | 62952489 | 85325  | 9.26    | 5.30427 | CEU |
| rs832891   | LOC348094 | GI_38176293-S | 15 | 15 | 62954386 | 83428  | 19.2642 | 5.30427 | CEU |
| rs869043   | LOC348094 | GI_38176293-S | 15 | 15 | 62958093 | 79721  | 8.6772  | 5.30427 | CEU |
| rs11633431 | LOC348094 | GI_38176293-S | 15 | 15 | 62962727 | 75087  | 9.0056  | 5.30427 | CEU |
| rs1719264  | LOC348094 | GI_38176293-S | 15 | 15 | 62963588 | 74226  | 17.6354 | 5.30427 | CEU |
| rs1916137  | LOC348094 | GI_38176293-S | 15 | 15 | 62963686 | 74128  | 8.5056  | 5.30427 | CEU |
| rs1916138  | LOC348094 | GI_38176293-S | 15 | 15 | 62963701 | 74113  | 9.26    | 5.30427 | CEU |
| rs1719266  | LOC348094 | GI_38176293-S | 15 | 15 | 62964279 | 73535  | 17.3525 | 5.30427 | CEU |
| rs4238397  | LOC348094 | GI_38176293-S | 15 | 15 | 62966217 | 71597  | 19.5902 | 5.30427 | CEU |
| rs12916644 | LOC348094 | GI_38176293-S | 15 | 15 | 62968071 | 69743  | 17.0056 | 5.30427 | CEU |
| rs2220258  | LOC348094 | GI_38176293-S | 15 | 15 | 62970786 | 67028  | 9.26    | 5.30427 | CEU |
| rs2200490  | LOC348094 | GI_38176293-S | 15 | 15 | 62971003 | 66811  | 9.26    | 5.30427 | CEU |
| rs1719273  | LOC348094 | GI_38176293-S | 15 | 15 | 62971545 | 66269  | 19.2642 | 5.30427 | CEU |
| rs1684034  | LOC348094 | GI_38176293-S | 15 | 15 | 62971919 | 65895  | 18.9004 | 5.30427 | CEU |
| rs1628955  | LOC348094 | GI_38176293-S | 15 | 15 | 62974273 | 63541  | 18.4038 | 5.30427 | CEU |
| rs1684054  | LOC348094 | GI_38176293-S | 15 | 15 | 62978449 | 59365  | 19.2642 | 5.30427 | CEU |
| rs936867   | LOC348094 | GI_38176293-S | 15 | 15 | 62982315 | 55499  | 8.9709  | 5.30427 | CEU |
| rs8035615  | LOC348094 | GI_38176293-S | 15 | 15 | 62991991 | 45823  | 7.6973  | 5.30427 | CEU |
| rs17483548 | IREB2     | GI_41352692-S | 15 | 15 | 76517368 | 60906  | 6.0898  | 6.06722 | CEU |
| rs17405217 | IREB2     | GI_41352692-S | 15 | 15 | 76518204 | 60070  | 6.0898  | 6.06722 | CEU |
| rs17483721 | IREB2     | GI_41352692-S | 15 | 15 | 76520786 | 57488  | 6.0898  | 6.06722 | CEU |
| rs2656052  | IREB2     | GI_41352692-S | 15 | 15 | 76527987 | 50287  | 6.0898  | 6.06722 | CEU |
| rs7181486  | IREB2     | GI_41352692-S | 15 | 15 | 76528673 | 49601  | 6.0898  | 6.06722 | CEU |
| rs17483929 | IREB2     | GI_41352692-S | 15 | 15 | 76529431 | 48843  | 6.0898  | 6.06722 | CEU |
| rs17484235 | IREB2     | GI_41352692-S | 15 | 15 | 76548469 | 29805  | 6.0898  | 6.06722 | CEU |
| rs9788721  | IREB2     | GI_41352692-S | 15 | 15 | 76589924 | 11650  | 6.1582  | 6.06722 | CEU |
| rs8034191  | IREB2     | GI_41352692-S | 15 | 15 | 76593078 | 14804  | 6.1582  | 6.06722 | CEU |
| rs10519203 | IREB2     | GI_41352692-S | 15 | 15 | 76601101 | 22827  | 6.1582  | 6.06722 | CEU |
| rs931794   | IREB2     | GI_41352692-S | 15 | 15 | 76613235 | 34961  | 6.1582  | 6.06722 | CEU |
| rs2036527  | IREB2     | GI_41352692-S | 15 | 15 | 76638670 | 60396  | 6.5711  | 6.06722 | CEU |
| rs17486278 | IREB2     | GI_41352692-S | 15 | 15 | 76654537 | 76263  | 6.73    | 6.06722 | CEU |
| rs1051730  | IREB2     | GI_41352692-S | 15 | 15 | 76681394 | 103120 | 6.139   | 6.06722 | CEU |
| rs11638844 | CTSH      | GI_23110956-A | 15 | 15 | 77018573 | 17162  | 6.87    | 5.98202 | CEU |
| rs10400902 | CTSH      | GI_23110956-A | 15 | 15 | 77018671 | 17260  | 7.3976  | 5.98202 | CEU |
| rs11072815 | CTSH      | GI_23110956-A | 15 | 15 | 77019374 | 17963  | 6.7719  | 5.98202 | CEU |
| rs11856301 | CTSH      | GI_23110956-A | 15 | 15 | 77019385 | 17974  | 6.0859  | 5.98202 | CEU |
| rs2870085  | CTSH      | GI_23110956-A | 15 | 15 | 77021323 | 19912  | 7.5947  | 5.98202 | CEU |
| rs11855406 | CTSH      | GI_23110956-A | 15 | 15 | 77021919 | 20508  | 7.6363  | 5.98202 | CEU |
| rs3825932  | CTSH      | GI_23110956-A | 15 | 15 | 77022501 | 21090  | 6.6284  | 5.98202 | CEU |
| rs11072817 | CTSH      | GI_23110956-A | 15 | 15 | 77023870 | 22459  | 7.9849  | 5.98202 | CEU |
| rs1036937  | CTSH      | GI_23110956-A | 15 | 15 | 77024235 | 22824  | 7.1108  | 5.98202 | CEU |
| rs1036938  | CTSH      | GI_23110956-A | 15 | 15 | 77024302 | 22891  | 8.2788  | 5.98202 | CEU |
| rs1369324  | CTSH      | GI_23110956-A | 15 | 15 | 77026774 | 25363  | 8.2788  | 5.98202 | CEU |

|            |               |               |    |    |          |       |         |         |     |
|------------|---------------|---------------|----|----|----------|-------|---------|---------|-----|
| rs2303824  | LOC400410     | GI_42660516-S | 15 | 15 | 78002652 | 8639  | 6.7338  | 6.03058 | CEU |
| rs3830160  | TMEM8         | GI_10864068-S | 16 | 16 | 359093   | 3084  | 12.4813 | 5.83862 | CEU |
| rs540      | TMEM8         | GI_10864068-S | 16 | 16 | 360908   | 1269  | 12.4813 | 5.83862 | CEU |
| rs3743888  | TMEM8         | GI_10864068-S | 16 | 16 | 364421   | 2244  | 12.4813 | 5.83862 | CEU |
| rs2071916  | TMEM8         | GI_10864068-S | 16 | 16 | 366477   | 4300  | 10.666  | 5.83862 | CEU |
| rs12597803 | DKFZP566J2046 | GI_13654273-S | 16 | 16 | 1806272  | 12442 | 6.1513  | 5.71588 | CEU |
| rs344361   | DKFZP566J2046 | GI_13654273-S | 16 | 16 | 1808555  | 10159 | 5.958   | 5.71588 | CEU |
| rs2268670  | DKFZP566J2046 | GI_13654273-S | 16 | 16 | 1811330  | 7384  | 5.958   | 5.71588 | CEU |
| rs3743853  | DKFZP566J2046 | GI_13654273-S | 16 | 16 | 1817559  | 1155  | 5.958   | 5.71588 | CEU |
| rs9652786  | DKFZP566J2046 | GI_13654273-S | 16 | 16 | 1826523  | 7809  | 6.131   | 5.71588 | CEU |
| rs9652777  | DKFZP566J2046 | GI_13654273-S | 16 | 16 | 1826610  | 7896  | 6.131   | 5.71588 | CEU |
| rs3848346  | DKFZP566J2046 | GI_13654273-S | 16 | 16 | 1829822  | 11108 | 5.958   | 5.71588 | CEU |
| rs3848348  | DKFZP566J2046 | GI_13654273-S | 16 | 16 | 1830057  | 11343 | 5.958   | 5.71588 | CEU |
| rs9806945  | DKFZP566J2046 | GI_13654273-S | 16 | 16 | 1834962  | 16248 | 5.8257  | 5.71588 | CEU |
| rs11640407 | DKFZP566J2046 | GI_13654273-S | 16 | 16 | 1837495  | 18781 | 5.958   | 5.71588 | CEU |
| rs11642885 | DKFZP566J2046 | GI_13654273-S | 16 | 16 | 1838377  | 19663 | 5.958   | 5.71588 | CEU |
| rs2575359  | DKFZP566J2046 | GI_13654273-S | 16 | 16 | 1840036  | 21322 | 5.958   | 5.71588 | CEU |
| rs1657116  | DKFZP566J2046 | GI_13654273-S | 16 | 16 | 1841479  | 22765 | 6.0128  | 5.71588 | CEU |
| rs1742419  | DKFZP566J2046 | GI_13654273-S | 16 | 16 | 1841810  | 23096 | 5.958   | 5.71588 | CEU |
| rs1625279  | DKFZP566J2046 | GI_13654273-S | 16 | 16 | 1841845  | 23131 | 5.958   | 5.71588 | CEU |
| rs1625393  | DKFZP566J2046 | GI_13654273-S | 16 | 16 | 1841894  | 23180 | 5.958   | 5.71588 | CEU |
| rs1617255  | DKFZP566J2046 | GI_13654273-S | 16 | 16 | 1842890  | 24176 | 5.958   | 5.71588 | CEU |
| rs1657117  | DKFZP566J2046 | GI_13654273-S | 16 | 16 | 1843652  | 24938 | 5.958   | 5.71588 | CEU |
| rs1742423  | DKFZP566J2046 | GI_13654273-S | 16 | 16 | 1844323  | 25609 | 5.958   | 5.71588 | CEU |
| rs11643972 | DKFZP566J2046 | GI_13654273-S | 16 | 16 | 1844546  | 25832 | 5.958   | 5.71588 | CEU |
| rs7199384  | DKFZP566J2046 | GI_13654273-S | 16 | 16 | 1844588  | 25874 | 5.958   | 5.71588 | CEU |
| rs1657118  | DKFZP566J2046 | GI_13654273-S | 16 | 16 | 1844641  | 25927 | 5.958   | 5.71588 | CEU |
| rs1742426  | DKFZP566J2046 | GI_13654273-S | 16 | 16 | 1844812  | 26098 | 5.958   | 5.71588 | CEU |
| rs1742429  | DKFZP566J2046 | GI_13654273-S | 16 | 16 | 1845007  | 26293 | 5.958   | 5.71588 | CEU |
| rs2754186  | DKFZP566J2046 | GI_13654273-S | 16 | 16 | 1845764  | 27050 | 5.958   | 5.71588 | CEU |
| rs1742431  | DKFZP566J2046 | GI_13654273-S | 16 | 16 | 1845875  | 27161 | 5.958   | 5.71588 | CEU |
| rs1657120  | DKFZP566J2046 | GI_13654273-S | 16 | 16 | 1847224  | 28510 | 5.9803  | 5.71588 | CEU |
| rs1742432  | DKFZP566J2046 | GI_13654273-S | 16 | 16 | 1847303  | 28589 | 5.958   | 5.71588 | CEU |
| rs428123   | DKFZP566J2046 | GI_13654273-S | 16 | 16 | 1847653  | 28939 | 5.958   | 5.71588 | CEU |
| rs408286   | DKFZP566J2046 | GI_13654273-S | 16 | 16 | 1847701  | 28987 | 6.0644  | 5.71588 | CEU |
| rs410465   | DKFZP566J2046 | GI_13654273-S | 16 | 16 | 1848219  | 29505 | 5.958   | 5.71588 | CEU |
| rs1657121  | DKFZP566J2046 | GI_13654273-S | 16 | 16 | 1848340  | 29626 | 5.958   | 5.71588 | CEU |
| rs1657122  | DKFZP566J2046 | GI_13654273-S | 16 | 16 | 1848501  | 29787 | 5.958   | 5.71588 | CEU |
| rs449530   | DKFZP566J2046 | GI_13654273-S | 16 | 16 | 1848669  | 29955 | 5.958   | 5.71588 | CEU |
| rs420681   | DKFZP566J2046 | GI_13654273-S | 16 | 16 | 1848750  | 30036 | 5.958   | 5.71588 | CEU |
| rs448961   | DKFZP566J2046 | GI_13654273-S | 16 | 16 | 1848888  | 30174 | 5.958   | 5.71588 | CEU |
| rs2754187  | DKFZP566J2046 | GI_13654273-S | 16 | 16 | 1849108  | 30394 | 5.958   | 5.71588 | CEU |
| rs427732   | DKFZP566J2046 | GI_13654273-S | 16 | 16 | 1849841  | 31127 | 5.8666  | 5.71588 | CEU |
| rs433268   | DKFZP566J2046 | GI_13654273-S | 16 | 16 | 1850374  | 31660 | 5.9948  | 5.71588 | CEU |
| rs2492881  | DKFZP566J2046 | GI_13654273-S | 16 | 16 | 1854890  | 36176 | 5.872   | 5.71588 | CEU |
| rs378201   | DKFZP566J2046 | GI_13654273-S | 16 | 16 | 1855035  | 36321 | 5.958   | 5.71588 | CEU |
| rs404413   | DKFZP566J2046 | GI_13654273-S | 16 | 16 | 1855056  | 36342 | 6.1611  | 5.71588 | CEU |
| rs11640914 | DKFZP566J2046 | GI_13654273-S | 16 | 16 | 1855459  | 36745 | 5.958   | 5.71588 | CEU |
| rs453494   | DKFZP566J2046 | GI_13654273-S | 16 | 16 | 1856104  | 37390 | 5.958   | 5.71588 | CEU |
| rs404772   | DKFZP566J2046 | GI_13654273-S | 16 | 16 | 1857175  | 38461 | 6.1229  | 5.71588 | CEU |
| rs9935266  | DKFZP566J2046 | GI_13654273-S | 16 | 16 | 1859452  | 40738 | 5.958   | 5.71588 | CEU |
| rs447782   | DKFZP566J2046 | GI_13654273-S | 16 | 16 | 1860317  | 41603 | 5.958   | 5.71588 | CEU |
| rs1657095  | DKFZP566J2046 | GI_13654273-S | 16 | 16 | 1860679  | 41965 | 5.958   | 5.71588 | CEU |
| rs2917523  | DKFZP566J2046 | GI_13654273-S | 16 | 16 | 1860741  | 42027 | 5.958   | 5.71588 | CEU |
| rs2974856  | DKFZP566J2046 | GI_13654273-S | 16 | 16 | 1860758  | 42044 | 5.7465  | 5.71588 | CEU |
| rs2982235  | DKFZP566J2046 | GI_13654273-S | 16 | 16 | 1860793  | 42079 | 5.958   | 5.71588 | CEU |



|            |               |               |    |    |          |        |         |         |     |
|------------|---------------|---------------|----|----|----------|--------|---------|---------|-----|
| rs1657129  | DKFZP566J2046 | GI_13654273-S | 16 | 16 | 1885827  | 67113  | 6.5368  | 5.71588 | CEU |
| rs1046495  | SYNGR3        | GI_22091456-S | 16 | 16 | 1976049  | 7853   | 7.705   | 6.02257 | CEU |
| rs1058474  | SYNGR3        | GI_22091456-S | 16 | 16 | 1988797  | 4895   | 6.9823  | 6.02257 | CEU |
| rs13334213 | DKFZp761A132  | GI_14150048-S | 16 | 16 | 2932115  | 7436   | 7.0098  | 5.71028 | CEU |
| rs12445430 | KIAA0643      | GI_13435144-S | 16 | 16 | 3553127  | 25934  | 7.207   | 5.93529 | CEU |
| rs12933120 | KIAA0643      | GI_13435144-S | 16 | 16 | 3574747  | 47554  | 6.4085  | 5.93529 | CEU |
| rs8061528  | KIAA0643      | GI_13435144-S | 16 | 16 | 3596483  | 69290  | 7.6118  | 5.93529 | CEU |
| rs11076781 | KIAA0643      | GI_13435144-S | 16 | 16 | 3603232  | 76039  | 7.6118  | 5.93529 | CEU |
| rs7194496  | CARHSP1       | GI_7656994-S  | 16 | 16 | 9620365  | 764034 | 6.0541  | 5.98396 | CEU |
| rs4780355  | MGC24665      | GI_24308244-S | 16 | 16 | 11255359 | 97558  | 6.6296  | 6.04296 | CEU |
| rs243325   | MGC24665      | GI_24308244-S | 16 | 16 | 11261998 | 90919  | 8.2511  | 6.04296 | CEU |
| rs243317   | MGC24665      | GI_24308244-S | 16 | 16 | 11264832 | 88085  | 8.3691  | 6.04296 | CEU |
| rs243318   | MGC24665      | GI_24308244-S | 16 | 16 | 11265519 | 87398  | 8.1931  | 6.04296 | CEU |
| rs243323   | MGC24665      | GI_24308244-S | 16 | 16 | 11268703 | 84214  | 8.7833  | 6.04296 | CEU |
| rs367569   | MGC24665      | GI_24308244-S | 16 | 16 | 11273001 | 79916  | 6.7885  | 6.04296 | CEU |
| rs4451969  | MGC24665      | GI_24308244-S | 16 | 16 | 11291020 | 61897  | 10.8106 | 6.04296 | CEU |
| rs918738   | MGC24665      | GI_24308244-S | 16 | 16 | 11347180 | 5737   | 6.6695  | 6.04296 | CEU |
| rs3760106  | Hs.460359     | Hs.460359-S   | 16 | 16 | 23753297 | 58998  | 6.3352  | 6.20775 | CEU |
| rs11641627 | Hs.460359     | Hs.460359-S   | 16 | 16 | 23804848 | 7447   | 6.7152  | 6.20775 | CEU |
| rs9934501  | Hs.460359     | Hs.460359-S   | 16 | 16 | 23818240 | 5945   | 6.7152  | 6.20775 | CEU |
| rs7188975  | LCMT1         | GI_15082255-I | 16 | 16 | 25044950 | 71178  | 13.1258 | 6.12493 | CEU |
| rs16974325 | LCMT1         | GI_15082255-I | 16 | 16 | 25045456 | 71684  | 8.7878  | 6.12493 | CEU |
| rs1549852  | LCMT1         | GI_15082255-I | 16 | 16 | 25046613 | 72841  | 7.3219  | 6.12493 | CEU |
| rs1549851  | LCMT1         | GI_15082255-I | 16 | 16 | 25049976 | 76204  | 8.7878  | 6.12493 | CEU |
| rs12708670 | LCMT1         | GI_15082255-I | 16 | 16 | 25053505 | 79733  | 8.7878  | 6.12493 | CEU |
| rs12600171 | LCMT1         | GI_15082255-I | 16 | 16 | 25054879 | 81107  | 8.7593  | 6.12493 | CEU |
| rs919705   | LCMT1         | GI_15082255-I | 16 | 16 | 25055429 | 81657  | 8.7878  | 6.12493 | CEU |
| rs11074678 | LCMT1         | GI_15082255-I | 16 | 16 | 25057227 | 83455  | 9.8261  | 6.12493 | CEU |
| rs277907   | LCMT1         | GI_15082255-I | 16 | 16 | 25060903 | 87131  | 8.7878  | 6.12493 | CEU |
| rs172134   | LCMT1         | GI_15082255-I | 16 | 16 | 25062133 | 88361  | 8.4235  | 6.12493 | CEU |
| rs277908   | LCMT1         | GI_15082255-I | 16 | 16 | 25062635 | 88863  | 9.8261  | 6.12493 | CEU |
| rs277909   | LCMT1         | GI_15082255-I | 16 | 16 | 25063704 | 89932  | 8.7878  | 6.12493 | CEU |
| rs277910   | LCMT1         | GI_15082255-I | 16 | 16 | 25063786 | 90014  | 8.7878  | 6.12493 | CEU |
| rs277914   | LCMT1         | GI_15082255-I | 16 | 16 | 25066419 | 92647  | 8.7878  | 6.12493 | CEU |
| rs277917   | LCMT1         | GI_15082255-I | 16 | 16 | 25066646 | 92874  | 13.1258 | 6.12493 | CEU |
| rs277886   | LCMT1         | GI_15082255-I | 16 | 16 | 25070005 | 96233  | 13.1258 | 6.12493 | CEU |
| rs277885   | LCMT1         | GI_15082255-I | 16 | 16 | 25070614 | 96842  | 8.7878  | 6.12493 | CEU |
| rs277884   | LCMT1         | GI_15082255-I | 16 | 16 | 25071300 | 97528  | 8.7878  | 6.12493 | CEU |
| rs277883   | LCMT1         | GI_15082255-I | 16 | 16 | 25072342 | 98570  | 8.7878  | 6.12493 | CEU |
| rs277894   | LCMT1         | GI_15082255-I | 16 | 16 | 25075486 | 101714 | 8.7878  | 6.12493 | CEU |
| rs277895   | LCMT1         | GI_15082255-I | 16 | 16 | 25077340 | 103568 | 8.7878  | 6.12493 | CEU |
| rs277897   | LCMT1         | GI_15082255-I | 16 | 16 | 25079173 | 105401 | 9.8039  | 6.12493 | CEU |
| rs277899   | LCMT1         | GI_15082255-I | 16 | 16 | 25079775 | 106003 | 8.156   | 6.12493 | CEU |
| rs277900   | LCMT1         | GI_15082255-I | 16 | 16 | 25081500 | 107728 | 13.1258 | 6.12493 | CEU |
| rs277903   | LCMT1         | GI_15082255-I | 16 | 16 | 25082623 | 108851 | 12.2066 | 6.12493 | CEU |
| rs277891   | LCMT1         | GI_15082255-I | 16 | 16 | 25088257 | 114485 | 13.1258 | 6.12493 | CEU |
| rs277892   | LCMT1         | GI_15082255-I | 16 | 16 | 25088400 | 114628 | 9.8261  | 6.12493 | CEU |
| rs182171   | LCMT1         | GI_15082255-I | 16 | 16 | 25088443 | 114671 | 8.7878  | 6.12493 | CEU |
| rs277893   | LCMT1         | GI_15082255-I | 16 | 16 | 25089212 | 115440 | 12.9985 | 6.12493 | CEU |
| rs277888   | LCMT1         | GI_15082255-I | 16 | 16 | 25091503 | 117731 | 8.6901  | 6.12493 | CEU |
| rs4787305  | LCMT1         | GI_15082255-I | 16 | 16 | 25103357 | 129585 | 8.7     | 6.12493 | CEU |
| rs4783935  | BBS2          | GI_22208996-S | 16 | 16 | 54932997 | 143177 | 7.3607  | 5.95852 | CEU |
| rs4784658  | BBS2          | GI_22208996-S | 16 | 16 | 54933783 | 142391 | 8.1878  | 5.95852 | CEU |
| rs17355357 | BBS2          | GI_22208996-S | 16 | 16 | 54958477 | 117697 | 10.4523 | 5.95852 | CEU |
| rs9921942  | BBS2          | GI_22208996-S | 16 | 16 | 54975837 | 100337 | 10.4523 | 5.95852 | CEU |
| rs8060037  | BBS2          | GI_22208996-S | 16 | 16 | 55042321 | 33853  | 9.2664  | 5.95852 | CEU |

|            |              |               |    |    |          |        |         |         |     |
|------------|--------------|---------------|----|----|----------|--------|---------|---------|-----|
| rs4556786  | BBS2         | GI_22208996-S | 16 | 16 | 55043372 | 32802  | 10.1356 | 5.95852 | CEU |
| rs13337155 | BBS2         | GI_22208996-S | 16 | 16 | 55062225 | 13949  | 12.3087 | 5.95852 | CEU |
| rs9889162  | BBS2         | GI_22208996-S | 16 | 16 | 55113289 | 37115  | 10.3858 | 5.95852 | CEU |
| rs9940872  | BBS2         | GI_22208996-S | 16 | 16 | 55119358 | 43184  | 7.9259  | 5.95852 | CEU |
| rs12596731 | LOC283970    | GI_40217627-S | 16 | 16 | 68109873 | 457977 | 5.9746  | 5.66505 | CEU |
| rs2270838  | LOC283970    | GI_40217627-S | 16 | 16 | 68516724 | 51126  | 9.3496  | 5.66505 | CEU |
| rs3748386  | LOC283970    | GI_40217627-S | 16 | 16 | 68532160 | 35690  | 15.3562 | 5.66505 | CEU |
| rs9939092  | LOC283970    | GI_40217627-S | 16 | 16 | 68596778 | 28928  | 18.9435 | 5.66505 | CEU |
| rs12930433 | LOC283970    | GI_40217627-S | 16 | 16 | 68608544 | 40694  | 18.0294 | 5.66505 | CEU |
| rs11866381 | LOC283970    | GI_40217627-S | 16 | 16 | 68621378 | 53528  | 18.9435 | 5.66505 | CEU |
| rs13337742 | LOC283970    | GI_40217627-S | 16 | 16 | 68629172 | 61322  | 11.2208 | 5.66505 | CEU |
| rs8058597  | LOC283970    | GI_40217627-S | 16 | 16 | 68639715 | 71865  | 18.9435 | 5.66505 | CEU |
| rs6499292  | LOC283970    | GI_40217627-S | 16 | 16 | 68661559 | 93709  | 18.6581 | 5.66505 | CEU |
| rs4888769  | WVVOX        | GI_18860883-I | 16 | 16 | 76837946 | 32090  | 7.2286  | 6.62057 | CEU |
| rs8054537  | WVVOX        | GI_18860883-I | 16 | 16 | 76853337 | 16699  | 9.8249  | 6.62057 | CEU |
| rs7189213  | WVVOX        | GI_18860883-I | 16 | 16 | 76857692 | 12344  | 10.2873 | 6.62057 | CEU |
| rs6564520  | WVVOX        | GI_18860883-I | 16 | 16 | 76863720 | 6316   | 10.4124 | 6.62057 | CEU |
| rs4270188  | WVVOX        | GI_18860883-I | 16 | 16 | 76868189 | 1847   | 6.6436  | 6.62057 | CEU |
| rs1317756  | LOC348180    | GI_37541570-S | 16 | 16 | 87307524 | 1587   | 7.3009  | 5.74506 | CEU |
| rs2965940  | SPG7         | GI_40806172-I | 16 | 16 | 88033941 | 97428  | 6.4871  | 6.02881 | CEU |
| rs4238830  | SPG7         | GI_40806172-I | 16 | 16 | 88067742 | 63627  | 6.0965  | 6.02881 | CEU |
| rs12446145 | SPG7         | GI_40806172-I | 16 | 16 | 88070196 | 61173  | 6.0965  | 6.02881 | CEU |
| rs12935112 | SPG7         | GI_40806172-I | 16 | 16 | 88070359 | 61010  | 6.0965  | 6.02881 | CEU |
| rs12935119 | SPG7         | GI_40806172-I | 16 | 16 | 88070375 | 60994  | 6.1391  | 6.02881 | CEU |
| rs3803681  | SPG7         | GI_40806172-I | 16 | 16 | 88072257 | 59112  | 6.1809  | 6.02881 | CEU |
| rs8043788  | SPG7         | GI_40806172-I | 16 | 16 | 88077063 | 54306  | 11.0953 | 6.02881 | CEU |
| rs8050512  | SPG7         | GI_40806172-I | 16 | 16 | 88079821 | 51548  | 6.0965  | 6.02881 | CEU |
| rs4329923  | SPG7         | GI_40806172-I | 16 | 16 | 88087679 | 43690  | 6.0965  | 6.02881 | CEU |
| rs4785571  | SPG7         | GI_40806172-I | 16 | 16 | 88092670 | 38699  | 6.0965  | 6.02881 | CEU |
| rs3809641  | SPG7         | GI_40806172-I | 16 | 16 | 88101667 | 29702  | 10.6038 | 6.02881 | CEU |
| rs3922634  | SPG7         | GI_40806172-I | 16 | 16 | 88104267 | 27102  | 10.6038 | 6.02881 | CEU |
| rs8046182  | SPG7         | GI_40806172-I | 16 | 16 | 88108717 | 22652  | 10.7715 | 6.02881 | CEU |
| rs8052076  | SPG7         | GI_40806172-I | 16 | 16 | 88111310 | 20059  | 10.9021 | 6.02881 | CEU |
| rs11862081 | SPG7         | GI_40806172-I | 16 | 16 | 88115989 | 15380  | 10.122  | 6.02881 | CEU |
| rs3803680  | SPG7         | GI_40806172-I | 16 | 16 | 88117744 | 13625  | 10.6038 | 6.02881 | CEU |
| rs3803679  | SPG7         | GI_40806172-I | 16 | 16 | 88118168 | 13201  | 10.9249 | 6.02881 | CEU |
| rs3935627  | SPG7         | GI_40806172-I | 16 | 16 | 88120123 | 11246  | 6.9221  | 6.02881 | CEU |
| rs3803677  | SPG7         | GI_40806172-I | 16 | 16 | 88123224 | 8145   | 10.6038 | 6.02881 | CEU |
| rs3803676  | SPG7         | GI_40806172-I | 16 | 16 | 88123607 | 7762   | 10.6038 | 6.02881 | CEU |
| rs463701   | SPG7         | GI_40806172-I | 16 | 16 | 88126261 | 5108   | 10.4953 | 6.02881 | CEU |
| rs2460456  | SPG7         | GI_40806172-I | 16 | 16 | 88129394 | 1975   | 8.2703  | 6.02881 | CEU |
| rs11640186 | SPG7         | GI_40806172-I | 16 | 16 | 88129507 | 1862   | 9.3619  | 6.02881 | CEU |
| rs382745   | SPG7         | GI_40806172-I | 16 | 16 | 88131087 | 282    | 10.4953 | 6.02881 | CEU |
| rs2056309  | SPG7         | GI_40806172-I | 16 | 16 | 88134915 | 3546   | 9.934   | 6.02881 | CEU |
| rs457372   | SPG7         | GI_40806172-I | 16 | 16 | 88135736 | 4367   | 8.1422  | 6.02881 | CEU |
| rs11150880 | LOC400566    | GI_42661283-S | 17 | 17 | 237667   | 26975  | 8.2582  | 5.7888  | CEU |
| rs10871516 | LOC400566    | GI_42661283-S | 17 | 17 | 245185   | 19457  | 7.1465  | 5.7888  | CEU |
| rs4130140  | LOC374758    | GI_37544593-S | 17 | 17 | 257873   | 6297   | 11.06   | 5.73361 | CEU |
| rs4130140  | LOC400566    | GI_42661283-S | 17 | 17 | 257873   | 6769   | 12.2793 | 5.7888  | CEU |
| rs6565724  | LOC374758    | GI_37544593-S | 17 | 17 | 271176   | 7006   | 9.6474  | 5.73361 | CEU |
| rs6565724  | LOC400566    | GI_42661283-S | 17 | 17 | 271176   | 6534   | 11.0187 | 5.7888  | CEU |
| rs161370   | CTNS         | GI_4826681-S  | 17 | 17 | 3477002  | 34422  | 7.7348  | 6.26732 | CEU |
| rs222790   | CTNS         | GI_4826681-S  | 17 | 17 | 3478239  | 33185  | 7.7348  | 6.26732 | CEU |
| rs12936393 | CTNS         | GI_4826681-S  | 17 | 17 | 3498059  | 13365  | 7.6812  | 6.26732 | CEU |
| rs4790530  | CTNS         | GI_4826681-S  | 17 | 17 | 3502173  | 9251   | 7.6812  | 6.26732 | CEU |
| rs12602901 | DKFZP566H073 | GI_14149701-S | 17 | 17 | 4765410  | 23767  | 8.7948  | 5.93025 | CEU |

|            |              |               |    |    |          |        |        |         |     |
|------------|--------------|---------------|----|----|----------|--------|--------|---------|-----|
| rs11078540 | DKFZP566H073 | GI_14149701-S | 17 | 17 | 4772985  | 16192  | 9.0666 | 5.93025 | CEU |
| rs400688   | DKFZP566H073 | GI_14149701-S | 17 | 17 | 4780674  | 8503   | 9.0941 | 5.93025 | CEU |
| rs238245   | DKFZP566H073 | GI_14149701-S | 17 | 17 | 4788188  | 989    | 8.493  | 5.93025 | CEU |
| rs238224   | DKFZP566H073 | GI_14149701-S | 17 | 17 | 4804133  | 14956  | 6.9492 | 5.93025 | CEU |
| rs452825   | DKFZP566H073 | GI_14149701-S | 17 | 17 | 4814939  | 25762  | 6.9538 | 5.93025 | CEU |
| rs238229   | DKFZP566H073 | GI_14149701-S | 17 | 17 | 4817844  | 28667  | 6.836  | 5.93025 | CEU |
| rs238228   | DKFZP566H073 | GI_14149701-S | 17 | 17 | 4819684  | 30507  | 6.836  | 5.93025 | CEU |
| rs1859434  | DKFZP566H073 | GI_14149701-S | 17 | 17 | 4823676  | 34499  | 6.9538 | 5.93025 | CEU |
| rs238234   | DKFZP566H073 | GI_14149701-S | 17 | 17 | 4824542  | 35365  | 6.9538 | 5.93025 | CEU |
| rs238232   | DKFZP566H073 | GI_14149701-S | 17 | 17 | 4826761  | 37584  | 6.9538 | 5.93025 | CEU |
| rs238237   | DKFZP566H073 | GI_14149701-S | 17 | 17 | 4843682  | 54505  | 7.6914 | 5.93025 | CEU |
| rs238235   | DKFZP566H073 | GI_14149701-S | 17 | 17 | 4865057  | 75880  | 6.7212 | 5.93025 | CEU |
| rs12603055 | DKFZP566H073 | GI_14149701-S | 17 | 17 | 4871095  | 81918  | 6.5947 | 5.93025 | CEU |
| rs3026133  | RABEP1       | GI_31377797-S | 17 | 17 | 5249327  | 19659  | 7.4474 | 6.11869 | CEU |
| rs2521985  | DERP6        | GI_44662829-A | 17 | 17 | 7062509  | 40416  | 8.6088 | 6.19332 | CEU |
| rs2074222  | DERP6        | GI_44662829-A | 17 | 17 | 7070698  | 32227  | 8.4877 | 6.19332 | CEU |
| rs222837   | DERP6        | GI_44662829-A | 17 | 17 | 7073280  | 29645  | 6.747  | 6.19332 | CEU |
| rs222835   | DERP6        | GI_44662825-I | 17 | 17 | 7074853  | 21588  | 8.1543 | 6.19332 | CEU |
| rs222851   | DERP6        | GI_44662825-I | 17 | 17 | 7079962  | 16479  | 8.439  | 6.19332 | CEU |
| rs222851   | DERP6        | GI_44662829-A | 17 | 17 | 7079962  | 22963  | 7.6321 | 6.19332 | CEU |
| rs222843   | DERP6        | GI_44662825-I | 17 | 17 | 7086705  | 9736   | 8.1564 | 6.19332 | CEU |
| rs222843   | DERP6        | GI_44662829-A | 17 | 17 | 7086705  | 16220  | 7.5302 | 6.19332 | CEU |
| rs402514   | DERP6        | GI_44662825-I | 17 | 17 | 7098927  | 2486   | 8.5623 | 6.19332 | CEU |
| rs402514   | DERP6        | GI_44662829-A | 17 | 17 | 7098927  | 3998   | 7.6712 | 6.19332 | CEU |
| rs4562     | DERP6        | GI_44662825-I | 17 | 17 | 7104463  | 8022   | 8.953  | 6.19332 | CEU |
| rs2654185  | DERP6        | GI_44662825-I | 17 | 17 | 7124086  | 27645  | 6.42   | 6.19332 | CEU |
| rs2292064  | EIF5A        | GI_34147551-S | 17 | 17 | 7158187  | 2239   | 6.2341 | 5.89711 | CEU |
| rs7216490  | EIF5A        | GI_34147551-S | 17 | 17 | 7162431  | 6483   | 5.9221 | 5.89711 | CEU |
| rs2324082  | Hs.379903    | Hs.379903-S   | 17 | 17 | 15809016 | 11674  | 6.7078 | 5.77711 | CEU |
| rs2779212  | Hs.379903    | Hs.379903-S   | 17 | 17 | 15817380 | 3310   | 7.7005 | 5.77711 | CEU |
| rs1045599  | Hs.379903    | Hs.379903-S   | 17 | 17 | 15820635 | 55     | 7.7005 | 5.77711 | CEU |
| rs11654    | Hs.379903    | Hs.379903-S   | 17 | 17 | 15821876 | 1186   | 7.7005 | 5.77711 | CEU |
| rs2286795  | Hs.379903    | Hs.379903-S   | 17 | 17 | 15824534 | 3844   | 7.7442 | 5.77711 | CEU |
| rs2286796  | Hs.379903    | Hs.379903-S   | 17 | 17 | 15824952 | 4262   | 7.7005 | 5.77711 | CEU |
| rs8070859  | Hs.379903    | Hs.379903-S   | 17 | 17 | 15828514 | 7824   | 6.0761 | 5.77711 | CEU |
| rs4792709  | Hs.379903    | Hs.379903-S   | 17 | 17 | 15833166 | 12476  | 6.7851 | 5.77711 | CEU |
| rs6502482  | Hs.379903    | Hs.379903-S   | 17 | 17 | 15839966 | 19276  | 6.7442 | 5.77711 | CEU |
| rs9891938  | Hs.379903    | Hs.379903-S   | 17 | 17 | 15855797 | 35107  | 6.4157 | 5.77711 | CEU |
| rs11869450 | Hs.379903    | Hs.379903-S   | 17 | 17 | 15864434 | 43744  | 6.7851 | 5.77711 | CEU |
| rs6416868  | Hs.379903    | Hs.379903-S   | 17 | 17 | 15865095 | 44405  | 6.1701 | 5.77711 | CEU |
| rs11657160 | Hs.379903    | Hs.379903-S   | 17 | 17 | 15884056 | 63366  | 6.6687 | 5.77711 | CEU |
| rs1075901  | Hs.379903    | Hs.379903-S   | 17 | 17 | 15884635 | 63945  | 6.5042 | 5.77711 | CEU |
| rs3785632  | Hs.379903    | Hs.379903-S   | 17 | 17 | 15886333 | 65643  | 5.9605 | 5.77711 | CEU |
| rs4792717  | Hs.379903    | Hs.379903-S   | 17 | 17 | 15889155 | 68465  | 6.7442 | 5.77711 | CEU |
| rs2157991  | Hs.379903    | Hs.379903-S   | 17 | 17 | 15902676 | 81986  | 6.7442 | 5.77711 | CEU |
| rs2157990  | Hs.379903    | Hs.379903-S   | 17 | 17 | 15902718 | 82028  | 6.7442 | 5.77711 | CEU |
| rs2285583  | Hs.379903    | Hs.379903-S   | 17 | 17 | 15908868 | 88178  | 6.7851 | 5.77711 | CEU |
| rs2285582  | Hs.379903    | Hs.379903-S   | 17 | 17 | 15909398 | 88708  | 7.1504 | 5.77711 | CEU |
| rs3785628  | Hs.379903    | Hs.379903-S   | 17 | 17 | 15911407 | 90717  | 6.7442 | 5.77711 | CEU |
| rs7214695  | Hs.379903    | Hs.379903-S   | 17 | 17 | 15925269 | 104579 | 6.193  | 5.77711 | CEU |
| rs7207463  | Hs.379903    | Hs.379903-S   | 17 | 17 | 15944984 | 124294 | 6.9826 | 5.77711 | CEU |
| rs2285580  | Hs.379903    | Hs.379903-S   | 17 | 17 | 15945912 | 125222 | 6.7442 | 5.77711 | CEU |
| rs11870608 | Hs.379903    | Hs.379903-S   | 17 | 17 | 15966395 | 145705 | 6.7442 | 5.77711 | CEU |
| rs9897388  | Hs.379903    | Hs.379903-S   | 17 | 17 | 15978351 | 157661 | 6.434  | 5.77711 | CEU |
| rs2324142  | Hs.379903    | Hs.379903-S   | 17 | 17 | 15982031 | 161341 | 6.7442 | 5.77711 | CEU |
| rs2285579  | Hs.379903    | Hs.379903-S   | 17 | 17 | 15987570 | 166880 | 6.7442 | 5.77711 | CEU |

|            |           |               |    |    |          |        |        |         |     |
|------------|-----------|---------------|----|----|----------|--------|--------|---------|-----|
| rs178839   | Hs.379903 | Hs.379903-S   | 17 | 17 | 16014596 | 193906 | 6.7442 | 5.77711 | CEU |
| rs178838   | Hs.379903 | Hs.379903-S   | 17 | 17 | 16016626 | 195936 | 6.7442 | 5.77711 | CEU |
| rs1236276  | Hs.379903 | Hs.379903-S   | 17 | 17 | 16024409 | 203719 | 6.452  | 5.77711 | CEU |
| rs178814   | Hs.379903 | Hs.379903-S   | 17 | 17 | 16034880 | 214190 | 6.7442 | 5.77711 | CEU |
| rs178810   | Hs.379903 | Hs.379903-S   | 17 | 17 | 16038155 | 217465 | 6.7442 | 5.77711 | CEU |
| rs11080326 | MGC19764  | GI_42661257-S | 17 | 17 | 30588522 | 30059  | 7.9669 | 5.875   | CEU |
| rs11080326 | hmm5445   | hmm5445-S     | 17 | 17 | 30588522 | 30032  | 7.2985 | 6.09049 | CEU |
| rs11867191 | MGC19764  | GI_42661257-S | 17 | 17 | 30593227 | 25354  | 7.9669 | 5.875   | CEU |
| rs11867191 | hmm5445   | hmm5445-S     | 17 | 17 | 30593227 | 25327  | 7.2985 | 6.09049 | CEU |
| rs883416   | MGC19764  | GI_42661257-S | 17 | 17 | 30594554 | 24027  | 8.6167 | 5.875   | CEU |
| rs883416   | hmm5445   | hmm5445-S     | 17 | 17 | 30594554 | 24000  | 7.9137 | 6.09049 | CEU |
| rs17547894 | MGC19764  | GI_42661257-S | 17 | 17 | 30608609 | 9972   | 6.0232 | 5.875   | CEU |
| rs1055636  | MGC19764  | GI_42661257-S | 17 | 17 | 30618433 | 148    | 6.0107 | 5.875   | CEU |
| rs228293   | PIP5K2B   | GI_20336255-A | 17 | 17 | 34185726 | 2406   | 6.0227 | 5.90649 | CEU |
| rs3744781  | MGC20781  | GI_34147471-S | 17 | 17 | 37235677 | 526    | 6.1617 | 5.30703 | CEU |
| rs9896766  | MGC20781  | GI_34147471-S | 17 | 17 | 37237170 | 2019   | 6.532  | 5.30703 | CEU |
| rs1046404  | MGC20781  | GI_34147471-S | 17 | 17 | 37237334 | 2183   | 6.532  | 5.30703 | CEU |
| rs1046403  | MGC20781  | GI_34147471-S | 17 | 17 | 37237346 | 2195   | 6.532  | 5.30703 | CEU |
| rs4796713  | MGC20781  | GI_34147471-S | 17 | 17 | 37240887 | 5736   | 6.532  | 5.30703 | CEU |
| rs4796715  | MGC20781  | GI_34147471-S | 17 | 17 | 37247297 | 12146  | 5.6977 | 5.30703 | CEU |
| rs1529933  | MGC20781  | GI_34147471-S | 17 | 17 | 37251667 | 16516  | 5.6977 | 5.30703 | CEU |
| rs4796721  | MGC20781  | GI_34147471-S | 17 | 17 | 37256947 | 21796  | 5.6977 | 5.30703 | CEU |
| rs3744782  | MGC20781  | GI_34147471-S | 17 | 17 | 37264505 | 29354  | 5.7204 | 5.30703 | CEU |
| rs9303318  | MGC20781  | GI_34147471-S | 17 | 17 | 37273611 | 38460  | 5.6977 | 5.30703 | CEU |
| rs9912300  | MGC20781  | GI_34147471-S | 17 | 17 | 37278790 | 43639  | 5.6977 | 5.30703 | CEU |
| rs3744779  | MGC20781  | GI_34147471-S | 17 | 17 | 37278979 | 43828  | 5.6977 | 5.30703 | CEU |
| rs8071753  | MGC20781  | GI_34147471-S | 17 | 17 | 37282067 | 46916  | 5.6977 | 5.30703 | CEU |
| rs8071234  | MGC20781  | GI_34147471-S | 17 | 17 | 37282094 | 46943  | 5.6977 | 5.30703 | CEU |
| rs4796726  | MGC20781  | GI_34147471-S | 17 | 17 | 37283979 | 48828  | 5.6977 | 5.30703 | CEU |
| rs4796734  | MGC20781  | GI_34147471-S | 17 | 17 | 37300095 | 64944  | 5.7098 | 5.30703 | CEU |
| rs4458050  | MGC20781  | GI_34147471-S | 17 | 17 | 37305248 | 70097  | 5.6977 | 5.30703 | CEU |
| rs9908955  | MGC20781  | GI_34147471-S | 17 | 17 | 37311007 | 75856  | 6.2237 | 5.30703 | CEU |
| rs9916650  | MGC20781  | GI_34147471-S | 17 | 17 | 37314376 | 79225  | 5.963  | 5.30703 | CEU |
| rs6503675  | MGC20781  | GI_34147471-S | 17 | 17 | 37339191 | 104040 | 5.6977 | 5.30703 | CEU |
| rs1468270  | SNX11     | GI_23111027-I | 17 | 17 | 43480190 | 62906  | 6.1844 | 5.71558 | CEU |
| rs12936731 | SNX11     | GI_23111027-I | 17 | 17 | 43483358 | 59738  | 6.5092 | 5.71558 | CEU |
| rs9899275  | SNX11     | GI_23111027-I | 17 | 17 | 43484314 | 58782  | 6.5092 | 5.71558 | CEU |
| rs9899461  | SNX11     | GI_23111027-I | 17 | 17 | 43484352 | 58744  | 6.5092 | 5.71558 | CEU |
| rs7212202  | SNX11     | GI_23111027-I | 17 | 17 | 43487722 | 55374  | 6.5092 | 5.71558 | CEU |
| rs11079806 | SNX11     | GI_23111027-I | 17 | 17 | 43497679 | 45417  | 6.5092 | 5.71558 | CEU |
| rs2051821  | SNX11     | GI_23111027-I | 17 | 17 | 43498514 | 44582  | 6.5092 | 5.71558 | CEU |
| rs11651097 | SNX11     | GI_23111027-I | 17 | 17 | 43502038 | 41058  | 6.0942 | 5.71558 | CEU |
| rs6847     | SNX11     | GI_23111027-I | 17 | 17 | 43502806 | 40290  | 6.5092 | 5.71558 | CEU |
| rs7224014  | SNX11     | GI_23111027-I | 17 | 17 | 43505860 | 37236  | 6.5092 | 5.71558 | CEU |
| rs2240122  | SNX11     | GI_23111027-I | 17 | 17 | 43507558 | 35538  | 6.5092 | 5.71558 | CEU |
| rs7217496  | SNX11     | GI_23111027-I | 17 | 17 | 43509201 | 33895  | 6.5092 | 5.71558 | CEU |
| rs6504025  | SNX11     | GI_23111027-I | 17 | 17 | 43521072 | 22024  | 6.5092 | 5.71558 | CEU |
| rs7220520  | SNX11     | GI_23111027-I | 17 | 17 | 43522941 | 20155  | 6.5092 | 5.71558 | CEU |
| rs2109984  | SNX11     | GI_23111027-I | 17 | 17 | 43526098 | 16998  | 6.3159 | 5.71558 | CEU |
| rs11079808 | SNX11     | GI_23111027-I | 17 | 17 | 43535231 | 7865   | 6.5092 | 5.71558 | CEU |
| rs8077860  | SNX11     | GI_23111027-I | 17 | 17 | 43540334 | 2762   | 5.8492 | 5.71558 | CEU |
| rs8080662  | SNX11     | GI_23111027-I | 17 | 17 | 43545818 | 2722   | 6.5092 | 5.71558 | CEU |
| rs8066391  | SNX11     | GI_23111027-I | 17 | 17 | 43550295 | 7199   | 6.5092 | 5.71558 | CEU |
| rs1010228  | SNX11     | GI_23111027-I | 17 | 17 | 43555347 | 12251  | 6.6542 | 5.71558 | CEU |
| rs1452665  | SNX11     | GI_23111027-I | 17 | 17 | 43652150 | 109054 | 6.9758 | 5.71558 | CEU |
| rs2306002  | FLJ21347  | GI_31542722-S | 17 | 17 | 45972828 | 15339  | 6.9239 | 6.14979 | CEU |

|            |           |               |    |    |          |       |         |         |     |
|------------|-----------|---------------|----|----|----------|-------|---------|---------|-----|
| rs1122634  | FLJ21347  | GI_31542722-S | 17 | 17 | 45976364 | 11803 | 10.4657 | 6.14979 | CEU |
| rs8076632  | FLJ21347  | GI_31542722-S | 17 | 17 | 45980927 | 7240  | 16.4558 | 6.14979 | CEU |
| rs989128   | FLJ21347  | GI_31542722-S | 17 | 17 | 45991533 | 3366  | 16.0837 | 6.14979 | CEU |
| rs8066241  | ABC1      | GI_38142463-S | 17 | 17 | 55511931 | 36480 | 6.0518  | 5.39584 | CEU |
| rs10515177 | ABC1      | GI_38142463-S | 17 | 17 | 55522267 | 46816 | 6.0518  | 5.39584 | CEU |
| rs8078068  | ABC1      | GI_38142463-S | 17 | 17 | 55523766 | 48315 | 6.0518  | 5.39584 | CEU |
| rs7223281  | ABC1      | GI_38142463-S | 17 | 17 | 55527229 | 51778 | 5.4616  | 5.39584 | CEU |
| rs7226234  | ABC1      | GI_38142463-S | 17 | 17 | 55531572 | 56121 | 5.9903  | 5.39584 | CEU |
| rs11079515 | CD79B     | GI_11038675-A | 17 | 17 | 59359377 | 756   | 5.8327  | 5.66522 | CEU |
| rs7221855  | FLJ46603  | GI_38348363-S | 17 | 17 | 72176449 | 11060 | 7.1539  | 6.26451 | CEU |
| rs9910053  | FLJ46603  | GI_38348363-S | 17 | 17 | 72179402 | 8107  | 8.0187  | 6.26451 | CEU |
| rs9910052  | FLJ46603  | GI_38348363-S | 17 | 17 | 72180396 | 7113  | 6.7901  | 6.26451 | CEU |
| rs10473    | FLJ46603  | GI_38348363-S | 17 | 17 | 72184002 | 3507  | 6.7901  | 6.26451 | CEU |
| rs4789349  | FLJ46603  | GI_38348363-S | 17 | 17 | 72217936 | 30427 | 8.7465  | 6.26451 | CEU |
| rs7225914  | PGS1      | GI_21314623-S | 17 | 17 | 73919964 | 12046 | 8.4312  | 6.1112  | CEU |
| rs3744216  | PGS1      | GI_21314623-S | 17 | 17 | 73922466 | 9544  | 7.9345  | 6.1112  | CEU |
| rs1540773  | PGS1      | GI_21314623-S | 17 | 17 | 73925980 | 6030  | 8.1794  | 6.1112  | CEU |
| rs8071516  | PGS1      | GI_21314623-S | 17 | 17 | 73928420 | 3590  | 8.3331  | 6.1112  | CEU |
| rs2376585  | PGS1      | GI_21314623-S | 17 | 17 | 73929478 | 2532  | 8.4312  | 6.1112  | CEU |
| rs12942703 | PGS1      | GI_21314623-S | 17 | 17 | 73931968 | 42    | 8.1353  | 6.1112  | CEU |
| rs8069521  | PGS1      | GI_21314623-S | 17 | 17 | 73933304 | 1294  | 8.4312  | 6.1112  | CEU |
| rs8069689  | PGS1      | GI_21314623-S | 17 | 17 | 73933390 | 1380  | 8.4312  | 6.1112  | CEU |
| rs691094   | PGS1      | GI_21314623-S | 17 | 17 | 73936771 | 4761  | 8.382   | 6.1112  | CEU |
| rs691277   | PGS1      | GI_21314623-S | 17 | 17 | 73941356 | 9346  | 6.9365  | 6.1112  | CEU |
| rs12450199 | GAA       | GI_11496988-S | 17 | 17 | 75691187 | 16853 | 8.4275  | 6.02775 | CEU |
| rs906175   | LOC284184 | GI_27500527-S | 17 | 17 | 76788057 | 40246 | 10.3499 | 5.77933 | CEU |
| rs2659030  | LOC284184 | GI_27500527-S | 17 | 17 | 76792569 | 35734 | 7.7278  | 5.77933 | CEU |
| rs2725391  | LOC284184 | GI_27500527-S | 17 | 17 | 76807025 | 21278 | 14.0845 | 5.77933 | CEU |
| rs9319617  | LOC284184 | GI_27500527-S | 17 | 17 | 76807041 | 21262 | 13.108  | 5.77933 | CEU |
| rs12939525 | LOC284184 | GI_27500527-S | 17 | 17 | 76808600 | 19703 | 6.8193  | 5.77933 | CEU |
| rs8073077  | LOC284184 | GI_27500527-S | 17 | 17 | 76809616 | 18687 | 6.2332  | 5.77933 | CEU |
| rs969413   | LOC284184 | GI_27500527-S | 17 | 17 | 76810409 | 17894 | 14.0845 | 5.77933 | CEU |
| rs1048775  | LOC284184 | GI_27500527-S | 17 | 17 | 76816924 | 11379 | 11.2614 | 5.77933 | CEU |
| rs2255166  | LOC284184 | GI_27500527-S | 17 | 17 | 76828157 | 146   | 16.8871 | 5.77933 | CEU |
| rs2659005  | LOC284184 | GI_27500527-S | 17 | 17 | 76833309 | 5006  | 12.6936 | 5.77933 | CEU |
| rs6565548  | LOC284184 | GI_27500527-S | 17 | 17 | 76836926 | 8623  | 6.0823  | 5.77933 | CEU |
| rs7224668  | LOC284184 | GI_27500527-S | 17 | 17 | 76850383 | 22080 | 6.8605  | 5.77933 | CEU |
| rs7219382  | LOC284184 | GI_27500527-S | 17 | 17 | 76855692 | 27389 | 6.4731  | 5.77933 | CEU |
| rs7223939  | LOC284184 | GI_27500527-S | 17 | 17 | 76856116 | 27813 | 6.3445  | 5.77933 | CEU |
| rs2292184  | LOC284184 | GI_27500527-S | 17 | 17 | 76859397 | 31094 | 6.4731  | 5.77933 | CEU |
| rs2271090  | LOC284184 | GI_27500527-S | 17 | 17 | 76861200 | 32897 | 6.4731  | 5.77933 | CEU |
| rs8070092  | LOC284184 | GI_27500527-S | 17 | 17 | 76861413 | 33110 | 8.5965  | 5.77933 | CEU |
| rs7219316  | LOC284184 | GI_27500527-S | 17 | 17 | 76862915 | 34612 | 5.8054  | 5.77933 | CEU |
| rs9892688  | LOC284184 | GI_27500527-S | 17 | 17 | 76867112 | 38809 | 6.4731  | 5.77933 | CEU |
| rs10445407 | LOC284184 | GI_27500527-S | 17 | 17 | 76876404 | 48101 | 6.9349  | 5.77933 | CEU |
| rs6565549  | LOC284184 | GI_27500527-S | 17 | 17 | 76882829 | 54526 | 5.8     | 5.77933 | CEU |
| rs7226091  | LOC339231 | GI_29739147-S | 17 | 17 | 77247772 | 11165 | 11.0676 | 5.78068 | CEU |
| rs7209877  | LOC339231 | GI_29739147-S | 17 | 17 | 77248042 | 10895 | 10.6654 | 5.78068 | CEU |
| rs7502491  | LOC339231 | GI_29739147-S | 17 | 17 | 77254609 | 4328  | 11.0676 | 5.78068 | CEU |
| rs7502521  | LOC339231 | GI_29739147-S | 17 | 17 | 77254717 | 4220  | 11.0676 | 5.78068 | CEU |
| rs6565619  | LOC339231 | GI_29739147-S | 17 | 17 | 77256301 | 2636  | 11.0676 | 5.78068 | CEU |
| rs8080624  | LOC339231 | GI_29739147-S | 17 | 17 | 77261080 | 2143  | 9.958   | 5.78068 | CEU |
| rs8070488  | LOC339231 | GI_29739147-S | 17 | 17 | 77274336 | 15399 | 10.6654 | 5.78068 | CEU |
| rs11868024 | LOC339231 | GI_29739147-S | 17 | 17 | 77286571 | 27634 | 10.6654 | 5.78068 | CEU |
| rs6565624  | LOC339231 | GI_29739147-S | 17 | 17 | 77288155 | 29218 | 10.6654 | 5.78068 | CEU |
| rs8081683  | LOC339231 | GI_29739147-S | 17 | 17 | 77291483 | 32546 | 9.4981  | 5.78068 | CEU |

|            |           |               |    |    |          |       |         |         |     |
|------------|-----------|---------------|----|----|----------|-------|---------|---------|-----|
| rs2254862  | RAB40B    | GI_5803162-S  | 17 | 17 | 78243554 | 34648 | 6.2851  | 5.60531 | CEU |
| rs2847325  | HSRTSBETA | GI_42544116-I | 18 | 18 | 693442   | 8950  | 8.5299  | 6.01822 | CEU |
| rs2847169  | HSRTSBETA | GI_42544116-I | 18 | 18 | 695695   | 6697  | 9.241   | 6.01822 | CEU |
| rs2847327  | HSRTSBETA | GI_42544116-I | 18 | 18 | 696047   | 6345  | 9.2982  | 6.01822 | CEU |
| rs2612102  | HSRTSBETA | GI_42544116-I | 18 | 18 | 696589   | 5803  | 9.088   | 6.01822 | CEU |
| rs8090148  | HSRTSBETA | GI_42544116-I | 18 | 18 | 717654   | 15262 | 8.4253  | 6.01822 | CEU |
| rs7228136  | HSRTSBETA | GI_42544116-I | 18 | 18 | 722017   | 19625 | 9.4872  | 6.01822 | CEU |
| rs9961743  | HSRTSBETA | GI_42544116-I | 18 | 18 | 732858   | 30466 | 6.0973  | 6.01822 | CEU |
| rs3786347  | HSRTSBETA | GI_42544116-I | 18 | 18 | 733226   | 30834 | 6.8058  | 6.01822 | CEU |
| rs8099748  | HSRTSBETA | GI_42544116-I | 18 | 18 | 734114   | 31722 | 6.8058  | 6.01822 | CEU |
| rs6506511  | HSRTSBETA | GI_42544116-I | 18 | 18 | 740937   | 38545 | 6.8058  | 6.01822 | CEU |
| rs10460020 | HSRTSBETA | GI_42544116-I | 18 | 18 | 748443   | 46051 | 7.5     | 6.01822 | CEU |
| rs7238524  | LOC400642 | GI_42661344-S | 18 | 18 | 5205596  | 30755 | 7.4104  | 5.96524 | CEU |
| rs9959482  | LOC400642 | GI_42661344-S | 18 | 18 | 5206054  | 30297 | 6.1391  | 5.96524 | CEU |
| rs4798315  | LOC400642 | GI_42661344-S | 18 | 18 | 5206795  | 29556 | 6.1391  | 5.96524 | CEU |
| rs9964310  | LOC400642 | GI_42661344-S | 18 | 18 | 5210378  | 25973 | 6.1391  | 5.96524 | CEU |
| rs1847871  | LOC400642 | GI_42661344-S | 18 | 18 | 5219126  | 17225 | 6.1391  | 5.96524 | CEU |
| rs13370631 | LOC400642 | GI_42661344-S | 18 | 18 | 5219653  | 16698 | 6.115   | 5.96524 | CEU |
| rs3887348  | LOC400642 | GI_42661344-S | 18 | 18 | 5223105  | 13246 | 6.6363  | 5.96524 | CEU |
| rs931833   | LOC400642 | GI_42661344-S | 18 | 18 | 5224117  | 12234 | 6.1391  | 5.96524 | CEU |
| rs17464416 | LOC400642 | GI_42661344-S | 18 | 18 | 5226747  | 9604  | 6.8089  | 5.96524 | CEU |
| rs8092760  | LOC400642 | GI_42661344-S | 18 | 18 | 5231500  | 4851  | 15.1036 | 5.96524 | CEU |
| rs4429380  | LOC400642 | GI_42661344-S | 18 | 18 | 5232053  | 4298  | 13.6223 | 5.96524 | CEU |
| rs12352    | LOC400642 | GI_42661344-S | 18 | 18 | 5233083  | 3268  | 14.8949 | 5.96524 | CEU |
| rs8089069  | LOC400642 | GI_42661344-S | 18 | 18 | 5233540  | 2811  | 13.9529 | 5.96524 | CEU |
| rs8084872  | LOC400642 | GI_42661344-S | 18 | 18 | 5233567  | 2784  | 8.1729  | 5.96524 | CEU |
| rs1062837  | LOC400642 | GI_42661344-S | 18 | 18 | 5234173  | 2178  | 6.183   | 5.96524 | CEU |
| rs11877479 | LOC400642 | GI_42661344-S | 18 | 18 | 5235228  | 1123  | 14.8949 | 5.96524 | CEU |
| rs11877315 | LOC400642 | GI_42661344-S | 18 | 18 | 5235247  | 1104  | 14.2657 | 5.96524 | CEU |
| rs17379984 | LOC400642 | GI_42661344-S | 18 | 18 | 5235824  | 527   | 14.8067 | 5.96524 | CEU |
| rs8576     | LOC400642 | GI_42661344-S | 18 | 18 | 5236398  | 47    | 8.3831  | 5.96524 | CEU |
| rs9948693  | LOC400642 | GI_42661344-S | 18 | 18 | 5237432  | 1081  | 8.3831  | 5.96524 | CEU |
| rs9964260  | LOC400642 | GI_42661344-S | 18 | 18 | 5238861  | 2510  | 6.1349  | 5.96524 | CEU |
| rs8092448  | LOC400642 | GI_42661344-S | 18 | 18 | 5240817  | 4466  | 8.0169  | 5.96524 | CEU |
| rs4798330  | LOC400642 | GI_42661344-S | 18 | 18 | 5241192  | 4841  | 8.0169  | 5.96524 | CEU |
| rs11081182 | LOC400642 | GI_42661344-S | 18 | 18 | 5270470  | 34119 | 13.1231 | 5.96524 | CEU |
| rs11872923 | LOC400642 | GI_42661344-S | 18 | 18 | 5272442  | 36091 | 12.3844 | 5.96524 | CEU |
| rs2789     | LOC400642 | GI_42661344-S | 18 | 18 | 5279887  | 43536 | 7.4211  | 5.96524 | CEU |
| rs12522    | LOC400642 | GI_42661344-S | 18 | 18 | 5280282  | 43931 | 8.3831  | 5.96524 | CEU |
| rs9952350  | LOC400642 | GI_42661344-S | 18 | 18 | 5282983  | 46632 | 6.1714  | 5.96524 | CEU |
| rs9957892  | LOC400642 | GI_42661344-S | 18 | 18 | 5283875  | 47524 | 7.4211  | 5.96524 | CEU |
| rs9957907  | LOC400642 | GI_42661344-S | 18 | 18 | 5283893  | 47542 | 6.9329  | 5.96524 | CEU |
| rs11665417 | LOC400642 | GI_42661344-S | 18 | 18 | 5283943  | 47592 | 7.4211  | 5.96524 | CEU |
| rs9945680  | LOC400642 | GI_42661344-S | 18 | 18 | 5284323  | 47972 | 7.1271  | 5.96524 | CEU |
| rs12960302 | MGC4083   | GI_14210535-S | 18 | 18 | 12274839 | 41357 | 6.356   | 5.79567 | CEU |
| rs7244709  | MGC4083   | GI_14210535-S | 18 | 18 | 12290136 | 26060 | 6.4336  | 5.79567 | CEU |
| rs9303766  | MGC4083   | GI_14210535-S | 18 | 18 | 12290849 | 25347 | 6.4886  | 5.79567 | CEU |
| rs9807444  | MGC4083   | GI_14210535-S | 18 | 18 | 12290936 | 25260 | 6.356   | 5.79567 | CEU |
| rs9303768  | MGC4083   | GI_14210535-S | 18 | 18 | 12291322 | 24874 | 6.5999  | 5.79567 | CEU |
| rs7504558  | MGC4083   | GI_14210535-S | 18 | 18 | 12294781 | 21415 | 6.356   | 5.79567 | CEU |
| rs10853224 | MGC4083   | GI_14210535-S | 18 | 18 | 12301984 | 14212 | 6.356   | 5.79567 | CEU |
| rs11080567 | MGC4083   | GI_14210535-S | 18 | 18 | 12302075 | 14121 | 6.356   | 5.79567 | CEU |
| rs12960267 | MGC4083   | GI_14210535-S | 18 | 18 | 12302492 | 13704 | 6.356   | 5.79567 | CEU |
| rs8083882  | MGC4083   | GI_14210535-S | 18 | 18 | 12304309 | 11887 | 6.356   | 5.79567 | CEU |
| rs12607321 | MGC4083   | GI_14210535-S | 18 | 18 | 12306779 | 9417  | 6.2711  | 5.79567 | CEU |
| rs4796960  | MGC4083   | GI_14210535-S | 18 | 18 | 12308027 | 8169  | 6.516   | 5.79567 | CEU |

|            |           |               |    |    |          |        |         |         |     |
|------------|-----------|---------------|----|----|----------|--------|---------|---------|-----|
| rs7505626  | MGC4083   | GI_14210535-S | 18 | 18 | 12311065 | 5131   | 5.8318  | 5.79567 | CEU |
| rs7232992  | MGC11386  | GI_40254998-S | 18 | 18 | 19115914 | 14850  | 6.3153  | 5.54161 | CEU |
| rs617505   | MOCOS     | GI_8923660-S  | 18 | 18 | 32051949 | 50616  | 7.7752  | 6.18708 | CEU |
| rs687211   | MOCOS     | GI_8923660-S  | 18 | 18 | 32084135 | 18430  | 6.5901  | 6.18708 | CEU |
| rs491339   | MOCOS     | GI_8923660-S  | 18 | 18 | 32087239 | 15326  | 6.9118  | 6.18708 | CEU |
| rs614621   | MOCOS     | GI_8923660-S  | 18 | 18 | 32087917 | 14648  | 6.9118  | 6.18708 | CEU |
| rs599457   | MOCOS     | GI_8923660-S  | 18 | 18 | 32089007 | 13558  | 6.9609  | 6.18708 | CEU |
| rs599433   | MOCOS     | GI_8923660-S  | 18 | 18 | 32089022 | 13543  | 7.189   | 6.18708 | CEU |
| rs587312   | MOCOS     | GI_8923660-S  | 18 | 18 | 32089386 | 13179  | 6.9609  | 6.18708 | CEU |
| rs676300   | MOCOS     | GI_8923660-S  | 18 | 18 | 32089670 | 12895  | 6.9609  | 6.18708 | CEU |
| rs585927   | MOCOS     | GI_8923660-S  | 18 | 18 | 32089685 | 12880  | 6.7412  | 6.18708 | CEU |
| rs2135434  | SERPINB10 | GI_4826901-S  | 18 | 18 | 59617912 | 135280 | 6.8362  | 5.91013 | CEU |
| rs9967135  | SERPINB10 | GI_4826901-S  | 18 | 18 | 59619881 | 133311 | 6.8362  | 5.91013 | CEU |
| rs17782413 | SERPINB10 | GI_4826901-S  | 18 | 18 | 59622503 | 130689 | 6.8962  | 5.91013 | CEU |
| rs10503087 | SERPINB10 | GI_4826901-S  | 18 | 18 | 59627434 | 125758 | 6.8362  | 5.91013 | CEU |
| rs1567053  | SERPINB10 | GI_4826901-S  | 18 | 18 | 59659131 | 94061  | 7.9634  | 5.91013 | CEU |
| rs1567054  | SERPINB10 | GI_4826901-S  | 18 | 18 | 59659179 | 94013  | 7.9634  | 5.91013 | CEU |
| rs7244091  | SERPINB10 | GI_4826901-S  | 18 | 18 | 59661316 | 91876  | 7.3557  | 5.91013 | CEU |
| rs2048028  | SERPINB10 | GI_4826901-S  | 18 | 18 | 59662552 | 90640  | 7.9634  | 5.91013 | CEU |
| rs9320027  | SERPINB10 | GI_4826901-S  | 18 | 18 | 59663492 | 89700  | 7.9634  | 5.91013 | CEU |
| rs1948914  | SERPINB10 | GI_4826901-S  | 18 | 18 | 59664154 | 89038  | 7.8477  | 5.91013 | CEU |
| rs9944887  | SERPINB10 | GI_4826901-S  | 18 | 18 | 59665948 | 87244  | 8.0758  | 5.91013 | CEU |
| rs9959974  | SERPINB10 | GI_4826901-S  | 18 | 18 | 59666056 | 87136  | 7.2643  | 5.91013 | CEU |
| rs9945681  | SERPINB10 | GI_4826901-S  | 18 | 18 | 59666101 | 87091  | 6.4665  | 5.91013 | CEU |
| rs17071932 | SERPINB10 | GI_4826901-S  | 18 | 18 | 59666204 | 86988  | 7.8592  | 5.91013 | CEU |
| rs9960785  | SERPINB10 | GI_4826901-S  | 18 | 18 | 59667093 | 86099  | 6.6358  | 5.91013 | CEU |
| rs9951203  | SERPINB10 | GI_4826901-S  | 18 | 18 | 59667720 | 85472  | 7.4351  | 5.91013 | CEU |
| rs9963905  | SERPINB10 | GI_4826901-S  | 18 | 18 | 59667857 | 85335  | 7.2299  | 5.91013 | CEU |
| rs9320028  | SERPINB10 | GI_4826901-S  | 18 | 18 | 59668150 | 85042  | 7.8477  | 5.91013 | CEU |
| rs8091518  | SERPINB10 | GI_4826901-S  | 18 | 18 | 59679155 | 74037  | 7.8477  | 5.91013 | CEU |
| rs8091945  | SERPINB10 | GI_4826901-S  | 18 | 18 | 59680510 | 72682  | 8.6767  | 5.91013 | CEU |
| rs9966495  | SERPINB10 | GI_4826901-S  | 18 | 18 | 59690850 | 62342  | 7.0925  | 5.91013 | CEU |
| rs9951512  | SERPINB10 | GI_4826901-S  | 18 | 18 | 59690885 | 62307  | 7.8477  | 5.91013 | CEU |
| rs9954175  | SERPINB10 | GI_4826901-S  | 18 | 18 | 59691368 | 61824  | 9.9971  | 5.91013 | CEU |
| rs9957643  | SERPINB10 | GI_4826901-S  | 18 | 18 | 59692597 | 60595  | 10.889  | 5.91013 | CEU |
| rs6567399  | SERPINB10 | GI_4826901-S  | 18 | 18 | 59695526 | 57666  | 10.9793 | 5.91013 | CEU |
| rs9951931  | SERPINB10 | GI_4826901-S  | 18 | 18 | 59697930 | 55262  | 10.889  | 5.91013 | CEU |
| rs9966459  | SERPINB10 | GI_4826901-S  | 18 | 18 | 59698270 | 54922  | 10.9793 | 5.91013 | CEU |
| rs8096886  | SERPINB10 | GI_4826901-S  | 18 | 18 | 59698513 | 54679  | 10.889  | 5.91013 | CEU |
| rs10513933 | SERPINB10 | GI_4826901-S  | 18 | 18 | 59699669 | 53523  | 9.9971  | 5.91013 | CEU |
| rs8097621  | SERPINB10 | GI_4826901-S  | 18 | 18 | 59700202 | 52990  | 10.9793 | 5.91013 | CEU |
| rs9946657  | SERPINB10 | GI_4826901-S  | 18 | 18 | 59701565 | 51627  | 10.9793 | 5.91013 | CEU |
| rs9959513  | SERPINB10 | GI_4826901-S  | 18 | 18 | 59701863 | 51329  | 9.9971  | 5.91013 | CEU |
| rs9964989  | SERPINB10 | GI_4826901-S  | 18 | 18 | 59702589 | 50603  | 10.9793 | 5.91013 | CEU |
| rs3760574  | SERPINB10 | GI_4826901-S  | 18 | 18 | 59703505 | 49687  | 10.9793 | 5.91013 | CEU |
| rs2288287  | SERPINB10 | GI_4826901-S  | 18 | 18 | 59706274 | 46918  | 10.9793 | 5.91013 | CEU |
| rs1025196  | SERPINB10 | GI_4826901-S  | 18 | 18 | 59708650 | 44542  | 10.889  | 5.91013 | CEU |
| rs6095     | SERPINB10 | GI_4826901-S  | 18 | 18 | 59709636 | 43556  | 8.2453  | 5.91013 | CEU |
| rs6094     | SERPINB10 | GI_4826901-S  | 18 | 18 | 59709862 | 43330  | 10.9793 | 5.91013 | CEU |
| rs9320029  | SERPINB10 | GI_4826901-S  | 18 | 18 | 59710543 | 42649  | 10.9793 | 5.91013 | CEU |
| rs9630856  | SERPINB10 | GI_4826901-S  | 18 | 18 | 59710691 | 42501  | 8.5639  | 5.91013 | CEU |
| rs9630857  | SERPINB10 | GI_4826901-S  | 18 | 18 | 59710766 | 42426  | 7.8174  | 5.91013 | CEU |
| rs9951333  | SERPINB10 | GI_4826901-S  | 18 | 18 | 59711133 | 42059  | 10.9793 | 5.91013 | CEU |
| rs9320030  | SERPINB10 | GI_4826901-S  | 18 | 18 | 59711516 | 41676  | 9.502   | 5.91013 | CEU |
| rs9320031  | SERPINB10 | GI_4826901-S  | 18 | 18 | 59711631 | 41561  | 10.9793 | 5.91013 | CEU |
| rs9630851  | SERPINB10 | GI_4826901-S  | 18 | 18 | 59712038 | 41154  | 10.0853 | 5.91013 | CEU |

|            |           |              |    |    |          |       |         |         |     |
|------------|-----------|--------------|----|----|----------|-------|---------|---------|-----|
| rs9320032  | SERPINB10 | GI_4826901-S | 18 | 18 | 59712191 | 41001 | 8.6285  | 5.91013 | CEU |
| rs3786335  | SERPINB10 | GI_4826901-S | 18 | 18 | 59712501 | 40691 | 10.9793 | 5.91013 | CEU |
| rs7233370  | SERPINB10 | GI_4826901-S | 18 | 18 | 59713351 | 39841 | 11.0348 | 5.91013 | CEU |
| rs7229383  | SERPINB10 | GI_4826901-S | 18 | 18 | 59713371 | 39821 | 10.9793 | 5.91013 | CEU |
| rs2140453  | SERPINB10 | GI_4826901-S | 18 | 18 | 59713769 | 39423 | 6.1932  | 5.91013 | CEU |
| rs1916662  | SERPINB10 | GI_4826901-S | 18 | 18 | 59714021 | 39171 | 10.9793 | 5.91013 | CEU |
| rs3819335  | SERPINB10 | GI_4826901-S | 18 | 18 | 59714172 | 39020 | 10.889  | 5.91013 | CEU |
| rs1532886  | SERPINB10 | GI_4826901-S | 18 | 18 | 59714445 | 38747 | 10.889  | 5.91013 | CEU |
| rs1532887  | SERPINB10 | GI_4826901-S | 18 | 18 | 59714686 | 38506 | 7.9508  | 5.91013 | CEU |
| rs1532889  | SERPINB10 | GI_4826901-S | 18 | 18 | 59714820 | 38372 | 10.9793 | 5.91013 | CEU |
| rs2332874  | SERPINB10 | GI_4826901-S | 18 | 18 | 59714990 | 38202 | 10.9793 | 5.91013 | CEU |
| rs2114380  | SERPINB10 | GI_4826901-S | 18 | 18 | 59715086 | 38106 | 10.889  | 5.91013 | CEU |
| rs6098     | SERPINB10 | GI_4826901-S | 18 | 18 | 59715374 | 37818 | 10.9793 | 5.91013 | CEU |
| rs2278180  | SERPINB10 | GI_4826901-S | 18 | 18 | 59715493 | 37699 | 10.9793 | 5.91013 | CEU |
| rs2278179  | SERPINB10 | GI_4826901-S | 18 | 18 | 59715512 | 37680 | 10.9793 | 5.91013 | CEU |
| rs2278178  | SERPINB10 | GI_4826901-S | 18 | 18 | 59715569 | 37623 | 10.889  | 5.91013 | CEU |
| rs2278177  | SERPINB10 | GI_4826901-S | 18 | 18 | 59715590 | 37602 | 9.4144  | 5.91013 | CEU |
| rs1916658  | SERPINB10 | GI_4826901-S | 18 | 18 | 59715759 | 37433 | 10.9793 | 5.91013 | CEU |
| rs1916659  | SERPINB10 | GI_4826901-S | 18 | 18 | 59716188 | 37004 | 10.9793 | 5.91013 | CEU |
| rs9947143  | SERPINB10 | GI_4826901-S | 18 | 18 | 59716517 | 36675 | 10.9793 | 5.91013 | CEU |
| rs9955420  | SERPINB10 | GI_4826901-S | 18 | 18 | 59716790 | 36402 | 10.4871 | 5.91013 | CEU |
| rs4599014  | SERPINB10 | GI_4826901-S | 18 | 18 | 59716905 | 36287 | 10.9793 | 5.91013 | CEU |
| rs9950615  | SERPINB10 | GI_4826901-S | 18 | 18 | 59717558 | 35634 | 10.889  | 5.91013 | CEU |
| rs7505052  | SERPINB10 | GI_4826901-S | 18 | 18 | 59717646 | 35546 | 9.9971  | 5.91013 | CEU |
| rs4349246  | SERPINB10 | GI_4826901-S | 18 | 18 | 59717712 | 35480 | 9.4704  | 5.91013 | CEU |
| rs2332875  | SERPINB10 | GI_4826901-S | 18 | 18 | 59718067 | 35125 | 10.889  | 5.91013 | CEU |
| rs1544896  | SERPINB10 | GI_4826901-S | 18 | 18 | 59718461 | 34731 | 10.9793 | 5.91013 | CEU |
| rs1544895  | SERPINB10 | GI_4826901-S | 18 | 18 | 59718636 | 34556 | 10.3189 | 5.91013 | CEU |
| rs1544894  | SERPINB10 | GI_4826901-S | 18 | 18 | 59718761 | 34431 | 10.9793 | 5.91013 | CEU |
| rs1544893  | SERPINB10 | GI_4826901-S | 18 | 18 | 59718952 | 34240 | 10.889  | 5.91013 | CEU |
| rs10513932 | SERPINB10 | GI_4826901-S | 18 | 18 | 59719294 | 33898 | 10.9793 | 5.91013 | CEU |
| rs1916660  | SERPINB10 | GI_4826901-S | 18 | 18 | 59719849 | 33343 | 10.889  | 5.91013 | CEU |
| rs1015416  | SERPINB10 | GI_4826901-S | 18 | 18 | 59720363 | 32829 | 10.889  | 5.91013 | CEU |
| rs1863583  | SERPINB10 | GI_4826901-S | 18 | 18 | 59720523 | 32669 | 10.9793 | 5.91013 | CEU |
| rs6102     | SERPINB10 | GI_4826901-S | 18 | 18 | 59721450 | 31742 | 9.9971  | 5.91013 | CEU |
| rs6103     | SERPINB10 | GI_4826901-S | 18 | 18 | 59721483 | 31709 | 10.9793 | 5.91013 | CEU |
| rs6104     | SERPINB10 | GI_4826901-S | 18 | 18 | 59721509 | 31683 | 10.9793 | 5.91013 | CEU |
| rs12102    | SERPINB10 | GI_4826901-S | 18 | 18 | 59721962 | 31230 | 10.9793 | 5.91013 | CEU |
| rs2114378  | SERPINB10 | GI_4826901-S | 18 | 18 | 59722179 | 31013 | 10.9793 | 5.91013 | CEU |
| rs2140452  | SERPINB10 | GI_4826901-S | 18 | 18 | 59722502 | 30690 | 10.9793 | 5.91013 | CEU |
| rs2332876  | SERPINB10 | GI_4826901-S | 18 | 18 | 59722566 | 30626 | 6.9059  | 5.91013 | CEU |
| rs7231714  | SERPINB10 | GI_4826901-S | 18 | 18 | 59725580 | 27612 | 10.889  | 5.91013 | CEU |
| rs1006961  | SERPINB10 | GI_4826901-S | 18 | 18 | 59726212 | 26980 | 10.9793 | 5.91013 | CEU |
| rs1006960  | SERPINB10 | GI_4826901-S | 18 | 18 | 59726552 | 26640 | 10.9793 | 5.91013 | CEU |
| rs8089365  | SERPINB10 | GI_4826901-S | 18 | 18 | 59726987 | 26205 | 10.889  | 5.91013 | CEU |
| rs9948717  | SERPINB10 | GI_4826901-S | 18 | 18 | 59727086 | 26106 | 7.7316  | 5.91013 | CEU |
| rs9963851  | SERPINB10 | GI_4826901-S | 18 | 18 | 59728021 | 25171 | 9.6462  | 5.91013 | CEU |
| rs9966367  | SERPINB10 | GI_4826901-S | 18 | 18 | 59728271 | 24921 | 8.7659  | 5.91013 | CEU |
| rs4499334  | SERPINB10 | GI_4826901-S | 18 | 18 | 59729788 | 23404 | 8.7313  | 5.91013 | CEU |
| rs12717154 | SERPINB10 | GI_4826901-S | 18 | 18 | 59730261 | 22931 | 9.8398  | 5.91013 | CEU |
| rs13371114 | SERPINB10 | GI_4826901-S | 18 | 18 | 59730357 | 22835 | 8.0769  | 5.91013 | CEU |
| rs12327005 | SERPINB10 | GI_4826901-S | 18 | 18 | 59731116 | 22076 | 9.6462  | 5.91013 | CEU |
| rs12327162 | SERPINB10 | GI_4826901-S | 18 | 18 | 59731189 | 22003 | 10.5646 | 5.91013 | CEU |
| rs12327006 | SERPINB10 | GI_4826901-S | 18 | 18 | 59731314 | 21878 | 8.9591  | 5.91013 | CEU |
| rs12327173 | SERPINB10 | GI_4826901-S | 18 | 18 | 59731522 | 21670 | 8.7355  | 5.91013 | CEU |
| rs8086765  | SERPINB10 | GI_4826901-S | 18 | 18 | 59731581 | 21611 | 10.5646 | 5.91013 | CEU |



|            |           |               |    |    |          |       |         |         |     |
|------------|-----------|---------------|----|----|----------|-------|---------|---------|-----|
| rs8085904  | SERPINB10 | GI_4826901-S  | 18 | 18 | 59731660 | 21532 | 9.1224  | 5.91013 | CEU |
| rs7241748  | SERPINB10 | GI_4826901-S  | 18 | 18 | 59733108 | 20084 | 9.0038  | 5.91013 | CEU |
| rs9952843  | SERPINB10 | GI_4826901-S  | 18 | 18 | 59733245 | 19947 | 8.9385  | 5.91013 | CEU |
| rs9953733  | SERPINB10 | GI_4826901-S  | 18 | 18 | 59733477 | 19715 | 9.6462  | 5.91013 | CEU |
| rs17072097 | SERPINB10 | GI_4826901-S  | 18 | 18 | 59733731 | 19461 | 9.6462  | 5.91013 | CEU |
| rs8097425  | SERPINB10 | GI_4826901-S  | 18 | 18 | 59733847 | 19345 | 10.5646 | 5.91013 | CEU |
| rs17072102 | SERPINB10 | GI_4826901-S  | 18 | 18 | 59734053 | 19139 | 9.2536  | 5.91013 | CEU |
| rs8084931  | SERPINB10 | GI_4826901-S  | 18 | 18 | 59735061 | 18131 | 10.3052 | 5.91013 | CEU |
| rs17072109 | SERPINB10 | GI_4826901-S  | 18 | 18 | 59735622 | 17570 | 8.9706  | 5.91013 | CEU |
| rs9320033  | SERPINB10 | GI_4826901-S  | 18 | 18 | 59735962 | 17230 | 10.0419 | 5.91013 | CEU |
| rs724557   | SERPINB10 | GI_4826901-S  | 18 | 18 | 59736125 | 17067 | 9.6462  | 5.91013 | CEU |
| rs724558   | SERPINB10 | GI_4826901-S  | 18 | 18 | 59736240 | 16952 | 9.8398  | 5.91013 | CEU |
| rs1944273  | SERPINB10 | GI_4826901-S  | 18 | 18 | 59736514 | 16678 | 9.6462  | 5.91013 | CEU |
| rs1944272  | SERPINB10 | GI_4826901-S  | 18 | 18 | 59736638 | 16554 | 9.6462  | 5.91013 | CEU |
| rs1944271  | SERPINB10 | GI_4826901-S  | 18 | 18 | 59736845 | 16347 | 9.6462  | 5.91013 | CEU |
| rs9955171  | SERPINB10 | GI_4826901-S  | 18 | 18 | 59736927 | 16265 | 9.6462  | 5.91013 | CEU |
| rs8085490  | SERPINB10 | GI_4826901-S  | 18 | 18 | 59737365 | 15827 | 10.5646 | 5.91013 | CEU |
| rs8099238  | SERPINB10 | GI_4826901-S  | 18 | 18 | 59737617 | 15575 | 8.7432  | 5.91013 | CEU |
| rs9955876  | SERPINB10 | GI_4826901-S  | 18 | 18 | 59737855 | 15337 | 9.6462  | 5.91013 | CEU |
| rs9967382  | SERPINB10 | GI_4826901-S  | 18 | 18 | 59738047 | 15145 | 9.2098  | 5.91013 | CEU |
| rs620535   | SERPINB10 | GI_4826901-S  | 18 | 18 | 59738269 | 14923 | 9.8398  | 5.91013 | CEU |
| rs976038   | SERPINB10 | GI_4826901-S  | 18 | 18 | 59738648 | 14544 | 10.5646 | 5.91013 | CEU |
| rs9947135  | SERPINB10 | GI_4826901-S  | 18 | 18 | 59738704 | 14488 | 8.191   | 5.91013 | CEU |
| rs4350667  | SERPINB10 | GI_4826901-S  | 18 | 18 | 59738743 | 14449 | 9.5972  | 5.91013 | CEU |
| rs9947504  | SERPINB10 | GI_4826901-S  | 18 | 18 | 59739063 | 14129 | 8.9385  | 5.91013 | CEU |
| rs17072158 | SERPINB10 | GI_4826901-S  | 18 | 18 | 59739617 | 13575 | 8.513   | 5.91013 | CEU |
| rs2114377  | SERPINB10 | GI_4826901-S  | 18 | 18 | 59743756 | 9436  | 5.9383  | 5.91013 | CEU |
| rs9960901  | SERPINB10 | GI_4826901-S  | 18 | 18 | 59744047 | 9145  | 5.9383  | 5.91013 | CEU |
| rs8093894  | SERPINB10 | GI_4826901-S  | 18 | 18 | 59744461 | 8731  | 5.9383  | 5.91013 | CEU |
| rs8089023  | SERPINB10 | GI_4826901-S  | 18 | 18 | 59744733 | 8459  | 5.9383  | 5.91013 | CEU |
| rs3786340  | SERPINB10 | GI_4826901-S  | 18 | 18 | 59748514 | 4678  | 5.9383  | 5.91013 | CEU |
| rs10163726 | SERPINB10 | GI_4826901-S  | 18 | 18 | 59748718 | 4474  | 5.9383  | 5.91013 | CEU |
| rs1544899  | SERPINB10 | GI_4826901-S  | 18 | 18 | 59749190 | 4002  | 5.9383  | 5.91013 | CEU |
| rs1544898  | SERPINB10 | GI_4826901-S  | 18 | 18 | 59749429 | 3763  | 5.9383  | 5.91013 | CEU |
| rs8096543  | SERPINB10 | GI_4826901-S  | 18 | 18 | 59750024 | 3168  | 5.9383  | 5.91013 | CEU |
| rs4630651  | SERPINB10 | GI_4826901-S  | 18 | 18 | 59750481 | 2711  | 5.9383  | 5.91013 | CEU |
| rs9964049  | SERPINB10 | GI_4826901-S  | 18 | 18 | 59751066 | 2126  | 5.9383  | 5.91013 | CEU |
| rs963075   | SERPINB10 | GI_4826901-S  | 18 | 18 | 59751364 | 1828  | 5.9383  | 5.91013 | CEU |
| rs9955410  | LOC284293 | GI_27485378-S | 18 | 18 | 59771017 | 569   | 8.1241  | 6.15781 | CEU |
| rs9945924  | LOC284293 | GI_27485378-S | 18 | 18 | 59771746 | 160   | 7.9362  | 6.15781 | CEU |
| rs8090046  | LOC284293 | GI_27485378-S | 18 | 18 | 59773066 | 1480  | 7.9362  | 6.15781 | CEU |
| rs8095151  | LOC284293 | GI_27485378-S | 18 | 18 | 59773196 | 1610  | 7.9362  | 6.15781 | CEU |
| rs9952485  | LOC284293 | GI_27485378-S | 18 | 18 | 59773771 | 2185  | 6.6683  | 6.15781 | CEU |
| rs9962574  | LOC284293 | GI_27485378-S | 18 | 18 | 59777098 | 5512  | 8.2271  | 6.15781 | CEU |
| rs9963550  | LOC284293 | GI_27485378-S | 18 | 18 | 59779238 | 7652  | 7.9362  | 6.15781 | CEU |
| rs9949621  | LOC284293 | GI_27485378-S | 18 | 18 | 59780377 | 8791  | 8.1241  | 6.15781 | CEU |
| rs9950903  | LOC284293 | GI_27485378-S | 18 | 18 | 59781783 | 10197 | 8.1241  | 6.15781 | CEU |
| rs8090586  | LOC284293 | GI_27485378-S | 18 | 18 | 59781864 | 10278 | 8.1241  | 6.15781 | CEU |
| rs1006755  | LOC284293 | GI_27485378-S | 18 | 18 | 59782026 | 10440 | 8.1241  | 6.15781 | CEU |
| rs4510128  | LOC284293 | GI_27485378-S | 18 | 18 | 59782312 | 10726 | 7.9362  | 6.15781 | CEU |
| rs1006754  | LOC284293 | GI_27485378-S | 18 | 18 | 59782427 | 10841 | 6.2065  | 6.15781 | CEU |
| rs17072304 | LOC284293 | GI_27485378-S | 18 | 18 | 59784549 | 12963 | 7.9362  | 6.15781 | CEU |
| rs3764642  | CNN2      | GI_41327728-S | 19 | 19 | 991046   | 1480  | 7.1539  | 6.00402 | CEU |
| rs17681742 | FLJ14009  | GI_13376098-S | 19 | 19 | 2928599  | 16467 | 7.693   | 5.70789 | CEU |
| rs17674528 | PIP5K1C   | GI_31317308-S | 19 | 19 | 3577771  | 3574  | 6.2215  | 5.99909 | CEU |
| rs1476591  | PIP5K1C   | GI_31317308-S | 19 | 19 | 3630607  | 49262 | 8.0787  | 5.99909 | CEU |

|            |           |               |    |    |         |        |        |         |     |
|------------|-----------|---------------|----|----|---------|--------|--------|---------|-----|
| rs1476592  | PIP5K1C   | GI_31317308-S | 19 | 19 | 3630740 | 49395  | 8.0787 | 5.99909 | CEU |
| rs10421993 | Hs.465789 | Hs.465789-S   | 19 | 19 | 7927665 | 51935  | 6.4178 | 5.91088 | CEU |
| rs6603128  | Hs.465789 | Hs.465789-S   | 19 | 19 | 7928377 | 51223  | 6.4178 | 5.91088 | CEU |
| rs952444   | Hs.465789 | Hs.465789-S   | 19 | 19 | 7992055 | 12455  | 7.3284 | 5.91088 | CEU |
| rs882951   | Hs.465789 | Hs.465789-S   | 19 | 19 | 7999265 | 19665  | 6.7444 | 5.91088 | CEU |
| rs10411185 | Hs.465789 | Hs.465789-S   | 19 | 19 | 8009881 | 30281  | 7.3108 | 5.91088 | CEU |
| rs10414250 | ZNF266    | GI_37622342-A | 19 | 19 | 9238716 | 145624 | 6.3331 | 5.82076 | CEU |
| rs9305057  | ZNF266    | GI_37622342-A | 19 | 19 | 9241475 | 142865 | 5.8769 | 5.82076 | CEU |
| rs10408485 | ZNF266    | GI_37622342-A | 19 | 19 | 9254110 | 130230 | 7.3598 | 5.82076 | CEU |
| rs17204992 | ZNF266    | GI_37622342-A | 19 | 19 | 9260996 | 123344 | 7.3598 | 5.82076 | CEU |
| rs7247108  | ZNF266    | GI_37622342-A | 19 | 19 | 9262704 | 121636 | 7.3598 | 5.82076 | CEU |
| rs10422910 | ZNF266    | GI_37622342-A | 19 | 19 | 9263877 | 120463 | 7.3598 | 5.82076 | CEU |
| rs7252865  | ZNF266    | GI_37622342-A | 19 | 19 | 9273535 | 110805 | 7.9677 | 5.82076 | CEU |
| rs10745023 | ZNF266    | GI_37622342-A | 19 | 19 | 9274896 | 109444 | 6.8573 | 5.82076 | CEU |
| rs12150875 | ZNF266    | GI_37622342-A | 19 | 19 | 9275172 | 109168 | 6.7802 | 5.82076 | CEU |
| rs2033482  | ZNF266    | GI_37622342-A | 19 | 19 | 9279184 | 105156 | 7.3598 | 5.82076 | CEU |
| rs8112682  | ZNF266    | GI_37622342-A | 19 | 19 | 9282296 | 102044 | 6.7248 | 5.82076 | CEU |
| rs10402374 | ZNF266    | GI_37622342-A | 19 | 19 | 9285709 | 98631  | 6.7313 | 5.82076 | CEU |
| rs6512047  | ZNF266    | GI_37622342-A | 19 | 19 | 9298812 | 85528  | 6.8083 | 5.82076 | CEU |
| rs10401135 | ZNF266    | GI_37622342-A | 19 | 19 | 9304332 | 80008  | 7.9123 | 5.82076 | CEU |
| rs8113427  | ZNF266    | GI_37622342-A | 19 | 19 | 9309917 | 74423  | 7.3598 | 5.82076 | CEU |
| rs8110584  | ZNF266    | GI_37622342-A | 19 | 19 | 9310337 | 74003  | 7.2136 | 5.82076 | CEU |
| rs13535    | ZNF266    | GI_37622342-A | 19 | 19 | 9315173 | 69167  | 7.3598 | 5.82076 | CEU |
| rs8103043  | ZNF266    | GI_37622342-A | 19 | 19 | 9315976 | 68364  | 7.3598 | 5.82076 | CEU |
| rs10418104 | ZNF266    | GI_37622342-A | 19 | 19 | 9316390 | 67950  | 7.3376 | 5.82076 | CEU |
| rs7253373  | ZNF266    | GI_37622342-A | 19 | 19 | 9317230 | 67110  | 7.2373 | 5.82076 | CEU |
| rs1865040  | ZNF266    | GI_37622342-A | 19 | 19 | 9318246 | 66094  | 6.8083 | 5.82076 | CEU |
| rs7259471  | ZNF266    | GI_37622342-A | 19 | 19 | 9329071 | 55269  | 7.3598 | 5.82076 | CEU |
| rs11883244 | ZNF266    | GI_37622342-A | 19 | 19 | 9329222 | 55118  | 7.9123 | 5.82076 | CEU |
| rs17205697 | ZNF266    | GI_37622342-A | 19 | 19 | 9330748 | 53592  | 7.3598 | 5.82076 | CEU |
| rs3760752  | ZNF266    | GI_37622342-A | 19 | 19 | 9332736 | 51604  | 6.8083 | 5.82076 | CEU |
| rs2278407  | ZNF266    | GI_37622342-A | 19 | 19 | 9334201 | 50139  | 7.3598 | 5.82076 | CEU |
| rs7249948  | ZNF266    | GI_37622342-A | 19 | 19 | 9335688 | 48652  | 7.4421 | 5.82076 | CEU |
| rs11086019 | ZNF266    | GI_37622342-A | 19 | 19 | 9336416 | 47924  | 7.9123 | 5.82076 | CEU |
| rs13344979 | ZNF266    | GI_37622342-A | 19 | 19 | 9337553 | 46787  | 7.9123 | 5.82076 | CEU |
| rs7255853  | ZNF266    | GI_37622342-A | 19 | 19 | 9339628 | 44712  | 7.3598 | 5.82076 | CEU |
| rs10426170 | ZNF266    | GI_37622342-A | 19 | 19 | 9340577 | 43763  | 7.6122 | 5.82076 | CEU |
| rs2878451  | ZNF266    | GI_37622342-A | 19 | 19 | 9341797 | 42543  | 7.3598 | 5.82076 | CEU |
| rs10416984 | ZNF266    | GI_37622342-A | 19 | 19 | 9343310 | 41030  | 7.9123 | 5.82076 | CEU |
| rs8100020  | ZNF266    | GI_37622342-A | 19 | 19 | 9345935 | 38405  | 7.3598 | 5.82076 | CEU |
| rs8103099  | ZNF266    | GI_37622342-A | 19 | 19 | 9346229 | 38111  | 7.9123 | 5.82076 | CEU |
| rs11669550 | ZNF266    | GI_37622342-A | 19 | 19 | 9348592 | 35748  | 7.3586 | 5.82076 | CEU |
| rs1347166  | ZNF266    | GI_37622342-A | 19 | 19 | 9348808 | 35532  | 7.9123 | 5.82076 | CEU |
| rs10401712 | ZNF266    | GI_37622342-A | 19 | 19 | 9349111 | 35229  | 7.3598 | 5.82076 | CEU |
| rs10416662 | ZNF266    | GI_37622342-A | 19 | 19 | 9349178 | 35162  | 7.9123 | 5.82076 | CEU |
| rs2304110  | ZNF266    | GI_37622342-A | 19 | 19 | 9350132 | 34208  | 7.9123 | 5.82076 | CEU |
| rs10411115 | ZNF266    | GI_37622342-A | 19 | 19 | 9351428 | 32912  | 7.3598 | 5.82076 | CEU |
| rs2217652  | ZNF266    | GI_37622342-A | 19 | 19 | 9351814 | 32526  | 7.3598 | 5.82076 | CEU |
| rs3826783  | ZNF266    | GI_37622342-A | 19 | 19 | 9353141 | 31199  | 7.9123 | 5.82076 | CEU |
| rs2230752  | ZNF266    | GI_37622342-A | 19 | 19 | 9353370 | 30970  | 7.9123 | 5.82076 | CEU |
| rs1433062  | ZNF266    | GI_37622342-A | 19 | 19 | 9355266 | 29074  | 6.8083 | 5.82076 | CEU |
| rs2335531  | ZNF266    | GI_37622342-A | 19 | 19 | 9357268 | 27072  | 6.2979 | 5.82076 | CEU |
| rs2163809  | ZNF266    | GI_37622342-A | 19 | 19 | 9357994 | 26346  | 6.7751 | 5.82076 | CEU |
| rs8112842  | ZNF266    | GI_37622342-A | 19 | 19 | 9359315 | 25025  | 7.9123 | 5.82076 | CEU |
| rs11666765 | ZNF266    | GI_37622342-A | 19 | 19 | 9361145 | 23195  | 6.8083 | 5.82076 | CEU |
| rs2082429  | ZNF266    | GI_37622342-A | 19 | 19 | 9361801 | 22539  | 5.9781 | 5.82076 | CEU |

|            |        |               |    |    |          |        |         |         |     |
|------------|--------|---------------|----|----|----------|--------|---------|---------|-----|
| rs11671340 | ZNF266 | GI_37622342-A | 19 | 19 | 9362393  | 21947  | 6.2349  | 5.82076 | CEU |
| rs11086027 | ZNF266 | GI_37622342-A | 19 | 19 | 9363441  | 20899  | 7.3598  | 5.82076 | CEU |
| rs11672602 | ZNF266 | GI_37622342-A | 19 | 19 | 9363587  | 20753  | 7.3598  | 5.82076 | CEU |
| rs17272543 | ZNF266 | GI_37622342-A | 19 | 19 | 9364937  | 19403  | 6.8083  | 5.82076 | CEU |
| rs7246082  | ZNF266 | GI_37622342-A | 19 | 19 | 9365006  | 19334  | 7.9123  | 5.82076 | CEU |
| rs7257650  | ZNF266 | GI_37622342-A | 19 | 19 | 9365101  | 19239  | 7.9123  | 5.82076 | CEU |
| rs2878452  | ZNF266 | GI_37622342-A | 19 | 19 | 9365510  | 18830  | 7.0836  | 5.82076 | CEU |
| rs2335532  | ZNF266 | GI_37622342-A | 19 | 19 | 9365598  | 18742  | 7.9123  | 5.82076 | CEU |
| rs8104611  | ZNF266 | GI_37622342-A | 19 | 19 | 9366805  | 17535  | 7.3598  | 5.82076 | CEU |
| rs2335938  | ZNF266 | GI_37622342-A | 19 | 19 | 9367269  | 17071  | 7.9123  | 5.82076 | CEU |
| rs12150994 | ZNF266 | GI_37622342-A | 19 | 19 | 9369228  | 15112  | 7.9123  | 5.82076 | CEU |
| rs4804436  | ZNF266 | GI_37622342-A | 19 | 19 | 9376200  | 8140   | 8.6432  | 5.82076 | CEU |
| rs11878970 | ZNF266 | GI_37622342-A | 19 | 19 | 9378537  | 5803   | 7.2946  | 5.82076 | CEU |
| rs8108167  | ZNF266 | GI_37622342-A | 19 | 19 | 9379331  | 5009   | 8.7994  | 5.82076 | CEU |
| rs6512108  | ZNF266 | GI_37622342-A | 19 | 19 | 9379670  | 4670   | 8.6432  | 5.82076 | CEU |
| rs11668157 | ZNF266 | GI_37622342-A | 19 | 19 | 9379846  | 4494   | 7.327   | 5.82076 | CEU |
| rs6512109  | ZNF266 | GI_37622342-A | 19 | 19 | 9380453  | 3887   | 8.081   | 5.82076 | CEU |
| rs7253847  | ZNF266 | GI_37622342-A | 19 | 19 | 9380894  | 3446   | 8.081   | 5.82076 | CEU |
| rs7259584  | ZNF266 | GI_37622342-A | 19 | 19 | 9381062  | 3278   | 8.081   | 5.82076 | CEU |
| rs10423720 | ZNF266 | GI_37622342-A | 19 | 19 | 9382727  | 1613   | 8.081   | 5.82076 | CEU |
| rs8109962  | ZNF266 | GI_37622342-A | 19 | 19 | 9383388  | 952    | 8.6432  | 5.82076 | CEU |
| rs8105020  | ZNF266 | GI_37622342-A | 19 | 19 | 9383477  | 863    | 8.6377  | 5.82076 | CEU |
| rs6512110  | ZNF266 | GI_37622342-A | 19 | 19 | 9383724  | 616    | 8.6432  | 5.82076 | CEU |
| rs7251490  | ZNF266 | GI_37622342-A | 19 | 19 | 9383802  | 538    | 8.081   | 5.82076 | CEU |
| rs10515    | ZNF266 | GI_37622342-A | 19 | 19 | 9384724  | 384    | 8.081   | 5.82076 | CEU |
| rs2241356  | ZNF266 | GI_37622342-A | 19 | 19 | 9385185  | 845    | 9.2014  | 5.82076 | CEU |
| rs7258150  | ZNF266 | GI_37622342-A | 19 | 19 | 9387017  | 2677   | 9.8367  | 5.82076 | CEU |
| rs1978713  | ZNF266 | GI_37622342-A | 19 | 19 | 9390783  | 6443   | 9.8367  | 5.82076 | CEU |
| rs1978711  | ZNF266 | GI_37622342-A | 19 | 19 | 9391081  | 6741   | 10.3957 | 5.82076 | CEU |
| rs1978435  | ZNF266 | GI_37622342-A | 19 | 19 | 9392116  | 7776   | 9.2014  | 5.82076 | CEU |
| rs11880207 | ZNF266 | GI_37622342-A | 19 | 19 | 9392693  | 8353   | 8.802   | 5.82076 | CEU |
| rs2112529  | ZNF266 | GI_37622342-A | 19 | 19 | 9393156  | 8816   | 9.2014  | 5.82076 | CEU |
| rs6512121  | ZNF266 | GI_37622342-A | 19 | 19 | 9394805  | 10465  | 8.9683  | 5.82076 | CEU |
| rs7254750  | ZNF266 | GI_37622342-A | 19 | 19 | 9395301  | 10961  | 9.8367  | 5.82076 | CEU |
| rs2335939  | ZNF266 | GI_37622342-A | 19 | 19 | 9395790  | 11450  | 9.8367  | 5.82076 | CEU |
| rs7258744  | ZNF266 | GI_37622342-A | 19 | 19 | 9395967  | 11627  | 9.8506  | 5.82076 | CEU |
| rs7246415  | ZNF266 | GI_37622342-A | 19 | 19 | 9395981  | 11641  | 9.8367  | 5.82076 | CEU |
| rs7258874  | ZNF266 | GI_37622342-A | 19 | 19 | 9396016  | 11676  | 9.2014  | 5.82076 | CEU |
| rs10411141 | ZNF266 | GI_37622342-A | 19 | 19 | 9397203  | 12863  | 9.8367  | 5.82076 | CEU |
| rs10406056 | ZNF266 | GI_37622342-A | 19 | 19 | 9397418  | 13078  | 9.7729  | 5.82076 | CEU |
| rs7252370  | ZNF266 | GI_37622342-A | 19 | 19 | 9398191  | 13851  | 9.8367  | 5.82076 | CEU |
| rs6512122  | ZNF266 | GI_37622342-A | 19 | 19 | 9398465  | 14125  | 9.2014  | 5.82076 | CEU |
| rs6512123  | ZNF266 | GI_37622342-A | 19 | 19 | 9398800  | 14460  | 9.2014  | 5.82076 | CEU |
| rs12461912 | ZNF266 | GI_37622342-A | 19 | 19 | 9400300  | 15960  | 9.2014  | 5.82076 | CEU |
| rs8107606  | ZNF266 | GI_37622342-A | 19 | 19 | 9400522  | 16182  | 9.8367  | 5.82076 | CEU |
| rs9305082  | ZNF266 | GI_37622342-A | 19 | 19 | 9401524  | 17184  | 9.8367  | 5.82076 | CEU |
| rs10404268 | ZNF266 | GI_37622342-A | 19 | 19 | 9402640  | 18300  | 9.8367  | 5.82076 | CEU |
| rs11673601 | ZNF266 | GI_37622342-A | 19 | 19 | 9403007  | 18667  | 7.327   | 5.82076 | CEU |
| rs9676745  | ZNF266 | GI_37622342-A | 19 | 19 | 9403342  | 19002  | 8.6432  | 5.82076 | CEU |
| rs10409256 | ZNF266 | GI_37622342-A | 19 | 19 | 9404830  | 20490  | 9.8367  | 5.82076 | CEU |
| rs8108483  | ZNF266 | GI_37622342-A | 19 | 19 | 9406030  | 21690  | 9.4722  | 5.82076 | CEU |
| rs6512130  | ZNF266 | GI_37622342-A | 19 | 19 | 9407351  | 23011  | 6.011   | 5.82076 | CEU |
| rs10423674 | PBX4   | GI_15149471-S | 19 | 19 | 18678903 | 854878 | 6.2276  | 5.73147 | CEU |
| rs10221489 | PBX4   | GI_15149471-S | 19 | 19 | 18687975 | 845806 | 6.2276  | 5.73147 | CEU |
| rs11085441 | ZNF493 | GI_40255231-S | 19 | 19 | 21265577 | 135177 | 6.4268  | 5.76246 | CEU |
| rs1781873  | ZNF493 | GI_40255231-S | 19 | 19 | 21269271 | 131483 | 5.923   | 5.76246 | CEU |

|            |           |               |    |    |          |        |        |         |     |
|------------|-----------|---------------|----|----|----------|--------|--------|---------|-----|
| rs8110967  | ZNF493    | GI_40255231-S | 19 | 19 | 21332527 | 68227  | 5.923  | 5.76246 | CEU |
| rs12975081 | ZNF493    | GI_40255231-S | 19 | 19 | 21336082 | 64672  | 5.923  | 5.76246 | CEU |
| rs12981735 | ZNF493    | GI_40255231-S | 19 | 19 | 21336306 | 64448  | 6.0043 | 5.76246 | CEU |
| rs12981564 | ZNF493    | GI_40255231-S | 19 | 19 | 21336354 | 64400  | 5.8766 | 5.76246 | CEU |
| rs12982420 | ZNF493    | GI_40255231-S | 19 | 19 | 21336411 | 64343  | 5.923  | 5.76246 | CEU |
| rs12982282 | ZNF493    | GI_40255231-S | 19 | 19 | 21336554 | 64200  | 5.9143 | 5.76246 | CEU |
| rs2914638  | ZNF493    | GI_40255231-S | 19 | 19 | 21336857 | 63897  | 5.923  | 5.76246 | CEU |
| rs4315457  | ZNF493    | GI_40255231-S | 19 | 19 | 21338863 | 61891  | 5.923  | 5.76246 | CEU |
| rs8103325  | ZNF493    | GI_40255231-S | 19 | 19 | 21340051 | 60703  | 5.9636 | 5.76246 | CEU |
| rs2170024  | ZNF493    | GI_40255231-S | 19 | 19 | 21345187 | 55567  | 5.923  | 5.76246 | CEU |
| rs8099940  | ZNF493    | GI_40255231-S | 19 | 19 | 21345938 | 54816  | 5.9143 | 5.76246 | CEU |
| rs7247411  | ZNF493    | GI_40255231-S | 19 | 19 | 21367210 | 33544  | 5.923  | 5.76246 | CEU |
| rs7257857  | ZNF493    | GI_40255231-S | 19 | 19 | 21371378 | 29376  | 5.923  | 5.76246 | CEU |
| rs7249412  | ZNF493    | GI_40255231-S | 19 | 19 | 21378637 | 22117  | 5.923  | 5.76246 | CEU |
| rs11667770 | ZNF493    | GI_40255231-S | 19 | 19 | 21386398 | 14356  | 5.8944 | 5.76246 | CEU |
| rs7259311  | ZNF493    | GI_40255231-S | 19 | 19 | 21390002 | 10752  | 5.923  | 5.76246 | CEU |
| rs11672772 | LOC400684 | GI_42661568-S | 19 | 19 | 37547708 | 25258  | 5.9197 | 5.8395  | CEU |
| rs7252763  | LOC400684 | GI_42661568-S | 19 | 19 | 37561918 | 11048  | 6.1968 | 5.8395  | CEU |
| rs11668037 | LOC400684 | GI_42661568-S | 19 | 19 | 37574062 | 1096   | 6.1968 | 5.8395  | CEU |
| rs881273   | FLJ13072  | GI_37551880-S | 19 | 19 | 37874160 | 137546 | 6.8289 | 5.94139 | CEU |
| rs7256750  | FLJ13072  | GI_37551880-S | 19 | 19 | 37899485 | 112221 | 7.6002 | 5.94139 | CEU |
| rs1559176  | FLJ13072  | GI_37551880-S | 19 | 19 | 37902229 | 109477 | 7.19   | 5.94139 | CEU |
| rs12151325 | FLJ13072  | GI_37551880-S | 19 | 19 | 37917014 | 94692  | 7.5823 | 5.94139 | CEU |
| rs977708   | FLJ13072  | GI_37551880-S | 19 | 19 | 37923626 | 88080  | 7.19   | 5.94139 | CEU |
| rs7260313  | FLJ13072  | GI_37551880-S | 19 | 19 | 37925264 | 86442  | 7.19   | 5.94139 | CEU |
| rs12973557 | FLJ13072  | GI_37551880-S | 19 | 19 | 37929929 | 81777  | 7.4002 | 5.94139 | CEU |
| rs12610846 | FLJ13072  | GI_37551880-S | 19 | 19 | 37930839 | 80867  | 7.19   | 5.94139 | CEU |
| rs4805804  | FLJ13072  | GI_37551880-S | 19 | 19 | 37930945 | 80761  | 5.983  | 5.94139 | CEU |
| rs4805805  | FLJ13072  | GI_37551880-S | 19 | 19 | 37931290 | 80416  | 7.064  | 5.94139 | CEU |
| rs2042263  | FLJ13072  | GI_37551880-S | 19 | 19 | 37931840 | 79866  | 6.7091 | 5.94139 | CEU |
| rs9783983  | FLJ13072  | GI_37551880-S | 19 | 19 | 37932410 | 79296  | 6.3646 | 5.94139 | CEU |
| rs4805806  | FLJ13072  | GI_37551880-S | 19 | 19 | 37933572 | 78134  | 6.6804 | 5.94139 | CEU |
| rs7249281  | FLJ13072  | GI_37551880-S | 19 | 19 | 37934492 | 77214  | 7.1039 | 5.94139 | CEU |
| rs7246228  | FLJ13072  | GI_37551880-S | 19 | 19 | 37936861 | 74845  | 7.19   | 5.94139 | CEU |
| rs8100942  | FLJ13072  | GI_37551880-S | 19 | 19 | 37938439 | 73267  | 6.6804 | 5.94139 | CEU |
| rs4422091  | FLJ13072  | GI_37551880-S | 19 | 19 | 37946608 | 65098  | 6.9459 | 5.94139 | CEU |
| rs2868188  | FLJ13072  | GI_37551880-S | 19 | 19 | 37946718 | 64988  | 7.19   | 5.94139 | CEU |
| rs755691   | FLJ13072  | GI_37551880-S | 19 | 19 | 37950657 | 61049  | 6.9954 | 5.94139 | CEU |
| rs12608647 | FLJ13072  | GI_37551880-S | 19 | 19 | 37956188 | 55518  | 7.19   | 5.94139 | CEU |
| rs6510289  | FLJ13072  | GI_37551880-S | 19 | 19 | 37962731 | 48975  | 6.8202 | 5.94139 | CEU |
| rs2278279  | FLJ13072  | GI_37551880-S | 19 | 19 | 37972967 | 38739  | 7.19   | 5.94139 | CEU |
| rs11881633 | FLJ13072  | GI_37551880-S | 19 | 19 | 37973764 | 37942  | 7.19   | 5.94139 | CEU |
| rs6510293  | FLJ13072  | GI_37551880-S | 19 | 19 | 37974463 | 37243  | 6.7119 | 5.94139 | CEU |
| rs10424621 | FLJ13072  | GI_37551880-S | 19 | 19 | 37979655 | 32051  | 7      | 5.94139 | CEU |
| rs10404371 | FLJ13072  | GI_37551880-S | 19 | 19 | 37985922 | 25784  | 6.049  | 5.94139 | CEU |
| rs10408313 | FLJ13072  | GI_37551880-S | 19 | 19 | 37990126 | 21580  | 7.5823 | 5.94139 | CEU |
| rs8107900  | FLJ13072  | GI_37551880-S | 19 | 19 | 37996530 | 15176  | 7.19   | 5.94139 | CEU |
| rs12461363 | FLJ13072  | GI_37551880-S | 19 | 19 | 37997367 | 14339  | 7.1386 | 5.94139 | CEU |
| rs12460944 | FLJ13072  | GI_37551880-S | 19 | 19 | 37997565 | 14141  | 6.8202 | 5.94139 | CEU |
| rs8105249  | FLJ13072  | GI_37551880-S | 19 | 19 | 37998840 | 12866  | 6.4922 | 5.94139 | CEU |
| rs8108383  | FLJ13072  | GI_37551880-S | 19 | 19 | 37998911 | 12795  | 6.6834 | 5.94139 | CEU |
| rs6510295  | FLJ13072  | GI_37551880-S | 19 | 19 | 37999147 | 12559  | 6.6969 | 5.94139 | CEU |
| rs3760945  | FLJ13072  | GI_37551880-S | 19 | 19 | 38001253 | 10453  | 6.6834 | 5.94139 | CEU |
| rs2868191  | FLJ13072  | GI_37551880-S | 19 | 19 | 38002287 | 9419   | 6.6952 | 5.94139 | CEU |
| rs4805812  | FLJ13072  | GI_37551880-S | 19 | 19 | 38006958 | 4748   | 6.6834 | 5.94139 | CEU |
| rs8101263  | FLJ13072  | GI_37551880-S | 19 | 19 | 38007346 | 4360   | 6.6834 | 5.94139 | CEU |

|            |          |               |    |    |          |        |        |         |     |
|------------|----------|---------------|----|----|----------|--------|--------|---------|-----|
| rs1035478  | FLJ13072 | GI_37551880-S | 19 | 19 | 38008163 | 3543   | 6.236  | 5.94139 | CEU |
| rs2032869  | FLJ13072 | GI_37551880-S | 19 | 19 | 38022506 | 10800  | 7.6704 | 5.94139 | CEU |
| rs7247583  | FLJ13072 | GI_37551880-S | 19 | 19 | 38022757 | 11051  | 6.237  | 5.94139 | CEU |
| rs929816   | FLJ13072 | GI_37551880-S | 19 | 19 | 38023753 | 12047  | 6.6864 | 5.94139 | CEU |
| rs3815760  | FLJ13072 | GI_37551880-S | 19 | 19 | 38026255 | 14549  | 7.6704 | 5.94139 | CEU |
| rs8102775  | FLJ13072 | GI_37551880-S | 19 | 19 | 38035562 | 23856  | 7.6704 | 5.94139 | CEU |
| rs2291067  | FLJ22573 | GI_13375912-S | 19 | 19 | 40965374 | 43070  | 6.3256 | 5.93218 | CEU |
| rs7253245  | SPINT2   | GI_10863908-S | 19 | 19 | 43445626 | 28992  | 5.6992 | 5.68956 | CEU |
| rs17626    | RPS16    | GI_34335151-S | 19 | 19 | 44618361 | 51     | 6.7421 | 5.59394 | CEU |
| rs530411   | RPS16    | GI_34335151-S | 19 | 19 | 44619380 | 968    | 6.6673 | 5.59394 | CEU |
| rs11881477 | RPS16    | GI_34335151-S | 19 | 19 | 44640619 | 22207  | 6.0867 | 5.59394 | CEU |
| rs12985456 | RPS16    | GI_34335151-S | 19 | 19 | 44648086 | 29674  | 5.8831 | 5.59394 | CEU |
| rs10402740 | FLJ36888 | GI_31341376-S | 19 | 19 | 45393021 | 125875 | 7.0164 | 5.69641 | CEU |
| rs7252471  | FLJ36888 | GI_31341376-S | 19 | 19 | 45405252 | 113644 | 6.1521 | 5.69641 | CEU |
| rs1129156  | FLJ36888 | GI_31341376-S | 19 | 19 | 45410916 | 107980 | 6.915  | 5.69641 | CEU |
| rs4802070  | FLJ36888 | GI_31341376-S | 19 | 19 | 45418176 | 100720 | 6.915  | 5.69641 | CEU |
| rs2304184  | FLJ36888 | GI_31341376-S | 19 | 19 | 45420257 | 98639  | 6.915  | 5.69641 | CEU |
| rs3730051  | FLJ36888 | GI_31341376-S | 19 | 19 | 45436537 | 82359  | 7.979  | 5.69641 | CEU |
| rs8100018  | FLJ36888 | GI_31341376-S | 19 | 19 | 45443863 | 75033  | 8.4311 | 5.69641 | CEU |
| rs4802071  | FLJ36888 | GI_31341376-S | 19 | 19 | 45456055 | 62841  | 7.3761 | 5.69641 | CEU |
| rs3730050  | FLJ36888 | GI_31341376-S | 19 | 19 | 45462822 | 56074  | 7.3761 | 5.69641 | CEU |
| rs969531   | FLJ36888 | GI_31341376-S | 19 | 19 | 45470706 | 48190  | 6.6678 | 5.69641 | CEU |
| rs7250897  | FLJ36888 | GI_31341376-S | 19 | 19 | 45475073 | 43823  | 7.3761 | 5.69641 | CEU |
| rs8102171  | FLJ36888 | GI_31341376-S | 19 | 19 | 45478363 | 40533  | 7.3761 | 5.69641 | CEU |
| rs12974529 | FLJ36888 | GI_31341376-S | 19 | 19 | 45504515 | 14381  | 7.3738 | 5.69641 | CEU |
| rs7508604  | FLJ36888 | GI_31341376-S | 19 | 19 | 45515811 | 3085   | 7.6967 | 5.69641 | CEU |
| rs4337402  | FLJ36888 | GI_31341376-S | 19 | 19 | 45521171 | 2275   | 7.0907 | 5.69641 | CEU |
| rs6508936  | FLJ36888 | GI_31341376-S | 19 | 19 | 45527673 | 8777   | 8.4979 | 5.69641 | CEU |
| rs11668242 | FLJ36888 | GI_31341376-S | 19 | 19 | 45528712 | 9816   | 8.2312 | 5.69641 | CEU |
| rs7257972  | FLJ36888 | GI_31341376-S | 19 | 19 | 45533154 | 14258  | 7.8622 | 5.69641 | CEU |
| rs4802073  | FLJ36888 | GI_31341376-S | 19 | 19 | 45535104 | 16208  | 7.8622 | 5.69641 | CEU |
| rs4802074  | FLJ36888 | GI_31341376-S | 19 | 19 | 45539921 | 21025  | 7.488  | 5.69641 | CEU |
| rs8110888  | FLJ36888 | GI_31341376-S | 19 | 19 | 45547095 | 28199  | 7.4968 | 5.69641 | CEU |
| rs10411731 | R29124_1 | GI_16117774-S | 19 | 19 | 46705897 | 71706  | 6.8503 | 5.49679 | CEU |
| rs10406988 | R29124_1 | GI_16117774-S | 19 | 19 | 46714284 | 63319  | 7.7176 | 5.49679 | CEU |
| rs10410081 | R29124_1 | GI_16117774-S | 19 | 19 | 46718226 | 59377  | 7.7176 | 5.49679 | CEU |
| rs4803476  | R29124_1 | GI_16117774-S | 19 | 19 | 46719354 | 58249  | 7.7176 | 5.49679 | CEU |
| rs11668699 | R29124_1 | GI_16117774-S | 19 | 19 | 46723432 | 54171  | 7.898  | 5.49679 | CEU |
| rs3826716  | R29124_1 | GI_16117774-S | 19 | 19 | 46727556 | 50047  | 7.898  | 5.49679 | CEU |
| rs12462897 | R29124_1 | GI_16117774-S | 19 | 19 | 46729809 | 47794  | 7.898  | 5.49679 | CEU |
| rs10424376 | R29124_1 | GI_16117774-S | 19 | 19 | 46739320 | 38283  | 8.6141 | 5.49679 | CEU |
| rs4802122  | R29124_1 | GI_16117774-S | 19 | 19 | 46739764 | 37839  | 9.8846 | 5.49679 | CEU |
| rs7255742  | R29124_1 | GI_16117774-S | 19 | 19 | 46741661 | 35942  | 9.131  | 5.49679 | CEU |
| rs10420992 | R29124_1 | GI_16117774-S | 19 | 19 | 46756302 | 21301  | 8.0548 | 5.49679 | CEU |
| rs4803480  | R29124_1 | GI_16117774-S | 19 | 19 | 46758119 | 19484  | 6.2674 | 5.49679 | CEU |
| rs4803481  | R29124_1 | GI_16117774-S | 19 | 19 | 46758396 | 19207  | 8.6621 | 5.49679 | CEU |
| rs11083627 | R29124_1 | GI_16117774-S | 19 | 19 | 46761740 | 15863  | 7.9171 | 5.49679 | CEU |
| rs12150975 | R29124_1 | GI_16117774-S | 19 | 19 | 46762200 | 15403  | 7.5806 | 5.49679 | CEU |
| rs12983999 | R29124_1 | GI_16117774-S | 19 | 19 | 46762368 | 15235  | 8.2299 | 5.49679 | CEU |
| rs3745937  | R29124_1 | GI_16117774-S | 19 | 19 | 46763129 | 14474  | 6.3193 | 5.49679 | CEU |
| rs12462194 | R29124_1 | GI_16117774-S | 19 | 19 | 46764129 | 13474  | 7.9171 | 5.49679 | CEU |
| rs11882144 | R29124_1 | GI_16117774-S | 19 | 19 | 46764442 | 13161  | 6.4257 | 5.49679 | CEU |
| rs10420470 | R29124_1 | GI_16117774-S | 19 | 19 | 46765273 | 12330  | 7.5537 | 5.49679 | CEU |
| rs1860255  | R29124_1 | GI_16117774-S | 19 | 19 | 46768912 | 8691   | 9.6405 | 5.49679 | CEU |
| rs9304595  | R29124_1 | GI_16117774-S | 19 | 19 | 46769831 | 7772   | 8.0775 | 5.49679 | CEU |
| rs10406221 | R29124_1 | GI_16117774-S | 19 | 19 | 46770443 | 7160   | 9.9285 | 5.49679 | CEU |

|            |           |               |    |    |          |       |         |         |     |
|------------|-----------|---------------|----|----|----------|-------|---------|---------|-----|
| rs2191019  | R29124_1  | GI_16117774-S | 19 | 19 | 46772763 | 4840  | 9.9285  | 5.49679 | CEU |
| rs4141218  | R29124_1  | GI_16117774-S | 19 | 19 | 46773747 | 3856  | 8.6039  | 5.49679 | CEU |
| rs714106   | R29124_1  | GI_16117774-S | 19 | 19 | 46775689 | 1914  | 9.9285  | 5.49679 | CEU |
| rs2302188  | R29124_1  | GI_16117774-S | 19 | 19 | 46777713 | 110   | 10.9161 | 5.49679 | CEU |
| rs3745936  | R29124_1  | GI_16117774-S | 19 | 19 | 46784655 | 7052  | 11.1853 | 5.49679 | CEU |
| rs2005606  | R29124_1  | GI_16117774-S | 19 | 19 | 46784952 | 7349  | 9.9285  | 5.49679 | CEU |
| rs11083629 | R29124_1  | GI_16117774-S | 19 | 19 | 46786574 | 8971  | 10.9161 | 5.49679 | CEU |
| rs10405306 | Hs.466924 | Hs.466924-S   | 19 | 19 | 50289063 | 32955 | 7.9002  | 5.74005 | CEU |
| rs733289   | Hs.466924 | Hs.466924-S   | 19 | 19 | 50292426 | 29592 | 9.3715  | 5.74005 | CEU |
| rs10408366 | Hs.466924 | Hs.466924-S   | 19 | 19 | 50292914 | 29104 | 9.3715  | 5.74005 | CEU |
| rs10410424 | Hs.466924 | Hs.466924-S   | 19 | 19 | 50295079 | 26939 | 9.3715  | 5.74005 | CEU |
| rs10417618 | Hs.466924 | Hs.466924-S   | 19 | 19 | 50295776 | 26242 | 9.3715  | 5.74005 | CEU |
| rs17562787 | Hs.466924 | Hs.466924-S   | 19 | 19 | 50298979 | 23039 | 9.3715  | 5.74005 | CEU |
| rs7257599  | Hs.466924 | Hs.466924-S   | 19 | 19 | 50299649 | 22369 | 9.3715  | 5.74005 | CEU |
| rs12459074 | Hs.466924 | Hs.466924-S   | 19 | 19 | 50300672 | 21346 | 6.6623  | 5.74005 | CEU |
| rs12461416 | Hs.466924 | Hs.466924-S   | 19 | 19 | 50301006 | 21012 | 9.3715  | 5.74005 | CEU |
| rs10412988 | Hs.466924 | Hs.466924-S   | 19 | 19 | 50304614 | 17404 | 9.1387  | 5.74005 | CEU |
| rs10409232 | Hs.466924 | Hs.466924-S   | 19 | 19 | 50307005 | 15013 | 8.6557  | 5.74005 | CEU |
| rs10403214 | Hs.466924 | Hs.466924-S   | 19 | 19 | 50309626 | 12392 | 8.7138  | 5.74005 | CEU |
| rs10421932 | Hs.466924 | Hs.466924-S   | 19 | 19 | 50314023 | 7995  | 9.2744  | 5.74005 | CEU |
| rs10409138 | Hs.466924 | Hs.466924-S   | 19 | 19 | 50316143 | 5875  | 8.8011  | 5.74005 | CEU |
| rs10425074 | Hs.466924 | Hs.466924-S   | 19 | 19 | 50331964 | 9946  | 6.538   | 5.74005 | CEU |
| rs2041262  | Hs.466924 | Hs.466924-S   | 19 | 19 | 50335730 | 13712 | 6.0759  | 5.74005 | CEU |
| rs1005451  | Hs.466924 | Hs.466924-S   | 19 | 19 | 50343919 | 21901 | 6.538   | 5.74005 | CEU |
| rs11881409 | Hs.466924 | Hs.466924-S   | 19 | 19 | 50356058 | 34040 | 7.4433  | 5.74005 | CEU |
| rs7253652  | Hs.466924 | Hs.466924-S   | 19 | 19 | 50372974 | 50956 | 7.0436  | 5.74005 | CEU |
| rs6509200  | Hs.466924 | Hs.466924-S   | 19 | 19 | 50375288 | 53270 | 7.0436  | 5.74005 | CEU |
| rs9807819  | SYMPK     | GI_4759195-S  | 19 | 19 | 50931438 | 80192 | 6.6387  | 6.03261 | CEU |
| rs10401971 | SYMPK     | GI_4759195-S  | 19 | 19 | 50953822 | 57808 | 6.1433  | 6.03261 | CEU |
| rs725660   | SYMPK     | GI_4759195-S  | 19 | 19 | 50954126 | 57504 | 6.6387  | 6.03261 | CEU |
| rs2341097  | SYMPK     | GI_4759195-S  | 19 | 19 | 50960742 | 50888 | 6.6387  | 6.03261 | CEU |
| rs2070737  | SYMPK     | GI_4759195-S  | 19 | 19 | 50974730 | 36900 | 6.6387  | 6.03261 | CEU |
| rs7252126  | SYMPK     | GI_4759195-S  | 19 | 19 | 50994214 | 17416 | 6.0615  | 6.03261 | CEU |
| rs1548029  | SYMPK     | GI_4759195-S  | 19 | 19 | 51001043 | 10587 | 6.6025  | 6.03261 | CEU |
| rs8102876  | SYMPK     | GI_4759195-S  | 19 | 19 | 51024682 | 13052 | 6.3268  | 6.03261 | CEU |
| rs7256192  | SYMPK     | GI_4759195-S  | 19 | 19 | 51030332 | 18702 | 6.1939  | 6.03261 | CEU |
| rs8103278  | SYMPK     | GI_4759195-S  | 19 | 19 | 51062221 | 50591 | 6.183   | 6.03261 | CEU |
| rs3745787  | FLJ10781  | GI_39780596-S | 19 | 19 | 51663203 | 1435  | 6.9868  | 5.89925 | CEU |
| rs8107491  | FLJ10781  | GI_39780596-S | 19 | 19 | 51667007 | 5239  | 10.1656 | 5.89925 | CEU |
| rs7254929  | FLJ10781  | GI_39780596-S | 19 | 19 | 51683141 | 21373 | 5.9431  | 5.89925 | CEU |
| rs1010089  | CARD8     | GI_7662403-S  | 19 | 19 | 53394031 | 9357  | 9.1666  | 5.90638 | CEU |
| rs2015209  | CARD8     | GI_7662403-S  | 19 | 19 | 53399477 | 3911  | 7.5971  | 5.90638 | CEU |
| rs4802442  | CARD8     | GI_7662403-S  | 19 | 19 | 53400939 | 2449  | 10.1514 | 5.90638 | CEU |
| rs11669584 | CARD8     | GI_7662403-S  | 19 | 19 | 53401992 | 1396  | 7.5971  | 5.90638 | CEU |
| rs11665831 | CARD8     | GI_7662403-S  | 19 | 19 | 53402009 | 1379  | 7.5971  | 5.90638 | CEU |
| rs1062808  | CARD8     | GI_7662403-S  | 19 | 19 | 53403288 | 100   | 7.5971  | 5.90638 | CEU |
| rs4802445  | CARD8     | GI_7662403-S  | 19 | 19 | 53404530 | 1142  | 9.8075  | 5.90638 | CEU |
| rs1971783  | CARD8     | GI_7662403-S  | 19 | 19 | 53404770 | 1382  | 7.5971  | 5.90638 | CEU |
| rs3745718  | CARD8     | GI_7662403-S  | 19 | 19 | 53406965 | 3577  | 10.1514 | 5.90638 | CEU |
| rs11669386 | CARD8     | GI_7662403-S  | 19 | 19 | 53407158 | 3770  | 10.1514 | 5.90638 | CEU |
| rs3786740  | CARD8     | GI_7662403-S  | 19 | 19 | 53410941 | 7553  | 9.2788  | 5.90638 | CEU |
| rs2009373  | CARD8     | GI_7662403-S  | 19 | 19 | 53411226 | 7838  | 11.0814 | 5.90638 | CEU |
| rs12052070 | CARD8     | GI_7662403-S  | 19 | 19 | 53411803 | 8415  | 11.0814 | 5.90638 | CEU |
| rs17294094 | CARD8     | GI_7662403-S  | 19 | 19 | 53412738 | 9350  | 11.0814 | 5.90638 | CEU |
| rs3826823  | CARD8     | GI_7662403-S  | 19 | 19 | 53412795 | 9407  | 11.0814 | 5.90638 | CEU |
| rs12980600 | Hs.467281 | Hs.467281-S   | 19 | 19 | 59399060 | 877   | 6.1659  | 6.08724 | CEU |

|            |           |               |    |    |          |        |         |         |     |
|------------|-----------|---------------|----|----|----------|--------|---------|---------|-----|
| rs3844452  | Hs.467281 | Hs.467281-S   | 19 | 19 | 59400458 | 2275   | 6.9301  | 6.08724 | CEU |
| rs17273267 | Hs.467281 | Hs.467281-S   | 19 | 19 | 59401140 | 2957   | 6.9301  | 6.08724 | CEU |
| rs17207321 | Hs.467281 | Hs.467281-S   | 19 | 19 | 59401255 | 3072   | 6.8616  | 6.08724 | CEU |
| rs11666543 | Hs.467281 | Hs.467281-S   | 19 | 19 | 59403793 | 5610   | 6.6586  | 6.08724 | CEU |
| rs1047128  | ZNF587    | GI_14249531-S | 19 | 19 | 63049358 | 22377  | 6.5882  | 5.93131 | CEU |
| rs7253130  | ZNF587    | GI_14249531-S | 19 | 19 | 63065942 | 5793   | 6.5225  | 5.93131 | CEU |
| rs8105935  | LOC113386 | GI_20270320-S | 19 | 19 | 63512900 | 5553   | 5.9463  | 5.71465 | CEU |
| rs3830     | MGC2752   | GI_33859747-S | 19 | 19 | 63558246 | 226966 | 6.4766  | 5.56885 | CEU |
| rs12461352 | MGC2752   | GI_33859747-S | 19 | 19 | 63560992 | 224220 | 7.3693  | 5.56885 | CEU |
| rs893188   | MGC2752   | GI_33859747-S | 19 | 19 | 63654770 | 130442 | 5.7323  | 5.56885 | CEU |
| rs11670764 | MGC2752   | GI_33859747-S | 19 | 19 | 63684708 | 100504 | 9.8092  | 5.56885 | CEU |
| rs2278497  | MGC2752   | GI_33859747-S | 19 | 19 | 63702631 | 82581  | 15.9748 | 5.56885 | CEU |
| rs13345233 | MGC2752   | GI_33859747-S | 19 | 19 | 63721118 | 64094  | 17.0623 | 5.56885 | CEU |
| rs11666790 | MGC2752   | GI_33859747-S | 19 | 19 | 63725153 | 60059  | 20.2265 | 5.56885 | CEU |
| rs7249714  | MGC2752   | GI_33859747-S | 19 | 19 | 63749895 | 35317  | 22.4526 | 5.56885 | CEU |
| rs895374   | MGC2752   | GI_33859747-S | 19 | 19 | 63758730 | 26482  | 22.4526 | 5.56885 | CEU |
| rs3794965  | MGC2752   | GI_33859747-S | 19 | 19 | 63761165 | 24047  | 22.1912 | 5.56885 | CEU |
| rs10413586 | MGC2752   | GI_33859747-S | 19 | 19 | 63763133 | 22079  | 22.4526 | 5.56885 | CEU |
| rs10448    | MGC2752   | GI_33859747-S | 19 | 19 | 63785051 | 161    | 17.3223 | 5.56885 | CEU |
| rs4801614  | MGC2752   | GI_33859747-S | 19 | 19 | 63788762 | 3550   | 23.6626 | 5.56885 | CEU |
| rs6041750  | FKBP1A    | GI_17149835-I | 20 | 20 | 1298709  | 1794   | 7.1978  | 6.30686 | CEU |
| rs6050481  | C20orf22  | GI_34147330-S | 20 | 20 | 25172580 | 51029  | 5.9915  | 5.88535 | CEU |
| rs2424698  | C20orf22  | GI_34147330-S | 20 | 20 | 25204106 | 19503  | 6.6946  | 5.88535 | CEU |
| rs2227892  | C20orf22  | GI_34147330-S | 20 | 20 | 25212814 | 10795  | 5.9584  | 5.88535 | CEU |
| rs2257712  | C20orf22  | GI_34147330-S | 20 | 20 | 25212910 | 10699  | 6.065   | 5.88535 | CEU |
| rs2257991  | C20orf22  | GI_34147330-S | 20 | 20 | 25218339 | 5270   | 6.4204  | 5.88535 | CEU |
| rs2258201  | C20orf22  | GI_34147330-S | 20 | 20 | 25220490 | 3119   | 6.4204  | 5.88535 | CEU |
| rs2474777  | C20orf22  | GI_34147330-S | 20 | 20 | 25220633 | 2976   | 6.4204  | 5.88535 | CEU |
| rs2258719  | C20orf22  | GI_34147330-S | 20 | 20 | 25223843 | 234    | 6.4204  | 5.88535 | CEU |
| rs2258769  | C20orf22  | GI_34147330-S | 20 | 20 | 25224680 | 1071   | 6.4204  | 5.88535 | CEU |
| rs1046073  | C20orf22  | GI_34147330-S | 20 | 20 | 25229333 | 5724   | 6.4204  | 5.88535 | CEU |
| rs2474780  | C20orf22  | GI_34147330-S | 20 | 20 | 25233835 | 10226  | 6.6638  | 5.88535 | CEU |
| rs6107027  | C20orf22  | GI_34147330-S | 20 | 20 | 25236632 | 13023  | 6.9687  | 5.88535 | CEU |
| rs2500432  | C20orf22  | GI_34147330-S | 20 | 20 | 25238512 | 14903  | 6.4204  | 5.88535 | CEU |
| rs1888999  | C20orf22  | GI_34147330-S | 20 | 20 | 25239848 | 16239  | 6.4204  | 5.88535 | CEU |
| rs2297496  | C20orf22  | GI_34147330-S | 20 | 20 | 25243787 | 20178  | 6.4204  | 5.88535 | CEU |
| rs2297497  | C20orf22  | GI_34147330-S | 20 | 20 | 25245909 | 22300  | 6.4204  | 5.88535 | CEU |
| rs7267979  | C20orf22  | GI_34147330-S | 20 | 20 | 25246087 | 22478  | 6.4204  | 5.88535 | CEU |
| rs6050532  | C20orf22  | GI_34147330-S | 20 | 20 | 25256793 | 33184  | 6.4204  | 5.88535 | CEU |
| rs6083804  | C20orf22  | GI_34147330-S | 20 | 20 | 25265060 | 41451  | 6.4204  | 5.88535 | CEU |
| rs6076336  | C20orf22  | GI_34147330-S | 20 | 20 | 25267212 | 43603  | 6.4204  | 5.88535 | CEU |
| rs6050544  | C20orf22  | GI_34147330-S | 20 | 20 | 25268228 | 44619  | 6.4204  | 5.88535 | CEU |
| rs6417588  | C20orf22  | GI_34147330-S | 20 | 20 | 25275151 | 51542  | 6.4204  | 5.88535 | CEU |
| rs6083809  | C20orf22  | GI_34147330-S | 20 | 20 | 25277309 | 53700  | 6.4938  | 5.88535 | CEU |
| rs6050559  | C20orf22  | GI_34147330-S | 20 | 20 | 25277915 | 54306  | 6.4204  | 5.88535 | CEU |
| rs6050561  | C20orf22  | GI_34147330-S | 20 | 20 | 25282855 | 59246  | 6.4938  | 5.88535 | CEU |
| rs6037097  | C20orf22  | GI_34147330-S | 20 | 20 | 25295221 | 71612  | 6.7996  | 5.88535 | CEU |
| rs6050565  | C20orf22  | GI_34147330-S | 20 | 20 | 25295563 | 71954  | 6.4938  | 5.88535 | CEU |
| rs4815411  | C20orf22  | GI_34147330-S | 20 | 20 | 25298223 | 74614  | 6.0838  | 5.88535 | CEU |
| rs4815412  | C20orf22  | GI_34147330-S | 20 | 20 | 25298325 | 74716  | 6.4938  | 5.88535 | CEU |
| rs2500399  | C20orf22  | GI_34147330-S | 20 | 20 | 25302694 | 79085  | 6.224   | 5.88535 | CEU |
| rs4815413  | C20orf22  | GI_34147330-S | 20 | 20 | 25307229 | 83620  | 6.2369  | 5.88535 | CEU |
| rs2500405  | C20orf22  | GI_34147330-S | 20 | 20 | 25308826 | 85217  | 6.4204  | 5.88535 | CEU |
| rs6050573  | C20orf22  | GI_34147330-S | 20 | 20 | 25314065 | 90456  | 6.4938  | 5.88535 | CEU |
| rs6083828  | C20orf22  | GI_34147330-S | 20 | 20 | 25317918 | 94309  | 6.4938  | 5.88535 | CEU |
| rs869358   | C20orf22  | GI_34147330-S | 20 | 20 | 25322674 | 99065  | 6.6638  | 5.88535 | CEU |

|            |         |               |    |    |          |        |        |         |     |
|------------|---------|---------------|----|----|----------|--------|--------|---------|-----|
| rs2387881  | C2orf22 | GI_34147330-S | 20 | 20 | 25326172 | 102563 | 6.4204 | 5.88535 | CEU |
| rs6515641  | C2orf22 | GI_34147330-S | 20 | 20 | 25327526 | 103917 | 6.4938 | 5.88535 | CEU |
| rs6515642  | C2orf22 | GI_34147330-S | 20 | 20 | 25328593 | 104984 | 6.4204 | 5.88535 | CEU |
| rs3761117  | C2orf22 | GI_34147330-S | 20 | 20 | 25336070 | 112461 | 5.9648 | 5.88535 | CEU |
| rs2500424  | C2orf22 | GI_34147330-S | 20 | 20 | 25339969 | 116360 | 6.4204 | 5.88535 | CEU |
| rs2482911  | C2orf22 | GI_34147330-S | 20 | 20 | 25343528 | 119919 | 6.4204 | 5.88535 | CEU |
| rs6050598  | C2orf22 | GI_34147330-S | 20 | 20 | 25345257 | 121648 | 6.4938 | 5.88535 | CEU |
| rs6076347  | C2orf22 | GI_34147330-S | 20 | 20 | 25346790 | 123181 | 6.6511 | 5.88535 | CEU |
| rs6050599  | C2orf22 | GI_34147330-S | 20 | 20 | 25348240 | 124631 | 5.9942 | 5.88535 | CEU |
| rs4423675  | C2orf22 | GI_34147330-S | 20 | 20 | 25350778 | 127169 | 6.9687 | 5.88535 | CEU |
| rs2500436  | C2orf22 | GI_34147330-S | 20 | 20 | 25354366 | 130757 | 6.4204 | 5.88535 | CEU |
| rs6417589  | C2orf22 | GI_34147330-S | 20 | 20 | 25359086 | 135477 | 6.4938 | 5.88535 | CEU |
| rs6050611  | C2orf22 | GI_34147330-S | 20 | 20 | 25362419 | 138810 | 6.4204 | 5.88535 | CEU |
| rs2151144  | C2orf22 | GI_34147330-S | 20 | 20 | 25362924 | 139315 | 5.9255 | 5.88535 | CEU |
| rs6050617  | C2orf22 | GI_34147330-S | 20 | 20 | 25369648 | 146039 | 6.4938 | 5.88535 | CEU |
| rs6050629  | C2orf22 | GI_34147330-S | 20 | 20 | 25378680 | 155071 | 5.9894 | 5.88535 | CEU |
| rs6050631  | C2orf22 | GI_34147330-S | 20 | 20 | 25379749 | 156140 | 6.4204 | 5.88535 | CEU |
| rs6115188  | C2orf22 | GI_34147330-S | 20 | 20 | 25380170 | 156561 | 6.6638 | 5.88535 | CEU |
| rs6050632  | C2orf22 | GI_34147330-S | 20 | 20 | 25380601 | 156992 | 6.4938 | 5.88535 | CEU |
| rs12428    | C2orf22 | GI_34147330-S | 20 | 20 | 25381821 | 158212 | 6.4938 | 5.88535 | CEU |
| rs7270835  | C2orf22 | GI_34147330-S | 20 | 20 | 25383067 | 159458 | 6.2162 | 5.88535 | CEU |
| rs11699203 | C2orf22 | GI_34147330-S | 20 | 20 | 25383169 | 159560 | 6.6893 | 5.88535 | CEU |
| rs6138572  | C2orf22 | GI_34147330-S | 20 | 20 | 25383934 | 160325 | 6.4204 | 5.88535 | CEU |
| rs454723   | C2orf22 | GI_34147330-S | 20 | 20 | 25386928 | 163319 | 6.4204 | 5.88535 | CEU |
| rs6138575  | C2orf22 | GI_34147330-S | 20 | 20 | 25386952 | 163343 | 6.4204 | 5.88535 | CEU |
| rs398036   | C2orf22 | GI_34147330-S | 20 | 20 | 25387850 | 164241 | 5.9179 | 5.88535 | CEU |
| rs397119   | C2orf22 | GI_34147330-S | 20 | 20 | 25388187 | 164578 | 6.4204 | 5.88535 | CEU |
| rs6115191  | C2orf22 | GI_34147330-S | 20 | 20 | 25388478 | 164869 | 5.9179 | 5.88535 | CEU |
| rs11087521 | C2orf22 | GI_34147330-S | 20 | 20 | 25388648 | 165039 | 6.1564 | 5.88535 | CEU |
| rs6107045  | C2orf22 | GI_34147330-S | 20 | 20 | 25389936 | 166327 | 6.4204 | 5.88535 | CEU |
| rs417110   | C2orf22 | GI_34147330-S | 20 | 20 | 25406297 | 182688 | 5.8987 | 5.88535 | CEU |
| rs417130   | C2orf22 | GI_34147330-S | 20 | 20 | 25406320 | 182711 | 6.4086 | 5.88535 | CEU |
| rs84816    | C2orf22 | GI_34147330-S | 20 | 20 | 25407919 | 184310 | 5.9526 | 5.88535 | CEU |
| rs431579   | C2orf22 | GI_34147330-S | 20 | 20 | 25418056 | 194447 | 6.6196 | 5.88535 | CEU |
| rs404775   | C2orf22 | GI_34147330-S | 20 | 20 | 25429117 | 205508 | 5.9343 | 5.88535 | CEU |
| rs374701   | C2orf22 | GI_34147330-S | 20 | 20 | 25431616 | 208007 | 5.9416 | 5.88535 | CEU |
| rs376742   | C2orf22 | GI_34147330-S | 20 | 20 | 25435417 | 211808 | 6.2165 | 5.88535 | CEU |
| rs443009   | C2orf22 | GI_34147330-S | 20 | 20 | 25447817 | 224208 | 5.9343 | 5.88535 | CEU |
| rs405822   | C2orf22 | GI_34147330-S | 20 | 20 | 25449314 | 225705 | 5.9343 | 5.88535 | CEU |
| rs1983974  | C2orf22 | GI_34147330-S | 20 | 20 | 25478619 | 255010 | 5.9343 | 5.88535 | CEU |
| rs3746427  | PROCR   | GI_34335271-S | 20 | 20 | 33194125 | 34439  | 5.732  | 5.25194 | CEU |
| rs1415771  | PROCR   | GI_34335271-S | 20 | 20 | 33198154 | 30410  | 5.6236 | 5.25194 | CEU |
| rs945959   | PROCR   | GI_34335271-S | 20 | 20 | 33198566 | 29998  | 5.5519 | 5.25194 | CEU |
| rs1124511  | PROCR   | GI_34335271-S | 20 | 20 | 33200358 | 28206  | 5.5519 | 5.25194 | CEU |
| rs6088747  | PROCR   | GI_34335271-S | 20 | 20 | 33218265 | 10299  | 5.732  | 5.25194 | CEU |
| rs2069952  | PROCR   | GI_34335271-S | 20 | 20 | 33227612 | 952    | 5.732  | 5.25194 | CEU |
| rs1415774  | PROCR   | GI_34335271-S | 20 | 20 | 33229277 | 713    | 5.732  | 5.25194 | CEU |
| rs2065979  | PROCR   | GI_34335271-S | 20 | 20 | 33231351 | 2787   | 5.732  | 5.25194 | CEU |
| rs6060285  | PROCR   | GI_34335271-S | 20 | 20 | 33234148 | 5584   | 5.732  | 5.25194 | CEU |
| rs6058202  | PROCR   | GI_34335271-S | 20 | 20 | 33241644 | 13080  | 5.7154 | 5.25194 | CEU |
| rs633198   | PROCR   | GI_34335271-S | 20 | 20 | 33242095 | 13531  | 5.732  | 5.25194 | CEU |
| rs4911478  | PROCR   | GI_34335271-S | 20 | 20 | 33246286 | 17722  | 5.5423 | 5.25194 | CEU |
| rs1577924  | PROCR   | GI_34335271-S | 20 | 20 | 33247949 | 19385  | 5.732  | 5.25194 | CEU |
| rs6142324  | PROCR   | GI_34335271-S | 20 | 20 | 33252704 | 24140  | 5.732  | 5.25194 | CEU |
| rs8114671  | PROCR   | GI_34335271-S | 20 | 20 | 33252803 | 24239  | 5.732  | 5.25194 | CEU |
| rs2093058  | PROCR   | GI_34335271-S | 20 | 20 | 33254942 | 26378  | 5.732  | 5.25194 | CEU |



|            |       |               |    |    |          |        |        |         |     |
|------------|-------|---------------|----|----|----------|--------|--------|---------|-----|
| rs7261862  | CPNE1 | GI_23397697-A | 20 | 20 | 33579696 | 97976  | 6.0327 | 5.36221 | CEU |
| rs2104417  | CPNE1 | GI_23397697-A | 20 | 20 | 33591285 | 86387  | 7.185  | 5.36221 | CEU |
| rs11700250 | CPNE1 | GI_23397697-A | 20 | 20 | 33595670 | 82002  | 7.1423 | 5.36221 | CEU |
| rs17092784 | CPNE1 | GI_23397697-A | 20 | 20 | 33605701 | 71971  | 6.0327 | 5.36221 | CEU |
| rs2277862  | CPNE1 | GI_23397697-A | 20 | 20 | 33616196 | 61476  | 7.185  | 5.36221 | CEU |
| rs6119625  | CPNE1 | GI_23397697-A | 20 | 20 | 33623869 | 53803  | 7.185  | 5.36221 | CEU |
| rs6060491  | CPNE1 | GI_23397697-A | 20 | 20 | 33638514 | 39158  | 7.1698 | 5.36221 | CEU |
| rs6120998  | CPNE1 | GI_23397697-A | 20 | 20 | 33650727 | 26945  | 7.1698 | 5.36221 | CEU |
| rs6060524  | CPNE1 | GI_23397697-A | 20 | 20 | 33684569 | 6897   | 6.5385 | 5.36221 | CEU |
| rs1118233  | CPNE1 | GI_23397697-A | 20 | 20 | 33691763 | 14091  | 7.2682 | 5.36221 | CEU |
| rs7273815  | CPNE1 | GI_23397697-A | 20 | 20 | 33695829 | 18157  | 6.6935 | 5.36221 | CEU |
| rs12480408 | CPNE1 | GI_23397697-A | 20 | 20 | 33698214 | 20542  | 7.2908 | 5.36221 | CEU |
| rs6060535  | CPNE1 | GI_23397697-A | 20 | 20 | 33698936 | 21264  | 7.2908 | 5.36221 | CEU |
| rs11696527 | CPNE1 | GI_23397697-A | 20 | 20 | 33708793 | 31121  | 7.2908 | 5.36221 | CEU |
| rs6058296  | CPNE1 | GI_23397697-A | 20 | 20 | 33732639 | 54967  | 6.5614 | 5.36221 | CEU |
| rs6060557  | CPNE1 | GI_23397697-A | 20 | 20 | 33733680 | 56008  | 7.2682 | 5.36221 | CEU |
| rs6060558  | CPNE1 | GI_23397697-A | 20 | 20 | 33734506 | 56834  | 6.5081 | 5.36221 | CEU |
| rs6060567  | CPNE1 | GI_23397697-A | 20 | 20 | 33751664 | 73992  | 6.5614 | 5.36221 | CEU |
| rs17092980 | CPNE1 | GI_23397697-A | 20 | 20 | 33752419 | 74747  | 6.5614 | 5.36221 | CEU |
| rs6058302  | CPNE1 | GI_23397697-A | 20 | 20 | 33753451 | 75779  | 6.5614 | 5.36221 | CEU |
| rs6058303  | CPNE1 | GI_23397697-A | 20 | 20 | 33753695 | 76023  | 7.2908 | 5.36221 | CEU |
| rs2425071  | CPNE1 | GI_23397697-A | 20 | 20 | 33756375 | 78703  | 6.5614 | 5.36221 | CEU |
| rs2050729  | CPNE1 | GI_23397697-A | 20 | 20 | 33757823 | 80151  | 6.5614 | 5.36221 | CEU |
| rs2425078  | CPNE1 | GI_23397697-A | 20 | 20 | 33761577 | 83905  | 7.2908 | 5.36221 | CEU |
| rs2425079  | CPNE1 | GI_23397697-A | 20 | 20 | 33761605 | 83933  | 6.5081 | 5.36221 | CEU |
| rs2425090  | CPNE1 | GI_23397697-A | 20 | 20 | 33768197 | 90525  | 6.5614 | 5.36221 | CEU |
| rs6060578  | CPNE1 | GI_23397697-A | 20 | 20 | 33768859 | 91187  | 7.2908 | 5.36221 | CEU |
| rs2425094  | CPNE1 | GI_23397697-A | 20 | 20 | 33770388 | 92716  | 6.5614 | 5.36221 | CEU |
| rs11696947 | CPNE1 | GI_23397697-A | 20 | 20 | 33776072 | 98400  | 6.6265 | 5.36221 | CEU |
| rs11699044 | CPNE1 | GI_23397697-A | 20 | 20 | 33776127 | 98455  | 7.2682 | 5.36221 | CEU |
| rs2425109  | CPNE1 | GI_23397697-A | 20 | 20 | 33779632 | 101960 | 6.5614 | 5.36221 | CEU |
| rs17093026 | CPNE1 | GI_23397697-A | 20 | 20 | 33782325 | 104653 | 7.9718 | 5.36221 | CEU |
| rs13038622 | CPNE1 | GI_23397697-A | 20 | 20 | 33782757 | 105085 | 5.8584 | 5.36221 | CEU |
| rs2425114  | CPNE1 | GI_23397697-A | 20 | 20 | 33785760 | 108088 | 6.568  | 5.36221 | CEU |
| rs2425116  | CPNE1 | GI_23397697-A | 20 | 20 | 33786967 | 109295 | 6.4606 | 5.36221 | CEU |
| rs2425117  | CPNE1 | GI_23397697-A | 20 | 20 | 33787190 | 109518 | 6.5614 | 5.36221 | CEU |
| rs2425120  | CPNE1 | GI_23397697-A | 20 | 20 | 33787870 | 110198 | 6.5614 | 5.36221 | CEU |
| rs6058312  | CPNE1 | GI_23397697-A | 20 | 20 | 33787898 | 110226 | 6.5614 | 5.36221 | CEU |
| rs2425122  | CPNE1 | GI_23397697-A | 20 | 20 | 33792262 | 114590 | 6.5614 | 5.36221 | CEU |
| rs3827029  | CPNE1 | GI_23397697-A | 20 | 20 | 33796198 | 118526 | 6.5614 | 5.36221 | CEU |
| rs2425131  | CPNE1 | GI_23397697-A | 20 | 20 | 33800488 | 122816 | 6.5614 | 5.36221 | CEU |
| rs2425132  | CPNE1 | GI_23397697-A | 20 | 20 | 33801804 | 124132 | 6.568  | 5.36221 | CEU |
| rs1970357  | CPNE1 | GI_23397697-A | 20 | 20 | 33802614 | 124942 | 7.2908 | 5.36221 | CEU |
| rs7268195  | CPNE1 | GI_23397697-A | 20 | 20 | 33803268 | 125596 | 6.5614 | 5.36221 | CEU |
| rs11167275 | CPNE1 | GI_23397697-A | 20 | 20 | 33803689 | 126017 | 6.4769 | 5.36221 | CEU |
| rs2425137  | CPNE1 | GI_23397697-A | 20 | 20 | 33808810 | 131138 | 6.5614 | 5.36221 | CEU |
| rs7264869  | CPNE1 | GI_23397697-A | 20 | 20 | 33809916 | 132244 | 5.8925 | 5.36221 | CEU |
| rs2425141  | CPNE1 | GI_23397697-A | 20 | 20 | 33813537 | 135865 | 6.6026 | 5.36221 | CEU |
| rs1890470  | CPNE1 | GI_23397697-A | 20 | 20 | 33820422 | 142750 | 6.6026 | 5.36221 | CEU |
| rs2425149  | CPNE1 | GI_23397697-A | 20 | 20 | 33823001 | 145329 | 6.6026 | 5.36221 | CEU |
| rs4911519  | CPNE1 | GI_23397697-A | 20 | 20 | 33825740 | 148068 | 6.6026 | 5.36221 | CEU |
| rs6058322  | CPNE1 | GI_23397697-A | 20 | 20 | 33830691 | 153019 | 5.8925 | 5.36221 | CEU |
| rs11906854 | CPNE1 | GI_23397697-A | 20 | 20 | 33847048 | 169376 | 5.8925 | 5.36221 | CEU |
| rs6058325  | CPNE1 | GI_23397697-A | 20 | 20 | 33852220 | 174548 | 6.5818 | 5.36221 | CEU |
| rs12479473 | CPNE1 | GI_23397697-A | 20 | 20 | 33862042 | 184370 | 6.6026 | 5.36221 | CEU |
| rs6060624  | CPNE1 | GI_23397697-A | 20 | 20 | 33877077 | 199405 | 6.6026 | 5.36221 | CEU |

|            |           |               |    |    |          |        |        |         |     |
|------------|-----------|---------------|----|----|----------|--------|--------|---------|-----|
| rs6060625  | CPNE1     | GI_23397697-A | 20 | 20 | 33877732 | 200060 | 6.6026 | 5.36221 | CEU |
| rs3787169  | CPNE1     | GI_23397697-A | 20 | 20 | 33883298 | 205626 | 5.8925 | 5.36221 | CEU |
| rs11907811 | CPNE1     | GI_23397697-A | 20 | 20 | 33891492 | 213820 | 6.6026 | 5.36221 | CEU |
| rs7273668  | CPNE1     | GI_23397697-A | 20 | 20 | 33906145 | 228473 | 6.6026 | 5.36221 | CEU |
| rs10485510 | CPNE1     | GI_23397697-A | 20 | 20 | 33908578 | 230906 | 6.6026 | 5.36221 | CEU |
| rs4504072  | CPNE1     | GI_23397697-A | 20 | 20 | 33912187 | 234515 | 5.8384 | 5.36221 | CEU |
| rs6060643  | CPNE1     | GI_23397697-A | 20 | 20 | 33913265 | 235593 | 6.5818 | 5.36221 | CEU |
| rs7271036  | CPNE1     | GI_23397697-A | 20 | 20 | 33930629 | 252957 | 5.7376 | 5.36221 | CEU |
| rs6060669  | CPNE1     | GI_23397697-A | 20 | 20 | 33943971 | 266299 | 5.7376 | 5.36221 | CEU |
| rs6058354  | CPNE1     | GI_23397697-A | 20 | 20 | 33954524 | 276852 | 5.7376 | 5.36221 | CEU |
| rs6058356  | CPNE1     | GI_23397697-A | 20 | 20 | 33954944 | 277272 | 5.7376 | 5.36221 | CEU |
| rs11696912 | CPNE1     | GI_23397697-A | 20 | 20 | 33961074 | 283402 | 5.7376 | 5.36221 | CEU |
| rs6060676  | CPNE1     | GI_23397697-A | 20 | 20 | 33961965 | 284293 | 5.7376 | 5.36221 | CEU |
| rs6060704  | CPNE1     | GI_23397697-A | 20 | 20 | 33993684 | 316012 | 5.7376 | 5.36221 | CEU |
| rs3829829  | CPNE1     | GI_23397697-A | 20 | 20 | 34000574 | 322902 | 5.7376 | 5.36221 | CEU |
| rs11699815 | CPNE1     | GI_23397697-A | 20 | 20 | 34006539 | 328867 | 5.7376 | 5.36221 | CEU |
| rs17432470 | CPNE1     | GI_23397697-A | 20 | 20 | 34011177 | 333505 | 5.7376 | 5.36221 | CEU |
| rs1739646  | LOC375097 | GI_37555934-S | 20 | 20 | 36470998 | 11936  | 6.2626 | 5.93662 | CEU |
| rs1739646  | Hs.400876 | Hs.400876-S   | 20 | 20 | 36470998 | 11787  | 6.4829 | 5.80071 | CEU |
| rs6025497  | LOC375097 | GI_37555934-S | 20 | 20 | 36476624 | 6310   | 6.2626 | 5.93662 | CEU |
| rs6025497  | Hs.400876 | Hs.400876-S   | 20 | 20 | 36476624 | 6161   | 6.4829 | 5.80071 | CEU |
| rs1739650  | LOC375097 | GI_37555934-S | 20 | 20 | 36476911 | 6023   | 6.8632 | 5.93662 | CEU |
| rs1739650  | Hs.400876 | Hs.400876-S   | 20 | 20 | 36476911 | 5874   | 7.0489 | 5.80071 | CEU |
| rs1739652  | LOC375097 | GI_37555934-S | 20 | 20 | 36482373 | 561    | 6.232  | 5.93662 | CEU |
| rs1739652  | Hs.400876 | Hs.400876-S   | 20 | 20 | 36482373 | 412    | 6.4769 | 5.80071 | CEU |
| rs3752277  | LOC375097 | GI_37555934-S | 20 | 20 | 36484167 | 1233   | 6.2626 | 5.93662 | CEU |
| rs3752277  | Hs.400876 | Hs.400876-S   | 20 | 20 | 36484167 | 1382   | 6.4829 | 5.80071 | CEU |
| rs3752278  | LOC375097 | GI_37555934-S | 20 | 20 | 36484231 | 1297   | 6.232  | 5.93662 | CEU |
| rs3752278  | Hs.400876 | Hs.400876-S   | 20 | 20 | 36484231 | 1446   | 6.4769 | 5.80071 | CEU |
| rs3752279  | LOC375097 | GI_37555934-S | 20 | 20 | 36484373 | 1439   | 6.232  | 5.93662 | CEU |
| rs3752279  | Hs.400876 | Hs.400876-S   | 20 | 20 | 36484373 | 1588   | 6.4769 | 5.80071 | CEU |
| rs3752280  | LOC375097 | GI_37555934-S | 20 | 20 | 36484421 | 1487   | 6.232  | 5.93662 | CEU |
| rs3752280  | Hs.400876 | Hs.400876-S   | 20 | 20 | 36484421 | 1636   | 6.4769 | 5.80071 | CEU |
| rs1780636  | LOC375097 | GI_37555934-S | 20 | 20 | 36486997 | 4063   | 6.2626 | 5.93662 | CEU |
| rs1780636  | Hs.400876 | Hs.400876-S   | 20 | 20 | 36486997 | 4212   | 6.4829 | 5.80071 | CEU |
| rs752775   | LOC375097 | GI_37555934-S | 20 | 20 | 36488195 | 5261   | 6.2353 | 5.93662 | CEU |
| rs752775   | Hs.400876 | Hs.400876-S   | 20 | 20 | 36488195 | 5410   | 6.4597 | 5.80071 | CEU |
| rs752774   | LOC375097 | GI_37555934-S | 20 | 20 | 36488429 | 5495   | 6.232  | 5.93662 | CEU |
| rs752774   | Hs.400876 | Hs.400876-S   | 20 | 20 | 36488429 | 5644   | 6.4769 | 5.80071 | CEU |
| rs707578   | LOC375097 | GI_37555934-S | 20 | 20 | 36489289 | 6355   | 6.2626 | 5.93662 | CEU |
| rs707578   | Hs.400876 | Hs.400876-S   | 20 | 20 | 36489289 | 6504   | 6.4829 | 5.80071 | CEU |
| rs788344   | LOC375097 | GI_37555934-S | 20 | 20 | 36492763 | 9829   | 6.232  | 5.93662 | CEU |
| rs788344   | Hs.400876 | Hs.400876-S   | 20 | 20 | 36492763 | 9978   | 6.4769 | 5.80071 | CEU |
| rs788347   | LOC375097 | GI_37555934-S | 20 | 20 | 36495997 | 13063  | 6.1738 | 5.93662 | CEU |
| rs788347   | Hs.400876 | Hs.400876-S   | 20 | 20 | 36495997 | 13212  | 6.4289 | 5.80071 | CEU |
| rs788348   | LOC375097 | GI_37555934-S | 20 | 20 | 36496888 | 13954  | 6.232  | 5.93662 | CEU |
| rs788348   | Hs.400876 | Hs.400876-S   | 20 | 20 | 36496888 | 14103  | 6.4769 | 5.80071 | CEU |
| rs788350   | LOC375097 | GI_37555934-S | 20 | 20 | 36498050 | 15116  | 6.232  | 5.93662 | CEU |
| rs788350   | Hs.400876 | Hs.400876-S   | 20 | 20 | 36498050 | 15265  | 6.4769 | 5.80071 | CEU |
| rs805529   | LOC375097 | GI_37555934-S | 20 | 20 | 36506696 | 23762  | 6.1139 | 5.93662 | CEU |
| rs805529   | Hs.400876 | Hs.400876-S   | 20 | 20 | 36506696 | 23911  | 6.4104 | 5.80071 | CEU |
| rs8133274  | DSCR5     | GI_24497598-A | 21 | 21 | 37369254 | 7785   | 6.947  | 6.04963 | CEU |
| rs3819262  | DSCR5     | GI_24497598-A | 21 | 21 | 37382760 | 21291  | 6.947  | 6.04963 | CEU |
| rs4817850  | DSCR5     | GI_24497598-A | 21 | 21 | 37391707 | 30238  | 6.947  | 6.04963 | CEU |
| rs1473807  | DSCR5     | GI_24497598-A | 21 | 21 | 37395043 | 33574  | 7.2907 | 6.04963 | CEU |
| rs2032088  | DSCR5     | GI_24497598-A | 21 | 21 | 37399200 | 37731  | 6.1909 | 6.04963 | CEU |

|            |           |               |    |    |          |        |         |         |     |
|------------|-----------|---------------|----|----|----------|--------|---------|---------|-----|
| rs2032089  | DSCR5     | GI_24497598-A | 21 | 21 | 37399441 | 37972  | 7.0766  | 6.04963 | CEU |
| rs8126889  | DSCR5     | GI_24497598-A | 21 | 21 | 37403118 | 41649  | 6.947   | 6.04963 | CEU |
| rs2835604  | DSCR5     | GI_24497598-A | 21 | 21 | 37411115 | 49646  | 7.2907  | 6.04963 | CEU |
| rs2835610  | DSCR5     | GI_24497598-A | 21 | 21 | 37417719 | 56250  | 6.1909  | 6.04963 | CEU |
| rs10470176 | DSCR5     | GI_24497598-A | 21 | 21 | 37426370 | 64901  | 6.8758  | 6.04963 | CEU |
| rs2000419  | DSCR5     | GI_24497598-A | 21 | 21 | 37433786 | 72317  | 7.2957  | 6.04963 | CEU |
| rs2835624  | DSCR5     | GI_24497598-A | 21 | 21 | 37434127 | 72658  | 7.0847  | 6.04963 | CEU |
| rs2835626  | DSCR5     | GI_24497598-A | 21 | 21 | 37434568 | 73099  | 7.0847  | 6.04963 | CEU |
| rs1344046  | DSCR5     | GI_24497598-A | 21 | 21 | 37439010 | 77541  | 6.7746  | 6.04963 | CEU |
| rs2835643  | DSCR5     | GI_24497598-A | 21 | 21 | 37465172 | 103703 | 7.0847  | 6.04963 | CEU |
| rs2835645  | DSCR5     | GI_24497598-A | 21 | 21 | 37468252 | 106783 | 7.0847  | 6.04963 | CEU |
| rs2835648  | DSCR5     | GI_24497598-A | 21 | 21 | 37469924 | 108455 | 6.7746  | 6.04963 | CEU |
| rs2835655  | DSCR5     | GI_24497598-A | 21 | 21 | 37485595 | 124126 | 7.0847  | 6.04963 | CEU |
| rs2073356  | DSCR5     | GI_24497598-A | 21 | 21 | 37522096 | 160627 | 6.7746  | 6.04963 | CEU |
| rs2836921  | C21orf107 | GI_38026951-l | 21 | 21 | 39437940 | 46387  | 6.3803  | 6.25154 | CEU |
| rs2836922  | C21orf107 | GI_38026951-l | 21 | 21 | 39438178 | 46149  | 19.2144 | 6.25154 | CEU |
| rs7281463  | C21orf107 | GI_38026951-l | 21 | 21 | 39442653 | 41674  | 11.5536 | 6.25154 | CEU |
| rs2836923  | C21orf107 | GI_38026951-l | 21 | 21 | 39446106 | 38221  | 6.5888  | 6.25154 | CEU |
| rs2836924  | C21orf107 | GI_38026951-l | 21 | 21 | 39447509 | 36818  | 6.5888  | 6.25154 | CEU |
| rs8128191  | C21orf107 | GI_38026951-l | 21 | 21 | 39449181 | 35146  | 6.5888  | 6.25154 | CEU |
| rs8132295  | C21orf107 | GI_38026951-l | 21 | 21 | 39449644 | 34683  | 6.5888  | 6.25154 | CEU |
| rs8132333  | C21orf107 | GI_38026951-l | 21 | 21 | 39449770 | 34557  | 6.4701  | 6.25154 | CEU |
| rs7279497  | C21orf107 | GI_38026951-l | 21 | 21 | 39453176 | 31151  | 18.9597 | 6.25154 | CEU |
| rs2836925  | C21orf107 | GI_38026951-l | 21 | 21 | 39454223 | 30104  | 6.9148  | 6.25154 | CEU |
| rs377098   | C21orf107 | GI_38026951-l | 21 | 21 | 39457086 | 27241  | 12.0679 | 6.25154 | CEU |
| rs418298   | C21orf107 | GI_38026951-l | 21 | 21 | 39458524 | 25803  | 12.0679 | 6.25154 | CEU |
| rs418359   | C21orf107 | GI_38026951-l | 21 | 21 | 39458604 | 25723  | 12.0679 | 6.25154 | CEU |
| rs2836926  | C21orf107 | GI_38026951-l | 21 | 21 | 39458660 | 25667  | 18.8607 | 6.25154 | CEU |
| rs7282604  | C21orf107 | GI_38026951-l | 21 | 21 | 39458780 | 25547  | 12.0679 | 6.25154 | CEU |
| rs419469   | C21orf107 | GI_38026951-l | 21 | 21 | 39459104 | 25223  | 12.0679 | 6.25154 | CEU |
| rs6517519  | C21orf107 | GI_38026951-l | 21 | 21 | 39462115 | 22212  | 6.5888  | 6.25154 | CEU |
| rs8134214  | C21orf107 | GI_38026951-l | 21 | 21 | 39464237 | 20090  | 18.8607 | 6.25154 | CEU |
| rs2836929  | C21orf107 | GI_38026951-l | 21 | 21 | 39465681 | 18646  | 6.5888  | 6.25154 | CEU |
| rs8127087  | C21orf107 | GI_38026951-l | 21 | 21 | 39466372 | 17955  | 6.5888  | 6.25154 | CEU |
| rs2836930  | C21orf107 | GI_38026951-l | 21 | 21 | 39467526 | 16801  | 18.8607 | 6.25154 | CEU |
| rs2836931  | C21orf107 | GI_38026951-l | 21 | 21 | 39468439 | 15888  | 18.4492 | 6.25154 | CEU |
| rs2836932  | C21orf107 | GI_38026951-l | 21 | 21 | 39468587 | 15740  | 6.5888  | 6.25154 | CEU |
| rs428602   | C21orf107 | GI_38026951-l | 21 | 21 | 39468874 | 15453  | 12.0679 | 6.25154 | CEU |
| rs2245455  | C21orf107 | GI_38026951-l | 21 | 21 | 39469957 | 14370  | 12.0679 | 6.25154 | CEU |
| rs2142111  | C21orf107 | GI_38026951-l | 21 | 21 | 39471159 | 13168  | 12.0679 | 6.25154 | CEU |
| rs14194    | C21orf107 | GI_38026951-l | 21 | 21 | 39471336 | 12991  | 6.5888  | 6.25154 | CEU |
| rs7280375  | C21orf107 | GI_38026951-l | 21 | 21 | 39474278 | 10049  | 6.5888  | 6.25154 | CEU |
| rs6517522  | C21orf107 | GI_38026951-l | 21 | 21 | 39475715 | 8612   | 7.5338  | 6.25154 | CEU |
| rs1571709  | C21orf107 | GI_38026951-l | 21 | 21 | 39475850 | 8477   | 6.5888  | 6.25154 | CEU |
| rs6517523  | C21orf107 | GI_38026951-l | 21 | 21 | 39479202 | 5125   | 6.5389  | 6.25154 | CEU |
| rs2297256  | C21orf107 | GI_38026951-l | 21 | 21 | 39480291 | 4036   | 17.9739 | 6.25154 | CEU |
| rs2836933  | C21orf107 | GI_38026951-l | 21 | 21 | 39486072 | 1745   | 6.4701  | 6.25154 | CEU |
| rs2836934  | C21orf107 | GI_38026951-l | 21 | 21 | 39486755 | 2428   | 18.8607 | 6.25154 | CEU |
| rs3945     | C21orf107 | GI_38026951-l | 21 | 21 | 39487937 | 3610   | 6.5888  | 6.25154 | CEU |
| rs2150411  | C21orf107 | GI_38026951-l | 21 | 21 | 39496422 | 12095  | 18.0689 | 6.25154 | CEU |
| rs4818001  | C21orf107 | GI_38026951-l | 21 | 21 | 39496958 | 12631  | 18.0689 | 6.25154 | CEU |
| rs8130320  | C21orf107 | GI_38026951-l | 21 | 21 | 39502128 | 17801  | 18.8607 | 6.25154 | CEU |
| rs6517526  | C21orf107 | GI_38026951-l | 21 | 21 | 39503400 | 19073  | 6.5389  | 6.25154 | CEU |
| rs8132143  | C21orf107 | GI_38026951-l | 21 | 21 | 39506128 | 21801  | 18.0689 | 6.25154 | CEU |
| rs8132424  | C21orf107 | GI_38026951-l | 21 | 21 | 39506282 | 21955  | 18.1545 | 6.25154 | CEU |
| rs2836942  | C21orf107 | GI_38026951-l | 21 | 21 | 39513251 | 28924  | 18.0689 | 6.25154 | CEU |

|            |           |               |    |    |          |        |         |         |     |
|------------|-----------|---------------|----|----|----------|--------|---------|---------|-----|
| rs2836943  | C21orf107 | GI_38026951-I | 21 | 21 | 39514481 | 30154  | 18.8607 | 6.25154 | CEU |
| rs2026265  | C21orf107 | GI_38026951-I | 21 | 21 | 39517387 | 33060  | 6.5888  | 6.25154 | CEU |
| rs2836948  | C21orf107 | GI_38026951-I | 21 | 21 | 39521547 | 37220  | 18.0689 | 6.25154 | CEU |
| rs17816433 | C21orf107 | GI_38026951-I | 21 | 21 | 39524326 | 39999  | 18.0689 | 6.25154 | CEU |
| rs2836950  | C21orf107 | GI_38026951-I | 21 | 21 | 39526299 | 41972  | 9.0302  | 6.25154 | CEU |
| rs8128102  | C21orf107 | GI_38026951-I | 21 | 21 | 39528284 | 43957  | 6.5888  | 6.25154 | CEU |
| rs11911822 | C21orf107 | GI_38026951-I | 21 | 21 | 39529713 | 45386  | 11.8803 | 6.25154 | CEU |
| rs2150413  | C21orf107 | GI_38026951-I | 21 | 21 | 39536748 | 52421  | 18.8607 | 6.25154 | CEU |
| rs2150414  | C21orf107 | GI_38026951-I | 21 | 21 | 39536858 | 52531  | 18.8607 | 6.25154 | CEU |
| rs2150415  | C21orf107 | GI_38026951-I | 21 | 21 | 39537237 | 52910  | 6.4071  | 6.25154 | CEU |
| rs2836952  | C21orf107 | GI_38026951-I | 21 | 21 | 39538521 | 54194  | 18.8607 | 6.25154 | CEU |
| rs2836956  | C21orf107 | GI_38026951-I | 21 | 21 | 39544888 | 60561  | 18.3414 | 6.25154 | CEU |
| rs2836957  | C21orf107 | GI_38026951-I | 21 | 21 | 39545004 | 60677  | 6.5389  | 6.25154 | CEU |
| rs2836958  | C21orf107 | GI_38026951-I | 21 | 21 | 39545396 | 61069  | 18.165  | 6.25154 | CEU |
| rs2836959  | C21orf107 | GI_38026951-I | 21 | 21 | 39545538 | 61211  | 18.0689 | 6.25154 | CEU |
| rs7278297  | C21orf107 | GI_38026951-I | 21 | 21 | 39547622 | 63295  | 18.0689 | 6.25154 | CEU |
| rs2836961  | C21orf107 | GI_38026951-I | 21 | 21 | 39548890 | 64563  | 10.3242 | 6.25154 | CEU |
| rs7276774  | C21orf107 | GI_38026951-I | 21 | 21 | 39550595 | 66268  | 12.5313 | 6.25154 | CEU |
| rs1541102  | C21orf107 | GI_38026951-I | 21 | 21 | 39550635 | 66308  | 6.3342  | 6.25154 | CEU |
| rs2836964  | C21orf107 | GI_38026951-I | 21 | 21 | 39552876 | 68549  | 6.5888  | 6.25154 | CEU |
| rs2836965  | C21orf107 | GI_38026951-I | 21 | 21 | 39555501 | 71174  | 6.5389  | 6.25154 | CEU |
| rs9941894  | C21orf107 | GI_38026951-I | 21 | 21 | 39555928 | 71601  | 6.5389  | 6.25154 | CEU |
| rs2836966  | C21orf107 | GI_38026951-I | 21 | 21 | 39559391 | 75064  | 18.8607 | 6.25154 | CEU |
| rs2836967  | C21orf107 | GI_38026951-I | 21 | 21 | 39560972 | 76645  | 6.5389  | 6.25154 | CEU |
| rs8130984  | C21orf107 | GI_38026951-I | 21 | 21 | 39561836 | 77509  | 6.3106  | 6.25154 | CEU |
| rs2836968  | C21orf107 | GI_38026951-I | 21 | 21 | 39564256 | 79929  | 6.5888  | 6.25154 | CEU |
| rs2836969  | C21orf107 | GI_38026951-I | 21 | 21 | 39570135 | 85808  | 12.0679 | 6.25154 | CEU |
| rs8132285  | C21orf107 | GI_38026951-I | 21 | 21 | 39577622 | 93295  | 6.5888  | 6.25154 | CEU |
| rs6517538  | C21orf107 | GI_38026951-I | 21 | 21 | 39578112 | 93785  | 6.5389  | 6.25154 | CEU |
| rs2836974  | C21orf107 | GI_38026951-I | 21 | 21 | 39585051 | 100724 | 6.5389  | 6.25154 | CEU |
| rs2836975  | C21orf107 | GI_38026951-I | 21 | 21 | 39585490 | 101163 | 11.8803 | 6.25154 | CEU |
| rs13625    | C21orf107 | GI_38026951-I | 21 | 21 | 39590953 | 106626 | 6.5888  | 6.25154 | CEU |
| rs2056844  | C21orf107 | GI_38026951-I | 21 | 21 | 39592330 | 108003 | 18.1545 | 6.25154 | CEU |
| rs7410020  | C21orf107 | GI_38026951-I | 21 | 21 | 39597363 | 113036 | 11.7996 | 6.25154 | CEU |
| rs2836980  | C21orf107 | GI_38026951-I | 21 | 21 | 39609488 | 125161 | 16.286  | 6.25154 | CEU |
| rs2836981  | C21orf107 | GI_38026951-I | 21 | 21 | 39610235 | 125908 | 11.0978 | 6.25154 | CEU |
| rs2836982  | C21orf107 | GI_38026951-I | 21 | 21 | 39611041 | 126714 | 11.0978 | 6.25154 | CEU |
| rs2836983  | C21orf107 | GI_38026951-I | 21 | 21 | 39611206 | 126879 | 16.286  | 6.25154 | CEU |
| rs7281853  | C21orf107 | GI_38026951-I | 21 | 21 | 39615360 | 131033 | 11.0978 | 6.25154 | CEU |
| rs7282582  | C21orf107 | GI_38026951-I | 21 | 21 | 39618844 | 134517 | 19.4164 | 6.25154 | CEU |
| rs11088471 | C21orf107 | GI_38026951-I | 21 | 21 | 39621183 | 136856 | 9.0684  | 6.25154 | CEU |
| rs2037925  | C21orf107 | GI_38026951-I | 21 | 21 | 39621801 | 137474 | 11.0978 | 6.25154 | CEU |
| rs2410123  | C21orf107 | GI_38026951-I | 21 | 21 | 39621963 | 137636 | 11.0978 | 6.25154 | CEU |
| rs2836985  | C21orf107 | GI_38026951-I | 21 | 21 | 39623039 | 138712 | 16.286  | 6.25154 | CEU |
| rs2836986  | C21orf107 | GI_38026951-I | 21 | 21 | 39624006 | 139679 | 11.0978 | 6.25154 | CEU |
| rs2836987  | C21orf107 | GI_38026951-I | 21 | 21 | 39628464 | 144137 | 11.0978 | 6.25154 | CEU |
| rs2836988  | C21orf107 | GI_38026951-I | 21 | 21 | 39629845 | 145518 | 11.0978 | 6.25154 | CEU |
| rs2776311  | C21orf107 | GI_38026951-I | 21 | 21 | 39638755 | 154428 | 6.5764  | 6.25154 | CEU |
| rs741795   | C21orf107 | GI_38026951-I | 21 | 21 | 39640310 | 155983 | 6.8562  | 6.25154 | CEU |
| rs220219   | C21orf121 | GI_37620213-S | 21 | 21 | 42317483 | 512    | 7.1485  | 6.0581  | CEU |
| rs2839533  | TSGA2     | GI_18254455-S | 21 | 21 | 42770095 | 4102   | 7.5654  | 6.34957 | CEU |
| rs228045   | Hs.473917 | Hs.473917-S   | 21 | 21 | 42824802 | 5214   | 6.6371  | 6.3318  | CEU |
| rs228062   | Hs.473917 | Hs.473917-S   | 21 | 21 | 42831984 | 12396  | 6.7691  | 6.3318  | CEU |
| rs228068   | Hs.473917 | Hs.473917-S   | 21 | 21 | 42833288 | 13700  | 6.7691  | 6.3318  | CEU |
| rs228069   | Hs.473917 | Hs.473917-S   | 21 | 21 | 42833309 | 13721  | 6.6599  | 6.3318  | CEU |
| rs228070   | Hs.473917 | Hs.473917-S   | 21 | 21 | 42833590 | 14002  | 6.6599  | 6.3318  | CEU |

|            |              |               |    |    |          |        |         |         |     |
|------------|--------------|---------------|----|----|----------|--------|---------|---------|-----|
| rs228072   | Hs.473917    | Hs.473917-S   | 21 | 21 | 42834674 | 15086  | 6.7691  | 6.3318  | CEU |
| rs228077   | Hs.473917    | Hs.473917-S   | 21 | 21 | 42838695 | 19107  | 6.6347  | 6.3318  | CEU |
| rs228079   | Hs.473917    | Hs.473917-S   | 21 | 21 | 42839213 | 19625  | 6.4963  | 6.3318  | CEU |
| rs228080   | Hs.473917    | Hs.473917-S   | 21 | 21 | 42839862 | 20274  | 6.951   | 6.3318  | CEU |
| rs228084   | Hs.473917    | Hs.473917-S   | 21 | 21 | 42841284 | 21696  | 6.4963  | 6.3318  | CEU |
| rs228085   | Hs.473917    | Hs.473917-S   | 21 | 21 | 42841928 | 22340  | 6.4963  | 6.3318  | CEU |
| rs884983   | Hs.245997    | Hs.245997-S   | 21 | 21 | 42858686 | 5860   | 6.4302  | 6.21776 | CEU |
| rs2839557  | Hs.245997    | Hs.245997-S   | 21 | 21 | 42863867 | 679    | 6.8314  | 6.21776 | CEU |
| rs3746933  | Hs.245997    | Hs.245997-S   | 21 | 21 | 42864660 | 114    | 6.2629  | 6.21776 | CEU |
| rs1399925  | Hs.245997    | Hs.245997-S   | 21 | 21 | 42865011 | 465    | 6.2629  | 6.21776 | CEU |
| rs445343   | Hs.245997    | Hs.245997-S   | 21 | 21 | 42866684 | 2138   | 6.8314  | 6.21776 | CEU |
| rs365443   | Hs.245997    | Hs.245997-S   | 21 | 21 | 42871365 | 6819   | 6.2629  | 6.21776 | CEU |
| rs401396   | Hs.245997    | Hs.245997-S   | 21 | 21 | 42871651 | 7105   | 7.3243  | 6.21776 | CEU |
| rs388907   | Hs.245997    | Hs.245997-S   | 21 | 21 | 42873435 | 8889   | 6.2629  | 6.21776 | CEU |
| rs454849   | Hs.245997    | Hs.245997-S   | 21 | 21 | 42874133 | 9587   | 6.2629  | 6.21776 | CEU |
| rs400625   | Hs.245997    | Hs.245997-S   | 21 | 21 | 42874864 | 10318  | 6.8314  | 6.21776 | CEU |
| rs366703   | Hs.245997    | Hs.245997-S   | 21 | 21 | 42876537 | 11991  | 6.2629  | 6.21776 | CEU |
| rs417252   | Hs.245997    | Hs.245997-S   | 21 | 21 | 42877322 | 12776  | 6.5654  | 6.21776 | CEU |
| rs447167   | Hs.245997    | Hs.245997-S   | 21 | 21 | 42877898 | 13352  | 6.2629  | 6.21776 | CEU |
| rs450508   | Hs.245997    | Hs.245997-S   | 21 | 21 | 42879076 | 14530  | 7.7176  | 6.21776 | CEU |
| rs408465   | Hs.245997    | Hs.245997-S   | 21 | 21 | 42879276 | 14730  | 6.8994  | 6.21776 | CEU |
| rs390268   | Hs.245997    | Hs.245997-S   | 21 | 21 | 42879293 | 14747  | 6.6537  | 6.21776 | CEU |
| rs452481   | Hs.245997    | Hs.245997-S   | 21 | 21 | 42879399 | 14853  | 7.3321  | 6.21776 | CEU |
| rs397322   | Hs.245997    | Hs.245997-S   | 21 | 21 | 42879967 | 15421  | 7.5273  | 6.21776 | CEU |
| rs395610   | Hs.245997    | Hs.245997-S   | 21 | 21 | 42893502 | 28956  | 6.6006  | 6.21776 | CEU |
| rs2329573  | CSTB         | GI_20357564-S | 21 | 21 | 44022950 | 4570   | 7.9939  | 6.01023 | CEU |
| rs1041456  | CSTB         | GI_20357564-S | 21 | 21 | 44030783 | 12403  | 7.8734  | 6.01023 | CEU |
| rs2838371  | CSTB         | GI_20357564-S | 21 | 21 | 44039474 | 21094  | 7.8734  | 6.01023 | CEU |
| rs731935   | CSTB         | GI_20357564-S | 21 | 21 | 44044998 | 26618  | 7.8734  | 6.01023 | CEU |
| rs4818868  | CSTB         | GI_20357564-S | 21 | 21 | 44046486 | 28106  | 6.4541  | 6.01023 | CEU |
| rs2838386  | CSTB         | GI_20357564-S | 21 | 21 | 44048612 | 30232  | 7.8734  | 6.01023 | CEU |
| rs6518322  | CSTB         | GI_20357564-S | 21 | 21 | 44050296 | 31916  | 7.8415  | 6.01023 | CEU |
| rs2329577  | CSTB         | GI_20357564-S | 21 | 21 | 44051727 | 33347  | 7.8734  | 6.01023 | CEU |
| rs2838387  | CSTB         | GI_20357564-S | 21 | 21 | 44052679 | 34299  | 7.8734  | 6.01023 | CEU |
| rs9985006  | CSTB         | GI_20357564-S | 21 | 21 | 44056750 | 38370  | 6.7572  | 6.01023 | CEU |
| rs2838398  | CSTB         | GI_20357564-S | 21 | 21 | 44061717 | 43337  | 7.3672  | 6.01023 | CEU |
| rs3788095  | Hs.473973    | Hs.473973-S   | 21 | 21 | 44217351 | 10154  | 7.3129  | 6.63441 | CEU |
| rs6518350  | Hs.124623    | Hs.124623-S   | 21 | 21 | 44446245 | 7633   | 9.7364  | 6.13356 | CEU |
| rs7282137  | Hs.124623    | Hs.124623-S   | 21 | 21 | 44449095 | 4783   | 9.7364  | 6.13356 | CEU |
| rs2838522  | Hs.124623    | Hs.124623-S   | 21 | 21 | 44452404 | 1474   | 10.9973 | 6.13356 | CEU |
| rs10854564 | DKFZp434N035 | GI_14149994-S | 22 | 22 | 18849621 | 533753 | 7.2064  | 5.91522 | CEU |
| rs1007888  | GSTT1        | GI_4504184-S  | 22 | 22 | 22565655 | 135301 | 12.2997 | 6.00017 | CEU |
| rs2000467  | GSTT1        | GI_4504184-S  | 22 | 22 | 22566087 | 134869 | 7.3021  | 6.00017 | CEU |
| rs4822450  | GSTT1        | GI_4504184-S  | 22 | 22 | 22567441 | 133515 | 12.4423 | 6.00017 | CEU |
| rs4820571  | GSTT1        | GI_4504184-S  | 22 | 22 | 22567527 | 133429 | 8.8527  | 6.00017 | CEU |
| rs5751760  | GSTT1        | GI_4504184-S  | 22 | 22 | 22568127 | 132829 | 12.4423 | 6.00017 | CEU |
| rs5751761  | GSTT1        | GI_4504184-S  | 22 | 22 | 22568290 | 132666 | 12.4423 | 6.00017 | CEU |
| rs4822451  | GSTT1        | GI_4504184-S  | 22 | 22 | 22572720 | 128236 | 9.3607  | 6.00017 | CEU |
| rs2330635  | GSTT1        | GI_4504184-S  | 22 | 22 | 22575898 | 125058 | 9.3607  | 6.00017 | CEU |
| rs2877178  | GSTT1        | GI_4504184-S  | 22 | 22 | 22576071 | 124885 | 9.3607  | 6.00017 | CEU |
| rs2154593  | GSTT1        | GI_4504184-S  | 22 | 22 | 22576639 | 124317 | 9.3607  | 6.00017 | CEU |
| rs2154594  | GSTT1        | GI_4504184-S  | 22 | 22 | 22578609 | 122347 | 9.3607  | 6.00017 | CEU |
| rs2186366  | GSTT1        | GI_4504184-S  | 22 | 22 | 22578667 | 122289 | 9.3607  | 6.00017 | CEU |
| rs4822453  | GSTT1        | GI_4504184-S  | 22 | 22 | 22579416 | 121540 | 11.6372 | 6.00017 | CEU |
| rs4822454  | GSTT1        | GI_4504184-S  | 22 | 22 | 22579762 | 121194 | 9.3607  | 6.00017 | CEU |
| rs1002286  | GSTT1        | GI_4504184-S  | 22 | 22 | 22581891 | 119065 | 12.4423 | 6.00017 | CEU |

|            |           |               |    |    |          |        |         |         |     |
|------------|-----------|---------------|----|----|----------|--------|---------|---------|-----|
| rs4822458  | GSTT1     | GI_4504184-S  | 22 | 22 | 22590213 | 110743 | 12.4423 | 6.00017 | CEU |
| rs575959   | GSTT1     | GI_4504184-S  | 22 | 22 | 22613919 | 87037  | 9.8176  | 6.00017 | CEU |
| rs2739330  | GSTT1     | GI_4504184-S  | 22 | 22 | 22619840 | 81116  | 10.3879 | 6.00017 | CEU |
| rs4822466  | GSTT1     | GI_4504184-S  | 22 | 22 | 22636758 | 64198  | 12.4423 | 6.00017 | CEU |
| rs1006771  | GSTT1     | GI_4504184-S  | 22 | 22 | 22638560 | 62396  | 8.4405  | 6.00017 | CEU |
| rs140188   | GSTT1     | GI_4504184-S  | 22 | 22 | 22648606 | 52350  | 9.8176  | 6.00017 | CEU |
| rs5760147  | GSTT1     | GI_4504184-S  | 22 | 22 | 22659502 | 41454  | 10.8475 | 6.00017 | CEU |
| rs407257   | GSTT1     | GI_4504184-S  | 22 | 22 | 22671104 | 29852  | 18.6842 | 6.00017 | CEU |
| rs5760176  | GSTT1     | GI_4504184-S  | 22 | 22 | 22726875 | 25919  | 17.1028 | 6.00017 | CEU |
| rs738809   | GSTT1     | GI_4504184-S  | 22 | 22 | 22730046 | 29090  | 6.5521  | 6.00017 | CEU |
| rs5755542  | LOC375165 | GI_37563669-S | 22 | 22 | 33767553 | 173150 | 6.0529  | 5.95402 | CEU |
| rs739152   | LOC375165 | GI_37563669-S | 22 | 22 | 33776786 | 182383 | 6.0529  | 5.95402 | CEU |
| rs361722   | LOC375165 | GI_37563669-S | 22 | 22 | 33782842 | 188439 | 6.0529  | 5.95402 | CEU |
| rs11089938 | SYNGR1    | GI_39777617-I | 22 | 22 | 37987203 | 118776 | 6.2356  | 5.89004 | CEU |
| rs1569497  | SYNGR1    | GI_39777617-I | 22 | 22 | 37989895 | 116084 | 6.1627  | 5.89004 | CEU |
| rs5757596  | SYNGR1    | GI_22035699-A | 22 | 22 | 37993461 | 103169 | 6.2072  | 5.89004 | CEU |
| rs5757596  | SYNGR1    | GI_39777617-I | 22 | 22 | 37993461 | 112518 | 6.5993  | 5.89004 | CEU |
| rs5757596  | SYNGR1    | GI_39777618-I | 22 | 22 | 37993461 | 105280 | 6.448   | 5.89004 | CEU |
| rs909685   | SYNGR1    | GI_22035699-A | 22 | 22 | 38072171 | 24459  | 8.9066  | 5.89004 | CEU |
| rs909685   | SYNGR1    | GI_39777617-I | 22 | 22 | 38072171 | 33808  | 9.0246  | 5.89004 | CEU |
| rs909685   | SYNGR1    | GI_39777618-I | 22 | 22 | 38072171 | 26570  | 9.2297  | 5.89004 | CEU |
| rs5996091  | TEF       | GI_34486096-S | 22 | 22 | 40668766 | 549034 | 6.7286  | 5.55998 | CEU |
| rs8137409  | TEF       | GI_34486096-S | 22 | 22 | 40684293 | 564561 | 6.7286  | 5.55998 | CEU |
| rs4822075  | TEF       | GI_34486096-S | 22 | 22 | 40687060 | 567328 | 6.7286  | 5.55998 | CEU |
| rs4822136  | CGI-96    | GI_25092724-S | 22 | 22 | 41205459 | 27825  | 9.5401  | 5.79393 | CEU |
| rs5996176  | CGI-96    | GI_25092724-S | 22 | 22 | 41205810 | 27474  | 9.5401  | 5.79393 | CEU |
| rs4820470  | CGI-96    | GI_25092724-S | 22 | 22 | 41230802 | 2482   | 11.1704 | 5.79393 | CEU |
| rs12485160 | CGI-96    | GI_25092724-S | 22 | 22 | 41232117 | 1167   | 10.6302 | 5.79393 | CEU |
| rs6002782  | CGI-96    | GI_25092724-S | 22 | 22 | 41243508 | 10224  | 9.8511  | 5.79393 | CEU |
| rs5751297  | CGI-96    | GI_25092724-S | 22 | 22 | 41243623 | 10339  | 7.881   | 5.79393 | CEU |
| rs4822152  | CGI-96    | GI_25092724-S | 22 | 22 | 41245265 | 11981  | 9.9455  | 5.79393 | CEU |
| rs5996181  | CGI-96    | GI_25092724-S | 22 | 22 | 41245969 | 12685  | 11.1704 | 5.79393 | CEU |
| rs12160166 | CGI-96    | GI_25092724-S | 22 | 22 | 41248976 | 15692  | 11.1704 | 5.79393 | CEU |
| rs16986101 | CGI-96    | GI_25092724-S | 22 | 22 | 41249130 | 15846  | 12.1478 | 5.79393 | CEU |
| rs5996184  | CGI-96    | GI_25092724-S | 22 | 22 | 41250252 | 16968  | 8.1236  | 5.79393 | CEU |
| rs12160355 | CGI-96    | GI_25092724-S | 22 | 22 | 41252606 | 19322  | 11.1704 | 5.79393 | CEU |
| rs6002788  | CGI-96    | GI_25092724-S | 22 | 22 | 41252976 | 19692  | 11.1704 | 5.79393 | CEU |
| rs4822158  | CGI-96    | GI_25092724-S | 22 | 22 | 41253763 | 20479  | 11.1704 | 5.79393 | CEU |
| rs12160044 | CGI-96    | GI_25092724-S | 22 | 22 | 41256387 | 23103  | 9.6062  | 5.79393 | CEU |
| rs12160782 | CGI-96    | GI_25092724-S | 22 | 22 | 41256631 | 23347  | 9.3027  | 5.79393 | CEU |
| rs4822160  | CGI-96    | GI_25092724-S | 22 | 22 | 41256815 | 23531  | 11.1704 | 5.79393 | CEU |
| rs1543371  | CGI-96    | GI_25092724-S | 22 | 22 | 41256886 | 23602  | 10.6302 | 5.79393 | CEU |
| rs5996186  | CGI-96    | GI_25092724-S | 22 | 22 | 41257813 | 24529  | 11.1704 | 5.79393 | CEU |
| rs11913309 | CGI-96    | GI_25092724-S | 22 | 22 | 41261051 | 27767  | 10.0812 | 5.79393 | CEU |
| rs12484049 | CGI-96    | GI_25092724-S | 22 | 22 | 41263443 | 30159  | 11.1704 | 5.79393 | CEU |
| rs4822167  | CGI-96    | GI_25092724-S | 22 | 22 | 41265350 | 32066  | 9.4746  | 5.79393 | CEU |
| rs1043606  | CGI-96    | GI_25092724-S | 22 | 22 | 41306176 | 72892  | 6.2552  | 5.79393 | CEU |
| rs2071842  | CGI-96    | GI_25092724-S | 22 | 22 | 41308280 | 74996  | 7.8749  | 5.79393 | CEU |
| rs4822171  | CGI-96    | GI_25092724-S | 22 | 22 | 41309808 | 76524  | 7.8749  | 5.79393 | CEU |
| rs4822173  | CGI-96    | GI_25092724-S | 22 | 22 | 41320647 | 87363  | 9.6587  | 5.79393 | CEU |
| rs4822236  | PACIN2    | GI_6005825-S  | 22 | 22 | 41682586 | 92113  | 6.0528  | 5.94181 | CEU |
| rs104664   | FLJ20635  | GI_8923587-S  | 22 | 22 | 44032391 | 24700  | 7.6396  | 6.27436 | CEU |
| rs170505   | FLJ20635  | GI_8923587-S  | 22 | 22 | 44033557 | 23534  | 6.5656  | 6.27436 | CEU |
| rs226492   | FLJ20635  | GI_8923587-S  | 22 | 22 | 44035026 | 22065  | 6.6229  | 6.27436 | CEU |
| rs2142552  | FLJ20635  | GI_8923587-S  | 22 | 22 | 44040034 | 17057  | 7.6396  | 6.27436 | CEU |
| rs738171   | FLJ20635  | GI_8923587-S  | 22 | 22 | 44041821 | 15270  | 6.6229  | 6.27436 | CEU |

|            |           |               |    |    |          |        |         |         |     |
|------------|-----------|---------------|----|----|----------|--------|---------|---------|-----|
| rs2350629  | FLJ20635  | GI_8923587-S  | 22 | 22 | 44051587 | 5504   | 7.309   | 6.27436 | CEU |
| rs738177   | FLJ20635  | GI_8923587-S  | 22 | 22 | 44052076 | 5015   | 8.3881  | 6.27436 | CEU |
| rs2205659  | FLJ20635  | GI_8923587-S  | 22 | 22 | 44052267 | 4824   | 6.6082  | 6.27436 | CEU |
| rs2205660  | FLJ20635  | GI_8923587-S  | 22 | 22 | 44052268 | 4823   | 7.8007  | 6.27436 | CEU |
| rs3827393  | FLJ20635  | GI_8923587-S  | 22 | 22 | 44056690 | 401    | 7.3432  | 6.27436 | CEU |
| rs9614647  | FLJ20635  | GI_8923587-S  | 22 | 22 | 44062255 | 5164   | 7.3432  | 6.27436 | CEU |
| rs6006992  | FLJ20635  | GI_8923587-S  | 22 | 22 | 44063297 | 6206   | 7.3432  | 6.27436 | CEU |
| rs6519844  | FLJ20635  | GI_8923587-S  | 22 | 22 | 44064960 | 7869   | 7.3432  | 6.27436 | CEU |
| rs5765271  | FLJ20635  | GI_8923587-S  | 22 | 22 | 44067363 | 10272  | 7.3432  | 6.27436 | CEU |
| rs5765272  | FLJ20635  | GI_8923587-S  | 22 | 22 | 44068438 | 11347  | 7.3432  | 6.27436 | CEU |
| rs5765276  | FLJ20635  | GI_8923587-S  | 22 | 22 | 44069399 | 12308  | 7.3432  | 6.27436 | CEU |
| rs1569413  | FLJ20635  | GI_8923587-S  | 22 | 22 | 44076618 | 19527  | 7.3432  | 6.27436 | CEU |
| rs136564   | FLJ20635  | GI_8923587-S  | 22 | 22 | 44085411 | 28320  | 7.3432  | 6.27436 | CEU |
| rs470062   | FLJ20635  | GI_8923587-S  | 22 | 22 | 44087906 | 30815  | 7.3432  | 6.27436 | CEU |
| rs5765304  | FLJ20635  | GI_8923587-S  | 22 | 22 | 44092511 | 35420  | 7.3432  | 6.27436 | CEU |
| rs136604   | FLJ20635  | GI_8923587-S  | 22 | 22 | 44110280 | 53189  | 6.4578  | 6.27436 | CEU |
| rs12162930 | FLJ20635  | GI_8923587-S  | 22 | 22 | 44114749 | 57658  | 7.3432  | 6.27436 | CEU |
| rs136611   | FLJ20635  | GI_8923587-S  | 22 | 22 | 44114820 | 57729  | 7.3432  | 6.27436 | CEU |
| rs5765327  | FLJ20635  | GI_8923587-S  | 22 | 22 | 44121463 | 64372  | 7.3432  | 6.27436 | CEU |
| rs761906   | Hs.40696  | Hs.40696-S    | 22 | 22 | 45459178 | 19369  | 7.2751  | 5.8237  | CEU |
| rs763126   | LOC400933 | GI_42662518-S | 22 | 22 | 48309435 | 179971 | 12.5936 | 6.21174 | CEU |
| rs17182154 | LOC400933 | GI_42662518-S | 22 | 22 | 48311331 | 181867 | 15.1954 | 6.21174 | CEU |
| rs1476038  | LOC400933 | GI_42662518-S | 22 | 22 | 48312416 | 182952 | 9.7928  | 6.21174 | CEU |
| rs5769698  | LOC400933 | GI_42662518-S | 22 | 22 | 48318567 | 189103 | 11.9454 | 6.21174 | CEU |
| rs763127   | LOC400933 | GI_42662518-S | 22 | 22 | 48326939 | 197475 | 12.5936 | 6.21174 | CEU |
| rs135871   | LOC400933 | GI_42662518-S | 22 | 22 | 48329830 | 200366 | 6.7205  | 6.21174 | CEU |
| rs1018812  | LOC400933 | GI_42662518-S | 22 | 22 | 48330934 | 201470 | 12.5936 | 6.21174 | CEU |
| rs5769707  | LOC400933 | GI_42662518-S | 22 | 22 | 48334263 | 204799 | 15.0712 | 6.21174 | CEU |
| rs739248   | LOC400933 | GI_42662518-S | 22 | 22 | 48346066 | 216602 | 15.7191 | 6.21174 | CEU |
| rs9616329  | LOC400933 | GI_42662518-S | 22 | 22 | 48347175 | 217711 | 7.7538  | 6.21174 | CEU |
| rs5770604  | LOC400933 | GI_42662518-S | 22 | 22 | 48351533 | 222069 | 8.8795  | 6.21174 | CEU |
| rs2071904  | LOC400933 | GI_42662518-S | 22 | 22 | 48355338 | 225874 | 15.7191 | 6.21174 | CEU |
| rs739236   | LOC400933 | GI_42662518-S | 22 | 22 | 48362463 | 232999 | 7.7538  | 6.21174 | CEU |
| rs916360   | LOC400933 | GI_42662518-S | 22 | 22 | 48362833 | 233369 | 7.7538  | 6.21174 | CEU |
| rs1107514  | LOC400933 | GI_42662518-S | 22 | 22 | 48363244 | 233780 | 7.7538  | 6.21174 | CEU |
| rs8137111  | LOC400933 | GI_42662518-S | 22 | 22 | 48364611 | 235147 | 7.7538  | 6.21174 | CEU |
| rs8140095  | LOC400933 | GI_42662518-S | 22 | 22 | 48364656 | 235192 | 7.3776  | 6.21174 | CEU |
| rs8141219  | LOC400933 | GI_42662518-S | 22 | 22 | 48365407 | 235943 | 12.1939 | 6.21174 | CEU |
| rs8138399  | LOC400933 | GI_42662518-S | 22 | 22 | 48365685 | 236221 | 13.6831 | 6.21174 | CEU |
| rs9616333  | LOC400933 | GI_42662518-S | 22 | 22 | 48371708 | 242244 | 15.7191 | 6.21174 | CEU |
| rs9616714  | LOC400933 | GI_42662518-S | 22 | 22 | 48371720 | 242256 | 15.8977 | 6.21174 | CEU |
| rs5770622  | LOC400933 | GI_42662518-S | 22 | 22 | 48372409 | 242945 | 14.5601 | 6.21174 | CEU |
| rs739240   | LOC400933 | GI_42662518-S | 22 | 22 | 48373468 | 244004 | 7.7538  | 6.21174 | CEU |
| rs12485195 | LOC400933 | GI_42662518-S | 22 | 22 | 48374732 | 245268 | 16.4469 | 6.21174 | CEU |
| rs739243   | LOC400933 | GI_42662518-S | 22 | 22 | 48378072 | 248608 | 11.2687 | 6.21174 | CEU |
| rs7286706  | LOC400933 | GI_42662518-S | 22 | 22 | 48379207 | 249743 | 11.8057 | 6.21174 | CEU |
| rs6009810  | LOC400933 | GI_42662518-S | 22 | 22 | 48380401 | 250937 | 6.9867  | 6.21174 | CEU |
| rs739244   | LOC400933 | GI_42662518-S | 22 | 22 | 48381019 | 251555 | 6.527   | 6.21174 | CEU |
| rs5770633  | LOC400933 | GI_42662518-S | 22 | 22 | 48383288 | 253824 | 6.9867  | 6.21174 | CEU |
| rs8142033  | ARSA      | GI_7262293-S  | 22 | 22 | 49352976 | 955    | 6.2429  | 5.72128 | CEU |
| rs6151429  | ARSA      | GI_7262293-S  | 22 | 22 | 49353621 | 310    | 6.3167  | 5.72128 | CEU |
| rs2071421  | ARSA      | GI_7262293-S  | 22 | 22 | 49354560 | 629    | 5.8233  | 5.72128 | CEU |
| rs664689   | UTS2      | GI_12056478-I | 1  | 1  | 7904358  | 56627  | 8.2743  | 6.1558  | CHB |
| rs664689   | UTS2      | GI_12056480-A | 1  | 1  | 7904358  | 59177  | 8.2328  | 6.1558  | CHB |
| rs664689   | UTS2      | GI_12056480-I | 1  | 1  | 7904358  | 57031  | 7.3301  | 6.1558  | CHB |
| rs161803   | UTS2      | GI_12056478-I | 1  | 1  | 7910055  | 62324  | 9.9319  | 6.1558  | CHB |

|            |           |               |   |   |          |        |         |         |     |
|------------|-----------|---------------|---|---|----------|--------|---------|---------|-----|
| rs161803   | UTS2      | GI_12056480-A | 1 | 1 | 7910055  | 64874  | 9.5535  | 6.1558  | CHB |
| rs161803   | UTS2      | GI_12056480-I | 1 | 1 | 7910055  | 62728  | 10.7869 | 6.1558  | CHB |
| rs161826   | UTS2      | GI_12056478-I | 1 | 1 | 7914604  | 66873  | 10.24   | 6.1558  | CHB |
| rs161826   | UTS2      | GI_12056480-A | 1 | 1 | 7914604  | 69423  | 9.9218  | 6.1558  | CHB |
| rs161826   | UTS2      | GI_12056480-I | 1 | 1 | 7914604  | 67277  | 11.7395 | 6.1558  | CHB |
| rs161827   | UTS2      | GI_12056478-I | 1 | 1 | 7916300  | 68569  | 9.9319  | 6.1558  | CHB |
| rs161827   | UTS2      | GI_12056480-A | 1 | 1 | 7916300  | 71119  | 9.5535  | 6.1558  | CHB |
| rs161827   | UTS2      | GI_12056480-I | 1 | 1 | 7916300  | 68973  | 10.7869 | 6.1558  | CHB |
| rs161818   | UTS2      | GI_12056478-I | 1 | 1 | 7921818  | 74087  | 9.9319  | 6.1558  | CHB |
| rs161818   | UTS2      | GI_12056480-A | 1 | 1 | 7921818  | 76637  | 9.5535  | 6.1558  | CHB |
| rs161818   | UTS2      | GI_12056480-I | 1 | 1 | 7921818  | 74491  | 10.7869 | 6.1558  | CHB |
| rs161822   | UTS2      | GI_12056478-I | 1 | 1 | 7923405  | 75674  | 9.9319  | 6.1558  | CHB |
| rs161822   | UTS2      | GI_12056480-A | 1 | 1 | 7923405  | 78224  | 9.5535  | 6.1558  | CHB |
| rs161822   | UTS2      | GI_12056480-I | 1 | 1 | 7923405  | 76078  | 10.7869 | 6.1558  | CHB |
| rs863171   | UTS2      | GI_12056478-I | 1 | 1 | 7926881  | 79150  | 7.05    | 6.1558  | CHB |
| rs863171   | UTS2      | GI_12056480-A | 1 | 1 | 7926881  | 81700  | 6.9504  | 6.1558  | CHB |
| rs863171   | UTS2      | GI_12056480-I | 1 | 1 | 7926881  | 79554  | 7.1205  | 6.1558  | CHB |
| rs161811   | UTS2      | GI_12056478-I | 1 | 1 | 7933868  | 86137  | 9.9319  | 6.1558  | CHB |
| rs161811   | UTS2      | GI_12056480-A | 1 | 1 | 7933868  | 88687  | 9.5535  | 6.1558  | CHB |
| rs161811   | UTS2      | GI_12056480-I | 1 | 1 | 7933868  | 86541  | 10.7869 | 6.1558  | CHB |
| rs161810   | UTS2      | GI_12056478-I | 1 | 1 | 7935063  | 87332  | 10.1278 | 6.1558  | CHB |
| rs161810   | UTS2      | GI_12056480-A | 1 | 1 | 7935063  | 89882  | 9.7392  | 6.1558  | CHB |
| rs161810   | UTS2      | GI_12056480-I | 1 | 1 | 7935063  | 87736  | 10.8052 | 6.1558  | CHB |
| rs150914   | UTS2      | GI_12056478-I | 1 | 1 | 7949702  | 101971 | 7.7629  | 6.1558  | CHB |
| rs150914   | UTS2      | GI_12056480-A | 1 | 1 | 7949702  | 104521 | 7.7478  | 6.1558  | CHB |
| rs150914   | UTS2      | GI_12056480-I | 1 | 1 | 7949702  | 102375 | 9.2485  | 6.1558  | CHB |
| rs406809   | UTS2      | GI_12056478-I | 1 | 1 | 7964681  | 116950 | 6.5137  | 6.1558  | CHB |
| rs406809   | UTS2      | GI_12056480-A | 1 | 1 | 7964681  | 119500 | 6.5154  | 6.1558  | CHB |
| rs406809   | UTS2      | GI_12056480-I | 1 | 1 | 7964681  | 117354 | 9.0835  | 6.1558  | CHB |
| rs161808   | UTS2      | GI_12056480-I | 1 | 1 | 7969980  | 122653 | 8.9435  | 6.1558  | CHB |
| rs225121   | UTS2      | GI_12056480-I | 1 | 1 | 7980813  | 133486 | 8.9435  | 6.1558  | CHB |
| rs9434576  | UTS2      | GI_12056480-I | 1 | 1 | 7987316  | 139989 | 8.4544  | 6.1558  | CHB |
| rs424436   | UTS2      | GI_12056480-I | 1 | 1 | 8016944  | 169617 | 8.3301  | 6.1558  | CHB |
| rs448472   | UTS2      | GI_12056480-I | 1 | 1 | 8017136  | 169809 | 8.3301  | 6.1558  | CHB |
| rs225128   | UTS2      | GI_12056480-I | 1 | 1 | 8027461  | 180134 | 7.2274  | 6.1558  | CHB |
| rs225133   | UTS2      | GI_12056480-I | 1 | 1 | 8032728  | 185401 | 6.7734  | 6.1558  | CHB |
| rs9434586  | UTS2      | GI_12056480-I | 1 | 1 | 8034905  | 187578 | 6.3192  | 6.1558  | CHB |
| rs11828    | LZIC      | GI_40255081-S | 1 | 1 | 9921273  | 3269   | 7.5034  | 5.91971 | CHB |
| rs1220398  | LZIC      | GI_40255081-S | 1 | 1 | 9928605  | 4063   | 6.8706  | 5.91971 | CHB |
| rs1234694  | LZIC      | GI_40255081-S | 1 | 1 | 9937586  | 13044  | 7.5034  | 5.91971 | CHB |
| rs1220421  | LZIC      | GI_40255081-S | 1 | 1 | 9942487  | 17945  | 7.5034  | 5.91971 | CHB |
| rs1660733  | LZIC      | GI_40255081-S | 1 | 1 | 9945337  | 20795  | 7.5034  | 5.91971 | CHB |
| rs2890358  | LZIC      | GI_40255081-S | 1 | 1 | 9961806  | 37264  | 7.5034  | 5.91971 | CHB |
| rs6661806  | LZIC      | GI_40255081-S | 1 | 1 | 9971734  | 47192  | 7.5034  | 5.91971 | CHB |
| rs12140058 | LZIC      | GI_40255081-S | 1 | 1 | 9983443  | 58901  | 6.1277  | 5.91971 | CHB |
| rs2480781  | Hs.211939 | Hs.211939-S   | 1 | 1 | 10527807 | 44697  | 7.0721  | 5.88809 | CHB |
| rs2506898  | Hs.211939 | Hs.211939-S   | 1 | 1 | 10538805 | 33699  | 6.0161  | 5.88809 | CHB |
| rs2480775  | Hs.211939 | Hs.211939-S   | 1 | 1 | 10541262 | 31242  | 7.0721  | 5.88809 | CHB |
| rs710130   | Hs.211939 | Hs.211939-S   | 1 | 1 | 10541660 | 30844  | 7.0721  | 5.88809 | CHB |
| rs944191   | Hs.211939 | Hs.211939-S   | 1 | 1 | 10541717 | 30787  | 7.2278  | 5.88809 | CHB |
| rs4846230  | Hs.211939 | Hs.211939-S   | 1 | 1 | 10542862 | 29642  | 7.0721  | 5.88809 | CHB |
| rs2480773  | Hs.211939 | Hs.211939-S   | 1 | 1 | 10543356 | 29148  | 7.0721  | 5.88809 | CHB |
| rs12128630 | Hs.211939 | Hs.211939-S   | 1 | 1 | 10543661 | 28843  | 7.0721  | 5.88809 | CHB |
| rs2480772  | Hs.211939 | Hs.211939-S   | 1 | 1 | 10543726 | 28778  | 6.9376  | 5.88809 | CHB |
| rs2506900  | Hs.211939 | Hs.211939-S   | 1 | 1 | 10545142 | 27362  | 6.7048  | 5.88809 | CHB |
| rs4846231  | Hs.211939 | Hs.211939-S   | 1 | 1 | 10546902 | 25602  | 7.0721  | 5.88809 | CHB |



|            |           |               |   |   |          |        |         |         |     |
|------------|-----------|---------------|---|---|----------|--------|---------|---------|-----|
| rs4846232  | Hs.211939 | Hs.211939-S   | 1 | 1 | 10547076 | 25428  | 7.0721  | 5.88809 | CHB |
| rs10157111 | Hs.211939 | Hs.211939-S   | 1 | 1 | 10547610 | 24894  | 7.0721  | 5.88809 | CHB |
| rs10864463 | Hs.211939 | Hs.211939-S   | 1 | 1 | 10547826 | 24678  | 6.4751  | 5.88809 | CHB |
| rs10779739 | Hs.211939 | Hs.211939-S   | 1 | 1 | 10549455 | 23049  | 7.0721  | 5.88809 | CHB |
| rs4846233  | Hs.211939 | Hs.211939-S   | 1 | 1 | 10550494 | 22010  | 6.0302  | 5.88809 | CHB |
| rs4240915  | Hs.211939 | Hs.211939-S   | 1 | 1 | 10550750 | 21754  | 6.8071  | 5.88809 | CHB |
| rs9660006  | Hs.211939 | Hs.211939-S   | 1 | 1 | 10551538 | 20966  | 7.0721  | 5.88809 | CHB |
| rs6663688  | Hs.211939 | Hs.211939-S   | 1 | 1 | 10558581 | 13923  | 7.0721  | 5.88809 | CHB |
| rs10779744 | Hs.211939 | Hs.211939-S   | 1 | 1 | 10563399 | 9105   | 6.2901  | 5.88809 | CHB |
| rs12565494 | Hs.211939 | Hs.211939-S   | 1 | 1 | 10563828 | 8676   | 6.7428  | 5.88809 | CHB |
| rs6687502  | Hs.211939 | Hs.211939-S   | 1 | 1 | 10567539 | 4965   | 7.0721  | 5.88809 | CHB |
| rs6540938  | Hs.211939 | Hs.211939-S   | 1 | 1 | 10570725 | 1779   | 7.0186  | 5.88809 | CHB |
| rs2086650  | Hs.211939 | Hs.211939-S   | 1 | 1 | 10574704 | 2200   | 7.0721  | 5.88809 | CHB |
| rs747124   | Hs.211939 | Hs.211939-S   | 1 | 1 | 10575199 | 2695   | 7.0721  | 5.88809 | CHB |
| rs4653017  | PHC2      | GI_37595529-A | 1 | 1 | 33445821 | 12751  | 9.9012  | 5.86307 | CHB |
| rs6682438  | PHC2      | GI_37595529-A | 1 | 1 | 33453239 | 5333   | 9.5724  | 5.86307 | CHB |
| rs4652839  | PHC2      | GI_37595529-A | 1 | 1 | 33454022 | 4550   | 10.9153 | 5.86307 | CHB |
| rs5861     | PHC2      | GI_37595529-A | 1 | 1 | 33458613 | 41     | 10.9153 | 5.86307 | CHB |
| rs10914684 | PHC2      | GI_37595529-A | 1 | 1 | 33464665 | 6093   | 9.8499  | 5.86307 | CHB |
| rs10914685 | PHC2      | GI_37595529-A | 1 | 1 | 33464683 | 6111   | 10.9153 | 5.86307 | CHB |
| rs7513015  | PHC2      | GI_37595529-A | 1 | 1 | 33468357 | 9785   | 10.9153 | 5.86307 | CHB |
| rs10798939 | PHC2      | GI_37595529-A | 1 | 1 | 33478530 | 19958  | 11.1848 | 5.86307 | CHB |
| rs4652856  | PHC2      | GI_37595529-A | 1 | 1 | 33487507 | 28935  | 8.6314  | 5.86307 | CHB |
| rs4233199  | PHC2      | GI_37595529-A | 1 | 1 | 33488655 | 30083  | 7.4399  | 5.86307 | CHB |
| rs4653081  | PHC2      | GI_37595529-A | 1 | 1 | 33488923 | 30351  | 8.6314  | 5.86307 | CHB |
| rs6678247  | PHC2      | GI_37595529-A | 1 | 1 | 33492362 | 33790  | 8.6314  | 5.86307 | CHB |
| rs6680310  | PHC2      | GI_37595529-A | 1 | 1 | 33497352 | 38780  | 8.6314  | 5.86307 | CHB |
| rs4653095  | PHC2      | GI_37595529-A | 1 | 1 | 33497927 | 39355  | 8.6314  | 5.86307 | CHB |
| rs6675264  | PHC2      | GI_37595529-A | 1 | 1 | 33500927 | 42355  | 8.6314  | 5.86307 | CHB |
| rs7545416  | PHC2      | GI_37595529-A | 1 | 1 | 33505889 | 47317  | 8.6314  | 5.86307 | CHB |
| rs4233201  | PHC2      | GI_37595529-A | 1 | 1 | 33511146 | 52574  | 8.6314  | 5.86307 | CHB |
| rs4652870  | PHC2      | GI_37595529-A | 1 | 1 | 33516833 | 58261  | 8.116   | 5.86307 | CHB |
| rs942485   | PHC2      | GI_37595529-A | 1 | 1 | 33524916 | 66344  | 8.116   | 5.86307 | CHB |
| rs2763038  | PHC2      | GI_37595529-A | 1 | 1 | 33527053 | 68481  | 7.8192  | 5.86307 | CHB |
| rs10798945 | PHC2      | GI_37595529-A | 1 | 1 | 33527966 | 69394  | 8.116   | 5.86307 | CHB |
| rs2247959  | PHC2      | GI_37595529-A | 1 | 1 | 33528832 | 70260  | 7.3652  | 5.86307 | CHB |
| rs4652871  | PHC2      | GI_37595529-A | 1 | 1 | 33531610 | 73038  | 8.116   | 5.86307 | CHB |
| rs4298699  | PHC2      | GI_37595529-A | 1 | 1 | 33535327 | 76755  | 8.116   | 5.86307 | CHB |
| rs4652874  | PHC2      | GI_37595529-A | 1 | 1 | 33537367 | 78795  | 8.116   | 5.86307 | CHB |
| rs4653125  | PHC2      | GI_37595529-A | 1 | 1 | 33539665 | 81093  | 8.116   | 5.86307 | CHB |
| rs6675663  | PHC2      | GI_37595529-A | 1 | 1 | 33546784 | 88212  | 8.1663  | 5.86307 | CHB |
| rs6677391  | PHC2      | GI_37595529-A | 1 | 1 | 33551761 | 93189  | 7.9007  | 5.86307 | CHB |
| rs10753283 | PHC2      | GI_37595529-A | 1 | 1 | 33552336 | 93764  | 8.116   | 5.86307 | CHB |
| rs4652880  | PHC2      | GI_37595529-A | 1 | 1 | 33553918 | 95346  | 8.116   | 5.86307 | CHB |
| rs1324480  | PHC2      | GI_37595529-A | 1 | 1 | 33556853 | 98281  | 7.8359  | 5.86307 | CHB |
| rs1998624  | PHC2      | GI_37595529-A | 1 | 1 | 33560242 | 101670 | 8.116   | 5.86307 | CHB |
| rs1324476  | PHC2      | GI_37595529-A | 1 | 1 | 33566337 | 107765 | 8.116   | 5.86307 | CHB |
| rs10798949 | PHC2      | GI_37595529-A | 1 | 1 | 33576272 | 117700 | 6.8579  | 5.86307 | CHB |
| rs16822818 | NOR1      | GI_45643130-I | 1 | 1 | 36542342 | 20761  | 7.053   | 5.67978 | CHB |
| rs10493072 | NOR1      | GI_45643130-I | 1 | 1 | 36551294 | 11809  | 7.8091  | 5.67978 | CHB |
| rs3738835  | NOR1      | GI_45643130-I | 1 | 1 | 36553791 | 9312   | 8.3312  | 5.67978 | CHB |
| rs3738836  | NOR1      | GI_45643130-I | 1 | 1 | 36554101 | 9002   | 8.3312  | 5.67978 | CHB |
| rs2282354  | NOR1      | GI_45643130-I | 1 | 1 | 36556624 | 6479   | 8.3312  | 5.67978 | CHB |
| rs16822947 | NOR1      | GI_45643130-I | 1 | 1 | 36557358 | 5745   | 8.3312  | 5.67978 | CHB |
| rs1416840  | NOR1      | GI_45643130-I | 1 | 1 | 36557555 | 5548   | 8.3312  | 5.67978 | CHB |
| rs16822954 | NOR1      | GI_45643130-I | 1 | 1 | 36558098 | 5005   | 6.2472  | 5.67978 | CHB |

|            |           |               |   |   |          |        |        |         |     |
|------------|-----------|---------------|---|---|----------|--------|--------|---------|-----|
| rs16822960 | NOR1      | GI_45643130-I | 1 | 1 | 36559173 | 3930   | 8.3312 | 5.67978 | CHB |
| rs1819661  | NOR1      | GI_45643130-I | 1 | 1 | 36560128 | 2975   | 8.2736 | 5.67978 | CHB |
| rs946680   | NOR1      | GI_45643130-I | 1 | 1 | 36566270 | 3167   | 8.3312 | 5.67978 | CHB |
| rs2282357  | NOR1      | GI_45643130-I | 1 | 1 | 36566946 | 3843   | 8.3312 | 5.67978 | CHB |
| rs16822988 | NOR1      | GI_45643130-I | 1 | 1 | 36575879 | 12776  | 8.2914 | 5.67978 | CHB |
| rs946681   | NOR1      | GI_45643130-I | 1 | 1 | 36577255 | 14152  | 8.3312 | 5.67978 | CHB |
| rs3795495  | NOR1      | GI_45643130-I | 1 | 1 | 36578660 | 15557  | 7.6156 | 5.67978 | CHB |
| rs1416841  | NOR1      | GI_45643130-I | 1 | 1 | 36583203 | 20100  | 8.3312 | 5.67978 | CHB |
| rs10493075 | NOR1      | GI_45643130-I | 1 | 1 | 36583635 | 20532  | 8.3312 | 5.67978 | CHB |
| rs10493076 | NOR1      | GI_45643130-I | 1 | 1 | 36583840 | 20737  | 8.3312 | 5.67978 | CHB |
| rs16823020 | NOR1      | GI_45643130-I | 1 | 1 | 36584033 | 20930  | 6.141  | 5.67978 | CHB |
| rs10493077 | NOR1      | GI_45643130-I | 1 | 1 | 36584107 | 21004  | 8.3312 | 5.67978 | CHB |
| rs16823025 | NOR1      | GI_45643130-I | 1 | 1 | 36584198 | 21095  | 6.8244 | 5.67978 | CHB |
| rs883694   | NOR1      | GI_45643130-I | 1 | 1 | 36589540 | 26437  | 7.6156 | 5.67978 | CHB |
| rs2275479  | NOR1      | GI_45643130-I | 1 | 1 | 36590320 | 27217  | 8.3312 | 5.67978 | CHB |
| rs2275480  | NOR1      | GI_45643130-I | 1 | 1 | 36590626 | 27523  | 6.5033 | 5.67978 | CHB |
| rs3738838  | NOR1      | GI_45643130-I | 1 | 1 | 36595502 | 32399  | 8.3312 | 5.67978 | CHB |
| rs2275476  | NOR1      | GI_45643130-I | 1 | 1 | 36595946 | 32843  | 6.9229 | 5.67978 | CHB |
| rs2275475  | NOR1      | GI_45643130-I | 1 | 1 | 36596039 | 32936  | 8.3312 | 5.67978 | CHB |
| rs2275474  | NOR1      | GI_45643130-I | 1 | 1 | 36598626 | 35523  | 6.22   | 5.67978 | CHB |
| rs3806288  | NOR1      | GI_45643130-I | 1 | 1 | 36599189 | 36086  | 5.9142 | 5.67978 | CHB |
| rs3806287  | NOR1      | GI_45643130-I | 1 | 1 | 36599279 | 36176  | 8.0207 | 5.67978 | CHB |
| rs2147594  | NDUFS5    | GI_4758789-S  | 1 | 1 | 39148759 | 12377  | 6.4586 | 5.73632 | CHB |
| rs10888656 | NDUFS5    | GI_4758789-S  | 1 | 1 | 39195758 | 34622  | 6.0152 | 5.73632 | CHB |
| rs11205622 | NDUFS5    | GI_4758789-S  | 1 | 1 | 39202494 | 41358  | 6.467  | 5.73632 | CHB |
| rs3219472  | Hs.396207 | Hs.396207-S   | 1 | 1 | 45473143 | 299851 | 5.4799 | 5.28137 | CHB |
| rs2153609  | Hs.396207 | Hs.396207-S   | 1 | 1 | 45483151 | 289843 | 5.9108 | 5.28137 | CHB |
| rs2185549  | Hs.396207 | Hs.396207-S   | 1 | 1 | 45483196 | 289798 | 6.0425 | 5.28137 | CHB |
| rs4660849  | Hs.396207 | Hs.396207-S   | 1 | 1 | 45488965 | 284029 | 6.0425 | 5.28137 | CHB |
| rs9429160  | Hs.396207 | Hs.396207-S   | 1 | 1 | 45497061 | 275933 | 6.0425 | 5.28137 | CHB |
| rs9326141  | Hs.396207 | Hs.396207-S   | 1 | 1 | 45498036 | 274958 | 6.0425 | 5.28137 | CHB |
| rs4660852  | Hs.396207 | Hs.396207-S   | 1 | 1 | 45518024 | 254970 | 6.0425 | 5.28137 | CHB |
| rs11211101 | Hs.396207 | Hs.396207-S   | 1 | 1 | 45518404 | 254590 | 6.0425 | 5.28137 | CHB |
| rs6657284  | Hs.396207 | Hs.396207-S   | 1 | 1 | 45548181 | 224813 | 6.4404 | 5.28137 | CHB |
| rs1826691  | Hs.396207 | Hs.396207-S   | 1 | 1 | 45550355 | 222639 | 6.4404 | 5.28137 | CHB |
| rs3790582  | Hs.396207 | Hs.396207-S   | 1 | 1 | 45556381 | 216613 | 6.4404 | 5.28137 | CHB |
| rs12139364 | Hs.396207 | Hs.396207-S   | 1 | 1 | 45559248 | 213746 | 6.5594 | 5.28137 | CHB |
| rs7531253  | Hs.396207 | Hs.396207-S   | 1 | 1 | 45559276 | 213718 | 6.2729 | 5.28137 | CHB |
| rs1006216  | Hs.396207 | Hs.396207-S   | 1 | 1 | 45579087 | 193907 | 6.4404 | 5.28137 | CHB |
| rs998199   | Hs.396207 | Hs.396207-S   | 1 | 1 | 45581991 | 191003 | 6.7318 | 5.28137 | CHB |
| rs7532573  | Hs.396207 | Hs.396207-S   | 1 | 1 | 45584985 | 188009 | 6.5594 | 5.28137 | CHB |
| rs10890330 | Hs.396207 | Hs.396207-S   | 1 | 1 | 45589499 | 183495 | 6.4404 | 5.28137 | CHB |
| rs2055145  | Hs.396207 | Hs.396207-S   | 1 | 1 | 45595588 | 177406 | 6.4404 | 5.28137 | CHB |
| rs10789463 | Hs.396207 | Hs.396207-S   | 1 | 1 | 45596941 | 176053 | 9.8404 | 5.28137 | CHB |
| rs12738318 | Hs.396207 | Hs.396207-S   | 1 | 1 | 45598682 | 174312 | 6.5594 | 5.28137 | CHB |
| rs781058   | Hs.396207 | Hs.396207-S   | 1 | 1 | 45604149 | 168845 | 6.5594 | 5.28137 | CHB |
| rs4660858  | Hs.396207 | Hs.396207-S   | 1 | 1 | 45605444 | 167550 | 6.0647 | 5.28137 | CHB |
| rs12743512 | Hs.396207 | Hs.396207-S   | 1 | 1 | 45623126 | 149868 | 6.4881 | 5.28137 | CHB |
| rs937291   | Hs.396207 | Hs.396207-S   | 1 | 1 | 45626132 | 146862 | 6.8963 | 5.28137 | CHB |
| rs12029322 | Hs.396207 | Hs.396207-S   | 1 | 1 | 45639539 | 133455 | 6.2528 | 5.28137 | CHB |
| rs10789465 | Hs.396207 | Hs.396207-S   | 1 | 1 | 45640852 | 132142 | 6.5594 | 5.28137 | CHB |
| rs2275276  | Hs.396207 | Hs.396207-S   | 1 | 1 | 45643021 | 129973 | 6.5594 | 5.28137 | CHB |
| rs7903     | Hs.396207 | Hs.396207-S   | 1 | 1 | 45645565 | 127429 | 6.4612 | 5.28137 | CHB |
| rs713358   | Hs.396207 | Hs.396207-S   | 1 | 1 | 45657360 | 115634 | 6.3886 | 5.28137 | CHB |
| rs868351   | Hs.396207 | Hs.396207-S   | 1 | 1 | 45678911 | 94083  | 5.9141 | 5.28137 | CHB |
| rs512026   | Hs.396207 | Hs.396207-S   | 1 | 1 | 45679039 | 93955  | 6.4612 | 5.28137 | CHB |

|            |           |              |   |   |          |        |         |         |     |
|------------|-----------|--------------|---|---|----------|--------|---------|---------|-----|
| rs622798   | Hs.396207 | Hs.396207-S  | 1 | 1 | 45684364 | 88630  | 8.1965  | 5.28137 | CHB |
| rs666720   | IPP       | GI_5174472-S | 1 | 1 | 45689888 | 143947 | 5.8946  | 5.8659  | CHB |
| rs666720   | Hs.396207 | Hs.396207-S  | 1 | 1 | 45689888 | 83106  | 11.8215 | 5.28137 | CHB |
| rs12049503 | IPP       | GI_5174472-S | 1 | 1 | 45690649 | 143186 | 5.9794  | 5.8659  | CHB |
| rs12049503 | Hs.396207 | Hs.396207-S  | 1 | 1 | 45690649 | 82345  | 7.2621  | 5.28137 | CHB |
| rs2993263  | Hs.396207 | Hs.396207-S  | 1 | 1 | 45690723 | 82271  | 8.1965  | 5.28137 | CHB |
| rs3790585  | Hs.396207 | Hs.396207-S  | 1 | 1 | 45692449 | 80545  | 12.4985 | 5.28137 | CHB |
| rs3014219  | Hs.396207 | Hs.396207-S  | 1 | 1 | 45693547 | 79447  | 7.8299  | 5.28137 | CHB |
| rs3014218  | Hs.396207 | Hs.396207-S  | 1 | 1 | 45695421 | 77573  | 7.8299  | 5.28137 | CHB |
| rs3014216  | Hs.396207 | Hs.396207-S  | 1 | 1 | 45704853 | 68141  | 9.0428  | 5.28137 | CHB |
| rs780957   | Hs.396207 | Hs.396207-S  | 1 | 1 | 45706450 | 66544  | 8.8888  | 5.28137 | CHB |
| rs780954   | Hs.396207 | Hs.396207-S  | 1 | 1 | 45708170 | 64824  | 16.1845 | 5.28137 | CHB |
| rs1084086  | Hs.396207 | Hs.396207-S  | 1 | 1 | 45710193 | 62801  | 16.1845 | 5.28137 | CHB |
| rs2152078  | Hs.396207 | Hs.396207-S  | 1 | 1 | 45724693 | 48301  | 16.1845 | 5.28137 | CHB |
| rs2991979  | Hs.396207 | Hs.396207-S  | 1 | 1 | 45724951 | 48043  | 16.1845 | 5.28137 | CHB |
| rs7548549  | Hs.396207 | Hs.396207-S  | 1 | 1 | 45735701 | 37293  | 9.4842  | 5.28137 | CHB |
| rs2230657  | Hs.396207 | Hs.396207-S  | 1 | 1 | 45742582 | 30412  | 9.5156  | 5.28137 | CHB |
| rs2050376  | Hs.396207 | Hs.396207-S  | 1 | 1 | 45747723 | 25271  | 9.4842  | 5.28137 | CHB |
| rs2230658  | Hs.396207 | Hs.396207-S  | 1 | 1 | 45747947 | 25047  | 9.4842  | 5.28137 | CHB |
| rs2230659  | Hs.396207 | Hs.396207-S  | 1 | 1 | 45747977 | 25017  | 9.2857  | 5.28137 | CHB |
| rs1972410  | Hs.396207 | Hs.396207-S  | 1 | 1 | 45750040 | 22954  | 16.1845 | 5.28137 | CHB |
| rs2991986  | Hs.396207 | Hs.396207-S  | 1 | 1 | 45750375 | 22619  | 9.4842  | 5.28137 | CHB |
| rs2991987  | Hs.396207 | Hs.396207-S  | 1 | 1 | 45750515 | 22479  | 9.2496  | 5.28137 | CHB |
| rs2253862  | Hs.396207 | Hs.396207-S  | 1 | 1 | 45751053 | 21941  | 14.3074 | 5.28137 | CHB |
| rs2991988  | Hs.396207 | Hs.396207-S  | 1 | 1 | 45751524 | 21470  | 14.2378 | 5.28137 | CHB |
| rs2991989  | Hs.396207 | Hs.396207-S  | 1 | 1 | 45752058 | 20936  | 13.827  | 5.28137 | CHB |
| rs1547924  | Hs.396207 | Hs.396207-S  | 1 | 1 | 45754205 | 18789  | 9.4842  | 5.28137 | CHB |
| rs1547925  | Hs.396207 | Hs.396207-S  | 1 | 1 | 45754449 | 18545  | 14.3074 | 5.28137 | CHB |
| rs2275086  | Hs.396207 | Hs.396207-S  | 1 | 1 | 45754972 | 18022  | 14.3074 | 5.28137 | CHB |
| rs3014245  | Hs.396207 | Hs.396207-S  | 1 | 1 | 45756006 | 16988  | 14.3074 | 5.28137 | CHB |
| rs3014242  | Hs.396207 | Hs.396207-S  | 1 | 1 | 45756670 | 16324  | 8.3587  | 5.28137 | CHB |
| rs3014238  | Hs.396207 | Hs.396207-S  | 1 | 1 | 45759307 | 13687  | 8.7352  | 5.28137 | CHB |
| rs3014237  | Hs.396207 | Hs.396207-S  | 1 | 1 | 45759345 | 13649  | 16.1845 | 5.28137 | CHB |
| rs3014235  | Hs.396207 | Hs.396207-S  | 1 | 1 | 45760605 | 12389  | 14.3074 | 5.28137 | CHB |
| rs9429172  | Hs.396207 | Hs.396207-S  | 1 | 1 | 45761569 | 11425  | 13.2493 | 5.28137 | CHB |
| rs1250     | Hs.396207 | Hs.396207-S  | 1 | 1 | 45763120 | 9874   | 9.4842  | 5.28137 | CHB |
| rs4391704  | Hs.396207 | Hs.396207-S  | 1 | 1 | 45763329 | 9665   | 7.4594  | 5.28137 | CHB |
| rs12037459 | Hs.396207 | Hs.396207-S  | 1 | 1 | 45764052 | 8942   | 9.6405  | 5.28137 | CHB |
| rs12037561 | Hs.396207 | Hs.396207-S  | 1 | 1 | 45764365 | 8629   | 14.3074 | 5.28137 | CHB |
| rs6703748  | Hs.396207 | Hs.396207-S  | 1 | 1 | 45765069 | 7925   | 16.1845 | 5.28137 | CHB |
| rs10890333 | Hs.396207 | Hs.396207-S  | 1 | 1 | 45769415 | 3579   | 9.4842  | 5.28137 | CHB |
| rs10890334 | Hs.396207 | Hs.396207-S  | 1 | 1 | 45769471 | 3523   | 13.6523 | 5.28137 | CHB |
| rs4431884  | Hs.396207 | Hs.396207-S  | 1 | 1 | 45770416 | 2578   | 9.4842  | 5.28137 | CHB |
| rs6694889  | Hs.396207 | Hs.396207-S  | 1 | 1 | 45770899 | 2095   | 13.6506 | 5.28137 | CHB |
| rs12023439 | Hs.396207 | Hs.396207-S  | 1 | 1 | 45773729 | 735    | 15.4427 | 5.28137 | CHB |
| rs12043945 | Hs.396207 | Hs.396207-S  | 1 | 1 | 45776015 | 3021   | 9.4842  | 5.28137 | CHB |
| rs12091503 | Hs.396207 | Hs.396207-S  | 1 | 1 | 45776961 | 3967   | 9.2161  | 5.28137 | CHB |
| rs11211145 | Hs.396207 | Hs.396207-S  | 1 | 1 | 45777584 | 4590   | 15.9107 | 5.28137 | CHB |
| rs5021934  | Hs.396207 | Hs.396207-S  | 1 | 1 | 45778397 | 5403   | 9.2945  | 5.28137 | CHB |
| rs11211147 | Hs.396207 | Hs.396207-S  | 1 | 1 | 45779187 | 6193   | 14.4239 | 5.28137 | CHB |
| rs4660312  | Hs.396207 | Hs.396207-S  | 1 | 1 | 45779665 | 6671   | 9.2945  | 5.28137 | CHB |
| rs4660313  | Hs.396207 | Hs.396207-S  | 1 | 1 | 45779934 | 6940   | 15.9107 | 5.28137 | CHB |
| rs4660880  | Hs.396207 | Hs.396207-S  | 1 | 1 | 45780133 | 7139   | 16.1845 | 5.28137 | CHB |
| rs10890336 | Hs.396207 | Hs.396207-S  | 1 | 1 | 45780149 | 7155   | 7.2461  | 5.28137 | CHB |
| rs11211149 | Hs.396207 | Hs.396207-S  | 1 | 1 | 45781311 | 8317   | 14.4829 | 5.28137 | CHB |
| rs4468203  | Hs.396207 | Hs.396207-S  | 1 | 1 | 45782365 | 9371   | 8.0262  | 5.28137 | CHB |

|            |           |             |   |   |          |        |         |         |     |
|------------|-----------|-------------|---|---|----------|--------|---------|---------|-----|
| rs11211152 | Hs.396207 | Hs.396207-S | 1 | 1 | 45783250 | 10256  | 16.1845 | 5.28137 | CHB |
| rs4660882  | Hs.396207 | Hs.396207-S | 1 | 1 | 45785385 | 12391  | 9.2945  | 5.28137 | CHB |
| rs4607935  | Hs.396207 | Hs.396207-S | 1 | 1 | 45786254 | 13260  | 12.7718 | 5.28137 | CHB |
| rs4609469  | Hs.396207 | Hs.396207-S | 1 | 1 | 45786278 | 13284  | 9.2496  | 5.28137 | CHB |
| rs12049027 | Hs.396207 | Hs.396207-S | 1 | 1 | 45787277 | 14283  | 7.6196  | 5.28137 | CHB |
| rs10789467 | Hs.396207 | Hs.396207-S | 1 | 1 | 45787838 | 14844  | 9.4842  | 5.28137 | CHB |
| rs6656279  | Hs.396207 | Hs.396207-S | 1 | 1 | 45793181 | 20187  | 9.2945  | 5.28137 | CHB |
| rs3811436  | Hs.396207 | Hs.396207-S | 1 | 1 | 45794973 | 21979  | 14.3074 | 5.28137 | CHB |
| rs12024590 | Hs.396207 | Hs.396207-S | 1 | 1 | 45796589 | 23595  | 16.1845 | 5.28137 | CHB |
| rs3013597  | Hs.396207 | Hs.396207-S | 1 | 1 | 45797449 | 24455  | 9.4978  | 5.28137 | CHB |
| rs11211157 | Hs.396207 | Hs.396207-S | 1 | 1 | 45801937 | 28943  | 9.4842  | 5.28137 | CHB |
| rs10430105 | Hs.396207 | Hs.396207-S | 1 | 1 | 45807969 | 34975  | 14.3074 | 5.28137 | CHB |
| rs11211160 | Hs.396207 | Hs.396207-S | 1 | 1 | 45815322 | 42328  | 16.1845 | 5.28137 | CHB |
| rs10890341 | Hs.396207 | Hs.396207-S | 1 | 1 | 45816333 | 43339  | 14.3074 | 5.28137 | CHB |
| rs3013595  | Hs.396207 | Hs.396207-S | 1 | 1 | 45822296 | 49302  | 9.2945  | 5.28137 | CHB |
| rs11211166 | Hs.396207 | Hs.396207-S | 1 | 1 | 45827035 | 54041  | 8.8493  | 5.28137 | CHB |
| rs10789470 | Hs.396207 | Hs.396207-S | 1 | 1 | 45827424 | 54430  | 9.4842  | 5.28137 | CHB |
| rs10749856 | Hs.396207 | Hs.396207-S | 1 | 1 | 45833939 | 60945  | 9.3412  | 5.28137 | CHB |
| rs4564187  | Hs.396207 | Hs.396207-S | 1 | 1 | 45835954 | 62960  | 9.3412  | 5.28137 | CHB |
| rs4274104  | Hs.396207 | Hs.396207-S | 1 | 1 | 45929961 | 156967 | 9.1106  | 5.28137 | CHB |
| rs11211173 | Hs.396207 | Hs.396207-S | 1 | 1 | 45931396 | 158402 | 14.5092 | 5.28137 | CHB |
| rs12560266 | Hs.396207 | Hs.396207-S | 1 | 1 | 45933637 | 160643 | 7.0078  | 5.28137 | CHB |
| rs11211176 | Hs.396207 | Hs.396207-S | 1 | 1 | 45935106 | 162112 | 8.5789  | 5.28137 | CHB |
| rs11211177 | Hs.396207 | Hs.396207-S | 1 | 1 | 45938369 | 165375 | 13.2608 | 5.28137 | CHB |
| rs11211178 | Hs.396207 | Hs.396207-S | 1 | 1 | 45939586 | 166592 | 9.0266  | 5.28137 | CHB |
| rs12025621 | Hs.396207 | Hs.396207-S | 1 | 1 | 45940411 | 167417 | 8.3472  | 5.28137 | CHB |
| rs4660314  | Hs.396207 | Hs.396207-S | 1 | 1 | 45941905 | 168911 | 9.0266  | 5.28137 | CHB |
| rs4660883  | Hs.396207 | Hs.396207-S | 1 | 1 | 45948118 | 175124 | 9.0266  | 5.28137 | CHB |
| rs6683274  | Hs.396207 | Hs.396207-S | 1 | 1 | 45953658 | 180664 | 5.7904  | 5.28137 | CHB |
| rs4626927  | Hs.396207 | Hs.396207-S | 1 | 1 | 45960665 | 187671 | 5.5869  | 5.28137 | CHB |
| rs7540578  | Hs.396207 | Hs.396207-S | 1 | 1 | 45964164 | 191170 | 5.7904  | 5.28137 | CHB |
| rs6690386  | Hs.396207 | Hs.396207-S | 1 | 1 | 45965031 | 192037 | 8.8928  | 5.28137 | CHB |
| rs6661163  | Hs.396207 | Hs.396207-S | 1 | 1 | 45967024 | 194030 | 5.5869  | 5.28137 | CHB |
| rs6429578  | Hs.396207 | Hs.396207-S | 1 | 1 | 45969130 | 196136 | 8.4045  | 5.28137 | CHB |
| rs12076580 | Hs.396207 | Hs.396207-S | 1 | 1 | 45970179 | 197185 | 8.8928  | 5.28137 | CHB |
| rs7539800  | Hs.396207 | Hs.396207-S | 1 | 1 | 45974149 | 201155 | 8.8928  | 5.28137 | CHB |
| rs10890350 | Hs.396207 | Hs.396207-S | 1 | 1 | 45974398 | 201404 | 10.5971 | 5.28137 | CHB |
| rs4390216  | Hs.396207 | Hs.396207-S | 1 | 1 | 45978476 | 205482 | 8.8928  | 5.28137 | CHB |
| rs6672115  | Hs.396207 | Hs.396207-S | 1 | 1 | 45984899 | 211905 | 8.8928  | 5.28137 | CHB |
| rs6429580  | Hs.396207 | Hs.396207-S | 1 | 1 | 45987668 | 214674 | 8.8928  | 5.28137 | CHB |
| rs6700597  | Hs.396207 | Hs.396207-S | 1 | 1 | 45996266 | 223272 | 5.9416  | 5.28137 | CHB |
| rs7546237  | Hs.396207 | Hs.396207-S | 1 | 1 | 45997630 | 224636 | 7.6611  | 5.28137 | CHB |
| rs11211200 | Hs.396207 | Hs.396207-S | 1 | 1 | 46000372 | 227378 | 8.8928  | 5.28137 | CHB |
| rs4376778  | Hs.396207 | Hs.396207-S | 1 | 1 | 46000866 | 227872 | 5.5869  | 5.28137 | CHB |
| rs6694340  | Hs.396207 | Hs.396207-S | 1 | 1 | 46001436 | 228442 | 8.4296  | 5.28137 | CHB |
| rs4660889  | Hs.396207 | Hs.396207-S | 1 | 1 | 46009351 | 236357 | 8.8928  | 5.28137 | CHB |
| rs6680380  | Hs.396207 | Hs.396207-S | 1 | 1 | 46012209 | 239215 | 5.5869  | 5.28137 | CHB |
| rs10890354 | Hs.396207 | Hs.396207-S | 1 | 1 | 46017367 | 244373 | 5.5869  | 5.28137 | CHB |
| rs4298677  | Hs.396207 | Hs.396207-S | 1 | 1 | 46018639 | 245645 | 8.8928  | 5.28137 | CHB |
| rs6701614  | Hs.396207 | Hs.396207-S | 1 | 1 | 46021440 | 248446 | 5.2928  | 5.28137 | CHB |
| rs10890355 | Hs.396207 | Hs.396207-S | 1 | 1 | 46029368 | 256374 | 7.6859  | 5.28137 | CHB |
| rs11211204 | Hs.396207 | Hs.396207-S | 1 | 1 | 46029884 | 256890 | 8.1566  | 5.28137 | CHB |
| rs7547189  | Hs.396207 | Hs.396207-S | 1 | 1 | 46031534 | 258540 | 8.5387  | 5.28137 | CHB |
| rs7547284  | Hs.396207 | Hs.396207-S | 1 | 1 | 46031585 | 258591 | 8.037   | 5.28137 | CHB |
| rs6429582  | Hs.396207 | Hs.396207-S | 1 | 1 | 46033863 | 260869 | 5.5869  | 5.28137 | CHB |
| rs6675222  | Hs.396207 | Hs.396207-S | 1 | 1 | 46038596 | 265602 | 8.7227  | 5.28137 | CHB |

|            |           |             |   |   |          |        |        |         |     |
|------------|-----------|-------------|---|---|----------|--------|--------|---------|-----|
| rs4660895  | Hs.396207 | Hs.396207-S | 1 | 1 | 46041759 | 268765 | 8.143  | 5.28137 | CHB |
| rs6688365  | Hs.396207 | Hs.396207-S | 1 | 1 | 46041904 | 268910 | 5.4034 | 5.28137 | CHB |
| rs7531911  | Hs.396207 | Hs.396207-S | 1 | 1 | 46042443 | 269449 | 8.8928 | 5.28137 | CHB |
| rs6656992  | Hs.396207 | Hs.396207-S | 1 | 1 | 46045088 | 272094 | 5.5869 | 5.28137 | CHB |
| rs11211208 | Hs.396207 | Hs.396207-S | 1 | 1 | 46046276 | 273282 | 5.5686 | 5.28137 | CHB |
| rs4660318  | Hs.396207 | Hs.396207-S | 1 | 1 | 46046896 | 273902 | 8.8928 | 5.28137 | CHB |
| rs4660319  | Hs.396207 | Hs.396207-S | 1 | 1 | 46053643 | 280649 | 5.5869 | 5.28137 | CHB |
| rs6682683  | Hs.396207 | Hs.396207-S | 1 | 1 | 46054357 | 281363 | 8.7227 | 5.28137 | CHB |
| rs11211213 | Hs.396207 | Hs.396207-S | 1 | 1 | 46054537 | 281543 | 5.9171 | 5.28137 | CHB |
| rs10890361 | Hs.396207 | Hs.396207-S | 1 | 1 | 46058254 | 285260 | 5.5869 | 5.28137 | CHB |
| rs11211217 | Hs.396207 | Hs.396207-S | 1 | 1 | 46060249 | 287255 | 8.8928 | 5.28137 | CHB |
| rs10789478 | Hs.396207 | Hs.396207-S | 1 | 1 | 46062526 | 289532 | 8.2887 | 5.28137 | CHB |
| rs12139630 | Hs.396207 | Hs.396207-S | 1 | 1 | 46062955 | 289961 | 5.9171 | 5.28137 | CHB |
| rs12144263 | Hs.396207 | Hs.396207-S | 1 | 1 | 46064466 | 291472 | 5.5869 | 5.28137 | CHB |
| rs10890363 | Hs.396207 | Hs.396207-S | 1 | 1 | 46068168 | 295174 | 5.5869 | 5.28137 | CHB |
| rs4539075  | Hs.396207 | Hs.396207-S | 1 | 1 | 46070030 | 297036 | 8.8928 | 5.28137 | CHB |
| rs12409773 | Hs.396207 | Hs.396207-S | 1 | 1 | 46070851 | 297857 | 5.5869 | 5.28137 | CHB |
| rs10890365 | Hs.396207 | Hs.396207-S | 1 | 1 | 46071368 | 298374 | 8.8928 | 5.28137 | CHB |
| rs4545281  | Hs.396207 | Hs.396207-S | 1 | 1 | 46072074 | 299080 | 5.5869 | 5.28137 | CHB |
| rs7512395  | Hs.396207 | Hs.396207-S | 1 | 1 | 46073197 | 300203 | 8.8928 | 5.28137 | CHB |
| rs7556436  | Hs.396207 | Hs.396207-S | 1 | 1 | 46075900 | 302906 | 5.5869 | 5.28137 | CHB |
| rs4660321  | Hs.396207 | Hs.396207-S | 1 | 1 | 46078780 | 305786 | 5.5869 | 5.28137 | CHB |
| rs7365705  | Hs.396207 | Hs.396207-S | 1 | 1 | 46079793 | 306799 | 5.5869 | 5.28137 | CHB |
| rs7527244  | Hs.396207 | Hs.396207-S | 1 | 1 | 46080792 | 307798 | 8.8928 | 5.28137 | CHB |
| rs9787412  | Hs.396207 | Hs.396207-S | 1 | 1 | 46083616 | 310622 | 8.1196 | 5.28137 | CHB |
| rs4660896  | Hs.396207 | Hs.396207-S | 1 | 1 | 46084436 | 311442 | 7.9099 | 5.28137 | CHB |
| rs10732844 | Hs.396207 | Hs.396207-S | 1 | 1 | 46084708 | 311714 | 8.1196 | 5.28137 | CHB |
| rs12133129 | Hs.396207 | Hs.396207-S | 1 | 1 | 46085368 | 312374 | 8.1196 | 5.28137 | CHB |
| rs11211223 | Hs.396207 | Hs.396207-S | 1 | 1 | 46092625 | 319631 | 7.9986 | 5.28137 | CHB |
| rs6687301  | Hs.396207 | Hs.396207-S | 1 | 1 | 46094872 | 321878 | 8.1196 | 5.28137 | CHB |
| rs6657720  | Hs.396207 | Hs.396207-S | 1 | 1 | 46098289 | 325295 | 8.1196 | 5.28137 | CHB |
| rs10890370 | Hs.396207 | Hs.396207-S | 1 | 1 | 46101237 | 328243 | 8.1196 | 5.28137 | CHB |
| rs7526369  | Hs.396207 | Hs.396207-S | 1 | 1 | 46102580 | 329586 | 8.1196 | 5.28137 | CHB |
| rs10890371 | Hs.396207 | Hs.396207-S | 1 | 1 | 46102917 | 329923 | 8.1196 | 5.28137 | CHB |
| rs10890372 | Hs.396207 | Hs.396207-S | 1 | 1 | 46103040 | 330046 | 7.896  | 5.28137 | CHB |
| rs4074225  | Hs.396207 | Hs.396207-S | 1 | 1 | 46104384 | 331390 | 8.1196 | 5.28137 | CHB |
| rs10890373 | Hs.396207 | Hs.396207-S | 1 | 1 | 46105775 | 332781 | 8.1196 | 5.28137 | CHB |
| rs4134387  | Hs.396207 | Hs.396207-S | 1 | 1 | 46107178 | 334184 | 8.1196 | 5.28137 | CHB |
| rs6681068  | Hs.396207 | Hs.396207-S | 1 | 1 | 46110402 | 337408 | 7.4384 | 5.28137 | CHB |
| rs11211228 | Hs.396207 | Hs.396207-S | 1 | 1 | 46111860 | 338866 | 8.1196 | 5.28137 | CHB |
| rs12022335 | Hs.396207 | Hs.396207-S | 1 | 1 | 46114752 | 341758 | 8.1196 | 5.28137 | CHB |
| rs10789485 | Hs.396207 | Hs.396207-S | 1 | 1 | 46119328 | 346334 | 8.1196 | 5.28137 | CHB |
| rs10789486 | Hs.396207 | Hs.396207-S | 1 | 1 | 46120687 | 347693 | 8.1196 | 5.28137 | CHB |
| rs10890378 | Hs.396207 | Hs.396207-S | 1 | 1 | 46122677 | 349683 | 8.1196 | 5.28137 | CHB |
| rs11211232 | Hs.396207 | Hs.396207-S | 1 | 1 | 46123166 | 350172 | 8.1196 | 5.28137 | CHB |
| rs4660900  | Hs.396207 | Hs.396207-S | 1 | 1 | 46131625 | 358631 | 8.1196 | 5.28137 | CHB |
| rs11211235 | Hs.396207 | Hs.396207-S | 1 | 1 | 46152395 | 379401 | 8.1196 | 5.28137 | CHB |
| rs11211236 | Hs.396207 | Hs.396207-S | 1 | 1 | 46155787 | 382793 | 8.1196 | 5.28137 | CHB |
| rs4660328  | Hs.396207 | Hs.396207-S | 1 | 1 | 46156851 | 383857 | 8.1196 | 5.28137 | CHB |
| rs11211237 | Hs.396207 | Hs.396207-S | 1 | 1 | 46159349 | 386355 | 6.6406 | 5.28137 | CHB |
| rs10890380 | Hs.396207 | Hs.396207-S | 1 | 1 | 46161489 | 388495 | 8.1196 | 5.28137 | CHB |
| rs10890381 | Hs.396207 | Hs.396207-S | 1 | 1 | 46163791 | 390797 | 6.0296 | 5.28137 | CHB |
| rs6429588  | Hs.396207 | Hs.396207-S | 1 | 1 | 46166078 | 393084 | 8.1196 | 5.28137 | CHB |
| rs11211243 | Hs.396207 | Hs.396207-S | 1 | 1 | 46167453 | 394459 | 8.1196 | 5.28137 | CHB |
| rs4660905  | Hs.396207 | Hs.396207-S | 1 | 1 | 46173607 | 400613 | 8.1196 | 5.28137 | CHB |
| rs4660334  | Hs.396207 | Hs.396207-S | 1 | 1 | 46174146 | 401152 | 8.1196 | 5.28137 | CHB |

|            |           |               |   |   |          |        |        |         |     |
|------------|-----------|---------------|---|---|----------|--------|--------|---------|-----|
| rs4073847  | Hs.396207 | Hs.396207-S   | 1 | 1 | 46175032 | 402038 | 8.1196 | 5.28137 | CHB |
| rs6661500  | Hs.396207 | Hs.396207-S   | 1 | 1 | 46177682 | 404688 | 8.1196 | 5.28137 | CHB |
| rs10890382 | Hs.396207 | Hs.396207-S   | 1 | 1 | 46181694 | 408700 | 8.1196 | 5.28137 | CHB |
| rs3922887  | Hs.396207 | Hs.396207-S   | 1 | 1 | 46185822 | 412828 | 8.1196 | 5.28137 | CHB |
| rs4660335  | Hs.396207 | Hs.396207-S   | 1 | 1 | 46186738 | 413744 | 8.1196 | 5.28137 | CHB |
| rs6677777  | Hs.396207 | Hs.396207-S   | 1 | 1 | 46187856 | 414862 | 8.1196 | 5.28137 | CHB |
| rs11211248 | Hs.396207 | Hs.396207-S   | 1 | 1 | 46188864 | 415870 | 8.1196 | 5.28137 | CHB |
| rs946528   | Hs.396207 | Hs.396207-S   | 1 | 1 | 46197582 | 424588 | 6.2389 | 5.28137 | CHB |
| rs946527   | Hs.396207 | Hs.396207-S   | 1 | 1 | 46197990 | 424996 | 8.1196 | 5.28137 | CHB |
| rs946524   | Hs.396207 | Hs.396207-S   | 1 | 1 | 46199580 | 426586 | 7.896  | 5.28137 | CHB |
| rs785478   | Hs.396207 | Hs.396207-S   | 1 | 1 | 46203655 | 430661 | 8.1196 | 5.28137 | CHB |
| rs785480   | Hs.396207 | Hs.396207-S   | 1 | 1 | 46204184 | 431190 | 8.1196 | 5.28137 | CHB |
| rs925524   | Hs.396207 | Hs.396207-S   | 1 | 1 | 46208729 | 435735 | 7.0773 | 5.28137 | CHB |
| rs1622208  | Hs.396207 | Hs.396207-S   | 1 | 1 | 46210395 | 437401 | 8.1196 | 5.28137 | CHB |
| rs6675259  | Hs.396207 | Hs.396207-S   | 1 | 1 | 46214315 | 441321 | 6.1558 | 5.28137 | CHB |
| rs7538978  | Hs.396207 | Hs.396207-S   | 1 | 1 | 46217074 | 444080 | 7.4628 | 5.28137 | CHB |
| rs1707322  | Hs.396207 | Hs.396207-S   | 1 | 1 | 46217167 | 444173 | 7.4628 | 5.28137 | CHB |
| rs1707337  | Hs.396207 | Hs.396207-S   | 1 | 1 | 46220789 | 447795 | 7.4628 | 5.28137 | CHB |
| rs1768807  | Hs.396207 | Hs.396207-S   | 1 | 1 | 46222590 | 449596 | 7.4628 | 5.28137 | CHB |
| rs1707317  | Hs.396207 | Hs.396207-S   | 1 | 1 | 46222662 | 449668 | 7.4628 | 5.28137 | CHB |
| rs1768818  | Hs.396207 | Hs.396207-S   | 1 | 1 | 46226306 | 453312 | 7.4628 | 5.28137 | CHB |
| rs1768817  | Hs.396207 | Hs.396207-S   | 1 | 1 | 46226554 | 453560 | 7.4628 | 5.28137 | CHB |
| rs785470   | Hs.396207 | Hs.396207-S   | 1 | 1 | 46231642 | 458648 | 7.4628 | 5.28137 | CHB |
| rs785468   | Hs.396207 | Hs.396207-S   | 1 | 1 | 46233537 | 460543 | 7.4628 | 5.28137 | CHB |
| rs785467   | Hs.396207 | Hs.396207-S   | 1 | 1 | 46233579 | 460585 | 7.4628 | 5.28137 | CHB |
| rs785465   | Hs.396207 | Hs.396207-S   | 1 | 1 | 46234597 | 461603 | 7.4628 | 5.28137 | CHB |
| rs785510   | Hs.396207 | Hs.396207-S   | 1 | 1 | 46240638 | 467644 | 7.4628 | 5.28137 | CHB |
| rs2458400  | Hs.396207 | Hs.396207-S   | 1 | 1 | 46242818 | 469824 | 7.4628 | 5.28137 | CHB |
| rs785506   | Hs.396207 | Hs.396207-S   | 1 | 1 | 46252672 | 479678 | 7.4628 | 5.28137 | CHB |
| rs1613296  | Hs.396207 | Hs.396207-S   | 1 | 1 | 46258872 | 485878 | 7.2648 | 5.28137 | CHB |
| rs1768801  | Hs.396207 | Hs.396207-S   | 1 | 1 | 46261157 | 488163 | 7.3693 | 5.28137 | CHB |
| rs809774   | Hs.396207 | Hs.396207-S   | 1 | 1 | 46272264 | 499270 | 5.6088 | 5.28137 | CHB |
| rs785484   | Hs.396207 | Hs.396207-S   | 1 | 1 | 46286035 | 513041 | 7.4628 | 5.28137 | CHB |
| rs785493   | Hs.396207 | Hs.396207-S   | 1 | 1 | 46296879 | 523885 | 7.4628 | 5.28137 | CHB |
| rs785497   | Hs.396207 | Hs.396207-S   | 1 | 1 | 46303923 | 530929 | 7.4628 | 5.28137 | CHB |
| rs1416706  | Hs.396207 | Hs.396207-S   | 1 | 1 | 46314864 | 541870 | 6.5097 | 5.28137 | CHB |
| rs10493531 | MGC22773  | GI_21687083-S | 1 | 1 | 74229688 | 128331 | 7.1937 | 5.51692 | CHB |
| rs4650243  | MGC22773  | GI_21687083-S | 1 | 1 | 74230485 | 127534 | 7.0812 | 5.51692 | CHB |
| rs4649996  | MGC22773  | GI_21687083-S | 1 | 1 | 74232300 | 125719 | 7.4789 | 5.51692 | CHB |
| rs11579809 | MGC22773  | GI_21687083-S | 1 | 1 | 74244608 | 113411 | 6.1707 | 5.51692 | CHB |
| rs7550195  | MGC22773  | GI_21687083-S | 1 | 1 | 74274326 | 83693  | 6.8112 | 5.51692 | CHB |
| rs10890108 | MGC22773  | GI_21687083-S | 1 | 1 | 74283203 | 74816  | 7.4789 | 5.51692 | CHB |
| rs2343864  | MGC22773  | GI_21687083-S | 1 | 1 | 74289090 | 68929  | 7.4789 | 5.51692 | CHB |
| rs11210417 | MGC22773  | GI_21687083-S | 1 | 1 | 74293180 | 64839  | 7.4789 | 5.51692 | CHB |
| rs11210418 | MGC22773  | GI_21687083-S | 1 | 1 | 74294698 | 63321  | 7.4789 | 5.51692 | CHB |
| rs11210419 | MGC22773  | GI_21687083-S | 1 | 1 | 74298989 | 59030  | 7.4789 | 5.51692 | CHB |
| rs7543134  | MGC22773  | GI_21687083-S | 1 | 1 | 74314071 | 43948  | 7.4789 | 5.51692 | CHB |
| rs1412824  | MGC22773  | GI_21687083-S | 1 | 1 | 74372246 | 14227  | 7.7098 | 5.51692 | CHB |
| rs7535418  | MGC22773  | GI_21687083-S | 1 | 1 | 74372749 | 14730  | 8.0047 | 5.51692 | CHB |
| rs10789391 | MGC22773  | GI_21687083-S | 1 | 1 | 74374602 | 16583  | 8.8488 | 5.51692 | CHB |
| rs1412825  | MGC22773  | GI_21687083-S | 1 | 1 | 74375835 | 17816  | 8.8488 | 5.51692 | CHB |
| rs4422957  | MGC22773  | GI_21687083-S | 1 | 1 | 74376170 | 18151  | 8.8488 | 5.51692 | CHB |
| rs792310   | MGC22773  | GI_21687083-S | 1 | 1 | 74377514 | 19495  | 8.8488 | 5.51692 | CHB |
| rs577367   | MGC22773  | GI_21687083-S | 1 | 1 | 74379707 | 21688  | 8.1579 | 5.51692 | CHB |
| rs487917   | MGC22773  | GI_21687083-S | 1 | 1 | 74380917 | 22898  | 8.8488 | 5.51692 | CHB |
| rs571848   | MGC22773  | GI_21687083-S | 1 | 1 | 74383540 | 25521  | 8.8488 | 5.51692 | CHB |

|            |          |               |   |   |           |       |         |         |     |
|------------|----------|---------------|---|---|-----------|-------|---------|---------|-----|
| rs520806   | MGC22773 | GI_21687083-S | 1 | 1 | 74385362  | 27343 | 8.8488  | 5.51692 | CHB |
| rs522759   | MGC22773 | GI_21687083-S | 1 | 1 | 74385603  | 27584 | 8.8488  | 5.51692 | CHB |
| rs545664   | MGC22773 | GI_21687083-S | 1 | 1 | 74385798  | 27779 | 6.8556  | 5.51692 | CHB |
| rs545721   | MGC22773 | GI_21687083-S | 1 | 1 | 74385820  | 27801 | 8.8488  | 5.51692 | CHB |
| rs581353   | MGC22773 | GI_21687083-S | 1 | 1 | 74387407  | 29388 | 8.8488  | 5.51692 | CHB |
| rs496008   | MGC22773 | GI_21687083-S | 1 | 1 | 74387827  | 29808 | 7.6794  | 5.51692 | CHB |
| rs485929   | MGC22773 | GI_21687083-S | 1 | 1 | 74390306  | 32287 | 8.8488  | 5.51692 | CHB |
| rs792321   | MGC22773 | GI_21687083-S | 1 | 1 | 74393989  | 35970 | 8.8488  | 5.51692 | CHB |
| rs524306   | MGC22773 | GI_21687083-S | 1 | 1 | 74394274  | 36255 | 7.6217  | 5.51692 | CHB |
| rs495027   | MGC22773 | GI_21687083-S | 1 | 1 | 74394280  | 36261 | 8.8488  | 5.51692 | CHB |
| rs533371   | MGC22773 | GI_21687083-S | 1 | 1 | 74399033  | 41014 | 8.8488  | 5.51692 | CHB |
| rs11210440 | MGC22773 | GI_21687083-S | 1 | 1 | 74405229  | 47210 | 8.8488  | 5.51692 | CHB |
| rs10890119 | MGC22773 | GI_21687083-S | 1 | 1 | 74407221  | 49202 | 8.5476  | 5.51692 | CHB |
| rs11210442 | MGC22773 | GI_21687083-S | 1 | 1 | 74407725  | 49706 | 7.1991  | 5.51692 | CHB |
| rs492302   | MGC22773 | GI_21687083-S | 1 | 1 | 74411352  | 53333 | 8.8488  | 5.51692 | CHB |
| rs500203   | MGC22773 | GI_21687083-S | 1 | 1 | 74413672  | 55653 | 8.8488  | 5.51692 | CHB |
| rs532221   | MGC22773 | GI_21687083-S | 1 | 1 | 74413971  | 55952 | 8.8488  | 5.51692 | CHB |
| rs568049   | MGC22773 | GI_21687083-S | 1 | 1 | 74416524  | 58505 | 8.8488  | 5.51692 | CHB |
| rs3765651  | MGC22773 | GI_21687083-S | 1 | 1 | 74421383  | 63364 | 8.8488  | 5.51692 | CHB |
| rs481387   | MGC22773 | GI_21687083-S | 1 | 1 | 74422471  | 64452 | 8.8488  | 5.51692 | CHB |
| rs2071487  | GSTM1    | GI_23065546-A | 1 | 1 | 109945123 | 1163  | 15.0494 | 5.9529  | CHB |
| rs2071487  | GSTM2    | GI_23065549-S | 1 | 1 | 109945123 | 18905 | 9.7198  | 5.74218 | CHB |
| rs2014578  | GSTM2    | GI_23065549-S | 1 | 1 | 109953413 | 27195 | 9.0088  | 5.74218 | CHB |
| rs11101985 | GSTM1    | GI_23065546-A | 1 | 1 | 109958078 | 14118 | 9.6333  | 5.9529  | CHB |
| rs11101985 | GSTM2    | GI_23065549-S | 1 | 1 | 109958078 | 31860 | 6.4635  | 5.74218 | CHB |
| rs11579576 | GSTM1    | GI_23065546-A | 1 | 1 | 109961218 | 17258 | 6.7861  | 5.9529  | CHB |
| rs7364941  | GSTM1    | GI_23065546-A | 1 | 1 | 109962210 | 18250 | 7.3656  | 5.9529  | CHB |
| rs366631   | GSTM1    | GI_23065546-A | 1 | 1 | 109964514 | 20554 | 14.4054 | 5.9529  | CHB |
| rs366631   | GSTM2    | GI_23065549-S | 1 | 1 | 109964514 | 38296 | 11.2369 | 5.74218 | CHB |
| rs11101989 | GSTM1    | GI_23065546-A | 1 | 1 | 109965783 | 21823 | 6.794   | 5.9529  | CHB |
| rs674787   | GSTM1    | GI_23065546-A | 1 | 1 | 109965953 | 21993 | 12.8545 | 5.9529  | CHB |
| rs674787   | GSTM2    | GI_23065549-S | 1 | 1 | 109965953 | 39735 | 10.3294 | 5.74218 | CHB |
| rs351372   | ST7L     | GI_38201636-A | 1 | 1 | 112771262 | 25437 | 10.507  | 6.17548 | CHB |
| rs351372   | ST7L     | GI_38201636-I | 1 | 1 | 112771262 | 25287 | 10.6558 | 6.17548 | CHB |
| rs1006298  | ST7L     | GI_38201636-A | 1 | 1 | 112774001 | 22698 | 9.6946  | 6.17548 | CHB |
| rs1006298  | ST7L     | GI_38201636-I | 1 | 1 | 112774001 | 22548 | 9.8752  | 6.17548 | CHB |
| rs910697   | ST7L     | GI_38201636-A | 1 | 1 | 112775167 | 21532 | 10.507  | 6.17548 | CHB |
| rs910697   | ST7L     | GI_38201636-I | 1 | 1 | 112775167 | 21382 | 10.6558 | 6.17548 | CHB |
| rs12728001 | ST7L     | GI_38201636-A | 1 | 1 | 112788798 | 7901  | 10.6892 | 6.17548 | CHB |
| rs12728001 | ST7L     | GI_38201636-I | 1 | 1 | 112788798 | 7751  | 10.5522 | 6.17548 | CHB |
| rs10745330 | ST7L     | GI_38201636-A | 1 | 1 | 112795481 | 1218  | 10.77   | 6.17548 | CHB |
| rs10745330 | ST7L     | GI_38201636-I | 1 | 1 | 112795481 | 1068  | 11.219  | 6.17548 | CHB |
| rs7544663  | ST7L     | GI_38201636-A | 1 | 1 | 112801048 | 4349  | 11.1521 | 6.17548 | CHB |
| rs7544663  | ST7L     | GI_38201636-I | 1 | 1 | 112801048 | 4499  | 11.3269 | 6.17548 | CHB |
| rs7513716  | ST7L     | GI_38201636-A | 1 | 1 | 112801362 | 4663  | 11.1521 | 6.17548 | CHB |
| rs7513716  | ST7L     | GI_38201636-I | 1 | 1 | 112801362 | 4813  | 11.3269 | 6.17548 | CHB |
| rs10857963 | ST7L     | GI_38201636-A | 1 | 1 | 112803529 | 6830  | 11.1521 | 6.17548 | CHB |
| rs10857963 | ST7L     | GI_38201636-I | 1 | 1 | 112803529 | 6980  | 11.3269 | 6.17548 | CHB |
| rs12126277 | ST7L     | GI_38201636-A | 1 | 1 | 112818411 | 21712 | 11.1521 | 6.17548 | CHB |
| rs12126277 | ST7L     | GI_38201636-I | 1 | 1 | 112818411 | 21862 | 11.3269 | 6.17548 | CHB |
| rs7554916  | ST7L     | GI_38201636-A | 1 | 1 | 112835776 | 39077 | 11.1521 | 6.17548 | CHB |
| rs7554916  | ST7L     | GI_38201636-I | 1 | 1 | 112835776 | 39227 | 11.3269 | 6.17548 | CHB |
| rs6666579  | ST7L     | GI_38201636-A | 1 | 1 | 112844435 | 47736 | 11.1521 | 6.17548 | CHB |
| rs6666579  | ST7L     | GI_38201636-I | 1 | 1 | 112844435 | 47886 | 11.3269 | 6.17548 | CHB |
| rs6682737  | ST7L     | GI_38201636-A | 1 | 1 | 112848271 | 51572 | 11.1521 | 6.17548 | CHB |
| rs6682737  | ST7L     | GI_38201636-I | 1 | 1 | 112848271 | 51722 | 11.3269 | 6.17548 | CHB |

|            |         |               |   |   |           |        |         |         |     |
|------------|---------|---------------|---|---|-----------|--------|---------|---------|-----|
| rs6700673  | ST7L    | GI_38201636-A | 1 | 1 | 112869096 | 72397  | 11.1781 | 6.17548 | CHB |
| rs6700673  | ST7L    | GI_38201636-I | 1 | 1 | 112869096 | 72547  | 10.4909 | 6.17548 | CHB |
| rs7415820  | ST7L    | GI_38201636-A | 1 | 1 | 112881491 | 84792  | 11.1781 | 6.17548 | CHB |
| rs7415820  | ST7L    | GI_38201636-I | 1 | 1 | 112881491 | 84942  | 10.4909 | 6.17548 | CHB |
| rs3013440  | ST7L    | GI_38201636-A | 1 | 1 | 112907831 | 111132 | 10.2071 | 6.17548 | CHB |
| rs3013440  | ST7L    | GI_38201636-I | 1 | 1 | 112907831 | 111282 | 9.5231  | 6.17548 | CHB |
| rs3013439  | ST7L    | GI_38201636-A | 1 | 1 | 112912713 | 116014 | 7.785   | 6.17548 | CHB |
| rs3013439  | ST7L    | GI_38201636-I | 1 | 1 | 112912713 | 116164 | 7.0613  | 6.17548 | CHB |
| rs2932536  | ST7L    | GI_38201636-A | 1 | 1 | 112914459 | 117760 | 8.9684  | 6.17548 | CHB |
| rs2932536  | ST7L    | GI_38201636-I | 1 | 1 | 112914459 | 117910 | 8.7568  | 6.17548 | CHB |
| rs2999154  | ST7L    | GI_38201636-A | 1 | 1 | 112934498 | 137799 | 11.1781 | 6.17548 | CHB |
| rs2999154  | ST7L    | GI_38201636-I | 1 | 1 | 112934498 | 137949 | 10.4909 | 6.17548 | CHB |
| rs3795819  | ST7L    | GI_38201636-A | 1 | 1 | 112946221 | 149522 | 7.8135  | 6.17548 | CHB |
| rs3795819  | ST7L    | GI_38201636-I | 1 | 1 | 112946221 | 149672 | 8.3492  | 6.17548 | CHB |
| rs2932532  | ST7L    | GI_38201636-A | 1 | 1 | 112946498 | 149799 | 11.5161 | 6.17548 | CHB |
| rs2932532  | ST7L    | GI_38201636-I | 1 | 1 | 112946498 | 149949 | 11.0101 | 6.17548 | CHB |
| rs902289   | ST7L    | GI_38201636-A | 1 | 1 | 112948129 | 151430 | 11.5161 | 6.17548 | CHB |
| rs902289   | ST7L    | GI_38201636-I | 1 | 1 | 112948129 | 151580 | 11.0101 | 6.17548 | CHB |
| rs3748656  | ST7L    | GI_38201636-A | 1 | 1 | 112948723 | 152024 | 7.733   | 6.17548 | CHB |
| rs3748656  | ST7L    | GI_38201636-I | 1 | 1 | 112948723 | 152174 | 8.3943  | 6.17548 | CHB |
| rs1106287  | ST7L    | GI_38201636-A | 1 | 1 | 112954164 | 157465 | 7.733   | 6.17548 | CHB |
| rs1106287  | ST7L    | GI_38201636-I | 1 | 1 | 112954164 | 157615 | 8.3943  | 6.17548 | CHB |
| rs954679   | ST7L    | GI_38201636-A | 1 | 1 | 112960407 | 163708 | 6.18    | 6.17548 | CHB |
| rs954679   | ST7L    | GI_38201636-I | 1 | 1 | 112960407 | 163858 | 6.246   | 6.17548 | CHB |
| rs6674384  | DCLRE1B | GI_24431998-S | 1 | 1 | 114167949 | 399    | 10.341  | 5.62207 | CHB |
| rs10858024 | DCLRE1B | GI_24431998-S | 1 | 1 | 114169811 | 1463   | 6.1784  | 5.62207 | CHB |
| rs878129   | DCLRE1B | GI_24431998-S | 1 | 1 | 114171237 | 2889   | 10.341  | 5.62207 | CHB |
| rs11811771 | DCLRE1B | GI_24431998-S | 1 | 1 | 114175091 | 6743   | 7.056   | 5.62207 | CHB |
| rs11102703 | DCLRE1B | GI_24431998-S | 1 | 1 | 114178152 | 9804   | 10.341  | 5.62207 | CHB |
| rs10494162 | DCLRE1B | GI_24431998-S | 1 | 1 | 114185125 | 16777  | 9.8856  | 5.62207 | CHB |
| rs17032011 | DCLRE1B | GI_24431998-S | 1 | 1 | 114187392 | 19044  | 5.8554  | 5.62207 | CHB |
| rs11102704 | DCLRE1B | GI_24431998-S | 1 | 1 | 114189539 | 21191  | 6.6457  | 5.62207 | CHB |
| rs7519860  | DCLRE1B | GI_24431998-S | 1 | 1 | 114194562 | 26214  | 10.341  | 5.62207 | CHB |
| rs7546851  | DCLRE1B | GI_24431998-S | 1 | 1 | 114196838 | 28490  | 8.7845  | 5.62207 | CHB |
| rs1503832  | DCLRE1B | GI_24431998-S | 1 | 1 | 114201731 | 33383  | 10.341  | 5.62207 | CHB |
| rs12127377 | DCLRE1B | GI_24431998-S | 1 | 1 | 114202015 | 33667  | 7.0636  | 5.62207 | CHB |
| rs1910485  | DCLRE1B | GI_24431998-S | 1 | 1 | 114202677 | 34329  | 10.341  | 5.62207 | CHB |
| rs1553450  | DCLRE1B | GI_24431998-S | 1 | 1 | 114202822 | 34474  | 11.0057 | 5.62207 | CHB |
| rs11102707 | DCLRE1B | GI_24431998-S | 1 | 1 | 114205625 | 37277  | 9.5855  | 5.62207 | CHB |
| rs7545300  | DCLRE1B | GI_24431998-S | 1 | 1 | 114215678 | 47330  | 10.341  | 5.62207 | CHB |
| rs6669370  | DCLRE1B | GI_24431998-S | 1 | 1 | 114218717 | 50369  | 10.341  | 5.62207 | CHB |
| rs11102709 | DCLRE1B | GI_24431998-S | 1 | 1 | 114224125 | 55777  | 10.341  | 5.62207 | CHB |
| rs10108    | DCLRE1B | GI_24431998-S | 1 | 1 | 114228372 | 60024  | 10.8171 | 5.62207 | CHB |
| rs10494163 | DCLRE1B | GI_24431998-S | 1 | 1 | 114232754 | 64406  | 11.161  | 5.62207 | CHB |
| rs7364     | DCLRE1B | GI_24431998-S | 1 | 1 | 114236703 | 68355  | 10.6562 | 5.62207 | CHB |
| rs12121158 | MGC5338 | GI_15011886-S | 1 | 1 | 115948393 | 260    | 6.0907  | 5.75529 | CHB |
| rs10494179 | MGC5338 | GI_15011886-S | 1 | 1 | 115951410 | 3277   | 6.8537  | 5.75529 | CHB |
| rs6668400  | MGC5338 | GI_15011886-S | 1 | 1 | 115952963 | 4830   | 7.2087  | 5.75529 | CHB |
| rs17034260 | MGC5338 | GI_15011886-S | 1 | 1 | 115957192 | 9059   | 7.448   | 5.75529 | CHB |
| rs2298081  | TBX15   | GI_42655979-S | 1 | 1 | 119282158 | 143996 | 5.9543  | 5.80569 | CHB |
| rs2794067  | N2N     | GI_44917616-S | 1 | 1 | 142758247 | 12777  | 5.7663  | 5.28258 | CHB |
| rs12091564 | N2N     | GI_44917616-S | 1 | 1 | 142884648 | 113624 | 6.1025  | 5.28258 | CHB |
| rs16827051 | N2N     | GI_44917616-S | 1 | 1 | 142885179 | 114155 | 6.1025  | 5.28258 | CHB |
| rs16827081 | N2N     | GI_44917616-S | 1 | 1 | 142887086 | 116062 | 6.0925  | 5.28258 | CHB |
| rs10218795 | N2N     | GI_44917616-S | 1 | 1 | 142905100 | 134076 | 6.1025  | 5.28258 | CHB |
| rs7551245  | N2N     | GI_44917616-S | 1 | 1 | 142906706 | 135682 | 6.1025  | 5.28258 | CHB |



|            |           |               |   |   |           |        |         |         |     |
|------------|-----------|---------------|---|---|-----------|--------|---------|---------|-----|
| rs2274739  | S100A13   | GI_41117409-S | 1 | 1 | 150425206 | 13257  | 6.3835  | 5.68557 | CHB |
| rs10797056 | S100A13   | GI_41117409-S | 1 | 1 | 150426856 | 14907  | 6.3835  | 5.68557 | CHB |
| rs3828031  | S100A13   | GI_41117409-S | 1 | 1 | 150430205 | 18256  | 6.3835  | 5.68557 | CHB |
| rs7934     | S100A13   | GI_41117409-S | 1 | 1 | 150431839 | 19890  | 6.173   | 5.68557 | CHB |
| rs913861   | S100A13   | GI_41117409-S | 1 | 1 | 150435293 | 23344  | 6.3835  | 5.68557 | CHB |
| rs7517978  | MGC3794   | GI_33239373-S | 1 | 1 | 164869703 | 31513  | 6.5389  | 5.84365 | CHB |
| rs4657739  | MGC3794   | GI_33239373-S | 1 | 1 | 164874147 | 27069  | 6.5389  | 5.84365 | CHB |
| rs7552728  | MGC3794   | GI_33239373-S | 1 | 1 | 164879050 | 22166  | 6.5389  | 5.84365 | CHB |
| rs2281016  | MGC3794   | GI_33239373-S | 1 | 1 | 164879550 | 21666  | 6.5389  | 5.84365 | CHB |
| rs11801584 | MGC3794   | GI_33239373-S | 1 | 1 | 164880629 | 20587  | 6.4268  | 5.84365 | CHB |
| rs12756816 | MGC3794   | GI_33239373-S | 1 | 1 | 164881648 | 19568  | 5.9578  | 5.84365 | CHB |
| rs2038033  | MGC3794   | GI_33239373-S | 1 | 1 | 164883418 | 17798  | 6.5389  | 5.84365 | CHB |
| rs2038035  | MGC3794   | GI_33239373-S | 1 | 1 | 164884748 | 16468  | 6.5389  | 5.84365 | CHB |
| rs2038034  | MGC3794   | GI_33239373-S | 1 | 1 | 164885028 | 16188  | 6.6264  | 5.84365 | CHB |
| rs3753935  | MGC3794   | GI_33239373-S | 1 | 1 | 164885459 | 15757  | 7.0262  | 5.84365 | CHB |
| rs2294253  | MGC3794   | GI_33239373-S | 1 | 1 | 164888285 | 12931  | 6.5389  | 5.84365 | CHB |
| rs2235207  | MGC3794   | GI_33239373-S | 1 | 1 | 164890920 | 10296  | 6.5389  | 5.84365 | CHB |
| rs1040404  | MGC3794   | GI_33239373-S | 1 | 1 | 164891548 | 9668   | 6.5389  | 5.84365 | CHB |
| rs2281014  | MGC3794   | GI_33239373-S | 1 | 1 | 164895496 | 5720   | 6.5389  | 5.84365 | CHB |
| rs1040403  | MGC3794   | GI_33239373-S | 1 | 1 | 164895855 | 5361   | 6.5389  | 5.84365 | CHB |
| rs2072778  | MGC3794   | GI_33239373-S | 1 | 1 | 164900408 | 808    | 6.5389  | 5.84365 | CHB |
| rs10918844 | MGC3794   | GI_33239373-S | 1 | 1 | 164904282 | 3066   | 6.5389  | 5.84365 | CHB |
| rs4916354  | dJ383J4.3 | GI_42655858-S | 1 | 1 | 170116484 | 383992 | 5.5325  | 5.31791 | CHB |
| rs4554754  | dJ383J4.3 | GI_42655858-S | 1 | 1 | 170117130 | 383346 | 5.5325  | 5.31791 | CHB |
| rs6702339  | dJ383J4.3 | GI_42655858-S | 1 | 1 | 170122865 | 377611 | 5.5325  | 5.31791 | CHB |
| rs3934577  | dJ383J4.3 | GI_42655858-S | 1 | 1 | 170129967 | 370509 | 5.5325  | 5.31791 | CHB |
| rs12085083 | dJ383J4.3 | GI_42655858-S | 1 | 1 | 170139974 | 360502 | 5.5325  | 5.31791 | CHB |
| rs6700269  | dJ383J4.3 | GI_42655858-S | 1 | 1 | 170156279 | 344197 | 5.807   | 5.31791 | CHB |
| rs7539322  | dJ383J4.3 | GI_42655858-S | 1 | 1 | 170347622 | 152854 | 11.3002 | 5.31791 | CHB |
| rs3791022  | dJ383J4.3 | GI_42655858-S | 1 | 1 | 170466426 | 34050  | 11.3002 | 5.31791 | CHB |
| rs2068871  | dJ383J4.3 | GI_42655858-S | 1 | 1 | 170527826 | 27350  | 11.3002 | 5.31791 | CHB |
| rs941987   | dJ383J4.3 | GI_42655858-S | 1 | 1 | 170572456 | 71980  | 5.3246  | 5.31791 | CHB |
| rs2065170  | dJ383J4.3 | GI_42655858-S | 1 | 1 | 170576889 | 76413  | 7.947   | 5.31791 | CHB |
| rs16846526 | dJ383J4.3 | GI_42655858-S | 1 | 1 | 170587894 | 87418  | 7.947   | 5.31791 | CHB |
| rs16846546 | dJ383J4.3 | GI_42655858-S | 1 | 1 | 170591839 | 91363  | 7.947   | 5.31791 | CHB |
| rs6691053  | dJ383J4.3 | GI_42655858-S | 1 | 1 | 170600612 | 100136 | 5.7313  | 5.31791 | CHB |
| rs16846561 | dJ383J4.3 | GI_42655858-S | 1 | 1 | 170600768 | 100292 | 7.947   | 5.31791 | CHB |
| rs2146372  | dJ383J4.3 | GI_42655858-S | 1 | 1 | 170601226 | 100750 | 7.947   | 5.31791 | CHB |
| rs2759328  | dJ383J4.3 | GI_42655858-S | 1 | 1 | 170608362 | 107886 | 7.947   | 5.31791 | CHB |
| rs941988   | dJ383J4.3 | GI_42655858-S | 1 | 1 | 170613550 | 113074 | 7.947   | 5.31791 | CHB |
| rs2227592  | dJ383J4.3 | GI_42655858-S | 1 | 1 | 170617369 | 116893 | 7.947   | 5.31791 | CHB |
| rs2227589  | dJ383J4.3 | GI_42655858-S | 1 | 1 | 170617873 | 117397 | 7.947   | 5.31791 | CHB |
| rs16846593 | dJ383J4.3 | GI_42655858-S | 1 | 1 | 170629874 | 129398 | 6.5816  | 5.31791 | CHB |
| rs6685043  | dJ383J4.3 | GI_42655858-S | 1 | 1 | 170689170 | 188694 | 6.5816  | 5.31791 | CHB |
| rs16846769 | dJ383J4.3 | GI_42655858-S | 1 | 1 | 170922402 | 421926 | 6.8279  | 5.31791 | CHB |
| rs10489254 | dJ383J4.3 | GI_42655858-S | 1 | 1 | 170929458 | 428982 | 6.5816  | 5.31791 | CHB |
| rs16846815 | dJ383J4.3 | GI_42655858-S | 1 | 1 | 170952199 | 451723 | 5.9102  | 5.31791 | CHB |
| rs16847018 | dJ383J4.3 | GI_42655858-S | 1 | 1 | 171151329 | 650853 | 5.3605  | 5.31791 | CHB |
| rs16847025 | dJ383J4.3 | GI_42655858-S | 1 | 1 | 171157515 | 657039 | 5.9516  | 5.31791 | CHB |
| rs10489261 | dJ383J4.3 | GI_42655858-S | 1 | 1 | 171172340 | 671864 | 5.9424  | 5.31791 | CHB |
| rs16847121 | dJ383J4.3 | GI_42655858-S | 1 | 1 | 171214090 | 713614 | 5.8158  | 5.31791 | CHB |
| rs16847206 | dJ383J4.3 | GI_42655858-S | 1 | 1 | 171272964 | 772488 | 5.9516  | 5.31791 | CHB |
| rs7543502  | dJ383J4.3 | GI_42655858-S | 1 | 1 | 171385358 | 884882 | 5.9424  | 5.31791 | CHB |
| rs6673649  | dJ383J4.3 | GI_42655858-S | 1 | 1 | 171465219 | 964743 | 5.9424  | 5.31791 | CHB |
| rs6692753  | dJ383J4.3 | GI_42655858-S | 1 | 1 | 171469114 | 968638 | 5.9424  | 5.31791 | CHB |
| rs6684015  | C1orf16   | GI_42476073-A | 1 | 1 | 180137451 | 117266 | 6.1919  | 5.69043 | CHB |

|            |          |               |   |   |           |        |        |         |     |
|------------|----------|---------------|---|---|-----------|--------|--------|---------|-----|
| rs6659327  | C1orf16  | GI_42476073-A | 1 | 1 | 180137510 | 117207 | 6.3176 | 5.69043 | CHB |
| rs4047801  | C1orf16  | GI_42476073-A | 1 | 1 | 180146975 | 107742 | 6.1919 | 5.69043 | CHB |
| rs12024309 | C1orf16  | GI_42476073-A | 1 | 1 | 180151638 | 103079 | 6.1919 | 5.69043 | CHB |
| rs9286848  | C1orf16  | GI_42476073-A | 1 | 1 | 180157906 | 96811  | 6.1919 | 5.69043 | CHB |
| rs2275676  | C1orf16  | GI_42476073-A | 1 | 1 | 180162479 | 92238  | 6.1919 | 5.69043 | CHB |
| rs2702178  | C1orf16  | GI_42476073-A | 1 | 1 | 180184202 | 70515  | 5.7973 | 5.69043 | CHB |
| rs2702205  | C1orf16  | GI_42476073-A | 1 | 1 | 180188855 | 65862  | 5.7973 | 5.69043 | CHB |
| rs2702204  | C1orf16  | GI_42476073-A | 1 | 1 | 180189053 | 65664  | 5.9385 | 5.69043 | CHB |
| rs2761581  | C1orf16  | GI_42476073-A | 1 | 1 | 180206507 | 48210  | 5.7973 | 5.69043 | CHB |
| rs10911353 | C1orf16  | GI_42476073-A | 1 | 1 | 180220860 | 33857  | 5.7973 | 5.69043 | CHB |
| rs2702182  | C1orf16  | GI_42476073-A | 1 | 1 | 180248097 | 6620   | 6.1656 | 5.69043 | CHB |
| rs2702180  | C1orf16  | GI_42476073-A | 1 | 1 | 180249628 | 5089   | 5.9341 | 5.69043 | CHB |
| rs12022218 | hmm26268 | hmm26268-S    | 1 | 1 | 218333069 | 3193   | 8.6442 | 5.95076 | CHB |
| rs3010848  | hmm26268 | hmm26268-S    | 1 | 1 | 218333518 | 2744   | 9.3614 | 5.95076 | CHB |
| rs12026940 | hmm26268 | hmm26268-S    | 1 | 1 | 218334109 | 2153   | 8.6442 | 5.95076 | CHB |
| rs12030246 | hmm26268 | hmm26268-S    | 1 | 1 | 218334167 | 2095   | 8.0089 | 5.95076 | CHB |
| rs3010852  | hmm26268 | hmm26268-S    | 1 | 1 | 218334602 | 1660   | 9.2226 | 5.95076 | CHB |
| rs7551182  | hmm26268 | hmm26268-S    | 1 | 1 | 218335485 | 777    | 9.2226 | 5.95076 | CHB |
| rs11118855 | hmm26268 | hmm26268-S    | 1 | 1 | 218336215 | 47     | 9.2226 | 5.95076 | CHB |
| rs3003902  | hmm26268 | hmm26268-S    | 1 | 1 | 218336419 | 157    | 9.3613 | 5.95076 | CHB |
| rs12034159 | hmm26268 | hmm26268-S    | 1 | 1 | 218337932 | 1670   | 9.2226 | 5.95076 | CHB |
| rs9441948  | hmm26268 | hmm26268-S    | 1 | 1 | 218337962 | 1700   | 9.2226 | 5.95076 | CHB |
| rs7532339  | hmm26268 | hmm26268-S    | 1 | 1 | 218339435 | 3173   | 8.4253 | 5.95076 | CHB |
| rs11118856 | hmm26268 | hmm26268-S    | 1 | 1 | 218339816 | 3554   | 9.2226 | 5.95076 | CHB |
| rs12036282 | hmm26268 | hmm26268-S    | 1 | 1 | 218340189 | 3927   | 8.1664 | 5.95076 | CHB |
| rs11118858 | hmm26268 | hmm26268-S    | 1 | 1 | 218341353 | 5091   | 8.303  | 5.95076 | CHB |
| rs6680297  | hmm26268 | hmm26268-S    | 1 | 1 | 218344970 | 8708   | 8.6442 | 5.95076 | CHB |
| rs6680316  | hmm26268 | hmm26268-S    | 1 | 1 | 218345021 | 8759   | 7.038  | 5.95076 | CHB |
| rs10495178 | hmm26268 | hmm26268-S    | 1 | 1 | 218348833 | 12571  | 7.1369 | 5.95076 | CHB |
| rs17010785 | hmm26268 | hmm26268-S    | 1 | 1 | 218353599 | 17337  | 6.2387 | 5.95076 | CHB |
| rs4403637  | hmm26268 | hmm26268-S    | 1 | 1 | 218356929 | 20667  | 7.7292 | 5.95076 | CHB |
| rs12038356 | hmm26268 | hmm26268-S    | 1 | 1 | 218361067 | 24805  | 6.3094 | 5.95076 | CHB |
| rs11118863 | hmm26268 | hmm26268-S    | 1 | 1 | 218361410 | 25148  | 7.8583 | 5.95076 | CHB |
| rs12039269 | hmm26268 | hmm26268-S    | 1 | 1 | 218361832 | 25570  | 6.4571 | 5.95076 | CHB |
| rs12139861 | MGC12458 | GI_14150107-S | 1 | 1 | 241452134 | 124946 | 6.3819 | 6.36595 | CHB |
| rs11590498 | MGC12458 | GI_14150107-S | 1 | 1 | 241461755 | 115325 | 6.7639 | 6.36595 | CHB |
| rs10927361 | MGC12458 | GI_14150107-S | 1 | 1 | 241466695 | 110385 | 6.7639 | 6.36595 | CHB |
| rs1021282  | MGC12458 | GI_14150107-S | 1 | 1 | 241470753 | 106327 | 6.7639 | 6.36595 | CHB |
| rs10927363 | MGC12458 | GI_14150107-S | 1 | 1 | 241474480 | 102600 | 6.7639 | 6.36595 | CHB |
| rs12403396 | MGC12458 | GI_14150107-S | 1 | 1 | 241474775 | 102305 | 6.7639 | 6.36595 | CHB |
| rs10927364 | MGC12458 | GI_14150107-S | 1 | 1 | 241476465 | 100615 | 6.7639 | 6.36595 | CHB |
| rs4658434  | MGC12458 | GI_14150107-S | 1 | 1 | 241478023 | 99057  | 6.7639 | 6.36595 | CHB |
| rs2050632  | MGC12458 | GI_14150107-S | 1 | 1 | 241485608 | 91472  | 6.7639 | 6.36595 | CHB |
| rs522595   | MGC12458 | GI_14150107-S | 1 | 1 | 241485780 | 91300  | 6.7639 | 6.36595 | CHB |
| rs644341   | MGC12458 | GI_14150107-S | 1 | 1 | 241485863 | 91217  | 6.7639 | 6.36595 | CHB |
| rs643352   | MGC12458 | GI_14150107-S | 1 | 1 | 241486132 | 90948  | 6.7639 | 6.36595 | CHB |
| rs10803250 | MGC12458 | GI_14150107-S | 1 | 1 | 241488109 | 88971  | 6.5002 | 6.36595 | CHB |
| rs651773   | MGC12458 | GI_14150107-S | 1 | 1 | 241490780 | 86300  | 6.7639 | 6.36595 | CHB |
| rs626070   | MGC12458 | GI_14150107-S | 1 | 1 | 241493372 | 83708  | 6.7639 | 6.36595 | CHB |
| rs4658685  | MGC12458 | GI_14150107-S | 1 | 1 | 241493912 | 83168  | 6.547  | 6.36595 | CHB |
| rs7552510  | MGC12458 | GI_14150107-S | 1 | 1 | 241494079 | 83001  | 6.7639 | 6.36595 | CHB |
| rs2786693  | MGC12458 | GI_14150107-S | 1 | 1 | 241495087 | 81993  | 6.8373 | 6.36595 | CHB |
| rs672008   | MGC12458 | GI_14150107-S | 1 | 1 | 241496919 | 80161  | 6.7639 | 6.36595 | CHB |
| rs2786691  | MGC12458 | GI_14150107-S | 1 | 1 | 241497170 | 79910  | 6.7639 | 6.36595 | CHB |
| rs10803251 | MGC12458 | GI_14150107-S | 1 | 1 | 241499501 | 77579  | 7.0507 | 6.36595 | CHB |
| rs1196365  | MGC12458 | GI_14150107-S | 1 | 1 | 241505212 | 71868  | 6.7639 | 6.36595 | CHB |

|            |           |               |   |   |           |       |         |         |     |
|------------|-----------|---------------|---|---|-----------|-------|---------|---------|-----|
| rs1196366  | MGC12458  | GI_14150107-S | 1 | 1 | 241505229 | 71851 | 9.7696  | 6.36595 | CHB |
| rs10927369 | MGC12458  | GI_14150107-S | 1 | 1 | 241506001 | 71079 | 6.7639  | 6.36595 | CHB |
| rs901664   | MGC12458  | GI_14150107-S | 1 | 1 | 241509620 | 67460 | 9.7696  | 6.36595 | CHB |
| rs901665   | MGC12458  | GI_14150107-S | 1 | 1 | 241509924 | 67156 | 9.7696  | 6.36595 | CHB |
| rs7528009  | MGC12458  | GI_14150107-S | 1 | 1 | 241511114 | 65966 | 6.7639  | 6.36595 | CHB |
| rs648282   | MGC12458  | GI_14150107-S | 1 | 1 | 241512775 | 64305 | 8.3163  | 6.36595 | CHB |
| rs600025   | MGC12458  | GI_14150107-S | 1 | 1 | 241517136 | 59944 | 9.7696  | 6.36595 | CHB |
| rs586013   | MGC12458  | GI_14150107-S | 1 | 1 | 241517934 | 59146 | 6.7639  | 6.36595 | CHB |
| rs632383   | MGC12458  | GI_14150107-S | 1 | 1 | 241518287 | 58793 | 9.0574  | 6.36595 | CHB |
| rs1979568  | MGC12458  | GI_14150107-S | 1 | 1 | 241518513 | 58567 | 9.0574  | 6.36595 | CHB |
| rs675033   | MGC12458  | GI_14150107-S | 1 | 1 | 241519964 | 57116 | 6.7639  | 6.36595 | CHB |
| rs632676   | MGC12458  | GI_14150107-S | 1 | 1 | 241521105 | 55975 | 9.7565  | 6.36595 | CHB |
| rs616540   | MGC12458  | GI_14150107-S | 1 | 1 | 241522450 | 54630 | 6.7639  | 6.36595 | CHB |
| rs665478   | MGC12458  | GI_14150107-S | 1 | 1 | 241524271 | 52809 | 6.7639  | 6.36595 | CHB |
| rs9428636  | MGC12458  | GI_14150107-S | 1 | 1 | 241526024 | 51056 | 6.7639  | 6.36595 | CHB |
| rs626106   | MGC12458  | GI_14150107-S | 1 | 1 | 241530870 | 46210 | 9.7407  | 6.36595 | CHB |
| rs2029249  | MGC12458  | GI_14150107-S | 1 | 1 | 241531718 | 45362 | 6.7639  | 6.36595 | CHB |
| rs11580510 | MGC12458  | GI_14150107-S | 1 | 1 | 241531917 | 45163 | 6.7639  | 6.36595 | CHB |
| rs12728471 | MGC12458  | GI_14150107-S | 1 | 1 | 241531931 | 45149 | 6.7639  | 6.36595 | CHB |
| rs4233441  | MGC12458  | GI_14150107-S | 1 | 1 | 241535175 | 41905 | 6.7639  | 6.36595 | CHB |
| rs619449   | MGC12458  | GI_14150107-S | 1 | 1 | 241539091 | 37989 | 9.7696  | 6.36595 | CHB |
| rs588923   | MGC12458  | GI_14150107-S | 1 | 1 | 241539921 | 37159 | 6.8735  | 6.36595 | CHB |
| rs4658688  | MGC12458  | GI_14150107-S | 1 | 1 | 241540837 | 36243 | 6.7639  | 6.36595 | CHB |
| rs1691230  | SBZF3     | GI_31742527-S | 1 | 1 | 243433041 | 2000  | 5.8934  | 5.78237 | CHB |
| rs2818886  | SBZF3     | GI_31742527-S | 1 | 1 | 243435449 | 408   | 5.8934  | 5.78237 | CHB |
| rs10924924 | Hs.421238 | Hs.421238-S   | 1 | 1 | 243609361 | 2050  | 6.253   | 6.01215 | CHB |
| rs4925715  | Hs.421238 | Hs.421238-S   | 1 | 1 | 243614510 | 3099  | 6.253   | 6.01215 | CHB |
| rs12093759 | Hs.421238 | Hs.421238-S   | 1 | 1 | 243631914 | 20503 | 6.3126  | 6.01215 | CHB |
| rs3844080  | Hs.421238 | Hs.421238-S   | 1 | 1 | 243632874 | 21463 | 6.253   | 6.01215 | CHB |
| rs10493861 | Hs.421238 | Hs.421238-S   | 1 | 1 | 243632958 | 21547 | 6.253   | 6.01215 | CHB |
| rs3844079  | Hs.421238 | Hs.421238-S   | 1 | 1 | 243633394 | 21983 | 6.253   | 6.01215 | CHB |
| rs7531763  | Hs.421238 | Hs.421238-S   | 1 | 1 | 243634832 | 23421 | 6.253   | 6.01215 | CHB |
| rs16846292 | Hs.421238 | Hs.421238-S   | 1 | 1 | 243637489 | 26078 | 6.253   | 6.01215 | CHB |
| rs6675536  | Hs.421238 | Hs.421238-S   | 1 | 1 | 243648339 | 36928 | 6.253   | 6.01215 | CHB |
| rs9793102  | Hs.421238 | Hs.421238-S   | 1 | 1 | 243649301 | 37890 | 6.253   | 6.01215 | CHB |
| rs11897611 | hmm27769  | hmm27769-S    | 2 | 2 | 20696945  | 21869 | 8.5402  | 5.95036 | CHB |
| rs10166792 | hmm27769  | hmm27769-S    | 2 | 2 | 20698777  | 20037 | 6.8235  | 5.95036 | CHB |
| rs10177787 | hmm27769  | hmm27769-S    | 2 | 2 | 20698916  | 19898 | 7.5286  | 5.95036 | CHB |
| rs4666429  | hmm27769  | hmm27769-S    | 2 | 2 | 20699245  | 19569 | 7.4374  | 5.95036 | CHB |
| rs2882035  | hmm27769  | hmm27769-S    | 2 | 2 | 20699384  | 19430 | 6.7144  | 5.95036 | CHB |
| rs4666430  | hmm27769  | hmm27769-S    | 2 | 2 | 20700087  | 18727 | 8.5402  | 5.95036 | CHB |
| rs12472478 | hmm27769  | hmm27769-S    | 2 | 2 | 20701010  | 17804 | 7.9678  | 5.95036 | CHB |
| rs4666431  | hmm27769  | hmm27769-S    | 2 | 2 | 20703165  | 15649 | 8.5402  | 5.95036 | CHB |
| rs12621527 | hmm27769  | hmm27769-S    | 2 | 2 | 20704543  | 14271 | 8.5402  | 5.95036 | CHB |
| rs6715159  | hmm27769  | hmm27769-S    | 2 | 2 | 20706311  | 12503 | 10.1967 | 5.95036 | CHB |
| rs16987853 | hmm27769  | hmm27769-S    | 2 | 2 | 20707408  | 11406 | 7.3641  | 5.95036 | CHB |
| rs16987857 | hmm27769  | hmm27769-S    | 2 | 2 | 20709681  | 9133  | 7.4374  | 5.95036 | CHB |
| rs6722960  | hmm27769  | hmm27769-S    | 2 | 2 | 20710329  | 8485  | 10.0517 | 5.95036 | CHB |
| rs2882036  | hmm27769  | hmm27769-S    | 2 | 2 | 20711634  | 7180  | 6.926   | 5.95036 | CHB |
| rs13032956 | hmm27769  | hmm27769-S    | 2 | 2 | 20711981  | 6833  | 8.286   | 5.95036 | CHB |
| rs10177834 | hmm27769  | hmm27769-S    | 2 | 2 | 20712140  | 6674  | 9.1921  | 5.95036 | CHB |
| rs921599   | hmm27769  | hmm27769-S    | 2 | 2 | 20712753  | 6061  | 9.3975  | 5.95036 | CHB |
| rs11096679 | hmm27769  | hmm27769-S    | 2 | 2 | 20714036  | 4778  | 9.5264  | 5.95036 | CHB |
| rs11885969 | hmm27769  | hmm27769-S    | 2 | 2 | 20714283  | 4531  | 9.1921  | 5.95036 | CHB |
| rs4666436  | hmm27769  | hmm27769-S    | 2 | 2 | 20717573  | 1241  | 9.3975  | 5.95036 | CHB |
| rs13031724 | hmm27769  | hmm27769-S    | 2 | 2 | 20718660  | 154   | 9.3975  | 5.95036 | CHB |

|            |           |               |   |   |          |       |        |         |     |
|------------|-----------|---------------|---|---|----------|-------|--------|---------|-----|
| rs13013281 | hmm27769  | hmm27769-S    | 2 | 2 | 20718716 | 98    | 9.1921 | 5.95036 | CHB |
| rs16987878 | hmm27769  | hmm27769-S    | 2 | 2 | 20719368 | 554   | 6.3381 | 5.95036 | CHB |
| rs16987880 | hmm27769  | hmm27769-S    | 2 | 2 | 20721465 | 2651  | 6.926  | 5.95036 | CHB |
| rs16987884 | hmm27769  | hmm27769-S    | 2 | 2 | 20723877 | 5063  | 6.926  | 5.95036 | CHB |
| rs921602   | hmm27769  | hmm27769-S    | 2 | 2 | 20728153 | 9339  | 6.926  | 5.95036 | CHB |
| rs6761076  | DTNB      | GI_37577100-A | 2 | 2 | 25519409 | 7604  | 8.325  | 5.71598 | CHB |
| rs7558082  | DTNB      | GI_37577100-A | 2 | 2 | 25524465 | 12660 | 7.9567 | 5.71598 | CHB |
| rs7577599  | DTNB      | GI_37577100-A | 2 | 2 | 25524797 | 12992 | 8.4585 | 5.71598 | CHB |
| rs17046986 | DTNB      | GI_37577100-A | 2 | 2 | 25532551 | 20746 | 8.325  | 5.71598 | CHB |
| rs7571570  | DTNB      | GI_37577100-A | 2 | 2 | 25533181 | 21376 | 8.325  | 5.71598 | CHB |
| rs1369704  | DTNB      | GI_37577100-A | 2 | 2 | 25535241 | 23436 | 8.325  | 5.71598 | CHB |
| rs2384232  | DTNB      | GI_37577100-A | 2 | 2 | 25535400 | 23595 | 8.325  | 5.71598 | CHB |
| rs10206012 | DTNB      | GI_37577100-A | 2 | 2 | 25535837 | 24032 | 7.8226 | 5.71598 | CHB |
| rs6546148  | DTNB      | GI_37577100-A | 2 | 2 | 25536656 | 24851 | 8.325  | 5.71598 | CHB |
| rs7583617  | DTNB      | GI_37577100-A | 2 | 2 | 25537510 | 25705 | 7.0298 | 5.71598 | CHB |
| rs7586918  | DTNB      | GI_37577100-A | 2 | 2 | 25538036 | 26231 | 8.325  | 5.71598 | CHB |
| rs6546149  | DTNB      | GI_37577100-A | 2 | 2 | 25541089 | 29284 | 8.325  | 5.71598 | CHB |
| rs888096   | QPCT      | GI_9257235-S  | 2 | 2 | 37515452 | 3945  | 6.3429 | 6.03865 | CHB |
| rs1451156  | CRIP1     | GI_41350204-S | 2 | 2 | 46744253 | 19148 | 6.6065 | 6.42783 | CHB |
| rs13000706 | CRIP1     | GI_41350204-S | 2 | 2 | 46749898 | 13503 | 6.6065 | 6.42783 | CHB |
| rs1531133  | CRIP1     | GI_41350204-S | 2 | 2 | 46755282 | 8119  | 6.6065 | 6.42783 | CHB |
| rs3087822  | CRIP1     | GI_41350204-S | 2 | 2 | 46763684 | 283   | 6.6065 | 6.42783 | CHB |
| rs1177284  | LOC339804 | GI_37546921-S | 2 | 2 | 61261097 | 40844 | 6.6181 | 5.9358  | CHB |
| rs1177285  | LOC339804 | GI_37546921-S | 2 | 2 | 61261788 | 40153 | 7.822  | 5.9358  | CHB |
| rs1177282  | LOC339804 | GI_37546921-S | 2 | 2 | 61269428 | 32513 | 7.5442 | 5.9358  | CHB |
| rs12473277 | LOC339804 | GI_37546921-S | 2 | 2 | 61270271 | 31670 | 9.4344 | 5.9358  | CHB |
| rs1729660  | LOC339804 | GI_37546921-S | 2 | 2 | 61277463 | 24478 | 9.0295 | 5.9358  | CHB |
| rs11498    | LOC339804 | GI_37546921-S | 2 | 2 | 61282470 | 19471 | 8.7303 | 5.9358  | CHB |
| rs3213944  | LOC339804 | GI_37546921-S | 2 | 2 | 61283949 | 17992 | 7.3357 | 5.9358  | CHB |
| rs2441467  | LOC339804 | GI_37546921-S | 2 | 2 | 61285800 | 16141 | 7.349  | 5.9358  | CHB |
| rs720201   | LOC339804 | GI_37546921-S | 2 | 2 | 61288114 | 13827 | 9.0295 | 5.9358  | CHB |
| rs1729653  | LOC339804 | GI_37546921-S | 2 | 2 | 61288659 | 13282 | 8.7288 | 5.9358  | CHB |
| rs1665270  | LOC339804 | GI_37546921-S | 2 | 2 | 61289317 | 12624 | 9.0295 | 5.9358  | CHB |
| rs1729652  | LOC339804 | GI_37546921-S | 2 | 2 | 61289670 | 12271 | 9.0295 | 5.9358  | CHB |
| rs2698190  | LOC339804 | GI_37546921-S | 2 | 2 | 61290268 | 11673 | 9.264  | 5.9358  | CHB |
| rs1665271  | LOC339804 | GI_37546921-S | 2 | 2 | 61290467 | 11474 | 8.8392 | 5.9358  | CHB |
| rs12475591 | LOC339804 | GI_37546921-S | 2 | 2 | 61293179 | 8762  | 8.6201 | 5.9358  | CHB |
| rs2592493  | LOC339804 | GI_37546921-S | 2 | 2 | 61293988 | 7953  | 8.6201 | 5.9358  | CHB |
| rs1665260  | LOC339804 | GI_37546921-S | 2 | 2 | 61296138 | 5803  | 8.6201 | 5.9358  | CHB |
| rs1665259  | LOC339804 | GI_37546921-S | 2 | 2 | 61296406 | 5535  | 9.0295 | 5.9358  | CHB |
| rs7558954  | LOC339804 | GI_37546921-S | 2 | 2 | 61296557 | 5384  | 7.5015 | 5.9358  | CHB |
| rs1729671  | LOC339804 | GI_37546921-S | 2 | 2 | 61296756 | 5185  | 7.4013 | 5.9358  | CHB |
| rs1177309  | LOC339804 | GI_37546921-S | 2 | 2 | 61296899 | 5042  | 8.5204 | 5.9358  | CHB |
| rs1177308  | LOC339804 | GI_37546921-S | 2 | 2 | 61298905 | 3036  | 9.4105 | 5.9358  | CHB |
| rs1177303  | LOC339804 | GI_37546921-S | 2 | 2 | 61300006 | 1935  | 9.0295 | 5.9358  | CHB |
| rs1729674  | LOC339804 | GI_37546921-S | 2 | 2 | 61301388 | 553   | 8.5204 | 5.9358  | CHB |
| rs1729673  | LOC339804 | GI_37546921-S | 2 | 2 | 61301450 | 491   | 9.0295 | 5.9358  | CHB |
| rs3889717  | LOC339804 | GI_37546921-S | 2 | 2 | 61302442 | 501   | 8.5204 | 5.9358  | CHB |
| rs1615070  | LOC339804 | GI_37546921-S | 2 | 2 | 61304826 | 2885  | 8.5204 | 5.9358  | CHB |
| rs2600668  | LOC339804 | GI_37546921-S | 2 | 2 | 61312078 | 10137 | 9.0295 | 5.9358  | CHB |
| rs2167564  | LOC339804 | GI_37546921-S | 2 | 2 | 61312467 | 10526 | 9.0295 | 5.9358  | CHB |
| rs2600669  | LOC339804 | GI_37546921-S | 2 | 2 | 61312947 | 11006 | 8.5204 | 5.9358  | CHB |
| rs935860   | LOC339804 | GI_37546921-S | 2 | 2 | 61318212 | 16271 | 7.9183 | 5.9358  | CHB |
| rs777584   | LOC339804 | GI_37546921-S | 2 | 2 | 61321997 | 20056 | 7.9035 | 5.9358  | CHB |
| rs777592   | LOC339804 | GI_37546921-S | 2 | 2 | 61329994 | 28053 | 7.5669 | 5.9358  | CHB |
| rs777587   | LOC339804 | GI_37546921-S | 2 | 2 | 61339326 | 37385 | 7.5669 | 5.9358  | CHB |

|            |           |               |   |   |          |        |        |         |     |
|------------|-----------|---------------|---|---|----------|--------|--------|---------|-----|
| rs4671397  | LOC339804 | GI_37546921-S | 2 | 2 | 61347498 | 45557  | 8.0922 | 5.9358  | CHB |
| rs4672424  | LOC339804 | GI_37546921-S | 2 | 2 | 61356424 | 54483  | 6.7157 | 5.9358  | CHB |
| rs7588041  | LOC339804 | GI_37546921-S | 2 | 2 | 61373063 | 71122  | 7.1224 | 5.9358  | CHB |
| rs7591772  | LOC339804 | GI_37546921-S | 2 | 2 | 61374051 | 72110  | 7.9509 | 5.9358  | CHB |
| rs4672427  | LOC339804 | GI_37546921-S | 2 | 2 | 61380901 | 78960  | 7.7992 | 5.9358  | CHB |
| rs13398770 | LOC339804 | GI_37546921-S | 2 | 2 | 61391068 | 89127  | 7.109  | 5.9358  | CHB |
| rs6737373  | LOC339804 | GI_37546921-S | 2 | 2 | 61409689 | 107748 | 7.9509 | 5.9358  | CHB |
| rs4599092  | LOC339804 | GI_37546921-S | 2 | 2 | 61410619 | 108678 | 7.9509 | 5.9358  | CHB |
| rs12713435 | LOC339804 | GI_37546921-S | 2 | 2 | 61411440 | 109499 | 7.9183 | 5.9358  | CHB |
| rs7583383  | LOC339804 | GI_37546921-S | 2 | 2 | 61411973 | 110032 | 7.3156 | 5.9358  | CHB |
| rs11677775 | LOC339804 | GI_37546921-S | 2 | 2 | 61414761 | 112820 | 7.9183 | 5.9358  | CHB |
| rs11677776 | LOC339804 | GI_37546921-S | 2 | 2 | 61414764 | 112823 | 7.2428 | 5.9358  | CHB |
| rs10169662 | LOC339804 | GI_37546921-S | 2 | 2 | 61419587 | 117646 | 8.1054 | 5.9358  | CHB |
| rs4671403  | LOC339804 | GI_37546921-S | 2 | 2 | 61423103 | 121162 | 6.6953 | 5.9358  | CHB |
| rs6545852  | LOC339804 | GI_37546921-S | 2 | 2 | 61425041 | 123100 | 8.1054 | 5.9358  | CHB |
| rs7561697  | LOC339804 | GI_37546921-S | 2 | 2 | 61430816 | 128875 | 8.1054 | 5.9358  | CHB |
| rs6545855  | LOC339804 | GI_37546921-S | 2 | 2 | 61444511 | 142570 | 8.1054 | 5.9358  | CHB |
| rs2694619  | LOC339804 | GI_37546921-S | 2 | 2 | 61448552 | 146611 | 6.7613 | 5.9358  | CHB |
| rs2694618  | LOC339804 | GI_37546921-S | 2 | 2 | 61448635 | 146694 | 6.7613 | 5.9358  | CHB |
| rs2600664  | LOC339804 | GI_37546921-S | 2 | 2 | 61451596 | 149655 | 8.1054 | 5.9358  | CHB |
| rs2694633  | LOC339804 | GI_37546921-S | 2 | 2 | 61452293 | 150352 | 8.1054 | 5.9358  | CHB |
| rs3765051  | LOC339804 | GI_37546921-S | 2 | 2 | 61454001 | 152060 | 6.7613 | 5.9358  | CHB |
| rs17482440 | LOC339804 | GI_37546921-S | 2 | 2 | 61460508 | 158567 | 6.6042 | 5.9358  | CHB |
| rs2593623  | LOC339804 | GI_37546921-S | 2 | 2 | 61463239 | 161298 | 8.1054 | 5.9358  | CHB |
| rs2593624  | LOC339804 | GI_37546921-S | 2 | 2 | 61464135 | 162194 | 7.0869 | 5.9358  | CHB |
| rs778159   | LOC339804 | GI_37546921-S | 2 | 2 | 61468395 | 166454 | 8.1054 | 5.9358  | CHB |
| rs778160   | LOC339804 | GI_37546921-S | 2 | 2 | 61468815 | 166874 | 6.7613 | 5.9358  | CHB |
| rs1405490  | LOC339804 | GI_37546921-S | 2 | 2 | 61471731 | 169790 | 6.9797 | 5.9358  | CHB |
| rs4541246  | LOC339804 | GI_37546921-S | 2 | 2 | 61474926 | 172985 | 6.5478 | 5.9358  | CHB |
| rs811871   | LOC339804 | GI_37546921-S | 2 | 2 | 61489600 | 187659 | 6.7613 | 5.9358  | CHB |
| rs4411680  | LOC339804 | GI_37546921-S | 2 | 2 | 61495756 | 193815 | 6.3951 | 5.9358  | CHB |
| rs12992614 | LOC339804 | GI_37546921-S | 2 | 2 | 61504727 | 202786 | 6.8196 | 5.9358  | CHB |
| rs10177225 | LOC339804 | GI_37546921-S | 2 | 2 | 61506149 | 204208 | 6.3951 | 5.9358  | CHB |
| rs1900573  | LOC339804 | GI_37546921-S | 2 | 2 | 61508563 | 206622 | 6.3951 | 5.9358  | CHB |
| rs2421066  | LOC339804 | GI_37546921-S | 2 | 2 | 61511173 | 209232 | 6.3951 | 5.9358  | CHB |
| rs2593620  | LOC339804 | GI_37546921-S | 2 | 2 | 61524912 | 222971 | 6.3951 | 5.9358  | CHB |
| rs2463097  | LOC339804 | GI_37546921-S | 2 | 2 | 61525952 | 224011 | 6.3951 | 5.9358  | CHB |
| rs4672440  | LOC339804 | GI_37546921-S | 2 | 2 | 61528304 | 226363 | 6.3951 | 5.9358  | CHB |
| rs7581034  | LOC339804 | GI_37546921-S | 2 | 2 | 61547014 | 245073 | 6.2012 | 5.9358  | CHB |
| rs4672441  | LOC339804 | GI_37546921-S | 2 | 2 | 61550603 | 248662 | 6.3951 | 5.9358  | CHB |
| rs2084318  | LOC339804 | GI_37546921-S | 2 | 2 | 61564252 | 262311 | 6.3951 | 5.9358  | CHB |
| rs13022034 | SLC1A4    | GI_21314631-S | 2 | 2 | 65042576 | 119790 | 6.2329 | 6.06382 | CHB |
| rs12473289 | SLC1A4    | GI_21314631-S | 2 | 2 | 65051426 | 110940 | 6.1484 | 6.06382 | CHB |
| rs17029619 | SLC1A4    | GI_21314631-S | 2 | 2 | 65052800 | 109566 | 6.7313 | 6.06382 | CHB |
| rs17029623 | SLC1A4    | GI_21314631-S | 2 | 2 | 65055150 | 107216 | 6.7313 | 6.06382 | CHB |
| rs4671629  | SLC1A4    | GI_21314631-S | 2 | 2 | 65056308 | 106058 | 6.5702 | 6.06382 | CHB |
| rs17029625 | SLC1A4    | GI_21314631-S | 2 | 2 | 65057712 | 104654 | 6.7692 | 6.06382 | CHB |
| rs4638779  | SLC1A4    | GI_21314631-S | 2 | 2 | 65066923 | 95443  | 6.5505 | 6.06382 | CHB |
| rs918060   | SLC1A4    | GI_21314631-S | 2 | 2 | 65068109 | 94257  | 7.8711 | 6.06382 | CHB |
| rs13008014 | SLC1A4    | GI_21314631-S | 2 | 2 | 65070665 | 91701  | 7.5905 | 6.06382 | CHB |
| rs6715047  | FLJ14668  | GI_14249519-S | 2 | 2 | 70944984 | 510029 | 5.9016 | 5.89128 | CHB |
| rs7581571  | FLJ10916  | GI_40538795-S | 2 | 2 | 88274497 | 50845  | 5.9272 | 5.48695 | CHB |
| rs11896492 | FLJ10916  | GI_40538795-S | 2 | 2 | 88294221 | 31121  | 5.9634 | 5.48695 | CHB |
| rs10185660 | FLJ10916  | GI_40538795-S | 2 | 2 | 88302499 | 22843  | 5.8116 | 5.48695 | CHB |
| rs9636487  | FLJ10916  | GI_40538795-S | 2 | 2 | 88304225 | 21117  | 6.0669 | 5.48695 | CHB |
| rs4243786  | UNQ2430   | GI_41190797-S | 2 | 2 | 96985619 | 302340 | 5.8283 | 5.18089 | CHB |

|            |           |               |   |   |           |        |         |         |     |
|------------|-----------|---------------|---|---|-----------|--------|---------|---------|-----|
| rs11164113 | UNQ2430   | GI_41190797-S | 2 | 2 | 97017502  | 270457 | 5.4841  | 5.18089 | CHB |
| rs11676858 | UNQ2430   | GI_41190797-S | 2 | 2 | 97019451  | 268508 | 5.4841  | 5.18089 | CHB |
| rs1257022  | UNQ2430   | GI_41190797-S | 2 | 2 | 97036810  | 251149 | 6.3106  | 5.18089 | CHB |
| rs1257021  | UNQ2430   | GI_41190797-S | 2 | 2 | 97037297  | 250662 | 5.8964  | 5.18089 | CHB |
| rs1796025  | UNQ2430   | GI_41190797-S | 2 | 2 | 97052236  | 235723 | 6.0659  | 5.18089 | CHB |
| rs1257013  | UNQ2430   | GI_41190797-S | 2 | 2 | 97053856  | 234103 | 6.0659  | 5.18089 | CHB |
| rs1257010  | UNQ2430   | GI_41190797-S | 2 | 2 | 97055688  | 232271 | 6.0659  | 5.18089 | CHB |
| rs1257007  | UNQ2430   | GI_41190797-S | 2 | 2 | 97057188  | 230771 | 5.9897  | 5.18089 | CHB |
| rs1796048  | UNQ2430   | GI_41190797-S | 2 | 2 | 97065450  | 222509 | 5.6712  | 5.18089 | CHB |
| rs1257026  | UNQ2430   | GI_41190797-S | 2 | 2 | 97077837  | 210122 | 5.6712  | 5.18089 | CHB |
| rs1796037  | UNQ2430   | GI_41190797-S | 2 | 2 | 97097744  | 190215 | 5.6712  | 5.18089 | CHB |
| rs4254543  | UNQ2430   | GI_41190797-S | 2 | 2 | 97105235  | 182724 | 5.6712  | 5.18089 | CHB |
| rs2463904  | UNQ2430   | GI_41190797-S | 2 | 2 | 97107615  | 180344 | 5.6712  | 5.18089 | CHB |
| rs1669760  | UNQ2430   | GI_41190797-S | 2 | 2 | 97132979  | 154980 | 5.349   | 5.18089 | CHB |
| rs1257117  | UNQ2430   | GI_41190797-S | 2 | 2 | 97134213  | 153746 | 5.9073  | 5.18089 | CHB |
| rs1148583  | UNQ2430   | GI_41190797-S | 2 | 2 | 97151047  | 136912 | 5.6737  | 5.18089 | CHB |
| rs1257089  | UNQ2430   | GI_41190797-S | 2 | 2 | 97175459  | 112500 | 5.6712  | 5.18089 | CHB |
| rs1257084  | UNQ2430   | GI_41190797-S | 2 | 2 | 97179383  | 108576 | 5.6712  | 5.18089 | CHB |
| rs1839920  | UNQ2430   | GI_41190797-S | 2 | 2 | 97287703  | 256    | 5.6037  | 5.18089 | CHB |
| rs4264593  | UNQ2430   | GI_41190797-S | 2 | 2 | 97472228  | 184269 | 5.7901  | 5.18089 | CHB |
| rs12989766 | UNQ2430   | GI_41190797-S | 2 | 2 | 97478097  | 190138 | 5.6712  | 5.18089 | CHB |
| rs12987946 | UNQ2430   | GI_41190797-S | 2 | 2 | 97480890  | 192931 | 5.7568  | 5.18089 | CHB |
| rs1515030  | UNQ2430   | GI_41190797-S | 2 | 2 | 97482040  | 194081 | 5.6712  | 5.18089 | CHB |
| rs7598442  | UNQ2430   | GI_41190797-S | 2 | 2 | 97483251  | 195292 | 5.7901  | 5.18089 | CHB |
| rs4851178  | TSGA10    | GI_41281983-I | 2 | 2 | 99005788  | 210639 | 5.8451  | 5.70121 | CHB |
| rs13397765 | TSGA10    | GI_41281983-I | 2 | 2 | 99007672  | 208755 | 6.6893  | 5.70121 | CHB |
| rs7570657  | TSGA10    | GI_41281983-I | 2 | 2 | 99112799  | 103628 | 5.8331  | 5.70121 | CHB |
| rs3811059  | PAX8      | GI_37577111-A | 2 | 2 | 113678302 | 13141  | 5.7819  | 5.71664 | CHB |
| rs12620738 | PAX8      | GI_37577111-A | 2 | 2 | 113679970 | 11473  | 5.7819  | 5.71664 | CHB |
| rs11123170 | PAX8      | GI_37577111-A | 2 | 2 | 113695171 | 3728   | 6.3187  | 5.71664 | CHB |
| rs4849177  | PAX8      | GI_37577111-A | 2 | 2 | 113698815 | 7372   | 6.3187  | 5.71664 | CHB |
| rs3748916  | PAX8      | GI_37577111-A | 2 | 2 | 113700264 | 8821   | 6.3187  | 5.71664 | CHB |
| rs4849179  | PAX8      | GI_37577111-A | 2 | 2 | 113701401 | 9958   | 6.3187  | 5.71664 | CHB |
| rs2863243  | PAX8      | GI_37577111-A | 2 | 2 | 113705498 | 14055  | 6.3187  | 5.71664 | CHB |
| rs1110839  | PAX8      | GI_37577111-A | 2 | 2 | 113710647 | 19204  | 6.9101  | 5.71664 | CHB |
| rs1491586  | PAX8      | GI_37577111-A | 2 | 2 | 113719709 | 28266  | 6.3683  | 5.71664 | CHB |
| rs1491584  | PAX8      | GI_37577111-A | 2 | 2 | 113720134 | 28691  | 6.5785  | 5.71664 | CHB |
| rs2289962  | Hs.147006 | Hs.147006-S   | 2 | 2 | 136239798 | 429927 | 9.4608  | 5.66244 | CHB |
| rs2289961  | Hs.147006 | Hs.147006-S   | 2 | 2 | 136239841 | 429884 | 9.4608  | 5.66244 | CHB |
| rs2289960  | Hs.147006 | Hs.147006-S   | 2 | 2 | 136239972 | 429753 | 9.4608  | 5.66244 | CHB |
| rs12614099 | Hs.147006 | Hs.147006-S   | 2 | 2 | 136301794 | 367931 | 9.4608  | 5.66244 | CHB |
| rs3739027  | Hs.147006 | Hs.147006-S   | 2 | 2 | 136315912 | 353813 | 9.4608  | 5.66244 | CHB |
| rs12617715 | Hs.147006 | Hs.147006-S   | 2 | 2 | 136372885 | 296840 | 10.6895 | 5.66244 | CHB |
| rs11903319 | Hs.147006 | Hs.147006-S   | 2 | 2 | 136430171 | 239554 | 12.7477 | 5.66244 | CHB |
| rs4988285  | Hs.147006 | Hs.147006-S   | 2 | 2 | 136431298 | 238427 | 12.7477 | 5.66244 | CHB |
| rs4988276  | Hs.147006 | Hs.147006-S   | 2 | 2 | 136433084 | 236641 | 12.7477 | 5.66244 | CHB |
| rs4988272  | Hs.147006 | Hs.147006-S   | 2 | 2 | 136435289 | 234436 | 12.7477 | 5.66244 | CHB |
| rs3754687  | Hs.147006 | Hs.147006-S   | 2 | 2 | 136436906 | 232819 | 12.7477 | 5.66244 | CHB |
| rs3729569  | Hs.147006 | Hs.147006-S   | 2 | 2 | 136437037 | 232688 | 12.7477 | 5.66244 | CHB |
| rs3769004  | Hs.147006 | Hs.147006-S   | 2 | 2 | 136437322 | 232403 | 12.7477 | 5.66244 | CHB |
| rs4988265  | Hs.147006 | Hs.147006-S   | 2 | 2 | 136437370 | 232355 | 12.7477 | 5.66244 | CHB |
| rs3769003  | Hs.147006 | Hs.147006-S   | 2 | 2 | 136437422 | 232303 | 12.7477 | 5.66244 | CHB |
| rs4988262  | Hs.147006 | Hs.147006-S   | 2 | 2 | 136437942 | 231783 | 9.7346  | 5.66244 | CHB |
| rs4988245  | Hs.147006 | Hs.147006-S   | 2 | 2 | 136441032 | 228693 | 12.7477 | 5.66244 | CHB |
| rs4988222  | Hs.147006 | Hs.147006-S   | 2 | 2 | 136446700 | 223025 | 12.7477 | 5.66244 | CHB |
| rs4988219  | Hs.147006 | Hs.147006-S   | 2 | 2 | 136447094 | 222631 | 12.7477 | 5.66244 | CHB |

|            |           |               |   |   |           |        |         |         |     |
|------------|-----------|---------------|---|---|-----------|--------|---------|---------|-----|
| rs4988213  | Hs.147006 | Hs.147006-S   | 2 | 2 | 136448486 | 221239 | 12.7477 | 5.66244 | CHB |
| rs4988211  | Hs.147006 | Hs.147006-S   | 2 | 2 | 136448687 | 221038 | 12.7477 | 5.66244 | CHB |
| rs4988203  | Hs.147006 | Hs.147006-S   | 2 | 2 | 136450055 | 219670 | 12.7477 | 5.66244 | CHB |
| rs12617885 | Hs.147006 | Hs.147006-S   | 2 | 2 | 136451826 | 217899 | 12.7477 | 5.66244 | CHB |
| rs4988196  | Hs.147006 | Hs.147006-S   | 2 | 2 | 136452846 | 216879 | 12.7477 | 5.66244 | CHB |
| rs3087353  | Hs.147006 | Hs.147006-S   | 2 | 2 | 136457449 | 212276 | 7.21    | 5.66244 | CHB |
| rs2289048  | Hs.147006 | Hs.147006-S   | 2 | 2 | 136457632 | 212093 | 11.0812 | 5.66244 | CHB |
| rs2289049  | Hs.147006 | Hs.147006-S   | 2 | 2 | 136457855 | 211870 | 12.7477 | 5.66244 | CHB |
| rs2070068  | Hs.147006 | Hs.147006-S   | 2 | 2 | 136457887 | 211838 | 9.3425  | 5.66244 | CHB |
| rs3087348  | Hs.147006 | Hs.147006-S   | 2 | 2 | 136458046 | 211679 | 12.7477 | 5.66244 | CHB |
| rs12624144 | Hs.147006 | Hs.147006-S   | 2 | 2 | 136568859 | 100866 | 15.1932 | 5.66244 | CHB |
| rs12613074 | Hs.147006 | Hs.147006-S   | 2 | 2 | 136570822 | 98903  | 15.1932 | 5.66244 | CHB |
| rs3768996  | Hs.147006 | Hs.147006-S   | 2 | 2 | 136575560 | 94165  | 15.1932 | 5.66244 | CHB |
| rs16832394 | Hs.147006 | Hs.147006-S   | 2 | 2 | 136577042 | 92683  | 15.1932 | 5.66244 | CHB |
| rs12618797 | Hs.147006 | Hs.147006-S   | 2 | 2 | 136580415 | 89310  | 15.1932 | 5.66244 | CHB |
| rs713391   | Hs.147006 | Hs.147006-S   | 2 | 2 | 136581699 | 88026  | 15.1932 | 5.66244 | CHB |
| rs7559769  | Hs.147006 | Hs.147006-S   | 2 | 2 | 136619085 | 50640  | 5.8652  | 5.66244 | CHB |
| rs7585965  | Hs.147006 | Hs.147006-S   | 2 | 2 | 136619420 | 50305  | 5.8652  | 5.66244 | CHB |
| rs12619854 | Hs.147006 | Hs.147006-S   | 2 | 2 | 136619501 | 50224  | 5.8652  | 5.66244 | CHB |
| rs3860492  | LOC51240  | GI_31377759-S | 2 | 2 | 190307251 | 153741 | 7.2561  | 5.72166 | CHB |
| rs7587662  | LOC51240  | GI_31377759-S | 2 | 2 | 190312748 | 148244 | 8.1831  | 5.72166 | CHB |
| rs1437889  | LOC51240  | GI_31377759-S | 2 | 2 | 190313316 | 147676 | 8.1831  | 5.72166 | CHB |
| rs1437887  | LOC51240  | GI_31377759-S | 2 | 2 | 190313632 | 147360 | 8.1831  | 5.72166 | CHB |
| rs6735087  | LOC51240  | GI_31377759-S | 2 | 2 | 190315547 | 145445 | 7.962   | 5.72166 | CHB |
| rs4667295  | LOC51240  | GI_31377759-S | 2 | 2 | 190329896 | 131096 | 9.8216  | 5.72166 | CHB |
| rs6761923  | LOC51240  | GI_31377759-S | 2 | 2 | 190333105 | 127887 | 11.3609 | 5.72166 | CHB |
| rs9646811  | LOC51240  | GI_31377759-S | 2 | 2 | 190334084 | 126908 | 8.3543  | 5.72166 | CHB |
| rs7568449  | LOC51240  | GI_31377759-S | 2 | 2 | 190346560 | 114432 | 11.3609 | 5.72166 | CHB |
| rs2289226  | LOC51240  | GI_31377759-S | 2 | 2 | 190351711 | 109281 | 14.1553 | 5.72166 | CHB |
| rs4667297  | LOC51240  | GI_31377759-S | 2 | 2 | 190354502 | 106490 | 14.1553 | 5.72166 | CHB |
| rs893784   | LOC51240  | GI_31377759-S | 2 | 2 | 190361789 | 99203  | 14.1553 | 5.72166 | CHB |
| rs10931430 | LOC51240  | GI_31377759-S | 2 | 2 | 190367692 | 93300  | 14.1553 | 5.72166 | CHB |
| rs11679767 | LOC51240  | GI_31377759-S | 2 | 2 | 190371806 | 89186  | 13.7503 | 5.72166 | CHB |
| rs7571089  | LOC51240  | GI_31377759-S | 2 | 2 | 190387299 | 73693  | 14.1553 | 5.72166 | CHB |
| rs1437891  | LOC51240  | GI_31377759-S | 2 | 2 | 190388214 | 72778  | 14.2539 | 5.72166 | CHB |
| rs10195109 | LOC51240  | GI_31377759-S | 2 | 2 | 190394697 | 66295  | 9.6935  | 5.72166 | CHB |
| rs6434365  | LOC51240  | GI_31377759-S | 2 | 2 | 190397927 | 63065  | 9.6935  | 5.72166 | CHB |
| rs11901295 | LOC51240  | GI_31377759-S | 2 | 2 | 190402284 | 58708  | 8.9005  | 5.72166 | CHB |
| rs7557519  | LOC51240  | GI_31377759-S | 2 | 2 | 190408693 | 52299  | 9.6935  | 5.72166 | CHB |
| rs12693557 | LOC51240  | GI_31377759-S | 2 | 2 | 190416443 | 44549  | 14.1553 | 5.72166 | CHB |
| rs1550388  | LOC51240  | GI_31377759-S | 2 | 2 | 190429286 | 31706  | 9.6935  | 5.72166 | CHB |
| rs2033870  | LOC51240  | GI_31377759-S | 2 | 2 | 190429336 | 31656  | 14.1553 | 5.72166 | CHB |
| rs1225101  | LOC51240  | GI_31377759-S | 2 | 2 | 190430927 | 30065  | 8.8488  | 5.72166 | CHB |
| rs1898560  | LOC51240  | GI_31377759-S | 2 | 2 | 190437833 | 23159  | 9.6935  | 5.72166 | CHB |
| rs4666783  | LOC51240  | GI_31377759-S | 2 | 2 | 190438486 | 22506  | 9.6935  | 5.72166 | CHB |
| rs6719224  | LOC51240  | GI_31377759-S | 2 | 2 | 190459777 | 1215   | 9.6935  | 5.72166 | CHB |
| rs1055091  | LOC51240  | GI_31377759-S | 2 | 2 | 190460649 | 343    | 14.1553 | 5.72166 | CHB |
| rs6942     | LOC51240  | GI_31377759-S | 2 | 2 | 190461917 | 925    | 14.1553 | 5.72166 | CHB |
| rs3791767  | LOC51240  | GI_31377759-S | 2 | 2 | 190465421 | 4429   | 9.6935  | 5.72166 | CHB |
| rs7591929  | LOC51240  | GI_31377759-S | 2 | 2 | 190468763 | 7771   | 14.1553 | 5.72166 | CHB |
| rs5742933  | LOC51240  | GI_31377759-S | 2 | 2 | 190474822 | 13830  | 9.6935  | 5.72166 | CHB |
| rs1899025  | LOC51240  | GI_31377759-S | 2 | 2 | 190475088 | 14096  | 14.1553 | 5.72166 | CHB |
| rs1233302  | LOC51240  | GI_31377759-S | 2 | 2 | 190494386 | 33394  | 11.7877 | 5.72166 | CHB |
| rs3791770  | LOC51240  | GI_31377759-S | 2 | 2 | 190499341 | 38349  | 9.5057  | 5.72166 | CHB |
| rs3791773  | LOC51240  | GI_31377759-S | 2 | 2 | 190508138 | 47146  | 9.6935  | 5.72166 | CHB |
| rs1233284  | LOC51240  | GI_31377759-S | 2 | 2 | 190515277 | 54285  | 14.1553 | 5.72166 | CHB |

|            |          |               |   |   |           |        |         |         |     |
|------------|----------|---------------|---|---|-----------|--------|---------|---------|-----|
| rs1233288  | LOC51240 | GI_31377759-S | 2 | 2 | 190516231 | 55239  | 14.1553 | 5.72166 | CHB |
| rs1233297  | LOC51240 | GI_31377759-S | 2 | 2 | 190519681 | 58689  | 14.1553 | 5.72166 | CHB |
| rs7577961  | LOC51240 | GI_31377759-S | 2 | 2 | 190519772 | 58780  | 10.5418 | 5.72166 | CHB |
| rs5743063  | LOC51240 | GI_31377759-S | 2 | 2 | 190519955 | 58963  | 10.1714 | 5.72166 | CHB |
| rs1233245  | LOC51240 | GI_31377759-S | 2 | 2 | 190526000 | 65008  | 11.5977 | 5.72166 | CHB |
| rs1233258  | LOC51240 | GI_31377759-S | 2 | 2 | 190532540 | 71548  | 8.3081  | 5.72166 | CHB |
| rs12618262 | LOC51240 | GI_31377759-S | 2 | 2 | 190533579 | 72587  | 5.8596  | 5.72166 | CHB |
| rs5743112  | LOC51240 | GI_31377759-S | 2 | 2 | 190534488 | 73496  | 6.5778  | 5.72166 | CHB |
| rs5743116  | LOC51240 | GI_31377759-S | 2 | 2 | 190539474 | 78482  | 6.5778  | 5.72166 | CHB |
| rs5743117  | LOC51240 | GI_31377759-S | 2 | 2 | 190539751 | 78759  | 6.223   | 5.72166 | CHB |
| rs733318   | LOC51240 | GI_31377759-S | 2 | 2 | 190549647 | 88655  | 6.5778  | 5.72166 | CHB |
| rs256567   | LOC51240 | GI_31377759-S | 2 | 2 | 190553037 | 92045  | 8.2614  | 5.72166 | CHB |
| rs256564   | LOC51240 | GI_31377759-S | 2 | 2 | 190555555 | 94563  | 8.2614  | 5.72166 | CHB |
| rs256563   | LOC51240 | GI_31377759-S | 2 | 2 | 190557338 | 96346  | 8.2638  | 5.72166 | CHB |
| rs1030136  | LOC51240 | GI_31377759-S | 2 | 2 | 190561166 | 100174 | 6.5778  | 5.72166 | CHB |
| rs256554   | LOC51240 | GI_31377759-S | 2 | 2 | 190564520 | 103528 | 5.7394  | 5.72166 | CHB |
| rs5743208  | LOC51240 | GI_31377759-S | 2 | 2 | 190568554 | 107562 | 6.5778  | 5.72166 | CHB |
| rs256550   | LOC51240 | GI_31377759-S | 2 | 2 | 190570244 | 109252 | 8.2614  | 5.72166 | CHB |
| rs6736360  | LOC51240 | GI_31377759-S | 2 | 2 | 190574255 | 113263 | 6.0534  | 5.72166 | CHB |
| rs16832155 | LOC51240 | GI_31377759-S | 2 | 2 | 190575347 | 114355 | 6.5778  | 5.72166 | CHB |
| rs256546   | LOC51240 | GI_31377759-S | 2 | 2 | 190576669 | 115677 | 8.0358  | 5.72166 | CHB |
| rs1233366  | LOC51240 | GI_31377759-S | 2 | 2 | 190582465 | 121473 | 8.2614  | 5.72166 | CHB |
| rs16832158 | LOC51240 | GI_31377759-S | 2 | 2 | 190584194 | 123202 | 6.5778  | 5.72166 | CHB |
| rs256539   | LOC51240 | GI_31377759-S | 2 | 2 | 190584326 | 123334 | 8.2614  | 5.72166 | CHB |
| rs7560327  | LOC51240 | GI_31377759-S | 2 | 2 | 190598028 | 137036 | 6.5778  | 5.72166 | CHB |
| rs12475694 | LOC51240 | GI_31377759-S | 2 | 2 | 190598114 | 137122 | 9.3852  | 5.72166 | CHB |
| rs2168057  | LOC51240 | GI_31377759-S | 2 | 2 | 190603210 | 142218 | 8.2614  | 5.72166 | CHB |
| rs4853634  | LOC51240 | GI_31377759-S | 2 | 2 | 190604737 | 143745 | 6.5778  | 5.72166 | CHB |
| rs12479375 | LOC51240 | GI_31377759-S | 2 | 2 | 190610992 | 150000 | 8.2614  | 5.72166 | CHB |
| rs9917356  | LOC51240 | GI_31377759-S | 2 | 2 | 190615500 | 154508 | 8.2614  | 5.72166 | CHB |
| rs7593661  | LOC51240 | GI_31377759-S | 2 | 2 | 190620195 | 159203 | 8.2614  | 5.72166 | CHB |
| rs6749232  | MYO1B    | GI_37549338-S | 2 | 2 | 191940558 | 174253 | 6.51    | 5.81837 | CHB |
| rs6749232  | MYO1B    | GI_44889480-S | 2 | 2 | 191940558 | 174229 | 6.51    | 5.81837 | CHB |
| rs4853562  | MYO1B    | GI_37549338-S | 2 | 2 | 191943928 | 170883 | 6.51    | 5.81837 | CHB |
| rs4853562  | MYO1B    | GI_44889480-S | 2 | 2 | 191943928 | 170859 | 6.51    | 5.81837 | CHB |
| rs7368746  | MYO1B    | GI_37549338-S | 2 | 2 | 191944804 | 170007 | 6.51    | 5.81837 | CHB |
| rs7368746  | MYO1B    | GI_44889480-S | 2 | 2 | 191944804 | 169983 | 6.51    | 5.81837 | CHB |
| rs4853564  | MYO1B    | GI_37549338-S | 2 | 2 | 191949171 | 165640 | 6.51    | 5.81837 | CHB |
| rs4853564  | MYO1B    | GI_44889480-S | 2 | 2 | 191949171 | 165616 | 6.51    | 5.81837 | CHB |
| rs4853462  | MYO1B    | GI_37549338-S | 2 | 2 | 191949310 | 165501 | 6.51    | 5.81837 | CHB |
| rs4853462  | MYO1B    | GI_44889480-S | 2 | 2 | 191949310 | 165477 | 6.51    | 5.81837 | CHB |
| rs13025919 | MYO1B    | GI_37549338-S | 2 | 2 | 191950407 | 164404 | 6.51    | 5.81837 | CHB |
| rs13025919 | MYO1B    | GI_44889480-S | 2 | 2 | 191950407 | 164380 | 6.51    | 5.81837 | CHB |
| rs12623832 | MYO1B    | GI_37549338-S | 2 | 2 | 191951150 | 163661 | 6.51    | 5.81837 | CHB |
| rs12623832 | MYO1B    | GI_44889480-S | 2 | 2 | 191951150 | 163637 | 6.51    | 5.81837 | CHB |
| rs4853568  | MYO1B    | GI_37549338-S | 2 | 2 | 191951696 | 163115 | 6.3721  | 5.81837 | CHB |
| rs4853568  | MYO1B    | GI_44889480-S | 2 | 2 | 191951696 | 163091 | 6.4591  | 5.81837 | CHB |
| rs12615939 | RPL37A   | GI_16306561-S | 2 | 2 | 217083875 | 105213 | 8.6773  | 6.15084 | CHB |
| rs16856031 | RPL37A   | GI_16306561-S | 2 | 2 | 217095621 | 93467  | 8.7207  | 6.15084 | CHB |
| rs16856033 | RPL37A   | GI_16306561-S | 2 | 2 | 217098568 | 90520  | 8.7207  | 6.15084 | CHB |
| rs16856035 | RPL37A   | GI_16306561-S | 2 | 2 | 217098606 | 90482  | 8.7207  | 6.15084 | CHB |
| rs16856038 | RPL37A   | GI_16306561-S | 2 | 2 | 217100778 | 88310  | 8.1615  | 6.15084 | CHB |
| rs12621805 | RPL37A   | GI_16306561-S | 2 | 2 | 217100957 | 88131  | 8.7207  | 6.15084 | CHB |
| rs3755142  | RPL37A   | GI_16306561-S | 2 | 2 | 217102433 | 86655  | 8.7207  | 6.15084 | CHB |
| rs3770491  | RPL37A   | GI_16306561-S | 2 | 2 | 217107405 | 81683  | 8.7207  | 6.15084 | CHB |
| rs3816784  | RPL37A   | GI_16306561-S | 2 | 2 | 217110913 | 78175  | 8.7207  | 6.15084 | CHB |



|            |        |               |   |   |           |        |         |         |     |
|------------|--------|---------------|---|---|-----------|--------|---------|---------|-----|
| rs2066518  | RPL37A | GI_16306561-S | 2 | 2 | 217113894 | 75194  | 11.8138 | 6.15084 | CHB |
| rs3770488  | RPL37A | GI_16306561-S | 2 | 2 | 217117579 | 71509  | 11.6178 | 6.15084 | CHB |
| rs3770487  | RPL37A | GI_16306561-S | 2 | 2 | 217117613 | 71475  | 11.8138 | 6.15084 | CHB |
| rs16856088 | RPL37A | GI_16306561-S | 2 | 2 | 217118220 | 70868  | 11.9079 | 6.15084 | CHB |
| rs3770485  | RPL37A | GI_16306561-S | 2 | 2 | 217118416 | 70672  | 11.8138 | 6.15084 | CHB |
| rs12621359 | RPL37A | GI_16306561-S | 2 | 2 | 217119330 | 69758  | 11.8138 | 6.15084 | CHB |
| rs12611945 | RPL37A | GI_16306561-S | 2 | 2 | 217119515 | 69573  | 11.8138 | 6.15084 | CHB |
| rs3770483  | RPL37A | GI_16306561-S | 2 | 2 | 217120269 | 68819  | 11.8138 | 6.15084 | CHB |
| rs2066521  | RPL37A | GI_16306561-S | 2 | 2 | 217122924 | 66164  | 11.8138 | 6.15084 | CHB |
| rs12612280 | RPL37A | GI_16306561-S | 2 | 2 | 217123766 | 65322  | 11.8138 | 6.15084 | CHB |
| rs16856126 | RPL37A | GI_16306561-S | 2 | 2 | 217124692 | 64396  | 11.8138 | 6.15084 | CHB |
| rs16856136 | RPL37A | GI_16306561-S | 2 | 2 | 217128131 | 60957  | 11.121  | 6.15084 | CHB |
| rs3816783  | RPL37A | GI_16306561-S | 2 | 2 | 217128593 | 60495  | 11.8138 | 6.15084 | CHB |
| rs12612749 | RPL37A | GI_16306561-S | 2 | 2 | 217129141 | 59947  | 11.8138 | 6.15084 | CHB |
| rs3770480  | RPL37A | GI_16306561-S | 2 | 2 | 217129746 | 59342  | 11.8138 | 6.15084 | CHB |
| rs1705105  | RPL37A | GI_16306561-S | 2 | 2 | 217131441 | 57647  | 11.8138 | 6.15084 | CHB |
| rs505883   | RPL37A | GI_16306561-S | 2 | 2 | 217131540 | 57548  | 11.1883 | 6.15084 | CHB |
| rs560025   | RPL37A | GI_16306561-S | 2 | 2 | 217133078 | 56010  | 11.8138 | 6.15084 | CHB |
| rs2627045  | RPL37A | GI_16306561-S | 2 | 2 | 217133513 | 55575  | 11.8138 | 6.15084 | CHB |
| rs284548   | RPL37A | GI_16306561-S | 2 | 2 | 217136361 | 52727  | 9.6895  | 6.15084 | CHB |
| rs284552   | RPL37A | GI_16306561-S | 2 | 2 | 217138550 | 50538  | 11.8138 | 6.15084 | CHB |
| rs2738286  | RPL37A | GI_16306561-S | 2 | 2 | 217140870 | 48218  | 11.8138 | 6.15084 | CHB |
| rs12468079 | RPL37A | GI_16306561-S | 2 | 2 | 217144583 | 44505  | 11.8138 | 6.15084 | CHB |
| rs4324305  | RPL37A | GI_16306561-S | 2 | 2 | 217155418 | 33670  | 11.9079 | 6.15084 | CHB |
| rs12620897 | RPL37A | GI_16306561-S | 2 | 2 | 217161264 | 27824  | 11.0917 | 6.15084 | CHB |
| rs2738289  | RPL37A | GI_16306561-S | 2 | 2 | 217169528 | 19560  | 11.8138 | 6.15084 | CHB |
| rs605702   | RPL37A | GI_16306561-S | 2 | 2 | 217172200 | 16888  | 11.121  | 6.15084 | CHB |
| rs654474   | RPL37A | GI_16306561-S | 2 | 2 | 217176114 | 12974  | 11.8138 | 6.15084 | CHB |
| rs540809   | RPL37A | GI_16306561-S | 2 | 2 | 217176378 | 12710  | 10.9343 | 6.15084 | CHB |
| rs284567   | RPL37A | GI_16306561-S | 2 | 2 | 217177980 | 11108  | 11.9079 | 6.15084 | CHB |
| rs284565   | RPL37A | GI_16306561-S | 2 | 2 | 217184312 | 4776   | 11.9079 | 6.15084 | CHB |
| rs3732019  | RPL37A | GI_16306561-S | 2 | 2 | 217187892 | 1196   | 12.6247 | 6.15084 | CHB |
| rs3806575  | RPL37A | GI_16306561-S | 2 | 2 | 217188440 | 648    | 11.8265 | 6.15084 | CHB |
| rs3755140  | RPL37A | GI_16306561-S | 2 | 2 | 217188555 | 533    | 10.5618 | 6.15084 | CHB |
| rs12619115 | RPL37A | GI_16306561-S | 2 | 2 | 217189346 | 258    | 9.8393  | 6.15084 | CHB |
| rs2272243  | RPL37A | GI_16306561-S | 2 | 2 | 217190270 | 1182   | 11.2425 | 6.15084 | CHB |
| rs12616410 | RPL37A | GI_16306561-S | 2 | 2 | 217193418 | 4330   | 11.2425 | 6.15084 | CHB |
| rs12472569 | RPL37A | GI_16306561-S | 2 | 2 | 217206912 | 17824  | 12.6247 | 6.15084 | CHB |
| rs12621480 | RPL37A | GI_16306561-S | 2 | 2 | 217210080 | 20992  | 6.7167  | 6.15084 | CHB |
| rs12612079 | RPL37A | GI_16306561-S | 2 | 2 | 217224087 | 34999  | 7.9307  | 6.15084 | CHB |
| rs7587025  | RPL37A | GI_16306561-S | 2 | 2 | 217229951 | 40863  | 9.2337  | 6.15084 | CHB |
| rs2141828  | COL4A4 | GI_15890083-S | 2 | 2 | 227747975 | 52413  | 5.949   | 5.85958 | CHB |
| rs11678750 | STK25  | GI_34147665-S | 2 | 2 | 241920909 | 233702 | 7.4102  | 5.74051 | CHB |
| rs3755324  | STK25  | GI_34147665-S | 2 | 2 | 241923210 | 231401 | 7.4102  | 5.74051 | CHB |
| rs11675957 | STK25  | GI_34147665-S | 2 | 2 | 241928782 | 225829 | 7.1423  | 5.74051 | CHB |
| rs6724257  | STK25  | GI_34147665-S | 2 | 2 | 241942387 | 212224 | 7.4472  | 5.74051 | CHB |
| rs10933548 | STK25  | GI_34147665-S | 2 | 2 | 241954827 | 199784 | 7.6472  | 5.74051 | CHB |
| rs1106523  | STK25  | GI_34147665-S | 2 | 2 | 241971529 | 183082 | 7.4472  | 5.74051 | CHB |
| rs7568     | STK25  | GI_34147665-S | 2 | 2 | 242011733 | 142878 | 11.9507 | 5.74051 | CHB |
| rs16843642 | STK25  | GI_34147665-S | 2 | 2 | 242071369 | 83242  | 12.0861 | 5.74051 | CHB |
| rs3771561  | STK25  | GI_34147665-S | 2 | 2 | 242073694 | 80917  | 11.9507 | 5.74051 | CHB |
| rs16842449 | STK25  | GI_34147665-S | 2 | 2 | 242074969 | 79642  | 11.2973 | 5.74051 | CHB |
| rs3771566  | STK25  | GI_34147665-S | 2 | 2 | 242078289 | 76322  | 11.9507 | 5.74051 | CHB |
| rs7423605  | STK25  | GI_34147665-S | 2 | 2 | 242083601 | 71010  | 11.9507 | 5.74051 | CHB |
| rs12612038 | STK25  | GI_34147665-S | 2 | 2 | 242089675 | 64936  | 11.9507 | 5.74051 | CHB |
| rs16843671 | STK25  | GI_34147665-S | 2 | 2 | 242094348 | 60263  | 12.074  | 5.74051 | CHB |

|            |           |               |   |   |           |        |         |         |     |
|------------|-----------|---------------|---|---|-----------|--------|---------|---------|-----|
| rs929409   | STK25     | GI_34147665-S | 2 | 2 | 242096497 | 58114  | 8.7201  | 5.74051 | CHB |
| rs3755400  | STK25     | GI_34147665-S | 2 | 2 | 242099785 | 54826  | 11.9507 | 5.74051 | CHB |
| rs3771569  | STK25     | GI_34147665-S | 2 | 2 | 242102596 | 52015  | 10.6127 | 5.74051 | CHB |
| rs3821281  | STK25     | GI_34147665-S | 2 | 2 | 242105330 | 49281  | 12.7138 | 5.74051 | CHB |
| rs2240482  | STK25     | GI_34147665-S | 2 | 2 | 242125011 | 29600  | 12.131  | 5.74051 | CHB |
| rs420537   | LOC132001 | GI_34147617-S | 3 | 3 | 11861751  | 27952  | 6.3146  | 5.9124  | CHB |
| rs440746   | LOC132001 | GI_34147617-S | 3 | 3 | 11863556  | 29757  | 6.5428  | 5.9124  | CHB |
| rs4684236  | Hs.224849 | Hs.224849-S   | 3 | 3 | 14675050  | 21183  | 6.6846  | 6.32393 | CHB |
| rs9830735  | Hs.224849 | Hs.224849-S   | 3 | 3 | 14676639  | 19594  | 6.7918  | 6.32393 | CHB |
| rs2053017  | Hs.224849 | Hs.224849-S   | 3 | 3 | 14677276  | 18957  | 6.6846  | 6.32393 | CHB |
| rs3773491  | Hs.224849 | Hs.224849-S   | 3 | 3 | 14687046  | 9187   | 7.454   | 6.32393 | CHB |
| rs1901     | Hs.224849 | Hs.224849-S   | 3 | 3 | 14687477  | 8756   | 7.454   | 6.32393 | CHB |
| rs11717438 | Hs.224849 | Hs.224849-S   | 3 | 3 | 14688062  | 8171   | 6.4295  | 6.32393 | CHB |
| rs9821143  | Hs.224849 | Hs.224849-S   | 3 | 3 | 14699417  | 3184   | 7.454   | 6.32393 | CHB |
| rs352158   | FLJ12442  | GI_12597652-S | 3 | 3 | 52192744  | 340934 | 5.792   | 5.65539 | CHB |
| rs614288   | FLJ12442  | GI_12597652-S | 3 | 3 | 52195243  | 338435 | 6.4883  | 5.65539 | CHB |
| rs181274   | FLJ12442  | GI_12597652-S | 3 | 3 | 52208901  | 324777 | 6.3521  | 5.65539 | CHB |
| rs352171   | FLJ12442  | GI_12597652-S | 3 | 3 | 52209243  | 324435 | 6.5866  | 5.65539 | CHB |
| rs352170   | FLJ12442  | GI_12597652-S | 3 | 3 | 52211117  | 322561 | 6.5295  | 5.65539 | CHB |
| rs352169   | FLJ12442  | GI_12597652-S | 3 | 3 | 52211802  | 321876 | 6.5295  | 5.65539 | CHB |
| rs352168   | FLJ12442  | GI_12597652-S | 3 | 3 | 52213010  | 320668 | 6.5295  | 5.65539 | CHB |
| rs352167   | FLJ12442  | GI_12597652-S | 3 | 3 | 52213696  | 319982 | 6.5295  | 5.65539 | CHB |
| rs352166   | FLJ12442  | GI_12597652-S | 3 | 3 | 52213717  | 319961 | 6.5295  | 5.65539 | CHB |
| rs352165   | FLJ12442  | GI_12597652-S | 3 | 3 | 52217942  | 315736 | 6.1118  | 5.65539 | CHB |
| rs11712164 | FLJ12442  | GI_12597652-S | 3 | 3 | 52219091  | 314587 | 6.5486  | 5.65539 | CHB |
| rs164640   | FLJ12442  | GI_12597652-S | 3 | 3 | 52222354  | 311324 | 6.5295  | 5.65539 | CHB |
| rs352162   | FLJ12442  | GI_12597652-S | 3 | 3 | 52228009  | 305669 | 6.5101  | 5.65539 | CHB |
| rs187084   | FLJ12442  | GI_12597652-S | 3 | 3 | 52236071  | 297607 | 6.5295  | 5.65539 | CHB |
| rs353547   | FLJ12442  | GI_12597652-S | 3 | 3 | 52243906  | 289772 | 6.909   | 5.65539 | CHB |
| rs7618915  | FLJ12442  | GI_12597652-S | 3 | 3 | 52254634  | 279044 | 7.6002  | 5.65539 | CHB |
| rs1060330  | FLJ12442  | GI_12597652-S | 3 | 3 | 52263985  | 269693 | 7.5219  | 5.65539 | CHB |
| rs7622851  | FLJ12442  | GI_12597652-S | 3 | 3 | 52308711  | 224967 | 8.0788  | 5.65539 | CHB |
| rs3844291  | FLJ12442  | GI_12597652-S | 3 | 3 | 52316255  | 217423 | 7.8749  | 5.65539 | CHB |
| rs730050   | FLJ12442  | GI_12597652-S | 3 | 3 | 52323404  | 210274 | 7.6785  | 5.65539 | CHB |
| rs3852064  | FLJ12442  | GI_12597652-S | 3 | 3 | 52324452  | 209226 | 7.3852  | 5.65539 | CHB |
| rs13094687 | FLJ12442  | GI_12597652-S | 3 | 3 | 52425083  | 108595 | 9.1287  | 5.65539 | CHB |
| rs2272088  | FLJ12442  | GI_12597652-S | 3 | 3 | 52432013  | 101665 | 5.8717  | 5.65539 | CHB |
| rs13094915 | FLJ12442  | GI_12597652-S | 3 | 3 | 52482759  | 50919  | 7.3149  | 5.65539 | CHB |
| rs731831   | FLJ12442  | GI_12597652-S | 3 | 3 | 52511554  | 22124  | 8.4577  | 5.65539 | CHB |
| rs1010552  | FLJ12442  | GI_12597652-S | 3 | 3 | 52515584  | 18094  | 6.2117  | 5.65539 | CHB |
| rs1010553  | FLJ12442  | GI_12597652-S | 3 | 3 | 52515813  | 17865  | 7.9269  | 5.65539 | CHB |
| rs1010554  | FLJ12442  | GI_12597652-S | 3 | 3 | 52517959  | 15719  | 8.8293  | 5.65539 | CHB |
| rs2015971  | FLJ12442  | GI_12597652-S | 3 | 3 | 52521860  | 11818  | 7.6387  | 5.65539 | CHB |
| rs13081028 | FLJ12442  | GI_12597652-S | 3 | 3 | 52530356  | 3322   | 8.2966  | 5.65539 | CHB |
| rs9853056  | FLJ12442  | GI_12597652-S | 3 | 3 | 52530997  | 2681   | 9.0125  | 5.65539 | CHB |
| rs4687625  | FLJ12442  | GI_12597652-S | 3 | 3 | 52538758  | 5080   | 10.0543 | 5.65539 | CHB |
| rs4282054  | FLJ12442  | GI_12597652-S | 3 | 3 | 52541105  | 7427   | 10.3199 | 5.65539 | CHB |
| rs7614981  | FLJ12442  | GI_12597652-S | 3 | 3 | 52541954  | 8276   | 9.1166  | 5.65539 | CHB |
| rs12489828 | FLJ12442  | GI_12597652-S | 3 | 3 | 52542054  | 8376   | 10.3461 | 5.65539 | CHB |
| rs6445528  | FLJ12442  | GI_12597652-S | 3 | 3 | 52547487  | 13809  | 10.3199 | 5.65539 | CHB |
| rs1133415  | FLJ12442  | GI_12597652-S | 3 | 3 | 52550871  | 17193  | 10.3199 | 5.65539 | CHB |
| rs2878628  | FLJ12442  | GI_12597652-S | 3 | 3 | 52559755  | 26077  | 10.3867 | 5.65539 | CHB |
| rs2251219  | FLJ12442  | GI_12597652-S | 3 | 3 | 52559827  | 26149  | 10.3867 | 5.65539 | CHB |
| rs1961959  | FLJ12442  | GI_12597652-S | 3 | 3 | 52560800  | 27122  | 8.286   | 5.65539 | CHB |
| rs1961958  | FLJ12442  | GI_12597652-S | 3 | 3 | 52561030  | 27352  | 11.1545 | 5.65539 | CHB |
| rs17052259 | FLJ12442  | GI_12597652-S | 3 | 3 | 52568178  | 34500  | 10.3867 | 5.65539 | CHB |

|            |          |               |   |   |          |        |         |         |     |
|------------|----------|---------------|---|---|----------|--------|---------|---------|-----|
| rs3796353  | FLJ12442 | GI_12597652-S | 3 | 3 | 52568270 | 34592  | 9.9032  | 5.65539 | CHB |
| rs6778844  | FLJ12442 | GI_12597652-S | 3 | 3 | 52571438 | 37760  | 10.3867 | 5.65539 | CHB |
| rs6798246  | FLJ12442 | GI_12597652-S | 3 | 3 | 52574962 | 41284  | 10.3867 | 5.65539 | CHB |
| rs11714565 | FLJ12442 | GI_12597652-S | 3 | 3 | 52581332 | 47654  | 9.3577  | 5.65539 | CHB |
| rs6805156  | FLJ12442 | GI_12597652-S | 3 | 3 | 52584402 | 50724  | 10.3867 | 5.65539 | CHB |
| rs7652191  | FLJ12442 | GI_12597652-S | 3 | 3 | 52585455 | 51777  | 10.3867 | 5.65539 | CHB |
| rs17264436 | FLJ12442 | GI_12597652-S | 3 | 3 | 52585691 | 52013  | 10.5505 | 5.65539 | CHB |
| rs4687629  | FLJ12442 | GI_12597652-S | 3 | 3 | 52590267 | 56589  | 10.5505 | 5.65539 | CHB |
| rs11720159 | FLJ12442 | GI_12597652-S | 3 | 3 | 52592842 | 59164  | 10.3867 | 5.65539 | CHB |
| rs11720243 | FLJ12442 | GI_12597652-S | 3 | 3 | 52593058 | 59380  | 9.4847  | 5.65539 | CHB |
| rs12487445 | FLJ12442 | GI_12597652-S | 3 | 3 | 52593359 | 59681  | 10.3867 | 5.65539 | CHB |
| rs2590838  | FLJ12442 | GI_12597652-S | 3 | 3 | 52597126 | 63448  | 9.9032  | 5.65539 | CHB |
| rs2336146  | FLJ12442 | GI_12597652-S | 3 | 3 | 52601686 | 68008  | 8.832   | 5.65539 | CHB |
| rs2118540  | FLJ12442 | GI_12597652-S | 3 | 3 | 52604426 | 70748  | 9.7403  | 5.65539 | CHB |
| rs2276824  | FLJ12442 | GI_12597652-S | 3 | 3 | 52612526 | 78848  | 10.3867 | 5.65539 | CHB |
| rs3774366  | FLJ12442 | GI_12597652-S | 3 | 3 | 52616295 | 82617  | 10.3867 | 5.65539 | CHB |
| rs3774365  | FLJ12442 | GI_12597652-S | 3 | 3 | 52617527 | 83849  | 10.3867 | 5.65539 | CHB |
| rs12487591 | FLJ12442 | GI_12597652-S | 3 | 3 | 52617976 | 84298  | 10.3867 | 5.65539 | CHB |
| rs3733045  | FLJ12442 | GI_12597652-S | 3 | 3 | 52618347 | 84669  | 10.3867 | 5.65539 | CHB |
| rs3755806  | FLJ12442 | GI_12597652-S | 3 | 3 | 52618725 | 85047  | 9.7767  | 5.65539 | CHB |
| rs9879090  | FLJ12442 | GI_12597652-S | 3 | 3 | 52623305 | 89627  | 9.7282  | 5.65539 | CHB |
| rs13083798 | FLJ12442 | GI_12597652-S | 3 | 3 | 52624788 | 91110  | 10.3867 | 5.65539 | CHB |
| rs10510760 | FLJ12442 | GI_12597652-S | 3 | 3 | 52625388 | 91710  | 10.3867 | 5.65539 | CHB |
| rs13064064 | FLJ12442 | GI_12597652-S | 3 | 3 | 52632042 | 98364  | 10.3867 | 5.65539 | CHB |
| rs1561337  | FLJ12442 | GI_12597652-S | 3 | 3 | 52635003 | 101325 | 10.3867 | 5.65539 | CHB |
| rs4687548  | FLJ12442 | GI_12597652-S | 3 | 3 | 52641690 | 108012 | 9.9032  | 5.65539 | CHB |
| rs2083180  | FLJ12442 | GI_12597652-S | 3 | 3 | 52643159 | 109481 | 8.8494  | 5.65539 | CHB |
| rs13068293 | FLJ12442 | GI_12597652-S | 3 | 3 | 52647207 | 113529 | 10.3867 | 5.65539 | CHB |
| rs11130312 | FLJ12442 | GI_12597652-S | 3 | 3 | 52650095 | 116417 | 9.7767  | 5.65539 | CHB |
| rs13085895 | FLJ12442 | GI_12597652-S | 3 | 3 | 52653310 | 119632 | 10.3867 | 5.65539 | CHB |
| rs13085775 | FLJ12442 | GI_12597652-S | 3 | 3 | 52653410 | 119732 | 10.3867 | 5.65539 | CHB |
| rs2289250  | FLJ12442 | GI_12597652-S | 3 | 3 | 52657986 | 124308 | 10.3867 | 5.65539 | CHB |
| rs2336149  | FLJ12442 | GI_12597652-S | 3 | 3 | 52667164 | 133486 | 10.227  | 5.65539 | CHB |
| rs7611731  | FLJ12442 | GI_12597652-S | 3 | 3 | 52667761 | 134083 | 10.3867 | 5.65539 | CHB |
| rs6804145  | FLJ12442 | GI_12597652-S | 3 | 3 | 52669238 | 135560 | 9.1139  | 5.65539 | CHB |
| rs10865973 | FLJ12442 | GI_12597652-S | 3 | 3 | 52693194 | 159516 | 10.3867 | 5.65539 | CHB |
| rs10865974 | FLJ12442 | GI_12597652-S | 3 | 3 | 52693320 | 159642 | 10.3867 | 5.65539 | CHB |
| rs1866268  | FLJ12442 | GI_12597652-S | 3 | 3 | 52694438 | 160760 | 10.3867 | 5.65539 | CHB |
| rs1108842  | FLJ12442 | GI_12597652-S | 3 | 3 | 52695120 | 161442 | 10.3867 | 5.65539 | CHB |
| rs1117     | FLJ12442 | GI_12597652-S | 3 | 3 | 52696345 | 162667 | 10.3867 | 5.65539 | CHB |
| rs6762813  | FLJ12442 | GI_12597652-S | 3 | 3 | 52701735 | 168057 | 10.3867 | 5.65539 | CHB |
| rs2289247  | FLJ12442 | GI_12597652-S | 3 | 3 | 52702297 | 168619 | 10.3867 | 5.65539 | CHB |
| rs6976     | FLJ12442 | GI_12597652-S | 3 | 3 | 52703844 | 170166 | 11.5156 | 5.65539 | CHB |
| rs3733041  | FLJ12442 | GI_12597652-S | 3 | 3 | 52706638 | 172960 | 9.9838  | 5.65539 | CHB |
| rs12635140 | FLJ12442 | GI_12597652-S | 3 | 3 | 52713205 | 179527 | 10.3867 | 5.65539 | CHB |
| rs6617     | FLJ12442 | GI_12597652-S | 3 | 3 | 52715222 | 181544 | 10.3867 | 5.65539 | CHB |
| rs3755798  | FLJ12442 | GI_12597652-S | 3 | 3 | 52716200 | 182522 | 9.113   | 5.65539 | CHB |
| rs6445534  | FLJ12442 | GI_12597652-S | 3 | 3 | 52718424 | 184746 | 11.6213 | 5.65539 | CHB |
| rs11235    | FLJ12442 | GI_12597652-S | 3 | 3 | 52720127 | 186449 | 9.5835  | 5.65539 | CHB |
| rs2268027  | FLJ12442 | GI_12597652-S | 3 | 3 | 52741646 | 207968 | 9.3118  | 5.65539 | CHB |
| rs11130323 | FLJ12442 | GI_12597652-S | 3 | 3 | 52745317 | 211639 | 10.3867 | 5.65539 | CHB |
| rs2268026  | FLJ12442 | GI_12597652-S | 3 | 3 | 52753387 | 219709 | 8.5418  | 5.65539 | CHB |
| rs2072390  | FLJ12442 | GI_12597652-S | 3 | 3 | 52755549 | 221871 | 10.3867 | 5.65539 | CHB |
| rs13082208 | FLJ12442 | GI_12597652-S | 3 | 3 | 52756579 | 222901 | 8.4354  | 5.65539 | CHB |
| rs13082960 | FLJ12442 | GI_12597652-S | 3 | 3 | 52760208 | 226530 | 9.9455  | 5.65539 | CHB |
| rs2336545  | FLJ12442 | GI_12597652-S | 3 | 3 | 52762643 | 228965 | 10.3867 | 5.65539 | CHB |

|            |          |               |   |   |           |        |         |         |     |
|------------|----------|---------------|---|---|-----------|--------|---------|---------|-----|
| rs12497998 | FLJ12442 | GI_12597652-S | 3 | 3 | 52768642  | 234964 | 7.6605  | 5.65539 | CHB |
| rs2268025  | FLJ12442 | GI_12597652-S | 3 | 3 | 52770264  | 236586 | 9.1564  | 5.65539 | CHB |
| rs1029871  | FLJ12442 | GI_12597652-S | 3 | 3 | 52772674  | 238996 | 10.3867 | 5.65539 | CHB |
| rs2230535  | FLJ12442 | GI_12597652-S | 3 | 3 | 52775324  | 241646 | 10.3867 | 5.65539 | CHB |
| rs2230534  | FLJ12442 | GI_12597652-S | 3 | 3 | 52777442  | 243764 | 10.3867 | 5.65539 | CHB |
| rs998909   | FLJ12442 | GI_12597652-S | 3 | 3 | 52780133  | 246455 | 9.7554  | 5.65539 | CHB |
| rs11717836 | FLJ12442 | GI_12597652-S | 3 | 3 | 52782776  | 249098 | 9.1629  | 5.65539 | CHB |
| rs2019065  | FLJ12442 | GI_12597652-S | 3 | 3 | 52784565  | 250887 | 8.7191  | 5.65539 | CHB |
| rs2710323  | FLJ12442 | GI_12597652-S | 3 | 3 | 52790945  | 257267 | 7.378   | 5.65539 | CHB |
| rs3774354  | FLJ12442 | GI_12597652-S | 3 | 3 | 52792715  | 259037 | 7.1706  | 5.65539 | CHB |
| rs3774355  | FLJ12442 | GI_12597652-S | 3 | 3 | 52792818  | 259140 | 7.1706  | 5.65539 | CHB |
| rs2239551  | FLJ12442 | GI_12597652-S | 3 | 3 | 52793619  | 259941 | 7.1706  | 5.65539 | CHB |
| rs678      | FLJ12442 | GI_12597652-S | 3 | 3 | 52796021  | 262343 | 8.2063  | 5.65539 | CHB |
| rs1042779  | FLJ12442 | GI_12597652-S | 3 | 3 | 52796051  | 262373 | 8.1877  | 5.65539 | CHB |
| rs2286798  | FLJ12442 | GI_12597652-S | 3 | 3 | 52796217  | 262539 | 8.2063  | 5.65539 | CHB |
| rs2239549  | FLJ12442 | GI_12597652-S | 3 | 3 | 52798166  | 264488 | 7.3014  | 5.65539 | CHB |
| rs4687550  | FLJ12442 | GI_12597652-S | 3 | 3 | 52798470  | 264792 | 7.1706  | 5.65539 | CHB |
| rs4687551  | FLJ12442 | GI_12597652-S | 3 | 3 | 52798488  | 264810 | 7.1706  | 5.65539 | CHB |
| rs2270197  | FLJ12442 | GI_12597652-S | 3 | 3 | 52799135  | 265457 | 7.1706  | 5.65539 | CHB |
| rs6778329  | FLJ12442 | GI_12597652-S | 3 | 3 | 52799650  | 265972 | 7.9851  | 5.65539 | CHB |
| rs1076425  | FLJ12442 | GI_12597652-S | 3 | 3 | 52800502  | 266824 | 7.1706  | 5.65539 | CHB |
| rs1075653  | FLJ12442 | GI_12597652-S | 3 | 3 | 52800568  | 266890 | 6.5638  | 5.65539 | CHB |
| rs2071507  | FLJ12442 | GI_12597652-S | 3 | 3 | 52801747  | 268069 | 8.2063  | 5.65539 | CHB |
| rs2071508  | FLJ12442 | GI_12597652-S | 3 | 3 | 52801886  | 268208 | 7.1706  | 5.65539 | CHB |
| rs2239699  | FLJ12442 | GI_12597652-S | 3 | 3 | 52802955  | 269277 | 6.1906  | 5.65539 | CHB |
| rs2240920  | FLJ12442 | GI_12597652-S | 3 | 3 | 52806049  | 272371 | 7.8481  | 5.65539 | CHB |
| rs2240919  | FLJ12442 | GI_12597652-S | 3 | 3 | 52806741  | 273063 | 8.2063  | 5.65539 | CHB |
| rs2535629  | FLJ12442 | GI_12597652-S | 3 | 3 | 52808259  | 274581 | 6.9374  | 5.65539 | CHB |
| rs3617     | FLJ12442 | GI_12597652-S | 3 | 3 | 52808845  | 275167 | 9.9998  | 5.65539 | CHB |
| rs736408   | FLJ12442 | GI_12597652-S | 3 | 3 | 52810394  | 276716 | 7.5936  | 5.65539 | CHB |
| rs4481150  | FLJ12442 | GI_12597652-S | 3 | 3 | 52812833  | 279155 | 8.3881  | 5.65539 | CHB |
| rs2535627  | FLJ12442 | GI_12597652-S | 3 | 3 | 52820145  | 286467 | 8.3591  | 5.65539 | CHB |
| rs2071044  | FLJ12442 | GI_12597652-S | 3 | 3 | 52822641  | 288963 | 8.6906  | 5.65539 | CHB |
| rs2256332  | FLJ12442 | GI_12597652-S | 3 | 3 | 52830905  | 297227 | 6.8155  | 5.65539 | CHB |
| rs2240915  | FLJ12442 | GI_12597652-S | 3 | 3 | 52834566  | 300888 | 6.8155  | 5.65539 | CHB |
| rs2535633  | FLJ12442 | GI_12597652-S | 3 | 3 | 52834670  | 300992 | 6.2839  | 5.65539 | CHB |
| rs6445541  | FLJ12442 | GI_12597652-S | 3 | 3 | 52855168  | 321490 | 6.3775  | 5.65539 | CHB |
| rs9836499  | FLJ12442 | GI_12597652-S | 3 | 3 | 52879564  | 345886 | 6.4837  | 5.65539 | CHB |
| rs2336664  | FLJ12442 | GI_12597652-S | 3 | 3 | 52880253  | 346575 | 6.4837  | 5.65539 | CHB |
| rs4687680  | FLJ12442 | GI_12597652-S | 3 | 3 | 52882412  | 348734 | 6.0534  | 5.65539 | CHB |
| rs9850563  | FLJ12442 | GI_12597652-S | 3 | 3 | 52887254  | 353576 | 6.3363  | 5.65539 | CHB |
| rs12492391 | FLJ12442 | GI_12597652-S | 3 | 3 | 52887336  | 353658 | 6.0534  | 5.65539 | CHB |
| rs4687682  | FLJ12442 | GI_12597652-S | 3 | 3 | 52891979  | 358301 | 6.4837  | 5.65539 | CHB |
| rs2336668  | FLJ12442 | GI_12597652-S | 3 | 3 | 52894136  | 360458 | 6.4837  | 5.65539 | CHB |
| rs6795646  | FLJ12442 | GI_12597652-S | 3 | 3 | 52897661  | 363983 | 6.0534  | 5.65539 | CHB |
| rs9810807  | FLJ12442 | GI_12597652-S | 3 | 3 | 52899267  | 365589 | 6.4837  | 5.65539 | CHB |
| rs3772985  | DNASE1L3 | GI_4826697-S  | 3 | 3 | 58161759  | 3116   | 6.6358  | 5.37427 | CHB |
| rs162064   | ESRRBL1  | GI_19923513-S | 3 | 3 | 109306751 | 55652  | 6.9206  | 5.70074 | CHB |
| rs326356   | ESRRBL1  | GI_19923513-S | 3 | 3 | 109307253 | 55150  | 6.9206  | 5.70074 | CHB |
| rs17231712 | ESRRBL1  | GI_19923513-S | 3 | 3 | 109312252 | 50151  | 6.9206  | 5.70074 | CHB |
| rs13075747 | ESRRBL1  | GI_19923513-S | 3 | 3 | 109312854 | 49549  | 6.9206  | 5.70074 | CHB |
| rs7648181  | ESRRBL1  | GI_19923513-S | 3 | 3 | 109315979 | 46424  | 5.7518  | 5.70074 | CHB |
| rs326338   | ESRRBL1  | GI_19923513-S | 3 | 3 | 109325694 | 36709  | 6.9206  | 5.70074 | CHB |
| rs721328   | ESRRBL1  | GI_19923513-S | 3 | 3 | 109326171 | 36232  | 7.4331  | 5.70074 | CHB |
| rs3792335  | ESRRBL1  | GI_19923513-S | 3 | 3 | 109376540 | 14137  | 7.1542  | 5.70074 | CHB |
| rs12632400 | ESRRBL1  | GI_19923513-S | 3 | 3 | 109424304 | 61901  | 6.69    | 5.70074 | CHB |

|            |          |               |   |   |           |        |        |         |     |
|------------|----------|---------------|---|---|-----------|--------|--------|---------|-----|
| rs6769464  | ESRRBL1  | GI_19923513-S | 3 | 3 | 109502854 | 140451 | 5.8278 | 5.70074 | CHB |
| rs6768207  | ESRRBL1  | GI_19923513-S | 3 | 3 | 109507591 | 145188 | 5.8278 | 5.70074 | CHB |
| rs6768963  | BITE     | GI_13346499-S | 3 | 3 | 139659632 | 36523  | 6.0285 | 5.53564 | CHB |
| rs13098554 | BITE     | GI_13346499-S | 3 | 3 | 139667720 | 28435  | 5.5692 | 5.53564 | CHB |
| rs2280596  | BITE     | GI_13346499-S | 3 | 3 | 139695864 | 291    | 6.5909 | 5.53564 | CHB |
| rs9049     | BITE     | GI_13346499-S | 3 | 3 | 139695990 | 165    | 6.5909 | 5.53564 | CHB |
| rs13084780 | BITE     | GI_13346499-S | 3 | 3 | 139742934 | 46779  | 6.5909 | 5.53564 | CHB |
| rs12632793 | BITE     | GI_13346499-S | 3 | 3 | 139749294 | 53139  | 6.4284 | 5.53564 | CHB |
| rs12632794 | BITE     | GI_13346499-S | 3 | 3 | 139749333 | 53178  | 6.5909 | 5.53564 | CHB |
| rs12635904 | BITE     | GI_13346499-S | 3 | 3 | 139774267 | 78112  | 5.5891 | 5.53564 | CHB |
| rs13059817 | BITE     | GI_13346499-S | 3 | 3 | 139775708 | 79553  | 5.8132 | 5.53564 | CHB |
| rs13095125 | BITE     | GI_13346499-S | 3 | 3 | 139780182 | 84027  | 6.5104 | 5.53564 | CHB |
| rs13062423 | BITE     | GI_13346499-S | 3 | 3 | 139791564 | 95409  | 6.5909 | 5.53564 | CHB |
| rs2305269  | BITE     | GI_13346499-S | 3 | 3 | 139824033 | 127878 | 6.1769 | 5.53564 | CHB |
| rs184695   | Hs.54543 | Hs.54543-S    | 3 | 3 | 157880091 | 67922  | 7.481  | 5.79585 | CHB |
| rs193197   | Hs.54543 | Hs.54543-S    | 3 | 3 | 157894434 | 53579  | 7.1875 | 5.79585 | CHB |
| rs1367311  | Hs.54543 | Hs.54543-S    | 3 | 3 | 157901458 | 46555  | 6.1979 | 5.79585 | CHB |
| rs9882795  | Hs.54543 | Hs.54543-S    | 3 | 3 | 157921988 | 26025  | 6.1979 | 5.79585 | CHB |
| rs168247   | Hs.54543 | Hs.54543-S    | 3 | 3 | 157922888 | 25125  | 7.3022 | 5.79585 | CHB |
| rs237250   | Hs.54543 | Hs.54543-S    | 3 | 3 | 157927085 | 20928  | 7.5989 | 5.79585 | CHB |
| rs344003   | Hs.54543 | Hs.54543-S    | 3 | 3 | 157940422 | 7591   | 7.5989 | 5.79585 | CHB |
| rs344034   | Hs.54543 | Hs.54543-S    | 3 | 3 | 157945706 | 2307   | 7.5989 | 5.79585 | CHB |
| rs344028   | Hs.54543 | Hs.54543-S    | 3 | 3 | 157948471 | 458    | 7.5989 | 5.79585 | CHB |
| rs344027   | Hs.54543 | Hs.54543-S    | 3 | 3 | 157951095 | 3082   | 7.912  | 5.79585 | CHB |
| rs17380954 | Hs.54543 | Hs.54543-S    | 3 | 3 | 157987808 | 39795  | 6.533  | 5.79585 | CHB |
| rs386736   | Hs.54543 | Hs.54543-S    | 3 | 3 | 157996110 | 48097  | 7.912  | 5.79585 | CHB |
| rs1430410  | Hs.54543 | Hs.54543-S    | 3 | 3 | 158008264 | 60251  | 7.2018 | 5.79585 | CHB |
| rs9874866  | Hs.54543 | Hs.54543-S    | 3 | 3 | 158021372 | 73359  | 7.2018 | 5.79585 | CHB |
| rs9858861  | Hs.54543 | Hs.54543-S    | 3 | 3 | 158025339 | 77326  | 7.3854 | 5.79585 | CHB |
| rs9820830  | Hs.54543 | Hs.54543-S    | 3 | 3 | 158025406 | 77393  | 7.3854 | 5.79585 | CHB |
| rs2641766  | MUC20    | GI_23097330-S | 3 | 3 | 196908637 | 41256  | 6.7838 | 5.90286 | CHB |
| rs2251330  | MUC20    | GI_23097330-S | 3 | 3 | 196950134 | 241    | 8.6897 | 5.90286 | CHB |
| rs842226   | MUC20    | GI_23097330-S | 3 | 3 | 196968445 | 18552  | 6.7314 | 5.90286 | CHB |
| rs842225   | MUC20    | GI_23097330-S | 3 | 3 | 196969332 | 19439  | 7.1017 | 5.90286 | CHB |
| rs9837428  | MUC20    | GI_23097330-S | 3 | 3 | 196976453 | 26560  | 6.8442 | 5.90286 | CHB |
| rs2246901  | MUC20    | GI_23097330-S | 3 | 3 | 196978593 | 28700  | 6.8442 | 5.90286 | CHB |
| rs844518   | MUC20    | GI_23097330-S | 3 | 3 | 196982401 | 32508  | 6.8442 | 5.90286 | CHB |
| rs2550240  | MUC20    | GI_23097330-S | 3 | 3 | 196985463 | 35570  | 8.311  | 5.90286 | CHB |
| rs2688492  | MUC20    | GI_23097330-S | 3 | 3 | 196985676 | 35783  | 6.8442 | 5.90286 | CHB |
| rs2293232  | MUC20    | GI_23097330-S | 3 | 3 | 196986690 | 36797  | 6.579  | 5.90286 | CHB |
| rs2259102  | MUC20    | GI_23097330-S | 3 | 3 | 196986721 | 36828  | 5.9392 | 5.90286 | CHB |
| rs2259331  | MUC20    | GI_23097330-S | 3 | 3 | 196990805 | 40912  | 7.764  | 5.90286 | CHB |
| rs2259419  | MUC20    | GI_23097330-S | 3 | 3 | 196994109 | 44216  | 6.2002 | 5.90286 | CHB |
| rs2688513  | MUC20    | GI_23097330-S | 3 | 3 | 196994356 | 44463  | 6.579  | 5.90286 | CHB |
| rs3103954  | MUC20    | GI_23097330-S | 3 | 3 | 197004938 | 55045  | 6.579  | 5.90286 | CHB |
| rs2177336  | MUC20    | GI_23097330-S | 3 | 3 | 197005186 | 55293  | 6.579  | 5.90286 | CHB |
| rs1106502  | MUC20    | GI_23097330-S | 3 | 3 | 197005566 | 55673  | 6.579  | 5.90286 | CHB |
| rs1104760  | MUC20    | GI_23097330-S | 3 | 3 | 197005629 | 55736  | 6.579  | 5.90286 | CHB |
| rs882605   | MUC20    | GI_23097330-S | 3 | 3 | 197005861 | 55968  | 6.3206 | 5.90286 | CHB |
| rs3107764  | MUC20    | GI_23097330-S | 3 | 3 | 197006638 | 56745  | 7.764  | 5.90286 | CHB |
| rs3103953  | MUC20    | GI_23097330-S | 3 | 3 | 197008907 | 59014  | 6.579  | 5.90286 | CHB |
| rs9844491  | MUC20    | GI_23097330-S | 3 | 3 | 197009841 | 59948  | 8.3162 | 5.90286 | CHB |
| rs3103952  | MUC20    | GI_23097330-S | 3 | 3 | 197011000 | 61107  | 6.579  | 5.90286 | CHB |
| rs3096337  | MUC20    | GI_23097330-S | 3 | 3 | 197021642 | 71749  | 6.9285 | 5.90286 | CHB |
| rs842461   | MUC20    | GI_23097330-S | 3 | 3 | 197023924 | 74031  | 6.9285 | 5.90286 | CHB |
| rs842458   | MUC20    | GI_23097330-S | 3 | 3 | 197025111 | 75218  | 6.9285 | 5.90286 | CHB |

|            |           |               |   |   |           |        |        |         |     |
|------------|-----------|---------------|---|---|-----------|--------|--------|---------|-----|
| rs2688533  | MUC20     | GI_23097330-S | 3 | 3 | 197029268 | 79375  | 6.9285 | 5.90286 | CHB |
| rs2550287  | MUC20     | GI_23097330-S | 3 | 3 | 197030264 | 80371  | 6.9285 | 5.90286 | CHB |
| rs12510517 | FLJ90036  | GI_31559781-S | 4 | 4 | 4705      | 141163 | 6.4528 | 5.94229 | CHB |
| rs6827719  | FLJ90036  | GI_31559781-S | 4 | 4 | 58063     | 87805  | 6.2332 | 5.94229 | CHB |
| rs12511220 | FLJ90036  | GI_31559781-S | 4 | 4 | 65174     | 80694  | 7.0427 | 5.94229 | CHB |
| rs13434621 | FLJ90036  | GI_31559781-S | 4 | 4 | 69535     | 76333  | 7.1598 | 5.94229 | CHB |
| rs7667153  | FLJ90036  | GI_31559781-S | 4 | 4 | 75422     | 70446  | 6.9324 | 5.94229 | CHB |
| rs2006748  | FLJ90036  | GI_31559781-S | 4 | 4 | 77113     | 68755  | 6.2332 | 5.94229 | CHB |
| rs11724335 | FLJ90036  | GI_31559781-S | 4 | 4 | 80883     | 64985  | 6.5299 | 5.94229 | CHB |
| rs2883236  | FLJ90036  | GI_31559781-S | 4 | 4 | 82605     | 63263  | 6.2332 | 5.94229 | CHB |
| rs12509346 | FLJ90036  | GI_31559781-S | 4 | 4 | 84380     | 61488  | 6.2332 | 5.94229 | CHB |
| rs6813136  | FLJ90036  | GI_31559781-S | 4 | 4 | 85506     | 60362  | 6.9324 | 5.94229 | CHB |
| rs2353623  | FLJ90036  | GI_31559781-S | 4 | 4 | 85560     | 60308  | 6.9324 | 5.94229 | CHB |
| rs9884834  | FLJ90036  | GI_31559781-S | 4 | 4 | 92571     | 53297  | 6.9324 | 5.94229 | CHB |
| rs6814287  | FLJ90036  | GI_31559781-S | 4 | 4 | 112323    | 33545  | 7.1634 | 5.94229 | CHB |
| rs7699689  | FLJ90036  | GI_31559781-S | 4 | 4 | 117452    | 28416  | 8.0107 | 5.94229 | CHB |
| rs10004179 | FLJ90036  | GI_31559781-S | 4 | 4 | 121548    | 24320  | 7.0427 | 5.94229 | CHB |
| rs6599293  | FLJ90036  | GI_31559781-S | 4 | 4 | 123027    | 22841  | 7.1634 | 5.94229 | CHB |
| rs6599295  | FLJ90036  | GI_31559781-S | 4 | 4 | 126942    | 18926  | 7.1634 | 5.94229 | CHB |
| rs11735742 | FLJ90036  | GI_31559781-S | 4 | 4 | 132550    | 13318  | 7.1634 | 5.94229 | CHB |
| rs6599306  | FLJ90036  | GI_31559781-S | 4 | 4 | 133439    | 12429  | 7.1634 | 5.94229 | CHB |
| rs6842197  | FLJ90036  | GI_31559781-S | 4 | 4 | 149061    | 3193   | 6.7787 | 5.94229 | CHB |
| rs10027536 | FLJ90036  | GI_31559781-S | 4 | 4 | 157596    | 11728  | 6.7787 | 5.94229 | CHB |
| rs11731927 | FLJ90036  | GI_31559781-S | 4 | 4 | 164105    | 18237  | 6.5056 | 5.94229 | CHB |
| rs11736321 | FLJ90036  | GI_31559781-S | 4 | 4 | 173278    | 27410  | 6.5056 | 5.94229 | CHB |
| rs12502384 | PI4K2B    | GI_18874095-S | 4 | 4 | 24880174  | 76279  | 5.9546 | 5.94252 | CHB |
| rs7688662  | STIM2     | GI_21070998-S | 4 | 4 | 26520738  | 182216 | 6.1454 | 5.89078 | CHB |
| rs7655631  | STIM2     | GI_21070998-S | 4 | 4 | 26545607  | 157347 | 6.244  | 5.89078 | CHB |
| rs11096956 | TLR1      | GI_41350336-S | 4 | 4 | 38598746  | 21943  | 6.4544 | 5.92222 | CHB |
| rs5743595  | Hs.214235 | Hs.214235-S   | 4 | 4 | 38625210  | 13169  | 6.7967 | 6.28098 | CHB |
| rs5743592  | Hs.214235 | Hs.214235-S   | 4 | 4 | 38625629  | 13588  | 6.7967 | 6.28098 | CHB |
| rs5743565  | Hs.214235 | Hs.214235-S   | 4 | 4 | 38628549  | 16508  | 7.9747 | 6.28098 | CHB |
| rs1439364  | FLJ13220  | GI_11345459-S | 4 | 4 | 44456193  | 85652  | 6.3877 | 5.69153 | CHB |
| rs17600797 | FLJ13220  | GI_11345459-S | 4 | 4 | 44467734  | 74111  | 6.3877 | 5.69153 | CHB |
| rs6831166  | FLJ13220  | GI_11345459-S | 4 | 4 | 44471905  | 69940  | 6.3877 | 5.69153 | CHB |
| rs6850107  | FLJ13220  | GI_11345459-S | 4 | 4 | 44474794  | 67051  | 6.3877 | 5.69153 | CHB |
| rs7661286  | FLJ13220  | GI_11345459-S | 4 | 4 | 44502246  | 39599  | 5.9783 | 5.69153 | CHB |
| rs11727343 | MGC45416  | GI_22748848-S | 4 | 4 | 48647125  | 89840  | 6.0852 | 5.6413  | CHB |
| rs13149083 | MGC45416  | GI_22748848-S | 4 | 4 | 48650873  | 86092  | 6.0852 | 5.6413  | CHB |
| rs7654032  | MGC45416  | GI_22748848-S | 4 | 4 | 48651107  | 85858  | 6.0852 | 5.6413  | CHB |
| rs7665209  | MGC45416  | GI_22748848-S | 4 | 4 | 48655615  | 81350  | 6.5578 | 5.6413  | CHB |
| rs3761729  | MGC45416  | GI_22748848-S | 4 | 4 | 48692865  | 44100  | 5.939  | 5.6413  | CHB |
| rs2712158  | MGC45416  | GI_22748848-S | 4 | 4 | 48698315  | 38650  | 5.939  | 5.6413  | CHB |
| rs6447666  | MGC45416  | GI_22748848-S | 4 | 4 | 48720302  | 16663  | 5.8854 | 5.6413  | CHB |
| rs2289065  | MGC45416  | GI_22748848-S | 4 | 4 | 48735909  | 1056   | 7.8267 | 5.6413  | CHB |
| rs2290516  | MGC45416  | GI_22748848-S | 4 | 4 | 48749282  | 12317  | 7.5192 | 5.6413  | CHB |
| rs2085292  | MGC45416  | GI_22748848-S | 4 | 4 | 48755864  | 18899  | 7.5192 | 5.6413  | CHB |
| rs724598   | MGC45416  | GI_22748848-S | 4 | 4 | 48756252  | 19287  | 7.5192 | 5.6413  | CHB |
| rs10517231 | MGC45416  | GI_22748848-S | 4 | 4 | 48759323  | 22358  | 7.5192 | 5.6413  | CHB |
| rs12504699 | MGC45416  | GI_22748848-S | 4 | 4 | 48775226  | 38261  | 7.759  | 5.6413  | CHB |
| rs2247481  | MGC45416  | GI_22748848-S | 4 | 4 | 48777749  | 40784  | 6.1777 | 5.6413  | CHB |
| rs10471154 | UGT2B17   | GI_4507820-S  | 4 | 4 | 69219098  | 12731  | 5.6124 | 5.44749 | CHB |
| rs10471154 | UGT2B7    | GI_4507824-S  | 4 | 4 | 69219098  | 939958 | 5.9545 | 5.45304 | CHB |
| rs10034124 | UGT2B10   | GI_27552756-S | 4 | 4 | 69222280  | 654976 | 7.2267 | 5.5592  | CHB |
| rs10034124 | UGT2B17   | GI_4507820-S  | 4 | 4 | 69222280  | 9549   | 8.3246 | 5.44749 | CHB |
| rs10034124 | UGT2B7    | GI_4507824-S  | 4 | 4 | 69222280  | 936776 | 8.3246 | 5.45304 | CHB |

|            |           |               |   |   |          |        |        |         |     |
|------------|-----------|---------------|---|---|----------|--------|--------|---------|-----|
| rs7435827  | UGT2B17   | GI_4507820-S  | 4 | 4 | 69243710 | 11881  | 6.0619 | 5.44749 | CHB |
| rs7435827  | UGT2B7    | GI_4507824-S  | 4 | 4 | 69243710 | 915346 | 5.6025 | 5.45304 | CHB |
| rs11732803 | UGT2B17   | GI_4507820-S  | 4 | 4 | 69253159 | 21330  | 6.0619 | 5.44749 | CHB |
| rs11732803 | UGT2B11   | GI_4507822-S  | 4 | 4 | 69253159 | 993964 | 5.8738 | 5.79788 | CHB |
| rs11732803 | UGT2B7    | GI_4507824-S  | 4 | 4 | 69253159 | 905897 | 5.6025 | 5.45304 | CHB |
| rs7442348  | UGT2B17   | GI_4507820-S  | 4 | 4 | 69253957 | 22128  | 6.0238 | 5.44749 | CHB |
| rs7442348  | UGT2B11   | GI_4507822-S  | 4 | 4 | 69253957 | 993166 | 5.8414 | 5.79788 | CHB |
| rs7442348  | UGT2B7    | GI_4507824-S  | 4 | 4 | 69253957 | 905099 | 5.5429 | 5.45304 | CHB |
| rs13144491 | UGT2B10   | GI_27552756-S | 4 | 4 | 69273573 | 603683 | 7.9354 | 5.5592  | CHB |
| rs13144491 | UGT2B17   | GI_4507820-S  | 4 | 4 | 69273573 | 41744  | 9.0643 | 5.44749 | CHB |
| rs13144491 | UGT2B11   | GI_4507822-S  | 4 | 4 | 69273573 | 973550 | 9.0643 | 5.79788 | CHB |
| rs13144491 | UGT2B7    | GI_4507824-S  | 4 | 4 | 69273573 | 885483 | 9.0643 | 5.45304 | CHB |
| rs13348005 | UGT2B10   | GI_27552756-S | 4 | 4 | 69293542 | 583714 | 7.9354 | 5.5592  | CHB |
| rs13348005 | UGT2B17   | GI_4507820-S  | 4 | 4 | 69293542 | 61713  | 9.0643 | 5.44749 | CHB |
| rs13348005 | UGT2B11   | GI_4507822-S  | 4 | 4 | 69293542 | 953581 | 9.0643 | 5.79788 | CHB |
| rs13348005 | UGT2B7    | GI_4507824-S  | 4 | 4 | 69293542 | 865514 | 9.0643 | 5.45304 | CHB |
| rs3100645  | UGT2B10   | GI_27552756-S | 4 | 4 | 69671954 | 205302 | 7.8024 | 5.5592  | CHB |
| rs3100645  | UGT2B17   | GI_4507820-S  | 4 | 4 | 69671954 | 440125 | 8.9836 | 5.44749 | CHB |
| rs3100645  | UGT2B11   | GI_4507822-S  | 4 | 4 | 69671954 | 575169 | 8.9836 | 5.79788 | CHB |
| rs3100645  | UGT2B7    | GI_4507824-S  | 4 | 4 | 69671954 | 487102 | 8.9124 | 5.45304 | CHB |
| rs4440295  | Hs.479894 | Hs.479894-S   | 4 | 4 | 70063226 | 33226  | 7.2833 | 5.71332 | CHB |
| rs4235106  | Hs.479894 | Hs.479894-S   | 4 | 4 | 70068197 | 28255  | 6.5319 | 5.71332 | CHB |
| rs7441736  | Hs.479894 | Hs.479894-S   | 4 | 4 | 70071929 | 24523  | 7.8523 | 5.71332 | CHB |
| rs4305590  | Hs.479894 | Hs.479894-S   | 4 | 4 | 70075491 | 20961  | 7.9072 | 5.71332 | CHB |
| rs13147648 | Hs.479894 | Hs.479894-S   | 4 | 4 | 70082423 | 14029  | 7.9072 | 5.71332 | CHB |
| rs4353969  | Hs.479894 | Hs.479894-S   | 4 | 4 | 70083182 | 13270  | 7.9072 | 5.71332 | CHB |
| rs13102620 | Hs.479894 | Hs.479894-S   | 4 | 4 | 70083761 | 12691  | 7.7361 | 5.71332 | CHB |
| rs4495114  | Hs.479894 | Hs.479894-S   | 4 | 4 | 70084504 | 11948  | 7.9072 | 5.71332 | CHB |
| rs4299665  | Hs.479894 | Hs.479894-S   | 4 | 4 | 70084684 | 11768  | 7.6994 | 5.71332 | CHB |
| rs4235111  | Hs.479894 | Hs.479894-S   | 4 | 4 | 70086017 | 10435  | 7.9072 | 5.71332 | CHB |
| rs4299666  | Hs.479894 | Hs.479894-S   | 4 | 4 | 70088357 | 8095   | 7.9072 | 5.71332 | CHB |
| rs4600986  | Hs.479894 | Hs.479894-S   | 4 | 4 | 70089060 | 7392   | 6.5192 | 5.71332 | CHB |
| rs13140844 | Hs.479894 | Hs.479894-S   | 4 | 4 | 70089467 | 6985   | 7.9072 | 5.71332 | CHB |
| rs7438808  | Hs.479894 | Hs.479894-S   | 4 | 4 | 70097144 | 692    | 7.9072 | 5.71332 | CHB |
| rs4377650  | Hs.479894 | Hs.479894-S   | 4 | 4 | 70097833 | 1381   | 7.9072 | 5.71332 | CHB |
| rs13350781 | Hs.479894 | Hs.479894-S   | 4 | 4 | 70098632 | 2180   | 8.1401 | 5.71332 | CHB |
| rs7438033  | Hs.479894 | Hs.479894-S   | 4 | 4 | 70105821 | 9369   | 8.0186 | 5.71332 | CHB |
| rs3922514  | Hs.479894 | Hs.479894-S   | 4 | 4 | 70107383 | 10931  | 8.6168 | 5.71332 | CHB |
| rs7434892  | Hs.479894 | Hs.479894-S   | 4 | 4 | 70108323 | 11871  | 8.5768 | 5.71332 | CHB |
| rs7662632  | Hs.479894 | Hs.479894-S   | 4 | 4 | 70108734 | 12282  | 8.6168 | 5.71332 | CHB |
| rs11931639 | Hs.479894 | Hs.479894-S   | 4 | 4 | 70109402 | 12950  | 8.6853 | 5.71332 | CHB |
| rs4400060  | Hs.479894 | Hs.479894-S   | 4 | 4 | 70117693 | 21241  | 8.458  | 5.71332 | CHB |
| rs4400061  | Hs.479894 | Hs.479894-S   | 4 | 4 | 70117759 | 21307  | 8.6168 | 5.71332 | CHB |
| rs4446390  | Hs.479894 | Hs.479894-S   | 4 | 4 | 70117806 | 21354  | 8.6168 | 5.71332 | CHB |
| rs12648830 | Hs.479894 | Hs.479894-S   | 4 | 4 | 70121914 | 25462  | 8.6168 | 5.71332 | CHB |
| rs7677996  | Hs.479894 | Hs.479894-S   | 4 | 4 | 70121951 | 25499  | 7.0482 | 5.71332 | CHB |
| rs4694610  | Hs.479894 | Hs.479894-S   | 4 | 4 | 70125702 | 29250  | 8.6168 | 5.71332 | CHB |
| rs7657426  | Hs.479894 | Hs.479894-S   | 4 | 4 | 70125769 | 29317  | 8.6168 | 5.71332 | CHB |
| rs4587017  | Hs.479894 | Hs.479894-S   | 4 | 4 | 70128158 | 31706  | 6.0021 | 5.71332 | CHB |
| rs7437174  | Hs.479894 | Hs.479894-S   | 4 | 4 | 70133363 | 36911  | 6.0021 | 5.71332 | CHB |
| rs6422323  | Hs.479894 | Hs.479894-S   | 4 | 4 | 70133840 | 37388  | 6.6446 | 5.71332 | CHB |
| rs11249527 | Hs.479894 | Hs.479894-S   | 4 | 4 | 70135745 | 39293  | 6.1396 | 5.71332 | CHB |
| rs11249528 | Hs.479894 | Hs.479894-S   | 4 | 4 | 70135815 | 39363  | 6.0021 | 5.71332 | CHB |
| rs7657423  | Hs.479894 | Hs.479894-S   | 4 | 4 | 70136674 | 40222  | 6.0021 | 5.71332 | CHB |
| rs7676472  | Hs.479894 | Hs.479894-S   | 4 | 4 | 70136704 | 40252  | 6.0021 | 5.71332 | CHB |
| rs6600881  | Hs.479894 | Hs.479894-S   | 4 | 4 | 70141315 | 44863  | 6.0021 | 5.71332 | CHB |

|            |           |               |   |   |          |       |        |         |     |
|------------|-----------|---------------|---|---|----------|-------|--------|---------|-----|
| rs11940316 | Hs.479894 | Hs.479894-S   | 4 | 4 | 70141887 | 45435 | 6.0021 | 5.71332 | CHB |
| rs7438135  | Hs.479894 | Hs.479894-S   | 4 | 4 | 70142099 | 45647 | 6.0021 | 5.71332 | CHB |
| rs7662029  | Hs.479894 | Hs.479894-S   | 4 | 4 | 70142672 | 46220 | 6.0021 | 5.71332 | CHB |
| rs7668258  | Hs.479894 | Hs.479894-S   | 4 | 4 | 70142838 | 46386 | 6.0021 | 5.71332 | CHB |
| rs7439366  | Hs.479894 | Hs.479894-S   | 4 | 4 | 70145098 | 48646 | 6.0021 | 5.71332 | CHB |
| rs7441774  | Hs.479894 | Hs.479894-S   | 4 | 4 | 70145314 | 48862 | 5.9073 | 5.71332 | CHB |
| rs7434332  | Hs.479894 | Hs.479894-S   | 4 | 4 | 70145619 | 49167 | 6.0021 | 5.71332 | CHB |
| rs4293848  | Hs.479894 | Hs.479894-S   | 4 | 4 | 70146262 | 49810 | 6.8568 | 5.71332 | CHB |
| rs12506962 | Hs.479894 | Hs.479894-S   | 4 | 4 | 70146784 | 50332 | 6.0021 | 5.71332 | CHB |
| rs12512526 | Hs.479894 | Hs.479894-S   | 4 | 4 | 70147178 | 50726 | 6.0021 | 5.71332 | CHB |
| rs7439152  | Hs.479894 | Hs.479894-S   | 4 | 4 | 70149766 | 53314 | 6.0021 | 5.71332 | CHB |
| rs6858558  | Hs.479894 | Hs.479894-S   | 4 | 4 | 70150303 | 53851 | 6.0021 | 5.71332 | CHB |
| rs7375178  | Hs.479894 | Hs.479894-S   | 4 | 4 | 70150439 | 53987 | 6.0021 | 5.71332 | CHB |
| rs3924192  | Hs.479894 | Hs.479894-S   | 4 | 4 | 70151724 | 55272 | 6.0021 | 5.71332 | CHB |
| rs6600891  | Hs.479894 | Hs.479894-S   | 4 | 4 | 70152356 | 55904 | 6.0021 | 5.71332 | CHB |
| rs7698645  | Hs.479894 | Hs.479894-S   | 4 | 4 | 70152670 | 56218 | 6.0021 | 5.71332 | CHB |
| rs12513195 | Hs.479894 | Hs.479894-S   | 4 | 4 | 70152846 | 56394 | 6.0021 | 5.71332 | CHB |
| rs5009865  | Hs.479894 | Hs.479894-S   | 4 | 4 | 70153032 | 56580 | 6.0021 | 5.71332 | CHB |
| rs5009866  | Hs.479894 | Hs.479894-S   | 4 | 4 | 70153079 | 56627 | 6.0021 | 5.71332 | CHB |
| rs4356975  | Hs.479894 | Hs.479894-S   | 4 | 4 | 70153223 | 56771 | 5.966  | 5.71332 | CHB |
| rs12642938 | Hs.479894 | Hs.479894-S   | 4 | 4 | 70156977 | 60525 | 6.0021 | 5.71332 | CHB |
| rs6600893  | Hs.479894 | Hs.479894-S   | 4 | 4 | 70159661 | 63209 | 6.0021 | 5.71332 | CHB |
| rs4274916  | Hs.479894 | Hs.479894-S   | 4 | 4 | 70169138 | 72686 | 5.86   | 5.71332 | CHB |
| rs4535394  | Hs.479894 | Hs.479894-S   | 4 | 4 | 70169213 | 72761 | 6.1373 | 5.71332 | CHB |
| rs4371687  | Hs.479894 | Hs.479894-S   | 4 | 4 | 70170758 | 74306 | 6.0021 | 5.71332 | CHB |
| rs4371688  | Hs.479894 | Hs.479894-S   | 4 | 4 | 70170801 | 74349 | 5.9356 | 5.71332 | CHB |
| rs7664140  | THAP6     | GI_37059751-S | 4 | 4 | 76795815 | 15264 | 6.4027 | 5.89862 | CHB |
| rs1817387  | THAP6     | GI_37059751-S | 4 | 4 | 76803397 | 7682  | 6.4027 | 5.89862 | CHB |
| rs6535523  | THAP6     | GI_37059751-S | 4 | 4 | 76819403 | 8324  | 7.0152 | 5.89862 | CHB |
| rs6812240  | MGC11324  | GI_40255053-S | 4 | 4 | 84835321 | 48412 | 7.0807 | 5.77793 | CHB |
| rs4693092  | MGC11324  | GI_40255053-S | 4 | 4 | 84853523 | 30210 | 7.3786 | 5.77793 | CHB |
| rs11734158 | MGC11324  | GI_40255053-S | 4 | 4 | 84855398 | 28335 | 7.3786 | 5.77793 | CHB |
| rs11723311 | MGC11324  | GI_40255053-S | 4 | 4 | 84864451 | 19282 | 7.0514 | 5.77793 | CHB |
| rs3733327  | MGC11324  | GI_40255053-S | 4 | 4 | 84873147 | 10586 | 6.6585 | 5.77793 | CHB |
| rs3733329  | MGC11324  | GI_40255053-S | 4 | 4 | 84875737 | 7996  | 6.6026 | 5.77793 | CHB |
| rs17355391 | MGC11324  | GI_40255053-S | 4 | 4 | 84882387 | 1346  | 6.6026 | 5.77793 | CHB |
| rs2061409  | MGC11324  | GI_40255053-S | 4 | 4 | 84898431 | 14698 | 6.6026 | 5.77793 | CHB |
| rs11726790 | MGC11324  | GI_40255053-S | 4 | 4 | 84906329 | 22596 | 6.6026 | 5.77793 | CHB |
| rs17355663 | MGC11324  | GI_40255053-S | 4 | 4 | 84909388 | 25655 | 6.6026 | 5.77793 | CHB |
| rs965824   | Hs.480174 | Hs.480174-S   | 4 | 4 | 88237275 | 39588 | 6.02   | 5.96588 | CHB |
| rs10003332 | Hs.480174 | Hs.480174-S   | 4 | 4 | 88252400 | 24463 | 6.02   | 5.96588 | CHB |
| rs6815546  | Hs.480174 | Hs.480174-S   | 4 | 4 | 88257100 | 19763 | 6.4866 | 5.96588 | CHB |
| rs10008600 | Hs.480174 | Hs.480174-S   | 4 | 4 | 88259008 | 17855 | 6.4866 | 5.96588 | CHB |
| rs6531942  | Hs.480174 | Hs.480174-S   | 4 | 4 | 88260227 | 16636 | 6.4866 | 5.96588 | CHB |
| rs7685248  | Hs.480174 | Hs.480174-S   | 4 | 4 | 88261252 | 15611 | 6.4866 | 5.96588 | CHB |
| rs1972969  | Hs.480174 | Hs.480174-S   | 4 | 4 | 88268475 | 8388  | 6.3961 | 5.96588 | CHB |
| rs4693799  | Hs.480174 | Hs.480174-S   | 4 | 4 | 88272474 | 4389  | 6.4866 | 5.96588 | CHB |
| rs4693155  | Hs.480174 | Hs.480174-S   | 4 | 4 | 88277199 | 336   | 6.4866 | 5.96588 | CHB |
| rs6531944  | Hs.480174 | Hs.480174-S   | 4 | 4 | 88278420 | 1557  | 6.4866 | 5.96588 | CHB |
| rs6531945  | Hs.480174 | Hs.480174-S   | 4 | 4 | 88278636 | 1773  | 6.4866 | 5.96588 | CHB |
| rs340631   | Hs.480174 | Hs.480174-S   | 4 | 4 | 88290346 | 13483 | 6.4866 | 5.96588 | CHB |
| rs340652   | Hs.480174 | Hs.480174-S   | 4 | 4 | 88292909 | 16046 | 6.4866 | 5.96588 | CHB |
| rs340649   | Hs.480174 | Hs.480174-S   | 4 | 4 | 88296416 | 19553 | 6.4866 | 5.96588 | CHB |
| rs340647   | Hs.480174 | Hs.480174-S   | 4 | 4 | 88299413 | 22550 | 6.4866 | 5.96588 | CHB |
| rs340644   | Hs.480174 | Hs.480174-S   | 4 | 4 | 88304302 | 27439 | 6.4916 | 5.96588 | CHB |
| rs17012291 | Hs.480174 | Hs.480174-S   | 4 | 4 | 88327384 | 50521 | 6.3961 | 5.96588 | CHB |



|            |          |               |   |   |           |        |         |         |     |
|------------|----------|---------------|---|---|-----------|--------|---------|---------|-----|
| rs2726507  | PPA2     | GI_31881619-A | 4 | 4 | 106596371 | 52048  | 5.9035  | 5.82514 | CHB |
| rs904273   | PPA2     | GI_31881619-A | 4 | 4 | 106596878 | 51541  | 5.9649  | 5.82514 | CHB |
| rs1909121  | PPA2     | GI_31881619-A | 4 | 4 | 106597688 | 50731  | 5.9649  | 5.82514 | CHB |
| rs2726475  | PPA2     | GI_31881619-A | 4 | 4 | 106606706 | 41713  | 6.1528  | 5.82514 | CHB |
| rs2726486  | PPA2     | GI_31881619-A | 4 | 4 | 106622285 | 26134  | 7.1465  | 5.82514 | CHB |
| rs2647265  | PPA2     | GI_31881619-A | 4 | 4 | 106626244 | 22175  | 10.7422 | 5.82514 | CHB |
| rs2726456  | PPA2     | GI_31881619-A | 4 | 4 | 106634181 | 14238  | 10.4313 | 5.82514 | CHB |
| rs924282   | PPA2     | GI_31881619-A | 4 | 4 | 106639721 | 8698   | 13.011  | 5.82514 | CHB |
| rs924283   | PPA2     | GI_31881619-A | 4 | 4 | 106639769 | 8650   | 13.011  | 5.82514 | CHB |
| rs11932428 | PPA2     | GI_31881619-A | 4 | 4 | 106644740 | 3679   | 13.011  | 5.82514 | CHB |
| rs11932512 | PPA2     | GI_31881619-A | 4 | 4 | 106644958 | 3461   | 12.3879 | 5.82514 | CHB |
| rs13108489 | PPA2     | GI_31881619-A | 4 | 4 | 106650729 | 2310   | 12.5823 | 5.82514 | CHB |
| rs2636693  | PPA2     | GI_31881619-A | 4 | 4 | 106652360 | 3941   | 13.3474 | 5.82514 | CHB |
| rs2636694  | PPA2     | GI_31881619-A | 4 | 4 | 106653451 | 5032   | 13.011  | 5.82514 | CHB |
| rs2713826  | PPA2     | GI_31881619-A | 4 | 4 | 106699232 | 50813  | 12.155  | 5.82514 | CHB |
| rs2046880  | PPA2     | GI_31881619-A | 4 | 4 | 106728420 | 80001  | 11.1892 | 5.82514 | CHB |
| rs2023840  | PPA2     | GI_31881619-A | 4 | 4 | 106730192 | 81773  | 11.1892 | 5.82514 | CHB |
| rs4699176  | PPA2     | GI_31881619-A | 4 | 4 | 106746306 | 97887  | 7.673   | 5.82514 | CHB |
| rs2298732  | PPA2     | GI_31881619-A | 4 | 4 | 106748697 | 100278 | 7.673   | 5.82514 | CHB |
| rs2866883  | PPA2     | GI_31881619-A | 4 | 4 | 106748969 | 100550 | 6.3703  | 5.82514 | CHB |
| rs7678401  | PPA2     | GI_31881619-A | 4 | 4 | 106749484 | 101065 | 7.673   | 5.82514 | CHB |
| rs1125254  | PPA2     | GI_31881619-A | 4 | 4 | 106762227 | 113808 | 7.673   | 5.82514 | CHB |
| rs3864225  | PPA2     | GI_31881619-A | 4 | 4 | 106766083 | 117664 | 6.3703  | 5.82514 | CHB |
| rs3855585  | PPA2     | GI_31881619-A | 4 | 4 | 106766282 | 117863 | 6.3703  | 5.82514 | CHB |
| rs11097891 | PPA2     | GI_31881619-A | 4 | 4 | 106766530 | 118111 | 6.3703  | 5.82514 | CHB |
| rs13110343 | PPA2     | GI_31881619-A | 4 | 4 | 106766800 | 118381 | 6.3703  | 5.82514 | CHB |
| rs2866806  | PPA2     | GI_31881619-A | 4 | 4 | 106767091 | 118672 | 6.3201  | 5.82514 | CHB |
| rs1490611  | PPA2     | GI_31881619-A | 4 | 4 | 106768848 | 120429 | 7.673   | 5.82514 | CHB |
| rs765220   | PPA2     | GI_31881619-A | 4 | 4 | 106769363 | 120944 | 7.0763  | 5.82514 | CHB |
| rs757176   | PPA2     | GI_31881619-A | 4 | 4 | 106770133 | 121714 | 7.673   | 5.82514 | CHB |
| rs6825111  | PPA2     | GI_31881619-A | 4 | 4 | 106776374 | 127955 | 7.673   | 5.82514 | CHB |
| rs6855572  | PPA2     | GI_31881619-A | 4 | 4 | 106776542 | 128123 | 7.673   | 5.82514 | CHB |
| rs6831138  | PPA2     | GI_31881619-A | 4 | 4 | 106777184 | 128765 | 7.673   | 5.82514 | CHB |
| rs4698941  | PPA2     | GI_31881619-A | 4 | 4 | 106780140 | 131721 | 7.673   | 5.82514 | CHB |
| rs9999896  | PPA2     | GI_31881619-A | 4 | 4 | 106781361 | 132942 | 6.3703  | 5.82514 | CHB |
| rs6816997  | PPA2     | GI_31881619-A | 4 | 4 | 106782193 | 133774 | 6.3703  | 5.82514 | CHB |
| rs6533201  | PPA2     | GI_31881619-A | 4 | 4 | 106782852 | 134433 | 9.9902  | 5.82514 | CHB |
| rs763289   | PPA2     | GI_31881619-A | 4 | 4 | 106783880 | 135461 | 7.673   | 5.82514 | CHB |
| rs10020998 | PPA2     | GI_31881619-A | 4 | 4 | 106786058 | 137639 | 7.673   | 5.82514 | CHB |
| rs10024331 | PPA2     | GI_31881619-A | 4 | 4 | 106787273 | 138854 | 6.8424  | 5.82514 | CHB |
| rs7671444  | KIAA1712 | GI_30794213-S | 4 | 4 | 175518224 | 109834 | 7.0551  | 6.31205 | CHB |
| rs13109634 | KIAA1712 | GI_30794213-S | 4 | 4 | 175545256 | 82802  | 6.556   | 6.31205 | CHB |
| rs10520277 | KIAA1712 | GI_30794213-S | 4 | 4 | 175561564 | 66494  | 6.556   | 6.31205 | CHB |
| rs7376146  | KIAA1712 | GI_30794213-S | 4 | 4 | 175576120 | 51938  | 6.646   | 6.31205 | CHB |
| rs1553669  | KIAA1712 | GI_30794213-S | 4 | 4 | 175612138 | 15920  | 6.8622  | 6.31205 | CHB |
| rs6834968  | DCTD     | GI_4503276-S  | 4 | 4 | 184186001 | 837    | 6.3472  | 6.05602 | CHB |
| rs7677967  | DCTD     | GI_4503276-S  | 4 | 4 | 184186281 | 557    | 6.3561  | 6.05602 | CHB |
| rs421718   | SLC12A7  | GI_5730042-S  | 5 | 5 | 784584    | 319042 | 6.1772  | 6.0304  | CHB |
| rs2624233  | MTRR     | GI_4505278-A  | 5 | 5 | 7983940   | 29950  | 6.2121  | 6.20997 | CHB |
| rs3733758  | Hs.26039 | Hs.26039-S    | 5 | 5 | 10708842  | 1145   | 7.5732  | 6.22429 | CHB |
| rs3733762  | Hs.26039 | Hs.26039-S    | 5 | 5 | 10709186  | 801    | 7.39    | 6.22429 | CHB |
| rs2279325  | Hs.26039 | Hs.26039-S    | 5 | 5 | 10710194  | 207    | 7.4336  | 6.22429 | CHB |
| rs1109383  | Hs.26039 | Hs.26039-S    | 5 | 5 | 10714120  | 4133   | 7.5732  | 6.22429 | CHB |
| rs1107818  | Hs.26039 | Hs.26039-S    | 5 | 5 | 10714928  | 4941   | 7.5732  | 6.22429 | CHB |
| rs7712435  | Hs.26039 | Hs.26039-S    | 5 | 5 | 10716402  | 6415   | 7.7858  | 6.22429 | CHB |
| rs6861311  | ENC1     | GI_4505460-S  | 5 | 5 | 73817710  | 141560 | 7.6188  | 6.20083 | CHB |

|            |       |               |   |   |           |        |        |         |     |
|------------|-------|---------------|---|---|-----------|--------|--------|---------|-----|
| rs2219771  | ENC1  | GI_4505460-S  | 5 | 5 | 73817986  | 141284 | 6.7159 | 6.20083 | CHB |
| rs2962179  | ENC1  | GI_4505460-S  | 5 | 5 | 73818055  | 141215 | 6.7159 | 6.20083 | CHB |
| rs2860531  | ENC1  | GI_4505460-S  | 5 | 5 | 73818739  | 140531 | 6.7159 | 6.20083 | CHB |
| rs2115281  | ENC1  | GI_4505460-S  | 5 | 5 | 73819793  | 139477 | 6.7159 | 6.20083 | CHB |
| rs2115280  | ENC1  | GI_4505460-S  | 5 | 5 | 73819919  | 139351 | 6.7159 | 6.20083 | CHB |
| rs10805888 | ENC1  | GI_4505460-S  | 5 | 5 | 73821303  | 137967 | 6.7159 | 6.20083 | CHB |
| rs6874566  | ENC1  | GI_4505460-S  | 5 | 5 | 73822636  | 136634 | 6.7159 | 6.20083 | CHB |
| rs1544939  | ENC1  | GI_4505460-S  | 5 | 5 | 73823034  | 136236 | 6.7159 | 6.20083 | CHB |
| rs11949928 | ENC1  | GI_4505460-S  | 5 | 5 | 73825005  | 134265 | 6.7159 | 6.20083 | CHB |
| rs2351245  | CAST  | GI_27765086-A | 5 | 5 | 96021489  | 110545 | 6.2948 | 5.82931 | CHB |
| rs7733671  | CAST  | GI_27765086-A | 5 | 5 | 96026025  | 106009 | 6.335  | 5.82931 | CHB |
| rs6860934  | CAST  | GI_27765086-A | 5 | 5 | 96027598  | 104436 | 6.5004 | 5.82931 | CHB |
| rs7704167  | CAST  | GI_27765086-A | 5 | 5 | 96030119  | 101915 | 6.5004 | 5.82931 | CHB |
| rs31250    | CAST  | GI_27765086-A | 5 | 5 | 96039197  | 92837  | 6.7834 | 5.82931 | CHB |
| rs31249    | CAST  | GI_27765086-A | 5 | 5 | 96039687  | 92347  | 6.5004 | 5.82931 | CHB |
| rs31248    | CAST  | GI_27765086-A | 5 | 5 | 96040439  | 91595  | 6.0397 | 5.82931 | CHB |
| rs26485    | CAST  | GI_27765086-A | 5 | 5 | 96042233  | 89801  | 7.6859 | 5.82931 | CHB |
| rs26484    | CAST  | GI_27765086-A | 5 | 5 | 96042325  | 89709  | 6.5004 | 5.82931 | CHB |
| rs26483    | CAST  | GI_27765086-A | 5 | 5 | 96042372  | 89662  | 6.5004 | 5.82931 | CHB |
| rs26482    | CAST  | GI_27765086-A | 5 | 5 | 96043712  | 88322  | 6.7781 | 5.82931 | CHB |
| rs152005   | CAST  | GI_27765086-A | 5 | 5 | 96051603  | 80431  | 6.5004 | 5.82931 | CHB |
| rs152020   | CAST  | GI_27765086-A | 5 | 5 | 96051841  | 80193  | 6.0916 | 5.82931 | CHB |
| rs152014   | CAST  | GI_27765086-A | 5 | 5 | 96053008  | 79026  | 6.0397 | 5.82931 | CHB |
| rs27991    | CAST  | GI_27765086-A | 5 | 5 | 96083069  | 48965  | 6.6516 | 5.82931 | CHB |
| rs26518    | CAST  | GI_27765086-A | 5 | 5 | 96083327  | 48707  | 6.046  | 5.82931 | CHB |
| rs26514    | CAST  | GI_27765086-A | 5 | 5 | 96089630  | 42404  | 6.046  | 5.82931 | CHB |
| rs27531    | CAST  | GI_27765086-A | 5 | 5 | 96090389  | 41645  | 6.046  | 5.82931 | CHB |
| rs151835   | CAST  | GI_27765086-A | 5 | 5 | 96096738  | 35296  | 5.8401 | 5.82931 | CHB |
| rs151834   | CAST  | GI_27765086-A | 5 | 5 | 96096782  | 35252  | 6.795  | 5.82931 | CHB |
| rs6882088  | CPEB4 | GI_32698754-S | 5 | 5 | 173226782 | 90805  | 6.2561 | 6.03539 | CHB |
| rs7705502  | CPEB4 | GI_32698754-S | 5 | 5 | 173253421 | 64166  | 6.2561 | 6.03539 | CHB |
| rs17695092 | CPEB4 | GI_32698754-S | 5 | 5 | 173270459 | 47128  | 6.2561 | 6.03539 | CHB |
| rs7736263  | CPEB4 | GI_32698754-S | 5 | 5 | 173271828 | 45759  | 6.2561 | 6.03539 | CHB |
| rs10516107 | CPEB4 | GI_32698754-S | 5 | 5 | 173280762 | 36825  | 6.2561 | 6.03539 | CHB |
| rs1484803  | CPEB4 | GI_32698754-S | 5 | 5 | 173282446 | 35141  | 6.2561 | 6.03539 | CHB |
| rs966544   | CPEB4 | GI_32698754-S | 5 | 5 | 173283011 | 34576  | 6.2561 | 6.03539 | CHB |
| rs1564823  | CPEB4 | GI_32698754-S | 5 | 5 | 173315800 | 1787   | 6.2561 | 6.03539 | CHB |
| rs1976074  | CPEB4 | GI_32698754-S | 5 | 5 | 173317269 | 318    | 6.2561 | 6.03539 | CHB |
| rs628506   | RAB24 | GI_18640747-S | 5 | 5 | 176467029 | 194134 | 6.6955 | 5.87563 | CHB |
| rs351861   | RAB24 | GI_18640747-S | 5 | 5 | 176474543 | 186620 | 6.7089 | 5.87563 | CHB |
| rs17078781 | RAB24 | GI_18640747-S | 5 | 5 | 176476834 | 184329 | 6.1631 | 5.87563 | CHB |
| rs4976639  | RAB24 | GI_18640747-S | 5 | 5 | 176482907 | 178256 | 6.341  | 5.87563 | CHB |
| rs4976640  | RAB24 | GI_18640747-S | 5 | 5 | 176484613 | 176550 | 7.5883 | 5.87563 | CHB |
| rs12519145 | RAB24 | GI_18640747-S | 5 | 5 | 176488129 | 173034 | 7.7872 | 5.87563 | CHB |
| rs1052432  | RAB24 | GI_18640747-S | 5 | 5 | 176496795 | 164368 | 6.2844 | 5.87563 | CHB |
| rs9885210  | RAB24 | GI_18640747-S | 5 | 5 | 176501794 | 159369 | 7.5883 | 5.87563 | CHB |
| rs11955537 | RAB24 | GI_18640747-S | 5 | 5 | 176506694 | 154469 | 6.1631 | 5.87563 | CHB |
| rs10039241 | RAB24 | GI_18640747-S | 5 | 5 | 176510678 | 150485 | 6.2844 | 5.87563 | CHB |
| rs244708   | RAB24 | GI_18640747-S | 5 | 5 | 176522191 | 138972 | 7.5883 | 5.87563 | CHB |
| rs9313749  | RAB24 | GI_18640747-S | 5 | 5 | 176530300 | 130863 | 7.5883 | 5.87563 | CHB |
| rs12716330 | RAB24 | GI_18640747-S | 5 | 5 | 176531108 | 130055 | 7.5883 | 5.87563 | CHB |
| rs1546363  | RAB24 | GI_18640747-S | 5 | 5 | 176533637 | 127526 | 7.7404 | 5.87563 | CHB |
| rs12658510 | RAB24 | GI_18640747-S | 5 | 5 | 176537879 | 123284 | 6.2844 | 5.87563 | CHB |
| rs7710269  | RAB24 | GI_18640747-S | 5 | 5 | 176547135 | 114028 | 6.2844 | 5.87563 | CHB |
| rs2878686  | RAB24 | GI_18640747-S | 5 | 5 | 176566355 | 94808  | 6.2844 | 5.87563 | CHB |
| rs1363405  | RAB24 | GI_18640747-S | 5 | 5 | 176569488 | 91675  | 7.5883 | 5.87563 | CHB |

|            |           |               |   |   |           |       |         |         |     |
|------------|-----------|---------------|---|---|-----------|-------|---------|---------|-----|
| rs3733875  | RAB24     | GI_18640747-S | 5 | 5 | 176569846 | 91317 | 6.2844  | 5.87563 | CHB |
| rs12187932 | RAB24     | GI_18640747-S | 5 | 5 | 176575757 | 85406 | 7.5883  | 5.87563 | CHB |
| rs9313751  | RAB24     | GI_18640747-S | 5 | 5 | 176576781 | 84382 | 6.2844  | 5.87563 | CHB |
| rs6890580  | RAB24     | GI_18640747-S | 5 | 5 | 176586126 | 75037 | 7.5883  | 5.87563 | CHB |
| rs10072499 | RAB24     | GI_18640747-S | 5 | 5 | 176587843 | 73320 | 6.2844  | 5.87563 | CHB |
| rs13159114 | RAB24     | GI_18640747-S | 5 | 5 | 176594414 | 66749 | 6.2844  | 5.87563 | CHB |
| rs2336237  | RAB24     | GI_18640747-S | 5 | 5 | 176598485 | 62678 | 7.5883  | 5.87563 | CHB |
| rs7719125  | RAB24     | GI_18640747-S | 5 | 5 | 176621772 | 39391 | 7.5883  | 5.87563 | CHB |
| rs10037055 | RAB24     | GI_18640747-S | 5 | 5 | 176623885 | 37278 | 7.5883  | 5.87563 | CHB |
| rs10077929 | RAB24     | GI_18640747-S | 5 | 5 | 176630450 | 30713 | 7.5883  | 5.87563 | CHB |
| rs12660023 | RAB24     | GI_18640747-S | 5 | 5 | 176633491 | 27672 | 7.5883  | 5.87563 | CHB |
| rs6880798  | RAB24     | GI_18640747-S | 5 | 5 | 176637063 | 24100 | 6.2844  | 5.87563 | CHB |
| rs6886255  | RAB24     | GI_18640747-S | 5 | 5 | 176650967 | 10196 | 7.5883  | 5.87563 | CHB |
| rs6872201  | RAB24     | GI_18640747-S | 5 | 5 | 176653372 | 7791  | 7.7872  | 5.87563 | CHB |
| rs3088050  | RAB24     | GI_18640747-S | 5 | 5 | 176659241 | 1922  | 6.1694  | 5.87563 | CHB |
| rs11949767 | RAB24     | GI_18640747-S | 5 | 5 | 176672850 | 11687 | 8.3533  | 5.87563 | CHB |
| rs6885410  | RAB24     | GI_18640747-S | 5 | 5 | 176673602 | 12439 | 6.4306  | 5.87563 | CHB |
| rs9503490  | LOC389362 | GI_41147302-S | 6 | 6 | 3196748   | 16364 | 7.3619  | 6.19833 | CHB |
| rs4959782  | LOC389362 | GI_41147302-S | 6 | 6 | 3197134   | 15978 | 7.3619  | 6.19833 | CHB |
| rs9501959  | LOC389362 | GI_41147302-S | 6 | 6 | 3200786   | 12326 | 7.3619  | 6.19833 | CHB |
| rs9503499  | LOC389362 | GI_41147302-S | 6 | 6 | 3200856   | 12256 | 6.2729  | 6.19833 | CHB |
| rs11242833 | LOC389362 | GI_41147302-S | 6 | 6 | 3200884   | 12228 | 7.3619  | 6.19833 | CHB |
| rs4445096  | LOC389362 | GI_41147302-S | 6 | 6 | 3201894   | 11218 | 6.3456  | 6.19833 | CHB |
| rs7756623  | LOC389362 | GI_41147302-S | 6 | 6 | 3203352   | 9760  | 7.3619  | 6.19833 | CHB |
| rs11242834 | LOC389362 | GI_41147302-S | 6 | 6 | 3204714   | 8398  | 7.3619  | 6.19833 | CHB |
| rs11242835 | LOC389362 | GI_41147302-S | 6 | 6 | 3206584   | 6528  | 11.9119 | 6.19833 | CHB |
| rs11242837 | LOC389362 | GI_41147302-S | 6 | 6 | 3206887   | 6225  | 11.5458 | 6.19833 | CHB |
| rs11242841 | LOC389362 | GI_41147302-S | 6 | 6 | 3207007   | 6105  | 12.2711 | 6.19833 | CHB |
| rs4602754  | LOC389362 | GI_41147302-S | 6 | 6 | 3207500   | 5612  | 10.2181 | 6.19833 | CHB |
| rs4421240  | LOC389362 | GI_41147302-S | 6 | 6 | 3207522   | 5590  | 9.3521  | 6.19833 | CHB |
| rs4246060  | LOC389362 | GI_41147302-S | 6 | 6 | 3207754   | 5358  | 12.2711 | 6.19833 | CHB |
| rs4246061  | LOC389362 | GI_41147302-S | 6 | 6 | 3207810   | 5302  | 12.2711 | 6.19833 | CHB |
| rs4316041  | LOC389362 | GI_41147302-S | 6 | 6 | 3208187   | 4925  | 11.0461 | 6.19833 | CHB |
| rs4400256  | LOC389362 | GI_41147302-S | 6 | 6 | 3208286   | 4826  | 12.2711 | 6.19833 | CHB |
| rs4317455  | LOC389362 | GI_41147302-S | 6 | 6 | 3208490   | 4622  | 10.9384 | 6.19833 | CHB |
| rs4959785  | LOC389362 | GI_41147302-S | 6 | 6 | 3209100   | 4012  | 12.2711 | 6.19833 | CHB |
| rs4959229  | LOC389362 | GI_41147302-S | 6 | 6 | 3209287   | 3825  | 12.2711 | 6.19833 | CHB |
| rs4959786  | LOC389362 | GI_41147302-S | 6 | 6 | 3209486   | 3626  | 10.0419 | 6.19833 | CHB |
| rs4959787  | LOC389362 | GI_41147302-S | 6 | 6 | 3209501   | 3611  | 10.1636 | 6.19833 | CHB |
| rs13193012 | LOC389362 | GI_41147302-S | 6 | 6 | 3209670   | 3442  | 12.2711 | 6.19833 | CHB |
| rs4324814  | LOC389362 | GI_41147302-S | 6 | 6 | 3209775   | 3337  | 12.2711 | 6.19833 | CHB |
| rs11753155 | LOC389362 | GI_41147302-S | 6 | 6 | 3209999   | 3113  | 10.1636 | 6.19833 | CHB |
| rs4602755  | LOC389362 | GI_41147302-S | 6 | 6 | 3210089   | 3023  | 12.1992 | 6.19833 | CHB |
| rs13196688 | LOC389362 | GI_41147302-S | 6 | 6 | 3210362   | 2750  | 12.2711 | 6.19833 | CHB |
| rs9501966  | LOC389362 | GI_41147302-S | 6 | 6 | 3210381   | 2731  | 12.2711 | 6.19833 | CHB |
| rs13207402 | LOC389362 | GI_41147302-S | 6 | 6 | 3210409   | 2703  | 12.2711 | 6.19833 | CHB |
| rs13207416 | LOC389362 | GI_41147302-S | 6 | 6 | 3210438   | 2674  | 12.2711 | 6.19833 | CHB |
| rs4959791  | LOC389362 | GI_41147302-S | 6 | 6 | 3210874   | 2238  | 11.0461 | 6.19833 | CHB |
| rs4959792  | LOC389362 | GI_41147302-S | 6 | 6 | 3211037   | 2075  | 11.2344 | 6.19833 | CHB |
| rs4959793  | LOC389362 | GI_41147302-S | 6 | 6 | 3211142   | 1970  | 9.8548  | 6.19833 | CHB |
| rs4998907  | LOC389362 | GI_41147302-S | 6 | 6 | 3211262   | 1850  | 11.8685 | 6.19833 | CHB |
| rs4336485  | LOC389362 | GI_41147302-S | 6 | 6 | 3211387   | 1725  | 12.2711 | 6.19833 | CHB |
| rs4337973  | LOC389362 | GI_41147302-S | 6 | 6 | 3211559   | 1553  | 12.7693 | 6.19833 | CHB |
| rs17136345 | LOC389362 | GI_41147302-S | 6 | 6 | 3211907   | 1205  | 9.9324  | 6.19833 | CHB |
| rs17136346 | LOC389362 | GI_41147302-S | 6 | 6 | 3211914   | 1198  | 11.8685 | 6.19833 | CHB |
| rs1633     | LOC389362 | GI_41147302-S | 6 | 6 | 3212535   | 577   | 6.8566  | 6.19833 | CHB |

|            |           |               |   |   |          |       |         |         |     |
|------------|-----------|---------------|---|---|----------|-------|---------|---------|-----|
| rs1634     | LOC389362 | GI_41147302-S | 6 | 6 | 3212556  | 556   | 8.8119  | 6.19833 | CHB |
| rs9328157  | LOC389362 | GI_41147302-S | 6 | 6 | 3212709  | 403   | 12.2711 | 6.19833 | CHB |
| rs3813487  | LOC389362 | GI_41147302-S | 6 | 6 | 3215063  | 1951  | 11.4016 | 6.19833 | CHB |
| rs1127477  | LOC389362 | GI_41147302-S | 6 | 6 | 3215509  | 2397  | 7.3062  | 6.19833 | CHB |
| rs7756175  | LOC389362 | GI_41147302-S | 6 | 6 | 3221744  | 8632  | 7.6248  | 6.19833 | CHB |
| rs7775219  | LOC389362 | GI_41147302-S | 6 | 6 | 3222297  | 9185  | 7.7997  | 6.19833 | CHB |
| rs11754676 | LOC389362 | GI_41147302-S | 6 | 6 | 3224786  | 11674 | 6.7865  | 6.19833 | CHB |
| rs4613858  | LOC389362 | GI_41147302-S | 6 | 6 | 3232680  | 19568 | 7.4895  | 6.19833 | CHB |
| rs200501   | HIST1H4K  | GI_15718726-S | 6 | 6 | 27896921 | 10036 | 6.5594  | 5.88447 | CHB |
| rs2017525  | LOC347981 | GI_30160064-S | 6 | 6 | 29876482 | 86061 | 6.3272  | 6.16193 | CHB |
| rs6935644  | LOC347981 | GI_30160064-S | 6 | 6 | 29922319 | 40224 | 6.2094  | 6.16193 | CHB |
| rs9689483  | LOC347981 | GI_30160064-S | 6 | 6 | 29922939 | 39604 | 6.2094  | 6.16193 | CHB |
| rs2894118  | LOC347981 | GI_30160064-S | 6 | 6 | 29923963 | 38580 | 6.2094  | 6.16193 | CHB |
| rs2394183  | LOC347981 | GI_30160064-S | 6 | 6 | 29923989 | 38554 | 6.2401  | 6.16193 | CHB |
| rs2394186  | LOC347981 | GI_30160064-S | 6 | 6 | 29924400 | 38143 | 6.2094  | 6.16193 | CHB |
| rs2107198  | LOC347981 | GI_30160064-S | 6 | 6 | 29927641 | 34902 | 6.2094  | 6.16193 | CHB |
| rs4087726  | Hs.519979 | Hs.519979-S   | 6 | 6 | 30006876 | 1530  | 8.6431  | 6.13955 | CHB |
| rs1632882  | Hs.519979 | Hs.519979-S   | 6 | 6 | 30024347 | 19001 | 8.6077  | 6.13955 | CHB |
| rs9260632  | Hs.519979 | Hs.519979-S   | 6 | 6 | 30031269 | 25923 | 7.2264  | 6.13955 | CHB |
| rs2735085  | Hs.519979 | Hs.519979-S   | 6 | 6 | 30035074 | 29728 | 6.6437  | 6.13955 | CHB |
| rs3869062  | Hs.519979 | Hs.519979-S   | 6 | 6 | 30042870 | 37524 | 7.4331  | 6.13955 | CHB |
| rs2893999  | Hs.519979 | Hs.519979-S   | 6 | 6 | 30051811 | 46465 | 7.2482  | 6.13955 | CHB |
| rs2517534  | hmm31752  | hmm31752-S    | 6 | 6 | 31125313 | 6765  | 9.0833  | 6.58466 | CHB |
| rs2517532  | hmm31752  | hmm31752-S    | 6 | 6 | 31126386 | 5692  | 9.8249  | 6.58466 | CHB |
| rs2523857  | hmm31752  | hmm31752-S    | 6 | 6 | 31129483 | 2595  | 10.4384 | 6.58466 | CHB |
| rs2523856  | hmm31752  | hmm31752-S    | 6 | 6 | 31129609 | 2469  | 11.3334 | 6.58466 | CHB |
| rs9262628  | hmm31752  | hmm31752-S    | 6 | 6 | 31131127 | 951   | 8.1849  | 6.58466 | CHB |
| rs2523852  | hmm31752  | hmm31752-S    | 6 | 6 | 31131847 | 231   | 8.1849  | 6.58466 | CHB |
| rs2517525  | hmm31752  | hmm31752-S    | 6 | 6 | 31133340 | 1262  | 7.1067  | 6.58466 | CHB |
| rs2523846  | hmm31752  | hmm31752-S    | 6 | 6 | 31134568 | 2490  | 8.1849  | 6.58466 | CHB |
| rs2517510  | hmm31752  | hmm31752-S    | 6 | 6 | 31138101 | 6023  | 8.1849  | 6.58466 | CHB |
| rs2517500  | hmm31752  | hmm31752-S    | 6 | 6 | 31141488 | 9410  | 8.1849  | 6.58466 | CHB |
| rs2517497  | hmm31752  | hmm31752-S    | 6 | 6 | 31144762 | 12684 | 7.5085  | 6.58466 | CHB |
| rs2523890  | hmm31752  | hmm31752-S    | 6 | 6 | 31147511 | 15433 | 8.1849  | 6.58466 | CHB |
| rs2246330  | hmm31752  | hmm31752-S    | 6 | 6 | 31149472 | 17394 | 8.1849  | 6.58466 | CHB |
| rs2523883  | hmm31752  | hmm31752-S    | 6 | 6 | 31150049 | 17971 | 8.1849  | 6.58466 | CHB |
| rs2523882  | hmm31752  | hmm31752-S    | 6 | 6 | 31150196 | 18118 | 7.8093  | 6.58466 | CHB |
| rs2517489  | hmm31752  | hmm31752-S    | 6 | 6 | 31150285 | 18207 | 8.1849  | 6.58466 | CHB |
| rs2523881  | hmm31752  | hmm31752-S    | 6 | 6 | 31150587 | 18509 | 8.1849  | 6.58466 | CHB |
| rs2523880  | hmm31752  | hmm31752-S    | 6 | 6 | 31150748 | 18670 | 8.1849  | 6.58466 | CHB |
| rs2249231  | hmm31752  | hmm31752-S    | 6 | 6 | 31151211 | 19133 | 8.1849  | 6.58466 | CHB |
| rs2523843  | hmm31752  | hmm31752-S    | 6 | 6 | 31154507 | 22429 | 8.2937  | 6.58466 | CHB |
| rs2249876  | hmm31752  | hmm31752-S    | 6 | 6 | 31156366 | 24288 | 8.237   | 6.58466 | CHB |
| rs9263473  | hmm31752  | hmm31752-S    | 6 | 6 | 31158158 | 26080 | 7.6847  | 6.58466 | CHB |
| rs9263474  | hmm31752  | hmm31752-S    | 6 | 6 | 31158223 | 26145 | 7.846   | 6.58466 | CHB |
| rs2535318  | hmm31752  | hmm31752-S    | 6 | 6 | 31159367 | 27289 | 8.237   | 6.58466 | CHB |
| rs2535317  | hmm31752  | hmm31752-S    | 6 | 6 | 31159833 | 27755 | 8.237   | 6.58466 | CHB |
| rs2517471  | hmm31752  | hmm31752-S    | 6 | 6 | 31160077 | 27999 | 8.237   | 6.58466 | CHB |
| rs2535315  | hmm31752  | hmm31752-S    | 6 | 6 | 31160106 | 28028 | 8.237   | 6.58466 | CHB |
| rs2535311  | hmm31752  | hmm31752-S    | 6 | 6 | 31160663 | 28585 | 8.1422  | 6.58466 | CHB |
| rs2535310  | hmm31752  | hmm31752-S    | 6 | 6 | 31161236 | 29158 | 8.6442  | 6.58466 | CHB |
| rs2535307  | hmm31752  | hmm31752-S    | 6 | 6 | 31161720 | 29642 | 7.6847  | 6.58466 | CHB |
| rs2535306  | hmm31752  | hmm31752-S    | 6 | 6 | 31161846 | 29768 | 8.237   | 6.58466 | CHB |
| rs9263478  | hmm31752  | hmm31752-S    | 6 | 6 | 31162360 | 30282 | 7.8034  | 6.58466 | CHB |
| rs2535304  | hmm31752  | hmm31752-S    | 6 | 6 | 31162666 | 30588 | 7.5822  | 6.58466 | CHB |
| rs3130959  | hmm31752  | hmm31752-S    | 6 | 6 | 31164337 | 32259 | 8.237   | 6.58466 | CHB |

|            |           |               |   |   |          |       |         |         |     |
|------------|-----------|---------------|---|---|----------|-------|---------|---------|-----|
| rs9263486  | hmm31752  | hmm31752-S    | 6 | 6 | 31164611 | 32533 | 8.237   | 6.58466 | CHB |
| rs2535301  | hmm31752  | hmm31752-S    | 6 | 6 | 31166606 | 34528 | 8.237   | 6.58466 | CHB |
| rs2517465  | hmm31752  | hmm31752-S    | 6 | 6 | 31167150 | 35072 | 7.693   | 6.58466 | CHB |
| rs2535299  | hmm31752  | hmm31752-S    | 6 | 6 | 31167224 | 35146 | 8.2937  | 6.58466 | CHB |
| rs2517464  | hmm31752  | hmm31752-S    | 6 | 6 | 31167233 | 35155 | 7.0931  | 6.58466 | CHB |
| rs3130961  | hmm31752  | hmm31752-S    | 6 | 6 | 31167365 | 35287 | 8.237   | 6.58466 | CHB |
| rs2517458  | hmm31752  | hmm31752-S    | 6 | 6 | 31167494 | 35416 | 7.8215  | 6.58466 | CHB |
| rs2517453  | hmm31752  | hmm31752-S    | 6 | 6 | 31168094 | 36016 | 8.237   | 6.58466 | CHB |
| rs2517452  | hmm31752  | hmm31752-S    | 6 | 6 | 31168141 | 36063 | 7.6847  | 6.58466 | CHB |
| rs2517450  | hmm31752  | hmm31752-S    | 6 | 6 | 31169418 | 37340 | 8.237   | 6.58466 | CHB |
| rs2535292  | hmm31752  | hmm31752-S    | 6 | 6 | 31170393 | 38315 | 7.2086  | 6.58466 | CHB |
| rs2535291  | hmm31752  | hmm31752-S    | 6 | 6 | 31170878 | 38800 | 8.237   | 6.58466 | CHB |
| rs2517423  | hmm31752  | hmm31752-S    | 6 | 6 | 31172806 | 40728 | 8.237   | 6.58466 | CHB |
| rs2517556  | hmm31752  | hmm31752-S    | 6 | 6 | 31176874 | 44796 | 7.2679  | 6.58466 | CHB |
| rs9405050  | hmm31752  | hmm31752-S    | 6 | 6 | 31179526 | 47448 | 8.237   | 6.58466 | CHB |
| rs7381897  | hmm31752  | hmm31752-S    | 6 | 6 | 31181882 | 49804 | 7.8383  | 6.58466 | CHB |
| rs1064190  | hmm31752  | hmm31752-S    | 6 | 6 | 31183094 | 51016 | 8.237   | 6.58466 | CHB |
| rs2535277  | hmm31752  | hmm31752-S    | 6 | 6 | 31184743 | 52665 | 7.8496  | 6.58466 | CHB |
| rs1265064  | hmm31752  | hmm31752-S    | 6 | 6 | 31185711 | 53633 | 7.4333  | 6.58466 | CHB |
| rs1265063  | hmm31752  | hmm31752-S    | 6 | 6 | 31185917 | 53839 | 8.237   | 6.58466 | CHB |
| rs1265059  | hmm31752  | hmm31752-S    | 6 | 6 | 31186474 | 54396 | 8.237   | 6.58466 | CHB |
| rs1265053  | hmm31752  | hmm31752-S    | 6 | 6 | 31187868 | 55790 | 8.938   | 6.58466 | CHB |
| rs2844529  | LOC282956 | GI_27483210-S | 6 | 6 | 31461572 | 8979  | 9.4995  | 6.13281 | CHB |
| rs4081552  | LOC282956 | GI_27483210-S | 6 | 6 | 31461668 | 8883  | 9.2553  | 6.13281 | CHB |
| rs6909461  | LOC282956 | GI_27483210-S | 6 | 6 | 31461929 | 8622  | 9.0414  | 6.13281 | CHB |
| rs2853973  | LOC282956 | GI_27483210-S | 6 | 6 | 31461971 | 8580  | 9.2704  | 6.13281 | CHB |
| rs2428486  | LOC282956 | GI_27483210-S | 6 | 6 | 31462083 | 8468  | 13.6154 | 6.13281 | CHB |
| rs4711268  | LOC282956 | GI_27483210-S | 6 | 6 | 31462483 | 8068  | 8.8554  | 6.13281 | CHB |
| rs2596562  | LOC282956 | GI_27483210-S | 6 | 6 | 31462574 | 7977  | 9.6917  | 6.13281 | CHB |
| rs13437092 | LOC282956 | GI_27483210-S | 6 | 6 | 31463035 | 7516  | 13.2831 | 6.13281 | CHB |
| rs13437088 | LOC282956 | GI_27483210-S | 6 | 6 | 31463098 | 7453  | 13.5653 | 6.13281 | CHB |
| rs7771971  | LOC282956 | GI_27483210-S | 6 | 6 | 31468320 | 2231  | 9.6531  | 6.13281 | CHB |
| rs7751725  | LOC282956 | GI_27483210-S | 6 | 6 | 31468412 | 2139  | 12.8875 | 6.13281 | CHB |
| rs7752021  | LOC282956 | GI_27483210-S | 6 | 6 | 31468505 | 2046  | 12.0112 | 6.13281 | CHB |
| rs10947206 | LOC282956 | GI_27483210-S | 6 | 6 | 31469376 | 1175  | 12.3657 | 6.13281 | CHB |
| rs10947207 | LOC282956 | GI_27483210-S | 6 | 6 | 31469464 | 1087  | 7.7754  | 6.13281 | CHB |
| rs2523475  | LOC282956 | GI_27483210-S | 6 | 6 | 31469689 | 862   | 11.0597 | 6.13281 | CHB |
| rs10947208 | LOC282956 | GI_27483210-S | 6 | 6 | 31469816 | 735   | 12.3657 | 6.13281 | CHB |
| rs2523473  | LOC282956 | GI_27483210-S | 6 | 6 | 31469876 | 675   | 12.8875 | 6.13281 | CHB |
| rs2523467  | LOC282956 | GI_27483210-S | 6 | 6 | 31470909 | 358   | 12.8875 | 6.13281 | CHB |
| rs9501387  | LOC282956 | GI_27483210-S | 6 | 6 | 31472438 | 1887  | 12.5361 | 6.13281 | CHB |
| rs2523459  | LOC282956 | GI_27483210-S | 6 | 6 | 31473287 | 2736  | 12.2377 | 6.13281 | CHB |
| rs2596542  | LOC282956 | GI_27483210-S | 6 | 6 | 31474574 | 4023  | 8.1406  | 6.13281 | CHB |
| rs2428475  | LOC282956 | GI_27483210-S | 6 | 6 | 31474601 | 4050  | 12.1186 | 6.13281 | CHB |
| rs2428474  | LOC282956 | GI_27483210-S | 6 | 6 | 31475002 | 4451  | 9.287   | 6.13281 | CHB |
| rs2523453  | LOC282956 | GI_27483210-S | 6 | 6 | 31476104 | 5553  | 12.3657 | 6.13281 | CHB |
| rs2523452  | LOC282956 | GI_27483210-S | 6 | 6 | 31476519 | 5968  | 9.6531  | 6.13281 | CHB |
| rs2596538  | LOC282956 | GI_27483210-S | 6 | 6 | 31476611 | 6060  | 8.2065  | 6.13281 | CHB |
| rs2844522  | LOC282956 | GI_27483210-S | 6 | 6 | 31476679 | 6128  | 10.4992 | 6.13281 | CHB |
| rs2844521  | LOC282956 | GI_27483210-S | 6 | 6 | 31476943 | 6392  | 9.6531  | 6.13281 | CHB |
| rs1051792  | LOC282956 | GI_27483210-S | 6 | 6 | 31486956 | 16405 | 12.8875 | 6.13281 | CHB |
| rs1051794  | LOC282956 | GI_27483210-S | 6 | 6 | 31487088 | 16537 | 12.8875 | 6.13281 | CHB |
| rs6934187  | LOC282956 | GI_27483210-S | 6 | 6 | 31488953 | 18402 | 11.3471 | 6.13281 | CHB |
| rs9266817  | LOC282956 | GI_27483210-S | 6 | 6 | 31489531 | 18980 | 7.5396  | 6.13281 | CHB |
| rs7775227  | LOC282956 | GI_27483210-S | 6 | 6 | 31490126 | 19575 | 12.8875 | 6.13281 | CHB |
| rs9266823  | LOC282956 | GI_27483210-S | 6 | 6 | 31490669 | 20118 | 11.7882 | 6.13281 | CHB |

|            |           |               |   |   |          |        |         |         |     |
|------------|-----------|---------------|---|---|----------|--------|---------|---------|-----|
| rs9266825  | LOC282956 | GI_27483210-S | 6 | 6 | 31490861 | 20310  | 9.4348  | 6.13281 | CHB |
| rs9266833  | LOC282956 | GI_27483210-S | 6 | 6 | 31491087 | 20536  | 7.7248  | 6.13281 | CHB |
| rs6932236  | LOC282956 | GI_27483210-S | 6 | 6 | 31491958 | 21407  | 12.8875 | 6.13281 | CHB |
| rs9266844  | LOC282956 | GI_27483210-S | 6 | 6 | 31492310 | 21759  | 12.2013 | 6.13281 | CHB |
| rs9266845  | LOC282956 | GI_27483210-S | 6 | 6 | 31492771 | 22220  | 11.2433 | 6.13281 | CHB |
| rs9266846  | LOC282956 | GI_27483210-S | 6 | 6 | 31492868 | 22317  | 11.8098 | 6.13281 | CHB |
| rs9283891  | LOC282956 | GI_27483210-S | 6 | 6 | 31496209 | 25658  | 8.8784  | 6.13281 | CHB |
| rs9295993  | LOC282956 | GI_27483210-S | 6 | 6 | 31496574 | 26023  | 9.8859  | 6.13281 | CHB |
| rs7772549  | LOC282956 | GI_27483210-S | 6 | 6 | 31515622 | 45071  | 12.8875 | 6.13281 | CHB |
| rs3869132  | LOC282956 | GI_27483210-S | 6 | 6 | 31518927 | 48376  | 12.3657 | 6.13281 | CHB |
| rs2516460  | LOC282956 | GI_27483210-S | 6 | 6 | 31526679 | 56128  | 6.5828  | 6.13281 | CHB |
| rs2523685  | LOC282956 | GI_27483210-S | 6 | 6 | 31534235 | 63684  | 10.3045 | 6.13281 | CHB |
| rs2254618  | LOC282956 | GI_27483210-S | 6 | 6 | 31535118 | 64567  | 7.1284  | 6.13281 | CHB |
| rs9405035  | HLA-DRB5  | GI_26665892-S | 6 | 6 | 32515046 | 78179  | 6.5451  | 6.34569 | CHB |
| rs9268853  | HLA-DQA2  | GI_11095446-S | 6 | 6 | 32537621 | 283412 | 10.5616 | 6.67738 | CHB |
| rs9268853  | HLA-DRB5  | GI_26665892-S | 6 | 6 | 32537621 | 55604  | 10.4413 | 6.34569 | CHB |
| rs9268858  | HLA-DQA2  | GI_11095446-S | 6 | 6 | 32537736 | 283297 | 10.5616 | 6.67738 | CHB |
| rs9268858  | HLA-DRB5  | GI_26665892-S | 6 | 6 | 32537736 | 55489  | 10.4413 | 6.34569 | CHB |
| rs9268906  | HLA-DQA2  | GI_11095446-S | 6 | 6 | 32540159 | 280874 | 10.2192 | 6.67738 | CHB |
| rs9268906  | HLA-DRB5  | GI_26665892-S | 6 | 6 | 32540159 | 53066  | 8.5484  | 6.34569 | CHB |
| rs9268923  | HLA-DQA2  | GI_11095446-S | 6 | 6 | 32540813 | 280220 | 9.9254  | 6.67738 | CHB |
| rs9268923  | HLA-DRB5  | GI_26665892-S | 6 | 6 | 32540813 | 52412  | 8.6026  | 6.34569 | CHB |
| rs2395185  | HLA-DQA2  | GI_11095446-S | 6 | 6 | 32541145 | 279888 | 10.5616 | 6.67738 | CHB |
| rs2395185  | HLA-DRB5  | GI_26665892-S | 6 | 6 | 32541145 | 52080  | 10.4413 | 6.34569 | CHB |
| rs9268969  | HLA-DQA2  | GI_11095446-S | 6 | 6 | 32542327 | 278706 | 9.0819  | 6.67738 | CHB |
| rs9268969  | HLA-DRB5  | GI_26665892-S | 6 | 6 | 32542327 | 50898  | 8.8932  | 6.34569 | CHB |
| rs9268970  | HLA-DQA2  | GI_11095446-S | 6 | 6 | 32542339 | 278694 | 10.5806 | 6.67738 | CHB |
| rs9268970  | HLA-DRB5  | GI_26665892-S | 6 | 6 | 32542339 | 50886  | 10.1745 | 6.34569 | CHB |
| rs9391877  | HLA-DQA2  | GI_11095446-S | 6 | 6 | 32546845 | 274188 | 8.046   | 6.67738 | CHB |
| rs9405040  | HLA-DQA2  | GI_11095446-S | 6 | 6 | 32547371 | 273662 | 10.5616 | 6.67738 | CHB |
| rs9405040  | HLA-DRB5  | GI_26665892-S | 6 | 6 | 32547371 | 45854  | 10.4413 | 6.34569 | CHB |
| rs9286790  | HLA-DQA2  | GI_11095446-S | 6 | 6 | 32547806 | 273227 | 9.4413  | 6.67738 | CHB |
| rs9286790  | HLA-DRB5  | GI_26665892-S | 6 | 6 | 32547806 | 45419  | 8.7948  | 6.34569 | CHB |
| rs12194148 | HLA-DQA2  | GI_11095446-S | 6 | 6 | 32552176 | 268857 | 8.9422  | 6.67738 | CHB |
| rs12194148 | HLA-DRB5  | GI_26665892-S | 6 | 6 | 32552176 | 41049  | 7.5497  | 6.34569 | CHB |
| rs9405112  | HLA-DQA2  | GI_11095446-S | 6 | 6 | 32553578 | 267455 | 10.5128 | 6.67738 | CHB |
| rs9405112  | HLA-DRB5  | GI_26665892-S | 6 | 6 | 32553578 | 39647  | 8.8081  | 6.34569 | CHB |
| rs9378212  | HLA-DQA2  | GI_11095446-S | 6 | 6 | 32553669 | 267364 | 8.4573  | 6.67738 | CHB |
| rs9378212  | HLA-DRB5  | GI_26665892-S | 6 | 6 | 32553669 | 39556  | 7.4381  | 6.34569 | CHB |
| rs9378266  | HLA-DQA2  | GI_11095446-S | 6 | 6 | 32556167 | 264866 | 8.6028  | 6.67738 | CHB |
| rs9378266  | HLA-DRB5  | GI_26665892-S | 6 | 6 | 32556167 | 37058  | 7.3341  | 6.34569 | CHB |
| rs9378213  | HLA-DQA2  | GI_11095446-S | 6 | 6 | 32556376 | 264657 | 8.9361  | 6.67738 | CHB |
| rs9378213  | HLA-DRB5  | GI_26665892-S | 6 | 6 | 32556376 | 36849  | 7.8596  | 6.34569 | CHB |
| rs9391786  | HLA-DQA2  | GI_11095446-S | 6 | 6 | 32556539 | 264494 | 8.9361  | 6.67738 | CHB |
| rs9391786  | HLA-DRB5  | GI_26665892-S | 6 | 6 | 32556539 | 36686  | 7.8596  | 6.34569 | CHB |
| rs5020946  | HLA-DQA2  | GI_11095446-S | 6 | 6 | 32558067 | 262966 | 11.1348 | 6.67738 | CHB |
| rs5020946  | HLA-DRB5  | GI_26665892-S | 6 | 6 | 32558067 | 35158  | 9.8221  | 6.34569 | CHB |
| rs2157337  | HLA-DQA2  | GI_11095446-S | 6 | 6 | 32609122 | 211911 | 8.7529  | 6.67738 | CHB |
| rs2157337  | HLA-DRB5  | GI_26665892-S | 6 | 6 | 32609122 | 15897  | 8.91    | 6.34569 | CHB |
| rs11757159 | HLA-DQA2  | GI_11095446-S | 6 | 6 | 32628250 | 192783 | 7.1806  | 6.67738 | CHB |
| rs17191234 | HLA-DQA2  | GI_11095446-S | 6 | 6 | 32672659 | 148374 | 8.6961  | 6.67738 | CHB |
| rs17191234 | HLA-DRB5  | GI_26665892-S | 6 | 6 | 32672659 | 79434  | 13.8057 | 6.34569 | CHB |
| rs9270657  | HLA-DRB5  | GI_26665892-S | 6 | 6 | 32673999 | 80774  | 15.8293 | 6.34569 | CHB |
| rs9689336  | HLA-DQA2  | GI_11095446-S | 6 | 6 | 32674690 | 146343 | 8.2301  | 6.67738 | CHB |
| rs9689336  | HLA-DRB5  | GI_26665892-S | 6 | 6 | 32674690 | 81465  | 12.6791 | 6.34569 | CHB |
| rs9766501  | HLA-DRB5  | GI_26665892-S | 6 | 6 | 32680158 | 86933  | 7.3349  | 6.34569 | CHB |

|            |           |               |   |   |          |        |         |         |     |
|------------|-----------|---------------|---|---|----------|--------|---------|---------|-----|
| rs9270911  | HLA-DRB5  | GI_26665892-S | 6 | 6 | 32680180 | 86955  | 7.3349  | 6.34569 | CHB |
| rs9271568  | HLA-DQA2  | GI_11095446-S | 6 | 6 | 32698441 | 122592 | 10.5419 | 6.67738 | CHB |
| rs9271568  | HLA-DRB5  | GI_26665892-S | 6 | 6 | 32698441 | 105216 | 10.7625 | 6.34569 | CHB |
| rs9271574  | HLA-DQA2  | GI_11095446-S | 6 | 6 | 32698568 | 122465 | 10.9103 | 6.67738 | CHB |
| rs9271574  | HLA-DRB5  | GI_26665892-S | 6 | 6 | 32698568 | 105343 | 10.5454 | 6.34569 | CHB |
| rs9271589  | HLA-DQA2  | GI_11095446-S | 6 | 6 | 32699106 | 121927 | 9.2375  | 6.67738 | CHB |
| rs9271591  | HLA-DQA2  | GI_11095446-S | 6 | 6 | 32699119 | 121914 | 9.801   | 6.67738 | CHB |
| rs9271605  | HLA-DQA2  | GI_11095446-S | 6 | 6 | 32699426 | 121607 | 10.6401 | 6.67738 | CHB |
| rs9271605  | HLA-DRB5  | GI_26665892-S | 6 | 6 | 32699426 | 106201 | 9.8886  | 6.34569 | CHB |
| rs9272218  | HLA-DRB5  | GI_26665892-S | 6 | 6 | 32710216 | 116991 | 12.6081 | 6.34569 | CHB |
| rs17842183 | HLA-DQA1  | GI_18426974-S | 6 | 6 | 32710408 | 8427   | 6.4869  | 6.2496  | CHB |
| rs9272346  | HLA-DQA1  | GI_18426974-S | 6 | 6 | 32712350 | 6485   | 14.0749 | 6.2496  | CHB |
| rs17426593 | HLA-DQA2  | GI_11095446-S | 6 | 6 | 32716055 | 104978 | 15.3523 | 6.67738 | CHB |
| rs17426593 | HLA-DRB5  | GI_26665892-S | 6 | 6 | 32716055 | 122830 | 6.4423  | 6.34569 | CHB |
| rs9272723  | HLA-DQA1  | GI_18426974-S | 6 | 6 | 32717405 | 1430   | 13.0312 | 6.2496  | CHB |
| rs6928482  | HLA-DQA1  | GI_18426974-S | 6 | 6 | 32734227 | 15392  | 10.3122 | 6.2496  | CHB |
| rs12918    | HLA-DQA1  | GI_18426974-S | 6 | 6 | 32735364 | 16529  | 10.2133 | 6.2496  | CHB |
| rs2395349  | hmm14647  | hmm14647-S    | 6 | 6 | 33191112 | 3144   | 6.4278  | 6.27547 | CHB |
| rs3117039  | hmm14647  | hmm14647-S    | 6 | 6 | 33193829 | 427    | 6.2832  | 6.27547 | CHB |
| rs3117035  | hmm14647  | hmm14647-S    | 6 | 6 | 33194227 | 29     | 7.9199  | 6.27547 | CHB |
| rs9277678  | hmm14647  | hmm14647-S    | 6 | 6 | 33195336 | 1080   | 7.9199  | 6.27547 | CHB |
| rs3117004  | hmm14647  | hmm14647-S    | 6 | 6 | 33204744 | 10488  | 6.7105  | 6.27547 | CHB |
| rs9277767  | hmm14647  | hmm14647-S    | 6 | 6 | 33205284 | 11028  | 6.7105  | 6.27547 | CHB |
| rs3763236  | PEX6      | GI_21361243-S | 6 | 6 | 43010486 | 29417  | 9.6275  | 5.86409 | CHB |
| rs1053538  | PEX6      | GI_21361243-S | 6 | 6 | 43011741 | 28162  | 8.7641  | 5.86409 | CHB |
| rs1053538  | GNMT      | GI_24475636-S | 6 | 6 | 43011741 | 27648  | 6.5418  | 5.88023 | CHB |
| rs9471976  | PEX6      | GI_21361243-S | 6 | 6 | 43028527 | 11376  | 5.8769  | 5.86409 | CHB |
| rs9462856  | PEX6      | GI_21361243-S | 6 | 6 | 43034002 | 5901   | 5.8769  | 5.86409 | CHB |
| rs2296804  | PEX6      | GI_21361243-S | 6 | 6 | 43039239 | 664    | 13.1277 | 5.86409 | CHB |
| rs2296804  | GNMT      | GI_24475636-S | 6 | 6 | 43039239 | 150    | 5.9713  | 5.88023 | CHB |
| rs2274517  | PEX6      | GI_21361243-S | 6 | 6 | 43040693 | 790    | 5.8769  | 5.86409 | CHB |
| rs2274514  | PEX6      | GI_21361243-S | 6 | 6 | 43042478 | 2575   | 5.8769  | 5.86409 | CHB |
| rs7741302  | PEX6      | GI_21361243-S | 6 | 6 | 43046355 | 6452   | 5.8769  | 5.86409 | CHB |
| rs2395943  | PEX6      | GI_21361243-S | 6 | 6 | 43048651 | 8748   | 13.1277 | 5.86409 | CHB |
| rs2395943  | GNMT      | GI_24475636-S | 6 | 6 | 43048651 | 9262   | 5.9713  | 5.88023 | CHB |
| rs2007950  | PEX6      | GI_21361243-S | 6 | 6 | 43157439 | 117536 | 7.7424  | 5.86409 | CHB |
| rs7749979  | LOC221362 | GI_27498596-S | 6 | 6 | 52328188 | 313172 | 6.2606  | 5.76019 | CHB |
| rs9367480  | LOC221362 | GI_27498596-S | 6 | 6 | 52328934 | 312426 | 6.2275  | 5.76019 | CHB |
| rs2025490  | Hs.485895 | Hs.485895-S   | 6 | 6 | 87875181 | 121509 | 8.2126  | 5.65664 | CHB |
| rs2031522  | Hs.485895 | Hs.485895-S   | 6 | 6 | 87878220 | 118470 | 8.2126  | 5.65664 | CHB |
| rs9450619  | Hs.485895 | Hs.485895-S   | 6 | 6 | 87884546 | 112144 | 8.2126  | 5.65664 | CHB |
| rs16878497 | Hs.485895 | Hs.485895-S   | 6 | 6 | 87903393 | 93297  | 8.2126  | 5.65664 | CHB |
| rs6913159  | Hs.485895 | Hs.485895-S   | 6 | 6 | 87954518 | 42172  | 8.2126  | 5.65664 | CHB |
| rs9450630  | Hs.485895 | Hs.485895-S   | 6 | 6 | 87955879 | 40811  | 7.9741  | 5.65664 | CHB |
| rs4707345  | Hs.485895 | Hs.485895-S   | 6 | 6 | 87958944 | 37746  | 8.2126  | 5.65664 | CHB |
| rs12181709 | Hs.485895 | Hs.485895-S   | 6 | 6 | 87959372 | 37318  | 8.8047  | 5.65664 | CHB |
| rs6940325  | Hs.485895 | Hs.485895-S   | 6 | 6 | 87963635 | 33055  | 8.8047  | 5.65664 | CHB |
| rs7752414  | Hs.485895 | Hs.485895-S   | 6 | 6 | 87972541 | 24149  | 8.8047  | 5.65664 | CHB |
| rs9450636  | Hs.485895 | Hs.485895-S   | 6 | 6 | 87986888 | 9802   | 8.8047  | 5.65664 | CHB |
| rs13201289 | Hs.485895 | Hs.485895-S   | 6 | 6 | 87993017 | 3673   | 8.8047  | 5.65664 | CHB |
| rs9450638  | Hs.485895 | Hs.485895-S   | 6 | 6 | 87994045 | 2645   | 8.8047  | 5.65664 | CHB |
| rs6932641  | Hs.485895 | Hs.485895-S   | 6 | 6 | 87997820 | 1130   | 8.8047  | 5.65664 | CHB |
| rs4707355  | Hs.485895 | Hs.485895-S   | 6 | 6 | 88009592 | 12902  | 8.8047  | 5.65664 | CHB |
| rs6908834  | Hs.485895 | Hs.485895-S   | 6 | 6 | 88022247 | 25557  | 8.8047  | 5.65664 | CHB |
| rs9450645  | Hs.485895 | Hs.485895-S   | 6 | 6 | 88034494 | 37804  | 8.0193  | 5.65664 | CHB |
| rs9450646  | Hs.485895 | Hs.485895-S   | 6 | 6 | 88035828 | 39138  | 8.8047  | 5.65664 | CHB |

|            |           |               |   |   |           |        |        |         |     |
|------------|-----------|---------------|---|---|-----------|--------|--------|---------|-----|
| rs9450651  | Hs.485895 | Hs.485895-S   | 6 | 6 | 88055360  | 58670  | 8.8047 | 5.65664 | CHB |
| rs9294376  | Hs.485895 | Hs.485895-S   | 6 | 6 | 88057485  | 60795  | 8.7785 | 5.65664 | CHB |
| rs9444491  | Hs.485895 | Hs.485895-S   | 6 | 6 | 88059104  | 62414  | 8.1506 | 5.65664 | CHB |
| rs9450653  | Hs.485895 | Hs.485895-S   | 6 | 6 | 88060840  | 64150  | 8.8047 | 5.65664 | CHB |
| rs6921673  | Hs.485895 | Hs.485895-S   | 6 | 6 | 88061477  | 64787  | 8.0763 | 5.65664 | CHB |
| rs6926686  | Hs.485895 | Hs.485895-S   | 6 | 6 | 88061917  | 65227  | 8.8047 | 5.65664 | CHB |
| rs6938885  | Hs.485895 | Hs.485895-S   | 6 | 6 | 88063898  | 67208  | 7.3999 | 5.65664 | CHB |
| rs6939075  | Hs.485895 | Hs.485895-S   | 6 | 6 | 88063925  | 67235  | 8.8047 | 5.65664 | CHB |
| rs440296   | Hs.485895 | Hs.485895-S   | 6 | 6 | 88065140  | 68450  | 8.8047 | 5.65664 | CHB |
| rs410683   | Hs.485895 | Hs.485895-S   | 6 | 6 | 88065639  | 68949  | 8.5965 | 5.65664 | CHB |
| rs242263   | Hs.485895 | Hs.485895-S   | 6 | 6 | 88075032  | 78342  | 8.5845 | 5.65664 | CHB |
| rs1145712  | Hs.485895 | Hs.485895-S   | 6 | 6 | 88077837  | 81147  | 8.5845 | 5.65664 | CHB |
| rs413687   | Hs.485895 | Hs.485895-S   | 6 | 6 | 88077999  | 81309  | 8.5845 | 5.65664 | CHB |
| rs414453   | Hs.485895 | Hs.485895-S   | 6 | 6 | 88078305  | 81615  | 8.5845 | 5.65664 | CHB |
| rs368267   | Hs.485895 | Hs.485895-S   | 6 | 6 | 88078414  | 81724  | 8.5845 | 5.65664 | CHB |
| rs411606   | Hs.485895 | Hs.485895-S   | 6 | 6 | 88078472  | 81782  | 8.5845 | 5.65664 | CHB |
| rs1145714  | Hs.485895 | Hs.485895-S   | 6 | 6 | 88081237  | 84547  | 8.5845 | 5.65664 | CHB |
| rs1145715  | Hs.485895 | Hs.485895-S   | 6 | 6 | 88081762  | 85072  | 8.5845 | 5.65664 | CHB |
| rs1203162  | Hs.485895 | Hs.485895-S   | 6 | 6 | 88081937  | 85247  | 8.5845 | 5.65664 | CHB |
| rs1203163  | Hs.485895 | Hs.485895-S   | 6 | 6 | 88082968  | 86278  | 8.5845 | 5.65664 | CHB |
| rs1203164  | Hs.485895 | Hs.485895-S   | 6 | 6 | 88083682  | 86992  | 8.5845 | 5.65664 | CHB |
| rs2983136  | Hs.485895 | Hs.485895-S   | 6 | 6 | 88084934  | 88244  | 8.9525 | 5.65664 | CHB |
| rs242282   | Hs.485895 | Hs.485895-S   | 6 | 6 | 88086299  | 89609  | 8.928  | 5.65664 | CHB |
| rs1746444  | Hs.485895 | Hs.485895-S   | 6 | 6 | 88096587  | 99897  | 8.5845 | 5.65664 | CHB |
| rs379455   | Hs.485895 | Hs.485895-S   | 6 | 6 | 88100279  | 103589 | 8.5845 | 5.65664 | CHB |
| rs242275   | Hs.485895 | Hs.485895-S   | 6 | 6 | 88102682  | 105992 | 8.5845 | 5.65664 | CHB |
| rs242276   | Hs.485895 | Hs.485895-S   | 6 | 6 | 88103096  | 106406 | 6.1618 | 5.65664 | CHB |
| rs397516   | Hs.485895 | Hs.485895-S   | 6 | 6 | 88107771  | 111081 | 6.8225 | 5.65664 | CHB |
| rs398140   | Hs.485895 | Hs.485895-S   | 6 | 6 | 88107981  | 111291 | 7.7731 | 5.65664 | CHB |
| rs452315   | Hs.485895 | Hs.485895-S   | 6 | 6 | 88109206  | 112516 | 7.7731 | 5.65664 | CHB |
| rs377288   | Hs.485895 | Hs.485895-S   | 6 | 6 | 88110196  | 113506 | 7.9239 | 5.65664 | CHB |
| rs1188819  | Hs.485895 | Hs.485895-S   | 6 | 6 | 88112067  | 115377 | 6.904  | 5.65664 | CHB |
| rs1188817  | Hs.485895 | Hs.485895-S   | 6 | 6 | 88112438  | 115748 | 7.7731 | 5.65664 | CHB |
| rs1188816  | Hs.485895 | Hs.485895-S   | 6 | 6 | 88112550  | 115860 | 7.1953 | 5.65664 | CHB |
| rs12211627 | Hs.485895 | Hs.485895-S   | 6 | 6 | 88113020  | 116330 | 7.7731 | 5.65664 | CHB |
| rs381798   | Hs.485895 | Hs.485895-S   | 6 | 6 | 88113849  | 117159 | 7.7731 | 5.65664 | CHB |
| rs242264   | Hs.485895 | Hs.485895-S   | 6 | 6 | 88117457  | 120767 | 7.7731 | 5.65664 | CHB |
| rs242265   | Hs.485895 | Hs.485895-S   | 6 | 6 | 88117758  | 121068 | 7.7731 | 5.65664 | CHB |
| rs242268   | Hs.485895 | Hs.485895-S   | 6 | 6 | 88118603  | 121913 | 5.9029 | 5.65664 | CHB |
| rs242269   | Hs.485895 | Hs.485895-S   | 6 | 6 | 88118708  | 122018 | 7.7731 | 5.65664 | CHB |
| rs540975   | Hs.485895 | Hs.485895-S   | 6 | 6 | 88119860  | 123170 | 7.7731 | 5.65664 | CHB |
| rs541170   | Hs.485895 | Hs.485895-S   | 6 | 6 | 88119935  | 123245 | 7.7731 | 5.65664 | CHB |
| rs910564   | Hs.485895 | Hs.485895-S   | 6 | 6 | 88120530  | 123840 | 7.7731 | 5.65664 | CHB |
| rs1739886  | Hs.485895 | Hs.485895-S   | 6 | 6 | 88122320  | 125630 | 7.7731 | 5.65664 | CHB |
| rs406981   | Hs.485895 | Hs.485895-S   | 6 | 6 | 88124034  | 127344 | 7.7731 | 5.65664 | CHB |
| rs9484143  | HEBP2     | GI_41393567-S | 6 | 6 | 138726192 | 42658  | 5.9653 | 5.96474 | CHB |
| rs7759603  | MGC35308  | GI_31341688-S | 6 | 6 | 166675043 | 15350  | 8.5946 | 6.21259 | CHB |
| rs7763448  | MGC35308  | GI_31341688-S | 6 | 6 | 166675134 | 15259  | 8.5946 | 6.21259 | CHB |
| rs1033725  | MGC35308  | GI_31341688-S | 6 | 6 | 166677661 | 12732  | 6.2354 | 6.21259 | CHB |
| rs7748966  | MGC35308  | GI_31341688-S | 6 | 6 | 166679643 | 10750  | 8.5946 | 6.21259 | CHB |
| rs798557   | LOC392620 | GI_41147689-S | 7 | 7 | 2532223   | 2675   | 8.8521 | 5.87031 | CHB |
| rs798556   | LOC392620 | GI_41147689-S | 7 | 7 | 2532243   | 2655   | 7.5531 | 5.87031 | CHB |
| rs798548   | LOC392620 | GI_41147689-S | 7 | 7 | 2534176   | 722    | 7.5531 | 5.87031 | CHB |
| rs798544   | LOC392620 | GI_41147689-S | 7 | 7 | 2536343   | 1445   | 6.6806 | 5.87031 | CHB |
| rs798536   | LOC392620 | GI_41147689-S | 7 | 7 | 2539624   | 4726   | 6.5585 | 5.87031 | CHB |
| rs798528   | LOC392620 | GI_41147689-S | 7 | 7 | 2545672   | 10774  | 8.3868 | 5.87031 | CHB |



|           |           |               |   |   |         |        |         |         |     |
|-----------|-----------|---------------|---|---|---------|--------|---------|---------|-----|
| rs798518  | LOC392620 | GI_41147689-S | 7 | 7 | 2551066 | 16168  | 8.3868  | 5.87031 | CHB |
| rs798512  | LOC392620 | GI_41147689-S | 7 | 7 | 2555833 | 20935  | 8.016   | 5.87031 | CHB |
| rs798503  | LOC392620 | GI_41147689-S | 7 | 7 | 2562945 | 28047  | 6.3662  | 5.87031 | CHB |
| rs798500  | LOC392620 | GI_41147689-S | 7 | 7 | 2563926 | 29028  | 8.3868  | 5.87031 | CHB |
| rs798499  | LOC392620 | GI_41147689-S | 7 | 7 | 2565254 | 30356  | 8.3954  | 5.87031 | CHB |
| rs798498  | LOC392620 | GI_41147689-S | 7 | 7 | 2569123 | 34225  | 8.3868  | 5.87031 | CHB |
| rs798497  | LOC392620 | GI_41147689-S | 7 | 7 | 2569198 | 34300  | 7.7433  | 5.87031 | CHB |
| rs798495  | LOC392620 | GI_41147689-S | 7 | 7 | 2570508 | 35610  | 7.7433  | 5.87031 | CHB |
| rs798494  | LOC392620 | GI_41147689-S | 7 | 7 | 2571535 | 36637  | 7.7433  | 5.87031 | CHB |
| rs798492  | LOC392620 | GI_41147689-S | 7 | 7 | 2572425 | 37527  | 7.7433  | 5.87031 | CHB |
| rs798491  | LOC392620 | GI_41147689-S | 7 | 7 | 2573762 | 38864  | 7.7433  | 5.87031 | CHB |
| rs798490  | LOC392620 | GI_41147689-S | 7 | 7 | 2574783 | 39885  | 9.463   | 5.87031 | CHB |
| rs798488  | LOC392620 | GI_41147689-S | 7 | 7 | 2575763 | 40865  | 9.463   | 5.87031 | CHB |
| rs798486  | LOC392620 | GI_41147689-S | 7 | 7 | 2576278 | 41380  | 10.2801 | 5.87031 | CHB |
| rs798485  | LOC392620 | GI_41147689-S | 7 | 7 | 2576751 | 41853  | 10.0235 | 5.87031 | CHB |
| rs1182209 | LOC392620 | GI_41147689-S | 7 | 7 | 2581836 | 46938  | 9.9288  | 5.87031 | CHB |
| rs1182208 | LOC392620 | GI_41147689-S | 7 | 7 | 2581973 | 47075  | 7.7349  | 5.87031 | CHB |
| rs7777484 | LOC392620 | GI_41147689-S | 7 | 7 | 2587512 | 52614  | 10.4147 | 5.87031 | CHB |
| rs7807978 | LOC392620 | GI_41147689-S | 7 | 7 | 2587876 | 52978  | 10.4147 | 5.87031 | CHB |
| rs2283779 | LOC392620 | GI_41147689-S | 7 | 7 | 2588381 | 53483  | 9.9742  | 5.87031 | CHB |
| rs2260230 | LOC392620 | GI_41147689-S | 7 | 7 | 2596227 | 61329  | 12.8538 | 5.87031 | CHB |
| rs2266922 | LOC392620 | GI_41147689-S | 7 | 7 | 2597948 | 63050  | 11.5773 | 5.87031 | CHB |
| rs2527684 | LOC392620 | GI_41147689-S | 7 | 7 | 2599163 | 64265  | 12.8538 | 5.87031 | CHB |
| rs2527687 | LOC392620 | GI_41147689-S | 7 | 7 | 2611726 | 76828  | 12.9613 | 5.87031 | CHB |
| rs2644312 | LOC392620 | GI_41147689-S | 7 | 7 | 2614405 | 79507  | 13.081  | 5.87031 | CHB |
| rs6976214 | LOC392620 | GI_41147689-S | 7 | 7 | 2618254 | 83356  | 6.0843  | 5.87031 | CHB |
| rs4722091 | LOC392620 | GI_41147689-S | 7 | 7 | 2620218 | 85320  | 6.0423  | 5.87031 | CHB |
| rs2644275 | LOC392620 | GI_41147689-S | 7 | 7 | 2627251 | 92353  | 11.5315 | 5.87031 | CHB |
| rs2644274 | LOC392620 | GI_41147689-S | 7 | 7 | 2627621 | 92723  | 12.8585 | 5.87031 | CHB |
| rs960273  | LOC392620 | GI_41147689-S | 7 | 7 | 2631117 | 96219  | 12.8538 | 5.87031 | CHB |
| rs2644297 | LOC392620 | GI_41147689-S | 7 | 7 | 2632147 | 97249  | 13.4204 | 5.87031 | CHB |
| rs2644296 | LOC392620 | GI_41147689-S | 7 | 7 | 2632302 | 97404  | 12.8538 | 5.87031 | CHB |
| rs2644295 | LOC392620 | GI_41147689-S | 7 | 7 | 2633458 | 98560  | 12.8538 | 5.87031 | CHB |
| rs1182199 | LOC392620 | GI_41147689-S | 7 | 7 | 2635783 | 100885 | 12.8299 | 5.87031 | CHB |
| rs1182199 | GNA12     | GI_42476110-S | 7 | 7 | 2635783 | 91597  | 6.0651  | 6.04868 | CHB |
| rs1182198 | LOC392620 | GI_41147689-S | 7 | 7 | 2636147 | 101249 | 12.4108 | 5.87031 | CHB |
| rs1182197 | LOC392620 | GI_41147689-S | 7 | 7 | 2636530 | 101632 | 9.1735  | 5.87031 | CHB |
| rs2158694 | LOC392620 | GI_41147689-S | 7 | 7 | 2636684 | 101786 | 12.8538 | 5.87031 | CHB |
| rs2107964 | LOC392620 | GI_41147689-S | 7 | 7 | 2636815 | 101917 | 12.9962 | 5.87031 | CHB |
| rs2107964 | GNA12     | GI_42476110-S | 7 | 7 | 2636815 | 92629  | 6.316   | 6.04868 | CHB |
| rs1713919 | LOC392620 | GI_41147689-S | 7 | 7 | 2637947 | 103049 | 12.9962 | 5.87031 | CHB |
| rs1713919 | GNA12     | GI_42476110-S | 7 | 7 | 2637947 | 93761  | 6.316   | 6.04868 | CHB |
| rs757791  | LOC392620 | GI_41147689-S | 7 | 7 | 2640537 | 105639 | 12.4108 | 5.87031 | CHB |
| rs757791  | GNA12     | GI_42476110-S | 7 | 7 | 2640537 | 96351  | 6.526   | 6.04868 | CHB |
| rs1182194 | LOC392620 | GI_41147689-S | 7 | 7 | 2642065 | 107167 | 9.2219  | 5.87031 | CHB |
| rs1182191 | LOC392620 | GI_41147689-S | 7 | 7 | 2642605 | 107707 | 9.0317  | 5.87031 | CHB |
| rs1182190 | LOC392620 | GI_41147689-S | 7 | 7 | 2642632 | 107734 | 8.5191  | 5.87031 | CHB |
| rs1182189 | LOC392620 | GI_41147689-S | 7 | 7 | 2642763 | 107865 | 9.2219  | 5.87031 | CHB |
| rs1182188 | LOC392620 | GI_41147689-S | 7 | 7 | 2643226 | 108328 | 9.0814  | 5.87031 | CHB |
| rs1182185 | LOC392620 | GI_41147689-S | 7 | 7 | 2645474 | 110576 | 9.2219  | 5.87031 | CHB |
| rs1182182 | LOC392620 | GI_41147689-S | 7 | 7 | 2646475 | 111577 | 9.2219  | 5.87031 | CHB |
| rs1182181 | LOC392620 | GI_41147689-S | 7 | 7 | 2646488 | 111590 | 9.2219  | 5.87031 | CHB |
| rs1182179 | LOC392620 | GI_41147689-S | 7 | 7 | 2646889 | 111991 | 9.2422  | 5.87031 | CHB |
| rs1182177 | LOC392620 | GI_41147689-S | 7 | 7 | 2647781 | 112883 | 9.2219  | 5.87031 | CHB |
| rs1182175 | LOC392620 | GI_41147689-S | 7 | 7 | 2648267 | 113369 | 9.2219  | 5.87031 | CHB |
| rs1182174 | LOC392620 | GI_41147689-S | 7 | 7 | 2648661 | 113763 | 9.5175  | 5.87031 | CHB |

|            |           |               |   |   |          |        |        |         |     |
|------------|-----------|---------------|---|---|----------|--------|--------|---------|-----|
| rs1183085  | LOC392620 | GI_41147689-S | 7 | 7 | 2648811  | 113913 | 9.5175 | 5.87031 | CHB |
| rs1182171  | LOC392620 | GI_41147689-S | 7 | 7 | 2651751  | 116853 | 9.5175 | 5.87031 | CHB |
| rs2533878  | LOC392620 | GI_41147689-S | 7 | 7 | 2651948  | 117050 | 8.757  | 5.87031 | CHB |
| rs1713920  | LOC392620 | GI_41147689-S | 7 | 7 | 2654176  | 119278 | 8.4139 | 5.87031 | CHB |
| rs12672450 | HRI       | GI_11125767-S | 7 | 7 | 5847440  | 10515  | 6.5446 | 5.77004 | CHB |
| rs2302334  | HRI       | GI_11125767-S | 7 | 7 | 5849064  | 12139  | 6.5446 | 5.77004 | CHB |
| rs2302333  | HRI       | GI_11125767-S | 7 | 7 | 5850510  | 13585  | 6.5446 | 5.77004 | CHB |
| rs852154   | HRI       | GI_11125767-S | 7 | 7 | 5863968  | 27043  | 5.8457 | 5.77004 | CHB |
| rs655692   | HRI       | GI_11125767-S | 7 | 7 | 5867942  | 31017  | 5.834  | 5.77004 | CHB |
| rs558030   | HRI       | GI_11125767-S | 7 | 7 | 5870908  | 33983  | 6.5446 | 5.77004 | CHB |
| rs642987   | HRI       | GI_11125767-S | 7 | 7 | 5875041  | 38116  | 6.4265 | 5.77004 | CHB |
| rs495124   | HRI       | GI_11125767-S | 7 | 7 | 5875275  | 38350  | 6.4189 | 5.77004 | CHB |
| rs631491   | HRI       | GI_11125767-S | 7 | 7 | 5875296  | 38371  | 6.5446 | 5.77004 | CHB |
| rs660547   | HRI       | GI_11125767-S | 7 | 7 | 5879972  | 43047  | 5.8416 | 5.77004 | CHB |
| rs1548882  | FLJ11273  | GI_40254892-S | 7 | 7 | 12059465 | 13759  | 6.4435 | 6.24188 | CHB |
| rs2108296  | DFNA5     | GI_4758153-S  | 7 | 7 | 24368830 | 142499 | 6.4375 | 6.24552 | CHB |
| rs2390980  | DFNA5     | GI_4758153-S  | 7 | 7 | 24369831 | 141498 | 6.4067 | 6.24552 | CHB |
| rs917263   | DFNA5     | GI_4758153-S  | 7 | 7 | 24376336 | 134993 | 6.4543 | 6.24552 | CHB |
| rs2711119  | DFNA5     | GI_4758153-S  | 7 | 7 | 24385681 | 125648 | 6.8991 | 6.24552 | CHB |
| rs2711094  | DFNA5     | GI_4758153-S  | 7 | 7 | 24388200 | 123129 | 6.4117 | 6.24552 | CHB |
| rs985062   | DFNA5     | GI_4758153-S  | 7 | 7 | 24389714 | 121615 | 7.6045 | 6.24552 | CHB |
| rs2711093  | DFNA5     | GI_4758153-S  | 7 | 7 | 24390530 | 120799 | 7.5539 | 6.24552 | CHB |
| rs2529038  | DFNA5     | GI_4758153-S  | 7 | 7 | 24393922 | 117407 | 7.2945 | 6.24552 | CHB |
| rs2711091  | DFNA5     | GI_4758153-S  | 7 | 7 | 24395326 | 116003 | 7.2945 | 6.24552 | CHB |
| rs4722378  | DFNA5     | GI_4758153-S  | 7 | 7 | 24404485 | 106844 | 6.6623 | 6.24552 | CHB |
| rs11766193 | DFNA5     | GI_4758153-S  | 7 | 7 | 24409259 | 102070 | 7.1451 | 6.24552 | CHB |
| rs12700538 | DFNA5     | GI_4758153-S  | 7 | 7 | 24410296 | 101033 | 7.1451 | 6.24552 | CHB |
| rs2711130  | DFNA5     | GI_4758153-S  | 7 | 7 | 24420014 | 91315  | 7.3552 | 6.24552 | CHB |
| rs12056164 | DFNA5     | GI_4758153-S  | 7 | 7 | 24420070 | 91259  | 6.3148 | 6.24552 | CHB |
| rs17149758 | DFNA5     | GI_4758153-S  | 7 | 7 | 24422730 | 88599  | 7.0673 | 6.24552 | CHB |
| rs10270776 | DFNA5     | GI_4758153-S  | 7 | 7 | 24446463 | 64866  | 7.6098 | 6.24552 | CHB |
| rs2721789  | DFNA5     | GI_4758153-S  | 7 | 7 | 24446492 | 64837  | 8.1301 | 6.24552 | CHB |
| rs13244368 | DFNA5     | GI_4758153-S  | 7 | 7 | 24448003 | 63326  | 7.1451 | 6.24552 | CHB |
| rs13231952 | DFNA5     | GI_4758153-S  | 7 | 7 | 24450205 | 61124  | 6.6614 | 6.24552 | CHB |
| rs2721790  | DFNA5     | GI_4758153-S  | 7 | 7 | 24452642 | 58687  | 7.7834 | 6.24552 | CHB |
| rs12700539 | DFNA5     | GI_4758153-S  | 7 | 7 | 24474075 | 37254  | 6.876  | 6.24552 | CHB |
| rs6943306  | DFNA5     | GI_4758153-S  | 7 | 7 | 24475235 | 36094  | 7.2945 | 6.24552 | CHB |
| rs1053962  | DFNA5     | GI_4758153-S  | 7 | 7 | 24476538 | 34791  | 7.6045 | 6.24552 | CHB |
| rs10253880 | DFNA5     | GI_4758153-S  | 7 | 7 | 24479357 | 31972  | 7.2945 | 6.24552 | CHB |
| rs11769204 | DFNA5     | GI_4758153-S  | 7 | 7 | 24497306 | 14023  | 6.2548 | 6.24552 | CHB |
| rs2721781  | DFNA5     | GI_4758153-S  | 7 | 7 | 24499074 | 12255  | 7.1872 | 6.24552 | CHB |
| rs2721779  | DFNA5     | GI_4758153-S  | 7 | 7 | 24502322 | 9007   | 6.9732 | 6.24552 | CHB |
| rs2721777  | DFNA5     | GI_4758153-S  | 7 | 7 | 24508986 | 2343   | 7.2945 | 6.24552 | CHB |
| rs2269812  | DFNA5     | GI_4758153-S  | 7 | 7 | 24519262 | 7933   | 7.4327 | 6.24552 | CHB |
| rs17149980 | DFNA5     | GI_4758153-S  | 7 | 7 | 24530470 | 19141  | 7.3634 | 6.24552 | CHB |
| rs17149990 | DFNA5     | GI_4758153-S  | 7 | 7 | 24531037 | 19708  | 7.3634 | 6.24552 | CHB |
| rs754554   | DFNA5     | GI_4758153-S  | 7 | 7 | 24532058 | 20729  | 7.1765 | 6.24552 | CHB |
| rs754553   | DFNA5     | GI_4758153-S  | 7 | 7 | 24532092 | 20763  | 7.8122 | 6.24552 | CHB |
| rs2237310  | DFNA5     | GI_4758153-S  | 7 | 7 | 24532888 | 21559  | 6.6355 | 6.24552 | CHB |
| rs2237313  | DFNA5     | GI_4758153-S  | 7 | 7 | 24533941 | 22612  | 7.5517 | 6.24552 | CHB |
| rs2237315  | DFNA5     | GI_4758153-S  | 7 | 7 | 24535090 | 23761  | 7.7148 | 6.24552 | CHB |
| rs12669044 | DFNA5     | GI_4758153-S  | 7 | 7 | 24535590 | 24261  | 8.5456 | 6.24552 | CHB |
| rs886234   | DFNA5     | GI_4758153-S  | 7 | 7 | 24542471 | 31142  | 7.0565 | 6.24552 | CHB |
| rs886235   | DFNA5     | GI_4758153-S  | 7 | 7 | 24542481 | 31152  | 6.8224 | 6.24552 | CHB |
| rs2237318  | DFNA5     | GI_4758153-S  | 7 | 7 | 24542518 | 31189  | 7.3634 | 6.24552 | CHB |
| rs2521763  | DFNA5     | GI_4758153-S  | 7 | 7 | 24543893 | 32564  | 6.8224 | 6.24552 | CHB |

|            |           |               |   |   |           |        |         |         |     |
|------------|-----------|---------------|---|---|-----------|--------|---------|---------|-----|
| rs2237322  | DFNA5     | GI_4758153-S  | 7 | 7 | 24543980  | 32651  | 7.3634  | 6.24552 | CHB |
| rs2158063  | DFNA5     | GI_4758153-S  | 7 | 7 | 24551111  | 39782  | 7.6475  | 6.24552 | CHB |
| rs2237323  | DFNA5     | GI_4758153-S  | 7 | 7 | 24554801  | 43472  | 7.3634  | 6.24552 | CHB |
| rs12700545 | DFNA5     | GI_4758153-S  | 7 | 7 | 24568259  | 56930  | 6.683   | 6.24552 | CHB |
| rs17150118 | DFNA5     | GI_4758153-S  | 7 | 7 | 24581608  | 70279  | 6.9943  | 6.24552 | CHB |
| rs12669780 | DFNA5     | GI_4758153-S  | 7 | 7 | 24581869  | 70540  | 6.8759  | 6.24552 | CHB |
| rs217378   | HNLF      | GI_33457307-S | 7 | 7 | 44381343  | 10837  | 6.4564  | 5.74996 | CHB |
| rs217372   | HNLF      | GI_33457307-S | 7 | 7 | 44385993  | 6187   | 5.9518  | 5.74996 | CHB |
| rs17133537 | HNLF      | GI_33457307-S | 7 | 7 | 44430980  | 38800  | 6.8126  | 5.74996 | CHB |
| rs740094   | HNLF      | GI_33457307-S | 7 | 7 | 44442938  | 50758  | 6.4564  | 5.74996 | CHB |
| rs10481004 | LOC378075 | GI_37538916-S | 7 | 7 | 55542880  | 415054 | 10.57   | 5.70349 | CHB |
| rs4563845  | LOC378075 | GI_37538916-S | 7 | 7 | 55552324  | 405610 | 12.7592 | 5.70349 | CHB |
| rs4610703  | LOC378075 | GI_37538916-S | 7 | 7 | 55552520  | 405414 | 6.6157  | 5.70349 | CHB |
| rs4333543  | LOC378075 | GI_37538916-S | 7 | 7 | 55562368  | 395566 | 6.5211  | 5.70349 | CHB |
| rs7809922  | LOC378075 | GI_37538916-S | 7 | 7 | 55597790  | 360144 | 6.5128  | 5.70349 | CHB |
| rs10232851 | LOC378075 | GI_37538916-S | 7 | 7 | 55603043  | 354891 | 16.1415 | 5.70349 | CHB |
| rs4577914  | LOC378075 | GI_37538916-S | 7 | 7 | 55606689  | 351245 | 5.9994  | 5.70349 | CHB |
| rs4273806  | LOC378075 | GI_37538916-S | 7 | 7 | 55607447  | 350487 | 6.5128  | 5.70349 | CHB |
| rs6700     | LOC378075 | GI_37538916-S | 7 | 7 | 55615397  | 342537 | 6.5128  | 5.70349 | CHB |
| rs10243293 | LOC378075 | GI_37538916-S | 7 | 7 | 55616309  | 341625 | 5.9854  | 5.70349 | CHB |
| rs6966061  | LOC378075 | GI_37538916-S | 7 | 7 | 55622999  | 334935 | 6.26    | 5.70349 | CHB |
| rs6944250  | LOC378075 | GI_37538916-S | 7 | 7 | 55628310  | 329624 | 6.26    | 5.70349 | CHB |
| rs11982736 | LOC378075 | GI_37538916-S | 7 | 7 | 55629389  | 328545 | 6.2665  | 5.70349 | CHB |
| rs9642404  | LOC378075 | GI_37538916-S | 7 | 7 | 55631008  | 326926 | 6.26    | 5.70349 | CHB |
| rs11768660 | LOC378075 | GI_37538916-S | 7 | 7 | 55658027  | 299907 | 6.7203  | 5.70349 | CHB |
| rs10085684 | FLJ13195  | GI_12597648-S | 7 | 7 | 66288161  | 57930  | 6.112   | 5.64699 | CHB |
| rs6946037  | WBSCR27   | GI_30795189-S | 7 | 7 | 72681366  | 12436  | 14.6866 | 5.39473 | CHB |
| rs4255023  | WBSCR27   | GI_30795189-S | 7 | 7 | 72684269  | 9533   | 14.6866 | 5.39473 | CHB |
| rs8629     | WBSCR27   | GI_30795189-S | 7 | 7 | 72690170  | 3632   | 14.6866 | 5.39473 | CHB |
| rs1127155  | WBSCR27   | GI_30795189-S | 7 | 7 | 72691112  | 2690   | 14.6866 | 5.39473 | CHB |
| rs11316    | WBSCR27   | GI_30795189-S | 7 | 7 | 72691206  | 2596   | 10.7619 | 5.39473 | CHB |
| rs13232463 | WBSCR27   | GI_30795189-S | 7 | 7 | 72693950  | 148    | 14.6866 | 5.39473 | CHB |
| rs4304218  | WBSCR27   | GI_30795189-S | 7 | 7 | 72697631  | 3829   | 14.6866 | 5.39473 | CHB |
| rs1073909  | WBSCR27   | GI_30795189-S | 7 | 7 | 72702940  | 9138   | 14.6866 | 5.39473 | CHB |
| rs4717112  | WBSCR27   | GI_30795189-S | 7 | 7 | 72710068  | 16266  | 13.6926 | 5.39473 | CHB |
| rs4327742  | WBSCR27   | GI_30795189-S | 7 | 7 | 72712377  | 18575  | 13.6926 | 5.39473 | CHB |
| rs6949053  | WBSCR27   | GI_30795189-S | 7 | 7 | 72714588  | 20786  | 13.6926 | 5.39473 | CHB |
| rs11770024 | WBSCR27   | GI_30795189-S | 7 | 7 | 72720152  | 26350  | 13.6926 | 5.39473 | CHB |
| rs17168173 | ACN9      | GI_9910179-S  | 7 | 7 | 96370364  | 84756  | 7.9571  | 6.05817 | CHB |
| rs17168174 | ACN9      | GI_9910179-S  | 7 | 7 | 96378623  | 76497  | 7.9571  | 6.05817 | CHB |
| rs17168179 | ACN9      | GI_9910179-S  | 7 | 7 | 96380187  | 74933  | 7.9571  | 6.05817 | CHB |
| rs6973504  | ACN9      | GI_9910179-S  | 7 | 7 | 96392135  | 62985  | 7.9571  | 6.05817 | CHB |
| rs10499936 | ACN9      | GI_9910179-S  | 7 | 7 | 96445652  | 9468   | 7.692   | 6.05817 | CHB |
| rs11975277 | ACN9      | GI_9910179-S  | 7 | 7 | 96453222  | 1898   | 7.9571  | 6.05817 | CHB |
| rs474229   | TRIM4     | GI_15011940-A | 7 | 7 | 99111209  | 22164  | 5.6984  | 5.61907 | CHB |
| rs1025576  | TRIM4     | GI_15011940-A | 7 | 7 | 99118275  | 15098  | 5.6984  | 5.61907 | CHB |
| rs2572022  | TRIM4     | GI_15011940-A | 7 | 7 | 99119380  | 13993  | 5.6984  | 5.61907 | CHB |
| rs10808114 | TRIM4     | GI_15011940-A | 7 | 7 | 99143150  | 9777   | 5.6509  | 5.61907 | CHB |
| rs2107351  | TRIM4     | GI_15011940-A | 7 | 7 | 99180602  | 47229  | 5.6384  | 5.61907 | CHB |
| rs2527894  | TRIM4     | GI_15011940-A | 7 | 7 | 99183492  | 50119  | 5.7503  | 5.61907 | CHB |
| rs1981548  | TRIM4     | GI_15011940-A | 7 | 7 | 99186011  | 52638  | 5.7503  | 5.61907 | CHB |
| rs2525541  | TRIM4     | GI_15011940-A | 7 | 7 | 99192181  | 58808  | 5.7503  | 5.61907 | CHB |
| rs7798064  | TRIM4     | GI_15011940-A | 7 | 7 | 99193506  | 60133  | 5.7059  | 5.61907 | CHB |
| rs2527886  | TRIM4     | GI_15011940-A | 7 | 7 | 99196819  | 63446  | 6.045   | 5.61907 | CHB |
| rs2525548  | TRIM4     | GI_15011940-A | 7 | 7 | 99197818  | 64445  | 5.7503  | 5.61907 | CHB |
| rs11761361 | POLR2J    | GI_21704275-S | 7 | 7 | 101701417 | 6262   | 5.5189  | 5.30759 | CHB |

|            |          |               |   |   |           |        |         |         |     |
|------------|----------|---------------|---|---|-----------|--------|---------|---------|-----|
| rs7804867  | POLR2J   | GI_21704275-S | 7 | 7 | 102627708 | 920029 | 5.7976  | 5.30759 | CHB |
| rs2270019  | POLR2J   | GI_21704275-S | 7 | 7 | 102650959 | 943280 | 6.0679  | 5.30759 | CHB |
| rs6968225  | IRF5     | GI_38683858-A | 7 | 7 | 128157558 | 25584  | 5.6803  | 5.67509 | CHB |
| rs7808907  | IRF5     | GI_38683858-A | 7 | 7 | 128178035 | 5107   | 8.4879  | 5.67509 | CHB |
| rs1874328  | IRF5     | GI_38683858-A | 7 | 7 | 128179055 | 4087   | 8.0803  | 5.67509 | CHB |
| rs13242262 | IRF5     | GI_38683858-A | 7 | 7 | 128185315 | 2173   | 9.6784  | 5.67509 | CHB |
| rs10488630 | IRF5     | GI_38683858-A | 7 | 7 | 128187899 | 4757   | 7.7226  | 5.67509 | CHB |
| rs2280714  | IRF5     | GI_38683858-A | 7 | 7 | 128188676 | 5534   | 6.9655  | 5.67509 | CHB |
| rs6966125  | IRF5     | GI_38683858-A | 7 | 7 | 128192476 | 9334   | 7.1808  | 5.67509 | CHB |
| rs10229001 | IRF5     | GI_38683858-A | 7 | 7 | 128193348 | 10206  | 12.8323 | 5.67509 | CHB |
| rs2172876  | IRF5     | GI_38683858-A | 7 | 7 | 128197243 | 14101  | 11.6837 | 5.67509 | CHB |
| rs7385716  | IRF5     | GI_38683858-A | 7 | 7 | 128199545 | 16403  | 12.8323 | 5.67509 | CHB |
| rs4731535  | IRF5     | GI_38683858-A | 7 | 7 | 128199918 | 16776  | 11.6837 | 5.67509 | CHB |
| rs8043     | IRF5     | GI_38683858-A | 7 | 7 | 128201335 | 18193  | 11.6837 | 5.67509 | CHB |
| rs6953869  | IRF5     | GI_38683858-A | 7 | 7 | 128202711 | 19569  | 8.1024  | 5.67509 | CHB |
| rs1874332  | IRF5     | GI_38683858-A | 7 | 7 | 128208564 | 25422  | 11.6837 | 5.67509 | CHB |
| rs7789423  | IRF5     | GI_38683858-A | 7 | 7 | 128215155 | 32013  | 7.9337  | 5.67509 | CHB |
| rs6948928  | IRF5     | GI_38683858-A | 7 | 7 | 128217048 | 33906  | 7.677   | 5.67509 | CHB |
| rs11770317 | IRF5     | GI_38683858-A | 7 | 7 | 128223422 | 40280  | 11.9484 | 5.67509 | CHB |
| rs2305323  | IRF5     | GI_38683858-A | 7 | 7 | 128227673 | 44531  | 7.7226  | 5.67509 | CHB |
| rs3958094  | IRF5     | GI_38683858-A | 7 | 7 | 128229218 | 46076  | 7.0961  | 5.67509 | CHB |
| rs7807018  | IRF5     | GI_38683858-A | 7 | 7 | 128234139 | 50997  | 12.5728 | 5.67509 | CHB |
| rs2305324  | IRF5     | GI_38683858-A | 7 | 7 | 128235177 | 52035  | 10.9515 | 5.67509 | CHB |
| rs11768572 | IRF5     | GI_38683858-A | 7 | 7 | 128239243 | 56101  | 7.2243  | 5.67509 | CHB |
| rs11767711 | IRF5     | GI_38683858-A | 7 | 7 | 128245783 | 62641  | 11.6111 | 5.67509 | CHB |
| rs2305325  | IRF5     | GI_38683858-A | 7 | 7 | 128248791 | 65649  | 10.9515 | 5.67509 | CHB |
| rs6965542  | IRF5     | GI_38683858-A | 7 | 7 | 128249869 | 66727  | 10.1136 | 5.67509 | CHB |
| rs3857852  | IRF5     | GI_38683858-A | 7 | 7 | 128251228 | 68086  | 6.9655  | 5.67509 | CHB |
| rs12155080 | IRF5     | GI_38683858-A | 7 | 7 | 128252690 | 69548  | 12.5728 | 5.67509 | CHB |
| rs13221560 | IRF5     | GI_38683858-A | 7 | 7 | 128257126 | 73984  | 7.2108  | 5.67509 | CHB |
| rs10239340 | IRF5     | GI_38683858-A | 7 | 7 | 128262461 | 79319  | 12.5728 | 5.67509 | CHB |
| rs11762968 | IRF5     | GI_38683858-A | 7 | 7 | 128264915 | 81773  | 11.8092 | 5.67509 | CHB |
| rs9649520  | IRF5     | GI_38683858-A | 7 | 7 | 128266596 | 83454  | 9.7368  | 5.67509 | CHB |
| rs1072767  | IRF5     | GI_38683858-A | 7 | 7 | 128267156 | 84014  | 6.9655  | 5.67509 | CHB |
| rs921403   | IRF5     | GI_38683858-A | 7 | 7 | 128270675 | 87533  | 7.677   | 5.67509 | CHB |
| rs4731541  | IRF5     | GI_38683858-A | 7 | 7 | 128272187 | 89045  | 9.4629  | 5.67509 | CHB |
| rs3807301  | IRF5     | GI_38683858-A | 7 | 7 | 128276963 | 93821  | 7.6048  | 5.67509 | CHB |
| rs10279821 | IRF5     | GI_38683858-A | 7 | 7 | 128277498 | 94356  | 6.9655  | 5.67509 | CHB |
| rs10156169 | IRF5     | GI_38683858-A | 7 | 7 | 128278522 | 95380  | 7.677   | 5.67509 | CHB |
| rs11767238 | IRF5     | GI_38683858-A | 7 | 7 | 128280289 | 97147  | 7.7226  | 5.67509 | CHB |
| rs2167273  | IRF5     | GI_38683858-A | 7 | 7 | 128283364 | 100222 | 10.9515 | 5.67509 | CHB |
| rs6960994  | IRF5     | GI_38683858-A | 7 | 7 | 128286608 | 103466 | 11.2583 | 5.67509 | CHB |
| rs6961014  | IRF5     | GI_38683858-A | 7 | 7 | 128286661 | 103519 | 11.2883 | 5.67509 | CHB |
| rs2242028  | IRF5     | GI_38683858-A | 7 | 7 | 128288927 | 105785 | 11.2583 | 5.67509 | CHB |
| rs2242029  | IRF5     | GI_38683858-A | 7 | 7 | 128289230 | 106088 | 6.2882  | 5.67509 | CHB |
| rs12534379 | KIAA0265 | GI_44917618-S | 7 | 7 | 129365068 | 2062   | 6.2286  | 5.7447  | CHB |
| rs13224302 | hIAN6    | GI_28416955-S | 7 | 7 | 149571975 | 41950  | 6.4898  | 5.82827 | CHB |
| rs6459698  | C7orf13  | GI_14249145-S | 7 | 7 | 155929790 | 1143   | 6.3674  | 5.91108 | CHB |
| rs6980337  | C7orf13  | GI_14249145-S | 7 | 7 | 155934022 | 3089   | 6.3674  | 5.91108 | CHB |
| rs7806832  | C7orf13  | GI_14249145-S | 7 | 7 | 155936341 | 5408   | 6.3674  | 5.91108 | CHB |
| rs4716438  | C7orf13  | GI_14249145-S | 7 | 7 | 155941679 | 10746  | 6.3674  | 5.91108 | CHB |
| rs6965850  | C7orf13  | GI_14249145-S | 7 | 7 | 155956213 | 25280  | 6.3674  | 5.91108 | CHB |
| rs2280902  | MYOM2    | GI_4505314-S  | 8 | 8 | 2064479   | 16074  | 13.3034 | 6.38853 | CHB |
| rs2099746  | MYOM2    | GI_4505314-S  | 8 | 8 | 2082848   | 2295   | 12.3614 | 6.38853 | CHB |
| rs6986035  | MYOM2    | GI_4505314-S  | 8 | 8 | 2084810   | 4257   | 8.541   | 6.38853 | CHB |
| rs4876217  | MYOM2    | GI_4505314-S  | 8 | 8 | 2086177   | 5624   | 8.541   | 6.38853 | CHB |

|            |         |               |   |   |           |        |        |         |     |
|------------|---------|---------------|---|---|-----------|--------|--------|---------|-----|
| rs7016120  | MYOM2   | GI_4505314-S  | 8 | 8 | 2088145   | 7592   | 8.541  | 6.38853 | CHB |
| rs10099190 | MYOM2   | GI_4505314-S  | 8 | 8 | 2088893   | 8340   | 8.541  | 6.38853 | CHB |
| rs6987264  | MYOM2   | GI_4505314-S  | 8 | 8 | 2089921   | 9368   | 8.541  | 6.38853 | CHB |
| rs7012209  | MYOM2   | GI_4505314-S  | 8 | 8 | 2089950   | 9397   | 8.1824 | 6.38853 | CHB |
| rs7387692  | RHOBTB2 | GI_14165285-S | 8 | 8 | 23312979  | 379584 | 7.4232 | 6.33092 | CHB |
| rs4872124  | RHOBTB2 | GI_14165285-S | 8 | 8 | 23321877  | 388482 | 7.4232 | 6.33092 | CHB |
| rs4872126  | RHOBTB2 | GI_14165285-S | 8 | 8 | 23324956  | 391561 | 6.8685 | 6.33092 | CHB |
| rs4058277  | STAR    | GI_4507250-S  | 8 | 8 | 38070292  | 50281  | 6.4721 | 5.64275 | CHB |
| rs7846109  | STAR    | GI_4507250-S  | 8 | 8 | 38071258  | 49315  | 6.0734 | 5.64275 | CHB |
| rs2282466  | STAR    | GI_4507250-S  | 8 | 8 | 38081602  | 38971  | 6.6686 | 5.64275 | CHB |
| rs2073353  | STAR    | GI_4507250-S  | 8 | 8 | 38081618  | 38955  | 5.7308 | 5.64275 | CHB |
| rs2073351  | STAR    | GI_4507250-S  | 8 | 8 | 38082396  | 38177  | 6.6686 | 5.64275 | CHB |
| rs3763555  | STAR    | GI_4507250-S  | 8 | 8 | 38087196  | 33377  | 6.6686 | 5.64275 | CHB |
| rs2517387  | STAR    | GI_4507250-S  | 8 | 8 | 38092549  | 28024  | 6.6686 | 5.64275 | CHB |
| rs1111460  | STAR    | GI_4507250-S  | 8 | 8 | 38093651  | 26922  | 6.6686 | 5.64275 | CHB |
| rs2843743  | STAR    | GI_4507250-S  | 8 | 8 | 38095525  | 25048  | 6.6686 | 5.64275 | CHB |
| rs2275958  | STAR    | GI_4507250-S  | 8 | 8 | 38095785  | 24788  | 6.6686 | 5.64275 | CHB |
| rs2517391  | STAR    | GI_4507250-S  | 8 | 8 | 38100504  | 20069  | 6.4721 | 5.64275 | CHB |
| rs2843740  | STAR    | GI_4507250-S  | 8 | 8 | 38105054  | 15519  | 6.4721 | 5.64275 | CHB |
| rs2517396  | STAR    | GI_4507250-S  | 8 | 8 | 38108462  | 12111  | 6.6686 | 5.64275 | CHB |
| rs3886364  | STAR    | GI_4507250-S  | 8 | 8 | 38111913  | 8660   | 6.1887 | 5.64275 | CHB |
| rs2275957  | STAR    | GI_4507250-S  | 8 | 8 | 38115484  | 5089   | 6.6686 | 5.64275 | CHB |
| rs2843737  | STAR    | GI_4507250-S  | 8 | 8 | 38124305  | 3732   | 6.4721 | 5.64275 | CHB |
| rs2507706  | STAR    | GI_4507250-S  | 8 | 8 | 38128432  | 7859   | 6.6686 | 5.64275 | CHB |
| rs3899796  | CGI-62  | GI_7705774-S  | 8 | 8 | 79730637  | 59414  | 5.6805 | 5.67823 | CHB |
| rs799331   | SNX16   | GI_23238247-A | 8 | 8 | 82895398  | 20839  | 5.8454 | 5.81428 | CHB |
| rs2980570  | PKHD1L1 | GI_31377831-S | 8 | 8 | 110417198 | 191057 | 7.328  | 5.89977 | CHB |
| rs2980571  | PKHD1L1 | GI_31377831-S | 8 | 8 | 110417425 | 190830 | 7.328  | 5.89977 | CHB |
| rs1870389  | PKHD1L1 | GI_31377831-S | 8 | 8 | 110420430 | 187825 | 7.328  | 5.89977 | CHB |
| rs2926239  | PKHD1L1 | GI_31377831-S | 8 | 8 | 110427848 | 180407 | 7.328  | 5.89977 | CHB |
| rs2980585  | PKHD1L1 | GI_31377831-S | 8 | 8 | 110429704 | 178551 | 7.4745 | 5.89977 | CHB |
| rs2926237  | PKHD1L1 | GI_31377831-S | 8 | 8 | 110430021 | 178234 | 7.4745 | 5.89977 | CHB |
| rs11998321 | PKHD1L1 | GI_31377831-S | 8 | 8 | 110432563 | 175692 | 7.871  | 5.89977 | CHB |
| rs2926233  | PKHD1L1 | GI_31377831-S | 8 | 8 | 110435551 | 172704 | 8.438  | 5.89977 | CHB |
| rs11987954 | PKHD1L1 | GI_31377831-S | 8 | 8 | 110436187 | 172068 | 7.871  | 5.89977 | CHB |
| rs2926225  | PKHD1L1 | GI_31377831-S | 8 | 8 | 110437719 | 170536 | 6.4192 | 5.89977 | CHB |
| rs1458920  | PKHD1L1 | GI_31377831-S | 8 | 8 | 110440985 | 167270 | 6.6459 | 5.89977 | CHB |
| rs7002606  | PKHD1L1 | GI_31377831-S | 8 | 8 | 110441547 | 166708 | 6.4545 | 5.89977 | CHB |
| rs7002926  | PKHD1L1 | GI_31377831-S | 8 | 8 | 110441762 | 166493 | 6.6459 | 5.89977 | CHB |
| rs6982748  | PKHD1L1 | GI_31377831-S | 8 | 8 | 110441844 | 166411 | 6.6459 | 5.89977 | CHB |
| rs6987198  | PKHD1L1 | GI_31377831-S | 8 | 8 | 110442003 | 166252 | 7.8764 | 5.89977 | CHB |
| rs4734212  | PKHD1L1 | GI_31377831-S | 8 | 8 | 110445727 | 162528 | 6.6459 | 5.89977 | CHB |
| rs10099126 | PKHD1L1 | GI_31377831-S | 8 | 8 | 110448791 | 159464 | 6.6459 | 5.89977 | CHB |
| rs7819141  | PKHD1L1 | GI_31377831-S | 8 | 8 | 110449856 | 158399 | 6.6459 | 5.89977 | CHB |
| rs7819151  | PKHD1L1 | GI_31377831-S | 8 | 8 | 110449873 | 158382 | 6.6459 | 5.89977 | CHB |
| rs12334438 | PKHD1L1 | GI_31377831-S | 8 | 8 | 110450959 | 157296 | 7.307  | 5.89977 | CHB |
| rs13253951 | PKHD1L1 | GI_31377831-S | 8 | 8 | 110459380 | 148875 | 6.6459 | 5.89977 | CHB |
| rs2349436  | PKHD1L1 | GI_31377831-S | 8 | 8 | 110460256 | 147999 | 6.6459 | 5.89977 | CHB |
| rs921960   | PKHD1L1 | GI_31377831-S | 8 | 8 | 110461305 | 146950 | 5.9801 | 5.89977 | CHB |
| rs1457292  | PKHD1L1 | GI_31377831-S | 8 | 8 | 110461824 | 146431 | 6.3584 | 5.89977 | CHB |
| rs6993552  | PKHD1L1 | GI_31377831-S | 8 | 8 | 110462318 | 145937 | 6.6459 | 5.89977 | CHB |
| rs2168679  | PKHD1L1 | GI_31377831-S | 8 | 8 | 110464203 | 144052 | 6.6459 | 5.89977 | CHB |
| rs7016085  | PKHD1L1 | GI_31377831-S | 8 | 8 | 110466914 | 141341 | 6.6459 | 5.89977 | CHB |
| rs9642806  | PKHD1L1 | GI_31377831-S | 8 | 8 | 110471667 | 136588 | 6.6459 | 5.89977 | CHB |
| rs13278812 | PKHD1L1 | GI_31377831-S | 8 | 8 | 110472672 | 135583 | 6.6459 | 5.89977 | CHB |
| rs1379370  | PKHD1L1 | GI_31377831-S | 8 | 8 | 110472874 | 135381 | 7.307  | 5.89977 | CHB |

|            |         |               |   |   |           |        |        |         |     |
|------------|---------|---------------|---|---|-----------|--------|--------|---------|-----|
| rs1457290  | PKHD1L1 | GI_31377831-S | 8 | 8 | 110474575 | 133680 | 6.9804 | 5.89977 | CHB |
| rs1457289  | PKHD1L1 | GI_31377831-S | 8 | 8 | 110474727 | 133528 | 7.307  | 5.89977 | CHB |
| rs10098672 | PKHD1L1 | GI_31377831-S | 8 | 8 | 110476273 | 131982 | 6.6459 | 5.89977 | CHB |
| rs1870108  | PKHD1L1 | GI_31377831-S | 8 | 8 | 110476737 | 131518 | 6.6459 | 5.89977 | CHB |
| rs6993467  | PKHD1L1 | GI_31377831-S | 8 | 8 | 110478788 | 129467 | 7.1741 | 5.89977 | CHB |
| rs13266374 | PKHD1L1 | GI_31377831-S | 8 | 8 | 110478901 | 129354 | 6.4907 | 5.89977 | CHB |
| rs13266838 | PKHD1L1 | GI_31377831-S | 8 | 8 | 110478916 | 129339 | 6.6758 | 5.89977 | CHB |
| rs921959   | PKHD1L1 | GI_31377831-S | 8 | 8 | 110480514 | 127741 | 6.6459 | 5.89977 | CHB |
| rs1379369  | PKHD1L1 | GI_31377831-S | 8 | 8 | 110481695 | 126560 | 7.307  | 5.89977 | CHB |
| rs2061295  | PKHD1L1 | GI_31377831-S | 8 | 8 | 110482124 | 126131 | 6.6459 | 5.89977 | CHB |
| rs1457287  | PKHD1L1 | GI_31377831-S | 8 | 8 | 110482154 | 126101 | 7.307  | 5.89977 | CHB |
| rs10101522 | PKHD1L1 | GI_31377831-S | 8 | 8 | 110482225 | 126030 | 6.6459 | 5.89977 | CHB |
| rs964307   | PKHD1L1 | GI_31377831-S | 8 | 8 | 110482938 | 125317 | 6.6459 | 5.89977 | CHB |
| rs965930   | PKHD1L1 | GI_31377831-S | 8 | 8 | 110483752 | 124503 | 6.6459 | 5.89977 | CHB |
| rs921958   | PKHD1L1 | GI_31377831-S | 8 | 8 | 110485623 | 122632 | 6.6459 | 5.89977 | CHB |
| rs1457286  | PKHD1L1 | GI_31377831-S | 8 | 8 | 110485989 | 122266 | 7.307  | 5.89977 | CHB |
| rs12679728 | PKHD1L1 | GI_31377831-S | 8 | 8 | 110487637 | 120618 | 6.6459 | 5.89977 | CHB |
| rs1037695  | PKHD1L1 | GI_31377831-S | 8 | 8 | 110488098 | 120157 | 7.307  | 5.89977 | CHB |
| rs10097258 | PKHD1L1 | GI_31377831-S | 8 | 8 | 110488287 | 119968 | 6.6459 | 5.89977 | CHB |
| rs1824193  | PKHD1L1 | GI_31377831-S | 8 | 8 | 110488942 | 119313 | 6.6459 | 5.89977 | CHB |
| rs1379363  | PKHD1L1 | GI_31377831-S | 8 | 8 | 110489247 | 119008 | 6.6459 | 5.89977 | CHB |
| rs1379364  | PKHD1L1 | GI_31377831-S | 8 | 8 | 110489325 | 118930 | 6.2479 | 5.89977 | CHB |
| rs13254245 | PKHD1L1 | GI_31377831-S | 8 | 8 | 110489560 | 118695 | 6.6459 | 5.89977 | CHB |
| rs13252234 | PKHD1L1 | GI_31377831-S | 8 | 8 | 110489605 | 118650 | 6.6459 | 5.89977 | CHB |
| rs9297425  | PKHD1L1 | GI_31377831-S | 8 | 8 | 110490289 | 117966 | 6.6459 | 5.89977 | CHB |
| rs12546429 | PKHD1L1 | GI_31377831-S | 8 | 8 | 110491526 | 116729 | 6.6459 | 5.89977 | CHB |
| rs10955518 | PKHD1L1 | GI_31377831-S | 8 | 8 | 110493352 | 114903 | 6.6459 | 5.89977 | CHB |
| rs4604408  | PKHD1L1 | GI_31377831-S | 8 | 8 | 110494770 | 113485 | 7.03   | 5.89977 | CHB |
| rs897838   | PKHD1L1 | GI_31377831-S | 8 | 8 | 110495783 | 112472 | 6.6459 | 5.89977 | CHB |
| rs897839   | PKHD1L1 | GI_31377831-S | 8 | 8 | 110496020 | 112235 | 6.6459 | 5.89977 | CHB |
| rs2349760  | PKHD1L1 | GI_31377831-S | 8 | 8 | 110496096 | 112159 | 7.307  | 5.89977 | CHB |
| rs2349761  | PKHD1L1 | GI_31377831-S | 8 | 8 | 110496200 | 112055 | 6.6459 | 5.89977 | CHB |
| rs3911483  | PKHD1L1 | GI_31377831-S | 8 | 8 | 110496369 | 111886 | 6.3888 | 5.89977 | CHB |
| rs2124982  | PKHD1L1 | GI_31377831-S | 8 | 8 | 110496868 | 111387 | 6.6459 | 5.89977 | CHB |
| rs9656882  | PKHD1L1 | GI_31377831-S | 8 | 8 | 110496959 | 111296 | 6.6459 | 5.89977 | CHB |
| rs13254461 | PKHD1L1 | GI_31377831-S | 8 | 8 | 110498098 | 110157 | 6.6459 | 5.89977 | CHB |
| rs9656793  | PKHD1L1 | GI_31377831-S | 8 | 8 | 110498129 | 110126 | 6.6459 | 5.89977 | CHB |
| rs1840908  | PKHD1L1 | GI_31377831-S | 8 | 8 | 110498628 | 109627 | 6.7453 | 5.89977 | CHB |
| rs7840592  | PKHD1L1 | GI_31377831-S | 8 | 8 | 110499617 | 108638 | 6.6459 | 5.89977 | CHB |
| rs10092565 | PKHD1L1 | GI_31377831-S | 8 | 8 | 110499679 | 108576 | 6.9346 | 5.89977 | CHB |
| rs10092693 | PKHD1L1 | GI_31377831-S | 8 | 8 | 110499780 | 108475 | 6.6459 | 5.89977 | CHB |
| rs6469260  | PKHD1L1 | GI_31377831-S | 8 | 8 | 110500234 | 108021 | 7.3122 | 5.89977 | CHB |
| rs7016609  | PKHD1L1 | GI_31377831-S | 8 | 8 | 110500393 | 107862 | 6.6459 | 5.89977 | CHB |
| rs13262995 | PKHD1L1 | GI_31377831-S | 8 | 8 | 110504590 | 103665 | 6.6459 | 5.89977 | CHB |
| rs7015262  | PKHD1L1 | GI_31377831-S | 8 | 8 | 110505780 | 102475 | 6.0315 | 5.89977 | CHB |
| rs10458302 | PKHD1L1 | GI_31377831-S | 8 | 8 | 110505939 | 102316 | 6.6459 | 5.89977 | CHB |
| rs4735133  | PKHD1L1 | GI_31377831-S | 8 | 8 | 110506560 | 101695 | 7.307  | 5.89977 | CHB |
| rs4735134  | PKHD1L1 | GI_31377831-S | 8 | 8 | 110506846 | 101409 | 6.6459 | 5.89977 | CHB |
| rs6469261  | PKHD1L1 | GI_31377831-S | 8 | 8 | 110509800 | 98455  | 5.9286 | 5.89977 | CHB |
| rs6469262  | PKHD1L1 | GI_31377831-S | 8 | 8 | 110512656 | 95599  | 6.5677 | 5.89977 | CHB |
| rs1870107  | PKHD1L1 | GI_31377831-S | 8 | 8 | 110517106 | 91149  | 7.307  | 5.89977 | CHB |
| rs2844253  | PKHD1L1 | GI_31377831-S | 8 | 8 | 110521087 | 87168  | 9.1004 | 5.89977 | CHB |
| rs1673408  | PKHD1L1 | GI_31377831-S | 8 | 8 | 110524497 | 83758  | 9.1004 | 5.89977 | CHB |
| rs1673407  | PKHD1L1 | GI_31377831-S | 8 | 8 | 110529664 | 78591  | 9.1004 | 5.89977 | CHB |
| rs1673405  | PKHD1L1 | GI_31377831-S | 8 | 8 | 110530694 | 77561  | 6.9227 | 5.89977 | CHB |
| rs1563579  | PKHD1L1 | GI_31377831-S | 8 | 8 | 110531534 | 76721  | 7.8024 | 5.89977 | CHB |

|           |         |               |   |   |           |       |         |         |     |
|-----------|---------|---------------|---|---|-----------|-------|---------|---------|-----|
| rs1783165 | PKHD1L1 | GI_31377831-S | 8 | 8 | 110533034 | 75221 | 8.1932  | 5.89977 | CHB |
| rs1673404 | PKHD1L1 | GI_31377831-S | 8 | 8 | 110534236 | 74019 | 8.1932  | 5.89977 | CHB |
| rs1783163 | PKHD1L1 | GI_31377831-S | 8 | 8 | 110535261 | 72994 | 9.1004  | 5.89977 | CHB |
| rs2607639 | PKHD1L1 | GI_31377831-S | 8 | 8 | 110539473 | 68782 | 8.1932  | 5.89977 | CHB |
| rs2607638 | PKHD1L1 | GI_31377831-S | 8 | 8 | 110539887 | 68368 | 9.1004  | 5.89977 | CHB |
| rs2844251 | PKHD1L1 | GI_31377831-S | 8 | 8 | 110540059 | 68196 | 8.4197  | 5.89977 | CHB |
| rs2607637 | PKHD1L1 | GI_31377831-S | 8 | 8 | 110540260 | 67995 | 8.1932  | 5.89977 | CHB |
| rs2844252 | PKHD1L1 | GI_31377831-S | 8 | 8 | 110540306 | 67949 | 9.9068  | 5.89977 | CHB |
| rs1457284 | PKHD1L1 | GI_31377831-S | 8 | 8 | 110540600 | 67655 | 8.3155  | 5.89977 | CHB |
| rs1026439 | PKHD1L1 | GI_31377831-S | 8 | 8 | 110543083 | 65172 | 9.1004  | 5.89977 | CHB |
| rs1026438 | PKHD1L1 | GI_31377831-S | 8 | 8 | 110543142 | 65113 | 9.1004  | 5.89977 | CHB |
| rs714994  | PKHD1L1 | GI_31377831-S | 8 | 8 | 110544279 | 63976 | 8.1932  | 5.89977 | CHB |
| rs1673401 | PKHD1L1 | GI_31377831-S | 8 | 8 | 110544752 | 63503 | 9.1004  | 5.89977 | CHB |
| rs1783145 | PKHD1L1 | GI_31377831-S | 8 | 8 | 110545050 | 63205 | 9.1004  | 5.89977 | CHB |
| rs1673398 | PKHD1L1 | GI_31377831-S | 8 | 8 | 110546169 | 62086 | 7.9579  | 5.89977 | CHB |
| rs1627570 | PKHD1L1 | GI_31377831-S | 8 | 8 | 110547000 | 61255 | 6.9316  | 5.89977 | CHB |
| rs1673397 | PKHD1L1 | GI_31377831-S | 8 | 8 | 110547112 | 61143 | 9.1004  | 5.89977 | CHB |
| rs1783143 | PKHD1L1 | GI_31377831-S | 8 | 8 | 110547650 | 60605 | 9.1004  | 5.89977 | CHB |
| rs1783142 | PKHD1L1 | GI_31377831-S | 8 | 8 | 110547837 | 60418 | 9.1004  | 5.89977 | CHB |
| rs1673396 | PKHD1L1 | GI_31377831-S | 8 | 8 | 110548797 | 59458 | 8.8304  | 5.89977 | CHB |
| rs1471125 | PKHD1L1 | GI_31377831-S | 8 | 8 | 110549755 | 58500 | 9.1004  | 5.89977 | CHB |
| rs1471124 | PKHD1L1 | GI_31377831-S | 8 | 8 | 110551558 | 56697 | 9.1004  | 5.89977 | CHB |
| rs1783152 | PKHD1L1 | GI_31377831-S | 8 | 8 | 110552076 | 56179 | 8.5465  | 5.89977 | CHB |
| rs1783151 | PKHD1L1 | GI_31377831-S | 8 | 8 | 110553119 | 55136 | 9.1004  | 5.89977 | CHB |
| rs1783149 | PKHD1L1 | GI_31377831-S | 8 | 8 | 110553988 | 54267 | 9.1004  | 5.89977 | CHB |
| rs1673390 | PKHD1L1 | GI_31377831-S | 8 | 8 | 110554319 | 53936 | 8.8034  | 5.89977 | CHB |
| rs1626759 | PKHD1L1 | GI_31377831-S | 8 | 8 | 110554960 | 53295 | 9.1004  | 5.89977 | CHB |
| rs1457282 | PKHD1L1 | GI_31377831-S | 8 | 8 | 110555942 | 52313 | 17.3335 | 5.89977 | CHB |
| rs1783148 | PKHD1L1 | GI_31377831-S | 8 | 8 | 110558796 | 49459 | 15.7587 | 5.89977 | CHB |
| rs1379361 | PKHD1L1 | GI_31377831-S | 8 | 8 | 110559318 | 48937 | 17.3335 | 5.89977 | CHB |
| rs1783147 | PKHD1L1 | GI_31377831-S | 8 | 8 | 110561016 | 47239 | 17.3335 | 5.89977 | CHB |
| rs1630942 | PKHD1L1 | GI_31377831-S | 8 | 8 | 110561053 | 47202 | 17.3335 | 5.89977 | CHB |
| rs1630134 | PKHD1L1 | GI_31377831-S | 8 | 8 | 110561140 | 47115 | 17.3335 | 5.89977 | CHB |
| rs1026437 | PKHD1L1 | GI_31377831-S | 8 | 8 | 110562125 | 46130 | 17.3335 | 5.89977 | CHB |
| rs2607635 | PKHD1L1 | GI_31377831-S | 8 | 8 | 110564040 | 44215 | 11.19   | 5.89977 | CHB |
| rs2844254 | PKHD1L1 | GI_31377831-S | 8 | 8 | 110564368 | 43887 | 17.3335 | 5.89977 | CHB |
| rs2607633 | PKHD1L1 | GI_31377831-S | 8 | 8 | 110565344 | 42911 | 17.3335 | 5.89977 | CHB |
| rs1009371 | PKHD1L1 | GI_31377831-S | 8 | 8 | 110567126 | 41129 | 17.3335 | 5.89977 | CHB |
| rs1783140 | PKHD1L1 | GI_31377831-S | 8 | 8 | 110568520 | 39735 | 16.9507 | 5.89977 | CHB |
| rs1783141 | PKHD1L1 | GI_31377831-S | 8 | 8 | 110569859 | 38396 | 16.1612 | 5.89977 | CHB |
| rs2607631 | PKHD1L1 | GI_31377831-S | 8 | 8 | 110573591 | 34664 | 17.3335 | 5.89977 | CHB |
| rs2607630 | PKHD1L1 | GI_31377831-S | 8 | 8 | 110574042 | 34213 | 12.0296 | 5.89977 | CHB |
| rs2607629 | PKHD1L1 | GI_31377831-S | 8 | 8 | 110574354 | 33901 | 17.3335 | 5.89977 | CHB |
| rs1013482 | PKHD1L1 | GI_31377831-S | 8 | 8 | 110574886 | 33369 | 17.3335 | 5.89977 | CHB |
| rs2607628 | PKHD1L1 | GI_31377831-S | 8 | 8 | 110575062 | 33193 | 17.3335 | 5.89977 | CHB |
| rs1563580 | PKHD1L1 | GI_31377831-S | 8 | 8 | 110575280 | 32975 | 16.7812 | 5.89977 | CHB |
| rs2607627 | PKHD1L1 | GI_31377831-S | 8 | 8 | 110575834 | 32421 | 17.3335 | 5.89977 | CHB |
| rs1673426 | PKHD1L1 | GI_31377831-S | 8 | 8 | 110576809 | 31446 | 17.3335 | 5.89977 | CHB |
| rs1783162 | PKHD1L1 | GI_31377831-S | 8 | 8 | 110577414 | 30841 | 17.3335 | 5.89977 | CHB |
| rs753995  | PKHD1L1 | GI_31377831-S | 8 | 8 | 110581622 | 26633 | 16.1612 | 5.89977 | CHB |
| rs1673422 | PKHD1L1 | GI_31377831-S | 8 | 8 | 110582601 | 25654 | 16.1612 | 5.89977 | CHB |
| rs1783159 | PKHD1L1 | GI_31377831-S | 8 | 8 | 110583540 | 24715 | 16.9507 | 5.89977 | CHB |
| rs1783158 | PKHD1L1 | GI_31377831-S | 8 | 8 | 110583563 | 24692 | 16.9507 | 5.89977 | CHB |
| rs1673421 | PKHD1L1 | GI_31377831-S | 8 | 8 | 110584402 | 23853 | 14.7421 | 5.89977 | CHB |
| rs1673420 | PKHD1L1 | GI_31377831-S | 8 | 8 | 110585296 | 22959 | 16.2828 | 5.89977 | CHB |
| rs1673419 | PKHD1L1 | GI_31377831-S | 8 | 8 | 110585433 | 22822 | 17.3335 | 5.89977 | CHB |

|            |         |               |   |   |           |       |         |         |     |
|------------|---------|---------------|---|---|-----------|-------|---------|---------|-----|
| rs1783157  | PKHD1L1 | GI_31377831-S | 8 | 8 | 110585436 | 22819 | 17.3335 | 5.89977 | CHB |
| rs1673416  | PKHD1L1 | GI_31377831-S | 8 | 8 | 110586668 | 21587 | 17.3335 | 5.89977 | CHB |
| rs1673415  | PKHD1L1 | GI_31377831-S | 8 | 8 | 110587384 | 20871 | 17.3335 | 5.89977 | CHB |
| rs1379367  | PKHD1L1 | GI_31377831-S | 8 | 8 | 110587710 | 20545 | 16.1612 | 5.89977 | CHB |
| rs1783154  | PKHD1L1 | GI_31377831-S | 8 | 8 | 110588748 | 19507 | 17.3335 | 5.89977 | CHB |
| rs1783153  | PKHD1L1 | GI_31377831-S | 8 | 8 | 110588990 | 19265 | 17.3335 | 5.89977 | CHB |
| rs2844257  | PKHD1L1 | GI_31377831-S | 8 | 8 | 110590653 | 17602 | 17.9504 | 5.89977 | CHB |
| rs2607625  | PKHD1L1 | GI_31377831-S | 8 | 8 | 110590692 | 17563 | 17.9504 | 5.89977 | CHB |
| rs2844258  | PKHD1L1 | GI_31377831-S | 8 | 8 | 110591692 | 16563 | 17.9504 | 5.89977 | CHB |
| rs2844259  | PKHD1L1 | GI_31377831-S | 8 | 8 | 110591903 | 16352 | 17.9504 | 5.89977 | CHB |
| rs2844260  | PKHD1L1 | GI_31377831-S | 8 | 8 | 110591948 | 16307 | 16.7812 | 5.89977 | CHB |
| rs1673412  | PKHD1L1 | GI_31377831-S | 8 | 8 | 110594900 | 13355 | 16.7812 | 5.89977 | CHB |
| rs1783166  | PKHD1L1 | GI_31377831-S | 8 | 8 | 110595060 | 13195 | 17.3335 | 5.89977 | CHB |
| rs1673411  | PKHD1L1 | GI_31377831-S | 8 | 8 | 110597325 | 10930 | 17.3335 | 5.89977 | CHB |
| rs1783168  | PKHD1L1 | GI_31377831-S | 8 | 8 | 110598046 | 10209 | 17.3335 | 5.89977 | CHB |
| rs1673413  | PKHD1L1 | GI_31377831-S | 8 | 8 | 110599052 | 9203  | 17.9504 | 5.89977 | CHB |
| rs1783169  | PKHD1L1 | GI_31377831-S | 8 | 8 | 110599950 | 8305  | 16.7812 | 5.89977 | CHB |
| rs1783170  | PKHD1L1 | GI_31377831-S | 8 | 8 | 110600142 | 8113  | 17.3335 | 5.89977 | CHB |
| rs1673409  | PKHD1L1 | GI_31377831-S | 8 | 8 | 110600946 | 7309  | 17.9504 | 5.89977 | CHB |
| rs1783171  | PKHD1L1 | GI_31377831-S | 8 | 8 | 110601912 | 6343  | 17.9504 | 5.89977 | CHB |
| rs1673428  | PKHD1L1 | GI_31377831-S | 8 | 8 | 110602120 | 6135  | 17.9504 | 5.89977 | CHB |
| rs2844261  | PKHD1L1 | GI_31377831-S | 8 | 8 | 110602670 | 5585  | 17.9504 | 5.89977 | CHB |
| rs1563578  | PKHD1L1 | GI_31377831-S | 8 | 8 | 110603688 | 4567  | 17.9504 | 5.89977 | CHB |
| rs1457288  | PKHD1L1 | GI_31377831-S | 8 | 8 | 110603951 | 4304  | 17.3335 | 5.89977 | CHB |
| rs897840   | PKHD1L1 | GI_31377831-S | 8 | 8 | 110605492 | 2763  | 17.9504 | 5.89977 | CHB |
| rs897842   | PKHD1L1 | GI_31377831-S | 8 | 8 | 110605957 | 2298  | 17.9504 | 5.89977 | CHB |
| rs1783172  | PKHD1L1 | GI_31377831-S | 8 | 8 | 110606128 | 2127  | 14.3901 | 5.89977 | CHB |
| rs730885   | PKHD1L1 | GI_31377831-S | 8 | 8 | 110606593 | 1662  | 16.3739 | 5.89977 | CHB |
| rs1783173  | PKHD1L1 | GI_31377831-S | 8 | 8 | 110607525 | 730   | 16.7812 | 5.89977 | CHB |
| rs1457294  | PKHD1L1 | GI_31377831-S | 8 | 8 | 110608063 | 192   | 17.9504 | 5.89977 | CHB |
| rs1457295  | PKHD1L1 | GI_31377831-S | 8 | 8 | 110608130 | 125   | 17.9504 | 5.89977 | CHB |
| rs1783174  | PKHD1L1 | GI_31377831-S | 8 | 8 | 110608362 | 107   | 17.9504 | 5.89977 | CHB |
| rs1673383  | PKHD1L1 | GI_31377831-S | 8 | 8 | 110609091 | 836   | 17.9504 | 5.89977 | CHB |
| rs1673384  | PKHD1L1 | GI_31377831-S | 8 | 8 | 110609441 | 1186  | 17.9504 | 5.89977 | CHB |
| rs1673386  | PKHD1L1 | GI_31377831-S | 8 | 8 | 110609938 | 1683  | 16.7812 | 5.89977 | CHB |
| rs1673389  | PKHD1L1 | GI_31377831-S | 8 | 8 | 110610255 | 2000  | 17.9504 | 5.89977 | CHB |
| rs1673395  | PKHD1L1 | GI_31377831-S | 8 | 8 | 110610586 | 2331  | 17.9504 | 5.89977 | CHB |
| rs1673399  | PKHD1L1 | GI_31377831-S | 8 | 8 | 110611139 | 2884  | 17.9504 | 5.89977 | CHB |
| rs1617259  | PKHD1L1 | GI_31377831-S | 8 | 8 | 110611474 | 3219  | 17.9504 | 5.89977 | CHB |
| rs2154660  | PKHD1L1 | GI_31377831-S | 8 | 8 | 110612697 | 4442  | 17.9504 | 5.89977 | CHB |
| rs7821242  | PKHD1L1 | GI_31377831-S | 8 | 8 | 110613700 | 5445  | 17.3335 | 5.89977 | CHB |
| rs10505133 | PKHD1L1 | GI_31377831-S | 8 | 8 | 110614253 | 5998  | 17.6124 | 5.89977 | CHB |
| rs2022935  | PKHD1L1 | GI_31377831-S | 8 | 8 | 110614686 | 6431  | 16.7812 | 5.89977 | CHB |
| rs10108943 | PKHD1L1 | GI_31377831-S | 8 | 8 | 110614783 | 6528  | 17.3335 | 5.89977 | CHB |
| rs10111682 | PKHD1L1 | GI_31377831-S | 8 | 8 | 110615076 | 6821  | 16.7812 | 5.89977 | CHB |
| rs13439864 | PKHD1L1 | GI_31377831-S | 8 | 8 | 110615884 | 7629  | 17.0249 | 5.89977 | CHB |
| rs10088258 | PKHD1L1 | GI_31377831-S | 8 | 8 | 110616575 | 8320  | 16.7812 | 5.89977 | CHB |
| rs7006166  | PKHD1L1 | GI_31377831-S | 8 | 8 | 110616688 | 8433  | 17.3335 | 5.89977 | CHB |
| rs7011340  | PKHD1L1 | GI_31377831-S | 8 | 8 | 110617590 | 9335  | 17.9504 | 5.89977 | CHB |
| rs7011803  | PKHD1L1 | GI_31377831-S | 8 | 8 | 110617624 | 9369  | 16.7812 | 5.89977 | CHB |
| rs4529437  | PKHD1L1 | GI_31377831-S | 8 | 8 | 110619006 | 10751 | 16.7812 | 5.89977 | CHB |
| rs3808380  | PKHD1L1 | GI_31377831-S | 8 | 8 | 110620310 | 12055 | 10.3791 | 5.89977 | CHB |
| rs1044230  | PKHD1L1 | GI_31377831-S | 8 | 8 | 110621753 | 13498 | 16.7812 | 5.89977 | CHB |
| rs2703389  | PKHD1L1 | GI_31377831-S | 8 | 8 | 110626059 | 17804 | 16.7812 | 5.89977 | CHB |
| rs2703386  | PKHD1L1 | GI_31377831-S | 8 | 8 | 110633100 | 24845 | 17.3335 | 5.89977 | CHB |
| rs2703377  | PKHD1L1 | GI_31377831-S | 8 | 8 | 110635360 | 27105 | 16.7812 | 5.89977 | CHB |



|            |           |               |   |   |           |        |         |         |     |
|------------|-----------|---------------|---|---|-----------|--------|---------|---------|-----|
| rs2022934  | PKHD1L1   | GI_31377831-S | 8 | 8 | 110636950 | 28695  | 17.3335 | 5.89977 | CHB |
| rs2844231  | PKHD1L1   | GI_31377831-S | 8 | 8 | 110639003 | 30748  | 17.3335 | 5.89977 | CHB |
| rs6995991  | PKHD1L1   | GI_31377831-S | 8 | 8 | 110639236 | 30981  | 7.6776  | 5.89977 | CHB |
| rs2844234  | PKHD1L1   | GI_31377831-S | 8 | 8 | 110651542 | 43287  | 16.6167 | 5.89977 | CHB |
| rs2703388  | PKHD1L1   | GI_31377831-S | 8 | 8 | 110651938 | 43683  | 16.0819 | 5.89977 | CHB |
| rs2844235  | PKHD1L1   | GI_31377831-S | 8 | 8 | 110663324 | 55069  | 16.6167 | 5.89977 | CHB |
| rs2844236  | PKHD1L1   | GI_31377831-S | 8 | 8 | 110663994 | 55739  | 16.6167 | 5.89977 | CHB |
| rs1892760  | PKHD1L1   | GI_31377831-S | 8 | 8 | 110666049 | 57794  | 16.6167 | 5.89977 | CHB |
| rs2236628  | PKHD1L1   | GI_31377831-S | 8 | 8 | 110667374 | 59119  | 16.6167 | 5.89977 | CHB |
| rs2703384  | PKHD1L1   | GI_31377831-S | 8 | 8 | 110669235 | 60980  | 17.277  | 5.89977 | CHB |
| rs2703382  | PKHD1L1   | GI_31377831-S | 8 | 8 | 110672655 | 64400  | 16.6167 | 5.89977 | CHB |
| rs2154658  | PKHD1L1   | GI_31377831-S | 8 | 8 | 110685758 | 77503  | 7.814   | 5.89977 | CHB |
| rs1892759  | PKHD1L1   | GI_31377831-S | 8 | 8 | 110686170 | 77915  | 6.8074  | 5.89977 | CHB |
| rs2514591  | Hs.453941 | Hs.453941-S   | 8 | 8 | 119680657 | 126737 | 8.6278  | 6.38865 | CHB |
| rs2514592  | Hs.453941 | Hs.453941-S   | 8 | 8 | 119681861 | 125533 | 11.3584 | 6.38865 | CHB |
| rs2460964  | Hs.453941 | Hs.453941-S   | 8 | 8 | 119682843 | 124551 | 11.3584 | 6.38865 | CHB |
| rs2460965  | Hs.453941 | Hs.453941-S   | 8 | 8 | 119687942 | 119452 | 11.3584 | 6.38865 | CHB |
| rs2460966  | Hs.453941 | Hs.453941-S   | 8 | 8 | 119693737 | 113657 | 11.2892 | 6.38865 | CHB |
| rs2514594  | Hs.453941 | Hs.453941-S   | 8 | 8 | 119694330 | 113064 | 11.3584 | 6.38865 | CHB |
| rs2460967  | Hs.453941 | Hs.453941-S   | 8 | 8 | 119697073 | 110321 | 8.683   | 6.38865 | CHB |
| rs2460968  | Hs.453941 | Hs.453941-S   | 8 | 8 | 119697411 | 109983 | 11.3584 | 6.38865 | CHB |
| rs2460970  | Hs.453941 | Hs.453941-S   | 8 | 8 | 119698635 | 108759 | 11.3584 | 6.38865 | CHB |
| rs880033   | Hs.453941 | Hs.453941-S   | 8 | 8 | 119702375 | 105019 | 11.3584 | 6.38865 | CHB |
| rs880034   | Hs.453941 | Hs.453941-S   | 8 | 8 | 119702442 | 104952 | 11.3584 | 6.38865 | CHB |
| rs2460972  | Hs.453941 | Hs.453941-S   | 8 | 8 | 119707958 | 99436  | 11.3584 | 6.38865 | CHB |
| rs2514602  | Hs.453941 | Hs.453941-S   | 8 | 8 | 119719731 | 87663  | 11.3584 | 6.38865 | CHB |
| rs2460975  | Hs.453941 | Hs.453941-S   | 8 | 8 | 119720018 | 87376  | 11.3584 | 6.38865 | CHB |
| rs2514603  | Hs.453941 | Hs.453941-S   | 8 | 8 | 119722156 | 85238  | 11.3584 | 6.38865 | CHB |
| rs2514605  | Hs.453941 | Hs.453941-S   | 8 | 8 | 119723591 | 83803  | 11.3584 | 6.38865 | CHB |
| rs2514607  | Hs.453941 | Hs.453941-S   | 8 | 8 | 119725499 | 81895  | 11.3584 | 6.38865 | CHB |
| rs2514608  | Hs.453941 | Hs.453941-S   | 8 | 8 | 119726049 | 81345  | 11.3584 | 6.38865 | CHB |
| rs2514609  | Hs.453941 | Hs.453941-S   | 8 | 8 | 119726405 | 80989  | 11.3584 | 6.38865 | CHB |
| rs2514610  | Hs.453941 | Hs.453941-S   | 8 | 8 | 119728552 | 78842  | 11.3584 | 6.38865 | CHB |
| rs2460979  | Hs.453941 | Hs.453941-S   | 8 | 8 | 119731021 | 76373  | 11.3584 | 6.38865 | CHB |
| rs2514576  | Hs.453941 | Hs.453941-S   | 8 | 8 | 119740944 | 66450  | 10.0207 | 6.38865 | CHB |
| rs2460982  | Hs.453941 | Hs.453941-S   | 8 | 8 | 119741293 | 66101  | 8.3163  | 6.38865 | CHB |
| rs2460983  | Hs.453941 | Hs.453941-S   | 8 | 8 | 119741315 | 66079  | 11.3584 | 6.38865 | CHB |
| rs1809148  | PP3856    | GI_40255088-S | 8 | 8 | 144734218 | 6085   | 8.1577  | 5.63602 | CHB |
| rs2123758  | PP3856    | GI_40255088-S | 8 | 8 | 144734804 | 6671   | 8.8898  | 5.63602 | CHB |
| rs1563148  | PP3856    | GI_40255088-S | 8 | 8 | 144735462 | 7329   | 8.8898  | 5.63602 | CHB |
| rs11136303 | PP3856    | GI_40255088-S | 8 | 8 | 144736712 | 8579   | 8.1577  | 5.63602 | CHB |
| rs2382961  | PP3856    | GI_40255088-S | 8 | 8 | 144738038 | 9905   | 8.1577  | 5.63602 | CHB |
| rs3793366  | PP3856    | GI_40255088-S | 8 | 8 | 144738898 | 10765  | 8.1577  | 5.63602 | CHB |
| rs2382962  | PP3856    | GI_40255088-S | 8 | 8 | 144740535 | 12402  | 8.1577  | 5.63602 | CHB |
| rs4874159  | PP3856    | GI_40255088-S | 8 | 8 | 144742093 | 13960  | 14.099  | 5.63602 | CHB |
| rs1466219  | PP3856    | GI_40255088-S | 8 | 8 | 144744865 | 16732  | 13.3405 | 5.63602 | CHB |
| rs7830957  | PP3856    | GI_40255088-S | 8 | 8 | 144745659 | 17526  | 8.1577  | 5.63602 | CHB |
| rs7821226  | PP3856    | GI_40255088-S | 8 | 8 | 144745701 | 17568  | 8.1577  | 5.63602 | CHB |
| rs4874164  | PP3856    | GI_40255088-S | 8 | 8 | 144746191 | 18058  | 14.099  | 5.63602 | CHB |
| rs10282929 | PP3856    | GI_40255088-S | 8 | 8 | 144752920 | 24787  | 14.099  | 5.63602 | CHB |
| rs10866913 | PP3856    | GI_40255088-S | 8 | 8 | 144754829 | 26696  | 14.099  | 5.63602 | CHB |
| rs10112966 | PP3856    | GI_40255088-S | 8 | 8 | 144755077 | 26944  | 14.099  | 5.63602 | CHB |
| rs755217   | PP3856    | GI_40255088-S | 8 | 8 | 144757655 | 29522  | 8.1577  | 5.63602 | CHB |
| rs896962   | PP3856    | GI_40255088-S | 8 | 8 | 144758235 | 30102  | 8.1577  | 5.63602 | CHB |
| rs2242089  | PP3856    | GI_40255088-S | 8 | 8 | 144760289 | 32156  | 8.1577  | 5.63602 | CHB |
| rs2242088  | PP3856    | GI_40255088-S | 8 | 8 | 144760607 | 32474  | 14.099  | 5.63602 | CHB |

|            |          |               |   |   |           |        |         |         |     |
|------------|----------|---------------|---|---|-----------|--------|---------|---------|-----|
| rs4873808  | PP3856   | GI_40255088-S | 8 | 8 | 144764993 | 36860  | 6.301   | 5.63602 | CHB |
| rs4873809  | PP3856   | GI_40255088-S | 8 | 8 | 144765210 | 37077  | 5.7545  | 5.63602 | CHB |
| rs4740810  | RLN1     | GI_20143931-S | 9 | 9 | 5312687   | 12616  | 7.4561  | 6.20225 | CHB |
| rs6476962  | RLN1     | GI_20143931-S | 9 | 9 | 5314922   | 10381  | 7.2118  | 6.20225 | CHB |
| rs2273782  | RLN1     | GI_20143931-S | 9 | 9 | 5325470   | 167    | 6.3064  | 6.20225 | CHB |
| rs1885498  | RLN1     | GI_20143931-S | 9 | 9 | 5326984   | 1681   | 6.3064  | 6.20225 | CHB |
| rs10975309 | FLJ23309 | GI_37540251-S | 9 | 9 | 5823337   | 48628  | 6.9737  | 6.02593 | CHB |
| rs10810373 | C9orf52  | GI_22749190-S | 9 | 9 | 15283620  | 121557 | 6.3084  | 6.08631 | CHB |
| rs10115392 | C9orf52  | GI_22749190-S | 9 | 9 | 15286526  | 124463 | 6.8669  | 6.08631 | CHB |
| rs10113903 | B4GALT1  | GI_13929461-S | 9 | 9 | 33112645  | 11727  | 7.5061  | 5.59645 | CHB |
| rs10758188 | B4GALT1  | GI_13929461-S | 9 | 9 | 33113386  | 12468  | 7.4442  | 5.59645 | CHB |
| rs10971419 | B4GALT1  | GI_13929461-S | 9 | 9 | 33114161  | 13243  | 6.4135  | 5.59645 | CHB |
| rs12342831 | B4GALT1  | GI_13929461-S | 9 | 9 | 33114872  | 13954  | 7.5965  | 5.59645 | CHB |
| rs10758189 | B4GALT1  | GI_13929461-S | 9 | 9 | 33115804  | 14886  | 7.5061  | 5.59645 | CHB |
| rs10813950 | B4GALT1  | GI_13929461-S | 9 | 9 | 33117640  | 16722  | 7.5061  | 5.59645 | CHB |
| rs10813951 | B4GALT1  | GI_13929461-S | 9 | 9 | 33118021  | 17103  | 7.5965  | 5.59645 | CHB |
| rs3780491  | B4GALT1  | GI_13929461-S | 9 | 9 | 33119607  | 18689  | 8.5438  | 5.59645 | CHB |
| rs10124479 | B4GALT1  | GI_13929461-S | 9 | 9 | 33126233  | 25315  | 7.0635  | 5.59645 | CHB |
| rs10813954 | B4GALT1  | GI_13929461-S | 9 | 9 | 33127596  | 26678  | 7.5061  | 5.59645 | CHB |
| rs7849148  | B4GALT1  | GI_13929461-S | 9 | 9 | 33128352  | 27434  | 7.5061  | 5.59645 | CHB |
| rs10971424 | B4GALT1  | GI_13929461-S | 9 | 9 | 33128775  | 27857  | 7.5354  | 5.59645 | CHB |
| rs3780486  | B4GALT1  | GI_13929461-S | 9 | 9 | 33129453  | 28535  | 7.5965  | 5.59645 | CHB |
| rs7865745  | B4GALT1  | GI_13929461-S | 9 | 9 | 33130976  | 30058  | 7.5061  | 5.59645 | CHB |
| rs7036812  | B4GALT1  | GI_13929461-S | 9 | 9 | 33133822  | 32904  | 7.9984  | 5.59645 | CHB |
| rs10813957 | B4GALT1  | GI_13929461-S | 9 | 9 | 33143527  | 42609  | 7.5965  | 5.59645 | CHB |
| rs10971438 | B4GALT1  | GI_13929461-S | 9 | 9 | 33170308  | 69390  | 5.7551  | 5.59645 | CHB |
| rs10813960 | B4GALT1  | GI_13929461-S | 9 | 9 | 33170362  | 69444  | 6.5609  | 5.59645 | CHB |
| rs10814080 | NUDT2    | GI_22219466-A | 9 | 9 | 34216942  | 116561 | 8.8615  | 5.73208 | CHB |
| rs10814080 | NUDT2    | GI_22265329-I | 9 | 9 | 34216942  | 109312 | 7.6027  | 5.73208 | CHB |
| rs7857658  | NUDT2    | GI_22265329-I | 9 | 9 | 34232242  | 94012  | 6.4678  | 5.73208 | CHB |
| rs1049557  | NUDT2    | GI_22265329-I | 9 | 9 | 34241943  | 84311  | 5.8594  | 5.73208 | CHB |
| rs10814083 | NUDT2    | GI_22265329-I | 9 | 9 | 34246347  | 79907  | 6.4678  | 5.73208 | CHB |
| rs10814084 | NUDT2    | GI_22219466-A | 9 | 9 | 34253389  | 80114  | 9.2024  | 5.73208 | CHB |
| rs10814084 | NUDT2    | GI_22265329-I | 9 | 9 | 34253389  | 72865  | 9.7242  | 5.73208 | CHB |
| rs10814086 | NUDT2    | GI_22219466-A | 9 | 9 | 34254597  | 78906  | 8.92    | 5.73208 | CHB |
| rs10814086 | NUDT2    | GI_22265329-I | 9 | 9 | 34254597  | 71657  | 9.6844  | 5.73208 | CHB |
| rs10814091 | NUDT2    | GI_22219466-A | 9 | 9 | 34277840  | 55663  | 7.649   | 5.73208 | CHB |
| rs10814091 | NUDT2    | GI_22265329-I | 9 | 9 | 34277840  | 48414  | 10.1572 | 5.73208 | CHB |
| rs10972047 | NUDT2    | GI_22219466-A | 9 | 9 | 34300357  | 33146  | 11.8473 | 5.73208 | CHB |
| rs10972047 | NUDT2    | GI_22265329-I | 9 | 9 | 34300357  | 25897  | 12.7532 | 5.73208 | CHB |
| rs10814098 | NUDT2    | GI_22219466-A | 9 | 9 | 34314168  | 19335  | 11.8473 | 5.73208 | CHB |
| rs10814098 | NUDT2    | GI_22265329-I | 9 | 9 | 34314168  | 12086  | 12.7532 | 5.73208 | CHB |
| rs7039222  | NUDT2    | GI_22219466-A | 9 | 9 | 34322740  | 10763  | 11.8473 | 5.73208 | CHB |
| rs7039222  | NUDT2    | GI_22265329-I | 9 | 9 | 34322740  | 3514   | 12.7532 | 5.73208 | CHB |
| rs16935536 | NUDT2    | GI_22265329-I | 9 | 9 | 34324126  | 2128   | 5.9465  | 5.73208 | CHB |
| rs10814105 | NUDT2    | GI_22219466-A | 9 | 9 | 34359062  | 25559  | 10.2793 | 5.73208 | CHB |
| rs10814105 | NUDT2    | GI_22265329-I | 9 | 9 | 34359062  | 32808  | 10.687  | 5.73208 | CHB |
| rs7852399  | NUDT2    | GI_22219466-A | 9 | 9 | 34361788  | 28285  | 6.4829  | 5.73208 | CHB |
| rs4310287  | NUDT2    | GI_22219466-A | 9 | 9 | 34364979  | 31476  | 10.7614 | 5.73208 | CHB |
| rs4310287  | NUDT2    | GI_22265329-I | 9 | 9 | 34364979  | 38725  | 11.4262 | 5.73208 | CHB |
| rs3818830  | NUDT2    | GI_22219466-A | 9 | 9 | 34368999  | 35496  | 5.7769  | 5.73208 | CHB |
| rs2273768  | C9orf95  | GI_8923529-S  | 9 | 9 | 74927820  | 14288  | 7.4435  | 6.00451 | CHB |
| rs10869495 | C9orf95  | GI_8923529-S  | 9 | 9 | 74929453  | 15921  | 7.4435  | 6.00451 | CHB |
| rs10869497 | C9orf95  | GI_8923529-S  | 9 | 9 | 74935124  | 21592  | 7.4435  | 6.00451 | CHB |
| rs10869499 | C9orf95  | GI_8923529-S  | 9 | 9 | 74935481  | 21949  | 7.4435  | 6.00451 | CHB |
| rs11144225 | C9orf95  | GI_8923529-S  | 9 | 9 | 74936854  | 23322  | 7.3301  | 6.00451 | CHB |

|            |           |               |   |   |          |        |        |         |     |
|------------|-----------|---------------|---|---|----------|--------|--------|---------|-----|
| rs10869500 | C9orf95   | GI_8923529-S  | 9 | 9 | 74937249 | 23717  | 7.4018 | 6.00451 | CHB |
| rs3824348  | C9orf95   | GI_8923529-S  | 9 | 9 | 74968105 | 54573  | 7.4435 | 6.00451 | CHB |
| rs6560421  | C9orf95   | GI_8923529-S  | 9 | 9 | 74973970 | 60438  | 7.5304 | 6.00451 | CHB |
| rs10491839 | VPS13A    | GI_15619007-I | 9 | 9 | 77270451 | 41099  | 6.3025 | 6.14748 | CHB |
| rs10747015 | VPS13A    | GI_15619007-I | 9 | 9 | 77271438 | 42086  | 7.1434 | 6.14748 | CHB |
| rs2377908  | VPS13A    | GI_15619007-I | 9 | 9 | 77272870 | 43518  | 6.8318 | 6.14748 | CHB |
| rs6478977  | LOC286353 | GI_27478844-S | 9 | 9 | 95639831 | 8439   | 6.7394 | 5.88924 | CHB |
| rs7871709  | LOC286353 | GI_27478844-S | 9 | 9 | 95640165 | 8105   | 6.2791 | 5.88924 | CHB |
| rs816675   | LOC286353 | GI_27478844-S | 9 | 9 | 95648636 | 366    | 6.2791 | 5.88924 | CHB |
| rs816673   | LOC286353 | GI_27478844-S | 9 | 9 | 95652971 | 4701   | 6.218  | 5.88924 | CHB |
| rs816670   | LOC286353 | GI_27478844-S | 9 | 9 | 95654989 | 6719   | 6.2791 | 5.88924 | CHB |
| rs700962   | LOC286353 | GI_27478844-S | 9 | 9 | 95657603 | 9333   | 6.218  | 5.88924 | CHB |
| rs816683   | LOC286353 | GI_27478844-S | 9 | 9 | 95664656 | 16386  | 6.2791 | 5.88924 | CHB |
| rs13299166 | LOC286353 | GI_27478844-S | 9 | 9 | 95675086 | 26816  | 6.1601 | 5.88924 | CHB |
| rs10818574 | LOC286353 | GI_27478844-S | 9 | 9 | 95678522 | 30252  | 6.2791 | 5.88924 | CHB |
| rs10760189 | LOC286353 | GI_27478844-S | 9 | 9 | 95680380 | 32110  | 6.2791 | 5.88924 | CHB |
| rs10985499 | LOC286353 | GI_27478844-S | 9 | 9 | 95682561 | 34291  | 6.2791 | 5.88924 | CHB |
| rs10760261 | LOC286353 | GI_27478844-S | 9 | 9 | 95692066 | 43796  | 6.7783 | 5.88924 | CHB |
| rs10760269 | LOC286353 | GI_27478844-S | 9 | 9 | 95694734 | 46464  | 6.7783 | 5.88924 | CHB |
| rs12349742 | LOC286353 | GI_27478844-S | 9 | 9 | 95699535 | 51265  | 6.7783 | 5.88924 | CHB |
| rs10818899 | LOC286353 | GI_27478844-S | 9 | 9 | 95701966 | 53696  | 6.266  | 5.88924 | CHB |
| rs689986   | LOC286353 | GI_27478844-S | 9 | 9 | 95708704 | 60434  | 6.7095 | 5.88924 | CHB |
| rs690633   | LOC286353 | GI_27478844-S | 9 | 9 | 95709731 | 61461  | 6.7783 | 5.88924 | CHB |
| rs689697   | LOC286353 | GI_27478844-S | 9 | 9 | 95718397 | 70127  | 6.7783 | 5.88924 | CHB |
| rs690495   | LOC286353 | GI_27478844-S | 9 | 9 | 95735348 | 87078  | 6.6441 | 5.88924 | CHB |
| rs12345187 | LOC286353 | GI_27478844-S | 9 | 9 | 95747925 | 99655  | 6.6961 | 5.88924 | CHB |
| rs617187   | LOC286353 | GI_27478844-S | 9 | 9 | 95759196 | 110926 | 6.6441 | 5.88924 | CHB |
| rs689619   | LOC286353 | GI_27478844-S | 9 | 9 | 95763526 | 115256 | 6.6961 | 5.88924 | CHB |
| rs10512245 | LOC286353 | GI_27478844-S | 9 | 9 | 95771366 | 123096 | 6.5035 | 5.88924 | CHB |
| rs671058   | LOC286353 | GI_27478844-S | 9 | 9 | 95773565 | 125295 | 6.5032 | 5.88924 | CHB |
| rs690056   | LOC286353 | GI_27478844-S | 9 | 9 | 95780541 | 132271 | 6.6961 | 5.88924 | CHB |
| rs682682   | LOC286353 | GI_27478844-S | 9 | 9 | 95781817 | 133547 | 6.1356 | 5.88924 | CHB |
| rs10988755 | LOC286353 | GI_27478844-S | 9 | 9 | 95785922 | 137652 | 6.5697 | 5.88924 | CHB |
| rs10988817 | LOC286353 | GI_27478844-S | 9 | 9 | 95802201 | 153931 | 6.6961 | 5.88924 | CHB |
| rs684455   | LOC286353 | GI_27478844-S | 9 | 9 | 95805898 | 157628 | 6.6961 | 5.88924 | CHB |
| rs589362   | LOC286353 | GI_27478844-S | 9 | 9 | 95808743 | 160473 | 6.6961 | 5.88924 | CHB |
| rs686048   | LOC286353 | GI_27478844-S | 9 | 9 | 95808937 | 160667 | 6.6961 | 5.88924 | CHB |
| rs649819   | LOC286353 | GI_27478844-S | 9 | 9 | 95811160 | 162890 | 6.6961 | 5.88924 | CHB |
| rs689761   | LOC286353 | GI_27478844-S | 9 | 9 | 95812739 | 164469 | 6.6961 | 5.88924 | CHB |
| rs666093   | LOC286353 | GI_27478844-S | 9 | 9 | 95825657 | 177387 | 6.6961 | 5.88924 | CHB |
| rs657451   | LOC286353 | GI_27478844-S | 9 | 9 | 95845333 | 197063 | 6.3007 | 5.88924 | CHB |
| rs625105   | LOC286353 | GI_27478844-S | 9 | 9 | 95849303 | 201033 | 6.2604 | 5.88924 | CHB |
| rs10983853 | Hs.43687  | Hs.43687-S    | 9 | 9 | 97659310 | 84260  | 7.1518 | 6.15261 | CHB |
| rs10983855 | Hs.43687  | Hs.43687-S    | 9 | 9 | 97660192 | 83378  | 7.1518 | 6.15261 | CHB |
| rs4297160  | Hs.43687  | Hs.43687-S    | 9 | 9 | 97665061 | 78509  | 6.5422 | 6.15261 | CHB |
| rs10983871 | Hs.43687  | Hs.43687-S    | 9 | 9 | 97665373 | 78197  | 7.1518 | 6.15261 | CHB |
| rs7045138  | Hs.43687  | Hs.43687-S    | 9 | 9 | 97671018 | 72552  | 6.5422 | 6.15261 | CHB |
| rs2401639  | Hs.43687  | Hs.43687-S    | 9 | 9 | 97687392 | 56178  | 6.8605 | 6.15261 | CHB |
| rs12348691 | Hs.43687  | Hs.43687-S    | 9 | 9 | 97688237 | 55333  | 6.8605 | 6.15261 | CHB |
| rs13288000 | Hs.43687  | Hs.43687-S    | 9 | 9 | 97688535 | 55035  | 6.8605 | 6.15261 | CHB |
| rs7873389  | Hs.43687  | Hs.43687-S    | 9 | 9 | 97688785 | 54785  | 6.5406 | 6.15261 | CHB |
| rs894673   | Hs.43687  | Hs.43687-S    | 9 | 9 | 97691825 | 51745  | 6.8605 | 6.15261 | CHB |
| rs3758251  | Hs.43687  | Hs.43687-S    | 9 | 9 | 97693255 | 50315  | 6.8605 | 6.15261 | CHB |
| rs3758249  | Hs.43687  | Hs.43687-S    | 9 | 9 | 97693695 | 49875  | 6.8605 | 6.15261 | CHB |
| rs1443434  | Hs.43687  | Hs.43687-S    | 9 | 9 | 97697034 | 46536  | 6.8605 | 6.15261 | CHB |
| rs4460498  | Hs.43687  | Hs.43687-S    | 9 | 9 | 97699967 | 43603  | 6.7049 | 6.15261 | CHB |

|            |           |               |    |    |           |        |         |         |     |
|------------|-----------|---------------|----|----|-----------|--------|---------|---------|-----|
| rs874004   | Hs.43687  | Hs.43687-S    | 9  | 9  | 97701673  | 41897  | 6.3519  | 6.15261 | CHB |
| rs7357707  | Hs.43687  | Hs.43687-S    | 9  | 9  | 97710504  | 33066  | 6.3519  | 6.15261 | CHB |
| rs7033315  | Hs.43687  | Hs.43687-S    | 9  | 9  | 97715795  | 27775  | 6.3519  | 6.15261 | CHB |
| rs7853349  | Hs.43687  | Hs.43687-S    | 9  | 9  | 97729814  | 13756  | 6.3519  | 6.15261 | CHB |
| rs6586     | Hs.43687  | Hs.43687-S    | 9  | 9  | 97746486  | 2916   | 6.3519  | 6.15261 | CHB |
| rs1561958  | Hs.43687  | Hs.43687-S    | 9  | 9  | 97749354  | 5784   | 6.3519  | 6.15261 | CHB |
| rs4743758  | NIPSNAP3B | GI_21361742-S | 9  | 9  | 104595369 | 20452  | 7.1585  | 6.02987 | CHB |
| rs4742921  | NIPSNAP3B | GI_21361742-S | 9  | 9  | 104595670 | 20151  | 6.5899  | 6.02987 | CHB |
| rs12351593 | NIPSNAP3B | GI_21361742-S | 9  | 9  | 104595896 | 19925  | 7.4638  | 6.02987 | CHB |
| rs10124782 | NIPSNAP3B | GI_21361742-S | 9  | 9  | 104598628 | 17193  | 7.4638  | 6.02987 | CHB |
| rs2162116  | NIPSNAP3B | GI_21361742-S | 9  | 9  | 104608968 | 6853   | 7.4638  | 6.02987 | CHB |
| rs4149340  | NIPSNAP3B | GI_21361742-S | 9  | 9  | 104624240 | 8419   | 7.4638  | 6.02987 | CHB |
| rs9650734  | BSPRY     | GI_8923147-S  | 9  | 9  | 112866194 | 346815 | 6.0806  | 5.95289 | CHB |
| rs872423   | CDK5RAP2  | GI_28872785-S | 9  | 9  | 120229045 | 1793   | 7.4928  | 5.60807 | CHB |
| rs7037806  | CDK5RAP2  | GI_28872785-S | 9  | 9  | 120230679 | 159    | 7.385   | 5.60807 | CHB |
| rs2297456  | CDK5RAP2  | GI_28872785-S | 9  | 9  | 120231795 | 957    | 7.4928  | 5.60807 | CHB |
| rs10125592 | CDK5RAP2  | GI_28872785-S | 9  | 9  | 120241289 | 10451  | 6.9842  | 5.60807 | CHB |
| rs10119527 | CDK5RAP2  | GI_28872785-S | 9  | 9  | 120241488 | 10650  | 6.9842  | 5.60807 | CHB |
| rs10818455 | CDK5RAP2  | GI_28872785-S | 9  | 9  | 120241946 | 11108  | 6.9842  | 5.60807 | CHB |
| rs12376337 | CDK5RAP2  | GI_28872785-S | 9  | 9  | 120242349 | 11511  | 7.4928  | 5.60807 | CHB |
| rs1547266  | CDK5RAP2  | GI_28872785-S | 9  | 9  | 120243030 | 12192  | 7.4928  | 5.60807 | CHB |
| rs3780673  | CDK5RAP2  | GI_28872785-S | 9  | 9  | 120246137 | 15299  | 7.4928  | 5.60807 | CHB |
| rs3780674  | CDK5RAP2  | GI_28872785-S | 9  | 9  | 120246473 | 15635  | 7.4928  | 5.60807 | CHB |
| rs16909810 | CDK5RAP2  | GI_28872785-S | 9  | 9  | 120322007 | 91169  | 6.3529  | 5.60807 | CHB |
| rs10984936 | CDK5RAP2  | GI_28872785-S | 9  | 9  | 120359152 | 128314 | 5.8     | 5.60807 | CHB |
| rs10984944 | CDK5RAP2  | GI_28872785-S | 9  | 9  | 120376518 | 145680 | 5.8038  | 5.60807 | CHB |
| rs7868597  | CDK5RAP2  | GI_28872785-S | 9  | 9  | 120377873 | 147035 | 5.8038  | 5.60807 | CHB |
| rs1475664  | CDK5RAP2  | GI_28872785-S | 9  | 9  | 120380208 | 149370 | 5.8038  | 5.60807 | CHB |
| rs10760482 | SLC2A8    | GI_21361448-S | 9  | 9  | 127209361 | 40030  | 5.9757  | 5.89861 | CHB |
| rs2247573  | SLC2A8    | GI_21361448-S | 9  | 9  | 127290500 | 41109  | 6.449   | 5.89861 | CHB |
| rs2247310  | SLC2A8    | GI_21361448-S | 9  | 9  | 127292664 | 43273  | 7.312   | 5.89861 | CHB |
| rs2246270  | RPL12     | GI_15431291-S | 9  | 9  | 127326118 | 32927  | 6.0186  | 5.79894 | CHB |
| rs2254622  | RPL12     | GI_15431291-S | 9  | 9  | 127362393 | 69202  | 6.1615  | 5.79894 | CHB |
| rs17150482 | SURF1     | GI_19557683-S | 9  | 9  | 133224149 | 24725  | 7.2533  | 6.16523 | CHB |
| rs886089   | SURF1     | GI_19557683-S | 9  | 9  | 133229020 | 19854  | 6.5458  | 6.16523 | CHB |
| rs487820   | SURF1     | GI_19557683-S | 9  | 9  | 133241923 | 6951   | 7.0386  | 6.16523 | CHB |
| rs616836   | SURF1     | GI_19557683-S | 9  | 9  | 133243075 | 5799   | 7.8924  | 6.16523 | CHB |
| rs553877   | SURF1     | GI_19557683-S | 9  | 9  | 133244509 | 4365   | 7.8924  | 6.16523 | CHB |
| rs484248   | SURF1     | GI_19557683-S | 9  | 9  | 133248144 | 730    | 6.7222  | 6.16523 | CHB |
| rs599924   | SURF1     | GI_19557683-S | 9  | 9  | 133248145 | 729    | 6.7222  | 6.16523 | CHB |
| rs2296810  | SURF1     | GI_19557683-S | 9  | 9  | 133257248 | 8374   | 7.8924  | 6.16523 | CHB |
| rs1059773  | SURF1     | GI_19557683-S | 9  | 9  | 133258419 | 9545   | 7.8924  | 6.16523 | CHB |
| rs2494     | SURF1     | GI_19557683-S | 9  | 9  | 133259387 | 10513  | 7.8924  | 6.16523 | CHB |
| rs17293266 | SURF1     | GI_19557683-S | 9  | 9  | 133262312 | 13438  | 6.5846  | 6.16523 | CHB |
| rs1179037  | SURF1     | GI_19557683-S | 9  | 9  | 133268063 | 19189  | 7.0386  | 6.16523 | CHB |
| rs3124751  | SURF1     | GI_19557683-S | 9  | 9  | 133295460 | 46586  | 7.0539  | 6.16523 | CHB |
| rs3124782  | SURF1     | GI_19557683-S | 9  | 9  | 133300550 | 51676  | 6.3025  | 6.16523 | CHB |
| rs3124781  | SURF1     | GI_19557683-S | 9  | 9  | 133304867 | 55993  | 7.2517  | 6.16523 | CHB |
| rs3118663  | SURF1     | GI_19557683-S | 9  | 9  | 133311307 | 62433  | 6.3025  | 6.16523 | CHB |
| rs3124779  | SURF1     | GI_19557683-S | 9  | 9  | 133311520 | 62646  | 7.2517  | 6.16523 | CHB |
| rs3124776  | SURF1     | GI_19557683-S | 9  | 9  | 133314004 | 65130  | 6.3025  | 6.16523 | CHB |
| rs3812561  | LOC206962 | GI_22046332-S | 9  | 9  | 136546713 | 13328  | 6.0228  | 5.95415 | CHB |
| rs11145846 | LOC206962 | GI_22046332-S | 9  | 9  | 136561492 | 28107  | 6.0228  | 5.95415 | CHB |
| rs1055340  | PTER      | GI_20070185-S | 10 | 10 | 16595534  | 974    | 15.7117 | 6.2148  | CHB |
| rs7909832  | PTER      | GI_20070185-S | 10 | 10 | 16596716  | 2156   | 14.534  | 6.2148  | CHB |
| rs2298126  | PTER      | GI_20070185-S | 10 | 10 | 16598991  | 4431   | 8.7823  | 6.2148  | CHB |

|            |           |               |    |    |          |       |         |         |     |
|------------|-----------|---------------|----|----|----------|-------|---------|---------|-----|
| rs2796332  | LOC387647 | GI_42659552-S | 10 | 10 | 29717054 | 35782 | 10.9187 | 5.94247 | CHB |
| rs2182757  | LOC387647 | GI_42659552-S | 10 | 10 | 29723671 | 29165 | 10.1562 | 5.94247 | CHB |
| rs6481579  | LOC387647 | GI_42659552-S | 10 | 10 | 29725998 | 26838 | 10.9187 | 5.94247 | CHB |
| rs6481580  | LOC387647 | GI_42659552-S | 10 | 10 | 29726244 | 26592 | 10.8426 | 5.94247 | CHB |
| rs7070414  | LOC387647 | GI_42659552-S | 10 | 10 | 29727486 | 25350 | 10.508  | 5.94247 | CHB |
| rs2368416  | LOC387647 | GI_42659552-S | 10 | 10 | 29736991 | 15845 | 10.9187 | 5.94247 | CHB |
| rs4237392  | LOC387647 | GI_42659552-S | 10 | 10 | 29737233 | 15603 | 10.8426 | 5.94247 | CHB |
| rs2887242  | LOC387647 | GI_42659552-S | 10 | 10 | 29737245 | 15591 | 10.4653 | 5.94247 | CHB |
| rs10740802 | LOC387647 | GI_42659552-S | 10 | 10 | 29738242 | 14594 | 10.9187 | 5.94247 | CHB |
| rs7073366  | LOC387647 | GI_42659552-S | 10 | 10 | 29740398 | 12438 | 10.0869 | 5.94247 | CHB |
| rs6481586  | LOC387647 | GI_42659552-S | 10 | 10 | 29741221 | 11615 | 10.8426 | 5.94247 | CHB |
| rs7902800  | LOC387647 | GI_42659552-S | 10 | 10 | 29741253 | 11583 | 10.3304 | 5.94247 | CHB |
| rs10826616 | LOC387647 | GI_42659552-S | 10 | 10 | 29742543 | 10293 | 10.9187 | 5.94247 | CHB |
| rs7086784  | LOC387647 | GI_42659552-S | 10 | 10 | 29742824 | 10012 | 9.4847  | 5.94247 | CHB |
| rs2182400  | LOC387647 | GI_42659552-S | 10 | 10 | 29747557 | 5279  | 10.8426 | 5.94247 | CHB |
| rs4749421  | LOC387647 | GI_42659552-S | 10 | 10 | 29751526 | 1310  | 10.8426 | 5.94247 | CHB |
| rs4749422  | LOC387647 | GI_42659552-S | 10 | 10 | 29751909 | 927   | 10.9279 | 5.94247 | CHB |
| rs10763716 | LOC387647 | GI_42659552-S | 10 | 10 | 29753497 | 661   | 10.5492 | 5.94247 | CHB |
| rs10826617 | LOC387647 | GI_42659552-S | 10 | 10 | 29753937 | 1101  | 10.8426 | 5.94247 | CHB |
| rs7081352  | LOC387647 | GI_42659552-S | 10 | 10 | 29754515 | 1679  | 10.8426 | 5.94247 | CHB |
| rs7078150  | LOC387647 | GI_42659552-S | 10 | 10 | 29755085 | 2249  | 10.8426 | 5.94247 | CHB |
| rs10082484 | LOC387647 | GI_42659552-S | 10 | 10 | 29755467 | 2631  | 10.8426 | 5.94247 | CHB |
| rs8317     | LOC387647 | GI_42659552-S | 10 | 10 | 29756359 | 3523  | 10.9187 | 5.94247 | CHB |
| rs7392705  | LOC387647 | GI_42659552-S | 10 | 10 | 29757378 | 4542  | 10.8426 | 5.94247 | CHB |
| rs4747656  | LOC387647 | GI_42659552-S | 10 | 10 | 29757510 | 4674  | 10.8426 | 5.94247 | CHB |
| rs4749423  | LOC387647 | GI_42659552-S | 10 | 10 | 29757845 | 5009  | 10.8426 | 5.94247 | CHB |
| rs4749424  | LOC387647 | GI_42659552-S | 10 | 10 | 29759251 | 6415  | 10.8426 | 5.94247 | CHB |
| rs7077629  | LOC387647 | GI_42659552-S | 10 | 10 | 29765529 | 12693 | 10.8426 | 5.94247 | CHB |
| rs4749429  | LOC387647 | GI_42659552-S | 10 | 10 | 29771592 | 18756 | 10.9187 | 5.94247 | CHB |
| rs2368411  | LOC387647 | GI_42659552-S | 10 | 10 | 29776306 | 23470 | 10.8426 | 5.94247 | CHB |
| rs11007591 | LOC387647 | GI_42659552-S | 10 | 10 | 29779687 | 26851 | 10.9187 | 5.94247 | CHB |
| rs7081524  | LOC387647 | GI_42659552-S | 10 | 10 | 29782090 | 29254 | 7.5057  | 5.94247 | CHB |
| rs7916641  | LOC387647 | GI_42659552-S | 10 | 10 | 29786091 | 33255 | 10.508  | 5.94247 | CHB |
| rs10740803 | LOC387647 | GI_42659552-S | 10 | 10 | 29790196 | 37360 | 10.8426 | 5.94247 | CHB |
| rs6481593  | LOC387647 | GI_42659552-S | 10 | 10 | 29793698 | 40862 | 10.8426 | 5.94247 | CHB |
| rs4749433  | LOC387647 | GI_42659552-S | 10 | 10 | 29795726 | 42890 | 9.1807  | 5.94247 | CHB |
| rs4749434  | LOC387647 | GI_42659552-S | 10 | 10 | 29797042 | 44206 | 9.3853  | 5.94247 | CHB |
| rs4747659  | LOC387647 | GI_42659552-S | 10 | 10 | 29797497 | 44661 | 11.0602 | 5.94247 | CHB |
| rs7906814  | LOC387647 | GI_42659552-S | 10 | 10 | 29799788 | 46952 | 9.3671  | 5.94247 | CHB |
| rs6481595  | LOC387647 | GI_42659552-S | 10 | 10 | 29800657 | 47821 | 10.8686 | 5.94247 | CHB |
| rs7897170  | LOC387647 | GI_42659552-S | 10 | 10 | 29801301 | 48465 | 10.3072 | 5.94247 | CHB |
| rs10826629 | LOC387647 | GI_42659552-S | 10 | 10 | 29801320 | 48484 | 10.8686 | 5.94247 | CHB |
| rs2281946  | LOC387647 | GI_42659552-S | 10 | 10 | 29802265 | 49429 | 10.8686 | 5.94247 | CHB |
| rs7097877  | LOC387647 | GI_42659552-S | 10 | 10 | 29803665 | 50829 | 10.8686 | 5.94247 | CHB |
| rs10763719 | LOC387647 | GI_42659552-S | 10 | 10 | 29803900 | 51064 | 10.8686 | 5.94247 | CHB |
| rs10740806 | LOC387647 | GI_42659552-S | 10 | 10 | 29804581 | 51745 | 10.8686 | 5.94247 | CHB |
| rs10826631 | LOC387647 | GI_42659552-S | 10 | 10 | 29804683 | 51847 | 10.7878 | 5.94247 | CHB |
| rs6481596  | LOC387647 | GI_42659552-S | 10 | 10 | 29805736 | 52900 | 7.1169  | 5.94247 | CHB |
| rs913034   | LOC387647 | GI_42659552-S | 10 | 10 | 29807247 | 54411 | 8.5442  | 5.94247 | CHB |
| rs7096453  | LOC387647 | GI_42659552-S | 10 | 10 | 29808505 | 55669 | 7.0247  | 5.94247 | CHB |
| rs3858231  | LOC387647 | GI_42659552-S | 10 | 10 | 29814161 | 61325 | 9.4696  | 5.94247 | CHB |
| rs10826644 | LOC387647 | GI_42659552-S | 10 | 10 | 29817312 | 64476 | 9.9889  | 5.94247 | CHB |
| rs11007619 | LOC387647 | GI_42659552-S | 10 | 10 | 29819061 | 66225 | 9.5097  | 5.94247 | CHB |
| rs3780853  | LOC387647 | GI_42659552-S | 10 | 10 | 29819205 | 66369 | 9.5097  | 5.94247 | CHB |
| rs10826645 | LOC387647 | GI_42659552-S | 10 | 10 | 29819236 | 66400 | 9.4611  | 5.94247 | CHB |
| rs11007621 | LOC387647 | GI_42659552-S | 10 | 10 | 29819551 | 66715 | 9.4657  | 5.94247 | CHB |

|            |           |               |    |    |          |        |         |         |     |
|------------|-----------|---------------|----|----|----------|--------|---------|---------|-----|
| rs2281940  | LOC387647 | GI_42659552-S | 10 | 10 | 29820166 | 67330  | 7.7023  | 5.94247 | CHB |
| rs2281941  | LOC387647 | GI_42659552-S | 10 | 10 | 29820297 | 67461  | 10.8686 | 5.94247 | CHB |
| rs7076662  | C10orf64  | GI_40255173-S | 10 | 10 | 49611073 | 2971   | 6.8899  | 5.72998 | CHB |
| rs10776642 | C10orf64  | GI_40255173-S | 10 | 10 | 49612776 | 1268   | 6.5481  | 5.72998 | CHB |
| rs4838646  | C10orf64  | GI_40255173-S | 10 | 10 | 49615600 | 1556   | 6.6533  | 5.72998 | CHB |
| rs17836423 | C10orf64  | GI_40255173-S | 10 | 10 | 49617648 | 3604   | 6.7808  | 5.72998 | CHB |
| rs12242299 | C10orf64  | GI_40255173-S | 10 | 10 | 49623610 | 9566   | 6.2246  | 5.72998 | CHB |
| rs10826176 | TFAM      | GI_4507400-I  | 10 | 10 | 59811543 | 14230  | 7.5364  | 5.76733 | CHB |
| rs11006127 | TFAM      | GI_4507400-I  | 10 | 10 | 59813027 | 12746  | 7.6918  | 5.76733 | CHB |
| rs16912188 | TFAM      | GI_4507400-I  | 10 | 10 | 59818757 | 7016   | 7.7467  | 5.76733 | CHB |
| rs16912196 | TFAM      | GI_4507400-I  | 10 | 10 | 59821152 | 4621   | 8.6232  | 5.76733 | CHB |
| rs16912197 | TFAM      | GI_4507400-I  | 10 | 10 | 59821248 | 4525   | 7.0582  | 5.76733 | CHB |
| rs16912201 | TFAM      | GI_4507400-I  | 10 | 10 | 59826692 | 919    | 8.6232  | 5.76733 | CHB |
| rs16912202 | TFAM      | GI_4507400-I  | 10 | 10 | 59828076 | 2303   | 8.6232  | 5.76733 | CHB |
| rs4747061  | PRF1      | GI_40254807-S | 10 | 10 | 72009074 | 18902  | 7.4877  | 6.42461 | CHB |
| rs3736278  | NUDT13    | GI_34330151-S | 10 | 10 | 74460386 | 100542 | 5.4877  | 5.40356 | CHB |
| rs12248308 | NUDT13    | GI_34330151-S | 10 | 10 | 74461628 | 99300  | 5.4877  | 5.40356 | CHB |
| rs7094342  | NUDT13    | GI_34330151-S | 10 | 10 | 74462172 | 98756  | 5.4877  | 5.40356 | CHB |
| rs7076642  | NUDT13    | GI_34330151-S | 10 | 10 | 74462469 | 98459  | 5.4203  | 5.40356 | CHB |
| rs12244049 | NUDT13    | GI_34330151-S | 10 | 10 | 74466669 | 94259  | 5.4877  | 5.40356 | CHB |
| rs12249126 | NUDT13    | GI_34330151-S | 10 | 10 | 74470638 | 90290  | 5.4877  | 5.40356 | CHB |
| rs10823975 | NUDT13    | GI_34330151-S | 10 | 10 | 74474450 | 86478  | 5.4877  | 5.40356 | CHB |
| rs11000499 | NUDT13    | GI_34330151-S | 10 | 10 | 74474938 | 85990  | 5.4877  | 5.40356 | CHB |
| rs16930271 | NUDT13    | GI_34330151-S | 10 | 10 | 74478991 | 81937  | 5.4877  | 5.40356 | CHB |
| rs6480659  | NUDT13    | GI_34330151-S | 10 | 10 | 74479623 | 81305  | 5.4877  | 5.40356 | CHB |
| rs7078818  | NUDT13    | GI_34330151-S | 10 | 10 | 74480549 | 80379  | 5.4877  | 5.40356 | CHB |
| rs12244027 | NUDT13    | GI_34330151-S | 10 | 10 | 74489595 | 71333  | 5.4877  | 5.40356 | CHB |
| rs12262696 | NUDT13    | GI_34330151-S | 10 | 10 | 74491111 | 69817  | 6.1652  | 5.40356 | CHB |
| rs12249431 | NUDT13    | GI_34330151-S | 10 | 10 | 74495202 | 65726  | 5.4877  | 5.40356 | CHB |
| rs7904719  | NUDT13    | GI_34330151-S | 10 | 10 | 74496637 | 64291  | 5.4877  | 5.40356 | CHB |
| rs4387274  | NUDT13    | GI_34330151-S | 10 | 10 | 74501304 | 59624  | 5.4877  | 5.40356 | CHB |
| rs10823977 | NUDT13    | GI_34330151-S | 10 | 10 | 74506792 | 54136  | 5.4877  | 5.40356 | CHB |
| rs12570974 | NUDT13    | GI_34330151-S | 10 | 10 | 74510261 | 50667  | 5.4877  | 5.40356 | CHB |
| rs12242214 | NUDT13    | GI_34330151-S | 10 | 10 | 74513083 | 47845  | 5.4877  | 5.40356 | CHB |
| rs12242222 | NUDT13    | GI_34330151-S | 10 | 10 | 74513132 | 47796  | 5.4877  | 5.40356 | CHB |
| rs7905836  | NUDT13    | GI_34330151-S | 10 | 10 | 74514395 | 46533  | 5.4877  | 5.40356 | CHB |
| rs7078127  | NUDT13    | GI_34330151-S | 10 | 10 | 74517640 | 43288  | 5.4877  | 5.40356 | CHB |
| rs6480667  | NUDT13    | GI_34330151-S | 10 | 10 | 74518880 | 42048  | 5.4877  | 5.40356 | CHB |
| rs6480668  | NUDT13    | GI_34330151-S | 10 | 10 | 74519332 | 41596  | 5.4877  | 5.40356 | CHB |
| rs7095810  | NUDT13    | GI_34330151-S | 10 | 10 | 74524150 | 36778  | 5.4877  | 5.40356 | CHB |
| rs7918396  | NUDT13    | GI_34330151-S | 10 | 10 | 74527553 | 33375  | 5.4877  | 5.40356 | CHB |
| rs7082363  | NUDT13    | GI_34330151-S | 10 | 10 | 74528776 | 32152  | 5.4877  | 5.40356 | CHB |
| rs7894359  | NUDT13    | GI_34330151-S | 10 | 10 | 74534394 | 26534  | 5.4877  | 5.40356 | CHB |
| rs872457   | NUDT13    | GI_34330151-S | 10 | 10 | 74539797 | 21131  | 5.4877  | 5.40356 | CHB |
| rs2280369  | NUDT13    | GI_34330151-S | 10 | 10 | 74540513 | 20415  | 5.4877  | 5.40356 | CHB |
| rs9971273  | NUDT13    | GI_34330151-S | 10 | 10 | 74543752 | 17176  | 5.4877  | 5.40356 | CHB |
| rs7916539  | NUDT13    | GI_34330151-S | 10 | 10 | 74548357 | 12571  | 5.4877  | 5.40356 | CHB |
| rs3829166  | NUDT13    | GI_34330151-S | 10 | 10 | 74549380 | 11548  | 5.4877  | 5.40356 | CHB |
| rs3750734  | NUDT13    | GI_34330151-S | 10 | 10 | 74549646 | 11282  | 5.4877  | 5.40356 | CHB |
| rs2394918  | NUDT13    | GI_34330151-S | 10 | 10 | 74552973 | 7955   | 5.4877  | 5.40356 | CHB |
| rs7914726  | NUDT13    | GI_34330151-S | 10 | 10 | 74553223 | 7705   | 5.4877  | 5.40356 | CHB |
| rs7075865  | NUDT13    | GI_34330151-S | 10 | 10 | 74553762 | 7166   | 5.4877  | 5.40356 | CHB |
| rs12569493 | NUDT13    | GI_34330151-S | 10 | 10 | 74556049 | 4879   | 5.4877  | 5.40356 | CHB |
| rs7901631  | NUDT13    | GI_34330151-S | 10 | 10 | 74557419 | 3509   | 6.9019  | 5.40356 | CHB |
| rs7918236  | NUDT13    | GI_34330151-S | 10 | 10 | 74559276 | 1652   | 5.4877  | 5.40356 | CHB |
| rs16930362 | NUDT13    | GI_34330151-S | 10 | 10 | 74560327 | 601    | 5.4877  | 5.40356 | CHB |

|            |        |               |    |    |          |        |        |         |     |
|------------|--------|---------------|----|----|----------|--------|--------|---------|-----|
| rs7083730  | NUDT13 | GI_34330151-S | 10 | 10 | 74560455 | 473    | 5.4877 | 5.40356 | CHB |
| rs2894215  | NUDT13 | GI_34330151-S | 10 | 10 | 74561195 | 267    | 5.4877 | 5.40356 | CHB |
| rs7079875  | NUDT13 | GI_34330151-S | 10 | 10 | 74563424 | 2496   | 5.4877 | 5.40356 | CHB |
| rs7080126  | NUDT13 | GI_34330151-S | 10 | 10 | 74563539 | 2611   | 5.4877 | 5.40356 | CHB |
| rs12571390 | NUDT13 | GI_34330151-S | 10 | 10 | 74563938 | 3010   | 5.4877 | 5.40356 | CHB |
| rs7908606  | NUDT13 | GI_34330151-S | 10 | 10 | 74563969 | 3041   | 5.4877 | 5.40356 | CHB |
| rs2271903  | NUDT13 | GI_34330151-S | 10 | 10 | 74564264 | 3336   | 6.8642 | 5.40356 | CHB |
| rs2271904  | NUDT13 | GI_34330151-S | 10 | 10 | 74564381 | 3453   | 5.4877 | 5.40356 | CHB |
| rs12249189 | NUDT13 | GI_34330151-S | 10 | 10 | 74565796 | 4868   | 5.4877 | 5.40356 | CHB |
| rs12260168 | NUDT13 | GI_34330151-S | 10 | 10 | 74567697 | 6769   | 5.4877 | 5.40356 | CHB |
| rs2271905  | NUDT13 | GI_34330151-S | 10 | 10 | 74567822 | 6894   | 5.4877 | 5.40356 | CHB |
| rs3817395  | NUDT13 | GI_34330151-S | 10 | 10 | 74568262 | 7334   | 5.7747 | 5.40356 | CHB |
| rs3736518  | NUDT13 | GI_34330151-S | 10 | 10 | 74569140 | 8212   | 5.4877 | 5.40356 | CHB |
| rs6480671  | NUDT13 | GI_34330151-S | 10 | 10 | 74570789 | 9861   | 5.4877 | 5.40356 | CHB |
| rs2395012  | NUDT13 | GI_34330151-S | 10 | 10 | 74577396 | 16468  | 5.4877 | 5.40356 | CHB |
| rs10437380 | NUDT13 | GI_34330151-S | 10 | 10 | 74578871 | 17943  | 5.4877 | 5.40356 | CHB |
| rs7072168  | NUDT13 | GI_34330151-S | 10 | 10 | 74579588 | 18660  | 5.4877 | 5.40356 | CHB |
| rs7069878  | NUDT13 | GI_34330151-S | 10 | 10 | 74582010 | 21082  | 5.4877 | 5.40356 | CHB |
| rs11000531 | NUDT13 | GI_34330151-S | 10 | 10 | 74584308 | 23380  | 5.4877 | 5.40356 | CHB |
| rs12240976 | NUDT13 | GI_34330151-S | 10 | 10 | 74586008 | 25080  | 5.4877 | 5.40356 | CHB |
| rs12241093 | NUDT13 | GI_34330151-S | 10 | 10 | 74586179 | 25251  | 5.4877 | 5.40356 | CHB |
| rs12260139 | NUDT13 | GI_34330151-S | 10 | 10 | 74590442 | 29514  | 5.4877 | 5.40356 | CHB |
| rs7069813  | NUDT13 | GI_34330151-S | 10 | 10 | 74591088 | 30160  | 5.4877 | 5.40356 | CHB |
| rs7092445  | NUDT13 | GI_34330151-S | 10 | 10 | 74591998 | 31070  | 5.4877 | 5.40356 | CHB |
| rs3812618  | NUDT13 | GI_34330151-S | 10 | 10 | 74593138 | 32210  | 5.4877 | 5.40356 | CHB |
| rs3812619  | NUDT13 | GI_34330151-S | 10 | 10 | 74593568 | 32640  | 5.4877 | 5.40356 | CHB |
| rs3763723  | NUDT13 | GI_34330151-S | 10 | 10 | 74597490 | 36562  | 5.4877 | 5.40356 | CHB |
| rs7917179  | NUDT13 | GI_34330151-S | 10 | 10 | 74601737 | 40809  | 5.4877 | 5.40356 | CHB |
| rs6480675  | NUDT13 | GI_34330151-S | 10 | 10 | 74602460 | 41532  | 5.4877 | 5.40356 | CHB |
| rs12261221 | NUDT13 | GI_34330151-S | 10 | 10 | 74603148 | 42220  | 5.4877 | 5.40356 | CHB |
| rs12256576 | NUDT13 | GI_34330151-S | 10 | 10 | 74604320 | 43392  | 5.4877 | 5.40356 | CHB |
| rs7923555  | NUDT13 | GI_34330151-S | 10 | 10 | 74606316 | 45388  | 5.4877 | 5.40356 | CHB |
| rs3750735  | NUDT13 | GI_34330151-S | 10 | 10 | 74607512 | 46584  | 5.4877 | 5.40356 | CHB |
| rs11000541 | NUDT13 | GI_34330151-S | 10 | 10 | 74610087 | 49159  | 5.4877 | 5.40356 | CHB |
| rs12268713 | NUDT13 | GI_34330151-S | 10 | 10 | 74615745 | 54817  | 5.4877 | 5.40356 | CHB |
| rs3998311  | NUDT13 | GI_34330151-S | 10 | 10 | 74627902 | 66974  | 5.9958 | 5.40356 | CHB |
| rs2394934  | NUDT13 | GI_34330151-S | 10 | 10 | 74632980 | 72052  | 5.9958 | 5.40356 | CHB |
| rs11000548 | NUDT13 | GI_34330151-S | 10 | 10 | 74635902 | 74974  | 9.3329 | 5.40356 | CHB |
| rs6480681  | NUDT13 | GI_34330151-S | 10 | 10 | 74636770 | 75842  | 5.9958 | 5.40356 | CHB |
| rs3736519  | NUDT13 | GI_34330151-S | 10 | 10 | 74638570 | 77642  | 5.9958 | 5.40356 | CHB |
| rs2394935  | NUDT13 | GI_34330151-S | 10 | 10 | 74639581 | 78653  | 5.9958 | 5.40356 | CHB |
| rs12261028 | NUDT13 | GI_34330151-S | 10 | 10 | 74643661 | 82733  | 5.5242 | 5.40356 | CHB |
| rs1867566  | NUDT13 | GI_34330151-S | 10 | 10 | 74647541 | 86613  | 5.9958 | 5.40356 | CHB |
| rs1867565  | NUDT13 | GI_34330151-S | 10 | 10 | 74647787 | 86859  | 5.9958 | 5.40356 | CHB |
| rs6480684  | NUDT13 | GI_34330151-S | 10 | 10 | 74651298 | 90370  | 5.7746 | 5.40356 | CHB |
| rs7913328  | NUDT13 | GI_34330151-S | 10 | 10 | 74653296 | 92368  | 5.9958 | 5.40356 | CHB |
| rs11000554 | NUDT13 | GI_34330151-S | 10 | 10 | 74655221 | 94293  | 5.8259 | 5.40356 | CHB |
| rs11000555 | NUDT13 | GI_34330151-S | 10 | 10 | 74655942 | 95014  | 5.9958 | 5.40356 | CHB |
| rs11000556 | NUDT13 | GI_34330151-S | 10 | 10 | 74657184 | 96256  | 5.9958 | 5.40356 | CHB |
| rs11000557 | NUDT13 | GI_34330151-S | 10 | 10 | 74657400 | 96472  | 5.9958 | 5.40356 | CHB |
| rs7900359  | NUDT13 | GI_34330151-S | 10 | 10 | 74657481 | 96553  | 5.9958 | 5.40356 | CHB |
| rs7077186  | NUDT13 | GI_34330151-S | 10 | 10 | 74659347 | 98419  | 5.8259 | 5.40356 | CHB |
| rs7093566  | NUDT13 | GI_34330151-S | 10 | 10 | 74659456 | 98528  | 5.9958 | 5.40356 | CHB |
| rs12570053 | NUDT13 | GI_34330151-S | 10 | 10 | 74660133 | 99205  | 5.9958 | 5.40356 | CHB |
| rs7098383  | NUDT13 | GI_34330151-S | 10 | 10 | 74660795 | 99867  | 5.9958 | 5.40356 | CHB |
| rs7068969  | NUDT13 | GI_34330151-S | 10 | 10 | 74661567 | 100639 | 5.9958 | 5.40356 | CHB |

|            |        |               |    |    |          |        |        |         |     |
|------------|--------|---------------|----|----|----------|--------|--------|---------|-----|
| rs2292948  | NUDT13 | GI_34330151-S | 10 | 10 | 74662620 | 101692 | 5.9958 | 5.40356 | CHB |
| rs957486   | NUDT13 | GI_34330151-S | 10 | 10 | 74663890 | 102962 | 5.9958 | 5.40356 | CHB |
| rs16915029 | NUDT13 | GI_34330151-S | 10 | 10 | 74672001 | 111073 | 5.9958 | 5.40356 | CHB |
| rs7100458  | NUDT13 | GI_34330151-S | 10 | 10 | 74673099 | 112171 | 5.9958 | 5.40356 | CHB |
| rs12258130 | NUDT13 | GI_34330151-S | 10 | 10 | 74675426 | 114498 | 5.9958 | 5.40356 | CHB |
| rs16930457 | NUDT13 | GI_34330151-S | 10 | 10 | 74676443 | 115515 | 6.261  | 5.40356 | CHB |
| rs14488    | NUDT13 | GI_34330151-S | 10 | 10 | 74677281 | 116353 | 5.9958 | 5.40356 | CHB |
| rs16930466 | NUDT13 | GI_34330151-S | 10 | 10 | 74677594 | 116666 | 5.9958 | 5.40356 | CHB |
| rs2018198  | NUDT13 | GI_34330151-S | 10 | 10 | 74679113 | 118185 | 5.9958 | 5.40356 | CHB |
| rs7097418  | NUDT13 | GI_34330151-S | 10 | 10 | 74681002 | 120074 | 6.1695 | 5.40356 | CHB |
| rs6480688  | NUDT13 | GI_34330151-S | 10 | 10 | 74684319 | 123391 | 5.9958 | 5.40356 | CHB |
| rs7342113  | NUDT13 | GI_34330151-S | 10 | 10 | 74684469 | 123541 | 5.9958 | 5.40356 | CHB |
| rs16930480 | NUDT13 | GI_34330151-S | 10 | 10 | 74685936 | 125008 | 5.9958 | 5.40356 | CHB |
| rs7915765  | NUDT13 | GI_34330151-S | 10 | 10 | 74686858 | 125930 | 6.328  | 5.40356 | CHB |
| rs11000566 | NUDT13 | GI_34330151-S | 10 | 10 | 74691688 | 130760 | 6.328  | 5.40356 | CHB |
| rs3998306  | NUDT13 | GI_34330151-S | 10 | 10 | 74692076 | 131148 | 6.328  | 5.40356 | CHB |
| rs4534497  | NUDT13 | GI_34330151-S | 10 | 10 | 74692347 | 131419 | 5.7591 | 5.40356 | CHB |
| rs12250907 | NUDT13 | GI_34330151-S | 10 | 10 | 74693254 | 132326 | 6.0173 | 5.40356 | CHB |
| rs11000569 | NUDT13 | GI_34330151-S | 10 | 10 | 74695120 | 134192 | 6.1408 | 5.40356 | CHB |
| rs11000572 | NUDT13 | GI_34330151-S | 10 | 10 | 74695383 | 134455 | 6.328  | 5.40356 | CHB |
| rs11000574 | NUDT13 | GI_34330151-S | 10 | 10 | 74697215 | 136287 | 6.328  | 5.40356 | CHB |
| rs11000576 | NUDT13 | GI_34330151-S | 10 | 10 | 74697604 | 136676 | 6.2405 | 5.40356 | CHB |
| rs11000579 | NUDT13 | GI_34330151-S | 10 | 10 | 74697968 | 137040 | 6.328  | 5.40356 | CHB |
| rs5011505  | NUDT13 | GI_34330151-S | 10 | 10 | 74701784 | 140856 | 5.9958 | 5.40356 | CHB |
| rs11000581 | NUDT13 | GI_34330151-S | 10 | 10 | 74702936 | 142008 | 5.9958 | 5.40356 | CHB |
| rs4294502  | NUDT13 | GI_34330151-S | 10 | 10 | 74705263 | 144335 | 5.9958 | 5.40356 | CHB |
| rs3812621  | NUDT13 | GI_34330151-S | 10 | 10 | 74706865 | 145937 | 5.9958 | 5.40356 | CHB |
| rs12570782 | NUDT13 | GI_34330151-S | 10 | 10 | 74710197 | 149269 | 5.9958 | 5.40356 | CHB |
| rs11000582 | NUDT13 | GI_34330151-S | 10 | 10 | 74710664 | 149736 | 5.9958 | 5.40356 | CHB |
| rs7910573  | NUDT13 | GI_34330151-S | 10 | 10 | 74719004 | 158076 | 5.9958 | 5.40356 | CHB |
| rs7093096  | NUDT13 | GI_34330151-S | 10 | 10 | 74724331 | 163403 | 5.9958 | 5.40356 | CHB |
| rs6480692  | NUDT13 | GI_34330151-S | 10 | 10 | 74726869 | 165941 | 5.9958 | 5.40356 | CHB |
| rs7096420  | NUDT13 | GI_34330151-S | 10 | 10 | 74728363 | 167435 | 5.9958 | 5.40356 | CHB |
| rs7079020  | NUDT13 | GI_34330151-S | 10 | 10 | 74728607 | 167679 | 5.9958 | 5.40356 | CHB |
| rs7897627  | NUDT13 | GI_34330151-S | 10 | 10 | 74732610 | 171682 | 5.9958 | 5.40356 | CHB |
| rs11000594 | NUDT13 | GI_34330151-S | 10 | 10 | 74734573 | 173645 | 5.9958 | 5.40356 | CHB |
| rs4498898  | NUDT13 | GI_34330151-S | 10 | 10 | 74740167 | 179239 | 5.9958 | 5.40356 | CHB |
| rs6480694  | NUDT13 | GI_34330151-S | 10 | 10 | 74746510 | 185582 | 5.9958 | 5.40356 | CHB |
| rs963036   | NUDT13 | GI_34330151-S | 10 | 10 | 74748661 | 187733 | 5.9958 | 5.40356 | CHB |
| rs2183902  | NUDT13 | GI_34330151-S | 10 | 10 | 74749286 | 188358 | 5.9958 | 5.40356 | CHB |
| rs7096911  | NUDT13 | GI_34330151-S | 10 | 10 | 74751606 | 190678 | 6.4057 | 5.40356 | CHB |
| rs12240326 | NUDT13 | GI_34330151-S | 10 | 10 | 74752965 | 192037 | 5.9958 | 5.40356 | CHB |
| rs11000607 | NUDT13 | GI_34330151-S | 10 | 10 | 74759784 | 198856 | 5.6625 | 5.40356 | CHB |
| rs12259183 | NUDT13 | GI_34330151-S | 10 | 10 | 74760826 | 199898 | 5.6625 | 5.40356 | CHB |
| rs7100955  | NUDT13 | GI_34330151-S | 10 | 10 | 74761263 | 200335 | 5.9958 | 5.40356 | CHB |
| rs2183903  | NUDT13 | GI_34330151-S | 10 | 10 | 74762692 | 201764 | 5.8912 | 5.40356 | CHB |
| rs7910669  | NUDT13 | GI_34330151-S | 10 | 10 | 74765355 | 204427 | 5.9958 | 5.40356 | CHB |
| rs12249585 | NUDT13 | GI_34330151-S | 10 | 10 | 74766159 | 205231 | 5.9958 | 5.40356 | CHB |
| rs11000613 | NUDT13 | GI_34330151-S | 10 | 10 | 74767314 | 206386 | 5.9958 | 5.40356 | CHB |
| rs4506555  | NUDT13 | GI_34330151-S | 10 | 10 | 74771503 | 210575 | 5.9958 | 5.40356 | CHB |
| rs6480699  | NUDT13 | GI_34330151-S | 10 | 10 | 74771635 | 210707 | 5.9958 | 5.40356 | CHB |
| rs6480700  | NUDT13 | GI_34330151-S | 10 | 10 | 74771696 | 210768 | 5.5904 | 5.40356 | CHB |
| rs12251310 | NUDT13 | GI_34330151-S | 10 | 10 | 74772491 | 211563 | 5.8922 | 5.40356 | CHB |
| rs16930534 | NUDT13 | GI_34330151-S | 10 | 10 | 74773513 | 212585 | 5.8936 | 5.40356 | CHB |
| rs6480703  | NUDT13 | GI_34330151-S | 10 | 10 | 74788009 | 227081 | 5.9958 | 5.40356 | CHB |
| rs11000630 | NUDT13 | GI_34330151-S | 10 | 10 | 74803899 | 242971 | 5.9958 | 5.40356 | CHB |



|            |        |               |    |    |           |        |         |         |     |
|------------|--------|---------------|----|----|-----------|--------|---------|---------|-----|
| rs12261772 | NUDT13 | GI_34330151-S | 10 | 10 | 74816817  | 255889 | 5.9958  | 5.40356 | CHB |
| rs16930547 | NUDT13 | GI_34330151-S | 10 | 10 | 74817585  | 256657 | 5.9958  | 5.40356 | CHB |
| rs2234965  | NUDT13 | GI_34330151-S | 10 | 10 | 74818122  | 257194 | 5.9958  | 5.40356 | CHB |
| rs16930554 | NUDT13 | GI_34330151-S | 10 | 10 | 74818582  | 257654 | 6.0313  | 5.40356 | CHB |
| rs7096875  | NUDT13 | GI_34330151-S | 10 | 10 | 74825686  | 264758 | 5.9958  | 5.40356 | CHB |
| rs7100670  | NUDT13 | GI_34330151-S | 10 | 10 | 74826042  | 265114 | 5.5236  | 5.40356 | CHB |
| rs12258241 | NUDT13 | GI_34330151-S | 10 | 10 | 74830263  | 269335 | 5.9958  | 5.40356 | CHB |
| rs11000645 | NUDT13 | GI_34330151-S | 10 | 10 | 74832269  | 271341 | 5.9958  | 5.40356 | CHB |
| rs7074613  | NUDT13 | GI_34330151-S | 10 | 10 | 74832930  | 272002 | 5.9958  | 5.40356 | CHB |
| rs16930573 | NUDT13 | GI_34330151-S | 10 | 10 | 74837652  | 276724 | 5.9958  | 5.40356 | CHB |
| rs3812623  | NUDT13 | GI_34330151-S | 10 | 10 | 74843895  | 282967 | 5.9958  | 5.40356 | CHB |
| rs12571847 | NUDT13 | GI_34330151-S | 10 | 10 | 74844926  | 283998 | 5.9958  | 5.40356 | CHB |
| rs12570678 | NUDT13 | GI_34330151-S | 10 | 10 | 74845022  | 284094 | 6.5371  | 5.40356 | CHB |
| rs12570685 | NUDT13 | GI_34330151-S | 10 | 10 | 74845081  | 284153 | 5.9958  | 5.40356 | CHB |
| rs2297452  | NUDT13 | GI_34330151-S | 10 | 10 | 74856618  | 295690 | 5.9958  | 5.40356 | CHB |
| rs1332178  | NUDT13 | GI_34330151-S | 10 | 10 | 74859592  | 298664 | 5.651   | 5.40356 | CHB |
| rs1041532  | NUDT13 | GI_34330151-S | 10 | 10 | 74877493  | 316565 | 5.651   | 5.40356 | CHB |
| rs12571454 | NUDT13 | GI_34330151-S | 10 | 10 | 74878961  | 318033 | 5.9958  | 5.40356 | CHB |
| rs12245450 | NUDT13 | GI_34330151-S | 10 | 10 | 74891291  | 330363 | 5.9958  | 5.40356 | CHB |
| rs11000666 | NUDT13 | GI_34330151-S | 10 | 10 | 74903000  | 342072 | 5.9958  | 5.40356 | CHB |
| rs3763679  | NUDT13 | GI_34330151-S | 10 | 10 | 74904832  | 343904 | 5.651   | 5.40356 | CHB |
| rs12569942 | NUDT13 | GI_34330151-S | 10 | 10 | 74915258  | 354330 | 5.651   | 5.40356 | CHB |
| rs3793663  | NUDT13 | GI_34330151-S | 10 | 10 | 74930189  | 369261 | 5.9958  | 5.40356 | CHB |
| rs7098453  | NUDT13 | GI_34330151-S | 10 | 10 | 74931627  | 370699 | 5.9958  | 5.40356 | CHB |
| rs7899149  | NUDT13 | GI_34330151-S | 10 | 10 | 74933335  | 372407 | 5.9958  | 5.40356 | CHB |
| rs12572177 | NUDT13 | GI_34330151-S | 10 | 10 | 74955843  | 394915 | 5.9958  | 5.40356 | CHB |
| rs12268338 | NUDT13 | GI_34330151-S | 10 | 10 | 74956812  | 395884 | 5.6687  | 5.40356 | CHB |
| rs7074504  | NUDT13 | GI_34330151-S | 10 | 10 | 74958005  | 397077 | 5.9958  | 5.40356 | CHB |
| rs12255505 | NUDT13 | GI_34330151-S | 10 | 10 | 74959365  | 398437 | 5.9958  | 5.40356 | CHB |
| rs4745717  | NUDT13 | GI_34330151-S | 10 | 10 | 74975791  | 414863 | 6.2104  | 5.40356 | CHB |
| rs1880701  | NUDT13 | GI_34330151-S | 10 | 10 | 74983238  | 422310 | 5.9958  | 5.40356 | CHB |
| rs4917915  | MRPL43 | GI_28872735-A | 10 | 10 | 102616568 | 120041 | 10.2111 | 5.91851 | CHB |
| rs9919402  | MRPL43 | GI_28872735-A | 10 | 10 | 102617001 | 119608 | 10.1092 | 5.91851 | CHB |
| rs10883547 | MRPL43 | GI_28872735-A | 10 | 10 | 102617218 | 119391 | 10.1092 | 5.91851 | CHB |
| rs10883548 | MRPL43 | GI_28872735-A | 10 | 10 | 102617343 | 119266 | 10.1092 | 5.91851 | CHB |
| rs2863071  | MRPL43 | GI_28872735-A | 10 | 10 | 102618727 | 117882 | 10.1092 | 5.91851 | CHB |
| rs7088572  | MRPL43 | GI_28872735-A | 10 | 10 | 102619531 | 117078 | 10.1092 | 5.91851 | CHB |
| rs10736151 | MRPL43 | GI_28872735-A | 10 | 10 | 102619858 | 116751 | 9.1452  | 5.91851 | CHB |
| rs912476   | MRPL43 | GI_28872735-A | 10 | 10 | 102619990 | 116619 | 7.3133  | 5.91851 | CHB |
| rs912475   | MRPL43 | GI_28872735-A | 10 | 10 | 102620673 | 115936 | 10.1092 | 5.91851 | CHB |
| rs10883549 | MRPL43 | GI_28872735-A | 10 | 10 | 102621253 | 115356 | 9.6221  | 5.91851 | CHB |
| rs7914607  | MRPL43 | GI_28872735-A | 10 | 10 | 102621634 | 114975 | 7.1865  | 5.91851 | CHB |
| rs7902564  | MRPL43 | GI_28872735-A | 10 | 10 | 102622612 | 113997 | 10.681  | 5.91851 | CHB |
| rs10883550 | MRPL43 | GI_28872735-A | 10 | 10 | 102622963 | 113646 | 10.681  | 5.91851 | CHB |
| rs10883551 | MRPL43 | GI_28872735-A | 10 | 10 | 102623049 | 113560 | 8.1842  | 5.91851 | CHB |
| rs10786609 | MRPL43 | GI_28872735-A | 10 | 10 | 102625475 | 111134 | 9.5927  | 5.91851 | CHB |
| rs6584403  | MRPL43 | GI_28872735-A | 10 | 10 | 102627973 | 108636 | 10.0043 | 5.91851 | CHB |
| rs912474   | MRPL43 | GI_28872735-A | 10 | 10 | 102628576 | 108033 | 9.5927  | 5.91851 | CHB |
| rs912473   | MRPL43 | GI_28872735-A | 10 | 10 | 102628983 | 107626 | 9.5927  | 5.91851 | CHB |
| rs2863072  | MRPL43 | GI_28872735-A | 10 | 10 | 102629131 | 107478 | 8.3027  | 5.91851 | CHB |
| rs2863073  | MRPL43 | GI_28872735-A | 10 | 10 | 102629151 | 107458 | 10.3569 | 5.91851 | CHB |
| rs912472   | MRPL43 | GI_28872735-A | 10 | 10 | 102629549 | 107060 | 6.2122  | 5.91851 | CHB |
| rs1555648  | MRPL43 | GI_28872735-A | 10 | 10 | 102629773 | 106836 | 10.7897 | 5.91851 | CHB |
| rs6584404  | MRPL43 | GI_28872735-A | 10 | 10 | 102630106 | 106503 | 11.1746 | 5.91851 | CHB |
| rs1324219  | MRPL43 | GI_28872735-A | 10 | 10 | 102631006 | 105603 | 6.0212  | 5.91851 | CHB |
| rs1467616  | MRPL43 | GI_28872735-A | 10 | 10 | 102631681 | 104928 | 10.7557 | 5.91851 | CHB |

|            |        |               |    |    |           |        |         |         |     |
|------------|--------|---------------|----|----|-----------|--------|---------|---------|-----|
| rs11595160 | MRPL43 | GI_28872735-A | 10 | 10 | 102633000 | 103609 | 10.4518 | 5.91851 | CHB |
| rs7901791  | MRPL43 | GI_28872735-A | 10 | 10 | 102635374 | 101235 | 10.7557 | 5.91851 | CHB |
| rs7899336  | MRPL43 | GI_28872735-A | 10 | 10 | 102637676 | 98933  | 6.7163  | 5.91851 | CHB |
| rs7899638  | MRPL43 | GI_28872735-A | 10 | 10 | 102637862 | 98747  | 6.6568  | 5.91851 | CHB |
| rs1408342  | MRPL43 | GI_28872735-A | 10 | 10 | 102638742 | 97867  | 15.5161 | 5.91851 | CHB |
| rs1408343  | MRPL43 | GI_28872735-A | 10 | 10 | 102638755 | 97854  | 13.8306 | 5.91851 | CHB |
| rs10786612 | MRPL43 | GI_28872735-A | 10 | 10 | 102643755 | 92854  | 12.8409 | 5.91851 | CHB |
| rs7903939  | MRPL43 | GI_28872735-A | 10 | 10 | 102648014 | 88595  | 5.9544  | 5.91851 | CHB |
| rs4917916  | MRPL43 | GI_28872735-A | 10 | 10 | 102663282 | 73327  | 15.5161 | 5.91851 | CHB |
| rs7078599  | MRPL43 | GI_28872735-A | 10 | 10 | 102671852 | 64757  | 6.6466  | 5.91851 | CHB |
| rs17113596 | MRPL43 | GI_28872735-A | 10 | 10 | 102678352 | 58257  | 5.9738  | 5.91851 | CHB |
| rs12241232 | MRPL43 | GI_28872735-A | 10 | 10 | 102682594 | 54015  | 15.5161 | 5.91851 | CHB |
| rs7911957  | MRPL43 | GI_28872735-A | 10 | 10 | 102682960 | 53649  | 15.5161 | 5.91851 | CHB |
| rs10883565 | MRPL43 | GI_28872735-A | 10 | 10 | 102693424 | 43185  | 13.5579 | 5.91851 | CHB |
| rs1056295  | MRPL43 | GI_28872735-A | 10 | 10 | 102705173 | 31436  | 16.3847 | 5.91851 | CHB |
| rs927302   | MRPL43 | GI_28872735-A | 10 | 10 | 102712906 | 23703  | 16.3847 | 5.91851 | CHB |
| rs2295718  | MRPL43 | GI_28872735-A | 10 | 10 | 102715643 | 20966  | 5.9431  | 5.91851 | CHB |
| rs4919510  | MRPL43 | GI_28872735-A | 10 | 10 | 102724768 | 11841  | 16.3847 | 5.91851 | CHB |
| rs735137   | MRPL43 | GI_28872735-A | 10 | 10 | 102725825 | 10784  | 16.3847 | 5.91851 | CHB |
| rs12571302 | MRPL43 | GI_28872735-A | 10 | 10 | 102732753 | 3856   | 15.3456 | 5.91851 | CHB |
| rs2295716  | MRPL43 | GI_28872735-A | 10 | 10 | 102734204 | 2405   | 13.6893 | 5.91851 | CHB |
| rs1535349  | MRPL43 | GI_28872735-A | 10 | 10 | 102735650 | 959    | 5.9431  | 5.91851 | CHB |
| rs2863095  | MRPL43 | GI_28872735-A | 10 | 10 | 102736493 | 116    | 16.3847 | 5.91851 | CHB |
| rs3740484  | MRPL43 | GI_28872735-A | 10 | 10 | 102737353 | 744    | 13.7122 | 5.91851 | CHB |
| rs3740487  | MRPL43 | GI_28872735-A | 10 | 10 | 102740773 | 4164   | 16.3847 | 5.91851 | CHB |
| rs3824783  | MRPL43 | GI_28872735-A | 10 | 10 | 102740841 | 4232   | 16.3847 | 5.91851 | CHB |
| rs3740488  | MRPL43 | GI_28872735-A | 10 | 10 | 102744023 | 7414   | 16.3847 | 5.91851 | CHB |
| rs3740490  | MRPL43 | GI_28872735-A | 10 | 10 | 102746733 | 10124  | 16.3847 | 5.91851 | CHB |
| rs750866   | MRPL43 | GI_28872735-A | 10 | 10 | 102751448 | 14839  | 16.3847 | 5.91851 | CHB |
| rs701835   | MRPL43 | GI_28872735-A | 10 | 10 | 102752117 | 15508  | 16.3847 | 5.91851 | CHB |
| rs807029   | MRPL43 | GI_28872735-A | 10 | 10 | 102754037 | 17428  | 9.4568  | 5.91851 | CHB |
| rs701836   | MRPL43 | GI_28872735-A | 10 | 10 | 102757107 | 20498  | 14.5743 | 5.91851 | CHB |
| rs2296588  | SFXN2  | GI_34222270-S | 10 | 10 | 104238077 | 250714 | 6.2949  | 5.64259 | CHB |
| rs7088470  | SFXN2  | GI_34222270-S | 10 | 10 | 104424184 | 64607  | 6.6274  | 5.64259 | CHB |
| rs3781571  | SFXN2  | GI_34222270-S | 10 | 10 | 104432447 | 56344  | 5.6585  | 5.64259 | CHB |
| rs3740606  | SFXN2  | GI_34222270-S | 10 | 10 | 104435358 | 53433  | 5.6585  | 5.64259 | CHB |
| rs10786705 | SFXN2  | GI_34222270-S | 10 | 10 | 104467695 | 21096  | 5.6585  | 5.64259 | CHB |
| rs2902548  | SFXN2  | GI_34222270-S | 10 | 10 | 104477372 | 11419  | 13.2442 | 5.64259 | CHB |
| rs2244258  | SFXN2  | GI_34222270-S | 10 | 10 | 104478890 | 9901   | 8.6251  | 5.64259 | CHB |
| rs2244254  | SFXN2  | GI_34222270-S | 10 | 10 | 104479001 | 9790   | 8.9575  | 5.64259 | CHB |
| rs2265308  | SFXN2  | GI_34222270-S | 10 | 10 | 104481104 | 7687   | 8.6251  | 5.64259 | CHB |
| rs3802676  | SFXN2  | GI_34222270-S | 10 | 10 | 104481692 | 7099   | 8.6251  | 5.64259 | CHB |
| rs2778037  | SFXN2  | GI_34222270-S | 10 | 10 | 104482697 | 6094   | 7.4783  | 5.64259 | CHB |
| rs10883769 | SFXN2  | GI_34222270-S | 10 | 10 | 104484937 | 3854   | 8.6251  | 5.64259 | CHB |
| rs7912571  | SFXN2  | GI_34222270-S | 10 | 10 | 104489378 | 587    | 7.722   | 5.64259 | CHB |
| rs7092723  | SFXN2  | GI_34222270-S | 10 | 10 | 104489754 | 963    | 8.6251  | 5.64259 | CHB |
| rs10786706 | SFXN2  | GI_34222270-S | 10 | 10 | 104490649 | 1858   | 8.5338  | 5.64259 | CHB |
| rs2297451  | SFXN2  | GI_34222270-S | 10 | 10 | 104493449 | 4658   | 8.6251  | 5.64259 | CHB |
| rs3818708  | SFXN2  | GI_34222270-S | 10 | 10 | 104493574 | 4783   | 8.5338  | 5.64259 | CHB |
| rs7074894  | SFXN2  | GI_34222270-S | 10 | 10 | 104494524 | 5733   | 8.6251  | 5.64259 | CHB |
| rs11191383 | SFXN2  | GI_34222270-S | 10 | 10 | 104495874 | 7083   | 8.6251  | 5.64259 | CHB |
| rs11191384 | SFXN2  | GI_34222270-S | 10 | 10 | 104496101 | 7310   | 8.6251  | 5.64259 | CHB |
| rs7923711  | SFXN2  | GI_34222270-S | 10 | 10 | 104496533 | 7742   | 8.3223  | 5.64259 | CHB |
| rs7342026  | SFXN2  | GI_34222270-S | 10 | 10 | 104498896 | 10105  | 8.6251  | 5.64259 | CHB |
| rs10883772 | SFXN2  | GI_34222270-S | 10 | 10 | 104500230 | 11439  | 8.6251  | 5.64259 | CHB |
| rs7476300  | SFXN2  | GI_34222270-S | 10 | 10 | 104500295 | 11504  | 7.7821  | 5.64259 | CHB |

|            |       |               |    |    |           |        |         |         |     |
|------------|-------|---------------|----|----|-----------|--------|---------|---------|-----|
| rs7090307  | SFXN2 | GI_34222270-S | 10 | 10 | 104507109 | 18318  | 8.6251  | 5.64259 | CHB |
| rs7092340  | SFXN2 | GI_34222270-S | 10 | 10 | 104519658 | 30867  | 8.6251  | 5.64259 | CHB |
| rs12266856 | SFXN2 | GI_34222270-S | 10 | 10 | 104521040 | 32249  | 8.6251  | 5.64259 | CHB |
| rs7913461  | USMG5 | GI_14249375-S | 10 | 10 | 104991315 | 152720 | 7.9103  | 5.82608 | CHB |
| rs1891292  | USMG5 | GI_14249375-S | 10 | 10 | 104991500 | 152535 | 6.7319  | 5.82608 | CHB |
| rs1891293  | USMG5 | GI_14249375-S | 10 | 10 | 104991787 | 152248 | 6.7319  | 5.82608 | CHB |
| rs2506961  | USMG5 | GI_14249375-S | 10 | 10 | 104997916 | 146119 | 6.7319  | 5.82608 | CHB |
| rs1712510  | USMG5 | GI_14249375-S | 10 | 10 | 104999076 | 144959 | 6.7332  | 5.82608 | CHB |
| rs1163075  | USMG5 | GI_14249375-S | 10 | 10 | 105011253 | 132782 | 6.7319  | 5.82608 | CHB |
| rs1163073  | USMG5 | GI_14249375-S | 10 | 10 | 105012924 | 131111 | 9.0586  | 5.82608 | CHB |
| rs1163081  | USMG5 | GI_14249375-S | 10 | 10 | 105019830 | 124205 | 7.2269  | 5.82608 | CHB |
| rs1712517  | USMG5 | GI_14249375-S | 10 | 10 | 105023005 | 121030 | 6.7319  | 5.82608 | CHB |
| rs1163087  | USMG5 | GI_14249375-S | 10 | 10 | 105033279 | 110756 | 6.7319  | 5.82608 | CHB |
| rs4918003  | USMG5 | GI_14249375-S | 10 | 10 | 105034147 | 109888 | 6.8833  | 5.82608 | CHB |
| rs3740381  | USMG5 | GI_14249375-S | 10 | 10 | 105036679 | 107356 | 14.1518 | 5.82608 | CHB |
| rs1063461  | USMG5 | GI_14249375-S | 10 | 10 | 105039095 | 104940 | 8.7543  | 5.82608 | CHB |
| rs4293062  | USMG5 | GI_14249375-S | 10 | 10 | 105042614 | 101421 | 8.7543  | 5.82608 | CHB |
| rs6584547  | USMG5 | GI_14249375-S | 10 | 10 | 105055399 | 88636  | 8.7543  | 5.82608 | CHB |
| rs12220267 | USMG5 | GI_14249375-S | 10 | 10 | 105065702 | 78333  | 15.6248 | 5.82608 | CHB |
| rs11191654 | USMG5 | GI_14249375-S | 10 | 10 | 105067114 | 76921  | 8.7543  | 5.82608 | CHB |
| rs4918007  | USMG5 | GI_14249375-S | 10 | 10 | 105097460 | 46575  | 8.7543  | 5.82608 | CHB |
| rs7074749  | USMG5 | GI_14249375-S | 10 | 10 | 105106046 | 37989  | 8.7543  | 5.82608 | CHB |
| rs11191666 | USMG5 | GI_14249375-S | 10 | 10 | 105117268 | 26767  | 8.7543  | 5.82608 | CHB |
| rs10883857 | USMG5 | GI_14249375-S | 10 | 10 | 105117577 | 26458  | 8.7543  | 5.82608 | CHB |
| rs7905968  | USMG5 | GI_14249375-S | 10 | 10 | 105125309 | 18726  | 8.7543  | 5.82608 | CHB |
| rs11191672 | USMG5 | GI_14249375-S | 10 | 10 | 105128951 | 15084  | 8.7543  | 5.82608 | CHB |
| rs7911488  | USMG5 | GI_14249375-S | 10 | 10 | 105144079 | 44     | 15.6248 | 5.82608 | CHB |
| rs11191676 | USMG5 | GI_14249375-S | 10 | 10 | 105145056 | 1021   | 8.7543  | 5.82608 | CHB |
| rs2292807  | USMG5 | GI_14249375-S | 10 | 10 | 105145635 | 1600   | 8.7543  | 5.82608 | CHB |
| rs10883863 | USMG5 | GI_14249375-S | 10 | 10 | 105151869 | 7834   | 8.7543  | 5.82608 | CHB |
| rs12414609 | USMG5 | GI_14249375-S | 10 | 10 | 105152131 | 8096   | 8.5745  | 5.82608 | CHB |
| rs7089271  | USMG5 | GI_14249375-S | 10 | 10 | 105166904 | 22869  | 8.2934  | 5.82608 | CHB |
| rs3740382  | USMG5 | GI_14249375-S | 10 | 10 | 105169204 | 25169  | 10.0953 | 5.82608 | CHB |
| rs11191686 | USMG5 | GI_14249375-S | 10 | 10 | 105177736 | 33701  | 15.6248 | 5.82608 | CHB |
| rs11191688 | USMG5 | GI_14249375-S | 10 | 10 | 105182560 | 38525  | 9.6621  | 5.82608 | CHB |
| rs2986014  | USMG5 | GI_14249375-S | 10 | 10 | 105184076 | 40041  | 8.7543  | 5.82608 | CHB |
| rs10883868 | USMG5 | GI_14249375-S | 10 | 10 | 105186804 | 42769  | 15.6248 | 5.82608 | CHB |
| rs2281861  | USMG5 | GI_14249375-S | 10 | 10 | 105191555 | 47520  | 6.507   | 5.82608 | CHB |
| rs7831     | USMG5 | GI_14249375-S | 10 | 10 | 105195292 | 51257  | 15.6248 | 5.82608 | CHB |
| rs6580     | USMG5 | GI_14249375-S | 10 | 10 | 105196864 | 52829  | 10.0953 | 5.82608 | CHB |
| rs942077   | PDCD4 | GI_34304340-A | 10 | 10 | 112585709 | 63897  | 6.1353  | 5.96121 | CHB |
| rs11195352 | PDCD4 | GI_34304340-A | 10 | 10 | 112592935 | 56671  | 6.1353  | 5.96121 | CHB |
| rs3741411  | SIRT3 | GI_13775603-S | 11 | 11 | 189256    | 17010  | 5.7402  | 5.39076 | CHB |
| rs2293168  | SIRT3 | GI_13775603-S | 11 | 11 | 201482    | 4784   | 9.8535  | 5.39076 | CHB |
| rs3847648  | SIRT3 | GI_13775603-S | 11 | 11 | 208613    | 2347   | 8.5353  | 5.39076 | CHB |
| rs4758629  | SIRT3 | GI_13775603-S | 11 | 11 | 218514    | 12248  | 8.8506  | 5.39076 | CHB |
| rs536715   | SIRT3 | GI_13775603-S | 11 | 11 | 220368    | 14102  | 8.634   | 5.39076 | CHB |
| rs524555   | SIRT3 | GI_13775603-S | 11 | 11 | 236678    | 30412  | 8.634   | 5.39076 | CHB |
| rs12576259 | SIRT3 | GI_13775603-S | 11 | 11 | 239834    | 33568  | 7.2401  | 5.39076 | CHB |
| rs3782114  | SIRT3 | GI_13775603-S | 11 | 11 | 240886    | 34620  | 6.4266  | 5.39076 | CHB |
| rs6540     | SIRT3 | GI_13775603-S | 11 | 11 | 242649    | 36383  | 7.2628  | 5.39076 | CHB |
| rs6542     | SIRT3 | GI_13775603-S | 11 | 11 | 242941    | 36675  | 6.5662  | 5.39076 | CHB |
| rs540078   | SIRT3 | GI_13775603-S | 11 | 11 | 244256    | 37990  | 7.2628  | 5.39076 | CHB |
| rs7104184  | SIRT3 | GI_13775603-S | 11 | 11 | 245014    | 38748  | 7.5214  | 5.39076 | CHB |
| rs2140116  | SIRT3 | GI_13775603-S | 11 | 11 | 245048    | 38782  | 6.6434  | 5.39076 | CHB |
| rs879872   | SIRT3 | GI_13775603-S | 11 | 11 | 246714    | 40448  | 6.9593  | 5.39076 | CHB |

|            |           |               |    |    |          |        |        |         |     |
|------------|-----------|---------------|----|----|----------|--------|--------|---------|-----|
| rs12274855 | SIRT3     | GI_13775603-S | 11 | 11 | 252234   | 45968  | 7.5214 | 5.39076 | CHB |
| rs4758635  | SIRT3     | GI_13775603-S | 11 | 11 | 273928   | 67662  | 5.4291 | 5.39076 | CHB |
| rs2242565  | FLJ22635  | GI_13376651-S | 11 | 11 | 285343   | 40     | 6.9751 | 5.27414 | CHB |
| rs2242566  | FLJ22635  | GI_13376651-S | 11 | 11 | 285876   | 573    | 6.5398 | 5.27414 | CHB |
| rs7479101  | RPLP2     | GI_16905512-S | 11 | 11 | 792115   | 8186   | 6.0743 | 5.72445 | CHB |
| rs10902222 | RPLP2     | GI_16905512-S | 11 | 11 | 800882   | 581    | 5.8354 | 5.72445 | CHB |
| rs7941928  | PHEMX     | GI_37595532-A | 11 | 11 | 2271980  | 23893  | 6.621  | 6.16048 | CHB |
| rs7941928  | C11orf21  | GI_7662662-S  | 11 | 11 | 2271980  | 1787   | 6.1921 | 6.10866 | CHB |
| rs2244891  | C11orf21  | GI_7662662-S  | 11 | 11 | 2275931  | 2164   | 6.241  | 6.10866 | CHB |
| rs2651838  | C11orf21  | GI_7662662-S  | 11 | 11 | 2276107  | 2340   | 6.2299 | 6.10866 | CHB |
| rs756924   | C11orf21  | GI_7662662-S  | 11 | 11 | 2279605  | 5838   | 6.667  | 6.10866 | CHB |
| rs2074021  | C11orf21  | GI_7662662-S  | 11 | 11 | 2280104  | 6337   | 6.241  | 6.10866 | CHB |
| rs2074022  | C11orf21  | GI_7662662-S  | 11 | 11 | 2280617  | 6850   | 7.6029 | 6.10866 | CHB |
| rs2074023  | PHEMX     | GI_37595532-A | 11 | 11 | 2282157  | 13716  | 6.9688 | 6.16048 | CHB |
| rs2074023  | C11orf21  | GI_7662662-S  | 11 | 11 | 2282157  | 8390   | 6.6691 | 6.10866 | CHB |
| rs937614   | PHEMX     | GI_37595532-A | 11 | 11 | 2283496  | 12377  | 6.621  | 6.16048 | CHB |
| rs937614   | C11orf21  | GI_7662662-S  | 11 | 11 | 2283496  | 9729   | 6.1921 | 6.10866 | CHB |
| rs756926   | C11orf21  | GI_7662662-S  | 11 | 11 | 2285654  | 11887  | 6.6513 | 6.10866 | CHB |
| rs2651821  | C11orf21  | GI_7662662-S  | 11 | 11 | 2287506  | 13739  | 6.5343 | 6.10866 | CHB |
| rs10840106 | LOC256273 | GI_22062109-S | 11 | 11 | 8658412  | 68139  | 6.7016 | 6.02666 | CHB |
| rs2289074  | SWAP70    | GI_30911100-S | 11 | 11 | 9592952  | 136754 | 6.5629 | 5.75988 | CHB |
| rs12273601 | SWAP70    | GI_30911100-S | 11 | 11 | 9593430  | 136276 | 6.7644 | 5.75988 | CHB |
| rs7124238  | SWAP70    | GI_30911100-S | 11 | 11 | 9598423  | 131283 | 6.5629 | 5.75988 | CHB |
| rs7109545  | SWAP70    | GI_30911100-S | 11 | 11 | 9601973  | 127733 | 7.1001 | 5.75988 | CHB |
| rs7109585  | SWAP70    | GI_30911100-S | 11 | 11 | 9602067  | 127639 | 7.1001 | 5.75988 | CHB |
| rs2060477  | SWAP70    | GI_30911100-S | 11 | 11 | 9603111  | 126595 | 7.0574 | 5.75988 | CHB |
| rs7118466  | SWAP70    | GI_30911100-S | 11 | 11 | 9603552  | 126154 | 7.2338 | 5.75988 | CHB |
| rs7118581  | SWAP70    | GI_30911100-S | 11 | 11 | 9603590  | 126116 | 7.1001 | 5.75988 | CHB |
| rs2956080  | MMRP19    | GI_7705723-S  | 11 | 11 | 34838168 | 28360  | 6.45   | 6.33387 | CHB |
| rs2985396  | MMRP19    | GI_7705723-S  | 11 | 11 | 34863530 | 2998   | 6.4716 | 6.33387 | CHB |
| rs2956091  | MMRP19    | GI_7705723-S  | 11 | 11 | 34864657 | 1871   | 6.4716 | 6.33387 | CHB |
| rs2985391  | MMRP19    | GI_7705723-S  | 11 | 11 | 34866148 | 380    | 6.4716 | 6.33387 | CHB |
| rs2303959  | MMRP19    | GI_7705723-S  | 11 | 11 | 34868589 | 2061   | 6.4347 | 6.33387 | CHB |
| rs2915224  | MMRP19    | GI_7705723-S  | 11 | 11 | 34868865 | 2337   | 6.4463 | 6.33387 | CHB |
| rs2986424  | MMRP19    | GI_7705723-S  | 11 | 11 | 34872022 | 5494   | 7.5363 | 6.33387 | CHB |
| rs2217478  | MMRP19    | GI_7705723-S  | 11 | 11 | 34873939 | 7411   | 6.6839 | 6.33387 | CHB |
| rs10836318 | MMRP19    | GI_7705723-S  | 11 | 11 | 34878954 | 12426  | 6.4716 | 6.33387 | CHB |
| rs11032917 | MMRP19    | GI_7705723-S  | 11 | 11 | 34879179 | 12651  | 6.4716 | 6.33387 | CHB |
| rs2956116  | MMRP19    | GI_7705723-S  | 11 | 11 | 34891228 | 24700  | 6.3726 | 6.33387 | CHB |
| rs2956107  | MMRP19    | GI_7705723-S  | 11 | 11 | 34897144 | 30616  | 6.9287 | 6.33387 | CHB |
| rs2956106  | MMRP19    | GI_7705723-S  | 11 | 11 | 34897558 | 31030  | 6.609  | 6.33387 | CHB |
| rs2915205  | MMRP19    | GI_7705723-S  | 11 | 11 | 34897664 | 31136  | 6.609  | 6.33387 | CHB |
| rs2915204  | MMRP19    | GI_7705723-S  | 11 | 11 | 34898421 | 31893  | 6.8169 | 6.33387 | CHB |
| rs2915200  | MMRP19    | GI_7705723-S  | 11 | 11 | 34900947 | 34419  | 6.9287 | 6.33387 | CHB |
| rs2956103  | MMRP19    | GI_7705723-S  | 11 | 11 | 34901029 | 34501  | 6.767  | 6.33387 | CHB |
| rs1998912  | MMRP19    | GI_7705723-S  | 11 | 11 | 34904520 | 37992  | 6.609  | 6.33387 | CHB |
| rs2986410  | MMRP19    | GI_7705723-S  | 11 | 11 | 34905162 | 38634  | 6.609  | 6.33387 | CHB |
| rs2985403  | MMRP19    | GI_7705723-S  | 11 | 11 | 34913650 | 47122  | 6.609  | 6.33387 | CHB |
| rs2915193  | MMRP19    | GI_7705723-S  | 11 | 11 | 34916032 | 49504  | 6.609  | 6.33387 | CHB |
| rs2956087  | MMRP19    | GI_7705723-S  | 11 | 11 | 34922133 | 55605  | 7.0117 | 6.33387 | CHB |
| rs2243948  | MMRP19    | GI_7705723-S  | 11 | 11 | 34935468 | 68940  | 6.609  | 6.33387 | CHB |
| rs10768107 | MMRP19    | GI_7705723-S  | 11 | 11 | 34937948 | 71420  | 6.6524 | 6.33387 | CHB |
| rs2732555  | MMRP19    | GI_7705723-S  | 11 | 11 | 34938809 | 72281  | 6.609  | 6.33387 | CHB |
| rs2761820  | MMRP19    | GI_7705723-S  | 11 | 11 | 34939897 | 73369  | 6.609  | 6.33387 | CHB |
| rs2762962  | MMRP19    | GI_7705723-S  | 11 | 11 | 34942022 | 75494  | 6.609  | 6.33387 | CHB |
| rs497582   | MMRP19    | GI_7705723-S  | 11 | 11 | 34948303 | 81775  | 6.609  | 6.33387 | CHB |

|            |         |               |    |    |          |        |         |         |     |
|------------|---------|---------------|----|----|----------|--------|---------|---------|-----|
| rs504034   | MMRP19  | GI_7705723-S  | 11 | 11 | 34954138 | 87610  | 6.609   | 6.33387 | CHB |
| rs2762956  | MMRP19  | GI_7705723-S  | 11 | 11 | 34954866 | 88338  | 6.609   | 6.33387 | CHB |
| rs10836326 | MMRP19  | GI_7705723-S  | 11 | 11 | 34956934 | 90406  | 6.609   | 6.33387 | CHB |
| rs2767038  | MMRP19  | GI_7705723-S  | 11 | 11 | 34957559 | 91031  | 6.609   | 6.33387 | CHB |
| rs2762954  | MMRP19  | GI_7705723-S  | 11 | 11 | 34965809 | 99281  | 6.609   | 6.33387 | CHB |
| rs1011518  | MMRP19  | GI_7705723-S  | 11 | 11 | 34967045 | 100517 | 6.609   | 6.33387 | CHB |
| rs2762953  | MMRP19  | GI_7705723-S  | 11 | 11 | 34971318 | 104790 | 6.609   | 6.33387 | CHB |
| rs2732564  | MMRP19  | GI_7705723-S  | 11 | 11 | 34971854 | 105326 | 6.609   | 6.33387 | CHB |
| rs2732565  | MMRP19  | GI_7705723-S  | 11 | 11 | 34972678 | 106150 | 6.609   | 6.33387 | CHB |
| rs9326     | MMRP19  | GI_7705723-S  | 11 | 11 | 34973781 | 107253 | 6.609   | 6.33387 | CHB |
| rs2767033  | MMRP19  | GI_7705723-S  | 11 | 11 | 34979484 | 112956 | 6.609   | 6.33387 | CHB |
| rs2762969  | MMRP19  | GI_7705723-S  | 11 | 11 | 34982258 | 115730 | 6.6075  | 6.33387 | CHB |
| rs1544079  | MMRP19  | GI_7705723-S  | 11 | 11 | 34984435 | 117907 | 6.609   | 6.33387 | CHB |
| rs523472   | MMRP19  | GI_7705723-S  | 11 | 11 | 34988244 | 121716 | 6.4347  | 6.33387 | CHB |
| rs4237645  | PHACS   | GI_14211920-S | 11 | 11 | 44032290 | 29579  | 6.0633  | 5.86406 | CHB |
| rs7928485  | PHACS   | GI_14211920-S | 11 | 11 | 44034823 | 27046  | 11.7696 | 5.86406 | CHB |
| rs178501   | PHACS   | GI_14211920-S | 11 | 11 | 44038292 | 23577  | 8.3125  | 5.86406 | CHB |
| rs178503   | PHACS   | GI_14211920-S | 11 | 11 | 44039507 | 22362  | 8.3125  | 5.86406 | CHB |
| rs178505   | PHACS   | GI_14211920-S | 11 | 11 | 44041425 | 20444  | 8.0903  | 5.86406 | CHB |
| rs178506   | PHACS   | GI_14211920-S | 11 | 11 | 44041945 | 19924  | 7.1849  | 5.86406 | CHB |
| rs7127924  | PHACS   | GI_14211920-S | 11 | 11 | 44042263 | 19606  | 13.9013 | 5.86406 | CHB |
| rs2074038  | PHACS   | GI_14211920-S | 11 | 11 | 44044565 | 17304  | 17.5207 | 5.86406 | CHB |
| rs7951555  | PHACS   | GI_14211920-S | 11 | 11 | 44047975 | 13894  | 13.1276 | 5.86406 | CHB |
| rs11826285 | PHACS   | GI_14211920-S | 11 | 11 | 44048254 | 13615  | 12.0235 | 5.86406 | CHB |
| rs2074040  | PHACS   | GI_14211920-S | 11 | 11 | 44049899 | 11970  | 12.0235 | 5.86406 | CHB |
| rs3094390  | PHACS   | GI_14211920-S | 11 | 11 | 44051197 | 10672  | 6.0664  | 5.86406 | CHB |
| rs3134911  | PHACS   | GI_14211920-S | 11 | 11 | 44064323 | 2454   | 6.9416  | 5.86406 | CHB |
| rs11037868 | PHACS   | GI_14211920-S | 11 | 11 | 44091183 | 29314  | 7.1223  | 5.86406 | CHB |
| rs11037870 | PHACS   | GI_14211920-S | 11 | 11 | 44093819 | 31950  | 6.9914  | 5.86406 | CHB |
| rs10838239 | PHACS   | GI_14211920-S | 11 | 11 | 44112011 | 50142  | 6.4078  | 5.86406 | CHB |
| rs4755790  | PHACS   | GI_14211920-S | 11 | 11 | 44166329 | 104460 | 6.4078  | 5.86406 | CHB |
| rs2291119  | Hs.6637 | Hs.6637-S     | 11 | 11 | 47254777 | 328958 | 7.2865  | 5.57346 | CHB |
| rs326217   | Hs.6637 | Hs.6637-S     | 11 | 11 | 47259851 | 323884 | 7.1139  | 5.57346 | CHB |
| rs11570094 | Hs.6637 | Hs.6637-S     | 11 | 11 | 47316282 | 267453 | 7.6905  | 5.57346 | CHB |
| rs2856650  | Hs.6637 | Hs.6637-S     | 11 | 11 | 47321775 | 261960 | 7.3295  | 5.57346 | CHB |
| rs2071304  | Hs.6637 | Hs.6637-S     | 11 | 11 | 47328953 | 254782 | 13.8936 | 5.57346 | CHB |
| rs7105851  | Hs.6637 | Hs.6637-S     | 11 | 11 | 47339851 | 243884 | 13.1261 | 5.57346 | CHB |
| rs10838698 | Hs.6637 | Hs.6637-S     | 11 | 11 | 47342499 | 241236 | 11.5266 | 5.57346 | CHB |
| rs10838699 | Hs.6637 | Hs.6637-S     | 11 | 11 | 47342649 | 241086 | 13.4819 | 5.57346 | CHB |
| rs10769258 | Hs.6637 | Hs.6637-S     | 11 | 11 | 47347615 | 236120 | 13.4819 | 5.57346 | CHB |
| rs11039212 | Hs.6637 | Hs.6637-S     | 11 | 11 | 47349879 | 233856 | 13.8936 | 5.57346 | CHB |
| rs4992357  | Hs.6637 | Hs.6637-S     | 11 | 11 | 47350214 | 233521 | 12.9729 | 5.57346 | CHB |
| rs896816   | Hs.6637 | Hs.6637-S     | 11 | 11 | 47350914 | 232821 | 13.4465 | 5.57346 | CHB |
| rs7940536  | Hs.6637 | Hs.6637-S     | 11 | 11 | 47351816 | 231919 | 13.4465 | 5.57346 | CHB |
| rs6485753  | Hs.6637 | Hs.6637-S     | 11 | 11 | 47366776 | 216959 | 13.8936 | 5.57346 | CHB |
| rs4752990  | Hs.6637 | Hs.6637-S     | 11 | 11 | 47366969 | 216766 | 13.1371 | 5.57346 | CHB |
| rs4752993  | Hs.6637 | Hs.6637-S     | 11 | 11 | 47367527 | 216208 | 13.4465 | 5.57346 | CHB |
| rs4752994  | Hs.6637 | Hs.6637-S     | 11 | 11 | 47367641 | 216094 | 13.4465 | 5.57346 | CHB |
| rs10769262 | Hs.6637 | Hs.6637-S     | 11 | 11 | 47368157 | 215578 | 13.4465 | 5.57346 | CHB |
| rs11605672 | Hs.6637 | Hs.6637-S     | 11 | 11 | 47370309 | 213426 | 13.8241 | 5.57346 | CHB |
| rs4752999  | Hs.6637 | Hs.6637-S     | 11 | 11 | 47385141 | 198594 | 16.6763 | 5.57346 | CHB |
| rs755553   | Hs.6637 | Hs.6637-S     | 11 | 11 | 47388879 | 194856 | 16.2295 | 5.57346 | CHB |
| rs2053979  | Hs.6637 | Hs.6637-S     | 11 | 11 | 47396020 | 187715 | 13.5541 | 5.57346 | CHB |
| rs2293580  | Hs.6637 | Hs.6637-S     | 11 | 11 | 47396859 | 186876 | 16.2295 | 5.57346 | CHB |
| rs3781627  | Hs.6637 | Hs.6637-S     | 11 | 11 | 47398048 | 185687 | 16.2295 | 5.57346 | CHB |
| rs10838708 | Hs.6637 | Hs.6637-S     | 11 | 11 | 47398089 | 185646 | 12.1478 | 5.57346 | CHB |

|            |           |               |    |    |          |        |         |         |     |
|------------|-----------|---------------|----|----|----------|--------|---------|---------|-----|
| rs3781626  | Hs.6637   | Hs.6637-S     | 11 | 11 | 47399469 | 184266 | 16.2295 | 5.57346 | CHB |
| rs3781625  | Hs.6637   | Hs.6637-S     | 11 | 11 | 47399656 | 184079 | 16.6763 | 5.57346 | CHB |
| rs2868459  | Hs.6637   | Hs.6637-S     | 11 | 11 | 47411548 | 172187 | 15.4896 | 5.57346 | CHB |
| rs11604680 | Hs.6637   | Hs.6637-S     | 11 | 11 | 47414115 | 169620 | 16.0661 | 5.57346 | CHB |
| rs1317149  | Hs.6637   | Hs.6637-S     | 11 | 11 | 47443461 | 140274 | 16.9918 | 5.57346 | CHB |
| rs7124681  | Hs.6637   | Hs.6637-S     | 11 | 11 | 47486523 | 97212  | 16.2295 | 5.57346 | CHB |
| rs4752845  | Hs.6637   | Hs.6637-S     | 11 | 11 | 47496273 | 87462  | 17.4863 | 5.57346 | CHB |
| rs7928842  | Hs.6637   | Hs.6637-S     | 11 | 11 | 47522928 | 60807  | 17.4863 | 5.57346 | CHB |
| rs12419692 | Hs.6637   | Hs.6637-S     | 11 | 11 | 47581290 | 2445   | 17.4863 | 5.57346 | CHB |
| rs1064608  | Hs.6637   | Hs.6637-S     | 11 | 11 | 47597005 | 13270  | 17.4863 | 5.57346 | CHB |
| rs3817335  | Hs.6637   | Hs.6637-S     | 11 | 11 | 47600467 | 16732  | 17.4863 | 5.57346 | CHB |
| rs4752856  | Hs.6637   | Hs.6637-S     | 11 | 11 | 47604618 | 20883  | 17.4863 | 5.57346 | CHB |
| rs3817334  | Hs.6637   | Hs.6637-S     | 11 | 11 | 47607569 | 23834  | 16.9918 | 5.57346 | CHB |
| rs4752857  | Hs.6637   | Hs.6637-S     | 11 | 11 | 47612328 | 28593  | 17.4863 | 5.57346 | CHB |
| rs12794570 | Hs.6637   | Hs.6637-S     | 11 | 11 | 47614890 | 31155  | 15.3856 | 5.57346 | CHB |
| rs10838738 | Hs.6637   | Hs.6637-S     | 11 | 11 | 47619625 | 35890  | 16.9918 | 5.57346 | CHB |
| rs12787112 | Hs.6637   | Hs.6637-S     | 11 | 11 | 47643723 | 59988  | 16.8388 | 5.57346 | CHB |
| rs10838747 | Hs.6637   | Hs.6637-S     | 11 | 11 | 47672900 | 89165  | 17.4863 | 5.57346 | CHB |
| rs12785949 | Hs.6637   | Hs.6637-S     | 11 | 11 | 47686346 | 102611 | 5.8616  | 5.57346 | CHB |
| rs17788930 | Hs.6637   | Hs.6637-S     | 11 | 11 | 47709351 | 125616 | 15.8757 | 5.57346 | CHB |
| rs10838757 | Hs.6637   | Hs.6637-S     | 11 | 11 | 47719592 | 135857 | 16.7629 | 5.57346 | CHB |
| rs9909     | Hs.6637   | Hs.6637-S     | 11 | 11 | 47756351 | 172616 | 14.4675 | 5.57346 | CHB |
| rs7105282  | Hs.6637   | Hs.6637-S     | 11 | 11 | 47762190 | 178455 | 15.0743 | 5.57346 | CHB |
| rs2290850  | Hs.6637   | Hs.6637-S     | 11 | 11 | 47764350 | 180615 | 15.0743 | 5.57346 | CHB |
| rs12418852 | Hs.6637   | Hs.6637-S     | 11 | 11 | 47825429 | 241694 | 15.0743 | 5.57346 | CHB |
| rs11039433 | Hs.6637   | Hs.6637-S     | 11 | 11 | 47834069 | 250334 | 14.4675 | 5.57346 | CHB |
| rs12364432 | Hs.6637   | Hs.6637-S     | 11 | 11 | 47859459 | 275724 | 14.4675 | 5.57346 | CHB |
| rs4752801  | Hs.6637   | Hs.6637-S     | 11 | 11 | 47864217 | 280482 | 14.1822 | 5.57346 | CHB |
| rs12361256 | Hs.6637   | Hs.6637-S     | 11 | 11 | 47867399 | 283664 | 13.1572 | 5.57346 | CHB |
| rs8995     | LOC144097 | GI_37541019-S | 11 | 11 | 63351648 | 40     | 6.4734  | 5.92552 | CHB |
| rs11231853 | SF1       | GI_42544126-I | 11 | 11 | 64207055 | 93244  | 5.9846  | 5.52031 | CHB |
| rs3809076  | SF1       | GI_42544126-I | 11 | 11 | 64239122 | 61177  | 5.9846  | 5.52031 | CHB |
| rs693235   | SF1       | GI_42544126-I | 11 | 11 | 64249338 | 50961  | 6.8225  | 5.52031 | CHB |
| rs2073798  | SF1       | GI_42544126-I | 11 | 11 | 64267898 | 32401  | 11.4835 | 5.52031 | CHB |
| rs547066   | SF1       | GI_42544126-I | 11 | 11 | 64280070 | 20229  | 8.6793  | 5.52031 | CHB |
| rs589691   | SF1       | GI_42544126-I | 11 | 11 | 64281792 | 18507  | 11.4835 | 5.52031 | CHB |
| rs489192   | SF1       | GI_42544126-I | 11 | 11 | 64282220 | 18079  | 12.2569 | 5.52031 | CHB |
| rs477549   | SF1       | GI_42544126-I | 11 | 11 | 64283656 | 16643  | 11.7504 | 5.52031 | CHB |
| rs523200   | SF1       | GI_42544126-I | 11 | 11 | 64289155 | 11144  | 11.4019 | 5.52031 | CHB |
| rs680273   | SF1       | GI_42544126-I | 11 | 11 | 64296211 | 4088   | 11.7504 | 5.52031 | CHB |
| rs474707   | SF1       | GI_42544126-I | 11 | 11 | 64300711 | 412    | 11.397  | 5.52031 | CHB |
| rs1633462  | SF1       | GI_42544126-I | 11 | 11 | 64302833 | 2534   | 11.1756 | 5.52031 | CHB |
| rs606458   | SF1       | GI_42544126-I | 11 | 11 | 64302967 | 2668   | 11.1756 | 5.52031 | CHB |
| rs607389   | SF1       | GI_42544126-I | 11 | 11 | 64310154 | 9855   | 7.9049  | 5.52031 | CHB |
| rs11231869 | SF1       | GI_42544126-I | 11 | 11 | 64313708 | 13409  | 8.1435  | 5.52031 | CHB |
| rs677298   | SF1       | GI_42544126-I | 11 | 11 | 64320784 | 20485  | 8.1843  | 5.52031 | CHB |
| rs669976   | SF1       | GI_42544126-I | 11 | 11 | 64330165 | 29866  | 6.7246  | 5.52031 | CHB |
| rs559566   | SF1       | GI_42544126-I | 11 | 11 | 64338234 | 37935  | 6.22    | 5.52031 | CHB |
| rs1626067  | RPS6KB2   | GI_4506738-S  | 11 | 11 | 66949131 | 10214  | 6.4378  | 5.50119 | CHB |
| rs1476792  | RPS6KB2   | GI_4506738-S  | 11 | 11 | 66952813 | 6532   | 6.7102  | 5.50119 | CHB |
| rs1638588  | RPS6KB2   | GI_4506738-S  | 11 | 11 | 66956282 | 3063   | 7.4281  | 5.50119 | CHB |
| rs1790753  | RPS6KB2   | GI_4506738-S  | 11 | 11 | 66957584 | 1761   | 6.9596  | 5.50119 | CHB |
| rs869736   | RPS6KB2   | GI_4506738-S  | 11 | 11 | 66962038 | 2693   | 7.4281  | 5.50119 | CHB |
| rs2302264  | RPS6KB2   | GI_4506738-S  | 11 | 11 | 66964002 | 4657   | 6.9412  | 5.50119 | CHB |
| rs1638556  | RPS6KB2   | GI_4506738-S  | 11 | 11 | 66970094 | 10749  | 6.9596  | 5.50119 | CHB |
| rs1790761  | RPS6KB2   | GI_4506738-S  | 11 | 11 | 66978430 | 19085  | 6.8404  | 5.50119 | CHB |

|            |          |               |    |    |          |        |        |         |     |
|------------|----------|---------------|----|----|----------|--------|--------|---------|-----|
| rs1531514  | RPS6KB2  | GI_4506738-S  | 11 | 11 | 67155438 | 196093 | 5.5967 | 5.50119 | CHB |
| rs604524   | MRPL21   | GI_31652223-A | 11 | 11 | 68386505 | 28909  | 6.5477 | 5.98165 | CHB |
| rs584108   | MRPL21   | GI_31652223-A | 11 | 11 | 68386858 | 28556  | 6.4966 | 5.98165 | CHB |
| rs596874   | MRPL21   | GI_31652223-A | 11 | 11 | 68387450 | 27964  | 6.5477 | 5.98165 | CHB |
| rs501799   | MRPL21   | GI_31652223-A | 11 | 11 | 68387816 | 27598  | 6.5477 | 5.98165 | CHB |
| rs557625   | MRPL21   | GI_31652223-A | 11 | 11 | 68391298 | 24116  | 6.5477 | 5.98165 | CHB |
| rs10792001 | MRPL21   | GI_31652223-A | 11 | 11 | 68394313 | 21101  | 6.5477 | 5.98165 | CHB |
| rs473997   | MRPL21   | GI_31652223-A | 11 | 11 | 68396057 | 19357  | 5.9949 | 5.98165 | CHB |
| rs1249368  | MRPL21   | GI_31652223-A | 11 | 11 | 68402722 | 12692  | 6.5477 | 5.98165 | CHB |
| rs592697   | MRPL21   | GI_31652223-A | 11 | 11 | 68406640 | 8774   | 6.5477 | 5.98165 | CHB |
| rs514833   | MRPL21   | GI_31652223-A | 11 | 11 | 68414310 | 1104   | 7.8534 | 5.98165 | CHB |
| rs488363   | MRPL21   | GI_31652223-A | 11 | 11 | 68414874 | 540    | 6.5477 | 5.98165 | CHB |
| rs660614   | MRPL21   | GI_31652223-A | 11 | 11 | 68416064 | 650    | 6.5844 | 5.98165 | CHB |
| rs507520   | MRPL21   | GI_31652223-A | 11 | 11 | 68422630 | 7216   | 6.5477 | 5.98165 | CHB |
| rs636049   | MRPL21   | GI_31652223-A | 11 | 11 | 68423774 | 8360   | 6.0203 | 5.98165 | CHB |
| rs668576   | MRPL21   | GI_31652223-A | 11 | 11 | 68424784 | 9370   | 6.5477 | 5.98165 | CHB |
| rs482172   | MRPL21   | GI_31652223-A | 11 | 11 | 68425013 | 9599   | 5.9949 | 5.98165 | CHB |
| rs513359   | MRPL21   | GI_31652223-A | 11 | 11 | 68426072 | 10658  | 6.5477 | 5.98165 | CHB |
| rs629426   | MRPL21   | GI_31652223-A | 11 | 11 | 68427680 | 12266  | 5.9949 | 5.98165 | CHB |
| rs583182   | MRPL21   | GI_31652223-A | 11 | 11 | 68435210 | 19796  | 6.7422 | 5.98165 | CHB |
| rs646586   | MRPL21   | GI_31652223-A | 11 | 11 | 68438229 | 22815  | 6.5477 | 5.98165 | CHB |
| rs553875   | MRPL21   | GI_31652223-A | 11 | 11 | 68451720 | 36306  | 6.5477 | 5.98165 | CHB |
| rs1249365  | MRPL21   | GI_31652223-A | 11 | 11 | 68455338 | 39924  | 6.5477 | 5.98165 | CHB |
| rs622082   | MRPL21   | GI_31652223-A | 11 | 11 | 68460535 | 45121  | 6.5477 | 5.98165 | CHB |
| rs546382   | MRPL21   | GI_31652223-A | 11 | 11 | 68460840 | 45426  | 6.5477 | 5.98165 | CHB |
| rs559032   | MRPL21   | GI_31652223-A | 11 | 11 | 68467423 | 52009  | 6.5477 | 5.98165 | CHB |
| rs10896384 | MRPL21   | GI_31652223-A | 11 | 11 | 68476587 | 61173  | 6.5477 | 5.98165 | CHB |
| rs10896398 | TPCN2    | GI_20589957-S | 11 | 11 | 68577192 | 35219  | 7.4339 | 5.93795 | CHB |
| rs10736671 | TPCN2    | GI_20589957-S | 11 | 11 | 68615483 | 3072   | 5.9404 | 5.93795 | CHB |
| rs11235932 | FLJ11848 | GI_13376750-S | 11 | 11 | 73249531 | 66679  | 8.1268 | 5.64271 | CHB |
| rs11220    | FLJ11848 | GI_13376750-S | 11 | 11 | 73259191 | 57019  | 8.3423 | 5.64271 | CHB |
| rs1670546  | FLJ11848 | GI_13376750-S | 11 | 11 | 73262821 | 53389  | 8.2591 | 5.64271 | CHB |
| rs1670545  | FLJ11848 | GI_13376750-S | 11 | 11 | 73263760 | 52450  | 8.4086 | 5.64271 | CHB |
| rs1792199  | FLJ11848 | GI_13376750-S | 11 | 11 | 73266218 | 49992  | 8.2591 | 5.64271 | CHB |
| rs7105293  | FLJ11848 | GI_13376750-S | 11 | 11 | 73269843 | 46367  | 8.4086 | 5.64271 | CHB |
| rs10898950 | FLJ11848 | GI_13376750-S | 11 | 11 | 73278536 | 37674  | 8.2591 | 5.64271 | CHB |
| rs11606662 | PP1665   | GI_34147050-S | 11 | 11 | 74902548 | 79136  | 9.577  | 5.95641 | CHB |
| rs12788428 | PP1665   | GI_34147050-S | 11 | 11 | 74932771 | 109359 | 7.1206 | 5.95641 | CHB |
| rs10898417 | SYTL2    | GI_15011899-A | 11 | 11 | 85225151 | 141660 | 7.0788 | 5.64511 | CHB |
| rs1445502  | SYTL2    | GI_15011899-A | 11 | 11 | 85266946 | 183455 | 5.7622 | 5.64511 | CHB |
| rs11234457 | SYTL2    | GI_15011899-A | 11 | 11 | 85268689 | 185198 | 5.7622 | 5.64511 | CHB |
| rs11512932 | SYTL2    | GI_15011899-A | 11 | 11 | 85268778 | 185287 | 5.7622 | 5.64511 | CHB |
| rs11234458 | SYTL2    | GI_15011899-A | 11 | 11 | 85269018 | 185527 | 5.7622 | 5.64511 | CHB |
| rs7113656  | SYTL2    | GI_15011899-A | 11 | 11 | 85272387 | 188896 | 5.7622 | 5.64511 | CHB |
| rs12361645 | SYTL2    | GI_15011899-A | 11 | 11 | 85272754 | 189263 | 5.7622 | 5.64511 | CHB |
| rs11234462 | SYTL2    | GI_15011899-A | 11 | 11 | 85274572 | 191081 | 5.7622 | 5.64511 | CHB |
| rs11234463 | SYTL2    | GI_15011899-A | 11 | 11 | 85274733 | 191242 | 5.7622 | 5.64511 | CHB |
| rs12280977 | SYTL2    | GI_15011899-A | 11 | 11 | 85276312 | 192821 | 5.7622 | 5.64511 | CHB |
| rs12271536 | SYTL2    | GI_15011899-A | 11 | 11 | 85278483 | 194992 | 5.7622 | 5.64511 | CHB |
| rs2399688  | FN5      | GI_9910225-S  | 11 | 11 | 92944131 | 92655  | 7.5528 | 6.12923 | CHB |
| rs11020421 | FN5      | GI_9910225-S  | 11 | 11 | 92947125 | 95649  | 8.0399 | 6.12923 | CHB |
| rs4753480  | FN5      | GI_9910225-S  | 11 | 11 | 92948688 | 97212  | 7.3854 | 6.12923 | CHB |
| rs4237559  | FN5      | GI_9910225-S  | 11 | 11 | 92949095 | 97619  | 6.9664 | 6.12923 | CHB |
| rs7123345  | FN5      | GI_9910225-S  | 11 | 11 | 92951521 | 100045 | 7.6685 | 6.12923 | CHB |
| rs10831060 | FN5      | GI_9910225-S  | 11 | 11 | 92952741 | 101265 | 6.5332 | 6.12923 | CHB |
| rs4753092  | FN5      | GI_9910225-S  | 11 | 11 | 92970566 | 119090 | 7.3854 | 6.12923 | CHB |

|            |           |               |    |    |           |        |         |         |     |
|------------|-----------|---------------|----|----|-----------|--------|---------|---------|-----|
| rs1939557  | FN5       | GI_9910225-S  | 11 | 11 | 92971984  | 120508 | 6.9707  | 6.12923 | CHB |
| rs4753093  | FN5       | GI_9910225-S  | 11 | 11 | 92977144  | 125668 | 7.5393  | 6.12923 | CHB |
| rs12222957 | FN5       | GI_9910225-S  | 11 | 11 | 92981045  | 129569 | 7.108   | 6.12923 | CHB |
| rs1954783  | FN5       | GI_9910225-S  | 11 | 11 | 92986134  | 134658 | 7.1166  | 6.12923 | CHB |
| rs10831076 | FN5       | GI_9910225-S  | 11 | 11 | 92990431  | 138955 | 7.6534  | 6.12923 | CHB |
| rs10831077 | FN5       | GI_9910225-S  | 11 | 11 | 92992306  | 140830 | 6.5363  | 6.12923 | CHB |
| rs11020450 | FN5       | GI_9910225-S  | 11 | 11 | 92993039  | 141563 | 6.3638  | 6.12923 | CHB |
| rs948017   | FN5       | GI_9910225-S  | 11 | 11 | 92995557  | 144081 | 6.6581  | 6.12923 | CHB |
| rs4753485  | FN5       | GI_9910225-S  | 11 | 11 | 93013924  | 162448 | 6.2124  | 6.12923 | CHB |
| rs10831082 | FN5       | GI_9910225-S  | 11 | 11 | 93020696  | 169220 | 6.8574  | 6.12923 | CHB |
| rs10741469 | FN5       | GI_9910225-S  | 11 | 11 | 93021835  | 170359 | 6.2124  | 6.12923 | CHB |
| rs659357   | Hs.98028  | Hs.98028-S    | 11 | 11 | 124165394 | 18941  | 6.1288  | 5.92135 | CHB |
| rs558814   | Hs.98028  | Hs.98028-S    | 11 | 11 | 124180424 | 3911   | 6.0898  | 5.92135 | CHB |
| rs646521   | Hs.98028  | Hs.98028-S    | 11 | 11 | 124183151 | 1184   | 6.0898  | 5.92135 | CHB |
| rs580213   | Hs.98028  | Hs.98028-S    | 11 | 11 | 124183179 | 1156   | 6.0732  | 5.92135 | CHB |
| rs3809258  | LOC399987 | GI_42660080-S | 12 | 12 | 3734571   | 1492   | 14.33   | 6.35263 | CHB |
| rs9300302  | LOC399987 | GI_42660080-S | 12 | 12 | 3737732   | 1669   | 12.355  | 6.35263 | CHB |
| rs10774171 | LOC399987 | GI_42660080-S | 12 | 12 | 3738570   | 2507   | 14.2569 | 6.35263 | CHB |
| rs3087835  | B7        | GI_42542401-A | 12 | 12 | 6923346   | 29739  | 6.0043  | 5.89864 | CHB |
| rs11050615 | LOC387834 | GI_42660007-S | 12 | 12 | 9427425   | 18927  | 7.1368  | 6.20576 | CHB |
| rs10743688 | LOC387834 | GI_42660007-S | 12 | 12 | 9429079   | 17273  | 7.4818  | 6.20576 | CHB |
| rs11050701 | LOC387834 | GI_42660007-S | 12 | 12 | 9440339   | 6013   | 6.789   | 6.20576 | CHB |
| rs10772285 | KLRK1     | GI_6679051-S  | 12 | 12 | 10510641  | 94129  | 6.132   | 6.06355 | CHB |
| rs1054637  | MGC10946  | GI_13386481-S | 12 | 12 | 21576375  | 3155   | 5.867   | 5.6526  | CHB |
| rs17684244 | MGC10946  | GI_13386481-S | 12 | 12 | 21577793  | 4573   | 5.71    | 5.6526  | CHB |
| rs759088   | MGC10946  | GI_13386481-S | 12 | 12 | 21580167  | 6947   | 5.867   | 5.6526  | CHB |
| rs2417995  | MGC10946  | GI_13386481-S | 12 | 12 | 21581644  | 8424   | 5.7428  | 5.6526  | CHB |
| rs10841842 | MGC10946  | GI_13386481-S | 12 | 12 | 21582041  | 8821   | 5.7428  | 5.6526  | CHB |
| rs10841843 | MGC10946  | GI_13386481-S | 12 | 12 | 21583158  | 9938   | 5.7428  | 5.6526  | CHB |
| rs1904121  | MGC10946  | GI_13386481-S | 12 | 12 | 21590775  | 17555  | 5.7428  | 5.6526  | CHB |
| rs6487236  | MGC10946  | GI_13386481-S | 12 | 12 | 21591183  | 17963  | 5.7428  | 5.6526  | CHB |
| rs6487238  | MGC10946  | GI_13386481-S | 12 | 12 | 21591206  | 17986  | 5.7428  | 5.6526  | CHB |
| rs7962754  | MGC10946  | GI_13386481-S | 12 | 12 | 21591762  | 18542  | 5.7428  | 5.6526  | CHB |
| rs2126885  | MGC10946  | GI_13386481-S | 12 | 12 | 21592704  | 19484  | 5.7428  | 5.6526  | CHB |
| rs2169745  | MGC10946  | GI_13386481-S | 12 | 12 | 21593770  | 20550  | 5.7428  | 5.6526  | CHB |
| rs1600123  | MGC10946  | GI_13386481-S | 12 | 12 | 21594113  | 20893  | 5.7428  | 5.6526  | CHB |
| rs1871143  | MGC10946  | GI_13386481-S | 12 | 12 | 21596323  | 23103  | 6.1374  | 5.6526  | CHB |
| rs1871145  | MGC10946  | GI_13386481-S | 12 | 12 | 21597549  | 24329  | 6.1374  | 5.6526  | CHB |
| rs1478299  | MGC10946  | GI_13386481-S | 12 | 12 | 21597921  | 24701  | 6.1374  | 5.6526  | CHB |
| rs11046113 | MGC10946  | GI_13386481-S | 12 | 12 | 21598800  | 25580  | 5.6821  | 5.6526  | CHB |
| rs10841848 | MGC10946  | GI_13386481-S | 12 | 12 | 21600821  | 27601  | 6.1374  | 5.6526  | CHB |
| rs11046115 | MGC10946  | GI_13386481-S | 12 | 12 | 21600840  | 27620  | 6.1374  | 5.6526  | CHB |
| rs7313335  | MGC10946  | GI_13386481-S | 12 | 12 | 21600871  | 27651  | 6.1374  | 5.6526  | CHB |
| rs11046116 | MGC10946  | GI_13386481-S | 12 | 12 | 21600886  | 27666  | 6.1374  | 5.6526  | CHB |
| rs11046117 | MGC10946  | GI_13386481-S | 12 | 12 | 21600924  | 27704  | 6.275   | 5.6526  | CHB |
| rs7953883  | MGC10946  | GI_13386481-S | 12 | 12 | 21602198  | 28978  | 6.6651  | 5.6526  | CHB |
| rs7967170  | MGC10946  | GI_13386481-S | 12 | 12 | 21602276  | 29056  | 6.1374  | 5.6526  | CHB |
| rs7977474  | MGC10946  | GI_13386481-S | 12 | 12 | 21602378  | 29158  | 6.1374  | 5.6526  | CHB |
| rs7977846  | MGC10946  | GI_13386481-S | 12 | 12 | 21602652  | 29432  | 6.1374  | 5.6526  | CHB |
| rs1871136  | MGC10946  | GI_13386481-S | 12 | 12 | 21603812  | 30592  | 6.1374  | 5.6526  | CHB |
| rs1871137  | MGC10946  | GI_13386481-S | 12 | 12 | 21603841  | 30621  | 6.1374  | 5.6526  | CHB |
| rs1871138  | MGC10946  | GI_13386481-S | 12 | 12 | 21604163  | 30943  | 6.1287  | 5.6526  | CHB |
| rs4639981  | MGC10946  | GI_13386481-S | 12 | 12 | 21604575  | 31355  | 6.1374  | 5.6526  | CHB |
| rs2306180  | MGC10946  | GI_13386481-S | 12 | 12 | 21604669  | 31449  | 6.1374  | 5.6526  | CHB |
| rs2126884  | MGC10946  | GI_13386481-S | 12 | 12 | 21604915  | 31695  | 6.1374  | 5.6526  | CHB |
| rs1463543  | MGC10946  | GI_13386481-S | 12 | 12 | 21605074  | 31854  | 6.1374  | 5.6526  | CHB |



|            |          |               |    |    |           |        |        |         |     |
|------------|----------|---------------|----|----|-----------|--------|--------|---------|-----|
| rs1473424  | MGC10946 | GI_13386481-S | 12 | 12 | 21605441  | 32221  | 6.1374 | 5.6526  | CHB |
| rs1473426  | MGC10946 | GI_13386481-S | 12 | 12 | 21605873  | 32653  | 6.1374 | 5.6526  | CHB |
| rs4762845  | MGC10946 | GI_13386481-S | 12 | 12 | 21606018  | 32798  | 5.867  | 5.6526  | CHB |
| rs4762706  | MGC10946 | GI_13386481-S | 12 | 12 | 21606167  | 32947  | 6.1374 | 5.6526  | CHB |
| rs1473421  | MGC10946 | GI_13386481-S | 12 | 12 | 21607068  | 33848  | 6.1374 | 5.6526  | CHB |
| rs10770836 | MGC10946 | GI_13386481-S | 12 | 12 | 21608008  | 34788  | 6.1374 | 5.6526  | CHB |
| rs10841850 | MGC10946 | GI_13386481-S | 12 | 12 | 21608123  | 34903  | 6.1374 | 5.6526  | CHB |
| rs11046122 | MGC10946 | GI_13386481-S | 12 | 12 | 21608288  | 35068  | 6.1374 | 5.6526  | CHB |
| rs2306179  | MGC10946 | GI_13386481-S | 12 | 12 | 21612900  | 39680  | 6.6651 | 5.6526  | CHB |
| rs3816655  | MGC10946 | GI_13386481-S | 12 | 12 | 21613281  | 40061  | 5.8863 | 5.6526  | CHB |
| rs6487241  | MGC10946 | GI_13386481-S | 12 | 12 | 21613920  | 40700  | 6.1855 | 5.6526  | CHB |
| rs7976688  | MGC10946 | GI_13386481-S | 12 | 12 | 21614934  | 41714  | 5.8606 | 5.6526  | CHB |
| rs11169506 | KIAA1463 | GI_39930390-S | 12 | 12 | 49297523  | 127392 | 7.6207 | 5.90072 | CHB |
| rs7309964  | KIAA1463 | GI_39930390-S | 12 | 12 | 49350331  | 74584  | 7.9678 | 5.90072 | CHB |
| rs11169520 | KIAA1463 | GI_39930390-S | 12 | 12 | 49359790  | 65125  | 8.5285 | 5.90072 | CHB |
| rs1047912  | KIAA1463 | GI_39930390-S | 12 | 12 | 49425129  | 214    | 9.8672 | 5.90072 | CHB |
| rs7313455  | RBMS2    | GI_4506448-S  | 12 | 12 | 55139498  | 129520 | 5.8731 | 5.71074 | CHB |
| rs3782235  | RBMS2    | GI_4506448-S  | 12 | 12 | 55201814  | 67204  | 7.9535 | 5.71074 | CHB |
| rs4759247  | RBMS2    | GI_4506448-S  | 12 | 12 | 55205101  | 63917  | 7.9535 | 5.71074 | CHB |
| rs1965307  | RBMS2    | GI_4506448-S  | 12 | 12 | 55211798  | 57220  | 6.9483 | 5.71074 | CHB |
| rs7314300  | RBMS2    | GI_4506448-S  | 12 | 12 | 55215611  | 53407  | 6.9483 | 5.71074 | CHB |
| rs10876902 | RBMS2    | GI_4506448-S  | 12 | 12 | 55215631  | 53387  | 6.3014 | 5.71074 | CHB |
| rs10876903 | RBMS2    | GI_4506448-S  | 12 | 12 | 55215714  | 53304  | 6.1474 | 5.71074 | CHB |
| rs11171887 | RBMS2    | GI_4506448-S  | 12 | 12 | 55215786  | 53232  | 6.9516 | 5.71074 | CHB |
| rs324010   | STAT6    | GI_23397677-S | 12 | 12 | 55768519  | 7074   | 6.4162 | 5.85165 | CHB |
| rs324019   | STAT6    | GI_23397677-S | 12 | 12 | 55772914  | 2679   | 6.1467 | 5.85165 | CHB |
| rs841718   | STAT6    | GI_23397677-S | 12 | 12 | 55779263  | 3670   | 7.8982 | 5.85165 | CHB |
| rs10506726 | E2F7     | GI_44955909-S | 12 | 12 | 75969533  | 51642  | 7.0158 | 5.78011 | CHB |
| rs11117026 | E2F7     | GI_44955909-S | 12 | 12 | 75984128  | 66237  | 7.0158 | 5.78011 | CHB |
| rs11519791 | E2F7     | GI_44955909-S | 12 | 12 | 75988140  | 70249  | 7.0158 | 5.78011 | CHB |
| rs12814954 | E2F7     | GI_44955909-S | 12 | 12 | 75993721  | 75830  | 7.0158 | 5.78011 | CHB |
| rs10506728 | E2F7     | GI_44955909-S | 12 | 12 | 75999549  | 81658  | 6.944  | 5.78011 | CHB |
| rs2114918  | CHPT1    | GI_9910383-S  | 12 | 12 | 100586986 | 32445  | 6.1841 | 6.04009 | CHB |
| rs10745921 | CHPT1    | GI_9910383-S  | 12 | 12 | 100589661 | 29770  | 6.2246 | 6.04009 | CHB |
| rs2695290  | CHPT1    | GI_9910383-S  | 12 | 12 | 100590312 | 29119  | 7.1178 | 6.04009 | CHB |
| rs2695284  | CHPT1    | GI_9910383-S  | 12 | 12 | 100591786 | 27645  | 6.7736 | 6.04009 | CHB |
| rs2695282  | CHPT1    | GI_9910383-S  | 12 | 12 | 100591970 | 27461  | 6.8679 | 6.04009 | CHB |
| rs2695281  | CHPT1    | GI_9910383-S  | 12 | 12 | 100592467 | 26964  | 6.8679 | 6.04009 | CHB |
| rs2559855  | CHPT1    | GI_9910383-S  | 12 | 12 | 100592548 | 26883  | 6.3878 | 6.04009 | CHB |
| rs3809260  | CHPT1    | GI_9910383-S  | 12 | 12 | 100593485 | 25946  | 7.5234 | 6.04009 | CHB |
| rs3205421  | CHPT1    | GI_9910383-S  | 12 | 12 | 100610813 | 8618   | 6.3802 | 6.04009 | CHB |
| rs3764973  | CHPT1    | GI_9910383-S  | 12 | 12 | 100619260 | 171    | 6.2265 | 6.04009 | CHB |
| rs9669539  | CHPT1    | GI_9910383-S  | 12 | 12 | 100621087 | 1656   | 6.2344 | 6.04009 | CHB |
| rs2288379  | CHPT1    | GI_9910383-S  | 12 | 12 | 100626387 | 6956   | 7.0772 | 6.04009 | CHB |
| rs11110986 | CHPT1    | GI_9910383-S  | 12 | 12 | 100627558 | 8127   | 7.0772 | 6.04009 | CHB |
| rs10860779 | CHPT1    | GI_9910383-S  | 12 | 12 | 100629730 | 10299  | 6.7671 | 6.04009 | CHB |
| rs7135472  | CHPT1    | GI_9910383-S  | 12 | 12 | 100640229 | 20798  | 6.4794 | 6.04009 | CHB |
| rs7957655  | CHPT1    | GI_9910383-S  | 12 | 12 | 100650759 | 31328  | 6.3776 | 6.04009 | CHB |
| rs730013   | CHPT1    | GI_9910383-S  | 12 | 12 | 100652449 | 33018  | 6.4701 | 6.04009 | CHB |
| rs3817305  | CHPT1    | GI_9910383-S  | 12 | 12 | 100654206 | 34775  | 6.9138 | 6.04009 | CHB |
| rs4764813  | CHPT1    | GI_9910383-S  | 12 | 12 | 100660021 | 40590  | 6.3802 | 6.04009 | CHB |
| rs4764814  | CHPT1    | GI_9910383-S  | 12 | 12 | 100663571 | 44140  | 6.3666 | 6.04009 | CHB |
| rs10492085 | CHPT1    | GI_9910383-S  | 12 | 12 | 100664793 | 45362  | 6.4701 | 6.04009 | CHB |
| rs11111024 | CHPT1    | GI_9910383-S  | 12 | 12 | 100686406 | 66975  | 7.3267 | 6.04009 | CHB |
| rs12322453 | CHPT1    | GI_9910383-S  | 12 | 12 | 100691649 | 72218  | 7.0772 | 6.04009 | CHB |
| rs10860790 | CHPT1    | GI_9910383-S  | 12 | 12 | 100700197 | 80766  | 6.9171 | 6.04009 | CHB |

|            |      |              |    |    |           |      |         |         |     |
|------------|------|--------------|----|----|-----------|------|---------|---------|-----|
| rs3741981  | OAS1 | GI_8051620-I | 12 | 12 | 111811590 | 8500 | 8.1496  | 6.47824 | CHB |
| rs2057778  | OAS1 | GI_8051620-I | 12 | 12 | 111813516 | 6574 | 9.6837  | 6.47824 | CHB |
| rs2057778  | OAS1 | GI_8051622-I | 12 | 12 | 111813516 | 4742 | 10.4258 | 6.47824 | CHB |
| rs2285934  | OAS1 | GI_8051620-I | 12 | 12 | 111814240 | 5850 | 9.6837  | 6.47824 | CHB |
| rs2285934  | OAS1 | GI_8051622-I | 12 | 12 | 111814240 | 4018 | 10.4258 | 6.47824 | CHB |
| rs10774671 | OAS1 | GI_8051620-I | 12 | 12 | 111819913 | 177  | 9.6837  | 6.47824 | CHB |
| rs10774671 | OAS1 | GI_8051622-I | 12 | 12 | 111819913 | 1655 | 10.4258 | 6.47824 | CHB |
| rs3177979  | OAS1 | GI_8051620-I | 12 | 12 | 111819929 | 161  | 7.7558  | 6.47824 | CHB |
| rs3177979  | OAS1 | GI_8051622-I | 12 | 12 | 111819929 | 1671 | 8.9631  | 6.47824 | CHB |
| rs1051042  | OAS1 | GI_8051620-I | 12 | 12 | 111819957 | 133  | 9.1505  | 6.47824 | CHB |
| rs1051042  | OAS1 | GI_8051622-I | 12 | 12 | 111819957 | 1699 | 9.6137  | 6.47824 | CHB |
| rs2660     | OAS1 | GI_8051620-I | 12 | 12 | 111820162 | 72   | 9.5062  | 6.47824 | CHB |
| rs2660     | OAS1 | GI_8051622-I | 12 | 12 | 111820162 | 1904 | 10.1406 | 6.47824 | CHB |
| rs7135577  | OAS1 | GI_8051620-I | 12 | 12 | 111820826 | 736  | 9.5062  | 6.47824 | CHB |
| rs7135577  | OAS1 | GI_8051622-I | 12 | 12 | 111820826 | 2568 | 10.1406 | 6.47824 | CHB |
| rs4767027  | OAS1 | GI_8051620-I | 12 | 12 | 111821877 | 1787 | 9.6837  | 6.47824 | CHB |
| rs4767027  | OAS1 | GI_8051622-I | 12 | 12 | 111821877 | 3619 | 10.4258 | 6.47824 | CHB |
| rs4767028  | OAS1 | GI_8051620-I | 12 | 12 | 111821908 | 1818 | 9.6837  | 6.47824 | CHB |
| rs4767028  | OAS1 | GI_8051622-I | 12 | 12 | 111821908 | 3650 | 10.4258 | 6.47824 | CHB |
| rs4767029  | OAS1 | GI_8051620-I | 12 | 12 | 111822038 | 1948 | 9.6837  | 6.47824 | CHB |
| rs4767029  | OAS1 | GI_8051622-I | 12 | 12 | 111822038 | 3780 | 10.4258 | 6.47824 | CHB |
| rs4767030  | OAS1 | GI_8051620-I | 12 | 12 | 111822297 | 2207 | 9.6837  | 6.47824 | CHB |
| rs4767030  | OAS1 | GI_8051622-I | 12 | 12 | 111822297 | 4039 | 10.4258 | 6.47824 | CHB |
| rs10850092 | OAS1 | GI_8051620-I | 12 | 12 | 111822423 | 2333 | 9.6837  | 6.47824 | CHB |
| rs10850092 | OAS1 | GI_8051622-I | 12 | 12 | 111822423 | 4165 | 10.4258 | 6.47824 | CHB |
| rs6489864  | OAS1 | GI_8051620-I | 12 | 12 | 111822745 | 2655 | 9.6837  | 6.47824 | CHB |
| rs6489864  | OAS1 | GI_8051622-I | 12 | 12 | 111822745 | 4487 | 10.4258 | 6.47824 | CHB |
| rs6489865  | OAS1 | GI_8051620-I | 12 | 12 | 111823022 | 2932 | 9.6837  | 6.47824 | CHB |
| rs6489865  | OAS1 | GI_8051622-I | 12 | 12 | 111823022 | 4764 | 10.4258 | 6.47824 | CHB |
| rs10850093 | OAS1 | GI_8051620-I | 12 | 12 | 111823188 | 3098 | 9.6837  | 6.47824 | CHB |
| rs10850093 | OAS1 | GI_8051622-I | 12 | 12 | 111823188 | 4930 | 10.4258 | 6.47824 | CHB |
| rs10850094 | OAS1 | GI_8051620-I | 12 | 12 | 111823283 | 3193 | 9.6837  | 6.47824 | CHB |
| rs10850094 | OAS1 | GI_8051622-I | 12 | 12 | 111823283 | 5025 | 10.4258 | 6.47824 | CHB |
| rs10850095 | OAS1 | GI_8051620-I | 12 | 12 | 111823295 | 3205 | 9.6837  | 6.47824 | CHB |
| rs10850095 | OAS1 | GI_8051622-I | 12 | 12 | 111823295 | 5037 | 10.4258 | 6.47824 | CHB |
| rs10850096 | OAS1 | GI_8051620-I | 12 | 12 | 111823506 | 3416 | 9.6837  | 6.47824 | CHB |
| rs10850096 | OAS1 | GI_8051622-I | 12 | 12 | 111823506 | 5248 | 10.4258 | 6.47824 | CHB |
| rs10850097 | OAS1 | GI_8051620-I | 12 | 12 | 111823837 | 3747 | 9.6837  | 6.47824 | CHB |
| rs10850097 | OAS1 | GI_8051622-I | 12 | 12 | 111823837 | 5579 | 10.4258 | 6.47824 | CHB |
| rs10774673 | OAS1 | GI_8051620-I | 12 | 12 | 111823878 | 3788 | 9.6837  | 6.47824 | CHB |
| rs10774673 | OAS1 | GI_8051622-I | 12 | 12 | 111823878 | 5620 | 10.4258 | 6.47824 | CHB |
| rs10774674 | OAS1 | GI_8051620-I | 12 | 12 | 111823894 | 3804 | 9.6837  | 6.47824 | CHB |
| rs10774674 | OAS1 | GI_8051622-I | 12 | 12 | 111823894 | 5636 | 10.4258 | 6.47824 | CHB |
| rs11066452 | OAS1 | GI_8051620-I | 12 | 12 | 111824294 | 4204 | 9.6837  | 6.47824 | CHB |
| rs11066452 | OAS1 | GI_8051622-I | 12 | 12 | 111824294 | 6036 | 10.4258 | 6.47824 | CHB |
| rs10850098 | OAS1 | GI_8051620-I | 12 | 12 | 111824778 | 4688 | 9.6837  | 6.47824 | CHB |
| rs10850098 | OAS1 | GI_8051622-I | 12 | 12 | 111824778 | 6520 | 10.4258 | 6.47824 | CHB |
| rs10774676 | OAS1 | GI_8051620-I | 12 | 12 | 111825127 | 5037 | 9.6837  | 6.47824 | CHB |
| rs10774676 | OAS1 | GI_8051622-I | 12 | 12 | 111825127 | 6869 | 10.4258 | 6.47824 | CHB |
| rs10774677 | OAS1 | GI_8051620-I | 12 | 12 | 111825141 | 5051 | 9.5062  | 6.47824 | CHB |
| rs10774677 | OAS1 | GI_8051622-I | 12 | 12 | 111825141 | 6883 | 10.1406 | 6.47824 | CHB |
| rs4766663  | OAS1 | GI_8051620-I | 12 | 12 | 111825694 | 5604 | 9.6837  | 6.47824 | CHB |
| rs4766663  | OAS1 | GI_8051622-I | 12 | 12 | 111825694 | 7436 | 10.4258 | 6.47824 | CHB |
| rs4766664  | OAS1 | GI_8051620-I | 12 | 12 | 111825717 | 5627 | 9.6837  | 6.47824 | CHB |
| rs4766664  | OAS1 | GI_8051622-I | 12 | 12 | 111825717 | 7459 | 10.4258 | 6.47824 | CHB |
| rs4766665  | OAS1 | GI_8051620-I | 12 | 12 | 111825829 | 5739 | 9.6837  | 6.47824 | CHB |

|           |      |              |    |    |           |       |         |         |     |
|-----------|------|--------------|----|----|-----------|-------|---------|---------|-----|
| rs4766665 | OAS1 | GI_8051622-I | 12 | 12 | 111825829 | 7571  | 10.4258 | 6.47824 | CHB |
| rs4988618 | OAS1 | GI_8051620-I | 12 | 12 | 111825898 | 5808  | 9.6837  | 6.47824 | CHB |
| rs4988618 | OAS1 | GI_8051622-I | 12 | 12 | 111825898 | 7640  | 10.4258 | 6.47824 | CHB |
| rs6489868 | OAS1 | GI_8051620-I | 12 | 12 | 111826412 | 6322  | 9.6837  | 6.47824 | CHB |
| rs6489868 | OAS1 | GI_8051622-I | 12 | 12 | 111826412 | 8154  | 10.4258 | 6.47824 | CHB |
| rs4766673 | OAS1 | GI_8051620-I | 12 | 12 | 111827881 | 7791  | 9.6837  | 6.47824 | CHB |
| rs4766673 | OAS1 | GI_8051622-I | 12 | 12 | 111827881 | 9623  | 10.4258 | 6.47824 | CHB |
| rs4766674 | OAS1 | GI_8051620-I | 12 | 12 | 111827921 | 7831  | 9.6837  | 6.47824 | CHB |
| rs4766674 | OAS1 | GI_8051622-I | 12 | 12 | 111827921 | 9663  | 10.4258 | 6.47824 | CHB |
| rs4766675 | OAS1 | GI_8051620-I | 12 | 12 | 111828173 | 8083  | 9.6837  | 6.47824 | CHB |
| rs4766675 | OAS1 | GI_8051622-I | 12 | 12 | 111828173 | 9915  | 10.4258 | 6.47824 | CHB |
| rs4766676 | OAS1 | GI_8051620-I | 12 | 12 | 111828301 | 8211  | 9.3966  | 6.47824 | CHB |
| rs4766676 | OAS1 | GI_8051622-I | 12 | 12 | 111828301 | 10043 | 10.4963 | 6.47824 | CHB |
| rs7315441 | OAS1 | GI_8051620-I | 12 | 12 | 111828407 | 8317  | 9.6837  | 6.47824 | CHB |
| rs7315441 | OAS1 | GI_8051622-I | 12 | 12 | 111828407 | 10149 | 10.4258 | 6.47824 | CHB |
| rs7305035 | OAS1 | GI_8051620-I | 12 | 12 | 111828523 | 8433  | 11.1764 | 6.47824 | CHB |
| rs7305035 | OAS1 | GI_8051622-I | 12 | 12 | 111828523 | 10265 | 8.2979  | 6.47824 | CHB |
| rs7316586 | OAS1 | GI_8051620-I | 12 | 12 | 111828548 | 8458  | 9.6837  | 6.47824 | CHB |
| rs7316586 | OAS1 | GI_8051622-I | 12 | 12 | 111828548 | 10290 | 10.4258 | 6.47824 | CHB |
| rs916972  | OAS1 | GI_8051620-I | 12 | 12 | 111828769 | 8679  | 9.6837  | 6.47824 | CHB |
| rs916972  | OAS1 | GI_8051622-I | 12 | 12 | 111828769 | 10511 | 10.4258 | 6.47824 | CHB |
| rs7134391 | OAS1 | GI_8051620-I | 12 | 12 | 111829411 | 9321  | 9.6837  | 6.47824 | CHB |
| rs7134391 | OAS1 | GI_8051622-I | 12 | 12 | 111829411 | 11153 | 10.4258 | 6.47824 | CHB |
| rs1859336 | OAS1 | GI_8051620-I | 12 | 12 | 111830029 | 9939  | 9.6837  | 6.47824 | CHB |
| rs1859336 | OAS1 | GI_8051622-I | 12 | 12 | 111830029 | 11771 | 10.4258 | 6.47824 | CHB |
| rs1859335 | OAS1 | GI_8051620-I | 12 | 12 | 111830045 | 9955  | 10.19   | 6.47824 | CHB |
| rs1859335 | OAS1 | GI_8051622-I | 12 | 12 | 111830045 | 11787 | 6.6799  | 6.47824 | CHB |
| rs2384071 | OAS1 | GI_8051620-I | 12 | 12 | 111830063 | 9973  | 9.2265  | 6.47824 | CHB |
| rs2384071 | OAS1 | GI_8051622-I | 12 | 12 | 111830063 | 11805 | 9.8469  | 6.47824 | CHB |
| rs2384072 | OAS1 | GI_8051620-I | 12 | 12 | 111830142 | 10052 | 9.4378  | 6.47824 | CHB |
| rs2384072 | OAS1 | GI_8051622-I | 12 | 12 | 111830142 | 11884 | 11.5976 | 6.47824 | CHB |
| rs2384073 | OAS1 | GI_8051620-I | 12 | 12 | 111830315 | 10225 | 11.3401 | 6.47824 | CHB |
| rs2384073 | OAS1 | GI_8051622-I | 12 | 12 | 111830315 | 12057 | 9.6736  | 6.47824 | CHB |
| rs6489874 | OAS1 | GI_8051620-I | 12 | 12 | 111830615 | 10525 | 9.3585  | 6.47824 | CHB |
| rs6489874 | OAS1 | GI_8051622-I | 12 | 12 | 111830615 | 12357 | 11.5511 | 6.47824 | CHB |
| rs6489878 | OAS1 | GI_8051620-I | 12 | 12 | 111830845 | 10755 | 10.9961 | 6.47824 | CHB |
| rs6489878 | OAS1 | GI_8051622-I | 12 | 12 | 111830845 | 12587 | 9.2834  | 6.47824 | CHB |
| rs7298184 | OAS1 | GI_8051620-I | 12 | 12 | 111830969 | 10879 | 9.3966  | 6.47824 | CHB |
| rs7298184 | OAS1 | GI_8051622-I | 12 | 12 | 111830969 | 12711 | 10.0947 | 6.47824 | CHB |
| rs7132404 | OAS1 | GI_8051620-I | 12 | 12 | 111831325 | 11235 | 9.6837  | 6.47824 | CHB |
| rs7132404 | OAS1 | GI_8051622-I | 12 | 12 | 111831325 | 13067 | 10.4258 | 6.47824 | CHB |
| rs4767036 | OAS1 | GI_8051620-I | 12 | 12 | 111831897 | 11807 | 9.6837  | 6.47824 | CHB |
| rs4767036 | OAS1 | GI_8051622-I | 12 | 12 | 111831897 | 13639 | 10.4258 | 6.47824 | CHB |
| rs7967461 | OAS1 | GI_8051620-I | 12 | 12 | 111832479 | 12389 | 9.6837  | 6.47824 | CHB |
| rs7967461 | OAS1 | GI_8051622-I | 12 | 12 | 111832479 | 14221 | 10.4258 | 6.47824 | CHB |
| rs1859333 | OAS1 | GI_8051620-I | 12 | 12 | 111833686 | 13596 | 9.6837  | 6.47824 | CHB |
| rs1859333 | OAS1 | GI_8051622-I | 12 | 12 | 111833686 | 15428 | 10.4258 | 6.47824 | CHB |
| rs1859332 | OAS1 | GI_8051620-I | 12 | 12 | 111833834 | 13744 | 9.5859  | 6.47824 | CHB |
| rs1859332 | OAS1 | GI_8051622-I | 12 | 12 | 111833834 | 15576 | 10.3947 | 6.47824 | CHB |
| rs7966314 | OAS1 | GI_8051620-I | 12 | 12 | 111835259 | 15169 | 9.6837  | 6.47824 | CHB |
| rs7966314 | OAS1 | GI_8051622-I | 12 | 12 | 111835259 | 17001 | 10.4258 | 6.47824 | CHB |
| rs4767037 | OAS1 | GI_8051620-I | 12 | 12 | 111835524 | 15434 | 9.7479  | 6.47824 | CHB |
| rs4767037 | OAS1 | GI_8051622-I | 12 | 12 | 111835524 | 17266 | 11.6596 | 6.47824 | CHB |
| rs3759375 | OAS1 | GI_8051620-I | 12 | 12 | 111836308 | 16218 | 9.5062  | 6.47824 | CHB |
| rs3759375 | OAS1 | GI_8051622-I | 12 | 12 | 111836308 | 18050 | 10.1406 | 6.47824 | CHB |
| rs4767040 | OAS1 | GI_8051620-I | 12 | 12 | 111836737 | 16647 | 9.6837  | 6.47824 | CHB |

|            |           |               |    |    |           |        |         |         |     |
|------------|-----------|---------------|----|----|-----------|--------|---------|---------|-----|
| rs4767040  | OAS1      | GI_8051622-I  | 12 | 12 | 111836737 | 18479  | 10.4258 | 6.47824 | CHB |
| rs10774679 | OAS1      | GI_8051620-I  | 12 | 12 | 111837468 | 17378  | 9.8637  | 6.47824 | CHB |
| rs10774679 | OAS1      | GI_8051622-I  | 12 | 12 | 111837468 | 19210  | 9.3822  | 6.47824 | CHB |
| rs7132797  | OAS1      | GI_8051620-I  | 12 | 12 | 111837756 | 17666  | 9.5062  | 6.47824 | CHB |
| rs7132797  | OAS1      | GI_8051622-I  | 12 | 12 | 111837756 | 19498  | 10.5251 | 6.47824 | CHB |
| rs4238033  | OAS1      | GI_8051620-I  | 12 | 12 | 111840801 | 20711  | 9.0393  | 6.47824 | CHB |
| rs4238033  | OAS1      | GI_8051622-I  | 12 | 12 | 111840801 | 22543  | 8.1666  | 6.47824 | CHB |
| rs10735079 | OAS1      | GI_8051620-I  | 12 | 12 | 111842728 | 22638  | 9.6837  | 6.47824 | CHB |
| rs10735079 | OAS1      | GI_8051622-I  | 12 | 12 | 111842728 | 24470  | 10.4258 | 6.47824 | CHB |
| rs7977345  | OAS1      | GI_8051620-I  | 12 | 12 | 111843428 | 23338  | 9.6837  | 6.47824 | CHB |
| rs7977345  | OAS1      | GI_8051622-I  | 12 | 12 | 111843428 | 25170  | 10.4258 | 6.47824 | CHB |
| rs6489881  | OAS1      | GI_8051620-I  | 12 | 12 | 111843937 | 23847  | 9.127   | 6.47824 | CHB |
| rs6489881  | OAS1      | GI_8051622-I  | 12 | 12 | 111843937 | 25679  | 10.0572 | 6.47824 | CHB |
| rs7131998  | OAS1      | GI_8051620-I  | 12 | 12 | 111844415 | 24325  | 9.5062  | 6.47824 | CHB |
| rs7131998  | OAS1      | GI_8051622-I  | 12 | 12 | 111844415 | 26157  | 10.3947 | 6.47824 | CHB |
| rs2269899  | OAS1      | GI_8051622-I  | 12 | 12 | 111844676 | 26418  | 8.5931  | 6.47824 | CHB |
| rs11065504 | CAMKK2    | GI_27437022-A | 12 | 12 | 120143180 | 2544   | 6.8476  | 5.74275 | CHB |
| rs12819431 | CAMKK2    | GI_27437022-A | 12 | 12 | 120143507 | 2217   | 6.6124  | 5.74275 | CHB |
| rs3794207  | CAMKK2    | GI_27437022-A | 12 | 12 | 120148798 | 3074   | 7.2126  | 5.74275 | CHB |
| rs2686343  | CAMKK2    | GI_27437022-A | 12 | 12 | 120148828 | 3104   | 7.6397  | 5.74275 | CHB |
| rs3794205  | CAMKK2    | GI_27437022-A | 12 | 12 | 120149649 | 3925   | 6.3179  | 5.74275 | CHB |
| rs12823779 | CAMKK2    | GI_27437022-A | 12 | 12 | 120150964 | 5240   | 7.2126  | 5.74275 | CHB |
| rs7991707  | B3GTL     | GI_34996530-S | 13 | 13 | 30770181  | 33374  | 7.254   | 6.13672 | CHB |
| rs876540   | B3GTL     | GI_34996530-S | 13 | 13 | 30803449  | 106    | 8.5034  | 6.13672 | CHB |
| rs912603   | B3GTL     | GI_34996530-S | 13 | 13 | 30803641  | 86     | 8.5034  | 6.13672 | CHB |
| rs2056443  | B3GTL     | GI_34996530-S | 13 | 13 | 30803942  | 387    | 8.5034  | 6.13672 | CHB |
| rs13080    | B3GTL     | GI_34996530-S | 13 | 13 | 30804141  | 586    | 8.5034  | 6.13672 | CHB |
| rs4057     | B3GTL     | GI_34996530-S | 13 | 13 | 30804291  | 736    | 8.5034  | 6.13672 | CHB |
| rs1409379  | B3GTL     | GI_34996530-S | 13 | 13 | 30805741  | 2186   | 8.5034  | 6.13672 | CHB |
| rs9545125  | B3GTL     | GI_34996530-S | 13 | 13 | 30809822  | 6267   | 8.1099  | 6.13672 | CHB |
| rs7999260  | B3GTL     | GI_34996530-S | 13 | 13 | 30810323  | 6768   | 6.9937  | 6.13672 | CHB |
| rs7983430  | B3GTL     | GI_34996530-S | 13 | 13 | 30819717  | 16162  | 7.7893  | 6.13672 | CHB |
| rs9574660  | B3GTL     | GI_34996530-S | 13 | 13 | 30819922  | 16367  | 8.5034  | 6.13672 | CHB |
| rs4943341  | B3GTL     | GI_34996530-S | 13 | 13 | 30822013  | 18458  | 8.5034  | 6.13672 | CHB |
| rs9601445  | B3GTL     | GI_34996530-S | 13 | 13 | 30822231  | 18676  | 8.5034  | 6.13672 | CHB |
| rs7333382  | B3GTL     | GI_34996530-S | 13 | 13 | 30825543  | 21988  | 8.3553  | 6.13672 | CHB |
| rs1590571  | B3GTL     | GI_34996530-S | 13 | 13 | 30831957  | 28402  | 7.1532  | 6.13672 | CHB |
| rs1590570  | B3GTL     | GI_34996530-S | 13 | 13 | 30832115  | 28560  | 7.1532  | 6.13672 | CHB |
| rs1326309  | B3GTL     | GI_34996530-S | 13 | 13 | 30833371  | 29816  | 7.1532  | 6.13672 | CHB |
| rs1326308  | B3GTL     | GI_34996530-S | 13 | 13 | 30833616  | 30061  | 7.1532  | 6.13672 | CHB |
| rs9565722  | B3GTL     | GI_34996530-S | 13 | 13 | 30835810  | 32255  | 7.1532  | 6.13672 | CHB |
| rs1326306  | B3GTL     | GI_34996530-S | 13 | 13 | 30836186  | 32631  | 7.1532  | 6.13672 | CHB |
| rs7328975  | B3GTL     | GI_34996530-S | 13 | 13 | 30836764  | 33209  | 7.1654  | 6.13672 | CHB |
| rs7335345  | B3GTL     | GI_34996530-S | 13 | 13 | 30836960  | 33405  | 7.1654  | 6.13672 | CHB |
| rs9531317  | B3GTL     | GI_34996530-S | 13 | 13 | 30837376  | 33821  | 7.0115  | 6.13672 | CHB |
| rs1121122  | B3GTL     | GI_34996530-S | 13 | 13 | 30839210  | 35655  | 7.3555  | 6.13672 | CHB |
| rs11617079 | DNAJD1    | GI_7019452-S  | 13 | 13 | 42495865  | 62059  | 6.2765  | 6.23967 | CHB |
| rs17066360 | LSR7      | GI_33354278-S | 13 | 13 | 44413395  | 86606  | 6.6435  | 6.10062 | CHB |
| rs9526021  | LSR7      | GI_33354278-S | 13 | 13 | 44416641  | 83360  | 6.6435  | 6.10062 | CHB |
| rs17252166 | Hs.123474 | Hs.123474-S   | 13 | 13 | 50792215  | 134026 | 5.8738  | 5.67361 | CHB |
| rs17837214 | Hs.123474 | Hs.123474-S   | 13 | 13 | 50834201  | 92040  | 5.8738  | 5.67361 | CHB |
| rs17837215 | Hs.123474 | Hs.123474-S   | 13 | 13 | 50834405  | 91836  | 5.8738  | 5.67361 | CHB |
| rs17837216 | Hs.123474 | Hs.123474-S   | 13 | 13 | 50834636  | 91605  | 5.8738  | 5.67361 | CHB |
| rs4942996  | Hs.123474 | Hs.123474-S   | 13 | 13 | 50842792  | 83449  | 6.1279  | 5.67361 | CHB |
| rs9563049  | Hs.123474 | Hs.123474-S   | 13 | 13 | 50850053  | 76188  | 6.2008  | 5.67361 | CHB |
| rs17252193 | Hs.123474 | Hs.123474-S   | 13 | 13 | 50856119  | 70122  | 5.8738  | 5.67361 | CHB |

|            |           |               |    |    |           |        |         |         |     |
|------------|-----------|---------------|----|----|-----------|--------|---------|---------|-----|
| rs17252200 | Hs.123474 | Hs.123474-S   | 13 | 13 | 50859401  | 66840  | 5.8738  | 5.67361 | CHB |
| rs9568586  | Hs.123474 | Hs.123474-S   | 13 | 13 | 50879170  | 47071  | 6.2008  | 5.67361 | CHB |
| rs17837217 | Hs.123474 | Hs.123474-S   | 13 | 13 | 50879529  | 46712  | 5.8738  | 5.67361 | CHB |
| rs11148219 | Hs.123474 | Hs.123474-S   | 13 | 13 | 50885719  | 40522  | 6.2008  | 5.67361 | CHB |
| rs1547710  | Hs.123474 | Hs.123474-S   | 13 | 13 | 50899986  | 26255  | 5.8738  | 5.67361 | CHB |
| rs4941699  | Hs.123474 | Hs.123474-S   | 13 | 13 | 50918259  | 7982   | 6.2008  | 5.67361 | CHB |
| rs7400282  | Hs.123474 | Hs.123474-S   | 13 | 13 | 50918405  | 7836   | 6.2008  | 5.67361 | CHB |
| rs8002112  | Hs.123474 | Hs.123474-S   | 13 | 13 | 50946898  | 20657  | 5.8738  | 5.67361 | CHB |
| rs1408656  | Hs.264076 | Hs.264076-S   | 13 | 13 | 78784655  | 111714 | 7.9355  | 5.95584 | CHB |
| rs17185717 | Hs.264076 | Hs.264076-S   | 13 | 13 | 78810900  | 85469  | 6.4577  | 5.95584 | CHB |
| rs2274554  | Hs.264076 | Hs.264076-S   | 13 | 13 | 78838530  | 57839  | 7.9355  | 5.95584 | CHB |
| rs1977354  | Hs.264076 | Hs.264076-S   | 13 | 13 | 78855409  | 40960  | 6.4577  | 5.95584 | CHB |
| rs3742121  | Hs.264076 | Hs.264076-S   | 13 | 13 | 78859145  | 37224  | 6.4577  | 5.95584 | CHB |
| rs12868295 | Hs.264076 | Hs.264076-S   | 13 | 13 | 78884066  | 12303  | 7.2556  | 5.95584 | CHB |
| rs12868591 | LOC87769  | GI_34147452-S | 13 | 13 | 100006429 | 24452  | 7.2966  | 6.52813 | CHB |
| rs9513762  | LOC87769  | GI_34147452-S | 13 | 13 | 100015675 | 33698  | 9.5624  | 6.52813 | CHB |
| rs9518089  | LOC87769  | GI_34147452-S | 13 | 13 | 100015780 | 33803  | 9.5356  | 6.52813 | CHB |
| rs9518091  | LOC87769  | GI_34147452-S | 13 | 13 | 100016204 | 34227  | 9.5356  | 6.52813 | CHB |
| rs9557453  | LOC87769  | GI_34147452-S | 13 | 13 | 100025790 | 43813  | 9.5624  | 6.52813 | CHB |
| rs9557454  | LOC87769  | GI_34147452-S | 13 | 13 | 100026034 | 44057  | 9.5624  | 6.52813 | CHB |
| rs9557456  | LOC87769  | GI_34147452-S | 13 | 13 | 100026423 | 44446  | 9.5624  | 6.52813 | CHB |
| rs9554707  | LOC87769  | GI_34147452-S | 13 | 13 | 100037593 | 55616  | 8.0047  | 6.52813 | CHB |
| rs9557459  | LOC87769  | GI_34147452-S | 13 | 13 | 100037714 | 55737  | 8.0047  | 6.52813 | CHB |
| rs9557460  | LOC87769  | GI_34147452-S | 13 | 13 | 100039757 | 57780  | 10.4292 | 6.52813 | CHB |
| rs12873514 | LOC87769  | GI_34147452-S | 13 | 13 | 100040938 | 58961  | 7.8248  | 6.52813 | CHB |
| rs12873649 | LOC87769  | GI_34147452-S | 13 | 13 | 100041009 | 59032  | 7.3899  | 6.52813 | CHB |
| rs12873940 | LOC87769  | GI_34147452-S | 13 | 13 | 100041162 | 59185  | 7.8248  | 6.52813 | CHB |
| rs7318180  | Hs.440933 | Hs.440933-S   | 13 | 13 | 113835272 | 61992  | 5.9778  | 5.80591 | CHB |
| rs6560958  | Hs.440933 | Hs.440933-S   | 13 | 13 | 113835392 | 61872  | 6.3642  | 5.80591 | CHB |
| rs9314890  | Hs.440933 | Hs.440933-S   | 13 | 13 | 113891257 | 6007   | 8.4638  | 5.80591 | CHB |
| rs9314891  | Hs.440933 | Hs.440933-S   | 13 | 13 | 113891307 | 5957   | 8.4638  | 5.80591 | CHB |
| rs9525266  | Hs.440933 | Hs.440933-S   | 13 | 13 | 113893262 | 4002   | 8.2671  | 5.80591 | CHB |
| rs9525180  | Hs.440933 | Hs.440933-S   | 13 | 13 | 113893340 | 3924   | 8.4638  | 5.80591 | CHB |
| rs7995373  | Hs.440933 | Hs.440933-S   | 13 | 13 | 113893720 | 3544   | 8.4638  | 5.80591 | CHB |
| rs7331571  | Hs.440933 | Hs.440933-S   | 13 | 13 | 113898451 | 1187   | 7.362   | 5.80591 | CHB |
| rs4982676  | SLC7A7    | GI_21361562-S | 14 | 14 | 22347843  | 35426  | 6.5046  | 6.22807 | CHB |
| rs712314   | hmm3151   | hmm3151-S     | 14 | 14 | 34478299  | 107136 | 5.9784  | 5.88071 | CHB |
| rs799464   | hmm3151   | hmm3151-S     | 14 | 14 | 34485481  | 99954  | 5.9784  | 5.88071 | CHB |
| rs799488   | hmm3151   | hmm3151-S     | 14 | 14 | 34521161  | 64274  | 5.9784  | 5.88071 | CHB |
| rs799498   | hmm3151   | hmm3151-S     | 14 | 14 | 34535387  | 50048  | 5.9784  | 5.88071 | CHB |
| rs12436917 | DLG7      | GI_21361644-S | 14 | 14 | 54619791  | 68562  | 6.0667  | 6.00133 | CHB |
| rs4902332  | C14orf52  | GI_21553312-S | 14 | 14 | 64445731  | 25025  | 10.8635 | 6.04341 | CHB |
| rs4902333  | C14orf52  | GI_21553312-S | 14 | 14 | 64445839  | 24917  | 8.5125  | 6.04341 | CHB |
| rs17102298 | C14orf52  | GI_21553312-S | 14 | 14 | 64446489  | 24267  | 10.1012 | 6.04341 | CHB |
| rs7154406  | C14orf52  | GI_21553312-S | 14 | 14 | 64446942  | 23814  | 10.1012 | 6.04341 | CHB |
| rs7153990  | C14orf52  | GI_21553312-S | 14 | 14 | 64447303  | 23453  | 8.5072  | 6.04341 | CHB |
| rs10139595 | C14orf52  | GI_21553312-S | 14 | 14 | 64448012  | 22744  | 10.1012 | 6.04341 | CHB |
| rs10151701 | C14orf52  | GI_21553312-S | 14 | 14 | 64448202  | 22554  | 9.3322  | 6.04341 | CHB |
| rs7143432  | C14orf52  | GI_21553312-S | 14 | 14 | 64448899  | 21857  | 9.342   | 6.04341 | CHB |
| rs7144811  | C14orf52  | GI_21553312-S | 14 | 14 | 64448900  | 21856  | 10.87   | 6.04341 | CHB |
| rs7143764  | C14orf52  | GI_21553312-S | 14 | 14 | 64449036  | 21720  | 8.2372  | 6.04341 | CHB |
| rs10143017 | C14orf52  | GI_21553312-S | 14 | 14 | 64449371  | 21385  | 10.8635 | 6.04341 | CHB |
| rs10148687 | C14orf52  | GI_21553312-S | 14 | 14 | 64454029  | 16727  | 10.8635 | 6.04341 | CHB |
| rs4902335  | C14orf52  | GI_21553312-S | 14 | 14 | 64455651  | 15105  | 10.87   | 6.04341 | CHB |
| rs10132742 | C14orf52  | GI_21553312-S | 14 | 14 | 64456675  | 14081  | 9.8148  | 6.04341 | CHB |
| rs4899152  | C14orf52  | GI_21553312-S | 14 | 14 | 64456869  | 13887  | 10.8635 | 6.04341 | CHB |

|            |          |               |    |    |          |        |         |         |     |
|------------|----------|---------------|----|----|----------|--------|---------|---------|-----|
| rs4902336  | C14orf52 | GI_21553312-S | 14 | 14 | 64457015 | 13741  | 10.8635 | 6.04341 | CHB |
| rs10138534 | C14orf52 | GI_21553312-S | 14 | 14 | 64457742 | 13014  | 10.8635 | 6.04341 | CHB |
| rs7401853  | C14orf52 | GI_21553312-S | 14 | 14 | 64458464 | 12292  | 8.1152  | 6.04341 | CHB |
| rs10141986 | C14orf52 | GI_21553312-S | 14 | 14 | 64459156 | 11600  | 10.8635 | 6.04341 | CHB |
| rs4902343  | C14orf52 | GI_21553312-S | 14 | 14 | 64465933 | 4823   | 10.8635 | 6.04341 | CHB |
| rs10149617 | C14orf52 | GI_21553312-S | 14 | 14 | 64471914 | 1158   | 8.4303  | 6.04341 | CHB |
| rs4902345  | C14orf52 | GI_21553312-S | 14 | 14 | 64473657 | 2901   | 10.8635 | 6.04341 | CHB |
| rs10132858 | C14orf52 | GI_21553312-S | 14 | 14 | 64473731 | 2975   | 10.1319 | 6.04341 | CHB |
| rs10133054 | C14orf52 | GI_21553312-S | 14 | 14 | 64473869 | 3113   | 10.8784 | 6.04341 | CHB |
| rs10133290 | C14orf52 | GI_21553312-S | 14 | 14 | 64474195 | 3439   | 10.8635 | 6.04341 | CHB |
| rs4902346  | C14orf52 | GI_21553312-S | 14 | 14 | 64476913 | 6157   | 9.3322  | 6.04341 | CHB |
| rs2412065  | C14orf52 | GI_21553312-S | 14 | 14 | 64477410 | 6654   | 10.8635 | 6.04341 | CHB |
| rs10142124 | EIF2S1   | GI_34147492-S | 14 | 14 | 65922259 | 999274 | 5.599   | 5.37723 | CHB |
| rs10142375 | EIF2S1   | GI_34147492-S | 14 | 14 | 65922298 | 999235 | 5.599   | 5.37723 | CHB |
| rs2085482  | EIF2S1   | GI_34147492-S | 14 | 14 | 65925557 | 995976 | 5.599   | 5.37723 | CHB |
| rs2319184  | EIF2S1   | GI_34147492-S | 14 | 14 | 65925740 | 995793 | 5.876   | 5.37723 | CHB |
| rs1457431  | EIF2S1   | GI_34147492-S | 14 | 14 | 65927667 | 993866 | 5.599   | 5.37723 | CHB |
| rs8007262  | EIF2S1   | GI_34147492-S | 14 | 14 | 65931618 | 989915 | 5.5062  | 5.37723 | CHB |
| rs7150418  | EIF2S1   | GI_34147492-S | 14 | 14 | 65932496 | 989037 | 5.599   | 5.37723 | CHB |
| rs7150773  | EIF2S1   | GI_34147492-S | 14 | 14 | 65932627 | 988906 | 5.3949  | 5.37723 | CHB |
| rs1457432  | EIF2S1   | GI_34147492-S | 14 | 14 | 65934852 | 986681 | 5.8195  | 5.37723 | CHB |
| rs1457433  | EIF2S1   | GI_34147492-S | 14 | 14 | 65934985 | 986548 | 5.599   | 5.37723 | CHB |
| rs1457434  | EIF2S1   | GI_34147492-S | 14 | 14 | 65935045 | 986488 | 5.599   | 5.37723 | CHB |
| rs10134278 | EIF2S1   | GI_34147492-S | 14 | 14 | 65939190 | 982343 | 5.599   | 5.37723 | CHB |
| rs12586868 | EIF2S1   | GI_34147492-S | 14 | 14 | 65940494 | 981039 | 5.876   | 5.37723 | CHB |
| rs7151102  | EIF2S1   | GI_34147492-S | 14 | 14 | 65941325 | 980208 | 5.599   | 5.37723 | CHB |
| rs8004856  | EIF2S1   | GI_34147492-S | 14 | 14 | 65942782 | 978751 | 6.0572  | 5.37723 | CHB |
| rs6573671  | EIF2S1   | GI_34147492-S | 14 | 14 | 65943060 | 978473 | 5.599   | 5.37723 | CHB |
| rs1379416  | EIF2S1   | GI_34147492-S | 14 | 14 | 65944456 | 977077 | 5.599   | 5.37723 | CHB |
| rs7159681  | EIF2S1   | GI_34147492-S | 14 | 14 | 65945875 | 975658 | 5.599   | 5.37723 | CHB |
| rs7159364  | EIF2S1   | GI_34147492-S | 14 | 14 | 65945887 | 975646 | 5.599   | 5.37723 | CHB |
| rs7160064  | EIF2S1   | GI_34147492-S | 14 | 14 | 65946058 | 975475 | 5.599   | 5.37723 | CHB |
| rs7158262  | EIF2S1   | GI_34147492-S | 14 | 14 | 65949339 | 972194 | 5.599   | 5.37723 | CHB |
| rs9332388  | EIF2S1   | GI_34147492-S | 14 | 14 | 65950415 | 971118 | 5.599   | 5.37723 | CHB |
| rs716234   | EIF2S1   | GI_34147492-S | 14 | 14 | 65950544 | 970989 | 5.599   | 5.37723 | CHB |
| rs716232   | EIF2S1   | GI_34147492-S | 14 | 14 | 65950702 | 970831 | 5.599   | 5.37723 | CHB |
| rs716233   | EIF2S1   | GI_34147492-S | 14 | 14 | 65950769 | 970764 | 5.599   | 5.37723 | CHB |
| rs8020532  | EIF2S1   | GI_34147492-S | 14 | 14 | 65956469 | 965064 | 5.599   | 5.37723 | CHB |
| rs12589479 | EIF2S1   | GI_34147492-S | 14 | 14 | 65963473 | 958060 | 5.599   | 5.37723 | CHB |
| rs2319185  | EIF2S1   | GI_34147492-S | 14 | 14 | 65965319 | 956214 | 5.599   | 5.37723 | CHB |
| rs735957   | EIF2S1   | GI_34147492-S | 14 | 14 | 65965477 | 956056 | 5.599   | 5.37723 | CHB |
| rs1598771  | EIF2S1   | GI_34147492-S | 14 | 14 | 65965718 | 955815 | 5.8195  | 5.37723 | CHB |
| rs13353130 | EIF2S1   | GI_34147492-S | 14 | 14 | 65966379 | 955154 | 5.599   | 5.37723 | CHB |
| rs7149651  | EIF2S1   | GI_34147492-S | 14 | 14 | 65966995 | 954538 | 5.4058  | 5.37723 | CHB |
| rs1902644  | EIF2S1   | GI_34147492-S | 14 | 14 | 65967909 | 953624 | 5.6017  | 5.37723 | CHB |
| rs8004227  | EIF2S1   | GI_34147492-S | 14 | 14 | 65969562 | 951971 | 5.599   | 5.37723 | CHB |
| rs7359130  | EIF2S1   | GI_34147492-S | 14 | 14 | 65970588 | 950945 | 5.8195  | 5.37723 | CHB |
| rs933039   | EIF2S1   | GI_34147492-S | 14 | 14 | 65973000 | 948533 | 5.599   | 5.37723 | CHB |
| rs1585182  | EIF2S1   | GI_34147492-S | 14 | 14 | 65974201 | 947332 | 5.599   | 5.37723 | CHB |
| rs2860116  | EIF2S1   | GI_34147492-S | 14 | 14 | 65974235 | 947298 | 5.599   | 5.37723 | CHB |
| rs7145185  | EIF2S1   | GI_34147492-S | 14 | 14 | 65975379 | 946154 | 5.599   | 5.37723 | CHB |
| rs6573672  | EIF2S1   | GI_34147492-S | 14 | 14 | 65976672 | 944861 | 5.4471  | 5.37723 | CHB |
| rs2219371  | EIF2S1   | GI_34147492-S | 14 | 14 | 65977384 | 944149 | 5.599   | 5.37723 | CHB |
| rs8012374  | EIF2S1   | GI_34147492-S | 14 | 14 | 65980729 | 940804 | 5.599   | 5.37723 | CHB |
| rs8011794  | EIF2S1   | GI_34147492-S | 14 | 14 | 65981001 | 940532 | 5.599   | 5.37723 | CHB |
| rs8019603  | EIF2S1   | GI_34147492-S | 14 | 14 | 65985716 | 935817 | 5.599   | 5.37723 | CHB |

|            |        |               |    |    |          |        |        |         |     |
|------------|--------|---------------|----|----|----------|--------|--------|---------|-----|
| rs17827523 | EIF2S1 | GI_34147492-S | 14 | 14 | 65986106 | 935427 | 5.599  | 5.37723 | CHB |
| rs1009294  | EIF2S1 | GI_34147492-S | 14 | 14 | 65990132 | 931401 | 5.599  | 5.37723 | CHB |
| rs11158629 | EIF2S1 | GI_34147492-S | 14 | 14 | 65991678 | 929855 | 5.599  | 5.37723 | CHB |
| rs12586427 | EIF2S1 | GI_34147492-S | 14 | 14 | 65999706 | 921827 | 5.599  | 5.37723 | CHB |
| rs7156981  | EIF2S1 | GI_34147492-S | 14 | 14 | 65999921 | 921612 | 5.599  | 5.37723 | CHB |
| rs13367574 | EIF2S1 | GI_34147492-S | 14 | 14 | 66003895 | 917638 | 5.6017 | 5.37723 | CHB |
| rs7142154  | EIF2S1 | GI_34147492-S | 14 | 14 | 66007793 | 913740 | 5.599  | 5.37723 | CHB |
| rs7141225  | EIF2S1 | GI_34147492-S | 14 | 14 | 66007991 | 913542 | 5.599  | 5.37723 | CHB |
| rs10130239 | EIF2S1 | GI_34147492-S | 14 | 14 | 66008550 | 912983 | 5.599  | 5.37723 | CHB |
| rs10133676 | EIF2S1 | GI_34147492-S | 14 | 14 | 66009656 | 911877 | 5.599  | 5.37723 | CHB |
| rs9943992  | EIF2S1 | GI_34147492-S | 14 | 14 | 66009744 | 911789 | 5.599  | 5.37723 | CHB |
| rs9944086  | EIF2S1 | GI_34147492-S | 14 | 14 | 66009936 | 911597 | 5.599  | 5.37723 | CHB |
| rs10142537 | EIF2S1 | GI_34147492-S | 14 | 14 | 66010269 | 911264 | 5.599  | 5.37723 | CHB |
| rs10141750 | EIF2S1 | GI_34147492-S | 14 | 14 | 66016884 | 904649 | 5.599  | 5.37723 | CHB |
| rs10148290 | EIF2S1 | GI_34147492-S | 14 | 14 | 66018937 | 902596 | 5.599  | 5.37723 | CHB |
| rs10134043 | EIF2S1 | GI_34147492-S | 14 | 14 | 66019803 | 901730 | 5.599  | 5.37723 | CHB |
| rs7157060  | EIF2S1 | GI_34147492-S | 14 | 14 | 66021548 | 899985 | 5.599  | 5.37723 | CHB |
| rs10129809 | EIF2S1 | GI_34147492-S | 14 | 14 | 66021795 | 899738 | 5.876  | 5.37723 | CHB |
| rs7147360  | EIF2S1 | GI_34147492-S | 14 | 14 | 66023287 | 898246 | 5.599  | 5.37723 | CHB |
| rs1457419  | EIF2S1 | GI_34147492-S | 14 | 14 | 66028359 | 893174 | 5.599  | 5.37723 | CHB |
| rs1457420  | EIF2S1 | GI_34147492-S | 14 | 14 | 66028429 | 893104 | 5.599  | 5.37723 | CHB |
| rs3737161  | EIF2S1 | GI_34147492-S | 14 | 14 | 66029370 | 892163 | 5.599  | 5.37723 | CHB |
| rs6573679  | EIF2S1 | GI_34147492-S | 14 | 14 | 66032510 | 889023 | 5.599  | 5.37723 | CHB |
| rs7160183  | EIF2S1 | GI_34147492-S | 14 | 14 | 66033945 | 887588 | 5.8195 | 5.37723 | CHB |
| rs2297620  | EIF2S1 | GI_34147492-S | 14 | 14 | 66034291 | 887242 | 5.599  | 5.37723 | CHB |
| rs3818770  | EIF2S1 | GI_34147492-S | 14 | 14 | 66035225 | 886308 | 5.599  | 5.37723 | CHB |
| rs10143291 | EIF2S1 | GI_34147492-S | 14 | 14 | 66035316 | 886217 | 5.3947 | 5.37723 | CHB |
| rs1457422  | EIF2S1 | GI_34147492-S | 14 | 14 | 66036270 | 885263 | 5.599  | 5.37723 | CHB |
| rs9323473  | EIF2S1 | GI_34147492-S | 14 | 14 | 66038079 | 883454 | 5.599  | 5.37723 | CHB |
| rs7146723  | EIF2S1 | GI_34147492-S | 14 | 14 | 66038848 | 882685 | 5.599  | 5.37723 | CHB |
| rs10220636 | EIF2S1 | GI_34147492-S | 14 | 14 | 66041917 | 879616 | 5.4489 | 5.37723 | CHB |
| rs928553   | EIF2S1 | GI_34147492-S | 14 | 14 | 66044227 | 877306 | 5.599  | 5.37723 | CHB |
| rs17827741 | EIF2S1 | GI_34147492-S | 14 | 14 | 66047565 | 873968 | 5.599  | 5.37723 | CHB |
| rs2319387  | EIF2S1 | GI_34147492-S | 14 | 14 | 66049246 | 872287 | 5.599  | 5.37723 | CHB |
| rs2045419  | EIF2S1 | GI_34147492-S | 14 | 14 | 66052268 | 869265 | 5.5062 | 5.37723 | CHB |
| rs7159063  | EIF2S1 | GI_34147492-S | 14 | 14 | 66052787 | 868746 | 5.6644 | 5.37723 | CHB |
| rs1379413  | EIF2S1 | GI_34147492-S | 14 | 14 | 66055897 | 865636 | 5.599  | 5.37723 | CHB |
| rs7156737  | EIF2S1 | GI_34147492-S | 14 | 14 | 66056366 | 865167 | 5.599  | 5.37723 | CHB |
| rs7140509  | EIF2S1 | GI_34147492-S | 14 | 14 | 66056901 | 864632 | 5.599  | 5.37723 | CHB |
| rs10144449 | EIF2S1 | GI_34147492-S | 14 | 14 | 66058012 | 863521 | 5.599  | 5.37723 | CHB |
| rs13368526 | EIF2S1 | GI_34147492-S | 14 | 14 | 66061630 | 859903 | 5.876  | 5.37723 | CHB |
| rs7142097  | EIF2S1 | GI_34147492-S | 14 | 14 | 66071459 | 850074 | 5.599  | 5.37723 | CHB |
| rs7145556  | EIF2S1 | GI_34147492-S | 14 | 14 | 66071725 | 849808 | 5.599  | 5.37723 | CHB |
| rs10148418 | EIF2S1 | GI_34147492-S | 14 | 14 | 66073626 | 847907 | 5.599  | 5.37723 | CHB |
| rs7160501  | EIF2S1 | GI_34147492-S | 14 | 14 | 66074452 | 847081 | 5.599  | 5.37723 | CHB |
| rs7143629  | EIF2S1 | GI_34147492-S | 14 | 14 | 66074719 | 846814 | 5.5221 | 5.37723 | CHB |
| rs7143823  | EIF2S1 | GI_34147492-S | 14 | 14 | 66074824 | 846709 | 5.599  | 5.37723 | CHB |
| rs7149668  | EIF2S1 | GI_34147492-S | 14 | 14 | 66076533 | 845000 | 5.599  | 5.37723 | CHB |
| rs7141220  | EIF2S1 | GI_34147492-S | 14 | 14 | 66079945 | 841588 | 5.599  | 5.37723 | CHB |
| rs8012784  | EIF2S1 | GI_34147492-S | 14 | 14 | 66085038 | 836495 | 5.599  | 5.37723 | CHB |
| rs10133769 | EIF2S1 | GI_34147492-S | 14 | 14 | 66088436 | 833097 | 5.599  | 5.37723 | CHB |
| rs8016639  | EIF2S1 | GI_34147492-S | 14 | 14 | 66091265 | 830268 | 5.599  | 5.37723 | CHB |
| rs1952068  | EIF2S1 | GI_34147492-S | 14 | 14 | 66098904 | 822629 | 5.574  | 5.37723 | CHB |
| rs8017351  | EIF2S1 | GI_34147492-S | 14 | 14 | 66099837 | 821696 | 5.8399 | 5.37723 | CHB |
| rs7156795  | EIF2S1 | GI_34147492-S | 14 | 14 | 66100648 | 820885 | 5.599  | 5.37723 | CHB |
| rs7146849  | EIF2S1 | GI_34147492-S | 14 | 14 | 66101823 | 819710 | 6.1441 | 5.37723 | CHB |

|            |        |               |    |    |          |        |        |         |     |
|------------|--------|---------------|----|----|----------|--------|--------|---------|-----|
| rs7142929  | EIF2S1 | GI_34147492-S | 14 | 14 | 66105239 | 816294 | 5.5062 | 5.37723 | CHB |
| rs8004106  | EIF2S1 | GI_34147492-S | 14 | 14 | 66110354 | 811179 | 5.599  | 5.37723 | CHB |
| rs10133641 | EIF2S1 | GI_34147492-S | 14 | 14 | 66111193 | 810340 | 5.599  | 5.37723 | CHB |
| rs13367039 | EIF2S1 | GI_34147492-S | 14 | 14 | 66111373 | 810160 | 5.599  | 5.37723 | CHB |
| rs7153313  | EIF2S1 | GI_34147492-S | 14 | 14 | 66112166 | 809367 | 5.599  | 5.37723 | CHB |
| rs10143929 | EIF2S1 | GI_34147492-S | 14 | 14 | 66117841 | 803692 | 5.599  | 5.37723 | CHB |
| rs10143934 | EIF2S1 | GI_34147492-S | 14 | 14 | 66117858 | 803675 | 5.7571 | 5.37723 | CHB |
| rs10146431 | EIF2S1 | GI_34147492-S | 14 | 14 | 66123995 | 797538 | 5.599  | 5.37723 | CHB |
| rs13368404 | EIF2S1 | GI_34147492-S | 14 | 14 | 66129721 | 791812 | 5.599  | 5.37723 | CHB |
| rs13368668 | EIF2S1 | GI_34147492-S | 14 | 14 | 66134079 | 787454 | 5.6017 | 5.37723 | CHB |
| rs9323475  | EIF2S1 | GI_34147492-S | 14 | 14 | 66135922 | 785611 | 5.599  | 5.37723 | CHB |
| rs8008550  | EIF2S1 | GI_34147492-S | 14 | 14 | 66139328 | 782205 | 5.599  | 5.37723 | CHB |
| rs8021202  | EIF2S1 | GI_34147492-S | 14 | 14 | 66143202 | 778331 | 5.599  | 5.37723 | CHB |
| rs8018444  | EIF2S1 | GI_34147492-S | 14 | 14 | 66146264 | 775269 | 5.599  | 5.37723 | CHB |
| rs7140281  | EIF2S1 | GI_34147492-S | 14 | 14 | 66146903 | 774630 | 5.599  | 5.37723 | CHB |
| rs8010110  | EIF2S1 | GI_34147492-S | 14 | 14 | 66147965 | 773568 | 5.599  | 5.37723 | CHB |
| rs1958001  | EIF2S1 | GI_34147492-S | 14 | 14 | 66149645 | 771888 | 5.599  | 5.37723 | CHB |
| rs8023060  | EIF2S1 | GI_34147492-S | 14 | 14 | 66153725 | 767808 | 5.599  | 5.37723 | CHB |
| rs10130016 | EIF2S1 | GI_34147492-S | 14 | 14 | 66154689 | 766844 | 5.574  | 5.37723 | CHB |
| rs8015958  | EIF2S1 | GI_34147492-S | 14 | 14 | 66156429 | 765104 | 5.599  | 5.37723 | CHB |
| rs8016353  | EIF2S1 | GI_34147492-S | 14 | 14 | 66156693 | 764840 | 5.5062 | 5.37723 | CHB |
| rs8013247  | EIF2S1 | GI_34147492-S | 14 | 14 | 66160801 | 760732 | 6.1245 | 5.37723 | CHB |
| rs7157919  | EIF2S1 | GI_34147492-S | 14 | 14 | 66162452 | 759081 | 5.599  | 5.37723 | CHB |
| rs8011928  | EIF2S1 | GI_34147492-S | 14 | 14 | 66164236 | 757297 | 5.4151 | 5.37723 | CHB |
| rs8015684  | EIF2S1 | GI_34147492-S | 14 | 14 | 66164975 | 756558 | 5.8225 | 5.37723 | CHB |
| rs8017245  | EIF2S1 | GI_34147492-S | 14 | 14 | 66165108 | 756425 | 5.599  | 5.37723 | CHB |
| rs8014806  | EIF2S1 | GI_34147492-S | 14 | 14 | 66170123 | 751410 | 5.599  | 5.37723 | CHB |
| rs8014849  | EIF2S1 | GI_34147492-S | 14 | 14 | 66170197 | 751336 | 5.599  | 5.37723 | CHB |
| rs12323903 | EIF2S1 | GI_34147492-S | 14 | 14 | 66170967 | 750566 | 5.8195 | 5.37723 | CHB |
| rs1886778  | EIF2S1 | GI_34147492-S | 14 | 14 | 66175818 | 745715 | 5.5062 | 5.37723 | CHB |
| rs10144010 | EIF2S1 | GI_34147492-S | 14 | 14 | 66176330 | 745203 | 5.6074 | 5.37723 | CHB |
| rs9323476  | EIF2S1 | GI_34147492-S | 14 | 14 | 66176387 | 745146 | 5.599  | 5.37723 | CHB |
| rs7152123  | EIF2S1 | GI_34147492-S | 14 | 14 | 66177191 | 744342 | 5.599  | 5.37723 | CHB |
| rs7152169  | EIF2S1 | GI_34147492-S | 14 | 14 | 66177344 | 744189 | 5.599  | 5.37723 | CHB |
| rs1952070  | EIF2S1 | GI_34147492-S | 14 | 14 | 66177823 | 743710 | 5.599  | 5.37723 | CHB |
| rs10133120 | EIF2S1 | GI_34147492-S | 14 | 14 | 66185424 | 736109 | 5.599  | 5.37723 | CHB |
| rs11158642 | EIF2S1 | GI_34147492-S | 14 | 14 | 66185483 | 736050 | 5.599  | 5.37723 | CHB |
| rs13367244 | EIF2S1 | GI_34147492-S | 14 | 14 | 66186351 | 735182 | 5.599  | 5.37723 | CHB |
| rs6573695  | EIF2S1 | GI_34147492-S | 14 | 14 | 66189645 | 731888 | 5.599  | 5.37723 | CHB |
| rs8007662  | EIF2S1 | GI_34147492-S | 14 | 14 | 66190185 | 731348 | 6.0086 | 5.37723 | CHB |
| rs8011027  | EIF2S1 | GI_34147492-S | 14 | 14 | 66194538 | 726995 | 5.599  | 5.37723 | CHB |
| rs7152601  | EIF2S1 | GI_34147492-S | 14 | 14 | 66198557 | 722976 | 5.599  | 5.37723 | CHB |
| rs4605098  | EIF2S1 | GI_34147492-S | 14 | 14 | 66199191 | 722342 | 5.599  | 5.37723 | CHB |
| rs4644792  | EIF2S1 | GI_34147492-S | 14 | 14 | 66200099 | 721434 | 5.599  | 5.37723 | CHB |
| rs7158823  | EIF2S1 | GI_34147492-S | 14 | 14 | 66201598 | 719935 | 5.5062 | 5.37723 | CHB |
| rs7142841  | EIF2S1 | GI_34147492-S | 14 | 14 | 66208808 | 712725 | 5.599  | 5.37723 | CHB |
| rs10139822 | EIF2S1 | GI_34147492-S | 14 | 14 | 66210429 | 711104 | 5.4775 | 5.37723 | CHB |
| rs8013315  | EIF2S1 | GI_34147492-S | 14 | 14 | 66212573 | 708960 | 5.599  | 5.37723 | CHB |
| rs8013215  | EIF2S1 | GI_34147492-S | 14 | 14 | 66212690 | 708843 | 5.5756 | 5.37723 | CHB |
| rs8018488  | EIF2S1 | GI_34147492-S | 14 | 14 | 66212779 | 708754 | 5.599  | 5.37723 | CHB |
| rs8015408  | EIF2S1 | GI_34147492-S | 14 | 14 | 66216433 | 705100 | 5.599  | 5.37723 | CHB |
| rs10136366 | EIF2S1 | GI_34147492-S | 14 | 14 | 66216698 | 704835 | 5.5219 | 5.37723 | CHB |
| rs4294753  | EIF2S1 | GI_34147492-S | 14 | 14 | 66216826 | 704707 | 5.599  | 5.37723 | CHB |
| rs3759753  | EIF2S1 | GI_34147492-S | 14 | 14 | 66217569 | 703964 | 5.599  | 5.37723 | CHB |
| rs8005352  | EIF2S1 | GI_34147492-S | 14 | 14 | 66217888 | 703645 | 5.876  | 5.37723 | CHB |
| rs9783601  | EIF2S1 | GI_34147492-S | 14 | 14 | 66218692 | 702841 | 6.0957 | 5.37723 | CHB |



|            |        |               |    |    |          |        |        |         |     |
|------------|--------|---------------|----|----|----------|--------|--------|---------|-----|
| rs6573706  | EIF2S1 | GI_34147492-S | 14 | 14 | 66220517 | 701016 | 5.599  | 5.37723 | CHB |
| rs8021356  | EIF2S1 | GI_34147492-S | 14 | 14 | 66225934 | 695599 | 5.599  | 5.37723 | CHB |
| rs6573710  | EIF2S1 | GI_34147492-S | 14 | 14 | 66229962 | 691571 | 5.5062 | 5.37723 | CHB |
| rs12101118 | EIF2S1 | GI_34147492-S | 14 | 14 | 66230533 | 691000 | 5.9743 | 5.37723 | CHB |
| rs7157740  | EIF2S1 | GI_34147492-S | 14 | 14 | 66231094 | 690439 | 5.599  | 5.37723 | CHB |
| rs7154017  | EIF2S1 | GI_34147492-S | 14 | 14 | 66233836 | 687697 | 5.599  | 5.37723 | CHB |
| rs1885198  | EIF2S1 | GI_34147492-S | 14 | 14 | 66234513 | 687020 | 5.599  | 5.37723 | CHB |
| rs7161029  | EIF2S1 | GI_34147492-S | 14 | 14 | 66235064 | 686469 | 5.599  | 5.37723 | CHB |
| rs1951354  | EIF2S1 | GI_34147492-S | 14 | 14 | 66235643 | 685890 | 5.599  | 5.37723 | CHB |
| rs6573711  | EIF2S1 | GI_34147492-S | 14 | 14 | 66247439 | 674094 | 5.599  | 5.37723 | CHB |
| rs1951357  | EIF2S1 | GI_34147492-S | 14 | 14 | 66257354 | 664179 | 5.6051 | 5.37723 | CHB |
| rs8012315  | EIF2S1 | GI_34147492-S | 14 | 14 | 66259521 | 662012 | 5.8552 | 5.37723 | CHB |
| rs8010952  | EIF2S1 | GI_34147492-S | 14 | 14 | 66259603 | 661930 | 6.3265 | 5.37723 | CHB |
| rs17836572 | EIF2S1 | GI_34147492-S | 14 | 14 | 66262776 | 658757 | 5.599  | 5.37723 | CHB |
| rs10150268 | EIF2S1 | GI_34147492-S | 14 | 14 | 66265929 | 655604 | 5.876  | 5.37723 | CHB |
| rs7156074  | EIF2S1 | GI_34147492-S | 14 | 14 | 66270929 | 650604 | 5.599  | 5.37723 | CHB |
| rs7156240  | EIF2S1 | GI_34147492-S | 14 | 14 | 66271023 | 650510 | 5.599  | 5.37723 | CHB |
| rs9323478  | EIF2S1 | GI_34147492-S | 14 | 14 | 66276181 | 645352 | 5.599  | 5.37723 | CHB |
| rs9323479  | EIF2S1 | GI_34147492-S | 14 | 14 | 66276240 | 645293 | 5.599  | 5.37723 | CHB |
| rs10143077 | EIF2S1 | GI_34147492-S | 14 | 14 | 66276463 | 645070 | 5.599  | 5.37723 | CHB |
| rs10132261 | EIF2S1 | GI_34147492-S | 14 | 14 | 66276615 | 644918 | 5.599  | 5.37723 | CHB |
| rs6573718  | EIF2S1 | GI_34147492-S | 14 | 14 | 66278354 | 643179 | 5.599  | 5.37723 | CHB |
| rs6573719  | EIF2S1 | GI_34147492-S | 14 | 14 | 66278401 | 643132 | 5.5062 | 5.37723 | CHB |
| rs9323480  | EIF2S1 | GI_34147492-S | 14 | 14 | 66280596 | 640937 | 5.599  | 5.37723 | CHB |
| rs766527   | EIF2S1 | GI_34147492-S | 14 | 14 | 66281840 | 639693 | 5.599  | 5.37723 | CHB |
| rs7148224  | EIF2S1 | GI_34147492-S | 14 | 14 | 66282325 | 639208 | 5.599  | 5.37723 | CHB |
| rs6573720  | EIF2S1 | GI_34147492-S | 14 | 14 | 66282721 | 638812 | 6.3819 | 5.37723 | CHB |
| rs8016213  | EIF2S1 | GI_34147492-S | 14 | 14 | 66282985 | 638548 | 5.599  | 5.37723 | CHB |
| rs9783678  | EIF2S1 | GI_34147492-S | 14 | 14 | 66284564 | 636969 | 5.599  | 5.37723 | CHB |
| rs8008369  | EIF2S1 | GI_34147492-S | 14 | 14 | 66284949 | 636584 | 5.4471 | 5.37723 | CHB |
| rs6573721  | EIF2S1 | GI_34147492-S | 14 | 14 | 66285863 | 635670 | 5.599  | 5.37723 | CHB |
| rs7148623  | EIF2S1 | GI_34147492-S | 14 | 14 | 66289570 | 631963 | 5.599  | 5.37723 | CHB |
| rs7142259  | EIF2S1 | GI_34147492-S | 14 | 14 | 66289717 | 631816 | 5.599  | 5.37723 | CHB |
| rs8012158  | EIF2S1 | GI_34147492-S | 14 | 14 | 66291448 | 630085 | 5.6017 | 5.37723 | CHB |
| rs17247749 | EIF2S1 | GI_34147492-S | 14 | 14 | 66292836 | 628697 | 5.599  | 5.37723 | CHB |
| rs10129827 | EIF2S1 | GI_34147492-S | 14 | 14 | 66302326 | 619207 | 5.599  | 5.37723 | CHB |
| rs10132625 | EIF2S1 | GI_34147492-S | 14 | 14 | 66303059 | 618474 | 5.599  | 5.37723 | CHB |
| rs9323483  | EIF2S1 | GI_34147492-S | 14 | 14 | 66309360 | 612173 | 5.599  | 5.37723 | CHB |
| rs9323484  | EIF2S1 | GI_34147492-S | 14 | 14 | 66309385 | 612148 | 5.599  | 5.37723 | CHB |
| rs6573724  | EIF2S1 | GI_34147492-S | 14 | 14 | 66310318 | 611215 | 5.599  | 5.37723 | CHB |
| rs7147690  | EIF2S1 | GI_34147492-S | 14 | 14 | 66312090 | 609443 | 5.599  | 5.37723 | CHB |
| rs9323485  | EIF2S1 | GI_34147492-S | 14 | 14 | 66313250 | 608283 | 5.599  | 5.37723 | CHB |
| rs10144919 | EIF2S1 | GI_34147492-S | 14 | 14 | 66319372 | 602161 | 5.599  | 5.37723 | CHB |
| rs7142669  | EIF2S1 | GI_34147492-S | 14 | 14 | 66320145 | 601388 | 5.599  | 5.37723 | CHB |
| rs7149711  | EIF2S1 | GI_34147492-S | 14 | 14 | 66321476 | 600057 | 5.7571 | 5.37723 | CHB |
| rs8022328  | EIF2S1 | GI_34147492-S | 14 | 14 | 66322788 | 598745 | 5.599  | 5.37723 | CHB |
| rs12587989 | EIF2S1 | GI_34147492-S | 14 | 14 | 66339876 | 581657 | 5.4737 | 5.37723 | CHB |
| rs4141703  | EIF2S1 | GI_34147492-S | 14 | 14 | 66347197 | 574336 | 5.599  | 5.37723 | CHB |
| rs4141702  | EIF2S1 | GI_34147492-S | 14 | 14 | 66347472 | 574061 | 5.599  | 5.37723 | CHB |
| rs7145718  | EIF2S1 | GI_34147492-S | 14 | 14 | 66351936 | 569597 | 5.599  | 5.37723 | CHB |
| rs3784075  | EIF2S1 | GI_34147492-S | 14 | 14 | 66360939 | 560594 | 5.599  | 5.37723 | CHB |
| rs8006552  | EIF2S1 | GI_34147492-S | 14 | 14 | 66363822 | 557711 | 5.599  | 5.37723 | CHB |
| rs12323781 | EIF2S1 | GI_34147492-S | 14 | 14 | 66364969 | 556564 | 5.876  | 5.37723 | CHB |
| rs8012660  | EIF2S1 | GI_34147492-S | 14 | 14 | 66370424 | 551109 | 5.4471 | 5.37723 | CHB |
| rs8018920  | EIF2S1 | GI_34147492-S | 14 | 14 | 66374819 | 546714 | 5.599  | 5.37723 | CHB |
| rs10142176 | EIF2S1 | GI_34147492-S | 14 | 14 | 66376569 | 544964 | 5.599  | 5.37723 | CHB |

|            |        |               |    |    |          |        |        |         |     |
|------------|--------|---------------|----|----|----------|--------|--------|---------|-----|
| rs17247862 | EIF2S1 | GI_34147492-S | 14 | 14 | 66382113 | 539420 | 5.599  | 5.37723 | CHB |
| rs10130604 | EIF2S1 | GI_34147492-S | 14 | 14 | 66385191 | 536342 | 5.599  | 5.37723 | CHB |
| rs10143670 | EIF2S1 | GI_34147492-S | 14 | 14 | 66389277 | 532256 | 5.876  | 5.37723 | CHB |
| rs6573726  | EIF2S1 | GI_34147492-S | 14 | 14 | 66394281 | 527252 | 5.599  | 5.37723 | CHB |
| rs2144909  | EIF2S1 | GI_34147492-S | 14 | 14 | 66395197 | 526336 | 5.599  | 5.37723 | CHB |
| rs12590085 | EIF2S1 | GI_34147492-S | 14 | 14 | 66398842 | 522691 | 5.876  | 5.37723 | CHB |
| rs1950689  | EIF2S1 | GI_34147492-S | 14 | 14 | 66408431 | 513102 | 5.4489 | 5.37723 | CHB |
| rs7156852  | EIF2S1 | GI_34147492-S | 14 | 14 | 66410302 | 511231 | 6.3819 | 5.37723 | CHB |
| rs6573727  | EIF2S1 | GI_34147492-S | 14 | 14 | 66413452 | 508081 | 5.4978 | 5.37723 | CHB |
| rs17836604 | EIF2S1 | GI_34147492-S | 14 | 14 | 66417469 | 504064 | 5.876  | 5.37723 | CHB |
| rs8022437  | EIF2S1 | GI_34147492-S | 14 | 14 | 66418094 | 503439 | 5.599  | 5.37723 | CHB |
| rs10047902 | EIF2S1 | GI_34147492-S | 14 | 14 | 66418900 | 502633 | 5.599  | 5.37723 | CHB |
| rs8014841  | EIF2S1 | GI_34147492-S | 14 | 14 | 66421979 | 499554 | 5.599  | 5.37723 | CHB |
| rs4578576  | EIF2S1 | GI_34147492-S | 14 | 14 | 66425392 | 496141 | 5.599  | 5.37723 | CHB |
| rs7156655  | EIF2S1 | GI_34147492-S | 14 | 14 | 66425814 | 495719 | 5.599  | 5.37723 | CHB |
| rs728647   | EIF2S1 | GI_34147492-S | 14 | 14 | 66447808 | 473725 | 5.599  | 5.37723 | CHB |
| rs723432   | EIF2S1 | GI_34147492-S | 14 | 14 | 66448768 | 472765 | 5.599  | 5.37723 | CHB |
| rs7156081  | EIF2S1 | GI_34147492-S | 14 | 14 | 66453896 | 467637 | 5.599  | 5.37723 | CHB |
| rs2038398  | EIF2S1 | GI_34147492-S | 14 | 14 | 66455481 | 466052 | 5.599  | 5.37723 | CHB |
| rs8022657  | EIF2S1 | GI_34147492-S | 14 | 14 | 66460252 | 461281 | 5.599  | 5.37723 | CHB |
| rs10135117 | EIF2S1 | GI_34147492-S | 14 | 14 | 66469144 | 452389 | 5.876  | 5.37723 | CHB |
| rs1950281  | EIF2S1 | GI_34147492-S | 14 | 14 | 66471052 | 450481 | 5.8195 | 5.37723 | CHB |
| rs10135701 | EIF2S1 | GI_34147492-S | 14 | 14 | 66486730 | 434803 | 5.876  | 5.37723 | CHB |
| rs10147954 | EIF2S1 | GI_34147492-S | 14 | 14 | 66486836 | 434697 | 5.876  | 5.37723 | CHB |
| rs12588821 | EIF2S1 | GI_34147492-S | 14 | 14 | 66494253 | 427280 | 5.599  | 5.37723 | CHB |
| rs8012063  | EIF2S1 | GI_34147492-S | 14 | 14 | 66504223 | 417310 | 5.599  | 5.37723 | CHB |
| rs8016725  | EIF2S1 | GI_34147492-S | 14 | 14 | 66504935 | 416598 | 5.5698 | 5.37723 | CHB |
| rs8013401  | EIF2S1 | GI_34147492-S | 14 | 14 | 66512912 | 408621 | 5.599  | 5.37723 | CHB |
| rs6573740  | EIF2S1 | GI_34147492-S | 14 | 14 | 66515522 | 406011 | 5.599  | 5.37723 | CHB |
| rs2319549  | EIF2S1 | GI_34147492-S | 14 | 14 | 66523146 | 398387 | 5.599  | 5.37723 | CHB |
| rs8020095  | EIF2S1 | GI_34147492-S | 14 | 14 | 66523611 | 397922 | 5.599  | 5.37723 | CHB |
| rs2013137  | EIF2S1 | GI_34147492-S | 14 | 14 | 66527748 | 393785 | 5.599  | 5.37723 | CHB |
| rs7142068  | EIF2S1 | GI_34147492-S | 14 | 14 | 66532765 | 388768 | 5.599  | 5.37723 | CHB |
| rs1955610  | EIF2S1 | GI_34147492-S | 14 | 14 | 66540615 | 380918 | 5.599  | 5.37723 | CHB |
| rs1955608  | EIF2S1 | GI_34147492-S | 14 | 14 | 66540848 | 380685 | 5.599  | 5.37723 | CHB |
| rs1955606  | EIF2S1 | GI_34147492-S | 14 | 14 | 66547400 | 374133 | 5.599  | 5.37723 | CHB |
| rs10138631 | EIF2S1 | GI_34147492-S | 14 | 14 | 66551129 | 370404 | 5.8598 | 5.37723 | CHB |
| rs9323489  | EIF2S1 | GI_34147492-S | 14 | 14 | 66554099 | 367434 | 5.876  | 5.37723 | CHB |
| rs6573745  | EIF2S1 | GI_34147492-S | 14 | 14 | 66572711 | 348822 | 5.599  | 5.37723 | CHB |
| rs8008739  | EIF2S1 | GI_34147492-S | 14 | 14 | 66586544 | 334989 | 5.599  | 5.37723 | CHB |
| rs8019510  | EIF2S1 | GI_34147492-S | 14 | 14 | 66593668 | 327865 | 5.599  | 5.37723 | CHB |
| rs7161664  | EIF2S1 | GI_34147492-S | 14 | 14 | 66594240 | 327293 | 5.4471 | 5.37723 | CHB |
| rs7141519  | EIF2S1 | GI_34147492-S | 14 | 14 | 66594278 | 327255 | 5.599  | 5.37723 | CHB |
| rs9323490  | EIF2S1 | GI_34147492-S | 14 | 14 | 66596090 | 325443 | 6.1087 | 5.37723 | CHB |
| rs2144061  | EIF2S1 | GI_34147492-S | 14 | 14 | 66596315 | 325218 | 7.1384 | 5.37723 | CHB |
| rs9323491  | EIF2S1 | GI_34147492-S | 14 | 14 | 66596988 | 324545 | 5.599  | 5.37723 | CHB |
| rs9323492  | EIF2S1 | GI_34147492-S | 14 | 14 | 66598210 | 323323 | 5.599  | 5.37723 | CHB |
| rs10138952 | EIF2S1 | GI_34147492-S | 14 | 14 | 66605772 | 315761 | 5.599  | 5.37723 | CHB |
| rs7150739  | EIF2S1 | GI_34147492-S | 14 | 14 | 66608701 | 312832 | 5.599  | 5.37723 | CHB |
| rs10149600 | EIF2S1 | GI_34147492-S | 14 | 14 | 66609583 | 311950 | 5.4982 | 5.37723 | CHB |
| rs13367791 | EIF2S1 | GI_34147492-S | 14 | 14 | 66612431 | 309102 | 5.599  | 5.37723 | CHB |
| rs10141815 | EIF2S1 | GI_34147492-S | 14 | 14 | 66619556 | 301977 | 6.0086 | 5.37723 | CHB |
| rs17104103 | EIF2S1 | GI_34147492-S | 14 | 14 | 66731705 | 189828 | 6.4968 | 5.37723 | CHB |
| rs17104106 | EIF2S1 | GI_34147492-S | 14 | 14 | 66733185 | 188348 | 6.4968 | 5.37723 | CHB |
| rs17104109 | EIF2S1 | GI_34147492-S | 14 | 14 | 66733703 | 187830 | 6.4968 | 5.37723 | CHB |
| rs10873200 | EIF2S1 | GI_34147492-S | 14 | 14 | 66736772 | 184761 | 6.4968 | 5.37723 | CHB |

|            |        |               |    |    |          |        |        |         |     |
|------------|--------|---------------|----|----|----------|--------|--------|---------|-----|
| rs17104114 | EIF2S1 | GI_34147492-S | 14 | 14 | 66737263 | 184270 | 6.4968 | 5.37723 | CHB |
| rs11158655 | EIF2S1 | GI_34147492-S | 14 | 14 | 66741454 | 180079 | 6.4968 | 5.37723 | CHB |
| rs10431718 | EIF2S1 | GI_34147492-S | 14 | 14 | 66752389 | 169144 | 6.4968 | 5.37723 | CHB |
| rs12590956 | EIF2S1 | GI_34147492-S | 14 | 14 | 66761202 | 160331 | 6.3851 | 5.37723 | CHB |
| rs8009318  | EIF2S1 | GI_34147492-S | 14 | 14 | 66762525 | 159008 | 6.3479 | 5.37723 | CHB |
| rs10141879 | EIF2S1 | GI_34147492-S | 14 | 14 | 66764943 | 156590 | 6.4968 | 5.37723 | CHB |
| rs10145744 | EIF2S1 | GI_34147492-S | 14 | 14 | 66766669 | 154864 | 6.9504 | 5.37723 | CHB |
| rs10152002 | EIF2S1 | GI_34147492-S | 14 | 14 | 66768669 | 152864 | 6.9504 | 5.37723 | CHB |
| rs1475127  | EIF2S1 | GI_34147492-S | 14 | 14 | 66768958 | 152575 | 6.9504 | 5.37723 | CHB |
| rs10147852 | EIF2S1 | GI_34147492-S | 14 | 14 | 66772413 | 149120 | 6.9504 | 5.37723 | CHB |
| rs10145913 | EIF2S1 | GI_34147492-S | 14 | 14 | 66774743 | 146790 | 6.8348 | 5.37723 | CHB |
| rs1078194  | EIF2S1 | GI_34147492-S | 14 | 14 | 66777549 | 143984 | 6.9504 | 5.37723 | CHB |
| rs10145586 | EIF2S1 | GI_34147492-S | 14 | 14 | 66780377 | 141156 | 6.9504 | 5.37723 | CHB |
| rs11158658 | EIF2S1 | GI_34147492-S | 14 | 14 | 66780885 | 140648 | 6.9504 | 5.37723 | CHB |
| rs8015862  | EIF2S1 | GI_34147492-S | 14 | 14 | 66780927 | 140606 | 6.9504 | 5.37723 | CHB |
| rs1073607  | EIF2S1 | GI_34147492-S | 14 | 14 | 66782437 | 139096 | 7.0005 | 5.37723 | CHB |
| rs12323494 | EIF2S1 | GI_34147492-S | 14 | 14 | 66784512 | 137021 | 6.7379 | 5.37723 | CHB |
| rs10459453 | EIF2S1 | GI_34147492-S | 14 | 14 | 66787029 | 134504 | 6.9504 | 5.37723 | CHB |
| rs6573763  | EIF2S1 | GI_34147492-S | 14 | 14 | 66788081 | 133452 | 6.9191 | 5.37723 | CHB |
| rs8016037  | EIF2S1 | GI_34147492-S | 14 | 14 | 66788464 | 133069 | 6.9504 | 5.37723 | CHB |
| rs8008236  | EIF2S1 | GI_34147492-S | 14 | 14 | 66799438 | 122095 | 6.9504 | 5.37723 | CHB |
| rs12589218 | EIF2S1 | GI_34147492-S | 14 | 14 | 66800713 | 120820 | 6.9504 | 5.37723 | CHB |
| rs9743911  | EIF2S1 | GI_34147492-S | 14 | 14 | 66802700 | 118833 | 6.9504 | 5.37723 | CHB |
| rs2146230  | EIF2S1 | GI_34147492-S | 14 | 14 | 66804629 | 116904 | 6.9504 | 5.37723 | CHB |
| rs7149535  | EIF2S1 | GI_34147492-S | 14 | 14 | 66805121 | 116412 | 6.9504 | 5.37723 | CHB |
| rs1318914  | EIF2S1 | GI_34147492-S | 14 | 14 | 66813819 | 107714 | 6.9504 | 5.37723 | CHB |
| rs8021896  | EIF2S1 | GI_34147492-S | 14 | 14 | 66818999 | 102534 | 7.4433 | 5.37723 | CHB |
| rs1535491  | EIF2S1 | GI_34147492-S | 14 | 14 | 66822448 | 99085  | 6.9504 | 5.37723 | CHB |
| rs10151464 | EIF2S1 | GI_34147492-S | 14 | 14 | 66828243 | 93290  | 7.4433 | 5.37723 | CHB |
| rs10140817 | EIF2S1 | GI_34147492-S | 14 | 14 | 66828361 | 93172  | 7.4433 | 5.37723 | CHB |
| rs10144401 | EIF2S1 | GI_34147492-S | 14 | 14 | 66831608 | 89925  | 7.4433 | 5.37723 | CHB |
| rs10150902 | EIF2S1 | GI_34147492-S | 14 | 14 | 66833662 | 87871  | 7.4433 | 5.37723 | CHB |
| rs12589091 | EIF2S1 | GI_34147492-S | 14 | 14 | 66834332 | 87201  | 6.0697 | 5.37723 | CHB |
| rs12586552 | EIF2S1 | GI_34147492-S | 14 | 14 | 66834488 | 87045  | 6.3563 | 5.37723 | CHB |
| rs4286048  | EIF2S1 | GI_34147492-S | 14 | 14 | 66836269 | 85264  | 7.362  | 5.37723 | CHB |
| rs10146722 | EIF2S1 | GI_34147492-S | 14 | 14 | 66838798 | 82735  | 5.4638 | 5.37723 | CHB |
| rs10146663 | EIF2S1 | GI_34147492-S | 14 | 14 | 66838930 | 82603  | 7.4433 | 5.37723 | CHB |
| rs10135903 | EIF2S1 | GI_34147492-S | 14 | 14 | 66840755 | 80778  | 6.6541 | 5.37723 | CHB |
| rs2146229  | EIF2S1 | GI_34147492-S | 14 | 14 | 66845445 | 76088  | 7.4433 | 5.37723 | CHB |
| rs10129779 | EIF2S1 | GI_34147492-S | 14 | 14 | 66846249 | 75284  | 7.013  | 5.37723 | CHB |
| rs1885589  | EIF2S1 | GI_34147492-S | 14 | 14 | 66852734 | 68799  | 7.4433 | 5.37723 | CHB |
| rs8007866  | EIF2S1 | GI_34147492-S | 14 | 14 | 66857060 | 64473  | 7.4433 | 5.37723 | CHB |
| rs8014966  | EIF2S1 | GI_34147492-S | 14 | 14 | 66858062 | 63471  | 7.2944 | 5.37723 | CHB |
| rs10138824 | EIF2S1 | GI_34147492-S | 14 | 14 | 66859310 | 62223  | 7.4433 | 5.37723 | CHB |
| rs2057396  | EIF2S1 | GI_34147492-S | 14 | 14 | 66860786 | 60747  | 7.4433 | 5.37723 | CHB |
| rs10131212 | EIF2S1 | GI_34147492-S | 14 | 14 | 66862120 | 59413  | 7.3162 | 5.37723 | CHB |
| rs17248616 | EIF2S1 | GI_34147492-S | 14 | 14 | 66866420 | 55113  | 6.8224 | 5.37723 | CHB |
| rs2236333  | EIF2S1 | GI_34147492-S | 14 | 14 | 66868676 | 52857  | 7.4433 | 5.37723 | CHB |
| rs2274335  | EIF2S1 | GI_34147492-S | 14 | 14 | 66874076 | 47457  | 7.3247 | 5.37723 | CHB |
| rs1045060  | EIF2S1 | GI_34147492-S | 14 | 14 | 66875006 | 46527  | 7.3247 | 5.37723 | CHB |
| rs10138755 | EIF2S1 | GI_34147492-S | 14 | 14 | 66882057 | 39476  | 5.9013 | 5.37723 | CHB |
| rs3818467  | EIF2S1 | GI_34147492-S | 14 | 14 | 66882227 | 39306  | 7.3247 | 5.37723 | CHB |
| rs2031563  | EIF2S1 | GI_34147492-S | 14 | 14 | 66884273 | 37260  | 6.7379 | 5.37723 | CHB |
| rs2274338  | EIF2S1 | GI_34147492-S | 14 | 14 | 66885736 | 35797  | 7.3247 | 5.37723 | CHB |
| rs1536271  | EIF2S1 | GI_34147492-S | 14 | 14 | 66890924 | 30609  | 7.3247 | 5.37723 | CHB |
| rs1536272  | EIF2S1 | GI_34147492-S | 14 | 14 | 66891054 | 30479  | 7.5734 | 5.37723 | CHB |

|            |           |               |    |    |          |       |         |         |     |
|------------|-----------|---------------|----|----|----------|-------|---------|---------|-----|
| rs8006519  | EIF2S1    | GI_34147492-S | 14 | 14 | 66892350 | 29183 | 7.3247  | 5.37723 | CHB |
| rs13379368 | EIF2S1    | GI_34147492-S | 14 | 14 | 66893244 | 28289 | 7.3247  | 5.37723 | CHB |
| rs13379142 | EIF2S1    | GI_34147492-S | 14 | 14 | 66893437 | 28096 | 8.3962  | 5.37723 | CHB |
| rs10137557 | EIF2S1    | GI_34147492-S | 14 | 14 | 66894077 | 27456 | 6.8434  | 5.37723 | CHB |
| rs10144417 | EIF2S1    | GI_34147492-S | 14 | 14 | 66896663 | 24870 | 7.3247  | 5.37723 | CHB |
| rs3759755  | EIF2S1    | GI_34147492-S | 14 | 14 | 66898229 | 23304 | 7.3247  | 5.37723 | CHB |
| rs8006391  | EIF2S1    | GI_34147492-S | 14 | 14 | 66899432 | 22101 | 7.3247  | 5.37723 | CHB |
| rs7156441  | EIF2S1    | GI_34147492-S | 14 | 14 | 66902990 | 18543 | 7.3247  | 5.37723 | CHB |
| rs12588478 | EIF2S1    | GI_34147492-S | 14 | 14 | 66907644 | 13889 | 7.2651  | 5.37723 | CHB |
| rs12589671 | EIF2S1    | GI_34147492-S | 14 | 14 | 66908914 | 12619 | 7.3247  | 5.37723 | CHB |
| rs8008724  | EIF2S1    | GI_34147492-S | 14 | 14 | 66916971 | 4562  | 7.3247  | 5.37723 | CHB |
| rs2296560  | EIF2S1    | GI_34147492-S | 14 | 14 | 66918647 | 2886  | 7.3247  | 5.37723 | CHB |
| rs10131175 | EIF2S1    | GI_34147492-S | 14 | 14 | 66922484 | 951   | 7.3247  | 5.37723 | CHB |
| rs3818468  | EIF2S1    | GI_34147492-S | 14 | 14 | 66932124 | 10591 | 7.3374  | 5.37723 | CHB |
| rs8004332  | EIF2S1    | GI_34147492-S | 14 | 14 | 66934497 | 12964 | 7.3733  | 5.37723 | CHB |
| rs8004864  | EIF2S1    | GI_34147492-S | 14 | 14 | 66942999 | 21466 | 7.4853  | 5.37723 | CHB |
| rs8007618  | EIF2S1    | GI_34147492-S | 14 | 14 | 66946945 | 25412 | 7.4853  | 5.37723 | CHB |
| rs1555853  | EIF2S1    | GI_34147492-S | 14 | 14 | 66948137 | 26604 | 7.4853  | 5.37723 | CHB |
| rs8004267  | EIF2S1    | GI_34147492-S | 14 | 14 | 66952882 | 31349 | 6.2163  | 5.37723 | CHB |
| rs1263389  | C14orf130 | GI_28411949-A | 14 | 14 | 92737473 | 18971 | 7.7109  | 6.19273 | CHB |
| rs3783896  | C14orf130 | GI_28411949-A | 14 | 14 | 92760054 | 3610  | 8.7798  | 6.19273 | CHB |
| rs2905     | C14orf130 | GI_28411949-A | 14 | 14 | 92763175 | 6731  | 10.0204 | 6.19273 | CHB |
| rs11621915 | C14orf130 | GI_28411949-A | 14 | 14 | 92763584 | 7140  | 10.1115 | 6.19273 | CHB |
| rs11625516 | C14orf130 | GI_28411949-A | 14 | 14 | 92766070 | 9626  | 8.7798  | 6.19273 | CHB |
| rs11629326 | SERPINA1  | GI_21361197-S | 14 | 14 | 93878584 | 36080 | 8.5273  | 6.22729 | CHB |
| rs941598   | SERPINA1  | GI_21361197-S | 14 | 14 | 93881223 | 33441 | 8.5417  | 6.22729 | CHB |
| rs2736883  | SERPINA1  | GI_21361197-S | 14 | 14 | 93885538 | 29126 | 7.7832  | 6.22729 | CHB |
| rs1956174  | SERPINA1  | GI_21361197-S | 14 | 14 | 93885874 | 28790 | 8.5273  | 6.22729 | CHB |
| rs2749530  | SERPINA1  | GI_21361197-S | 14 | 14 | 93886052 | 28612 | 8.9499  | 6.22729 | CHB |
| rs2749529  | SERPINA1  | GI_21361197-S | 14 | 14 | 93890212 | 24452 | 8.9499  | 6.22729 | CHB |
| rs2749527  | SERPINA1  | GI_21361197-S | 14 | 14 | 93896821 | 17843 | 8.687   | 6.22729 | CHB |
| rs1950652  | SERPINA1  | GI_21361197-S | 14 | 14 | 93904089 | 10575 | 7.319   | 6.22729 | CHB |
| rs3762132  | SERPINA1  | GI_21361197-S | 14 | 14 | 93904328 | 10336 | 7.2013  | 6.22729 | CHB |
| rs4900229  | SERPINA1  | GI_21361197-S | 14 | 14 | 93906282 | 8382  | 7.5628  | 6.22729 | CHB |
| rs1243171  | SERPINA1  | GI_21361197-S | 14 | 14 | 93906537 | 8127  | 8.5417  | 6.22729 | CHB |
| rs4900230  | SERPINA1  | GI_21361197-S | 14 | 14 | 93908855 | 5809  | 7.0616  | 6.22729 | CHB |
| rs17090693 | SERPINA1  | GI_21361197-S | 14 | 14 | 93911084 | 3580  | 7.4299  | 6.22729 | CHB |
| rs11832    | SERPINA1  | GI_21361197-S | 14 | 14 | 93913318 | 1346  | 8.3593  | 6.22729 | CHB |
| rs2239652  | SERPINA1  | GI_21361197-S | 14 | 14 | 93918026 | 3362  | 7.0844  | 6.22729 | CHB |
| rs2239651  | SERPINA1  | GI_21361197-S | 14 | 14 | 93918300 | 3636  | 7.511   | 6.22729 | CHB |
| rs3748318  | SERPINA1  | GI_21361197-S | 14 | 14 | 93923250 | 8586  | 6.4435  | 6.22729 | CHB |
| rs3748317  | SERPINA1  | GI_21361197-S | 14 | 14 | 93923432 | 8768  | 6.4435  | 6.22729 | CHB |
| rs2296310  | TCL6      | GI_21536345-A | 14 | 14 | 95206528 | 966   | 15.4144 | 6.2789  | CHB |
| rs2296310  | TCL1B     | GI_40548373-A | 14 | 14 | 95206528 | 21921 | 13.9239 | 6.47744 | CHB |
| rs2249778  | TCL6      | GI_21536345-A | 14 | 14 | 95206547 | 947   | 12.3377 | 6.2789  | CHB |
| rs2249778  | TCL1B     | GI_40548373-A | 14 | 14 | 95206547 | 21902 | 10.3373 | 6.47744 | CHB |
| rs7176722  | IVD       | GI_6031167-S  | 15 | 15 | 38464205 | 33839 | 6.2334  | 5.7299  | CHB |
| rs2289332  | IVD       | GI_6031167-S  | 15 | 15 | 38471072 | 26972 | 6.0032  | 5.7299  | CHB |
| rs11636361 | IVD       | GI_6031167-S  | 15 | 15 | 38475120 | 22924 | 6.0032  | 5.7299  | CHB |
| rs10518693 | IVD       | GI_6031167-S  | 15 | 15 | 38487314 | 10730 | 6.1836  | 5.7299  | CHB |
| rs9635324  | IVD       | GI_6031167-S  | 15 | 15 | 38490503 | 7541  | 6.1836  | 5.7299  | CHB |
| rs7494968  | MGC20481  | GI_33086946-S | 15 | 15 | 38599150 | 33625 | 6.0101  | 5.95776 | CHB |
| rs11638742 | MGC20481  | GI_33086946-S | 15 | 15 | 38604772 | 28003 | 6.2736  | 5.95776 | CHB |
| rs12595610 | MGC20481  | GI_33086946-S | 15 | 15 | 38605375 | 27400 | 6.2736  | 5.95776 | CHB |
| rs12594548 | MGC20481  | GI_33086946-S | 15 | 15 | 38612498 | 20277 | 6.0135  | 5.95776 | CHB |
| rs2959536  | MGC20481  | GI_33086946-S | 15 | 15 | 38613402 | 19373 | 5.9987  | 5.95776 | CHB |

|            |          |               |    |    |          |        |         |         |     |
|------------|----------|---------------|----|----|----------|--------|---------|---------|-----|
| rs2924388  | MGC20481 | GI_33086946-S | 15 | 15 | 38615974 | 16801  | 6.2736  | 5.95776 | CHB |
| rs2412534  | MGC20481 | GI_33086946-S | 15 | 15 | 38623411 | 9364   | 6.361   | 5.95776 | CHB |
| rs2412532  | MGC20481 | GI_33086946-S | 15 | 15 | 38626584 | 6191   | 6.0199  | 5.95776 | CHB |
| rs2412531  | MGC20481 | GI_33086946-S | 15 | 15 | 38626607 | 6168   | 6.711   | 5.95776 | CHB |
| rs4923876  | MGC20481 | GI_33086946-S | 15 | 15 | 38627849 | 4926   | 6.2736  | 5.95776 | CHB |
| rs4924481  | MGC20481 | GI_33086946-S | 15 | 15 | 38629477 | 3298   | 6.2736  | 5.95776 | CHB |
| rs6582     | MGC20481 | GI_33086946-S | 15 | 15 | 38632889 | 114    | 6.2736  | 5.95776 | CHB |
| rs8029384  | MGC20481 | GI_33086946-S | 15 | 15 | 38636972 | 4197   | 6.2736  | 5.95776 | CHB |
| rs7181238  | CCNDBP1  | GI_16554567-I | 15 | 15 | 40850112 | 415497 | 8.2117  | 5.52876 | CHB |
| rs7181238  | TGM5     | GI_4759229-A  | 15 | 15 | 40850112 | 462981 | 5.7076  | 5.03974 | CHB |
| rs8024266  | CCNDBP1  | GI_16554567-I | 15 | 15 | 40853973 | 411636 | 5.5357  | 5.52876 | CHB |
| rs8024266  | TGM5     | GI_4759229-A  | 15 | 15 | 40853973 | 459120 | 5.9348  | 5.03974 | CHB |
| rs9920624  | CCNDBP1  | GI_16554567-I | 15 | 15 | 40860807 | 404802 | 9.2914  | 5.52876 | CHB |
| rs9920624  | TGM5     | GI_4759229-A  | 15 | 15 | 40860807 | 452286 | 6.2248  | 5.03974 | CHB |
| rs9920562  | CCNDBP1  | GI_16554567-I | 15 | 15 | 40860889 | 404720 | 8.2117  | 5.52876 | CHB |
| rs9920562  | TGM5     | GI_4759229-A  | 15 | 15 | 40860889 | 452204 | 5.7076  | 5.03974 | CHB |
| rs9920935  | CCNDBP1  | GI_16554567-I | 15 | 15 | 40862494 | 403115 | 9.2914  | 5.52876 | CHB |
| rs9920935  | TGM5     | GI_4759229-A  | 15 | 15 | 40862494 | 450599 | 6.2248  | 5.03974 | CHB |
| rs9920092  | CCNDBP1  | GI_16554567-I | 15 | 15 | 40862823 | 402786 | 8.6394  | 5.52876 | CHB |
| rs9920092  | TGM5     | GI_4759229-A  | 15 | 15 | 40862823 | 450270 | 5.5817  | 5.03974 | CHB |
| rs11070378 | CCNDBP1  | GI_16554567-I | 15 | 15 | 40863616 | 401993 | 5.5357  | 5.52876 | CHB |
| rs11070378 | TGM5     | GI_4759229-A  | 15 | 15 | 40863616 | 449477 | 5.9348  | 5.03974 | CHB |
| rs16957165 | CCNDBP1  | GI_16554567-I | 15 | 15 | 40872184 | 393425 | 9.619   | 5.52876 | CHB |
| rs16957165 | TGM5     | GI_4759229-A  | 15 | 15 | 40872184 | 440909 | 6.1178  | 5.03974 | CHB |
| rs16957167 | TGM5     | GI_4759229-A  | 15 | 15 | 40874029 | 439064 | 5.5269  | 5.03974 | CHB |
| rs11070380 | CCNDBP1  | GI_16554567-I | 15 | 15 | 40910963 | 354646 | 9.4304  | 5.52876 | CHB |
| rs11070380 | TGM5     | GI_4759229-A  | 15 | 15 | 40910963 | 402130 | 5.8852  | 5.03974 | CHB |
| rs16957244 | CCNDBP1  | GI_16554567-I | 15 | 15 | 40953321 | 312288 | 9.619   | 5.52876 | CHB |
| rs16957244 | TGM5     | GI_4759229-A  | 15 | 15 | 40953321 | 359772 | 6.1178  | 5.03974 | CHB |
| rs2682073  | CCNDBP1  | GI_16554567-I | 15 | 15 | 40983850 | 281759 | 9.619   | 5.52876 | CHB |
| rs2682073  | TGM5     | GI_4759229-A  | 15 | 15 | 40983850 | 329243 | 6.1178  | 5.03974 | CHB |
| rs7178567  | CCNDBP1  | GI_16554567-I | 15 | 15 | 41023904 | 241705 | 10.0533 | 5.52876 | CHB |
| rs7178567  | TGM5     | GI_4759229-A  | 15 | 15 | 41023904 | 289189 | 5.4875  | 5.03974 | CHB |
| rs3803341  | CCNDBP1  | GI_16554567-I | 15 | 15 | 41024495 | 241114 | 11.797  | 5.52876 | CHB |
| rs2277532  | CCNDBP1  | GI_16554567-I | 15 | 15 | 41031991 | 233618 | 5.8393  | 5.52876 | CHB |
| rs2054389  | CCNDBP1  | GI_16554567-I | 15 | 15 | 41043413 | 222196 | 10.0533 | 5.52876 | CHB |
| rs2054389  | TGM5     | GI_4759229-A  | 15 | 15 | 41043413 | 269680 | 5.4875  | 5.03974 | CHB |
| rs8037022  | CCNDBP1  | GI_16554567-I | 15 | 15 | 41044767 | 220842 | 11.666  | 5.52876 | CHB |
| rs8037022  | TGM5     | GI_4759229-A  | 15 | 15 | 41044767 | 268326 | 5.0815  | 5.03974 | CHB |
| rs1381855  | CCNDBP1  | GI_16554567-I | 15 | 15 | 41051297 | 214312 | 5.8393  | 5.52876 | CHB |
| rs12440651 | CCNDBP1  | GI_16554567-I | 15 | 15 | 41051690 | 213919 | 5.8393  | 5.52876 | CHB |
| rs4509988  | CCNDBP1  | GI_16554567-I | 15 | 15 | 41059748 | 205861 | 11.797  | 5.52876 | CHB |
| rs1993813  | CCNDBP1  | GI_16554567-I | 15 | 15 | 41060543 | 205066 | 12.2975 | 5.52876 | CHB |
| rs2412746  | CCNDBP1  | GI_16554567-I | 15 | 15 | 41074038 | 191571 | 11.2244 | 5.52876 | CHB |
| rs2412746  | TGM5     | GI_4759229-A  | 15 | 15 | 41074038 | 239055 | 5.2899  | 5.03974 | CHB |
| rs2412747  | CCNDBP1  | GI_16554567-I | 15 | 15 | 41074095 | 191514 | 11.797  | 5.52876 | CHB |
| rs6416436  | CCNDBP1  | GI_16554567-I | 15 | 15 | 41075511 | 190098 | 11.797  | 5.52876 | CHB |
| rs8042481  | CCNDBP1  | GI_16554567-I | 15 | 15 | 41081510 | 184099 | 11.797  | 5.52876 | CHB |
| rs4923955  | CCNDBP1  | GI_16554567-I | 15 | 15 | 41082380 | 183229 | 11.797  | 5.52876 | CHB |
| rs1037990  | CCNDBP1  | GI_16554567-I | 15 | 15 | 41086979 | 178630 | 11.797  | 5.52876 | CHB |
| rs11630595 | CCNDBP1  | GI_16554567-I | 15 | 15 | 41097413 | 168196 | 11.797  | 5.52876 | CHB |
| rs11070386 | CCNDBP1  | GI_16554567-I | 15 | 15 | 41099902 | 165707 | 11.5137 | 5.52876 | CHB |
| rs8027733  | CCNDBP1  | GI_16554567-I | 15 | 15 | 41101610 | 163999 | 11.797  | 5.52876 | CHB |
| rs4573908  | CCNDBP1  | GI_16554567-I | 15 | 15 | 41101784 | 163825 | 11.797  | 5.52876 | CHB |
| rs6493076  | CCNDBP1  | GI_16554567-I | 15 | 15 | 41105432 | 160177 | 9.5961  | 5.52876 | CHB |
| rs6493076  | TGM5     | GI_4759229-A  | 15 | 15 | 41105432 | 207661 | 5.6139  | 5.03974 | CHB |

|            |        |               |    |    |          |        |         |         |     |
|------------|--------|---------------|----|----|----------|--------|---------|---------|-----|
| rs3736054  | CCNDP1 | GI_16554567-I | 15 | 15 | 41109405 | 156204 | 10.0533 | 5.52876 | CHB |
| rs3736054  | TGM5   | GI_4759229-A  | 15 | 15 | 41109405 | 203688 | 5.4875  | 5.03974 | CHB |
| rs6493077  | CCNDP1 | GI_16554567-I | 15 | 15 | 41112234 | 153375 | 11.797  | 5.52876 | CHB |
| rs3784265  | CCNDP1 | GI_16554567-I | 15 | 15 | 41115955 | 149654 | 11.797  | 5.52876 | CHB |
| rs4923956  | CCNDP1 | GI_16554567-I | 15 | 15 | 41125944 | 139665 | 5.8393  | 5.52876 | CHB |
| rs2412752  | CCNDP1 | GI_16554567-I | 15 | 15 | 41127265 | 138344 | 11.797  | 5.52876 | CHB |
| rs2035170  | CCNDP1 | GI_16554567-I | 15 | 15 | 41132178 | 133431 | 11.797  | 5.52876 | CHB |
| rs4924704  | CCNDP1 | GI_16554567-I | 15 | 15 | 41139333 | 126276 | 10.0533 | 5.52876 | CHB |
| rs4924704  | TGM5   | GI_4759229-A  | 15 | 15 | 41139333 | 173760 | 5.4875  | 5.03974 | CHB |
| rs2056346  | CCNDP1 | GI_16554567-I | 15 | 15 | 41167320 | 98289  | 6.0089  | 5.52876 | CHB |
| rs1474200  | CCNDP1 | GI_16554567-I | 15 | 15 | 41173035 | 92574  | 6.4112  | 5.52876 | CHB |
| rs11070389 | CCNDP1 | GI_16554567-I | 15 | 15 | 41181608 | 84001  | 5.8393  | 5.52876 | CHB |
| rs12913112 | CCNDP1 | GI_16554567-I | 15 | 15 | 41184129 | 81480  | 5.8393  | 5.52876 | CHB |
| rs11632120 | CCNDP1 | GI_16554567-I | 15 | 15 | 41202665 | 62944  | 5.8071  | 5.52876 | CHB |
| rs12899266 | CCNDP1 | GI_16554567-I | 15 | 15 | 41227078 | 38531  | 9.293   | 5.52876 | CHB |
| rs12899266 | TGM5   | GI_4759229-A  | 15 | 15 | 41227078 | 86015  | 5.719   | 5.03974 | CHB |
| rs7166467  | CCNDP1 | GI_16554567-I | 15 | 15 | 41227814 | 37795  | 5.8071  | 5.52876 | CHB |
| rs540587   | CCNDP1 | GI_16554567-I | 15 | 15 | 41265405 | 204    | 14.0256 | 5.52876 | CHB |
| rs530305   | CCNDP1 | GI_16554567-I | 15 | 15 | 41283192 | 17583  | 7.9029  | 5.52876 | CHB |
| rs530305   | TGM5   | GI_4759229-A  | 15 | 15 | 41283192 | 29901  | 5.4674  | 5.03974 | CHB |
| rs531850   | CCNDP1 | GI_16554567-I | 15 | 15 | 41283334 | 17725  | 10.0533 | 5.52876 | CHB |
| rs531850   | TGM5   | GI_4759229-A  | 15 | 15 | 41283334 | 29759  | 5.4875  | 5.03974 | CHB |
| rs494863   | CCNDP1 | GI_16554567-I | 15 | 15 | 41289594 | 23985  | 14.0256 | 5.52876 | CHB |
| rs2899077  | CCNDP1 | GI_16554567-I | 15 | 15 | 41297317 | 31708  | 14.0256 | 5.52876 | CHB |
| rs12592725 | CCNDP1 | GI_16554567-I | 15 | 15 | 41303687 | 38078  | 9.2027  | 5.52876 | CHB |
| rs489964   | CCNDP1 | GI_16554567-I | 15 | 15 | 41304846 | 39237  | 5.8071  | 5.52876 | CHB |
| rs11070396 | CCNDP1 | GI_16554567-I | 15 | 15 | 41310214 | 44605  | 10.0533 | 5.52876 | CHB |
| rs11070396 | TGM5   | GI_4759229-A  | 15 | 15 | 41310214 | 2879   | 5.4875  | 5.03974 | CHB |
| rs502157   | CCNDP1 | GI_16554567-I | 15 | 15 | 41315865 | 50256  | 5.8071  | 5.52876 | CHB |
| rs7183814  | CCNDP1 | GI_16554567-I | 15 | 15 | 41316922 | 51313  | 14.0256 | 5.52876 | CHB |
| rs2241516  | CCNDP1 | GI_16554567-I | 15 | 15 | 41317939 | 52330  | 10.0533 | 5.52876 | CHB |
| rs2241516  | TGM5   | GI_4759229-A  | 15 | 15 | 41317939 | 4846   | 5.4875  | 5.03974 | CHB |
| rs11855754 | CCNDP1 | GI_16554567-I | 15 | 15 | 41322259 | 56650  | 9.9572  | 5.52876 | CHB |
| rs11855754 | TGM5   | GI_4759229-A  | 15 | 15 | 41322259 | 9166   | 5.3686  | 5.03974 | CHB |
| rs525403   | CCNDP1 | GI_16554567-I | 15 | 15 | 41322388 | 56779  | 6.1189  | 5.52876 | CHB |
| rs16957511 | CCNDP1 | GI_16554567-I | 15 | 15 | 41327409 | 61800  | 10.6162 | 5.52876 | CHB |
| rs16957511 | TGM5   | GI_4759229-A  | 15 | 15 | 41327409 | 14316  | 5.6577  | 5.03974 | CHB |
| rs512431   | TGM5   | GI_4759229-A  | 15 | 15 | 41329231 | 16138  | 8.194   | 5.03974 | CHB |
| rs493177   | TGM5   | GI_4759229-A  | 15 | 15 | 41330550 | 17457  | 8.1477  | 5.03974 | CHB |
| rs9652444  | CCNDP1 | GI_16554567-I | 15 | 15 | 41330988 | 65379  | 7.0919  | 5.52876 | CHB |
| rs555001   | TGM5   | GI_4759229-A  | 15 | 15 | 41333020 | 19927  | 8.1477  | 5.03974 | CHB |
| rs572959   | TGM5   | GI_4759229-A  | 15 | 15 | 41337794 | 24701  | 8.1477  | 5.03974 | CHB |
| rs574065   | TGM5   | GI_4759229-A  | 15 | 15 | 41337947 | 24854  | 8.1477  | 5.03974 | CHB |
| rs524547   | TGM5   | GI_4759229-A  | 15 | 15 | 41338315 | 25222  | 8.1477  | 5.03974 | CHB |
| rs554001   | TGM5   | GI_4759229-A  | 15 | 15 | 41339211 | 26118  | 8.1477  | 5.03974 | CHB |
| rs501884   | TGM5   | GI_4759229-A  | 15 | 15 | 41341274 | 28181  | 8.1477  | 5.03974 | CHB |
| rs504417   | TGM5   | GI_4759229-A  | 15 | 15 | 41341518 | 28425  | 8.1477  | 5.03974 | CHB |
| rs1197256  | TGM5   | GI_4759229-A  | 15 | 15 | 41342991 | 29898  | 8.1477  | 5.03974 | CHB |
| rs11853991 | CCNDP1 | GI_16554567-I | 15 | 15 | 41344841 | 79232  | 8.026   | 5.52876 | CHB |
| rs11853991 | TGM5   | GI_4759229-A  | 15 | 15 | 41344841 | 31748  | 5.5272  | 5.03974 | CHB |
| rs471122   | TGM5   | GI_4759229-A  | 15 | 15 | 41345866 | 32773  | 8.1477  | 5.03974 | CHB |
| rs531910   | TGM5   | GI_4759229-A  | 15 | 15 | 41347899 | 34806  | 8.1477  | 5.03974 | CHB |
| rs493444   | TGM5   | GI_4759229-A  | 15 | 15 | 41353762 | 40669  | 8.1477  | 5.03974 | CHB |
| rs473554   | TGM5   | GI_4759229-A  | 15 | 15 | 41355499 | 42406  | 8.0863  | 5.03974 | CHB |
| rs530683   | TGM5   | GI_4759229-A  | 15 | 15 | 41356291 | 43198  | 8.1477  | 5.03974 | CHB |
| rs567357   | TGM5   | GI_4759229-A  | 15 | 15 | 41358682 | 45589  | 7.7534  | 5.03974 | CHB |

|            |      |               |    |    |          |        |        |         |     |
|------------|------|---------------|----|----|----------|--------|--------|---------|-----|
| rs513970   | TGM5 | GI_4759229-A  | 15 | 15 | 41366858 | 53765  | 8.1477 | 5.03974 | CHB |
| rs538238   | TGM5 | GI_4759229-A  | 15 | 15 | 41372812 | 59719  | 5.3861 | 5.03974 | CHB |
| rs489509   | TGM5 | GI_4759229-A  | 15 | 15 | 41374199 | 61106  | 8.5334 | 5.03974 | CHB |
| rs532672   | TGM5 | GI_4759229-A  | 15 | 15 | 41374200 | 61107  | 8.5334 | 5.03974 | CHB |
| rs825740   | TGM5 | GI_4759229-A  | 15 | 15 | 41379700 | 66607  | 8.5334 | 5.03974 | CHB |
| rs825739   | TGM5 | GI_4759229-A  | 15 | 15 | 41379720 | 66627  | 8.3682 | 5.03974 | CHB |
| rs478104   | TGM5 | GI_4759229-A  | 15 | 15 | 41382192 | 69099  | 7.8147 | 5.03974 | CHB |
| rs524527   | TGM5 | GI_4759229-A  | 15 | 15 | 41386408 | 73315  | 7.8147 | 5.03974 | CHB |
| rs526450   | TGM5 | GI_4759229-A  | 15 | 15 | 41386617 | 73524  | 7.8147 | 5.03974 | CHB |
| rs510108   | TGM5 | GI_4759229-A  | 15 | 15 | 41392731 | 79638  | 7.5596 | 5.03974 | CHB |
| rs1095386  | TGM5 | GI_4759229-A  | 15 | 15 | 41396801 | 83708  | 6.6283 | 5.03974 | CHB |
| rs507178   | TGM5 | GI_4759229-A  | 15 | 15 | 41397427 | 84334  | 6.6283 | 5.03974 | CHB |
| rs478028   | TGM5 | GI_4759229-A  | 15 | 15 | 41398064 | 84971  | 6.5045 | 5.03974 | CHB |
| rs552701   | ELL3 | GI_13376767-S | 15 | 15 | 41401102 | 451307 | 5.5537 | 5.34242 | CHB |
| rs552701   | TGM5 | GI_4759229-A  | 15 | 15 | 41401102 | 88009  | 5.9909 | 5.03974 | CHB |
| rs573615   | TGM5 | GI_4759229-A  | 15 | 15 | 41401573 | 88480  | 6.6283 | 5.03974 | CHB |
| rs488756   | TGM5 | GI_4759229-A  | 15 | 15 | 41402016 | 88923  | 6.6283 | 5.03974 | CHB |
| rs956391   | TGM5 | GI_4759229-A  | 15 | 15 | 41404785 | 91692  | 7.0818 | 5.03974 | CHB |
| rs3742971  | TGM5 | GI_4759229-A  | 15 | 15 | 41410208 | 97115  | 6.6283 | 5.03974 | CHB |
| rs1549525  | TGM5 | GI_4759229-A  | 15 | 15 | 41415147 | 102054 | 6.6283 | 5.03974 | CHB |
| rs4547312  | TGM5 | GI_4759229-A  | 15 | 15 | 41419430 | 106337 | 6.6283 | 5.03974 | CHB |
| rs2278857  | TGM5 | GI_4759229-A  | 15 | 15 | 41419841 | 106748 | 6.6283 | 5.03974 | CHB |
| rs2278859  | TGM5 | GI_4759229-A  | 15 | 15 | 41420252 | 107159 | 6.6953 | 5.03974 | CHB |
| rs7170489  | TGM5 | GI_4759229-A  | 15 | 15 | 41423943 | 110850 | 6.1557 | 5.03974 | CHB |
| rs6493083  | TGM5 | GI_4759229-A  | 15 | 15 | 41425277 | 112184 | 6.6283 | 5.03974 | CHB |
| rs9920879  | TGM5 | GI_4759229-A  | 15 | 15 | 41427062 | 113969 | 6.6283 | 5.03974 | CHB |
| rs4296223  | TGM5 | GI_4759229-A  | 15 | 15 | 41432538 | 119445 | 6.6283 | 5.03974 | CHB |
| rs6493084  | TGM5 | GI_4759229-A  | 15 | 15 | 41434919 | 121826 | 6.6953 | 5.03974 | CHB |
| rs12905772 | TGM5 | GI_4759229-A  | 15 | 15 | 41435736 | 122643 | 6.6283 | 5.03974 | CHB |
| rs4075674  | TGM5 | GI_4759229-A  | 15 | 15 | 41437522 | 124429 | 6.6283 | 5.03974 | CHB |
| rs2412780  | TGM5 | GI_4759229-A  | 15 | 15 | 41443086 | 129993 | 5.6465 | 5.03974 | CHB |
| rs2412779  | TGM5 | GI_4759229-A  | 15 | 15 | 41443219 | 130126 | 6.0518 | 5.03974 | CHB |
| rs2278860  | TGM5 | GI_4759229-A  | 15 | 15 | 41446338 | 133245 | 6.6283 | 5.03974 | CHB |
| rs3809482  | TGM5 | GI_4759229-A  | 15 | 15 | 41449094 | 136001 | 6.6283 | 5.03974 | CHB |
| rs6493087  | TGM5 | GI_4759229-A  | 15 | 15 | 41453264 | 140171 | 6.6283 | 5.03974 | CHB |
| rs2412781  | TGM5 | GI_4759229-A  | 15 | 15 | 41455192 | 142099 | 6.6283 | 5.03974 | CHB |
| rs3213990  | TGM5 | GI_4759229-A  | 15 | 15 | 41457518 | 144425 | 6.6283 | 5.03974 | CHB |
| rs3213991  | TGM5 | GI_4759229-A  | 15 | 15 | 41457572 | 144479 | 5.5519 | 5.03974 | CHB |
| rs7163288  | TGM5 | GI_4759229-A  | 15 | 15 | 41458647 | 145554 | 6.6283 | 5.03974 | CHB |
| rs11637572 | TGM5 | GI_4759229-A  | 15 | 15 | 41472432 | 159339 | 5.1006 | 5.03974 | CHB |
| rs2243434  | TGM5 | GI_4759229-A  | 15 | 15 | 41477159 | 164066 | 6.6283 | 5.03974 | CHB |
| rs2444036  | TGM5 | GI_4759229-A  | 15 | 15 | 41481400 | 168307 | 6.6283 | 5.03974 | CHB |
| rs1837960  | TGM5 | GI_4759229-A  | 15 | 15 | 41485894 | 172801 | 5.0449 | 5.03974 | CHB |
| rs1058298  | ELL3 | GI_13376767-S | 15 | 15 | 41488222 | 364187 | 5.5367 | 5.34242 | CHB |
| rs2242069  | ELL3 | GI_13376767-S | 15 | 15 | 41500926 | 351483 | 5.5367 | 5.34242 | CHB |
| rs693510   | ELL3 | GI_13376767-S | 15 | 15 | 41501917 | 350492 | 5.3606 | 5.34242 | CHB |
| rs689835   | ELL3 | GI_13376767-S | 15 | 15 | 41502262 | 350147 | 5.5367 | 5.34242 | CHB |
| rs690512   | ELL3 | GI_13376767-S | 15 | 15 | 41504970 | 347439 | 5.6439 | 5.34242 | CHB |
| rs690512   | TGM5 | GI_4759229-A  | 15 | 15 | 41504970 | 191877 | 5.1931 | 5.03974 | CHB |
| rs542898   | ELL3 | GI_13376767-S | 15 | 15 | 41506684 | 345725 | 5.5367 | 5.34242 | CHB |
| rs689767   | ELL3 | GI_13376767-S | 15 | 15 | 41509369 | 343040 | 5.5367 | 5.34242 | CHB |
| rs2602141  | ELL3 | GI_13376767-S | 15 | 15 | 41511938 | 340471 | 5.5367 | 5.34242 | CHB |
| rs536313   | ELL3 | GI_13376767-S | 15 | 15 | 41517290 | 335119 | 5.5367 | 5.34242 | CHB |
| rs2467737  | ELL3 | GI_13376767-S | 15 | 15 | 41524480 | 327929 | 5.5367 | 5.34242 | CHB |
| rs2444029  | ELL3 | GI_13376767-S | 15 | 15 | 41524776 | 327633 | 5.5367 | 5.34242 | CHB |
| rs690316   | TGM5 | GI_4759229-A  | 15 | 15 | 41525172 | 212079 | 5.0672 | 5.03974 | CHB |

|            |      |               |    |    |          |        |        |         |     |
|------------|------|---------------|----|----|----------|--------|--------|---------|-----|
| rs2467739  | ELL3 | GI_13376767-S | 15 | 15 | 41527488 | 324921 | 5.5367 | 5.34242 | CHB |
| rs2467741  | ELL3 | GI_13376767-S | 15 | 15 | 41529918 | 322491 | 5.3606 | 5.34242 | CHB |
| rs690367   | ELL3 | GI_13376767-S | 15 | 15 | 41535596 | 316813 | 5.5367 | 5.34242 | CHB |
| rs7173370  | ELL3 | GI_13376767-S | 15 | 15 | 41537208 | 315201 | 5.5367 | 5.34242 | CHB |
| rs2444032  | ELL3 | GI_13376767-S | 15 | 15 | 41542638 | 309771 | 5.5367 | 5.34242 | CHB |
| rs694725   | ELL3 | GI_13376767-S | 15 | 15 | 41543502 | 308907 | 5.5367 | 5.34242 | CHB |
| rs1814538  | ELL3 | GI_13376767-S | 15 | 15 | 41547066 | 305343 | 5.5367 | 5.34242 | CHB |
| rs689647   | ELL3 | GI_13376767-S | 15 | 15 | 41549488 | 302921 | 5.5367 | 5.34242 | CHB |
| rs2251538  | ELL3 | GI_13376767-S | 15 | 15 | 41554501 | 297908 | 5.5367 | 5.34242 | CHB |
| rs560191   | ELL3 | GI_13376767-S | 15 | 15 | 41555066 | 297343 | 5.5367 | 5.34242 | CHB |
| rs527921   | ELL3 | GI_13376767-S | 15 | 15 | 41557708 | 294701 | 6.6265 | 5.34242 | CHB |
| rs493377   | ELL3 | GI_13376767-S | 15 | 15 | 41560759 | 291650 | 5.5367 | 5.34242 | CHB |
| rs544122   | ELL3 | GI_13376767-S | 15 | 15 | 41563024 | 289385 | 6.6265 | 5.34242 | CHB |
| rs689754   | ELL3 | GI_13376767-S | 15 | 15 | 41563187 | 289222 | 7.1911 | 5.34242 | CHB |
| rs1079309  | ELL3 | GI_13376767-S | 15 | 15 | 41570456 | 281953 | 5.9407 | 5.34242 | CHB |
| rs2439831  | ELL3 | GI_13376767-S | 15 | 15 | 41571767 | 280642 | 5.4013 | 5.34242 | CHB |
| rs2439850  | ELL3 | GI_13376767-S | 15 | 15 | 41572146 | 280263 | 5.5367 | 5.34242 | CHB |
| rs689781   | ELL3 | GI_13376767-S | 15 | 15 | 41579389 | 273020 | 5.5367 | 5.34242 | CHB |
| rs2253708  | ELL3 | GI_13376767-S | 15 | 15 | 41584565 | 267844 | 5.5367 | 5.34242 | CHB |
| rs495175   | ELL3 | GI_13376767-S | 15 | 15 | 41585976 | 266433 | 5.5367 | 5.34242 | CHB |
| rs2253268  | ELL3 | GI_13376767-S | 15 | 15 | 41588260 | 264149 | 5.5367 | 5.34242 | CHB |
| rs506120   | ELL3 | GI_13376767-S | 15 | 15 | 41589316 | 263093 | 5.3843 | 5.34242 | CHB |
| rs2470134  | ELL3 | GI_13376767-S | 15 | 15 | 41637178 | 215231 | 5.9156 | 5.34242 | CHB |
| rs2439     | ELL3 | GI_13376767-S | 15 | 15 | 41678804 | 173605 | 5.9156 | 5.34242 | CHB |
| rs2447196  | ELL3 | GI_13376767-S | 15 | 15 | 41681110 | 171299 | 5.9156 | 5.34242 | CHB |
| rs3101443  | ELL3 | GI_13376767-S | 15 | 15 | 41699664 | 152745 | 5.5477 | 5.34242 | CHB |
| rs2614811  | ELL3 | GI_13376767-S | 15 | 15 | 41700779 | 151630 | 5.5477 | 5.34242 | CHB |
| rs2447208  | ELL3 | GI_13376767-S | 15 | 15 | 41721187 | 131222 | 5.5477 | 5.34242 | CHB |
| rs8042868  | ELL3 | GI_13376767-S | 15 | 15 | 41726934 | 125475 | 5.5477 | 5.34242 | CHB |
| rs12441127 | ELL3 | GI_13376767-S | 15 | 15 | 41808467 | 43942  | 5.5477 | 5.34242 | CHB |
| rs2467402  | ELL3 | GI_13376767-S | 15 | 15 | 41811782 | 40627  | 5.7298 | 5.34242 | CHB |
| rs7175129  | ELL3 | GI_13376767-S | 15 | 15 | 41817310 | 35099  | 5.5477 | 5.34242 | CHB |
| rs11070408 | ELL3 | GI_13376767-S | 15 | 15 | 41822080 | 30329  | 5.5477 | 5.34242 | CHB |
| rs16950562 | ELL3 | GI_13376767-S | 15 | 15 | 41823656 | 28753  | 5.5477 | 5.34242 | CHB |
| rs10163054 | ELL3 | GI_13376767-S | 15 | 15 | 41834930 | 17479  | 5.5477 | 5.34242 | CHB |
| rs7174208  | ELL3 | GI_13376767-S | 15 | 15 | 41839974 | 12435  | 5.5477 | 5.34242 | CHB |
| rs11070410 | ELL3 | GI_13376767-S | 15 | 15 | 41844337 | 8072   | 5.5477 | 5.34242 | CHB |
| rs3862142  | ELL3 | GI_13376767-S | 15 | 15 | 41852098 | 311    | 5.5477 | 5.34242 | CHB |
| rs2788     | ELL3 | GI_13376767-S | 15 | 15 | 41852178 | 231    | 5.5477 | 5.34242 | CHB |
| rs8023458  | ELL3 | GI_13376767-S | 15 | 15 | 41868231 | 15822  | 5.5477 | 5.34242 | CHB |
| rs3759791  | ELL3 | GI_13376767-S | 15 | 15 | 41878090 | 25681  | 5.8401 | 5.34242 | CHB |
| rs694461   | ELL3 | GI_13376767-S | 15 | 15 | 41883355 | 30946  | 5.5477 | 5.34242 | CHB |
| rs16965120 | ELL3 | GI_13376767-S | 15 | 15 | 41887634 | 35225  | 5.4669 | 5.34242 | CHB |
| rs2228368  | ELL3 | GI_13376767-S | 15 | 15 | 41889302 | 36893  | 5.4669 | 5.34242 | CHB |
| rs3825783  | ELL3 | GI_13376767-S | 15 | 15 | 41889601 | 37192  | 5.5477 | 5.34242 | CHB |
| rs693919   | ELL3 | GI_13376767-S | 15 | 15 | 41889620 | 37211  | 5.5477 | 5.34242 | CHB |
| rs3736180  | ELL3 | GI_13376767-S | 15 | 15 | 41893916 | 41507  | 5.5477 | 5.34242 | CHB |
| rs12440573 | ELL3 | GI_13376767-S | 15 | 15 | 41896289 | 43880  | 5.5477 | 5.34242 | CHB |
| rs575082   | ELL3 | GI_13376767-S | 15 | 15 | 41897434 | 45025  | 5.5477 | 5.34242 | CHB |
| rs3816792  | ELL3 | GI_13376767-S | 15 | 15 | 41904278 | 51869  | 5.8401 | 5.34242 | CHB |
| rs3759790  | ELL3 | GI_13376767-S | 15 | 15 | 41908322 | 55913  | 5.5477 | 5.34242 | CHB |
| rs12441984 | ELL3 | GI_13376767-S | 15 | 15 | 41913577 | 61168  | 5.5477 | 5.34242 | CHB |
| rs7169322  | ELL3 | GI_13376767-S | 15 | 15 | 41918306 | 65897  | 5.5477 | 5.34242 | CHB |
| rs8032649  | ELL3 | GI_13376767-S | 15 | 15 | 41922214 | 69805  | 5.4669 | 5.34242 | CHB |
| rs16977724 | ELL3 | GI_13376767-S | 15 | 15 | 41938591 | 86182  | 5.5477 | 5.34242 | CHB |
| rs16977798 | ELL3 | GI_13376767-S | 15 | 15 | 41939240 | 86831  | 5.5477 | 5.34242 | CHB |



|            |           |               |    |    |          |        |         |         |     |
|------------|-----------|---------------|----|----|----------|--------|---------|---------|-----|
| rs11856795 | ELL3      | GI_13376767-S | 15 | 15 | 41947874 | 95465  | 5.5477  | 5.34242 | CHB |
| rs9944216  | ELL3      | GI_13376767-S | 15 | 15 | 41948065 | 95656  | 5.5477  | 5.34242 | CHB |
| rs8023508  | ELL3      | GI_13376767-S | 15 | 15 | 41963395 | 110986 | 5.5477  | 5.34242 | CHB |
| rs3742982  | ELL3      | GI_13376767-S | 15 | 15 | 41963973 | 111564 | 5.5477  | 5.34242 | CHB |
| rs524908   | ELL3      | GI_13376767-S | 15 | 15 | 41975283 | 122874 | 5.5477  | 5.34242 | CHB |
| rs8034728  | Hs.11898  | Hs.11898-S    | 15 | 15 | 50652177 | 84453  | 6.6287  | 6.24974 | CHB |
| rs17651808 | Hs.11898  | Hs.11898-S    | 15 | 15 | 50659613 | 77017  | 6.941   | 6.24974 | CHB |
| rs17651844 | Hs.11898  | Hs.11898-S    | 15 | 15 | 50670164 | 66466  | 7.1667  | 6.24974 | CHB |
| rs17651850 | Hs.11898  | Hs.11898-S    | 15 | 15 | 50671062 | 65568  | 6.4776  | 6.24974 | CHB |
| rs17708301 | Hs.11898  | Hs.11898-S    | 15 | 15 | 50680438 | 56192  | 6.4014  | 6.24974 | CHB |
| rs3751613  | Hs.11898  | Hs.11898-S    | 15 | 15 | 50689206 | 47424  | 6.4776  | 6.24974 | CHB |
| rs11070906 | Hs.11898  | Hs.11898-S    | 15 | 15 | 50709817 | 26813  | 10.0326 | 6.24974 | CHB |
| rs8030871  | Hs.11898  | Hs.11898-S    | 15 | 15 | 50725393 | 11237  | 13.0614 | 6.24974 | CHB |
| rs17708373 | Hs.11898  | Hs.11898-S    | 15 | 15 | 50732750 | 3880   | 6.3963  | 6.24974 | CHB |
| rs8036979  | Hs.11898  | Hs.11898-S    | 15 | 15 | 50735287 | 1343   | 12.3352 | 6.24974 | CHB |
| rs11633933 | Hs.11898  | Hs.11898-S    | 15 | 15 | 50735649 | 981    | 12.6413 | 6.24974 | CHB |
| rs17651941 | Hs.11898  | Hs.11898-S    | 15 | 15 | 50735918 | 712    | 10.8439 | 6.24974 | CHB |
| rs877975   | Hs.11898  | Hs.11898-S    | 15 | 15 | 50753519 | 16889  | 6.4776  | 6.24974 | CHB |
| rs2414172  | Hs.11898  | Hs.11898-S    | 15 | 15 | 50756247 | 19617  | 7.3908  | 6.24974 | CHB |
| rs6495451  | LOC400410 | GI_42660516-S | 15 | 15 | 77951108 | 42905  | 9.2107  | 6.04273 | CHB |
| rs1113983  | LOC400410 | GI_42660516-S | 15 | 15 | 77953652 | 40361  | 9.2107  | 6.04273 | CHB |
| rs934134   | LOC400410 | GI_42660516-S | 15 | 15 | 77955273 | 38740  | 8.7431  | 6.04273 | CHB |
| rs8036559  | LOC400410 | GI_42660516-S | 15 | 15 | 77957618 | 36395  | 9.2107  | 6.04273 | CHB |
| rs2562744  | LOC400410 | GI_42660516-S | 15 | 15 | 77961443 | 32570  | 9.2107  | 6.04273 | CHB |
| rs12438477 | LOC400410 | GI_42660516-S | 15 | 15 | 77965338 | 28675  | 9.2107  | 6.04273 | CHB |
| rs8042012  | LOC400410 | GI_42660516-S | 15 | 15 | 77966902 | 27111  | 8.6625  | 6.04273 | CHB |
| rs2586183  | LOC400410 | GI_42660516-S | 15 | 15 | 77967161 | 26852  | 9.2107  | 6.04273 | CHB |
| rs2733088  | LOC400410 | GI_42660516-S | 15 | 15 | 77971712 | 22301  | 9.2107  | 6.04273 | CHB |
| rs2586179  | LOC400410 | GI_42660516-S | 15 | 15 | 77975061 | 18952  | 10.886  | 6.04273 | CHB |
| rs2115539  | LOC400410 | GI_42660516-S | 15 | 15 | 77977940 | 16073  | 10.0762 | 6.04273 | CHB |
| rs4778889  | IL16      | GI_27262656-I | 15 | 15 | 79376050 | 11845  | 8.7244  | 6.14594 | CHB |
| rs4778891  | IL16      | GI_27262656-I | 15 | 15 | 79376885 | 11010  | 11.3617 | 6.14594 | CHB |
| rs11857713 | IL16      | GI_27262656-I | 15 | 15 | 79378320 | 9575   | 10.1032 | 6.14594 | CHB |
| rs4778636  | IL16      | GI_27262656-I | 15 | 15 | 79378694 | 9201   | 11.6006 | 6.14594 | CHB |
| rs3898677  | IL16      | GI_27262656-I | 15 | 15 | 79383617 | 4278   | 9.3695  | 6.14594 | CHB |
| rs4577037  | IL16      | GI_27262656-I | 15 | 15 | 79383715 | 4180   | 11.1027 | 6.14594 | CHB |
| rs1803275  | IL16      | GI_27262656-I | 15 | 15 | 79385471 | 2424   | 11.1026 | 6.14594 | CHB |
| rs3926277  | IL16      | GI_27262656-I | 15 | 15 | 79386349 | 1546   | 9.4069  | 6.14594 | CHB |
| rs3926278  | IL16      | GI_27262656-I | 15 | 15 | 79386410 | 1485   | 11.1026 | 6.14594 | CHB |
| rs3926279  | IL16      | GI_27262656-I | 15 | 15 | 79386498 | 1397   | 10.4143 | 6.14594 | CHB |
| rs4778639  | IL16      | GI_27262656-I | 15 | 15 | 79387506 | 389    | 11.3617 | 6.14594 | CHB |
| rs4778640  | IL16      | GI_27262656-I | 15 | 15 | 79391186 | 3291   | 7.5596  | 6.14594 | CHB |
| rs12593780 | SCAND2    | GI_15991818-I | 15 | 15 | 82910120 | 75363  | 6.0662  | 5.98867 | CHB |
| rs7180051  | SCAND2    | GI_15991818-I | 15 | 15 | 82917298 | 68185  | 6.0662  | 5.98867 | CHB |
| rs7169769  | SCAND2    | GI_15991818-I | 15 | 15 | 82948914 | 36569  | 10.0564 | 5.98867 | CHB |
| rs11858419 | SCAND2    | GI_15991818-I | 15 | 15 | 82969180 | 16303  | 10.5403 | 5.98867 | CHB |
| rs11073686 | SCAND2    | GI_15991818-I | 15 | 15 | 83085690 | 100207 | 7.2618  | 5.98867 | CHB |
| rs8182086  | SCAND2    | GI_15991818-I | 15 | 15 | 83142863 | 157380 | 7.6603  | 5.98867 | CHB |
| rs8023889  | SCAND2    | GI_15991818-I | 15 | 15 | 83154607 | 169124 | 7.1592  | 5.98867 | CHB |
| rs7173483  | AP3S2     | GI_39725670-S | 15 | 15 | 88172552 | 5489   | 7.401   | 6.06195 | CHB |
| rs2290351  | AP3S2     | GI_39725670-S | 15 | 15 | 88175785 | 2256   | 7.401   | 6.06195 | CHB |
| rs4932145  | AP3S2     | GI_39725670-S | 15 | 15 | 88177463 | 578    | 7.401   | 6.06195 | CHB |
| rs16943647 | AP3S2     | GI_39725670-S | 15 | 15 | 88186315 | 8274   | 6.0881  | 6.06195 | CHB |
| rs16943651 | AP3S2     | GI_39725670-S | 15 | 15 | 88190467 | 12426  | 6.0881  | 6.06195 | CHB |
| rs10852122 | AP3S2     | GI_39725670-S | 15 | 15 | 88192925 | 14884  | 6.0881  | 6.06195 | CHB |
| rs12903394 | PACE4     | GI_27894284-I | 15 | 15 | 99750601 | 27907  | 6.3645  | 5.96259 | CHB |

|            |           |               |    |    |          |        |         |         |     |
|------------|-----------|---------------|----|----|----------|--------|---------|---------|-----|
| rs224185   | ZNF213    | GI_32698677-S | 16 | 16 | 3143036  | 10533  | 5.8512  | 5.67027 | CHB |
| rs170381   | ZNF213    | GI_32698677-S | 16 | 16 | 3144728  | 12225  | 6.4154  | 5.67027 | CHB |
| rs2075637  | LOC342346 | GI_37541802-S | 16 | 16 | 4878281  | 288014 | 6.1384  | 6.01746 | CHB |
| rs2253910  | FLJ32871  | GI_21389568-S | 16 | 16 | 10663548 | 34532  | 6.6241  | 6.15301 | CHB |
| rs2253913  | FLJ32871  | GI_21389568-S | 16 | 16 | 10663583 | 34567  | 6.635   | 6.15301 | CHB |
| rs2541517  | FLJ32871  | GI_21389568-S | 16 | 16 | 10664294 | 35278  | 8.9231  | 6.15301 | CHB |
| rs2430635  | FLJ32871  | GI_21389568-S | 16 | 16 | 10664445 | 35429  | 6.635   | 6.15301 | CHB |
| rs2466120  | FLJ32871  | GI_21389568-S | 16 | 16 | 10664470 | 35454  | 6.635   | 6.15301 | CHB |
| rs12931841 | FLJ32871  | GI_21389568-S | 16 | 16 | 10664511 | 35495  | 6.344   | 6.15301 | CHB |
| rs1548956  | FLJ32871  | GI_21389568-S | 16 | 16 | 10664693 | 35677  | 6.635   | 6.15301 | CHB |
| rs1548955  | FLJ32871  | GI_21389568-S | 16 | 16 | 10664795 | 35779  | 6.9315  | 6.15301 | CHB |
| rs4780972  | FLJ32871  | GI_21389568-S | 16 | 16 | 10665383 | 36367  | 6.635   | 6.15301 | CHB |
| rs7194053  | FLJ32871  | GI_21389568-S | 16 | 16 | 10665699 | 36683  | 6.635   | 6.15301 | CHB |
| rs2541516  | FLJ32871  | GI_21389568-S | 16 | 16 | 10665718 | 36702  | 6.635   | 6.15301 | CHB |
| rs2719680  | FLJ32871  | GI_21389568-S | 16 | 16 | 10667209 | 38193  | 6.9831  | 6.15301 | CHB |
| rs2719681  | FLJ32871  | GI_21389568-S | 16 | 16 | 10667885 | 38869  | 7.7191  | 6.15301 | CHB |
| rs2541513  | FLJ32871  | GI_21389568-S | 16 | 16 | 10668135 | 39119  | 9.1356  | 6.15301 | CHB |
| rs9935466  | FLJ32871  | GI_21389568-S | 16 | 16 | 10668664 | 39648  | 7.7191  | 6.15301 | CHB |
| rs2541508  | FLJ32871  | GI_21389568-S | 16 | 16 | 10669832 | 40816  | 9.1356  | 6.15301 | CHB |
| rs2719691  | FLJ32871  | GI_21389568-S | 16 | 16 | 10670082 | 41066  | 6.3787  | 6.15301 | CHB |
| rs4780974  | FLJ32871  | GI_21389568-S | 16 | 16 | 10670239 | 41223  | 7.9743  | 6.15301 | CHB |
| rs2719695  | FLJ32871  | GI_21389568-S | 16 | 16 | 10671946 | 42930  | 9.1356  | 6.15301 | CHB |
| rs2719701  | FLJ32871  | GI_21389568-S | 16 | 16 | 10674017 | 45001  | 6.635   | 6.15301 | CHB |
| rs2719706  | FLJ32871  | GI_21389568-S | 16 | 16 | 10674800 | 45784  | 7.5806  | 6.15301 | CHB |
| rs7202417  | FLJ32871  | GI_21389568-S | 16 | 16 | 10676141 | 47125  | 6.8889  | 6.15301 | CHB |
| rs9939594  | FLJ32871  | GI_21389568-S | 16 | 16 | 10681786 | 52770  | 8.9231  | 6.15301 | CHB |
| rs12446112 | FLJ32871  | GI_21389568-S | 16 | 16 | 10683162 | 54146  | 8.1787  | 6.15301 | CHB |
| rs12918646 | FLJ32871  | GI_21389568-S | 16 | 16 | 10683356 | 54340  | 7.1523  | 6.15301 | CHB |
| rs9932893  | FLJ32871  | GI_21389568-S | 16 | 16 | 10684024 | 55008  | 7.1523  | 6.15301 | CHB |
| rs7187976  | LOC339053 | GI_29746836-S | 16 | 16 | 19615697 | 9726   | 6.47    | 5.66849 | CHB |
| rs9935063  | LOC339053 | GI_29746836-S | 16 | 16 | 19618203 | 7220   | 6.47    | 5.66849 | CHB |
| rs1544352  | LOC339053 | GI_29746836-S | 16 | 16 | 19621383 | 4040   | 6.47    | 5.66849 | CHB |
| rs720176   | LOC339053 | GI_29746836-S | 16 | 16 | 19629016 | 3593   | 6.47    | 5.66849 | CHB |
| rs11644834 | LOC339053 | GI_29746836-S | 16 | 16 | 19629810 | 4387   | 6.47    | 5.66849 | CHB |
| rs3829539  | LOC339053 | GI_29746836-S | 16 | 16 | 19629867 | 4444   | 6.47    | 5.66849 | CHB |
| rs2074037  | LOC339053 | GI_29746836-S | 16 | 16 | 19632631 | 7208   | 6.47    | 5.66849 | CHB |
| rs4780822  | LOC339053 | GI_29746836-S | 16 | 16 | 19635499 | 10076  | 6.47    | 5.66849 | CHB |
| rs11645910 | LOC339053 | GI_29746836-S | 16 | 16 | 19635956 | 10533  | 6.47    | 5.66849 | CHB |
| rs4782272  | LOC339053 | GI_29746836-S | 16 | 16 | 19636517 | 11094  | 5.8325  | 5.66849 | CHB |
| rs6497396  | LOC339053 | GI_29746836-S | 16 | 16 | 19643198 | 17775  | 6.47    | 5.66849 | CHB |
| rs7206184  | LOC339053 | GI_29746836-S | 16 | 16 | 19646503 | 21080  | 6.47    | 5.66849 | CHB |
| rs739564   | LOC339053 | GI_29746836-S | 16 | 16 | 19647738 | 22315  | 6.47    | 5.66849 | CHB |
| rs1858973  | LOC339053 | GI_29746836-S | 16 | 16 | 19651150 | 25727  | 6.3811  | 5.66849 | CHB |
| rs8055485  | LOC339053 | GI_29746836-S | 16 | 16 | 19657552 | 32129  | 6.47    | 5.66849 | CHB |
| rs8056301  | LOC339053 | GI_29746836-S | 16 | 16 | 19657776 | 32353  | 6.47    | 5.66849 | CHB |
| rs1858975  | LOC339053 | GI_29746836-S | 16 | 16 | 19660835 | 35412  | 6.47    | 5.66849 | CHB |
| rs1858974  | LOC339053 | GI_29746836-S | 16 | 16 | 19660957 | 35534  | 6.47    | 5.66849 | CHB |
| rs4782277  | LOC339053 | GI_29746836-S | 16 | 16 | 19666386 | 40963  | 6.47    | 5.66849 | CHB |
| rs4782279  | LOC339053 | GI_29746836-S | 16 | 16 | 19666508 | 41085  | 6.47    | 5.66849 | CHB |
| rs4780826  | LOC339053 | GI_29746836-S | 16 | 16 | 19667076 | 41653  | 6.47    | 5.66849 | CHB |
| rs16951276 | LOC339053 | GI_29746836-S | 16 | 16 | 19670436 | 45013  | 6.6636  | 5.66849 | CHB |
| rs6497401  | LOC339053 | GI_29746836-S | 16 | 16 | 19673535 | 48112  | 6.47    | 5.66849 | CHB |
| rs6497402  | LOC339053 | GI_29746836-S | 16 | 16 | 19676895 | 51472  | 6.47    | 5.66849 | CHB |
| rs4782281  | LOC339053 | GI_29746836-S | 16 | 16 | 19677324 | 51901  | 6.47    | 5.66849 | CHB |
| rs8052404  | LOC339053 | GI_29746836-S | 16 | 16 | 19682214 | 56791  | 6.47    | 5.66849 | CHB |
| rs7188975  | LCMT1     | GI_15082255-I | 16 | 16 | 25044950 | 71178  | 14.1869 | 6.20734 | CHB |

|            |         |               |    |    |          |        |         |         |     |
|------------|---------|---------------|----|----|----------|--------|---------|---------|-----|
| rs11074678 | LCMT1   | GI_15082255-I | 16 | 16 | 25057227 | 83455  | 14.1869 | 6.20734 | CHB |
| rs277908   | LCMT1   | GI_15082255-I | 16 | 16 | 25062635 | 88863  | 14.1869 | 6.20734 | CHB |
| rs277913   | LCMT1   | GI_15082255-I | 16 | 16 | 25066244 | 92472  | 9.8128  | 6.20734 | CHB |
| rs277917   | LCMT1   | GI_15082255-I | 16 | 16 | 25066646 | 92874  | 14.1869 | 6.20734 | CHB |
| rs277886   | LCMT1   | GI_15082255-I | 16 | 16 | 25070005 | 96233  | 14.1869 | 6.20734 | CHB |
| rs277898   | LCMT1   | GI_15082255-I | 16 | 16 | 25079311 | 105539 | 13.0453 | 6.20734 | CHB |
| rs277900   | LCMT1   | GI_15082255-I | 16 | 16 | 25081500 | 107728 | 9.5672  | 6.20734 | CHB |
| rs277903   | LCMT1   | GI_15082255-I | 16 | 16 | 25082623 | 108851 | 11.8278 | 6.20734 | CHB |
| rs277891   | LCMT1   | GI_15082255-I | 16 | 16 | 25088257 | 114485 | 11.1468 | 6.20734 | CHB |
| rs277893   | LCMT1   | GI_15082255-I | 16 | 16 | 25089212 | 115440 | 13.0453 | 6.20734 | CHB |
| rs4787697  | LCMT1   | GI_15082255-I | 16 | 16 | 25111249 | 137477 | 9.3741  | 6.20734 | CHB |
| rs8056099  | TK2     | GI_33636700-S | 16 | 16 | 65067654 | 34593  | 6.5268  | 5.94247 | CHB |
| rs37166    | TK2     | GI_33636700-S | 16 | 16 | 65072621 | 29626  | 6.4617  | 5.94247 | CHB |
| rs16956575 | CKLFSF3 | GI_32130529-A | 16 | 16 | 65079376 | 125531 | 6.3523  | 5.96818 | CHB |
| rs16956575 | TK2     | GI_33636700-S | 16 | 16 | 65079376 | 22871  | 6.3669  | 5.94247 | CHB |
| rs8049640  | TK2     | GI_33636700-S | 16 | 16 | 65082075 | 20172  | 6.2145  | 5.94247 | CHB |
| rs16956585 | CKLF    | GI_10092611-A | 16 | 16 | 65085360 | 58696  | 6.0696  | 5.61541 | CHB |
| rs16956585 | CKLFSF3 | GI_32130529-A | 16 | 16 | 65085360 | 119547 | 7.2493  | 5.96818 | CHB |
| rs16956585 | TK2     | GI_33636700-S | 16 | 16 | 65085360 | 16887  | 7.3472  | 5.94247 | CHB |
| rs1428106  | TK2     | GI_33636700-S | 16 | 16 | 65093758 | 8489   | 6.3125  | 5.94247 | CHB |
| rs3743711  | TK2     | GI_33636700-S | 16 | 16 | 65100458 | 1789   | 6.1489  | 5.94247 | CHB |
| rs3743712  | TK2     | GI_33636700-S | 16 | 16 | 65101151 | 1096   | 6.1489  | 5.94247 | CHB |
| rs880530   | TK2     | GI_33636700-S | 16 | 16 | 65102607 | 360    | 6.0723  | 5.94247 | CHB |
| rs2241618  | TK2     | GI_33636700-S | 16 | 16 | 65104772 | 2525   | 6.1489  | 5.94247 | CHB |
| rs16956609 | CKLFSF3 | GI_32130529-A | 16 | 16 | 65106781 | 98126  | 6.2589  | 5.96818 | CHB |
| rs16956609 | TK2     | GI_33636700-S | 16 | 16 | 65106781 | 4534   | 6.9794  | 5.94247 | CHB |
| rs3826160  | CKLF    | GI_10092611-A | 16 | 16 | 65113246 | 30810  | 5.8911  | 5.61541 | CHB |
| rs3826160  | CKLFSF3 | GI_32130529-A | 16 | 16 | 65113246 | 91661  | 7.0722  | 5.96818 | CHB |
| rs3826160  | TK2     | GI_33636700-S | 16 | 16 | 65113246 | 10999  | 7.056   | 5.94247 | CHB |
| rs13334391 | TK2     | GI_33636700-S | 16 | 16 | 65114919 | 12672  | 6.1489  | 5.94247 | CHB |
| rs755716   | CKLF    | GI_10092611-A | 16 | 16 | 65119772 | 24284  | 6.8211  | 5.61541 | CHB |
| rs755716   | CKLFSF3 | GI_32130529-A | 16 | 16 | 65119772 | 85135  | 7.198   | 5.96818 | CHB |
| rs755716   | TK2     | GI_33636700-S | 16 | 16 | 65119772 | 17525  | 6.7576  | 5.94247 | CHB |
| rs755717   | CKLF    | GI_10092611-A | 16 | 16 | 65119801 | 24255  | 6.0696  | 5.61541 | CHB |
| rs755717   | CKLFSF3 | GI_32130529-A | 16 | 16 | 65119801 | 85106  | 7.2493  | 5.96818 | CHB |
| rs755717   | TK2     | GI_33636700-S | 16 | 16 | 65119801 | 17554  | 7.3472  | 5.94247 | CHB |
| rs1366213  | CKLFSF3 | GI_32130529-A | 16 | 16 | 65132315 | 72592  | 6.0439  | 5.96818 | CHB |
| rs4783639  | CKLFSF3 | GI_32130529-A | 16 | 16 | 65134031 | 70876  | 6.4775  | 5.96818 | CHB |
| rs4783639  | TK2     | GI_33636700-S | 16 | 16 | 65134031 | 31784  | 6.3031  | 5.94247 | CHB |
| rs3743713  | CKLF    | GI_10092611-A | 16 | 16 | 65140529 | 3527   | 6.0326  | 5.61541 | CHB |
| rs3743713  | CKLFSF3 | GI_32130529-A | 16 | 16 | 65140529 | 64378  | 7.2809  | 5.96818 | CHB |
| rs3743713  | TK2     | GI_33636700-S | 16 | 16 | 65140529 | 38282  | 8.3767  | 5.94247 | CHB |
| rs725131   | TK2     | GI_33636700-S | 16 | 16 | 65143211 | 40964  | 7.1768  | 5.94247 | CHB |
| rs12449200 | TK2     | GI_33636700-S | 16 | 16 | 65148073 | 45826  | 6.6893  | 5.94247 | CHB |
| rs8058090  | TK2     | GI_33636700-S | 16 | 16 | 65150568 | 48321  | 6.6893  | 5.94247 | CHB |
| rs16956693 | TK2     | GI_33636700-S | 16 | 16 | 65151495 | 49248  | 6.7011  | 5.94247 | CHB |
| rs13332711 | TK2     | GI_33636700-S | 16 | 16 | 65154144 | 51897  | 6.7011  | 5.94247 | CHB |
| rs2232728  | TK2     | GI_33636700-S | 16 | 16 | 65157274 | 55027  | 6.6893  | 5.94247 | CHB |
| rs7193473  | TK2     | GI_33636700-S | 16 | 16 | 65157980 | 55733  | 7.1768  | 5.94247 | CHB |
| rs4783568  | TK2     | GI_33636700-S | 16 | 16 | 65159533 | 57286  | 6.6893  | 5.94247 | CHB |
| rs10500537 | TK2     | GI_33636700-S | 16 | 16 | 65160772 | 58525  | 6.6893  | 5.94247 | CHB |
| rs4783569  | TK2     | GI_33636700-S | 16 | 16 | 65162105 | 59858  | 6.6893  | 5.94247 | CHB |
| rs4783678  | TK2     | GI_33636700-S | 16 | 16 | 65163456 | 61209  | 6.531   | 5.94247 | CHB |
| rs4783679  | TK2     | GI_33636700-S | 16 | 16 | 65163498 | 61251  | 6.6893  | 5.94247 | CHB |
| rs4783680  | TK2     | GI_33636700-S | 16 | 16 | 65163517 | 61270  | 6.2185  | 5.94247 | CHB |
| rs10500538 | TK2     | GI_33636700-S | 16 | 16 | 65165690 | 63443  | 6.1524  | 5.94247 | CHB |

|            |           |               |    |    |          |        |        |         |     |
|------------|-----------|---------------|----|----|----------|--------|--------|---------|-----|
| rs7187854  | TK2       | GI_33636700-S | 16 | 16 | 65165991 | 63744  | 6.6893 | 5.94247 | CHB |
| rs8054708  | TK2       | GI_33636700-S | 16 | 16 | 65167378 | 65131  | 6.6893 | 5.94247 | CHB |
| rs2290182  | TK2       | GI_33636700-S | 16 | 16 | 65171509 | 69262  | 6.3204 | 5.94247 | CHB |
| rs16956795 | TK2       | GI_33636700-S | 16 | 16 | 65172546 | 70299  | 6.1611 | 5.94247 | CHB |
| rs12446364 | TK2       | GI_33636700-S | 16 | 16 | 65173037 | 70790  | 6.6893 | 5.94247 | CHB |
| rs12447963 | TK2       | GI_33636700-S | 16 | 16 | 65174980 | 72733  | 6.531  | 5.94247 | CHB |
| rs2305312  | TK2       | GI_33636700-S | 16 | 16 | 65179712 | 77465  | 6.6893 | 5.94247 | CHB |
| rs3816410  | TK2       | GI_33636700-S | 16 | 16 | 65179742 | 77495  | 6.6893 | 5.94247 | CHB |
| rs12448207 | TK2       | GI_33636700-S | 16 | 16 | 65189886 | 87639  | 6.5988 | 5.94247 | CHB |
| rs355936   | TK2       | GI_33636700-S | 16 | 16 | 65198619 | 96372  | 6.5988 | 5.94247 | CHB |
| rs355938   | CKLFSF3   | GI_32130529-A | 16 | 16 | 65200677 | 4230   | 5.9742 | 5.96818 | CHB |
| rs355938   | TK2       | GI_33636700-S | 16 | 16 | 65200677 | 98430  | 7.0485 | 5.94247 | CHB |
| rs355944   | TK2       | GI_33636700-S | 16 | 16 | 65209746 | 107499 | 6.5988 | 5.94247 | CHB |
| rs355947   | CKLFSF3   | GI_32130529-A | 16 | 16 | 65213648 | 8741   | 5.9742 | 5.96818 | CHB |
| rs355947   | TK2       | GI_33636700-S | 16 | 16 | 65213648 | 111401 | 7.0485 | 5.94247 | CHB |
| rs355949   | TK2       | GI_33636700-S | 16 | 16 | 65214972 | 112725 | 6.5988 | 5.94247 | CHB |
| rs355950   | TK2       | GI_33636700-S | 16 | 16 | 65216525 | 114278 | 6.5988 | 5.94247 | CHB |
| rs165207   | TK2       | GI_33636700-S | 16 | 16 | 65217319 | 115072 | 6.5988 | 5.94247 | CHB |
| rs355974   | CKLFSF3   | GI_32130529-A | 16 | 16 | 65224138 | 19231  | 5.9742 | 5.96818 | CHB |
| rs355974   | TK2       | GI_33636700-S | 16 | 16 | 65224138 | 121891 | 7.0485 | 5.94247 | CHB |
| rs355971   | TK2       | GI_33636700-S | 16 | 16 | 65228152 | 125905 | 6.5988 | 5.94247 | CHB |
| rs48573    | TK2       | GI_33636700-S | 16 | 16 | 65229558 | 127311 | 6.6767 | 5.94247 | CHB |
| rs165204   | CKLFSF3   | GI_32130529-A | 16 | 16 | 65234962 | 30055  | 5.9742 | 5.96818 | CHB |
| rs165204   | TK2       | GI_33636700-S | 16 | 16 | 65234962 | 132715 | 7.0485 | 5.94247 | CHB |
| rs165205   | CKLFSF3   | GI_32130529-A | 16 | 16 | 65235723 | 30816  | 5.9742 | 5.96818 | CHB |
| rs165205   | TK2       | GI_33636700-S | 16 | 16 | 65235723 | 133476 | 7.0485 | 5.94247 | CHB |
| rs355975   | TK2       | GI_33636700-S | 16 | 16 | 65237544 | 135297 | 6.5988 | 5.94247 | CHB |
| rs355965   | TK2       | GI_33636700-S | 16 | 16 | 65241531 | 139284 | 6.5988 | 5.94247 | CHB |
| rs355964   | TK2       | GI_33636700-S | 16 | 16 | 65241725 | 139478 | 6.5988 | 5.94247 | CHB |
| rs355963   | CKLFSF3   | GI_32130529-A | 16 | 16 | 65242380 | 37473  | 5.9742 | 5.96818 | CHB |
| rs355963   | TK2       | GI_33636700-S | 16 | 16 | 65242380 | 140133 | 7.0485 | 5.94247 | CHB |
| rs355960   | TK2       | GI_33636700-S | 16 | 16 | 65244211 | 141964 | 6.0513 | 5.94247 | CHB |
| rs355959   | TK2       | GI_33636700-S | 16 | 16 | 65245604 | 143357 | 6.5988 | 5.94247 | CHB |
| rs355958   | TK2       | GI_33636700-S | 16 | 16 | 65246064 | 143817 | 6.3262 | 5.94247 | CHB |
| rs355956   | CKLFSF3   | GI_32130529-A | 16 | 16 | 65250873 | 45966  | 5.9742 | 5.96818 | CHB |
| rs355956   | TK2       | GI_33636700-S | 16 | 16 | 65250873 | 148626 | 7.0485 | 5.94247 | CHB |
| rs2917666  | LOC283970 | GI_40217627-S | 16 | 16 | 68321461 | 246389 | 5.6141 | 5.53826 | CHB |
| rs1469908  | LOC283970 | GI_40217627-S | 16 | 16 | 68321913 | 245937 | 6.2115 | 5.53826 | CHB |
| rs7186296  | LOC283970 | GI_40217627-S | 16 | 16 | 68366499 | 201351 | 5.9345 | 5.53826 | CHB |
| rs3748386  | LOC283970 | GI_40217627-S | 16 | 16 | 68532160 | 35690  | 6.8077 | 5.53826 | CHB |
| rs9939092  | LOC283970 | GI_40217627-S | 16 | 16 | 68596778 | 28928  | 6.8028 | 5.53826 | CHB |
| rs12930433 | LOC283970 | GI_40217627-S | 16 | 16 | 68608544 | 40694  | 6.0868 | 5.53826 | CHB |
| rs8058597  | LOC283970 | GI_40217627-S | 16 | 16 | 68639715 | 71865  | 6.0868 | 5.53826 | CHB |
| rs6499292  | LOC283970 | GI_40217627-S | 16 | 16 | 68661559 | 93709  | 6.8028 | 5.53826 | CHB |
| rs7197453  | DHX38     | GI_41406095-S | 16 | 16 | 70636628 | 67375  | 7.4226 | 5.63486 | CHB |
| rs7197869  | DHX38     | GI_41406095-S | 16 | 16 | 70636853 | 67150  | 6.4832 | 5.63486 | CHB |
| rs2000999  | DHX38     | GI_41406095-S | 16 | 16 | 70665594 | 38409  | 6.6333 | 5.63486 | CHB |
| rs2550038  | DHX38     | GI_41406095-S | 16 | 16 | 70669514 | 34489  | 6.6318 | 5.63486 | CHB |
| rs2550035  | DHX38     | GI_41406095-S | 16 | 16 | 70670917 | 33086  | 6.3139 | 5.63486 | CHB |
| rs11075920 | DHX38     | GI_41406095-S | 16 | 16 | 70672739 | 31264  | 8.0436 | 5.63486 | CHB |
| rs10492813 | DHX38     | GI_41406095-S | 16 | 16 | 70679964 | 24039  | 6.6318 | 5.63486 | CHB |
| rs3852781  | DHX38     | GI_41406095-S | 16 | 16 | 70681057 | 22946  | 6.6318 | 5.63486 | CHB |
| rs7191127  | DHX38     | GI_41406095-S | 16 | 16 | 70681493 | 22510  | 8.0436 | 5.63486 | CHB |
| rs7190995  | DHX38     | GI_41406095-S | 16 | 16 | 70681658 | 22345  | 8.0436 | 5.63486 | CHB |
| rs2303285  | DHX38     | GI_41406095-S | 16 | 16 | 70681996 | 22007  | 6.6318 | 5.63486 | CHB |
| rs3764311  | DHX38     | GI_41406095-S | 16 | 16 | 70683118 | 20885  | 6.4131 | 5.63486 | CHB |

|            |              |               |    |    |          |       |         |         |     |
|------------|--------------|---------------|----|----|----------|-------|---------|---------|-----|
| rs3764312  | DHX38        | GI_41406095-S | 16 | 16 | 70683234 | 20769 | 8.0436  | 5.63486 | CHB |
| rs10492814 | DHX38        | GI_41406095-S | 16 | 16 | 70684015 | 19988 | 6.6318  | 5.63486 | CHB |
| rs12924413 | DHX38        | GI_41406095-S | 16 | 16 | 70687246 | 16757 | 6.8306  | 5.63486 | CHB |
| rs1050361  | DHX38        | GI_41406095-S | 16 | 16 | 70687704 | 16299 | 6.6318  | 5.63486 | CHB |
| rs1050362  | DHX38        | GI_41406095-S | 16 | 16 | 70688316 | 15687 | 8.0436  | 5.63486 | CHB |
| rs12708928 | DHX38        | GI_41406095-S | 16 | 16 | 70694728 | 9275  | 7.4589  | 5.63486 | CHB |
| rs2240243  | DHX38        | GI_41406095-S | 16 | 16 | 70695062 | 8941  | 7.1296  | 5.63486 | CHB |
| rs12325142 | DHX38        | GI_41406095-S | 16 | 16 | 70695613 | 8390  | 7.2218  | 5.63486 | CHB |
| rs2074626  | DHX38        | GI_41406095-S | 16 | 16 | 70696685 | 7318  | 7.9611  | 5.63486 | CHB |
| rs8051882  | DHX38        | GI_41406095-S | 16 | 16 | 70699573 | 4430  | 8.0436  | 5.63486 | CHB |
| rs9926156  | DHX38        | GI_41406095-S | 16 | 16 | 70700396 | 3607  | 7.7502  | 5.63486 | CHB |
| rs2241412  | DHX38        | GI_41406095-S | 16 | 16 | 70701785 | 2218  | 7.8102  | 5.63486 | CHB |
| rs6499560  | DHX38        | GI_41406095-S | 16 | 16 | 70705167 | 1164  | 8.0436  | 5.63486 | CHB |
| rs8047377  | DHX38        | GI_41406095-S | 16 | 16 | 70705840 | 1837  | 7.4244  | 5.63486 | CHB |
| rs6499561  | DHX38        | GI_41406095-S | 16 | 16 | 70705905 | 1902  | 6.6428  | 5.63486 | CHB |
| rs6416742  | DHX38        | GI_41406095-S | 16 | 16 | 70706562 | 2559  | 7.4244  | 5.63486 | CHB |
| rs8044555  | DHX38        | GI_41406095-S | 16 | 16 | 70710256 | 6253  | 7.6739  | 5.63486 | CHB |
| rs7184169  | DHX38        | GI_41406095-S | 16 | 16 | 70710434 | 6431  | 7.9997  | 5.63486 | CHB |
| rs8050238  | DHX38        | GI_41406095-S | 16 | 16 | 70711688 | 7685  | 7.9611  | 5.63486 | CHB |
| rs3812987  | DHX38        | GI_41406095-S | 16 | 16 | 70716421 | 12418 | 6.9092  | 5.63486 | CHB |
| rs7188058  | DHX38        | GI_41406095-S | 16 | 16 | 70723357 | 19354 | 8.4068  | 5.63486 | CHB |
| rs3902135  | DHX38        | GI_41406095-S | 16 | 16 | 70733321 | 29318 | 8.4068  | 5.63486 | CHB |
| rs7198572  | DHX38        | GI_41406095-S | 16 | 16 | 70740721 | 36718 | 9.1221  | 5.63486 | CHB |
| rs12928732 | DHX38        | GI_41406095-S | 16 | 16 | 70746184 | 42181 | 7.9595  | 5.63486 | CHB |
| rs13334151 | DHX38        | GI_41406095-S | 16 | 16 | 70747228 | 43225 | 8.4068  | 5.63486 | CHB |
| rs4782328  | LOC197322    | GI_28372536-S | 16 | 16 | 87709719 | 39854 | 6.2074  | 6.0408  | CHB |
| rs8052780  | LOC197322    | GI_28372536-S | 16 | 16 | 87710427 | 39146 | 6.3457  | 6.0408  | CHB |
| rs3809641  | SPG7         | GI_40806172-I | 16 | 16 | 88101667 | 29702 | 6.3053  | 5.54329 | CHB |
| rs3922634  | SPG7         | GI_40806172-I | 16 | 16 | 88104267 | 27102 | 5.8685  | 5.54329 | CHB |
| rs8052076  | SPG7         | GI_40806172-I | 16 | 16 | 88111310 | 20059 | 5.8685  | 5.54329 | CHB |
| rs11862081 | SPG7         | GI_40806172-I | 16 | 16 | 88115989 | 15380 | 5.8685  | 5.54329 | CHB |
| rs3803680  | SPG7         | GI_40806172-I | 16 | 16 | 88117744 | 13625 | 5.8685  | 5.54329 | CHB |
| rs3803679  | SPG7         | GI_40806172-I | 16 | 16 | 88118168 | 13201 | 5.8685  | 5.54329 | CHB |
| rs3803677  | SPG7         | GI_40806172-I | 16 | 16 | 88123224 | 8145  | 5.8685  | 5.54329 | CHB |
| rs3803676  | SPG7         | GI_40806172-I | 16 | 16 | 88123607 | 7762  | 5.8685  | 5.54329 | CHB |
| rs463701   | SPG7         | GI_40806172-I | 16 | 16 | 88126261 | 5108  | 5.813   | 5.54329 | CHB |
| rs11640186 | SPG7         | GI_40806172-I | 16 | 16 | 88129507 | 1862  | 5.813   | 5.54329 | CHB |
| rs382745   | SPG7         | GI_40806172-I | 16 | 16 | 88131087 | 282   | 5.813   | 5.54329 | CHB |
| rs8064453  | LOC374758    | GI_37544593-S | 17 | 17 | 265835   | 1665  | 10.4463 | 5.72599 | CHB |
| rs8064453  | LOC400566    | GI_42661283-S | 17 | 17 | 265835   | 1193  | 8.6858  | 5.86938 | CHB |
| rs6565726  | LOC374758    | GI_37544593-S | 17 | 17 | 272556   | 8386  | 9.2117  | 5.72599 | CHB |
| rs6565726  | LOC400566    | GI_42661283-S | 17 | 17 | 272556   | 7914  | 6.7426  | 5.86938 | CHB |
| rs17224526 | DKFZP566H073 | GI_14149701-S | 17 | 17 | 4758349  | 30828 | 6.1688  | 6.06628 | CHB |
| rs4796576  | SLC16A11     | GI_23503292-S | 17 | 17 | 6883990  | 1944  | 6.1916  | 6.07354 | CHB |
| rs1662680  | SLC16A11     | GI_23503292-S | 17 | 17 | 6893488  | 7554  | 7.3291  | 6.07354 | CHB |
| rs1875673  | DERP6        | GI_44662825-I | 17 | 17 | 7049230  | 47211 | 6.3784  | 6.16968 | CHB |
| rs222835   | DERP6        | GI_44662825-I | 17 | 17 | 7074853  | 21588 | 7.341   | 6.16968 | CHB |
| rs222835   | DERP6        | GI_44662829-A | 17 | 17 | 7074853  | 28072 | 6.3925  | 6.16968 | CHB |
| rs222843   | DERP6        | GI_44662825-I | 17 | 17 | 7086705  | 9736  | 6.7788  | 6.16968 | CHB |
| rs222843   | DERP6        | GI_44662829-A | 17 | 17 | 7086705  | 16220 | 6.868   | 6.16968 | CHB |
| rs402514   | DERP6        | GI_44662825-I | 17 | 17 | 7098927  | 2486  | 6.6274  | 6.16968 | CHB |
| rs402514   | DERP6        | GI_44662829-A | 17 | 17 | 7098927  | 3998  | 6.8817  | 6.16968 | CHB |
| rs8067500  | DERP6        | GI_44662825-I | 17 | 17 | 7113355  | 16914 | 6.4306  | 6.16968 | CHB |
| rs8067500  | DERP6        | GI_44662829-A | 17 | 17 | 7113355  | 10430 | 6.3423  | 6.16968 | CHB |
| rs3803796  | LOC400571    | GI_42661084-S | 17 | 17 | 7395252  | 31126 | 6.6929  | 5.92593 | CHB |
| rs10438740 | LOC400571    | GI_42661084-S | 17 | 17 | 7413608  | 12770 | 6.5636  | 5.92593 | CHB |

|            |           |               |    |    |          |        |        |         |     |
|------------|-----------|---------------|----|----|----------|--------|--------|---------|-----|
| rs2270341  | LOC400571 | GI_42661084-S | 17 | 17 | 7421271  | 5107   | 8.5731 | 5.92593 | CHB |
| rs9901673  | LOC400571 | GI_42661084-S | 17 | 17 | 7424825  | 1553   | 8.3725 | 5.92593 | CHB |
| rs8066665  | LOC400571 | GI_42661084-S | 17 | 17 | 7426576  | 198    | 8.6219 | 5.92593 | CHB |
| rs10852891 | LOC400571 | GI_42661084-S | 17 | 17 | 7431534  | 5156   | 7.8969 | 5.92593 | CHB |
| rs858526   | LOC400571 | GI_42661084-S | 17 | 17 | 7440107  | 13729  | 8.5731 | 5.92593 | CHB |
| rs12936934 | LOC400571 | GI_42661084-S | 17 | 17 | 7441490  | 15112  | 8.6419 | 5.92593 | CHB |
| rs17643401 | LOC400571 | GI_42661084-S | 17 | 17 | 7445583  | 19205  | 7.7015 | 5.92593 | CHB |
| rs858524   | LOC400571 | GI_42661084-S | 17 | 17 | 7452012  | 25634  | 8.7383 | 5.92593 | CHB |
| rs2908809  | LOC400571 | GI_42661084-S | 17 | 17 | 7462425  | 36047  | 8.0141 | 5.92593 | CHB |
| rs9898876  | LOC400571 | GI_42661084-S | 17 | 17 | 7467687  | 41309  | 8.3725 | 5.92593 | CHB |
| rs2518023  | MGC10744  | GI_34101277-A | 17 | 17 | 7997331  | 20306  | 9.5983 | 6.2005  | CHB |
| rs2278637  | MGC10744  | GI_34101277-A | 17 | 17 | 8002827  | 14810  | 8.2093 | 6.2005  | CHB |
| rs8067606  | MGC10744  | GI_34101277-A | 17 | 17 | 8007508  | 10129  | 8.3495 | 6.2005  | CHB |
| rs9899533  | MGC10744  | GI_34101277-A | 17 | 17 | 8008770  | 8867   | 8.3495 | 6.2005  | CHB |
| rs8069739  | MGC10744  | GI_34101277-A | 17 | 17 | 8019490  | 1853   | 8.0837 | 6.2005  | CHB |
| rs8064449  | MGC10744  | GI_34101277-A | 17 | 17 | 8019754  | 2117   | 7.9521 | 6.2005  | CHB |
| rs3027268  | MGC10744  | GI_34101277-A | 17 | 17 | 8031764  | 14127  | 8.5669 | 6.2005  | CHB |
| rs1476162  | MGC10744  | GI_34101277-A | 17 | 17 | 8031808  | 14171  | 9.6104 | 6.2005  | CHB |
| rs9891949  | MGC10744  | GI_34101277-A | 17 | 17 | 8039908  | 22271  | 8.4237 | 6.2005  | CHB |
| rs9900848  | MGC10744  | GI_34101277-A | 17 | 17 | 8040096  | 22459  | 9.6104 | 6.2005  | CHB |
| rs11078734 | MGC10744  | GI_34101277-A | 17 | 17 | 8041949  | 24312  | 9.6104 | 6.2005  | CHB |
| rs1059476  | MGC10744  | GI_34101277-A | 17 | 17 | 8049056  | 31419  | 9.4548 | 6.2005  | CHB |
| rs2779212  | Hs.379903 | Hs.379903-S   | 17 | 17 | 15817380 | 3310   | 9.243  | 6.32707 | CHB |
| rs1045599  | Hs.379903 | Hs.379903-S   | 17 | 17 | 15820635 | 55     | 9.243  | 6.32707 | CHB |
| rs11654    | Hs.379903 | Hs.379903-S   | 17 | 17 | 15821876 | 1186   | 8.5221 | 6.32707 | CHB |
| rs2286795  | Hs.379903 | Hs.379903-S   | 17 | 17 | 15824534 | 3844   | 6.8296 | 6.32707 | CHB |
| rs2286796  | Hs.379903 | Hs.379903-S   | 17 | 17 | 15824952 | 4262   | 6.8296 | 6.32707 | CHB |
| rs8070859  | Hs.379903 | Hs.379903-S   | 17 | 17 | 15828514 | 7824   | 6.8296 | 6.32707 | CHB |
| rs9891938  | Hs.379903 | Hs.379903-S   | 17 | 17 | 15855797 | 35107  | 6.6206 | 6.32707 | CHB |
| rs11869450 | Hs.379903 | Hs.379903-S   | 17 | 17 | 15864434 | 43744  | 6.8296 | 6.32707 | CHB |
| rs6416868  | Hs.379903 | Hs.379903-S   | 17 | 17 | 15865095 | 44405  | 6.8296 | 6.32707 | CHB |
| rs178831   | Hs.379903 | Hs.379903-S   | 17 | 17 | 16021574 | 200884 | 6.5692 | 6.32707 | CHB |
| rs12451886 | BHD       | GI_34335183-A | 17 | 17 | 17140966 | 75345  | 6.0935 | 5.97874 | CHB |
| rs6502578  | BHD       | GI_34335183-A | 17 | 17 | 17154233 | 88612  | 6.2547 | 5.97874 | CHB |
| rs9912109  | BHD       | GI_34335183-A | 17 | 17 | 17156307 | 90686  | 6.2547 | 5.97874 | CHB |
| rs3181215  | ERAL1     | GI_24307898-S | 17 | 17 | 24101458 | 110418 | 6.3789 | 5.46114 | CHB |
| rs12325788 | ERAL1     | GI_24307898-S | 17 | 17 | 24104176 | 107700 | 5.8712 | 5.46114 | CHB |
| rs4794836  | ERAL1     | GI_24307898-S | 17 | 17 | 24106837 | 105039 | 6.2133 | 5.46114 | CHB |
| rs11658900 | ERAL1     | GI_24307898-S | 17 | 17 | 24119611 | 92265  | 5.6959 | 5.46114 | CHB |
| rs9892942  | ERAL1     | GI_24307898-S | 17 | 17 | 24202887 | 8989   | 6.6363 | 5.46114 | CHB |
| rs9895443  | ERAL1     | GI_24307898-S | 17 | 17 | 24207070 | 4806   | 7.8609 | 5.46114 | CHB |
| rs9914988  | ERAL1     | GI_24307898-S | 17 | 17 | 24207230 | 4646   | 7.8609 | 5.46114 | CHB |
| rs2242345  | ERAL1     | GI_24307898-S | 17 | 17 | 24209953 | 1923   | 5.8305 | 5.46114 | CHB |
| rs6803     | ERAL1     | GI_24307898-S | 17 | 17 | 24211915 | 39     | 7.8609 | 5.46114 | CHB |
| rs901975   | ERAL1     | GI_24307898-S | 17 | 17 | 24213900 | 2024   | 7.8609 | 5.46114 | CHB |
| rs968726   | ERAL1     | GI_24307898-S | 17 | 17 | 24218760 | 6884   | 5.8305 | 5.46114 | CHB |
| rs1982706  | MGC19764  | GI_42661257-S | 17 | 17 | 30571980 | 46601  | 6.7369 | 6.15363 | CHB |
| rs4796060  | MGC19764  | GI_42661257-S | 17 | 17 | 30572621 | 45960  | 6.7369 | 6.15363 | CHB |
| rs4795066  | MGC19764  | GI_42661257-S | 17 | 17 | 30573985 | 44596  | 6.5104 | 6.15363 | CHB |
| rs4796062  | MGC19764  | GI_42661257-S | 17 | 17 | 30574117 | 44464  | 6.7369 | 6.15363 | CHB |
| rs8065018  | MGC19764  | GI_42661257-S | 17 | 17 | 30575410 | 43171  | 6.7369 | 6.15363 | CHB |
| rs11080326 | MGC19764  | GI_42661257-S | 17 | 17 | 30588522 | 30059  | 6.4063 | 6.15363 | CHB |
| rs11080326 | hmm5445   | hmm5445-S     | 17 | 17 | 30588522 | 30032  | 6.5844 | 6.07451 | CHB |
| rs1480949  | MGC19764  | GI_42661257-S | 17 | 17 | 30589952 | 28629  | 6.7369 | 6.15363 | CHB |
| rs11867191 | MGC19764  | GI_42661257-S | 17 | 17 | 30593227 | 25354  | 6.8245 | 6.15363 | CHB |
| rs11867191 | hmm5445   | hmm5445-S     | 17 | 17 | 30593227 | 25327  | 7.0135 | 6.07451 | CHB |

|            |           |               |    |    |          |        |        |         |     |
|------------|-----------|---------------|----|----|----------|--------|--------|---------|-----|
| rs883416   | MGC19764  | GI_42661257-S | 17 | 17 | 30594554 | 24027  | 6.8245 | 6.15363 | CHB |
| rs883416   | hmm5445   | hmm5445-S     | 17 | 17 | 30594554 | 24000  | 7.0135 | 6.07451 | CHB |
| rs4795090  | RAD52B    | GI_31563532-S | 17 | 17 | 31147710 | 121566 | 7.0362 | 5.86335 | CHB |
| rs6505496  | RAD52B    | GI_31563532-S | 17 | 17 | 31153180 | 116096 | 7.0362 | 5.86335 | CHB |
| rs4251703  | CCL5      | GI_22538813-S | 17 | 17 | 31159071 | 63620  | 6.5903 | 5.9798  | CHB |
| rs4251703  | RAD52B    | GI_31563532-S | 17 | 17 | 31159071 | 110205 | 8.5298 | 5.86335 | CHB |
| rs11868785 | RAD52B    | GI_31563532-S | 17 | 17 | 31163331 | 105945 | 8.8642 | 5.86335 | CHB |
| rs4251719  | RAD52B    | GI_31563532-S | 17 | 17 | 31166475 | 102801 | 7.24   | 5.86335 | CHB |
| rs4251724  | RAD52B    | GI_31563532-S | 17 | 17 | 31167758 | 101518 | 5.9673 | 5.86335 | CHB |
| rs4251737  | RAD52B    | GI_31563532-S | 17 | 17 | 31170931 | 98345  | 7.24   | 5.86335 | CHB |
| rs4325615  | RAD52B    | GI_31563532-S | 17 | 17 | 31177496 | 91780  | 5.8756 | 5.86335 | CHB |
| rs3760327  | RAD52B    | GI_31563532-S | 17 | 17 | 31187500 | 81776  | 6.2254 | 5.86335 | CHB |
| rs4251769  | RAD52B    | GI_31563532-S | 17 | 17 | 31188640 | 80636  | 7.24   | 5.86335 | CHB |
| rs2306630  | RAD52B    | GI_31563532-S | 17 | 17 | 31206454 | 62822  | 7.24   | 5.86335 | CHB |
| rs9303692  | RAD52B    | GI_31563532-S | 17 | 17 | 31212609 | 56667  | 7.24   | 5.86335 | CHB |
| rs2291299  | RAD52B    | GI_31563532-S | 17 | 17 | 31215519 | 53757  | 6.2254 | 5.86335 | CHB |
| rs3817655  | RAD52B    | GI_31563532-S | 17 | 17 | 31223754 | 45522  | 6.2254 | 5.86335 | CHB |
| rs2280789  | RAD52B    | GI_31563532-S | 17 | 17 | 31231116 | 38160  | 7.0787 | 5.86335 | CHB |
| rs4796123  | RAD52B    | GI_31563532-S | 17 | 17 | 31235573 | 33703  | 7.2628 | 5.86335 | CHB |
| rs4796128  | RAD52B    | GI_31563532-S | 17 | 17 | 31250385 | 18891  | 6.6652 | 5.86335 | CHB |
| rs17474883 | MGC21518  | GI_21687219-S | 17 | 17 | 36254836 | 10051  | 5.5948 | 5.51657 | CHB |
| rs17475389 | MGC21518  | GI_21687219-S | 17 | 17 | 36267394 | 22609  | 5.8317 | 5.51657 | CHB |
| rs3744781  | MGC20781  | GI_34147471-S | 17 | 17 | 37235677 | 526    | 5.7107 | 5.46018 | CHB |
| rs9896766  | MGC20781  | GI_34147471-S | 17 | 17 | 37237170 | 2019   | 5.7495 | 5.46018 | CHB |
| rs1046404  | MGC20781  | GI_34147471-S | 17 | 17 | 37237334 | 2183   | 5.7495 | 5.46018 | CHB |
| rs1046403  | MGC20781  | GI_34147471-S | 17 | 17 | 37237346 | 2195   | 5.7495 | 5.46018 | CHB |
| rs4796713  | MGC20781  | GI_34147471-S | 17 | 17 | 37240887 | 5736   | 5.7495 | 5.46018 | CHB |
| rs4796715  | MGC20781  | GI_34147471-S | 17 | 17 | 37247297 | 12146  | 5.7495 | 5.46018 | CHB |
| rs2306002  | FLJ21347  | GI_31542722-S | 17 | 17 | 45972828 | 15339  | 6.0471 | 5.93923 | CHB |
| rs1122634  | FLJ21347  | GI_31542722-S | 17 | 17 | 45976364 | 11803  | 9.1646 | 5.93923 | CHB |
| rs8076632  | FLJ21347  | GI_31542722-S | 17 | 17 | 45980927 | 7240   | 9.1646 | 5.93923 | CHB |
| rs989128   | FLJ21347  | GI_31542722-S | 17 | 17 | 45991533 | 3366   | 7.0132 | 5.93923 | CHB |
| rs4789349  | FLJ46603  | GI_38348363-S | 17 | 17 | 72217936 | 30427  | 9.0574 | 6.58285 | CHB |
| rs8081738  | LOC284178 | GI_27484781-S | 17 | 17 | 73990778 | 18971  | 6.324  | 6.0737  | CHB |
| rs9302876  | LOC284178 | GI_27484781-S | 17 | 17 | 73990984 | 18765  | 6.324  | 6.0737  | CHB |
| rs6501217  | LOC284178 | GI_27484781-S | 17 | 17 | 73991376 | 18373  | 6.324  | 6.0737  | CHB |
| rs6501219  | LOC284178 | GI_27484781-S | 17 | 17 | 73991417 | 18332  | 6.324  | 6.0737  | CHB |
| rs691142   | LOC284178 | GI_27484781-S | 17 | 17 | 73993851 | 15898  | 6.324  | 6.0737  | CHB |
| rs11654661 | LOC284178 | GI_27484781-S | 17 | 17 | 73996543 | 13206  | 6.5256 | 6.0737  | CHB |
| rs7213123  | USP36     | GI_35250685-S | 17 | 17 | 74176865 | 118408 | 7.5847 | 6.30918 | CHB |
| rs6501238  | USP36     | GI_35250685-S | 17 | 17 | 74181334 | 113939 | 7.5847 | 6.30918 | CHB |
| rs3936118  | USP36     | GI_35250685-S | 17 | 17 | 74185852 | 109421 | 7.5847 | 6.30918 | CHB |
| rs11657360 | USP36     | GI_35250685-S | 17 | 17 | 74187256 | 108017 | 7.5847 | 6.30918 | CHB |
| rs7225707  | USP36     | GI_35250685-S | 17 | 17 | 74196565 | 98708  | 7.2521 | 6.30918 | CHB |
| rs7225601  | USP36     | GI_35250685-S | 17 | 17 | 74196701 | 98572  | 7.9552 | 6.30918 | CHB |
| rs922838   | USP36     | GI_35250685-S | 17 | 17 | 74203893 | 91380  | 7.2144 | 6.30918 | CHB |
| rs10512617 | USP36     | GI_35250685-S | 17 | 17 | 74205146 | 90127  | 7.2144 | 6.30918 | CHB |
| rs7207392  | USP36     | GI_35250685-S | 17 | 17 | 74233533 | 61740  | 8.2419 | 6.30918 | CHB |
| rs17736494 | USP36     | GI_35250685-S | 17 | 17 | 74240263 | 55010  | 6.5906 | 6.30918 | CHB |
| rs1384367  | USP36     | GI_35250685-S | 17 | 17 | 74241352 | 53921  | 6.5906 | 6.30918 | CHB |
| rs4103047  | USP36     | GI_35250685-S | 17 | 17 | 74248785 | 46488  | 8.2419 | 6.30918 | CHB |
| rs7218899  | USP36     | GI_35250685-S | 17 | 17 | 74251445 | 43828  | 6.5906 | 6.30918 | CHB |
| rs6501243  | USP36     | GI_35250685-S | 17 | 17 | 74256150 | 39123  | 7.7715 | 6.30918 | CHB |
| rs7208285  | USP36     | GI_35250685-S | 17 | 17 | 74257920 | 37353  | 8.616  | 6.30918 | CHB |
| rs12951541 | USP36     | GI_35250685-S | 17 | 17 | 74263706 | 31567  | 8.2419 | 6.30918 | CHB |
| rs1871935  | USP36     | GI_35250685-S | 17 | 17 | 74275740 | 19533  | 7.9056 | 6.30918 | CHB |

|            |           |               |    |    |          |        |         |         |     |
|------------|-----------|---------------|----|----|----------|--------|---------|---------|-----|
| rs7224711  | USP36     | GI_35250685-S | 17 | 17 | 74283883 | 11390  | 6.5906  | 6.30918 | CHB |
| rs12604076 | USP36     | GI_35250685-S | 17 | 17 | 74285233 | 10040  | 6.5906  | 6.30918 | CHB |
| rs8079047  | USP36     | GI_35250685-S | 17 | 17 | 74287268 | 8005   | 8.4316  | 6.30918 | CHB |
| rs1044486  | USP36     | GI_35250685-S | 17 | 17 | 74303774 | 8501   | 6.5906  | 6.30918 | CHB |
| rs3744802  | USP36     | GI_35250685-S | 17 | 17 | 74305195 | 9922   | 6.5906  | 6.30918 | CHB |
| rs3744801  | USP36     | GI_35250685-S | 17 | 17 | 74305323 | 10050  | 6.6245  | 6.30918 | CHB |
| rs3744800  | USP36     | GI_35250685-S | 17 | 17 | 74305420 | 10147  | 8.4316  | 6.30918 | CHB |
| rs3826552  | USP36     | GI_35250685-S | 17 | 17 | 74305480 | 10207  | 6.5906  | 6.30918 | CHB |
| rs3744799  | USP36     | GI_35250685-S | 17 | 17 | 74306369 | 11096  | 7.9056  | 6.30918 | CHB |
| rs2279308  | USP36     | GI_35250685-S | 17 | 17 | 74306576 | 11303  | 7.7693  | 6.30918 | CHB |
| rs3088040  | USP36     | GI_35250685-S | 17 | 17 | 74311455 | 16182  | 6.7857  | 6.30918 | CHB |
| rs7213204  | USP36     | GI_35250685-S | 17 | 17 | 74343395 | 48122  | 7.8172  | 6.30918 | CHB |
| rs4352096  | USP36     | GI_35250685-S | 17 | 17 | 74345511 | 50238  | 7.4361  | 6.30918 | CHB |
| rs1062935  | raptor    | GI_22094986-S | 17 | 17 | 76554452 | 37     | 6.1084  | 5.94495 | CHB |
| rs4969322  | raptor    | GI_22094986-S | 17 | 17 | 76558699 | 4284   | 6.1084  | 5.94495 | CHB |
| rs7225354  | LOC284184 | GI_27500527-S | 17 | 17 | 76772657 | 55646  | 5.6494  | 5.54137 | CHB |
| rs11870723 | LOC284184 | GI_27500527-S | 17 | 17 | 76773398 | 54905  | 5.6312  | 5.54137 | CHB |
| rs8069265  | LOC284184 | GI_27500527-S | 17 | 17 | 76774020 | 54283  | 7.6357  | 5.54137 | CHB |
| rs2279921  | LOC284184 | GI_27500527-S | 17 | 17 | 76780213 | 48090  | 7.6357  | 5.54137 | CHB |
| rs2279920  | LOC284184 | GI_27500527-S | 17 | 17 | 76780281 | 48022  | 6.6275  | 5.54137 | CHB |
| rs2279916  | LOC284184 | GI_27500527-S | 17 | 17 | 76780796 | 47507  | 7.5474  | 5.54137 | CHB |
| rs2279914  | LOC284184 | GI_27500527-S | 17 | 17 | 76782746 | 45557  | 7.6357  | 5.54137 | CHB |
| rs8071693  | LOC284184 | GI_27500527-S | 17 | 17 | 76784539 | 43764  | 5.6637  | 5.54137 | CHB |
| rs906175   | LOC284184 | GI_27500527-S | 17 | 17 | 76788057 | 40246  | 7.7433  | 5.54137 | CHB |
| rs2659030  | LOC284184 | GI_27500527-S | 17 | 17 | 76792569 | 35734  | 7.3878  | 5.54137 | CHB |
| rs969413   | LOC284184 | GI_27500527-S | 17 | 17 | 76810409 | 17894  | 9.2365  | 5.54137 | CHB |
| rs1048775  | LOC284184 | GI_27500527-S | 17 | 17 | 76816924 | 11379  | 9.5946  | 5.54137 | CHB |
| rs9898133  | LOC284184 | GI_27500527-S | 17 | 17 | 76864592 | 36289  | 5.6264  | 5.54137 | CHB |
| rs10445407 | LOC284184 | GI_27500527-S | 17 | 17 | 76876404 | 48101  | 5.5479  | 5.54137 | CHB |
| rs6565549  | LOC284184 | GI_27500527-S | 17 | 17 | 76882829 | 54526  | 5.5479  | 5.54137 | CHB |
| rs7219431  | LOC284184 | GI_27500527-S | 17 | 17 | 76888080 | 59777  | 5.5479  | 5.54137 | CHB |
| rs7406991  | NPL4      | GI_8923608-S  | 17 | 17 | 77159051 | 24409  | 6.3078  | 5.5953  | CHB |
| rs8075102  | NPL4      | GI_8923608-S  | 17 | 17 | 77169413 | 34771  | 5.6299  | 5.5953  | CHB |
| rs7405469  | NPL4      | GI_8923608-S  | 17 | 17 | 77177034 | 42392  | 6.0013  | 5.5953  | CHB |
| rs11652797 | NPL4      | GI_8923608-S  | 17 | 17 | 77184566 | 49924  | 10.5095 | 5.5953  | CHB |
| rs7222241  | NPL4      | GI_8923608-S  | 17 | 17 | 77185156 | 50514  | 10.5095 | 5.5953  | CHB |
| rs3935543  | NPL4      | GI_8923608-S  | 17 | 17 | 77190317 | 55675  | 10.5095 | 5.5953  | CHB |
| rs7503679  | NPL4      | GI_8923608-S  | 17 | 17 | 77194284 | 59642  | 10.5095 | 5.5953  | CHB |
| rs7405901  | NPL4      | GI_8923608-S  | 17 | 17 | 77198218 | 63576  | 10.5095 | 5.5953  | CHB |
| rs6565604  | NPL4      | GI_8923608-S  | 17 | 17 | 77199647 | 65005  | 10.5095 | 5.5953  | CHB |
| rs6565605  | NPL4      | GI_8923608-S  | 17 | 17 | 77199764 | 65122  | 10.5095 | 5.5953  | CHB |
| rs9894429  | NPL4      | GI_8923608-S  | 17 | 17 | 77207216 | 72574  | 10.5095 | 5.5953  | CHB |
| rs6565612  | NPL4      | GI_8923608-S  | 17 | 17 | 77213225 | 78583  | 10.5095 | 5.5953  | CHB |
| rs6565616  | NPL4      | GI_8923608-S  | 17 | 17 | 77222566 | 87924  | 8.6456  | 5.5953  | CHB |
| rs9905639  | NPL4      | GI_8923608-S  | 17 | 17 | 77224559 | 89917  | 8.6456  | 5.5953  | CHB |
| rs7406828  | LOC339229 | GI_41150782-S | 17 | 17 | 77229631 | 13164  | 7.1306  | 6.34043 | CHB |
| rs7406828  | NPL4      | GI_8923608-S  | 17 | 17 | 77229631 | 94989  | 7.3522  | 5.5953  | CHB |
| rs3830068  | LOC339229 | GI_41150782-S | 17 | 17 | 77233304 | 9491   | 9.6162  | 6.34043 | CHB |
| rs3830068  | NPL4      | GI_8923608-S  | 17 | 17 | 77233304 | 98662  | 6.7024  | 5.5953  | CHB |
| rs7226091  | LOC339229 | GI_41150782-S | 17 | 17 | 77247772 | 4977   | 9.6162  | 6.34043 | CHB |
| rs7226091  | NPL4      | GI_8923608-S  | 17 | 17 | 77247772 | 113130 | 6.7024  | 5.5953  | CHB |
| rs7209877  | LOC339229 | GI_41150782-S | 17 | 17 | 77248042 | 5247   | 9.6162  | 6.34043 | CHB |
| rs7209877  | NPL4      | GI_8923608-S  | 17 | 17 | 77248042 | 113400 | 6.7024  | 5.5953  | CHB |
| rs7502491  | LOC339229 | GI_41150782-S | 17 | 17 | 77254609 | 11814  | 9.6162  | 6.34043 | CHB |
| rs7502491  | NPL4      | GI_8923608-S  | 17 | 17 | 77254609 | 119967 | 6.7024  | 5.5953  | CHB |
| rs7502521  | LOC339229 | GI_41150782-S | 17 | 17 | 77254717 | 11922  | 8.8081  | 6.34043 | CHB |



|            |           |               |    |    |          |        |         |         |     |
|------------|-----------|---------------|----|----|----------|--------|---------|---------|-----|
| rs7502521  | NPL4      | GI_8923608-S  | 17 | 17 | 77254717 | 120075 | 6.0207  | 5.5953  | CHB |
| rs6565619  | LOC339229 | GI_41150782-S | 17 | 17 | 77256301 | 13506  | 8.7005  | 6.34043 | CHB |
| rs6565619  | NPL4      | GI_8923608-S  | 17 | 17 | 77256301 | 121659 | 6.0956  | 5.5953  | CHB |
| rs8070488  | LOC339229 | GI_41150782-S | 17 | 17 | 77274336 | 31541  | 8.7005  | 6.34043 | CHB |
| rs8070488  | NPL4      | GI_8923608-S  | 17 | 17 | 77274336 | 139694 | 6.0956  | 5.5953  | CHB |
| rs11868024 | LOC339229 | GI_41150782-S | 17 | 17 | 77286571 | 43776  | 8.7005  | 6.34043 | CHB |
| rs11868024 | NPL4      | GI_8923608-S  | 17 | 17 | 77286571 | 151929 | 6.0956  | 5.5953  | CHB |
| rs6565624  | LOC339229 | GI_41150782-S | 17 | 17 | 77288155 | 45360  | 8.7005  | 6.34043 | CHB |
| rs6565624  | NPL4      | GI_8923608-S  | 17 | 17 | 77288155 | 153513 | 6.0956  | 5.5953  | CHB |
| rs8081683  | LOC339229 | GI_41150782-S | 17 | 17 | 77291483 | 48688  | 8.7005  | 6.34043 | CHB |
| rs8081683  | NPL4      | GI_8923608-S  | 17 | 17 | 77291483 | 156841 | 6.0956  | 5.5953  | CHB |
| rs2243523  | FN3KRP    | GI_20149679-S | 17 | 17 | 78273738 | 5134   | 6.4494  | 5.48589 | CHB |
| rs1046875  | FN3KRP    | GI_20149679-S | 17 | 17 | 78278715 | 157    | 6.7483  | 5.48589 | CHB |
| rs1046896  | FN3KRP    | GI_20149679-S | 17 | 17 | 78278822 | 50     | 6.7483  | 5.48589 | CHB |
| rs2257084  | FN3KRP    | GI_20149679-S | 17 | 17 | 78280764 | 1892   | 7.8985  | 5.48589 | CHB |
| rs2847602  | HSRTSBETA | GI_42544118-A | 18 | 18 | 684206   | 18825  | 6.4385  | 6.31747 | CHB |
| rs7235957  | HSRTSBETA | GI_42544118-A | 18 | 18 | 707229   | 41848  | 6.7406  | 6.31747 | CHB |
| rs7228136  | HSRTSBETA | GI_42544118-A | 18 | 18 | 722017   | 56636  | 6.7406  | 6.31747 | CHB |
| rs3865405  | HSRTSBETA | GI_42544118-A | 18 | 18 | 730876   | 65495  | 6.5831  | 6.31747 | CHB |
| rs7244709  | MGC4083   | GI_14210535-S | 18 | 18 | 12290136 | 26060  | 8.4593  | 5.92055 | CHB |
| rs9303766  | MGC4083   | GI_14210535-S | 18 | 18 | 12290849 | 25347  | 8.4593  | 5.92055 | CHB |
| rs9807444  | MGC4083   | GI_14210535-S | 18 | 18 | 12290936 | 25260  | 8.4593  | 5.92055 | CHB |
| rs9303768  | MGC4083   | GI_14210535-S | 18 | 18 | 12291322 | 24874  | 8.4593  | 5.92055 | CHB |
| rs7504558  | MGC4083   | GI_14210535-S | 18 | 18 | 12294781 | 21415  | 8.4593  | 5.92055 | CHB |
| rs10853224 | MGC4083   | GI_14210535-S | 18 | 18 | 12301984 | 14212  | 6.7875  | 5.92055 | CHB |
| rs11080567 | MGC4083   | GI_14210535-S | 18 | 18 | 12302075 | 14121  | 6.7875  | 5.92055 | CHB |
| rs12960267 | MGC4083   | GI_14210535-S | 18 | 18 | 12302492 | 13704  | 8.4602  | 5.92055 | CHB |
| rs8083882  | MGC4083   | GI_14210535-S | 18 | 18 | 12304309 | 11887  | 6.7875  | 5.92055 | CHB |
| rs12607321 | MGC4083   | GI_14210535-S | 18 | 18 | 12306779 | 9417   | 6.4187  | 5.92055 | CHB |
| rs4796960  | MGC4083   | GI_14210535-S | 18 | 18 | 12308027 | 8169   | 6.6371  | 5.92055 | CHB |
| rs11663340 | MGC4083   | GI_14210535-S | 18 | 18 | 12323686 | 7490   | 8.4602  | 5.92055 | CHB |
| rs7231304  | MGC4083   | GI_14210535-S | 18 | 18 | 12340505 | 24309  | 7.4929  | 5.92055 | CHB |
| rs9966470  | MGC4083   | GI_14210535-S | 18 | 18 | 12343178 | 26982  | 7.4929  | 5.92055 | CHB |
| rs3819091  | MGC4083   | GI_14210535-S | 18 | 18 | 12354185 | 37989  | 6.8946  | 5.92055 | CHB |
| rs617505   | MOCOS     | GI_8923660-S  | 18 | 18 | 32051949 | 50616  | 6.8381  | 5.65716 | CHB |
| rs635601   | MOCOS     | GI_8923660-S  | 18 | 18 | 32060414 | 42151  | 6.3023  | 5.65716 | CHB |
| rs2105676  | MOCOS     | GI_8923660-S  | 18 | 18 | 32077728 | 24837  | 6.8381  | 5.65716 | CHB |
| rs1245951  | MOCOS     | GI_8923660-S  | 18 | 18 | 32078553 | 24012  | 6.8381  | 5.65716 | CHB |
| rs567458   | MOCOS     | GI_8923660-S  | 18 | 18 | 32082978 | 19587  | 6.8381  | 5.65716 | CHB |
| rs568388   | MOCOS     | GI_8923660-S  | 18 | 18 | 32083075 | 19490  | 6.8381  | 5.65716 | CHB |
| rs489043   | MOCOS     | GI_8923660-S  | 18 | 18 | 32084108 | 18457  | 6.4529  | 5.65716 | CHB |
| rs9944887  | LOC284293 | GI_27485378-S | 18 | 18 | 59665948 | 105638 | 7.0633  | 6.00707 | CHB |
| rs9959974  | LOC284293 | GI_27485378-S | 18 | 18 | 59666056 | 105530 | 8.7848  | 6.00707 | CHB |
| rs9945681  | LOC284293 | GI_27485378-S | 18 | 18 | 59666101 | 105485 | 8.6163  | 6.00707 | CHB |
| rs17071932 | LOC284293 | GI_27485378-S | 18 | 18 | 59666204 | 105382 | 6.6187  | 6.00707 | CHB |
| rs9960785  | LOC284293 | GI_27485378-S | 18 | 18 | 59667093 | 104493 | 7.4785  | 6.00707 | CHB |
| rs9951203  | LOC284293 | GI_27485378-S | 18 | 18 | 59667720 | 103866 | 10.0373 | 6.00707 | CHB |
| rs9963905  | LOC284293 | GI_27485378-S | 18 | 18 | 59667857 | 103729 | 6.5796  | 6.00707 | CHB |
| rs9320028  | LOC284293 | GI_27485378-S | 18 | 18 | 59668150 | 103436 | 11.3685 | 6.00707 | CHB |
| rs8091518  | LOC284293 | GI_27485378-S | 18 | 18 | 59679155 | 92431  | 11.3685 | 6.00707 | CHB |
| rs9966495  | LOC284293 | GI_27485378-S | 18 | 18 | 59690850 | 80736  | 10.5969 | 6.00707 | CHB |
| rs9951512  | LOC284293 | GI_27485378-S | 18 | 18 | 59690885 | 80701  | 11.3685 | 6.00707 | CHB |
| rs9954175  | LOC284293 | GI_27485378-S | 18 | 18 | 59691368 | 80218  | 11.3685 | 6.00707 | CHB |
| rs10513933 | LOC284293 | GI_27485378-S | 18 | 18 | 59699669 | 71917  | 11.3685 | 6.00707 | CHB |
| rs9959513  | LOC284293 | GI_27485378-S | 18 | 18 | 59701863 | 69723  | 11.6441 | 6.00707 | CHB |
| rs9320032  | LOC284293 | GI_27485378-S | 18 | 18 | 59712191 | 59395  | 11.6441 | 6.00707 | CHB |

|            |           |               |    |    |          |       |         |         |     |
|------------|-----------|---------------|----|----|----------|-------|---------|---------|-----|
| rs7505052  | LOC284293 | GI_27485378-S | 18 | 18 | 59717646 | 53940 | 11.6441 | 6.00707 | CHB |
| rs6102     | LOC284293 | GI_27485378-S | 18 | 18 | 59721450 | 50136 | 11.6441 | 6.00707 | CHB |
| rs2332876  | LOC284293 | GI_27485378-S | 18 | 18 | 59722566 | 49020 | 9.0832  | 6.00707 | CHB |
| rs4499334  | LOC284293 | GI_27485378-S | 18 | 18 | 59729788 | 41798 | 11.6441 | 6.00707 | CHB |
| rs12717154 | LOC284293 | GI_27485378-S | 18 | 18 | 59730261 | 41325 | 10.9557 | 6.00707 | CHB |
| rs13371114 | LOC284293 | GI_27485378-S | 18 | 18 | 59730357 | 41229 | 11.5456 | 6.00707 | CHB |
| rs12327005 | LOC284293 | GI_27485378-S | 18 | 18 | 59731116 | 40470 | 11.6441 | 6.00707 | CHB |
| rs12327006 | LOC284293 | GI_27485378-S | 18 | 18 | 59731314 | 40272 | 10.9189 | 6.00707 | CHB |
| rs12327173 | LOC284293 | GI_27485378-S | 18 | 18 | 59731522 | 40064 | 11.6441 | 6.00707 | CHB |
| rs8085904  | LOC284293 | GI_27485378-S | 18 | 18 | 59731660 | 39926 | 10.2516 | 6.00707 | CHB |
| rs7241748  | SERPINB10 | GI_4826901-S  | 18 | 18 | 59733108 | 20084 | 6.3959  | 6.01035 | CHB |
| rs9952843  | LOC284293 | GI_27485378-S | 18 | 18 | 59733245 | 38341 | 11.6441 | 6.00707 | CHB |
| rs9953733  | LOC284293 | GI_27485378-S | 18 | 18 | 59733477 | 38109 | 11.6441 | 6.00707 | CHB |
| rs17072097 | LOC284293 | GI_27485378-S | 18 | 18 | 59733731 | 37855 | 11.6441 | 6.00707 | CHB |
| rs17072102 | LOC284293 | GI_27485378-S | 18 | 18 | 59734053 | 37533 | 11.6441 | 6.00707 | CHB |
| rs17072109 | LOC284293 | GI_27485378-S | 18 | 18 | 59735622 | 35964 | 11.6441 | 6.00707 | CHB |
| rs9320033  | SERPINB10 | GI_4826901-S  | 18 | 18 | 59735962 | 17230 | 6.5128  | 6.01035 | CHB |
| rs724557   | LOC284293 | GI_27485378-S | 18 | 18 | 59736125 | 35461 | 11.6441 | 6.00707 | CHB |
| rs724558   | LOC284293 | GI_27485378-S | 18 | 18 | 59736240 | 35346 | 11.6441 | 6.00707 | CHB |
| rs1944273  | LOC284293 | GI_27485378-S | 18 | 18 | 59736514 | 35072 | 11.6441 | 6.00707 | CHB |
| rs1944272  | LOC284293 | GI_27485378-S | 18 | 18 | 59736638 | 34948 | 11.6441 | 6.00707 | CHB |
| rs1944271  | LOC284293 | GI_27485378-S | 18 | 18 | 59736845 | 34741 | 11.6441 | 6.00707 | CHB |
| rs9955171  | LOC284293 | GI_27485378-S | 18 | 18 | 59736927 | 34659 | 11.6441 | 6.00707 | CHB |
| rs9955876  | LOC284293 | GI_27485378-S | 18 | 18 | 59737855 | 33731 | 11.6441 | 6.00707 | CHB |
| rs9967382  | LOC284293 | GI_27485378-S | 18 | 18 | 59738047 | 33539 | 9.9554  | 6.00707 | CHB |
| rs620535   | LOC284293 | GI_27485378-S | 18 | 18 | 59738269 | 33317 | 11.6441 | 6.00707 | CHB |
| rs9947135  | LOC284293 | GI_27485378-S | 18 | 18 | 59738704 | 32882 | 10.2516 | 6.00707 | CHB |
| rs4350667  | LOC284293 | GI_27485378-S | 18 | 18 | 59738743 | 32843 | 10.171  | 6.00707 | CHB |
| rs9947504  | LOC284293 | GI_27485378-S | 18 | 18 | 59739063 | 32523 | 11.6441 | 6.00707 | CHB |
| rs17072158 | LOC284293 | GI_27485378-S | 18 | 18 | 59739617 | 31969 | 11.6441 | 6.00707 | CHB |
| rs9957733  | LOC284293 | GI_27485378-S | 18 | 18 | 59743343 | 28243 | 11.6441 | 6.00707 | CHB |
| rs17072204 | LOC284293 | GI_27485378-S | 18 | 18 | 59752346 | 19240 | 11.6441 | 6.00707 | CHB |
| rs11152409 | LOC284293 | GI_27485378-S | 18 | 18 | 59755259 | 16327 | 11.6441 | 6.00707 | CHB |
| rs9783897  | LOC284293 | GI_27485378-S | 18 | 18 | 59755762 | 15824 | 11.5983 | 6.00707 | CHB |
| rs9783898  | LOC284293 | GI_27485378-S | 18 | 18 | 59755785 | 15801 | 11.6441 | 6.00707 | CHB |
| rs9783908  | LOC284293 | GI_27485378-S | 18 | 18 | 59755942 | 15644 | 8.8864  | 6.00707 | CHB |
| rs13381197 | LOC284293 | GI_27485378-S | 18 | 18 | 59757967 | 13619 | 11.6441 | 6.00707 | CHB |
| rs9807138  | LOC284293 | GI_27485378-S | 18 | 18 | 59758363 | 13223 | 11.6441 | 6.00707 | CHB |
| rs9955763  | LOC284293 | GI_27485378-S | 18 | 18 | 59765415 | 6171  | 11.6441 | 6.00707 | CHB |
| rs13370584 | LOC284293 | GI_27485378-S | 18 | 18 | 59766324 | 5262  | 11.6441 | 6.00707 | CHB |
| rs9955410  | LOC284293 | GI_27485378-S | 18 | 18 | 59771017 | 569   | 11.8315 | 6.00707 | CHB |
| rs9945924  | LOC284293 | GI_27485378-S | 18 | 18 | 59771746 | 160   | 11.8315 | 6.00707 | CHB |
| rs8090046  | LOC284293 | GI_27485378-S | 18 | 18 | 59773066 | 1480  | 11.8315 | 6.00707 | CHB |
| rs8095151  | LOC284293 | GI_27485378-S | 18 | 18 | 59773196 | 1610  | 11.8315 | 6.00707 | CHB |
| rs9962574  | LOC284293 | GI_27485378-S | 18 | 18 | 59777098 | 5512  | 9.7913  | 6.00707 | CHB |
| rs9963550  | LOC284293 | GI_27485378-S | 18 | 18 | 59779238 | 7652  | 7.7421  | 6.00707 | CHB |
| rs9949621  | LOC284293 | GI_27485378-S | 18 | 18 | 59780377 | 8791  | 8.2155  | 6.00707 | CHB |
| rs9950903  | LOC284293 | GI_27485378-S | 18 | 18 | 59781783 | 10197 | 10.1127 | 6.00707 | CHB |
| rs8090586  | LOC284293 | GI_27485378-S | 18 | 18 | 59781864 | 10278 | 10.1127 | 6.00707 | CHB |
| rs1006755  | LOC284293 | GI_27485378-S | 18 | 18 | 59782026 | 10440 | 10.1127 | 6.00707 | CHB |
| rs4510128  | LOC284293 | GI_27485378-S | 18 | 18 | 59782312 | 10726 | 10.1127 | 6.00707 | CHB |
| rs1006754  | LOC284293 | GI_27485378-S | 18 | 18 | 59782427 | 10841 | 7.5038  | 6.00707 | CHB |
| rs2009989  | LOC284293 | GI_27485378-S | 18 | 18 | 59784224 | 12638 | 10.1127 | 6.00707 | CHB |
| rs17072304 | LOC284293 | GI_27485378-S | 18 | 18 | 59784549 | 12963 | 10.1127 | 6.00707 | CHB |
| rs9961615  | LOC284293 | GI_27485378-S | 18 | 18 | 59788652 | 17066 | 8.3527  | 6.00707 | CHB |
| rs11260040 | Hs.465789 | Hs.465789-S   | 19 | 19 | 7926793  | 52807 | 8.3672  | 6.27361 | CHB |

|            |           |               |    |    |         |        |         |         |     |
|------------|-----------|---------------|----|----|---------|--------|---------|---------|-----|
| rs12983784 | Hs.465789 | Hs.465789-S   | 19 | 19 | 7931491 | 48109  | 7.9957  | 6.27361 | CHB |
| rs3826740  | Hs.465789 | Hs.465789-S   | 19 | 19 | 7938432 | 41168  | 6.4816  | 6.27361 | CHB |
| rs11670116 | Hs.465789 | Hs.465789-S   | 19 | 19 | 7981202 | 1602   | 11.0951 | 6.27361 | CHB |
| rs952444   | Hs.465789 | Hs.465789-S   | 19 | 19 | 7992055 | 12455  | 7.7083  | 6.27361 | CHB |
| rs882951   | Hs.465789 | Hs.465789-S   | 19 | 19 | 7999265 | 19665  | 7.3055  | 6.27361 | CHB |
| rs10411185 | Hs.465789 | Hs.465789-S   | 19 | 19 | 8009881 | 30281  | 7.7083  | 6.27361 | CHB |
| rs10422910 | ZNF266    | GI_37622342-A | 19 | 19 | 9263877 | 120463 | 6.2676  | 5.84654 | CHB |
| rs7252865  | ZNF266    | GI_37622342-A | 19 | 19 | 9273535 | 110805 | 6.1424  | 5.84654 | CHB |
| rs10745023 | ZNF266    | GI_37622342-A | 19 | 19 | 9274896 | 109444 | 5.8569  | 5.84654 | CHB |
| rs12150875 | ZNF266    | GI_37622342-A | 19 | 19 | 9275172 | 109168 | 5.9453  | 5.84654 | CHB |
| rs2033482  | ZNF266    | GI_37622342-A | 19 | 19 | 9279184 | 105156 | 6.1424  | 5.84654 | CHB |
| rs8112682  | ZNF266    | GI_37622342-A | 19 | 19 | 9282296 | 102044 | 6.2093  | 5.84654 | CHB |
| rs10402374 | ZNF266    | GI_37622342-A | 19 | 19 | 9285709 | 98631  | 5.9453  | 5.84654 | CHB |
| rs6512047  | ZNF266    | GI_37622342-A | 19 | 19 | 9298812 | 85528  | 6.6204  | 5.84654 | CHB |
| rs8113427  | ZNF266    | GI_37622342-A | 19 | 19 | 9309917 | 74423  | 6.7692  | 5.84654 | CHB |
| rs8110584  | ZNF266    | GI_37622342-A | 19 | 19 | 9310337 | 74003  | 6.7692  | 5.84654 | CHB |
| rs13535    | ZNF266    | GI_37622342-A | 19 | 19 | 9315173 | 69167  | 6.7692  | 5.84654 | CHB |
| rs8103043  | ZNF266    | GI_37622342-A | 19 | 19 | 9315976 | 68364  | 6.7692  | 5.84654 | CHB |
| rs1865040  | ZNF266    | GI_37622342-A | 19 | 19 | 9318246 | 66094  | 6.6204  | 5.84654 | CHB |
| rs11883244 | ZNF266    | GI_37622342-A | 19 | 19 | 9329222 | 55118  | 6.7692  | 5.84654 | CHB |
| rs17205697 | ZNF266    | GI_37622342-A | 19 | 19 | 9330748 | 53592  | 6.7692  | 5.84654 | CHB |
| rs2278407  | ZNF266    | GI_37622342-A | 19 | 19 | 9334201 | 50139  | 6.7692  | 5.84654 | CHB |
| rs7249948  | ZNF266    | GI_37622342-A | 19 | 19 | 9335688 | 48652  | 6.7029  | 5.84654 | CHB |
| rs11086019 | ZNF266    | GI_37622342-A | 19 | 19 | 9336416 | 47924  | 6.8789  | 5.84654 | CHB |
| rs13344979 | ZNF266    | GI_37622342-A | 19 | 19 | 9337553 | 46787  | 6.7692  | 5.84654 | CHB |
| rs7255853  | ZNF266    | GI_37622342-A | 19 | 19 | 9339628 | 44712  | 6.8258  | 5.84654 | CHB |
| rs10426170 | ZNF266    | GI_37622342-A | 19 | 19 | 9340577 | 43763  | 6.7068  | 5.84654 | CHB |
| rs2878451  | ZNF266    | GI_37622342-A | 19 | 19 | 9341797 | 42543  | 6.7692  | 5.84654 | CHB |
| rs10416984 | ZNF266    | GI_37622342-A | 19 | 19 | 9343310 | 41030  | 6.7692  | 5.84654 | CHB |
| rs8100020  | ZNF266    | GI_37622342-A | 19 | 19 | 9345935 | 38405  | 6.7692  | 5.84654 | CHB |
| rs1347166  | ZNF266    | GI_37622342-A | 19 | 19 | 9348808 | 35532  | 6.7692  | 5.84654 | CHB |
| rs10401712 | ZNF266    | GI_37622342-A | 19 | 19 | 9349111 | 35229  | 6.7692  | 5.84654 | CHB |
| rs10416662 | ZNF266    | GI_37622342-A | 19 | 19 | 9349178 | 35162  | 6.7692  | 5.84654 | CHB |
| rs8103270  | ZNF266    | GI_37622342-A | 19 | 19 | 9349461 | 34879  | 6.6204  | 5.84654 | CHB |
| rs2304110  | ZNF266    | GI_37622342-A | 19 | 19 | 9350132 | 34208  | 6.7692  | 5.84654 | CHB |
| rs10411115 | ZNF266    | GI_37622342-A | 19 | 19 | 9351428 | 32912  | 6.7692  | 5.84654 | CHB |
| rs2217652  | ZNF266    | GI_37622342-A | 19 | 19 | 9351814 | 32526  | 6.7692  | 5.84654 | CHB |
| rs3826783  | ZNF266    | GI_37622342-A | 19 | 19 | 9353141 | 31199  | 6.7692  | 5.84654 | CHB |
| rs2230752  | ZNF266    | GI_37622342-A | 19 | 19 | 9353370 | 30970  | 6.7692  | 5.84654 | CHB |
| rs1433062  | ZNF266    | GI_37622342-A | 19 | 19 | 9355266 | 29074  | 6.6204  | 5.84654 | CHB |
| rs2335531  | ZNF266    | GI_37622342-A | 19 | 19 | 9357268 | 27072  | 6.6204  | 5.84654 | CHB |
| rs8112842  | ZNF266    | GI_37622342-A | 19 | 19 | 9359315 | 25025  | 6.7692  | 5.84654 | CHB |
| rs11666765 | ZNF266    | GI_37622342-A | 19 | 19 | 9361145 | 23195  | 6.6457  | 5.84654 | CHB |
| rs11671340 | ZNF266    | GI_37622342-A | 19 | 19 | 9362393 | 21947  | 6.2179  | 5.84654 | CHB |
| rs11086027 | ZNF266    | GI_37622342-A | 19 | 19 | 9363441 | 20899  | 6.7692  | 5.84654 | CHB |
| rs11672602 | ZNF266    | GI_37622342-A | 19 | 19 | 9363587 | 20753  | 6.7692  | 5.84654 | CHB |
| rs17272543 | ZNF266    | GI_37622342-A | 19 | 19 | 9364937 | 19403  | 6.6204  | 5.84654 | CHB |
| rs7246082  | ZNF266    | GI_37622342-A | 19 | 19 | 9365006 | 19334  | 6.7692  | 5.84654 | CHB |
| rs7257650  | ZNF266    | GI_37622342-A | 19 | 19 | 9365101 | 19239  | 6.7692  | 5.84654 | CHB |
| rs2878452  | ZNF266    | GI_37622342-A | 19 | 19 | 9365510 | 18830  | 6.8173  | 5.84654 | CHB |
| rs2335532  | ZNF266    | GI_37622342-A | 19 | 19 | 9365598 | 18742  | 6.3286  | 5.84654 | CHB |
| rs8104611  | ZNF266    | GI_37622342-A | 19 | 19 | 9366805 | 17535  | 6.5233  | 5.84654 | CHB |
| rs2335938  | ZNF266    | GI_37622342-A | 19 | 19 | 9367269 | 17071  | 6.7692  | 5.84654 | CHB |
| rs12150994 | ZNF266    | GI_37622342-A | 19 | 19 | 9369228 | 15112  | 6.2072  | 5.84654 | CHB |
| rs4804436  | ZNF266    | GI_37622342-A | 19 | 19 | 9376200 | 8140   | 6.2816  | 5.84654 | CHB |
| rs8108167  | ZNF266    | GI_37622342-A | 19 | 19 | 9379331 | 5009   | 6.2816  | 5.84654 | CHB |

|            |           |               |    |    |          |       |        |         |     |
|------------|-----------|---------------|----|----|----------|-------|--------|---------|-----|
| rs6512108  | ZNF266    | GI_37622342-A | 19 | 19 | 9379670  | 4670  | 6.2816 | 5.84654 | CHB |
| rs11668157 | ZNF266    | GI_37622342-A | 19 | 19 | 9379846  | 4494  | 6.6204 | 5.84654 | CHB |
| rs6512109  | ZNF266    | GI_37622342-A | 19 | 19 | 9380453  | 3887  | 6.7692 | 5.84654 | CHB |
| rs7253847  | ZNF266    | GI_37622342-A | 19 | 19 | 9380894  | 3446  | 6.7692 | 5.84654 | CHB |
| rs7259584  | ZNF266    | GI_37622342-A | 19 | 19 | 9381062  | 3278  | 6.7692 | 5.84654 | CHB |
| rs10423720 | ZNF266    | GI_37622342-A | 19 | 19 | 9382727  | 1613  | 6.7692 | 5.84654 | CHB |
| rs8105020  | ZNF266    | GI_37622342-A | 19 | 19 | 9383477  | 863   | 6.2816 | 5.84654 | CHB |
| rs6512110  | ZNF266    | GI_37622342-A | 19 | 19 | 9383724  | 616   | 6.2816 | 5.84654 | CHB |
| rs7251490  | ZNF266    | GI_37622342-A | 19 | 19 | 9383802  | 538   | 6.7692 | 5.84654 | CHB |
| rs10515    | ZNF266    | GI_37622342-A | 19 | 19 | 9384724  | 384   | 6.7692 | 5.84654 | CHB |
| rs2241356  | ZNF266    | GI_37622342-A | 19 | 19 | 9385185  | 845   | 6.7692 | 5.84654 | CHB |
| rs7258150  | ZNF266    | GI_37622342-A | 19 | 19 | 9387017  | 2677  | 6.0601 | 5.84654 | CHB |
| rs1978711  | ZNF266    | GI_37622342-A | 19 | 19 | 9391081  | 6741  | 5.957  | 5.84654 | CHB |
| rs1978435  | ZNF266    | GI_37622342-A | 19 | 19 | 9392116  | 7776  | 6.8379 | 5.84654 | CHB |
| rs2112529  | ZNF266    | GI_37622342-A | 19 | 19 | 9393156  | 8816  | 6.7692 | 5.84654 | CHB |
| rs6512121  | ZNF266    | GI_37622342-A | 19 | 19 | 9394805  | 10465 | 6.2816 | 5.84654 | CHB |
| rs7254750  | ZNF266    | GI_37622342-A | 19 | 19 | 9395301  | 10961 | 6.1562 | 5.84654 | CHB |
| rs2335939  | ZNF266    | GI_37622342-A | 19 | 19 | 9395790  | 11450 | 6.1562 | 5.84654 | CHB |
| rs7258744  | ZNF266    | GI_37622342-A | 19 | 19 | 9395967  | 11627 | 5.858  | 5.84654 | CHB |
| rs7246415  | ZNF266    | GI_37622342-A | 19 | 19 | 9395981  | 11641 | 6.2816 | 5.84654 | CHB |
| rs7258874  | ZNF266    | GI_37622342-A | 19 | 19 | 9396016  | 11676 | 6.7692 | 5.84654 | CHB |
| rs10411141 | ZNF266    | GI_37622342-A | 19 | 19 | 9397203  | 12863 | 6.1562 | 5.84654 | CHB |
| rs7252370  | ZNF266    | GI_37622342-A | 19 | 19 | 9398191  | 13851 | 5.9668 | 5.84654 | CHB |
| rs6512122  | ZNF266    | GI_37622342-A | 19 | 19 | 9398465  | 14125 | 6.7692 | 5.84654 | CHB |
| rs6512123  | ZNF266    | GI_37622342-A | 19 | 19 | 9398800  | 14460 | 6.7692 | 5.84654 | CHB |
| rs12461912 | ZNF266    | GI_37622342-A | 19 | 19 | 9400300  | 15960 | 6.6321 | 5.84654 | CHB |
| rs8107606  | ZNF266    | GI_37622342-A | 19 | 19 | 9400522  | 16182 | 6.7692 | 5.84654 | CHB |
| rs9305082  | ZNF266    | GI_37622342-A | 19 | 19 | 9401524  | 17184 | 6.7692 | 5.84654 | CHB |
| rs10404268 | ZNF266    | GI_37622342-A | 19 | 19 | 9402640  | 18300 | 6.7692 | 5.84654 | CHB |
| rs11673601 | ZNF266    | GI_37622342-A | 19 | 19 | 9403007  | 18667 | 6.6204 | 5.84654 | CHB |
| rs9676745  | ZNF266    | GI_37622342-A | 19 | 19 | 9403342  | 19002 | 6.7692 | 5.84654 | CHB |
| rs10409256 | ZNF266    | GI_37622342-A | 19 | 19 | 9404830  | 20490 | 6.6321 | 5.84654 | CHB |
| rs8108483  | ZNF266    | GI_37622342-A | 19 | 19 | 9406030  | 21690 | 6.1856 | 5.84654 | CHB |
| rs6512130  | ZNF266    | GI_37622342-A | 19 | 19 | 9407351  | 23011 | 6.7386 | 5.84654 | CHB |
| rs2288541  | NR2F6     | GI_42661997-S | 19 | 19 | 17198308 | 5555  | 6.155  | 6.04257 | CHB |
| rs2288540  | NR2F6     | GI_42661997-S | 19 | 19 | 17198344 | 5519  | 6.155  | 6.04257 | CHB |
| rs7508153  | ZNF253    | GI_10567821-S | 19 | 19 | 19831113 | 33501 | 5.7978 | 5.71677 | CHB |
| rs12610295 | ZNF253    | GI_10567821-S | 19 | 19 | 19899967 | 35353 | 5.9668 | 5.71677 | CHB |
| rs11666112 | ZNF253    | GI_10567821-S | 19 | 19 | 19902801 | 38187 | 5.7978 | 5.71677 | CHB |
| rs11085283 | ZNF253    | GI_10567821-S | 19 | 19 | 19904551 | 39937 | 5.7978 | 5.71677 | CHB |
| rs1019280  | ZNF253    | GI_10567821-S | 19 | 19 | 19908429 | 43815 | 6.2726 | 5.71677 | CHB |
| rs4809014  | ZNF253    | GI_10567821-S | 19 | 19 | 19916002 | 51388 | 6.0317 | 5.71677 | CHB |
| rs1654261  | LOC388519 | GI_41151129-S | 19 | 19 | 20190637 | 92750 | 6.5488 | 5.83697 | CHB |
| rs6510591  | FLJ32191  | GI_34303923-S | 19 | 19 | 42315928 | 3693  | 5.8254 | 5.61997 | CHB |
| rs2278009  | HNRPL     | GI_4557644-S  | 19 | 19 | 44019696 | 228   | 6.1326 | 6.12284 | CHB |
| rs7255774  | HNRPL     | GI_4557644-S  | 19 | 19 | 44027114 | 7190  | 6.1326 | 6.12284 | CHB |
| rs1001413  | HNRPL     | GI_4557644-S  | 19 | 19 | 44058951 | 39027 | 6.1326 | 6.12284 | CHB |
| rs251859   | RPS16     | GI_34335151-S | 19 | 19 | 44610569 | 7843  | 6.5431 | 5.84739 | CHB |
| rs251857   | RPS16     | GI_34335151-S | 19 | 19 | 44611378 | 7034  | 6.5431 | 5.84739 | CHB |
| rs566130   | RPS16     | GI_34335151-S | 19 | 19 | 44615969 | 2443  | 6.5431 | 5.84739 | CHB |
| rs17626    | RPS16     | GI_34335151-S | 19 | 19 | 44618361 | 51    | 6.1007 | 5.84739 | CHB |
| rs530411   | RPS16     | GI_34335151-S | 19 | 19 | 44619380 | 968   | 6.9931 | 5.84739 | CHB |
| rs2353678  | RPS16     | GI_34335151-S | 19 | 19 | 44622899 | 4487  | 6.9931 | 5.84739 | CHB |
| rs1865091  | RPS16     | GI_34335151-S | 19 | 19 | 44623906 | 5494  | 6.9931 | 5.84739 | CHB |
| rs2116932  | RPS16     | GI_34335151-S | 19 | 19 | 44628533 | 10121 | 6.0139 | 5.84739 | CHB |
| rs4803240  | RPS16     | GI_34335151-S | 19 | 19 | 44639422 | 21010 | 6.0256 | 5.84739 | CHB |

|            |           |               |    |    |          |        |         |         |     |
|------------|-----------|---------------|----|----|----------|--------|---------|---------|-----|
| rs2009970  | RPS16     | GI_34335151-S | 19 | 19 | 44642926 | 24514  | 6.0256  | 5.84739 | CHB |
| rs2060271  | RPS16     | GI_34335151-S | 19 | 19 | 44643846 | 25434  | 6.0256  | 5.84739 | CHB |
| rs1560730  | RPS16     | GI_34335151-S | 19 | 19 | 44647631 | 29219  | 6.0256  | 5.84739 | CHB |
| rs2304219  | RPS16     | GI_34335151-S | 19 | 19 | 44655158 | 36746  | 6.0256  | 5.84739 | CHB |
| rs2288933  | RPS16     | GI_34335151-S | 19 | 19 | 44664103 | 45691  | 6.443   | 5.84739 | CHB |
| rs2288934  | RPS16     | GI_34335151-S | 19 | 19 | 44665943 | 47531  | 6.1142  | 5.84739 | CHB |
| rs4803245  | RPS16     | GI_34335151-S | 19 | 19 | 44668304 | 49892  | 6.1142  | 5.84739 | CHB |
| rs2317314  | R29124_1  | GI_16117774-S | 19 | 19 | 46754147 | 23456  | 7.4019  | 5.72567 | CHB |
| rs7251994  | R29124_1  | GI_16117774-S | 19 | 19 | 46755515 | 22088  | 6.8515  | 5.72567 | CHB |
| rs10420992 | R29124_1  | GI_16117774-S | 19 | 19 | 46756302 | 21301  | 8.7555  | 5.72567 | CHB |
| rs17724225 | R29124_1  | GI_16117774-S | 19 | 19 | 46756350 | 21253  | 7.3684  | 5.72567 | CHB |
| rs4803481  | R29124_1  | GI_16117774-S | 19 | 19 | 46758396 | 19207  | 7.5534  | 5.72567 | CHB |
| rs10421584 | R29124_1  | GI_16117774-S | 19 | 19 | 46759818 | 17785  | 7.3684  | 5.72567 | CHB |
| rs10421785 | R29124_1  | GI_16117774-S | 19 | 19 | 46759870 | 17733  | 6.8515  | 5.72567 | CHB |
| rs11083627 | R29124_1  | GI_16117774-S | 19 | 19 | 46761740 | 15863  | 8.0508  | 5.72567 | CHB |
| rs12150975 | R29124_1  | GI_16117774-S | 19 | 19 | 46762200 | 15403  | 8.3999  | 5.72567 | CHB |
| rs12983999 | R29124_1  | GI_16117774-S | 19 | 19 | 46762368 | 15235  | 8.165   | 5.72567 | CHB |
| rs3745938  | R29124_1  | GI_16117774-S | 19 | 19 | 46763007 | 14596  | 7.8899  | 5.72567 | CHB |
| rs12462194 | R29124_1  | GI_16117774-S | 19 | 19 | 46764129 | 13474  | 10.5075 | 5.72567 | CHB |
| rs10409976 | R29124_1  | GI_16117774-S | 19 | 19 | 46767612 | 9991   | 8.7412  | 5.72567 | CHB |
| rs1860255  | R29124_1  | GI_16117774-S | 19 | 19 | 46768912 | 8691   | 9.4921  | 5.72567 | CHB |
| rs10406221 | R29124_1  | GI_16117774-S | 19 | 19 | 46770443 | 7160   | 10.5075 | 5.72567 | CHB |
| rs2191019  | R29124_1  | GI_16117774-S | 19 | 19 | 46772763 | 4840   | 9.4921  | 5.72567 | CHB |
| rs7257657  | R29124_1  | GI_16117774-S | 19 | 19 | 46774166 | 3437   | 7.081   | 5.72567 | CHB |
| rs7247842  | R29124_1  | GI_16117774-S | 19 | 19 | 46775513 | 2090   | 7.6534  | 5.72567 | CHB |
| rs714106   | R29124_1  | GI_16117774-S | 19 | 19 | 46775689 | 1914   | 9.4856  | 5.72567 | CHB |
| rs740591   | R29124_1  | GI_16117774-S | 19 | 19 | 46776426 | 1177   | 6.4143  | 5.72567 | CHB |
| rs758350   | R29124_1  | GI_16117774-S | 19 | 19 | 46777002 | 601    | 7.6534  | 5.72567 | CHB |
| rs2302188  | R29124_1  | GI_16117774-S | 19 | 19 | 46777713 | 110    | 9.4921  | 5.72567 | CHB |
| rs3745936  | R29124_1  | GI_16117774-S | 19 | 19 | 46784655 | 7052   | 10.5075 | 5.72567 | CHB |
| rs11083629 | R29124_1  | GI_16117774-S | 19 | 19 | 46786574 | 8971   | 9.4921  | 5.72567 | CHB |
| rs2006209  | R29124_1  | GI_16117774-S | 19 | 19 | 46788068 | 10465  | 6.4395  | 5.72567 | CHB |
| rs2191241  | R29124_1  | GI_16117774-S | 19 | 19 | 46795392 | 17789  | 6.7026  | 5.72567 | CHB |
| rs2298881  | ERCC1     | GI_42544170-A | 19 | 19 | 50618756 | 8758   | 6.2083  | 5.95459 | CHB |
| rs12609260 | FLJ10781  | GI_39780596-S | 19 | 19 | 51652806 | 8962   | 7.8225  | 6.25899 | CHB |
| rs12609521 | FLJ10781  | GI_39780596-S | 19 | 19 | 51658767 | 3001   | 7.8225  | 6.25899 | CHB |
| rs3745787  | FLJ10781  | GI_39780596-S | 19 | 19 | 51663203 | 1435   | 10.005  | 6.25899 | CHB |
| rs1653554  | PLA2G4C   | GI_4505850-S  | 19 | 19 | 53300284 | 57300  | 6.1967  | 5.88292 | CHB |
| rs2307279  | PLA2G4C   | GI_4505850-S  | 19 | 19 | 53300410 | 57426  | 9.3324  | 5.88292 | CHB |
| rs7250148  | PLA2G4C   | GI_4505850-S  | 19 | 19 | 53308470 | 65486  | 7.313   | 5.88292 | CHB |
| rs1047405  | ZNF587    | GI_14249531-S | 19 | 19 | 63072690 | 955    | 6.7233  | 5.76636 | CHB |
| rs7245531  | ZNF587    | GI_14249531-S | 19 | 19 | 63080519 | 8784   | 7.2394  | 5.76636 | CHB |
| rs4801273  | SLC27A5   | GI_13325056-S | 19 | 19 | 63692085 | 9719   | 6.573   | 5.60852 | CHB |
| rs11666790 | MGC2752   | GI_33859747-S | 19 | 19 | 63725153 | 60059  | 7.6738  | 5.54208 | CHB |
| rs7249714  | MGC2752   | GI_33859747-S | 19 | 19 | 63749895 | 35317  | 7.6738  | 5.54208 | CHB |
| rs895374   | MGC2752   | GI_33859747-S | 19 | 19 | 63758730 | 26482  | 9.009   | 5.54208 | CHB |
| rs3794965  | MGC2752   | GI_33859747-S | 19 | 19 | 63761165 | 24047  | 8.8693  | 5.54208 | CHB |
| rs10413586 | MGC2752   | GI_33859747-S | 19 | 19 | 63763133 | 22079  | 8.8693  | 5.54208 | CHB |
| rs4801614  | MGC2752   | GI_33859747-S | 19 | 19 | 63788762 | 3550   | 9.9729  | 5.54208 | CHB |
| rs4815580  | Hs.516827 | Hs.516827-S   | 20 | 20 | 333052   | 6165   | 6.9351  | 6.19841 | CHB |
| rs6052278  | RNF24     | GI_10518498-S | 20 | 20 | 3991843  | 129808 | 6.2686  | 6.24558 | CHB |
| rs6057602  | DUSP15    | GI_29826316-A | 20 | 20 | 30645469 | 732897 | 5.4418  | 5.18388 | CHB |
| rs6087398  | DUSP15    | GI_29826316-A | 20 | 20 | 30648260 | 735688 | 5.4418  | 5.18388 | CHB |
| rs751199   | DUSP15    | GI_29826316-A | 20 | 20 | 30651165 | 738593 | 5.5194  | 5.18388 | CHB |
| rs1739652  | LOC375097 | GI_37555934-S | 20 | 20 | 36482373 | 561    | 7.3211  | 5.97194 | CHB |
| rs1739652  | Hs.400876 | Hs.400876-S   | 20 | 20 | 36482373 | 412    | 7.3211  | 5.88673 | CHB |

|            |           |               |    |    |          |        |        |         |     |
|------------|-----------|---------------|----|----|----------|--------|--------|---------|-----|
| rs3752277  | LOC375097 | GI_37555934-S | 20 | 20 | 36484167 | 1233   | 7.4006 | 5.97194 | CHB |
| rs3752277  | Hs.400876 | Hs.400876-S   | 20 | 20 | 36484167 | 1382   | 7.4006 | 5.88673 | CHB |
| rs3752278  | LOC375097 | GI_37555934-S | 20 | 20 | 36484231 | 1297   | 7.4006 | 5.97194 | CHB |
| rs3752278  | Hs.400876 | Hs.400876-S   | 20 | 20 | 36484231 | 1446   | 7.4006 | 5.88673 | CHB |
| rs3752279  | LOC375097 | GI_37555934-S | 20 | 20 | 36484373 | 1439   | 7.3211 | 5.97194 | CHB |
| rs3752279  | Hs.400876 | Hs.400876-S   | 20 | 20 | 36484373 | 1588   | 7.3211 | 5.88673 | CHB |
| rs3752280  | LOC375097 | GI_37555934-S | 20 | 20 | 36484421 | 1487   | 7.4006 | 5.97194 | CHB |
| rs3752280  | Hs.400876 | Hs.400876-S   | 20 | 20 | 36484421 | 1636   | 7.4006 | 5.88673 | CHB |
| rs1780636  | LOC375097 | GI_37555934-S | 20 | 20 | 36486997 | 4063   | 7.4006 | 5.97194 | CHB |
| rs1780636  | Hs.400876 | Hs.400876-S   | 20 | 20 | 36486997 | 4212   | 7.4006 | 5.88673 | CHB |
| rs752775   | LOC375097 | GI_37555934-S | 20 | 20 | 36488195 | 5261   | 7.4006 | 5.97194 | CHB |
| rs752775   | Hs.400876 | Hs.400876-S   | 20 | 20 | 36488195 | 5410   | 7.4006 | 5.88673 | CHB |
| rs752774   | LOC375097 | GI_37555934-S | 20 | 20 | 36488429 | 5495   | 7.3211 | 5.97194 | CHB |
| rs752774   | Hs.400876 | Hs.400876-S   | 20 | 20 | 36488429 | 5644   | 7.3211 | 5.88673 | CHB |
| rs707578   | LOC375097 | GI_37555934-S | 20 | 20 | 36489289 | 6355   | 7.4006 | 5.97194 | CHB |
| rs707578   | Hs.400876 | Hs.400876-S   | 20 | 20 | 36489289 | 6504   | 7.4006 | 5.88673 | CHB |
| rs788347   | LOC375097 | GI_37555934-S | 20 | 20 | 36495997 | 13063  | 7.4006 | 5.97194 | CHB |
| rs788347   | Hs.400876 | Hs.400876-S   | 20 | 20 | 36495997 | 13212  | 7.4006 | 5.88673 | CHB |
| rs788348   | LOC375097 | GI_37555934-S | 20 | 20 | 36496888 | 13954  | 7.3211 | 5.97194 | CHB |
| rs788348   | Hs.400876 | Hs.400876-S   | 20 | 20 | 36496888 | 14103  | 7.3211 | 5.88673 | CHB |
| rs788350   | LOC375097 | GI_37555934-S | 20 | 20 | 36498050 | 15116  | 7.4006 | 5.97194 | CHB |
| rs788350   | Hs.400876 | Hs.400876-S   | 20 | 20 | 36498050 | 15265  | 7.4006 | 5.88673 | CHB |
| rs805527   | LOC375097 | GI_37555934-S | 20 | 20 | 36506018 | 23084  | 7.3211 | 5.97194 | CHB |
| rs805527   | Hs.400876 | Hs.400876-S   | 20 | 20 | 36506018 | 23233  | 7.3211 | 5.88673 | CHB |
| rs805528   | LOC375097 | GI_37555934-S | 20 | 20 | 36506505 | 23571  | 7.3625 | 5.97194 | CHB |
| rs805528   | Hs.400876 | Hs.400876-S   | 20 | 20 | 36506505 | 23720  | 7.3625 | 5.88673 | CHB |
| rs805530   | LOC375097 | GI_37555934-S | 20 | 20 | 36507613 | 24679  | 7.4006 | 5.97194 | CHB |
| rs805530   | Hs.400876 | Hs.400876-S   | 20 | 20 | 36507613 | 24828  | 7.4006 | 5.88673 | CHB |
| rs805531   | LOC375097 | GI_37555934-S | 20 | 20 | 36508140 | 25206  | 7.4006 | 5.97194 | CHB |
| rs805531   | Hs.400876 | Hs.400876-S   | 20 | 20 | 36508140 | 25355  | 7.4006 | 5.88673 | CHB |
| rs12397    | LOC375097 | GI_37555934-S | 20 | 20 | 36512651 | 29717  | 7.4006 | 5.97194 | CHB |
| rs12397    | Hs.400876 | Hs.400876-S   | 20 | 20 | 36512651 | 29866  | 7.4006 | 5.88673 | CHB |
| rs805532   | LOC375097 | GI_37555934-S | 20 | 20 | 36513421 | 30487  | 7.4006 | 5.97194 | CHB |
| rs805532   | Hs.400876 | Hs.400876-S   | 20 | 20 | 36513421 | 30636  | 7.4006 | 5.88673 | CHB |
| rs805552   | LOC375097 | GI_37555934-S | 20 | 20 | 36536221 | 53287  | 7.4006 | 5.97194 | CHB |
| rs805552   | Hs.400876 | Hs.400876-S   | 20 | 20 | 36536221 | 53436  | 7.4006 | 5.88673 | CHB |
| rs1303567  | LOC375097 | GI_37555934-S | 20 | 20 | 36539571 | 56637  | 7.4006 | 5.97194 | CHB |
| rs1303567  | Hs.400876 | Hs.400876-S   | 20 | 20 | 36539571 | 56786  | 7.4006 | 5.88673 | CHB |
| rs805554   | LOC375097 | GI_37555934-S | 20 | 20 | 36540455 | 57521  | 7.4006 | 5.97194 | CHB |
| rs805554   | Hs.400876 | Hs.400876-S   | 20 | 20 | 36540455 | 57670  | 7.4006 | 5.88673 | CHB |
| rs1303588  | LOC375097 | GI_37555934-S | 20 | 20 | 36541160 | 58226  | 7.4006 | 5.97194 | CHB |
| rs1303588  | Hs.400876 | Hs.400876-S   | 20 | 20 | 36541160 | 58375  | 7.4006 | 5.88673 | CHB |
| rs1303582  | LOC375097 | GI_37555934-S | 20 | 20 | 36546349 | 63415  | 7.3211 | 5.97194 | CHB |
| rs1303582  | Hs.400876 | Hs.400876-S   | 20 | 20 | 36546349 | 63564  | 7.3211 | 5.88673 | CHB |
| rs1303581  | LOC375097 | GI_37555934-S | 20 | 20 | 36547300 | 64366  | 7.4006 | 5.97194 | CHB |
| rs1303581  | Hs.400876 | Hs.400876-S   | 20 | 20 | 36547300 | 64515  | 7.4006 | 5.88673 | CHB |
| rs1303575  | LOC375097 | GI_37555934-S | 20 | 20 | 36562231 | 79297  | 7.4006 | 5.97194 | CHB |
| rs1303575  | Hs.400876 | Hs.400876-S   | 20 | 20 | 36562231 | 79446  | 7.4006 | 5.88673 | CHB |
| rs1303574  | LOC375097 | GI_37555934-S | 20 | 20 | 36562655 | 79721  | 7.4006 | 5.97194 | CHB |
| rs1303574  | Hs.400876 | Hs.400876-S   | 20 | 20 | 36562655 | 79870  | 7.4006 | 5.88673 | CHB |
| rs1315305  | LOC375097 | GI_37555934-S | 20 | 20 | 36565135 | 82201  | 7.4006 | 5.97194 | CHB |
| rs1315305  | Hs.400876 | Hs.400876-S   | 20 | 20 | 36565135 | 82350  | 7.4006 | 5.88673 | CHB |
| rs1303571  | LOC375097 | GI_37555934-S | 20 | 20 | 36566533 | 83599  | 6.0604 | 5.97194 | CHB |
| rs1303571  | Hs.400876 | Hs.400876-S   | 20 | 20 | 36566533 | 83748  | 6.0604 | 5.88673 | CHB |
| rs11699660 | LOC375097 | GI_37555934-S | 20 | 20 | 36585303 | 102369 | 7.3211 | 5.97194 | CHB |
| rs11699660 | Hs.400876 | Hs.400876-S   | 20 | 20 | 36585303 | 102518 | 7.3211 | 5.88673 | CHB |

|           |           |               |    |    |          |        |         |         |     |
|-----------|-----------|---------------|----|----|----------|--------|---------|---------|-----|
| rs805559  | LOC375097 | GI_37555934-S | 20 | 20 | 36591367 | 108433 | 6.7034  | 5.97194 | CHB |
| rs805559  | Hs.400876 | Hs.400876-S   | 20 | 20 | 36591367 | 108582 | 6.7034  | 5.88673 | CHB |
| rs805540  | LOC375097 | GI_37555934-S | 20 | 20 | 36599772 | 116838 | 7.1205  | 5.97194 | CHB |
| rs805540  | Hs.400876 | Hs.400876-S   | 20 | 20 | 36599772 | 116987 | 6.9835  | 5.88673 | CHB |
| rs4812025 | LOC375097 | GI_37555934-S | 20 | 20 | 36614832 | 131898 | 7.3211  | 5.97194 | CHB |
| rs4812025 | Hs.400876 | Hs.400876-S   | 20 | 20 | 36614832 | 132047 | 7.3211  | 5.88673 | CHB |
| rs2864932 | LOC375097 | GI_37555934-S | 20 | 20 | 36619423 | 136489 | 7.4006  | 5.97194 | CHB |
| rs2864932 | Hs.400876 | Hs.400876-S   | 20 | 20 | 36619423 | 136638 | 7.4006  | 5.88673 | CHB |
| rs2185594 | LOC375097 | GI_37555934-S | 20 | 20 | 36627668 | 144734 | 7.3211  | 5.97194 | CHB |
| rs2185594 | Hs.400876 | Hs.400876-S   | 20 | 20 | 36627668 | 144883 | 7.3211  | 5.88673 | CHB |
| rs1295992 | LOC375097 | GI_37555934-S | 20 | 20 | 36630815 | 147881 | 7.3211  | 5.97194 | CHB |
| rs1295992 | Hs.400876 | Hs.400876-S   | 20 | 20 | 36630815 | 148030 | 7.3211  | 5.88673 | CHB |
| rs2206783 | LOC375097 | GI_37555934-S | 20 | 20 | 36633736 | 150802 | 7.4006  | 5.97194 | CHB |
| rs2206783 | Hs.400876 | Hs.400876-S   | 20 | 20 | 36633736 | 150951 | 7.4006  | 5.88673 | CHB |
| rs1115600 | LOC375097 | GI_37555934-S | 20 | 20 | 36635587 | 152653 | 7.3211  | 5.97194 | CHB |
| rs1115600 | Hs.400876 | Hs.400876-S   | 20 | 20 | 36635587 | 152802 | 7.3211  | 5.88673 | CHB |
| rs6064733 | LOC375097 | GI_37555934-S | 20 | 20 | 36641941 | 159007 | 7.4006  | 5.97194 | CHB |
| rs6064733 | Hs.400876 | Hs.400876-S   | 20 | 20 | 36641941 | 159156 | 7.4006  | 5.88673 | CHB |
| rs1033516 | LOC375097 | GI_37555934-S | 20 | 20 | 36642400 | 159466 | 7.4006  | 5.97194 | CHB |
| rs1033516 | Hs.400876 | Hs.400876-S   | 20 | 20 | 36642400 | 159615 | 7.4006  | 5.88673 | CHB |
| rs4812047 | LOC375097 | GI_37555934-S | 20 | 20 | 36642920 | 159986 | 7.4006  | 5.97194 | CHB |
| rs4812047 | Hs.400876 | Hs.400876-S   | 20 | 20 | 36642920 | 160135 | 7.4006  | 5.88673 | CHB |
| rs4560183 | MYBL2     | GI_31652260-S | 20 | 20 | 41646027 | 132313 | 10.4105 | 6.10874 | CHB |
| rs1055334 | MYBL2     | GI_31652260-S | 20 | 20 | 41650061 | 128279 | 10.1671 | 6.10874 | CHB |
| rs1894668 | MYBL2     | GI_31652260-S | 20 | 20 | 41652333 | 126007 | 8.3478  | 6.10874 | CHB |
| rs6073136 | MYBL2     | GI_31652260-S | 20 | 20 | 41652679 | 125661 | 10.9255 | 6.10874 | CHB |
| rs3752562 | MYBL2     | GI_31652260-S | 20 | 20 | 41653245 | 125095 | 10.1671 | 6.10874 | CHB |
| rs6073139 | MYBL2     | GI_31652260-S | 20 | 20 | 41655020 | 123320 | 9.7333  | 6.10874 | CHB |
| rs6030975 | MYBL2     | GI_31652260-S | 20 | 20 | 41656398 | 121942 | 10.1671 | 6.10874 | CHB |
| rs2664519 | MYBL2     | GI_31652260-S | 20 | 20 | 41658528 | 119812 | 10.1671 | 6.10874 | CHB |
| rs6073142 | MYBL2     | GI_31652260-S | 20 | 20 | 41660426 | 117914 | 10.1671 | 6.10874 | CHB |
| rs6030978 | MYBL2     | GI_31652260-S | 20 | 20 | 41664058 | 114282 | 10.1671 | 6.10874 | CHB |
| rs6073143 | MYBL2     | GI_31652260-S | 20 | 20 | 41664109 | 114231 | 10.1671 | 6.10874 | CHB |
| rs2145214 | MYBL2     | GI_31652260-S | 20 | 20 | 41670481 | 107859 | 10.1671 | 6.10874 | CHB |
| rs4473450 | MYBL2     | GI_31652260-S | 20 | 20 | 41676114 | 102226 | 9.8536  | 6.10874 | CHB |
| rs1555348 | MYBL2     | GI_31652260-S | 20 | 20 | 41682812 | 95528  | 10.1671 | 6.10874 | CHB |
| rs6073157 | MYBL2     | GI_31652260-S | 20 | 20 | 41686956 | 91384  | 9.2167  | 6.10874 | CHB |
| rs2093139 | MYBL2     | GI_31652260-S | 20 | 20 | 41689278 | 89062  | 10.1671 | 6.10874 | CHB |
| rs6030998 | MYBL2     | GI_31652260-S | 20 | 20 | 41692374 | 85966  | 10.1671 | 6.10874 | CHB |
| rs714998  | MYBL2     | GI_31652260-S | 20 | 20 | 41693050 | 85290  | 10.1671 | 6.10874 | CHB |
| rs6073162 | MYBL2     | GI_31652260-S | 20 | 20 | 41693661 | 84679  | 10.1671 | 6.10874 | CHB |
| rs6031007 | MYBL2     | GI_31652260-S | 20 | 20 | 41697916 | 80424  | 9.3641  | 6.10874 | CHB |
| rs2273523 | MYBL2     | GI_31652260-S | 20 | 20 | 41698140 | 80200  | 10.1671 | 6.10874 | CHB |
| rs6017129 | MYBL2     | GI_31652260-S | 20 | 20 | 41699064 | 79276  | 9.9048  | 6.10874 | CHB |
| rs6065638 | MYBL2     | GI_31652260-S | 20 | 20 | 41699114 | 79226  | 10.1671 | 6.10874 | CHB |
| rs383634  | MYBL2     | GI_31652260-S | 20 | 20 | 41704251 | 74089  | 10.1671 | 6.10874 | CHB |
| rs439115  | MYBL2     | GI_31652260-S | 20 | 20 | 41704335 | 74005  | 9.8308  | 6.10874 | CHB |
| rs3091647 | MYBL2     | GI_31652260-S | 20 | 20 | 41710058 | 68282  | 9.3966  | 6.10874 | CHB |
| rs826962  | MYBL2     | GI_31652260-S | 20 | 20 | 41713141 | 65199  | 10.1671 | 6.10874 | CHB |
| rs385609  | MYBL2     | GI_31652260-S | 20 | 20 | 41719304 | 59036  | 10.1671 | 6.10874 | CHB |
| rs826941  | MYBL2     | GI_31652260-S | 20 | 20 | 41723562 | 54778  | 10.1671 | 6.10874 | CHB |
| rs385345  | MYBL2     | GI_31652260-S | 20 | 20 | 41725375 | 52965  | 10.1671 | 6.10874 | CHB |
| rs452734  | MYBL2     | GI_31652260-S | 20 | 20 | 41727294 | 51046  | 9.9577  | 6.10874 | CHB |
| rs619289  | MYBL2     | GI_31652260-S | 20 | 20 | 41728027 | 50313  | 10.1671 | 6.10874 | CHB |
| rs285206  | MYBL2     | GI_31652260-S | 20 | 20 | 41729956 | 48384  | 10.1671 | 6.10874 | CHB |
| rs285205  | MYBL2     | GI_31652260-S | 20 | 20 | 41730058 | 48282  | 10.1671 | 6.10874 | CHB |

|            |           |               |    |    |          |       |         |         |     |
|------------|-----------|---------------|----|----|----------|-------|---------|---------|-----|
| rs826950   | MYBL2     | GI_31652260-S | 20 | 20 | 41735785 | 42555 | 10.1671 | 6.10874 | CHB |
| rs6103415  | MYBL2     | GI_31652260-S | 20 | 20 | 41741631 | 36709 | 10.1671 | 6.10874 | CHB |
| rs3091246  | MYBL2     | GI_31652260-S | 20 | 20 | 41742999 | 35341 | 10.1671 | 6.10874 | CHB |
| rs433732   | MYBL2     | GI_31652260-S | 20 | 20 | 41743432 | 34908 | 10.1671 | 6.10874 | CHB |
| rs419842   | MYBL2     | GI_31652260-S | 20 | 20 | 41744225 | 34115 | 10.1671 | 6.10874 | CHB |
| rs387769   | MYBL2     | GI_31652260-S | 20 | 20 | 41745269 | 33071 | 10.1671 | 6.10874 | CHB |
| rs826960   | MYBL2     | GI_31652260-S | 20 | 20 | 41748425 | 29915 | 10.1671 | 6.10874 | CHB |
| rs285165   | MYBL2     | GI_31652260-S | 20 | 20 | 41763213 | 15127 | 10.1671 | 6.10874 | CHB |
| rs826955   | MYBL2     | GI_31652260-S | 20 | 20 | 41769619 | 8721  | 9.116   | 6.10874 | CHB |
| rs285171   | MYBL2     | GI_31652260-S | 20 | 20 | 41771289 | 7051  | 8.7279  | 6.10874 | CHB |
| rs285172   | MYBL2     | GI_31652260-S | 20 | 20 | 41774098 | 4242  | 6.9576  | 6.10874 | CHB |
| rs6010789  | Hs.517172 | Hs.517172-S   | 20 | 20 | 61031598 | 104   | 5.874   | 5.85263 | CHB |
| rs2836922  | C21orf107 | GI_38026951-I | 21 | 21 | 39438178 | 46149 | 10.1529 | 6.48    | CHB |
| rs7281463  | C21orf107 | GI_38026951-I | 21 | 21 | 39442653 | 41674 | 7.0546  | 6.48    | CHB |
| rs2037923  | C21orf107 | GI_38026951-I | 21 | 21 | 39447157 | 37170 | 7.1669  | 6.48    | CHB |
| rs7279497  | C21orf107 | GI_38026951-I | 21 | 21 | 39453176 | 31151 | 10.1529 | 6.48    | CHB |
| rs6517518  | C21orf107 | GI_38026951-I | 21 | 21 | 39455643 | 28684 | 7.1669  | 6.48    | CHB |
| rs377098   | C21orf107 | GI_38026951-I | 21 | 21 | 39457086 | 27241 | 7.0546  | 6.48    | CHB |
| rs418298   | C21orf107 | GI_38026951-I | 21 | 21 | 39458524 | 25803 | 7.2816  | 6.48    | CHB |
| rs418359   | C21orf107 | GI_38026951-I | 21 | 21 | 39458604 | 25723 | 7.0546  | 6.48    | CHB |
| rs2836926  | C21orf107 | GI_38026951-I | 21 | 21 | 39458660 | 25667 | 10.1529 | 6.48    | CHB |
| rs7282604  | C21orf107 | GI_38026951-I | 21 | 21 | 39458780 | 25547 | 7.0546  | 6.48    | CHB |
| rs419469   | C21orf107 | GI_38026951-I | 21 | 21 | 39459104 | 25223 | 7.2816  | 6.48    | CHB |
| rs8134214  | C21orf107 | GI_38026951-I | 21 | 21 | 39464237 | 20090 | 10.1529 | 6.48    | CHB |
| rs2836930  | C21orf107 | GI_38026951-I | 21 | 21 | 39467526 | 16801 | 10.1529 | 6.48    | CHB |
| rs2836931  | C21orf107 | GI_38026951-I | 21 | 21 | 39468439 | 15888 | 9.7454  | 6.48    | CHB |
| rs428602   | C21orf107 | GI_38026951-I | 21 | 21 | 39468874 | 15453 | 7.0546  | 6.48    | CHB |
| rs2245455  | C21orf107 | GI_38026951-I | 21 | 21 | 39469957 | 14370 | 7.0546  | 6.48    | CHB |
| rs2236437  | C21orf107 | GI_38026951-I | 21 | 21 | 39478465 | 5862  | 8.9649  | 6.48    | CHB |
| rs2297256  | C21orf107 | GI_38026951-I | 21 | 21 | 39480291 | 4036  | 14.1738 | 6.48    | CHB |
| rs2410104  | C21orf107 | GI_38026951-I | 21 | 21 | 39486334 | 2007  | 9.6531  | 6.48    | CHB |
| rs2836934  | C21orf107 | GI_38026951-I | 21 | 21 | 39486755 | 2428  | 14.1738 | 6.48    | CHB |
| rs2150410  | C21orf107 | GI_38026951-I | 21 | 21 | 39491649 | 7322  | 9.8125  | 6.48    | CHB |
| rs1041439  | C21orf107 | GI_38026951-I | 21 | 21 | 39493116 | 8789  | 9.6531  | 6.48    | CHB |
| rs13051430 | C21orf107 | GI_38026951-I | 21 | 21 | 39495900 | 11573 | 10.2829 | 6.48    | CHB |
| rs2150411  | C21orf107 | GI_38026951-I | 21 | 21 | 39496422 | 12095 | 14.1738 | 6.48    | CHB |
| rs4818001  | C21orf107 | GI_38026951-I | 21 | 21 | 39496958 | 12631 | 14.1738 | 6.48    | CHB |
| rs8130320  | C21orf107 | GI_38026951-I | 21 | 21 | 39502128 | 17801 | 14.1738 | 6.48    | CHB |
| rs8132230  | C21orf107 | GI_38026951-I | 21 | 21 | 39505951 | 21624 | 9.6531  | 6.48    | CHB |
| rs8132143  | C21orf107 | GI_38026951-I | 21 | 21 | 39506128 | 21801 | 14.1738 | 6.48    | CHB |
| rs8132424  | C21orf107 | GI_38026951-I | 21 | 21 | 39506282 | 21955 | 14.1738 | 6.48    | CHB |
| rs2836942  | C21orf107 | GI_38026951-I | 21 | 21 | 39513251 | 28924 | 14.1738 | 6.48    | CHB |
| rs8128118  | C21orf107 | GI_38026951-I | 21 | 21 | 39514099 | 29772 | 7.1183  | 6.48    | CHB |
| rs2836943  | C21orf107 | GI_38026951-I | 21 | 21 | 39514481 | 30154 | 14.2454 | 6.48    | CHB |
| rs2183575  | C21orf107 | GI_38026951-I | 21 | 21 | 39516230 | 31903 | 8.8554  | 6.48    | CHB |
| rs2183576  | C21orf107 | GI_38026951-I | 21 | 21 | 39521095 | 36768 | 8.8482  | 6.48    | CHB |
| rs2836948  | C21orf107 | GI_38026951-I | 21 | 21 | 39521547 | 37220 | 14.1738 | 6.48    | CHB |
| rs2026266  | C21orf107 | GI_38026951-I | 21 | 21 | 39521590 | 37263 | 8.8905  | 6.48    | CHB |
| rs4816619  | C21orf107 | GI_38026951-I | 21 | 21 | 39521746 | 37419 | 9.4559  | 6.48    | CHB |
| rs11702268 | C21orf107 | GI_38026951-I | 21 | 21 | 39522183 | 37856 | 8.4466  | 6.48    | CHB |
| rs17816433 | C21orf107 | GI_38026951-I | 21 | 21 | 39524326 | 39999 | 11.9334 | 6.48    | CHB |
| rs1541101  | C21orf107 | GI_38026951-I | 21 | 21 | 39525800 | 41473 | 9.5483  | 6.48    | CHB |
| rs8131263  | C21orf107 | GI_38026951-I | 21 | 21 | 39527088 | 42761 | 9.6531  | 6.48    | CHB |
| rs2150413  | C21orf107 | GI_38026951-I | 21 | 21 | 39536748 | 52421 | 14.1738 | 6.48    | CHB |
| rs2150414  | C21orf107 | GI_38026951-I | 21 | 21 | 39536858 | 52531 | 14.1738 | 6.48    | CHB |
| rs2836952  | C21orf107 | GI_38026951-I | 21 | 21 | 39538521 | 54194 | 13.0143 | 6.48    | CHB |



|            |           |               |    |    |          |        |         |         |     |
|------------|-----------|---------------|----|----|----------|--------|---------|---------|-----|
| rs9978591  | C21orf107 | GI_38026951-I | 21 | 21 | 39541997 | 57670  | 9.6531  | 6.48    | CHB |
| rs2836956  | C21orf107 | GI_38026951-I | 21 | 21 | 39544888 | 60561  | 14.1738 | 6.48    | CHB |
| rs2836958  | C21orf107 | GI_38026951-I | 21 | 21 | 39545396 | 61069  | 14.2454 | 6.48    | CHB |
| rs2836959  | C21orf107 | GI_38026951-I | 21 | 21 | 39545538 | 61211  | 14.1738 | 6.48    | CHB |
| rs7278297  | C21orf107 | GI_38026951-I | 21 | 21 | 39547622 | 63295  | 14.1738 | 6.48    | CHB |
| rs7276774  | C21orf107 | GI_38026951-I | 21 | 21 | 39550595 | 66268  | 8.0765  | 6.48    | CHB |
| rs8127391  | C21orf107 | GI_38026951-I | 21 | 21 | 39557930 | 73603  | 9.6531  | 6.48    | CHB |
| rs2836966  | C21orf107 | GI_38026951-I | 21 | 21 | 39559391 | 75064  | 14.1738 | 6.48    | CHB |
| rs6517531  | C21orf107 | GI_38026951-I | 21 | 21 | 39559517 | 75190  | 8.3966  | 6.48    | CHB |
| rs1541100  | C21orf107 | GI_38026951-I | 21 | 21 | 39562922 | 78595  | 9.8125  | 6.48    | CHB |
| rs6517532  | C21orf107 | GI_38026951-I | 21 | 21 | 39564059 | 79732  | 9.6531  | 6.48    | CHB |
| rs7283439  | C21orf107 | GI_38026951-I | 21 | 21 | 39567607 | 83280  | 9.4559  | 6.48    | CHB |
| rs7275773  | C21orf107 | GI_38026951-I | 21 | 21 | 39567960 | 83633  | 9.6531  | 6.48    | CHB |
| rs2836969  | C21orf107 | GI_38026951-I | 21 | 21 | 39570135 | 85808  | 9.6252  | 6.48    | CHB |
| rs4818011  | C21orf107 | GI_38026951-I | 21 | 21 | 39570465 | 86138  | 9.8125  | 6.48    | CHB |
| rs973521   | C21orf107 | GI_38026951-I | 21 | 21 | 39572491 | 88164  | 9.4559  | 6.48    | CHB |
| rs2836971  | C21orf107 | GI_38026951-I | 21 | 21 | 39573910 | 89583  | 8.1054  | 6.48    | CHB |
| rs718225   | C21orf107 | GI_38026951-I | 21 | 21 | 39574486 | 90159  | 9.4559  | 6.48    | CHB |
| rs2836975  | C21orf107 | GI_38026951-I | 21 | 21 | 39585490 | 101163 | 8.2867  | 6.48    | CHB |
| rs2142117  | C21orf107 | GI_38026951-I | 21 | 21 | 39591175 | 106848 | 9.4559  | 6.48    | CHB |
| rs1984748  | C21orf107 | GI_38026951-I | 21 | 21 | 39591768 | 107441 | 9.4559  | 6.48    | CHB |
| rs2056844  | C21orf107 | GI_38026951-I | 21 | 21 | 39592330 | 108003 | 14.1738 | 6.48    | CHB |
| rs7410020  | C21orf107 | GI_38026951-I | 21 | 21 | 39597363 | 113036 | 9.815   | 6.48    | CHB |
| rs8131150  | C21orf107 | GI_38026951-I | 21 | 21 | 39599185 | 114858 | 9.6531  | 6.48    | CHB |
| rs2272576  | C21orf107 | GI_38026951-I | 21 | 21 | 39606259 | 121932 | 7.0033  | 6.48    | CHB |
| rs2836980  | C21orf107 | GI_38026951-I | 21 | 21 | 39609488 | 125161 | 11.4807 | 6.48    | CHB |
| rs2836981  | C21orf107 | GI_38026951-I | 21 | 21 | 39610235 | 125908 | 7.2052  | 6.48    | CHB |
| rs2836982  | C21orf107 | GI_38026951-I | 21 | 21 | 39611041 | 126714 | 9.6252  | 6.48    | CHB |
| rs2836983  | C21orf107 | GI_38026951-I | 21 | 21 | 39611206 | 126879 | 14.1738 | 6.48    | CHB |
| rs7281853  | C21orf107 | GI_38026951-I | 21 | 21 | 39615360 | 131033 | 9.6252  | 6.48    | CHB |
| rs7282582  | C21orf107 | GI_38026951-I | 21 | 21 | 39618844 | 134517 | 11.4807 | 6.48    | CHB |
| rs11088471 | C21orf107 | GI_38026951-I | 21 | 21 | 39621183 | 136856 | 8.0842  | 6.48    | CHB |
| rs2037925  | C21orf107 | GI_38026951-I | 21 | 21 | 39621801 | 137474 | 7.2052  | 6.48    | CHB |
| rs2410123  | C21orf107 | GI_38026951-I | 21 | 21 | 39621963 | 137636 | 7.3785  | 6.48    | CHB |
| rs2836985  | C21orf107 | GI_38026951-I | 21 | 21 | 39623039 | 138712 | 10.3795 | 6.48    | CHB |
| rs2836988  | C21orf107 | GI_38026951-I | 21 | 21 | 39629845 | 145518 | 7.2052  | 6.48    | CHB |
| rs726046   | C21orf107 | GI_38026951-I | 21 | 21 | 39634237 | 149910 | 7.9571  | 6.48    | CHB |
| rs2070867  | C21orf107 | GI_38026951-I | 21 | 21 | 39637002 | 152675 | 7.9571  | 6.48    | CHB |
| rs2735310  | C21orf107 | GI_38026951-I | 21 | 21 | 39639370 | 155043 | 7.2155  | 6.48    | CHB |
| rs10084614 | TSGA2     | GI_18254455-S | 21 | 21 | 42761422 | 4571   | 7.1516  | 6.28223 | CHB |
| rs2839533  | TSGA2     | GI_18254455-S | 21 | 21 | 42770095 | 4102   | 8.0849  | 6.28223 | CHB |
| rs228048   | Hs.473917 | Hs.473917-S   | 21 | 21 | 42825210 | 5622   | 6.8111  | 6.37265 | CHB |
| rs228051   | Hs.473917 | Hs.473917-S   | 21 | 21 | 42826147 | 6559   | 6.8111  | 6.37265 | CHB |
| rs228052   | Hs.473917 | Hs.473917-S   | 21 | 21 | 42826723 | 7135   | 7.0325  | 6.37265 | CHB |
| rs228055   | Hs.473917 | Hs.473917-S   | 21 | 21 | 42827611 | 8023   | 6.8111  | 6.37265 | CHB |
| rs228056   | Hs.473917 | Hs.473917-S   | 21 | 21 | 42828496 | 8908   | 6.6537  | 6.37265 | CHB |
| rs228057   | Hs.473917 | Hs.473917-S   | 21 | 21 | 42829123 | 9535   | 7.0325  | 6.37265 | CHB |
| rs228059   | Hs.473917 | Hs.473917-S   | 21 | 21 | 42830394 | 10806  | 7.0325  | 6.37265 | CHB |
| rs228060   | Hs.473917 | Hs.473917-S   | 21 | 21 | 42830618 | 11030  | 6.8111  | 6.37265 | CHB |
| rs228073   | Hs.473917 | Hs.473917-S   | 21 | 21 | 42835327 | 15739  | 6.7355  | 6.37265 | CHB |
| rs228076   | Hs.473917 | Hs.473917-S   | 21 | 21 | 42837051 | 17463  | 6.8111  | 6.37265 | CHB |
| rs915874   | Hs.245997 | Hs.245997-S   | 21 | 21 | 42858085 | 6461   | 6.5248  | 6.24434 | CHB |
| rs915875   | Hs.245997 | Hs.245997-S   | 21 | 21 | 42858194 | 6352   | 6.6578  | 6.24434 | CHB |
| rs9976677  | Hs.245997 | Hs.245997-S   | 21 | 21 | 42859573 | 4973   | 6.6578  | 6.24434 | CHB |
| rs2839556  | Hs.245997 | Hs.245997-S   | 21 | 21 | 42863019 | 1527   | 6.8585  | 6.24434 | CHB |
| rs3827235  | Hs.245997 | Hs.245997-S   | 21 | 21 | 42863494 | 1052   | 7.6094  | 6.24434 | CHB |

|            |           |               |    |    |          |        |         |         |     |
|------------|-----------|---------------|----|----|----------|--------|---------|---------|-----|
| rs2839557  | Hs.245997 | Hs.245997-S   | 21 | 21 | 42863867 | 679    | 7.0727  | 6.24434 | CHB |
| rs3746933  | Hs.245997 | Hs.245997-S   | 21 | 21 | 42864660 | 114    | 7.0727  | 6.24434 | CHB |
| rs1399925  | Hs.245997 | Hs.245997-S   | 21 | 21 | 42865011 | 465    | 7.0727  | 6.24434 | CHB |
| rs400893   | Hs.245997 | Hs.245997-S   | 21 | 21 | 42866355 | 1809   | 7.0727  | 6.24434 | CHB |
| rs445343   | Hs.245997 | Hs.245997-S   | 21 | 21 | 42866684 | 2138   | 7.0727  | 6.24434 | CHB |
| rs412212   | Hs.245997 | Hs.245997-S   | 21 | 21 | 42866712 | 2166   | 7.0727  | 6.24434 | CHB |
| rs445554   | Hs.245997 | Hs.245997-S   | 21 | 21 | 42866873 | 2327   | 6.926   | 6.24434 | CHB |
| rs451954   | Hs.245997 | Hs.245997-S   | 21 | 21 | 42869023 | 4477   | 6.7711  | 6.24434 | CHB |
| rs365443   | Hs.245997 | Hs.245997-S   | 21 | 21 | 42871365 | 6819   | 7.0727  | 6.24434 | CHB |
| rs401396   | Hs.245997 | Hs.245997-S   | 21 | 21 | 42871651 | 7105   | 7.0727  | 6.24434 | CHB |
| rs380152   | Hs.245997 | Hs.245997-S   | 21 | 21 | 42873121 | 8575   | 7.0727  | 6.24434 | CHB |
| rs388907   | Hs.245997 | Hs.245997-S   | 21 | 21 | 42873435 | 8889   | 7.0727  | 6.24434 | CHB |
| rs390840   | Hs.245997 | Hs.245997-S   | 21 | 21 | 42873970 | 9424   | 7.0727  | 6.24434 | CHB |
| rs454849   | Hs.245997 | Hs.245997-S   | 21 | 21 | 42874133 | 9587   | 7.0727  | 6.24434 | CHB |
| rs398717   | Hs.245997 | Hs.245997-S   | 21 | 21 | 42874233 | 9687   | 7.0727  | 6.24434 | CHB |
| rs400625   | Hs.245997 | Hs.245997-S   | 21 | 21 | 42874864 | 10318  | 7.0727  | 6.24434 | CHB |
| rs366703   | Hs.245997 | Hs.245997-S   | 21 | 21 | 42876537 | 11991  | 7.0727  | 6.24434 | CHB |
| rs380282   | Hs.245997 | Hs.245997-S   | 21 | 21 | 42876752 | 12206  | 6.5737  | 6.24434 | CHB |
| rs442723   | Hs.245997 | Hs.245997-S   | 21 | 21 | 42876979 | 12433  | 7.0727  | 6.24434 | CHB |
| rs381899   | Hs.245997 | Hs.245997-S   | 21 | 21 | 42877191 | 12645  | 6.9287  | 6.24434 | CHB |
| rs388831   | Hs.245997 | Hs.245997-S   | 21 | 21 | 42877218 | 12672  | 6.9287  | 6.24434 | CHB |
| rs447167   | Hs.245997 | Hs.245997-S   | 21 | 21 | 42877898 | 13352  | 6.6578  | 6.24434 | CHB |
| rs1788448  | Hs.245997 | Hs.245997-S   | 21 | 21 | 42880315 | 15769  | 6.6578  | 6.24434 | CHB |
| rs6586334  | Hs.245997 | Hs.245997-S   | 21 | 21 | 42891021 | 26475  | 6.8982  | 6.24434 | CHB |
| rs387738   | Hs.245997 | Hs.245997-S   | 21 | 21 | 42891148 | 26602  | 6.8982  | 6.24434 | CHB |
| rs397620   | Hs.245997 | Hs.245997-S   | 21 | 21 | 42891949 | 27403  | 6.8982  | 6.24434 | CHB |
| rs379010   | Hs.245997 | Hs.245997-S   | 21 | 21 | 42893215 | 28669  | 6.8982  | 6.24434 | CHB |
| rs433632   | Hs.245997 | Hs.245997-S   | 21 | 21 | 42893492 | 28946  | 6.8982  | 6.24434 | CHB |
| rs401909   | Hs.245997 | Hs.245997-S   | 21 | 21 | 42893720 | 29174  | 6.8982  | 6.24434 | CHB |
| rs5760147  | GSTT1     | GI_4504184-S  | 22 | 22 | 22659502 | 41454  | 10.7202 | 5.88168 | CHB |
| rs407257   | GSTT1     | GI_4504184-S  | 22 | 22 | 22671104 | 29852  | 18.0578 | 5.88168 | CHB |
| rs6004035  | GSTT1     | GI_4504184-S  | 22 | 22 | 22709801 | 8845   | 10.1801 | 5.88168 | CHB |
| rs17004810 | GSTT1     | GI_4504184-S  | 22 | 22 | 22726874 | 25918  | 10.4885 | 5.88168 | CHB |
| rs6519611  | CRYBB2    | GI_4503062-S  | 22 | 22 | 24170409 | 218080 | 6.8781  | 6.01499 | CHB |
| rs9624836  | CRYBB2    | GI_4503062-S  | 22 | 22 | 24170641 | 218312 | 6.8781  | 6.01499 | CHB |
| rs6004652  | CRYBB2    | GI_4503062-S  | 22 | 22 | 24173365 | 221036 | 6.8784  | 6.01499 | CHB |
| rs5996938  | CRYBB2    | GI_4503062-S  | 22 | 22 | 24175589 | 223260 | 6.1434  | 6.01499 | CHB |
| rs6004662  | CRYBB2    | GI_4503062-S  | 22 | 22 | 24186678 | 234349 | 6.8781  | 6.01499 | CHB |
| rs997872   | CRYBB2    | GI_4503062-S  | 22 | 22 | 24203168 | 250839 | 6.8781  | 6.01499 | CHB |
| rs6004672  | CRYBB2    | GI_4503062-S  | 22 | 22 | 24205567 | 253238 | 6.8781  | 6.01499 | CHB |
| rs8141065  | CRYBB2    | GI_4503062-S  | 22 | 22 | 24209742 | 257413 | 6.8781  | 6.01499 | CHB |
| rs6004673  | CRYBB2    | GI_4503062-S  | 22 | 22 | 24209907 | 257578 | 6.8781  | 6.01499 | CHB |
| rs1930966  | CRYBB2    | GI_4503062-S  | 22 | 22 | 24210258 | 257929 | 6.8781  | 6.01499 | CHB |
| rs6004675  | CRYBB2    | GI_4503062-S  | 22 | 22 | 24213939 | 261610 | 6.8781  | 6.01499 | CHB |
| rs16980314 | CRYBB2    | GI_4503062-S  | 22 | 22 | 24230900 | 278571 | 6.8784  | 6.01499 | CHB |
| rs5750715  | APOBEC3B  | GI_22907024-S | 22 | 22 | 37668416 | 41615  | 7.3252  | 5.67395 | CHB |
| rs6001335  | APOBEC3B  | GI_22907024-S | 22 | 22 | 37670466 | 39565  | 6.9647  | 5.67395 | CHB |
| rs2019907  | APOBEC3B  | GI_22907024-S | 22 | 22 | 37713920 | 3889   | 7.2078  | 5.67395 | CHB |
| rs2142833  | APOBEC3B  | GI_22907024-S | 22 | 22 | 37716796 | 6765   | 7.3435  | 5.67395 | CHB |
| rs6001363  | APOBEC3B  | GI_22907024-S | 22 | 22 | 37716980 | 6949   | 5.9621  | 5.67395 | CHB |
| rs9611070  | APOBEC3B  | GI_22907024-S | 22 | 22 | 37720207 | 10176  | 7.3485  | 5.67395 | CHB |
| rs6001371  | APOBEC3B  | GI_22907024-S | 22 | 22 | 37730207 | 20176  | 6.6221  | 5.67395 | CHB |
| rs104664   | FLJ20635  | GI_8923587-S  | 22 | 22 | 44032391 | 24700  | 6.9076  | 6.40248 | CHB |
| rs738171   | FLJ20635  | GI_8923587-S  | 22 | 22 | 44041821 | 15270  | 6.9076  | 6.40248 | CHB |
| rs7285172  | FLJ20635  | GI_8923587-S  | 22 | 22 | 44046882 | 10209  | 6.9076  | 6.40248 | CHB |
| rs3827393  | FLJ20635  | GI_8923587-S  | 22 | 22 | 44056690 | 401    | 6.9076  | 6.40248 | CHB |

|            |           |               |    |    |          |        |         |         |     |
|------------|-----------|---------------|----|----|----------|--------|---------|---------|-----|
| rs3747240  | FLJ20635  | GI_8923587-S  | 22 | 22 | 44060761 | 3670   | 6.9076  | 6.40248 | CHB |
| rs9614647  | FLJ20635  | GI_8923587-S  | 22 | 22 | 44062255 | 5164   | 6.9076  | 6.40248 | CHB |
| rs6006992  | FLJ20635  | GI_8923587-S  | 22 | 22 | 44063297 | 6206   | 6.9076  | 6.40248 | CHB |
| rs6519844  | FLJ20635  | GI_8923587-S  | 22 | 22 | 44064960 | 7869   | 6.9076  | 6.40248 | CHB |
| rs5765271  | FLJ20635  | GI_8923587-S  | 22 | 22 | 44067363 | 10272  | 6.9076  | 6.40248 | CHB |
| rs5765272  | FLJ20635  | GI_8923587-S  | 22 | 22 | 44068438 | 11347  | 6.9076  | 6.40248 | CHB |
| rs5765276  | FLJ20635  | GI_8923587-S  | 22 | 22 | 44069399 | 12308  | 6.9076  | 6.40248 | CHB |
| rs1569413  | FLJ20635  | GI_8923587-S  | 22 | 22 | 44076618 | 19527  | 6.9076  | 6.40248 | CHB |
| rs136564   | FLJ20635  | GI_8923587-S  | 22 | 22 | 44085411 | 28320  | 6.9076  | 6.40248 | CHB |
| rs470062   | FLJ20635  | GI_8923587-S  | 22 | 22 | 44087906 | 30815  | 6.9076  | 6.40248 | CHB |
| rs5765304  | FLJ20635  | GI_8923587-S  | 22 | 22 | 44092511 | 35420  | 6.9076  | 6.40248 | CHB |
| rs136584   | FLJ20635  | GI_8923587-S  | 22 | 22 | 44096750 | 39659  | 6.9076  | 6.40248 | CHB |
| rs136604   | FLJ20635  | GI_8923587-S  | 22 | 22 | 44110280 | 53189  | 6.9076  | 6.40248 | CHB |
| rs12162930 | FLJ20635  | GI_8923587-S  | 22 | 22 | 44114749 | 57658  | 6.9076  | 6.40248 | CHB |
| rs136611   | FLJ20635  | GI_8923587-S  | 22 | 22 | 44114820 | 57729  | 6.9076  | 6.40248 | CHB |
| rs5765327  | FLJ20635  | GI_8923587-S  | 22 | 22 | 44121463 | 64372  | 6.9076  | 6.40248 | CHB |
| rs5769136  | Hs.40696  | Hs.40696-S    | 22 | 22 | 45477222 | 1325   | 9.0753  | 5.91986 | CHB |
| rs801643   | Hs.40696  | Hs.40696-S    | 22 | 22 | 45477658 | 889    | 6.6277  | 5.91986 | CHB |
| rs5769138  | Hs.40696  | Hs.40696-S    | 22 | 22 | 45477740 | 807    | 9.0753  | 5.91986 | CHB |
| rs2295441  | Hs.40696  | Hs.40696-S    | 22 | 22 | 45478963 | 416    | 10.1931 | 5.91986 | CHB |
| rs763124   | 384D8-2   | GI_23097284-I | 22 | 22 | 48269111 | 982713 | 5.8031  | 5.63179 | CHB |
| rs2319345  | 384D8-2   | GI_23097284-I | 22 | 22 | 48282545 | 969279 | 5.8031  | 5.63179 | CHB |
| rs1008320  | 384D8-2   | GI_23097284-I | 22 | 22 | 48289581 | 962243 | 6.64    | 5.63179 | CHB |
| rs9616685  | 384D8-2   | GI_23097284-I | 22 | 22 | 48289814 | 962010 | 7.6664  | 5.63179 | CHB |
| rs8136912  | 384D8-2   | GI_23097284-I | 22 | 22 | 48290014 | 961810 | 6.64    | 5.63179 | CHB |
| rs2071894  | 384D8-2   | GI_23097284-I | 22 | 22 | 48298059 | 953765 | 6.64    | 5.63179 | CHB |
| rs5770562  | 384D8-2   | GI_23097284-I | 22 | 22 | 48299363 | 952461 | 6.7771  | 5.63179 | CHB |
| rs2071893  | 384D8-2   | GI_23097284-I | 22 | 22 | 48299436 | 952388 | 6.64    | 5.63179 | CHB |
| rs10854874 | 384D8-2   | GI_23097284-I | 22 | 22 | 48305549 | 946275 | 6.64    | 5.63179 | CHB |
| rs5770567  | 384D8-2   | GI_23097284-I | 22 | 22 | 48305828 | 945996 | 6.9152  | 5.63179 | CHB |
| rs763126   | LOC400933 | GI_42662518-S | 22 | 22 | 48309435 | 179971 | 13.4507 | 6.13516 | CHB |
| rs2007024  | LOC400933 | GI_42662518-S | 22 | 22 | 48309676 | 180212 | 6.2605  | 6.13516 | CHB |
| rs17182154 | LOC400933 | GI_42662518-S | 22 | 22 | 48311331 | 181867 | 13.2019 | 6.13516 | CHB |
| rs5769698  | LOC400933 | GI_42662518-S | 22 | 22 | 48318567 | 189103 | 13.4724 | 6.13516 | CHB |
| rs763127   | LOC400933 | GI_42662518-S | 22 | 22 | 48326939 | 197475 | 13.4507 | 6.13516 | CHB |
| rs1018812  | LOC400933 | GI_42662518-S | 22 | 22 | 48330934 | 201470 | 13.4507 | 6.13516 | CHB |
| rs135875   | LOC400933 | GI_42662518-S | 22 | 22 | 48333280 | 203816 | 6.2605  | 6.13516 | CHB |
| rs5769707  | LOC400933 | GI_42662518-S | 22 | 22 | 48334263 | 204799 | 13.1194 | 6.13516 | CHB |
| rs135876   | LOC400933 | GI_42662518-S | 22 | 22 | 48334434 | 204970 | 7.0391  | 6.13516 | CHB |
| rs135877   | LOC400933 | GI_42662518-S | 22 | 22 | 48334863 | 205399 | 6.2605  | 6.13516 | CHB |
| rs135878   | LOC400933 | GI_42662518-S | 22 | 22 | 48335230 | 205766 | 6.2605  | 6.13516 | CHB |
| rs6009786  | LOC400933 | GI_42662518-S | 22 | 22 | 48336006 | 206542 | 6.2605  | 6.13516 | CHB |
| rs7288869  | LOC400933 | GI_42662518-S | 22 | 22 | 48336188 | 206724 | 13.4507 | 6.13516 | CHB |
| rs916362   | LOC400933 | GI_42662518-S | 22 | 22 | 48338095 | 208631 | 6.2605  | 6.13516 | CHB |
| rs916363   | LOC400933 | GI_42662518-S | 22 | 22 | 48338417 | 208953 | 12.8502 | 6.13516 | CHB |
| rs5770594  | LOC400933 | GI_42662518-S | 22 | 22 | 48339358 | 209894 | 13.4507 | 6.13516 | CHB |
| rs739248   | LOC400933 | GI_42662518-S | 22 | 22 | 48346066 | 216602 | 13.4507 | 6.13516 | CHB |
| rs9616329  | LOC400933 | GI_42662518-S | 22 | 22 | 48347175 | 217711 | 6.2605  | 6.13516 | CHB |
| rs5770604  | LOC400933 | GI_42662518-S | 22 | 22 | 48351533 | 222069 | 13.4507 | 6.13516 | CHB |
| rs2071904  | LOC400933 | GI_42662518-S | 22 | 22 | 48355338 | 225874 | 13.4507 | 6.13516 | CHB |
| rs739236   | LOC400933 | GI_42662518-S | 22 | 22 | 48362463 | 232999 | 7.0023  | 6.13516 | CHB |
| rs916360   | LOC400933 | GI_42662518-S | 22 | 22 | 48362833 | 233369 | 7.0023  | 6.13516 | CHB |
| rs1107514  | LOC400933 | GI_42662518-S | 22 | 22 | 48363244 | 233780 | 7.0023  | 6.13516 | CHB |
| rs8137111  | LOC400933 | GI_42662518-S | 22 | 22 | 48364611 | 235147 | 7.0023  | 6.13516 | CHB |
| rs8140095  | LOC400933 | GI_42662518-S | 22 | 22 | 48364656 | 235192 | 7.0023  | 6.13516 | CHB |
| rs8141219  | LOC400933 | GI_42662518-S | 22 | 22 | 48365407 | 235943 | 7.0023  | 6.13516 | CHB |

|            |           |               |    |    |          |        |         |         |     |
|------------|-----------|---------------|----|----|----------|--------|---------|---------|-----|
| rs8138399  | LOC400933 | GI_42662518-S | 22 | 22 | 48365685 | 236221 | 14.2578 | 6.13516 | CHB |
| rs9616333  | LOC400933 | GI_42662518-S | 22 | 22 | 48371708 | 242244 | 14.2578 | 6.13516 | CHB |
| rs9616714  | LOC400933 | GI_42662518-S | 22 | 22 | 48371720 | 242256 | 13.3774 | 6.13516 | CHB |
| rs739240   | LOC400933 | GI_42662518-S | 22 | 22 | 48373468 | 244004 | 7.0023  | 6.13516 | CHB |
| rs12485195 | LOC400933 | GI_42662518-S | 22 | 22 | 48374732 | 245268 | 11.8303 | 6.13516 | CHB |
| rs739243   | LOC400933 | GI_42662518-S | 22 | 22 | 48378072 | 248608 | 14.9831 | 6.13516 | CHB |
| rs7286706  | LOC400933 | GI_42662518-S | 22 | 22 | 48379207 | 249743 | 14.9831 | 6.13516 | CHB |
| rs6009810  | LOC400933 | GI_42662518-S | 22 | 22 | 48380401 | 250937 | 8.4153  | 6.13516 | CHB |
| rs739244   | LOC400933 | GI_42662518-S | 22 | 22 | 48381019 | 251555 | 8.4153  | 6.13516 | CHB |
| rs5770633  | LOC400933 | GI_42662518-S | 22 | 22 | 48383288 | 253824 | 8.4153  | 6.13516 | CHB |
| rs12562034 | LOC284591 | GI_37547228-S | 1  | 1  | 808311   | 18979  | 4.997   | 4.81284 | JPT |
| rs664689   | UTS2      | GI_12056478-I | 1  | 1  | 7904358  | 56627  | 7.3363  | 6.07763 | JPT |
| rs664689   | UTS2      | GI_12056480-A | 1  | 1  | 7904358  | 59177  | 7.3976  | 6.07763 | JPT |
| rs664689   | UTS2      | GI_12056480-I | 1  | 1  | 7904358  | 57031  | 6.3845  | 6.07763 | JPT |
| rs161803   | UTS2      | GI_12056478-I | 1  | 1  | 7910055  | 62324  | 6.5823  | 6.07763 | JPT |
| rs161803   | UTS2      | GI_12056480-A | 1  | 1  | 7910055  | 64874  | 6.6991  | 6.07763 | JPT |
| rs161827   | UTS2      | GI_12056478-I | 1  | 1  | 7916300  | 68569  | 6.5164  | 6.07763 | JPT |
| rs161827   | UTS2      | GI_12056480-A | 1  | 1  | 7916300  | 71119  | 6.3899  | 6.07763 | JPT |
| rs161818   | UTS2      | GI_12056478-I | 1  | 1  | 7921818  | 74087  | 6.5164  | 6.07763 | JPT |
| rs161818   | UTS2      | GI_12056480-A | 1  | 1  | 7921818  | 76637  | 6.3899  | 6.07763 | JPT |
| rs161822   | UTS2      | GI_12056478-I | 1  | 1  | 7923405  | 75674  | 7.0774  | 6.07763 | JPT |
| rs161822   | UTS2      | GI_12056480-A | 1  | 1  | 7923405  | 78224  | 7.009   | 6.07763 | JPT |
| rs161822   | UTS2      | GI_12056480-I | 1  | 1  | 7923405  | 76078  | 6.5078  | 6.07763 | JPT |
| rs161811   | UTS2      | GI_12056478-I | 1  | 1  | 7933868  | 86137  | 7.0884  | 6.07763 | JPT |
| rs161811   | UTS2      | GI_12056480-A | 1  | 1  | 7933868  | 88687  | 7.2265  | 6.07763 | JPT |
| rs161811   | UTS2      | GI_12056480-I | 1  | 1  | 7933868  | 86541  | 6.8499  | 6.07763 | JPT |
| rs161810   | UTS2      | GI_12056478-I | 1  | 1  | 7935063  | 87332  | 6.5279  | 6.07763 | JPT |
| rs161810   | UTS2      | GI_12056480-A | 1  | 1  | 7935063  | 89882  | 6.605   | 6.07763 | JPT |
| rs161810   | UTS2      | GI_12056480-I | 1  | 1  | 7935063  | 87736  | 6.245   | 6.07763 | JPT |
| rs11828    | LZIC      | GI_40255081-S | 1  | 1  | 9921273  | 3269   | 9.4035  | 6.13739 | JPT |
| rs1220398  | LZIC      | GI_40255081-S | 1  | 1  | 9928605  | 4063   | 6.3208  | 6.13739 | JPT |
| rs1234694  | LZIC      | GI_40255081-S | 1  | 1  | 9937586  | 13044  | 9.2087  | 6.13739 | JPT |
| rs1220421  | LZIC      | GI_40255081-S | 1  | 1  | 9942487  | 17945  | 9.2087  | 6.13739 | JPT |
| rs1660733  | LZIC      | GI_40255081-S | 1  | 1  | 9945337  | 20795  | 8.8115  | 6.13739 | JPT |
| rs2890358  | LZIC      | GI_40255081-S | 1  | 1  | 9961806  | 37264  | 9.2087  | 6.13739 | JPT |
| rs6661806  | LZIC      | GI_40255081-S | 1  | 1  | 9971734  | 47192  | 8.9281  | 6.13739 | JPT |
| rs12140058 | LZIC      | GI_40255081-S | 1  | 1  | 9983443  | 58901  | 9.1155  | 6.13739 | JPT |
| rs6664631  | LZIC      | GI_40255081-S | 1  | 1  | 9992370  | 67828  | 9.3163  | 6.13739 | JPT |
| rs3003376  | LZIC      | GI_40255081-S | 1  | 1  | 10005567 | 81025  | 9.7902  | 6.13739 | JPT |
| rs3123522  | LZIC      | GI_40255081-S | 1  | 1  | 10006863 | 82321  | 9.7902  | 6.13739 | JPT |
| rs7528979  | LZIC      | GI_40255081-S | 1  | 1  | 10027723 | 103181 | 7.4458  | 6.13739 | JPT |
| rs221035   | ARHGEF19  | GI_40255148-S | 1  | 1  | 16271835 | 1740   | 5.7095  | 5.5164  | JPT |
| rs885795   | ARHGEF19  | GI_40255148-S | 1  | 1  | 16292272 | 22177  | 5.6869  | 5.5164  | JPT |
| rs10907222 | ARHGEF19  | GI_40255148-S | 1  | 1  | 16339361 | 69266  | 5.9544  | 5.5164  | JPT |
| rs11804252 | ARHGEF19  | GI_40255148-S | 1  | 1  | 16388155 | 118060 | 5.5781  | 5.5164  | JPT |
| rs4654783  | HSPC157   | GI_7661813-S  | 1  | 1  | 22184826 | 82027  | 6.9017  | 6.02409 | JPT |
| rs11581013 | AK2       | GI_26665888-I | 1  | 1  | 33122811 | 21556  | 6.1711  | 5.76817 | JPT |
| rs760594   | AK2       | GI_26665888-I | 1  | 1  | 33127896 | 16471  | 6.1711  | 5.76817 | JPT |
| rs7548117  | AK2       | GI_26665888-I | 1  | 1  | 33131717 | 12650  | 6.0795  | 5.76817 | JPT |
| rs7513629  | AK2       | GI_26665888-I | 1  | 1  | 33132099 | 12268  | 6.1722  | 5.76817 | JPT |
| rs10914641 | AK2       | GI_26665888-I | 1  | 1  | 33137369 | 6998   | 6.1711  | 5.76817 | JPT |
| rs1534892  | AK2       | GI_26665888-I | 1  | 1  | 33142017 | 2350   | 6.1722  | 5.76817 | JPT |
| rs998664   | AK2       | GI_26665888-I | 1  | 1  | 33144519 | 152    | 6.1722  | 5.76817 | JPT |
| rs6884     | AK2       | GI_26665888-I | 1  | 1  | 33144884 | 517    | 6.1711  | 5.76817 | JPT |
| rs2075986  | AK2       | GI_26665888-I | 1  | 1  | 33148954 | 4587   | 6.1711  | 5.76817 | JPT |
| rs2268692  | AK2       | GI_26665888-I | 1  | 1  | 33153313 | 8946   | 6.1711  | 5.76817 | JPT |

|            |          |               |   |   |          |        |         |         |     |
|------------|----------|---------------|---|---|----------|--------|---------|---------|-----|
| rs10914647 | AK2      | GI_26665888-I | 1 | 1 | 33159515 | 15148  | 6.1722  | 5.76817 | JPT |
| rs10798924 | AK2      | GI_26665888-I | 1 | 1 | 33161853 | 17486  | 6.1711  | 5.76817 | JPT |
| rs2268693  | AK2      | GI_26665888-I | 1 | 1 | 33163551 | 19184  | 6.1722  | 5.76817 | JPT |
| rs3766810  | AK2      | GI_26665888-I | 1 | 1 | 33168521 | 24154  | 6.1711  | 5.76817 | JPT |
| rs6660919  | AK2      | GI_26665888-I | 1 | 1 | 33175046 | 30679  | 6.1722  | 5.76817 | JPT |
| rs10914650 | AK2      | GI_26665888-I | 1 | 1 | 33177620 | 33253  | 5.9749  | 5.76817 | JPT |
| rs6682377  | AK2      | GI_26665888-I | 1 | 1 | 33182445 | 38078  | 5.9749  | 5.76817 | JPT |
| rs2306258  | AK2      | GI_26665888-I | 1 | 1 | 33193343 | 48976  | 6.1058  | 5.76817 | JPT |
| rs2074676  | FLJ38984 | GI_22748804-S | 1 | 1 | 35696804 | 152026 | 5.8725  | 5.54365 | JPT |
| rs16822818 | NOR1     | GI_45643130-I | 1 | 1 | 36542342 | 20761  | 7.2834  | 5.59063 | JPT |
| rs10493072 | NOR1     | GI_45643130-I | 1 | 1 | 36551294 | 11809  | 10.5504 | 5.59063 | JPT |
| rs3738835  | NOR1     | GI_45643130-I | 1 | 1 | 36553791 | 9312   | 10.7868 | 5.59063 | JPT |
| rs3738836  | NOR1     | GI_45643130-I | 1 | 1 | 36554101 | 9002   | 10.6585 | 5.59063 | JPT |
| rs2282354  | NOR1     | GI_45643130-I | 1 | 1 | 36556624 | 6479   | 10.5504 | 5.59063 | JPT |
| rs16822947 | NOR1     | GI_45643130-I | 1 | 1 | 36557358 | 5745   | 10.7868 | 5.59063 | JPT |
| rs1416840  | NOR1     | GI_45643130-I | 1 | 1 | 36557555 | 5548   | 10.5504 | 5.59063 | JPT |
| rs16822954 | NOR1     | GI_45643130-I | 1 | 1 | 36558098 | 5005   | 10.3334 | 5.59063 | JPT |
| rs16822960 | NOR1     | GI_45643130-I | 1 | 1 | 36559173 | 3930   | 10.7868 | 5.59063 | JPT |
| rs1819661  | NOR1     | GI_45643130-I | 1 | 1 | 36560128 | 2975   | 10.7868 | 5.59063 | JPT |
| rs946680   | NOR1     | GI_45643130-I | 1 | 1 | 36566270 | 3167   | 10.7868 | 5.59063 | JPT |
| rs2282357  | NOR1     | GI_45643130-I | 1 | 1 | 36566946 | 3843   | 10.5504 | 5.59063 | JPT |
| rs16822988 | NOR1     | GI_45643130-I | 1 | 1 | 36575879 | 12776  | 10.2784 | 5.59063 | JPT |
| rs946681   | NOR1     | GI_45643130-I | 1 | 1 | 36577255 | 14152  | 10.5504 | 5.59063 | JPT |
| rs3795495  | NOR1     | GI_45643130-I | 1 | 1 | 36578660 | 15557  | 10.7868 | 5.59063 | JPT |
| rs1416841  | NOR1     | GI_45643130-I | 1 | 1 | 36583203 | 20100  | 10.5504 | 5.59063 | JPT |
| rs10493075 | NOR1     | GI_45643130-I | 1 | 1 | 36583635 | 20532  | 10.7868 | 5.59063 | JPT |
| rs10493076 | NOR1     | GI_45643130-I | 1 | 1 | 36583840 | 20737  | 10.5504 | 5.59063 | JPT |
| rs16823020 | NOR1     | GI_45643130-I | 1 | 1 | 36584033 | 20930  | 10.2784 | 5.59063 | JPT |
| rs10493077 | NOR1     | GI_45643130-I | 1 | 1 | 36584107 | 21004  | 10.7868 | 5.59063 | JPT |
| rs16823025 | NOR1     | GI_45643130-I | 1 | 1 | 36584198 | 21095  | 8.6441  | 5.59063 | JPT |
| rs883694   | NOR1     | GI_45643130-I | 1 | 1 | 36589540 | 26437  | 10.7868 | 5.59063 | JPT |
| rs16823037 | NOR1     | GI_45643130-I | 1 | 1 | 36590046 | 26943  | 6.1163  | 5.59063 | JPT |
| rs2275479  | NOR1     | GI_45643130-I | 1 | 1 | 36590320 | 27217  | 10.5504 | 5.59063 | JPT |
| rs2275480  | NOR1     | GI_45643130-I | 1 | 1 | 36590626 | 27523  | 10.2784 | 5.59063 | JPT |
| rs3738838  | NOR1     | GI_45643130-I | 1 | 1 | 36595502 | 32399  | 10.5504 | 5.59063 | JPT |
| rs2275476  | NOR1     | GI_45643130-I | 1 | 1 | 36595946 | 32843  | 10.2784 | 5.59063 | JPT |
| rs2275475  | NOR1     | GI_45643130-I | 1 | 1 | 36596039 | 32936  | 10.7868 | 5.59063 | JPT |
| rs2275474  | NOR1     | GI_45643130-I | 1 | 1 | 36598626 | 35523  | 8.6748  | 5.59063 | JPT |
| rs3806289  | NOR1     | GI_45643130-I | 1 | 1 | 36599081 | 35978  | 6.9504  | 5.59063 | JPT |
| rs3806288  | NOR1     | GI_45643130-I | 1 | 1 | 36599189 | 36086  | 9.2473  | 5.59063 | JPT |
| rs3806287  | NOR1     | GI_45643130-I | 1 | 1 | 36599279 | 36176  | 9.6907  | 5.59063 | JPT |
| rs3918015  | NOR1     | GI_45643130-I | 1 | 1 | 36607702 | 44599  | 8.7818  | 5.59063 | JPT |
| rs11205515 | NDUFS5   | GI_4758789-S  | 1 | 1 | 39127974 | 33162  | 6.289   | 5.72111 | JPT |
| rs4147754  | NDUFS5   | GI_4758789-S  | 1 | 1 | 39137898 | 23238  | 11.5687 | 5.72111 | JPT |
| rs4147753  | NDUFS5   | GI_4758789-S  | 1 | 1 | 39139457 | 21679  | 8.6732  | 5.72111 | JPT |
| rs4147750  | NDUFS5   | GI_4758789-S  | 1 | 1 | 39143150 | 17986  | 11.7697 | 5.72111 | JPT |
| rs7538228  | NDUFS5   | GI_4758789-S  | 1 | 1 | 39146728 | 14408  | 9.7971  | 5.72111 | JPT |
| rs1555745  | NDUFS5   | GI_4758789-S  | 1 | 1 | 39152222 | 8914   | 9.8767  | 5.72111 | JPT |
| rs1974041  | NDUFS5   | GI_4758789-S  | 1 | 1 | 39152530 | 8606   | 9.7971  | 5.72111 | JPT |
| rs3768324  | NDUFS5   | GI_4758789-S  | 1 | 1 | 39161555 | 419    | 11.148  | 5.72111 | JPT |
| rs1555741  | NDUFS5   | GI_4758789-S  | 1 | 1 | 39162214 | 1078   | 9.8767  | 5.72111 | JPT |
| rs6663155  | NDUFS5   | GI_4758789-S  | 1 | 1 | 39167584 | 6448   | 9.7971  | 5.72111 | JPT |
| rs11205591 | NDUFS5   | GI_4758789-S  | 1 | 1 | 39170342 | 9206   | 5.8237  | 5.72111 | JPT |
| rs7554800  | NDUFS5   | GI_4758789-S  | 1 | 1 | 39172936 | 11800  | 9.0695  | 5.72111 | JPT |
| rs7554809  | NDUFS5   | GI_4758789-S  | 1 | 1 | 39172971 | 11835  | 9.8767  | 5.72111 | JPT |
| rs4660993  | NDUFS5   | GI_4758789-S  | 1 | 1 | 39174711 | 13575  | 9.7971  | 5.72111 | JPT |

|            |           |               |   |   |          |        |         |         |     |
|------------|-----------|---------------|---|---|----------|--------|---------|---------|-----|
| rs11205599 | NDUFS5    | GI_4758789-S  | 1 | 1 | 39175234 | 14098  | 11.1871 | 5.72111 | JPT |
| rs10888650 | NDUFS5    | GI_4758789-S  | 1 | 1 | 39176254 | 15118  | 10.9042 | 5.72111 | JPT |
| rs10888651 | NDUFS5    | GI_4758789-S  | 1 | 1 | 39176284 | 15148  | 9.8767  | 5.72111 | JPT |
| rs4661002  | NDUFS5    | GI_4758789-S  | 1 | 1 | 39177384 | 16248  | 9.042   | 5.72111 | JPT |
| rs10749684 | NDUFS5    | GI_4758789-S  | 1 | 1 | 39181483 | 20347  | 9.9182  | 5.72111 | JPT |
| rs10465799 | NDUFS5    | GI_4758789-S  | 1 | 1 | 39187099 | 25963  | 8.041   | 5.72111 | JPT |
| rs11205611 | NDUFS5    | GI_4758789-S  | 1 | 1 | 39188511 | 27375  | 8.041   | 5.72111 | JPT |
| rs12032116 | NDUFS5    | GI_4758789-S  | 1 | 1 | 39189402 | 28266  | 11.7116 | 5.72111 | JPT |
| rs2377582  | NDUFS5    | GI_4758789-S  | 1 | 1 | 39191379 | 30243  | 8.041   | 5.72111 | JPT |
| rs6692557  | NDUFS5    | GI_4758789-S  | 1 | 1 | 39194294 | 33158  | 7.3743  | 5.72111 | JPT |
| rs7535221  | NDUFS5    | GI_4758789-S  | 1 | 1 | 39195683 | 34547  | 9.6462  | 5.72111 | JPT |
| rs10888656 | NDUFS5    | GI_4758789-S  | 1 | 1 | 39195758 | 34622  | 9.6462  | 5.72111 | JPT |
| rs7550065  | NDUFS5    | GI_4758789-S  | 1 | 1 | 39197004 | 35868  | 11.5323 | 5.72111 | JPT |
| rs9786967  | NDUFS5    | GI_4758789-S  | 1 | 1 | 39197164 | 36028  | 9.0695  | 5.72111 | JPT |
| rs10788909 | NDUFS5    | GI_4758789-S  | 1 | 1 | 39197177 | 36041  | 9.7568  | 5.72111 | JPT |
| rs6600284  | NDUFS5    | GI_4758789-S  | 1 | 1 | 39198351 | 37215  | 8.0337  | 5.72111 | JPT |
| rs6600285  | NDUFS5    | GI_4758789-S  | 1 | 1 | 39200004 | 38868  | 8.5548  | 5.72111 | JPT |
| rs11205622 | NDUFS5    | GI_4758789-S  | 1 | 1 | 39202494 | 41358  | 9.2571  | 5.72111 | JPT |
| rs16830164 | PPIH      | GI_45439322-S | 1 | 1 | 43108439 | 306267 | 6.1556  | 5.85757 | JPT |
| rs3738516  | PPIH      | GI_45439322-S | 1 | 1 | 43109294 | 307122 | 6.1903  | 5.85757 | JPT |
| rs7903     | Hs.396207 | Hs.396207-S   | 1 | 1 | 45645565 | 127429 | 7.2228  | 5.24624 | JPT |
| rs11211129 | Hs.396207 | Hs.396207-S   | 1 | 1 | 45652173 | 120821 | 5.74    | 5.24624 | JPT |
| rs713358   | Hs.396207 | Hs.396207-S   | 1 | 1 | 45657360 | 115634 | 6.8911  | 5.24624 | JPT |
| rs868351   | Hs.396207 | Hs.396207-S   | 1 | 1 | 45678911 | 94083  | 6.1428  | 5.24624 | JPT |
| rs512026   | Hs.396207 | Hs.396207-S   | 1 | 1 | 45679039 | 93955  | 6.2248  | 5.24624 | JPT |
| rs622798   | Hs.396207 | Hs.396207-S   | 1 | 1 | 45684364 | 88630  | 6.2523  | 5.24624 | JPT |
| rs666720   | IPP       | GI_5174472-S  | 1 | 1 | 45689888 | 143947 | 6.1069  | 5.63248 | JPT |
| rs666720   | Hs.396207 | Hs.396207-S   | 1 | 1 | 45689888 | 83106  | 9.3028  | 5.24624 | JPT |
| rs12049503 | Hs.396207 | Hs.396207-S   | 1 | 1 | 45690649 | 82345  | 7.6136  | 5.24624 | JPT |
| rs2993263  | Hs.396207 | Hs.396207-S   | 1 | 1 | 45690723 | 82271  | 6.2523  | 5.24624 | JPT |
| rs3790585  | IPP       | GI_5174472-S  | 1 | 1 | 45692449 | 141386 | 7.8718  | 5.63248 | JPT |
| rs3790585  | Hs.390503 | Hs.390503-S   | 1 | 1 | 45692449 | 139466 | 6.593   | 5.88878 | JPT |
| rs3790585  | Hs.396207 | Hs.396207-S   | 1 | 1 | 45692449 | 80545  | 11.6787 | 5.24624 | JPT |
| rs3014219  | Hs.396207 | Hs.396207-S   | 1 | 1 | 45693547 | 79447  | 6.4681  | 5.24624 | JPT |
| rs780954   | Hs.396207 | Hs.396207-S   | 1 | 1 | 45708170 | 64824  | 8.8104  | 5.24624 | JPT |
| rs1084086  | Hs.396207 | Hs.396207-S   | 1 | 1 | 45710193 | 62801  | 8.8499  | 5.24624 | JPT |
| rs2152078  | Hs.396207 | Hs.396207-S   | 1 | 1 | 45724693 | 48301  | 8.8104  | 5.24624 | JPT |
| rs2991979  | Hs.396207 | Hs.396207-S   | 1 | 1 | 45724951 | 48043  | 8.8104  | 5.24624 | JPT |
| rs2230657  | Hs.396207 | Hs.396207-S   | 1 | 1 | 45742582 | 30412  | 6.1068  | 5.24624 | JPT |
| rs2050376  | Hs.396207 | Hs.396207-S   | 1 | 1 | 45747723 | 25271  | 6.1512  | 5.24624 | JPT |
| rs2230658  | Hs.396207 | Hs.396207-S   | 1 | 1 | 45747947 | 25047  | 6.4681  | 5.24624 | JPT |
| rs2230659  | Hs.396207 | Hs.396207-S   | 1 | 1 | 45747977 | 25017  | 5.8203  | 5.24624 | JPT |
| rs1972410  | IPP       | GI_5174472-S  | 1 | 1 | 45750040 | 83795  | 7.8718  | 5.63248 | JPT |
| rs1972410  | Hs.390503 | Hs.390503-S   | 1 | 1 | 45750040 | 81875  | 6.593   | 5.88878 | JPT |
| rs1972410  | Hs.396207 | Hs.396207-S   | 1 | 1 | 45750040 | 22954  | 11.6787 | 5.24624 | JPT |
| rs2991986  | Hs.396207 | Hs.396207-S   | 1 | 1 | 45750375 | 22619  | 6.4681  | 5.24624 | JPT |
| rs2991987  | Hs.396207 | Hs.396207-S   | 1 | 1 | 45750515 | 22479  | 6.1227  | 5.24624 | JPT |
| rs2253862  | IPP       | GI_5174472-S  | 1 | 1 | 45751053 | 82782  | 8.1688  | 5.63248 | JPT |
| rs2253862  | Hs.390503 | Hs.390503-S   | 1 | 1 | 45751053 | 80862  | 6.6618  | 5.88878 | JPT |
| rs2253862  | Hs.396207 | Hs.396207-S   | 1 | 1 | 45751053 | 21941  | 11.1613 | 5.24624 | JPT |
| rs2991988  | IPP       | GI_5174472-S  | 1 | 1 | 45751524 | 82311  | 8.0966  | 5.63248 | JPT |
| rs2991988  | Hs.390503 | Hs.390503-S   | 1 | 1 | 45751524 | 80391  | 6.8099  | 5.88878 | JPT |
| rs2991988  | Hs.396207 | Hs.396207-S   | 1 | 1 | 45751524 | 21470  | 11.1907 | 5.24624 | JPT |
| rs2991989  | IPP       | GI_5174472-S  | 1 | 1 | 45752058 | 81777  | 7.8305  | 5.63248 | JPT |
| rs2991989  | Hs.390503 | Hs.390503-S   | 1 | 1 | 45752058 | 79857  | 6.588   | 5.88878 | JPT |
| rs2991989  | Hs.396207 | Hs.396207-S   | 1 | 1 | 45752058 | 20936  | 11.1265 | 5.24624 | JPT |

|            |           |              |   |   |          |       |         |         |     |
|------------|-----------|--------------|---|---|----------|-------|---------|---------|-----|
| rs1547924  | Hs.396207 | Hs.396207-S  | 1 | 1 | 45754205 | 18789 | 6.4681  | 5.24624 | JPT |
| rs1547925  | IPP       | GI_5174472-S | 1 | 1 | 45754449 | 79386 | 8.0966  | 5.63248 | JPT |
| rs1547925  | Hs.390503 | Hs.390503-S  | 1 | 1 | 45754449 | 77466 | 6.8099  | 5.88878 | JPT |
| rs1547925  | Hs.396207 | Hs.396207-S  | 1 | 1 | 45754449 | 18545 | 11.1907 | 5.24624 | JPT |
| rs2275086  | IPP       | GI_5174472-S | 1 | 1 | 45754972 | 78863 | 8.0966  | 5.63248 | JPT |
| rs2275086  | Hs.390503 | Hs.390503-S  | 1 | 1 | 45754972 | 76943 | 6.8099  | 5.88878 | JPT |
| rs2275086  | Hs.396207 | Hs.396207-S  | 1 | 1 | 45754972 | 18022 | 11.1907 | 5.24624 | JPT |
| rs3014245  | IPP       | GI_5174472-S | 1 | 1 | 45756006 | 77829 | 8.0966  | 5.63248 | JPT |
| rs3014245  | Hs.390503 | Hs.390503-S  | 1 | 1 | 45756006 | 75909 | 6.8099  | 5.88878 | JPT |
| rs3014245  | Hs.396207 | Hs.396207-S  | 1 | 1 | 45756006 | 16988 | 11.1907 | 5.24624 | JPT |
| rs3014242  | Hs.396207 | Hs.396207-S  | 1 | 1 | 45756670 | 16324 | 7.0397  | 5.24624 | JPT |
| rs3014238  | Hs.396207 | Hs.396207-S  | 1 | 1 | 45759307 | 13687 | 6.4681  | 5.24624 | JPT |
| rs3014237  | IPP       | GI_5174472-S | 1 | 1 | 45759345 | 74490 | 7.8718  | 5.63248 | JPT |
| rs3014237  | Hs.390503 | Hs.390503-S  | 1 | 1 | 45759345 | 72570 | 6.593   | 5.88878 | JPT |
| rs3014237  | Hs.396207 | Hs.396207-S  | 1 | 1 | 45759345 | 13649 | 11.6787 | 5.24624 | JPT |
| rs3014235  | IPP       | GI_5174472-S | 1 | 1 | 45760605 | 73230 | 8.0966  | 5.63248 | JPT |
| rs3014235  | Hs.390503 | Hs.390503-S  | 1 | 1 | 45760605 | 71310 | 6.8099  | 5.88878 | JPT |
| rs3014235  | Hs.396207 | Hs.396207-S  | 1 | 1 | 45760605 | 12389 | 11.1907 | 5.24624 | JPT |
| rs9429172  | IPP       | GI_5174472-S | 1 | 1 | 45761569 | 72266 | 7.2475  | 5.63248 | JPT |
| rs9429172  | Hs.390503 | Hs.390503-S  | 1 | 1 | 45761569 | 70346 | 6.7868  | 5.88878 | JPT |
| rs9429172  | Hs.396207 | Hs.396207-S  | 1 | 1 | 45761569 | 11425 | 10.1453 | 5.24624 | JPT |
| rs1250     | Hs.396207 | Hs.396207-S  | 1 | 1 | 45763120 | 9874  | 6.1512  | 5.24624 | JPT |
| rs4391704  | Hs.396207 | Hs.396207-S  | 1 | 1 | 45763329 | 9665  | 5.4402  | 5.24624 | JPT |
| rs12037459 | IPP       | GI_5174472-S | 1 | 1 | 45764052 | 69783 | 8.1897  | 5.63248 | JPT |
| rs12037459 | Hs.390503 | Hs.390503-S  | 1 | 1 | 45764052 | 67863 | 6.5586  | 5.88878 | JPT |
| rs12037459 | Hs.396207 | Hs.396207-S  | 1 | 1 | 45764052 | 8942  | 10.8373 | 5.24624 | JPT |
| rs12037561 | IPP       | GI_5174472-S | 1 | 1 | 45764365 | 69470 | 8.0966  | 5.63248 | JPT |
| rs12037561 | Hs.390503 | Hs.390503-S  | 1 | 1 | 45764365 | 67550 | 6.8099  | 5.88878 | JPT |
| rs12037561 | Hs.396207 | Hs.396207-S  | 1 | 1 | 45764365 | 8629  | 11.1907 | 5.24624 | JPT |
| rs6703748  | IPP       | GI_5174472-S | 1 | 1 | 45765069 | 68766 | 7.8718  | 5.63248 | JPT |
| rs6703748  | Hs.390503 | Hs.390503-S  | 1 | 1 | 45765069 | 66846 | 6.593   | 5.88878 | JPT |
| rs6703748  | Hs.396207 | Hs.396207-S  | 1 | 1 | 45765069 | 7925  | 11.6787 | 5.24624 | JPT |
| rs10890333 | Hs.396207 | Hs.396207-S  | 1 | 1 | 45769415 | 3579  | 5.8826  | 5.24624 | JPT |
| rs10890334 | IPP       | GI_5174472-S | 1 | 1 | 45769471 | 64364 | 8.0966  | 5.63248 | JPT |
| rs10890334 | Hs.390503 | Hs.390503-S  | 1 | 1 | 45769471 | 62444 | 6.8099  | 5.88878 | JPT |
| rs10890334 | Hs.396207 | Hs.396207-S  | 1 | 1 | 45769471 | 3523  | 11.1907 | 5.24624 | JPT |
| rs4431884  | Hs.396207 | Hs.396207-S  | 1 | 1 | 45770416 | 2578  | 6.1512  | 5.24624 | JPT |
| rs6694889  | IPP       | GI_5174472-S | 1 | 1 | 45770899 | 62936 | 7.7558  | 5.63248 | JPT |
| rs6694889  | Hs.390503 | Hs.390503-S  | 1 | 1 | 45770899 | 61016 | 6.4916  | 5.88878 | JPT |
| rs6694889  | Hs.396207 | Hs.396207-S  | 1 | 1 | 45770899 | 2095  | 10.4985 | 5.24624 | JPT |
| rs12023439 | IPP       | GI_5174472-S | 1 | 1 | 45773729 | 60106 | 7.8718  | 5.63248 | JPT |
| rs12023439 | Hs.390503 | Hs.390503-S  | 1 | 1 | 45773729 | 58186 | 6.593   | 5.88878 | JPT |
| rs12023439 | Hs.396207 | Hs.396207-S  | 1 | 1 | 45773729 | 735   | 11.6787 | 5.24624 | JPT |
| rs12043945 | Hs.396207 | Hs.396207-S  | 1 | 1 | 45776015 | 3021  | 6.4681  | 5.24624 | JPT |
| rs12091503 | Hs.396207 | Hs.396207-S  | 1 | 1 | 45776961 | 3967  | 6.4681  | 5.24624 | JPT |
| rs11211145 | IPP       | GI_5174472-S | 1 | 1 | 45777584 | 56251 | 7.8718  | 5.63248 | JPT |
| rs11211145 | Hs.390503 | Hs.390503-S  | 1 | 1 | 45777584 | 54331 | 6.593   | 5.88878 | JPT |
| rs11211145 | Hs.396207 | Hs.396207-S  | 1 | 1 | 45777584 | 4590  | 11.6787 | 5.24624 | JPT |
| rs5021934  | Hs.396207 | Hs.396207-S  | 1 | 1 | 45778397 | 5403  | 6.4681  | 5.24624 | JPT |
| rs11211147 | IPP       | GI_5174472-S | 1 | 1 | 45779187 | 54648 | 6.5394  | 5.63248 | JPT |
| rs11211147 | Hs.396207 | Hs.396207-S  | 1 | 1 | 45779187 | 6193  | 9.3842  | 5.24624 | JPT |
| rs4660312  | Hs.396207 | Hs.396207-S  | 1 | 1 | 45779665 | 6671  | 6.1512  | 5.24624 | JPT |
| rs4660313  | IPP       | GI_5174472-S | 1 | 1 | 45779934 | 53901 | 7.398   | 5.63248 | JPT |
| rs4660313  | Hs.390503 | Hs.390503-S  | 1 | 1 | 45779934 | 51981 | 6.1385  | 5.88878 | JPT |
| rs4660313  | Hs.396207 | Hs.396207-S  | 1 | 1 | 45779934 | 6940  | 10.9112 | 5.24624 | JPT |
| rs4660880  | IPP       | GI_5174472-S | 1 | 1 | 45780133 | 53702 | 7.8718  | 5.63248 | JPT |

|            |           |              |   |   |          |        |         |         |     |
|------------|-----------|--------------|---|---|----------|--------|---------|---------|-----|
| rs4660880  | Hs.390503 | Hs.390503-S  | 1 | 1 | 45780133 | 51782  | 6.593   | 5.88878 | JPT |
| rs4660880  | Hs.396207 | Hs.396207-S  | 1 | 1 | 45780133 | 7139   | 11.6787 | 5.24624 | JPT |
| rs11211149 | IPP       | GI_5174472-S | 1 | 1 | 45781311 | 52524  | 7.3089  | 5.63248 | JPT |
| rs11211149 | Hs.390503 | Hs.390503-S  | 1 | 1 | 45781311 | 50604  | 5.9345  | 5.88878 | JPT |
| rs11211149 | Hs.396207 | Hs.396207-S  | 1 | 1 | 45781311 | 8317   | 10.2134 | 5.24624 | JPT |
| rs4468203  | Hs.396207 | Hs.396207-S  | 1 | 1 | 45782365 | 9371   | 5.7213  | 5.24624 | JPT |
| rs11211152 | IPP       | GI_5174472-S | 1 | 1 | 45783250 | 50585  | 7.9321  | 5.63248 | JPT |
| rs11211152 | Hs.390503 | Hs.390503-S  | 1 | 1 | 45783250 | 48665  | 6.4366  | 5.88878 | JPT |
| rs11211152 | Hs.396207 | Hs.396207-S  | 1 | 1 | 45783250 | 10256  | 11.6842 | 5.24624 | JPT |
| rs4660882  | Hs.396207 | Hs.396207-S  | 1 | 1 | 45785385 | 12391  | 6.1512  | 5.24624 | JPT |
| rs4607935  | IPP       | GI_5174472-S | 1 | 1 | 45786254 | 47581  | 8.7995  | 5.63248 | JPT |
| rs4607935  | Hs.390503 | Hs.390503-S  | 1 | 1 | 45786254 | 45661  | 7.3646  | 5.88878 | JPT |
| rs4607935  | Hs.396207 | Hs.396207-S  | 1 | 1 | 45786254 | 13260  | 11.0856 | 5.24624 | JPT |
| rs4609469  | Hs.396207 | Hs.396207-S  | 1 | 1 | 45786278 | 13284  | 6.4681  | 5.24624 | JPT |
| rs12049027 | Hs.396207 | Hs.396207-S  | 1 | 1 | 45787277 | 14283  | 5.4471  | 5.24624 | JPT |
| rs10789467 | Hs.396207 | Hs.396207-S  | 1 | 1 | 45787838 | 14844  | 6.4681  | 5.24624 | JPT |
| rs6656279  | Hs.396207 | Hs.396207-S  | 1 | 1 | 45793181 | 20187  | 6.1512  | 5.24624 | JPT |
| rs3811436  | IPP       | GI_5174472-S | 1 | 1 | 45794973 | 38862  | 8.1688  | 5.63248 | JPT |
| rs3811436  | Hs.390503 | Hs.390503-S  | 1 | 1 | 45794973 | 36942  | 6.6618  | 5.88878 | JPT |
| rs3811436  | Hs.396207 | Hs.396207-S  | 1 | 1 | 45794973 | 21979  | 11.1613 | 5.24624 | JPT |
| rs12024590 | IPP       | GI_5174472-S | 1 | 1 | 45796589 | 37246  | 8.0662  | 5.63248 | JPT |
| rs12024590 | Hs.390503 | Hs.390503-S  | 1 | 1 | 45796589 | 35326  | 6.5214  | 5.88878 | JPT |
| rs12024590 | Hs.396207 | Hs.396207-S  | 1 | 1 | 45796589 | 23595  | 11.6894 | 5.24624 | JPT |
| rs3013597  | Hs.396207 | Hs.396207-S  | 1 | 1 | 45797449 | 24455  | 6.2928  | 5.24624 | JPT |
| rs11211157 | Hs.396207 | Hs.396207-S  | 1 | 1 | 45801937 | 28943  | 6.1512  | 5.24624 | JPT |
| rs10430105 | IPP       | GI_5174472-S | 1 | 1 | 45807969 | 25866  | 8.1688  | 5.63248 | JPT |
| rs10430105 | Hs.390503 | Hs.390503-S  | 1 | 1 | 45807969 | 23946  | 6.6618  | 5.88878 | JPT |
| rs10430105 | Hs.396207 | Hs.396207-S  | 1 | 1 | 45807969 | 34975  | 11.1613 | 5.24624 | JPT |
| rs11211160 | IPP       | GI_5174472-S | 1 | 1 | 45815322 | 18513  | 7.9321  | 5.63248 | JPT |
| rs11211160 | Hs.390503 | Hs.390503-S  | 1 | 1 | 45815322 | 16593  | 6.4366  | 5.88878 | JPT |
| rs11211160 | Hs.396207 | Hs.396207-S  | 1 | 1 | 45815322 | 42328  | 11.6842 | 5.24624 | JPT |
| rs10890341 | IPP       | GI_5174472-S | 1 | 1 | 45816333 | 17502  | 7.6046  | 5.63248 | JPT |
| rs10890341 | Hs.390503 | Hs.390503-S  | 1 | 1 | 45816333 | 15582  | 6.3332  | 5.88878 | JPT |
| rs10890341 | Hs.396207 | Hs.396207-S  | 1 | 1 | 45816333 | 43339  | 10.4985 | 5.24624 | JPT |
| rs3013595  | Hs.396207 | Hs.396207-S  | 1 | 1 | 45822296 | 49302  | 6.1512  | 5.24624 | JPT |
| rs11211166 | Hs.396207 | Hs.396207-S  | 1 | 1 | 45827035 | 54041  | 5.5328  | 5.24624 | JPT |
| rs10789470 | Hs.396207 | Hs.396207-S  | 1 | 1 | 45827424 | 54430  | 6.1512  | 5.24624 | JPT |
| rs10749856 | Hs.396207 | Hs.396207-S  | 1 | 1 | 45833939 | 60945  | 6.1512  | 5.24624 | JPT |
| rs4564187  | Hs.396207 | Hs.396207-S  | 1 | 1 | 45835954 | 62960  | 6.1512  | 5.24624 | JPT |
| rs4274104  | Hs.396207 | Hs.396207-S  | 1 | 1 | 45929961 | 156967 | 6.1512  | 5.24624 | JPT |
| rs11211173 | IPP       | GI_5174472-S | 1 | 1 | 45931396 | 97561  | 7.9321  | 5.63248 | JPT |
| rs11211173 | Hs.390503 | Hs.390503-S  | 1 | 1 | 45931396 | 99481  | 6.4366  | 5.88878 | JPT |
| rs11211173 | Hs.396207 | Hs.396207-S  | 1 | 1 | 45931396 | 158402 | 11.6842 | 5.24624 | JPT |
| rs12560266 | Hs.396207 | Hs.396207-S  | 1 | 1 | 45933637 | 160643 | 6.1512  | 5.24624 | JPT |
| rs11211176 | Hs.396207 | Hs.396207-S  | 1 | 1 | 45935106 | 162112 | 6.8321  | 5.24624 | JPT |
| rs11211177 | IPP       | GI_5174472-S | 1 | 1 | 45938369 | 104534 | 7.8841  | 5.63248 | JPT |
| rs11211177 | Hs.390503 | Hs.390503-S  | 1 | 1 | 45938369 | 106454 | 6.439   | 5.88878 | JPT |
| rs11211177 | Hs.396207 | Hs.396207-S  | 1 | 1 | 45938369 | 165375 | 11.1014 | 5.24624 | JPT |
| rs11211178 | Hs.396207 | Hs.396207-S  | 1 | 1 | 45939586 | 166592 | 6.5215  | 5.24624 | JPT |
| rs4660314  | Hs.396207 | Hs.396207-S  | 1 | 1 | 45941905 | 168911 | 6.5215  | 5.24624 | JPT |
| rs4660883  | Hs.396207 | Hs.396207-S  | 1 | 1 | 45948118 | 175124 | 6.8384  | 5.24624 | JPT |
| rs4626927  | Hs.396207 | Hs.396207-S  | 1 | 1 | 45960665 | 187671 | 5.6039  | 5.24624 | JPT |
| rs7540578  | Hs.396207 | Hs.396207-S  | 1 | 1 | 45964164 | 191170 | 5.6039  | 5.24624 | JPT |
| rs6690386  | Hs.396207 | Hs.396207-S  | 1 | 1 | 45965031 | 192037 | 9.9133  | 5.24624 | JPT |
| rs6661163  | Hs.396207 | Hs.396207-S  | 1 | 1 | 45967024 | 194030 | 5.6039  | 5.24624 | JPT |
| rs6429578  | Hs.396207 | Hs.396207-S  | 1 | 1 | 45969130 | 196136 | 9.4008  | 5.24624 | JPT |



|            |           |              |   |   |          |        |        |         |     |
|------------|-----------|--------------|---|---|----------|--------|--------|---------|-----|
| rs12076580 | Hs.396207 | Hs.396207-S  | 1 | 1 | 45970179 | 197185 | 9.2777 | 5.24624 | JPT |
| rs7539800  | Hs.396207 | Hs.396207-S  | 1 | 1 | 45974149 | 201155 | 9.7115 | 5.24624 | JPT |
| rs10890350 | Hs.396207 | Hs.396207-S  | 1 | 1 | 45974398 | 201404 | 9.1001 | 5.24624 | JPT |
| rs4390216  | Hs.396207 | Hs.396207-S  | 1 | 1 | 45978476 | 205482 | 9.7115 | 5.24624 | JPT |
| rs6672115  | Hs.396207 | Hs.396207-S  | 1 | 1 | 45984899 | 211905 | 9.7115 | 5.24624 | JPT |
| rs6429580  | Hs.396207 | Hs.396207-S  | 1 | 1 | 45987668 | 214674 | 9.7115 | 5.24624 | JPT |
| rs7546237  | IPP       | GI_5174472-S | 1 | 1 | 45997630 | 163795 | 5.9108 | 5.63248 | JPT |
| rs7546237  | Hs.396207 | Hs.396207-S  | 1 | 1 | 45997630 | 224636 | 8.9202 | 5.24624 | JPT |
| rs11211199 | Hs.396207 | Hs.396207-S  | 1 | 1 | 45999889 | 226895 | 6.6757 | 5.24624 | JPT |
| rs11211200 | Hs.396207 | Hs.396207-S  | 1 | 1 | 46000372 | 227378 | 9.7115 | 5.24624 | JPT |
| rs6694340  | Hs.396207 | Hs.396207-S  | 1 | 1 | 46001436 | 228442 | 9.7115 | 5.24624 | JPT |
| rs4660889  | Hs.396207 | Hs.396207-S  | 1 | 1 | 46009351 | 236357 | 9.7115 | 5.24624 | JPT |
| rs10890354 | Hs.396207 | Hs.396207-S  | 1 | 1 | 46017367 | 244373 | 5.5385 | 5.24624 | JPT |
| rs4298677  | Hs.396207 | Hs.396207-S  | 1 | 1 | 46018639 | 245645 | 9.7901 | 5.24624 | JPT |
| rs10890355 | Hs.396207 | Hs.396207-S  | 1 | 1 | 46029368 | 256374 | 9.7115 | 5.24624 | JPT |
| rs11211204 | Hs.396207 | Hs.396207-S  | 1 | 1 | 46029884 | 256890 | 9.7901 | 5.24624 | JPT |
| rs7547189  | Hs.396207 | Hs.396207-S  | 1 | 1 | 46031534 | 258540 | 9.6253 | 5.24624 | JPT |
| rs7547284  | Hs.396207 | Hs.396207-S  | 1 | 1 | 46031585 | 258591 | 9.7901 | 5.24624 | JPT |
| rs6429582  | Hs.396207 | Hs.396207-S  | 1 | 1 | 46033863 | 260869 | 5.5385 | 5.24624 | JPT |
| rs6675222  | Hs.396207 | Hs.396207-S  | 1 | 1 | 46038596 | 265602 | 9.7901 | 5.24624 | JPT |
| rs4660895  | Hs.396207 | Hs.396207-S  | 1 | 1 | 46041759 | 268765 | 9.1001 | 5.24624 | JPT |
| rs6688365  | Hs.396207 | Hs.396207-S  | 1 | 1 | 46041904 | 268910 | 5.5385 | 5.24624 | JPT |
| rs7531911  | Hs.396207 | Hs.396207-S  | 1 | 1 | 46042443 | 269449 | 9.7115 | 5.24624 | JPT |
| rs4660318  | Hs.396207 | Hs.396207-S  | 1 | 1 | 46046896 | 273902 | 9.7115 | 5.24624 | JPT |
| rs6682683  | Hs.396207 | Hs.396207-S  | 1 | 1 | 46054357 | 281363 | 9.7901 | 5.24624 | JPT |
| rs11211213 | Hs.396207 | Hs.396207-S  | 1 | 1 | 46054537 | 281543 | 5.9536 | 5.24624 | JPT |
| rs10890361 | Hs.396207 | Hs.396207-S  | 1 | 1 | 46058254 | 285260 | 5.5385 | 5.24624 | JPT |
| rs11211217 | Hs.396207 | Hs.396207-S  | 1 | 1 | 46060249 | 287255 | 9.7115 | 5.24624 | JPT |
| rs10789478 | Hs.396207 | Hs.396207-S  | 1 | 1 | 46062526 | 289532 | 9.073  | 5.24624 | JPT |
| rs10890363 | Hs.396207 | Hs.396207-S  | 1 | 1 | 46068168 | 295174 | 5.5385 | 5.24624 | JPT |
| rs4539075  | Hs.396207 | Hs.396207-S  | 1 | 1 | 46070030 | 297036 | 9.7115 | 5.24624 | JPT |
| rs12409773 | Hs.396207 | Hs.396207-S  | 1 | 1 | 46070851 | 297857 | 5.5385 | 5.24624 | JPT |
| rs10890365 | Hs.396207 | Hs.396207-S  | 1 | 1 | 46071368 | 298374 | 9.7901 | 5.24624 | JPT |
| rs7512395  | Hs.396207 | Hs.396207-S  | 1 | 1 | 46073197 | 300203 | 9.7901 | 5.24624 | JPT |
| rs7556436  | Hs.396207 | Hs.396207-S  | 1 | 1 | 46075900 | 302906 | 5.5385 | 5.24624 | JPT |
| rs7365705  | Hs.396207 | Hs.396207-S  | 1 | 1 | 46079793 | 306799 | 5.4774 | 5.24624 | JPT |
| rs7527244  | Hs.396207 | Hs.396207-S  | 1 | 1 | 46080792 | 307798 | 9.7115 | 5.24624 | JPT |
| rs9787412  | Hs.396207 | Hs.396207-S  | 1 | 1 | 46083616 | 310622 | 7.6777 | 5.24624 | JPT |
| rs4660896  | Hs.396207 | Hs.396207-S  | 1 | 1 | 46084436 | 311442 | 7.6777 | 5.24624 | JPT |
| rs10732844 | Hs.396207 | Hs.396207-S  | 1 | 1 | 46084708 | 311714 | 5.2742 | 5.24624 | JPT |
| rs12133129 | Hs.396207 | Hs.396207-S  | 1 | 1 | 46085368 | 312374 | 7.4583 | 5.24624 | JPT |
| rs11211223 | Hs.396207 | Hs.396207-S  | 1 | 1 | 46092625 | 319631 | 7.6777 | 5.24624 | JPT |
| rs6687301  | Hs.396207 | Hs.396207-S  | 1 | 1 | 46094872 | 321878 | 7.6699 | 5.24624 | JPT |
| rs6657720  | Hs.396207 | Hs.396207-S  | 1 | 1 | 46098289 | 325295 | 7.5715 | 5.24624 | JPT |
| rs10890370 | Hs.396207 | Hs.396207-S  | 1 | 1 | 46101237 | 328243 | 7.6777 | 5.24624 | JPT |
| rs7526369  | Hs.396207 | Hs.396207-S  | 1 | 1 | 46102580 | 329586 | 7.5715 | 5.24624 | JPT |
| rs10890371 | Hs.396207 | Hs.396207-S  | 1 | 1 | 46102917 | 329923 | 7.6777 | 5.24624 | JPT |
| rs10890372 | Hs.396207 | Hs.396207-S  | 1 | 1 | 46103040 | 330046 | 7.1249 | 5.24624 | JPT |
| rs4074225  | Hs.396207 | Hs.396207-S  | 1 | 1 | 46104384 | 331390 | 7.6777 | 5.24624 | JPT |
| rs10890373 | Hs.396207 | Hs.396207-S  | 1 | 1 | 46105775 | 332781 | 7.6777 | 5.24624 | JPT |
| rs4134387  | Hs.396207 | Hs.396207-S  | 1 | 1 | 46107178 | 334184 | 6.9238 | 5.24624 | JPT |
| rs6681068  | Hs.396207 | Hs.396207-S  | 1 | 1 | 46110402 | 337408 | 6.0605 | 5.24624 | JPT |
| rs11211228 | Hs.396207 | Hs.396207-S  | 1 | 1 | 46111860 | 338866 | 7.6777 | 5.24624 | JPT |
| rs12022335 | Hs.396207 | Hs.396207-S  | 1 | 1 | 46114752 | 341758 | 7.6699 | 5.24624 | JPT |
| rs10789485 | Hs.396207 | Hs.396207-S  | 1 | 1 | 46119328 | 346334 | 7.5715 | 5.24624 | JPT |
| rs10789486 | Hs.396207 | Hs.396207-S  | 1 | 1 | 46120687 | 347693 | 7.6777 | 5.24624 | JPT |

|            |           |               |   |   |          |        |        |         |     |
|------------|-----------|---------------|---|---|----------|--------|--------|---------|-----|
| rs10890378 | Hs.396207 | Hs.396207-S   | 1 | 1 | 46122677 | 349683 | 7.5715 | 5.24624 | JPT |
| rs11211232 | Hs.396207 | Hs.396207-S   | 1 | 1 | 46123166 | 350172 | 7.5715 | 5.24624 | JPT |
| rs4660900  | Hs.396207 | Hs.396207-S   | 1 | 1 | 46131625 | 358631 | 7.5715 | 5.24624 | JPT |
| rs11211235 | Hs.396207 | Hs.396207-S   | 1 | 1 | 46152395 | 379401 | 7.5715 | 5.24624 | JPT |
| rs11211236 | Hs.396207 | Hs.396207-S   | 1 | 1 | 46155787 | 382793 | 7.44   | 5.24624 | JPT |
| rs4660328  | Hs.396207 | Hs.396207-S   | 1 | 1 | 46156851 | 383857 | 7.5715 | 5.24624 | JPT |
| rs10890380 | Hs.396207 | Hs.396207-S   | 1 | 1 | 46161489 | 388495 | 7.5715 | 5.24624 | JPT |
| rs10890381 | Hs.396207 | Hs.396207-S   | 1 | 1 | 46163791 | 390797 | 6.7791 | 5.24624 | JPT |
| rs6429588  | Hs.396207 | Hs.396207-S   | 1 | 1 | 46166078 | 393084 | 7.5715 | 5.24624 | JPT |
| rs11211243 | Hs.396207 | Hs.396207-S   | 1 | 1 | 46167453 | 394459 | 7.5715 | 5.24624 | JPT |
| rs4660905  | Hs.396207 | Hs.396207-S   | 1 | 1 | 46173607 | 400613 | 7.5715 | 5.24624 | JPT |
| rs4660334  | Hs.396207 | Hs.396207-S   | 1 | 1 | 46174146 | 401152 | 7.6777 | 5.24624 | JPT |
| rs4073847  | Hs.396207 | Hs.396207-S   | 1 | 1 | 46175032 | 402038 | 7.6777 | 5.24624 | JPT |
| rs6661500  | Hs.396207 | Hs.396207-S   | 1 | 1 | 46177682 | 404688 | 7.6777 | 5.24624 | JPT |
| rs10890382 | Hs.396207 | Hs.396207-S   | 1 | 1 | 46181694 | 408700 | 7.5715 | 5.24624 | JPT |
| rs3922887  | Hs.396207 | Hs.396207-S   | 1 | 1 | 46185822 | 412828 | 7.5715 | 5.24624 | JPT |
| rs4660335  | Hs.396207 | Hs.396207-S   | 1 | 1 | 46186738 | 413744 | 7.5715 | 5.24624 | JPT |
| rs6677777  | Hs.396207 | Hs.396207-S   | 1 | 1 | 46187856 | 414862 | 7.6777 | 5.24624 | JPT |
| rs11211248 | Hs.396207 | Hs.396207-S   | 1 | 1 | 46188864 | 415870 | 7.5715 | 5.24624 | JPT |
| rs946528   | Hs.396207 | Hs.396207-S   | 1 | 1 | 46197582 | 424588 | 7.061  | 5.24624 | JPT |
| rs946527   | Hs.396207 | Hs.396207-S   | 1 | 1 | 46197990 | 424996 | 7.6777 | 5.24624 | JPT |
| rs946524   | Hs.396207 | Hs.396207-S   | 1 | 1 | 46199580 | 426586 | 7.6526 | 5.24624 | JPT |
| rs785478   | Hs.396207 | Hs.396207-S   | 1 | 1 | 46203655 | 430661 | 7.5715 | 5.24624 | JPT |
| rs785480   | Hs.396207 | Hs.396207-S   | 1 | 1 | 46204184 | 431190 | 7.6777 | 5.24624 | JPT |
| rs1622208  | Hs.396207 | Hs.396207-S   | 1 | 1 | 46210395 | 437401 | 6.0953 | 5.24624 | JPT |
| rs6675259  | Hs.396207 | Hs.396207-S   | 1 | 1 | 46214315 | 441321 | 6.271  | 5.24624 | JPT |
| rs12120440 | FLJ10884  | GI_31542662-S | 1 | 1 | 62364379 | 24790  | 8.3993 | 6.25071 | JPT |
| rs12116810 | FLJ10884  | GI_31542662-S | 1 | 1 | 62369551 | 19618  | 8.3993 | 6.25071 | JPT |
| rs12143736 | FLJ10884  | GI_31542662-S | 1 | 1 | 62370801 | 18368  | 7.8341 | 6.25071 | JPT |
| rs11577415 | FLJ10884  | GI_31542662-S | 1 | 1 | 62405373 | 16204  | 6.9679 | 6.25071 | JPT |
| rs922936   | MGC22773  | GI_21687083-S | 1 | 1 | 74188342 | 169677 | 8.6087 | 5.635   | JPT |
| rs11210400 | MGC22773  | GI_21687083-S | 1 | 1 | 74202480 | 155539 | 8.1636 | 5.635   | JPT |
| rs1384883  | MGC22773  | GI_21687083-S | 1 | 1 | 74213498 | 144521 | 8.1046 | 5.635   | JPT |
| rs1843024  | MGC22773  | GI_21687083-S | 1 | 1 | 74214650 | 143369 | 8.4911 | 5.635   | JPT |
| rs12029234 | MGC22773  | GI_21687083-S | 1 | 1 | 74220765 | 137254 | 8.6717 | 5.635   | JPT |
| rs6676622  | MGC22773  | GI_21687083-S | 1 | 1 | 74221826 | 136193 | 8.6087 | 5.635   | JPT |
| rs10493531 | MGC22773  | GI_21687083-S | 1 | 1 | 74229688 | 128331 | 9.737  | 5.635   | JPT |
| rs4650243  | MGC22773  | GI_21687083-S | 1 | 1 | 74230485 | 127534 | 9.9504 | 5.635   | JPT |
| rs4649996  | MGC22773  | GI_21687083-S | 1 | 1 | 74232300 | 125719 | 9.737  | 5.635   | JPT |
| rs6424573  | MGC22773  | GI_21687083-S | 1 | 1 | 74234495 | 123524 | 8.7831 | 5.635   | JPT |
| rs1032082  | MGC22773  | GI_21687083-S | 1 | 1 | 74244008 | 114011 | 8.6087 | 5.635   | JPT |
| rs11579809 | MGC22773  | GI_21687083-S | 1 | 1 | 74244608 | 113411 | 8.724  | 5.635   | JPT |
| rs11210404 | MGC22773  | GI_21687083-S | 1 | 1 | 74250273 | 107746 | 8.6087 | 5.635   | JPT |
| rs12746996 | MGC22773  | GI_21687083-S | 1 | 1 | 74252170 | 105849 | 7.952  | 5.635   | JPT |
| rs1483795  | MGC22773  | GI_21687083-S | 1 | 1 | 74254948 | 103071 | 8.6087 | 5.635   | JPT |
| rs2035473  | MGC22773  | GI_21687083-S | 1 | 1 | 74257247 | 100772 | 7.952  | 5.635   | JPT |
| rs1843023  | MGC22773  | GI_21687083-S | 1 | 1 | 74257548 | 100471 | 8.6087 | 5.635   | JPT |
| rs11210405 | MGC22773  | GI_21687083-S | 1 | 1 | 74259536 | 98483  | 7.6972 | 5.635   | JPT |
| rs7535929  | MGC22773  | GI_21687083-S | 1 | 1 | 74272023 | 85996  | 8.6087 | 5.635   | JPT |
| rs10789387 | MGC22773  | GI_21687083-S | 1 | 1 | 74272432 | 85587  | 8.6087 | 5.635   | JPT |
| rs11210407 | MGC22773  | GI_21687083-S | 1 | 1 | 74272624 | 85395  | 8.4911 | 5.635   | JPT |
| rs7550195  | MGC22773  | GI_21687083-S | 1 | 1 | 74274326 | 83693  | 9.9504 | 5.635   | JPT |
| rs12122433 | MGC22773  | GI_21687083-S | 1 | 1 | 74274897 | 83122  | 7.1922 | 5.635   | JPT |
| rs10789388 | MGC22773  | GI_21687083-S | 1 | 1 | 74280773 | 77246  | 8.6087 | 5.635   | JPT |
| rs12746942 | MGC22773  | GI_21687083-S | 1 | 1 | 74282012 | 76007  | 8.5784 | 5.635   | JPT |
| rs10890108 | MGC22773  | GI_21687083-S | 1 | 1 | 74283203 | 74816  | 9.9504 | 5.635   | JPT |

|            |          |               |   |   |          |       |         |       |     |
|------------|----------|---------------|---|---|----------|-------|---------|-------|-----|
| rs4142949  | MGC22773 | GI_21687083-S | 1 | 1 | 74284276 | 73743 | 8.4226  | 5.635 | JPT |
| rs4142948  | MGC22773 | GI_21687083-S | 1 | 1 | 74284372 | 73647 | 8.6087  | 5.635 | JPT |
| rs2128935  | MGC22773 | GI_21687083-S | 1 | 1 | 74285757 | 72262 | 8.6087  | 5.635 | JPT |
| rs2343864  | MGC22773 | GI_21687083-S | 1 | 1 | 74289090 | 68929 | 13.508  | 5.635 | JPT |
| rs4596834  | MGC22773 | GI_21687083-S | 1 | 1 | 74289979 | 68040 | 7.2792  | 5.635 | JPT |
| rs11210417 | MGC22773 | GI_21687083-S | 1 | 1 | 74293180 | 64839 | 13.9232 | 5.635 | JPT |
| rs11210418 | MGC22773 | GI_21687083-S | 1 | 1 | 74294698 | 63321 | 13.6592 | 5.635 | JPT |
| rs6676103  | MGC22773 | GI_21687083-S | 1 | 1 | 74295054 | 62965 | 8.6087  | 5.635 | JPT |
| rs11210419 | MGC22773 | GI_21687083-S | 1 | 1 | 74298989 | 59030 | 13.6592 | 5.635 | JPT |
| rs12048351 | MGC22773 | GI_21687083-S | 1 | 1 | 74300938 | 57081 | 8.4911  | 5.635 | JPT |
| rs12036659 | MGC22773 | GI_21687083-S | 1 | 1 | 74303726 | 54293 | 8.4911  | 5.635 | JPT |
| rs1601152  | MGC22773 | GI_21687083-S | 1 | 1 | 74306922 | 51097 | 8.7899  | 5.635 | JPT |
| rs7543134  | MGC22773 | GI_21687083-S | 1 | 1 | 74314071 | 43948 | 13.508  | 5.635 | JPT |
| rs12043976 | MGC22773 | GI_21687083-S | 1 | 1 | 74316209 | 41810 | 8.5784  | 5.635 | JPT |
| rs12029814 | MGC22773 | GI_21687083-S | 1 | 1 | 74321553 | 36466 | 5.6384  | 5.635 | JPT |
| rs1856789  | MGC22773 | GI_21687083-S | 1 | 1 | 74322707 | 35312 | 8.4911  | 5.635 | JPT |
| rs12410230 | MGC22773 | GI_21687083-S | 1 | 1 | 74324140 | 33879 | 7.9074  | 5.635 | JPT |
| rs10493530 | MGC22773 | GI_21687083-S | 1 | 1 | 74328443 | 29576 | 7.8739  | 5.635 | JPT |
| rs7529384  | MGC22773 | GI_21687083-S | 1 | 1 | 74330117 | 27902 | 8.4911  | 5.635 | JPT |
| rs12402231 | MGC22773 | GI_21687083-S | 1 | 1 | 74335095 | 22924 | 8.4911  | 5.635 | JPT |
| rs10493529 | MGC22773 | GI_21687083-S | 1 | 1 | 74335469 | 22550 | 8.4911  | 5.635 | JPT |
| rs12033705 | MGC22773 | GI_21687083-S | 1 | 1 | 74346181 | 11838 | 8.4911  | 5.635 | JPT |
| rs11210427 | MGC22773 | GI_21687083-S | 1 | 1 | 74356537 | 1482  | 11.0497 | 5.635 | JPT |
| rs12029606 | MGC22773 | GI_21687083-S | 1 | 1 | 74361611 | 3592  | 11.0111 | 5.635 | JPT |
| rs1930588  | MGC22773 | GI_21687083-S | 1 | 1 | 74367377 | 9358  | 9.1531  | 5.635 | JPT |
| rs1412824  | MGC22773 | GI_21687083-S | 1 | 1 | 74372246 | 14227 | 11.5364 | 5.635 | JPT |
| rs7535418  | MGC22773 | GI_21687083-S | 1 | 1 | 74372749 | 14730 | 13.249  | 5.635 | JPT |
| rs10789391 | MGC22773 | GI_21687083-S | 1 | 1 | 74374602 | 16583 | 15.0825 | 5.635 | JPT |
| rs1412825  | MGC22773 | GI_21687083-S | 1 | 1 | 74375835 | 17816 | 14.7177 | 5.635 | JPT |
| rs4422957  | MGC22773 | GI_21687083-S | 1 | 1 | 74376170 | 18151 | 10.4132 | 5.635 | JPT |
| rs792310   | MGC22773 | GI_21687083-S | 1 | 1 | 74377514 | 19495 | 15.0825 | 5.635 | JPT |
| rs9804006  | MGC22773 | GI_21687083-S | 1 | 1 | 74378528 | 20509 | 10.379  | 5.635 | JPT |
| rs577367   | MGC22773 | GI_21687083-S | 1 | 1 | 74379707 | 21688 | 15.0825 | 5.635 | JPT |
| rs487917   | MGC22773 | GI_21687083-S | 1 | 1 | 74380917 | 22898 | 15.0825 | 5.635 | JPT |
| rs12046751 | MGC22773 | GI_21687083-S | 1 | 1 | 74382193 | 24174 | 10.379  | 5.635 | JPT |
| rs571848   | MGC22773 | GI_21687083-S | 1 | 1 | 74383540 | 25521 | 14.7177 | 5.635 | JPT |
| rs956      | MGC22773 | GI_21687083-S | 1 | 1 | 74384661 | 26642 | 12.7485 | 5.635 | JPT |
| rs520806   | MGC22773 | GI_21687083-S | 1 | 1 | 74385362 | 27343 | 15.0825 | 5.635 | JPT |
| rs522759   | MGC22773 | GI_21687083-S | 1 | 1 | 74385603 | 27584 | 15.0825 | 5.635 | JPT |
| rs545664   | MGC22773 | GI_21687083-S | 1 | 1 | 74385798 | 27779 | 13.7953 | 5.635 | JPT |
| rs545721   | MGC22773 | GI_21687083-S | 1 | 1 | 74385820 | 27801 | 14.7177 | 5.635 | JPT |
| rs581353   | MGC22773 | GI_21687083-S | 1 | 1 | 74387407 | 29388 | 14.7177 | 5.635 | JPT |
| rs496008   | MGC22773 | GI_21687083-S | 1 | 1 | 74387827 | 29808 | 12.7568 | 5.635 | JPT |
| rs485929   | MGC22773 | GI_21687083-S | 1 | 1 | 74390306 | 32287 | 14.7177 | 5.635 | JPT |
| rs792321   | MGC22773 | GI_21687083-S | 1 | 1 | 74393989 | 35970 | 15.0825 | 5.635 | JPT |
| rs524306   | MGC22773 | GI_21687083-S | 1 | 1 | 74394274 | 36255 | 15.0164 | 5.635 | JPT |
| rs495027   | MGC22773 | GI_21687083-S | 1 | 1 | 74394280 | 36261 | 14.7177 | 5.635 | JPT |
| rs533371   | MGC22773 | GI_21687083-S | 1 | 1 | 74399033 | 41014 | 14.7177 | 5.635 | JPT |
| rs12024616 | MGC22773 | GI_21687083-S | 1 | 1 | 74402186 | 44167 | 11.0828 | 5.635 | JPT |
| rs12031026 | MGC22773 | GI_21687083-S | 1 | 1 | 74405182 | 47163 | 10.3529 | 5.635 | JPT |
| rs11210440 | MGC22773 | GI_21687083-S | 1 | 1 | 74405229 | 47210 | 15.0825 | 5.635 | JPT |
| rs12038237 | MGC22773 | GI_21687083-S | 1 | 1 | 74405656 | 47637 | 11.0828 | 5.635 | JPT |
| rs10890119 | MGC22773 | GI_21687083-S | 1 | 1 | 74407221 | 49202 | 14.0106 | 5.635 | JPT |
| rs11210442 | MGC22773 | GI_21687083-S | 1 | 1 | 74407725 | 49706 | 11.0753 | 5.635 | JPT |
| rs492302   | MGC22773 | GI_21687083-S | 1 | 1 | 74411352 | 53333 | 15.0825 | 5.635 | JPT |
| rs500203   | MGC22773 | GI_21687083-S | 1 | 1 | 74413672 | 55653 | 14.7177 | 5.635 | JPT |

|            |          |               |   |   |           |        |         |         |     |
|------------|----------|---------------|---|---|-----------|--------|---------|---------|-----|
| rs532221   | MGC22773 | GI_21687083-S | 1 | 1 | 74413971  | 55952  | 14.7177 | 5.635   | JPT |
| rs568049   | MGC22773 | GI_21687083-S | 1 | 1 | 74416524  | 58505  | 14.7177 | 5.635   | JPT |
| rs3765651  | MGC22773 | GI_21687083-S | 1 | 1 | 74421383  | 63364  | 14.7177 | 5.635   | JPT |
| rs481387   | MGC22773 | GI_21687083-S | 1 | 1 | 74422471  | 64452  | 14.7177 | 5.635   | JPT |
| rs12565479 | CRYZ     | GI_14251216-S | 1 | 1 | 74964275  | 80197  | 5.7285  | 5.69153 | JPT |
| rs12568674 | CRYZ     | GI_14251216-S | 1 | 1 | 74964295  | 80217  | 6.4178  | 5.69153 | JPT |
| rs11163400 | CRYZ     | GI_14251216-S | 1 | 1 | 74964348  | 80270  | 5.6956  | 5.69153 | JPT |
| rs1327089  | CRYZ     | GI_14251216-S | 1 | 1 | 74972672  | 88594  | 5.7575  | 5.69153 | JPT |
| rs277381   | CRYZ     | GI_14251216-S | 1 | 1 | 74978836  | 94758  | 5.6956  | 5.69153 | JPT |
| rs12745189 | GSTM2    | GI_23065549-S | 1 | 1 | 109898605 | 27613  | 7.3963  | 6.06418 | JPT |
| rs542338   | GSTM2    | GI_23065549-S | 1 | 1 | 109904808 | 21410  | 6.7855  | 6.06418 | JPT |
| rs592586   | GSTM2    | GI_23065549-S | 1 | 1 | 109905432 | 20786  | 7.2953  | 6.06418 | JPT |
| rs661417   | GSTM2    | GI_23065549-S | 1 | 1 | 109906951 | 19267  | 6.9677  | 6.06418 | JPT |
| rs525362   | GSTM2    | GI_23065549-S | 1 | 1 | 109907156 | 19062  | 6.9677  | 6.06418 | JPT |
| rs681991   | GSTM2    | GI_23065549-S | 1 | 1 | 109907270 | 18948  | 6.9677  | 6.06418 | JPT |
| rs668413   | GSTM2    | GI_23065549-S | 1 | 1 | 109907986 | 18232  | 6.7855  | 6.06418 | JPT |
| rs1010167  | GSTM2    | GI_23065549-S | 1 | 1 | 109910769 | 15449  | 6.8824  | 6.06418 | JPT |
| rs1010167  | GSTM4    | GI_23065559-A | 1 | 1 | 109910769 | 2775   | 6.3721  | 6.03166 | JPT |
| rs638820   | GSTM2    | GI_23065549-S | 1 | 1 | 109921948 | 4270   | 6.3216  | 6.06418 | JPT |
| rs655315   | GSTM2    | GI_23065549-S | 1 | 1 | 109927220 | 1002   | 6.9505  | 6.06418 | JPT |
| rs2071487  | GSTM1    | GI_23065546-A | 1 | 1 | 109945123 | 1163   | 15.4099 | 5.86477 | JPT |
| rs2071487  | GSTM2    | GI_23065549-S | 1 | 1 | 109945123 | 18905  | 7.8444  | 6.06418 | JPT |
| rs2014578  | GSTM1    | GI_23065546-A | 1 | 1 | 109953413 | 9453   | 13.285  | 5.86477 | JPT |
| rs2014578  | GSTM2    | GI_23065549-S | 1 | 1 | 109953413 | 27195  | 6.5725  | 6.06418 | JPT |
| rs11101985 | GSTM1    | GI_23065546-A | 1 | 1 | 109958078 | 14118  | 8.9872  | 5.86477 | JPT |
| rs11579576 | GSTM1    | GI_23065546-A | 1 | 1 | 109961218 | 17258  | 7.0425  | 5.86477 | JPT |
| rs7364941  | GSTM1    | GI_23065546-A | 1 | 1 | 109962210 | 18250  | 6.1254  | 5.86477 | JPT |
| rs366631   | GSTM1    | GI_23065546-A | 1 | 1 | 109964514 | 20554  | 11.0931 | 5.86477 | JPT |
| rs366631   | GSTM2    | GI_23065549-S | 1 | 1 | 109964514 | 38296  | 7.2565  | 6.06418 | JPT |
| rs3754446  | GSTM1    | GI_23065546-A | 1 | 1 | 109965283 | 21323  | 7.6768  | 5.86477 | JPT |
| rs11101989 | GSTM1    | GI_23065546-A | 1 | 1 | 109965783 | 21823  | 7.7331  | 5.86477 | JPT |
| rs674787   | GSTM1    | GI_23065546-A | 1 | 1 | 109965953 | 21993  | 8.9947  | 5.86477 | JPT |
| rs929166   | GSTM1    | GI_23065546-A | 1 | 1 | 109967216 | 23256  | 8.1035  | 5.86477 | JPT |
| rs4970773  | GSTM1    | GI_23065546-A | 1 | 1 | 109967638 | 23678  | 8.3811  | 5.86477 | JPT |
| rs3768490  | GSTM1    | GI_23065546-A | 1 | 1 | 109971058 | 27098  | 7.6066  | 5.86477 | JPT |
| rs1854962  | GSTM1    | GI_23065546-A | 1 | 1 | 109981328 | 37368  | 6.2332  | 5.86477 | JPT |
| rs4970737  | GSTM1    | GI_23065546-A | 1 | 1 | 109996254 | 52294  | 6.5652  | 5.86477 | JPT |
| rs15864    | GSTM1    | GI_23065546-A | 1 | 1 | 110004898 | 60938  | 7.3801  | 5.86477 | JPT |
| rs3795819  | ST7L     | GI_38201636-A | 1 | 1 | 112946221 | 149522 | 6.6883  | 5.749   | JPT |
| rs3748656  | ST7L     | GI_38201636-A | 1 | 1 | 112948723 | 152024 | 6.6883  | 5.749   | JPT |
| rs1106287  | ST7L     | GI_38201636-A | 1 | 1 | 112954164 | 157465 | 6.4462  | 5.749   | JPT |
| rs11102778 | PHTF1    | GI_5729975-S  | 1 | 1 | 114566166 | 613957 | 5.8045  | 5.44977 | JPT |
| rs7524620  | CTSS     | GI_23110961-S | 1 | 1 | 147429772 | 86214  | 5.4152  | 5.384   | JPT |
| rs7529194  | CTSS     | GI_23110961-S | 1 | 1 | 147435693 | 80293  | 5.4684  | 5.384   | JPT |
| rs6678013  | CTSS     | GI_23110961-S | 1 | 1 | 147436358 | 79628  | 5.498   | 5.384   | JPT |
| rs6661415  | CTSS     | GI_23110961-S | 1 | 1 | 147448942 | 67044  | 5.498   | 5.384   | JPT |
| rs12403255 | CTSS     | GI_23110961-S | 1 | 1 | 147473485 | 42501  | 5.4152  | 5.384   | JPT |
| rs17658705 | CTSS     | GI_23110961-S | 1 | 1 | 147491144 | 24842  | 5.9313  | 5.384   | JPT |
| rs11804276 | CTSS     | GI_23110961-S | 1 | 1 | 147498834 | 17152  | 5.4152  | 5.384   | JPT |
| rs7418501  | CTSS     | GI_23110961-S | 1 | 1 | 147524969 | 8983   | 5.4152  | 5.384   | JPT |
| rs2864871  | CTSS     | GI_23110961-S | 1 | 1 | 147580037 | 64051  | 5.4476  | 5.384   | JPT |
| rs4509581  | CTSS     | GI_23110961-S | 1 | 1 | 147587538 | 71552  | 5.4476  | 5.384   | JPT |
| rs12085336 | CTSS     | GI_23110961-S | 1 | 1 | 147588853 | 72867  | 5.4476  | 5.384   | JPT |
| rs11589458 | CTSS     | GI_23110961-S | 1 | 1 | 147605689 | 89703  | 5.4476  | 5.384   | JPT |
| rs1889740  | CTSS     | GI_23110961-S | 1 | 1 | 147612828 | 96842  | 5.4476  | 5.384   | JPT |
| rs12401316 | CTSS     | GI_23110961-S | 1 | 1 | 147613728 | 97742  | 6.0134  | 5.384   | JPT |

|            |           |               |   |   |           |        |         |         |     |
|------------|-----------|---------------|---|---|-----------|--------|---------|---------|-----|
| rs2228099  | CTSS      | GI_23110961-S | 1 | 1 | 147621962 | 105976 | 5.4476  | 5.384   | JPT |
| rs2256355  | CTSS      | GI_23110961-S | 1 | 1 | 147624867 | 108881 | 5.4476  | 5.384   | JPT |
| rs3768015  | CTSS      | GI_23110961-S | 1 | 1 | 147626027 | 110041 | 6.0134  | 5.384   | JPT |
| rs3768013  | CTSS      | GI_23110961-S | 1 | 1 | 147628484 | 112498 | 5.4476  | 5.384   | JPT |
| rs7532045  | CTSS      | GI_23110961-S | 1 | 1 | 147634920 | 118934 | 5.4476  | 5.384   | JPT |
| rs2274739  | S100A13   | GI_41117409-S | 1 | 1 | 150425206 | 13257  | 8.1968  | 5.68108 | JPT |
| rs10797056 | S100A13   | GI_41117409-S | 1 | 1 | 150426856 | 14907  | 8.4748  | 5.68108 | JPT |
| rs3790412  | S100A13   | GI_41117409-S | 1 | 1 | 150429930 | 17981  | 7.7618  | 5.68108 | JPT |
| rs3828031  | S100A13   | GI_41117409-S | 1 | 1 | 150430205 | 18256  | 8.1968  | 5.68108 | JPT |
| rs7934     | S100A13   | GI_41117409-S | 1 | 1 | 150431839 | 19890  | 6.6887  | 5.68108 | JPT |
| rs913860   | S100A13   | GI_41117409-S | 1 | 1 | 150433200 | 21251  | 6.2309  | 5.68108 | JPT |
| rs913861   | S100A13   | GI_41117409-S | 1 | 1 | 150435293 | 23344  | 8.1968  | 5.68108 | JPT |
| rs4845563  | S100A13   | GI_41117409-S | 1 | 1 | 150442099 | 30150  | 7.1979  | 5.68108 | JPT |
| rs3806234  | S100A13   | GI_41117409-S | 1 | 1 | 150444144 | 32195  | 7.3261  | 5.68108 | JPT |
| rs7345     | S100A13   | GI_41117409-S | 1 | 1 | 150447131 | 35182  | 8.1968  | 5.68108 | JPT |
| rs4515830  | S100A13   | GI_41117409-S | 1 | 1 | 150449545 | 37596  | 6.8287  | 5.68108 | JPT |
| rs4351684  | S100A13   | GI_41117409-S | 1 | 1 | 150449933 | 37984  | 8.4748  | 5.68108 | JPT |
| rs3862047  | S100A13   | GI_41117409-S | 1 | 1 | 150450690 | 38741  | 7.4563  | 5.68108 | JPT |
| rs10797096 | S100A13   | GI_41117409-S | 1 | 1 | 150453738 | 41789  | 6.4677  | 5.68108 | JPT |
| rs11265625 | S100A13   | GI_41117409-S | 1 | 1 | 150455982 | 44033  | 6.4677  | 5.68108 | JPT |
| rs10908848 | S100A13   | GI_41117409-S | 1 | 1 | 150458953 | 47004  | 6.4677  | 5.68108 | JPT |
| rs6674929  | S100A13   | GI_41117409-S | 1 | 1 | 150461734 | 49785  | 6.4677  | 5.68108 | JPT |
| rs9661993  | S100A13   | GI_41117409-S | 1 | 1 | 150469478 | 57529  | 7.5014  | 5.68108 | JPT |
| rs3767749  | KIS       | GI_28467002-I | 1 | 1 | 159278085 | 52874  | 6.6734  | 6.18844 | JPT |
| rs4540637  | MGC3794   | GI_33239373-S | 1 | 1 | 164835203 | 66013  | 6.0605  | 6.04846 | JPT |
| rs1406822  | MGC3794   | GI_33239373-S | 1 | 1 | 164839701 | 61515  | 6.1693  | 6.04846 | JPT |
| rs12736803 | MGC3794   | GI_33239373-S | 1 | 1 | 164856724 | 44492  | 7.6464  | 6.04846 | JPT |
| rs6681002  | MGC3794   | GI_33239373-S | 1 | 1 | 164857385 | 43831  | 8.1137  | 6.04846 | JPT |
| rs12742613 | MGC3794   | GI_33239373-S | 1 | 1 | 164857947 | 43269  | 7.6444  | 6.04846 | JPT |
| rs11807802 | MGC3794   | GI_33239373-S | 1 | 1 | 164858819 | 42397  | 8.2122  | 6.04846 | JPT |
| rs1535007  | MGC3794   | GI_33239373-S | 1 | 1 | 164866287 | 34929  | 8.1137  | 6.04846 | JPT |
| rs7517978  | MGC3794   | GI_33239373-S | 1 | 1 | 164869703 | 31513  | 11.5261 | 6.04846 | JPT |
| rs4657739  | MGC3794   | GI_33239373-S | 1 | 1 | 164874147 | 27069  | 12.9334 | 6.04846 | JPT |
| rs7552728  | MGC3794   | GI_33239373-S | 1 | 1 | 164879050 | 22166  | 11.6681 | 6.04846 | JPT |
| rs2281016  | MGC3794   | GI_33239373-S | 1 | 1 | 164879550 | 21666  | 12.9334 | 6.04846 | JPT |
| rs10918838 | MGC3794   | GI_33239373-S | 1 | 1 | 164880487 | 20729  | 12.9334 | 6.04846 | JPT |
| rs11801584 | MGC3794   | GI_33239373-S | 1 | 1 | 164880629 | 20587  | 12.6283 | 6.04846 | JPT |
| rs4657741  | MGC3794   | GI_33239373-S | 1 | 1 | 164880800 | 20416  | 7.782   | 6.04846 | JPT |
| rs12756816 | MGC3794   | GI_33239373-S | 1 | 1 | 164881648 | 19568  | 12.4196 | 6.04846 | JPT |
| rs2038033  | MGC3794   | GI_33239373-S | 1 | 1 | 164883418 | 17798  | 13.7382 | 6.04846 | JPT |
| rs2038035  | MGC3794   | GI_33239373-S | 1 | 1 | 164884748 | 16468  | 12.9334 | 6.04846 | JPT |
| rs2038034  | MGC3794   | GI_33239373-S | 1 | 1 | 164885028 | 16188  | 13.0153 | 6.04846 | JPT |
| rs3753935  | MGC3794   | GI_33239373-S | 1 | 1 | 164885459 | 15757  | 10.9809 | 6.04846 | JPT |
| rs1320993  | MGC3794   | GI_33239373-S | 1 | 1 | 164886257 | 14959  | 11.9929 | 6.04846 | JPT |
| rs2294253  | MGC3794   | GI_33239373-S | 1 | 1 | 164888285 | 12931  | 12.9334 | 6.04846 | JPT |
| rs2235207  | MGC3794   | GI_33239373-S | 1 | 1 | 164890920 | 10296  | 12.9334 | 6.04846 | JPT |
| rs1040404  | MGC3794   | GI_33239373-S | 1 | 1 | 164891548 | 9668   | 12.9334 | 6.04846 | JPT |
| rs2281014  | MGC3794   | GI_33239373-S | 1 | 1 | 164895496 | 5720   | 13.0153 | 6.04846 | JPT |
| rs1040403  | MGC3794   | GI_33239373-S | 1 | 1 | 164895855 | 5361   | 12.7466 | 6.04846 | JPT |
| rs2072778  | MGC3794   | GI_33239373-S | 1 | 1 | 164900408 | 808    | 13.2424 | 6.04846 | JPT |
| rs2072776  | MGC3794   | GI_33239373-S | 1 | 1 | 164901110 | 106    | 9.2522  | 6.04846 | JPT |
| rs10918844 | MGC3794   | GI_33239373-S | 1 | 1 | 164904282 | 3066   | 12.7466 | 6.04846 | JPT |
| rs6702339  | dJ383J4.3 | GI_42655858-S | 1 | 1 | 170122865 | 377611 | 5.8544  | 5.39193 | JPT |
| rs3934577  | dJ383J4.3 | GI_42655858-S | 1 | 1 | 170129967 | 370509 | 5.8544  | 5.39193 | JPT |
| rs12085083 | dJ383J4.3 | GI_42655858-S | 1 | 1 | 170139974 | 360502 | 5.8544  | 5.39193 | JPT |
| rs7534736  | dJ383J4.3 | GI_42655858-S | 1 | 1 | 170145337 | 355139 | 5.5119  | 5.39193 | JPT |

|            |           |               |   |   |           |        |         |         |     |
|------------|-----------|---------------|---|---|-----------|--------|---------|---------|-----|
| rs6700269  | dJ383J4.3 | GI_42655858-S | 1 | 1 | 170156279 | 344197 | 5.8544  | 5.39193 | JPT |
| rs16846593 | dJ383J4.3 | GI_42655858-S | 1 | 1 | 170629874 | 129398 | 5.9465  | 5.39193 | JPT |
| rs6685043  | dJ383J4.3 | GI_42655858-S | 1 | 1 | 170689170 | 188694 | 5.8035  | 5.39193 | JPT |
| rs10489254 | dJ383J4.3 | GI_42655858-S | 1 | 1 | 170929458 | 428982 | 5.8035  | 5.39193 | JPT |
| rs16846809 | dJ383J4.3 | GI_42655858-S | 1 | 1 | 170951055 | 450579 | 5.9652  | 5.39193 | JPT |
| rs16846815 | dJ383J4.3 | GI_42655858-S | 1 | 1 | 170952199 | 451723 | 5.9465  | 5.39193 | JPT |
| rs16847018 | dJ383J4.3 | GI_42655858-S | 1 | 1 | 171151329 | 650853 | 6.3788  | 5.39193 | JPT |
| rs16847025 | dJ383J4.3 | GI_42655858-S | 1 | 1 | 171157515 | 657039 | 6.7556  | 5.39193 | JPT |
| rs10489261 | dJ383J4.3 | GI_42655858-S | 1 | 1 | 171172340 | 671864 | 6.7556  | 5.39193 | JPT |
| rs16847121 | dJ383J4.3 | GI_42655858-S | 1 | 1 | 171214090 | 713614 | 6.2351  | 5.39193 | JPT |
| rs16847206 | dJ383J4.3 | GI_42655858-S | 1 | 1 | 171272964 | 772488 | 6.9135  | 5.39193 | JPT |
| rs7543502  | dJ383J4.3 | GI_42655858-S | 1 | 1 | 171385358 | 884882 | 6.9135  | 5.39193 | JPT |
| rs6673649  | dJ383J4.3 | GI_42655858-S | 1 | 1 | 171465219 | 964743 | 6.7556  | 5.39193 | JPT |
| rs6692753  | dJ383J4.3 | GI_42655858-S | 1 | 1 | 171469114 | 968638 | 6.7556  | 5.39193 | JPT |
| rs7515776  | CHI3L1    | GI_4557017-S  | 1 | 1 | 199887360 | 7455   | 8.2822  | 5.98932 | JPT |
| rs10399805 | CHI3L1    | GI_4557017-S  | 1 | 1 | 199887655 | 7750   | 8.4129  | 5.98932 | JPT |
| rs6691378  | CHI3L1    | GI_4557017-S  | 1 | 1 | 199888779 | 8874   | 9.4505  | 5.98932 | JPT |
| rs2886117  | CHI3L1    | GI_4557017-S  | 1 | 1 | 199900538 | 20633  | 8.6543  | 5.98932 | JPT |
| rs416768   | FLJ14146  | GI_31542689-S | 1 | 1 | 217251766 | 8835   | 6.022   | 5.93302 | JPT |
| rs364360   | FLJ14146  | GI_31542689-S | 1 | 1 | 217253371 | 7230   | 7.3355  | 5.93302 | JPT |
| rs425437   | FLJ14146  | GI_31542689-S | 1 | 1 | 217256903 | 3698   | 8.7841  | 5.93302 | JPT |
| rs425437   | FLJ20605  | GI_31542712-S | 1 | 1 | 217256903 | 88767  | 6.9745  | 6.10941 | JPT |
| rs437078   | FLJ14146  | GI_31542689-S | 1 | 1 | 217257022 | 3579   | 8.4549  | 5.93302 | JPT |
| rs437078   | FLJ20605  | GI_31542712-S | 1 | 1 | 217257022 | 88648  | 6.7016  | 6.10941 | JPT |
| rs700036   | FLJ14146  | GI_31542689-S | 1 | 1 | 217264434 | 3833   | 6.6666  | 5.93302 | JPT |
| rs384264   | FLJ14146  | GI_31542689-S | 1 | 1 | 217265327 | 4726   | 7.3355  | 5.93302 | JPT |
| rs774128   | FLJ14146  | GI_31542689-S | 1 | 1 | 217265785 | 5184   | 7.3355  | 5.93302 | JPT |
| rs17008307 | FLJ14146  | GI_31542689-S | 1 | 1 | 217271782 | 11181  | 6.6666  | 5.93302 | JPT |
| rs414180   | FLJ14146  | GI_31542689-S | 1 | 1 | 217272761 | 12160  | 6.12    | 5.93302 | JPT |
| rs439513   | FLJ14146  | GI_31542689-S | 1 | 1 | 217272893 | 12292  | 9.9496  | 5.93302 | JPT |
| rs439513   | FLJ20605  | GI_31542712-S | 1 | 1 | 217272893 | 72777  | 6.7417  | 6.10941 | JPT |
| rs368664   | FLJ14146  | GI_31542689-S | 1 | 1 | 217275430 | 14829  | 6.9728  | 5.93302 | JPT |
| rs12022218 | hmm26268  | hmm26268-S    | 1 | 1 | 218333069 | 3193   | 7.8914  | 5.67992 | JPT |
| rs3010848  | hmm26268  | hmm26268-S    | 1 | 1 | 218333518 | 2744   | 12.4659 | 5.67992 | JPT |
| rs12026940 | hmm26268  | hmm26268-S    | 1 | 1 | 218334109 | 2153   | 7.8914  | 5.67992 | JPT |
| rs12030246 | hmm26268  | hmm26268-S    | 1 | 1 | 218334167 | 2095   | 7.8914  | 5.67992 | JPT |
| rs3010852  | hmm26268  | hmm26268-S    | 1 | 1 | 218334602 | 1660   | 12.4659 | 5.67992 | JPT |
| rs7551182  | hmm26268  | hmm26268-S    | 1 | 1 | 218335485 | 777    | 10.7107 | 5.67992 | JPT |
| rs11118855 | hmm26268  | hmm26268-S    | 1 | 1 | 218336215 | 47     | 12.53   | 5.67992 | JPT |
| rs3003902  | hmm26268  | hmm26268-S    | 1 | 1 | 218336419 | 157    | 12.0021 | 5.67992 | JPT |
| rs12034159 | hmm26268  | hmm26268-S    | 1 | 1 | 218337932 | 1670   | 11.5211 | 5.67992 | JPT |
| rs9441948  | hmm26268  | hmm26268-S    | 1 | 1 | 218337962 | 1700   | 10.9622 | 5.67992 | JPT |
| rs7532339  | hmm26268  | hmm26268-S    | 1 | 1 | 218339435 | 3173   | 6.5763  | 5.67992 | JPT |
| rs11118856 | hmm26268  | hmm26268-S    | 1 | 1 | 218339816 | 3554   | 11.5211 | 5.67992 | JPT |
| rs12036282 | hmm26268  | hmm26268-S    | 1 | 1 | 218340189 | 3927   | 6.6586  | 5.67992 | JPT |
| rs11118858 | hmm26268  | hmm26268-S    | 1 | 1 | 218341353 | 5091   | 6.6863  | 5.67992 | JPT |
| rs6680297  | hmm26268  | hmm26268-S    | 1 | 1 | 218344970 | 8708   | 6.6863  | 5.67992 | JPT |
| rs6680316  | hmm26268  | hmm26268-S    | 1 | 1 | 218345021 | 8759   | 6.1702  | 5.67992 | JPT |
| rs10495178 | hmm26268  | hmm26268-S    | 1 | 1 | 218348833 | 12571  | 6.6863  | 5.67992 | JPT |
| rs17010785 | hmm26268  | hmm26268-S    | 1 | 1 | 218353599 | 17337  | 6.7144  | 5.67992 | JPT |
| rs4403637  | hmm26268  | hmm26268-S    | 1 | 1 | 218356929 | 20667  | 11.5211 | 5.67992 | JPT |
| rs12038356 | hmm26268  | hmm26268-S    | 1 | 1 | 218361067 | 24805  | 6.5808  | 5.67992 | JPT |
| rs11118863 | hmm26268  | hmm26268-S    | 1 | 1 | 218361410 | 25148  | 11.5211 | 5.67992 | JPT |
| rs12039269 | hmm26268  | hmm26268-S    | 1 | 1 | 218361832 | 25570  | 6.5808  | 5.67992 | JPT |
| rs11590498 | MGC12458  | GI_14150107-S | 1 | 1 | 241461755 | 115325 | 8.8121  | 6.12061 | JPT |
| rs10927361 | MGC12458  | GI_14150107-S | 1 | 1 | 241466695 | 110385 | 8.359   | 6.12061 | JPT |

|            |          |               |   |   |           |        |         |         |     |
|------------|----------|---------------|---|---|-----------|--------|---------|---------|-----|
| rs1021282  | MGC12458 | GI_14150107-S | 1 | 1 | 241470753 | 106327 | 8.8121  | 6.12061 | JPT |
| rs10927363 | MGC12458 | GI_14150107-S | 1 | 1 | 241474480 | 102600 | 8.0124  | 6.12061 | JPT |
| rs12403396 | MGC12458 | GI_14150107-S | 1 | 1 | 241474775 | 102305 | 8.2751  | 6.12061 | JPT |
| rs10927364 | MGC12458 | GI_14150107-S | 1 | 1 | 241476465 | 100615 | 8.8121  | 6.12061 | JPT |
| rs4658434  | MGC12458 | GI_14150107-S | 1 | 1 | 241478023 | 99057  | 8.5959  | 6.12061 | JPT |
| rs2050632  | MGC12458 | GI_14150107-S | 1 | 1 | 241485608 | 91472  | 8.5959  | 6.12061 | JPT |
| rs522595   | MGC12458 | GI_14150107-S | 1 | 1 | 241485780 | 91300  | 8.5959  | 6.12061 | JPT |
| rs644341   | MGC12458 | GI_14150107-S | 1 | 1 | 241485863 | 91217  | 8.8121  | 6.12061 | JPT |
| rs643352   | MGC12458 | GI_14150107-S | 1 | 1 | 241486132 | 90948  | 8.3169  | 6.12061 | JPT |
| rs10803250 | MGC12458 | GI_14150107-S | 1 | 1 | 241488109 | 88971  | 8.3169  | 6.12061 | JPT |
| rs651773   | MGC12458 | GI_14150107-S | 1 | 1 | 241490780 | 86300  | 8.8121  | 6.12061 | JPT |
| rs626070   | MGC12458 | GI_14150107-S | 1 | 1 | 241493372 | 83708  | 8.5959  | 6.12061 | JPT |
| rs4658685  | MGC12458 | GI_14150107-S | 1 | 1 | 241493912 | 83168  | 8.3169  | 6.12061 | JPT |
| rs7552510  | MGC12458 | GI_14150107-S | 1 | 1 | 241494079 | 83001  | 8.3169  | 6.12061 | JPT |
| rs2786693  | MGC12458 | GI_14150107-S | 1 | 1 | 241495087 | 81993  | 7.7111  | 6.12061 | JPT |
| rs672008   | MGC12458 | GI_14150107-S | 1 | 1 | 241496919 | 80161  | 8.8121  | 6.12061 | JPT |
| rs2786691  | MGC12458 | GI_14150107-S | 1 | 1 | 241497170 | 79910  | 8.8121  | 6.12061 | JPT |
| rs10803251 | MGC12458 | GI_14150107-S | 1 | 1 | 241499501 | 77579  | 8.3169  | 6.12061 | JPT |
| rs1196365  | MGC12458 | GI_14150107-S | 1 | 1 | 241505212 | 71868  | 8.8121  | 6.12061 | JPT |
| rs1196366  | MGC12458 | GI_14150107-S | 1 | 1 | 241505229 | 71851  | 9.1525  | 6.12061 | JPT |
| rs10927369 | MGC12458 | GI_14150107-S | 1 | 1 | 241506001 | 71079  | 8.3169  | 6.12061 | JPT |
| rs901664   | MGC12458 | GI_14150107-S | 1 | 1 | 241509620 | 67460  | 9.2159  | 6.12061 | JPT |
| rs901665   | MGC12458 | GI_14150107-S | 1 | 1 | 241509924 | 67156  | 9.2159  | 6.12061 | JPT |
| rs7528009  | MGC12458 | GI_14150107-S | 1 | 1 | 241511114 | 65966  | 8.8121  | 6.12061 | JPT |
| rs628713   | MGC12458 | GI_14150107-S | 1 | 1 | 241515295 | 61785  | 8.5316  | 6.12061 | JPT |
| rs600025   | MGC12458 | GI_14150107-S | 1 | 1 | 241517136 | 59944  | 10.7901 | 6.12061 | JPT |
| rs586013   | MGC12458 | GI_14150107-S | 1 | 1 | 241517934 | 59146  | 12.9177 | 6.12061 | JPT |
| rs632383   | MGC12458 | GI_14150107-S | 1 | 1 | 241518287 | 58793  | 11.4465 | 6.12061 | JPT |
| rs1979568  | MGC12458 | GI_14150107-S | 1 | 1 | 241518513 | 58567  | 10.7901 | 6.12061 | JPT |
| rs675033   | MGC12458 | GI_14150107-S | 1 | 1 | 241519964 | 57116  | 12.3973 | 6.12061 | JPT |
| rs632676   | MGC12458 | GI_14150107-S | 1 | 1 | 241521105 | 55975  | 11.4144 | 6.12061 | JPT |
| rs616540   | MGC12458 | GI_14150107-S | 1 | 1 | 241522450 | 54630  | 12.9177 | 6.12061 | JPT |
| rs665478   | MGC12458 | GI_14150107-S | 1 | 1 | 241524271 | 52809  | 12.3973 | 6.12061 | JPT |
| rs9428636  | MGC12458 | GI_14150107-S | 1 | 1 | 241526024 | 51056  | 12.9177 | 6.12061 | JPT |
| rs556935   | MGC12458 | GI_14150107-S | 1 | 1 | 241530141 | 46939  | 7.3808  | 6.12061 | JPT |
| rs626106   | MGC12458 | GI_14150107-S | 1 | 1 | 241530870 | 46210  | 8.3449  | 6.12061 | JPT |
| rs2029249  | MGC12458 | GI_14150107-S | 1 | 1 | 241531718 | 45362  | 12.3973 | 6.12061 | JPT |
| rs11580510 | MGC12458 | GI_14150107-S | 1 | 1 | 241531917 | 45163  | 11.8299 | 6.12061 | JPT |
| rs12728471 | MGC12458 | GI_14150107-S | 1 | 1 | 241531931 | 45149  | 10.7301 | 6.12061 | JPT |
| rs4233441  | MGC12458 | GI_14150107-S | 1 | 1 | 241535175 | 41905  | 12.9177 | 6.12061 | JPT |
| rs619449   | MGC12458 | GI_14150107-S | 1 | 1 | 241539091 | 37989  | 10.9305 | 6.12061 | JPT |
| rs4658688  | MGC12458 | GI_14150107-S | 1 | 1 | 241540837 | 36243  | 12.9177 | 6.12061 | JPT |
| rs611185   | MGC12458 | GI_14150107-S | 1 | 1 | 241545095 | 31985  | 7.4821  | 6.12061 | JPT |
| rs576872   | MGC12458 | GI_14150107-S | 1 | 1 | 241549105 | 27975  | 7.4821  | 6.12061 | JPT |
| rs547441   | MGC12458 | GI_14150107-S | 1 | 1 | 241550008 | 27072  | 7.3876  | 6.12061 | JPT |
| rs2843423  | MGC12458 | GI_14150107-S | 1 | 1 | 241554766 | 22314  | 7.3876  | 6.12061 | JPT |
| rs6692143  | MGC12458 | GI_14150107-S | 1 | 1 | 241554927 | 22153  | 8.8575  | 6.12061 | JPT |
| rs664252   | MGC12458 | GI_14150107-S | 1 | 1 | 241555077 | 22003  | 6.5402  | 6.12061 | JPT |
| rs1538165  | MGC12458 | GI_14150107-S | 1 | 1 | 241556751 | 20329  | 9.5717  | 6.12061 | JPT |
| rs10754848 | MGC12458 | GI_14150107-S | 1 | 1 | 241559014 | 18066  | 9.5717  | 6.12061 | JPT |
| rs7536388  | MGC12458 | GI_14150107-S | 1 | 1 | 241561374 | 15706  | 7.7572  | 6.12061 | JPT |
| rs10927383 | MGC12458 | GI_14150107-S | 1 | 1 | 241564744 | 12336  | 8.9108  | 6.12061 | JPT |
| rs4658690  | MGC12458 | GI_14150107-S | 1 | 1 | 241565036 | 12044  | 7.6774  | 6.12061 | JPT |
| rs4658694  | MGC12458 | GI_14150107-S | 1 | 1 | 241570210 | 6870   | 7.6774  | 6.12061 | JPT |
| rs10754849 | MGC12458 | GI_14150107-S | 1 | 1 | 241573221 | 3859   | 7.6774  | 6.12061 | JPT |
| rs6429522  | MGC12458 | GI_14150107-S | 1 | 1 | 241574484 | 2596   | 6.3099  | 6.12061 | JPT |

|            |           |               |   |   |           |        |        |         |     |
|------------|-----------|---------------|---|---|-----------|--------|--------|---------|-----|
| rs4658696  | MGC12458  | GI_14150107-S | 1 | 1 | 241577480 | 400    | 7.5466 | 6.12061 | JPT |
| rs11888045 | LOC130502 | GI_37539459-S | 2 | 2 | 20013518  | 5885   | 8.1226 | 5.99603 | JPT |
| rs7563410  | LOC130502 | GI_37539459-S | 2 | 2 | 20018564  | 839    | 8.677  | 5.99603 | JPT |
| rs7572167  | LOC130502 | GI_37539459-S | 2 | 2 | 20022616  | 3213   | 8.8044 | 5.99603 | JPT |
| rs2304588  | LOC130502 | GI_37539459-S | 2 | 2 | 20023345  | 3942   | 8.9079 | 5.99603 | JPT |
| rs7594214  | LOC130502 | GI_37539459-S | 2 | 2 | 20027997  | 8594   | 7.0251 | 5.99603 | JPT |
| rs2293671  | LOC130502 | GI_37539459-S | 2 | 2 | 20059492  | 40089  | 8.9079 | 5.99603 | JPT |
| rs11096632 | LOC130502 | GI_37539459-S | 2 | 2 | 20066000  | 46597  | 8.9079 | 5.99603 | JPT |
| rs6707471  | LOC130502 | GI_37539459-S | 2 | 2 | 20068472  | 49069  | 8.739  | 5.99603 | JPT |
| rs6719397  | LOC130502 | GI_37539459-S | 2 | 2 | 20077173  | 57770  | 8.6306 | 5.99603 | JPT |
| rs12620863 | LOC130502 | GI_37539459-S | 2 | 2 | 20080092  | 60689  | 8.8044 | 5.99603 | JPT |
| rs10169398 | LOC130502 | GI_37539459-S | 2 | 2 | 20081837  | 62434  | 8.5643 | 5.99603 | JPT |
| rs12613209 | LOC130502 | GI_37539459-S | 2 | 2 | 20084599  | 65196  | 8.3103 | 5.99603 | JPT |
| rs16987265 | LOC130502 | GI_37539459-S | 2 | 2 | 20096530  | 77127  | 8.9079 | 5.99603 | JPT |
| rs10197385 | LOC130502 | GI_37539459-S | 2 | 2 | 20098202  | 78799  | 8.8044 | 5.99603 | JPT |
| rs1381817  | LOC130502 | GI_37539459-S | 2 | 2 | 20100848  | 81445  | 8.8044 | 5.99603 | JPT |
| rs1060742  | LOC130502 | GI_37539459-S | 2 | 2 | 20110643  | 91240  | 7.2064 | 5.99603 | JPT |
| rs10495701 | LOC130502 | GI_37539459-S | 2 | 2 | 20119479  | 100076 | 8.3385 | 5.99603 | JPT |
| rs6731612  | GALNT14   | GI_13375743-S | 2 | 2 | 31257851  | 212604 | 6.4684 | 5.86197 | JPT |
| rs6543603  | GALNT14   | GI_13375743-S | 2 | 2 | 31257918  | 212671 | 6.6476 | 5.86197 | JPT |
| rs6760144  | GALNT14   | GI_13375743-S | 2 | 2 | 31257976  | 212729 | 8.0836 | 5.86197 | JPT |
| rs6760355  | GALNT14   | GI_13375743-S | 2 | 2 | 31258144  | 212897 | 8.0836 | 5.86197 | JPT |
| rs888096   | QPCT      | GI_9257235-S  | 2 | 2 | 37515452  | 3945   | 6.5357 | 6.16378 | JPT |
| rs1451153  | CRIP1     | GI_41350204-S | 2 | 2 | 46711503  | 51898  | 6.9837 | 6.054   | JPT |
| rs7589801  | CRIP1     | GI_41350204-S | 2 | 2 | 46727893  | 35508  | 9.0948 | 6.054   | JPT |
| rs1901263  | CRIP1     | GI_41350204-S | 2 | 2 | 46730237  | 33164  | 7.6126 | 6.054   | JPT |
| rs17818399 | CRIP1     | GI_41350204-S | 2 | 2 | 46737677  | 25724  | 9.7272 | 6.054   | JPT |
| rs13001566 | CRIP1     | GI_41350204-S | 2 | 2 | 46741138  | 22263  | 9.3441 | 6.054   | JPT |
| rs1451156  | CRIP1     | GI_41350204-S | 2 | 2 | 46744253  | 19148  | 9.0948 | 6.054   | JPT |
| rs13000706 | CRIP1     | GI_41350204-S | 2 | 2 | 46749898  | 13503  | 9.0948 | 6.054   | JPT |
| rs1531133  | CRIP1     | GI_41350204-S | 2 | 2 | 46755282  | 8119   | 8.2411 | 6.054   | JPT |
| rs2346419  | CRIP1     | GI_41350204-S | 2 | 2 | 46756720  | 6681   | 9.7272 | 6.054   | JPT |
| rs3087822  | CRIP1     | GI_41350204-S | 2 | 2 | 46763684  | 283    | 9.0948 | 6.054   | JPT |
| rs6739397  | CRIP1     | GI_41350204-S | 2 | 2 | 46769972  | 6571   | 7.917  | 6.054   | JPT |
| rs12104572 | CRIP1     | GI_41350204-S | 2 | 2 | 46774117  | 10716  | 8.0888 | 6.054   | JPT |
| rs12105006 | CRIP1     | GI_41350204-S | 2 | 2 | 46774237  | 10836  | 9.8751 | 6.054   | JPT |
| rs6544906  | CRIP1     | GI_41350204-S | 2 | 2 | 46775523  | 12122  | 7.917  | 6.054   | JPT |
| rs13385693 | CRIP1     | GI_41350204-S | 2 | 2 | 46778809  | 15408  | 8.0888 | 6.054   | JPT |
| rs6544907  | CRIP1     | GI_41350204-S | 2 | 2 | 46779970  | 16569  | 7.917  | 6.054   | JPT |
| rs982395   | CRIP1     | GI_41350204-S | 2 | 2 | 46784696  | 21295  | 8.814  | 6.054   | JPT |
| rs10495934 | CRIP1     | GI_41350204-S | 2 | 2 | 46786397  | 22996  | 8.8928 | 6.054   | JPT |
| rs7560464  | CRIP1     | GI_41350204-S | 2 | 2 | 46787685  | 24284  | 8.8928 | 6.054   | JPT |
| rs6712910  | CRIP1     | GI_41350204-S | 2 | 2 | 46788609  | 25208  | 8.8928 | 6.054   | JPT |
| rs6544909  | CRIP1     | GI_41350204-S | 2 | 2 | 46788897  | 25496  | 8.8572 | 6.054   | JPT |
| rs13406663 | CRIP1     | GI_41350204-S | 2 | 2 | 46790025  | 26624  | 7.2361 | 6.054   | JPT |
| rs4618102  | CRIP1     | GI_41350204-S | 2 | 2 | 46790579  | 27178  | 8.8928 | 6.054   | JPT |
| rs2881504  | CRIP1     | GI_41350204-S | 2 | 2 | 46790720  | 27319  | 8.814  | 6.054   | JPT |
| rs6544910  | CRIP1     | GI_41350204-S | 2 | 2 | 46793197  | 29796  | 8.814  | 6.054   | JPT |
| rs1869836  | CRIP1     | GI_41350204-S | 2 | 2 | 46794044  | 30643  | 8.814  | 6.054   | JPT |
| rs12624153 | SPTBN1    | GI_30315657-A | 2 | 2 | 54769452  | 29310  | 7.0772 | 6.22701 | JPT |
| rs7568777  | FLJ31438  | GI_22748824-S | 2 | 2 | 55295078  | 19467  | 8.4535 | 5.63688 | JPT |
| rs7349405  | FLJ31438  | GI_22748824-S | 2 | 2 | 55302945  | 11600  | 7.936  | 5.63688 | JPT |
| rs2576722  | FLJ31438  | GI_22748824-S | 2 | 2 | 55373474  | 58929  | 5.8274 | 5.63688 | JPT |
| rs1177234  | LOC339804 | GI_37546921-S | 2 | 2 | 61171714  | 130227 | 6.1756 | 5.70418 | JPT |
| rs3108630  | LOC339804 | GI_37546921-S | 2 | 2 | 61179811  | 122130 | 6.1756 | 5.70418 | JPT |
| rs1729672  | LOC339804 | GI_37546921-S | 2 | 2 | 61241868  | 60073  | 7.5829 | 5.70418 | JPT |



|            |           |               |   |   |          |       |         |         |     |
|------------|-----------|---------------|---|---|----------|-------|---------|---------|-----|
| rs1177293  | LOC339804 | GI_37546921-S | 2 | 2 | 61259731 | 42210 | 7.1332  | 5.70418 | JPT |
| rs1177283  | LOC339804 | GI_37546921-S | 2 | 2 | 61260455 | 41486 | 9.8664  | 5.70418 | JPT |
| rs1177284  | LOC339804 | GI_37546921-S | 2 | 2 | 61261097 | 40844 | 9.3581  | 5.70418 | JPT |
| rs1177285  | LOC339804 | GI_37546921-S | 2 | 2 | 61261788 | 40153 | 14.3076 | 5.70418 | JPT |
| rs1177286  | LOC339804 | GI_37546921-S | 2 | 2 | 61263541 | 38400 | 6.0332  | 5.70418 | JPT |
| rs1177287  | LOC339804 | GI_37546921-S | 2 | 2 | 61263814 | 38127 | 7.9249  | 5.70418 | JPT |
| rs1177288  | LOC339804 | GI_37546921-S | 2 | 2 | 61264636 | 37305 | 8.483   | 5.70418 | JPT |
| rs1177289  | LOC339804 | GI_37546921-S | 2 | 2 | 61264907 | 37034 | 8.483   | 5.70418 | JPT |
| rs1177282  | LOC339804 | GI_37546921-S | 2 | 2 | 61269428 | 32513 | 14.7238 | 5.70418 | JPT |
| rs12473277 | LOC339804 | GI_37546921-S | 2 | 2 | 61270271 | 31670 | 11.1227 | 5.70418 | JPT |
| rs1729660  | LOC339804 | GI_37546921-S | 2 | 2 | 61277463 | 24478 | 14.3076 | 5.70418 | JPT |
| rs11498    | LOC339804 | GI_37546921-S | 2 | 2 | 61282470 | 19471 | 15.3081 | 5.70418 | JPT |
| rs3213944  | LOC339804 | GI_37546921-S | 2 | 2 | 61283949 | 17992 | 14.9658 | 5.70418 | JPT |
| rs2441467  | LOC339804 | GI_37546921-S | 2 | 2 | 61285800 | 16141 | 13.4635 | 5.70418 | JPT |
| rs720201   | LOC339804 | GI_37546921-S | 2 | 2 | 61288114 | 13827 | 15.3081 | 5.70418 | JPT |
| rs1729653  | LOC339804 | GI_37546921-S | 2 | 2 | 61288659 | 13282 | 15.6545 | 5.70418 | JPT |
| rs1665270  | LOC339804 | GI_37546921-S | 2 | 2 | 61289317 | 12624 | 15.6545 | 5.70418 | JPT |
| rs1729652  | LOC339804 | GI_37546921-S | 2 | 2 | 61289670 | 12271 | 15.3081 | 5.70418 | JPT |
| rs2698190  | LOC339804 | GI_37546921-S | 2 | 2 | 61290268 | 11673 | 11.8829 | 5.70418 | JPT |
| rs1665271  | LOC339804 | GI_37546921-S | 2 | 2 | 61290467 | 11474 | 15.6545 | 5.70418 | JPT |
| rs1665272  | LOC339803 | GI_42656315-S | 2 | 2 | 61290937 | 9937  | 6.6583  | 5.82803 | JPT |
| rs12475591 | LOC339804 | GI_37546921-S | 2 | 2 | 61293179 | 8762  | 15.6545 | 5.70418 | JPT |
| rs2592493  | LOC339804 | GI_37546921-S | 2 | 2 | 61293988 | 7953  | 15.6545 | 5.70418 | JPT |
| rs2698197  | LOC339803 | GI_42656315-S | 2 | 2 | 61294094 | 13094 | 6.6583  | 5.82803 | JPT |
| rs1665263  | LOC339804 | GI_37546921-S | 2 | 2 | 61294410 | 7531  | 13.6034 | 5.70418 | JPT |
| rs1665260  | LOC339804 | GI_37546921-S | 2 | 2 | 61296138 | 5803  | 15.6545 | 5.70418 | JPT |
| rs1665259  | LOC339804 | GI_37546921-S | 2 | 2 | 61296406 | 5535  | 15.3081 | 5.70418 | JPT |
| rs7558954  | LOC339804 | GI_37546921-S | 2 | 2 | 61296557 | 5384  | 12.0107 | 5.70418 | JPT |
| rs1729671  | LOC339804 | GI_37546921-S | 2 | 2 | 61296756 | 5185  | 14.9291 | 5.70418 | JPT |
| rs1177309  | LOC339804 | GI_37546921-S | 2 | 2 | 61296899 | 5042  | 12.0107 | 5.70418 | JPT |
| rs1177308  | LOC339804 | GI_37546921-S | 2 | 2 | 61298905 | 3036  | 12.0107 | 5.70418 | JPT |
| rs1177303  | LOC339804 | GI_37546921-S | 2 | 2 | 61300006 | 1935  | 15.6545 | 5.70418 | JPT |
| rs1729674  | LOC339804 | GI_37546921-S | 2 | 2 | 61301388 | 553   | 11.668  | 5.70418 | JPT |
| rs1729673  | LOC339804 | GI_37546921-S | 2 | 2 | 61301450 | 491   | 15.3081 | 5.70418 | JPT |
| rs3889717  | LOC339804 | GI_37546921-S | 2 | 2 | 61302442 | 501   | 9.6855  | 5.70418 | JPT |
| rs1729662  | LOC339803 | GI_42656315-S | 2 | 2 | 61302956 | 21956 | 8.5317  | 5.82803 | JPT |
| rs1615070  | LOC339804 | GI_37546921-S | 2 | 2 | 61304826 | 2885  | 12.0107 | 5.70418 | JPT |
| rs2600671  | LOC339803 | GI_42656315-S | 2 | 2 | 61306502 | 25502 | 7.7994  | 5.82803 | JPT |
| rs2600668  | LOC339804 | GI_37546921-S | 2 | 2 | 61312078 | 10137 | 14.5921 | 5.70418 | JPT |
| rs2167564  | LOC339804 | GI_37546921-S | 2 | 2 | 61312467 | 10526 | 15.3081 | 5.70418 | JPT |
| rs2600669  | LOC339804 | GI_37546921-S | 2 | 2 | 61312947 | 11006 | 11.2749 | 5.70418 | JPT |
| rs2600665  | LOC339803 | GI_42656315-S | 2 | 2 | 61317446 | 36446 | 5.8756  | 5.82803 | JPT |
| rs935860   | LOC339804 | GI_37546921-S | 2 | 2 | 61318212 | 16271 | 7.7289  | 5.70418 | JPT |
| rs777584   | LOC339804 | GI_37546921-S | 2 | 2 | 61321997 | 20056 | 9.3819  | 5.70418 | JPT |
| rs777592   | LOC339804 | GI_37546921-S | 2 | 2 | 61329994 | 28053 | 6.6994  | 5.70418 | JPT |
| rs777593   | LOC339803 | GI_42656315-S | 2 | 2 | 61330754 | 49754 | 5.8756  | 5.82803 | JPT |
| rs777589   | LOC339803 | GI_42656315-S | 2 | 2 | 61337272 | 56272 | 5.8756  | 5.82803 | JPT |
| rs777587   | LOC339804 | GI_37546921-S | 2 | 2 | 61339326 | 37385 | 9.1284  | 5.70418 | JPT |
| rs4671397  | LOC339804 | GI_37546921-S | 2 | 2 | 61347498 | 45557 | 8.2239  | 5.70418 | JPT |
| rs4671398  | LOC339804 | GI_37546921-S | 2 | 2 | 61352158 | 50217 | 10.4659 | 5.70418 | JPT |
| rs2123112  | LOC339804 | GI_37546921-S | 2 | 2 | 61353726 | 51785 | 10.6216 | 5.70418 | JPT |
| rs6545846  | LOC339804 | GI_37546921-S | 2 | 2 | 61354561 | 52620 | 10.7888 | 5.70418 | JPT |
| rs4672424  | LOC339804 | GI_37546921-S | 2 | 2 | 61356424 | 54483 | 8.0805  | 5.70418 | JPT |
| rs2290324  | LOC339803 | GI_42656315-S | 2 | 2 | 61360427 | 79427 | 5.8756  | 5.82803 | JPT |
| rs4672426  | LOC339803 | GI_42656315-S | 2 | 2 | 61368799 | 87799 | 5.8756  | 5.82803 | JPT |
| rs7591772  | LOC339804 | GI_37546921-S | 2 | 2 | 61374051 | 72110 | 8.4658  | 5.70418 | JPT |

|            |           |               |   |   |          |        |         |         |     |
|------------|-----------|---------------|---|---|----------|--------|---------|---------|-----|
| rs4672427  | LOC339804 | GI_37546921-S | 2 | 2 | 61380901 | 78960  | 8.1064  | 5.70418 | JPT |
| rs2167565  | LOC339804 | GI_37546921-S | 2 | 2 | 61388109 | 86168  | 8.528   | 5.70418 | JPT |
| rs6737373  | LOC339804 | GI_37546921-S | 2 | 2 | 61409689 | 107748 | 8.1064  | 5.70418 | JPT |
| rs4599092  | LOC339804 | GI_37546921-S | 2 | 2 | 61410619 | 108678 | 8.1064  | 5.70418 | JPT |
| rs12713435 | LOC339804 | GI_37546921-S | 2 | 2 | 61411440 | 109499 | 8.1064  | 5.70418 | JPT |
| rs7583383  | LOC339804 | GI_37546921-S | 2 | 2 | 61411973 | 110032 | 7.93    | 5.70418 | JPT |
| rs11677775 | LOC339804 | GI_37546921-S | 2 | 2 | 61414761 | 112820 | 8.1064  | 5.70418 | JPT |
| rs11677776 | LOC339804 | GI_37546921-S | 2 | 2 | 61414764 | 112823 | 8.6555  | 5.70418 | JPT |
| rs10169662 | LOC339804 | GI_37546921-S | 2 | 2 | 61419587 | 117646 | 8.1064  | 5.70418 | JPT |
| rs4671403  | LOC339804 | GI_37546921-S | 2 | 2 | 61423103 | 121162 | 8.1064  | 5.70418 | JPT |
| rs6545852  | LOC339804 | GI_37546921-S | 2 | 2 | 61425041 | 123100 | 8.2723  | 5.70418 | JPT |
| rs7561697  | LOC339804 | GI_37546921-S | 2 | 2 | 61430816 | 128875 | 8.1064  | 5.70418 | JPT |
| rs6545855  | LOC339804 | GI_37546921-S | 2 | 2 | 61444511 | 142570 | 8.1064  | 5.70418 | JPT |
| rs2694619  | LOC339804 | GI_37546921-S | 2 | 2 | 61448552 | 146611 | 8.7942  | 5.70418 | JPT |
| rs2694618  | LOC339804 | GI_37546921-S | 2 | 2 | 61448635 | 146694 | 7.3499  | 5.70418 | JPT |
| rs2600664  | LOC339804 | GI_37546921-S | 2 | 2 | 61451596 | 149655 | 8.1064  | 5.70418 | JPT |
| rs2694633  | LOC339804 | GI_37546921-S | 2 | 2 | 61452293 | 150352 | 6.5828  | 5.70418 | JPT |
| rs3765051  | LOC339804 | GI_37546921-S | 2 | 2 | 61454001 | 152060 | 7.3499  | 5.70418 | JPT |
| rs17482440 | LOC339804 | GI_37546921-S | 2 | 2 | 61460508 | 158567 | 7.3499  | 5.70418 | JPT |
| rs2593623  | LOC339804 | GI_37546921-S | 2 | 2 | 61463239 | 161298 | 8.2723  | 5.70418 | JPT |
| rs778159   | LOC339804 | GI_37546921-S | 2 | 2 | 61468395 | 166454 | 8.2723  | 5.70418 | JPT |
| rs778160   | LOC339804 | GI_37546921-S | 2 | 2 | 61468815 | 166874 | 5.9082  | 5.70418 | JPT |
| rs4541246  | LOC339804 | GI_37546921-S | 2 | 2 | 61474926 | 172985 | 7.0996  | 5.70418 | JPT |
| rs811871   | LOC339804 | GI_37546921-S | 2 | 2 | 61489600 | 187659 | 8.1064  | 5.70418 | JPT |
| rs4411680  | LOC339804 | GI_37546921-S | 2 | 2 | 61495756 | 193815 | 8.1064  | 5.70418 | JPT |
| rs12992614 | LOC339804 | GI_37546921-S | 2 | 2 | 61504727 | 202786 | 7.8301  | 5.70418 | JPT |
| rs10177225 | LOC339804 | GI_37546921-S | 2 | 2 | 61506149 | 204208 | 7.7373  | 5.70418 | JPT |
| rs1900573  | LOC339804 | GI_37546921-S | 2 | 2 | 61508563 | 206622 | 6.3513  | 5.70418 | JPT |
| rs2421066  | LOC339804 | GI_37546921-S | 2 | 2 | 61511173 | 209232 | 8.1064  | 5.70418 | JPT |
| rs10196146 | LOC339804 | GI_37546921-S | 2 | 2 | 61517030 | 215089 | 10.4659 | 5.70418 | JPT |
| rs10208769 | LOC339804 | GI_37546921-S | 2 | 2 | 61517265 | 215324 | 10.4659 | 5.70418 | JPT |
| rs778153   | LOC339804 | GI_37546921-S | 2 | 2 | 61520303 | 218362 | 8.2723  | 5.70418 | JPT |
| rs2593620  | LOC339804 | GI_37546921-S | 2 | 2 | 61524912 | 222971 | 8.1064  | 5.70418 | JPT |
| rs2463097  | LOC339804 | GI_37546921-S | 2 | 2 | 61525952 | 224011 | 8.2033  | 5.70418 | JPT |
| rs4672440  | LOC339804 | GI_37546921-S | 2 | 2 | 61528304 | 226363 | 6.6994  | 5.70418 | JPT |
| rs7581034  | LOC339804 | GI_37546921-S | 2 | 2 | 61547014 | 245073 | 8.2723  | 5.70418 | JPT |
| rs4672441  | LOC339804 | GI_37546921-S | 2 | 2 | 61550603 | 248662 | 8.4391  | 5.70418 | JPT |
| rs2084318  | LOC339804 | GI_37546921-S | 2 | 2 | 61564252 | 262311 | 8.1064  | 5.70418 | JPT |
| rs6545868  | LOC339804 | GI_37546921-S | 2 | 2 | 61567016 | 265075 | 6.6687  | 5.70418 | JPT |
| rs967968   | LOC339804 | GI_37546921-S | 2 | 2 | 61567707 | 265766 | 6.4319  | 5.70418 | JPT |
| rs778139   | LOC339804 | GI_37546921-S | 2 | 2 | 61596215 | 294274 | 6.4319  | 5.70418 | JPT |
| rs3771744  | MRPL53    | GI_22035595-S | 2 | 2 | 74490191 | 121203 | 7.3677  | 5.89436 | JPT |
| rs9309485  | MRPL53    | GI_22035595-S | 2 | 2 | 74549512 | 61882  | 7.2882  | 5.89436 | JPT |
| rs2240444  | MRPL53    | GI_22035595-S | 2 | 2 | 74553279 | 58115  | 7.3677  | 5.89436 | JPT |
| rs2268421  | MRPL53    | GI_22035595-S | 2 | 2 | 74565742 | 45652  | 7.3677  | 5.89436 | JPT |
| rs7556852  | MRPL53    | GI_22035595-S | 2 | 2 | 74581170 | 30224  | 7.3677  | 5.89436 | JPT |
| rs7562663  | MRPL53    | GI_22035595-S | 2 | 2 | 74587796 | 23598  | 7.3677  | 5.89436 | JPT |
| rs6746854  | MRPL53    | GI_22035595-S | 2 | 2 | 74593157 | 18237  | 7.4295  | 5.89436 | JPT |
| rs2268417  | MRPL53    | GI_22035595-S | 2 | 2 | 74594167 | 17227  | 7.3677  | 5.89436 | JPT |
| rs2270016  | MRPL53    | GI_22035595-S | 2 | 2 | 74597984 | 13410  | 7.3677  | 5.89436 | JPT |
| rs2268416  | MRPL53    | GI_22035595-S | 2 | 2 | 74601694 | 9700   | 7.2468  | 5.89436 | JPT |
| rs1063588  | MRPL53    | GI_22035595-S | 2 | 2 | 74602033 | 9361   | 7.3677  | 5.89436 | JPT |
| rs2284708  | MRPL53    | GI_22035595-S | 2 | 2 | 74604302 | 7092   | 7.3677  | 5.89436 | JPT |
| rs1047911  | MRPL53    | GI_22035595-S | 2 | 2 | 74611433 | 39     | 7.3677  | 5.89436 | JPT |
| rs6707475  | MRPL53    | GI_22035595-S | 2 | 2 | 74622146 | 10752  | 7.3677  | 5.89436 | JPT |
| rs17009980 | MRPL53    | GI_22035595-S | 2 | 2 | 74631565 | 20171  | 7.1455  | 5.89436 | JPT |

|            |        |               |   |   |          |        |        |         |     |
|------------|--------|---------------|---|---|----------|--------|--------|---------|-----|
| rs2301984  | MRPL53 | GI_22035595-S | 2 | 2 | 74632710 | 21316  | 7.3677 | 5.89436 | JPT |
| rs3755445  | MRPL53 | GI_22035595-S | 2 | 2 | 74633825 | 22431  | 6.4128 | 5.89436 | JPT |
| rs3755446  | MRPL53 | GI_22035595-S | 2 | 2 | 74633879 | 22485  | 6.2894 | 5.89436 | JPT |
| rs17009998 | MRPL53 | GI_22035595-S | 2 | 2 | 74636833 | 25439  | 6.529  | 5.89436 | JPT |
| rs10454145 | MRPL53 | GI_22035595-S | 2 | 2 | 74637459 | 26065  | 7.1707 | 5.89436 | JPT |
| rs11676323 | MRPL53 | GI_22035595-S | 2 | 2 | 74641136 | 29742  | 7.3677 | 5.89436 | JPT |
| rs3806607  | MRPL53 | GI_22035595-S | 2 | 2 | 74647269 | 35875  | 7.3677 | 5.89436 | JPT |
| rs3755447  | MRPL53 | GI_22035595-S | 2 | 2 | 74651849 | 40455  | 6.266  | 5.89436 | JPT |
| rs6546909  | MRPL53 | GI_22035595-S | 2 | 2 | 74657977 | 46583  | 6.266  | 5.89436 | JPT |
| rs10779958 | MRPL53 | GI_22035595-S | 2 | 2 | 74667433 | 56039  | 6.1842 | 5.89436 | JPT |
| rs2231250  | MRPL53 | GI_22035595-S | 2 | 2 | 74667831 | 56437  | 6.266  | 5.89436 | JPT |
| rs6707302  | MRPL53 | GI_22035595-S | 2 | 2 | 74673077 | 61683  | 6.266  | 5.89436 | JPT |
| rs715407   | MRPL53 | GI_22035595-S | 2 | 2 | 74677348 | 65954  | 6.266  | 5.89436 | JPT |
| rs11126435 | MRPL53 | GI_22035595-S | 2 | 2 | 74701355 | 89961  | 6.266  | 5.89436 | JPT |
| rs2021725  | MRPL53 | GI_22035595-S | 2 | 2 | 74713872 | 102478 | 6.266  | 5.89436 | JPT |
| rs752070   | MRPL53 | GI_22035595-S | 2 | 2 | 74736625 | 125231 | 6.266  | 5.89436 | JPT |
| rs759075   | MRPL53 | GI_22035595-S | 2 | 2 | 74736806 | 125412 | 6.024  | 5.89436 | JPT |
| rs6739708  | MRPL53 | GI_22035595-S | 2 | 2 | 74776654 | 165260 | 6.1027 | 5.89436 | JPT |
| rs7603085  | MRPL53 | GI_22035595-S | 2 | 2 | 74779986 | 168592 | 6.266  | 5.89436 | JPT |
| rs6718184  | MRPL53 | GI_22035595-S | 2 | 2 | 74784960 | 173566 | 6.266  | 5.89436 | JPT |
| rs6546917  | MRPL53 | GI_22035595-S | 2 | 2 | 74785036 | 173642 | 6.1821 | 5.89436 | JPT |
| rs4853081  | POLE4  | GI_38455393-S | 2 | 2 | 75077560 | 30753  | 7.4075 | 6.28932 | JPT |
| rs11902447 | POLE4  | GI_38455393-S | 2 | 2 | 75078432 | 29881  | 7.4075 | 6.28932 | JPT |
| rs2129604  | POLE4  | GI_38455393-S | 2 | 2 | 75094912 | 13401  | 7.2015 | 6.28932 | JPT |
| rs3771800  | POLE4  | GI_38455393-S | 2 | 2 | 75099524 | 8789   | 7.4075 | 6.28932 | JPT |
| rs13402369 | POLE4  | GI_38455393-S | 2 | 2 | 75101392 | 6921   | 7.4075 | 6.28932 | JPT |
| rs12713820 | POLE4  | GI_38455393-S | 2 | 2 | 75101679 | 6634   | 7.2015 | 6.28932 | JPT |
| rs12617404 | POLE4  | GI_38455393-S | 2 | 2 | 75102296 | 6017   | 7.2772 | 6.28932 | JPT |
| rs12327957 | POLE4  | GI_38455393-S | 2 | 2 | 75102954 | 5359   | 7.4075 | 6.28932 | JPT |
| rs4330128  | POLE4  | GI_38455393-S | 2 | 2 | 75116528 | 8215   | 7.6496 | 6.28932 | JPT |
| rs7423348  | POLE4  | GI_38455393-S | 2 | 2 | 75117320 | 9007   | 7.6496 | 6.28932 | JPT |
| rs5001327  | POLE4  | GI_38455393-S | 2 | 2 | 75119346 | 11033  | 7.6496 | 6.28932 | JPT |
| rs3886110  | POLE4  | GI_38455393-S | 2 | 2 | 75119487 | 11174  | 7.4299 | 6.28932 | JPT |
| rs12620300 | POLE4  | GI_38455393-S | 2 | 2 | 75122895 | 14582  | 7.6496 | 6.28932 | JPT |
| rs13012822 | POLE4  | GI_38455393-S | 2 | 2 | 75123843 | 15530  | 6.5084 | 6.28932 | JPT |
| rs4585057  | POLE4  | GI_38455393-S | 2 | 2 | 75124259 | 15946  | 7.6496 | 6.28932 | JPT |
| rs7602776  | POLE4  | GI_38455393-S | 2 | 2 | 75129986 | 21673  | 7.6496 | 6.28932 | JPT |
| rs923276   | POLE4  | GI_38455393-S | 2 | 2 | 75135171 | 26858  | 7.4299 | 6.28932 | JPT |
| rs923275   | POLE4  | GI_38455393-S | 2 | 2 | 75135348 | 27035  | 7.4299 | 6.28932 | JPT |
| rs17010597 | POLE4  | GI_38455393-S | 2 | 2 | 75136366 | 28053  | 7.6496 | 6.28932 | JPT |
| rs13410632 | POLE4  | GI_38455393-S | 2 | 2 | 75142093 | 33780  | 7.5176 | 6.28932 | JPT |
| rs7574356  | POLE4  | GI_38455393-S | 2 | 2 | 75147355 | 39042  | 7.6496 | 6.28932 | JPT |
| rs12990965 | POLE4  | GI_38455393-S | 2 | 2 | 75147518 | 39205  | 7.6496 | 6.28932 | JPT |
| rs7575416  | POLE4  | GI_38455393-S | 2 | 2 | 75151280 | 42967  | 7.6496 | 6.28932 | JPT |
| rs12713823 | POLE4  | GI_38455393-S | 2 | 2 | 75158244 | 49931  | 7.4299 | 6.28932 | JPT |
| rs13024157 | POLE4  | GI_38455393-S | 2 | 2 | 75160816 | 52503  | 7.6496 | 6.28932 | JPT |
| rs13032854 | POLE4  | GI_38455393-S | 2 | 2 | 75162523 | 54210  | 7.6496 | 6.28932 | JPT |
| rs12613723 | POLE4  | GI_38455393-S | 2 | 2 | 75165461 | 57148  | 6.6972 | 6.28932 | JPT |
| rs2422089  | POLE4  | GI_38455393-S | 2 | 2 | 75168901 | 60588  | 7.4299 | 6.28932 | JPT |
| rs7589773  | POLE4  | GI_38455393-S | 2 | 2 | 75177896 | 69583  | 7.4299 | 6.28932 | JPT |
| rs12713826 | POLE4  | GI_38455393-S | 2 | 2 | 75179793 | 71480  | 7.2323 | 6.28932 | JPT |
| rs2422090  | POLE4  | GI_38455393-S | 2 | 2 | 75180135 | 71822  | 7.9806 | 6.28932 | JPT |
| rs2422091  | POLE4  | GI_38455393-S | 2 | 2 | 75180168 | 71855  | 7.2323 | 6.28932 | JPT |
| rs754978   | POLE4  | GI_38455393-S | 2 | 2 | 75183451 | 75138  | 6.9846 | 6.28932 | JPT |
| rs12622183 | POLE4  | GI_38455393-S | 2 | 2 | 75185038 | 76725  | 7.6496 | 6.28932 | JPT |
| rs713082   | POLE4  | GI_38455393-S | 2 | 2 | 75185121 | 76808  | 7.4299 | 6.28932 | JPT |

|            |           |               |   |   |           |        |        |         |     |
|------------|-----------|---------------|---|---|-----------|--------|--------|---------|-----|
| rs12713828 | POLE4     | GI_38455393-S | 2 | 2 | 75187736  | 79423  | 7.6496 | 6.28932 | JPT |
| rs14242    | hmm28069  | hmm28069-S    | 2 | 2 | 85732070  | 15703  | 6.1938 | 6.13445 | JPT |
| rs3755011  | hmm28069  | hmm28069-S    | 2 | 2 | 85733257  | 14516  | 6.1938 | 6.13445 | JPT |
| rs1562322  | hmm28069  | hmm28069-S    | 2 | 2 | 85733614  | 14159  | 6.1938 | 6.13445 | JPT |
| rs2232745  | hmm28069  | hmm28069-S    | 2 | 2 | 85735290  | 12483  | 7.6577 | 6.13445 | JPT |
| rs2232750  | hmm28069  | hmm28069-S    | 2 | 2 | 85736126  | 11647  | 7.6577 | 6.13445 | JPT |
| rs6733550  | hmm28069  | hmm28069-S    | 2 | 2 | 85739672  | 8101   | 7.7493 | 6.13445 | JPT |
| rs3827550  | hmm28069  | hmm28069-S    | 2 | 2 | 85740630  | 7143   | 7.6577 | 6.13445 | JPT |
| rs6743051  | hmm28069  | hmm28069-S    | 2 | 2 | 85755819  | 8046   | 7.6577 | 6.13445 | JPT |
| rs13383605 | hmm28069  | hmm28069-S    | 2 | 2 | 85757987  | 10214  | 7.6577 | 6.13445 | JPT |
| rs2304564  | hmm28069  | hmm28069-S    | 2 | 2 | 85764325  | 16552  | 7.6577 | 6.13445 | JPT |
| rs6547629  | hmm28069  | hmm28069-S    | 2 | 2 | 85771886  | 24113  | 7.7493 | 6.13445 | JPT |
| rs10180770 | hmm28069  | hmm28069-S    | 2 | 2 | 85780707  | 32934  | 7.6577 | 6.13445 | JPT |
| rs3821020  | hmm28069  | hmm28069-S    | 2 | 2 | 85781580  | 33807  | 7.6577 | 6.13445 | JPT |
| rs10182351 | hmm28069  | hmm28069-S    | 2 | 2 | 85783943  | 36170  | 7.9746 | 6.13445 | JPT |
| rs13414982 | hmm28069  | hmm28069-S    | 2 | 2 | 85793122  | 45349  | 8.0915 | 6.13445 | JPT |
| rs3024831  | hmm28069  | hmm28069-S    | 2 | 2 | 85796042  | 48269  | 8.0915 | 6.13445 | JPT |
| rs2040349  | hmm28069  | hmm28069-S    | 2 | 2 | 85801183  | 53410  | 6.9362 | 6.13445 | JPT |
| rs2118177  | hmm28069  | hmm28069-S    | 2 | 2 | 85801951  | 54178  | 7.1838 | 6.13445 | JPT |
| rs1978842  | POLR1A    | GI_7661685-S  | 2 | 2 | 86138197  | 28542  | 7.2149 | 5.70219 | JPT |
| rs17579744 | POLR1A    | GI_7661685-S  | 2 | 2 | 86142717  | 24022  | 7.2149 | 5.70219 | JPT |
| rs1469981  | POLR1A    | GI_7661685-S  | 2 | 2 | 86151430  | 15309  | 7.2149 | 5.70219 | JPT |
| rs6741224  | POLR1A    | GI_7661685-S  | 2 | 2 | 86157075  | 9664   | 7.2149 | 5.70219 | JPT |
| rs3731822  | POLR1A    | GI_7661685-S  | 2 | 2 | 86160152  | 6587   | 6.7418 | 5.70219 | JPT |
| rs12124    | POLR1A    | GI_7661685-S  | 2 | 2 | 86165166  | 1573   | 6.7418 | 5.70219 | JPT |
| rs3755005  | POLR1A    | GI_7661685-S  | 2 | 2 | 86173172  | 6433   | 6.7418 | 5.70219 | JPT |
| rs3770091  | POLR1A    | GI_7661685-S  | 2 | 2 | 86174824  | 8085   | 6.7418 | 5.70219 | JPT |
| rs3770088  | POLR1A    | GI_7661685-S  | 2 | 2 | 86175599  | 8860   | 5.8597 | 5.70219 | JPT |
| rs3770086  | POLR1A    | GI_7661685-S  | 2 | 2 | 86178936  | 12197  | 6.7418 | 5.70219 | JPT |
| rs2278532  | POLR1A    | GI_7661685-S  | 2 | 2 | 86182579  | 15840  | 6.7418 | 5.70219 | JPT |
| rs6755228  | POLR1A    | GI_7661685-S  | 2 | 2 | 86185655  | 18916  | 7.2535 | 5.70219 | JPT |
| rs10184159 | POLR1A    | GI_7661685-S  | 2 | 2 | 86188053  | 21314  | 7.2535 | 5.70219 | JPT |
| rs3770085  | POLR1A    | GI_7661685-S  | 2 | 2 | 86190605  | 23866  | 6.7418 | 5.70219 | JPT |
| rs3770084  | POLR1A    | GI_7661685-S  | 2 | 2 | 86190663  | 23924  | 6.7418 | 5.70219 | JPT |
| rs2288116  | POLR1A    | GI_7661685-S  | 2 | 2 | 86214067  | 47328  | 6.7418 | 5.70219 | JPT |
| rs3770064  | POLR1A    | GI_7661685-S  | 2 | 2 | 86315073  | 148334 | 6.7061 | 5.70219 | JPT |
| rs3770063  | POLR1A    | GI_7661685-S  | 2 | 2 | 86315157  | 148418 | 6.7061 | 5.70219 | JPT |
| rs10865489 | FLJ10916  | GI_40538795-S | 2 | 2 | 88286154  | 39188  | 9.5882 | 5.56867 | JPT |
| rs6547752  | FLJ10916  | GI_40538795-S | 2 | 2 | 88286699  | 38643  | 9.5882 | 5.56867 | JPT |
| rs7582011  | FLJ10916  | GI_40538795-S | 2 | 2 | 88292002  | 33340  | 9.5882 | 5.56867 | JPT |
| rs6727043  | FLJ10916  | GI_40538795-S | 2 | 2 | 88300774  | 24568  | 9.5882 | 5.56867 | JPT |
| rs10173112 | FLJ10916  | GI_40538795-S | 2 | 2 | 88302417  | 22925  | 9.202  | 5.56867 | JPT |
| rs4359651  | FLJ10916  | GI_40538795-S | 2 | 2 | 88304102  | 21240  | 9.5882 | 5.56867 | JPT |
| rs10469888 | FLJ10916  | GI_40538795-S | 2 | 2 | 88306838  | 18504  | 9.7387 | 5.56867 | JPT |
| rs4490185  | FLJ10916  | GI_40538795-S | 2 | 2 | 88307196  | 18146  | 9.5882 | 5.56867 | JPT |
| rs7584641  | LOC375249 | GI_37547210-S | 2 | 2 | 97029529  | 200735 | 6.0337 | 5.19579 | JPT |
| rs6756880  | TSGA10    | GI_41281983-I | 2 | 2 | 99135509  | 80918  | 6.2793 | 5.72123 | JPT |
| rs6754843  | TSGA10    | GI_41281983-I | 2 | 2 | 99139003  | 77424  | 5.9835 | 5.72123 | JPT |
| rs10203613 | GCC2      | GI_34335132-A | 2 | 2 | 108997900 | 436364 | 5.9    | 5.60139 | JPT |
| rs4849194  | Hs.169006 | Hs.169006-S   | 2 | 2 | 113765795 | 51552  | 6.0891 | 5.942   | JPT |
| rs4665041  | FLJ36175  | GI_22749102-S | 2 | 2 | 159898542 | 19589  | 6.6673 | 5.93019 | JPT |
| rs10490002 | FLJ36175  | GI_22749102-S | 2 | 2 | 159934765 | 16634  | 6.7992 | 5.93019 | JPT |
| rs6761921  | FLJ36175  | GI_22749102-S | 2 | 2 | 159948587 | 30456  | 7.2568 | 5.93019 | JPT |
| rs12478479 | FLJ36175  | GI_22749102-S | 2 | 2 | 159954107 | 35976  | 6.8511 | 5.93019 | JPT |
| rs714156   | FLJ36175  | GI_22749102-S | 2 | 2 | 159966575 | 48444  | 6.7992 | 5.93019 | JPT |
| rs13026048 | FLJ36175  | GI_22749102-S | 2 | 2 | 159971684 | 53553  | 6.5141 | 5.93019 | JPT |

|            |          |               |   |   |           |        |         |         |     |
|------------|----------|---------------|---|---|-----------|--------|---------|---------|-----|
| rs4667295  | LOC51240 | GI_31377759-S | 2 | 2 | 190329896 | 131096 | 8.7245  | 5.79687 | JPT |
| rs6761923  | LOC51240 | GI_31377759-S | 2 | 2 | 190333105 | 127887 | 8.1433  | 5.79687 | JPT |
| rs9646811  | LOC51240 | GI_31377759-S | 2 | 2 | 190334084 | 126908 | 7.6641  | 5.79687 | JPT |
| rs7568449  | LOC51240 | GI_31377759-S | 2 | 2 | 190346560 | 114432 | 13.0264 | 5.79687 | JPT |
| rs2289226  | LOC51240 | GI_31377759-S | 2 | 2 | 190351711 | 109281 | 13.0966 | 5.79687 | JPT |
| rs4667297  | LOC51240 | GI_31377759-S | 2 | 2 | 190354502 | 106490 | 13.0264 | 5.79687 | JPT |
| rs893784   | LOC51240 | GI_31377759-S | 2 | 2 | 190361789 | 99203  | 13.0264 | 5.79687 | JPT |
| rs10931430 | LOC51240 | GI_31377759-S | 2 | 2 | 190367692 | 93300  | 13.0264 | 5.79687 | JPT |
| rs11679767 | LOC51240 | GI_31377759-S | 2 | 2 | 190371806 | 89186  | 13.0264 | 5.79687 | JPT |
| rs7571089  | LOC51240 | GI_31377759-S | 2 | 2 | 190387299 | 73693  | 13.0264 | 5.79687 | JPT |
| rs1437891  | LOC51240 | GI_31377759-S | 2 | 2 | 190388214 | 72778  | 13.0264 | 5.79687 | JPT |
| rs10195109 | LOC51240 | GI_31377759-S | 2 | 2 | 190394697 | 66295  | 12.3171 | 5.79687 | JPT |
| rs6434365  | LOC51240 | GI_31377759-S | 2 | 2 | 190397927 | 63065  | 12.3171 | 5.79687 | JPT |
| rs11901295 | LOC51240 | GI_31377759-S | 2 | 2 | 190402284 | 58708  | 11.9154 | 5.79687 | JPT |
| rs7557519  | LOC51240 | GI_31377759-S | 2 | 2 | 190408693 | 52299  | 12.3171 | 5.79687 | JPT |
| rs12693557 | LOC51240 | GI_31377759-S | 2 | 2 | 190416443 | 44549  | 13.0966 | 5.79687 | JPT |
| rs1550388  | LOC51240 | GI_31377759-S | 2 | 2 | 190429286 | 31706  | 12.3171 | 5.79687 | JPT |
| rs2033870  | LOC51240 | GI_31377759-S | 2 | 2 | 190429336 | 31656  | 13.0966 | 5.79687 | JPT |
| rs1225101  | LOC51240 | GI_31377759-S | 2 | 2 | 190430927 | 30065  | 9.4564  | 5.79687 | JPT |
| rs1898560  | LOC51240 | GI_31377759-S | 2 | 2 | 190437833 | 23159  | 13.2612 | 5.79687 | JPT |
| rs4666783  | LOC51240 | GI_31377759-S | 2 | 2 | 190438486 | 22506  | 12.7139 | 5.79687 | JPT |
| rs6719224  | LOC51240 | GI_31377759-S | 2 | 2 | 190459777 | 1215   | 13.2612 | 5.79687 | JPT |
| rs1055091  | LOC51240 | GI_31377759-S | 2 | 2 | 190460649 | 343    | 13.9791 | 5.79687 | JPT |
| rs6942     | LOC51240 | GI_31377759-S | 2 | 2 | 190461917 | 925    | 14.0589 | 5.79687 | JPT |
| rs3791767  | LOC51240 | GI_31377759-S | 2 | 2 | 190465421 | 4429   | 13.1278 | 5.79687 | JPT |
| rs7591929  | LOC51240 | GI_31377759-S | 2 | 2 | 190468763 | 7771   | 13.9791 | 5.79687 | JPT |
| rs5742933  | LOC51240 | GI_31377759-S | 2 | 2 | 190474822 | 13830  | 12.7139 | 5.79687 | JPT |
| rs1899025  | LOC51240 | GI_31377759-S | 2 | 2 | 190475088 | 14096  | 13.9791 | 5.79687 | JPT |
| rs1233302  | LOC51240 | GI_31377759-S | 2 | 2 | 190494386 | 33394  | 12.7105 | 5.79687 | JPT |
| rs3791770  | LOC51240 | GI_31377759-S | 2 | 2 | 190499341 | 38349  | 13.1278 | 5.79687 | JPT |
| rs3791773  | LOC51240 | GI_31377759-S | 2 | 2 | 190508138 | 47146  | 13.1278 | 5.79687 | JPT |
| rs1233284  | LOC51240 | GI_31377759-S | 2 | 2 | 190515277 | 54285  | 13.9791 | 5.79687 | JPT |
| rs1233288  | LOC51240 | GI_31377759-S | 2 | 2 | 190516231 | 55239  | 13.9791 | 5.79687 | JPT |
| rs1233297  | LOC51240 | GI_31377759-S | 2 | 2 | 190519681 | 58689  | 13.5516 | 5.79687 | JPT |
| rs7577961  | LOC51240 | GI_31377759-S | 2 | 2 | 190519772 | 58780  | 13.1204 | 5.79687 | JPT |
| rs5743063  | LOC51240 | GI_31377759-S | 2 | 2 | 190519955 | 58963  | 13.1204 | 5.79687 | JPT |
| rs1233245  | LOC51240 | GI_31377759-S | 2 | 2 | 190526000 | 65008  | 9.933   | 5.79687 | JPT |
| rs256546   | LOC51240 | GI_31377759-S | 2 | 2 | 190576669 | 115677 | 7.0338  | 5.79687 | JPT |
| rs12475694 | LOC51240 | GI_31377759-S | 2 | 2 | 190598114 | 137122 | 7.4696  | 5.79687 | JPT |
| rs2241135  | ALS2CR4  | GI_22748830-S | 2 | 2 | 202332738 | 16411  | 7.8087  | 5.89489 | JPT |
| rs10931966 | ALS2CR4  | GI_22748830-S | 2 | 2 | 202343180 | 26853  | 7.2472  | 5.89489 | JPT |
| rs2066518  | RPL37A   | GI_16306561-S | 2 | 2 | 217113894 | 75194  | 7.6469  | 5.96361 | JPT |
| rs3770488  | RPL37A   | GI_16306561-S | 2 | 2 | 217117579 | 71509  | 6.255   | 5.96361 | JPT |
| rs3770487  | RPL37A   | GI_16306561-S | 2 | 2 | 217117613 | 71475  | 8.3897  | 5.96361 | JPT |
| rs16856088 | RPL37A   | GI_16306561-S | 2 | 2 | 217118220 | 70868  | 8.3897  | 5.96361 | JPT |
| rs3770485  | RPL37A   | GI_16306561-S | 2 | 2 | 217118416 | 70672  | 8.3897  | 5.96361 | JPT |
| rs12621359 | RPL37A   | GI_16306561-S | 2 | 2 | 217119330 | 69758  | 8.3897  | 5.96361 | JPT |
| rs12611945 | RPL37A   | GI_16306561-S | 2 | 2 | 217119515 | 69573  | 8.3897  | 5.96361 | JPT |
| rs3770483  | RPL37A   | GI_16306561-S | 2 | 2 | 217120269 | 68819  | 8.3897  | 5.96361 | JPT |
| rs2066521  | RPL37A   | GI_16306561-S | 2 | 2 | 217122924 | 66164  | 8.3897  | 5.96361 | JPT |
| rs12612280 | RPL37A   | GI_16306561-S | 2 | 2 | 217123766 | 65322  | 8.3897  | 5.96361 | JPT |
| rs16856126 | RPL37A   | GI_16306561-S | 2 | 2 | 217124692 | 64396  | 8.3897  | 5.96361 | JPT |
| rs16856136 | RPL37A   | GI_16306561-S | 2 | 2 | 217128131 | 60957  | 6.9277  | 5.96361 | JPT |
| rs3816783  | RPL37A   | GI_16306561-S | 2 | 2 | 217128593 | 60495  | 8.3897  | 5.96361 | JPT |
| rs12612749 | RPL37A   | GI_16306561-S | 2 | 2 | 217129141 | 59947  | 8.3897  | 5.96361 | JPT |
| rs3770480  | RPL37A   | GI_16306561-S | 2 | 2 | 217129746 | 59342  | 7.6469  | 5.96361 | JPT |

|            |        |               |   |   |           |       |        |         |     |
|------------|--------|---------------|---|---|-----------|-------|--------|---------|-----|
| rs1705105  | RPL37A | GI_16306561-S | 2 | 2 | 217131441 | 57647 | 7.6469 | 5.96361 | JPT |
| rs505883   | RPL37A | GI_16306561-S | 2 | 2 | 217131540 | 57548 | 8.3897 | 5.96361 | JPT |
| rs560025   | RPL37A | GI_16306561-S | 2 | 2 | 217133078 | 56010 | 8.3897 | 5.96361 | JPT |
| rs2627045  | RPL37A | GI_16306561-S | 2 | 2 | 217133513 | 55575 | 8.3897 | 5.96361 | JPT |
| rs284548   | RPL37A | GI_16306561-S | 2 | 2 | 217136361 | 52727 | 6.9277 | 5.96361 | JPT |
| rs284552   | RPL37A | GI_16306561-S | 2 | 2 | 217138550 | 50538 | 7.6469 | 5.96361 | JPT |
| rs2738286  | RPL37A | GI_16306561-S | 2 | 2 | 217140870 | 48218 | 8.3897 | 5.96361 | JPT |
| rs12468079 | RPL37A | GI_16306561-S | 2 | 2 | 217144583 | 44505 | 8.3897 | 5.96361 | JPT |
| rs4324305  | RPL37A | GI_16306561-S | 2 | 2 | 217155418 | 33670 | 8.3897 | 5.96361 | JPT |
| rs12620897 | RPL37A | GI_16306561-S | 2 | 2 | 217161264 | 27824 | 8.3897 | 5.96361 | JPT |
| rs2738289  | RPL37A | GI_16306561-S | 2 | 2 | 217169528 | 19560 | 8.3897 | 5.96361 | JPT |
| rs605702   | RPL37A | GI_16306561-S | 2 | 2 | 217172200 | 16888 | 8.3897 | 5.96361 | JPT |
| rs654474   | RPL37A | GI_16306561-S | 2 | 2 | 217176114 | 12974 | 8.3897 | 5.96361 | JPT |
| rs540809   | RPL37A | GI_16306561-S | 2 | 2 | 217176378 | 12710 | 7.6469 | 5.96361 | JPT |
| rs284567   | RPL37A | GI_16306561-S | 2 | 2 | 217177980 | 11108 | 7.6469 | 5.96361 | JPT |
| rs284565   | RPL37A | GI_16306561-S | 2 | 2 | 217184312 | 4776  | 7.6469 | 5.96361 | JPT |
| rs3732019  | RPL37A | GI_16306561-S | 2 | 2 | 217187892 | 1196  | 7.7237 | 5.96361 | JPT |
| rs3806575  | RPL37A | GI_16306561-S | 2 | 2 | 217188440 | 648   | 8.3236 | 5.96361 | JPT |
| rs3755140  | RPL37A | GI_16306561-S | 2 | 2 | 217188555 | 533   | 8.4895 | 5.96361 | JPT |
| rs12619115 | RPL37A | GI_16306561-S | 2 | 2 | 217189346 | 258   | 6.9277 | 5.96361 | JPT |
| rs2272243  | RPL37A | GI_16306561-S | 2 | 2 | 217190270 | 1182  | 8.4957 | 5.96361 | JPT |
| rs12616410 | RPL37A | GI_16306561-S | 2 | 2 | 217193418 | 4330  | 8.4957 | 5.96361 | JPT |
| rs12472569 | RPL37A | GI_16306561-S | 2 | 2 | 217206912 | 17824 | 8.4957 | 5.96361 | JPT |
| rs12621480 | RPL37A | GI_16306561-S | 2 | 2 | 217210080 | 20992 | 6.1439 | 5.96361 | JPT |
| rs7587025  | RPL37A | GI_16306561-S | 2 | 2 | 217229951 | 40863 | 6.39   | 5.96361 | JPT |
| rs16856373 | RPL37A | GI_16306561-S | 2 | 2 | 217242368 | 53280 | 6.8931 | 5.96361 | JPT |
| rs627473   | WDFY1  | GI_30795191-I | 2 | 2 | 224557747 | 50431 | 6.0857 | 6.00444 | JPT |
| rs624086   | WDFY1  | GI_30795191-I | 2 | 2 | 224563619 | 44559 | 7.2639 | 6.00444 | JPT |
| rs633956   | WDFY1  | GI_30795191-I | 2 | 2 | 224564462 | 43716 | 6.5537 | 6.00444 | JPT |
| rs496471   | WDFY1  | GI_30795191-I | 2 | 2 | 224567308 | 40870 | 6.5537 | 6.00444 | JPT |
| rs678746   | WDFY1  | GI_30795191-I | 2 | 2 | 224567498 | 40680 | 6.5537 | 6.00444 | JPT |
| rs638829   | WDFY1  | GI_30795191-I | 2 | 2 | 224577070 | 31108 | 7.2639 | 6.00444 | JPT |
| rs585147   | WDFY1  | GI_30795191-I | 2 | 2 | 224577147 | 31031 | 7.027  | 6.00444 | JPT |
| rs648667   | WDFY1  | GI_30795191-I | 2 | 2 | 224578640 | 29538 | 6.5537 | 6.00444 | JPT |
| rs632138   | WDFY1  | GI_30795191-I | 2 | 2 | 224580042 | 28136 | 6.5537 | 6.00444 | JPT |
| rs684700   | WDFY1  | GI_30795191-I | 2 | 2 | 224580333 | 27845 | 6.5537 | 6.00444 | JPT |
| rs472756   | WDFY1  | GI_30795191-I | 2 | 2 | 224585009 | 23169 | 6.5537 | 6.00444 | JPT |
| rs597349   | WDFY1  | GI_30795191-I | 2 | 2 | 224585999 | 22179 | 6.5537 | 6.00444 | JPT |
| rs530065   | WDFY1  | GI_30795191-I | 2 | 2 | 224589321 | 18857 | 6.5537 | 6.00444 | JPT |
| rs585740   | WDFY1  | GI_30795191-I | 2 | 2 | 224590641 | 17537 | 6.5537 | 6.00444 | JPT |
| rs616968   | WDFY1  | GI_30795191-I | 2 | 2 | 224591011 | 17167 | 6.8776 | 6.00444 | JPT |
| rs616901   | WDFY1  | GI_30795191-I | 2 | 2 | 224591053 | 17125 | 7.2639 | 6.00444 | JPT |
| rs604990   | WDFY1  | GI_30795191-I | 2 | 2 | 224591399 | 16779 | 7.2639 | 6.00444 | JPT |
| rs678370   | WDFY1  | GI_30795191-I | 2 | 2 | 224591755 | 16423 | 7.2639 | 6.00444 | JPT |
| rs548518   | WDFY1  | GI_30795191-I | 2 | 2 | 224592476 | 15702 | 7.2639 | 6.00444 | JPT |
| rs520116   | WDFY1  | GI_30795191-I | 2 | 2 | 224593273 | 14905 | 6.5537 | 6.00444 | JPT |
| rs649160   | WDFY1  | GI_30795191-I | 2 | 2 | 224594237 | 13941 | 6.5537 | 6.00444 | JPT |
| rs649260   | WDFY1  | GI_30795191-I | 2 | 2 | 224594304 | 13874 | 7.2639 | 6.00444 | JPT |
| rs677024   | WDFY1  | GI_30795191-I | 2 | 2 | 224595894 | 12284 | 7.2639 | 6.00444 | JPT |
| rs622896   | WDFY1  | GI_30795191-I | 2 | 2 | 224596285 | 11893 | 6.5537 | 6.00444 | JPT |
| rs590872   | WDFY1  | GI_30795191-I | 2 | 2 | 224598860 | 9318  | 7.2639 | 6.00444 | JPT |
| rs6708830  | WDFY1  | GI_30795191-I | 2 | 2 | 224622708 | 14530 | 6.5537 | 6.00444 | JPT |
| rs10205233 | IRS1   | GI_5031804-S  | 2 | 2 | 227439510 | 13340 | 6.4117 | 5.75936 | JPT |
| rs10181778 | IRS1   | GI_5031804-S  | 2 | 2 | 227439742 | 13572 | 6.351  | 5.75936 | JPT |
| rs12052364 | IRS1   | GI_5031804-S  | 2 | 2 | 227460713 | 34543 | 6.2516 | 5.75936 | JPT |
| rs4675093  | IRS1   | GI_5031804-S  | 2 | 2 | 227463268 | 37098 | 7.3691 | 5.75936 | JPT |

|            |       |               |   |   |           |        |         |         |     |
|------------|-------|---------------|---|---|-----------|--------|---------|---------|-----|
| rs16822642 | IRS1  | GI_5031804-S  | 2 | 2 | 227475058 | 48888  | 6.0244  | 5.75936 | JPT |
| rs4675094  | IRS1  | GI_5031804-S  | 2 | 2 | 227477296 | 51126  | 6.2758  | 5.75936 | JPT |
| rs1560251  | IRS1  | GI_5031804-S  | 2 | 2 | 227479453 | 53283  | 6.2758  | 5.75936 | JPT |
| rs6741923  | RAMP1 | GI_5032018-S  | 2 | 2 | 238581206 | 21449  | 9.3275  | 6.06143 | JPT |
| rs7578855  | RAMP1 | GI_5032018-S  | 2 | 2 | 238583297 | 19358  | 9.3966  | 6.06143 | JPT |
| rs1064767  | STK25 | GI_34147665-S | 2 | 2 | 241887327 | 267284 | 7.254   | 5.75962 | JPT |
| rs7568     | STK25 | GI_34147665-S | 2 | 2 | 242011733 | 142878 | 11.9996 | 5.75962 | JPT |
| rs16843642 | STK25 | GI_34147665-S | 2 | 2 | 242071369 | 83242  | 11.951  | 5.75962 | JPT |
| rs3771561  | STK25 | GI_34147665-S | 2 | 2 | 242073694 | 80917  | 11.9996 | 5.75962 | JPT |
| rs16842449 | STK25 | GI_34147665-S | 2 | 2 | 242074969 | 79642  | 12.7206 | 5.75962 | JPT |
| rs3771566  | STK25 | GI_34147665-S | 2 | 2 | 242078289 | 76322  | 11.9996 | 5.75962 | JPT |
| rs7423605  | STK25 | GI_34147665-S | 2 | 2 | 242083601 | 71010  | 11.9996 | 5.75962 | JPT |
| rs12612038 | STK25 | GI_34147665-S | 2 | 2 | 242089675 | 64936  | 11.951  | 5.75962 | JPT |
| rs16843671 | STK25 | GI_34147665-S | 2 | 2 | 242094348 | 60263  | 10.9379 | 5.75962 | JPT |
| rs929409   | STK25 | GI_34147665-S | 2 | 2 | 242096497 | 58114  | 8.9261  | 5.75962 | JPT |
| rs3755400  | STK25 | GI_34147665-S | 2 | 2 | 242099785 | 54826  | 11.951  | 5.75962 | JPT |
| rs3771569  | STK25 | GI_34147665-S | 2 | 2 | 242102596 | 52015  | 11.951  | 5.75962 | JPT |
| rs3821281  | STK25 | GI_34147665-S | 2 | 2 | 242105330 | 49281  | 11.951  | 5.75962 | JPT |
| rs2240482  | STK25 | GI_34147665-S | 2 | 2 | 242125011 | 29600  | 11.9996 | 5.75962 | JPT |
| rs3771588  | STK25 | GI_34147665-S | 2 | 2 | 242132099 | 22512  | 6.7229  | 5.75962 | JPT |
| rs9990224  | RAD18 | GI_14550404-S | 3 | 3 | 8883331   | 13727  | 7.3994  | 5.89535 | JPT |
| rs6798600  | RAD18 | GI_14550404-S | 3 | 3 | 8887662   | 9396   | 6.677   | 5.89535 | JPT |
| rs658371   | RAD18 | GI_14550404-S | 3 | 3 | 8890119   | 6939   | 6.6001  | 5.89535 | JPT |
| rs250394   | RAD18 | GI_14550404-S | 3 | 3 | 8890957   | 6101   | 7.5008  | 5.89535 | JPT |
| rs250401   | RAD18 | GI_14550404-S | 3 | 3 | 8893879   | 3179   | 7.451   | 5.89535 | JPT |
| rs250405   | RAD18 | GI_14550404-S | 3 | 3 | 8900041   | 2983   | 8.2873  | 5.89535 | JPT |
| rs376167   | RAD18 | GI_14550404-S | 3 | 3 | 8902364   | 5306   | 6.5543  | 5.89535 | JPT |
| rs124847   | RAD18 | GI_14550404-S | 3 | 3 | 8903604   | 6546   | 5.9685  | 5.89535 | JPT |
| rs166095   | RAD18 | GI_14550404-S | 3 | 3 | 8903911   | 6853   | 6.752   | 5.89535 | JPT |
| rs620103   | RAD18 | GI_14550404-S | 3 | 3 | 8906707   | 9649   | 6.752   | 5.89535 | JPT |
| rs607531   | RAD18 | GI_14550404-S | 3 | 3 | 8907189   | 10131  | 6.4384  | 5.89535 | JPT |
| rs604360   | RAD18 | GI_14550404-S | 3 | 3 | 8907918   | 10860  | 6.5043  | 5.89535 | JPT |
| rs671237   | RAD18 | GI_14550404-S | 3 | 3 | 8907989   | 10931  | 6.5043  | 5.89535 | JPT |
| rs593483   | RAD18 | GI_14550404-S | 3 | 3 | 8908048   | 10990  | 6.1316  | 5.89535 | JPT |
| rs589565   | RAD18 | GI_14550404-S | 3 | 3 | 8908892   | 11834  | 6.752   | 5.89535 | JPT |
| rs686195   | RAD18 | GI_14550404-S | 3 | 3 | 8908946   | 11888  | 6.2708  | 5.89535 | JPT |
| rs669906   | RAD18 | GI_14550404-S | 3 | 3 | 8909079   | 12021  | 6.0716  | 5.89535 | JPT |
| rs193922   | RAD18 | GI_14550404-S | 3 | 3 | 8916834   | 19776  | 6.1812  | 5.89535 | JPT |
| rs373090   | RAD18 | GI_14550404-S | 3 | 3 | 8917606   | 20548  | 6.5043  | 5.89535 | JPT |
| rs547904   | RAD18 | GI_14550404-S | 3 | 3 | 8922601   | 25543  | 6.752   | 5.89535 | JPT |
| rs341782   | RAD18 | GI_14550404-S | 3 | 3 | 8924343   | 27285  | 6.752   | 5.89535 | JPT |
| rs341781   | RAD18 | GI_14550404-S | 3 | 3 | 8924803   | 27745  | 6.5043  | 5.89535 | JPT |
| rs341778   | RAD18 | GI_14550404-S | 3 | 3 | 8926522   | 29464  | 6.752   | 5.89535 | JPT |
| rs341777   | RAD18 | GI_14550404-S | 3 | 3 | 8926777   | 29719  | 6.752   | 5.89535 | JPT |
| rs341774   | RAD18 | GI_14550404-S | 3 | 3 | 8927614   | 30556  | 6.752   | 5.89535 | JPT |
| rs373572   | RAD18 | GI_14550404-S | 3 | 3 | 8930389   | 33331  | 6.5043  | 5.89535 | JPT |
| rs589320   | RAD18 | GI_14550404-S | 3 | 3 | 8931131   | 34073  | 6.752   | 5.89535 | JPT |
| rs589301   | RAD18 | GI_14550404-S | 3 | 3 | 8931146   | 34088  | 6.752   | 5.89535 | JPT |
| rs575559   | RAD18 | GI_14550404-S | 3 | 3 | 8931371   | 34313  | 6.752   | 5.89535 | JPT |
| rs574776   | RAD18 | GI_14550404-S | 3 | 3 | 8931418   | 34360  | 6.752   | 5.89535 | JPT |
| rs415015   | RAD18 | GI_14550404-S | 3 | 3 | 8932727   | 35669  | 6.752   | 5.89535 | JPT |
| rs407176   | RAD18 | GI_14550404-S | 3 | 3 | 8933387   | 36329  | 6.4872  | 5.89535 | JPT |
| rs395559   | RAD18 | GI_14550404-S | 3 | 3 | 8933872   | 36814  | 6.7061  | 5.89535 | JPT |
| rs564032   | RAD18 | GI_14550404-S | 3 | 3 | 8935428   | 38370  | 6.752   | 5.89535 | JPT |
| rs528203   | RAD18 | GI_14550404-S | 3 | 3 | 8937063   | 40005  | 6.752   | 5.89535 | JPT |
| rs674610   | RAD18 | GI_14550404-S | 3 | 3 | 8937510   | 40452  | 6.1812  | 5.89535 | JPT |

|            |           |               |   |   |          |       |        |         |     |
|------------|-----------|---------------|---|---|----------|-------|--------|---------|-----|
| rs500938   | RAD18     | GI_14550404-S | 3 | 3 | 8937724  | 40666 | 6.0858 | 5.89535 | JPT |
| rs1161812  | RAD18     | GI_14550404-S | 3 | 3 | 8946650  | 49592 | 7.2329 | 5.89535 | JPT |
| rs1161811  | RAD18     | GI_14550404-S | 3 | 3 | 8946710  | 49652 | 6.752  | 5.89535 | JPT |
| rs1161808  | RAD18     | GI_14550404-S | 3 | 3 | 8946869  | 49811 | 6.752  | 5.89535 | JPT |
| rs1161807  | RAD18     | GI_14550404-S | 3 | 3 | 8946931  | 49873 | 6.1316 | 5.89535 | JPT |
| rs1161806  | RAD18     | GI_14550404-S | 3 | 3 | 8947027  | 49969 | 6.3301 | 5.89535 | JPT |
| rs1161805  | RAD18     | GI_14550404-S | 3 | 3 | 8947222  | 50164 | 6.752  | 5.89535 | JPT |
| rs377012   | RAD18     | GI_14550404-S | 3 | 3 | 8948271  | 51213 | 6.5043 | 5.89535 | JPT |
| rs1161800  | RAD18     | GI_14550404-S | 3 | 3 | 8948542  | 51484 | 6.752  | 5.89535 | JPT |
| rs602193   | RAD18     | GI_14550404-S | 3 | 3 | 8948804  | 51746 | 6.752  | 5.89535 | JPT |
| rs550964   | RAD18     | GI_14550404-S | 3 | 3 | 8949093  | 52035 | 6.752  | 5.89535 | JPT |
| rs1161793  | RAD18     | GI_14550404-S | 3 | 3 | 8949924  | 52866 | 6.752  | 5.89535 | JPT |
| rs367621   | RAD18     | GI_14550404-S | 3 | 3 | 8950156  | 53098 | 6.752  | 5.89535 | JPT |
| rs408483   | RAD18     | GI_14550404-S | 3 | 3 | 8950200  | 53142 | 6.752  | 5.89535 | JPT |
| rs446923   | RAD18     | GI_14550404-S | 3 | 3 | 8950236  | 53178 | 6.752  | 5.89535 | JPT |
| rs375053   | RAD18     | GI_14550404-S | 3 | 3 | 8950393  | 53335 | 6.3536 | 5.89535 | JPT |
| rs374679   | RAD18     | GI_14550404-S | 3 | 3 | 8950538  | 53480 | 6.752  | 5.89535 | JPT |
| rs447423   | RAD18     | GI_14550404-S | 3 | 3 | 8950742  | 53684 | 6.752  | 5.89535 | JPT |
| rs406333   | RAD18     | GI_14550404-S | 3 | 3 | 8951019  | 53961 | 6.752  | 5.89535 | JPT |
| rs435936   | RAD18     | GI_14550404-S | 3 | 3 | 8951115  | 54057 | 6.752  | 5.89535 | JPT |
| rs375649   | RAD18     | GI_14550404-S | 3 | 3 | 8951779  | 54721 | 6.9147 | 5.89535 | JPT |
| rs171029   | RAD18     | GI_14550404-S | 3 | 3 | 8957481  | 60423 | 6.0743 | 5.89535 | JPT |
| rs385253   | RAD18     | GI_14550404-S | 3 | 3 | 8959464  | 62406 | 6.752  | 5.89535 | JPT |
| rs518319   | RAD18     | GI_14550404-S | 3 | 3 | 8963200  | 66142 | 6.7061 | 5.89535 | JPT |
| rs689296   | RAD18     | GI_14550404-S | 3 | 3 | 8963809  | 66751 | 6.752  | 5.89535 | JPT |
| rs341793   | RAD18     | GI_14550404-S | 3 | 3 | 8973937  | 76879 | 6.6786 | 5.89535 | JPT |
| rs4684236  | Hs.224849 | Hs.224849-S   | 3 | 3 | 14675050 | 21183 | 6.255  | 6.11371 | JPT |
| rs9830735  | Hs.224849 | Hs.224849-S   | 3 | 3 | 14676639 | 19594 | 6.255  | 6.11371 | JPT |
| rs6770707  | MGC15763  | GI_19923906-S | 3 | 3 | 16270269 | 47973 | 6.6683 | 6.18457 | JPT |
| rs842251   | MGC15763  | GI_19923906-S | 3 | 3 | 16274095 | 44147 | 6.6683 | 6.18457 | JPT |
| rs842253   | MGC15763  | GI_19923906-S | 3 | 3 | 16275339 | 42903 | 6.6683 | 6.18457 | JPT |
| rs842254   | MGC15763  | GI_19923906-S | 3 | 3 | 16275629 | 42613 | 6.6683 | 6.18457 | JPT |
| rs842256   | MGC15763  | GI_19923906-S | 3 | 3 | 16278651 | 39591 | 6.6203 | 6.18457 | JPT |
| rs859703   | MGC15763  | GI_19923906-S | 3 | 3 | 16278843 | 39399 | 6.6203 | 6.18457 | JPT |
| rs842257   | MGC15763  | GI_19923906-S | 3 | 3 | 16279150 | 39092 | 6.5102 | 6.18457 | JPT |
| rs2245721  | MGC15763  | GI_19923906-S | 3 | 3 | 16280678 | 37564 | 6.5964 | 6.18457 | JPT |
| rs1514892  | MGC15763  | GI_19923906-S | 3 | 3 | 16282047 | 36195 | 6.6465 | 6.18457 | JPT |
| rs842259   | MGC15763  | GI_19923906-S | 3 | 3 | 16287568 | 30674 | 6.6543 | 6.18457 | JPT |
| rs842287   | MGC15763  | GI_19923906-S | 3 | 3 | 16292947 | 25295 | 6.5913 | 6.18457 | JPT |
| rs1566972  | MGC15763  | GI_19923906-S | 3 | 3 | 16295364 | 22878 | 6.6543 | 6.18457 | JPT |
| rs842274   | MGC15763  | GI_19923906-S | 3 | 3 | 16302859 | 15383 | 6.6558 | 6.18457 | JPT |
| rs842273   | MGC15763  | GI_19923906-S | 3 | 3 | 16303360 | 14882 | 6.6543 | 6.18457 | JPT |
| rs842272   | MGC15763  | GI_19923906-S | 3 | 3 | 16307050 | 11192 | 6.5631 | 6.18457 | JPT |
| rs13091727 | MGC15763  | GI_19923906-S | 3 | 3 | 16313702 | 4540  | 6.5913 | 6.18457 | JPT |
| rs842284   | MGC15763  | GI_19923906-S | 3 | 3 | 16315672 | 2570  | 6.6558 | 6.18457 | JPT |
| rs842424   | MGC15763  | GI_19923906-S | 3 | 3 | 16332982 | 14740 | 6.2216 | 6.18457 | JPT |
| rs493626   | MGC15763  | GI_19923906-S | 3 | 3 | 16334965 | 16723 | 6.9892 | 6.18457 | JPT |
| rs689716   | MGC15763  | GI_19923906-S | 3 | 3 | 16335349 | 17107 | 7.1208 | 6.18457 | JPT |
| rs567541   | MGC15763  | GI_19923906-S | 3 | 3 | 16339621 | 21379 | 6.7521 | 6.18457 | JPT |
| rs690216   | MGC15763  | GI_19923906-S | 3 | 3 | 16339923 | 21681 | 6.7731 | 6.18457 | JPT |
| rs6765960  | MGC15763  | GI_19923906-S | 3 | 3 | 16341640 | 23398 | 6.7731 | 6.18457 | JPT |
| rs541299   | MGC15763  | GI_19923906-S | 3 | 3 | 16342126 | 23884 | 6.7731 | 6.18457 | JPT |
| rs568798   | MGC15763  | GI_19923906-S | 3 | 3 | 16342826 | 24584 | 6.7731 | 6.18457 | JPT |
| rs568833   | MGC15763  | GI_19923906-S | 3 | 3 | 16342840 | 24598 | 6.7521 | 6.18457 | JPT |
| rs690145   | MGC15763  | GI_19923906-S | 3 | 3 | 16343125 | 24883 | 6.9291 | 6.18457 | JPT |
| rs519819   | MGC15763  | GI_19923906-S | 3 | 3 | 16343579 | 25337 | 6.7521 | 6.18457 | JPT |



|            |          |               |   |   |          |        |        |         |     |
|------------|----------|---------------|---|---|----------|--------|--------|---------|-----|
| rs690094   | MGC15763 | GI_19923906-S | 3 | 3 | 16343703 | 25461  | 6.3755 | 6.18457 | JPT |
| rs12634131 | KIAA1449 | GI_21314694-S | 3 | 3 | 38841595 | 271081 | 6.3274 | 5.97508 | JPT |
| rs4398365  | KIAA1449 | GI_21314694-S | 3 | 3 | 38853808 | 258868 | 8.4745 | 5.97508 | JPT |
| rs4676476  | KIAA1449 | GI_21314694-S | 3 | 3 | 38857013 | 255663 | 8.2862 | 5.97508 | JPT |
| rs7619839  | KIAA1449 | GI_21314694-S | 3 | 3 | 38861460 | 251216 | 6.53   | 5.97508 | JPT |
| rs7620018  | KIAA1449 | GI_21314694-S | 3 | 3 | 38861653 | 251023 | 7.0589 | 5.97508 | JPT |
| rs6776510  | KIAA1449 | GI_21314694-S | 3 | 3 | 38862257 | 250419 | 6.1697 | 5.97508 | JPT |
| rs9858516  | KIAA1449 | GI_21314694-S | 3 | 3 | 38866552 | 246124 | 7.2416 | 5.97508 | JPT |
| rs4364115  | KIAA1449 | GI_21314694-S | 3 | 3 | 38870363 | 242313 | 7.5489 | 5.97508 | JPT |
| rs6799915  | KIAA1449 | GI_21314694-S | 3 | 3 | 38877474 | 235202 | 6.7076 | 5.97508 | JPT |
| rs6786732  | KIAA1449 | GI_21314694-S | 3 | 3 | 38895207 | 217469 | 6.3274 | 5.97508 | JPT |
| rs9818630  | KIAA1449 | GI_21314694-S | 3 | 3 | 38905311 | 207365 | 8.4745 | 5.97508 | JPT |
| rs4342048  | KIAA1449 | GI_21314694-S | 3 | 3 | 38987947 | 124729 | 6.2977 | 5.97508 | JPT |
| rs4616582  | KIAA1449 | GI_21314694-S | 3 | 3 | 39003858 | 108818 | 7.0763 | 5.97508 | JPT |
| rs6802490  | KIAA1449 | GI_21314694-S | 3 | 3 | 39008911 | 103765 | 6.6016 | 5.97508 | JPT |
| rs7619193  | KIAA1449 | GI_21314694-S | 3 | 3 | 39019120 | 93556  | 6.8471 | 5.97508 | JPT |
| rs883565   | KIAA1449 | GI_21314694-S | 3 | 3 | 39030321 | 82355  | 6.1639 | 5.97508 | JPT |
| rs6599000  | KIAA1449 | GI_21314694-S | 3 | 3 | 39036516 | 76160  | 7.2743 | 5.97508 | JPT |
| rs883349   | KIAA1449 | GI_21314694-S | 3 | 3 | 39042929 | 69747  | 6.0847 | 5.97508 | JPT |
| rs6599004  | KIAA1449 | GI_21314694-S | 3 | 3 | 39070682 | 41994  | 7.1821 | 5.97508 | JPT |
| rs6769051  | KIAA1449 | GI_21314694-S | 3 | 3 | 39075205 | 37471  | 7.6663 | 5.97508 | JPT |
| rs4676481  | KIAA1449 | GI_21314694-S | 3 | 3 | 39085045 | 27631  | 7.0763 | 5.97508 | JPT |
| rs7629839  | KIAA1449 | GI_21314694-S | 3 | 3 | 39090298 | 22378  | 7.0763 | 5.97508 | JPT |
| rs12636980 | KIAA1449 | GI_21314694-S | 3 | 3 | 39099136 | 13540  | 6.1639 | 5.97508 | JPT |
| rs2056613  | KIAA1449 | GI_21314694-S | 3 | 3 | 39100297 | 12379  | 9.1172 | 5.97508 | JPT |
| rs3736573  | KIAA1449 | GI_21314694-S | 3 | 3 | 39104746 | 7930   | 9.1172 | 5.97508 | JPT |
| rs1053530  | KIAA1449 | GI_21314694-S | 3 | 3 | 39113086 | 410    | 9.0857 | 5.97508 | JPT |
| rs6777651  | KIAA1449 | GI_21314694-S | 3 | 3 | 39118603 | 5927   | 7.0763 | 5.97508 | JPT |
| rs7633233  | KIAA1449 | GI_21314694-S | 3 | 3 | 39121728 | 9052   | 6.0432 | 5.97508 | JPT |
| rs811971   | KIAA1449 | GI_21314694-S | 3 | 3 | 39143287 | 30611  | 6.9393 | 5.97508 | JPT |
| rs749511   | DHX30    | GI_20336291-A | 3 | 3 | 47010739 | 855437 | 5.4085 | 5.33331 | JPT |
| rs749512   | DHX30    | GI_20336291-A | 3 | 3 | 47010904 | 855272 | 5.4085 | 5.33331 | JPT |
| rs2278963  | DHX30    | GI_20336291-A | 3 | 3 | 47029873 | 836303 | 5.4699 | 5.33331 | JPT |
| rs17784127 | DHX30    | GI_20336291-A | 3 | 3 | 47036704 | 829472 | 5.4699 | 5.33331 | JPT |
| rs11715121 | DHX30    | GI_20336291-A | 3 | 3 | 47047625 | 818551 | 5.4085 | 5.33331 | JPT |
| rs11713693 | DHX30    | GI_20336291-A | 3 | 3 | 47049910 | 816266 | 6.5896 | 5.33331 | JPT |
| rs9845728  | DHX30    | GI_20336291-A | 3 | 3 | 47078380 | 787796 | 5.4085 | 5.33331 | JPT |
| rs6442055  | DHX30    | GI_20336291-A | 3 | 3 | 47085726 | 780450 | 5.4699 | 5.33331 | JPT |
| rs7433300  | DHX30    | GI_20336291-A | 3 | 3 | 47095644 | 770532 | 5.4085 | 5.33331 | JPT |
| rs12631730 | DHX30    | GI_20336291-A | 3 | 3 | 47104907 | 761269 | 5.7413 | 5.33331 | JPT |
| rs9311403  | DHX30    | GI_20336291-A | 3 | 3 | 47113882 | 752294 | 5.9488 | 5.33331 | JPT |
| rs6767907  | DHX30    | GI_20336291-A | 3 | 3 | 47137665 | 728511 | 5.4699 | 5.33331 | JPT |
| rs9837343  | DHX30    | GI_20336291-A | 3 | 3 | 47152392 | 713784 | 5.4085 | 5.33331 | JPT |
| rs6766230  | DHX30    | GI_20336291-A | 3 | 3 | 47171213 | 694963 | 5.5263 | 5.33331 | JPT |
| rs7620997  | DHX30    | GI_20336291-A | 3 | 3 | 47189126 | 677050 | 5.4085 | 5.33331 | JPT |
| rs11920354 | DHX30    | GI_20336291-A | 3 | 3 | 47237250 | 628926 | 5.9488 | 5.33331 | JPT |
| rs7632501  | DHX30    | GI_20336291-A | 3 | 3 | 47243310 | 622866 | 5.9488 | 5.33331 | JPT |
| rs11130126 | DHX30    | GI_20336291-A | 3 | 3 | 47281898 | 584278 | 5.9488 | 5.33331 | JPT |
| rs11920853 | DHX30    | GI_20336291-A | 3 | 3 | 47283187 | 582989 | 6.0418 | 5.33331 | JPT |
| rs11915074 | DHX30    | GI_20336291-A | 3 | 3 | 47284761 | 581415 | 5.9488 | 5.33331 | JPT |
| rs10490798 | DHX30    | GI_20336291-A | 3 | 3 | 47303748 | 562428 | 5.7025 | 5.33331 | JPT |
| rs17410853 | DHX30    | GI_20336291-A | 3 | 3 | 47338975 | 527201 | 6.0418 | 5.33331 | JPT |
| rs2240796  | DHX30    | GI_20336291-A | 3 | 3 | 47355503 | 510673 | 5.7025 | 5.33331 | JPT |
| rs11130129 | NME6     | GI_38564323-S | 3 | 3 | 47464889 | 846091 | 5.672  | 5.22876 | JPT |
| rs616589   | HEMK     | GI_7705408-S  | 3 | 3 | 50638633 | 41389  | 5.2678 | 5.21818 | JPT |
| rs3617     | ITIH4    | GI_40288189-S | 3 | 3 | 52808845 | 13631  | 6.9454 | 6.32604 | JPT |

|            |          |               |   |   |           |        |        |         |     |
|------------|----------|---------------|---|---|-----------|--------|--------|---------|-----|
| rs736408   | ITIH4    | GI_40288189-S | 3 | 3 | 52810394  | 12082  | 7.4589 | 6.32604 | JPT |
| rs4481150  | ITIH4    | GI_40288189-S | 3 | 3 | 52812833  | 9643   | 6.814  | 6.32604 | JPT |
| rs2535627  | ITIH4    | GI_40288189-S | 3 | 3 | 52820145  | 2331   | 7.0086 | 6.32604 | JPT |
| rs2071044  | ITIH4    | GI_40288189-S | 3 | 3 | 52822641  | 165    | 7.1133 | 6.32604 | JPT |
| rs4687657  | ITIH4    | GI_40288189-S | 3 | 3 | 52827578  | 5102   | 6.4021 | 6.32604 | JPT |
| rs2256332  | ITIH4    | GI_40288189-S | 3 | 3 | 52830905  | 8429   | 7.0832 | 6.32604 | JPT |
| rs2240915  | ITIH4    | GI_40288189-S | 3 | 3 | 52834566  | 12090  | 7.0832 | 6.32604 | JPT |
| rs2535633  | ITIH4    | GI_40288189-S | 3 | 3 | 52834670  | 12194  | 6.5291 | 6.32604 | JPT |
| rs4687658  | ITIH4    | GI_40288189-S | 3 | 3 | 52835406  | 12930  | 6.5469 | 6.32604 | JPT |
| rs2276817  | ITIH4    | GI_40288189-S | 3 | 3 | 52835976  | 13500  | 8.2152 | 6.32604 | JPT |
| rs13072536 | ITIH4    | GI_40288189-S | 3 | 3 | 52836251  | 13775  | 6.7202 | 6.32604 | JPT |
| rs4687554  | ITIH4    | GI_40288189-S | 3 | 3 | 52839175  | 16699  | 6.4777 | 6.32604 | JPT |
| rs1573815  | ITIH4    | GI_40288189-S | 3 | 3 | 52845172  | 22696  | 6.5469 | 6.32604 | JPT |
| rs3733047  | ITIH4    | GI_40288189-S | 3 | 3 | 52846969  | 24493  | 6.5469 | 6.32604 | JPT |
| rs6445538  | ITIH4    | GI_40288189-S | 3 | 3 | 52849328  | 26852  | 6.3922 | 6.32604 | JPT |
| rs6445541  | ITIH4    | GI_40288189-S | 3 | 3 | 52855168  | 32692  | 7.0832 | 6.32604 | JPT |
| rs4687672  | ITIH4    | GI_40288189-S | 3 | 3 | 52855583  | 33107  | 6.5469 | 6.32604 | JPT |
| rs2276825  | ITIH4    | GI_40288189-S | 3 | 3 | 52861645  | 39169  | 6.5469 | 6.32604 | JPT |
| rs9682464  | ITIH4    | GI_40288189-S | 3 | 3 | 52863525  | 41049  | 6.5469 | 6.32604 | JPT |
| rs6803519  | ITIH4    | GI_40288189-S | 3 | 3 | 52864811  | 42335  | 6.5469 | 6.32604 | JPT |
| rs9845458  | DNASE1L3 | GI_4826697-S  | 3 | 3 | 58150400  | 8243   | 5.8006 | 5.44846 | JPT |
| rs4681819  | DNASE1L3 | GI_4826697-S  | 3 | 3 | 58159966  | 1323   | 5.9205 | 5.44846 | JPT |
| rs3772985  | DNASE1L3 | GI_4826697-S  | 3 | 3 | 58161759  | 3116   | 6.4088 | 5.44846 | JPT |
| rs326356   | ESRRBL1  | GI_19923513-S | 3 | 3 | 109307253 | 55150  | 5.7365 | 5.6209  | JPT |
| rs17231712 | ESRRBL1  | GI_19923513-S | 3 | 3 | 109312252 | 50151  | 5.7365 | 5.6209  | JPT |
| rs13075747 | ESRRBL1  | GI_19923513-S | 3 | 3 | 109312854 | 49549  | 5.7365 | 5.6209  | JPT |
| rs721328   | ESRRBL1  | GI_19923513-S | 3 | 3 | 109326171 | 36232  | 5.7365 | 5.6209  | JPT |
| rs6781014  | Hs.48344 | Hs.48344-S    | 3 | 3 | 114239776 | 23089  | 6.4303 | 6.31822 | JPT |
| rs333330   | UMPS     | GI_4507834-S  | 3 | 3 | 125812221 | 133668 | 6.2818 | 5.96047 | JPT |
| rs333312   | UMPS     | GI_4507834-S  | 3 | 3 | 125822164 | 123725 | 7.8193 | 5.96047 | JPT |
| rs10512627 | UMPS     | GI_4507834-S  | 3 | 3 | 125822912 | 122977 | 7.2763 | 5.96047 | JPT |
| rs582288   | UMPS     | GI_4507834-S  | 3 | 3 | 125824225 | 121664 | 7.8193 | 5.96047 | JPT |
| rs10512628 | UMPS     | GI_4507834-S  | 3 | 3 | 125824496 | 121393 | 7.2763 | 5.96047 | JPT |
| rs9822952  | NMNAT3   | GI_31342325-S | 3 | 3 | 140867955 | 106092 | 8.6877 | 5.95523 | JPT |
| rs11714276 | NMNAT3   | GI_31342325-S | 3 | 3 | 140873511 | 111648 | 6.3828 | 5.95523 | JPT |
| rs6798004  | NMNAT3   | GI_31342325-S | 3 | 3 | 140875620 | 113757 | 9.1228 | 5.95523 | JPT |
| rs3922622  | NMNAT3   | GI_31342325-S | 3 | 3 | 140880597 | 118734 | 6.3267 | 5.95523 | JPT |
| rs10935342 | NMNAT3   | GI_31342325-S | 3 | 3 | 140888040 | 126177 | 9.6201 | 5.95523 | JPT |
| rs12492528 | NMNAT3   | GI_31342325-S | 3 | 3 | 140888594 | 126731 | 6.3828 | 5.95523 | JPT |
| rs4640519  | NMNAT3   | GI_31342325-S | 3 | 3 | 140899041 | 137178 | 7.0024 | 5.95523 | JPT |
| rs9683206  | NMNAT3   | GI_31342325-S | 3 | 3 | 140899516 | 137653 | 8.0422 | 5.95523 | JPT |
| rs7427023  | NMNAT3   | GI_31342325-S | 3 | 3 | 140899613 | 137750 | 7.9229 | 5.95523 | JPT |
| rs4367021  | NMNAT3   | GI_31342325-S | 3 | 3 | 140902916 | 141053 | 7.5086 | 5.95523 | JPT |
| rs4640518  | NMNAT3   | GI_31342325-S | 3 | 3 | 140902944 | 141081 | 7.5693 | 5.95523 | JPT |
| rs10935344 | NMNAT3   | GI_31342325-S | 3 | 3 | 140905475 | 143612 | 6.948  | 5.95523 | JPT |
| rs4074740  | NMNAT3   | GI_31342325-S | 3 | 3 | 140906001 | 144138 | 7.0024 | 5.95523 | JPT |
| rs4504138  | NMNAT3   | GI_31342325-S | 3 | 3 | 140906522 | 144659 | 6.6677 | 5.95523 | JPT |
| rs10804670 | NMNAT3   | GI_31342325-S | 3 | 3 | 140907748 | 145885 | 6.948  | 5.95523 | JPT |
| rs10935345 | NMNAT3   | GI_31342325-S | 3 | 3 | 140910483 | 148620 | 6.948  | 5.95523 | JPT |
| rs4528899  | NMNAT3   | GI_31342325-S | 3 | 3 | 140912370 | 150507 | 6.5619 | 5.95523 | JPT |
| rs7648532  | NMNAT3   | GI_31342325-S | 3 | 3 | 140912635 | 150772 | 6.948  | 5.95523 | JPT |
| rs4428139  | NMNAT3   | GI_31342325-S | 3 | 3 | 140913091 | 151228 | 7.0024 | 5.95523 | JPT |
| rs11720033 | NMNAT3   | GI_31342325-S | 3 | 3 | 140914555 | 152692 | 7.0024 | 5.95523 | JPT |
| rs11717128 | NMNAT3   | GI_31342325-S | 3 | 3 | 140916069 | 154206 | 6.5619 | 5.95523 | JPT |
| rs11717212 | NMNAT3   | GI_31342325-S | 3 | 3 | 140916146 | 154283 | 6.948  | 5.95523 | JPT |
| rs9813439  | NMNAT3   | GI_31342325-S | 3 | 3 | 140916734 | 154871 | 6.2269 | 5.95523 | JPT |

|            |          |               |   |   |           |        |        |         |     |
|------------|----------|---------------|---|---|-----------|--------|--------|---------|-----|
| rs11713380 | NMNAT3   | GI_31342325-S | 3 | 3 | 140917748 | 155885 | 6.5778 | 5.95523 | JPT |
| rs4683681  | NMNAT3   | GI_31342325-S | 3 | 3 | 140917961 | 156098 | 6.948  | 5.95523 | JPT |
| rs4389440  | NMNAT3   | GI_31342325-S | 3 | 3 | 140920311 | 158448 | 6.948  | 5.95523 | JPT |
| rs4683683  | NMNAT3   | GI_31342325-S | 3 | 3 | 140921187 | 159324 | 7.0024 | 5.95523 | JPT |
| rs4683684  | NMNAT3   | GI_31342325-S | 3 | 3 | 140921351 | 159488 | 6.948  | 5.95523 | JPT |
| rs10804671 | NMNAT3   | GI_31342325-S | 3 | 3 | 140921881 | 160018 | 6.948  | 5.95523 | JPT |
| rs12629519 | NMNAT3   | GI_31342325-S | 3 | 3 | 140922125 | 160262 | 6.417  | 5.95523 | JPT |
| rs11710180 | NMNAT3   | GI_31342325-S | 3 | 3 | 140922300 | 160437 | 7.0024 | 5.95523 | JPT |
| rs11718071 | NMNAT3   | GI_31342325-S | 3 | 3 | 140922474 | 160611 | 7.0024 | 5.95523 | JPT |
| rs11718895 | NMNAT3   | GI_31342325-S | 3 | 3 | 140922703 | 160840 | 7.0024 | 5.95523 | JPT |
| rs10935347 | NMNAT3   | GI_31342325-S | 3 | 3 | 140922823 | 160960 | 7.0024 | 5.95523 | JPT |
| rs9823295  | NMNAT3   | GI_31342325-S | 3 | 3 | 140924169 | 162306 | 6.948  | 5.95523 | JPT |
| rs4683404  | FLJ35036 | GI_37550554-S | 3 | 3 | 142643069 | 4056   | 8.891  | 5.7292  | JPT |
| rs7626871  | FLJ35036 | GI_37550554-S | 3 | 3 | 142643580 | 3545   | 9.0311 | 5.7292  | JPT |
| rs16851435 | FLJ35036 | GI_37550554-S | 3 | 3 | 142644883 | 2242   | 7.5709 | 5.7292  | JPT |
| rs16851438 | FLJ35036 | GI_37550554-S | 3 | 3 | 142651810 | 4685   | 6.4121 | 5.7292  | JPT |
| rs9878347  | FLJ35036 | GI_37550554-S | 3 | 3 | 142652680 | 5555   | 6.4121 | 5.7292  | JPT |
| rs9879503  | FLJ35036 | GI_37550554-S | 3 | 3 | 142653359 | 6234   | 6.3552 | 5.7292  | JPT |
| rs16851441 | FLJ35036 | GI_37550554-S | 3 | 3 | 142656219 | 9094   | 7.5609 | 5.7292  | JPT |
| rs1863867  | FLJ35036 | GI_37550554-S | 3 | 3 | 142658318 | 11193  | 6.1852 | 5.7292  | JPT |
| rs2312193  | FLJ35036 | GI_37550554-S | 3 | 3 | 142671097 | 23972  | 7.4187 | 5.7292  | JPT |
| rs3806646  | FLJ35036 | GI_37550554-S | 3 | 3 | 142687542 | 40417  | 6.1852 | 5.7292  | JPT |
| rs11917587 | FLJ35036 | GI_37550554-S | 3 | 3 | 142690273 | 43148  | 6.1852 | 5.7292  | JPT |
| rs7643837  | FLJ35036 | GI_37550554-S | 3 | 3 | 142692565 | 45440  | 6.1852 | 5.7292  | JPT |
| rs6795168  | FLJ35036 | GI_37550554-S | 3 | 3 | 142696279 | 49154  | 6.1852 | 5.7292  | JPT |
| rs6808837  | FLJ35036 | GI_37550554-S | 3 | 3 | 142700652 | 53527  | 6.1852 | 5.7292  | JPT |
| rs6767158  | FLJ35036 | GI_37550554-S | 3 | 3 | 142711572 | 64447  | 6.7586 | 5.7292  | JPT |
| rs6785874  | FLJ35036 | GI_37550554-S | 3 | 3 | 142727514 | 80389  | 6.1852 | 5.7292  | JPT |
| rs6800122  | FLJ35036 | GI_37550554-S | 3 | 3 | 142732096 | 84971  | 6.1852 | 5.7292  | JPT |
| rs16851483 | FLJ35036 | GI_37550554-S | 3 | 3 | 142758134 | 111009 | 7.5609 | 5.7292  | JPT |
| rs3821709  | FLJ35036 | GI_37550554-S | 3 | 3 | 142762971 | 115846 | 7.4187 | 5.7292  | JPT |
| rs11711375 | FLJ35036 | GI_37550554-S | 3 | 3 | 142770237 | 123112 | 6.1852 | 5.7292  | JPT |
| rs1493209  | FLJ35036 | GI_37550554-S | 3 | 3 | 142775316 | 128191 | 6.1852 | 5.7292  | JPT |
| rs3732869  | FLJ35036 | GI_37550554-S | 3 | 3 | 142778476 | 131351 | 7.4187 | 5.7292  | JPT |
| rs3821710  | FLJ35036 | GI_37550554-S | 3 | 3 | 142784149 | 137024 | 6.1852 | 5.7292  | JPT |
| rs2035935  | FLJ35036 | GI_37550554-S | 3 | 3 | 142788711 | 141586 | 7.4187 | 5.7292  | JPT |
| rs295320   | FLJ35036 | GI_37550554-S | 3 | 3 | 142807254 | 160129 | 6.1852 | 5.7292  | JPT |
| rs295323   | FLJ35036 | GI_37550554-S | 3 | 3 | 142810172 | 163047 | 6.1852 | 5.7292  | JPT |
| rs2640017  | FLJ35036 | GI_37550554-S | 3 | 3 | 142817819 | 170694 | 7.4187 | 5.7292  | JPT |
| rs2639998  | FLJ35036 | GI_37550554-S | 3 | 3 | 142819406 | 172281 | 6.2455 | 5.7292  | JPT |
| rs344027   | Hs.54543 | Hs.54543-S    | 3 | 3 | 157951095 | 3082   | 5.8969 | 5.82545 | JPT |
| rs17380954 | Hs.54543 | Hs.54543-S    | 3 | 3 | 157987808 | 39795  | 6.0223 | 5.82545 | JPT |
| rs386736   | Hs.54543 | Hs.54543-S    | 3 | 3 | 157996110 | 48097  | 5.8969 | 5.82545 | JPT |
| rs1430410  | Hs.54543 | Hs.54543-S    | 3 | 3 | 158008264 | 60251  | 8.4037 | 5.82545 | JPT |
| rs9874866  | Hs.54543 | Hs.54543-S    | 3 | 3 | 158021372 | 73359  | 8.4037 | 5.82545 | JPT |
| rs9858861  | Hs.54543 | Hs.54543-S    | 3 | 3 | 158025339 | 77326  | 6.7125 | 5.82545 | JPT |
| rs9820830  | Hs.54543 | Hs.54543-S    | 3 | 3 | 158025406 | 77393  | 6.7125 | 5.82545 | JPT |
| rs9883566  | B3GALT3  | GI_15451873-I | 3 | 3 | 162253025 | 31484  | 6.1081 | 5.76327 | JPT |
| rs9876142  | B3GALT3  | GI_15451873-I | 3 | 3 | 162263670 | 20839  | 6.3187 | 5.76327 | JPT |
| rs13256    | B3GALT3  | GI_15451873-I | 3 | 3 | 162279207 | 5302   | 7.7265 | 5.76327 | JPT |
| rs9813136  | B3GALT3  | GI_15451873-I | 3 | 3 | 162283828 | 681    | 5.7644 | 5.76327 | JPT |
| rs11717272 | B3GALT3  | GI_15451873-I | 3 | 3 | 162293057 | 8548   | 7.334  | 5.76327 | JPT |
| rs4521287  | B3GALT3  | GI_15451873-I | 3 | 3 | 162295454 | 10945  | 7.334  | 5.76327 | JPT |
| rs11720263 | B3GALT3  | GI_15451873-I | 3 | 3 | 162330995 | 46486  | 7.0536 | 5.76327 | JPT |
| rs7618924  | B3GALT3  | GI_15451873-I | 3 | 3 | 162338301 | 53792  | 7.334  | 5.76327 | JPT |
| rs6441362  | B3GALT3  | GI_15451873-I | 3 | 3 | 162360315 | 75806  | 6.4854 | 5.76327 | JPT |

|            |           |               |   |   |           |        |        |         |     |
|------------|-----------|---------------|---|---|-----------|--------|--------|---------|-----|
| rs6772723  | B3GALT3   | GI_15451873-I | 3 | 3 | 162377776 | 93267  | 8.345  | 5.76327 | JPT |
| rs1599375  | B3GALT3   | GI_15451873-I | 3 | 3 | 162380473 | 95964  | 8.4912 | 5.76327 | JPT |
| rs16831981 | B3GALT3   | GI_15451873-I | 3 | 3 | 162380482 | 95973  | 8.345  | 5.76327 | JPT |
| rs1585481  | B3GALT3   | GI_15451873-I | 3 | 3 | 162384183 | 99674  | 8.345  | 5.76327 | JPT |
| rs11915989 | B3GALT3   | GI_15451873-I | 3 | 3 | 162384961 | 100452 | 8.345  | 5.76327 | JPT |
| rs7610800  | B3GALT3   | GI_15451873-I | 3 | 3 | 162485284 | 200775 | 7.8221 | 5.76327 | JPT |
| rs4856769  | B3GALT3   | GI_15451873-I | 3 | 3 | 162487251 | 202742 | 7.805  | 5.76327 | JPT |
| rs1382429  | B3GALT3   | GI_15451873-I | 3 | 3 | 162497855 | 213346 | 8.2571 | 5.76327 | JPT |
| rs11715591 | B3GALT3   | GI_15451873-I | 3 | 3 | 162525839 | 241330 | 8.2571 | 5.76327 | JPT |
| rs16832082 | B3GALT3   | GI_15451873-I | 3 | 3 | 162526273 | 241764 | 8.2571 | 5.76327 | JPT |
| rs13073147 | B3GALT3   | GI_15451873-I | 3 | 3 | 162527939 | 243430 | 8.2571 | 5.76327 | JPT |
| rs4856703  | B3GALT3   | GI_15451873-I | 3 | 3 | 162530422 | 245913 | 8.0808 | 5.76327 | JPT |
| rs11718905 | B3GALT3   | GI_15451873-I | 3 | 3 | 162534495 | 249986 | 8.2571 | 5.76327 | JPT |
| rs11711695 | B3GALT3   | GI_15451873-I | 3 | 3 | 162540295 | 255786 | 7.2845 | 5.76327 | JPT |
| rs6780536  | B3GALT3   | GI_15451873-I | 3 | 3 | 162541428 | 256919 | 6.8947 | 5.76327 | JPT |
| rs10513564 | B3GALT3   | GI_15451873-I | 3 | 3 | 162542464 | 257955 | 6.8947 | 5.76327 | JPT |
| rs13059340 | B3GALT3   | GI_15451873-I | 3 | 3 | 162545333 | 260824 | 7.2845 | 5.76327 | JPT |
| rs6441374  | B3GALT3   | GI_15451873-I | 3 | 3 | 162547242 | 262733 | 7.2845 | 5.76327 | JPT |
| rs1450522  | B3GALT3   | GI_15451873-I | 3 | 3 | 162560332 | 275823 | 7.18   | 5.76327 | JPT |
| rs2054710  | B3GALT3   | GI_15451873-I | 3 | 3 | 162573318 | 288809 | 6.8424 | 5.76327 | JPT |
| rs7624747  | B3GALT3   | GI_15451873-I | 3 | 3 | 162690676 | 406167 | 6.1575 | 5.76327 | JPT |
| rs9832020  | B3GALT3   | GI_15451873-I | 3 | 3 | 162691717 | 407208 | 6.8678 | 5.76327 | JPT |
| rs6441380  | B3GALT3   | GI_15451873-I | 3 | 3 | 162696338 | 411829 | 6.2172 | 5.76327 | JPT |
| rs9837033  | Hs.135624 | Hs.135624-S   | 3 | 3 | 180505476 | 66284  | 5.8382 | 5.73661 | JPT |
| rs6786409  | Hs.135624 | Hs.135624-S   | 3 | 3 | 180528195 | 43565  | 5.8557 | 5.73661 | JPT |
| rs7620017  | Hs.135624 | Hs.135624-S   | 3 | 3 | 180558165 | 13595  | 6.1895 | 5.73661 | JPT |
| rs6443643  | Hs.135624 | Hs.135624-S   | 3 | 3 | 180561856 | 9904   | 5.8557 | 5.73661 | JPT |
| rs9865666  | Hs.135624 | Hs.135624-S   | 3 | 3 | 180575691 | 3931   | 5.8557 | 5.73661 | JPT |
| rs6784871  | Hs.135624 | Hs.135624-S   | 3 | 3 | 180576500 | 4740   | 6.1895 | 5.73661 | JPT |
| rs3976523  | Hs.135624 | Hs.135624-S   | 3 | 3 | 180581881 | 10121  | 5.8557 | 5.73661 | JPT |
| rs3853153  | Hs.135624 | Hs.135624-S   | 3 | 3 | 180589721 | 17961  | 5.8557 | 5.73661 | JPT |
| rs3806682  | Hs.135624 | Hs.135624-S   | 3 | 3 | 180628541 | 56781  | 6.4433 | 5.73661 | JPT |
| rs2024497  | Hs.135624 | Hs.135624-S   | 3 | 3 | 180629873 | 58113  | 5.9741 | 5.73661 | JPT |
| rs4455277  | LOC151963 | GI_31341922-S | 3 | 3 | 194097010 | 99443  | 6.2509 | 5.74849 | JPT |
| rs4455278  | LOC151963 | GI_31341922-S | 3 | 3 | 194097185 | 99618  | 5.9078 | 5.74849 | JPT |
| rs11716375 | LOC151963 | GI_31341922-S | 3 | 3 | 194100965 | 103398 | 6.0809 | 5.74849 | JPT |
| rs6827719  | FLJ90036  | GI_31559781-S | 4 | 4 | 58063     | 87805  | 6.6558 | 5.5877  | JPT |
| rs2006748  | FLJ90036  | GI_31559781-S | 4 | 4 | 77113     | 68755  | 6.4889 | 5.5877  | JPT |
| rs2883236  | FLJ90036  | GI_31559781-S | 4 | 4 | 82605     | 63263  | 6.4889 | 5.5877  | JPT |
| rs12509346 | FLJ90036  | GI_31559781-S | 4 | 4 | 84380     | 61488  | 6.6558 | 5.5877  | JPT |
| rs6814287  | FLJ90036  | GI_31559781-S | 4 | 4 | 112323    | 33545  | 6.6558 | 5.5877  | JPT |
| rs10004179 | FLJ90036  | GI_31559781-S | 4 | 4 | 121548    | 24320  | 6.4889 | 5.5877  | JPT |
| rs6599293  | FLJ90036  | GI_31559781-S | 4 | 4 | 123027    | 22841  | 6.4889 | 5.5877  | JPT |
| rs3829     | FLJ90036  | GI_31559781-S | 4 | 4 | 124851    | 21017  | 6.8039 | 5.5877  | JPT |
| rs6599295  | FLJ90036  | GI_31559781-S | 4 | 4 | 126942    | 18926  | 6.4889 | 5.5877  | JPT |
| rs11735742 | FLJ90036  | GI_31559781-S | 4 | 4 | 132550    | 13318  | 6.4889 | 5.5877  | JPT |
| rs6599306  | FLJ90036  | GI_31559781-S | 4 | 4 | 133439    | 12429  | 5.76   | 5.5877  | JPT |
| rs7688662  | STIM2     | GI_21070998-S | 4 | 4 | 26520738  | 182216 | 6.102  | 5.87141 | JPT |
| rs11466640 | Hs.214235 | Hs.214235-S   | 4 | 4 | 38601469  | 10572  | 5.9641 | 5.84147 | JPT |
| rs11466617 | Hs.214235 | Hs.214235-S   | 4 | 4 | 38603037  | 9004   | 6.2836 | 5.84147 | JPT |
| rs7653908  | Hs.214235 | Hs.214235-S   | 4 | 4 | 38604787  | 7254   | 6.3386 | 5.84147 | JPT |
| rs11725309 | TLR10     | GI_13569929-S | 4 | 4 | 38606414  | 8932   | 5.9659 | 5.94812 | JPT |
| rs11725309 | Hs.214235 | Hs.214235-S   | 4 | 4 | 38606414  | 5627   | 6.7835 | 5.84147 | JPT |
| rs5743595  | TLR10     | GI_13569929-S | 4 | 4 | 38625210  | 27728  | 7.0636 | 5.94812 | JPT |
| rs5743595  | TLR6      | GI_20143970-S | 4 | 4 | 38625210  | 25910  | 6.4848 | 5.92095 | JPT |
| rs5743595  | Hs.214235 | Hs.214235-S   | 4 | 4 | 38625210  | 13169  | 7.0456 | 5.84147 | JPT |

|            |           |               |   |   |           |        |        |         |     |
|------------|-----------|---------------|---|---|-----------|--------|--------|---------|-----|
| rs5743592  | TLR10     | GI_13569929-S | 4 | 4 | 38625629  | 28147  | 6.6858 | 5.94812 | JPT |
| rs5743592  | Hs.214235 | Hs.214235-S   | 4 | 4 | 38625629  | 13588  | 6.616  | 5.84147 | JPT |
| rs5743565  | TLR10     | GI_13569929-S | 4 | 4 | 38628549  | 31067  | 9.7562 | 5.94812 | JPT |
| rs5743565  | TLR6      | GI_20143970-S | 4 | 4 | 38628549  | 22571  | 7.6399 | 5.92095 | JPT |
| rs5743565  | Hs.214235 | Hs.214235-S   | 4 | 4 | 38628549  | 16508  | 9.4096 | 5.84147 | JPT |
| rs5743563  | Hs.214235 | Hs.214235-S   | 4 | 4 | 38628585  | 16544  | 6.4407 | 5.84147 | JPT |
| rs5743557  | TLR10     | GI_13569929-S | 4 | 4 | 38629393  | 31911  | 7.0636 | 5.94812 | JPT |
| rs5743557  | TLR6      | GI_20143970-S | 4 | 4 | 38629393  | 21727  | 6.4848 | 5.92095 | JPT |
| rs5743557  | Hs.214235 | Hs.214235-S   | 4 | 4 | 38629393  | 17352  | 7.0456 | 5.84147 | JPT |
| rs5743794  | Hs.214235 | Hs.214235-S   | 4 | 4 | 38655293  | 43252  | 5.9309 | 5.84147 | JPT |
| rs2174284  | TLR10     | GI_13569929-S | 4 | 4 | 38681905  | 84423  | 7.3391 | 5.94812 | JPT |
| rs2174284  | Hs.214235 | Hs.214235-S   | 4 | 4 | 38681905  | 69864  | 6.7993 | 5.84147 | JPT |
| rs2566104  | FLJ23235  | GI_13376422-S | 4 | 4 | 38842478  | 51436  | 6.6765 | 6.10683 | JPT |
| rs10015492 | FLJ23235  | GI_13376422-S | 4 | 4 | 38844476  | 53434  | 7.1551 | 6.10683 | JPT |
| rs12710812 | FLJ23235  | GI_13376422-S | 4 | 4 | 38845081  | 54039  | 6.4779 | 6.10683 | JPT |
| rs2711968  | FLJ23235  | GI_13376422-S | 4 | 4 | 38846558  | 55516  | 7.6038 | 6.10683 | JPT |
| rs2254075  | FLJ23235  | GI_13376422-S | 4 | 4 | 38852749  | 61707  | 9.437  | 6.10683 | JPT |
| rs2254212  | FLJ23235  | GI_13376422-S | 4 | 4 | 38854408  | 63366  | 9.437  | 6.10683 | JPT |
| rs2711976  | FLJ23235  | GI_13376422-S | 4 | 4 | 38857352  | 66310  | 9.437  | 6.10683 | JPT |
| rs2566094  | FLJ23235  | GI_13376422-S | 4 | 4 | 38858940  | 67898  | 8.2658 | 6.10683 | JPT |
| rs2566097  | FLJ23235  | GI_13376422-S | 4 | 4 | 38859902  | 68860  | 8.4937 | 6.10683 | JPT |
| rs2711981  | FLJ23235  | GI_13376422-S | 4 | 4 | 38861824  | 70782  | 9.437  | 6.10683 | JPT |
| rs2711982  | FLJ23235  | GI_13376422-S | 4 | 4 | 38866563  | 75521  | 8.6579 | 6.10683 | JPT |
| rs2711983  | FLJ23235  | GI_13376422-S | 4 | 4 | 38867486  | 76444  | 8.6579 | 6.10683 | JPT |
| rs6813885  | FLJ23235  | GI_13376422-S | 4 | 4 | 38868473  | 77431  | 8.5041 | 6.10683 | JPT |
| rs2246770  | Hs.164463 | Hs.164463-S   | 4 | 4 | 54397811  | 45576  | 7.4524 | 6.0839  | JPT |
| rs2616440  | Hs.164463 | Hs.164463-S   | 4 | 4 | 54398497  | 44890  | 7.5286 | 6.0839  | JPT |
| rs2616439  | Hs.164463 | Hs.164463-S   | 4 | 4 | 54398861  | 44526  | 7.4374 | 6.0839  | JPT |
| rs2668531  | Hs.164463 | Hs.164463-S   | 4 | 4 | 54401725  | 41662  | 7.4374 | 6.0839  | JPT |
| rs13126826 | Hs.164463 | Hs.164463-S   | 4 | 4 | 54403213  | 40174  | 7.5286 | 6.0839  | JPT |
| rs2898980  | Hs.164463 | Hs.164463-S   | 4 | 4 | 54407259  | 36128  | 6.6645 | 6.0839  | JPT |
| rs10034124 | UGT2B10   | GI_27552756-S | 4 | 4 | 69222280  | 654976 | 8.9331 | 5.79266 | JPT |
| rs10034124 | UGT2B17   | GI_4507820-S  | 4 | 4 | 69222280  | 9549   | 9.7217 | 6.04278 | JPT |
| rs10034124 | UGT2B7    | GI_4507824-S  | 4 | 4 | 69222280  | 936776 | 9.7217 | 5.98545 | JPT |
| rs7435827  | UGT2B10   | GI_27552756-S | 4 | 4 | 69243710  | 633546 | 6.1957 | 5.79266 | JPT |
| rs11732803 | UGT2B10   | GI_27552756-S | 4 | 4 | 69253159  | 624097 | 6.1957 | 5.79266 | JPT |
| rs11732803 | UGT2B11   | GI_4507822-S  | 4 | 4 | 69253159  | 993964 | 5.7276 | 5.69406 | JPT |
| rs7442348  | UGT2B10   | GI_27552756-S | 4 | 4 | 69253957  | 623299 | 6.2785 | 5.79266 | JPT |
| rs7442348  | UGT2B11   | GI_4507822-S  | 4 | 4 | 69253957  | 993166 | 5.8157 | 5.69406 | JPT |
| rs7442348  | UGT2B7    | GI_4507824-S  | 4 | 4 | 69253957  | 905099 | 5.9965 | 5.98545 | JPT |
| rs13144491 | UGT2B10   | GI_27552756-S | 4 | 4 | 69273573  | 603683 | 9.0308 | 5.79266 | JPT |
| rs13144491 | UGT2B17   | GI_4507820-S  | 4 | 4 | 69273573  | 41744  | 9.7565 | 6.04278 | JPT |
| rs13144491 | UGT2B11   | GI_4507822-S  | 4 | 4 | 69273573  | 973550 | 9.7565 | 5.69406 | JPT |
| rs13144491 | UGT2B7    | GI_4507824-S  | 4 | 4 | 69273573  | 885483 | 9.7565 | 5.98545 | JPT |
| rs13348005 | UGT2B10   | GI_27552756-S | 4 | 4 | 69293542  | 583714 | 9.0308 | 5.79266 | JPT |
| rs13348005 | UGT2B17   | GI_4507820-S  | 4 | 4 | 69293542  | 61713  | 9.7565 | 6.04278 | JPT |
| rs13348005 | UGT2B11   | GI_4507822-S  | 4 | 4 | 69293542  | 953581 | 9.7565 | 5.69406 | JPT |
| rs13348005 | UGT2B7    | GI_4507824-S  | 4 | 4 | 69293542  | 865514 | 9.7565 | 5.98545 | JPT |
| rs3100645  | UGT2B10   | GI_27552756-S | 4 | 4 | 69671954  | 205302 | 9.1729 | 5.79266 | JPT |
| rs3100645  | UGT2B17   | GI_4507820-S  | 4 | 4 | 69671954  | 440125 | 9.8929 | 6.04278 | JPT |
| rs3100645  | UGT2B11   | GI_4507822-S  | 4 | 4 | 69671954  | 575169 | 9.8929 | 5.69406 | JPT |
| rs3100645  | UGT2B7    | GI_4507824-S  | 4 | 4 | 69671954  | 487102 | 9.8929 | 5.98545 | JPT |
| rs6535524  | THAP6     | GI_37059751-S | 4 | 4 | 76819495  | 8416   | 6.3219 | 6.00247 | JPT |
| rs12640004 | DDIT4L    | GI_34222182-S | 4 | 4 | 101360655 | 103765 | 5.8512 | 5.72756 | JPT |
| rs12502279 | DDIT4L    | GI_34222182-S | 4 | 4 | 101364367 | 100053 | 6.5302 | 5.72756 | JPT |
| rs12650258 | DDIT4L    | GI_34222182-S | 4 | 4 | 101377992 | 86428  | 7.4773 | 5.72756 | JPT |

|            |        |               |   |   |           |        |         |         |     |
|------------|--------|---------------|---|---|-----------|--------|---------|---------|-----|
| rs4532240  | DDIT4L | GI_34222182-S | 4 | 4 | 101378705 | 85715  | 8.6515  | 5.72756 | JPT |
| rs12642221 | DDIT4L | GI_34222182-S | 4 | 4 | 101378934 | 85486  | 8.4345  | 5.72756 | JPT |
| rs12505112 | DDIT4L | GI_34222182-S | 4 | 4 | 101379296 | 85124  | 7.8143  | 5.72756 | JPT |
| rs4235443  | DDIT4L | GI_34222182-S | 4 | 4 | 101380606 | 83814  | 8.6515  | 5.72756 | JPT |
| rs7675143  | DDIT4L | GI_34222182-S | 4 | 4 | 101384325 | 80095  | 6.9294  | 5.72756 | JPT |
| rs6823618  | DDIT4L | GI_34222182-S | 4 | 4 | 101386441 | 77979  | 7.2664  | 5.72756 | JPT |
| rs12513071 | DDIT4L | GI_34222182-S | 4 | 4 | 101397297 | 67123  | 7.4233  | 5.72756 | JPT |
| rs6855061  | DDIT4L | GI_34222182-S | 4 | 4 | 101412190 | 52230  | 7.7158  | 5.72756 | JPT |
| rs4699777  | DDIT4L | GI_34222182-S | 4 | 4 | 101415183 | 49237  | 7.4666  | 5.72756 | JPT |
| rs12510456 | DDIT4L | GI_34222182-S | 4 | 4 | 101427738 | 36682  | 6.722   | 5.72756 | JPT |
| rs2866184  | DDIT4L | GI_34222182-S | 4 | 4 | 101429665 | 34755  | 6.722   | 5.72756 | JPT |
| rs2866185  | DDIT4L | GI_34222182-S | 4 | 4 | 101429912 | 34508  | 7.2546  | 5.72756 | JPT |
| rs2866188  | DDIT4L | GI_34222182-S | 4 | 4 | 101440738 | 23682  | 6.722   | 5.72756 | JPT |
| rs4380532  | DDIT4L | GI_34222182-S | 4 | 4 | 101441170 | 23250  | 6.722   | 5.72756 | JPT |
| rs2866190  | DDIT4L | GI_34222182-S | 4 | 4 | 101443598 | 20822  | 6.9457  | 5.72756 | JPT |
| rs11097693 | DDIT4L | GI_34222182-S | 4 | 4 | 101478569 | 14149  | 6.1257  | 5.72756 | JPT |
| rs2866201  | DDIT4L | GI_34222182-S | 4 | 4 | 101479783 | 15363  | 6.1802  | 5.72756 | JPT |
| rs6839044  | DDIT4L | GI_34222182-S | 4 | 4 | 101480310 | 15890  | 5.774   | 5.72756 | JPT |
| rs6851998  | DDIT4L | GI_34222182-S | 4 | 4 | 101481793 | 17373  | 5.9245  | 5.72756 | JPT |
| rs11097694 | DDIT4L | GI_34222182-S | 4 | 4 | 101482085 | 17665  | 6.0752  | 5.72756 | JPT |
| rs11097695 | DDIT4L | GI_34222182-S | 4 | 4 | 101482122 | 17702  | 6.1802  | 5.72756 | JPT |
| rs12500659 | DDIT4L | GI_34222182-S | 4 | 4 | 101483708 | 19288  | 6.1007  | 5.72756 | JPT |
| rs2866202  | DDIT4L | GI_34222182-S | 4 | 4 | 101484174 | 19754  | 6.1326  | 5.72756 | JPT |
| rs2866203  | DDIT4L | GI_34222182-S | 4 | 4 | 101484854 | 20434  | 5.9988  | 5.72756 | JPT |
| rs2866204  | DDIT4L | GI_34222182-S | 4 | 4 | 101484943 | 20523  | 6.1802  | 5.72756 | JPT |
| rs868911   | DDIT4L | GI_34222182-S | 4 | 4 | 101485389 | 20969  | 6.1802  | 5.72756 | JPT |
| rs6843469  | DDIT4L | GI_34222182-S | 4 | 4 | 101485997 | 21577  | 5.9447  | 5.72756 | JPT |
| rs2866206  | DDIT4L | GI_34222182-S | 4 | 4 | 101486924 | 22504  | 6.1257  | 5.72756 | JPT |
| rs11097699 | DDIT4L | GI_34222182-S | 4 | 4 | 101487010 | 22590  | 6.1326  | 5.72756 | JPT |
| rs10856953 | DDIT4L | GI_34222182-S | 4 | 4 | 101487328 | 22908  | 6.1802  | 5.72756 | JPT |
| rs6833525  | DDIT4L | GI_34222182-S | 4 | 4 | 101487634 | 23214  | 6.1326  | 5.72756 | JPT |
| rs6532852  | DDIT4L | GI_34222182-S | 4 | 4 | 101487894 | 23474  | 6.0144  | 5.72756 | JPT |
| rs904273   | PPA2   | GI_31881619-A | 4 | 4 | 106596878 | 51541  | 7.8005  | 5.73254 | JPT |
| rs1909121  | PPA2   | GI_31881619-A | 4 | 4 | 106597688 | 50731  | 7.2984  | 5.73254 | JPT |
| rs2726486  | PPA2   | GI_31881619-A | 4 | 4 | 106622285 | 26134  | 7.8005  | 5.73254 | JPT |
| rs2647265  | PPA2   | GI_31881619-A | 4 | 4 | 106626244 | 22175  | 11.9327 | 5.73254 | JPT |
| rs2726456  | PPA2   | GI_31881619-A | 4 | 4 | 106634181 | 14238  | 12.4226 | 5.73254 | JPT |
| rs924282   | PPA2   | GI_31881619-A | 4 | 4 | 106639721 | 8698   | 12.4876 | 5.73254 | JPT |
| rs924283   | PPA2   | GI_31881619-A | 4 | 4 | 106639769 | 8650   | 12.4876 | 5.73254 | JPT |
| rs2647255  | PPA2   | GI_31881619-A | 4 | 4 | 106642497 | 5922   | 10.2003 | 5.73254 | JPT |
| rs11932428 | PPA2   | GI_31881619-A | 4 | 4 | 106644740 | 3679   | 12.7388 | 5.73254 | JPT |
| rs11941401 | PPA2   | GI_31881619-A | 4 | 4 | 106644770 | 3649   | 11.6704 | 5.73254 | JPT |
| rs11932512 | PPA2   | GI_31881619-A | 4 | 4 | 106644958 | 3461   | 13.3283 | 5.73254 | JPT |
| rs13108489 | PPA2   | GI_31881619-A | 4 | 4 | 106650729 | 2310   | 13.3163 | 5.73254 | JPT |
| rs2636693  | PPA2   | GI_31881619-A | 4 | 4 | 106652360 | 3941   | 13.3283 | 5.73254 | JPT |
| rs2636694  | PPA2   | GI_31881619-A | 4 | 4 | 106653451 | 5032   | 13.3283 | 5.73254 | JPT |
| rs2713826  | PPA2   | GI_31881619-A | 4 | 4 | 106699232 | 50813  | 10.2835 | 5.73254 | JPT |
| rs2046880  | PPA2   | GI_31881619-A | 4 | 4 | 106728420 | 80001  | 10.3261 | 5.73254 | JPT |
| rs2023840  | PPA2   | GI_31881619-A | 4 | 4 | 106730192 | 81773  | 10.3261 | 5.73254 | JPT |
| rs2029513  | PPA2   | GI_31881619-A | 4 | 4 | 106739872 | 91453  | 7.1109  | 5.73254 | JPT |
| rs4699176  | PPA2   | GI_31881619-A | 4 | 4 | 106746306 | 97887  | 9.01    | 5.73254 | JPT |
| rs2298732  | PPA2   | GI_31881619-A | 4 | 4 | 106748697 | 100278 | 9.01    | 5.73254 | JPT |
| rs2866883  | PPA2   | GI_31881619-A | 4 | 4 | 106748969 | 100550 | 9.01    | 5.73254 | JPT |
| rs7678401  | PPA2   | GI_31881619-A | 4 | 4 | 106749484 | 101065 | 9.01    | 5.73254 | JPT |
| rs1125254  | PPA2   | GI_31881619-A | 4 | 4 | 106762227 | 113808 | 8.3269  | 5.73254 | JPT |
| rs3864225  | PPA2   | GI_31881619-A | 4 | 4 | 106766083 | 117664 | 9.01    | 5.73254 | JPT |

|            |          |               |   |   |           |        |        |         |     |
|------------|----------|---------------|---|---|-----------|--------|--------|---------|-----|
| rs3855585  | PPA2     | GI_31881619-A | 4 | 4 | 106766282 | 117863 | 8.9317 | 5.73254 | JPT |
| rs11097891 | PPA2     | GI_31881619-A | 4 | 4 | 106766530 | 118111 | 8.5677 | 5.73254 | JPT |
| rs13110343 | PPA2     | GI_31881619-A | 4 | 4 | 106766800 | 118381 | 9.01   | 5.73254 | JPT |
| rs2866806  | PPA2     | GI_31881619-A | 4 | 4 | 106767091 | 118672 | 9.01   | 5.73254 | JPT |
| rs1490611  | PPA2     | GI_31881619-A | 4 | 4 | 106768848 | 120429 | 7.1167 | 5.73254 | JPT |
| rs765220   | PPA2     | GI_31881619-A | 4 | 4 | 106769363 | 120944 | 8.2497 | 5.73254 | JPT |
| rs757176   | PPA2     | GI_31881619-A | 4 | 4 | 106770133 | 121714 | 8.5787 | 5.73254 | JPT |
| rs7686073  | PPA2     | GI_31881619-A | 4 | 4 | 106775460 | 127041 | 6.6871 | 5.73254 | JPT |
| rs6825111  | PPA2     | GI_31881619-A | 4 | 4 | 106776374 | 127955 | 8.9317 | 5.73254 | JPT |
| rs6855572  | PPA2     | GI_31881619-A | 4 | 4 | 106776542 | 128123 | 8.3269 | 5.73254 | JPT |
| rs6831138  | PPA2     | GI_31881619-A | 4 | 4 | 106777184 | 128765 | 8.9317 | 5.73254 | JPT |
| rs4698941  | PPA2     | GI_31881619-A | 4 | 4 | 106780140 | 131721 | 8.9317 | 5.73254 | JPT |
| rs9999896  | PPA2     | GI_31881619-A | 4 | 4 | 106781361 | 132942 | 8.8473 | 5.73254 | JPT |
| rs6816997  | PPA2     | GI_31881619-A | 4 | 4 | 106782193 | 133774 | 8.3269 | 5.73254 | JPT |
| rs6533201  | PPA2     | GI_31881619-A | 4 | 4 | 106782852 | 134433 | 8.3074 | 5.73254 | JPT |
| rs763289   | PPA2     | GI_31881619-A | 4 | 4 | 106783880 | 135461 | 8.3269 | 5.73254 | JPT |
| rs10020998 | PPA2     | GI_31881619-A | 4 | 4 | 106786058 | 137639 | 9.01   | 5.73254 | JPT |
| rs10024331 | PPA2     | GI_31881619-A | 4 | 4 | 106787273 | 138854 | 9.01   | 5.73254 | JPT |
| rs6817520  | hmm30172 | hmm30172-S    | 4 | 4 | 119678315 | 36660  | 6.4821 | 6.144   | JPT |
| rs1818521  | hmm30172 | hmm30172-S    | 4 | 4 | 119679607 | 35368  | 6.4821 | 6.144   | JPT |
| rs954926   | KIAA1712 | GI_30794213-S | 4 | 4 | 175514110 | 113948 | 6.4497 | 5.89846 | JPT |
| rs13109634 | KIAA1712 | GI_30794213-S | 4 | 4 | 175545256 | 82802  | 6.7604 | 5.89846 | JPT |
| rs10520277 | KIAA1712 | GI_30794213-S | 4 | 4 | 175561564 | 66494  | 6.7676 | 5.89846 | JPT |
| rs7376146  | KIAA1712 | GI_30794213-S | 4 | 4 | 175576120 | 51938  | 7.6634 | 5.89846 | JPT |
| rs7658307  | KIAA1712 | GI_30794213-S | 4 | 4 | 175581254 | 46804  | 6.1688 | 5.89846 | JPT |
| rs1553669  | KIAA1712 | GI_30794213-S | 4 | 4 | 175612138 | 15920  | 7.1638 | 5.89846 | JPT |
| rs6834938  | DCTD     | GI_4503276-S  | 4 | 4 | 184185962 | 876    | 6.2546 | 6.03503 | JPT |
| rs6834968  | DCTD     | GI_4503276-S  | 4 | 4 | 184186001 | 837    | 6.1537 | 6.03503 | JPT |
| rs7699576  | KIAA1430 | GI_37540396-S | 4 | 4 | 186909283 | 452679 | 6.268  | 6.17538 | JPT |
| rs12657631 | Hs.5855  | Hs.5855-S     | 5 | 5 | 543237    | 9508   | 6.3717 | 5.52269 | JPT |
| rs326123   | MTRR     | GI_4505278-A  | 5 | 5 | 7929861   | 24129  | 9.9664 | 6.21435 | JPT |
| rs161869   | MTRR     | GI_4505278-A  | 5 | 5 | 7930831   | 23159  | 8.7084 | 6.21435 | JPT |
| rs6555501  | MTRR     | GI_4505278-A  | 5 | 5 | 7932983   | 21007  | 7.1026 | 6.21435 | JPT |
| rs162033   | MTRR     | GI_4505278-A  | 5 | 5 | 7933835   | 20155  | 6.9808 | 6.21435 | JPT |
| rs327588   | MTRR     | GI_4505278-A  | 5 | 5 | 7961359   | 7369   | 7.8726 | 6.21435 | JPT |
| rs840399   | C1QTNF3  | GI_13569918-I | 5 | 5 | 34051438  | 4377   | 6.8105 | 6.04887 | JPT |
| rs840397   | C1QTNF3  | GI_13569918-I | 5 | 5 | 34051895  | 3920   | 6.8105 | 6.04887 | JPT |
| rs840396   | C1QTNF3  | GI_13569918-I | 5 | 5 | 34052241  | 3574   | 6.9641 | 6.04887 | JPT |
| rs840395   | C1QTNF3  | GI_13569918-I | 5 | 5 | 34052311  | 3504   | 6.8105 | 6.04887 | JPT |
| rs840393   | C1QTNF3  | GI_13569918-I | 5 | 5 | 34053660  | 2155   | 6.7594 | 6.04887 | JPT |
| rs840391   | C1QTNF3  | GI_13569918-I | 5 | 5 | 34054261  | 1554   | 6.8105 | 6.04887 | JPT |
| rs6546     | C1QTNF3  | GI_13569918-I | 5 | 5 | 34055787  | 28     | 6.6768 | 6.04887 | JPT |
| rs840386   | C1QTNF3  | GI_13569918-I | 5 | 5 | 34056034  | 219    | 6.8105 | 6.04887 | JPT |
| rs840385   | C1QTNF3  | GI_13569918-I | 5 | 5 | 34056115  | 300    | 6.8105 | 6.04887 | JPT |
| rs840384   | C1QTNF3  | GI_13569918-I | 5 | 5 | 34056910  | 1095   | 6.8105 | 6.04887 | JPT |
| rs840381   | C1QTNF3  | GI_13569918-I | 5 | 5 | 34058118  | 2303   | 6.8105 | 6.04887 | JPT |
| rs299608   | C1QTNF3  | GI_13569918-I | 5 | 5 | 34060142  | 4327   | 6.6768 | 6.04887 | JPT |
| rs299607   | C1QTNF3  | GI_13569918-I | 5 | 5 | 34060412  | 4597   | 6.8105 | 6.04887 | JPT |
| rs299606   | C1QTNF3  | GI_13569918-I | 5 | 5 | 34060511  | 4696   | 6.7474 | 6.04887 | JPT |
| rs299605   | C1QTNF3  | GI_13569918-I | 5 | 5 | 34060701  | 4886   | 6.8105 | 6.04887 | JPT |
| rs299602   | C1QTNF3  | GI_13569918-I | 5 | 5 | 34061668  | 5853   | 6.6768 | 6.04887 | JPT |
| rs299596   | C1QTNF3  | GI_13569918-I | 5 | 5 | 34067771  | 11956  | 6.2174 | 6.04887 | JPT |
| rs213583   | C1QTNF3  | GI_13569918-I | 5 | 5 | 34070570  | 14755  | 6.3323 | 6.04887 | JPT |
| rs299591   | C1QTNF3  | GI_13569918-I | 5 | 5 | 34070901  | 15086  | 6.2174 | 6.04887 | JPT |
| rs1217788  | MAP1B    | GI_14165455-A | 5 | 5 | 71406252  | 131701 | 6.3009 | 5.62444 | JPT |
| rs1217814  | MAP1B    | GI_14165455-A | 5 | 5 | 71423062  | 114891 | 7.2194 | 5.62444 | JPT |

|            |           |               |   |   |           |        |        |         |     |
|------------|-----------|---------------|---|---|-----------|--------|--------|---------|-----|
| rs1217816  | MAP1B     | GI_14165455-A | 5 | 5 | 71424094  | 113859 | 5.7335 | 5.62444 | JPT |
| rs1217817  | MAP1B     | GI_14165455-A | 5 | 5 | 71425507  | 112446 | 6.3034 | 5.62444 | JPT |
| rs4835729  | SLC23A1   | GI_44680142-I | 5 | 5 | 138791228 | 60349  | 5.8623 | 5.57181 | JPT |
| rs4835730  | SLC23A1   | GI_44680142-I | 5 | 5 | 138791706 | 60827  | 5.9606 | 5.57181 | JPT |
| rs11242467 | SLC23A1   | GI_44680142-I | 5 | 5 | 138795464 | 64585  | 5.8623 | 5.57181 | JPT |
| rs11242468 | SLC23A1   | GI_44680142-I | 5 | 5 | 138800490 | 69611  | 5.5876 | 5.57181 | JPT |
| rs10900864 | SLC23A1   | GI_44680142-I | 5 | 5 | 138800989 | 70110  | 5.8623 | 5.57181 | JPT |
| rs7445264  | SLC23A1   | GI_44680142-I | 5 | 5 | 138803451 | 72572  | 5.5876 | 5.57181 | JPT |
| rs340033   | MGC21644  | GI_45505153-A | 5 | 5 | 145170174 | 50052  | 6.1434 | 5.66031 | JPT |
| rs2636306  | MGC21644  | GI_45505153-A | 5 | 5 | 145173704 | 53582  | 6.1434 | 5.66031 | JPT |
| rs189294   | MGC21644  | GI_45505153-A | 5 | 5 | 145183139 | 63017  | 5.9659 | 5.66031 | JPT |
| rs6891216  | LOC345462 | GI_37550406-S | 5 | 5 | 178379632 | 13494  | 7.174  | 5.85736 | JPT |
| rs6888539  | LOC345462 | GI_37550406-S | 5 | 5 | 178381616 | 11510  | 6.4753 | 5.85736 | JPT |
| rs6880315  | LOC345462 | GI_37550406-S | 5 | 5 | 178385108 | 8018   | 6.0679 | 5.85736 | JPT |
| rs2047354  | LOC345462 | GI_37550406-S | 5 | 5 | 178387853 | 5273   | 6.4753 | 5.85736 | JPT |
| rs7733072  | LOC345462 | GI_37550406-S | 5 | 5 | 178388613 | 4513   | 6.6581 | 5.85736 | JPT |
| rs11957976 | LOC345462 | GI_37550406-S | 5 | 5 | 178388841 | 4285   | 6.6581 | 5.85736 | JPT |
| rs2132671  | LOC345462 | GI_37550406-S | 5 | 5 | 178390040 | 3086   | 6.4753 | 5.85736 | JPT |
| rs17078991 | LOC345462 | GI_37550406-S | 5 | 5 | 178392032 | 1094   | 6.6581 | 5.85736 | JPT |
| rs7707587  | LOC345462 | GI_37550406-S | 5 | 5 | 178395196 | 2070   | 6.6581 | 5.85736 | JPT |
| rs7709054  | LOC345462 | GI_37550406-S | 5 | 5 | 178395363 | 2237   | 6.4753 | 5.85736 | JPT |
| rs7704565  | LOC345462 | GI_37550406-S | 5 | 5 | 178406529 | 13403  | 6.4753 | 5.85736 | JPT |
| rs13156530 | LOC345462 | GI_37550406-S | 5 | 5 | 178407623 | 14497  | 6.2382 | 5.85736 | JPT |
| rs7711420  | LOC345462 | GI_37550406-S | 5 | 5 | 178415600 | 22474  | 6.6318 | 5.85736 | JPT |
| rs11951738 | LOC345462 | GI_37550406-S | 5 | 5 | 178423834 | 30708  | 6.4753 | 5.85736 | JPT |
| rs4701030  | LOC345462 | GI_37550406-S | 5 | 5 | 178435944 | 42818  | 6.6525 | 5.85736 | JPT |
| rs4700780  | LOC345462 | GI_37550406-S | 5 | 5 | 178436246 | 43120  | 7.2447 | 5.85736 | JPT |
| rs2518581  | NQO2      | GI_4505416-S  | 6 | 6 | 2954943   | 7206   | 7.6318 | 6.34729 | JPT |
| rs1143684  | NQO2      | GI_4505416-S  | 6 | 6 | 2955389   | 6760   | 7.5558 | 6.34729 | JPT |
| rs9378353  | NQO2      | GI_4505416-S  | 6 | 6 | 2956174   | 5975   | 7.3972 | 6.34729 | JPT |
| rs3757081  | NQO2      | GI_4505416-S  | 6 | 6 | 2959133   | 3016   | 7.6318 | 6.34729 | JPT |
| rs10223369 | NQO2      | GI_4505416-S  | 6 | 6 | 2963173   | 1024   | 7.6318 | 6.34729 | JPT |
| rs9501910  | NQO2      | GI_4505416-S  | 6 | 6 | 2963773   | 1624   | 6.4322 | 6.34729 | JPT |
| rs6924045  | NQO2      | GI_4505416-S  | 6 | 6 | 2966029   | 3880   | 7.6318 | 6.34729 | JPT |
| rs11242837 | LOC389362 | GI_41147302-S | 6 | 6 | 3206887   | 6225   | 6.2413 | 6.09738 | JPT |
| rs11242841 | LOC389362 | GI_41147302-S | 6 | 6 | 3207007   | 6105   | 7.4629 | 6.09738 | JPT |
| rs4602754  | LOC389362 | GI_41147302-S | 6 | 6 | 3207500   | 5612   | 7.1953 | 6.09738 | JPT |
| rs4421240  | LOC389362 | GI_41147302-S | 6 | 6 | 3207522   | 5590   | 6.794  | 6.09738 | JPT |
| rs4246060  | LOC389362 | GI_41147302-S | 6 | 6 | 3207754   | 5358   | 7.4629 | 6.09738 | JPT |
| rs4316041  | LOC389362 | GI_41147302-S | 6 | 6 | 3208187   | 4925   | 6.8741 | 6.09738 | JPT |
| rs4400256  | LOC389362 | GI_41147302-S | 6 | 6 | 3208286   | 4826   | 7.4629 | 6.09738 | JPT |
| rs4317455  | LOC389362 | GI_41147302-S | 6 | 6 | 3208490   | 4622   | 7.4629 | 6.09738 | JPT |
| rs4959785  | LOC389362 | GI_41147302-S | 6 | 6 | 3209100   | 4012   | 7.4629 | 6.09738 | JPT |
| rs4959229  | LOC389362 | GI_41147302-S | 6 | 6 | 3209287   | 3825   | 6.9897 | 6.09738 | JPT |
| rs4959786  | LOC389362 | GI_41147302-S | 6 | 6 | 3209486   | 3626   | 6.7945 | 6.09738 | JPT |
| rs4959787  | LOC389362 | GI_41147302-S | 6 | 6 | 3209501   | 3611   | 7.4629 | 6.09738 | JPT |
| rs13193012 | LOC389362 | GI_41147302-S | 6 | 6 | 3209670   | 3442   | 6.9897 | 6.09738 | JPT |
| rs4324814  | LOC389362 | GI_41147302-S | 6 | 6 | 3209775   | 3337   | 6.2255 | 6.09738 | JPT |
| rs11753155 | LOC389362 | GI_41147302-S | 6 | 6 | 3209999   | 3113   | 7.439  | 6.09738 | JPT |
| rs4602755  | LOC389362 | GI_41147302-S | 6 | 6 | 3210089   | 3023   | 6.9897 | 6.09738 | JPT |
| rs13196688 | LOC389362 | GI_41147302-S | 6 | 6 | 3210362   | 2750   | 6.9897 | 6.09738 | JPT |
| rs9501966  | LOC389362 | GI_41147302-S | 6 | 6 | 3210381   | 2731   | 6.9897 | 6.09738 | JPT |
| rs13207402 | LOC389362 | GI_41147302-S | 6 | 6 | 3210409   | 2703   | 6.9897 | 6.09738 | JPT |
| rs13207416 | LOC389362 | GI_41147302-S | 6 | 6 | 3210438   | 2674   | 6.9897 | 6.09738 | JPT |
| rs4959792  | LOC389362 | GI_41147302-S | 6 | 6 | 3211037   | 2075   | 7.6509 | 6.09738 | JPT |
| rs4998907  | LOC389362 | GI_41147302-S | 6 | 6 | 3211262   | 1850   | 6.9762 | 6.09738 | JPT |



|            |           |               |   |   |          |        |         |         |     |
|------------|-----------|---------------|---|---|----------|--------|---------|---------|-----|
| rs4336485  | LOC389362 | GI_41147302-S | 6 | 6 | 3211387  | 1725   | 7.2031  | 6.09738 | JPT |
| rs17136345 | LOC389362 | GI_41147302-S | 6 | 6 | 3211907  | 1205   | 7.1416  | 6.09738 | JPT |
| rs17136346 | LOC389362 | GI_41147302-S | 6 | 6 | 3211914  | 1198   | 6.9897  | 6.09738 | JPT |
| rs1633     | LOC389362 | GI_41147302-S | 6 | 6 | 3212535  | 577    | 6.7461  | 6.09738 | JPT |
| rs9328157  | LOC389362 | GI_41147302-S | 6 | 6 | 3212709  | 403    | 6.7035  | 6.09738 | JPT |
| rs3813487  | LOC389362 | GI_41147302-S | 6 | 6 | 3215063  | 1951   | 6.6806  | 6.09738 | JPT |
| rs1127477  | LOC389362 | GI_41147302-S | 6 | 6 | 3215509  | 2397   | 6.7035  | 6.09738 | JPT |
| rs9379896  | LOC221711 | GI_34916021-S | 6 | 6 | 10994935 | 87288  | 6.1764  | 6.0972  | JPT |
| rs946351   | LOC221711 | GI_34916021-S | 6 | 6 | 11001106 | 81117  | 6.1764  | 6.0972  | JPT |
| rs6941992  | LOC222701 | GI_27498465-S | 6 | 6 | 28214120 | 31082  | 5.8386  | 5.83495 | JPT |
| rs9283884  | LOC222701 | GI_27498465-S | 6 | 6 | 28243639 | 1563   | 6.3649  | 5.83495 | JPT |
| rs1737055  | LOC347981 | GI_30160064-S | 6 | 6 | 29841721 | 120822 | 7.7678  | 5.96755 | JPT |
| rs1737052  | LOC347981 | GI_30160064-S | 6 | 6 | 29842097 | 120446 | 7.2669  | 5.96755 | JPT |
| rs1737046  | LOC347981 | GI_30160064-S | 6 | 6 | 29843672 | 118871 | 6.6666  | 5.96755 | JPT |
| rs9258295  | LOC347981 | GI_30160064-S | 6 | 6 | 29843808 | 118735 | 8.1569  | 5.96755 | JPT |
| rs1737043  | LOC347981 | GI_30160064-S | 6 | 6 | 29844026 | 118517 | 7.2823  | 5.96755 | JPT |
| rs9258302  | LOC347981 | GI_30160064-S | 6 | 6 | 29849317 | 113226 | 11.0832 | 5.96755 | JPT |
| rs9258303  | LOC347981 | GI_30160064-S | 6 | 6 | 29850909 | 111634 | 11.0832 | 5.96755 | JPT |
| rs9258436  | LOC347981 | GI_30160064-S | 6 | 6 | 29875325 | 87218  | 9.2488  | 5.96755 | JPT |
| rs3873243  | LOC347981 | GI_30160064-S | 6 | 6 | 29875604 | 86939  | 10.3616 | 5.96755 | JPT |
| rs2017525  | LOC347981 | GI_30160064-S | 6 | 6 | 29876482 | 86061  | 11.0832 | 5.96755 | JPT |
| rs909718   | LOC347981 | GI_30160064-S | 6 | 6 | 29876684 | 85859  | 8.9817  | 5.96755 | JPT |
| rs1736981  | LOC347981 | GI_30160064-S | 6 | 6 | 29878301 | 84242  | 7.3039  | 5.96755 | JPT |
| rs1632974  | LOC347981 | GI_30160064-S | 6 | 6 | 29885086 | 77457  | 7.8382  | 5.96755 | JPT |
| rs753545   | LOC347981 | GI_30160064-S | 6 | 6 | 29888919 | 73624  | 6.8778  | 5.96755 | JPT |
| rs4607472  | LOC347981 | GI_30160064-S | 6 | 6 | 29918522 | 44021  | 11.1236 | 5.96755 | JPT |
| rs2844827  | LOC347981 | GI_30160064-S | 6 | 6 | 29919216 | 43327  | 9.6756  | 5.96755 | JPT |
| rs4084096  | LOC347981 | GI_30160064-S | 6 | 6 | 29919847 | 42696  | 10.6149 | 5.96755 | JPT |
| rs5013309  | LOC347981 | GI_30160064-S | 6 | 6 | 29920421 | 42122  | 11.0832 | 5.96755 | JPT |
| rs2734990  | LOC347981 | GI_30160064-S | 6 | 6 | 29920484 | 42059  | 8.9805  | 5.96755 | JPT |
| rs2523767  | LOC347981 | GI_30160064-S | 6 | 6 | 29920786 | 41757  | 8.9805  | 5.96755 | JPT |
| rs2517879  | LOC347981 | GI_30160064-S | 6 | 6 | 29920953 | 41590  | 9.6999  | 5.96755 | JPT |
| rs3873260  | LOC347981 | GI_30160064-S | 6 | 6 | 29921661 | 40882  | 8.9805  | 5.96755 | JPT |
| rs6935644  | LOC347981 | GI_30160064-S | 6 | 6 | 29922319 | 40224  | 11.0832 | 5.96755 | JPT |
| rs9689483  | LOC347981 | GI_30160064-S | 6 | 6 | 29922939 | 39604  | 11.0832 | 5.96755 | JPT |
| rs6922605  | LOC347981 | GI_30160064-S | 6 | 6 | 29923723 | 38820  | 11.0589 | 5.96755 | JPT |
| rs9258566  | LOC347981 | GI_30160064-S | 6 | 6 | 29923733 | 38810  | 8.4638  | 5.96755 | JPT |
| rs2894118  | LOC347981 | GI_30160064-S | 6 | 6 | 29923963 | 38580  | 11.0832 | 5.96755 | JPT |
| rs2394183  | LOC347981 | GI_30160064-S | 6 | 6 | 29923989 | 38554  | 11.0832 | 5.96755 | JPT |
| rs2394185  | LOC347981 | GI_30160064-S | 6 | 6 | 29924350 | 38193  | 10.1443 | 5.96755 | JPT |
| rs2394186  | LOC347981 | GI_30160064-S | 6 | 6 | 29924400 | 38143  | 10.3616 | 5.96755 | JPT |
| rs9258568  | LOC347981 | GI_30160064-S | 6 | 6 | 29926210 | 36333  | 10.5381 | 5.96755 | JPT |
| rs9258584  | LOC347981 | GI_30160064-S | 6 | 6 | 29927201 | 35342  | 10.5687 | 5.96755 | JPT |
| rs2107198  | LOC347981 | GI_30160064-S | 6 | 6 | 29927641 | 34902  | 11.8833 | 5.96755 | JPT |
| rs3862293  | LOC347981 | GI_30160064-S | 6 | 6 | 29928445 | 34098  | 10.5687 | 5.96755 | JPT |
| rs2523756  | LOC347981 | GI_30160064-S | 6 | 6 | 29928696 | 33847  | 9.4464  | 5.96755 | JPT |
| rs9258651  | LOC347981 | GI_30160064-S | 6 | 6 | 29930334 | 32209  | 9.4464  | 5.96755 | JPT |
| rs2428510  | LOC347981 | GI_30160064-S | 6 | 6 | 29931006 | 31537  | 8.6851  | 5.96755 | JPT |
| rs2734979  | LOC347981 | GI_30160064-S | 6 | 6 | 29931140 | 31403  | 8.6851  | 5.96755 | JPT |
| rs6939251  | LOC347981 | GI_30160064-S | 6 | 6 | 29931708 | 30835  | 9.4464  | 5.96755 | JPT |
| rs6919119  | LOC347981 | GI_30160064-S | 6 | 6 | 29931761 | 30782  | 9.2461  | 5.96755 | JPT |
| rs6939446  | LOC347981 | GI_30160064-S | 6 | 6 | 29931798 | 30745  | 9.1437  | 5.96755 | JPT |
| rs6919513  | LOC347981 | GI_30160064-S | 6 | 6 | 29931973 | 30570  | 8.6911  | 5.96755 | JPT |
| rs9258679  | LOC347981 | GI_30160064-S | 6 | 6 | 29932038 | 30505  | 9.2461  | 5.96755 | JPT |
| rs9258681  | LOC347981 | GI_30160064-S | 6 | 6 | 29932075 | 30468  | 9.0988  | 5.96755 | JPT |
| rs9258687  | LOC347981 | GI_30160064-S | 6 | 6 | 29932214 | 30329  | 10.5687 | 5.96755 | JPT |

|            |           |               |   |   |          |        |         |         |     |
|------------|-----------|---------------|---|---|----------|--------|---------|---------|-----|
| rs9258689  | LOC347981 | GI_30160064-S | 6 | 6 | 29932266 | 30277  | 9.4464  | 5.96755 | JPT |
| rs7740849  | LOC347981 | GI_30160064-S | 6 | 6 | 29932824 | 29719  | 8.1606  | 5.96755 | JPT |
| rs1611670  | LOC347981 | GI_30160064-S | 6 | 6 | 29933218 | 29325  | 9.4464  | 5.96755 | JPT |
| rs9258714  | LOC347981 | GI_30160064-S | 6 | 6 | 29933413 | 29130  | 10.3224 | 5.96755 | JPT |
| rs12662275 | LOC347981 | GI_30160064-S | 6 | 6 | 29934193 | 28350  | 9.8076  | 5.96755 | JPT |
| rs9258738  | LOC347981 | GI_30160064-S | 6 | 6 | 29935369 | 27174  | 9.4464  | 5.96755 | JPT |
| rs9258739  | LOC347981 | GI_30160064-S | 6 | 6 | 29935642 | 26901  | 9.4464  | 5.96755 | JPT |
| rs1611699  | LOC347981 | GI_30160064-S | 6 | 6 | 29935732 | 26811  | 9.4464  | 5.96755 | JPT |
| rs9258740  | LOC347981 | GI_30160064-S | 6 | 6 | 29935878 | 26665  | 10.5687 | 5.96755 | JPT |
| rs1611705  | LOC347981 | GI_30160064-S | 6 | 6 | 29936472 | 26071  | 9.4464  | 5.96755 | JPT |
| rs1611709  | LOC347981 | GI_30160064-S | 6 | 6 | 29936865 | 25678  | 9.0511  | 5.96755 | JPT |
| rs1611710  | LOC347981 | GI_30160064-S | 6 | 6 | 29936895 | 25648  | 9.4464  | 5.96755 | JPT |
| rs9258750  | LOC347981 | GI_30160064-S | 6 | 6 | 29936951 | 25592  | 10.5687 | 5.96755 | JPT |
| rs1611719  | LOC347981 | GI_30160064-S | 6 | 6 | 29937615 | 24928  | 11.8833 | 5.96755 | JPT |
| rs1611720  | LOC347981 | GI_30160064-S | 6 | 6 | 29937973 | 24570  | 8.9884  | 5.96755 | JPT |
| rs9258766  | LOC347981 | GI_30160064-S | 6 | 6 | 29938390 | 24153  | 7.8656  | 5.96755 | JPT |
| rs1611723  | LOC347981 | GI_30160064-S | 6 | 6 | 29938484 | 24059  | 8.6851  | 5.96755 | JPT |
| rs9258771  | LOC347981 | GI_30160064-S | 6 | 6 | 29938631 | 23912  | 7.9847  | 5.96755 | JPT |
| rs1611732  | LOC347981 | GI_30160064-S | 6 | 6 | 29938987 | 23556  | 8.3883  | 5.96755 | JPT |
| rs1611737  | LOC347981 | GI_30160064-S | 6 | 6 | 29939550 | 22993  | 8.6851  | 5.96755 | JPT |
| rs1611739  | LOC347981 | GI_30160064-S | 6 | 6 | 29939777 | 22766  | 7.8656  | 5.96755 | JPT |
| rs9258795  | LOC347981 | GI_30160064-S | 6 | 6 | 29939995 | 22548  | 7.8656  | 5.96755 | JPT |
| rs9258797  | LOC347981 | GI_30160064-S | 6 | 6 | 29940149 | 22394  | 7.8382  | 5.96755 | JPT |
| rs9258798  | LOC347981 | GI_30160064-S | 6 | 6 | 29940176 | 22367  | 8.9148  | 5.96755 | JPT |
| rs9258811  | LOC347981 | GI_30160064-S | 6 | 6 | 29940505 | 22038  | 7.8656  | 5.96755 | JPT |
| rs3094165  | LOC347981 | GI_30160064-S | 6 | 6 | 29941520 | 21023  | 7.6593  | 5.96755 | JPT |
| rs2734971  | LOC347981 | GI_30160064-S | 6 | 6 | 29942428 | 20115  | 7.0684  | 5.96755 | JPT |
| rs4078116  | LOC347981 | GI_30160064-S | 6 | 6 | 29960516 | 2027   | 11.0606 | 5.96755 | JPT |
| rs2975046  | LOC347981 | GI_30160064-S | 6 | 6 | 30023128 | 60585  | 11.8833 | 5.96755 | JPT |
| rs1632883  | ZNRD1     | GI_25777706-I | 6 | 6 | 30023972 | 113233 | 7.9478  | 6.68538 | JPT |
| rs16896742 | LOC347981 | GI_30160064-S | 6 | 6 | 30030719 | 68176  | 7.2553  | 5.96755 | JPT |
| rs9260603  | LOC347981 | GI_30160064-S | 6 | 6 | 30030733 | 68190  | 7.061   | 5.96755 | JPT |
| rs2904758  | ZNRD1     | GI_25777706-I | 6 | 6 | 30031330 | 105875 | 6.75    | 6.68538 | JPT |
| rs2571400  | LOC347981 | GI_30160064-S | 6 | 6 | 30035701 | 73158  | 8.8934  | 5.96755 | JPT |
| rs2517681  | LOC347981 | GI_30160064-S | 6 | 6 | 30040309 | 77766  | 8.5162  | 5.96755 | JPT |
| rs2523932  | ZNRD1     | GI_25777706-I | 6 | 6 | 30041138 | 96067  | 7.3459  | 6.68538 | JPT |
| rs2844806  | LOC347981 | GI_30160064-S | 6 | 6 | 30041418 | 78875  | 7.6026  | 5.96755 | JPT |
| rs2517672  | LOC347981 | GI_30160064-S | 6 | 6 | 30045241 | 82698  | 11.2679 | 5.96755 | JPT |
| rs2256543  | LOC347981 | GI_30160064-S | 6 | 6 | 30045812 | 83269  | 11.2679 | 5.96755 | JPT |
| rs2523971  | LOC347981 | GI_30160064-S | 6 | 6 | 30046237 | 83694  | 10.5116 | 5.96755 | JPT |
| rs2571377  | LOC347981 | GI_30160064-S | 6 | 6 | 30046550 | 84007  | 10.9422 | 5.96755 | JPT |
| rs2523966  | LOC347981 | GI_30160064-S | 6 | 6 | 30047219 | 84676  | 9.7665  | 5.96755 | JPT |
| rs2523964  | LOC347981 | GI_30160064-S | 6 | 6 | 30047273 | 84730  | 11.2334 | 5.96755 | JPT |
| rs2523963  | LOC347981 | GI_30160064-S | 6 | 6 | 30047462 | 84919  | 10.5116 | 5.96755 | JPT |
| rs2523962  | LOC347981 | GI_30160064-S | 6 | 6 | 30047523 | 84980  | 10.5116 | 5.96755 | JPT |
| rs2523961  | ZNRD1     | GI_25777706-I | 6 | 6 | 30047559 | 89646  | 6.8737  | 6.68538 | JPT |
| rs1264813  | LOC347981 | GI_30160064-S | 6 | 6 | 30047879 | 85336  | 11.2679 | 5.96755 | JPT |
| rs2523960  | LOC347981 | GI_30160064-S | 6 | 6 | 30047931 | 85388  | 11.2334 | 5.96755 | JPT |
| rs2256820  | ZNRD1     | GI_25777706-I | 6 | 6 | 30048085 | 89120  | 6.7225  | 6.68538 | JPT |
| rs2256902  | ZNRD1     | GI_25777706-I | 6 | 6 | 30048351 | 88854  | 6.787   | 6.68538 | JPT |
| rs2844805  | LOC347981 | GI_30160064-S | 6 | 6 | 30048658 | 86115  | 6.6595  | 5.96755 | JPT |
| rs2256922  | LOC347981 | GI_30160064-S | 6 | 6 | 30048793 | 86250  | 10.7326 | 5.96755 | JPT |
| rs2571376  | LOC347981 | GI_30160064-S | 6 | 6 | 30049163 | 86620  | 9.6451  | 5.96755 | JPT |
| rs9357090  | LOC347981 | GI_30160064-S | 6 | 6 | 30049379 | 86836  | 10.577  | 5.96755 | JPT |
| rs2844804  | LOC347981 | GI_30160064-S | 6 | 6 | 30050105 | 87562  | 8.3813  | 5.96755 | JPT |
| rs2523945  | LOC347981 | GI_30160064-S | 6 | 6 | 30050303 | 87760  | 8.7769  | 5.96755 | JPT |

|            |           |               |   |   |          |        |        |         |     |
|------------|-----------|---------------|---|---|----------|--------|--------|---------|-----|
| rs426483   | LOC347981 | GI_30160064-S | 6 | 6 | 30050569 | 88026  | 9.2846 | 5.96755 | JPT |
| rs2232238  | ZNRD1     | GI_25777706-I | 6 | 6 | 30050836 | 86369  | 6.787  | 6.68538 | JPT |
| rs2523943  | ZNRD1     | GI_25777706-I | 6 | 6 | 30050906 | 86299  | 6.8737 | 6.68538 | JPT |
| rs422640   | ZNRD1     | GI_25777706-I | 6 | 6 | 30050984 | 86221  | 6.787  | 6.68538 | JPT |
| rs2735076  | ZNRD1     | GI_25777706-I | 6 | 6 | 30051469 | 85736  | 8.753  | 6.68538 | JPT |
| rs2735075  | LOC347981 | GI_30160064-S | 6 | 6 | 30052522 | 89979  | 8.759  | 5.96755 | JPT |
| rs2246198  | ZNRD1     | GI_25777706-I | 6 | 6 | 30053581 | 83624  | 7.7959 | 6.68538 | JPT |
| rs2246199  | ZNRD1     | GI_25777706-I | 6 | 6 | 30053599 | 83606  | 8.5047 | 6.68538 | JPT |
| rs2108691  | ZNRD1     | GI_25777706-I | 6 | 6 | 30056344 | 80861  | 8.4745 | 6.68538 | JPT |
| rs2735069  | ZNRD1     | GI_25777706-I | 6 | 6 | 30056461 | 80744  | 7.5066 | 6.68538 | JPT |
| rs2844802  | LOC347981 | GI_30160064-S | 6 | 6 | 30056791 | 94248  | 9.5989 | 5.96755 | JPT |
| rs2517810  | ZNRD1     | GI_25777706-I | 6 | 6 | 30057009 | 80196  | 8.1063 | 6.68538 | JPT |
| rs423808   | ZNRD1     | GI_25777706-I | 6 | 6 | 30057102 | 80103  | 8.5047 | 6.68538 | JPT |
| rs410909   | ZNRD1     | GI_25777706-I | 6 | 6 | 30057147 | 80058  | 8.5047 | 6.68538 | JPT |
| rs2517809  | ZNRD1     | GI_25777706-I | 6 | 6 | 30057272 | 79933  | 8.1063 | 6.68538 | JPT |
| rs2246642  | ZNRD1     | GI_25777706-I | 6 | 6 | 30057497 | 79708  | 8.5047 | 6.68538 | JPT |
| rs379221   | ZNRD1     | GI_25777706-I | 6 | 6 | 30058119 | 79086  | 8.3651 | 6.68538 | JPT |
| rs2735067  | LOC347981 | GI_30160064-S | 6 | 6 | 30059085 | 96542  | 9.9242 | 5.96755 | JPT |
| rs11759891 | ZNRD1     | GI_25777706-I | 6 | 6 | 30060126 | 77079  | 8.5047 | 6.68538 | JPT |
| rs11757750 | ZNRD1     | GI_25777706-I | 6 | 6 | 30060141 | 77064  | 8.1063 | 6.68538 | JPT |
| rs11755374 | ZNRD1     | GI_25777706-I | 6 | 6 | 30060338 | 76867  | 8.5047 | 6.68538 | JPT |
| rs11755966 | ZNRD1     | GI_25777706-I | 6 | 6 | 30060910 | 76295  | 8.5047 | 6.68538 | JPT |
| rs11755984 | ZNRD1     | GI_25777706-I | 6 | 6 | 30061014 | 76191  | 8.3651 | 6.68538 | JPT |
| rs11755961 | ZNRD1     | GI_25777706-I | 6 | 6 | 30061078 | 76127  | 8.5047 | 6.68538 | JPT |
| rs11758493 | ZNRD1     | GI_25777706-I | 6 | 6 | 30061407 | 75798  | 7.3102 | 6.68538 | JPT |
| rs11756025 | ZNRD1     | GI_25777706-I | 6 | 6 | 30061421 | 75784  | 7.2239 | 6.68538 | JPT |
| rs9260988  | ZNRD1     | GI_25777706-I | 6 | 6 | 30070494 | 66711  | 7.8728 | 6.68538 | JPT |
| rs6911583  | ZNRD1     | GI_25777706-I | 6 | 6 | 30071500 | 65705  | 8.5047 | 6.68538 | JPT |
| rs9261033  | ZNRD1     | GI_25777706-I | 6 | 6 | 30074111 | 63094  | 7.8728 | 6.68538 | JPT |
| rs2530388  | LOC347981 | GI_30160064-S | 6 | 6 | 30075107 | 112564 | 8.9944 | 5.96755 | JPT |
| rs12664967 | ZNRD1     | GI_25777706-I | 6 | 6 | 30076159 | 61046  | 8.5047 | 6.68538 | JPT |
| rs11755549 | ZNRD1     | GI_25777706-I | 6 | 6 | 30078317 | 58888  | 8.5047 | 6.68538 | JPT |
| rs11760176 | ZNRD1     | GI_25777706-I | 6 | 6 | 30078406 | 58799  | 8.5047 | 6.68538 | JPT |
| rs7738475  | ZNRD1     | GI_25777706-I | 6 | 6 | 30078824 | 58381  | 7.8728 | 6.68538 | JPT |
| rs7742799  | ZNRD1     | GI_25777706-I | 6 | 6 | 30078907 | 58298  | 7.7041 | 6.68538 | JPT |
| rs7762851  | ZNRD1     | GI_25777706-I | 6 | 6 | 30079013 | 58192  | 8.1295 | 6.68538 | JPT |
| rs6912001  | ZNRD1     | GI_25777706-I | 6 | 6 | 30080753 | 56452  | 8.1063 | 6.68538 | JPT |
| rs11965524 | ZNRD1     | GI_25777706-I | 6 | 6 | 30081166 | 56039  | 6.9408 | 6.68538 | JPT |
| rs4313034  | ZNRD1     | GI_25777706-I | 6 | 6 | 30081904 | 55301  | 8.7714 | 6.68538 | JPT |
| rs356968   | LOC347981 | GI_30160064-S | 6 | 6 | 30083026 | 120483 | 9.7069 | 5.96755 | JPT |
| rs3765608  | ZNRD1     | GI_25777706-I | 6 | 6 | 30083745 | 53460  | 8.5047 | 6.68538 | JPT |
| rs12663252 | ZNRD1     | GI_25777706-I | 6 | 6 | 30084720 | 52485  | 8.5047 | 6.68538 | JPT |
| rs356969   | LOC347981 | GI_30160064-S | 6 | 6 | 30085124 | 122581 | 7.8654 | 5.96755 | JPT |
| rs12661053 | ZNRD1     | GI_25777706-I | 6 | 6 | 30086006 | 51199  | 8.5047 | 6.68538 | JPT |
| rs11753431 | ZNRD1     | GI_25777706-I | 6 | 6 | 30087622 | 49583  | 8.5564 | 6.68538 | JPT |
| rs11754620 | ZNRD1     | GI_25777706-I | 6 | 6 | 30088978 | 48227  | 8.1295 | 6.68538 | JPT |
| rs9261134  | ZNRD1     | GI_25777706-I | 6 | 6 | 30089347 | 47858  | 7.8728 | 6.68538 | JPT |
| rs11759388 | ZNRD1     | GI_25777706-I | 6 | 6 | 30089712 | 47493  | 8.1063 | 6.68538 | JPT |
| rs11965659 | ZNRD1     | GI_25777706-I | 6 | 6 | 30090742 | 46463  | 7.0084 | 6.68538 | JPT |
| rs356954   | LOC347981 | GI_30160064-S | 6 | 6 | 30091517 | 128974 | 8.9944 | 5.96755 | JPT |
| rs6931672  | ZNRD1     | GI_25777706-I | 6 | 6 | 30094121 | 43084  | 8.5047 | 6.68538 | JPT |
| rs6932091  | ZNRD1     | GI_25777706-I | 6 | 6 | 30094480 | 42725  | 8.5047 | 6.68538 | JPT |
| rs165256   | ZNRD1     | GI_25777706-I | 6 | 6 | 30094663 | 42542  | 8.1063 | 6.68538 | JPT |
| rs6928966  | ZNRD1     | GI_25777706-I | 6 | 6 | 30096943 | 40262  | 8.5047 | 6.68538 | JPT |
| rs165255   | LOC347981 | GI_30160064-S | 6 | 6 | 30097674 | 135131 | 7.985  | 5.96755 | JPT |
| rs1150743  | LOC347981 | GI_30160064-S | 6 | 6 | 30100240 | 137697 | 8.9944 | 5.96755 | JPT |

|            |           |               |   |   |          |        |        |         |     |
|------------|-----------|---------------|---|---|----------|--------|--------|---------|-----|
| rs7748909  | LOC347981 | GI_30160064-S | 6 | 6 | 30103439 | 140896 | 8.9944 | 5.96755 | JPT |
| rs7746555  | ZNRD1     | GI_25777706-I | 6 | 6 | 30106003 | 31202  | 6.718  | 6.68538 | JPT |
| rs10947046 | ZNRD1     | GI_25777706-I | 6 | 6 | 30108952 | 28253  | 8.5973 | 6.68538 | JPT |
| rs259929   | LOC347981 | GI_30160064-S | 6 | 6 | 30110031 | 147488 | 8.9944 | 5.96755 | JPT |
| rs259931   | LOC347981 | GI_30160064-S | 6 | 6 | 30112350 | 149807 | 8.9944 | 5.96755 | JPT |
| rs259934   | LOC347981 | GI_30160064-S | 6 | 6 | 30114855 | 152312 | 8.9944 | 5.96755 | JPT |
| rs259935   | LOC347981 | GI_30160064-S | 6 | 6 | 30115030 | 152487 | 8.9944 | 5.96755 | JPT |
| rs10947047 | ZNRD1     | GI_25777706-I | 6 | 6 | 30115690 | 21515  | 8.5047 | 6.68538 | JPT |
| rs11962771 | ZNRD1     | GI_25777706-I | 6 | 6 | 30115963 | 21242  | 8.5047 | 6.68538 | JPT |
| rs259938   | LOC347981 | GI_30160064-S | 6 | 6 | 30115982 | 153439 | 8.4699 | 5.96755 | JPT |
| rs12661609 | ZNRD1     | GI_25777706-I | 6 | 6 | 30117240 | 19965  | 7.0084 | 6.68538 | JPT |
| rs12664794 | ZNRD1     | GI_25777706-I | 6 | 6 | 30117643 | 19562  | 7.1674 | 6.68538 | JPT |
| rs259939   | LOC347981 | GI_30160064-S | 6 | 6 | 30119560 | 157017 | 7.9918 | 5.96755 | JPT |
| rs259940   | LOC347981 | GI_30160064-S | 6 | 6 | 30119913 | 157370 | 8.9944 | 5.96755 | JPT |
| rs6940552  | ZNRD1     | GI_25777706-I | 6 | 6 | 30120319 | 16886  | 8.5047 | 6.68538 | JPT |
| rs259919   | LOC347981 | GI_30160064-S | 6 | 6 | 30133482 | 170939 | 7.985  | 5.96755 | JPT |
| rs1150742  | LOC347981 | GI_30160064-S | 6 | 6 | 30136810 | 174267 | 8.9944 | 5.96755 | JPT |
| rs1150741  | LOC347981 | GI_30160064-S | 6 | 6 | 30137630 | 175087 | 8.288  | 5.96755 | JPT |
| rs3188482  | ZNRD1     | GI_25777706-I | 6 | 6 | 30140652 | 3447   | 7.5812 | 6.68538 | JPT |
| rs1150736  | LOC347981 | GI_30160064-S | 6 | 6 | 30150934 | 188391 | 8.288  | 5.96755 | JPT |
| rs3807033  | ZNRD1     | GI_25777706-I | 6 | 6 | 30151934 | 14729  | 8.3268 | 6.68538 | JPT |
| rs1150735  | LOC347981 | GI_30160064-S | 6 | 6 | 30153178 | 190635 | 7.9918 | 5.96755 | JPT |
| rs7753935  | ZNRD1     | GI_25777706-I | 6 | 6 | 30168762 | 31557  | 6.8515 | 6.68538 | JPT |
| rs7765810  | ZNRD1     | GI_25777706-I | 6 | 6 | 30171475 | 34270  | 6.8515 | 6.68538 | JPT |
| rs7761563  | ZNRD1     | GI_25777706-I | 6 | 6 | 30171639 | 34434  | 6.8515 | 6.68538 | JPT |
| rs1264703  | ZNRD1     | GI_25777706-I | 6 | 6 | 30173395 | 36190  | 6.9027 | 6.68538 | JPT |
| rs1264702  | ZNRD1     | GI_25777706-I | 6 | 6 | 30173554 | 36349  | 6.9615 | 6.68538 | JPT |
| rs916570   | ZNRD1     | GI_25777706-I | 6 | 6 | 30174010 | 36805  | 6.9615 | 6.68538 | JPT |
| rs916569   | ZNRD1     | GI_25777706-I | 6 | 6 | 30174076 | 36871  | 6.8515 | 6.68538 | JPT |
| rs1264698  | ZNRD1     | GI_25777706-I | 6 | 6 | 30175156 | 37951  | 6.9615 | 6.68538 | JPT |
| rs1264695  | ZNRD1     | GI_25777706-I | 6 | 6 | 30175871 | 38666  | 6.7225 | 6.68538 | JPT |
| rs2428507  | LOC401245 | GI_42657607-S | 6 | 6 | 30337285 | 30196  | 6.65   | 6.46353 | JPT |
| rs2428506  | LOC401245 | GI_42657607-S | 6 | 6 | 30337747 | 29734  | 6.9742 | 6.46353 | JPT |
| rs2844766  | LOC401245 | GI_42657607-S | 6 | 6 | 30338640 | 28841  | 6.6909 | 6.46353 | JPT |
| rs2844764  | LOC401245 | GI_42657607-S | 6 | 6 | 30342647 | 24834  | 6.8759 | 6.46353 | JPT |
| rs2516696  | LOC401245 | GI_42657607-S | 6 | 6 | 30343025 | 24456  | 6.8759 | 6.46353 | JPT |
| rs2844762  | LOC401245 | GI_42657607-S | 6 | 6 | 30344733 | 22748  | 6.65   | 6.46353 | JPT |
| rs6457188  | LOC401245 | GI_42657607-S | 6 | 6 | 30346863 | 20618  | 8.0247 | 6.46353 | JPT |
| rs968909   | LOC401245 | GI_42657607-S | 6 | 6 | 30352558 | 14923  | 6.5733 | 6.46353 | JPT |
| rs1264624  | LOC401245 | GI_42657607-S | 6 | 6 | 30363068 | 4413   | 6.5903 | 6.46353 | JPT |
| rs3734841  | LOC401245 | GI_42657607-S | 6 | 6 | 30367284 | 197    | 6.6909 | 6.46353 | JPT |
| rs261950   | LOC401245 | GI_42657607-S | 6 | 6 | 30377540 | 10059  | 6.7605 | 6.46353 | JPT |
| rs261947   | LOC401245 | GI_42657607-S | 6 | 6 | 30379123 | 11642  | 6.8759 | 6.46353 | JPT |
| rs9380167  | LOC401245 | GI_42657607-S | 6 | 6 | 30382440 | 14959  | 6.6966 | 6.46353 | JPT |
| rs12055553 | LOC401245 | GI_42657607-S | 6 | 6 | 30382707 | 15226  | 6.8759 | 6.46353 | JPT |
| rs9295842  | LOC401245 | GI_42657607-S | 6 | 6 | 30388901 | 21420  | 6.8759 | 6.46353 | JPT |
| rs6912771  | LOC401245 | GI_42657607-S | 6 | 6 | 30392354 | 24873  | 6.8759 | 6.46353 | JPT |
| rs6924453  | LOC401245 | GI_42657607-S | 6 | 6 | 30393934 | 26453  | 6.65   | 6.46353 | JPT |
| rs6931387  | LOC401245 | GI_42657607-S | 6 | 6 | 30395496 | 28015  | 6.65   | 6.46353 | JPT |
| rs6900042  | LOC401245 | GI_42657607-S | 6 | 6 | 30397250 | 29769  | 6.65   | 6.46353 | JPT |
| rs9368635  | LOC401245 | GI_42657607-S | 6 | 6 | 30398015 | 30534  | 6.8759 | 6.46353 | JPT |
| rs4711213  | LOC401245 | GI_42657607-S | 6 | 6 | 30400315 | 32834  | 6.6909 | 6.46353 | JPT |
| rs3094622  | LOC401245 | GI_42657607-S | 6 | 6 | 30435931 | 68450  | 6.5511 | 6.46353 | JPT |
| rs9261661  | LOC401245 | GI_42657607-S | 6 | 6 | 30436732 | 69251  | 6.5511 | 6.46353 | JPT |
| rs12181116 | LOC401245 | GI_42657607-S | 6 | 6 | 30440139 | 72658  | 6.5511 | 6.46353 | JPT |
| rs2251830  | hmm31752  | hmm31752-S    | 6 | 6 | 31124957 | 7121   | 7.4177 | 6.06783 | JPT |

|           |          |            |   |   |          |       |         |         |     |
|-----------|----------|------------|---|---|----------|-------|---------|---------|-----|
| rs2517534 | hmm31752 | hmm31752-S | 6 | 6 | 31125313 | 6765  | 14.5522 | 6.06783 | JPT |
| rs2523866 | hmm31752 | hmm31752-S | 6 | 6 | 31125326 | 6752  | 7.9622  | 6.06783 | JPT |
| rs2517532 | hmm31752 | hmm31752-S | 6 | 6 | 31126386 | 5692  | 13.3165 | 6.06783 | JPT |
| rs2523865 | hmm31752 | hmm31752-S | 6 | 6 | 31126427 | 5651  | 8.0403  | 6.06783 | JPT |
| rs2523864 | hmm31752 | hmm31752-S | 6 | 6 | 31126525 | 5553  | 7.4239  | 6.06783 | JPT |
| rs2523857 | hmm31752 | hmm31752-S | 6 | 6 | 31129483 | 2595  | 12.5531 | 6.06783 | JPT |
| rs2517527 | hmm31752 | hmm31752-S | 6 | 6 | 31129526 | 2552  | 11.4956 | 6.06783 | JPT |
| rs2523856 | hmm31752 | hmm31752-S | 6 | 6 | 31129609 | 2469  | 13.7285 | 6.06783 | JPT |
| rs2523855 | hmm31752 | hmm31752-S | 6 | 6 | 31130137 | 1941  | 7.2857  | 6.06783 | JPT |
| rs9262628 | hmm31752 | hmm31752-S | 6 | 6 | 31131127 | 951   | 13.2483 | 6.06783 | JPT |
| rs2523852 | hmm31752 | hmm31752-S | 6 | 6 | 31131847 | 231   | 13.2483 | 6.06783 | JPT |
| rs2517525 | hmm31752 | hmm31752-S | 6 | 6 | 31133340 | 1262  | 13.2483 | 6.06783 | JPT |
| rs2517524 | hmm31752 | hmm31752-S | 6 | 6 | 31133692 | 1614  | 8.4423  | 6.06783 | JPT |
| rs2523846 | hmm31752 | hmm31752-S | 6 | 6 | 31134568 | 2490  | 13.2483 | 6.06783 | JPT |
| rs2517510 | hmm31752 | hmm31752-S | 6 | 6 | 31138101 | 6023  | 13.2483 | 6.06783 | JPT |
| rs2517500 | hmm31752 | hmm31752-S | 6 | 6 | 31141488 | 9410  | 12.4086 | 6.06783 | JPT |
| rs2517497 | hmm31752 | hmm31752-S | 6 | 6 | 31144762 | 12684 | 12.0107 | 6.06783 | JPT |
| rs2523890 | hmm31752 | hmm31752-S | 6 | 6 | 31147511 | 15433 | 12.0107 | 6.06783 | JPT |
| rs2246330 | hmm31752 | hmm31752-S | 6 | 6 | 31149472 | 17394 | 13.2483 | 6.06783 | JPT |
| rs2523883 | hmm31752 | hmm31752-S | 6 | 6 | 31150049 | 17971 | 13.2483 | 6.06783 | JPT |
| rs2523882 | hmm31752 | hmm31752-S | 6 | 6 | 31150196 | 18118 | 7.0959  | 6.06783 | JPT |
| rs2517489 | hmm31752 | hmm31752-S | 6 | 6 | 31150285 | 18207 | 13.2483 | 6.06783 | JPT |
| rs2523881 | hmm31752 | hmm31752-S | 6 | 6 | 31150587 | 18509 | 12.4086 | 6.06783 | JPT |
| rs2523880 | hmm31752 | hmm31752-S | 6 | 6 | 31150748 | 18670 | 11.7466 | 6.06783 | JPT |
| rs2249231 | hmm31752 | hmm31752-S | 6 | 6 | 31151211 | 19133 | 12.4086 | 6.06783 | JPT |
| rs2523860 | hmm31752 | hmm31752-S | 6 | 6 | 31153553 | 21475 | 9.6308  | 6.06783 | JPT |
| rs2523843 | hmm31752 | hmm31752-S | 6 | 6 | 31154507 | 22429 | 11.9292 | 6.06783 | JPT |
| rs2249876 | hmm31752 | hmm31752-S | 6 | 6 | 31156366 | 24288 | 12.4086 | 6.06783 | JPT |
| rs3132562 | hmm31752 | hmm31752-S | 6 | 6 | 31156971 | 24893 | 9.1727  | 6.06783 | JPT |
| rs9263473 | hmm31752 | hmm31752-S | 6 | 6 | 31158158 | 26080 | 11.7466 | 6.06783 | JPT |
| rs9263474 | hmm31752 | hmm31752-S | 6 | 6 | 31158223 | 26145 | 11.7466 | 6.06783 | JPT |
| rs2535318 | hmm31752 | hmm31752-S | 6 | 6 | 31159367 | 27289 | 12.4086 | 6.06783 | JPT |
| rs2535317 | hmm31752 | hmm31752-S | 6 | 6 | 31159833 | 27755 | 13.2483 | 6.06783 | JPT |
| rs2517471 | hmm31752 | hmm31752-S | 6 | 6 | 31160077 | 27999 | 12.5041 | 6.06783 | JPT |
| rs2535315 | hmm31752 | hmm31752-S | 6 | 6 | 31160106 | 28028 | 12.5041 | 6.06783 | JPT |
| rs2535311 | hmm31752 | hmm31752-S | 6 | 6 | 31160663 | 28585 | 11.9292 | 6.06783 | JPT |
| rs2535310 | hmm31752 | hmm31752-S | 6 | 6 | 31161236 | 29158 | 11.6553 | 6.06783 | JPT |
| rs2535307 | hmm31752 | hmm31752-S | 6 | 6 | 31161720 | 29642 | 13.2483 | 6.06783 | JPT |
| rs2535306 | hmm31752 | hmm31752-S | 6 | 6 | 31161846 | 29768 | 12.4086 | 6.06783 | JPT |
| rs9263478 | hmm31752 | hmm31752-S | 6 | 6 | 31162360 | 30282 | 12.8857 | 6.06783 | JPT |
| rs2535304 | hmm31752 | hmm31752-S | 6 | 6 | 31162666 | 30588 | 13.2483 | 6.06783 | JPT |
| rs3130959 | hmm31752 | hmm31752-S | 6 | 6 | 31164337 | 32259 | 13.2483 | 6.06783 | JPT |
| rs9263486 | hmm31752 | hmm31752-S | 6 | 6 | 31164611 | 32533 | 13.2483 | 6.06783 | JPT |
| rs2535301 | hmm31752 | hmm31752-S | 6 | 6 | 31166606 | 34528 | 12.5041 | 6.06783 | JPT |
| rs2535300 | hmm31752 | hmm31752-S | 6 | 6 | 31167124 | 35046 | 11.8301 | 6.06783 | JPT |
| rs2517465 | hmm31752 | hmm31752-S | 6 | 6 | 31167150 | 35072 | 12.5041 | 6.06783 | JPT |
| rs2535299 | hmm31752 | hmm31752-S | 6 | 6 | 31167224 | 35146 | 12.4311 | 6.06783 | JPT |
| rs3130961 | hmm31752 | hmm31752-S | 6 | 6 | 31167365 | 35287 | 13.2483 | 6.06783 | JPT |
| rs2517458 | hmm31752 | hmm31752-S | 6 | 6 | 31167494 | 35416 | 13.2483 | 6.06783 | JPT |
| rs2517453 | hmm31752 | hmm31752-S | 6 | 6 | 31168094 | 36016 | 13.2483 | 6.06783 | JPT |
| rs2517452 | hmm31752 | hmm31752-S | 6 | 6 | 31168141 | 36063 | 13.2483 | 6.06783 | JPT |
| rs2517450 | hmm31752 | hmm31752-S | 6 | 6 | 31169418 | 37340 | 12.0107 | 6.06783 | JPT |
| rs2535292 | hmm31752 | hmm31752-S | 6 | 6 | 31170393 | 38315 | 13.2483 | 6.06783 | JPT |
| rs2517448 | hmm31752 | hmm31752-S | 6 | 6 | 31170646 | 38568 | 7.7985  | 6.06783 | JPT |
| rs2535291 | hmm31752 | hmm31752-S | 6 | 6 | 31170878 | 38800 | 13.2483 | 6.06783 | JPT |
| rs2535289 | hmm31752 | hmm31752-S | 6 | 6 | 31171212 | 39134 | 8.6715  | 6.06783 | JPT |

|            |           |               |   |   |          |        |         |         |     |
|------------|-----------|---------------|---|---|----------|--------|---------|---------|-----|
| rs2517423  | hmm31752  | hmm31752-S    | 6 | 6 | 31172806 | 40728  | 12.0107 | 6.06783 | JPT |
| rs9263515  | hmm31752  | hmm31752-S    | 6 | 6 | 31174807 | 42729  | 7.7635  | 6.06783 | JPT |
| rs7381697  | hmm31752  | hmm31752-S    | 6 | 6 | 31176005 | 43927  | 10.1699 | 6.06783 | JPT |
| rs2517556  | hmm31752  | hmm31752-S    | 6 | 6 | 31176874 | 44796  | 10.2288 | 6.06783 | JPT |
| rs9405050  | hmm31752  | hmm31752-S    | 6 | 6 | 31179526 | 47448  | 13.2483 | 6.06783 | JPT |
| rs7381897  | hmm31752  | hmm31752-S    | 6 | 6 | 31181882 | 49804  | 11.0996 | 6.06783 | JPT |
| rs6457327  | hmm31752  | hmm31752-S    | 6 | 6 | 31182009 | 49931  | 10.1006 | 6.06783 | JPT |
| rs1064190  | hmm31752  | hmm31752-S    | 6 | 6 | 31183094 | 51016  | 12.5041 | 6.06783 | JPT |
| rs9263625  | hmm31752  | hmm31752-S    | 6 | 6 | 31183140 | 51062  | 10.0207 | 6.06783 | JPT |
| rs2535277  | hmm31752  | hmm31752-S    | 6 | 6 | 31184743 | 52665  | 13.2483 | 6.06783 | JPT |
| rs1265064  | hmm31752  | hmm31752-S    | 6 | 6 | 31185711 | 53633  | 12.0078 | 6.06783 | JPT |
| rs1265063  | hmm31752  | hmm31752-S    | 6 | 6 | 31185917 | 53839  | 12.5041 | 6.06783 | JPT |
| rs1265059  | hmm31752  | hmm31752-S    | 6 | 6 | 31186474 | 54396  | 12.4086 | 6.06783 | JPT |
| rs1265056  | hmm31752  | hmm31752-S    | 6 | 6 | 31186629 | 54551  | 13.1468 | 6.06783 | JPT |
| rs1265053  | hmm31752  | hmm31752-S    | 6 | 6 | 31187868 | 55790  | 12.5041 | 6.06783 | JPT |
| rs2233977  | hmm31752  | hmm31752-S    | 6 | 6 | 31187873 | 55795  | 10.6084 | 6.06783 | JPT |
| rs2233969  | hmm31752  | hmm31752-S    | 6 | 6 | 31188411 | 56333  | 9.1835  | 6.06783 | JPT |
| rs1265052  | hmm31752  | hmm31752-S    | 6 | 6 | 31188450 | 56372  | 11.3251 | 6.06783 | JPT |
| rs2233967  | hmm31752  | hmm31752-S    | 6 | 6 | 31188807 | 56729  | 8.0182  | 6.06783 | JPT |
| rs2233966  | hmm31752  | hmm31752-S    | 6 | 6 | 31188838 | 56760  | 11.282  | 6.06783 | JPT |
| rs2233965  | hmm31752  | hmm31752-S    | 6 | 6 | 31188878 | 56800  | 6.6784  | 6.06783 | JPT |
| rs2233964  | hmm31752  | hmm31752-S    | 6 | 6 | 31188898 | 56820  | 9.5261  | 6.06783 | JPT |
| rs3130553  | hmm31752  | hmm31752-S    | 6 | 6 | 31190264 | 58186  | 6.9818  | 6.06783 | JPT |
| rs3130685  | hmm31752  | hmm31752-S    | 6 | 6 | 31314185 | 182107 | 6.3482  | 6.06783 | JPT |
| rs2507976  | LOC282956 | GI_27483210-S | 6 | 6 | 31459866 | 10685  | 7.2609  | 6.2514  | JPT |
| rs2844529  | LOC282956 | GI_27483210-S | 6 | 6 | 31461572 | 8979   | 12.9166 | 6.2514  | JPT |
| rs4081552  | LOC282956 | GI_27483210-S | 6 | 6 | 31461668 | 8883   | 6.6789  | 6.2514  | JPT |
| rs6909461  | LOC282956 | GI_27483210-S | 6 | 6 | 31461929 | 8622   | 7.5416  | 6.2514  | JPT |
| rs2853973  | LOC282956 | GI_27483210-S | 6 | 6 | 31461971 | 8580   | 10.4088 | 6.2514  | JPT |
| rs2428486  | LOC282956 | GI_27483210-S | 6 | 6 | 31462083 | 8468   | 13.3003 | 6.2514  | JPT |
| rs4711268  | LOC282956 | GI_27483210-S | 6 | 6 | 31462483 | 8068   | 6.6789  | 6.2514  | JPT |
| rs13437082 | LOC282956 | GI_27483210-S | 6 | 6 | 31462539 | 8012   | 8.4865  | 6.2514  | JPT |
| rs2596562  | LOC282956 | GI_27483210-S | 6 | 6 | 31462574 | 7977   | 10.5993 | 6.2514  | JPT |
| rs13437092 | LOC282956 | GI_27483210-S | 6 | 6 | 31463035 | 7516   | 7.7827  | 6.2514  | JPT |
| rs13437088 | LOC282956 | GI_27483210-S | 6 | 6 | 31463098 | 7453   | 7.6175  | 6.2514  | JPT |
| rs9266791  | LOC282956 | GI_27483210-S | 6 | 6 | 31466922 | 3629   | 6.2603  | 6.2514  | JPT |
| rs7771971  | LOC282956 | GI_27483210-S | 6 | 6 | 31468320 | 2231   | 6.6789  | 6.2514  | JPT |
| rs7751725  | LOC282956 | GI_27483210-S | 6 | 6 | 31468412 | 2139   | 7.0272  | 6.2514  | JPT |
| rs7752021  | LOC282956 | GI_27483210-S | 6 | 6 | 31468505 | 2046   | 7.0272  | 6.2514  | JPT |
| rs10947206 | LOC282956 | GI_27483210-S | 6 | 6 | 31469376 | 1175   | 7.0272  | 6.2514  | JPT |
| rs2523475  | LOC282956 | GI_27483210-S | 6 | 6 | 31469689 | 862    | 10.3993 | 6.2514  | JPT |
| rs10947208 | LOC282956 | GI_27483210-S | 6 | 6 | 31469816 | 735    | 7.0272  | 6.2514  | JPT |
| rs2523473  | LOC282956 | GI_27483210-S | 6 | 6 | 31469876 | 675    | 11.5125 | 6.2514  | JPT |
| rs2523467  | LOC282956 | GI_27483210-S | 6 | 6 | 31470909 | 358    | 10.3266 | 6.2514  | JPT |
| rs9501387  | LOC282956 | GI_27483210-S | 6 | 6 | 31472438 | 1887   | 11.5125 | 6.2514  | JPT |
| rs2523459  | LOC282956 | GI_27483210-S | 6 | 6 | 31473287 | 2736   | 10.673  | 6.2514  | JPT |
| rs2596542  | LOC282956 | GI_27483210-S | 6 | 6 | 31474574 | 4023   | 8.6657  | 6.2514  | JPT |
| rs2428475  | LOC282956 | GI_27483210-S | 6 | 6 | 31474601 | 4050   | 9.6789  | 6.2514  | JPT |
| rs2428474  | LOC282956 | GI_27483210-S | 6 | 6 | 31475002 | 4451   | 9.1728  | 6.2514  | JPT |
| rs2523453  | LOC282956 | GI_27483210-S | 6 | 6 | 31476104 | 5553   | 11.5125 | 6.2514  | JPT |
| rs2523452  | LOC282956 | GI_27483210-S | 6 | 6 | 31476519 | 5968   | 9.3325  | 6.2514  | JPT |
| rs2844521  | LOC282956 | GI_27483210-S | 6 | 6 | 31476943 | 6392   | 9.7838  | 6.2514  | JPT |
| rs1051792  | LOC282956 | GI_27483210-S | 6 | 6 | 31486956 | 16405  | 7.0272  | 6.2514  | JPT |
| rs1051794  | LOC282956 | GI_27483210-S | 6 | 6 | 31487088 | 16537  | 6.3023  | 6.2514  | JPT |
| rs6934187  | LOC282956 | GI_27483210-S | 6 | 6 | 31488953 | 18402  | 6.2698  | 6.2514  | JPT |
| rs7775227  | LOC282956 | GI_27483210-S | 6 | 6 | 31490126 | 19575  | 6.3023  | 6.2514  | JPT |

|            |           |               |   |   |          |        |         |         |     |
|------------|-----------|---------------|---|---|----------|--------|---------|---------|-----|
| rs9266823  | LOC282956 | GI_27483210-S | 6 | 6 | 31490669 | 20118  | 7.0272  | 6.2514  | JPT |
| rs9266825  | LOC282956 | GI_27483210-S | 6 | 6 | 31490861 | 20310  | 6.9628  | 6.2514  | JPT |
| rs9266830  | LOC282956 | GI_27483210-S | 6 | 6 | 31491050 | 20499  | 6.4439  | 6.2514  | JPT |
| rs6932236  | LOC282956 | GI_27483210-S | 6 | 6 | 31491958 | 21407  | 6.3023  | 6.2514  | JPT |
| rs9266845  | LOC282956 | GI_27483210-S | 6 | 6 | 31492771 | 22220  | 7.0272  | 6.2514  | JPT |
| rs9266846  | LOC282956 | GI_27483210-S | 6 | 6 | 31492868 | 22317  | 6.4861  | 6.2514  | JPT |
| rs9295991  | LOC282956 | GI_27483210-S | 6 | 6 | 31496256 | 25705  | 7.4365  | 6.2514  | JPT |
| rs9295993  | LOC282956 | GI_27483210-S | 6 | 6 | 31496574 | 26023  | 6.2984  | 6.2514  | JPT |
| rs3869132  | LOC282956 | GI_27483210-S | 6 | 6 | 31518927 | 48376  | 10.2506 | 6.2514  | JPT |
| rs9296015  | HLA-DQA2  | GI_11095446-S | 6 | 6 | 32326967 | 494066 | 6.2874  | 6.06907 | JPT |
| rs9296016  | HLA-DQA2  | GI_11095446-S | 6 | 6 | 32326988 | 494045 | 6.2874  | 6.06907 | JPT |
| rs9268557  | HLA-DQA2  | GI_11095446-S | 6 | 6 | 32497283 | 323750 | 6.9355  | 6.06907 | JPT |
| rs9405035  | HLA-DRB5  | GI_26665892-S | 6 | 6 | 32515046 | 78179  | 6.7491  | 6.07053 | JPT |
| rs3129878  | HLA-DQA1  | GI_18426974-S | 6 | 6 | 32516713 | 202122 | 6.5232  | 6.2098  | JPT |
| rs6926374  | HLA-DQA1  | GI_18426974-S | 6 | 6 | 32517283 | 201552 | 7.8961  | 6.2098  | JPT |
| rs9268657  | HLA-DQA2  | GI_11095446-S | 6 | 6 | 32517634 | 303399 | 8.2187  | 6.06907 | JPT |
| rs9268659  | HLA-DQA1  | GI_18426974-S | 6 | 6 | 32518919 | 199916 | 6.915   | 6.2098  | JPT |
| rs2239804  | HLA-DQA1  | GI_18426974-S | 6 | 6 | 32519501 | 199334 | 7.4045  | 6.2098  | JPT |
| rs7192     | HLA-DQA1  | GI_18426974-S | 6 | 6 | 32519624 | 199211 | 6.551   | 6.2098  | JPT |
| rs2239803  | HLA-DQA1  | GI_18426974-S | 6 | 6 | 32519811 | 199024 | 7.886   | 6.2098  | JPT |
| rs4935354  | HLA-DQA1  | GI_18426974-S | 6 | 6 | 32520376 | 198459 | 8.3317  | 6.2098  | JPT |
| rs7194     | HLA-DQA1  | GI_18426974-S | 6 | 6 | 32520458 | 198377 | 6.551   | 6.2098  | JPT |
| rs2213585  | HLA-DQA1  | GI_18426974-S | 6 | 6 | 32521128 | 197707 | 6.8364  | 6.2098  | JPT |
| rs2227139  | HLA-DQA1  | GI_18426974-S | 6 | 6 | 32521437 | 197398 | 6.551   | 6.2098  | JPT |
| rs3763327  | HLA-DQA1  | GI_18426974-S | 6 | 6 | 32521808 | 197027 | 6.551   | 6.2098  | JPT |
| rs7452076  | HLA-DQA1  | GI_18426974-S | 6 | 6 | 32523058 | 195777 | 9.2263  | 6.2098  | JPT |
| rs7743415  | HLA-DQA2  | GI_11095446-S | 6 | 6 | 32533113 | 287920 | 6.5763  | 6.06907 | JPT |
| rs9268831  | HLA-DQA2  | GI_11095446-S | 6 | 6 | 32535726 | 285307 | 7.7882  | 6.06907 | JPT |
| rs9268831  | HLA-DQA1  | GI_18426974-S | 6 | 6 | 32535726 | 183109 | 7.9971  | 6.2098  | JPT |
| rs9268853  | HLA-DQA2  | GI_11095446-S | 6 | 6 | 32537621 | 283412 | 12.4529 | 6.06907 | JPT |
| rs9268853  | HLA-DRB5  | GI_26665892-S | 6 | 6 | 32537621 | 55604  | 7.0862  | 6.07053 | JPT |
| rs9268858  | HLA-DQA2  | GI_11095446-S | 6 | 6 | 32537736 | 283297 | 11.8459 | 6.06907 | JPT |
| rs9268858  | HLA-DRB5  | GI_26665892-S | 6 | 6 | 32537736 | 55489  | 6.4274  | 6.07053 | JPT |
| rs9268906  | HLA-DQA2  | GI_11095446-S | 6 | 6 | 32540159 | 280874 | 11.8729 | 6.06907 | JPT |
| rs9268906  | HLA-DRB5  | GI_26665892-S | 6 | 6 | 32540159 | 53066  | 7.0932  | 6.07053 | JPT |
| rs9268923  | HLA-DQA2  | GI_11095446-S | 6 | 6 | 32540813 | 280220 | 11.7149 | 6.06907 | JPT |
| rs9268923  | HLA-DRB5  | GI_26665892-S | 6 | 6 | 32540813 | 52412  | 7.1743  | 6.07053 | JPT |
| rs2395185  | HLA-DQA2  | GI_11095446-S | 6 | 6 | 32541145 | 279888 | 11.9467 | 6.06907 | JPT |
| rs2395185  | HLA-DRB5  | GI_26665892-S | 6 | 6 | 32541145 | 52080  | 6.5503  | 6.07053 | JPT |
| rs9268969  | HLA-DQA2  | GI_11095446-S | 6 | 6 | 32542327 | 278706 | 11.0544 | 6.06907 | JPT |
| rs9268969  | HLA-DRB5  | GI_26665892-S | 6 | 6 | 32542327 | 50898  | 6.6704  | 6.07053 | JPT |
| rs9268970  | HLA-DQA2  | GI_11095446-S | 6 | 6 | 32542339 | 278694 | 11.7149 | 6.06907 | JPT |
| rs9268970  | HLA-DRB5  | GI_26665892-S | 6 | 6 | 32542339 | 50886  | 7.1743  | 6.07053 | JPT |
| rs9391877  | HLA-DQA2  | GI_11095446-S | 6 | 6 | 32546845 | 274188 | 10.7875 | 6.06907 | JPT |
| rs9405040  | HLA-DQA2  | GI_11095446-S | 6 | 6 | 32547371 | 273662 | 11.7466 | 6.06907 | JPT |
| rs9405040  | HLA-DRB5  | GI_26665892-S | 6 | 6 | 32547371 | 45854  | 6.933   | 6.07053 | JPT |
| rs9286790  | HLA-DQA2  | GI_11095446-S | 6 | 6 | 32547806 | 273227 | 9.3799  | 6.06907 | JPT |
| rs9286790  | HLA-DRB5  | GI_26665892-S | 6 | 6 | 32547806 | 45419  | 6.5497  | 6.07053 | JPT |
| rs12194148 | HLA-DQA2  | GI_11095446-S | 6 | 6 | 32552176 | 268857 | 9.3137  | 6.06907 | JPT |
| rs9405112  | HLA-DQA2  | GI_11095446-S | 6 | 6 | 32553578 | 267455 | 12.4529 | 6.06907 | JPT |
| rs9405112  | HLA-DRB5  | GI_26665892-S | 6 | 6 | 32553578 | 39647  | 7.0862  | 6.07053 | JPT |
| rs9378212  | HLA-DQA2  | GI_11095446-S | 6 | 6 | 32553669 | 267364 | 8.1113  | 6.06907 | JPT |
| rs9378266  | HLA-DQA2  | GI_11095446-S | 6 | 6 | 32556167 | 264866 | 9.3137  | 6.06907 | JPT |
| rs9378213  | HLA-DQA2  | GI_11095446-S | 6 | 6 | 32556376 | 264657 | 9.3137  | 6.06907 | JPT |
| rs9391786  | HLA-DQA2  | GI_11095446-S | 6 | 6 | 32556539 | 264494 | 9.3137  | 6.06907 | JPT |
| rs5020946  | HLA-DQA2  | GI_11095446-S | 6 | 6 | 32558067 | 262966 | 8.853   | 6.06907 | JPT |

|            |          |               |   |   |          |        |         |         |     |
|------------|----------|---------------|---|---|----------|--------|---------|---------|-----|
| rs6916742  | HLA-DQA2 | GI_11095446-S | 6 | 6 | 32561169 | 259864 | 7.1747  | 6.06907 | JPT |
| rs6916742  | HLA-DQA1 | GI_18426974-S | 6 | 6 | 32561169 | 157666 | 7.0181  | 6.2098  | JPT |
| rs2157337  | HLA-DQA2 | GI_11095446-S | 6 | 6 | 32609122 | 211911 | 8.812   | 6.06907 | JPT |
| rs17191234 | HLA-DQA2 | GI_11095446-S | 6 | 6 | 32672659 | 148374 | 8.4846  | 6.06907 | JPT |
| rs17191234 | HLA-DRB5 | GI_26665892-S | 6 | 6 | 32672659 | 79434  | 10.2874 | 6.07053 | JPT |
| rs9270657  | HLA-DRB5 | GI_26665892-S | 6 | 6 | 32673999 | 80774  | 8.9163  | 6.07053 | JPT |
| rs9766501  | HLA-DRB5 | GI_26665892-S | 6 | 6 | 32680158 | 86933  | 6.208   | 6.07053 | JPT |
| rs9271568  | HLA-DQA2 | GI_11095446-S | 6 | 6 | 32698441 | 122592 | 10.5006 | 6.06907 | JPT |
| rs9271568  | HLA-DQA1 | GI_18426974-S | 6 | 6 | 32698441 | 20394  | 6.4632  | 6.2098  | JPT |
| rs9271574  | HLA-DQA2 | GI_11095446-S | 6 | 6 | 32698568 | 122465 | 16.3016 | 6.06907 | JPT |
| rs9271586  | HLA-DQA2 | GI_11095446-S | 6 | 6 | 32698877 | 122156 | 7.0908  | 6.06907 | JPT |
| rs9271588  | HLA-DQA2 | GI_11095446-S | 6 | 6 | 32698931 | 122102 | 7.3063  | 6.06907 | JPT |
| rs9271589  | HLA-DQA2 | GI_11095446-S | 6 | 6 | 32699106 | 121927 | 7.8698  | 6.06907 | JPT |
| rs9271591  | HLA-DQA2 | GI_11095446-S | 6 | 6 | 32699119 | 121914 | 8.1281  | 6.06907 | JPT |
| rs9271605  | HLA-DQA2 | GI_11095446-S | 6 | 6 | 32699426 | 121607 | 13.7677 | 6.06907 | JPT |
| rs9272218  | HLA-DRB5 | GI_26665892-S | 6 | 6 | 32710216 | 116991 | 8.0678  | 6.07053 | JPT |
| rs9272346  | HLA-DQA1 | GI_18426974-S | 6 | 6 | 32712350 | 6485   | 10.089  | 6.2098  | JPT |
| rs17426593 | HLA-DQA2 | GI_11095446-S | 6 | 6 | 32716055 | 104978 | 17.3335 | 6.06907 | JPT |
| rs9272723  | HLA-DQA1 | GI_18426974-S | 6 | 6 | 32717405 | 1430   | 6.5463  | 6.2098  | JPT |
| rs6928482  | HLA-DQA1 | GI_18426974-S | 6 | 6 | 32734227 | 15392  | 10.0052 | 6.2098  | JPT |
| rs9273363  | HLA-DQA2 | GI_11095446-S | 6 | 6 | 32734250 | 86783  | 13.2797 | 6.06907 | JPT |
| rs5002702  | HLA-DQA1 | GI_18426974-S | 6 | 6 | 32767136 | 48301  | 6.8697  | 6.2098  | JPT |
| rs4248168  | HLA-DQA2 | GI_11095446-S | 6 | 6 | 32767721 | 53312  | 6.0715  | 6.06907 | JPT |
| rs4248168  | HLA-DQA1 | GI_18426974-S | 6 | 6 | 32767721 | 48886  | 7.616   | 6.2098  | JPT |
| rs9275224  | HLA-DQA2 | GI_11095446-S | 6 | 6 | 32767856 | 53177  | 6.1998  | 6.06907 | JPT |
| rs9275224  | HLA-DQA1 | GI_18426974-S | 6 | 6 | 32767856 | 49021  | 7.6365  | 6.2098  | JPT |
| rs4713581  | HLA-DQA2 | GI_11095446-S | 6 | 6 | 32768001 | 53032  | 6.0715  | 6.06907 | JPT |
| rs4713581  | HLA-DQA1 | GI_18426974-S | 6 | 6 | 32768001 | 49166  | 7.616   | 6.2098  | JPT |
| rs4713582  | HLA-DQA2 | GI_11095446-S | 6 | 6 | 32768029 | 53004  | 6.0715  | 6.06907 | JPT |
| rs4713582  | HLA-DQA1 | GI_18426974-S | 6 | 6 | 32768029 | 49194  | 7.616   | 6.2098  | JPT |
| rs4713583  | HLA-DQA1 | GI_18426974-S | 6 | 6 | 32768131 | 49296  | 7.4221  | 6.2098  | JPT |
| rs9275292  | HLA-DQA1 | GI_18426974-S | 6 | 6 | 32771267 | 52432  | 7.8201  | 6.2098  | JPT |
| rs9275295  | HLA-DQA1 | GI_18426974-S | 6 | 6 | 32771369 | 52534  | 7.6368  | 6.2098  | JPT |
| rs5000634  | HLA-DQA2 | GI_11095446-S | 6 | 6 | 32771542 | 49491  | 6.6367  | 6.06907 | JPT |
| rs5000634  | HLA-DQA1 | GI_18426974-S | 6 | 6 | 32771542 | 52707  | 9.2549  | 6.2098  | JPT |
| rs6457617  | HLA-DQA1 | GI_18426974-S | 6 | 6 | 32771829 | 52994  | 6.6009  | 6.2098  | JPT |
| rs6457619  | HLA-DQA2 | GI_11095446-S | 6 | 6 | 32771964 | 49069  | 6.5671  | 6.06907 | JPT |
| rs6457619  | HLA-DQA1 | GI_18426974-S | 6 | 6 | 32771964 | 53129  | 7.0303  | 6.2098  | JPT |
| rs6457620  | HLA-DQA2 | GI_11095446-S | 6 | 6 | 32771977 | 49056  | 6.0715  | 6.06907 | JPT |
| rs6457620  | HLA-DQA1 | GI_18426974-S | 6 | 6 | 32771977 | 53142  | 7.616   | 6.2098  | JPT |
| rs2647015  | HLA-DQA1 | GI_18426974-S | 6 | 6 | 32772071 | 53236  | 6.5733  | 6.2098  | JPT |
| rs6457622  | HLA-DQA1 | GI_18426974-S | 6 | 6 | 32772141 | 53306  | 7.8362  | 6.2098  | JPT |
| rs7745040  | HLA-DQA2 | GI_11095446-S | 6 | 6 | 32772310 | 48723  | 6.6367  | 6.06907 | JPT |
| rs7745040  | HLA-DQA1 | GI_18426974-S | 6 | 6 | 32772310 | 53475  | 9.2549  | 6.2098  | JPT |
| rs2395522  | HLA-DQA1 | GI_18426974-S | 6 | 6 | 32772700 | 53865  | 6.9289  | 6.2098  | JPT |
| rs2858308  | HLA-DQA1 | GI_18426974-S | 6 | 6 | 32777978 | 59143  | 6.5733  | 6.2098  | JPT |
| rs2859065  | HLA-DQA1 | GI_18426974-S | 6 | 6 | 32800327 | 81492  | 9.3011  | 6.2098  | JPT |
| rs2859062  | HLA-DQA1 | GI_18426974-S | 6 | 6 | 32801019 | 82184  | 9.9093  | 6.2098  | JPT |
| rs2859056  | HLA-DQA1 | GI_18426974-S | 6 | 6 | 32802398 | 83563  | 8.1175  | 6.2098  | JPT |
| rs2858886  | HLA-DQA1 | GI_18426974-S | 6 | 6 | 32803214 | 84379  | 8.9576  | 6.2098  | JPT |
| rs2859054  | HLA-DQA1 | GI_18426974-S | 6 | 6 | 32803660 | 84825  | 7.837   | 6.2098  | JPT |
| rs9461804  | HLA-DQA1 | GI_18426974-S | 6 | 6 | 32804394 | 85559  | 9.9093  | 6.2098  | JPT |
| rs2859111  | HLA-DQA1 | GI_18426974-S | 6 | 6 | 32806022 | 87187  | 9.3011  | 6.2098  | JPT |
| rs2859109  | HLA-DQA1 | GI_18426974-S | 6 | 6 | 32806185 | 87350  | 6.2535  | 6.2098  | JPT |
| rs2859100  | HLA-DQA1 | GI_18426974-S | 6 | 6 | 32807457 | 88622  | 7.3283  | 6.2098  | JPT |
| rs16870693 | HLA-DQA1 | GI_18426974-S | 6 | 6 | 32819669 | 100834 | 6.6304  | 6.2098  | JPT |



|            |        |               |   |   |          |        |         |         |     |
|------------|--------|---------------|---|---|----------|--------|---------|---------|-----|
| rs2296804  | PEX6   | GI_21361243-S | 6 | 6 | 43039239 | 664    | 10.1155 | 5.79223 | JPT |
| rs2395943  | PEX6   | GI_21361243-S | 6 | 6 | 43048651 | 8748   | 10.1155 | 5.79223 | JPT |
| rs2007950  | PEX6   | GI_21361243-S | 6 | 6 | 43157439 | 117536 | 6.6554  | 5.79223 | JPT |
| rs6904780  | PEX6   | GI_21361243-S | 6 | 6 | 43159592 | 119689 | 5.8116  | 5.79223 | JPT |
| rs12661980 | PEX6   | GI_21361243-S | 6 | 6 | 43161669 | 121766 | 6.8904  | 5.79223 | JPT |
| rs3805941  | PEX6   | GI_21361243-S | 6 | 6 | 43165559 | 125656 | 6.9187  | 5.79223 | JPT |
| rs227832   | SUPT3H | GI_4507308-A  | 6 | 6 | 44789235 | 239866 | 6.9151  | 5.85129 | JPT |
| rs227835   | SUPT3H | GI_4507308-A  | 6 | 6 | 44790294 | 238807 | 6.754   | 5.85129 | JPT |
| rs227836   | SUPT3H | GI_4507308-A  | 6 | 6 | 44790718 | 238383 | 6.9151  | 5.85129 | JPT |
| rs13206206 | SUPT3H | GI_4507308-A  | 6 | 6 | 44792102 | 236999 | 6.9151  | 5.85129 | JPT |
| rs227839   | SUPT3H | GI_4507308-A  | 6 | 6 | 44793588 | 235513 | 5.8622  | 5.85129 | JPT |
| rs227840   | SUPT3H | GI_4507308-A  | 6 | 6 | 44794282 | 234819 | 6.754   | 5.85129 | JPT |
| rs227844   | SUPT3H | GI_4507308-A  | 6 | 6 | 44800190 | 228911 | 6.6709  | 5.85129 | JPT |
| rs227845   | SUPT3H | GI_4507308-A  | 6 | 6 | 44803316 | 225785 | 6.9936  | 5.85129 | JPT |
| rs227847   | SUPT3H | GI_4507308-A  | 6 | 6 | 44803471 | 225630 | 5.9359  | 5.85129 | JPT |
| rs227849   | SUPT3H | GI_4507308-A  | 6 | 6 | 44806686 | 222415 | 7.2825  | 5.85129 | JPT |
| rs9472331  | SUPT3H | GI_4507308-A  | 6 | 6 | 44807332 | 221769 | 7.2578  | 5.85129 | JPT |
| rs227852   | SUPT3H | GI_4507308-A  | 6 | 6 | 44807537 | 221564 | 6.9151  | 5.85129 | JPT |
| rs227853   | SUPT3H | GI_4507308-A  | 6 | 6 | 44807724 | 221377 | 6.5763  | 5.85129 | JPT |
| rs4714812  | SUPT3H | GI_4507308-A  | 6 | 6 | 44808692 | 220409 | 6.8883  | 5.85129 | JPT |
| rs227857   | SUPT3H | GI_4507308-A  | 6 | 6 | 44812370 | 216731 | 8.9483  | 5.85129 | JPT |
| rs609643   | SUPT3H | GI_4507308-A  | 6 | 6 | 44813281 | 215820 | 8.9483  | 5.85129 | JPT |
| rs687878   | SUPT3H | GI_4507308-A  | 6 | 6 | 44814768 | 214333 | 6.2687  | 5.85129 | JPT |
| rs4714813  | SUPT3H | GI_4507308-A  | 6 | 6 | 44817868 | 211233 | 6.2687  | 5.85129 | JPT |
| rs9463017  | SUPT3H | GI_4507308-A  | 6 | 6 | 44818282 | 210819 | 9.1047  | 5.85129 | JPT |
| rs9472336  | SUPT3H | GI_4507308-A  | 6 | 6 | 44818370 | 210731 | 7.2825  | 5.85129 | JPT |
| rs764397   | SUPT3H | GI_4507308-A  | 6 | 6 | 44818749 | 210352 | 7.1901  | 5.85129 | JPT |
| rs1418435  | SUPT3H | GI_4507308-A  | 6 | 6 | 44818858 | 210243 | 8.7796  | 5.85129 | JPT |
| rs2211393  | SUPT3H | GI_4507308-A  | 6 | 6 | 44824344 | 204757 | 7.1901  | 5.85129 | JPT |
| rs4714819  | SUPT3H | GI_4507308-A  | 6 | 6 | 44843263 | 185838 | 7.0908  | 5.85129 | JPT |
| rs12192367 | SUPT3H | GI_4507308-A  | 6 | 6 | 44846526 | 182575 | 6.9271  | 5.85129 | JPT |
| rs2038557  | SUPT3H | GI_4507308-A  | 6 | 6 | 44848449 | 180652 | 7.2825  | 5.85129 | JPT |
| rs2038556  | SUPT3H | GI_4507308-A  | 6 | 6 | 44848546 | 180555 | 7.1901  | 5.85129 | JPT |
| rs2040032  | SUPT3H | GI_4507308-A  | 6 | 6 | 44850987 | 178114 | 7.2825  | 5.85129 | JPT |
| rs9472360  | SUPT3H | GI_4507308-A  | 6 | 6 | 44855388 | 173713 | 7.2825  | 5.85129 | JPT |
| rs1342370  | SUPT3H | GI_4507308-A  | 6 | 6 | 44855710 | 173391 | 6.8413  | 5.85129 | JPT |
| rs1418434  | SUPT3H | GI_4507308-A  | 6 | 6 | 44856343 | 172758 | 7.2825  | 5.85129 | JPT |
| rs4711798  | SUPT3H | GI_4507308-A  | 6 | 6 | 44858755 | 170346 | 7.2825  | 5.85129 | JPT |
| rs9472362  | SUPT3H | GI_4507308-A  | 6 | 6 | 44859263 | 169838 | 7.2825  | 5.85129 | JPT |
| rs9463039  | SUPT3H | GI_4507308-A  | 6 | 6 | 44860102 | 168999 | 9.1047  | 5.85129 | JPT |
| rs9463040  | SUPT3H | GI_4507308-A  | 6 | 6 | 44860264 | 168837 | 9.1047  | 5.85129 | JPT |
| rs1557143  | SUPT3H | GI_4507308-A  | 6 | 6 | 44864393 | 164708 | 7.0979  | 5.85129 | JPT |
| rs1293457  | SUPT3H | GI_4507308-A  | 6 | 6 | 44866076 | 163025 | 7.2527  | 5.85129 | JPT |
| rs2894599  | SUPT3H | GI_4507308-A  | 6 | 6 | 44868838 | 160263 | 8.0433  | 5.85129 | JPT |
| rs4714825  | SUPT3H | GI_4507308-A  | 6 | 6 | 44869524 | 159577 | 8.0433  | 5.85129 | JPT |
| rs2145826  | SUPT3H | GI_4507308-A  | 6 | 6 | 44871759 | 157342 | 6.1852  | 5.85129 | JPT |
| rs720989   | SUPT3H | GI_4507308-A  | 6 | 6 | 44873513 | 155588 | 7.8652  | 5.85129 | JPT |
| rs720988   | SUPT3H | GI_4507308-A  | 6 | 6 | 44873638 | 155463 | 8.0433  | 5.85129 | JPT |
| rs4711799  | SUPT3H | GI_4507308-A  | 6 | 6 | 44873758 | 155343 | 7.0979  | 5.85129 | JPT |
| rs12190136 | SUPT3H | GI_4507308-A  | 6 | 6 | 44875050 | 154051 | 7.2527  | 5.85129 | JPT |
| rs1293467  | SUPT3H | GI_4507308-A  | 6 | 6 | 44877182 | 151919 | 7.0979  | 5.85129 | JPT |
| rs16872574 | SUPT3H | GI_4507308-A  | 6 | 6 | 44879019 | 150082 | 8.0433  | 5.85129 | JPT |
| rs929614   | SUPT3H | GI_4507308-A  | 6 | 6 | 44879912 | 149189 | 7.0979  | 5.85129 | JPT |
| rs7769218  | SUPT3H | GI_4507308-A  | 6 | 6 | 44891435 | 137666 | 7.9164  | 5.85129 | JPT |
| rs6904015  | SUPT3H | GI_4507308-A  | 6 | 6 | 44893480 | 135621 | 6.933   | 5.85129 | JPT |
| rs9349303  | SUPT3H | GI_4507308-A  | 6 | 6 | 44900557 | 128544 | 6.3839  | 5.85129 | JPT |

|            |        |              |   |   |          |        |        |         |     |
|------------|--------|--------------|---|---|----------|--------|--------|---------|-----|
| rs9395049  | SUPT3H | GI_4507308-A | 6 | 6 | 44900696 | 128405 | 6.8015 | 5.85129 | JPT |
| rs2139863  | SUPT3H | GI_4507308-A | 6 | 6 | 44904117 | 124984 | 8.0433 | 5.85129 | JPT |
| rs524492   | SUPT3H | GI_4507308-A | 6 | 6 | 44904574 | 124527 | 8.0433 | 5.85129 | JPT |
| rs9369514  | SUPT3H | GI_4507308-A | 6 | 6 | 44905249 | 123852 | 7.6395 | 5.85129 | JPT |
| rs3799965  | SUPT3H | GI_4507308-A | 6 | 6 | 44906595 | 122506 | 8.2173 | 5.85129 | JPT |
| rs3799967  | SUPT3H | GI_4507308-A | 6 | 6 | 44906679 | 122422 | 6.5539 | 5.85129 | JPT |
| rs1402599  | SUPT3H | GI_4507308-A | 6 | 6 | 44907635 | 121466 | 8.0433 | 5.85129 | JPT |
| rs542444   | SUPT3H | GI_4507308-A | 6 | 6 | 44907993 | 121108 | 8.0433 | 5.85129 | JPT |
| rs9472376  | SUPT3H | GI_4507308-A | 6 | 6 | 44908225 | 120876 | 7.8652 | 5.85129 | JPT |
| rs3823252  | SUPT3H | GI_4507308-A | 6 | 6 | 44918396 | 110705 | 7.8652 | 5.85129 | JPT |
| rs9369515  | SUPT3H | GI_4507308-A | 6 | 6 | 44920493 | 108608 | 6.8157 | 5.85129 | JPT |
| rs6910294  | SUPT3H | GI_4507308-A | 6 | 6 | 44920543 | 108558 | 7.654  | 5.85129 | JPT |
| rs16869119 | SUPT3H | GI_4507308-A | 6 | 6 | 44922870 | 106231 | 8.0433 | 5.85129 | JPT |
| rs13206526 | SUPT3H | GI_4507308-A | 6 | 6 | 44924159 | 104942 | 7.3473 | 5.85129 | JPT |
| rs3799971  | SUPT3H | GI_4507308-A | 6 | 6 | 44927297 | 101804 | 9.2735 | 5.85129 | JPT |
| rs3799972  | SUPT3H | GI_4507308-A | 6 | 6 | 44931251 | 97850  | 7.8652 | 5.85129 | JPT |
| rs3799973  | SUPT3H | GI_4507308-A | 6 | 6 | 44931705 | 97396  | 8.3907 | 5.85129 | JPT |
| rs3799974  | SUPT3H | GI_4507308-A | 6 | 6 | 44932926 | 96175  | 7.8652 | 5.85129 | JPT |
| rs9395051  | SUPT3H | GI_4507308-A | 6 | 6 | 44933693 | 95408  | 9.2735 | 5.85129 | JPT |
| rs9369516  | SUPT3H | GI_4507308-A | 6 | 6 | 44941576 | 87525  | 9.3986 | 5.85129 | JPT |
| rs3799976  | SUPT3H | GI_4507308-A | 6 | 6 | 44943600 | 85501  | 9.6475 | 5.85129 | JPT |
| rs3799977  | SUPT3H | GI_4507308-A | 6 | 6 | 44945334 | 83767  | 9.3986 | 5.85129 | JPT |
| rs3799979  | SUPT3H | GI_4507308-A | 6 | 6 | 44953492 | 75609  | 9.3986 | 5.85129 | JPT |
| rs4714828  | SUPT3H | GI_4507308-A | 6 | 6 | 44953986 | 75115  | 9.6475 | 5.85129 | JPT |
| rs7754378  | SUPT3H | GI_4507308-A | 6 | 6 | 44971084 | 58017  | 9.3986 | 5.85129 | JPT |
| rs12529522 | SUPT3H | GI_4507308-A | 6 | 6 | 44973498 | 55603  | 7.8845 | 5.85129 | JPT |
| rs12530016 | SUPT3H | GI_4507308-A | 6 | 6 | 44974300 | 54801  | 7.8845 | 5.85129 | JPT |
| rs538801   | SUPT3H | GI_4507308-A | 6 | 6 | 44983740 | 45361  | 9.7523 | 5.85129 | JPT |
| rs12525009 | SUPT3H | GI_4507308-A | 6 | 6 | 44983821 | 45280  | 9.99   | 5.85129 | JPT |
| rs7763421  | SUPT3H | GI_4507308-A | 6 | 6 | 44985291 | 43810  | 8.4211 | 5.85129 | JPT |
| rs10948183 | SUPT3H | GI_4507308-A | 6 | 6 | 44988859 | 40242  | 9.99   | 5.85129 | JPT |
| rs6458415  | SUPT3H | GI_4507308-A | 6 | 6 | 44989570 | 39531  | 9.99   | 5.85129 | JPT |
| rs3799981  | SUPT3H | GI_4507308-A | 6 | 6 | 44990358 | 38743  | 9.7523 | 5.85129 | JPT |
| rs12526711 | SUPT3H | GI_4507308-A | 6 | 6 | 44991851 | 37250  | 8.4569 | 5.85129 | JPT |
| rs10484627 | SUPT3H | GI_4507308-A | 6 | 6 | 44992245 | 36856  | 9.6475 | 5.85129 | JPT |
| rs9367211  | SUPT3H | GI_4507308-A | 6 | 6 | 44993283 | 35818  | 9.6475 | 5.85129 | JPT |
| rs6919161  | SUPT3H | GI_4507308-A | 6 | 6 | 44996095 | 33006  | 7.8501 | 5.85129 | JPT |
| rs608941   | SUPT3H | GI_4507308-A | 6 | 6 | 44996718 | 32383  | 9.7523 | 5.85129 | JPT |
| rs3799984  | SUPT3H | GI_4507308-A | 6 | 6 | 45001618 | 27483  | 9.3986 | 5.85129 | JPT |
| rs3778507  | SUPT3H | GI_4507308-A | 6 | 6 | 45004781 | 24320  | 9.7523 | 5.85129 | JPT |
| rs3799986  | SUPT3H | GI_4507308-A | 6 | 6 | 45008231 | 20870  | 9.7523 | 5.85129 | JPT |
| rs10948185 | SUPT3H | GI_4507308-A | 6 | 6 | 45009705 | 19396  | 9.99   | 5.85129 | JPT |
| rs10948186 | SUPT3H | GI_4507308-A | 6 | 6 | 45011226 | 17875  | 9.99   | 5.85129 | JPT |
| rs9369523  | SUPT3H | GI_4507308-A | 6 | 6 | 45016706 | 12395  | 7.6939 | 5.85129 | JPT |
| rs9472407  | SUPT3H | GI_4507308-A | 6 | 6 | 45016778 | 12323  | 9.0457 | 5.85129 | JPT |
| rs12196818 | SUPT3H | GI_4507308-A | 6 | 6 | 45019392 | 9709   | 9.7523 | 5.85129 | JPT |
| rs4711807  | SUPT3H | GI_4507308-A | 6 | 6 | 45019630 | 9471   | 9.7523 | 5.85129 | JPT |
| rs7749865  | SUPT3H | GI_4507308-A | 6 | 6 | 45026384 | 2717   | 9.4978 | 5.85129 | JPT |
| rs12190513 | SUPT3H | GI_4507308-A | 6 | 6 | 45028657 | 444    | 9.5004 | 5.85129 | JPT |
| rs10948187 | SUPT3H | GI_4507308-A | 6 | 6 | 45029298 | 197    | 9.99   | 5.85129 | JPT |
| rs4512220  | SUPT3H | GI_4507308-A | 6 | 6 | 45031116 | 2015   | 8.3601 | 5.85129 | JPT |
| rs12214778 | SUPT3H | GI_4507308-A | 6 | 6 | 45032390 | 3289   | 9.99   | 5.85129 | JPT |
| rs3799987  | SUPT3H | GI_4507308-A | 6 | 6 | 45033812 | 4711   | 8.1621 | 5.85129 | JPT |
| rs9472409  | SUPT3H | GI_4507308-A | 6 | 6 | 45034409 | 5308   | 9.99   | 5.85129 | JPT |
| rs1980265  | SUPT3H | GI_4507308-A | 6 | 6 | 45036846 | 7745   | 9.99   | 5.85129 | JPT |
| rs1360195  | SUPT3H | GI_4507308-A | 6 | 6 | 45039309 | 10208  | 8.3601 | 5.85129 | JPT |

|            |        |              |   |   |          |        |        |         |     |
|------------|--------|--------------|---|---|----------|--------|--------|---------|-----|
| rs1521355  | SUPT3H | GI_4507308-A | 6 | 6 | 45040733 | 11632  | 9.7523 | 5.85129 | JPT |
| rs636845   | SUPT3H | GI_4507308-A | 6 | 6 | 45043319 | 14218  | 9.7523 | 5.85129 | JPT |
| rs13215618 | SUPT3H | GI_4507308-A | 6 | 6 | 45044546 | 15445  | 9.99   | 5.85129 | JPT |
| rs13216116 | SUPT3H | GI_4507308-A | 6 | 6 | 45044659 | 15558  | 9.99   | 5.85129 | JPT |
| rs494982   | SUPT3H | GI_4507308-A | 6 | 6 | 45045233 | 16132  | 9.99   | 5.85129 | JPT |
| rs10948190 | SUPT3H | GI_4507308-A | 6 | 6 | 45050278 | 21177  | 9.7523 | 5.85129 | JPT |
| rs2396369  | SUPT3H | GI_4507308-A | 6 | 6 | 45054441 | 25340  | 9.1108 | 5.85129 | JPT |
| rs9472414  | SUPT3H | GI_4507308-A | 6 | 6 | 45054484 | 25383  | 8.3601 | 5.85129 | JPT |
| rs2396371  | SUPT3H | GI_4507308-A | 6 | 6 | 45054528 | 25427  | 9.4978 | 5.85129 | JPT |
| rs10948192 | SUPT3H | GI_4507308-A | 6 | 6 | 45055299 | 26198  | 8.8785 | 5.85129 | JPT |
| rs1360197  | SUPT3H | GI_4507308-A | 6 | 6 | 45057608 | 28507  | 9.4932 | 5.85129 | JPT |
| rs6925017  | SUPT3H | GI_4507308-A | 6 | 6 | 45058806 | 29705  | 8.7669 | 5.85129 | JPT |
| rs9472416  | SUPT3H | GI_4507308-A | 6 | 6 | 45058941 | 29840  | 8.5777 | 5.85129 | JPT |
| rs10948194 | SUPT3H | GI_4507308-A | 6 | 6 | 45059968 | 30867  | 8.5777 | 5.85129 | JPT |
| rs9357464  | SUPT3H | GI_4507308-A | 6 | 6 | 45060419 | 31318  | 8.5777 | 5.85129 | JPT |
| rs976699   | SUPT3H | GI_4507308-A | 6 | 6 | 45060830 | 31729  | 7.809  | 5.85129 | JPT |
| rs1329716  | SUPT3H | GI_4507308-A | 6 | 6 | 45061736 | 32635  | 8.3528 | 5.85129 | JPT |
| rs9296450  | SUPT3H | GI_4507308-A | 6 | 6 | 45061764 | 32663  | 7.2771 | 5.85129 | JPT |
| rs4714830  | SUPT3H | GI_4507308-A | 6 | 6 | 45063506 | 34405  | 8.3528 | 5.85129 | JPT |
| rs11967188 | SUPT3H | GI_4507308-A | 6 | 6 | 45064903 | 35802  | 9.5489 | 5.85129 | JPT |
| rs2396372  | SUPT3H | GI_4507308-A | 6 | 6 | 45074845 | 45744  | 8.214  | 5.85129 | JPT |
| rs10948197 | SUPT3H | GI_4507308-A | 6 | 6 | 45075468 | 46367  | 8.5777 | 5.85129 | JPT |
| rs7775717  | SUPT3H | GI_4507308-A | 6 | 6 | 45075739 | 46638  | 8.5777 | 5.85129 | JPT |
| rs9472418  | SUPT3H | GI_4507308-A | 6 | 6 | 45076050 | 46949  | 6.6492 | 5.85129 | JPT |
| rs1329710  | SUPT3H | GI_4507308-A | 6 | 6 | 45077103 | 48002  | 8.3528 | 5.85129 | JPT |
| rs1159131  | SUPT3H | GI_4507308-A | 6 | 6 | 45080187 | 51086  | 8.2806 | 5.85129 | JPT |
| rs1023091  | SUPT3H | GI_4507308-A | 6 | 6 | 45083000 | 53899  | 8.1621 | 5.85129 | JPT |
| rs7381322  | SUPT3H | GI_4507308-A | 6 | 6 | 45088319 | 59218  | 8.3601 | 5.85129 | JPT |
| rs12528232 | SUPT3H | GI_4507308-A | 6 | 6 | 45090571 | 61470  | 8.1621 | 5.85129 | JPT |
| rs2396373  | SUPT3H | GI_4507308-A | 6 | 6 | 45091112 | 62011  | 8.7635 | 5.85129 | JPT |
| rs17424547 | SUPT3H | GI_4507308-A | 6 | 6 | 45096948 | 67847  | 9.7523 | 5.85129 | JPT |
| rs1028944  | SUPT3H | GI_4507308-A | 6 | 6 | 45097497 | 68396  | 8.1621 | 5.85129 | JPT |
| rs9381359  | SUPT3H | GI_4507308-A | 6 | 6 | 45098603 | 69502  | 8.7635 | 5.85129 | JPT |
| rs1971482  | SUPT3H | GI_4507308-A | 6 | 6 | 45099091 | 69990  | 9.99   | 5.85129 | JPT |
| rs6925467  | SUPT3H | GI_4507308-A | 6 | 6 | 45106016 | 76915  | 9.7523 | 5.85129 | JPT |
| rs13209827 | SUPT3H | GI_4507308-A | 6 | 6 | 45106610 | 77509  | 8.3601 | 5.85129 | JPT |
| rs7742360  | SUPT3H | GI_4507308-A | 6 | 6 | 45106670 | 77569  | 9.99   | 5.85129 | JPT |
| rs13201942 | SUPT3H | GI_4507308-A | 6 | 6 | 45111805 | 82704  | 7.9516 | 5.85129 | JPT |
| rs4398713  | SUPT3H | GI_4507308-A | 6 | 6 | 45111906 | 82805  | 9.99   | 5.85129 | JPT |
| rs13205113 | SUPT3H | GI_4507308-A | 6 | 6 | 45111968 | 82867  | 8.3601 | 5.85129 | JPT |
| rs1329713  | SUPT3H | GI_4507308-A | 6 | 6 | 45112006 | 82905  | 9.7523 | 5.85129 | JPT |
| rs12528762 | SUPT3H | GI_4507308-A | 6 | 6 | 45112163 | 83062  | 8.3601 | 5.85129 | JPT |
| rs9369529  | SUPT3H | GI_4507308-A | 6 | 6 | 45112511 | 83410  | 9.7523 | 5.85129 | JPT |
| rs10948198 | SUPT3H | GI_4507308-A | 6 | 6 | 45117142 | 88041  | 9.7523 | 5.85129 | JPT |
| rs1023090  | SUPT3H | GI_4507308-A | 6 | 6 | 45120359 | 91258  | 9.99   | 5.85129 | JPT |
| rs1041332  | SUPT3H | GI_4507308-A | 6 | 6 | 45120789 | 91688  | 9.7523 | 5.85129 | JPT |
| rs12529490 | SUPT3H | GI_4507308-A | 6 | 6 | 45126229 | 97128  | 9.99   | 5.85129 | JPT |
| rs4714836  | SUPT3H | GI_4507308-A | 6 | 6 | 45127755 | 98654  | 9.7523 | 5.85129 | JPT |
| rs12205071 | SUPT3H | GI_4507308-A | 6 | 6 | 45129193 | 100092 | 9.4431 | 5.85129 | JPT |
| rs13211006 | SUPT3H | GI_4507308-A | 6 | 6 | 45131054 | 101953 | 7.9663 | 5.85129 | JPT |
| rs12205894 | SUPT3H | GI_4507308-A | 6 | 6 | 45131204 | 102103 | 9.99   | 5.85129 | JPT |
| rs2186062  | SUPT3H | GI_4507308-A | 6 | 6 | 45131710 | 102609 | 9.99   | 5.85129 | JPT |
| rs12208023 | SUPT3H | GI_4507308-A | 6 | 6 | 45132665 | 103564 | 9.7523 | 5.85129 | JPT |
| rs9367214  | SUPT3H | GI_4507308-A | 6 | 6 | 45133890 | 104789 | 9.7523 | 5.85129 | JPT |
| rs7763450  | SUPT3H | GI_4507308-A | 6 | 6 | 45137874 | 108773 | 9.7523 | 5.85129 | JPT |
| rs7745506  | SUPT3H | GI_4507308-A | 6 | 6 | 45137988 | 108887 | 8.117  | 5.85129 | JPT |

|            |        |              |   |   |          |        |         |         |     |
|------------|--------|--------------|---|---|----------|--------|---------|---------|-----|
| rs9395063  | SUPT3H | GI_4507308-A | 6 | 6 | 45148771 | 119670 | 10.4822 | 5.85129 | JPT |
| rs6899845  | SUPT3H | GI_4507308-A | 6 | 6 | 45151330 | 122229 | 9.99    | 5.85129 | JPT |
| rs1411148  | SUPT3H | GI_4507308-A | 6 | 6 | 45151596 | 122495 | 6.5471  | 5.85129 | JPT |
| rs1937046  | SUPT3H | GI_4507308-A | 6 | 6 | 45156221 | 127120 | 9.4978  | 5.85129 | JPT |
| rs12526649 | SUPT3H | GI_4507308-A | 6 | 6 | 45157244 | 128143 | 8.3601  | 5.85129 | JPT |
| rs12529990 | SUPT3H | GI_4507308-A | 6 | 6 | 45157296 | 128195 | 8.3601  | 5.85129 | JPT |
| rs12208483 | SUPT3H | GI_4507308-A | 6 | 6 | 45157553 | 128452 | 9.99    | 5.85129 | JPT |
| rs9357469  | SUPT3H | GI_4507308-A | 6 | 6 | 45157789 | 128688 | 9.7523  | 5.85129 | JPT |
| rs11964325 | SUPT3H | GI_4507308-A | 6 | 6 | 45161595 | 132494 | 9.99    | 5.85129 | JPT |
| rs11966936 | SUPT3H | GI_4507308-A | 6 | 6 | 45161650 | 132549 | 9.4978  | 5.85129 | JPT |
| rs6922772  | SUPT3H | GI_4507308-A | 6 | 6 | 45167562 | 138461 | 9.99    | 5.85129 | JPT |
| rs6922660  | SUPT3H | GI_4507308-A | 6 | 6 | 45167652 | 138551 | 9.7523  | 5.85129 | JPT |
| rs1284986  | SUPT3H | GI_4507308-A | 6 | 6 | 45171303 | 142202 | 8.1621  | 5.85129 | JPT |
| rs1284987  | SUPT3H | GI_4507308-A | 6 | 6 | 45171699 | 142598 | 9.99    | 5.85129 | JPT |
| rs1284988  | SUPT3H | GI_4507308-A | 6 | 6 | 45172750 | 143649 | 9.7523  | 5.85129 | JPT |
| rs9357470  | SUPT3H | GI_4507308-A | 6 | 6 | 45173591 | 144490 | 9.7523  | 5.85129 | JPT |
| rs7739928  | SUPT3H | GI_4507308-A | 6 | 6 | 45176031 | 146930 | 9.8238  | 5.85129 | JPT |
| rs1284992  | SUPT3H | GI_4507308-A | 6 | 6 | 45179122 | 150021 | 9.99    | 5.85129 | JPT |
| rs1324532  | SUPT3H | GI_4507308-A | 6 | 6 | 45183773 | 154672 | 9.99    | 5.85129 | JPT |
| rs1284972  | SUPT3H | GI_4507308-A | 6 | 6 | 45185376 | 156275 | 9.7523  | 5.85129 | JPT |
| rs9381365  | SUPT3H | GI_4507308-A | 6 | 6 | 45185953 | 156852 | 9.5004  | 5.85129 | JPT |
| rs1886345  | SUPT3H | GI_4507308-A | 6 | 6 | 45186244 | 157143 | 9.0689  | 5.85129 | JPT |
| rs6899378  | SUPT3H | GI_4507308-A | 6 | 6 | 45188346 | 159245 | 9.7523  | 5.85129 | JPT |
| rs6458419  | SUPT3H | GI_4507308-A | 6 | 6 | 45193016 | 163915 | 9.99    | 5.85129 | JPT |
| rs1555681  | SUPT3H | GI_4507308-A | 6 | 6 | 45194345 | 165244 | 8.7635  | 5.85129 | JPT |
| rs12530207 | SUPT3H | GI_4507308-A | 6 | 6 | 45196433 | 167332 | 8.1621  | 5.85129 | JPT |
| rs9357471  | SUPT3H | GI_4507308-A | 6 | 6 | 45198955 | 169854 | 8.7635  | 5.85129 | JPT |
| rs1284999  | SUPT3H | GI_4507308-A | 6 | 6 | 45202417 | 173316 | 7.9516  | 5.85129 | JPT |
| rs9395066  | SUPT3H | GI_4507308-A | 6 | 6 | 45203141 | 174040 | 9.7523  | 5.85129 | JPT |
| rs1285004  | SUPT3H | GI_4507308-A | 6 | 6 | 45206179 | 177078 | 9.99    | 5.85129 | JPT |
| rs1285005  | SUPT3H | GI_4507308-A | 6 | 6 | 45208302 | 179201 | 8.1621  | 5.85129 | JPT |
| rs1285007  | SUPT3H | GI_4507308-A | 6 | 6 | 45210003 | 180902 | 8.3601  | 5.85129 | JPT |
| rs1285009  | SUPT3H | GI_4507308-A | 6 | 6 | 45210528 | 181427 | 8.3601  | 5.85129 | JPT |
| rs9472442  | SUPT3H | GI_4507308-A | 6 | 6 | 45210839 | 181738 | 8.3601  | 5.85129 | JPT |
| rs1285011  | SUPT3H | GI_4507308-A | 6 | 6 | 45211770 | 182669 | 8.3601  | 5.85129 | JPT |
| rs1285026  | SUPT3H | GI_4507308-A | 6 | 6 | 45228812 | 199711 | 9.7523  | 5.85129 | JPT |
| rs1285029  | SUPT3H | GI_4507308-A | 6 | 6 | 45230225 | 201124 | 8.1621  | 5.85129 | JPT |
| rs12662272 | SUPT3H | GI_4507308-A | 6 | 6 | 45231867 | 202766 | 8.1186  | 5.85129 | JPT |
| rs1285033  | SUPT3H | GI_4507308-A | 6 | 6 | 45235130 | 206029 | 8.1621  | 5.85129 | JPT |
| rs9395069  | SUPT3H | GI_4507308-A | 6 | 6 | 45236499 | 207398 | 6.6586  | 5.85129 | JPT |
| rs964452   | SUPT3H | GI_4507308-A | 6 | 6 | 45236720 | 207619 | 8.0911  | 5.85129 | JPT |
| rs6458422  | SUPT3H | GI_4507308-A | 6 | 6 | 45241332 | 212231 | 9.7523  | 5.85129 | JPT |
| rs1324530  | SUPT3H | GI_4507308-A | 6 | 6 | 45244325 | 215224 | 8.1621  | 5.85129 | JPT |
| rs1748233  | SUPT3H | GI_4507308-A | 6 | 6 | 45244902 | 215801 | 8.3601  | 5.85129 | JPT |
| rs6458423  | SUPT3H | GI_4507308-A | 6 | 6 | 45248623 | 219522 | 9.6611  | 5.85129 | JPT |
| rs1748234  | SUPT3H | GI_4507308-A | 6 | 6 | 45248831 | 219730 | 9.99    | 5.85129 | JPT |
| rs1748235  | SUPT3H | GI_4507308-A | 6 | 6 | 45249339 | 220238 | 9.081   | 5.85129 | JPT |
| rs1748238  | SUPT3H | GI_4507308-A | 6 | 6 | 45251307 | 222206 | 8.1621  | 5.85129 | JPT |
| rs1284969  | SUPT3H | GI_4507308-A | 6 | 6 | 45261859 | 232758 | 9.7523  | 5.85129 | JPT |
| rs1797145  | SUPT3H | GI_4507308-A | 6 | 6 | 45263760 | 234659 | 9.99    | 5.85129 | JPT |
| rs7740542  | SUPT3H | GI_4507308-A | 6 | 6 | 45264407 | 235306 | 8.3601  | 5.85129 | JPT |
| rs6936475  | SUPT3H | GI_4507308-A | 6 | 6 | 45266059 | 236958 | 8.1621  | 5.85129 | JPT |
| rs1629542  | SUPT3H | GI_4507308-A | 6 | 6 | 45266463 | 237362 | 9.99    | 5.85129 | JPT |
| rs1748240  | SUPT3H | GI_4507308-A | 6 | 6 | 45268060 | 238959 | 8.1621  | 5.85129 | JPT |
| rs1748242  | SUPT3H | GI_4507308-A | 6 | 6 | 45271328 | 242227 | 9.7523  | 5.85129 | JPT |
| rs1285013  | SUPT3H | GI_4507308-A | 6 | 6 | 45273186 | 244085 | 9.0045  | 5.85129 | JPT |

|            |        |              |   |   |          |        |        |         |     |
|------------|--------|--------------|---|---|----------|--------|--------|---------|-----|
| rs1285014  | SUPT3H | GI_4507308-A | 6 | 6 | 45273203 | 244102 | 9.99   | 5.85129 | JPT |
| rs1285019  | SUPT3H | GI_4507308-A | 6 | 6 | 45275650 | 246549 | 9.7523 | 5.85129 | JPT |
| rs927658   | SUPT3H | GI_4507308-A | 6 | 6 | 45276031 | 246930 | 9.99   | 5.85129 | JPT |
| rs7738526  | SUPT3H | GI_4507308-A | 6 | 6 | 45276395 | 247294 | 9.99   | 5.85129 | JPT |
| rs1290386  | SUPT3H | GI_4507308-A | 6 | 6 | 45276731 | 247630 | 9.99   | 5.85129 | JPT |
| rs6905396  | SUPT3H | GI_4507308-A | 6 | 6 | 45277143 | 248042 | 9.99   | 5.85129 | JPT |
| rs1284955  | SUPT3H | GI_4507308-A | 6 | 6 | 45278099 | 248998 | 8.3601 | 5.85129 | JPT |
| rs9463076  | SUPT3H | GI_4507308-A | 6 | 6 | 45279340 | 250239 | 9.99   | 5.85129 | JPT |
| rs1284961  | SUPT3H | GI_4507308-A | 6 | 6 | 45280599 | 251498 | 9.7523 | 5.85129 | JPT |
| rs1284962  | SUPT3H | GI_4507308-A | 6 | 6 | 45281686 | 252585 | 8.0145 | 5.85129 | JPT |
| rs6458425  | SUPT3H | GI_4507308-A | 6 | 6 | 45281835 | 252734 | 9.99   | 5.85129 | JPT |
| rs988147   | SUPT3H | GI_4507308-A | 6 | 6 | 45282358 | 253257 | 9.99   | 5.85129 | JPT |
| rs9381373  | SUPT3H | GI_4507308-A | 6 | 6 | 45283886 | 254785 | 9.99   | 5.85129 | JPT |
| rs1284964  | SUPT3H | GI_4507308-A | 6 | 6 | 45284518 | 255417 | 8.0933 | 5.85129 | JPT |
| rs1284965  | SUPT3H | GI_4507308-A | 6 | 6 | 45284889 | 255788 | 9.6611 | 5.85129 | JPT |
| rs2396425  | SUPT3H | GI_4507308-A | 6 | 6 | 45285003 | 255902 | 9.4978 | 5.85129 | JPT |
| rs6458427  | SUPT3H | GI_4507308-A | 6 | 6 | 45287782 | 258681 | 9.6611 | 5.85129 | JPT |
| rs1284967  | SUPT3H | GI_4507308-A | 6 | 6 | 45288040 | 258939 | 8.062  | 5.85129 | JPT |
| rs16873257 | SUPT3H | GI_4507308-A | 6 | 6 | 45288515 | 259414 | 8.3601 | 5.85129 | JPT |
| rs2815263  | SUPT3H | GI_4507308-A | 6 | 6 | 45288911 | 259810 | 8.1621 | 5.85129 | JPT |
| rs9463078  | SUPT3H | GI_4507308-A | 6 | 6 | 45289318 | 260217 | 8.1717 | 5.85129 | JPT |
| rs6901786  | SUPT3H | GI_4507308-A | 6 | 6 | 45294151 | 265050 | 9.99   | 5.85129 | JPT |
| rs6899763  | SUPT3H | GI_4507308-A | 6 | 6 | 45297329 | 268228 | 9.7523 | 5.85129 | JPT |
| rs6919847  | SUPT3H | GI_4507308-A | 6 | 6 | 45297358 | 268257 | 8.8018 | 5.85129 | JPT |
| rs9369549  | SUPT3H | GI_4507308-A | 6 | 6 | 45298733 | 269632 | 7.9516 | 5.85129 | JPT |
| rs9395081  | SUPT3H | GI_4507308-A | 6 | 6 | 45298782 | 269681 | 8.1621 | 5.85129 | JPT |
| rs6917352  | SUPT3H | GI_4507308-A | 6 | 6 | 45299966 | 270865 | 8.1621 | 5.85129 | JPT |
| rs9472451  | SUPT3H | GI_4507308-A | 6 | 6 | 45306774 | 277673 | 9.7523 | 5.85129 | JPT |
| rs1080415  | SUPT3H | GI_4507308-A | 6 | 6 | 45307412 | 278311 | 9.7523 | 5.85129 | JPT |
| rs6458432  | SUPT3H | GI_4507308-A | 6 | 6 | 45312995 | 283894 | 6.4781 | 5.85129 | JPT |
| rs2057552  | SUPT3H | GI_4507308-A | 6 | 6 | 45322163 | 293062 | 8.1621 | 5.85129 | JPT |
| rs9472453  | SUPT3H | GI_4507308-A | 6 | 6 | 45322655 | 293554 | 8.3601 | 5.85129 | JPT |
| rs9357480  | SUPT3H | GI_4507308-A | 6 | 6 | 45327490 | 298389 | 9.7523 | 5.85129 | JPT |
| rs9395084  | SUPT3H | GI_4507308-A | 6 | 6 | 45328153 | 299052 | 8.6088 | 5.85129 | JPT |
| rs6458435  | SUPT3H | GI_4507308-A | 6 | 6 | 45330652 | 301551 | 8.1621 | 5.85129 | JPT |
| rs9296453  | SUPT3H | GI_4507308-A | 6 | 6 | 45335410 | 306309 | 9.7523 | 5.85129 | JPT |
| rs7382968  | SUPT3H | GI_4507308-A | 6 | 6 | 45339052 | 309951 | 8.6313 | 5.85129 | JPT |
| rs4714848  | SUPT3H | GI_4507308-A | 6 | 6 | 45339113 | 310012 | 9.7523 | 5.85129 | JPT |
| rs9463081  | SUPT3H | GI_4507308-A | 6 | 6 | 45341086 | 311985 | 9.7523 | 5.85129 | JPT |
| rs9296455  | SUPT3H | GI_4507308-A | 6 | 6 | 45344759 | 315658 | 9.6275 | 5.85129 | JPT |
| rs7453550  | SUPT3H | GI_4507308-A | 6 | 6 | 45348281 | 319180 | 8.3601 | 5.85129 | JPT |
| rs7451423  | SUPT3H | GI_4507308-A | 6 | 6 | 45349321 | 320220 | 9.99   | 5.85129 | JPT |
| rs10948222 | SUPT3H | GI_4507308-A | 6 | 6 | 45352393 | 323292 | 8.3601 | 5.85129 | JPT |
| rs12205274 | SUPT3H | GI_4507308-A | 6 | 6 | 45353004 | 323903 | 9.7523 | 5.85129 | JPT |
| rs12529946 | SUPT3H | GI_4507308-A | 6 | 6 | 45363272 | 334171 | 9.7523 | 5.85129 | JPT |
| rs3923353  | SUPT3H | GI_4507308-A | 6 | 6 | 45364460 | 335359 | 9.7523 | 5.85129 | JPT |
| rs4446571  | SUPT3H | GI_4507308-A | 6 | 6 | 45365640 | 336539 | 9.4978 | 5.85129 | JPT |
| rs4312985  | SUPT3H | GI_4507308-A | 6 | 6 | 45366273 | 337172 | 6.795  | 5.85129 | JPT |
| rs9357484  | SUPT3H | GI_4507308-A | 6 | 6 | 45373860 | 344759 | 9.7523 | 5.85129 | JPT |
| rs6938177  | SUPT3H | GI_4507308-A | 6 | 6 | 45379812 | 350711 | 9.7523 | 5.85129 | JPT |
| rs12662685 | SUPT3H | GI_4507308-A | 6 | 6 | 45381809 | 352708 | 8.3601 | 5.85129 | JPT |
| rs9395095  | SUPT3H | GI_4507308-A | 6 | 6 | 45381855 | 352754 | 7.3021 | 5.85129 | JPT |
| rs9369558  | SUPT3H | GI_4507308-A | 6 | 6 | 45381999 | 352898 | 9.99   | 5.85129 | JPT |
| rs7382422  | SUPT3H | GI_4507308-A | 6 | 6 | 45385840 | 356739 | 8.0626 | 5.85129 | JPT |
| rs4072928  | SUPT3H | GI_4507308-A | 6 | 6 | 45399207 | 370106 | 9.4978 | 5.85129 | JPT |
| rs4590263  | SUPT3H | GI_4507308-A | 6 | 6 | 45399359 | 370258 | 8.3601 | 5.85129 | JPT |

|            |           |               |   |   |          |        |         |         |     |
|------------|-----------|---------------|---|---|----------|--------|---------|---------|-----|
| rs7757282  | SUPT3H    | GI_4507308-A  | 6 | 6 | 45410632 | 381531 | 9.7523  | 5.85129 | JPT |
| rs967588   | SUPT3H    | GI_4507308-A  | 6 | 6 | 45414449 | 385348 | 7.4684  | 5.85129 | JPT |
| rs7760112  | SUPT3H    | GI_4507308-A  | 6 | 6 | 45417610 | 388509 | 8.1621  | 5.85129 | JPT |
| rs16873348 | SUPT3H    | GI_4507308-A  | 6 | 6 | 45421722 | 392621 | 8.3601  | 5.85129 | JPT |
| rs12529295 | SUPT3H    | GI_4507308-A  | 6 | 6 | 45423306 | 394205 | 8.1621  | 5.85129 | JPT |
| rs2024787  | SUPT3H    | GI_4507308-A  | 6 | 6 | 45425980 | 396879 | 8.1621  | 5.85129 | JPT |
| rs2024786  | SUPT3H    | GI_4507308-A  | 6 | 6 | 45426699 | 397598 | 8.3601  | 5.85129 | JPT |
| rs6934594  | SUPT3H    | GI_4507308-A  | 6 | 6 | 45427854 | 398753 | 9.99    | 5.85129 | JPT |
| rs6926638  | SUPT3H    | GI_4507308-A  | 6 | 6 | 45429991 | 400890 | 7.9663  | 5.85129 | JPT |
| rs6458440  | SUPT3H    | GI_4507308-A  | 6 | 6 | 45430201 | 401100 | 8.1621  | 5.85129 | JPT |
| rs4711814  | SUPT3H    | GI_4507308-A  | 6 | 6 | 45434029 | 404928 | 6.3647  | 5.85129 | JPT |
| rs1406848  | SUPT3H    | GI_4507308-A  | 6 | 6 | 45434840 | 405739 | 7.5973  | 5.85129 | JPT |
| rs16873364 | SUPT3H    | GI_4507308-A  | 6 | 6 | 45436135 | 407034 | 8.3601  | 5.85129 | JPT |
| rs16873366 | SUPT3H    | GI_4507308-A  | 6 | 6 | 45437171 | 408070 | 8.3601  | 5.85129 | JPT |
| rs12663469 | SUPT3H    | GI_4507308-A  | 6 | 6 | 45439447 | 410346 | 8.3601  | 5.85129 | JPT |
| rs6932926  | SUPT3H    | GI_4507308-A  | 6 | 6 | 45440283 | 411182 | 8.3601  | 5.85129 | JPT |
| rs16873373 | SUPT3H    | GI_4507308-A  | 6 | 6 | 45443679 | 414578 | 8.3601  | 5.85129 | JPT |
| rs16873379 | SUPT3H    | GI_4507308-A  | 6 | 6 | 45447829 | 418728 | 8.3601  | 5.85129 | JPT |
| rs6928753  | SUPT3H    | GI_4507308-A  | 6 | 6 | 45448048 | 418947 | 9.7523  | 5.85129 | JPT |
| rs12208924 | SUPT3H    | GI_4507308-A  | 6 | 6 | 45450029 | 420928 | 9.7523  | 5.85129 | JPT |
| rs4714853  | SUPT3H    | GI_4507308-A  | 6 | 6 | 45451849 | 422748 | 7.9516  | 5.85129 | JPT |
| rs3749863  | SUPT3H    | GI_4507308-A  | 6 | 6 | 45453226 | 424125 | 8.7635  | 5.85129 | JPT |
| rs3763190  | SUPT3H    | GI_4507308-A  | 6 | 6 | 45455622 | 426521 | 8.1621  | 5.85129 | JPT |
| rs311678   | C6orf150  | GI_31581597-S | 6 | 6 | 74191737 | 141    | 7.3965  | 6.30467 | JPT |
| rs7774080  | Hs.485895 | Hs.485895-S   | 6 | 6 | 87872220 | 124470 | 6.2804  | 5.88614 | JPT |
| rs1610330  | Hs.485895 | Hs.485895-S   | 6 | 6 | 87873075 | 123615 | 7.5145  | 5.88614 | JPT |
| rs4574603  | Hs.485895 | Hs.485895-S   | 6 | 6 | 87873624 | 123066 | 6.2804  | 5.88614 | JPT |
| rs1590429  | Hs.485895 | Hs.485895-S   | 6 | 6 | 87875112 | 121578 | 6.7151  | 5.88614 | JPT |
| rs2025490  | Hs.485895 | Hs.485895-S   | 6 | 6 | 87875181 | 121509 | 10.3085 | 5.88614 | JPT |
| rs3932521  | Hs.485895 | Hs.485895-S   | 6 | 6 | 87875317 | 121373 | 6.356   | 5.88614 | JPT |
| rs2031522  | Hs.485895 | Hs.485895-S   | 6 | 6 | 87878220 | 118470 | 9.3414  | 5.88614 | JPT |
| rs2031521  | Hs.485895 | Hs.485895-S   | 6 | 6 | 87878340 | 118350 | 5.9558  | 5.88614 | JPT |
| rs1075068  | Hs.485895 | Hs.485895-S   | 6 | 6 | 87882028 | 114662 | 5.8924  | 5.88614 | JPT |
| rs9450619  | Hs.485895 | Hs.485895-S   | 6 | 6 | 87884546 | 112144 | 10.9873 | 5.88614 | JPT |
| rs12177532 | Hs.485895 | Hs.485895-S   | 6 | 6 | 87884847 | 111843 | 6.2804  | 5.88614 | JPT |
| rs4391234  | Hs.485895 | Hs.485895-S   | 6 | 6 | 87890203 | 106487 | 6.385   | 5.88614 | JPT |
| rs6454581  | Hs.485895 | Hs.485895-S   | 6 | 6 | 87890787 | 105903 | 6.2804  | 5.88614 | JPT |
| rs9353450  | Hs.485895 | Hs.485895-S   | 6 | 6 | 87893105 | 103585 | 6.2804  | 5.88614 | JPT |
| rs6934717  | Hs.485895 | Hs.485895-S   | 6 | 6 | 87897718 | 98972  | 6.2804  | 5.88614 | JPT |
| rs9353455  | Hs.485895 | Hs.485895-S   | 6 | 6 | 87900084 | 96606  | 6.356   | 5.88614 | JPT |
| rs9353456  | Hs.485895 | Hs.485895-S   | 6 | 6 | 87900363 | 96327  | 6.356   | 5.88614 | JPT |
| rs7773568  | Hs.485895 | Hs.485895-S   | 6 | 6 | 87902002 | 94688  | 6.2804  | 5.88614 | JPT |
| rs1998765  | Hs.485895 | Hs.485895-S   | 6 | 6 | 87902966 | 93724  | 6.2804  | 5.88614 | JPT |
| rs16878497 | Hs.485895 | Hs.485895-S   | 6 | 6 | 87903393 | 93297  | 10.683  | 5.88614 | JPT |
| rs6454582  | Hs.485895 | Hs.485895-S   | 6 | 6 | 87905021 | 91669  | 6.2804  | 5.88614 | JPT |
| rs6940194  | Hs.485895 | Hs.485895-S   | 6 | 6 | 87905733 | 90957  | 6.2804  | 5.88614 | JPT |
| rs994170   | Hs.485895 | Hs.485895-S   | 6 | 6 | 87912232 | 84458  | 6.2804  | 5.88614 | JPT |
| rs6907805  | Hs.485895 | Hs.485895-S   | 6 | 6 | 87912722 | 83968  | 6.2804  | 5.88614 | JPT |
| rs6454587  | Hs.485895 | Hs.485895-S   | 6 | 6 | 87914601 | 82089  | 6.2804  | 5.88614 | JPT |
| rs9362398  | Hs.485895 | Hs.485895-S   | 6 | 6 | 87918814 | 77876  | 6.0979  | 5.88614 | JPT |
| rs1925689  | Hs.485895 | Hs.485895-S   | 6 | 6 | 87920070 | 76620  | 6.2804  | 5.88614 | JPT |
| rs9450624  | Hs.485895 | Hs.485895-S   | 6 | 6 | 87920859 | 75831  | 6.1433  | 5.88614 | JPT |
| rs1886752  | Hs.485895 | Hs.485895-S   | 6 | 6 | 87928442 | 68248  | 6.2804  | 5.88614 | JPT |
| rs9353462  | Hs.485895 | Hs.485895-S   | 6 | 6 | 87936431 | 60259  | 5.9265  | 5.88614 | JPT |
| rs1925692  | Hs.485895 | Hs.485895-S   | 6 | 6 | 87940726 | 55964  | 6.2804  | 5.88614 | JPT |
| rs6909021  | Hs.485895 | Hs.485895-S   | 6 | 6 | 87941032 | 55658  | 6.356   | 5.88614 | JPT |

|            |           |             |   |   |          |       |         |         |     |
|------------|-----------|-------------|---|---|----------|-------|---------|---------|-----|
| rs6909200  | Hs.485895 | Hs.485895-S | 6 | 6 | 87941146 | 55544 | 6.356   | 5.88614 | JPT |
| rs7739726  | Hs.485895 | Hs.485895-S | 6 | 6 | 87943303 | 53387 | 6.2804  | 5.88614 | JPT |
| rs7757827  | Hs.485895 | Hs.485895-S | 6 | 6 | 87943444 | 53246 | 6.2804  | 5.88614 | JPT |
| rs7768575  | Hs.485895 | Hs.485895-S | 6 | 6 | 87945397 | 51293 | 6.356   | 5.88614 | JPT |
| rs6454591  | Hs.485895 | Hs.485895-S | 6 | 6 | 87946003 | 50687 | 6.0642  | 5.88614 | JPT |
| rs1980790  | Hs.485895 | Hs.485895-S | 6 | 6 | 87946853 | 49837 | 6.2804  | 5.88614 | JPT |
| rs2147917  | Hs.485895 | Hs.485895-S | 6 | 6 | 87947184 | 49506 | 6.356   | 5.88614 | JPT |
| rs7766324  | Hs.485895 | Hs.485895-S | 6 | 6 | 87949941 | 46749 | 6.2804  | 5.88614 | JPT |
| rs1080596  | Hs.485895 | Hs.485895-S | 6 | 6 | 87951157 | 45533 | 6.2804  | 5.88614 | JPT |
| rs6913159  | Hs.485895 | Hs.485895-S | 6 | 6 | 87954518 | 42172 | 10.683  | 5.88614 | JPT |
| rs9450630  | Hs.485895 | Hs.485895-S | 6 | 6 | 87955879 | 40811 | 9.6715  | 5.88614 | JPT |
| rs7742710  | Hs.485895 | Hs.485895-S | 6 | 6 | 87955954 | 40736 | 6.1253  | 5.88614 | JPT |
| rs7776407  | Hs.485895 | Hs.485895-S | 6 | 6 | 87957380 | 39310 | 6.2804  | 5.88614 | JPT |
| rs4707345  | Hs.485895 | Hs.485895-S | 6 | 6 | 87958944 | 37746 | 10.7556 | 5.88614 | JPT |
| rs12181709 | Hs.485895 | Hs.485895-S | 6 | 6 | 87959372 | 37318 | 10.7556 | 5.88614 | JPT |
| rs6454593  | Hs.485895 | Hs.485895-S | 6 | 6 | 87961618 | 35072 | 6.306   | 5.88614 | JPT |
| rs1925695  | Hs.485895 | Hs.485895-S | 6 | 6 | 87962772 | 33918 | 5.9265  | 5.88614 | JPT |
| rs6940325  | Hs.485895 | Hs.485895-S | 6 | 6 | 87963635 | 33055 | 10.683  | 5.88614 | JPT |
| rs9344690  | Hs.485895 | Hs.485895-S | 6 | 6 | 87965250 | 31440 | 6.08    | 5.88614 | JPT |
| rs2147918  | Hs.485895 | Hs.485895-S | 6 | 6 | 87967855 | 28835 | 6.356   | 5.88614 | JPT |
| rs9344691  | Hs.485895 | Hs.485895-S | 6 | 6 | 87968227 | 28463 | 6.2804  | 5.88614 | JPT |
| rs2147920  | Hs.485895 | Hs.485895-S | 6 | 6 | 87968525 | 28165 | 6.0642  | 5.88614 | JPT |
| rs2147921  | Hs.485895 | Hs.485895-S | 6 | 6 | 87968580 | 28110 | 6.356   | 5.88614 | JPT |
| rs7773715  | Hs.485895 | Hs.485895-S | 6 | 6 | 87968776 | 27914 | 6.1433  | 5.88614 | JPT |
| rs4707346  | Hs.485895 | Hs.485895-S | 6 | 6 | 87970195 | 26495 | 6.356   | 5.88614 | JPT |
| rs6913932  | Hs.485895 | Hs.485895-S | 6 | 6 | 87971829 | 24861 | 6.356   | 5.88614 | JPT |
| rs7752485  | Hs.485895 | Hs.485895-S | 6 | 6 | 87972336 | 24354 | 6.2804  | 5.88614 | JPT |
| rs7752414  | Hs.485895 | Hs.485895-S | 6 | 6 | 87972541 | 24149 | 10.683  | 5.88614 | JPT |
| rs4707347  | Hs.485895 | Hs.485895-S | 6 | 6 | 87974481 | 22209 | 6.356   | 5.88614 | JPT |
| rs4110984  | Hs.485895 | Hs.485895-S | 6 | 6 | 87975193 | 21497 | 6.356   | 5.88614 | JPT |
| rs7755883  | Hs.485895 | Hs.485895-S | 6 | 6 | 87976321 | 20369 | 6.356   | 5.88614 | JPT |
| rs4099964  | Hs.485895 | Hs.485895-S | 6 | 6 | 87978314 | 18376 | 6.2804  | 5.88614 | JPT |
| rs3857483  | Hs.485895 | Hs.485895-S | 6 | 6 | 87980515 | 16175 | 6.2804  | 5.88614 | JPT |
| rs9450636  | Hs.485895 | Hs.485895-S | 6 | 6 | 87986888 | 9802  | 10.7556 | 5.88614 | JPT |
| rs3904088  | Hs.485895 | Hs.485895-S | 6 | 6 | 87987496 | 9194  | 6.2804  | 5.88614 | JPT |
| rs9353464  | Hs.485895 | Hs.485895-S | 6 | 6 | 87989958 | 6732  | 6.2009  | 5.88614 | JPT |
| rs9362411  | Hs.485895 | Hs.485895-S | 6 | 6 | 87990572 | 6118  | 6.356   | 5.88614 | JPT |
| rs13201289 | Hs.485895 | Hs.485895-S | 6 | 6 | 87993017 | 3673  | 10.683  | 5.88614 | JPT |
| rs7774603  | Hs.485895 | Hs.485895-S | 6 | 6 | 87993744 | 2946  | 6.356   | 5.88614 | JPT |
| rs9450638  | Hs.485895 | Hs.485895-S | 6 | 6 | 87994045 | 2645  | 10.7556 | 5.88614 | JPT |
| rs6926831  | Hs.485895 | Hs.485895-S | 6 | 6 | 87995082 | 1608  | 6.3502  | 5.88614 | JPT |
| rs9344693  | Hs.485895 | Hs.485895-S | 6 | 6 | 87996356 | 334   | 6.2804  | 5.88614 | JPT |
| rs6932641  | Hs.485895 | Hs.485895-S | 6 | 6 | 87997820 | 1130  | 10.683  | 5.88614 | JPT |
| rs6933046  | Hs.485895 | Hs.485895-S | 6 | 6 | 87998138 | 1448  | 6.356   | 5.88614 | JPT |
| rs4707355  | Hs.485895 | Hs.485895-S | 6 | 6 | 88009592 | 12902 | 10.7556 | 5.88614 | JPT |
| rs9344695  | Hs.485895 | Hs.485895-S | 6 | 6 | 88012963 | 16273 | 6.356   | 5.88614 | JPT |
| rs9353465  | Hs.485895 | Hs.485895-S | 6 | 6 | 88013005 | 16315 | 6.356   | 5.88614 | JPT |
| rs9362414  | Hs.485895 | Hs.485895-S | 6 | 6 | 88016474 | 19784 | 6.2804  | 5.88614 | JPT |
| rs7758618  | Hs.485895 | Hs.485895-S | 6 | 6 | 88020857 | 24167 | 6.2804  | 5.88614 | JPT |
| rs6908834  | Hs.485895 | Hs.485895-S | 6 | 6 | 88022247 | 25557 | 10.7556 | 5.88614 | JPT |
| rs9362415  | Hs.485895 | Hs.485895-S | 6 | 6 | 88025284 | 28594 | 6.2804  | 5.88614 | JPT |
| rs3734187  | Hs.485895 | Hs.485895-S | 6 | 6 | 88026456 | 29766 | 6.2804  | 5.88614 | JPT |
| rs9353468  | Hs.485895 | Hs.485895-S | 6 | 6 | 88030346 | 33656 | 6.356   | 5.88614 | JPT |
| rs4707356  | Hs.485895 | Hs.485895-S | 6 | 6 | 88032792 | 36102 | 6.356   | 5.88614 | JPT |
| rs9450645  | Hs.485895 | Hs.485895-S | 6 | 6 | 88034494 | 37804 | 11.0015 | 5.88614 | JPT |
| rs12176253 | Hs.485895 | Hs.485895-S | 6 | 6 | 88035509 | 38819 | 6.356   | 5.88614 | JPT |

|           |           |             |   |   |          |        |         |         |     |
|-----------|-----------|-------------|---|---|----------|--------|---------|---------|-----|
| rs9450646 | Hs.485895 | Hs.485895-S | 6 | 6 | 88035828 | 39138  | 10.683  | 5.88614 | JPT |
| rs6454596 | Hs.485895 | Hs.485895-S | 6 | 6 | 88037454 | 40764  | 6.2804  | 5.88614 | JPT |
| rs9450647 | Hs.485895 | Hs.485895-S | 6 | 6 | 88038314 | 41624  | 6.356   | 5.88614 | JPT |
| rs4707357 | Hs.485895 | Hs.485895-S | 6 | 6 | 88039715 | 43025  | 6.2804  | 5.88614 | JPT |
| rs9362417 | Hs.485895 | Hs.485895-S | 6 | 6 | 88040409 | 43719  | 6.356   | 5.88614 | JPT |
| rs6454599 | Hs.485895 | Hs.485895-S | 6 | 6 | 88041187 | 44497  | 6.356   | 5.88614 | JPT |
| rs6918942 | Hs.485895 | Hs.485895-S | 6 | 6 | 88043135 | 46445  | 6.2804  | 5.88614 | JPT |
| rs6899394 | Hs.485895 | Hs.485895-S | 6 | 6 | 88043415 | 46725  | 6.2804  | 5.88614 | JPT |
| rs6925648 | Hs.485895 | Hs.485895-S | 6 | 6 | 88044265 | 47575  | 6.356   | 5.88614 | JPT |
| rs9351124 | Hs.485895 | Hs.485895-S | 6 | 6 | 88047827 | 51137  | 6.356   | 5.88614 | JPT |
| rs6916994 | Hs.485895 | Hs.485895-S | 6 | 6 | 88047955 | 51265  | 6.356   | 5.88614 | JPT |
| rs6917432 | Hs.485895 | Hs.485895-S | 6 | 6 | 88048244 | 51554  | 6.356   | 5.88614 | JPT |
| rs2240459 | Hs.485895 | Hs.485895-S | 6 | 6 | 88049127 | 52437  | 6.356   | 5.88614 | JPT |
| rs2240461 | Hs.485895 | Hs.485895-S | 6 | 6 | 88049809 | 53119  | 6.1433  | 5.88614 | JPT |
| rs3812130 | Hs.485895 | Hs.485895-S | 6 | 6 | 88050480 | 53790  | 6.2804  | 5.88614 | JPT |
| rs6934603 | Hs.485895 | Hs.485895-S | 6 | 6 | 88050734 | 54044  | 6.2804  | 5.88614 | JPT |
| rs4707358 | Hs.485895 | Hs.485895-S | 6 | 6 | 88051291 | 54601  | 6.2804  | 5.88614 | JPT |
| rs9359743 | Hs.485895 | Hs.485895-S | 6 | 6 | 88053463 | 56773  | 6.356   | 5.88614 | JPT |
| rs9450650 | Hs.485895 | Hs.485895-S | 6 | 6 | 88055170 | 58480  | 6.356   | 5.88614 | JPT |
| rs9450651 | Hs.485895 | Hs.485895-S | 6 | 6 | 88055360 | 58670  | 10.683  | 5.88614 | JPT |
| rs6940544 | Hs.485895 | Hs.485895-S | 6 | 6 | 88057300 | 60610  | 6.2804  | 5.88614 | JPT |
| rs9294376 | Hs.485895 | Hs.485895-S | 6 | 6 | 88057485 | 60795  | 10.7556 | 5.88614 | JPT |
| rs3857488 | Hs.485895 | Hs.485895-S | 6 | 6 | 88057783 | 61093  | 6.2804  | 5.88614 | JPT |
| rs9450652 | Hs.485895 | Hs.485895-S | 6 | 6 | 88059076 | 62386  | 6.356   | 5.88614 | JPT |
| rs9444491 | Hs.485895 | Hs.485895-S | 6 | 6 | 88059104 | 62414  | 10.683  | 5.88614 | JPT |
| rs9450653 | Hs.485895 | Hs.485895-S | 6 | 6 | 88060840 | 64150  | 10.7556 | 5.88614 | JPT |
| rs6921673 | Hs.485895 | Hs.485895-S | 6 | 6 | 88061477 | 64787  | 10.7556 | 5.88614 | JPT |
| rs6926686 | Hs.485895 | Hs.485895-S | 6 | 6 | 88061917 | 65227  | 10.1249 | 5.88614 | JPT |
| rs6938885 | Hs.485895 | Hs.485895-S | 6 | 6 | 88063898 | 67208  | 8.283   | 5.88614 | JPT |
| rs6939075 | Hs.485895 | Hs.485895-S | 6 | 6 | 88063925 | 67235  | 10.7556 | 5.88614 | JPT |
| rs440296  | Hs.485895 | Hs.485895-S | 6 | 6 | 88065140 | 68450  | 10.683  | 5.88614 | JPT |
| rs410683  | Hs.485895 | Hs.485895-S | 6 | 6 | 88065639 | 68949  | 10.683  | 5.88614 | JPT |
| rs1328477 | Hs.485895 | Hs.485895-S | 6 | 6 | 88065764 | 69074  | 6.3393  | 5.88614 | JPT |
| rs242263  | Hs.485895 | Hs.485895-S | 6 | 6 | 88075032 | 78342  | 10.7556 | 5.88614 | JPT |
| rs59322   | Hs.485895 | Hs.485895-S | 6 | 6 | 88077240 | 80550  | 6.356   | 5.88614 | JPT |
| rs1145712 | Hs.485895 | Hs.485895-S | 6 | 6 | 88077837 | 81147  | 10.7556 | 5.88614 | JPT |
| rs413687  | Hs.485895 | Hs.485895-S | 6 | 6 | 88077999 | 81309  | 10.683  | 5.88614 | JPT |
| rs414453  | Hs.485895 | Hs.485895-S | 6 | 6 | 88078305 | 81615  | 10.7556 | 5.88614 | JPT |
| rs368267  | Hs.485895 | Hs.485895-S | 6 | 6 | 88078414 | 81724  | 10.683  | 5.88614 | JPT |
| rs411606  | Hs.485895 | Hs.485895-S | 6 | 6 | 88078472 | 81782  | 10.683  | 5.88614 | JPT |
| rs1145714 | Hs.485895 | Hs.485895-S | 6 | 6 | 88081237 | 84547  | 10.683  | 5.88614 | JPT |
| rs1145715 | Hs.485895 | Hs.485895-S | 6 | 6 | 88081762 | 85072  | 10.7556 | 5.88614 | JPT |
| rs1203162 | Hs.485895 | Hs.485895-S | 6 | 6 | 88081937 | 85247  | 10.683  | 5.88614 | JPT |
| rs1203163 | Hs.485895 | Hs.485895-S | 6 | 6 | 88082968 | 86278  | 10.3453 | 5.88614 | JPT |
| rs1203164 | Hs.485895 | Hs.485895-S | 6 | 6 | 88083682 | 86992  | 10.683  | 5.88614 | JPT |
| rs2983136 | Hs.485895 | Hs.485895-S | 6 | 6 | 88084934 | 88244  | 10.1249 | 5.88614 | JPT |
| rs242282  | Hs.485895 | Hs.485895-S | 6 | 6 | 88086299 | 89609  | 10.683  | 5.88614 | JPT |
| rs2875533 | Hs.485895 | Hs.485895-S | 6 | 6 | 88087306 | 90616  | 6.1433  | 5.88614 | JPT |
| rs242283  | Hs.485895 | Hs.485895-S | 6 | 6 | 88087650 | 90960  | 6.356   | 5.88614 | JPT |
| rs1746444 | Hs.485895 | Hs.485895-S | 6 | 6 | 88096587 | 99897  | 10.683  | 5.88614 | JPT |
| rs448580  | Hs.485895 | Hs.485895-S | 6 | 6 | 88097118 | 100428 | 6.2804  | 5.88614 | JPT |
| rs451465  | Hs.485895 | Hs.485895-S | 6 | 6 | 88100091 | 103401 | 5.9978  | 5.88614 | JPT |
| rs369674  | Hs.485895 | Hs.485895-S | 6 | 6 | 88100121 | 103431 | 6.2804  | 5.88614 | JPT |
| rs379455  | Hs.485895 | Hs.485895-S | 6 | 6 | 88100279 | 103589 | 10.683  | 5.88614 | JPT |
| rs242275  | Hs.485895 | Hs.485895-S | 6 | 6 | 88102682 | 105992 | 10.7556 | 5.88614 | JPT |
| rs242276  | Hs.485895 | Hs.485895-S | 6 | 6 | 88103096 | 106406 | 6.8551  | 5.88614 | JPT |



|            |           |               |   |   |           |        |         |         |     |
|------------|-----------|---------------|---|---|-----------|--------|---------|---------|-----|
| rs397516   | Hs.485895 | Hs.485895-S   | 6 | 6 | 88107771  | 111081 | 10.7942 | 5.88614 | JPT |
| rs398140   | Hs.485895 | Hs.485895-S   | 6 | 6 | 88107981  | 111291 | 10.7556 | 5.88614 | JPT |
| rs452315   | Hs.485895 | Hs.485895-S   | 6 | 6 | 88109206  | 112516 | 10.683  | 5.88614 | JPT |
| rs377288   | Hs.485895 | Hs.485895-S   | 6 | 6 | 88110196  | 113506 | 10.683  | 5.88614 | JPT |
| rs1201409  | Hs.485895 | Hs.485895-S   | 6 | 6 | 88111983  | 115293 | 6.2804  | 5.88614 | JPT |
| rs1188819  | Hs.485895 | Hs.485895-S   | 6 | 6 | 88112067  | 115377 | 9.2984  | 5.88614 | JPT |
| rs1188817  | Hs.485895 | Hs.485895-S   | 6 | 6 | 88112438  | 115748 | 10.5708 | 5.88614 | JPT |
| rs1188816  | Hs.485895 | Hs.485895-S   | 6 | 6 | 88112550  | 115860 | 10.4165 | 5.88614 | JPT |
| rs12211627 | Hs.485895 | Hs.485895-S   | 6 | 6 | 88113020  | 116330 | 10.683  | 5.88614 | JPT |
| rs373646   | Hs.485895 | Hs.485895-S   | 6 | 6 | 88113615  | 116925 | 6.356   | 5.88614 | JPT |
| rs381798   | Hs.485895 | Hs.485895-S   | 6 | 6 | 88113849  | 117159 | 10.683  | 5.88614 | JPT |
| rs910563   | Hs.485895 | Hs.485895-S   | 6 | 6 | 88115604  | 118914 | 6.2804  | 5.88614 | JPT |
| rs242264   | Hs.485895 | Hs.485895-S   | 6 | 6 | 88117457  | 120767 | 10.683  | 5.88614 | JPT |
| rs183599   | Hs.485895 | Hs.485895-S   | 6 | 6 | 88117743  | 121053 | 6.356   | 5.88614 | JPT |
| rs242265   | Hs.485895 | Hs.485895-S   | 6 | 6 | 88117758  | 121068 | 10.683  | 5.88614 | JPT |
| rs242267   | Hs.485895 | Hs.485895-S   | 6 | 6 | 88118556  | 121866 | 6.356   | 5.88614 | JPT |
| rs242268   | Hs.485895 | Hs.485895-S   | 6 | 6 | 88118603  | 121913 | 9.1365  | 5.88614 | JPT |
| rs242269   | Hs.485895 | Hs.485895-S   | 6 | 6 | 88118708  | 122018 | 10.683  | 5.88614 | JPT |
| rs242270   | Hs.485895 | Hs.485895-S   | 6 | 6 | 88118909  | 122219 | 6.356   | 5.88614 | JPT |
| rs540975   | Hs.485895 | Hs.485895-S   | 6 | 6 | 88119860  | 123170 | 10.683  | 5.88614 | JPT |
| rs541170   | Hs.485895 | Hs.485895-S   | 6 | 6 | 88119935  | 123245 | 10.7556 | 5.88614 | JPT |
| rs910564   | Hs.485895 | Hs.485895-S   | 6 | 6 | 88120530  | 123840 | 10.683  | 5.88614 | JPT |
| rs1739886  | Hs.485895 | Hs.485895-S   | 6 | 6 | 88122320  | 125630 | 10.683  | 5.88614 | JPT |
| rs406981   | Hs.485895 | Hs.485895-S   | 6 | 6 | 88124034  | 127344 | 10.7556 | 5.88614 | JPT |
| rs107690   | Hs.485895 | Hs.485895-S   | 6 | 6 | 88126071  | 129381 | 6.4768  | 5.88614 | JPT |
| rs242287   | Hs.485895 | Hs.485895-S   | 6 | 6 | 88128544  | 131854 | 6.2303  | 5.88614 | JPT |
| rs4895867  | KIAA1913  | GI_40538800-S | 6 | 6 | 130586202 | 219432 | 14.2122 | 5.95055 | JPT |
| rs4897380  | KIAA1913  | GI_40538800-S | 6 | 6 | 130589849 | 215785 | 15.9894 | 5.95055 | JPT |
| rs10447441 | KIAA1913  | GI_40538800-S | 6 | 6 | 130591445 | 214189 | 15.9894 | 5.95055 | JPT |
| rs10447418 | KIAA1913  | GI_40538800-S | 6 | 6 | 130591494 | 214140 | 15.9894 | 5.95055 | JPT |
| rs10447419 | KIAA1913  | GI_40538800-S | 6 | 6 | 130591756 | 213878 | 15.9894 | 5.95055 | JPT |
| rs17058546 | KIAA1913  | GI_40538800-S | 6 | 6 | 130592441 | 213193 | 6.0343  | 5.95055 | JPT |
| rs6927351  | KIAA1913  | GI_40538800-S | 6 | 6 | 130592657 | 212977 | 6.0343  | 5.95055 | JPT |
| rs12192791 | KIAA1913  | GI_40538800-S | 6 | 6 | 130593959 | 211675 | 15.9894 | 5.95055 | JPT |
| rs12194348 | KIAA1913  | GI_40538800-S | 6 | 6 | 130594437 | 211197 | 15.3597 | 5.95055 | JPT |
| rs1000424  | KIAA1913  | GI_40538800-S | 6 | 6 | 130595447 | 210187 | 15.9894 | 5.95055 | JPT |
| rs6930501  | KIAA1913  | GI_40538800-S | 6 | 6 | 130601967 | 203667 | 6.0343  | 5.95055 | JPT |
| rs12526676 | KIAA1913  | GI_40538800-S | 6 | 6 | 130603607 | 202027 | 6.0343  | 5.95055 | JPT |
| rs17058585 | KIAA1913  | GI_40538800-S | 6 | 6 | 130605490 | 200144 | 6.0343  | 5.95055 | JPT |
| rs9492501  | KIAA1913  | GI_40538800-S | 6 | 6 | 130608381 | 197253 | 15.9894 | 5.95055 | JPT |
| rs2064874  | KIAA1913  | GI_40538800-S | 6 | 6 | 130611524 | 194110 | 6.0343  | 5.95055 | JPT |
| rs2024974  | KIAA1913  | GI_40538800-S | 6 | 6 | 130611808 | 193826 | 15.3267 | 5.95055 | JPT |
| rs17058615 | KIAA1913  | GI_40538800-S | 6 | 6 | 130613127 | 192507 | 6.0343  | 5.95055 | JPT |
| rs990187   | KIAA1913  | GI_40538800-S | 6 | 6 | 130615210 | 190424 | 15.3267 | 5.95055 | JPT |
| rs2326946  | KIAA1913  | GI_40538800-S | 6 | 6 | 130618308 | 187326 | 14.6132 | 5.95055 | JPT |
| rs2086163  | KIAA1913  | GI_40538800-S | 6 | 6 | 130618528 | 187106 | 15.9894 | 5.95055 | JPT |
| rs962010   | KIAA1913  | GI_40538800-S | 6 | 6 | 130619088 | 186546 | 15.3267 | 5.95055 | JPT |
| rs962011   | KIAA1913  | GI_40538800-S | 6 | 6 | 130619370 | 186264 | 15.9894 | 5.95055 | JPT |
| rs1999683  | KIAA1913  | GI_40538800-S | 6 | 6 | 130619878 | 185756 | 15.9894 | 5.95055 | JPT |
| rs7751789  | KIAA1913  | GI_40538800-S | 6 | 6 | 130620331 | 185303 | 15.9894 | 5.95055 | JPT |
| rs7739747  | KIAA1913  | GI_40538800-S | 6 | 6 | 130630866 | 174768 | 15.3267 | 5.95055 | JPT |
| rs6569671  | KIAA1913  | GI_40538800-S | 6 | 6 | 130632280 | 173354 | 15.3267 | 5.95055 | JPT |
| rs6913808  | KIAA1913  | GI_40538800-S | 6 | 6 | 130633251 | 172383 | 15.3267 | 5.95055 | JPT |
| rs6918577  | KIAA1913  | GI_40538800-S | 6 | 6 | 130633532 | 172102 | 15.9894 | 5.95055 | JPT |
| rs6941691  | KIAA1913  | GI_40538800-S | 6 | 6 | 130633554 | 172080 | 15.6227 | 5.95055 | JPT |
| rs6918930  | KIAA1913  | GI_40538800-S | 6 | 6 | 130633705 | 171929 | 15.9894 | 5.95055 | JPT |

|            |          |               |   |   |           |        |         |         |     |
|------------|----------|---------------|---|---|-----------|--------|---------|---------|-----|
| rs10457545 | KIAA1913 | GI_40538800-S | 6 | 6 | 130633854 | 171780 | 15.9894 | 5.95055 | JPT |
| rs1478572  | KIAA1913 | GI_40538800-S | 6 | 6 | 130635360 | 170274 | 15.9894 | 5.95055 | JPT |
| rs4479965  | KIAA1913 | GI_40538800-S | 6 | 6 | 130635380 | 170254 | 15.9894 | 5.95055 | JPT |
| rs4568476  | KIAA1913 | GI_40538800-S | 6 | 6 | 130635461 | 170173 | 14.9748 | 5.95055 | JPT |
| rs6569672  | KIAA1913 | GI_40538800-S | 6 | 6 | 130635710 | 169924 | 15.9894 | 5.95055 | JPT |
| rs4513812  | KIAA1913 | GI_40538800-S | 6 | 6 | 130635813 | 169821 | 15.9894 | 5.95055 | JPT |
| rs6932063  | KIAA1913 | GI_40538800-S | 6 | 6 | 130636079 | 169555 | 15.3267 | 5.95055 | JPT |
| rs6931937  | KIAA1913 | GI_40538800-S | 6 | 6 | 130636135 | 169499 | 15.3808 | 5.95055 | JPT |
| rs6911840  | KIAA1913 | GI_40538800-S | 6 | 6 | 130636147 | 169487 | 15.9894 | 5.95055 | JPT |
| rs7772495  | KIAA1913 | GI_40538800-S | 6 | 6 | 130636964 | 168670 | 15.9894 | 5.95055 | JPT |
| rs11154556 | KIAA1913 | GI_40538800-S | 6 | 6 | 130637227 | 168407 | 15.9894 | 5.95055 | JPT |
| rs11154557 | KIAA1913 | GI_40538800-S | 6 | 6 | 130637287 | 168347 | 15.9894 | 5.95055 | JPT |
| rs11154558 | KIAA1913 | GI_40538800-S | 6 | 6 | 130637649 | 167985 | 15.6227 | 5.95055 | JPT |
| rs12189819 | KIAA1913 | GI_40538800-S | 6 | 6 | 130638084 | 167550 | 15.3267 | 5.95055 | JPT |
| rs4897394  | KIAA1913 | GI_40538800-S | 6 | 6 | 130639247 | 166387 | 15.3267 | 5.95055 | JPT |
| rs4897396  | KIAA1913 | GI_40538800-S | 6 | 6 | 130639612 | 166022 | 14.2827 | 5.95055 | JPT |
| rs12193492 | KIAA1913 | GI_40538800-S | 6 | 6 | 130639930 | 165704 | 10.9823 | 5.95055 | JPT |
| rs12206915 | KIAA1913 | GI_40538800-S | 6 | 6 | 130639964 | 165670 | 15.004  | 5.95055 | JPT |
| rs12193542 | KIAA1913 | GI_40538800-S | 6 | 6 | 130640033 | 165601 | 15.6099 | 5.95055 | JPT |
| rs12202107 | KIAA1913 | GI_40538800-S | 6 | 6 | 130640316 | 165318 | 15.9894 | 5.95055 | JPT |
| rs12197027 | KIAA1913 | GI_40538800-S | 6 | 6 | 130641595 | 164039 | 15.9894 | 5.95055 | JPT |
| rs12210502 | KIAA1913 | GI_40538800-S | 6 | 6 | 130641733 | 163901 | 15.9894 | 5.95055 | JPT |
| rs12197194 | KIAA1913 | GI_40538800-S | 6 | 6 | 130641749 | 163885 | 15.9894 | 5.95055 | JPT |
| rs11154559 | KIAA1913 | GI_40538800-S | 6 | 6 | 130642921 | 162713 | 12.9463 | 5.95055 | JPT |
| rs12212688 | KIAA1913 | GI_40538800-S | 6 | 6 | 130643073 | 162561 | 13.6296 | 5.95055 | JPT |
| rs12214250 | KIAA1913 | GI_40538800-S | 6 | 6 | 130643473 | 162161 | 15.3267 | 5.95055 | JPT |
| rs2089997  | KIAA1913 | GI_40538800-S | 6 | 6 | 130644811 | 160823 | 15.3267 | 5.95055 | JPT |
| rs2089998  | KIAA1913 | GI_40538800-S | 6 | 6 | 130644917 | 160717 | 15.9894 | 5.95055 | JPT |
| rs7765872  | KIAA1913 | GI_40538800-S | 6 | 6 | 130646121 | 159513 | 15.9894 | 5.95055 | JPT |
| rs7766039  | KIAA1913 | GI_40538800-S | 6 | 6 | 130646204 | 159430 | 15.5406 | 5.95055 | JPT |
| rs7770566  | KIAA1913 | GI_40538800-S | 6 | 6 | 130646423 | 159211 | 14.343  | 5.95055 | JPT |
| rs4897398  | KIAA1913 | GI_40538800-S | 6 | 6 | 130649264 | 156370 | 15.3267 | 5.95055 | JPT |
| rs12333039 | KIAA1913 | GI_40538800-S | 6 | 6 | 130649396 | 156238 | 10.7566 | 5.95055 | JPT |
| rs4895874  | KIAA1913 | GI_40538800-S | 6 | 6 | 130649931 | 155703 | 6.0343  | 5.95055 | JPT |
| rs4895875  | KIAA1913 | GI_40538800-S | 6 | 6 | 130649986 | 155648 | 6.0343  | 5.95055 | JPT |
| rs9492526  | KIAA1913 | GI_40538800-S | 6 | 6 | 130650354 | 155280 | 10.6998 | 5.95055 | JPT |
| rs10872358 | KIAA1913 | GI_40538800-S | 6 | 6 | 130650847 | 154787 | 10.7566 | 5.95055 | JPT |
| rs10872359 | KIAA1913 | GI_40538800-S | 6 | 6 | 130650861 | 154773 | 10.7566 | 5.95055 | JPT |
| rs11154561 | KIAA1913 | GI_40538800-S | 6 | 6 | 130650927 | 154707 | 10.4648 | 5.95055 | JPT |
| rs11154562 | KIAA1913 | GI_40538800-S | 6 | 6 | 130651243 | 154391 | 10.7566 | 5.95055 | JPT |
| rs11154564 | KIAA1913 | GI_40538800-S | 6 | 6 | 130651358 | 154276 | 10.7566 | 5.95055 | JPT |
| rs4897399  | KIAA1913 | GI_40538800-S | 6 | 6 | 130651450 | 154184 | 10.7566 | 5.95055 | JPT |
| rs11154565 | KIAA1913 | GI_40538800-S | 6 | 6 | 130651562 | 154072 | 10.7566 | 5.95055 | JPT |
| rs4897400  | KIAA1913 | GI_40538800-S | 6 | 6 | 130651582 | 154052 | 10.7566 | 5.95055 | JPT |
| rs4897401  | KIAA1913 | GI_40538800-S | 6 | 6 | 130651672 | 153962 | 10.7566 | 5.95055 | JPT |
| rs4897402  | KIAA1913 | GI_40538800-S | 6 | 6 | 130651701 | 153933 | 10.7566 | 5.95055 | JPT |
| rs12213521 | KIAA1913 | GI_40538800-S | 6 | 6 | 130652208 | 153426 | 10.1831 | 5.95055 | JPT |
| rs4897405  | KIAA1913 | GI_40538800-S | 6 | 6 | 130653866 | 151768 | 10.9665 | 5.95055 | JPT |
| rs4897406  | KIAA1913 | GI_40538800-S | 6 | 6 | 130653881 | 151753 | 10.3925 | 5.95055 | JPT |
| rs12211647 | KIAA1913 | GI_40538800-S | 6 | 6 | 130654552 | 151082 | 10.7566 | 5.95055 | JPT |
| rs12211796 | KIAA1913 | GI_40538800-S | 6 | 6 | 130654646 | 150988 | 11.0393 | 5.95055 | JPT |
| rs12211846 | KIAA1913 | GI_40538800-S | 6 | 6 | 130654693 | 150941 | 10.7566 | 5.95055 | JPT |
| rs12211753 | KIAA1913 | GI_40538800-S | 6 | 6 | 130654737 | 150897 | 10.5421 | 5.95055 | JPT |
| rs12198283 | KIAA1913 | GI_40538800-S | 6 | 6 | 130654814 | 150820 | 10.0619 | 5.95055 | JPT |
| rs12198460 | KIAA1913 | GI_40538800-S | 6 | 6 | 130655077 | 150557 | 9.0912  | 5.95055 | JPT |
| rs12194113 | KIAA1913 | GI_40538800-S | 6 | 6 | 130656028 | 149606 | 10.7566 | 5.95055 | JPT |

|            |          |               |   |   |           |        |         |         |     |
|------------|----------|---------------|---|---|-----------|--------|---------|---------|-----|
| rs12213950 | KIAA1913 | GI_40538800-S | 6 | 6 | 130656150 | 149484 | 10.7566 | 5.95055 | JPT |
| rs11154567 | KIAA1913 | GI_40538800-S | 6 | 6 | 130656627 | 149007 | 10.3816 | 5.95055 | JPT |
| rs12194184 | KIAA1913 | GI_40538800-S | 6 | 6 | 130658099 | 147535 | 10.7566 | 5.95055 | JPT |
| rs11154568 | KIAA1913 | GI_40538800-S | 6 | 6 | 130658363 | 147271 | 10.2996 | 5.95055 | JPT |
| rs4897407  | KIAA1913 | GI_40538800-S | 6 | 6 | 130658402 | 147232 | 10.3816 | 5.95055 | JPT |
| rs12528700 | KIAA1913 | GI_40538800-S | 6 | 6 | 130659022 | 146612 | 6.0343  | 5.95055 | JPT |
| rs12528756 | KIAA1913 | GI_40538800-S | 6 | 6 | 130659164 | 146470 | 6.0343  | 5.95055 | JPT |
| rs11966784 | KIAA1913 | GI_40538800-S | 6 | 6 | 130664247 | 141387 | 6.0343  | 5.95055 | JPT |
| rs11962431 | KIAA1913 | GI_40538800-S | 6 | 6 | 130664274 | 141360 | 7.5066  | 5.95055 | JPT |
| rs6938087  | KIAA1913 | GI_40538800-S | 6 | 6 | 130664561 | 141073 | 10.6509 | 5.95055 | JPT |
| rs7758496  | KIAA1913 | GI_40538800-S | 6 | 6 | 130670682 | 134952 | 10.3816 | 5.95055 | JPT |
| rs4349832  | KIAA1913 | GI_40538800-S | 6 | 6 | 130673256 | 132378 | 6.0343  | 5.95055 | JPT |
| rs1983720  | KIAA1913 | GI_40538800-S | 6 | 6 | 130674252 | 131382 | 5.9935  | 5.95055 | JPT |
| rs6923783  | KIAA1913 | GI_40538800-S | 6 | 6 | 130674855 | 130779 | 6.0343  | 5.95055 | JPT |
| rs7760869  | KIAA1913 | GI_40538800-S | 6 | 6 | 130675230 | 130404 | 6.0343  | 5.95055 | JPT |
| rs2037020  | KIAA1913 | GI_40538800-S | 6 | 6 | 130676393 | 129241 | 10.7566 | 5.95055 | JPT |
| rs2037021  | KIAA1913 | GI_40538800-S | 6 | 6 | 130676504 | 129130 | 10.7566 | 5.95055 | JPT |
| rs2024972  | KIAA1913 | GI_40538800-S | 6 | 6 | 130677226 | 128408 | 10.3816 | 5.95055 | JPT |
| rs9492535  | KIAA1913 | GI_40538800-S | 6 | 6 | 130678209 | 127425 | 10.7566 | 5.95055 | JPT |
| rs9492536  | KIAA1913 | GI_40538800-S | 6 | 6 | 130678343 | 127291 | 10.7566 | 5.95055 | JPT |
| rs9492537  | KIAA1913 | GI_40538800-S | 6 | 6 | 130678398 | 127236 | 10.4349 | 5.95055 | JPT |
| rs9492538  | KIAA1913 | GI_40538800-S | 6 | 6 | 130678417 | 127217 | 10.7566 | 5.95055 | JPT |
| rs6915557  | KIAA1913 | GI_40538800-S | 6 | 6 | 130678637 | 126997 | 10.7566 | 5.95055 | JPT |
| rs9492542  | KIAA1913 | GI_40538800-S | 6 | 6 | 130679567 | 126067 | 10.3816 | 5.95055 | JPT |
| rs7740388  | KIAA1913 | GI_40538800-S | 6 | 6 | 130679817 | 125817 | 10.3816 | 5.95055 | JPT |
| rs7758457  | KIAA1913 | GI_40538800-S | 6 | 6 | 130679842 | 125792 | 10.7566 | 5.95055 | JPT |
| rs7759052  | KIAA1913 | GI_40538800-S | 6 | 6 | 130680032 | 125602 | 10.7566 | 5.95055 | JPT |
| rs10872360 | KIAA1913 | GI_40538800-S | 6 | 6 | 130680419 | 125215 | 10.7566 | 5.95055 | JPT |
| rs9492544  | KIAA1913 | GI_40538800-S | 6 | 6 | 130680443 | 125191 | 10.7566 | 5.95055 | JPT |
| rs9492546  | KIAA1913 | GI_40538800-S | 6 | 6 | 130680602 | 125032 | 10.7566 | 5.95055 | JPT |
| rs10457551 | KIAA1913 | GI_40538800-S | 6 | 6 | 130680771 | 124863 | 10.7566 | 5.95055 | JPT |
| rs6928320  | KIAA1913 | GI_40538800-S | 6 | 6 | 130680803 | 124831 | 10.7566 | 5.95055 | JPT |
| rs6928618  | KIAA1913 | GI_40538800-S | 6 | 6 | 130681164 | 124470 | 6.0343  | 5.95055 | JPT |
| rs6928644  | KIAA1913 | GI_40538800-S | 6 | 6 | 130681206 | 124428 | 10.7566 | 5.95055 | JPT |
| rs4897409  | KIAA1913 | GI_40538800-S | 6 | 6 | 130681805 | 123829 | 10.7566 | 5.95055 | JPT |
| rs6940357  | KIAA1913 | GI_40538800-S | 6 | 6 | 130682614 | 123020 | 10.7566 | 5.95055 | JPT |
| rs6940373  | KIAA1913 | GI_40538800-S | 6 | 6 | 130682646 | 122988 | 10.7566 | 5.95055 | JPT |
| rs6940232  | KIAA1913 | GI_40538800-S | 6 | 6 | 130682686 | 122948 | 10.7566 | 5.95055 | JPT |
| rs9321222  | KIAA1913 | GI_40538800-S | 6 | 6 | 130682917 | 122717 | 10.7566 | 5.95055 | JPT |
| rs4895880  | KIAA1913 | GI_40538800-S | 6 | 6 | 130683654 | 121980 | 10.7566 | 5.95055 | JPT |
| rs4897410  | KIAA1913 | GI_40538800-S | 6 | 6 | 130683802 | 121832 | 10.7566 | 5.95055 | JPT |
| rs2326939  | KIAA1913 | GI_40538800-S | 6 | 6 | 130684015 | 121619 | 10.7566 | 5.95055 | JPT |
| rs7742461  | KIAA1913 | GI_40538800-S | 6 | 6 | 130684242 | 121392 | 10.7566 | 5.95055 | JPT |
| rs6569675  | KIAA1913 | GI_40538800-S | 6 | 6 | 130684416 | 121218 | 10.7566 | 5.95055 | JPT |
| rs6909415  | KIAA1913 | GI_40538800-S | 6 | 6 | 130684608 | 121026 | 10.7566 | 5.95055 | JPT |
| rs6909334  | KIAA1913 | GI_40538800-S | 6 | 6 | 130684804 | 120830 | 10.7566 | 5.95055 | JPT |
| rs6909986  | KIAA1913 | GI_40538800-S | 6 | 6 | 130684914 | 120720 | 10.7566 | 5.95055 | JPT |
| rs6910182  | KIAA1913 | GI_40538800-S | 6 | 6 | 130685049 | 120585 | 10.7566 | 5.95055 | JPT |
| rs899276   | KIAA1913 | GI_40538800-S | 6 | 6 | 130685849 | 119785 | 10.3816 | 5.95055 | JPT |
| rs12195758 | KIAA1913 | GI_40538800-S | 6 | 6 | 130686711 | 118923 | 10.7566 | 5.95055 | JPT |
| rs9398942  | KIAA1913 | GI_40538800-S | 6 | 6 | 130686750 | 118884 | 10.7566 | 5.95055 | JPT |
| rs724324   | KIAA1913 | GI_40538800-S | 6 | 6 | 130689089 | 116545 | 10.3816 | 5.95055 | JPT |
| rs1546555  | KIAA1913 | GI_40538800-S | 6 | 6 | 130689687 | 115947 | 10.7566 | 5.95055 | JPT |
| rs4141939  | KIAA1913 | GI_40538800-S | 6 | 6 | 130691021 | 114613 | 10.7566 | 5.95055 | JPT |
| rs4141940  | KIAA1913 | GI_40538800-S | 6 | 6 | 130691297 | 114337 | 10.7566 | 5.95055 | JPT |
| rs6569676  | KIAA1913 | GI_40538800-S | 6 | 6 | 130692019 | 113615 | 10.7566 | 5.95055 | JPT |

|            |          |               |   |   |           |        |         |         |     |
|------------|----------|---------------|---|---|-----------|--------|---------|---------|-----|
| rs4895881  | KIAA1913 | GI_40538800-S | 6 | 6 | 130695294 | 110340 | 10.7566 | 5.95055 | JPT |
| rs4897412  | KIAA1913 | GI_40538800-S | 6 | 6 | 130695438 | 110196 | 10.7566 | 5.95055 | JPT |
| rs12179502 | KIAA1913 | GI_40538800-S | 6 | 6 | 130697215 | 108419 | 6.0343  | 5.95055 | JPT |
| rs7759745  | KIAA1913 | GI_40538800-S | 6 | 6 | 130697540 | 108094 | 10.7566 | 5.95055 | JPT |
| rs6935211  | KIAA1913 | GI_40538800-S | 6 | 6 | 130699287 | 106347 | 10.3816 | 5.95055 | JPT |
| rs4897413  | KIAA1913 | GI_40538800-S | 6 | 6 | 130699411 | 106223 | 10.3816 | 5.95055 | JPT |
| rs12209659 | KIAA1913 | GI_40538800-S | 6 | 6 | 130704458 | 101176 | 6.0343  | 5.95055 | JPT |
| rs6914642  | KIAA1913 | GI_40538800-S | 6 | 6 | 130706341 | 99293  | 10.5421 | 5.95055 | JPT |
| rs6916087  | KIAA1913 | GI_40538800-S | 6 | 6 | 130707082 | 98552  | 10.7566 | 5.95055 | JPT |
| rs13362616 | KIAA1913 | GI_40538800-S | 6 | 6 | 130707139 | 98495  | 6.0343  | 5.95055 | JPT |
| rs907785   | KIAA1913 | GI_40538800-S | 6 | 6 | 130708036 | 97598  | 8.3207  | 5.95055 | JPT |
| rs12200185 | KIAA1913 | GI_40538800-S | 6 | 6 | 130708407 | 97227  | 6.0343  | 5.95055 | JPT |
| rs6915757  | KIAA1913 | GI_40538800-S | 6 | 6 | 130708877 | 96757  | 10.3816 | 5.95055 | JPT |
| rs10872364 | KIAA1913 | GI_40538800-S | 6 | 6 | 130712337 | 93297  | 10.7566 | 5.95055 | JPT |
| rs11154571 | KIAA1913 | GI_40538800-S | 6 | 6 | 130715399 | 90235  | 6.0343  | 5.95055 | JPT |
| rs6917875  | KIAA1913 | GI_40538800-S | 6 | 6 | 130717689 | 87945  | 10.3816 | 5.95055 | JPT |
| rs11154572 | KIAA1913 | GI_40538800-S | 6 | 6 | 130720479 | 85155  | 10.7566 | 5.95055 | JPT |
| rs1398816  | KIAA1913 | GI_40538800-S | 6 | 6 | 130721658 | 83976  | 10.7566 | 5.95055 | JPT |
| rs12192053 | KIAA1913 | GI_40538800-S | 6 | 6 | 130723955 | 81679  | 6.0343  | 5.95055 | JPT |
| rs12193766 | KIAA1913 | GI_40538800-S | 6 | 6 | 130724715 | 80919  | 6.0343  | 5.95055 | JPT |
| rs11154573 | KIAA1913 | GI_40538800-S | 6 | 6 | 130725578 | 80056  | 6.0343  | 5.95055 | JPT |
| rs905633   | KIAA1913 | GI_40538800-S | 6 | 6 | 130733973 | 71661  | 10.3816 | 5.95055 | JPT |
| rs4897418  | KIAA1913 | GI_40538800-S | 6 | 6 | 130743923 | 61711  | 10.3816 | 5.95055 | JPT |
| rs2011841  | KIAA1913 | GI_40538800-S | 6 | 6 | 130745726 | 59908  | 10.3816 | 5.95055 | JPT |
| rs9492566  | KIAA1913 | GI_40538800-S | 6 | 6 | 130749105 | 56529  | 10.3816 | 5.95055 | JPT |
| rs9492567  | KIAA1913 | GI_40538800-S | 6 | 6 | 130751476 | 54158  | 10.7566 | 5.95055 | JPT |
| rs9492570  | KIAA1913 | GI_40538800-S | 6 | 6 | 130755149 | 50485  | 10.7566 | 5.95055 | JPT |
| rs7755542  | KIAA1913 | GI_40538800-S | 6 | 6 | 130762210 | 43424  | 7.306   | 5.95055 | JPT |
| rs1553993  | KIAA1913 | GI_40538800-S | 6 | 6 | 130763423 | 42211  | 10.7566 | 5.95055 | JPT |
| rs1513541  | KIAA1913 | GI_40538800-S | 6 | 6 | 130769657 | 35977  | 10.3816 | 5.95055 | JPT |
| rs1504025  | KIAA1913 | GI_40538800-S | 6 | 6 | 130773567 | 32067  | 10.3816 | 5.95055 | JPT |
| rs6569682  | KIAA1913 | GI_40538800-S | 6 | 6 | 130776475 | 29159  | 10.3816 | 5.95055 | JPT |
| rs6941686  | KIAA1913 | GI_40538800-S | 6 | 6 | 130788356 | 17278  | 10.7566 | 5.95055 | JPT |
| rs10485237 | KIAA1913 | GI_40538800-S | 6 | 6 | 130791153 | 14481  | 9.985   | 5.95055 | JPT |
| rs10485238 | KIAA1913 | GI_40538800-S | 6 | 6 | 130792468 | 13166  | 10.7566 | 5.95055 | JPT |
| rs4897423  | KIAA1913 | GI_40538800-S | 6 | 6 | 130794585 | 11049  | 10.3816 | 5.95055 | JPT |
| rs7775870  | KIAA1913 | GI_40538800-S | 6 | 6 | 130795465 | 10169  | 10.4349 | 5.95055 | JPT |
| rs6927593  | KIAA1913 | GI_40538800-S | 6 | 6 | 130798637 | 6997   | 10.3816 | 5.95055 | JPT |
| rs10456986 | KIAA1913 | GI_40538800-S | 6 | 6 | 130800816 | 4818   | 10.7566 | 5.95055 | JPT |
| rs7768817  | KIAA1913 | GI_40538800-S | 6 | 6 | 130806857 | 1223   | 9.9617  | 5.95055 | JPT |
| rs4897424  | KIAA1913 | GI_40538800-S | 6 | 6 | 130808042 | 2408   | 10.7566 | 5.95055 | JPT |
| rs4555944  | KIAA1913 | GI_40538800-S | 6 | 6 | 130808797 | 3163   | 10.7566 | 5.95055 | JPT |
| rs2025353  | KIAA1913 | GI_40538800-S | 6 | 6 | 130809722 | 4088   | 10.3816 | 5.95055 | JPT |
| rs9372991  | AKAP7    | GI_20336197-A | 6 | 6 | 131493747 | 152338 | 6.6373  | 6.09719 | JPT |
| rs9402579  | SGK      | GI_25168262-S | 6 | 6 | 134642350 | 109697 | 6.0426  | 5.75257 | JPT |
| rs2072827  | ALDH8A1  | GI_25952151-A | 6 | 6 | 135295296 | 14842  | 6.4975  | 5.92921 | JPT |
| rs3817776  | ALDH8A1  | GI_25952151-A | 6 | 6 | 135298449 | 17995  | 6.344   | 5.92921 | JPT |
| rs4445070  | ALDH8A1  | GI_25952151-A | 6 | 6 | 135350905 | 70451  | 6.0931  | 5.92921 | JPT |
| rs11964805 | HEBP2    | GI_41393567-S | 6 | 6 | 138704089 | 64761  | 6.6476  | 6.06568 | JPT |
| rs7740144  | HEBP2    | GI_41393567-S | 6 | 6 | 138705078 | 63772  | 6.5109  | 6.06568 | JPT |
| rs9495020  | HEBP2    | GI_41393567-S | 6 | 6 | 138710940 | 57910  | 6.5109  | 6.06568 | JPT |
| rs9495025  | HEBP2    | GI_41393567-S | 6 | 6 | 138717557 | 51293  | 6.6476  | 6.06568 | JPT |
| rs7748815  | HEBP2    | GI_41393567-S | 6 | 6 | 138720945 | 47905  | 6.5109  | 6.06568 | JPT |
| rs7753628  | HEBP2    | GI_41393567-S | 6 | 6 | 138721532 | 47318  | 6.6476  | 6.06568 | JPT |
| rs11970756 | HEBP2    | GI_41393567-S | 6 | 6 | 138723146 | 45704  | 6.5109  | 6.06568 | JPT |
| rs9495030  | HEBP2    | GI_41393567-S | 6 | 6 | 138724217 | 44633  | 6.5109  | 6.06568 | JPT |

|            |           |               |   |   |           |       |         |         |     |
|------------|-----------|---------------|---|---|-----------|-------|---------|---------|-----|
| rs17067480 | HEBP2     | GI_41393567-S | 6 | 6 | 138725218 | 43632 | 6.6476  | 6.06568 | JPT |
| rs9484143  | HEBP2     | GI_41393567-S | 6 | 6 | 138726192 | 42658 | 6.5109  | 6.06568 | JPT |
| rs17067484 | HEBP2     | GI_41393567-S | 6 | 6 | 138726403 | 42447 | 6.6476  | 6.06568 | JPT |
| rs9689169  | HEBP2     | GI_41393567-S | 6 | 6 | 138726550 | 42300 | 6.5109  | 6.06568 | JPT |
| rs6933880  | HEBP2     | GI_41393567-S | 6 | 6 | 138730044 | 38806 | 6.5109  | 6.06568 | JPT |
| rs9495045  | HEBP2     | GI_41393567-S | 6 | 6 | 138732137 | 36713 | 6.4609  | 6.06568 | JPT |
| rs10223504 | HEBP2     | GI_41393567-S | 6 | 6 | 138732666 | 36184 | 7.5673  | 6.06568 | JPT |
| rs6570228  | HEBP2     | GI_41393567-S | 6 | 6 | 138732788 | 36062 | 7.7446  | 6.06568 | JPT |
| rs2076278  | HEBP2     | GI_41393567-S | 6 | 6 | 138732918 | 35932 | 7.2574  | 6.06568 | JPT |
| rs7752490  | HEBP2     | GI_41393567-S | 6 | 6 | 138734108 | 34742 | 7.6232  | 6.06568 | JPT |
| rs7756927  | HEBP2     | GI_41393567-S | 6 | 6 | 138734418 | 34432 | 7.8363  | 6.06568 | JPT |
| rs11966129 | HEBP2     | GI_41393567-S | 6 | 6 | 138735690 | 33160 | 7.6592  | 6.06568 | JPT |
| rs9495050  | HEBP2     | GI_41393567-S | 6 | 6 | 138738236 | 30614 | 7.7446  | 6.06568 | JPT |
| rs9495051  | HEBP2     | GI_41393567-S | 6 | 6 | 138738326 | 30524 | 7.7446  | 6.06568 | JPT |
| rs9495052  | HEBP2     | GI_41393567-S | 6 | 6 | 138738411 | 30439 | 7.6592  | 6.06568 | JPT |
| rs9495053  | HEBP2     | GI_41393567-S | 6 | 6 | 138739065 | 29785 | 7.6592  | 6.06568 | JPT |
| rs12181239 | HEBP2     | GI_41393567-S | 6 | 6 | 138742843 | 26007 | 7.7446  | 6.06568 | JPT |
| rs6918995  | HEBP2     | GI_41393567-S | 6 | 6 | 138744490 | 24360 | 7.6592  | 6.06568 | JPT |
| rs9484151  | HEBP2     | GI_41393567-S | 6 | 6 | 138744898 | 23952 | 7.7446  | 6.06568 | JPT |
| rs9484152  | HEBP2     | GI_41393567-S | 6 | 6 | 138744936 | 23914 | 7.7446  | 6.06568 | JPT |
| rs2076273  | HEBP2     | GI_41393567-S | 6 | 6 | 138745333 | 23517 | 7.8095  | 6.06568 | JPT |
| rs2076272  | HEBP2     | GI_41393567-S | 6 | 6 | 138745455 | 23395 | 7.7446  | 6.06568 | JPT |
| rs11966257 | HEBP2     | GI_41393567-S | 6 | 6 | 138747488 | 21362 | 7.7446  | 6.06568 | JPT |
| rs9495063  | HEBP2     | GI_41393567-S | 6 | 6 | 138749877 | 18973 | 7.7446  | 6.06568 | JPT |
| rs9495064  | HEBP2     | GI_41393567-S | 6 | 6 | 138750902 | 17948 | 7.6592  | 6.06568 | JPT |
| rs9495066  | HEBP2     | GI_41393567-S | 6 | 6 | 138751653 | 17197 | 7.6592  | 6.06568 | JPT |
| rs7765991  | HEBP2     | GI_41393567-S | 6 | 6 | 138752217 | 16633 | 7.7446  | 6.06568 | JPT |
| rs9495068  | HEBP2     | GI_41393567-S | 6 | 6 | 138753988 | 14862 | 7.7446  | 6.06568 | JPT |
| rs9495070  | HEBP2     | GI_41393567-S | 6 | 6 | 138756312 | 12538 | 7.6592  | 6.06568 | JPT |
| rs17053774 | HEBP2     | GI_41393567-S | 6 | 6 | 138757930 | 10920 | 7.7446  | 6.06568 | JPT |
| rs6914861  | HEBP2     | GI_41393567-S | 6 | 6 | 138761445 | 7405  | 7.6592  | 6.06568 | JPT |
| rs3756890  | HEBP2     | GI_41393567-S | 6 | 6 | 138765462 | 3388  | 7.6592  | 6.06568 | JPT |
| rs9495076  | HEBP2     | GI_41393567-S | 6 | 6 | 138767550 | 1300  | 7.7446  | 6.06568 | JPT |
| rs6919872  | HEBP2     | GI_41393567-S | 6 | 6 | 138767876 | 974   | 7.7446  | 6.06568 | JPT |
| rs3734304  | HEBP2     | GI_41393567-S | 6 | 6 | 138769098 | 248   | 7.6592  | 6.06568 | JPT |
| rs6570232  | HEBP2     | GI_41393567-S | 6 | 6 | 138771357 | 2507  | 7.6592  | 6.06568 | JPT |
| rs9495079  | HEBP2     | GI_41393567-S | 6 | 6 | 138774449 | 5599  | 7.7446  | 6.06568 | JPT |
| rs2076279  | HEBP2     | GI_41393567-S | 6 | 6 | 138775722 | 6872  | 7.6592  | 6.06568 | JPT |
| rs1053657  | HEBP2     | GI_41393567-S | 6 | 6 | 138776115 | 7265  | 7.7446  | 6.06568 | JPT |
| rs9484159  | HEBP2     | GI_41393567-S | 6 | 6 | 138776970 | 8120  | 7.7446  | 6.06568 | JPT |
| rs6570234  | HEBP2     | GI_41393567-S | 6 | 6 | 138781694 | 12844 | 6.1279  | 6.06568 | JPT |
| rs6930305  | HEBP2     | GI_41393567-S | 6 | 6 | 138781875 | 13025 | 6.2008  | 6.06568 | JPT |
| rs10946158 | LOC135043 | GI_17463264-S | 6 | 6 | 166701700 | 25306 | 14.0418 | 6.05026 | JPT |
| rs9347123  | LOC135043 | GI_17463264-S | 6 | 6 | 166705064 | 21942 | 6.84    | 6.05026 | JPT |
| rs9295336  | LOC135043 | GI_17463264-S | 6 | 6 | 166706773 | 20233 | 6.84    | 6.05026 | JPT |
| rs941683   | LOC135043 | GI_17463264-S | 6 | 6 | 166710681 | 16325 | 14.0418 | 6.05026 | JPT |
| rs12214812 | LOC135043 | GI_17463264-S | 6 | 6 | 166713571 | 13435 | 12.9834 | 6.05026 | JPT |
| rs9348119  | LOC135043 | GI_17463264-S | 6 | 6 | 166714171 | 12835 | 6.84    | 6.05026 | JPT |
| rs11752886 | LOC135043 | GI_17463264-S | 6 | 6 | 166716710 | 10296 | 14.1002 | 6.05026 | JPT |
| rs4144887  | LOC135043 | GI_17463264-S | 6 | 6 | 166717923 | 9083  | 11.0861 | 6.05026 | JPT |
| rs4144886  | LOC135043 | GI_17463264-S | 6 | 6 | 166717983 | 9023  | 13.5519 | 6.05026 | JPT |
| rs4144888  | LOC135043 | GI_17463264-S | 6 | 6 | 166718207 | 8799  | 14.1002 | 6.05026 | JPT |
| rs12198613 | LOC135043 | GI_17463264-S | 6 | 6 | 166718318 | 8688  | 14.1002 | 6.05026 | JPT |
| rs10455809 | LOC135043 | GI_17463264-S | 6 | 6 | 166721171 | 5835  | 13.0218 | 6.05026 | JPT |
| rs4710042  | LOC135043 | GI_17463264-S | 6 | 6 | 166722088 | 4918  | 6.2587  | 6.05026 | JPT |
| rs9348121  | LOC135043 | GI_17463264-S | 6 | 6 | 166725423 | 1583  | 6.88    | 6.05026 | JPT |

|            |           |               |   |   |           |        |         |         |     |
|------------|-----------|---------------|---|---|-----------|--------|---------|---------|-----|
| rs11755305 | LOC135043 | GI_17463264-S | 6 | 6 | 166725686 | 1320   | 14.1002 | 6.05026 | JPT |
| rs2294335  | LOC135043 | GI_17463264-S | 6 | 6 | 166726541 | 465    | 14.0418 | 6.05026 | JPT |
| rs2294334  | LOC135043 | GI_17463264-S | 6 | 6 | 166726590 | 416    | 13.8501 | 6.05026 | JPT |
| rs11753652 | LOC135043 | GI_17463264-S | 6 | 6 | 166727402 | 396    | 13.8501 | 6.05026 | JPT |
| rs12701834 | LOC389456 | GI_41147544-S | 7 | 7 | 878667    | 12094  | 6.3154  | 6.11044 | JPT |
| rs7787274  | FTSJ2     | GI_29294652-I | 7 | 7 | 2049234   | 1687   | 6.0504  | 6.01528 | JPT |
| rs798518   | LOC392620 | GI_41147689-S | 7 | 7 | 2551066   | 16168  | 6.3713  | 6.19336 | JPT |
| rs798500   | LOC392620 | GI_41147689-S | 7 | 7 | 2563926   | 29028  | 7.4929  | 6.19336 | JPT |
| rs798499   | LOC392620 | GI_41147689-S | 7 | 7 | 2565254   | 30356  | 6.7625  | 6.19336 | JPT |
| rs798498   | LOC392620 | GI_41147689-S | 7 | 7 | 2569123   | 34225  | 7.2653  | 6.19336 | JPT |
| rs798497   | LOC392620 | GI_41147689-S | 7 | 7 | 2569198   | 34300  | 6.6812  | 6.19336 | JPT |
| rs798495   | LOC392620 | GI_41147689-S | 7 | 7 | 2570508   | 35610  | 7.4929  | 6.19336 | JPT |
| rs798494   | LOC392620 | GI_41147689-S | 7 | 7 | 2571535   | 36637  | 7.4929  | 6.19336 | JPT |
| rs798492   | LOC392620 | GI_41147689-S | 7 | 7 | 2572425   | 37527  | 7.2653  | 6.19336 | JPT |
| rs798491   | LOC392620 | GI_41147689-S | 7 | 7 | 2573762   | 38864  | 7.4929  | 6.19336 | JPT |
| rs798490   | LOC392620 | GI_41147689-S | 7 | 7 | 2574783   | 39885  | 7.4929  | 6.19336 | JPT |
| rs798486   | LOC392620 | GI_41147689-S | 7 | 7 | 2576278   | 41380  | 8.3511  | 6.19336 | JPT |
| rs798485   | LOC392620 | GI_41147689-S | 7 | 7 | 2576751   | 41853  | 7.0089  | 6.19336 | JPT |
| rs1182208  | LOC392620 | GI_41147689-S | 7 | 7 | 2581973   | 47075  | 7.4929  | 6.19336 | JPT |
| rs7777484  | LOC392620 | GI_41147689-S | 7 | 7 | 2587512   | 52614  | 7.1227  | 6.19336 | JPT |
| rs7807978  | LOC392620 | GI_41147689-S | 7 | 7 | 2587876   | 52978  | 7.2653  | 6.19336 | JPT |
| rs2283779  | LOC392620 | GI_41147689-S | 7 | 7 | 2588381   | 53483  | 7.0089  | 6.19336 | JPT |
| rs2527684  | LOC392620 | GI_41147689-S | 7 | 7 | 2599163   | 64265  | 7.4929  | 6.19336 | JPT |
| rs2527687  | LOC392620 | GI_41147689-S | 7 | 7 | 2611726   | 76828  | 7.5057  | 6.19336 | JPT |
| rs2644312  | LOC392620 | GI_41147689-S | 7 | 7 | 2614405   | 79507  | 7.6045  | 6.19336 | JPT |
| rs2644275  | LOC392620 | GI_41147689-S | 7 | 7 | 2627251   | 92353  | 6.8247  | 6.19336 | JPT |
| rs2644274  | LOC392620 | GI_41147689-S | 7 | 7 | 2627621   | 92723  | 7.4828  | 6.19336 | JPT |
| rs960273   | LOC392620 | GI_41147689-S | 7 | 7 | 2631117   | 96219  | 6.6263  | 6.19336 | JPT |
| rs2644296  | LOC392620 | GI_41147689-S | 7 | 7 | 2632302   | 97404  | 7.2653  | 6.19336 | JPT |
| rs2644295  | LOC392620 | GI_41147689-S | 7 | 7 | 2633458   | 98560  | 7.2653  | 6.19336 | JPT |
| rs1182198  | LOC392620 | GI_41147689-S | 7 | 7 | 2636147   | 101249 | 7.8406  | 6.19336 | JPT |
| rs2158694  | LOC392620 | GI_41147689-S | 7 | 7 | 2636684   | 101786 | 7.612   | 6.19336 | JPT |
| rs2107964  | LOC392620 | GI_41147689-S | 7 | 7 | 2636815   | 101917 | 7.612   | 6.19336 | JPT |
| rs1713919  | LOC392620 | GI_41147689-S | 7 | 7 | 2637947   | 103049 | 6.5356  | 6.19336 | JPT |
| rs1182196  | LOC392620 | GI_41147689-S | 7 | 7 | 2639719   | 104821 | 7.2653  | 6.19336 | JPT |
| rs757791   | LOC392620 | GI_41147689-S | 7 | 7 | 2640537   | 105639 | 6.8247  | 6.19336 | JPT |
| rs11769380 | HRI       | GI_11125767-S | 7 | 7 | 5815763   | 21162  | 5.8348  | 5.8087  | JPT |
| rs2068459  | GPNMB     | GI_4505404-S  | 7 | 7 | 22927553  | 160033 | 6.629   | 6.08927 | JPT |
| rs1468593  | GPNMB     | GI_4505404-S  | 7 | 7 | 22953372  | 134214 | 6.4679  | 6.08927 | JPT |
| rs6942981  | GPNMB     | GI_4505404-S  | 7 | 7 | 23004788  | 82798  | 6.1063  | 6.08927 | JPT |
| rs2160195  | Hs.128024 | Hs.128024-S   | 7 | 7 | 38178211  | 13021  | 6.1398  | 6.04682 | JPT |
| rs1058655  | Hs.128024 | Hs.128024-S   | 7 | 7 | 38204721  | 13489  | 7.1745  | 6.04682 | JPT |
| rs17553002 | ZNFN1A1   | GI_31657112-S | 7 | 7 | 50251707  | 7344   | 11.3175 | 5.84248 | JPT |
| rs17634434 | ZNFN1A1   | GI_31657112-S | 7 | 7 | 50252989  | 8626   | 10.1194 | 5.84248 | JPT |
| rs17553022 | ZNFN1A1   | GI_31657112-S | 7 | 7 | 50257663  | 13300  | 10.4279 | 5.84248 | JPT |
| rs7792486  | ZNFN1A1   | GI_31657112-S | 7 | 7 | 50260518  | 16155  | 9.9915  | 5.84248 | JPT |
| rs7779747  | ZNFN1A1   | GI_31657112-S | 7 | 7 | 50265567  | 21204  | 10.1194 | 5.84248 | JPT |
| rs7779917  | ZNFN1A1   | GI_31657112-S | 7 | 7 | 50265720  | 21357  | 10.1194 | 5.84248 | JPT |
| rs17634488 | ZNFN1A1   | GI_31657112-S | 7 | 7 | 50271340  | 26977  | 9.2065  | 5.84248 | JPT |
| rs4563845  | LOC378075 | GI_37538916-S | 7 | 7 | 55552324  | 405610 | 7.8311  | 5.95303 | JPT |
| rs10232851 | LOC378075 | GI_37538916-S | 7 | 7 | 55603043  | 354891 | 13.3632 | 5.95303 | JPT |
| rs12668532 | LOC378075 | GI_37538916-S | 7 | 7 | 55811192  | 146742 | 5.9537  | 5.95303 | JPT |
| rs12534109 | hmm32897  | hmm32897-S    | 7 | 7 | 65057800  | 591804 | 6.2562  | 5.76081 | JPT |
| rs2292936  | hmm32897  | hmm32897-S    | 7 | 7 | 65061805  | 587799 | 6.3003  | 5.76081 | JPT |
| rs12532675 | hmm32897  | hmm32897-S    | 7 | 7 | 65150964  | 498640 | 6.2562  | 5.76081 | JPT |
| rs12531900 | hmm32897  | hmm32897-S    | 7 | 7 | 65171078  | 478526 | 6.3003  | 5.76081 | JPT |

|            |          |               |   |   |          |        |        |         |     |
|------------|----------|---------------|---|---|----------|--------|--------|---------|-----|
| rs1363056  | hmm32897 | hmm32897-S    | 7 | 7 | 65261623 | 387981 | 6.3003 | 5.76081 | JPT |
| rs4718345  | hmm32897 | hmm32897-S    | 7 | 7 | 65338339 | 311265 | 6.2562 | 5.76081 | JPT |
| rs12540667 | hmm32897 | hmm32897-S    | 7 | 7 | 65343783 | 305821 | 6.3003 | 5.76081 | JPT |
| rs12537368 | hmm32897 | hmm32897-S    | 7 | 7 | 65343800 | 305804 | 6.2562 | 5.76081 | JPT |
| rs3735146  | hmm32897 | hmm32897-S    | 7 | 7 | 65414445 | 235159 | 6.2562 | 5.76081 | JPT |
| rs12534985 | hmm32897 | hmm32897-S    | 7 | 7 | 65460597 | 189007 | 6.1036 | 5.76081 | JPT |
| rs17228285 | hmm32897 | hmm32897-S    | 7 | 7 | 65476397 | 173207 | 6.3003 | 5.76081 | JPT |
| rs4717305  | hmm32897 | hmm32897-S    | 7 | 7 | 65499604 | 150000 | 5.7912 | 5.76081 | JPT |
| rs12532267 | hmm32897 | hmm32897-S    | 7 | 7 | 65559585 | 90019  | 6.471  | 5.76081 | JPT |
| rs2286682  | hmm32897 | hmm32897-S    | 7 | 7 | 65574028 | 75576  | 6.2562 | 5.76081 | JPT |
| rs4718390  | hmm32897 | hmm32897-S    | 7 | 7 | 65627657 | 21947  | 5.7762 | 5.76081 | JPT |
| rs12537403 | hmm32897 | hmm32897-S    | 7 | 7 | 65632465 | 17139  | 6.3003 | 5.76081 | JPT |
| rs4718391  | hmm32897 | hmm32897-S    | 7 | 7 | 65643494 | 6110   | 6.3003 | 5.76081 | JPT |
| rs3778906  | hmm32897 | hmm32897-S    | 7 | 7 | 65657350 | 7746   | 6.3003 | 5.76081 | JPT |
| rs12532147 | hmm32897 | hmm32897-S    | 7 | 7 | 65660100 | 10496  | 6.3003 | 5.76081 | JPT |
| rs12531402 | hmm32897 | hmm32897-S    | 7 | 7 | 65661658 | 12054  | 6.3003 | 5.76081 | JPT |
| rs4718395  | hmm32897 | hmm32897-S    | 7 | 7 | 65665299 | 15695  | 6.2562 | 5.76081 | JPT |
| rs4718398  | hmm32897 | hmm32897-S    | 7 | 7 | 65673785 | 24181  | 6.1957 | 5.76081 | JPT |
| rs12539848 | hmm32897 | hmm32897-S    | 7 | 7 | 65683981 | 34377  | 6.3003 | 5.76081 | JPT |
| rs10499785 | hmm32897 | hmm32897-S    | 7 | 7 | 65698271 | 48667  | 6.2562 | 5.76081 | JPT |
| rs4718407  | hmm32897 | hmm32897-S    | 7 | 7 | 65710453 | 60849  | 6.5508 | 5.76081 | JPT |
| rs3778911  | hmm32897 | hmm32897-S    | 7 | 7 | 65720303 | 70699  | 6.2562 | 5.76081 | JPT |
| rs12531377 | hmm32897 | hmm32897-S    | 7 | 7 | 65726565 | 76961  | 6.2562 | 5.76081 | JPT |
| rs12535268 | hmm32897 | hmm32897-S    | 7 | 7 | 65784895 | 135291 | 6.2562 | 5.76081 | JPT |
| rs4717329  | hmm32897 | hmm32897-S    | 7 | 7 | 65798534 | 148930 | 6.2008 | 5.76081 | JPT |
| rs2293351  | hmm32897 | hmm32897-S    | 7 | 7 | 65831041 | 181437 | 6.2089 | 5.76081 | JPT |
| rs12539366 | hmm32897 | hmm32897-S    | 7 | 7 | 65836330 | 186726 | 6.2562 | 5.76081 | JPT |
| rs12537955 | hmm32897 | hmm32897-S    | 7 | 7 | 65852343 | 202739 | 6.1705 | 5.76081 | JPT |
| rs7384621  | RABGEF1  | GI_7657495-S  | 7 | 7 | 65884650 | 164550 | 6.6245 | 5.72699 | JPT |
| rs12540695 | hmm32897 | hmm32897-S    | 7 | 7 | 65897727 | 248123 | 6.2562 | 5.76081 | JPT |
| rs12534401 | hmm32897 | hmm32897-S    | 7 | 7 | 65899722 | 250118 | 6.1957 | 5.76081 | JPT |
| rs4355658  | WBSCR27  | GI_30795189-S | 7 | 7 | 72670343 | 23459  | 5.9152 | 5.43738 | JPT |
| rs6946037  | WBSCR27  | GI_30795189-S | 7 | 7 | 72681366 | 12436  | 7.9789 | 5.43738 | JPT |
| rs4255023  | WBSCR27  | GI_30795189-S | 7 | 7 | 72684269 | 9533   | 7.9789 | 5.43738 | JPT |
| rs8629     | WBSCR27  | GI_30795189-S | 7 | 7 | 72690170 | 3632   | 7.9789 | 5.43738 | JPT |
| rs1127155  | WBSCR27  | GI_30795189-S | 7 | 7 | 72691112 | 2690   | 8.5735 | 5.43738 | JPT |
| rs11316    | WBSCR27  | GI_30795189-S | 7 | 7 | 72691206 | 2596   | 7.7287 | 5.43738 | JPT |
| rs13232463 | WBSCR27  | GI_30795189-S | 7 | 7 | 72693950 | 148    | 7.9789 | 5.43738 | JPT |
| rs4304218  | WBSCR27  | GI_30795189-S | 7 | 7 | 72697631 | 3829   | 7.2781 | 5.43738 | JPT |
| rs1073909  | WBSCR27  | GI_30795189-S | 7 | 7 | 72702940 | 9138   | 7.9789 | 5.43738 | JPT |
| rs4717112  | WBSCR27  | GI_30795189-S | 7 | 7 | 72710068 | 16266  | 7.146  | 5.43738 | JPT |
| rs4327742  | WBSCR27  | GI_30795189-S | 7 | 7 | 72712377 | 18575  | 7.237  | 5.43738 | JPT |
| rs13224065 | STEAP    | GI_22027487-S | 7 | 7 | 89447014 | 8383   | 6.6057 | 5.84738 | JPT |
| rs17168173 | ACN9     | GI_9910179-S  | 7 | 7 | 96370364 | 84756  | 7.4349 | 5.81414 | JPT |
| rs17168174 | ACN9     | GI_9910179-S  | 7 | 7 | 96378623 | 76497  | 7.4349 | 5.81414 | JPT |
| rs17168179 | ACN9     | GI_9910179-S  | 7 | 7 | 96380187 | 74933  | 7.4349 | 5.81414 | JPT |
| rs6973504  | ACN9     | GI_9910179-S  | 7 | 7 | 96392135 | 62985  | 7.1871 | 5.81414 | JPT |
| rs10499936 | ACN9     | GI_9910179-S  | 7 | 7 | 96445652 | 9468   | 7.1871 | 5.81414 | JPT |
| rs11975277 | ACN9     | GI_9910179-S  | 7 | 7 | 96453222 | 1898   | 7.4349 | 5.81414 | JPT |
| rs2527927  | TRIM4    | GI_15011940-A | 7 | 7 | 99122077 | 11296  | 6.1881 | 5.41747 | JPT |
| rs2082744  | TRIM4    | GI_15011940-A | 7 | 7 | 99126067 | 7306   | 6.0681 | 5.41747 | JPT |
| rs2572011  | TRIM4    | GI_15011940-A | 7 | 7 | 99131722 | 1651   | 6.1881 | 5.41747 | JPT |
| rs2572010  | TRIM4    | GI_15011940-A | 7 | 7 | 99133194 | 179    | 5.9523 | 5.41747 | JPT |
| rs1048705  | TRIM4    | GI_15011940-A | 7 | 7 | 99133591 | 218    | 5.9523 | 5.41747 | JPT |
| rs2572009  | TRIM4    | GI_15011940-A | 7 | 7 | 99133656 | 283    | 5.9523 | 5.41747 | JPT |
| rs2572008  | TRIM4    | GI_15011940-A | 7 | 7 | 99135607 | 2234   | 5.9523 | 5.41747 | JPT |

|            |           |               |   |   |           |        |         |         |     |
|------------|-----------|---------------|---|---|-----------|--------|---------|---------|-----|
| rs2527922  | TRIM4     | GI_15011940-A | 7 | 7 | 99137407  | 4034   | 6.1881  | 5.41747 | JPT |
| rs2572006  | TRIM4     | GI_15011940-A | 7 | 7 | 99138462  | 5089   | 6.0884  | 5.41747 | JPT |
| rs2527919  | TRIM4     | GI_15011940-A | 7 | 7 | 99139164  | 5791   | 5.9523  | 5.41747 | JPT |
| rs2527914  | TRIM4     | GI_15011940-A | 7 | 7 | 99142796  | 9423   | 5.6341  | 5.41747 | JPT |
| rs2572003  | TRIM4     | GI_15011940-A | 7 | 7 | 99145964  | 12591  | 5.8603  | 5.41747 | JPT |
| rs7781442  | TRIM4     | GI_15011940-A | 7 | 7 | 99149874  | 16501  | 5.6419  | 5.41747 | JPT |
| rs2572000  | TRIM4     | GI_15011940-A | 7 | 7 | 99153975  | 20602  | 6.1881  | 5.41747 | JPT |
| rs2571998  | TRIM4     | GI_15011940-A | 7 | 7 | 99156023  | 22650  | 6.4889  | 5.41747 | JPT |
| rs1865472  | TRIM4     | GI_15011940-A | 7 | 7 | 99156214  | 22841  | 5.9523  | 5.41747 | JPT |
| rs2571997  | TRIM4     | GI_15011940-A | 7 | 7 | 99159068  | 25695  | 5.9523  | 5.41747 | JPT |
| rs2571992  | TRIM4     | GI_15011940-A | 7 | 7 | 99164567  | 31194  | 6.1881  | 5.41747 | JPT |
| rs2527908  | TRIM4     | GI_15011940-A | 7 | 7 | 99165214  | 31841  | 5.9523  | 5.41747 | JPT |
| rs1121592  | TRIM4     | GI_15011940-A | 7 | 7 | 99168282  | 34909  | 6.1881  | 5.41747 | JPT |
| rs2527901  | TRIM4     | GI_15011940-A | 7 | 7 | 99169763  | 36390  | 6.1881  | 5.41747 | JPT |
| rs2527900  | TRIM4     | GI_15011940-A | 7 | 7 | 99169892  | 36519  | 6.1863  | 5.41747 | JPT |
| rs12912    | Hs.397369 | Hs.397369-S   | 7 | 7 | 100334220 | 1659   | 5.9027  | 5.63368 | JPT |
| rs13242262 | IRF5      | GI_38683858-A | 7 | 7 | 128185315 | 2173   | 11.0368 | 5.9125  | JPT |
| rs2280714  | IRF5      | GI_38683858-A | 7 | 7 | 128188676 | 5534   | 5.9773  | 5.9125  | JPT |
| rs10229001 | IRF5      | GI_38683858-A | 7 | 7 | 128193348 | 10206  | 12.4944 | 5.9125  | JPT |
| rs2172876  | IRF5      | GI_38683858-A | 7 | 7 | 128197243 | 14101  | 11.8147 | 5.9125  | JPT |
| rs7385716  | IRF5      | GI_38683858-A | 7 | 7 | 128199545 | 16403  | 13.4494 | 5.9125  | JPT |
| rs4731535  | IRF5      | GI_38683858-A | 7 | 7 | 128199918 | 16776  | 13.795  | 5.9125  | JPT |
| rs8043     | IRF5      | GI_38683858-A | 7 | 7 | 128201335 | 18193  | 13.0717 | 5.9125  | JPT |
| rs6953869  | IRF5      | GI_38683858-A | 7 | 7 | 128202711 | 19569  | 13.5928 | 5.9125  | JPT |
| rs1874332  | IRF5      | GI_38683858-A | 7 | 7 | 128208564 | 25422  | 13.0717 | 5.9125  | JPT |
| rs7789423  | IRF5      | GI_38683858-A | 7 | 7 | 128215155 | 32013  | 5.9773  | 5.9125  | JPT |
| rs6948928  | IRF5      | GI_38683858-A | 7 | 7 | 128217048 | 33906  | 6.4426  | 5.9125  | JPT |
| rs11770317 | IRF5      | GI_38683858-A | 7 | 7 | 128223422 | 40280  | 13.795  | 5.9125  | JPT |
| rs7807018  | IRF5      | GI_38683858-A | 7 | 7 | 128234139 | 50997  | 13.0717 | 5.9125  | JPT |
| rs2305324  | IRF5      | GI_38683858-A | 7 | 7 | 128235177 | 52035  | 8.473   | 5.9125  | JPT |
| rs11767711 | IRF5      | GI_38683858-A | 7 | 7 | 128245783 | 62641  | 13.839  | 5.9125  | JPT |
| rs2305325  | IRF5      | GI_38683858-A | 7 | 7 | 128248791 | 65649  | 8.1163  | 5.9125  | JPT |
| rs6965542  | IRF5      | GI_38683858-A | 7 | 7 | 128249869 | 66727  | 8.2601  | 5.9125  | JPT |
| rs12155080 | IRF5      | GI_38683858-A | 7 | 7 | 128252690 | 69548  | 13.795  | 5.9125  | JPT |
| rs13221560 | IRF5      | GI_38683858-A | 7 | 7 | 128257126 | 73984  | 6.3951  | 5.9125  | JPT |
| rs10239340 | IRF5      | GI_38683858-A | 7 | 7 | 128262461 | 79319  | 13.0717 | 5.9125  | JPT |
| rs11762968 | IRF5      | GI_38683858-A | 7 | 7 | 128264915 | 81773  | 13.795  | 5.9125  | JPT |
| rs1072767  | IRF5      | GI_38683858-A | 7 | 7 | 128267156 | 84014  | 5.9773  | 5.9125  | JPT |
| rs921403   | IRF5      | GI_38683858-A | 7 | 7 | 128270675 | 87533  | 6.4426  | 5.9125  | JPT |
| rs4731541  | IRF5      | GI_38683858-A | 7 | 7 | 128272187 | 89045  | 13.0717 | 5.9125  | JPT |
| rs10279821 | IRF5      | GI_38683858-A | 7 | 7 | 128277498 | 94356  | 5.9773  | 5.9125  | JPT |
| rs2167273  | IRF5      | GI_38683858-A | 7 | 7 | 128283364 | 100222 | 7.992   | 5.9125  | JPT |
| rs6960994  | IRF5      | GI_38683858-A | 7 | 7 | 128286608 | 103466 | 13.0717 | 5.9125  | JPT |
| rs6961014  | IRF5      | GI_38683858-A | 7 | 7 | 128286661 | 103519 | 13.795  | 5.9125  | JPT |
| rs2242028  | IRF5      | GI_38683858-A | 7 | 7 | 128288927 | 105785 | 13.795  | 5.9125  | JPT |
| rs10241456 | KIAA0265  | GI_44917618-S | 7 | 7 | 129306475 | 60655  | 6.2763  | 5.96965 | JPT |
| rs12531444 | KIAA0265  | GI_44917618-S | 7 | 7 | 129330831 | 36299  | 7.3113  | 5.96965 | JPT |
| rs1474409  | KIAA0265  | GI_44917618-S | 7 | 7 | 129344813 | 22317  | 7.0969  | 5.96965 | JPT |
| rs7781447  | KIAA0265  | GI_44917618-S | 7 | 7 | 129346263 | 20867  | 6.4885  | 5.96965 | JPT |
| rs4324873  | KIAA0265  | GI_44917618-S | 7 | 7 | 129355034 | 12096  | 8.6879  | 5.96965 | JPT |
| rs12534379 | KIAA0265  | GI_44917618-S | 7 | 7 | 129365068 | 2062   | 9.5871  | 5.96965 | JPT |
| rs3807344  | CPA4      | GI_10047105-S | 7 | 7 | 129528170 | 29489  | 7.577   | 5.68944 | JPT |
| rs2082725  | Hs.490095 | Hs.490095-S   | 7 | 7 | 130255915 | 11647  | 6.7903  | 6.04704 | JPT |
| rs7456421  | LOC389562 | GI_41147546-S | 7 | 7 | 138868976 | 81359  | 6.6302  | 5.7114  | JPT |
| rs12703395 | LOC389562 | GI_41147546-S | 7 | 7 | 138880556 | 69779  | 6.0425  | 5.7114  | JPT |
| rs12673068 | LOC389562 | GI_41147546-S | 7 | 7 | 138887400 | 62935  | 6.344   | 5.7114  | JPT |



|            |           |               |   |   |           |        |        |         |     |
|------------|-----------|---------------|---|---|-----------|--------|--------|---------|-----|
| rs7782128  | LOC389562 | GI_41147546-S | 7 | 7 | 138894845 | 55490  | 6.0706 | 5.7114  | JPT |
| rs10215942 | LOC389562 | GI_41147546-S | 7 | 7 | 138897208 | 53127  | 6.7701 | 5.7114  | JPT |
| rs11983375 | LOC389562 | GI_41147546-S | 7 | 7 | 138899995 | 50340  | 6.7701 | 5.7114  | JPT |
| rs10236187 | LOC389562 | GI_41147546-S | 7 | 7 | 138900561 | 49774  | 6.7701 | 5.7114  | JPT |
| rs11972982 | LOC389562 | GI_41147546-S | 7 | 7 | 138901557 | 48778  | 6.7701 | 5.7114  | JPT |
| rs6464214  | LOC389562 | GI_41147546-S | 7 | 7 | 138907349 | 42986  | 6.4472 | 5.7114  | JPT |
| rs6464220  | LOC389562 | GI_41147546-S | 7 | 7 | 138907442 | 42893  | 6.6302 | 5.7114  | JPT |
| rs1015122  | LOC389562 | GI_41147546-S | 7 | 7 | 138908027 | 42308  | 6.0706 | 5.7114  | JPT |
| rs12532543 | LOC389562 | GI_41147546-S | 7 | 7 | 138909358 | 40977  | 6.7701 | 5.7114  | JPT |
| rs2109338  | LOC389562 | GI_41147546-S | 7 | 7 | 138912360 | 37975  | 7.3896 | 5.7114  | JPT |
| rs2058265  | LOC389562 | GI_41147546-S | 7 | 7 | 138915433 | 34902  | 6.0706 | 5.7114  | JPT |
| rs7807797  | LOC389562 | GI_41147546-S | 7 | 7 | 138915677 | 34658  | 6.6302 | 5.7114  | JPT |
| rs1541481  | LOC389562 | GI_41147546-S | 7 | 7 | 138918461 | 31874  | 6.0706 | 5.7114  | JPT |
| rs4726525  | LOC389562 | GI_41147546-S | 7 | 7 | 138921656 | 28679  | 6.1139 | 5.7114  | JPT |
| rs6990007  | MYOM2     | GI_4505314-S  | 8 | 8 | 2054882   | 25671  | 6.5276 | 6.52208 | JPT |
| rs17758721 | LOC340435 | GI_29735811-S | 8 | 8 | 71627105  | 154822 | 9.3698 | 5.7192  | JPT |
| rs7012577  | LOC340435 | GI_29735811-S | 8 | 8 | 71634598  | 147329 | 9.4827 | 5.7192  | JPT |
| rs13251292 | LOC340435 | GI_29735811-S | 8 | 8 | 71636909  | 145018 | 7.3496 | 5.7192  | JPT |
| rs2035196  | LOC340435 | GI_29735811-S | 8 | 8 | 71647904  | 134023 | 9.3698 | 5.7192  | JPT |
| rs3816745  | LOC340435 | GI_29735811-S | 8 | 8 | 71669188  | 112739 | 9.4827 | 5.7192  | JPT |
| rs6988053  | LOC340435 | GI_29735811-S | 8 | 8 | 71709517  | 72410  | 9.5962 | 5.7192  | JPT |
| rs13258368 | LOC340435 | GI_29735811-S | 8 | 8 | 71711305  | 70622  | 9.5962 | 5.7192  | JPT |
| rs7831792  | LOC340435 | GI_29735811-S | 8 | 8 | 71727910  | 54017  | 8.7793 | 5.7192  | JPT |
| rs13255886 | LOC340435 | GI_29735811-S | 8 | 8 | 71728508  | 53419  | 9.4573 | 5.7192  | JPT |
| rs6994814  | LOC340435 | GI_29735811-S | 8 | 8 | 71731692  | 50235  | 9.4573 | 5.7192  | JPT |
| rs7830515  | LOC340435 | GI_29735811-S | 8 | 8 | 71732788  | 49139  | 9.4573 | 5.7192  | JPT |
| rs7814274  | LOC340435 | GI_29735811-S | 8 | 8 | 71732965  | 48962  | 9.4573 | 5.7192  | JPT |
| rs7830550  | LOC340435 | GI_29735811-S | 8 | 8 | 71732985  | 48942  | 8.7089 | 5.7192  | JPT |
| rs6993326  | LOC340435 | GI_29735811-S | 8 | 8 | 71738154  | 43773  | 9.4827 | 5.7192  | JPT |
| rs10504479 | LOC340435 | GI_29735811-S | 8 | 8 | 71740069  | 41858  | 9.4573 | 5.7192  | JPT |
| rs11987501 | LOC340435 | GI_29735811-S | 8 | 8 | 71741072  | 40855  | 8.7793 | 5.7192  | JPT |
| rs1993862  | LOC340435 | GI_29735811-S | 8 | 8 | 71741916  | 40011  | 9.4573 | 5.7192  | JPT |
| rs2279128  | LOC340435 | GI_29735811-S | 8 | 8 | 71744113  | 37814  | 9.5962 | 5.7192  | JPT |
| rs13271442 | LOC340435 | GI_29735811-S | 8 | 8 | 71747723  | 34204  | 9.4827 | 5.7192  | JPT |
| rs6472538  | LOC340435 | GI_29735811-S | 8 | 8 | 71749525  | 32402  | 9.4573 | 5.7192  | JPT |
| rs7001162  | LOC340435 | GI_29735811-S | 8 | 8 | 71750024  | 31903  | 9.5566 | 5.7192  | JPT |
| rs12681420 | LOC340435 | GI_29735811-S | 8 | 8 | 71755752  | 26175  | 9.4827 | 5.7192  | JPT |
| rs6991329  | LOC340435 | GI_29735811-S | 8 | 8 | 71755979  | 25948  | 9.4573 | 5.7192  | JPT |
| rs7831507  | LOC340435 | GI_29735811-S | 8 | 8 | 71757780  | 24147  | 9.4827 | 5.7192  | JPT |
| rs13256250 | LOC340435 | GI_29735811-S | 8 | 8 | 71758747  | 23180  | 9.4827 | 5.7192  | JPT |
| rs13256093 | LOC340435 | GI_29735811-S | 8 | 8 | 71758931  | 22996  | 9.4573 | 5.7192  | JPT |
| rs12675271 | LOC340435 | GI_29735811-S | 8 | 8 | 71764563  | 17364  | 9.4573 | 5.7192  | JPT |
| rs12156043 | LOC340435 | GI_29735811-S | 8 | 8 | 71776597  | 5330   | 8.7588 | 5.7192  | JPT |
| rs7842091  | LOC340435 | GI_29735811-S | 8 | 8 | 71777335  | 4592   | 9.4573 | 5.7192  | JPT |
| rs1477945  | LOC340435 | GI_29735811-S | 8 | 8 | 71778107  | 3820   | 9.4284 | 5.7192  | JPT |
| rs13252808 | LOC340435 | GI_29735811-S | 8 | 8 | 71779209  | 2718   | 8.7588 | 5.7192  | JPT |
| rs17760532 | LOC340435 | GI_29735811-S | 8 | 8 | 71782841  | 914    | 9.4284 | 5.7192  | JPT |
| rs13280922 | LOC340435 | GI_29735811-S | 8 | 8 | 71787952  | 6025   | 9.4827 | 5.7192  | JPT |
| rs13253842 | LOC340435 | GI_29735811-S | 8 | 8 | 71788057  | 6130   | 8.7793 | 5.7192  | JPT |
| rs13254908 | LOC340435 | GI_29735811-S | 8 | 8 | 71788652  | 6725   | 8.7793 | 5.7192  | JPT |
| rs13264669 | LOC340435 | GI_29735811-S | 8 | 8 | 71789326  | 7399   | 9.4827 | 5.7192  | JPT |
| rs7013657  | LOC340435 | GI_29735811-S | 8 | 8 | 71800113  | 18186  | 9.4573 | 5.7192  | JPT |
| rs6987515  | LOC340435 | GI_29735811-S | 8 | 8 | 71802856  | 20929  | 9.4573 | 5.7192  | JPT |
| rs2290702  | LOC340435 | GI_29735811-S | 8 | 8 | 71809534  | 27607  | 9.4573 | 5.7192  | JPT |
| rs7015035  | LOC340435 | GI_29735811-S | 8 | 8 | 71816155  | 34228  | 9.4573 | 5.7192  | JPT |
| rs6472542  | LOC340435 | GI_29735811-S | 8 | 8 | 71816641  | 34714  | 9.4573 | 5.7192  | JPT |

|            |           |               |   |   |          |        |        |        |     |
|------------|-----------|---------------|---|---|----------|--------|--------|--------|-----|
| rs6982406  | LOC340435 | GI_29735811-S | 8 | 8 | 71817162 | 35235  | 9.4573 | 5.7192 | JPT |
| rs1902614  | LOC340435 | GI_29735811-S | 8 | 8 | 71818721 | 36794  | 9.4573 | 5.7192 | JPT |
| rs6998024  | LOC340435 | GI_29735811-S | 8 | 8 | 71823394 | 41467  | 9.4573 | 5.7192 | JPT |
| rs1348535  | LOC340435 | GI_29735811-S | 8 | 8 | 71825295 | 43368  | 9.4573 | 5.7192 | JPT |
| rs7825446  | LOC340435 | GI_29735811-S | 8 | 8 | 71826728 | 44801  | 9.4573 | 5.7192 | JPT |
| rs6472543  | LOC340435 | GI_29735811-S | 8 | 8 | 71826962 | 45035  | 9.4573 | 5.7192 | JPT |
| rs7819332  | LOC340435 | GI_29735811-S | 8 | 8 | 71830819 | 48892  | 9.4827 | 5.7192 | JPT |
| rs6991708  | LOC340435 | GI_29735811-S | 8 | 8 | 71831082 | 49155  | 9.4573 | 5.7192 | JPT |
| rs7012404  | LOC340435 | GI_29735811-S | 8 | 8 | 71831252 | 49325  | 9.4827 | 5.7192 | JPT |
| rs17760766 | LOC340435 | GI_29735811-S | 8 | 8 | 71833743 | 51816  | 9.4573 | 5.7192 | JPT |
| rs13258584 | LOC340435 | GI_29735811-S | 8 | 8 | 71834133 | 52206  | 9.4827 | 5.7192 | JPT |
| rs7838421  | LOC340435 | GI_29735811-S | 8 | 8 | 71834877 | 52950  | 8.3246 | 5.7192 | JPT |
| rs1471114  | LOC340435 | GI_29735811-S | 8 | 8 | 71838101 | 56174  | 9.4573 | 5.7192 | JPT |
| rs7012796  | LOC340435 | GI_29735811-S | 8 | 8 | 71838747 | 56820  | 9.4573 | 5.7192 | JPT |
| rs7017481  | LOC340435 | GI_29735811-S | 8 | 8 | 71839324 | 57397  | 9.4827 | 5.7192 | JPT |
| rs11993453 | LOC340435 | GI_29735811-S | 8 | 8 | 71840393 | 58466  | 9.4827 | 5.7192 | JPT |
| rs12680166 | LOC340435 | GI_29735811-S | 8 | 8 | 71841192 | 59265  | 9.4827 | 5.7192 | JPT |
| rs7459870  | LOC340435 | GI_29735811-S | 8 | 8 | 71845137 | 63210  | 9.1431 | 5.7192 | JPT |
| rs17688313 | LOC340435 | GI_29735811-S | 8 | 8 | 71846418 | 64491  | 9.4573 | 5.7192 | JPT |
| rs12674966 | LOC340435 | GI_29735811-S | 8 | 8 | 71846964 | 65037  | 9.4827 | 5.7192 | JPT |
| rs7845516  | LOC340435 | GI_29735811-S | 8 | 8 | 71848376 | 66449  | 9.4573 | 5.7192 | JPT |
| rs1373480  | LOC340435 | GI_29735811-S | 8 | 8 | 71849521 | 67594  | 9.4573 | 5.7192 | JPT |
| rs7000647  | LOC340435 | GI_29735811-S | 8 | 8 | 71850962 | 69035  | 9.4573 | 5.7192 | JPT |
| rs11992027 | LOC340435 | GI_29735811-S | 8 | 8 | 71851424 | 69497  | 8.0675 | 5.7192 | JPT |
| rs13254801 | LOC340435 | GI_29735811-S | 8 | 8 | 71851538 | 69611  | 8.0675 | 5.7192 | JPT |
| rs7013495  | LOC340435 | GI_29735811-S | 8 | 8 | 71856071 | 74144  | 9.4573 | 5.7192 | JPT |
| rs6993170  | LOC340435 | GI_29735811-S | 8 | 8 | 71856073 | 74146  | 8.7588 | 5.7192 | JPT |
| rs6998989  | LOC340435 | GI_29735811-S | 8 | 8 | 71857085 | 75158  | 6.8668 | 5.7192 | JPT |
| rs6998786  | LOC340435 | GI_29735811-S | 8 | 8 | 71857184 | 75257  | 9.4827 | 5.7192 | JPT |
| rs6981149  | LOC340435 | GI_29735811-S | 8 | 8 | 71857236 | 75309  | 8.7793 | 5.7192 | JPT |
| rs12680988 | LOC340435 | GI_29735811-S | 8 | 8 | 71858444 | 76517  | 8.3246 | 5.7192 | JPT |
| rs6986479  | LOC340435 | GI_29735811-S | 8 | 8 | 71860112 | 78185  | 9.4827 | 5.7192 | JPT |
| rs1596566  | LOC340435 | GI_29735811-S | 8 | 8 | 71861130 | 79203  | 9.4573 | 5.7192 | JPT |
| rs1596565  | LOC340435 | GI_29735811-S | 8 | 8 | 71861386 | 79459  | 9.4827 | 5.7192 | JPT |
| rs6993115  | LOC340435 | GI_29735811-S | 8 | 8 | 71861737 | 79810  | 8.7089 | 5.7192 | JPT |
| rs10504481 | LOC340435 | GI_29735811-S | 8 | 8 | 71862071 | 80144  | 9.4573 | 5.7192 | JPT |
| rs1444339  | LOC340435 | GI_29735811-S | 8 | 8 | 71863196 | 81269  | 9.4573 | 5.7192 | JPT |
| rs7826483  | LOC340435 | GI_29735811-S | 8 | 8 | 71865447 | 83520  | 9.4573 | 5.7192 | JPT |
| rs7822474  | LOC340435 | GI_29735811-S | 8 | 8 | 71868287 | 86360  | 9.4573 | 5.7192 | JPT |
| rs13257800 | LOC340435 | GI_29735811-S | 8 | 8 | 71876687 | 94760  | 9.4573 | 5.7192 | JPT |
| rs13261146 | LOC340435 | GI_29735811-S | 8 | 8 | 71889473 | 107546 | 9.4573 | 5.7192 | JPT |
| rs13261712 | LOC340435 | GI_29735811-S | 8 | 8 | 71894818 | 112891 | 9.4573 | 5.7192 | JPT |
| rs13252719 | LOC340435 | GI_29735811-S | 8 | 8 | 71897123 | 115196 | 9.4573 | 5.7192 | JPT |
| rs1822651  | LOC340435 | GI_29735811-S | 8 | 8 | 71899215 | 117288 | 9.4573 | 5.7192 | JPT |
| rs13274062 | LOC340435 | GI_29735811-S | 8 | 8 | 71899641 | 117714 | 9.4284 | 5.7192 | JPT |
| rs6983845  | LOC340435 | GI_29735811-S | 8 | 8 | 71909034 | 127107 | 9.4573 | 5.7192 | JPT |
| rs1457198  | LOC340435 | GI_29735811-S | 8 | 8 | 71909723 | 127796 | 9.4573 | 5.7192 | JPT |
| rs13255849 | LOC340435 | GI_29735811-S | 8 | 8 | 71915307 | 133380 | 9.4827 | 5.7192 | JPT |
| rs6472548  | LOC340435 | GI_29735811-S | 8 | 8 | 71916853 | 134926 | 9.4827 | 5.7192 | JPT |
| rs1156955  | LOC340435 | GI_29735811-S | 8 | 8 | 71917513 | 135586 | 9.4573 | 5.7192 | JPT |
| rs1156956  | LOC340435 | GI_29735811-S | 8 | 8 | 71917592 | 135665 | 9.4573 | 5.7192 | JPT |
| rs13274381 | LOC340435 | GI_29735811-S | 8 | 8 | 71927648 | 145721 | 9.4573 | 5.7192 | JPT |
| rs11994581 | LOC340435 | GI_29735811-S | 8 | 8 | 71936961 | 155034 | 9.4573 | 5.7192 | JPT |
| rs4446768  | LOC340435 | GI_29735811-S | 8 | 8 | 71940143 | 158216 | 9.4573 | 5.7192 | JPT |
| rs7015825  | LOC340435 | GI_29735811-S | 8 | 8 | 71941227 | 159300 | 7.3357 | 5.7192 | JPT |
| rs13273773 | LOC340435 | GI_29735811-S | 8 | 8 | 71941801 | 159874 | 9.4827 | 5.7192 | JPT |

|            |           |               |   |   |          |        |        |        |     |
|------------|-----------|---------------|---|---|----------|--------|--------|--------|-----|
| rs6472551  | LOC340435 | GI_29735811-S | 8 | 8 | 71944403 | 162476 | 9.4573 | 5.7192 | JPT |
| rs10453108 | LOC340435 | GI_29735811-S | 8 | 8 | 71945494 | 163567 | 9.4573 | 5.7192 | JPT |
| rs6998354  | LOC340435 | GI_29735811-S | 8 | 8 | 71948723 | 166796 | 9.4827 | 5.7192 | JPT |
| rs12156377 | LOC340435 | GI_29735811-S | 8 | 8 | 71950246 | 168319 | 9.4827 | 5.7192 | JPT |
| rs6472552  | LOC340435 | GI_29735811-S | 8 | 8 | 71951524 | 169597 | 9.4573 | 5.7192 | JPT |
| rs7003788  | LOC340435 | GI_29735811-S | 8 | 8 | 71951678 | 169751 | 9.3954 | 5.7192 | JPT |
| rs4629903  | LOC340435 | GI_29735811-S | 8 | 8 | 71967686 | 185759 | 9.4573 | 5.7192 | JPT |
| rs11985482 | LOC340435 | GI_29735811-S | 8 | 8 | 71973132 | 191205 | 9.4573 | 5.7192 | JPT |
| rs13248937 | LOC340435 | GI_29735811-S | 8 | 8 | 71981303 | 199376 | 9.4573 | 5.7192 | JPT |
| rs6992048  | LOC340435 | GI_29735811-S | 8 | 8 | 71986425 | 204498 | 9.4573 | 5.7192 | JPT |
| rs10957533 | LOC340435 | GI_29735811-S | 8 | 8 | 71987661 | 205734 | 9.4827 | 5.7192 | JPT |
| rs12156041 | LOC340435 | GI_29735811-S | 8 | 8 | 71989479 | 207552 | 9.4573 | 5.7192 | JPT |
| rs6984663  | LOC340435 | GI_29735811-S | 8 | 8 | 71990219 | 208292 | 9.4573 | 5.7192 | JPT |
| rs2017035  | LOC340435 | GI_29735811-S | 8 | 8 | 72004360 | 222433 | 7.3132 | 5.7192 | JPT |
| rs10504487 | LOC340435 | GI_29735811-S | 8 | 8 | 72006153 | 224226 | 7.3132 | 5.7192 | JPT |
| rs1493199  | LOC340435 | GI_29735811-S | 8 | 8 | 72009058 | 227131 | 7.3132 | 5.7192 | JPT |
| rs10089583 | LOC340435 | GI_29735811-S | 8 | 8 | 72012038 | 230111 | 7.3132 | 5.7192 | JPT |
| rs1493198  | LOC340435 | GI_29735811-S | 8 | 8 | 72014511 | 232584 | 7.3132 | 5.7192 | JPT |
| rs2008517  | LOC340435 | GI_29735811-S | 8 | 8 | 72019074 | 237147 | 7.3132 | 5.7192 | JPT |
| rs2732087  | LOC340435 | GI_29735811-S | 8 | 8 | 72022993 | 241066 | 7.3132 | 5.7192 | JPT |
| rs2639911  | LOC340435 | GI_29735811-S | 8 | 8 | 72023266 | 241339 | 6.7593 | 5.7192 | JPT |
| rs3098859  | LOC340435 | GI_29735811-S | 8 | 8 | 72027586 | 245659 | 7.3132 | 5.7192 | JPT |
| rs3110268  | LOC340435 | GI_29735811-S | 8 | 8 | 72028722 | 246795 | 7.3132 | 5.7192 | JPT |
| rs2732144  | LOC340435 | GI_29735811-S | 8 | 8 | 72029173 | 247246 | 7.3132 | 5.7192 | JPT |
| rs2639949  | LOC340435 | GI_29735811-S | 8 | 8 | 72029570 | 247643 | 7.3804 | 5.7192 | JPT |
| rs2639950  | LOC340435 | GI_29735811-S | 8 | 8 | 72029612 | 247685 | 7.3132 | 5.7192 | JPT |
| rs1973364  | LOC340435 | GI_29735811-S | 8 | 8 | 72029796 | 247869 | 7.3132 | 5.7192 | JPT |
| rs2639919  | LOC340435 | GI_29735811-S | 8 | 8 | 72037682 | 255755 | 7.3132 | 5.7192 | JPT |
| rs7008083  | LOC340435 | GI_29735811-S | 8 | 8 | 72047202 | 265275 | 7.3132 | 5.7192 | JPT |
| rs11988221 | LOC340435 | GI_29735811-S | 8 | 8 | 72051953 | 270026 | 7.3132 | 5.7192 | JPT |
| rs2732127  | LOC340435 | GI_29735811-S | 8 | 8 | 72059373 | 277446 | 6.7593 | 5.7192 | JPT |
| rs1845217  | LOC340435 | GI_29735811-S | 8 | 8 | 72059805 | 277878 | 7.3804 | 5.7192 | JPT |
| rs2956611  | LOC340435 | GI_29735811-S | 8 | 8 | 72060422 | 278495 | 7.3132 | 5.7192 | JPT |
| rs2732125  | LOC340435 | GI_29735811-S | 8 | 8 | 72061055 | 279128 | 7.3804 | 5.7192 | JPT |
| rs2732124  | LOC340435 | GI_29735811-S | 8 | 8 | 72061236 | 279309 | 7.3132 | 5.7192 | JPT |
| rs950903   | LOC340435 | GI_29735811-S | 8 | 8 | 72063328 | 281401 | 7.3132 | 5.7192 | JPT |
| rs6472558  | LOC340435 | GI_29735811-S | 8 | 8 | 72063697 | 281770 | 7.3132 | 5.7192 | JPT |
| rs2732120  | LOC340435 | GI_29735811-S | 8 | 8 | 72067547 | 285620 | 7.3132 | 5.7192 | JPT |
| rs2639924  | LOC340435 | GI_29735811-S | 8 | 8 | 72068095 | 286168 | 7.3132 | 5.7192 | JPT |
| rs2639948  | LOC340435 | GI_29735811-S | 8 | 8 | 72071040 | 289113 | 7.3804 | 5.7192 | JPT |
| rs2732118  | LOC340435 | GI_29735811-S | 8 | 8 | 72071219 | 289292 | 7.3804 | 5.7192 | JPT |
| rs2732117  | LOC340435 | GI_29735811-S | 8 | 8 | 72071632 | 289705 | 6.8182 | 5.7192 | JPT |
| rs2732140  | LOC340435 | GI_29735811-S | 8 | 8 | 72073280 | 291353 | 7.3132 | 5.7192 | JPT |
| rs2732141  | LOC340435 | GI_29735811-S | 8 | 8 | 72073461 | 291534 | 6.8182 | 5.7192 | JPT |
| rs2639947  | LOC340435 | GI_29735811-S | 8 | 8 | 72073991 | 292064 | 5.9479 | 5.7192 | JPT |
| rs2732146  | LOC340435 | GI_29735811-S | 8 | 8 | 72074672 | 292745 | 7.3132 | 5.7192 | JPT |
| rs2639945  | LOC340435 | GI_29735811-S | 8 | 8 | 72075093 | 293166 | 7.3804 | 5.7192 | JPT |
| rs2639942  | LOC340435 | GI_29735811-S | 8 | 8 | 72075728 | 293801 | 7.3132 | 5.7192 | JPT |
| rs2035929  | LOC340435 | GI_29735811-S | 8 | 8 | 72075926 | 293999 | 7.3132 | 5.7192 | JPT |
| rs2639941  | LOC340435 | GI_29735811-S | 8 | 8 | 72076459 | 294532 | 7.3132 | 5.7192 | JPT |
| rs2639939  | LOC340435 | GI_29735811-S | 8 | 8 | 72076477 | 294550 | 7.3132 | 5.7192 | JPT |
| rs2035925  | LOC340435 | GI_29735811-S | 8 | 8 | 72076770 | 294843 | 7.3132 | 5.7192 | JPT |
| rs2639938  | LOC340435 | GI_29735811-S | 8 | 8 | 72076906 | 294979 | 7.3132 | 5.7192 | JPT |
| rs2639937  | LOC340435 | GI_29735811-S | 8 | 8 | 72076910 | 294983 | 6.1948 | 5.7192 | JPT |
| rs2035924  | LOC340435 | GI_29735811-S | 8 | 8 | 72077007 | 295080 | 7.3804 | 5.7192 | JPT |
| rs2732089  | LOC340435 | GI_29735811-S | 8 | 8 | 72077718 | 295791 | 7.3132 | 5.7192 | JPT |

|           |           |               |   |   |          |        |        |        |     |
|-----------|-----------|---------------|---|---|----------|--------|--------|--------|-----|
| rs3098865 | LOC340435 | GI_29735811-S | 8 | 8 | 72078538 | 296611 | 7.3132 | 5.7192 | JPT |
| rs3098866 | LOC340435 | GI_29735811-S | 8 | 8 | 72079128 | 297201 | 7.3132 | 5.7192 | JPT |
| rs3110239 | LOC340435 | GI_29735811-S | 8 | 8 | 72079299 | 297372 | 7.3132 | 5.7192 | JPT |
| rs3098867 | LOC340435 | GI_29735811-S | 8 | 8 | 72079425 | 297498 | 7.3132 | 5.7192 | JPT |
| rs2639904 | LOC340435 | GI_29735811-S | 8 | 8 | 72079684 | 297757 | 7.3132 | 5.7192 | JPT |
| rs2639901 | LOC340435 | GI_29735811-S | 8 | 8 | 72080305 | 298378 | 7.3132 | 5.7192 | JPT |
| rs2732090 | LOC340435 | GI_29735811-S | 8 | 8 | 72080811 | 298884 | 7.3132 | 5.7192 | JPT |
| rs2732091 | LOC340435 | GI_29735811-S | 8 | 8 | 72080977 | 299050 | 7.3804 | 5.7192 | JPT |
| rs2732093 | LOC340435 | GI_29735811-S | 8 | 8 | 72081633 | 299706 | 7.3132 | 5.7192 | JPT |
| rs2732094 | LOC340435 | GI_29735811-S | 8 | 8 | 72082472 | 300545 | 7.3132 | 5.7192 | JPT |
| rs2732095 | LOC340435 | GI_29735811-S | 8 | 8 | 72082500 | 300573 | 7.3132 | 5.7192 | JPT |
| rs2732096 | LOC340435 | GI_29735811-S | 8 | 8 | 72082534 | 300607 | 6.6959 | 5.7192 | JPT |
| rs2639898 | LOC340435 | GI_29735811-S | 8 | 8 | 72082864 | 300937 | 7.3132 | 5.7192 | JPT |
| rs2639897 | LOC340435 | GI_29735811-S | 8 | 8 | 72083230 | 301303 | 7.3132 | 5.7192 | JPT |
| rs2639896 | LOC340435 | GI_29735811-S | 8 | 8 | 72083337 | 301410 | 7.2408 | 5.7192 | JPT |
| rs1353058 | LOC340435 | GI_29735811-S | 8 | 8 | 72084572 | 302645 | 7.3132 | 5.7192 | JPT |
| rs1353057 | LOC340435 | GI_29735811-S | 8 | 8 | 72084651 | 302724 | 7.3132 | 5.7192 | JPT |
| rs2639960 | LOC340435 | GI_29735811-S | 8 | 8 | 72084693 | 302766 | 6.7593 | 5.7192 | JPT |
| rs2639958 | LOC340435 | GI_29735811-S | 8 | 8 | 72084704 | 302777 | 7.3804 | 5.7192 | JPT |
| rs1908036 | LOC340435 | GI_29735811-S | 8 | 8 | 72084878 | 302951 | 7.3132 | 5.7192 | JPT |
| rs1908035 | LOC340435 | GI_29735811-S | 8 | 8 | 72084962 | 303035 | 7.3132 | 5.7192 | JPT |
| rs1908034 | LOC340435 | GI_29735811-S | 8 | 8 | 72085108 | 303181 | 7.3132 | 5.7192 | JPT |
| rs1908033 | LOC340435 | GI_29735811-S | 8 | 8 | 72085353 | 303426 | 7.3132 | 5.7192 | JPT |
| rs2732102 | LOC340435 | GI_29735811-S | 8 | 8 | 72085426 | 303499 | 7.3132 | 5.7192 | JPT |
| rs2639957 | LOC340435 | GI_29735811-S | 8 | 8 | 72085756 | 303829 | 7.3132 | 5.7192 | JPT |
| rs2732103 | LOC340435 | GI_29735811-S | 8 | 8 | 72086050 | 304123 | 7.3132 | 5.7192 | JPT |
| rs2732104 | LOC340435 | GI_29735811-S | 8 | 8 | 72086073 | 304146 | 6.7593 | 5.7192 | JPT |
| rs2732106 | LOC340435 | GI_29735811-S | 8 | 8 | 72086393 | 304466 | 7.3132 | 5.7192 | JPT |
| rs2639956 | LOC340435 | GI_29735811-S | 8 | 8 | 72086645 | 304718 | 7.3132 | 5.7192 | JPT |
| rs1389206 | LOC340435 | GI_29735811-S | 8 | 8 | 72087416 | 305489 | 7.3132 | 5.7192 | JPT |
| rs2732107 | LOC340435 | GI_29735811-S | 8 | 8 | 72087862 | 305935 | 7.3132 | 5.7192 | JPT |
| rs2639955 | LOC340435 | GI_29735811-S | 8 | 8 | 72087896 | 305969 | 7.3132 | 5.7192 | JPT |
| rs2639954 | LOC340435 | GI_29735811-S | 8 | 8 | 72088129 | 306202 | 7.3132 | 5.7192 | JPT |
| rs2639953 | LOC340435 | GI_29735811-S | 8 | 8 | 72088214 | 306287 | 7.3132 | 5.7192 | JPT |
| rs2639952 | LOC340435 | GI_29735811-S | 8 | 8 | 72088284 | 306357 | 7.3132 | 5.7192 | JPT |
| rs2732108 | LOC340435 | GI_29735811-S | 8 | 8 | 72088653 | 306726 | 7.3132 | 5.7192 | JPT |
| rs2732109 | LOC340435 | GI_29735811-S | 8 | 8 | 72088777 | 306850 | 7.3132 | 5.7192 | JPT |
| rs1493203 | LOC340435 | GI_29735811-S | 8 | 8 | 72089061 | 307134 | 7.3132 | 5.7192 | JPT |
| rs2732110 | LOC340435 | GI_29735811-S | 8 | 8 | 72089365 | 307438 | 7.3804 | 5.7192 | JPT |
| rs2639951 | LOC340435 | GI_29735811-S | 8 | 8 | 72089779 | 307852 | 7.3132 | 5.7192 | JPT |
| rs2732111 | LOC340435 | GI_29735811-S | 8 | 8 | 72089983 | 308056 | 7.3132 | 5.7192 | JPT |
| rs2732112 | LOC340435 | GI_29735811-S | 8 | 8 | 72090395 | 308468 | 7.3132 | 5.7192 | JPT |
| rs2732114 | LOC340435 | GI_29735811-S | 8 | 8 | 72091266 | 309339 | 6.8182 | 5.7192 | JPT |
| rs2732115 | LOC340435 | GI_29735811-S | 8 | 8 | 72091408 | 309481 | 7.3132 | 5.7192 | JPT |
| rs2732116 | LOC340435 | GI_29735811-S | 8 | 8 | 72091881 | 309954 | 7.3132 | 5.7192 | JPT |
| rs2956610 | LOC340435 | GI_29735811-S | 8 | 8 | 72092087 | 310160 | 7.3132 | 5.7192 | JPT |
| rs3098868 | LOC340435 | GI_29735811-S | 8 | 8 | 72092246 | 310319 | 7.3132 | 5.7192 | JPT |
| rs3098869 | LOC340435 | GI_29735811-S | 8 | 8 | 72092386 | 310459 | 6.8182 | 5.7192 | JPT |
| rs3110240 | LOC340435 | GI_29735811-S | 8 | 8 | 72092658 | 310731 | 7.3132 | 5.7192 | JPT |
| rs3098871 | LOC340435 | GI_29735811-S | 8 | 8 | 72092969 | 311042 | 7.3132 | 5.7192 | JPT |
| rs3098872 | LOC340435 | GI_29735811-S | 8 | 8 | 72094758 | 312831 | 6.7593 | 5.7192 | JPT |
| rs3098873 | LOC340435 | GI_29735811-S | 8 | 8 | 72095140 | 313213 | 7.3132 | 5.7192 | JPT |
| rs3110244 | LOC340435 | GI_29735811-S | 8 | 8 | 72095751 | 313824 | 8.0319 | 5.7192 | JPT |
| rs3098874 | LOC340435 | GI_29735811-S | 8 | 8 | 72096892 | 314965 | 7.3132 | 5.7192 | JPT |
| rs6982447 | LOC340435 | GI_29735811-S | 8 | 8 | 72097167 | 315240 | 7.3132 | 5.7192 | JPT |
| rs6982601 | LOC340435 | GI_29735811-S | 8 | 8 | 72097242 | 315315 | 6.6959 | 5.7192 | JPT |

|            |           |               |   |   |          |        |        |         |     |
|------------|-----------|---------------|---|---|----------|--------|--------|---------|-----|
| rs6983299  | LOC340435 | GI_29735811-S | 8 | 8 | 72097441 | 315514 | 7.3132 | 5.7192  | JPT |
| rs6982942  | LOC340435 | GI_29735811-S | 8 | 8 | 72097489 | 315562 | 6.6959 | 5.7192  | JPT |
| rs13256029 | LOC340435 | GI_29735811-S | 8 | 8 | 72098099 | 316172 | 7.3804 | 5.7192  | JPT |
| rs3098876  | LOC340435 | GI_29735811-S | 8 | 8 | 72098798 | 316871 | 6.8182 | 5.7192  | JPT |
| rs3110250  | LOC340435 | GI_29735811-S | 8 | 8 | 72098938 | 317011 | 7.3132 | 5.7192  | JPT |
| rs3098877  | LOC340435 | GI_29735811-S | 8 | 8 | 72099000 | 317073 | 6.7593 | 5.7192  | JPT |
| rs3110251  | LOC340435 | GI_29735811-S | 8 | 8 | 72099528 | 317601 | 6.5759 | 5.7192  | JPT |
| rs3110252  | LOC340435 | GI_29735811-S | 8 | 8 | 72099774 | 317847 | 6.8182 | 5.7192  | JPT |
| rs3098878  | LOC340435 | GI_29735811-S | 8 | 8 | 72100023 | 318096 | 7.3132 | 5.7192  | JPT |
| rs3110253  | LOC340435 | GI_29735811-S | 8 | 8 | 72100107 | 318180 | 7.3132 | 5.7192  | JPT |
| rs3110255  | LOC340435 | GI_29735811-S | 8 | 8 | 72100604 | 318677 | 7.3132 | 5.7192  | JPT |
| rs3110256  | LOC340435 | GI_29735811-S | 8 | 8 | 72100690 | 318763 | 6.8182 | 5.7192  | JPT |
| rs3098879  | LOC340435 | GI_29735811-S | 8 | 8 | 72101014 | 319087 | 7.3132 | 5.7192  | JPT |
| rs3110258  | LOC340435 | GI_29735811-S | 8 | 8 | 72101086 | 319159 | 7.2408 | 5.7192  | JPT |
| rs3098880  | LOC340435 | GI_29735811-S | 8 | 8 | 72101475 | 319548 | 7.3132 | 5.7192  | JPT |
| rs7002064  | LOC340435 | GI_29735811-S | 8 | 8 | 72102648 | 320721 | 6.7593 | 5.7192  | JPT |
| rs3110260  | LOC340435 | GI_29735811-S | 8 | 8 | 72103042 | 321115 | 7.3132 | 5.7192  | JPT |
| rs3110261  | LOC340435 | GI_29735811-S | 8 | 8 | 72104005 | 322078 | 7.3132 | 5.7192  | JPT |
| rs3110262  | LOC340435 | GI_29735811-S | 8 | 8 | 72104184 | 322257 | 7.3132 | 5.7192  | JPT |
| rs3110263  | LOC340435 | GI_29735811-S | 8 | 8 | 72105246 | 323319 | 7.3132 | 5.7192  | JPT |
| rs3098883  | LOC340435 | GI_29735811-S | 8 | 8 | 72106121 | 324194 | 8.0675 | 5.7192  | JPT |
| rs4532626  | LOC340435 | GI_29735811-S | 8 | 8 | 72107449 | 325522 | 7.3132 | 5.7192  | JPT |
| rs4434651  | LOC340435 | GI_29735811-S | 8 | 8 | 72109741 | 327814 | 7.3132 | 5.7192  | JPT |
| rs12542300 | LOC340435 | GI_29735811-S | 8 | 8 | 72113949 | 332022 | 7.3132 | 5.7192  | JPT |
| rs10091471 | LOC340435 | GI_29735811-S | 8 | 8 | 72116309 | 334382 | 7.3132 | 5.7192  | JPT |
| rs11779364 | LOC340435 | GI_29735811-S | 8 | 8 | 72117150 | 335223 | 7.3804 | 5.7192  | JPT |
| rs6472561  | LOC340435 | GI_29735811-S | 8 | 8 | 72117737 | 335810 | 7.3132 | 5.7192  | JPT |
| rs4074908  | LOC340435 | GI_29735811-S | 8 | 8 | 72117886 | 335959 | 7.3132 | 5.7192  | JPT |
| rs4074909  | LOC340435 | GI_29735811-S | 8 | 8 | 72118381 | 336454 | 7.3132 | 5.7192  | JPT |
| rs4078067  | LOC340435 | GI_29735811-S | 8 | 8 | 72119025 | 337098 | 7.3132 | 5.7192  | JPT |
| rs4504667  | LOC340435 | GI_29735811-S | 8 | 8 | 72119346 | 337419 | 7.3132 | 5.7192  | JPT |
| rs4571761  | LOC340435 | GI_29735811-S | 8 | 8 | 72119727 | 337800 | 7.3132 | 5.7192  | JPT |
| rs4738105  | LOC340435 | GI_29735811-S | 8 | 8 | 72121472 | 339545 | 7.3132 | 5.7192  | JPT |
| rs17699084 | LOC340435 | GI_29735811-S | 8 | 8 | 72125965 | 344038 | 7.3804 | 5.7192  | JPT |
| rs6472562  | LOC340435 | GI_29735811-S | 8 | 8 | 72132432 | 350505 | 7.3132 | 5.7192  | JPT |
| rs6472563  | LOC340435 | GI_29735811-S | 8 | 8 | 72132461 | 350534 | 6.7593 | 5.7192  | JPT |
| rs10110676 | LOC340435 | GI_29735811-S | 8 | 8 | 72133363 | 351436 | 7.3132 | 5.7192  | JPT |
| rs10504492 | LOC340435 | GI_29735811-S | 8 | 8 | 72140513 | 358586 | 7.3804 | 5.7192  | JPT |
| rs6472564  | LOC340435 | GI_29735811-S | 8 | 8 | 72140954 | 359027 | 7.3132 | 5.7192  | JPT |
| rs13268251 | LOC340435 | GI_29735811-S | 8 | 8 | 72141368 | 359441 | 7.3132 | 5.7192  | JPT |
| rs17699685 | LOC340435 | GI_29735811-S | 8 | 8 | 72141558 | 359631 | 7.3804 | 5.7192  | JPT |
| rs11987409 | LOC340435 | GI_29735811-S | 8 | 8 | 72142614 | 360687 | 8.7793 | 5.7192  | JPT |
| rs17699710 | LOC340435 | GI_29735811-S | 8 | 8 | 72142764 | 360837 | 7.3804 | 5.7192  | JPT |
| rs7825815  | LOC340435 | GI_29735811-S | 8 | 8 | 72148959 | 367032 | 7.3132 | 5.7192  | JPT |
| rs4526394  | LOC340435 | GI_29735811-S | 8 | 8 | 72150881 | 368954 | 6.7593 | 5.7192  | JPT |
| rs12674838 | LOC340435 | GI_29735811-S | 8 | 8 | 72152834 | 370907 | 7.2408 | 5.7192  | JPT |
| rs17778232 | LOC340435 | GI_29735811-S | 8 | 8 | 72154072 | 372145 | 7.3804 | 5.7192  | JPT |
| rs9650238  | LOC340435 | GI_29735811-S | 8 | 8 | 72155260 | 373333 | 8.7588 | 5.7192  | JPT |
| rs12155783 | LOC340435 | GI_29735811-S | 8 | 8 | 72161680 | 379753 | 7.3804 | 5.7192  | JPT |
| rs1159724  | LOC340435 | GI_29735811-S | 8 | 8 | 72162375 | 380448 | 7.3467 | 5.7192  | JPT |
| rs6472566  | LOC340435 | GI_29735811-S | 8 | 8 | 72163038 | 381111 | 7.3132 | 5.7192  | JPT |
| rs10504497 | LOC340435 | GI_29735811-S | 8 | 8 | 72171441 | 389514 | 7.3132 | 5.7192  | JPT |
| rs2546220  | LOC375671 | GI_37556019-S | 8 | 8 | 74331172 | 621    | 6.2804 | 6.21248 | JPT |
| rs6473301  | SNX16     | GI_23238247-A | 8 | 8 | 82853895 | 20664  | 6.3238 | 5.85911 | JPT |
| rs7815272  | SNX16     | GI_23238247-A | 8 | 8 | 82854364 | 20195  | 6.3238 | 5.85911 | JPT |
| rs17783207 | SNX16     | GI_23238247-A | 8 | 8 | 82855390 | 19169  | 5.8755 | 5.85911 | JPT |

|            |       |               |   |   |          |       |         |         |     |
|------------|-------|---------------|---|---|----------|-------|---------|---------|-----|
| rs7834555  | SNX16 | GI_23238247-A | 8 | 8 | 82860180 | 14379 | 6.8711  | 5.85911 | JPT |
| rs4285442  | SNX16 | GI_23238247-A | 8 | 8 | 82865958 | 8601  | 6.8711  | 5.85911 | JPT |
| rs10091077 | SNX16 | GI_23238247-A | 8 | 8 | 82868019 | 6540  | 6.8919  | 5.85911 | JPT |
| rs6473310  | SNX16 | GI_23238247-A | 8 | 8 | 82870536 | 4023  | 9.7969  | 5.85911 | JPT |
| rs4272332  | SNX16 | GI_23238247-A | 8 | 8 | 82870584 | 3975  | 10.9633 | 5.85911 | JPT |
| rs7460277  | SNX16 | GI_23238247-A | 8 | 8 | 82872332 | 2227  | 9.4063  | 5.85911 | JPT |
| rs7460280  | SNX16 | GI_23238247-A | 8 | 8 | 82872380 | 2179  | 10.2263 | 5.85911 | JPT |
| rs1054078  | SNX16 | GI_23238247-A | 8 | 8 | 82874708 | 149   | 9.8053  | 5.85911 | JPT |
| rs2029416  | SNX16 | GI_23238247-A | 8 | 8 | 82876882 | 2323  | 6.1023  | 5.85911 | JPT |
| rs1489587  | SNX16 | GI_23238247-A | 8 | 8 | 82878407 | 3848  | 10.5382 | 5.85911 | JPT |
| rs2600599  | SNX16 | GI_23238247-A | 8 | 8 | 82881555 | 6996  | 10.9633 | 5.85911 | JPT |
| rs2600605  | SNX16 | GI_23238247-A | 8 | 8 | 82883315 | 8756  | 10.2263 | 5.85911 | JPT |
| rs774466   | SNX16 | GI_23238247-A | 8 | 8 | 82883945 | 9386  | 10.7406 | 5.85911 | JPT |
| rs774467   | SNX16 | GI_23238247-A | 8 | 8 | 82884146 | 9587  | 10.046  | 5.85911 | JPT |
| rs799332   | SNX16 | GI_23238247-A | 8 | 8 | 82884689 | 10130 | 10.9633 | 5.85911 | JPT |
| rs10958045 | SNX16 | GI_23238247-A | 8 | 8 | 82885549 | 10990 | 9.7969  | 5.85911 | JPT |
| rs774468   | SNX16 | GI_23238247-A | 8 | 8 | 82885666 | 11107 | 10.9633 | 5.85911 | JPT |
| rs7825180  | SNX16 | GI_23238247-A | 8 | 8 | 82886546 | 11987 | 9.9329  | 5.85911 | JPT |
| rs774471   | SNX16 | GI_23238247-A | 8 | 8 | 82886984 | 12425 | 8.4265  | 5.85911 | JPT |
| rs774473   | SNX16 | GI_23238247-A | 8 | 8 | 82887517 | 12958 | 9.0476  | 5.85911 | JPT |
| rs774474   | SNX16 | GI_23238247-A | 8 | 8 | 82888695 | 14136 | 9.0701  | 5.85911 | JPT |
| rs6473311  | SNX16 | GI_23238247-A | 8 | 8 | 82889237 | 14678 | 8.9446  | 5.85911 | JPT |
| rs2635482  | SNX16 | GI_23238247-A | 8 | 8 | 82890070 | 15511 | 10.1551 | 5.85911 | JPT |
| rs2600606  | SNX16 | GI_23238247-A | 8 | 8 | 82890075 | 15516 | 10.5382 | 5.85911 | JPT |
| rs16909651 | SNX16 | GI_23238247-A | 8 | 8 | 82890124 | 15565 | 9.3765  | 5.85911 | JPT |
| rs13255262 | SNX16 | GI_23238247-A | 8 | 8 | 82890579 | 16020 | 9.7969  | 5.85911 | JPT |
| rs774477   | SNX16 | GI_23238247-A | 8 | 8 | 82890858 | 16299 | 10.9633 | 5.85911 | JPT |
| rs774479   | SNX16 | GI_23238247-A | 8 | 8 | 82891638 | 17079 | 10.7406 | 5.85911 | JPT |
| rs10958046 | SNX16 | GI_23238247-A | 8 | 8 | 82891765 | 17206 | 9.7969  | 5.85911 | JPT |
| rs7833384  | SNX16 | GI_23238247-A | 8 | 8 | 82893470 | 18911 | 9.1457  | 5.85911 | JPT |
| rs7833790  | SNX16 | GI_23238247-A | 8 | 8 | 82893712 | 19153 | 9.7969  | 5.85911 | JPT |
| rs799331   | SNX16 | GI_23238247-A | 8 | 8 | 82895398 | 20839 | 9.0511  | 5.85911 | JPT |
| rs774462   | SNX16 | GI_23238247-A | 8 | 8 | 82895695 | 21136 | 9.8139  | 5.85911 | JPT |
| rs774463   | SNX16 | GI_23238247-A | 8 | 8 | 82895794 | 21235 | 10.9633 | 5.85911 | JPT |
| rs774464   | SNX16 | GI_23238247-A | 8 | 8 | 82896218 | 21659 | 9.9247  | 5.85911 | JPT |
| rs774465   | SNX16 | GI_23238247-A | 8 | 8 | 82896686 | 22127 | 9.7228  | 5.85911 | JPT |
| rs4739627  | SNX16 | GI_23238247-A | 8 | 8 | 82897212 | 22653 | 9.7969  | 5.85911 | JPT |
| rs2635492  | SNX16 | GI_23238247-A | 8 | 8 | 82897458 | 22899 | 10.7406 | 5.85911 | JPT |
| rs1021328  | SNX16 | GI_23238247-A | 8 | 8 | 82899261 | 24702 | 7.9271  | 5.85911 | JPT |
| rs1463259  | SNX16 | GI_23238247-A | 8 | 8 | 82900300 | 25741 | 9.478   | 5.85911 | JPT |
| rs12546081 | SNX16 | GI_23238247-A | 8 | 8 | 82902603 | 28044 | 10.0628 | 5.85911 | JPT |
| rs1470787  | SNX16 | GI_23238247-A | 8 | 8 | 82903057 | 28498 | 10.9633 | 5.85911 | JPT |
| rs1451995  | SNX16 | GI_23238247-A | 8 | 8 | 82908678 | 34119 | 9.8053  | 5.85911 | JPT |
| rs12674769 | SNX16 | GI_23238247-A | 8 | 8 | 82911451 | 36892 | 10.9633 | 5.85911 | JPT |
| rs12674770 | SNX16 | GI_23238247-A | 8 | 8 | 82911483 | 36924 | 10.7406 | 5.85911 | JPT |
| rs1814534  | SNX16 | GI_23238247-A | 8 | 8 | 82914377 | 39818 | 10.9633 | 5.85911 | JPT |
| rs12056632 | SNX16 | GI_23238247-A | 8 | 8 | 82914846 | 40287 | 10.7406 | 5.85911 | JPT |
| rs1452000  | SNX16 | GI_23238247-A | 8 | 8 | 82929953 | 55394 | 10.9633 | 5.85911 | JPT |
| rs12541224 | SNX16 | GI_23238247-A | 8 | 8 | 82930729 | 56170 | 10.2263 | 5.85911 | JPT |
| rs17713368 | SNX16 | GI_23238247-A | 8 | 8 | 82931925 | 57366 | 5.8755  | 5.85911 | JPT |
| rs12676336 | SNX16 | GI_23238247-A | 8 | 8 | 82933563 | 59004 | 9.376   | 5.85911 | JPT |
| rs10958047 | SNX16 | GI_23238247-A | 8 | 8 | 82935117 | 60558 | 10.7406 | 5.85911 | JPT |
| rs1451998  | SNX16 | GI_23238247-A | 8 | 8 | 82935597 | 61038 | 10.9633 | 5.85911 | JPT |
| rs1451997  | SNX16 | GI_23238247-A | 8 | 8 | 82936608 | 62049 | 7.9174  | 5.85911 | JPT |
| rs4540369  | SNX16 | GI_23238247-A | 8 | 8 | 82937919 | 63360 | 10.7406 | 5.85911 | JPT |
| rs1597755  | SNX16 | GI_23238247-A | 8 | 8 | 82940494 | 65935 | 10.9633 | 5.85911 | JPT |

|            |          |               |   |   |           |        |        |         |     |
|------------|----------|---------------|---|---|-----------|--------|--------|---------|-----|
| rs16909729 | SNX16    | GI_23238247-A | 8 | 8 | 82955497  | 80938  | 8.258  | 5.85911 | JPT |
| rs4610705  | SNX16    | GI_23238247-A | 8 | 8 | 82988069  | 113510 | 5.8755 | 5.85911 | JPT |
| rs1018088  | ATP6V1C1 | GI_19913430-S | 8 | 8 | 104162535 | 12355  | 7.1464 | 6.16403 | JPT |
| rs4314624  | PKHD1L1  | GI_31377831-S | 8 | 8 | 110235192 | 373063 | 5.5976 | 5.46611 | JPT |
| rs4607576  | PKHD1L1  | GI_31377831-S | 8 | 8 | 110235212 | 373043 | 5.5976 | 5.46611 | JPT |
| rs11987753 | PKHD1L1  | GI_31377831-S | 8 | 8 | 110235415 | 372840 | 5.5059 | 5.46611 | JPT |
| rs10955506 | PKHD1L1  | GI_31377831-S | 8 | 8 | 110235561 | 372694 | 5.4983 | 5.46611 | JPT |
| rs10955507 | PKHD1L1  | GI_31377831-S | 8 | 8 | 110235623 | 372632 | 5.5976 | 5.46611 | JPT |
| rs12544150 | PKHD1L1  | GI_31377831-S | 8 | 8 | 110236961 | 371294 | 5.5976 | 5.46611 | JPT |
| rs10081564 | PKHD1L1  | GI_31377831-S | 8 | 8 | 110237340 | 370915 | 5.5976 | 5.46611 | JPT |
| rs11992819 | PKHD1L1  | GI_31377831-S | 8 | 8 | 110240602 | 367653 | 5.5976 | 5.46611 | JPT |
| rs11992834 | PKHD1L1  | GI_31377831-S | 8 | 8 | 110240767 | 367488 | 5.559  | 5.46611 | JPT |
| rs12541767 | PKHD1L1  | GI_31377831-S | 8 | 8 | 110240847 | 367408 | 5.5976 | 5.46611 | JPT |
| rs4628235  | PKHD1L1  | GI_31377831-S | 8 | 8 | 110241202 | 367053 | 5.5976 | 5.46611 | JPT |
| rs10955508 | PKHD1L1  | GI_31377831-S | 8 | 8 | 110242060 | 366195 | 6.71   | 5.46611 | JPT |
| rs10808429 | PKHD1L1  | GI_31377831-S | 8 | 8 | 110242285 | 365970 | 5.6682 | 5.46611 | JPT |
| rs10955509 | PKHD1L1  | GI_31377831-S | 8 | 8 | 110242408 | 365847 | 6.4236 | 5.46611 | JPT |
| rs13262431 | PKHD1L1  | GI_31377831-S | 8 | 8 | 110242760 | 365495 | 5.5976 | 5.46611 | JPT |
| rs13282488 | PKHD1L1  | GI_31377831-S | 8 | 8 | 110244879 | 363376 | 5.5976 | 5.46611 | JPT |
| rs4645539  | PKHD1L1  | GI_31377831-S | 8 | 8 | 110245255 | 363000 | 5.5976 | 5.46611 | JPT |
| rs10089544 | PKHD1L1  | GI_31377831-S | 8 | 8 | 110245743 | 362512 | 5.5976 | 5.46611 | JPT |
| rs7845815  | PKHD1L1  | GI_31377831-S | 8 | 8 | 110247020 | 361235 | 5.5976 | 5.46611 | JPT |
| rs4734197  | PKHD1L1  | GI_31377831-S | 8 | 8 | 110247681 | 360574 | 5.6223 | 5.46611 | JPT |
| rs4734198  | PKHD1L1  | GI_31377831-S | 8 | 8 | 110248128 | 360127 | 5.6223 | 5.46611 | JPT |
| rs10101189 | PKHD1L1  | GI_31377831-S | 8 | 8 | 110248548 | 359707 | 5.7478 | 5.46611 | JPT |
| rs7010380  | PKHD1L1  | GI_31377831-S | 8 | 8 | 110249233 | 359022 | 5.5976 | 5.46611 | JPT |
| rs12544503 | PKHD1L1  | GI_31377831-S | 8 | 8 | 110249835 | 358420 | 5.4983 | 5.46611 | JPT |
| rs12546967 | PKHD1L1  | GI_31377831-S | 8 | 8 | 110252844 | 355411 | 5.5976 | 5.46611 | JPT |
| rs10111874 | PKHD1L1  | GI_31377831-S | 8 | 8 | 110254194 | 354061 | 5.5976 | 5.46611 | JPT |
| rs13280742 | PKHD1L1  | GI_31377831-S | 8 | 8 | 110254313 | 353942 | 5.4937 | 5.46611 | JPT |
| rs7387721  | PKHD1L1  | GI_31377831-S | 8 | 8 | 110255074 | 353181 | 5.5505 | 5.46611 | JPT |
| rs7387722  | PKHD1L1  | GI_31377831-S | 8 | 8 | 110255117 | 353138 | 5.5976 | 5.46611 | JPT |
| rs7387748  | PKHD1L1  | GI_31377831-S | 8 | 8 | 110255167 | 353088 | 5.5976 | 5.46611 | JPT |
| rs11986161 | PKHD1L1  | GI_31377831-S | 8 | 8 | 110256866 | 351389 | 5.5976 | 5.46611 | JPT |
| rs11994164 | PKHD1L1  | GI_31377831-S | 8 | 8 | 110257066 | 351189 | 5.5976 | 5.46611 | JPT |
| rs11785243 | PKHD1L1  | GI_31377831-S | 8 | 8 | 110259359 | 348896 | 5.5976 | 5.46611 | JPT |
| rs2980570  | PKHD1L1  | GI_31377831-S | 8 | 8 | 110417198 | 191057 | 8.7869 | 5.46611 | JPT |
| rs2980571  | PKHD1L1  | GI_31377831-S | 8 | 8 | 110417425 | 190830 | 8.7869 | 5.46611 | JPT |
| rs1870389  | PKHD1L1  | GI_31377831-S | 8 | 8 | 110420430 | 187825 | 8.7869 | 5.46611 | JPT |
| rs2926239  | PKHD1L1  | GI_31377831-S | 8 | 8 | 110427848 | 180407 | 8.7869 | 5.46611 | JPT |
| rs2980585  | PKHD1L1  | GI_31377831-S | 8 | 8 | 110429704 | 178551 | 8.1608 | 5.46611 | JPT |
| rs2926237  | PKHD1L1  | GI_31377831-S | 8 | 8 | 110430021 | 178234 | 9.6389 | 5.46611 | JPT |
| rs11998321 | PKHD1L1  | GI_31377831-S | 8 | 8 | 110432563 | 175692 | 9.5433 | 5.46611 | JPT |
| rs1458920  | PKHD1L1  | GI_31377831-S | 8 | 8 | 110440985 | 167270 | 6.4314 | 5.46611 | JPT |
| rs12680439 | PKHD1L1  | GI_31377831-S | 8 | 8 | 110441470 | 166785 | 6.4962 | 5.46611 | JPT |
| rs7002606  | PKHD1L1  | GI_31377831-S | 8 | 8 | 110441547 | 166708 | 6.0613 | 5.46611 | JPT |
| rs7002926  | PKHD1L1  | GI_31377831-S | 8 | 8 | 110441762 | 166493 | 6.7692 | 5.46611 | JPT |
| rs6982748  | PKHD1L1  | GI_31377831-S | 8 | 8 | 110441844 | 166411 | 6.7692 | 5.46611 | JPT |
| rs4734212  | PKHD1L1  | GI_31377831-S | 8 | 8 | 110445727 | 162528 | 6.4314 | 5.46611 | JPT |
| rs10099126 | PKHD1L1  | GI_31377831-S | 8 | 8 | 110448791 | 159464 | 6.262  | 5.46611 | JPT |
| rs7819141  | PKHD1L1  | GI_31377831-S | 8 | 8 | 110449856 | 158399 | 6.4962 | 5.46611 | JPT |
| rs7819151  | PKHD1L1  | GI_31377831-S | 8 | 8 | 110449873 | 158382 | 6.8464 | 5.46611 | JPT |
| rs12334438 | PKHD1L1  | GI_31377831-S | 8 | 8 | 110450959 | 157296 | 6.8464 | 5.46611 | JPT |
| rs13253951 | PKHD1L1  | GI_31377831-S | 8 | 8 | 110459380 | 148875 | 6.9509 | 5.46611 | JPT |
| rs2349436  | PKHD1L1  | GI_31377831-S | 8 | 8 | 110460256 | 147999 | 6.4314 | 5.46611 | JPT |
| rs921960   | PKHD1L1  | GI_31377831-S | 8 | 8 | 110461305 | 146950 | 7.1344 | 5.46611 | JPT |

|            |         |               |   |   |           |        |        |         |     |
|------------|---------|---------------|---|---|-----------|--------|--------|---------|-----|
| rs1457292  | PKHD1L1 | GI_31377831-S | 8 | 8 | 110461824 | 146431 | 6.4314 | 5.46611 | JPT |
| rs6993552  | PKHD1L1 | GI_31377831-S | 8 | 8 | 110462318 | 145937 | 6.4962 | 5.46611 | JPT |
| rs2168679  | PKHD1L1 | GI_31377831-S | 8 | 8 | 110464203 | 144052 | 6.7692 | 5.46611 | JPT |
| rs7016085  | PKHD1L1 | GI_31377831-S | 8 | 8 | 110466914 | 141341 | 6.4314 | 5.46611 | JPT |
| rs13278812 | PKHD1L1 | GI_31377831-S | 8 | 8 | 110472672 | 135583 | 6.8464 | 5.46611 | JPT |
| rs1379370  | PKHD1L1 | GI_31377831-S | 8 | 8 | 110472874 | 135381 | 6.5544 | 5.46611 | JPT |
| rs1457290  | PKHD1L1 | GI_31377831-S | 8 | 8 | 110474575 | 133680 | 6.0699 | 5.46611 | JPT |
| rs1457289  | PKHD1L1 | GI_31377831-S | 8 | 8 | 110474727 | 133528 | 6.7692 | 5.46611 | JPT |
| rs10098672 | PKHD1L1 | GI_31377831-S | 8 | 8 | 110476273 | 131982 | 6.8464 | 5.46611 | JPT |
| rs1870108  | PKHD1L1 | GI_31377831-S | 8 | 8 | 110476737 | 131518 | 6.4314 | 5.46611 | JPT |
| rs6993467  | PKHD1L1 | GI_31377831-S | 8 | 8 | 110478788 | 129467 | 6.8464 | 5.46611 | JPT |
| rs13266374 | PKHD1L1 | GI_31377831-S | 8 | 8 | 110478901 | 129354 | 6.4962 | 5.46611 | JPT |
| rs13266838 | PKHD1L1 | GI_31377831-S | 8 | 8 | 110478916 | 129339 | 5.7715 | 5.46611 | JPT |
| rs921959   | PKHD1L1 | GI_31377831-S | 8 | 8 | 110480514 | 127741 | 6.4314 | 5.46611 | JPT |
| rs1379369  | PKHD1L1 | GI_31377831-S | 8 | 8 | 110481695 | 126560 | 6.7692 | 5.46611 | JPT |
| rs2061295  | PKHD1L1 | GI_31377831-S | 8 | 8 | 110482124 | 126131 | 6.7692 | 5.46611 | JPT |
| rs1457287  | PKHD1L1 | GI_31377831-S | 8 | 8 | 110482154 | 126101 | 6.7692 | 5.46611 | JPT |
| rs10101522 | PKHD1L1 | GI_31377831-S | 8 | 8 | 110482225 | 126030 | 6.3205 | 5.46611 | JPT |
| rs964307   | PKHD1L1 | GI_31377831-S | 8 | 8 | 110482938 | 125317 | 6.4314 | 5.46611 | JPT |
| rs2061294  | PKHD1L1 | GI_31377831-S | 8 | 8 | 110483000 | 125255 | 6.3657 | 5.46611 | JPT |
| rs965930   | PKHD1L1 | GI_31377831-S | 8 | 8 | 110483752 | 124503 | 6.4314 | 5.46611 | JPT |
| rs921958   | PKHD1L1 | GI_31377831-S | 8 | 8 | 110485623 | 122632 | 6.4314 | 5.46611 | JPT |
| rs1457286  | PKHD1L1 | GI_31377831-S | 8 | 8 | 110485989 | 122266 | 6.7692 | 5.46611 | JPT |
| rs12679728 | PKHD1L1 | GI_31377831-S | 8 | 8 | 110487637 | 120618 | 6.4962 | 5.46611 | JPT |
| rs1037695  | PKHD1L1 | GI_31377831-S | 8 | 8 | 110488098 | 120157 | 6.7692 | 5.46611 | JPT |
| rs10097258 | PKHD1L1 | GI_31377831-S | 8 | 8 | 110488287 | 119968 | 6.4962 | 5.46611 | JPT |
| rs1824193  | PKHD1L1 | GI_31377831-S | 8 | 8 | 110488942 | 119313 | 6.4314 | 5.46611 | JPT |
| rs1379363  | PKHD1L1 | GI_31377831-S | 8 | 8 | 110489247 | 119008 | 6.4314 | 5.46611 | JPT |
| rs1379364  | PKHD1L1 | GI_31377831-S | 8 | 8 | 110489325 | 118930 | 6.4168 | 5.46611 | JPT |
| rs13254245 | PKHD1L1 | GI_31377831-S | 8 | 8 | 110489560 | 118695 | 6.4962 | 5.46611 | JPT |
| rs13252234 | PKHD1L1 | GI_31377831-S | 8 | 8 | 110489605 | 118650 | 6.4962 | 5.46611 | JPT |
| rs9297425  | PKHD1L1 | GI_31377831-S | 8 | 8 | 110490289 | 117966 | 6.317  | 5.46611 | JPT |
| rs12546429 | PKHD1L1 | GI_31377831-S | 8 | 8 | 110491526 | 116729 | 6.4314 | 5.46611 | JPT |
| rs10955518 | PKHD1L1 | GI_31377831-S | 8 | 8 | 110493352 | 114903 | 6.4314 | 5.46611 | JPT |
| rs4604408  | PKHD1L1 | GI_31377831-S | 8 | 8 | 110494770 | 113485 | 5.7048 | 5.46611 | JPT |
| rs897838   | PKHD1L1 | GI_31377831-S | 8 | 8 | 110495783 | 112472 | 6.7692 | 5.46611 | JPT |
| rs897839   | PKHD1L1 | GI_31377831-S | 8 | 8 | 110496020 | 112235 | 6.4962 | 5.46611 | JPT |
| rs2349760  | PKHD1L1 | GI_31377831-S | 8 | 8 | 110496096 | 112159 | 6.7692 | 5.46611 | JPT |
| rs2349761  | PKHD1L1 | GI_31377831-S | 8 | 8 | 110496200 | 112055 | 6.4314 | 5.46611 | JPT |
| rs3911483  | PKHD1L1 | GI_31377831-S | 8 | 8 | 110496369 | 111886 | 6.3205 | 5.46611 | JPT |
| rs2124982  | PKHD1L1 | GI_31377831-S | 8 | 8 | 110496868 | 111387 | 6.4314 | 5.46611 | JPT |
| rs9656882  | PKHD1L1 | GI_31377831-S | 8 | 8 | 110496959 | 111296 | 6.4962 | 5.46611 | JPT |
| rs13254461 | PKHD1L1 | GI_31377831-S | 8 | 8 | 110498098 | 110157 | 6.4962 | 5.46611 | JPT |
| rs9656793  | PKHD1L1 | GI_31377831-S | 8 | 8 | 110498129 | 110126 | 6.4962 | 5.46611 | JPT |
| rs1840908  | PKHD1L1 | GI_31377831-S | 8 | 8 | 110498628 | 109627 | 6.8464 | 5.46611 | JPT |
| rs7840592  | PKHD1L1 | GI_31377831-S | 8 | 8 | 110499617 | 108638 | 6.7692 | 5.46611 | JPT |
| rs10092565 | PKHD1L1 | GI_31377831-S | 8 | 8 | 110499679 | 108576 | 6.4962 | 5.46611 | JPT |
| rs10092693 | PKHD1L1 | GI_31377831-S | 8 | 8 | 110499780 | 108475 | 6.4314 | 5.46611 | JPT |
| rs6469260  | PKHD1L1 | GI_31377831-S | 8 | 8 | 110500234 | 108021 | 6.5097 | 5.46611 | JPT |
| rs7016609  | PKHD1L1 | GI_31377831-S | 8 | 8 | 110500393 | 107862 | 6.4962 | 5.46611 | JPT |
| rs13262995 | PKHD1L1 | GI_31377831-S | 8 | 8 | 110504590 | 103665 | 6.4962 | 5.46611 | JPT |
| rs7015262  | PKHD1L1 | GI_31377831-S | 8 | 8 | 110505780 | 102475 | 7.6963 | 5.46611 | JPT |
| rs10458302 | PKHD1L1 | GI_31377831-S | 8 | 8 | 110505939 | 102316 | 6.4314 | 5.46611 | JPT |
| rs4735133  | PKHD1L1 | GI_31377831-S | 8 | 8 | 110506560 | 101695 | 6.7692 | 5.46611 | JPT |
| rs4735134  | PKHD1L1 | GI_31377831-S | 8 | 8 | 110506846 | 101409 | 6.4314 | 5.46611 | JPT |
| rs13258279 | PKHD1L1 | GI_31377831-S | 8 | 8 | 110507791 | 100464 | 5.4842 | 5.46611 | JPT |



|           |         |               |   |   |           |       |         |         |     |
|-----------|---------|---------------|---|---|-----------|-------|---------|---------|-----|
| rs6469261 | PKHD1L1 | GI_31377831-S | 8 | 8 | 110509800 | 98455 | 6.7692  | 5.46611 | JPT |
| rs6469262 | PKHD1L1 | GI_31377831-S | 8 | 8 | 110512656 | 95599 | 6.8464  | 5.46611 | JPT |
| rs1870107 | PKHD1L1 | GI_31377831-S | 8 | 8 | 110517106 | 91149 | 6.7692  | 5.46611 | JPT |
| rs2844253 | PKHD1L1 | GI_31377831-S | 8 | 8 | 110521087 | 87168 | 7.209   | 5.46611 | JPT |
| rs1673408 | PKHD1L1 | GI_31377831-S | 8 | 8 | 110524497 | 83758 | 7.209   | 5.46611 | JPT |
| rs1673407 | PKHD1L1 | GI_31377831-S | 8 | 8 | 110529664 | 78591 | 7.209   | 5.46611 | JPT |
| rs1563579 | PKHD1L1 | GI_31377831-S | 8 | 8 | 110531534 | 76721 | 6.1544  | 5.46611 | JPT |
| rs1783165 | PKHD1L1 | GI_31377831-S | 8 | 8 | 110533034 | 75221 | 6.8266  | 5.46611 | JPT |
| rs1673404 | PKHD1L1 | GI_31377831-S | 8 | 8 | 110534236 | 74019 | 7.2418  | 5.46611 | JPT |
| rs1783163 | PKHD1L1 | GI_31377831-S | 8 | 8 | 110535261 | 72994 | 7.209   | 5.46611 | JPT |
| rs2607639 | PKHD1L1 | GI_31377831-S | 8 | 8 | 110539473 | 68782 | 7.0226  | 5.46611 | JPT |
| rs2607638 | PKHD1L1 | GI_31377831-S | 8 | 8 | 110539887 | 68368 | 7.209   | 5.46611 | JPT |
| rs2844251 | PKHD1L1 | GI_31377831-S | 8 | 8 | 110540059 | 68196 | 7.2418  | 5.46611 | JPT |
| rs2607637 | PKHD1L1 | GI_31377831-S | 8 | 8 | 110540260 | 67995 | 7.209   | 5.46611 | JPT |
| rs2844252 | PKHD1L1 | GI_31377831-S | 8 | 8 | 110540306 | 67949 | 7.2418  | 5.46611 | JPT |
| rs1457284 | PKHD1L1 | GI_31377831-S | 8 | 8 | 110540600 | 67655 | 7.2418  | 5.46611 | JPT |
| rs1026439 | PKHD1L1 | GI_31377831-S | 8 | 8 | 110543083 | 65172 | 7.209   | 5.46611 | JPT |
| rs1026438 | PKHD1L1 | GI_31377831-S | 8 | 8 | 110543142 | 65113 | 7.209   | 5.46611 | JPT |
| rs714994  | PKHD1L1 | GI_31377831-S | 8 | 8 | 110544279 | 63976 | 6.8266  | 5.46611 | JPT |
| rs1673401 | PKHD1L1 | GI_31377831-S | 8 | 8 | 110544752 | 63503 | 7.209   | 5.46611 | JPT |
| rs1783145 | PKHD1L1 | GI_31377831-S | 8 | 8 | 110545050 | 63205 | 7.209   | 5.46611 | JPT |
| rs1783144 | PKHD1L1 | GI_31377831-S | 8 | 8 | 110545167 | 63088 | 7.018   | 5.46611 | JPT |
| rs1673400 | PKHD1L1 | GI_31377831-S | 8 | 8 | 110545286 | 62969 | 7.209   | 5.46611 | JPT |
| rs1673398 | PKHD1L1 | GI_31377831-S | 8 | 8 | 110546169 | 62086 | 6.7942  | 5.46611 | JPT |
| rs1627570 | PKHD1L1 | GI_31377831-S | 8 | 8 | 110547000 | 61255 | 6.6548  | 5.46611 | JPT |
| rs1673397 | PKHD1L1 | GI_31377831-S | 8 | 8 | 110547112 | 61143 | 7.209   | 5.46611 | JPT |
| rs1783143 | PKHD1L1 | GI_31377831-S | 8 | 8 | 110547650 | 60605 | 7.209   | 5.46611 | JPT |
| rs1783142 | PKHD1L1 | GI_31377831-S | 8 | 8 | 110547837 | 60418 | 7.209   | 5.46611 | JPT |
| rs1673396 | PKHD1L1 | GI_31377831-S | 8 | 8 | 110548797 | 59458 | 7.209   | 5.46611 | JPT |
| rs1471125 | PKHD1L1 | GI_31377831-S | 8 | 8 | 110549755 | 58500 | 7.209   | 5.46611 | JPT |
| rs1471124 | PKHD1L1 | GI_31377831-S | 8 | 8 | 110551558 | 56697 | 7.209   | 5.46611 | JPT |
| rs1783152 | PKHD1L1 | GI_31377831-S | 8 | 8 | 110552076 | 56179 | 6.9919  | 5.46611 | JPT |
| rs1673393 | PKHD1L1 | GI_31377831-S | 8 | 8 | 110553021 | 55234 | 7.209   | 5.46611 | JPT |
| rs1783151 | PKHD1L1 | GI_31377831-S | 8 | 8 | 110553119 | 55136 | 7.2418  | 5.46611 | JPT |
| rs1783149 | PKHD1L1 | GI_31377831-S | 8 | 8 | 110553988 | 54267 | 7.209   | 5.46611 | JPT |
| rs1673390 | PKHD1L1 | GI_31377831-S | 8 | 8 | 110554319 | 53936 | 6.8539  | 5.46611 | JPT |
| rs1457282 | PKHD1L1 | GI_31377831-S | 8 | 8 | 110555942 | 52313 | 15.1913 | 5.46611 | JPT |
| rs1783148 | PKHD1L1 | GI_31377831-S | 8 | 8 | 110558796 | 49459 | 10.5331 | 5.46611 | JPT |
| rs1379361 | PKHD1L1 | GI_31377831-S | 8 | 8 | 110559318 | 48937 | 15.1913 | 5.46611 | JPT |
| rs1783147 | PKHD1L1 | GI_31377831-S | 8 | 8 | 110561016 | 47239 | 15.1913 | 5.46611 | JPT |
| rs1630942 | PKHD1L1 | GI_31377831-S | 8 | 8 | 110561053 | 47202 | 15.1913 | 5.46611 | JPT |
| rs1630134 | PKHD1L1 | GI_31377831-S | 8 | 8 | 110561140 | 47115 | 15.1913 | 5.46611 | JPT |
| rs1026437 | PKHD1L1 | GI_31377831-S | 8 | 8 | 110562125 | 46130 | 15.1913 | 5.46611 | JPT |
| rs2607635 | PKHD1L1 | GI_31377831-S | 8 | 8 | 110564040 | 44215 | 13.0319 | 5.46611 | JPT |
| rs2844254 | PKHD1L1 | GI_31377831-S | 8 | 8 | 110564368 | 43887 | 15.1913 | 5.46611 | JPT |
| rs2607633 | PKHD1L1 | GI_31377831-S | 8 | 8 | 110565344 | 42911 | 15.1913 | 5.46611 | JPT |
| rs1009371 | PKHD1L1 | GI_31377831-S | 8 | 8 | 110567126 | 41129 | 15.1913 | 5.46611 | JPT |
| rs1783140 | PKHD1L1 | GI_31377831-S | 8 | 8 | 110568520 | 39735 | 15.261  | 5.46611 | JPT |
| rs1783141 | PKHD1L1 | GI_31377831-S | 8 | 8 | 110569859 | 38396 | 15.1913 | 5.46611 | JPT |
| rs2607631 | PKHD1L1 | GI_31377831-S | 8 | 8 | 110573591 | 34664 | 15.1913 | 5.46611 | JPT |
| rs2607630 | PKHD1L1 | GI_31377831-S | 8 | 8 | 110574042 | 34213 | 13.0319 | 5.46611 | JPT |
| rs2607629 | PKHD1L1 | GI_31377831-S | 8 | 8 | 110574354 | 33901 | 15.1913 | 5.46611 | JPT |
| rs1013482 | PKHD1L1 | GI_31377831-S | 8 | 8 | 110574886 | 33369 | 15.1913 | 5.46611 | JPT |
| rs2607628 | PKHD1L1 | GI_31377831-S | 8 | 8 | 110575062 | 33193 | 15.1913 | 5.46611 | JPT |
| rs1563580 | PKHD1L1 | GI_31377831-S | 8 | 8 | 110575280 | 32975 | 14.5862 | 5.46611 | JPT |
| rs2607627 | PKHD1L1 | GI_31377831-S | 8 | 8 | 110575834 | 32421 | 15.1913 | 5.46611 | JPT |

|            |         |               |   |   |           |       |         |         |     |
|------------|---------|---------------|---|---|-----------|-------|---------|---------|-----|
| rs1673426  | PKHD1L1 | GI_31377831-S | 8 | 8 | 110576809 | 31446 | 15.1913 | 5.46611 | JPT |
| rs1783162  | PKHD1L1 | GI_31377831-S | 8 | 8 | 110577414 | 30841 | 15.1913 | 5.46611 | JPT |
| rs1673422  | PKHD1L1 | GI_31377831-S | 8 | 8 | 110582601 | 25654 | 15.1913 | 5.46611 | JPT |
| rs1783159  | PKHD1L1 | GI_31377831-S | 8 | 8 | 110583540 | 24715 | 14.3868 | 5.46611 | JPT |
| rs1783158  | PKHD1L1 | GI_31377831-S | 8 | 8 | 110583563 | 24692 | 13.884  | 5.46611 | JPT |
| rs1673421  | PKHD1L1 | GI_31377831-S | 8 | 8 | 110584402 | 23853 | 11.3245 | 5.46611 | JPT |
| rs1673420  | PKHD1L1 | GI_31377831-S | 8 | 8 | 110585296 | 22959 | 12.7801 | 5.46611 | JPT |
| rs1673419  | PKHD1L1 | GI_31377831-S | 8 | 8 | 110585433 | 22822 | 15.1913 | 5.46611 | JPT |
| rs1783157  | PKHD1L1 | GI_31377831-S | 8 | 8 | 110585436 | 22819 | 15.1913 | 5.46611 | JPT |
| rs1673416  | PKHD1L1 | GI_31377831-S | 8 | 8 | 110586668 | 21587 | 15.1913 | 5.46611 | JPT |
| rs1673415  | PKHD1L1 | GI_31377831-S | 8 | 8 | 110587384 | 20871 | 15.1913 | 5.46611 | JPT |
| rs1379367  | PKHD1L1 | GI_31377831-S | 8 | 8 | 110587710 | 20545 | 15.1913 | 5.46611 | JPT |
| rs1783154  | PKHD1L1 | GI_31377831-S | 8 | 8 | 110588748 | 19507 | 15.1913 | 5.46611 | JPT |
| rs1783153  | PKHD1L1 | GI_31377831-S | 8 | 8 | 110588990 | 19265 | 15.1913 | 5.46611 | JPT |
| rs2844257  | PKHD1L1 | GI_31377831-S | 8 | 8 | 110590653 | 17602 | 14.5862 | 5.46611 | JPT |
| rs2607625  | PKHD1L1 | GI_31377831-S | 8 | 8 | 110590692 | 17563 | 14.5862 | 5.46611 | JPT |
| rs2844258  | PKHD1L1 | GI_31377831-S | 8 | 8 | 110591692 | 16563 | 14.5862 | 5.46611 | JPT |
| rs2844259  | PKHD1L1 | GI_31377831-S | 8 | 8 | 110591903 | 16352 | 14.5862 | 5.46611 | JPT |
| rs1673412  | PKHD1L1 | GI_31377831-S | 8 | 8 | 110594900 | 13355 | 13.7456 | 5.46611 | JPT |
| rs1783166  | PKHD1L1 | GI_31377831-S | 8 | 8 | 110595060 | 13195 | 15.1913 | 5.46611 | JPT |
| rs1673411  | PKHD1L1 | GI_31377831-S | 8 | 8 | 110597325 | 10930 | 15.1913 | 5.46611 | JPT |
| rs1783168  | PKHD1L1 | GI_31377831-S | 8 | 8 | 110598046 | 10209 | 15.1913 | 5.46611 | JPT |
| rs1673410  | PKHD1L1 | GI_31377831-S | 8 | 8 | 110598253 | 10002 | 14.5862 | 5.46611 | JPT |
| rs1673413  | PKHD1L1 | GI_31377831-S | 8 | 8 | 110599052 | 9203  | 14.5862 | 5.46611 | JPT |
| rs1783169  | PKHD1L1 | GI_31377831-S | 8 | 8 | 110599950 | 8305  | 14.5862 | 5.46611 | JPT |
| rs1783170  | PKHD1L1 | GI_31377831-S | 8 | 8 | 110600142 | 8113  | 15.1913 | 5.46611 | JPT |
| rs1673409  | PKHD1L1 | GI_31377831-S | 8 | 8 | 110600946 | 7309  | 14.5862 | 5.46611 | JPT |
| rs1783171  | PKHD1L1 | GI_31377831-S | 8 | 8 | 110601912 | 6343  | 13.7456 | 5.46611 | JPT |
| rs1673428  | PKHD1L1 | GI_31377831-S | 8 | 8 | 110602120 | 6135  | 14.5862 | 5.46611 | JPT |
| rs2844261  | PKHD1L1 | GI_31377831-S | 8 | 8 | 110602670 | 5585  | 14.5862 | 5.46611 | JPT |
| rs1563578  | PKHD1L1 | GI_31377831-S | 8 | 8 | 110603688 | 4567  | 14.5862 | 5.46611 | JPT |
| rs1457288  | PKHD1L1 | GI_31377831-S | 8 | 8 | 110603951 | 4304  | 15.1913 | 5.46611 | JPT |
| rs897840   | PKHD1L1 | GI_31377831-S | 8 | 8 | 110605492 | 2763  | 14.5862 | 5.46611 | JPT |
| rs897842   | PKHD1L1 | GI_31377831-S | 8 | 8 | 110605957 | 2298  | 14.5862 | 5.46611 | JPT |
| rs1783172  | PKHD1L1 | GI_31377831-S | 8 | 8 | 110606128 | 2127  | 14.5862 | 5.46611 | JPT |
| rs730885   | PKHD1L1 | GI_31377831-S | 8 | 8 | 110606593 | 1662  | 14.5862 | 5.46611 | JPT |
| rs1783173  | PKHD1L1 | GI_31377831-S | 8 | 8 | 110607525 | 730   | 14.5862 | 5.46611 | JPT |
| rs1457295  | PKHD1L1 | GI_31377831-S | 8 | 8 | 110608130 | 125   | 14.5862 | 5.46611 | JPT |
| rs1783174  | PKHD1L1 | GI_31377831-S | 8 | 8 | 110608362 | 107   | 14.5862 | 5.46611 | JPT |
| rs1673383  | PKHD1L1 | GI_31377831-S | 8 | 8 | 110609091 | 836   | 14.5862 | 5.46611 | JPT |
| rs1673384  | PKHD1L1 | GI_31377831-S | 8 | 8 | 110609441 | 1186  | 14.5862 | 5.46611 | JPT |
| rs1673386  | PKHD1L1 | GI_31377831-S | 8 | 8 | 110609938 | 1683  | 14.5862 | 5.46611 | JPT |
| rs1673389  | PKHD1L1 | GI_31377831-S | 8 | 8 | 110610255 | 2000  | 14.5862 | 5.46611 | JPT |
| rs1673395  | PKHD1L1 | GI_31377831-S | 8 | 8 | 110610586 | 2331  | 14.5862 | 5.46611 | JPT |
| rs1673399  | PKHD1L1 | GI_31377831-S | 8 | 8 | 110611139 | 2884  | 14.5862 | 5.46611 | JPT |
| rs1617259  | PKHD1L1 | GI_31377831-S | 8 | 8 | 110611474 | 3219  | 14.5862 | 5.46611 | JPT |
| rs2154660  | PKHD1L1 | GI_31377831-S | 8 | 8 | 110612697 | 4442  | 14.5862 | 5.46611 | JPT |
| rs7821242  | PKHD1L1 | GI_31377831-S | 8 | 8 | 110613700 | 5445  | 15.261  | 5.46611 | JPT |
| rs10505133 | PKHD1L1 | GI_31377831-S | 8 | 8 | 110614253 | 5998  | 13.9148 | 5.46611 | JPT |
| rs2022935  | PKHD1L1 | GI_31377831-S | 8 | 8 | 110614686 | 6431  | 14.5862 | 5.46611 | JPT |
| rs10108943 | PKHD1L1 | GI_31377831-S | 8 | 8 | 110614783 | 6528  | 15.261  | 5.46611 | JPT |
| rs10111682 | PKHD1L1 | GI_31377831-S | 8 | 8 | 110615076 | 6821  | 14.6291 | 5.46611 | JPT |
| rs13439864 | PKHD1L1 | GI_31377831-S | 8 | 8 | 110615884 | 7629  | 12.5561 | 5.46611 | JPT |
| rs10088258 | PKHD1L1 | GI_31377831-S | 8 | 8 | 110616575 | 8320  | 14.6291 | 5.46611 | JPT |
| rs7006166  | PKHD1L1 | GI_31377831-S | 8 | 8 | 110616688 | 8433  | 15.7036 | 5.46611 | JPT |
| rs7011340  | PKHD1L1 | GI_31377831-S | 8 | 8 | 110617590 | 9335  | 14.5862 | 5.46611 | JPT |

|            |         |               |   |   |           |        |         |         |     |
|------------|---------|---------------|---|---|-----------|--------|---------|---------|-----|
| rs7011803  | PKHD1L1 | GI_31377831-S | 8 | 8 | 110617624 | 9369   | 14.5862 | 5.46611 | JPT |
| rs4529437  | PKHD1L1 | GI_31377831-S | 8 | 8 | 110619006 | 10751  | 14.5862 | 5.46611 | JPT |
| rs3808380  | PKHD1L1 | GI_31377831-S | 8 | 8 | 110620310 | 12055  | 15.1913 | 5.46611 | JPT |
| rs1044230  | PKHD1L1 | GI_31377831-S | 8 | 8 | 110621753 | 13498  | 15.1913 | 5.46611 | JPT |
| rs2703389  | PKHD1L1 | GI_31377831-S | 8 | 8 | 110626059 | 17804  | 15.1913 | 5.46611 | JPT |
| rs2703386  | PKHD1L1 | GI_31377831-S | 8 | 8 | 110633100 | 24845  | 15.1913 | 5.46611 | JPT |
| rs2703377  | PKHD1L1 | GI_31377831-S | 8 | 8 | 110635360 | 27105  | 15.1913 | 5.46611 | JPT |
| rs2022934  | PKHD1L1 | GI_31377831-S | 8 | 8 | 110636950 | 28695  | 15.1913 | 5.46611 | JPT |
| rs2844231  | PKHD1L1 | GI_31377831-S | 8 | 8 | 110639003 | 30748  | 15.1913 | 5.46611 | JPT |
| rs6995991  | PKHD1L1 | GI_31377831-S | 8 | 8 | 110639236 | 30981  | 6.4588  | 5.46611 | JPT |
| rs2844234  | PKHD1L1 | GI_31377831-S | 8 | 8 | 110651542 | 43287  | 12.4214 | 5.46611 | JPT |
| rs2703388  | PKHD1L1 | GI_31377831-S | 8 | 8 | 110651938 | 43683  | 13.622  | 5.46611 | JPT |
| rs2844235  | PKHD1L1 | GI_31377831-S | 8 | 8 | 110663324 | 55069  | 13.622  | 5.46611 | JPT |
| rs2844236  | PKHD1L1 | GI_31377831-S | 8 | 8 | 110663994 | 55739  | 13.622  | 5.46611 | JPT |
| rs1892760  | PKHD1L1 | GI_31377831-S | 8 | 8 | 110666049 | 57794  | 13.622  | 5.46611 | JPT |
| rs2236628  | PKHD1L1 | GI_31377831-S | 8 | 8 | 110667374 | 59119  | 13.622  | 5.46611 | JPT |
| rs2236627  | PKHD1L1 | GI_31377831-S | 8 | 8 | 110667784 | 59529  | 14.3674 | 5.46611 | JPT |
| rs2703384  | PKHD1L1 | GI_31377831-S | 8 | 8 | 110669235 | 60980  | 13.622  | 5.46611 | JPT |
| rs2703382  | PKHD1L1 | GI_31377831-S | 8 | 8 | 110672655 | 64400  | 13.622  | 5.46611 | JPT |
| rs2154658  | PKHD1L1 | GI_31377831-S | 8 | 8 | 110685758 | 77503  | 14.3674 | 5.46611 | JPT |
| rs1892759  | PKHD1L1 | GI_31377831-S | 8 | 8 | 110686170 | 77915  | 14.3674 | 5.46611 | JPT |
| rs2844238  | PKHD1L1 | GI_31377831-S | 8 | 8 | 110690042 | 81787  | 9.7471  | 5.46611 | JPT |
| rs1892758  | PKHD1L1 | GI_31377831-S | 8 | 8 | 110690534 | 82279  | 9.7471  | 5.46611 | JPT |
| rs2703391  | PKHD1L1 | GI_31377831-S | 8 | 8 | 110691249 | 82994  | 9.7471  | 5.46611 | JPT |
| rs1954714  | PKHD1L1 | GI_31377831-S | 8 | 8 | 110692007 | 83752  | 9.7471  | 5.46611 | JPT |
| rs2844239  | PKHD1L1 | GI_31377831-S | 8 | 8 | 110693355 | 85100  | 9.8154  | 5.46611 | JPT |
| rs2703383  | PKHD1L1 | GI_31377831-S | 8 | 8 | 110693448 | 85193  | 9.7471  | 5.46611 | JPT |
| rs2844240  | PKHD1L1 | GI_31377831-S | 8 | 8 | 110693762 | 85507  | 9.7471  | 5.46611 | JPT |
| rs2844241  | PKHD1L1 | GI_31377831-S | 8 | 8 | 110693813 | 85558  | 9.7471  | 5.46611 | JPT |
| rs2703380  | PKHD1L1 | GI_31377831-S | 8 | 8 | 110694448 | 86193  | 10.6114 | 5.46611 | JPT |
| rs2844242  | PKHD1L1 | GI_31377831-S | 8 | 8 | 110694933 | 86678  | 9.7471  | 5.46611 | JPT |
| rs2844243  | PKHD1L1 | GI_31377831-S | 8 | 8 | 110694945 | 86690  | 9.088   | 5.46611 | JPT |
| rs2844244  | PKHD1L1 | GI_31377831-S | 8 | 8 | 110695306 | 87051  | 9.7471  | 5.46611 | JPT |
| rs2703379  | PKHD1L1 | GI_31377831-S | 8 | 8 | 110695365 | 87110  | 9.8154  | 5.46611 | JPT |
| rs2844245  | PKHD1L1 | GI_31377831-S | 8 | 8 | 110696181 | 87926  | 9.7471  | 5.46611 | JPT |
| rs2844246  | PKHD1L1 | GI_31377831-S | 8 | 8 | 110696292 | 88037  | 9.7471  | 5.46611 | JPT |
| rs2844247  | PKHD1L1 | GI_31377831-S | 8 | 8 | 110696934 | 88679  | 9.7471  | 5.46611 | JPT |
| rs2022930  | PKHD1L1 | GI_31377831-S | 8 | 8 | 110699358 | 91103  | 9.7471  | 5.46611 | JPT |
| rs1954713  | PKHD1L1 | GI_31377831-S | 8 | 8 | 110699616 | 91361  | 9.7471  | 5.46611 | JPT |
| rs2844250  | PKHD1L1 | GI_31377831-S | 8 | 8 | 110702451 | 94196  | 9.7471  | 5.46611 | JPT |
| rs13254530 | PKHD1L1 | GI_31377831-S | 8 | 8 | 110704573 | 96318  | 9.3595  | 5.46611 | JPT |
| rs4367512  | PKHD1L1 | GI_31377831-S | 8 | 8 | 110706520 | 98265  | 9.8154  | 5.46611 | JPT |
| rs7813979  | PKHD1L1 | GI_31377831-S | 8 | 8 | 110710349 | 102094 | 9.7471  | 5.46611 | JPT |
| rs6982034  | PKHD1L1 | GI_31377831-S | 8 | 8 | 110712070 | 103815 | 9.7471  | 5.46611 | JPT |
| rs6469270  | PKHD1L1 | GI_31377831-S | 8 | 8 | 110712471 | 104216 | 8.846   | 5.46611 | JPT |
| rs6469271  | PKHD1L1 | GI_31377831-S | 8 | 8 | 110713950 | 105695 | 9.7471  | 5.46611 | JPT |
| rs6469272  | PKHD1L1 | GI_31377831-S | 8 | 8 | 110714367 | 106112 | 9.7471  | 5.46611 | JPT |
| rs6469273  | PKHD1L1 | GI_31377831-S | 8 | 8 | 110714661 | 106406 | 9.7471  | 5.46611 | JPT |
| rs6994349  | PKHD1L1 | GI_31377831-S | 8 | 8 | 110714909 | 106654 | 8.8259  | 5.46611 | JPT |
| rs7003380  | PKHD1L1 | GI_31377831-S | 8 | 8 | 110716029 | 107774 | 9.7471  | 5.46611 | JPT |
| rs16879844 | PKHD1L1 | GI_31377831-S | 8 | 8 | 110717448 | 109193 | 9.8154  | 5.46611 | JPT |
| rs6469274  | PKHD1L1 | GI_31377831-S | 8 | 8 | 110717957 | 109702 | 9.7471  | 5.46611 | JPT |
| rs3134316  | PKHD1L1 | GI_31377831-S | 8 | 8 | 110743074 | 134819 | 8.4106  | 5.46611 | JPT |
| rs3134318  | PKHD1L1 | GI_31377831-S | 8 | 8 | 110743403 | 135148 | 8.7495  | 5.46611 | JPT |
| rs3108867  | PKHD1L1 | GI_31377831-S | 8 | 8 | 110745215 | 136960 | 8.7495  | 5.46611 | JPT |
| rs3108830  | PKHD1L1 | GI_31377831-S | 8 | 8 | 110751314 | 143059 | 6.7365  | 5.46611 | JPT |

|            |           |               |   |   |           |        |        |         |     |
|------------|-----------|---------------|---|---|-----------|--------|--------|---------|-----|
| rs3133920  | PKHD1L1   | GI_31377831-S | 8 | 8 | 110752342 | 144087 | 8.1078 | 5.46611 | JPT |
| rs3134326  | PKHD1L1   | GI_31377831-S | 8 | 8 | 110752980 | 144725 | 8.1497 | 5.46611 | JPT |
| rs10090133 | PKHD1L1   | GI_31377831-S | 8 | 8 | 110757649 | 149394 | 7.9091 | 5.46611 | JPT |
| rs3108839  | PKHD1L1   | GI_31377831-S | 8 | 8 | 110761865 | 153610 | 8.7495 | 5.46611 | JPT |
| rs3133933  | PKHD1L1   | GI_31377831-S | 8 | 8 | 110765782 | 157527 | 8.1497 | 5.46611 | JPT |
| rs3108834  | PKHD1L1   | GI_31377831-S | 8 | 8 | 110767265 | 159010 | 8.8646 | 5.46611 | JPT |
| rs3108855  | PKHD1L1   | GI_31377831-S | 8 | 8 | 110771989 | 163734 | 8.1078 | 5.46611 | JPT |
| rs3134337  | PKHD1L1   | GI_31377831-S | 8 | 8 | 110779780 | 171525 | 8.1078 | 5.46611 | JPT |
| rs3134338  | PKHD1L1   | GI_31377831-S | 8 | 8 | 110780200 | 171945 | 8.1078 | 5.46611 | JPT |
| rs3108841  | PKHD1L1   | GI_31377831-S | 8 | 8 | 110783256 | 175001 | 8.3651 | 5.46611 | JPT |
| rs2068893  | PKHD1L1   | GI_31377831-S | 8 | 8 | 110784948 | 176693 | 8.2606 | 5.46611 | JPT |
| rs3133941  | PKHD1L1   | GI_31377831-S | 8 | 8 | 110785108 | 176853 | 8.2832 | 5.46611 | JPT |
| rs2514591  | LOC377696 | GI_37555914-S | 8 | 8 | 119680657 | 18483  | 6.8357 | 5.83547 | JPT |
| rs2514591  | Hs.453941 | Hs.453941-S   | 8 | 8 | 119680657 | 126737 | 6.6761 | 6.06653 | JPT |
| rs2514592  | Hs.453941 | Hs.453941-S   | 8 | 8 | 119681861 | 125533 | 6.5195 | 6.06653 | JPT |
| rs2460964  | Hs.453941 | Hs.453941-S   | 8 | 8 | 119682843 | 124551 | 6.5195 | 6.06653 | JPT |
| rs2460965  | Hs.453941 | Hs.453941-S   | 8 | 8 | 119687942 | 119452 | 6.5195 | 6.06653 | JPT |
| rs2460966  | LOC377696 | GI_37555914-S | 8 | 8 | 119693737 | 31563  | 6.7737 | 5.83547 | JPT |
| rs2460966  | Hs.453941 | Hs.453941-S   | 8 | 8 | 119693737 | 113657 | 7.301  | 6.06653 | JPT |
| rs2514594  | LOC377696 | GI_37555914-S | 8 | 8 | 119694330 | 32156  | 6.8357 | 5.83547 | JPT |
| rs2514594  | Hs.453941 | Hs.453941-S   | 8 | 8 | 119694330 | 113064 | 6.6761 | 6.06653 | JPT |
| rs2460967  | Hs.453941 | Hs.453941-S   | 8 | 8 | 119697073 | 110321 | 6.5195 | 6.06653 | JPT |
| rs2460968  | Hs.453941 | Hs.453941-S   | 8 | 8 | 119697411 | 109983 | 6.5195 | 6.06653 | JPT |
| rs2460970  | LOC377696 | GI_37555914-S | 8 | 8 | 119698635 | 36461  | 6.8357 | 5.83547 | JPT |
| rs2460970  | Hs.453941 | Hs.453941-S   | 8 | 8 | 119698635 | 108759 | 6.6761 | 6.06653 | JPT |
| rs880033   | LOC377696 | GI_37555914-S | 8 | 8 | 119702375 | 40201  | 6.8357 | 5.83547 | JPT |
| rs880033   | Hs.453941 | Hs.453941-S   | 8 | 8 | 119702375 | 105019 | 6.6761 | 6.06653 | JPT |
| rs880034   | LOC377696 | GI_37555914-S | 8 | 8 | 119702442 | 40268  | 6.8357 | 5.83547 | JPT |
| rs880034   | Hs.453941 | Hs.453941-S   | 8 | 8 | 119702442 | 104952 | 6.6761 | 6.06653 | JPT |
| rs2460972  | LOC377696 | GI_37555914-S | 8 | 8 | 119707958 | 45784  | 6.8357 | 5.83547 | JPT |
| rs2460972  | Hs.453941 | Hs.453941-S   | 8 | 8 | 119707958 | 99436  | 6.6761 | 6.06653 | JPT |
| rs2514602  | LOC377696 | GI_37555914-S | 8 | 8 | 119719731 | 57557  | 6.8357 | 5.83547 | JPT |
| rs2514602  | Hs.453941 | Hs.453941-S   | 8 | 8 | 119719731 | 87663  | 6.6761 | 6.06653 | JPT |
| rs2460975  | LOC377696 | GI_37555914-S | 8 | 8 | 119720018 | 57844  | 6.8357 | 5.83547 | JPT |
| rs2460975  | Hs.453941 | Hs.453941-S   | 8 | 8 | 119720018 | 87376  | 6.6761 | 6.06653 | JPT |
| rs2514603  | LOC377696 | GI_37555914-S | 8 | 8 | 119722156 | 59982  | 6.8357 | 5.83547 | JPT |
| rs2514603  | Hs.453941 | Hs.453941-S   | 8 | 8 | 119722156 | 85238  | 6.6761 | 6.06653 | JPT |
| rs2514605  | LOC377696 | GI_37555914-S | 8 | 8 | 119723591 | 61417  | 6.8631 | 5.83547 | JPT |
| rs2514605  | Hs.453941 | Hs.453941-S   | 8 | 8 | 119723591 | 83803  | 6.7074 | 6.06653 | JPT |
| rs2514607  | LOC377696 | GI_37555914-S | 8 | 8 | 119725499 | 63325  | 6.8357 | 5.83547 | JPT |
| rs2514607  | Hs.453941 | Hs.453941-S   | 8 | 8 | 119725499 | 81895  | 6.6761 | 6.06653 | JPT |
| rs2514608  | LOC377696 | GI_37555914-S | 8 | 8 | 119726049 | 63875  | 6.8631 | 5.83547 | JPT |
| rs2514608  | Hs.453941 | Hs.453941-S   | 8 | 8 | 119726049 | 81345  | 6.7074 | 6.06653 | JPT |
| rs2514609  | LOC377696 | GI_37555914-S | 8 | 8 | 119726405 | 64231  | 6.8631 | 5.83547 | JPT |
| rs2514609  | Hs.453941 | Hs.453941-S   | 8 | 8 | 119726405 | 80989  | 6.7074 | 6.06653 | JPT |
| rs2514610  | LOC377696 | GI_37555914-S | 8 | 8 | 119728552 | 66378  | 6.8357 | 5.83547 | JPT |
| rs2514610  | Hs.453941 | Hs.453941-S   | 8 | 8 | 119728552 | 78842  | 6.6761 | 6.06653 | JPT |
| rs2460979  | LOC377696 | GI_37555914-S | 8 | 8 | 119731021 | 68847  | 6.8631 | 5.83547 | JPT |
| rs2460979  | Hs.453941 | Hs.453941-S   | 8 | 8 | 119731021 | 76373  | 6.7074 | 6.06653 | JPT |
| rs2514576  | LOC377696 | GI_37555914-S | 8 | 8 | 119740944 | 78770  | 6.078  | 5.83547 | JPT |
| rs4874159  | PP3856    | GI_40255088-S | 8 | 8 | 144742093 | 13960  | 8.2944 | 5.64214 | JPT |
| rs1466219  | PP3856    | GI_40255088-S | 8 | 8 | 144744865 | 16732  | 8.3702 | 5.64214 | JPT |
| rs4874164  | PP3856    | GI_40255088-S | 8 | 8 | 144746191 | 18058  | 8.2944 | 5.64214 | JPT |
| rs10282929 | PP3856    | GI_40255088-S | 8 | 8 | 144752920 | 24787  | 7.674  | 5.64214 | JPT |
| rs10866913 | PP3856    | GI_40255088-S | 8 | 8 | 144754829 | 26696  | 7.674  | 5.64214 | JPT |
| rs10112966 | PP3856    | GI_40255088-S | 8 | 8 | 144755077 | 26944  | 8.184  | 5.64214 | JPT |

|            |         |               |   |   |           |        |         |         |     |
|------------|---------|---------------|---|---|-----------|--------|---------|---------|-----|
| rs2242088  | PP3856  | GI_40255088-S | 8 | 8 | 144760607 | 32474  | 6.0888  | 5.64214 | JPT |
| rs10738391 | C9orf52 | GI_22749190-S | 9 | 9 | 15283579  | 121516 | 6.8628  | 6.33337 | JPT |
| rs17327373 | C9orf52 | GI_22749190-S | 9 | 9 | 15284331  | 122268 | 7.2143  | 6.33337 | JPT |
| rs10114494 | C9orf52 | GI_22749190-S | 9 | 9 | 15285073  | 123010 | 7.2143  | 6.33337 | JPT |
| rs10961965 | C9orf52 | GI_22749190-S | 9 | 9 | 15286355  | 124292 | 7.2143  | 6.33337 | JPT |
| rs10118629 | C9orf52 | GI_22749190-S | 9 | 9 | 15286450  | 124387 | 7.2143  | 6.33337 | JPT |
| rs4878501  | ANXA2   | GI_4757755-S  | 9 | 9 | 32699876  | 915237 | 6.3424  | 5.8488  | JPT |
| rs10113903 | B4GALT1 | GI_13929461-S | 9 | 9 | 33112645  | 11727  | 10.0751 | 6.08872 | JPT |
| rs10758188 | B4GALT1 | GI_13929461-S | 9 | 9 | 33113386  | 12468  | 10.0342 | 6.08872 | JPT |
| rs10738905 | B4GALT1 | GI_13929461-S | 9 | 9 | 33113627  | 12709  | 10.0751 | 6.08872 | JPT |
| rs10971419 | B4GALT1 | GI_13929461-S | 9 | 9 | 33114161  | 13243  | 10.3009 | 6.08872 | JPT |
| rs12342831 | B4GALT1 | GI_13929461-S | 9 | 9 | 33114872  | 13954  | 8.9723  | 6.08872 | JPT |
| rs10758189 | B4GALT1 | GI_13929461-S | 9 | 9 | 33115804  | 14886  | 10.0342 | 6.08872 | JPT |
| rs10813950 | B4GALT1 | GI_13929461-S | 9 | 9 | 33117640  | 16722  | 10.4396 | 6.08872 | JPT |
| rs10813951 | B4GALT1 | GI_13929461-S | 9 | 9 | 33118021  | 17103  | 9.0803  | 6.08872 | JPT |
| rs3780491  | B4GALT1 | GI_13929461-S | 9 | 9 | 33119607  | 18689  | 9.8489  | 6.08872 | JPT |
| rs10124479 | B4GALT1 | GI_13929461-S | 9 | 9 | 33126233  | 25315  | 10.0751 | 6.08872 | JPT |
| rs10813954 | B4GALT1 | GI_13929461-S | 9 | 9 | 33127596  | 26678  | 10.7993 | 6.08872 | JPT |
| rs7849148  | B4GALT1 | GI_13929461-S | 9 | 9 | 33128352  | 27434  | 10.0003 | 6.08872 | JPT |
| rs10971424 | B4GALT1 | GI_13929461-S | 9 | 9 | 33128775  | 27857  | 8.9573  | 6.08872 | JPT |
| rs3780486  | B4GALT1 | GI_13929461-S | 9 | 9 | 33129453  | 28535  | 8.6305  | 6.08872 | JPT |
| rs7865745  | B4GALT1 | GI_13929461-S | 9 | 9 | 33130976  | 30058  | 10.0751 | 6.08872 | JPT |
| rs7036812  | B4GALT1 | GI_13929461-S | 9 | 9 | 33133822  | 32904  | 9.3515  | 6.08872 | JPT |
| rs10813957 | B4GALT1 | GI_13929461-S | 9 | 9 | 33143527  | 42609  | 8.6305  | 6.08872 | JPT |
| rs3780480  | B4GALT1 | GI_13929461-S | 9 | 9 | 33153486  | 52568  | 9.3287  | 6.08872 | JPT |
| rs10971438 | B4GALT1 | GI_13929461-S | 9 | 9 | 33170308  | 69390  | 6.6564  | 6.08872 | JPT |
| rs10813960 | B4GALT1 | GI_13929461-S | 9 | 9 | 33170362  | 69444  | 6.9985  | 6.08872 | JPT |
| rs10971957 | NUDT2   | GI_22219466-A | 9 | 9 | 34141463  | 192040 | 10.4174 | 5.82376 | JPT |
| rs10971957 | NUDT2   | GI_22265329-I | 9 | 9 | 34141463  | 184791 | 11.3701 | 5.82376 | JPT |
| rs11791037 | NUDT2   | GI_22219466-A | 9 | 9 | 34150775  | 182728 | 6.4202  | 5.82376 | JPT |
| rs11791037 | NUDT2   | GI_22265329-I | 9 | 9 | 34150775  | 175479 | 7.1687  | 5.82376 | JPT |
| rs7018487  | NUDT2   | GI_22219466-A | 9 | 9 | 34157733  | 175770 | 6.0334  | 5.82376 | JPT |
| rs7018487  | NUDT2   | GI_22265329-I | 9 | 9 | 34157733  | 168521 | 6.7724  | 5.82376 | JPT |
| rs7032947  | NUDT2   | GI_22219466-A | 9 | 9 | 34187861  | 145642 | 6.5142  | 5.82376 | JPT |
| rs7032947  | NUDT2   | GI_22265329-I | 9 | 9 | 34187861  | 138393 | 7.2622  | 5.82376 | JPT |
| rs2094998  | NUDT2   | GI_22219466-A | 9 | 9 | 34188916  | 144587 | 6.0334  | 5.82376 | JPT |
| rs2094998  | NUDT2   | GI_22265329-I | 9 | 9 | 34188916  | 137338 | 6.7724  | 5.82376 | JPT |
| rs4879760  | NUDT2   | GI_22219466-A | 9 | 9 | 34198138  | 135365 | 6.0334  | 5.82376 | JPT |
| rs4879760  | NUDT2   | GI_22265329-I | 9 | 9 | 34198138  | 128116 | 6.7724  | 5.82376 | JPT |
| rs4879763  | NUDT2   | GI_22219466-A | 9 | 9 | 34209476  | 124027 | 6.0334  | 5.82376 | JPT |
| rs4879763  | NUDT2   | GI_22265329-I | 9 | 9 | 34209476  | 116778 | 6.7724  | 5.82376 | JPT |
| rs4879764  | NUDT2   | GI_22219466-A | 9 | 9 | 34212444  | 121059 | 6.0334  | 5.82376 | JPT |
| rs4879764  | NUDT2   | GI_22265329-I | 9 | 9 | 34212444  | 113810 | 6.7724  | 5.82376 | JPT |
| rs10814079 | NUDT2   | GI_22219466-A | 9 | 9 | 34216087  | 117416 | 6.5142  | 5.82376 | JPT |
| rs10814079 | NUDT2   | GI_22265329-I | 9 | 9 | 34216087  | 110167 | 7.2622  | 5.82376 | JPT |
| rs10814080 | NUDT2   | GI_22219466-A | 9 | 9 | 34216942  | 116561 | 12.6203 | 5.82376 | JPT |
| rs10814080 | NUDT2   | GI_22265329-I | 9 | 9 | 34216942  | 109312 | 16.3111 | 5.82376 | JPT |
| rs7040201  | NUDT2   | GI_22219466-A | 9 | 9 | 34222396  | 111107 | 6.0334  | 5.82376 | JPT |
| rs7040201  | NUDT2   | GI_22265329-I | 9 | 9 | 34222396  | 103858 | 6.7724  | 5.82376 | JPT |
| rs7857658  | NUDT2   | GI_22219466-A | 9 | 9 | 34232242  | 101261 | 6.5142  | 5.82376 | JPT |
| rs7857658  | NUDT2   | GI_22265329-I | 9 | 9 | 34232242  | 94012  | 7.2622  | 5.82376 | JPT |
| rs10814083 | NUDT2   | GI_22219466-A | 9 | 9 | 34246347  | 87156  | 6.0334  | 5.82376 | JPT |
| rs10814083 | NUDT2   | GI_22265329-I | 9 | 9 | 34246347  | 79907  | 6.7724  | 5.82376 | JPT |
| rs10814084 | NUDT2   | GI_22219466-A | 9 | 9 | 34253389  | 80114  | 12.6203 | 5.82376 | JPT |
| rs10814084 | NUDT2   | GI_22265329-I | 9 | 9 | 34253389  | 72865  | 16.3111 | 5.82376 | JPT |
| rs10814086 | NUDT2   | GI_22219466-A | 9 | 9 | 34254597  | 78906  | 12.6203 | 5.82376 | JPT |

|            |           |               |   |   |          |       |         |         |     |
|------------|-----------|---------------|---|---|----------|-------|---------|---------|-----|
| rs10814086 | NUDT2     | GI_22265329-I | 9 | 9 | 34254597 | 71657 | 16.3111 | 5.82376 | JPT |
| rs17350373 | NUDT2     | GI_22265329-I | 9 | 9 | 34274944 | 51310 | 6.514   | 5.82376 | JPT |
| rs10814091 | NUDT2     | GI_22219466-A | 9 | 9 | 34277840 | 55663 | 10.2771 | 5.82376 | JPT |
| rs10814091 | NUDT2     | GI_22265329-I | 9 | 9 | 34277840 | 48414 | 14.4998 | 5.82376 | JPT |
| rs10972047 | NUDT2     | GI_22219466-A | 9 | 9 | 34300357 | 33146 | 13.596  | 5.82376 | JPT |
| rs10972047 | NUDT2     | GI_22265329-I | 9 | 9 | 34300357 | 25897 | 17.5604 | 5.82376 | JPT |
| rs10814098 | NUDT2     | GI_22219466-A | 9 | 9 | 34314168 | 19335 | 12.6231 | 5.82376 | JPT |
| rs10814098 | NUDT2     | GI_22265329-I | 9 | 9 | 34314168 | 12086 | 16.1445 | 5.82376 | JPT |
| rs7039222  | NUDT2     | GI_22219466-A | 9 | 9 | 34322740 | 10763 | 13.596  | 5.82376 | JPT |
| rs7039222  | NUDT2     | GI_22265329-I | 9 | 9 | 34322740 | 3514  | 17.5604 | 5.82376 | JPT |
| rs10814105 | NUDT2     | GI_22219466-A | 9 | 9 | 34359062 | 25559 | 10.8525 | 5.82376 | JPT |
| rs10814105 | NUDT2     | GI_22265329-I | 9 | 9 | 34359062 | 32808 | 13.9739 | 5.82376 | JPT |
| rs7852399  | NUDT2     | GI_22219466-A | 9 | 9 | 34361788 | 28285 | 6.5346  | 5.82376 | JPT |
| rs4310287  | NUDT2     | GI_22219466-A | 9 | 9 | 34364979 | 31476 | 12.8593 | 5.82376 | JPT |
| rs4310287  | NUDT2     | GI_22265329-I | 9 | 9 | 34364979 | 38725 | 16.7514 | 5.82376 | JPT |
| rs3818830  | NUDT2     | GI_22219466-A | 9 | 9 | 34368999 | 35496 | 6.7112  | 5.82376 | JPT |
| rs3818830  | NUDT2     | GI_22265329-I | 9 | 9 | 34368999 | 42745 | 8.9822  | 5.82376 | JPT |
| rs4879849  | Hs.402723 | Hs.402723-S   | 9 | 9 | 34986014 | 74776 | 7.3413  | 5.76013 | JPT |
| rs9608     | Hs.402723 | Hs.402723-S   | 9 | 9 | 34988003 | 72787 | 7.0562  | 5.76013 | JPT |
| rs7856118  | Hs.402723 | Hs.402723-S   | 9 | 9 | 34990920 | 69870 | 9.7538  | 5.76013 | JPT |
| rs10972281 | Hs.402723 | Hs.402723-S   | 9 | 9 | 35000738 | 60052 | 7.599   | 5.76013 | JPT |
| rs10972282 | Hs.402723 | Hs.402723-S   | 9 | 9 | 35000827 | 59963 | 7.242   | 5.76013 | JPT |
| rs4878595  | Hs.402723 | Hs.402723-S   | 9 | 9 | 35001131 | 59659 | 7.0562  | 5.76013 | JPT |
| rs4879852  | Hs.402723 | Hs.402723-S   | 9 | 9 | 35001305 | 59485 | 9.5544  | 5.76013 | JPT |
| rs4878596  | Hs.402723 | Hs.402723-S   | 9 | 9 | 35002033 | 58757 | 7.0562  | 5.76013 | JPT |
| rs12002486 | Hs.402723 | Hs.402723-S   | 9 | 9 | 35006428 | 54362 | 9.5544  | 5.76013 | JPT |
| rs808196   | Hs.402723 | Hs.402723-S   | 9 | 9 | 35019581 | 41209 | 7.0562  | 5.76013 | JPT |
| rs615474   | Hs.402723 | Hs.402723-S   | 9 | 9 | 35033291 | 27499 | 7.0562  | 5.76013 | JPT |
| rs813422   | Hs.402723 | Hs.402723-S   | 9 | 9 | 35036291 | 24499 | 7.0562  | 5.76013 | JPT |
| rs7048389  | Hs.402723 | Hs.402723-S   | 9 | 9 | 35039508 | 21282 | 9.5544  | 5.76013 | JPT |
| rs565070   | Hs.402723 | Hs.402723-S   | 9 | 9 | 35044586 | 16204 | 9.5544  | 5.76013 | JPT |
| rs595429   | Hs.402723 | Hs.402723-S   | 9 | 9 | 35045669 | 15121 | 9.5544  | 5.76013 | JPT |
| rs2258240  | Hs.402723 | Hs.402723-S   | 9 | 9 | 35050955 | 9835  | 7.0562  | 5.76013 | JPT |
| rs607671   | Hs.402723 | Hs.402723-S   | 9 | 9 | 35052613 | 8177  | 7.0562  | 5.76013 | JPT |
| rs514492   | Hs.402723 | Hs.402723-S   | 9 | 9 | 35052972 | 7818  | 7.0562  | 5.76013 | JPT |
| rs568300   | Hs.402723 | Hs.402723-S   | 9 | 9 | 35083020 | 22230 | 9.5544  | 5.76013 | JPT |
| rs666549   | Hs.402723 | Hs.402723-S   | 9 | 9 | 35090468 | 29678 | 7.0562  | 5.76013 | JPT |
| rs586017   | Hs.402723 | Hs.402723-S   | 9 | 9 | 35090569 | 29779 | 7.0562  | 5.76013 | JPT |
| rs693325   | Hs.402723 | Hs.402723-S   | 9 | 9 | 35091870 | 31080 | 7.242   | 5.76013 | JPT |
| rs630961   | Hs.402723 | Hs.402723-S   | 9 | 9 | 35093722 | 32932 | 9.5544  | 5.76013 | JPT |
| rs7030595  | Hs.402723 | Hs.402723-S   | 9 | 9 | 35095257 | 34467 | 9.5544  | 5.76013 | JPT |
| rs7856203  | VPS13A    | GI_15619007-I | 9 | 9 | 77226021 | 3331  | 11.5739 | 6.53503 | JPT |
| rs7860800  | VPS13A    | GI_15619007-I | 9 | 9 | 77231112 | 1760  | 12.0012 | 6.53503 | JPT |
| rs7875619  | VPS13A    | GI_15619007-I | 9 | 9 | 77236094 | 6742  | 11.5739 | 6.53503 | JPT |
| rs2025845  | VPS13A    | GI_15619007-I | 9 | 9 | 77242536 | 13184 | 11.5739 | 6.53503 | JPT |
| rs12342273 | VPS13A    | GI_15619007-I | 9 | 9 | 77259304 | 29952 | 9.5716  | 6.53503 | JPT |
| rs2274486  | VPS13A    | GI_15619007-I | 9 | 9 | 77260383 | 31031 | 11.5739 | 6.53503 | JPT |
| rs3824402  | VPS13A    | GI_15619007-I | 9 | 9 | 77263922 | 34570 | 9.5944  | 6.53503 | JPT |
| rs17063625 | VPS13A    | GI_15619007-I | 9 | 9 | 77267799 | 38447 | 12.0012 | 6.53503 | JPT |
| rs10491839 | VPS13A    | GI_15619007-I | 9 | 9 | 77270451 | 41099 | 14.2052 | 6.53503 | JPT |
| rs12352759 | VPS13A    | GI_15619007-I | 9 | 9 | 77270501 | 41149 | 13.4021 | 6.53503 | JPT |
| rs7860724  | VPS13A    | GI_15619007-I | 9 | 9 | 77271195 | 41843 | 10.6562 | 6.53503 | JPT |
| rs2377908  | VPS13A    | GI_15619007-I | 9 | 9 | 77272870 | 43518 | 9.0195  | 6.53503 | JPT |
| rs2296781  | VPS13A    | GI_15619007-I | 9 | 9 | 77273610 | 44258 | 10.4532 | 6.53503 | JPT |
| rs731943   | VPS13A    | GI_15619007-I | 9 | 9 | 77274648 | 45296 | 8.7043  | 6.53503 | JPT |
| rs10114048 | VPS13A    | GI_15619007-I | 9 | 9 | 77276954 | 47602 | 8.958   | 6.53503 | JPT |

|            |          |               |   |   |           |        |         |         |     |
|------------|----------|---------------|---|---|-----------|--------|---------|---------|-----|
| rs13285446 | VPS13A   | GI_15619007-I | 9 | 9 | 77280263  | 50911  | 8.1273  | 6.53503 | JPT |
| rs12683817 | VPS13A   | GI_15619007-I | 9 | 9 | 77280364  | 51012  | 7.821   | 6.53503 | JPT |
| rs1036955  | VPS13A   | GI_15619007-I | 9 | 9 | 77287113  | 57761  | 7.0783  | 6.53503 | JPT |
| rs7019154  | VPS13A   | GI_15619007-I | 9 | 9 | 77288589  | 59237  | 7.2611  | 6.53503 | JPT |
| rs7875124  | CDC14B   | GI_15451935-I | 9 | 9 | 96010066  | 332960 | 6.0743  | 5.91157 | JPT |
| rs10818452 | CDK5RAP2 | GI_28872785-S | 9 | 9 | 120222927 | 7911   | 5.758   | 5.70397 | JPT |
| rs872423   | CDK5RAP2 | GI_28872785-S | 9 | 9 | 120229045 | 1793   | 10.0602 | 5.70397 | JPT |
| rs7037806  | CDK5RAP2 | GI_28872785-S | 9 | 9 | 120230679 | 159    | 10.0602 | 5.70397 | JPT |
| rs2297456  | CDK5RAP2 | GI_28872785-S | 9 | 9 | 120231795 | 957    | 10.0602 | 5.70397 | JPT |
| rs10125592 | CDK5RAP2 | GI_28872785-S | 9 | 9 | 120241289 | 10451  | 10.1785 | 5.70397 | JPT |
| rs10119527 | CDK5RAP2 | GI_28872785-S | 9 | 9 | 120241488 | 10650  | 10.7194 | 5.70397 | JPT |
| rs10818455 | CDK5RAP2 | GI_28872785-S | 9 | 9 | 120241946 | 11108  | 10.1785 | 5.70397 | JPT |
| rs12379034 | CDK5RAP2 | GI_28872785-S | 9 | 9 | 120242220 | 11382  | 10.2097 | 5.70397 | JPT |
| rs12376337 | CDK5RAP2 | GI_28872785-S | 9 | 9 | 120242349 | 11511  | 10.7194 | 5.70397 | JPT |
| rs1547266  | CDK5RAP2 | GI_28872785-S | 9 | 9 | 120243030 | 12192  | 10.1785 | 5.70397 | JPT |
| rs3780673  | CDK5RAP2 | GI_28872785-S | 9 | 9 | 120246137 | 15299  | 10.1785 | 5.70397 | JPT |
| rs3780674  | CDK5RAP2 | GI_28872785-S | 9 | 9 | 120246473 | 15635  | 10.1785 | 5.70397 | JPT |
| rs7853439  | CDK5RAP2 | GI_28872785-S | 9 | 9 | 120252419 | 21581  | 5.708   | 5.70397 | JPT |
| rs10984914 | CDK5RAP2 | GI_28872785-S | 9 | 9 | 120278149 | 47311  | 10.9168 | 5.70397 | JPT |
| rs10984920 | CDK5RAP2 | GI_28872785-S | 9 | 9 | 120297264 | 66426  | 11.3987 | 5.70397 | JPT |
| rs2501727  | CDK5RAP2 | GI_28872785-S | 9 | 9 | 120300383 | 69545  | 5.9452  | 5.70397 | JPT |
| rs10984921 | CDK5RAP2 | GI_28872785-S | 9 | 9 | 120307536 | 76698  | 10.9168 | 5.70397 | JPT |
| rs16909810 | CDK5RAP2 | GI_28872785-S | 9 | 9 | 120322007 | 91169  | 10.9168 | 5.70397 | JPT |
| rs2490594  | CDK5RAP2 | GI_28872785-S | 9 | 9 | 120329298 | 98460  | 10.1171 | 5.70397 | JPT |
| rs3849113  | CDK5RAP2 | GI_28872785-S | 9 | 9 | 120354939 | 124101 | 9.0741  | 5.70397 | JPT |
| rs10984936 | CDK5RAP2 | GI_28872785-S | 9 | 9 | 120359152 | 128314 | 9.5678  | 5.70397 | JPT |
| rs2095064  | CDK5RAP2 | GI_28872785-S | 9 | 9 | 120360504 | 129666 | 8.8045  | 5.70397 | JPT |
| rs4837777  | CDK5RAP2 | GI_28872785-S | 9 | 9 | 120364440 | 133602 | 10.168  | 5.70397 | JPT |
| rs12683306 | CDK5RAP2 | GI_28872785-S | 9 | 9 | 120367146 | 136308 | 10.5555 | 5.70397 | JPT |
| rs4836822  | CDK5RAP2 | GI_28872785-S | 9 | 9 | 120370590 | 139752 | 10.9168 | 5.70397 | JPT |
| rs2416758  | CDK5RAP2 | GI_28872785-S | 9 | 9 | 120373064 | 142226 | 10.5555 | 5.70397 | JPT |
| rs7867825  | CDK5RAP2 | GI_28872785-S | 9 | 9 | 120375299 | 144461 | 10.5555 | 5.70397 | JPT |
| rs7853010  | CDK5RAP2 | GI_28872785-S | 9 | 9 | 120375743 | 144905 | 10.6551 | 5.70397 | JPT |
| rs10984944 | CDK5RAP2 | GI_28872785-S | 9 | 9 | 120376518 | 145680 | 10.6551 | 5.70397 | JPT |
| rs12238807 | CDK5RAP2 | GI_28872785-S | 9 | 9 | 120376999 | 146161 | 10.5555 | 5.70397 | JPT |
| rs7868597  | CDK5RAP2 | GI_28872785-S | 9 | 9 | 120377873 | 147035 | 10.5555 | 5.70397 | JPT |
| rs10984948 | CDK5RAP2 | GI_28872785-S | 9 | 9 | 120379499 | 148661 | 10.9168 | 5.70397 | JPT |
| rs10984949 | CDK5RAP2 | GI_28872785-S | 9 | 9 | 120379586 | 148748 | 10.9168 | 5.70397 | JPT |
| rs1475664  | CDK5RAP2 | GI_28872785-S | 9 | 9 | 120380208 | 149370 | 10.5555 | 5.70397 | JPT |
| rs3750494  | CDK5RAP2 | GI_28872785-S | 9 | 9 | 120380900 | 150062 | 10.9168 | 5.70397 | JPT |
| rs7875141  | CDK5RAP2 | GI_28872785-S | 9 | 9 | 120382406 | 151568 | 9.1384  | 5.70397 | JPT |
| rs7854663  | CDK5RAP2 | GI_28872785-S | 9 | 9 | 120384774 | 153936 | 10.129  | 5.70397 | JPT |
| rs10984951 | CDK5RAP2 | GI_28872785-S | 9 | 9 | 120386336 | 155498 | 10.129  | 5.70397 | JPT |
| rs914617   | CDK5RAP2 | GI_28872785-S | 9 | 9 | 120386509 | 155671 | 10.129  | 5.70397 | JPT |
| rs7043614  | CDK5RAP2 | GI_28872785-S | 9 | 9 | 120390347 | 159509 | 10.129  | 5.70397 | JPT |
| rs10760101 | CDK5RAP2 | GI_28872785-S | 9 | 9 | 120391645 | 160807 | 10.129  | 5.70397 | JPT |
| rs954214   | CDK5RAP2 | GI_28872785-S | 9 | 9 | 120392800 | 161962 | 9.7425  | 5.70397 | JPT |
| rs10818464 | CDK5RAP2 | GI_28872785-S | 9 | 9 | 120393551 | 162713 | 5.9838  | 5.70397 | JPT |
| rs4837779  | CDK5RAP2 | GI_28872785-S | 9 | 9 | 120395576 | 164738 | 9.5227  | 5.70397 | JPT |
| rs3933338  | CDK5RAP2 | GI_28872785-S | 9 | 9 | 120398930 | 168092 | 9.7425  | 5.70397 | JPT |
| rs10818467 | CDK5RAP2 | GI_28872785-S | 9 | 9 | 120401867 | 171029 | 10.129  | 5.70397 | JPT |
| rs1475663  | CDK5RAP2 | GI_28872785-S | 9 | 9 | 120402254 | 171416 | 5.9838  | 5.70397 | JPT |
| rs10984956 | CDK5RAP2 | GI_28872785-S | 9 | 9 | 120404399 | 173561 | 10.129  | 5.70397 | JPT |
| rs7852102  | CDK5RAP2 | GI_28872785-S | 9 | 9 | 120405133 | 174295 | 10.4172 | 5.70397 | JPT |
| rs7028134  | CDK5RAP2 | GI_28872785-S | 9 | 9 | 120406012 | 175174 | 10.129  | 5.70397 | JPT |
| rs7045249  | CDK5RAP2 | GI_28872785-S | 9 | 9 | 120406544 | 175706 | 9.7425  | 5.70397 | JPT |

|            |          |               |    |    |           |        |         |         |     |
|------------|----------|---------------|----|----|-----------|--------|---------|---------|-----|
| rs10984957 | CDK5RAP2 | GI_28872785-S | 9  | 9  | 120409890 | 179052 | 10.129  | 5.70397 | JPT |
| rs4837782  | CDK5RAP2 | GI_28872785-S | 9  | 9  | 120410367 | 179529 | 10.129  | 5.70397 | JPT |
| rs10739568 | CDK5RAP2 | GI_28872785-S | 9  | 9  | 120410693 | 179855 | 10.129  | 5.70397 | JPT |
| rs10984958 | CDK5RAP2 | GI_28872785-S | 9  | 9  | 120410942 | 180104 | 6.0495  | 5.70397 | JPT |
| rs10760103 | CDK5RAP2 | GI_28872785-S | 9  | 9  | 120417552 | 186714 | 10.129  | 5.70397 | JPT |
| rs7389978  | CDK5RAP2 | GI_28872785-S | 9  | 9  | 120418176 | 187338 | 9.8658  | 5.70397 | JPT |
| rs7857382  | CDK5RAP2 | GI_28872785-S | 9  | 9  | 120420743 | 189905 | 10.129  | 5.70397 | JPT |
| rs7861226  | EGFL5    | GI_42659252-S | 9  | 9  | 120430675 | 12379  | 6.3213  | 5.74828 | JPT |
| rs10819291 | SLC2A8   | GI_21361448-S | 9  | 9  | 127266254 | 16863  | 6.0153  | 5.84474 | JPT |
| rs10739692 | ZNF79    | GI_24307936-S | 9  | 9  | 127272319 | 14846  | 5.7564  | 5.64474 | JPT |
| rs4628351  | ZNF79    | GI_24307936-S | 9  | 9  | 127275787 | 11378  | 5.7564  | 5.64474 | JPT |
| rs4504745  | ZNF79    | GI_24307936-S | 9  | 9  | 127276968 | 10197  | 5.7564  | 5.64474 | JPT |
| rs7853047  | ZNF79    | GI_24307936-S | 9  | 9  | 127277654 | 9511   | 6.1025  | 5.64474 | JPT |
| rs6478780  | ZNF79    | GI_24307936-S | 9  | 9  | 127279987 | 7178   | 5.7564  | 5.64474 | JPT |
| rs7869023  | ZNF79    | GI_24307936-S | 9  | 9  | 127281232 | 5933   | 6.1025  | 5.64474 | JPT |
| rs7869823  | ZNF79    | GI_24307936-S | 9  | 9  | 127281643 | 5522   | 6.1025  | 5.64474 | JPT |
| rs2298182  | SLC2A8   | GI_21361448-S | 9  | 9  | 127286223 | 36832  | 6.0153  | 5.84474 | JPT |
| rs2247905  | ZNF79    | GI_24307936-S | 9  | 9  | 127287930 | 765    | 5.7564  | 5.64474 | JPT |
| rs7847465  | SLC2A8   | GI_21361448-S | 9  | 9  | 127288632 | 39241  | 6.26    | 5.84474 | JPT |
| rs1139400  | ZNF79    | GI_24307936-S | 9  | 9  | 127289665 | 2500   | 5.6736  | 5.64474 | JPT |
| rs2247322  | ZNF79    | GI_24307936-S | 9  | 9  | 127292430 | 5265   | 5.7564  | 5.64474 | JPT |
| rs2247303  | ZNF79    | GI_24307936-S | 9  | 9  | 127292852 | 5687   | 5.7564  | 5.64474 | JPT |
| rs2244624  | ZNF79    | GI_24307936-S | 9  | 9  | 127293062 | 5897   | 6.1025  | 5.64474 | JPT |
| rs2244468  | ZNF79    | GI_24307936-S | 9  | 9  | 127294833 | 7668   | 5.7564  | 5.64474 | JPT |
| rs4837154  | SLC2A8   | GI_21361448-S | 9  | 9  | 127298963 | 49572  | 6.26    | 5.84474 | JPT |
| rs2243906  | ZNF79    | GI_24307936-S | 9  | 9  | 127299223 | 12058  | 6.1025  | 5.64474 | JPT |
| rs2243903  | ZNF79    | GI_24307936-S | 9  | 9  | 127299297 | 12132  | 5.7564  | 5.64474 | JPT |
| rs2243784  | ZNF79    | GI_24307936-S | 9  | 9  | 127300510 | 13345  | 7.2627  | 5.64474 | JPT |
| rs2243767  | ZNF79    | GI_24307936-S | 9  | 9  | 127300942 | 13777  | 5.7564  | 5.64474 | JPT |
| rs2254437  | ZNF79    | GI_24307936-S | 9  | 9  | 127304481 | 17316  | 5.7564  | 5.64474 | JPT |
| rs2243608  | ZNF79    | GI_24307936-S | 9  | 9  | 127306463 | 19298  | 5.7564  | 5.64474 | JPT |
| rs2253639  | ZNF79    | GI_24307936-S | 9  | 9  | 127310971 | 23806  | 5.7564  | 5.64474 | JPT |
| rs2246000  | ZNF79    | GI_24307936-S | 9  | 9  | 127328698 | 41533  | 5.7564  | 5.64474 | JPT |
| rs1317843  | SLC2A8   | GI_21361448-S | 9  | 9  | 127331840 | 82449  | 6.0698  | 5.84474 | JPT |
| rs4332224  | ZNF79    | GI_24307936-S | 9  | 9  | 127336759 | 49594  | 5.7564  | 5.64474 | JPT |
| rs4837158  | SLC2A8   | GI_21361448-S | 9  | 9  | 127346710 | 97319  | 6.0153  | 5.84474 | JPT |
| rs12335    | SURF1    | GI_19557683-S | 9  | 9  | 133227388 | 21486  | 7.3201  | 6.12822 | JPT |
| rs10793964 | SURF1    | GI_19557683-S | 9  | 9  | 133228143 | 20731  | 6.7098  | 6.12822 | JPT |
| rs886089   | SURF1    | GI_19557683-S | 9  | 9  | 133229020 | 19854  | 6.2863  | 6.12822 | JPT |
| rs120858   | SURF1    | GI_19557683-S | 9  | 9  | 133230364 | 18510  | 7.3201  | 6.12822 | JPT |
| rs487820   | SURF1    | GI_19557683-S | 9  | 9  | 133241923 | 6951   | 7.3201  | 6.12822 | JPT |
| rs616836   | SURF1    | GI_19557683-S | 9  | 9  | 133243075 | 5799   | 6.2863  | 6.12822 | JPT |
| rs553877   | SURF1    | GI_19557683-S | 9  | 9  | 133244509 | 4365   | 6.2863  | 6.12822 | JPT |
| rs484248   | SURF1    | GI_19557683-S | 9  | 9  | 133248144 | 730    | 6.4795  | 6.12822 | JPT |
| rs599924   | SURF1    | GI_19557683-S | 9  | 9  | 133248145 | 729    | 7.3201  | 6.12822 | JPT |
| rs2296810  | SURF1    | GI_19557683-S | 9  | 9  | 133257248 | 8374   | 6.2863  | 6.12822 | JPT |
| rs1059773  | SURF1    | GI_19557683-S | 9  | 9  | 133258419 | 9545   | 6.2863  | 6.12822 | JPT |
| rs2494     | SURF1    | GI_19557683-S | 9  | 9  | 133259387 | 10513  | 6.2863  | 6.12822 | JPT |
| rs17293266 | SURF1    | GI_19557683-S | 9  | 9  | 133262312 | 13438  | 7.5747  | 6.12822 | JPT |
| rs1179037  | SURF1    | GI_19557683-S | 9  | 9  | 133268063 | 19189  | 7.3201  | 6.12822 | JPT |
| rs1055340  | PTER     | GI_20070185-S | 10 | 10 | 16595534  | 974    | 13.3697 | 6.02042 | JPT |
| rs7909832  | PTER     | GI_20070185-S | 10 | 10 | 16596716  | 2156   | 13.3697 | 6.02042 | JPT |
| rs2298126  | PTER     | GI_20070185-S | 10 | 10 | 16598991  | 4431   | 6.4495  | 6.02042 | JPT |
| rs11597990 | C10orf68 | GI_13375961-S | 10 | 10 | 32697411  | 514311 | 5.8826  | 5.79168 | JPT |
| rs7086385  | C10orf68 | GI_13375961-S | 10 | 10 | 32708723  | 502999 | 7.6001  | 5.79168 | JPT |
| rs7086284  | C10orf68 | GI_13375961-S | 10 | 10 | 32708829  | 502893 | 7.9407  | 5.79168 | JPT |



|            |         |               |    |    |          |        |        |         |     |
|------------|---------|---------------|----|----|----------|--------|--------|---------|-----|
| rs7087237  | C1orf68 | GI_13375961-S | 10 | 10 | 32709300 | 502422 | 6.8077 | 5.79168 | JPT |
| rs11008906 | C1orf68 | GI_13375961-S | 10 | 10 | 32710848 | 500874 | 7.6001 | 5.79168 | JPT |
| rs4749722  | C1orf68 | GI_13375961-S | 10 | 10 | 32715336 | 496386 | 7.6001 | 5.79168 | JPT |
| rs11008914 | C1orf68 | GI_13375961-S | 10 | 10 | 32720645 | 491077 | 6.0733 | 5.79168 | JPT |
| rs4747779  | C1orf68 | GI_13375961-S | 10 | 10 | 32721716 | 490006 | 6.6516 | 5.79168 | JPT |
| rs12572165 | C1orf68 | GI_13375961-S | 10 | 10 | 32723647 | 488075 | 6.0733 | 5.79168 | JPT |
| rs7922515  | C1orf68 | GI_13375961-S | 10 | 10 | 32724132 | 487590 | 5.9017 | 5.79168 | JPT |
| rs7099897  | C1orf68 | GI_13375961-S | 10 | 10 | 32724433 | 487289 | 6.0733 | 5.79168 | JPT |
| rs12573301 | C1orf68 | GI_13375961-S | 10 | 10 | 32725345 | 486377 | 6.12   | 5.79168 | JPT |
| rs2370768  | C1orf68 | GI_13375961-S | 10 | 10 | 32730448 | 481274 | 5.8832 | 5.79168 | JPT |
| rs2370772  | C1orf68 | GI_13375961-S | 10 | 10 | 32744471 | 467251 | 6.2595 | 5.79168 | JPT |
| rs3006715  | C1orf68 | GI_13375961-S | 10 | 10 | 32765594 | 446128 | 7.1767 | 5.79168 | JPT |
| rs2997515  | C1orf68 | GI_13375961-S | 10 | 10 | 32770832 | 440890 | 7.7225 | 5.79168 | JPT |
| rs9338709  | C1orf68 | GI_13375961-S | 10 | 10 | 32794766 | 416956 | 6.5403 | 5.79168 | JPT |
| rs2947067  | C1orf68 | GI_13375961-S | 10 | 10 | 32799529 | 412193 | 7.7225 | 5.79168 | JPT |
| rs7095289  | C1orf68 | GI_13375961-S | 10 | 10 | 32811373 | 400349 | 6.4469 | 5.79168 | JPT |
| rs7901257  | C1orf68 | GI_13375961-S | 10 | 10 | 32831805 | 379917 | 7.7225 | 5.79168 | JPT |
| rs10740855 | C1orf68 | GI_13375961-S | 10 | 10 | 32838953 | 372769 | 6.4469 | 5.79168 | JPT |
| rs7075553  | C1orf68 | GI_13375961-S | 10 | 10 | 32844328 | 367394 | 6.5403 | 5.79168 | JPT |
| rs2947051  | C1orf68 | GI_13375961-S | 10 | 10 | 32846300 | 365422 | 7.5824 | 5.79168 | JPT |
| rs10827071 | C1orf68 | GI_13375961-S | 10 | 10 | 32855927 | 355795 | 8.0231 | 5.79168 | JPT |
| rs10827072 | C1orf68 | GI_13375961-S | 10 | 10 | 32855962 | 355760 | 7.7225 | 5.79168 | JPT |
| rs11008963 | C1orf68 | GI_13375961-S | 10 | 10 | 32859888 | 351834 | 7.0936 | 5.79168 | JPT |
| rs10827075 | C1orf68 | GI_13375961-S | 10 | 10 | 32867271 | 344451 | 7.7225 | 5.79168 | JPT |
| rs2947066  | C1orf68 | GI_13375961-S | 10 | 10 | 32871691 | 340031 | 7.371  | 5.79168 | JPT |
| rs3006744  | C1orf68 | GI_13375961-S | 10 | 10 | 32871928 | 339794 | 7.4797 | 5.79168 | JPT |
| rs3006745  | C1orf68 | GI_13375961-S | 10 | 10 | 32874049 | 337673 | 8.7071 | 5.79168 | JPT |
| rs2947077  | C1orf68 | GI_13375961-S | 10 | 10 | 32884808 | 326914 | 8.6346 | 5.79168 | JPT |
| rs2947078  | C1orf68 | GI_13375961-S | 10 | 10 | 32885140 | 326582 | 7.3832 | 5.79168 | JPT |
| rs3006743  | C1orf68 | GI_13375961-S | 10 | 10 | 32899498 | 312224 | 7.7225 | 5.79168 | JPT |
| rs2990962  | C1orf68 | GI_13375961-S | 10 | 10 | 32903593 | 308129 | 7.7225 | 5.79168 | JPT |
| rs2990963  | C1orf68 | GI_13375961-S | 10 | 10 | 32909480 | 302242 | 6.7928 | 5.79168 | JPT |
| rs3006739  | C1orf68 | GI_13375961-S | 10 | 10 | 32911811 | 299911 | 7.7225 | 5.79168 | JPT |
| rs2947085  | C1orf68 | GI_13375961-S | 10 | 10 | 32913062 | 298660 | 7.4797 | 5.79168 | JPT |
| rs7075843  | C1orf68 | GI_13375961-S | 10 | 10 | 32925102 | 286620 | 7.7225 | 5.79168 | JPT |
| rs11492485 | C1orf68 | GI_13375961-S | 10 | 10 | 32928481 | 283241 | 6.4469 | 5.79168 | JPT |
| rs9338799  | C1orf68 | GI_13375961-S | 10 | 10 | 32938968 | 272754 | 7.7225 | 5.79168 | JPT |
| rs3006748  | C1orf68 | GI_13375961-S | 10 | 10 | 32948372 | 263350 | 7.7225 | 5.79168 | JPT |
| rs1356892  | C1orf68 | GI_13375961-S | 10 | 10 | 32952177 | 259545 | 7.4797 | 5.79168 | JPT |
| rs7905328  | C1orf68 | GI_13375961-S | 10 | 10 | 32956316 | 255406 | 6.4722 | 5.79168 | JPT |
| rs10827086 | C1orf68 | GI_13375961-S | 10 | 10 | 32956589 | 255133 | 7.7225 | 5.79168 | JPT |
| rs11009005 | C1orf68 | GI_13375961-S | 10 | 10 | 32961822 | 249900 | 7.4321 | 5.79168 | JPT |
| rs12220874 | C1orf68 | GI_13375961-S | 10 | 10 | 32972979 | 238743 | 7.7225 | 5.79168 | JPT |
| rs10827091 | C1orf68 | GI_13375961-S | 10 | 10 | 32982957 | 228765 | 7.7225 | 5.79168 | JPT |
| rs10827097 | C1orf68 | GI_13375961-S | 10 | 10 | 32993542 | 218180 | 8.0231 | 5.79168 | JPT |
| rs7899433  | C1orf68 | GI_13375961-S | 10 | 10 | 32995092 | 216630 | 6.5403 | 5.79168 | JPT |
| rs7899442  | C1orf68 | GI_13375961-S | 10 | 10 | 32995111 | 216611 | 6.4469 | 5.79168 | JPT |
| rs11009027 | C1orf68 | GI_13375961-S | 10 | 10 | 33000799 | 210923 | 7.9735 | 5.79168 | JPT |
| rs11009028 | C1orf68 | GI_13375961-S | 10 | 10 | 33003003 | 208719 | 8.0231 | 5.79168 | JPT |
| rs16915634 | C1orf68 | GI_13375961-S | 10 | 10 | 33008545 | 203177 | 8.0231 | 5.79168 | JPT |
| rs11009030 | C1orf68 | GI_13375961-S | 10 | 10 | 33011096 | 200626 | 6.6205 | 5.79168 | JPT |
| rs10827102 | C1orf68 | GI_13375961-S | 10 | 10 | 33011443 | 200279 | 8.0081 | 5.79168 | JPT |
| rs7394139  | C1orf68 | GI_13375961-S | 10 | 10 | 33012011 | 199711 | 8.0231 | 5.79168 | JPT |
| rs11009046 | C1orf68 | GI_13375961-S | 10 | 10 | 33038472 | 173250 | 7.7225 | 5.79168 | JPT |
| rs7915146  | C1orf68 | GI_13375961-S | 10 | 10 | 33041044 | 170678 | 8.0231 | 5.79168 | JPT |
| rs4749750  | C1orf68 | GI_13375961-S | 10 | 10 | 33041320 | 170402 | 7.7225 | 5.79168 | JPT |

|            |         |               |    |    |          |        |         |         |     |
|------------|---------|---------------|----|----|----------|--------|---------|---------|-----|
| rs11009049 | C1orf68 | GI_13375961-S | 10 | 10 | 33041711 | 170011 | 5.8418  | 5.79168 | JPT |
| rs11009051 | C1orf68 | GI_13375961-S | 10 | 10 | 33043339 | 168383 | 6.1828  | 5.79168 | JPT |
| rs11009052 | C1orf68 | GI_13375961-S | 10 | 10 | 33046886 | 164836 | 8.0231  | 5.79168 | JPT |
| rs4747786  | C1orf68 | GI_13375961-S | 10 | 10 | 33052224 | 159498 | 7.7225  | 5.79168 | JPT |
| rs4145862  | C1orf68 | GI_13375961-S | 10 | 10 | 33056639 | 155083 | 8.0231  | 5.79168 | JPT |
| rs951342   | C1orf68 | GI_13375961-S | 10 | 10 | 33068141 | 143581 | 6.3356  | 5.79168 | JPT |
| rs7091133  | C1orf68 | GI_13375961-S | 10 | 10 | 33069096 | 142626 | 7.7225  | 5.79168 | JPT |
| rs10827119 | C1orf68 | GI_13375961-S | 10 | 10 | 33075193 | 136529 | 7.7225  | 5.79168 | JPT |
| rs11009064 | C1orf68 | GI_13375961-S | 10 | 10 | 33081566 | 130156 | 8.0231  | 5.79168 | JPT |
| rs10827125 | C1orf68 | GI_13375961-S | 10 | 10 | 33091352 | 120370 | 6.1253  | 5.79168 | JPT |
| rs11009068 | C1orf68 | GI_13375961-S | 10 | 10 | 33093060 | 118662 | 8.0231  | 5.79168 | JPT |
| rs12359061 | C1orf68 | GI_13375961-S | 10 | 10 | 33094860 | 116862 | 6.2178  | 5.79168 | JPT |
| rs12359069 | C1orf68 | GI_13375961-S | 10 | 10 | 33094899 | 116823 | 6.3341  | 5.79168 | JPT |
| rs12359085 | C1orf68 | GI_13375961-S | 10 | 10 | 33095001 | 116721 | 6.9529  | 5.79168 | JPT |
| rs10827127 | C1orf68 | GI_13375961-S | 10 | 10 | 33111629 | 100093 | 7.7225  | 5.79168 | JPT |
| rs7914502  | C1orf68 | GI_13375961-S | 10 | 10 | 33120110 | 91612  | 5.8031  | 5.79168 | JPT |
| rs10827131 | C1orf68 | GI_13375961-S | 10 | 10 | 33125790 | 85932  | 6.9254  | 5.79168 | JPT |
| rs4615926  | C1orf68 | GI_13375961-S | 10 | 10 | 33125876 | 85846  | 6.9254  | 5.79168 | JPT |
| rs7901041  | C1orf68 | GI_13375961-S | 10 | 10 | 33133363 | 78359  | 6.9254  | 5.79168 | JPT |
| rs7901284  | C1orf68 | GI_13375961-S | 10 | 10 | 33133499 | 78223  | 6.9254  | 5.79168 | JPT |
| rs7087288  | C1orf68 | GI_13375961-S | 10 | 10 | 33144089 | 67633  | 6.9254  | 5.79168 | JPT |
| rs10827142 | C1orf68 | GI_13375961-S | 10 | 10 | 33173059 | 38663  | 6.7687  | 5.79168 | JPT |
| rs12220061 | C1orf68 | GI_13375961-S | 10 | 10 | 33180273 | 31449  | 7.1706  | 5.79168 | JPT |
| rs7901143  | C1orf68 | GI_13375961-S | 10 | 10 | 33182025 | 29697  | 7.1706  | 5.79168 | JPT |
| rs7393329  | C1orf68 | GI_13375961-S | 10 | 10 | 33184975 | 26747  | 6.9359  | 5.79168 | JPT |
| rs12777235 | C1orf68 | GI_13375961-S | 10 | 10 | 33185392 | 26330  | 6.2851  | 5.79168 | JPT |
| rs10827145 | C1orf68 | GI_13375961-S | 10 | 10 | 33191623 | 20099  | 6.9254  | 5.79168 | JPT |
| rs10827146 | C1orf68 | GI_13375961-S | 10 | 10 | 33193337 | 18385  | 7.7397  | 5.79168 | JPT |
| rs881034   | C1orf68 | GI_13375961-S | 10 | 10 | 33194916 | 16806  | 6.9254  | 5.79168 | JPT |
| rs10827151 | C1orf68 | GI_13375961-S | 10 | 10 | 33210776 | 946    | 7.1706  | 5.79168 | JPT |
| rs11009122 | C1orf68 | GI_13375961-S | 10 | 10 | 33211257 | 465    | 7.7191  | 5.79168 | JPT |
| rs7086237  | C1orf68 | GI_13375961-S | 10 | 10 | 33216320 | 4598   | 6.2043  | 5.79168 | JPT |
| rs11009130 | C1orf68 | GI_13375961-S | 10 | 10 | 33223020 | 11298  | 7.1706  | 5.79168 | JPT |
| rs10827155 | C1orf68 | GI_13375961-S | 10 | 10 | 33223197 | 11475  | 6.5605  | 5.79168 | JPT |
| rs7914799  | C1orf68 | GI_13375961-S | 10 | 10 | 33224664 | 12942  | 6.9026  | 5.79168 | JPT |
| rs11009132 | C1orf68 | GI_13375961-S | 10 | 10 | 33227625 | 15903  | 6.5605  | 5.79168 | JPT |
| rs1539385  | C1orf68 | GI_13375961-S | 10 | 10 | 33233848 | 22126  | 6.9254  | 5.79168 | JPT |
| rs16933787 | C1orf68 | GI_13375961-S | 10 | 10 | 33248262 | 36540  | 7.7927  | 5.79168 | JPT |
| rs3780876  | C1orf68 | GI_13375961-S | 10 | 10 | 33248726 | 37004  | 6.7043  | 5.79168 | JPT |
| rs3780871  | C1orf68 | GI_13375961-S | 10 | 10 | 33253971 | 42249  | 6.9254  | 5.79168 | JPT |
| rs2298141  | C1orf68 | GI_13375961-S | 10 | 10 | 33254808 | 43086  | 6.6879  | 5.79168 | JPT |
| rs10827162 | C1orf68 | GI_13375961-S | 10 | 10 | 33255678 | 43956  | 7.1706  | 5.79168 | JPT |
| rs10763902 | C1orf68 | GI_13375961-S | 10 | 10 | 33258082 | 46360  | 6.7412  | 5.79168 | JPT |
| rs11009151 | C1orf68 | GI_13375961-S | 10 | 10 | 33259115 | 47393  | 7.2662  | 5.79168 | JPT |
| rs11009152 | C1orf68 | GI_13375961-S | 10 | 10 | 33259280 | 47558  | 7.1706  | 5.79168 | JPT |
| rs16933819 | C1orf68 | GI_13375961-S | 10 | 10 | 33267483 | 55761  | 7.1706  | 5.79168 | JPT |
| rs10827166 | C1orf68 | GI_13375961-S | 10 | 10 | 33296869 | 85147  | 6.6912  | 5.79168 | JPT |
| rs11009161 | C1orf68 | GI_13375961-S | 10 | 10 | 33303273 | 91551  | 6.8215  | 5.79168 | JPT |
| rs7076662  | C1orf64 | GI_40255173-S | 10 | 10 | 49611073 | 2971   | 6.2194  | 5.9138  | JPT |
| rs10776642 | C1orf64 | GI_40255173-S | 10 | 10 | 49612776 | 1268   | 6.2194  | 5.9138  | JPT |
| rs4838646  | C1orf64 | GI_40255173-S | 10 | 10 | 49615600 | 1556   | 6.2194  | 5.9138  | JPT |
| rs17836423 | C1orf64 | GI_40255173-S | 10 | 10 | 49617648 | 3604   | 5.9502  | 5.9138  | JPT |
| rs10826176 | TFAM    | GI_4507400-I  | 10 | 10 | 59811543 | 14230  | 12.4919 | 5.97919 | JPT |
| rs11006127 | TFAM    | GI_4507400-I  | 10 | 10 | 59813027 | 12746  | 6.4027  | 5.97919 | JPT |
| rs4397793  | TFAM    | GI_4507400-I  | 10 | 10 | 59815603 | 10170  | 6.0437  | 5.97919 | JPT |
| rs16912188 | TFAM    | GI_4507400-I  | 10 | 10 | 59818757 | 7016   | 12.8336 | 5.97919 | JPT |

|            |          |               |    |    |          |        |         |         |     |
|------------|----------|---------------|----|----|----------|--------|---------|---------|-----|
| rs16912196 | TFAM     | GI_4507400-I  | 10 | 10 | 59821152 | 4621   | 12.8336 | 5.97919 | JPT |
| rs16912197 | TFAM     | GI_4507400-I  | 10 | 10 | 59821248 | 4525   | 12.8336 | 5.97919 | JPT |
| rs16912201 | TFAM     | GI_4507400-I  | 10 | 10 | 59826692 | 919    | 12.8336 | 5.97919 | JPT |
| rs7089361  | TFAM     | GI_4507400-I  | 10 | 10 | 59827345 | 1572   | 6.0437  | 5.97919 | JPT |
| rs16912202 | TFAM     | GI_4507400-I  | 10 | 10 | 59828076 | 2303   | 12.8336 | 5.97919 | JPT |
| rs12259591 | TFAM     | GI_4507400-I  | 10 | 10 | 59828391 | 2618   | 6.2423  | 5.97919 | JPT |
| rs12254586 | TFAM     | GI_4507400-I  | 10 | 10 | 59828452 | 2679   | 6.0437  | 5.97919 | JPT |
| rs12245545 | TFAM     | GI_4507400-I  | 10 | 10 | 59829368 | 3595   | 6.0084  | 5.97919 | JPT |
| rs16912212 | TFAM     | GI_4507400-I  | 10 | 10 | 59830461 | 4688   | 6.0437  | 5.97919 | JPT |
| rs10763540 | TFAM     | GI_4507400-I  | 10 | 10 | 59831646 | 5873   | 6.0437  | 5.97919 | JPT |
| rs11006137 | TFAM     | GI_4507400-I  | 10 | 10 | 59834566 | 8793   | 6.3283  | 5.97919 | JPT |
| rs10826182 | TFAM     | GI_4507400-I  | 10 | 10 | 59834826 | 9053   | 6.0089  | 5.97919 | JPT |
| rs6481387  | TFAM     | GI_4507400-I  | 10 | 10 | 59837888 | 12115  | 6.3283  | 5.97919 | JPT |
| rs7905675  | TFAM     | GI_4507400-I  | 10 | 10 | 59838009 | 12236  | 6.3283  | 5.97919 | JPT |
| rs9658769  | TNFRSF6  | GI_23510430-A | 10 | 10 | 90763343 | 1837   | 5.9328  | 5.90812 | JPT |
| rs1468063  | TNFRSF6  | GI_23510430-A | 10 | 10 | 90765271 | 91     | 5.9328  | 5.90812 | JPT |
| rs7915235  | TNFRSF6  | GI_23510430-A | 10 | 10 | 90769077 | 3897   | 6.0565  | 5.90812 | JPT |
| rs727427   | MPHOSPH1 | GI_7705347-S  | 10 | 10 | 91390364 | 134203 | 8.523   | 6.10978 | JPT |
| rs716781   | MPHOSPH1 | GI_7705347-S  | 10 | 10 | 91399801 | 124766 | 8.5677  | 6.10978 | JPT |
| rs7076259  | MPHOSPH1 | GI_7705347-S  | 10 | 10 | 91402582 | 121985 | 8.5677  | 6.10978 | JPT |
| rs7094633  | MPHOSPH1 | GI_7705347-S  | 10 | 10 | 91406730 | 117837 | 8.182   | 6.10978 | JPT |
| rs11185830 | MPHOSPH1 | GI_7705347-S  | 10 | 10 | 91407260 | 117307 | 8.182   | 6.10978 | JPT |
| rs10785894 | MPHOSPH1 | GI_7705347-S  | 10 | 10 | 91407618 | 116949 | 8.428   | 6.10978 | JPT |
| rs10785895 | MPHOSPH1 | GI_7705347-S  | 10 | 10 | 91408240 | 116327 | 8.5074  | 6.10978 | JPT |
| rs7088570  | MPHOSPH1 | GI_7705347-S  | 10 | 10 | 91408454 | 116113 | 8.5677  | 6.10978 | JPT |
| rs10881615 | MPHOSPH1 | GI_7705347-S  | 10 | 10 | 91409411 | 115156 | 8.428   | 6.10978 | JPT |
| rs11185831 | MPHOSPH1 | GI_7705347-S  | 10 | 10 | 91409604 | 114963 | 8.428   | 6.10978 | JPT |
| rs12218194 | MPHOSPH1 | GI_7705347-S  | 10 | 10 | 91409976 | 114591 | 8.428   | 6.10978 | JPT |
| rs11185833 | MPHOSPH1 | GI_7705347-S  | 10 | 10 | 91411059 | 113508 | 8.428   | 6.10978 | JPT |
| rs10881618 | MPHOSPH1 | GI_7705347-S  | 10 | 10 | 91412609 | 111958 | 7.8972  | 6.10978 | JPT |
| rs10785896 | MPHOSPH1 | GI_7705347-S  | 10 | 10 | 91413361 | 111206 | 8.5677  | 6.10978 | JPT |
| rs7087240  | MPHOSPH1 | GI_7705347-S  | 10 | 10 | 91413572 | 110995 | 8.5677  | 6.10978 | JPT |
| rs7100603  | MPHOSPH1 | GI_7705347-S  | 10 | 10 | 91415745 | 108822 | 8.428   | 6.10978 | JPT |
| rs7097496  | MPHOSPH1 | GI_7705347-S  | 10 | 10 | 91416048 | 108519 | 8.428   | 6.10978 | JPT |
| rs10881619 | MPHOSPH1 | GI_7705347-S  | 10 | 10 | 91417527 | 107040 | 8.0957  | 6.10978 | JPT |
| rs1409358  | MPHOSPH1 | GI_7705347-S  | 10 | 10 | 91417813 | 106754 | 8.428   | 6.10978 | JPT |
| rs3908479  | MPHOSPH1 | GI_7705347-S  | 10 | 10 | 91420161 | 104406 | 8.428   | 6.10978 | JPT |
| rs10881620 | MPHOSPH1 | GI_7705347-S  | 10 | 10 | 91430268 | 94299  | 8.182   | 6.10978 | JPT |
| rs10881621 | MPHOSPH1 | GI_7705347-S  | 10 | 10 | 91434765 | 89802  | 7.2062  | 6.10978 | JPT |
| rs7088104  | MPHOSPH1 | GI_7705347-S  | 10 | 10 | 91438054 | 86513  | 7.3347  | 6.10978 | JPT |
| rs9325443  | MPHOSPH1 | GI_7705347-S  | 10 | 10 | 91451052 | 73515  | 6.8398  | 6.10978 | JPT |
| rs7077349  | MPHOSPH1 | GI_7705347-S  | 10 | 10 | 91455780 | 68787  | 8.0957  | 6.10978 | JPT |
| rs10881628 | MPHOSPH1 | GI_7705347-S  | 10 | 10 | 91457845 | 66722  | 8.182   | 6.10978 | JPT |
| rs2182396  | MPHOSPH1 | GI_7705347-S  | 10 | 10 | 91458281 | 66286  | 7.7958  | 6.10978 | JPT |
| rs10881631 | MPHOSPH1 | GI_7705347-S  | 10 | 10 | 91459556 | 65011  | 8.428   | 6.10978 | JPT |
| rs6586218  | MPHOSPH1 | GI_7705347-S  | 10 | 10 | 91460481 | 64086  | 8.5677  | 6.10978 | JPT |
| rs3758385  | MPHOSPH1 | GI_7705347-S  | 10 | 10 | 91467046 | 57521  | 7.7504  | 6.10978 | JPT |
| rs7085805  | MPHOSPH1 | GI_7705347-S  | 10 | 10 | 91470216 | 54351  | 8.5677  | 6.10978 | JPT |
| rs10430645 | MPHOSPH1 | GI_7705347-S  | 10 | 10 | 91470906 | 53661  | 8.428   | 6.10978 | JPT |
| rs10430646 | MPHOSPH1 | GI_7705347-S  | 10 | 10 | 91470999 | 53568  | 8.5677  | 6.10978 | JPT |
| rs7096466  | MPHOSPH1 | GI_7705347-S  | 10 | 10 | 91472900 | 51667  | 8.428   | 6.10978 | JPT |
| rs8181361  | MPHOSPH1 | GI_7705347-S  | 10 | 10 | 91474760 | 49807  | 8.428   | 6.10978 | JPT |
| rs9663129  | MPHOSPH1 | GI_7705347-S  | 10 | 10 | 91477264 | 47303  | 8.5282  | 6.10978 | JPT |
| rs10881645 | MPHOSPH1 | GI_7705347-S  | 10 | 10 | 91480067 | 44500  | 7.8079  | 6.10978 | JPT |
| rs10881646 | MPHOSPH1 | GI_7705347-S  | 10 | 10 | 91480337 | 44230  | 7.1212  | 6.10978 | JPT |
| rs10881647 | MPHOSPH1 | GI_7705347-S  | 10 | 10 | 91480340 | 44227  | 7.2758  | 6.10978 | JPT |

|            |          |               |    |    |           |        |        |         |     |
|------------|----------|---------------|----|----|-----------|--------|--------|---------|-----|
| rs11185861 | MPHOSPH1 | GI_7705347-S  | 10 | 10 | 91483670  | 40897  | 8.5677 | 6.10978 | JPT |
| rs10509579 | MPHOSPH1 | GI_7705347-S  | 10 | 10 | 91485752  | 38815  | 8.5677 | 6.10978 | JPT |
| rs7895379  | MPHOSPH1 | GI_7705347-S  | 10 | 10 | 91486687  | 37880  | 8.5677 | 6.10978 | JPT |
| rs1062465  | MPHOSPH1 | GI_7705347-S  | 10 | 10 | 91487611  | 36956  | 8.5677 | 6.10978 | JPT |
| rs1886997  | MPHOSPH1 | GI_7705347-S  | 10 | 10 | 91488234  | 36333  | 8.1788 | 6.10978 | JPT |
| rs7909550  | MPHOSPH1 | GI_7705347-S  | 10 | 10 | 91492783  | 31784  | 7.0316 | 6.10978 | JPT |
| rs7898670  | MPHOSPH1 | GI_7705347-S  | 10 | 10 | 91500069  | 24498  | 8.5677 | 6.10978 | JPT |
| rs7092444  | MPHOSPH1 | GI_7705347-S  | 10 | 10 | 91502717  | 21850  | 8.5677 | 6.10978 | JPT |
| rs2026550  | MPHOSPH1 | GI_7705347-S  | 10 | 10 | 91508219  | 16348  | 8.5677 | 6.10978 | JPT |
| rs3740037  | MPHOSPH1 | GI_7705347-S  | 10 | 10 | 91512290  | 12277  | 8.5677 | 6.10978 | JPT |
| rs10881664 | MPHOSPH1 | GI_7705347-S  | 10 | 10 | 91516512  | 8055   | 8.1793 | 6.10978 | JPT |
| rs7912464  | MPHOSPH1 | GI_7705347-S  | 10 | 10 | 91518364  | 6203   | 7.3512 | 6.10978 | JPT |
| rs962524   | MPHOSPH1 | GI_7705347-S  | 10 | 10 | 91518838  | 5729   | 8.428  | 6.10978 | JPT |
| rs7095818  | MPHOSPH1 | GI_7705347-S  | 10 | 10 | 91519465  | 5102   | 8.428  | 6.10978 | JPT |
| rs7081362  | MPHOSPH1 | GI_7705347-S  | 10 | 10 | 91521695  | 2872   | 8.5677 | 6.10978 | JPT |
| rs10881666 | MPHOSPH1 | GI_7705347-S  | 10 | 10 | 91522218  | 2349   | 8.428  | 6.10978 | JPT |
| rs1555868  | MPHOSPH1 | GI_7705347-S  | 10 | 10 | 91523004  | 1563   | 8.5677 | 6.10978 | JPT |
| rs10881667 | MPHOSPH1 | GI_7705347-S  | 10 | 10 | 91524778  | 211    | 8.428  | 6.10978 | JPT |
| rs7921817  | MPHOSPH1 | GI_7705347-S  | 10 | 10 | 91528921  | 4354   | 6.9306 | 6.10978 | JPT |
| rs10881668 | MPHOSPH1 | GI_7705347-S  | 10 | 10 | 91529447  | 4880   | 8.428  | 6.10978 | JPT |
| rs10881669 | MPHOSPH1 | GI_7705347-S  | 10 | 10 | 91529987  | 5420   | 8.428  | 6.10978 | JPT |
| rs12254296 | MPHOSPH1 | GI_7705347-S  | 10 | 10 | 91531143  | 6576   | 7.9443 | 6.10978 | JPT |
| rs11185880 | MPHOSPH1 | GI_7705347-S  | 10 | 10 | 91531761  | 7194   | 7.0176 | 6.10978 | JPT |
| rs10881670 | MPHOSPH1 | GI_7705347-S  | 10 | 10 | 91534724  | 10157  | 8.5677 | 6.10978 | JPT |
| rs2419057  | MPHOSPH1 | GI_7705347-S  | 10 | 10 | 91540999  | 16432  | 8.5677 | 6.10978 | JPT |
| rs10881674 | MPHOSPH1 | GI_7705347-S  | 10 | 10 | 91542910  | 18343  | 8.428  | 6.10978 | JPT |
| rs10881675 | MPHOSPH1 | GI_7705347-S  | 10 | 10 | 91543539  | 18972  | 8.182  | 6.10978 | JPT |
| rs2900813  | MPHOSPH1 | GI_7705347-S  | 10 | 10 | 91546074  | 21507  | 7.2855 | 6.10978 | JPT |
| rs4934502  | MPHOSPH1 | GI_7705347-S  | 10 | 10 | 91547203  | 22636  | 8.428  | 6.10978 | JPT |
| rs1409318  | MPHOSPH1 | GI_7705347-S  | 10 | 10 | 91550416  | 25849  | 8.5677 | 6.10978 | JPT |
| rs1324699  | MPHOSPH1 | GI_7705347-S  | 10 | 10 | 91556037  | 31470  | 8.5677 | 6.10978 | JPT |
| rs1324700  | MPHOSPH1 | GI_7705347-S  | 10 | 10 | 91556182  | 31615  | 8.428  | 6.10978 | JPT |
| rs10881677 | MPHOSPH1 | GI_7705347-S  | 10 | 10 | 91556941  | 32374  | 7.5044 | 6.10978 | JPT |
| rs913033   | MPHOSPH1 | GI_7705347-S  | 10 | 10 | 91559667  | 35100  | 8.65   | 6.10978 | JPT |
| rs10881678 | MPHOSPH1 | GI_7705347-S  | 10 | 10 | 91560885  | 36318  | 7.7454 | 6.10978 | JPT |
| rs11185888 | MPHOSPH1 | GI_7705347-S  | 10 | 10 | 91563257  | 38690  | 7.7454 | 6.10978 | JPT |
| rs7067762  | ENTPD1   | GI_45580699-S | 10 | 10 | 97596833  | 19364  | 5.9942 | 5.98624 | JPT |
| rs7921462  | MGC10120 | GI_28603839-S | 10 | 10 | 101833130 | 191367 | 8.2487 | 6.03705 | JPT |
| rs1408580  | MGC10120 | GI_28603839-S | 10 | 10 | 101850621 | 173876 | 8.2487 | 6.03705 | JPT |
| rs7086648  | MGC10120 | GI_28603839-S | 10 | 10 | 101886696 | 137801 | 8.3169 | 6.03705 | JPT |
| rs12769818 | MGC10120 | GI_28603839-S | 10 | 10 | 101905619 | 118878 | 8.3432 | 6.03705 | JPT |
| rs12764732 | MGC10120 | GI_28603839-S | 10 | 10 | 101948760 | 75737  | 8.3432 | 6.03705 | JPT |
| rs12764727 | MGC10120 | GI_28603839-S | 10 | 10 | 101948787 | 75710  | 8.3432 | 6.03705 | JPT |
| rs17729417 | MGC10120 | GI_28603839-S | 10 | 10 | 101950132 | 74365  | 8.3432 | 6.03705 | JPT |
| rs12762869 | MGC10120 | GI_28603839-S | 10 | 10 | 101983702 | 40795  | 8.3403 | 6.03705 | JPT |
| rs7092983  | MGC10120 | GI_28603839-S | 10 | 10 | 101984471 | 40026  | 8.3432 | 6.03705 | JPT |
| rs12771909 | MGC10120 | GI_28603839-S | 10 | 10 | 101985275 | 39222  | 8.3403 | 6.03705 | JPT |
| rs17668159 | MGC10120 | GI_28603839-S | 10 | 10 | 101988820 | 35677  | 8.3403 | 6.03705 | JPT |
| rs7923115  | MGC10120 | GI_28603839-S | 10 | 10 | 101990210 | 34287  | 8.3432 | 6.03705 | JPT |
| rs12763385 | MGC10120 | GI_28603839-S | 10 | 10 | 101991221 | 33276  | 8.3432 | 6.03705 | JPT |
| rs7073610  | MGC10120 | GI_28603839-S | 10 | 10 | 101996615 | 27882  | 8.3432 | 6.03705 | JPT |
| rs17112791 | MGC10120 | GI_28603839-S | 10 | 10 | 101999700 | 24797  | 8.3432 | 6.03705 | JPT |
| rs7072367  | MGC10120 | GI_28603839-S | 10 | 10 | 101999970 | 24527  | 8.3403 | 6.03705 | JPT |
| rs7897454  | MGC10120 | GI_28603839-S | 10 | 10 | 102001692 | 22805  | 8.3403 | 6.03705 | JPT |
| rs17730369 | MGC10120 | GI_28603839-S | 10 | 10 | 102006580 | 17917  | 7.6121 | 6.03705 | JPT |
| rs7896703  | MGC10120 | GI_28603839-S | 10 | 10 | 102008621 | 15876  | 7.6121 | 6.03705 | JPT |

|            |          |               |    |    |           |       |         |         |     |
|------------|----------|---------------|----|----|-----------|-------|---------|---------|-----|
| rs12782963 | MGC10120 | GI_28603839-S | 10 | 10 | 102038198 | 13701 | 6.1439  | 6.03705 | JPT |
| rs2305386  | MGC10120 | GI_28603839-S | 10 | 10 | 102038259 | 13762 | 8.3403  | 6.03705 | JPT |
| rs6584356  | MGC10120 | GI_28603839-S | 10 | 10 | 102040232 | 15735 | 8.3403  | 6.03705 | JPT |
| rs11190456 | MGC10120 | GI_28603839-S | 10 | 10 | 102041753 | 17256 | 6.6362  | 6.03705 | JPT |
| rs12241379 | MGC10120 | GI_28603839-S | 10 | 10 | 102042363 | 17866 | 6.6362  | 6.03705 | JPT |
| rs12767633 | MGC10120 | GI_28603839-S | 10 | 10 | 102046430 | 21933 | 6.5574  | 6.03705 | JPT |
| rs2278842  | MGC10120 | GI_28603839-S | 10 | 10 | 102046735 | 22238 | 6.5109  | 6.03705 | JPT |
| rs12781019 | MGC10120 | GI_28603839-S | 10 | 10 | 102047558 | 23061 | 6.5109  | 6.03705 | JPT |
| rs2242050  | MGC10120 | GI_28603839-S | 10 | 10 | 102049319 | 24822 | 6.5109  | 6.03705 | JPT |
| rs17112901 | MGC10120 | GI_28603839-S | 10 | 10 | 102056175 | 31678 | 6.5574  | 6.03705 | JPT |
| rs11190470 | MGC10120 | GI_28603839-S | 10 | 10 | 102059064 | 34567 | 6.5574  | 6.03705 | JPT |
| rs7899336  | MRPL43   | GI_28872735-A | 10 | 10 | 102637676 | 98933 | 8.4439  | 5.74869 | JPT |
| rs7899638  | MRPL43   | GI_28872735-A | 10 | 10 | 102637862 | 98747 | 6.9103  | 5.74869 | JPT |
| rs1408342  | MRPL43   | GI_28872735-A | 10 | 10 | 102638742 | 97867 | 12.5046 | 5.74869 | JPT |
| rs1408343  | MRPL43   | GI_28872735-A | 10 | 10 | 102638755 | 97854 | 12.5046 | 5.74869 | JPT |
| rs10786612 | MRPL43   | GI_28872735-A | 10 | 10 | 102643755 | 92854 | 8.7299  | 5.74869 | JPT |
| rs7903939  | MRPL43   | GI_28872735-A | 10 | 10 | 102648014 | 88595 | 7.9421  | 5.74869 | JPT |
| rs4917916  | MRPL43   | GI_28872735-A | 10 | 10 | 102663282 | 73327 | 12.5046 | 5.74869 | JPT |
| rs7078599  | MRPL43   | GI_28872735-A | 10 | 10 | 102671852 | 64757 | 8.4439  | 5.74869 | JPT |
| rs12241232 | MRPL43   | GI_28872735-A | 10 | 10 | 102682594 | 54015 | 11.7483 | 5.74869 | JPT |
| rs7911957  | MRPL43   | GI_28872735-A | 10 | 10 | 102682960 | 53649 | 11.7483 | 5.74869 | JPT |
| rs10883565 | MRPL43   | GI_28872735-A | 10 | 10 | 102693424 | 43185 | 7.8551  | 5.74869 | JPT |
| rs1056295  | MRPL43   | GI_28872735-A | 10 | 10 | 102705173 | 31436 | 11.1209 | 5.74869 | JPT |
| rs927302   | MRPL43   | GI_28872735-A | 10 | 10 | 102712906 | 23703 | 13.3692 | 5.74869 | JPT |
| rs2295718  | MRPL43   | GI_28872735-A | 10 | 10 | 102715643 | 20966 | 10.8588 | 5.74869 | JPT |
| rs4919510  | MRPL43   | GI_28872735-A | 10 | 10 | 102724768 | 11841 | 14.1355 | 5.74869 | JPT |
| rs735137   | MRPL43   | GI_28872735-A | 10 | 10 | 102725825 | 10784 | 13.3692 | 5.74869 | JPT |
| rs12571302 | MRPL43   | GI_28872735-A | 10 | 10 | 102732753 | 3856  | 13.3738 | 5.74869 | JPT |
| rs2295716  | MRPL43   | GI_28872735-A | 10 | 10 | 102734204 | 2405  | 9.2277  | 5.74869 | JPT |
| rs722435   | MRPL43   | GI_28872735-A | 10 | 10 | 102735052 | 1557  | 11.6106 | 5.74869 | JPT |
| rs1535349  | MRPL43   | GI_28872735-A | 10 | 10 | 102735650 | 959   | 11.4426 | 5.74869 | JPT |
| rs2863095  | MRPL43   | GI_28872735-A | 10 | 10 | 102736493 | 116   | 13.3692 | 5.74869 | JPT |
| rs3740484  | MRPL43   | GI_28872735-A | 10 | 10 | 102737353 | 744   | 13.3692 | 5.74869 | JPT |
| rs3740487  | MRPL43   | GI_28872735-A | 10 | 10 | 102740773 | 4164  | 10.7657 | 5.74869 | JPT |
| rs3824783  | MRPL43   | GI_28872735-A | 10 | 10 | 102740841 | 4232  | 11.41   | 5.74869 | JPT |
| rs3740488  | MRPL43   | GI_28872735-A | 10 | 10 | 102744023 | 7414  | 10.7657 | 5.74869 | JPT |
| rs3740490  | MRPL43   | GI_28872735-A | 10 | 10 | 102746733 | 10124 | 10.7657 | 5.74869 | JPT |
| rs750866   | MRPL43   | GI_28872735-A | 10 | 10 | 102751448 | 14839 | 10.7657 | 5.74869 | JPT |
| rs701835   | MRPL43   | GI_28872735-A | 10 | 10 | 102752117 | 15508 | 10.7657 | 5.74869 | JPT |
| rs807029   | MRPL43   | GI_28872735-A | 10 | 10 | 102754037 | 17428 | 9.4672  | 5.74869 | JPT |
| rs807028   | MRPL43   | GI_28872735-A | 10 | 10 | 102754501 | 17892 | 9.3288  | 5.74869 | JPT |
| rs701836   | MRPL43   | GI_28872735-A | 10 | 10 | 102757107 | 20498 | 9.7993  | 5.74869 | JPT |
| rs2902548  | SFXN2    | GI_34222270-S | 10 | 10 | 104477372 | 11419 | 10.2703 | 5.50293 | JPT |
| rs2244258  | SFXN2    | GI_34222270-S | 10 | 10 | 104478890 | 9901  | 6.1601  | 5.50293 | JPT |
| rs2244254  | SFXN2    | GI_34222270-S | 10 | 10 | 104479001 | 9790  | 5.8118  | 5.50293 | JPT |
| rs2265308  | SFXN2    | GI_34222270-S | 10 | 10 | 104481104 | 7687  | 6.1601  | 5.50293 | JPT |
| rs3802676  | SFXN2    | GI_34222270-S | 10 | 10 | 104481692 | 7099  | 6.13    | 5.50293 | JPT |
| rs2778037  | SFXN2    | GI_34222270-S | 10 | 10 | 104482697 | 6094  | 6.13    | 5.50293 | JPT |
| rs10883769 | SFXN2    | GI_34222270-S | 10 | 10 | 104484937 | 3854  | 6.13    | 5.50293 | JPT |
| rs7092723  | SFXN2    | GI_34222270-S | 10 | 10 | 104489754 | 963   | 6.13    | 5.50293 | JPT |
| rs10786706 | SFXN2    | GI_34222270-S | 10 | 10 | 104490649 | 1858  | 6.5221  | 5.50293 | JPT |
| rs2297451  | SFXN2    | GI_34222270-S | 10 | 10 | 104493449 | 4658  | 5.8637  | 5.50293 | JPT |
| rs3818708  | SFXN2    | GI_34222270-S | 10 | 10 | 104493574 | 4783  | 6.5221  | 5.50293 | JPT |
| rs7074894  | SFXN2    | GI_34222270-S | 10 | 10 | 104494524 | 5733  | 6.1601  | 5.50293 | JPT |
| rs11191383 | SFXN2    | GI_34222270-S | 10 | 10 | 104495874 | 7083  | 6.1601  | 5.50293 | JPT |
| rs11191384 | SFXN2    | GI_34222270-S | 10 | 10 | 104496101 | 7310  | 6.1601  | 5.50293 | JPT |

|            |          |               |    |    |           |        |         |         |     |
|------------|----------|---------------|----|----|-----------|--------|---------|---------|-----|
| rs7923711  | SFXN2    | GI_34222270-S | 10 | 10 | 104496533 | 7742   | 5.8211  | 5.50293 | JPT |
| rs7342026  | SFXN2    | GI_34222270-S | 10 | 10 | 104498896 | 10105  | 6.1601  | 5.50293 | JPT |
| rs10883772 | SFXN2    | GI_34222270-S | 10 | 10 | 104500230 | 11439  | 6.13    | 5.50293 | JPT |
| rs7476300  | SFXN2    | GI_34222270-S | 10 | 10 | 104500295 | 11504  | 6.3574  | 5.50293 | JPT |
| rs7090307  | SFXN2    | GI_34222270-S | 10 | 10 | 104507109 | 18318  | 6.13    | 5.50293 | JPT |
| rs2902549  | SFXN2    | GI_34222270-S | 10 | 10 | 104509459 | 20668  | 6.13    | 5.50293 | JPT |
| rs7092340  | SFXN2    | GI_34222270-S | 10 | 10 | 104519658 | 30867  | 6.13    | 5.50293 | JPT |
| rs12266856 | SFXN2    | GI_34222270-S | 10 | 10 | 104521040 | 32249  | 6.13    | 5.50293 | JPT |
| rs1163073  | USMG5    | GI_14249375-S | 10 | 10 | 105012924 | 131111 | 7.857   | 5.698   | JPT |
| rs4918003  | USMG5    | GI_14249375-S | 10 | 10 | 105034147 | 109888 | 6.1447  | 5.698   | JPT |
| rs3740381  | USMG5    | GI_14249375-S | 10 | 10 | 105036679 | 107356 | 17.703  | 5.698   | JPT |
| rs1063461  | USMG5    | GI_14249375-S | 10 | 10 | 105039095 | 104940 | 8.6117  | 5.698   | JPT |
| rs4293062  | USMG5    | GI_14249375-S | 10 | 10 | 105042614 | 101421 | 8.6117  | 5.698   | JPT |
| rs6584547  | USMG5    | GI_14249375-S | 10 | 10 | 105055399 | 88636  | 8.6117  | 5.698   | JPT |
| rs12220267 | USMG5    | GI_14249375-S | 10 | 10 | 105065702 | 78333  | 16.646  | 5.698   | JPT |
| rs11191654 | USMG5    | GI_14249375-S | 10 | 10 | 105067114 | 76921  | 8.6117  | 5.698   | JPT |
| rs7093667  | USMG5    | GI_14249375-S | 10 | 10 | 105070565 | 73470  | 5.8184  | 5.698   | JPT |
| rs10883855 | USMG5    | GI_14249375-S | 10 | 10 | 105082437 | 61598  | 5.8184  | 5.698   | JPT |
| rs4918007  | USMG5    | GI_14249375-S | 10 | 10 | 105097460 | 46575  | 8.6117  | 5.698   | JPT |
| rs7074749  | USMG5    | GI_14249375-S | 10 | 10 | 105106046 | 37989  | 8.6117  | 5.698   | JPT |
| rs11191666 | USMG5    | GI_14249375-S | 10 | 10 | 105117268 | 26767  | 8.6117  | 5.698   | JPT |
| rs10883857 | USMG5    | GI_14249375-S | 10 | 10 | 105117577 | 26458  | 8.6117  | 5.698   | JPT |
| rs7905968  | USMG5    | GI_14249375-S | 10 | 10 | 105125309 | 18726  | 8.6117  | 5.698   | JPT |
| rs11191672 | USMG5    | GI_14249375-S | 10 | 10 | 105128951 | 15084  | 7.4015  | 5.698   | JPT |
| rs7911488  | USMG5    | GI_14249375-S | 10 | 10 | 105144079 | 44     | 15.7795 | 5.698   | JPT |
| rs11191676 | USMG5    | GI_14249375-S | 10 | 10 | 105145056 | 1021   | 8.7611  | 5.698   | JPT |
| rs2292807  | USMG5    | GI_14249375-S | 10 | 10 | 105145635 | 1600   | 8.6117  | 5.698   | JPT |
| rs10883863 | USMG5    | GI_14249375-S | 10 | 10 | 105151869 | 7834   | 8.6117  | 5.698   | JPT |
| rs12414609 | USMG5    | GI_14249375-S | 10 | 10 | 105152131 | 8096   | 7.1759  | 5.698   | JPT |
| rs3740382  | USMG5    | GI_14249375-S | 10 | 10 | 105169204 | 25169  | 13.3848 | 5.698   | JPT |
| rs11191686 | USMG5    | GI_14249375-S | 10 | 10 | 105177736 | 33701  | 15.2388 | 5.698   | JPT |
| rs11191688 | USMG5    | GI_14249375-S | 10 | 10 | 105182560 | 38525  | 11.9243 | 5.698   | JPT |
| rs2986014  | USMG5    | GI_14249375-S | 10 | 10 | 105184076 | 40041  | 8.3316  | 5.698   | JPT |
| rs10883868 | USMG5    | GI_14249375-S | 10 | 10 | 105186804 | 42769  | 14.7177 | 5.698   | JPT |
| rs2281861  | USMG5    | GI_14249375-S | 10 | 10 | 105191555 | 47520  | 9.3196  | 5.698   | JPT |
| rs7831     | USMG5    | GI_14249375-S | 10 | 10 | 105195292 | 51257  | 16.7439 | 5.698   | JPT |
| rs6580     | USMG5    | GI_14249375-S | 10 | 10 | 105196864 | 52829  | 13.3848 | 5.698   | JPT |
| rs196205   | INPP5F   | GI_38327543-I | 10 | 10 | 121535428 | 6159   | 6.277   | 6.1367  | JPT |
| rs7902274  | C10orf88 | GI_13376420-S | 10 | 10 | 124647799 | 33336  | 6.2736  | 5.95435 | JPT |
| rs12801980 | FLJ22635 | GI_13376651-S | 11 | 11 | 283188    | 2115   | 5.9706  | 5.56893 | JPT |
| rs2242565  | FLJ22635 | GI_13376651-S | 11 | 11 | 285343    | 40     | 12.3453 | 5.56893 | JPT |
| rs2242566  | FLJ22635 | GI_13376651-S | 11 | 11 | 285876    | 573    | 11.8065 | 5.56893 | JPT |
| rs2651836  | C11orf21 | GI_7662662-S  | 11 | 11 | 2273296   | 471    | 6.9474  | 5.98335 | JPT |
| rs2244891  | C11orf21 | GI_7662662-S  | 11 | 11 | 2275931   | 2164   | 6.0827  | 5.98335 | JPT |
| rs2651838  | C11orf21 | GI_7662662-S  | 11 | 11 | 2276107   | 2340   | 6.8327  | 5.98335 | JPT |
| rs756924   | C11orf21 | GI_7662662-S  | 11 | 11 | 2279605   | 5838   | 7.1067  | 5.98335 | JPT |
| rs2074021  | C11orf21 | GI_7662662-S  | 11 | 11 | 2280104   | 6337   | 6.5772  | 5.98335 | JPT |
| rs2074022  | C11orf21 | GI_7662662-S  | 11 | 11 | 2280617   | 6850   | 7.2099  | 5.98335 | JPT |
| rs6484742  | MMRP19   | GI_7705723-S  | 11 | 11 | 34847955  | 18573  | 7.465   | 6.12692 | JPT |
| rs2941048  | MMRP19   | GI_7705723-S  | 11 | 11 | 34849835  | 16693  | 7.465   | 6.12692 | JPT |
| rs2941047  | MMRP19   | GI_7705723-S  | 11 | 11 | 34849920  | 16608  | 7.465   | 6.12692 | JPT |
| rs2956082  | MMRP19   | GI_7705723-S  | 11 | 11 | 34853758  | 12770  | 7.465   | 6.12692 | JPT |
| rs2956085  | MMRP19   | GI_7705723-S  | 11 | 11 | 34858679  | 7849   | 7.465   | 6.12692 | JPT |
| rs2288667  | MMRP19   | GI_7705723-S  | 11 | 11 | 34860975  | 5553   | 7.1937  | 6.12692 | JPT |
| rs2288668  | MMRP19   | GI_7705723-S  | 11 | 11 | 34861085  | 5443   | 7.465   | 6.12692 | JPT |
| rs2956088  | MMRP19   | GI_7705723-S  | 11 | 11 | 34862423  | 4105   | 6.7482  | 6.12692 | JPT |

|            |        |              |    |    |          |       |        |         |     |
|------------|--------|--------------|----|----|----------|-------|--------|---------|-----|
| rs2985399  | MMRP19 | GI_7705723-S | 11 | 11 | 34862570 | 3958  | 7.465  | 6.12692 | JPT |
| rs2985398  | MMRP19 | GI_7705723-S | 11 | 11 | 34862621 | 3907  | 7.465  | 6.12692 | JPT |
| rs1998603  | MMRP19 | GI_7705723-S | 11 | 11 | 34863138 | 3390  | 7.465  | 6.12692 | JPT |
| rs2985396  | MMRP19 | GI_7705723-S | 11 | 11 | 34863530 | 2998  | 7.465  | 6.12692 | JPT |
| rs2956091  | MMRP19 | GI_7705723-S | 11 | 11 | 34864657 | 1871  | 7.465  | 6.12692 | JPT |
| rs2985391  | MMRP19 | GI_7705723-S | 11 | 11 | 34866148 | 380   | 7.2787 | 6.12692 | JPT |
| rs2985390  | MMRP19 | GI_7705723-S | 11 | 11 | 34866251 | 277   | 7.465  | 6.12692 | JPT |
| rs1571133  | MMRP19 | GI_7705723-S | 11 | 11 | 34866502 | 26    | 7.1937 | 6.12692 | JPT |
| rs1571134  | MMRP19 | GI_7705723-S | 11 | 11 | 34866653 | 125   | 7.3438 | 6.12692 | JPT |
| rs1571135  | MMRP19 | GI_7705723-S | 11 | 11 | 34866793 | 265   | 7.2787 | 6.12692 | JPT |
| rs1977420  | MMRP19 | GI_7705723-S | 11 | 11 | 34866973 | 445   | 7.1937 | 6.12692 | JPT |
| rs2303959  | MMRP19 | GI_7705723-S | 11 | 11 | 34868589 | 2061  | 7.8155 | 6.12692 | JPT |
| rs2915224  | MMRP19 | GI_7705723-S | 11 | 11 | 34868865 | 2337  | 7.465  | 6.12692 | JPT |
| rs1430855  | MMRP19 | GI_7705723-S | 11 | 11 | 34869484 | 2956  | 7.465  | 6.12692 | JPT |
| rs2985389  | MMRP19 | GI_7705723-S | 11 | 11 | 34869740 | 3212  | 7.465  | 6.12692 | JPT |
| rs2915223  | MMRP19 | GI_7705723-S | 11 | 11 | 34870713 | 4185  | 7.465  | 6.12692 | JPT |
| rs2915222  | MMRP19 | GI_7705723-S | 11 | 11 | 34870936 | 4408  | 7.465  | 6.12692 | JPT |
| rs2915221  | MMRP19 | GI_7705723-S | 11 | 11 | 34871056 | 4528  | 7.6816 | 6.12692 | JPT |
| rs2915220  | MMRP19 | GI_7705723-S | 11 | 11 | 34871226 | 4698  | 7.465  | 6.12692 | JPT |
| rs2986424  | MMRP19 | GI_7705723-S | 11 | 11 | 34872022 | 5494  | 6.6599 | 6.12692 | JPT |
| rs2986425  | MMRP19 | GI_7705723-S | 11 | 11 | 34872332 | 5804  | 7.465  | 6.12692 | JPT |
| rs2986427  | MMRP19 | GI_7705723-S | 11 | 11 | 34872921 | 6393  | 7.465  | 6.12692 | JPT |
| rs1326940  | MMRP19 | GI_7705723-S | 11 | 11 | 34873060 | 6532  | 7.465  | 6.12692 | JPT |
| rs1326941  | MMRP19 | GI_7705723-S | 11 | 11 | 34873286 | 6758  | 7.465  | 6.12692 | JPT |
| rs1326942  | MMRP19 | GI_7705723-S | 11 | 11 | 34873361 | 6833  | 7.465  | 6.12692 | JPT |
| rs1326943  | MMRP19 | GI_7705723-S | 11 | 11 | 34873444 | 6916  | 7.1937 | 6.12692 | JPT |
| rs2217478  | MMRP19 | GI_7705723-S | 11 | 11 | 34873939 | 7411  | 7.3648 | 6.12692 | JPT |
| rs2986429  | MMRP19 | GI_7705723-S | 11 | 11 | 34874951 | 8423  | 7.465  | 6.12692 | JPT |
| rs10836318 | MMRP19 | GI_7705723-S | 11 | 11 | 34878954 | 12426 | 7.8155 | 6.12692 | JPT |
| rs11032917 | MMRP19 | GI_7705723-S | 11 | 11 | 34879179 | 12651 | 7.3648 | 6.12692 | JPT |
| rs11032918 | MMRP19 | GI_7705723-S | 11 | 11 | 34879348 | 12820 | 6.7752 | 6.12692 | JPT |
| rs2985381  | MMRP19 | GI_7705723-S | 11 | 11 | 34879792 | 13264 | 7.465  | 6.12692 | JPT |
| rs1117446  | MMRP19 | GI_7705723-S | 11 | 11 | 34885098 | 18570 | 7.3648 | 6.12692 | JPT |
| rs2956114  | MMRP19 | GI_7705723-S | 11 | 11 | 34894389 | 27861 | 7.1937 | 6.12692 | JPT |
| rs2956107  | MMRP19 | GI_7705723-S | 11 | 11 | 34897144 | 30616 | 7.3648 | 6.12692 | JPT |
| rs2956106  | MMRP19 | GI_7705723-S | 11 | 11 | 34897558 | 31030 | 7.465  | 6.12692 | JPT |
| rs2915205  | MMRP19 | GI_7705723-S | 11 | 11 | 34897664 | 31136 | 7.1722 | 6.12692 | JPT |
| rs2915204  | MMRP19 | GI_7705723-S | 11 | 11 | 34898421 | 31893 | 6.6366 | 6.12692 | JPT |
| rs2915200  | MMRP19 | GI_7705723-S | 11 | 11 | 34900947 | 34419 | 7.3648 | 6.12692 | JPT |
| rs1998912  | MMRP19 | GI_7705723-S | 11 | 11 | 34904520 | 37992 | 7.465  | 6.12692 | JPT |
| rs2986410  | MMRP19 | GI_7705723-S | 11 | 11 | 34905162 | 38634 | 7.1937 | 6.12692 | JPT |
| rs2956081  | MMRP19 | GI_7705723-S | 11 | 11 | 34906772 | 40244 | 7.1937 | 6.12692 | JPT |
| rs2956098  | MMRP19 | GI_7705723-S | 11 | 11 | 34908691 | 42163 | 6.1588 | 6.12692 | JPT |
| rs2031686  | MMRP19 | GI_7705723-S | 11 | 11 | 34910558 | 44030 | 6.3454 | 6.12692 | JPT |
| rs2985405  | MMRP19 | GI_7705723-S | 11 | 11 | 34912160 | 45632 | 6.9999 | 6.12692 | JPT |
| rs2985403  | MMRP19 | GI_7705723-S | 11 | 11 | 34913650 | 47122 | 6.9684 | 6.12692 | JPT |
| rs2915193  | MMRP19 | GI_7705723-S | 11 | 11 | 34916032 | 49504 | 7.465  | 6.12692 | JPT |
| rs496653   | MMRP19 | GI_7705723-S | 11 | 11 | 34918332 | 51804 | 6.3827 | 6.12692 | JPT |
| rs2956087  | MMRP19 | GI_7705723-S | 11 | 11 | 34922133 | 55605 | 6.8743 | 6.12692 | JPT |
| rs614668   | MMRP19 | GI_7705723-S | 11 | 11 | 34925099 | 58571 | 7.3392 | 6.12692 | JPT |
| rs2915227  | MMRP19 | GI_7705723-S | 11 | 11 | 34931643 | 65115 | 6.2518 | 6.12692 | JPT |
| rs2762962  | MMRP19 | GI_7705723-S | 11 | 11 | 34942022 | 75494 | 6.2012 | 6.12692 | JPT |
| rs2732557  | MMRP19 | GI_7705723-S | 11 | 11 | 34943087 | 76559 | 6.2518 | 6.12692 | JPT |
| rs10836326 | MMRP19 | GI_7705723-S | 11 | 11 | 34956934 | 90406 | 6.2518 | 6.12692 | JPT |
| rs2767038  | MMRP19 | GI_7705723-S | 11 | 11 | 34957559 | 91031 | 6.2518 | 6.12692 | JPT |
| rs2025780  | MMRP19 | GI_7705723-S | 11 | 11 | 34963041 | 96513 | 6.7682 | 6.12692 | JPT |

|            |          |               |    |    |          |        |         |         |     |
|------------|----------|---------------|----|----|----------|--------|---------|---------|-----|
| rs2732564  | MMRP19   | GI_7705723-S  | 11 | 11 | 34971854 | 105326 | 6.2518  | 6.12692 | JPT |
| rs2732565  | MMRP19   | GI_7705723-S  | 11 | 11 | 34972678 | 106150 | 6.2518  | 6.12692 | JPT |
| rs2767033  | MMRP19   | GI_7705723-S  | 11 | 11 | 34979484 | 112956 | 6.2518  | 6.12692 | JPT |
| rs1326948  | MMRP19   | GI_7705723-S  | 11 | 11 | 34981352 | 114824 | 6.2518  | 6.12692 | JPT |
| rs2762969  | MMRP19   | GI_7705723-S  | 11 | 11 | 34982258 | 115730 | 6.2518  | 6.12692 | JPT |
| rs10768983 | HSD17B12 | GI_7705854-S  | 11 | 11 | 43796511 | 37970  | 6.4825  | 5.98532 | JPT |
| rs7127924  | PHACS    | GI_14211920-S | 11 | 11 | 44042263 | 19606  | 9.8829  | 6.16708 | JPT |
| rs2074038  | PHACS    | GI_14211920-S | 11 | 11 | 44044565 | 17304  | 10.8474 | 6.16708 | JPT |
| rs2074040  | PHACS    | GI_14211920-S | 11 | 11 | 44049899 | 11970  | 6.3224  | 6.16708 | JPT |
| rs3134907  | PHACS    | GI_14211920-S | 11 | 11 | 44056164 | 5705   | 7.054   | 6.16708 | JPT |
| rs3134911  | PHACS    | GI_14211920-S | 11 | 11 | 44064323 | 2454   | 7.563   | 6.16708 | JPT |
| rs7105851  | Hs.6637  | Hs.6637-S     | 11 | 11 | 47339851 | 243884 | 8.1586  | 5.37296 | JPT |
| rs10838698 | Hs.6637  | Hs.6637-S     | 11 | 11 | 47342499 | 241236 | 8.6104  | 5.37296 | JPT |
| rs10838699 | Hs.6637  | Hs.6637-S     | 11 | 11 | 47342649 | 241086 | 8.1586  | 5.37296 | JPT |
| rs10769258 | Hs.6637  | Hs.6637-S     | 11 | 11 | 47347615 | 236120 | 8.1586  | 5.37296 | JPT |
| rs11039212 | Hs.6637  | Hs.6637-S     | 11 | 11 | 47349879 | 233856 | 8.7432  | 5.37296 | JPT |
| rs4992357  | Hs.6637  | Hs.6637-S     | 11 | 11 | 47350214 | 233521 | 8.3502  | 5.37296 | JPT |
| rs896816   | Hs.6637  | Hs.6637-S     | 11 | 11 | 47350914 | 232821 | 8.7432  | 5.37296 | JPT |
| rs7940536  | Hs.6637  | Hs.6637-S     | 11 | 11 | 47351816 | 231919 | 7.9771  | 5.37296 | JPT |
| rs6485753  | Hs.6637  | Hs.6637-S     | 11 | 11 | 47366776 | 216959 | 8.1586  | 5.37296 | JPT |
| rs4752990  | Hs.6637  | Hs.6637-S     | 11 | 11 | 47366969 | 216766 | 7.8609  | 5.37296 | JPT |
| rs4752993  | Hs.6637  | Hs.6637-S     | 11 | 11 | 47367527 | 216208 | 8.7432  | 5.37296 | JPT |
| rs4752994  | Hs.6637  | Hs.6637-S     | 11 | 11 | 47367641 | 216094 | 8.1586  | 5.37296 | JPT |
| rs10769262 | Hs.6637  | Hs.6637-S     | 11 | 11 | 47368157 | 215578 | 8.7432  | 5.37296 | JPT |
| rs11605672 | Hs.6637  | Hs.6637-S     | 11 | 11 | 47370309 | 213426 | 8.7432  | 5.37296 | JPT |
| rs4752999  | Hs.6637  | Hs.6637-S     | 11 | 11 | 47385141 | 198594 | 14.1899 | 5.37296 | JPT |
| rs755553   | Hs.6637  | Hs.6637-S     | 11 | 11 | 47388879 | 194856 | 14.1899 | 5.37296 | JPT |
| rs2053979  | Hs.6637  | Hs.6637-S     | 11 | 11 | 47396020 | 187715 | 12.9826 | 5.37296 | JPT |
| rs2293580  | Hs.6637  | Hs.6637-S     | 11 | 11 | 47396859 | 186876 | 14.1899 | 5.37296 | JPT |
| rs3781627  | Hs.6637  | Hs.6637-S     | 11 | 11 | 47398048 | 185687 | 15.0616 | 5.37296 | JPT |
| rs10838708 | Hs.6637  | Hs.6637-S     | 11 | 11 | 47398089 | 185646 | 13.3106 | 5.37296 | JPT |
| rs3781626  | Hs.6637  | Hs.6637-S     | 11 | 11 | 47399469 | 184266 | 15.0616 | 5.37296 | JPT |
| rs3781625  | Hs.6637  | Hs.6637-S     | 11 | 11 | 47399656 | 184079 | 14.1899 | 5.37296 | JPT |
| rs2868459  | Hs.6637  | Hs.6637-S     | 11 | 11 | 47411548 | 172187 | 14.1899 | 5.37296 | JPT |
| rs11604680 | Hs.6637  | Hs.6637-S     | 11 | 11 | 47414115 | 169620 | 14.5271 | 5.37296 | JPT |
| rs1317149  | Hs.6637  | Hs.6637-S     | 11 | 11 | 47443461 | 140274 | 13.2788 | 5.37296 | JPT |
| rs7124681  | Hs.6637  | Hs.6637-S     | 11 | 11 | 47486523 | 97212  | 15.0616 | 5.37296 | JPT |
| rs4752845  | Hs.6637  | Hs.6637-S     | 11 | 11 | 47496273 | 87462  | 14.1899 | 5.37296 | JPT |
| rs7928842  | Hs.6637  | Hs.6637-S     | 11 | 11 | 47522928 | 60807  | 14.1899 | 5.37296 | JPT |
| rs12419692 | Hs.6637  | Hs.6637-S     | 11 | 11 | 47581290 | 2445   | 15.0616 | 5.37296 | JPT |
| rs1064608  | Hs.6637  | Hs.6637-S     | 11 | 11 | 47597005 | 13270  | 14.1899 | 5.37296 | JPT |
| rs3817335  | Hs.6637  | Hs.6637-S     | 11 | 11 | 47600467 | 16732  | 14.1899 | 5.37296 | JPT |
| rs4752856  | Hs.6637  | Hs.6637-S     | 11 | 11 | 47604618 | 20883  | 15.0616 | 5.37296 | JPT |
| rs3817334  | Hs.6637  | Hs.6637-S     | 11 | 11 | 47607569 | 23834  | 15.0616 | 5.37296 | JPT |
| rs4752857  | Hs.6637  | Hs.6637-S     | 11 | 11 | 47612328 | 28593  | 14.1899 | 5.37296 | JPT |
| rs12794570 | Hs.6637  | Hs.6637-S     | 11 | 11 | 47614890 | 31155  | 11.1999 | 5.37296 | JPT |
| rs10838738 | Hs.6637  | Hs.6637-S     | 11 | 11 | 47619625 | 35890  | 14.1899 | 5.37296 | JPT |
| rs12787112 | Hs.6637  | Hs.6637-S     | 11 | 11 | 47643723 | 59988  | 11.7157 | 5.37296 | JPT |
| rs10838747 | Hs.6637  | Hs.6637-S     | 11 | 11 | 47672900 | 89165  | 10.9945 | 5.37296 | JPT |
| rs17788930 | Hs.6637  | Hs.6637-S     | 11 | 11 | 47709351 | 125616 | 11.7157 | 5.37296 | JPT |
| rs10838757 | Hs.6637  | Hs.6637-S     | 11 | 11 | 47719592 | 135857 | 11.1377 | 5.37296 | JPT |
| rs9909     | Hs.6637  | Hs.6637-S     | 11 | 11 | 47756351 | 172616 | 9.6278  | 5.37296 | JPT |
| rs7105282  | Hs.6637  | Hs.6637-S     | 11 | 11 | 47762190 | 178455 | 10.1967 | 5.37296 | JPT |
| rs2290850  | Hs.6637  | Hs.6637-S     | 11 | 11 | 47764350 | 180615 | 9.5638  | 5.37296 | JPT |
| rs12418852 | Hs.6637  | Hs.6637-S     | 11 | 11 | 47825429 | 241694 | 9.5638  | 5.37296 | JPT |
| rs11039433 | Hs.6637  | Hs.6637-S     | 11 | 11 | 47834069 | 250334 | 8.8633  | 5.37296 | JPT |



|            |           |               |    |    |          |        |         |         |     |
|------------|-----------|---------------|----|----|----------|--------|---------|---------|-----|
| rs4752801  | Hs.6637   | Hs.6637-S     | 11 | 11 | 47864217 | 280482 | 5.5269  | 5.37296 | JPT |
| rs12361256 | Hs.6637   | Hs.6637-S     | 11 | 11 | 47867399 | 283664 | 6.0627  | 5.37296 | JPT |
| rs2511983  | TIMM10    | GI_6912707-S  | 11 | 11 | 57103450 | 50832  | 7.1117  | 5.82134 | JPT |
| rs2649662  | TIMM10    | GI_6912707-S  | 11 | 11 | 57109138 | 56520  | 6.2493  | 5.82134 | JPT |
| rs2729356  | TIMM10    | GI_6912707-S  | 11 | 11 | 57109973 | 57355  | 6.0085  | 5.82134 | JPT |
| rs2848630  | TIMM10    | GI_6912707-S  | 11 | 11 | 57113483 | 60865  | 6.2493  | 5.82134 | JPT |
| rs2649663  | TIMM10    | GI_6912707-S  | 11 | 11 | 57113881 | 61263  | 6.2493  | 5.82134 | JPT |
| rs2848628  | TIMM10    | GI_6912707-S  | 11 | 11 | 57114290 | 61672  | 6.2493  | 5.82134 | JPT |
| rs643634   | LOC144097 | GI_37541019-S | 11 | 11 | 63342380 | 9308   | 6.2758  | 5.93    | JPT |
| rs612010   | LOC144097 | GI_37541019-S | 11 | 11 | 63347581 | 4107   | 6.2601  | 5.93    | JPT |
| rs626333   | LOC144097 | GI_37541019-S | 11 | 11 | 63348437 | 3251   | 6.2758  | 5.93    | JPT |
| rs480874   | LOC144097 | GI_37541019-S | 11 | 11 | 63348541 | 3147   | 6.5988  | 5.93    | JPT |
| rs8995     | LOC144097 | GI_37541019-S | 11 | 11 | 63351648 | 40     | 6.2758  | 5.93    | JPT |
| rs2285030  | LOC144097 | GI_37541019-S | 11 | 11 | 63351793 | 105    | 6.2758  | 5.93    | JPT |
| rs475688   | SF1       | GI_42544126-I | 11 | 11 | 64120867 | 179432 | 5.9963  | 5.70131 | JPT |
| rs476037   | SF1       | GI_42544126-I | 11 | 11 | 64126116 | 174183 | 7.7642  | 5.70131 | JPT |
| rs17146121 | SF1       | GI_42544126-I | 11 | 11 | 64143102 | 157197 | 6.6933  | 5.70131 | JPT |
| rs7939965  | SF1       | GI_42544126-I | 11 | 11 | 64181600 | 118699 | 7.9588  | 5.70131 | JPT |
| rs11231853 | SF1       | GI_42544126-I | 11 | 11 | 64207055 | 93244  | 7.1025  | 5.70131 | JPT |
| rs480617   | SF1       | GI_42544126-I | 11 | 11 | 64234896 | 65403  | 5.858   | 5.70131 | JPT |
| rs3809076  | SF1       | GI_42544126-I | 11 | 11 | 64239122 | 61177  | 8.5041  | 5.70131 | JPT |
| rs693235   | SF1       | GI_42544126-I | 11 | 11 | 64249338 | 50961  | 10.9103 | 5.70131 | JPT |
| rs2073798  | SF1       | GI_42544126-I | 11 | 11 | 64267898 | 32401  | 13.6231 | 5.70131 | JPT |
| rs569602   | SF1       | GI_42544126-I | 11 | 11 | 64271082 | 29217  | 13.9545 | 5.70131 | JPT |
| rs547066   | SF1       | GI_42544126-I | 11 | 11 | 64280070 | 20229  | 12.4747 | 5.70131 | JPT |
| rs589691   | SF1       | GI_42544126-I | 11 | 11 | 64281792 | 18507  | 13.9545 | 5.70131 | JPT |
| rs489192   | SF1       | GI_42544126-I | 11 | 11 | 64282220 | 18079  | 14.1586 | 5.70131 | JPT |
| rs477549   | SF1       | GI_42544126-I | 11 | 11 | 64283656 | 16643  | 12.6732 | 5.70131 | JPT |
| rs680273   | SF1       | GI_42544126-I | 11 | 11 | 64296211 | 4088   | 15.7543 | 5.70131 | JPT |
| rs474707   | SF1       | GI_42544126-I | 11 | 11 | 64300711 | 412    | 16.3998 | 5.70131 | JPT |
| rs1633462  | SF1       | GI_42544126-I | 11 | 11 | 64302833 | 2534   | 14.0929 | 5.70131 | JPT |
| rs606458   | SF1       | GI_42544126-I | 11 | 11 | 64302967 | 2668   | 14.0929 | 5.70131 | JPT |
| rs607389   | SF1       | GI_42544126-I | 11 | 11 | 64310154 | 9855   | 13.852  | 5.70131 | JPT |
| rs11231869 | SF1       | GI_42544126-I | 11 | 11 | 64313708 | 13409  | 14.178  | 5.70131 | JPT |
| rs677298   | SF1       | GI_42544126-I | 11 | 11 | 64320784 | 20485  | 10.6476 | 5.70131 | JPT |
| rs1143937  | SF1       | GI_42544126-I | 11 | 11 | 64325576 | 25277  | 8.216   | 5.70131 | JPT |
| rs669976   | SF1       | GI_42544126-I | 11 | 11 | 64330165 | 29866  | 8.4258  | 5.70131 | JPT |
| rs559566   | SF1       | GI_42544126-I | 11 | 11 | 64338234 | 37935  | 8.2296  | 5.70131 | JPT |
| rs1476792  | RPS6KB2   | GI_4506738-S  | 11 | 11 | 66952813 | 6532   | 7.647   | 5.82918 | JPT |
| rs1638588  | RPS6KB2   | GI_4506738-S  | 11 | 11 | 66956282 | 3063   | 6.9803  | 5.82918 | JPT |
| rs1790753  | RPS6KB2   | GI_4506738-S  | 11 | 11 | 66957584 | 1761   | 6.9803  | 5.82918 | JPT |
| rs869736   | RPS6KB2   | GI_4506738-S  | 11 | 11 | 66962038 | 2693   | 6.9803  | 5.82918 | JPT |
| rs2302264  | RPS6KB2   | GI_4506738-S  | 11 | 11 | 66964002 | 4657   | 6.9803  | 5.82918 | JPT |
| rs1638556  | RPS6KB2   | GI_4506738-S  | 11 | 11 | 66970094 | 10749  | 6.9803  | 5.82918 | JPT |
| rs1790761  | RPS6KB2   | GI_4506738-S  | 11 | 11 | 66978430 | 19085  | 7.647   | 5.82918 | JPT |
| rs3741168  | RPS6KB2   | GI_4506738-S  | 11 | 11 | 66991927 | 32582  | 7.0226  | 5.82918 | JPT |
| rs2276020  | GSTP1     | GI_6552334-S  | 11 | 11 | 67014132 | 96080  | 6.9135  | 5.08404 | JPT |
| rs672432   | GSTP1     | GI_6552334-S  | 11 | 11 | 67033045 | 77167  | 5.5474  | 5.08404 | JPT |
| rs687343   | GSTP1     | GI_6552334-S  | 11 | 11 | 67034030 | 76182  | 5.5474  | 5.08404 | JPT |
| rs627956   | GSTP1     | GI_6552334-S  | 11 | 11 | 67040431 | 69781  | 5.5474  | 5.08404 | JPT |
| rs604904   | GSTP1     | GI_6552334-S  | 11 | 11 | 67040467 | 69745  | 5.5474  | 5.08404 | JPT |
| rs682208   | GSTP1     | GI_6552334-S  | 11 | 11 | 67042651 | 67561  | 5.8301  | 5.08404 | JPT |
| rs2276118  | RPS6KB2   | GI_4506738-S  | 11 | 11 | 67045170 | 85825  | 6.7537  | 5.82918 | JPT |
| rs687316   | GSTP1     | GI_6552334-S  | 11 | 11 | 67063408 | 46804  | 7.3963  | 5.08404 | JPT |
| rs661624   | GSTP1     | GI_6552334-S  | 11 | 11 | 67065137 | 45075  | 7.3963  | 5.08404 | JPT |
| rs694616   | GSTP1     | GI_6552334-S  | 11 | 11 | 67067834 | 42378  | 6.1843  | 5.08404 | JPT |

|            |         |               |    |    |          |        |         |         |     |
|------------|---------|---------------|----|----|----------|--------|---------|---------|-----|
| rs611663   | RPS6KB2 | GI_4506738-S  | 11 | 11 | 67068797 | 109452 | 5.9423  | 5.82918 | JPT |
| rs612162   | GSTP1   | GI_6552334-S  | 11 | 11 | 67068933 | 41279  | 7.3963  | 5.08404 | JPT |
| rs615270   | GSTP1   | GI_6552334-S  | 11 | 11 | 67069632 | 40580  | 7.5581  | 5.08404 | JPT |
| rs644670   | GSTP1   | GI_6552334-S  | 11 | 11 | 67071605 | 38607  | 7.0192  | 5.08404 | JPT |
| rs601531   | GSTP1   | GI_6552334-S  | 11 | 11 | 67080578 | 29634  | 7.5581  | 5.08404 | JPT |
| rs638140   | RPS6KB2 | GI_4506738-S  | 11 | 11 | 67090434 | 131089 | 6.1738  | 5.82918 | JPT |
| rs675679   | GSTP1   | GI_6552334-S  | 11 | 11 | 67095854 | 14358  | 6.3119  | 5.08404 | JPT |
| rs688878   | GSTP1   | GI_6552334-S  | 11 | 11 | 67096525 | 13687  | 7.3963  | 5.08404 | JPT |
| rs656652   | RPS6KB2 | GI_4506738-S  | 11 | 11 | 67100533 | 141188 | 6.1738  | 5.82918 | JPT |
| rs625978   | RPS6KB2 | GI_4506738-S  | 11 | 11 | 67101240 | 141895 | 6.1738  | 5.82918 | JPT |
| rs612020   | GSTP1   | GI_6552334-S  | 11 | 11 | 67102017 | 8195   | 7.5581  | 5.08404 | JPT |
| rs7927381  | GSTP1   | GI_6552334-S  | 11 | 11 | 67103319 | 6893   | 7.5581  | 5.08404 | JPT |
| rs614080   | RPS6KB2 | GI_4506738-S  | 11 | 11 | 67103863 | 144518 | 6.1738  | 5.82918 | JPT |
| rs2169650  | GSTP1   | GI_6552334-S  | 11 | 11 | 67120493 | 10281  | 5.9947  | 5.08404 | JPT |
| rs11227848 | GSTP1   | GI_6552334-S  | 11 | 11 | 67125413 | 15201  | 5.9947  | 5.08404 | JPT |
| rs1531514  | RPS6KB2 | GI_4506738-S  | 11 | 11 | 67155438 | 196093 | 5.9889  | 5.82918 | JPT |
| rs3765088  | RPS6KB2 | GI_4506738-S  | 11 | 11 | 67156546 | 197201 | 5.9889  | 5.82918 | JPT |
| rs678904   | MRPL21  | GI_31652223-A | 11 | 11 | 68372176 | 43238  | 7.3671  | 6.05598 | JPT |
| rs497149   | MRPL21  | GI_31652223-A | 11 | 11 | 68383215 | 32199  | 8.4244  | 6.05598 | JPT |
| rs604524   | MRPL21  | GI_31652223-A | 11 | 11 | 68386505 | 28909  | 9.6574  | 6.05598 | JPT |
| rs584108   | MRPL21  | GI_31652223-A | 11 | 11 | 68386858 | 28556  | 8.4753  | 6.05598 | JPT |
| rs596874   | MRPL21  | GI_31652223-A | 11 | 11 | 68387450 | 27964  | 9.9461  | 6.05598 | JPT |
| rs501799   | MRPL21  | GI_31652223-A | 11 | 11 | 68387816 | 27598  | 9.9461  | 6.05598 | JPT |
| rs557625   | MRPL21  | GI_31652223-A | 11 | 11 | 68391298 | 24116  | 9.1837  | 6.05598 | JPT |
| rs686877   | MRPL21  | GI_31652223-A | 11 | 11 | 68393745 | 21669  | 6.6535  | 6.05598 | JPT |
| rs10792001 | MRPL21  | GI_31652223-A | 11 | 11 | 68394313 | 21101  | 9.577   | 6.05598 | JPT |
| rs473997   | MRPL21  | GI_31652223-A | 11 | 11 | 68396057 | 19357  | 8.2091  | 6.05598 | JPT |
| rs631001   | MRPL21  | GI_31652223-A | 11 | 11 | 68399550 | 15864  | 7.3376  | 6.05598 | JPT |
| rs1249368  | MRPL21  | GI_31652223-A | 11 | 11 | 68402722 | 12692  | 9.6574  | 6.05598 | JPT |
| rs592697   | MRPL21  | GI_31652223-A | 11 | 11 | 68406640 | 8774   | 8.8635  | 6.05598 | JPT |
| rs686390   | MRPL21  | GI_31652223-A | 11 | 11 | 68412653 | 2761   | 7.8301  | 6.05598 | JPT |
| rs514833   | MRPL21  | GI_31652223-A | 11 | 11 | 68414310 | 1104   | 6.9969  | 6.05598 | JPT |
| rs488363   | MRPL21  | GI_31652223-A | 11 | 11 | 68414874 | 540    | 9.6574  | 6.05598 | JPT |
| rs660614   | MRPL21  | GI_31652223-A | 11 | 11 | 68416064 | 650    | 9.6574  | 6.05598 | JPT |
| rs507520   | MRPL21  | GI_31652223-A | 11 | 11 | 68422630 | 7216   | 8.4753  | 6.05598 | JPT |
| rs636049   | MRPL21  | GI_31652223-A | 11 | 11 | 68423774 | 8360   | 9.9461  | 6.05598 | JPT |
| rs668576   | MRPL21  | GI_31652223-A | 11 | 11 | 68424784 | 9370   | 9.9461  | 6.05598 | JPT |
| rs482172   | MRPL21  | GI_31652223-A | 11 | 11 | 68425013 | 9599   | 9.9461  | 6.05598 | JPT |
| rs513359   | MRPL21  | GI_31652223-A | 11 | 11 | 68426072 | 10658  | 9.9461  | 6.05598 | JPT |
| rs629426   | MRPL21  | GI_31652223-A | 11 | 11 | 68427680 | 12266  | 9.6574  | 6.05598 | JPT |
| rs583182   | MRPL21  | GI_31652223-A | 11 | 11 | 68435210 | 19796  | 9.9461  | 6.05598 | JPT |
| rs673821   | MRPL21  | GI_31652223-A | 11 | 11 | 68435294 | 19880  | 6.9757  | 6.05598 | JPT |
| rs646586   | MRPL21  | GI_31652223-A | 11 | 11 | 68438229 | 22815  | 9.9461  | 6.05598 | JPT |
| rs483626   | MRPL21  | GI_31652223-A | 11 | 11 | 68441431 | 26017  | 10.4258 | 6.05598 | JPT |
| rs685320   | MRPL21  | GI_31652223-A | 11 | 11 | 68448717 | 33303  | 10.1406 | 6.05598 | JPT |
| rs637120   | MRPL21  | GI_31652223-A | 11 | 11 | 68451157 | 35743  | 9.9155  | 6.05598 | JPT |
| rs1249365  | MRPL21  | GI_31652223-A | 11 | 11 | 68455338 | 39924  | 8.4753  | 6.05598 | JPT |
| rs478647   | MRPL21  | GI_31652223-A | 11 | 11 | 68457000 | 41586  | 8.4753  | 6.05598 | JPT |
| rs622082   | MRPL21  | GI_31652223-A | 11 | 11 | 68460535 | 45121  | 8.2091  | 6.05598 | JPT |
| rs546382   | MRPL21  | GI_31652223-A | 11 | 11 | 68460840 | 45426  | 8.2091  | 6.05598 | JPT |
| rs568862   | MRPL21  | GI_31652223-A | 11 | 11 | 68463511 | 48097  | 10.1406 | 6.05598 | JPT |
| rs477935   | MRPL21  | GI_31652223-A | 11 | 11 | 68466511 | 51097  | 10.1406 | 6.05598 | JPT |
| rs559032   | MRPL21  | GI_31652223-A | 11 | 11 | 68467423 | 52009  | 8.4753  | 6.05598 | JPT |
| rs1249468  | MRPL21  | GI_31652223-A | 11 | 11 | 68468357 | 52943  | 10.1406 | 6.05598 | JPT |
| rs7395379  | MRPL21  | GI_31652223-A | 11 | 11 | 68469553 | 54139  | 10.1823 | 6.05598 | JPT |
| rs664312   | MRPL21  | GI_31652223-A | 11 | 11 | 68471319 | 55905  | 10.4258 | 6.05598 | JPT |

|            |           |               |    |    |           |        |         |         |     |
|------------|-----------|---------------|----|----|-----------|--------|---------|---------|-----|
| rs520235   | MRPL21    | GI_31652223-A | 11 | 11 | 68471802  | 56388  | 10.5251 | 6.05598 | JPT |
| rs494607   | MRPL21    | GI_31652223-A | 11 | 11 | 68472314  | 56900  | 10.1406 | 6.05598 | JPT |
| rs2507833  | MRPL21    | GI_31652223-A | 11 | 11 | 68472444  | 57030  | 10.4258 | 6.05598 | JPT |
| rs2508849  | MRPL21    | GI_31652223-A | 11 | 11 | 68472468  | 57054  | 10.4392 | 6.05598 | JPT |
| rs2507832  | MRPL21    | GI_31652223-A | 11 | 11 | 68472571  | 57157  | 9.1575  | 6.05598 | JPT |
| rs491830   | MRPL21    | GI_31652223-A | 11 | 11 | 68472616  | 57202  | 10.4258 | 6.05598 | JPT |
| rs646913   | MRPL21    | GI_31652223-A | 11 | 11 | 68472871  | 57457  | 10.4258 | 6.05598 | JPT |
| rs6421653  | MRPL21    | GI_31652223-A | 11 | 11 | 68476174  | 60760  | 10.5354 | 6.05598 | JPT |
| rs10896384 | MRPL21    | GI_31652223-A | 11 | 11 | 68476587  | 61173  | 8.3284  | 6.05598 | JPT |
| rs4244840  | MRPL21    | GI_31652223-A | 11 | 11 | 68481831  | 66417  | 10.2547 | 6.05598 | JPT |
| rs7935851  | MRPL21    | GI_31652223-A | 11 | 11 | 68487698  | 72284  | 8.3284  | 6.05598 | JPT |
| rs7940105  | MRPL21    | GI_31652223-A | 11 | 11 | 68488602  | 73188  | 8.5905  | 6.05598 | JPT |
| rs11235932 | FLJ11848  | GI_13376750-S | 11 | 11 | 73249531  | 66679  | 5.8827  | 5.8575  | JPT |
| rs11606662 | PP1665    | GI_34147050-S | 11 | 11 | 74902548  | 79136  | 6.344   | 5.83956 | JPT |
| rs2059333  | ARHGAP20  | GI_45433494-S | 11 | 11 | 110227339 | 273839 | 5.9346  | 5.73577 | JPT |
| rs10488718 | ARHGAP20  | GI_45433494-S | 11 | 11 | 110260746 | 307246 | 6.4598  | 5.73577 | JPT |
| rs7124691  | ARHGAP20  | GI_45433494-S | 11 | 11 | 110262862 | 309362 | 6.6748  | 5.73577 | JPT |
| rs7947485  | ARHGAP20  | GI_45433494-S | 11 | 11 | 110267281 | 313781 | 6.5032  | 5.73577 | JPT |
| rs7941199  | ARHGAP20  | GI_45433494-S | 11 | 11 | 110274342 | 320842 | 6.6947  | 5.73577 | JPT |
| rs1025102  | ARHGAP20  | GI_45433494-S | 11 | 11 | 110275581 | 322081 | 6.6947  | 5.73577 | JPT |
| rs1486909  | ARHGAP20  | GI_45433494-S | 11 | 11 | 110282467 | 328967 | 6.5032  | 5.73577 | JPT |
| rs2276189  | SPA17     | GI_15718773-S | 11 | 11 | 124010138 | 59336  | 7.1913  | 6.09182 | JPT |
| rs7941327  | SPA17     | GI_15718773-S | 11 | 11 | 124012177 | 57297  | 7.029   | 6.09182 | JPT |
| rs7937294  | SPA17     | GI_15718773-S | 11 | 11 | 124018485 | 50989  | 7.029   | 6.09182 | JPT |
| rs7940161  | SPA17     | GI_15718773-S | 11 | 11 | 124018585 | 50889  | 7.029   | 6.09182 | JPT |
| rs7128043  | SPA17     | GI_15718773-S | 11 | 11 | 124021220 | 48254  | 7.029   | 6.09182 | JPT |
| rs1942664  | SPA17     | GI_15718773-S | 11 | 11 | 124024143 | 45331  | 7.298   | 6.09182 | JPT |
| rs12295168 | SPA17     | GI_15718773-S | 11 | 11 | 124027378 | 42096  | 7.9264  | 6.09182 | JPT |
| rs11219743 | SPA17     | GI_15718773-S | 11 | 11 | 124027930 | 41544  | 7.5062  | 6.09182 | JPT |
| rs1942663  | SPA17     | GI_15718773-S | 11 | 11 | 124029837 | 39637  | 7.029   | 6.09182 | JPT |
| rs7926572  | SPA17     | GI_15718773-S | 11 | 11 | 124033151 | 36323  | 7.5062  | 6.09182 | JPT |
| rs7124585  | SPA17     | GI_15718773-S | 11 | 11 | 124037650 | 31824  | 7.5062  | 6.09182 | JPT |
| rs1942662  | SPA17     | GI_15718773-S | 11 | 11 | 124037710 | 31764  | 7.029   | 6.09182 | JPT |
| rs11219749 | SPA17     | GI_15718773-S | 11 | 11 | 124038377 | 31097  | 7.029   | 6.09182 | JPT |
| rs10893281 | SPA17     | GI_15718773-S | 11 | 11 | 124040022 | 29452  | 7.5062  | 6.09182 | JPT |
| rs7119225  | SPA17     | GI_15718773-S | 11 | 11 | 124042004 | 27470  | 7.029   | 6.09182 | JPT |
| rs11825168 | SPA17     | GI_15718773-S | 11 | 11 | 124043411 | 26063  | 7.5062  | 6.09182 | JPT |
| rs12282107 | SPA17     | GI_15718773-S | 11 | 11 | 124044483 | 24991  | 7.5062  | 6.09182 | JPT |
| rs7927406  | SPA17     | GI_15718773-S | 11 | 11 | 124049013 | 20461  | 7.029   | 6.09182 | JPT |
| rs7938692  | SPA17     | GI_15718773-S | 11 | 11 | 124071401 | 1927   | 6.7444  | 6.09182 | JPT |
| rs558814   | Hs.98028  | Hs.98028-S    | 11 | 11 | 124180424 | 3911   | 6.8346  | 5.97288 | JPT |
| rs11824062 | Hs.98028  | Hs.98028-S    | 11 | 11 | 124182242 | 2093   | 7.564   | 5.97288 | JPT |
| rs646521   | Hs.98028  | Hs.98028-S    | 11 | 11 | 124183151 | 1184   | 7.7571  | 5.97288 | JPT |
| rs580213   | Hs.98028  | Hs.98028-S    | 11 | 11 | 124183179 | 1156   | 8.1584  | 5.97288 | JPT |
| rs3809258  | LOC399987 | GI_42660080-S | 12 | 12 | 3734571   | 1492   | 11.5977 | 6.24058 | JPT |
| rs9300302  | LOC399987 | GI_42660080-S | 12 | 12 | 3737732   | 1669   | 12.415  | 6.24058 | JPT |
| rs10774171 | LOC399987 | GI_42660080-S | 12 | 12 | 3738570   | 2507   | 10.5827 | 6.24058 | JPT |
| rs12354    | LTBR      | GI_4505038-S  | 12 | 12 | 6370366   | 362    | 6.7876  | 6.00396 | JPT |
| rs4301834  | LTBR      | GI_4505038-S  | 12 | 12 | 6371104   | 376    | 6.6844  | 6.00396 | JPT |
| rs10744706 | LTBR      | GI_4505038-S  | 12 | 12 | 6373479   | 2751   | 6.6844  | 6.00396 | JPT |
| rs9669611  | LTBR      | GI_4505038-S  | 12 | 12 | 6374047   | 3319   | 6.6844  | 6.00396 | JPT |
| rs9668139  | LTBR      | GI_4505038-S  | 12 | 12 | 6374359   | 3631   | 6.6844  | 6.00396 | JPT |
| rs7314788  | B7        | GI_42542401-A | 12 | 12 | 6857433   | 36174  | 6.8471  | 6.14092 | JPT |
| rs9737890  | B7        | GI_42542401-A | 12 | 12 | 6860714   | 32893  | 6.7789  | 6.14092 | JPT |
| rs2040352  | B7        | GI_31745192-I | 12 | 12 | 6877265   | 15155  | 6.7247  | 6.14092 | JPT |
| rs2040352  | B7        | GI_42542401-A | 12 | 12 | 6877265   | 16342  | 12.042  | 6.14092 | JPT |

|            |         |               |    |    |          |       |         |         |     |
|------------|---------|---------------|----|----|----------|-------|---------|---------|-----|
| rs12315364 | B7      | GI_42542401-A | 12 | 12 | 6879531  | 14076 | 9.3118  | 6.14092 | JPT |
| rs3759349  | B7      | GI_31745192-I | 12 | 12 | 6882086  | 10334 | 6.7247  | 6.14092 | JPT |
| rs3759349  | B7      | GI_42542401-A | 12 | 12 | 6882086  | 11521 | 12.042  | 6.14092 | JPT |
| rs3759350  | B7      | GI_31745192-I | 12 | 12 | 6882208  | 10212 | 7.0668  | 6.14092 | JPT |
| rs3759350  | B7      | GI_42542401-A | 12 | 12 | 6882208  | 11399 | 12.5284 | 6.14092 | JPT |
| rs3759352  | B7      | GI_31745192-I | 12 | 12 | 6882316  | 10104 | 6.4528  | 6.14092 | JPT |
| rs3759352  | B7      | GI_42542401-A | 12 | 12 | 6882316  | 11291 | 10.0457 | 6.14092 | JPT |
| rs2239163  | B7      | GI_31745192-I | 12 | 12 | 6884337  | 8083  | 6.4837  | 6.14092 | JPT |
| rs2239163  | B7      | GI_42542401-A | 12 | 12 | 6884337  | 9270  | 12.4235 | 6.14092 | JPT |
| rs3741921  | B7      | GI_31745192-I | 12 | 12 | 6886710  | 5710  | 6.4837  | 6.14092 | JPT |
| rs3741921  | B7      | GI_42542401-A | 12 | 12 | 6886710  | 6897  | 12.4235 | 6.14092 | JPT |
| rs2301137  | B7      | GI_31745192-I | 12 | 12 | 6889210  | 3210  | 7.0607  | 6.14092 | JPT |
| rs2301137  | B7      | GI_42542401-A | 12 | 12 | 6889210  | 4397  | 9.6499  | 6.14092 | JPT |
| rs1057077  | B7      | GI_31745192-I | 12 | 12 | 6892346  | 74    | 6.4837  | 6.14092 | JPT |
| rs1057077  | B7      | GI_42542401-A | 12 | 12 | 6892346  | 1261  | 12.4235 | 6.14092 | JPT |
| rs7965269  | B7      | GI_31745192-I | 12 | 12 | 6923283  | 30863 | 6.313   | 6.14092 | JPT |
| rs7965269  | B7      | GI_42542401-A | 12 | 12 | 6923283  | 29676 | 6.7612  | 6.14092 | JPT |
| rs3087835  | B7      | GI_42542401-A | 12 | 12 | 6923346  | 29739 | 7.0139  | 6.14092 | JPT |
| rs1044189  | B7      | GI_31745192-I | 12 | 12 | 6923410  | 30990 | 6.4606  | 6.14092 | JPT |
| rs1044189  | B7      | GI_42542401-A | 12 | 12 | 6923410  | 29803 | 7.2403  | 6.14092 | JPT |
| rs2908700  | CLECSF2 | GI_37577106-S | 12 | 12 | 9895915  | 540   | 8.5884  | 6.10394 | JPT |
| rs253156   | CLECSF2 | GI_37577106-S | 12 | 12 | 9897687  | 1232  | 6.8408  | 6.10394 | JPT |
| rs33870    | CLECSF2 | GI_37577106-S | 12 | 12 | 9899130  | 2675  | 9.2327  | 6.10394 | JPT |
| rs33872    | CLECSF2 | GI_37577106-S | 12 | 12 | 9899269  | 2814  | 9.2327  | 6.10394 | JPT |
| rs253154   | CLECSF2 | GI_37577106-S | 12 | 12 | 9902507  | 6052  | 8.7012  | 6.10394 | JPT |
| rs1597097  | CLECSF2 | GI_37577106-S | 12 | 12 | 9911534  | 15079 | 9.1752  | 6.10394 | JPT |
| rs2617160  | KLRK1   | GI_6679051-S  | 12 | 12 | 10436864 | 20352 | 6.168   | 6.05381 | JPT |
| rs2617171  | KLRK1   | GI_6679051-S  | 12 | 12 | 10452546 | 36034 | 6.1166  | 6.05381 | JPT |
| rs10772381 | PROL4   | GI_6005801-S  | 12 | 12 | 10937970 | 47019 | 6.9134  | 5.75536 | JPT |
| rs11054066 | PROL4   | GI_6005801-S  | 12 | 12 | 10940116 | 49165 | 6.6808  | 5.75536 | JPT |
| rs10845232 | PROL4   | GI_6005801-S  | 12 | 12 | 10941517 | 50566 | 6.6808  | 5.75536 | JPT |
| rs10772384 | PROL4   | GI_6005801-S  | 12 | 12 | 10941885 | 50934 | 6.3968  | 5.75536 | JPT |
| rs4763222  | PROL4   | GI_6005801-S  | 12 | 12 | 10942907 | 51956 | 6.6808  | 5.75536 | JPT |
| rs4763223  | PROL4   | GI_6005801-S  | 12 | 12 | 10943345 | 52394 | 6.6808  | 5.75536 | JPT |
| rs4763592  | PROL4   | GI_6005801-S  | 12 | 12 | 10943750 | 52799 | 6.4722  | 5.75536 | JPT |
| rs9669144  | PROL4   | GI_6005801-S  | 12 | 12 | 10943877 | 52926 | 6.1992  | 5.75536 | JPT |
| rs10743934 | PROL4   | GI_6005801-S  | 12 | 12 | 10944288 | 53337 | 6.5638  | 5.75536 | JPT |
| rs7486068  | PROL4   | GI_6005801-S  | 12 | 12 | 10945589 | 54638 | 6.3787  | 5.75536 | JPT |
| rs10845237 | PROL4   | GI_6005801-S  | 12 | 12 | 10948651 | 57700 | 6.3261  | 5.75536 | JPT |
| rs2418222  | PROL4   | GI_6005801-S  | 12 | 12 | 10948945 | 57994 | 6.0252  | 5.75536 | JPT |
| rs11054070 | PROL4   | GI_6005801-S  | 12 | 12 | 10949814 | 58863 | 5.7979  | 5.75536 | JPT |
| rs10845240 | PROL4   | GI_6005801-S  | 12 | 12 | 10950561 | 59610 | 6.9134  | 5.75536 | JPT |
| rs1015442  | PROL4   | GI_6005801-S  | 12 | 12 | 10951962 | 61011 | 6.4722  | 5.75536 | JPT |
| rs1015443  | PROL4   | GI_6005801-S  | 12 | 12 | 10952389 | 61438 | 6.4722  | 5.75536 | JPT |
| rs10772386 | PROL4   | GI_6005801-S  | 12 | 12 | 10954263 | 63312 | 7.1221  | 5.75536 | JPT |
| rs10743935 | PROL4   | GI_6005801-S  | 12 | 12 | 10954474 | 63523 | 6.6808  | 5.75536 | JPT |
| rs10845242 | PROL4   | GI_6005801-S  | 12 | 12 | 10957806 | 66855 | 6.4722  | 5.75536 | JPT |
| rs10845244 | PROL4   | GI_6005801-S  | 12 | 12 | 10963251 | 72300 | 6.6808  | 5.75536 | JPT |
| rs11054075 | PROL4   | GI_6005801-S  | 12 | 12 | 10963569 | 72618 | 6.6808  | 5.75536 | JPT |
| rs10772390 | PROL4   | GI_6005801-S  | 12 | 12 | 10963882 | 72931 | 6.6808  | 5.75536 | JPT |
| rs7968647  | PROL4   | GI_6005801-S  | 12 | 12 | 10965035 | 74084 | 6.4722  | 5.75536 | JPT |
| rs11054078 | PROL4   | GI_6005801-S  | 12 | 12 | 10966182 | 75231 | 6.6808  | 5.75536 | JPT |
| rs10845247 | PROL4   | GI_6005801-S  | 12 | 12 | 10971009 | 80058 | 6.5741  | 5.75536 | JPT |
| rs3851581  | PROL4   | GI_6005801-S  | 12 | 12 | 10971034 | 80083 | 7.3595  | 5.75536 | JPT |
| rs3851583  | PROL4   | GI_6005801-S  | 12 | 12 | 10980622 | 89671 | 5.7979  | 5.75536 | JPT |
| rs7138535  | PROL4   | GI_6005801-S  | 12 | 12 | 10982960 | 92009 | 5.7979  | 5.75536 | JPT |

|            |       |              |    |    |          |        |        |         |     |
|------------|-------|--------------|----|----|----------|--------|--------|---------|-----|
| rs11054084 | PROL4 | GI_6005801-S | 12 | 12 | 11005743 | 114792 | 5.7979 | 5.75536 | JPT |
| rs11054089 | PROL4 | GI_6005801-S | 12 | 12 | 11007349 | 116398 | 5.7979 | 5.75536 | JPT |
| rs11054090 | PROL4 | GI_6005801-S | 12 | 12 | 11007531 | 116580 | 5.7979 | 5.75536 | JPT |
| rs1044683  | PROL4 | GI_6005801-S | 12 | 12 | 11007759 | 116808 | 5.7979 | 5.75536 | JPT |
| rs10845254 | PROL4 | GI_6005801-S | 12 | 12 | 11010582 | 119631 | 5.7979 | 5.75536 | JPT |
| rs10845256 | PROL4 | GI_6005801-S | 12 | 12 | 11011406 | 120455 | 5.7979 | 5.75536 | JPT |
| rs10772394 | PROL4 | GI_6005801-S | 12 | 12 | 11011720 | 120769 | 5.7979 | 5.75536 | JPT |
| rs7303183  | PROL4 | GI_6005801-S | 12 | 12 | 11012380 | 121429 | 5.7979 | 5.75536 | JPT |
| rs10845257 | PROL4 | GI_6005801-S | 12 | 12 | 11012684 | 121733 | 5.7979 | 5.75536 | JPT |
| rs10845258 | PROL4 | GI_6005801-S | 12 | 12 | 11012842 | 121891 | 5.7979 | 5.75536 | JPT |
| rs11054112 | PROL4 | GI_6005801-S | 12 | 12 | 11014147 | 123196 | 5.7979 | 5.75536 | JPT |
| rs11054124 | PROL4 | GI_6005801-S | 12 | 12 | 11016027 | 125076 | 5.7979 | 5.75536 | JPT |
| rs11054125 | PROL4 | GI_6005801-S | 12 | 12 | 11016048 | 125097 | 5.7979 | 5.75536 | JPT |
| rs4763232  | PROL4 | GI_6005801-S | 12 | 12 | 11017378 | 126427 | 5.7979 | 5.75536 | JPT |
| rs7314608  | PROL4 | GI_6005801-S | 12 | 12 | 11017695 | 126744 | 5.7979 | 5.75536 | JPT |
| rs7294858  | PROL4 | GI_6005801-S | 12 | 12 | 11017844 | 126893 | 5.7979 | 5.75536 | JPT |
| rs4763602  | PROL4 | GI_6005801-S | 12 | 12 | 11020700 | 129749 | 6.0184 | 5.75536 | JPT |
| rs2218820  | PROL4 | GI_6005801-S | 12 | 12 | 11022837 | 131886 | 6.0184 | 5.75536 | JPT |
| rs2900554  | PROL4 | GI_6005801-S | 12 | 12 | 11025968 | 135017 | 6.0184 | 5.75536 | JPT |
| rs1376251  | PROL4 | GI_6005801-S | 12 | 12 | 11030119 | 139168 | 7.6901 | 5.75536 | JPT |
| rs2418302  | PROL4 | GI_6005801-S | 12 | 12 | 11033019 | 142068 | 7.6901 | 5.75536 | JPT |
| rs10845266 | PROL4 | GI_6005801-S | 12 | 12 | 11034009 | 143058 | 7.6901 | 5.75536 | JPT |
| rs10845271 | PROL4 | GI_6005801-S | 12 | 12 | 11035068 | 144117 | 7.8875 | 5.75536 | JPT |
| rs10845272 | PROL4 | GI_6005801-S | 12 | 12 | 11035133 | 144182 | 7.6901 | 5.75536 | JPT |
| rs10845277 | PROL4 | GI_6005801-S | 12 | 12 | 11036785 | 145834 | 7.6901 | 5.75536 | JPT |
| rs10772407 | PROL4 | GI_6005801-S | 12 | 12 | 11037961 | 147010 | 7.8875 | 5.75536 | JPT |
| rs12311490 | PROL4 | GI_6005801-S | 12 | 12 | 11038848 | 147897 | 7.8875 | 5.75536 | JPT |
| rs11054140 | PROL4 | GI_6005801-S | 12 | 12 | 11038927 | 147976 | 7.8875 | 5.75536 | JPT |
| rs11054141 | PROL4 | GI_6005801-S | 12 | 12 | 11039122 | 148171 | 7.6901 | 5.75536 | JPT |
| rs1450839  | PROL4 | GI_6005801-S | 12 | 12 | 11040799 | 149848 | 7.6901 | 5.75536 | JPT |
| rs10845279 | PROL4 | GI_6005801-S | 12 | 12 | 11040978 | 150027 | 7.0175 | 5.75536 | JPT |
| rs10845281 | PROL4 | GI_6005801-S | 12 | 12 | 11041036 | 150085 | 7.6901 | 5.75536 | JPT |
| rs12226919 | PROL4 | GI_6005801-S | 12 | 12 | 11041300 | 150349 | 7.8875 | 5.75536 | JPT |
| rs12226920 | PROL4 | GI_6005801-S | 12 | 12 | 11041313 | 150362 | 6.5816 | 5.75536 | JPT |
| rs11054142 | PROL4 | GI_6005801-S | 12 | 12 | 11041481 | 150530 | 7.8875 | 5.75536 | JPT |
| rs7301234  | PROL4 | GI_6005801-S | 12 | 12 | 11042151 | 151200 | 7.6901 | 5.75536 | JPT |
| rs7301364  | PROL4 | GI_6005801-S | 12 | 12 | 11042270 | 151319 | 7.8875 | 5.75536 | JPT |
| rs7301545  | PROL4 | GI_6005801-S | 12 | 12 | 11042297 | 151346 | 8.2267 | 5.75536 | JPT |
| rs7301713  | PROL4 | GI_6005801-S | 12 | 12 | 11042480 | 151529 | 7.3595 | 5.75536 | JPT |
| rs10845282 | PROL4 | GI_6005801-S | 12 | 12 | 11043093 | 152142 | 7.8875 | 5.75536 | JPT |
| rs11054144 | PROL4 | GI_6005801-S | 12 | 12 | 11043296 | 152345 | 7.8875 | 5.75536 | JPT |
| rs11054145 | PROL4 | GI_6005801-S | 12 | 12 | 11043467 | 152516 | 7.8875 | 5.75536 | JPT |
| rs11054146 | PROL4 | GI_6005801-S | 12 | 12 | 11043617 | 152666 | 7.8875 | 5.75536 | JPT |
| rs11054147 | PROL4 | GI_6005801-S | 12 | 12 | 11044814 | 153863 | 8.0627 | 5.75536 | JPT |
| rs10772409 | PROL4 | GI_6005801-S | 12 | 12 | 11045019 | 154068 | 6.4362 | 5.75536 | JPT |
| rs10772411 | PROL4 | GI_6005801-S | 12 | 12 | 11045033 | 154082 | 7.7586 | 5.75536 | JPT |
| rs12581501 | PROL4 | GI_6005801-S | 12 | 12 | 11045061 | 154110 | 6.1845 | 5.75536 | JPT |
| rs11054148 | PROL4 | GI_6005801-S | 12 | 12 | 11045311 | 154360 | 6.1845 | 5.75536 | JPT |
| rs10772412 | PROL4 | GI_6005801-S | 12 | 12 | 11045503 | 154552 | 7.6901 | 5.75536 | JPT |
| rs10772413 | PROL4 | GI_6005801-S | 12 | 12 | 11047390 | 156439 | 7.8875 | 5.75536 | JPT |
| rs10845283 | PROL4 | GI_6005801-S | 12 | 12 | 11047968 | 157017 | 6.0184 | 5.75536 | JPT |
| rs10845284 | PROL4 | GI_6005801-S | 12 | 12 | 11049566 | 158615 | 7.794  | 5.75536 | JPT |
| rs10845285 | PROL4 | GI_6005801-S | 12 | 12 | 11049657 | 158706 | 7.8875 | 5.75536 | JPT |
| rs10845286 | PROL4 | GI_6005801-S | 12 | 12 | 11050317 | 159366 | 7.8875 | 5.75536 | JPT |
| rs11054152 | PROL4 | GI_6005801-S | 12 | 12 | 11050779 | 159828 | 7.8875 | 5.75536 | JPT |
| rs11054154 | PROL4 | GI_6005801-S | 12 | 12 | 11050960 | 160009 | 7.8875 | 5.75536 | JPT |

|            |           |               |    |    |          |        |        |         |     |
|------------|-----------|---------------|----|----|----------|--------|--------|---------|-----|
| rs11054155 | PROL4     | GI_6005801-S  | 12 | 12 | 11051659 | 160708 | 6.2908 | 5.75536 | JPT |
| rs10772415 | PROL4     | GI_6005801-S  | 12 | 12 | 11051726 | 160775 | 7.8875 | 5.75536 | JPT |
| rs11054156 | PROL4     | GI_6005801-S  | 12 | 12 | 11053398 | 162447 | 7.8017 | 5.75536 | JPT |
| rs11054157 | PROL4     | GI_6005801-S  | 12 | 12 | 11053407 | 162456 | 7.8875 | 5.75536 | JPT |
| rs11054158 | PROL4     | GI_6005801-S  | 12 | 12 | 11053554 | 162603 | 6.6856 | 5.75536 | JPT |
| rs11054159 | PROL4     | GI_6005801-S  | 12 | 12 | 11053709 | 162758 | 7.8875 | 5.75536 | JPT |
| rs11054160 | PROL4     | GI_6005801-S  | 12 | 12 | 11053800 | 162849 | 7.8875 | 5.75536 | JPT |
| rs11054161 | PROL4     | GI_6005801-S  | 12 | 12 | 11053946 | 162995 | 7.8875 | 5.75536 | JPT |
| rs4763608  | PROL4     | GI_6005801-S  | 12 | 12 | 11054325 | 163374 | 7.6901 | 5.75536 | JPT |
| rs7311538  | PROL4     | GI_6005801-S  | 12 | 12 | 11055064 | 164113 | 7.8875 | 5.75536 | JPT |
| rs7297768  | PROL4     | GI_6005801-S  | 12 | 12 | 11055160 | 164209 | 7.8875 | 5.75536 | JPT |
| rs7301147  | PROL4     | GI_6005801-S  | 12 | 12 | 11055213 | 164262 | 7.4811 | 5.75536 | JPT |
| rs7304447  | PROL4     | GI_6005801-S  | 12 | 12 | 11055369 | 164418 | 7.8875 | 5.75536 | JPT |
| rs7316239  | PROL4     | GI_6005801-S  | 12 | 12 | 11055595 | 164644 | 7.0513 | 5.75536 | JPT |
| rs7304936  | PROL4     | GI_6005801-S  | 12 | 12 | 11055749 | 164798 | 7.1332 | 5.75536 | JPT |
| rs7316390  | PROL4     | GI_6005801-S  | 12 | 12 | 11055787 | 164836 | 7.5839 | 5.75536 | JPT |
| rs4763611  | PROL4     | GI_6005801-S  | 12 | 12 | 11056384 | 165433 | 6.1845 | 5.75536 | JPT |
| rs1376250  | PROL4     | GI_6005801-S  | 12 | 12 | 11056661 | 165710 | 6.0184 | 5.75536 | JPT |
| rs4553441  | PROL4     | GI_6005801-S  | 12 | 12 | 11056910 | 165959 | 7.8875 | 5.75536 | JPT |
| rs10772418 | PROL4     | GI_6005801-S  | 12 | 12 | 11062010 | 171059 | 6.0184 | 5.75536 | JPT |
| rs1868765  | PROL4     | GI_6005801-S  | 12 | 12 | 11063326 | 172375 | 6.1845 | 5.75536 | JPT |
| rs10772420 | PROL4     | GI_6005801-S  | 12 | 12 | 11065543 | 174592 | 6.0184 | 5.75536 | JPT |
| rs4763235  | PROL4     | GI_6005801-S  | 12 | 12 | 11066681 | 175730 | 7.8875 | 5.75536 | JPT |
| rs11054172 | PROL4     | GI_6005801-S  | 12 | 12 | 11068087 | 177136 | 6.1845 | 5.75536 | JPT |
| rs11054173 | PROL4     | GI_6005801-S  | 12 | 12 | 11068490 | 177539 | 6.1845 | 5.75536 | JPT |
| rs10845292 | PROL4     | GI_6005801-S  | 12 | 12 | 11070577 | 179626 | 6.1845 | 5.75536 | JPT |
| rs2900578  | PROL4     | GI_6005801-S  | 12 | 12 | 11071471 | 180520 | 6.1845 | 5.75536 | JPT |
| rs11612527 | PROL4     | GI_6005801-S  | 12 | 12 | 11072815 | 181864 | 5.9691 | 5.75536 | JPT |
| rs7953498  | PROL4     | GI_6005801-S  | 12 | 12 | 11073683 | 182732 | 6.1845 | 5.75536 | JPT |
| rs7952952  | PROL4     | GI_6005801-S  | 12 | 12 | 11073899 | 182948 | 6.1845 | 5.75536 | JPT |
| rs10845293 | PROL4     | GI_6005801-S  | 12 | 12 | 11074522 | 183571 | 6.0184 | 5.75536 | JPT |
| rs12370363 | PROL4     | GI_6005801-S  | 12 | 12 | 11074779 | 183828 | 6.1845 | 5.75536 | JPT |
| rs7134036  | PROL4     | GI_6005801-S  | 12 | 12 | 11076851 | 185900 | 6.1845 | 5.75536 | JPT |
| rs7297949  | PROL4     | GI_6005801-S  | 12 | 12 | 11079407 | 188456 | 6.1845 | 5.75536 | JPT |
| rs9651805  | PROL4     | GI_6005801-S  | 12 | 12 | 11085147 | 194196 | 6.1845 | 5.75536 | JPT |
| rs2443097  | PROL4     | GI_6005801-S  | 12 | 12 | 11098963 | 208012 | 6.1002 | 5.75536 | JPT |
| rs2597996  | PROL4     | GI_6005801-S  | 12 | 12 | 11099651 | 208700 | 6.1845 | 5.75536 | JPT |
| rs7955495  | PROL4     | GI_6005801-S  | 12 | 12 | 11204940 | 313989 | 6.0184 | 5.75536 | JPT |
| rs876080   | KIAA1463  | GI_39930390-S | 12 | 12 | 49317031 | 107884 | 6.4186 | 6.02051 | JPT |
| rs12818741 | KIAA1463  | GI_39930390-S | 12 | 12 | 49318682 | 106233 | 6.7363 | 6.02051 | JPT |
| rs13378012 | KIAA1463  | GI_39930390-S | 12 | 12 | 49326664 | 98251  | 6.6661 | 6.02051 | JPT |
| rs11169520 | KIAA1463  | GI_39930390-S | 12 | 12 | 49359790 | 65125  | 6.3748 | 6.02051 | JPT |
| rs7137845  | KIAA1463  | GI_39930390-S | 12 | 12 | 49367207 | 57708  | 6.4186 | 6.02051 | JPT |
| rs2090852  | KIAA1463  | GI_39930390-S | 12 | 12 | 49373198 | 51717  | 6.6661 | 6.02051 | JPT |
| rs2139930  | KIAA1463  | GI_39930390-S | 12 | 12 | 49375554 | 49361  | 6.4186 | 6.02051 | JPT |
| rs11169524 | KIAA1463  | GI_39930390-S | 12 | 12 | 49376001 | 48914  | 6.6661 | 6.02051 | JPT |
| rs4388959  | KIAA1463  | GI_39930390-S | 12 | 12 | 49414681 | 10234  | 6.6661 | 6.02051 | JPT |
| rs3742062  | KIAA1463  | GI_39930390-S | 12 | 12 | 49415099 | 9816   | 6.4186 | 6.02051 | JPT |
| rs2280503  | KIAA1463  | GI_39930390-S | 12 | 12 | 49424954 | 39     | 6.4186 | 6.02051 | JPT |
| rs1047912  | KIAA1463  | GI_39930390-S | 12 | 12 | 49425129 | 214    | 6.9974 | 6.02051 | JPT |
| rs11169571 | KIAA1463  | GI_39930390-S | 12 | 12 | 49500032 | 75117  | 6.7768 | 6.02051 | JPT |
| rs7302925  | LOC283377 | GI_37542981-S | 12 | 12 | 55147725 | 1805   | 6.6871 | 5.56583 | JPT |
| rs2657880  | LOC283377 | GI_37542981-S | 12 | 12 | 55150037 | 507    | 6.6871 | 5.56583 | JPT |
| rs1043011  | LOC283377 | GI_37542981-S | 12 | 12 | 55151307 | 1777   | 6.6871 | 5.56583 | JPT |
| rs2657879  | LOC283377 | GI_37542981-S | 12 | 12 | 55151605 | 2075   | 6.6871 | 5.56583 | JPT |
| rs3782235  | RBMS2     | GI_4506448-S  | 12 | 12 | 55201814 | 67204  | 6.0478 | 5.91101 | JPT |

|            |               |               |    |    |          |        |        |         |     |
|------------|---------------|---------------|----|----|----------|--------|--------|---------|-----|
| rs4759247  | RBMS2         | GI_4506448-S  | 12 | 12 | 55205101 | 63917  | 6.0478 | 5.91101 | JPT |
| rs324019   | STAT6         | GI_23397677-S | 12 | 12 | 55772914 | 2679   | 5.8164 | 5.54896 | JPT |
| rs703842   | DKFZP586D0919 | GI_24308058-S | 12 | 12 | 56449006 | 13473  | 6.5404 | 5.83269 | JPT |
| rs10877015 | DKFZP586D0919 | GI_24308058-S | 12 | 12 | 56454055 | 8424   | 6.3951 | 5.83269 | JPT |
| rs11172333 | DKFZP586D0919 | GI_24308058-S | 12 | 12 | 56456602 | 5877   | 6.2158 | 5.83269 | JPT |
| rs10877019 | DKFZP586D0919 | GI_24308058-S | 12 | 12 | 56459196 | 3283   | 6.2158 | 5.83269 | JPT |
| rs8181644  | DKFZP586D0919 | GI_24308058-S | 12 | 12 | 56459733 | 2746   | 6.2158 | 5.83269 | JPT |
| rs923829   | DKFZP586D0919 | GI_24308058-S | 12 | 12 | 56460573 | 1906   | 6.5404 | 5.83269 | JPT |
| rs11172335 | DKFZP586D0919 | GI_24308058-S | 12 | 12 | 56461468 | 1011   | 6.5665 | 5.83269 | JPT |
| rs10747783 | DKFZP586D0919 | GI_24308058-S | 12 | 12 | 56462881 | 402    | 5.8656 | 5.83269 | JPT |
| rs10431552 | DKFZP586D0919 | GI_24308058-S | 12 | 12 | 56464415 | 1936   | 6.2158 | 5.83269 | JPT |
| rs6581155  | DKFZP586D0919 | GI_24308058-S | 12 | 12 | 56464429 | 1950   | 6.2158 | 5.83269 | JPT |
| rs724834   | DKFZP586D0919 | GI_24308058-S | 12 | 12 | 56466683 | 4204   | 6.5404 | 5.83269 | JPT |
| rs11172343 | DKFZP586D0919 | GI_24308058-S | 12 | 12 | 56474424 | 11945  | 6.2158 | 5.83269 | JPT |
| rs11172344 | DKFZP586D0919 | GI_24308058-S | 12 | 12 | 56479715 | 17236  | 6.5404 | 5.83269 | JPT |
| rs3825079  | DKFZP586D0919 | GI_24308058-S | 12 | 12 | 56489621 | 27142  | 6.2158 | 5.83269 | JPT |
| rs1021469  | DKFZP586D0919 | GI_24308058-S | 12 | 12 | 56494431 | 31952  | 7.3778 | 5.83269 | JPT |
| rs11172349 | DKFZP586D0919 | GI_24308058-S | 12 | 12 | 56498795 | 36316  | 6.2158 | 5.83269 | JPT |
| rs11172351 | DKFZP586D0919 | GI_24308058-S | 12 | 12 | 56499752 | 37273  | 6.2158 | 5.83269 | JPT |
| rs10431506 | KUB3          | GI_32698766-S | 12 | 12 | 56597791 | 38965  | 7.253  | 5.66616 | JPT |
| rs10747788 | KUB3          | GI_32698766-S | 12 | 12 | 56601605 | 35151  | 8.2177 | 5.66616 | JPT |
| rs10877040 | KUB3          | GI_32698766-S | 12 | 12 | 56612715 | 24041  | 8.3713 | 5.66616 | JPT |
| rs10877041 | KUB3          | GI_32698766-S | 12 | 12 | 56614767 | 21989  | 8.3713 | 5.66616 | JPT |
| rs2372309  | KUB3          | GI_32698766-S | 12 | 12 | 56616087 | 20669  | 8.2177 | 5.66616 | JPT |
| rs3751325  | KUB3          | GI_32698766-S | 12 | 12 | 56621893 | 14863  | 8.2177 | 5.66616 | JPT |
| rs7977671  | KUB3          | GI_32698766-S | 12 | 12 | 56644971 | 8215   | 5.8034 | 5.66616 | JPT |
| rs7954291  | KUB3          | GI_32698766-S | 12 | 12 | 56646767 | 10011  | 5.7765 | 5.66616 | JPT |
| rs11172400 | KUB3          | GI_32698766-S | 12 | 12 | 56647237 | 10481  | 5.7765 | 5.66616 | JPT |
| rs11172408 | KUB3          | GI_32698766-S | 12 | 12 | 56653747 | 16991  | 5.7765 | 5.66616 | JPT |
| rs12366757 | KUB3          | GI_32698766-S | 12 | 12 | 56656200 | 19444  | 5.7765 | 5.66616 | JPT |
| rs12366794 | KUB3          | GI_32698766-S | 12 | 12 | 56656390 | 19634  | 5.7765 | 5.66616 | JPT |
| rs11172412 | KUB3          | GI_32698766-S | 12 | 12 | 56660351 | 23595  | 5.7765 | 5.66616 | JPT |
| rs12827878 | KUB3          | GI_32698766-S | 12 | 12 | 56661171 | 24415  | 5.8844 | 5.66616 | JPT |
| rs1848129  | KUB3          | GI_32698766-S | 12 | 12 | 56664276 | 27520  | 5.7765 | 5.66616 | JPT |
| rs2372379  | KUB3          | GI_32698766-S | 12 | 12 | 56665062 | 28306  | 5.7104 | 5.66616 | JPT |
| rs7960942  | KUB3          | GI_32698766-S | 12 | 12 | 56669847 | 33091  | 5.7765 | 5.66616 | JPT |
| rs12828647 | KUB3          | GI_32698766-S | 12 | 12 | 56670683 | 33927  | 5.7765 | 5.66616 | JPT |
| rs1605333  | KUB3          | GI_32698766-S | 12 | 12 | 56674499 | 37743  | 5.7765 | 5.66616 | JPT |
| rs11172418 | KUB3          | GI_32698766-S | 12 | 12 | 56675719 | 38963  | 6.6557 | 5.66616 | JPT |
| rs11608939 | KUB3          | GI_32698766-S | 12 | 12 | 56677593 | 40837  | 6.4714 | 5.66616 | JPT |
| rs11172420 | KUB3          | GI_32698766-S | 12 | 12 | 56679770 | 43014  | 5.7765 | 5.66616 | JPT |
| rs3913866  | KUB3          | GI_32698766-S | 12 | 12 | 56680853 | 44097  | 5.7765 | 5.66616 | JPT |
| rs7963367  | KUB3          | GI_32698766-S | 12 | 12 | 56682940 | 46184  | 5.7765 | 5.66616 | JPT |
| rs2659646  | KUB3          | GI_32698766-S | 12 | 12 | 56746138 | 109382 | 5.7215 | 5.66616 | JPT |
| rs9262     | FLJ13615      | GI_13376688-S | 12 | 12 | 86943144 | 64908  | 5.7826 | 5.35889 | JPT |
| rs2468240  | FLJ13615      | GI_13376688-S | 12 | 12 | 86947060 | 60992  | 5.7826 | 5.35889 | JPT |
| rs2471544  | FLJ13615      | GI_13376688-S | 12 | 12 | 86972486 | 35566  | 5.7826 | 5.35889 | JPT |
| rs2471534  | FLJ13615      | GI_13376688-S | 12 | 12 | 86997186 | 10866  | 5.7826 | 5.35889 | JPT |
| rs11104738 | FLJ13615      | GI_13376688-S | 12 | 12 | 87003315 | 4737   | 7.3408 | 5.35889 | JPT |
| rs12831250 | FLJ13615      | GI_13376688-S | 12 | 12 | 87076009 | 67957  | 5.7826 | 5.35889 | JPT |
| rs11104775 | FLJ13615      | GI_13376688-S | 12 | 12 | 87142158 | 134106 | 8.766  | 5.35889 | JPT |
| rs11104778 | FLJ13615      | GI_13376688-S | 12 | 12 | 87145770 | 137718 | 5.7826 | 5.35889 | JPT |
| rs11104789 | FLJ13615      | GI_13376688-S | 12 | 12 | 87181269 | 173217 | 7.9552 | 5.35889 | JPT |
| rs11104790 | FLJ13615      | GI_13376688-S | 12 | 12 | 87181713 | 173661 | 6.5091 | 5.35889 | JPT |
| rs11104800 | FLJ13615      | GI_13376688-S | 12 | 12 | 87195529 | 187477 | 6.0593 | 5.35889 | JPT |
| rs11104860 | FLJ13615      | GI_13376688-S | 12 | 12 | 87317455 | 309403 | 5.3867 | 5.35889 | JPT |

|            |          |               |    |    |           |        |        |         |     |
|------------|----------|---------------|----|----|-----------|--------|--------|---------|-----|
| rs7484757  | FLJ13615 | GI_13376688-S | 12 | 12 | 87322908  | 314856 | 6.1006 | 5.35889 | JPT |
| rs10858729 | FLJ13615 | GI_13376688-S | 12 | 12 | 87323634  | 315582 | 6.249  | 5.35889 | JPT |
| rs10777115 | FLJ13615 | GI_13376688-S | 12 | 12 | 87328072  | 320020 | 6.249  | 5.35889 | JPT |
| rs11104867 | FLJ13615 | GI_13376688-S | 12 | 12 | 87330321  | 322269 | 6.2622 | 5.35889 | JPT |
| rs11104868 | FLJ13615 | GI_13376688-S | 12 | 12 | 87330910  | 322858 | 6.2622 | 5.35889 | JPT |
| rs7487416  | FLJ13615 | GI_13376688-S | 12 | 12 | 87331987  | 323935 | 6.249  | 5.35889 | JPT |
| rs10858733 | FLJ13615 | GI_13376688-S | 12 | 12 | 87338105  | 330053 | 6.9628 | 5.35889 | JPT |
| rs7487564  | FLJ13615 | GI_13376688-S | 12 | 12 | 87340431  | 332379 | 6.2622 | 5.35889 | JPT |
| rs10777119 | FLJ13615 | GI_13376688-S | 12 | 12 | 87342213  | 334161 | 5.3982 | 5.35889 | JPT |
| rs10777121 | FLJ13615 | GI_13376688-S | 12 | 12 | 87346233  | 338181 | 5.526  | 5.35889 | JPT |
| rs7979666  | FLJ13615 | GI_13376688-S | 12 | 12 | 87346295  | 338243 | 6.2622 | 5.35889 | JPT |
| rs10858741 | FLJ13615 | GI_13376688-S | 12 | 12 | 87347886  | 339834 | 6.249  | 5.35889 | JPT |
| rs4842620  | FLJ13615 | GI_13376688-S | 12 | 12 | 87348687  | 340635 | 6.2622 | 5.35889 | JPT |
| rs1162374  | FLJ13615 | GI_13376688-S | 12 | 12 | 87354011  | 345959 | 6.4515 | 5.35889 | JPT |
| rs10777123 | FLJ13615 | GI_13376688-S | 12 | 12 | 87367158  | 359106 | 6.1261 | 5.35889 | JPT |
| rs1508598  | FLJ13615 | GI_13376688-S | 12 | 12 | 87368390  | 360338 | 5.8484 | 5.35889 | JPT |
| rs1162371  | FLJ13615 | GI_13376688-S | 12 | 12 | 87384671  | 376619 | 5.7427 | 5.35889 | JPT |
| rs1508594  | FLJ13615 | GI_13376688-S | 12 | 12 | 87390359  | 382307 | 5.6777 | 5.35889 | JPT |
| rs4842625  | FLJ13615 | GI_13376688-S | 12 | 12 | 87390715  | 382663 | 6.1142 | 5.35889 | JPT |
| rs1907699  | FLJ13615 | GI_13376688-S | 12 | 12 | 87392445  | 384393 | 6.1261 | 5.35889 | JPT |
| rs995029   | FLJ13615 | GI_13376688-S | 12 | 12 | 87392989  | 384937 | 5.6444 | 5.35889 | JPT |
| rs995030   | FLJ13615 | GI_13376688-S | 12 | 12 | 87393139  | 385087 | 6.1261 | 5.35889 | JPT |
| rs4284478  | FLJ13615 | GI_13376688-S | 12 | 12 | 87410031  | 401979 | 6.1261 | 5.35889 | JPT |
| rs10777125 | FLJ13615 | GI_13376688-S | 12 | 12 | 87418303  | 410251 | 6.1853 | 5.35889 | JPT |
| rs1022034  | FLJ13615 | GI_13376688-S | 12 | 12 | 87421211  | 413159 | 6.1261 | 5.35889 | JPT |
| rs1492347  | FLJ13615 | GI_13376688-S | 12 | 12 | 87428441  | 420389 | 5.976  | 5.35889 | JPT |
| rs3782176  | FLJ13615 | GI_13376688-S | 12 | 12 | 87441601  | 433549 | 5.5465 | 5.35889 | JPT |
| rs2407206  | FLJ13615 | GI_13376688-S | 12 | 12 | 87445791  | 437739 | 5.7637 | 5.35889 | JPT |
| rs1492351  | FLJ13615 | GI_13376688-S | 12 | 12 | 87446477  | 438425 | 5.7507 | 5.35889 | JPT |
| rs1000788  | FLJ13615 | GI_13376688-S | 12 | 12 | 87449245  | 441193 | 5.7507 | 5.35889 | JPT |
| rs1466691  | FLJ13615 | GI_13376688-S | 12 | 12 | 87449339  | 441287 | 5.7637 | 5.35889 | JPT |
| rs1472899  | FLJ13615 | GI_13376688-S | 12 | 12 | 87453953  | 445901 | 5.7507 | 5.35889 | JPT |
| rs3782179  | FLJ13615 | GI_13376688-S | 12 | 12 | 87455794  | 447742 | 5.7637 | 5.35889 | JPT |
| rs3782180  | FLJ13615 | GI_13376688-S | 12 | 12 | 87455867  | 447815 | 5.7637 | 5.35889 | JPT |
| rs3782181  | FLJ13615 | GI_13376688-S | 12 | 12 | 87456029  | 447977 | 5.7507 | 5.35889 | JPT |
| rs4474514  | FLJ13615 | GI_13376688-S | 12 | 12 | 87456427  | 448375 | 5.7637 | 5.35889 | JPT |
| rs2046971  | FLJ13615 | GI_13376688-S | 12 | 12 | 87461978  | 453926 | 5.7507 | 5.35889 | JPT |
| rs1352947  | FLJ13615 | GI_13376688-S | 12 | 12 | 87463195  | 455143 | 5.7637 | 5.35889 | JPT |
| rs10777129 | FLJ13615 | GI_13376688-S | 12 | 12 | 87464181  | 456129 | 5.7507 | 5.35889 | JPT |
| rs2046970  | FLJ13615 | GI_13376688-S | 12 | 12 | 87465010  | 456958 | 5.7507 | 5.35889 | JPT |
| rs10506957 | FLJ13615 | GI_13376688-S | 12 | 12 | 87469475  | 461423 | 5.7507 | 5.35889 | JPT |
| rs1508595  | FLJ13615 | GI_13376688-S | 12 | 12 | 87488484  | 480432 | 5.7507 | 5.35889 | JPT |
| rs931936   | FLJ13615 | GI_13376688-S | 12 | 12 | 87496400  | 488348 | 6.6003 | 5.35889 | JPT |
| rs3990713  | FLJ13615 | GI_13376688-S | 12 | 12 | 87503410  | 495358 | 6.5471 | 5.35889 | JPT |
| rs2639099  | FLJ13615 | GI_13376688-S | 12 | 12 | 87510832  | 502780 | 5.7507 | 5.35889 | JPT |
| rs2639101  | FLJ13615 | GI_13376688-S | 12 | 12 | 87515320  | 507268 | 5.7507 | 5.35889 | JPT |
| rs1492355  | FLJ13615 | GI_13376688-S | 12 | 12 | 87515610  | 507558 | 5.7507 | 5.35889 | JPT |
| rs1703078  | FLJ13615 | GI_13376688-S | 12 | 12 | 87521351  | 513299 | 7.0225 | 5.35889 | JPT |
| rs10745506 | GALNT4   | GI_34452724-S | 12 | 12 | 88413969  | 4015   | 6.548  | 5.84552 | JPT |
| rs10745921 | CHPT1    | GI_9910383-S  | 12 | 12 | 100589661 | 29770  | 6.4309 | 6.13809 | JPT |
| rs2695290  | CHPT1    | GI_9910383-S  | 12 | 12 | 100590312 | 29119  | 7.4912 | 6.13809 | JPT |
| rs2695284  | CHPT1    | GI_9910383-S  | 12 | 12 | 100591786 | 27645  | 6.2952 | 6.13809 | JPT |
| rs2695282  | CHPT1    | GI_9910383-S  | 12 | 12 | 100591970 | 27461  | 6.759  | 6.13809 | JPT |
| rs2695281  | CHPT1    | GI_9910383-S  | 12 | 12 | 100592467 | 26964  | 6.6034 | 6.13809 | JPT |
| rs2559855  | CHPT1    | GI_9910383-S  | 12 | 12 | 100592548 | 26883  | 6.759  | 6.13809 | JPT |
| rs4331189  | MGC40397 | GI_22748696-S | 12 | 12 | 103889112 | 1126   | 6.9784 | 6.23065 | JPT |



|            |      |              |    |    |           |       |        |         |     |
|------------|------|--------------|----|----|-----------|-------|--------|---------|-----|
| rs2057778  | OAS1 | GI_8051620-I | 12 | 12 | 111813516 | 6574  | 6.9822 | 6.12716 | JPT |
| rs2057778  | OAS1 | GI_8051622-I | 12 | 12 | 111813516 | 4742  | 9.1494 | 6.12716 | JPT |
| rs2285934  | OAS1 | GI_8051620-I | 12 | 12 | 111814240 | 5850  | 7.0876 | 6.12716 | JPT |
| rs2285934  | OAS1 | GI_8051622-I | 12 | 12 | 111814240 | 4018  | 9.0072 | 6.12716 | JPT |
| rs10774671 | OAS1 | GI_8051620-I | 12 | 12 | 111819913 | 177   | 6.2818 | 6.12716 | JPT |
| rs10774671 | OAS1 | GI_8051622-I | 12 | 12 | 111819913 | 1655  | 8.6909 | 6.12716 | JPT |
| rs3177979  | OAS1 | GI_8051622-I | 12 | 12 | 111819929 | 1671  | 6.7283 | 6.12716 | JPT |
| rs1051042  | OAS1 | GI_8051620-I | 12 | 12 | 111819957 | 133   | 7.0876 | 6.12716 | JPT |
| rs1051042  | OAS1 | GI_8051622-I | 12 | 12 | 111819957 | 1699  | 9.0072 | 6.12716 | JPT |
| rs2660     | OAS1 | GI_8051620-I | 12 | 12 | 111820162 | 72    | 7.0876 | 6.12716 | JPT |
| rs2660     | OAS1 | GI_8051622-I | 12 | 12 | 111820162 | 1904  | 9.0072 | 6.12716 | JPT |
| rs7135577  | OAS1 | GI_8051620-I | 12 | 12 | 111820826 | 736   | 6.8224 | 6.12716 | JPT |
| rs7135577  | OAS1 | GI_8051622-I | 12 | 12 | 111820826 | 2568  | 8.5619 | 6.12716 | JPT |
| rs4767027  | OAS1 | GI_8051620-I | 12 | 12 | 111821877 | 1787  | 7.0876 | 6.12716 | JPT |
| rs4767027  | OAS1 | GI_8051622-I | 12 | 12 | 111821877 | 3619  | 9.0072 | 6.12716 | JPT |
| rs4767028  | OAS1 | GI_8051620-I | 12 | 12 | 111821908 | 1818  | 6.9822 | 6.12716 | JPT |
| rs4767028  | OAS1 | GI_8051622-I | 12 | 12 | 111821908 | 3650  | 9.1494 | 6.12716 | JPT |
| rs4767029  | OAS1 | GI_8051620-I | 12 | 12 | 111822038 | 1948  | 6.9822 | 6.12716 | JPT |
| rs4767029  | OAS1 | GI_8051622-I | 12 | 12 | 111822038 | 3780  | 9.1494 | 6.12716 | JPT |
| rs4767030  | OAS1 | GI_8051620-I | 12 | 12 | 111822297 | 2207  | 6.9822 | 6.12716 | JPT |
| rs4767030  | OAS1 | GI_8051622-I | 12 | 12 | 111822297 | 4039  | 9.1494 | 6.12716 | JPT |
| rs10850092 | OAS1 | GI_8051620-I | 12 | 12 | 111822423 | 2333  | 6.9822 | 6.12716 | JPT |
| rs10850092 | OAS1 | GI_8051622-I | 12 | 12 | 111822423 | 4165  | 9.1494 | 6.12716 | JPT |
| rs6489864  | OAS1 | GI_8051622-I | 12 | 12 | 111822745 | 4487  | 8.9291 | 6.12716 | JPT |
| rs6489865  | OAS1 | GI_8051622-I | 12 | 12 | 111823022 | 4764  | 8.9291 | 6.12716 | JPT |
| rs10850093 | OAS1 | GI_8051620-I | 12 | 12 | 111823188 | 3098  | 7.0876 | 6.12716 | JPT |
| rs10850093 | OAS1 | GI_8051622-I | 12 | 12 | 111823188 | 4930  | 9.0072 | 6.12716 | JPT |
| rs10850094 | OAS1 | GI_8051622-I | 12 | 12 | 111823283 | 5025  | 8.9291 | 6.12716 | JPT |
| rs10850095 | OAS1 | GI_8051622-I | 12 | 12 | 111823295 | 5037  | 8.9291 | 6.12716 | JPT |
| rs10850096 | OAS1 | GI_8051622-I | 12 | 12 | 111823506 | 5248  | 8.9291 | 6.12716 | JPT |
| rs10850097 | OAS1 | GI_8051622-I | 12 | 12 | 111823837 | 5579  | 8.8147 | 6.12716 | JPT |
| rs10774673 | OAS1 | GI_8051622-I | 12 | 12 | 111823878 | 5620  | 8.5603 | 6.12716 | JPT |
| rs10774674 | OAS1 | GI_8051622-I | 12 | 12 | 111823894 | 5636  | 8.9291 | 6.12716 | JPT |
| rs11066452 | OAS1 | GI_8051622-I | 12 | 12 | 111824294 | 6036  | 8.9291 | 6.12716 | JPT |
| rs10850098 | OAS1 | GI_8051622-I | 12 | 12 | 111824778 | 6520  | 8.9291 | 6.12716 | JPT |
| rs10774676 | OAS1 | GI_8051622-I | 12 | 12 | 111825127 | 6869  | 8.9291 | 6.12716 | JPT |
| rs10774677 | OAS1 | GI_8051622-I | 12 | 12 | 111825141 | 6883  | 8.5603 | 6.12716 | JPT |
| rs4766663  | OAS1 | GI_8051622-I | 12 | 12 | 111825694 | 7436  | 8.9291 | 6.12716 | JPT |
| rs4766664  | OAS1 | GI_8051622-I | 12 | 12 | 111825717 | 7459  | 8.5603 | 6.12716 | JPT |
| rs4766665  | OAS1 | GI_8051622-I | 12 | 12 | 111825829 | 7571  | 8.9291 | 6.12716 | JPT |
| rs4988618  | OAS1 | GI_8051622-I | 12 | 12 | 111825898 | 7640  | 8.4351 | 6.12716 | JPT |
| rs6489868  | OAS1 | GI_8051622-I | 12 | 12 | 111826412 | 8154  | 8.9291 | 6.12716 | JPT |
| rs10850100 | OAS1 | GI_8051622-I | 12 | 12 | 111827232 | 8974  | 8.3572 | 6.12716 | JPT |
| rs4766673  | OAS1 | GI_8051622-I | 12 | 12 | 111827881 | 9623  | 8.9291 | 6.12716 | JPT |
| rs4766674  | OAS1 | GI_8051622-I | 12 | 12 | 111827921 | 9663  | 8.9291 | 6.12716 | JPT |
| rs4766675  | OAS1 | GI_8051622-I | 12 | 12 | 111828173 | 9915  | 8.9291 | 6.12716 | JPT |
| rs7315441  | OAS1 | GI_8051622-I | 12 | 12 | 111828407 | 10149 | 8.9291 | 6.12716 | JPT |
| rs7305035  | OAS1 | GI_8051622-I | 12 | 12 | 111828523 | 10265 | 6.7427 | 6.12716 | JPT |
| rs7316586  | OAS1 | GI_8051622-I | 12 | 12 | 111828548 | 10290 | 8.3122 | 6.12716 | JPT |
| rs916972   | OAS1 | GI_8051622-I | 12 | 12 | 111828769 | 10511 | 8.8147 | 6.12716 | JPT |
| rs7134391  | OAS1 | GI_8051622-I | 12 | 12 | 111829411 | 11153 | 8.9291 | 6.12716 | JPT |
| rs1859336  | OAS1 | GI_8051622-I | 12 | 12 | 111830029 | 11771 | 8.9291 | 6.12716 | JPT |
| rs1859335  | OAS1 | GI_8051622-I | 12 | 12 | 111830045 | 11787 | 8.6909 | 6.12716 | JPT |
| rs2384071  | OAS1 | GI_8051622-I | 12 | 12 | 111830063 | 11805 | 8.4351 | 6.12716 | JPT |
| rs2384072  | OAS1 | GI_8051622-I | 12 | 12 | 111830142 | 11884 | 6.3078 | 6.12716 | JPT |
| rs6489874  | OAS1 | GI_8051622-I | 12 | 12 | 111830615 | 12357 | 6.9174 | 6.12716 | JPT |

|            |           |               |    |    |           |        |         |         |     |
|------------|-----------|---------------|----|----|-----------|--------|---------|---------|-----|
| rs7298184  | OAS1      | GI_8051622-I  | 12 | 12 | 111830969 | 12711  | 7.7401  | 6.12716 | JPT |
| rs7132404  | OAS1      | GI_8051622-I  | 12 | 12 | 111831325 | 13067  | 8.9291  | 6.12716 | JPT |
| rs4767036  | OAS1      | GI_8051622-I  | 12 | 12 | 111831897 | 13639  | 7.8716  | 6.12716 | JPT |
| rs7967461  | OAS1      | GI_8051622-I  | 12 | 12 | 111832479 | 14221  | 8.4351  | 6.12716 | JPT |
| rs1859333  | OAS1      | GI_8051622-I  | 12 | 12 | 111833686 | 15428  | 8.8147  | 6.12716 | JPT |
| rs1859332  | OAS1      | GI_8051622-I  | 12 | 12 | 111833834 | 15576  | 7.8035  | 6.12716 | JPT |
| rs7966314  | OAS1      | GI_8051622-I  | 12 | 12 | 111835259 | 17001  | 8.9291  | 6.12716 | JPT |
| rs4767037  | OAS1      | GI_8051622-I  | 12 | 12 | 111835524 | 17266  | 7.9249  | 6.12716 | JPT |
| rs3759375  | OAS1      | GI_8051622-I  | 12 | 12 | 111836308 | 18050  | 7.3996  | 6.12716 | JPT |
| rs4767040  | OAS1      | GI_8051622-I  | 12 | 12 | 111836737 | 18479  | 8.9291  | 6.12716 | JPT |
| rs10774679 | OAS1      | GI_8051622-I  | 12 | 12 | 111837468 | 19210  | 8.8147  | 6.12716 | JPT |
| rs7132797  | OAS1      | GI_8051622-I  | 12 | 12 | 111837756 | 19498  | 6.8601  | 6.12716 | JPT |
| rs4238033  | OAS1      | GI_8051622-I  | 12 | 12 | 111840801 | 22543  | 8.9291  | 6.12716 | JPT |
| rs10735079 | OAS1      | GI_8051622-I  | 12 | 12 | 111842728 | 24470  | 8.9291  | 6.12716 | JPT |
| rs7977345  | OAS1      | GI_8051622-I  | 12 | 12 | 111843428 | 25170  | 8.6909  | 6.12716 | JPT |
| rs6489881  | OAS1      | GI_8051622-I  | 12 | 12 | 111843937 | 25679  | 8.9291  | 6.12716 | JPT |
| rs7131998  | OAS1      | GI_8051622-I  | 12 | 12 | 111844415 | 26157  | 6.3654  | 6.12716 | JPT |
| rs12425458 | LOC387895 | GI_41149833-S | 12 | 12 | 125763746 | 6343   | 6.6902  | 6.18161 | JPT |
| rs12426807 | LOC387895 | GI_41149833-S | 12 | 12 | 125765841 | 8438   | 6.6902  | 6.18161 | JPT |
| rs7991707  | B3GTL     | GI_34996530-S | 13 | 13 | 30770181  | 33374  | 7.6291  | 6.23775 | JPT |
| rs876540   | B3GTL     | GI_34996530-S | 13 | 13 | 30803449  | 106    | 8.9324  | 6.23775 | JPT |
| rs912603   | B3GTL     | GI_34996530-S | 13 | 13 | 30803641  | 86     | 9.2738  | 6.23775 | JPT |
| rs2056443  | B3GTL     | GI_34996530-S | 13 | 13 | 30803942  | 387    | 8.0314  | 6.23775 | JPT |
| rs13080    | B3GTL     | GI_34996530-S | 13 | 13 | 30804141  | 586    | 8.2418  | 6.23775 | JPT |
| rs4057     | B3GTL     | GI_34996530-S | 13 | 13 | 30804291  | 736    | 7.6296  | 6.23775 | JPT |
| rs1409379  | B3GTL     | GI_34996530-S | 13 | 13 | 30805741  | 2186   | 7.6296  | 6.23775 | JPT |
| rs9545125  | B3GTL     | GI_34996530-S | 13 | 13 | 30809822  | 6267   | 8.4946  | 6.23775 | JPT |
| rs7999260  | B3GTL     | GI_34996530-S | 13 | 13 | 30810323  | 6768   | 8.3491  | 6.23775 | JPT |
| rs7983430  | B3GTL     | GI_34996530-S | 13 | 13 | 30819717  | 16162  | 7.6179  | 6.23775 | JPT |
| rs9574660  | B3GTL     | GI_34996530-S | 13 | 13 | 30819922  | 16367  | 8.515   | 6.23775 | JPT |
| rs4943341  | B3GTL     | GI_34996530-S | 13 | 13 | 30822013  | 18458  | 8.515   | 6.23775 | JPT |
| rs9601445  | B3GTL     | GI_34996530-S | 13 | 13 | 30822231  | 18676  | 6.9625  | 6.23775 | JPT |
| rs7333382  | B3GTL     | GI_34996530-S | 13 | 13 | 30825543  | 21988  | 7.5381  | 6.23775 | JPT |
| rs1326309  | B3GTL     | GI_34996530-S | 13 | 13 | 30833371  | 29816  | 6.4798  | 6.23775 | JPT |
| rs9565722  | B3GTL     | GI_34996530-S | 13 | 13 | 30835810  | 32255  | 6.7103  | 6.23775 | JPT |
| rs7328975  | B3GTL     | GI_34996530-S | 13 | 13 | 30836764  | 33209  | 6.7103  | 6.23775 | JPT |
| rs9531317  | B3GTL     | GI_34996530-S | 13 | 13 | 30837376  | 33821  | 7.1454  | 6.23775 | JPT |
| rs1121122  | B3GTL     | GI_34996530-S | 13 | 13 | 30839210  | 35655  | 6.6765  | 6.23775 | JPT |
| rs11840502 | PFAAP5    | GI_7656970-S  | 13 | 13 | 32096709  | 107431 | 6.2518  | 6.17845 | JPT |
| rs1935099  | SPG20     | GI_40806197-S | 13 | 13 | 35868927  | 93700  | 6.1565  | 5.90581 | JPT |
| rs198584   | LOC220097 | GI_20547709-S | 13 | 13 | 47933468  | 115929 | 6.0281  | 5.8992  | JPT |
| rs9543894  | TBC1D4    | GI_42660198-S | 13 | 13 | 74765511  | 8136   | 6.4528  | 6.02063 | JPT |
| rs507901   | TBC1D4    | GI_42660198-S | 13 | 13 | 74767653  | 10278  | 11.3851 | 6.02063 | JPT |
| rs1408656  | Hs.264076 | Hs.264076-S   | 13 | 13 | 78784655  | 111714 | 9.8926  | 5.66098 | JPT |
| rs2274554  | Hs.264076 | Hs.264076-S   | 13 | 13 | 78838530  | 57839  | 9.8926  | 5.66098 | JPT |
| rs12868295 | Hs.264076 | Hs.264076-S   | 13 | 13 | 78884066  | 12303  | 8.8052  | 5.66098 | JPT |
| rs12585625 | Hs.264076 | Hs.264076-S   | 13 | 13 | 78910197  | 13828  | 9.0273  | 5.66098 | JPT |
| rs420387   | Hs.264076 | Hs.264076-S   | 13 | 13 | 78914719  | 18350  | 6.9203  | 5.66098 | JPT |
| rs7334344  | Hs.264076 | Hs.264076-S   | 13 | 13 | 78917639  | 21270  | 9.6546  | 5.66098 | JPT |
| rs7990250  | Hs.264076 | Hs.264076-S   | 13 | 13 | 78986923  | 90554  | 5.7569  | 5.66098 | JPT |
| rs7984163  | Hs.264076 | Hs.264076-S   | 13 | 13 | 79056401  | 160032 | 8.3351  | 5.66098 | JPT |
| rs4885640  | Hs.264076 | Hs.264076-S   | 13 | 13 | 79061430  | 165061 | 8.3351  | 5.66098 | JPT |
| rs12868591 | LOC87769  | GI_34147452-S | 13 | 13 | 100006429 | 24452  | 7.7237  | 6.48254 | JPT |
| rs9513762  | LOC87769  | GI_34147452-S | 13 | 13 | 100015675 | 33698  | 7.7177  | 6.48254 | JPT |
| rs9518089  | LOC87769  | GI_34147452-S | 13 | 13 | 100015780 | 33803  | 7.7177  | 6.48254 | JPT |
| rs9518091  | LOC87769  | GI_34147452-S | 13 | 13 | 100016204 | 34227  | 7.7177  | 6.48254 | JPT |

|            |           |               |    |    |           |        |         |         |     |
|------------|-----------|---------------|----|----|-----------|--------|---------|---------|-----|
| rs9557453  | LOC87769  | GI_34147452-S | 13 | 13 | 100025790 | 43813  | 6.9597  | 6.48254 | JPT |
| rs9557454  | LOC87769  | GI_34147452-S | 13 | 13 | 100026034 | 44057  | 7.7177  | 6.48254 | JPT |
| rs9557456  | LOC87769  | GI_34147452-S | 13 | 13 | 100026423 | 44446  | 7.7177  | 6.48254 | JPT |
| rs9554707  | LOC87769  | GI_34147452-S | 13 | 13 | 100037593 | 55616  | 7.7237  | 6.48254 | JPT |
| rs9557459  | LOC87769  | GI_34147452-S | 13 | 13 | 100037714 | 55737  | 7.7357  | 6.48254 | JPT |
| rs9525262  | Hs.440933 | Hs.440933-S   | 13 | 13 | 113891161 | 6103   | 5.5929  | 5.47815 | JPT |
| rs9525181  | Hs.440933 | Hs.440933-S   | 13 | 13 | 113893447 | 3817   | 6.0951  | 5.47815 | JPT |
| rs17211943 | SLC7A7    | GI_21361562-S | 14 | 14 | 22333505  | 21088  | 7.9923  | 6.25991 | JPT |
| rs12884337 | SLC7A7    | GI_21361562-S | 14 | 14 | 22342954  | 30537  | 13.9179 | 6.25991 | JPT |
| rs2281678  | SLC7A7    | GI_21361562-S | 14 | 14 | 22354008  | 41591  | 9.3815  | 6.25991 | JPT |
| rs7157367  | PRKCM     | GI_4506074-S  | 14 | 14 | 29375612  | 259412 | 6.6912  | 5.82115 | JPT |
| rs1958980  | PRKCM     | GI_4506074-S  | 14 | 14 | 29381842  | 265642 | 6.6912  | 5.82115 | JPT |
| rs11851625 | PRKCM     | GI_4506074-S  | 14 | 14 | 29383910  | 267710 | 5.8792  | 5.82115 | JPT |
| rs10134670 | PRKCM     | GI_4506074-S  | 14 | 14 | 29386693  | 270493 | 6.6912  | 5.82115 | JPT |
| rs10147856 | PRKCM     | GI_4506074-S  | 14 | 14 | 29386884  | 270684 | 6.8081  | 5.82115 | JPT |
| rs4441176  | PRKCM     | GI_4506074-S  | 14 | 14 | 29388428  | 272228 | 7.2108  | 5.82115 | JPT |
| rs1953209  | PRKCM     | GI_4506074-S  | 14 | 14 | 29395444  | 279244 | 6.6912  | 5.82115 | JPT |
| rs1958988  | PRKCM     | GI_4506074-S  | 14 | 14 | 29404718  | 288518 | 6.6302  | 5.82115 | JPT |
| rs2184280  | PRKCM     | GI_4506074-S  | 14 | 14 | 29430356  | 314156 | 7.0546  | 5.82115 | JPT |
| rs2151746  | PRKCM     | GI_4506074-S  | 14 | 14 | 29431133  | 314933 | 6.6071  | 5.82115 | JPT |
| rs10142416 | PRKCM     | GI_4506074-S  | 14 | 14 | 29432883  | 316683 | 7.0546  | 5.82115 | JPT |
| rs7147286  | GCH1      | GI_4503948-S  | 14 | 14 | 54428415  | 49047  | 6.2978  | 5.98757 | JPT |
| rs1951489  | RAB15     | GI_38371738-S | 14 | 14 | 64435601  | 46873  | 6.7743  | 5.97677 | JPT |
| rs4902332  | C14orf52  | GI_21553312-S | 14 | 14 | 64445731  | 25025  | 6.8784  | 5.81458 | JPT |
| rs17102298 | C14orf52  | GI_21553312-S | 14 | 14 | 64446489  | 24267  | 6.8784  | 5.81458 | JPT |
| rs7154406  | C14orf52  | GI_21553312-S | 14 | 14 | 64446942  | 23814  | 6.8784  | 5.81458 | JPT |
| rs7153990  | C14orf52  | GI_21553312-S | 14 | 14 | 64447303  | 23453  | 6.8781  | 5.81458 | JPT |
| rs10151701 | C14orf52  | GI_21553312-S | 14 | 14 | 64448202  | 22554  | 6.8781  | 5.81458 | JPT |
| rs7144811  | C14orf52  | GI_21553312-S | 14 | 14 | 64448900  | 21856  | 6.8784  | 5.81458 | JPT |
| rs7143764  | C14orf52  | GI_21553312-S | 14 | 14 | 64449036  | 21720  | 6.1438  | 5.81458 | JPT |
| rs10143017 | C14orf52  | GI_21553312-S | 14 | 14 | 64449371  | 21385  | 6.8781  | 5.81458 | JPT |
| rs10148687 | C14orf52  | GI_21553312-S | 14 | 14 | 64454029  | 16727  | 6.8784  | 5.81458 | JPT |
| rs4902335  | C14orf52  | GI_21553312-S | 14 | 14 | 64455651  | 15105  | 6.8781  | 5.81458 | JPT |
| rs10132742 | C14orf52  | GI_21553312-S | 14 | 14 | 64456675  | 14081  | 6.8784  | 5.81458 | JPT |
| rs4899152  | C14orf52  | GI_21553312-S | 14 | 14 | 64456869  | 13887  | 6.8781  | 5.81458 | JPT |
| rs4902336  | C14orf52  | GI_21553312-S | 14 | 14 | 64457015  | 13741  | 6.8781  | 5.81458 | JPT |
| rs10138534 | C14orf52  | GI_21553312-S | 14 | 14 | 64457742  | 13014  | 6.8781  | 5.81458 | JPT |
| rs7401853  | C14orf52  | GI_21553312-S | 14 | 14 | 64458464  | 12292  | 6.8781  | 5.81458 | JPT |
| rs10141986 | C14orf52  | GI_21553312-S | 14 | 14 | 64459156  | 11600  | 6.8781  | 5.81458 | JPT |
| rs4902343  | C14orf52  | GI_21553312-S | 14 | 14 | 64465933  | 4823   | 6.8784  | 5.81458 | JPT |
| rs10149617 | C14orf52  | GI_21553312-S | 14 | 14 | 64471914  | 1158   | 6.8781  | 5.81458 | JPT |
| rs4902345  | C14orf52  | GI_21553312-S | 14 | 14 | 64473657  | 2901   | 6.8781  | 5.81458 | JPT |
| rs10133290 | C14orf52  | GI_21553312-S | 14 | 14 | 64474195  | 3439   | 6.8781  | 5.81458 | JPT |
| rs2412065  | C14orf52  | GI_21553312-S | 14 | 14 | 64477410  | 6654   | 6.8781  | 5.81458 | JPT |
| rs10142124 | EIF2S1    | GI_34147492-S | 14 | 14 | 65922259  | 999274 | 6.788   | 5.71716 | JPT |
| rs10142375 | EIF2S1    | GI_34147492-S | 14 | 14 | 65922298  | 999235 | 7.3084  | 5.71716 | JPT |
| rs1457428  | EIF2S1    | GI_34147492-S | 14 | 14 | 65924438  | 997095 | 7.4976  | 5.71716 | JPT |
| rs2085482  | EIF2S1    | GI_34147492-S | 14 | 14 | 65925557  | 995976 | 6.8674  | 5.71716 | JPT |
| rs2319184  | EIF2S1    | GI_34147492-S | 14 | 14 | 65925740  | 995793 | 8.2108  | 5.71716 | JPT |
| rs1457431  | EIF2S1    | GI_34147492-S | 14 | 14 | 65927667  | 993866 | 6.8314  | 5.71716 | JPT |
| rs10142143 | EIF2S1    | GI_34147492-S | 14 | 14 | 65929301  | 992232 | 7.3084  | 5.71716 | JPT |
| rs1379414  | EIF2S1    | GI_34147492-S | 14 | 14 | 65929333  | 992200 | 7.3084  | 5.71716 | JPT |
| rs8007262  | EIF2S1    | GI_34147492-S | 14 | 14 | 65931618  | 989915 | 6.8314  | 5.71716 | JPT |
| rs7150418  | EIF2S1    | GI_34147492-S | 14 | 14 | 65932496  | 989037 | 7.3084  | 5.71716 | JPT |
| rs7150773  | EIF2S1    | GI_34147492-S | 14 | 14 | 65932627  | 988906 | 7.3693  | 5.71716 | JPT |
| rs1457432  | EIF2S1    | GI_34147492-S | 14 | 14 | 65934852  | 986681 | 7.3084  | 5.71716 | JPT |

|            |        |               |    |    |          |        |        |         |     |
|------------|--------|---------------|----|----|----------|--------|--------|---------|-----|
| rs1457433  | EIF2S1 | GI_34147492-S | 14 | 14 | 65934985 | 986548 | 7.3084 | 5.71716 | JPT |
| rs1457434  | EIF2S1 | GI_34147492-S | 14 | 14 | 65935045 | 986488 | 8.6594 | 5.71716 | JPT |
| rs10134278 | EIF2S1 | GI_34147492-S | 14 | 14 | 65939190 | 982343 | 7.3084 | 5.71716 | JPT |
| rs12586868 | EIF2S1 | GI_34147492-S | 14 | 14 | 65940494 | 981039 | 7.4398 | 5.71716 | JPT |
| rs7151102  | EIF2S1 | GI_34147492-S | 14 | 14 | 65941325 | 980208 | 6.8314 | 5.71716 | JPT |
| rs8004856  | EIF2S1 | GI_34147492-S | 14 | 14 | 65942782 | 978751 | 8.7327 | 5.71716 | JPT |
| rs6573671  | EIF2S1 | GI_34147492-S | 14 | 14 | 65943060 | 978473 | 7.3084 | 5.71716 | JPT |
| rs1379416  | EIF2S1 | GI_34147492-S | 14 | 14 | 65944456 | 977077 | 7.1751 | 5.71716 | JPT |
| rs7159681  | EIF2S1 | GI_34147492-S | 14 | 14 | 65945875 | 975658 | 7.3084 | 5.71716 | JPT |
| rs7159364  | EIF2S1 | GI_34147492-S | 14 | 14 | 65945887 | 975646 | 7.3084 | 5.71716 | JPT |
| rs7160064  | EIF2S1 | GI_34147492-S | 14 | 14 | 65946058 | 975475 | 7.3236 | 5.71716 | JPT |
| rs7158262  | EIF2S1 | GI_34147492-S | 14 | 14 | 65949339 | 972194 | 6.8314 | 5.71716 | JPT |
| rs12588933 | EIF2S1 | GI_34147492-S | 14 | 14 | 65950115 | 971418 | 7.3084 | 5.71716 | JPT |
| rs9332388  | EIF2S1 | GI_34147492-S | 14 | 14 | 65950415 | 971118 | 7.3084 | 5.71716 | JPT |
| rs716234   | EIF2S1 | GI_34147492-S | 14 | 14 | 65950544 | 970989 | 7.3084 | 5.71716 | JPT |
| rs716232   | EIF2S1 | GI_34147492-S | 14 | 14 | 65950702 | 970831 | 6.8314 | 5.71716 | JPT |
| rs716233   | EIF2S1 | GI_34147492-S | 14 | 14 | 65950769 | 970764 | 6.8314 | 5.71716 | JPT |
| rs13368766 | EIF2S1 | GI_34147492-S | 14 | 14 | 65953164 | 968369 | 7.3084 | 5.71716 | JPT |
| rs9635252  | EIF2S1 | GI_34147492-S | 14 | 14 | 65954503 | 967030 | 6.845  | 5.71716 | JPT |
| rs9652292  | EIF2S1 | GI_34147492-S | 14 | 14 | 65954974 | 966559 | 6.547  | 5.71716 | JPT |
| rs8020532  | EIF2S1 | GI_34147492-S | 14 | 14 | 65956469 | 965064 | 7.3084 | 5.71716 | JPT |
| rs12589479 | EIF2S1 | GI_34147492-S | 14 | 14 | 65963473 | 958060 | 6.6558 | 5.71716 | JPT |
| rs2319185  | EIF2S1 | GI_34147492-S | 14 | 14 | 65965319 | 956214 | 7.4398 | 5.71716 | JPT |
| rs1598771  | EIF2S1 | GI_34147492-S | 14 | 14 | 65965718 | 955815 | 7.3236 | 5.71716 | JPT |
| rs13353130 | EIF2S1 | GI_34147492-S | 14 | 14 | 65966379 | 955154 | 7.3084 | 5.71716 | JPT |
| rs7149651  | EIF2S1 | GI_34147492-S | 14 | 14 | 65966995 | 954538 | 8.4674 | 5.71716 | JPT |
| rs1902644  | EIF2S1 | GI_34147492-S | 14 | 14 | 65967909 | 953624 | 6.8314 | 5.71716 | JPT |
| rs8004227  | EIF2S1 | GI_34147492-S | 14 | 14 | 65969562 | 951971 | 7.3084 | 5.71716 | JPT |
| rs7359130  | EIF2S1 | GI_34147492-S | 14 | 14 | 65970588 | 950945 | 8.1696 | 5.71716 | JPT |
| rs1350330  | EIF2S1 | GI_34147492-S | 14 | 14 | 65971333 | 950200 | 7.1216 | 5.71716 | JPT |
| rs933039   | EIF2S1 | GI_34147492-S | 14 | 14 | 65973000 | 948533 | 7.3084 | 5.71716 | JPT |
| rs1585182  | EIF2S1 | GI_34147492-S | 14 | 14 | 65974201 | 947332 | 7.3084 | 5.71716 | JPT |
| rs2860116  | EIF2S1 | GI_34147492-S | 14 | 14 | 65974235 | 947298 | 7.3084 | 5.71716 | JPT |
| rs7145185  | EIF2S1 | GI_34147492-S | 14 | 14 | 65975379 | 946154 | 7.3084 | 5.71716 | JPT |
| rs928552   | EIF2S1 | GI_34147492-S | 14 | 14 | 65976220 | 945313 | 6.7874 | 5.71716 | JPT |
| rs6573672  | EIF2S1 | GI_34147492-S | 14 | 14 | 65976672 | 944861 | 6.8314 | 5.71716 | JPT |
| rs2219371  | EIF2S1 | GI_34147492-S | 14 | 14 | 65977384 | 944149 | 7.3084 | 5.71716 | JPT |
| rs8012374  | EIF2S1 | GI_34147492-S | 14 | 14 | 65980729 | 940804 | 6.8314 | 5.71716 | JPT |
| rs8011794  | EIF2S1 | GI_34147492-S | 14 | 14 | 65981001 | 940532 | 6.8314 | 5.71716 | JPT |
| rs8019603  | EIF2S1 | GI_34147492-S | 14 | 14 | 65985716 | 935817 | 6.7521 | 5.71716 | JPT |
| rs17827523 | EIF2S1 | GI_34147492-S | 14 | 14 | 65986106 | 935427 | 6.9365 | 5.71716 | JPT |
| rs1009294  | EIF2S1 | GI_34147492-S | 14 | 14 | 65990132 | 931401 | 6.7521 | 5.71716 | JPT |
| rs11158628 | EIF2S1 | GI_34147492-S | 14 | 14 | 65991334 | 930199 | 7.2294 | 5.71716 | JPT |
| rs11158629 | EIF2S1 | GI_34147492-S | 14 | 14 | 65991678 | 929855 | 7.4077 | 5.71716 | JPT |
| rs12586427 | EIF2S1 | GI_34147492-S | 14 | 14 | 65999706 | 921827 | 7.2294 | 5.71716 | JPT |
| rs7156981  | EIF2S1 | GI_34147492-S | 14 | 14 | 65999921 | 921612 | 6.7521 | 5.71716 | JPT |
| rs13367574 | EIF2S1 | GI_34147492-S | 14 | 14 | 66003895 | 917638 | 6.5219 | 5.71716 | JPT |
| rs8003769  | EIF2S1 | GI_34147492-S | 14 | 14 | 66004664 | 916869 | 8.804  | 5.71716 | JPT |
| rs7157879  | EIF2S1 | GI_34147492-S | 14 | 14 | 66007683 | 913850 | 7.7714 | 5.71716 | JPT |
| rs7142154  | EIF2S1 | GI_34147492-S | 14 | 14 | 66007793 | 913740 | 7.2294 | 5.71716 | JPT |
| rs7141225  | EIF2S1 | GI_34147492-S | 14 | 14 | 66007991 | 913542 | 7.4077 | 5.71716 | JPT |
| rs10130239 | EIF2S1 | GI_34147492-S | 14 | 14 | 66008550 | 912983 | 6.7521 | 5.71716 | JPT |
| rs10133818 | EIF2S1 | GI_34147492-S | 14 | 14 | 66009633 | 911900 | 6.7112 | 5.71716 | JPT |
| rs10133676 | EIF2S1 | GI_34147492-S | 14 | 14 | 66009656 | 911877 | 7.2294 | 5.71716 | JPT |
| rs9944086  | EIF2S1 | GI_34147492-S | 14 | 14 | 66009936 | 911597 | 6.7521 | 5.71716 | JPT |
| rs10142537 | EIF2S1 | GI_34147492-S | 14 | 14 | 66010269 | 911264 | 7.2294 | 5.71716 | JPT |

|            |        |               |    |    |          |        |        |         |     |
|------------|--------|---------------|----|----|----------|--------|--------|---------|-----|
| rs10141750 | EIF2S1 | GI_34147492-S | 14 | 14 | 66016884 | 904649 | 6.7521 | 5.71716 | JPT |
| rs10141991 | EIF2S1 | GI_34147492-S | 14 | 14 | 66016948 | 904585 | 7.1434 | 5.71716 | JPT |
| rs10148290 | EIF2S1 | GI_34147492-S | 14 | 14 | 66018937 | 902596 | 7.2294 | 5.71716 | JPT |
| rs10134043 | EIF2S1 | GI_34147492-S | 14 | 14 | 66019803 | 901730 | 7.2294 | 5.71716 | JPT |
| rs7157060  | EIF2S1 | GI_34147492-S | 14 | 14 | 66021548 | 899985 | 6.7521 | 5.71716 | JPT |
| rs10129809 | EIF2S1 | GI_34147492-S | 14 | 14 | 66021795 | 899738 | 6.4293 | 5.71716 | JPT |
| rs7147360  | EIF2S1 | GI_34147492-S | 14 | 14 | 66023287 | 898246 | 6.7521 | 5.71716 | JPT |
| rs1457420  | EIF2S1 | GI_34147492-S | 14 | 14 | 66028429 | 893104 | 7.4077 | 5.71716 | JPT |
| rs3737161  | EIF2S1 | GI_34147492-S | 14 | 14 | 66029370 | 892163 | 7.2294 | 5.71716 | JPT |
| rs6573679  | EIF2S1 | GI_34147492-S | 14 | 14 | 66032510 | 889023 | 7.2294 | 5.71716 | JPT |
| rs7159796  | EIF2S1 | GI_34147492-S | 14 | 14 | 66033770 | 887763 | 8.1696 | 5.71716 | JPT |
| rs7160183  | EIF2S1 | GI_34147492-S | 14 | 14 | 66033945 | 887588 | 7.2294 | 5.71716 | JPT |
| rs2297620  | EIF2S1 | GI_34147492-S | 14 | 14 | 66034291 | 887242 | 7.2294 | 5.71716 | JPT |
| rs3818770  | EIF2S1 | GI_34147492-S | 14 | 14 | 66035225 | 886308 | 6.9365 | 5.71716 | JPT |
| rs10143291 | EIF2S1 | GI_34147492-S | 14 | 14 | 66035316 | 886217 | 7.2294 | 5.71716 | JPT |
| rs1457422  | EIF2S1 | GI_34147492-S | 14 | 14 | 66036270 | 885263 | 7.2294 | 5.71716 | JPT |
| rs9323473  | EIF2S1 | GI_34147492-S | 14 | 14 | 66038079 | 883454 | 6.7521 | 5.71716 | JPT |
| rs7146723  | EIF2S1 | GI_34147492-S | 14 | 14 | 66038848 | 882685 | 6.7521 | 5.71716 | JPT |
| rs10220636 | EIF2S1 | GI_34147492-S | 14 | 14 | 66041917 | 879616 | 7.4077 | 5.71716 | JPT |
| rs1457423  | EIF2S1 | GI_34147492-S | 14 | 14 | 66042001 | 879532 | 7.2322 | 5.71716 | JPT |
| rs928553   | EIF2S1 | GI_34147492-S | 14 | 14 | 66044227 | 877306 | 6.7521 | 5.71716 | JPT |
| rs17827735 | EIF2S1 | GI_34147492-S | 14 | 14 | 66047141 | 874392 | 7.8084 | 5.71716 | JPT |
| rs17827741 | EIF2S1 | GI_34147492-S | 14 | 14 | 66047565 | 873968 | 7.2294 | 5.71716 | JPT |
| rs2319387  | EIF2S1 | GI_34147492-S | 14 | 14 | 66049246 | 872287 | 7.2294 | 5.71716 | JPT |
| rs2045419  | EIF2S1 | GI_34147492-S | 14 | 14 | 66052268 | 869265 | 6.7521 | 5.71716 | JPT |
| rs7159063  | EIF2S1 | GI_34147492-S | 14 | 14 | 66052787 | 868746 | 7.1415 | 5.71716 | JPT |
| rs1379413  | EIF2S1 | GI_34147492-S | 14 | 14 | 66055897 | 865636 | 6.7521 | 5.71716 | JPT |
| rs7156737  | EIF2S1 | GI_34147492-S | 14 | 14 | 66056366 | 865167 | 7.2294 | 5.71716 | JPT |
| rs7140509  | EIF2S1 | GI_34147492-S | 14 | 14 | 66056901 | 864632 | 7.2294 | 5.71716 | JPT |
| rs10144449 | EIF2S1 | GI_34147492-S | 14 | 14 | 66058012 | 863521 | 7.2294 | 5.71716 | JPT |
| rs7154154  | EIF2S1 | GI_34147492-S | 14 | 14 | 66059664 | 861869 | 7.5199 | 5.71716 | JPT |
| rs13368526 | EIF2S1 | GI_34147492-S | 14 | 14 | 66061630 | 859903 | 7.7294 | 5.71716 | JPT |
| rs13379248 | EIF2S1 | GI_34147492-S | 14 | 14 | 66069026 | 852507 | 7.2294 | 5.71716 | JPT |
| rs7142097  | EIF2S1 | GI_34147492-S | 14 | 14 | 66071459 | 850074 | 6.7521 | 5.71716 | JPT |
| rs7145556  | EIF2S1 | GI_34147492-S | 14 | 14 | 66071725 | 849808 | 7.4077 | 5.71716 | JPT |
| rs10148418 | EIF2S1 | GI_34147492-S | 14 | 14 | 66073626 | 847907 | 7.4077 | 5.71716 | JPT |
| rs7160501  | EIF2S1 | GI_34147492-S | 14 | 14 | 66074452 | 847081 | 7.2294 | 5.71716 | JPT |
| rs7143629  | EIF2S1 | GI_34147492-S | 14 | 14 | 66074719 | 846814 | 7.4077 | 5.71716 | JPT |
| rs7143823  | EIF2S1 | GI_34147492-S | 14 | 14 | 66074824 | 846709 | 7.2294 | 5.71716 | JPT |
| rs7149668  | EIF2S1 | GI_34147492-S | 14 | 14 | 66076533 | 845000 | 6.7521 | 5.71716 | JPT |
| rs7141220  | EIF2S1 | GI_34147492-S | 14 | 14 | 66079945 | 841588 | 6.7521 | 5.71716 | JPT |
| rs8012784  | EIF2S1 | GI_34147492-S | 14 | 14 | 66085038 | 836495 | 7.4077 | 5.71716 | JPT |
| rs10133769 | EIF2S1 | GI_34147492-S | 14 | 14 | 66088436 | 833097 | 7.4077 | 5.71716 | JPT |
| rs8016639  | EIF2S1 | GI_34147492-S | 14 | 14 | 66091265 | 830268 | 6.7521 | 5.71716 | JPT |
| rs10140083 | EIF2S1 | GI_34147492-S | 14 | 14 | 66091980 | 829553 | 6.15   | 5.71716 | JPT |
| rs7151773  | EIF2S1 | GI_34147492-S | 14 | 14 | 66093753 | 827780 | 8.7142 | 5.71716 | JPT |
| rs17827790 | EIF2S1 | GI_34147492-S | 14 | 14 | 66094717 | 826816 | 6.394  | 5.71716 | JPT |
| rs1952068  | EIF2S1 | GI_34147492-S | 14 | 14 | 66098904 | 822629 | 6.6108 | 5.71716 | JPT |
| rs8017351  | EIF2S1 | GI_34147492-S | 14 | 14 | 66099837 | 821696 | 7.2294 | 5.71716 | JPT |
| rs7156795  | EIF2S1 | GI_34147492-S | 14 | 14 | 66100648 | 820885 | 6.3889 | 5.71716 | JPT |
| rs7146849  | EIF2S1 | GI_34147492-S | 14 | 14 | 66101823 | 819710 | 7.2294 | 5.71716 | JPT |
| rs7142929  | EIF2S1 | GI_34147492-S | 14 | 14 | 66105239 | 816294 | 6.7521 | 5.71716 | JPT |
| rs8004106  | EIF2S1 | GI_34147492-S | 14 | 14 | 66110354 | 811179 | 7.2294 | 5.71716 | JPT |
| rs10133641 | EIF2S1 | GI_34147492-S | 14 | 14 | 66111193 | 810340 | 7.2294 | 5.71716 | JPT |
| rs13367039 | EIF2S1 | GI_34147492-S | 14 | 14 | 66111373 | 810160 | 7.2294 | 5.71716 | JPT |
| rs7153313  | EIF2S1 | GI_34147492-S | 14 | 14 | 66112166 | 809367 | 6.7521 | 5.71716 | JPT |

|            |        |               |    |    |          |        |        |         |     |
|------------|--------|---------------|----|----|----------|--------|--------|---------|-----|
| rs7157828  | EIF2S1 | GI_34147492-S | 14 | 14 | 66116313 | 805220 | 6.3673 | 5.71716 | JPT |
| rs12100780 | EIF2S1 | GI_34147492-S | 14 | 14 | 66116507 | 805026 | 7.0476 | 5.71716 | JPT |
| rs7161397  | EIF2S1 | GI_34147492-S | 14 | 14 | 66116713 | 804820 | 6.7521 | 5.71716 | JPT |
| rs10143929 | EIF2S1 | GI_34147492-S | 14 | 14 | 66117841 | 803692 | 7.4077 | 5.71716 | JPT |
| rs10143934 | EIF2S1 | GI_34147492-S | 14 | 14 | 66117858 | 803675 | 7.1088 | 5.71716 | JPT |
| rs13368404 | EIF2S1 | GI_34147492-S | 14 | 14 | 66129721 | 791812 | 6.7521 | 5.71716 | JPT |
| rs13368668 | EIF2S1 | GI_34147492-S | 14 | 14 | 66134079 | 787454 | 6.267  | 5.71716 | JPT |
| rs9323475  | EIF2S1 | GI_34147492-S | 14 | 14 | 66135922 | 785611 | 6.6699 | 5.71716 | JPT |
| rs8008550  | EIF2S1 | GI_34147492-S | 14 | 14 | 66139328 | 782205 | 6.7521 | 5.71716 | JPT |
| rs8008596  | EIF2S1 | GI_34147492-S | 14 | 14 | 66139402 | 782131 | 6.6349 | 5.71716 | JPT |
| rs10144894 | EIF2S1 | GI_34147492-S | 14 | 14 | 66141562 | 779971 | 7.2294 | 5.71716 | JPT |
| rs8021202  | EIF2S1 | GI_34147492-S | 14 | 14 | 66143202 | 778331 | 6.7521 | 5.71716 | JPT |
| rs8018444  | EIF2S1 | GI_34147492-S | 14 | 14 | 66146264 | 775269 | 7.2294 | 5.71716 | JPT |
| rs7161707  | EIF2S1 | GI_34147492-S | 14 | 14 | 66146792 | 774741 | 6.7461 | 5.71716 | JPT |
| rs7140281  | EIF2S1 | GI_34147492-S | 14 | 14 | 66146903 | 774630 | 7.2294 | 5.71716 | JPT |
| rs8010110  | EIF2S1 | GI_34147492-S | 14 | 14 | 66147965 | 773568 | 7.2294 | 5.71716 | JPT |
| rs1958001  | EIF2S1 | GI_34147492-S | 14 | 14 | 66149645 | 771888 | 7.5951 | 5.71716 | JPT |
| rs8023060  | EIF2S1 | GI_34147492-S | 14 | 14 | 66153725 | 767808 | 7.6902 | 5.71716 | JPT |
| rs10130016 | EIF2S1 | GI_34147492-S | 14 | 14 | 66154689 | 766844 | 6.7521 | 5.71716 | JPT |
| rs8015958  | EIF2S1 | GI_34147492-S | 14 | 14 | 66156429 | 765104 | 6.7899 | 5.71716 | JPT |
| rs8016353  | EIF2S1 | GI_34147492-S | 14 | 14 | 66156693 | 764840 | 7.5081 | 5.71716 | JPT |
| rs8008296  | EIF2S1 | GI_34147492-S | 14 | 14 | 66159719 | 761814 | 6.6337 | 5.71716 | JPT |
| rs10135254 | EIF2S1 | GI_34147492-S | 14 | 14 | 66161394 | 760139 | 6.5817 | 5.71716 | JPT |
| rs7157919  | EIF2S1 | GI_34147492-S | 14 | 14 | 66162452 | 759081 | 6.7521 | 5.71716 | JPT |
| rs8011928  | EIF2S1 | GI_34147492-S | 14 | 14 | 66164236 | 757297 | 7.0497 | 5.71716 | JPT |
| rs8010897  | EIF2S1 | GI_34147492-S | 14 | 14 | 66164470 | 757063 | 7.018  | 5.71716 | JPT |
| rs8015684  | EIF2S1 | GI_34147492-S | 14 | 14 | 66164975 | 756558 | 7.2294 | 5.71716 | JPT |
| rs8015842  | EIF2S1 | GI_34147492-S | 14 | 14 | 66165065 | 756468 | 7.018  | 5.71716 | JPT |
| rs8017245  | EIF2S1 | GI_34147492-S | 14 | 14 | 66165108 | 756425 | 6.7521 | 5.71716 | JPT |
| rs10873195 | EIF2S1 | GI_34147492-S | 14 | 14 | 66165366 | 756167 | 8.8194 | 5.71716 | JPT |
| rs7140649  | EIF2S1 | GI_34147492-S | 14 | 14 | 66166600 | 754933 | 7.2294 | 5.71716 | JPT |
| rs8014806  | EIF2S1 | GI_34147492-S | 14 | 14 | 66170123 | 751410 | 6.7521 | 5.71716 | JPT |
| rs8014849  | EIF2S1 | GI_34147492-S | 14 | 14 | 66170197 | 751336 | 7.2688 | 5.71716 | JPT |
| rs12323903 | EIF2S1 | GI_34147492-S | 14 | 14 | 66170967 | 750566 | 7.2294 | 5.71716 | JPT |
| rs7342493  | EIF2S1 | GI_34147492-S | 14 | 14 | 66175512 | 746021 | 6.4752 | 5.71716 | JPT |
| rs1886778  | EIF2S1 | GI_34147492-S | 14 | 14 | 66175818 | 745715 | 7.5626 | 5.71716 | JPT |
| rs10144010 | EIF2S1 | GI_34147492-S | 14 | 14 | 66176330 | 745203 | 7.1297 | 5.71716 | JPT |
| rs9323476  | EIF2S1 | GI_34147492-S | 14 | 14 | 66176387 | 745146 | 6.9365 | 5.71716 | JPT |
| rs7152123  | EIF2S1 | GI_34147492-S | 14 | 14 | 66177191 | 744342 | 6.7521 | 5.71716 | JPT |
| rs7151830  | EIF2S1 | GI_34147492-S | 14 | 14 | 66177279 | 744254 | 7.1088 | 5.71716 | JPT |
| rs7152169  | EIF2S1 | GI_34147492-S | 14 | 14 | 66177344 | 744189 | 7.4077 | 5.71716 | JPT |
| rs7153011  | EIF2S1 | GI_34147492-S | 14 | 14 | 66177652 | 743881 | 6.341  | 5.71716 | JPT |
| rs1952070  | EIF2S1 | GI_34147492-S | 14 | 14 | 66177823 | 743710 | 6.7521 | 5.71716 | JPT |
| rs7159473  | EIF2S1 | GI_34147492-S | 14 | 14 | 66178304 | 743229 | 7.018  | 5.71716 | JPT |
| rs7156021  | EIF2S1 | GI_34147492-S | 14 | 14 | 66183167 | 738366 | 7.0235 | 5.71716 | JPT |
| rs10133120 | EIF2S1 | GI_34147492-S | 14 | 14 | 66185424 | 736109 | 6.4494 | 5.71716 | JPT |
| rs2094100  | EIF2S1 | GI_34147492-S | 14 | 14 | 66185956 | 735577 | 7.1122 | 5.71716 | JPT |
| rs13367244 | EIF2S1 | GI_34147492-S | 14 | 14 | 66186351 | 735182 | 7.2294 | 5.71716 | JPT |
| rs6573695  | EIF2S1 | GI_34147492-S | 14 | 14 | 66189645 | 731888 | 6.6901 | 5.71716 | JPT |
| rs8007662  | EIF2S1 | GI_34147492-S | 14 | 14 | 66190185 | 731348 | 6.6358 | 5.71716 | JPT |
| rs8011027  | EIF2S1 | GI_34147492-S | 14 | 14 | 66194538 | 726995 | 6.7521 | 5.71716 | JPT |
| rs7152601  | EIF2S1 | GI_34147492-S | 14 | 14 | 66198557 | 722976 | 6.7521 | 5.71716 | JPT |
| rs4605098  | EIF2S1 | GI_34147492-S | 14 | 14 | 66199191 | 722342 | 6.7521 | 5.71716 | JPT |
| rs4644792  | EIF2S1 | GI_34147492-S | 14 | 14 | 66200099 | 721434 | 6.9365 | 5.71716 | JPT |
| rs7158823  | EIF2S1 | GI_34147492-S | 14 | 14 | 66201598 | 719935 | 6.7521 | 5.71716 | JPT |
| rs7142841  | EIF2S1 | GI_34147492-S | 14 | 14 | 66208808 | 712725 | 6.2167 | 5.71716 | JPT |

|            |        |               |    |    |          |        |        |         |     |
|------------|--------|---------------|----|----|----------|--------|--------|---------|-----|
| rs10139822 | EIF2S1 | GI_34147492-S | 14 | 14 | 66210429 | 711104 | 6.6699 | 5.71716 | JPT |
| rs13367863 | EIF2S1 | GI_34147492-S | 14 | 14 | 66211159 | 710374 | 7.2294 | 5.71716 | JPT |
| rs8013315  | EIF2S1 | GI_34147492-S | 14 | 14 | 66212573 | 708960 | 7.018  | 5.71716 | JPT |
| rs8013215  | EIF2S1 | GI_34147492-S | 14 | 14 | 66212690 | 708843 | 6.5524 | 5.71716 | JPT |
| rs8018488  | EIF2S1 | GI_34147492-S | 14 | 14 | 66212779 | 708754 | 6.7521 | 5.71716 | JPT |
| rs8014297  | EIF2S1 | GI_34147492-S | 14 | 14 | 66215870 | 705663 | 6.7521 | 5.71716 | JPT |
| rs8015408  | EIF2S1 | GI_34147492-S | 14 | 14 | 66216433 | 705100 | 7.2647 | 5.71716 | JPT |
| rs10136366 | EIF2S1 | GI_34147492-S | 14 | 14 | 66216698 | 704835 | 5.8906 | 5.71716 | JPT |
| rs4294753  | EIF2S1 | GI_34147492-S | 14 | 14 | 66216826 | 704707 | 7.2294 | 5.71716 | JPT |
| rs3759753  | EIF2S1 | GI_34147492-S | 14 | 14 | 66217569 | 703964 | 6.7521 | 5.71716 | JPT |
| rs8005352  | EIF2S1 | GI_34147492-S | 14 | 14 | 66217888 | 703645 | 7.4077 | 5.71716 | JPT |
| rs6573702  | EIF2S1 | GI_34147492-S | 14 | 14 | 66218239 | 703294 | 7.6448 | 5.71716 | JPT |
| rs6573706  | EIF2S1 | GI_34147492-S | 14 | 14 | 66220517 | 701016 | 7.2294 | 5.71716 | JPT |
| rs8021356  | EIF2S1 | GI_34147492-S | 14 | 14 | 66225934 | 695599 | 7.2294 | 5.71716 | JPT |
| rs6573710  | EIF2S1 | GI_34147492-S | 14 | 14 | 66229962 | 691571 | 7.2061 | 5.71716 | JPT |
| rs12101118 | EIF2S1 | GI_34147492-S | 14 | 14 | 66230533 | 691000 | 5.9569 | 5.71716 | JPT |
| rs7158148  | EIF2S1 | GI_34147492-S | 14 | 14 | 66231033 | 690500 | 8.4287 | 5.71716 | JPT |
| rs7157740  | EIF2S1 | GI_34147492-S | 14 | 14 | 66231094 | 690439 | 7.2294 | 5.71716 | JPT |
| rs7154017  | EIF2S1 | GI_34147492-S | 14 | 14 | 66233836 | 687697 | 7.2294 | 5.71716 | JPT |
| rs1885198  | EIF2S1 | GI_34147492-S | 14 | 14 | 66234513 | 687020 | 7.2294 | 5.71716 | JPT |
| rs7161029  | EIF2S1 | GI_34147492-S | 14 | 14 | 66235064 | 686469 | 6.9365 | 5.71716 | JPT |
| rs1951354  | EIF2S1 | GI_34147492-S | 14 | 14 | 66235643 | 685890 | 7.4077 | 5.71716 | JPT |
| rs13366714 | EIF2S1 | GI_34147492-S | 14 | 14 | 66239224 | 682309 | 8.1891 | 5.71716 | JPT |
| rs6573711  | EIF2S1 | GI_34147492-S | 14 | 14 | 66247439 | 674094 | 7.2294 | 5.71716 | JPT |
| rs1951355  | EIF2S1 | GI_34147492-S | 14 | 14 | 66257317 | 664216 | 6.7521 | 5.71716 | JPT |
| rs1951357  | EIF2S1 | GI_34147492-S | 14 | 14 | 66257354 | 664179 | 6.15   | 5.71716 | JPT |
| rs12100903 | EIF2S1 | GI_34147492-S | 14 | 14 | 66257989 | 663544 | 6.7521 | 5.71716 | JPT |
| rs8012315  | EIF2S1 | GI_34147492-S | 14 | 14 | 66259521 | 662012 | 5.7991 | 5.71716 | JPT |
| rs17836572 | EIF2S1 | GI_34147492-S | 14 | 14 | 66262776 | 658757 | 7.2294 | 5.71716 | JPT |
| rs10150268 | EIF2S1 | GI_34147492-S | 14 | 14 | 66265929 | 655604 | 6.7245 | 5.71716 | JPT |
| rs8007677  | EIF2S1 | GI_34147492-S | 14 | 14 | 66267703 | 653830 | 7.2294 | 5.71716 | JPT |
| rs7156074  | EIF2S1 | GI_34147492-S | 14 | 14 | 66270929 | 650604 | 7.2294 | 5.71716 | JPT |
| rs7156240  | EIF2S1 | GI_34147492-S | 14 | 14 | 66271023 | 650510 | 6.7521 | 5.71716 | JPT |
| rs10150028 | EIF2S1 | GI_34147492-S | 14 | 14 | 66271655 | 649878 | 8.0822 | 5.71716 | JPT |
| rs9323478  | EIF2S1 | GI_34147492-S | 14 | 14 | 66276181 | 645352 | 6.6901 | 5.71716 | JPT |
| rs9323479  | EIF2S1 | GI_34147492-S | 14 | 14 | 66276240 | 645293 | 6.6901 | 5.71716 | JPT |
| rs10143077 | EIF2S1 | GI_34147492-S | 14 | 14 | 66276463 | 645070 | 6.853  | 5.71716 | JPT |
| rs10132261 | EIF2S1 | GI_34147492-S | 14 | 14 | 66276615 | 644918 | 6.6901 | 5.71716 | JPT |
| rs6573718  | EIF2S1 | GI_34147492-S | 14 | 14 | 66278354 | 643179 | 6.7899 | 5.71716 | JPT |
| rs6573719  | EIF2S1 | GI_34147492-S | 14 | 14 | 66278401 | 643132 | 6.6901 | 5.71716 | JPT |
| rs9323480  | EIF2S1 | GI_34147492-S | 14 | 14 | 66280596 | 640937 | 6.6901 | 5.71716 | JPT |
| rs766527   | EIF2S1 | GI_34147492-S | 14 | 14 | 66281840 | 639693 | 6.6901 | 5.71716 | JPT |
| rs7148224  | EIF2S1 | GI_34147492-S | 14 | 14 | 66282325 | 639208 | 6.7521 | 5.71716 | JPT |
| rs6573720  | EIF2S1 | GI_34147492-S | 14 | 14 | 66282721 | 638812 | 7.808  | 5.71716 | JPT |
| rs8016213  | EIF2S1 | GI_34147492-S | 14 | 14 | 66282985 | 638548 | 7.2294 | 5.71716 | JPT |
| rs9783678  | EIF2S1 | GI_34147492-S | 14 | 14 | 66284564 | 636969 | 7.2294 | 5.71716 | JPT |
| rs8008369  | EIF2S1 | GI_34147492-S | 14 | 14 | 66284949 | 636584 | 7.2294 | 5.71716 | JPT |
| rs6573721  | EIF2S1 | GI_34147492-S | 14 | 14 | 66285863 | 635670 | 7.2294 | 5.71716 | JPT |
| rs7148623  | EIF2S1 | GI_34147492-S | 14 | 14 | 66289570 | 631963 | 6.7521 | 5.71716 | JPT |
| rs7142259  | EIF2S1 | GI_34147492-S | 14 | 14 | 66289717 | 631816 | 7.2294 | 5.71716 | JPT |
| rs8012158  | EIF2S1 | GI_34147492-S | 14 | 14 | 66291448 | 630085 | 6.7521 | 5.71716 | JPT |
| rs17247749 | EIF2S1 | GI_34147492-S | 14 | 14 | 66292836 | 628697 | 7.2294 | 5.71716 | JPT |
| rs10129827 | EIF2S1 | GI_34147492-S | 14 | 14 | 66302326 | 619207 | 6.5204 | 5.71716 | JPT |
| rs10132625 | EIF2S1 | GI_34147492-S | 14 | 14 | 66303059 | 618474 | 6.9365 | 5.71716 | JPT |
| rs6573723  | EIF2S1 | GI_34147492-S | 14 | 14 | 66305475 | 616058 | 6.7521 | 5.71716 | JPT |
| rs9323483  | EIF2S1 | GI_34147492-S | 14 | 14 | 66309360 | 612173 | 7.2294 | 5.71716 | JPT |

|            |        |               |    |    |          |        |        |         |     |
|------------|--------|---------------|----|----|----------|--------|--------|---------|-----|
| rs9323484  | EIF2S1 | GI_34147492-S | 14 | 14 | 66309385 | 612148 | 7.2294 | 5.71716 | JPT |
| rs6573724  | EIF2S1 | GI_34147492-S | 14 | 14 | 66310318 | 611215 | 6.7521 | 5.71716 | JPT |
| rs7147690  | EIF2S1 | GI_34147492-S | 14 | 14 | 66312090 | 609443 | 7.2294 | 5.71716 | JPT |
| rs9323485  | EIF2S1 | GI_34147492-S | 14 | 14 | 66313250 | 608283 | 6.394  | 5.71716 | JPT |
| rs10144919 | EIF2S1 | GI_34147492-S | 14 | 14 | 66319372 | 602161 | 7.2294 | 5.71716 | JPT |
| rs7142669  | EIF2S1 | GI_34147492-S | 14 | 14 | 66320145 | 601388 | 7.2294 | 5.71716 | JPT |
| rs7149711  | EIF2S1 | GI_34147492-S | 14 | 14 | 66321476 | 600057 | 7.459  | 5.71716 | JPT |
| rs8022328  | EIF2S1 | GI_34147492-S | 14 | 14 | 66322788 | 598745 | 7.2294 | 5.71716 | JPT |
| rs8008773  | EIF2S1 | GI_34147492-S | 14 | 14 | 66332916 | 588617 | 5.9125 | 5.71716 | JPT |
| rs11158647 | EIF2S1 | GI_34147492-S | 14 | 14 | 66347063 | 574470 | 7.5846 | 5.71716 | JPT |
| rs4141703  | EIF2S1 | GI_34147492-S | 14 | 14 | 66347197 | 574336 | 6.9365 | 5.71716 | JPT |
| rs4141702  | EIF2S1 | GI_34147492-S | 14 | 14 | 66347472 | 574061 | 6.7521 | 5.71716 | JPT |
| rs7145718  | EIF2S1 | GI_34147492-S | 14 | 14 | 66351936 | 569597 | 6.7521 | 5.71716 | JPT |
| rs3784075  | EIF2S1 | GI_34147492-S | 14 | 14 | 66360939 | 560594 | 6.9365 | 5.71716 | JPT |
| rs8006552  | EIF2S1 | GI_34147492-S | 14 | 14 | 66363822 | 557711 | 6.7521 | 5.71716 | JPT |
| rs12323781 | EIF2S1 | GI_34147492-S | 14 | 14 | 66364969 | 556564 | 7.8155 | 5.71716 | JPT |
| rs8012660  | EIF2S1 | GI_34147492-S | 14 | 14 | 66370424 | 551109 | 6.7521 | 5.71716 | JPT |
| rs8018920  | EIF2S1 | GI_34147492-S | 14 | 14 | 66374819 | 546714 | 6.7521 | 5.71716 | JPT |
| rs10142176 | EIF2S1 | GI_34147492-S | 14 | 14 | 66376569 | 544964 | 6.9365 | 5.71716 | JPT |
| rs17247862 | EIF2S1 | GI_34147492-S | 14 | 14 | 66382113 | 539420 | 7.4077 | 5.71716 | JPT |
| rs9323486  | EIF2S1 | GI_34147492-S | 14 | 14 | 66385324 | 536209 | 6.1701 | 5.71716 | JPT |
| rs10143670 | EIF2S1 | GI_34147492-S | 14 | 14 | 66389277 | 532256 | 6.8122 | 5.71716 | JPT |
| rs6573726  | EIF2S1 | GI_34147492-S | 14 | 14 | 66394281 | 527252 | 7.2294 | 5.71716 | JPT |
| rs2144909  | EIF2S1 | GI_34147492-S | 14 | 14 | 66395197 | 526336 | 7.2294 | 5.71716 | JPT |
| rs12590085 | EIF2S1 | GI_34147492-S | 14 | 14 | 66398842 | 522691 | 7.1457 | 5.71716 | JPT |
| rs7160476  | EIF2S1 | GI_34147492-S | 14 | 14 | 66402130 | 519403 | 6.9365 | 5.71716 | JPT |
| rs1950689  | EIF2S1 | GI_34147492-S | 14 | 14 | 66408431 | 513102 | 6.7521 | 5.71716 | JPT |
| rs7156852  | EIF2S1 | GI_34147492-S | 14 | 14 | 66410302 | 511231 | 7.3279 | 5.71716 | JPT |
| rs6573727  | EIF2S1 | GI_34147492-S | 14 | 14 | 66413452 | 508081 | 7.2294 | 5.71716 | JPT |
| rs17836604 | EIF2S1 | GI_34147492-S | 14 | 14 | 66417469 | 504064 | 7.2622 | 5.71716 | JPT |
| rs8022437  | EIF2S1 | GI_34147492-S | 14 | 14 | 66418094 | 503439 | 7.4077 | 5.71716 | JPT |
| rs10047902 | EIF2S1 | GI_34147492-S | 14 | 14 | 66418900 | 502633 | 6.7521 | 5.71716 | JPT |
| rs8014841  | EIF2S1 | GI_34147492-S | 14 | 14 | 66421979 | 499554 | 6.7521 | 5.71716 | JPT |
| rs4578576  | EIF2S1 | GI_34147492-S | 14 | 14 | 66425392 | 496141 | 6.7521 | 5.71716 | JPT |
| rs728647   | EIF2S1 | GI_34147492-S | 14 | 14 | 66447808 | 473725 | 6.7521 | 5.71716 | JPT |
| rs723432   | EIF2S1 | GI_34147492-S | 14 | 14 | 66448768 | 472765 | 6.2252 | 5.71716 | JPT |
| rs7156081  | EIF2S1 | GI_34147492-S | 14 | 14 | 66453896 | 467637 | 6.9365 | 5.71716 | JPT |
| rs2038398  | EIF2S1 | GI_34147492-S | 14 | 14 | 66455481 | 466052 | 7.4077 | 5.71716 | JPT |
| rs8022657  | EIF2S1 | GI_34147492-S | 14 | 14 | 66460252 | 461281 | 6.7521 | 5.71716 | JPT |
| rs10135117 | EIF2S1 | GI_34147492-S | 14 | 14 | 66469144 | 452389 | 6.7521 | 5.71716 | JPT |
| rs1950281  | EIF2S1 | GI_34147492-S | 14 | 14 | 66471052 | 450481 | 6.7521 | 5.71716 | JPT |
| rs10135701 | EIF2S1 | GI_34147492-S | 14 | 14 | 66486730 | 434803 | 6.9365 | 5.71716 | JPT |
| rs10147954 | EIF2S1 | GI_34147492-S | 14 | 14 | 66486836 | 434697 | 6.9365 | 5.71716 | JPT |
| rs12588821 | EIF2S1 | GI_34147492-S | 14 | 14 | 66494253 | 427280 | 6.7521 | 5.71716 | JPT |
| rs8012063  | EIF2S1 | GI_34147492-S | 14 | 14 | 66504223 | 417310 | 6.7532 | 5.71716 | JPT |
| rs8016725  | EIF2S1 | GI_34147492-S | 14 | 14 | 66504935 | 416598 | 6.8799 | 5.71716 | JPT |
| rs8013401  | EIF2S1 | GI_34147492-S | 14 | 14 | 66512912 | 408621 | 7.2294 | 5.71716 | JPT |
| rs6573740  | EIF2S1 | GI_34147492-S | 14 | 14 | 66515522 | 406011 | 6.2716 | 5.71716 | JPT |
| rs2319549  | EIF2S1 | GI_34147492-S | 14 | 14 | 66523146 | 398387 | 6.9365 | 5.71716 | JPT |
| rs8020095  | EIF2S1 | GI_34147492-S | 14 | 14 | 66523611 | 397922 | 6.7521 | 5.71716 | JPT |
| rs2013137  | EIF2S1 | GI_34147492-S | 14 | 14 | 66527748 | 393785 | 7.8482 | 5.71716 | JPT |
| rs7152001  | EIF2S1 | GI_34147492-S | 14 | 14 | 66531101 | 390432 | 6.8252 | 5.71716 | JPT |
| rs7142068  | EIF2S1 | GI_34147492-S | 14 | 14 | 66532765 | 388768 | 6.9365 | 5.71716 | JPT |
| rs10150424 | EIF2S1 | GI_34147492-S | 14 | 14 | 66539544 | 381989 | 6.9365 | 5.71716 | JPT |
| rs8016391  | EIF2S1 | GI_34147492-S | 14 | 14 | 66540033 | 381500 | 7.5199 | 5.71716 | JPT |
| rs1955610  | EIF2S1 | GI_34147492-S | 14 | 14 | 66540615 | 380918 | 6.9365 | 5.71716 | JPT |



|            |        |               |    |    |          |        |        |         |     |
|------------|--------|---------------|----|----|----------|--------|--------|---------|-----|
| rs1955609  | EIF2S1 | GI_34147492-S | 14 | 14 | 66540824 | 380709 | 6.9365 | 5.71716 | JPT |
| rs1955608  | EIF2S1 | GI_34147492-S | 14 | 14 | 66540848 | 380685 | 7.5199 | 5.71716 | JPT |
| rs8012944  | EIF2S1 | GI_34147492-S | 14 | 14 | 66543451 | 378082 | 7.4077 | 5.71716 | JPT |
| rs1955606  | EIF2S1 | GI_34147492-S | 14 | 14 | 66547400 | 374133 | 6.7521 | 5.71716 | JPT |
| rs1955605  | EIF2S1 | GI_34147492-S | 14 | 14 | 66550797 | 370736 | 7.9325 | 5.71716 | JPT |
| rs10138631 | EIF2S1 | GI_34147492-S | 14 | 14 | 66551129 | 370404 | 7.9138 | 5.71716 | JPT |
| rs10131242 | EIF2S1 | GI_34147492-S | 14 | 14 | 66552316 | 369217 | 7.4077 | 5.71716 | JPT |
| rs10142059 | EIF2S1 | GI_34147492-S | 14 | 14 | 66552382 | 369151 | 7.2294 | 5.71716 | JPT |
| rs7144580  | EIF2S1 | GI_34147492-S | 14 | 14 | 66552641 | 368892 | 6.9644 | 5.71716 | JPT |
| rs1950284  | EIF2S1 | GI_34147492-S | 14 | 14 | 66553274 | 368259 | 7.4077 | 5.71716 | JPT |
| rs9323489  | EIF2S1 | GI_34147492-S | 14 | 14 | 66554099 | 367434 | 6.9365 | 5.71716 | JPT |
| rs6573744  | EIF2S1 | GI_34147492-S | 14 | 14 | 66555393 | 366140 | 7.4077 | 5.71716 | JPT |
| rs1950282  | EIF2S1 | GI_34147492-S | 14 | 14 | 66557382 | 364151 | 7.2294 | 5.71716 | JPT |
| rs7157126  | EIF2S1 | GI_34147492-S | 14 | 14 | 66557983 | 363550 | 7.2294 | 5.71716 | JPT |
| rs1546940  | EIF2S1 | GI_34147492-S | 14 | 14 | 66563531 | 358002 | 6.7521 | 5.71716 | JPT |
| rs7149905  | EIF2S1 | GI_34147492-S | 14 | 14 | 66569469 | 352064 | 7.0473 | 5.71716 | JPT |
| rs7145295  | EIF2S1 | GI_34147492-S | 14 | 14 | 66570480 | 351053 | 6.7521 | 5.71716 | JPT |
| rs7151086  | EIF2S1 | GI_34147492-S | 14 | 14 | 66571308 | 350225 | 6.776  | 5.71716 | JPT |
| rs6573745  | EIF2S1 | GI_34147492-S | 14 | 14 | 66572711 | 348822 | 7.0277 | 5.71716 | JPT |
| rs10136622 | EIF2S1 | GI_34147492-S | 14 | 14 | 66575362 | 346171 | 6.7521 | 5.71716 | JPT |
| rs6573746  | EIF2S1 | GI_34147492-S | 14 | 14 | 66576406 | 345127 | 7.4077 | 5.71716 | JPT |
| rs12587392 | EIF2S1 | GI_34147492-S | 14 | 14 | 66580101 | 341432 | 7.1664 | 5.71716 | JPT |
| rs10220477 | EIF2S1 | GI_34147492-S | 14 | 14 | 66581500 | 340033 | 7.459  | 5.71716 | JPT |
| rs7161698  | EIF2S1 | GI_34147492-S | 14 | 14 | 66585036 | 336497 | 7.6181 | 5.71716 | JPT |
| rs8008739  | EIF2S1 | GI_34147492-S | 14 | 14 | 66586544 | 334989 | 6.853  | 5.71716 | JPT |
| rs6573747  | EIF2S1 | GI_34147492-S | 14 | 14 | 66587601 | 333932 | 6.7521 | 5.71716 | JPT |
| rs8019510  | EIF2S1 | GI_34147492-S | 14 | 14 | 66593668 | 327865 | 7.6232 | 5.71716 | JPT |
| rs7161664  | EIF2S1 | GI_34147492-S | 14 | 14 | 66594240 | 327293 | 7.2294 | 5.71716 | JPT |
| rs7141519  | EIF2S1 | GI_34147492-S | 14 | 14 | 66594278 | 327255 | 7.2294 | 5.71716 | JPT |
| rs9323490  | EIF2S1 | GI_34147492-S | 14 | 14 | 66596090 | 325443 | 6.2252 | 5.71716 | JPT |
| rs2144061  | EIF2S1 | GI_34147492-S | 14 | 14 | 66596315 | 325218 | 6.7521 | 5.71716 | JPT |
| rs9323491  | EIF2S1 | GI_34147492-S | 14 | 14 | 66596988 | 324545 | 6.2252 | 5.71716 | JPT |
| rs9323492  | EIF2S1 | GI_34147492-S | 14 | 14 | 66598210 | 323323 | 7.6773 | 5.71716 | JPT |
| rs8003929  | EIF2S1 | GI_34147492-S | 14 | 14 | 66603026 | 318507 | 7.5791 | 5.71716 | JPT |
| rs10138952 | EIF2S1 | GI_34147492-S | 14 | 14 | 66605772 | 315761 | 6.6108 | 5.71716 | JPT |
| rs7150739  | EIF2S1 | GI_34147492-S | 14 | 14 | 66608701 | 312832 | 6.9365 | 5.71716 | JPT |
| rs10149600 | EIF2S1 | GI_34147492-S | 14 | 14 | 66609583 | 311950 | 6.7899 | 5.71716 | JPT |
| rs13367791 | EIF2S1 | GI_34147492-S | 14 | 14 | 66612431 | 309102 | 6.7521 | 5.71716 | JPT |
| rs10141815 | EIF2S1 | GI_34147492-S | 14 | 14 | 66619556 | 301977 | 6.394  | 5.71716 | JPT |
| rs10483793 | EIF2S1 | GI_34147492-S | 14 | 14 | 66626018 | 295515 | 6.9365 | 5.71716 | JPT |
| rs7158228  | EIF2S1 | GI_34147492-S | 14 | 14 | 66632476 | 289057 | 7.9761 | 5.71716 | JPT |
| rs7157394  | EIF2S1 | GI_34147492-S | 14 | 14 | 66632522 | 289011 | 7.9761 | 5.71716 | JPT |
| rs7157418  | EIF2S1 | GI_34147492-S | 14 | 14 | 66632568 | 288965 | 7.9761 | 5.71716 | JPT |
| rs17248252 | EIF2S1 | GI_34147492-S | 14 | 14 | 66632682 | 288851 | 7.9761 | 5.71716 | JPT |
| rs8009087  | EIF2S1 | GI_34147492-S | 14 | 14 | 66633963 | 287570 | 6.7521 | 5.71716 | JPT |
| rs768770   | EIF2S1 | GI_34147492-S | 14 | 14 | 66636923 | 284610 | 6.9365 | 5.71716 | JPT |
| rs7493580  | EIF2S1 | GI_34147492-S | 14 | 14 | 66650203 | 271330 | 6.5522 | 5.71716 | JPT |
| rs2039055  | EIF2S1 | GI_34147492-S | 14 | 14 | 66650546 | 270987 | 6.7521 | 5.71716 | JPT |
| rs8012776  | EIF2S1 | GI_34147492-S | 14 | 14 | 66657631 | 263902 | 6.7521 | 5.71716 | JPT |
| rs10141952 | EIF2S1 | GI_34147492-S | 14 | 14 | 66669922 | 251611 | 6.9365 | 5.71716 | JPT |
| rs10144371 | EIF2S1 | GI_34147492-S | 14 | 14 | 66674390 | 247143 | 7.0867 | 5.71716 | JPT |
| rs10138850 | EIF2S1 | GI_34147492-S | 14 | 14 | 66676521 | 245012 | 7.9761 | 5.71716 | JPT |
| rs10138865 | EIF2S1 | GI_34147492-S | 14 | 14 | 66676555 | 244978 | 7.2783 | 5.71716 | JPT |
| rs1918483  | EIF2S1 | GI_34147492-S | 14 | 14 | 66677376 | 244157 | 7.7164 | 5.71716 | JPT |
| rs7146638  | EIF2S1 | GI_34147492-S | 14 | 14 | 66683145 | 238388 | 8.6852 | 5.71716 | JPT |
| rs17248357 | EIF2S1 | GI_34147492-S | 14 | 14 | 66687707 | 233826 | 8.2031 | 5.71716 | JPT |

|            |        |               |    |    |          |        |        |         |     |
|------------|--------|---------------|----|----|----------|--------|--------|---------|-----|
| rs7148044  | EIF2S1 | GI_34147492-S | 14 | 14 | 66692323 | 229210 | 7.5974 | 5.71716 | JPT |
| rs7148425  | EIF2S1 | GI_34147492-S | 14 | 14 | 66692569 | 228964 | 7.9761 | 5.71716 | JPT |
| rs10131984 | EIF2S1 | GI_34147492-S | 14 | 14 | 66695169 | 226364 | 7.2294 | 5.71716 | JPT |
| rs7151898  | EIF2S1 | GI_34147492-S | 14 | 14 | 66696347 | 225186 | 6.7521 | 5.71716 | JPT |
| rs3866760  | EIF2S1 | GI_34147492-S | 14 | 14 | 66702333 | 219200 | 7.4077 | 5.71716 | JPT |
| rs2295903  | EIF2S1 | GI_34147492-S | 14 | 14 | 66704071 | 217462 | 7.9366 | 5.71716 | JPT |
| rs2281676  | EIF2S1 | GI_34147492-S | 14 | 14 | 66708208 | 213325 | 7.2294 | 5.71716 | JPT |
| rs7154905  | EIF2S1 | GI_34147492-S | 14 | 14 | 66709646 | 211887 | 7.2734 | 5.71716 | JPT |
| rs6573754  | EIF2S1 | GI_34147492-S | 14 | 14 | 66709924 | 211609 | 6.1045 | 5.71716 | JPT |
| rs10134592 | EIF2S1 | GI_34147492-S | 14 | 14 | 66710419 | 211114 | 6.6193 | 5.71716 | JPT |
| rs7156119  | EIF2S1 | GI_34147492-S | 14 | 14 | 66719868 | 201665 | 7.5951 | 5.71716 | JPT |
| rs17248421 | EIF2S1 | GI_34147492-S | 14 | 14 | 66722675 | 198858 | 8.2031 | 5.71716 | JPT |
| rs6573755  | EIF2S1 | GI_34147492-S | 14 | 14 | 66724229 | 197304 | 7.7294 | 5.71716 | JPT |
| rs11158653 | EIF2S1 | GI_34147492-S | 14 | 14 | 66728648 | 192885 | 7.4998 | 5.71716 | JPT |
| rs17104103 | EIF2S1 | GI_34147492-S | 14 | 14 | 66731705 | 189828 | 8.4442 | 5.71716 | JPT |
| rs17104106 | EIF2S1 | GI_34147492-S | 14 | 14 | 66733185 | 188348 | 9.4212 | 5.71716 | JPT |
| rs10873200 | EIF2S1 | GI_34147492-S | 14 | 14 | 66736772 | 184761 | 8.9133 | 5.71716 | JPT |
| rs8004488  | EIF2S1 | GI_34147492-S | 14 | 14 | 66737155 | 184378 | 8.2028 | 5.71716 | JPT |
| rs11158655 | EIF2S1 | GI_34147492-S | 14 | 14 | 66741454 | 180079 | 8.9133 | 5.71716 | JPT |
| rs6573760  | EIF2S1 | GI_34147492-S | 14 | 14 | 66747128 | 174405 | 7.4945 | 5.71716 | JPT |
| rs10431718 | EIF2S1 | GI_34147492-S | 14 | 14 | 66752389 | 169144 | 8.9133 | 5.71716 | JPT |
| rs12590956 | EIF2S1 | GI_34147492-S | 14 | 14 | 66761202 | 160331 | 7.6902 | 5.71716 | JPT |
| rs8009318  | EIF2S1 | GI_34147492-S | 14 | 14 | 66762525 | 159008 | 8.9133 | 5.71716 | JPT |
| rs10141879 | EIF2S1 | GI_34147492-S | 14 | 14 | 66764943 | 156590 | 9.1127 | 5.71716 | JPT |
| rs10145744 | EIF2S1 | GI_34147492-S | 14 | 14 | 66766669 | 154864 | 9.4212 | 5.71716 | JPT |
| rs10152002 | EIF2S1 | GI_34147492-S | 14 | 14 | 66768669 | 152864 | 9.4212 | 5.71716 | JPT |
| rs1475127  | EIF2S1 | GI_34147492-S | 14 | 14 | 66768958 | 152575 | 8.4194 | 5.71716 | JPT |
| rs10147852 | EIF2S1 | GI_34147492-S | 14 | 14 | 66772413 | 149120 | 8.9133 | 5.71716 | JPT |
| rs10145913 | EIF2S1 | GI_34147492-S | 14 | 14 | 66774743 | 146790 | 9.1969 | 5.71716 | JPT |
| rs1078194  | EIF2S1 | GI_34147492-S | 14 | 14 | 66777549 | 143984 | 7.6902 | 5.71716 | JPT |
| rs10145586 | EIF2S1 | GI_34147492-S | 14 | 14 | 66780377 | 141156 | 8.9133 | 5.71716 | JPT |
| rs11158658 | EIF2S1 | GI_34147492-S | 14 | 14 | 66780885 | 140648 | 8.1744 | 5.71716 | JPT |
| rs8015862  | EIF2S1 | GI_34147492-S | 14 | 14 | 66780927 | 140606 | 9.4212 | 5.71716 | JPT |
| rs1073607  | EIF2S1 | GI_34147492-S | 14 | 14 | 66782437 | 139096 | 8.9133 | 5.71716 | JPT |
| rs12323494 | EIF2S1 | GI_34147492-S | 14 | 14 | 66784512 | 137021 | 9.6321 | 5.71716 | JPT |
| rs10459453 | EIF2S1 | GI_34147492-S | 14 | 14 | 66787029 | 134504 | 8.9133 | 5.71716 | JPT |
| rs6573763  | EIF2S1 | GI_34147492-S | 14 | 14 | 66788081 | 133452 | 8.5079 | 5.71716 | JPT |
| rs8016037  | EIF2S1 | GI_34147492-S | 14 | 14 | 66788464 | 133069 | 9.4212 | 5.71716 | JPT |
| rs8008236  | EIF2S1 | GI_34147492-S | 14 | 14 | 66799438 | 122095 | 8.9133 | 5.71716 | JPT |
| rs8008443  | EIF2S1 | GI_34147492-S | 14 | 14 | 66799568 | 121965 | 7.1808 | 5.71716 | JPT |
| rs4636843  | EIF2S1 | GI_34147492-S | 14 | 14 | 66800353 | 121180 | 7.0203 | 5.71716 | JPT |
| rs12589218 | EIF2S1 | GI_34147492-S | 14 | 14 | 66800713 | 120820 | 9.4212 | 5.71716 | JPT |
| rs9743912  | EIF2S1 | GI_34147492-S | 14 | 14 | 66802614 | 118919 | 7.1007 | 5.71716 | JPT |
| rs9743911  | EIF2S1 | GI_34147492-S | 14 | 14 | 66802700 | 118833 | 9.4212 | 5.71716 | JPT |
| rs9743983  | EIF2S1 | GI_34147492-S | 14 | 14 | 66802717 | 118816 | 7.4884 | 5.71716 | JPT |
| rs2146230  | EIF2S1 | GI_34147492-S | 14 | 14 | 66804629 | 116904 | 9.4212 | 5.71716 | JPT |
| rs7149535  | EIF2S1 | GI_34147492-S | 14 | 14 | 66805121 | 116412 | 9.4212 | 5.71716 | JPT |
| rs1006595  | EIF2S1 | GI_34147492-S | 14 | 14 | 66808605 | 112928 | 6.6533 | 5.71716 | JPT |
| rs1318914  | EIF2S1 | GI_34147492-S | 14 | 14 | 66813819 | 107714 | 8.9133 | 5.71716 | JPT |
| rs8021896  | EIF2S1 | GI_34147492-S | 14 | 14 | 66818999 | 102534 | 8.9133 | 5.71716 | JPT |
| rs1535491  | EIF2S1 | GI_34147492-S | 14 | 14 | 66822448 | 99085  | 8.9133 | 5.71716 | JPT |
| rs6573765  | EIF2S1 | GI_34147492-S | 14 | 14 | 66825989 | 95544  | 7.1007 | 5.71716 | JPT |
| rs10140817 | EIF2S1 | GI_34147492-S | 14 | 14 | 66828361 | 93172  | 8.9133 | 5.71716 | JPT |
| rs10144401 | EIF2S1 | GI_34147492-S | 14 | 14 | 66831608 | 89925  | 9.4212 | 5.71716 | JPT |
| rs10150902 | EIF2S1 | GI_34147492-S | 14 | 14 | 66833662 | 87871  | 8.524  | 5.71716 | JPT |
| rs12589091 | EIF2S1 | GI_34147492-S | 14 | 14 | 66834332 | 87201  | 6.886  | 5.71716 | JPT |

|            |          |               |    |    |          |        |         |         |     |
|------------|----------|---------------|----|----|----------|--------|---------|---------|-----|
| rs12586552 | EIF2S1   | GI_34147492-S | 14 | 14 | 66834488 | 87045  | 7.0701  | 5.71716 | JPT |
| rs1885590  | EIF2S1   | GI_34147492-S | 14 | 14 | 66836055 | 85478  | 7.3703  | 5.71716 | JPT |
| rs4286048  | EIF2S1   | GI_34147492-S | 14 | 14 | 66836269 | 85264  | 9.0088  | 5.71716 | JPT |
| rs10146722 | EIF2S1   | GI_34147492-S | 14 | 14 | 66838798 | 82735  | 10.8628 | 5.71716 | JPT |
| rs10146663 | EIF2S1   | GI_34147492-S | 14 | 14 | 66838930 | 82603  | 9.4212  | 5.71716 | JPT |
| rs2146229  | EIF2S1   | GI_34147492-S | 14 | 14 | 66845445 | 76088  | 9.4212  | 5.71716 | JPT |
| rs10129779 | EIF2S1   | GI_34147492-S | 14 | 14 | 66846249 | 75284  | 8.1414  | 5.71716 | JPT |
| rs8015819  | EIF2S1   | GI_34147492-S | 14 | 14 | 66848338 | 73195  | 8.0499  | 5.71716 | JPT |
| rs12588292 | EIF2S1   | GI_34147492-S | 14 | 14 | 66849259 | 72274  | 6.6533  | 5.71716 | JPT |
| rs1885589  | EIF2S1   | GI_34147492-S | 14 | 14 | 66852734 | 68799  | 8.7492  | 5.71716 | JPT |
| rs8007866  | EIF2S1   | GI_34147492-S | 14 | 14 | 66857060 | 64473  | 6.4019  | 5.71716 | JPT |
| rs8014966  | EIF2S1   | GI_34147492-S | 14 | 14 | 66858062 | 63471  | 8.9133  | 5.71716 | JPT |
| rs10138824 | EIF2S1   | GI_34147492-S | 14 | 14 | 66859310 | 62223  | 9.4212  | 5.71716 | JPT |
| rs2057396  | EIF2S1   | GI_34147492-S | 14 | 14 | 66860786 | 60747  | 8.9133  | 5.71716 | JPT |
| rs10131212 | EIF2S1   | GI_34147492-S | 14 | 14 | 66862120 | 59413  | 8.9133  | 5.71716 | JPT |
| rs17248616 | EIF2S1   | GI_34147492-S | 14 | 14 | 66866420 | 55113  | 10.738  | 5.71716 | JPT |
| rs2236333  | EIF2S1   | GI_34147492-S | 14 | 14 | 66868676 | 52857  | 8.9133  | 5.71716 | JPT |
| rs960797   | EIF2S1   | GI_34147492-S | 14 | 14 | 66870069 | 51464  | 6.6533  | 5.71716 | JPT |
| rs1045060  | EIF2S1   | GI_34147492-S | 14 | 14 | 66875006 | 46527  | 9.3756  | 5.71716 | JPT |
| rs2319777  | EIF2S1   | GI_34147492-S | 14 | 14 | 66879786 | 41747  | 6.5662  | 5.71716 | JPT |
| rs10138755 | EIF2S1   | GI_34147492-S | 14 | 14 | 66882057 | 39476  | 8.7092  | 5.71716 | JPT |
| rs3818467  | EIF2S1   | GI_34147492-S | 14 | 14 | 66882227 | 39306  | 9.4212  | 5.71716 | JPT |
| rs2031563  | EIF2S1   | GI_34147492-S | 14 | 14 | 66884273 | 37260  | 9.4212  | 5.71716 | JPT |
| rs2274338  | EIF2S1   | GI_34147492-S | 14 | 14 | 66885736 | 35797  | 8.9133  | 5.71716 | JPT |
| rs8020850  | EIF2S1   | GI_34147492-S | 14 | 14 | 66889355 | 32178  | 6.6533  | 5.71716 | JPT |
| rs8015641  | EIF2S1   | GI_34147492-S | 14 | 14 | 66890457 | 31076  | 6.7382  | 5.71716 | JPT |
| rs1536271  | EIF2S1   | GI_34147492-S | 14 | 14 | 66890924 | 30609  | 8.9133  | 5.71716 | JPT |
| rs1536272  | EIF2S1   | GI_34147492-S | 14 | 14 | 66891054 | 30479  | 8.9133  | 5.71716 | JPT |
| rs8006519  | EIF2S1   | GI_34147492-S | 14 | 14 | 66892350 | 29183  | 7.7349  | 5.71716 | JPT |
| rs13379368 | EIF2S1   | GI_34147492-S | 14 | 14 | 66893244 | 28289  | 8.9133  | 5.71716 | JPT |
| rs13379142 | EIF2S1   | GI_34147492-S | 14 | 14 | 66893437 | 28096  | 11.1266 | 5.71716 | JPT |
| rs10137557 | EIF2S1   | GI_34147492-S | 14 | 14 | 66894077 | 27456  | 8.6141  | 5.71716 | JPT |
| rs10144417 | EIF2S1   | GI_34147492-S | 14 | 14 | 66896663 | 24870  | 9.4212  | 5.71716 | JPT |
| rs8016024  | EIF2S1   | GI_34147492-S | 14 | 14 | 66897231 | 24302  | 6.6533  | 5.71716 | JPT |
| rs2031564  | EIF2S1   | GI_34147492-S | 14 | 14 | 66897269 | 24264  | 6.668   | 5.71716 | JPT |
| rs3759755  | EIF2S1   | GI_34147492-S | 14 | 14 | 66898229 | 23304  | 8.9133  | 5.71716 | JPT |
| rs8006391  | EIF2S1   | GI_34147492-S | 14 | 14 | 66899432 | 22101  | 11.497  | 5.71716 | JPT |
| rs12588458 | EIF2S1   | GI_34147492-S | 14 | 14 | 66900609 | 20924  | 7.1808  | 5.71716 | JPT |
| rs7156441  | EIF2S1   | GI_34147492-S | 14 | 14 | 66902990 | 18543  | 9.4212  | 5.71716 | JPT |
| rs12588478 | EIF2S1   | GI_34147492-S | 14 | 14 | 66907644 | 13889  | 8.7826  | 5.71716 | JPT |
| rs12589671 | EIF2S1   | GI_34147492-S | 14 | 14 | 66908914 | 12619  | 8.9133  | 5.71716 | JPT |
| rs12590065 | EIF2S1   | GI_34147492-S | 14 | 14 | 66911331 | 10202  | 6.6533  | 5.71716 | JPT |
| rs8008724  | EIF2S1   | GI_34147492-S | 14 | 14 | 66916971 | 4562   | 9.4212  | 5.71716 | JPT |
| rs2296560  | EIF2S1   | GI_34147492-S | 14 | 14 | 66918647 | 2886   | 7.8696  | 5.71716 | JPT |
| rs2296561  | EIF2S1   | GI_34147492-S | 14 | 14 | 66918892 | 2641   | 6.5662  | 5.71716 | JPT |
| rs10131175 | EIF2S1   | GI_34147492-S | 14 | 14 | 66922484 | 951    | 8.9133  | 5.71716 | JPT |
| rs3784085  | EIF2S1   | GI_34147492-S | 14 | 14 | 66927906 | 6373   | 5.9558  | 5.71716 | JPT |
| rs8004332  | EIF2S1   | GI_34147492-S | 14 | 14 | 66934497 | 12964  | 8.2621  | 5.71716 | JPT |
| rs7153725  | EIF2S1   | GI_34147492-S | 14 | 14 | 66936424 | 14891  | 5.9327  | 5.71716 | JPT |
| rs7154607  | EIF2S1   | GI_34147492-S | 14 | 14 | 66936681 | 15148  | 6.3153  | 5.71716 | JPT |
| rs8004864  | EIF2S1   | GI_34147492-S | 14 | 14 | 66942999 | 21466  | 7.8355  | 5.71716 | JPT |
| rs8007618  | EIF2S1   | GI_34147492-S | 14 | 14 | 66946945 | 25412  | 7.0025  | 5.71716 | JPT |
| rs1555853  | EIF2S1   | GI_34147492-S | 14 | 14 | 66948137 | 26604  | 6.6115  | 5.71716 | JPT |
| rs8020262  | EIF2S1   | GI_34147492-S | 14 | 14 | 66955870 | 34337  | 6.1883  | 5.71716 | JPT |
| rs12590782 | KIAA1036 | GI_40254856-S | 14 | 14 | 76217429 | 101519 | 6.8125  | 5.93742 | JPT |
| rs12434722 | KIAA1036 | GI_40254856-S | 14 | 14 | 76217854 | 101094 | 5.9652  | 5.93742 | JPT |

|            |           |               |    |    |           |       |         |         |     |
|------------|-----------|---------------|----|----|-----------|-------|---------|---------|-----|
| rs12587318 | KIAA1036  | GI_40254856-S | 14 | 14 | 76221556  | 97392 | 6.0434  | 5.93742 | JPT |
| rs2216094  | KIAA1036  | GI_40254856-S | 14 | 14 | 76227269  | 91679 | 6.3505  | 5.93742 | JPT |
| rs4899603  | KIAA1036  | GI_40254856-S | 14 | 14 | 76228217  | 90731 | 6.3659  | 5.93742 | JPT |
| rs10459551 | KIAA1036  | GI_40254856-S | 14 | 14 | 76231023  | 87925 | 6.3673  | 5.93742 | JPT |
| rs10459552 | KIAA1036  | GI_40254856-S | 14 | 14 | 76231076  | 87872 | 6.0434  | 5.93742 | JPT |
| rs2905     | C14orf130 | GI_28411949-A | 14 | 14 | 92763175  | 6731  | 6.3337  | 6.21926 | JPT |
| rs11621915 | C14orf130 | GI_28411949-A | 14 | 14 | 92763584  | 7140  | 6.3337  | 6.21926 | JPT |
| rs1950652  | KIAA1622  | GI_17402885-I | 14 | 14 | 93904089  | 88802 | 6.5865  | 6.2083  | JPT |
| rs17093165 | TCL6      | GI_21536345-A | 14 | 14 | 95202248  | 5246  | 6.6951  | 6.38762 | JPT |
| rs3759537  | TCL6      | GI_21536345-A | 14 | 14 | 95204869  | 2625  | 6.7113  | 6.38762 | JPT |
| rs2296310  | TCL6      | GI_21536345-A | 14 | 14 | 95206528  | 966   | 11.7017 | 6.38762 | JPT |
| rs2296310  | TCL1B     | GI_40548373-A | 14 | 14 | 95206528  | 21921 | 8.3818  | 6.29273 | JPT |
| rs2249778  | TCL6      | GI_21536345-A | 14 | 14 | 95206547  | 947   | 12.543  | 6.38762 | JPT |
| rs2249778  | TCL1B     | GI_40548373-A | 14 | 14 | 95206547  | 21902 | 8.2729  | 6.29273 | JPT |
| rs7142772  | SIVA      | GI_11277467-I | 14 | 14 | 104271422 | 21741 | 6.2333  | 5.87184 | JPT |
| rs4247034  | SIVA      | GI_11277467-I | 14 | 14 | 104279924 | 13239 | 7.7088  | 5.87184 | JPT |
| rs4983386  | SIVA      | GI_11277467-I | 14 | 14 | 104281252 | 11911 | 7.7216  | 5.87184 | JPT |
| rs4983543  | SIVA      | GI_11277467-I | 14 | 14 | 104283444 | 9719  | 7.6087  | 5.87184 | JPT |
| rs6644     | SIVA      | GI_11277467-I | 14 | 14 | 104284388 | 8775  | 7.6087  | 5.87184 | JPT |
| rs12590163 | SIVA      | GI_11277467-I | 14 | 14 | 104294570 | 1407  | 6.2008  | 5.87184 | JPT |
| rs2075624  | IVD       | GI_6031167-S  | 15 | 15 | 38498015  | 29    | 5.8893  | 5.83    | JPT |
| rs7174915  | CCNDBP1   | GI_16554567-I | 15 | 15 | 41208461  | 57148 | 6.5333  | 5.5983  | JPT |
| rs11070391 | CCNDBP1   | GI_16554567-I | 15 | 15 | 41220895  | 44714 | 8.0148  | 5.5983  | JPT |
| rs530305   | CCNDBP1   | GI_16554567-I | 15 | 15 | 41283192  | 17583 | 6.6175  | 5.5983  | JPT |
| rs531850   | CCNDBP1   | GI_16554567-I | 15 | 15 | 41283334  | 17725 | 6.4164  | 5.5983  | JPT |
| rs494863   | CCNDBP1   | GI_16554567-I | 15 | 15 | 41289594  | 23985 | 6.8181  | 5.5983  | JPT |
| rs2899077  | CCNDBP1   | GI_16554567-I | 15 | 15 | 41297317  | 31708 | 7.1349  | 5.5983  | JPT |
| rs11070396 | CCNDBP1   | GI_16554567-I | 15 | 15 | 41310214  | 44605 | 6.7411  | 5.5983  | JPT |
| rs7183814  | CCNDBP1   | GI_16554567-I | 15 | 15 | 41316922  | 51313 | 7.1349  | 5.5983  | JPT |
| rs2241516  | CCNDBP1   | GI_16554567-I | 15 | 15 | 41317939  | 52330 | 6.4164  | 5.5983  | JPT |
| rs16957511 | CCNDBP1   | GI_16554567-I | 15 | 15 | 41327409  | 61800 | 7.1349  | 5.5983  | JPT |
| rs11070906 | Hs.11898  | Hs.11898-S    | 15 | 15 | 50709817  | 26813 | 9.1807  | 6.14388 | JPT |
| rs8030871  | Hs.11898  | Hs.11898-S    | 15 | 15 | 50725393  | 11237 | 9.5221  | 6.14388 | JPT |
| rs8036979  | Hs.11898  | Hs.11898-S    | 15 | 15 | 50735287  | 1343  | 8.8993  | 6.14388 | JPT |
| rs11633933 | Hs.11898  | Hs.11898-S    | 15 | 15 | 50735649  | 981   | 9.5616  | 6.14388 | JPT |
| rs17651941 | Hs.11898  | Hs.11898-S    | 15 | 15 | 50735918  | 712   | 9.1807  | 6.14388 | JPT |
| rs11638844 | CTSH      | GI_23110956-A | 15 | 15 | 77018573  | 17162 | 5.9702  | 5.83067 | JPT |
| rs10400902 | CTSH      | GI_23110956-A | 15 | 15 | 77018671  | 17260 | 6.8166  | 5.83067 | JPT |
| rs1550065  | CTSH      | GI_23110956-A | 15 | 15 | 77034155  | 32744 | 6.6011  | 5.83067 | JPT |
| rs6495451  | LOC400410 | GI_42660516-S | 15 | 15 | 77951108  | 42905 | 7.4831  | 6.31875 | JPT |
| rs1113983  | LOC400410 | GI_42660516-S | 15 | 15 | 77953652  | 40361 | 9.7928  | 6.31875 | JPT |
| rs934134   | LOC400410 | GI_42660516-S | 15 | 15 | 77955273  | 38740 | 7.4831  | 6.31875 | JPT |
| rs8036559  | LOC400410 | GI_42660516-S | 15 | 15 | 77957618  | 36395 | 7.4831  | 6.31875 | JPT |
| rs2562744  | LOC400410 | GI_42660516-S | 15 | 15 | 77961443  | 32570 | 9.7928  | 6.31875 | JPT |
| rs12438477 | LOC400410 | GI_42660516-S | 15 | 15 | 77965338  | 28675 | 10.1155 | 6.31875 | JPT |
| rs8042012  | LOC400410 | GI_42660516-S | 15 | 15 | 77966902  | 27111 | 10.9229 | 6.31875 | JPT |
| rs2586183  | LOC400410 | GI_42660516-S | 15 | 15 | 77967161  | 26852 | 10.5685 | 6.31875 | JPT |
| rs2733088  | LOC400410 | GI_42660516-S | 15 | 15 | 77971712  | 22301 | 7.7581  | 6.31875 | JPT |
| rs2115539  | LOC400410 | GI_42660516-S | 15 | 15 | 77977940  | 16073 | 7.7581  | 6.31875 | JPT |
| rs4778889  | IL16      | GI_27262656-I | 15 | 15 | 79376050  | 11845 | 6.6072  | 6.2148  | JPT |
| rs4778891  | IL16      | GI_27262656-I | 15 | 15 | 79376885  | 11010 | 6.3446  | 6.2148  | JPT |
| rs4778636  | IL16      | GI_27262656-I | 15 | 15 | 79378694  | 9201  | 6.5113  | 6.2148  | JPT |
| rs3898677  | IL16      | GI_27262656-I | 15 | 15 | 79383617  | 4278  | 7.064   | 6.2148  | JPT |
| rs3926277  | IL16      | GI_27262656-I | 15 | 15 | 79386349  | 1546  | 6.2525  | 6.2148  | JPT |
| rs3926278  | IL16      | GI_27262656-I | 15 | 15 | 79386410  | 1485  | 6.5113  | 6.2148  | JPT |
| rs4778639  | IL16      | GI_27262656-I | 15 | 15 | 79387506  | 389   | 6.6685  | 6.2148  | JPT |

|            |               |               |    |    |          |        |        |         |     |
|------------|---------------|---------------|----|----|----------|--------|--------|---------|-----|
| rs540      | MRPL28        | GI_39812062-S | 16 | 16 | 360908   | 3475   | 5.5565 | 5.52668 | JPT |
| rs3743888  | MRPL28        | GI_39812062-S | 16 | 16 | 364421   | 6988   | 5.5565 | 5.52668 | JPT |
| rs1573736  | MRPL28        | GI_39812062-S | 16 | 16 | 372752   | 15319  | 5.5939 | 5.52668 | JPT |
| rs378201   | DKFZP566J2046 | GI_13654273-S | 16 | 16 | 1855035  | 36321  | 6.0924 | 5.79647 | JPT |
| rs404413   | DKFZP566J2046 | GI_13654273-S | 16 | 16 | 1855056  | 36342  | 5.8195 | 5.79647 | JPT |
| rs404772   | DKFZP566J2046 | GI_13654273-S | 16 | 16 | 1857175  | 38461  | 5.942  | 5.79647 | JPT |
| rs9935266  | DKFZP566J2046 | GI_13654273-S | 16 | 16 | 1859452  | 40738  | 5.942  | 5.79647 | JPT |
| rs447782   | DKFZP566J2046 | GI_13654273-S | 16 | 16 | 1860317  | 41603  | 5.942  | 5.79647 | JPT |
| rs1657095  | DKFZP566J2046 | GI_13654273-S | 16 | 16 | 1860630  | 41916  | 6.0924 | 5.79647 | JPT |
| rs1657095  | DKFZP566J2046 | GI_13654273-S | 16 | 16 | 1860679  | 41965  | 5.942  | 5.79647 | JPT |
| rs2917523  | DKFZP566J2046 | GI_13654273-S | 16 | 16 | 1860741  | 42027  | 6.0924 | 5.79647 | JPT |
| rs2974856  | DKFZP566J2046 | GI_13654273-S | 16 | 16 | 1860758  | 42044  | 5.942  | 5.79647 | JPT |
| rs2982235  | DKFZP566J2046 | GI_13654273-S | 16 | 16 | 1860793  | 42079  | 6.0924 | 5.79647 | JPT |
| rs173164   | DKFZP566J2046 | GI_13654273-S | 16 | 16 | 1865280  | 46566  | 5.942  | 5.79647 | JPT |
| rs9926522  | PRO0149       | GI_38016918-S | 16 | 16 | 9124449  | 3613   | 6.5915 | 6.52573 | JPT |
| rs2719691  | FLJ32871      | GI_21389568-S | 16 | 16 | 10670082 | 41066  | 6.2727 | 6.13918 | JPT |
| rs4780974  | FLJ32871      | GI_21389568-S | 16 | 16 | 10670239 | 41223  | 6.2124 | 6.13918 | JPT |
| rs7196606  | MYH11         | GI_13124878-A | 16 | 16 | 15848526 | 143884 | 8.5077 | 5.73249 | JPT |
| rs9922682  | MYH11         | GI_13124878-A | 16 | 16 | 15854279 | 149637 | 7.6697 | 5.73249 | JPT |
| rs13335286 | MYH11         | GI_13124878-A | 16 | 16 | 15855666 | 151024 | 7.6697 | 5.73249 | JPT |
| rs9933130  | MYH11         | GI_13124878-A | 16 | 16 | 15855786 | 151144 | 7.0945 | 5.73249 | JPT |
| rs9932525  | MYH11         | GI_13124878-A | 16 | 16 | 15855860 | 151218 | 6.5126 | 5.73249 | JPT |
| rs9932695  | MYH11         | GI_13124878-A | 16 | 16 | 15856040 | 151398 | 7.6697 | 5.73249 | JPT |
| rs9925632  | MYH11         | GI_13124878-A | 16 | 16 | 15856066 | 151424 | 7.4726 | 5.73249 | JPT |
| rs9933417  | MYH11         | GI_13124878-A | 16 | 16 | 15856133 | 151491 | 7.6802 | 5.73249 | JPT |
| rs9925813  | MYH11         | GI_13124878-A | 16 | 16 | 15856269 | 151627 | 7.3359 | 5.73249 | JPT |
| rs9935015  | MYH11         | GI_13124878-A | 16 | 16 | 15856402 | 151760 | 6.3018 | 5.73249 | JPT |
| rs3851702  | MYH11         | GI_13124878-A | 16 | 16 | 15857063 | 152421 | 7.6697 | 5.73249 | JPT |
| rs3851703  | MYH11         | GI_13124878-A | 16 | 16 | 15857148 | 152506 | 7.5    | 5.73249 | JPT |
| rs1544352  | LOC339053     | GI_29746836-S | 16 | 16 | 19621383 | 4040   | 6.0884 | 5.95794 | JPT |
| rs8044607  | LOC339053     | GI_29746836-S | 16 | 16 | 19627447 | 2024   | 6.5222 | 5.95794 | JPT |
| rs3829539  | LOC339053     | GI_29746836-S | 16 | 16 | 19629867 | 4444   | 6.0884 | 5.95794 | JPT |
| rs2074037  | LOC339053     | GI_29746836-S | 16 | 16 | 19632631 | 7208   | 6.0884 | 5.95794 | JPT |
| rs4780822  | LOC339053     | GI_29746836-S | 16 | 16 | 19635499 | 10076  | 6.0884 | 5.95794 | JPT |
| rs1858973  | LOC339053     | GI_29746836-S | 16 | 16 | 19651150 | 25727  | 6.0137 | 5.95794 | JPT |
| rs8055485  | LOC339053     | GI_29746836-S | 16 | 16 | 19657552 | 32129  | 6.0137 | 5.95794 | JPT |
| rs8056301  | LOC339053     | GI_29746836-S | 16 | 16 | 19657776 | 32353  | 6.0884 | 5.95794 | JPT |
| rs924815   | LOC339053     | GI_29746836-S | 16 | 16 | 19664502 | 39079  | 6.0884 | 5.95794 | JPT |
| rs4780826  | LOC339053     | GI_29746836-S | 16 | 16 | 19667076 | 41653  | 6.0884 | 5.95794 | JPT |
| rs6497402  | LOC339053     | GI_29746836-S | 16 | 16 | 19676895 | 51472  | 6.0884 | 5.95794 | JPT |
| rs4782281  | LOC339053     | GI_29746836-S | 16 | 16 | 19677324 | 51901  | 6.0884 | 5.95794 | JPT |
| rs1021865  | LOC339053     | GI_29746836-S | 16 | 16 | 19692192 | 66769  | 6.0884 | 5.95794 | JPT |
| rs9931167  | LOC339053     | GI_29746836-S | 16 | 16 | 19700099 | 74676  | 6.0884 | 5.95794 | JPT |
| rs6497404  | LOC339053     | GI_29746836-S | 16 | 16 | 19707634 | 82211  | 6.0884 | 5.95794 | JPT |
| rs7191155  | LOC339053     | GI_29746836-S | 16 | 16 | 19707714 | 82291  | 7.0214 | 5.95794 | JPT |
| rs7202651  | LOC339053     | GI_29746836-S | 16 | 16 | 19709515 | 84092  | 6.0884 | 5.95794 | JPT |
| rs8050872  | LOC339053     | GI_29746836-S | 16 | 16 | 19711347 | 85924  | 6.0923 | 5.95794 | JPT |
| rs11865403 | LOC339053     | GI_29746836-S | 16 | 16 | 19731994 | 106571 | 6.0884 | 5.95794 | JPT |
| rs8056711  | LOC339053     | GI_29746836-S | 16 | 16 | 19734035 | 108612 | 6.0884 | 5.95794 | JPT |
| rs249869   | MGC3248       | GI_34147426-S | 16 | 16 | 23574058 | 14332  | 6.0467 | 5.86167 | JPT |
| rs35585    | MGC3248       | GI_34147426-S | 16 | 16 | 23584612 | 3778   | 6.0584 | 5.86167 | JPT |
| rs40076    | MGC3248       | GI_34147426-S | 16 | 16 | 23599906 | 11516  | 6.0467 | 5.86167 | JPT |
| rs35635    | MGC3248       | GI_34147426-S | 16 | 16 | 23601271 | 12881  | 6.0584 | 5.86167 | JPT |
| rs42873    | MGC3248       | GI_34147426-S | 16 | 16 | 23602233 | 13843  | 6.0058 | 5.86167 | JPT |
| rs26767    | MGC3248       | GI_34147426-S | 16 | 16 | 23605958 | 17568  | 6.0587 | 5.86167 | JPT |
| rs26764    | MGC3248       | GI_34147426-S | 16 | 16 | 23619426 | 31036  | 7.3778 | 5.86167 | JPT |

|            |           |               |    |    |          |        |         |         |     |
|------------|-----------|---------------|----|----|----------|--------|---------|---------|-----|
| rs11074570 | MGC3248   | GI_34147426-S | 16 | 16 | 23620229 | 31839  | 5.9931  | 5.86167 | JPT |
| rs7188975  | LCMT1     | GI_15082255-I | 16 | 16 | 25044950 | 71178  | 10.7745 | 6.22166 | JPT |
| rs11074678 | LCMT1     | GI_15082255-I | 16 | 16 | 25057227 | 83455  | 10.949  | 6.22166 | JPT |
| rs277908   | LCMT1     | GI_15082255-I | 16 | 16 | 25062635 | 88863  | 10.949  | 6.22166 | JPT |
| rs277913   | LCMT1     | GI_15082255-I | 16 | 16 | 25066244 | 92472  | 11.1105 | 6.22166 | JPT |
| rs277917   | LCMT1     | GI_15082255-I | 16 | 16 | 25066646 | 92874  | 10.949  | 6.22166 | JPT |
| rs277886   | LCMT1     | GI_15082255-I | 16 | 16 | 25070005 | 96233  | 10.949  | 6.22166 | JPT |
| rs277898   | LCMT1     | GI_15082255-I | 16 | 16 | 25079311 | 105539 | 6.4466  | 6.22166 | JPT |
| rs277900   | LCMT1     | GI_15082255-I | 16 | 16 | 25081500 | 107728 | 9.6824  | 6.22166 | JPT |
| rs277903   | LCMT1     | GI_15082255-I | 16 | 16 | 25082623 | 108851 | 8.442   | 6.22166 | JPT |
| rs277891   | LCMT1     | GI_15082255-I | 16 | 16 | 25088257 | 114485 | 10.949  | 6.22166 | JPT |
| rs277893   | LCMT1     | GI_15082255-I | 16 | 16 | 25089212 | 115440 | 10.949  | 6.22166 | JPT |
| rs7205902  | LCMT1     | GI_15082255-I | 16 | 16 | 25120016 | 146244 | 6.4434  | 6.22166 | JPT |
| rs725131   | TK2       | GI_33636700-S | 16 | 16 | 65143211 | 40964  | 5.5083  | 5.50787 | JPT |
| rs7193473  | TK2       | GI_33636700-S | 16 | 16 | 65157980 | 55733  | 5.5083  | 5.50787 | JPT |
| rs12448207 | TK2       | GI_33636700-S | 16 | 16 | 65189886 | 87639  | 5.7918  | 5.50787 | JPT |
| rs244422   | LOC283970 | GI_40217627-S | 16 | 16 | 68175014 | 392836 | 5.7619  | 5.38324 | JPT |
| rs33063    | LOC283970 | GI_40217627-S | 16 | 16 | 68197718 | 370132 | 5.6592  | 5.38324 | JPT |
| rs9980     | LOC283970 | GI_40217627-S | 16 | 16 | 68294969 | 272881 | 5.7489  | 5.38324 | JPT |
| rs17299478 | LOC283970 | GI_40217627-S | 16 | 16 | 68333001 | 234849 | 9.2557  | 5.38324 | JPT |
| rs3748386  | LOC283970 | GI_40217627-S | 16 | 16 | 68532160 | 35690  | 8.1436  | 5.38324 | JPT |
| rs3748385  | LOC283970 | GI_40217627-S | 16 | 16 | 68573917 | 6067   | 10.8772 | 5.38324 | JPT |
| rs9939092  | LOC283970 | GI_40217627-S | 16 | 16 | 68596778 | 28928  | 10.4219 | 5.38324 | JPT |
| rs929840   | LOC283970 | GI_40217627-S | 16 | 16 | 68603409 | 35559  | 8.1196  | 5.38324 | JPT |
| rs12930433 | LOC283970 | GI_40217627-S | 16 | 16 | 68608544 | 40694  | 8.9997  | 5.38324 | JPT |
| rs6499292  | LOC283970 | GI_40217627-S | 16 | 16 | 68661559 | 93709  | 10.4219 | 5.38324 | JPT |
| rs17303895 | LOC283970 | GI_40217627-S | 16 | 16 | 68663185 | 95335  | 6.7622  | 5.38324 | JPT |
| rs16970320 | COG4      | GI_21070955-A | 16 | 16 | 69168567 | 96438  | 5.647   | 5.55596 | JPT |
| rs2303216  | BM039     | GI_39725678-S | 16 | 16 | 79567671 | 43688  | 7.4623  | 6.26861 | JPT |
| rs16954368 | BM039     | GI_39725678-S | 16 | 16 | 79568447 | 42912  | 7.4623  | 6.26861 | JPT |
| rs3743503  | BM039     | GI_39725678-S | 16 | 16 | 79613942 | 2583   | 7.3624  | 6.26861 | JPT |
| rs4782328  | LOC197322 | GI_28372536-S | 16 | 16 | 87709719 | 39854  | 6.3842  | 6.24028 | JPT |
| rs8053537  | LOC197322 | GI_28372536-S | 16 | 16 | 87710698 | 38875  | 7.5179  | 6.24028 | JPT |
| rs4782327  | LOC197322 | GI_28372536-S | 16 | 16 | 87711636 | 37937  | 7.8776  | 6.24028 | JPT |
| rs11076770 | LOC197322 | GI_28372536-S | 16 | 16 | 87733011 | 16562  | 8.0952  | 6.24028 | JPT |
| rs10852635 | LOC197322 | GI_28372536-S | 16 | 16 | 87733374 | 16199  | 8.0952  | 6.24028 | JPT |
| rs12931350 | LOC197322 | GI_28372536-S | 16 | 16 | 87735816 | 13757  | 8.0952  | 6.24028 | JPT |
| rs12597637 | LOC197322 | GI_28372536-S | 16 | 16 | 87749296 | 277    | 6.7281  | 6.24028 | JPT |
| rs12599862 | LOC197322 | GI_28372536-S | 16 | 16 | 87763436 | 13863  | 8.9763  | 6.24028 | JPT |
| rs3785414  | LOC197322 | GI_28372536-S | 16 | 16 | 87777900 | 28327  | 9.4553  | 6.24028 | JPT |
| rs4785569  | SPG7      | GI_40806172-I | 16 | 16 | 88082815 | 48554  | 7.5972  | 6.03539 | JPT |
| rs4329923  | SPG7      | GI_40806172-I | 16 | 16 | 88087679 | 43690  | 7.7057  | 6.03539 | JPT |
| rs4785571  | SPG7      | GI_40806172-I | 16 | 16 | 88092670 | 38699  | 7.4623  | 6.03539 | JPT |
| rs9921048  | SPG7      | GI_40806172-I | 16 | 16 | 88094785 | 36584  | 7.5972  | 6.03539 | JPT |
| rs4347628  | SPG7      | GI_40806172-I | 16 | 16 | 88098136 | 33233  | 7.5972  | 6.03539 | JPT |
| rs9922341  | SPG7      | GI_40806172-I | 16 | 16 | 88099316 | 32053  | 7.4623  | 6.03539 | JPT |
| rs3809641  | SPG7      | GI_40806172-I | 16 | 16 | 88101667 | 29702  | 7.4157  | 6.03539 | JPT |
| rs3922634  | SPG7      | GI_40806172-I | 16 | 16 | 88104267 | 27102  | 7.5972  | 6.03539 | JPT |
| rs8046182  | SPG7      | GI_40806172-I | 16 | 16 | 88108717 | 22652  | 7.4623  | 6.03539 | JPT |
| rs8052076  | SPG7      | GI_40806172-I | 16 | 16 | 88111310 | 20059  | 7.0565  | 6.03539 | JPT |
| rs11862081 | SPG7      | GI_40806172-I | 16 | 16 | 88115989 | 15380  | 7.4623  | 6.03539 | JPT |
| rs3803680  | SPG7      | GI_40806172-I | 16 | 16 | 88117744 | 13625  | 7.5972  | 6.03539 | JPT |
| rs3803679  | SPG7      | GI_40806172-I | 16 | 16 | 88118168 | 13201  | 7.5972  | 6.03539 | JPT |
| rs3803677  | SPG7      | GI_40806172-I | 16 | 16 | 88123224 | 8145   | 7.9533  | 6.03539 | JPT |
| rs3803676  | SPG7      | GI_40806172-I | 16 | 16 | 88123607 | 7762   | 8.236   | 6.03539 | JPT |
| rs463701   | SPG7      | GI_40806172-I | 16 | 16 | 88126261 | 5108   | 8.388   | 6.03539 | JPT |

|            |              |               |    |    |          |        |         |         |     |
|------------|--------------|---------------|----|----|----------|--------|---------|---------|-----|
| rs2460456  | SPG7         | GI_40806172-I | 16 | 16 | 88129394 | 1975   | 6.2726  | 6.03539 | JPT |
| rs11640186 | SPG7         | GI_40806172-I | 16 | 16 | 88129507 | 1862   | 8.236   | 6.03539 | JPT |
| rs382745   | SPG7         | GI_40806172-I | 16 | 16 | 88131087 | 282    | 8.236   | 6.03539 | JPT |
| rs2056309  | SPG7         | GI_40806172-I | 16 | 16 | 88134915 | 3546   | 6.1623  | 6.03539 | JPT |
| rs11150880 | LOC400566    | GI_42661283-S | 17 | 17 | 237667   | 26975  | 6.2031  | 5.90249 | JPT |
| rs8064453  | LOC400566    | GI_42661283-S | 17 | 17 | 265835   | 1193   | 9.6004  | 5.90249 | JPT |
| rs6565726  | LOC400566    | GI_42661283-S | 17 | 17 | 272556   | 7914   | 9.6004  | 5.90249 | JPT |
| rs12936393 | CTNS         | GI_4826681-S  | 17 | 17 | 3498059  | 13365  | 7.4452  | 5.94733 | JPT |
| rs4790530  | CTNS         | GI_4826681-S  | 17 | 17 | 3502173  | 9251   | 7.4452  | 5.94733 | JPT |
| rs238242   | DKFZP566H073 | GI_14149701-S | 17 | 17 | 4790519  | 1342   | 7.2339  | 5.96733 | JPT |
| rs238238   | DKFZP566H073 | GI_14149701-S | 17 | 17 | 4797122  | 7945   | 6.7732  | 5.96733 | JPT |
| rs238224   | DKFZP566H073 | GI_14149701-S | 17 | 17 | 4804133  | 14956  | 7.693   | 5.96733 | JPT |
| rs452825   | DKFZP566H073 | GI_14149701-S | 17 | 17 | 4814939  | 25762  | 8.7177  | 5.96733 | JPT |
| rs238230   | DKFZP566H073 | GI_14149701-S | 17 | 17 | 4816290  | 27113  | 6.1748  | 5.96733 | JPT |
| rs238229   | DKFZP566H073 | GI_14149701-S | 17 | 17 | 4817844  | 28667  | 8.4057  | 5.96733 | JPT |
| rs238228   | DKFZP566H073 | GI_14149701-S | 17 | 17 | 4819684  | 30507  | 8.4057  | 5.96733 | JPT |
| rs1859434  | DKFZP566H073 | GI_14149701-S | 17 | 17 | 4823676  | 34499  | 8.1917  | 5.96733 | JPT |
| rs238234   | DKFZP566H073 | GI_14149701-S | 17 | 17 | 4824542  | 35365  | 8.1917  | 5.96733 | JPT |
| rs238233   | DKFZP566H073 | GI_14149701-S | 17 | 17 | 4826706  | 37529  | 6.6951  | 5.96733 | JPT |
| rs238232   | DKFZP566H073 | GI_14149701-S | 17 | 17 | 4826761  | 37584  | 8.1917  | 5.96733 | JPT |
| rs238237   | DKFZP566H073 | GI_14149701-S | 17 | 17 | 4843682  | 54505  | 7.4547  | 5.96733 | JPT |
| rs238235   | DKFZP566H073 | GI_14149701-S | 17 | 17 | 4865057  | 75880  | 6.5992  | 5.96733 | JPT |
| rs1875673  | DERP6        | GI_44662825-I | 17 | 17 | 7049230  | 47211  | 9.0401  | 6.31588 | JPT |
| rs2521985  | DERP6        | GI_44662825-I | 17 | 17 | 7062509  | 33932  | 9.4806  | 6.31588 | JPT |
| rs222837   | DERP6        | GI_44662825-I | 17 | 17 | 7073280  | 23161  | 9.1046  | 6.31588 | JPT |
| rs222835   | DERP6        | GI_44662825-I | 17 | 17 | 7074853  | 21588  | 9.6799  | 6.31588 | JPT |
| rs222843   | DERP6        | GI_44662825-I | 17 | 17 | 7086705  | 9736   | 13.8738 | 6.31588 | JPT |
| rs402514   | DERP6        | GI_44662825-I | 17 | 17 | 7098927  | 2486   | 13.8738 | 6.31588 | JPT |
| rs8067500  | DERP6        | GI_44662825-I | 17 | 17 | 7113355  | 16914  | 8.8232  | 6.31588 | JPT |
| rs2654189  | DERP6        | GI_44662825-I | 17 | 17 | 7118596  | 22155  | 11.0575 | 6.31588 | JPT |
| rs5415     | DERP6        | GI_44662825-I | 17 | 17 | 7125205  | 28764  | 8.7378  | 6.31588 | JPT |
| rs222849   | DERP6        | GI_44662825-I | 17 | 17 | 7126585  | 30144  | 6.7625  | 6.31588 | JPT |
| rs5435     | DERP6        | GI_44662825-I | 17 | 17 | 7127847  | 31406  | 8.3052  | 6.31588 | JPT |
| rs10438740 | LOC400571    | GI_42661084-S | 17 | 17 | 7413608  | 12770  | 6.5847  | 6.46764 | JPT |
| rs2270341  | LOC400571    | GI_42661084-S | 17 | 17 | 7421271  | 5107   | 7.7804  | 6.46764 | JPT |
| rs9901673  | LOC400571    | GI_42661084-S | 17 | 17 | 7424825  | 1553   | 6.7713  | 6.46764 | JPT |
| rs8066665  | LOC400571    | GI_42661084-S | 17 | 17 | 7426576  | 198    | 7.7804  | 6.46764 | JPT |
| rs10852891 | LOC400571    | GI_42661084-S | 17 | 17 | 7431534  | 5156   | 6.4914  | 6.46764 | JPT |
| rs858526   | LOC400571    | GI_42661084-S | 17 | 17 | 7440107  | 13729  | 7.2158  | 6.46764 | JPT |
| rs858524   | LOC400571    | GI_42661084-S | 17 | 17 | 7452012  | 25634  | 7.0119  | 6.46764 | JPT |
| rs2779212  | Hs.379903    | Hs.379903-S   | 17 | 17 | 15817380 | 3310   | 11.8558 | 6.09622 | JPT |
| rs1045599  | Hs.379903    | Hs.379903-S   | 17 | 17 | 15820635 | 55     | 12.4423 | 6.09622 | JPT |
| rs11654    | Hs.379903    | Hs.379903-S   | 17 | 17 | 15821876 | 1186   | 11.5382 | 6.09622 | JPT |
| rs2286795  | Hs.379903    | Hs.379903-S   | 17 | 17 | 15824534 | 3844   | 11.5382 | 6.09622 | JPT |
| rs2286796  | Hs.379903    | Hs.379903-S   | 17 | 17 | 15824952 | 4262   | 11.3958 | 6.09622 | JPT |
| rs8070859  | Hs.379903    | Hs.379903-S   | 17 | 17 | 15828514 | 7824   | 11.5382 | 6.09622 | JPT |
| rs4792709  | Hs.379903    | Hs.379903-S   | 17 | 17 | 15833166 | 12476  | 11.5382 | 6.09622 | JPT |
| rs9891938  | Hs.379903    | Hs.379903-S   | 17 | 17 | 15855797 | 35107  | 10.8891 | 6.09622 | JPT |
| rs11869450 | Hs.379903    | Hs.379903-S   | 17 | 17 | 15864434 | 43744  | 8.8356  | 6.09622 | JPT |
| rs6416868  | Hs.379903    | Hs.379903-S   | 17 | 17 | 15865095 | 44405  | 11.8558 | 6.09622 | JPT |
| rs4792715  | Hs.379903    | Hs.379903-S   | 17 | 17 | 15867948 | 47258  | 9.9634  | 6.09622 | JPT |
| rs2285583  | Hs.379903    | Hs.379903-S   | 17 | 17 | 15908868 | 88178  | 11.8558 | 6.09622 | JPT |
| rs178831   | Hs.379903    | Hs.379903-S   | 17 | 17 | 16021574 | 200884 | 9.328   | 6.09622 | JPT |
| rs854774   | SHMT1        | GI_22547185-I | 17 | 17 | 17992700 | 186953 | 5.7828  | 5.64698 | JPT |
| rs854773   | SHMT1        | GI_22547185-I | 17 | 17 | 17995593 | 184060 | 6.0003  | 5.64698 | JPT |
| rs12937179 | ALDH3A2      | GI_4557302-S  | 17 | 17 | 19524677 | 3590   | 5.5284  | 5.33633 | JPT |

|            |          |               |    |    |          |        |         |         |     |
|------------|----------|---------------|----|----|----------|--------|---------|---------|-----|
| rs3744362  | FLJ10458 | GI_20070287-S | 17 | 17 | 30483209 | 632    | 8.8942  | 5.92237 | JPT |
| rs2306512  | FLJ10458 | GI_20070287-S | 17 | 17 | 30484544 | 1967   | 8.8942  | 5.92237 | JPT |
| rs2306513  | FLJ10458 | GI_20070287-S | 17 | 17 | 30484629 | 2052   | 8.8427  | 5.92237 | JPT |
| rs1982706  | hmm5445  | hmm5445-S     | 17 | 17 | 30571980 | 46574  | 6.5078  | 6.03999 | JPT |
| rs7211922  | MGC19764 | GI_42661257-S | 17 | 17 | 30572361 | 46220  | 6.0888  | 6.00869 | JPT |
| rs4796060  | hmm5445  | hmm5445-S     | 17 | 17 | 30572621 | 45933  | 6.3149  | 6.03999 | JPT |
| rs4795066  | hmm5445  | hmm5445-S     | 17 | 17 | 30573985 | 44569  | 6.3007  | 6.03999 | JPT |
| rs12947525 | MGC19764 | GI_42661257-S | 17 | 17 | 30574776 | 43805  | 6.0888  | 6.00869 | JPT |
| rs8065018  | hmm5445  | hmm5445-S     | 17 | 17 | 30575410 | 43144  | 6.2327  | 6.03999 | JPT |
| rs12945522 | MGC19764 | GI_42661257-S | 17 | 17 | 30586993 | 31588  | 6.0888  | 6.00869 | JPT |
| rs11654852 | MGC19764 | GI_42661257-S | 17 | 17 | 30587382 | 31199  | 6.2026  | 6.00869 | JPT |
| rs11651305 | MGC19764 | GI_42661257-S | 17 | 17 | 30587415 | 31166  | 6.0888  | 6.00869 | JPT |
| rs11080325 | MGC19764 | GI_42661257-S | 17 | 17 | 30587822 | 30759  | 6.0888  | 6.00869 | JPT |
| rs12602385 | MGC19764 | GI_42661257-S | 17 | 17 | 30587869 | 30712  | 6.5442  | 6.00869 | JPT |
| rs12945972 | MGC19764 | GI_42661257-S | 17 | 17 | 30588134 | 30447  | 6.0888  | 6.00869 | JPT |
| rs11080326 | MGC19764 | GI_42661257-S | 17 | 17 | 30588522 | 30059  | 10.3348 | 6.00869 | JPT |
| rs11080326 | hmm5445  | hmm5445-S     | 17 | 17 | 30588522 | 30032  | 9.8073  | 6.03999 | JPT |
| rs11867191 | MGC19764 | GI_42661257-S | 17 | 17 | 30593227 | 25354  | 10.5579 | 6.00869 | JPT |
| rs11867191 | hmm5445  | hmm5445-S     | 17 | 17 | 30593227 | 25327  | 9.3972  | 6.03999 | JPT |
| rs883416   | MGC19764 | GI_42661257-S | 17 | 17 | 30594554 | 24027  | 10.0813 | 6.00869 | JPT |
| rs883416   | hmm5445  | hmm5445-S     | 17 | 17 | 30594554 | 24000  | 9.6221  | 6.03999 | JPT |
| rs3744781  | MGC20781 | GI_34147471-S | 17 | 17 | 37235677 | 526    | 6.1859  | 5.4498  | JPT |
| rs9896766  | MGC20781 | GI_34147471-S | 17 | 17 | 37237170 | 2019   | 8.0521  | 5.4498  | JPT |
| rs1046404  | MGC20781 | GI_34147471-S | 17 | 17 | 37237334 | 2183   | 8.0521  | 5.4498  | JPT |
| rs1046403  | MGC20781 | GI_34147471-S | 17 | 17 | 37237346 | 2195   | 8.0521  | 5.4498  | JPT |
| rs4796713  | MGC20781 | GI_34147471-S | 17 | 17 | 37240887 | 5736   | 8.0063  | 5.4498  | JPT |
| rs4796715  | MGC20781 | GI_34147471-S | 17 | 17 | 37247297 | 12146  | 8.0063  | 5.4498  | JPT |
| rs1529933  | MGC20781 | GI_34147471-S | 17 | 17 | 37251667 | 16516  | 8.0521  | 5.4498  | JPT |
| rs4796721  | MGC20781 | GI_34147471-S | 17 | 17 | 37256947 | 21796  | 8.0063  | 5.4498  | JPT |
| rs3744782  | MGC20781 | GI_34147471-S | 17 | 17 | 37264505 | 29354  | 6.8031  | 5.4498  | JPT |
| rs9303318  | MGC20781 | GI_34147471-S | 17 | 17 | 37273611 | 38460  | 6.9138  | 5.4498  | JPT |
| rs9912300  | MGC20781 | GI_34147471-S | 17 | 17 | 37278790 | 43639  | 5.8703  | 5.4498  | JPT |
| rs3744779  | MGC20781 | GI_34147471-S | 17 | 17 | 37278979 | 43828  | 6.9201  | 5.4498  | JPT |
| rs8071753  | MGC20781 | GI_34147471-S | 17 | 17 | 37282067 | 46916  | 6.9201  | 5.4498  | JPT |
| rs8071234  | MGC20781 | GI_34147471-S | 17 | 17 | 37282094 | 46943  | 6.9201  | 5.4498  | JPT |
| rs4796726  | MGC20781 | GI_34147471-S | 17 | 17 | 37283979 | 48828  | 6.9138  | 5.4498  | JPT |
| rs4796729  | MGC20781 | GI_34147471-S | 17 | 17 | 37295202 | 60051  | 6.9138  | 5.4498  | JPT |
| rs12937036 | MGC20781 | GI_34147471-S | 17 | 17 | 37297994 | 62843  | 6.9201  | 5.4498  | JPT |
| rs4796734  | MGC20781 | GI_34147471-S | 17 | 17 | 37300095 | 64944  | 6.9138  | 5.4498  | JPT |
| rs4458050  | MGC20781 | GI_34147471-S | 17 | 17 | 37305248 | 70097  | 6.9138  | 5.4498  | JPT |
| rs9908955  | MGC20781 | GI_34147471-S | 17 | 17 | 37311007 | 75856  | 6.2948  | 5.4498  | JPT |
| rs9916650  | MGC20781 | GI_34147471-S | 17 | 17 | 37314376 | 79225  | 6.9138  | 5.4498  | JPT |
| rs2304499  | MGC20781 | GI_34147471-S | 17 | 17 | 37322139 | 86988  | 6.9138  | 5.4498  | JPT |
| rs6503675  | MGC20781 | GI_34147471-S | 17 | 17 | 37339191 | 104040 | 6.9138  | 5.4498  | JPT |
| rs3809878  | MGC20781 | GI_34147471-S | 17 | 17 | 37348361 | 113210 | 6.3961  | 5.4498  | JPT |
| rs4796744  | MGC20781 | GI_34147471-S | 17 | 17 | 37349999 | 114848 | 6.3961  | 5.4498  | JPT |
| rs4594300  | MGC20781 | GI_34147471-S | 17 | 17 | 37351713 | 116562 | 6.3961  | 5.4498  | JPT |
| rs8078650  | MGC20781 | GI_34147471-S | 17 | 17 | 37374297 | 139146 | 6.3961  | 5.4498  | JPT |
| rs4796751  | MGC20781 | GI_34147471-S | 17 | 17 | 37381063 | 145912 | 7.1182  | 5.4498  | JPT |
| rs6503679  | MGC20781 | GI_34147471-S | 17 | 17 | 37400496 | 165345 | 7.1182  | 5.4498  | JPT |
| rs11652600 | MGC20781 | GI_34147471-S | 17 | 17 | 37404105 | 168954 | 7.1182  | 5.4498  | JPT |
| rs4239268  | MGC20781 | GI_34147471-S | 17 | 17 | 37408303 | 173152 | 7.1167  | 5.4498  | JPT |
| rs4796756  | MGC20781 | GI_34147471-S | 17 | 17 | 37409324 | 174173 | 7.1182  | 5.4498  | JPT |
| rs4796758  | MGC20781 | GI_34147471-S | 17 | 17 | 37423045 | 187894 | 7.1182  | 5.4498  | JPT |
| rs4796759  | MGC20781 | GI_34147471-S | 17 | 17 | 37428367 | 193216 | 7.1167  | 5.4498  | JPT |
| rs2240011  | MGC20781 | GI_34147471-S | 17 | 17 | 37447235 | 212084 | 6.8488  | 5.4498  | JPT |



|            |           |               |    |    |          |        |         |         |     |
|------------|-----------|---------------|----|----|----------|--------|---------|---------|-----|
| rs4796763  | MGC20781  | GI_34147471-S | 17 | 17 | 37458592 | 223441 | 6.8488  | 5.4498  | JPT |
| rs6503684  | MGC20781  | GI_34147471-S | 17 | 17 | 37460910 | 225759 | 6.8488  | 5.4498  | JPT |
| rs2074162  | MGC20781  | GI_34147471-S | 17 | 17 | 37468202 | 233051 | 8.2133  | 5.4498  | JPT |
| rs8078309  | ProSAPiP2 | GI_7662301-S  | 17 | 17 | 43129071 | 15138  | 5.9395  | 5.63538 | JPT |
| rs3803753  | RAD51C    | GI_17402895-I | 17 | 17 | 53895109 | 234059 | 6.7617  | 5.82455 | JPT |
| rs3803752  | RAD51C    | GI_17402895-I | 17 | 17 | 53895266 | 233902 | 6.6503  | 5.82455 | JPT |
| rs3087762  | RAD51C    | GI_17402895-I | 17 | 17 | 53923679 | 205489 | 6.7617  | 5.82455 | JPT |
| rs12603808 | RAD51C    | GI_17402895-I | 17 | 17 | 53933507 | 195661 | 6.7617  | 5.82455 | JPT |
| rs2240719  | RAD51C    | GI_17402895-I | 17 | 17 | 53937476 | 191692 | 6.5213  | 5.82455 | JPT |
| rs2007993  | RAD51C    | GI_17402895-I | 17 | 17 | 53945642 | 183526 | 6.7617  | 5.82455 | JPT |
| rs714959   | RAD51C    | GI_17402895-I | 17 | 17 | 53983600 | 145568 | 7.6587  | 5.82455 | JPT |
| rs7210432  | RAD51C    | GI_17402895-I | 17 | 17 | 54023169 | 105999 | 7.9733  | 5.82455 | JPT |
| rs1864754  | RAD51C    | GI_17402895-I | 17 | 17 | 54043788 | 85380  | 7.6587  | 5.82455 | JPT |
| rs411988   | RAD51C    | GI_17402895-I | 17 | 17 | 54064033 | 65135  | 7.6587  | 5.82455 | JPT |
| rs412000   | RAD51C    | GI_17402895-I | 17 | 17 | 54064057 | 65111  | 6.6964  | 5.82455 | JPT |
| rs17822837 | RAD51C    | GI_17402895-I | 17 | 17 | 54092837 | 36331  | 7.6587  | 5.82455 | JPT |
| rs2116450  | RAD51C    | GI_17402895-I | 17 | 17 | 54100560 | 28608  | 6.8694  | 5.82455 | JPT |
| rs12939313 | RAD51C    | GI_17402895-I | 17 | 17 | 54110615 | 18553  | 7.4052  | 5.82455 | JPT |
| rs12946522 | RAD51C    | GI_17402895-I | 17 | 17 | 54123102 | 6066   | 7.6587  | 5.82455 | JPT |
| rs17222691 | RAD51C    | GI_17402895-I | 17 | 17 | 54126095 | 3073   | 7.4052  | 5.82455 | JPT |
| rs17822908 | RAD51C    | GI_17402895-I | 17 | 17 | 54156777 | 27609  | 6.5592  | 5.82455 | JPT |
| rs8074016  | RAD51C    | GI_17402895-I | 17 | 17 | 54195586 | 66418  | 6.096   | 5.82455 | JPT |
| rs7224276  | RAD51C    | GI_17402895-I | 17 | 17 | 54252826 | 123658 | 5.9146  | 5.82455 | JPT |
| rs17175663 | RAD51C    | GI_17402895-I | 17 | 17 | 54463219 | 334051 | 6.0069  | 5.82455 | JPT |
| rs896064   | FTSJ3     | GI_17017990-S | 17 | 17 | 59214664 | 36168  | 5.5915  | 5.47162 | JPT |
| rs2044125  | FTSJ3     | GI_17017990-S | 17 | 17 | 59216916 | 33916  | 5.5371  | 5.47162 | JPT |
| rs2251164  | FTSJ3     | GI_17017990-S | 17 | 17 | 59237852 | 12980  | 5.8773  | 5.47162 | JPT |
| rs2665823  | FTSJ3     | GI_17017990-S | 17 | 17 | 59239649 | 11183  | 5.7304  | 5.47162 | JPT |
| rs2584624  | FTSJ3     | GI_17017990-S | 17 | 17 | 59258278 | 7446   | 5.5915  | 5.47162 | JPT |
| rs968719   | FTSJ3     | GI_17017990-S | 17 | 17 | 59262003 | 11171  | 5.5371  | 5.47162 | JPT |
| rs2665831  | FTSJ3     | GI_17017990-S | 17 | 17 | 59266124 | 15292  | 5.5371  | 5.47162 | JPT |
| rs2665797  | FTSJ3     | GI_17017990-S | 17 | 17 | 59276217 | 25385  | 5.5371  | 5.47162 | JPT |
| rs2727330  | FTSJ3     | GI_17017990-S | 17 | 17 | 59279230 | 28398  | 5.5371  | 5.47162 | JPT |
| rs2584610  | FTSJ3     | GI_17017990-S | 17 | 17 | 59288515 | 37683  | 5.5371  | 5.47162 | JPT |
| rs2584608  | FTSJ3     | GI_17017990-S | 17 | 17 | 59290442 | 39610  | 5.5371  | 5.47162 | JPT |
| rs2236737  | FTSJ3     | GI_17017990-S | 17 | 17 | 59291832 | 41000  | 5.5371  | 5.47162 | JPT |
| rs2584642  | FTSJ3     | GI_17017990-S | 17 | 17 | 59296159 | 45327  | 5.6616  | 5.47162 | JPT |
| rs2854214  | FTSJ3     | GI_17017990-S | 17 | 17 | 59299181 | 48349  | 5.5371  | 5.47162 | JPT |
| rs2854210  | FTSJ3     | GI_17017990-S | 17 | 17 | 59300070 | 49238  | 5.5022  | 5.47162 | JPT |
| rs1171197  | CMRF35    | GI_21314647-S | 17 | 17 | 70024240 | 24670  | 6.4356  | 6.37152 | JPT |
| rs783235   | CMRF35    | GI_21314647-S | 17 | 17 | 70056915 | 8005   | 7.311   | 6.37152 | JPT |
| rs4789349  | FLJ46603  | GI_38348363-S | 17 | 17 | 72217936 | 30427  | 9.8866  | 6.0462  | JPT |
| rs11654661 | LOC284178 | GI_27484781-S | 17 | 17 | 73996543 | 13206  | 8.6534  | 6.19807 | JPT |
| rs1062935  | raptor    | GI_22094986-S | 17 | 17 | 76554452 | 37     | 8.1599  | 5.74041 | JPT |
| rs2292182  | LOC284184 | GI_27500527-S | 17 | 17 | 76778244 | 50059  | 6.1884  | 6.02142 | JPT |
| rs3924327  | FLJ22175  | GI_19923616-S | 17 | 17 | 77128811 | 11372  | 7.8647  | 6.08559 | JPT |
| rs2243523  | FN3KRP    | GI_20149679-S | 17 | 17 | 78273738 | 5134   | 7.2222  | 5.7344  | JPT |
| rs502396   | HSRTSBETA | GI_42544118-A | 18 | 18 | 649236   | 16145  | 6.5862  | 6.01589 | JPT |
| rs1004474  | HSRTSBETA | GI_42544118-A | 18 | 18 | 650383   | 14998  | 7.0623  | 6.01589 | JPT |
| rs2244500  | HSRTSBETA | GI_42544116-I | 18 | 18 | 651005   | 51387  | 12.6659 | 6.01589 | JPT |
| rs2244500  | HSRTSBETA | GI_42544118-A | 18 | 18 | 651005   | 14376  | 8.3812  | 6.01589 | JPT |
| rs1001761  | HSRTSBETA | GI_42544116-I | 18 | 18 | 652103   | 50289  | 12.6659 | 6.01589 | JPT |
| rs1001761  | HSRTSBETA | GI_42544118-A | 18 | 18 | 652103   | 13278  | 8.3812  | 6.01589 | JPT |
| rs2612095  | HSRTSBETA | GI_42544116-I | 18 | 18 | 652370   | 50022  | 13.0065 | 6.01589 | JPT |
| rs2612095  | HSRTSBETA | GI_42544118-A | 18 | 18 | 652370   | 13011  | 8.7014  | 6.01589 | JPT |
| rs2847149  | HSRTSBETA | GI_42544116-I | 18 | 18 | 656371   | 46021  | 12.6659 | 6.01589 | JPT |

|            |           |               |    |    |          |        |         |         |     |
|------------|-----------|---------------|----|----|----------|--------|---------|---------|-----|
| rs2847149  | HSRTSBETA | GI_42544118-A | 18 | 18 | 656371   | 9010   | 8.3812  | 6.01589 | JPT |
| rs15872    | HSRTSBETA | GI_42544116-I | 18 | 18 | 658258   | 44134  | 13.1418 | 6.01589 | JPT |
| rs15872    | HSRTSBETA | GI_42544118-A | 18 | 18 | 658258   | 7123   | 8.4466  | 6.01589 | JPT |
| rs2847150  | HSRTSBETA | GI_42544116-I | 18 | 18 | 658300   | 44092  | 13.1418 | 6.01589 | JPT |
| rs2847150  | HSRTSBETA | GI_42544118-A | 18 | 18 | 658300   | 7081   | 8.4466  | 6.01589 | JPT |
| rs1051527  | HSRTSBETA | GI_42544116-I | 18 | 18 | 658376   | 44016  | 13.1418 | 6.01589 | JPT |
| rs1051527  | HSRTSBETA | GI_42544118-A | 18 | 18 | 658376   | 7005   | 8.4466  | 6.01589 | JPT |
| rs2853528  | HSRTSBETA | GI_42544116-I | 18 | 18 | 658650   | 43742  | 13.1418 | 6.01589 | JPT |
| rs2853528  | HSRTSBETA | GI_42544118-A | 18 | 18 | 658650   | 6731   | 8.4466  | 6.01589 | JPT |
| rs2853532  | HSRTSBETA | GI_42544116-I | 18 | 18 | 660414   | 41978  | 12.7619 | 6.01589 | JPT |
| rs2853532  | HSRTSBETA | GI_42544118-A | 18 | 18 | 660414   | 4967   | 8.1058  | 6.01589 | JPT |
| rs2612100  | HSRTSBETA | GI_42544116-I | 18 | 18 | 662363   | 40029  | 13.8251 | 6.01589 | JPT |
| rs2612100  | HSRTSBETA | GI_42544118-A | 18 | 18 | 662363   | 3018   | 9.8882  | 6.01589 | JPT |
| rs699517   | HSRTSBETA | GI_42544116-I | 18 | 18 | 663016   | 39376  | 13.8251 | 6.01589 | JPT |
| rs699517   | HSRTSBETA | GI_42544118-A | 18 | 18 | 663016   | 2365   | 9.8882  | 6.01589 | JPT |
| rs1059384  | HSRTSBETA | GI_42544116-I | 18 | 18 | 663995   | 38397  | 9.9108  | 6.01589 | JPT |
| rs1059384  | HSRTSBETA | GI_42544118-A | 18 | 18 | 663995   | 1386   | 6.894   | 6.01589 | JPT |
| rs3744962  | HSRTSBETA | GI_42544116-I | 18 | 18 | 664320   | 38072  | 7.6941  | 6.01589 | JPT |
| rs3744962  | HSRTSBETA | GI_42544118-A | 18 | 18 | 664320   | 1061   | 6.595   | 6.01589 | JPT |
| rs11081251 | HSRTSBETA | GI_42544116-I | 18 | 18 | 664440   | 37952  | 13.0191 | 6.01589 | JPT |
| rs11081251 | HSRTSBETA | GI_42544118-A | 18 | 18 | 664440   | 941    | 9.3888  | 6.01589 | JPT |
| rs9948583  | HSRTSBETA | GI_42544116-I | 18 | 18 | 665000   | 37392  | 11.3022 | 6.01589 | JPT |
| rs9948583  | HSRTSBETA | GI_42544118-A | 18 | 18 | 665000   | 381    | 9.8408  | 6.01589 | JPT |
| rs2276115  | HSRTSBETA | GI_42544118-A | 18 | 18 | 665774   | 393    | 7.2297  | 6.01589 | JPT |
| rs10502290 | HSRTSBETA | GI_42544118-A | 18 | 18 | 665903   | 522    | 7.1682  | 6.01589 | JPT |
| rs495139   | HSRTSBETA | GI_42544116-I | 18 | 18 | 666008   | 36384  | 13.7392 | 6.01589 | JPT |
| rs495139   | HSRTSBETA | GI_42544118-A | 18 | 18 | 666008   | 627    | 11.0293 | 6.01589 | JPT |
| rs7229142  | HSRTSBETA | GI_42544118-A | 18 | 18 | 667214   | 1833   | 7.1682  | 6.01589 | JPT |
| rs3819101  | HSRTSBETA | GI_42544118-A | 18 | 18 | 667240   | 1859   | 6.8454  | 6.01589 | JPT |
| rs2298583  | HSRTSBETA | GI_42544118-A | 18 | 18 | 667302   | 1921   | 7.1682  | 6.01589 | JPT |
| rs2741186  | HSRTSBETA | GI_42544116-I | 18 | 18 | 668947   | 33445  | 11.0866 | 6.01589 | JPT |
| rs2741186  | HSRTSBETA | GI_42544118-A | 18 | 18 | 668947   | 3566   | 8.7224  | 6.01589 | JPT |
| rs2612091  | HSRTSBETA | GI_42544116-I | 18 | 18 | 673607   | 28785  | 10.1136 | 6.01589 | JPT |
| rs2612091  | HSRTSBETA | GI_42544118-A | 18 | 18 | 673607   | 8226   | 7.4164  | 6.01589 | JPT |
| rs2612090  | HSRTSBETA | GI_42544116-I | 18 | 18 | 674766   | 27626  | 8.7536  | 6.01589 | JPT |
| rs2612090  | HSRTSBETA | GI_42544118-A | 18 | 18 | 674766   | 9385   | 6.467   | 6.01589 | JPT |
| rs12968285 | HSRTSBETA | GI_42544116-I | 18 | 18 | 682282   | 20110  | 8.9616  | 6.01589 | JPT |
| rs2305995  | HSRTSBETA | GI_42544116-I | 18 | 18 | 683977   | 18415  | 9.2054  | 6.01589 | JPT |
| rs2847602  | HSRTSBETA | GI_42544116-I | 18 | 18 | 684206   | 18186  | 14.7524 | 6.01589 | JPT |
| rs2847602  | HSRTSBETA | GI_42544118-A | 18 | 18 | 684206   | 18825  | 8.9175  | 6.01589 | JPT |
| rs2847325  | HSRTSBETA | GI_42544116-I | 18 | 18 | 693442   | 8950   | 14.5626 | 6.01589 | JPT |
| rs2847325  | HSRTSBETA | GI_42544118-A | 18 | 18 | 693442   | 28061  | 6.7711  | 6.01589 | JPT |
| rs2847327  | HSRTSBETA | GI_42544116-I | 18 | 18 | 696047   | 6345   | 13.4171 | 6.01589 | JPT |
| rs7235957  | HSRTSBETA | GI_42544116-I | 18 | 18 | 707229   | 4837   | 11.4324 | 6.01589 | JPT |
| rs8090148  | HSRTSBETA | GI_42544116-I | 18 | 18 | 717654   | 15262  | 11.4324 | 6.01589 | JPT |
| rs7228136  | HSRTSBETA | GI_42544116-I | 18 | 18 | 722017   | 19625  | 11.4324 | 6.01589 | JPT |
| rs9961743  | HSRTSBETA | GI_42544116-I | 18 | 18 | 732858   | 30466  | 14.0887 | 6.01589 | JPT |
| rs9961743  | HSRTSBETA | GI_42544118-A | 18 | 18 | 732858   | 67477  | 6.6928  | 6.01589 | JPT |
| rs3786347  | HSRTSBETA | GI_42544116-I | 18 | 18 | 733226   | 30834  | 11.4324 | 6.01589 | JPT |
| rs6506511  | HSRTSBETA | GI_42544116-I | 18 | 18 | 740937   | 38545  | 9.934   | 6.01589 | JPT |
| rs10460020 | HSRTSBETA | GI_42544116-I | 18 | 18 | 748443   | 46051  | 11.4324 | 6.01589 | JPT |
| rs3897601  | HSRTSBETA | GI_42544116-I | 18 | 18 | 757210   | 54818  | 8.63    | 6.01589 | JPT |
| rs9964147  | HSRTSBETA | GI_42544116-I | 18 | 18 | 773325   | 70933  | 8.9274  | 6.01589 | JPT |
| rs3887348  | LOC400642 | GI_42661344-S | 18 | 18 | 5223105  | 13246  | 6.1434  | 5.8148  | JPT |
| rs8576     | LOC400642 | GI_42661344-S | 18 | 18 | 5236398  | 47     | 6.6002  | 5.8148  | JPT |
| rs264200   | FLJ23403  | GI_13384601-S | 18 | 18 | 10953991 | 293003 | 6.4503  | 6.32258 | JPT |

|            |               |               |    |    |          |        |        |         |     |
|------------|---------------|---------------|----|----|----------|--------|--------|---------|-----|
| rs8099544  | FLJ23403      | GI_13384601-S | 18 | 18 | 10957641 | 296653 | 6.4245 | 6.32258 | JPT |
| rs264236   | FLJ34907      | GI_29743984-S | 18 | 18 | 10962496 | 177545 | 6.5806 | 6.42752 | JPT |
| rs264232   | FLJ34907      | GI_29743984-S | 18 | 18 | 10964823 | 179872 | 6.5806 | 6.42752 | JPT |
| rs155323   | FLJ34907      | GI_29743984-S | 18 | 18 | 10965413 | 180462 | 7.1479 | 6.42752 | JPT |
| rs2660283  | FLJ23403      | GI_13384601-S | 18 | 18 | 10987117 | 326129 | 6.399  | 6.32258 | JPT |
| rs12960302 | MGC4083       | GI_14210535-S | 18 | 18 | 12274839 | 41357  | 5.9018 | 5.74396 | JPT |
| rs9303766  | MGC4083       | GI_14210535-S | 18 | 18 | 12290849 | 25347  | 6.1023 | 5.74396 | JPT |
| rs9807444  | MGC4083       | GI_14210535-S | 18 | 18 | 12290936 | 25260  | 7.0566 | 5.74396 | JPT |
| rs9303768  | MGC4083       | GI_14210535-S | 18 | 18 | 12291322 | 24874  | 6.734  | 5.74396 | JPT |
| rs7504558  | MGC4083       | GI_14210535-S | 18 | 18 | 12294781 | 21415  | 7.0566 | 5.74396 | JPT |
| rs10853224 | MGC4083       | GI_14210535-S | 18 | 18 | 12301984 | 14212  | 6.734  | 5.74396 | JPT |
| rs11080567 | MGC4083       | GI_14210535-S | 18 | 18 | 12302075 | 14121  | 6.734  | 5.74396 | JPT |
| rs12960267 | MGC4083       | GI_14210535-S | 18 | 18 | 12302492 | 13704  | 7.0566 | 5.74396 | JPT |
| rs8083882  | MGC4083       | GI_14210535-S | 18 | 18 | 12304309 | 11887  | 6.7973 | 5.74396 | JPT |
| rs12607321 | MGC4083       | GI_14210535-S | 18 | 18 | 12306779 | 9417   | 6.1449 | 5.74396 | JPT |
| rs4796960  | MGC4083       | GI_14210535-S | 18 | 18 | 12308027 | 8169   | 5.7459 | 5.74396 | JPT |
| rs11663340 | MGC4083       | GI_14210535-S | 18 | 18 | 12323686 | 7490   | 7.1379 | 5.74396 | JPT |
| rs2878879  | MGC11386      | GI_40254998-S | 18 | 18 | 19194586 | 63822  | 6.1302 | 5.68199 | JPT |
| rs3809965  | DKFZP564D1378 | GI_34222341-S | 18 | 18 | 42930870 | 43036  | 6.2751 | 6.06962 | JPT |
| rs17784414 | DKFZP564D1378 | GI_34222341-S | 18 | 18 | 42954765 | 66931  | 6.2751 | 6.06962 | JPT |
| rs317807   | FECH          | GI_4557592-S  | 18 | 18 | 53401668 | 33429  | 5.9383 | 5.82777 | JPT |
| rs492274   | FECH          | GI_4557592-S  | 18 | 18 | 53401892 | 33653  | 5.9348 | 5.82777 | JPT |
| rs317814   | FECH          | GI_4557592-S  | 18 | 18 | 53403611 | 35372  | 5.9348 | 5.82777 | JPT |
| rs659894   | PIGN          | GI_34328903-A | 18 | 18 | 57845899 | 17091  | 7.6242 | 5.91339 | JPT |
| rs565610   | PIGN          | GI_34328903-A | 18 | 18 | 57848576 | 14414  | 7.5938 | 5.91339 | JPT |
| rs2003066  | PIGN          | GI_34328903-A | 18 | 18 | 57853994 | 8996   | 7.08   | 5.91339 | JPT |
| rs974901   | PIGN          | GI_34328903-A | 18 | 18 | 57854418 | 8572   | 6.8705 | 5.91339 | JPT |
| rs11152327 | PIGN          | GI_34328903-A | 18 | 18 | 57859445 | 3545   | 6.8658 | 5.91339 | JPT |
| rs3829634  | PIGN          | GI_34328903-A | 18 | 18 | 57861307 | 1683   | 6.8658 | 5.91339 | JPT |
| rs9636100  | PIGN          | GI_34328903-A | 18 | 18 | 57862290 | 700    | 6.8658 | 5.91339 | JPT |
| rs1116258  | PIGN          | GI_34328903-A | 18 | 18 | 57865771 | 2781   | 6.8658 | 5.91339 | JPT |
| rs9966853  | PIGN          | GI_34328903-A | 18 | 18 | 57871310 | 8320   | 7.2458 | 5.91339 | JPT |
| rs1594487  | PIGN          | GI_34328903-A | 18 | 18 | 57871964 | 8974   | 7.4989 | 5.91339 | JPT |
| rs11659635 | PIGN          | GI_34328903-A | 18 | 18 | 57875230 | 12240  | 7.08   | 5.91339 | JPT |
| rs11663976 | PIGN          | GI_34328903-A | 18 | 18 | 57877093 | 14103  | 6.8658 | 5.91339 | JPT |
| rs12605762 | PIGN          | GI_34328903-A | 18 | 18 | 57877890 | 14900  | 7.08   | 5.91339 | JPT |
| rs879656   | PIGN          | GI_34328903-A | 18 | 18 | 57878366 | 15376  | 6.8658 | 5.91339 | JPT |
| rs891690   | PIGN          | GI_34328903-A | 18 | 18 | 57879013 | 16023  | 6.8658 | 5.91339 | JPT |
| rs948687   | PIGN          | GI_34328903-A | 18 | 18 | 57882714 | 19724  | 7.4989 | 5.91339 | JPT |
| rs543977   | PIGN          | GI_34328903-A | 18 | 18 | 57882935 | 19945  | 7.6242 | 5.91339 | JPT |
| rs9965630  | PIGN          | GI_34328903-A | 18 | 18 | 57883254 | 20264  | 6.8658 | 5.91339 | JPT |
| rs12458329 | PIGN          | GI_34328903-A | 18 | 18 | 57885724 | 22734  | 6.8658 | 5.91339 | JPT |
| rs1653224  | PIGN          | GI_34328903-A | 18 | 18 | 57886197 | 23207  | 7.6242 | 5.91339 | JPT |
| rs1030582  | PIGN          | GI_34328903-A | 18 | 18 | 57886440 | 23450  | 6.8658 | 5.91339 | JPT |
| rs4941107  | PIGN          | GI_34328903-A | 18 | 18 | 57902311 | 39321  | 7.4989 | 5.91339 | JPT |
| rs633490   | PIGN          | GI_34328903-A | 18 | 18 | 57909790 | 46800  | 7.5605 | 5.91339 | JPT |
| rs583873   | PIGN          | GI_34328903-A | 18 | 18 | 57913569 | 50579  | 6.9187 | 5.91339 | JPT |
| rs655080   | PIGN          | GI_34328903-A | 18 | 18 | 57917416 | 54426  | 7.5938 | 5.91339 | JPT |
| rs9955716  | PIGN          | GI_34328903-A | 18 | 18 | 57930101 | 67111  | 7.4989 | 5.91339 | JPT |
| rs4602128  | PIGN          | GI_34328903-A | 18 | 18 | 57940356 | 77366  | 7.6242 | 5.91339 | JPT |
| rs17715425 | PIGN          | GI_34328903-A | 18 | 18 | 57944675 | 81685  | 6.3174 | 5.91339 | JPT |
| rs3851141  | PIGN          | GI_34328903-A | 18 | 18 | 57974715 | 111725 | 7.4687 | 5.91339 | JPT |
| rs3851142  | PIGN          | GI_34328903-A | 18 | 18 | 57974865 | 111875 | 7.2743 | 5.91339 | JPT |
| rs1021952  | PIGN          | GI_34328903-A | 18 | 18 | 57975189 | 112199 | 7.2659 | 5.91339 | JPT |
| rs1021953  | PIGN          | GI_34328903-A | 18 | 18 | 57975470 | 112480 | 7.2743 | 5.91339 | JPT |
| rs931843   | PIGN          | GI_34328903-A | 18 | 18 | 57976498 | 113508 | 7.2743 | 5.91339 | JPT |

|            |           |               |    |    |          |        |        |         |     |
|------------|-----------|---------------|----|----|----------|--------|--------|---------|-----|
| rs7505932  | PIGN      | GI_34328903-A | 18 | 18 | 57976806 | 113816 | 7.2743 | 5.91339 | JPT |
| rs3794908  | PIGN      | GI_34328903-A | 18 | 18 | 57979749 | 116759 | 7.2743 | 5.91339 | JPT |
| rs4468721  | PIGN      | GI_34328903-A | 18 | 18 | 57980152 | 117162 | 7.2743 | 5.91339 | JPT |
| rs9953509  | PIGN      | GI_34328903-A | 18 | 18 | 57982442 | 119452 | 7.2743 | 5.91339 | JPT |
| rs4941116  | PIGN      | GI_34328903-A | 18 | 18 | 57986988 | 123998 | 7.2659 | 5.91339 | JPT |
| rs4941117  | PIGN      | GI_34328903-A | 18 | 18 | 57987385 | 124395 | 7.2743 | 5.91339 | JPT |
| rs17716459 | PIGN      | GI_34328903-A | 18 | 18 | 57991184 | 128194 | 7.2659 | 5.91339 | JPT |
| rs1567040  | PIGN      | GI_34328903-A | 18 | 18 | 57992601 | 129611 | 7.2743 | 5.91339 | JPT |
| rs1126080  | PIGN      | GI_34328903-A | 18 | 18 | 57993073 | 130083 | 7.2743 | 5.91339 | JPT |
| rs4245289  | PIGN      | GI_34328903-A | 18 | 18 | 57993542 | 130552 | 7.2743 | 5.91339 | JPT |
| rs4245290  | PIGN      | GI_34328903-A | 18 | 18 | 57994054 | 131064 | 7.2743 | 5.91339 | JPT |
| rs9320002  | PIGN      | GI_34328903-A | 18 | 18 | 57995284 | 132294 | 6.1121 | 5.91339 | JPT |
| rs12456615 | PIGN      | GI_34328903-A | 18 | 18 | 57996896 | 133906 | 7.2183 | 5.91339 | JPT |
| rs12608383 | PIGN      | GI_34328903-A | 18 | 18 | 57996910 | 133920 | 7.4687 | 5.91339 | JPT |
| rs1605230  | PIGN      | GI_34328903-A | 18 | 18 | 57997375 | 134385 | 7.2743 | 5.91339 | JPT |
| rs4940548  | PIGN      | GI_34328903-A | 18 | 18 | 57998415 | 135425 | 6.11   | 5.91339 | JPT |
| rs4940549  | PIGN      | GI_34328903-A | 18 | 18 | 57998649 | 135659 | 6.1121 | 5.91339 | JPT |
| rs994332   | PIGN      | GI_34328903-A | 18 | 18 | 57998878 | 135888 | 6.004  | 5.91339 | JPT |
| rs7504331  | PIGN      | GI_34328903-A | 18 | 18 | 57999290 | 136300 | 6.0674 | 5.91339 | JPT |
| rs9945824  | PIGN      | GI_34328903-A | 18 | 18 | 57999776 | 136786 | 7.2659 | 5.91339 | JPT |
| rs2089313  | PIGN      | GI_34328903-A | 18 | 18 | 58000521 | 137531 | 7.2743 | 5.91339 | JPT |
| rs6567261  | PIGN      | GI_34328903-A | 18 | 18 | 58002222 | 139232 | 6.1121 | 5.91339 | JPT |
| rs7235710  | PIGN      | GI_34328903-A | 18 | 18 | 58003081 | 140091 | 7.2743 | 5.91339 | JPT |
| rs10439025 | PIGN      | GI_34328903-A | 18 | 18 | 58003712 | 140722 | 7.2743 | 5.91339 | JPT |
| rs11662963 | PIGN      | GI_34328903-A | 18 | 18 | 58018716 | 155726 | 6.0565 | 5.91339 | JPT |
| rs9956180  | PIGN      | GI_34328903-A | 18 | 18 | 58043161 | 180171 | 6.004  | 5.91339 | JPT |
| rs4941122  | PIGN      | GI_34328903-A | 18 | 18 | 58058043 | 195053 | 6.004  | 5.91339 | JPT |
| rs9945414  | PIGN      | GI_34328903-A | 18 | 18 | 58079989 | 216999 | 6.004  | 5.91339 | JPT |
| rs17645961 | PIGN      | GI_34328903-A | 18 | 18 | 58086928 | 223938 | 6.0565 | 5.91339 | JPT |
| rs4940550  | PIGN      | GI_34328903-A | 18 | 18 | 58096152 | 233162 | 6.004  | 5.91339 | JPT |
| rs2980980  | PIGN      | GI_34328903-A | 18 | 18 | 58097548 | 234558 | 7.2743 | 5.91339 | JPT |
| rs8084388  | PIGN      | GI_34328903-A | 18 | 18 | 58110302 | 247312 | 6.004  | 5.91339 | JPT |
| rs17646954 | PIGN      | GI_34328903-A | 18 | 18 | 58110826 | 247836 | 6.0565 | 5.91339 | JPT |
| rs17719830 | PIGN      | GI_34328903-A | 18 | 18 | 58117169 | 254179 | 6.0565 | 5.91339 | JPT |
| rs12457042 | PIGN      | GI_34328903-A | 18 | 18 | 58144433 | 281443 | 6.004  | 5.91339 | JPT |
| rs4429388  | PIGN      | GI_34328903-A | 18 | 18 | 58149472 | 286482 | 6.0565 | 5.91339 | JPT |
| rs9944887  | LOC284293 | GI_27485378-S | 18 | 18 | 59665948 | 105638 | 7.6973 | 6.2174  | JPT |
| rs9959974  | LOC284293 | GI_27485378-S | 18 | 18 | 59666056 | 105530 | 8.292  | 6.2174  | JPT |
| rs9945681  | LOC284293 | GI_27485378-S | 18 | 18 | 59666101 | 105485 | 7.6583 | 6.2174  | JPT |
| rs17071932 | LOC284293 | GI_27485378-S | 18 | 18 | 59666204 | 105382 | 7.6344 | 6.2174  | JPT |
| rs9960785  | LOC284293 | GI_27485378-S | 18 | 18 | 59667093 | 104493 | 9.1084 | 6.2174  | JPT |
| rs9951203  | LOC284293 | GI_27485378-S | 18 | 18 | 59667720 | 103866 | 9.1921 | 6.2174  | JPT |
| rs9320028  | LOC284293 | GI_27485378-S | 18 | 18 | 59668150 | 103436 | 9.1613 | 6.2174  | JPT |
| rs2689416  | SERPINB10 | GI_4826901-S  | 18 | 18 | 59671341 | 81851  | 6.6272 | 6.08803 | JPT |
| rs8091518  | LOC284293 | GI_27485378-S | 18 | 18 | 59679155 | 92431  | 9.1613 | 6.2174  | JPT |
| rs8091945  | SERPINB10 | GI_4826901-S  | 18 | 18 | 59680510 | 72682  | 8.1047 | 6.08803 | JPT |
| rs9966495  | LOC284293 | GI_27485378-S | 18 | 18 | 59690850 | 80736  | 9.0885 | 6.2174  | JPT |
| rs9951512  | LOC284293 | GI_27485378-S | 18 | 18 | 59690885 | 80701  | 9.1921 | 6.2174  | JPT |
| rs9954175  | LOC284293 | GI_27485378-S | 18 | 18 | 59691368 | 80218  | 9.1613 | 6.2174  | JPT |
| rs9957643  | SERPINB10 | GI_4826901-S  | 18 | 18 | 59692597 | 60595  | 8.1869 | 6.08803 | JPT |
| rs6567399  | SERPINB10 | GI_4826901-S  | 18 | 18 | 59695526 | 57666  | 8.1869 | 6.08803 | JPT |
| rs9951931  | SERPINB10 | GI_4826901-S  | 18 | 18 | 59697930 | 55262  | 8.1047 | 6.08803 | JPT |
| rs9966459  | SERPINB10 | GI_4826901-S  | 18 | 18 | 59698270 | 54922  | 8.1047 | 6.08803 | JPT |
| rs8096886  | SERPINB10 | GI_4826901-S  | 18 | 18 | 59698513 | 54679  | 8.1869 | 6.08803 | JPT |
| rs10513933 | LOC284293 | GI_27485378-S | 18 | 18 | 59699669 | 71917  | 9.1613 | 6.2174  | JPT |
| rs8097621  | SERPINB10 | GI_4826901-S  | 18 | 18 | 59700202 | 52990  | 8.1047 | 6.08803 | JPT |

|            |           |               |    |    |          |       |         |         |     |
|------------|-----------|---------------|----|----|----------|-------|---------|---------|-----|
| rs9946657  | SERPINB10 | GI_4826901-S  | 18 | 18 | 59701565 | 51627 | 10.2677 | 6.08803 | JPT |
| rs9959513  | LOC284293 | GI_27485378-S | 18 | 18 | 59701863 | 69723 | 10.446  | 6.2174  | JPT |
| rs9959513  | SERPINB10 | GI_4826901-S  | 18 | 18 | 59701863 | 51329 | 6.2424  | 6.08803 | JPT |
| rs9964989  | SERPINB10 | GI_4826901-S  | 18 | 18 | 59702589 | 50603 | 10.0717 | 6.08803 | JPT |
| rs3760574  | SERPINB10 | GI_4826901-S  | 18 | 18 | 59703505 | 49687 | 10.2677 | 6.08803 | JPT |
| rs2288287  | SERPINB10 | GI_4826901-S  | 18 | 18 | 59706274 | 46918 | 10.2677 | 6.08803 | JPT |
| rs1025196  | SERPINB10 | GI_4826901-S  | 18 | 18 | 59708650 | 44542 | 10.2677 | 6.08803 | JPT |
| rs6095     | SERPINB10 | GI_4826901-S  | 18 | 18 | 59709636 | 43556 | 10.0717 | 6.08803 | JPT |
| rs6094     | SERPINB10 | GI_4826901-S  | 18 | 18 | 59709862 | 43330 | 10.2677 | 6.08803 | JPT |
| rs9320029  | SERPINB10 | GI_4826901-S  | 18 | 18 | 59710543 | 42649 | 9.6284  | 6.08803 | JPT |
| rs9630856  | SERPINB10 | GI_4826901-S  | 18 | 18 | 59710691 | 42501 | 10.0717 | 6.08803 | JPT |
| rs9630857  | SERPINB10 | GI_4826901-S  | 18 | 18 | 59710766 | 42426 | 9.0436  | 6.08803 | JPT |
| rs9951333  | SERPINB10 | GI_4826901-S  | 18 | 18 | 59711133 | 42059 | 10.3721 | 6.08803 | JPT |
| rs9320030  | SERPINB10 | GI_4826901-S  | 18 | 18 | 59711516 | 41676 | 8.337   | 6.08803 | JPT |
| rs9320031  | SERPINB10 | GI_4826901-S  | 18 | 18 | 59711631 | 41561 | 9.8532  | 6.08803 | JPT |
| rs9636040  | SERPINB10 | GI_4826901-S  | 18 | 18 | 59712103 | 41089 | 10.675  | 6.08803 | JPT |
| rs9320032  | LOC284293 | GI_27485378-S | 18 | 18 | 59712191 | 59395 | 8.2548  | 6.2174  | JPT |
| rs9320032  | SERPINB10 | GI_4826901-S  | 18 | 18 | 59712191 | 41001 | 7.0423  | 6.08803 | JPT |
| rs3786335  | SERPINB10 | GI_4826901-S  | 18 | 18 | 59712501 | 40691 | 10.2677 | 6.08803 | JPT |
| rs7233370  | SERPINB10 | GI_4826901-S  | 18 | 18 | 59713351 | 39841 | 10.0717 | 6.08803 | JPT |
| rs7229383  | SERPINB10 | GI_4826901-S  | 18 | 18 | 59713371 | 39821 | 10.0717 | 6.08803 | JPT |
| rs2140453  | SERPINB10 | GI_4826901-S  | 18 | 18 | 59713769 | 39423 | 8.5168  | 6.08803 | JPT |
| rs1916662  | SERPINB10 | GI_4826901-S  | 18 | 18 | 59714021 | 39171 | 10.0717 | 6.08803 | JPT |
| rs3819335  | SERPINB10 | GI_4826901-S  | 18 | 18 | 59714172 | 39020 | 10.2677 | 6.08803 | JPT |
| rs1532886  | SERPINB10 | GI_4826901-S  | 18 | 18 | 59714445 | 38747 | 10.2677 | 6.08803 | JPT |
| rs1532887  | SERPINB10 | GI_4826901-S  | 18 | 18 | 59714686 | 38506 | 10.2677 | 6.08803 | JPT |
| rs1532889  | SERPINB10 | GI_4826901-S  | 18 | 18 | 59714820 | 38372 | 10.2677 | 6.08803 | JPT |
| rs2332874  | SERPINB10 | GI_4826901-S  | 18 | 18 | 59714990 | 38202 | 10.2677 | 6.08803 | JPT |
| rs2114380  | SERPINB10 | GI_4826901-S  | 18 | 18 | 59715086 | 38106 | 10.2677 | 6.08803 | JPT |
| rs6098     | SERPINB10 | GI_4826901-S  | 18 | 18 | 59715374 | 37818 | 10.2677 | 6.08803 | JPT |
| rs2278180  | SERPINB10 | GI_4826901-S  | 18 | 18 | 59715493 | 37699 | 10.2677 | 6.08803 | JPT |
| rs2278179  | SERPINB10 | GI_4826901-S  | 18 | 18 | 59715512 | 37680 | 10.0717 | 6.08803 | JPT |
| rs2278178  | SERPINB10 | GI_4826901-S  | 18 | 18 | 59715569 | 37623 | 10.0717 | 6.08803 | JPT |
| rs2278177  | SERPINB10 | GI_4826901-S  | 18 | 18 | 59715590 | 37602 | 10.1211 | 6.08803 | JPT |
| rs1916658  | SERPINB10 | GI_4826901-S  | 18 | 18 | 59715759 | 37433 | 10.2677 | 6.08803 | JPT |
| rs1916659  | SERPINB10 | GI_4826901-S  | 18 | 18 | 59716188 | 37004 | 10.2677 | 6.08803 | JPT |
| rs9947143  | SERPINB10 | GI_4826901-S  | 18 | 18 | 59716517 | 36675 | 10.2677 | 6.08803 | JPT |
| rs9955420  | SERPINB10 | GI_4826901-S  | 18 | 18 | 59716790 | 36402 | 10.2126 | 6.08803 | JPT |
| rs4599014  | SERPINB10 | GI_4826901-S  | 18 | 18 | 59716905 | 36287 | 10.1081 | 6.08803 | JPT |
| rs9950615  | SERPINB10 | GI_4826901-S  | 18 | 18 | 59717558 | 35634 | 9.9414  | 6.08803 | JPT |
| rs7505052  | LOC284293 | GI_27485378-S | 18 | 18 | 59717646 | 53940 | 8.3739  | 6.2174  | JPT |
| rs7505052  | SERPINB10 | GI_4826901-S  | 18 | 18 | 59717646 | 35546 | 7.1916  | 6.08803 | JPT |
| rs4349246  | SERPINB10 | GI_4826901-S  | 18 | 18 | 59717712 | 35480 | 7.0405  | 6.08803 | JPT |
| rs2332875  | SERPINB10 | GI_4826901-S  | 18 | 18 | 59718067 | 35125 | 9.6684  | 6.08803 | JPT |
| rs1544897  | SERPINB10 | GI_4826901-S  | 18 | 18 | 59718440 | 34752 | 8.9504  | 6.08803 | JPT |
| rs1544896  | SERPINB10 | GI_4826901-S  | 18 | 18 | 59718461 | 34731 | 8.7923  | 6.08803 | JPT |
| rs1544895  | SERPINB10 | GI_4826901-S  | 18 | 18 | 59718636 | 34556 | 10.0717 | 6.08803 | JPT |
| rs1544894  | SERPINB10 | GI_4826901-S  | 18 | 18 | 59718761 | 34431 | 10.2677 | 6.08803 | JPT |
| rs1544893  | SERPINB10 | GI_4826901-S  | 18 | 18 | 59718952 | 34240 | 10.2677 | 6.08803 | JPT |
| rs10513932 | SERPINB10 | GI_4826901-S  | 18 | 18 | 59719294 | 33898 | 10.2677 | 6.08803 | JPT |
| rs1916660  | SERPINB10 | GI_4826901-S  | 18 | 18 | 59719849 | 33343 | 10.2677 | 6.08803 | JPT |
| rs1015416  | SERPINB10 | GI_4826901-S  | 18 | 18 | 59720363 | 32829 | 10.0717 | 6.08803 | JPT |
| rs6102     | LOC284293 | GI_27485378-S | 18 | 18 | 59721450 | 50136 | 8.2548  | 6.2174  | JPT |
| rs6102     | SERPINB10 | GI_4826901-S  | 18 | 18 | 59721450 | 31742 | 7.0423  | 6.08803 | JPT |
| rs6103     | SERPINB10 | GI_4826901-S  | 18 | 18 | 59721483 | 31709 | 10.2677 | 6.08803 | JPT |
| rs6104     | SERPINB10 | GI_4826901-S  | 18 | 18 | 59721509 | 31683 | 10.2677 | 6.08803 | JPT |

|            |           |               |    |    |          |       |         |         |     |
|------------|-----------|---------------|----|----|----------|-------|---------|---------|-----|
| rs12102    | SERPINB10 | GI_4826901-S  | 18 | 18 | 59721962 | 31230 | 10.2677 | 6.08803 | JPT |
| rs2114378  | SERPINB10 | GI_4826901-S  | 18 | 18 | 59722179 | 31013 | 10.2677 | 6.08803 | JPT |
| rs2140452  | SERPINB10 | GI_4826901-S  | 18 | 18 | 59722502 | 30690 | 10.2677 | 6.08803 | JPT |
| rs2332876  | LOC284293 | GI_27485378-S | 18 | 18 | 59722566 | 49020 | 9.7033  | 6.2174  | JPT |
| rs2332876  | SERPINB10 | GI_4826901-S  | 18 | 18 | 59722566 | 30626 | 7.1196  | 6.08803 | JPT |
| rs7231714  | SERPINB10 | GI_4826901-S  | 18 | 18 | 59725580 | 27612 | 10.2677 | 6.08803 | JPT |
| rs1006961  | SERPINB10 | GI_4826901-S  | 18 | 18 | 59726212 | 26980 | 10.2677 | 6.08803 | JPT |
| rs1006960  | SERPINB10 | GI_4826901-S  | 18 | 18 | 59726552 | 26640 | 10.0717 | 6.08803 | JPT |
| rs8089365  | SERPINB10 | GI_4826901-S  | 18 | 18 | 59726987 | 26205 | 10.0717 | 6.08803 | JPT |
| rs9948717  | SERPINB10 | GI_4826901-S  | 18 | 18 | 59727086 | 26106 | 8.2527  | 6.08803 | JPT |
| rs9963851  | LOC284293 | GI_27485378-S | 18 | 18 | 59728021 | 43565 | 10.4121 | 6.2174  | JPT |
| rs9963851  | SERPINB10 | GI_4826901-S  | 18 | 18 | 59728021 | 25171 | 6.5653  | 6.08803 | JPT |
| rs9966367  | SERPINB10 | GI_4826901-S  | 18 | 18 | 59728271 | 24921 | 9.1731  | 6.08803 | JPT |
| rs4499334  | LOC284293 | GI_27485378-S | 18 | 18 | 59729788 | 41798 | 8.2148  | 6.2174  | JPT |
| rs12717154 | LOC284293 | GI_27485378-S | 18 | 18 | 59730261 | 41325 | 10.446  | 6.2174  | JPT |
| rs12717154 | SERPINB10 | GI_4826901-S  | 18 | 18 | 59730261 | 22931 | 6.2424  | 6.08803 | JPT |
| rs13371114 | LOC284293 | GI_27485378-S | 18 | 18 | 59730357 | 41229 | 10.446  | 6.2174  | JPT |
| rs13371114 | SERPINB10 | GI_4826901-S  | 18 | 18 | 59730357 | 22835 | 6.2424  | 6.08803 | JPT |
| rs12327005 | LOC284293 | GI_27485378-S | 18 | 18 | 59731116 | 40470 | 10.446  | 6.2174  | JPT |
| rs12327005 | SERPINB10 | GI_4826901-S  | 18 | 18 | 59731116 | 22076 | 6.2424  | 6.08803 | JPT |
| rs12327162 | SERPINB10 | GI_4826901-S  | 18 | 18 | 59731189 | 22003 | 9.607   | 6.08803 | JPT |
| rs12327006 | LOC284293 | GI_27485378-S | 18 | 18 | 59731314 | 40272 | 8.9748  | 6.2174  | JPT |
| rs12327173 | LOC284293 | GI_27485378-S | 18 | 18 | 59731522 | 40064 | 8.3739  | 6.2174  | JPT |
| rs12327173 | SERPINB10 | GI_4826901-S  | 18 | 18 | 59731522 | 21670 | 7.1916  | 6.08803 | JPT |
| rs8086765  | SERPINB10 | GI_4826901-S  | 18 | 18 | 59731581 | 21611 | 9.2499  | 6.08803 | JPT |
| rs8085904  | LOC284293 | GI_27485378-S | 18 | 18 | 59731660 | 39926 | 10.446  | 6.2174  | JPT |
| rs8085904  | SERPINB10 | GI_4826901-S  | 18 | 18 | 59731660 | 21532 | 6.2424  | 6.08803 | JPT |
| rs7241748  | SERPINB10 | GI_4826901-S  | 18 | 18 | 59733108 | 20084 | 8.8917  | 6.08803 | JPT |
| rs9952843  | LOC284293 | GI_27485378-S | 18 | 18 | 59733245 | 38341 | 10.446  | 6.2174  | JPT |
| rs9952843  | SERPINB10 | GI_4826901-S  | 18 | 18 | 59733245 | 19947 | 6.2424  | 6.08803 | JPT |
| rs9953733  | LOC284293 | GI_27485378-S | 18 | 18 | 59733477 | 38109 | 10.446  | 6.2174  | JPT |
| rs9953733  | SERPINB10 | GI_4826901-S  | 18 | 18 | 59733477 | 19715 | 6.2424  | 6.08803 | JPT |
| rs8097425  | SERPINB10 | GI_4826901-S  | 18 | 18 | 59733847 | 19345 | 9.607   | 6.08803 | JPT |
| rs17072102 | LOC284293 | GI_27485378-S | 18 | 18 | 59734053 | 37533 | 10.446  | 6.2174  | JPT |
| rs17072102 | SERPINB10 | GI_4826901-S  | 18 | 18 | 59734053 | 19139 | 6.2424  | 6.08803 | JPT |
| rs8084931  | SERPINB10 | GI_4826901-S  | 18 | 18 | 59735061 | 18131 | 8.0878  | 6.08803 | JPT |
| rs17072109 | LOC284293 | GI_27485378-S | 18 | 18 | 59735622 | 35964 | 8.3739  | 6.2174  | JPT |
| rs17072109 | SERPINB10 | GI_4826901-S  | 18 | 18 | 59735622 | 17570 | 7.1916  | 6.08803 | JPT |
| rs9320033  | SERPINB10 | GI_4826901-S  | 18 | 18 | 59735962 | 17230 | 9.4311  | 6.08803 | JPT |
| rs724557   | LOC284293 | GI_27485378-S | 18 | 18 | 59736125 | 35461 | 8.2548  | 6.2174  | JPT |
| rs724557   | SERPINB10 | GI_4826901-S  | 18 | 18 | 59736125 | 17067 | 7.0423  | 6.08803 | JPT |
| rs724558   | LOC284293 | GI_27485378-S | 18 | 18 | 59736240 | 35346 | 7.6344  | 6.2174  | JPT |
| rs724558   | SERPINB10 | GI_4826901-S  | 18 | 18 | 59736240 | 16952 | 6.6281  | 6.08803 | JPT |
| rs1944273  | LOC284293 | GI_27485378-S | 18 | 18 | 59736514 | 35072 | 8.2548  | 6.2174  | JPT |
| rs1944273  | SERPINB10 | GI_4826901-S  | 18 | 18 | 59736514 | 16678 | 7.0423  | 6.08803 | JPT |
| rs1944272  | LOC284293 | GI_27485378-S | 18 | 18 | 59736638 | 34948 | 8.2548  | 6.2174  | JPT |
| rs1944272  | SERPINB10 | GI_4826901-S  | 18 | 18 | 59736638 | 16554 | 7.0423  | 6.08803 | JPT |
| rs1944271  | LOC284293 | GI_27485378-S | 18 | 18 | 59736845 | 34741 | 8.2548  | 6.2174  | JPT |
| rs1944271  | SERPINB10 | GI_4826901-S  | 18 | 18 | 59736845 | 16347 | 7.0423  | 6.08803 | JPT |
| rs9955171  | LOC284293 | GI_27485378-S | 18 | 18 | 59736927 | 34659 | 8.3739  | 6.2174  | JPT |
| rs9955171  | SERPINB10 | GI_4826901-S  | 18 | 18 | 59736927 | 16265 | 7.1916  | 6.08803 | JPT |
| rs8085490  | SERPINB10 | GI_4826901-S  | 18 | 18 | 59737365 | 15827 | 9.607   | 6.08803 | JPT |
| rs8099238  | SERPINB10 | GI_4826901-S  | 18 | 18 | 59737617 | 15575 | 9.4311  | 6.08803 | JPT |
| rs9955876  | LOC284293 | GI_27485378-S | 18 | 18 | 59737855 | 33731 | 8.3739  | 6.2174  | JPT |
| rs9955876  | SERPINB10 | GI_4826901-S  | 18 | 18 | 59737855 | 15337 | 7.1916  | 6.08803 | JPT |
| rs9967382  | LOC284293 | GI_27485378-S | 18 | 18 | 59738047 | 33539 | 7.1577  | 6.2174  | JPT |

|            |           |               |    |    |          |       |         |         |     |
|------------|-----------|---------------|----|----|----------|-------|---------|---------|-----|
| rs9967382  | SERPINB10 | GI_4826901-S  | 18 | 18 | 59738047 | 15145 | 7.1915  | 6.08803 | JPT |
| rs620535   | LOC284293 | GI_27485378-S | 18 | 18 | 59738269 | 33317 | 8.2548  | 6.2174  | JPT |
| rs620535   | SERPINB10 | GI_4826901-S  | 18 | 18 | 59738269 | 14923 | 7.0423  | 6.08803 | JPT |
| rs9947135  | LOC284293 | GI_27485378-S | 18 | 18 | 59738704 | 32882 | 7.745   | 6.2174  | JPT |
| rs9947135  | SERPINB10 | GI_4826901-S  | 18 | 18 | 59738704 | 14488 | 6.8862  | 6.08803 | JPT |
| rs4350667  | LOC284293 | GI_27485378-S | 18 | 18 | 59738743 | 32843 | 7.2503  | 6.2174  | JPT |
| rs9947504  | LOC284293 | GI_27485378-S | 18 | 18 | 59739063 | 32523 | 8.3739  | 6.2174  | JPT |
| rs9947504  | SERPINB10 | GI_4826901-S  | 18 | 18 | 59739063 | 14129 | 7.1916  | 6.08803 | JPT |
| rs17072158 | LOC284293 | GI_27485378-S | 18 | 18 | 59739617 | 31969 | 8.3739  | 6.2174  | JPT |
| rs17072158 | SERPINB10 | GI_4826901-S  | 18 | 18 | 59739617 | 13575 | 7.1916  | 6.08803 | JPT |
| rs9957733  | LOC284293 | GI_27485378-S | 18 | 18 | 59743343 | 28243 | 8.2548  | 6.2174  | JPT |
| rs9957733  | SERPINB10 | GI_4826901-S  | 18 | 18 | 59743343 | 9849  | 7.0423  | 6.08803 | JPT |
| rs2114377  | SERPINB10 | GI_4826901-S  | 18 | 18 | 59743756 | 9436  | 9.607   | 6.08803 | JPT |
| rs9960901  | SERPINB10 | GI_4826901-S  | 18 | 18 | 59744047 | 9145  | 9.607   | 6.08803 | JPT |
| rs8090188  | SERPINB10 | GI_4826901-S  | 18 | 18 | 59744441 | 8751  | 7.9362  | 6.08803 | JPT |
| rs8093894  | SERPINB10 | GI_4826901-S  | 18 | 18 | 59744461 | 8731  | 9.1731  | 6.08803 | JPT |
| rs8094058  | SERPINB10 | GI_4826901-S  | 18 | 18 | 59744599 | 8593  | 9.4311  | 6.08803 | JPT |
| rs8089023  | SERPINB10 | GI_4826901-S  | 18 | 18 | 59744733 | 8459  | 9.4311  | 6.08803 | JPT |
| rs3786340  | SERPINB10 | GI_4826901-S  | 18 | 18 | 59748514 | 4678  | 9.607   | 6.08803 | JPT |
| rs10163726 | SERPINB10 | GI_4826901-S  | 18 | 18 | 59748718 | 4474  | 9.4311  | 6.08803 | JPT |
| rs9951724  | SERPINB10 | GI_4826901-S  | 18 | 18 | 59749057 | 4135  | 9.4311  | 6.08803 | JPT |
| rs1544899  | SERPINB10 | GI_4826901-S  | 18 | 18 | 59749190 | 4002  | 9.607   | 6.08803 | JPT |
| rs8096543  | SERPINB10 | GI_4826901-S  | 18 | 18 | 59750024 | 3168  | 9.607   | 6.08803 | JPT |
| rs4630651  | SERPINB10 | GI_4826901-S  | 18 | 18 | 59750481 | 2711  | 9.607   | 6.08803 | JPT |
| rs963075   | SERPINB10 | GI_4826901-S  | 18 | 18 | 59751364 | 1828  | 9.607   | 6.08803 | JPT |
| rs17072204 | LOC284293 | GI_27485378-S | 18 | 18 | 59752346 | 19240 | 10.4306 | 6.2174  | JPT |
| rs17072204 | SERPINB10 | GI_4826901-S  | 18 | 18 | 59752346 | 846   | 6.1031  | 6.08803 | JPT |
| rs11152409 | LOC284293 | GI_27485378-S | 18 | 18 | 59755259 | 16327 | 10.4306 | 6.2174  | JPT |
| rs11152409 | SERPINB10 | GI_4826901-S  | 18 | 18 | 59755259 | 2067  | 6.1031  | 6.08803 | JPT |
| rs9783897  | LOC284293 | GI_27485378-S | 18 | 18 | 59755762 | 15824 | 10.4306 | 6.2174  | JPT |
| rs9783897  | SERPINB10 | GI_4826901-S  | 18 | 18 | 59755762 | 2570  | 6.1031  | 6.08803 | JPT |
| rs9783898  | LOC284293 | GI_27485378-S | 18 | 18 | 59755785 | 15801 | 10.4306 | 6.2174  | JPT |
| rs9783898  | SERPINB10 | GI_4826901-S  | 18 | 18 | 59755785 | 2593  | 6.1031  | 6.08803 | JPT |
| rs9783908  | LOC284293 | GI_27485378-S | 18 | 18 | 59755942 | 15644 | 8.7105  | 6.2174  | JPT |
| rs9783908  | SERPINB10 | GI_4826901-S  | 18 | 18 | 59755942 | 2750  | 6.2535  | 6.08803 | JPT |
| rs13381197 | LOC284293 | GI_27485378-S | 18 | 18 | 59757967 | 13619 | 10.4306 | 6.2174  | JPT |
| rs13381197 | SERPINB10 | GI_4826901-S  | 18 | 18 | 59757967 | 4775  | 6.1031  | 6.08803 | JPT |
| rs9807138  | LOC284293 | GI_27485378-S | 18 | 18 | 59758363 | 13223 | 10.4306 | 6.2174  | JPT |
| rs9807138  | SERPINB10 | GI_4826901-S  | 18 | 18 | 59758363 | 5171  | 6.1031  | 6.08803 | JPT |
| rs9955763  | LOC284293 | GI_27485378-S | 18 | 18 | 59765415 | 6171  | 10.4306 | 6.2174  | JPT |
| rs9955763  | SERPINB10 | GI_4826901-S  | 18 | 18 | 59765415 | 12223 | 6.1031  | 6.08803 | JPT |
| rs13370584 | LOC284293 | GI_27485378-S | 18 | 18 | 59766324 | 5262  | 10.4306 | 6.2174  | JPT |
| rs13370584 | SERPINB10 | GI_4826901-S  | 18 | 18 | 59766324 | 13132 | 6.1031  | 6.08803 | JPT |
| rs9955410  | LOC284293 | GI_27485378-S | 18 | 18 | 59771017 | 569   | 11.9757 | 6.2174  | JPT |
| rs9945924  | LOC284293 | GI_27485378-S | 18 | 18 | 59771746 | 160   | 12.0006 | 6.2174  | JPT |
| rs9945924  | SERPINB10 | GI_4826901-S  | 18 | 18 | 59771746 | 18554 | 6.1924  | 6.08803 | JPT |
| rs8090046  | LOC284293 | GI_27485378-S | 18 | 18 | 59773066 | 1480  | 11.9757 | 6.2174  | JPT |
| rs8095151  | LOC284293 | GI_27485378-S | 18 | 18 | 59773196 | 1610  | 11.9757 | 6.2174  | JPT |
| rs9962574  | LOC284293 | GI_27485378-S | 18 | 18 | 59777098 | 5512  | 11.9757 | 6.2174  | JPT |
| rs9963550  | LOC284293 | GI_27485378-S | 18 | 18 | 59779238 | 7652  | 12.0006 | 6.2174  | JPT |
| rs9963550  | SERPINB10 | GI_4826901-S  | 18 | 18 | 59779238 | 26046 | 6.1924  | 6.08803 | JPT |
| rs9949621  | LOC284293 | GI_27485378-S | 18 | 18 | 59780377 | 8791  | 11.9757 | 6.2174  | JPT |
| rs9950903  | LOC284293 | GI_27485378-S | 18 | 18 | 59781783 | 10197 | 12.0006 | 6.2174  | JPT |
| rs9950903  | SERPINB10 | GI_4826901-S  | 18 | 18 | 59781783 | 28591 | 6.1924  | 6.08803 | JPT |
| rs8090586  | LOC284293 | GI_27485378-S | 18 | 18 | 59781864 | 10278 | 12.0006 | 6.2174  | JPT |
| rs8090586  | SERPINB10 | GI_4826901-S  | 18 | 18 | 59781864 | 28672 | 6.1924  | 6.08803 | JPT |

|            |           |               |    |    |          |        |         |         |     |
|------------|-----------|---------------|----|----|----------|--------|---------|---------|-----|
| rs1006755  | LOC284293 | GI_27485378-S | 18 | 18 | 59782026 | 10440  | 11.9757 | 6.2174  | JPT |
| rs1006754  | LOC284293 | GI_27485378-S | 18 | 18 | 59782427 | 10841  | 12.0006 | 6.2174  | JPT |
| rs1006754  | SERPINB10 | GI_4826901-S  | 18 | 18 | 59782427 | 29235  | 6.1924  | 6.08803 | JPT |
| rs2009989  | LOC284293 | GI_27485378-S | 18 | 18 | 59784224 | 12638  | 12.0006 | 6.2174  | JPT |
| rs2009989  | SERPINB10 | GI_4826901-S  | 18 | 18 | 59784224 | 31032  | 6.1924  | 6.08803 | JPT |
| rs17072304 | LOC284293 | GI_27485378-S | 18 | 18 | 59784549 | 12963  | 12.0006 | 6.2174  | JPT |
| rs17072304 | SERPINB10 | GI_4826901-S  | 18 | 18 | 59784549 | 31357  | 6.1924  | 6.08803 | JPT |
| rs9961615  | LOC284293 | GI_27485378-S | 18 | 18 | 59788652 | 17066  | 11.121  | 6.2174  | JPT |
| rs9961615  | SERPINB10 | GI_4826901-S  | 18 | 18 | 59788652 | 35460  | 6.0921  | 6.08803 | JPT |
| rs7232988  | NFATC1    | GI_27502392-I | 18 | 18 | 74336980 | 991885 | 6.2221  | 6.10584 | JPT |
| rs4807569  | GPX4      | GI_4504106-S  | 19 | 19 | 1074378  | 17586  | 6.4652  | 5.97963 | JPT |
| rs11260040 | Hs.465789 | Hs.465789-S   | 19 | 19 | 7926793  | 52807  | 6.7342  | 6.27796 | JPT |
| rs11670116 | Hs.465789 | Hs.465789-S   | 19 | 19 | 7981202  | 1602   | 6.5322  | 6.27796 | JPT |
| rs2303683  | BST2      | GI_7262372-S  | 19 | 19 | 17374715 | 146    | 5.8443  | 5.82949 | JPT |
| rs7248363  | hmm6891   | hmm6891-S     | 19 | 19 | 18328886 | 907559 | 6.2796  | 5.63469 | JPT |
| rs7248612  | LOC91120  | GI_15150800-S | 19 | 19 | 19824086 | 154231 | 6.0813  | 5.53382 | JPT |
| rs3761090  | F25965    | GI_28144915-S | 19 | 19 | 40841290 | 95920  | 6.7261  | 5.58506 | JPT |
| rs2267587  | F25965    | GI_28144915-S | 19 | 19 | 40857309 | 79901  | 5.9726  | 5.58506 | JPT |
| rs3787052  | F25965    | GI_28144915-S | 19 | 19 | 40893895 | 43315  | 8.8499  | 5.58506 | JPT |
| rs231241   | F25965    | GI_28144915-S | 19 | 19 | 40937253 | 43     | 6.841   | 5.58506 | JPT |
| rs7253245  | SPINT2    | GI_10863908-S | 19 | 19 | 43445626 | 28992  | 6.2412  | 5.52953 | JPT |
| rs3786870  | SPINT2    | GI_10863908-S | 19 | 19 | 43447704 | 26914  | 6.3858  | 5.52953 | JPT |
| rs11881477 | RPS16     | GI_34335151-S | 19 | 19 | 44640619 | 22207  | 6.7556  | 5.91587 | JPT |
| rs8103195  | R29124_1  | GI_16117774-S | 19 | 19 | 46708720 | 68883  | 5.78    | 5.42028 | JPT |
| rs10406371 | R29124_1  | GI_16117774-S | 19 | 19 | 46714129 | 63474  | 5.78    | 5.42028 | JPT |
| rs10424376 | R29124_1  | GI_16117774-S | 19 | 19 | 46739320 | 38283  | 6.3942  | 5.42028 | JPT |
| rs4802122  | R29124_1  | GI_16117774-S | 19 | 19 | 46739764 | 37839  | 6.6352  | 5.42028 | JPT |
| rs7255742  | R29124_1  | GI_16117774-S | 19 | 19 | 46741661 | 35942  | 7.1443  | 5.42028 | JPT |
| rs2317314  | R29124_1  | GI_16117774-S | 19 | 19 | 46754147 | 23456  | 6.3233  | 5.42028 | JPT |
| rs7251994  | R29124_1  | GI_16117774-S | 19 | 19 | 46755515 | 22088  | 6.3423  | 5.42028 | JPT |
| rs10420992 | R29124_1  | GI_16117774-S | 19 | 19 | 46756302 | 21301  | 7.8161  | 5.42028 | JPT |
| rs17724225 | R29124_1  | GI_16117774-S | 19 | 19 | 46756350 | 21253  | 6.7999  | 5.42028 | JPT |
| rs4803481  | R29124_1  | GI_16117774-S | 19 | 19 | 46758396 | 19207  | 7.1897  | 5.42028 | JPT |
| rs10421584 | R29124_1  | GI_16117774-S | 19 | 19 | 46759818 | 17785  | 6.7999  | 5.42028 | JPT |
| rs10421785 | R29124_1  | GI_16117774-S | 19 | 19 | 46759870 | 17733  | 6.3423  | 5.42028 | JPT |
| rs11083627 | R29124_1  | GI_16117774-S | 19 | 19 | 46761740 | 15863  | 7.8161  | 5.42028 | JPT |
| rs12150975 | R29124_1  | GI_16117774-S | 19 | 19 | 46762200 | 15403  | 8.0196  | 5.42028 | JPT |
| rs12983999 | R29124_1  | GI_16117774-S | 19 | 19 | 46762368 | 15235  | 7.8161  | 5.42028 | JPT |
| rs3745938  | R29124_1  | GI_16117774-S | 19 | 19 | 46763007 | 14596  | 6.3538  | 5.42028 | JPT |
| rs12462194 | R29124_1  | GI_16117774-S | 19 | 19 | 46764129 | 13474  | 7.8161  | 5.42028 | JPT |
| rs10409976 | R29124_1  | GI_16117774-S | 19 | 19 | 46767612 | 9991   | 6.3538  | 5.42028 | JPT |
| rs1860255  | R29124_1  | GI_16117774-S | 19 | 19 | 46768912 | 8691   | 6.6742  | 5.42028 | JPT |
| rs10406221 | R29124_1  | GI_16117774-S | 19 | 19 | 46770443 | 7160   | 8.9025  | 5.42028 | JPT |
| rs2191019  | R29124_1  | GI_16117774-S | 19 | 19 | 46772763 | 4840   | 7.5626  | 5.42028 | JPT |
| rs7257657  | R29124_1  | GI_16117774-S | 19 | 19 | 46774166 | 3437   | 7.6963  | 5.42028 | JPT |
| rs7247842  | R29124_1  | GI_16117774-S | 19 | 19 | 46775513 | 2090   | 7.6697  | 5.42028 | JPT |
| rs714106   | R29124_1  | GI_16117774-S | 19 | 19 | 46775689 | 1914   | 8.2008  | 5.42028 | JPT |
| rs740591   | R29124_1  | GI_16117774-S | 19 | 19 | 46776426 | 1177   | 7.1234  | 5.42028 | JPT |
| rs758350   | R29124_1  | GI_16117774-S | 19 | 19 | 46777002 | 601    | 7.1403  | 5.42028 | JPT |
| rs2302188  | R29124_1  | GI_16117774-S | 19 | 19 | 46777713 | 110    | 7.5626  | 5.42028 | JPT |
| rs3745936  | R29124_1  | GI_16117774-S | 19 | 19 | 46784655 | 7052   | 13.2428 | 5.42028 | JPT |
| rs11083629 | R29124_1  | GI_16117774-S | 19 | 19 | 46786574 | 8971   | 8.8468  | 5.42028 | JPT |
| rs4803643  | LOC284345 | GI_27485260-S | 19 | 19 | 48799337 | 128098 | 6.028   | 5.79471 | JPT |
| rs12609260 | FLJ10781  | GI_39780596-S | 19 | 19 | 51652806 | 8962   | 6.1745  | 5.88002 | JPT |
| rs12609521 | FLJ10781  | GI_39780596-S | 19 | 19 | 51658767 | 3001   | 6.1769  | 5.88002 | JPT |
| rs385203   | PLA2G4C   | GI_4505850-S  | 19 | 19 | 53298343 | 55359  | 7.0625  | 6.02253 | JPT |



|            |           |               |    |    |          |        |         |         |     |
|------------|-----------|---------------|----|----|----------|--------|---------|---------|-----|
| rs436943   | PLA2G4C   | GI_4505850-S  | 19 | 19 | 53298474 | 55490  | 6.7649  | 6.02253 | JPT |
| rs1653554  | PLA2G4C   | GI_4505850-S  | 19 | 19 | 53300284 | 57300  | 6.7649  | 6.02253 | JPT |
| rs2307279  | PLA2G4C   | GI_4505850-S  | 19 | 19 | 53300410 | 57426  | 6.5863  | 6.02253 | JPT |
| rs11668962 | RCN3      | GI_28626509-S | 19 | 19 | 54410360 | 328246 | 6.0351  | 5.81251 | JPT |
| rs11670810 | LILRB3    | GI_5803059-S  | 19 | 19 | 59420315 | 7683   | 7.1761  | 6.0727  | JPT |
| rs3859534  | LILRB3    | GI_5803059-S  | 19 | 19 | 59420579 | 7947   | 6.4502  | 6.0727  | JPT |
| rs7247394  | LILRB3    | GI_5803059-S  | 19 | 19 | 59423295 | 10663  | 7.2167  | 6.0727  | JPT |
| rs11084325 | LILRB3    | GI_5803059-S  | 19 | 19 | 59424868 | 12236  | 7.2167  | 6.0727  | JPT |
| rs11672654 | LILRB3    | GI_5803059-S  | 19 | 19 | 59425145 | 12513  | 7.2167  | 6.0727  | JPT |
| rs4801583  | SLC27A5   | GI_13325056-S | 19 | 19 | 63610217 | 91587  | 6.0387  | 5.64597 | JPT |
| rs3764535  | SLC27A5   | GI_13325056-S | 19 | 19 | 63620864 | 80940  | 5.848   | 5.64597 | JPT |
| rs1465789  | SLC27A5   | GI_13325056-S | 19 | 19 | 63637868 | 63936  | 5.848   | 5.64597 | JPT |
| rs893185   | SLC27A5   | GI_13325056-S | 19 | 19 | 63681307 | 20497  | 5.848   | 5.64597 | JPT |
| rs11670764 | MGC2752   | GI_33859747-S | 19 | 19 | 63684708 | 100504 | 8.1641  | 5.66875 | JPT |
| rs4801273  | SLC27A5   | GI_13325056-S | 19 | 19 | 63692085 | 9719   | 6.3311  | 5.64597 | JPT |
| rs2278497  | MGC2752   | GI_33859747-S | 19 | 19 | 63702631 | 82581  | 8.0512  | 5.66875 | JPT |
| rs11666790 | MGC2752   | GI_33859747-S | 19 | 19 | 63725153 | 60059  | 11.427  | 5.66875 | JPT |
| rs7249714  | MGC2752   | GI_33859747-S | 19 | 19 | 63749895 | 35317  | 11.427  | 5.66875 | JPT |
| rs895374   | MGC2752   | GI_33859747-S | 19 | 19 | 63758730 | 26482  | 12.8521 | 5.66875 | JPT |
| rs3794965  | MGC2752   | GI_33859747-S | 19 | 19 | 63761165 | 24047  | 15.0066 | 5.66875 | JPT |
| rs10413586 | MGC2752   | GI_33859747-S | 19 | 19 | 63763133 | 22079  | 15.1461 | 5.66875 | JPT |
| rs4801614  | MGC2752   | GI_33859747-S | 19 | 19 | 63788762 | 3550   | 15.0066 | 5.66875 | JPT |
| rs654750   | VPS16     | GI_17978482-A | 20 | 20 | 2959188  | 163902 | 6.4563  | 6.16894 | JPT |
| rs761228   | SNRPB2    | GI_38149917-I | 20 | 20 | 16650501 | 8253   | 6.8229  | 6.51092 | JPT |
| rs3787509  | SNRPB2    | GI_38149917-I | 20 | 20 | 16656109 | 2645   | 7.6594  | 6.51092 | JPT |
| rs3787508  | SNRPB2    | GI_38149917-I | 20 | 20 | 16656164 | 2590   | 7.6594  | 6.51092 | JPT |
| rs2073055  | SNRPB2    | GI_38149917-I | 20 | 20 | 16658791 | 37     | 8.2191  | 6.51092 | JPT |
| rs11698885 | POLR3F    | GI_33598951-S | 20 | 20 | 18491691 | 78619  | 6.427   | 6.1888  | JPT |
| rs6060632  | CPNE1     | GI_23397697-A | 20 | 20 | 33886015 | 208343 | 5.6408  | 5.53939 | JPT |
| rs7270009  | CPNE1     | GI_23397697-A | 20 | 20 | 33896975 | 219303 | 5.6567  | 5.53939 | JPT |
| rs1739646  | LOC375097 | GI_37555934-S | 20 | 20 | 36470998 | 11936  | 7.5114  | 5.67294 | JPT |
| rs1739646  | Hs.400876 | Hs.400876-S   | 20 | 20 | 36470998 | 11787  | 7.9742  | 6.13416 | JPT |
| rs6070062  | LOC375097 | GI_37555934-S | 20 | 20 | 36476409 | 6525   | 6.8148  | 5.67294 | JPT |
| rs6070062  | Hs.400876 | Hs.400876-S   | 20 | 20 | 36476409 | 6376   | 7.3648  | 6.13416 | JPT |
| rs6025497  | LOC375097 | GI_37555934-S | 20 | 20 | 36476624 | 6310   | 6.1465  | 5.67294 | JPT |
| rs6025497  | Hs.400876 | Hs.400876-S   | 20 | 20 | 36476624 | 6161   | 6.6528  | 6.13416 | JPT |
| rs1739652  | LOC375097 | GI_37555934-S | 20 | 20 | 36482373 | 561    | 6.1465  | 5.67294 | JPT |
| rs1739652  | Hs.400876 | Hs.400876-S   | 20 | 20 | 36482373 | 412    | 6.6528  | 6.13416 | JPT |
| rs3752277  | LOC375097 | GI_37555934-S | 20 | 20 | 36484167 | 1233   | 6.8148  | 5.67294 | JPT |
| rs3752277  | Hs.400876 | Hs.400876-S   | 20 | 20 | 36484167 | 1382   | 7.3648  | 6.13416 | JPT |
| rs3752278  | LOC375097 | GI_37555934-S | 20 | 20 | 36484231 | 1297   | 6.7709  | 5.67294 | JPT |
| rs3752278  | Hs.400876 | Hs.400876-S   | 20 | 20 | 36484231 | 1446   | 7.2747  | 6.13416 | JPT |
| rs3752279  | LOC375097 | GI_37555934-S | 20 | 20 | 36484373 | 1439   | 6.1465  | 5.67294 | JPT |
| rs3752279  | Hs.400876 | Hs.400876-S   | 20 | 20 | 36484373 | 1588   | 6.6528  | 6.13416 | JPT |
| rs3752280  | LOC375097 | GI_37555934-S | 20 | 20 | 36484421 | 1487   | 6.7709  | 5.67294 | JPT |
| rs3752280  | Hs.400876 | Hs.400876-S   | 20 | 20 | 36484421 | 1636   | 7.2747  | 6.13416 | JPT |
| rs1780636  | LOC375097 | GI_37555934-S | 20 | 20 | 36486997 | 4063   | 6.7334  | 5.67294 | JPT |
| rs1780636  | Hs.400876 | Hs.400876-S   | 20 | 20 | 36486997 | 4212   | 7.2995  | 6.13416 | JPT |
| rs752775   | LOC375097 | GI_37555934-S | 20 | 20 | 36488195 | 5261   | 6.6465  | 5.67294 | JPT |
| rs752775   | Hs.400876 | Hs.400876-S   | 20 | 20 | 36488195 | 5410   | 7.2292  | 6.13416 | JPT |
| rs707578   | LOC375097 | GI_37555934-S | 20 | 20 | 36489289 | 6355   | 6.0895  | 5.67294 | JPT |
| rs707578   | Hs.400876 | Hs.400876-S   | 20 | 20 | 36489289 | 6504   | 6.6302  | 6.13416 | JPT |
| rs788347   | LOC375097 | GI_37555934-S | 20 | 20 | 36495997 | 13063  | 6.8101  | 5.67294 | JPT |
| rs788347   | Hs.400876 | Hs.400876-S   | 20 | 20 | 36495997 | 13212  | 7.2561  | 6.13416 | JPT |
| rs788348   | LOC375097 | GI_37555934-S | 20 | 20 | 36496888 | 13954  | 6.7789  | 5.67294 | JPT |
| rs788348   | Hs.400876 | Hs.400876-S   | 20 | 20 | 36496888 | 14103  | 7.2408  | 6.13416 | JPT |

|           |           |               |    |    |          |        |        |         |     |
|-----------|-----------|---------------|----|----|----------|--------|--------|---------|-----|
| rs788350  | LOC375097 | GI_37555934-S | 20 | 20 | 36498050 | 15116  | 7.5114 | 5.67294 | JPT |
| rs788350  | Hs.400876 | Hs.400876-S   | 20 | 20 | 36498050 | 15265  | 7.9742 | 6.13416 | JPT |
| rs6099675 | LOC375097 | GI_37555934-S | 20 | 20 | 36500903 | 17969  | 6.1068 | 5.67294 | JPT |
| rs6099675 | Hs.400876 | Hs.400876-S   | 20 | 20 | 36500903 | 18118  | 6.5356 | 6.13416 | JPT |
| rs805527  | LOC375097 | GI_37555934-S | 20 | 20 | 36506018 | 23084  | 6.7789 | 5.67294 | JPT |
| rs805527  | Hs.400876 | Hs.400876-S   | 20 | 20 | 36506018 | 23233  | 7.2408 | 6.13416 | JPT |
| rs805528  | LOC375097 | GI_37555934-S | 20 | 20 | 36506505 | 23571  | 6.8101 | 5.67294 | JPT |
| rs805528  | Hs.400876 | Hs.400876-S   | 20 | 20 | 36506505 | 23720  | 7.2561 | 6.13416 | JPT |
| rs805529  | LOC375097 | GI_37555934-S | 20 | 20 | 36506696 | 23762  | 5.9653 | 5.67294 | JPT |
| rs805529  | Hs.400876 | Hs.400876-S   | 20 | 20 | 36506696 | 23911  | 6.243  | 6.13416 | JPT |
| rs805530  | LOC375097 | GI_37555934-S | 20 | 20 | 36507613 | 24679  | 6.8101 | 5.67294 | JPT |
| rs805530  | Hs.400876 | Hs.400876-S   | 20 | 20 | 36507613 | 24828  | 7.2561 | 6.13416 | JPT |
| rs805531  | LOC375097 | GI_37555934-S | 20 | 20 | 36508140 | 25206  | 6.8101 | 5.67294 | JPT |
| rs805531  | Hs.400876 | Hs.400876-S   | 20 | 20 | 36508140 | 25355  | 7.2561 | 6.13416 | JPT |
| rs12397   | LOC375097 | GI_37555934-S | 20 | 20 | 36512651 | 29717  | 7.5114 | 5.67294 | JPT |
| rs12397   | Hs.400876 | Hs.400876-S   | 20 | 20 | 36512651 | 29866  | 7.9742 | 6.13416 | JPT |
| rs805532  | LOC375097 | GI_37555934-S | 20 | 20 | 36513421 | 30487  | 6.8101 | 5.67294 | JPT |
| rs805532  | Hs.400876 | Hs.400876-S   | 20 | 20 | 36513421 | 30636  | 7.2561 | 6.13416 | JPT |
| rs805552  | LOC375097 | GI_37555934-S | 20 | 20 | 36536221 | 53287  | 6.8101 | 5.67294 | JPT |
| rs805552  | Hs.400876 | Hs.400876-S   | 20 | 20 | 36536221 | 53436  | 7.2561 | 6.13416 | JPT |
| rs1303567 | LOC375097 | GI_37555934-S | 20 | 20 | 36539571 | 56637  | 5.6941 | 5.67294 | JPT |
| rs1303567 | Hs.400876 | Hs.400876-S   | 20 | 20 | 36539571 | 56786  | 6.1898 | 6.13416 | JPT |
| rs805554  | LOC375097 | GI_37555934-S | 20 | 20 | 36540455 | 57521  | 7.5114 | 5.67294 | JPT |
| rs805554  | Hs.400876 | Hs.400876-S   | 20 | 20 | 36540455 | 57670  | 7.9742 | 6.13416 | JPT |
| rs1303588 | LOC375097 | GI_37555934-S | 20 | 20 | 36541160 | 58226  | 7.5114 | 5.67294 | JPT |
| rs1303588 | Hs.400876 | Hs.400876-S   | 20 | 20 | 36541160 | 58375  | 7.9742 | 6.13416 | JPT |
| rs1303582 | LOC375097 | GI_37555934-S | 20 | 20 | 36546349 | 63415  | 6.7789 | 5.67294 | JPT |
| rs1303582 | Hs.400876 | Hs.400876-S   | 20 | 20 | 36546349 | 63564  | 7.2408 | 6.13416 | JPT |
| rs1303581 | LOC375097 | GI_37555934-S | 20 | 20 | 36547300 | 64366  | 7.5114 | 5.67294 | JPT |
| rs1303581 | Hs.400876 | Hs.400876-S   | 20 | 20 | 36547300 | 64515  | 7.9742 | 6.13416 | JPT |
| rs1303577 | LOC375097 | GI_37555934-S | 20 | 20 | 36559271 | 76337  | 7.5114 | 5.67294 | JPT |
| rs1303577 | Hs.400876 | Hs.400876-S   | 20 | 20 | 36559271 | 76486  | 7.9742 | 6.13416 | JPT |
| rs1303575 | LOC375097 | GI_37555934-S | 20 | 20 | 36562231 | 79297  | 7.5114 | 5.67294 | JPT |
| rs1303575 | Hs.400876 | Hs.400876-S   | 20 | 20 | 36562231 | 79446  | 7.9742 | 6.13416 | JPT |
| rs1303574 | LOC375097 | GI_37555934-S | 20 | 20 | 36562655 | 79721  | 7.5114 | 5.67294 | JPT |
| rs1303574 | Hs.400876 | Hs.400876-S   | 20 | 20 | 36562655 | 79870  | 7.9742 | 6.13416 | JPT |
| rs1315305 | LOC375097 | GI_37555934-S | 20 | 20 | 36565135 | 82201  | 6.8101 | 5.67294 | JPT |
| rs1315305 | Hs.400876 | Hs.400876-S   | 20 | 20 | 36565135 | 82350  | 7.2561 | 6.13416 | JPT |
| rs1303571 | LOC375097 | GI_37555934-S | 20 | 20 | 36566533 | 83599  | 7.3987 | 5.67294 | JPT |
| rs1303571 | Hs.400876 | Hs.400876-S   | 20 | 20 | 36566533 | 83748  | 7.9151 | 6.13416 | JPT |
| rs805559  | LOC375097 | GI_37555934-S | 20 | 20 | 36591367 | 108433 | 6.1068 | 5.67294 | JPT |
| rs805559  | Hs.400876 | Hs.400876-S   | 20 | 20 | 36591367 | 108582 | 6.5356 | 6.13416 | JPT |
| rs4812025 | LOC375097 | GI_37555934-S | 20 | 20 | 36614832 | 131898 | 6.7789 | 5.67294 | JPT |
| rs4812025 | Hs.400876 | Hs.400876-S   | 20 | 20 | 36614832 | 132047 | 7.2408 | 6.13416 | JPT |
| rs2864932 | LOC375097 | GI_37555934-S | 20 | 20 | 36619423 | 136489 | 7.5114 | 5.67294 | JPT |
| rs2864932 | Hs.400876 | Hs.400876-S   | 20 | 20 | 36619423 | 136638 | 7.9742 | 6.13416 | JPT |
| rs2185594 | LOC375097 | GI_37555934-S | 20 | 20 | 36627668 | 144734 | 6.7789 | 5.67294 | JPT |
| rs2185594 | Hs.400876 | Hs.400876-S   | 20 | 20 | 36627668 | 144883 | 7.2408 | 6.13416 | JPT |
| rs2206783 | LOC375097 | GI_37555934-S | 20 | 20 | 36633736 | 150802 | 7.0292 | 5.67294 | JPT |
| rs2206783 | Hs.400876 | Hs.400876-S   | 20 | 20 | 36633736 | 150951 | 7.2561 | 6.13416 | JPT |
| rs1115600 | LOC375097 | GI_37555934-S | 20 | 20 | 36635587 | 152653 | 6.7789 | 5.67294 | JPT |
| rs1115600 | Hs.400876 | Hs.400876-S   | 20 | 20 | 36635587 | 152802 | 7.2408 | 6.13416 | JPT |
| rs6064733 | LOC375097 | GI_37555934-S | 20 | 20 | 36641941 | 159007 | 6.8101 | 5.67294 | JPT |
| rs6064733 | Hs.400876 | Hs.400876-S   | 20 | 20 | 36641941 | 159156 | 7.2561 | 6.13416 | JPT |
| rs1033516 | LOC375097 | GI_37555934-S | 20 | 20 | 36642400 | 159466 | 7.5114 | 5.67294 | JPT |
| rs1033516 | Hs.400876 | Hs.400876-S   | 20 | 20 | 36642400 | 159615 | 7.9742 | 6.13416 | JPT |

|            |           |               |    |    |          |        |        |         |     |
|------------|-----------|---------------|----|----|----------|--------|--------|---------|-----|
| rs4812047  | LOC375097 | GI_37555934-S | 20 | 20 | 36642920 | 159986 | 7.5114 | 5.67294 | JPT |
| rs4812047  | Hs.400876 | Hs.400876-S   | 20 | 20 | 36642920 | 160135 | 7.9742 | 6.13416 | JPT |
| rs6026642  | LOC375097 | GI_37555934-S | 20 | 20 | 36643690 | 160756 | 7.1417 | 5.67294 | JPT |
| rs6026642  | Hs.400876 | Hs.400876-S   | 20 | 20 | 36643690 | 160905 | 7.4913 | 6.13416 | JPT |
| rs1055334  | MYBL2     | GI_31652260-S | 20 | 20 | 41650061 | 128279 | 5.9083 | 5.85707 | JPT |
| rs1894668  | MYBL2     | GI_31652260-S | 20 | 20 | 41652333 | 126007 | 6.1154 | 5.85707 | JPT |
| rs3752562  | MYBL2     | GI_31652260-S | 20 | 20 | 41653245 | 125095 | 5.9083 | 5.85707 | JPT |
| rs6073139  | MYBL2     | GI_31652260-S | 20 | 20 | 41655020 | 123320 | 6.0681 | 5.85707 | JPT |
| rs2664519  | MYBL2     | GI_31652260-S | 20 | 20 | 41658528 | 119812 | 5.9083 | 5.85707 | JPT |
| rs6073142  | MYBL2     | GI_31652260-S | 20 | 20 | 41660426 | 117914 | 6.1134 | 5.85707 | JPT |
| rs2145214  | MYBL2     | GI_31652260-S | 20 | 20 | 41670481 | 107859 | 5.9083 | 5.85707 | JPT |
| rs4473450  | MYBL2     | GI_31652260-S | 20 | 20 | 41676114 | 102226 | 6.3654 | 5.85707 | JPT |
| rs6073157  | MYBL2     | GI_31652260-S | 20 | 20 | 41686956 | 91384  | 5.9083 | 5.85707 | JPT |
| rs2093139  | MYBL2     | GI_31652260-S | 20 | 20 | 41689278 | 89062  | 6.1134 | 5.85707 | JPT |
| rs6073162  | MYBL2     | GI_31652260-S | 20 | 20 | 41693661 | 84679  | 5.9083 | 5.85707 | JPT |
| rs6031007  | MYBL2     | GI_31652260-S | 20 | 20 | 41697916 | 80424  | 6.218  | 5.85707 | JPT |
| rs2273523  | MYBL2     | GI_31652260-S | 20 | 20 | 41698140 | 80200  | 5.9083 | 5.85707 | JPT |
| rs6017129  | MYBL2     | GI_31652260-S | 20 | 20 | 41699064 | 79276  | 6.1134 | 5.85707 | JPT |
| rs383634   | MYBL2     | GI_31652260-S | 20 | 20 | 41704251 | 74089  | 5.9083 | 5.85707 | JPT |
| rs439115   | MYBL2     | GI_31652260-S | 20 | 20 | 41704335 | 74005  | 5.912  | 5.85707 | JPT |
| rs826962   | MYBL2     | GI_31652260-S | 20 | 20 | 41713141 | 65199  | 5.9083 | 5.85707 | JPT |
| rs385609   | MYBL2     | GI_31652260-S | 20 | 20 | 41719304 | 59036  | 5.9083 | 5.85707 | JPT |
| rs385345   | MYBL2     | GI_31652260-S | 20 | 20 | 41725375 | 52965  | 5.9083 | 5.85707 | JPT |
| rs12798    | TOMM34    | GI_40807467-S | 20 | 20 | 42995068 | 9326   | 5.8844 | 5.8464  | JPT |
| rs12031    | TOMM34    | GI_40807467-S | 20 | 20 | 42995074 | 9320   | 6.0155 | 5.8464  | JPT |
| rs3746583  | TOMM34    | GI_40807467-S | 20 | 20 | 42998973 | 5421   | 5.8844 | 5.8464  | JPT |
| rs2273357  | TOMM34    | GI_40807467-S | 20 | 20 | 43000277 | 4117   | 6.0285 | 5.8464  | JPT |
| rs11907237 | TOMM34    | GI_40807467-S | 20 | 20 | 43002180 | 2214   | 6.6871 | 5.8464  | JPT |
| rs2284268  | TOMM34    | GI_40807467-S | 20 | 20 | 43015135 | 10741  | 6.555  | 5.8464  | JPT |
| rs2294213  | PLTP      | GI_33356542-I | 20 | 20 | 43974099 | 2493   | 6.4087 | 5.99518 | JPT |
| rs290431   | BCAS1     | GI_4502372-S  | 20 | 20 | 52109454 | 115356 | 6.5254 | 6.01965 | JPT |
| rs290432   | BCAS1     | GI_4502372-S  | 20 | 20 | 52109702 | 115604 | 6.3785 | 6.01965 | JPT |
| rs290436   | BCAS1     | GI_4502372-S  | 20 | 20 | 52112899 | 118801 | 6.58   | 6.01965 | JPT |
| rs462174   | BCAS1     | GI_4502372-S  | 20 | 20 | 52113705 | 119607 | 6.58   | 6.01965 | JPT |
| rs463420   | BCAS1     | GI_4502372-S  | 20 | 20 | 52114490 | 120392 | 6.0792 | 6.01965 | JPT |
| rs460470   | BCAS1     | GI_4502372-S  | 20 | 20 | 52114574 | 120476 | 6.1111 | 6.01965 | JPT |
| rs290449   | BCAS1     | GI_4502372-S  | 20 | 20 | 52118804 | 124706 | 6.1607 | 6.01965 | JPT |
| rs6128407  | NPEPL1    | GI_20070332-S | 20 | 20 | 56705464 | 18747  | 6.1168 | 6.05799 | JPT |
| rs3746395  | NPEPL1    | GI_20070332-S | 20 | 20 | 56712374 | 11837  | 6.9158 | 6.05799 | JPT |
| rs6026468  | NPEPL1    | GI_20070332-S | 20 | 20 | 56723754 | 457    | 7.1004 | 6.05799 | JPT |
| rs8978     | NPEPL1    | GI_20070332-S | 20 | 20 | 56724253 | 42     | 6.8613 | 6.05799 | JPT |
| rs1886839  | NPEPL1    | GI_20070332-S | 20 | 20 | 56724837 | 626    | 6.621  | 6.05799 | JPT |
| rs745405   | NPEPL1    | GI_20070332-S | 20 | 20 | 56725390 | 1179   | 6.4368 | 6.05799 | JPT |
| rs6026470  | NPEPL1    | GI_20070332-S | 20 | 20 | 56726496 | 2285   | 7.511  | 6.05799 | JPT |
| rs2426777  | NPEPL1    | GI_20070332-S | 20 | 20 | 56726525 | 2314   | 7.3698 | 6.05799 | JPT |
| rs12480759 | NPEPL1    | GI_20070332-S | 20 | 20 | 56726757 | 2546   | 6.6879 | 6.05799 | JPT |
| rs2426778  | NPEPL1    | GI_20070332-S | 20 | 20 | 56726884 | 2673   | 6.8613 | 6.05799 | JPT |
| rs2246228  | NPEPL1    | GI_20070332-S | 20 | 20 | 56727395 | 3184   | 6.4368 | 6.05799 | JPT |
| rs6089809  | Hs.517172 | Hs.517172-S   | 20 | 20 | 60993353 | 38349  | 7.2297 | 5.89607 | JPT |
| rs7271169  | Hs.517172 | Hs.517172-S   | 20 | 20 | 60997396 | 34306  | 9.4589 | 5.89607 | JPT |
| rs755740   | Hs.517172 | Hs.517172-S   | 20 | 20 | 60997925 | 33777  | 9.773  | 5.89607 | JPT |
| rs1883848  | Hs.517172 | Hs.517172-S   | 20 | 20 | 60998751 | 32951  | 9.773  | 5.89607 | JPT |
| rs6089810  | Hs.517172 | Hs.517172-S   | 20 | 20 | 61001027 | 30675  | 10.23  | 5.89607 | JPT |
| rs6011456  | Hs.517172 | Hs.517172-S   | 20 | 20 | 61001169 | 30533  | 10.23  | 5.89607 | JPT |
| rs6010784  | Hs.517172 | Hs.517172-S   | 20 | 20 | 61010764 | 20938  | 6.8965 | 5.89607 | JPT |
| rs6010786  | Hs.517172 | Hs.517172-S   | 20 | 20 | 61015159 | 16543  | 7.4462 | 5.89607 | JPT |

|            |           |               |    |    |          |       |         |         |     |
|------------|-----------|---------------|----|----|----------|-------|---------|---------|-----|
| rs6010789  | Hs.517172 | Hs.517172-S   | 20 | 20 | 61031598 | 104   | 7.8537  | 5.89607 | JPT |
| rs2249828  | DSCR5     | GI_24497594-I | 21 | 21 | 37354491 | 11851 | 6.4728  | 6.25356 | JPT |
| rs2836922  | C21orf107 | GI_38026951-I | 21 | 21 | 39438178 | 46149 | 8.8996  | 6.24556 | JPT |
| rs7281463  | C21orf107 | GI_38026951-I | 21 | 21 | 39442653 | 41674 | 11.1055 | 6.24556 | JPT |
| rs9977198  | C21orf107 | GI_38026951-I | 21 | 21 | 39445034 | 39293 | 12.3156 | 6.24556 | JPT |
| rs2037923  | C21orf107 | GI_38026951-I | 21 | 21 | 39447157 | 37170 | 11.5572 | 6.24556 | JPT |
| rs7279497  | C21orf107 | GI_38026951-I | 21 | 21 | 39453176 | 31151 | 11.9738 | 6.24556 | JPT |
| rs377098   | C21orf107 | GI_38026951-I | 21 | 21 | 39457086 | 27241 | 13.2526 | 6.24556 | JPT |
| rs418298   | C21orf107 | GI_38026951-I | 21 | 21 | 39458524 | 25803 | 13.5656 | 6.24556 | JPT |
| rs418359   | C21orf107 | GI_38026951-I | 21 | 21 | 39458604 | 25723 | 13.5656 | 6.24556 | JPT |
| rs2836926  | C21orf107 | GI_38026951-I | 21 | 21 | 39458660 | 25667 | 11.665  | 6.24556 | JPT |
| rs7282604  | C21orf107 | GI_38026951-I | 21 | 21 | 39458780 | 25547 | 13.2526 | 6.24556 | JPT |
| rs419469   | C21orf107 | GI_38026951-I | 21 | 21 | 39459104 | 25223 | 13.5656 | 6.24556 | JPT |
| rs1235441  | C21orf107 | GI_38026951-I | 21 | 21 | 39459607 | 24720 | 13.8422 | 6.24556 | JPT |
| rs8134214  | C21orf107 | GI_38026951-I | 21 | 21 | 39464237 | 20090 | 11.665  | 6.24556 | JPT |
| rs413078   | C21orf107 | GI_38026951-I | 21 | 21 | 39464565 | 19762 | 13.8422 | 6.24556 | JPT |
| rs2836931  | C21orf107 | GI_38026951-I | 21 | 21 | 39468439 | 15888 | 11.3377 | 6.24556 | JPT |
| rs428602   | C21orf107 | GI_38026951-I | 21 | 21 | 39468874 | 15453 | 13.2526 | 6.24556 | JPT |
| rs9982122  | C21orf107 | GI_38026951-I | 21 | 21 | 39469180 | 15147 | 14.045  | 6.24556 | JPT |
| rs2245455  | C21orf107 | GI_38026951-I | 21 | 21 | 39469957 | 14370 | 13.2526 | 6.24556 | JPT |
| rs391062   | C21orf107 | GI_38026951-I | 21 | 21 | 39470137 | 14190 | 13.8422 | 6.24556 | JPT |
| rs6517520  | C21orf107 | GI_38026951-I | 21 | 21 | 39470768 | 13559 | 14.045  | 6.24556 | JPT |
| rs2142111  | C21orf107 | GI_38026951-I | 21 | 21 | 39471159 | 13168 | 13.2526 | 6.24556 | JPT |
| rs2236437  | C21orf107 | GI_38026951-I | 21 | 21 | 39478465 | 5862  | 17.8427 | 6.24556 | JPT |
| rs2297256  | C21orf107 | GI_38026951-I | 21 | 21 | 39480291 | 4036  | 13.8749 | 6.24556 | JPT |
| rs2410104  | C21orf107 | GI_38026951-I | 21 | 21 | 39486334 | 2007  | 17.1569 | 6.24556 | JPT |
| rs2836934  | C21orf107 | GI_38026951-I | 21 | 21 | 39486755 | 2428  | 13.5078 | 6.24556 | JPT |
| rs2150410  | C21orf107 | GI_38026951-I | 21 | 21 | 39491649 | 7322  | 16.6246 | 6.24556 | JPT |
| rs1041439  | C21orf107 | GI_38026951-I | 21 | 21 | 39493116 | 8789  | 17.8427 | 6.24556 | JPT |
| rs13051430 | C21orf107 | GI_38026951-I | 21 | 21 | 39495900 | 11573 | 16.9067 | 6.24556 | JPT |
| rs2150411  | C21orf107 | GI_38026951-I | 21 | 21 | 39496422 | 12095 | 13.5078 | 6.24556 | JPT |
| rs2150412  | C21orf107 | GI_38026951-I | 21 | 21 | 39496539 | 12212 | 13.1699 | 6.24556 | JPT |
| rs4818001  | C21orf107 | GI_38026951-I | 21 | 21 | 39496958 | 12631 | 13.5078 | 6.24556 | JPT |
| rs8130320  | C21orf107 | GI_38026951-I | 21 | 21 | 39502128 | 17801 | 13.8749 | 6.24556 | JPT |
| rs8132230  | C21orf107 | GI_38026951-I | 21 | 21 | 39505951 | 21624 | 16.7653 | 6.24556 | JPT |
| rs8132143  | C21orf107 | GI_38026951-I | 21 | 21 | 39506128 | 21801 | 13.5078 | 6.24556 | JPT |
| rs8132424  | C21orf107 | GI_38026951-I | 21 | 21 | 39506282 | 21955 | 13.8749 | 6.24556 | JPT |
| rs2836942  | C21orf107 | GI_38026951-I | 21 | 21 | 39513251 | 28924 | 13.5078 | 6.24556 | JPT |
| rs8128118  | C21orf107 | GI_38026951-I | 21 | 21 | 39514099 | 29772 | 17.9997 | 6.24556 | JPT |
| rs2836943  | C21orf107 | GI_38026951-I | 21 | 21 | 39514481 | 30154 | 13.5078 | 6.24556 | JPT |
| rs2183575  | C21orf107 | GI_38026951-I | 21 | 21 | 39516230 | 31903 | 17.2958 | 6.24556 | JPT |
| rs2183576  | C21orf107 | GI_38026951-I | 21 | 21 | 39521095 | 36768 | 17.4023 | 6.24556 | JPT |
| rs2836948  | C21orf107 | GI_38026951-I | 21 | 21 | 39521547 | 37220 | 13.5078 | 6.24556 | JPT |
| rs2026266  | C21orf107 | GI_38026951-I | 21 | 21 | 39521590 | 37263 | 16.2113 | 6.24556 | JPT |
| rs4816619  | C21orf107 | GI_38026951-I | 21 | 21 | 39521746 | 37419 | 17.8427 | 6.24556 | JPT |
| rs11702268 | C21orf107 | GI_38026951-I | 21 | 21 | 39522183 | 37856 | 16.6059 | 6.24556 | JPT |
| rs17816433 | C21orf107 | GI_38026951-I | 21 | 21 | 39524326 | 39999 | 13.5078 | 6.24556 | JPT |
| rs1541101  | C21orf107 | GI_38026951-I | 21 | 21 | 39525800 | 41473 | 17.8427 | 6.24556 | JPT |
| rs8131263  | C21orf107 | GI_38026951-I | 21 | 21 | 39527088 | 42761 | 17.5955 | 6.24556 | JPT |
| rs2150413  | C21orf107 | GI_38026951-I | 21 | 21 | 39536748 | 52421 | 13.2222 | 6.24556 | JPT |
| rs2150414  | C21orf107 | GI_38026951-I | 21 | 21 | 39536858 | 52531 | 13.5078 | 6.24556 | JPT |
| rs2836952  | C21orf107 | GI_38026951-I | 21 | 21 | 39538521 | 54194 | 13.0572 | 6.24556 | JPT |
| rs9978591  | C21orf107 | GI_38026951-I | 21 | 21 | 39541997 | 57670 | 17.9997 | 6.24556 | JPT |
| rs2836956  | C21orf107 | GI_38026951-I | 21 | 21 | 39544888 | 60561 | 13.5078 | 6.24556 | JPT |
| rs2836958  | C21orf107 | GI_38026951-I | 21 | 21 | 39545396 | 61069 | 12.5699 | 6.24556 | JPT |
| rs2836959  | C21orf107 | GI_38026951-I | 21 | 21 | 39545538 | 61211 | 13.5078 | 6.24556 | JPT |

|            |           |               |    |    |          |        |         |         |     |
|------------|-----------|---------------|----|----|----------|--------|---------|---------|-----|
| rs7278297  | C21orf107 | GI_38026951-I | 21 | 21 | 39547622 | 63295  | 13.5078 | 6.24556 | JPT |
| rs7276774  | C21orf107 | GI_38026951-I | 21 | 21 | 39550595 | 66268  | 11.9519 | 6.24556 | JPT |
| rs8127391  | C21orf107 | GI_38026951-I | 21 | 21 | 39557930 | 73603  | 16.7653 | 6.24556 | JPT |
| rs2836966  | C21orf107 | GI_38026951-I | 21 | 21 | 39559391 | 75064  | 13.5078 | 6.24556 | JPT |
| rs6517531  | C21orf107 | GI_38026951-I | 21 | 21 | 39559517 | 75190  | 17.175  | 6.24556 | JPT |
| rs1541100  | C21orf107 | GI_38026951-I | 21 | 21 | 39562922 | 78595  | 16.7653 | 6.24556 | JPT |
| rs6517532  | C21orf107 | GI_38026951-I | 21 | 21 | 39564059 | 79732  | 17.9997 | 6.24556 | JPT |
| rs7283439  | C21orf107 | GI_38026951-I | 21 | 21 | 39567607 | 83280  | 17.8427 | 6.24556 | JPT |
| rs7275773  | C21orf107 | GI_38026951-I | 21 | 21 | 39567960 | 83633  | 17.9997 | 6.24556 | JPT |
| rs2836969  | C21orf107 | GI_38026951-I | 21 | 21 | 39570135 | 85808  | 16.5615 | 6.24556 | JPT |
| rs4818011  | C21orf107 | GI_38026951-I | 21 | 21 | 39570465 | 86138  | 15.9837 | 6.24556 | JPT |
| rs973521   | C21orf107 | GI_38026951-I | 21 | 21 | 39572491 | 88164  | 17.8427 | 6.24556 | JPT |
| rs2836971  | C21orf107 | GI_38026951-I | 21 | 21 | 39573910 | 89583  | 15.9758 | 6.24556 | JPT |
| rs718225   | C21orf107 | GI_38026951-I | 21 | 21 | 39574486 | 90159  | 17.8427 | 6.24556 | JPT |
| rs2836975  | C21orf107 | GI_38026951-I | 21 | 21 | 39585490 | 101163 | 16.9202 | 6.24556 | JPT |
| rs2142117  | C21orf107 | GI_38026951-I | 21 | 21 | 39591175 | 106848 | 17.8427 | 6.24556 | JPT |
| rs1984748  | C21orf107 | GI_38026951-I | 21 | 21 | 39591768 | 107441 | 17.8427 | 6.24556 | JPT |
| rs2056844  | C21orf107 | GI_38026951-I | 21 | 21 | 39592330 | 108003 | 13.5078 | 6.24556 | JPT |
| rs7410020  | C21orf107 | GI_38026951-I | 21 | 21 | 39597363 | 113036 | 16.9202 | 6.24556 | JPT |
| rs8131150  | C21orf107 | GI_38026951-I | 21 | 21 | 39599185 | 114858 | 18.6663 | 6.24556 | JPT |
| rs2272576  | C21orf107 | GI_38026951-I | 21 | 21 | 39606259 | 121932 | 17.8427 | 6.24556 | JPT |
| rs2836980  | C21orf107 | GI_38026951-I | 21 | 21 | 39609488 | 125161 | 10.5821 | 6.24556 | JPT |
| rs2836981  | C21orf107 | GI_38026951-I | 21 | 21 | 39610235 | 125908 | 13.4807 | 6.24556 | JPT |
| rs2836982  | C21orf107 | GI_38026951-I | 21 | 21 | 39611041 | 126714 | 13.4807 | 6.24556 | JPT |
| rs2836983  | C21orf107 | GI_38026951-I | 21 | 21 | 39611206 | 126879 | 10.5821 | 6.24556 | JPT |
| rs7281853  | C21orf107 | GI_38026951-I | 21 | 21 | 39615360 | 131033 | 13.4807 | 6.24556 | JPT |
| rs7282582  | C21orf107 | GI_38026951-I | 21 | 21 | 39618844 | 134517 | 10.1155 | 6.24556 | JPT |
| rs11088471 | C21orf107 | GI_38026951-I | 21 | 21 | 39621183 | 136856 | 9.1342  | 6.24556 | JPT |
| rs2037925  | C21orf107 | GI_38026951-I | 21 | 21 | 39621801 | 137474 | 11.9679 | 6.24556 | JPT |
| rs2410123  | C21orf107 | GI_38026951-I | 21 | 21 | 39621963 | 137636 | 12.1953 | 6.24556 | JPT |
| rs2836985  | C21orf107 | GI_38026951-I | 21 | 21 | 39623039 | 138712 | 9.8695  | 6.24556 | JPT |
| rs2836988  | C21orf107 | GI_38026951-I | 21 | 21 | 39629845 | 145518 | 11.9679 | 6.24556 | JPT |
| rs726046   | C21orf107 | GI_38026951-I | 21 | 21 | 39634237 | 149910 | 12.7852 | 6.24556 | JPT |
| rs2070867  | C21orf107 | GI_38026951-I | 21 | 21 | 39637002 | 152675 | 12.7852 | 6.24556 | JPT |
| rs2735310  | C21orf107 | GI_38026951-I | 21 | 21 | 39639370 | 155043 | 11.3577 | 6.24556 | JPT |
| rs2839533  | TSGA2     | GI_18254455-S | 21 | 21 | 42770095 | 4102   | 6.1608  | 6.09996 | JPT |
| rs228042   | Hs.473917 | Hs.473917-S   | 21 | 21 | 42823373 | 3785   | 6.4392  | 6.0623  | JPT |
| rs228043   | Hs.473917 | Hs.473917-S   | 21 | 21 | 42823507 | 3919   | 6.2829  | 6.0623  | JPT |
| rs228045   | Hs.473917 | Hs.473917-S   | 21 | 21 | 42824802 | 5214   | 7.7212  | 6.0623  | JPT |
| rs228046   | Hs.473917 | Hs.473917-S   | 21 | 21 | 42825006 | 5418   | 8.1088  | 6.0623  | JPT |
| rs228047   | Hs.473917 | Hs.473917-S   | 21 | 21 | 42825058 | 5470   | 8.1088  | 6.0623  | JPT |
| rs228050   | Hs.473917 | Hs.473917-S   | 21 | 21 | 42825637 | 6049   | 8.1088  | 6.0623  | JPT |
| rs228054   | Hs.473917 | Hs.473917-S   | 21 | 21 | 42827332 | 7744   | 8.1088  | 6.0623  | JPT |
| rs228058   | Hs.473917 | Hs.473917-S   | 21 | 21 | 42829968 | 10380  | 6.2829  | 6.0623  | JPT |
| rs228062   | Hs.473917 | Hs.473917-S   | 21 | 21 | 42831984 | 12396  | 7.5947  | 6.0623  | JPT |
| rs228068   | Hs.473917 | Hs.473917-S   | 21 | 21 | 42833288 | 13700  | 8.1088  | 6.0623  | JPT |
| rs228069   | Hs.473917 | Hs.473917-S   | 21 | 21 | 42833309 | 13721  | 8.1088  | 6.0623  | JPT |
| rs228070   | Hs.473917 | Hs.473917-S   | 21 | 21 | 42833590 | 14002  | 7.951   | 6.0623  | JPT |
| rs228077   | Hs.473917 | Hs.473917-S   | 21 | 21 | 42838695 | 19107  | 8.0544  | 6.0623  | JPT |
| rs228079   | Hs.473917 | Hs.473917-S   | 21 | 21 | 42839213 | 19625  | 8.1088  | 6.0623  | JPT |
| rs228080   | Hs.473917 | Hs.473917-S   | 21 | 21 | 42839862 | 20274  | 8.1088  | 6.0623  | JPT |
| rs228083   | Hs.473917 | Hs.473917-S   | 21 | 21 | 42841135 | 21547  | 7.951   | 6.0623  | JPT |
| rs228084   | Hs.473917 | Hs.473917-S   | 21 | 21 | 42841284 | 21696  | 8.1088  | 6.0623  | JPT |
| rs228085   | Hs.473917 | Hs.473917-S   | 21 | 21 | 42841928 | 22340  | 8.1088  | 6.0623  | JPT |
| rs1788414  | Hs.245997 | Hs.245997-S   | 21 | 21 | 42878403 | 13857  | 7.193   | 6.29596 | JPT |
| rs450508   | Hs.245997 | Hs.245997-S   | 21 | 21 | 42879076 | 14530  | 7.0709  | 6.29596 | JPT |

|            |           |               |    |    |          |        |        |         |     |
|------------|-----------|---------------|----|----|----------|--------|--------|---------|-----|
| rs449014   | Hs.245997 | Hs.245997-S   | 21 | 21 | 42879186 | 14640  | 7.193  | 6.29596 | JPT |
| rs408465   | Hs.245997 | Hs.245997-S   | 21 | 21 | 42879276 | 14730  | 7.193  | 6.29596 | JPT |
| rs390268   | Hs.245997 | Hs.245997-S   | 21 | 21 | 42879293 | 14747  | 7.193  | 6.29596 | JPT |
| rs1788449  | Hs.245997 | Hs.245997-S   | 21 | 21 | 42880585 | 16039  | 7.0709 | 6.29596 | JPT |
| rs6586334  | Hs.245997 | Hs.245997-S   | 21 | 21 | 42891021 | 26475  | 6.3603 | 6.29596 | JPT |
| rs2839603  | NDUFV3    | GI_21361323-S | 21 | 21 | 43197575 | 4490   | 7.1436 | 5.97318 | JPT |
| rs8128787  | NDUFV3    | GI_21361323-S | 21 | 21 | 43245902 | 43837  | 6.6025 | 5.97318 | JPT |
| rs8128929  | NDUFV3    | GI_21361323-S | 21 | 21 | 43245973 | 43908  | 6.6025 | 5.97318 | JPT |
| rs2246604  | CSTB      | GI_20357564-S | 21 | 21 | 44189637 | 171257 | 6.0689 | 6.03131 | JPT |
| rs2838456  | Hs.473973 | Hs.473973-S   | 21 | 21 | 44221396 | 14199  | 6.3621 | 6.2551  | JPT |
| rs181359   | UBE2L3    | GI_38157977-A | 22 | 22 | 20253195 | 49572  | 6.0967 | 6.06845 | JPT |
| rs181360   | UBE2L3    | GI_38157977-A | 22 | 22 | 20253470 | 49297  | 6.3069 | 6.06845 | JPT |
| rs5998599  | UBE2L3    | GI_38157977-A | 22 | 22 | 20266535 | 36232  | 6.3069 | 6.06845 | JPT |
| rs5754295  | UBE2L3    | GI_38157977-A | 22 | 22 | 20276294 | 26473  | 6.3211 | 6.06845 | JPT |
| rs4821112  | UBE2L3    | GI_38157977-A | 22 | 22 | 20289315 | 13452  | 6.7628 | 6.06845 | JPT |
| rs5754352  | UBE2L3    | GI_38157977-A | 22 | 22 | 20289505 | 13262  | 6.3211 | 6.06845 | JPT |
| rs5998672  | UBE2L3    | GI_38157977-A | 22 | 22 | 20290996 | 11771  | 6.3211 | 6.06845 | JPT |
| rs738127   | UBE2L3    | GI_38157977-A | 22 | 22 | 20292775 | 9992   | 6.3211 | 6.06845 | JPT |
| rs738129   | UBE2L3    | GI_38157977-A | 22 | 22 | 20295595 | 7172   | 6.3211 | 6.06845 | JPT |
| rs11089637 | UBE2L3    | GI_38157977-A | 22 | 22 | 20303650 | 883    | 6.3211 | 6.06845 | JPT |
| rs12158299 | UBE2L3    | GI_38157977-A | 22 | 22 | 20304138 | 1371   | 6.7628 | 6.06845 | JPT |
| rs5760147  | GSTT1     | GI_4504184-S  | 22 | 22 | 22659502 | 41454  | 13.346 | 5.83858 | JPT |
| rs407257   | GSTT1     | GI_4504184-S  | 22 | 22 | 22671104 | 29852  | 15.066 | 5.83858 | JPT |
| rs6004035  | GSTT1     | GI_4504184-S  | 22 | 22 | 22709801 | 8845   | 6.8668 | 5.83858 | JPT |
| rs17004810 | GSTT1     | GI_4504184-S  | 22 | 22 | 22726874 | 25918  | 8.5069 | 5.83858 | JPT |
| rs5760176  | GSTT1     | GI_4504184-S  | 22 | 22 | 22726875 | 25919  | 6.9117 | 5.83858 | JPT |
| rs138433   | C22orf2   | GI_21359898-S | 22 | 22 | 37202256 | 191851 | 7.8318 | 5.51709 | JPT |
| rs138435   | C22orf2   | GI_21359898-S | 22 | 22 | 37202418 | 191689 | 6.8763 | 5.51709 | JPT |
| rs138462   | C22orf2   | GI_21359898-S | 22 | 22 | 37229946 | 164161 | 7.2916 | 5.51709 | JPT |
| rs138462   | DDX17     | GI_38201709-I | 22 | 22 | 37229946 | 14743  | 6.1512 | 5.79468 | JPT |
| rs138465   | C22orf2   | GI_21359898-S | 22 | 22 | 37232349 | 161758 | 6.6102 | 5.51709 | JPT |
| rs16999046 | C22orf2   | GI_21359898-S | 22 | 22 | 37257075 | 137032 | 7.2916 | 5.51709 | JPT |
| rs16999046 | DDX17     | GI_38201709-I | 22 | 22 | 37257075 | 41872  | 6.1512 | 5.79468 | JPT |
| rs4987164  | C22orf2   | GI_21359898-S | 22 | 22 | 37259015 | 135092 | 7.2916 | 5.51709 | JPT |
| rs4987164  | DDX17     | GI_38201709-I | 22 | 22 | 37259015 | 43812  | 6.1512 | 5.79468 | JPT |
| rs10427947 | C22orf2   | GI_21359898-S | 22 | 22 | 37261051 | 133056 | 7.2916 | 5.51709 | JPT |
| rs10427947 | DDX17     | GI_38201709-I | 22 | 22 | 37261051 | 45848  | 6.1512 | 5.79468 | JPT |
| rs9917599  | C22orf2   | GI_21359898-S | 22 | 22 | 37261104 | 133003 | 7.1717 | 5.51709 | JPT |
| rs6001149  | C22orf2   | GI_21359898-S | 22 | 22 | 37262450 | 131657 | 7.2916 | 5.51709 | JPT |
| rs6001149  | DDX17     | GI_38201709-I | 22 | 22 | 37262450 | 47247  | 6.1512 | 5.79468 | JPT |
| rs11570373 | C22orf2   | GI_21359898-S | 22 | 22 | 37289377 | 104730 | 7.2916 | 5.51709 | JPT |
| rs11570373 | DDX17     | GI_38201709-I | 22 | 22 | 37289377 | 74174  | 6.1512 | 5.79468 | JPT |
| rs16999109 | C22orf2   | GI_21359898-S | 22 | 22 | 37306531 | 87576  | 8.7859 | 5.51709 | JPT |
| rs16999114 | C22orf2   | GI_21359898-S | 22 | 22 | 37306858 | 87249  | 8.7859 | 5.51709 | JPT |
| rs16999142 | C22orf2   | GI_21359898-S | 22 | 22 | 37323282 | 70825  | 7.9946 | 5.51709 | JPT |
| rs16999166 | C22orf2   | GI_21359898-S | 22 | 22 | 37352683 | 41424  | 8.7859 | 5.51709 | JPT |
| rs16999173 | C22orf2   | GI_21359898-S | 22 | 22 | 37359286 | 34821  | 8.7859 | 5.51709 | JPT |
| rs16999186 | C22orf2   | GI_21359898-S | 22 | 22 | 37377333 | 16774  | 8.7859 | 5.51709 | JPT |
| rs6519132  | C22orf2   | GI_21359898-S | 22 | 22 | 37395422 | 1315   | 8.6564 | 5.51709 | JPT |
| rs16999224 | C22orf2   | GI_21359898-S | 22 | 22 | 37401087 | 6980   | 8.7859 | 5.51709 | JPT |
| rs16999281 | C22orf2   | GI_21359898-S | 22 | 22 | 37433133 | 39026  | 8.7859 | 5.51709 | JPT |
| rs138691   | C22orf2   | GI_21359898-S | 22 | 22 | 37439810 | 45703  | 8.7859 | 5.51709 | JPT |
| rs138694   | C22orf2   | GI_21359898-S | 22 | 22 | 37444596 | 50489  | 8.7859 | 5.51709 | JPT |
| rs138695   | C22orf2   | GI_21359898-S | 22 | 22 | 37444738 | 50631  | 8.694  | 5.51709 | JPT |
| rs138696   | C22orf2   | GI_21359898-S | 22 | 22 | 37444994 | 50887  | 8.694  | 5.51709 | JPT |
| rs16999297 | C22orf2   | GI_21359898-S | 22 | 22 | 37446538 | 52431  | 8.7859 | 5.51709 | JPT |

|            |           |               |    |    |          |        |         |         |     |
|------------|-----------|---------------|----|----|----------|--------|---------|---------|-----|
| rs138697   | C22orf2   | GI_21359898-S | 22 | 22 | 37448826 | 54719  | 8.7859  | 5.51709 | JPT |
| rs16999301 | C22orf2   | GI_21359898-S | 22 | 22 | 37450029 | 55922  | 8.7859  | 5.51709 | JPT |
| rs763124   | LOC400933 | GI_42662518-S | 22 | 22 | 48269111 | 139647 | 7.3031  | 6.57993 | JPT |
| rs135819   | LOC400933 | GI_42662518-S | 22 | 22 | 48276351 | 146887 | 9.4162  | 6.57993 | JPT |
| rs135824   | LOC400933 | GI_42662518-S | 22 | 22 | 48279913 | 150449 | 9.6315  | 6.57993 | JPT |
| rs135827   | LOC400933 | GI_42662518-S | 22 | 22 | 48281090 | 151626 | 9.5358  | 6.57993 | JPT |
| rs135831   | LOC400933 | GI_42662518-S | 22 | 22 | 48282209 | 152745 | 8.0941  | 6.57993 | JPT |
| rs135832   | LOC400933 | GI_42662518-S | 22 | 22 | 48282412 | 152948 | 8.1412  | 6.57993 | JPT |
| rs135833   | LOC400933 | GI_42662518-S | 22 | 22 | 48282905 | 153441 | 8.0941  | 6.57993 | JPT |
| rs135834   | LOC400933 | GI_42662518-S | 22 | 22 | 48283275 | 153811 | 8.0941  | 6.57993 | JPT |
| rs135846   | LOC400933 | GI_42662518-S | 22 | 22 | 48285909 | 156445 | 9.0718  | 6.57993 | JPT |
| rs1008320  | LOC400933 | GI_42662518-S | 22 | 22 | 48289581 | 160117 | 7.4845  | 6.57993 | JPT |
| rs9616685  | LOC400933 | GI_42662518-S | 22 | 22 | 48289814 | 160350 | 7.4966  | 6.57993 | JPT |
| rs8136912  | LOC400933 | GI_42662518-S | 22 | 22 | 48290014 | 160550 | 7.4966  | 6.57993 | JPT |
| rs5769691  | LOC400933 | GI_42662518-S | 22 | 22 | 48291659 | 162195 | 7.4845  | 6.57993 | JPT |
| rs135847   | LOC400933 | GI_42662518-S | 22 | 22 | 48292086 | 162622 | 9.0387  | 6.57993 | JPT |
| rs135848   | LOC400933 | GI_42662518-S | 22 | 22 | 48292810 | 163346 | 9.0387  | 6.57993 | JPT |
| rs135850   | LOC400933 | GI_42662518-S | 22 | 22 | 48296916 | 167452 | 10.4199 | 6.57993 | JPT |
| rs2071894  | LOC400933 | GI_42662518-S | 22 | 22 | 48298059 | 168595 | 8.4135  | 6.57993 | JPT |
| rs135853   | LOC400933 | GI_42662518-S | 22 | 22 | 48299314 | 169850 | 10.2597 | 6.57993 | JPT |
| rs5770562  | LOC400933 | GI_42662518-S | 22 | 22 | 48299363 | 169899 | 8.1841  | 6.57993 | JPT |
| rs2071893  | LOC400933 | GI_42662518-S | 22 | 22 | 48299436 | 169972 | 8.4135  | 6.57993 | JPT |
| rs135854   | LOC400933 | GI_42662518-S | 22 | 22 | 48299949 | 170485 | 10.2803 | 6.57993 | JPT |
| rs2187890  | LOC400933 | GI_42662518-S | 22 | 22 | 48301620 | 172156 | 7.6887  | 6.57993 | JPT |
| rs5770567  | LOC400933 | GI_42662518-S | 22 | 22 | 48305828 | 176364 | 6.7803  | 6.57993 | JPT |
| rs763126   | LOC400933 | GI_42662518-S | 22 | 22 | 48309435 | 179971 | 8.1069  | 6.57993 | JPT |
| rs2007024  | LOC400933 | GI_42662518-S | 22 | 22 | 48309676 | 180212 | 10.1321 | 6.57993 | JPT |
| rs17182154 | LOC400933 | GI_42662518-S | 22 | 22 | 48311331 | 181867 | 7.5999  | 6.57993 | JPT |
| rs2071890  | LOC400933 | GI_42662518-S | 22 | 22 | 48322152 | 192688 | 9.8064  | 6.57993 | JPT |
| rs763127   | LOC400933 | GI_42662518-S | 22 | 22 | 48326939 | 197475 | 9.3701  | 6.57993 | JPT |
| rs1018812  | LOC400933 | GI_42662518-S | 22 | 22 | 48330934 | 201470 | 9.3701  | 6.57993 | JPT |
| rs10854876 | LOC400933 | GI_42662518-S | 22 | 22 | 48331431 | 201967 | 10.0464 | 6.57993 | JPT |
| rs135875   | LOC400933 | GI_42662518-S | 22 | 22 | 48333280 | 203816 | 11.3614 | 6.57993 | JPT |
| rs5769707  | LOC400933 | GI_42662518-S | 22 | 22 | 48334263 | 204799 | 8.972   | 6.57993 | JPT |
| rs135876   | LOC400933 | GI_42662518-S | 22 | 22 | 48334434 | 204970 | 10.0464 | 6.57993 | JPT |
| rs135877   | LOC400933 | GI_42662518-S | 22 | 22 | 48334863 | 205399 | 11.7636 | 6.57993 | JPT |
| rs135878   | LOC400933 | GI_42662518-S | 22 | 22 | 48335230 | 205766 | 12.0923 | 6.57993 | JPT |
| rs6009786  | LOC400933 | GI_42662518-S | 22 | 22 | 48336006 | 206542 | 11.7636 | 6.57993 | JPT |
| rs7288869  | LOC400933 | GI_42662518-S | 22 | 22 | 48336188 | 206724 | 9.9897  | 6.57993 | JPT |
| rs916363   | LOC400933 | GI_42662518-S | 22 | 22 | 48338417 | 208953 | 8.3067  | 6.57993 | JPT |
| rs5770594  | LOC400933 | GI_42662518-S | 22 | 22 | 48339358 | 209894 | 9.5266  | 6.57993 | JPT |
| rs5770601  | LOC400933 | GI_42662518-S | 22 | 22 | 48342764 | 213300 | 9.9469  | 6.57993 | JPT |
| rs739248   | LOC400933 | GI_42662518-S | 22 | 22 | 48346066 | 216602 | 9.2925  | 6.57993 | JPT |
| rs9616329  | LOC400933 | GI_42662518-S | 22 | 22 | 48347175 | 217711 | 11.4136 | 6.57993 | JPT |
| rs5770604  | LOC400933 | GI_42662518-S | 22 | 22 | 48351533 | 222069 | 9.5266  | 6.57993 | JPT |
| rs4824070  | LOC400933 | GI_42662518-S | 22 | 22 | 48352382 | 222918 | 7.7093  | 6.57993 | JPT |
| rs2071904  | LOC400933 | GI_42662518-S | 22 | 22 | 48355338 | 225874 | 9.3701  | 6.57993 | JPT |
| rs739236   | LOC400933 | GI_42662518-S | 22 | 22 | 48362463 | 232999 | 11.3614 | 6.57993 | JPT |
| rs1107514  | LOC400933 | GI_42662518-S | 22 | 22 | 48363244 | 233780 | 11.3614 | 6.57993 | JPT |
| rs8137111  | LOC400933 | GI_42662518-S | 22 | 22 | 48364611 | 235147 | 10.0464 | 6.57993 | JPT |
| rs8140095  | LOC400933 | GI_42662518-S | 22 | 22 | 48364656 | 235192 | 10.0464 | 6.57993 | JPT |
| rs8141219  | LOC400933 | GI_42662518-S | 22 | 22 | 48365407 | 235943 | 10.0771 | 6.57993 | JPT |
| rs8138399  | LOC400933 | GI_42662518-S | 22 | 22 | 48365685 | 236221 | 9.3398  | 6.57993 | JPT |
| rs9616333  | LOC400933 | GI_42662518-S | 22 | 22 | 48371708 | 242244 | 9.1534  | 6.57993 | JPT |
| rs9616714  | LOC400933 | GI_42662518-S | 22 | 22 | 48371720 | 242256 | 9.3398  | 6.57993 | JPT |
| rs739240   | LOC400933 | GI_42662518-S | 22 | 22 | 48373468 | 244004 | 11.3614 | 6.57993 | JPT |

|            |           |               |    |    |          |        |         |         |     |
|------------|-----------|---------------|----|----|----------|--------|---------|---------|-----|
| rs12485195 | LOC400933 | GI_42662518-S | 22 | 22 | 48374732 | 245268 | 9.8434  | 6.57993 | JPT |
| rs739243   | LOC400933 | GI_42662518-S | 22 | 22 | 48378072 | 248608 | 8.4526  | 6.57993 | JPT |
| rs7286706  | LOC400933 | GI_42662518-S | 22 | 22 | 48379207 | 249743 | 8.42    | 6.57993 | JPT |
| rs6009810  | LOC400933 | GI_42662518-S | 22 | 22 | 48380401 | 250937 | 9.8757  | 6.57993 | JPT |
| rs739244   | LOC400933 | GI_42662518-S | 22 | 22 | 48381019 | 251555 | 9.8757  | 6.57993 | JPT |
| rs5770633  | LOC400933 | GI_42662518-S | 22 | 22 | 48383288 | 253824 | 11.1825 | 6.57993 | JPT |
| rs739245   | LOC400933 | GI_42662518-S | 22 | 22 | 48387611 | 258147 | 7.5913  | 6.57993 | JPT |
| rs4337585  | LOC400933 | GI_42662518-S | 22 | 22 | 48391852 | 262388 | 6.9979  | 6.57993 | JPT |
| rs4276120  | LOC400933 | GI_42662518-S | 22 | 22 | 48391880 | 262416 | 7.3442  | 6.57993 | JPT |
| rs2073604  | CHKL      | GI_23238259-I | 22 | 22 | 49299069 | 8510   | 6.6353  | 5.83932 | JPT |
| rs12627787 | CHKL      | GI_23238259-I | 22 | 22 | 49302525 | 5054   | 6.9153  | 5.83932 | JPT |
| rs1557503  | CHKL      | GI_23238259-I | 22 | 22 | 49303216 | 4363   | 6.3472  | 5.83932 | JPT |
| rs3213446  | CHKL      | GI_23238259-I | 22 | 22 | 49305818 | 1761   | 6.3472  | 5.83932 | JPT |
| rs3213445  | CHKL      | GI_23238259-I | 22 | 22 | 49305982 | 1597   | 6.66    | 5.83932 | JPT |
| rs3094315  | LOC284591 | GI_37547228-S | 1  | 1  | 792429   | 34861  | 5.0755  | 5.04198 | YRI |
| rs4040617  | LOC284591 | GI_37547228-S | 1  | 1  | 819185   | 8105   | 5.2137  | 5.04198 | YRI |
| rs11260570 | FLJ20542  | GI_39725639-I | 1  | 1  | 1241563  | 45522  | 5.9002  | 5.48921 | YRI |
| rs6663688  | Hs.211939 | Hs.211939-S   | 1  | 1  | 10558581 | 13923  | 7.0257  | 6.20566 | YRI |
| rs11121594 | Hs.211939 | Hs.211939-S   | 1  | 1  | 10561188 | 11316  | 6.516   | 6.20566 | YRI |
| rs10779744 | Hs.211939 | Hs.211939-S   | 1  | 1  | 10563399 | 9105   | 6.3457  | 6.20566 | YRI |
| rs12565494 | Hs.211939 | Hs.211939-S   | 1  | 1  | 10563828 | 8676   | 7.6332  | 6.20566 | YRI |
| rs6687502  | Hs.211939 | Hs.211939-S   | 1  | 1  | 10567539 | 4965   | 7.0257  | 6.20566 | YRI |
| rs6540938  | Hs.211939 | Hs.211939-S   | 1  | 1  | 10570725 | 1779   | 7.0257  | 6.20566 | YRI |
| rs221035   | ARHGFE19  | GI_40255148-S | 1  | 1  | 16271835 | 1740   | 7.0254  | 5.99105 | YRI |
| rs10796439 | ARHGFE19  | GI_40255148-S | 1  | 1  | 16274149 | 4054   | 7.3663  | 5.99105 | YRI |
| rs221045   | ARHGFE19  | GI_40255148-S | 1  | 1  | 16275355 | 5260   | 6.3899  | 5.99105 | YRI |
| rs221047   | ARHGFE19  | GI_40255148-S | 1  | 1  | 16275670 | 5575   | 7.29    | 5.99105 | YRI |
| rs1342086  | FLJ13171  | GI_40254956-S | 1  | 1  | 28726182 | 82065  | 5.9578  | 5.89507 | YRI |
| rs11581013 | AK2       | GI_26665889-I | 1  | 1  | 33122811 | 25038  | 7.0412  | 6.219   | YRI |
| rs11810032 | AK2       | GI_26665889-I | 1  | 1  | 33138367 | 9482   | 7.1459  | 6.219   | YRI |
| rs13376642 | AK2       | GI_26665889-I | 1  | 1  | 33147656 | 193    | 6.5696  | 6.219   | YRI |
| rs9970553  | AK2       | GI_26665889-I | 1  | 1  | 33149457 | 1608   | 7.1459  | 6.219   | YRI |
| rs11811191 | AK2       | GI_26665889-I | 1  | 1  | 33206037 | 58188  | 7.1459  | 6.219   | YRI |
| rs4653296  | FLJ11730  | GI_40255019-S | 1  | 1  | 37647866 | 19389  | 6.1612  | 5.88739 | YRI |
| rs6693076  | TRIT1     | GI_32306540-S | 1  | 1  | 39972196 | 4111   | 6.2347  | 5.83619 | YRI |
| rs7523024  | TRIT1     | GI_32306540-S | 1  | 1  | 40015094 | 38787  | 6.8324  | 5.83619 | YRI |
| rs7533329  | TRIT1     | GI_32306540-S | 1  | 1  | 40015222 | 38915  | 6.8324  | 5.83619 | YRI |
| rs3131691  | TRIT1     | GI_32306540-S | 1  | 1  | 40026361 | 50054  | 7.5248  | 5.83619 | YRI |
| rs11811998 | TRIT1     | GI_32306540-S | 1  | 1  | 40027819 | 51512  | 8.6778  | 5.83619 | YRI |
| rs4660863  | Hs.396207 | Hs.396207-S   | 1  | 1  | 45624961 | 148033 | 6.0124  | 5.7667  | YRI |
| rs12029322 | Hs.396207 | Hs.396207-S   | 1  | 1  | 45639539 | 133455 | 5.9433  | 5.7667  | YRI |
| rs868351   | Hs.396207 | Hs.396207-S   | 1  | 1  | 45678911 | 94083  | 5.886   | 5.7667  | YRI |
| rs12049503 | IPP       | GI_5174472-S  | 1  | 1  | 45690649 | 143186 | 6.4679  | 5.73157 | YRI |
| rs12049503 | Hs.396207 | Hs.396207-S   | 1  | 1  | 45690649 | 82345  | 6.2322  | 5.7667  | YRI |
| rs3790585  | IPP       | GI_5174472-S  | 1  | 1  | 45692449 | 141386 | 6.8777  | 5.73157 | YRI |
| rs3790585  | Hs.396207 | Hs.396207-S   | 1  | 1  | 45692449 | 80545  | 7.8211  | 5.7667  | YRI |
| rs780954   | IPP       | GI_5174472-S  | 1  | 1  | 45708170 | 125665 | 6.6089  | 5.73157 | YRI |
| rs780954   | Hs.396207 | Hs.396207-S   | 1  | 1  | 45708170 | 64824  | 10.1069 | 5.7667  | YRI |
| rs1084086  | IPP       | GI_5174472-S  | 1  | 1  | 45710193 | 123642 | 6.2567  | 5.73157 | YRI |
| rs1084086  | Hs.396207 | Hs.396207-S   | 1  | 1  | 45710193 | 62801  | 10.7603 | 5.7667  | YRI |
| rs2152078  | IPP       | GI_5174472-S  | 1  | 1  | 45724693 | 109142 | 6.2567  | 5.73157 | YRI |
| rs2152078  | Hs.396207 | Hs.396207-S   | 1  | 1  | 45724693 | 48301  | 10.7603 | 5.7667  | YRI |
| rs2991979  | IPP       | GI_5174472-S  | 1  | 1  | 45724951 | 108884 | 6.2567  | 5.73157 | YRI |
| rs2991979  | Hs.396207 | Hs.396207-S   | 1  | 1  | 45724951 | 48043  | 10.7603 | 5.7667  | YRI |
| rs2230657  | Hs.396207 | Hs.396207-S   | 1  | 1  | 45742582 | 30412  | 7.791   | 5.7667  | YRI |
| rs2050376  | IPP       | GI_5174472-S  | 1  | 1  | 45747723 | 86112  | 6.2567  | 5.73157 | YRI |



|            |           |              |   |   |          |       |         |         |     |
|------------|-----------|--------------|---|---|----------|-------|---------|---------|-----|
| rs2050376  | Hs.396207 | Hs.396207-S  | 1 | 1 | 45747723 | 25271 | 10.7603 | 5.7667  | YRI |
| rs2230658  | IPP       | GI_5174472-S | 1 | 1 | 45747947 | 85888 | 6.2567  | 5.73157 | YRI |
| rs2230658  | Hs.396207 | Hs.396207-S  | 1 | 1 | 45747947 | 25047 | 10.7603 | 5.7667  | YRI |
| rs2230659  | IPP       | GI_5174472-S | 1 | 1 | 45747977 | 85858 | 6.2567  | 5.73157 | YRI |
| rs2230659  | Hs.396207 | Hs.396207-S  | 1 | 1 | 45747977 | 25017 | 10.7603 | 5.7667  | YRI |
| rs1972410  | IPP       | GI_5174472-S | 1 | 1 | 45750040 | 83795 | 6.2567  | 5.73157 | YRI |
| rs1972410  | Hs.396207 | Hs.396207-S  | 1 | 1 | 45750040 | 22954 | 10.7603 | 5.7667  | YRI |
| rs2991986  | IPP       | GI_5174472-S | 1 | 1 | 45750375 | 83460 | 6.2567  | 5.73157 | YRI |
| rs2991986  | Hs.396207 | Hs.396207-S  | 1 | 1 | 45750375 | 22619 | 10.7603 | 5.7667  | YRI |
| rs2991987  | IPP       | GI_5174472-S | 1 | 1 | 45750515 | 83320 | 5.877   | 5.73157 | YRI |
| rs2991987  | Hs.396207 | Hs.396207-S  | 1 | 1 | 45750515 | 22479 | 10.9312 | 5.7667  | YRI |
| rs2253862  | IPP       | GI_5174472-S | 1 | 1 | 45751053 | 82782 | 6.2567  | 5.73157 | YRI |
| rs2253862  | Hs.396207 | Hs.396207-S  | 1 | 1 | 45751053 | 21941 | 10.7603 | 5.7667  | YRI |
| rs2991988  | IPP       | GI_5174472-S | 1 | 1 | 45751524 | 82311 | 6.2567  | 5.73157 | YRI |
| rs2991988  | Hs.396207 | Hs.396207-S  | 1 | 1 | 45751524 | 21470 | 10.7603 | 5.7667  | YRI |
| rs2991989  | IPP       | GI_5174472-S | 1 | 1 | 45752058 | 81777 | 6.2853  | 5.73157 | YRI |
| rs2991989  | Hs.396207 | Hs.396207-S  | 1 | 1 | 45752058 | 20936 | 10.711  | 5.7667  | YRI |
| rs1547924  | IPP       | GI_5174472-S | 1 | 1 | 45754205 | 79630 | 6.8763  | 5.73157 | YRI |
| rs1547924  | Hs.396207 | Hs.396207-S  | 1 | 1 | 45754205 | 18789 | 10.4627 | 5.7667  | YRI |
| rs1547925  | IPP       | GI_5174472-S | 1 | 1 | 45754449 | 79386 | 6.2567  | 5.73157 | YRI |
| rs1547925  | Hs.396207 | Hs.396207-S  | 1 | 1 | 45754449 | 18545 | 10.7603 | 5.7667  | YRI |
| rs2275086  | IPP       | GI_5174472-S | 1 | 1 | 45754972 | 78863 | 6.2567  | 5.73157 | YRI |
| rs2275086  | Hs.396207 | Hs.396207-S  | 1 | 1 | 45754972 | 18022 | 10.7603 | 5.7667  | YRI |
| rs3014245  | IPP       | GI_5174472-S | 1 | 1 | 45756006 | 77829 | 6.2567  | 5.73157 | YRI |
| rs3014245  | Hs.396207 | Hs.396207-S  | 1 | 1 | 45756006 | 16988 | 10.7603 | 5.7667  | YRI |
| rs3014242  | IPP       | GI_5174472-S | 1 | 1 | 45756670 | 77165 | 6.5648  | 5.73157 | YRI |
| rs3014242  | Hs.396207 | Hs.396207-S  | 1 | 1 | 45756670 | 16324 | 10.7644 | 5.7667  | YRI |
| rs3014241  | Hs.396207 | Hs.396207-S  | 1 | 1 | 45756972 | 16022 | 7.0973  | 5.7667  | YRI |
| rs3014237  | IPP       | GI_5174472-S | 1 | 1 | 45759345 | 74490 | 6.2567  | 5.73157 | YRI |
| rs3014237  | Hs.396207 | Hs.396207-S  | 1 | 1 | 45759345 | 13649 | 10.7603 | 5.7667  | YRI |
| rs3014235  | IPP       | GI_5174472-S | 1 | 1 | 45760605 | 73230 | 6.2567  | 5.73157 | YRI |
| rs3014235  | Hs.396207 | Hs.396207-S  | 1 | 1 | 45760605 | 12389 | 10.7603 | 5.7667  | YRI |
| rs9429172  | Hs.396207 | Hs.396207-S  | 1 | 1 | 45761569 | 11425 | 14.3987 | 5.7667  | YRI |
| rs1250     | Hs.396207 | Hs.396207-S  | 1 | 1 | 45763120 | 9874  | 6.3949  | 5.7667  | YRI |
| rs12037561 | IPP       | GI_5174472-S | 1 | 1 | 45764365 | 69470 | 6.2567  | 5.73157 | YRI |
| rs12037561 | Hs.396207 | Hs.396207-S  | 1 | 1 | 45764365 | 8629  | 10.7603 | 5.7667  | YRI |
| rs6703748  | IPP       | GI_5174472-S | 1 | 1 | 45765069 | 68766 | 6.1129  | 5.73157 | YRI |
| rs6703748  | Hs.396207 | Hs.396207-S  | 1 | 1 | 45765069 | 7925  | 10.5333 | 5.7667  | YRI |
| rs10890333 | IPP       | GI_5174472-S | 1 | 1 | 45769415 | 64420 | 6.2567  | 5.73157 | YRI |
| rs10890333 | Hs.396207 | Hs.396207-S  | 1 | 1 | 45769415 | 3579  | 10.7603 | 5.7667  | YRI |
| rs10890334 | IPP       | GI_5174472-S | 1 | 1 | 45769471 | 64364 | 6.1129  | 5.73157 | YRI |
| rs10890334 | Hs.396207 | Hs.396207-S  | 1 | 1 | 45769471 | 3523  | 10.5333 | 5.7667  | YRI |
| rs6694889  | IPP       | GI_5174472-S | 1 | 1 | 45770899 | 62936 | 5.7731  | 5.73157 | YRI |
| rs6694889  | Hs.396207 | Hs.396207-S  | 1 | 1 | 45770899 | 2095  | 10.0372 | 5.7667  | YRI |
| rs12023439 | Hs.396207 | Hs.396207-S  | 1 | 1 | 45773729 | 735   | 14.4147 | 5.7667  | YRI |
| rs12043945 | IPP       | GI_5174472-S | 1 | 1 | 45776015 | 57820 | 6.2567  | 5.73157 | YRI |
| rs12043945 | Hs.396207 | Hs.396207-S  | 1 | 1 | 45776015 | 3021  | 10.7603 | 5.7667  | YRI |
| rs12091503 | Hs.396207 | Hs.396207-S  | 1 | 1 | 45776961 | 3967  | 9.9899  | 5.7667  | YRI |
| rs11211145 | IPP       | GI_5174472-S | 1 | 1 | 45777584 | 56251 | 6.1129  | 5.73157 | YRI |
| rs11211145 | Hs.396207 | Hs.396207-S  | 1 | 1 | 45777584 | 4590  | 10.5333 | 5.7667  | YRI |
| rs11211147 | IPP       | GI_5174472-S | 1 | 1 | 45779187 | 54648 | 6.7103  | 5.73157 | YRI |
| rs11211147 | Hs.396207 | Hs.396207-S  | 1 | 1 | 45779187 | 6193  | 8.9045  | 5.7667  | YRI |
| rs4660313  | Hs.396207 | Hs.396207-S  | 1 | 1 | 45779934 | 6940  | 9.9899  | 5.7667  | YRI |
| rs4660880  | Hs.396207 | Hs.396207-S  | 1 | 1 | 45780133 | 7139  | 15.2499 | 5.7667  | YRI |
| rs10890336 | Hs.396207 | Hs.396207-S  | 1 | 1 | 45780149 | 7155  | 7.2016  | 5.7667  | YRI |
| rs11211149 | Hs.396207 | Hs.396207-S  | 1 | 1 | 45781311 | 8317  | 14.3951 | 5.7667  | YRI |

|            |           |              |   |   |          |        |         |         |     |
|------------|-----------|--------------|---|---|----------|--------|---------|---------|-----|
| rs11211152 | IPP       | GI_5174472-S | 1 | 1 | 45783250 | 50585  | 6.5648  | 5.73157 | YRI |
| rs11211152 | Hs.396207 | Hs.396207-S  | 1 | 1 | 45783250 | 10256  | 10.7644 | 5.7667  | YRI |
| rs4607935  | IPP       | GI_5174472-S | 1 | 1 | 45786254 | 47581  | 6.1747  | 5.73157 | YRI |
| rs4607935  | Hs.396207 | Hs.396207-S  | 1 | 1 | 45786254 | 13260  | 10.6071 | 5.7667  | YRI |
| rs4609469  | IPP       | GI_5174472-S | 1 | 1 | 45786278 | 47557  | 6.0531  | 5.73157 | YRI |
| rs4609469  | Hs.396207 | Hs.396207-S  | 1 | 1 | 45786278 | 13284  | 10.4515 | 5.7667  | YRI |
| rs10789467 | IPP       | GI_5174472-S | 1 | 1 | 45787838 | 45997  | 6.2567  | 5.73157 | YRI |
| rs10789467 | Hs.396207 | Hs.396207-S  | 1 | 1 | 45787838 | 14844  | 10.7603 | 5.7667  | YRI |
| rs3811436  | IPP       | GI_5174472-S | 1 | 1 | 45794973 | 38862  | 6.2567  | 5.73157 | YRI |
| rs3811436  | Hs.396207 | Hs.396207-S  | 1 | 1 | 45794973 | 21979  | 10.7603 | 5.7667  | YRI |
| rs12024590 | IPP       | GI_5174472-S | 1 | 1 | 45796589 | 37246  | 6.1129  | 5.73157 | YRI |
| rs12024590 | Hs.396207 | Hs.396207-S  | 1 | 1 | 45796589 | 23595  | 10.5333 | 5.7667  | YRI |
| rs11211157 | IPP       | GI_5174472-S | 1 | 1 | 45801937 | 31898  | 6.2567  | 5.73157 | YRI |
| rs11211157 | Hs.396207 | Hs.396207-S  | 1 | 1 | 45801937 | 28943  | 10.7603 | 5.7667  | YRI |
| rs10430105 | IPP       | GI_5174472-S | 1 | 1 | 45807969 | 25866  | 6.2902  | 5.73157 | YRI |
| rs10430105 | Hs.396207 | Hs.396207-S  | 1 | 1 | 45807969 | 34975  | 10.9217 | 5.7667  | YRI |
| rs10890341 | IPP       | GI_5174472-S | 1 | 1 | 45816333 | 17502  | 5.9282  | 5.73157 | YRI |
| rs10890341 | Hs.396207 | Hs.396207-S  | 1 | 1 | 45816333 | 43339  | 9.3497  | 5.7667  | YRI |
| rs11211163 | Hs.396207 | Hs.396207-S  | 1 | 1 | 45822641 | 49647  | 6.2157  | 5.7667  | YRI |
| rs11211166 | IPP       | GI_5174472-S | 1 | 1 | 45827035 | 6800   | 6.0259  | 5.73157 | YRI |
| rs11211166 | Hs.396207 | Hs.396207-S  | 1 | 1 | 45827035 | 54041  | 10.5333 | 5.7667  | YRI |
| rs10789470 | IPP       | GI_5174472-S | 1 | 1 | 45827424 | 6411   | 6.2567  | 5.73157 | YRI |
| rs10789470 | Hs.396207 | Hs.396207-S  | 1 | 1 | 45827424 | 54430  | 10.7603 | 5.7667  | YRI |
| rs10749856 | IPP       | GI_5174472-S | 1 | 1 | 45833939 | 104    | 6.2567  | 5.73157 | YRI |
| rs10749856 | Hs.396207 | Hs.396207-S  | 1 | 1 | 45833939 | 60945  | 10.7603 | 5.7667  | YRI |
| rs4564187  | IPP       | GI_5174472-S | 1 | 1 | 45835954 | 2119   | 6.2567  | 5.73157 | YRI |
| rs4564187  | Hs.396207 | Hs.396207-S  | 1 | 1 | 45835954 | 62960  | 10.7603 | 5.7667  | YRI |
| rs11211173 | Hs.396207 | Hs.396207-S  | 1 | 1 | 45931396 | 158402 | 9.2479  | 5.7667  | YRI |
| rs12560266 | Hs.396207 | Hs.396207-S  | 1 | 1 | 45933637 | 160643 | 7.2767  | 5.7667  | YRI |
| rs6690386  | Hs.396207 | Hs.396207-S  | 1 | 1 | 45965031 | 192037 | 7.1292  | 5.7667  | YRI |
| rs12076580 | Hs.396207 | Hs.396207-S  | 1 | 1 | 45970179 | 197185 | 7.1292  | 5.7667  | YRI |
| rs7539800  | Hs.396207 | Hs.396207-S  | 1 | 1 | 45974149 | 201155 | 6.8954  | 5.7667  | YRI |
| rs6672115  | Hs.396207 | Hs.396207-S  | 1 | 1 | 45984899 | 211905 | 6.8954  | 5.7667  | YRI |
| rs10789478 | Hs.396207 | Hs.396207-S  | 1 | 1 | 46062526 | 289532 | 6.314   | 5.7667  | YRI |
| rs7512395  | Hs.396207 | Hs.396207-S  | 1 | 1 | 46073197 | 300203 | 6.2934  | 5.7667  | YRI |
| rs4074225  | Hs.396207 | Hs.396207-S  | 1 | 1 | 46104384 | 331390 | 6.8954  | 5.7667  | YRI |
| rs10890373 | Hs.396207 | Hs.396207-S  | 1 | 1 | 46105775 | 332781 | 6.2934  | 5.7667  | YRI |
| rs4134387  | Hs.396207 | Hs.396207-S  | 1 | 1 | 46107178 | 334184 | 6.8387  | 5.7667  | YRI |
| rs10789485 | Hs.396207 | Hs.396207-S  | 1 | 1 | 46119328 | 346334 | 6.8982  | 5.7667  | YRI |
| rs11211232 | Hs.396207 | Hs.396207-S  | 1 | 1 | 46123166 | 350172 | 6.2934  | 5.7667  | YRI |
| rs10890382 | Hs.396207 | Hs.396207-S  | 1 | 1 | 46181694 | 408700 | 6.2934  | 5.7667  | YRI |
| rs4660335  | Hs.396207 | Hs.396207-S  | 1 | 1 | 46186738 | 413744 | 6.8954  | 5.7667  | YRI |
| rs6677777  | Hs.396207 | Hs.396207-S  | 1 | 1 | 46187856 | 414862 | 6.8954  | 5.7667  | YRI |
| rs1622208  | Hs.396207 | Hs.396207-S  | 1 | 1 | 46210395 | 437401 | 6.8954  | 5.7667  | YRI |
| rs6675259  | Hs.396207 | Hs.396207-S  | 1 | 1 | 46214315 | 441321 | 6.1914  | 5.7667  | YRI |
| rs785467   | Hs.396207 | Hs.396207-S  | 1 | 1 | 46233579 | 460585 | 6.1591  | 5.7667  | YRI |
| rs785510   | Hs.396207 | Hs.396207-S  | 1 | 1 | 46240638 | 467644 | 6.5977  | 5.7667  | YRI |
| rs785484   | Hs.396207 | Hs.396207-S  | 1 | 1 | 46286035 | 513041 | 6.8954  | 5.7667  | YRI |
| rs785490   | Hs.396207 | Hs.396207-S  | 1 | 1 | 46289144 | 516150 | 6.4945  | 5.7667  | YRI |
| rs785493   | Hs.396207 | Hs.396207-S  | 1 | 1 | 46296879 | 523885 | 6.8954  | 5.7667  | YRI |
| rs785497   | Hs.396207 | Hs.396207-S  | 1 | 1 | 46303923 | 530929 | 6.9965  | 5.7667  | YRI |
| rs1416706  | Hs.396207 | Hs.396207-S  | 1 | 1 | 46314864 | 541870 | 6.1931  | 5.7667  | YRI |
| rs9429095  | Hs.396207 | Hs.396207-S  | 1 | 1 | 46315368 | 542374 | 8.564   | 5.7667  | YRI |
| rs785475   | Hs.396207 | Hs.396207-S  | 1 | 1 | 46321756 | 548762 | 6.011   | 5.7667  | YRI |
| rs10489769 | hmm8232   | hmm8232-S    | 1 | 1 | 46518723 | 21021  | 9.6347  | 5.61038 | YRI |
| rs17357621 | hmm8232   | hmm8232-S    | 1 | 1 | 46519717 | 20027  | 8.5135  | 5.61038 | YRI |

|            |          |               |   |   |          |       |         |         |     |
|------------|----------|---------------|---|---|----------|-------|---------|---------|-----|
| rs17357628 | hmm8232  | hmm8232-S     | 1 | 1 | 46520482 | 19262 | 9.9603  | 5.61038 | YRI |
| rs17357635 | hmm8232  | hmm8232-S     | 1 | 1 | 46520688 | 19056 | 9.9603  | 5.61038 | YRI |
| rs7525309  | hmm8232  | hmm8232-S     | 1 | 1 | 46521045 | 18699 | 9.2184  | 5.61038 | YRI |
| rs7548675  | hmm8232  | hmm8232-S     | 1 | 1 | 46521341 | 18403 | 6.9723  | 5.61038 | YRI |
| rs7515284  | hmm8232  | hmm8232-S     | 1 | 1 | 46521439 | 18305 | 9.9603  | 5.61038 | YRI |
| rs17361763 | hmm8232  | hmm8232-S     | 1 | 1 | 46522690 | 17054 | 9.9603  | 5.61038 | YRI |
| rs6684274  | hmm8232  | hmm8232-S     | 1 | 1 | 46522862 | 16882 | 9.9603  | 5.61038 | YRI |
| rs6696777  | hmm8232  | hmm8232-S     | 1 | 1 | 46522990 | 16754 | 9.9603  | 5.61038 | YRI |
| rs6659228  | hmm8232  | hmm8232-S     | 1 | 1 | 46523047 | 16697 | 9.9603  | 5.61038 | YRI |
| rs6697123  | hmm8232  | hmm8232-S     | 1 | 1 | 46523330 | 16414 | 10.0981 | 5.61038 | YRI |
| rs17357676 | hmm8232  | hmm8232-S     | 1 | 1 | 46524464 | 15280 | 9.9603  | 5.61038 | YRI |
| rs17361791 | hmm8232  | hmm8232-S     | 1 | 1 | 46524539 | 15205 | 9.9478  | 5.61038 | YRI |
| rs17361805 | hmm8232  | hmm8232-S     | 1 | 1 | 46525987 | 13757 | 9.9603  | 5.61038 | YRI |
| rs17361812 | hmm8232  | hmm8232-S     | 1 | 1 | 46526028 | 13716 | 9.9603  | 5.61038 | YRI |
| rs5013330  | hmm8232  | hmm8232-S     | 1 | 1 | 46527174 | 12570 | 9.1227  | 5.61038 | YRI |
| rs17357683 | hmm8232  | hmm8232-S     | 1 | 1 | 46527398 | 12346 | 9.9603  | 5.61038 | YRI |
| rs6667861  | hmm8232  | hmm8232-S     | 1 | 1 | 46527769 | 11975 | 9.9478  | 5.61038 | YRI |
| rs1057534  | hmm8232  | hmm8232-S     | 1 | 1 | 46527900 | 11844 | 9.9478  | 5.61038 | YRI |
| rs1057535  | hmm8232  | hmm8232-S     | 1 | 1 | 46527918 | 11826 | 9.9603  | 5.61038 | YRI |
| rs1475390  | hmm8232  | hmm8232-S     | 1 | 1 | 46528360 | 11384 | 9.9478  | 5.61038 | YRI |
| rs1475389  | hmm8232  | hmm8232-S     | 1 | 1 | 46528449 | 11295 | 9.9462  | 5.61038 | YRI |
| rs966907   | hmm8232  | hmm8232-S     | 1 | 1 | 46529145 | 10599 | 9.9478  | 5.61038 | YRI |
| rs17413694 | hmm8232  | hmm8232-S     | 1 | 1 | 46530436 | 9308  | 9.9478  | 5.61038 | YRI |
| rs17413701 | hmm8232  | hmm8232-S     | 1 | 1 | 46530472 | 9272  | 9.9344  | 5.61038 | YRI |
| rs7515598  | hmm8232  | hmm8232-S     | 1 | 1 | 46530499 | 9245  | 9.9014  | 5.61038 | YRI |
| rs12385696 | hmm8232  | hmm8232-S     | 1 | 1 | 46530856 | 8888  | 9.9603  | 5.61038 | YRI |
| rs12385693 | hmm8232  | hmm8232-S     | 1 | 1 | 46530941 | 8803  | 9.9603  | 5.61038 | YRI |
| rs10157084 | hmm8232  | hmm8232-S     | 1 | 1 | 46532995 | 6749  | 9.9603  | 5.61038 | YRI |
| rs10158572 | hmm8232  | hmm8232-S     | 1 | 1 | 46534460 | 5284  | 9.9603  | 5.61038 | YRI |
| rs9661240  | hmm8232  | hmm8232-S     | 1 | 1 | 46539070 | 674   | 9.9603  | 5.61038 | YRI |
| rs1053624  | hmm8232  | hmm8232-S     | 1 | 1 | 46539505 | 239   | 9.9603  | 5.61038 | YRI |
| rs6429599  | hmm8232  | hmm8232-S     | 1 | 1 | 46539891 | 147   | 9.2976  | 5.61038 | YRI |
| rs17361819 | hmm8232  | hmm8232-S     | 1 | 1 | 46540129 | 385   | 9.9603  | 5.61038 | YRI |
| rs17361833 | hmm8232  | hmm8232-S     | 1 | 1 | 46540720 | 976   | 8.7893  | 5.61038 | YRI |
| rs17357711 | hmm8232  | hmm8232-S     | 1 | 1 | 46541033 | 1289  | 9.9603  | 5.61038 | YRI |
| rs12062    | hmm8232  | hmm8232-S     | 1 | 1 | 46542467 | 2723  | 9.9603  | 5.61038 | YRI |
| rs17357759 | hmm8232  | hmm8232-S     | 1 | 1 | 46544554 | 4810  | 9.2184  | 5.61038 | YRI |
| rs17361873 | hmm8232  | hmm8232-S     | 1 | 1 | 46544706 | 4962  | 7.7686  | 5.61038 | YRI |
| rs13374968 | hmm8232  | hmm8232-S     | 1 | 1 | 46555928 | 16184 | 7.523   | 5.61038 | YRI |
| rs6695043  | hmm8232  | hmm8232-S     | 1 | 1 | 46556550 | 16806 | 9.9603  | 5.61038 | YRI |
| rs17361915 | hmm8232  | hmm8232-S     | 1 | 1 | 46559341 | 19597 | 9.904   | 5.61038 | YRI |
| rs6681857  | hmm8232  | hmm8232-S     | 1 | 1 | 46562144 | 22400 | 9.7543  | 5.61038 | YRI |
| rs3991877  | hmm8232  | hmm8232-S     | 1 | 1 | 46565769 | 26025 | 9.7543  | 5.61038 | YRI |
| rs1984490  | hmm8232  | hmm8232-S     | 1 | 1 | 46570754 | 31010 | 9.9603  | 5.61038 | YRI |
| rs6703374  | hmm8232  | hmm8232-S     | 1 | 1 | 46574352 | 34608 | 6.9723  | 5.61038 | YRI |
| rs6703669  | hmm8232  | hmm8232-S     | 1 | 1 | 46574575 | 34831 | 9.9603  | 5.61038 | YRI |
| rs17361936 | hmm8232  | hmm8232-S     | 1 | 1 | 46574913 | 35169 | 10.1165 | 5.61038 | YRI |
| rs17361950 | hmm8232  | hmm8232-S     | 1 | 1 | 46576170 | 36426 | 6.3927  | 5.61038 | YRI |
| rs1154     | FLJ32112 | GI_23308504-S | 1 | 1 | 54204590 | 72514 | 8.4806  | 6.08265 | YRI |
| rs7526578  | FLJ32112 | GI_23308504-S | 1 | 1 | 54208501 | 68603 | 8.4076  | 6.08265 | YRI |
| rs11206279 | FLJ32112 | GI_23308504-S | 1 | 1 | 54231179 | 45925 | 9.3641  | 6.08265 | YRI |
| rs3820112  | FLJ32112 | GI_23308504-S | 1 | 1 | 54234328 | 42776 | 9.1881  | 6.08265 | YRI |
| rs17109690 | FLJ32112 | GI_23308504-S | 1 | 1 | 54239850 | 37254 | 9.2988  | 6.08265 | YRI |
| rs950397   | FLJ32112 | GI_23308504-S | 1 | 1 | 54241547 | 35557 | 9.7041  | 6.08265 | YRI |
| rs11801621 | FLJ32112 | GI_23308504-S | 1 | 1 | 54242018 | 35086 | 9.7041  | 6.08265 | YRI |
| rs17109699 | FLJ32112 | GI_23308504-S | 1 | 1 | 54244343 | 32761 | 8.2147  | 6.08265 | YRI |

|            |              |               |   |   |           |        |         |         |     |
|------------|--------------|---------------|---|---|-----------|--------|---------|---------|-----|
| rs17109707 | FLJ32112     | GI_23308504-S | 1 | 1 | 54244456  | 32648  | 9.4234  | 6.08265 | YRI |
| rs17109712 | FLJ32112     | GI_23308504-S | 1 | 1 | 54248107  | 28997  | 9.4234  | 6.08265 | YRI |
| rs7556423  | FLJ32112     | GI_23308504-S | 1 | 1 | 54258470  | 18634  | 10.7772 | 6.08265 | YRI |
| rs7538004  | FLJ32112     | GI_23308504-S | 1 | 1 | 54275543  | 1561   | 8.183   | 6.08265 | YRI |
| rs12093818 | FLJ32112     | GI_23308504-S | 1 | 1 | 54281603  | 4499   | 6.5184  | 6.08265 | YRI |
| rs12093973 | FLJ32112     | GI_23308504-S | 1 | 1 | 54288933  | 11829  | 8.0268  | 6.08265 | YRI |
| rs9919295  | FLJ32112     | GI_23308504-S | 1 | 1 | 54290121  | 13017  | 8.3412  | 6.08265 | YRI |
| rs9919296  | FLJ32112     | GI_23308504-S | 1 | 1 | 54290157  | 13053  | 8.0603  | 6.08265 | YRI |
| rs11206284 | FLJ32112     | GI_23308504-S | 1 | 1 | 54290679  | 13575  | 15.5147 | 6.08265 | YRI |
| rs17109780 | FLJ32112     | GI_23308504-S | 1 | 1 | 54290689  | 13585  | 7.0059  | 6.08265 | YRI |
| rs1329779  | FLJ32112     | GI_23308504-S | 1 | 1 | 54291676  | 14572  | 6.96    | 6.08265 | YRI |
| rs12062443 | FLJ32112     | GI_23308504-S | 1 | 1 | 54293392  | 16288  | 6.8093  | 6.08265 | YRI |
| rs17119280 | FLJ10986     | GI_21361729-S | 1 | 1 | 59511182  | 340599 | 6.3911  | 6.31395 | YRI |
| rs1390450  | BBP          | GI_17738309-S | 1 | 1 | 61852409  | 26242  | 7.789   | 6.16517 | YRI |
| rs11539585 | BBP          | GI_17738309-S | 1 | 1 | 61859040  | 19611  | 7.789   | 6.16517 | YRI |
| rs11805607 | BBP          | GI_17738309-S | 1 | 1 | 61879483  | 832    | 7.789   | 6.16517 | YRI |
| rs13375232 | BBP          | GI_17738309-S | 1 | 1 | 61883395  | 4744   | 7.789   | 6.16517 | YRI |
| rs7554012  | BBP          | GI_17738309-S | 1 | 1 | 61902429  | 23778  | 7.6295  | 6.16517 | YRI |
| rs17122726 | BBP          | GI_17738309-S | 1 | 1 | 61903342  | 24691  | 7.2862  | 6.16517 | YRI |
| rs17122742 | BBP          | GI_17738309-S | 1 | 1 | 61911321  | 32670  | 7.789   | 6.16517 | YRI |
| rs12044746 | INADL        | GI_29029547-I | 1 | 1 | 62292222  | 262    | 6.4363  | 6.40396 | YRI |
| rs17123111 | INADL        | GI_29029547-I | 1 | 1 | 62295548  | 3064   | 6.4363  | 6.40396 | YRI |
| rs10157174 | MGC22773     | GI_21687083-S | 1 | 1 | 74199285  | 158734 | 6.9566  | 6.16373 | YRI |
| rs7554468  | MGC22773     | GI_21687083-S | 1 | 1 | 74283794  | 74225  | 6.5034  | 6.16373 | YRI |
| rs2069302  | MGC22773     | GI_21687083-S | 1 | 1 | 74377628  | 19609  | 7.1539  | 6.16373 | YRI |
| rs9285629  | SNX7         | GI_23111054-A | 1 | 1 | 98849718  | 87955  | 8.1902  | 6.426   | YRI |
| rs9726996  | SNX7         | GI_23111054-A | 1 | 1 | 98861639  | 76034  | 7.484   | 6.426   | YRI |
| rs9433890  | SNX7         | GI_23111054-A | 1 | 1 | 98876957  | 60716  | 6.7225  | 6.426   | YRI |
| rs9659487  | SNX7         | GI_23111054-A | 1 | 1 | 98880800  | 56873  | 8.1076  | 6.426   | YRI |
| rs17121829 | DKFZp761A078 | GI_35038600-S | 1 | 1 | 100251471 | 10062  | 6.547   | 6.14001 | YRI |
| rs17121850 | DKFZp761A078 | GI_35038600-S | 1 | 1 | 100256672 | 4861   | 6.547   | 6.14001 | YRI |
| rs6660019  | DKFZp761A078 | GI_35038600-S | 1 | 1 | 100262466 | 933    | 7.0667  | 6.14001 | YRI |
| rs6662945  | DKFZp761A078 | GI_35038600-S | 1 | 1 | 100296767 | 35234  | 6.3599  | 6.14001 | YRI |
| rs4970811  | Hs.485352    | Hs.485352-S   | 1 | 1 | 109015349 | 999919 | 6.8815  | 6.29991 | YRI |
| rs659543   | KIAA1324     | GI_38569481-S | 1 | 1 | 109447458 | 10395  | 5.9705  | 5.82768 | YRI |
| rs366732   | GSTM1        | GI_23065546-A | 1 | 1 | 109935049 | 8911   | 22.4473 | 6.08475 | YRI |
| rs366732   | GSTM2        | GI_23065549-S | 1 | 1 | 109935049 | 8831   | 8.8504  | 6.167   | YRI |
| rs1858749  | GSTM1        | GI_23065546-A | 1 | 1 | 109953494 | 9534   | 21.276  | 6.08475 | YRI |
| rs1858749  | GSTM2        | GI_23065549-S | 1 | 1 | 109953494 | 27276  | 7.273   | 6.167   | YRI |
| rs366631   | GSTM1        | GI_23065546-A | 1 | 1 | 109964514 | 20554  | 18.174  | 6.08475 | YRI |
| rs366631   | GSTM2        | GI_23065549-S | 1 | 1 | 109964514 | 38296  | 8.2095  | 6.167   | YRI |
| rs1006298  | ST7L         | GI_38201636-A | 1 | 1 | 112774001 | 22698  | 7.5429  | 6.2315  | YRI |
| rs12728001 | ST7L         | GI_38201636-A | 1 | 1 | 112788798 | 7901   | 8.645   | 6.2315  | YRI |
| rs10745330 | ST7L         | GI_38201636-A | 1 | 1 | 112795481 | 1218   | 14.8845 | 6.2315  | YRI |
| rs10745330 | ST7L         | GI_38201636-I | 1 | 1 | 112795481 | 1068   | 10.2937 | 6.2315  | YRI |
| rs7544663  | ST7L         | GI_38201636-A | 1 | 1 | 112801048 | 4349   | 14.3621 | 6.2315  | YRI |
| rs7544663  | ST7L         | GI_38201636-I | 1 | 1 | 112801048 | 4499   | 9.842   | 6.2315  | YRI |
| rs7513716  | ST7L         | GI_38201636-A | 1 | 1 | 112801362 | 4663   | 12.8468 | 6.2315  | YRI |
| rs7513716  | ST7L         | GI_38201636-I | 1 | 1 | 112801362 | 4813   | 9.9091  | 6.2315  | YRI |
| rs7516421  | ST7L         | GI_38201636-A | 1 | 1 | 112801738 | 5039   | 11.4714 | 6.2315  | YRI |
| rs7516421  | ST7L         | GI_38201636-I | 1 | 1 | 112801738 | 5189   | 7.2105  | 6.2315  | YRI |
| rs10857963 | ST7L         | GI_38201636-A | 1 | 1 | 112803529 | 6830   | 12.7118 | 6.2315  | YRI |
| rs10857963 | ST7L         | GI_38201636-I | 1 | 1 | 112803529 | 6980   | 8.6607  | 6.2315  | YRI |
| rs12126277 | ST7L         | GI_38201636-A | 1 | 1 | 112818411 | 21712  | 14.8845 | 6.2315  | YRI |
| rs12126277 | ST7L         | GI_38201636-I | 1 | 1 | 112818411 | 21862  | 10.2937 | 6.2315  | YRI |
| rs10776757 | ST7L         | GI_38201636-A | 1 | 1 | 112833715 | 37016  | 10.1635 | 6.2315  | YRI |

|            |           |               |   |   |           |        |         |         |     |
|------------|-----------|---------------|---|---|-----------|--------|---------|---------|-----|
| rs10776757 | ST7L      | GI_38201636-I | 1 | 1 | 112833715 | 37166  | 8.526   | 6.2315  | YRI |
| rs7554916  | ST7L      | GI_38201636-A | 1 | 1 | 112835776 | 39077  | 14.8845 | 6.2315  | YRI |
| rs7554916  | ST7L      | GI_38201636-I | 1 | 1 | 112835776 | 39227  | 10.2937 | 6.2315  | YRI |
| rs6671645  | ST7L      | GI_38201636-A | 1 | 1 | 112841170 | 44471  | 11.4714 | 6.2315  | YRI |
| rs6671645  | ST7L      | GI_38201636-I | 1 | 1 | 112841170 | 44621  | 7.2105  | 6.2315  | YRI |
| rs6666579  | ST7L      | GI_38201636-A | 1 | 1 | 112844435 | 47736  | 14.2961 | 6.2315  | YRI |
| rs6666579  | ST7L      | GI_38201636-I | 1 | 1 | 112844435 | 47886  | 9.7954  | 6.2315  | YRI |
| rs6682737  | ST7L      | GI_38201636-A | 1 | 1 | 112848271 | 51572  | 14.8845 | 6.2315  | YRI |
| rs6682737  | ST7L      | GI_38201636-I | 1 | 1 | 112848271 | 51722  | 10.2937 | 6.2315  | YRI |
| rs4839254  | ST7L      | GI_38201636-A | 1 | 1 | 112852968 | 56269  | 8.2353  | 6.2315  | YRI |
| rs4839254  | ST7L      | GI_38201636-I | 1 | 1 | 112852968 | 56419  | 7.735   | 6.2315  | YRI |
| rs6537745  | ST7L      | GI_38201636-A | 1 | 1 | 112866122 | 69423  | 9.4885  | 6.2315  | YRI |
| rs6700673  | ST7L      | GI_38201636-A | 1 | 1 | 112869096 | 72397  | 14.3621 | 6.2315  | YRI |
| rs6700673  | ST7L      | GI_38201636-I | 1 | 1 | 112869096 | 72547  | 9.842   | 6.2315  | YRI |
| rs9429486  | ST7L      | GI_38201636-A | 1 | 1 | 112869414 | 72715  | 8.001   | 6.2315  | YRI |
| rs9429486  | ST7L      | GI_38201636-I | 1 | 1 | 112869414 | 72865  | 7.2718  | 6.2315  | YRI |
| rs4838960  | ST7L      | GI_38201636-A | 1 | 1 | 112875674 | 78975  | 9.7557  | 6.2315  | YRI |
| rs4838960  | ST7L      | GI_38201636-I | 1 | 1 | 112875674 | 79125  | 6.9112  | 6.2315  | YRI |
| rs7415820  | ST7L      | GI_38201636-A | 1 | 1 | 112881491 | 84792  | 15.0944 | 6.2315  | YRI |
| rs7415820  | ST7L      | GI_38201636-I | 1 | 1 | 112881491 | 84942  | 9.3848  | 6.2315  | YRI |
| rs12046208 | ST7L      | GI_38201636-A | 1 | 1 | 112883631 | 86932  | 9.1273  | 6.2315  | YRI |
| rs12046208 | ST7L      | GI_38201636-I | 1 | 1 | 112883631 | 87082  | 7.9203  | 6.2315  | YRI |
| rs6537747  | ST7L      | GI_38201636-A | 1 | 1 | 112891639 | 94940  | 12.3546 | 6.2315  | YRI |
| rs6537747  | ST7L      | GI_38201636-I | 1 | 1 | 112891639 | 95090  | 7.0273  | 6.2315  | YRI |
| rs3013440  | ST7L      | GI_38201636-A | 1 | 1 | 112907831 | 111132 | 15.0944 | 6.2315  | YRI |
| rs3013440  | ST7L      | GI_38201636-I | 1 | 1 | 112907831 | 111282 | 9.3848  | 6.2315  | YRI |
| rs3013439  | ST7L      | GI_38201636-A | 1 | 1 | 112912713 | 116014 | 14.5076 | 6.2315  | YRI |
| rs3013439  | ST7L      | GI_38201636-I | 1 | 1 | 112912713 | 116164 | 8.2921  | 6.2315  | YRI |
| rs2932536  | ST7L      | GI_38201636-A | 1 | 1 | 112914459 | 117760 | 14.4143 | 6.2315  | YRI |
| rs2932536  | ST7L      | GI_38201636-I | 1 | 1 | 112914459 | 117910 | 7.8537  | 6.2315  | YRI |
| rs4839257  | ST7L      | GI_38201636-A | 1 | 1 | 112931430 | 134731 | 12.8833 | 6.2315  | YRI |
| rs4839257  | ST7L      | GI_38201636-I | 1 | 1 | 112931430 | 134881 | 7.9225  | 6.2315  | YRI |
| rs2999154  | ST7L      | GI_38201636-A | 1 | 1 | 112934498 | 137799 | 13.5245 | 6.2315  | YRI |
| rs2999154  | ST7L      | GI_38201636-I | 1 | 1 | 112934498 | 137949 | 9.0583  | 6.2315  | YRI |
| rs2932532  | ST7L      | GI_38201636-A | 1 | 1 | 112946498 | 149799 | 14.4299 | 6.2315  | YRI |
| rs2932532  | ST7L      | GI_38201636-I | 1 | 1 | 112946498 | 149949 | 8.9048  | 6.2315  | YRI |
| rs902289   | ST7L      | GI_38201636-A | 1 | 1 | 112948129 | 151430 | 14.6246 | 6.2315  | YRI |
| rs902289   | ST7L      | GI_38201636-I | 1 | 1 | 112948129 | 151580 | 8.5008  | 6.2315  | YRI |
| rs1110043  | ST7L      | GI_38201636-A | 1 | 1 | 112948463 | 151764 | 7.4066  | 6.2315  | YRI |
| rs1110043  | ST7L      | GI_38201636-I | 1 | 1 | 112948463 | 151914 | 7.6315  | 6.2315  | YRI |
| rs954679   | ST7L      | GI_38201636-A | 1 | 1 | 112960407 | 163708 | 6.5908  | 6.2315  | YRI |
| rs11580225 | MAN1A2    | GI_40254840-S | 1 | 1 | 117597445 | 180133 | 7.2807  | 6.07189 | YRI |
| rs2066374  | MAN1A2    | GI_40254840-S | 1 | 1 | 117599073 | 178505 | 7.4526  | 6.07189 | YRI |
| rs6657965  | MAN1A2    | GI_40254840-S | 1 | 1 | 117604860 | 172718 | 6.2115  | 6.07189 | YRI |
| rs17037223 | MAN1A2    | GI_40254840-S | 1 | 1 | 117640841 | 136737 | 7.3577  | 6.07189 | YRI |
| rs17037253 | MAN1A2    | GI_40254840-S | 1 | 1 | 117656235 | 121343 | 7.3577  | 6.07189 | YRI |
| rs4460623  | MAN1A2    | GI_40254840-S | 1 | 1 | 117659287 | 118291 | 7.3577  | 6.07189 | YRI |
| rs2359247  | MAN1A2    | GI_40254840-S | 1 | 1 | 117665932 | 111646 | 7.4329  | 6.07189 | YRI |
| rs11577788 | MAN1A2    | GI_40254840-S | 1 | 1 | 117703691 | 73887  | 7.3577  | 6.07189 | YRI |
| rs17037323 | MAN1A2    | GI_40254840-S | 1 | 1 | 117726363 | 51215  | 7.3026  | 6.07189 | YRI |
| rs12129406 | MAN1A2    | GI_40254840-S | 1 | 1 | 117728625 | 48953  | 6.5978  | 6.07189 | YRI |
| rs17037333 | MAN1A2    | GI_40254840-S | 1 | 1 | 117744199 | 33379  | 6.6895  | 6.07189 | YRI |
| rs10923322 | MAN1A2    | GI_40254840-S | 1 | 1 | 117752553 | 25025  | 7.3577  | 6.07189 | YRI |
| rs12120771 | MAN1A2    | GI_40254840-S | 1 | 1 | 117777961 | 383    | 7.3577  | 6.07189 | YRI |
| rs12131251 | MAN1A2    | GI_40254840-S | 1 | 1 | 117793893 | 16315  | 7.3026  | 6.07189 | YRI |
| rs10494258 | LOC388673 | GI_41115452-S | 1 | 1 | 146525817 | 136389 | 5.4671  | 5.36439 | YRI |

|            |           |               |   |   |           |        |         |         |     |
|------------|-----------|---------------|---|---|-----------|--------|---------|---------|-----|
| rs3754210  | ARNT      | GI_30795239-A | 1 | 1 | 147767334 | 171977 | 5.8526  | 5.80126 | YRI |
| rs4970934  | ARNT      | GI_30795239-A | 1 | 1 | 147808309 | 212952 | 5.9106  | 5.80126 | YRI |
| rs2932574  | S100A10   | GI_4506760-S  | 1 | 1 | 148795093 | 26445  | 7.3908  | 6.06799 | YRI |
| rs2932570  | S100A10   | GI_4506760-S  | 1 | 1 | 148799893 | 31245  | 6.1664  | 6.06799 | YRI |
| rs1532133  | S100A10   | GI_4506760-S  | 1 | 1 | 148809681 | 41033  | 6.7775  | 6.06799 | YRI |
| rs3124314  | S100A10   | GI_4506760-S  | 1 | 1 | 148850588 | 81940  | 6.1547  | 6.06799 | YRI |
| rs2999563  | S100A10   | GI_4506760-S  | 1 | 1 | 148860068 | 91420  | 6.6407  | 6.06799 | YRI |
| rs7366237  | P66beta   | GI_21218437-S | 1 | 1 | 150577773 | 14893  | 7.0826  | 6.40924 | YRI |
| rs16835596 | P66beta   | GI_21218437-S | 1 | 1 | 150583054 | 9612   | 7.5663  | 6.40924 | YRI |
| rs16835600 | P66beta   | GI_21218437-S | 1 | 1 | 150586502 | 6164   | 7.4358  | 6.40924 | YRI |
| rs6676863  | P66beta   | GI_21218437-S | 1 | 1 | 150703291 | 110625 | 7.4358  | 6.40924 | YRI |
| rs6695083  | P66beta   | GI_21218437-S | 1 | 1 | 150723573 | 130907 | 7.5663  | 6.40924 | YRI |
| rs11801584 | MGC3794   | GI_33239373-S | 1 | 1 | 164880629 | 20587  | 10.9506 | 5.98575 | YRI |
| rs2281014  | MGC3794   | GI_33239373-S | 1 | 1 | 164895496 | 5720   | 11.5286 | 5.98575 | YRI |
| rs10797666 | MR1       | GI_4504416-S  | 1 | 1 | 177750456 | 3963   | 7.6413  | 6.2166  | YRI |
| rs1052632  | MR1       | GI_4504416-S  | 1 | 1 | 177751887 | 2532   | 7.0697  | 6.2166  | YRI |
| rs3845423  | MR1       | GI_4504416-S  | 1 | 1 | 177753514 | 905    | 10.264  | 6.2166  | YRI |
| rs3747956  | MR1       | GI_4504416-S  | 1 | 1 | 177756061 | 1642   | 7.0462  | 6.2166  | YRI |
| rs16856699 | MR1       | GI_4504416-S  | 1 | 1 | 177756767 | 2348   | 7.7233  | 6.2166  | YRI |
| rs6665072  | CYB5R1    | GI_7706454-S  | 1 | 1 | 198686464 | 976230 | 6.1885  | 6.06646 | YRI |
| rs1131906  | RABIF     | GI_31543539-S | 1 | 1 | 199581380 | 1119   | 6.52    | 6.05691 | YRI |
| rs1131905  | RABIF     | GI_31543539-S | 1 | 1 | 199581427 | 1166   | 6.52    | 6.05691 | YRI |
| rs4950886  | RABIF     | GI_31543539-S | 1 | 1 | 199582519 | 2258   | 6.1377  | 6.05691 | YRI |
| rs7523420  | RABIF     | GI_31543539-S | 1 | 1 | 199597361 | 17100  | 8.2443  | 6.05691 | YRI |
| rs700036   | FLJ14146  | GI_31542689-S | 1 | 1 | 217264434 | 3833   | 6.5776  | 5.85561 | YRI |
| rs619449   | MGC12458  | GI_14150107-S | 1 | 1 | 241539091 | 37989  | 7.6926  | 6.13737 | YRI |
| rs611185   | MGC12458  | GI_14150107-S | 1 | 1 | 241545095 | 31985  | 8.4778  | 6.13737 | YRI |
| rs576872   | MGC12458  | GI_14150107-S | 1 | 1 | 241549105 | 27975  | 9.1751  | 6.13737 | YRI |
| rs664252   | MGC12458  | GI_14150107-S | 1 | 1 | 241555077 | 22003  | 7.6735  | 6.13737 | YRI |
| rs500494   | MGC12458  | GI_14150107-S | 1 | 1 | 241555418 | 21662  | 7.2223  | 6.13737 | YRI |
| rs586865   | MGC12458  | GI_14150107-S | 1 | 1 | 241556998 | 20082  | 7.7839  | 6.13737 | YRI |
| rs12083437 | MGC12458  | GI_14150107-S | 1 | 1 | 241567770 | 9310   | 6.2883  | 6.13737 | YRI |
| rs10927386 | MGC12458  | GI_14150107-S | 1 | 1 | 241571419 | 5661   | 7.2648  | 6.13737 | YRI |
| rs10927387 | MGC12458  | GI_14150107-S | 1 | 1 | 241571443 | 5637   | 6.6456  | 6.13737 | YRI |
| rs6429522  | MGC12458  | GI_14150107-S | 1 | 1 | 241574484 | 2596   | 7.312   | 6.13737 | YRI |
| rs11806396 | MGC12458  | GI_14150107-S | 1 | 1 | 241578384 | 1304   | 6.6827  | 6.13737 | YRI |
| rs7419196  | CGI-49    | GI_7705766-S  | 1 | 1 | 243217385 | 39559  | 6.7076  | 6.11995 | YRI |
| rs6656460  | CGI-49    | GI_7705766-S  | 1 | 1 | 243229501 | 27443  | 7.3677  | 6.11995 | YRI |
| rs1127098  | CGI-49    | GI_7705766-S  | 1 | 1 | 243248431 | 8513   | 7.1521  | 6.11995 | YRI |
| rs6697063  | CGI-49    | GI_7705766-S  | 1 | 1 | 243249902 | 7042   | 8.2349  | 6.11995 | YRI |
| rs6699332  | CGI-49    | GI_7705766-S  | 1 | 1 | 243261052 | 4108   | 6.2054  | 6.11995 | YRI |
| rs4926442  | CGI-49    | GI_7705766-S  | 1 | 1 | 243267760 | 10816  | 6.2043  | 6.11995 | YRI |
| rs4926443  | CGI-49    | GI_7705766-S  | 1 | 1 | 243268148 | 11204  | 6.6921  | 6.11995 | YRI |
| rs12409066 | CGI-49    | GI_7705766-S  | 1 | 1 | 243273590 | 16646  | 6.6921  | 6.11995 | YRI |
| rs7366445  | SBZF3     | GI_31742527-S | 1 | 1 | 243480118 | 45077  | 7.46    | 5.97035 | YRI |
| rs4971322  | SBZF3     | GI_31742527-S | 1 | 1 | 243480583 | 45542  | 6.9522  | 5.97035 | YRI |
| rs12727420 | SBZF3     | GI_31742527-S | 1 | 1 | 243480739 | 45698  | 7.272   | 5.97035 | YRI |
| rs4925715  | Hs.421238 | Hs.421238-S   | 1 | 1 | 243614510 | 3099   | 12.1404 | 6.51262 | YRI |
| rs1561289  | POMC      | GI_4505948-S  | 2 | 2 | 25280691  | 14997  | 6.058   | 5.84725 | YRI |
| rs17039879 | POMC      | GI_4505948-S  | 2 | 2 | 25283128  | 12560  | 7.0954  | 5.84725 | YRI |
| rs7565877  | POMC      | GI_4505948-S  | 2 | 2 | 25297715  | 2027   | 7.9459  | 5.84725 | YRI |
| rs17046986 | DTNB      | GI_37577100-A | 2 | 2 | 25532551  | 20746  | 5.9955  | 5.79255 | YRI |
| rs7571570  | DTNB      | GI_37577100-A | 2 | 2 | 25533181  | 21376  | 8.368   | 5.79255 | YRI |
| rs2384232  | DTNB      | GI_37577100-A | 2 | 2 | 25535400  | 23595  | 6.2539  | 5.79255 | YRI |
| rs10206012 | DTNB      | GI_37577100-A | 2 | 2 | 25535837  | 24032  | 6.0954  | 5.79255 | YRI |
| rs7586918  | DTNB      | GI_37577100-A | 2 | 2 | 25538036  | 26231  | 7.0886  | 5.79255 | YRI |

|            |           |               |   |   |          |        |         |         |     |
|------------|-----------|---------------|---|---|----------|--------|---------|---------|-----|
| rs212679   | CARD12    | GI_40788014-S | 2 | 2 | 32342758 | 18657  | 6.0937  | 5.91369 | YRI |
| rs212717   | CARD12    | GI_40788014-S | 2 | 2 | 32373291 | 11876  | 6.4164  | 5.91369 | YRI |
| rs6726255  | CARD12    | GI_40788014-S | 2 | 2 | 32405936 | 44521  | 6.0601  | 5.91369 | YRI |
| rs1531021  | SOS1      | GI_15529995-S | 2 | 2 | 39111606 | 13144  | 10.3628 | 6.08725 | YRI |
| rs12473092 | SOS1      | GI_15529995-S | 2 | 2 | 39115691 | 9059   | 6.347   | 6.08725 | YRI |
| rs1043793  | SOS1      | GI_15529995-S | 2 | 2 | 39120698 | 4052   | 10.2965 | 6.08725 | YRI |
| rs1037495  | SOS1      | GI_15529995-S | 2 | 2 | 39121077 | 3673   | 12.1089 | 6.08725 | YRI |
| rs963730   | SOS1      | GI_15529995-S | 2 | 2 | 39128424 | 3674   | 11.1529 | 6.08725 | YRI |
| rs4670902  | SOS1      | GI_15529995-S | 2 | 2 | 39132555 | 7805   | 9.9873  | 6.08725 | YRI |
| rs12471731 | SOS1      | GI_15529995-S | 2 | 2 | 39136822 | 12072  | 11.625  | 6.08725 | YRI |
| rs6544186  | SOS1      | GI_15529995-S | 2 | 2 | 39137922 | 13172  | 12.1089 | 6.08725 | YRI |
| rs4670904  | SOS1      | GI_15529995-S | 2 | 2 | 39140534 | 15784  | 9.5702  | 6.08725 | YRI |
| rs3796038  | SOS1      | GI_15529995-S | 2 | 2 | 39151223 | 26473  | 8.8988  | 6.08725 | YRI |
| rs10184015 | SOS1      | GI_15529995-S | 2 | 2 | 39154780 | 30030  | 8.9663  | 6.08725 | YRI |
| rs1470914  | SOS1      | GI_15529995-S | 2 | 2 | 39157407 | 32657  | 8.8988  | 6.08725 | YRI |
| rs2123882  | SOS1      | GI_15529995-S | 2 | 2 | 39159507 | 34757  | 8.1133  | 6.08725 | YRI |
| rs13033392 | SOS1      | GI_15529995-S | 2 | 2 | 39161060 | 36310  | 8.7193  | 6.08725 | YRI |
| rs10190377 | SOS1      | GI_15529995-S | 2 | 2 | 39162324 | 37574  | 7.5398  | 6.08725 | YRI |
| rs7565814  | SOS1      | GI_15529995-S | 2 | 2 | 39163278 | 38528  | 6.8415  | 6.08725 | YRI |
| rs13031871 | SOS1      | GI_15529995-S | 2 | 2 | 39164502 | 39752  | 10.6065 | 6.08725 | YRI |
| rs7583010  | SOS1      | GI_15529995-S | 2 | 2 | 39172902 | 48152  | 6.1257  | 6.08725 | YRI |
| rs2060988  | SOS1      | GI_15529995-S | 2 | 2 | 39194335 | 69585  | 6.3852  | 6.08725 | YRI |
| rs10169337 | SOS1      | GI_15529995-S | 2 | 2 | 39196313 | 71563  | 7.6534  | 6.08725 | YRI |
| rs10205802 | SOS1      | GI_15529995-S | 2 | 2 | 39196533 | 71783  | 7.6534  | 6.08725 | YRI |
| rs6758330  | SOS1      | GI_15529995-S | 2 | 2 | 39199834 | 75084  | 7.6534  | 6.08725 | YRI |
| rs10206751 | SOS1      | GI_15529995-S | 2 | 2 | 39200655 | 75905  | 6.3499  | 6.08725 | YRI |
| rs297131   | SOS1      | GI_15529995-S | 2 | 2 | 39211910 | 87160  | 8.3156  | 6.08725 | YRI |
| rs297136   | SOS1      | GI_15529995-S | 2 | 2 | 39217140 | 92390  | 7.9456  | 6.08725 | YRI |
| rs297120   | SOS1      | GI_15529995-S | 2 | 2 | 39220297 | 95547  | 6.7329  | 6.08725 | YRI |
| rs297124   | SOS1      | GI_15529995-S | 2 | 2 | 39225297 | 100547 | 6.7329  | 6.08725 | YRI |
| rs297142   | SOS1      | GI_15529995-S | 2 | 2 | 39231099 | 106349 | 6.4451  | 6.08725 | YRI |
| rs297144   | SOS1      | GI_15529995-S | 2 | 2 | 39232488 | 107738 | 7.6534  | 6.08725 | YRI |
| rs297161   | SOS1      | GI_15529995-S | 2 | 2 | 39244319 | 119569 | 6.7363  | 6.08725 | YRI |
| rs6419600  | SOS1      | GI_15529995-S | 2 | 2 | 39254185 | 129435 | 7.0588  | 6.08725 | YRI |
| rs12622969 | SOS1      | GI_15529995-S | 2 | 2 | 39254834 | 130084 | 7.1697  | 6.08725 | YRI |
| rs12620003 | SOS1      | GI_15529995-S | 2 | 2 | 39257513 | 132763 | 6.4828  | 6.08725 | YRI |
| rs10165968 | SOS1      | GI_15529995-S | 2 | 2 | 39262502 | 137752 | 6.8033  | 6.08725 | YRI |
| rs6735427  | SOS1      | GI_15529995-S | 2 | 2 | 39288449 | 163699 | 6.4927  | 6.08725 | YRI |
| rs17031753 | LRPPRC    | GI_31621304-S | 2 | 2 | 44026565 | 245    | 6.7395  | 6.23278 | YRI |
| rs1385274  | SPTBN1    | GI_4507194-I  | 2 | 2 | 54336188 | 471119 | 7.0882  | 6.31997 | YRI |
| rs1177265  | LOC339804 | GI_37546921-S | 2 | 2 | 61250483 | 51458  | 7.8351  | 6.31844 | YRI |
| rs1665278  | LOC339804 | GI_37546921-S | 2 | 2 | 61253496 | 48445  | 6.4052  | 6.31844 | YRI |
| rs3814032  | LOC339804 | GI_37546921-S | 2 | 2 | 61261166 | 40775  | 9.9677  | 6.31844 | YRI |
| rs1177285  | LOC339804 | GI_37546921-S | 2 | 2 | 61261788 | 40153  | 12.2228 | 6.31844 | YRI |
| rs1729660  | LOC339804 | GI_37546921-S | 2 | 2 | 61277463 | 24478  | 17.6489 | 6.31844 | YRI |
| rs1177274  | LOC339804 | GI_37546921-S | 2 | 2 | 61280183 | 21758  | 13.0918 | 6.31844 | YRI |
| rs11647    | LOC339803 | GI_42656315-S | 2 | 2 | 61282415 | 1415   | 6.4303  | 6.04631 | YRI |
| rs11498    | LOC339804 | GI_37546921-S | 2 | 2 | 61282470 | 19471  | 14.4419 | 6.31844 | YRI |
| rs3213944  | LOC339804 | GI_37546921-S | 2 | 2 | 61283949 | 17992  | 14.5586 | 6.31844 | YRI |
| rs2441467  | LOC339804 | GI_37546921-S | 2 | 2 | 61285800 | 16141  | 16.0963 | 6.31844 | YRI |
| rs720201   | LOC339804 | GI_37546921-S | 2 | 2 | 61288114 | 13827  | 15.8466 | 6.31844 | YRI |
| rs1729653  | LOC339804 | GI_37546921-S | 2 | 2 | 61288659 | 13282  | 15.8466 | 6.31844 | YRI |
| rs1665270  | LOC339804 | GI_37546921-S | 2 | 2 | 61289317 | 12624  | 15.8466 | 6.31844 | YRI |
| rs1729652  | LOC339804 | GI_37546921-S | 2 | 2 | 61289670 | 12271  | 15.8466 | 6.31844 | YRI |
| rs1665271  | LOC339804 | GI_37546921-S | 2 | 2 | 61290467 | 11474  | 15.8466 | 6.31844 | YRI |
| rs12475591 | LOC339804 | GI_37546921-S | 2 | 2 | 61293179 | 8762   | 10.9227 | 6.31844 | YRI |

|            |           |               |   |   |          |        |         |         |     |
|------------|-----------|---------------|---|---|----------|--------|---------|---------|-----|
| rs2592493  | LOC339804 | GI_37546921-S | 2 | 2 | 61293988 | 7953   | 15.8466 | 6.31844 | YRI |
| rs1665263  | LOC339804 | GI_37546921-S | 2 | 2 | 61294410 | 7531   | 11.5678 | 6.31844 | YRI |
| rs1665260  | LOC339804 | GI_37546921-S | 2 | 2 | 61296138 | 5803   | 15.8466 | 6.31844 | YRI |
| rs1665259  | LOC339804 | GI_37546921-S | 2 | 2 | 61296406 | 5535   | 15.8466 | 6.31844 | YRI |
| rs7558954  | LOC339804 | GI_37546921-S | 2 | 2 | 61296557 | 5384   | 14.3857 | 6.31844 | YRI |
| rs1729671  | LOC339804 | GI_37546921-S | 2 | 2 | 61296756 | 5185   | 14.6072 | 6.31844 | YRI |
| rs1177309  | LOC339804 | GI_37546921-S | 2 | 2 | 61296899 | 5042   | 15.4195 | 6.31844 | YRI |
| rs1177308  | LOC339804 | GI_37546921-S | 2 | 2 | 61298905 | 3036   | 15.4195 | 6.31844 | YRI |
| rs1177303  | LOC339804 | GI_37546921-S | 2 | 2 | 61300006 | 1935   | 15.4195 | 6.31844 | YRI |
| rs1729674  | LOC339804 | GI_37546921-S | 2 | 2 | 61301388 | 553    | 15.4195 | 6.31844 | YRI |
| rs1729673  | LOC339804 | GI_37546921-S | 2 | 2 | 61301450 | 491    | 16.9259 | 6.31844 | YRI |
| rs3889717  | LOC339804 | GI_37546921-S | 2 | 2 | 61302442 | 501    | 18.1811 | 6.31844 | YRI |
| rs1615070  | LOC339804 | GI_37546921-S | 2 | 2 | 61304826 | 2885   | 18.1811 | 6.31844 | YRI |
| rs2600668  | LOC339804 | GI_37546921-S | 2 | 2 | 61312078 | 10137  | 6.4834  | 6.31844 | YRI |
| rs2167564  | LOC339804 | GI_37546921-S | 2 | 2 | 61312467 | 10526  | 6.9004  | 6.31844 | YRI |
| rs935860   | LOC339804 | GI_37546921-S | 2 | 2 | 61318212 | 16271  | 6.4834  | 6.31844 | YRI |
| rs7583383  | LOC339804 | GI_37546921-S | 2 | 2 | 61411973 | 110032 | 6.6333  | 6.31844 | YRI |
| rs4411680  | LOC339804 | GI_37546921-S | 2 | 2 | 61495756 | 193815 | 6.5723  | 6.31844 | YRI |
| rs10779948 | LOC339804 | GI_37546921-S | 2 | 2 | 61755811 | 453870 | 6.5265  | 6.31844 | YRI |
| rs11896863 | SPRED2    | GI_32401444-S | 2 | 2 | 65495067 | 45184  | 7.208   | 6.17813 | YRI |
| rs7583316  | SPRED2    | GI_32401444-S | 2 | 2 | 65511818 | 61935  | 8.6625  | 6.17813 | YRI |
| rs11892868 | SPRED2    | GI_32401444-S | 2 | 2 | 65529047 | 79164  | 9.8008  | 6.17813 | YRI |
| rs2272532  | SNRPG     | GI_21359839-S | 2 | 2 | 70432149 | 347    | 8.8528  | 6.37463 | YRI |
| rs1047911  | MRPL53    | GI_22035595-S | 2 | 2 | 74611433 | 39     | 7.688   | 6.33724 | YRI |
| rs7573143  | C2orf3    | GI_44890064-S | 2 | 2 | 75916040 | 112738 | 6.1007  | 6.09356 | YRI |
| rs12124    | POLR1A    | GI_7661685-S  | 2 | 2 | 86165166 | 1573   | 10.9553 | 6.14447 | YRI |
| rs4832254  | MRPL35    | GI_22035593-A | 2 | 2 | 86340722 | 10723  | 6.6285  | 6.01207 | YRI |
| rs749579   | MRPL35    | GI_22035591-I | 2 | 2 | 86360066 | 9252   | 6.0962  | 6.01207 | YRI |
| rs7419344  | MRPL35    | GI_22035591-I | 2 | 2 | 86362802 | 11988  | 6.0512  | 6.01207 | YRI |
| rs11127018 | MRPL35    | GI_22035593-A | 2 | 2 | 86366572 | 15127  | 6.6468  | 6.01207 | YRI |
| rs10865489 | FLJ10916  | GI_40538795-S | 2 | 2 | 88286154 | 39188  | 8.8148  | 5.99953 | YRI |
| rs6547752  | FLJ10916  | GI_40538795-S | 2 | 2 | 88286699 | 38643  | 8.0511  | 5.99953 | YRI |
| rs7582011  | FLJ10916  | GI_40538795-S | 2 | 2 | 88292002 | 33340  | 9.2407  | 5.99953 | YRI |
| rs6727043  | FLJ10916  | GI_40538795-S | 2 | 2 | 88300774 | 24568  | 8.5613  | 5.99953 | YRI |
| rs10173112 | FLJ10916  | GI_40538795-S | 2 | 2 | 88302417 | 22925  | 9.0604  | 5.99953 | YRI |
| rs10185660 | FLJ10916  | GI_40538795-S | 2 | 2 | 88302499 | 22843  | 6.2065  | 5.99953 | YRI |
| rs4359651  | FLJ10916  | GI_40538795-S | 2 | 2 | 88304102 | 21240  | 8.8148  | 5.99953 | YRI |
| rs10469888 | FLJ10916  | GI_40538795-S | 2 | 2 | 88306838 | 18504  | 10.4996 | 5.99953 | YRI |
| rs4490185  | FLJ10916  | GI_40538795-S | 2 | 2 | 88307196 | 18146  | 8.8148  | 5.99953 | YRI |
| rs7586608  | TSGA10    | GI_41281983-I | 2 | 2 | 99016535 | 199892 | 7.6898  | 5.85835 | YRI |
| rs10181422 | TSGA10    | GI_41281983-I | 2 | 2 | 99017488 | 198939 | 8.0634  | 5.85835 | YRI |
| rs6722164  | TSGA10    | GI_41281983-I | 2 | 2 | 99020045 | 196382 | 7.8808  | 5.85835 | YRI |
| rs1453564  | TSGA10    | GI_41281983-I | 2 | 2 | 99022946 | 193481 | 7.8808  | 5.85835 | YRI |
| rs2309520  | TSGA10    | GI_41281983-I | 2 | 2 | 99028995 | 187432 | 7.8808  | 5.85835 | YRI |
| rs6740054  | TSGA10    | GI_41281983-I | 2 | 2 | 99035149 | 181278 | 7.8808  | 5.85835 | YRI |
| rs13406288 | TSGA10    | GI_41281983-I | 2 | 2 | 99048103 | 168324 | 7.8808  | 5.85835 | YRI |
| rs13390672 | TSGA10    | GI_41281983-I | 2 | 2 | 99048347 | 168080 | 7.8808  | 5.85835 | YRI |
| rs7605218  | TSGA10    | GI_41281983-I | 2 | 2 | 99051598 | 164829 | 7.8808  | 5.85835 | YRI |
| rs12612688 | TSGA10    | GI_41281983-I | 2 | 2 | 99071609 | 144818 | 7.8808  | 5.85835 | YRI |
| rs2278895  | TSGA10    | GI_41281983-I | 2 | 2 | 99072002 | 144425 | 7.8808  | 5.85835 | YRI |
| rs7571390  | TSGA10    | GI_41281983-I | 2 | 2 | 99085111 | 131316 | 7.8808  | 5.85835 | YRI |
| rs7371676  | TSGA10    | GI_41281983-I | 2 | 2 | 99087667 | 128760 | 7.8808  | 5.85835 | YRI |
| rs7605734  | TSGA10    | GI_41281983-I | 2 | 2 | 99102586 | 113841 | 7.8108  | 5.85835 | YRI |
| rs7606635  | TSGA10    | GI_41281983-I | 2 | 2 | 99103300 | 113127 | 7.8808  | 5.85835 | YRI |
| rs6735801  | TSGA10    | GI_41281983-I | 2 | 2 | 99116513 | 99914  | 7.8808  | 5.85835 | YRI |
| rs6752352  | TSGA10    | GI_41281983-I | 2 | 2 | 99120866 | 95561  | 7.8808  | 5.85835 | YRI |



|            |           |               |   |   |           |        |         |         |     |
|------------|-----------|---------------|---|---|-----------|--------|---------|---------|-----|
| rs9710648  | TSGA10    | GI_41281983-I | 2 | 2 | 99131647  | 84780  | 7.8808  | 5.85835 | YRI |
| rs6756880  | TSGA10    | GI_41281983-I | 2 | 2 | 99135509  | 80918  | 7.1131  | 5.85835 | YRI |
| rs6750876  | TSGA10    | GI_41281983-I | 2 | 2 | 99138191  | 78236  | 7.8808  | 5.85835 | YRI |
| rs6754843  | TSGA10    | GI_41281983-I | 2 | 2 | 99139003  | 77424  | 6.372   | 5.85835 | YRI |
| rs6737257  | TSGA10    | GI_41281983-I | 2 | 2 | 99141848  | 74579  | 7.8808  | 5.85835 | YRI |
| rs12470471 | TSGA10    | GI_41281983-I | 2 | 2 | 99147659  | 68768  | 7.8808  | 5.85835 | YRI |
| rs2123686  | TSGA10    | GI_41281983-I | 2 | 2 | 99148653  | 67774  | 7.8808  | 5.85835 | YRI |
| rs10181344 | TSGA10    | GI_41281983-I | 2 | 2 | 99151347  | 65080  | 6.0897  | 5.85835 | YRI |
| rs17708262 | TSGA10    | GI_41281983-I | 2 | 2 | 99154831  | 61596  | 6.7211  | 5.85835 | YRI |
| rs1563107  | TSGA10    | GI_41281983-I | 2 | 2 | 99159794  | 56633  | 7.8808  | 5.85835 | YRI |
| rs1453563  | TSGA10    | GI_41281983-I | 2 | 2 | 99178785  | 37642  | 7.8808  | 5.85835 | YRI |
| rs11683188 | TSGA10    | GI_41281983-I | 2 | 2 | 99183030  | 33397  | 7.8808  | 5.85835 | YRI |
| rs6733285  | TSGA10    | GI_41281983-I | 2 | 2 | 99184093  | 32334  | 6.0468  | 5.85835 | YRI |
| rs12613624 | TSGA10    | GI_41281983-I | 2 | 2 | 99191259  | 25168  | 7.8808  | 5.85835 | YRI |
| rs11692336 | TSGA10    | GI_41281983-I | 2 | 2 | 99199124  | 17303  | 7.2575  | 5.85835 | YRI |
| rs13008171 | TSGA10    | GI_41281983-I | 2 | 2 | 99201937  | 14490  | 6.6733  | 5.85835 | YRI |
| rs4850897  | TSGA10    | GI_41281983-I | 2 | 2 | 99226937  | 10510  | 7.8808  | 5.85835 | YRI |
| rs2516830  | TSGA10    | GI_41281983-I | 2 | 2 | 99232220  | 15793  | 7.9835  | 5.85835 | YRI |
| rs2632283  | TSGA10    | GI_41281983-I | 2 | 2 | 99234518  | 18091  | 7.8808  | 5.85835 | YRI |
| rs2516835  | TSGA10    | GI_41281983-I | 2 | 2 | 99237649  | 21222  | 7.8808  | 5.85835 | YRI |
| rs6727749  | TSGA10    | GI_41281983-I | 2 | 2 | 99252108  | 35681  | 7.8808  | 5.85835 | YRI |
| rs13033012 | TSGA10    | GI_41281983-I | 2 | 2 | 99253667  | 37240  | 7.754   | 5.85835 | YRI |
| rs11898910 | LOC205251 | GI_28372544-S | 2 | 2 | 110294476 | 32896  | 8.2119  | 5.55229 | YRI |
| rs11894410 | LOC205251 | GI_28372544-S | 2 | 2 | 110321690 | 5682   | 6.0197  | 5.55229 | YRI |
| rs11904760 | LOC205251 | GI_28372544-S | 2 | 2 | 110332070 | 4698   | 12.6483 | 5.55229 | YRI |
| rs10171646 | LOC205251 | GI_28372544-S | 2 | 2 | 110334732 | 7360   | 12.6483 | 5.55229 | YRI |
| rs1307470  | SESTD1    | GI_31342410-S | 2 | 2 | 179774899 | 25172  | 6.9957  | 5.88332 | YRI |
| rs12615736 | SESTD1    | GI_31342410-S | 2 | 2 | 179791114 | 8957   | 7.1277  | 5.88332 | YRI |
| rs1968618  | SESTD1    | GI_31342410-S | 2 | 2 | 179792310 | 7761   | 6.1903  | 5.88332 | YRI |
| rs2289994  | SESTD1    | GI_31342410-S | 2 | 2 | 179802758 | 2687   | 7.6978  | 5.88332 | YRI |
| rs10930855 | SESTD1    | GI_31342410-S | 2 | 2 | 179803516 | 3445   | 6.3482  | 5.88332 | YRI |
| rs2289993  | SESTD1    | GI_31342410-S | 2 | 2 | 179805436 | 5365   | 7.6978  | 5.88332 | YRI |
| rs10188759 | SESTD1    | GI_31342410-S | 2 | 2 | 179818272 | 18201  | 6.1043  | 5.88332 | YRI |
| rs13396334 | SESTD1    | GI_31342410-S | 2 | 2 | 179827555 | 27484  | 5.9265  | 5.88332 | YRI |
| rs10084229 | SESTD1    | GI_31342410-S | 2 | 2 | 179829090 | 29019  | 5.9265  | 5.88332 | YRI |
| rs17454311 | SESTD1    | GI_31342410-S | 2 | 2 | 179849673 | 49602  | 6.9957  | 5.88332 | YRI |
| rs1844763  | SESTD1    | GI_31342410-S | 2 | 2 | 179867165 | 67094  | 6.0925  | 5.88332 | YRI |
| rs10164814 | SESTD1    | GI_31342410-S | 2 | 2 | 179885371 | 85300  | 6.1683  | 5.88332 | YRI |
| rs7601366  | SESTD1    | GI_31342410-S | 2 | 2 | 179911345 | 111274 | 6.3084  | 5.88332 | YRI |
| rs12693179 | SESTD1    | GI_31342410-S | 2 | 2 | 179912873 | 112802 | 6.6183  | 5.88332 | YRI |
| rs10181464 | SESTD1    | GI_31342410-S | 2 | 2 | 179913327 | 113256 | 6.6183  | 5.88332 | YRI |
| rs10439300 | SESTD1    | GI_31342410-S | 2 | 2 | 179913497 | 113426 | 6.6183  | 5.88332 | YRI |
| rs9288025  | SESTD1    | GI_31342410-S | 2 | 2 | 179914022 | 113951 | 7.0544  | 5.88332 | YRI |
| rs10208593 | SESTD1    | GI_31342410-S | 2 | 2 | 179914474 | 114403 | 6.9957  | 5.88332 | YRI |
| rs10164707 | SESTD1    | GI_31342410-S | 2 | 2 | 179915346 | 115275 | 6.6183  | 5.88332 | YRI |
| rs12987285 | SESTD1    | GI_31342410-S | 2 | 2 | 179915489 | 115418 | 6.6183  | 5.88332 | YRI |
| rs10930857 | SESTD1    | GI_31342410-S | 2 | 2 | 179916484 | 116413 | 6.6057  | 5.88332 | YRI |
| rs7608745  | SESTD1    | GI_31342410-S | 2 | 2 | 179919146 | 119075 | 6.6183  | 5.88332 | YRI |
| rs6743412  | SESTD1    | GI_31342410-S | 2 | 2 | 179921358 | 121287 | 6.5321  | 5.88332 | YRI |
| rs12621023 | SESTD1    | GI_31342410-S | 2 | 2 | 179927283 | 127212 | 6.8707  | 5.88332 | YRI |
| rs12621115 | SESTD1    | GI_31342410-S | 2 | 2 | 179927366 | 127295 | 6.6569  | 5.88332 | YRI |
| rs9288026  | SESTD1    | GI_31342410-S | 2 | 2 | 179929115 | 129044 | 6.0405  | 5.88332 | YRI |
| rs10209887 | SESTD1    | GI_31342410-S | 2 | 2 | 179930272 | 130201 | 6.6183  | 5.88332 | YRI |
| rs12617002 | SESTD1    | GI_31342410-S | 2 | 2 | 179947904 | 147833 | 6.6183  | 5.88332 | YRI |
| rs6759983  | SESTD1    | GI_31342410-S | 2 | 2 | 179948335 | 148264 | 6.6183  | 5.88332 | YRI |
| rs12622075 | SESTD1    | GI_31342410-S | 2 | 2 | 179949410 | 149339 | 6.6183  | 5.88332 | YRI |

|            |          |               |   |   |           |        |         |         |     |
|------------|----------|---------------|---|---|-----------|--------|---------|---------|-----|
| rs10931430 | LOC51240 | GI_31377759-S | 2 | 2 | 190367692 | 93300  | 8.8202  | 6.08233 | YRI |
| rs1437891  | LOC51240 | GI_31377759-S | 2 | 2 | 190388214 | 72778  | 8.8202  | 6.08233 | YRI |
| rs12693557 | LOC51240 | GI_31377759-S | 2 | 2 | 190416443 | 44549  | 8.8202  | 6.08233 | YRI |
| rs10210345 | LOC51240 | GI_31377759-S | 2 | 2 | 190444992 | 16000  | 8.8202  | 6.08233 | YRI |
| rs1055091  | LOC51240 | GI_31377759-S | 2 | 2 | 190460649 | 343    | 8.8202  | 6.08233 | YRI |
| rs6942     | LOC51240 | GI_31377759-S | 2 | 2 | 190461917 | 925    | 8.8202  | 6.08233 | YRI |
| rs7591929  | LOC51240 | GI_31377759-S | 2 | 2 | 190468763 | 7771   | 8.8202  | 6.08233 | YRI |
| rs1899025  | LOC51240 | GI_31377759-S | 2 | 2 | 190475088 | 14096  | 8.8202  | 6.08233 | YRI |
| rs6435065  | PPIL3    | GI_19557635-A | 2 | 2 | 201494697 | 66614  | 6.5448  | 5.95588 | YRI |
| rs2348316  | PPIL3    | GI_19557635-A | 2 | 2 | 201522005 | 39306  | 6.5448  | 5.95588 | YRI |
| rs11892119 | PPIL3    | GI_19557635-A | 2 | 2 | 201561618 | 307    | 11.3823 | 5.95588 | YRI |
| rs7562391  | PPIL3    | GI_19557635-A | 2 | 2 | 201561672 | 361    | 11.3823 | 5.95588 | YRI |
| rs7606251  | PPIL3    | GI_19557635-A | 2 | 2 | 201562240 | 929    | 14.6287 | 5.95588 | YRI |
| rs2136600  | PPIL3    | GI_19557635-A | 2 | 2 | 201567851 | 6540   | 17.0722 | 5.95588 | YRI |
| rs7588993  | PPIL3    | GI_19557635-A | 2 | 2 | 201589372 | 28061  | 17.0222 | 5.95588 | YRI |
| rs6435066  | PPIL3    | GI_19557635-A | 2 | 2 | 201591529 | 30218  | 13.1828 | 5.95588 | YRI |
| rs13396213 | PPIL3    | GI_19557635-A | 2 | 2 | 201593744 | 32433  | 12.4875 | 5.95588 | YRI |
| rs11894842 | PPIL3    | GI_19557635-A | 2 | 2 | 201599051 | 37740  | 12.4875 | 5.95588 | YRI |
| rs4381763  | PPIL3    | GI_19557635-A | 2 | 2 | 201602494 | 41183  | 11.6147 | 5.95588 | YRI |
| rs2307358  | PPIL3    | GI_19557635-A | 2 | 2 | 201611163 | 49852  | 8.7454  | 5.95588 | YRI |
| rs2307362  | PPIL3    | GI_19557635-A | 2 | 2 | 201611343 | 50032  | 9.9432  | 5.95588 | YRI |
| rs4622700  | PPIL3    | GI_19557635-A | 2 | 2 | 201618619 | 57308  | 9.9432  | 5.95588 | YRI |
| rs9288314  | PPIL3    | GI_19557635-A | 2 | 2 | 201619679 | 58368  | 9.4292  | 5.95588 | YRI |
| rs10183261 | PPIL3    | GI_19557635-A | 2 | 2 | 201623182 | 61871  | 10.0467 | 5.95588 | YRI |
| rs13408964 | PPIL3    | GI_19557635-A | 2 | 2 | 201630478 | 69167  | 9.9432  | 5.95588 | YRI |
| rs10167387 | PPIL3    | GI_19557635-A | 2 | 2 | 201634124 | 72813  | 16.9655 | 5.95588 | YRI |
| rs10205561 | PPIL3    | GI_19557635-A | 2 | 2 | 201635210 | 73899  | 11.6147 | 5.95588 | YRI |
| rs13429609 | PPIL3    | GI_19557635-A | 2 | 2 | 201641763 | 80452  | 9.9432  | 5.95588 | YRI |
| rs11892372 | PPIL3    | GI_19557635-A | 2 | 2 | 201644989 | 83678  | 17.0722 | 5.95588 | YRI |
| rs2307357  | PPIL3    | GI_19557635-A | 2 | 2 | 201649598 | 88287  | 9.9432  | 5.95588 | YRI |
| rs3087357  | PPIL3    | GI_19557635-A | 2 | 2 | 201653871 | 92560  | 9.9432  | 5.95588 | YRI |
| rs874358   | PPIL3    | GI_19557635-A | 2 | 2 | 201655108 | 93797  | 9.9432  | 5.95588 | YRI |
| rs10931929 | PPIL3    | GI_19557635-A | 2 | 2 | 201673392 | 112081 | 8.0504  | 5.95588 | YRI |
| rs16836477 | PPIL3    | GI_19557635-A | 2 | 2 | 201678963 | 117652 | 9.9432  | 5.95588 | YRI |
| rs3901120  | PPIL3    | GI_19557635-A | 2 | 2 | 201689036 | 127725 | 17.0722 | 5.95588 | YRI |
| rs3900738  | PPIL3    | GI_19557635-A | 2 | 2 | 201689309 | 127998 | 11.6147 | 5.95588 | YRI |
| rs7591222  | PPIL3    | GI_19557635-A | 2 | 2 | 201690698 | 129387 | 6.5448  | 5.95588 | YRI |
| rs6719992  | PPIL3    | GI_19557635-A | 2 | 2 | 201697484 | 136173 | 9.9432  | 5.95588 | YRI |
| rs16836568 | PPIL3    | GI_19557635-A | 2 | 2 | 201705454 | 144143 | 9.9432  | 5.95588 | YRI |
| rs13405753 | PPIL3    | GI_19557635-A | 2 | 2 | 201707183 | 145872 | 9.9432  | 5.95588 | YRI |
| rs10197103 | PPIL3    | GI_19557635-A | 2 | 2 | 201710799 | 149488 | 9.9432  | 5.95588 | YRI |
| rs16836591 | PPIL3    | GI_19557635-A | 2 | 2 | 201720449 | 159138 | 12.4875 | 5.95588 | YRI |
| rs10185136 | PPIL3    | GI_19557635-A | 2 | 2 | 201729807 | 168496 | 12.4875 | 5.95588 | YRI |
| rs13384791 | PPIL3    | GI_19557635-A | 2 | 2 | 201736670 | 175359 | 9.9432  | 5.95588 | YRI |
| rs13417843 | PPIL3    | GI_19557635-A | 2 | 2 | 201738935 | 177624 | 9.9432  | 5.95588 | YRI |
| rs10207746 | PPIL3    | GI_19557635-A | 2 | 2 | 201741924 | 180613 | 9.9432  | 5.95588 | YRI |
| rs6737556  | PPIL3    | GI_19557635-A | 2 | 2 | 201749584 | 188273 | 9.9432  | 5.95588 | YRI |
| rs16842071 | PPIL3    | GI_19557635-A | 2 | 2 | 201757236 | 195925 | 17.0722 | 5.95588 | YRI |
| rs10194168 | PPIL3    | GI_19557635-A | 2 | 2 | 201767943 | 206632 | 8.6027  | 5.95588 | YRI |
| rs2110728  | PPIL3    | GI_19557635-A | 2 | 2 | 201791184 | 229873 | 9.1243  | 5.95588 | YRI |
| rs13410282 | PPIL3    | GI_19557635-A | 2 | 2 | 201796530 | 235219 | 9.2165  | 5.95588 | YRI |
| rs7583529  | PPIL3    | GI_19557635-A | 2 | 2 | 201813744 | 252433 | 9.6874  | 5.95588 | YRI |
| rs6728771  | PPIL3    | GI_19557635-A | 2 | 2 | 201817913 | 256602 | 10.3707 | 5.95588 | YRI |
| rs7591912  | PPIL3    | GI_19557635-A | 2 | 2 | 201888099 | 326788 | 6.2513  | 5.95588 | YRI |
| rs6435069  | PPIL3    | GI_19557635-A | 2 | 2 | 201904000 | 342689 | 7.6739  | 5.95588 | YRI |
| rs7579792  | PPIL3    | GI_19557635-A | 2 | 2 | 202025956 | 464645 | 5.9774  | 5.95588 | YRI |

|            |           |               |   |   |           |       |         |         |     |
|------------|-----------|---------------|---|---|-----------|-------|---------|---------|-----|
| rs3732019  | RPL37A    | GI_16306561-S | 2 | 2 | 217187892 | 1196  | 6.4623  | 6.43454 | YRI |
| rs12472569 | RPL37A    | GI_16306561-S | 2 | 2 | 217206912 | 17824 | 6.4623  | 6.43454 | YRI |
| rs7598072  | CCL20     | GI_4759075-S  | 2 | 2 | 228503199 | 4183  | 6.8996  | 6.0418  | YRI |
| rs3138114  | CCL20     | GI_4759075-S  | 2 | 2 | 228505842 | 1540  | 6.7483  | 6.0418  | YRI |
| rs2174626  | CCL20     | GI_4759075-S  | 2 | 2 | 228506896 | 486   | 7.1049  | 6.0418  | YRI |
| rs2135483  | CCL20     | GI_4759075-S  | 2 | 2 | 228506978 | 404   | 6.7483  | 6.0418  | YRI |
| rs3138117  | CCL20     | GI_4759075-S  | 2 | 2 | 228508046 | 664   | 6.7483  | 6.0418  | YRI |
| rs3138118  | CCL20     | GI_4759075-S  | 2 | 2 | 228508107 | 725   | 6.7483  | 6.0418  | YRI |
| rs3138119  | CCL20     | GI_4759075-S  | 2 | 2 | 228508174 | 792   | 6.7483  | 6.0418  | YRI |
| rs3138122  | CCL20     | GI_4759075-S  | 2 | 2 | 228508339 | 957   | 6.7483  | 6.0418  | YRI |
| rs16823995 | CCL20     | GI_4759075-S  | 2 | 2 | 228508368 | 986   | 6.7483  | 6.0418  | YRI |
| rs2880131  | LOC151174 | GI_37547484-S | 2 | 2 | 238871151 | 44728 | 6.7515  | 6.46979 | YRI |
| rs2240482  | STK25     | GI_34147665-S | 2 | 2 | 242125011 | 29600 | 9.19    | 5.964   | YRI |
| rs1705805  | TRNT1     | GI_41281989-I | 3 | 3 | 3164279   | 1184  | 7.036   | 6.71972 | YRI |
| rs2053017  | Hs.224849 | Hs.224849-S   | 3 | 3 | 14677276  | 18957 | 11.2217 | 5.98036 | YRI |
| rs1901     | Hs.224849 | Hs.224849-S   | 3 | 3 | 14687477  | 8756  | 11.827  | 5.98036 | YRI |
| rs11717438 | Hs.224849 | Hs.224849-S   | 3 | 3 | 14688062  | 8171  | 15.0321 | 5.98036 | YRI |
| rs7651009  | LOC51244  | GI_31652250-S | 3 | 3 | 14705731  | 16825 | 7.0272  | 6.23054 | YRI |
| rs842251   | MGC15763  | GI_19923906-S | 3 | 3 | 16274095  | 44147 | 6.1948  | 6.00656 | YRI |
| rs842256   | MGC15763  | GI_19923906-S | 3 | 3 | 16278651  | 39591 | 6.6295  | 6.00656 | YRI |
| rs842257   | MGC15763  | GI_19923906-S | 3 | 3 | 16279150  | 39092 | 6.9157  | 6.00656 | YRI |
| rs2245721  | MGC15763  | GI_19923906-S | 3 | 3 | 16280678  | 37564 | 7.0765  | 6.00656 | YRI |
| rs1514892  | MGC15763  | GI_19923906-S | 3 | 3 | 16282047  | 36195 | 7.244   | 6.00656 | YRI |
| rs842287   | MGC15763  | GI_19923906-S | 3 | 3 | 16292947  | 25295 | 7.244   | 6.00656 | YRI |
| rs1566972  | MGC15763  | GI_19923906-S | 3 | 3 | 16295364  | 22878 | 7.244   | 6.00656 | YRI |
| rs842274   | MGC15763  | GI_19923906-S | 3 | 3 | 16302859  | 15383 | 7.244   | 6.00656 | YRI |
| rs842273   | MGC15763  | GI_19923906-S | 3 | 3 | 16303360  | 14882 | 7.244   | 6.00656 | YRI |
| rs842272   | MGC15763  | GI_19923906-S | 3 | 3 | 16307050  | 11192 | 6.2272  | 6.00656 | YRI |
| rs493626   | MGC15763  | GI_19923906-S | 3 | 3 | 16334965  | 16723 | 7.6503  | 6.00656 | YRI |
| rs689716   | MGC15763  | GI_19923906-S | 3 | 3 | 16335349  | 17107 | 6.6792  | 6.00656 | YRI |
| rs478483   | MGC15763  | GI_19923906-S | 3 | 3 | 16337133  | 18891 | 7.7001  | 6.00656 | YRI |
| rs567541   | MGC15763  | GI_19923906-S | 3 | 3 | 16339621  | 21379 | 7.244   | 6.00656 | YRI |
| rs17016894 | TOP2B     | GI_19913407-S | 3 | 3 | 25647782  | 32887 | 6.6232  | 6.19867 | YRI |
| rs11709485 | TOP2B     | GI_19913407-S | 3 | 3 | 25649488  | 34593 | 7.1723  | 6.19867 | YRI |
| rs12632577 | TOP2B     | GI_19913407-S | 3 | 3 | 25668982  | 54087 | 7.8726  | 6.19867 | YRI |
| rs11917359 | TOP2B     | GI_19913407-S | 3 | 3 | 25673708  | 58813 | 7.2534  | 6.19867 | YRI |
| rs6799331  | TOP2B     | GI_19913407-S | 3 | 3 | 25678644  | 63749 | 6.6232  | 6.19867 | YRI |
| rs4681070  | TOP2B     | GI_19913407-S | 3 | 3 | 25698365  | 83470 | 6.2103  | 6.19867 | YRI |
| rs6806366  | CDCP1     | GI_30410802-A | 3 | 3 | 45176369  | 49296 | 6.2019  | 6.15736 | YRI |
| rs17078206 | SACM1L    | GI_41281578-S | 3 | 3 | 45695803  | 65974 | 6.5863  | 5.91937 | YRI |
| rs9851400  | SACM1L    | GI_41281578-S | 3 | 3 | 45698894  | 62883 | 6.6939  | 5.91937 | YRI |
| rs17078210 | SACM1L    | GI_41281578-S | 3 | 3 | 45701602  | 60175 | 11.5107 | 5.91937 | YRI |
| rs1534876  | SACM1L    | GI_41281578-S | 3 | 3 | 45716261  | 45516 | 6.7725  | 5.91937 | YRI |
| rs2673047  | SACM1L    | GI_41281578-S | 3 | 3 | 45718117  | 43660 | 6.1911  | 5.91937 | YRI |
| rs2742438  | SACM1L    | GI_41281578-S | 3 | 3 | 45718394  | 43383 | 5.9629  | 5.91937 | YRI |
| rs2742439  | SACM1L    | GI_41281578-S | 3 | 3 | 45719252  | 42525 | 6.5165  | 5.91937 | YRI |
| rs2373047  | SACM1L    | GI_41281578-S | 3 | 3 | 45722501  | 39276 | 6.1911  | 5.91937 | YRI |
| rs2245705  | SACM1L    | GI_41281578-S | 3 | 3 | 45724726  | 37051 | 6.1911  | 5.91937 | YRI |
| rs2742390  | SACM1L    | GI_41281578-S | 3 | 3 | 45731726  | 30051 | 6.1911  | 5.91937 | YRI |
| rs2742393  | SACM1L    | GI_41281578-S | 3 | 3 | 45732421  | 29356 | 6.1911  | 5.91937 | YRI |
| rs17078233 | SACM1L    | GI_41281578-S | 3 | 3 | 45734879  | 26898 | 13.4405 | 5.91937 | YRI |
| rs2673025  | SACM1L    | GI_41281578-S | 3 | 3 | 45735487  | 26290 | 6.1911  | 5.91937 | YRI |
| rs9810777  | SACM1L    | GI_41281578-S | 3 | 3 | 45746226  | 15551 | 6.1911  | 5.91937 | YRI |
| rs2742462  | SACM1L    | GI_41281578-S | 3 | 3 | 45749700  | 12077 | 6.1911  | 5.91937 | YRI |
| rs17078280 | SACM1L    | GI_41281578-S | 3 | 3 | 45752117  | 9660  | 13.4405 | 5.91937 | YRI |
| rs2742373  | SACM1L    | GI_41281578-S | 3 | 3 | 45759050  | 2727  | 6.0962  | 5.91937 | YRI |

|            |        |               |   |   |          |        |         |         |     |
|------------|--------|---------------|---|---|----------|--------|---------|---------|-----|
| rs17078308 | SACM1L | GI_41281578-S | 3 | 3 | 45772995 | 11218  | 11.9632 | 5.91937 | YRI |
| rs6768156  | SACM1L | GI_41281578-S | 3 | 3 | 45785608 | 23831  | 6.0697  | 5.91937 | YRI |
| rs1110295  | HEMK   | GI_7705408-S  | 3 | 3 | 49855947 | 741297 | 6.3747  | 5.45556 | YRI |
| rs17050913 | HEMK   | GI_7705408-S  | 3 | 3 | 50073341 | 523903 | 6.5691  | 5.45556 | YRI |
| rs17050922 | HEMK   | GI_7705408-S  | 3 | 3 | 50132239 | 465005 | 6.5691  | 5.45556 | YRI |
| rs7611074  | HEMK   | GI_7705408-S  | 3 | 3 | 50204033 | 393211 | 9.1627  | 5.45556 | YRI |
| rs2071203  | HEMK   | GI_7705408-S  | 3 | 3 | 50286904 | 310340 | 6.1487  | 5.45556 | YRI |
| rs2071204  | HEMK   | GI_7705408-S  | 3 | 3 | 50305991 | 291253 | 5.7507  | 5.45556 | YRI |
| rs2269432  | HEMK   | GI_7705408-S  | 3 | 3 | 50309235 | 288009 | 6.1372  | 5.45556 | YRI |
| rs2285044  | HEMK   | GI_7705408-S  | 3 | 3 | 50311665 | 285579 | 6.4396  | 5.45556 | YRI |
| rs11130248 | HEMK   | GI_7705408-S  | 3 | 3 | 50327204 | 270040 | 5.7945  | 5.45556 | YRI |
| rs4688679  | HEMK   | GI_7705408-S  | 3 | 3 | 50359762 | 237482 | 5.4814  | 5.45556 | YRI |
| rs2233476  | HEMK   | GI_7705408-S  | 3 | 3 | 50363387 | 233857 | 5.4814  | 5.45556 | YRI |
| rs17050976 | HEMK   | GI_7705408-S  | 3 | 3 | 50416575 | 180669 | 8.5408  | 5.45556 | YRI |
| rs17050977 | HEMK   | GI_7705408-S  | 3 | 3 | 50427476 | 169768 | 9.3066  | 5.45556 | YRI |
| rs4450808  | HEMK   | GI_7705408-S  | 3 | 3 | 50582802 | 14442  | 9.5382  | 5.45556 | YRI |
| rs636168   | HEMK   | GI_7705408-S  | 3 | 3 | 50584127 | 13117  | 10.5937 | 5.45556 | YRI |
| rs1208923  | HEMK   | GI_7705408-S  | 3 | 3 | 50591053 | 6191   | 10.5937 | 5.45556 | YRI |
| rs12494326 | HEMK   | GI_7705408-S  | 3 | 3 | 50604663 | 7419   | 9.3003  | 5.45556 | YRI |
| rs2239750  | HEMK   | GI_7705408-S  | 3 | 3 | 50604982 | 7738   | 7.6145  | 5.45556 | YRI |
| rs2239753  | HEMK   | GI_7705408-S  | 3 | 3 | 50620162 | 22918  | 9.3904  | 5.45556 | YRI |
| rs2239752  | HEMK   | GI_7705408-S  | 3 | 3 | 50620417 | 23173  | 9.4396  | 5.45556 | YRI |
| rs2239751  | HEMK   | GI_7705408-S  | 3 | 3 | 50622892 | 25648  | 9.3383  | 5.45556 | YRI |
| rs3792323  | HEMK   | GI_7705408-S  | 3 | 3 | 50635335 | 38091  | 8.2321  | 5.45556 | YRI |
| rs876103   | HEMK   | GI_7705408-S  | 3 | 3 | 50659015 | 61771  | 5.4659  | 5.45556 | YRI |
| rs12491440 | HEMK   | GI_7705408-S  | 3 | 3 | 50662866 | 65622  | 9.4396  | 5.45556 | YRI |
| rs12489607 | HEMK   | GI_7705408-S  | 3 | 3 | 50664043 | 66799  | 9.4396  | 5.45556 | YRI |
| rs17051043 | HEMK   | GI_7705408-S  | 3 | 3 | 50669002 | 71758  | 9.4396  | 5.45556 | YRI |
| rs17051045 | HEMK   | GI_7705408-S  | 3 | 3 | 50669630 | 72386  | 9.4396  | 5.45556 | YRI |
| rs728902   | HEMK   | GI_7705408-S  | 3 | 3 | 50670366 | 73122  | 9.4396  | 5.45556 | YRI |
| rs17051403 | HEMK   | GI_7705408-S  | 3 | 3 | 50726647 | 129403 | 9.3904  | 5.45556 | YRI |
| rs12495399 | HEMK   | GI_7705408-S  | 3 | 3 | 50751886 | 154642 | 9.3904  | 5.45556 | YRI |
| rs7372716  | HEMK   | GI_7705408-S  | 3 | 3 | 50793400 | 196156 | 9.4396  | 5.45556 | YRI |
| rs12487821 | HEMK   | GI_7705408-S  | 3 | 3 | 50817482 | 220238 | 9.4396  | 5.45556 | YRI |
| rs17051468 | HEMK   | GI_7705408-S  | 3 | 3 | 50843124 | 245880 | 8.2883  | 5.45556 | YRI |
| rs12492850 | HEMK   | GI_7705408-S  | 3 | 3 | 50928959 | 331715 | 8.3468  | 5.45556 | YRI |
| rs4078296  | HEMK   | GI_7705408-S  | 3 | 3 | 50943937 | 346693 | 9.4396  | 5.45556 | YRI |
| rs12488948 | HEMK   | GI_7705408-S  | 3 | 3 | 50945005 | 347761 | 9.4396  | 5.45556 | YRI |
| rs12488831 | HEMK   | GI_7705408-S  | 3 | 3 | 50955438 | 358194 | 8.6774  | 5.45556 | YRI |
| rs7372342  | HEMK   | GI_7705408-S  | 3 | 3 | 50959822 | 362578 | 8.5503  | 5.45556 | YRI |
| rs12488700 | HEMK   | GI_7705408-S  | 3 | 3 | 50994169 | 396925 | 7.2866  | 5.45556 | YRI |
| rs7427615  | HEMK   | GI_7705408-S  | 3 | 3 | 50996353 | 399109 | 8.2883  | 5.45556 | YRI |
| rs12496621 | HEMK   | GI_7705408-S  | 3 | 3 | 51013950 | 416706 | 8.2883  | 5.45556 | YRI |
| rs7374205  | HEMK   | GI_7705408-S  | 3 | 3 | 51061110 | 463866 | 8.2883  | 5.45556 | YRI |
| rs4927961  | HEMK   | GI_7705408-S  | 3 | 3 | 51085235 | 487991 | 8.2883  | 5.45556 | YRI |
| rs4130473  | HEMK   | GI_7705408-S  | 3 | 3 | 51187952 | 590708 | 6.9775  | 5.45556 | YRI |
| rs4346580  | HEMK   | GI_7705408-S  | 3 | 3 | 51191618 | 594374 | 7.4147  | 5.45556 | YRI |
| rs12492615 | HEMK   | GI_7705408-S  | 3 | 3 | 51192397 | 595153 | 6.4912  | 5.45556 | YRI |
| rs12495561 | HEMK   | GI_7705408-S  | 3 | 3 | 51250297 | 653053 | 6.3232  | 5.45556 | YRI |
| rs9878592  | HEMK   | GI_7705408-S  | 3 | 3 | 51255405 | 658161 | 7.5485  | 5.45556 | YRI |
| rs12493034 | HEMK   | GI_7705408-S  | 3 | 3 | 51275950 | 678706 | 7.481   | 5.45556 | YRI |
| rs1480359  | HEMK   | GI_7705408-S  | 3 | 3 | 51289234 | 691990 | 7.4147  | 5.45556 | YRI |
| rs2170177  | HEMK   | GI_7705408-S  | 3 | 3 | 51324927 | 727683 | 6.962   | 5.45556 | YRI |
| rs880477   | HEMK   | GI_7705408-S  | 3 | 3 | 51352691 | 755447 | 6.9775  | 5.45556 | YRI |
| rs12487468 | HEMK   | GI_7705408-S  | 3 | 3 | 51364610 | 767366 | 6.9775  | 5.45556 | YRI |
| rs1480366  | HEMK   | GI_7705408-S  | 3 | 3 | 51368414 | 771170 | 6.9775  | 5.45556 | YRI |

|            |           |               |   |   |           |        |         |         |     |
|------------|-----------|---------------|---|---|-----------|--------|---------|---------|-----|
| rs17051802 | HEMK      | GI_7705408-S  | 3 | 3 | 51477177  | 879933 | 6.3668  | 5.45556 | YRI |
| rs6775459  | LOC285256 | GI_27481220-S | 3 | 3 | 130025163 | 1857   | 7.5886  | 5.49104 | YRI |
| rs9840633  | LOC285256 | GI_27481220-S | 3 | 3 | 130050900 | 23880  | 5.6785  | 5.49104 | YRI |
| rs9841086  | LOC285256 | GI_27481220-S | 3 | 3 | 130050990 | 23970  | 5.6785  | 5.49104 | YRI |
| rs9841503  | LOC285256 | GI_27481220-S | 3 | 3 | 130051403 | 24383  | 5.6785  | 5.49104 | YRI |
| rs9846096  | LOC285256 | GI_27481220-S | 3 | 3 | 130051929 | 24909  | 5.6785  | 5.49104 | YRI |
| rs9871780  | LOC285256 | GI_27481220-S | 3 | 3 | 130053166 | 26146  | 6.0872  | 5.49104 | YRI |
| rs13322981 | LOC285256 | GI_27481220-S | 3 | 3 | 130054433 | 27413  | 5.6785  | 5.49104 | YRI |
| rs9862461  | LOC285256 | GI_27481220-S | 3 | 3 | 130055012 | 27992  | 5.6785  | 5.49104 | YRI |
| rs11921456 | LOC285256 | GI_27481220-S | 3 | 3 | 130063699 | 36679  | 5.6785  | 5.49104 | YRI |
| rs6789094  | LOC285256 | GI_27481220-S | 3 | 3 | 130073965 | 46945  | 5.5765  | 5.49104 | YRI |
| rs6792605  | LOC285256 | GI_27481220-S | 3 | 3 | 130075040 | 48020  | 6.0872  | 5.49104 | YRI |
| rs6768014  | LOC285256 | GI_27481220-S | 3 | 3 | 130075155 | 48135  | 5.6785  | 5.49104 | YRI |
| rs6796031  | LOC285256 | GI_27481220-S | 3 | 3 | 130075957 | 48937  | 5.6785  | 5.49104 | YRI |
| rs9847759  | LOC285256 | GI_27481220-S | 3 | 3 | 130077071 | 50051  | 5.6785  | 5.49104 | YRI |
| rs9825119  | LOC285256 | GI_27481220-S | 3 | 3 | 130078212 | 51192  | 5.6785  | 5.49104 | YRI |
| rs6806468  | LOC285256 | GI_27481220-S | 3 | 3 | 130094927 | 67907  | 5.653   | 5.49104 | YRI |
| rs9848050  | LOC285256 | GI_27481220-S | 3 | 3 | 130135120 | 108100 | 6.0872  | 5.49104 | YRI |
| rs9810890  | LOC285256 | GI_27481220-S | 3 | 3 | 130135251 | 108231 | 6.0872  | 5.49104 | YRI |
| rs6787128  | LOC285256 | GI_27481220-S | 3 | 3 | 130138245 | 111225 | 6.0343  | 5.49104 | YRI |
| rs2737717  | BFSP2     | GI_21536442-S | 3 | 3 | 134668532 | 8193   | 12.0713 | 5.95715 | YRI |
| rs11928329 | BFSP2     | GI_21536442-S | 3 | 3 | 134669835 | 6890   | 5.9691  | 5.95715 | YRI |
| rs9822952  | NMNAT3    | GI_31342325-S | 3 | 3 | 140867955 | 106092 | 7.7476  | 5.96991 | YRI |
| rs7636269  | NMNAT3    | GI_31342325-S | 3 | 3 | 140873866 | 112003 | 7.9471  | 5.96991 | YRI |
| rs4640518  | NMNAT3    | GI_31342325-S | 3 | 3 | 140902944 | 141081 | 6.3422  | 5.96991 | YRI |
| rs7648532  | NMNAT3    | GI_31342325-S | 3 | 3 | 140912635 | 150772 | 7.1061  | 5.96991 | YRI |
| rs4683684  | NMNAT3    | GI_31342325-S | 3 | 3 | 140921351 | 159488 | 7.1061  | 5.96991 | YRI |
| rs9813586  | NMNAT3    | GI_31342325-S | 3 | 3 | 140946901 | 185038 | 6.2061  | 5.96991 | YRI |
| rs7641514  | TRPC1     | GI_27545448-S | 3 | 3 | 144003459 | 5616   | 7.0856  | 6.11975 | YRI |
| rs4462895  | LOC151963 | GI_31341922-S | 3 | 3 | 194096503 | 98936  | 6.0017  | 5.83723 | YRI |
| rs4455278  | LOC151963 | GI_31341922-S | 3 | 3 | 194097185 | 99618  | 7.5234  | 5.83723 | YRI |
| rs2133864  | LOC151963 | GI_31341922-S | 3 | 3 | 194098959 | 101392 | 6.2105  | 5.83723 | YRI |
| rs2367133  | LOC151963 | GI_31341922-S | 3 | 3 | 194099108 | 101541 | 6.2105  | 5.83723 | YRI |
| rs11716375 | LOC151963 | GI_31341922-S | 3 | 3 | 194100965 | 103398 | 6.2105  | 5.83723 | YRI |
| rs7643379  | LOC151963 | GI_31341922-S | 3 | 3 | 194102085 | 104518 | 6.2105  | 5.83723 | YRI |
| rs6599293  | FLJ90036  | GI_31559781-S | 4 | 4 | 123027    | 22841  | 12.2779 | 5.84921 | YRI |
| rs11735742 | FLJ90036  | GI_31559781-S | 4 | 4 | 132550    | 13318  | 11.6266 | 5.84921 | YRI |
| rs6830247  | FLJ90036  | GI_31559781-S | 4 | 4 | 140683    | 5185   | 12.2779 | 5.84921 | YRI |
| rs7670453  | FLJ90036  | GI_31559781-S | 4 | 4 | 185246    | 39378  | 12.335  | 5.84921 | YRI |
| rs7683872  | FLJ90036  | GI_31559781-S | 4 | 4 | 214446    | 68578  | 7.4432  | 5.84921 | YRI |
| rs7667471  | FLJ90036  | GI_31559781-S | 4 | 4 | 229205    | 83337  | 7.4432  | 5.84921 | YRI |
| rs7659395  | MSX1      | GI_4505266-S  | 4 | 4 | 5125449   | 142206 | 6.412   | 6.27614 | YRI |
| rs2566104  | FLJ23235  | GI_13376422-S | 4 | 4 | 38842478  | 51436  | 6.4746  | 6.17273 | YRI |
| rs2254075  | FLJ23235  | GI_13376422-S | 4 | 4 | 38852749  | 61707  | 9.0874  | 6.17273 | YRI |
| rs2254212  | FLJ23235  | GI_13376422-S | 4 | 4 | 38854408  | 63366  | 9.0874  | 6.17273 | YRI |
| rs2711976  | FLJ23235  | GI_13376422-S | 4 | 4 | 38857352  | 66310  | 9.0874  | 6.17273 | YRI |
| rs2566094  | FLJ23235  | GI_13376422-S | 4 | 4 | 38858940  | 67898  | 8.9856  | 6.17273 | YRI |
| rs2711981  | FLJ23235  | GI_13376422-S | 4 | 4 | 38861824  | 70782  | 9.3095  | 6.17273 | YRI |
| rs2711952  | FLJ23235  | GI_13376422-S | 4 | 4 | 38879384  | 88342  | 6.1753  | 6.17273 | YRI |
| rs1367299  | FLJ23235  | GI_13376422-S | 4 | 4 | 38880357  | 89315  | 6.3963  | 6.17273 | YRI |
| rs2566122  | FLJ23235  | GI_13376422-S | 4 | 4 | 38880931  | 89889  | 6.1753  | 6.17273 | YRI |
| rs2566126  | FLJ23235  | GI_13376422-S | 4 | 4 | 38884386  | 93344  | 6.3613  | 6.17273 | YRI |
| rs2711943  | FLJ23235  | GI_13376422-S | 4 | 4 | 38885002  | 93960  | 6.1753  | 6.17273 | YRI |
| rs2252519  | FLJ23235  | GI_13376422-S | 4 | 4 | 38900470  | 109428 | 6.1753  | 6.17273 | YRI |
| rs13126826 | Hs.164463 | Hs.164463-S   | 4 | 4 | 54403213  | 40174  | 11.5978 | 6.30324 | YRI |
| rs2616394  | Hs.164463 | Hs.164463-S   | 4 | 4 | 54415202  | 28185  | 6.8674  | 6.30324 | YRI |

|            |           |               |   |   |          |        |        |         |     |
|------------|-----------|---------------|---|---|----------|--------|--------|---------|-----|
| rs728586   | Hs.164463 | Hs.164463-S   | 4 | 4 | 54415402 | 27985  | 6.3625 | 6.30324 | YRI |
| rs2616397  | Hs.164463 | Hs.164463-S   | 4 | 4 | 54421616 | 21771  | 6.8674 | 6.30324 | YRI |
| rs2616403  | Hs.164463 | Hs.164463-S   | 4 | 4 | 54428037 | 15350  | 7.0227 | 6.30324 | YRI |
| rs6848989  | Hs.164463 | Hs.164463-S   | 4 | 4 | 54450998 | 7611   | 6.6176 | 6.30324 | YRI |
| rs11722881 | Hs.164463 | Hs.164463-S   | 4 | 4 | 54451790 | 8403   | 6.6176 | 6.30324 | YRI |
| rs17635222 | LOC401135 | GI_42657007-S | 4 | 4 | 68415033 | 1798   | 6.8512 | 5.97541 | YRI |
| rs12651577 | LOC401135 | GI_42657007-S | 4 | 4 | 68424184 | 7353   | 6.2518 | 5.97541 | YRI |
| rs3100645  | UGT2B11   | GI_4507822-S  | 4 | 4 | 69671954 | 575169 | 7.1462 | 5.94319 | YRI |
| rs3100645  | UGT2B7    | GI_4507824-S  | 4 | 4 | 69671954 | 487102 | 6.7847 | 5.80524 | YRI |
| rs7441736  | Hs.479894 | Hs.479894-S   | 4 | 4 | 70071929 | 24523  | 7.1095 | 5.97181 | YRI |
| rs4305590  | Hs.479894 | Hs.479894-S   | 4 | 4 | 70075491 | 20961  | 7.1095 | 5.97181 | YRI |
| rs13147648 | Hs.479894 | Hs.479894-S   | 4 | 4 | 70082423 | 14029  | 7.1095 | 5.97181 | YRI |
| rs4353969  | Hs.479894 | Hs.479894-S   | 4 | 4 | 70083182 | 13270  | 7.0235 | 5.97181 | YRI |
| rs13102620 | Hs.479894 | Hs.479894-S   | 4 | 4 | 70083761 | 12691  | 6.5097 | 5.97181 | YRI |
| rs4495114  | Hs.479894 | Hs.479894-S   | 4 | 4 | 70084504 | 11948  | 7.5595 | 5.97181 | YRI |
| rs4299665  | Hs.479894 | Hs.479894-S   | 4 | 4 | 70084684 | 11768  | 7.2649 | 5.97181 | YRI |
| rs4235111  | Hs.479894 | Hs.479894-S   | 4 | 4 | 70086017 | 10435  | 7.1929 | 5.97181 | YRI |
| rs4299666  | Hs.479894 | Hs.479894-S   | 4 | 4 | 70088357 | 8095   | 8.2593 | 5.97181 | YRI |
| rs13140844 | Hs.479894 | Hs.479894-S   | 4 | 4 | 70089467 | 6985   | 7.1095 | 5.97181 | YRI |
| rs4518318  | Hs.479894 | Hs.479894-S   | 4 | 4 | 70091957 | 4495   | 6.5821 | 5.97181 | YRI |
| rs7438808  | Hs.479894 | Hs.479894-S   | 4 | 4 | 70097144 | 692    | 7.18   | 5.97181 | YRI |
| rs6842618  | Hs.479894 | Hs.479894-S   | 4 | 4 | 70097800 | 1348   | 6.599  | 5.97181 | YRI |
| rs4377650  | Hs.479894 | Hs.479894-S   | 4 | 4 | 70097833 | 1381   | 6.3776 | 5.97181 | YRI |
| rs13350781 | Hs.479894 | Hs.479894-S   | 4 | 4 | 70098632 | 2180   | 7.0242 | 5.97181 | YRI |
| rs7438033  | Hs.479894 | Hs.479894-S   | 4 | 4 | 70105821 | 9369   | 6.8109 | 5.97181 | YRI |
| rs3922514  | Hs.479894 | Hs.479894-S   | 4 | 4 | 70107383 | 10931  | 6.8109 | 5.97181 | YRI |
| rs7434892  | Hs.479894 | Hs.479894-S   | 4 | 4 | 70108323 | 11871  | 6.564  | 5.97181 | YRI |
| rs4400060  | Hs.479894 | Hs.479894-S   | 4 | 4 | 70117693 | 21241  | 6.1715 | 5.97181 | YRI |
| rs4400061  | Hs.479894 | Hs.479894-S   | 4 | 4 | 70117759 | 21307  | 6.0468 | 5.97181 | YRI |
| rs4446390  | Hs.479894 | Hs.479894-S   | 4 | 4 | 70117806 | 21354  | 6.1715 | 5.97181 | YRI |
| rs7677996  | Hs.479894 | Hs.479894-S   | 4 | 4 | 70121951 | 25499  | 6.6176 | 5.97181 | YRI |
| rs7657426  | Hs.479894 | Hs.479894-S   | 4 | 4 | 70125769 | 29317  | 6.8029 | 5.97181 | YRI |
| rs2903701  | THAP6     | GI_37059751-S | 4 | 4 | 76794063 | 17016  | 6.0611 | 6.05702 | YRI |
| rs13138223 | ASAH1     | GI_30794501-S | 4 | 4 | 77216794 | 17704  | 7.9311 | 6.36489 | YRI |
| rs6826085  | ASAH1     | GI_30794501-S | 4 | 4 | 77227408 | 28318  | 7.4899 | 6.36489 | YRI |
| rs2242471  | ASAH1     | GI_30794501-S | 4 | 4 | 77235895 | 36805  | 7.3369 | 6.36489 | YRI |
| rs2242473  | ASAH1     | GI_30794501-S | 4 | 4 | 77236135 | 37045  | 6.9836 | 6.36489 | YRI |
| rs2273     | ASAH1     | GI_30794501-S | 4 | 4 | 77246567 | 47477  | 7.3369 | 6.36489 | YRI |
| rs4859413  | ASAH1     | GI_30794501-S | 4 | 4 | 77255429 | 56339  | 7.2508 | 6.36489 | YRI |
| rs4859581  | ASAH1     | GI_30794501-S | 4 | 4 | 77264153 | 65063  | 7.3369 | 6.36489 | YRI |
| rs4282209  | ASAH1     | GI_30794501-S | 4 | 4 | 77276715 | 77625  | 8.308  | 6.36489 | YRI |
| rs10031452 | ASAH1     | GI_30794501-S | 4 | 4 | 77282112 | 83022  | 6.8063 | 6.36489 | YRI |
| rs6532083  | ASAH1     | GI_30794501-S | 4 | 4 | 77286380 | 87290  | 6.8063 | 6.36489 | YRI |
| rs7670789  | ASAH1     | GI_30794501-S | 4 | 4 | 77297560 | 98470  | 7.0098 | 6.36489 | YRI |
| rs8878     | ASAH1     | GI_30794501-S | 4 | 4 | 77299479 | 100389 | 7.0098 | 6.36489 | YRI |
| rs4859584  | ASAH1     | GI_30794501-S | 4 | 4 | 77300316 | 101226 | 6.4601 | 6.36489 | YRI |
| rs4859587  | ASAH1     | GI_30794501-S | 4 | 4 | 77300475 | 101385 | 6.8559 | 6.36489 | YRI |
| rs4859588  | ASAH1     | GI_30794501-S | 4 | 4 | 77300856 | 101766 | 7.0098 | 6.36489 | YRI |
| rs4257674  | ASAH1     | GI_30794501-S | 4 | 4 | 77302864 | 103774 | 7.0098 | 6.36489 | YRI |
| rs4417995  | ASAH1     | GI_30794501-S | 4 | 4 | 77303178 | 104088 | 6.8036 | 6.36489 | YRI |
| rs4386624  | ASAH1     | GI_30794501-S | 4 | 4 | 77303318 | 104228 | 7.0098 | 6.36489 | YRI |
| rs9884374  | ASAH1     | GI_30794501-S | 4 | 4 | 77303897 | 104807 | 7.0098 | 6.36489 | YRI |
| rs4241579  | ASAH1     | GI_30794501-S | 4 | 4 | 77304463 | 105373 | 6.8559 | 6.36489 | YRI |
| rs4859590  | ASAH1     | GI_30794501-S | 4 | 4 | 77305567 | 106477 | 7.0098 | 6.36489 | YRI |
| rs4859591  | ASAH1     | GI_30794501-S | 4 | 4 | 77305757 | 106667 | 6.8137 | 6.36489 | YRI |
| rs4859414  | ASAH1     | GI_30794501-S | 4 | 4 | 77307176 | 108086 | 7.4094 | 6.36489 | YRI |

|            |           |               |   |   |           |        |         |         |     |
|------------|-----------|---------------|---|---|-----------|--------|---------|---------|-----|
| rs6845396  | AS AHL    | GI_30794501-S | 4 | 4 | 77308729  | 109639 | 7.0098  | 6.36489 | YRI |
| rs6850760  | AS AHL    | GI_30794501-S | 4 | 4 | 77308863  | 109773 | 7.0098  | 6.36489 | YRI |
| rs10021768 | AS AHL    | GI_30794501-S | 4 | 4 | 77308943  | 109853 | 7.0098  | 6.36489 | YRI |
| rs4302486  | AS AHL    | GI_30794501-S | 4 | 4 | 77310256  | 111166 | 7.0098  | 6.36489 | YRI |
| rs4512021  | AS AHL    | GI_30794501-S | 4 | 4 | 77311586  | 112496 | 7.0098  | 6.36489 | YRI |
| rs7436646  | AS AHL    | GI_30794501-S | 4 | 4 | 77312408  | 113318 | 6.7829  | 6.36489 | YRI |
| rs7674409  | AS AHL    | GI_30794501-S | 4 | 4 | 77315513  | 116423 | 7.0098  | 6.36489 | YRI |
| rs4129781  | AS AHL    | GI_30794501-S | 4 | 4 | 77316567  | 117477 | 7.0098  | 6.36489 | YRI |
| rs6532121  | AS AHL    | GI_30794501-S | 4 | 4 | 77319785  | 120695 | 6.9115  | 6.36489 | YRI |
| rs7684461  | AS AHL    | GI_30794501-S | 4 | 4 | 77320175  | 121085 | 7.0098  | 6.36489 | YRI |
| rs5005114  | AS AHL    | GI_30794501-S | 4 | 4 | 77343219  | 144129 | 7.0887  | 6.36489 | YRI |
| rs4304003  | AS AHL    | GI_30794501-S | 4 | 4 | 77352642  | 153552 | 7.0098  | 6.36489 | YRI |
| rs6820201  | Hs.119946 | Hs.119946-S   | 4 | 4 | 89532096  | 77466  | 7.857   | 6.21347 | YRI |
| rs17013974 | Hs.119946 | Hs.119946-S   | 4 | 4 | 89559909  | 49653  | 11.6271 | 6.21347 | YRI |
| rs17013978 | Hs.119946 | Hs.119946-S   | 4 | 4 | 89560376  | 49186  | 10.523  | 6.21347 | YRI |
| rs2604209  | NAP1L5    | GI_24371267-S | 4 | 4 | 89978250  | 3712   | 6.6588  | 5.97368 | YRI |
| rs6532733  | Hs.212658 | Hs.212658-S   | 4 | 4 | 99706135  | 15537  | 7.0404  | 5.98206 | YRI |
| rs4699634  | Hs.212658 | Hs.212658-S   | 4 | 4 | 99721799  | 127    | 7.3001  | 5.98206 | YRI |
| rs1603705  | PPA2      | GI_31881619-A | 4 | 4 | 106576743 | 71676  | 7.7449  | 6.09252 | YRI |
| rs2726475  | PPA2      | GI_31881619-A | 4 | 4 | 106606706 | 41713  | 10.6121 | 6.09252 | YRI |
| rs2647254  | PPA2      | GI_31881619-A | 4 | 4 | 106642694 | 5725   | 10.3437 | 6.09252 | YRI |
| rs11932512 | PPA2      | GI_31881619-A | 4 | 4 | 106644958 | 3461   | 10.4774 | 6.09252 | YRI |
| rs13123933 | PPA2      | GI_31881619-A | 4 | 4 | 106645796 | 2623   | 9.9771  | 6.09252 | YRI |
| rs2726526  | PPA2      | GI_31881619-A | 4 | 4 | 106649725 | 1306   | 8.6458  | 6.09252 | YRI |
| rs13108489 | PPA2      | GI_31881619-A | 4 | 4 | 106650729 | 2310   | 20.2165 | 6.09252 | YRI |
| rs2713831  | PPA2      | GI_31881619-A | 4 | 4 | 106652126 | 3707   | 6.9661  | 6.09252 | YRI |
| rs2713833  | PPA2      | GI_31881619-A | 4 | 4 | 106654980 | 6561   | 8.5401  | 6.09252 | YRI |
| rs2636723  | PPA2      | GI_31881619-A | 4 | 4 | 106662275 | 13856  | 8.2324  | 6.09252 | YRI |
| rs2713827  | PPA2      | GI_31881619-A | 4 | 4 | 106666161 | 17742  | 10.4177 | 6.09252 | YRI |
| rs2636732  | PPA2      | GI_31881619-A | 4 | 4 | 106694459 | 46040  | 7.9087  | 6.09252 | YRI |
| rs12643660 | PPA2      | GI_31881619-A | 4 | 4 | 106744364 | 95945  | 9.69    | 6.09252 | YRI |
| rs13104830 | PPA2      | GI_31881619-A | 4 | 4 | 106746901 | 98482  | 6.9699  | 6.09252 | YRI |
| rs4699177  | PPA2      | GI_31881619-A | 4 | 4 | 106749690 | 101271 | 6.9699  | 6.09252 | YRI |
| rs10050189 | PPA2      | GI_31881619-A | 4 | 4 | 106759693 | 111274 | 6.9699  | 6.09252 | YRI |
| rs17008180 | PPA2      | GI_31881619-A | 4 | 4 | 106763687 | 115268 | 8.9893  | 6.09252 | YRI |
| rs4508886  | PPA2      | GI_31881619-A | 4 | 4 | 106766300 | 117881 | 6.9699  | 6.09252 | YRI |
| rs12646618 | PPA2      | GI_31881619-A | 4 | 4 | 106766550 | 118131 | 6.9699  | 6.09252 | YRI |
| rs13144832 | PPA2      | GI_31881619-A | 4 | 4 | 106777122 | 128703 | 6.9699  | 6.09252 | YRI |
| rs2892949  | ANXA5     | GI_4809273-S  | 4 | 4 | 122941711 | 5464   | 6.1911  | 6.14991 | YRI |
| rs17718    | ANXA5     | GI_4809273-S  | 4 | 4 | 122946888 | 287    | 6.2724  | 6.14991 | YRI |
| rs6854854  | ANXA5     | GI_4809273-S  | 4 | 4 | 122964524 | 17349  | 6.2724  | 6.14991 | YRI |
| rs6534309  | ANXA5     | GI_4809273-S  | 4 | 4 | 122967534 | 20359  | 6.2724  | 6.14991 | YRI |
| rs11736418 | KIAA1712  | GI_30794213-S | 4 | 4 | 175525211 | 102847 | 8.8451  | 6.05872 | YRI |
| rs13109634 | KIAA1712  | GI_30794213-S | 4 | 4 | 175545256 | 82802  | 6.6129  | 6.05872 | YRI |
| rs10520277 | KIAA1712  | GI_30794213-S | 4 | 4 | 175561564 | 66494  | 6.6129  | 6.05872 | YRI |
| rs11725521 | KIAA1712  | GI_30794213-S | 4 | 4 | 175570334 | 57724  | 8.9425  | 6.05872 | YRI |
| rs7659617  | KIAA1712  | GI_30794213-S | 4 | 4 | 175572410 | 55648  | 15.8721 | 6.05872 | YRI |
| rs7376146  | KIAA1712  | GI_30794213-S | 4 | 4 | 175576120 | 51938  | 17.8325 | 6.05872 | YRI |
| rs7658307  | KIAA1712  | GI_30794213-S | 4 | 4 | 175581254 | 46804  | 17.8325 | 6.05872 | YRI |
| rs4695918  | KIAA1712  | GI_30794213-S | 4 | 4 | 175600182 | 27876  | 9.4752  | 6.05872 | YRI |
| rs1553669  | KIAA1712  | GI_30794213-S | 4 | 4 | 175612138 | 15920  | 17.1345 | 6.05872 | YRI |
| rs6835318  | DCTD      | GI_4503276-S  | 4 | 4 | 184186014 | 824    | 6.6475  | 6.18874 | YRI |
| rs13474    | LOC133957 | GI_34222184-S | 5 | 5 | 258077    | 179    | 5.9553  | 5.75547 | YRI |
| rs326210   | MTRR      | GI_4505278-A  | 5 | 5 | 7910582   | 43408  | 8.4681  | 6.4592  | YRI |
| rs1046014  | MTRR      | GI_4505278-A  | 5 | 5 | 7912434   | 41556  | 7.2522  | 6.4592  | YRI |
| rs162026   | MTRR      | GI_4505278-A  | 5 | 5 | 7914470   | 39520  | 8.1976  | 6.4592  | YRI |

|            |           |               |   |   |          |        |         |         |     |
|------------|-----------|---------------|---|---|----------|--------|---------|---------|-----|
| rs162131   | MTRR      | GI_4505278-A  | 5 | 5 | 7929751  | 24239  | 8.6967  | 6.4592  | YRI |
| rs162034   | MTRR      | GI_4505278-A  | 5 | 5 | 7935979  | 18011  | 9.5606  | 6.4592  | YRI |
| rs161871   | MTRR      | GI_4505278-A  | 5 | 5 | 7937389  | 16601  | 9.4641  | 6.4592  | YRI |
| rs162036   | MTRR      | GI_4505278-A  | 5 | 5 | 7938959  | 15031  | 9.5924  | 6.4592  | YRI |
| rs3776455  | MTRR      | GI_4505278-A  | 5 | 5 | 7949511  | 4479   | 6.5354  | 6.4592  | YRI |
| rs10520874 | MTRR      | GI_4505278-A  | 5 | 5 | 7952909  | 1081   | 7.0005  | 6.4592  | YRI |
| rs8659     | MTRR      | GI_4505278-A  | 5 | 5 | 7953833  | 157    | 6.5354  | 6.4592  | YRI |
| rs16879410 | MTRR      | GI_4505278-A  | 5 | 5 | 7966668  | 12678  | 6.5255  | 6.4592  | YRI |
| rs327581   | MTRR      | GI_4505278-A  | 5 | 5 | 7967554  | 13564  | 6.9002  | 6.4592  | YRI |
| rs3822410  | Hs.26039  | Hs.26039-S    | 5 | 5 | 10707769 | 2218   | 10.6705 | 6.37615 | YRI |
| rs3733758  | Hs.26039  | Hs.26039-S    | 5 | 5 | 10708842 | 1145   | 10.6705 | 6.37615 | YRI |
| rs3733761  | Hs.26039  | Hs.26039-S    | 5 | 5 | 10709162 | 825    | 7.1643  | 6.37615 | YRI |
| rs3733762  | Hs.26039  | Hs.26039-S    | 5 | 5 | 10709186 | 801    | 10.2947 | 6.37615 | YRI |
| rs2279327  | Hs.26039  | Hs.26039-S    | 5 | 5 | 10709785 | 202    | 10.9467 | 6.37615 | YRI |
| rs2279325  | Hs.26039  | Hs.26039-S    | 5 | 5 | 10710194 | 207    | 9.9701  | 6.37615 | YRI |
| rs1109383  | Hs.26039  | Hs.26039-S    | 5 | 5 | 10714120 | 4133   | 10.6705 | 6.37615 | YRI |
| rs1107818  | Hs.26039  | Hs.26039-S    | 5 | 5 | 10714928 | 4941   | 11.0794 | 6.37615 | YRI |
| rs7712435  | Hs.26039  | Hs.26039-S    | 5 | 5 | 10716402 | 6415   | 7.0898  | 6.37615 | YRI |
| rs6890108  | Hs.482037 | Hs.482037-S   | 5 | 5 | 43462224 | 89042  | 7.7891  | 5.97337 | YRI |
| rs7712723  | Hs.482037 | Hs.482037-S   | 5 | 5 | 43466016 | 85250  | 8.366   | 5.97337 | YRI |
| rs16873327 | Hs.482037 | Hs.482037-S   | 5 | 5 | 43473387 | 77879  | 9.8807  | 5.97337 | YRI |
| rs6451694  | Hs.482037 | Hs.482037-S   | 5 | 5 | 43479504 | 71762  | 8.366   | 5.97337 | YRI |
| rs7716564  | Hs.482037 | Hs.482037-S   | 5 | 5 | 43537149 | 14117  | 10.1161 | 5.97337 | YRI |
| rs7737947  | Hs.482037 | Hs.482037-S   | 5 | 5 | 43652459 | 101193 | 6.1584  | 5.97337 | YRI |
| rs7700826  | Hs.482037 | Hs.482037-S   | 5 | 5 | 43652877 | 101611 | 7.3185  | 5.97337 | YRI |
| rs16873406 | Hs.482037 | Hs.482037-S   | 5 | 5 | 43659422 | 108156 | 7.3185  | 5.97337 | YRI |
| rs6873555  | Hs.482037 | Hs.482037-S   | 5 | 5 | 43660258 | 108992 | 7.3185  | 5.97337 | YRI |
| rs7702621  | Hs.482037 | Hs.482037-S   | 5 | 5 | 43700995 | 149729 | 6.7807  | 5.97337 | YRI |
| rs16873501 | Hs.482037 | Hs.482037-S   | 5 | 5 | 43736878 | 185612 | 6.553   | 5.97337 | YRI |
| rs7703953  | Hs.482037 | Hs.482037-S   | 5 | 5 | 43908839 | 357573 | 5.9971  | 5.97337 | YRI |
| rs13185925 | Hs.482037 | Hs.482037-S   | 5 | 5 | 43924595 | 373329 | 5.9971  | 5.97337 | YRI |
| rs16898496 | SLC30A5   | GI_20149672-A | 5 | 5 | 68435478 | 779    | 6.485   | 6.11614 | YRI |
| rs1217800  | MAP1B     | GI_14165455-A | 5 | 5 | 71412888 | 125065 | 7.4318  | 6.28533 | YRI |
| rs1217817  | MAP1B     | GI_14165455-A | 5 | 5 | 71425507 | 112446 | 7.1557  | 6.28533 | YRI |
| rs1048167  | TINP1     | GI_21359901-S | 5 | 5 | 74053255 | 52264  | 7.3802  | 6.55631 | YRI |
| rs16872220 | TINP1     | GI_21359901-S | 5 | 5 | 74054530 | 50989  | 18.6349 | 6.55631 | YRI |
| rs6877188  | TINP1     | GI_21359901-S | 5 | 5 | 74067281 | 38238  | 18.6349 | 6.55631 | YRI |
| rs16872231 | TINP1     | GI_21359901-S | 5 | 5 | 74067872 | 37647  | 18.0965 | 6.55631 | YRI |
| rs7713812  | TINP1     | GI_21359901-S | 5 | 5 | 74068653 | 36866  | 18.6349 | 6.55631 | YRI |
| rs6453076  | TINP1     | GI_21359901-S | 5 | 5 | 74069457 | 36062  | 18.6349 | 6.55631 | YRI |
| rs7732843  | TINP1     | GI_21359901-S | 5 | 5 | 74070001 | 35518  | 18.3771 | 6.55631 | YRI |
| rs6453079  | TINP1     | GI_21359901-S | 5 | 5 | 74077085 | 28434  | 18.6349 | 6.55631 | YRI |
| rs6873998  | TINP1     | GI_21359901-S | 5 | 5 | 74082412 | 23107  | 17.6445 | 6.55631 | YRI |
| rs16872242 | TINP1     | GI_21359901-S | 5 | 5 | 74083192 | 22327  | 7.3802  | 6.55631 | YRI |
| rs6898684  | TINP1     | GI_21359901-S | 5 | 5 | 74083719 | 21800  | 18.6349 | 6.55631 | YRI |
| rs6873912  | TINP1     | GI_21359901-S | 5 | 5 | 74083906 | 21613  | 18.6349 | 6.55631 | YRI |
| rs6884338  | TINP1     | GI_21359901-S | 5 | 5 | 74086027 | 19492  | 18.6349 | 6.55631 | YRI |
| rs957680   | TINP1     | GI_21359901-S | 5 | 5 | 74090965 | 14554  | 12.9902 | 6.55631 | YRI |
| rs7705519  | TINP1     | GI_21359901-S | 5 | 5 | 74092269 | 13250  | 18.6349 | 6.55631 | YRI |
| rs10515192 | TINP1     | GI_21359901-S | 5 | 5 | 74093470 | 12049  | 16.9993 | 6.55631 | YRI |
| rs10515194 | TINP1     | GI_21359901-S | 5 | 5 | 74095607 | 9912   | 18.6349 | 6.55631 | YRI |
| rs6882035  | TINP1     | GI_21359901-S | 5 | 5 | 74101577 | 3942   | 18.2105 | 6.55631 | YRI |
| rs16872259 | TINP1     | GI_21359901-S | 5 | 5 | 74104530 | 989    | 7.3802  | 6.55631 | YRI |
| rs6883420  | TINP1     | GI_21359901-S | 5 | 5 | 74105890 | 371    | 17.6243 | 6.55631 | YRI |
| rs3733794  | TINP1     | GI_21359901-S | 5 | 5 | 74111966 | 6447   | 18.6349 | 6.55631 | YRI |
| rs10515199 | TINP1     | GI_21359901-S | 5 | 5 | 74135390 | 29871  | 6.6335  | 6.55631 | YRI |



|            |           |               |   |   |           |        |         |         |     |
|------------|-----------|---------------|---|---|-----------|--------|---------|---------|-----|
| rs11739122 | TINP1     | GI_21359901-S | 5 | 5 | 74140125  | 34606  | 18.6349 | 6.55631 | YRI |
| rs1350097  | TINP1     | GI_21359901-S | 5 | 5 | 74143602  | 38083  | 18.3325 | 6.55631 | YRI |
| rs6882499  | TINP1     | GI_21359901-S | 5 | 5 | 74146165  | 40646  | 18.6349 | 6.55631 | YRI |
| rs11749137 | TINP1     | GI_21359901-S | 5 | 5 | 74147091  | 41572  | 18.6349 | 6.55631 | YRI |
| rs6881400  | TINP1     | GI_21359901-S | 5 | 5 | 74152776  | 47257  | 7.3802  | 6.55631 | YRI |
| rs6877442  | TINP1     | GI_21359901-S | 5 | 5 | 74155242  | 49723  | 18.6349 | 6.55631 | YRI |
| rs1447453  | TINP1     | GI_21359901-S | 5 | 5 | 74158084  | 52565  | 7.5024  | 6.55631 | YRI |
| rs11741789 | TINP1     | GI_21359901-S | 5 | 5 | 74162738  | 57219  | 7.0027  | 6.55631 | YRI |
| rs6884843  | TINP1     | GI_21359901-S | 5 | 5 | 74164720  | 59201  | 17.8851 | 6.55631 | YRI |
| rs7728889  | TINP1     | GI_21359901-S | 5 | 5 | 74181841  | 76322  | 18.6349 | 6.55631 | YRI |
| rs16872345 | TINP1     | GI_21359901-S | 5 | 5 | 74185234  | 79715  | 7.3802  | 6.55631 | YRI |
| rs16872349 | TINP1     | GI_21359901-S | 5 | 5 | 74188193  | 82674  | 7.3802  | 6.55631 | YRI |
| rs2061162  | TINP1     | GI_21359901-S | 5 | 5 | 74191574  | 86055  | 18.3771 | 6.55631 | YRI |
| rs6861935  | TINP1     | GI_21359901-S | 5 | 5 | 74191747  | 86228  | 7.3802  | 6.55631 | YRI |
| rs16872362 | TINP1     | GI_21359901-S | 5 | 5 | 74194913  | 89394  | 7.249   | 6.55631 | YRI |
| rs11740809 | TINP1     | GI_21359901-S | 5 | 5 | 74212599  | 107080 | 6.8699  | 6.55631 | YRI |
| rs11956837 | WDR36     | GI_21281676-S | 5 | 5 | 110482656 | 6695   | 7.6183  | 6.11215 | YRI |
| rs976586   | DMXL1     | GI_21536473-S | 5 | 5 | 118353971 | 258465 | 6.8516  | 6.28696 | YRI |
| rs3943550  | DMXL1     | GI_21536473-S | 5 | 5 | 118364004 | 248432 | 8.245   | 6.28696 | YRI |
| rs6884405  | DMXL1     | GI_21536473-S | 5 | 5 | 118379978 | 232458 | 7.1745  | 6.28696 | YRI |
| rs13183994 | Hs.483613 | Hs.483613-S   | 5 | 5 | 141283872 | 8631   | 8.3722  | 6.34957 | YRI |
| rs10036567 | Hs.483613 | Hs.483613-S   | 5 | 5 | 141288017 | 4486   | 7.4093  | 6.34957 | YRI |
| rs6887230  | MGC3265   | GI_31543180-S | 5 | 5 | 148706339 | 22713  | 6.8719  | 6.45829 | YRI |
| rs10062143 | LOC389338 | GI_41146997-S | 5 | 5 | 151127235 | 2710   | 7.0801  | 6.25637 | YRI |
| rs6865148  | Hs.122090 | Hs.122090-S   | 5 | 5 | 153601208 | 19573  | 7.9306  | 6.14692 | YRI |
| rs6580066  | Hs.122090 | Hs.122090-S   | 5 | 5 | 153615786 | 34151  | 7.5463  | 6.14692 | YRI |
| rs7733778  | Hs.122090 | Hs.122090-S   | 5 | 5 | 153621271 | 39636  | 8.1845  | 6.14692 | YRI |
| rs17552495 | Hs.122090 | Hs.122090-S   | 5 | 5 | 153629307 | 47672  | 6.5491  | 6.14692 | YRI |
| rs17552639 | Hs.122090 | Hs.122090-S   | 5 | 5 | 153631652 | 50017  | 8.1845  | 6.14692 | YRI |
| rs6881721  | Hs.122090 | Hs.122090-S   | 5 | 5 | 153631760 | 50125  | 8.1845  | 6.14692 | YRI |
| rs6882166  | Hs.122090 | Hs.122090-S   | 5 | 5 | 153631796 | 50161  | 7.2497  | 6.14692 | YRI |
| rs1833734  | Hs.122090 | Hs.122090-S   | 5 | 5 | 153636511 | 54876  | 6.7415  | 6.14692 | YRI |
| rs7708102  | Hs.122090 | Hs.122090-S   | 5 | 5 | 153638062 | 56427  | 6.4784  | 6.14692 | YRI |
| rs7730945  | Hs.122090 | Hs.122090-S   | 5 | 5 | 153659895 | 78260  | 6.4784  | 6.14692 | YRI |
| rs10069380 | Hs.519704 | Hs.519704-S   | 5 | 5 | 156985707 | 44446  | 9.8906  | 6.0283  | YRI |
| rs4262087  | Hs.519704 | Hs.519704-S   | 5 | 5 | 156995295 | 34858  | 9.8059  | 6.0283  | YRI |
| rs7448800  | Hs.519704 | Hs.519704-S   | 5 | 5 | 157008539 | 21614  | 10.2905 | 6.0283  | YRI |
| rs10069721 | Hs.519704 | Hs.519704-S   | 5 | 5 | 157010338 | 19815  | 10.0741 | 6.0283  | YRI |
| rs10051838 | Hs.519704 | Hs.519704-S   | 5 | 5 | 157034737 | 4584   | 9.9844  | 6.0283  | YRI |
| rs4094449  | Hs.519704 | Hs.519704-S   | 5 | 5 | 157036343 | 6190   | 8.379   | 6.0283  | YRI |
| rs12188530 | Hs.519704 | Hs.519704-S   | 5 | 5 | 157051157 | 21004  | 6.2697  | 6.0283  | YRI |
| rs10277    | SQSTM1    | GI_19923742-S | 5 | 5 | 179197337 | 249    | 7.4837  | 5.95019 | YRI |
| rs6896513  | MAPK9     | GI_21237744-A | 5 | 5 | 179615088 | 19156  | 6.6499  | 6.22548 | YRI |
| rs17143705 | SLC35B3   | GI_21361502-S | 6 | 6 | 8366504   | 7887   | 6.4186  | 6.40427 | YRI |
| rs17143713 | SLC35B3   | GI_21361502-S | 6 | 6 | 8366962   | 8345   | 6.4186  | 6.40427 | YRI |
| rs6938655  | LOC389366 | GI_42657574-S | 6 | 6 | 10754304  | 25403  | 11.1426 | 6.4292  | YRI |
| rs12663489 | LOC389366 | GI_42657574-S | 6 | 6 | 10756118  | 23589  | 8.1052  | 6.4292  | YRI |
| rs12664137 | LOC389366 | GI_42657574-S | 6 | 6 | 10762799  | 16908  | 9.0638  | 6.4292  | YRI |
| rs3737278  | LOC389366 | GI_42657574-S | 6 | 6 | 10779750  | 43     | 10.9768 | 6.4292  | YRI |
| rs7757582  | LOC389366 | GI_42657574-S | 6 | 6 | 10790534  | 10827  | 7.5847  | 6.4292  | YRI |
| rs7744606  | LOC389366 | GI_42657574-S | 6 | 6 | 10800507  | 20800  | 8.3386  | 6.4292  | YRI |
| rs7745856  | LOC389366 | GI_42657574-S | 6 | 6 | 10803144  | 23437  | 15.3231 | 6.4292  | YRI |
| rs7764604  | LOC389366 | GI_42657574-S | 6 | 6 | 10804311  | 24604  | 15.3466 | 6.4292  | YRI |
| rs7766501  | LOC389366 | GI_42657574-S | 6 | 6 | 10804663  | 24956  | 14.9513 | 6.4292  | YRI |
| rs12662481 | LOC389366 | GI_42657574-S | 6 | 6 | 10805345  | 25638  | 14.0492 | 6.4292  | YRI |
| rs12661484 | LOC389366 | GI_42657574-S | 6 | 6 | 10805426  | 25719  | 14.3022 | 6.4292  | YRI |

|            |           |               |   |   |          |        |         |         |     |
|------------|-----------|---------------|---|---|----------|--------|---------|---------|-----|
| rs2439551  | TBC1D7    | GI_24475975-S | 6 | 6 | 13427381 | 14023  | 6.3046  | 6.20537 | YRI |
| rs2458308  | TBC1D7    | GI_24475975-S | 6 | 6 | 13427847 | 14489  | 6.3046  | 6.20537 | YRI |
| rs7775305  | Hs.158943 | Hs.158943-S   | 6 | 6 | 27445339 | 393336 | 7.737   | 5.961   | YRI |
| rs766093   | Hs.158943 | Hs.158943-S   | 6 | 6 | 27476102 | 362573 | 9.4693  | 5.961   | YRI |
| rs7768826  | Hs.158943 | Hs.158943-S   | 6 | 6 | 27484674 | 354001 | 7.737   | 5.961   | YRI |
| rs16899633 | Hs.158943 | Hs.158943-S   | 6 | 6 | 27485346 | 353329 | 7.737   | 5.961   | YRI |
| rs7750919  | Hs.158943 | Hs.158943-S   | 6 | 6 | 27487845 | 350830 | 7.0135  | 5.961   | YRI |
| rs7744655  | Hs.158943 | Hs.158943-S   | 6 | 6 | 27492048 | 346627 | 7.3369  | 5.961   | YRI |
| rs16899778 | Hs.158943 | Hs.158943-S   | 6 | 6 | 27498129 | 340546 | 7.737   | 5.961   | YRI |
| rs9468147  | Hs.158943 | Hs.158943-S   | 6 | 6 | 27594690 | 243985 | 8.9704  | 5.961   | YRI |
| rs7764081  | LOC222701 | GI_27498465-S | 6 | 6 | 27625956 | 619246 | 6.675   | 6.04355 | YRI |
| rs16867858 | Hs.158943 | Hs.158943-S   | 6 | 6 | 27637488 | 201187 | 6.1452  | 5.961   | YRI |
| rs9468160  | Hs.158943 | Hs.158943-S   | 6 | 6 | 27646420 | 192255 | 7.0006  | 5.961   | YRI |
| rs16867870 | Hs.158943 | Hs.158943-S   | 6 | 6 | 27648047 | 190628 | 8.9706  | 5.961   | YRI |
| rs6904979  | Hs.158943 | Hs.158943-S   | 6 | 6 | 27649995 | 188680 | 7.8058  | 5.961   | YRI |
| rs9468183  | Hs.158943 | Hs.158943-S   | 6 | 6 | 27719720 | 118955 | 7.3756  | 5.961   | YRI |
| rs9468189  | Hs.158943 | Hs.158943-S   | 6 | 6 | 27738590 | 100085 | 9.8754  | 5.961   | YRI |
| rs9468190  | Hs.158943 | Hs.158943-S   | 6 | 6 | 27738767 | 99908  | 9.8754  | 5.961   | YRI |
| rs16867899 | Hs.158943 | Hs.158943-S   | 6 | 6 | 27762711 | 75964  | 12.0212 | 5.961   | YRI |
| rs1010261  | Hs.158943 | Hs.158943-S   | 6 | 6 | 27763543 | 75132  | 7.3756  | 5.961   | YRI |
| rs16867901 | Hs.158943 | Hs.158943-S   | 6 | 6 | 27764055 | 74620  | 9.8754  | 5.961   | YRI |
| rs16867911 | Hs.158943 | Hs.158943-S   | 6 | 6 | 27770183 | 68492  | 8.4474  | 5.961   | YRI |
| rs9295739  | Hs.158943 | Hs.158943-S   | 6 | 6 | 27770374 | 68301  | 9.8754  | 5.961   | YRI |
| rs9468198  | Hs.158943 | Hs.158943-S   | 6 | 6 | 27788111 | 50564  | 10.4177 | 5.961   | YRI |
| rs9468202  | Hs.158943 | Hs.158943-S   | 6 | 6 | 27796609 | 42066  | 9.1313  | 5.961   | YRI |
| rs7740062  | Hs.158943 | Hs.158943-S   | 6 | 6 | 27813577 | 25098  | 15.2925 | 5.961   | YRI |
| rs7742752  | Hs.158943 | Hs.158943-S   | 6 | 6 | 27835030 | 3645   | 6.2668  | 5.961   | YRI |
| rs6901712  | Hs.158943 | Hs.158943-S   | 6 | 6 | 27846944 | 8269   | 6.475   | 5.961   | YRI |
| rs6901437  | Hs.158943 | Hs.158943-S   | 6 | 6 | 27850165 | 11490  | 6.5801  | 5.961   | YRI |
| rs9468227  | Hs.158943 | Hs.158943-S   | 6 | 6 | 27854321 | 15646  | 6.3956  | 5.961   | YRI |
| rs9468228  | Hs.158943 | Hs.158943-S   | 6 | 6 | 27856928 | 18253  | 11.6318 | 5.961   | YRI |
| rs200470   | Hs.158943 | Hs.158943-S   | 6 | 6 | 27870166 | 31491  | 11.6318 | 5.961   | YRI |
| rs169263   | Hs.158943 | Hs.158943-S   | 6 | 6 | 27880636 | 41961  | 9.0486  | 5.961   | YRI |
| rs200490   | Hs.158943 | Hs.158943-S   | 6 | 6 | 27904914 | 66239  | 6.0805  | 5.961   | YRI |
| rs201005   | Hs.158943 | Hs.158943-S   | 6 | 6 | 27912139 | 73464  | 7.9808  | 5.961   | YRI |
| rs201002   | Hs.158943 | Hs.158943-S   | 6 | 6 | 27916171 | 77496  | 6.0805  | 5.961   | YRI |
| rs200995   | Hs.158943 | Hs.158943-S   | 6 | 6 | 27921673 | 82998  | 6.8497  | 5.961   | YRI |
| rs200984   | Hs.158943 | Hs.158943-S   | 6 | 6 | 27935656 | 96981  | 7.9808  | 5.961   | YRI |
| rs200982   | Hs.158943 | Hs.158943-S   | 6 | 6 | 27939223 | 100548 | 7.9322  | 5.961   | YRI |
| rs200981   | Hs.158943 | Hs.158943-S   | 6 | 6 | 27941153 | 102478 | 8.5662  | 5.961   | YRI |
| rs200947   | Hs.158943 | Hs.158943-S   | 6 | 6 | 27943110 | 104435 | 7.4419  | 5.961   | YRI |
| rs200955   | Hs.158943 | Hs.158943-S   | 6 | 6 | 27947291 | 108616 | 8.1471  | 5.961   | YRI |
| rs200959   | Hs.158943 | Hs.158943-S   | 6 | 6 | 27950026 | 111351 | 9.1341  | 5.961   | YRI |
| rs200979   | Hs.158943 | Hs.158943-S   | 6 | 6 | 27960336 | 121661 | 6.8497  | 5.961   | YRI |
| rs200975   | Hs.158943 | Hs.158943-S   | 6 | 6 | 27963604 | 124929 | 6.8497  | 5.961   | YRI |
| rs200974   | Hs.158943 | Hs.158943-S   | 6 | 6 | 27963824 | 125149 | 6.8497  | 5.961   | YRI |
| rs200968   | Hs.158943 | Hs.158943-S   | 6 | 6 | 27967547 | 128872 | 6.6665  | 5.961   | YRI |
| rs200962   | Hs.158943 | Hs.158943-S   | 6 | 6 | 27983676 | 145001 | 9.9325  | 5.961   | YRI |
| rs2130357  | Hs.158943 | Hs.158943-S   | 6 | 6 | 27994809 | 156134 | 7.493   | 5.961   | YRI |
| rs425159   | Hs.158943 | Hs.158943-S   | 6 | 6 | 28010151 | 171476 | 7.7411  | 5.961   | YRI |
| rs276372   | Hs.158943 | Hs.158943-S   | 6 | 6 | 28015383 | 176708 | 7.7411  | 5.961   | YRI |
| rs839777   | Hs.158943 | Hs.158943-S   | 6 | 6 | 28017636 | 178961 | 9.0486  | 5.961   | YRI |
| rs9461424  | LOC222701 | GI_27498465-S | 6 | 6 | 28027380 | 217822 | 6.5681  | 6.04355 | YRI |
| rs276366   | Hs.158943 | Hs.158943-S   | 6 | 6 | 28035460 | 196785 | 10.326  | 5.961   | YRI |
| rs276364   | Hs.158943 | Hs.158943-S   | 6 | 6 | 28039599 | 200924 | 10.6211 | 5.961   | YRI |
| rs276361   | Hs.158943 | Hs.158943-S   | 6 | 6 | 28047388 | 208713 | 10.6638 | 5.961   | YRI |

|            |           |               |   |   |          |        |         |         |     |
|------------|-----------|---------------|---|---|----------|--------|---------|---------|-----|
| rs149898   | Hs.158943 | Hs.158943-S   | 6 | 6 | 28066051 | 227376 | 7.7411  | 5.961   | YRI |
| rs156741   | Hs.158943 | Hs.158943-S   | 6 | 6 | 28070363 | 231688 | 10.6638 | 5.961   | YRI |
| rs156742   | Hs.158943 | Hs.158943-S   | 6 | 6 | 28071171 | 232496 | 10.6638 | 5.961   | YRI |
| rs1143887  | Hs.158943 | Hs.158943-S   | 6 | 6 | 28072802 | 234127 | 8.3972  | 5.961   | YRI |
| rs9295755  | LOC222701 | GI_27498465-S | 6 | 6 | 28141153 | 104049 | 6.4622  | 6.04355 | YRI |
| rs9295756  | LOC222701 | GI_27498465-S | 6 | 6 | 28141375 | 103827 | 6.4622  | 6.04355 | YRI |
| rs10484403 | LOC222701 | GI_27498465-S | 6 | 6 | 28141502 | 103700 | 6.4622  | 6.04355 | YRI |
| rs7755442  | LOC222701 | GI_27498465-S | 6 | 6 | 28146994 | 98208  | 8.2262  | 6.04355 | YRI |
| rs4713135  | LOC222701 | GI_27498465-S | 6 | 6 | 28147565 | 97637  | 10.4892 | 6.04355 | YRI |
| rs12174753 | LOC222701 | GI_27498465-S | 6 | 6 | 28150444 | 94758  | 8.3244  | 6.04355 | YRI |
| rs2295594  | LOC222701 | GI_27498465-S | 6 | 6 | 28161076 | 84126  | 8.6205  | 6.04355 | YRI |
| rs16893666 | LOC222701 | GI_27498465-S | 6 | 6 | 28162686 | 82516  | 9.3095  | 6.04355 | YRI |
| rs3734573  | LOC222701 | GI_27498465-S | 6 | 6 | 28167416 | 77786  | 9.3095  | 6.04355 | YRI |
| rs175955   | Hs.158943 | Hs.158943-S   | 6 | 6 | 28167713 | 329038 | 7.3444  | 5.961   | YRI |
| rs9393890  | LOC222701 | GI_27498465-S | 6 | 6 | 28171834 | 73368  | 8.6205  | 6.04355 | YRI |
| rs9380052  | LOC222701 | GI_27498465-S | 6 | 6 | 28172602 | 72600  | 9.3095  | 6.04355 | YRI |
| rs2281588  | LOC222701 | GI_27498465-S | 6 | 6 | 28180581 | 64621  | 9.3095  | 6.04355 | YRI |
| rs17711344 | LOC222701 | GI_27498465-S | 6 | 6 | 28185581 | 59621  | 9.3095  | 6.04355 | YRI |
| rs6932109  | LOC222701 | GI_27498465-S | 6 | 6 | 28186282 | 58920  | 9.3095  | 6.04355 | YRI |
| rs6931858  | LOC222701 | GI_27498465-S | 6 | 6 | 28186390 | 58812  | 9.2798  | 6.04355 | YRI |
| rs9468286  | LOC222701 | GI_27498465-S | 6 | 6 | 28187407 | 57795  | 9.3095  | 6.04355 | YRI |
| rs9380055  | LOC222701 | GI_27498465-S | 6 | 6 | 28189608 | 55594  | 9.3095  | 6.04355 | YRI |
| rs9368553  | LOC222701 | GI_27498465-S | 6 | 6 | 28190244 | 54958  | 10.4677 | 6.04355 | YRI |
| rs4713137  | LOC222701 | GI_27498465-S | 6 | 6 | 28191500 | 53702  | 9.0846  | 6.04355 | YRI |
| rs9348793  | LOC222701 | GI_27498465-S | 6 | 6 | 28192168 | 53034  | 9.0742  | 6.04355 | YRI |
| rs6922063  | LOC222701 | GI_27498465-S | 6 | 6 | 28202345 | 42857  | 8.7093  | 6.04355 | YRI |
| rs2275508  | LOC222701 | GI_27498465-S | 6 | 6 | 28202710 | 42492  | 8.4599  | 6.04355 | YRI |
| rs9461433  | LOC222701 | GI_27498465-S | 6 | 6 | 28203151 | 42051  | 8.4599  | 6.04355 | YRI |
| rs1340004  | LOC222701 | GI_27498465-S | 6 | 6 | 28211670 | 33532  | 9.3095  | 6.04355 | YRI |
| rs9380057  | LOC222701 | GI_27498465-S | 6 | 6 | 28212613 | 32589  | 9.3634  | 6.04355 | YRI |
| rs1947862  | LOC222701 | GI_27498465-S | 6 | 6 | 28213175 | 32027  | 9.3095  | 6.04355 | YRI |
| rs6941992  | LOC222701 | GI_27498465-S | 6 | 6 | 28214120 | 31082  | 10.4362 | 6.04355 | YRI |
| rs4713143  | LOC222701 | GI_27498465-S | 6 | 6 | 28214738 | 30464  | 9.3095  | 6.04355 | YRI |
| rs4713144  | LOC222701 | GI_27498465-S | 6 | 6 | 28214769 | 30433  | 9.3095  | 6.04355 | YRI |
| rs4713145  | LOC222701 | GI_27498465-S | 6 | 6 | 28214806 | 30396  | 9.3095  | 6.04355 | YRI |
| rs1904840  | LOC222701 | GI_27498465-S | 6 | 6 | 28216211 | 28991  | 8.9997  | 6.04355 | YRI |
| rs9368555  | LOC222701 | GI_27498465-S | 6 | 6 | 28216946 | 28256  | 9.4621  | 6.04355 | YRI |
| rs9393893  | LOC222701 | GI_27498465-S | 6 | 6 | 28217241 | 27961  | 9.1268  | 6.04355 | YRI |
| rs868987   | LOC222701 | GI_27498465-S | 6 | 6 | 28218127 | 27075  | 9.6649  | 6.04355 | YRI |
| rs7382533  | LOC222701 | GI_27498465-S | 6 | 6 | 28223163 | 22039  | 9.6649  | 6.04355 | YRI |
| rs4713148  | LOC222701 | GI_27498465-S | 6 | 6 | 28223900 | 21302  | 9.6649  | 6.04355 | YRI |
| rs9348794  | LOC222701 | GI_27498465-S | 6 | 6 | 28225736 | 19466  | 9.7634  | 6.04355 | YRI |
| rs2622318  | Hs.158943 | Hs.158943-S   | 6 | 6 | 28227865 | 389190 | 7.2542  | 5.961   | YRI |
| rs9295758  | LOC222701 | GI_27498465-S | 6 | 6 | 28228642 | 16560  | 9.6649  | 6.04355 | YRI |
| rs17774663 | LOC222701 | GI_27498465-S | 6 | 6 | 28228877 | 16325  | 9.6649  | 6.04355 | YRI |
| rs9295759  | LOC222701 | GI_27498465-S | 6 | 6 | 28232448 | 12754  | 9.6649  | 6.04355 | YRI |
| rs9348796  | LOC222701 | GI_27498465-S | 6 | 6 | 28234181 | 11021  | 9.6649  | 6.04355 | YRI |
| rs9283884  | LOC222701 | GI_27498465-S | 6 | 6 | 28243639 | 1563   | 9.6649  | 6.04355 | YRI |
| rs9393901  | LOC222701 | GI_27498465-S | 6 | 6 | 28244776 | 426    | 11.2234 | 6.04355 | YRI |
| rs9380062  | LOC222701 | GI_27498465-S | 6 | 6 | 28245548 | 346    | 7.6151  | 6.04355 | YRI |
| rs1619221  | Hs.158943 | Hs.158943-S   | 6 | 6 | 28253181 | 414506 | 7.3444  | 5.961   | YRI |
| rs9295761  | LOC222701 | GI_27498465-S | 6 | 6 | 28255966 | 10764  | 9.6649  | 6.04355 | YRI |
| rs1225593  | Hs.158943 | Hs.158943-S   | 6 | 6 | 28258498 | 419823 | 7.3444  | 5.961   | YRI |
| rs238874   | Hs.519979 | Hs.519979-S   | 6 | 6 | 29459115 | 546231 | 6.8106  | 6.21537 | YRI |
| rs238873   | Hs.519979 | Hs.519979-S   | 6 | 6 | 29459620 | 545726 | 7.7008  | 6.21537 | YRI |
| rs12527959 | LOC347981 | GI_30160064-S | 6 | 6 | 29645405 | 317138 | 7.2651  | 5.99961 | YRI |

|            |           |               |   |   |          |        |         |         |     |
|------------|-----------|---------------|---|---|----------|--------|---------|---------|-----|
| rs1003581  | LOC347981 | GI_30160064-S | 6 | 6 | 29648183 | 314360 | 6.7228  | 5.99961 | YRI |
| rs29240    | LOC347981 | GI_30160064-S | 6 | 6 | 29715455 | 247088 | 6.4217  | 5.99961 | YRI |
| rs3025623  | LOC347981 | GI_30160064-S | 6 | 6 | 29715726 | 246817 | 6.4217  | 5.99961 | YRI |
| rs29235    | LOC347981 | GI_30160064-S | 6 | 6 | 29732057 | 230486 | 6.4714  | 5.99961 | YRI |
| rs4607472  | LOC347981 | GI_30160064-S | 6 | 6 | 29918522 | 44021  | 7.3673  | 5.99961 | YRI |
| rs2894118  | LOC347981 | GI_30160064-S | 6 | 6 | 29923963 | 38580  | 8.01    | 5.99961 | YRI |
| rs2394183  | LOC347981 | GI_30160064-S | 6 | 6 | 29923989 | 38554  | 8.01    | 5.99961 | YRI |
| rs2394186  | LOC347981 | GI_30160064-S | 6 | 6 | 29924400 | 38143  | 6.8295  | 5.99961 | YRI |
| rs9258568  | LOC347981 | GI_30160064-S | 6 | 6 | 29926210 | 36333  | 6.1777  | 5.99961 | YRI |
| rs2107198  | LOC347981 | GI_30160064-S | 6 | 6 | 29927641 | 34902  | 9.0796  | 5.99961 | YRI |
| rs3115627  | Hs.519979 | Hs.519979-S   | 6 | 6 | 29928257 | 77089  | 6.5285  | 6.21537 | YRI |
| rs2517861  | Hs.519979 | Hs.519979-S   | 6 | 6 | 29929961 | 75385  | 8.4335  | 6.21537 | YRI |
| rs12662275 | LOC347981 | GI_30160064-S | 6 | 6 | 29934193 | 28350  | 8.9824  | 5.99961 | YRI |
| rs1611719  | LOC347981 | GI_30160064-S | 6 | 6 | 29937615 | 24928  | 8.01    | 5.99961 | YRI |
| rs2571413  | Hs.519979 | Hs.519979-S   | 6 | 6 | 29977624 | 27722  | 8.2917  | 6.21537 | YRI |
| rs1611527  | LOC347981 | GI_30160064-S | 6 | 6 | 29980936 | 18393  | 8.1599  | 5.99961 | YRI |
| rs3132689  | Hs.519979 | Hs.519979-S   | 6 | 6 | 29990509 | 14837  | 9.4203  | 6.21537 | YRI |
| rs1655950  | Hs.519979 | Hs.519979-S   | 6 | 6 | 29995460 | 9886   | 9.1126  | 6.21537 | YRI |
| rs2471869  | Hs.519979 | Hs.519979-S   | 6 | 6 | 29998385 | 6961   | 7.8998  | 6.21537 | YRI |
| rs3115588  | Hs.519979 | Hs.519979-S   | 6 | 6 | 29999499 | 5847   | 7.5352  | 6.21537 | YRI |
| rs389600   | Hs.519979 | Hs.519979-S   | 6 | 6 | 30004978 | 368    | 10.8779 | 6.21537 | YRI |
| rs1655927  | Hs.519979 | Hs.519979-S   | 6 | 6 | 30007472 | 2126   | 11.5415 | 6.21537 | YRI |
| rs439935   | Hs.519979 | Hs.519979-S   | 6 | 6 | 30015940 | 10594  | 11.6683 | 6.21537 | YRI |
| rs1632882  | Hs.519979 | Hs.519979-S   | 6 | 6 | 30024347 | 19001  | 11.4129 | 6.21537 | YRI |
| rs1655900  | Hs.519979 | Hs.519979-S   | 6 | 6 | 30024597 | 19251  | 11.4129 | 6.21537 | YRI |
| rs9260632  | Hs.519979 | Hs.519979-S   | 6 | 6 | 30031269 | 25923  | 9.2728  | 6.21537 | YRI |
| rs1632872  | Hs.519979 | Hs.519979-S   | 6 | 6 | 30037807 | 32461  | 8.4384  | 6.21537 | YRI |
| rs1150744  | Hs.519979 | Hs.519979-S   | 6 | 6 | 30045368 | 40022  | 10.9336 | 6.21537 | YRI |
| rs2523971  | Hs.519979 | Hs.519979-S   | 6 | 6 | 30046237 | 40891  | 11.6683 | 6.21537 | YRI |
| rs9260918  | LOC347981 | GI_30160064-S | 6 | 6 | 30056730 | 94187  | 8.2438  | 5.99961 | YRI |
| rs2844802  | Hs.519979 | Hs.519979-S   | 6 | 6 | 30056791 | 51445  | 10.0065 | 6.21537 | YRI |
| rs2735067  | Hs.519979 | Hs.519979-S   | 6 | 6 | 30059085 | 53739  | 9.3604  | 6.21537 | YRI |
| rs356957   | Hs.519979 | Hs.519979-S   | 6 | 6 | 30071946 | 66600  | 11.6683 | 6.21537 | YRI |
| rs356959   | Hs.519979 | Hs.519979-S   | 6 | 6 | 30074766 | 69420  | 10.0065 | 6.21537 | YRI |
| rs2530388  | Hs.519979 | Hs.519979-S   | 6 | 6 | 30075107 | 69761  | 6.333   | 6.21537 | YRI |
| rs356968   | Hs.519979 | Hs.519979-S   | 6 | 6 | 30083026 | 77680  | 11.6683 | 6.21537 | YRI |
| rs356969   | Hs.519979 | Hs.519979-S   | 6 | 6 | 30085124 | 79778  | 11.6683 | 6.21537 | YRI |
| rs356971   | Hs.519979 | Hs.519979-S   | 6 | 6 | 30087776 | 82430  | 11.6683 | 6.21537 | YRI |
| rs356954   | Hs.519979 | Hs.519979-S   | 6 | 6 | 30091517 | 86171  | 11.6055 | 6.21537 | YRI |
| rs165255   | Hs.519979 | Hs.519979-S   | 6 | 6 | 30097674 | 92328  | 11.6683 | 6.21537 | YRI |
| rs7748909  | Hs.519979 | Hs.519979-S   | 6 | 6 | 30103439 | 98093  | 11.6683 | 6.21537 | YRI |
| rs259929   | Hs.519979 | Hs.519979-S   | 6 | 6 | 30110031 | 104685 | 11.6683 | 6.21537 | YRI |
| rs259931   | Hs.519979 | Hs.519979-S   | 6 | 6 | 30112350 | 107004 | 11.6683 | 6.21537 | YRI |
| rs259932   | Hs.519979 | Hs.519979-S   | 6 | 6 | 30112828 | 107482 | 11.6683 | 6.21537 | YRI |
| rs259934   | Hs.519979 | Hs.519979-S   | 6 | 6 | 30114855 | 109509 | 11.6683 | 6.21537 | YRI |
| rs259935   | Hs.519979 | Hs.519979-S   | 6 | 6 | 30115030 | 109684 | 6.9774  | 6.21537 | YRI |
| rs259938   | Hs.519979 | Hs.519979-S   | 6 | 6 | 30115982 | 110636 | 9.1267  | 6.21537 | YRI |
| rs259939   | Hs.519979 | Hs.519979-S   | 6 | 6 | 30119560 | 114214 | 9.1267  | 6.21537 | YRI |
| rs259940   | Hs.519979 | Hs.519979-S   | 6 | 6 | 30119913 | 114567 | 11.6683 | 6.21537 | YRI |
| rs259919   | Hs.519979 | Hs.519979-S   | 6 | 6 | 30133482 | 128136 | 11.6683 | 6.21537 | YRI |
| rs1150742  | Hs.519979 | Hs.519979-S   | 6 | 6 | 30136810 | 131464 | 9.6242  | 6.21537 | YRI |
| rs1150741  | Hs.519979 | Hs.519979-S   | 6 | 6 | 30137630 | 132284 | 11.5683 | 6.21537 | YRI |
| rs1150736  | Hs.519979 | Hs.519979-S   | 6 | 6 | 30150934 | 145588 | 6.8852  | 6.21537 | YRI |
| rs1150735  | Hs.519979 | Hs.519979-S   | 6 | 6 | 30153178 | 147832 | 9.1267  | 6.21537 | YRI |
| rs1264709  | Hs.519979 | Hs.519979-S   | 6 | 6 | 30164455 | 159109 | 7.8596  | 6.21537 | YRI |
| rs6920344  | Hs.519979 | Hs.519979-S   | 6 | 6 | 30263032 | 257686 | 6.5425  | 6.21537 | YRI |

|            |           |               |   |   |          |        |         |         |     |
|------------|-----------|---------------|---|---|----------|--------|---------|---------|-----|
| rs9461576  | Hs.519979 | Hs.519979-S   | 6 | 6 | 30337105 | 331759 | 6.274   | 6.21537 | YRI |
| rs7772365  | Hs.519979 | Hs.519979-S   | 6 | 6 | 30360553 | 355207 | 6.284   | 6.21537 | YRI |
| rs9501430  | Hs.519979 | Hs.519979-S   | 6 | 6 | 30364820 | 359474 | 6.284   | 6.21537 | YRI |
| rs3734841  | LOC401245 | GI_42657607-S | 6 | 6 | 30367284 | 197    | 6.655   | 6.63492 | YRI |
| rs261950   | LOC401245 | GI_42657607-S | 6 | 6 | 30377540 | 10059  | 6.655   | 6.63492 | YRI |
| rs261947   | LOC401245 | GI_42657607-S | 6 | 6 | 30379123 | 11642  | 6.655   | 6.63492 | YRI |
| rs9295842  | LOC401245 | GI_42657607-S | 6 | 6 | 30388901 | 21420  | 6.655   | 6.63492 | YRI |
| rs6912771  | LOC401245 | GI_42657607-S | 6 | 6 | 30392354 | 24873  | 6.655   | 6.63492 | YRI |
| rs6900042  | LOC401245 | GI_42657607-S | 6 | 6 | 30397250 | 29769  | 6.8892  | 6.63492 | YRI |
| rs4711213  | LOC401245 | GI_42657607-S | 6 | 6 | 30400315 | 32834  | 6.8892  | 6.63492 | YRI |
| rs1264568  | hmm31752  | hmm31752-S    | 6 | 6 | 30474055 | 658023 | 7.6322  | 6.07587 | YRI |
| rs1264547  | hmm31752  | hmm31752-S    | 6 | 6 | 30486426 | 645652 | 6.8217  | 6.07587 | YRI |
| rs1264539  | hmm31752  | hmm31752-S    | 6 | 6 | 30496680 | 635398 | 7.0378  | 6.07587 | YRI |
| rs1264512  | hmm31752  | hmm31752-S    | 6 | 6 | 30521680 | 610398 | 6.1171  | 6.07587 | YRI |
| rs1078792  | hmm31752  | hmm31752-S    | 6 | 6 | 30527599 | 604479 | 7.0378  | 6.07587 | YRI |
| rs2516671  | hmm31752  | hmm31752-S    | 6 | 6 | 30528743 | 603335 | 7.0378  | 6.07587 | YRI |
| rs2245514  | hmm31752  | hmm31752-S    | 6 | 6 | 30540434 | 591644 | 6.5526  | 6.07587 | YRI |
| rs2844723  | hmm31752  | hmm31752-S    | 6 | 6 | 30578280 | 553798 | 6.2995  | 6.07587 | YRI |
| rs2844720  | hmm31752  | hmm31752-S    | 6 | 6 | 30583696 | 548382 | 6.2995  | 6.07587 | YRI |
| rs996589   | hmm31752  | hmm31752-S    | 6 | 6 | 30585214 | 546864 | 6.2995  | 6.07587 | YRI |
| rs996588   | hmm31752  | hmm31752-S    | 6 | 6 | 30585235 | 546843 | 6.2995  | 6.07587 | YRI |
| rs2844718  | hmm31752  | hmm31752-S    | 6 | 6 | 30585255 | 546823 | 6.2995  | 6.07587 | YRI |
| rs975195   | hmm31752  | hmm31752-S    | 6 | 6 | 30585926 | 546152 | 6.2995  | 6.07587 | YRI |
| rs2534807  | hmm31752  | hmm31752-S    | 6 | 6 | 30593912 | 538166 | 6.2518  | 6.07587 | YRI |
| rs2534825  | hmm31752  | hmm31752-S    | 6 | 6 | 30603722 | 528356 | 6.2995  | 6.07587 | YRI |
| rs2534823  | hmm31752  | hmm31752-S    | 6 | 6 | 30604795 | 527283 | 6.1617  | 6.07587 | YRI |
| rs1362119  | hmm31752  | hmm31752-S    | 6 | 6 | 30607711 | 524367 | 6.2995  | 6.07587 | YRI |
| rs12182166 | Hs.519979 | Hs.519979-S   | 6 | 6 | 30801456 | 796110 | 6.5152  | 6.21537 | YRI |
| rs2844665  | hmm31752  | hmm31752-S    | 6 | 6 | 31114834 | 17244  | 10.6854 | 6.07587 | YRI |
| rs2517549  | hmm31752  | hmm31752-S    | 6 | 6 | 31116577 | 15501  | 8.5894  | 6.07587 | YRI |
| rs2517548  | hmm31752  | hmm31752-S    | 6 | 6 | 31116797 | 15281  | 10.1116 | 6.07587 | YRI |
| rs9262564  | hmm31752  | hmm31752-S    | 6 | 6 | 31117116 | 14962  | 9.0634  | 6.07587 | YRI |
| rs9262567  | hmm31752  | hmm31752-S    | 6 | 6 | 31117188 | 14890  | 9.8846  | 6.07587 | YRI |
| rs10947128 | hmm31752  | hmm31752-S    | 6 | 6 | 31117214 | 14864  | 9.7653  | 6.07587 | YRI |
| rs2517544  | hmm31752  | hmm31752-S    | 6 | 6 | 31117487 | 14591  | 7.0164  | 6.07587 | YRI |
| rs2508015  | hmm31752  | hmm31752-S    | 6 | 6 | 31118179 | 13899  | 9.4502  | 6.07587 | YRI |
| rs2844647  | hmm31752  | hmm31752-S    | 6 | 6 | 31118992 | 13086  | 7.366   | 6.07587 | YRI |
| rs2248386  | hmm31752  | hmm31752-S    | 6 | 6 | 31119226 | 12852  | 7.7154  | 6.07587 | YRI |
| rs2517540  | hmm31752  | hmm31752-S    | 6 | 6 | 31119871 | 12207  | 6.7948  | 6.07587 | YRI |
| rs2523873  | hmm31752  | hmm31752-S    | 6 | 6 | 31120242 | 11836  | 10.4812 | 6.07587 | YRI |
| rs3131927  | hmm31752  | hmm31752-S    | 6 | 6 | 31120975 | 11103  | 10.3291 | 6.07587 | YRI |
| rs2517538  | hmm31752  | hmm31752-S    | 6 | 6 | 31121520 | 10558  | 10.6854 | 6.07587 | YRI |
| rs2523871  | hmm31752  | hmm31752-S    | 6 | 6 | 31121988 | 10090  | 10.6854 | 6.07587 | YRI |
| rs2523870  | hmm31752  | hmm31752-S    | 6 | 6 | 31122095 | 9983   | 10.6854 | 6.07587 | YRI |
| rs2844645  | hmm31752  | hmm31752-S    | 6 | 6 | 31123161 | 8917   | 6.958   | 6.07587 | YRI |
| rs2251830  | hmm31752  | hmm31752-S    | 6 | 6 | 31124957 | 7121   | 7.1262  | 6.07587 | YRI |
| rs2517534  | hmm31752  | hmm31752-S    | 6 | 6 | 31125313 | 6765   | 12.5614 | 6.07587 | YRI |
| rs2523866  | hmm31752  | hmm31752-S    | 6 | 6 | 31125326 | 6752   | 8.8187  | 6.07587 | YRI |
| rs2517532  | hmm31752  | hmm31752-S    | 6 | 6 | 31126386 | 5692   | 12.7469 | 6.07587 | YRI |
| rs2523865  | hmm31752  | hmm31752-S    | 6 | 6 | 31126427 | 5651   | 8.8187  | 6.07587 | YRI |
| rs2523864  | hmm31752  | hmm31752-S    | 6 | 6 | 31126525 | 5553   | 8.8187  | 6.07587 | YRI |
| rs2517527  | hmm31752  | hmm31752-S    | 6 | 6 | 31129526 | 2552   | 10.1336 | 6.07587 | YRI |
| rs2523856  | hmm31752  | hmm31752-S    | 6 | 6 | 31129609 | 2469   | 8.3182  | 6.07587 | YRI |
| rs9262628  | hmm31752  | hmm31752-S    | 6 | 6 | 31131127 | 951    | 6.8396  | 6.07587 | YRI |
| rs2523852  | hmm31752  | hmm31752-S    | 6 | 6 | 31131847 | 231    | 6.8396  | 6.07587 | YRI |
| rs2517525  | hmm31752  | hmm31752-S    | 6 | 6 | 31133340 | 1262   | 7.2784  | 6.07587 | YRI |

|            |           |               |   |   |          |        |         |         |     |
|------------|-----------|---------------|---|---|----------|--------|---------|---------|-----|
| rs2517524  | hmm31752  | hmm31752-S    | 6 | 6 | 31133692 | 1614   | 7.5985  | 6.07587 | YRI |
| rs2523846  | hmm31752  | hmm31752-S    | 6 | 6 | 31134568 | 2490   | 6.8396  | 6.07587 | YRI |
| rs2517510  | hmm31752  | hmm31752-S    | 6 | 6 | 31138101 | 6023   | 6.8396  | 6.07587 | YRI |
| rs2517497  | hmm31752  | hmm31752-S    | 6 | 6 | 31144762 | 12684  | 6.8396  | 6.07587 | YRI |
| rs2523890  | hmm31752  | hmm31752-S    | 6 | 6 | 31147511 | 15433  | 6.8396  | 6.07587 | YRI |
| rs2246330  | hmm31752  | hmm31752-S    | 6 | 6 | 31149472 | 17394  | 6.8396  | 6.07587 | YRI |
| rs2523880  | hmm31752  | hmm31752-S    | 6 | 6 | 31150748 | 18670  | 6.8396  | 6.07587 | YRI |
| rs2249231  | hmm31752  | hmm31752-S    | 6 | 6 | 31151211 | 19133  | 6.8396  | 6.07587 | YRI |
| rs2249876  | hmm31752  | hmm31752-S    | 6 | 6 | 31156366 | 24288  | 6.2431  | 6.07587 | YRI |
| rs3132562  | hmm31752  | hmm31752-S    | 6 | 6 | 31156971 | 24893  | 8.7874  | 6.07587 | YRI |
| rs9263473  | hmm31752  | hmm31752-S    | 6 | 6 | 31158158 | 26080  | 6.6061  | 6.07587 | YRI |
| rs2535318  | hmm31752  | hmm31752-S    | 6 | 6 | 31159367 | 27289  | 6.6061  | 6.07587 | YRI |
| rs2517471  | hmm31752  | hmm31752-S    | 6 | 6 | 31160077 | 27999  | 6.2431  | 6.07587 | YRI |
| rs2535307  | hmm31752  | hmm31752-S    | 6 | 6 | 31161720 | 29642  | 6.34    | 6.07587 | YRI |
| rs2535304  | hmm31752  | hmm31752-S    | 6 | 6 | 31162666 | 30588  | 6.8644  | 6.07587 | YRI |
| rs2517448  | hmm31752  | hmm31752-S    | 6 | 6 | 31170646 | 38568  | 7.2732  | 6.07587 | YRI |
| rs3130541  | HLA-C     | GI_19557676-S | 6 | 6 | 31337020 | 7701   | 7.7821  | 5.95993 | YRI |
| rs2844626  | LOC282956 | GI_27483210-S | 6 | 6 | 31337531 | 133020 | 6.3403  | 6.19768 | YRI |
| rs2524117  | LOC282956 | GI_27483210-S | 6 | 6 | 31338848 | 131703 | 6.4901  | 6.19768 | YRI |
| rs2074489  | LOC282956 | GI_27483210-S | 6 | 6 | 31348107 | 122444 | 7.6241  | 6.19768 | YRI |
| rs4361609  | LOC282956 | GI_27483210-S | 6 | 6 | 31348614 | 121937 | 8.1971  | 6.19768 | YRI |
| rs5010528  | LOC282956 | GI_27483210-S | 6 | 6 | 31349011 | 121540 | 8.0871  | 6.19768 | YRI |
| rs2040748  | LOC282956 | GI_27483210-S | 6 | 6 | 31351764 | 118787 | 7.1826  | 6.19768 | YRI |
| rs4386816  | LOC282956 | GI_27483210-S | 6 | 6 | 31355114 | 115437 | 8.4929  | 6.19768 | YRI |
| rs9461684  | LOC282956 | GI_27483210-S | 6 | 6 | 31361423 | 109128 | 9.3817  | 6.19768 | YRI |
| rs9468919  | LOC282956 | GI_27483210-S | 6 | 6 | 31361845 | 108706 | 8.9466  | 6.19768 | YRI |
| rs1634752  | LOC282956 | GI_27483210-S | 6 | 6 | 31388921 | 81630  | 6.4049  | 6.19768 | YRI |
| rs1634747  | LOC282956 | GI_27483210-S | 6 | 6 | 31389855 | 80696  | 6.9052  | 6.19768 | YRI |
| rs1634746  | LOC282956 | GI_27483210-S | 6 | 6 | 31390756 | 79795  | 6.9052  | 6.19768 | YRI |
| rs9264989  | LOC282956 | GI_27483210-S | 6 | 6 | 31391388 | 79163  | 6.2487  | 6.19768 | YRI |
| rs7450827  | LOC282956 | GI_27483210-S | 6 | 6 | 31396385 | 74166  | 6.9235  | 6.19768 | YRI |
| rs4394275  | LOC282956 | GI_27483210-S | 6 | 6 | 31426156 | 44395  | 7.5727  | 6.19768 | YRI |
| rs9501374  | LOC282956 | GI_27483210-S | 6 | 6 | 31440311 | 30240  | 8.1389  | 6.19768 | YRI |
| rs9501571  | LOC282956 | GI_27483210-S | 6 | 6 | 31441589 | 28962  | 7.9458  | 6.19768 | YRI |
| rs9501572  | LOC282956 | GI_27483210-S | 6 | 6 | 31441799 | 28752  | 7.8728  | 6.19768 | YRI |
| rs6457401  | LOC282956 | GI_27483210-S | 6 | 6 | 31442831 | 27720  | 7.8728  | 6.19768 | YRI |
| rs6457402  | LOC282956 | GI_27483210-S | 6 | 6 | 31442843 | 27708  | 7.8728  | 6.19768 | YRI |
| rs7767216  | LOC282956 | GI_27483210-S | 6 | 6 | 31443075 | 27476  | 7.9458  | 6.19768 | YRI |
| rs7767142  | LOC282956 | GI_27483210-S | 6 | 6 | 31443290 | 27261  | 8.5618  | 6.19768 | YRI |
| rs7743761  | LOC282956 | GI_27483210-S | 6 | 6 | 31444079 | 26472  | 7.7694  | 6.19768 | YRI |
| rs13215664 | LOC282956 | GI_27483210-S | 6 | 6 | 31445290 | 25261  | 7.9458  | 6.19768 | YRI |
| rs6930905  | LOC282956 | GI_27483210-S | 6 | 6 | 31448456 | 22095  | 8.2032  | 6.19768 | YRI |
| rs6936035  | LOC282956 | GI_27483210-S | 6 | 6 | 31449135 | 21416  | 7.9458  | 6.19768 | YRI |
| rs2844551  | LOC282956 | GI_27483210-S | 6 | 6 | 31450760 | 19791  | 6.8655  | 6.19768 | YRI |
| rs7775117  | LOC282956 | GI_27483210-S | 6 | 6 | 31453465 | 17086  | 10.4645 | 6.19768 | YRI |
| rs9501587  | LOC282956 | GI_27483210-S | 6 | 6 | 31454916 | 15635  | 9.9708  | 6.19768 | YRI |
| rs9501588  | LOC282956 | GI_27483210-S | 6 | 6 | 31454999 | 15552  | 7.9896  | 6.19768 | YRI |
| rs9266689  | LOC282956 | GI_27483210-S | 6 | 6 | 31456559 | 13992  | 7.5278  | 6.19768 | YRI |
| rs2844535  | LOC282956 | GI_27483210-S | 6 | 6 | 31458282 | 12269  | 7.5476  | 6.19768 | YRI |
| rs3016013  | LOC282956 | GI_27483210-S | 6 | 6 | 31459221 | 11330  | 6.5242  | 6.19768 | YRI |
| rs3099848  | LOC282956 | GI_27483210-S | 6 | 6 | 31459421 | 11130  | 6.5242  | 6.19768 | YRI |
| rs2442752  | LOC282956 | GI_27483210-S | 6 | 6 | 31459743 | 10808  | 7.5938  | 6.19768 | YRI |
| rs7775759  | LOC282956 | GI_27483210-S | 6 | 6 | 31460425 | 10126  | 8.6608  | 6.19768 | YRI |
| rs7741091  | LOC282956 | GI_27483210-S | 6 | 6 | 31460610 | 9941   | 7.9925  | 6.19768 | YRI |
| rs2844529  | LOC282956 | GI_27483210-S | 6 | 6 | 31461572 | 8979   | 9.6956  | 6.19768 | YRI |
| rs4081552  | LOC282956 | GI_27483210-S | 6 | 6 | 31461668 | 8883   | 8.6608  | 6.19768 | YRI |

|            |           |               |   |   |          |       |         |         |     |
|------------|-----------|---------------|---|---|----------|-------|---------|---------|-----|
| rs6909461  | LOC282956 | GI_27483210-S | 6 | 6 | 31461929 | 8622  | 7.3556  | 6.19768 | YRI |
| rs2853973  | LOC282956 | GI_27483210-S | 6 | 6 | 31461971 | 8580  | 8.8754  | 6.19768 | YRI |
| rs2428486  | LOC282956 | GI_27483210-S | 6 | 6 | 31462083 | 8468  | 11.1827 | 6.19768 | YRI |
| rs6932730  | LOC282956 | GI_27483210-S | 6 | 6 | 31462161 | 8390  | 8.2797  | 6.19768 | YRI |
| rs4711268  | LOC282956 | GI_27483210-S | 6 | 6 | 31462483 | 8068  | 9.0427  | 6.19768 | YRI |
| rs13437082 | LOC282956 | GI_27483210-S | 6 | 6 | 31462539 | 8012  | 9.921   | 6.19768 | YRI |
| rs2596562  | LOC282956 | GI_27483210-S | 6 | 6 | 31462574 | 7977  | 10.7594 | 6.19768 | YRI |
| rs13437092 | LOC282956 | GI_27483210-S | 6 | 6 | 31463035 | 7516  | 11.3109 | 6.19768 | YRI |
| rs13437088 | LOC282956 | GI_27483210-S | 6 | 6 | 31463098 | 7453  | 10.7839 | 6.19768 | YRI |
| rs9348866  | LOC282956 | GI_27483210-S | 6 | 6 | 31466934 | 3617  | 9.7079  | 6.19768 | YRI |
| rs7771971  | LOC282956 | GI_27483210-S | 6 | 6 | 31468320 | 2231  | 8.4736  | 6.19768 | YRI |
| rs7751725  | LOC282956 | GI_27483210-S | 6 | 6 | 31468412 | 2139  | 10.9845 | 6.19768 | YRI |
| rs7752021  | LOC282956 | GI_27483210-S | 6 | 6 | 31468505 | 2046  | 10.9845 | 6.19768 | YRI |
| rs10947206 | LOC282956 | GI_27483210-S | 6 | 6 | 31469376 | 1175  | 10.9845 | 6.19768 | YRI |
| rs2523475  | LOC282956 | GI_27483210-S | 6 | 6 | 31469689 | 862   | 10.2163 | 6.19768 | YRI |
| rs10947208 | LOC282956 | GI_27483210-S | 6 | 6 | 31469816 | 735   | 10.9845 | 6.19768 | YRI |
| rs2523473  | LOC282956 | GI_27483210-S | 6 | 6 | 31469876 | 675   | 11.2921 | 6.19768 | YRI |
| rs2523467  | LOC282956 | GI_27483210-S | 6 | 6 | 31470909 | 358   | 11.8864 | 6.19768 | YRI |
| rs9501387  | LOC282956 | GI_27483210-S | 6 | 6 | 31472438 | 1887  | 11.2921 | 6.19768 | YRI |
| rs7739560  | LOC282956 | GI_27483210-S | 6 | 6 | 31472769 | 2218  | 9.374   | 6.19768 | YRI |
| rs2523459  | LOC282956 | GI_27483210-S | 6 | 6 | 31473287 | 2736  | 11.1949 | 6.19768 | YRI |
| rs2596542  | LOC282956 | GI_27483210-S | 6 | 6 | 31474574 | 4023  | 6.8361  | 6.19768 | YRI |
| rs2428475  | LOC282956 | GI_27483210-S | 6 | 6 | 31474601 | 4050  | 11.4166 | 6.19768 | YRI |
| rs2428474  | LOC282956 | GI_27483210-S | 6 | 6 | 31475002 | 4451  | 10.7495 | 6.19768 | YRI |
| rs2523453  | LOC282956 | GI_27483210-S | 6 | 6 | 31476104 | 5553  | 11.169  | 6.19768 | YRI |
| rs2523452  | LOC282956 | GI_27483210-S | 6 | 6 | 31476519 | 5968  | 8.9632  | 6.19768 | YRI |
| rs2844521  | LOC282956 | GI_27483210-S | 6 | 6 | 31476943 | 6392  | 8.9424  | 6.19768 | YRI |
| rs9295988  | LOC282956 | GI_27483210-S | 6 | 6 | 31481697 | 11146 | 8.4863  | 6.19768 | YRI |
| rs6910087  | LOC282956 | GI_27483210-S | 6 | 6 | 31485026 | 14475 | 7.7603  | 6.19768 | YRI |
| rs6934097  | LOC282956 | GI_27483210-S | 6 | 6 | 31488724 | 18173 | 6.5768  | 6.19768 | YRI |
| rs9468992  | LOC282956 | GI_27483210-S | 6 | 6 | 31492557 | 22006 | 7.4685  | 6.19768 | YRI |
| rs9501106  | LOC282956 | GI_27483210-S | 6 | 6 | 31496088 | 25537 | 7.2862  | 6.19768 | YRI |
| rs2394999  | LOC282956 | GI_27483210-S | 6 | 6 | 31508914 | 38363 | 8.1036  | 6.19768 | YRI |
| rs9469002  | LOC282956 | GI_27483210-S | 6 | 6 | 31515751 | 45200 | 6.4104  | 6.19768 | YRI |
| rs4713465  | LOC282956 | GI_27483210-S | 6 | 6 | 31517507 | 46956 | 7.1407  | 6.19768 | YRI |
| rs3869130  | LOC282956 | GI_27483210-S | 6 | 6 | 31518730 | 48179 | 7.6868  | 6.19768 | YRI |
| rs16899646 | LOC282956 | GI_27483210-S | 6 | 6 | 31524899 | 54348 | 8.245   | 6.19768 | YRI |
| rs3131622  | LOC282956 | GI_27483210-S | 6 | 6 | 31528479 | 57928 | 6.808   | 6.19768 | YRI |
| rs9268614  | HLA-DRB5  | GI_26665892-S | 6 | 6 | 32510756 | 82469 | 6.3192  | 6.14128 | YRI |
| rs6926374  | HLA-DRB5  | GI_26665892-S | 6 | 6 | 32517283 | 75942 | 8.301   | 6.14128 | YRI |
| rs9268659  | HLA-DRB5  | GI_26665892-S | 6 | 6 | 32518919 | 74306 | 8.0125  | 6.14128 | YRI |
| rs8084     | HLA-DRB5  | GI_26665892-S | 6 | 6 | 32519013 | 74212 | 8.0125  | 6.14128 | YRI |
| rs2239804  | HLA-DRB5  | GI_26665892-S | 6 | 6 | 32519501 | 73724 | 8.3279  | 6.14128 | YRI |
| rs7192     | HLA-DRB5  | GI_26665892-S | 6 | 6 | 32519624 | 73601 | 8.0125  | 6.14128 | YRI |
| rs2239803  | HLA-DRB5  | GI_26665892-S | 6 | 6 | 32519811 | 73414 | 8.7925  | 6.14128 | YRI |
| rs7194     | HLA-DRB5  | GI_26665892-S | 6 | 6 | 32520458 | 72767 | 7.2079  | 6.14128 | YRI |
| rs2213585  | HLA-DRB5  | GI_26665892-S | 6 | 6 | 32521128 | 72097 | 8.0125  | 6.14128 | YRI |
| rs2227139  | HLA-DRB5  | GI_26665892-S | 6 | 6 | 32521437 | 71788 | 7.2079  | 6.14128 | YRI |
| rs3763327  | HLA-DRB5  | GI_26665892-S | 6 | 6 | 32521808 | 71417 | 7.2079  | 6.14128 | YRI |
| rs9268853  | HLA-DRB5  | GI_26665892-S | 6 | 6 | 32537621 | 55604 | 8.1796  | 6.14128 | YRI |
| rs9268856  | HLA-DRB5  | GI_26665892-S | 6 | 6 | 32537697 | 55528 | 7.7597  | 6.14128 | YRI |
| rs9268858  | HLA-DRB5  | GI_26665892-S | 6 | 6 | 32537736 | 55489 | 8.2367  | 6.14128 | YRI |
| rs9268862  | HLA-DRB5  | GI_26665892-S | 6 | 6 | 32538145 | 55080 | 7.7597  | 6.14128 | YRI |
| rs4428528  | HLA-DRB5  | GI_26665892-S | 6 | 6 | 32538340 | 54885 | 6.7673  | 6.14128 | YRI |
| rs4434496  | HLA-DRB5  | GI_26665892-S | 6 | 6 | 32538486 | 54739 | 7.3443  | 6.14128 | YRI |
| rs7766843  | HLA-DRB5  | GI_26665892-S | 6 | 6 | 32538707 | 54518 | 7.7597  | 6.14128 | YRI |

|            |           |               |   |   |          |       |         |         |     |
|------------|-----------|---------------|---|---|----------|-------|---------|---------|-----|
| rs7746922  | HLA-DRB5  | GI_26665892-S | 6 | 6 | 32538953 | 54272 | 7.7597  | 6.14128 | YRI |
| rs9268878  | HLA-DRB5  | GI_26665892-S | 6 | 6 | 32539270 | 53955 | 7.7597  | 6.14128 | YRI |
| rs9268885  | HLA-DRB5  | GI_26665892-S | 6 | 6 | 32539683 | 53542 | 7.7038  | 6.14128 | YRI |
| rs9268906  | HLA-DRB5  | GI_26665892-S | 6 | 6 | 32540159 | 53066 | 7.0688  | 6.14128 | YRI |
| rs9268923  | HLA-DRB5  | GI_26665892-S | 6 | 6 | 32540813 | 52412 | 7.481   | 6.14128 | YRI |
| rs2395185  | HLA-DRB5  | GI_26665892-S | 6 | 6 | 32541145 | 52080 | 8.1796  | 6.14128 | YRI |
| rs9268969  | HLA-DRB5  | GI_26665892-S | 6 | 6 | 32542327 | 50898 | 6.6322  | 6.14128 | YRI |
| rs9268970  | HLA-DRB5  | GI_26665892-S | 6 | 6 | 32542339 | 50886 | 7.0259  | 6.14128 | YRI |
| rs9268973  | HLA-DRB5  | GI_26665892-S | 6 | 6 | 32542756 | 50469 | 8.0723  | 6.14128 | YRI |
| rs9268974  | HLA-DRB5  | GI_26665892-S | 6 | 6 | 32542808 | 50417 | 7.0412  | 6.14128 | YRI |
| rs9268976  | HLA-DRB5  | GI_26665892-S | 6 | 6 | 32542852 | 50373 | 7.3419  | 6.14128 | YRI |
| rs9269043  | HLA-DRB5  | GI_26665892-S | 6 | 6 | 32546576 | 46649 | 7.7597  | 6.14128 | YRI |
| rs9391877  | HLA-DRB5  | GI_26665892-S | 6 | 6 | 32546845 | 46380 | 6.9243  | 6.14128 | YRI |
| rs9405040  | HLA-DRB5  | GI_26665892-S | 6 | 6 | 32547371 | 45854 | 8.1796  | 6.14128 | YRI |
| rs5026740  | HLA-DRB5  | GI_26665892-S | 6 | 6 | 32547731 | 45494 | 7.6225  | 6.14128 | YRI |
| rs9286790  | HLA-DRB5  | GI_26665892-S | 6 | 6 | 32547806 | 45419 | 7.5568  | 6.14128 | YRI |
| rs12194148 | HLA-DRB5  | GI_26665892-S | 6 | 6 | 32552176 | 41049 | 8.0216  | 6.14128 | YRI |
| rs9405112  | HLA-DRB5  | GI_26665892-S | 6 | 6 | 32553578 | 39647 | 8.6356  | 6.14128 | YRI |
| rs9378212  | HLA-DRB5  | GI_26665892-S | 6 | 6 | 32553669 | 39556 | 8.3039  | 6.14128 | YRI |
| rs9378266  | HLA-DRB5  | GI_26665892-S | 6 | 6 | 32556167 | 37058 | 7.4708  | 6.14128 | YRI |
| rs9378213  | HLA-DRB5  | GI_26665892-S | 6 | 6 | 32556376 | 36849 | 8.427   | 6.14128 | YRI |
| rs9269186  | HLA-DRB5  | GI_26665892-S | 6 | 6 | 32556394 | 36831 | 7.7597  | 6.14128 | YRI |
| rs9391786  | HLA-DRB5  | GI_26665892-S | 6 | 6 | 32556539 | 36686 | 8.3039  | 6.14128 | YRI |
| rs5020946  | HLA-DRB5  | GI_26665892-S | 6 | 6 | 32558067 | 35158 | 8.0648  | 6.14128 | YRI |
| rs2157337  | HLA-DRB5  | GI_26665892-S | 6 | 6 | 32609122 | 15897 | 8.3754  | 6.14128 | YRI |
| rs9270657  | HLA-DRB5  | GI_26665892-S | 6 | 6 | 32673999 | 80774 | 9.6722  | 6.14128 | YRI |
| rs2858870  | HLA-DRB5  | GI_26665892-S | 6 | 6 | 32680229 | 87004 | 7.8461  | 6.14128 | YRI |
| rs586610   | HLA-DRB5  | GI_26665892-S | 6 | 6 | 32680289 | 87064 | 9.2535  | 6.14128 | YRI |
| rs615672   | HLA-DRB5  | GI_26665892-S | 6 | 6 | 32682149 | 88924 | 9.2813  | 6.14128 | YRI |
| rs9272346  | HLA-DQA1  | GI_18426974-S | 6 | 6 | 32712350 | 6485  | 22.374  | 6.40789 | YRI |
| rs9272723  | HLA-DQA1  | GI_18426974-S | 6 | 6 | 32717405 | 1430  | 10.2938 | 6.40789 | YRI |
| rs7744001  | HLA-DQA1  | GI_18426974-S | 6 | 6 | 32734064 | 15229 | 8.7269  | 6.40789 | YRI |
| rs6928482  | HLA-DQA1  | GI_18426974-S | 6 | 6 | 32734227 | 15392 | 11.0124 | 6.40789 | YRI |
| rs6906021  | HLA-DQA1  | GI_18426974-S | 6 | 6 | 32734289 | 15454 | 10.0385 | 6.40789 | YRI |
| rs12918    | HLA-DQA1  | GI_18426974-S | 6 | 6 | 32735364 | 16529 | 14.0903 | 6.40789 | YRI |
| rs9275141  | HLA-DQA1  | GI_18426974-S | 6 | 6 | 32759095 | 40260 | 6.6887  | 6.40789 | YRI |
| rs3134975  | HLA-DQA1  | GI_18426974-S | 6 | 6 | 32760559 | 41724 | 7.5536  | 6.40789 | YRI |
| rs2858330  | HLA-DQA1  | GI_18426974-S | 6 | 6 | 32766693 | 47858 | 6.7401  | 6.40789 | YRI |
| rs3129719  | HLA-DQA1  | GI_18426974-S | 6 | 6 | 32769757 | 50922 | 7.5536  | 6.40789 | YRI |
| rs3129720  | HLA-DQA1  | GI_18426974-S | 6 | 6 | 32771609 | 52774 | 7.4223  | 6.40789 | YRI |
| rs3135006  | HLA-DQA1  | GI_18426974-S | 6 | 6 | 32775097 | 56262 | 7.5872  | 6.40789 | YRI |
| rs9380319  | HLA-DQA1  | GI_18426974-S | 6 | 6 | 32785890 | 67055 | 6.7957  | 6.40789 | YRI |
| rs7755161  | TAPBP     | GI_27436892-I | 6 | 6 | 33321733 | 53759 | 7.2915  | 6.44791 | YRI |
| rs1801823  | TAPBP     | GI_27436892-I | 6 | 6 | 33367560 | 7932  | 8.062   | 6.44791 | YRI |
| rs9968886  | C6orf64   | GI_8922866-S  | 6 | 6 | 39168456 | 11511 | 7.3643  | 6.27872 | YRI |
| rs16891597 | C6orf64   | GI_8922866-S  | 6 | 6 | 39178189 | 1778  | 6.3553  | 6.27872 | YRI |
| rs13219366 | LOC221362 | GI_27498596-S | 6 | 6 | 52635339 | 6021  | 6.5883  | 6.12422 | YRI |
| rs2670123  | LOC221362 | GI_27498596-S | 6 | 6 | 52637673 | 3687  | 6.3863  | 6.12422 | YRI |
| rs2397096  | LOC221362 | GI_27498596-S | 6 | 6 | 52639658 | 1702  | 6.5259  | 6.12422 | YRI |
| rs2397097  | LOC221362 | GI_27498596-S | 6 | 6 | 52639796 | 1564  | 6.6931  | 6.12422 | YRI |
| rs3087705  | LOC221362 | GI_27498596-S | 6 | 6 | 52640611 | 749   | 6.6931  | 6.12422 | YRI |
| rs1043937  | LOC221362 | GI_27498596-S | 6 | 6 | 52641510 | 150   | 7.9158  | 6.12422 | YRI |
| rs7762854  | LOC221362 | GI_27498596-S | 6 | 6 | 52642037 | 677   | 7.4627  | 6.12422 | YRI |
| rs1000810  | LOC221362 | GI_27498596-S | 6 | 6 | 52642890 | 1530  | 7.4627  | 6.12422 | YRI |
| rs1000809  | LOC221362 | GI_27498596-S | 6 | 6 | 52643233 | 1873  | 7.6884  | 6.12422 | YRI |
| rs311678   | C6orf150  | GI_31581597-S | 6 | 6 | 74191737 | 141   | 10.9776 | 6.12426 | YRI |



|            |           |               |   |   |           |       |         |         |     |
|------------|-----------|---------------|---|---|-----------|-------|---------|---------|-----|
| rs2756369  | RNGTT     | GI_4506562-S  | 6 | 6 | 89382936  | 6119  | 11.6799 | 6.15225 | YRI |
| rs12445    | PNRC1     | GI_5802981-S  | 6 | 6 | 89851115  | 267   | 10.1325 | 6.10339 | YRI |
| rs1590958  | PNRC1     | GI_5802981-S  | 6 | 6 | 89865656  | 14274 | 7.6735  | 6.10339 | YRI |
| rs2274819  | PNRC1     | GI_5802981-S  | 6 | 6 | 89871775  | 20393 | 9.765   | 6.10339 | YRI |
| rs12661431 | PNRC1     | GI_5802981-S  | 6 | 6 | 89880913  | 29531 | 9.765   | 6.10339 | YRI |
| rs10944434 | PNRC1     | GI_5802981-S  | 6 | 6 | 89927303  | 75921 | 7.1196  | 6.10339 | YRI |
| rs9321515  | hmm31999  | hmm31999-S    | 6 | 6 | 99941650  | 38754 | 11.2499 | 6.20051 | YRI |
| rs9376127  | hmm31999  | hmm31999-S    | 6 | 6 | 99947640  | 32764 | 7.4577  | 6.20051 | YRI |
| rs9376138  | hmm31999  | hmm31999-S    | 6 | 6 | 99948859  | 31545 | 7.5072  | 6.20051 | YRI |
| rs9385739  | hmm31999  | hmm31999-S    | 6 | 6 | 99960448  | 19956 | 12.4576 | 6.20051 | YRI |
| rs9373152  | hmm31999  | hmm31999-S    | 6 | 6 | 99968672  | 11732 | 12.4576 | 6.20051 | YRI |
| rs4840040  | hmm31999  | hmm31999-S    | 6 | 6 | 99979972  | 432   | 6.7037  | 6.20051 | YRI |
| rs6923983  | hmm31999  | hmm31999-S    | 6 | 6 | 99983940  | 3536  | 8.5584  | 6.20051 | YRI |
| rs7745110  | hmm31999  | hmm31999-S    | 6 | 6 | 99985340  | 4936  | 12.4576 | 6.20051 | YRI |
| rs6915401  | hmm31999  | hmm31999-S    | 6 | 6 | 99987560  | 7156  | 12.4576 | 6.20051 | YRI |
| rs6570064  | hmm31999  | hmm31999-S    | 6 | 6 | 99989858  | 9454  | 12.4576 | 6.20051 | YRI |
| rs4840044  | hmm31999  | hmm31999-S    | 6 | 6 | 99994734  | 14330 | 12.4576 | 6.20051 | YRI |
| rs4144163  | hmm31999  | hmm31999-S    | 6 | 6 | 99996188  | 15784 | 7.5072  | 6.20051 | YRI |
| rs4499939  | hmm31999  | hmm31999-S    | 6 | 6 | 99999500  | 19096 | 9.6737  | 6.20051 | YRI |
| rs3747787  | AIM1      | GI_37551098-S | 6 | 6 | 107074471 | 50152 | 6.2354  | 6.0721  | YRI |
| rs13200233 | QRSL1     | GI_19923522-S | 6 | 6 | 107196533 | 25261 | 6.5452  | 5.96193 | YRI |
| rs1026619  | QRSL1     | GI_19923522-S | 6 | 6 | 107221054 | 740   | 6.5656  | 5.96193 | YRI |
| rs9495020  | HEBP2     | GI_41393567-S | 6 | 6 | 138710940 | 57910 | 7.3436  | 6.2194  | YRI |
| rs7753628  | HEBP2     | GI_41393567-S | 6 | 6 | 138721532 | 47318 | 7.6355  | 6.2194  | YRI |
| rs11970756 | HEBP2     | GI_41393567-S | 6 | 6 | 138723146 | 45704 | 7.3436  | 6.2194  | YRI |
| rs6570228  | HEBP2     | GI_41393567-S | 6 | 6 | 138732788 | 36062 | 6.6448  | 6.2194  | YRI |
| rs7752490  | HEBP2     | GI_41393567-S | 6 | 6 | 138734108 | 34742 | 9.0915  | 6.2194  | YRI |
| rs9495052  | HEBP2     | GI_41393567-S | 6 | 6 | 138738411 | 30439 | 7.4012  | 6.2194  | YRI |
| rs9495053  | HEBP2     | GI_41393567-S | 6 | 6 | 138739065 | 29785 | 7.3436  | 6.2194  | YRI |
| rs9495054  | HEBP2     | GI_41393567-S | 6 | 6 | 138742711 | 26139 | 11.5617 | 6.2194  | YRI |
| rs12181239 | HEBP2     | GI_41393567-S | 6 | 6 | 138742843 | 26007 | 8.6452  | 6.2194  | YRI |
| rs6918995  | HEBP2     | GI_41393567-S | 6 | 6 | 138744490 | 24360 | 8.6452  | 6.2194  | YRI |
| rs9484152  | HEBP2     | GI_41393567-S | 6 | 6 | 138744936 | 23914 | 11.9374 | 6.2194  | YRI |
| rs2076273  | HEBP2     | GI_41393567-S | 6 | 6 | 138745333 | 23517 | 8.6584  | 6.2194  | YRI |
| rs2076272  | HEBP2     | GI_41393567-S | 6 | 6 | 138745455 | 23395 | 11.7015 | 6.2194  | YRI |
| rs11966257 | HEBP2     | GI_41393567-S | 6 | 6 | 138747488 | 21362 | 8.6452  | 6.2194  | YRI |
| rs9495063  | HEBP2     | GI_41393567-S | 6 | 6 | 138749877 | 18973 | 9.6247  | 6.2194  | YRI |
| rs9495064  | HEBP2     | GI_41393567-S | 6 | 6 | 138750902 | 17948 | 11.9374 | 6.2194  | YRI |
| rs9495065  | HEBP2     | GI_41393567-S | 6 | 6 | 138751549 | 17301 | 13.8106 | 6.2194  | YRI |
| rs9495066  | HEBP2     | GI_41393567-S | 6 | 6 | 138751653 | 17197 | 13.4059 | 6.2194  | YRI |
| rs7765991  | HEBP2     | GI_41393567-S | 6 | 6 | 138752217 | 16633 | 12.2352 | 6.2194  | YRI |
| rs9495068  | HEBP2     | GI_41393567-S | 6 | 6 | 138753988 | 14862 | 9.9416  | 6.2194  | YRI |
| rs9495070  | HEBP2     | GI_41393567-S | 6 | 6 | 138756312 | 12538 | 9.9471  | 6.2194  | YRI |
| rs17053774 | HEBP2     | GI_41393567-S | 6 | 6 | 138757930 | 10920 | 14.8484 | 6.2194  | YRI |
| rs3756890  | HEBP2     | GI_41393567-S | 6 | 6 | 138765462 | 3388  | 10.09   | 6.2194  | YRI |
| rs6919872  | HEBP2     | GI_41393567-S | 6 | 6 | 138767876 | 974   | 13.2544 | 6.2194  | YRI |
| rs6570232  | HEBP2     | GI_41393567-S | 6 | 6 | 138771357 | 2507  | 13.2544 | 6.2194  | YRI |
| rs4722006  | LOC392620 | GI_41147689-S | 7 | 7 | 2538964   | 4066  | 11.0194 | 6.24916 | YRI |
| rs798534   | LOC392620 | GI_41147689-S | 7 | 7 | 2540848   | 5950  | 7.8889  | 6.24916 | YRI |
| rs709280   | LOC392620 | GI_41147689-S | 7 | 7 | 2554331   | 19433 | 6.6664  | 6.24916 | YRI |
| rs798512   | LOC392620 | GI_41147689-S | 7 | 7 | 2555833   | 20935 | 12.2283 | 6.24916 | YRI |
| rs798503   | LOC392620 | GI_41147689-S | 7 | 7 | 2562945   | 28047 | 10.3328 | 6.24916 | YRI |
| rs798499   | LOC392620 | GI_41147689-S | 7 | 7 | 2565254   | 30356 | 11.9939 | 6.24916 | YRI |
| rs798498   | LOC392620 | GI_41147689-S | 7 | 7 | 2569123   | 34225 | 7.1216  | 6.24916 | YRI |
| rs798492   | LOC392620 | GI_41147689-S | 7 | 7 | 2572425   | 37527 | 12.2777 | 6.24916 | YRI |
| rs1182209  | LOC392620 | GI_41147689-S | 7 | 7 | 2581836   | 46938 | 8.2921  | 6.24916 | YRI |

|            |           |               |   |   |          |        |        |         |     |
|------------|-----------|---------------|---|---|----------|--------|--------|---------|-----|
| rs7807978  | LOC392620 | GI_41147689-S | 7 | 7 | 2587876  | 52978  | 7.8031 | 6.24916 | YRI |
| rs2266922  | LOC392620 | GI_41147689-S | 7 | 7 | 2597948  | 63050  | 9.8322 | 6.24916 | YRI |
| rs2527684  | LOC392620 | GI_41147689-S | 7 | 7 | 2599163  | 64265  | 8.182  | 6.24916 | YRI |
| rs3846992  | LOC392620 | GI_41147689-S | 7 | 7 | 2603484  | 68586  | 6.5928 | 6.24916 | YRI |
| rs2644306  | LOC392620 | GI_41147689-S | 7 | 7 | 2604843  | 69945  | 8.2492 | 6.24916 | YRI |
| rs2527686  | LOC392620 | GI_41147689-S | 7 | 7 | 2607654  | 72756  | 8.182  | 6.24916 | YRI |
| rs2533886  | LOC392620 | GI_41147689-S | 7 | 7 | 2608110  | 73212  | 7.1425 | 6.24916 | YRI |
| rs757786   | LOC392620 | GI_41147689-S | 7 | 7 | 2609260  | 74362  | 9.8366 | 6.24916 | YRI |
| rs2527687  | LOC392620 | GI_41147689-S | 7 | 7 | 2611726  | 76828  | 8.8207 | 6.24916 | YRI |
| rs2644275  | LOC392620 | GI_41147689-S | 7 | 7 | 2627251  | 92353  | 7.1911 | 6.24916 | YRI |
| rs2527690  | LOC392620 | GI_41147689-S | 7 | 7 | 2627491  | 92593  | 7.0631 | 6.24916 | YRI |
| rs2644274  | LOC392620 | GI_41147689-S | 7 | 7 | 2627621  | 92723  | 6.8426 | 6.24916 | YRI |
| rs2644297  | LOC392620 | GI_41147689-S | 7 | 7 | 2632147  | 97249  | 8.3981 | 6.24916 | YRI |
| rs2644296  | LOC392620 | GI_41147689-S | 7 | 7 | 2632302  | 97404  | 7.8284 | 6.24916 | YRI |
| rs2644295  | LOC392620 | GI_41147689-S | 7 | 7 | 2633458  | 98560  | 7.7013 | 6.24916 | YRI |
| rs1182199  | LOC392620 | GI_41147689-S | 7 | 7 | 2635783  | 100885 | 8.2131 | 6.24916 | YRI |
| rs1182197  | LOC392620 | GI_41147689-S | 7 | 7 | 2636530  | 101632 | 6.4056 | 6.24916 | YRI |
| rs1636264  | LOC392620 | GI_41147689-S | 7 | 7 | 2637827  | 102929 | 9.7636 | 6.24916 | YRI |
| rs757791   | LOC392620 | GI_41147689-S | 7 | 7 | 2640537  | 105639 | 9.7636 | 6.24916 | YRI |
| rs1182194  | LOC392620 | GI_41147689-S | 7 | 7 | 2642065  | 107167 | 9.7636 | 6.24916 | YRI |
| rs17132741 | LOC392620 | GI_41147689-S | 7 | 7 | 2642238  | 107340 | 6.4056 | 6.24916 | YRI |
| rs1182191  | LOC392620 | GI_41147689-S | 7 | 7 | 2642605  | 107707 | 9.7636 | 6.24916 | YRI |
| rs1182190  | LOC392620 | GI_41147689-S | 7 | 7 | 2642632  | 107734 | 9.3559 | 6.24916 | YRI |
| rs1182175  | LOC392620 | GI_41147689-S | 7 | 7 | 2648267  | 113369 | 9.8366 | 6.24916 | YRI |
| rs1713920  | LOC392620 | GI_41147689-S | 7 | 7 | 2654176  | 119278 | 7.8945 | 6.24916 | YRI |
| rs7810433  | KIAA0415  | GI_37538331-S | 7 | 7 | 4590701  | 16508  | 6.1979 | 6.01556 | YRI |
| rs17135130 | KIAA0415  | GI_37538331-S | 7 | 7 | 4602222  | 4987   | 6.3126 | 6.01556 | YRI |
| rs1014373  | HIBADH    | GI_41393565-S | 7 | 7 | 27344333 | 5242   | 6.6677 | 6.26404 | YRI |
| rs9639552  | HIBADH    | GI_41393565-S | 7 | 7 | 27348763 | 9672   | 6.3731 | 6.26404 | YRI |
| rs1404282  | HIBADH    | GI_41393565-S | 7 | 7 | 27358691 | 19600  | 6.6677 | 6.26404 | YRI |
| rs4719902  | HIBADH    | GI_41393565-S | 7 | 7 | 27361582 | 22491  | 6.6677 | 6.26404 | YRI |
| rs1404276  | HIBADH    | GI_41393565-S | 7 | 7 | 27364087 | 24996  | 6.6677 | 6.26404 | YRI |
| rs12673949 | HIBADH    | GI_41393565-S | 7 | 7 | 27373874 | 34783  | 6.6787 | 6.26404 | YRI |
| rs6462033  | HIBADH    | GI_41393565-S | 7 | 7 | 27391925 | 52834  | 6.6866 | 6.26404 | YRI |
| rs1524529  | HIBADH    | GI_41393565-S | 7 | 7 | 27393655 | 54564  | 6.6677 | 6.26404 | YRI |
| rs1608663  | HIBADH    | GI_41393565-S | 7 | 7 | 27397016 | 57925  | 6.7626 | 6.26404 | YRI |
| rs1980330  | HIBADH    | GI_41393565-S | 7 | 7 | 27403563 | 64472  | 6.6149 | 6.26404 | YRI |
| rs1015265  | HIBADH    | GI_41393565-S | 7 | 7 | 27412849 | 73758  | 6.6149 | 6.26404 | YRI |
| rs2391444  | HIBADH    | GI_41393565-S | 7 | 7 | 27415660 | 76569  | 6.6677 | 6.26404 | YRI |
| rs2391445  | HIBADH    | GI_41393565-S | 7 | 7 | 27422111 | 83020  | 6.3731 | 6.26404 | YRI |
| rs2391446  | HIBADH    | GI_41393565-S | 7 | 7 | 27422160 | 83069  | 6.3731 | 6.26404 | YRI |
| rs961723   | HIBADH    | GI_41393565-S | 7 | 7 | 27431213 | 92122  | 6.3731 | 6.26404 | YRI |
| rs961724   | HIBADH    | GI_41393565-S | 7 | 7 | 27431275 | 92184  | 6.3731 | 6.26404 | YRI |
| rs961725   | HIBADH    | GI_41393565-S | 7 | 7 | 27431310 | 92219  | 6.3731 | 6.26404 | YRI |
| rs6462039  | HIBADH    | GI_41393565-S | 7 | 7 | 27439622 | 100531 | 6.3731 | 6.26404 | YRI |
| rs6415252  | HIBADH    | GI_41393565-S | 7 | 7 | 27442100 | 103009 | 6.3001 | 6.26404 | YRI |
| rs7779990  | HIBADH    | GI_41393565-S | 7 | 7 | 27445139 | 106048 | 6.3731 | 6.26404 | YRI |
| rs12700825 | HIBADH    | GI_41393565-S | 7 | 7 | 27445811 | 106720 | 6.3731 | 6.26404 | YRI |
| rs10486548 | HIBADH    | GI_41393565-S | 7 | 7 | 27445935 | 106844 | 6.3731 | 6.26404 | YRI |
| rs11764753 | HIBADH    | GI_41393565-S | 7 | 7 | 27446199 | 107108 | 6.4009 | 6.26404 | YRI |
| rs2391447  | HIBADH    | GI_41393565-S | 7 | 7 | 27447804 | 108713 | 6.3731 | 6.26404 | YRI |
| rs12700829 | HIBADH    | GI_41393565-S | 7 | 7 | 27460342 | 121251 | 6.3731 | 6.26404 | YRI |
| rs2391454  | HIBADH    | GI_41393565-S | 7 | 7 | 27463864 | 124773 | 6.3001 | 6.26404 | YRI |
| rs6943883  | HIBADH    | GI_41393565-S | 7 | 7 | 27466133 | 127042 | 6.6229 | 6.26404 | YRI |
| rs6957378  | HIBADH    | GI_41393565-S | 7 | 7 | 27470189 | 131098 | 6.3731 | 6.26404 | YRI |
| rs42087    | HIBADH    | GI_41393565-S | 7 | 7 | 27473722 | 134631 | 6.3731 | 6.26404 | YRI |

|            |           |               |   |   |          |        |         |         |     |
|------------|-----------|---------------|---|---|----------|--------|---------|---------|-----|
| rs42088    | HIBADH    | GI_41393565-S | 7 | 7 | 27475101 | 136010 | 6.3731  | 6.26404 | YRI |
| rs979356   | LOC402476 | GI_42658265-S | 7 | 7 | 32237235 | 337988 | 7.0623  | 6.09064 | YRI |
| rs6462366  | LOC402476 | GI_42658265-S | 7 | 7 | 32238187 | 337036 | 6.9054  | 6.09064 | YRI |
| rs13223936 | LOC402476 | GI_42658265-S | 7 | 7 | 32260616 | 314607 | 9.0178  | 6.09064 | YRI |
| rs6962129  | LOC402476 | GI_42658265-S | 7 | 7 | 32265870 | 309353 | 9.0178  | 6.09064 | YRI |
| rs6944615  | LOC402476 | GI_42658265-S | 7 | 7 | 32266080 | 309143 | 8.791   | 6.09064 | YRI |
| rs1580017  | LOC402476 | GI_42658265-S | 7 | 7 | 32266849 | 308374 | 7.0406  | 6.09064 | YRI |
| rs6462367  | LOC402476 | GI_42658265-S | 7 | 7 | 32268073 | 307150 | 8.3236  | 6.09064 | YRI |
| rs1580024  | LOC402476 | GI_42658265-S | 7 | 7 | 32271208 | 304015 | 8.4205  | 6.09064 | YRI |
| rs1610140  | LOC402476 | GI_42658265-S | 7 | 7 | 32271840 | 303383 | 8.4205  | 6.09064 | YRI |
| rs1901203  | LOC402476 | GI_42658265-S | 7 | 7 | 32274323 | 300900 | 8.3751  | 6.09064 | YRI |
| rs10232444 | LOC402476 | GI_42658265-S | 7 | 7 | 32284099 | 291124 | 8.0806  | 6.09064 | YRI |
| rs2392063  | LOC402476 | GI_42658265-S | 7 | 7 | 32290067 | 285156 | 8.3751  | 6.09064 | YRI |
| rs10251316 | LOC402476 | GI_42658265-S | 7 | 7 | 32290328 | 284895 | 8.3751  | 6.09064 | YRI |
| rs1599896  | LOC402476 | GI_42658265-S | 7 | 7 | 32290452 | 284771 | 8.3751  | 6.09064 | YRI |
| rs1599895  | LOC402476 | GI_42658265-S | 7 | 7 | 32290803 | 284420 | 8.3751  | 6.09064 | YRI |
| rs12538356 | LOC402476 | GI_42658265-S | 7 | 7 | 32294630 | 280593 | 8.3751  | 6.09064 | YRI |
| rs6968412  | LOC402476 | GI_42658265-S | 7 | 7 | 32295188 | 280035 | 8.3751  | 6.09064 | YRI |
| rs2893425  | LOC402476 | GI_42658265-S | 7 | 7 | 32296659 | 278564 | 8.7712  | 6.09064 | YRI |
| rs2392066  | LOC402476 | GI_42658265-S | 7 | 7 | 32296835 | 278388 | 8.3751  | 6.09064 | YRI |
| rs6952557  | LOC402476 | GI_42658265-S | 7 | 7 | 32299421 | 275802 | 8.3751  | 6.09064 | YRI |
| rs12670233 | LOC402476 | GI_42658265-S | 7 | 7 | 32318830 | 256393 | 7.13    | 6.09064 | YRI |
| rs12673952 | LOC402476 | GI_42658265-S | 7 | 7 | 32332436 | 242787 | 8.5274  | 6.09064 | YRI |
| rs17161398 | LOC402476 | GI_42658265-S | 7 | 7 | 32345552 | 229671 | 9.1423  | 6.09064 | YRI |
| rs7786546  | LOC402476 | GI_42658265-S | 7 | 7 | 32346943 | 228280 | 8.8614  | 6.09064 | YRI |
| rs7780544  | LOC402476 | GI_42658265-S | 7 | 7 | 32351170 | 224053 | 8.9348  | 6.09064 | YRI |
| rs2290213  | LOC402476 | GI_42658265-S | 7 | 7 | 32371870 | 203353 | 7.7636  | 6.09064 | YRI |
| rs2290214  | LOC402476 | GI_42658265-S | 7 | 7 | 32371896 | 203327 | 7.2023  | 6.09064 | YRI |
| rs17161428 | LOC402476 | GI_42658265-S | 7 | 7 | 32383427 | 191796 | 7.2023  | 6.09064 | YRI |
| rs11980863 | LOC402476 | GI_42658265-S | 7 | 7 | 32398051 | 177172 | 9.6026  | 6.09064 | YRI |
| rs3173734  | LOC402476 | GI_42658265-S | 7 | 7 | 32398766 | 176457 | 7.5957  | 6.09064 | YRI |
| rs11983596 | LOC402476 | GI_42658265-S | 7 | 7 | 32406261 | 168962 | 7.9133  | 6.09064 | YRI |
| rs4720069  | LOC402476 | GI_42658265-S | 7 | 7 | 32407490 | 167733 | 9.2105  | 6.09064 | YRI |
| rs6950856  | LOC402476 | GI_42658265-S | 7 | 7 | 32422429 | 152794 | 10.5725 | 6.09064 | YRI |
| rs12669940 | LOC402476 | GI_42658265-S | 7 | 7 | 32424192 | 151031 | 10.8708 | 6.09064 | YRI |
| rs17170062 | LOC402476 | GI_42658265-S | 7 | 7 | 32430119 | 145104 | 8.3193  | 6.09064 | YRI |
| rs2893429  | LOC402476 | GI_42658265-S | 7 | 7 | 32436713 | 138510 | 11.359  | 6.09064 | YRI |
| rs11978751 | LOC402476 | GI_42658265-S | 7 | 7 | 32452451 | 122772 | 11.5055 | 6.09064 | YRI |
| rs11984083 | LOC402476 | GI_42658265-S | 7 | 7 | 32471824 | 103399 | 12.0716 | 6.09064 | YRI |
| rs4723187  | LOC402476 | GI_42658265-S | 7 | 7 | 32476141 | 99082  | 11.6613 | 6.09064 | YRI |
| rs13225338 | LOC402476 | GI_42658265-S | 7 | 7 | 32484049 | 91174  | 11.3402 | 6.09064 | YRI |
| rs11983625 | LOC402476 | GI_42658265-S | 7 | 7 | 32488991 | 86232  | 7.533   | 6.09064 | YRI |
| rs4723199  | LOC402476 | GI_42658265-S | 7 | 7 | 32562726 | 12497  | 6.7488  | 6.09064 | YRI |
| rs12672074 | LOC402476 | GI_42658265-S | 7 | 7 | 32575919 | 696    | 9.4272  | 6.09064 | YRI |
| rs2392135  | LOC402476 | GI_42658265-S | 7 | 7 | 32580988 | 5765   | 9.8649  | 6.09064 | YRI |
| rs11976674 | LOC402476 | GI_42658265-S | 7 | 7 | 32582262 | 7039   | 9.5244  | 6.09064 | YRI |
| rs4723203  | LOC402476 | GI_42658265-S | 7 | 7 | 32588748 | 13525  | 9.8649  | 6.09064 | YRI |
| rs17152014 | ZNFN1A1   | GI_31657112-S | 7 | 7 | 50316512 | 72149  | 6.4502  | 6.31276 | YRI |
| rs6946037  | WBSCR27   | GI_30795189-S | 7 | 7 | 72681366 | 12436  | 7.6263  | 5.82345 | YRI |
| rs8629     | WBSCR27   | GI_30795189-S | 7 | 7 | 72690170 | 3632   | 8.3493  | 5.82345 | YRI |
| rs1127155  | WBSCR27   | GI_30795189-S | 7 | 7 | 72691112 | 2690   | 5.9783  | 5.82345 | YRI |
| rs11316    | WBSCR27   | GI_30795189-S | 7 | 7 | 72691206 | 2596   | 7.814   | 5.82345 | YRI |
| rs13232463 | WBSCR27   | GI_30795189-S | 7 | 7 | 72693950 | 148    | 8.8308  | 5.82345 | YRI |
| rs4304218  | WBSCR27   | GI_30795189-S | 7 | 7 | 72697631 | 3829   | 7.8136  | 5.82345 | YRI |
| rs1073909  | WBSCR27   | GI_30795189-S | 7 | 7 | 72702940 | 9138   | 5.9783  | 5.82345 | YRI |
| rs11770024 | WBSCR27   | GI_30795189-S | 7 | 7 | 72720152 | 26350  | 6.296   | 5.82345 | YRI |

|            |          |               |   |   |           |        |         |         |     |
|------------|----------|---------------|---|---|-----------|--------|---------|---------|-----|
| rs10499902 | TP53AP1  | GI_6005909-S  | 7 | 7 | 86609620  | 10225  | 6.5015  | 5.91215 | YRI |
| rs11977186 | TP53AP1  | GI_6005909-S  | 7 | 7 | 86609816  | 10421  | 6.9224  | 5.91215 | YRI |
| rs11975323 | TP53AP1  | GI_6005909-S  | 7 | 7 | 86611335  | 11940  | 6.0999  | 5.91215 | YRI |
| rs11976069 | TP53AP1  | GI_6005909-S  | 7 | 7 | 86611569  | 12174  | 6.0999  | 5.91215 | YRI |
| rs11983904 | TP53AP1  | GI_6005909-S  | 7 | 7 | 86620215  | 20820  | 6.5015  | 5.91215 | YRI |
| rs6943724  | TP53AP1  | GI_6005909-S  | 7 | 7 | 86622299  | 22904  | 6.9583  | 5.91215 | YRI |
| rs11975766 | TP53AP1  | GI_6005909-S  | 7 | 7 | 86623993  | 24598  | 6.9583  | 5.91215 | YRI |
| rs4729568  | AP4M1    | GI_14917110-S | 7 | 7 | 99284096  | 65052  | 7.7519  | 5.5233  | YRI |
| rs6960432  | AP4M1    | GI_14917110-S | 7 | 7 | 99315526  | 33622  | 7.6421  | 5.5233  | YRI |
| rs2272338  | AP4M1    | GI_14917110-S | 7 | 7 | 99352363  | 3215   | 7.8484  | 5.5233  | YRI |
| rs3807479  | AP4M1    | GI_14917110-S | 7 | 7 | 99361552  | 12404  | 7.9923  | 5.5233  | YRI |
| rs7785070  | AP4M1    | GI_14917110-S | 7 | 7 | 99391781  | 42633  | 7.0059  | 5.5233  | YRI |
| rs1404213  | SVH      | GI_31377662-S | 7 | 7 | 102310866 | 22513  | 7.6752  | 6.29734 | YRI |
| rs6465890  | SVH      | GI_31377662-S | 7 | 7 | 102311663 | 21716  | 6.5917  | 6.29734 | YRI |
| rs4729870  | SVH      | GI_31377662-S | 7 | 7 | 102316698 | 16681  | 7.8093  | 6.29734 | YRI |
| rs4729871  | SVH      | GI_31377662-S | 7 | 7 | 102318323 | 15056  | 7.4698  | 6.29734 | YRI |
| rs1861730  | SVH      | GI_31377662-S | 7 | 7 | 102328551 | 4828   | 7.4698  | 6.29734 | YRI |
| rs6966872  | SVH      | GI_31377662-S | 7 | 7 | 102329091 | 4288   | 6.7128  | 6.29734 | YRI |
| rs4729875  | SVH      | GI_31377662-S | 7 | 7 | 102329632 | 3747   | 6.9285  | 6.29734 | YRI |
| rs2041949  | SVH      | GI_31377662-S | 7 | 7 | 102331202 | 2177   | 7.4698  | 6.29734 | YRI |
| rs2193418  | SVH      | GI_31377662-S | 7 | 7 | 102331362 | 2017   | 7.2584  | 6.29734 | YRI |
| rs1861728  | SVH      | GI_31377662-S | 7 | 7 | 102332351 | 1028   | 7.9127  | 6.29734 | YRI |
| rs6950177  | SVH      | GI_31377662-S | 7 | 7 | 102334634 | 1255   | 7.6752  | 6.29734 | YRI |
| rs7783856  | SVH      | GI_31377662-S | 7 | 7 | 102334985 | 1606   | 6.8183  | 6.29734 | YRI |
| rs7784337  | SVH      | GI_31377662-S | 7 | 7 | 102335044 | 1665   | 7.6752  | 6.29734 | YRI |
| rs13242079 | SVH      | GI_31377662-S | 7 | 7 | 102336169 | 2790   | 7.4698  | 6.29734 | YRI |
| rs3181009  | SVH      | GI_31377662-S | 7 | 7 | 102337844 | 4465   | 7.3957  | 6.29734 | YRI |
| rs10808125 | SVH      | GI_31377662-S | 7 | 7 | 102338710 | 5331   | 7.3957  | 6.29734 | YRI |
| rs6976034  | SVH      | GI_31377662-S | 7 | 7 | 102339301 | 5922   | 7.3957  | 6.29734 | YRI |
| rs6976794  | SVH      | GI_31377662-S | 7 | 7 | 102339751 | 6372   | 7.3957  | 6.29734 | YRI |
| rs1968199  | SVH      | GI_31377662-S | 7 | 7 | 102347722 | 14343  | 7.2121  | 6.29734 | YRI |
| rs1968198  | SVH      | GI_31377662-S | 7 | 7 | 102347807 | 14428  | 7.5283  | 6.29734 | YRI |
| rs7792240  | SVH      | GI_31377662-S | 7 | 7 | 102348894 | 15515  | 7.3957  | 6.29734 | YRI |
| rs4729882  | SVH      | GI_31377662-S | 7 | 7 | 102349281 | 15902  | 7.3957  | 6.29734 | YRI |
| rs1477163  | SVH      | GI_31377662-S | 7 | 7 | 102351385 | 18006  | 7.2121  | 6.29734 | YRI |
| rs6966961  | SVH      | GI_31377662-S | 7 | 7 | 102352002 | 18623  | 7.3957  | 6.29734 | YRI |
| rs6946968  | SVH      | GI_31377662-S | 7 | 7 | 102352035 | 18656  | 7.3957  | 6.29734 | YRI |
| rs6465898  | SVH      | GI_31377662-S | 7 | 7 | 102352681 | 19302  | 7.3957  | 6.29734 | YRI |
| rs1558853  | SVH      | GI_31377662-S | 7 | 7 | 102354725 | 21346  | 7.4788  | 6.29734 | YRI |
| rs1861725  | SVH      | GI_31377662-S | 7 | 7 | 102376397 | 43018  | 7.151   | 6.29734 | YRI |
| rs6465905  | SVH      | GI_31377662-S | 7 | 7 | 102381086 | 47707  | 7.3682  | 6.29734 | YRI |
| rs11760826 | SVH      | GI_31377662-S | 7 | 7 | 102385762 | 52383  | 8.0532  | 6.29734 | YRI |
| rs17136728 | FLJ36166 | GI_32699073-S | 7 | 7 | 102583677 | 173947 | 5.9085  | 5.88008 | YRI |
| rs6968225  | IRF5     | GI_38683858-A | 7 | 7 | 128157558 | 25584  | 15.9464 | 6.07989 | YRI |
| rs4728142  | IRF5     | GI_38683858-A | 7 | 7 | 128167918 | 15224  | 8.8104  | 6.07989 | YRI |
| rs752637   | IRF5     | GI_38683858-A | 7 | 7 | 128173371 | 9771   | 11.8401 | 6.07989 | YRI |
| rs3807306  | IRF5     | GI_38683858-A | 7 | 7 | 128174631 | 8511   | 7.1617  | 6.07989 | YRI |
| rs7808907  | IRF5     | GI_38683858-A | 7 | 7 | 128178035 | 5107   | 9.7899  | 6.07989 | YRI |
| rs1874328  | IRF5     | GI_38683858-A | 7 | 7 | 128179055 | 4087   | 9.9577  | 6.07989 | YRI |
| rs13242262 | IRF5     | GI_38683858-A | 7 | 7 | 128185315 | 2173   | 12.33   | 6.07989 | YRI |
| rs2280714  | IRF5     | GI_38683858-A | 7 | 7 | 128188676 | 5534   | 19.2782 | 6.07989 | YRI |
| rs10229001 | IRF5     | GI_38683858-A | 7 | 7 | 128193348 | 10206  | 19.0604 | 6.07989 | YRI |
| rs2172876  | IRF5     | GI_38683858-A | 7 | 7 | 128197243 | 14101  | 15.3428 | 6.07989 | YRI |
| rs7385716  | IRF5     | GI_38683858-A | 7 | 7 | 128199545 | 16403  | 20.3886 | 6.07989 | YRI |
| rs4731535  | IRF5     | GI_38683858-A | 7 | 7 | 128199918 | 16776  | 15.3428 | 6.07989 | YRI |
| rs8043     | IRF5     | GI_38683858-A | 7 | 7 | 128201335 | 18193  | 15.3428 | 6.07989 | YRI |

|            |          |                |   |   |           |        |         |         |     |
|------------|----------|----------------|---|---|-----------|--------|---------|---------|-----|
| rs6953869  | IRF5     | GI_38683858-A  | 7 | 7 | 128202711 | 19569  | 14.2506 | 6.07989 | YRI |
| rs1874332  | IRF5     | GI_38683858-A  | 7 | 7 | 128208564 | 25422  | 15.3428 | 6.07989 | YRI |
| rs7789423  | IRF5     | GI_38683858-A  | 7 | 7 | 128215155 | 32013  | 19.6477 | 6.07989 | YRI |
| rs6948928  | IRF5     | GI_38683858-A  | 7 | 7 | 128217048 | 33906  | 19.6477 | 6.07989 | YRI |
| rs7788977  | IRF5     | GI_38683858-A  | 7 | 7 | 128218378 | 35236  | 8.2557  | 6.07989 | YRI |
| rs11770317 | IRF5     | GI_38683858-A  | 7 | 7 | 128223422 | 40280  | 14.4829 | 6.07989 | YRI |
| rs6969930  | IRF5     | GI_38683858-A  | 7 | 7 | 128224264 | 41122  | 18.4221 | 6.07989 | YRI |
| rs2076960  | IRF5     | GI_38683858-A  | 7 | 7 | 128226759 | 43617  | 8.2557  | 6.07989 | YRI |
| rs7807018  | IRF5     | GI_38683858-A  | 7 | 7 | 128234139 | 50997  | 15.3428 | 6.07989 | YRI |
| rs11767711 | IRF5     | GI_38683858-A  | 7 | 7 | 128245783 | 62641  | 13.1218 | 6.07989 | YRI |
| rs6965542  | IRF5     | GI_38683858-A  | 7 | 7 | 128249869 | 66727  | 13.6951 | 6.07989 | YRI |
| rs3857852  | IRF5     | GI_38683858-A  | 7 | 7 | 128251228 | 68086  | 19.6477 | 6.07989 | YRI |
| rs12155080 | IRF5     | GI_38683858-A  | 7 | 7 | 128252690 | 69548  | 8.2728  | 6.07989 | YRI |
| rs13221560 | IRF5     | GI_38683858-A  | 7 | 7 | 128257126 | 73984  | 18.7888 | 6.07989 | YRI |
| rs10239340 | IRF5     | GI_38683858-A  | 7 | 7 | 128262461 | 79319  | 20.5162 | 6.07989 | YRI |
| rs11762968 | IRF5     | GI_38683858-A  | 7 | 7 | 128264915 | 81773  | 15.3428 | 6.07989 | YRI |
| rs1072767  | IRF5     | GI_38683858-A  | 7 | 7 | 128267156 | 84014  | 19.6477 | 6.07989 | YRI |
| rs921403   | IRF5     | GI_38683858-A  | 7 | 7 | 128270675 | 87533  | 19.6477 | 6.07989 | YRI |
| rs4731541  | IRF5     | GI_38683858-A  | 7 | 7 | 128272187 | 89045  | 20.5162 | 6.07989 | YRI |
| rs10279821 | IRF5     | GI_38683858-A  | 7 | 7 | 128277498 | 94356  | 19.6477 | 6.07989 | YRI |
| rs10156169 | IRF5     | GI_38683858-A  | 7 | 7 | 128278522 | 95380  | 19.6477 | 6.07989 | YRI |
| rs17166957 | IRF5     | GI_38683858-A  | 7 | 7 | 128281438 | 98296  | 7.2588  | 6.07989 | YRI |
| rs17167001 | IRF5     | GI_38683858-A  | 7 | 7 | 128286578 | 103436 | 8.0223  | 6.07989 | YRI |
| rs6960994  | IRF5     | GI_38683858-A  | 7 | 7 | 128286608 | 103466 | 6.5341  | 6.07989 | YRI |
| rs2242028  | IRF5     | GI_38683858-A  | 7 | 7 | 128288927 | 105785 | 6.1301  | 6.07989 | YRI |
| rs2242029  | IRF5     | GI_38683858-A  | 7 | 7 | 128289230 | 106088 | 8.3824  | 6.07989 | YRI |
| rs11766016 | IRF5     | GI_38683858-A  | 7 | 7 | 128291648 | 108506 | 7.6396  | 6.07989 | YRI |
| rs11766495 | IRF5     | GI_38683858-A  | 7 | 7 | 128294957 | 111815 | 7.2588  | 6.07989 | YRI |
| rs17167079 | IRF5     | GI_38683858-A  | 7 | 7 | 128303122 | 119980 | 8.8974  | 6.07989 | YRI |
| rs1901198  | IRF5     | GI_38683858-A  | 7 | 7 | 128303740 | 120598 | 6.8912  | 6.07989 | YRI |
| rs7458937  | IRF5     | GI_38683858-A  | 7 | 7 | 128322705 | 139563 | 6.3359  | 6.07989 | YRI |
| rs3807344  | CPA4     | GI_100471105-S | 7 | 7 | 129528170 | 29489  | 9.8176  | 6.04712 | YRI |
| rs10863    | COPG2    | GI_6912319-S   | 7 | 7 | 129739540 | 1008   | 7.0386  | 6.24755 | YRI |
| rs7803211  | COPG2    | GI_6912319-S   | 7 | 7 | 129748552 | 8004   | 6.6176  | 6.24755 | YRI |
| rs6467312  | COPG2    | GI_6912319-S   | 7 | 7 | 129805299 | 64751  | 6.7181  | 6.24755 | YRI |
| rs2718157  | MGC5242  | GI_13162284-S  | 7 | 7 | 134133424 | 174600 | 6.4582  | 6.1969  | YRI |
| rs2718160  | MGC5242  | GI_13162284-S  | 7 | 7 | 134135313 | 172711 | 6.4145  | 6.1969  | YRI |
| rs4442075  | MGC5242  | GI_13162284-S  | 7 | 7 | 134137391 | 170633 | 6.8583  | 6.1969  | YRI |
| rs4366013  | MGC5242  | GI_13162284-S  | 7 | 7 | 134140511 | 167513 | 6.2264  | 6.1969  | YRI |
| rs4236652  | MGC5242  | GI_13162284-S  | 7 | 7 | 134147340 | 160684 | 6.3011  | 6.1969  | YRI |
| rs4286887  | MGC5242  | GI_13162284-S  | 7 | 7 | 134158530 | 149494 | 6.7842  | 6.1969  | YRI |
| rs4732081  | MGC5242  | GI_13162284-S  | 7 | 7 | 134159474 | 148550 | 6.7815  | 6.1969  | YRI |
| rs4728347  | MGC5242  | GI_13162284-S  | 7 | 7 | 134161007 | 147017 | 6.3157  | 6.1969  | YRI |
| rs4732085  | MGC5242  | GI_13162284-S  | 7 | 7 | 134194443 | 113581 | 6.3049  | 6.1969  | YRI |
| rs7793904  | MGC5242  | GI_13162284-S  | 7 | 7 | 134200693 | 107331 | 6.7842  | 6.1969  | YRI |
| rs2348057  | MGC5242  | GI_13162284-S  | 7 | 7 | 134206261 | 101763 | 6.4145  | 6.1969  | YRI |
| rs7810068  | MGC5242  | GI_13162284-S  | 7 | 7 | 134207587 | 100437 | 6.4145  | 6.1969  | YRI |
| rs10488439 | MGC5242  | GI_13162284-S  | 7 | 7 | 134220453 | 87571  | 6.8829  | 6.1969  | YRI |
| rs2348277  | MGC5242  | GI_13162284-S  | 7 | 7 | 134258172 | 49852  | 6.4145  | 6.1969  | YRI |
| rs1254430  | MGC5242  | GI_13162284-S  | 7 | 7 | 134318523 | 10499  | 6.2813  | 6.1969  | YRI |
| rs292546   | MGC5242  | GI_13162284-S  | 7 | 7 | 134323932 | 15908  | 6.3026  | 6.1969  | YRI |
| rs292598   | MGC5242  | GI_13162284-S  | 7 | 7 | 134350279 | 42255  | 6.2142  | 6.1969  | YRI |
| rs292608   | MGC5242  | GI_13162284-S  | 7 | 7 | 134356692 | 48668  | 6.3026  | 6.1969  | YRI |
| rs2774961  | KIAA1549 | GI_42658625-S  | 7 | 7 | 138083430 | 104128 | 6.3031  | 6.16682 | YRI |
| rs7788200  | C7orf13  | GI_14249145-S  | 7 | 7 | 155932719 | 1786   | 6.7101  | 6.28622 | YRI |
| rs10235562 | C7orf13  | GI_14249145-S  | 7 | 7 | 155936470 | 5537   | 7.1365  | 6.28622 | YRI |

|            |           |               |   |   |           |        |         |         |     |
|------------|-----------|---------------|---|---|-----------|--------|---------|---------|-----|
| rs10243532 | C7orf13   | GI_14249145-S | 7 | 7 | 155937938 | 7005   | 7.8646  | 6.28622 | YRI |
| rs10253748 | C7orf13   | GI_14249145-S | 7 | 7 | 155937991 | 7058   | 7.8646  | 6.28622 | YRI |
| rs7800925  | C7orf13   | GI_14249145-S | 7 | 7 | 155938273 | 7340   | 7.8646  | 6.28622 | YRI |
| rs4716647  | C7orf13   | GI_14249145-S | 7 | 7 | 155940337 | 9404   | 8.0869  | 6.28622 | YRI |
| rs4716437  | C7orf13   | GI_14249145-S | 7 | 7 | 155941511 | 10578  | 8.5817  | 6.28622 | YRI |
| rs10236219 | C7orf13   | GI_14249145-S | 7 | 7 | 155945794 | 14861  | 7.7431  | 6.28622 | YRI |
| rs10251511 | C7orf13   | GI_14249145-S | 7 | 7 | 155945876 | 14943  | 7.8646  | 6.28622 | YRI |
| rs6978799  | C7orf13   | GI_14249145-S | 7 | 7 | 155946312 | 15379  | 7.8646  | 6.28622 | YRI |
| rs1014831  | C7orf13   | GI_14249145-S | 7 | 7 | 155946547 | 15614  | 7.8646  | 6.28622 | YRI |
| rs2302150  | C7orf13   | GI_14249145-S | 7 | 7 | 155954339 | 23406  | 7.6561  | 6.28622 | YRI |
| rs2240645  | C7orf13   | GI_14249145-S | 7 | 7 | 155970624 | 39691  | 6.6908  | 6.28622 | YRI |
| rs2657381  | FLJ10300  | GI_21361686-S | 7 | 7 | 158150563 | 87408  | 7.6997  | 5.90959 | YRI |
| rs4909278  | FLJ10300  | GI_21361686-S | 7 | 7 | 158158496 | 79475  | 6.9134  | 5.90959 | YRI |
| rs7002633  | FLJ21616  | GI_13375737-S | 8 | 8 | 28792835  | 172186 | 6.3465  | 6.17751 | YRI |
| rs983365   | FLJ21616  | GI_13375737-S | 8 | 8 | 28806348  | 158673 | 9.618   | 6.17751 | YRI |
| rs13280242 | FLJ21616  | GI_13375737-S | 8 | 8 | 28812657  | 152364 | 7.6277  | 6.17751 | YRI |
| rs1858462  | FLJ21616  | GI_13375737-S | 8 | 8 | 28816656  | 148365 | 7.8582  | 6.17751 | YRI |
| rs11987985 | FLJ21616  | GI_13375737-S | 8 | 8 | 28819961  | 145060 | 6.5015  | 6.17751 | YRI |
| rs2203209  | FLJ21616  | GI_13375737-S | 8 | 8 | 28843952  | 121069 | 9.7223  | 6.17751 | YRI |
| rs2221894  | FLJ21616  | GI_13375737-S | 8 | 8 | 28847078  | 117943 | 16.4899 | 6.17751 | YRI |
| rs4732893  | FLJ21616  | GI_13375737-S | 8 | 8 | 28850597  | 114424 | 10.4569 | 6.17751 | YRI |
| rs11136052 | FLJ21616  | GI_13375737-S | 8 | 8 | 28858994  | 106027 | 9.618   | 6.17751 | YRI |
| rs2137471  | FLJ21616  | GI_13375737-S | 8 | 8 | 28861568  | 103453 | 16.4899 | 6.17751 | YRI |
| rs2292478  | FLJ21616  | GI_13375737-S | 8 | 8 | 28863275  | 101746 | 16.4899 | 6.17751 | YRI |
| rs4732894  | FLJ21616  | GI_13375737-S | 8 | 8 | 28878970  | 86051  | 9.618   | 6.17751 | YRI |
| rs4732896  | FLJ21616  | GI_13375737-S | 8 | 8 | 28881393  | 83628  | 16.4899 | 6.17751 | YRI |
| rs10111019 | FLJ21616  | GI_13375737-S | 8 | 8 | 28886219  | 78802  | 8.4979  | 6.17751 | YRI |
| rs12674777 | FLJ21616  | GI_13375737-S | 8 | 8 | 28899640  | 65381  | 8.4979  | 6.17751 | YRI |
| rs7823358  | FLJ21616  | GI_13375737-S | 8 | 8 | 28907096  | 57925  | 6.4902  | 6.17751 | YRI |
| rs7842492  | FLJ21616  | GI_13375737-S | 8 | 8 | 28925556  | 39465  | 16.2814 | 6.17751 | YRI |
| rs1487969  | FLJ21616  | GI_13375737-S | 8 | 8 | 28941580  | 23441  | 16.4899 | 6.17751 | YRI |
| rs6558089  | FLJ21616  | GI_13375737-S | 8 | 8 | 28950156  | 14865  | 16.4899 | 6.17751 | YRI |
| rs7018244  | FLJ21616  | GI_13375737-S | 8 | 8 | 28950910  | 14111  | 9.618   | 6.17751 | YRI |
| rs1948132  | FLJ21616  | GI_13375737-S | 8 | 8 | 28956006  | 9015   | 9.618   | 6.17751 | YRI |
| rs8180944  | FLJ21616  | GI_13375737-S | 8 | 8 | 28960005  | 5016   | 16.4899 | 6.17751 | YRI |
| rs10088428 | FLJ21616  | GI_13375737-S | 8 | 8 | 28965442  | 421    | 18.5185 | 6.17751 | YRI |
| rs2693     | FLJ21616  | GI_13375737-S | 8 | 8 | 28980777  | 15756  | 9.2036  | 6.17751 | YRI |
| rs4732901  | FLJ21616  | GI_13375737-S | 8 | 8 | 28987298  | 22277  | 6.4649  | 6.17751 | YRI |
| rs13255886 | LOC340435 | GI_29735811-S | 8 | 8 | 71728508  | 53419  | 12.0216 | 5.97675 | YRI |
| rs7814274  | LOC340435 | GI_29735811-S | 8 | 8 | 71732965  | 48962  | 12.0216 | 5.97675 | YRI |
| rs7830550  | LOC340435 | GI_29735811-S | 8 | 8 | 71732985  | 48942  | 12.0216 | 5.97675 | YRI |
| rs6993326  | LOC340435 | GI_29735811-S | 8 | 8 | 71738154  | 43773  | 8.3932  | 5.97675 | YRI |
| rs10504479 | LOC340435 | GI_29735811-S | 8 | 8 | 71740069  | 41858  | 12.0216 | 5.97675 | YRI |
| rs1993862  | LOC340435 | GI_29735811-S | 8 | 8 | 71741916  | 40011  | 9.3127  | 5.97675 | YRI |
| rs2279128  | LOC340435 | GI_29735811-S | 8 | 8 | 71744113  | 37814  | 8.3932  | 5.97675 | YRI |
| rs1477943  | LOC340435 | GI_29735811-S | 8 | 8 | 71745317  | 36610  | 7.1641  | 5.97675 | YRI |
| rs13271442 | LOC340435 | GI_29735811-S | 8 | 8 | 71747723  | 34204  | 9.4821  | 5.97675 | YRI |
| rs6472538  | LOC340435 | GI_29735811-S | 8 | 8 | 71749525  | 32402  | 12.0216 | 5.97675 | YRI |
| rs7001162  | LOC340435 | GI_29735811-S | 8 | 8 | 71750024  | 31903  | 9.8903  | 5.97675 | YRI |
| rs12681420 | LOC340435 | GI_29735811-S | 8 | 8 | 71755752  | 26175  | 8.3932  | 5.97675 | YRI |
| rs6991329  | LOC340435 | GI_29735811-S | 8 | 8 | 71755979  | 25948  | 12.0216 | 5.97675 | YRI |
| rs7831507  | LOC340435 | GI_29735811-S | 8 | 8 | 71757780  | 24147  | 8.3932  | 5.97675 | YRI |
| rs13256093 | LOC340435 | GI_29735811-S | 8 | 8 | 71758931  | 22996  | 8.3932  | 5.97675 | YRI |
| rs12675271 | LOC340435 | GI_29735811-S | 8 | 8 | 71764563  | 17364  | 12.0216 | 5.97675 | YRI |
| rs7842091  | LOC340435 | GI_29735811-S | 8 | 8 | 71777335  | 4592   | 8.3932  | 5.97675 | YRI |
| rs1477945  | LOC340435 | GI_29735811-S | 8 | 8 | 71778107  | 3820   | 8.3932  | 5.97675 | YRI |

|            |           |               |   |   |          |        |         |         |     |
|------------|-----------|---------------|---|---|----------|--------|---------|---------|-----|
| rs1477944  | LOC340435 | GI_29735811-S | 8 | 8 | 71778154 | 3773   | 6.8742  | 5.97675 | YRI |
| rs17760532 | LOC340435 | GI_29735811-S | 8 | 8 | 71782841 | 914    | 8.3932  | 5.97675 | YRI |
| rs13253842 | LOC340435 | GI_29735811-S | 8 | 8 | 71788057 | 6130   | 11.7258 | 5.97675 | YRI |
| rs13254908 | LOC340435 | GI_29735811-S | 8 | 8 | 71788652 | 6725   | 11.9675 | 5.97675 | YRI |
| rs13264669 | LOC340435 | GI_29735811-S | 8 | 8 | 71789326 | 7399   | 12.0216 | 5.97675 | YRI |
| rs7013657  | LOC340435 | GI_29735811-S | 8 | 8 | 71800113 | 18186  | 12.0216 | 5.97675 | YRI |
| rs2290702  | LOC340435 | GI_29735811-S | 8 | 8 | 71809534 | 27607  | 8.3932  | 5.97675 | YRI |
| rs7015035  | LOC340435 | GI_29735811-S | 8 | 8 | 71816155 | 34228  | 12.0216 | 5.97675 | YRI |
| rs6472542  | LOC340435 | GI_29735811-S | 8 | 8 | 71816641 | 34714  | 12.0216 | 5.97675 | YRI |
| rs6982406  | LOC340435 | GI_29735811-S | 8 | 8 | 71817162 | 35235  | 12.0216 | 5.97675 | YRI |
| rs1902614  | LOC340435 | GI_29735811-S | 8 | 8 | 71818721 | 36794  | 12.0216 | 5.97675 | YRI |
| rs6998024  | LOC340435 | GI_29735811-S | 8 | 8 | 71823394 | 41467  | 8.4668  | 5.97675 | YRI |
| rs1348535  | LOC340435 | GI_29735811-S | 8 | 8 | 71825295 | 43368  | 12.0216 | 5.97675 | YRI |
| rs7825446  | LOC340435 | GI_29735811-S | 8 | 8 | 71826728 | 44801  | 12.0216 | 5.97675 | YRI |
| rs6472543  | LOC340435 | GI_29735811-S | 8 | 8 | 71826962 | 45035  | 12.0216 | 5.97675 | YRI |
| rs7819332  | LOC340435 | GI_29735811-S | 8 | 8 | 71830819 | 48892  | 12.0216 | 5.97675 | YRI |
| rs7012404  | LOC340435 | GI_29735811-S | 8 | 8 | 71831252 | 49325  | 11.9675 | 5.97675 | YRI |
| rs13258584 | LOC340435 | GI_29735811-S | 8 | 8 | 71834133 | 52206  | 10.0433 | 5.97675 | YRI |
| rs1471114  | LOC340435 | GI_29735811-S | 8 | 8 | 71838101 | 56174  | 12.0216 | 5.97675 | YRI |
| rs7017481  | LOC340435 | GI_29735811-S | 8 | 8 | 71839324 | 57397  | 8.3932  | 5.97675 | YRI |
| rs11993453 | LOC340435 | GI_29735811-S | 8 | 8 | 71840393 | 58466  | 12.0216 | 5.97675 | YRI |
| rs12680166 | LOC340435 | GI_29735811-S | 8 | 8 | 71841192 | 59265  | 12.0216 | 5.97675 | YRI |
| rs17688313 | LOC340435 | GI_29735811-S | 8 | 8 | 71846418 | 64491  | 11.9675 | 5.97675 | YRI |
| rs12674966 | LOC340435 | GI_29735811-S | 8 | 8 | 71846964 | 65037  | 8.1602  | 5.97675 | YRI |
| rs1373480  | LOC340435 | GI_29735811-S | 8 | 8 | 71849521 | 67594  | 12.0216 | 5.97675 | YRI |
| rs7000647  | LOC340435 | GI_29735811-S | 8 | 8 | 71850962 | 69035  | 12.0216 | 5.97675 | YRI |
| rs13254801 | LOC340435 | GI_29735811-S | 8 | 8 | 71851538 | 69611  | 7.2958  | 5.97675 | YRI |
| rs6993170  | LOC340435 | GI_29735811-S | 8 | 8 | 71856073 | 74146  | 7.6271  | 5.97675 | YRI |
| rs6998786  | LOC340435 | GI_29735811-S | 8 | 8 | 71857184 | 75257  | 11.7258 | 5.97675 | YRI |
| rs6981149  | LOC340435 | GI_29735811-S | 8 | 8 | 71857236 | 75309  | 8.1602  | 5.97675 | YRI |
| rs12680988 | LOC340435 | GI_29735811-S | 8 | 8 | 71858444 | 76517  | 10.7794 | 5.97675 | YRI |
| rs1596566  | LOC340435 | GI_29735811-S | 8 | 8 | 71861130 | 79203  | 12.0216 | 5.97675 | YRI |
| rs1596565  | LOC340435 | GI_29735811-S | 8 | 8 | 71861386 | 79459  | 8.3932  | 5.97675 | YRI |
| rs6993115  | LOC340435 | GI_29735811-S | 8 | 8 | 71861737 | 79810  | 11.9675 | 5.97675 | YRI |
| rs10504481 | LOC340435 | GI_29735811-S | 8 | 8 | 71862071 | 80144  | 12.0216 | 5.97675 | YRI |
| rs7826483  | LOC340435 | GI_29735811-S | 8 | 8 | 71865447 | 83520  | 12.0216 | 5.97675 | YRI |
| rs13257800 | LOC340435 | GI_29735811-S | 8 | 8 | 71876687 | 94760  | 12.0216 | 5.97675 | YRI |
| rs13261712 | LOC340435 | GI_29735811-S | 8 | 8 | 71894818 | 112891 | 12.0216 | 5.97675 | YRI |
| rs13252719 | LOC340435 | GI_29735811-S | 8 | 8 | 71897123 | 115196 | 11.785  | 5.97675 | YRI |
| rs13274062 | LOC340435 | GI_29735811-S | 8 | 8 | 71899641 | 117714 | 12.0216 | 5.97675 | YRI |
| rs13274381 | LOC340435 | GI_29735811-S | 8 | 8 | 71927648 | 145721 | 12.0216 | 5.97675 | YRI |
| rs6472551  | LOC340435 | GI_29735811-S | 8 | 8 | 71944403 | 162476 | 12.0216 | 5.97675 | YRI |
| rs6989188  | LOC375671 | GI_37556019-S | 8 | 8 | 74339869 | 8076   | 6.3144  | 6.17533 | YRI |
| rs1466526  | CGI-62    | GI_7705774-S  | 8 | 8 | 79718029 | 72022  | 6.3104  | 6.00898 | YRI |
| rs4739134  | CGI-62    | GI_7705774-S  | 8 | 8 | 79718703 | 71348  | 6.3104  | 6.00898 | YRI |
| rs900567   | CGI-62    | GI_7705774-S  | 8 | 8 | 79722177 | 67874  | 6.2661  | 6.00898 | YRI |
| rs12708100 | CGI-62    | GI_7705774-S  | 8 | 8 | 79727624 | 62427  | 11.2816 | 6.00898 | YRI |
| rs13251931 | CGI-62    | GI_7705774-S  | 8 | 8 | 79728780 | 61271  | 11.2816 | 6.00898 | YRI |
| rs3899796  | CGI-62    | GI_7705774-S  | 8 | 8 | 79730637 | 59414  | 9.7012  | 6.00898 | YRI |
| rs4739135  | CGI-62    | GI_7705774-S  | 8 | 8 | 79730847 | 59204  | 11.2816 | 6.00898 | YRI |
| rs2887482  | CGI-62    | GI_7705774-S  | 8 | 8 | 79734423 | 55628  | 11.2816 | 6.00898 | YRI |
| rs1384804  | CGI-62    | GI_7705774-S  | 8 | 8 | 79734777 | 55274  | 12.6569 | 6.00898 | YRI |
| rs1905364  | CGI-62    | GI_7705774-S  | 8 | 8 | 79735034 | 55017  | 11.2816 | 6.00898 | YRI |
| rs9298314  | CGI-62    | GI_7705774-S  | 8 | 8 | 79735664 | 54387  | 11.2816 | 6.00898 | YRI |
| rs1021157  | CGI-62    | GI_7705774-S  | 8 | 8 | 79737728 | 52323  | 11.2816 | 6.00898 | YRI |
| rs1021156  | CGI-62    | GI_7705774-S  | 8 | 8 | 79738359 | 51692  | 6.757   | 6.00898 | YRI |

|            |         |               |   |   |           |       |         |         |     |
|------------|---------|---------------|---|---|-----------|-------|---------|---------|-----|
| rs979564   | CGI-62  | GI_7705774-S  | 8 | 8 | 79738714  | 51337 | 6.6481  | 6.00898 | YRI |
| rs3808619  | CGI-62  | GI_7705774-S  | 8 | 8 | 79740281  | 49770 | 12.6569 | 6.00898 | YRI |
| rs1384803  | CGI-62  | GI_7705774-S  | 8 | 8 | 79744183  | 45868 | 12.1384 | 6.00898 | YRI |
| rs4641056  | CGI-62  | GI_7705774-S  | 8 | 8 | 79745051  | 45000 | 11.3645 | 6.00898 | YRI |
| rs3736169  | CGI-62  | GI_7705774-S  | 8 | 8 | 79750410  | 39641 | 6.757   | 6.00898 | YRI |
| rs7839152  | CGI-62  | GI_7705774-S  | 8 | 8 | 79752567  | 37484 | 12.6569 | 6.00898 | YRI |
| rs9643739  | CGI-62  | GI_7705774-S  | 8 | 8 | 79754325  | 35726 | 6.6481  | 6.00898 | YRI |
| rs7842142  | CGI-62  | GI_7705774-S  | 8 | 8 | 79756291  | 33760 | 12.6569 | 6.00898 | YRI |
| rs10093127 | CGI-62  | GI_7705774-S  | 8 | 8 | 79761659  | 28392 | 6.757   | 6.00898 | YRI |
| rs10113703 | CGI-62  | GI_7705774-S  | 8 | 8 | 79763194  | 26857 | 11.9052 | 6.00898 | YRI |
| rs1872072  | CGI-62  | GI_7705774-S  | 8 | 8 | 79763975  | 26076 | 6.757   | 6.00898 | YRI |
| rs7001074  | CGI-62  | GI_7705774-S  | 8 | 8 | 79766479  | 23572 | 12.6569 | 6.00898 | YRI |
| rs10109359 | CGI-62  | GI_7705774-S  | 8 | 8 | 79769159  | 20892 | 7.4009  | 6.00898 | YRI |
| rs7017898  | CGI-62  | GI_7705774-S  | 8 | 8 | 79771937  | 18114 | 12.1384 | 6.00898 | YRI |
| rs1054283  | CGI-62  | GI_7705774-S  | 8 | 8 | 79773265  | 16786 | 12.6569 | 6.00898 | YRI |
| rs13280202 | CGI-62  | GI_7705774-S  | 8 | 8 | 79775028  | 15023 | 6.3296  | 6.00898 | YRI |
| rs7010299  | CGI-62  | GI_7705774-S  | 8 | 8 | 79782576  | 7475  | 12.1384 | 6.00898 | YRI |
| rs7010897  | CGI-62  | GI_7705774-S  | 8 | 8 | 79782909  | 7142  | 12.0601 | 6.00898 | YRI |
| rs2369440  | CGI-62  | GI_7705774-S  | 8 | 8 | 79784264  | 5787  | 12.6569 | 6.00898 | YRI |
| rs2717540  | CGI-62  | GI_7705774-S  | 8 | 8 | 79784918  | 5133  | 6.6481  | 6.00898 | YRI |
| rs1483573  | CGI-62  | GI_7705774-S  | 8 | 8 | 79786172  | 3879  | 6.757   | 6.00898 | YRI |
| rs13267679 | CGI-62  | GI_7705774-S  | 8 | 8 | 79786393  | 3658  | 7.959   | 6.00898 | YRI |
| rs2953477  | CGI-62  | GI_7705774-S  | 8 | 8 | 79787160  | 2891  | 10.0798 | 6.00898 | YRI |
| rs2625663  | CGI-62  | GI_7705774-S  | 8 | 8 | 79792896  | 2845  | 12.1384 | 6.00898 | YRI |
| rs2717538  | CGI-62  | GI_7705774-S  | 8 | 8 | 79795704  | 5653  | 12.6569 | 6.00898 | YRI |
| rs2919936  | CGI-62  | GI_7705774-S  | 8 | 8 | 79796562  | 6511  | 6.757   | 6.00898 | YRI |
| rs2717544  | CGI-62  | GI_7705774-S  | 8 | 8 | 79799097  | 9046  | 6.6481  | 6.00898 | YRI |
| rs2953475  | CGI-62  | GI_7705774-S  | 8 | 8 | 79800693  | 10642 | 10.0798 | 6.00898 | YRI |
| rs1441438  | CGI-62  | GI_7705774-S  | 8 | 8 | 79804324  | 14273 | 12.6569 | 6.00898 | YRI |
| rs1036751  | CGI-62  | GI_7705774-S  | 8 | 8 | 79804461  | 14410 | 6.6481  | 6.00898 | YRI |
| rs1545228  | CGI-62  | GI_7705774-S  | 8 | 8 | 79806992  | 16941 | 12.6569 | 6.00898 | YRI |
| rs894221   | CGI-62  | GI_7705774-S  | 8 | 8 | 79811612  | 21561 | 12.3422 | 6.00898 | YRI |
| rs894222   | CGI-62  | GI_7705774-S  | 8 | 8 | 79811824  | 21773 | 6.7041  | 6.00898 | YRI |
| rs2583778  | CGI-62  | GI_7705774-S  | 8 | 8 | 79813696  | 23645 | 6.2006  | 6.00898 | YRI |
| rs7822425  | CGI-62  | GI_7705774-S  | 8 | 8 | 79819544  | 29493 | 6.757   | 6.00898 | YRI |
| rs1441850  | CGI-62  | GI_7705774-S  | 8 | 8 | 79820221  | 30170 | 12.6569 | 6.00898 | YRI |
| rs4430065  | CML66   | GI_31377641-S | 8 | 8 | 110256339 | 66180 | 6.2668  | 6.03554 | YRI |
| rs16879252 | CML66   | GI_31377641-S | 8 | 8 | 110328866 | 6347  | 7.2327  | 6.03554 | YRI |
| rs16879260 | CML66   | GI_31377641-S | 8 | 8 | 110329101 | 6582  | 7.2327  | 6.03554 | YRI |
| rs6469251  | CML66   | GI_31377641-S | 8 | 8 | 110374265 | 51746 | 7.1126  | 6.03554 | YRI |
| rs11997273 | CML66   | GI_31377641-S | 8 | 8 | 110378558 | 56039 | 7.1126  | 6.03554 | YRI |
| rs16879306 | CML66   | GI_31377641-S | 8 | 8 | 110404561 | 82042 | 7.2327  | 6.03554 | YRI |
| rs2607638  | PKHD1L1 | GI_31377831-S | 8 | 8 | 110539887 | 68368 | 6.4644  | 5.88164 | YRI |
| rs2844252  | PKHD1L1 | GI_31377831-S | 8 | 8 | 110540306 | 67949 | 6.4644  | 5.88164 | YRI |
| rs1026438  | PKHD1L1 | GI_31377831-S | 8 | 8 | 110543142 | 65113 | 6.4644  | 5.88164 | YRI |
| rs1673401  | PKHD1L1 | GI_31377831-S | 8 | 8 | 110544752 | 63503 | 6.4644  | 5.88164 | YRI |
| rs1783145  | PKHD1L1 | GI_31377831-S | 8 | 8 | 110545050 | 63205 | 6.4644  | 5.88164 | YRI |
| rs1673400  | PKHD1L1 | GI_31377831-S | 8 | 8 | 110545286 | 62969 | 6.4644  | 5.88164 | YRI |
| rs1673398  | PKHD1L1 | GI_31377831-S | 8 | 8 | 110546169 | 62086 | 7.767   | 5.88164 | YRI |
| rs1673397  | PKHD1L1 | GI_31377831-S | 8 | 8 | 110547112 | 61143 | 6.4644  | 5.88164 | YRI |
| rs1783143  | PKHD1L1 | GI_31377831-S | 8 | 8 | 110547650 | 60605 | 6.4644  | 5.88164 | YRI |
| rs1783142  | PKHD1L1 | GI_31377831-S | 8 | 8 | 110547837 | 60418 | 6.4644  | 5.88164 | YRI |
| rs1673396  | PKHD1L1 | GI_31377831-S | 8 | 8 | 110548797 | 59458 | 6.4644  | 5.88164 | YRI |
| rs1471125  | PKHD1L1 | GI_31377831-S | 8 | 8 | 110549755 | 58500 | 6.4644  | 5.88164 | YRI |
| rs1471124  | PKHD1L1 | GI_31377831-S | 8 | 8 | 110551558 | 56697 | 6.4644  | 5.88164 | YRI |
| rs1783152  | PKHD1L1 | GI_31377831-S | 8 | 8 | 110552076 | 56179 | 6.2256  | 5.88164 | YRI |



|            |           |               |   |   |           |       |         |         |     |
|------------|-----------|---------------|---|---|-----------|-------|---------|---------|-----|
| rs1783151  | PKHD1L1   | GI_31377831-S | 8 | 8 | 110553119 | 55136 | 6.4644  | 5.88164 | YRI |
| rs1783149  | PKHD1L1   | GI_31377831-S | 8 | 8 | 110553988 | 54267 | 6.4644  | 5.88164 | YRI |
| rs1626759  | PKHD1L1   | GI_31377831-S | 8 | 8 | 110554960 | 53295 | 13.6498 | 5.88164 | YRI |
| rs1457282  | PKHD1L1   | GI_31377831-S | 8 | 8 | 110555942 | 52313 | 13.6498 | 5.88164 | YRI |
| rs1783148  | PKHD1L1   | GI_31377831-S | 8 | 8 | 110558796 | 49459 | 13.7936 | 5.88164 | YRI |
| rs1379361  | PKHD1L1   | GI_31377831-S | 8 | 8 | 110559318 | 48937 | 13.6498 | 5.88164 | YRI |
| rs1783147  | PKHD1L1   | GI_31377831-S | 8 | 8 | 110561016 | 47239 | 13.6498 | 5.88164 | YRI |
| rs1630942  | PKHD1L1   | GI_31377831-S | 8 | 8 | 110561053 | 47202 | 13.5647 | 5.88164 | YRI |
| rs1630134  | PKHD1L1   | GI_31377831-S | 8 | 8 | 110561140 | 47115 | 13.6498 | 5.88164 | YRI |
| rs1026437  | PKHD1L1   | GI_31377831-S | 8 | 8 | 110562125 | 46130 | 13.6498 | 5.88164 | YRI |
| rs2844254  | PKHD1L1   | GI_31377831-S | 8 | 8 | 110564368 | 43887 | 13.6498 | 5.88164 | YRI |
| rs2607633  | PKHD1L1   | GI_31377831-S | 8 | 8 | 110565344 | 42911 | 13.6498 | 5.88164 | YRI |
| rs1009371  | PKHD1L1   | GI_31377831-S | 8 | 8 | 110567126 | 41129 | 12.0579 | 5.88164 | YRI |
| rs1783140  | PKHD1L1   | GI_31377831-S | 8 | 8 | 110568520 | 39735 | 13.6498 | 5.88164 | YRI |
| rs16879653 | PKHD1L1   | GI_31377831-S | 8 | 8 | 110571643 | 36612 | 6.2316  | 5.88164 | YRI |
| rs16879659 | PKHD1L1   | GI_31377831-S | 8 | 8 | 110573394 | 34861 | 6.9556  | 5.88164 | YRI |
| rs2607631  | PKHD1L1   | GI_31377831-S | 8 | 8 | 110573591 | 34664 | 13.6498 | 5.88164 | YRI |
| rs2607630  | PKHD1L1   | GI_31377831-S | 8 | 8 | 110574042 | 34213 | 14.6664 | 5.88164 | YRI |
| rs2607629  | PKHD1L1   | GI_31377831-S | 8 | 8 | 110574354 | 33901 | 13.6498 | 5.88164 | YRI |
| rs1013482  | PKHD1L1   | GI_31377831-S | 8 | 8 | 110574886 | 33369 | 12.0579 | 5.88164 | YRI |
| rs2607628  | PKHD1L1   | GI_31377831-S | 8 | 8 | 110575062 | 33193 | 13.6498 | 5.88164 | YRI |
| rs2607627  | PKHD1L1   | GI_31377831-S | 8 | 8 | 110575834 | 32421 | 8.5133  | 5.88164 | YRI |
| rs1783162  | PKHD1L1   | GI_31377831-S | 8 | 8 | 110577414 | 30841 | 12.0579 | 5.88164 | YRI |
| rs9774677  | Hs.171169 | Hs.171169-S   | 8 | 8 | 110580169 | 37252 | 6.159   | 5.84024 | YRI |
| rs1783159  | PKHD1L1   | GI_31377831-S | 8 | 8 | 110583540 | 24715 | 10.6601 | 5.88164 | YRI |
| rs1783158  | PKHD1L1   | GI_31377831-S | 8 | 8 | 110583563 | 24692 | 13.4055 | 5.88164 | YRI |
| rs1673421  | PKHD1L1   | GI_31377831-S | 8 | 8 | 110584402 | 23853 | 7.7232  | 5.88164 | YRI |
| rs1673419  | PKHD1L1   | GI_31377831-S | 8 | 8 | 110585433 | 22822 | 13.6498 | 5.88164 | YRI |
| rs1783157  | PKHD1L1   | GI_31377831-S | 8 | 8 | 110585436 | 22819 | 13.6498 | 5.88164 | YRI |
| rs1673416  | PKHD1L1   | GI_31377831-S | 8 | 8 | 110586668 | 21587 | 13.6498 | 5.88164 | YRI |
| rs1673415  | PKHD1L1   | GI_31377831-S | 8 | 8 | 110587384 | 20871 | 13.6498 | 5.88164 | YRI |
| rs1379366  | PKHD1L1   | GI_31377831-S | 8 | 8 | 110587810 | 20445 | 12.0579 | 5.88164 | YRI |
| rs1783154  | PKHD1L1   | GI_31377831-S | 8 | 8 | 110588748 | 19507 | 13.6498 | 5.88164 | YRI |
| rs1783153  | PKHD1L1   | GI_31377831-S | 8 | 8 | 110588990 | 19265 | 12.0579 | 5.88164 | YRI |
| rs2844257  | PKHD1L1   | GI_31377831-S | 8 | 8 | 110590653 | 17602 | 17.7354 | 5.88164 | YRI |
| rs2607625  | PKHD1L1   | GI_31377831-S | 8 | 8 | 110590692 | 17563 | 17.7354 | 5.88164 | YRI |
| rs2844258  | PKHD1L1   | GI_31377831-S | 8 | 8 | 110591692 | 16563 | 17.7354 | 5.88164 | YRI |
| rs2844259  | PKHD1L1   | GI_31377831-S | 8 | 8 | 110591903 | 16352 | 17.7354 | 5.88164 | YRI |
| rs1783166  | PKHD1L1   | GI_31377831-S | 8 | 8 | 110595060 | 13195 | 16.2001 | 5.88164 | YRI |
| rs1673411  | PKHD1L1   | GI_31377831-S | 8 | 8 | 110597325 | 10930 | 9.5182  | 5.88164 | YRI |
| rs1783168  | PKHD1L1   | GI_31377831-S | 8 | 8 | 110598046 | 10209 | 7.7379  | 5.88164 | YRI |
| rs1673410  | PKHD1L1   | GI_31377831-S | 8 | 8 | 110598253 | 10002 | 17.7354 | 5.88164 | YRI |
| rs1673413  | PKHD1L1   | GI_31377831-S | 8 | 8 | 110599052 | 9203  | 17.7354 | 5.88164 | YRI |
| rs7842842  | Hs.171169 | Hs.171169-S   | 8 | 8 | 110600053 | 17368 | 6.159   | 5.84024 | YRI |
| rs1783170  | PKHD1L1   | GI_31377831-S | 8 | 8 | 110600142 | 8113  | 16.2001 | 5.88164 | YRI |
| rs1673409  | PKHD1L1   | GI_31377831-S | 8 | 8 | 110600946 | 7309  | 17.7354 | 5.88164 | YRI |
| rs1783171  | PKHD1L1   | GI_31377831-S | 8 | 8 | 110601912 | 6343  | 17.0128 | 5.88164 | YRI |
| rs1673428  | PKHD1L1   | GI_31377831-S | 8 | 8 | 110602120 | 6135  | 17.7354 | 5.88164 | YRI |
| rs2844261  | PKHD1L1   | GI_31377831-S | 8 | 8 | 110602670 | 5585  | 17.7354 | 5.88164 | YRI |
| rs1563578  | PKHD1L1   | GI_31377831-S | 8 | 8 | 110603688 | 4567  | 17.7354 | 5.88164 | YRI |
| rs1457288  | PKHD1L1   | GI_31377831-S | 8 | 8 | 110603951 | 4304  | 13.8898 | 5.88164 | YRI |
| rs897840   | PKHD1L1   | GI_31377831-S | 8 | 8 | 110605492 | 2763  | 17.7354 | 5.88164 | YRI |
| rs897842   | PKHD1L1   | GI_31377831-S | 8 | 8 | 110605957 | 2298  | 17.7354 | 5.88164 | YRI |
| rs1783172  | PKHD1L1   | GI_31377831-S | 8 | 8 | 110606128 | 2127  | 17.7354 | 5.88164 | YRI |
| rs1457294  | PKHD1L1   | GI_31377831-S | 8 | 8 | 110608063 | 192   | 17.7354 | 5.88164 | YRI |
| rs1457295  | PKHD1L1   | GI_31377831-S | 8 | 8 | 110608130 | 125   | 17.7354 | 5.88164 | YRI |

|            |           |               |   |   |           |        |         |         |     |
|------------|-----------|---------------|---|---|-----------|--------|---------|---------|-----|
| rs1783174  | PKHD1L1   | GI_31377831-S | 8 | 8 | 110608362 | 107    | 17.7354 | 5.88164 | YRI |
| rs1673383  | PKHD1L1   | GI_31377831-S | 8 | 8 | 110609091 | 836    | 17.7354 | 5.88164 | YRI |
| rs1673384  | PKHD1L1   | GI_31377831-S | 8 | 8 | 110609441 | 1186   | 17.7354 | 5.88164 | YRI |
| rs1673389  | PKHD1L1   | GI_31377831-S | 8 | 8 | 110610255 | 2000   | 17.7354 | 5.88164 | YRI |
| rs1673395  | PKHD1L1   | GI_31377831-S | 8 | 8 | 110610586 | 2331   | 17.7354 | 5.88164 | YRI |
| rs1673399  | PKHD1L1   | GI_31377831-S | 8 | 8 | 110611139 | 2884   | 17.7354 | 5.88164 | YRI |
| rs1617259  | PKHD1L1   | GI_31377831-S | 8 | 8 | 110611474 | 3219   | 17.7354 | 5.88164 | YRI |
| rs2154660  | PKHD1L1   | GI_31377831-S | 8 | 8 | 110612697 | 4442   | 17.7354 | 5.88164 | YRI |
| rs7821242  | PKHD1L1   | GI_31377831-S | 8 | 8 | 110613700 | 5445   | 13.1981 | 5.88164 | YRI |
| rs13439864 | PKHD1L1   | GI_31377831-S | 8 | 8 | 110615884 | 7629   | 16.6275 | 5.88164 | YRI |
| rs7006166  | PKHD1L1   | GI_31377831-S | 8 | 8 | 110616688 | 8433   | 10.4901 | 5.88164 | YRI |
| rs7011340  | PKHD1L1   | GI_31377831-S | 8 | 8 | 110617590 | 9335   | 17.7354 | 5.88164 | YRI |
| rs2460966  | Hs.453941 | Hs.453941-S   | 8 | 8 | 119693737 | 113657 | 6.5397  | 6.34879 | YRI |
| rs2460970  | LOC377696 | GI_37555914-S | 8 | 8 | 119698635 | 36461  | 7.536   | 6.63918 | YRI |
| rs2460970  | Hs.453941 | Hs.453941-S   | 8 | 8 | 119698635 | 108759 | 9.1248  | 6.34879 | YRI |
| rs880033   | LOC377696 | GI_37555914-S | 8 | 8 | 119702375 | 40201  | 6.989   | 6.63918 | YRI |
| rs880033   | Hs.453941 | Hs.453941-S   | 8 | 8 | 119702375 | 105019 | 8.7118  | 6.34879 | YRI |
| rs880034   | LOC377696 | GI_37555914-S | 8 | 8 | 119702442 | 40268  | 7.224   | 6.63918 | YRI |
| rs880034   | Hs.453941 | Hs.453941-S   | 8 | 8 | 119702442 | 104952 | 7.9786  | 6.34879 | YRI |
| rs2460972  | LOC377696 | GI_37555914-S | 8 | 8 | 119707958 | 45784  | 6.9145  | 6.63918 | YRI |
| rs2460972  | Hs.453941 | Hs.453941-S   | 8 | 8 | 119707958 | 99436  | 8.2104  | 6.34879 | YRI |
| rs2514602  | Hs.453941 | Hs.453941-S   | 8 | 8 | 119719731 | 87663  | 7.2477  | 6.34879 | YRI |
| rs2460975  | Hs.453941 | Hs.453941-S   | 8 | 8 | 119720018 | 87376  | 6.9164  | 6.34879 | YRI |
| rs2514603  | LOC377696 | GI_37555914-S | 8 | 8 | 119722156 | 59982  | 6.9145  | 6.63918 | YRI |
| rs2514603  | Hs.453941 | Hs.453941-S   | 8 | 8 | 119722156 | 85238  | 8.2104  | 6.34879 | YRI |
| rs2514605  | LOC377696 | GI_37555914-S | 8 | 8 | 119723591 | 61417  | 6.9145  | 6.63918 | YRI |
| rs2514605  | Hs.453941 | Hs.453941-S   | 8 | 8 | 119723591 | 83803  | 8.2104  | 6.34879 | YRI |
| rs2514607  | LOC377696 | GI_37555914-S | 8 | 8 | 119725499 | 63325  | 6.9145  | 6.63918 | YRI |
| rs2514607  | Hs.453941 | Hs.453941-S   | 8 | 8 | 119725499 | 81895  | 8.2104  | 6.34879 | YRI |
| rs2514608  | LOC377696 | GI_37555914-S | 8 | 8 | 119726049 | 63875  | 6.9145  | 6.63918 | YRI |
| rs2514608  | Hs.453941 | Hs.453941-S   | 8 | 8 | 119726049 | 81345  | 8.2104  | 6.34879 | YRI |
| rs2514609  | LOC377696 | GI_37555914-S | 8 | 8 | 119726405 | 64231  | 6.9145  | 6.63918 | YRI |
| rs2514609  | Hs.453941 | Hs.453941-S   | 8 | 8 | 119726405 | 80989  | 8.2104  | 6.34879 | YRI |
| rs2514610  | LOC377696 | GI_37555914-S | 8 | 8 | 119728552 | 66378  | 6.9145  | 6.63918 | YRI |
| rs2514610  | Hs.453941 | Hs.453941-S   | 8 | 8 | 119728552 | 78842  | 8.2104  | 6.34879 | YRI |
| rs2460979  | LOC377696 | GI_37555914-S | 8 | 8 | 119731021 | 68847  | 6.8713  | 6.63918 | YRI |
| rs2460979  | Hs.453941 | Hs.453941-S   | 8 | 8 | 119731021 | 76373  | 8.0315  | 6.34879 | YRI |
| rs2514576  | Hs.453941 | Hs.453941-S   | 8 | 8 | 119740944 | 66450  | 6.4613  | 6.34879 | YRI |
| rs2460982  | Hs.453941 | Hs.453941-S   | 8 | 8 | 119741293 | 66101  | 7.3222  | 6.34879 | YRI |
| rs3942977  | hmm35174  | hmm35174-S    | 8 | 8 | 142614039 | 193461 | 6.5165  | 6.15911 | YRI |
| rs2450772  | TOP1MT    | GI_16418460-S | 8 | 8 | 144484791 | 15214  | 8.2476  | 5.84299 | YRI |
| rs744113   | TOP1MT    | GI_16418460-S | 8 | 8 | 144487406 | 17829  | 8.339   | 5.84299 | YRI |
| rs2467952  | TOP1MT    | GI_16418460-S | 8 | 8 | 144489470 | 19893  | 8.339   | 5.84299 | YRI |
| rs901773   | TOP1MT    | GI_16418460-S | 8 | 8 | 144489976 | 20399  | 7.1869  | 5.84299 | YRI |
| rs6420187  | TOP1MT    | GI_16418460-S | 8 | 8 | 144490663 | 21086  | 8.339   | 5.84299 | YRI |
| rs2980262  | TOP1MT    | GI_16418460-S | 8 | 8 | 144494098 | 24521  | 6.3852  | 5.84299 | YRI |
| rs2977365  | TOP1MT    | GI_16418460-S | 8 | 8 | 144494617 | 25040  | 6.4571  | 5.84299 | YRI |
| rs2980260  | TOP1MT    | GI_16418460-S | 8 | 8 | 144494894 | 25317  | 8.7051  | 5.84299 | YRI |
| rs2931719  | TOP1MT    | GI_16418460-S | 8 | 8 | 144495295 | 25718  | 8.339   | 5.84299 | YRI |
| rs2450781  | TOP1MT    | GI_16418460-S | 8 | 8 | 144496719 | 27142  | 7.4308  | 5.84299 | YRI |
| rs6558354  | TOP1MT    | GI_16418460-S | 8 | 8 | 144507216 | 37639  | 6.413   | 5.84299 | YRI |
| rs2450758  | TOP1MT    | GI_16418460-S | 8 | 8 | 144509422 | 39845  | 6.5308  | 5.84299 | YRI |
| rs7003432  | RHPN1     | GI_19882236-S | 8 | 8 | 144518730 | 17080  | 6.9332  | 5.73078 | YRI |
| rs1809148  | PP3856    | GI_40255088-S | 8 | 8 | 144734218 | 6085   | 8.3671  | 5.68173 | YRI |
| rs755217   | PP3856    | GI_40255088-S | 8 | 8 | 144757655 | 29522  | 8.4591  | 5.68173 | YRI |
| rs896962   | PP3856    | GI_40255088-S | 8 | 8 | 144758235 | 30102  | 8.4591  | 5.68173 | YRI |

|            |           |               |   |   |           |        |         |         |     |
|------------|-----------|---------------|---|---|-----------|--------|---------|---------|-----|
| rs2242089  | PP3856    | GI_40255088-S | 8 | 8 | 144760289 | 32156  | 10.4046 | 5.68173 | YRI |
| rs6985603  | MGC61633  | GI_38348417-S | 8 | 8 | 145158416 | 15414  | 5.8333  | 5.70154 | YRI |
| rs4742329  | ANKRD15   | GI_23510374-A | 9 | 9 | 741144    | 5431   | 10.1438 | 6.3275  | YRI |
| rs4740880  | ANKRD15   | GI_23510374-A | 9 | 9 | 741167    | 5454   | 11.5444 | 6.3275  | YRI |
| rs12001769 | ANKRD15   | GI_23510374-A | 9 | 9 | 741992    | 6279   | 11.5444 | 6.3275  | YRI |
| rs1548299  | Hs.155793 | Hs.155793-S   | 9 | 9 | 3640174   | 2751   | 7.5234  | 6.47599 | YRI |
| rs7036812  | B4GALT1   | GI_13929461-S | 9 | 9 | 33133822  | 32904  | 6.5246  | 6.2752  | YRI |
| rs1969964  | NUDT2     | GI_22219466-A | 9 | 9 | 34145112  | 188391 | 9.6664  | 5.92191 | YRI |
| rs7042499  | NUDT2     | GI_22219466-A | 9 | 9 | 34152975  | 180528 | 6.6412  | 5.92191 | YRI |
| rs7032924  | NUDT2     | GI_22219466-A | 9 | 9 | 34157694  | 175809 | 11.5671 | 5.92191 | YRI |
| rs2769707  | NUDT2     | GI_22219466-A | 9 | 9 | 34157721  | 175782 | 11.5671 | 5.92191 | YRI |
| rs2769708  | NUDT2     | GI_22219466-A | 9 | 9 | 34158112  | 175391 | 11.5671 | 5.92191 | YRI |
| rs2769710  | NUDT2     | GI_22219466-A | 9 | 9 | 34160980  | 172523 | 11.5671 | 5.92191 | YRI |
| rs1198663  | NUDT2     | GI_22219466-A | 9 | 9 | 34165561  | 167942 | 11.5671 | 5.92191 | YRI |
| rs4879758  | NUDT2     | GI_22219466-A | 9 | 9 | 34178403  | 155100 | 9.1344  | 5.92191 | YRI |
| rs10814078 | NUDT2     | GI_22219466-A | 9 | 9 | 34184053  | 149450 | 9.1344  | 5.92191 | YRI |
| rs10971988 | NUDT2     | GI_22219466-A | 9 | 9 | 34187250  | 146253 | 9.1344  | 5.92191 | YRI |
| rs7032947  | NUDT2     | GI_22219466-A | 9 | 9 | 34187861  | 145642 | 6.4976  | 5.92191 | YRI |
| rs7036296  | NUDT2     | GI_22219466-A | 9 | 9 | 34188002  | 145501 | 9.1344  | 5.92191 | YRI |
| rs2094998  | NUDT2     | GI_22219466-A | 9 | 9 | 34188916  | 144587 | 6.4976  | 5.92191 | YRI |
| rs7853065  | NUDT2     | GI_22219466-A | 9 | 9 | 34194241  | 139262 | 11.5897 | 5.92191 | YRI |
| rs4319185  | NUDT2     | GI_22219466-A | 9 | 9 | 34200872  | 132631 | 11.1291 | 5.92191 | YRI |
| rs1556439  | NUDT2     | GI_22219466-A | 9 | 9 | 34201942  | 131561 | 11.1291 | 5.92191 | YRI |
| rs7341762  | NUDT2     | GI_22219466-A | 9 | 9 | 34205270  | 128233 | 8.4818  | 5.92191 | YRI |
| rs10733472 | NUDT2     | GI_22219466-A | 9 | 9 | 34206384  | 127119 | 14.8068 | 5.92191 | YRI |
| rs10758248 | NUDT2     | GI_22219466-A | 9 | 9 | 34207135  | 126368 | 8.6854  | 5.92191 | YRI |
| rs4879763  | NUDT2     | GI_22219466-A | 9 | 9 | 34209476  | 124027 | 6.4976  | 5.92191 | YRI |
| rs4879764  | NUDT2     | GI_22219466-A | 9 | 9 | 34212444  | 121059 | 6.4976  | 5.92191 | YRI |
| rs10814079 | NUDT2     | GI_22219466-A | 9 | 9 | 34216087  | 117416 | 6.4976  | 5.92191 | YRI |
| rs9695200  | NUDT2     | GI_22219466-A | 9 | 9 | 34217873  | 115630 | 8.6854  | 5.92191 | YRI |
| rs7040201  | NUDT2     | GI_22219466-A | 9 | 9 | 34222396  | 111107 | 6.4976  | 5.92191 | YRI |
| rs7025829  | NUDT2     | GI_22219466-A | 9 | 9 | 34222465  | 111038 | 8.6854  | 5.92191 | YRI |
| rs4879765  | NUDT2     | GI_22219466-A | 9 | 9 | 34226552  | 106951 | 9.1344  | 5.92191 | YRI |
| rs10972013 | NUDT2     | GI_22219466-A | 9 | 9 | 34227044  | 106459 | 9.1344  | 5.92191 | YRI |
| rs7857658  | NUDT2     | GI_22219466-A | 9 | 9 | 34232242  | 101261 | 6.4976  | 5.92191 | YRI |
| rs4008745  | NUDT2     | GI_22219466-A | 9 | 9 | 34234227  | 99276  | 9.1344  | 5.92191 | YRI |
| rs2380926  | NUDT2     | GI_22219466-A | 9 | 9 | 34239354  | 94149  | 8.6854  | 5.92191 | YRI |
| rs1049557  | NUDT2     | GI_22219466-A | 9 | 9 | 34241943  | 91560  | 7.4732  | 5.92191 | YRI |
| rs1049567  | NUDT2     | GI_22219466-A | 9 | 9 | 34242127  | 91376  | 7.2605  | 5.92191 | YRI |
| rs10814083 | NUDT2     | GI_22219466-A | 9 | 9 | 34246347  | 87156  | 8.4359  | 5.92191 | YRI |
| rs7020934  | NUDT2     | GI_22219466-A | 9 | 9 | 34251117  | 82386  | 9.1344  | 5.92191 | YRI |
| rs10814084 | NUDT2     | GI_22219466-A | 9 | 9 | 34253389  | 80114  | 7.2832  | 5.92191 | YRI |
| rs10814086 | NUDT2     | GI_22219466-A | 9 | 9 | 34254597  | 78906  | 6.4976  | 5.92191 | YRI |
| rs10814087 | NUDT2     | GI_22219466-A | 9 | 9 | 34255763  | 77740  | 9.7232  | 5.92191 | YRI |
| rs10972032 | NUDT2     | GI_22219466-A | 9 | 9 | 34259079  | 74424  | 9.1344  | 5.92191 | YRI |
| rs7868756  | NUDT2     | GI_22219466-A | 9 | 9 | 34261381  | 72122  | 9.1344  | 5.92191 | YRI |
| rs1929638  | NUDT2     | GI_22219466-A | 9 | 9 | 34262258  | 71245  | 9.7232  | 5.92191 | YRI |
| rs2890545  | NUDT2     | GI_22219466-A | 9 | 9 | 34267053  | 66450  | 9.7232  | 5.92191 | YRI |
| rs7045680  | NUDT2     | GI_22219466-A | 9 | 9 | 34271390  | 62113  | 11.1364 | 5.92191 | YRI |
| rs7862080  | NUDT2     | GI_22219466-A | 9 | 9 | 34293922  | 39581  | 11.1364 | 5.92191 | YRI |
| rs7042250  | NUDT2     | GI_22219466-A | 9 | 9 | 34295076  | 38427  | 9.1344  | 5.92191 | YRI |
| rs10972047 | NUDT2     | GI_22219466-A | 9 | 9 | 34300357  | 33146  | 5.9402  | 5.92191 | YRI |
| rs7853609  | NUDT2     | GI_22219466-A | 9 | 9 | 34310195  | 23308  | 8.0689  | 5.92191 | YRI |
| rs7867248  | NUDT2     | GI_22219466-A | 9 | 9 | 34310264  | 23239  | 15.4233 | 5.92191 | YRI |
| rs10814098 | NUDT2     | GI_22219466-A | 9 | 9 | 34314168  | 19335  | 7.2832  | 5.92191 | YRI |
| rs2039343  | NUDT2     | GI_22219466-A | 9 | 9 | 34316936  | 16567  | 9.7232  | 5.92191 | YRI |

|            |           |               |   |   |          |        |         |         |     |
|------------|-----------|---------------|---|---|----------|--------|---------|---------|-----|
| rs7875342  | NUDT2     | GI_22219466-A | 9 | 9 | 34319110 | 14393  | 9.1344  | 5.92191 | YRI |
| rs2039345  | NUDT2     | GI_22219466-A | 9 | 9 | 34319839 | 13664  | 14.8719 | 5.92191 | YRI |
| rs7039222  | NUDT2     | GI_22219466-A | 9 | 9 | 34322740 | 10763  | 7.989   | 5.92191 | YRI |
| rs4879775  | NUDT2     | GI_22219466-A | 9 | 9 | 34324793 | 8710   | 9.3906  | 5.92191 | YRI |
| rs7025269  | NUDT2     | GI_22219466-A | 9 | 9 | 34326266 | 7237   | 15.4233 | 5.92191 | YRI |
| rs7848476  | NUDT2     | GI_22219466-A | 9 | 9 | 34330521 | 2982   | 14.9499 | 5.92191 | YRI |
| rs10972067 | NUDT2     | GI_22219466-A | 9 | 9 | 34332634 | 869    | 9.1344  | 5.92191 | YRI |
| rs10814105 | NUDT2     | GI_22219466-A | 9 | 9 | 34359062 | 25559  | 7.5205  | 5.92191 | YRI |
| rs7852399  | NUDT2     | GI_22219466-A | 9 | 9 | 34361788 | 28285  | 6.4345  | 5.92191 | YRI |
| rs2381117  | NUDT2     | GI_22219466-A | 9 | 9 | 34372175 | 38672  | 11.666  | 5.92191 | YRI |
| rs3808876  | NUDT2     | GI_22219466-A | 9 | 9 | 34372726 | 39223  | 5.9502  | 5.92191 | YRI |
| rs2890585  | NUDT2     | GI_22219466-A | 9 | 9 | 34374063 | 40560  | 7.9659  | 5.92191 | YRI |
| rs10119084 | NUDT2     | GI_22219466-A | 9 | 9 | 34375949 | 42446  | 11.666  | 5.92191 | YRI |
| rs4878595  | Hs.402723 | Hs.402723-S   | 9 | 9 | 35001131 | 59659  | 6.2207  | 5.92804 | YRI |
| rs4878596  | Hs.402723 | Hs.402723-S   | 9 | 9 | 35002033 | 58757  | 6.2207  | 5.92804 | YRI |
| rs2073576  | Hs.402723 | Hs.402723-S   | 9 | 9 | 35058948 | 1842   | 10.0795 | 5.92804 | YRI |
| rs10121009 | C9orf24   | GI_22219472-I | 9 | 9 | 35259819 | 884149 | 6.423   | 6.04853 | YRI |
| rs10114937 | C9orf24   | GI_22219472-I | 9 | 9 | 35261817 | 886147 | 6.423   | 6.04853 | YRI |
| rs7866794  | C9orf24   | GI_22219472-I | 9 | 9 | 35273368 | 897698 | 6.5848  | 6.04853 | YRI |
| rs7873418  | FLJ20444  | GI_44888815-S | 9 | 9 | 64197638 | 8749   | 4.3109  | 4.14444 | YRI |
| rs13440192 | FLJ20444  | GI_44888815-S | 9 | 9 | 64205798 | 589    | 5.1893  | 4.14444 | YRI |
| rs11262395 | FLJ20444  | GI_44888815-S | 9 | 9 | 64207745 | 1358   | 6.9747  | 4.14444 | YRI |
| rs10119939 | FLJ20444  | GI_44888815-S | 9 | 9 | 64232092 | 25705  | 6.9747  | 4.14444 | YRI |
| rs6606188  | FLJ30435  | GI_31340828-S | 9 | 9 | 65018691 | 51597  | 4.6092  | 4.59194 | YRI |
| rs12340061 | SPTLC1    | GI_30474870-I | 9 | 9 | 91748143 | 173227 | 7.4534  | 6.25988 | YRI |
| rs7038823  | SPTLC1    | GI_30474870-I | 9 | 9 | 91777042 | 144328 | 7.0018  | 6.25988 | YRI |
| rs1534534  | SPTLC1    | GI_30474870-I | 9 | 9 | 91781380 | 139990 | 7.0018  | 6.25988 | YRI |
| rs10115262 | SPTLC1    | GI_30474870-A | 9 | 9 | 91781821 | 140057 | 11.0181 | 6.25988 | YRI |
| rs10115262 | SPTLC1    | GI_30474870-I | 9 | 9 | 91781821 | 139549 | 13.8788 | 6.25988 | YRI |
| rs9774945  | SPTLC1    | GI_30474870-I | 9 | 9 | 91790402 | 130968 | 7.1377  | 6.25988 | YRI |
| rs3750440  | SPTLC1    | GI_30474870-I | 9 | 9 | 91790571 | 130799 | 6.3217  | 6.25988 | YRI |
| rs10118409 | SPTLC1    | GI_30474870-A | 9 | 9 | 91807503 | 114375 | 8.5681  | 6.25988 | YRI |
| rs10118409 | SPTLC1    | GI_30474870-I | 9 | 9 | 91807503 | 113867 | 12.4503 | 6.25988 | YRI |
| rs12351358 | SPTLC1    | GI_30474870-I | 9 | 9 | 91828047 | 93323  | 9.1416  | 6.25988 | YRI |
| rs10125563 | SPTLC1    | GI_30474870-I | 9 | 9 | 91832030 | 89340  | 8.1504  | 6.25988 | YRI |
| rs6479395  | SPTLC1    | GI_30474870-I | 9 | 9 | 91838053 | 83317  | 8.5976  | 6.25988 | YRI |
| rs16908046 | SPTLC1    | GI_30474870-A | 9 | 9 | 91838952 | 82926  | 7.9328  | 6.25988 | YRI |
| rs16908046 | SPTLC1    | GI_30474870-I | 9 | 9 | 91838952 | 82418  | 10.7673 | 6.25988 | YRI |
| rs7867394  | SPTLC1    | GI_30474870-A | 9 | 9 | 91842691 | 79187  | 9.5518  | 6.25988 | YRI |
| rs7867394  | SPTLC1    | GI_30474870-I | 9 | 9 | 91842691 | 78679  | 13.8149 | 6.25988 | YRI |
| rs7033888  | SPTLC1    | GI_30474870-A | 9 | 9 | 91843582 | 78296  | 9.3988  | 6.25988 | YRI |
| rs7033888  | SPTLC1    | GI_30474870-I | 9 | 9 | 91843582 | 77788  | 13.5964 | 6.25988 | YRI |
| rs7045602  | SPTLC1    | GI_30474870-I | 9 | 9 | 91843788 | 77582  | 7.8944  | 6.25988 | YRI |
| rs7851249  | SPTLC1    | GI_30474870-I | 9 | 9 | 91846202 | 75168  | 8.1398  | 6.25988 | YRI |
| rs7028378  | SPTLC1    | GI_30474870-A | 9 | 9 | 91855007 | 66871  | 13.652  | 6.25988 | YRI |
| rs7028378  | SPTLC1    | GI_30474870-I | 9 | 9 | 91855007 | 66363  | 19.3713 | 6.25988 | YRI |
| rs7039366  | SPTLC1    | GI_30474870-A | 9 | 9 | 91855211 | 66667  | 13.652  | 6.25988 | YRI |
| rs7039366  | SPTLC1    | GI_30474870-I | 9 | 9 | 91855211 | 66159  | 19.3713 | 6.25988 | YRI |
| rs12353142 | SPTLC1    | GI_30474870-A | 9 | 9 | 91857005 | 64873  | 10.2172 | 6.25988 | YRI |
| rs12353142 | SPTLC1    | GI_30474870-I | 9 | 9 | 91857005 | 64365  | 13.3611 | 6.25988 | YRI |
| rs10115181 | SPTLC1    | GI_30474870-A | 9 | 9 | 91861396 | 60482  | 8.5274  | 6.25988 | YRI |
| rs10115181 | SPTLC1    | GI_30474870-I | 9 | 9 | 91861396 | 59974  | 10.2479 | 6.25988 | YRI |
| rs7871997  | SPTLC1    | GI_30474870-A | 9 | 9 | 91861919 | 59959  | 13.652  | 6.25988 | YRI |
| rs7871997  | SPTLC1    | GI_30474870-I | 9 | 9 | 91861919 | 59451  | 19.3713 | 6.25988 | YRI |
| rs10117113 | SPTLC1    | GI_30474870-A | 9 | 9 | 91864260 | 57618  | 9.6765  | 6.25988 | YRI |
| rs10117113 | SPTLC1    | GI_30474870-I | 9 | 9 | 91864260 | 57110  | 13.2191 | 6.25988 | YRI |

|            |        |               |   |   |          |       |         |         |     |
|------------|--------|---------------|---|---|----------|-------|---------|---------|-----|
| rs13366143 | SPTLC1 | GI_30474870-A | 9 | 9 | 91864408 | 57470 | 13.652  | 6.25988 | YRI |
| rs13366143 | SPTLC1 | GI_30474870-I | 9 | 9 | 91864408 | 56962 | 19.3713 | 6.25988 | YRI |
| rs7848959  | SPTLC1 | GI_30474870-A | 9 | 9 | 91867604 | 54274 | 9.7959  | 6.25988 | YRI |
| rs7848959  | SPTLC1 | GI_30474870-I | 9 | 9 | 91867604 | 53766 | 13.9514 | 6.25988 | YRI |
| rs10121694 | SPTLC1 | GI_30474870-A | 9 | 9 | 91870871 | 51007 | 13.652  | 6.25988 | YRI |
| rs10121694 | SPTLC1 | GI_30474870-I | 9 | 9 | 91870871 | 50499 | 19.3713 | 6.25988 | YRI |
| rs10122415 | SPTLC1 | GI_30474870-A | 9 | 9 | 91871212 | 50666 | 13.652  | 6.25988 | YRI |
| rs10122415 | SPTLC1 | GI_30474870-I | 9 | 9 | 91871212 | 50158 | 19.3713 | 6.25988 | YRI |
| rs10123181 | SPTLC1 | GI_30474870-A | 9 | 9 | 91871886 | 49992 | 13.652  | 6.25988 | YRI |
| rs10123181 | SPTLC1 | GI_30474870-I | 9 | 9 | 91871886 | 49484 | 19.3713 | 6.25988 | YRI |
| rs7018595  | SPTLC1 | GI_30474870-A | 9 | 9 | 91872609 | 49269 | 13.7984 | 6.25988 | YRI |
| rs7018595  | SPTLC1 | GI_30474870-I | 9 | 9 | 91872609 | 48761 | 19.1231 | 6.25988 | YRI |
| rs7018827  | SPTLC1 | GI_30474870-A | 9 | 9 | 91872750 | 49128 | 13.652  | 6.25988 | YRI |
| rs7018827  | SPTLC1 | GI_30474870-I | 9 | 9 | 91872750 | 48620 | 19.3713 | 6.25988 | YRI |
| rs7021285  | SPTLC1 | GI_30474870-A | 9 | 9 | 91875946 | 45932 | 13.652  | 6.25988 | YRI |
| rs7021285  | SPTLC1 | GI_30474870-I | 9 | 9 | 91875946 | 45424 | 19.3713 | 6.25988 | YRI |
| rs16908106 | SPTLC1 | GI_30474870-A | 9 | 9 | 91878408 | 43470 | 13.652  | 6.25988 | YRI |
| rs16908106 | SPTLC1 | GI_30474870-I | 9 | 9 | 91878408 | 42962 | 19.3713 | 6.25988 | YRI |
| rs7027257  | SPTLC1 | GI_30474870-A | 9 | 9 | 91879862 | 42016 | 13.652  | 6.25988 | YRI |
| rs7027257  | SPTLC1 | GI_30474870-I | 9 | 9 | 91879862 | 41508 | 19.3713 | 6.25988 | YRI |
| rs3858086  | SPTLC1 | GI_30474870-A | 9 | 9 | 91880410 | 41468 | 13.652  | 6.25988 | YRI |
| rs3858086  | SPTLC1 | GI_30474870-I | 9 | 9 | 91880410 | 40960 | 19.3713 | 6.25988 | YRI |
| rs12339869 | SPTLC1 | GI_30474870-A | 9 | 9 | 91884274 | 37604 | 7.8532  | 6.25988 | YRI |
| rs12339869 | SPTLC1 | GI_30474870-I | 9 | 9 | 91884274 | 37096 | 7.2411  | 6.25988 | YRI |
| rs16908113 | SPTLC1 | GI_30474870-A | 9 | 9 | 91886316 | 35562 | 13.4728 | 6.25988 | YRI |
| rs16908113 | SPTLC1 | GI_30474870-I | 9 | 9 | 91886316 | 35054 | 19.226  | 6.25988 | YRI |
| rs4604504  | SPTLC1 | GI_30474870-A | 9 | 9 | 91890922 | 30956 | 13.652  | 6.25988 | YRI |
| rs4604504  | SPTLC1 | GI_30474870-I | 9 | 9 | 91890922 | 30448 | 19.3713 | 6.25988 | YRI |
| rs4344138  | SPTLC1 | GI_30474870-A | 9 | 9 | 91891068 | 30810 | 13.652  | 6.25988 | YRI |
| rs4344138  | SPTLC1 | GI_30474870-I | 9 | 9 | 91891068 | 30302 | 19.3713 | 6.25988 | YRI |
| rs4498616  | SPTLC1 | GI_30474870-A | 9 | 9 | 91891100 | 30778 | 13.652  | 6.25988 | YRI |
| rs4498616  | SPTLC1 | GI_30474870-I | 9 | 9 | 91891100 | 30270 | 19.3713 | 6.25988 | YRI |
| rs12343645 | SPTLC1 | GI_30474870-A | 9 | 9 | 91901964 | 19914 | 13.3353 | 6.25988 | YRI |
| rs12343645 | SPTLC1 | GI_30474870-I | 9 | 9 | 91901964 | 19406 | 19.2471 | 6.25988 | YRI |
| rs12343647 | SPTLC1 | GI_30474870-A | 9 | 9 | 91901973 | 19905 | 13.652  | 6.25988 | YRI |
| rs12343647 | SPTLC1 | GI_30474870-I | 9 | 9 | 91901973 | 19397 | 19.3713 | 6.25988 | YRI |
| rs12336497 | SPTLC1 | GI_30474870-A | 9 | 9 | 91903404 | 18474 | 9.6765  | 6.25988 | YRI |
| rs12336497 | SPTLC1 | GI_30474870-I | 9 | 9 | 91903404 | 17966 | 13.3718 | 6.25988 | YRI |
| rs7024215  | SPTLC1 | GI_30474870-A | 9 | 9 | 91904022 | 17856 | 13.2161 | 6.25988 | YRI |
| rs7024215  | SPTLC1 | GI_30474870-I | 9 | 9 | 91904022 | 17348 | 17.912  | 6.25988 | YRI |
| rs7871565  | SPTLC1 | GI_30474870-A | 9 | 9 | 91905055 | 16823 | 12.742  | 6.25988 | YRI |
| rs7871565  | SPTLC1 | GI_30474870-I | 9 | 9 | 91905055 | 16315 | 17.7268 | 6.25988 | YRI |
| rs12353321 | SPTLC1 | GI_30474870-A | 9 | 9 | 91905712 | 16166 | 8.5274  | 6.25988 | YRI |
| rs12353321 | SPTLC1 | GI_30474870-I | 9 | 9 | 91905712 | 15658 | 10.2479 | 6.25988 | YRI |
| rs16908131 | SPTLC1 | GI_30474870-A | 9 | 9 | 91911410 | 10468 | 13.652  | 6.25988 | YRI |
| rs16908131 | SPTLC1 | GI_30474870-I | 9 | 9 | 91911410 | 9960  | 19.3713 | 6.25988 | YRI |
| rs10117143 | SPTLC1 | GI_30474870-A | 9 | 9 | 91912119 | 9759  | 13.652  | 6.25988 | YRI |
| rs10117143 | SPTLC1 | GI_30474870-I | 9 | 9 | 91912119 | 9251  | 19.3713 | 6.25988 | YRI |
| rs7870565  | SPTLC1 | GI_30474870-A | 9 | 9 | 91919061 | 2817  | 13.652  | 6.25988 | YRI |
| rs7870565  | SPTLC1 | GI_30474870-I | 9 | 9 | 91919061 | 2309  | 19.3713 | 6.25988 | YRI |
| rs12352341 | SPTLC1 | GI_30474870-A | 9 | 9 | 91931747 | 9869  | 13.652  | 6.25988 | YRI |
| rs12352341 | SPTLC1 | GI_30474870-I | 9 | 9 | 91931747 | 10377 | 19.3713 | 6.25988 | YRI |
| rs12349327 | SPTLC1 | GI_30474870-A | 9 | 9 | 91932383 | 10505 | 13.381  | 6.25988 | YRI |
| rs12349327 | SPTLC1 | GI_30474870-I | 9 | 9 | 91932383 | 11013 | 19.0669 | 6.25988 | YRI |
| rs12336689 | SPTLC1 | GI_30474870-A | 9 | 9 | 91934049 | 12171 | 13.652  | 6.25988 | YRI |
| rs12336689 | SPTLC1 | GI_30474870-I | 9 | 9 | 91934049 | 12679 | 19.3713 | 6.25988 | YRI |

|            |          |               |   |   |          |        |         |         |     |
|------------|----------|---------------|---|---|----------|--------|---------|---------|-----|
| rs7021408  | SPTLC1   | GI_30474870-A | 9 | 9 | 91936202 | 14324  | 13.652  | 6.25988 | YRI |
| rs7021408  | SPTLC1   | GI_30474870-I | 9 | 9 | 91936202 | 14832  | 19.3713 | 6.25988 | YRI |
| rs12341791 | SPTLC1   | GI_30474870-A | 9 | 9 | 91937679 | 15801  | 13.1931 | 6.25988 | YRI |
| rs12341791 | SPTLC1   | GI_30474870-I | 9 | 9 | 91937679 | 16309  | 18.9298 | 6.25988 | YRI |
| rs7025703  | SPTLC1   | GI_30474870-A | 9 | 9 | 91939550 | 17672  | 13.4728 | 6.25988 | YRI |
| rs7025703  | SPTLC1   | GI_30474870-I | 9 | 9 | 91939550 | 18180  | 19.226  | 6.25988 | YRI |
| rs10116088 | SPTLC1   | GI_30474870-A | 9 | 9 | 91940534 | 18656  | 13.652  | 6.25988 | YRI |
| rs10116088 | SPTLC1   | GI_30474870-I | 9 | 9 | 91940534 | 19164  | 19.3713 | 6.25988 | YRI |
| rs12338124 | SPTLC1   | GI_30474870-A | 9 | 9 | 91942463 | 20585  | 13.652  | 6.25988 | YRI |
| rs12338124 | SPTLC1   | GI_30474870-I | 9 | 9 | 91942463 | 21093  | 19.3713 | 6.25988 | YRI |
| rs10119983 | SPTLC1   | GI_30474870-A | 9 | 9 | 91953526 | 31648  | 11.6203 | 6.25988 | YRI |
| rs10119983 | SPTLC1   | GI_30474870-I | 9 | 9 | 91953526 | 32156  | 16.5035 | 6.25988 | YRI |
| rs9299418  | FLJ14753 | GI_14211858-S | 9 | 9 | 94120792 | 181651 | 8.394   | 6.12766 | YRI |
| rs7859571  | FLJ14753 | GI_14211858-S | 9 | 9 | 94211440 | 91003  | 17.772  | 6.12766 | YRI |
| rs9632920  | FLJ14753 | GI_14211858-S | 9 | 9 | 94255655 | 46788  | 16.174  | 6.12766 | YRI |
| rs7036474  | FLJ14753 | GI_14211858-S | 9 | 9 | 94270934 | 31509  | 17.772  | 6.12766 | YRI |
| rs7025878  | FLJ14753 | GI_14211858-S | 9 | 9 | 94278347 | 24096  | 17.0913 | 6.12766 | YRI |
| rs7045712  | FLJ14753 | GI_14211858-S | 9 | 9 | 94287872 | 14571  | 18.0535 | 6.12766 | YRI |
| rs7046779  | FLJ14753 | GI_14211858-S | 9 | 9 | 94290447 | 11996  | 19.11   | 6.12766 | YRI |
| rs7034153  | FLJ14753 | GI_14211858-S | 9 | 9 | 94294879 | 7564   | 10.6725 | 6.12766 | YRI |
| rs7037298  | FLJ14753 | GI_14211858-S | 9 | 9 | 94295718 | 6725   | 18.7969 | 6.12766 | YRI |
| rs6479545  | FLJ14753 | GI_14211858-S | 9 | 9 | 94296830 | 5613   | 17.731  | 6.12766 | YRI |
| rs7868703  | FLJ14753 | GI_14211858-S | 9 | 9 | 94323341 | 20898  | 7.8043  | 6.12766 | YRI |
| rs7042219  | FLJ14753 | GI_14211858-S | 9 | 9 | 94327241 | 24798  | 7.8043  | 6.12766 | YRI |
| rs908808   | FLJ14753 | GI_14211858-S | 9 | 9 | 94351543 | 49100  | 6.3442  | 6.12766 | YRI |
| rs10761332 | PTCH     | GI_25121959-S | 9 | 9 | 94390316 | 895929 | 6.4669  | 6.26436 | YRI |
| rs10821365 | PTCH     | GI_25121959-S | 9 | 9 | 94390939 | 895306 | 6.706   | 6.26436 | YRI |
| rs10761333 | PTCH     | GI_25121959-S | 9 | 9 | 94392139 | 894106 | 6.706   | 6.26436 | YRI |
| rs7048277  | PTCH     | GI_25121959-S | 9 | 9 | 94394688 | 891557 | 7.0722  | 6.26436 | YRI |
| rs10993241 | PTCH     | GI_25121959-S | 9 | 9 | 94396443 | 889802 | 6.6321  | 6.26436 | YRI |
| rs10993242 | PTCH     | GI_25121959-S | 9 | 9 | 94396505 | 889740 | 7.0722  | 6.26436 | YRI |
| rs10761339 | FBP1     | GI_16579887-S | 9 | 9 | 94407868 | 37306  | 6.0487  | 5.80263 | YRI |
| rs16910750 | HABP4    | GI_24307946-S | 9 | 9 | 96164026 | 167907 | 6.891   | 5.90711 | YRI |
| rs7869506  | HABP4    | GI_24307946-S | 9 | 9 | 96166767 | 165166 | 6.6583  | 5.90711 | YRI |
| rs10820378 | HABP4    | GI_24307946-S | 9 | 9 | 96172304 | 159629 | 8.9863  | 5.90711 | YRI |
| rs7028361  | HABP4    | GI_24307946-S | 9 | 9 | 96173274 | 158659 | 8.9863  | 5.90711 | YRI |
| rs10820386 | HABP4    | GI_24307946-S | 9 | 9 | 96176865 | 155068 | 8.9863  | 5.90711 | YRI |
| rs10123368 | HABP4    | GI_24307946-S | 9 | 9 | 96190939 | 140994 | 6.3958  | 5.90711 | YRI |
| rs10990682 | HABP4    | GI_24307946-S | 9 | 9 | 96196175 | 135758 | 6.3958  | 5.90711 | YRI |
| rs10820447 | HABP4    | GI_24307946-S | 9 | 9 | 96211599 | 120334 | 8.9891  | 5.90711 | YRI |
| rs7851198  | HABP4    | GI_24307946-S | 9 | 9 | 96211930 | 120003 | 8.9891  | 5.90711 | YRI |
| rs7020954  | HABP4    | GI_24307946-S | 9 | 9 | 96224468 | 107465 | 8.4261  | 5.90711 | YRI |
| rs7861768  | HABP4    | GI_24307946-S | 9 | 9 | 96230334 | 101599 | 7.5745  | 5.90711 | YRI |
| rs7853063  | HABP4    | GI_24307946-S | 9 | 9 | 96233926 | 98007  | 8.7858  | 5.90711 | YRI |
| rs7044391  | HABP4    | GI_24307946-S | 9 | 9 | 96239346 | 92587  | 8.1184  | 5.90711 | YRI |
| rs2025151  | HABP4    | GI_24307946-S | 9 | 9 | 96241067 | 90866  | 7.8103  | 5.90711 | YRI |
| rs6479312  | HABP4    | GI_24307946-S | 9 | 9 | 96247474 | 84459  | 8.6532  | 5.90711 | YRI |
| rs10820564 | HABP4    | GI_24307946-S | 9 | 9 | 96251186 | 80747  | 6.3929  | 5.90711 | YRI |
| rs2145985  | HABP4    | GI_24307946-S | 9 | 9 | 96254086 | 77847  | 8.1184  | 5.90711 | YRI |
| rs10122517 | HABP4    | GI_24307946-S | 9 | 9 | 96255011 | 76922  | 8.7858  | 5.90711 | YRI |
| rs10761006 | HABP4    | GI_24307946-S | 9 | 9 | 96258339 | 73594  | 8.1184  | 5.90711 | YRI |
| rs1885427  | HABP4    | GI_24307946-S | 9 | 9 | 96267803 | 64130  | 8.6812  | 5.90711 | YRI |
| rs10820597 | HABP4    | GI_24307946-S | 9 | 9 | 96267902 | 64031  | 8.1911  | 5.90711 | YRI |
| rs10820598 | HABP4    | GI_24307946-S | 9 | 9 | 96268810 | 63123  | 6.8833  | 5.90711 | YRI |
| rs7857610  | HABP4    | GI_24307946-S | 9 | 9 | 96269508 | 62425  | 8.1911  | 5.90711 | YRI |
| rs10820604 | HABP4    | GI_24307946-S | 9 | 9 | 96272049 | 59884  | 8.3055  | 5.90711 | YRI |

|            |           |               |   |   |          |        |         |         |     |
|------------|-----------|---------------|---|---|----------|--------|---------|---------|-----|
| rs2406005  | HABP4     | GI_24307946-S | 9 | 9 | 96277210 | 54723  | 8.16    | 5.90711 | YRI |
| rs7870753  | HABP4     | GI_24307946-S | 9 | 9 | 96281140 | 50793  | 7.617   | 5.90711 | YRI |
| rs10761013 | HABP4     | GI_24307946-S | 9 | 9 | 96281494 | 50439  | 7.9143  | 5.90711 | YRI |
| rs10820626 | HABP4     | GI_24307946-S | 9 | 9 | 96283735 | 48198  | 7.9143  | 5.90711 | YRI |
| rs7861282  | HABP4     | GI_24307946-S | 9 | 9 | 96284023 | 47910  | 7.9414  | 5.90711 | YRI |
| rs7858287  | HABP4     | GI_24307946-S | 9 | 9 | 96284071 | 47862  | 7.9596  | 5.90711 | YRI |
| rs7870106  | HABP4     | GI_24307946-S | 9 | 9 | 96290139 | 41794  | 8.6812  | 5.90711 | YRI |
| rs10820634 | HABP4     | GI_24307946-S | 9 | 9 | 96294659 | 37274  | 8.1151  | 5.90711 | YRI |
| rs7857261  | HABP4     | GI_24307946-S | 9 | 9 | 96299334 | 32599  | 9.4711  | 5.90711 | YRI |
| rs3802441  | HABP4     | GI_24307946-S | 9 | 9 | 96299950 | 31983  | 9.4711  | 5.90711 | YRI |
| rs7870253  | HABP4     | GI_24307946-S | 9 | 9 | 96310651 | 21282  | 8.0389  | 5.90711 | YRI |
| rs16910858 | HABP4     | GI_24307946-S | 9 | 9 | 96314112 | 17821  | 8.336   | 5.90711 | YRI |
| rs10820666 | HABP4     | GI_24307946-S | 9 | 9 | 96314552 | 17381  | 8.8576  | 5.90711 | YRI |
| rs10761035 | HABP4     | GI_24307946-S | 9 | 9 | 96315647 | 16286  | 7.8156  | 5.90711 | YRI |
| rs7038932  | HABP4     | GI_24307946-S | 9 | 9 | 96315881 | 16052  | 6.3235  | 5.90711 | YRI |
| rs7024214  | HABP4     | GI_24307946-S | 9 | 9 | 96318728 | 13205  | 8.1392  | 5.90711 | YRI |
| rs6477489  | HABP4     | GI_24307946-S | 9 | 9 | 96319396 | 12537  | 8.3479  | 5.90711 | YRI |
| rs10820682 | HABP4     | GI_24307946-S | 9 | 9 | 96321142 | 10791  | 8.8576  | 5.90711 | YRI |
| rs7865488  | HABP4     | GI_24307946-S | 9 | 9 | 96324136 | 7797   | 6.3235  | 5.90711 | YRI |
| rs7039472  | HABP4     | GI_24307946-S | 9 | 9 | 96325129 | 6804   | 8.3321  | 5.90711 | YRI |
| rs1590973  | HABP4     | GI_24307946-S | 9 | 9 | 96325714 | 6219   | 9.4711  | 5.90711 | YRI |
| rs1590971  | HABP4     | GI_24307946-S | 9 | 9 | 96325772 | 6161   | 8.8576  | 5.90711 | YRI |
| rs10512239 | HABP4     | GI_24307946-S | 9 | 9 | 96326567 | 5366   | 6.3235  | 5.90711 | YRI |
| rs16910870 | HABP4     | GI_24307946-S | 9 | 9 | 96326658 | 5275   | 7.6394  | 5.90711 | YRI |
| rs10991346 | HABP4     | GI_24307946-S | 9 | 9 | 96327313 | 4620   | 8.3321  | 5.90711 | YRI |
| rs10991348 | HABP4     | GI_24307946-S | 9 | 9 | 96327382 | 4551   | 8.8228  | 5.90711 | YRI |
| rs7867323  | HABP4     | GI_24307946-S | 9 | 9 | 96327612 | 4321   | 8.8576  | 5.90711 | YRI |
| rs10991352 | HABP4     | GI_24307946-S | 9 | 9 | 96329103 | 2830   | 9.0759  | 5.90711 | YRI |
| rs10991354 | HABP4     | GI_24307946-S | 9 | 9 | 96329264 | 2669   | 8.8576  | 5.90711 | YRI |
| rs7030316  | HABP4     | GI_24307946-S | 9 | 9 | 96330018 | 1915   | 8.8576  | 5.90711 | YRI |
| rs1057687  | HABP4     | GI_24307946-S | 9 | 9 | 96332019 | 86     | 9.4711  | 5.90711 | YRI |
| rs10991367 | HABP4     | GI_24307946-S | 9 | 9 | 96333488 | 1555   | 9.4711  | 5.90711 | YRI |
| rs6477496  | HABP4     | GI_24307946-S | 9 | 9 | 96335967 | 4034   | 6.5135  | 5.90711 | YRI |
| rs10820739 | HABP4     | GI_24307946-S | 9 | 9 | 96343376 | 11443  | 9.075   | 5.90711 | YRI |
| rs7035310  | HABP4     | GI_24307946-S | 9 | 9 | 96348245 | 16312  | 8.008   | 5.90711 | YRI |
| rs7852498  | HABP4     | GI_24307946-S | 9 | 9 | 96359976 | 28043  | 6.0782  | 5.90711 | YRI |
| rs10125239 | HABP4     | GI_24307946-S | 9 | 9 | 96363287 | 31354  | 7.0006  | 5.90711 | YRI |
| rs7037498  | HABP4     | GI_24307946-S | 9 | 9 | 96371681 | 39748  | 7.0006  | 5.90711 | YRI |
| rs10121119 | HABP4     | GI_24307946-S | 9 | 9 | 96389648 | 57715  | 6.8013  | 5.90711 | YRI |
| rs7869415  | HABP4     | GI_24307946-S | 9 | 9 | 96390732 | 58799  | 7.0006  | 5.90711 | YRI |
| rs7849397  | HABP4     | GI_24307946-S | 9 | 9 | 96400585 | 68652  | 6.1258  | 5.90711 | YRI |
| rs12338220 | HABP4     | GI_24307946-S | 9 | 9 | 96409607 | 77674  | 7.7321  | 5.90711 | YRI |
| rs12115682 | KIAA0972  | GI_7662423-S  | 9 | 9 | 96516889 | 80951  | 6.1805  | 5.79256 | YRI |
| rs7040493  | LOC286356 | GI_27478865-S | 9 | 9 | 96699832 | 33918  | 10.3498 | 6.10158 | YRI |
| rs7868847  | LOC286356 | GI_27478865-S | 9 | 9 | 96704256 | 29494  | 9.0753  | 6.10158 | YRI |
| rs7023776  | LOC286356 | GI_27478865-S | 9 | 9 | 96720452 | 13298  | 11.1826 | 6.10158 | YRI |
| rs14479    | KIAA0972  | GI_7662423-S  | 9 | 9 | 96730358 | 132518 | 6.6605  | 5.79256 | YRI |
| rs1046795  | LOC286356 | GI_27478865-S | 9 | 9 | 96734913 | 1163   | 15.5961 | 6.10158 | YRI |
| rs1046794  | LOC286356 | GI_27478865-S | 9 | 9 | 96735090 | 1340   | 15.5961 | 6.10158 | YRI |
| rs10979481 | LOC286356 | GI_27478865-S | 9 | 9 | 96738762 | 5012   | 6.6762  | 6.10158 | YRI |
| rs7873123  | LOC286356 | GI_27478865-S | 9 | 9 | 96815260 | 81510  | 8.5308  | 6.10158 | YRI |
| rs3889406  | LOC286356 | GI_27478865-S | 9 | 9 | 96852359 | 118609 | 6.3078  | 6.10158 | YRI |
| rs7045160  | Hs.407089 | Hs.407089-S   | 9 | 9 | 97526080 | 6387   | 6.2728  | 6.18813 | YRI |
| rs4297160  | Hs.43687  | Hs.43687-S    | 9 | 9 | 97665061 | 78509  | 6.2423  | 6.20201 | YRI |
| rs10983871 | Hs.43687  | Hs.43687-S    | 9 | 9 | 97665373 | 78197  | 6.814   | 6.20201 | YRI |
| rs7045138  | Hs.43687  | Hs.43687-S    | 9 | 9 | 97671018 | 72552  | 6.2423  | 6.20201 | YRI |

|            |          |               |    |    |           |       |         |         |     |
|------------|----------|---------------|----|----|-----------|-------|---------|---------|-----|
| rs7388958  | Hs.43687 | Hs.43687-S    | 9  | 9  | 97678123  | 65447 | 6.9848  | 6.20201 | YRI |
| rs10983920 | Hs.43687 | Hs.43687-S    | 9  | 9  | 97682168  | 61402 | 6.5544  | 6.20201 | YRI |
| rs2401639  | Hs.43687 | Hs.43687-S    | 9  | 9  | 97687392  | 56178 | 6.672   | 6.20201 | YRI |
| rs12378536 | Hs.43687 | Hs.43687-S    | 9  | 9  | 97688011  | 55559 | 6.5544  | 6.20201 | YRI |
| rs12348691 | Hs.43687 | Hs.43687-S    | 9  | 9  | 97688237  | 55333 | 6.672   | 6.20201 | YRI |
| rs13288000 | Hs.43687 | Hs.43687-S    | 9  | 9  | 97688535  | 55035 | 6.672   | 6.20201 | YRI |
| rs7873389  | Hs.43687 | Hs.43687-S    | 9  | 9  | 97688785  | 54785 | 6.2167  | 6.20201 | YRI |
| rs894673   | Hs.43687 | Hs.43687-S    | 9  | 9  | 97691825  | 51745 | 6.672   | 6.20201 | YRI |
| rs3758251  | Hs.43687 | Hs.43687-S    | 9  | 9  | 97693255  | 50315 | 6.672   | 6.20201 | YRI |
| rs3758249  | Hs.43687 | Hs.43687-S    | 9  | 9  | 97693695  | 49875 | 6.672   | 6.20201 | YRI |
| rs1443434  | Hs.43687 | Hs.43687-S    | 9  | 9  | 97697034  | 46536 | 6.672   | 6.20201 | YRI |
| rs4460498  | Hs.43687 | Hs.43687-S    | 9  | 9  | 97699967  | 43603 | 6.3578  | 6.20201 | YRI |
| rs874004   | Hs.43687 | Hs.43687-S    | 9  | 9  | 97701673  | 41897 | 8.4012  | 6.20201 | YRI |
| rs7357707  | Hs.43687 | Hs.43687-S    | 9  | 9  | 97710504  | 33066 | 8.4012  | 6.20201 | YRI |
| rs7033315  | Hs.43687 | Hs.43687-S    | 9  | 9  | 97715795  | 27775 | 8.2058  | 6.20201 | YRI |
| rs10119795 | Hs.43687 | Hs.43687-S    | 9  | 9  | 97716894  | 26676 | 8.4012  | 6.20201 | YRI |
| rs17346310 | Hs.43687 | Hs.43687-S    | 9  | 9  | 97729088  | 14482 | 10.4533 | 6.20201 | YRI |
| rs7853349  | Hs.43687 | Hs.43687-S    | 9  | 9  | 97729814  | 13756 | 10.6008 | 6.20201 | YRI |
| rs12238579 | Hs.43687 | Hs.43687-S    | 9  | 9  | 97731613  | 11957 | 10.1836 | 6.20201 | YRI |
| rs10984193 | Hs.43687 | Hs.43687-S    | 9  | 9  | 97731991  | 11579 | 12.9764 | 6.20201 | YRI |
| rs7040232  | Hs.43687 | Hs.43687-S    | 9  | 9  | 97743749  | 179   | 8.2673  | 6.20201 | YRI |
| rs6586     | Hs.43687 | Hs.43687-S    | 9  | 9  | 97746486  | 2916  | 14.5853 | 6.20201 | YRI |
| rs1561958  | Hs.43687 | Hs.43687-S    | 9  | 9  | 97749354  | 5784  | 10.301  | 6.20201 | YRI |
| rs10985382 | CORO2A   | GI_34335234-A | 9  | 9  | 98039087  | 72632 | 7.2408  | 6.40522 | YRI |
| rs3758258  | CORO2A   | GI_34335234-A | 9  | 9  | 98058097  | 91642 | 6.4739  | 6.40522 | YRI |
| rs3824452  | CORO2A   | GI_34335234-A | 9  | 9  | 98059040  | 92585 | 6.4739  | 6.40522 | YRI |
| rs7873862  | BSPRY    | GI_8923147-S  | 9  | 9  | 113192950 | 20059 | 8.5076  | 6.49378 | YRI |
| rs7037806  | CDK5RAP2 | GI_28872785-S | 9  | 9  | 120230679 | 159   | 16.7538 | 6.46328 | YRI |
| rs10125592 | CDK5RAP2 | GI_28872785-S | 9  | 9  | 120241289 | 10451 | 7.3637  | 6.46328 | YRI |
| rs10818455 | CDK5RAP2 | GI_28872785-S | 9  | 9  | 120241946 | 11108 | 10.4063 | 6.46328 | YRI |
| rs12379034 | CDK5RAP2 | GI_28872785-S | 9  | 9  | 120242220 | 11382 | 7.0483  | 6.46328 | YRI |
| rs12376337 | CDK5RAP2 | GI_28872785-S | 9  | 9  | 120242349 | 11511 | 13.7115 | 6.46328 | YRI |
| rs2297454  | CDK5RAP2 | GI_28872785-S | 9  | 9  | 120251309 | 20471 | 8.0673  | 6.46328 | YRI |
| rs10119716 | CDK5RAP2 | GI_28872785-S | 9  | 9  | 120251836 | 20998 | 8.2519  | 6.46328 | YRI |
| rs7853439  | CDK5RAP2 | GI_28872785-S | 9  | 9  | 120252419 | 21581 | 8.5779  | 6.46328 | YRI |
| rs2282169  | PTGS1    | GI_18104968-A | 9  | 9  | 122220250 | 17191 | 8.5484  | 6.01231 | YRI |
| rs9299282  | PTGS1    | GI_18104968-A | 9  | 9  | 122227474 | 9967  | 6.0777  | 6.01231 | YRI |
| rs10306173 | PTGS1    | GI_18104968-A | 9  | 9  | 122231794 | 5647  | 6.5405  | 6.01231 | YRI |
| rs3842801  | PTGS1    | GI_18104968-A | 9  | 9  | 122233993 | 3448  | 8.0927  | 6.01231 | YRI |
| rs3842803  | PTGS1    | GI_18104968-A | 9  | 9  | 122234089 | 3352  | 8.0927  | 6.01231 | YRI |
| rs10306183 | PTGS1    | GI_18104968-A | 9  | 9  | 122234464 | 2977  | 8.3514  | 6.01231 | YRI |
| rs10306187 | PTGS1    | GI_18104968-A | 9  | 9  | 122234867 | 2574  | 7.3894  | 6.01231 | YRI |
| rs10306188 | PTGS1    | GI_18104968-A | 9  | 9  | 122235239 | 2202  | 7.7735  | 6.01231 | YRI |
| rs10306202 | PTGS1    | GI_18104968-A | 9  | 9  | 122239075 | 1634  | 8.3212  | 6.01231 | YRI |
| rs3739890  | SURF6    | GI_39812452-S | 9  | 9  | 133224366 | 3247  | 7.8232  | 6.09969 | YRI |
| rs12335    | SURF6    | GI_39812452-S | 9  | 9  | 133227388 | 225   | 11.178  | 6.09969 | YRI |
| rs120858   | SURF6    | GI_39812452-S | 9  | 9  | 133230364 | 2751  | 11.178  | 6.09969 | YRI |
| rs487820   | SURF6    | GI_39812452-S | 9  | 9  | 133241923 | 14310 | 12.0128 | 6.09969 | YRI |
| rs484248   | SURF6    | GI_39812452-S | 9  | 9  | 133248144 | 20531 | 12.0128 | 6.09969 | YRI |
| rs599924   | SURF6    | GI_39812452-S | 9  | 9  | 133248145 | 20532 | 12.0128 | 6.09969 | YRI |
| rs1179037  | SURF6    | GI_39812452-S | 9  | 9  | 133268063 | 40450 | 11.5516 | 6.09969 | YRI |
| rs3124752  | SURF6    | GI_39812452-S | 9  | 9  | 133294047 | 66434 | 10.9597 | 6.09969 | YRI |
| rs3118663  | SURF6    | GI_39812452-S | 9  | 9  | 133311307 | 83694 | 9.8313  | 6.09969 | YRI |
| rs3124779  | SURF6    | GI_39812452-S | 9  | 9  | 133311520 | 83907 | 10.0536 | 6.09969 | YRI |
| rs3124776  | SURF6    | GI_39812452-S | 9  | 9  | 133314004 | 86391 | 8.691   | 6.09969 | YRI |
| rs1055340  | PTER     | GI_20070185-S | 10 | 10 | 16595534  | 974   | 16.4788 | 6.36898 | YRI |



|            |           |               |    |    |          |        |         |         |     |
|------------|-----------|---------------|----|----|----------|--------|---------|---------|-----|
| rs6481580  | LOC387647 | GI_42659552-S | 10 | 10 | 29726244 | 26592  | 10.6754 | 6.27266 | YRI |
| rs4237392  | LOC387647 | GI_42659552-S | 10 | 10 | 29737233 | 15603  | 9.7771  | 6.27266 | YRI |
| rs2887242  | LOC387647 | GI_42659552-S | 10 | 10 | 29737245 | 15591  | 7.3611  | 6.27266 | YRI |
| rs7073366  | LOC387647 | GI_42659552-S | 10 | 10 | 29740398 | 12438  | 8.2905  | 6.27266 | YRI |
| rs2182400  | LOC387647 | GI_42659552-S | 10 | 10 | 29747557 | 5279   | 9.7906  | 6.27266 | YRI |
| rs10763716 | LOC387647 | GI_42659552-S | 10 | 10 | 29753497 | 661    | 13.1151 | 6.27266 | YRI |
| rs10826617 | LOC387647 | GI_42659552-S | 10 | 10 | 29753937 | 1101   | 13.1151 | 6.27266 | YRI |
| rs7081352  | LOC387647 | GI_42659552-S | 10 | 10 | 29754515 | 1679   | 9.7906  | 6.27266 | YRI |
| rs7008150  | LOC387647 | GI_42659552-S | 10 | 10 | 29755085 | 2249   | 13.1151 | 6.27266 | YRI |
| rs10082484 | LOC387647 | GI_42659552-S | 10 | 10 | 29755467 | 2631   | 13.0521 | 6.27266 | YRI |
| rs7392705  | LOC387647 | GI_42659552-S | 10 | 10 | 29757378 | 4542   | 13.1151 | 6.27266 | YRI |
| rs4747656  | LOC387647 | GI_42659552-S | 10 | 10 | 29757510 | 4674   | 12.9976 | 6.27266 | YRI |
| rs4749423  | LOC387647 | GI_42659552-S | 10 | 10 | 29757845 | 5009   | 13.1151 | 6.27266 | YRI |
| rs4749424  | LOC387647 | GI_42659552-S | 10 | 10 | 29759251 | 6415   | 13.0521 | 6.27266 | YRI |
| rs7077629  | LOC387647 | GI_42659552-S | 10 | 10 | 29765529 | 12693  | 13.1151 | 6.27266 | YRI |
| rs2368411  | LOC387647 | GI_42659552-S | 10 | 10 | 29776306 | 23470  | 13.1151 | 6.27266 | YRI |
| rs4749433  | LOC387647 | GI_42659552-S | 10 | 10 | 29795726 | 42890  | 7.386   | 6.27266 | YRI |
| rs4749434  | LOC387647 | GI_42659552-S | 10 | 10 | 29797042 | 44206  | 9.5724  | 6.27266 | YRI |
| rs11007607 | LOC387647 | GI_42659552-S | 10 | 10 | 29799231 | 46395  | 6.8139  | 6.27266 | YRI |
| rs7906814  | LOC387647 | GI_42659552-S | 10 | 10 | 29799788 | 46952  | 10.4727 | 6.27266 | YRI |
| rs6481595  | LOC387647 | GI_42659552-S | 10 | 10 | 29800657 | 47821  | 8.7574  | 6.27266 | YRI |
| rs10826629 | LOC387647 | GI_42659552-S | 10 | 10 | 29801320 | 48484  | 10.3788 | 6.27266 | YRI |
| rs2281946  | LOC387647 | GI_42659552-S | 10 | 10 | 29802265 | 49429  | 10.223  | 6.27266 | YRI |
| rs10763719 | LOC387647 | GI_42659552-S | 10 | 10 | 29803900 | 51064  | 10.223  | 6.27266 | YRI |
| rs10740806 | LOC387647 | GI_42659552-S | 10 | 10 | 29804581 | 51745  | 10.0942 | 6.27266 | YRI |
| rs10826631 | LOC387647 | GI_42659552-S | 10 | 10 | 29804683 | 51847  | 8.969   | 6.27266 | YRI |
| rs7909727  | LOC387647 | GI_42659552-S | 10 | 10 | 29805766 | 52930  | 8.5319  | 6.27266 | YRI |
| rs7096194  | LOC387647 | GI_42659552-S | 10 | 10 | 29808359 | 55523  | 10.1269 | 6.27266 | YRI |
| rs1162760  | SLC25A16  | GI_31652216-S | 10 | 10 | 69768652 | 143926 | 6.6135  | 6.16077 | YRI |
| rs3758626  | SLC25A16  | GI_31652216-S | 10 | 10 | 69895510 | 17068  | 11.0416 | 6.16077 | YRI |
| rs2281699  | SLC25A16  | GI_31652216-S | 10 | 10 | 69901339 | 11239  | 11.0416 | 6.16077 | YRI |
| rs1535539  | SLC25A16  | GI_31652216-S | 10 | 10 | 69901707 | 10871  | 12.2431 | 6.16077 | YRI |
| rs1535539  | DNA2L     | GI_37551214-S | 10 | 10 | 69901707 | 57598  | 6.024   | 6.02177 | YRI |
| rs7478105  | SLC25A16  | GI_31652216-S | 10 | 10 | 69902147 | 10431  | 8.9924  | 6.16077 | YRI |
| rs12774079 | SLC25A16  | GI_31652216-S | 10 | 10 | 69902420 | 10158  | 6.229   | 6.16077 | YRI |
| rs12774084 | SLC25A16  | GI_31652216-S | 10 | 10 | 69902422 | 10156  | 6.229   | 6.16077 | YRI |
| rs10998210 | SLC25A16  | GI_31652216-S | 10 | 10 | 69907166 | 5412   | 14.2427 | 6.16077 | YRI |
| rs12767790 | SLC25A16  | GI_31652216-S | 10 | 10 | 69910121 | 2457   | 7.4843  | 6.16077 | YRI |
| rs12767669 | SLC25A16  | GI_31652216-S | 10 | 10 | 69910240 | 2338   | 11.1942 | 6.16077 | YRI |
| rs10998218 | SLC25A16  | GI_31652216-S | 10 | 10 | 69912471 | 107    | 6.1673  | 6.16077 | YRI |
| rs1136645  | SLC25A16  | GI_31652216-S | 10 | 10 | 69912519 | 59     | 12.9087 | 6.16077 | YRI |
| rs7091312  | SLC25A16  | GI_31652216-S | 10 | 10 | 69913735 | 1157   | 12.2013 | 6.16077 | YRI |
| rs7906309  | SLC25A16  | GI_31652216-S | 10 | 10 | 69915150 | 2572   | 12.128  | 6.16077 | YRI |
| rs7900548  | SLC25A16  | GI_31652216-S | 10 | 10 | 69920626 | 8048   | 13.4693 | 6.16077 | YRI |
| rs10823224 | SLC25A16  | GI_31652216-S | 10 | 10 | 69960835 | 48257  | 6.8742  | 6.16077 | YRI |
| rs1539316  | SLC25A16  | GI_31652216-S | 10 | 10 | 69964780 | 52202  | 6.8742  | 6.16077 | YRI |
| rs10740349 | KIAA1274  | GI_22050996-S | 10 | 10 | 71893795 | 104243 | 6.6978  | 6.16757 | YRI |
| rs4747032  | KIAA1274  | GI_22050996-S | 10 | 10 | 71904802 | 93236  | 9.2353  | 6.16757 | YRI |
| rs1871598  | KIAA1274  | GI_22050996-S | 10 | 10 | 71906235 | 91803  | 12.4324 | 6.16757 | YRI |
| rs1871595  | KIAA1274  | GI_22050996-S | 10 | 10 | 71910576 | 87462  | 12.4324 | 6.16757 | YRI |
| rs11818000 | KIAA1274  | GI_22050996-S | 10 | 10 | 71910620 | 87418  | 12.4324 | 6.16757 | YRI |
| rs7915565  | KIAA1274  | GI_22050996-S | 10 | 10 | 71911087 | 86951  | 12.0781 | 6.16757 | YRI |
| rs7920307  | KIAA1274  | GI_22050996-S | 10 | 10 | 71912380 | 85658  | 12.0781 | 6.16757 | YRI |
| rs7897191  | NUDT13    | GI_34330151-S | 10 | 10 | 74431509 | 129419 | 7.3903  | 5.62982 | YRI |
| rs7922533  | NUDT13    | GI_34330151-S | 10 | 10 | 74433359 | 127569 | 7.3903  | 5.62982 | YRI |
| rs2394925  | NUDT13    | GI_34330151-S | 10 | 10 | 74434119 | 126809 | 7.3903  | 5.62982 | YRI |

|            |        |               |    |    |          |        |        |         |     |
|------------|--------|---------------|----|----|----------|--------|--------|---------|-----|
| rs12253630 | NUDT13 | GI_34330151-S | 10 | 10 | 74438930 | 121998 | 7.3903 | 5.62982 | YRI |
| rs7085141  | NUDT13 | GI_34330151-S | 10 | 10 | 74446787 | 114141 | 7.3903 | 5.62982 | YRI |
| rs12249050 | NUDT13 | GI_34330151-S | 10 | 10 | 74449543 | 111385 | 7.2878 | 5.62982 | YRI |
| rs12253317 | NUDT13 | GI_34330151-S | 10 | 10 | 74451536 | 109392 | 7.3903 | 5.62982 | YRI |
| rs3736278  | NUDT13 | GI_34330151-S | 10 | 10 | 74460386 | 100542 | 7.3903 | 5.62982 | YRI |
| rs7094342  | NUDT13 | GI_34330151-S | 10 | 10 | 74462172 | 98756  | 7.227  | 5.62982 | YRI |
| rs7076642  | NUDT13 | GI_34330151-S | 10 | 10 | 74462469 | 98459  | 7.227  | 5.62982 | YRI |
| rs12247364 | NUDT13 | GI_34330151-S | 10 | 10 | 74464041 | 96887  | 6.0623 | 5.62982 | YRI |
| rs6480659  | NUDT13 | GI_34330151-S | 10 | 10 | 74479623 | 81305  | 7.3903 | 5.62982 | YRI |
| rs7078818  | NUDT13 | GI_34330151-S | 10 | 10 | 74480549 | 80379  | 7.2569 | 5.62982 | YRI |
| rs12244027 | NUDT13 | GI_34330151-S | 10 | 10 | 74489595 | 71333  | 7.3903 | 5.62982 | YRI |
| rs7904719  | NUDT13 | GI_34330151-S | 10 | 10 | 74496637 | 64291  | 7.5788 | 5.62982 | YRI |
| rs4387274  | NUDT13 | GI_34330151-S | 10 | 10 | 74501304 | 59624  | 7.3903 | 5.62982 | YRI |
| rs12570974 | NUDT13 | GI_34330151-S | 10 | 10 | 74510261 | 50667  | 7.0413 | 5.62982 | YRI |
| rs11000516 | NUDT13 | GI_34330151-S | 10 | 10 | 74513969 | 46959  | 7.5788 | 5.62982 | YRI |
| rs7905836  | NUDT13 | GI_34330151-S | 10 | 10 | 74514395 | 46533  | 7.5788 | 5.62982 | YRI |
| rs7920974  | NUDT13 | GI_34330151-S | 10 | 10 | 74514557 | 46371  | 7.5788 | 5.62982 | YRI |
| rs6480667  | NUDT13 | GI_34330151-S | 10 | 10 | 74518880 | 42048  | 7.2852 | 5.62982 | YRI |
| rs6480668  | NUDT13 | GI_34330151-S | 10 | 10 | 74519332 | 41596  | 7.5788 | 5.62982 | YRI |
| rs7095810  | NUDT13 | GI_34330151-S | 10 | 10 | 74524150 | 36778  | 7.0109 | 5.62982 | YRI |
| rs7918396  | NUDT13 | GI_34330151-S | 10 | 10 | 74527553 | 33375  | 6.3527 | 5.62982 | YRI |
| rs7082363  | NUDT13 | GI_34330151-S | 10 | 10 | 74528776 | 32152  | 7.0109 | 5.62982 | YRI |
| rs7094115  | NUDT13 | GI_34330151-S | 10 | 10 | 74528868 | 32060  | 6.6184 | 5.62982 | YRI |
| rs7894359  | NUDT13 | GI_34330151-S | 10 | 10 | 74534394 | 26534  | 7.35   | 5.62982 | YRI |
| rs872457   | NUDT13 | GI_34330151-S | 10 | 10 | 74539797 | 21131  | 7.35   | 5.62982 | YRI |
| rs2280369  | NUDT13 | GI_34330151-S | 10 | 10 | 74540513 | 20415  | 7.35   | 5.62982 | YRI |
| rs9971273  | NUDT13 | GI_34330151-S | 10 | 10 | 74543752 | 17176  | 7.35   | 5.62982 | YRI |
| rs7916539  | NUDT13 | GI_34330151-S | 10 | 10 | 74548357 | 12571  | 7.35   | 5.62982 | YRI |
| rs3829166  | NUDT13 | GI_34330151-S | 10 | 10 | 74549380 | 11548  | 7.35   | 5.62982 | YRI |
| rs3750734  | NUDT13 | GI_34330151-S | 10 | 10 | 74549646 | 11282  | 7.35   | 5.62982 | YRI |
| rs2894215  | NUDT13 | GI_34330151-S | 10 | 10 | 74561195 | 267    | 7.35   | 5.62982 | YRI |
| rs7079875  | NUDT13 | GI_34330151-S | 10 | 10 | 74563424 | 2496   | 7.35   | 5.62982 | YRI |
| rs7080126  | NUDT13 | GI_34330151-S | 10 | 10 | 74563539 | 2611   | 7.35   | 5.62982 | YRI |
| rs7908606  | NUDT13 | GI_34330151-S | 10 | 10 | 74563969 | 3041   | 7.35   | 5.62982 | YRI |
| rs2271903  | NUDT13 | GI_34330151-S | 10 | 10 | 74564264 | 3336   | 6.9648 | 5.62982 | YRI |
| rs12249189 | NUDT13 | GI_34330151-S | 10 | 10 | 74565796 | 4868   | 6.9653 | 5.62982 | YRI |
| rs12260168 | NUDT13 | GI_34330151-S | 10 | 10 | 74567697 | 6769   | 7.35   | 5.62982 | YRI |
| rs2271905  | NUDT13 | GI_34330151-S | 10 | 10 | 74567822 | 6894   | 7.35   | 5.62982 | YRI |
| rs3817395  | NUDT13 | GI_34330151-S | 10 | 10 | 74568262 | 7334   | 6.2056 | 5.62982 | YRI |
| rs3736518  | NUDT13 | GI_34330151-S | 10 | 10 | 74569140 | 8212   | 7.1964 | 5.62982 | YRI |
| rs6480671  | NUDT13 | GI_34330151-S | 10 | 10 | 74570789 | 9861   | 8.1681 | 5.62982 | YRI |
| rs2395012  | NUDT13 | GI_34330151-S | 10 | 10 | 74577396 | 16468  | 7.35   | 5.62982 | YRI |
| rs10437381 | NUDT13 | GI_34330151-S | 10 | 10 | 74579161 | 18233  | 7.1008 | 5.62982 | YRI |
| rs7072168  | NUDT13 | GI_34330151-S | 10 | 10 | 74579588 | 18660  | 7.35   | 5.62982 | YRI |
| rs7069878  | NUDT13 | GI_34330151-S | 10 | 10 | 74582010 | 21082  | 7.35   | 5.62982 | YRI |
| rs11000531 | NUDT13 | GI_34330151-S | 10 | 10 | 74584308 | 23380  | 7.35   | 5.62982 | YRI |
| rs11000532 | NUDT13 | GI_34330151-S | 10 | 10 | 74584405 | 23477  | 6.4786 | 5.62982 | YRI |
| rs12260139 | NUDT13 | GI_34330151-S | 10 | 10 | 74590442 | 29514  | 7.35   | 5.62982 | YRI |
| rs7069813  | NUDT13 | GI_34330151-S | 10 | 10 | 74591088 | 30160  | 6.9653 | 5.62982 | YRI |
| rs7092445  | NUDT13 | GI_34330151-S | 10 | 10 | 74591998 | 31070  | 7.35   | 5.62982 | YRI |
| rs3812618  | NUDT13 | GI_34330151-S | 10 | 10 | 74593138 | 32210  | 7.35   | 5.62982 | YRI |
| rs3812619  | NUDT13 | GI_34330151-S | 10 | 10 | 74593568 | 32640  | 7.1681 | 5.62982 | YRI |
| rs3763723  | NUDT13 | GI_34330151-S | 10 | 10 | 74597490 | 36562  | 7.35   | 5.62982 | YRI |
| rs7917179  | NUDT13 | GI_34330151-S | 10 | 10 | 74601737 | 40809  | 7.35   | 5.62982 | YRI |
| rs6480675  | NUDT13 | GI_34330151-S | 10 | 10 | 74602460 | 41532  | 7.35   | 5.62982 | YRI |
| rs6480677  | NUDT13 | GI_34330151-S | 10 | 10 | 74603208 | 42280  | 6.1151 | 5.62982 | YRI |

|            |           |               |    |    |           |        |         |         |     |
|------------|-----------|---------------|----|----|-----------|--------|---------|---------|-----|
| rs12256576 | NUDT13    | GI_34330151-S | 10 | 10 | 74604320  | 43392  | 7.35    | 5.62982 | YRI |
| rs7923555  | NUDT13    | GI_34330151-S | 10 | 10 | 74606316  | 45388  | 7.35    | 5.62982 | YRI |
| rs11000541 | NUDT13    | GI_34330151-S | 10 | 10 | 74610087  | 49159  | 7.35    | 5.62982 | YRI |
| rs12268713 | NUDT13    | GI_34330151-S | 10 | 10 | 74615745  | 54817  | 7.35    | 5.62982 | YRI |
| rs7899149  | NUDT13    | GI_34330151-S | 10 | 10 | 74933335  | 372407 | 5.8703  | 5.62982 | YRI |
| rs2140933  | NUDT13    | GI_34330151-S | 10 | 10 | 75003198  | 442270 | 6.5515  | 5.62982 | YRI |
| rs7073027  | NUDT13    | GI_34330151-S | 10 | 10 | 75013847  | 452919 | 6.5515  | 5.62982 | YRI |
| rs7899274  | NUDT13    | GI_34330151-S | 10 | 10 | 75014767  | 453839 | 6.5515  | 5.62982 | YRI |
| rs12256735 | NUDT13    | GI_34330151-S | 10 | 10 | 75020904  | 459976 | 6.5515  | 5.62982 | YRI |
| rs7097343  | NUDT13    | GI_34330151-S | 10 | 10 | 75031795  | 470867 | 6.5515  | 5.62982 | YRI |
| rs11000723 | NUDT13    | GI_34330151-S | 10 | 10 | 75054988  | 494060 | 6.5515  | 5.62982 | YRI |
| rs3218619  | Hs.146747 | Hs.146747-S   | 10 | 10 | 90752781  | 13687  | 6.8553  | 6.35807 | YRI |
| rs9658756  | Hs.146747 | Hs.146747-S   | 10 | 10 | 90759282  | 7186   | 8.4889  | 6.35807 | YRI |
| rs9658783  | Hs.146747 | Hs.146747-S   | 10 | 10 | 90765731  | 737    | 8.4889  | 6.35807 | YRI |
| rs12764727 | MGC10120  | GI_28603839-S | 10 | 10 | 101948787 | 75710  | 7.3843  | 6.13157 | YRI |
| rs17729417 | MGC10120  | GI_28603839-S | 10 | 10 | 101950132 | 74365  | 6.4035  | 6.13157 | YRI |
| rs12762869 | MGC10120  | GI_28603839-S | 10 | 10 | 101983702 | 40795  | 9.9504  | 6.13157 | YRI |
| rs7092983  | MGC10120  | GI_28603839-S | 10 | 10 | 101984471 | 40026  | 9.9589  | 6.13157 | YRI |
| rs12771909 | MGC10120  | GI_28603839-S | 10 | 10 | 101985275 | 39222  | 9.9504  | 6.13157 | YRI |
| rs7912400  | MGC10120  | GI_28603839-S | 10 | 10 | 101992668 | 31829  | 9.2196  | 6.13157 | YRI |
| rs17112791 | MGC10120  | GI_28603839-S | 10 | 10 | 101999700 | 24797  | 9.9504  | 6.13157 | YRI |
| rs7072367  | MGC10120  | GI_28603839-S | 10 | 10 | 101999970 | 24527  | 9.9504  | 6.13157 | YRI |
| rs7897454  | MGC10120  | GI_28603839-S | 10 | 10 | 102001692 | 22805  | 8.7956  | 6.13157 | YRI |
| rs17730369 | MGC10120  | GI_28603839-S | 10 | 10 | 102006580 | 17917  | 9.9589  | 6.13157 | YRI |
| rs11595160 | MRPL43    | GI_28872735-A | 10 | 10 | 102633000 | 103609 | 7.3379  | 6.07742 | YRI |
| rs7901791  | MRPL43    | GI_28872733-I | 10 | 10 | 102635374 | 100942 | 7.1386  | 6.07742 | YRI |
| rs7901791  | MRPL43    | GI_28872735-A | 10 | 10 | 102635374 | 101235 | 9.4788  | 6.07742 | YRI |
| rs1408342  | MRPL43    | GI_28872735-A | 10 | 10 | 102638742 | 97867  | 7.0423  | 6.07742 | YRI |
| rs10786612 | MRPL43    | GI_28872735-A | 10 | 10 | 102643755 | 92854  | 7.1358  | 6.07742 | YRI |
| rs4917916  | MRPL43    | GI_28872733-I | 10 | 10 | 102663282 | 73034  | 14.1389 | 6.07742 | YRI |
| rs4917916  | MRPL43    | GI_28872735-A | 10 | 10 | 102663282 | 73327  | 15.9566 | 6.07742 | YRI |
| rs12241232 | MRPL43    | GI_28872733-I | 10 | 10 | 102682594 | 53722  | 14.1389 | 6.07742 | YRI |
| rs12241232 | MRPL43    | GI_28872735-A | 10 | 10 | 102682594 | 54015  | 15.9566 | 6.07742 | YRI |
| rs7911957  | MRPL43    | GI_28872733-I | 10 | 10 | 102682960 | 53356  | 13.9057 | 6.07742 | YRI |
| rs7911957  | MRPL43    | GI_28872735-A | 10 | 10 | 102682960 | 53649  | 15.8267 | 6.07742 | YRI |
| rs10883565 | MRPL43    | GI_28872733-I | 10 | 10 | 102693424 | 42892  | 13.2319 | 6.07742 | YRI |
| rs10883565 | MRPL43    | GI_28872735-A | 10 | 10 | 102693424 | 43185  | 13.0092 | 6.07742 | YRI |
| rs1056295  | MRPL43    | GI_28872733-I | 10 | 10 | 102705173 | 31143  | 15.4496 | 6.07742 | YRI |
| rs1056295  | MRPL43    | GI_28872735-A | 10 | 10 | 102705173 | 31436  | 17.7126 | 6.07742 | YRI |
| rs927302   | MRPL43    | GI_28872733-I | 10 | 10 | 102712906 | 23410  | 15.8958 | 6.07742 | YRI |
| rs927302   | MRPL43    | GI_28872735-A | 10 | 10 | 102712906 | 23703  | 18.361  | 6.07742 | YRI |
| rs4919510  | MRPL43    | GI_28872733-I | 10 | 10 | 102724768 | 11548  | 12.4343 | 6.07742 | YRI |
| rs4919510  | MRPL43    | GI_28872735-A | 10 | 10 | 102724768 | 11841  | 16.0062 | 6.07742 | YRI |
| rs735137   | MRPL43    | GI_28872733-I | 10 | 10 | 102725825 | 10491  | 12.4343 | 6.07742 | YRI |
| rs735137   | MRPL43    | GI_28872735-A | 10 | 10 | 102725825 | 10784  | 16.0062 | 6.07742 | YRI |
| rs12571302 | MRPL43    | GI_28872733-I | 10 | 10 | 102732753 | 3563   | 15.6405 | 6.07742 | YRI |
| rs12571302 | MRPL43    | GI_28872735-A | 10 | 10 | 102732753 | 3856   | 19.9914 | 6.07742 | YRI |
| rs2295716  | MRPL43    | GI_28872733-I | 10 | 10 | 102734204 | 2112   | 9.6555  | 6.07742 | YRI |
| rs2295716  | MRPL43    | GI_28872735-A | 10 | 10 | 102734204 | 2405   | 14.3289 | 6.07742 | YRI |
| rs722435   | MRPL43    | GI_28872733-I | 10 | 10 | 102735052 | 1264   | 11.7791 | 6.07742 | YRI |
| rs722435   | MRPL43    | GI_28872735-A | 10 | 10 | 102735052 | 1557   | 14.7517 | 6.07742 | YRI |
| rs2863095  | MRPL43    | GI_28872733-I | 10 | 10 | 102736493 | 177    | 18.7843 | 6.07742 | YRI |
| rs2863095  | MRPL43    | GI_28872735-A | 10 | 10 | 102736493 | 116    | 20.6428 | 6.07742 | YRI |
| rs3740484  | MRPL43    | GI_28872733-I | 10 | 10 | 102737353 | 1037   | 12.4343 | 6.07742 | YRI |
| rs3740484  | MRPL43    | GI_28872735-A | 10 | 10 | 102737353 | 744    | 16.0062 | 6.07742 | YRI |
| rs3740487  | MRPL43    | GI_28872733-I | 10 | 10 | 102740773 | 4457   | 10.5627 | 6.07742 | YRI |

|            |        |               |    |    |           |       |         |         |     |
|------------|--------|---------------|----|----|-----------|-------|---------|---------|-----|
| rs3740487  | MRPL43 | GI_28872735-A | 10 | 10 | 102740773 | 4164  | 13.2256 | 6.07742 | YRI |
| rs3824783  | MRPL43 | GI_28872733-I | 10 | 10 | 102740841 | 4525  | 10.5627 | 6.07742 | YRI |
| rs3824783  | MRPL43 | GI_28872735-A | 10 | 10 | 102740841 | 4232  | 13.2256 | 6.07742 | YRI |
| rs3740488  | MRPL43 | GI_28872733-I | 10 | 10 | 102744023 | 7707  | 10.5627 | 6.07742 | YRI |
| rs3740488  | MRPL43 | GI_28872735-A | 10 | 10 | 102744023 | 7414  | 13.2256 | 6.07742 | YRI |
| rs3740490  | MRPL43 | GI_28872733-I | 10 | 10 | 102746733 | 10417 | 18.117  | 6.07742 | YRI |
| rs3740490  | MRPL43 | GI_28872735-A | 10 | 10 | 102746733 | 10124 | 19.7868 | 6.07742 | YRI |
| rs750866   | MRPL43 | GI_28872733-I | 10 | 10 | 102751448 | 15132 | 15.7703 | 6.07742 | YRI |
| rs750866   | MRPL43 | GI_28872735-A | 10 | 10 | 102751448 | 14839 | 18.0254 | 6.07742 | YRI |
| rs701835   | MRPL43 | GI_28872733-I | 10 | 10 | 102752117 | 15801 | 15.7703 | 6.07742 | YRI |
| rs701835   | MRPL43 | GI_28872735-A | 10 | 10 | 102752117 | 15508 | 18.0254 | 6.07742 | YRI |
| rs701836   | MRPL43 | GI_28872733-I | 10 | 10 | 102757107 | 20791 | 9.8303  | 6.07742 | YRI |
| rs701836   | MRPL43 | GI_28872735-A | 10 | 10 | 102757107 | 20498 | 12.7599 | 6.07742 | YRI |
| rs807018   | MRPL43 | GI_28872733-I | 10 | 10 | 102763001 | 26685 | 8.1715  | 6.07742 | YRI |
| rs807018   | MRPL43 | GI_28872735-A | 10 | 10 | 102763001 | 26392 | 8.2824  | 6.07742 | YRI |
| rs2297450  | SFXN2  | GI_34222270-S | 10 | 10 | 104493164 | 4373  | 7.6481  | 5.44965 | YRI |
| rs11191393 | SFXN2  | GI_34222270-S | 10 | 10 | 104517420 | 28629 | 7.6481  | 5.44965 | YRI |
| rs1339919  | SFXN2  | GI_34222270-S | 10 | 10 | 104524438 | 35647 | 7.6481  | 5.44965 | YRI |
| rs12244332 | GSTO1  | GI_4758483-S  | 10 | 10 | 106010130 | 6998  | 7.9468  | 6.12301 | YRI |
| rs12259337 | GSTO1  | GI_4758483-S  | 10 | 10 | 106010210 | 6918  | 7.9468  | 6.12301 | YRI |
| rs7083244  | GSTO1  | GI_4758483-S  | 10 | 10 | 106010696 | 6432  | 7.9468  | 6.12301 | YRI |
| rs7101149  | GSTO1  | GI_4758483-S  | 10 | 10 | 106012625 | 4503  | 7.8088  | 6.12301 | YRI |
| rs12263834 | GSTO1  | GI_4758483-S  | 10 | 10 | 106013476 | 3652  | 8.2627  | 6.12301 | YRI |
| rs12264196 | GSTO1  | GI_4758483-S  | 10 | 10 | 106014019 | 3109  | 9.3878  | 6.12301 | YRI |
| rs17116741 | GSTO1  | GI_4758483-S  | 10 | 10 | 106014292 | 2836  | 8.3421  | 6.12301 | YRI |
| rs12241913 | GSTO1  | GI_4758483-S  | 10 | 10 | 106014447 | 2681  | 7.9468  | 6.12301 | YRI |
| rs7077259  | GSTO1  | GI_4758483-S  | 10 | 10 | 106014913 | 2215  | 7.9468  | 6.12301 | YRI |
| rs7077635  | GSTO1  | GI_4758483-S  | 10 | 10 | 106014924 | 2204  | 7.9468  | 6.12301 | YRI |
| rs7077729  | GSTO1  | GI_4758483-S  | 10 | 10 | 106014937 | 2191  | 7.7864  | 6.12301 | YRI |
| rs7077787  | GSTO1  | GI_4758483-S  | 10 | 10 | 106015139 | 1989  | 7.9468  | 6.12301 | YRI |
| rs7077797  | GSTO1  | GI_4758483-S  | 10 | 10 | 106015167 | 1961  | 8.9979  | 6.12301 | YRI |
| rs7096068  | GSTO1  | GI_4758483-S  | 10 | 10 | 106015376 | 1752  | 8.0918  | 6.12301 | YRI |
| rs7099492  | GSTO1  | GI_4758483-S  | 10 | 10 | 106015479 | 1649  | 7.9468  | 6.12301 | YRI |
| rs7906892  | GSTO1  | GI_4758483-S  | 10 | 10 | 106015980 | 1148  | 7.9468  | 6.12301 | YRI |
| rs7906559  | GSTO1  | GI_4758483-S  | 10 | 10 | 106016008 | 1120  | 7.9468  | 6.12301 | YRI |
| rs7906957  | GSTO1  | GI_4758483-S  | 10 | 10 | 106016194 | 934   | 8.1807  | 6.12301 | YRI |
| rs17116751 | GSTO1  | GI_4758483-S  | 10 | 10 | 106016530 | 598   | 7.9468  | 6.12301 | YRI |
| rs17116753 | GSTO1  | GI_4758483-S  | 10 | 10 | 106016543 | 585   | 8.1447  | 6.12301 | YRI |
| rs17116754 | GSTO1  | GI_4758483-S  | 10 | 10 | 106016644 | 484   | 7.9468  | 6.12301 | YRI |
| rs17116755 | GSTO1  | GI_4758483-S  | 10 | 10 | 106016659 | 469   | 7.9468  | 6.12301 | YRI |
| rs17116758 | GSTO1  | GI_4758483-S  | 10 | 10 | 106016833 | 295   | 8.3421  | 6.12301 | YRI |
| rs12264646 | GSTO1  | GI_4758483-S  | 10 | 10 | 106017892 | 764   | 7.9468  | 6.12301 | YRI |
| rs10509769 | GSTO1  | GI_4758483-S  | 10 | 10 | 106018060 | 932   | 7.4157  | 6.12301 | YRI |
| rs12264844 | GSTO1  | GI_4758483-S  | 10 | 10 | 106018240 | 1112  | 7.3827  | 6.12301 | YRI |
| rs17116770 | GSTO1  | GI_4758483-S  | 10 | 10 | 106018719 | 1591  | 7.9468  | 6.12301 | YRI |
| rs12267156 | GSTO1  | GI_4758483-S  | 10 | 10 | 106019328 | 2200  | 7.3827  | 6.12301 | YRI |
| rs7089730  | GSTO1  | GI_4758483-S  | 10 | 10 | 106020461 | 3333  | 7.9468  | 6.12301 | YRI |
| rs7897376  | GSTO1  | GI_4758483-S  | 10 | 10 | 106021020 | 3892  | 8.3421  | 6.12301 | YRI |
| rs7914492  | GSTO1  | GI_4758483-S  | 10 | 10 | 106021286 | 4158  | 7.9468  | 6.12301 | YRI |
| rs12261808 | GSTO1  | GI_4758483-S  | 10 | 10 | 106021751 | 4623  | 7.9468  | 6.12301 | YRI |
| rs12247206 | GSTO1  | GI_4758483-S  | 10 | 10 | 106021804 | 4676  | 7.9468  | 6.12301 | YRI |
| rs12262175 | GSTO1  | GI_4758483-S  | 10 | 10 | 106022115 | 4987  | 7.8088  | 6.12301 | YRI |
| rs7910156  | GSTO1  | GI_4758483-S  | 10 | 10 | 106022240 | 5112  | 7.9468  | 6.12301 | YRI |
| rs17116784 | GSTO1  | GI_4758483-S  | 10 | 10 | 106022815 | 5687  | 8.3421  | 6.12301 | YRI |
| rs17116785 | GSTO1  | GI_4758483-S  | 10 | 10 | 106022954 | 5826  | 7.9468  | 6.12301 | YRI |
| rs17116786 | GSTO1  | GI_4758483-S  | 10 | 10 | 106023014 | 5886  | 6.9606  | 6.12301 | YRI |

|            |          |               |    |    |           |       |         |         |     |
|------------|----------|---------------|----|----|-----------|-------|---------|---------|-----|
| rs11191982 | GSTO1    | GI_4758483-S  | 10 | 10 | 106023311 | 6183  | 7.7743  | 6.12301 | YRI |
| rs11191983 | GSTO1    | GI_4758483-S  | 10 | 10 | 106023337 | 6209  | 7.9468  | 6.12301 | YRI |
| rs11191984 | GSTO1    | GI_4758483-S  | 10 | 10 | 106023470 | 6342  | 7.9468  | 6.12301 | YRI |
| rs11191985 | GSTO1    | GI_4758483-S  | 10 | 10 | 106023564 | 6436  | 8.2044  | 6.12301 | YRI |
| rs11191986 | GSTO1    | GI_4758483-S  | 10 | 10 | 106023684 | 6556  | 7.9468  | 6.12301 | YRI |
| rs11191987 | GSTO1    | GI_4758483-S  | 10 | 10 | 106023741 | 6613  | 8.5278  | 6.12301 | YRI |
| rs7070750  | GSTO1    | GI_4758483-S  | 10 | 10 | 106025845 | 8717  | 7.7439  | 6.12301 | YRI |
| rs12245345 | GSTO1    | GI_4758483-S  | 10 | 10 | 106028196 | 11068 | 7.9468  | 6.12301 | YRI |
| rs12264024 | GSTO1    | GI_4758483-S  | 10 | 10 | 106030242 | 13114 | 7.9468  | 6.12301 | YRI |
| rs9422807  | OAT      | GI_4557808-S  | 10 | 10 | 126083981 | 7549  | 6.4162  | 6.15043 | YRI |
| rs7096307  | DPYSL4   | GI_11321616-S | 10 | 10 | 133833417 | 35749 | 6.4405  | 6.35684 | YRI |
| rs4880341  | DPYSL4   | GI_11321616-S | 10 | 10 | 133842679 | 26487 | 7.5423  | 6.35684 | YRI |
| rs10781563 | DPYSL4   | GI_11321616-S | 10 | 10 | 133858802 | 10364 | 8.0568  | 6.35684 | YRI |
| rs4075289  | CD151    | GI_34328914-A | 11 | 11 | 820670    | 8073  | 6.9154  | 6.02699 | YRI |
| rs7924806  | CD151    | GI_34328914-A | 11 | 11 | 823668    | 5075  | 8.4552  | 6.02699 | YRI |
| rs16928081 | PHEMX    | GI_37595532-A | 11 | 11 | 2277542   | 18331 | 8.1866  | 5.97305 | YRI |
| rs16928081 | C11orf21 | GI_7662662-S  | 11 | 11 | 2277542   | 3775  | 6.3577  | 6.02147 | YRI |
| rs2074021  | PHEMX    | GI_37595532-A | 11 | 11 | 2280104   | 15769 | 10.8476 | 5.97305 | YRI |
| rs2074021  | C11orf21 | GI_7662662-S  | 11 | 11 | 2280104   | 6337  | 9.3479  | 6.02147 | YRI |
| rs7123429  | C11orf17 | GI_21361869-I | 11 | 11 | 8823384   | 74697 | 7.3064  | 6.42638 | YRI |
| rs1560569  | C11orf17 | GI_21361869-A | 11 | 11 | 8896463   | 1267  | 6.9434  | 6.42638 | YRI |
| rs3751068  | C11orf17 | GI_21361869-I | 11 | 11 | 8903526   | 5445  | 6.4964  | 6.42638 | YRI |
| rs3925781  | TSG101   | GI_18765712-S | 11 | 11 | 18481066  | 21289 | 10.6568 | 6.50859 | YRI |
| rs12419063 | TSG101   | GI_18765712-S | 11 | 11 | 18481894  | 22117 | 10.6568 | 6.50859 | YRI |
| rs4298881  | TSG101   | GI_18765712-S | 11 | 11 | 18485368  | 25591 | 10.6568 | 6.50859 | YRI |
| rs10500836 | TSG101   | GI_18765712-S | 11 | 11 | 18485684  | 25907 | 10.6568 | 6.50859 | YRI |
| rs7931630  | TSG101   | GI_18765712-S | 11 | 11 | 18503908  | 44131 | 10.6568 | 6.50859 | YRI |
| rs1395319  | TSG101   | GI_18765712-S | 11 | 11 | 18504759  | 44982 | 8.3355  | 6.50859 | YRI |
| rs1395320  | TSG101   | GI_18765712-S | 11 | 11 | 18504771  | 44994 | 9.6688  | 6.50859 | YRI |
| rs7105889  | TSG101   | GI_18765712-S | 11 | 11 | 18520637  | 60860 | 9.6688  | 6.50859 | YRI |
| rs12224694 | TSG101   | GI_18765712-S | 11 | 11 | 18521413  | 61636 | 8.7577  | 6.50859 | YRI |
| rs10832940 | TSG101   | GI_18765712-S | 11 | 11 | 18525921  | 66144 | 9.5948  | 6.50859 | YRI |
| rs7107057  | TSG101   | GI_18765712-S | 11 | 11 | 18528736  | 68959 | 9.6688  | 6.50859 | YRI |
| rs2941052  | MMRP19   | GI_7705723-S  | 11 | 11 | 34846707  | 19821 | 6.3415  | 6.28493 | YRI |
| rs2915233  | MMRP19   | GI_7705723-S  | 11 | 11 | 34848869  | 17659 | 6.3415  | 6.28493 | YRI |
| rs2288667  | MMRP19   | GI_7705723-S  | 11 | 11 | 34860975  | 5553  | 9.6849  | 6.28493 | YRI |
| rs2956088  | MMRP19   | GI_7705723-S  | 11 | 11 | 34862423  | 4105  | 9.6849  | 6.28493 | YRI |
| rs2985399  | MMRP19   | GI_7705723-S  | 11 | 11 | 34862570  | 3958  | 9.6849  | 6.28493 | YRI |
| rs2985398  | MMRP19   | GI_7705723-S  | 11 | 11 | 34862621  | 3907  | 9.4438  | 6.28493 | YRI |
| rs1998603  | MMRP19   | GI_7705723-S  | 11 | 11 | 34863138  | 3390  | 9.6849  | 6.28493 | YRI |
| rs2985396  | MMRP19   | GI_7705723-S  | 11 | 11 | 34863530  | 2998  | 9.1065  | 6.28493 | YRI |
| rs2956091  | MMRP19   | GI_7705723-S  | 11 | 11 | 34864657  | 1871  | 9.7601  | 6.28493 | YRI |
| rs2985391  | MMRP19   | GI_7705723-S  | 11 | 11 | 34866148  | 380   | 10.335  | 6.28493 | YRI |
| rs1571133  | MMRP19   | GI_7705723-S  | 11 | 11 | 34866502  | 26    | 11.1607 | 6.28493 | YRI |
| rs1571134  | MMRP19   | GI_7705723-S  | 11 | 11 | 34866653  | 125   | 10.4157 | 6.28493 | YRI |
| rs2915224  | MMRP19   | GI_7705723-S  | 11 | 11 | 34868865  | 2337  | 9.6849  | 6.28493 | YRI |
| rs1430855  | MMRP19   | GI_7705723-S  | 11 | 11 | 34869484  | 2956  | 9.6849  | 6.28493 | YRI |
| rs2985389  | MMRP19   | GI_7705723-S  | 11 | 11 | 34869740  | 3212  | 9.6849  | 6.28493 | YRI |
| rs2915223  | MMRP19   | GI_7705723-S  | 11 | 11 | 34870713  | 4185  | 9.6849  | 6.28493 | YRI |
| rs2915222  | MMRP19   | GI_7705723-S  | 11 | 11 | 34870936  | 4408  | 9.6849  | 6.28493 | YRI |
| rs2915221  | MMRP19   | GI_7705723-S  | 11 | 11 | 34871056  | 4528  | 6.7293  | 6.28493 | YRI |
| rs2915220  | MMRP19   | GI_7705723-S  | 11 | 11 | 34871226  | 4698  | 9.6849  | 6.28493 | YRI |
| rs2986424  | MMRP19   | GI_7705723-S  | 11 | 11 | 34872022  | 5494  | 7.9386  | 6.28493 | YRI |
| rs1326940  | MMRP19   | GI_7705723-S  | 11 | 11 | 34873060  | 6532  | 9.6849  | 6.28493 | YRI |
| rs1326941  | MMRP19   | GI_7705723-S  | 11 | 11 | 34873286  | 6758  | 9.6849  | 6.28493 | YRI |
| rs1326942  | MMRP19   | GI_7705723-S  | 11 | 11 | 34873361  | 6833  | 9.4438  | 6.28493 | YRI |

|            |           |               |    |    |          |        |         |         |     |
|------------|-----------|---------------|----|----|----------|--------|---------|---------|-----|
| rs1326943  | MMRP19    | GI_7705723-S  | 11 | 11 | 34873444 | 6916   | 9.6849  | 6.28493 | YRI |
| rs2217478  | MMRP19    | GI_7705723-S  | 11 | 11 | 34873939 | 7411   | 9.1844  | 6.28493 | YRI |
| rs2915227  | MMRP19    | GI_7705723-S  | 11 | 11 | 34931643 | 65115  | 7.1753  | 6.28493 | YRI |
| rs12277745 | LOC119710 | GI_42476215-S | 11 | 11 | 36543756 | 82442  | 6.9905  | 6.14488 | YRI |
| rs4150999  | LOC119710 | GI_42476215-S | 11 | 11 | 36545769 | 80429  | 6.2862  | 6.14488 | YRI |
| rs4151001  | LOC119710 | GI_42476215-S | 11 | 11 | 36546694 | 79504  | 7.2695  | 6.14488 | YRI |
| rs4151030  | LOC119710 | GI_42476215-S | 11 | 11 | 36552336 | 73862  | 7.6377  | 6.14488 | YRI |
| rs4151047  | LOC119710 | GI_42476215-S | 11 | 11 | 36557092 | 69106  | 7.6377  | 6.14488 | YRI |
| rs12274228 | LOC119710 | GI_42476215-S | 11 | 11 | 36563208 | 62990  | 7.4148  | 6.14488 | YRI |
| rs12271279 | LOC119710 | GI_42476215-S | 11 | 11 | 36565599 | 60599  | 7.2695  | 6.14488 | YRI |
| rs11033704 | LOC119710 | GI_42476215-S | 11 | 11 | 36574821 | 51377  | 7.6377  | 6.14488 | YRI |
| rs11033705 | LOC119710 | GI_42476215-S | 11 | 11 | 36578171 | 48027  | 7.6377  | 6.14488 | YRI |
| rs12271312 | LOC119710 | GI_42476215-S | 11 | 11 | 36582755 | 43443  | 7.2695  | 6.14488 | YRI |
| rs12281063 | LOC119710 | GI_42476215-S | 11 | 11 | 36588453 | 37745  | 7.2759  | 6.14488 | YRI |
| rs11825620 | LOC119710 | GI_42476215-S | 11 | 11 | 36594132 | 32066  | 7.6377  | 6.14488 | YRI |
| rs12273796 | LOC119710 | GI_42476215-S | 11 | 11 | 36603304 | 22894  | 6.2717  | 6.14488 | YRI |
| rs12283026 | LOC119710 | GI_42476215-S | 11 | 11 | 36617208 | 8990   | 7.6377  | 6.14488 | YRI |
| rs11033738 | LOC119710 | GI_42476215-S | 11 | 11 | 36633029 | 6831   | 7.2759  | 6.14488 | YRI |
| rs7119565  | LOC119710 | GI_42476215-S | 11 | 11 | 36682341 | 56143  | 6.8706  | 6.14488 | YRI |
| rs10838158 | HSD17B12  | GI_7705854-S  | 11 | 11 | 43709098 | 125383 | 9.8827  | 6.24086 | YRI |
| rs6485455  | HSD17B12  | GI_7705854-S  | 11 | 11 | 43710301 | 124180 | 8.7147  | 6.24086 | YRI |
| rs10768975 | HSD17B12  | GI_7705854-S  | 11 | 11 | 43710948 | 123533 | 9.871   | 6.24086 | YRI |
| rs6485456  | HSD17B12  | GI_7705854-S  | 11 | 11 | 43723478 | 111003 | 9.8827  | 6.24086 | YRI |
| rs10742688 | HSD17B12  | GI_7705854-S  | 11 | 11 | 43724830 | 109651 | 9.8827  | 6.24086 | YRI |
| rs7115970  | HSD17B12  | GI_7705854-S  | 11 | 11 | 43725871 | 108610 | 8.6835  | 6.24086 | YRI |
| rs10768976 | HSD17B12  | GI_7705854-S  | 11 | 11 | 43730389 | 104092 | 9.5147  | 6.24086 | YRI |
| rs4643069  | HSD17B12  | GI_7705854-S  | 11 | 11 | 43732310 | 102171 | 9.8827  | 6.24086 | YRI |
| rs7110437  | HSD17B12  | GI_7705854-S  | 11 | 11 | 43737129 | 97352  | 9.4254  | 6.24086 | YRI |
| rs7928134  | HSD17B12  | GI_7705854-S  | 11 | 11 | 43742889 | 91592  | 9.871   | 6.24086 | YRI |
| rs10838162 | HSD17B12  | GI_7705854-S  | 11 | 11 | 43745798 | 88683  | 9.8827  | 6.24086 | YRI |
| rs4755741  | HSD17B12  | GI_7705854-S  | 11 | 11 | 43759830 | 74651  | 9.8827  | 6.24086 | YRI |
| rs6485462  | HSD17B12  | GI_7705854-S  | 11 | 11 | 43772776 | 61705  | 7.6242  | 6.24086 | YRI |
| rs7118659  | HSD17B12  | GI_7705854-S  | 11 | 11 | 43773701 | 60780  | 7.4686  | 6.24086 | YRI |
| rs1878851  | HSD17B12  | GI_7705854-S  | 11 | 11 | 43777100 | 57381  | 9.8827  | 6.24086 | YRI |
| rs4755745  | HSD17B12  | GI_7705854-S  | 11 | 11 | 43777580 | 56901  | 9.8827  | 6.24086 | YRI |
| rs1518814  | HSD17B12  | GI_7705854-S  | 11 | 11 | 43781209 | 53272  | 9.8827  | 6.24086 | YRI |
| rs6485464  | HSD17B12  | GI_7705854-S  | 11 | 11 | 43782057 | 52424  | 9.8827  | 6.24086 | YRI |
| rs10768983 | HSD17B12  | GI_7705854-S  | 11 | 11 | 43796511 | 37970  | 10.1235 | 6.24086 | YRI |
| rs7101808  | HSD17B12  | GI_7705854-S  | 11 | 11 | 43800155 | 34326  | 8.6974  | 6.24086 | YRI |
| rs7131110  | HSD17B12  | GI_7705854-S  | 11 | 11 | 43803426 | 31055  | 10.1235 | 6.24086 | YRI |
| rs2139154  | HSD17B12  | GI_7705854-S  | 11 | 11 | 43815258 | 19223  | 10.1235 | 6.24086 | YRI |
| rs10734518 | HSD17B12  | GI_7705854-S  | 11 | 11 | 43818324 | 16157  | 6.4104  | 6.24086 | YRI |
| rs9971535  | HSD17B12  | GI_7705854-S  | 11 | 11 | 43818901 | 15580  | 10.1235 | 6.24086 | YRI |
| rs2176598  | HSD17B12  | GI_7705854-S  | 11 | 11 | 43820854 | 13627  | 8.4381  | 6.24086 | YRI |
| rs1914773  | HSD17B12  | GI_7705854-S  | 11 | 11 | 43822870 | 11611  | 6.4104  | 6.24086 | YRI |
| rs939015   | HSD17B12  | GI_7705854-S  | 11 | 11 | 43825227 | 9254   | 10.1235 | 6.24086 | YRI |
| rs10838185 | HSD17B12  | GI_7705854-S  | 11 | 11 | 43826515 | 7966   | 6.2996  | 6.24086 | YRI |
| rs10838186 | HSD17B12  | GI_7705854-S  | 11 | 11 | 43826556 | 7925   | 6.4104  | 6.24086 | YRI |
| rs11037676 | HSD17B12  | GI_7705854-S  | 11 | 11 | 43827788 | 6693   | 6.25    | 6.24086 | YRI |
| rs1518822  | HSD17B12  | GI_7705854-S  | 11 | 11 | 43828373 | 6108   | 10.1235 | 6.24086 | YRI |
| rs1518821  | HSD17B12  | GI_7705854-S  | 11 | 11 | 43828572 | 5909   | 10.1235 | 6.24086 | YRI |
| rs1518820  | HSD17B12  | GI_7705854-S  | 11 | 11 | 43830115 | 4366   | 6.9602  | 6.24086 | YRI |
| rs3736505  | HSD17B12  | GI_7705854-S  | 11 | 11 | 43833011 | 1470   | 8.5399  | 6.24086 | YRI |
| rs1061810  | HSD17B12  | GI_7705854-S  | 11 | 11 | 43834510 | 29     | 8.9871  | 6.24086 | YRI |
| rs7120753  | HSD17B12  | GI_7705854-S  | 11 | 11 | 43836089 | 1608   | 7.465   | 6.24086 | YRI |
| rs2013867  | DDB2      | GI_4557514-S  | 11 | 11 | 47216848 | 273    | 5.7138  | 5.50755 | YRI |

|            |           |               |    |    |          |       |         |         |     |
|------------|-----------|---------------|----|----|----------|-------|---------|---------|-----|
| rs1001956  | TIMM10    | GI_6912707-S  | 11 | 11 | 57023525 | 29093 | 5.9718  | 5.90135 | YRI |
| rs2513077  | ASRGL1    | GI_23308566-S | 11 | 11 | 61862501 | 53815 | 6.2948  | 6.17431 | YRI |
| rs516041   | SF1       | GI_42544126-I | 11 | 11 | 64248645 | 51654 | 6.7381  | 5.71282 | YRI |
| rs559977   | SF1       | GI_42544126-I | 11 | 11 | 64253163 | 47136 | 6.7381  | 5.71282 | YRI |
| rs553618   | SF1       | GI_42544126-I | 11 | 11 | 64259755 | 40544 | 8.2386  | 5.71282 | YRI |
| rs550930   | SF1       | GI_42544126-I | 11 | 11 | 64263891 | 36408 | 8.6959  | 5.71282 | YRI |
| rs546323   | SF1       | GI_42544126-I | 11 | 11 | 64264375 | 35924 | 8.6959  | 5.71282 | YRI |
| rs583887   | CTSW      | GI_23110963-S | 11 | 11 | 65400603 | 7039  | 5.962   | 5.83275 | YRI |
| rs658524   | CTSW      | GI_23110963-S | 11 | 11 | 65403836 | 3806  | 5.962   | 5.83275 | YRI |
| rs694994   | CTSW      | GI_23110963-S | 11 | 11 | 65409885 | 2243  | 5.962   | 5.83275 | YRI |
| rs641018   | CTSW      | GI_23110963-S | 11 | 11 | 65411969 | 4327  | 5.962   | 5.83275 | YRI |
| rs2302264  | RPS6KB2   | GI_4506738-S  | 11 | 11 | 66964002 | 4657  | 10.577  | 5.94356 | YRI |
| rs17159533 | LRP5      | GI_4505018-S  | 11 | 11 | 67895542 | 77596 | 5.9563  | 5.94096 | YRI |
| rs636049   | MRPL21    | GI_31652223-A | 11 | 11 | 68423774 | 8360  | 6.2732  | 5.95322 | YRI |
| rs7949850  | LOC374421 | GI_37541454-S | 11 | 11 | 93035170 | 67589 | 8.8846  | 6.19745 | YRI |
| rs4753488  | LOC374421 | GI_37541454-S | 11 | 11 | 93037265 | 65494 | 10.1595 | 6.19745 | YRI |
| rs4753489  | LOC374421 | GI_37541454-S | 11 | 11 | 93039754 | 63005 | 10.3475 | 6.19745 | YRI |
| rs7939847  | LOC374421 | GI_37541454-S | 11 | 11 | 93041268 | 61491 | 10.3475 | 6.19745 | YRI |
| rs1944101  | LOC374421 | GI_37541454-S | 11 | 11 | 93041744 | 61015 | 10.2846 | 6.19745 | YRI |
| rs1954994  | LOC374421 | GI_37541454-S | 11 | 11 | 93042715 | 60044 | 9.1861  | 6.19745 | YRI |
| rs1944102  | LOC374421 | GI_37541454-S | 11 | 11 | 93042994 | 59765 | 10.3475 | 6.19745 | YRI |
| rs7127033  | LOC374421 | GI_37541454-S | 11 | 11 | 93043626 | 59133 | 9.758   | 6.19745 | YRI |
| rs10765624 | LOC374421 | GI_37541454-S | 11 | 11 | 93045170 | 57589 | 10.3475 | 6.19745 | YRI |
| rs4753095  | LOC374421 | GI_37541454-S | 11 | 11 | 93045381 | 57378 | 7.1138  | 6.19745 | YRI |
| rs4753096  | LOC374421 | GI_37541454-S | 11 | 11 | 93045763 | 56996 | 10.3475 | 6.19745 | YRI |
| rs4753490  | LOC374421 | GI_37541454-S | 11 | 11 | 93045795 | 56964 | 10.2099 | 6.19745 | YRI |
| rs10831085 | LOC374421 | GI_37541454-S | 11 | 11 | 93045930 | 56829 | 9.1861  | 6.19745 | YRI |
| rs11020477 | LOC374421 | GI_37541454-S | 11 | 11 | 93046865 | 55894 | 8.1905  | 6.19745 | YRI |
| rs10765627 | LOC374421 | GI_37541454-S | 11 | 11 | 93047310 | 55449 | 9.5777  | 6.19745 | YRI |
| rs10765628 | LOC374421 | GI_37541454-S | 11 | 11 | 93047417 | 55342 | 9.1861  | 6.19745 | YRI |
| rs10765629 | LOC374421 | GI_37541454-S | 11 | 11 | 93047587 | 55172 | 10.245  | 6.19745 | YRI |
| rs10831088 | LOC374421 | GI_37541454-S | 11 | 11 | 93048479 | 54280 | 10.3475 | 6.19745 | YRI |
| rs10765631 | LOC374421 | GI_37541454-S | 11 | 11 | 93049693 | 53066 | 9.8536  | 6.19745 | YRI |
| rs10741471 | LOC374421 | GI_37541454-S | 11 | 11 | 93049946 | 52813 | 10.2846 | 6.19745 | YRI |
| rs4753097  | LOC374421 | GI_37541454-S | 11 | 11 | 93050801 | 51958 | 10.2846 | 6.19745 | YRI |
| rs1944100  | LOC374421 | GI_37541454-S | 11 | 11 | 93052422 | 50337 | 10.2846 | 6.19745 | YRI |
| rs1944106  | LOC374421 | GI_37541454-S | 11 | 11 | 93054941 | 47818 | 10.3475 | 6.19745 | YRI |
| rs4753098  | LOC374421 | GI_37541454-S | 11 | 11 | 93057085 | 45674 | 8.8074  | 6.19745 | YRI |
| rs7926876  | LOC374421 | GI_37541454-S | 11 | 11 | 93057842 | 44917 | 8.5594  | 6.19745 | YRI |
| rs2186686  | LOC374421 | GI_37541454-S | 11 | 11 | 93059767 | 42992 | 10.2846 | 6.19745 | YRI |
| rs4303195  | LOC374421 | GI_37541454-S | 11 | 11 | 93061485 | 41274 | 10.3475 | 6.19745 | YRI |
| rs7937523  | LOC374421 | GI_37541454-S | 11 | 11 | 93062100 | 40659 | 10.2846 | 6.19745 | YRI |
| rs10741472 | LOC374421 | GI_37541454-S | 11 | 11 | 93062885 | 39874 | 9.9292  | 6.19745 | YRI |
| rs4753495  | LOC374421 | GI_37541454-S | 11 | 11 | 93064807 | 37952 | 10.3475 | 6.19745 | YRI |
| rs1011993  | LOC374421 | GI_37541454-S | 11 | 11 | 93079070 | 23689 | 10.3972 | 6.19745 | YRI |
| rs2186688  | LOC374421 | GI_37541454-S | 11 | 11 | 93088237 | 14522 | 7.3243  | 6.19745 | YRI |
| rs6416000  | LOC374421 | GI_37541454-S | 11 | 11 | 93088468 | 14291 | 10.3475 | 6.19745 | YRI |
| rs1784203  | LOC374421 | GI_37541454-S | 11 | 11 | 93089782 | 12977 | 9.3382  | 6.19745 | YRI |
| rs648162   | LOC374421 | GI_37541454-S | 11 | 11 | 93092742 | 10017 | 9.072   | 6.19745 | YRI |
| rs628916   | LOC374421 | GI_37541454-S | 11 | 11 | 93096363 | 6396  | 8.7548  | 6.19745 | YRI |
| rs2509840  | LOC374421 | GI_37541454-S | 11 | 11 | 93101049 | 1710  | 9.4389  | 6.19745 | YRI |
| rs1944099  | LOC374421 | GI_37541454-S | 11 | 11 | 93101750 | 1009  | 8.9143  | 6.19745 | YRI |
| rs7101779  | LOC374421 | GI_37541454-S | 11 | 11 | 93102980 | 221   | 9.7889  | 6.19745 | YRI |
| rs630648   | LOC374421 | GI_37541454-S | 11 | 11 | 93114326 | 11567 | 10.4949 | 6.19745 | YRI |
| rs623510   | LOC374421 | GI_37541454-S | 11 | 11 | 93114439 | 11680 | 10.4949 | 6.19745 | YRI |
| rs631116   | LOC374421 | GI_37541454-S | 11 | 11 | 93114475 | 11716 | 9.3528  | 6.19745 | YRI |

|            |               |               |    |    |           |        |         |         |     |
|------------|---------------|---------------|----|----|-----------|--------|---------|---------|-----|
| rs7943669  | MGC33948      | GI_40255122-S | 11 | 11 | 107378616 | 390578 | 6.7543  | 5.95002 | YRI |
| rs2235001  | MGC33948      | GI_40255122-S | 11 | 11 | 107619842 | 149352 | 6.2054  | 5.95002 | YRI |
| rs4987926  | MGC33948      | GI_40255122-S | 11 | 11 | 107622397 | 146797 | 6.2957  | 5.95002 | YRI |
| rs4987929  | MGC33948      | GI_40255122-S | 11 | 11 | 107623342 | 145852 | 6.2957  | 5.95002 | YRI |
| rs2234994  | MGC33948      | GI_40255122-S | 11 | 11 | 107644330 | 124864 | 6.2054  | 5.95002 | YRI |
| rs3092856  | MGC33948      | GI_40255122-S | 11 | 11 | 107664942 | 104252 | 6.2054  | 5.95002 | YRI |
| rs4988050  | MGC33948      | GI_40255122-S | 11 | 11 | 107681538 | 87656  | 6.2054  | 5.95002 | YRI |
| rs11821299 | MGC33948      | GI_40255122-S | 11 | 11 | 107722341 | 46853  | 6.1252  | 5.95002 | YRI |
| rs11825355 | MGC33948      | GI_40255122-S | 11 | 11 | 107724851 | 44343  | 6.5087  | 5.95002 | YRI |
| rs17107969 | MGC33948      | GI_40255122-S | 11 | 11 | 107726213 | 42981  | 7.6383  | 5.95002 | YRI |
| rs17107980 | MGC33948      | GI_40255122-S | 11 | 11 | 107732685 | 36509  | 7.6383  | 5.95002 | YRI |
| rs3092836  | MGC33948      | GI_40255122-S | 11 | 11 | 107742872 | 26322  | 7.6383  | 5.95002 | YRI |
| rs17108054 | MGC33948      | GI_40255122-S | 11 | 11 | 107848530 | 79336  | 8.8376  | 5.95002 | YRI |
| rs7126039  | LOC120376     | GI_37540715-S | 11 | 11 | 110716002 | 31452  | 6.3183  | 6.06185 | YRI |
| rs7104680  | LOC120376     | GI_37540715-S | 11 | 11 | 110718392 | 33842  | 6.1865  | 6.06185 | YRI |
| rs4936947  | SPA17         | GI_15718773-S | 11 | 11 | 124003995 | 65479  | 6.7109  | 6.41621 | YRI |
| rs7941327  | SPA17         | GI_15718773-S | 11 | 11 | 124012177 | 57297  | 7.4202  | 6.41621 | YRI |
| rs7937294  | SPA17         | GI_15718773-S | 11 | 11 | 124018485 | 50989  | 7.4202  | 6.41621 | YRI |
| rs7940161  | SPA17         | GI_15718773-S | 11 | 11 | 124018585 | 50889  | 7.4202  | 6.41621 | YRI |
| rs3819084  | SPA17         | GI_15718773-S | 11 | 11 | 124022331 | 47143  | 7.2322  | 6.41621 | YRI |
| rs12295168 | SPA17         | GI_15718773-S | 11 | 11 | 124027378 | 42096  | 7.5608  | 6.41621 | YRI |
| rs11219743 | SPA17         | GI_15718773-S | 11 | 11 | 124027930 | 41544  | 7.2818  | 6.41621 | YRI |
| rs11219749 | SPA17         | GI_15718773-S | 11 | 11 | 124038377 | 31097  | 6.9866  | 6.41621 | YRI |
| rs10893281 | SPA17         | GI_15718773-S | 11 | 11 | 124040022 | 29452  | 7.4202  | 6.41621 | YRI |
| rs7119225  | SPA17         | GI_15718773-S | 11 | 11 | 124042004 | 27470  | 7.4202  | 6.41621 | YRI |
| rs11825168 | SPA17         | GI_15718773-S | 11 | 11 | 124043411 | 26063  | 7.4202  | 6.41621 | YRI |
| rs7927406  | SPA17         | GI_15718773-S | 11 | 11 | 124049013 | 20461  | 8.6502  | 6.41621 | YRI |
| rs7938692  | SPA17         | GI_15718773-S | 11 | 11 | 124071401 | 1927   | 6.5749  | 6.41621 | YRI |
| rs646521   | Hs.98028      | Hs.98028-S    | 11 | 11 | 124183151 | 1184   | 6.9859  | 6.20524 | YRI |
| rs3809258  | LOC399987     | GI_42660080-S | 12 | 12 | 3734571   | 1492   | 10.6427 | 6.56438 | YRI |
| rs9300302  | LOC399987     | GI_42660080-S | 12 | 12 | 3737732   | 1669   | 10.7511 | 6.56438 | YRI |
| rs33870    | CLECSF2       | GI_37577106-S | 12 | 12 | 9899130   | 2675   | 7.2426  | 6.47789 | YRI |
| rs1915325  | KLRF1         | GI_7705573-S  | 12 | 12 | 10559961  | 673704 | 6.6423  | 6.39666 | YRI |
| rs2111941  | DKFZP434F0318 | GI_13540611-S | 12 | 12 | 12720671  | 114802 | 8.3369  | 6.2057  | YRI |
| rs12816452 | DKFZP434F0318 | GI_13540611-S | 12 | 12 | 12724273  | 111200 | 8.3369  | 6.2057  | YRI |
| rs7132848  | DKFZP434F0318 | GI_13540611-S | 12 | 12 | 12733512  | 101961 | 8.338   | 6.2057  | YRI |
| rs10845611 | DKFZP434F0318 | GI_13540611-S | 12 | 12 | 12743649  | 91824  | 9.7022  | 6.2057  | YRI |
| rs34329    | DKFZP434F0318 | GI_13540611-S | 12 | 12 | 12764500  | 70973  | 6.4126  | 6.2057  | YRI |
| rs2948     | Hs.39429      | Hs.39429-S    | 12 | 12 | 16078899  | 111    | 9.7437  | 6.08644 | YRI |
| rs10772889 | Hs.39429      | Hs.39429-S    | 12 | 12 | 16083004  | 4216   | 6.7829  | 6.08644 | YRI |
| rs7964268  | Hs.39429      | Hs.39429-S    | 12 | 12 | 16091944  | 13156  | 6.7829  | 6.08644 | YRI |
| rs7309958  | MGC35033      | GI_34303924-S | 12 | 12 | 47123156  | 53134  | 9.1805  | 6.05726 | YRI |
| rs7139348  | MGC35033      | GI_34303924-S | 12 | 12 | 47123287  | 53003  | 11.0263 | 6.05726 | YRI |
| rs7975269  | MGC35033      | GI_34303924-S | 12 | 12 | 47130923  | 45367  | 10.2495 | 6.05726 | YRI |
| rs2468939  | MGC35033      | GI_34303924-S | 12 | 12 | 47134509  | 41781  | 9.4067  | 6.05726 | YRI |
| rs2468940  | MGC35033      | GI_34303924-S | 12 | 12 | 47134988  | 41302  | 8.2857  | 6.05726 | YRI |
| rs2956466  | MGC35033      | GI_34303924-S | 12 | 12 | 47140510  | 35780  | 9.4067  | 6.05726 | YRI |
| rs2731092  | MGC35033      | GI_34303924-S | 12 | 12 | 47166817  | 9473   | 8.7018  | 6.05726 | YRI |
| rs2705124  | MGC35033      | GI_34303924-S | 12 | 12 | 47166990  | 9300   | 7.9358  | 6.05726 | YRI |
| rs2705125  | MGC35033      | GI_34303924-S | 12 | 12 | 47168158  | 8132   | 7.9358  | 6.05726 | YRI |
| rs2731096  | MGC35033      | GI_34303924-S | 12 | 12 | 47169287  | 7003   | 9.5165  | 6.05726 | YRI |
| rs2731099  | MGC35033      | GI_34303924-S | 12 | 12 | 47170193  | 6097   | 10.9702 | 6.05726 | YRI |
| rs2731102  | MGC35033      | GI_34303924-S | 12 | 12 | 47170802  | 5488   | 7.4509  | 6.05726 | YRI |
| rs2731105  | MGC35033      | GI_34303924-S | 12 | 12 | 47171959  | 4331   | 7.9358  | 6.05726 | YRI |
| rs2731106  | MGC35033      | GI_34303924-S | 12 | 12 | 47172751  | 3539   | 9.2391  | 6.05726 | YRI |
| rs2956465  | MGC35033      | GI_34303924-S | 12 | 12 | 47177153  | 863    | 6.5397  | 6.05726 | YRI |



|            |           |               |    |    |           |        |         |         |     |
|------------|-----------|---------------|----|----|-----------|--------|---------|---------|-----|
| rs2731065  | MGC35033  | GI_34303924-S | 12 | 12 | 47179190  | 2900   | 6.3574  | 6.05726 | YRI |
| rs2705163  | MGC35033  | GI_34303924-S | 12 | 12 | 47183381  | 7091   | 6.7608  | 6.05726 | YRI |
| rs10783258 | MGC35033  | GI_34303924-S | 12 | 12 | 47187423  | 11133  | 6.7608  | 6.05726 | YRI |
| rs10783259 | MGC35033  | GI_34303924-S | 12 | 12 | 47187566  | 11276  | 6.7608  | 6.05726 | YRI |
| rs2705151  | MGC35033  | GI_34303924-S | 12 | 12 | 47195312  | 19022  | 6.7737  | 6.05726 | YRI |
| rs7309964  | KIAA1463  | GI_39930390-S | 12 | 12 | 49350331  | 74584  | 6.7195  | 5.80301 | YRI |
| rs1047912  | KIAA1463  | GI_39930390-S | 12 | 12 | 49425129  | 214    | 6.6007  | 5.80301 | YRI |
| rs2630367  | SLC11A2   | GI_10835168-S | 12 | 12 | 49641438  | 24698  | 6.2416  | 5.89423 | YRI |
| rs706803   | SLC11A2   | GI_10835168-S | 12 | 12 | 49660517  | 5619   | 6.6168  | 5.89423 | YRI |
| rs2630362  | SLC11A2   | GI_10835168-S | 12 | 12 | 49664675  | 1461   | 7.2138  | 5.89423 | YRI |
| rs150909   | SLC11A2   | GI_10835168-S | 12 | 12 | 49667344  | 1208   | 7.2138  | 5.89423 | YRI |
| rs161044   | SLC11A2   | GI_10835168-S | 12 | 12 | 49668499  | 2363   | 7.2138  | 5.89423 | YRI |
| rs224566   | SLC11A2   | GI_10835168-S | 12 | 12 | 49670267  | 4131   | 7.2138  | 5.89423 | YRI |
| rs224569   | SLC11A2   | GI_10835168-S | 12 | 12 | 49673106  | 6970   | 7.2138  | 5.89423 | YRI |
| rs161045   | SLC11A2   | GI_10835168-S | 12 | 12 | 49677224  | 11088  | 6.6739  | 5.89423 | YRI |
| rs161046   | SLC11A2   | GI_10835168-S | 12 | 12 | 49678519  | 12383  | 6.2213  | 5.89423 | YRI |
| rs161047   | SLC11A2   | GI_10835168-S | 12 | 12 | 49678878  | 12742  | 7.2138  | 5.89423 | YRI |
| rs445520   | SLC11A2   | GI_10835168-S | 12 | 12 | 49689172  | 23036  | 7.2138  | 5.89423 | YRI |
| rs394384   | SLC11A2   | GI_10835168-S | 12 | 12 | 49689916  | 23780  | 7.3813  | 5.89423 | YRI |
| rs224573   | SLC11A2   | GI_10835168-S | 12 | 12 | 49703528  | 37392  | 7.2138  | 5.89423 | YRI |
| rs224574   | SLC11A2   | GI_10835168-S | 12 | 12 | 49705527  | 39391  | 7.2138  | 5.89423 | YRI |
| rs6580780  | SLC11A2   | GI_10835168-S | 12 | 12 | 49716927  | 50791  | 6.3875  | 5.89423 | YRI |
| rs7299484  | SLC11A2   | GI_10835168-S | 12 | 12 | 49721177  | 55041  | 7.2138  | 5.89423 | YRI |
| rs7972608  | SLC11A2   | GI_10835168-S | 12 | 12 | 49728883  | 62747  | 6.7203  | 5.89423 | YRI |
| rs4768959  | SLC11A2   | GI_10835168-S | 12 | 12 | 49731928  | 65792  | 7.0517  | 5.89423 | YRI |
| rs7974923  | SLC11A2   | GI_10835168-S | 12 | 12 | 49734400  | 68264  | 7.2138  | 5.89423 | YRI |
| rs7975628  | SLC11A2   | GI_10835168-S | 12 | 12 | 49734791  | 68655  | 6.7147  | 5.89423 | YRI |
| rs10783412 | SLC11A2   | GI_10835168-S | 12 | 12 | 49752272  | 86136  | 6.9016  | 5.89423 | YRI |
| rs7978782  | SLC11A2   | GI_10835168-S | 12 | 12 | 49791066  | 124930 | 7.2138  | 5.89423 | YRI |
| rs10747749 | USP52     | GI_41281526-S | 12 | 12 | 54065470  | 931663 | 6.3006  | 5.98351 | YRI |
| rs3741600  | Hs.510003 | Hs.510003-S   | 12 | 12 | 67440272  | 8299   | 10.5519 | 6.40879 | YRI |
| rs11609067 | Hs.510003 | Hs.510003-S   | 12 | 12 | 67440397  | 8174   | 7.9522  | 6.40879 | YRI |
| rs12321570 | Hs.510003 | Hs.510003-S   | 12 | 12 | 67448510  | 61     | 19.6129 | 6.40879 | YRI |
| rs10745921 | CHPT1     | GI_9910383-S  | 12 | 12 | 100589661 | 29770  | 8.5162  | 6.46802 | YRI |
| rs2695290  | CHPT1     | GI_9910383-S  | 12 | 12 | 100590312 | 29119  | 9.1965  | 6.46802 | YRI |
| rs2695284  | CHPT1     | GI_9910383-S  | 12 | 12 | 100591786 | 27645  | 9.1965  | 6.46802 | YRI |
| rs2695282  | CHPT1     | GI_9910383-S  | 12 | 12 | 100591970 | 27461  | 9.1965  | 6.46802 | YRI |
| rs2695281  | CHPT1     | GI_9910383-S  | 12 | 12 | 100592467 | 26964  | 9.1965  | 6.46802 | YRI |
| rs2559855  | CHPT1     | GI_9910383-S  | 12 | 12 | 100592548 | 26883  | 8.4731  | 6.46802 | YRI |
| rs3809260  | CHPT1     | GI_9910383-S  | 12 | 12 | 100593485 | 25946  | 9.1965  | 6.46802 | YRI |
| rs12320499 | LNK       | GI_4885454-S  | 12 | 12 | 110311554 | 40253  | 6.0732  | 5.78996 | YRI |
| rs11830222 | LNK       | GI_4885454-S  | 12 | 12 | 110315426 | 36381  | 6.7167  | 5.78996 | YRI |
| rs11831659 | LNK       | GI_4885454-S  | 12 | 12 | 110318398 | 33409  | 8.8296  | 5.78996 | YRI |
| rs7972796  | LNK       | GI_4885454-S  | 12 | 12 | 110319213 | 32594  | 7.6255  | 5.78996 | YRI |
| rs12306935 | LNK       | GI_4885454-S  | 12 | 12 | 110325456 | 26351  | 7.6255  | 5.78996 | YRI |
| rs12301866 | LNK       | GI_4885454-S  | 12 | 12 | 110326309 | 25498  | 7.6255  | 5.78996 | YRI |
| rs12312248 | LNK       | GI_4885454-S  | 12 | 12 | 110327573 | 24234  | 7.6255  | 5.78996 | YRI |
| rs11065900 | LNK       | GI_4885454-S  | 12 | 12 | 110335396 | 16411  | 7.6255  | 5.78996 | YRI |
| rs7299305  | LNK       | GI_4885454-S  | 12 | 12 | 110336989 | 14818  | 6.8482  | 5.78996 | YRI |
| rs12315206 | LNK       | GI_4885454-S  | 12 | 12 | 110345074 | 6733   | 7.4866  | 5.78996 | YRI |
| rs1107853  | LNK       | GI_4885454-S  | 12 | 12 | 110349004 | 2803   | 7.4819  | 5.78996 | YRI |
| rs14555    | LNK       | GI_4885454-S  | 12 | 12 | 110352036 | 229    | 7.6255  | 5.78996 | YRI |
| rs7311116  | LNK       | GI_4885454-S  | 12 | 12 | 110352261 | 454    | 7.1697  | 5.78996 | YRI |
| rs7295678  | LNK       | GI_4885454-S  | 12 | 12 | 110354587 | 2780   | 7.6255  | 5.78996 | YRI |
| rs7956220  | LNK       | GI_4885454-S  | 12 | 12 | 110358619 | 6812   | 7.7615  | 5.78996 | YRI |
| rs11065908 | LNK       | GI_4885454-S  | 12 | 12 | 110362122 | 10315  | 8.8296  | 5.78996 | YRI |

|            |         |               |    |    |           |        |         |         |     |
|------------|---------|---------------|----|----|-----------|--------|---------|---------|-----|
| rs6490140  | LNK     | GI_4885454-S  | 12 | 12 | 110363013 | 11206  | 7.1403  | 5.78996 | YRI |
| rs11065915 | LNK     | GI_4885454-S  | 12 | 12 | 110368714 | 16907  | 6.8358  | 5.78996 | YRI |
| rs12299245 | LNK     | GI_4885454-S  | 12 | 12 | 110372740 | 20933  | 7.6255  | 5.78996 | YRI |
| rs10161383 | LNK     | GI_4885454-S  | 12 | 12 | 110379001 | 27194  | 7.6255  | 5.78996 | YRI |
| rs10400565 | LNK     | GI_4885454-S  | 12 | 12 | 110386186 | 34379  | 7.6255  | 5.78996 | YRI |
| rs12301101 | LNK     | GI_4885454-S  | 12 | 12 | 110387142 | 35335  | 7.6255  | 5.78996 | YRI |
| rs10400460 | LNK     | GI_4885454-S  | 12 | 12 | 110387966 | 36159  | 7.6255  | 5.78996 | YRI |
| rs7136567  | LNK     | GI_4885454-S  | 12 | 12 | 110400486 | 48679  | 7.5598  | 5.78996 | YRI |
| rs11065934 | LNK     | GI_4885454-S  | 12 | 12 | 110409557 | 57750  | 7.6255  | 5.78996 | YRI |
| rs6490172  | LNK     | GI_4885454-S  | 12 | 12 | 110412837 | 61030  | 7.6255  | 5.78996 | YRI |
| rs11065936 | LNK     | GI_4885454-S  | 12 | 12 | 110419751 | 67944  | 7.6255  | 5.78996 | YRI |
| rs7134907  | LNK     | GI_4885454-S  | 12 | 12 | 110420711 | 68904  | 6.2891  | 5.78996 | YRI |
| rs12310120 | LNK     | GI_4885454-S  | 12 | 12 | 110421253 | 69446  | 6.0426  | 5.78996 | YRI |
| rs7139444  | LNK     | GI_4885454-S  | 12 | 12 | 110424506 | 72699  | 7.6255  | 5.78996 | YRI |
| rs7302641  | LNK     | GI_4885454-S  | 12 | 12 | 110425644 | 73837  | 7.6255  | 5.78996 | YRI |
| rs16941551 | LNK     | GI_4885454-S  | 12 | 12 | 110427324 | 75517  | 7.6255  | 5.78996 | YRI |
| rs7301374  | LNK     | GI_4885454-S  | 12 | 12 | 110428737 | 76930  | 7.2044  | 5.78996 | YRI |
| rs7305662  | LNK     | GI_4885454-S  | 12 | 12 | 110431637 | 79830  | 6.6417  | 5.78996 | YRI |
| rs7978331  | LNK     | GI_4885454-S  | 12 | 12 | 110433953 | 82146  | 6.9256  | 5.78996 | YRI |
| rs7136679  | LNK     | GI_4885454-S  | 12 | 12 | 110434999 | 83192  | 7.2044  | 5.78996 | YRI |
| rs7979403  | LNK     | GI_4885454-S  | 12 | 12 | 110440864 | 89057  | 7.6255  | 5.78996 | YRI |
| rs16934167 | LNK     | GI_4885454-S  | 12 | 12 | 110441780 | 89973  | 7.6255  | 5.78996 | YRI |
| rs7311293  | LNK     | GI_4885454-S  | 12 | 12 | 110455826 | 104019 | 7.6255  | 5.78996 | YRI |
| rs12301021 | LNK     | GI_4885454-S  | 12 | 12 | 110457936 | 106129 | 7.416   | 5.78996 | YRI |
| rs11065951 | LNK     | GI_4885454-S  | 12 | 12 | 110458198 | 106391 | 7.6255  | 5.78996 | YRI |
| rs7308857  | LNK     | GI_4885454-S  | 12 | 12 | 110461920 | 110113 | 6.567   | 5.78996 | YRI |
| rs13377932 | LNK     | GI_4885454-S  | 12 | 12 | 110463737 | 111930 | 6.0482  | 5.78996 | YRI |
| rs12314647 | LNK     | GI_4885454-S  | 12 | 12 | 110469049 | 117242 | 7.416   | 5.78996 | YRI |
| rs16941578 | LNK     | GI_4885454-S  | 12 | 12 | 110471419 | 119612 | 7.8251  | 5.78996 | YRI |
| rs7972340  | LNK     | GI_4885454-S  | 12 | 12 | 110472134 | 120327 | 7.6255  | 5.78996 | YRI |
| rs12308557 | LNK     | GI_4885454-S  | 12 | 12 | 110500837 | 149030 | 7.6255  | 5.78996 | YRI |
| rs12316988 | LNK     | GI_4885454-S  | 12 | 12 | 110501052 | 149245 | 7.3353  | 5.78996 | YRI |
| rs11066443 | OAS1    | GI_8051622-I  | 12 | 12 | 111800451 | 17807  | 7.1113  | 6.05684 | YRI |
| rs10744785 | OAS1    | GI_8051622-I  | 12 | 12 | 111807976 | 10282  | 8.9479  | 6.05684 | YRI |
| rs10774671 | OAS1    | GI_8051620-I  | 12 | 12 | 111819913 | 177    | 7.4125  | 6.05684 | YRI |
| rs10774671 | OAS1    | GI_8051622-I  | 12 | 12 | 111819913 | 1655   | 19.8824 | 6.05684 | YRI |
| rs2686343  | CAMKK2  | GI_27437022-A | 12 | 12 | 120148828 | 3104   | 6.9864  | 5.96832 | YRI |
| rs11060932 | ARL6IP4 | GI_8923906-A  | 12 | 12 | 121958529 | 33756  | 7.1195  | 5.68945 | YRI |
| rs12311043 | ARL6IP4 | GI_8923906-A  | 12 | 12 | 121965492 | 26793  | 7.1195  | 5.68945 | YRI |
| rs752164   | ARL6IP4 | GI_8923906-A  | 12 | 12 | 122032694 | 40409  | 6.6306  | 5.68945 | YRI |
| rs7952760  | ARL6IP4 | GI_8923906-A  | 12 | 12 | 122068527 | 76242  | 6.6306  | 5.68945 | YRI |
| rs7957096  | ARL6IP4 | GI_8923906-A  | 12 | 12 | 122069758 | 77473  | 6.306   | 5.68945 | YRI |
| rs7964036  | ARL6IP4 | GI_8923906-A  | 12 | 12 | 122096022 | 103737 | 6.6306  | 5.68945 | YRI |
| rs12310205 | SBNO1   | GI_33620762-S | 12 | 12 | 122124605 | 182838 | 6.6407  | 5.8658  | YRI |
| rs6488889  | GTF2H3  | GI_28376643-S | 12 | 12 | 122669673 | 317    | 5.832   | 5.72136 | YRI |
| rs9579573  | ZNF237  | GI_7657706-S  | 13 | 13 | 19118129  | 192906 | 6.4325  | 6.42985 | YRI |
| rs9579659  | ZNF237  | GI_7657706-S  | 13 | 13 | 19157345  | 153690 | 6.8629  | 6.42985 | YRI |
| rs9579660  | ZNF237  | GI_7657706-S  | 13 | 13 | 19157463  | 153572 | 7.0018  | 6.42985 | YRI |
| rs7996928  | ZNF237  | GI_7657706-S  | 13 | 13 | 19165854  | 145181 | 7.6264  | 6.42985 | YRI |
| rs9579663  | ZNF237  | GI_7657706-S  | 13 | 13 | 19166933  | 144102 | 7.0018  | 6.42985 | YRI |
| rs9579673  | ZNF237  | GI_7657706-S  | 13 | 13 | 19208307  | 102728 | 7.0018  | 6.42985 | YRI |
| rs9579674  | ZNF237  | GI_7657706-S  | 13 | 13 | 19208942  | 102093 | 7.0018  | 6.42985 | YRI |
| rs9579676  | ZNF237  | GI_7657706-S  | 13 | 13 | 19215098  | 95937  | 7.92    | 6.42985 | YRI |
| rs9578209  | ZNF237  | GI_7657706-S  | 13 | 13 | 19215298  | 95737  | 6.4325  | 6.42985 | YRI |
| rs17086336 | ZNF237  | GI_7657706-S  | 13 | 13 | 19219788  | 91247  | 8.1657  | 6.42985 | YRI |
| rs9579677  | ZNF237  | GI_7657706-S  | 13 | 13 | 19220519  | 90516  | 6.4325  | 6.42985 | YRI |

|            |          |               |    |    |          |       |        |         |     |
|------------|----------|---------------|----|----|----------|-------|--------|---------|-----|
| rs7320086  | ZNF237   | GI_7657706-S  | 13 | 13 | 19231071 | 79964 | 7.92   | 6.42985 | YRI |
| rs17086752 | ZNF237   | GI_7657706-S  | 13 | 13 | 19254998 | 56037 | 7.0018 | 6.42985 | YRI |
| rs9579686  | ZNF237   | GI_7657706-S  | 13 | 13 | 19273074 | 37961 | 7.7804 | 6.42985 | YRI |
| rs9579694  | ZNF237   | GI_7657706-S  | 13 | 13 | 19279515 | 31520 | 7.0018 | 6.42985 | YRI |
| rs9579695  | ZNF237   | GI_7657706-S  | 13 | 13 | 19280882 | 30153 | 7.92   | 6.42985 | YRI |
| rs9578218  | ZNF237   | GI_7657706-S  | 13 | 13 | 19283207 | 27828 | 7.92   | 6.42985 | YRI |
| rs9579701  | ZNF237   | GI_7657706-S  | 13 | 13 | 19291811 | 19224 | 7.92   | 6.42985 | YRI |
| rs11838644 | ZNF237   | GI_7657706-S  | 13 | 13 | 19295058 | 15977 | 7.7804 | 6.42985 | YRI |
| rs9579703  | ZNF237   | GI_7657706-S  | 13 | 13 | 19295124 | 15911 | 7.92   | 6.42985 | YRI |
| rs9578222  | ZNF237   | GI_7657706-S  | 13 | 13 | 19299310 | 11725 | 7.92   | 6.42985 | YRI |
| rs9579706  | ZNF237   | GI_7657706-S  | 13 | 13 | 19300878 | 10157 | 7.0018 | 6.42985 | YRI |
| rs11147487 | ZNF237   | GI_7657706-S  | 13 | 13 | 19307444 | 3591  | 7.7804 | 6.42985 | YRI |
| rs11840619 | ZNF237   | GI_7657706-S  | 13 | 13 | 19308571 | 2464  | 7.7205 | 6.42985 | YRI |
| rs11839389 | ZNF237   | GI_7657706-S  | 13 | 13 | 19308910 | 2125  | 7.92   | 6.42985 | YRI |
| rs7988277  | ZNF237   | GI_7657706-S  | 13 | 13 | 19309701 | 1334  | 7.7804 | 6.42985 | YRI |
| rs9578225  | ZNF237   | GI_7657706-S  | 13 | 13 | 19318137 | 7102  | 7.2417 | 6.42985 | YRI |
| rs9579714  | ZNF237   | GI_7657706-S  | 13 | 13 | 19321616 | 10581 | 7.0018 | 6.42985 | YRI |
| rs10219966 | ZNF237   | GI_7657706-S  | 13 | 13 | 19322260 | 11225 | 7.6343 | 6.42985 | YRI |
| rs9579717  | ZNF237   | GI_7657706-S  | 13 | 13 | 19323911 | 12876 | 7.6343 | 6.42985 | YRI |
| rs9579719  | ZNF237   | GI_7657706-S  | 13 | 13 | 19325358 | 14323 | 7.6343 | 6.42985 | YRI |
| rs10161995 | ZNF237   | GI_7657706-S  | 13 | 13 | 19336935 | 25900 | 6.4325 | 6.42985 | YRI |
| rs9579725  | ZNF237   | GI_7657706-S  | 13 | 13 | 19340134 | 29099 | 7.0619 | 6.42985 | YRI |
| rs9579726  | ZNF237   | GI_7657706-S  | 13 | 13 | 19342079 | 31044 | 7.328  | 6.42985 | YRI |
| rs9579730  | ZNF237   | GI_7657706-S  | 13 | 13 | 19345401 | 34366 | 7.1685 | 6.42985 | YRI |
| rs7999935  | ZNF237   | GI_7657706-S  | 13 | 13 | 19346857 | 35822 | 7.0525 | 6.42985 | YRI |
| rs9578229  | ZNF237   | GI_7657706-S  | 13 | 13 | 19350008 | 38973 | 7.0018 | 6.42985 | YRI |
| rs912603   | B3GTL    | GI_34996530-S | 13 | 13 | 30803641 | 86    | 8.3739 | 6.50254 | YRI |
| rs13080    | B3GTL    | GI_34996530-S | 13 | 13 | 30804141 | 586   | 7.2809 | 6.50254 | YRI |
| rs4057     | B3GTL    | GI_34996530-S | 13 | 13 | 30804291 | 736   | 7.2809 | 6.50254 | YRI |
| rs7999260  | B3GTL    | GI_34996530-S | 13 | 13 | 30810323 | 6768  | 6.7543 | 6.50254 | YRI |
| rs7983430  | B3GTL    | GI_34996530-S | 13 | 13 | 30819717 | 16162 | 7.5536 | 6.50254 | YRI |
| rs4943341  | B3GTL    | GI_34996530-S | 13 | 13 | 30822013 | 18458 | 8.1355 | 6.50254 | YRI |
| rs7333382  | B3GTL    | GI_34996530-S | 13 | 13 | 30825543 | 21988 | 6.5081 | 6.50254 | YRI |
| rs2149845  | RFC3     | GI_31795537-A | 13 | 13 | 33380562 | 77081 | 6.5205 | 6.32329 | YRI |
| rs10459322 | RFC3     | GI_31795537-A | 13 | 13 | 33386532 | 83051 | 6.5097 | 6.32329 | YRI |
| rs17080155 | RFC3     | GI_31795537-A | 13 | 13 | 33388516 | 85035 | 6.3811 | 6.32329 | YRI |
| rs9563930  | RFC3     | GI_31795537-A | 13 | 13 | 33391228 | 87747 | 6.5809 | 6.32329 | YRI |
| rs9570601  | RFC3     | GI_31795537-A | 13 | 13 | 33393451 | 89970 | 6.5809 | 6.32329 | YRI |
| rs9563935  | RFC3     | GI_31795537-A | 13 | 13 | 33394938 | 91457 | 6.3811 | 6.32329 | YRI |
| rs3809325  | EBRP     | GI_14211872-S | 13 | 13 | 49164110 | 30844 | 6.0866 | 5.89973 | YRI |
| rs9530084  | Hs.28465 | Hs.28465-S    | 13 | 13 | 72175801 | 5107  | 6.5725 | 6.28289 | YRI |
| rs716660   | Hs.28465 | Hs.28465-S    | 13 | 13 | 72186503 | 5595  | 6.5725 | 6.28289 | YRI |
| rs1812314  | Hs.28465 | Hs.28465-S    | 13 | 13 | 72186611 | 5703  | 6.5725 | 6.28289 | YRI |
| rs9285279  | Hs.28465 | Hs.28465-S    | 13 | 13 | 72186716 | 5808  | 7.1498 | 6.28289 | YRI |
| rs9543093  | Hs.28465 | Hs.28465-S    | 13 | 13 | 72187079 | 6171  | 6.5725 | 6.28289 | YRI |
| rs9318116  | Hs.28465 | Hs.28465-S    | 13 | 13 | 72189013 | 8105  | 6.834  | 6.28289 | YRI |
| rs4885032  | Hs.28465 | Hs.28465-S    | 13 | 13 | 72189451 | 8543  | 6.834  | 6.28289 | YRI |
| rs7337938  | Hs.28465 | Hs.28465-S    | 13 | 13 | 72190245 | 9337  | 6.834  | 6.28289 | YRI |
| rs7326192  | Hs.28465 | Hs.28465-S    | 13 | 13 | 72191530 | 10622 | 6.5725 | 6.28289 | YRI |
| rs9318117  | Hs.28465 | Hs.28465-S    | 13 | 13 | 72192155 | 11247 | 6.5486 | 6.28289 | YRI |
| rs9543101  | Hs.28465 | Hs.28465-S    | 13 | 13 | 72193908 | 13000 | 6.5725 | 6.28289 | YRI |
| rs1372001  | Hs.28465 | Hs.28465-S    | 13 | 13 | 72195580 | 14672 | 6.834  | 6.28289 | YRI |
| rs1465898  | Hs.28465 | Hs.28465-S    | 13 | 13 | 72199408 | 18500 | 6.523  | 6.28289 | YRI |
| rs1465897  | Hs.28465 | Hs.28465-S    | 13 | 13 | 72199656 | 18748 | 6.5725 | 6.28289 | YRI |
| rs4885034  | Hs.28465 | Hs.28465-S    | 13 | 13 | 72200482 | 19574 | 6.7922 | 6.28289 | YRI |
| rs1467603  | Hs.28465 | Hs.28465-S    | 13 | 13 | 72200707 | 19799 | 7.8695 | 6.28289 | YRI |

|            |           |               |    |    |           |        |         |         |     |
|------------|-----------|---------------|----|----|-----------|--------|---------|---------|-----|
| rs1951897  | Hs.28465  | Hs.28465-S    | 13 | 13 | 72201593  | 20685  | 7.8262  | 6.28289 | YRI |
| rs9285280  | Hs.28465  | Hs.28465-S    | 13 | 13 | 72204160  | 23252  | 8.3016  | 6.28289 | YRI |
| rs4885035  | Hs.28465  | Hs.28465-S    | 13 | 13 | 72204433  | 23525  | 7.8262  | 6.28289 | YRI |
| rs9543104  | Hs.28465  | Hs.28465-S    | 13 | 13 | 72205528  | 24620  | 7.8181  | 6.28289 | YRI |
| rs7996083  | Hs.28465  | Hs.28465-S    | 13 | 13 | 72206902  | 25994  | 6.8868  | 6.28289 | YRI |
| rs1431833  | TBC1D4    | GI_42660198-S | 13 | 13 | 74768948  | 11573  | 6.8349  | 6.77637 | YRI |
| rs837344   | LOC87769  | GI_34147452-S | 13 | 13 | 99984057  | 2080   | 7.2603  | 6.39394 | YRI |
| rs2760307  | LOC87769  | GI_34147452-S | 13 | 13 | 99988330  | 6353   | 9.0036  | 6.39394 | YRI |
| rs837305   | LOC87769  | GI_34147452-S | 13 | 13 | 99991706  | 9729   | 8.6802  | 6.39394 | YRI |
| rs844384   | LOC87769  | GI_34147452-S | 13 | 13 | 99994043  | 12066  | 6.4264  | 6.39394 | YRI |
| rs837314   | LOC87769  | GI_34147452-S | 13 | 13 | 100003502 | 21525  | 7.8381  | 6.39394 | YRI |
| rs11616731 | LOC87769  | GI_34147452-S | 13 | 13 | 100010301 | 28324  | 7.2924  | 6.39394 | YRI |
| rs9585460  | LOC87769  | GI_34147452-S | 13 | 13 | 100012523 | 30546  | 6.5302  | 6.39394 | YRI |
| rs9518088  | LOC87769  | GI_34147452-S | 13 | 13 | 100013781 | 31804  | 6.5302  | 6.39394 | YRI |
| rs4772307  | LOC87769  | GI_34147452-S | 13 | 13 | 100016314 | 34337  | 8.3506  | 6.39394 | YRI |
| rs9518092  | LOC87769  | GI_34147452-S | 13 | 13 | 100017153 | 35176  | 8.8001  | 6.39394 | YRI |
| rs9518096  | LOC87769  | GI_34147452-S | 13 | 13 | 100021110 | 39133  | 7.9385  | 6.39394 | YRI |
| rs927494   | C14orf122 | GI_34222327-S | 14 | 14 | 23670230  | 7892   | 6.0185  | 5.99417 | YRI |
| rs8010715  | C14orf122 | GI_34222327-S | 14 | 14 | 23678987  | 865    | 9.3201  | 5.99417 | YRI |
| rs17121543 | RPL36AL   | GI_34335143-S | 14 | 14 | 49079339  | 77736  | 7.9738  | 6.26532 | YRI |
| rs1952013  | RPL36AL   | GI_34335143-S | 14 | 14 | 49157107  | 32     | 11.1551 | 6.26532 | YRI |
| rs2985697  | RPL36AL   | GI_34335143-S | 14 | 14 | 49162652  | 5577   | 11.5036 | 6.26532 | YRI |
| rs2985696  | RPL36AL   | GI_34335143-S | 14 | 14 | 49164663  | 7588   | 11.5036 | 6.26532 | YRI |
| rs11157696 | RPL36AL   | GI_34335143-S | 14 | 14 | 49175496  | 18421  | 8.63    | 6.26532 | YRI |
| rs1253642  | LOC341858 | GI_29736248-S | 14 | 14 | 51496904  | 9747   | 6.4326  | 6.34344 | YRI |
| rs4901334  | DDHD1     | GI_37545942-S | 14 | 14 | 52555108  | 28233  | 7.3238  | 6.43371 | YRI |
| rs17126054 | DDHD1     | GI_37545942-S | 14 | 14 | 52555765  | 27576  | 7.1335  | 6.43371 | YRI |
| rs17126064 | DDHD1     | GI_37545942-S | 14 | 14 | 52561478  | 21863  | 6.8207  | 6.43371 | YRI |
| rs8003676  | DDHD1     | GI_37545942-S | 14 | 14 | 52567792  | 15549  | 7.1335  | 6.43371 | YRI |
| rs17126068 | DDHD1     | GI_37545942-S | 14 | 14 | 52569647  | 13694  | 7.1335  | 6.43371 | YRI |
| rs7151619  | DDHD1     | GI_37545942-S | 14 | 14 | 52574990  | 8351   | 7.1335  | 6.43371 | YRI |
| rs17126074 | DDHD1     | GI_37545942-S | 14 | 14 | 52580484  | 2857   | 7.1335  | 6.43371 | YRI |
| rs17126081 | DDHD1     | GI_37545942-S | 14 | 14 | 52590474  | 7133   | 7.1335  | 6.43371 | YRI |
| rs17126082 | DDHD1     | GI_37545942-S | 14 | 14 | 52592707  | 9366   | 7.1335  | 6.43371 | YRI |
| rs7143059  | DDHD1     | GI_37545942-S | 14 | 14 | 52621634  | 38293  | 7.226   | 6.43371 | YRI |
| rs17126123 | DDHD1     | GI_37545942-S | 14 | 14 | 52630883  | 47542  | 7.1067  | 6.43371 | YRI |
| rs8018948  | DDHD1     | GI_37545942-S | 14 | 14 | 52676635  | 93294  | 7.7188  | 6.43371 | YRI |
| rs17126206 | DDHD1     | GI_37545942-S | 14 | 14 | 52687656  | 104315 | 7.7188  | 6.43371 | YRI |
| rs8005652  | DDHD1     | GI_37545942-S | 14 | 14 | 52695157  | 111816 | 6.9467  | 6.43371 | YRI |
| rs4899150  | C14orf52  | GI_21553312-S | 14 | 14 | 64414153  | 56603  | 6.4309  | 5.90959 | YRI |
| rs4902330  | C14orf52  | GI_21553312-S | 14 | 14 | 64439984  | 30772  | 6.3331  | 5.90959 | YRI |
| rs4902332  | C14orf52  | GI_21553312-S | 14 | 14 | 64445731  | 25025  | 25.8855 | 5.90959 | YRI |
| rs17102298 | C14orf52  | GI_21553312-S | 14 | 14 | 64446489  | 24267  | 25.8855 | 5.90959 | YRI |
| rs7154406  | C14orf52  | GI_21553312-S | 14 | 14 | 64446942  | 23814  | 25.3097 | 5.90959 | YRI |
| rs7153990  | C14orf52  | GI_21553312-S | 14 | 14 | 64447303  | 23453  | 22.9382 | 5.90959 | YRI |
| rs10139595 | C14orf52  | GI_21553312-S | 14 | 14 | 64448012  | 22744  | 25.7349 | 5.90959 | YRI |
| rs8022462  | C14orf52  | GI_21553312-S | 14 | 14 | 64448129  | 22627  | 7.3202  | 5.90959 | YRI |
| rs10151701 | C14orf52  | GI_21553312-S | 14 | 14 | 64448202  | 22554  | 25.8855 | 5.90959 | YRI |
| rs7143432  | C14orf52  | GI_21553312-S | 14 | 14 | 64448899  | 21857  | 22.7749 | 5.90959 | YRI |
| rs7143764  | C14orf52  | GI_21553312-S | 14 | 14 | 64449036  | 21720  | 19.852  | 5.90959 | YRI |
| rs10143017 | C14orf52  | GI_21553312-S | 14 | 14 | 64449371  | 21385  | 25.8855 | 5.90959 | YRI |
| rs12147448 | C14orf52  | GI_21553312-S | 14 | 14 | 64451517  | 19239  | 7.3202  | 5.90959 | YRI |
| rs10148687 | C14orf52  | GI_21553312-S | 14 | 14 | 64454029  | 16727  | 23.47   | 5.90959 | YRI |
| rs17102320 | C14orf52  | GI_21553312-S | 14 | 14 | 64454446  | 16310  | 12.8868 | 5.90959 | YRI |
| rs4902335  | C14orf52  | GI_21553312-S | 14 | 14 | 64455651  | 15105  | 25.7349 | 5.90959 | YRI |
| rs10132742 | C14orf52  | GI_21553312-S | 14 | 14 | 64456675  | 14081  | 24.8601 | 5.90959 | YRI |

|            |          |               |    |    |          |        |         |         |     |
|------------|----------|---------------|----|----|----------|--------|---------|---------|-----|
| rs4899152  | C14orf52 | GI_21553312-S | 14 | 14 | 64456869 | 13887  | 25.0222 | 5.90959 | YRI |
| rs4902336  | C14orf52 | GI_21553312-S | 14 | 14 | 64457015 | 13741  | 25.7349 | 5.90959 | YRI |
| rs10138534 | C14orf52 | GI_21553312-S | 14 | 14 | 64457742 | 13014  | 25.7349 | 5.90959 | YRI |
| rs10138506 | C14orf52 | GI_21553312-S | 14 | 14 | 64457996 | 12760  | 6.5151  | 5.90959 | YRI |
| rs7401853  | C14orf52 | GI_21553312-S | 14 | 14 | 64458464 | 12292  | 25.8855 | 5.90959 | YRI |
| rs10141986 | C14orf52 | GI_21553312-S | 14 | 14 | 64459156 | 11600  | 25.8855 | 5.90959 | YRI |
| rs4902343  | C14orf52 | GI_21553312-S | 14 | 14 | 64465933 | 4823   | 25.8855 | 5.90959 | YRI |
| rs9323457  | C14orf52 | GI_21553312-S | 14 | 14 | 64468536 | 2220   | 11.3294 | 5.90959 | YRI |
| rs10149617 | C14orf52 | GI_21553312-S | 14 | 14 | 64471914 | 1158   | 25.7349 | 5.90959 | YRI |
| rs4902345  | C14orf52 | GI_21553312-S | 14 | 14 | 64473657 | 2901   | 25.7349 | 5.90959 | YRI |
| rs10132858 | C14orf52 | GI_21553312-S | 14 | 14 | 64473731 | 2975   | 23.4149 | 5.90959 | YRI |
| rs10133054 | C14orf52 | GI_21553312-S | 14 | 14 | 64473869 | 3113   | 17.8942 | 5.90959 | YRI |
| rs10133290 | C14orf52 | GI_21553312-S | 14 | 14 | 64474195 | 3439   | 25.8855 | 5.90959 | YRI |
| rs4902346  | C14orf52 | GI_21553312-S | 14 | 14 | 64476913 | 6157   | 23.6504 | 5.90959 | YRI |
| rs2412065  | C14orf52 | GI_21553312-S | 14 | 14 | 64477410 | 6654   | 25.8855 | 5.90959 | YRI |
| rs4902352  | C14orf52 | GI_21553312-S | 14 | 14 | 64492549 | 21793  | 5.9981  | 5.90959 | YRI |
| rs3818770  | EIF2S1   | GI_34147492-S | 14 | 14 | 66035225 | 886308 | 7.0294  | 5.85091 | YRI |
| rs1457422  | EIF2S1   | GI_34147492-S | 14 | 14 | 66036270 | 885263 | 5.9665  | 5.85091 | YRI |
| rs10220636 | EIF2S1   | GI_34147492-S | 14 | 14 | 66041917 | 879616 | 6.2694  | 5.85091 | YRI |
| rs17827735 | EIF2S1   | GI_34147492-S | 14 | 14 | 66047141 | 874392 | 6.9149  | 5.85091 | YRI |
| rs7159063  | EIF2S1   | GI_34147492-S | 14 | 14 | 66052787 | 868746 | 7.1561  | 5.85091 | YRI |
| rs10144449 | EIF2S1   | GI_34147492-S | 14 | 14 | 66058012 | 863521 | 7.0294  | 5.85091 | YRI |
| rs7154154  | EIF2S1   | GI_34147492-S | 14 | 14 | 66059664 | 861869 | 6.4295  | 5.85091 | YRI |
| rs13368526 | EIF2S1   | GI_34147492-S | 14 | 14 | 66061630 | 859903 | 10.6941 | 5.85091 | YRI |
| rs13379248 | EIF2S1   | GI_34147492-S | 14 | 14 | 66069026 | 852507 | 6.4195  | 5.85091 | YRI |
| rs7145556  | EIF2S1   | GI_34147492-S | 14 | 14 | 66071725 | 849808 | 7.0294  | 5.85091 | YRI |
| rs10148418 | EIF2S1   | GI_34147492-S | 14 | 14 | 66073626 | 847907 | 7.0294  | 5.85091 | YRI |
| rs7143629  | EIF2S1   | GI_34147492-S | 14 | 14 | 66074719 | 846814 | 9.0596  | 5.85091 | YRI |
| rs7149668  | EIF2S1   | GI_34147492-S | 14 | 14 | 66076533 | 845000 | 7.0294  | 5.85091 | YRI |
| rs8012784  | EIF2S1   | GI_34147492-S | 14 | 14 | 66085038 | 836495 | 6.9915  | 5.85091 | YRI |
| rs10133769 | EIF2S1   | GI_34147492-S | 14 | 14 | 66088436 | 833097 | 7.3369  | 5.85091 | YRI |
| rs7151773  | EIF2S1   | GI_34147492-S | 14 | 14 | 66093753 | 827780 | 8.7221  | 5.85091 | YRI |
| rs17827790 | EIF2S1   | GI_34147492-S | 14 | 14 | 66094717 | 826816 | 6.6246  | 5.85091 | YRI |
| rs7156795  | EIF2S1   | GI_34147492-S | 14 | 14 | 66100648 | 820885 | 6.7346  | 5.85091 | YRI |
| rs7146849  | EIF2S1   | GI_34147492-S | 14 | 14 | 66101823 | 819710 | 6.8217  | 5.85091 | YRI |
| rs8004106  | EIF2S1   | GI_34147492-S | 14 | 14 | 66110354 | 811179 | 7.0294  | 5.85091 | YRI |
| rs7157828  | EIF2S1   | GI_34147492-S | 14 | 14 | 66116313 | 805220 | 6.5895  | 5.85091 | YRI |
| rs10143929 | EIF2S1   | GI_34147492-S | 14 | 14 | 66117841 | 803692 | 7.0294  | 5.85091 | YRI |
| rs13368404 | EIF2S1   | GI_34147492-S | 14 | 14 | 66129721 | 791812 | 7.0294  | 5.85091 | YRI |
| rs13368668 | EIF2S1   | GI_34147492-S | 14 | 14 | 66134079 | 787454 | 6.0087  | 5.85091 | YRI |
| rs8008596  | EIF2S1   | GI_34147492-S | 14 | 14 | 66139402 | 782131 | 6.1048  | 5.85091 | YRI |
| rs10144894 | EIF2S1   | GI_34147492-S | 14 | 14 | 66141562 | 779971 | 7.0294  | 5.85091 | YRI |
| rs8021202  | EIF2S1   | GI_34147492-S | 14 | 14 | 66143202 | 778331 | 7.0294  | 5.85091 | YRI |
| rs8018444  | EIF2S1   | GI_34147492-S | 14 | 14 | 66146264 | 775269 | 6.1788  | 5.85091 | YRI |
| rs7161707  | EIF2S1   | GI_34147492-S | 14 | 14 | 66146792 | 774741 | 7.0294  | 5.85091 | YRI |
| rs7140281  | EIF2S1   | GI_34147492-S | 14 | 14 | 66146903 | 774630 | 6.7496  | 5.85091 | YRI |
| rs8010110  | EIF2S1   | GI_34147492-S | 14 | 14 | 66147965 | 773568 | 7.0294  | 5.85091 | YRI |
| rs1958001  | EIF2S1   | GI_34147492-S | 14 | 14 | 66149645 | 771888 | 6.8599  | 5.85091 | YRI |
| rs8023060  | EIF2S1   | GI_34147492-S | 14 | 14 | 66153725 | 767808 | 6.2301  | 5.85091 | YRI |
| rs8015958  | EIF2S1   | GI_34147492-S | 14 | 14 | 66156429 | 765104 | 7.0294  | 5.85091 | YRI |
| rs8016353  | EIF2S1   | GI_34147492-S | 14 | 14 | 66156693 | 764840 | 6.4469  | 5.85091 | YRI |
| rs8011928  | EIF2S1   | GI_34147492-S | 14 | 14 | 66164236 | 757297 | 7.5629  | 5.85091 | YRI |
| rs8015842  | EIF2S1   | GI_34147492-S | 14 | 14 | 66165065 | 756468 | 7.0854  | 5.85091 | YRI |
| rs7140649  | EIF2S1   | GI_34147492-S | 14 | 14 | 66166600 | 754933 | 7.0294  | 5.85091 | YRI |
| rs12323903 | EIF2S1   | GI_34147492-S | 14 | 14 | 66170967 | 750566 | 6.1732  | 5.85091 | YRI |
| rs9323476  | EIF2S1   | GI_34147492-S | 14 | 14 | 66176387 | 745146 | 7.0294  | 5.85091 | YRI |

|            |        |               |    |    |          |        |         |         |     |
|------------|--------|---------------|----|----|----------|--------|---------|---------|-----|
| rs7152169  | EIF2S1 | GI_34147492-S | 14 | 14 | 66177344 | 744189 | 7.0294  | 5.85091 | YRI |
| rs7153011  | EIF2S1 | GI_34147492-S | 14 | 14 | 66177652 | 743881 | 6.0571  | 5.85091 | YRI |
| rs1952070  | EIF2S1 | GI_34147492-S | 14 | 14 | 66177823 | 743710 | 7.0294  | 5.85091 | YRI |
| rs7159473  | EIF2S1 | GI_34147492-S | 14 | 14 | 66178304 | 743229 | 6.7286  | 5.85091 | YRI |
| rs10133120 | EIF2S1 | GI_34147492-S | 14 | 14 | 66185424 | 736109 | 6.7545  | 5.85091 | YRI |
| rs11158642 | EIF2S1 | GI_34147492-S | 14 | 14 | 66185483 | 736050 | 6.8751  | 5.85091 | YRI |
| rs6573695  | EIF2S1 | GI_34147492-S | 14 | 14 | 66189645 | 731888 | 7.0294  | 5.85091 | YRI |
| rs8007662  | EIF2S1 | GI_34147492-S | 14 | 14 | 66190185 | 731348 | 6.4569  | 5.85091 | YRI |
| rs4644792  | EIF2S1 | GI_34147492-S | 14 | 14 | 66200099 | 721434 | 7.0294  | 5.85091 | YRI |
| rs7158823  | EIF2S1 | GI_34147492-S | 14 | 14 | 66201598 | 719935 | 7.0294  | 5.85091 | YRI |
| rs13367863 | EIF2S1 | GI_34147492-S | 14 | 14 | 66211159 | 710374 | 6.5002  | 5.85091 | YRI |
| rs8013215  | EIF2S1 | GI_34147492-S | 14 | 14 | 66212690 | 708843 | 6.2904  | 5.85091 | YRI |
| rs8018488  | EIF2S1 | GI_34147492-S | 14 | 14 | 66212779 | 708754 | 7.0294  | 5.85091 | YRI |
| rs8014297  | EIF2S1 | GI_34147492-S | 14 | 14 | 66215870 | 705663 | 7.7661  | 5.85091 | YRI |
| rs8015408  | EIF2S1 | GI_34147492-S | 14 | 14 | 66216433 | 705100 | 6.9915  | 5.85091 | YRI |
| rs4294753  | EIF2S1 | GI_34147492-S | 14 | 14 | 66216826 | 704707 | 6.2877  | 5.85091 | YRI |
| rs8005352  | EIF2S1 | GI_34147492-S | 14 | 14 | 66217888 | 703645 | 9.9112  | 5.85091 | YRI |
| rs6573702  | EIF2S1 | GI_34147492-S | 14 | 14 | 66218239 | 703294 | 7.0294  | 5.85091 | YRI |
| rs9783601  | EIF2S1 | GI_34147492-S | 14 | 14 | 66218692 | 702841 | 7.0294  | 5.85091 | YRI |
| rs6573706  | EIF2S1 | GI_34147492-S | 14 | 14 | 66220517 | 701016 | 7.0294  | 5.85091 | YRI |
| rs6573710  | EIF2S1 | GI_34147492-S | 14 | 14 | 66229962 | 691571 | 7.0294  | 5.85091 | YRI |
| rs12101118 | EIF2S1 | GI_34147492-S | 14 | 14 | 66230533 | 691000 | 6.809   | 5.85091 | YRI |
| rs7157740  | EIF2S1 | GI_34147492-S | 14 | 14 | 66231094 | 690439 | 7.0294  | 5.85091 | YRI |
| rs7154017  | EIF2S1 | GI_34147492-S | 14 | 14 | 66233836 | 687697 | 7.0294  | 5.85091 | YRI |
| rs7161029  | EIF2S1 | GI_34147492-S | 14 | 14 | 66235064 | 686469 | 7.0294  | 5.85091 | YRI |
| rs1951354  | EIF2S1 | GI_34147492-S | 14 | 14 | 66235643 | 685890 | 6.4424  | 5.85091 | YRI |
| rs13366714 | EIF2S1 | GI_34147492-S | 14 | 14 | 66239224 | 682309 | 6.5105  | 5.85091 | YRI |
| rs6573711  | EIF2S1 | GI_34147492-S | 14 | 14 | 66247439 | 674094 | 6.1394  | 5.85091 | YRI |
| rs1951357  | EIF2S1 | GI_34147492-S | 14 | 14 | 66257354 | 664179 | 6.1726  | 5.85091 | YRI |
| rs12100903 | EIF2S1 | GI_34147492-S | 14 | 14 | 66257989 | 663544 | 7.0294  | 5.85091 | YRI |
| rs8010952  | EIF2S1 | GI_34147492-S | 14 | 14 | 66259603 | 661930 | 6.8736  | 5.85091 | YRI |
| rs7156074  | EIF2S1 | GI_34147492-S | 14 | 14 | 66270929 | 650604 | 7.0294  | 5.85091 | YRI |
| rs10150028 | EIF2S1 | GI_34147492-S | 14 | 14 | 66271655 | 649878 | 6.8203  | 5.85091 | YRI |
| rs9323479  | EIF2S1 | GI_34147492-S | 14 | 14 | 66276240 | 645293 | 6.1723  | 5.85091 | YRI |
| rs10143077 | EIF2S1 | GI_34147492-S | 14 | 14 | 66276463 | 645070 | 6.8203  | 5.85091 | YRI |
| rs6573719  | EIF2S1 | GI_34147492-S | 14 | 14 | 66278401 | 643132 | 7.0294  | 5.85091 | YRI |
| rs766527   | EIF2S1 | GI_34147492-S | 14 | 14 | 66281840 | 639693 | 6.8203  | 5.85091 | YRI |
| rs6573720  | EIF2S1 | GI_34147492-S | 14 | 14 | 66282721 | 638812 | 9.9112  | 5.85091 | YRI |
| rs8016213  | EIF2S1 | GI_34147492-S | 14 | 14 | 66282985 | 638548 | 7.0294  | 5.85091 | YRI |
| rs8008369  | EIF2S1 | GI_34147492-S | 14 | 14 | 66284949 | 636584 | 6.2433  | 5.85091 | YRI |
| rs7148623  | EIF2S1 | GI_34147492-S | 14 | 14 | 66289570 | 631963 | 7.0294  | 5.85091 | YRI |
| rs8012158  | EIF2S1 | GI_34147492-S | 14 | 14 | 66291448 | 630085 | 6.7035  | 5.85091 | YRI |
| rs17247749 | EIF2S1 | GI_34147492-S | 14 | 14 | 66292836 | 628697 | 7.0294  | 5.85091 | YRI |
| rs10132625 | EIF2S1 | GI_34147492-S | 14 | 14 | 66303059 | 618474 | 7.0294  | 5.85091 | YRI |
| rs10144919 | EIF2S1 | GI_34147492-S | 14 | 14 | 66319372 | 602161 | 7.0294  | 5.85091 | YRI |
| rs7149711  | EIF2S1 | GI_34147492-S | 14 | 14 | 66321476 | 600057 | 7.0294  | 5.85091 | YRI |
| rs11158647 | EIF2S1 | GI_34147492-S | 14 | 14 | 66347063 | 574470 | 10.4925 | 5.85091 | YRI |
| rs4141703  | EIF2S1 | GI_34147492-S | 14 | 14 | 66347197 | 574336 | 7.0263  | 5.85091 | YRI |
| rs12323781 | EIF2S1 | GI_34147492-S | 14 | 14 | 66364969 | 556564 | 10.97   | 5.85091 | YRI |
| rs17247862 | EIF2S1 | GI_34147492-S | 14 | 14 | 66382113 | 539420 | 7.0294  | 5.85091 | YRI |
| rs10143670 | EIF2S1 | GI_34147492-S | 14 | 14 | 66389277 | 532256 | 11.4641 | 5.85091 | YRI |
| rs2144909  | EIF2S1 | GI_34147492-S | 14 | 14 | 66395197 | 526336 | 5.9397  | 5.85091 | YRI |
| rs7160476  | EIF2S1 | GI_34147492-S | 14 | 14 | 66402130 | 519403 | 7.0294  | 5.85091 | YRI |
| rs7156852  | EIF2S1 | GI_34147492-S | 14 | 14 | 66410302 | 511231 | 6.3019  | 5.85091 | YRI |
| rs6573727  | EIF2S1 | GI_34147492-S | 14 | 14 | 66413452 | 508081 | 7.0294  | 5.85091 | YRI |
| rs8022437  | EIF2S1 | GI_34147492-S | 14 | 14 | 66418094 | 503439 | 7.0294  | 5.85091 | YRI |

|            |        |               |    |    |          |        |         |         |     |
|------------|--------|---------------|----|----|----------|--------|---------|---------|-----|
| rs8014841  | EIF2S1 | GI_34147492-S | 14 | 14 | 66421979 | 499554 | 7.0294  | 5.85091 | YRI |
| rs4578576  | EIF2S1 | GI_34147492-S | 14 | 14 | 66425392 | 496141 | 7.0294  | 5.85091 | YRI |
| rs7156081  | EIF2S1 | GI_34147492-S | 14 | 14 | 66453896 | 467637 | 6.6242  | 5.85091 | YRI |
| rs2038398  | EIF2S1 | GI_34147492-S | 14 | 14 | 66455481 | 466052 | 6.6242  | 5.85091 | YRI |
| rs10135117 | EIF2S1 | GI_34147492-S | 14 | 14 | 66469144 | 452389 | 7.5905  | 5.85091 | YRI |
| rs1950281  | EIF2S1 | GI_34147492-S | 14 | 14 | 66471052 | 450481 | 6.461   | 5.85091 | YRI |
| rs10135701 | EIF2S1 | GI_34147492-S | 14 | 14 | 66486730 | 434803 | 9.9112  | 5.85091 | YRI |
| rs10147954 | EIF2S1 | GI_34147492-S | 14 | 14 | 66486836 | 434697 | 9.8314  | 5.85091 | YRI |
| rs8012063  | EIF2S1 | GI_34147492-S | 14 | 14 | 66504223 | 417310 | 6.5145  | 5.85091 | YRI |
| rs8016725  | EIF2S1 | GI_34147492-S | 14 | 14 | 66504935 | 416598 | 9.9112  | 5.85091 | YRI |
| rs6573740  | EIF2S1 | GI_34147492-S | 14 | 14 | 66515522 | 406011 | 6.5282  | 5.85091 | YRI |
| rs10150424 | EIF2S1 | GI_34147492-S | 14 | 14 | 66539544 | 381989 | 6.5544  | 5.85091 | YRI |
| rs8016391  | EIF2S1 | GI_34147492-S | 14 | 14 | 66540033 | 381500 | 6.5282  | 5.85091 | YRI |
| rs1955610  | EIF2S1 | GI_34147492-S | 14 | 14 | 66540615 | 380918 | 6.5544  | 5.85091 | YRI |
| rs1955609  | EIF2S1 | GI_34147492-S | 14 | 14 | 66540824 | 380709 | 6.5282  | 5.85091 | YRI |
| rs8012944  | EIF2S1 | GI_34147492-S | 14 | 14 | 66543451 | 378082 | 6.2532  | 5.85091 | YRI |
| rs9323489  | EIF2S1 | GI_34147492-S | 14 | 14 | 66554099 | 367434 | 6.133   | 5.85091 | YRI |
| rs1546940  | EIF2S1 | GI_34147492-S | 14 | 14 | 66563531 | 358002 | 6.0711  | 5.85091 | YRI |
| rs7151086  | EIF2S1 | GI_34147492-S | 14 | 14 | 66571308 | 350225 | 5.9748  | 5.85091 | YRI |
| rs7161698  | EIF2S1 | GI_34147492-S | 14 | 14 | 66585036 | 336497 | 6.3338  | 5.85091 | YRI |
| rs10483793 | EIF2S1 | GI_34147492-S | 14 | 14 | 66626018 | 295515 | 6.1738  | 5.85091 | YRI |
| rs768770   | EIF2S1 | GI_34147492-S | 14 | 14 | 66636923 | 284610 | 7.2039  | 5.85091 | YRI |
| rs7493580  | EIF2S1 | GI_34147492-S | 14 | 14 | 66650203 | 271330 | 5.8577  | 5.85091 | YRI |
| rs10141952 | EIF2S1 | GI_34147492-S | 14 | 14 | 66669922 | 251611 | 10.7443 | 5.85091 | YRI |
| rs10144371 | EIF2S1 | GI_34147492-S | 14 | 14 | 66674390 | 247143 | 6.5544  | 5.85091 | YRI |
| rs10138850 | EIF2S1 | GI_34147492-S | 14 | 14 | 66676521 | 245012 | 6.3468  | 5.85091 | YRI |
| rs10138865 | EIF2S1 | GI_34147492-S | 14 | 14 | 66676555 | 244978 | 6.16    | 5.85091 | YRI |
| rs7146638  | EIF2S1 | GI_34147492-S | 14 | 14 | 66683145 | 238388 | 7.0929  | 5.85091 | YRI |
| rs8006281  | EIF2S1 | GI_34147492-S | 14 | 14 | 66686490 | 235043 | 7.579   | 5.85091 | YRI |
| rs17248357 | EIF2S1 | GI_34147492-S | 14 | 14 | 66687707 | 233826 | 7.5334  | 5.85091 | YRI |
| rs7147534  | EIF2S1 | GI_34147492-S | 14 | 14 | 66692092 | 229441 | 7.0929  | 5.85091 | YRI |
| rs3866760  | EIF2S1 | GI_34147492-S | 14 | 14 | 66702333 | 219200 | 6.5544  | 5.85091 | YRI |
| rs2295903  | EIF2S1 | GI_34147492-S | 14 | 14 | 66704071 | 217462 | 7.579   | 5.85091 | YRI |
| rs7154905  | EIF2S1 | GI_34147492-S | 14 | 14 | 66709646 | 211887 | 6.8417  | 5.85091 | YRI |
| rs7156119  | EIF2S1 | GI_34147492-S | 14 | 14 | 66719868 | 201665 | 6.4345  | 5.85091 | YRI |
| rs17248421 | EIF2S1 | GI_34147492-S | 14 | 14 | 66722675 | 198858 | 7.2367  | 5.85091 | YRI |
| rs6573755  | EIF2S1 | GI_34147492-S | 14 | 14 | 66724229 | 197304 | 7.462   | 5.85091 | YRI |
| rs11158653 | EIF2S1 | GI_34147492-S | 14 | 14 | 66728648 | 192885 | 5.9843  | 5.85091 | YRI |
| rs17104103 | EIF2S1 | GI_34147492-S | 14 | 14 | 66731705 | 189828 | 12.1731 | 5.85091 | YRI |
| rs17104106 | EIF2S1 | GI_34147492-S | 14 | 14 | 66733185 | 188348 | 11.9141 | 5.85091 | YRI |
| rs17104109 | EIF2S1 | GI_34147492-S | 14 | 14 | 66733703 | 187830 | 14.8048 | 5.85091 | YRI |
| rs10873200 | EIF2S1 | GI_34147492-S | 14 | 14 | 66736772 | 184761 | 12.3106 | 5.85091 | YRI |
| rs8004488  | EIF2S1 | GI_34147492-S | 14 | 14 | 66737155 | 184378 | 8.1029  | 5.85091 | YRI |
| rs17104114 | EIF2S1 | GI_34147492-S | 14 | 14 | 66737263 | 184270 | 8.8802  | 5.85091 | YRI |
| rs11158655 | EIF2S1 | GI_34147492-S | 14 | 14 | 66741454 | 180079 | 12.3106 | 5.85091 | YRI |
| rs6573760  | EIF2S1 | GI_34147492-S | 14 | 14 | 66747128 | 174405 | 9.5721  | 5.85091 | YRI |
| rs10431718 | EIF2S1 | GI_34147492-S | 14 | 14 | 66752389 | 169144 | 11.2259 | 5.85091 | YRI |
| rs12590956 | EIF2S1 | GI_34147492-S | 14 | 14 | 66761202 | 160331 | 8.8802  | 5.85091 | YRI |
| rs8009318  | EIF2S1 | GI_34147492-S | 14 | 14 | 66762525 | 159008 | 16.9489 | 5.85091 | YRI |
| rs10141879 | EIF2S1 | GI_34147492-S | 14 | 14 | 66764943 | 156590 | 11.0147 | 5.85091 | YRI |
| rs10145744 | EIF2S1 | GI_34147492-S | 14 | 14 | 66766669 | 154864 | 16.9489 | 5.85091 | YRI |
| rs10152002 | EIF2S1 | GI_34147492-S | 14 | 14 | 66768669 | 152864 | 16.9489 | 5.85091 | YRI |
| rs1475127  | EIF2S1 | GI_34147492-S | 14 | 14 | 66768958 | 152575 | 15.3465 | 5.85091 | YRI |
| rs10147852 | EIF2S1 | GI_34147492-S | 14 | 14 | 66772413 | 149120 | 15.9856 | 5.85091 | YRI |
| rs10145913 | EIF2S1 | GI_34147492-S | 14 | 14 | 66774743 | 146790 | 14.4298 | 5.85091 | YRI |
| rs1078194  | EIF2S1 | GI_34147492-S | 14 | 14 | 66777549 | 143984 | 10.182  | 5.85091 | YRI |

|            |        |               |    |    |          |        |         |         |     |
|------------|--------|---------------|----|----|----------|--------|---------|---------|-----|
| rs10145586 | EIF2S1 | GI_34147492-S | 14 | 14 | 66780377 | 141156 | 14.9188 | 5.85091 | YRI |
| rs8015862  | EIF2S1 | GI_34147492-S | 14 | 14 | 66780927 | 140606 | 11.2259 | 5.85091 | YRI |
| rs1073607  | EIF2S1 | GI_34147492-S | 14 | 14 | 66782437 | 139096 | 10.7243 | 5.85091 | YRI |
| rs1073605  | EIF2S1 | GI_34147492-S | 14 | 14 | 66782810 | 138723 | 8.6021  | 5.85091 | YRI |
| rs12323494 | EIF2S1 | GI_34147492-S | 14 | 14 | 66784512 | 137021 | 14.5624 | 5.85091 | YRI |
| rs10459453 | EIF2S1 | GI_34147492-S | 14 | 14 | 66787029 | 134504 | 14.9188 | 5.85091 | YRI |
| rs7152903  | EIF2S1 | GI_34147492-S | 14 | 14 | 66787724 | 133809 | 9.3004  | 5.85091 | YRI |
| rs6573763  | EIF2S1 | GI_34147492-S | 14 | 14 | 66788081 | 133452 | 9.1671  | 5.85091 | YRI |
| rs8016037  | EIF2S1 | GI_34147492-S | 14 | 14 | 66788464 | 133069 | 14.7463 | 5.85091 | YRI |
| rs8008236  | EIF2S1 | GI_34147492-S | 14 | 14 | 66799438 | 122095 | 15.4524 | 5.85091 | YRI |
| rs8008443  | EIF2S1 | GI_34147492-S | 14 | 14 | 66799568 | 121965 | 15.9929 | 5.85091 | YRI |
| rs4636843  | EIF2S1 | GI_34147492-S | 14 | 14 | 66800353 | 121180 | 7.0068  | 5.85091 | YRI |
| rs12589218 | EIF2S1 | GI_34147492-S | 14 | 14 | 66800713 | 120820 | 15.8797 | 5.85091 | YRI |
| rs9743912  | EIF2S1 | GI_34147492-S | 14 | 14 | 66802614 | 118919 | 9.3734  | 5.85091 | YRI |
| rs9743911  | EIF2S1 | GI_34147492-S | 14 | 14 | 66802700 | 118833 | 14.8495 | 5.85091 | YRI |
| rs2146230  | EIF2S1 | GI_34147492-S | 14 | 14 | 66804629 | 116904 | 15.8797 | 5.85091 | YRI |
| rs7149535  | EIF2S1 | GI_34147492-S | 14 | 14 | 66805121 | 116412 | 15.53   | 5.85091 | YRI |
| rs1006595  | EIF2S1 | GI_34147492-S | 14 | 14 | 66808605 | 112928 | 10.2902 | 5.85091 | YRI |
| rs1318914  | EIF2S1 | GI_34147492-S | 14 | 14 | 66813819 | 107714 | 14.8812 | 5.85091 | YRI |
| rs1535491  | EIF2S1 | GI_34147492-S | 14 | 14 | 66822448 | 99085  | 15.8797 | 5.85091 | YRI |
| rs6573765  | EIF2S1 | GI_34147492-S | 14 | 14 | 66825989 | 95544  | 5.9182  | 5.85091 | YRI |
| rs10151464 | EIF2S1 | GI_34147492-S | 14 | 14 | 66828243 | 93290  | 15.4524 | 5.85091 | YRI |
| rs10140817 | EIF2S1 | GI_34147492-S | 14 | 14 | 66828361 | 93172  | 15.297  | 5.85091 | YRI |
| rs10144401 | EIF2S1 | GI_34147492-S | 14 | 14 | 66831608 | 89925  | 15.8797 | 5.85091 | YRI |
| rs10150902 | EIF2S1 | GI_34147492-S | 14 | 14 | 66833662 | 87871  | 15.8659 | 5.85091 | YRI |
| rs12589091 | EIF2S1 | GI_34147492-S | 14 | 14 | 66834332 | 87201  | 16.2221 | 5.85091 | YRI |
| rs12586552 | EIF2S1 | GI_34147492-S | 14 | 14 | 66834488 | 87045  | 13.89   | 5.85091 | YRI |
| rs1885590  | EIF2S1 | GI_34147492-S | 14 | 14 | 66836055 | 85478  | 11.7708 | 5.85091 | YRI |
| rs4286048  | EIF2S1 | GI_34147492-S | 14 | 14 | 66836269 | 85264  | 16.2201 | 5.85091 | YRI |
| rs10146722 | EIF2S1 | GI_34147492-S | 14 | 14 | 66838798 | 82735  | 12.0263 | 5.85091 | YRI |
| rs10146663 | EIF2S1 | GI_34147492-S | 14 | 14 | 66838930 | 82603  | 15.1794 | 5.85091 | YRI |
| rs10135903 | EIF2S1 | GI_34147492-S | 14 | 14 | 66840755 | 80778  | 15.8797 | 5.85091 | YRI |
| rs2146229  | EIF2S1 | GI_34147492-S | 14 | 14 | 66845445 | 76088  | 13.2237 | 5.85091 | YRI |
| rs10129779 | EIF2S1 | GI_34147492-S | 14 | 14 | 66846249 | 75284  | 13.4829 | 5.85091 | YRI |
| rs8015819  | EIF2S1 | GI_34147492-S | 14 | 14 | 66848338 | 73195  | 8.897   | 5.85091 | YRI |
| rs12588292 | EIF2S1 | GI_34147492-S | 14 | 14 | 66849259 | 72274  | 12.1118 | 5.85091 | YRI |
| rs1885589  | EIF2S1 | GI_34147492-S | 14 | 14 | 66852734 | 68799  | 15.5426 | 5.85091 | YRI |
| rs8014966  | EIF2S1 | GI_34147492-S | 14 | 14 | 66858062 | 63471  | 15.8797 | 5.85091 | YRI |
| rs10138824 | EIF2S1 | GI_34147492-S | 14 | 14 | 66859310 | 62223  | 13.0609 | 5.85091 | YRI |
| rs2057396  | EIF2S1 | GI_34147492-S | 14 | 14 | 66860786 | 60747  | 15.8797 | 5.85091 | YRI |
| rs10131212 | EIF2S1 | GI_34147492-S | 14 | 14 | 66862120 | 59413  | 15.8797 | 5.85091 | YRI |
| rs17248616 | EIF2S1 | GI_34147492-S | 14 | 14 | 66866420 | 55113  | 10.5175 | 5.85091 | YRI |
| rs2236333  | EIF2S1 | GI_34147492-S | 14 | 14 | 66868676 | 52857  | 15.8797 | 5.85091 | YRI |
| rs960797   | EIF2S1 | GI_34147492-S | 14 | 14 | 66870069 | 51464  | 12.1118 | 5.85091 | YRI |
| rs2274335  | EIF2S1 | GI_34147492-S | 14 | 14 | 66874076 | 47457  | 15.8797 | 5.85091 | YRI |
| rs1045060  | EIF2S1 | GI_34147492-S | 14 | 14 | 66875006 | 46527  | 15.8797 | 5.85091 | YRI |
| rs2319777  | EIF2S1 | GI_34147492-S | 14 | 14 | 66879786 | 41747  | 9.6093  | 5.85091 | YRI |
| rs3818467  | EIF2S1 | GI_34147492-S | 14 | 14 | 66882227 | 39306  | 15.8797 | 5.85091 | YRI |
| rs2031563  | EIF2S1 | GI_34147492-S | 14 | 14 | 66884273 | 37260  | 14.1739 | 5.85091 | YRI |
| rs2274338  | EIF2S1 | GI_34147492-S | 14 | 14 | 66885736 | 35797  | 15.3465 | 5.85091 | YRI |
| rs8020850  | EIF2S1 | GI_34147492-S | 14 | 14 | 66889355 | 32178  | 14.2252 | 5.85091 | YRI |
| rs8015641  | EIF2S1 | GI_34147492-S | 14 | 14 | 66890457 | 31076  | 12.7223 | 5.85091 | YRI |
| rs1536271  | EIF2S1 | GI_34147492-S | 14 | 14 | 66890924 | 30609  | 15.8797 | 5.85091 | YRI |
| rs1536272  | EIF2S1 | GI_34147492-S | 14 | 14 | 66891054 | 30479  | 15.8797 | 5.85091 | YRI |
| rs8006519  | EIF2S1 | GI_34147492-S | 14 | 14 | 66892350 | 29183  | 16.0082 | 5.85091 | YRI |
| rs13379368 | EIF2S1 | GI_34147492-S | 14 | 14 | 66893244 | 28289  | 15.8797 | 5.85091 | YRI |



|            |           |               |    |    |          |       |         |         |     |
|------------|-----------|---------------|----|----|----------|-------|---------|---------|-----|
| rs13379142 | EIF2S1    | GI_34147492-S | 14 | 14 | 66893437 | 28096 | 16.3233 | 5.85091 | YRI |
| rs10144417 | EIF2S1    | GI_34147492-S | 14 | 14 | 66896663 | 24870 | 16.3233 | 5.85091 | YRI |
| rs8016024  | EIF2S1    | GI_34147492-S | 14 | 14 | 66897231 | 24302 | 14.3747 | 5.85091 | YRI |
| rs2031564  | EIF2S1    | GI_34147492-S | 14 | 14 | 66897269 | 24264 | 8.6313  | 5.85091 | YRI |
| rs3759755  | EIF2S1    | GI_34147492-S | 14 | 14 | 66898229 | 23304 | 15.8797 | 5.85091 | YRI |
| rs8006042  | EIF2S1    | GI_34147492-S | 14 | 14 | 66899325 | 22208 | 12.6856 | 5.85091 | YRI |
| rs8006391  | EIF2S1    | GI_34147492-S | 14 | 14 | 66899432 | 22101 | 13.1526 | 5.85091 | YRI |
| rs12588458 | EIF2S1    | GI_34147492-S | 14 | 14 | 66900609 | 20924 | 10.1833 | 5.85091 | YRI |
| rs7156441  | EIF2S1    | GI_34147492-S | 14 | 14 | 66902990 | 18543 | 15.53   | 5.85091 | YRI |
| rs12590065 | EIF2S1    | GI_34147492-S | 14 | 14 | 66911331 | 10202 | 14.2135 | 5.85091 | YRI |
| rs8008724  | EIF2S1    | GI_34147492-S | 14 | 14 | 66916971 | 4562  | 13.0609 | 5.85091 | YRI |
| rs10132093 | EIF2S1    | GI_34147492-S | 14 | 14 | 66917264 | 4269  | 8.1782  | 5.85091 | YRI |
| rs2296560  | EIF2S1    | GI_34147492-S | 14 | 14 | 66918647 | 2886  | 15.1943 | 5.85091 | YRI |
| rs2296561  | EIF2S1    | GI_34147492-S | 14 | 14 | 66918892 | 2641  | 9.6093  | 5.85091 | YRI |
| rs10131175 | EIF2S1    | GI_34147492-S | 14 | 14 | 66922484 | 951   | 15.8797 | 5.85091 | YRI |
| rs3784085  | EIF2S1    | GI_34147492-S | 14 | 14 | 66927906 | 6373  | 13.279  | 5.85091 | YRI |
| rs10139684 | EIF2S1    | GI_34147492-S | 14 | 14 | 66929993 | 8460  | 6.616   | 5.85091 | YRI |
| rs3818468  | EIF2S1    | GI_34147492-S | 14 | 14 | 66932124 | 10591 | 10.1577 | 5.85091 | YRI |
| rs7153725  | EIF2S1    | GI_34147492-S | 14 | 14 | 66936424 | 14891 | 6.6972  | 5.85091 | YRI |
| rs9323497  | EIF2S1    | GI_34147492-S | 14 | 14 | 66942881 | 21348 | 9.1023  | 5.85091 | YRI |
| rs8004864  | EIF2S1    | GI_34147492-S | 14 | 14 | 66942999 | 21466 | 10.5864 | 5.85091 | YRI |
| rs7155726  | EIF2S1    | GI_34147492-S | 14 | 14 | 66951849 | 30316 | 5.9919  | 5.85091 | YRI |
| rs8011424  | Hs.304334 | Hs.304334-S   | 14 | 14 | 68342009 | 9960  | 6.528   | 6.14884 | YRI |
| rs8019383  | Hs.304334 | Hs.304334-S   | 14 | 14 | 68347094 | 4875  | 9.3042  | 6.14884 | YRI |
| rs10139199 | Hs.304334 | Hs.304334-S   | 14 | 14 | 68347553 | 4416  | 13.5246 | 6.14884 | YRI |
| rs4899260  | Hs.304334 | Hs.304334-S   | 14 | 14 | 68347957 | 4012  | 14.965  | 6.14884 | YRI |
| rs4902652  | Hs.304334 | Hs.304334-S   | 14 | 14 | 68350062 | 1907  | 14.965  | 6.14884 | YRI |
| rs194745   | Hs.304334 | Hs.304334-S   | 14 | 14 | 68354889 | 2920  | 13.2773 | 6.14884 | YRI |
| rs194743   | Hs.304334 | Hs.304334-S   | 14 | 14 | 68355905 | 3936  | 14.2213 | 6.14884 | YRI |
| rs194742   | Hs.304334 | Hs.304334-S   | 14 | 14 | 68357236 | 5267  | 13.832  | 6.14884 | YRI |
| rs1274955  | Hs.304334 | Hs.304334-S   | 14 | 14 | 68359065 | 7096  | 13.832  | 6.14884 | YRI |
| rs10873217 | Hs.304334 | Hs.304334-S   | 14 | 14 | 68371458 | 19489 | 6.6504  | 6.14884 | YRI |
| rs10146889 | MAP3K9    | GI_37545956-S | 14 | 14 | 70271394 | 6287  | 10.4652 | 6.09773 | YRI |
| rs1859465  | MAP3K9    | GI_37545956-S | 14 | 14 | 70272984 | 7877  | 9.7936  | 6.09773 | YRI |
| rs4902843  | MAP3K9    | GI_37545956-S | 14 | 14 | 70278778 | 13671 | 6.3133  | 6.09773 | YRI |
| rs10129495 | MAP3K9    | GI_37545956-S | 14 | 14 | 70285482 | 20375 | 6.3425  | 6.09773 | YRI |
| rs12886990 | MAP3K9    | GI_37545956-S | 14 | 14 | 70298991 | 33884 | 8.1908  | 6.09773 | YRI |
| rs12897648 | MAP3K9    | GI_37545956-S | 14 | 14 | 70306650 | 41543 | 9.0216  | 6.09773 | YRI |
| rs2158531  | MAP3K9    | GI_37545956-S | 14 | 14 | 70316721 | 51614 | 9.0216  | 6.09773 | YRI |
| rs2158530  | MAP3K9    | GI_37545956-S | 14 | 14 | 70316748 | 51641 | 8.9872  | 6.09773 | YRI |
| rs10131177 | MAP3K9    | GI_37545956-S | 14 | 14 | 70320936 | 55829 | 6.5664  | 6.09773 | YRI |
| rs8020663  | MAP3K9    | GI_37545956-S | 14 | 14 | 70326948 | 61841 | 9.1607  | 6.09773 | YRI |
| rs2543378  | C14orf118 | GI_40018643-A | 14 | 14 | 75681524 | 56903 | 7.1457  | 6.2651  | YRI |
| rs2543379  | C14orf118 | GI_40018643-A | 14 | 14 | 75681555 | 56872 | 7.1457  | 6.2651  | YRI |
| rs2591084  | C14orf118 | GI_40018643-A | 14 | 14 | 75685315 | 53112 | 7.1457  | 6.2651  | YRI |
| rs935336   | C14orf118 | GI_40018643-A | 14 | 14 | 75687782 | 50645 | 7.4128  | 6.2651  | YRI |
| rs2289835  | C14orf118 | GI_40018643-A | 14 | 14 | 75688512 | 49915 | 7.1457  | 6.2651  | YRI |
| rs2543388  | C14orf118 | GI_40018643-A | 14 | 14 | 75699021 | 39406 | 6.3251  | 6.2651  | YRI |
| rs2543389  | C14orf118 | GI_40018643-A | 14 | 14 | 75699141 | 39286 | 7.1457  | 6.2651  | YRI |
| rs12434176 | C14orf118 | GI_40018643-A | 14 | 14 | 75703439 | 34988 | 7.2711  | 6.2651  | YRI |
| rs8005709  | C14orf118 | GI_40018643-A | 14 | 14 | 75703764 | 34663 | 6.8978  | 6.2651  | YRI |
| rs8006797  | C14orf118 | GI_40018643-A | 14 | 14 | 75704395 | 34032 | 7.1457  | 6.2651  | YRI |
| rs8006717  | C14orf118 | GI_40018643-A | 14 | 14 | 75704549 | 33878 | 7.0241  | 6.2651  | YRI |
| rs11159178 | C14orf118 | GI_40018643-A | 14 | 14 | 75705338 | 33089 | 7.0324  | 6.2651  | YRI |
| rs12436562 | C14orf118 | GI_40018643-A | 14 | 14 | 75706039 | 32388 | 7.1457  | 6.2651  | YRI |
| rs11627896 | C14orf118 | GI_40018643-A | 14 | 14 | 75709367 | 29060 | 7.1457  | 6.2651  | YRI |

|            |           |               |    |    |          |        |         |         |     |
|------------|-----------|---------------|----|----|----------|--------|---------|---------|-----|
| rs7144326  | C14orf118 | GI_40018643-A | 14 | 14 | 75712951 | 25476  | 7.1457  | 6.2651  | YRI |
| rs1055616  | C14orf118 | GI_40018643-A | 14 | 14 | 75713856 | 24571  | 7.1457  | 6.2651  | YRI |
| rs3816316  | C14orf118 | GI_40018643-A | 14 | 14 | 75716663 | 21764  | 7.1457  | 6.2651  | YRI |
| rs11851925 | C14orf118 | GI_40018643-A | 14 | 14 | 75719654 | 18773  | 7.2711  | 6.2651  | YRI |
| rs11851969 | C14orf118 | GI_40018643-A | 14 | 14 | 75719692 | 18735  | 7.1457  | 6.2651  | YRI |
| rs10498533 | C14orf118 | GI_40018643-A | 14 | 14 | 75719885 | 18542  | 7.8199  | 6.2651  | YRI |
| rs11848148 | C14orf118 | GI_40018643-A | 14 | 14 | 75721417 | 17010  | 6.6167  | 6.2651  | YRI |
| rs12433257 | C14orf118 | GI_40018643-A | 14 | 14 | 75723379 | 15048  | 10.9952 | 6.2651  | YRI |
| rs12432637 | C14orf118 | GI_40018643-A | 14 | 14 | 75726530 | 11897  | 7.144   | 6.2651  | YRI |
| rs11622112 | C14orf118 | GI_40018643-A | 14 | 14 | 75731614 | 6813   | 7.287   | 6.2651  | YRI |
| rs4903387  | C14orf118 | GI_40018643-A | 14 | 14 | 75744972 | 6545   | 11.2599 | 6.2651  | YRI |
| rs1947084  | C14orf118 | GI_40018643-A | 14 | 14 | 75746653 | 8226   | 7.287   | 6.2651  | YRI |
| rs11629326 | KIAA1622  | GI_17402885-I | 14 | 14 | 93878584 | 63297  | 7.6167  | 6.46822 | YRI |
| rs3759541  | TCL6      | GI_21536345-A | 14 | 14 | 95203529 | 3965   | 12.0682 | 6.45057 | YRI |
| rs3759541  | TCL1B     | GI_40548373-A | 14 | 14 | 95203529 | 24920  | 10.2049 | 6.25005 | YRI |
| rs17093192 | TCL6      | GI_21536345-A | 14 | 14 | 95203950 | 3544   | 13.0137 | 6.45057 | YRI |
| rs17093192 | TCL1B     | GI_40548373-A | 14 | 14 | 95203950 | 24499  | 11.0892 | 6.25005 | YRI |
| rs2296310  | TCL6      | GI_21536345-A | 14 | 14 | 95206528 | 966    | 17.9863 | 6.45057 | YRI |
| rs2296310  | TCL1B     | GI_40548373-A | 14 | 14 | 95206528 | 21921  | 15.149  | 6.25005 | YRI |
| rs10518681 | ZFYVE19   | GI_33636761-S | 15 | 15 | 38227456 | 666507 | 5.8679  | 5.78991 | YRI |
| rs12902191 | ZFYVE19   | GI_33636761-S | 15 | 15 | 38227855 | 666108 | 5.9563  | 5.78991 | YRI |
| rs2619683  | RAD51     | GI_19924134-A | 15 | 15 | 38768635 | 42662  | 8.7045  | 6.06713 | YRI |
| rs2619679  | RAD51     | GI_19924134-A | 15 | 15 | 38773529 | 37768  | 8.7045  | 6.06713 | YRI |
| rs13379583 | RAD51     | GI_19924134-A | 15 | 15 | 38777645 | 33652  | 8.6458  | 6.06713 | YRI |
| rs7172195  | RAD51     | GI_19924134-A | 15 | 15 | 38782100 | 29197  | 8.7045  | 6.06713 | YRI |
| rs12908284 | RAD51     | GI_19924134-A | 15 | 15 | 38786796 | 24501  | 8.7045  | 6.06713 | YRI |
| rs3092982  | RAD51     | GI_19924134-A | 15 | 15 | 38792114 | 19183  | 7.5207  | 6.06713 | YRI |
| rs2412546  | RAD51     | GI_19924134-A | 15 | 15 | 38793815 | 17482  | 8.7045  | 6.06713 | YRI |
| rs11858338 | RAD51     | GI_19924134-A | 15 | 15 | 38795605 | 15692  | 7.6605  | 6.06713 | YRI |
| rs2412547  | RAD51     | GI_19924134-A | 15 | 15 | 38799987 | 11310  | 8.7045  | 6.06713 | YRI |
| rs11070291 | RAD51     | GI_19924134-A | 15 | 15 | 38803850 | 7447   | 8.7045  | 6.06713 | YRI |
| rs11633269 | RAD51     | GI_19924134-A | 15 | 15 | 38807159 | 4138   | 8.3353  | 6.06713 | YRI |
| rs2304582  | RAD51     | GI_19924134-A | 15 | 15 | 38818157 | 6860   | 8.9327  | 6.06713 | YRI |
| rs4923884  | RAD51     | GI_19924134-A | 15 | 15 | 38823740 | 12443  | 7.0386  | 6.06713 | YRI |
| rs12372947 | RAD51     | GI_19924134-A | 15 | 15 | 38825374 | 14077  | 8.0367  | 6.06713 | YRI |
| rs11070293 | RAD51     | GI_19924134-A | 15 | 15 | 38829167 | 17870  | 7.6502  | 6.06713 | YRI |
| rs752012   | RAD51     | GI_19924134-A | 15 | 15 | 38832182 | 20885  | 6.85    | 6.06713 | YRI |
| rs12442845 | RAD51     | GI_19924134-A | 15 | 15 | 38836795 | 25498  | 7.6067  | 6.06713 | YRI |
| rs7164041  | CCNDBP1   | GI_16554567-I | 15 | 15 | 40997322 | 268287 | 6.8873  | 5.96204 | YRI |
| rs2176870  | CCNDBP1   | GI_16554567-I | 15 | 15 | 41223702 | 41907  | 12.9968 | 5.96204 | YRI |
| rs540587   | CCNDBP1   | GI_16554567-I | 15 | 15 | 41265405 | 204    | 18.2832 | 5.96204 | YRI |
| rs1863601  | CCNDBP1   | GI_16554567-I | 15 | 15 | 41282504 | 16895  | 6.156   | 5.96204 | YRI |
| rs530305   | ELL3      | GI_13376767-S | 15 | 15 | 41283192 | 569217 | 6.3632  | 5.9225  | YRI |
| rs531850   | ELL3      | GI_13376767-S | 15 | 15 | 41283334 | 569075 | 6.4759  | 5.9225  | YRI |
| rs494863   | CCNDBP1   | GI_16554567-I | 15 | 15 | 41289594 | 23985  | 9.8198  | 5.96204 | YRI |
| rs2899077  | CCNDBP1   | GI_16554567-I | 15 | 15 | 41297317 | 31708  | 15.3369 | 5.96204 | YRI |
| rs11070396 | ELL3      | GI_13376767-S | 15 | 15 | 41310214 | 542195 | 6.5736  | 5.9225  | YRI |
| rs7183814  | CCNDBP1   | GI_16554567-I | 15 | 15 | 41316922 | 51313  | 9.1101  | 5.96204 | YRI |
| rs2241516  | ELL3      | GI_13376767-S | 15 | 15 | 41317939 | 534470 | 6.5736  | 5.9225  | YRI |
| rs11855754 | ELL3      | GI_13376767-S | 15 | 15 | 41322259 | 530150 | 6.5736  | 5.9225  | YRI |
| rs542036   | CCNDBP1   | GI_16554567-I | 15 | 15 | 41328431 | 62822  | 6.78    | 5.96204 | YRI |
| rs16957715 | FLJ35867  | GI_31542776-S | 15 | 15 | 41496029 | 55435  | 5.7201  | 5.49653 | YRI |
| rs4776058  | Hs.11898  | Hs.11898-S    | 15 | 15 | 50667555 | 69075  | 9.6185  | 6.15376 | YRI |
| rs12902679 | Hs.11898  | Hs.11898-S    | 15 | 15 | 50668609 | 68021  | 9.6185  | 6.15376 | YRI |
| rs12915981 | Hs.11898  | Hs.11898-S    | 15 | 15 | 50688725 | 47905  | 9.1873  | 6.15376 | YRI |
| rs871447   | LOC348094 | GI_38176293-S | 15 | 15 | 62957490 | 80324  | 7.4463  | 5.78659 | YRI |

|            |              |               |    |    |          |        |         |         |     |
|------------|--------------|---------------|----|----|----------|--------|---------|---------|-----|
| rs1719264  | LOC348094    | GI_38176293-S | 15 | 15 | 62963588 | 74226  | 7.4463  | 5.78659 | YRI |
| rs4238397  | LOC348094    | GI_38176293-S | 15 | 15 | 62966217 | 71597  | 7.4463  | 5.78659 | YRI |
| rs12916644 | LOC348094    | GI_38176293-S | 15 | 15 | 62968071 | 69743  | 7.4446  | 5.78659 | YRI |
| rs1719273  | LOC348094    | GI_38176293-S | 15 | 15 | 62971545 | 66269  | 7.4463  | 5.78659 | YRI |
| rs1684034  | LOC348094    | GI_38176293-S | 15 | 15 | 62971919 | 65895  | 6.8611  | 5.78659 | YRI |
| rs1628955  | LOC348094    | GI_38176293-S | 15 | 15 | 62974273 | 63541  | 7.4463  | 5.78659 | YRI |
| rs1684054  | LOC348094    | GI_38176293-S | 15 | 15 | 62978449 | 59365  | 7.4463  | 5.78659 | YRI |
| rs11632086 | SCAMP5       | GI_42544128-S | 15 | 15 | 72560527 | 540039 | 5.8902  | 5.60852 | YRI |
| rs16970170 | SCAMP5       | GI_42544128-S | 15 | 15 | 72655153 | 445413 | 5.9402  | 5.60852 | YRI |
| rs2069521  | SCAMP5       | GI_42544128-S | 15 | 15 | 72826020 | 274546 | 5.7045  | 5.60852 | YRI |
| rs11633539 | SCAMP5       | GI_42544128-S | 15 | 15 | 72853349 | 247217 | 5.9402  | 5.60852 | YRI |
| rs8041468  | DKFZP434C131 | GI_39930360-S | 15 | 15 | 73057707 | 142091 | 5.9374  | 5.80945 | YRI |
| rs10152266 | LOC283726    | GI_37540927-S | 15 | 15 | 80237458 | 126494 | 8.1902  | 6.01187 | YRI |
| rs9972386  | LOC283726    | GI_37540927-S | 15 | 15 | 80241338 | 122614 | 8.1146  | 6.01187 | YRI |
| rs12442609 | LOC283726    | GI_37540927-S | 15 | 15 | 80246409 | 117543 | 8.7464  | 6.01187 | YRI |
| rs12323987 | LOC283726    | GI_37540927-S | 15 | 15 | 80265482 | 98470  | 6.6774  | 6.01187 | YRI |
| rs12442655 | LOC283726    | GI_37540927-S | 15 | 15 | 80269582 | 94370  | 8.987   | 6.01187 | YRI |
| rs12439679 | LOC283726    | GI_37540927-S | 15 | 15 | 80278186 | 85766  | 7.4748  | 6.01187 | YRI |
| rs11854157 | FLJ13119     | GI_40255246-S | 15 | 15 | 80360380 | 150449 | 6.4348  | 5.9073  | YRI |
| rs11856590 | FLJ13119     | GI_40255246-S | 15 | 15 | 80367791 | 157860 | 6.4348  | 5.9073  | YRI |
| rs1267658  | LOC283726    | GI_37540927-S | 15 | 15 | 81011209 | 647257 | 6.7412  | 6.01187 | YRI |
| rs12441776 | LOC283726    | GI_37540927-S | 15 | 15 | 81016365 | 652413 | 6.2111  | 6.01187 | YRI |
| rs12324877 | LOC283726    | GI_37540927-S | 15 | 15 | 81018864 | 654912 | 6.37    | 6.01187 | YRI |
| rs10163167 | LOC283726    | GI_37540927-S | 15 | 15 | 81026450 | 662498 | 6.5298  | 6.01187 | YRI |
| rs8023333  | LOC283726    | GI_37540927-S | 15 | 15 | 81033105 | 669153 | 6.7412  | 6.01187 | YRI |
| rs783543   | LOC283726    | GI_37540927-S | 15 | 15 | 81036541 | 672589 | 6.7412  | 6.01187 | YRI |
| rs4779032  | LOC283726    | GI_37540927-S | 15 | 15 | 81042381 | 678429 | 6.7412  | 6.01187 | YRI |
| rs12438371 | LOC283726    | GI_37540927-S | 15 | 15 | 81068125 | 704173 | 6.3033  | 6.01187 | YRI |
| rs17158059 | HDGFRP3      | GI_21359902-S | 15 | 15 | 81640965 | 42932  | 5.9832  | 5.85985 | YRI |
| rs16944716 | Hs.311038    | Hs.311038-S   | 15 | 15 | 89006612 | 2197   | 6.4302  | 6.3615  | YRI |
| rs16944717 | Hs.311038    | Hs.311038-S   | 15 | 15 | 89006626 | 2183   | 9.1892  | 6.3615  | YRI |
| rs9874     | SELS         | GI_45439348-I | 15 | 15 | 99628927 | 129    | 7.7485  | 6.43429 | YRI |
| rs7194791  | LOC114984    | GI_34147539-S | 16 | 16 | 2866140  | 23074  | 6.1564  | 5.88065 | YRI |
| rs8046450  | LOC114984    | GI_34147539-S | 16 | 16 | 2872822  | 16392  | 8.9864  | 5.88065 | YRI |
| rs2335462  | LOC114984    | GI_34147539-S | 16 | 16 | 2874318  | 14896  | 6.6231  | 5.88065 | YRI |
| rs8051991  | LOC114984    | GI_34147539-S | 16 | 16 | 2887052  | 2162   | 6.0566  | 5.88065 | YRI |
| rs1859254  | LOC114984    | GI_34147539-S | 16 | 16 | 2887347  | 1867   | 6.1355  | 5.88065 | YRI |
| rs757166   | LOC114984    | GI_34147539-S | 16 | 16 | 2903262  | 14048  | 6.5649  | 5.88065 | YRI |
| rs757165   | LOC114984    | GI_34147539-S | 16 | 16 | 2903318  | 14104  | 6.8928  | 5.88065 | YRI |
| rs886323   | LOC114984    | GI_34147539-S | 16 | 16 | 2903811  | 14597  | 6.5872  | 5.88065 | YRI |
| rs8054735  | LOC114984    | GI_34147539-S | 16 | 16 | 2905520  | 16306  | 6.4374  | 5.88065 | YRI |
| rs9922546  | ZNF213       | GI_32698677-S | 16 | 16 | 3107796  | 24707  | 6.5587  | 6.02491 | YRI |
| rs2735537  | ZNF213       | GI_32698677-S | 16 | 16 | 3131357  | 1146   | 8.5323  | 6.02491 | YRI |
| rs2238378  | ZNF213       | GI_32698677-S | 16 | 16 | 3133218  | 715    | 9.4705  | 6.02491 | YRI |
| rs7191458  | HSCARG       | GI_24476001-S | 16 | 16 | 4451753  | 128    | 11.0951 | 6.391   | YRI |
| rs17137051 | HSCARG       | GI_24476001-S | 16 | 16 | 4461750  | 9869   | 7.3118  | 6.391   | YRI |
| rs17137053 | HSCARG       | GI_24476001-S | 16 | 16 | 4464156  | 12275  | 11.9789 | 6.391   | YRI |
| rs17137056 | HSCARG       | GI_24476001-S | 16 | 16 | 4464686  | 12805  | 10.8722 | 6.391   | YRI |
| rs8058798  | HSCARG       | GI_24476001-S | 16 | 16 | 4471660  | 19779  | 11.0951 | 6.391   | YRI |
| rs8063956  | HSCARG       | GI_24476001-S | 16 | 16 | 4471762  | 19881  | 11.0951 | 6.391   | YRI |
| rs8057858  | HSCARG       | GI_24476001-S | 16 | 16 | 4471815  | 19934  | 11.0951 | 6.391   | YRI |
| rs11866840 | HSCARG       | GI_24476001-S | 16 | 16 | 4476355  | 24474  | 7.532   | 6.391   | YRI |
| rs8063084  | HSCARG       | GI_24476001-S | 16 | 16 | 4476556  | 24675  | 9.928   | 6.391   | YRI |
| rs8047271  | HSCARG       | GI_24476001-S | 16 | 16 | 4476635  | 24754  | 10.2043 | 6.391   | YRI |
| rs8055559  | HSCARG       | GI_24476001-S | 16 | 16 | 4480228  | 28347  | 11.0951 | 6.391   | YRI |
| rs1362627  | HSCARG       | GI_24476001-S | 16 | 16 | 4491506  | 39625  | 7.621   | 6.391   | YRI |

|            |          |               |    |    |          |        |         |         |     |
|------------|----------|---------------|----|----|----------|--------|---------|---------|-----|
| rs10500325 | HSCARG   | GI_24476001-S | 16 | 16 | 4493193  | 41312  | 7.621   | 6.391   | YRI |
| rs11860985 | HSCARG   | GI_24476001-S | 16 | 16 | 4495966  | 44085  | 7.3118  | 6.391   | YRI |
| rs25685    | HSCARG   | GI_24476001-S | 16 | 16 | 4496912  | 45031  | 7.5131  | 6.391   | YRI |
| rs17137098 | HSCARG   | GI_24476001-S | 16 | 16 | 4500536  | 48655  | 7.621   | 6.391   | YRI |
| rs12446765 | HSCARG   | GI_24476001-S | 16 | 16 | 4509626  | 57745  | 9.4573  | 6.391   | YRI |
| rs9922933  | HSCARG   | GI_24476001-S | 16 | 16 | 4512603  | 60722  | 9.3584  | 6.391   | YRI |
| rs8062952  | HSCARG   | GI_24476001-S | 16 | 16 | 4513230  | 61349  | 6.4236  | 6.391   | YRI |
| rs8044698  | HSCARG   | GI_24476001-S | 16 | 16 | 4517070  | 65189  | 11.1255 | 6.391   | YRI |
| rs841231   | HSCARG   | GI_24476001-S | 16 | 16 | 4523148  | 71267  | 6.4428  | 6.391   | YRI |
| rs2541517  | FLJ32871 | GI_21389568-S | 16 | 16 | 10664294 | 35278  | 10.1241 | 6.39478 | YRI |
| rs2430635  | FLJ32871 | GI_21389568-S | 16 | 16 | 10664445 | 35429  | 6.5494  | 6.39478 | YRI |
| rs2466120  | FLJ32871 | GI_21389568-S | 16 | 16 | 10664470 | 35454  | 6.4819  | 6.39478 | YRI |
| rs7194053  | FLJ32871 | GI_21389568-S | 16 | 16 | 10665699 | 36683  | 6.598   | 6.39478 | YRI |
| rs2541516  | FLJ32871 | GI_21389568-S | 16 | 16 | 10665718 | 36702  | 6.6612  | 6.39478 | YRI |
| rs2719680  | FLJ32871 | GI_21389568-S | 16 | 16 | 10667209 | 38193  | 10.1186 | 6.39478 | YRI |
| rs2719681  | FLJ32871 | GI_21389568-S | 16 | 16 | 10667885 | 38869  | 11.2968 | 6.39478 | YRI |
| rs2541513  | FLJ32871 | GI_21389568-S | 16 | 16 | 10668135 | 39119  | 12.2367 | 6.39478 | YRI |
| rs9935466  | FLJ32871 | GI_21389568-S | 16 | 16 | 10668664 | 39648  | 12.0275 | 6.39478 | YRI |
| rs2541508  | FLJ32871 | GI_21389568-S | 16 | 16 | 10669832 | 40816  | 11.6475 | 6.39478 | YRI |
| rs2719691  | FLJ32871 | GI_21389568-S | 16 | 16 | 10670082 | 41066  | 10.5436 | 6.39478 | YRI |
| rs4780974  | FLJ32871 | GI_21389568-S | 16 | 16 | 10670239 | 41223  | 9.6606  | 6.39478 | YRI |
| rs2719695  | FLJ32871 | GI_21389568-S | 16 | 16 | 10671946 | 42930  | 12.2367 | 6.39478 | YRI |
| rs2541505  | FLJ32871 | GI_21389568-S | 16 | 16 | 10672073 | 43057  | 11.8353 | 6.39478 | YRI |
| rs2719696  | FLJ32871 | GI_21389568-S | 16 | 16 | 10672392 | 43376  | 9.4903  | 6.39478 | YRI |
| rs2719701  | FLJ32871 | GI_21389568-S | 16 | 16 | 10674017 | 45001  | 7.834   | 6.39478 | YRI |
| rs2719702  | FLJ32871 | GI_21389568-S | 16 | 16 | 10674163 | 45147  | 7.0624  | 6.39478 | YRI |
| rs2719704  | FLJ32871 | GI_21389568-S | 16 | 16 | 10674434 | 45418  | 7.834   | 6.39478 | YRI |
| rs2719706  | FLJ32871 | GI_21389568-S | 16 | 16 | 10674800 | 45784  | 10.4995 | 6.39478 | YRI |
| rs7188975  | LCMT1    | GI_15082255-I | 16 | 16 | 25044950 | 71178  | 15.3811 | 6.33222 | YRI |
| rs11074678 | LCMT1    | GI_15082255-I | 16 | 16 | 25057227 | 83455  | 11.3352 | 6.33222 | YRI |
| rs277908   | LCMT1    | GI_15082255-I | 16 | 16 | 25062635 | 88863  | 6.7111  | 6.33222 | YRI |
| rs277913   | LCMT1    | GI_15082255-I | 16 | 16 | 25066244 | 92472  | 9.6263  | 6.33222 | YRI |
| rs277886   | LCMT1    | GI_15082255-I | 16 | 16 | 25070005 | 96233  | 16.9061 | 6.33222 | YRI |
| rs277903   | LCMT1    | GI_15082255-I | 16 | 16 | 25082623 | 108851 | 14.9493 | 6.33222 | YRI |
| rs277891   | LCMT1    | GI_15082255-I | 16 | 16 | 25088257 | 114485 | 16.9061 | 6.33222 | YRI |
| rs277893   | LCMT1    | GI_15082255-I | 16 | 16 | 25089212 | 115440 | 16.9061 | 6.33222 | YRI |
| rs9328707  | Hs.42217 | Hs.42217-S    | 16 | 16 | 45716367 | 257579 | 10.0245 | 5.52804 | YRI |
| rs9936810  | Hs.42217 | Hs.42217-S    | 16 | 16 | 45725162 | 248784 | 6.1406  | 5.52804 | YRI |
| rs4386162  | Hs.42217 | Hs.42217-S    | 16 | 16 | 45730162 | 243784 | 10.5694 | 5.52804 | YRI |
| rs9935641  | Hs.42217 | Hs.42217-S    | 16 | 16 | 45730479 | 243467 | 6.1181  | 5.52804 | YRI |
| rs16952589 | Hs.42217 | Hs.42217-S    | 16 | 16 | 45731776 | 242170 | 8.8633  | 5.52804 | YRI |
| rs16953067 | Hs.42217 | Hs.42217-S    | 16 | 16 | 45757666 | 216280 | 9.1401  | 5.52804 | YRI |
| rs7202975  | Hs.42217 | Hs.42217-S    | 16 | 16 | 45768733 | 205213 | 5.6266  | 5.52804 | YRI |
| rs9928466  | Hs.42217 | Hs.42217-S    | 16 | 16 | 45780919 | 193027 | 6.516   | 5.52804 | YRI |
| rs1018171  | Hs.42217 | Hs.42217-S    | 16 | 16 | 45795581 | 178365 | 6.516   | 5.52804 | YRI |
| rs8055882  | Hs.42217 | Hs.42217-S    | 16 | 16 | 45796590 | 177356 | 6.516   | 5.52804 | YRI |
| rs8044842  | Hs.42217 | Hs.42217-S    | 16 | 16 | 45829377 | 144569 | 9.1401  | 5.52804 | YRI |
| rs16954067 | Hs.42217 | Hs.42217-S    | 16 | 16 | 45839254 | 134692 | 11.0963 | 5.52804 | YRI |
| rs8063584  | Hs.42217 | Hs.42217-S    | 16 | 16 | 45841478 | 132468 | 6.2509  | 5.52804 | YRI |
| rs2062968  | Hs.42217 | Hs.42217-S    | 16 | 16 | 45850317 | 123629 | 6.6051  | 5.52804 | YRI |
| rs13339406 | Hs.42217 | Hs.42217-S    | 16 | 16 | 45858493 | 115453 | 10.7261 | 5.52804 | YRI |
| rs8053323  | Hs.42217 | Hs.42217-S    | 16 | 16 | 45887745 | 86201  | 6.3042  | 5.52804 | YRI |
| rs16955095 | Hs.42217 | Hs.42217-S    | 16 | 16 | 45891124 | 82822  | 8.2901  | 5.52804 | YRI |
| rs11862517 | Hs.42217 | Hs.42217-S    | 16 | 16 | 45915052 | 58894  | 5.9008  | 5.52804 | YRI |
| rs16955781 | Hs.42217 | Hs.42217-S    | 16 | 16 | 45924772 | 49174  | 8.684   | 5.52804 | YRI |
| rs16956024 | Hs.42217 | Hs.42217-S    | 16 | 16 | 45948101 | 25845  | 7.9206  | 5.52804 | YRI |

|            |          |            |    |    |          |        |        |         |     |
|------------|----------|------------|----|----|----------|--------|--------|---------|-----|
| rs16956031 | Hs.42217 | Hs.42217-S | 16 | 16 | 45948570 | 25376  | 7.6146 | 5.52804 | YRI |
| rs16956083 | Hs.42217 | Hs.42217-S | 16 | 16 | 45952887 | 21059  | 6.0591 | 5.52804 | YRI |
| rs16956093 | Hs.42217 | Hs.42217-S | 16 | 16 | 45956961 | 16985  | 7.9206 | 5.52804 | YRI |
| rs7202716  | Hs.42217 | Hs.42217-S | 16 | 16 | 45975932 | 1986   | 6.3042 | 5.52804 | YRI |
| rs13339357 | Hs.42217 | Hs.42217-S | 16 | 16 | 45993518 | 19572  | 6.479  | 5.52804 | YRI |
| rs11860257 | Hs.42217 | Hs.42217-S | 16 | 16 | 46003798 | 29852  | 5.664  | 5.52804 | YRI |
| rs13334239 | Hs.42217 | Hs.42217-S | 16 | 16 | 46013255 | 39309  | 7.6714 | 5.52804 | YRI |
| rs7192537  | Hs.42217 | Hs.42217-S | 16 | 16 | 46016351 | 42405  | 8.1355 | 5.52804 | YRI |
| rs9932230  | Hs.42217 | Hs.42217-S | 16 | 16 | 46035974 | 62028  | 5.8829 | 5.52804 | YRI |
| rs16945357 | Hs.42217 | Hs.42217-S | 16 | 16 | 46042340 | 68394  | 5.6843 | 5.52804 | YRI |
| rs16945358 | Hs.42217 | Hs.42217-S | 16 | 16 | 46044060 | 70114  | 5.8016 | 5.52804 | YRI |
| rs16945372 | Hs.42217 | Hs.42217-S | 16 | 16 | 46060674 | 86728  | 8.0767 | 5.52804 | YRI |
| rs7200554  | Hs.42217 | Hs.42217-S | 16 | 16 | 46066799 | 92853  | 5.6843 | 5.52804 | YRI |
| rs9328592  | Hs.42217 | Hs.42217-S | 16 | 16 | 46068824 | 94878  | 5.6843 | 5.52804 | YRI |
| rs16945379 | Hs.42217 | Hs.42217-S | 16 | 16 | 46070308 | 96362  | 8.8225 | 5.52804 | YRI |
| rs16945387 | Hs.42217 | Hs.42217-S | 16 | 16 | 46102198 | 128252 | 5.6843 | 5.52804 | YRI |
| rs9933052  | Hs.42217 | Hs.42217-S | 16 | 16 | 46103614 | 129668 | 5.6843 | 5.52804 | YRI |
| rs11862096 | Hs.42217 | Hs.42217-S | 16 | 16 | 46127233 | 153287 | 5.6843 | 5.52804 | YRI |
| rs7194249  | Hs.42217 | Hs.42217-S | 16 | 16 | 46141373 | 167427 | 8.8225 | 5.52804 | YRI |
| rs8051273  | Hs.42217 | Hs.42217-S | 16 | 16 | 46143780 | 169834 | 8.8225 | 5.52804 | YRI |
| rs13332953 | Hs.42217 | Hs.42217-S | 16 | 16 | 46152084 | 178138 | 5.6843 | 5.52804 | YRI |
| rs16945408 | Hs.42217 | Hs.42217-S | 16 | 16 | 46152506 | 178560 | 5.7621 | 5.52804 | YRI |
| rs16945413 | Hs.42217 | Hs.42217-S | 16 | 16 | 46157977 | 184031 | 5.6431 | 5.52804 | YRI |
| rs9935427  | Hs.42217 | Hs.42217-S | 16 | 16 | 46169800 | 195854 | 5.6843 | 5.52804 | YRI |
| rs7199696  | Hs.42217 | Hs.42217-S | 16 | 16 | 46170519 | 196573 | 5.6843 | 5.52804 | YRI |
| rs13332058 | Hs.42217 | Hs.42217-S | 16 | 16 | 46175119 | 201173 | 6.3042 | 5.52804 | YRI |
| rs11862281 | Hs.42217 | Hs.42217-S | 16 | 16 | 46217535 | 243589 | 5.9298 | 5.52804 | YRI |
| rs10521162 | Hs.42217 | Hs.42217-S | 16 | 16 | 46222649 | 248703 | 5.6843 | 5.52804 | YRI |
| rs16942513 | Hs.42217 | Hs.42217-S | 16 | 16 | 46229980 | 256034 | 5.6843 | 5.52804 | YRI |
| rs16945460 | Hs.42217 | Hs.42217-S | 16 | 16 | 46248354 | 274408 | 8.5902 | 5.52804 | YRI |
| rs16945474 | Hs.42217 | Hs.42217-S | 16 | 16 | 46255119 | 281173 | 8.8225 | 5.52804 | YRI |
| rs16945493 | Hs.42217 | Hs.42217-S | 16 | 16 | 46285584 | 311638 | 8.8225 | 5.52804 | YRI |
| rs11860828 | Hs.42217 | Hs.42217-S | 16 | 16 | 46286823 | 312877 | 5.6843 | 5.52804 | YRI |
| rs10521163 | Hs.42217 | Hs.42217-S | 16 | 16 | 46288947 | 315001 | 6.382  | 5.52804 | YRI |
| rs8046175  | Hs.42217 | Hs.42217-S | 16 | 16 | 46298697 | 324751 | 5.6843 | 5.52804 | YRI |
| rs2054000  | Hs.42217 | Hs.42217-S | 16 | 16 | 46301992 | 328046 | 5.6843 | 5.52804 | YRI |
| rs9328600  | Hs.42217 | Hs.42217-S | 16 | 16 | 46306307 | 332361 | 5.6843 | 5.52804 | YRI |
| rs9922381  | Hs.42217 | Hs.42217-S | 16 | 16 | 46307586 | 333640 | 5.6843 | 5.52804 | YRI |
| rs16945509 | Hs.42217 | Hs.42217-S | 16 | 16 | 46312587 | 338641 | 6.5961 | 5.52804 | YRI |
| rs9929392  | Hs.42217 | Hs.42217-S | 16 | 16 | 46335833 | 361887 | 6.5093 | 5.52804 | YRI |
| rs9936580  | Hs.42217 | Hs.42217-S | 16 | 16 | 46335988 | 362042 | 6.7604 | 5.52804 | YRI |
| rs13331748 | Hs.42217 | Hs.42217-S | 16 | 16 | 46338505 | 364559 | 7.1068 | 5.52804 | YRI |
| rs16945553 | Hs.42217 | Hs.42217-S | 16 | 16 | 46342457 | 368511 | 7.1068 | 5.52804 | YRI |
| rs16945557 | Hs.42217 | Hs.42217-S | 16 | 16 | 46346862 | 372916 | 6.7614 | 5.52804 | YRI |
| rs7192029  | Hs.42217 | Hs.42217-S | 16 | 16 | 46356542 | 382596 | 7.1068 | 5.52804 | YRI |
| rs7199371  | Hs.42217 | Hs.42217-S | 16 | 16 | 46358591 | 384645 | 9.0108 | 5.52804 | YRI |
| rs9923591  | Hs.42217 | Hs.42217-S | 16 | 16 | 46368599 | 394653 | 9.0108 | 5.52804 | YRI |
| rs8048279  | Hs.42217 | Hs.42217-S | 16 | 16 | 46369551 | 395605 | 9.0108 | 5.52804 | YRI |
| rs8046259  | Hs.42217 | Hs.42217-S | 16 | 16 | 46371922 | 397976 | 9.0108 | 5.52804 | YRI |
| rs7189446  | Hs.42217 | Hs.42217-S | 16 | 16 | 46374923 | 400977 | 8.9639 | 5.52804 | YRI |
| rs7202612  | Hs.42217 | Hs.42217-S | 16 | 16 | 46376723 | 402777 | 9.0108 | 5.52804 | YRI |
| rs7202145  | Hs.42217 | Hs.42217-S | 16 | 16 | 46376825 | 402879 | 9.0108 | 5.52804 | YRI |
| rs7186864  | Hs.42217 | Hs.42217-S | 16 | 16 | 46378036 | 404090 | 8.7962 | 5.52804 | YRI |
| rs13333995 | Hs.42217 | Hs.42217-S | 16 | 16 | 46380784 | 406838 | 6.6771 | 5.52804 | YRI |
| rs2100421  | Hs.42217 | Hs.42217-S | 16 | 16 | 46383703 | 409757 | 7.4449 | 5.52804 | YRI |
| rs13339190 | Hs.42217 | Hs.42217-S | 16 | 16 | 46386220 | 412274 | 9.0108 | 5.52804 | YRI |

|            |          |               |    |    |          |        |         |         |     |
|------------|----------|---------------|----|----|----------|--------|---------|---------|-----|
| rs13335089 | Hs.42217 | Hs.42217-S    | 16 | 16 | 46387037 | 413091 | 8.7006  | 5.52804 | YRI |
| rs2101373  | Hs.42217 | Hs.42217-S    | 16 | 16 | 46388252 | 414306 | 9.0108  | 5.52804 | YRI |
| rs9930026  | Hs.42217 | Hs.42217-S    | 16 | 16 | 46388320 | 414374 | 7.4177  | 5.52804 | YRI |
| rs13337972 | Hs.42217 | Hs.42217-S    | 16 | 16 | 46389226 | 415280 | 8.4319  | 5.52804 | YRI |
| rs16945594 | Hs.42217 | Hs.42217-S    | 16 | 16 | 46390875 | 416929 | 8.8225  | 5.52804 | YRI |
| rs16945604 | Hs.42217 | Hs.42217-S    | 16 | 16 | 46391488 | 417542 | 11.0108 | 5.52804 | YRI |
| rs16945609 | Hs.42217 | Hs.42217-S    | 16 | 16 | 46391531 | 417585 | 8.8225  | 5.52804 | YRI |
| rs16945613 | Hs.42217 | Hs.42217-S    | 16 | 16 | 46391563 | 417617 | 11.0108 | 5.52804 | YRI |
| rs7500053  | Hs.42217 | Hs.42217-S    | 16 | 16 | 46392205 | 418259 | 11.0108 | 5.52804 | YRI |
| rs16945617 | Hs.42217 | Hs.42217-S    | 16 | 16 | 46394327 | 420381 | 11.0108 | 5.52804 | YRI |
| rs16945621 | Hs.42217 | Hs.42217-S    | 16 | 16 | 46394372 | 420426 | 8.8225  | 5.52804 | YRI |
| rs16945624 | Hs.42217 | Hs.42217-S    | 16 | 16 | 46396057 | 422111 | 8.8225  | 5.52804 | YRI |
| rs1031469  | Hs.42217 | Hs.42217-S    | 16 | 16 | 46397491 | 423545 | 10.1758 | 5.52804 | YRI |
| rs16945629 | Hs.42217 | Hs.42217-S    | 16 | 16 | 46397850 | 423904 | 10.2808 | 5.52804 | YRI |
| rs8062780  | Hs.42217 | Hs.42217-S    | 16 | 16 | 46398450 | 424504 | 10.0304 | 5.52804 | YRI |
| rs9926457  | Hs.42217 | Hs.42217-S    | 16 | 16 | 46405964 | 432018 | 9.0108  | 5.52804 | YRI |
| rs9932128  | Hs.42217 | Hs.42217-S    | 16 | 16 | 46407811 | 433865 | 9.0108  | 5.52804 | YRI |
| rs16945641 | Hs.42217 | Hs.42217-S    | 16 | 16 | 46408552 | 434606 | 8.2429  | 5.52804 | YRI |
| rs4271615  | Hs.42217 | Hs.42217-S    | 16 | 16 | 46410392 | 436446 | 8.8225  | 5.52804 | YRI |
| rs7187134  | Hs.42217 | Hs.42217-S    | 16 | 16 | 46410554 | 436608 | 9.4306  | 5.52804 | YRI |
| rs7203019  | Hs.42217 | Hs.42217-S    | 16 | 16 | 46410569 | 436623 | 8.4866  | 5.52804 | YRI |
| rs16945650 | Hs.42217 | Hs.42217-S    | 16 | 16 | 46411341 | 437395 | 8.5589  | 5.52804 | YRI |
| rs16945652 | Hs.42217 | Hs.42217-S    | 16 | 16 | 46411368 | 437422 | 9.1276  | 5.52804 | YRI |
| rs8055695  | Hs.42217 | Hs.42217-S    | 16 | 16 | 46418453 | 444507 | 9.0108  | 5.52804 | YRI |
| rs16945662 | Hs.42217 | Hs.42217-S    | 16 | 16 | 46420933 | 446987 | 9.0108  | 5.52804 | YRI |
| rs13336200 | Hs.42217 | Hs.42217-S    | 16 | 16 | 46421249 | 447303 | 9.0108  | 5.52804 | YRI |
| rs13337281 | Hs.42217 | Hs.42217-S    | 16 | 16 | 46421459 | 447513 | 8.7301  | 5.52804 | YRI |
| rs13338447 | Hs.42217 | Hs.42217-S    | 16 | 16 | 46421601 | 447655 | 10.2408 | 5.52804 | YRI |
| rs8053042  | Hs.42217 | Hs.42217-S    | 16 | 16 | 46421717 | 447771 | 9.0108  | 5.52804 | YRI |
| rs8055624  | Hs.42217 | Hs.42217-S    | 16 | 16 | 46422092 | 448146 | 8.6679  | 5.52804 | YRI |
| rs9940610  | Hs.42217 | Hs.42217-S    | 16 | 16 | 46427333 | 453387 | 9.0108  | 5.52804 | YRI |
| rs3903067  | Hs.42217 | Hs.42217-S    | 16 | 16 | 46450036 | 476090 | 7.5486  | 5.52804 | YRI |
| rs16945673 | Hs.42217 | Hs.42217-S    | 16 | 16 | 46454603 | 480657 | 9.0108  | 5.52804 | YRI |
| rs13337810 | Hs.42217 | Hs.42217-S    | 16 | 16 | 46461312 | 487366 | 7.3231  | 5.52804 | YRI |
| rs10492847 | Hs.42217 | Hs.42217-S    | 16 | 16 | 46461498 | 487552 | 7.5486  | 5.52804 | YRI |
| rs3852743  | Hs.42217 | Hs.42217-S    | 16 | 16 | 46467047 | 493101 | 7.3711  | 5.52804 | YRI |
| rs9937177  | Hs.42217 | Hs.42217-S    | 16 | 16 | 46468124 | 494178 | 6.4917  | 5.52804 | YRI |
| rs16945694 | Hs.42217 | Hs.42217-S    | 16 | 16 | 46473394 | 499448 | 6.1577  | 5.52804 | YRI |
| rs13339608 | Hs.42217 | Hs.42217-S    | 16 | 16 | 46487391 | 513445 | 6.1577  | 5.52804 | YRI |
| rs13337036 | Hs.42217 | Hs.42217-S    | 16 | 16 | 46500110 | 526164 | 6.883   | 5.52804 | YRI |
| rs9936877  | Hs.42217 | Hs.42217-S    | 16 | 16 | 46511024 | 537078 | 5.5407  | 5.52804 | YRI |
| rs2303200  | PDPR     | GI_32261325-S | 16 | 16 | 68735149 | 17281  | 8.1135  | 5.80868 | YRI |
| rs2287980  | PDPR     | GI_32261325-S | 16 | 16 | 68744771 | 7659   | 8.6555  | 5.80868 | YRI |
| rs8058702  | FLJ10305 | GI_39780551-S | 16 | 16 | 69359737 | 80738  | 6.7276  | 6.08131 | YRI |
| rs7403966  | FLJ10305 | GI_39780551-S | 16 | 16 | 69364175 | 85176  | 6.3396  | 6.08131 | YRI |
| rs9929358  | FLJ10305 | GI_39780551-S | 16 | 16 | 69385389 | 106390 | 6.4612  | 6.08131 | YRI |
| rs1770429  | FLJ10305 | GI_39780551-S | 16 | 16 | 69418057 | 139058 | 6.1766  | 6.08131 | YRI |
| rs16954525 | BM039    | GI_39725678-S | 16 | 16 | 79636464 | 25105  | 7.6956  | 7.06873 | YRI |
| rs3784879  | LOC51693 | GI_7706428-S  | 16 | 16 | 87441447 | 13502  | 7.3775  | 6.02998 | YRI |
| rs12709105 | LOC51693 | GI_7706428-S  | 16 | 16 | 87444352 | 10597  | 6.6916  | 6.02998 | YRI |
| rs12932588 | LOC51693 | GI_7706428-S  | 16 | 16 | 87448994 | 5955   | 8.299   | 6.02998 | YRI |
| rs12596491 | LOC51693 | GI_7706428-S  | 16 | 16 | 87455918 | 969    | 6.1436  | 6.02998 | YRI |
| rs889753   | LOC51693 | GI_7706428-S  | 16 | 16 | 87459415 | 4466   | 6.7865  | 6.02998 | YRI |
| rs382745   | SPG7     | GI_40806172-I | 16 | 16 | 88131087 | 282    | 6.2945  | 5.95477 | YRI |
| rs12709088 | RPL13    | GI_15431296-A | 16 | 16 | 88157713 | 686    | 6.7453  | 5.86877 | YRI |
| rs12709089 | RPL13    | GI_15431296-A | 16 | 16 | 88157812 | 785    | 7.0296  | 5.86877 | YRI |

|            |           |               |    |    |          |       |         |         |     |
|------------|-----------|---------------|----|----|----------|-------|---------|---------|-----|
| rs6500441  | FANCA     | GI_4503654-S  | 16 | 16 | 88356170 | 24510 | 6.7456  | 5.92069 | YRI |
| rs2159113  | FANCA     | GI_4503654-S  | 16 | 16 | 88359584 | 27924 | 7.5774  | 5.92069 | YRI |
| rs7203907  | FANCA     | GI_4503654-S  | 16 | 16 | 88361275 | 29615 | 6.8724  | 5.92069 | YRI |
| rs4785595  | FANCA     | GI_4503654-S  | 16 | 16 | 88363022 | 31362 | 7.4131  | 5.92069 | YRI |
| rs886952   | FANCA     | GI_4503654-S  | 16 | 16 | 88364282 | 32622 | 6.513   | 5.92069 | YRI |
| rs8046872  | FANCA     | GI_4503654-S  | 16 | 16 | 88369053 | 37393 | 6.7683  | 5.92069 | YRI |
| rs8058179  | FANCA     | GI_4503654-S  | 16 | 16 | 88374488 | 42828 | 6.3328  | 5.92069 | YRI |
| rs1065483  | RABEP1    | GI_31377797-S | 17 | 17 | 5225494  | 4174  | 7.3284  | 6.23641 | YRI |
| rs7426     | RABEP1    | GI_31377797-S | 17 | 17 | 5229707  | 39    | 7.844   | 6.23641 | YRI |
| rs1806255  | RABEP1    | GI_31377797-S | 17 | 17 | 5254987  | 25319 | 6.5455  | 6.23641 | YRI |
| rs2189338  | RABEP1    | GI_31377797-S | 17 | 17 | 5267065  | 37397 | 8.2076  | 6.23641 | YRI |
| rs222843   | DERP6     | GI_44662825-I | 17 | 17 | 7086705  | 9736  | 9.7287  | 6.13581 | YRI |
| rs402514   | DERP6     | GI_44662825-I | 17 | 17 | 7098927  | 2486  | 9.7287  | 6.13581 | YRI |
| rs8067500  | DERP6     | GI_44662825-I | 17 | 17 | 7113355  | 16914 | 9.197   | 6.13581 | YRI |
| rs8066665  | LOC400571 | GI_42661084-S | 17 | 17 | 7426576  | 198   | 6.4344  | 6.09228 | YRI |
| rs2518023  | MGC10744  | GI_34101277-A | 17 | 17 | 7997331  | 20306 | 9.5108  | 6.32022 | YRI |
| rs2278637  | MGC10744  | GI_34101277-A | 17 | 17 | 8002827  | 14810 | 6.6818  | 6.32022 | YRI |
| rs8067606  | MGC10744  | GI_34101277-A | 17 | 17 | 8007508  | 10129 | 6.3428  | 6.32022 | YRI |
| rs9899533  | MGC10744  | GI_34101277-A | 17 | 17 | 8008770  | 8867  | 10.8823 | 6.32022 | YRI |
| rs8069739  | MGC10744  | GI_34101277-A | 17 | 17 | 8019490  | 1853  | 8.1114  | 6.32022 | YRI |
| rs8064449  | MGC10744  | GI_34101277-A | 17 | 17 | 8019754  | 2117  | 6.4144  | 6.32022 | YRI |
| rs1476162  | MGC10744  | GI_34101277-A | 17 | 17 | 8031808  | 14171 | 9.3638  | 6.32022 | YRI |
| rs8531     | MGC10744  | GI_34101277-A | 17 | 17 | 8033419  | 15782 | 6.8257  | 6.32022 | YRI |
| rs2278636  | MGC10744  | GI_34101277-A | 17 | 17 | 8034745  | 17108 | 8.1887  | 6.32022 | YRI |
| rs9891949  | MGC10744  | GI_34101277-A | 17 | 17 | 8039908  | 22271 | 7.5015  | 6.32022 | YRI |
| rs9900848  | MGC10744  | GI_34101277-A | 17 | 17 | 8040096  | 22459 | 10.4658 | 6.32022 | YRI |
| rs11078734 | MGC10744  | GI_34101277-A | 17 | 17 | 8041949  | 24312 | 10.4658 | 6.32022 | YRI |
| rs12943463 | MGC10744  | GI_34101277-A | 17 | 17 | 8043752  | 26115 | 7.512   | 6.32022 | YRI |
| rs1059476  | MGC10744  | GI_34101277-A | 17 | 17 | 8049056  | 31419 | 8.7418  | 6.32022 | YRI |
| rs3027260  | MGC10744  | GI_34101277-A | 17 | 17 | 8053911  | 36274 | 6.7355  | 6.32022 | YRI |
| rs2779212  | Hs.379903 | Hs.379903-S   | 17 | 17 | 15817380 | 3310  | 11.0195 | 5.99859 | YRI |
| rs1045599  | Hs.379903 | Hs.379903-S   | 17 | 17 | 15820635 | 55    | 11.8052 | 5.99859 | YRI |
| rs11654    | Hs.379903 | Hs.379903-S   | 17 | 17 | 15821876 | 1186  | 11.8052 | 5.99859 | YRI |
| rs2286796  | Hs.379903 | Hs.379903-S   | 17 | 17 | 15824952 | 4262  | 11.4343 | 5.99859 | YRI |
| rs9891938  | Hs.379903 | Hs.379903-S   | 17 | 17 | 15855797 | 35107 | 6.931   | 5.99859 | YRI |
| rs16961516 | NT5M      | GI_22547230-S | 17 | 17 | 17148957 | 42687 | 8.7444  | 6.39322 | YRI |
| rs11080326 | MGC19764  | GI_42661257-S | 17 | 17 | 30588522 | 30059 | 7.1641  | 6.30502 | YRI |
| rs11080326 | hmm5445   | hmm5445-S     | 17 | 17 | 30588522 | 30032 | 7.4712  | 6.39382 | YRI |
| rs11867191 | MGC19764  | GI_42661257-S | 17 | 17 | 30593227 | 25354 | 10.866  | 6.30502 | YRI |
| rs11867191 | hmm5445   | hmm5445-S     | 17 | 17 | 30593227 | 25327 | 10.5903 | 6.39382 | YRI |
| rs883416   | MGC19764  | GI_42661257-S | 17 | 17 | 30594554 | 24027 | 9.8275  | 6.30502 | YRI |
| rs883416   | hmm5445   | hmm5445-S     | 17 | 17 | 30594554 | 24000 | 9.7234  | 6.39382 | YRI |
| rs12601614 | MGC19764  | GI_42661257-S | 17 | 17 | 30598366 | 20215 | 7.6633  | 6.30502 | YRI |
| rs12601614 | hmm5445   | hmm5445-S     | 17 | 17 | 30598366 | 20188 | 9.1449  | 6.39382 | YRI |
| rs3760144  | FLJ20291  | GI_34147582-S | 17 | 17 | 34210958 | 196   | 6.4877  | 5.98181 | YRI |
| rs7214654  | FLJ20291  | GI_34147582-S | 17 | 17 | 34225779 | 14625 | 8.7865  | 5.98181 | YRI |
| rs12936231 | ORMDL3    | GI_27544926-S | 17 | 17 | 35282646 | 48452 | 10.0292 | 5.63074 | YRI |
| rs8067378  | ORMDL3    | GI_27544926-S | 17 | 17 | 35304874 | 26224 | 9.2578  | 5.63074 | YRI |
| rs9303281  | ORMDL3    | GI_27544926-S | 17 | 17 | 35327572 | 3526  | 5.8339  | 5.63074 | YRI |
| rs9898129  | RAPGEFL1  | GI_7705938-S  | 17 | 17 | 35519475 | 85860 | 7.3193  | 5.79617 | YRI |
| rs9903261  | RAPGEFL1  | GI_7705938-S  | 17 | 17 | 35530994 | 74341 | 9.2298  | 5.79617 | YRI |
| rs9900154  | RAPGEFL1  | GI_7705938-S  | 17 | 17 | 35536725 | 68610 | 6.7387  | 5.79617 | YRI |
| rs10512482 | RAPGEFL1  | GI_7705938-S  | 17 | 17 | 35542587 | 62748 | 5.9905  | 5.79617 | YRI |
| rs16965669 | RAPGEFL1  | GI_7705938-S  | 17 | 17 | 35557882 | 47453 | 5.9639  | 5.79617 | YRI |
| rs9898500  | RAPGEFL1  | GI_7705938-S  | 17 | 17 | 35558907 | 46428 | 9.2853  | 5.79617 | YRI |
| rs9910373  | RAPGEFL1  | GI_7705938-S  | 17 | 17 | 35561768 | 43567 | 5.9639  | 5.79617 | YRI |

|            |          |               |    |    |          |        |         |         |     |
|------------|----------|---------------|----|----|----------|--------|---------|---------|-----|
| rs9894807  | RAPGEFL1 | GI_7705938-S  | 17 | 17 | 35583704 | 21631  | 5.9639  | 5.79617 | YRI |
| rs9911936  | RAPGEFL1 | GI_7705938-S  | 17 | 17 | 35586558 | 18777  | 6.3089  | 5.79617 | YRI |
| rs8076915  | RAPGEFL1 | GI_7705938-S  | 17 | 17 | 35645052 | 39717  | 8.0137  | 5.79617 | YRI |
| rs8072718  | RAPGEFL1 | GI_7705938-S  | 17 | 17 | 35653135 | 47800  | 6.6155  | 5.79617 | YRI |
| rs12936565 | RAPGEFL1 | GI_7705938-S  | 17 | 17 | 35658563 | 53228  | 7.3305  | 5.79617 | YRI |
| rs1130199  | RAPGEFL1 | GI_7705938-S  | 17 | 17 | 35701095 | 95760  | 6.7424  | 5.79617 | YRI |
| rs9892367  | RAPGEFL1 | GI_7705938-S  | 17 | 17 | 35716914 | 111579 | 6.4028  | 5.79617 | YRI |
| rs8065665  | RAPGEFL1 | GI_7705938-S  | 17 | 17 | 35735789 | 130454 | 8.8545  | 5.79617 | YRI |
| rs7218938  | RAPGEFL1 | GI_7705938-S  | 17 | 17 | 35755369 | 150034 | 8.8237  | 5.79617 | YRI |
| rs3744781  | MGC20781 | GI_34147471-S | 17 | 17 | 37235677 | 526    | 6.8404  | 5.79953 | YRI |
| rs9896766  | MGC20781 | GI_34147471-S | 17 | 17 | 37237170 | 2019   | 7.6789  | 5.79953 | YRI |
| rs1046404  | MGC20781 | GI_34147471-S | 17 | 17 | 37237334 | 2183   | 7.6789  | 5.79953 | YRI |
| rs4796713  | MGC20781 | GI_34147471-S | 17 | 17 | 37240887 | 5736   | 7.6789  | 5.79953 | YRI |
| rs4796715  | MGC20781 | GI_34147471-S | 17 | 17 | 37247297 | 12146  | 8.5027  | 5.79953 | YRI |
| rs1529933  | MGC20781 | GI_34147471-S | 17 | 17 | 37251667 | 16516  | 7.0032  | 5.79953 | YRI |
| rs3744782  | MGC20781 | GI_34147471-S | 17 | 17 | 37264505 | 29354  | 6.6545  | 5.79953 | YRI |
| rs9905601  | MGC20781 | GI_34147471-S | 17 | 17 | 37268737 | 33586  | 7.3715  | 5.79953 | YRI |
| rs9912300  | MGC20781 | GI_34147471-S | 17 | 17 | 37278790 | 43639  | 7.0032  | 5.79953 | YRI |
| rs3744779  | MGC20781 | GI_34147471-S | 17 | 17 | 37278979 | 43828  | 6.5256  | 5.79953 | YRI |
| rs8071753  | MGC20781 | GI_34147471-S | 17 | 17 | 37282067 | 46916  | 6.5256  | 5.79953 | YRI |
| rs8071234  | MGC20781 | GI_34147471-S | 17 | 17 | 37282094 | 46943  | 7.0032  | 5.79953 | YRI |
| rs1468270  | SNX11    | GI_23111027-I | 17 | 17 | 43480190 | 62906  | 8.2668  | 5.70209 | YRI |
| rs12936731 | SNX11    | GI_23111027-I | 17 | 17 | 43483358 | 59738  | 7.8547  | 5.70209 | YRI |
| rs9899275  | SNX11    | GI_23111027-I | 17 | 17 | 43484314 | 58782  | 7.7795  | 5.70209 | YRI |
| rs9899461  | SNX11    | GI_23111027-I | 17 | 17 | 43484352 | 58744  | 8.2668  | 5.70209 | YRI |
| rs7212202  | SNX11    | GI_23111027-I | 17 | 17 | 43487722 | 55374  | 8.2668  | 5.70209 | YRI |
| rs11079806 | SNX11    | GI_23111027-I | 17 | 17 | 43497679 | 45417  | 8.2668  | 5.70209 | YRI |
| rs2051821  | SNX11    | GI_23111027-I | 17 | 17 | 43498514 | 44582  | 8.2668  | 5.70209 | YRI |
| rs11651097 | SNX11    | GI_23111027-I | 17 | 17 | 43502038 | 41058  | 8.2668  | 5.70209 | YRI |
| rs6847     | SNX11    | GI_23111027-I | 17 | 17 | 43502806 | 40290  | 8.2668  | 5.70209 | YRI |
| rs7224014  | SNX11    | GI_23111027-I | 17 | 17 | 43505860 | 37236  | 8.2668  | 5.70209 | YRI |
| rs2240122  | SNX11    | GI_23111027-I | 17 | 17 | 43507558 | 35538  | 8.2668  | 5.70209 | YRI |
| rs7217496  | SNX11    | GI_23111027-I | 17 | 17 | 43509201 | 33895  | 8.1163  | 5.70209 | YRI |
| rs6504025  | SNX11    | GI_23111027-I | 17 | 17 | 43521072 | 22024  | 8.8896  | 5.70209 | YRI |
| rs7220520  | SNX11    | GI_23111027-I | 17 | 17 | 43522941 | 20155  | 8.2668  | 5.70209 | YRI |
| rs2109984  | SNX11    | GI_23111027-I | 17 | 17 | 43526098 | 16998  | 8.1471  | 5.70209 | YRI |
| rs11079808 | SNX11    | GI_23111027-I | 17 | 17 | 43535231 | 7865   | 8.2668  | 5.70209 | YRI |
| rs8077860  | SNX11    | GI_23111027-I | 17 | 17 | 43540334 | 2762   | 8.2668  | 5.70209 | YRI |
| rs8080662  | SNX11    | GI_23111027-I | 17 | 17 | 43545818 | 2722   | 8.2668  | 5.70209 | YRI |
| rs8066391  | SNX11    | GI_23111027-I | 17 | 17 | 43550295 | 7199   | 8.2668  | 5.70209 | YRI |
| rs1010228  | SNX11    | GI_23111027-I | 17 | 17 | 43555347 | 12251  | 8.2668  | 5.70209 | YRI |
| rs1452665  | SNX11    | GI_23111027-I | 17 | 17 | 43652150 | 109054 | 8.2668  | 5.70209 | YRI |
| rs11651212 | HOXB9    | GI_24797138-S | 17 | 17 | 44056140 | 2385   | 6.4282  | 5.67095 | YRI |
| rs7208074  | NDP52    | GI_33519473-S | 17 | 17 | 44249072 | 47951  | 8.3951  | 5.87844 | YRI |
| rs8076178  | NDP52    | GI_33519473-S | 17 | 17 | 44263279 | 33744  | 7.1855  | 5.87844 | YRI |
| rs12450440 | NDP52    | GI_33519473-S | 17 | 17 | 44266352 | 30671  | 9.1264  | 5.87844 | YRI |
| rs8080446  | NDP52    | GI_33519473-S | 17 | 17 | 44267435 | 29588  | 11.9315 | 5.87844 | YRI |
| rs8078984  | NDP52    | GI_33519473-S | 17 | 17 | 44267550 | 29473  | 11.9315 | 5.87844 | YRI |
| rs8078992  | NDP52    | GI_33519473-S | 17 | 17 | 44267572 | 29451  | 11.9315 | 5.87844 | YRI |
| rs3744604  | NDP52    | GI_33519473-S | 17 | 17 | 44280858 | 16165  | 11.9315 | 5.87844 | YRI |
| rs2303015  | NDP52    | GI_33519473-S | 17 | 17 | 44284907 | 12116  | 11.9315 | 5.87844 | YRI |
| rs11434    | NDP52    | GI_33519473-S | 17 | 17 | 44296244 | 779    | 11.9315 | 5.87844 | YRI |
| rs7222365  | NDP52    | GI_33519473-S | 17 | 17 | 44296816 | 207    | 11.9315 | 5.87844 | YRI |
| rs11654595 | NDP52    | GI_33519473-S | 17 | 17 | 44297999 | 976    | 10.7125 | 5.87844 | YRI |
| rs12450692 | NDP52    | GI_33519473-S | 17 | 17 | 44300502 | 3479   | 11.7559 | 5.87844 | YRI |
| rs12450563 | NDP52    | GI_33519473-S | 17 | 17 | 44300565 | 3542   | 9.9074  | 5.87844 | YRI |



|            |           |               |    |    |          |        |         |         |     |
|------------|-----------|---------------|----|----|----------|--------|---------|---------|-----|
| rs12453671 | NDP52     | GI_33519473-S | 17 | 17 | 44300832 | 3809   | 10.0386 | 5.87844 | YRI |
| rs12449856 | NDP52     | GI_33519473-S | 17 | 17 | 44301996 | 4973   | 9.9074  | 5.87844 | YRI |
| rs2411377  | NDP52     | GI_33519473-S | 17 | 17 | 44303217 | 6194   | 11.9315 | 5.87844 | YRI |
| rs8079874  | NDP52     | GI_33519473-S | 17 | 17 | 44305974 | 8951   | 12.137  | 5.87844 | YRI |
| rs2306002  | FLJ21347  | GI_31542722-S | 17 | 17 | 45972828 | 15339  | 8.3527  | 6.10352 | YRI |
| rs1122634  | FLJ21347  | GI_31542722-S | 17 | 17 | 45976364 | 11803  | 8.446   | 6.10352 | YRI |
| rs8076632  | FLJ21347  | GI_31542722-S | 17 | 17 | 45980927 | 7240   | 6.2466  | 6.10352 | YRI |
| rs9895182  | ABC1      | GI_38142463-S | 17 | 17 | 55506667 | 31216  | 7.0022  | 5.90314 | YRI |
| rs8066241  | ABC1      | GI_38142463-S | 17 | 17 | 55511931 | 36480  | 13.0946 | 5.90314 | YRI |
| rs10515177 | ABC1      | GI_38142463-S | 17 | 17 | 55522267 | 46816  | 13.9967 | 5.90314 | YRI |
| rs9303417  | ABC1      | GI_38142463-S | 17 | 17 | 55523104 | 47653  | 6.1605  | 5.90314 | YRI |
| rs8078068  | ABC1      | GI_38142463-S | 17 | 17 | 55523766 | 48315  | 13.9183 | 5.90314 | YRI |
| rs7223281  | ABC1      | GI_38142463-S | 17 | 17 | 55527229 | 51778  | 12.0707 | 5.90314 | YRI |
| rs7226234  | ABC1      | GI_38142463-S | 17 | 17 | 55531572 | 56121  | 11.9927 | 5.90314 | YRI |
| rs2058215  | FLJ46603  | GI_38348363-S | 17 | 17 | 72239677 | 52168  | 7.7834  | 6.17159 | YRI |
| rs237059   | FLJ46603  | GI_38348363-S | 17 | 17 | 72242438 | 54929  | 8.362   | 6.17159 | YRI |
| rs237054   | FLJ46603  | GI_38348363-S | 17 | 17 | 72245918 | 58409  | 8.362   | 6.17159 | YRI |
| rs237053   | FLJ46603  | GI_38348363-S | 17 | 17 | 72246193 | 58684  | 8.3102  | 6.17159 | YRI |
| rs2429452  | FLJ46603  | GI_38348363-S | 17 | 17 | 72256609 | 69100  | 6.3038  | 6.17159 | YRI |
| rs116719   | FLJ46603  | GI_38348363-S | 17 | 17 | 72261926 | 74417  | 6.7445  | 6.17159 | YRI |
| rs7211288  | raptor    | GI_22094986-S | 17 | 17 | 76544134 | 10281  | 7.4261  | 5.98628 | YRI |
| rs9906358  | OCSP      | GI_31543356-S | 17 | 17 | 77224886 | 1223   | 7.4615  | 6.13609 | YRI |
| rs7502869  | LOC339229 | GI_41150782-S | 17 | 17 | 77241821 | 974    | 6.9889  | 5.97004 | YRI |
| rs7215409  | CSNK1D    | GI_20544143-A | 17 | 17 | 77788066 | 7554   | 8.9357  | 5.72495 | YRI |
| rs1131633  | CSNK1D    | GI_20544143-A | 17 | 17 | 77790638 | 4982   | 9.477   | 5.72495 | YRI |
| rs1131633  | CSNK1D    | GI_20544144-I | 17 | 17 | 77790638 | 6541   | 6.5155  | 5.72495 | YRI |
| rs7213159  | CSNK1D    | GI_20544143-A | 17 | 17 | 77816337 | 20717  | 7.2073  | 5.72495 | YRI |
| rs4789773  | NARF      | GI_14165459-A | 17 | 17 | 77984973 | 54139  | 6.9654  | 6.47945 | YRI |
| rs8092760  | LOC400642 | GI_42661344-S | 18 | 18 | 5231500  | 4851   | 17.5232 | 6.39305 | YRI |
| rs8084872  | LOC400642 | GI_42661344-S | 18 | 18 | 5233567  | 2784   | 7.4739  | 6.39305 | YRI |
| rs11877479 | LOC400642 | GI_42661344-S | 18 | 18 | 5235228  | 1123   | 9.0282  | 6.39305 | YRI |
| rs11877315 | LOC400642 | GI_42661344-S | 18 | 18 | 5235247  | 1104   | 8.3354  | 6.39305 | YRI |
| rs17379984 | LOC400642 | GI_42661344-S | 18 | 18 | 5235824  | 527    | 9.0282  | 6.39305 | YRI |
| rs9948693  | LOC400642 | GI_42661344-S | 18 | 18 | 5237432  | 1081   | 8.0659  | 6.39305 | YRI |
| rs16955185 | RALBP1    | GI_21361362-S | 18 | 18 | 9524960  | 3045   | 7.2065  | 6.29247 | YRI |
| rs16955209 | RALBP1    | GI_21361362-S | 18 | 18 | 9528425  | 420    | 9.0173  | 6.29247 | YRI |
| rs16955215 | RALBP1    | GI_21361362-S | 18 | 18 | 9528483  | 478    | 9.0173  | 6.29247 | YRI |
| rs16955235 | RALBP1    | GI_21361362-S | 18 | 18 | 9528981  | 976    | 9.0173  | 6.29247 | YRI |
| rs7231567  | RALBP1    | GI_21361362-S | 18 | 18 | 9529544  | 1539   | 9.0173  | 6.29247 | YRI |
| rs16955256 | RALBP1    | GI_21361362-S | 18 | 18 | 9530042  | 2037   | 9.0173  | 6.29247 | YRI |
| rs16955261 | RALBP1    | GI_21361362-S | 18 | 18 | 9530388  | 2383   | 9.0173  | 6.29247 | YRI |
| rs1893126  | RAB31     | GI_33589860-S | 18 | 18 | 9702098  | 150233 | 6.8671  | 6.54642 | YRI |
| rs12457104 | SIAT8E    | GI_28373100-S | 18 | 18 | 42587877 | 74587  | 8.868   | 6.30321 | YRI |
| rs3809958  | SIAT8E    | GI_28373100-S | 18 | 18 | 42591684 | 78394  | 8.868   | 6.30321 | YRI |
| rs3897629  | SIAT8E    | GI_28373100-S | 18 | 18 | 42594084 | 80794  | 8.868   | 6.30321 | YRI |
| rs8085750  | SIAT8E    | GI_28373100-S | 18 | 18 | 42596223 | 82933  | 8.255   | 6.30321 | YRI |
| rs8087201  | SIAT8E    | GI_28373100-S | 18 | 18 | 42596473 | 83183  | 8.868   | 6.30321 | YRI |
| rs6567002  | MALT1     | GI_27886565-A | 18 | 18 | 54494262 | 73858  | 6.3397  | 6.28642 | YRI |
| rs4940736  | MALT1     | GI_27886565-A | 18 | 18 | 54496411 | 71709  | 6.3209  | 6.28642 | YRI |
| rs7227586  | MALT1     | GI_27886565-A | 18 | 18 | 54516958 | 51162  | 7.3782  | 6.28642 | YRI |
| rs4940742  | MALT1     | GI_27886565-A | 18 | 18 | 54517561 | 50559  | 6.3209  | 6.28642 | YRI |
| rs9961487  | MALT1     | GI_27886565-A | 18 | 18 | 54522612 | 45508  | 7.5279  | 6.28642 | YRI |
| rs4293479  | MALT1     | GI_27886565-A | 18 | 18 | 54527916 | 40204  | 6.4392  | 6.28642 | YRI |
| rs4293480  | MALT1     | GI_27886565-A | 18 | 18 | 54527980 | 40140  | 6.3209  | 6.28642 | YRI |
| rs9946840  | MALT1     | GI_27886565-A | 18 | 18 | 54530171 | 37949  | 6.3209  | 6.28642 | YRI |
| rs8099417  | MALT1     | GI_27886565-A | 18 | 18 | 54531072 | 37048  | 6.802   | 6.28642 | YRI |

|            |           |               |    |    |          |        |         |         |     |
|------------|-----------|---------------|----|----|----------|--------|---------|---------|-----|
| rs9966101  | MALT1     | GI_27886565-A | 18 | 18 | 54533928 | 34192  | 6.3209  | 6.28642 | YRI |
| rs9958802  | MALT1     | GI_27886565-A | 18 | 18 | 54546303 | 21817  | 6.3813  | 6.28642 | YRI |
| rs9952213  | MALT1     | GI_27886565-A | 18 | 18 | 54550359 | 17761  | 7.809   | 6.28642 | YRI |
| rs1015416  | SERPINB10 | GI_4826901-S  | 18 | 18 | 59720363 | 32829  | 6.8319  | 6.37043 | YRI |
| rs8090188  | SERPINB10 | GI_4826901-S  | 18 | 18 | 59744441 | 8751   | 6.8719  | 6.37043 | YRI |
| rs9945924  | LOC284293 | GI_27485378-S | 18 | 18 | 59771746 | 160    | 20.9357 | 6.72537 | YRI |
| rs8090046  | LOC284293 | GI_27485378-S | 18 | 18 | 59773066 | 1480   | 20.3613 | 6.72537 | YRI |
| rs8095151  | LOC284293 | GI_27485378-S | 18 | 18 | 59773196 | 1610   | 11.0171 | 6.72537 | YRI |
| rs9963550  | LOC284293 | GI_27485378-S | 18 | 18 | 59779238 | 7652   | 9.2427  | 6.72537 | YRI |
| rs9949621  | LOC284293 | GI_27485378-S | 18 | 18 | 59780377 | 8791   | 8.3285  | 6.72537 | YRI |
| rs9950903  | LOC284293 | GI_27485378-S | 18 | 18 | 59781783 | 10197  | 8.3285  | 6.72537 | YRI |
| rs8090586  | LOC284293 | GI_27485378-S | 18 | 18 | 59781864 | 10278  | 8.3285  | 6.72537 | YRI |
| rs1006755  | LOC284293 | GI_27485378-S | 18 | 18 | 59782026 | 10440  | 8.3285  | 6.72537 | YRI |
| rs1006754  | LOC284293 | GI_27485378-S | 18 | 18 | 59782427 | 10841  | 7.5159  | 6.72537 | YRI |
| rs2009989  | LOC284293 | GI_27485378-S | 18 | 18 | 59784224 | 12638  | 10.2397 | 6.72537 | YRI |
| rs10417907 | FLJ14009  | GI_13376098-S | 19 | 19 | 2928630  | 16436  | 6.0489  | 5.92551 | YRI |
| rs12459781 | MRPL54    | GI_27436907-S | 19 | 19 | 3713119  | 3187   | 6.7346  | 6.10154 | YRI |
| rs13960    | MRPL54    | GI_27436907-S | 19 | 19 | 3713698  | 2608   | 7.9494  | 6.10154 | YRI |
| rs2278438  | DAPK3     | GI_4557510-S  | 19 | 19 | 3915106  | 5361   | 8.2104  | 6.26379 | YRI |
| rs8113281  | DAPK3     | GI_4557510-S  | 19 | 19 | 3917132  | 7387   | 8.2104  | 6.26379 | YRI |
| rs350911   | MAP2K2    | GI_21614527-S | 19 | 19 | 4050187  | 8814   | 6.5081  | 5.92627 | YRI |
| rs2115475  | ZNF557    | GI_13236592-S | 19 | 19 | 7039333  | 5026   | 6.7545  | 6.04984 | YRI |
| rs2033482  | ZNF266    | GI_37622342-A | 19 | 19 | 9279184  | 105156 | 6.0476  | 5.9413  | YRI |
| rs11883244 | ZNF266    | GI_37622342-A | 19 | 19 | 9329222  | 55118  | 7.0475  | 5.9413  | YRI |
| rs7249948  | ZNF266    | GI_37622342-A | 19 | 19 | 9335688  | 48652  | 6.6291  | 5.9413  | YRI |
| rs11086019 | ZNF266    | GI_37622342-A | 19 | 19 | 9336416  | 47924  | 6.6327  | 5.9413  | YRI |
| rs13344979 | ZNF266    | GI_37622342-A | 19 | 19 | 9337553  | 46787  | 6.6327  | 5.9413  | YRI |
| rs10426170 | ZNF266    | GI_37622342-A | 19 | 19 | 9340577  | 43763  | 7.2233  | 5.9413  | YRI |
| rs10416984 | ZNF266    | GI_37622342-A | 19 | 19 | 9343310  | 41030  | 6.9436  | 5.9413  | YRI |
| rs8103099  | ZNF266    | GI_37622342-A | 19 | 19 | 9346229  | 38111  | 8.2417  | 5.9413  | YRI |
| rs1347166  | ZNF266    | GI_37622342-A | 19 | 19 | 9348808  | 35532  | 9.4273  | 5.9413  | YRI |
| rs10416662 | ZNF266    | GI_37622342-A | 19 | 19 | 9349178  | 35162  | 7.2189  | 5.9413  | YRI |
| rs2304110  | ZNF266    | GI_37622342-A | 19 | 19 | 9350132  | 34208  | 9.4273  | 5.9413  | YRI |
| rs3826783  | ZNF266    | GI_37622342-A | 19 | 19 | 9353141  | 31199  | 9.4273  | 5.9413  | YRI |
| rs2230752  | ZNF266    | GI_37622342-A | 19 | 19 | 9353370  | 30970  | 9.3422  | 5.9413  | YRI |
| rs2163809  | ZNF266    | GI_37622342-A | 19 | 19 | 9357994  | 26346  | 7.7684  | 5.9413  | YRI |
| rs8112842  | ZNF266    | GI_37622342-A | 19 | 19 | 9359315  | 25025  | 9.4273  | 5.9413  | YRI |
| rs7246082  | ZNF266    | GI_37622342-A | 19 | 19 | 9365006  | 19334  | 9.4273  | 5.9413  | YRI |
| rs7257650  | ZNF266    | GI_37622342-A | 19 | 19 | 9365101  | 19239  | 8.7039  | 5.9413  | YRI |
| rs2335532  | ZNF266    | GI_37622342-A | 19 | 19 | 9365598  | 18742  | 9.4273  | 5.9413  | YRI |
| rs2335938  | ZNF266    | GI_37622342-A | 19 | 19 | 9367269  | 17071  | 9.4273  | 5.9413  | YRI |
| rs12150994 | ZNF266    | GI_37622342-A | 19 | 19 | 9369228  | 15112  | 8.8176  | 5.9413  | YRI |
| rs4804436  | ZNF266    | GI_37622342-A | 19 | 19 | 9376200  | 8140   | 9.8387  | 5.9413  | YRI |
| rs11878970 | ZNF266    | GI_37622342-A | 19 | 19 | 9378537  | 5803   | 6.1362  | 5.9413  | YRI |
| rs8108167  | ZNF266    | GI_37622342-A | 19 | 19 | 9379331  | 5009   | 7.4108  | 5.9413  | YRI |
| rs6512108  | ZNF266    | GI_37622342-A | 19 | 19 | 9379670  | 4670   | 9.8387  | 5.9413  | YRI |
| rs8109962  | ZNF266    | GI_37622342-A | 19 | 19 | 9383388  | 952    | 8.992   | 5.9413  | YRI |
| rs8105020  | ZNF266    | GI_37622342-A | 19 | 19 | 9383477  | 863    | 8.992   | 5.9413  | YRI |
| rs6512110  | ZNF266    | GI_37622342-A | 19 | 19 | 9383724  | 616    | 8.992   | 5.9413  | YRI |
| rs7258150  | ZNF266    | GI_37622342-A | 19 | 19 | 9387017  | 2677   | 7.437   | 5.9413  | YRI |
| rs1978713  | ZNF266    | GI_37622342-A | 19 | 19 | 9390783  | 6443   | 8.992   | 5.9413  | YRI |
| rs1978711  | ZNF266    | GI_37622342-A | 19 | 19 | 9391081  | 6741   | 8.2414  | 5.9413  | YRI |
| rs11880207 | ZNF266    | GI_37622342-A | 19 | 19 | 9392693  | 8353   | 6.8269  | 5.9413  | YRI |
| rs6512121  | ZNF266    | GI_37622342-A | 19 | 19 | 9394805  | 10465  | 8.992   | 5.9413  | YRI |
| rs7254750  | ZNF266    | GI_37622342-A | 19 | 19 | 9395301  | 10961  | 7.7144  | 5.9413  | YRI |
| rs2335939  | ZNF266    | GI_37622342-A | 19 | 19 | 9395790  | 11450  | 7.7297  | 5.9413  | YRI |

|            |           |               |    |    |          |        |        |         |     |
|------------|-----------|---------------|----|----|----------|--------|--------|---------|-----|
| rs7258744  | ZNF266    | GI_37622342-A | 19 | 19 | 9395967  | 11627  | 7.3094 | 5.9413  | YRI |
| rs7246415  | ZNF266    | GI_37622342-A | 19 | 19 | 9395981  | 11641  | 7.7297 | 5.9413  | YRI |
| rs10411141 | ZNF266    | GI_37622342-A | 19 | 19 | 9397203  | 12863  | 7.713  | 5.9413  | YRI |
| rs10406056 | ZNF266    | GI_37622342-A | 19 | 19 | 9397418  | 13078  | 7.4011 | 5.9413  | YRI |
| rs7252370  | ZNF266    | GI_37622342-A | 19 | 19 | 9398191  | 13851  | 8.9209 | 5.9413  | YRI |
| rs8107606  | ZNF266    | GI_37622342-A | 19 | 19 | 9400522  | 16182  | 8.9209 | 5.9413  | YRI |
| rs9305082  | ZNF266    | GI_37622342-A | 19 | 19 | 9401524  | 17184  | 8.992  | 5.9413  | YRI |
| rs10404268 | ZNF266    | GI_37622342-A | 19 | 19 | 9402640  | 18300  | 8.9209 | 5.9413  | YRI |
| rs9676745  | ZNF266    | GI_37622342-A | 19 | 19 | 9403342  | 19002  | 8.992  | 5.9413  | YRI |
| rs10409256 | ZNF266    | GI_37622342-A | 19 | 19 | 9404830  | 20490  | 9.0788 | 5.9413  | YRI |
| rs2241357  | PRKCL1    | GI_42476156-S | 19 | 19 | 14451919 | 9297   | 6.8687 | 6.25621 | YRI |
| rs7255372  | LOC199777 | GI_21699081-S | 19 | 19 | 20580887 | 39191  | 5.8134 | 5.74631 | YRI |
| rs8100147  | LOC199777 | GI_21699081-S | 19 | 19 | 20613255 | 6823   | 7.8188 | 5.74631 | YRI |
| rs10413287 | LOC199777 | GI_21699081-S | 19 | 19 | 20636232 | 16154  | 7.0026 | 5.74631 | YRI |
| rs10413663 | LOC199777 | GI_21699081-S | 19 | 19 | 20636317 | 16239  | 6.8619 | 5.74631 | YRI |
| rs8108244  | LOC199777 | GI_21699081-S | 19 | 19 | 20654590 | 34512  | 6.1205 | 5.74631 | YRI |
| rs2115097  | LOC199777 | GI_21699081-S | 19 | 19 | 20682138 | 62060  | 8.029  | 5.74631 | YRI |
| rs10422476 | LOC199777 | GI_21699081-S | 19 | 19 | 20690272 | 70194  | 6.4128 | 5.74631 | YRI |
| rs10454111 | ZNF85     | GI_4508038-S  | 19 | 19 | 20904788 | 20413  | 8.0244 | 5.86349 | YRI |
| rs11667715 | ZNF85     | GI_4508038-S  | 19 | 19 | 20907506 | 17695  | 7.2862 | 5.86349 | YRI |
| rs11669193 | ZNF85     | GI_4508038-S  | 19 | 19 | 20917241 | 7960   | 8.0244 | 5.86349 | YRI |
| rs11085409 | ZNF85     | GI_4508038-S  | 19 | 19 | 20921070 | 4131   | 8.0244 | 5.86349 | YRI |
| rs10454112 | ZNF85     | GI_4508038-S  | 19 | 19 | 20922094 | 3107   | 8.0244 | 5.86349 | YRI |
| rs10454115 | ZNF85     | GI_4508038-S  | 19 | 19 | 20922109 | 3092   | 8.0187 | 5.86349 | YRI |
| rs17679995 | ZNF85     | GI_4508038-S  | 19 | 19 | 20922587 | 2614   | 7.2979 | 5.86349 | YRI |
| rs11665978 | ZNF85     | GI_4508038-S  | 19 | 19 | 20923710 | 1491   | 8.0244 | 5.86349 | YRI |
| rs11672610 | ZNF85     | GI_4508038-S  | 19 | 19 | 20926103 | 902    | 8.0244 | 5.86349 | YRI |
| rs11669114 | ZNF85     | GI_4508038-S  | 19 | 19 | 20926209 | 1008   | 8.0244 | 5.86349 | YRI |
| rs17618121 | ZNF85     | GI_4508038-S  | 19 | 19 | 20928636 | 3435   | 5.9853 | 5.86349 | YRI |
| rs17618139 | ZNF85     | GI_4508038-S  | 19 | 19 | 20929176 | 3975   | 8.0244 | 5.86349 | YRI |
| rs17680052 | ZNF85     | GI_4508038-S  | 19 | 19 | 20929868 | 4667   | 6.2549 | 5.86349 | YRI |
| rs2042268  | ZNF85     | GI_4508038-S  | 19 | 19 | 20937234 | 12033  | 6.8901 | 5.86349 | YRI |
| rs2161464  | ZNF85     | GI_4508038-S  | 19 | 19 | 20937796 | 12595  | 6.8901 | 5.86349 | YRI |
| rs1004397  | ZNF85     | GI_4508038-S  | 19 | 19 | 20938183 | 12982  | 6.833  | 5.86349 | YRI |
| rs4513231  | ZNF85     | GI_4508038-S  | 19 | 19 | 20939522 | 14321  | 6.2237 | 5.86349 | YRI |
| rs11085419 | ZNF85     | GI_4508038-S  | 19 | 19 | 20940179 | 14978  | 5.9071 | 5.86349 | YRI |
| rs7252759  | ZNF493    | GI_40255231-S | 19 | 19 | 21243405 | 157349 | 7.2844 | 5.75576 | YRI |
| rs2061915  | ZNF493    | GI_40255231-S | 19 | 19 | 21250873 | 149881 | 7.9219 | 5.75576 | YRI |
| rs279797   | ZNF493    | GI_40255231-S | 19 | 19 | 21254099 | 146655 | 7.0204 | 5.75576 | YRI |
| rs279813   | ZNF493    | GI_40255231-S | 19 | 19 | 21260156 | 140598 | 7.8624 | 5.75576 | YRI |
| rs11085441 | ZNF493    | GI_40255231-S | 19 | 19 | 21265577 | 135177 | 7.1034 | 5.75576 | YRI |
| rs8110967  | ZNF493    | GI_40255231-S | 19 | 19 | 21332527 | 68227  | 7.7662 | 5.75576 | YRI |
| rs2012013  | ZNF493    | GI_40255231-S | 19 | 19 | 21333646 | 67108  | 7.5988 | 5.75576 | YRI |
| rs12975081 | ZNF493    | GI_40255231-S | 19 | 19 | 21336082 | 64672  | 7.7662 | 5.75576 | YRI |
| rs12981735 | ZNF493    | GI_40255231-S | 19 | 19 | 21336306 | 64448  | 7.3685 | 5.75576 | YRI |
| rs12981564 | ZNF493    | GI_40255231-S | 19 | 19 | 21336354 | 64400  | 7.7662 | 5.75576 | YRI |
| rs12982420 | ZNF493    | GI_40255231-S | 19 | 19 | 21336411 | 64343  | 7.7662 | 5.75576 | YRI |
| rs12982282 | ZNF493    | GI_40255231-S | 19 | 19 | 21336554 | 64200  | 7.5414 | 5.75576 | YRI |
| rs7508671  | ZNF493    | GI_40255231-S | 19 | 19 | 21338702 | 62052  | 6.9296 | 5.75576 | YRI |
| rs4315457  | ZNF493    | GI_40255231-S | 19 | 19 | 21338863 | 61891  | 7.7662 | 5.75576 | YRI |
| rs8103325  | ZNF493    | GI_40255231-S | 19 | 19 | 21340051 | 60703  | 7.0075 | 5.75576 | YRI |
| rs8103459  | ZNF493    | GI_40255231-S | 19 | 19 | 21340166 | 60588  | 6.1079 | 5.75576 | YRI |
| rs8099940  | ZNF493    | GI_40255231-S | 19 | 19 | 21345938 | 54816  | 7.2045 | 5.75576 | YRI |
| rs7249636  | ZNF493    | GI_40255231-S | 19 | 19 | 21348594 | 52160  | 5.9098 | 5.75576 | YRI |
| rs2088762  | ZNF493    | GI_40255231-S | 19 | 19 | 21349675 | 51079  | 6.4099 | 5.75576 | YRI |
| rs11085447 | ZNF493    | GI_40255231-S | 19 | 19 | 21360939 | 39815  | 7.5917 | 5.75576 | YRI |

|            |          |               |    |    |          |        |         |         |     |
|------------|----------|---------------|----|----|----------|--------|---------|---------|-----|
| rs1976384  | ZNF493   | GI_40255231-S | 19 | 19 | 21363458 | 37296  | 5.9098  | 5.75576 | YRI |
| rs7257857  | ZNF493   | GI_40255231-S | 19 | 19 | 21371378 | 29376  | 7.8921  | 5.75576 | YRI |
| rs7249412  | ZNF493   | GI_40255231-S | 19 | 19 | 21378637 | 22117  | 7.8921  | 5.75576 | YRI |
| rs1055753  | ZNF493   | GI_40255231-S | 19 | 19 | 21380532 | 20222  | 7.4171  | 5.75576 | YRI |
| rs6511239  | ZNF493   | GI_40255231-S | 19 | 19 | 21380966 | 19788  | 7.9267  | 5.75576 | YRI |
| rs11667770 | ZNF493   | GI_40255231-S | 19 | 19 | 21386398 | 14356  | 6.3601  | 5.75576 | YRI |
| rs7259311  | ZNF493   | GI_40255231-S | 19 | 19 | 21390002 | 10752  | 7.8921  | 5.75576 | YRI |
| rs8107938  | ZNF493   | GI_40255231-S | 19 | 19 | 21405676 | 4922   | 5.904   | 5.75576 | YRI |
| rs1012040  | ZNF493   | GI_40255231-S | 19 | 19 | 21464254 | 63500  | 6.5072  | 5.75576 | YRI |
| rs2133820  | ZNF493   | GI_40255231-S | 19 | 19 | 21465722 | 64968  | 7.0607  | 5.75576 | YRI |
| rs2650791  | ZNF493   | GI_40255231-S | 19 | 19 | 21465922 | 65168  | 6.0762  | 5.75576 | YRI |
| rs2562448  | ZNF493   | GI_40255231-S | 19 | 19 | 21466754 | 66000  | 6.0226  | 5.75576 | YRI |
| rs2246914  | ZNF493   | GI_40255231-S | 19 | 19 | 21466802 | 66048  | 6.0172  | 5.75576 | YRI |
| rs1500401  | ZNF493   | GI_40255231-S | 19 | 19 | 21470387 | 69633  | 5.879   | 5.75576 | YRI |
| rs8100318  | ZNF493   | GI_40255231-S | 19 | 19 | 21481849 | 81095  | 6.8891  | 5.75576 | YRI |
| rs2062564  | ZNF493   | GI_40255231-S | 19 | 19 | 21483239 | 82485  | 6.9389  | 5.75576 | YRI |
| rs1984771  | ZNF493   | GI_40255231-S | 19 | 19 | 21483637 | 82883  | 6.9564  | 5.75576 | YRI |
| rs1520071  | ZNF493   | GI_40255231-S | 19 | 19 | 21493880 | 93126  | 5.8283  | 5.75576 | YRI |
| rs2650757  | ZNF493   | GI_40255231-S | 19 | 19 | 21495385 | 94631  | 7.0607  | 5.75576 | YRI |
| rs2681365  | ZNF493   | GI_40255231-S | 19 | 19 | 21495804 | 95050  | 6.0172  | 5.75576 | YRI |
| rs2681366  | ZNF493   | GI_40255231-S | 19 | 19 | 21495943 | 95189  | 7.2422  | 5.75576 | YRI |
| rs2681368  | ZNF493   | GI_40255231-S | 19 | 19 | 21496004 | 95250  | 6.0172  | 5.75576 | YRI |
| rs8110814  | ZNF493   | GI_40255231-S | 19 | 19 | 21496685 | 95931  | 7.3821  | 5.75576 | YRI |
| rs1607664  | ZNF493   | GI_40255231-S | 19 | 19 | 21497820 | 97066  | 7.0607  | 5.75576 | YRI |
| rs2681371  | ZNF493   | GI_40255231-S | 19 | 19 | 21499568 | 98814  | 5.8847  | 5.75576 | YRI |
| rs2562470  | ZNF493   | GI_40255231-S | 19 | 19 | 21506996 | 106242 | 7.0607  | 5.75576 | YRI |
| rs10406824 | ZNF493   | GI_40255231-S | 19 | 19 | 21513329 | 112575 | 6.9389  | 5.75576 | YRI |
| rs2562399  | ZNF493   | GI_40255231-S | 19 | 19 | 21514674 | 113920 | 7.0607  | 5.75576 | YRI |
| rs2681384  | ZNF493   | GI_40255231-S | 19 | 19 | 21517965 | 117211 | 6.0172  | 5.75576 | YRI |
| rs12984226 | ZNF257   | GI_15627000-S | 19 | 19 | 21977650 | 86624  | 6.3017  | 5.85539 | YRI |
| rs7248488  | ZNF257   | GI_15627000-S | 19 | 19 | 21980549 | 83725  | 6.1582  | 5.85539 | YRI |
| rs1628959  | FLJ32191 | GI_34303923-S | 19 | 19 | 42182216 | 130019 | 5.757   | 5.74432 | YRI |
| rs2304115  | MRPS12   | GI_11056055-I | 19 | 19 | 44113544 | 169    | 12.1451 | 5.92413 | YRI |
| rs16972885 | MRPS12   | GI_11056055-I | 19 | 19 | 44113591 | 122    | 13.8753 | 5.92413 | YRI |
| rs2304116  | MRPS12   | GI_11056055-I | 19 | 19 | 44113660 | 53     | 12.3446 | 5.92413 | YRI |
| rs2070250  | MRPS12   | GI_11056055-I | 19 | 19 | 44113768 | 55     | 12.3446 | 5.92413 | YRI |
| rs6508826  | MRPS12   | GI_11056055-I | 19 | 19 | 44117562 | 3849   | 10.9474 | 5.92413 | YRI |
| rs17626    | RPS16    | GI_34335151-S | 19 | 19 | 44618361 | 51     | 7.1146  | 6.01889 | YRI |
| rs3745936  | R29124_1 | GI_16117774-S | 19 | 19 | 46784655 | 7052   | 7.8024  | 5.78882 | YRI |
| rs10424030 | FLJ10781 | GI_39780596-S | 19 | 19 | 51655667 | 6101   | 6.5224  | 5.65289 | YRI |
| rs8107491  | FLJ10781 | GI_39780596-S | 19 | 19 | 51667007 | 5239   | 7.0362  | 5.65289 | YRI |
| rs11878999 | PRRG2    | GI_4506136-S  | 19 | 19 | 54809873 | 23894  | 6.4078  | 6.15468 | YRI |
| rs722121   | ZFP100   | GI_27485310-S | 19 | 19 | 55171976 | 71648  | 12.491  | 5.84343 | YRI |
| rs722121   | VRK3     | GI_31982928-S | 19 | 19 | 55171976 | 331    | 7.2735  | 5.99008 | YRI |
| rs16981592 | ZFP100   | GI_27485310-S | 19 | 19 | 55172521 | 71103  | 12.491  | 5.84343 | YRI |
| rs16981592 | VRK3     | GI_31982928-S | 19 | 19 | 55172521 | 876    | 7.2735  | 5.99008 | YRI |
| rs16981594 | ZFP100   | GI_27485310-S | 19 | 19 | 55172579 | 71045  | 11.7534 | 5.84343 | YRI |
| rs16981594 | VRK3     | GI_31982928-S | 19 | 19 | 55172579 | 934    | 7.1845  | 5.99008 | YRI |
| rs10416166 | ZFP100   | GI_27485310-S | 19 | 19 | 55172966 | 70658  | 10.6665 | 5.84343 | YRI |
| rs10416166 | VRK3     | GI_31982928-S | 19 | 19 | 55172966 | 1321   | 7.426   | 5.99008 | YRI |
| rs205338   | ZFP100   | GI_27485310-S | 19 | 19 | 55173096 | 70528  | 11.9335 | 5.84343 | YRI |
| rs205338   | VRK3     | GI_31982928-S | 19 | 19 | 55173096 | 1451   | 6.96    | 5.99008 | YRI |
| rs10416566 | ZFP100   | GI_27485310-S | 19 | 19 | 55173132 | 70492  | 11.9335 | 5.84343 | YRI |
| rs10416566 | VRK3     | GI_31982928-S | 19 | 19 | 55173132 | 1487   | 7.0192  | 5.99008 | YRI |
| rs755969   | ZFP100   | GI_27485310-S | 19 | 19 | 55173739 | 69885  | 12.491  | 5.84343 | YRI |
| rs755969   | VRK3     | GI_31982928-S | 19 | 19 | 55173739 | 2094   | 7.2735  | 5.99008 | YRI |

|            |        |               |    |    |          |       |         |         |     |
|------------|--------|---------------|----|----|----------|-------|---------|---------|-----|
| rs16981611 | ZFP100 | GI_27485310-S | 19 | 19 | 55174292 | 69332 | 11.8645 | 5.84343 | YRI |
| rs16981611 | VRK3   | GI_31982928-S | 19 | 19 | 55174292 | 2647  | 7.0856  | 5.99008 | YRI |
| rs16981613 | ZFP100 | GI_27485310-S | 19 | 19 | 55175482 | 68142 | 12.491  | 5.84343 | YRI |
| rs16981613 | VRK3   | GI_31982928-S | 19 | 19 | 55175482 | 3837  | 7.2735  | 5.99008 | YRI |
| rs16981615 | ZFP100 | GI_27485310-S | 19 | 19 | 55175864 | 67760 | 11.8645 | 5.84343 | YRI |
| rs16981615 | VRK3   | GI_31982928-S | 19 | 19 | 55175864 | 4219  | 7.0856  | 5.99008 | YRI |
| rs16981620 | ZFP100 | GI_27485310-S | 19 | 19 | 55176159 | 67465 | 7.7727  | 5.84343 | YRI |
| rs16981620 | VRK3   | GI_31982928-S | 19 | 19 | 55176159 | 4514  | 6.3869  | 5.99008 | YRI |
| rs12165126 | ZFP100 | GI_27485310-S | 19 | 19 | 55179244 | 64380 | 9.2068  | 5.84343 | YRI |
| rs13382171 | ZFP100 | GI_27485310-S | 19 | 19 | 55179633 | 63991 | 12.491  | 5.84343 | YRI |
| rs13382171 | VRK3   | GI_31982928-S | 19 | 19 | 55179633 | 7988  | 7.2735  | 5.99008 | YRI |
| rs10409147 | ZFP100 | GI_27485310-S | 19 | 19 | 55181376 | 62248 | 12.491  | 5.84343 | YRI |
| rs10409147 | VRK3   | GI_31982928-S | 19 | 19 | 55181376 | 9731  | 7.2735  | 5.99008 | YRI |
| rs11882374 | ZFP100 | GI_27485310-S | 19 | 19 | 55181637 | 61987 | 12.3    | 5.84343 | YRI |
| rs11882374 | VRK3   | GI_31982928-S | 19 | 19 | 55181637 | 9992  | 7.2236  | 5.99008 | YRI |
| rs11879527 | ZFP100 | GI_27485310-S | 19 | 19 | 55181773 | 61851 | 12.3025 | 5.84343 | YRI |
| rs11879527 | VRK3   | GI_31982928-S | 19 | 19 | 55181773 | 10128 | 7.033   | 5.99008 | YRI |
| rs11879568 | ZFP100 | GI_27485310-S | 19 | 19 | 55181887 | 61737 | 12.491  | 5.84343 | YRI |
| rs11879568 | VRK3   | GI_31982928-S | 19 | 19 | 55181887 | 10242 | 7.2735  | 5.99008 | YRI |
| rs11879639 | ZFP100 | GI_27485310-S | 19 | 19 | 55182302 | 61322 | 11.6823 | 5.84343 | YRI |
| rs11879639 | VRK3   | GI_31982928-S | 19 | 19 | 55182302 | 10657 | 7.0856  | 5.99008 | YRI |
| rs11879661 | ZFP100 | GI_27485310-S | 19 | 19 | 55182351 | 61273 | 12.3956 | 5.84343 | YRI |
| rs11879661 | VRK3   | GI_31982928-S | 19 | 19 | 55182351 | 10706 | 7.033   | 5.99008 | YRI |
| rs11879641 | ZFP100 | GI_27485310-S | 19 | 19 | 55182382 | 61242 | 12.4897 | 5.84343 | YRI |
| rs11879641 | VRK3   | GI_31982928-S | 19 | 19 | 55182382 | 10737 | 7.2068  | 5.99008 | YRI |
| rs7254850  | ZFP100 | GI_27485310-S | 19 | 19 | 55183842 | 59782 | 11.9487 | 5.84343 | YRI |
| rs7254850  | VRK3   | GI_31982928-S | 19 | 19 | 55183842 | 12197 | 6.4233  | 5.99008 | YRI |
| rs7254964  | ZFP100 | GI_27485310-S | 19 | 19 | 55183932 | 59692 | 11.3097 | 5.84343 | YRI |
| rs7254964  | VRK3   | GI_31982928-S | 19 | 19 | 55183932 | 12287 | 6.8914  | 5.99008 | YRI |
| rs16981637 | ZFP100 | GI_27485310-S | 19 | 19 | 55184084 | 59540 | 10.2539 | 5.84343 | YRI |
| rs16981637 | VRK3   | GI_31982928-S | 19 | 19 | 55184084 | 12439 | 7.5957  | 5.99008 | YRI |
| rs10418911 | ZFP100 | GI_27485310-S | 19 | 19 | 55184563 | 59061 | 8.3346  | 5.84343 | YRI |
| rs10418911 | VRK3   | GI_31982928-S | 19 | 19 | 55184563 | 12918 | 6.4082  | 5.99008 | YRI |
| rs10424249 | ZFP100 | GI_27485310-S | 19 | 19 | 55184625 | 58999 | 9.5409  | 5.84343 | YRI |
| rs10424249 | VRK3   | GI_31982928-S | 19 | 19 | 55184625 | 12980 | 7.1677  | 5.99008 | YRI |
| rs8102461  | ZFP100 | GI_27485310-S | 19 | 19 | 55185804 | 57820 | 9.9421  | 5.84343 | YRI |
| rs8102461  | VRK3   | GI_31982928-S | 19 | 19 | 55185804 | 14159 | 6.2448  | 5.99008 | YRI |
| rs10406726 | ZFP100 | GI_27485310-S | 19 | 19 | 55186297 | 57327 | 11.8464 | 5.84343 | YRI |
| rs10406726 | VRK3   | GI_31982928-S | 19 | 19 | 55186297 | 14652 | 6.73    | 5.99008 | YRI |
| rs10407109 | ZFP100 | GI_27485310-S | 19 | 19 | 55186375 | 57249 | 9.7104  | 5.84343 | YRI |
| rs10407109 | VRK3   | GI_31982928-S | 19 | 19 | 55186375 | 14730 | 7.2956  | 5.99008 | YRI |
| rs10423200 | ZFP100 | GI_27485310-S | 19 | 19 | 55188256 | 55368 | 12.491  | 5.84343 | YRI |
| rs10423200 | VRK3   | GI_31982928-S | 19 | 19 | 55188256 | 16611 | 7.2735  | 5.99008 | YRI |
| rs2304113  | ZFP100 | GI_27485310-S | 19 | 19 | 55188298 | 55326 | 6.0072  | 5.84343 | YRI |
| rs9304691  | ZFP100 | GI_27485310-S | 19 | 19 | 55188434 | 55190 | 8.9651  | 5.84343 | YRI |
| rs9304695  | ZFP100 | GI_27485310-S | 19 | 19 | 55188896 | 54728 | 10.1609 | 5.84343 | YRI |
| rs9304695  | VRK3   | GI_31982928-S | 19 | 19 | 55188896 | 17251 | 6.1703  | 5.99008 | YRI |
| rs10409085 | ZFP100 | GI_27485310-S | 19 | 19 | 55189799 | 53825 | 11.6823 | 5.84343 | YRI |
| rs10409085 | VRK3   | GI_31982928-S | 19 | 19 | 55189799 | 18154 | 7.0856  | 5.99008 | YRI |
| rs10411020 | ZFP100 | GI_27485310-S | 19 | 19 | 55189849 | 53775 | 11.9335 | 5.84343 | YRI |
| rs10411020 | VRK3   | GI_31982928-S | 19 | 19 | 55189849 | 18204 | 7.0192  | 5.99008 | YRI |
| rs10409482 | ZFP100 | GI_27485310-S | 19 | 19 | 55189890 | 53734 | 13.8835 | 5.84343 | YRI |
| rs10409482 | VRK3   | GI_31982928-S | 19 | 19 | 55189890 | 18245 | 7.4246  | 5.99008 | YRI |
| rs10410075 | ZFP100 | GI_27485310-S | 19 | 19 | 55189950 | 53674 | 12.491  | 5.84343 | YRI |
| rs10410075 | VRK3   | GI_31982928-S | 19 | 19 | 55189950 | 18305 | 7.2735  | 5.99008 | YRI |
| rs9304696  | ZFP100 | GI_27485310-S | 19 | 19 | 55190140 | 53484 | 12.491  | 5.84343 | YRI |

|            |        |               |    |    |          |       |         |         |     |
|------------|--------|---------------|----|----|----------|-------|---------|---------|-----|
| rs9304696  | VRK3   | GI_31982928-S | 19 | 19 | 55190140 | 18495 | 7.2735  | 5.99008 | YRI |
| rs9304697  | ZFP100 | GI_27485310-S | 19 | 19 | 55190200 | 53424 | 12.491  | 5.84343 | YRI |
| rs9304697  | VRK3   | GI_31982928-S | 19 | 19 | 55190200 | 18555 | 7.2735  | 5.99008 | YRI |
| rs9304700  | ZFP100 | GI_27485310-S | 19 | 19 | 55190447 | 53177 | 12.491  | 5.84343 | YRI |
| rs9304700  | VRK3   | GI_31982928-S | 19 | 19 | 55190447 | 18802 | 7.2735  | 5.99008 | YRI |
| rs11882497 | ZFP100 | GI_27485310-S | 19 | 19 | 55191520 | 52104 | 8.6353  | 5.84343 | YRI |
| rs11879616 | ZFP100 | GI_27485310-S | 19 | 19 | 55195868 | 47756 | 12.491  | 5.84343 | YRI |
| rs11879616 | VRK3   | GI_31982928-S | 19 | 19 | 55195868 | 24223 | 7.2735  | 5.99008 | YRI |
| rs11879620 | ZFP100 | GI_27485310-S | 19 | 19 | 55195909 | 47715 | 12.491  | 5.84343 | YRI |
| rs11879620 | VRK3   | GI_31982928-S | 19 | 19 | 55195909 | 24264 | 7.2735  | 5.99008 | YRI |
| rs3786675  | ZFP100 | GI_27485310-S | 19 | 19 | 55198178 | 45446 | 12.491  | 5.84343 | YRI |
| rs3786675  | VRK3   | GI_31982928-S | 19 | 19 | 55198178 | 26533 | 7.2735  | 5.99008 | YRI |
| rs11547883 | ZFP100 | GI_27485310-S | 19 | 19 | 55202674 | 40950 | 12.5858 | 5.84343 | YRI |
| rs11547883 | VRK3   | GI_31982928-S | 19 | 19 | 55202674 | 31029 | 7.0107  | 5.99008 | YRI |
| rs16981659 | ZFP100 | GI_27485310-S | 19 | 19 | 55204128 | 39496 | 12.491  | 5.84343 | YRI |
| rs16981659 | VRK3   | GI_31982928-S | 19 | 19 | 55204128 | 32483 | 7.2735  | 5.99008 | YRI |
| rs10416851 | ZFP100 | GI_27485310-S | 19 | 19 | 55205377 | 38247 | 12.4874 | 5.84343 | YRI |
| rs10416851 | VRK3   | GI_31982928-S | 19 | 19 | 55205377 | 33732 | 7.8738  | 5.99008 | YRI |
| rs10417044 | ZFP100 | GI_27485310-S | 19 | 19 | 55205432 | 38192 | 10.4801 | 5.84343 | YRI |
| rs10417044 | VRK3   | GI_31982928-S | 19 | 19 | 55205432 | 33787 | 6.3671  | 5.99008 | YRI |
| rs10418769 | ZFP100 | GI_27485310-S | 19 | 19 | 55205447 | 38177 | 12.491  | 5.84343 | YRI |
| rs10418769 | VRK3   | GI_31982928-S | 19 | 19 | 55205447 | 33802 | 7.2735  | 5.99008 | YRI |
| rs10422826 | ZFP100 | GI_27485310-S | 19 | 19 | 55205694 | 37930 | 12.491  | 5.84343 | YRI |
| rs10422826 | VRK3   | GI_31982928-S | 19 | 19 | 55205694 | 34049 | 7.2735  | 5.99008 | YRI |
| rs10407227 | ZFP100 | GI_27485310-S | 19 | 19 | 55207405 | 36219 | 12.491  | 5.84343 | YRI |
| rs10407227 | VRK3   | GI_31982928-S | 19 | 19 | 55207405 | 35760 | 7.2735  | 5.99008 | YRI |
| rs10407701 | ZFP100 | GI_27485310-S | 19 | 19 | 55207616 | 36008 | 12.7775 | 5.84343 | YRI |
| rs10407701 | VRK3   | GI_31982928-S | 19 | 19 | 55207616 | 35971 | 7.2582  | 5.99008 | YRI |
| rs10426566 | ZFP100 | GI_27485310-S | 19 | 19 | 55209711 | 33913 | 8.3846  | 5.84343 | YRI |
| rs10416786 | ZFP100 | GI_27485310-S | 19 | 19 | 55212600 | 31024 | 10.1584 | 5.84343 | YRI |
| rs10416786 | VRK3   | GI_31982928-S | 19 | 19 | 55212600 | 40955 | 7.3125  | 5.99008 | YRI |
| rs10423869 | ZFP100 | GI_27485310-S | 19 | 19 | 55212695 | 30929 | 10.8233 | 5.84343 | YRI |
| rs10423869 | VRK3   | GI_31982928-S | 19 | 19 | 55212695 | 41050 | 6.4659  | 5.99008 | YRI |
| rs10424288 | ZFP100 | GI_27485310-S | 19 | 19 | 55212873 | 30751 | 8.5941  | 5.84343 | YRI |
| rs10424288 | VRK3   | GI_31982928-S | 19 | 19 | 55212873 | 41228 | 6.7306  | 5.99008 | YRI |
| rs16981691 | ZFP100 | GI_27485310-S | 19 | 19 | 55213472 | 30152 | 12.491  | 5.84343 | YRI |
| rs16981691 | VRK3   | GI_31982928-S | 19 | 19 | 55213472 | 41827 | 7.2735  | 5.99008 | YRI |
| rs10500302 | ZFP100 | GI_27485310-S | 19 | 19 | 55215534 | 28090 | 12.1985 | 5.84343 | YRI |
| rs10500302 | VRK3   | GI_31982928-S | 19 | 19 | 55215534 | 43889 | 7.2191  | 5.99008 | YRI |
| rs10414564 | ZFP100 | GI_27485310-S | 19 | 19 | 55217452 | 26172 | 12.491  | 5.84343 | YRI |
| rs10414564 | VRK3   | GI_31982928-S | 19 | 19 | 55217452 | 45807 | 7.2735  | 5.99008 | YRI |
| rs10416182 | ZFP100 | GI_27485310-S | 19 | 19 | 55217510 | 26114 | 12.491  | 5.84343 | YRI |
| rs10416182 | VRK3   | GI_31982928-S | 19 | 19 | 55217510 | 45865 | 7.2735  | 5.99008 | YRI |
| rs11880872 | ZFP100 | GI_27485310-S | 19 | 19 | 55218855 | 24769 | 12.491  | 5.84343 | YRI |
| rs11880872 | VRK3   | GI_31982928-S | 19 | 19 | 55218855 | 47210 | 7.2735  | 5.99008 | YRI |
| rs10409358 | ZFP100 | GI_27485310-S | 19 | 19 | 55219725 | 23899 | 12.491  | 5.84343 | YRI |
| rs10409358 | VRK3   | GI_31982928-S | 19 | 19 | 55219725 | 48080 | 7.2735  | 5.99008 | YRI |
| rs10410818 | ZFP100 | GI_27485310-S | 19 | 19 | 55219874 | 23750 | 11.7548 | 5.84343 | YRI |
| rs10410818 | VRK3   | GI_31982928-S | 19 | 19 | 55219874 | 48229 | 6.8387  | 5.99008 | YRI |
| rs10411239 | ZFP100 | GI_27485310-S | 19 | 19 | 55220045 | 23579 | 12.0324 | 5.84343 | YRI |
| rs10411239 | VRK3   | GI_31982928-S | 19 | 19 | 55220045 | 48400 | 6.9405  | 5.99008 | YRI |
| rs10410111 | ZFP100 | GI_27485310-S | 19 | 19 | 55220096 | 23528 | 12.491  | 5.84343 | YRI |
| rs10410111 | VRK3   | GI_31982928-S | 19 | 19 | 55220096 | 48451 | 7.2735  | 5.99008 | YRI |
| rs10410420 | ZFP100 | GI_27485310-S | 19 | 19 | 55220406 | 23218 | 12.491  | 5.84343 | YRI |
| rs10410420 | VRK3   | GI_31982928-S | 19 | 19 | 55220406 | 48761 | 7.2735  | 5.99008 | YRI |
| rs10412158 | ZFP100 | GI_27485310-S | 19 | 19 | 55220508 | 23116 | 12.5847 | 5.84343 | YRI |

|            |        |               |    |    |          |       |         |         |     |
|------------|--------|---------------|----|----|----------|-------|---------|---------|-----|
| rs10412158 | VRK3   | GI_31982928-S | 19 | 19 | 55220508 | 48863 | 7.033   | 5.99008 | YRI |
| rs10425942 | ZFP100 | GI_27485310-S | 19 | 19 | 55222101 | 21523 | 12.491  | 5.84343 | YRI |
| rs10425942 | VRK3   | GI_31982928-S | 19 | 19 | 55222101 | 50456 | 7.2735  | 5.99008 | YRI |
| rs10425282 | ZFP100 | GI_27485310-S | 19 | 19 | 55222517 | 21107 | 12.3025 | 5.84343 | YRI |
| rs10425282 | VRK3   | GI_31982928-S | 19 | 19 | 55222517 | 50872 | 7.033   | 5.99008 | YRI |
| rs10439113 | ZFP100 | GI_27485310-S | 19 | 19 | 55223758 | 19866 | 12.491  | 5.84343 | YRI |
| rs10439113 | VRK3   | GI_31982928-S | 19 | 19 | 55223758 | 52113 | 7.2735  | 5.99008 | YRI |
| rs10422354 | ZFP100 | GI_27485310-S | 19 | 19 | 55224729 | 18895 | 12.491  | 5.84343 | YRI |
| rs10422354 | VRK3   | GI_31982928-S | 19 | 19 | 55224729 | 53084 | 7.2735  | 5.99008 | YRI |
| rs10422936 | ZFP100 | GI_27485310-S | 19 | 19 | 55224784 | 18840 | 12.491  | 5.84343 | YRI |
| rs10422936 | VRK3   | GI_31982928-S | 19 | 19 | 55224784 | 53139 | 7.2735  | 5.99008 | YRI |
| rs8112178  | ZFP100 | GI_27485310-S | 19 | 19 | 55225237 | 18387 | 12.1476 | 5.84343 | YRI |
| rs8112178  | VRK3   | GI_31982928-S | 19 | 19 | 55225237 | 53592 | 7.7547  | 5.99008 | YRI |
| rs11083999 | ZFP100 | GI_27485310-S | 19 | 19 | 55226041 | 17583 | 12.491  | 5.84343 | YRI |
| rs11083999 | VRK3   | GI_31982928-S | 19 | 19 | 55226041 | 54396 | 7.2735  | 5.99008 | YRI |
| rs10405642 | ZFP100 | GI_27485310-S | 19 | 19 | 55226580 | 17044 | 12.491  | 5.84343 | YRI |
| rs10405642 | VRK3   | GI_31982928-S | 19 | 19 | 55226580 | 54935 | 7.2735  | 5.99008 | YRI |
| rs10413334 | ZFP100 | GI_27485310-S | 19 | 19 | 55227017 | 16607 | 12.491  | 5.84343 | YRI |
| rs10413334 | VRK3   | GI_31982928-S | 19 | 19 | 55227017 | 55372 | 7.2735  | 5.99008 | YRI |
| rs11880683 | ZFP100 | GI_27485310-S | 19 | 19 | 55228741 | 14883 | 11.9335 | 5.84343 | YRI |
| rs11880683 | VRK3   | GI_31982928-S | 19 | 19 | 55228741 | 57096 | 7.172   | 5.99008 | YRI |
| rs11878219 | ZFP100 | GI_27485310-S | 19 | 19 | 55228897 | 14727 | 11.558  | 5.84343 | YRI |
| rs11878219 | VRK3   | GI_31982928-S | 19 | 19 | 55228897 | 57252 | 6.525   | 5.99008 | YRI |
| rs10407938 | ZFP100 | GI_27485310-S | 19 | 19 | 55230059 | 13565 | 10.8421 | 5.84343 | YRI |
| rs10407938 | VRK3   | GI_31982928-S | 19 | 19 | 55230059 | 58414 | 6.3064  | 5.99008 | YRI |
| rs10412562 | ZFP100 | GI_27485310-S | 19 | 19 | 55235855 | 7769  | 12.491  | 5.84343 | YRI |
| rs10412562 | VRK3   | GI_31982928-S | 19 | 19 | 55235855 | 64210 | 7.2735  | 5.99008 | YRI |
| rs10419876 | ZFP100 | GI_27485310-S | 19 | 19 | 55236837 | 6787  | 12.491  | 5.84343 | YRI |
| rs10419876 | VRK3   | GI_31982928-S | 19 | 19 | 55236837 | 65192 | 7.2735  | 5.99008 | YRI |
| rs10419911 | ZFP100 | GI_27485310-S | 19 | 19 | 55236882 | 6742  | 12.491  | 5.84343 | YRI |
| rs10419911 | VRK3   | GI_31982928-S | 19 | 19 | 55236882 | 65237 | 7.2735  | 5.99008 | YRI |
| rs10420700 | ZFP100 | GI_27485310-S | 19 | 19 | 55237156 | 6468  | 11.1856 | 5.84343 | YRI |
| rs10420700 | VRK3   | GI_31982928-S | 19 | 19 | 55237156 | 65511 | 6.6561  | 5.99008 | YRI |
| rs11882888 | ZFP100 | GI_27485310-S | 19 | 19 | 55237552 | 6072  | 10.583  | 5.84343 | YRI |
| rs11882888 | VRK3   | GI_31982928-S | 19 | 19 | 55237552 | 65907 | 6.5212  | 5.99008 | YRI |
| rs16981705 | ZFP100 | GI_27485310-S | 19 | 19 | 55240003 | 3621  | 11.9335 | 5.84343 | YRI |
| rs16981705 | VRK3   | GI_31982928-S | 19 | 19 | 55240003 | 68358 | 6.96    | 5.99008 | YRI |
| rs16981706 | ZFP100 | GI_27485310-S | 19 | 19 | 55240438 | 3186  | 12.568  | 5.84343 | YRI |
| rs16981706 | VRK3   | GI_31982928-S | 19 | 19 | 55240438 | 68793 | 6.8     | 5.99008 | YRI |
| rs10419043 | ZFP100 | GI_27485310-S | 19 | 19 | 55240499 | 3125  | 12.491  | 5.84343 | YRI |
| rs10419043 | VRK3   | GI_31982928-S | 19 | 19 | 55240499 | 68854 | 7.2735  | 5.99008 | YRI |
| rs10426374 | ZFP100 | GI_27485310-S | 19 | 19 | 55241496 | 2128  | 12.491  | 5.84343 | YRI |
| rs10426374 | VRK3   | GI_31982928-S | 19 | 19 | 55241496 | 69851 | 7.2735  | 5.99008 | YRI |
| rs11881187 | ZFP100 | GI_27485310-S | 19 | 19 | 55241939 | 1685  | 12.491  | 5.84343 | YRI |
| rs11881187 | VRK3   | GI_31982928-S | 19 | 19 | 55241939 | 70294 | 7.2735  | 5.99008 | YRI |
| rs9304701  | ZFP100 | GI_27485310-S | 19 | 19 | 55242623 | 1001  | 12.491  | 5.84343 | YRI |
| rs9304701  | VRK3   | GI_31982928-S | 19 | 19 | 55242623 | 70978 | 7.2735  | 5.99008 | YRI |
| rs16981716 | ZFP100 | GI_27485310-S | 19 | 19 | 55242863 | 761   | 11.9705 | 5.84343 | YRI |
| rs16981716 | VRK3   | GI_31982928-S | 19 | 19 | 55242863 | 71218 | 6.9101  | 5.99008 | YRI |
| rs10412271 | ZFP100 | GI_27485310-S | 19 | 19 | 55243013 | 611   | 12.491  | 5.84343 | YRI |
| rs10412271 | VRK3   | GI_31982928-S | 19 | 19 | 55243013 | 71368 | 7.2735  | 5.99008 | YRI |
| rs10413068 | ZFP100 | GI_27485310-S | 19 | 19 | 55243114 | 510   | 12.1692 | 5.84343 | YRI |
| rs10413068 | VRK3   | GI_31982928-S | 19 | 19 | 55243114 | 71469 | 7.0197  | 5.99008 | YRI |
| rs10415125 | ZFP100 | GI_27485310-S | 19 | 19 | 55243477 | 147   | 11.3061 | 5.84343 | YRI |
| rs10415125 | VRK3   | GI_31982928-S | 19 | 19 | 55243477 | 71832 | 6.7958  | 5.99008 | YRI |
| rs11878761 | ZFP100 | GI_27485310-S | 19 | 19 | 55244285 | 661   | 11.8235 | 5.84343 | YRI |

|            |        |               |    |    |          |        |         |         |     |
|------------|--------|---------------|----|----|----------|--------|---------|---------|-----|
| rs11878761 | VRK3   | GI_31982928-S | 19 | 19 | 55244285 | 72640  | 7.8985  | 5.99008 | YRI |
| rs9973262  | ZFP100 | GI_27485310-S | 19 | 19 | 55244706 | 1082   | 11.8235 | 5.84343 | YRI |
| rs9973262  | VRK3   | GI_31982928-S | 19 | 19 | 55244706 | 73061  | 7.8985  | 5.99008 | YRI |
| rs10416688 | ZFP100 | GI_27485310-S | 19 | 19 | 55245384 | 1760   | 10.9086 | 5.84343 | YRI |
| rs10416688 | VRK3   | GI_31982928-S | 19 | 19 | 55245384 | 73739  | 7.0059  | 5.99008 | YRI |
| rs10421463 | ZFP100 | GI_27485310-S | 19 | 19 | 55245787 | 2163   | 11.8235 | 5.84343 | YRI |
| rs10421463 | VRK3   | GI_31982928-S | 19 | 19 | 55245787 | 74142  | 7.8985  | 5.99008 | YRI |
| rs10422147 | ZFP100 | GI_27485310-S | 19 | 19 | 55246050 | 2426   | 11.3112 | 5.84343 | YRI |
| rs10422147 | VRK3   | GI_31982928-S | 19 | 19 | 55246050 | 74405  | 7.8015  | 5.99008 | YRI |
| rs11879695 | ZFP100 | GI_27485310-S | 19 | 19 | 55253943 | 10319  | 11.9335 | 5.84343 | YRI |
| rs11879695 | VRK3   | GI_31982928-S | 19 | 19 | 55253943 | 82298  | 7.172   | 5.99008 | YRI |
| rs11879700 | ZFP100 | GI_27485310-S | 19 | 19 | 55253987 | 10363  | 12.4158 | 5.84343 | YRI |
| rs11879700 | VRK3   | GI_31982928-S | 19 | 19 | 55253987 | 82342  | 6.992   | 5.99008 | YRI |
| rs10424346 | ZFP100 | GI_27485310-S | 19 | 19 | 55254926 | 11302  | 11.1772 | 5.84343 | YRI |
| rs10424346 | VRK3   | GI_31982928-S | 19 | 19 | 55254926 | 83281  | 6.5164  | 5.99008 | YRI |
| rs10422999 | ZFP100 | GI_27485310-S | 19 | 19 | 55255032 | 11408  | 11.1098 | 5.84343 | YRI |
| rs10422999 | VRK3   | GI_31982928-S | 19 | 19 | 55255032 | 83387  | 7.052   | 5.99008 | YRI |
| rs10424805 | ZFP100 | GI_27485310-S | 19 | 19 | 55255218 | 11594  | 8.2614  | 5.84343 | YRI |
| rs10424805 | VRK3   | GI_31982928-S | 19 | 19 | 55255218 | 83573  | 6.7643  | 5.99008 | YRI |
| rs10423709 | ZFP100 | GI_27485310-S | 19 | 19 | 55255357 | 11733  | 8.0305  | 5.84343 | YRI |
| rs10423709 | VRK3   | GI_31982928-S | 19 | 19 | 55255357 | 83712  | 6.9272  | 5.99008 | YRI |
| rs10423788 | ZFP100 | GI_27485310-S | 19 | 19 | 55255510 | 11886  | 12.491  | 5.84343 | YRI |
| rs10423788 | VRK3   | GI_31982928-S | 19 | 19 | 55255510 | 83865  | 7.2735  | 5.99008 | YRI |
| rs10424489 | ZFP100 | GI_27485310-S | 19 | 19 | 55255538 | 11914  | 6.6537  | 5.84343 | YRI |
| rs7250130  | ZFP100 | GI_27485310-S | 19 | 19 | 55277771 | 34147  | 11.1968 | 5.84343 | YRI |
| rs7250130  | VRK3   | GI_31982928-S | 19 | 19 | 55277771 | 106126 | 6.668   | 5.99008 | YRI |
| rs11878430 | ZFP100 | GI_27485310-S | 19 | 19 | 55285805 | 42181  | 11.0925 | 5.84343 | YRI |
| rs11878430 | VRK3   | GI_31982928-S | 19 | 19 | 55285805 | 114160 | 6.4514  | 5.99008 | YRI |
| rs10414850 | ZFP100 | GI_27485310-S | 19 | 19 | 55340131 | 96507  | 9.6928  | 5.84343 | YRI |
| rs10414850 | VRK3   | GI_31982928-S | 19 | 19 | 55340131 | 168486 | 6.2485  | 5.99008 | YRI |
| rs8107344  | ZFP100 | GI_27485310-S | 19 | 19 | 55340394 | 96770  | 9.7906  | 5.84343 | YRI |
| rs10409245 | ZFP100 | GI_27485310-S | 19 | 19 | 55342689 | 99065  | 11.1968 | 5.84343 | YRI |
| rs10409245 | VRK3   | GI_31982928-S | 19 | 19 | 55342689 | 171044 | 6.668   | 5.99008 | YRI |
| rs11881272 | ZFP100 | GI_27485310-S | 19 | 19 | 55360157 | 116533 | 6.8793  | 5.84343 | YRI |
| rs11881272 | VRK3   | GI_31982928-S | 19 | 19 | 55360157 | 188512 | 6.6525  | 5.99008 | YRI |
| rs10420818 | RPL28  | GI_34486095-S | 19 | 19 | 60588993 | 6064   | 7.9822  | 6.08824 | YRI |
| rs10410269 | RPL28  | GI_34486095-S | 19 | 19 | 60591293 | 3764   | 8.0674  | 6.08824 | YRI |
| rs10411984 | RPL28  | GI_34486095-S | 19 | 19 | 60591361 | 3696   | 8.0674  | 6.08824 | YRI |
| rs10416908 | RPL28  | GI_34486095-S | 19 | 19 | 60591944 | 3113   | 8.0674  | 6.08824 | YRI |
| rs10425596 | RPL28  | GI_34486095-S | 19 | 19 | 60592911 | 2146   | 8.0674  | 6.08824 | YRI |
| rs10424652 | RPL28  | GI_34486095-S | 19 | 19 | 60593122 | 1935   | 8.0674  | 6.08824 | YRI |
| rs10425107 | RPL28  | GI_34486095-S | 19 | 19 | 60593364 | 1693   | 8.0674  | 6.08824 | YRI |
| rs10408088 | RPL28  | GI_34486095-S | 19 | 19 | 60596405 | 1348   | 8.0674  | 6.08824 | YRI |
| rs10408540 | RPL28  | GI_34486095-S | 19 | 19 | 60596514 | 1457   | 8.0674  | 6.08824 | YRI |
| rs10403564 | RPL28  | GI_34486095-S | 19 | 19 | 60599106 | 4049   | 8.0674  | 6.08824 | YRI |
| rs10408448 | RPL28  | GI_34486095-S | 19 | 19 | 60611960 | 16903  | 8.0674  | 6.08824 | YRI |
| rs9749085  | ZNF211 | GI_38569444-S | 19 | 19 | 62834298 | 11438  | 8.0234  | 6.18535 | YRI |
| rs9749218  | ZNF211 | GI_38569444-S | 19 | 19 | 62834703 | 11033  | 8.0234  | 6.18535 | YRI |
| rs9749254  | ZNF211 | GI_38569444-S | 19 | 19 | 62835275 | 10461  | 6.6287  | 6.18535 | YRI |
| rs9749442  | ZNF211 | GI_38569444-S | 19 | 19 | 62836331 | 9405   | 6.4493  | 6.18535 | YRI |
| rs10420575 | ZNF211 | GI_38569444-S | 19 | 19 | 62836360 | 9376   | 6.4312  | 6.18535 | YRI |
| rs9749449  | ZNF211 | GI_38569444-S | 19 | 19 | 62836527 | 9209   | 7.021   | 6.18535 | YRI |
| rs2885006  | ZNF211 | GI_38569444-S | 19 | 19 | 62838609 | 7127   | 8.0234  | 6.18535 | YRI |
| rs12609066 | ZNF211 | GI_38569444-S | 19 | 19 | 62841631 | 4105   | 7.3877  | 6.18535 | YRI |
| rs12609093 | ZNF211 | GI_38569444-S | 19 | 19 | 62841839 | 3897   | 7.3877  | 6.18535 | YRI |
| rs12610500 | ZNF211 | GI_38569444-S | 19 | 19 | 62841861 | 3875   | 7.3877  | 6.18535 | YRI |



|            |           |               |    |    |          |       |         |         |     |
|------------|-----------|---------------|----|----|----------|-------|---------|---------|-----|
| rs4801235  | ZNF211    | GI_38569444-S | 19 | 19 | 62842435 | 3301  | 7.7088  | 6.18535 | YRI |
| rs4801507  | ZNF211    | GI_38569444-S | 19 | 19 | 62842935 | 2801  | 7.1921  | 6.18535 | YRI |
| rs4801508  | ZNF211    | GI_38569444-S | 19 | 19 | 62843098 | 2638  | 7.1921  | 6.18535 | YRI |
| rs2360540  | ZNF211    | GI_38569444-S | 19 | 19 | 62843636 | 2100  | 7.3877  | 6.18535 | YRI |
| rs3746221  | ZNF211    | GI_38569444-S | 19 | 19 | 62843832 | 1904  | 7.3877  | 6.18535 | YRI |
| rs3746220  | ZNF211    | GI_38569444-S | 19 | 19 | 62843845 | 1891  | 7.3877  | 6.18535 | YRI |
| rs11879465 | ZNF211    | GI_38569444-S | 19 | 19 | 62844607 | 1129  | 8.0234  | 6.18535 | YRI |
| rs11880050 | ZNF211    | GI_38569444-S | 19 | 19 | 62844629 | 1107  | 7.3877  | 6.18535 | YRI |
| rs3746218  | ZNF211    | GI_38569444-S | 19 | 19 | 62844812 | 924   | 7.3877  | 6.18535 | YRI |
| rs3746217  | ZNF211    | GI_38569444-S | 19 | 19 | 62844821 | 915   | 7.3877  | 6.18535 | YRI |
| rs3746216  | ZNF211    | GI_38569444-S | 19 | 19 | 62845389 | 347   | 7.3877  | 6.18535 | YRI |
| rs3746210  | ZNF211    | GI_38569444-S | 19 | 19 | 62846071 | 335   | 8.0234  | 6.18535 | YRI |
| rs3746209  | ZNF211    | GI_38569444-S | 19 | 19 | 62846117 | 381   | 8.0234  | 6.18535 | YRI |
| rs11880986 | ZNF211    | GI_38569444-S | 19 | 19 | 62846285 | 549   | 7.3877  | 6.18535 | YRI |
| rs10404811 | ZNF211    | GI_38569444-S | 19 | 19 | 62846619 | 883   | 7.3877  | 6.18535 | YRI |
| rs10409262 | ZNF211    | GI_38569444-S | 19 | 19 | 62846767 | 1031  | 7.3877  | 6.18535 | YRI |
| rs10408931 | ZNF211    | GI_38569444-S | 19 | 19 | 62846872 | 1136  | 7.0973  | 6.18535 | YRI |
| rs10425321 | ZNF211    | GI_38569444-S | 19 | 19 | 62848845 | 3109  | 7.3877  | 6.18535 | YRI |
| rs10423688 | ZNF211    | GI_38569444-S | 19 | 19 | 62848902 | 3166  | 7.3877  | 6.18535 | YRI |
| rs11882938 | LOC113386 | GI_20270320-S | 19 | 19 | 63510925 | 7528  | 8.5305  | 5.88855 | YRI |
| rs8100253  | hmm25128  | hmm25128-S    | 19 | 19 | 63779291 | 10162 | 7.187   | 5.8876  | YRI |
| rs6041749  | FKBP1A    | GI_17149835-I | 20 | 20 | 1298672  | 1831  | 11.4002 | 6.65422 | YRI |
| rs6041750  | FKBP1A    | GI_17149835-I | 20 | 20 | 1298709  | 1794  | 18.0338 | 6.65422 | YRI |
| rs6140494  | hmm9596   | hmm9596-S     | 20 | 20 | 7937180  | 26805 | 7.0148  | 6.31301 | YRI |
| rs4142416  | hmm9596   | hmm9596-S     | 20 | 20 | 7940324  | 29949 | 7.1676  | 6.31301 | YRI |
| rs7269654  | Hs.472118 | Hs.472118-S   | 20 | 20 | 10340453 | 9613  | 6.8644  | 6.18603 | YRI |
| rs2073055  | SNRPB2    | GI_38149917-I | 20 | 20 | 16658791 | 37    | 9.5214  | 6.808   | YRI |
| rs1988646  | POLR3F    | GI_33598951-S | 20 | 20 | 18405204 | 7868  | 9.1761  | 6.16876 | YRI |
| rs7351208  | POLR3F    | GI_33598951-S | 20 | 20 | 18406060 | 7012  | 9.1761  | 6.16876 | YRI |
| rs6081158  | POLR3F    | GI_33598951-S | 20 | 20 | 18407386 | 5686  | 6.393   | 6.16876 | YRI |
| rs6075348  | POLR3F    | GI_33598951-S | 20 | 20 | 18421042 | 7970  | 10.0117 | 6.16876 | YRI |
| rs7262824  | POLR3F    | GI_33598951-S | 20 | 20 | 18431105 | 18033 | 11.0922 | 6.16876 | YRI |
| rs2009092  | POLR3F    | GI_33598951-S | 20 | 20 | 18433412 | 20340 | 11.7191 | 6.16876 | YRI |
| rs2180661  | POLR3F    | GI_33598951-S | 20 | 20 | 18434315 | 21243 | 10.5605 | 6.16876 | YRI |
| rs1022681  | POLR3F    | GI_33598951-S | 20 | 20 | 18435014 | 21942 | 11.0922 | 6.16876 | YRI |
| rs6075350  | POLR3F    | GI_33598951-S | 20 | 20 | 18436065 | 22993 | 7.6789  | 6.16876 | YRI |
| rs6081176  | POLR3F    | GI_33598951-S | 20 | 20 | 18438242 | 25170 | 7.6789  | 6.16876 | YRI |
| rs6075351  | POLR3F    | GI_33598951-S | 20 | 20 | 18438913 | 25841 | 7.716   | 6.16876 | YRI |
| rs1555354  | POLR3F    | GI_33598951-S | 20 | 20 | 18454825 | 41753 | 7.716   | 6.16876 | YRI |
| rs6081183  | POLR3F    | GI_33598951-S | 20 | 20 | 18458175 | 45103 | 7.473   | 6.16876 | YRI |
| rs6081184  | POLR3F    | GI_33598951-S | 20 | 20 | 18458182 | 45110 | 6.8453  | 6.16876 | YRI |
| rs6081187  | POLR3F    | GI_33598951-S | 20 | 20 | 18458919 | 45847 | 6.9222  | 6.16876 | YRI |
| rs6136400  | POLR3F    | GI_33598951-S | 20 | 20 | 18463877 | 50805 | 7.1075  | 6.16876 | YRI |
| rs3818218  | POLR3F    | GI_33598951-S | 20 | 20 | 18464722 | 51650 | 7.716   | 6.16876 | YRI |
| rs6112011  | POLR3F    | GI_33598951-S | 20 | 20 | 18465418 | 52346 | 7.0039  | 6.16876 | YRI |
| rs2295557  | POLR3F    | GI_33598951-S | 20 | 20 | 18471864 | 58792 | 7.6848  | 6.16876 | YRI |
| rs4814760  | POLR3F    | GI_33598951-S | 20 | 20 | 18476254 | 63182 | 7.3876  | 6.16876 | YRI |
| rs6081207  | POLR3F    | GI_33598951-S | 20 | 20 | 18480592 | 67520 | 7.716   | 6.16876 | YRI |
| rs1973957  | POLR3F    | GI_33598951-S | 20 | 20 | 18483502 | 70430 | 7.5369  | 6.16876 | YRI |
| rs6075363  | POLR3F    | GI_33598951-S | 20 | 20 | 18484092 | 71020 | 7.716   | 6.16876 | YRI |
| rs6075365  | POLR3F    | GI_33598951-S | 20 | 20 | 18488266 | 75194 | 7.4148  | 6.16876 | YRI |
| rs11698885 | POLR3F    | GI_33598951-S | 20 | 20 | 18491691 | 78619 | 7.2505  | 6.16876 | YRI |
| rs2424699  | PYGB      | GI_34577123-S | 20 | 20 | 25205462 | 20890 | 6.0623  | 5.85769 | YRI |
| rs2261109  | C20orf22  | GI_34147330-S | 20 | 20 | 25207200 | 16409 | 6.9807  | 6.03913 | YRI |
| rs2261796  | C20orf22  | GI_34147330-S | 20 | 20 | 25211277 | 12332 | 6.6327  | 6.03913 | YRI |
| rs2227892  | C20orf22  | GI_34147330-S | 20 | 20 | 25212814 | 10795 | 6.6327  | 6.03913 | YRI |

|            |           |               |    |    |          |        |         |         |     |
|------------|-----------|---------------|----|----|----------|--------|---------|---------|-----|
| rs2257712  | C2orf22   | GI_34147330-S | 20 | 20 | 25212910 | 10699  | 6.2673  | 6.03913 | YRI |
| rs2257991  | C2orf22   | GI_34147330-S | 20 | 20 | 25218339 | 5270   | 6.6327  | 6.03913 | YRI |
| rs2258201  | C2orf22   | GI_34147330-S | 20 | 20 | 25220490 | 3119   | 6.6327  | 6.03913 | YRI |
| rs2474777  | C2orf22   | GI_34147330-S | 20 | 20 | 25220633 | 2976   | 6.6327  | 6.03913 | YRI |
| rs2258769  | C2orf22   | GI_34147330-S | 20 | 20 | 25224680 | 1071   | 6.6327  | 6.03913 | YRI |
| rs2297496  | C2orf22   | GI_34147330-S | 20 | 20 | 25243787 | 20178  | 6.6327  | 6.03913 | YRI |
| rs2297497  | C2orf22   | GI_34147330-S | 20 | 20 | 25245909 | 22300  | 6.6327  | 6.03913 | YRI |
| rs6050532  | C2orf22   | GI_34147330-S | 20 | 20 | 25256793 | 33184  | 6.6327  | 6.03913 | YRI |
| rs6083804  | C2orf22   | GI_34147330-S | 20 | 20 | 25265060 | 41451  | 6.6327  | 6.03913 | YRI |
| rs6076336  | C2orf22   | GI_34147330-S | 20 | 20 | 25267212 | 43603  | 6.6327  | 6.03913 | YRI |
| rs6515641  | C2orf22   | GI_34147330-S | 20 | 20 | 25327526 | 103917 | 6.6327  | 6.03913 | YRI |
| rs6050598  | C2orf22   | GI_34147330-S | 20 | 20 | 25345257 | 121648 | 6.6327  | 6.03913 | YRI |
| rs6417589  | C2orf22   | GI_34147330-S | 20 | 20 | 25359086 | 135477 | 6.6327  | 6.03913 | YRI |
| rs6050617  | C2orf22   | GI_34147330-S | 20 | 20 | 25369648 | 146039 | 6.6327  | 6.03913 | YRI |
| rs6050629  | C2orf22   | GI_34147330-S | 20 | 20 | 25378680 | 155071 | 6.6327  | 6.03913 | YRI |
| rs6050632  | C2orf22   | GI_34147330-S | 20 | 20 | 25380601 | 156992 | 6.6327  | 6.03913 | YRI |
| rs12428    | C2orf22   | GI_34147330-S | 20 | 20 | 25381821 | 158212 | 6.6327  | 6.03913 | YRI |
| rs422844   | C2orf22   | GI_34147330-S | 20 | 20 | 25393591 | 169982 | 6.6327  | 6.03913 | YRI |
| rs449370   | C2orf22   | GI_34147330-S | 20 | 20 | 25399180 | 175571 | 6.6327  | 6.03913 | YRI |
| rs17093829 | TM9SF4    | GI_41281478-S | 20 | 20 | 30162409 | 56058  | 6.9613  | 5.86934 | YRI |
| rs7264087  | TM9SF4    | GI_41281478-S | 20 | 20 | 30192161 | 26306  | 6.2669  | 5.86934 | YRI |
| rs6058205  | LOC400843 | GI_42662295-S | 20 | 20 | 33263738 | 64098  | 7.2534  | 5.96548 | YRI |
| rs2275274  | LOC400843 | GI_42662295-S | 20 | 20 | 33320958 | 6878   | 7.0509  | 5.96548 | YRI |
| rs1739646  | LOC375097 | GI_37555934-S | 20 | 20 | 36470998 | 11936  | 6.2847  | 6.01881 | YRI |
| rs1739646  | Hs.400876 | Hs.400876-S   | 20 | 20 | 36470998 | 11787  | 6.5328  | 6.20436 | YRI |
| rs6025497  | LOC375097 | GI_37555934-S | 20 | 20 | 36476624 | 6310   | 6.8256  | 6.01881 | YRI |
| rs6025497  | Hs.400876 | Hs.400876-S   | 20 | 20 | 36476624 | 6161   | 6.8399  | 6.20436 | YRI |
| rs1739652  | LOC375097 | GI_37555934-S | 20 | 20 | 36482373 | 561    | 16.5331 | 6.01881 | YRI |
| rs1739652  | Hs.400876 | Hs.400876-S   | 20 | 20 | 36482373 | 412    | 18.2352 | 6.20436 | YRI |
| rs3752277  | LOC375097 | GI_37555934-S | 20 | 20 | 36484167 | 1233   | 15.2522 | 6.01881 | YRI |
| rs3752277  | Hs.400876 | Hs.400876-S   | 20 | 20 | 36484167 | 1382   | 16.0774 | 6.20436 | YRI |
| rs3752278  | LOC375097 | GI_37555934-S | 20 | 20 | 36484231 | 1297   | 16.5331 | 6.01881 | YRI |
| rs3752278  | Hs.400876 | Hs.400876-S   | 20 | 20 | 36484231 | 1446   | 18.2352 | 6.20436 | YRI |
| rs3752280  | LOC375097 | GI_37555934-S | 20 | 20 | 36484421 | 1487   | 10.1992 | 6.01881 | YRI |
| rs3752280  | Hs.400876 | Hs.400876-S   | 20 | 20 | 36484421 | 1636   | 11.1632 | 6.20436 | YRI |
| rs1780636  | LOC375097 | GI_37555934-S | 20 | 20 | 36486997 | 4063   | 15.1674 | 6.01881 | YRI |
| rs1780636  | Hs.400876 | Hs.400876-S   | 20 | 20 | 36486997 | 4212   | 16.3056 | 6.20436 | YRI |
| rs752775   | LOC375097 | GI_37555934-S | 20 | 20 | 36488195 | 5261   | 6.5067  | 6.01881 | YRI |
| rs752775   | Hs.400876 | Hs.400876-S   | 20 | 20 | 36488195 | 5410   | 6.3979  | 6.20436 | YRI |
| rs752774   | LOC375097 | GI_37555934-S | 20 | 20 | 36488429 | 5495   | 16.5789 | 6.01881 | YRI |
| rs752774   | Hs.400876 | Hs.400876-S   | 20 | 20 | 36488429 | 5644   | 18.3895 | 6.20436 | YRI |
| rs707578   | LOC375097 | GI_37555934-S | 20 | 20 | 36489289 | 6355   | 9.6524  | 6.01881 | YRI |
| rs707578   | Hs.400876 | Hs.400876-S   | 20 | 20 | 36489289 | 6504   | 10.8549 | 6.20436 | YRI |
| rs788347   | LOC375097 | GI_37555934-S | 20 | 20 | 36495997 | 13063  | 15.6938 | 6.01881 | YRI |
| rs788347   | Hs.400876 | Hs.400876-S   | 20 | 20 | 36495997 | 13212  | 16.6159 | 6.20436 | YRI |
| rs788348   | LOC375097 | GI_37555934-S | 20 | 20 | 36496888 | 13954  | 10.5586 | 6.01881 | YRI |
| rs788348   | Hs.400876 | Hs.400876-S   | 20 | 20 | 36496888 | 14103  | 11.6095 | 6.20436 | YRI |
| rs788350   | LOC375097 | GI_37555934-S | 20 | 20 | 36498050 | 15116  | 10.1895 | 6.01881 | YRI |
| rs788350   | Hs.400876 | Hs.400876-S   | 20 | 20 | 36498050 | 15265  | 11.2363 | 6.20436 | YRI |
| rs805529   | LOC375097 | GI_37555934-S | 20 | 20 | 36506696 | 23762  | 6.0883  | 6.01881 | YRI |
| rs805529   | Hs.400876 | Hs.400876-S   | 20 | 20 | 36506696 | 23911  | 6.6993  | 6.20436 | YRI |
| rs2245231  | FLJ12785  | GI_31542679-S | 20 | 20 | 36829534 | 4543   | 6.7411  | 5.97423 | YRI |
| rs2077109  | FLJ12785  | GI_31542679-S | 20 | 20 | 36852700 | 18623  | 7.6286  | 5.97423 | YRI |
| rs6071614  | FLJ12785  | GI_31542679-S | 20 | 20 | 36932642 | 98565  | 6.8121  | 5.97423 | YRI |
| rs10485453 | TOMM34    | GI_40807467-S | 20 | 20 | 43002140 | 2254   | 9.2445  | 6.22561 | YRI |
| rs2284268  | TOMM34    | GI_40807467-S | 20 | 20 | 43015135 | 10741  | 9.2445  | 6.22561 | YRI |

|            |              |               |    |    |          |        |        |         |     |
|------------|--------------|---------------|----|----|----------|--------|--------|---------|-----|
| rs2427555  | Hs.473309    | Hs.473309-S   | 20 | 20 | 62021161 | 4183   | 5.5341 | 5.51303 | YRI |
| rs230640   | HSF2BP       | GI_5901979-S  | 21 | 21 | 43739243 | 34552  | 6.4224 | 6.30353 | YRI |
| rs230645   | HSF2BP       | GI_5901979-S  | 21 | 21 | 43743035 | 30760  | 7.451  | 6.30353 | YRI |
| rs162381   | HSF2BP       | GI_5901979-S  | 21 | 21 | 43745343 | 28452  | 8.3044 | 6.30353 | YRI |
| rs91424    | HSF2BP       | GI_5901979-S  | 21 | 21 | 43745589 | 28206  | 8.3044 | 6.30353 | YRI |
| rs162378   | HSF2BP       | GI_5901979-S  | 21 | 21 | 43750333 | 23462  | 8.244  | 6.30353 | YRI |
| rs162367   | HSF2BP       | GI_5901979-S  | 21 | 21 | 43759285 | 14510  | 8.1334 | 6.30353 | YRI |
| rs162388   | HSF2BP       | GI_5901979-S  | 21 | 21 | 43760460 | 13335  | 7.4298 | 6.30353 | YRI |
| rs167930   | HSF2BP       | GI_5901979-S  | 21 | 21 | 43771053 | 2742   | 7.5703 | 6.30353 | YRI |
| rs162396   | HSF2BP       | GI_5901979-S  | 21 | 21 | 43772235 | 1560   | 7.4929 | 6.30353 | YRI |
| rs162398   | HSF2BP       | GI_5901979-S  | 21 | 21 | 43773713 | 82     | 7.4929 | 6.30353 | YRI |
| rs162343   | HSF2BP       | GI_5901979-S  | 21 | 21 | 43781500 | 7705   | 7.4929 | 6.30353 | YRI |
| rs1836856  | HSF2BP       | GI_5901979-S  | 21 | 21 | 43789066 | 15271  | 8.6705 | 6.30353 | YRI |
| rs8131020  | HSF2BP       | GI_5901979-S  | 21 | 21 | 43805491 | 31696  | 8.6705 | 6.30353 | YRI |
| rs11701518 | HSF2BP       | GI_5901979-S  | 21 | 21 | 43811507 | 37712  | 8.6705 | 6.30353 | YRI |
| rs3788062  | HSF2BP       | GI_5901979-S  | 21 | 21 | 43815587 | 41792  | 7.906  | 6.30353 | YRI |
| rs2838317  | HSF2BP       | GI_5901979-S  | 21 | 21 | 43816219 | 42424  | 8.6705 | 6.30353 | YRI |
| rs2838319  | HSF2BP       | GI_5901979-S  | 21 | 21 | 43816329 | 42534  | 8.6705 | 6.30353 | YRI |
| rs2838321  | HSF2BP       | GI_5901979-S  | 21 | 21 | 43819916 | 46121  | 8.0983 | 6.30353 | YRI |
| rs9978811  | HSF2BP       | GI_5901979-S  | 21 | 21 | 43823111 | 49316  | 7.6373 | 6.30353 | YRI |
| rs1378079  | HSF2BP       | GI_5901979-S  | 21 | 21 | 43835615 | 61820  | 7.9359 | 6.30353 | YRI |
| rs1454651  | HSF2BP       | GI_5901979-S  | 21 | 21 | 43836904 | 63109  | 7.8167 | 6.30353 | YRI |
| rs7279958  | HSF2BP       | GI_5901979-S  | 21 | 21 | 43840444 | 66649  | 8.3769 | 6.30353 | YRI |
| rs6518301  | HSF2BP       | GI_5901979-S  | 21 | 21 | 43841246 | 67451  | 7.6263 | 6.30353 | YRI |
| rs9981790  | HSF2BP       | GI_5901979-S  | 21 | 21 | 43869480 | 95685  | 6.335  | 6.30353 | YRI |
| rs12627667 | HSF2BP       | GI_5901979-S  | 21 | 21 | 43895824 | 122029 | 8.8406 | 6.30353 | YRI |
| rs2838336  | HSF2BP       | GI_5901979-S  | 21 | 21 | 43896169 | 122374 | 8.8406 | 6.30353 | YRI |
| rs2838341  | HSF2BP       | GI_5901979-S  | 21 | 21 | 43900871 | 127076 | 8.8406 | 6.30353 | YRI |
| rs7279968  | HSF2BP       | GI_5901979-S  | 21 | 21 | 43901826 | 128031 | 8.7128 | 6.30353 | YRI |
| rs2838343  | HSF2BP       | GI_5901979-S  | 21 | 21 | 43902463 | 128668 | 9.3949 | 6.30353 | YRI |
| rs7276633  | HSF2BP       | GI_5901979-S  | 21 | 21 | 43903228 | 129433 | 8.0302 | 6.30353 | YRI |
| rs7282122  | HSF2BP       | GI_5901979-S  | 21 | 21 | 43906793 | 132998 | 7.9354 | 6.30353 | YRI |
| rs2250773  | HSF2BP       | GI_5901979-S  | 21 | 21 | 43912214 | 138419 | 7.3277 | 6.30353 | YRI |
| rs2838344  | HSF2BP       | GI_5901979-S  | 21 | 21 | 43914305 | 140510 | 7.3277 | 6.30353 | YRI |
| rs2251253  | HSF2BP       | GI_5901979-S  | 21 | 21 | 43916685 | 142890 | 7.3277 | 6.30353 | YRI |
| rs2155722  | HSF2BP       | GI_5901979-S  | 21 | 21 | 43920634 | 146839 | 7.3277 | 6.30353 | YRI |
| rs6518310  | HSF2BP       | GI_5901979-S  | 21 | 21 | 43923098 | 149303 | 8.0051 | 6.30353 | YRI |
| rs3827249  | Hs.473973    | Hs.473973-S   | 21 | 21 | 44195756 | 11441  | 7.7817 | 6.17724 | YRI |
| rs2839129  | C21orf56     | GI_23346426-S | 21 | 21 | 46415403 | 9877   | 6.1093 | 6.00723 | YRI |
| rs2839133  | C21orf56     | GI_23346426-S | 21 | 21 | 46416198 | 10672  | 6.0629 | 6.00723 | YRI |
| rs7409924  | C21orf56     | GI_23346426-S | 21 | 21 | 46417871 | 12345  | 6.5885 | 6.00723 | YRI |
| rs9637215  | C21orf56     | GI_23346426-S | 21 | 21 | 46420663 | 15137  | 9.5915 | 6.00723 | YRI |
| rs8133866  | C21orf56     | GI_23346426-S | 21 | 21 | 46423604 | 18078  | 7.5969 | 6.00723 | YRI |
| rs8133205  | C21orf56     | GI_23346426-S | 21 | 21 | 46423708 | 18182  | 8.9379 | 6.00723 | YRI |
| rs6518275  | C21orf56     | GI_23346426-S | 21 | 21 | 46424246 | 18720  | 7.2311 | 6.00723 | YRI |
| rs8133082  | C21orf56     | GI_23346426-S | 21 | 21 | 46424341 | 18815  | 8.5501 | 6.00723 | YRI |
| rs8134519  | C21orf56     | GI_23346426-S | 21 | 21 | 46426577 | 21051  | 6.5649 | 6.00723 | YRI |
| rs429994   | DKFZp434N035 | GI_14149994-S | 22 | 22 | 18530665 | 852709 | 6.0719 | 6.07045 | YRI |
| rs28384    | DKFZp434N035 | GI_14149994-S | 22 | 22 | 18530969 | 852405 | 6.0719 | 6.07045 | YRI |
| rs181362   | UBE2L3       | GI_38157977-A | 22 | 22 | 20256622 | 46145  | 6.3096 | 6.1093  | YRI |
| rs181363   | UBE2L3       | GI_38157977-A | 22 | 22 | 20256818 | 45949  | 6.4106 | 6.1093  | YRI |
| rs5754217  | UBE2L3       | GI_38157977-A | 22 | 22 | 20264229 | 38538  | 6.3096 | 6.1093  | YRI |
| rs4820091  | UBE2L3       | GI_38157977-A | 22 | 22 | 20264743 | 38024  | 6.3096 | 6.1093  | YRI |
| rs5998672  | UBE2L3       | GI_38157977-A | 22 | 22 | 20290996 | 11771  | 6.3096 | 6.1093  | YRI |
| rs738129   | UBE2L3       | GI_38157977-A | 22 | 22 | 20295595 | 7172   | 6.3096 | 6.1093  | YRI |
| rs11089637 | UBE2L3       | GI_38157977-A | 22 | 22 | 20303650 | 883    | 6.3096 | 6.1093  | YRI |

|            |           |               |    |    |          |        |         |         |     |
|------------|-----------|---------------|----|----|----------|--------|---------|---------|-----|
| rs878825   | UBE2L3    | GI_38157977-A | 22 | 22 | 20306803 | 4036   | 8.1151  | 6.1093  | YRI |
| rs2298429  | UBE2L3    | GI_38157977-A | 22 | 22 | 20307814 | 5047   | 6.8643  | 6.1093  | YRI |
| rs6519611  | CRYBB2    | GI_4503062-S  | 22 | 22 | 24170409 | 218080 | 8.9078  | 6.3738  | YRI |
| rs6519611  | Hs.150050 | Hs.150050-S   | 22 | 22 | 24170409 | 70900  | 10.2983 | 6.31786 | YRI |
| rs9624836  | CRYBB2    | GI_4503062-S  | 22 | 22 | 24170641 | 218312 | 9.7087  | 6.3738  | YRI |
| rs9624836  | Hs.150050 | Hs.150050-S   | 22 | 22 | 24170641 | 70668  | 10.8846 | 6.31786 | YRI |
| rs6004662  | CRYBB2    | GI_4503062-S  | 22 | 22 | 24186678 | 234349 | 8.9078  | 6.3738  | YRI |
| rs6004662  | Hs.150050 | Hs.150050-S   | 22 | 22 | 24186678 | 54631  | 10.2983 | 6.31786 | YRI |
| rs560175   | CRYBB2    | GI_4503062-S  | 22 | 22 | 24190779 | 238450 | 7.0356  | 6.3738  | YRI |
| rs594239   | Hs.150050 | Hs.150050-S   | 22 | 22 | 24193760 | 47549  | 6.8351  | 6.31786 | YRI |
| rs760554   | CRYBB2    | GI_4503062-S  | 22 | 22 | 24197146 | 244817 | 11.1015 | 6.3738  | YRI |
| rs760554   | Hs.150050 | Hs.150050-S   | 22 | 22 | 24197146 | 44163  | 14.177  | 6.31786 | YRI |
| rs760555   | CRYBB2    | GI_4503062-S  | 22 | 22 | 24197391 | 245062 | 8.9078  | 6.3738  | YRI |
| rs760555   | Hs.150050 | Hs.150050-S   | 22 | 22 | 24197391 | 43918  | 10.2983 | 6.31786 | YRI |
| rs6004667  | CRYBB2    | GI_4503062-S  | 22 | 22 | 24199018 | 246689 | 9.6667  | 6.3738  | YRI |
| rs6004667  | Hs.150050 | Hs.150050-S   | 22 | 22 | 24199018 | 42291  | 10.1552 | 6.31786 | YRI |
| rs6004668  | CRYBB2    | GI_4503062-S  | 22 | 22 | 24199056 | 246727 | 8.9078  | 6.3738  | YRI |
| rs6004668  | Hs.150050 | Hs.150050-S   | 22 | 22 | 24199056 | 42253  | 10.2983 | 6.31786 | YRI |
| rs7285549  | CRYBB2    | GI_4503062-S  | 22 | 22 | 24199134 | 246805 | 8.1998  | 6.3738  | YRI |
| rs7285549  | Hs.150050 | Hs.150050-S   | 22 | 22 | 24199134 | 42175  | 10.0067 | 6.31786 | YRI |
| rs1930961  | CRYBB2    | GI_4503062-S  | 22 | 22 | 24199819 | 247490 | 8.9078  | 6.3738  | YRI |
| rs1930961  | Hs.150050 | Hs.150050-S   | 22 | 22 | 24199819 | 41490  | 10.2983 | 6.31786 | YRI |
| rs5996945  | CRYBB2    | GI_4503062-S  | 22 | 22 | 24200127 | 247798 | 8.9078  | 6.3738  | YRI |
| rs5996945  | Hs.150050 | Hs.150050-S   | 22 | 22 | 24200127 | 41182  | 10.2983 | 6.31786 | YRI |
| rs6004669  | CRYBB2    | GI_4503062-S  | 22 | 22 | 24200357 | 248028 | 10.1162 | 6.3738  | YRI |
| rs6004669  | Hs.150050 | Hs.150050-S   | 22 | 22 | 24200357 | 40952  | 8.4615  | 6.31786 | YRI |
| rs997872   | CRYBB2    | GI_4503062-S  | 22 | 22 | 24203168 | 250839 | 8.9078  | 6.3738  | YRI |
| rs997872   | Hs.150050 | Hs.150050-S   | 22 | 22 | 24203168 | 38141  | 10.2983 | 6.31786 | YRI |
| rs6004672  | CRYBB2    | GI_4503062-S  | 22 | 22 | 24205567 | 253238 | 9.7087  | 6.3738  | YRI |
| rs6004672  | Hs.150050 | Hs.150050-S   | 22 | 22 | 24205567 | 35742  | 10.8846 | 6.31786 | YRI |
| rs6004673  | CRYBB2    | GI_4503062-S  | 22 | 22 | 24209907 | 257578 | 9.4008  | 6.3738  | YRI |
| rs6004673  | Hs.150050 | Hs.150050-S   | 22 | 22 | 24209907 | 31402  | 9.5379  | 6.31786 | YRI |
| rs6004675  | CRYBB2    | GI_4503062-S  | 22 | 22 | 24213939 | 261610 | 8.9078  | 6.3738  | YRI |
| rs6004675  | Hs.150050 | Hs.150050-S   | 22 | 22 | 24213939 | 27370  | 10.2983 | 6.31786 | YRI |
| rs738194   | Hs.150050 | Hs.150050-S   | 22 | 22 | 24229975 | 11334  | 6.8351  | 6.31786 | YRI |
| rs653042   | Hs.150050 | Hs.150050-S   | 22 | 22 | 24234071 | 7238   | 6.8351  | 6.31786 | YRI |
| rs487272   | Hs.150050 | Hs.150050-S   | 22 | 22 | 24235433 | 5876   | 6.8351  | 6.31786 | YRI |
| rs5752169  | Hs.150050 | Hs.150050-S   | 22 | 22 | 24242215 | 906    | 6.6167  | 6.31786 | YRI |
| rs138435   | DDX17     | GI_38201711-I | 22 | 22 | 37202418 | 6287   | 7.4329  | 6.20827 | YRI |
| rs8140235  | DDX17     | GI_38201711-I | 22 | 22 | 37247079 | 38374  | 7.2229  | 6.20827 | YRI |
| rs6001149  | DDX17     | GI_38201711-I | 22 | 22 | 37262450 | 53745  | 7.2229  | 6.20827 | YRI |
| rs3761455  | C22orf2   | GI_21359898-S | 22 | 22 | 37391351 | 2756   | 6.2853  | 5.94722 | YRI |
| rs3761455  | KIAA0063  | GI_34222319-S | 22 | 22 | 37391351 | 14975  | 5.8609  | 5.75952 | YRI |
| rs6519132  | C22orf2   | GI_21359898-S | 22 | 22 | 37395422 | 1315   | 6.1701  | 5.94722 | YRI |
| rs16999224 | KIAA0063  | GI_34222319-S | 22 | 22 | 37401087 | 5239   | 6.7963  | 5.75952 | YRI |
| rs2072800  | C22orf2   | GI_21359898-S | 22 | 22 | 37420487 | 26380  | 6.8242  | 5.94722 | YRI |
| rs2072800  | KIAA0063  | GI_34222319-S | 22 | 22 | 37420487 | 14161  | 5.941   | 5.75952 | YRI |
| rs16999281 | C22orf2   | GI_21359898-S | 22 | 22 | 37433133 | 39026  | 6.8242  | 5.94722 | YRI |
| rs16999281 | KIAA0063  | GI_34222319-S | 22 | 22 | 37433133 | 26807  | 5.941   | 5.75952 | YRI |
| rs138691   | C22orf2   | GI_21359898-S | 22 | 22 | 37439810 | 45703  | 6.8242  | 5.94722 | YRI |
| rs138691   | KIAA0063  | GI_34222319-S | 22 | 22 | 37439810 | 33484  | 5.941   | 5.75952 | YRI |
| rs138694   | C22orf2   | GI_21359898-S | 22 | 22 | 37444596 | 50489  | 6.8242  | 5.94722 | YRI |
| rs138694   | KIAA0063  | GI_34222319-S | 22 | 22 | 37444596 | 38270  | 5.941   | 5.75952 | YRI |
| rs138695   | C22orf2   | GI_21359898-S | 22 | 22 | 37444738 | 50631  | 6.8242  | 5.94722 | YRI |
| rs138695   | KIAA0063  | GI_34222319-S | 22 | 22 | 37444738 | 38412  | 5.941   | 5.75952 | YRI |
| rs138696   | C22orf2   | GI_21359898-S | 22 | 22 | 37444994 | 50887  | 6.8242  | 5.94722 | YRI |

|            |           |               |    |    |          |       |         |         |     |
|------------|-----------|---------------|----|----|----------|-------|---------|---------|-----|
| rs138696   | KIAA0063  | GI_34222319-S | 22 | 22 | 37444994 | 38668 | 5.941   | 5.75952 | YRI |
| rs16999297 | C22orf2   | GI_21359898-S | 22 | 22 | 37446538 | 52431 | 6.8242  | 5.94722 | YRI |
| rs16999297 | KIAA0063  | GI_34222319-S | 22 | 22 | 37446538 | 40212 | 5.941   | 5.75952 | YRI |
| rs138697   | C22orf2   | GI_21359898-S | 22 | 22 | 37448826 | 54719 | 6.8242  | 5.94722 | YRI |
| rs138697   | KIAA0063  | GI_34222319-S | 22 | 22 | 37448826 | 42500 | 5.941   | 5.75952 | YRI |
| rs16999301 | C22orf2   | GI_21359898-S | 22 | 22 | 37450029 | 55922 | 6.6442  | 5.94722 | YRI |
| rs16999301 | KIAA0063  | GI_34222319-S | 22 | 22 | 37450029 | 43703 | 5.7882  | 5.75952 | YRI |
| rs137698   | SYNGR1    | GI_22035699-A | 22 | 22 | 38071303 | 25327 | 7.7898  | 6.0291  | YRI |
| rs137698   | SYNGR1    | GI_39777618-I | 22 | 22 | 38071303 | 27438 | 7.8016  | 6.0291  | YRI |
| rs909685   | SYNGR1    | GI_22035699-A | 22 | 22 | 38072171 | 24459 | 16.7864 | 6.0291  | YRI |
| rs909685   | SYNGR1    | GI_39777617-I | 22 | 22 | 38072171 | 33808 | 7.6716  | 6.0291  | YRI |
| rs909685   | SYNGR1    | GI_39777618-I | 22 | 22 | 38072171 | 26570 | 15.5136 | 6.0291  | YRI |
| rs3788551  | SYNGR1    | GI_22035699-A | 22 | 22 | 38077027 | 19603 | 6.9475  | 6.0291  | YRI |
| rs3788551  | SYNGR1    | GI_39777618-I | 22 | 22 | 38077027 | 21714 | 7.2289  | 6.0291  | YRI |
| rs132858   | NUP50     | GI_24497446-A | 22 | 22 | 43883272 | 17633 | 7.3454  | 6.21864 | YRI |
| rs132863   | NUP50     | GI_24497446-A | 22 | 22 | 43884964 | 15941 | 7.6163  | 6.21864 | YRI |
| rs132871   | NUP50     | GI_24497446-A | 22 | 22 | 43886950 | 13955 | 7.6163  | 6.21864 | YRI |
| rs132873   | NUP50     | GI_24497446-A | 22 | 22 | 43887239 | 13666 | 7.6163  | 6.21864 | YRI |
| rs132874   | NUP50     | GI_24497446-A | 22 | 22 | 43887380 | 13525 | 7.6163  | 6.21864 | YRI |
| rs132875   | NUP50     | GI_24497446-A | 22 | 22 | 43887449 | 13456 | 7.6163  | 6.21864 | YRI |
| rs132881   | NUP50     | GI_24497446-A | 22 | 22 | 43888117 | 12788 | 7.5737  | 6.21864 | YRI |
| rs132883   | NUP50     | GI_24497446-A | 22 | 22 | 43889048 | 11857 | 7.5107  | 6.21864 | YRI |
| rs132884   | NUP50     | GI_24497446-A | 22 | 22 | 43889523 | 11382 | 7.6163  | 6.21864 | YRI |
| rs226523   | NUP50     | GI_24497446-A | 22 | 22 | 43897647 | 3258  | 7.0774  | 6.21864 | YRI |
| rs6007761  | FLJ20699  | GI_8923627-S  | 22 | 22 | 44990913 | 19341 | 6.5748  | 6.13276 | YRI |
| rs9615338  | FLJ20699  | GI_8923627-S  | 22 | 22 | 44991239 | 19015 | 6.5748  | 6.13276 | YRI |
| rs11090858 | FLJ20699  | GI_8923627-S  | 22 | 22 | 44998516 | 11738 | 8.3233  | 6.13276 | YRI |
| rs6008497  | FLJ20699  | GI_8923627-S  | 22 | 22 | 44999185 | 11069 | 8.5195  | 6.13276 | YRI |
| rs6008506  | FLJ20699  | GI_8923627-S  | 22 | 22 | 45000540 | 9714  | 8.3233  | 6.13276 | YRI |
| rs6007794  | FLJ20699  | GI_8923627-S  | 22 | 22 | 45005536 | 4718  | 10.1844 | 6.13276 | YRI |
| rs6008552  | FLJ20699  | GI_8923627-S  | 22 | 22 | 45008727 | 1527  | 17.8505 | 6.13276 | YRI |
| rs6008553  | FLJ20699  | GI_8923627-S  | 22 | 22 | 45008840 | 1414  | 18.7533 | 6.13276 | YRI |
| rs8140182  | FLJ20699  | GI_8923627-S  | 22 | 22 | 45011919 | 1665  | 13.8733 | 6.13276 | YRI |
| rs7290732  | FLJ20699  | GI_8923627-S  | 22 | 22 | 45012422 | 2168  | 8.222   | 6.13276 | YRI |
| rs6008587  | FLJ20699  | GI_8923627-S  | 22 | 22 | 45022510 | 12256 | 10.2395 | 6.13276 | YRI |
| rs12165597 | FLJ20699  | GI_8923627-S  | 22 | 22 | 45026103 | 15849 | 7.4212  | 6.13276 | YRI |
| rs6008622  | FLJ20699  | GI_8923627-S  | 22 | 22 | 45030400 | 20146 | 9.0175  | 6.13276 | YRI |
| rs6008625  | FLJ20699  | GI_8923627-S  | 22 | 22 | 45030675 | 20421 | 10.5139 | 6.13276 | YRI |
| rs6008662  | FLJ20699  | GI_8923627-S  | 22 | 22 | 45034436 | 24182 | 10.0033 | 6.13276 | YRI |
| rs131777   | LOC388918 | GI_42662524-S | 22 | 22 | 49281177 | 1293  | 6.6299  | 5.73363 | YRI |
| rs2073604  | CHKL      | GI_23238259-I | 22 | 22 | 49299069 | 8510  | 7.1126  | 5.72556 | YRI |
| rs12627787 | CHKL      | GI_23238259-I | 22 | 22 | 49302525 | 5054  | 9.1647  | 5.72556 | YRI |
| rs2269383  | CHKL      | GI_23238259-I | 22 | 22 | 49302919 | 4660  | 10.4393 | 5.72556 | YRI |
| rs1557503  | CHKL      | GI_23238259-I | 22 | 22 | 49303216 | 4363  | 9.6388  | 5.72556 | YRI |
| rs17836732 | CHKL      | GI_23238259-I | 22 | 22 | 49303340 | 4239  | 10.4926 | 5.72556 | YRI |
| rs3213446  | CHKL      | GI_23238259-I | 22 | 22 | 49305818 | 1761  | 9.6388  | 5.72556 | YRI |
| rs3213445  | CHKL      | GI_23238259-I | 22 | 22 | 49305982 | 1597  | 5.7462  | 5.72556 | YRI |
| rs5770916  | CHKL      | GI_23238259-I | 22 | 22 | 49306242 | 1337  | 7.2445  | 5.72556 | YRI |
| rs6009931  | CHKL      | GI_23238259-I | 22 | 22 | 49313296 | 5717  | 8.0881  | 5.72556 | YRI |
| rs6010023  | CHKL      | GI_23238259-I | 22 | 22 | 49318346 | 10767 | 8.0881  | 5.72556 | YRI |
| rs6010088  | RABL2B    | GI_5902039-S  | 22 | 22 | 49512244 | 15979 | 6.0995  | 5.67826 | YRI |
