# Supplementary material
Source: PubMed Central journal article supplement (PMC2683249)
Supplement: NIHMS4491-supplement-4.pdf [file NIHMS4491-supplement-4.pdf]

**Significant *trans* - associations**  
**linear regression, individual population analysis, 0.001 permutation threshold.**

| Gene      | Illumina GeneID | SNP Label  | Gene chromosome | SNP chromosome | SNP coordinate (NCBI B35) | $-\log_{10}(p\text{-value})$ | Adjusted R <sup>2</sup> | Association gradient | permutation threshold (0.001) | Population |
|-----------|-----------------|------------|-----------------|----------------|---------------------------|------------------------------|-------------------------|----------------------|-------------------------------|------------|
| SNX27     | GI_31742500-S   | rs10753434 | 1               | 1              | 223867335                 | 6.9944                       | 0.3786                  | -0.2697              | 6.8283                        | CEU        |
| C19orf24  | GI_42476017-S   | rs10753434 | 19              | 1              | 223867335                 | 7.1019                       | 0.3837                  | -0.2616              | 6.8390                        | CEU        |
| ARIH1     | GI_9966762-S    | rs10753434 | 15              | 1              | 223867335                 | 7.0443                       | 0.3810                  | -0.2005              | 6.9786                        | CEU        |
| Hs.132700 | Hs.132700-S     | rs10865974 | 15              | 3              | 52693320                  | 7.5672                       | 0.4056                  | -0.0563              | 6.9235                        | CEU        |
| SNX27     | GI_31742500-S   | rs10916133 | 1               | 1              | 223872402                 | 6.9944                       | 0.3786                  | 0.2697               | 6.8283                        | CEU        |
| C19orf24  | GI_42476017-S   | rs10916133 | 19              | 1              | 223872402                 | 7.1019                       | 0.3837                  | 0.2616               | 6.8390                        | CEU        |
| ARIH1     | GI_9966762-S    | rs10916133 | 15              | 1              | 223872402                 | 7.0443                       | 0.3810                  | 0.2005               | 6.9786                        | CEU        |
| Hs.132700 | Hs.132700-S     | rs1108842  | 15              | 3              | 52695120                  | 6.9335                       | 0.3756                  | -0.0543              | 6.9235                        | CEU        |
| LOC401154 | GI_42656959-S   | rs1113765  | 4               | 7              | 55663543                  | 11.5989                      | 0.5662                  | -0.3376              | 7.2717                        | CEU        |
| LOC401154 | GI_42656959-S   | rs11238381 | 4               | 7              | 55666110                  | 10.6640                      | 0.5332                  | 0.3305               | 7.2717                        | CEU        |
| ZFYVE27   | GI_34303918-S   | rs11242837 | 10              | 6              | 3206887                   | 7.1921                       | 0.4413                  | -0.0947              | 6.8628                        | CEU        |
| Hs.132700 | Hs.132700-S     | rs11714565 | 15              | 3              | 52581332                  | 8.3128                       | 0.4628                  | -0.0575              | 6.9235                        | CEU        |
| Hs.132700 | Hs.132700-S     | rs11720243 | 15              | 3              | 52593058                  | 7.4592                       | 0.4060                  | 0.0561               | 6.9235                        | CEU        |
| LOC401118 | GI_42657060-S   | rs11757159 | 4               | 6              | 32628250                  | 7.1443                       | 0.3858                  | -0.8205              | 6.9800                        | CEU        |
| LOC401154 | GI_42656959-S   | rs11982736 | 4               | 7              | 55629389                  | 14.7860                      | 0.6623                  | -0.3743              | 7.2717                        | CEU        |
| Hs.475035 | Hs.475035-S     | rs12085083 | 1               | 1              | 170139974                 | 7.0745                       | 0.3877                  | 0.1047               | 6.8608                        | CEU        |
| LOC401118 | GI_42657060-S   | rs12191360 | 4               | 6              | 32559339                  | 9.8565                       | 0.5027                  | 0.9883               | 6.9800                        | CEU        |
| Hs.132700 | Hs.132700-S     | rs12635140 | 15              | 3              | 52713205                  | 7.5672                       | 0.4056                  | 0.0563               | 6.9235                        | CEU        |
| Hs.132700 | Hs.132700-S     | rs13083798 | 15              | 3              | 52624788                  | 6.9335                       | 0.3756                  | -0.0543              | 6.9235                        | CEU        |
| Hs.132700 | Hs.132700-S     | rs13085775 | 15              | 3              | 52653410                  | 7.5672                       | 0.4056                  | -0.0563              | 6.9235                        | CEU        |
| Hs.132700 | Hs.132700-S     | rs17052259 | 15              | 3              | 52568178                  | 7.5571                       | 0.4051                  | -0.0559              | 6.9235                        | CEU        |
| LOC400452 | GI_42660576-S   | rs17816433 | 15              | 21             | 39524326                  | 13.5733                      | 0.6349                  | 1.7343               | 7.6952                        | CEU        |
| Hs.132700 | Hs.132700-S     | rs1866268  | 15              | 3              | 52694438                  | 7.5672                       | 0.4056                  | -0.0563              | 6.9235                        | CEU        |
| GGPS1     | GI_21359876-S   | rs194590   | 1               | 7              | 111333793                 | 7.6476                       | 0.4261                  | -0.1893              | 6.9375                        | CEU        |
| CTBP2     | GI_4557498-I    | rs2040748  | 10              | 6              | 31351764                  | 7.8938                       | 0.4317                  | -0.4819              | 7.7086                        | CEU        |
| LOC400452 | GI_42660576-S   | rs2056844  | 15              | 21             | 39592330                  | 13.8045                      | 0.6352                  | 1.7345               | 7.6952                        | CEU        |
| Hs.132700 | Hs.132700-S     | rs2072390  | 15              | 3              | 52755549                  | 7.5672                       | 0.4056                  | 0.0563               | 6.9235                        | CEU        |
| LOC400452 | GI_42660576-S   | rs2150411  | 15              | 21             | 39496422                  | 13.5733                      | 0.6349                  | -1.7343              | 7.6952                        | CEU        |
| LOC400452 | GI_42660576-S   | rs2150413  | 15              | 21             | 39536748                  | 14.2607                      | 0.6545                  | -1.7400              | 7.6952                        | CEU        |
| LOC400452 | GI_42660576-S   | rs2150414  | 15              | 21             | 39536858                  | 14.2607                      | 0.6545                  | -1.7400              | 7.6952                        | CEU        |
| LOC401118 | GI_42657060-S   | rs2157051  | 4               | 6              | 32766602                  | 13.0812                      | 0.6472                  | -1.1313              | 6.9800                        | CEU        |
| Hs.132700 | Hs.132700-S     | rs2289247  | 15              | 3              | 52702297                  | 7.5672                       | 0.4056                  | -0.0563              | 6.9235                        | CEU        |
| LOC400452 | GI_42660576-S   | rs2297256  | 15              | 21             | 39480291                  | 13.5267                      | 0.6401                  | 1.7380               | 7.6952                        | CEU        |
| Hs.132700 | Hs.132700-S     | rs2336146  | 15              | 3              | 52601686                  | 7.2168                       | 0.3945                  | 0.0552               | 6.9235                        | CEU        |
| Hs.132700 | Hs.132700-S     | rs2336149  | 15              | 3              | 52667164                  | 6.9909                       | 0.3836                  | 0.0557               | 6.9235                        | CEU        |
| LOC401118 | GI_42657060-S   | rs2395185  | 4               | 6              | 32541145                  | 7.4625                       | 0.4007                  | -0.8735              | 6.9800                        | CEU        |
| LOC401118 | GI_42657060-S   | rs2516049  | 4               | 6              | 32678378                  | 7.6861                       | 0.4110                  | -0.8642              | 6.9800                        | CEU        |

|           |               |           |    |    |           |         |        |         |        |     |
|-----------|---------------|-----------|----|----|-----------|---------|--------|---------|--------|-----|
| SPTLC1    | GI_30474870-A | rs25803   | 9  | 5  | 129056512 | 7.1416  | 0.3856 | -0.2832 | 7.1331 | CEU |
| SPTLC1    | GI_30474870-A | rs25816   | 9  | 5  | 129020335 | 7.1416  | 0.3856 | 0.2832  | 7.1331 | CEU |
| SPTLC1    | GI_30474870-A | rs25821   | 9  | 5  | 129019081 | 7.1416  | 0.3856 | -0.2832 | 7.1331 | CEU |
| LOC400452 | GI_42660576-S | rs2776311 | 15 | 21 | 39638755  | 23.1317 | 0.8306 | 1.9649  | 7.6952 | CEU |
| LOC400452 | GI_42660576-S | rs2836922 | 15 | 21 | 39438178  | 13.3075 | 0.6271 | -1.6726 | 7.6952 | CEU |
| LOC400452 | GI_42660576-S | rs2836926 | 15 | 21 | 39458660  | 14.2607 | 0.6545 | 1.7400  | 7.6952 | CEU |
| LOC400452 | GI_42660576-S | rs2836930 | 15 | 21 | 39467526  | 14.2607 | 0.6545 | -1.7400 | 7.6952 | CEU |
| LOC400452 | GI_42660576-S | rs2836931 | 15 | 21 | 39468439  | 14.7985 | 0.6822 | 1.7344  | 7.6952 | CEU |
| LOC400452 | GI_42660576-S | rs2836934 | 15 | 21 | 39486755  | 14.2607 | 0.6545 | -1.7400 | 7.6952 | CEU |
| LOC400452 | GI_42660576-S | rs2836942 | 15 | 21 | 39513251  | 13.5733 | 0.6349 | -1.7343 | 7.6952 | CEU |
| LOC400452 | GI_42660576-S | rs2836943 | 15 | 21 | 39514481  | 14.2607 | 0.6545 | -1.7400 | 7.6952 | CEU |
| LOC400452 | GI_42660576-S | rs2836948 | 15 | 21 | 39521547  | 13.5733 | 0.6349 | 1.7343  | 7.6952 | CEU |
| LOC400452 | GI_42660576-S | rs2836950 | 15 | 21 | 39526299  | 10.1830 | 0.5214 | -1.7602 | 7.6952 | CEU |
| LOC400452 | GI_42660576-S | rs2836952 | 15 | 21 | 39538521  | 14.2607 | 0.6545 | 1.7400  | 7.6952 | CEU |
| LOC400452 | GI_42660576-S | rs2836956 | 15 | 21 | 39544888  | 13.1899 | 0.6171 | 1.6789  | 7.6952 | CEU |
| LOC400452 | GI_42660576-S | rs2836958 | 15 | 21 | 39545396  | 13.2279 | 0.6587 | 1.6948  | 7.6952 | CEU |
| LOC400452 | GI_42660576-S | rs2836959 | 15 | 21 | 39545538  | 13.5733 | 0.6349 | 1.7343  | 7.6952 | CEU |
| LOC400452 | GI_42660576-S | rs2836961 | 15 | 21 | 39548890  | 12.3294 | 0.5968 | -1.7760 | 7.6952 | CEU |
| LOC400452 | GI_42660576-S | rs2836966 | 15 | 21 | 39559391  | 14.2607 | 0.6545 | -1.7400 | 7.6952 | CEU |
| LOC400452 | GI_42660576-S | rs2836980 | 15 | 21 | 39609488  | 14.5527 | 0.6625 | -1.7379 | 7.6952 | CEU |
| LOC400452 | GI_42660576-S | rs2836983 | 15 | 21 | 39611206  | 14.5527 | 0.6625 | 1.7379  | 7.6952 | CEU |
| LOC400452 | GI_42660576-S | rs2836985 | 15 | 21 | 39623039  | 14.5527 | 0.6625 | -1.7379 | 7.6952 | CEU |
| LOC401118 | GI_42657060-S | rs2858330 | 4  | 6  | 32766693  | 7.1473  | 0.3859 | -0.8366 | 6.9800 | CEU |
| Hs.132700 | Hs.132700-S   | rs2878628 | 15 | 3  | 52559755  | 7.5571  | 0.4051 | -0.0559 | 6.9235 | CEU |
| SNX27     | GI_31742500-S | rs3014272 | 1  | 1  | 223890175 | 6.9944  | 0.3786 | -0.2697 | 6.8283 | CEU |
| C19orf24  | GI_42476017-S | rs3014272 | 19 | 1  | 223890175 | 7.1019  | 0.3837 | -0.2616 | 6.8390 | CEU |
| ARIH1     | GI_9966762-S  | rs3014272 | 15 | 1  | 223890175 | 7.0443  | 0.3810 | -0.2005 | 6.9786 | CEU |
| SPTLC1    | GI_30474870-A | rs30649   | 9  | 5  | 129041704 | 7.1416  | 0.3856 | 0.2832  | 7.1331 | CEU |
| SPTLC1    | GI_30474870-A | rs30656   | 9  | 5  | 129038668 | 7.1416  | 0.3856 | -0.2832 | 7.1331 | CEU |
| SPTLC1    | GI_30474870-A | rs30658   | 9  | 5  | 129037957 | 7.1416  | 0.3856 | -0.2832 | 7.1331 | CEU |
| SPTLC1    | GI_30474870-A | rs30662   | 9  | 5  | 129036031 | 7.1416  | 0.3856 | -0.2832 | 7.1331 | CEU |
| LOC388461 | GI_41150880-S | rs3129719 | 18 | 6  | 32769757  | 8.1396  | 0.4314 | 0.1533  | 7.3269 | CEU |
| LOC401118 | GI_42657060-S | rs3129719 | 4  | 6  | 32769757  | 15.8032 | 0.6883 | 1.1745  | 6.9800 | CEU |
| LOC388461 | GI_41150880-S | rs3129720 | 18 | 6  | 32771609  | 8.1536  | 0.4435 | 0.1549  | 7.3269 | CEU |
| LOC401118 | GI_42657060-S | rs3129720 | 4  | 6  | 32771609  | 15.2143 | 0.6864 | 1.1637  | 6.9800 | CEU |
| LOC388461 | GI_41150880-S | rs3134975 | 18 | 6  | 32760559  | 8.1396  | 0.4314 | -0.1533 | 7.3269 | CEU |
| LOC401118 | GI_42657060-S | rs3134975 | 4  | 6  | 32760559  | 15.8032 | 0.6883 | -1.1745 | 6.9800 | CEU |
| LOC388461 | GI_41150880-S | rs3135006 | 18 | 6  | 32775097  | 7.9449  | 0.4284 | -0.1525 | 7.3269 | CEU |
| LOC401118 | GI_42657060-S | rs3135006 | 4  | 6  | 32775097  | 15.5425 | 0.6882 | -1.1668 | 6.9800 | CEU |
| Hs.132700 | Hs.132700-S   | rs3733041 | 15 | 3  | 52706638  | 7.3045  | 0.4098 | 0.0569  | 6.9235 | CEU |
| Hs.132700 | Hs.132700-S   | rs3733045 | 15 | 3  | 52618347  | 7.5672  | 0.4056 | 0.0563  | 6.9235 | CEU |
| Hs.132700 | Hs.132700-S   | rs3755798 | 15 | 3  | 52716200  | 7.4533  | 0.4057 | 0.0568  | 6.9235 | CEU |
| LOC388565 | GI_41208836-S | rs3756890 | 19 | 6  | 138765462 | 7.6271  | 0.4083 | -0.1968 | 7.5162 | CEU |
| Hs.132700 | Hs.132700-S   | rs3774366 | 15 | 3  | 52616295  | 7.5672  | 0.4056 | -0.0563 | 6.9235 | CEU |
| Hs.132700 | Hs.132700-S   | rs3796353 | 15 | 3  | 52568270  | 7.3652  | 0.4071 | 0.0566  | 6.9235 | CEU |
| DPCK      | GI_22095394-S | rs4233227 | 17 | 1  | 223888315 | 7.0510  | 0.3865 | -0.2143 | 6.8782 | CEU |
| MRPL10    | GI_22547113-A | rs4233227 | 17 | 1  | 223888315 | 7.2872  | 0.3979 | -0.2326 | 7.1349 | CEU |
| SNX27     | GI_31742500-S | rs4233227 | 1  | 1  | 223888315 | 7.1608  | 0.3918 | -0.2731 | 6.8283 | CEU |
| C19orf24  | GI_42476017-S | rs4233227 | 19 | 1  | 223888315 | 7.0381  | 0.3859 | -0.2628 | 6.8390 | CEU |
| ADPRHL2   | GI_8923416-S  | rs4233227 | 1  | 1  | 223888315 | 7.0703  | 0.3875 | -0.2295 | 7.0622 | CEU |
| SNX27     | GI_31742500-S | rs4294380 | 1  | 1  | 223885720 | 6.8485  | 0.3767 | 0.2677  | 6.8283 | CEU |
| C19orf24  | GI_42476017-S | rs4294380 | 19 | 1  | 223885720 | 6.9564  | 0.3819 | 0.2596  | 6.8390 | CEU |

|           |               |           |    |    |           |         |        |         |        |     |
|-----------|---------------|-----------|----|----|-----------|---------|--------|---------|--------|-----|
| ARIH1     | GI_9966762-S  | rs4294380 | 15 | 1  | 223885720 | 7.0453  | 0.3863 | 0.1971  | 6.9786 | CEU |
| Hs.132700 | Hs.132700-S   | rs4687629 | 15 | 3  | 52590267  | 7.3389  | 0.4058 | 0.0545  | 6.9235 | CEU |
| LOC400452 | GI_42660576-S | rs4818001 | 15 | 21 | 39496958  | 13.5733 | 0.6349 | 1.7343  | 7.6952 | CEU |
| Hs.132700 | Hs.132700-S   | rs6445534 | 15 | 3  | 52718424  | 7.1526  | 0.3968 | 0.0543  | 6.9235 | CEU |
| C20orf155 | GI_34147220-S | rs6484718 | 20 | 11 | 34389333  | 7.5576  | 0.4813 | -0.3628 | 6.8928 | CEU |
| LOC400452 | GI_42660576-S | rs6517522 | 15 | 21 | 39475715  | 18.8434 | 0.7608 | -1.9012 | 7.6952 | CEU |
| LOC388565 | GI_41208836-S | rs6570228 | 19 | 6  | 138732788 | 7.6271  | 0.4083 | -0.1968 | 7.5162 | CEU |
| LOC401154 | GI_42656959-S | rs6593279 | 4  | 7  | 55578179  | 14.4794 | 0.6942 | -0.3885 | 7.2717 | CEU |
| Hs.132700 | Hs.132700-S   | rs6805156 | 15 | 3  | 52584402  | 7.5571  | 0.4051 | 0.0559  | 6.9235 | CEU |
| LOC401118 | GI_42657060-S | rs6903608 | 4  | 6  | 32536263  | 9.8565  | 0.5027 | -0.9883 | 6.9800 | CEU |
| LOC388461 | GI_41150880-S | rs6916742 | 18 | 6  | 32561169  | 8.3504  | 0.4407 | 0.1625  | 7.3269 | CEU |
| LOC401118 | GI_42657060-S | rs6916742 | 4  | 6  | 32561169  | 9.7741  | 0.4995 | 1.0546  | 6.9800 | CEU |
| LOC388461 | GI_41150880-S | rs6928482 | 18 | 6  | 32734227  | 8.5641  | 0.4499 | 0.1501  | 7.3269 | CEU |
| LOC401118 | GI_42657060-S | rs6928482 | 4  | 6  | 32734227  | 7.8822  | 0.4199 | 0.8875  | 6.9800 | CEU |
| EPB41L4A  | GI_37537711-S | rs701831  | 5  | 6  | 32657379  | 11.9383 | 0.5776 | -0.3960 | 7.0086 | CEU |
| LOC401118 | GI_42657060-S | rs701831  | 4  | 6  | 32657379  | 11.2426 | 0.5539 | -1.1701 | 6.9800 | CEU |
| LOC400452 | GI_42660576-S | rs7278297 | 15 | 21 | 39547622  | 13.5733 | 0.6349 | -1.7343 | 7.6952 | CEU |
| LOC400452 | GI_42660576-S | rs7279497 | 15 | 21 | 39453176  | 14.5043 | 0.6547 | -1.7401 | 7.6952 | CEU |
| LOC400452 | GI_42660576-S | rs7282582 | 15 | 21 | 39618844  | 10.6900 | 0.5341 | 1.6079  | 7.6952 | CEU |
| RABIF     | GI_31543539-S | rs7287503 | 1  | 22 | 40896855  | 8.6645  | 0.4600 | -0.2450 | 7.3833 | CEU |
| LOC400452 | GI_42660576-S | rs741795  | 15 | 21 | 39640310  | 22.4323 | 0.8154 | 1.9234  | 7.6952 | CEU |
| SNX27     | GI_31742500-S | rs7555764 | 1  | 1  | 223866754 | 6.9944  | 0.3786 | -0.2697 | 6.8283 | CEU |
| C19orf24  | GI_42476017-S | rs7555764 | 19 | 1  | 223866754 | 7.1019  | 0.3837 | -0.2616 | 6.8390 | CEU |
| ARIH1     | GI_9966762-S  | rs7555764 | 15 | 1  | 223866754 | 7.0443  | 0.3810 | -0.2005 | 6.9786 | CEU |
| Hs.132700 | Hs.132700-S   | rs7652191 | 15 | 3  | 52585455  | 8.0746  | 0.4582 | 0.0590  | 6.9235 | CEU |
| KIAA1892  | GI_22218618-S | rs769218  | 9  | 11 | 34427255  | 7.8978  | 0.4262 | 0.3666  | 7.5323 | CEU |
| LOC388461 | GI_41150880-S | rs7739203 | 18 | 6  | 32549533  | 8.2096  | 0.4345 | -0.1321 | 7.3269 | CEU |
| LOC401118 | GI_42657060-S | rs7739203 | 4  | 6  | 32549533  | 8.1896  | 0.4337 | -0.8066 | 6.9800 | CEU |
| LOC401118 | GI_42657060-S | rs7739357 | 4  | 6  | 32549619  | 7.8566  | 0.4744 | -0.8685 | 6.9800 | CEU |
| LOC401118 | GI_42657060-S | rs7749092 | 4  | 6  | 32557028  | 8.5657  | 0.4558 | 1.3332  | 6.9800 | CEU |
| LOC401118 | GI_42657060-S | rs7749242 | 4  | 6  | 32557008  | 9.8565  | 0.5027 | -0.9883 | 6.9800 | CEU |
| LOC388461 | GI_41150880-S | rs7755212 | 18 | 6  | 32549386  | 7.5892  | 0.4546 | -0.1397 | 7.3269 | CEU |
| LOC401118 | GI_42657060-S | rs7755212 | 4  | 6  | 32549386  | 8.7016  | 0.5067 | -0.9050 | 6.9800 | CEU |
| LOC400452 | GI_42660576-S | rs8130320 | 15 | 21 | 39502128  | 14.2607 | 0.6545 | 1.7400  | 7.6952 | CEU |
| LOC400452 | GI_42660576-S | rs8132143 | 15 | 21 | 39506128  | 13.5733 | 0.6349 | -1.7343 | 7.6952 | CEU |
| LOC400452 | GI_42660576-S | rs8132424 | 15 | 21 | 39506282  | 13.8045 | 0.6352 | -1.7345 | 7.6952 | CEU |
| LOC400452 | GI_42660576-S | rs8134214 | 15 | 21 | 39464237  | 14.2607 | 0.6545 | -1.7400 | 7.6952 | CEU |
| CUEDC2    | GI_13128995-S | rs845552  | 10 | 7  | 55019716  | 7.6188  | 0.4080 | 0.1579  | 6.9800 | CEU |
| LDHB      | GI_22726178-S | rs845552  | 12 | 7  | 55019716  | 7.9394  | 0.4225 | 0.1470  | 6.9777 | CEU |
| SCFD1     | GI_33469977-A | rs910091  | 14 | 11 | 34393603  | 6.9576  | 0.3928 | -0.1763 | 6.8372 | CEU |
| EPB41L4A  | GI_37537711-S | rs9268199 | 5  | 6  | 32386613  | 8.8714  | 0.4630 | 0.3558  | 7.0086 | CEU |
| LOC401118 | GI_42657060-S | rs9268199 | 4  | 6  | 32386613  | 11.6176 | 0.5668 | 1.1833  | 6.9800 | CEU |
| LOC401118 | GI_42657060-S | rs9268228 | 4  | 6  | 32395097  | 7.6619  | 0.4099 | 0.9639  | 6.9800 | CEU |
| LOC401118 | GI_42657060-S | rs9268853 | 4  | 6  | 32537621  | 7.4625  | 0.4007 | 0.8735  | 6.9800 | CEU |
| LOC401118 | GI_42657060-S | rs9268858 | 4  | 6  | 32537736  | 7.4625  | 0.4007 | 0.8735  | 6.9800 | CEU |
| LOC388461 | GI_41150880-S | rs9268877 | 18 | 6  | 32539125  | 8.3781  | 0.4419 | -0.1346 | 7.3269 | CEU |
| LOC401118 | GI_42657060-S | rs9268877 | 4  | 6  | 32539125  | 8.3619  | 0.4412 | -0.8218 | 6.9800 | CEU |
| LOC401118 | GI_42657060-S | rs9268882 | 4  | 6  | 32539601  | 7.9439  | 0.4585 | 0.8381  | 6.9800 | CEU |
| LOC401118 | GI_42657060-S | rs9268914 | 4  | 6  | 32540534  | 10.1024 | 0.5513 | -1.0155 | 6.9800 | CEU |
| LOC388461 | GI_41150880-S | rs9268923 | 18 | 6  | 32540813  | 7.7501  | 0.4430 | -0.1301 | 7.3269 | CEU |
| LOC401118 | GI_42657060-S | rs9268923 | 4  | 6  | 32540813  | 10.4751 | 0.5587 | -0.9001 | 6.9800 | CEU |
| LOC401118 | GI_42657060-S | rs9268969 | 4  | 6  | 32542327  | 9.2416  | 0.5526 | -0.8463 | 6.9800 | CEU |

|           |               |            |    |    |           |         |        |         |         |     |
|-----------|---------------|------------|----|----|-----------|---------|--------|---------|---------|-----|
| LOC401118 | GI_42657060-S | rs9268979  | 4  | 6  | 32543022  | 7.4549  | 0.4170 | 0.7654  | 6.9800  | CEU |
| LOC401118 | GI_42657060-S | rs9269065  | 4  | 6  | 32548150  | 8.4603  | 0.4823 | 0.8792  | 6.9800  | CEU |
| LOC388461 | GI_41150880-S | rs9269069  | 18 | 6  | 32548340  | 8.1222  | 0.4363 | -0.1346 | 7.3269  | CEU |
| LOC401118 | GI_42657060-S | rs9269069  | 4  | 6  | 32548340  | 8.4945  | 0.4527 | -0.8415 | 6.9800  | CEU |
| LOC401118 | GI_42657060-S | rs9269070  | 4  | 6  | 32548429  | 7.9420  | 0.4717 | 0.9132  | 6.9800  | CEU |
| LOC388461 | GI_41150880-S | rs9269071  | 18 | 6  | 32548445  | 8.3781  | 0.4419 | 0.1346  | 7.3269  | CEU |
| LOC401118 | GI_42657060-S | rs9269071  | 4  | 6  | 32548445  | 8.3619  | 0.4412 | 0.8218  | 6.9800  | CEU |
| LOC401118 | GI_42657060-S | rs9269078  | 4  | 6  | 32548857  | 9.4545  | 0.5053 | -0.9793 | 6.9800  | CEU |
| LOC388461 | GI_41150880-S | rs9269080  | 18 | 6  | 32548947  | 8.3781  | 0.4419 | 0.1346  | 7.3269  | CEU |
| LOC401118 | GI_42657060-S | rs9269080  | 4  | 6  | 32548947  | 8.3619  | 0.4412 | 0.8218  | 6.9800  | CEU |
| LOC401118 | GI_42657060-S | rs9269081  | 4  | 6  | 32549078  | 9.1948  | 0.4763 | -0.9577 | 6.9800  | CEU |
| LOC401118 | GI_42657060-S | rs9269190  | 4  | 6  | 32556478  | 9.8565  | 0.5027 | 0.9883  | 6.9800  | CEU |
| EPB41L4A  | GI_37537711-S | rs9270986  | 5  | 6  | 32682038  | 11.7013 | 0.5760 | -0.3968 | 7.0086  | CEU |
| LOC401118 | GI_42657060-S | rs9270986  | 4  | 6  | 32682038  | 10.9348 | 0.5493 | -1.1577 | 6.9800  | CEU |
| LOC388461 | GI_41150880-S | rs9272346  | 18 | 6  | 32712350  | 15.3893 | 0.6780 | 0.1753  | 7.3269  | CEU |
| LOC401118 | GI_42657060-S | rs9272346  | 4  | 6  | 32712350  | 13.8668 | 0.6370 | 1.0389  | 6.9800  | CEU |
| LOC388461 | GI_41150880-S | rs9272723  | 18 | 6  | 32717405  | 14.3162 | 0.6496 | 0.1697  | 7.3269  | CEU |
| LOC401118 | GI_42657060-S | rs9272723  | 4  | 6  | 32717405  | 12.6378 | 0.6001 | 0.9976  | 6.9800  | CEU |
| LOC401118 | GI_42657060-S | rs9275141  | 4  | 6  | 32759095  | 7.1473  | 0.3859 | 0.8366  | 6.9800  | CEU |
| LOC388461 | GI_41150880-S | rs9275562  | 18 | 6  | 32785824  | 7.9932  | 0.4363 | 0.1529  | 7.3269  | CEU |
| LOC401118 | GI_42657060-S | rs9275562  | 4  | 6  | 32785824  | 13.7229 | 0.6458 | 1.1288  | 6.9800  | CEU |
| LOC401118 | GI_42657060-S | rs9286790  | 4  | 6  | 32547806  | 7.1120  | 0.4180 | 0.9063  | 6.9800  | CEU |
| LOC401118 | GI_42657060-S | rs9380319  | 4  | 6  | 32785890  | 7.1715  | 0.3923 | -0.8796 | 6.9800  | CEU |
| LOC401118 | GI_42657060-S | rs9405040  | 4  | 6  | 32547371  | 7.4625  | 0.4007 | -0.8735 | 6.9800  | CEU |
| LOC401118 | GI_42657060-S | rs9405112  | 4  | 6  | 32553578  | 7.4625  | 0.4007 | 0.8735  | 6.9800  | CEU |
| LOC388565 | GI_41208836-S | rs9495068  | 19 | 6  | 138753988 | 8.0298  | 0.4322 | 0.1932  | 7.5162  | CEU |
| LOC388565 | GI_41208836-S | rs9495070  | 19 | 6  | 138756312 | 7.6271  | 0.4083 | 0.1968  | 7.5162  | CEU |
| LOC401154 | GI_42656959-S | rs9642404  | 4  | 7  | 55631008  | 7.9797  | 0.4243 | -0.3522 | 7.2717  | CEU |
| Hs.132700 | Hs.132700-S   | rs998909   | 15 | 3  | 52780133  | 7.5672  | 0.4056 | 0.0563  | 6.9235  | CEU |
| LOC401155 | GI_42656964-S | rs17802433 | 9  | 2  | 94959504  | 27.2677 | 0.8741 | 0.9000  | 7.5869  | CEU |
| hmm3588   | hmm3588-S     | rs1529874  | 14 | 2  | 233175093 | 12.2414 | 0.5875 | -0.3096 | 11.7630 | CEU |
| KCNMB3    | GI_25952101-I | rs3739038  | 3  | 2  | 238454703 | 21.7376 | 0.8217 | -0.6067 | 7.7728  | CEU |
| KIAA1002  | GI_33356165-S | rs2270286  | 12 | 16 | 8630130   | 6.8756  | 0.3728 | 0.3186  | 6.8374  | CEU |
| PRIM1     | GI_41349493-S | rs2270286  | 12 | 16 | 8630130   | 7.1618  | 0.3866 | 0.5057  | 7.1398  | CEU |
| LDHC      | GI_9257227-A  | rs17075173 | 11 | 13 | 50488434  | 7.3687  | 0.3963 | -0.7269 | 7.1269  | CEU |
| GYG       | GI_20127456-S | rs7990383  | 3  | 13 | 109909236 | 7.0764  | 0.3825 | 0.2964  | 7.0155  | CEU |
| PEPD      | GI_4557834-S  | rs7990383  | 19 | 13 | 109909236 | 7.3826  | 0.3970 | 0.2555  | 6.9451  | CEU |
| ZNF322B   | GI_39841070-S | rs3736781  | 9  | 6  | 26613341  | 7.6562  | 0.4097 | -0.2954 | 7.2611  | CEU |
| EPB41L4A  | GI_37537711-S | rs3129941  | 5  | 6  | 32445664  | 11.3258 | 0.5568 | -0.3644 | 7.0086  | CEU |
| RPL14     | GI_16753224-S | rs1047855  | 4  | 3  | 40443900  | 20.7198 | 0.7886 | 0.8941  | 7.1014  | CEU |
| BMP4      | GI_19528651-A | rs16845107 | 14 | 3  | 114610681 | 10.0488 | 0.5101 | -1.2816 | 9.1525  | CEU |
| RRAS2     | GI_38569462-S | rs17579502 | 1  | 9  | 5910886   | 7.8651  | 0.4192 | 0.7333  | 7.8247  | CEU |
| MGC24133  | GI_31341350-S | rs7302230  | 1  | 12 | 7179699   | 7.5568  | 0.4051 | 1.5356  | 7.3859  | CEU |
| CACNB2    | GI_45359833-I | rs7167599  | 10 | 15 | 97490122  | 9.6014  | 0.4988 | -0.2415 | 9.4786  | CEU |
| FLJ23506  | GI_13376239-S | rs17610219 | 19 | 4  | 148182469 | 7.7779  | 0.4152 | -0.2218 | 7.3020  | CEU |
| PEPD      | GI_4557834-S  | rs3803236  | 19 | 13 | 109915746 | 7.1692  | 0.4611 | 0.2832  | 6.9451  | CEU |
| FLT1      | GI_32306519-S | rs2271194  | 13 | 12 | 54763961  | 17.1168 | 0.7190 | 0.4180  | 7.1378  | CEU |
| LOC389472 | GI_42657859-S | rs2271194  | 7  | 12 | 54763961  | 16.6517 | 0.7085 | 0.6920  | 7.0910  | CEU |
| LOC401470 | GI_42658911-S | rs2271194  | 8  | 12 | 54763961  | 14.5914 | 0.6571 | 0.6390  | 7.3419  | CEU |
| hmm32535  | hmm32535-S    | rs2271194  | 7  | 12 | 54763961  | 16.1568 | 0.6969 | 0.2107  | 8.0518  | CEU |
| UGT2B11   | GI_4507822-S  | rs10034124 | 4  | 4  | 69222280  | 24.7728 | 0.9389 | -2.8313 | 9.2561  | CHB |
| LOC389972 | GI_41149334-S | rs10037055 | 10 | 5  | 176623885 | 11.8628 | 0.6857 | -0.2549 | 7.2677  | CHB |

|            |               |            |    |    |           |         |        |         |        |     |
|------------|---------------|------------|----|----|-----------|---------|--------|---------|--------|-----|
| FACL2      | GI_12669906-S | rs10040724 | 4  | 5  | 873594    | 7.8200  | 0.5182 | 0.3571  | 7.3032 | CHB |
| FLJ14803   | GI_14249557-S | rs10040724 | 7  | 5  | 873594    | 7.8386  | 0.5191 | 0.2734  | 6.9672 | CHB |
| NOP5/NOP58 | GI_34222329-S | rs10040724 | 2  | 5  | 873594    | 8.4284  | 0.5481 | 0.2544  | 6.9808 | CHB |
| LOC389972  | GI_41149334-S | rs10077929 | 10 | 5  | 176630450 | 11.8628 | 0.6857 | 0.2549  | 7.2677 | CHB |
| LOC401154  | GI_42656959-S | rs10232851 | 4  | 7  | 55603043  | 15.0702 | 0.8004 | -0.3902 | 7.0518 | CHB |
| UGT2B11    | GI_4507822-S  | rs10471154 | 4  | 4  | 69219098  | 9.5995  | 0.6006 | -2.0833 | 9.2561 | CHB |
| LOC401154  | GI_42656959-S | rs10481004 | 4  | 7  | 55542880  | 9.7304  | 0.6061 | 0.3436  | 7.0518 | CHB |
| LOC389972  | GI_41149334-S | rs11949767 | 10 | 5  | 176672850 | 8.8773  | 0.5689 | 0.2271  | 7.2677 | CHB |
| LOC389972  | GI_41149334-S | rs12187932 | 10 | 5  | 176575757 | 11.8628 | 0.6857 | 0.2549  | 7.2677 | CHB |
| LOC377709  | GI_37552433-S | rs12468079 | 8  | 2  | 217144583 | 9.6979  | 0.6047 | -0.1720 | 8.1994 | CHB |
| LOC377709  | GI_37552433-S | rs12472569 | 8  | 2  | 217206912 | 8.5418  | 0.5534 | 0.1639  | 8.1994 | CHB |
| LOC389972  | GI_41149334-S | rs12519145 | 10 | 5  | 176488129 | 8.6779  | 0.5598 | -0.2334 | 7.2677 | CHB |
| LOC377709  | GI_37552433-S | rs12611945 | 8  | 2  | 217119515 | 9.6979  | 0.6047 | 0.1720  | 8.1994 | CHB |
| LOC377709  | GI_37552433-S | rs12612280 | 8  | 2  | 217123766 | 9.6979  | 0.6047 | 0.1720  | 8.1994 | CHB |
| LOC377709  | GI_37552433-S | rs12612749 | 8  | 2  | 217129141 | 9.6979  | 0.6047 | -0.1720 | 8.1994 | CHB |
| LOC377709  | GI_37552433-S | rs12619115 | 8  | 2  | 217189346 | 8.7148  | 0.5974 | -0.1762 | 8.1994 | CHB |
| LOC377709  | GI_37552433-S | rs12620897 | 8  | 2  | 217161264 | 9.0808  | 0.5957 | -0.1714 | 8.1994 | CHB |
| LOC377709  | GI_37552433-S | rs12621359 | 8  | 2  | 217119330 | 9.6979  | 0.6047 | -0.1720 | 8.1994 | CHB |
| FACL2      | GI_12669906-S | rs12655323 | 4  | 5  | 875109    | 7.7899  | 0.5250 | 0.3598  | 7.3032 | CHB |
| FLJ14803   | GI_14249557-S | rs12655323 | 7  | 5  | 875109    | 7.8012  | 0.5256 | 0.2754  | 6.9672 | CHB |
| NOP5/NOP58 | GI_34222329-S | rs12655323 | 2  | 5  | 875109    | 8.3612  | 0.5534 | 0.2560  | 6.9808 | CHB |
| ARID3A     | GI_4885192-S  | rs12655323 | 19 | 5  | 875109    | 7.0077  | 0.4834 | 0.2827  | 6.8830 | CHB |
| FACL2      | GI_12669906-S | rs12656150 | 4  | 5  | 875123    | 7.8200  | 0.5182 | -0.3571 | 7.3032 | CHB |
| FLJ14803   | GI_14249557-S | rs12656150 | 7  | 5  | 875123    | 7.8386  | 0.5191 | -0.2734 | 6.9672 | CHB |
| NOP5/NOP58 | GI_34222329-S | rs12656150 | 2  | 5  | 875123    | 8.4284  | 0.5481 | -0.2544 | 6.9808 | CHB |
| LOC389972  | GI_41149334-S | rs12660023 | 10 | 5  | 176633491 | 11.8628 | 0.6857 | -0.2549 | 7.2677 | CHB |
| LOC389972  | GI_41149334-S | rs12716330 | 10 | 5  | 176531108 | 11.8628 | 0.6857 | 0.2549  | 7.2677 | CHB |
| LOC388461  | GI_41150880-S | rs12918    | 18 | 6  | 32735364  | 13.5603 | 0.7375 | -0.2729 | 7.4936 | CHB |
| LOC401118  | GI_42657060-S | rs12918    | 4  | 6  | 32735364  | 9.5885  | 0.6001 | -1.3850 | 7.4613 | CHB |
| LOC389972  | GI_41149334-S | rs1363405  | 10 | 5  | 176569488 | 11.8628 | 0.6857 | -0.2549 | 7.2677 | CHB |
| LOC389972  | GI_41149334-S | rs1546363  | 10 | 5  | 176533637 | 11.7306 | 0.6899 | 0.2536  | 7.2677 | CHB |
| LOC377709  | GI_37552433-S | rs16856088 | 8  | 2  | 217118220 | 9.6077  | 0.6009 | 0.1705  | 8.1994 | CHB |
| LOC377709  | GI_37552433-S | rs16856102 | 8  | 2  | 217120743 | 9.1355  | 0.6569 | -0.1884 | 8.1994 | CHB |
| LOC377709  | GI_37552433-S | rs16856126 | 8  | 2  | 217124692 | 9.6979  | 0.6047 | 0.1720  | 8.1994 | CHB |
| LOC377709  | GI_37552433-S | rs16856136 | 8  | 2  | 217128131 | 9.5549  | 0.6074 | -0.1743 | 8.1994 | CHB |
| LOC377709  | GI_37552433-S | rs1705105  | 8  | 2  | 217131441 | 9.6979  | 0.6047 | 0.1720  | 8.1994 | CHB |
| EPB41L4A   | GI_37537711-S | rs17191234 | 5  | 6  | 32672659  | 7.6184  | 0.5079 | 0.3054  | 7.1949 | CHB |
| LOC377709  | GI_37552433-S | rs2066518  | 8  | 2  | 217113894 | 9.6979  | 0.6047 | 0.1720  | 8.1994 | CHB |
| LOC377709  | GI_37552433-S | rs2066521  | 8  | 2  | 217122924 | 9.6979  | 0.6047 | -0.1720 | 8.1994 | CHB |
| ZFP91      | GI_25777699-I | rs2074411  | 11 | 17 | 32953876  | 7.3879  | 0.4958 | 0.4225  | 7.1887 | CHB |
| PREI3      | GI_41349448-A | rs2074411  | 2  | 17 | 32953876  | 7.1606  | 0.4837 | 0.3648  | 7.1576 | CHB |
| LOC389972  | GI_41149334-S | rs2336237  | 10 | 5  | 176598485 | 11.8628 | 0.6857 | 0.2549  | 7.2677 | CHB |
| LOC389972  | GI_41149334-S | rs244708   | 10 | 5  | 176522191 | 11.8628 | 0.6857 | 0.2549  | 7.2677 | CHB |
| LOC377709  | GI_37552433-S | rs2627045  | 8  | 2  | 217133513 | 9.6979  | 0.6047 | -0.1720 | 8.1994 | CHB |
| LOC377709  | GI_37552433-S | rs2738286  | 8  | 2  | 217140870 | 9.6979  | 0.6047 | -0.1720 | 8.1994 | CHB |
| LOC377709  | GI_37552433-S | rs2738289  | 8  | 2  | 217169528 | 9.6979  | 0.6047 | 0.1720  | 8.1994 | CHB |
| LOC400452  | GI_42660576-S | rs2776311  | 15 | 21 | 39638755  | 21.0874 | 0.8823 | 2.5836  | 7.6924 | CHB |
| LOC377709  | GI_37552433-S | rs284548   | 8  | 2  | 217136361 | 10.0309 | 0.6452 | -0.1773 | 8.1994 | CHB |
| LOC377709  | GI_37552433-S | rs284552   | 8  | 2  | 217138550 | 9.6979  | 0.6047 | -0.1720 | 8.1994 | CHB |
| LOC377709  | GI_37552433-S | rs284565   | 8  | 2  | 217184312 | 9.6077  | 0.6009 | 0.1705  | 8.1994 | CHB |
| LOC377709  | GI_37552433-S | rs284567   | 8  | 2  | 217177980 | 9.6077  | 0.6009 | -0.1705 | 8.1994 | CHB |
| LOC389972  | GI_41149334-S | rs351861   | 10 | 5  | 176474543 | 10.8669 | 0.6507 | -0.2452 | 7.2677 | CHB |

|            |               |            |    |    |           |         |        |         |        |     |
|------------|---------------|------------|----|----|-----------|---------|--------|---------|--------|-----|
| LOC377709  | GI_37552433-S | rs3732019  | 8  | 2  | 217187892 | 8.5418  | 0.5534 | -0.1639 | 8.1994 | CHB |
| FACL2      | GI_12669906-S | rs3734155  | 4  | 5  | 874390    | 7.6974  | 0.5203 | 0.3586  | 7.3032 | CHB |
| FLJ14803   | GI_14249557-S | rs3734155  | 7  | 5  | 874390    | 7.6594  | 0.5183 | 0.2736  | 6.9672 | CHB |
| NOP5/NOP58 | GI_34222329-S | rs3734155  | 2  | 5  | 874390    | 8.2117  | 0.5461 | 0.2539  | 6.9808 | CHB |
| LOC377709  | GI_37552433-S | rs3770480  | 8  | 2  | 217129746 | 9.6979  | 0.6047 | 0.1720  | 8.1994 | CHB |
| LOC377709  | GI_37552433-S | rs3770483  | 8  | 2  | 217120269 | 9.6979  | 0.6047 | 0.1720  | 8.1994 | CHB |
| LOC377709  | GI_37552433-S | rs3770485  | 8  | 2  | 217118416 | 9.6979  | 0.6047 | 0.1720  | 8.1994 | CHB |
| LOC377709  | GI_37552433-S | rs3770487  | 8  | 2  | 217117613 | 9.6979  | 0.6047 | 0.1720  | 8.1994 | CHB |
| LOC377709  | GI_37552433-S | rs3770488  | 8  | 2  | 217117579 | 9.4292  | 0.6296 | -0.1748 | 8.1994 | CHB |
| LOC377709  | GI_37552433-S | rs3806575  | 8  | 2  | 217188440 | 8.2438  | 0.5748 | 0.1710  | 8.1994 | CHB |
| LOC377709  | GI_37552433-S | rs3816783  | 8  | 2  | 217128593 | 9.6979  | 0.6047 | -0.1720 | 8.1994 | CHB |
| LOC377709  | GI_37552433-S | rs4324305  | 8  | 2  | 217155418 | 9.6077  | 0.6009 | 0.1705  | 8.1994 | CHB |
| LOC401154  | GI_42656959-S | rs4563845  | 4  | 7  | 55552324  | 11.0544 | 0.6752 | 0.3354  | 7.0518 | CHB |
| LOC389972  | GI_41149334-S | rs4976640  | 10 | 5  | 176484613 | 11.8628 | 0.6857 | -0.2549 | 7.2677 | CHB |
| LOC377709  | GI_37552433-S | rs505883   | 8  | 2  | 217131540 | 9.0327  | 0.5935 | 0.1687  | 8.1994 | CHB |
| LOC377709  | GI_37552433-S | rs560025   | 8  | 2  | 217133078 | 9.6979  | 0.6047 | -0.1720 | 8.1994 | CHB |
| LOC377709  | GI_37552433-S | rs605702   | 8  | 2  | 217172200 | 9.3198  | 0.5973 | -0.1670 | 8.1994 | CHB |
| LOC400452  | GI_42660576-S | rs6517522  | 15 | 21 | 39475715  | 10.4710 | 0.6357 | -2.2007 | 7.6924 | CHB |
| LOC377709  | GI_37552433-S | rs654474   | 8  | 2  | 217176114 | 9.6979  | 0.6047 | 0.1720  | 8.1994 | CHB |
| C1orf27    | GI_20127566-S | rs6715047  | 1  | 2  | 70944984  | 8.2818  | 0.5410 | 0.1204  | 8.0067 | CHB |
| LOC389972  | GI_41149334-S | rs6872201  | 10 | 5  | 176653372 | 8.6779  | 0.5598 | 0.2334  | 7.2677 | CHB |
| FACL2      | GI_12669906-S | rs6875688  | 4  | 5  | 871479    | 7.6974  | 0.5203 | -0.3586 | 7.3032 | CHB |
| FLJ14803   | GI_14249557-S | rs6875688  | 7  | 5  | 871479    | 7.6594  | 0.5183 | -0.2736 | 6.9672 | CHB |
| NOP5/NOP58 | GI_34222329-S | rs6875688  | 2  | 5  | 871479    | 8.2117  | 0.5461 | -0.2539 | 6.9808 | CHB |
| LOC389972  | GI_41149334-S | rs6886255  | 10 | 5  | 176650967 | 11.8628 | 0.6857 | 0.2549  | 7.2677 | CHB |
| LOC389972  | GI_41149334-S | rs6890580  | 10 | 5  | 176586126 | 11.8628 | 0.6857 | 0.2549  | 7.2677 | CHB |
| LOC388461  | GI_41150880-S | rs6928482  | 18 | 6  | 32734227  | 11.2738 | 0.6654 | 0.1745  | 7.4936 | CHB |
| LOC401118  | GI_42657060-S | rs6928482  | 4  | 6  | 32734227  | 7.7622  | 0.5152 | 0.8651  | 7.4613 | CHB |
| LOC400452  | GI_42660576-S | rs741795   | 15 | 21 | 39640310  | 21.0874 | 0.8823 | 2.5836  | 7.6924 | CHB |
| UGT2B11    | GI_4507822-S  | rs7435827  | 4  | 4  | 69243710  | 11.0625 | 0.6578 | 2.6051  | 9.2561 | CHB |
| LOC389972  | GI_41149334-S | rs7719125  | 10 | 5  | 176621772 | 11.8628 | 0.6857 | -0.2549 | 7.2677 | CHB |
| ALDH1B1    | GI_25777729-S | rs7739357  | 9  | 6  | 32549619  | 7.2970  | 0.5544 | 0.2018  | 7.0320 | CHB |
| ANAPC11    | GI_19923724-S | rs7764237  | 17 | 6  | 30105965  | 6.9264  | 0.5332 | -0.2676 | 6.5271 | CHB |
| CD1C       | GI_4502646-S  | rs9262564  | 1  | 6  | 31117116  | 7.7413  | 0.5401 | -0.4358 | 7.6371 | CHB |
| CACNA1H    | GI_10864076-S | rs9270657  | 16 | 6  | 32673999  | 8.0626  | 0.5303 | -0.1228 | 7.3606 | CHB |
| EPB41L4A   | GI_37537711-S | rs9270657  | 5  | 6  | 32673999  | 12.2948 | 0.6998 | 0.3911  | 7.1949 | CHB |
| EPB41L4A   | GI_37537711-S | rs9272218  | 5  | 6  | 32710216  | 9.4784  | 0.6223 | -0.3508 | 7.1949 | CHB |
| LOC388461  | GI_41150880-S | rs9272346  | 18 | 6  | 32712350  | 14.2539 | 0.7562 | 0.1823  | 7.4936 | CHB |
| LOC401118  | GI_42657060-S | rs9272346  | 4  | 6  | 32712350  | 10.5679 | 0.6394 | 0.9424  | 7.4613 | CHB |
| LOC388461  | GI_41150880-S | rs9272723  | 18 | 6  | 32717405  | 12.4898 | 0.7059 | 0.1748  | 7.4936 | CHB |
| LOC401118  | GI_42657060-S | rs9272723  | 4  | 6  | 32717405  | 9.3152  | 0.5884 | 0.8974  | 7.4613 | CHB |
| LOC389972  | GI_41149334-S | rs9313749  | 10 | 5  | 176530300 | 11.8628 | 0.6857 | 0.2549  | 7.2677 | CHB |
| LOC389972  | GI_41149334-S | rs9885210  | 10 | 5  | 176501794 | 11.8628 | 0.6857 | 0.2549  | 7.2677 | CHB |
| POMZP3     | GI_23510405-A | rs2286428  | 7  | 7  | 75699023  | 12.2408 | 0.6980 | 0.9772  | 9.3542 | CHB |
| LOC283520  | GI_27482429-S | rs722896   | 13 | 2  | 70955116  | 7.3574  | 0.4942 | 0.1581  | 7.0816 | CHB |
| LOC283520  | GI_27482429-S | rs2075221  | 13 | 2  | 70955866  | 7.3574  | 0.4942 | -0.1581 | 7.0816 | CHB |
| LOC401155  | GI_42656964-S | rs17802433 | 9  | 2  | 94959504  | 19.6544 | 0.8756 | 0.9351  | 7.4464 | CHB |
| KCNMB3     | GI_25952101-I | rs3739038  | 3  | 2  | 238454703 | 14.9962 | 0.8069 | -0.6132 | 7.1872 | CHB |
| APOL1      | GI_21735617-A | rs2295320  | 22 | 14 | 23752607  | 7.5358  | 0.5036 | -0.6110 | 6.7211 | CHB |
| RPL30      | GI_15812218-S | rs6089219  | 8  | 20 | 60399713  | 6.9881  | 0.4742 | -0.1359 | 6.7902 | CHB |
| RPL35A     | GI_16117790-S | rs6089219  | 3  | 20 | 60399713  | 6.8553  | 0.4669 | -0.1066 | 6.8323 | CHB |
| RPL24      | GI_17017969-S | rs6089219  | 3  | 20 | 60399713  | 7.5319  | 0.5034 | -0.0980 | 7.0568 | CHB |

|               |               |            |    |    |           |         |        |         |        |     |
|---------------|---------------|------------|----|----|-----------|---------|--------|---------|--------|-----|
| Hs.483001     | Hs.483001-S   | rs1538264  | 5  | 10 | 120393426 | 8.7422  | 0.5628 | 0.0529  | 7.4517 | CHB |
| MICA          | GI_4557750-S  | rs7575     | 6  | 22 | 17797804  | 7.4144  | 0.4972 | 0.7768  | 7.2698 | CHB |
| ChGn          | GI_40255140-S | rs7023244  | 8  | 9  | 14809370  | 7.3086  | 0.4916 | 0.2749  | 7.2630 | CHB |
| LOC201294     | GI_29736784-S | rs2269700  | 17 | 9  | 115243117 | 7.9811  | 0.5263 | 0.3031  | 7.5925 | CHB |
| Hs.486750     | Hs.486750-S   | rs1551118  | 6  | 12 | 79263898  | 7.2042  | 0.4860 | -0.0677 | 6.9923 | CHB |
| LOC389972     | GI_41149334-S | rs3733875  | 10 | 5  | 176569846 | 11.1771 | 0.6620 | -0.2544 | 7.2677 | CHB |
| HIST1H3H      | GI_15718725-S | rs2271194  | 6  | 12 | 54763961  | 7.5884  | 0.5063 | 0.2273  | 7.2973 | CHB |
| FLT1          | GI_32306519-S | rs2271194  | 13 | 12 | 54763961  | 12.3665 | 0.7020 | 0.4372  | 7.2192 | CHB |
| LOC389472     | GI_42657859-S | rs2271194  | 7  | 12 | 54763961  | 12.9292 | 0.7193 | 0.7286  | 7.0419 | CHB |
| LOC401470     | GI_42658911-S | rs2271194  | 8  | 12 | 54763961  | 11.5018 | 0.6734 | 0.7210  | 7.2314 | CHB |
| hmm32535      | hmm32535-S    | rs2271194  | 7  | 12 | 54763961  | 9.2507  | 0.5856 | 0.1890  | 7.6540 | CHB |
| UGT2B11       | GI_4507822-S  | rs10034124 | 4  | 4  | 69222280  | 28.1888 | 0.9557 | -2.5800 | 8.8707 | JPT |
| LOC389972     | GI_41149334-S | rs10037055 | 10 | 5  | 176623885 | 11.1854 | 0.6623 | -0.2448 | 7.2502 | JPT |
| LOC389972     | GI_41149334-S | rs10077929 | 10 | 5  | 176630450 | 11.1854 | 0.6623 | 0.2448  | 7.2502 | JPT |
| LOC401154     | GI_42656959-S | rs10232851 | 4  | 7  | 55603043  | 8.0479  | 0.5557 | -0.2974 | 7.2421 | JPT |
| GPD2          | GI_4504084-S  | rs10411185 | 2  | 19 | 8009881   | 7.1733  | 0.4843 | -0.3124 | 6.9394 | JPT |
| PIGS          | GI_23397651-S | rs10490798 | 17 | 3  | 47303748  | 6.8304  | 0.4735 | -0.2084 | 6.6648 | JPT |
| DKFZP564I0422 | GI_13899258-S | rs11102778 | 12 | 1  | 114566166 | 8.1884  | 0.5537 | -0.4308 | 8.1146 | JPT |
| FBXL4         | GI_21536437-S | rs11102778 | 6  | 1  | 114566166 | 8.4431  | 0.5661 | -0.2721 | 8.3858 | JPT |
| CLK3          | GI_4557478-A  | rs11102778 | 15 | 1  | 114566166 | 7.6552  | 0.5267 | -0.8226 | 7.4599 | JPT |
| Hs.96557      | Hs.96557-S    | rs11102778 | 8  | 1  | 114566166 | 7.4513  | 0.5160 | -0.4466 | 7.0729 | JPT |
| Magmas        | GI_27363460-S | rs11130126 | 16 | 3  | 47281898  | 7.4138  | 0.5054 | -0.2407 | 7.2322 | JPT |
| OSBPL8        | GI_22035617-S | rs11242837 | 12 | 6  | 3206887   | 8.0135  | 0.6032 | 0.2760  | 7.0403 | JPT |
| Magmas        | GI_27363460-S | rs11713693 | 16 | 3  | 47049910  | 7.3420  | 0.5373 | 0.2584  | 7.2322 | JPT |
| Magmas        | GI_27363460-S | rs11915074 | 16 | 3  | 47284761  | 7.4138  | 0.5054 | -0.2407 | 7.2322 | JPT |
| Magmas        | GI_27363460-S | rs11920354 | 16 | 3  | 47237250  | 7.4138  | 0.5054 | 0.2407  | 7.2322 | JPT |
| Magmas        | GI_27363460-S | rs11920853 | 16 | 3  | 47283187  | 7.3491  | 0.4938 | 0.2357  | 7.2322 | JPT |
| LOC389972     | GI_41149334-S | rs11949767 | 10 | 5  | 176672850 | 10.1076 | 0.6215 | 0.2209  | 7.2502 | JPT |
| LOC389972     | GI_41149334-S | rs12187932 | 10 | 5  | 176575757 | 8.2229  | 0.5382 | 0.2107  | 7.2502 | JPT |
| LOC377709     | GI_37552433-S | rs12472569 | 8  | 2  | 217206912 | 8.9009  | 0.5875 | 0.1787  | 7.7060 | JPT |
| LOC389972     | GI_41149334-S | rs12519145 | 10 | 5  | 176488129 | 8.1493  | 0.5346 | -0.2051 | 7.2502 | JPT |
| LOC377709     | GI_37552433-S | rs12616410 | 8  | 2  | 217193418 | 8.7359  | 0.5799 | -0.1822 | 7.7060 | JPT |
| LOC389972     | GI_41149334-S | rs12660023 | 10 | 5  | 176633491 | 10.8341 | 0.6762 | -0.2447 | 7.2502 | JPT |
| LOC389972     | GI_41149334-S | rs12716330 | 10 | 5  | 176531108 | 8.2229  | 0.5382 | 0.2107  | 7.2502 | JPT |
| LOC389972     | GI_41149334-S | rs1363405  | 10 | 5  | 176569488 | 8.0553  | 0.5384 | -0.2106 | 7.2502 | JPT |
| LOC389972     | GI_41149334-S | rs1546363  | 10 | 5  | 176533637 | 8.0553  | 0.5384 | 0.2106  | 7.2502 | JPT |
| LOC377709     | GI_37552433-S | rs1705105  | 8  | 2  | 217131441 | 7.7666  | 0.5238 | 0.2011  | 7.7060 | JPT |
| Magmas        | GI_27363460-S | rs17410853 | 16 | 3  | 47338975  | 7.3491  | 0.4938 | -0.2357 | 7.2322 | JPT |
| Hs.505053     | Hs.505053-S   | rs2010300  | 21 | 15 | 38867423  | 8.4992  | 0.5600 | -0.0650 | 8.0872 | JPT |
| LOC377709     | GI_37552433-S | rs2066518  | 8  | 2  | 217113894 | 7.7666  | 0.5238 | 0.2011  | 7.7060 | JPT |
| PIGS          | GI_23397651-S | rs2240796  | 17 | 3  | 47355503  | 6.8304  | 0.4735 | -0.2084 | 6.6648 | JPT |
| LOC377709     | GI_37552433-S | rs2272243  | 8  | 2  | 217190270 | 8.8616  | 0.5857 | -0.1876 | 7.7060 | JPT |
| LOC389972     | GI_41149334-S | rs2336237  | 10 | 5  | 176598485 | 8.0553  | 0.5384 | 0.2106  | 7.2502 | JPT |
| TK1           | GI_4507518-S  | rs238233   | 17 | 17 | 4826706   | 7.1831  | 0.4930 | 0.3422  | 7.1287 | JPT |
| LOC401118     | GI_42657060-S | rs2395522  | 4  | 6  | 32772700  | 10.2313 | 0.6821 | 0.9489  | 7.2431 | JPT |
| LOC389972     | GI_41149334-S | rs244708   | 10 | 5  | 176522191 | 8.0553  | 0.5384 | 0.2106  | 7.2502 | JPT |
| LOC400452     | GI_42660576-S | rs2776311  | 15 | 21 | 39638755  | 24.2805 | 0.9212 | 2.8295  | 8.5824 | JPT |
| LOC377709     | GI_37552433-S | rs284552   | 8  | 2  | 217138550 | 7.7666  | 0.5238 | -0.2011 | 7.7060 | JPT |
| LOC377709     | GI_37552433-S | rs284565   | 8  | 2  | 217184312 | 7.7666  | 0.5238 | 0.2011  | 7.7060 | JPT |
| LOC377709     | GI_37552433-S | rs284567   | 8  | 2  | 217177980 | 7.7666  | 0.5238 | -0.2011 | 7.7060 | JPT |
| LOC283887     | GI_42660747-S | rs2947066  | 16 | 10 | 32871691  | 7.0726  | 0.4870 | -0.1002 | 6.8029 | JPT |
| LOC377709     | GI_37552433-S | rs3732019  | 8  | 2  | 217187892 | 9.2027  | 0.5922 | -0.1914 | 7.7060 | JPT |

|           |               |            |    |    |           |         |        |         |        |     |
|-----------|---------------|------------|----|----|-----------|---------|--------|---------|--------|-----|
| LOC377709 | GI_37552433-S | rs3755140  | 8  | 2  | 217188555 | 8.8167  | 0.5748 | 0.1854  | 7.7060 | JPT |
| LOC377709 | GI_37552433-S | rs3770480  | 8  | 2  | 217129746 | 7.7666  | 0.5238 | 0.2011  | 7.7060 | JPT |
| LOC401118 | GI_42657060-S | rs4248168  | 4  | 6  | 32767721  | 11.1448 | 0.6608 | 0.8995  | 7.2431 | JPT |
| LOC401118 | GI_42657060-S | rs4713581  | 4  | 6  | 32768001  | 11.1448 | 0.6608 | 0.8995  | 7.2431 | JPT |
| LOC401118 | GI_42657060-S | rs4713582  | 4  | 6  | 32768029  | 11.1448 | 0.6608 | 0.8995  | 7.2431 | JPT |
| LOC389972 | GI_41149334-S | rs4976640  | 10 | 5  | 176484613 | 8.0553  | 0.5384 | -0.2106 | 7.2502 | JPT |
| LOC388461 | GI_41150880-S | rs5000634  | 18 | 6  | 32771542  | 8.4505  | 0.5491 | 0.1572  | 7.1838 | JPT |
| LOC401118 | GI_42657060-S | rs5000634  | 4  | 6  | 32771542  | 9.1497  | 0.5811 | 0.8891  | 7.2431 | JPT |
| LOC401118 | GI_42657060-S | rs5002702  | 4  | 6  | 32767136  | 9.7756  | 0.6348 | -0.8917 | 7.2431 | JPT |
| LOC401118 | GI_42657060-S | rs6457619  | 4  | 6  | 32771964  | 9.3597  | 0.5903 | -0.8299 | 7.2431 | JPT |
| LOC401118 | GI_42657060-S | rs6457620  | 4  | 6  | 32771977  | 11.1448 | 0.6608 | 0.8995  | 7.2431 | JPT |
| LOC388461 | GI_41150880-S | rs6457622  | 18 | 6  | 32772141  | 7.2049  | 0.5393 | -0.1456 | 7.1838 | JPT |
| LOC400452 | GI_42660576-S | rs6517522  | 15 | 21 | 39475715  | 24.2805 | 0.9212 | -2.8295 | 8.5824 | JPT |
| LOC389972 | GI_41149334-S | rs6872201  | 10 | 5  | 176653372 | 10.8198 | 0.6577 | 0.2380  | 7.2502 | JPT |
| LOC389972 | GI_41149334-S | rs6886255  | 10 | 5  | 176650967 | 11.1854 | 0.6623 | 0.2448  | 7.2502 | JPT |
| LOC389972 | GI_41149334-S | rs6890580  | 10 | 5  | 176586126 | 8.0553  | 0.5384 | 0.2106  | 7.2502 | JPT |
| LOC388461 | GI_41150880-S | rs6916742  | 18 | 6  | 32561169  | 7.2441  | 0.4963 | 0.1498  | 7.1838 | JPT |
| LOC388461 | GI_41150880-S | rs6928482  | 18 | 6  | 32734227  | 8.3601  | 0.5621 | 0.1610  | 7.1838 | JPT |
| LOC401118 | GI_42657060-S | rs6928482  | 4  | 6  | 32734227  | 10.5834 | 0.6577 | 0.9765  | 7.2431 | JPT |
| LOC400452 | GI_42660576-S | rs741795   | 15 | 21 | 39640310  | 24.2805 | 0.9212 | 2.8295  | 8.5824 | JPT |
| UGT2B11   | GI_4507822-S  | rs7435827  | 4  | 4  | 69243710  | 11.3464 | 0.6767 | 2.3770  | 8.8707 | JPT |
| Magmas    | GI_27363460-S | rs7632501  | 16 | 3  | 47243310  | 7.4138  | 0.5054 | 0.2407  | 7.2322 | JPT |
| LOC389972 | GI_41149334-S | rs7719125  | 10 | 5  | 176621772 | 11.1854 | 0.6623 | -0.2448 | 7.2502 | JPT |
| LOC388461 | GI_41150880-S | rs7745040  | 18 | 6  | 32772310  | 8.4505  | 0.5491 | 0.1572  | 7.1838 | JPT |
| LOC401118 | GI_42657060-S | rs7745040  | 4  | 6  | 32772310  | 9.1497  | 0.5811 | 0.8891  | 7.2431 | JPT |
| GPD2      | GI_4504084-S  | rs882951   | 2  | 19 | 7999265   | 7.0338  | 0.4848 | -0.3127 | 6.9394 | JPT |
| MGC955    | GI_13129101-S | rs892086   | 1  | 19 | 10698677  | 7.1254  | 0.4817 | -0.2334 | 7.0651 | JPT |
| LOC401118 | GI_42657060-S | rs9268831  | 4  | 6  | 32535726  | 9.6106  | 0.6010 | -0.8448 | 7.2431 | JPT |
| Hs.442025 | Hs.442025-S   | rs9269070  | 6  | 6  | 32548429  | 7.0640  | 0.5620 | -0.0690 | 6.9110 | JPT |
| EPB41L4A  | GI_37537711-S | rs9270657  | 5  | 6  | 32673999  | 8.8144  | 0.5836 | 0.3087  | 7.2238 | JPT |
| LOC388461 | GI_41150880-S | rs9271568  | 18 | 6  | 32698441  | 7.2770  | 0.5433 | 0.1318  | 7.1838 | JPT |
| LOC401118 | GI_42657060-S | rs9271586  | 4  | 6  | 32698877  | 7.7846  | 0.5515 | -0.7099 | 7.2431 | JPT |
| LOC401118 | GI_42657060-S | rs9271589  | 4  | 6  | 32699106  | 8.1484  | 0.5518 | 0.6734  | 7.2431 | JPT |
| LOC401118 | GI_42657060-S | rs9271591  | 4  | 6  | 32699119  | 8.5961  | 0.5918 | 0.6957  | 7.2431 | JPT |
| EPB41L4A  | GI_37537711-S | rs9272218  | 5  | 6  | 32710216  | 8.8759  | 0.5864 | -0.2974 | 7.2238 | JPT |
| LOC388461 | GI_41150880-S | rs9272346  | 18 | 6  | 32712350  | 8.3399  | 0.5611 | 0.1618  | 7.1838 | JPT |
| LOC401118 | GI_42657060-S | rs9272346  | 4  | 6  | 32712350  | 10.5269 | 0.6556 | 0.9701  | 7.2431 | JPT |
| LOC401118 | GI_42657060-S | rs9272723  | 4  | 6  | 32717405  | 7.5753  | 0.5405 | 0.8416  | 7.2431 | JPT |
| LOC401118 | GI_42657060-S | rs9275224  | 4  | 6  | 32767856  | 11.1930 | 0.6801 | -0.9368 | 7.2431 | JPT |
| LOC401118 | GI_42657060-S | rs9275292  | 4  | 6  | 32771267  | 11.6570 | 0.6962 | 0.9442  | 7.2431 | JPT |
| LOC389972 | GI_41149334-S | rs9313749  | 10 | 5  | 176530300 | 8.2229  | 0.5382 | 0.2107  | 7.2502 | JPT |
| LOC389972 | GI_41149334-S | rs9885210  | 10 | 5  | 176501794 | 8.0553  | 0.5384 | 0.2106  | 7.2502 | JPT |
| LOC401155 | GI_42656964-S | rs17802433 | 9  | 2  | 94959504  | 24.6330 | 0.9288 | 0.8192  | 7.5639 | JPT |
| KCNMB3    | GI_25952101-I | rs3739038  | 3  | 2  | 238454703 | 18.0430 | 0.8650 | -0.5503 | 7.2900 | JPT |
| C6orf80   | GI_31083115-S | rs1771487  | 6  | 1  | 224708856 | 7.3101  | 0.4999 | -0.3142 | 7.1396 | JPT |
| GCSH      | GI_31542839-S | rs10459872 | 1  | 16 | 79652452  | 7.4271  | 0.4979 | -0.4121 | 7.1040 | JPT |
| SLC19A2   | GI_27734718-S | rs3790267  | 1  | 20 | 19513693  | 7.1427  | 0.4992 | -0.3579 | 7.0473 | JPT |
| CLN3      | GI_4502888-S  | rs3790267  | 16 | 20 | 19513693  | 6.8345  | 0.4820 | -0.2952 | 6.7855 | JPT |
| DIA1      | GI_6552326-A  | rs3790267  | 22 | 20 | 19513693  | 7.3972  | 0.5131 | -0.3085 | 7.0000 | JPT |
| ZNF322B   | GI_39841070-S | rs3736781  | 9  | 6  | 26613341  | 9.6549  | 0.6116 | -0.3937 | 7.1494 | JPT |
| HIF1AN    | GI_8923568-S  | rs9367097  | 10 | 6  | 41293436  | 6.9928  | 0.4826 | -0.1035 | 6.8946 | JPT |
| RPL14     | GI_16753224-S | rs1047855  | 4  | 3  | 40443900  | 11.1422 | 0.6694 | 0.7699  | 7.6449 | JPT |



|           |               |            |    |    |           |         |        |         |        |     |
|-----------|---------------|------------|----|----|-----------|---------|--------|---------|--------|-----|
| LOC401495 | GI_42659169-S | rs7037849  | 9  | 9  | 137249657 | 10.9302 | 0.6617 | -0.4000 | 8.4647 | JPT |
| NAP1L5    | GI_24371267-S | rs1852450  | 4  | 12 | 16289001  | 7.1721  | 0.5009 | -0.2258 | 6.8448 | JPT |
| hmm30082  | hmm30082-S    | rs2166807  | 4  | 12 | 32025905  | 6.9689  | 0.4732 | 0.2492  | 6.7734 | JPT |
| hmm30082  | hmm30082-S    | rs3759301  | 4  | 12 | 32026708  | 7.1099  | 0.4809 | 0.2583  | 6.7734 | JPT |
| LOC389972 | GI_41149334-S | rs3733875  | 10 | 5  | 176569846 | 8.4430  | 0.5573 | -0.2198 | 7.2502 | JPT |
| FLT1      | GI_32306519-S | rs2271194  | 13 | 12 | 54763961  | 13.8332 | 0.7533 | 0.4153  | 7.3486 | JPT |
| LOC389472 | GI_42657859-S | rs2271194  | 7  | 12 | 54763961  | 15.6374 | 0.7973 | 0.7990  | 7.5532 | JPT |
| LOC401470 | GI_42658911-S | rs2271194  | 8  | 12 | 54763961  | 14.5168 | 0.7710 | 0.8526  | 7.2210 | JPT |
| hmm32535  | hmm32535-S    | rs2271194  | 7  | 12 | 54763961  | 8.1926  | 0.5452 | 0.1290  | 7.5717 | JPT |
| LOC387805 | GI_41149627-S | rs11065706 | 11 | 12 | 109618251 | 9.7424  | 0.4983 | 0.3727  | 9.2056 | YRI |
| C9orf74   | GI_13569869-S | rs11769548 | 9  | 7  | 55428976  | 7.2704  | 0.4025 | 0.2161  | 7.1743 | YRI |
| LOC388461 | GI_41150880-S | rs12918    | 18 | 6  | 32735364  | 11.2883 | 0.5555 | -0.2191 | 7.1764 | YRI |
| LOC401118 | GI_42657060-S | rs12918    | 4  | 6  | 32735364  | 8.3208  | 0.4394 | -0.9367 | 7.1702 | YRI |
| CYBA      | GI_4557504-S  | rs1603705  | 16 | 4  | 106576743 | 7.9385  | 0.4397 | -0.2825 | 7.1655 | YRI |
| LOC400452 | GI_42660576-S | rs2037925  | 15 | 21 | 39621801  | 9.0283  | 0.4695 | -1.4538 | 8.5168 | YRI |
| LOC387805 | GI_41149627-S | rs2338754  | 11 | 12 | 108954453 | 9.3943  | 0.4904 | -0.3324 | 9.2056 | YRI |
| LOC400452 | GI_42660576-S | rs2776311  | 15 | 21 | 39638755  | 22.4023 | 0.8149 | 1.9538  | 8.5168 | YRI |
| LOC400452 | GI_42660576-S | rs2836985  | 15 | 21 | 39623039  | 10.5242 | 0.5280 | -1.5286 | 8.5168 | YRI |
| LOC400452 | GI_42660576-S | rs2836988  | 15 | 21 | 39629845  | 9.0283  | 0.4695 | -1.4538 | 8.5168 | YRI |
| LOC401118 | GI_42657060-S | rs3129719  | 4  | 6  | 32769757  | 19.5878 | 0.7688 | 1.0231  | 7.1702 | YRI |
| LOC401118 | GI_42657060-S | rs3129720  | 4  | 6  | 32771609  | 17.2878 | 0.7290 | 1.0042  | 7.1702 | YRI |
| LOC401118 | GI_42657060-S | rs3134975  | 4  | 6  | 32760559  | 19.5878 | 0.7688 | -1.0231 | 7.1702 | YRI |
| LOC401118 | GI_42657060-S | rs3135006  | 4  | 6  | 32775097  | 19.1021 | 0.7657 | -1.0236 | 7.1702 | YRI |
| LOC388461 | GI_41150880-S | rs6906021  | 18 | 6  | 32734289  | 7.5532  | 0.4217 | 0.1490  | 7.1764 | YRI |
| LOC401118 | GI_42657060-S | rs6906021  | 4  | 6  | 32734289  | 8.4983  | 0.4648 | 0.7426  | 7.1702 | YRI |
| LOC401118 | GI_42657060-S | rs6928482  | 4  | 6  | 32734227  | 8.2917  | 0.4381 | 0.6261  | 7.1702 | YRI |
| LOC400452 | GI_42660576-S | rs741795   | 15 | 21 | 39640310  | 14.5530 | 0.6625 | 1.9287  | 8.5168 | YRI |
| LOC401118 | GI_42657060-S | rs7744001  | 4  | 6  | 32734064  | 7.9873  | 0.4419 | 0.6454  | 7.1702 | YRI |
| Hs.444908 | Hs.444908-S   | rs7919631  | 1  | 10 | 127457290 | 7.7706  | 0.4149 | 0.1160  | 7.5676 | YRI |
| LOC388461 | GI_41150880-S | rs9272346  | 18 | 6  | 32712350  | 15.4353 | 0.6792 | 0.1599  | 7.1764 | YRI |
| LOC401118 | GI_42657060-S | rs9272346  | 4  | 6  | 32712350  | 9.8780  | 0.5036 | 0.6620  | 7.1702 | YRI |
| LOC388461 | GI_41150880-S | rs9272723  | 18 | 6  | 32717405  | 9.4451  | 0.4865 | 0.1275  | 7.1764 | YRI |
| C20orf12  | GI_18491021-S | rs17802433 | 20 | 2  | 94959504  | 7.6127  | 0.4077 | 0.4761  | 7.2277 | YRI |
| FJX1      | GI_18765710-S | rs17802433 | 11 | 2  | 94959504  | 7.3504  | 0.3955 | 0.5940  | 7.1970 | YRI |
| AK2       | GI_26665888-I | rs17802433 | 1  | 2  | 94959504  | 7.4536  | 0.4003 | 0.3735  | 7.2961 | YRI |
| CSRP2BP   | GI_29570789-I | rs17802433 | 20 | 2  | 94959504  | 7.8902  | 0.4203 | 0.2660  | 7.2467 | YRI |
| LOC401155 | GI_42656964-S | rs17802433 | 9  | 2  | 94959504  | 36.7748 | 0.9407 | 0.8429  | 7.5260 | YRI |
| UAP1      | GI_34147515-S | rs2043449  | 1  | 2  | 203942196 | 7.5526  | 0.4049 | -0.3052 | 6.9956 | YRI |
| KCNMB3    | GI_25952101-I | rs3739040  | 3  | 2  | 238454290 | 10.7860 | 0.5376 | -0.4880 | 7.4546 | YRI |
| KCNMB3    | GI_25952101-I | rs3739038  | 3  | 2  | 238454703 | 23.3168 | 0.8278 | -0.5972 | 7.4546 | YRI |
| EGLN2     | GI_18141577-A | rs7222388  | 19 | 17 | 54447817  | 8.1175  | 0.4305 | 0.3988  | 8.0166 | YRI |
| PARC      | GI_24307990-S | rs11578336 | 6  | 1  | 163690368 | 8.1484  | 0.4318 | -0.1743 | 7.2101 | YRI |
| FLJ10579  | GI_8922531-S  | rs12435621 | 15 | 14 | 97182294  | 7.9215  | 0.4217 | 0.1925  | 7.4600 | YRI |
| COPS7A    | GI_7705329-S  | rs4647958  | 12 | 20 | 48034038  | 7.5069  | 0.4028 | 0.1493  | 7.0327 | YRI |
| ATP9B     | GI_41327759-S | rs643788   | 18 | 11 | 118472968 | 7.4540  | 0.4003 | -0.1331 | 7.1528 | YRI |
| ZNF322B   | GI_39841070-S | rs3736781  | 9  | 6  | 26613341  | 14.4872 | 0.6543 | -0.3385 | 7.1958 | YRI |
| FLJ33979  | GI_22749298-S | rs2444007  | 11 | 15 | 42834417  | 12.8642 | 0.6136 | 0.7662  | 8.5900 | YRI |
| LOC154428 | GI_18564351-S | rs1351419  | 6  | 4  | 71382148  | 7.9075  | 0.4211 | 0.0502  | 7.1641 | YRI |
| MAP2K5    | GI_21729898-A | rs3924661  | 15 | 10 | 4919527   | 7.4791  | 0.4240 | -0.1760 | 7.1276 | YRI |
