# Supplementary material
Source: PubMed Central journal article supplement (PMC2683249)
Supplement: NIHMS4491-supplement-5.pdf [file NIHMS4491-supplement-5.pdf]

**Significant *trans*- associations**  
**linear regression, multiple population analysis, 0.001 permutation threshold.**

| SNP label  | Gene      | illumina GeneID | Gene chromosome | SNP chromosome | SNP coordinate (NCBI B35) | probe midpoint coordinate (NCBI B35) | $-\log_{10}(p\text{-value})$ | Adjusted R <sup>2</sup> | Association gradient | permutation threshold (0.001) | Population combination |
|------------|-----------|-----------------|-----------------|----------------|---------------------------|--------------------------------------|------------------------------|-------------------------|----------------------|-------------------------------|------------------------|
| rs10180866 | Hs.435267 | Hs.435267-S     | 2               | 12             | 41989308                  | 49486487                             | 7.0173                       | 0.1239                  | -0.061               | 6.8574                        | CEU-CHB-JPT-YRI        |
| rs10510701 | LOC389848 | GI_42662536-S   | 3               | 9              | 39441449                  | 76243681                             | 57.8929                      | 0.7154                  | -1.7103              | 8.7509                        | CEU-CHB-JPT-YRI        |
| rs1056315  | LOC388461 | GI_41150880-S   | 6               | 18             | 32735493                  | 6719059                              | 7.594                        | 0.136                   | -0.0942              | 7.3115                        | CEU-CHB-JPT-YRI        |
| rs10947260 | CACNA1H   | GI_10864076-S   | 6               | 16             | 32481163                  | 1211455                              | 11.6158                      | 0.2069                  | -0.1086              | 10.8582                       | CEU-CHB-JPT-YRI        |
| rs11146603 | LOC158160 | GI_33469144-S   | 10              | 1              | 39021034                  | 159501679                            | 7.9845                       | 0.142                   | 0.1952               | 7.142                         | CEU-CHB-JPT-YRI        |
| rs11146896 | LOC158160 | GI_33469144-S   | 10              | 1              | 38916425                  | 159501679                            | 7.5335                       | 0.136                   | 0.1847               | 7.142                         | CEU-CHB-JPT-YRI        |
| rs11146896 | LOC387655 | GI_42659564-S   | 10              | 1              | 38916425                  | 159519011                            | 7.6073                       | 0.1374                  | 0.0547               | 7.2769                        | CEU-CHB-JPT-YRI        |
| rs11264319 | LOC256273 | GI_22062109-S   | 1               | 11             | 151897015                 | 8590273                              | 10.4444                      | 0.1906                  | 0.2002               | 10.3893                       | CEU-CHB-JPT-YRI        |
| rs11652559 | TSG101    | GI_18765712-S   | 17              | 11             | 33076712                  | 18459777                             | 15.4013                      | 0.2721                  | -0.1659              | 14.301                        | CEU-CHB-JPT-YRI        |
| rs11757159 | Spc25     | GI_23510353-S   | 6               | 19             | 32628250                  | 32745805                             | 8.2269                       | 0.1471                  | 0.1203               | 7.1769                        | CEU-CHB-JPT-YRI        |
| rs12191360 | LOC388461 | GI_41150880-S   | 6               | 18             | 32559339                  | 6719059                              | 10.4781                      | 0.1904                  | 0.0934               | 7.3115                        | CEU-CHB-JPT-YRI        |
| rs12191360 | LOC401118 | GI_42657060-S   | 6               | 4              | 32559339                  | 4168029                              | 14.8308                      | 0.265                   | 0.6266               | 9.1059                        | CEU-CHB-JPT-YRI        |
| rs12194148 | CACNA1H   | GI_10864076-S   | 6               | 16             | 32552176                  | 1211455                              | 16.7854                      | 0.2928                  | -0.0938              | 10.8582                       | CEU-CHB-JPT-YRI        |
| rs12194148 | Spc25     | GI_23510353-S   | 6               | 19             | 32552176                  | 32745805                             | 9.1912                       | 0.1648                  | 0.1255               | 7.1769                        | CEU-CHB-JPT-YRI        |
| rs12246481 | LOC387655 | GI_42659564-S   | 10              | 1              | 38922467                  | 159519011                            | 7.4657                       | 0.1329                  | 0.0524               | 7.2769                        | CEU-CHB-JPT-YRI        |
| rs12257209 | LOC158160 | GI_33469144-S   | 10              | 1              | 38832513                  | 159501679                            | 8.6395                       | 0.1547                  | -0.1958              | 7.142                         | CEU-CHB-JPT-YRI        |
| rs12357369 | LOC158160 | GI_33469144-S   | 10              | 1              | 38570175                  | 159501679                            | 7.6452                       | 0.1357                  | -0.198               | 7.142                         | CEU-CHB-JPT-YRI        |
| rs12493418 | LOC389848 | GI_42662536-S   | 3               | 9              | 39446198                  | 76243681                             | 55.129                       | 0.7009                  | 1.6791               | 8.7509                        | CEU-CHB-JPT-YRI        |
| rs12632510 | LOC389848 | GI_42662536-S   | 3               | 9              | 39441613                  | 76243681                             | 38.2795                      | 0.5709                  | -1.4898              | 8.7509                        | CEU-CHB-JPT-YRI        |
| rs12635452 | LOC389848 | GI_42662536-S   | 3               | 9              | 39441630                  | 76243681                             | 41.998                       | 0.6004                  | 1.5828               | 8.7509                        | CEU-CHB-JPT-YRI        |
| rs12635760 | LOC389848 | GI_42662536-S   | 3               | 9              | 39416055                  | 76243681                             | 64.3548                      | 0.7551                  | -1.7767              | 8.7509                        | CEU-CHB-JPT-YRI        |
| rs12638341 | LOC389848 | GI_42662536-S   | 3               | 9              | 39430358                  | 76243681                             | 64.9916                      | 0.7553                  | -1.7732              | 8.7509                        | CEU-CHB-JPT-YRI        |
| rs12638378 | LOC389848 | GI_42662536-S   | 3               | 9              | 39430319                  | 76243681                             | 64.9916                      | 0.7553                  | 1.7732               | 8.7509                        | CEU-CHB-JPT-YRI        |
| rs12658510 | LOC392660 | GI_41147791-S   | 5               | 7              | 176537879                 | 38170828                             | 13.258                       | 0.2358                  | 0.0785               | 12.2692                       | CEU-CHB-JPT-YRI        |
| rs12761215 | LOC158160 | GI_33469144-S   | 10              | 1              | 38915296                  | 159501679                            | 8.6269                       | 0.1545                  | -0.1959              | 7.142                         | CEU-CHB-JPT-YRI        |
| rs12781136 | LOC158160 | GI_33469144-S   | 10              | 1              | 38922386                  | 159501679                            | 10.0191                      | 0.1805                  | 0.2092               | 7.142                         | CEU-CHB-JPT-YRI        |
| rs12860901 | hmm25278  | hmm25278-S      | 13              | 1              | 113901892                 | 13244693                             | 15.0098                      | 0.2668                  | 0.0973               | 12.3979                       | CEU-CHB-JPT-YRI        |
| rs12860901 | hmm26651  | hmm26651-S      | 13              | 20             | 113901892                 | 21738865                             | 14.9682                      | 0.2662                  | 0.1412               | 13.3468                       | CEU-CHB-JPT-YRI        |
| rs1329786  | LOC158160 | GI_33469144-S   | 10              | 1              | 38467770                  | 159501679                            | 7.6363                       | 0.1367                  | 0.1957               | 7.142                         | CEU-CHB-JPT-YRI        |
| rs1548255  | LOC158160 | GI_33469144-S   | 10              | 1              | 38457199                  | 159501679                            | 10.8465                      | 0.1944                  | -0.2195              | 7.142                         | CEU-CHB-JPT-YRI        |
| rs17078781 | LOC392660 | GI_41147791-S   | 5               | 7              | 176476834                 | 38170828                             | 14.9585                      | 0.2649                  | 0.0838               | 12.2692                       | CEU-CHB-JPT-YRI        |
| rs1740733  | LOC158160 | GI_33469144-S   | 10              | 1              | 38532383                  | 159501679                            | 7.3894                       | 0.1327                  | 0.1959               | 7.142                         | CEU-CHB-JPT-YRI        |
| rs1740735  | LOC158160 | GI_33469144-S   | 10              | 1              | 38537783                  | 159501679                            | 8.109                        | 0.1449                  | 0.1978               | 7.142                         | CEU-CHB-JPT-YRI        |
| rs1740739  | LOC158160 | GI_33469144-S   | 10              | 1              | 38552836                  | 159501679                            | 8.3774                       | 0.1499                  | 0.2002               | 7.142                         | CEU-CHB-JPT-YRI        |
| rs1740743  | LOC158160 | GI_33469144-S   | 10              | 1              | 38559228                  | 159501679                            | 8.708                        | 0.1567                  | 0.2055               | 7.142                         | CEU-CHB-JPT-YRI        |
| rs1740750  | LOC158160 | GI_33469144-S   | 10              | 1              | 38565049                  | 159501679                            | 11.1149                      | 0.1991                  | 0.2244               | 7.142                         | CEU-CHB-JPT-YRI        |
| rs176838   | LOC158160 | GI_33469144-S   | 10              | 1              | 38411905                  | 159501679                            | 7.6923                       | 0.1372                  | -0.1853              | 7.142                         | CEU-CHB-JPT-YRI        |
| rs176838   | LOC387655 | GI_42659564-S   | 10              | 1              | 38411905                  | 159519011                            | 7.6188                       | 0.1358                  | -0.0541              | 7.2769                        | CEU-CHB-JPT-YRI        |
| rs176880   | LOC158160 | GI_33469144-S   | 10              | 1              | 38441423                  | 159501679                            | 11.0475                      | 0.1971                  | 0.2205               | 7.142                         | CEU-CHB-JPT-YRI        |
| rs176885   | LOC158160 | GI_33469144-S   | 10              | 1              | 38442795                  | 159501679                            | 7.6625                       | 0.1366                  | 0.196                | 7.142                         | CEU-CHB-JPT-YRI        |
| rs176887   | LOC158160 | GI_33469144-S   | 10              | 1              | 38446100                  | 159501679                            | 10.5553                      | 0.1901                  | -0.2179              | 7.142                         | CEU-CHB-JPT-YRI        |
| rs1780116  | LOC158160 | GI_33469144-S   | 10              | 1              | 38566627                  | 159501679                            | 11.3102                      | 0.2052                  | 0.2299               | 7.142                         | CEU-CHB-JPT-YRI        |
| rs1780131  | LOC158160 | GI_33469144-S   | 10              | 1              | 38531938                  | 159501679                            | 7.9729                       | 0.143                   | 0.2035               | 7.142                         | CEU-CHB-JPT-YRI        |
| rs1780141  | LOC158160 | GI_33469144-S   | 10              | 1              | 38544305                  | 159501679                            | 7.9444                       | 0.1425                  | -0.1982              | 7.142                         | CEU-CHB-JPT-YRI        |
| rs17802433 | LOC126235 | GI_37552052-S   | 2               | 19             | 94959504                  | 39275629                             | 18.9947                      | 0.3303                  | 0.1268               | 7.119                         | CEU-CHB-JPT-YRI        |
| rs17802433 | LOC401155 | GI_42656964-S   | 2               | 9              | 94959504                  | 44389723                             | 86.3456                      | 0.8529                  | 0.8556               | 6.6526                        | CEU-CHB-JPT-YRI        |
| rs1877555  | LOC389848 | GI_42662536-S   | 3               | 9              | 39440456                  | 76243681                             | 50.4059                      | 0.6729                  | -1.649               | 8.7509                        | CEU-CHB-JPT-YRI        |

|           |           |               |    |    |           |           |         |        |         |         |                 |
|-----------|-----------|---------------|----|----|-----------|-----------|---------|--------|---------|---------|-----------------|
| rs1892143 | LOC158160 | GI_33469144-S | 10 | 1  | 38646511  | 159501679 | 11.5084 | 0.206  | 0.2277  | 7.142   | CEU-CHB-JPT-YRI |
| rs1892143 | LOC387655 | GI_42659564-S | 10 | 1  | 38646511  | 159519011 | 7.8193  | 0.1395 | 0.0552  | 7.2769  | CEU-CHB-JPT-YRI |
| rs197922  | LOC376453 | GI_37545699-S | 17 | 18 | 42363569  | 27560290  | 12.6642 | 0.2268 | -0.186  | 10.6304 | CEU-CHB-JPT-YRI |
| rs1993152 | FLJ33979  | GI_22749298-S | 15 | 11 | 42806582  | 28311200  | 26.0309 | 0.4279 | -0.581  | 7.5524  | CEU-CHB-JPT-YRI |
| rs1998062 | LOC158160 | GI_33469144-S | 10 | 1  | 38497658  | 159501679 | 10.1681 | 0.1832 | -0.2132 | 7.142   | CEU-CHB-JPT-YRI |
| rs2008449 | LOC158160 | GI_33469144-S | 10 | 1  | 38454210  | 159501679 | 8.0393  | 0.1436 | -0.193  | 7.142   | CEU-CHB-JPT-YRI |
| rs2019065 | LOC91056  | GI_38679899-S | 3  | 11 | 52784565  | 65300280  | 6.7718  | 0.1232 | 0.073   | 6.7569  | CEU-CHB-JPT-YRI |
| rs2021650 | LOC158160 | GI_33469144-S | 10 | 1  | 38431923  | 159501679 | 7.6363  | 0.1367 | -0.1957 | 7.142   | CEU-CHB-JPT-YRI |
| rs2074154 | MGC11256  | GI_31543145-S | 17 | 22 | 37513506  | 48640003  | 10.9309 | 0.1959 | 0.2701  | 10.8895 | CEU-CHB-JPT-YRI |
| rs2077456 | LOC158160 | GI_33469144-S | 10 | 1  | 38515627  | 159501679 | 7.8403  | 0.1406 | -0.2006 | 7.142   | CEU-CHB-JPT-YRI |
| rs2105117 | MXD3      | GI_34147394-S | 1  | 5  | 149297202 | 176667097 | 9.7388  | 0.1755 | -0.1259 | 9.6779  | CEU-CHB-JPT-YRI |
| rs2133579 | LOC389848 | GI_42662536-S | 3  | 9  | 39421292  | 76243681  | 63.8767 | 0.7492 | -1.7447 | 8.7509  | CEU-CHB-JPT-YRI |
| rs2157337 | CACNA1H   | GI_10864076-S | 6  | 16 | 32609122  | 1211455   | 15.3899 | 0.2764 | -0.0949 | 10.8582 | CEU-CHB-JPT-YRI |
| rs2157337 | Spc25     | GI_23510353-S | 6  | 19 | 32609122  | 32745805  | 7.6915  | 0.1403 | 0.1187  | 7.1769  | CEU-CHB-JPT-YRI |
| rs2227139 | LOC401118 | GI_42657060-S | 6  | 4  | 32521437  | 4168029   | 9.7125  | 0.1766 | -0.4894 | 9.1059  | CEU-CHB-JPT-YRI |
| rs2239804 | LOC388461 | GI_41150880-S | 6  | 18 | 32519501  | 6719059   | 7.8083  | 0.1412 | -0.0778 | 7.3115  | CEU-CHB-JPT-YRI |
| rs2239804 | LOC401118 | GI_42657060-S | 6  | 4  | 32519501  | 4168029   | 10.6772 | 0.1939 | -0.5178 | 9.1059  | CEU-CHB-JPT-YRI |
| rs2256922 | HLA-C     | GI_19557676-S | 6  | 6  | 30048793  | 31344721  | 7.4585  | 0.1328 | -0.1726 | 7.1886  | CEU-CHB-JPT-YRI |
| rs2271194 | HIST1H3H  | GI_15718725-S | 12 | 6  | 54763961  | 27885962  | 12.8395 | 0.2288 | 0.16    | 11.4166 | CEU-CHB-JPT-YRI |
| rs2271194 | DPF2      | GI_21536317-S | 12 | 11 | 54763961  | 64876774  | 14.1763 | 0.2511 | -0.1414 | 8.66    | CEU-CHB-JPT-YRI |
| rs2271194 | hmm32535  | hmm32535-S    | 12 | 7  | 54763961  | 20656686  | 35.0138 | 0.5273 | 0.1636  | 12.7905 | CEU-CHB-JPT-YRI |
| rs2271194 | Hs.514777 | Hs.514777-S   | 12 | 17 | 54763961  | 25915376  | 14.2264 | 0.2519 | 0.039   | 13.0555 | CEU-CHB-JPT-YRI |
| rs2395185 | CACNA1H   | GI_10864076-S | 6  | 16 | 32541145  | 1211455   | 13.3416 | 0.2382 | -0.0927 | 10.8582 | CEU-CHB-JPT-YRI |
| rs2395185 | Spc25     | GI_23510353-S | 6  | 19 | 32541145  | 32745805  | 11.2081 | 0.2016 | 0.1517  | 7.1769  | CEU-CHB-JPT-YRI |
| rs2395185 | LOC388461 | GI_41150880-S | 6  | 18 | 32541145  | 6719059   | 9.8244  | 0.177  | -0.0917 | 7.3115  | CEU-CHB-JPT-YRI |
| rs2395185 | LOC401118 | GI_42657060-S | 6  | 4  | 32541145  | 4168029   | 10.2048 | 0.1838 | -0.5364 | 9.1059  | CEU-CHB-JPT-YRI |
| rs2472174 | LOC158160 | GI_33469144-S | 10 | 1  | 38415388  | 159501679 | 10.8465 | 0.1944 | 0.2195  | 7.142   | CEU-CHB-JPT-YRI |
| rs2472177 | LOC158160 | GI_33469144-S | 10 | 1  | 38424021  | 159501679 | 8.4081  | 0.1505 | -0.1984 | 7.142   | CEU-CHB-JPT-YRI |
| rs2474556 | LOC158160 | GI_33469144-S | 10 | 1  | 38506335  | 159501679 | 7.8403  | 0.1406 | 0.2006  | 7.142   | CEU-CHB-JPT-YRI |
| rs2474568 | LOC158160 | GI_33469144-S | 10 | 1  | 38423153  | 159501679 | 11.0475 | 0.1971 | 0.2205  | 7.142   | CEU-CHB-JPT-YRI |
| rs2474584 | LOC158160 | GI_33469144-S | 10 | 1  | 38456395  | 159501679 | 10.8465 | 0.1944 | 0.2195  | 7.142   | CEU-CHB-JPT-YRI |
| rs2474587 | LOC158160 | GI_33469144-S | 10 | 1  | 38460672  | 159501679 | 9.9608  | 0.1795 | 0.2108  | 7.142   | CEU-CHB-JPT-YRI |
| rs2474594 | LOC158160 | GI_33469144-S | 10 | 1  | 38466667  | 159501679 | 9.8573  | 0.1776 | -0.2106 | 7.142   | CEU-CHB-JPT-YRI |
| rs2474595 | LOC158160 | GI_33469144-S | 10 | 1  | 38466788  | 159501679 | 11.0475 | 0.1971 | -0.2205 | 7.142   | CEU-CHB-JPT-YRI |
| rs2474598 | LOC158160 | GI_33469144-S | 10 | 1  | 38470302  | 159501679 | 10.7575 | 0.1937 | -0.2246 | 7.142   | CEU-CHB-JPT-YRI |
| rs2474599 | LOC158160 | GI_33469144-S | 10 | 1  | 38478945  | 159501679 | 10.946  | 0.197  | 0.223   | 7.142   | CEU-CHB-JPT-YRI |
| rs2474608 | LOC158160 | GI_33469144-S | 10 | 1  | 38497115  | 159501679 | 8.5998  | 0.154  | 0.2018  | 7.142   | CEU-CHB-JPT-YRI |
| rs2474610 | LOC158160 | GI_33469144-S | 10 | 1  | 38499125  | 159501679 | 7.6363  | 0.1367 | -0.1957 | 7.142   | CEU-CHB-JPT-YRI |
| rs2505179 | LOC158160 | GI_33469144-S | 10 | 1  | 38455137  | 159501679 | 7.3293  | 0.1298 | 0.1906  | 7.142   | CEU-CHB-JPT-YRI |
| rs2505193 | LOC158160 | GI_33469144-S | 10 | 1  | 38434644  | 159501679 | 10.8465 | 0.1944 | 0.2195  | 7.142   | CEU-CHB-JPT-YRI |
| rs2505194 | LOC158160 | GI_33469144-S | 10 | 1  | 38433887  | 159501679 | 11.0775 | 0.1985 | -0.2208 | 7.142   | CEU-CHB-JPT-YRI |
| rs2505196 | LOC158160 | GI_33469144-S | 10 | 1  | 38433569  | 159501679 | 11.0775 | 0.1985 | 0.2208  | 7.142   | CEU-CHB-JPT-YRI |
| rs2505216 | LOC158160 | GI_33469144-S | 10 | 1  | 38522836  | 159501679 | 11.1149 | 0.1991 | -0.2244 | 7.142   | CEU-CHB-JPT-YRI |
| rs2505248 | LOC158160 | GI_33469144-S | 10 | 1  | 38499103  | 159501679 | 11.0475 | 0.1971 | 0.2205  | 7.142   | CEU-CHB-JPT-YRI |
| rs2505257 | LOC158160 | GI_33469144-S | 10 | 1  | 38412670  | 159501679 | 10.6367 | 0.1915 | 0.2197  | 7.142   | CEU-CHB-JPT-YRI |
| rs2516049 | Spc25     | GI_23510353-S | 6  | 19 | 32678378  | 32745805  | 10.0266 | 0.1823 | 0.1496  | 7.1769  | CEU-CHB-JPT-YRI |
| rs2516049 | LOC388461 | GI_41150880-S | 6  | 18 | 32678378  | 6719059   | 9.3161  | 0.1693 | -0.0945 | 7.3115  | CEU-CHB-JPT-YRI |
| rs2517672 | HLA-C     | GI_19557676-S | 6  | 6  | 30045241  | 31344721  | 8.5877  | 0.1545 | 0.1903  | 7.1886  | CEU-CHB-JPT-YRI |
| rs2523960 | HLA-C     | GI_19557676-S | 6  | 6  | 30047931  | 31344721  | 8.5925  | 0.1552 | -0.1918 | 7.1886  | CEU-CHB-JPT-YRI |
| rs2523962 | HLA-C     | GI_19557676-S | 6  | 6  | 30047523  | 31344721  | 7.8947  | 0.1429 | -0.1861 | 7.1886  | CEU-CHB-JPT-YRI |
| rs2523963 | HLA-C     | GI_19557676-S | 6  | 6  | 30047462  | 31344721  | 8.0391  | 0.1436 | 0.185   | 7.1886  | CEU-CHB-JPT-YRI |
| rs2523964 | HLA-C     | GI_19557676-S | 6  | 6  | 30047273  | 31344721  | 8.7451  | 0.1567 | 0.1918  | 7.1886  | CEU-CHB-JPT-YRI |
| rs2571376 | HLA-C     | GI_19557676-S | 6  | 6  | 30049163  | 31344721  | 7.6368  | 0.1374 | 0.1756  | 7.1886  | CEU-CHB-JPT-YRI |
| rs2647003 | Spc25     | GI_23510353-S | 6  | 19 | 32772858  | 32745805  | 7.5033  | 0.1342 | 0.13    | 7.1769  | CEU-CHB-JPT-YRI |
| rs2647003 | LOC401118 | GI_42657060-S | 6  | 4  | 32772858  | 4168029   | 15.3125 | 0.2706 | -0.6842 | 9.1059  | CEU-CHB-JPT-YRI |
| rs2647012 | Spc25     | GI_23510353-S | 6  | 19 | 32772436  | 32745805  | 7.336   | 0.1311 | 0.1283  | 7.1769  | CEU-CHB-JPT-YRI |
| rs2647012 | LOC401118 | GI_42657060-S | 6  | 4  | 32772436  | 4168029   | 15.9196 | 0.2803 | -0.69   | 9.1059  | CEU-CHB-JPT-YRI |
| rs2647040 | LOC401118 | GI_42657060-S | 6  | 4  | 32775258  | 4168029   | 15.7188 | 0.2794 | -0.6967 | 9.1059  | CEU-CHB-JPT-YRI |
| rs2647046 | LOC401118 | GI_42657060-S | 6  | 4  | 32776314  | 4168029   | 14.4262 | 0.2573 | -0.6529 | 9.1059  | CEU-CHB-JPT-YRI |
| rs2776311 | HMG1      | GI_34147704-S | 21 | 2  | 39638755  | 97902997  | 12.8978 | 0.2307 | 0.1783  | 10.9478 | CEU-CHB-JPT-YRI |
| rs2776311 | LOC400452 | GI_42660576-S | 21 | 15 | 39638755  | 91056810  | 82.777  | 0.8377 | 2.1723  | 11.6796 | CEU-CHB-JPT-YRI |
| rs2800485 | LOC158160 | GI_33469144-S | 10 | 1  | 38582594  | 159501679 | 9.2734  | 0.167  | -0.2129 | 7.142   | CEU-CHB-JPT-YRI |
| rs2800549 | LOC158160 | GI_33469144-S | 10 | 1  | 38523042  | 159501679 | 7.3488  | 0.1307 | -0.1943 | 7.142   | CEU-CHB-JPT-YRI |
| rs2800550 | LOC158160 | GI_33469144-S | 10 | 1  | 38522935  | 159501679 | 11.1149 | 0.1991 | 0.2244  | 7.142   | CEU-CHB-JPT-YRI |

|           |           |               |    |    |           |           |         |        |         |         |                 |
|-----------|-----------|---------------|----|----|-----------|-----------|---------|--------|---------|---------|-----------------|
| rs2804649 | LOC158160 | GI_33469144-S | 10 | 1  | 38777260  | 159501679 | 7.8715  | 0.1412 | -0.1942 | 7.142   | CEU-CHB-JPT-YRI |
| rs2804675 | LOC158160 | GI_33469144-S | 10 | 1  | 38699790  | 159501679 | 7.955   | 0.1421 | 0.1949  | 7.142   | CEU-CHB-JPT-YRI |
| rs2841936 | LOC158160 | GI_33469144-S | 10 | 1  | 38664058  | 159501679 | 7.955   | 0.1421 | 0.1949  | 7.142   | CEU-CHB-JPT-YRI |
| rs284565  | LOC377709 | GI_37552433-S | 2  | 8  | 217184312 | 145177330 | 11.0025 | 0.1971 | 0.0974  | 9.4894  | CEU-CHB-JPT-YRI |
| rs2858310 | LOC401118 | GI_42657060-S | 6  | 4  | 32776301  | 4168029   | 15.6364 | 0.2747 | -0.691  | 9.1059  | CEU-CHB-JPT-YRI |
| rs2858330 | LOC388461 | GI_41150880-S | 6  | 18 | 32766693  | 6719059   | 9.2446  | 0.1672 | -0.0876 | 7.3115  | CEU-CHB-JPT-YRI |
| rs2858330 | LOC401118 | GI_42657060-S | 6  | 4  | 32766693  | 4168029   | 13.3056 | 0.2386 | -0.5966 | 9.1059  | CEU-CHB-JPT-YRI |
| rs2983338 | LOC158160 | GI_33469144-S | 10 | 1  | 38590740  | 159501679 | 8.8761  | 0.1591 | 0.2071  | 7.142   | CEU-CHB-JPT-YRI |
| rs2996580 | LOC158160 | GI_33469144-S | 10 | 1  | 38596344  | 159501679 | 7.5386  | 0.1343 | 0.1932  | 7.142   | CEU-CHB-JPT-YRI |
| rs3100139 | FLJ33979  | GI_22749298-S | 15 | 11 | 42834865  | 28311200  | 16.0676 | 0.2815 | 0.4261  | 7.5524  | CEU-CHB-JPT-YRI |
| rs3129719 | LOC388461 | GI_41150880-S | 6  | 18 | 32769757  | 6719059   | 13.1733 | 0.2354 | 0.1198  | 7.3115  | CEU-CHB-JPT-YRI |
| rs3129719 | LOC401118 | GI_42657060-S | 6  | 4  | 32769757  | 4168029   | 32.0586 | 0.497  | 0.9928  | 9.1059  | CEU-CHB-JPT-YRI |
| rs3129720 | LOC388461 | GI_41150880-S | 6  | 18 | 32771609  | 6719059   | 13.7582 | 0.2473 | 0.1234  | 7.3115  | CEU-CHB-JPT-YRI |
| rs3129720 | LOC401118 | GI_42657060-S | 6  | 4  | 32771609  | 4168029   | 29.5339 | 0.4712 | 0.9666  | 9.1059  | CEU-CHB-JPT-YRI |
| rs3134975 | LOC388461 | GI_41150880-S | 6  | 18 | 32760559  | 6719059   | 13.1733 | 0.2354 | -0.1198 | 7.3115  | CEU-CHB-JPT-YRI |
| rs3134975 | LOC401118 | GI_42657060-S | 6  | 4  | 32760559  | 4168029   | 32.0586 | 0.497  | -0.9928 | 9.1059  | CEU-CHB-JPT-YRI |
| rs3135005 | EPB41L4A  | GI_37537711-S | 6  | 5  | 32693997  | 111532671 | 19.8167 | 0.3398 | 0.3614  | 9.3572  | CEU-CHB-JPT-YRI |
| rs3135005 | LOC388461 | GI_41150880-S | 6  | 18 | 32693997  | 6719059   | 8.5867  | 0.1544 | 0.1077  | 7.3115  | CEU-CHB-JPT-YRI |
| rs3135005 | LOC401118 | GI_42657060-S | 6  | 4  | 32693997  | 4168029   | 18.807  | 0.3249 | 0.8851  | 9.1059  | CEU-CHB-JPT-YRI |
| rs3135006 | LOC388461 | GI_41150880-S | 6  | 18 | 32775097  | 6719059   | 11.5046 | 0.2132 | -0.1171 | 7.3115  | CEU-CHB-JPT-YRI |
| rs3135006 | LOC401118 | GI_42657060-S | 6  | 4  | 32775097  | 4168029   | 27.9242 | 0.46   | -0.9583 | 9.1059  | CEU-CHB-JPT-YRI |
| rs3135392 | EPB41L4A  | GI_37537711-S | 6  | 5  | 32517220  | 111532671 | 13.7736 | 0.2434 | -0.2561 | 9.3572  | CEU-CHB-JPT-YRI |
| rs3736781 | ZNF322B   | GI_39841070-S | 6  | 9  | 26613341  | 97039218  | 31.7404 | 0.4917 | -0.3034 | 11.545  | CEU-CHB-JPT-YRI |
| rs3739038 | KCNMB3    | GI_25952101-I | 2  | 3  | 238454703 | 180459604 | 29.3635 | 0.481  | -0.4566 | 10.7775 | CEU-CHB-JPT-YRI |
| rs3752277 | GADD45A   | GI_9790904-S  | 20 | 1  | 36484167  | 67865583  | 9.7066  | 0.1741 | 0.2674  | 9.2413  | CEU-CHB-JPT-YRI |
| rs3772141 | LOC389848 | GI_42662536-S | 3  | 9  | 39424445  | 76243681  | 50.4608 | 0.6715 | 1.7025  | 8.7509  | CEU-CHB-JPT-YRI |
| rs4016652 | LOC389848 | GI_42662536-S | 3  | 9  | 39436041  | 76243681  | 57.8929 | 0.7154 | -1.7103 | 8.7509  | CEU-CHB-JPT-YRI |
| rs4246529 | CD81      | GI_21237760-S | 1  | 11 | 151928333 | 2375102   | 9.1103  | 0.1633 | 0.1313  | 8.8711  | CEU-CHB-JPT-YRI |
| rs4324305 | LOC377709 | GI_37552433-S | 2  | 8  | 217155418 | 145177330 | 10.5724 | 0.1887 | 0.0968  | 9.4894  | CEU-CHB-JPT-YRI |
| rs4464383 | LOC389848 | GI_42662536-S | 3  | 9  | 39419874  | 76243681  | 64.9916 | 0.7553 | -1.7732 | 8.7509  | CEU-CHB-JPT-YRI |
| rs4530284 | RNPEP     | GI_40316914-S | 19 | 1  | 4542634   | 198706699 | 8.5594  | 0.1539 | 0.149   | 8.0418  | CEU-CHB-JPT-YRI |
| rs4713582 | LOC401118 | GI_42657060-S | 6  | 4  | 32768029  | 4168029   | 13.7358 | 0.2458 | 0.6143  | 9.1059  | CEU-CHB-JPT-YRI |
| rs4976639 | LOC392660 | GI_41147791-S | 5  | 7  | 176482907 | 38170828  | 13.6462 | 0.2443 | 0.0803  | 12.2692 | CEU-CHB-JPT-YRI |
| rs5002702 | LOC401118 | GI_42657060-S | 6  | 4  | 32767136  | 4168029   | 13.2345 | 0.2395 | -0.6169 | 9.1059  | CEU-CHB-JPT-YRI |
| rs5020946 | CACNA1H   | GI_10864076-S | 6  | 16 | 32558067  | 1211455   | 16.9956 | 0.2973 | -0.0981 | 10.8582 | CEU-CHB-JPT-YRI |
| rs5020946 | Spc25     | GI_23510353-S | 6  | 19 | 32558067  | 32745805  | 8.1834  | 0.147  | 0.1233  | 7.1769  | CEU-CHB-JPT-YRI |
| rs570963  | CACNA1H   | GI_10864076-S | 6  | 16 | 32397572  | 1211455   | 11.3621 | 0.2026 | -0.0847 | 10.8582 | CEU-CHB-JPT-YRI |
| rs615672  | CACNA1H   | GI_10864076-S | 6  | 16 | 32682149  | 1211455   | 19.3135 | 0.3298 | -0.0989 | 10.8582 | CEU-CHB-JPT-YRI |
| rs615672  | EPB41L4A  | GI_37537711-S | 6  | 5  | 32682149  | 111532671 | 10.7874 | 0.1925 | 0.1998  | 9.3572  | CEU-CHB-JPT-YRI |
| rs6427158 | Hs.517172 | Hs.517172-S   | 1  | 20 | 151887976 | 61031702  | 11.5628 | 0.2069 | -0.1408 | 10.9233 | CEU-CHB-JPT-YRI |
| rs6457617 | LOC401118 | GI_42657060-S | 6  | 4  | 32771829  | 4168029   | 13.894  | 0.2474 | -0.6246 | 9.1059  | CEU-CHB-JPT-YRI |
| rs6457620 | LOC388461 | GI_41150880-S | 6  | 18 | 32771977  | 6719059   | 8.3174  | 0.1481 | 0.0852  | 7.3115  | CEU-CHB-JPT-YRI |
| rs6457620 | LOC401118 | GI_42657060-S | 6  | 4  | 32771977  | 4168029   | 14.4916 | 0.2552 | 0.6353  | 9.1059  | CEU-CHB-JPT-YRI |
| rs6517522 | HMGNI     | GI_34147704-S | 21 | 2  | 39475715  | 97902997  | 11.9865 | 0.2152 | -0.1726 | 10.9478 | CEU-CHB-JPT-YRI |
| rs6517522 | LOC400452 | GI_42660576-S | 21 | 15 | 39475715  | 91056810  | 49.536  | 0.6592 | -1.9323 | 11.6796 | CEU-CHB-JPT-YRI |
| rs6781576 | LOC389848 | GI_42662536-S | 3  | 9  | 39420900  | 76243681  | 64.9916 | 0.7553 | 1.7732  | 8.7509  | CEU-CHB-JPT-YRI |
| rs6796054 | Hs.292310 | Hs.292310-S   | 3  | 8  | 131325693 | 8120259   | 13.9193 | 0.2521 | 0.1022  | 10.2782 | CEU-CHB-JPT-YRI |
| rs6806372 | LOC389848 | GI_42662536-S | 3  | 9  | 39420784  | 76243681  | 64.9916 | 0.7553 | -1.7732 | 8.7509  | CEU-CHB-JPT-YRI |
| rs6903608 | Spc25     | GI_23510353-S | 6  | 19 | 32536263  | 32745805  | 7.6265  | 0.1366 | 0.1226  | 7.1769  | CEU-CHB-JPT-YRI |
| rs6903608 | LOC388461 | GI_41150880-S | 6  | 18 | 32536263  | 6719059   | 7.7936  | 0.1397 | -0.0799 | 7.3115  | CEU-CHB-JPT-YRI |
| rs6903608 | LOC401118 | GI_42657060-S | 6  | 4  | 32536263  | 4168029   | 10.7982 | 0.1944 | -0.5385 | 9.1059  | CEU-CHB-JPT-YRI |
| rs6916742 | LOC388461 | GI_41150880-S | 6  | 18 | 32561169  | 6719059   | 13.7965 | 0.2479 | 0.1088  | 7.3115  | CEU-CHB-JPT-YRI |
| rs6916742 | LOC401118 | GI_42657060-S | 6  | 4  | 32561169  | 4168029   | 13.7643 | 0.2474 | 0.6201  | 9.1059  | CEU-CHB-JPT-YRI |
| rs6926374 | LOC388461 | GI_41150880-S | 6  | 18 | 32517283  | 6719059   | 7.6804  | 0.1395 | -0.0774 | 7.3115  | CEU-CHB-JPT-YRI |
| rs6926374 | LOC401118 | GI_42657060-S | 6  | 4  | 32517283  | 4168029   | 10.0216 | 0.183  | -0.5004 | 9.1059  | CEU-CHB-JPT-YRI |
| rs6928482 | Spc25     | GI_23510353-S | 6  | 19 | 32734227  | 32745805  | 9.5421  | 0.1719 | -0.1378 | 7.1769  | CEU-CHB-JPT-YRI |
| rs6928482 | LOC388461 | GI_41150880-S | 6  | 18 | 32734227  | 6719059   | 30.2135 | 0.4759 | 0.1464  | 7.3115  | CEU-CHB-JPT-YRI |
| rs6928482 | LOC401118 | GI_42657060-S | 6  | 4  | 32734227  | 4168029   | 29.1535 | 0.4634 | 0.8299  | 9.1059  | CEU-CHB-JPT-YRI |
| rs6931337 | EPB41L4A  | GI_37537711-S | 6  | 5  | 32692587  | 111532671 | 19.8795 | 0.3421 | -0.3653 | 9.3572  | CEU-CHB-JPT-YRI |
| rs6931337 | LOC388461 | GI_41150880-S | 6  | 18 | 32692587  | 6719059   | 8.5583  | 0.1546 | -0.1074 | 7.3115  | CEU-CHB-JPT-YRI |
| rs6931337 | LOC401118 | GI_42657060-S | 6  | 4  | 32692587  | 4168029   | 18.5725 | 0.3226 | -0.8832 | 9.1059  | CEU-CHB-JPT-YRI |
| rs701831  | EPB41L4A  | GI_37537711-S | 6  | 5  | 32657379  | 111532671 | 23.0418 | 0.3883 | -0.3825 | 9.3572  | CEU-CHB-JPT-YRI |
| rs701831  | LOC388461 | GI_41150880-S | 6  | 18 | 32657379  | 6719059   | 10.3895 | 0.1888 | -0.117  | 7.3115  | CEU-CHB-JPT-YRI |
| rs701831  | LOC401118 | GI_42657060-S | 6  | 4  | 32657379  | 4168029   | 19.4871 | 0.3376 | -0.8876 | 9.1059  | CEU-CHB-JPT-YRI |

|           |           |               |    |    |           |           |         |        |         |         |                 |
|-----------|-----------|---------------|----|----|-----------|-----------|---------|--------|---------|---------|-----------------|
| rs7165535 | FLJ33979  | GI_22749298-S | 15 | 11 | 42803637  | 28311200  | 13.5989 | 0.2415 | 0.5344  | 7.5524  | CEU-CHB-JPT-YRI |
| rs7194    | LOC401118 | GI_42657060-S | 6  | 4  | 32520458  | 4168029   | 9.4868  | 0.1724 | 0.4868  | 9.1059  | CEU-CHB-JPT-YRI |
| rs726046  | LOC400452 | GI_42660576-S | 21 | 15 | 39634237  | 91056810  | 11.7504 | 0.2111 | 1.2005  | 11.6796 | CEU-CHB-JPT-YRI |
| rs7318180 | hmm25278  | hmm25278-S    | 13 | 1  | 113835272 | 13244693  | 13.1201 | 0.2385 | -0.082  | 12.3979 | CEU-CHB-JPT-YRI |
| rs7318180 | hmm26651  | hmm26651-S    | 13 | 20 | 113835272 | 21738865  | 14.6304 | 0.264  | -0.1273 | 13.3468 | CEU-CHB-JPT-YRI |
| rs7318180 | hmm34610  | hmm34610-S    | 13 | 8  | 113835272 | 12670185  | 16.1623 | 0.2889 | -0.1395 | 15      | CEU-CHB-JPT-YRI |
| rs7365544 | Hs.517172 | Hs.517172-S   | 1  | 20 | 151881821 | 61031702  | 11.5628 | 0.2069 | 0.1408  | 10.9233 | CEU-CHB-JPT-YRI |
| rs7393382 | LOC158160 | GI_33469144-S | 10 | 1  | 38573123  | 159501679 | 8.3466  | 0.1493 | -0.2002 | 7.142   | CEU-CHB-JPT-YRI |
| rs741795  | HMGN1     | GI_34147704-S | 21 | 2  | 39640310  | 97902997  | 12.7671 | 0.2285 | 0.1816  | 10.9478 | CEU-CHB-JPT-YRI |
| rs741795  | LOC400452 | GI_42660576-S | 21 | 15 | 39640310  | 91056810  | 73.1525 | 0.7988 | 2.1856  | 11.6796 | CEU-CHB-JPT-YRI |
| rs7451962 | LOC388461 | GI_41150880-S | 6  | 18 | 32690413  | 6719059   | 8.6895  | 0.157  | 0.0829  | 7.3115  | CEU-CHB-JPT-YRI |
| rs7451962 | LOC401118 | GI_42657060-S | 6  | 4  | 32690413  | 4168029   | 12.8626 | 0.2311 | 0.573   | 9.1059  | CEU-CHB-JPT-YRI |
| rs763806  | LOC158160 | GI_33469144-S | 10 | 1  | 38841015  | 159501679 | 8.8839  | 0.1599 | 0.1997  | 7.142   | CEU-CHB-JPT-YRI |
| rs7745040 | LOC388461 | GI_41150880-S | 6  | 18 | 32772310  | 6719059   | 13.7712 | 0.2444 | 0.1093  | 7.3115  | CEU-CHB-JPT-YRI |
| rs7745040 | LOC401118 | GI_42657060-S | 6  | 4  | 32772310  | 4168029   | 13.4073 | 0.2383 | 0.6203  | 9.1059  | CEU-CHB-JPT-YRI |
| rs7746922 | CACNA1H   | GI_10864076-S | 6  | 16 | 32538953  | 1211455   | 11.2164 | 0.2009 | -0.0851 | 10.8582 | CEU-CHB-JPT-YRI |
| rs7746922 | EPB41L4A  | GI_37537711-S | 6  | 5  | 32538953  | 111532671 | 9.5259  | 0.1709 | 0.2072  | 9.3572  | CEU-CHB-JPT-YRI |
| rs7749242 | Spc25     | GI_23510353-S | 6  | 19 | 32557008  | 32745805  | 7.3063  | 0.1305 | 0.1206  | 7.1769  | CEU-CHB-JPT-YRI |
| rs7749242 | LOC388461 | GI_41150880-S | 6  | 18 | 32557008  | 6719059   | 8.156   | 0.1465 | -0.0833 | 7.3115  | CEU-CHB-JPT-YRI |
| rs7749242 | LOC401118 | GI_42657060-S | 6  | 4  | 32557008  | 4168029   | 11.0075 | 0.1981 | -0.551  | 9.1059  | CEU-CHB-JPT-YRI |
| rs7755212 | Spc25     | GI_23510353-S | 6  | 19 | 32549386  | 32745805  | 7.5469  | 0.1428 | 0.1182  | 7.1769  | CEU-CHB-JPT-YRI |
| rs7766843 | EPB41L4A  | GI_37537711-S | 6  | 5  | 32538707  | 111532671 | 9.6884  | 0.1746 | -0.2107 | 9.3572  | CEU-CHB-JPT-YRI |
| rs7920562 | LOC158160 | GI_33469144-S | 10 | 1  | 38569515  | 159501679 | 11.1149 | 0.1991 | -0.2244 | 7.142   | CEU-CHB-JPT-YRI |
| rs799685  | TIGD7     | GI_22325391-S | 14 | 16 | 34429974  | 3289119   | 10.4414 | 0.1872 | 0.1568  | 8.095   | CEU-CHB-JPT-YRI |
| rs8045294 | LOC387745 | GI_42659691-S | 16 | 11 | 5062682   | 67317058  | 8.6457  | 0.1548 | -0.1612 | 8.6196  | CEU-CHB-JPT-YRI |
| rs811340  | TIGD7     | GI_22325391-S | 14 | 16 | 34429399  | 3289119   | 8.441   | 0.1511 | 0.1404  | 8.095   | CEU-CHB-JPT-YRI |
| rs8436    | ACACA     | GI_38679979-A | 10 | 17 | 129784973 | 32516249  | 6.99    | 0.124  | 0.1377  | 6.8937  | CEU-CHB-JPT-YRI |
| rs871841  | LOC400768 | GI_42655578-S | 17 | 1  | 8157193   | 108687503 | 10.0912 | 0.1826 | 0.0647  | 7.6186  | CEU-CHB-JPT-YRI |
| rs9268831 | LOC388461 | GI_41150880-S | 6  | 18 | 32535726  | 6719059   | 15.3137 | 0.2684 | -0.1092 | 7.3115  | CEU-CHB-JPT-YRI |
| rs9268831 | LOC401118 | GI_42657060-S | 6  | 4  | 32535726  | 4168029   | 17.0524 | 0.2957 | -0.6551 | 9.1059  | CEU-CHB-JPT-YRI |
| rs9268853 | CACNA1H   | GI_10864076-S | 6  | 16 | 32537621  | 1211455   | 13.7822 | 0.2435 | 0.093   | 10.8582 | CEU-CHB-JPT-YRI |
| rs9268853 | Spc25     | GI_23510353-S | 6  | 19 | 32537621  | 32745805  | 10.834  | 0.1933 | -0.1474 | 7.1769  | CEU-CHB-JPT-YRI |
| rs9268853 | LOC388461 | GI_41150880-S | 6  | 18 | 32537621  | 6719059   | 9.746   | 0.1741 | 0.0909  | 7.3115  | CEU-CHB-JPT-YRI |
| rs9268853 | LOC401118 | GI_42657060-S | 6  | 4  | 32537621  | 4168029   | 9.9826  | 0.1783 | 0.526   | 9.1059  | CEU-CHB-JPT-YRI |
| rs9268856 | CACNA1H   | GI_10864076-S | 6  | 16 | 32537697  | 1211455   | 11.1363 | 0.1986 | -0.0854 | 10.8582 | CEU-CHB-JPT-YRI |
| rs9268856 | EPB41L4A  | GI_37537711-S | 6  | 5  | 32537697  | 111532671 | 9.7822  | 0.1747 | 0.2112  | 9.3572  | CEU-CHB-JPT-YRI |
| rs9268858 | CACNA1H   | GI_10864076-S | 6  | 16 | 32537736  | 1211455   | 13.8506 | 0.2467 | 0.0943  | 10.8582 | CEU-CHB-JPT-YRI |
| rs9268858 | Spc25     | GI_23510353-S | 6  | 19 | 32537736  | 32745805  | 11.0826 | 0.1994 | -0.1504 | 7.1769  | CEU-CHB-JPT-YRI |
| rs9268858 | LOC388461 | GI_41150880-S | 6  | 18 | 32537736  | 6719059   | 8.7159  | 0.1568 | 0.0869  | 7.3115  | CEU-CHB-JPT-YRI |
| rs9268858 | LOC401118 | GI_42657060-S | 6  | 4  | 32537736  | 4168029   | 9.2749  | 0.1671 | 0.5111  | 9.1059  | CEU-CHB-JPT-YRI |
| rs9268862 | CACNA1H   | GI_10864076-S | 6  | 16 | 32538145  | 1211455   | 10.9411 | 0.1961 | 0.0847  | 10.8582 | CEU-CHB-JPT-YRI |
| rs9268862 | EPB41L4A  | GI_37537711-S | 6  | 5  | 32538145  | 111532671 | 9.6684  | 0.1734 | -0.2106 | 9.3572  | CEU-CHB-JPT-YRI |
| rs9268877 | Spc25     | GI_23510353-S | 6  | 19 | 32539125  | 32745805  | 7.9296  | 0.1416 | 0.1211  | 7.1769  | CEU-CHB-JPT-YRI |
| rs9268877 | LOC388461 | GI_41150880-S | 6  | 18 | 32539125  | 6719059   | 11.7257 | 0.2097 | -0.0955 | 7.3115  | CEU-CHB-JPT-YRI |
| rs9268877 | LOC401118 | GI_42657060-S | 6  | 4  | 32539125  | 4168029   | 11.9009 | 0.2128 | -0.5503 | 9.1059  | CEU-CHB-JPT-YRI |
| rs9268878 | CACNA1H   | GI_10864076-S | 6  | 16 | 32539270  | 1211455   | 11.1363 | 0.1986 | -0.0854 | 10.8582 | CEU-CHB-JPT-YRI |
| rs9268878 | EPB41L4A  | GI_37537711-S | 6  | 5  | 32539270  | 111532671 | 9.7822  | 0.1747 | 0.2112  | 9.3572  | CEU-CHB-JPT-YRI |
| rs9268923 | Spc25     | GI_23510353-S | 6  | 19 | 32540813  | 32745805  | 7.8092  | 0.1459 | 0.1211  | 7.1769  | CEU-CHB-JPT-YRI |
| rs9268979 | LOC388461 | GI_41150880-S | 6  | 18 | 32543022  | 6719059   | 8.5208  | 0.1619 | 0.082   | 7.3115  | CEU-CHB-JPT-YRI |
| rs9268979 | LOC401118 | GI_42657060-S | 6  | 4  | 32543022  | 4168029   | 9.1753  | 0.1745 | 0.4822  | 9.1059  | CEU-CHB-JPT-YRI |
| rs9269043 | EPB41L4A  | GI_37537711-S | 6  | 5  | 32546576  | 111532671 | 9.6884  | 0.1746 | 0.2107  | 9.3572  | CEU-CHB-JPT-YRI |
| rs9269069 | Spc25     | GI_23510353-S | 6  | 19 | 32548340  | 32745805  | 8.0599  | 0.1466 | 0.1229  | 7.1769  | CEU-CHB-JPT-YRI |
| rs9269069 | LOC388461 | GI_41150880-S | 6  | 18 | 32548340  | 6719059   | 14.2934 | 0.2573 | -0.1039 | 7.3115  | CEU-CHB-JPT-YRI |
| rs9269069 | LOC401118 | GI_42657060-S | 6  | 4  | 32548340  | 4168029   | 13.1882 | 0.2387 | -0.5812 | 9.1059  | CEU-CHB-JPT-YRI |
| rs9269071 | Spc25     | GI_23510353-S | 6  | 19 | 32548445  | 32745805  | 7.4405  | 0.1343 | -0.1158 | 7.1769  | CEU-CHB-JPT-YRI |
| rs9269071 | LOC388461 | GI_41150880-S | 6  | 18 | 32548445  | 6719059   | 12.3842 | 0.2239 | 0.0976  | 7.3115  | CEU-CHB-JPT-YRI |
| rs9269071 | LOC401118 | GI_42657060-S | 6  | 4  | 32548445  | 4168029   | 11.5979 | 0.2102 | 0.5423  | 9.1059  | CEU-CHB-JPT-YRI |
| rs9269078 | LOC388461 | GI_41150880-S | 6  | 18 | 32548857  | 6719059   | 8.403   | 0.1545 | -0.0838 | 7.3115  | CEU-CHB-JPT-YRI |
| rs9269078 | LOC401118 | GI_42657060-S | 6  | 4  | 32548857  | 4168029   | 10.2159 | 0.1882 | -0.5306 | 9.1059  | CEU-CHB-JPT-YRI |
| rs9269080 | Spc25     | GI_23510353-S | 6  | 19 | 32548947  | 32745805  | 8.1993  | 0.1479 | -0.1205 | 7.1769  | CEU-CHB-JPT-YRI |
| rs9269080 | LOC388461 | GI_41150880-S | 6  | 18 | 32548947  | 6719059   | 11.7329 | 0.2117 | 0.0934  | 7.3115  | CEU-CHB-JPT-YRI |
| rs9269080 | LOC401118 | GI_42657060-S | 6  | 4  | 32548947  | 4168029   | 11.3298 | 0.2046 | 0.5294  | 9.1059  | CEU-CHB-JPT-YRI |
| rs9269081 | Spc25     | GI_23510353-S | 6  | 19 | 32549078  | 32745805  | 7.3526  | 0.1314 | 0.1225  | 7.1769  | CEU-CHB-JPT-YRI |
| rs9269081 | LOC388461 | GI_41150880-S | 6  | 18 | 32549078  | 6719059   | 7.8684  | 0.1411 | -0.0827 | 7.3115  | CEU-CHB-JPT-YRI |

|            |           |               |    |    |           |           |         |        |         |         |                 |
|------------|-----------|---------------|----|----|-----------|-----------|---------|--------|---------|---------|-----------------|
| rs9269081  | LOC401118 | GI_42657060-S | 6  | 4  | 32549078  | 4168029   | 11.4925 | 0.2066 | -0.5682 | 9.1059  | CEU-CHB-JPT-YRI |
| rs9269186  | EPB41L4A  | GI_37537711-S | 6  | 5  | 32556394  | 111532671 | 9.3678  | 0.1687 | -0.2057 | 9.3572  | CEU-CHB-JPT-YRI |
| rs9269190  | LOC401118 | GI_42657060-S | 6  | 4  | 32556478  | 4168029   | 9.4306  | 0.1753 | 0.5244  | 9.1059  | CEU-CHB-JPT-YRI |
| rs9270657  | CACNA1H   | GI_10864076-S | 6  | 16 | 32673999  | 1211455   | 28.8974 | 0.4603 | -0.1195 | 10.8582 | CEU-CHB-JPT-YRI |
| rs9270657  | EPB41L4A  | GI_37537711-S | 6  | 5  | 32673999  | 111532671 | 26.0183 | 0.4247 | 0.3036  | 9.3572  | CEU-CHB-JPT-YRI |
| rs9270986  | EPB41L4A  | GI_37537711-S | 6  | 5  | 32682038  | 111532671 | 22.7217 | 0.3795 | -0.3798 | 9.3572  | CEU-CHB-JPT-YRI |
| rs9270986  | LOC388461 | GI_41150880-S | 6  | 18 | 32682038  | 6719059   | 10.1122 | 0.1814 | -0.1157 | 7.3115  | CEU-CHB-JPT-YRI |
| rs9270986  | LOC401118 | GI_42657060-S | 6  | 4  | 32682038  | 4168029   | 18.8763 | 0.3246 | -0.8748 | 9.1059  | CEU-CHB-JPT-YRI |
| rs9271366  | EPB41L4A  | GI_37537711-S | 6  | 5  | 32694832  | 111532671 | 19.9989 | 0.3425 | 0.3618  | 9.3572  | CEU-CHB-JPT-YRI |
| rs9271366  | LOC388461 | GI_41150880-S | 6  | 18 | 32694832  | 6719059   | 7.8964  | 0.1416 | 0.103   | 7.3115  | CEU-CHB-JPT-YRI |
| rs9271366  | LOC401118 | GI_42657060-S | 6  | 4  | 32694832  | 4168029   | 18.2109 | 0.3159 | 0.8707  | 9.1059  | CEU-CHB-JPT-YRI |
| rs9272219  | CACNA1H   | GI_10864076-S | 6  | 16 | 32710247  | 1211455   | 11.8226 | 0.2105 | 0.0975  | 10.8582 | CEU-CHB-JPT-YRI |
| rs9272219  | EPB41L4A  | GI_37537711-S | 6  | 5  | 32710247  | 111532671 | 12.5235 | 0.2225 | -0.2636 | 9.3572  | CEU-CHB-JPT-YRI |
| rs9272219  | LOC388461 | GI_41150880-S | 6  | 18 | 32710247  | 6719059   | 8.0912  | 0.144  | -0.0932 | 7.3115  | CEU-CHB-JPT-YRI |
| rs9272346  | LOC388461 | GI_41150880-S | 6  | 18 | 32712350  | 6719059   | 48.8807 | 0.6542 | 0.1681  | 7.3115  | CEU-CHB-JPT-YRI |
| rs9272346  | LOC401118 | GI_42657060-S | 6  | 4  | 32712350  | 4168029   | 39.5469 | 0.5742 | 0.9035  | 9.1059  | CEU-CHB-JPT-YRI |
| rs9272535  | CACNA1H   | GI_10864076-S | 6  | 16 | 32714734  | 1211455   | 12.1665 | 0.2183 | -0.0985 | 10.8582 | CEU-CHB-JPT-YRI |
| rs9272535  | EPB41L4A  | GI_37537711-S | 6  | 5  | 32714734  | 111532671 | 12.9399 | 0.2314 | 0.2682  | 9.3572  | CEU-CHB-JPT-YRI |
| rs9272535  | LOC388461 | GI_41150880-S | 6  | 18 | 32714734  | 6719059   | 8.1974  | 0.1472 | 0.0935  | 7.3115  | CEU-CHB-JPT-YRI |
| rs9272723  | LOC388461 | GI_41150880-S | 6  | 18 | 32717405  | 6719059   | 38.229  | 0.5651 | 0.1512  | 7.3115  | CEU-CHB-JPT-YRI |
| rs9272723  | LOC401118 | GI_42657060-S | 6  | 4  | 32717405  | 4168029   | 30.9275 | 0.4875 | 0.8065  | 9.1059  | CEU-CHB-JPT-YRI |
| rs9273363  | LOC388461 | GI_41150880-S | 6  | 18 | 32734250  | 6719059   | 10.5133 | 0.1919 | 0.0988  | 7.3115  | CEU-CHB-JPT-YRI |
| rs9275141  | LOC388461 | GI_41150880-S | 6  | 18 | 32759095  | 6719059   | 9.2274  | 0.1662 | 0.0877  | 7.3115  | CEU-CHB-JPT-YRI |
| rs9275141  | LOC401118 | GI_42657060-S | 6  | 4  | 32759095  | 4168029   | 13.2509 | 0.2367 | 0.5953  | 9.1059  | CEU-CHB-JPT-YRI |
| rs9275292  | LOC401118 | GI_42657060-S | 6  | 4  | 32771267  | 4168029   | 10.5403 | 0.1958 | 0.5595  | 9.1059  | CEU-CHB-JPT-YRI |
| rs9275521  | LOC401118 | GI_42657060-S | 6  | 4  | 32782930  | 4168029   | 15.5506 | 0.2722 | 0.6808  | 9.1059  | CEU-CHB-JPT-YRI |
| rs9275562  | LOC401118 | GI_42657060-S | 6  | 4  | 32785824  | 4168029   | 12.0562 | 0.2192 | 0.6174  | 9.1059  | CEU-CHB-JPT-YRI |
| rs9275596  | LOC401118 | GI_42657060-S | 6  | 4  | 32789609  | 4168029   | 17.7178 | 0.3072 | -0.7305 | 9.1059  | CEU-CHB-JPT-YRI |
| rs9296032  | Spc25     | GI_23510353-S | 6  | 19 | 32526688  | 32745805  | 7.277   | 0.1318 | -0.1296 | 7.1769  | CEU-CHB-JPT-YRI |
| rs9296032  | LOC388461 | GI_41150880-S | 6  | 18 | 32526688  | 6719059   | 8.5657  | 0.1561 | 0.0907  | 7.3115  | CEU-CHB-JPT-YRI |
| rs9296032  | LOC401118 | GI_42657060-S | 6  | 4  | 32526688  | 4168029   | 13.1771 | 0.2385 | 0.6371  | 9.1059  | CEU-CHB-JPT-YRI |
| rs9299770  | LOC158160 | GI_33469144-S | 10 | 1  | 38643855  | 159501679 | 8.152   | 0.147  | -0.1959 | 7.142   | CEU-CHB-JPT-YRI |
| rs9340352  | LOC158160 | GI_33469144-S | 10 | 1  | 38805785  | 159501679 | 7.955   | 0.1421 | -0.1949 | 7.142   | CEU-CHB-JPT-YRI |
| rs9378212  | CACNA1H   | GI_10864076-S | 6  | 16 | 32553669  | 1211455   | 14.6489 | 0.2665 | -0.089  | 10.8582 | CEU-CHB-JPT-YRI |
| rs9378212  | Spc25     | GI_23510353-S | 6  | 19 | 32553669  | 32745805  | 8.8237  | 0.1632 | 0.1251  | 7.1769  | CEU-CHB-JPT-YRI |
| rs9378213  | CACNA1H   | GI_10864076-S | 6  | 16 | 32556376  | 1211455   | 17.0194 | 0.2976 | 0.0947  | 10.8582 | CEU-CHB-JPT-YRI |
| rs9378213  | Spc25     | GI_23510353-S | 6  | 19 | 32556376  | 32745805  | 9.0424  | 0.1628 | -0.1237 | 7.1769  | CEU-CHB-JPT-YRI |
| rs9378266  | CACNA1H   | GI_10864076-S | 6  | 16 | 32556167  | 1211455   | 14.4144 | 0.2626 | -0.0899 | 10.8582 | CEU-CHB-JPT-YRI |
| rs9378266  | Spc25     | GI_23510353-S | 6  | 19 | 32556167  | 32745805  | 8.1885  | 0.1511 | 0.1213  | 7.1769  | CEU-CHB-JPT-YRI |
| rs9380319  | LOC388461 | GI_41150880-S | 6  | 18 | 32785890  | 6719059   | 10.6667 | 0.1912 | -0.0941 | 7.3115  | CEU-CHB-JPT-YRI |
| rs9380319  | LOC401118 | GI_42657060-S | 6  | 4  | 32785890  | 4168029   | 9.7794  | 0.1754 | -0.5175 | 9.1059  | CEU-CHB-JPT-YRI |
| rs9389034  | RPS12     | GI_14277699-S | 6  | 11 | 133179703 | 74134830  | 9.9587  | 0.1779 | -0.1503 | 9.4702  | CEU-CHB-JPT-YRI |
| rs9391786  | CACNA1H   | GI_10864076-S | 6  | 16 | 32556539  | 1211455   | 16.7732 | 0.2926 | -0.0937 | 10.8582 | CEU-CHB-JPT-YRI |
| rs9391786  | Spc25     | GI_23510353-S | 6  | 19 | 32556539  | 32745805  | 9.1492  | 0.164  | 0.1251  | 7.1769  | CEU-CHB-JPT-YRI |
| rs9405040  | CACNA1H   | GI_10864076-S | 6  | 16 | 32547371  | 1211455   | 13.4897 | 0.2397 | -0.0929 | 10.8582 | CEU-CHB-JPT-YRI |
| rs9405040  | Spc25     | GI_23510353-S | 6  | 19 | 32547371  | 32745805  | 10.8931 | 0.1952 | 0.1494  | 7.1769  | CEU-CHB-JPT-YRI |
| rs9405040  | LOC388461 | GI_41150880-S | 6  | 18 | 32547371  | 6719059   | 9.3734  | 0.1681 | -0.0898 | 7.3115  | CEU-CHB-JPT-YRI |
| rs9405040  | LOC401118 | GI_42657060-S | 6  | 4  | 32547371  | 4168029   | 9.7909  | 0.1756 | -0.5261 | 9.1059  | CEU-CHB-JPT-YRI |
| rs9405112  | CACNA1H   | GI_10864076-S | 6  | 16 | 32553578  | 1211455   | 12.5276 | 0.2264 | 0.0885  | 10.8582 | CEU-CHB-JPT-YRI |
| rs9405112  | Spc25     | GI_23510353-S | 6  | 19 | 32553578  | 32745805  | 9.9008  | 0.18   | -0.1391 | 7.1769  | CEU-CHB-JPT-YRI |
| rs9405112  | LOC388461 | GI_41150880-S | 6  | 18 | 32553578  | 6719059   | 8.8187  | 0.1601 | 0.0863  | 7.3115  | CEU-CHB-JPT-YRI |
| rs9405112  | LOC401118 | GI_42657060-S | 6  | 4  | 32553578  | 4168029   | 9.7722  | 0.1776 | 0.5191  | 9.1059  | CEU-CHB-JPT-YRI |
| rs9525181  | hmm25278  | hmm25278-S    | 13 | 1  | 113893447 | 13244693  | 23.6665 | 0.3909 | -0.1179 | 12.3979 | CEU-CHB-JPT-YRI |
| rs9525181  | hmm26651  | hmm26651-S    | 13 | 20 | 113893447 | 21738865  | 23.2943 | 0.3859 | -0.1702 | 13.3468 | CEU-CHB-JPT-YRI |
| rs9525181  | hmm32074  | hmm32074-S    | 13 | 6  | 113893447 | 121752831 | 19.3319 | 0.3301 | -0.1195 | 14.2218 | CEU-CHB-JPT-YRI |
| rs9525181  | hmm34610  | hmm34610-S    | 13 | 8  | 113893447 | 12670185  | 21.4889 | 0.361  | -0.172  | 15      | CEU-CHB-JPT-YRI |
| rs953275   | LOC389848 | GI_42662536-S | 3  | 9  | 39440781  | 76243681  | 57.8929 | 0.7154 | 1.7103  | 8.7509  | CEU-CHB-JPT-YRI |
| rs9757129  | Hs.292310 | Hs.292310-S   | 3  | 8  | 131327159 | 8120259   | 16.5761 | 0.2895 | -0.108  | 10.2782 | CEU-CHB-JPT-YRI |
| rs9851402  | RPL14     | GI_16753224-S | 3  | 4  | 40512833  | 141645625 | 8.3044  | 0.1492 | 0.2881  | 7.6964  | CEU-CHB-JPT-YRI |
| rs10037055 | LOC392660 | GI_41147791-S | 5  | 7  | 176623885 | 38170828  | 15.5135 | 0.3597 | -0.0983 | 12.0424 | CEU-CHB-JPT     |
| rs10039241 | LOC392660 | GI_41147791-S | 5  | 7  | 176510678 | 38170828  | 14.0989 | 0.3349 | 0.096   | 12.0424 | CEU-CHB-JPT     |
| rs10072499 | LOC392660 | GI_41147791-S | 5  | 7  | 176587843 | 38170828  | 14.3226 | 0.3358 | 0.0959  | 12.0424 | CEU-CHB-JPT     |
| rs10077929 | LOC392660 | GI_41147791-S | 5  | 7  | 176630450 | 38170828  | 13.741  | 0.3257 | 0.0949  | 12.0424 | CEU-CHB-JPT     |
| rs10230845 | LOC401154 | GI_42656959-S | 7  | 4  | 55680105  | 120736741 | 14.0719 | 0.352  | 0.2816  | 14      | CEU-CHB-JPT     |

|            |           |               |    |    |           |           |         |        |         |         |             |
|------------|-----------|---------------|----|----|-----------|-----------|---------|--------|---------|---------|-------------|
| rs10243293 | LOC401154 | GI_42656959-S | 7  | 4  | 55616309  | 120736741 | 16.8512 | 0.3938 | 0.2951  | 14      | CEU-CHB-JPT |
| rs1042779  | LOC91056  | GI_38679899-S | 3  | 11 | 52796051  | 65300280  | 7.2854  | 0.1787 | 0.0895  | 6.9394  | CEU-CHB-JPT |
| rs10481004 | LOC401154 | GI_42656959-S | 7  | 4  | 55542880  | 120736741 | 20.6798 | 0.4678 | 0.2636  | 14      | CEU-CHB-JPT |
| rs10499759 | LOC401154 | GI_42656959-S | 7  | 4  | 55703748  | 120736741 | 14.6903 | 0.3471 | -0.2655 | 14      | CEU-CHB-JPT |
| rs10510701 | LOC389848 | GI_42662536-S | 3  | 9  | 39441449  | 76243681  | 49.1001 | 0.776  | -1.9312 | 8.0259  | CEU-CHB-JPT |
| rs1052432  | LOC392660 | GI_41147791-S | 5  | 7  | 176496795 | 38170828  | 14.1759 | 0.3347 | 0.095   | 12.0424 | CEU-CHB-JPT |
| rs1075653  | LOC91056  | GI_38679899-S | 3  | 11 | 52800568  | 65300280  | 7.1593  | 0.186  | 0.093   | 6.9394  | CEU-CHB-JPT |
| rs10832750 | Hs.443245 | Hs.443245-S   | 11 | 8  | 17217494  | 130527319 | 7.8313  | 0.1901 | 0.0298  | 7.7312  | CEU-CHB-JPT |
| rs10832752 | Hs.443245 | Hs.443245-S   | 11 | 8  | 17242063  | 130527319 | 7.8985  | 0.1977 | -0.0308 | 7.7312  | CEU-CHB-JPT |
| rs10837771 | GCAT      | GI_22035688-S | 11 | 22 | 5279313   | 36537154  | 7.7432  | 0.189  | 0.1773  | 7.7029  | CEU-CHB-JPT |
| rs10947260 | CACNA1H   | GI_10864076-S | 6  | 16 | 32481163  | 1211455   | 17.942  | 0.4058 | -0.1498 | 10.8005 | CEU-CHB-JPT |
| rs10947332 | LOC388461 | GI_41150880-S | 6  | 18 | 32785418  | 6719059   | 6.8805  | 0.1674 | -0.1452 | 6.6688  | CEU-CHB-JPT |
| rs1113765  | LOC401154 | GI_42656959-S | 7  | 4  | 55663543  | 120736741 | 20.458  | 0.4525 | -0.3038 | 14      | CEU-CHB-JPT |
| rs11264314 | C14orf87  | GI_42516575-S | 1  | 14 | 151891496 | 95080561  | 9.812   | 0.2492 | -0.187  | 9.7108  | CEU-CHB-JPT |
| rs11264319 | LOC256273 | GI_22062109-S | 1  | 11 | 151897015 | 8590273   | 11.2561 | 0.2751 | 0.2479  | 10.5395 | CEU-CHB-JPT |
| rs11652075 | Hs.502399 | Hs.502399-S   | 17 | 11 | 75793488  | 43439094  | 7.7339  | 0.19   | -0.0333 | 7.5904  | CEU-CHB-JPT |
| rs11751697 | CACNA1H   | GI_10864076-S | 6  | 16 | 32374403  | 1211455   | 11.8735 | 0.2856 | 0.1264  | 10.8005 | CEU-CHB-JPT |
| rs11755505 | CACNA1H   | GI_10864076-S | 6  | 16 | 32385457  | 1211455   | 11.5332 | 0.2847 | 0.1251  | 10.8005 | CEU-CHB-JPT |
| rs11761352 | LOC401154 | GI_42656959-S | 7  | 4  | 55725156  | 120736741 | 14.3701 | 0.3405 | -0.2795 | 14      | CEU-CHB-JPT |
| rs11773016 | LOC401154 | GI_42656959-S | 7  | 4  | 55700726  | 120736741 | 14.0331 | 0.3317 | -0.277  | 14      | CEU-CHB-JPT |
| rs11955537 | LOC392660 | GI_41147791-S | 5  | 7  | 176506694 | 38170828  | 12.8272 | 0.3116 | -0.0916 | 12.0424 | CEU-CHB-JPT |
| rs11982736 | LOC401154 | GI_42656959-S | 7  | 4  | 55629389  | 120736741 | 24.7607 | 0.5187 | -0.3384 | 14      | CEU-CHB-JPT |
| rs12191360 | LOC388461 | GI_41150880-S | 6  | 18 | 32559339  | 6719059   | 12.9269 | 0.3085 | 0.124   | 6.6688  | CEU-CHB-JPT |
| rs12191360 | LOC401118 | GI_42657060-S | 6  | 4  | 32559339  | 4168029   | 15.285  | 0.3571 | 0.7899  | 7.7588  | CEU-CHB-JPT |
| rs12194148 | Sp25      | GI_23510353-S | 6  | 19 | 32552176  | 32745805  | 7.5195  | 0.1824 | 0.1354  | 7.4073  | CEU-CHB-JPT |
| rs12194148 | LOC388461 | GI_41150880-S | 6  | 18 | 32552176  | 6719059   | 8.462   | 0.2054 | -0.0927 | 6.6688  | CEU-CHB-JPT |
| rs12194148 | LOC401118 | GI_42657060-S | 6  | 4  | 32552176  | 4168029   | 11.1364 | 0.2677 | -0.6224 | 7.7588  | CEU-CHB-JPT |
| rs12493418 | LOC389848 | GI_42662536-S | 3  | 9  | 39446198  | 76243681  | 48.0956 | 0.7688 | 1.9021  | 8.0259  | CEU-CHB-JPT |
| rs12632510 | LOC389848 | GI_42662536-S | 3  | 9  | 39441613  | 76243681  | 31.5521 | 0.6226 | -1.6869 | 8.0259  | CEU-CHB-JPT |
| rs12635452 | LOC389848 | GI_42662536-S | 3  | 9  | 39441630  | 76243681  | 33.2311 | 0.6398 | 1.7813  | 8.0259  | CEU-CHB-JPT |
| rs12635760 | LOC389848 | GI_42662536-S | 3  | 9  | 39416055  | 76243681  | 48.7901 | 0.7761 | -1.9353 | 8.0259  | CEU-CHB-JPT |
| rs12638341 | LOC389848 | GI_42662536-S | 3  | 9  | 39430358  | 76243681  | 49.374  | 0.7756 | -1.9265 | 8.0259  | CEU-CHB-JPT |
| rs12638378 | LOC389848 | GI_42662536-S | 3  | 9  | 39430319  | 76243681  | 49.374  | 0.7756 | 1.9265  | 8.0259  | CEU-CHB-JPT |
| rs12658510 | LOC392660 | GI_41147791-S | 5  | 7  | 176537879 | 38170828  | 14.2055 | 0.3353 | 0.0958  | 12.0424 | CEU-CHB-JPT |
| rs12660023 | LOC392660 | GI_41147791-S | 5  | 7  | 176633491 | 38170828  | 13.7472 | 0.3294 | -0.0951 | 12.0424 | CEU-CHB-JPT |
| rs12716330 | LOC392660 | GI_41147791-S | 5  | 7  | 176531108 | 38170828  | 12.5715 | 0.2991 | 0.0905  | 12.0424 | CEU-CHB-JPT |
| rs12860901 | hmm25278  | hmm25278-S    | 13 | 1  | 113901892 | 13244693  | 12.1098 | 0.2925 | 0.1087  | 9.8194  | CEU-CHB-JPT |
| rs12860901 | hmm26651  | hmm26651-S    | 13 | 20 | 113901892 | 21738865  | 11.379  | 0.2762 | 0.1524  | 10.2839 | CEU-CHB-JPT |
| rs1363405  | LOC392660 | GI_41147791-S | 5  | 7  | 176569488 | 38170828  | 12.0719 | 0.2916 | -0.0898 | 12.0424 | CEU-CHB-JPT |
| rs1488933  | Hs.443245 | Hs.443245-S   | 11 | 8  | 17223605  | 130527319 | 7.9883  | 0.1963 | -0.0302 | 7.7312  | CEU-CHB-JPT |
| rs1546363  | LOC392660 | GI_41147791-S | 5  | 7  | 176533637 | 38170828  | 12.1933 | 0.2943 | 0.0896  | 12.0424 | CEU-CHB-JPT |
| rs17078781 | LOC392660 | GI_41147791-S | 5  | 7  | 176476834 | 38170828  | 13.934  | 0.3315 | 0.0942  | 12.0424 | CEU-CHB-JPT |
| rs17802433 | LOC126235 | GI_37552052-S | 2  | 19 | 94959504  | 39275629  | 12.5192 | 0.3049 | 0.1267  | 7.0619  | CEU-CHB-JPT |
| rs17802433 | LOC401155 | GI_42656964-S | 2  | 9  | 94959504  | 44389723  | 55.3968 | 0.8224 | 0.8612  | 7.119   | CEU-CHB-JPT |
| rs1877555  | LOC389848 | GI_42662536-S | 3  | 9  | 39440456  | 76243681  | 47.174  | 0.7691 | -1.9079 | 8.0259  | CEU-CHB-JPT |
| rs197922   | LOC376453 | GI_37545699-S | 17 | 18 | 42363569  | 27560290  | 11.7276 | 0.2824 | -0.2024 | 6.7992  | CEU-CHB-JPT |
| rs1993152  | FLJ33979  | GI_22749298-S | 15 | 11 | 42806582  | 28311200  | 21.3747 | 0.4725 | -0.7071 | 7.2243  | CEU-CHB-JPT |
| rs2019065  | LOC91056  | GI_38679899-S | 3  | 11 | 52784565  | 65300280  | 6.955   | 0.1748 | 0.0903  | 6.9394  | CEU-CHB-JPT |
| rs2133579  | LOC389848 | GI_42662536-S | 3  | 9  | 39421292  | 76243681  | 49.374  | 0.7756 | -1.9265 | 8.0259  | CEU-CHB-JPT |
| rs2157337  | CACNA1H   | GI_10864076-S | 6  | 16 | 32609122  | 1211455   | 11.1936 | 0.2721 | -0.0928 | 10.8005 | CEU-CHB-JPT |
| rs2157337  | LOC388461 | GI_41150880-S | 6  | 18 | 32609122  | 6719059   | 6.9002  | 0.169  | -0.0879 | 6.6688  | CEU-CHB-JPT |
| rs2157337  | LOC401118 | GI_42657060-S | 6  | 4  | 32609122  | 4168029   | 10.1008 | 0.247  | -0.624  | 7.7588  | CEU-CHB-JPT |
| rs2213585  | LOC401118 | GI_42657060-S | 6  | 4  | 32521128  | 4168029   | 10.6576 | 0.2614 | -0.6367 | 7.7588  | CEU-CHB-JPT |
| rs2227139  | LOC401118 | GI_42657060-S | 6  | 4  | 32521437  | 4168029   | 11.9721 | 0.2878 | -0.6596 | 7.7588  | CEU-CHB-JPT |
| rs2237263  | TBK1      | GI_19743810-S | 6  | 12 | 136937159 | 63181844  | 7.303   | 0.1781 | 0.2153  | 7.2975  | CEU-CHB-JPT |
| rs2239803  | LOC388461 | GI_41150880-S | 6  | 18 | 32519811  | 6719059   | 7.0743  | 0.1802 | 0.0888  | 6.6688  | CEU-CHB-JPT |
| rs2239803  | LOC401118 | GI_42657060-S | 6  | 4  | 32519811  | 4168029   | 9.6688  | 0.2457 | 0.6038  | 7.7588  | CEU-CHB-JPT |
| rs2239804  | LOC388461 | GI_41150880-S | 6  | 18 | 32519501  | 6719059   | 7.5707  | 0.1848 | -0.0915 | 6.6688  | CEU-CHB-JPT |
| rs2239804  | LOC401118 | GI_42657060-S | 6  | 4  | 32519501  | 4168029   | 11.1781 | 0.2701 | -0.6521 | 7.7588  | CEU-CHB-JPT |
| rs2244830  | LOC389387 | GI_41197110-S | 9  | 6  | 127351560 | 37167155  | 8.728   | 0.217  | -0.17   | 8.2333  | CEU-CHB-JPT |
| rs2244843  | LOC389387 | GI_41197110-S | 9  | 6  | 127351220 | 37167155  | 8.523   | 0.2081 | 0.1629  | 8.2333  | CEU-CHB-JPT |
| rs2245051  | LOC389387 | GI_41197110-S | 9  | 6  | 127349340 | 37167155  | 8.5328  | 0.2084 | 0.1612  | 8.2333  | CEU-CHB-JPT |
| rs2247675  | SENP3     | GI_21361498-S | 19 | 17 | 1312793   | 7415727   | 8.2171  | 0.2019 | -0.1258 | 8.062   | CEU-CHB-JPT |
| rs2254868  | LOC389387 | GI_41197110-S | 9  | 6  | 127360143 | 37167155  | 8.3777  | 0.2059 | -0.1555 | 8.2333  | CEU-CHB-JPT |

|           |           |               |    |    |           |           |         |        |         |         |             |
|-----------|-----------|---------------|----|----|-----------|-----------|---------|--------|---------|---------|-------------|
| rs2271194 | HIST1H3H  | GI_15718725-S | 12 | 6  | 54763961  | 27885962  | 11.1431 | 0.2694 | 0.1823  | 8.184   | CEU-CHB-JPT |
| rs2271194 | DPF2      | GI_21536317-S | 12 | 11 | 54763961  | 64876774  | 9.5437  | 0.2325 | -0.1555 | 7.5475  | CEU-CHB-JPT |
| rs2271194 | FLT1      | GI_32306519-S | 12 | 13 | 54763961  | 27773909  | 38.7262 | 0.6902 | 0.4236  | 7.4107  | CEU-CHB-JPT |
| rs2271194 | LOC389472 | GI_42657859-S | 12 | 7  | 54763961  | 22586816  | 39.8329 | 0.7007 | 0.7307  | 7.4685  | CEU-CHB-JPT |
| rs2271194 | LOC401470 | GI_42658911-S | 12 | 8  | 54763961  | 93225770  | 36.7527 | 0.6705 | 0.7191  | 7.8672  | CEU-CHB-JPT |
| rs2271194 | hmm32535  | hmm32535-S    | 12 | 7  | 54763961  | 20656686  | 29.3355 | 0.5847 | 0.1859  | 7.7739  | CEU-CHB-JPT |
| rs2272243 | LOC377709 | GI_37552433-S | 2  | 8  | 217190270 | 145177330 | 11.0509 | 0.2786 | -0.1336 | 9.8441  | CEU-CHB-JPT |
| rs2275254 | APOBEC3C  | GI_22907038-S | 1  | 22 | 111574016 | 37739136  | 10.3519 | 0.2513 | 0.1656  | 9.968   | CEU-CHB-JPT |
| rs2336237 | LOC392660 | GI_41147791-S | 5  | 7  | 176598485 | 38170828  | 12.1227 | 0.2911 | 0.0896  | 12.0424 | CEU-CHB-JPT |
| rs2395181 | EPB41L4A  | GI_37537711-S | 6  | 5  | 32515382  | 111532671 | 10.3626 | 0.2516 | 0.2599  | 7.4618  | CEU-CHB-JPT |
| rs2395185 | Spc25     | GI_23510353-S | 6  | 19 | 32541145  | 32745805  | 8.9706  | 0.2202 | 0.1631  | 7.4073  | CEU-CHB-JPT |
| rs2395185 | LOC388461 | GI_41150880-S | 6  | 18 | 32541145  | 6719059   | 13.7034 | 0.3267 | -0.1262 | 6.6688  | CEU-CHB-JPT |
| rs2395185 | LOC401118 | GI_42657060-S | 6  | 4  | 32541145  | 4168029   | 13.0209 | 0.3122 | -0.7334 | 7.7588  | CEU-CHB-JPT |
| rs2395522 | LOC401118 | GI_42657060-S | 6  | 4  | 32772700  | 4168029   | 9.3416  | 0.2438 | 0.6535  | 7.7588  | CEU-CHB-JPT |
| rs2516049 | LOC388461 | GI_41150880-S | 6  | 18 | 32678378  | 6719059   | 9.3295  | 0.2275 | -0.1115 | 6.6688  | CEU-CHB-JPT |
| rs2647003 | Spc25     | GI_23510353-S | 6  | 19 | 32772858  | 32745805  | 7.8803  | 0.1924 | 0.1562  | 7.4073  | CEU-CHB-JPT |
| rs2647003 | LOC401118 | GI_42657060-S | 6  | 4  | 32772858  | 4168029   | 10.5259 | 0.2553 | -0.6841 | 7.7588  | CEU-CHB-JPT |
| rs2647012 | Spc25     | GI_23510353-S | 6  | 19 | 32772436  | 32745805  | 7.4869  | 0.1827 | 0.1503  | 7.4073  | CEU-CHB-JPT |
| rs2647012 | LOC401118 | GI_42657060-S | 6  | 4  | 32772436  | 4168029   | 10.4714 | 0.2541 | -0.6733 | 7.7588  | CEU-CHB-JPT |
| rs2647040 | LOC401118 | GI_42657060-S | 6  | 4  | 32775258  | 4168029   | 9.7871  | 0.2411 | -0.658  | 7.7588  | CEU-CHB-JPT |
| rs2647046 | LOC401118 | GI_42657060-S | 6  | 4  | 32776314  | 4168029   | 9.2466  | 0.2255 | -0.6314 | 7.7588  | CEU-CHB-JPT |
| rs2668423 | SEN3P     | GI_21361498-S | 19 | 17 | 1321526   | 7415727   | 8.1378  | 0.1988 | 0.1295  | 8.062   | CEU-CHB-JPT |
| rs2746025 | LOC154995 | GI_37539232-S | 17 | 7  | 18092336  | 130804415 | 9.3067  | 0.2269 | 0.1632  | 9.1439  | CEU-CHB-JPT |
| rs2776311 | HMG1      | GI_34147704-S | 21 | 2  | 39638755  | 97902997  | 11.3758 | 0.2762 | 0.2127  | 10.735  | CEU-CHB-JPT |
| rs2776311 | LOC400452 | GI_42660576-S | 21 | 15 | 39638755  | 91056810  | 61.1525 | 0.8483 | 2.3133  | 10.7771 | CEU-CHB-JPT |
| rs2801883 | SMNDC1    | GI_21361283-S | 10 | 10 | 5129003   | 112042945 | 9.8101  | 0.2491 | 0.2166  | 9.4053  | CEU-CHB-JPT |
| rs2801883 | REV1L     | GI_7706680-S  | 10 | 2  | 5129003   | 99476186  | 11.2995 | 0.2844 | 0.24    | 11.0838 | CEU-CHB-JPT |
| rs2836946 | LOC400452 | GI_42660576-S | 21 | 15 | 39518633  | 91056810  | 11.0237 | 0.2682 | -1.8206 | 10.7771 | CEU-CHB-JPT |
| rs2858310 | LOC401118 | GI_42657060-S | 6  | 4  | 32776301  | 4168029   | 9.9844  | 0.2428 | -0.6604 | 7.7588  | CEU-CHB-JPT |
| rs2858330 | Spc25     | GI_23510353-S | 6  | 19 | 32766693  | 32745805  | 7.6902  | 0.1901 | 0.1459  | 7.4073  | CEU-CHB-JPT |
| rs2858330 | LOC388461 | GI_41150880-S | 6  | 18 | 32766693  | 6719059   | 7.2158  | 0.1781 | -0.0907 | 6.6688  | CEU-CHB-JPT |
| rs2858330 | LOC401118 | GI_42657060-S | 6  | 4  | 32766693  | 4168029   | 10.1942 | 0.2507 | -0.6326 | 7.7588  | CEU-CHB-JPT |
| rs3014272 | PCBP1     | GI_14141164-S | 1  | 2  | 223890175 | 70227601  | 7.4769  | 0.1813 | -0.1174 | 7.2662  | CEU-CHB-JPT |
| rs3014272 | ARHT2     | GI_20270302-S | 1  | 16 | 223890175 | 664069    | 8.7084  | 0.2113 | -0.1566 | 8.339   | CEU-CHB-JPT |
| rs3014272 | MRPL37    | GI_22547133-S | 1  | 1  | 223890175 | 54396039  | 7.2086  | 0.1746 | -0.1489 | 7.2009  | CEU-CHB-JPT |
| rs3096700 | LOC401118 | GI_42657060-S | 6  | 4  | 32329760  | 4168029   | 8.6435  | 0.2111 | 0.5955  | 7.7588  | CEU-CHB-JPT |
| rs3100139 | FLJ33979  | GI_22749298-S | 15 | 11 | 42834865  | 28311200  | 13.0653 | 0.3114 | 0.5031  | 7.2243  | CEU-CHB-JPT |
| rs3115571 | LOC401118 | GI_42657060-S | 6  | 4  | 32328896  | 4168029   | 8.4197  | 0.2044 | 0.586   | 7.7588  | CEU-CHB-JPT |
| rs3115572 | LOC401118 | GI_42657060-S | 6  | 4  | 32328462  | 4168029   | 8.2562  | 0.2017 | 0.5822  | 7.7588  | CEU-CHB-JPT |
| rs3129719 | LOC388461 | GI_41150880-S | 6  | 18 | 32769757  | 6719059   | 8.7437  | 0.2148 | 0.1137  | 6.6688  | CEU-CHB-JPT |
| rs3129719 | LOC401118 | GI_42657060-S | 6  | 4  | 32769757  | 4168029   | 21.2437 | 0.468  | 0.9872  | 7.7588  | CEU-CHB-JPT |
| rs3129720 | LOC388461 | GI_41150880-S | 6  | 18 | 32771609  | 6719059   | 9.4738  | 0.2337 | 0.12    | 6.6688  | CEU-CHB-JPT |
| rs3129720 | LOC401118 | GI_42657060-S | 6  | 4  | 32771609  | 4168029   | 21.6023 | 0.4762 | 0.9922  | 7.7588  | CEU-CHB-JPT |
| rs3129768 | LOC401118 | GI_42657060-S | 6  | 4  | 32703061  | 4168029   | 9.1751  | 0.2279 | -0.6971 | 7.7588  | CEU-CHB-JPT |
| rs3129876 | EPB41L4A  | GI_37537711-S | 6  | 5  | 32515990  | 111532671 | 9.5785  | 0.2376 | 0.2506  | 7.4618  | CEU-CHB-JPT |
| rs3130316 | LOC401118 | GI_42657060-S | 6  | 4  | 32329206  | 4168029   | 8.4197  | 0.2044 | 0.586   | 7.7588  | CEU-CHB-JPT |
| rs3134975 | LOC388461 | GI_41150880-S | 6  | 18 | 32760559  | 6719059   | 8.7437  | 0.2148 | -0.1137 | 6.6688  | CEU-CHB-JPT |
| rs3134975 | LOC401118 | GI_42657060-S | 6  | 4  | 32760559  | 4168029   | 21.2437 | 0.468  | -0.9872 | 7.7588  | CEU-CHB-JPT |
| rs3135005 | EPB41L4A  | GI_37537711-S | 6  | 5  | 32693997  | 111532671 | 14.4413 | 0.3401 | 0.3229  | 7.4618  | CEU-CHB-JPT |
| rs3135005 | LOC388461 | GI_41150880-S | 6  | 18 | 32693997  | 6719059   | 6.9413  | 0.169  | 0.1087  | 6.6688  | CEU-CHB-JPT |
| rs3135005 | LOC401118 | GI_42657060-S | 6  | 4  | 32693997  | 4168029   | 15.6735 | 0.3648 | 0.9373  | 7.7588  | CEU-CHB-JPT |
| rs3135006 | LOC388461 | GI_41150880-S | 6  | 18 | 32775097  | 6719059   | 6.7101  | 0.1706 | -0.1038 | 6.6688  | CEU-CHB-JPT |
| rs3135006 | LOC401118 | GI_42657060-S | 6  | 4  | 32775097  | 4168029   | 17.2455 | 0.4101 | -0.9472 | 7.7588  | CEU-CHB-JPT |
| rs3135392 | EPB41L4A  | GI_37537711-S | 6  | 5  | 32517220  | 111532671 | 10.8836 | 0.262  | -0.2531 | 7.4618  | CEU-CHB-JPT |
| rs3736781 | ZNF322B   | GI_39841070-S | 6  | 9  | 26613341  | 97039218  | 17.2205 | 0.3945 | -0.2676 | 7.4557  | CEU-CHB-JPT |
| rs3739038 | KCNMB3    | GI_25952101-I | 2  | 3  | 238454703 | 180459604 | 15.602  | 0.3841 | -0.4029 | 10.0752 | CEU-CHB-JPT |
| rs3749967 | CACNA1H   | GI_10864076-S | 6  | 16 | 32391822  | 1211455   | 12.019  | 0.2905 | -0.1273 | 10.8005 | CEU-CHB-JPT |
| rs3763327 | LOC401118 | GI_42657060-S | 6  | 4  | 32521808  | 4168029   | 11.3061 | 0.273  | 0.6542  | 7.7588  | CEU-CHB-JPT |
| rs3772141 | LOC389848 | GI_42662536-S | 3  | 9  | 39424445  | 76243681  | 36.4675 | 0.6777 | 1.8431  | 8.0259  | CEU-CHB-JPT |
| rs4016652 | LOC389848 | GI_42662536-S | 3  | 9  | 39436041  | 76243681  | 49.1001 | 0.776  | -1.9312 | 8.0259  | CEU-CHB-JPT |
| rs4233227 | ARHT2     | GI_20270302-S | 1  | 16 | 223888315 | 664069    | 8.697   | 0.2123 | -0.1613 | 8.339   | CEU-CHB-JPT |
| rs4233227 | MRPL37    | GI_22547133-S | 1  | 1  | 223888315 | 54396039  | 7.2786  | 0.1775 | -0.1542 | 7.2009  | CEU-CHB-JPT |
| rs4233227 | PSME1     | GI_30581139-A | 1  | 14 | 223888315 | 23677961  | 7.6774  | 0.1874 | -0.126  | 7.5617  | CEU-CHB-JPT |
| rs4248166 | EPB41L4A  | GI_37537711-S | 6  | 5  | 32474399  | 111532671 | 8.2296  | 0.2022 | 0.2414  | 7.4618  | CEU-CHB-JPT |

|           |           |               |    |    |           |           |         |        |         |         |             |
|-----------|-----------|---------------|----|----|-----------|-----------|---------|--------|---------|---------|-------------|
| rs4273806 | LOC401154 | GI_42656959-S | 7  | 4  | 55607447  | 120736741 | 19.3438 | 0.4354 | 0.309   | 14      | CEU-CHB-JPT |
| rs4450782 | ABCB6     | GI_9955962-S  | 3  | 2  | 42265151  | 219900198 | 11.9281 | 0.2885 | 0.2227  | 11.6749 | CEU-CHB-JPT |
| rs4464383 | LOC389848 | GI_42662536-S | 3  | 9  | 39419874  | 76243681  | 49.374  | 0.7756 | -1.9265 | 8.0259  | CEU-CHB-JPT |
| rs4530284 | UK114     | GI_5032214-S  | 19 | 8  | 4542634   | 99184263  | 8.4458  | 0.2075 | 0.3029  | 8.042   | CEU-CHB-JPT |
| rs4530284 | TALDO1    | GI_5803186-S  | 19 | 11 | 4542634   | 754904    | 7.6992  | 0.1891 | 0.1575  | 7.3796  | CEU-CHB-JPT |
| rs4533619 | ABCB6     | GI_9955962-S  | 3  | 2  | 42264816  | 219900198 | 12.2205 | 0.2932 | -0.2224 | 11.6749 | CEU-CHB-JPT |
| rs4563845 | LOC401154 | GI_42656959-S | 7  | 4  | 55552324  | 120736741 | 25.891  | 0.5425 | 0.277   | 14      | CEU-CHB-JPT |
| rs4713582 | LOC388461 | GI_41150880-S | 6  | 18 | 32768029  | 6719059   | 8.2197  | 0.202  | 0.0976  | 6.6688  | CEU-CHB-JPT |
| rs4713582 | LOC401118 | GI_42657060-S | 6  | 4  | 32768029  | 4168029   | 13.5284 | 0.323  | 0.7269  | 7.7588  | CEU-CHB-JPT |
| rs4713583 | LOC401118 | GI_42657060-S | 6  | 4  | 32768131  | 4168029   | 9.6752  | 0.2521 | 0.6135  | 7.7588  | CEU-CHB-JPT |
| rs4976636 | LOC392660 | GI_41147791-S | 5  | 7  | 176477698 | 38170828  | 12.0742 | 0.29   | -0.0908 | 12.0424 | CEU-CHB-JPT |
| rs4976639 | LOC392660 | GI_41147791-S | 5  | 7  | 176482907 | 38170828  | 14.1682 | 0.3382 | 0.0955  | 12.0424 | CEU-CHB-JPT |
| rs4976640 | LOC392660 | GI_41147791-S | 5  | 7  | 176484613 | 38170828  | 12.4741 | 0.2987 | -0.0904 | 12.0424 | CEU-CHB-JPT |
| rs5002702 | LOC401118 | GI_42657060-S | 6  | 4  | 32767136  | 4168029   | 12.0375 | 0.296  | -0.706  | 7.7588  | CEU-CHB-JPT |
| rs5020946 | LOC388461 | GI_41150880-S | 6  | 18 | 32558067  | 6719059   | 8.0716  | 0.1983 | -0.0934 | 6.6688  | CEU-CHB-JPT |
| rs5020946 | LOC401118 | GI_42657060-S | 6  | 4  | 32558067  | 4168029   | 9.9819  | 0.2442 | -0.6137 | 7.7588  | CEU-CHB-JPT |
| rs570963  | CACNA1H   | GI_10864076-S | 6  | 16 | 32397572  | 1211455   | 11.3146 | 0.2716 | -0.0983 | 10.8005 | CEU-CHB-JPT |
| rs615672  | CACNA1H   | GI_10864076-S | 6  | 16 | 32682149  | 1211455   | 14.0704 | 0.3307 | -0.097  | 10.8005 | CEU-CHB-JPT |
| rs6457617 | LOC388461 | GI_41150880-S | 6  | 18 | 32771829  | 6719059   | 6.9421  | 0.1701 | -0.09   | 6.6688  | CEU-CHB-JPT |
| rs6457617 | LOC401118 | GI_42657060-S | 6  | 4  | 32771829  | 4168029   | 12.7062 | 0.3055 | -0.7105 | 7.7588  | CEU-CHB-JPT |
| rs6457620 | LOC388461 | GI_41150880-S | 6  | 18 | 32771977  | 6719059   | 7.575   | 0.1837 | 0.0938  | 6.6688  | CEU-CHB-JPT |
| rs6457620 | LOC401118 | GI_42657060-S | 6  | 4  | 32771977  | 4168029   | 13.3576 | 0.3158 | 0.7208  | 7.7588  | CEU-CHB-JPT |
| rs6517522 | HMG1      | GI_34147704-S | 21 | 2  | 39475715  | 97902997  | 11.0579 | 0.269  | -0.2088 | 10.735  | CEU-CHB-JPT |
| rs6517522 | LOC400452 | GI_42660576-S | 21 | 15 | 39475715  | 91056810  | 47.6334 | 0.7678 | -2.1888 | 10.7771 | CEU-CHB-JPT |
| rs655590  | hmm24608  | hmm24608-S    | 1  | 19 | 35791140  | 5404418   | 15.1538 | 0.3545 | 0.0489  | 15      | CEU-CHB-JPT |
| rs660895  | LOC388461 | GI_41150880-S | 6  | 18 | 32685358  | 6719059   | 8.2732  | 0.2033 | -0.1138 | 6.6688  | CEU-CHB-JPT |
| rs6700    | LOC401154 | GI_42656959-S | 7  | 4  | 55615397  | 120736741 | 15.8044 | 0.3796 | -0.2916 | 14      | CEU-CHB-JPT |
| rs677661  | hmm24608  | hmm24608-S    | 1  | 19 | 35803011  | 5404418   | 15.4201 | 0.3598 | -0.049  | 15      | CEU-CHB-JPT |
| rs6781576 | LOC389848 | GI_42662536-S | 3  | 9  | 39420900  | 76243681  | 49.374  | 0.7756 | 1.9265  | 8.0259  | CEU-CHB-JPT |
| rs6796054 | Hs.292310 | Hs.292310-S   | 3  | 8  | 131325693 | 8120259   | 12.0635 | 0.2931 | 0.1101  | 9.787   | CEU-CHB-JPT |
| rs6806372 | LOC389848 | GI_42662536-S | 3  | 9  | 39420784  | 76243681  | 49.374  | 0.7756 | -1.9265 | 8.0259  | CEU-CHB-JPT |
| rs6880798 | LOC392660 | GI_41147791-S | 5  | 7  | 176637063 | 38170828  | 15.2679 | 0.3607 | -0.0989 | 12.0424 | CEU-CHB-JPT |
| rs6886255 | LOC392660 | GI_41147791-S | 5  | 7  | 176650967 | 38170828  | 15.2534 | 0.3565 | 0.098   | 12.0424 | CEU-CHB-JPT |
| rs6903608 | LOC388461 | GI_41150880-S | 6  | 18 | 32536263  | 6719059   | 9.2281  | 0.2264 | -0.1066 | 6.6688  | CEU-CHB-JPT |
| rs6903608 | LOC401118 | GI_42657060-S | 6  | 4  | 32536263  | 4168029   | 10.734  | 0.2616 | -0.679  | 7.7588  | CEU-CHB-JPT |
| rs6916742 | LOC388461 | GI_41150880-S | 6  | 18 | 32561169  | 6719059   | 18.3697 | 0.4158 | 0.1428  | 6.6688  | CEU-CHB-JPT |
| rs6916742 | LOC401118 | GI_42657060-S | 6  | 4  | 32561169  | 4168029   | 14.4742 | 0.3408 | 0.768   | 7.7588  | CEU-CHB-JPT |
| rs6926374 | LOC388461 | GI_41150880-S | 6  | 18 | 32517283  | 6719059   | 7.6045  | 0.1903 | -0.0928 | 6.6688  | CEU-CHB-JPT |
| rs6926374 | LOC401118 | GI_42657060-S | 6  | 4  | 32517283  | 4168029   | 11.0595 | 0.2738 | -0.647  | 7.7588  | CEU-CHB-JPT |
| rs6928482 | Spc25     | GI_23510353-S | 6  | 19 | 32734227  | 32745805  | 9.221   | 0.2262 | -0.1616 | 7.4073  | CEU-CHB-JPT |
| rs6928482 | LOC388461 | GI_41150880-S | 6  | 18 | 32734227  | 6719059   | 25.2575 | 0.5308 | 0.1567  | 6.6688  | CEU-CHB-JPT |
| rs6928482 | LOC401118 | GI_42657060-S | 6  | 4  | 32734227  | 4168029   | 24.2109 | 0.5152 | 0.9172  | 7.7588  | CEU-CHB-JPT |
| rs6931337 | EPB41L4A  | GI_37537711-S | 6  | 5  | 32692587  | 111532671 | 14.5607 | 0.3463 | -0.3273 | 7.4618  | CEU-CHB-JPT |
| rs6931337 | LOC388461 | GI_41150880-S | 6  | 18 | 32692587  | 6719059   | 7.2184  | 0.1782 | -0.1117 | 6.6688  | CEU-CHB-JPT |
| rs6931337 | LOC401118 | GI_42657060-S | 6  | 4  | 32692587  | 4168029   | 15.8024 | 0.3713 | -0.9471 | 7.7588  | CEU-CHB-JPT |
| rs6944250 | LOC401154 | GI_42656959-S | 7  | 4  | 55628310  | 120736741 | 19.7117 | 0.4418 | 0.3208  | 14      | CEU-CHB-JPT |
| rs6966061 | LOC401154 | GI_42656959-S | 7  | 4  | 55622999  | 120736741 | 19.4178 | 0.4412 | 0.3146  | 14      | CEU-CHB-JPT |
| rs701831  | EPB41L4A  | GI_37537711-S | 6  | 5  | 32657379  | 111532671 | 16.4483 | 0.3799 | -0.3388 | 7.4618  | CEU-CHB-JPT |
| rs701831  | LOC388461 | GI_41150880-S | 6  | 18 | 32657379  | 6719059   | 8.2458  | 0.2014 | -0.1176 | 6.6688  | CEU-CHB-JPT |
| rs701831  | LOC401118 | GI_42657060-S | 6  | 4  | 32657379  | 4168029   | 15.5808 | 0.363  | -0.9292 | 7.7588  | CEU-CHB-JPT |
| rs7037849 | LOC401495 | GI_42659169-S | 9  | 9  | 137249657 | 22145687  | 10.2267 | 0.2485 | -0.2115 | 7.6647  | CEU-CHB-JPT |
| rs7165535 | FLJ33979  | GI_22749298-S | 15 | 11 | 42803637  | 28311200  | 24.6403 | 0.5193 | 0.7606  | 7.2243  | CEU-CHB-JPT |
| rs7192    | LOC401118 | GI_42657060-S | 6  | 4  | 32519624  | 4168029   | 11.5287 | 0.2796 | 0.655   | 7.7588  | CEU-CHB-JPT |
| rs7194    | LOC401118 | GI_42657060-S | 6  | 4  | 32520458  | 4168029   | 11.7819 | 0.2836 | 0.6606  | 7.7588  | CEU-CHB-JPT |
| rs741795  | HMG1      | GI_34147704-S | 21 | 2  | 39640310  | 97902997  | 11.9197 | 0.2866 | 0.217   | 10.735  | CEU-CHB-JPT |
| rs741795  | LOC400452 | GI_42660576-S | 21 | 15 | 39640310  | 91056810  | 63.4478 | 0.857  | 2.3167  | 10.7771 | CEU-CHB-JPT |
| rs7451962 | LOC401118 | GI_42657060-S | 6  | 4  | 32690413  | 4168029   | 9.5415  | 0.2353 | 0.6493  | 7.7588  | CEU-CHB-JPT |
| rs7548955 | LOC256273 | GI_22062109-S | 1  | 11 | 151895371 | 8590273   | 10.6532 | 0.2598 | 0.2407  | 10.5395 | CEU-CHB-JPT |
| rs756159  | hmm26321  | hmm26321-S    | 1  | 1  | 35833770  | 226108828 | 11.166  | 0.273  | -0.0287 | 10.478  | CEU-CHB-JPT |
| rs7710269 | LOC392660 | GI_41147791-S | 5  | 7  | 176547135 | 38170828  | 13.6319 | 0.3252 | 0.0945  | 12.0424 | CEU-CHB-JPT |
| rs7739203 | LOC388461 | GI_41150880-S | 6  | 18 | 32549533  | 6719059   | 13.3418 | 0.3381 | -0.1205 | 6.6688  | CEU-CHB-JPT |
| rs7739203 | LOC401118 | GI_42657060-S | 6  | 4  | 32549533  | 4168029   | 11.2095 | 0.2893 | -0.6653 | 7.7588  | CEU-CHB-JPT |
| rs7745040 | LOC388461 | GI_41150880-S | 6  | 18 | 32772310  | 6719059   | 12.0528 | 0.2879 | 0.1194  | 6.6688  | CEU-CHB-JPT |
| rs7745040 | LOC401118 | GI_42657060-S | 6  | 4  | 32772310  | 4168029   | 14.4287 | 0.338  | 0.7623  | 7.7588  | CEU-CHB-JPT |



|           |           |               |   |    |          |           |         |        |         |         |             |
|-----------|-----------|---------------|---|----|----------|-----------|---------|--------|---------|---------|-------------|
| rs7749242 | LOC388461 | GI_41150880-S | 6 | 18 | 32557008 | 6719059   | 10.2153 | 0.2482 | -0.1126 | 6.6688  | CEU-CHB-JPT |
| rs7749242 | LOC401118 | GI_42657060-S | 6 | 4  | 32557008 | 4168029   | 11.3156 | 0.2732 | -0.6954 | 7.7588  | CEU-CHB-JPT |
| rs7755212 | LOC388461 | GI_41150880-S | 6 | 18 | 32549386 | 6719059   | 9.0311  | 0.2375 | -0.1064 | 6.6688  | CEU-CHB-JPT |
| rs7755212 | LOC401118 | GI_42657060-S | 6 | 4  | 32549386 | 4168029   | 8.1116  | 0.2138 | -0.5922 | 7.7588  | CEU-CHB-JPT |
| rs7809922 | LOC401154 | GI_42656959-S | 7 | 4  | 55597790 | 120736741 | 19.7188 | 0.4375 | -0.3132 | 14      | CEU-CHB-JPT |
| rs8084    | LOC401118 | GI_42657060-S | 6 | 4  | 32519013 | 4168029   | 9.2932  | 0.2294 | -0.5919 | 7.7588  | CEU-CHB-JPT |
| rs9268528 | LOC388461 | GI_41150880-S | 6 | 18 | 32491086 | 6719059   | 7.214   | 0.1815 | -0.092  | 6.6688  | CEU-CHB-JPT |
| rs9268528 | LOC401118 | GI_42657060-S | 6 | 4  | 32491086 | 4168029   | 7.9193  | 0.1995 | -0.5667 | 7.7588  | CEU-CHB-JPT |
| rs9268542 | LOC401118 | GI_42657060-S | 6 | 4  | 32492699 | 4168029   | 7.9536  | 0.1966 | -0.5753 | 7.7588  | CEU-CHB-JPT |
| rs9268544 | LOC388461 | GI_41150880-S | 6 | 18 | 32493431 | 6719059   | 6.7388  | 0.1659 | 0.0892  | 6.6688  | CEU-CHB-JPT |
| rs9268556 | LOC388461 | GI_41150880-S | 6 | 18 | 32494942 | 6719059   | 7.0739  | 0.1734 | 0.0903  | 6.6688  | CEU-CHB-JPT |
| rs9268556 | LOC401118 | GI_42657060-S | 6 | 4  | 32494942 | 4168029   | 8.2779  | 0.2034 | 0.5756  | 7.7588  | CEU-CHB-JPT |
| rs9268557 | LOC401118 | GI_42657060-S | 6 | 4  | 32497283 | 4168029   | 10.3795 | 0.2505 | 0.6071  | 7.7588  | CEU-CHB-JPT |
| rs9268657 | LOC388461 | GI_41150880-S | 6 | 18 | 32517634 | 6719059   | 7.5342  | 0.1909 | 0.0921  | 6.6688  | CEU-CHB-JPT |
| rs9268657 | LOC401118 | GI_42657060-S | 6 | 4  | 32517634 | 4168029   | 10.0794 | 0.2541 | 0.6223  | 7.7588  | CEU-CHB-JPT |
| rs9268659 | LOC401118 | GI_42657060-S | 6 | 4  | 32518919 | 4168029   | 10.8178 | 0.2605 | 0.6266  | 7.7588  | CEU-CHB-JPT |
| rs9268831 | LOC388461 | GI_41150880-S | 6 | 18 | 32535726 | 6719059   | 13.9395 | 0.328  | -0.124  | 6.6688  | CEU-CHB-JPT |
| rs9268831 | LOC401118 | GI_42657060-S | 6 | 4  | 32535726 | 4168029   | 16.6834 | 0.3823 | -0.7895 | 7.7588  | CEU-CHB-JPT |
| rs9268853 | Spc25     | GI_23510353-S | 6 | 19 | 32537621 | 32745805  | 8.5316  | 0.2071 | -0.1566 | 7.4073  | CEU-CHB-JPT |
| rs9268853 | LOC388461 | GI_41150880-S | 6 | 18 | 32537621 | 6719059   | 13.1962 | 0.3124 | 0.1237  | 6.6688  | CEU-CHB-JPT |
| rs9268853 | LOC401118 | GI_42657060-S | 6 | 4  | 32537621 | 4168029   | 12.4481 | 0.2965 | 0.7118  | 7.7588  | CEU-CHB-JPT |
| rs9268858 | Spc25     | GI_23510353-S | 6 | 19 | 32537736 | 32745805  | 8.8771  | 0.2167 | -0.1617 | 7.4073  | CEU-CHB-JPT |
| rs9268858 | LOC388461 | GI_41150880-S | 6 | 18 | 32537736 | 6719059   | 12.7238 | 0.3041 | 0.1225  | 6.6688  | CEU-CHB-JPT |
| rs9268858 | LOC401118 | GI_42657060-S | 6 | 4  | 32537736 | 4168029   | 12.2078 | 0.293  | 0.7134  | 7.7588  | CEU-CHB-JPT |
| rs9268877 | LOC388461 | GI_41150880-S | 6 | 18 | 32539125 | 6719059   | 13.1917 | 0.3141 | -0.1225 | 6.6688  | CEU-CHB-JPT |
| rs9268877 | LOC401118 | GI_42657060-S | 6 | 4  | 32539125 | 4168029   | 10.7383 | 0.2602 | -0.6601 | 7.7588  | CEU-CHB-JPT |
| rs9268923 | LOC388461 | GI_41150880-S | 6 | 18 | 32540813 | 6719059   | 8.0636  | 0.207  | -0.0939 | 6.6688  | CEU-CHB-JPT |
| rs9268923 | LOC401118 | GI_42657060-S | 6 | 4  | 32540813 | 4168029   | 9.4578  | 0.2421 | -0.6023 | 7.7588  | CEU-CHB-JPT |
| rs9268979 | LOC388461 | GI_41150880-S | 6 | 18 | 32543022 | 6719059   | 11.1704 | 0.278  | 0.1134  | 6.6688  | CEU-CHB-JPT |
| rs9268979 | LOC401118 | GI_42657060-S | 6 | 4  | 32543022 | 4168029   | 9.2425  | 0.2324 | 0.607   | 7.7588  | CEU-CHB-JPT |
| rs9269069 | LOC388461 | GI_41150880-S | 6 | 18 | 32548340 | 6719059   | 13.6999 | 0.3303 | -0.1237 | 6.6688  | CEU-CHB-JPT |
| rs9269069 | LOC401118 | GI_42657060-S | 6 | 4  | 32548340 | 4168029   | 11.2151 | 0.2758 | -0.6686 | 7.7588  | CEU-CHB-JPT |
| rs9269071 | LOC388461 | GI_41150880-S | 6 | 18 | 32548445 | 6719059   | 13.5546 | 0.3236 | 0.1218  | 6.6688  | CEU-CHB-JPT |
| rs9269071 | LOC401118 | GI_42657060-S | 6 | 4  | 32548445 | 4168029   | 10.8809 | 0.265  | 0.651   | 7.7588  | CEU-CHB-JPT |
| rs9269078 | LOC388461 | GI_41150880-S | 6 | 18 | 32548857 | 6719059   | 9.9875  | 0.2473 | -0.112  | 6.6688  | CEU-CHB-JPT |
| rs9269078 | LOC401118 | GI_42657060-S | 6 | 4  | 32548857 | 4168029   | 10.7152 | 0.2643 | -0.6811 | 7.7588  | CEU-CHB-JPT |
| rs9269080 | LOC388461 | GI_41150880-S | 6 | 18 | 32548947 | 6719059   | 13.2744 | 0.3176 | 0.1202  | 6.6688  | CEU-CHB-JPT |
| rs9269080 | LOC401118 | GI_42657060-S | 6 | 4  | 32548947 | 4168029   | 10.7381 | 0.2617 | 0.6466  | 7.7588  | CEU-CHB-JPT |
| rs9269081 | LOC388461 | GI_41150880-S | 6 | 18 | 32549078 | 6719059   | 9.4692  | 0.2322 | -0.1102 | 6.6688  | CEU-CHB-JPT |
| rs9269081 | LOC401118 | GI_42657060-S | 6 | 4  | 32549078 | 4168029   | 11.3537 | 0.2757 | -0.7062 | 7.7588  | CEU-CHB-JPT |
| rs9269190 | LOC388461 | GI_41150880-S | 6 | 18 | 32556478 | 6719059   | 9.3429  | 0.2319 | 0.1106  | 6.6688  | CEU-CHB-JPT |
| rs9269190 | LOC401118 | GI_42657060-S | 6 | 4  | 32556478 | 4168029   | 11.345  | 0.2787 | 0.7104  | 7.7588  | CEU-CHB-JPT |
| rs9270657 | CACNA1H   | GI_10864076-S | 6 | 16 | 32673999 | 1211455   | 22.878  | 0.4945 | -0.1296 | 10.8005 | CEU-CHB-JPT |
| rs9270657 | EPB41L4A  | GI_37537711-S | 6 | 5  | 32673999 | 111532671 | 19.1905 | 0.4327 | 0.3042  | 7.4618  | CEU-CHB-JPT |
| rs9270986 | EPB41L4A  | GI_37537711-S | 6 | 5  | 32682038 | 111532671 | 16.3848 | 0.3787 | -0.3386 | 7.4618  | CEU-CHB-JPT |
| rs9270986 | LOC388461 | GI_41150880-S | 6 | 18 | 32682038 | 6719059   | 8.3334  | 0.2035 | -0.1192 | 6.6688  | CEU-CHB-JPT |
| rs9270986 | LOC401118 | GI_42657060-S | 6 | 4  | 32682038 | 4168029   | 15.454  | 0.3605 | -0.9235 | 7.7588  | CEU-CHB-JPT |
| rs9271366 | EPB41L4A  | GI_37537711-S | 6 | 5  | 32694832 | 111532671 | 14.5624 | 0.3426 | 0.3234  | 7.4618  | CEU-CHB-JPT |
| rs9271366 | LOC401118 | GI_42657060-S | 6 | 4  | 32694832 | 4168029   | 15.0133 | 0.3517 | 0.9186  | 7.7588  | CEU-CHB-JPT |
| rs9271775 | LOC401118 | GI_42657060-S | 6 | 4  | 32702306 | 4168029   | 9.9495  | 0.2435 | -0.7232 | 7.7588  | CEU-CHB-JPT |
| rs9272346 | LOC388461 | GI_41150880-S | 6 | 18 | 32712350 | 6719059   | 35.4847 | 0.6597 | 0.1708  | 6.6688  | CEU-CHB-JPT |
| rs9272346 | LOC401118 | GI_42657060-S | 6 | 4  | 32712350 | 4168029   | 33.106  | 0.6333 | 0.9932  | 7.7588  | CEU-CHB-JPT |
| rs9272723 | LOC388461 | GI_41150880-S | 6 | 18 | 32717405 | 6719059   | 29.6854 | 0.5968 | 0.1598  | 6.6688  | CEU-CHB-JPT |
| rs9272723 | LOC401118 | GI_42657060-S | 6 | 4  | 32717405 | 4168029   | 28.6037 | 0.5826 | 0.938   | 7.7588  | CEU-CHB-JPT |
| rs9273363 | LOC388461 | GI_41150880-S | 6 | 18 | 32734250 | 6719059   | 11.9972 | 0.2951 | 0.1193  | 6.6688  | CEU-CHB-JPT |
| rs9273363 | LOC401118 | GI_42657060-S | 6 | 4  | 32734250 | 4168029   | 10.4906 | 0.2607 | 0.6668  | 7.7588  | CEU-CHB-JPT |
| rs9275141 | Spc25     | GI_23510353-S | 6 | 19 | 32759095 | 32745805  | 7.6207  | 0.186  | -0.1443 | 7.4073  | CEU-CHB-JPT |
| rs9275141 | LOC388461 | GI_41150880-S | 6 | 18 | 32759095 | 6719059   | 6.7592  | 0.1644 | 0.0873  | 6.6688  | CEU-CHB-JPT |
| rs9275141 | LOC401118 | GI_42657060-S | 6 | 4  | 32759095 | 4168029   | 9.5104  | 0.2317 | 0.6113  | 7.7588  | CEU-CHB-JPT |
| rs9275224 | LOC401118 | GI_42657060-S | 6 | 4  | 32767856 | 4168029   | 8.7925  | 0.227  | -0.6252 | 7.7588  | CEU-CHB-JPT |
| rs9275292 | LOC388461 | GI_41150880-S | 6 | 18 | 32771267 | 6719059   | 7.1516  | 0.181  | 0.0939  | 6.6688  | CEU-CHB-JPT |
| rs9275292 | LOC401118 | GI_42657060-S | 6 | 4  | 32771267 | 4168029   | 12.6313 | 0.3128 | 0.7254  | 7.7588  | CEU-CHB-JPT |
| rs9275521 | LOC401118 | GI_42657060-S | 6 | 4  | 32782930 | 4168029   | 10.0509 | 0.243  | 0.6599  | 7.7588  | CEU-CHB-JPT |
| rs9275562 | LOC401118 | GI_42657060-S | 6 | 4  | 32785824 | 4168029   | 9.4354  | 0.2328 | 0.6607  | 7.7588  | CEU-CHB-JPT |

|            |           |               |    |    |           |           |         |        |         |         |             |
|------------|-----------|---------------|----|----|-----------|-----------|---------|--------|---------|---------|-------------|
| rs9275596  | LOC401118 | GI_42657060-S | 6  | 4  | 32789609  | 4168029   | 12.0406 | 0.2893 | -0.7322 | 7.7588  | CEU-CHB-JPT |
| rs9286790  | SpC25     | GI_23510353-S | 6  | 19 | 32547806  | 32745805  | 9.0813  | 0.2388 | -0.1577 | 7.4073  | CEU-CHB-JPT |
| rs9286790  | LOC388461 | GI_41150880-S | 6  | 18 | 32547806  | 6719059   | 7.8928  | 0.208  | 0.0961  | 6.6688  | CEU-CHB-JPT |
| rs9286790  | LOC401118 | GI_42657060-S | 6  | 4  | 32547806  | 4168029   | 7.8439  | 0.2067 | 0.5649  | 7.7588  | CEU-CHB-JPT |
| rs9296032  | LOC388461 | GI_41150880-S | 6  | 18 | 32526688  | 6719059   | 8.8424  | 0.2185 | 0.1077  | 6.6688  | CEU-CHB-JPT |
| rs9296032  | LOC401118 | GI_42657060-S | 6  | 4  | 32526688  | 4168029   | 13.7896 | 0.3303 | 0.7785  | 7.7588  | CEU-CHB-JPT |
| rs9305669  | LOC400452 | GI_42660576-S | 21 | 15 | 39469199  | 91056810  | 12.416  | 0.2975 | 1.9107  | 10.7771 | CEU-CHB-JPT |
| rs9313749  | LOC392660 | GI_41147791-S | 5  | 7  | 176530300 | 38170828  | 12.7661 | 0.3085 | 0.0909  | 12.0424 | CEU-CHB-JPT |
| rs9313751  | LOC392660 | GI_41147791-S | 5  | 7  | 176576781 | 38170828  | 13.7877 | 0.3285 | 0.0942  | 12.0424 | CEU-CHB-JPT |
| rs9378212  | LOC388461 | GI_41150880-S | 6  | 18 | 32553669  | 6719059   | 8.8358  | 0.2252 | -0.0952 | 6.6688  | CEU-CHB-JPT |
| rs9378212  | LOC401118 | GI_42657060-S | 6  | 4  | 32553669  | 4168029   | 11.188  | 0.2818 | -0.6217 | 7.7588  | CEU-CHB-JPT |
| rs9378213  | SpC25     | GI_23510353-S | 6  | 19 | 32556376  | 32745805  | 7.4856  | 0.1826 | -0.1352 | 7.4073  | CEU-CHB-JPT |
| rs9378213  | LOC388461 | GI_41150880-S | 6  | 18 | 32556376  | 6719059   | 8.428   | 0.2058 | 0.0927  | 6.6688  | CEU-CHB-JPT |
| rs9378213  | LOC401118 | GI_42657060-S | 6  | 4  | 32556376  | 4168029   | 11.1462 | 0.2694 | 0.6231  | 7.7588  | CEU-CHB-JPT |
| rs9378266  | LOC388461 | GI_41150880-S | 6  | 18 | 32556167  | 6719059   | 8.3749  | 0.2058 | -0.0932 | 6.6688  | CEU-CHB-JPT |
| rs9378266  | LOC401118 | GI_42657060-S | 6  | 4  | 32556167  | 4168029   | 11.2903 | 0.2743 | -0.6316 | 7.7588  | CEU-CHB-JPT |
| rs9380319  | LOC388461 | GI_41150880-S | 6  | 18 | 32785890  | 6719059   | 7.5289  | 0.1837 | -0.0936 | 6.6688  | CEU-CHB-JPT |
| rs9380319  | LOC401118 | GI_42657060-S | 6  | 4  | 32785890  | 4168029   | 7.9707  | 0.1947 | -0.5699 | 7.7588  | CEU-CHB-JPT |
| rs9389034  | RPS12     | GI_14277699-S | 6  | 11 | 133179703 | 74134830  | 9.9435  | 0.2405 | -0.189  | 9.7124  | CEU-CHB-JPT |
| rs9391786  | SpC25     | GI_23510353-S | 6  | 19 | 32556539  | 32745805  | 7.4856  | 0.1826 | 0.1352  | 7.4073  | CEU-CHB-JPT |
| rs9391786  | LOC388461 | GI_41150880-S | 6  | 18 | 32556539  | 6719059   | 8.428   | 0.2058 | -0.0927 | 6.6688  | CEU-CHB-JPT |
| rs9391786  | LOC401118 | GI_42657060-S | 6  | 4  | 32556539  | 4168029   | 11.1462 | 0.2694 | -0.6231 | 7.7588  | CEU-CHB-JPT |
| rs9393790  | ZNF322B   | GI_39841070-S | 6  | 9  | 27222031  | 97039218  | 7.6005  | 0.1902 | -0.2161 | 7.4557  | CEU-CHB-JPT |
| rs9405040  | SpC25     | GI_23510353-S | 6  | 19 | 32547371  | 32745805  | 8.5614  | 0.2091 | 0.159   | 7.4073  | CEU-CHB-JPT |
| rs9405040  | LOC388461 | GI_41150880-S | 6  | 18 | 32547371  | 6719059   | 12.7286 | 0.3042 | -0.1225 | 6.6688  | CEU-CHB-JPT |
| rs9405040  | LOC401118 | GI_42657060-S | 6  | 4  | 32547371  | 4168029   | 12.1951 | 0.2927 | -0.713  | 7.7588  | CEU-CHB-JPT |
| rs9405112  | SpC25     | GI_23510353-S | 6  | 19 | 32553578  | 32745805  | 8.5019  | 0.2102 | -0.1546 | 7.4073  | CEU-CHB-JPT |
| rs9405112  | LOC388461 | GI_41150880-S | 6  | 18 | 32553578  | 6719059   | 12.448  | 0.3016 | 0.1192  | 6.6688  | CEU-CHB-JPT |
| rs9405112  | LOC401118 | GI_42657060-S | 6  | 4  | 32553578  | 4168029   | 12.6974 | 0.307  | 0.7133  | 7.7588  | CEU-CHB-JPT |
| rs9501173  | CACNA1H   | GI_10864076-S | 6  | 16 | 32387880  | 1211455   | 12.0119 | 0.287  | -0.127  | 10.8005 | CEU-CHB-JPT |
| rs9501176  | CACNA1H   | GI_10864076-S | 6  | 16 | 32394922  | 1211455   | 12.0119 | 0.287  | -0.127  | 10.8005 | CEU-CHB-JPT |
| rs9501179  | CACNA1H   | GI_10864076-S | 6  | 16 | 32400971  | 1211455   | 12.0119 | 0.287  | -0.127  | 10.8005 | CEU-CHB-JPT |
| rs9525181  | hmm25278  | hmm25278-S    | 13 | 1  | 113893447 | 13244693  | 15.9305 | 0.3679 | -0.1217 | 9.8194  | CEU-CHB-JPT |
| rs9525181  | hmm26651  | hmm26651-S    | 13 | 20 | 113893447 | 21738865  | 14.6526 | 0.3425 | -0.1695 | 10.2839 | CEU-CHB-JPT |
| rs9525181  | hmm32074  | hmm32074-S    | 13 | 6  | 113893447 | 121752831 | 13.0959 | 0.3103 | -0.1243 | 11.025  | CEU-CHB-JPT |
| rs9525181  | hmm34610  | hmm34610-S    | 13 | 8  | 113893447 | 12670185  | 13.8079 | 0.3252 | -0.1732 | 10.8487 | CEU-CHB-JPT |
| rs953275   | LOC389848 | GI_42662536-S | 3  | 9  | 39440781  | 76243681  | 49.1001 | 0.776  | 1.9312  | 8.0259  | CEU-CHB-JPT |
| rs9642404  | LOC401154 | GI_42656959-S | 7  | 4  | 55631008  | 120736741 | 19.9678 | 0.444  | -0.3201 | 14      | CEU-CHB-JPT |
| rs9757129  | Hs.292310 | Hs.292310-S   | 3  | 8  | 131327159 | 8120259   | 12.8581 | 0.307  | -0.1117 | 9.787   | CEU-CHB-JPT |
| rs9885210  | LOC392660 | GI_41147791-S | 5  | 7  | 176501794 | 38170828  | 12.4408 | 0.2997 | 0.0907  | 12.0424 | CEU-CHB-JPT |
| rs10037055 | LOC389972 | GI_41149334-S | 5  | 10 | 176623885 | 64857752  | 20.9227 | 0.6438 | -0.2425 | 7.1183  | CHB-JPT     |
| rs10039241 | LOC389972 | GI_41149334-S | 5  | 10 | 176510678 | 64857752  | 17.0991 | 0.5697 | 0.2279  | 7.1183  | CHB-JPT     |
| rs10072499 | LOC389972 | GI_41149334-S | 5  | 10 | 176587843 | 64857752  | 17.4342 | 0.573  | 0.227   | 7.1183  | CHB-JPT     |
| rs10077929 | LOC389972 | GI_41149334-S | 5  | 10 | 176630450 | 64857752  | 20.9227 | 0.6438 | 0.2425  | 7.1183  | CHB-JPT     |
| rs1041885  | LOC388461 | GI_41150880-S | 6  | 18 | 32520787  | 6719059   | 7.4704  | 0.2916 | 0.1301  | 7.0809  | CHB-JPT     |
| rs1041885  | LOC401118 | GI_42657060-S | 6  | 4  | 32520787  | 4168029   | 9.2642  | 0.3552 | 0.8086  | 7.2476  | CHB-JPT     |
| rs10481004 | LOC401154 | GI_42656959-S | 7  | 4  | 55542880  | 120736741 | 12.4296 | 0.4543 | 0.2782  | 6.9747  | CHB-JPT     |
| rs10510701 | LOC389848 | GI_42662536-S | 3  | 9  | 39441449  | 76243681  | 29.7534 | 0.779  | -1.9116 | 8.8859  | CHB-JPT     |
| rs1051336  | LOC401118 | GI_42657060-S | 6  | 4  | 32520570  | 4168029   | 8.6668  | 0.3284 | -0.785  | 7.2476  | CHB-JPT     |
| rs1052432  | LOC389972 | GI_41149334-S | 5  | 10 | 176496795 | 64857752  | 17.3005 | 0.5742 | 0.2272  | 7.1183  | CHB-JPT     |
| rs10947260 | CACNA1H   | GI_10864076-S | 6  | 16 | 32481163  | 1211455   | 10.8807 | 0.4006 | -0.1296 | 7.4182  | CHB-JPT     |
| rs1113765  | LOC401154 | GI_42656959-S | 7  | 4  | 55663543  | 120736741 | 7.2551  | 0.2809 | -0.227  | 6.9747  | CHB-JPT     |
| rs11185543 | MBD5      | GI_38202208-S | 3  | 2  | 197703970 | 149104233 | 7.7893  | 0.3004 | -0.1867 | 7.3825  | CHB-JPT     |
| rs11211213 | Hs.444195 | Hs.444195-S   | 1  | 5  | 46054537  | 68769730  | 7.039   | 0.2783 | 0.0376  | 7.0265  | CHB-JPT     |
| rs11751697 | CACNA1H   | GI_10864076-S | 6  | 16 | 32374403  | 1211455   | 8.0613  | 0.3102 | 0.1141  | 7.4182  | CHB-JPT     |
| rs11755505 | CACNA1H   | GI_10864076-S | 6  | 16 | 32385457  | 1211455   | 8.0382  | 0.3216 | 0.1146  | 7.4182  | CHB-JPT     |
| rs11949767 | LOC389972 | GI_41149334-S | 5  | 10 | 176672850 | 64857752  | 17.0088 | 0.5635 | 0.2162  | 7.1183  | CHB-JPT     |
| rs11955537 | LOC389972 | GI_41149334-S | 5  | 10 | 176506694 | 64857752  | 16.7536 | 0.566  | -0.2247 | 7.1183  | CHB-JPT     |
| rs11982736 | LOC401154 | GI_42656959-S | 7  | 4  | 55629389  | 120736741 | 9.1735  | 0.3456 | -0.2623 | 6.9747  | CHB-JPT     |
| rs12187932 | LOC389972 | GI_41149334-S | 5  | 10 | 176575757 | 64857752  | 17.5497 | 0.5756 | 0.223   | 7.1183  | CHB-JPT     |
| rs12191360 | LOC388461 | GI_41150880-S | 6  | 18 | 32559339  | 6719059   | 8.1081  | 0.3119 | 0.1236  | 7.0809  | CHB-JPT     |
| rs12191360 | LOC401118 | GI_42657060-S | 6  | 4  | 32559339  | 4168029   | 7.5482  | 0.2916 | 0.6732  | 7.2476  | CHB-JPT     |
| rs12194148 | CACNA1H   | GI_10864076-S | 6  | 16 | 32552176  | 1211455   | 7.498   | 0.287  | -0.0899 | 7.4182  | CHB-JPT     |
| rs12202302 | RPS12     | GI_14277699-S | 6  | 11 | 133177557 | 74134830  | 7.925   | 0.3053 | -0.2183 | 7.1345  | CHB-JPT     |

|            |           |               |    |    |           |           |         |        |         |        |         |
|------------|-----------|---------------|----|----|-----------|-----------|---------|--------|---------|--------|---------|
| rs12203586 | EPB41L4A  | GI_37537711-S | 6  | 5  | 32787569  | 111532671 | 9.1981  | 0.3465 | -0.2631 | 7.3362 | CHB-JPT |
| rs12493418 | LOC389848 | GI_42662536-S | 3  | 9  | 39446198  | 76243681  | 29.9761 | 0.7778 | 1.9023  | 8.8859 | CHB-JPT |
| rs12519145 | LOC389972 | GI_41149334-S | 5  | 10 | 176488129 | 64857752  | 14.5488 | 0.5041 | -0.2064 | 7.1183 | CHB-JPT |
| rs12632510 | LOC389848 | GI_42662536-S | 3  | 9  | 39441613  | 76243681  | 29.8857 | 0.7844 | -1.9122 | 8.8859 | CHB-JPT |
| rs12635452 | LOC389848 | GI_42662536-S | 3  | 9  | 39441630  | 76243681  | 29.1053 | 0.7752 | 1.8627  | 8.8859 | CHB-JPT |
| rs12635760 | LOC389848 | GI_42662536-S | 3  | 9  | 39416055  | 76243681  | 29.4908 | 0.7798 | -1.9203 | 8.8859 | CHB-JPT |
| rs12638341 | LOC389848 | GI_42662536-S | 3  | 9  | 39430358  | 76243681  | 29.9761 | 0.7778 | -1.9023 | 8.8859 | CHB-JPT |
| rs12638378 | LOC389848 | GI_42662536-S | 3  | 9  | 39430319  | 76243681  | 29.9761 | 0.7778 | 1.9023  | 8.8859 | CHB-JPT |
| rs12658510 | LOC389972 | GI_41149334-S | 5  | 10 | 176537879 | 64857752  | 17.3005 | 0.5742 | 0.2272  | 7.1183 | CHB-JPT |
| rs12660023 | LOC389972 | GI_41149334-S | 5  | 10 | 176633491 | 64857752  | 20.5685 | 0.65   | -0.2426 | 7.1183 | CHB-JPT |
| rs12716330 | LOC389972 | GI_41149334-S | 5  | 10 | 176531108 | 64857752  | 17.5497 | 0.5756 | 0.223   | 7.1183 | CHB-JPT |
| rs12949588 | KIAA0649  | GI_45387957-S | 17 | 9  | 30588304  | 135606624 | 7.6019  | 0.325  | 0.4427  | 7.2276 | CHB-JPT |
| rs1363405  | LOC389972 | GI_41149334-S | 5  | 10 | 176569488 | 64857752  | 17.4247 | 0.577  | -0.2232 | 7.1183 | CHB-JPT |
| rs1546363  | LOC389972 | GI_41149334-S | 5  | 10 | 176533637 | 64857752  | 17.0764 | 0.5734 | 0.2205  | 7.1183 | CHB-JPT |
| rs16856088 | LOC377709 | GI_37552433-S | 2  | 8  | 217118220 | 145177330 | 13.827  | 0.4852 | 0.1695  | 7.8661 | CHB-JPT |
| rs16856373 | LOC377709 | GI_37552433-S | 2  | 8  | 217242368 | 145177330 | 10.4418 | 0.3904 | 0.1637  | 7.8661 | CHB-JPT |
| rs17078781 | LOC389972 | GI_41149334-S | 5  | 10 | 176476834 | 64857752  | 16.2706 | 0.5548 | 0.2198  | 7.1183 | CHB-JPT |
| rs17581326 | EPB41L4A  | GI_37537711-S | 6  | 5  | 32786731  | 111532671 | 7.7701  | 0.3026 | 0.247   | 7.3362 | CHB-JPT |
| rs17802433 | LOC401155 | GI_42656964-S | 2  | 9  | 94959504  | 44389723  | 30.1297 | 0.7949 | 0.8384  | 7.0032 | CHB-JPT |
| rs1805388  | CREB3L1   | GI_16418354-S | 13 | 11 | 107661592 | 46299092  | 9.6012  | 0.3631 | 0.2193  | 8.7572 | CHB-JPT |
| rs1860596  | KIBRA     | GI_29789057-S | 4  | 5  | 17336351  | 167829159 | 8.0457  | 0.3096 | 0.3971  | 8.0411 | CHB-JPT |
| rs1877555  | LOC389848 | GI_42662536-S | 3  | 9  | 39440456  | 76243681  | 29.6455 | 0.7778 | -1.9047 | 8.8859 | CHB-JPT |
| rs1882777  | LOC400452 | GI_42660576-S | 21 | 15 | 39421368  | 91056810  | 9.4347  | 0.3543 | -1.7679 | 7.7044 | CHB-JPT |
| rs197922   | LOC376453 | GI_37545699-S | 17 | 18 | 42363569  | 27560290  | 7.7421  | 0.2987 | -0.1964 | 7.0497 | CHB-JPT |
| rs1993152  | FLJ33979  | GI_22749298-S | 15 | 11 | 42806582  | 28311200  | 26.59   | 0.7389 | -0.9105 | 7.861  | CHB-JPT |
| rs2133579  | LOC389848 | GI_42662536-S | 3  | 9  | 39421292  | 76243681  | 29.9761 | 0.7778 | -1.9023 | 8.8859 | CHB-JPT |
| rs2157337  | CACNA1H   | GI_10864076-S | 6  | 16 | 32609122  | 1211455   | 8.7212  | 0.3365 | -0.1034 | 7.4182 | CHB-JPT |
| rs2167273  | TNIP3     | GI_21361999-S | 7  | 4  | 128283364 | 122410424 | 8.1138  | 0.3121 | 0.178   | 7.5782 | CHB-JPT |
| rs2187247  | PMCH      | GI_4505898-S  | 21 | 12 | 43212447  | 101092901 | 7.9452  | 0.306  | -0.1351 | 7.6221 | CHB-JPT |
| rs2239806  | LOC401118 | GI_42657060-S | 6  | 4  | 32519285  | 4168029   | 8.4855  | 0.3252 | -0.7806 | 7.2476 | CHB-JPT |
| rs2271194  | FLT1      | GI_32306519-S | 12 | 13 | 54763961  | 27773909  | 21.423  | 0.6572 | 0.4289  | 7.4359 | CHB-JPT |
| rs2271194  | LOC389472 | GI_42657859-S | 12 | 7  | 54763961  | 22586816  | 23.0636 | 0.6856 | 0.7617  | 7.299  | CHB-JPT |
| rs2271194  | LOC401470 | GI_42658911-S | 12 | 8  | 54763961  | 93225770  | 22.4012 | 0.6744 | 0.7806  | 7.4577 | CHB-JPT |
| rs2271194  | hmm32535  | hmm32535-S    | 12 | 7  | 54763961  | 20656686  | 13.293  | 0.4747 | 0.1634  | 8.2187 | CHB-JPT |
| rs2272243  | LOC377709 | GI_37552433-S | 2  | 8  | 217190270 | 145177330 | 10.702  | 0.4132 | -0.153  | 7.8661 | CHB-JPT |
| rs2274755  | RHEBL1    | GI_21389384-S | 20 | 12 | 44073099  | 47744815  | 7.4654  | 0.2858 | -0.3278 | 7.3355 | CHB-JPT |
| rs2286771  | KIBRA     | GI_29789057-S | 4  | 5  | 17320117  | 167829159 | 8.0457  | 0.3096 | -0.3971 | 8.0411 | CHB-JPT |
| rs2305324  | TNIP3     | GI_21361999-S | 7  | 4  | 128235177 | 122410424 | 7.8207  | 0.3016 | -0.1721 | 7.5782 | CHB-JPT |
| rs2305325  | TNIP3     | GI_21361999-S | 7  | 4  | 128248791 | 122410424 | 7.6905  | 0.2997 | -0.1726 | 7.5782 | CHB-JPT |
| rs2336237  | LOC389972 | GI_41149334-S | 5  | 10 | 176598485 | 64857752  | 17.4247 | 0.577  | 0.2232  | 7.1183 | CHB-JPT |
| rs2395185  | CACNA1H   | GI_10864076-S | 6  | 16 | 32541145  | 1211455   | 7.6015  | 0.2965 | -0.1048 | 7.4182 | CHB-JPT |
| rs2395185  | LOC388461 | GI_41150880-S | 6  | 18 | 32541145  | 6719059   | 8.0051  | 0.3112 | -0.1222 | 7.0809 | CHB-JPT |
| rs2395522  | LOC401118 | GI_42657060-S | 6  | 4  | 32772700  | 4168029   | 9.5895  | 0.3913 | 0.7434  | 7.2476 | CHB-JPT |
| rs244708   | LOC389972 | GI_41149334-S | 5  | 10 | 176522191 | 64857752  | 17.4247 | 0.577  | 0.2232  | 7.1183 | CHB-JPT |
| rs2708697  | UGT2B11   | GI_4507822-S  | 4  | 4  | 69177800  | 70247123  | 9.997   | 0.3761 | 1.5905  | 7.9488 | CHB-JPT |
| rs2776311  | LOC400452 | GI_42660576-S | 21 | 15 | 39638755  | 91056810  | 43.2887 | 0.8919 | 2.7354  | 7.7044 | CHB-JPT |
| rs2836946  | LOC400452 | GI_42660576-S | 21 | 15 | 39518633  | 91056810  | 21.1521 | 0.6523 | -2.5216 | 7.7044 | CHB-JPT |
| rs2836976  | LOC400452 | GI_42660576-S | 21 | 15 | 39586191  | 91056810  | 19.2438 | 0.6156 | -2.4335 | 7.7044 | CHB-JPT |
| rs284565   | LOC377709 | GI_37552433-S | 2  | 8  | 217184312 | 145177330 | 13.7598 | 0.4874 | 0.1712  | 7.8661 | CHB-JPT |
| rs284567   | LOC377709 | GI_37552433-S | 2  | 8  | 217177980 | 145177330 | 13.7598 | 0.4874 | -0.1712 | 7.8661 | CHB-JPT |
| rs3100139  | FLJ33979  | GI_22749298-S | 15 | 11 | 42834865  | 28311200  | 13.1856 | 0.4717 | 0.6441  | 7.861  | CHB-JPT |
| rs3135392  | EPB41L4A  | GI_37537711-S | 6  | 5  | 32517220  | 111532671 | 7.769   | 0.2968 | -0.2482 | 7.3362 | CHB-JPT |
| rs340504   | PRDM1     | GI_33946272-I | 2  | 6  | 44993810  | 106642930 | 8.379   | 0.3214 | 0.2409  | 8.1758 | CHB-JPT |
| rs351861   | LOC389972 | GI_41149334-S | 5  | 10 | 176474543 | 64857752  | 13.0359 | 0.4676 | -0.1927 | 7.1183 | CHB-JPT |
| rs3736781  | ZNF322B   | GI_39841070-S | 6  | 9  | 26613341  | 97039218  | 11.0392 | 0.4091 | -0.302  | 7.0064 | CHB-JPT |
| rs3739038  | KCNMB3    | GI_25952101-I | 2  | 3  | 238454703 | 180459604 | 11.6119 | 0.4538 | -0.4468 | 7.4397 | CHB-JPT |
| rs3749967  | CACNA1H   | GI_10864076-S | 6  | 16 | 32391822  | 1211455   | 8.1661  | 0.3169 | -0.1154 | 7.4182 | CHB-JPT |
| rs3772141  | LOC389848 | GI_42662536-S | 3  | 9  | 39424445  | 76243681  | 28.1485 | 0.7675 | 1.8658  | 8.8859 | CHB-JPT |
| rs3796129  | MBD5      | GI_38202208-S | 3  | 2  | 197687514 | 149104233 | 7.7893  | 0.3004 | 0.1867  | 7.3825 | CHB-JPT |
| rs3809875  | SSB3      | GI_38679885-S | 17 | 16 | 1650293   | 1767413   | 8.567   | 0.328  | -0.1721 | 8.1216 | CHB-JPT |
| rs3809875  | CD37      | GI_4502662-S  | 17 | 19 | 1650293   | 54535344  | 9.1913  | 0.3494 | -0.2765 | 9.104  | CHB-JPT |
| rs4016652  | LOC389848 | GI_42662536-S | 3  | 9  | 39436041  | 76243681  | 29.7534 | 0.779  | -1.9116 | 8.8859 | CHB-JPT |
| rs4260611  | UGT2B11   | GI_4507822-S  | 4  | 4  | 69213372  | 70247123  | 8.4128  | 0.3257 | -2.1744 | 7.9488 | CHB-JPT |
| rs4273806  | LOC401154 | GI_42656959-S | 7  | 4  | 55607447  | 120736741 | 7.7265  | 0.301  | 0.2397  | 6.9747 | CHB-JPT |

|           |              |               |    |    |           |           |         |        |         |        |         |
|-----------|--------------|---------------|----|----|-----------|-----------|---------|--------|---------|--------|---------|
| rs4324305 | LOC377709    | GI_37552433-S | 2  | 8  | 217155418 | 145177330 | 13.827  | 0.4852 | 0.1695  | 7.8661 | CHB-JPT |
| rs4464383 | LOC389848    | GI_42662536-S | 3  | 9  | 39419874  | 76243681  | 29.9761 | 0.7778 | -1.9023 | 8.8859 | CHB-JPT |
| rs4530284 | DKFZP564O243 | GI_34147328-S | 19 | 3  | 4542634   | 51990075  | 7.7697  | 0.3026 | 0.1376  | 7.4985 | CHB-JPT |
| rs4563845 | LOC401154    | GI_42656959-S | 7  | 4  | 55552324  | 120736741 | 12.0582 | 0.4473 | 0.2479  | 6.9747 | CHB-JPT |
| rs4713582 | LOC401118    | GI_42657060-S | 6  | 4  | 32768029  | 4168029   | 10.5368 | 0.3934 | 0.7084  | 7.2476 | CHB-JPT |
| rs4713583 | LOC401118    | GI_42657060-S | 6  | 4  | 32768131  | 4168029   | 10.4778 | 0.4136 | 0.6874  | 7.2476 | CHB-JPT |
| rs4920155 | TOMM34       | GI_40807467-S | 21 | 20 | 43090662  | 43004394  | 7.5248  | 0.2908 | 0.3246  | 7.3972 | CHB-JPT |
| rs4920156 | TOMM34       | GI_40807467-S | 21 | 20 | 43092668  | 43004394  | 7.5248  | 0.2908 | -0.3246 | 7.3972 | CHB-JPT |
| rs4976636 | LOC389972    | GI_41149334-S | 5  | 10 | 176477698 | 64857752  | 16.6468 | 0.5594 | -0.22   | 7.1183 | CHB-JPT |
| rs4976639 | LOC389972    | GI_41149334-S | 5  | 10 | 176482907 | 64857752  | 16.6752 | 0.5685 | 0.2273  | 7.1183 | CHB-JPT |
| rs4976640 | LOC389972    | GI_41149334-S | 5  | 10 | 176484613 | 64857752  | 17.4247 | 0.577  | -0.2232 | 7.1183 | CHB-JPT |
| rs5002702 | LOC401118    | GI_42657060-S | 6  | 4  | 32767136  | 4168029   | 8.8749  | 0.3518 | -0.6806 | 7.2476 | CHB-JPT |
| rs5020946 | CACNA1H      | GI_10864076-S | 6  | 16 | 32558067  | 1211455   | 7.5032  | 0.2928 | -0.0966 | 7.4182 | CHB-JPT |
| rs505883  | LOC377709    | GI_37552433-S | 2  | 8  | 217131540 | 145177330 | 13.2536 | 0.4775 | 0.1686  | 7.8661 | CHB-JPT |
| rs526351  | PRDM1        | GI_33946272-I | 2  | 6  | 44984640  | 106642930 | 8.379   | 0.3214 | -0.2409 | 8.1758 | CHB-JPT |
| rs539162  | PRDM1        | GI_33946272-I | 2  | 6  | 44990315  | 106642930 | 8.379   | 0.3214 | 0.2409  | 8.1758 | CHB-JPT |
| rs6457617 | LOC401118    | GI_42657060-S | 6  | 4  | 327711829 | 4168029   | 9.7714  | 0.3721 | -0.6949 | 7.2476 | CHB-JPT |
| rs6457620 | LOC401118    | GI_42657060-S | 6  | 4  | 32771977  | 4168029   | 10.433  | 0.3867 | 0.7067  | 7.2476 | CHB-JPT |
| rs6517522 | LOC400452    | GI_42660576-S | 21 | 15 | 39475715  | 91056810  | 28.5745 | 0.7648 | -2.5182 | 7.7044 | CHB-JPT |
| rs6700    | LOC401154    | GI_42656959-S | 7  | 4  | 55615397  | 120736741 | 7.7238  | 0.3009 | -0.2412 | 6.9747 | CHB-JPT |
| rs6781576 | LOC389848    | GI_42662536-S | 3  | 9  | 39420900  | 76243681  | 29.9761 | 0.7778 | 1.9023  | 8.8859 | CHB-JPT |
| rs6796054 | Hs.292310    | Hs.292310-S   | 3  | 8  | 131325693 | 8120259   | 9.0392  | 0.3411 | 0.1041  | 7.1428 | CHB-JPT |
| rs6806372 | LOC389848    | GI_42662536-S | 3  | 9  | 39420784  | 76243681  | 29.9761 | 0.7778 | -1.9023 | 8.8859 | CHB-JPT |
| rs6872201 | LOC389972    | GI_41149334-S | 5  | 10 | 176653372 | 64857752  | 17.0877 | 0.5694 | 0.2257  | 7.1183 | CHB-JPT |
| rs6880798 | LOC389972    | GI_41149334-S | 5  | 10 | 176637063 | 64857752  | 20.6741 | 0.6434 | -0.2472 | 7.1183 | CHB-JPT |
| rs6885410 | LOC389972    | GI_41149334-S | 5  | 10 | 176673602 | 64857752  | 17.4541 | 0.5735 | -0.223  | 7.1183 | CHB-JPT |
| rs6886255 | LOC389972    | GI_41149334-S | 5  | 10 | 176650967 | 64857752  | 20.9227 | 0.6438 | 0.2425  | 7.1183 | CHB-JPT |
| rs6890580 | LOC389972    | GI_41149334-S | 5  | 10 | 176586126 | 64857752  | 17.4247 | 0.577  | 0.2232  | 7.1183 | CHB-JPT |
| rs6916742 | LOC388461    | GI_41150880-S | 6  | 18 | 32561169  | 6719059   | 10.8917 | 0.4045 | 0.1355  | 7.0809 | CHB-JPT |
| rs6916742 | LOC401118    | GI_42657060-S | 6  | 4  | 32561169  | 4168029   | 8.625   | 0.33   | 0.6905  | 7.2476 | CHB-JPT |
| rs6928482 | LOC388461    | GI_41150880-S | 6  | 18 | 32734227  | 6719059   | 19.0919 | 0.6167 | 0.1666  | 7.0809 | CHB-JPT |
| rs6928482 | LOC401118    | GI_42657060-S | 6  | 4  | 32734227  | 4168029   | 17.5573 | 0.5842 | 0.9168  | 7.2476 | CHB-JPT |
| rs6944250 | LOC401154    | GI_42656959-S | 7  | 4  | 55628310  | 120736741 | 8.0608  | 0.3102 | 0.2532  | 6.9747 | CHB-JPT |
| rs6966061 | LOC401154    | GI_42656959-S | 7  | 4  | 55622999  | 120736741 | 7.7441  | 0.3046 | 0.2445  | 6.9747 | CHB-JPT |
| rs6975697 | LOC401154    | GI_42656959-S | 7  | 4  | 55778291  | 120736741 | 7.2207  | 0.2796 | -0.2426 | 6.9747 | CHB-JPT |
| rs7037849 | LOC401495    | GI_42659169-S | 9  | 9  | 137249657 | 22145687  | 14.5451 | 0.508  | -0.323  | 7.7427 | CHB-JPT |
| rs7165535 | FLJ33979     | GI_22749298-S | 15 | 11 | 42803637  | 28311200  | 29.9137 | 0.7771 | 0.9392  | 7.861  | CHB-JPT |
| rs7260480 | ATP2A3       | GI_28373114-A | 19 | 17 | 1299164   | 3774170   | 8.0511  | 0.3098 | 0.2239  | 7.5302 | CHB-JPT |
| rs7260486 | ATP2A3       | GI_28373114-A | 19 | 17 | 1299184   | 3774170   | 8.0511  | 0.3098 | 0.2239  | 7.5302 | CHB-JPT |
| rs7277934 | TOMM34       | GI_40807467-S | 21 | 20 | 43102552  | 43004394  | 7.9675  | 0.3068 | 0.3408  | 7.3972 | CHB-JPT |
| rs741795  | LOC400452    | GI_42660576-S | 21 | 15 | 39640310  | 91056810  | 43.2887 | 0.8919 | 2.7354  | 7.7044 | CHB-JPT |
| rs7452076 | LOC401118    | GI_42657060-S | 6  | 4  | 32523058  | 4168029   | 8.0743  | 0.3136 | -0.6363 | 7.2476 | CHB-JPT |
| rs7612450 | MBD5         | GI_38202208-S | 3  | 2  | 197697840 | 149104233 | 7.8469  | 0.3025 | 0.1873  | 7.3825 | CHB-JPT |
| rs7646174 | MBD5         | GI_38202208-S | 3  | 2  | 197699118 | 149104233 | 7.7893  | 0.3004 | -0.1867 | 7.3825 | CHB-JPT |
| rs7646273 | MBD5         | GI_38202208-S | 3  | 2  | 197699204 | 149104233 | 7.7893  | 0.3004 | -0.1867 | 7.3825 | CHB-JPT |
| rs7710269 | LOC389972    | GI_41149334-S | 5  | 10 | 176547135 | 64857752  | 17.3005 | 0.5742 | 0.2272  | 7.1183 | CHB-JPT |
| rs7719125 | LOC389972    | GI_41149334-S | 5  | 10 | 176621772 | 64857752  | 20.9227 | 0.6438 | -0.2425 | 7.1183 | CHB-JPT |
| rs7745040 | LOC388461    | GI_41150880-S | 6  | 18 | 32772310  | 6719059   | 7.9651  | 0.3038 | 0.1168  | 7.0809 | CHB-JPT |
| rs7745040 | LOC401118    | GI_42657060-S | 6  | 4  | 32772310  | 4168029   | 9.8509  | 0.368  | 0.7145  | 7.2476 | CHB-JPT |
| rs7809922 | LOC401154    | GI_42656959-S | 7  | 4  | 55597790  | 120736741 | 7.8348  | 0.2992 | -0.2421 | 6.9747 | CHB-JPT |
| rs9268557 | LOC401118    | GI_42657060-S | 6  | 4  | 32497283  | 4168029   | 9.3176  | 0.3504 | 0.6514  | 7.2476 | CHB-JPT |
| rs9268657 | LOC401118    | GI_42657060-S | 6  | 4  | 32517634  | 4168029   | 9.1706  | 0.352  | 0.6387  | 7.2476 | CHB-JPT |
| rs9268831 | LOC388461    | GI_41150880-S | 6  | 18 | 32535726  | 6719059   | 8.6266  | 0.327  | -0.1204 | 7.0809 | CHB-JPT |
| rs9268831 | LOC401118    | GI_42657060-S | 6  | 4  | 32535726  | 4168029   | 11.1646 | 0.4093 | -0.7483 | 7.2476 | CHB-JPT |
| rs9268853 | CACNA1H      | GI_10864076-S | 6  | 16 | 32537621  | 1211455   | 8.1328  | 0.3098 | 0.1053  | 7.4182 | CHB-JPT |
| rs9268853 | LOC388461    | GI_41150880-S | 6  | 18 | 32537621  | 6719059   | 7.5259  | 0.288  | 0.1182  | 7.0809 | CHB-JPT |
| rs9268858 | CACNA1H      | GI_10864076-S | 6  | 16 | 32537736  | 1211455   | 7.7727  | 0.2998 | 0.1049  | 7.4182 | CHB-JPT |
| rs9270657 | CACNA1H      | GI_10864076-S | 6  | 16 | 32673999  | 1211455   | 14.9225 | 0.5217 | -0.1254 | 7.4182 | CHB-JPT |
| rs9270657 | EPB41L4A     | GI_37537711-S | 6  | 5  | 32673999  | 111532671 | 19.4144 | 0.6233 | 0.3404  | 7.3362 | CHB-JPT |
| rs9272346 | LOC388461    | GI_41150880-S | 6  | 18 | 32712350  | 6719059   | 20.6032 | 0.6464 | 0.1683  | 7.0809 | CHB-JPT |
| rs9272346 | LOC401118    | GI_42657060-S | 6  | 4  | 32712350  | 4168029   | 20.7913 | 0.6499 | 0.9447  | 7.2476 | CHB-JPT |
| rs9272723 | LOC388461    | GI_41150880-S | 6  | 18 | 32717405  | 6719059   | 16.1268 | 0.5599 | 0.1539  | 7.0809 | CHB-JPT |
| rs9272723 | LOC401118    | GI_42657060-S | 6  | 4  | 32717405  | 4168029   | 16.7303 | 0.5741 | 0.8713  | 7.2476 | CHB-JPT |
| rs9273363 | LOC388461    | GI_41150880-S | 6  | 18 | 32734250  | 6719059   | 7.3291  | 0.2951 | 0.1155  | 7.0809 | CHB-JPT |

|           |           |               |    |    |           |           |         |        |         |        |         |
|-----------|-----------|---------------|----|----|-----------|-----------|---------|--------|---------|--------|---------|
| rs9275224 | LOC401118 | GI_42657060-S | 6  | 4  | 32767856  | 4168029   | 8.6453  | 0.3505 | -0.692  | 7.2476 | CHB-JPT |
| rs9275292 | LOC401118 | GI_42657060-S | 6  | 4  | 32771267  | 4168029   | 9.105   | 0.3669 | 0.7033  | 7.2476 | CHB-JPT |
| rs9296032 | LOC401118 | GI_42657060-S | 6  | 4  | 32526688  | 4168029   | 7.3787  | 0.2911 | 0.6852  | 7.2476 | CHB-JPT |
| rs9305669 | LOC400452 | GI_42660576-S | 21 | 15 | 39469199  | 91056810  | 21.4689 | 0.6538 | 2.5293  | 7.7044 | CHB-JPT |
| rs9313749 | LOC389972 | GI_41149334-S | 5  | 10 | 176530300 | 64857752  | 17.5497 | 0.5756 | 0.223   | 7.1183 | CHB-JPT |
| rs9313751 | LOC389972 | GI_41149334-S | 5  | 10 | 176576781 | 64857752  | 17.3005 | 0.5742 | 0.2272  | 7.1183 | CHB-JPT |
| rs9325643 | TOMM34    | GI_40807467-S | 21 | 20 | 43111615  | 43004394  | 7.4366  | 0.3118 | -0.3451 | 7.3972 | CHB-JPT |
| rs9378213 | CACNA1H   | GI_10864076-S | 6  | 16 | 32556376  | 1211455   | 7.4195  | 0.2869 | 0.0897  | 7.4182 | CHB-JPT |
| rs9389034 | RPS12     | GI_14277699-S | 6  | 11 | 133179703 | 74134830  | 9.3502  | 0.3515 | -0.2059 | 7.1345 | CHB-JPT |
| rs9391786 | CACNA1H   | GI_10864076-S | 6  | 16 | 32556539  | 1211455   | 7.4195  | 0.2869 | -0.0897 | 7.4182 | CHB-JPT |
| rs9405040 | CACNA1H   | GI_10864076-S | 6  | 16 | 32547371  | 1211455   | 7.7305  | 0.2983 | -0.1045 | 7.4182 | CHB-JPT |
| rs9501173 | CACNA1H   | GI_10864076-S | 6  | 16 | 32387880  | 1211455   | 8.2447  | 0.3137 | -0.1154 | 7.4182 | CHB-JPT |
| rs9501176 | CACNA1H   | GI_10864076-S | 6  | 16 | 32394922  | 1211455   | 8.2447  | 0.3137 | -0.1154 | 7.4182 | CHB-JPT |
| rs9501179 | CACNA1H   | GI_10864076-S | 6  | 16 | 32400971  | 1211455   | 8.2447  | 0.3137 | -0.1154 | 7.4182 | CHB-JPT |
| rs9525181 | hmm25278  | hmm25278-S    | 13 | 1  | 113893447 | 13244693  | 10.8388 | 0.3993 | -0.099  | 8.4052 | CHB-JPT |
| rs9525181 | hmm34610  | hmm34610-S    | 13 | 8  | 113893447 | 12670185  | 9.2805  | 0.3492 | -0.1448 | 8.7533 | CHB-JPT |
| rs953275  | LOC389848 | GI_42662536-S | 3  | 9  | 39440781  | 76243681  | 29.7534 | 0.779  | 1.9116  | 8.8859 | CHB-JPT |
| rs9642404 | LOC401154 | GI_42656959-S | 7  | 4  | 55631008  | 120736741 | 7.8744  | 0.3035 | -0.2462 | 6.9747 | CHB-JPT |
| rs9757129 | Hs.292310 | Hs.292310-S   | 3  | 8  | 131327159 | 8120259   | 8.9176  | 0.3401 | -0.1039 | 7.1428 | CHB-JPT |
| rs9858020 | H3F3B     | GI_38373691-S | 3  | 17 | 197708104 | 71284418  | 7.4057  | 0.2864 | -0.3747 | 7.2203 | CHB-JPT |
| rs9885210 | LOC389972 | GI_41149334-S | 5  | 10 | 176501794 | 64857752  | 17.4247 | 0.577  | 0.2232  | 7.1183 | CHB-JPT |
| rs9980962 | TOMM34    | GI_40807467-S | 21 | 20 | 43101964  | 43004394  | 7.9675  | 0.3068 | 0.3408  | 7.3972 | CHB-JPT |
