# Supplementary material
Source: PubMed Central journal article supplement (PMC2683249)
Supplement: NIHMS4491-supplement-7.pdf [file NIHMS4491-supplement-7.pdf]

## Figure legends

**Figure 1:** Associations of SNPs with gene expression of SPRED2 on chromosome 2. Panels contrast the results obtained using phase I HapMap SNPs and phase II HapMap SNPs. Coordinates are in NCBI Build 35. Blue arrows represent the location (not to scale) and direction of transcription of the associated gene.

**Figure 2:** Comparison of detected *cis* associations between single and multi-population analysis. **(A)** Numbers of genes with significant *cis*- associations as uncovered by single and multi-population analysis and proportion overlap of associations across the two methodologies. **(B)** Associations of SNPs of the phase II HapMap with gene expression of SGPP2 on chromosome 2. Coordinates are in NCBI Build 35. Panels show results of 4-population multi-population analysis, and individual population analysis for CEU, CHB, JPT, and YRI. Blue arrows represent the location (not to scale) and direction of transcription of the associated gene. In this case the SNP was not rare in any of the populations (MAF was between 0.08 and 0.44) but the effect was small ( $R^2 = 0.25$  and slope = 0.25) so it could only be detected when we pooled the populations increasing the sample size. **(C)** Comparison of the adjusted  $R^2$  values (proportion of the variance in expression explained by the linear relationship between genotype and phenotype) of *cis* significant associations obtained from single and multi-population analysis (0.001 permutation threshold).

**Figure 3:** Comparison of the direction of shared SNP-gene allelic effects across all pairs of populations (0.001 permutation threshold). White panels indicate effects in the same direction.

**Figure 4:** Statistical significance, adjusted  $R^2$  of the association (proportion of the expression variance explained by the linear relationship between genotype and phenotype), and absolute value of the slope of the linear regression, as a function of distance from the transcription start site, of the most significantly associated SNP per gene in each of the 4 populations (order CEU, CHB, JPT and YRI) and the pooled sample of all 4 populations.

## Supplementary Figure legends:

**Figure S1:** The triangle indicates the number of genes that have significantly different median value for each population comparison. ASN indicates the pooled CHB+JPT population. The external lines and numbers indicate genes that are differentiated only for that given pair. The internal lines and numbers indicate genes differentiated in multiple comparisons. For example, there 1320 genes that are only different between CEU and YRI, 799 genes are different between YRI-CEU and YRI-ASN but not CEU-ASN and 342 genes are different in all 3 populations. Please note that the CEU population is more differentiated than the other two possibly due to the age of the cell lines

**Figure S2:** Correlation of gene expression variance for identical probes on the whole-genome and custom arrays, plotted against the p-value of the correlation.

**Figure S3:** Overlap of genes with significant *cis*- association as detected by the Phase I vs. Phase II HapMap.

**Figure S4:** The plot shows the maximum  $-\log p$ -value (Y-axis) for the *cis* analysis (distance < 1Mb) for each of the 14072 genes relative to estimated heritability (slope of the mid-parent-offspring regression; X-axis). Note that genes with high  $-\log p$ -values tend to have high heritability estimates. Negative values of estimated heritability are expected when there is no genetic effect on the expression phenotype.

**Figure S5:** Difference in expected heterozygosity ( $2pq$ ) of SNPs in shared and unshared associations. A. Same SNP and gene significantly associated in 2 populations:  $2pq_{\text{population1}} - 2pq_{\text{population2}}$  B. Same gene, but not same SNP significantly associated in 2 populations:  $2pq_{\text{associated pop}} - 2pq_{\text{not associated pop}}$  C. Different genes and different SNPs significantly associated in 2 populations:  $2pq_{\text{associated pop}} - 2pq_{\text{not associated pop}}$ .

**Figure S6:** This figure shows a specific example where the outlier high value in the CC genotype category drives a very significant nominal p-value for the linear regression ( $-\log p_{\text{val}} = 8.01$ ), while the Spearman rank correlation p-value is much higher ( $P > 0.01$ ).

Figure S1

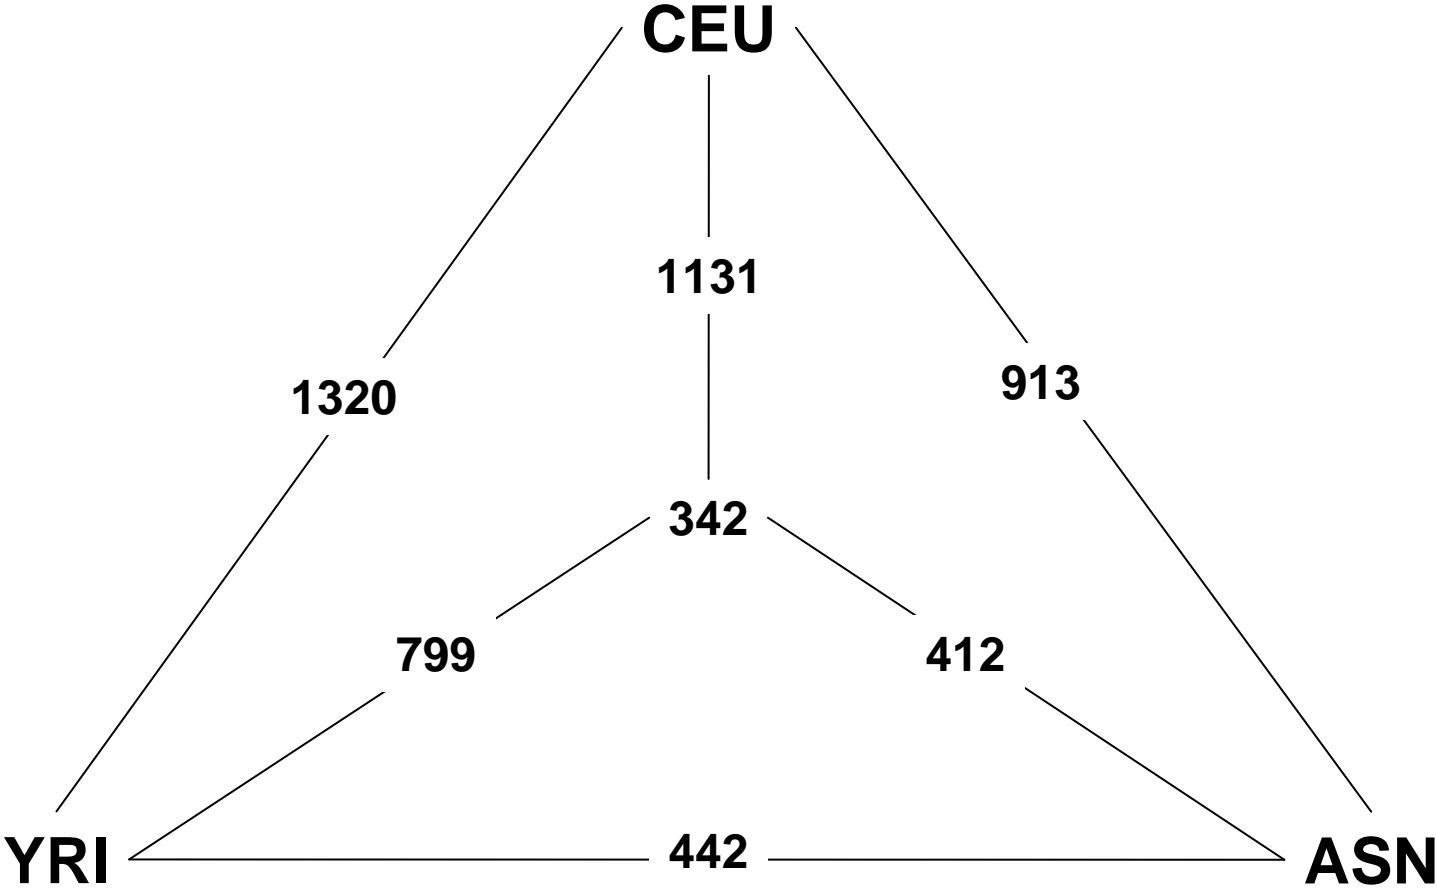

Figure S2

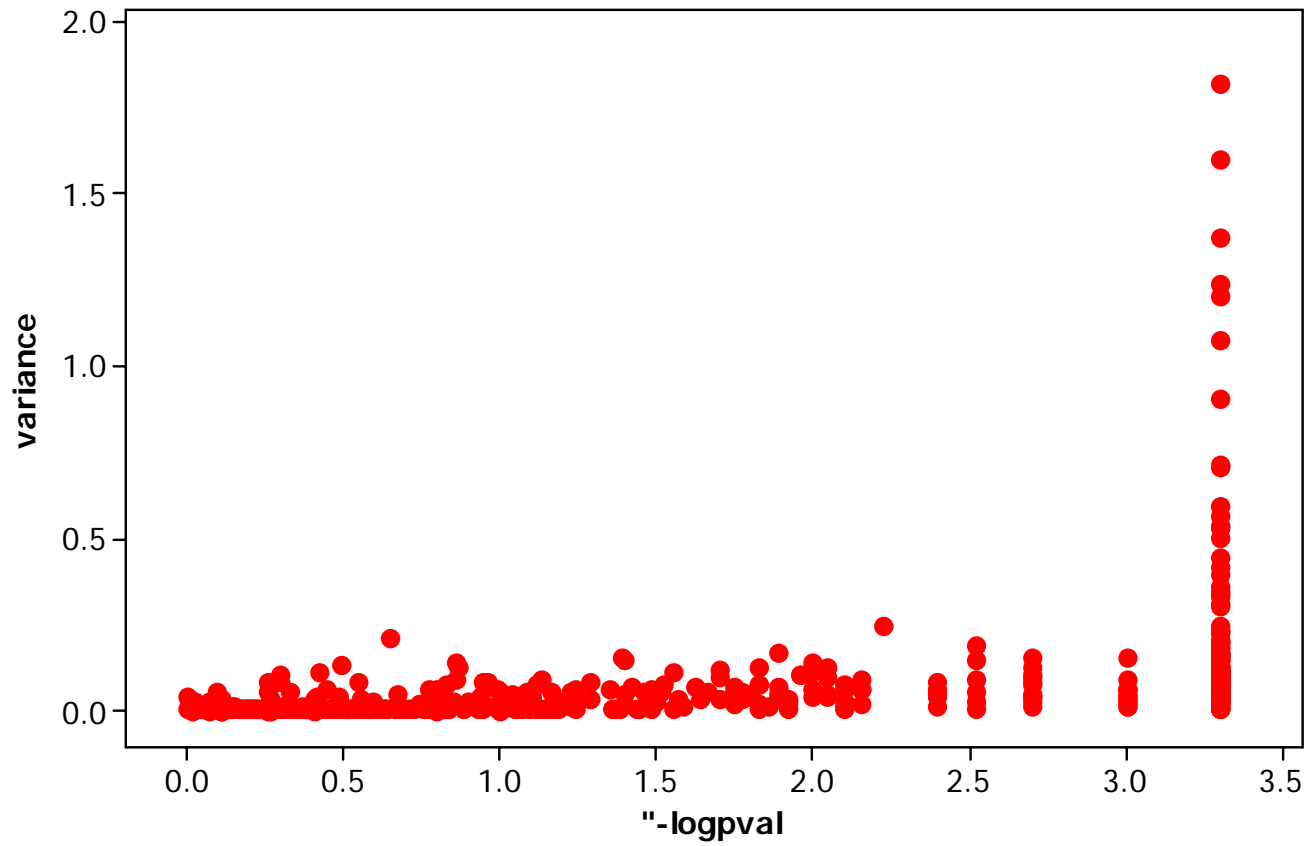

Figure S3

*cis*- significant genes (0.001)

|            | <u>phase I<br/>HapMap</u> |         | <u>both</u> |         | <u>phase II<br/>HapMap</u> |
|------------|---------------------------|---------|-------------|---------|----------------------------|
| <b>CEU</b> | 286                       | ← 90% → | 258         | ← 86% → | 299                        |
| <b>CHB</b> | 317                       | ← 85% → | 269         | ← 85% → | 318                        |
| <b>JPT</b> | 337                       | ← 87% → | 297         | ← 87% → | 341                        |
| <b>YRI</b> | 356                       | ← 87% → | 310         | ← 79% → | 394                        |

Figure S4

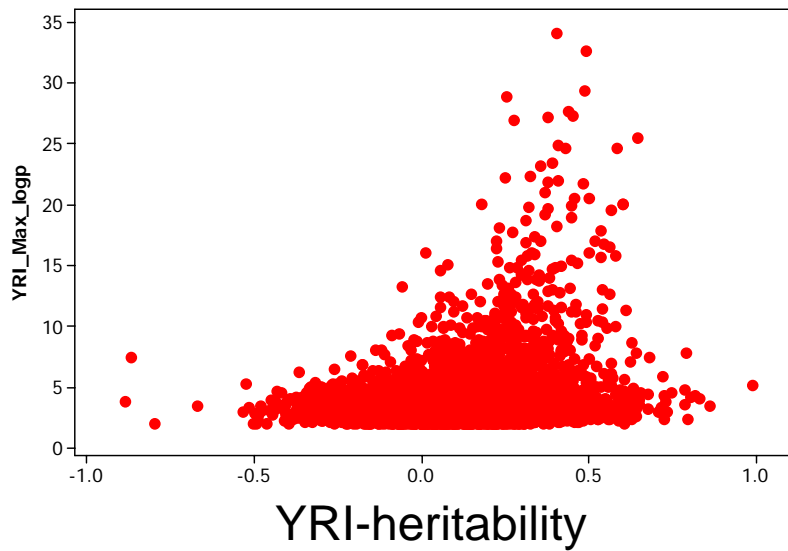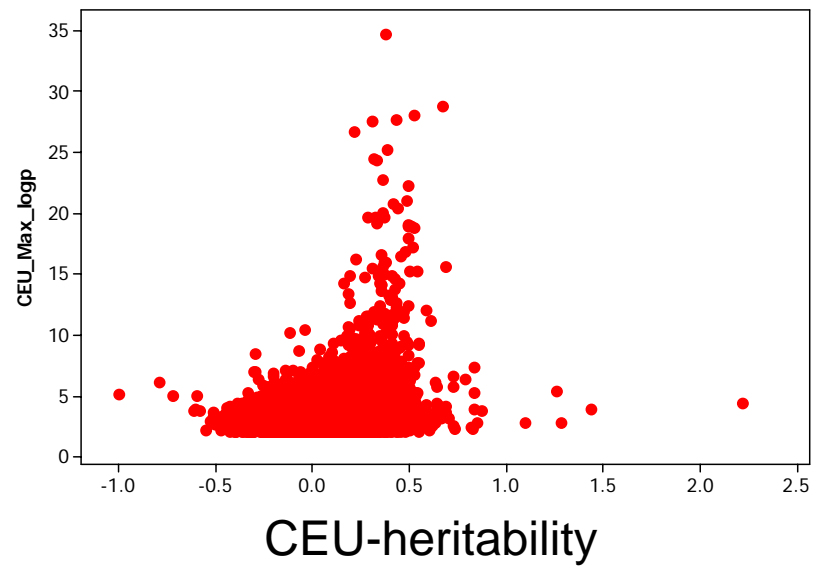

Figure S5

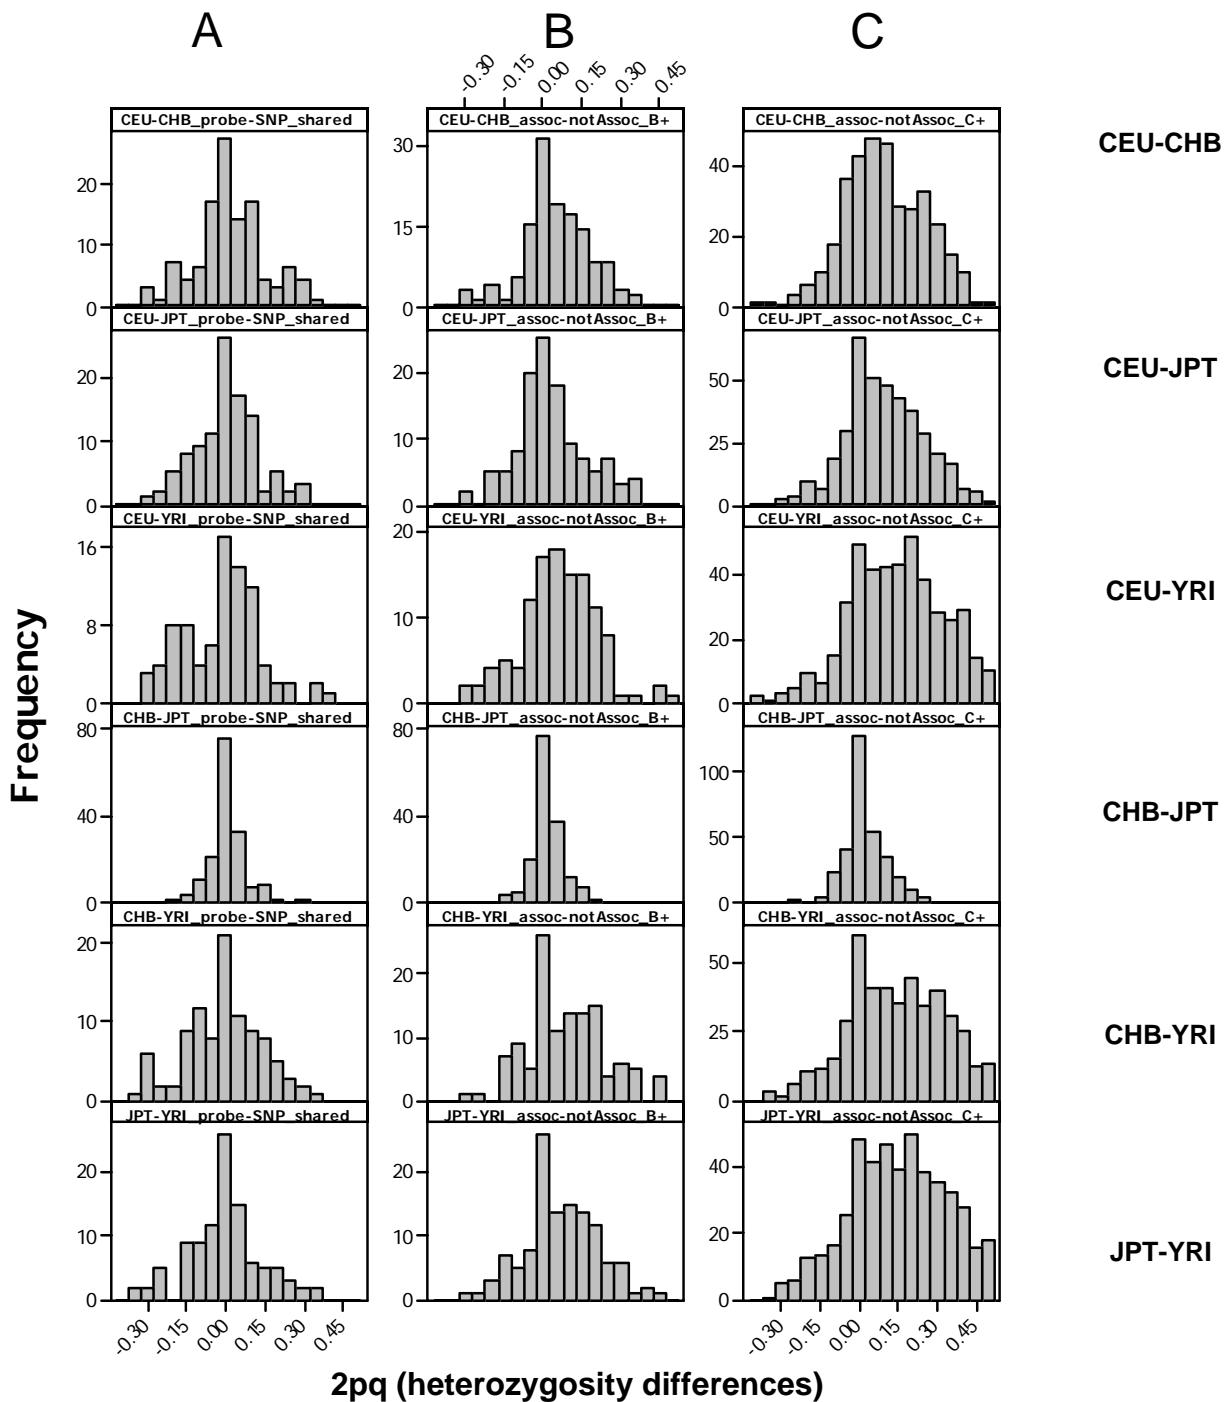

Figure S6

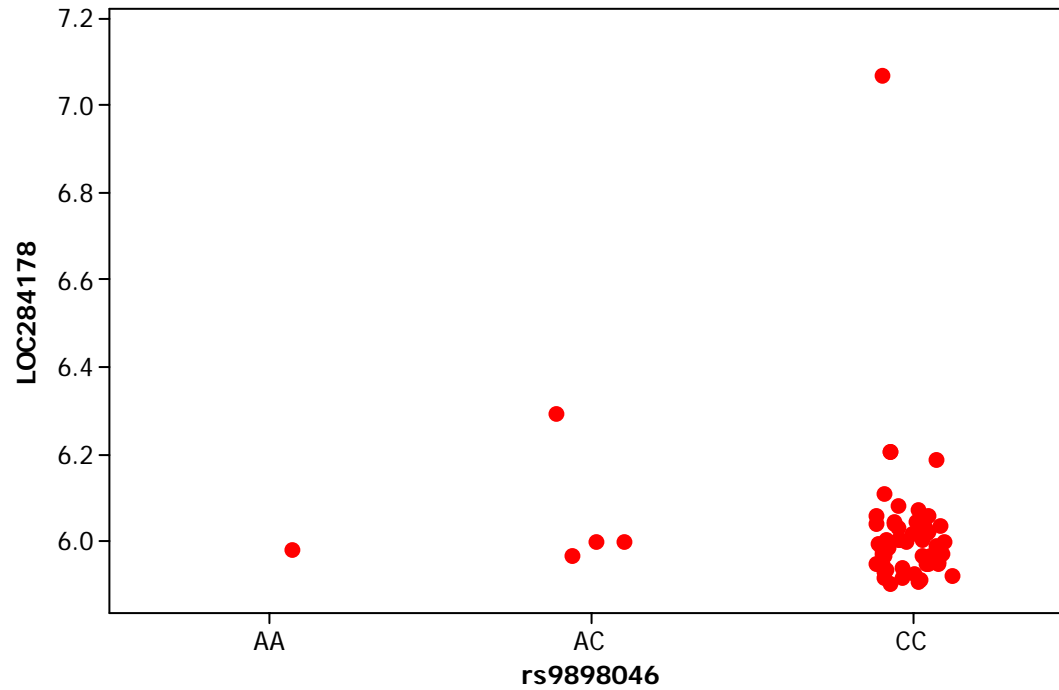

LR  $-\log p$ -value = 8.0121  
SRC  $-\log p$ -value > 0.01



Table S1

**Number of genes with significant cis- associations shared by population pairs**

|            | <b>CEU</b> | <b>CHB</b> | <b>JPT</b> | <b>YRI</b> |     |
|------------|------------|------------|------------|------------|-----|
| <b>CEU</b> |            | 133        | 122        | 119        | 299 |
| <b>CHB</b> | 230        |            | 172        | 123        | 318 |
| <b>JPT</b> | 240        | 291        |            | 125        | 341 |
| <b>YRI</b> | 219        | 203        | 228        |            | 394 |
|            | 606        | 634        | 679        | 742        |     |

Above the diagonal, 0.001 significant.

Below the diagonal, 0.01 significant.

Extra column and row: 0.001 and 0.01 within-population significant gene counts.

## Table S2

### Number and source category of SNPs used in trans analysis

|                                  | <u>CEU</u> | <u>CHB</u> | <u>JPT</u> | <u>YRI</u> |
|----------------------------------|------------|------------|------------|------------|
| <b>cis- associated (rSNPs)</b>   | 13221      | 13133      | 13191      | 13375      |
| <b>Non-synonymous</b>            | 9904       | 9383       | 9378       | 10727      |
| <b>Splicing</b>                  | 1756       | 1585       | 1594       | 1950       |
| <b>miRNA</b>                     | 34         | 34         | 32         | 37         |
| <b>Non-redundant<sup>a</sup></b> | 24635      | 23854      | 23907      | 25797      |

<sup>a</sup>Note: all SNPs are > 0.05 frequency in the respective population.
